# Supplementary material for: Optimized fragmentation schemes and data analysis strategies for proteome-wide cross-link identification
Source: PubMed Central journal article supplement (PMC5454533; doi:10.1038/ncomms15473), 2017-05-19

**Supplementary Data 2.** All annotated mass spectra of cross-linked *E. coli* peptides. Shown are the output files derived from XlinkX v2.0.

EAAEQAKR  
EAQQAER

EAAEQAKR+XL\_S

EAAEQAKR+XL\_L

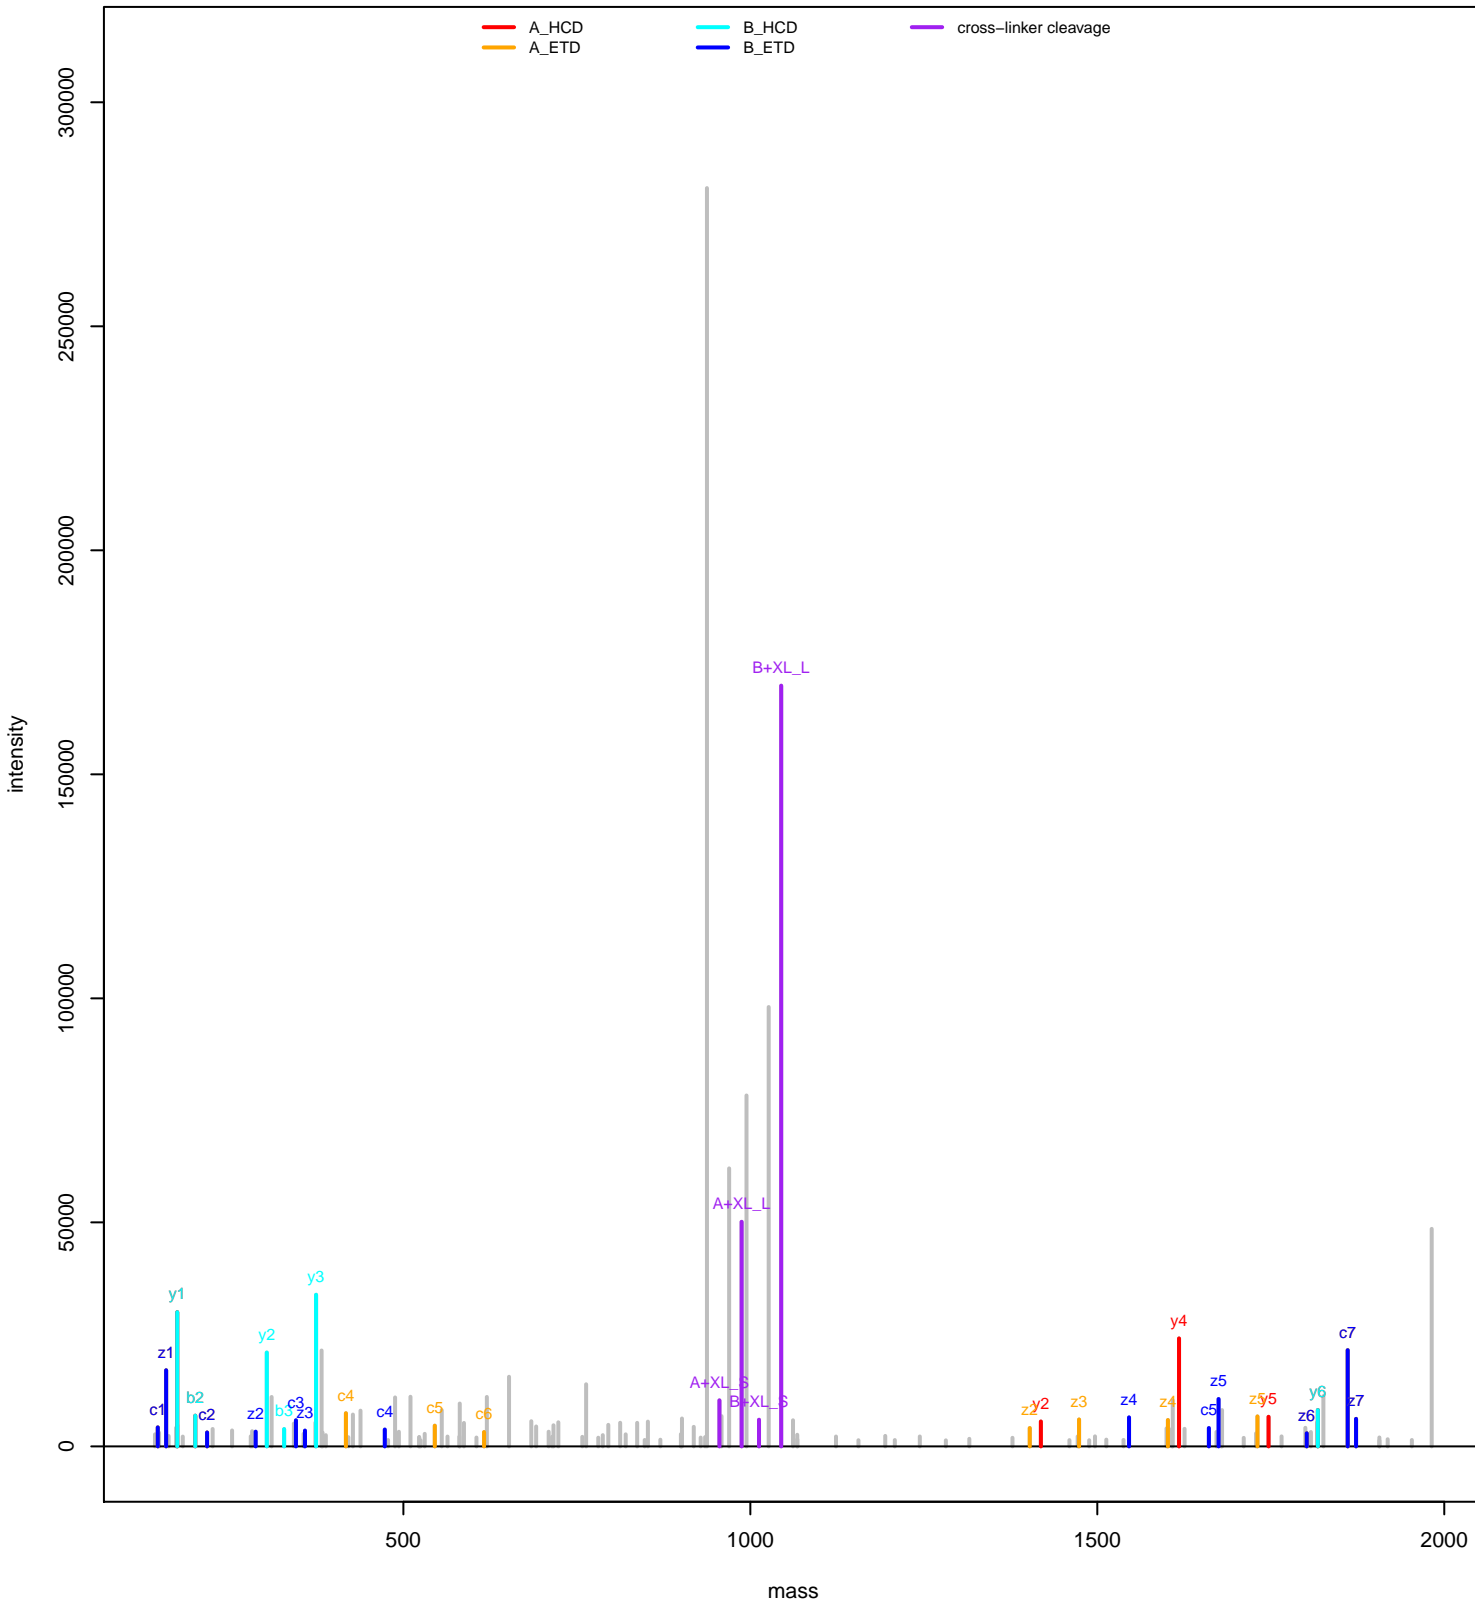

EAQQAER+XL\_S

EAQQAER+XL\_L

KAAGIK  
SGSGKPNKDK

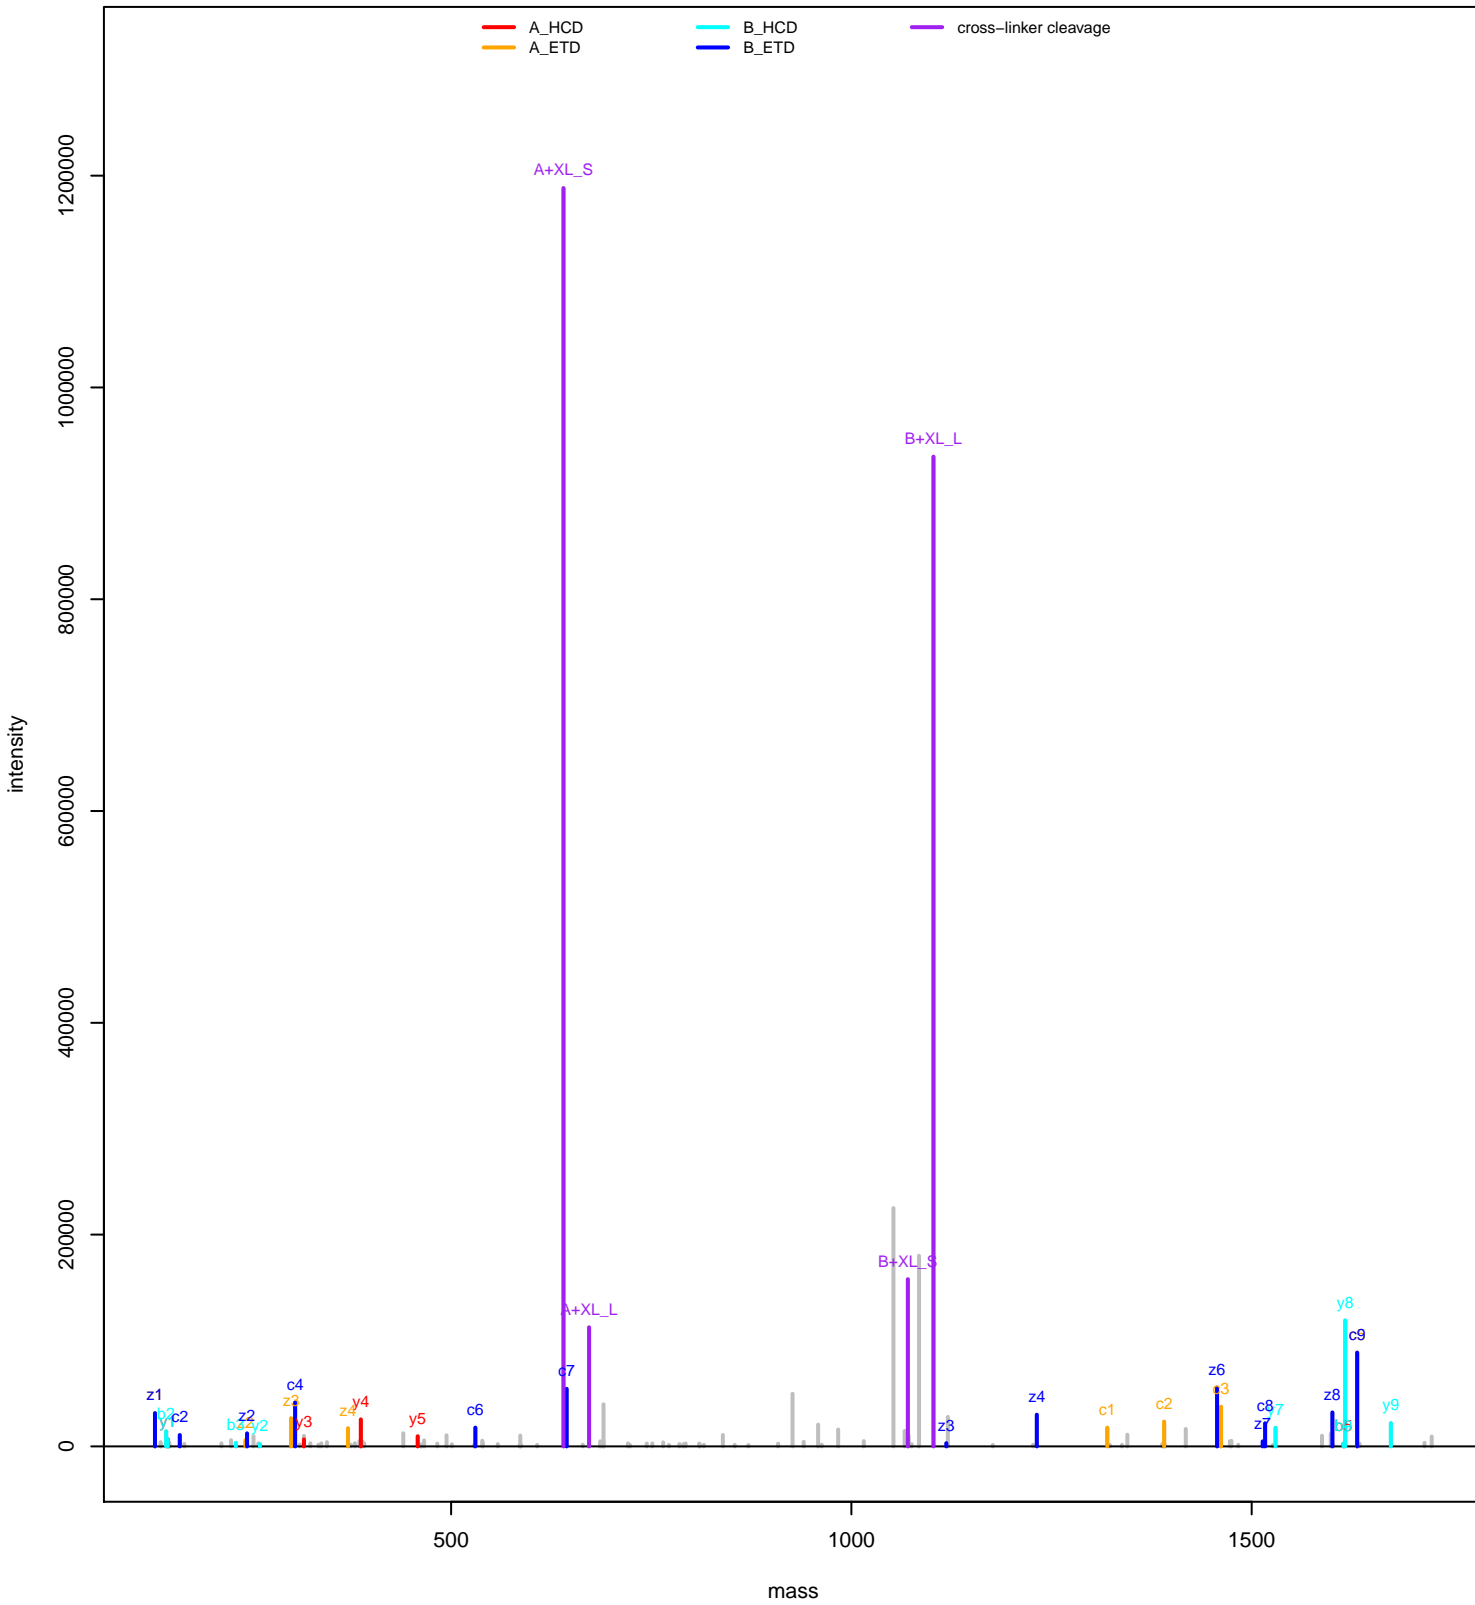

KAAGIK+XL\_S

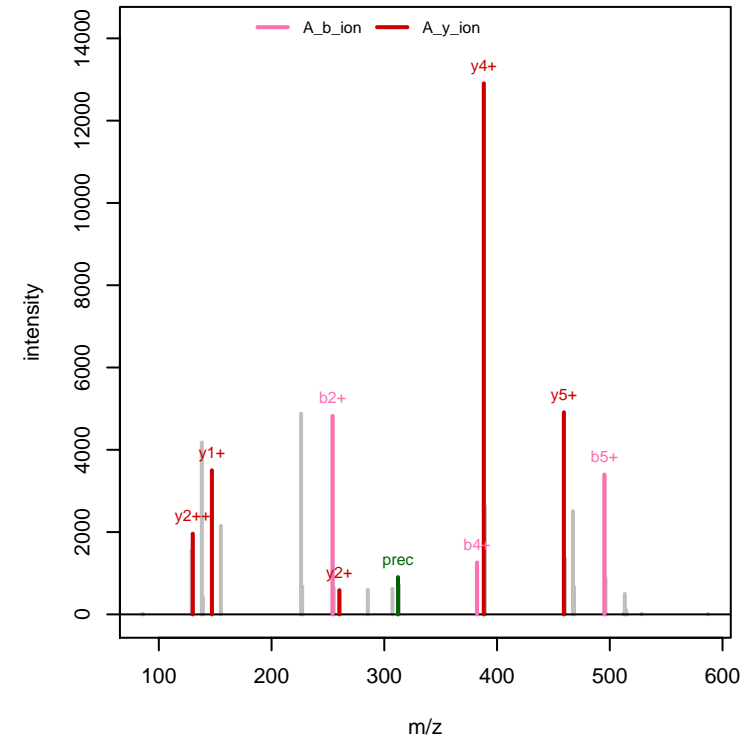

KAAGIK+XL\_L

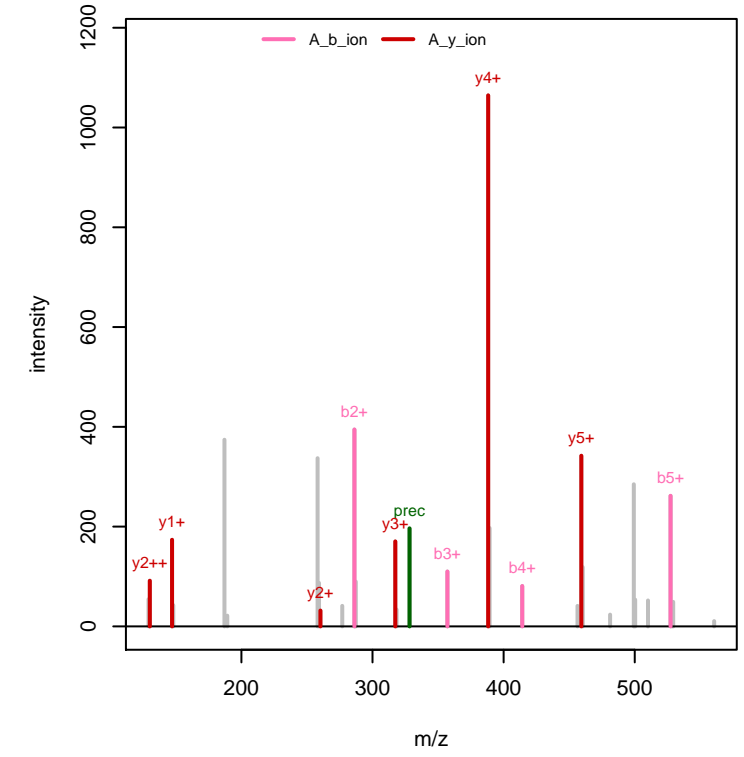

SGSGKPNKDK+XL\_S

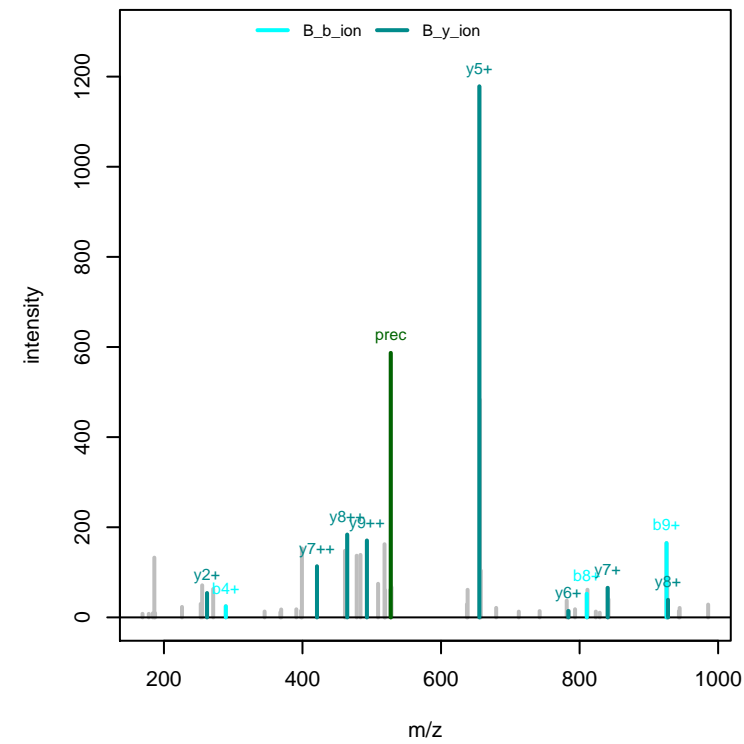

SGSGKPNKDK+XL\_L

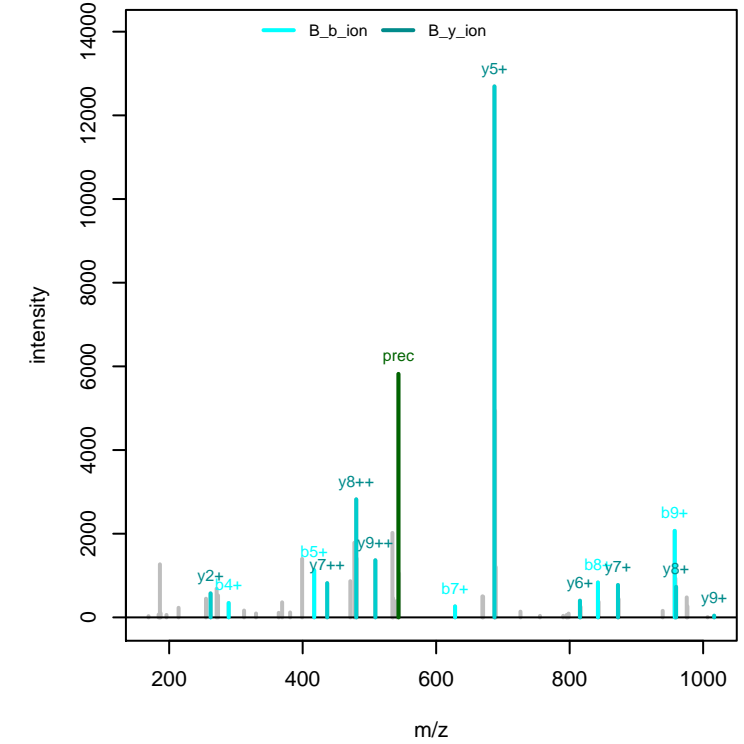

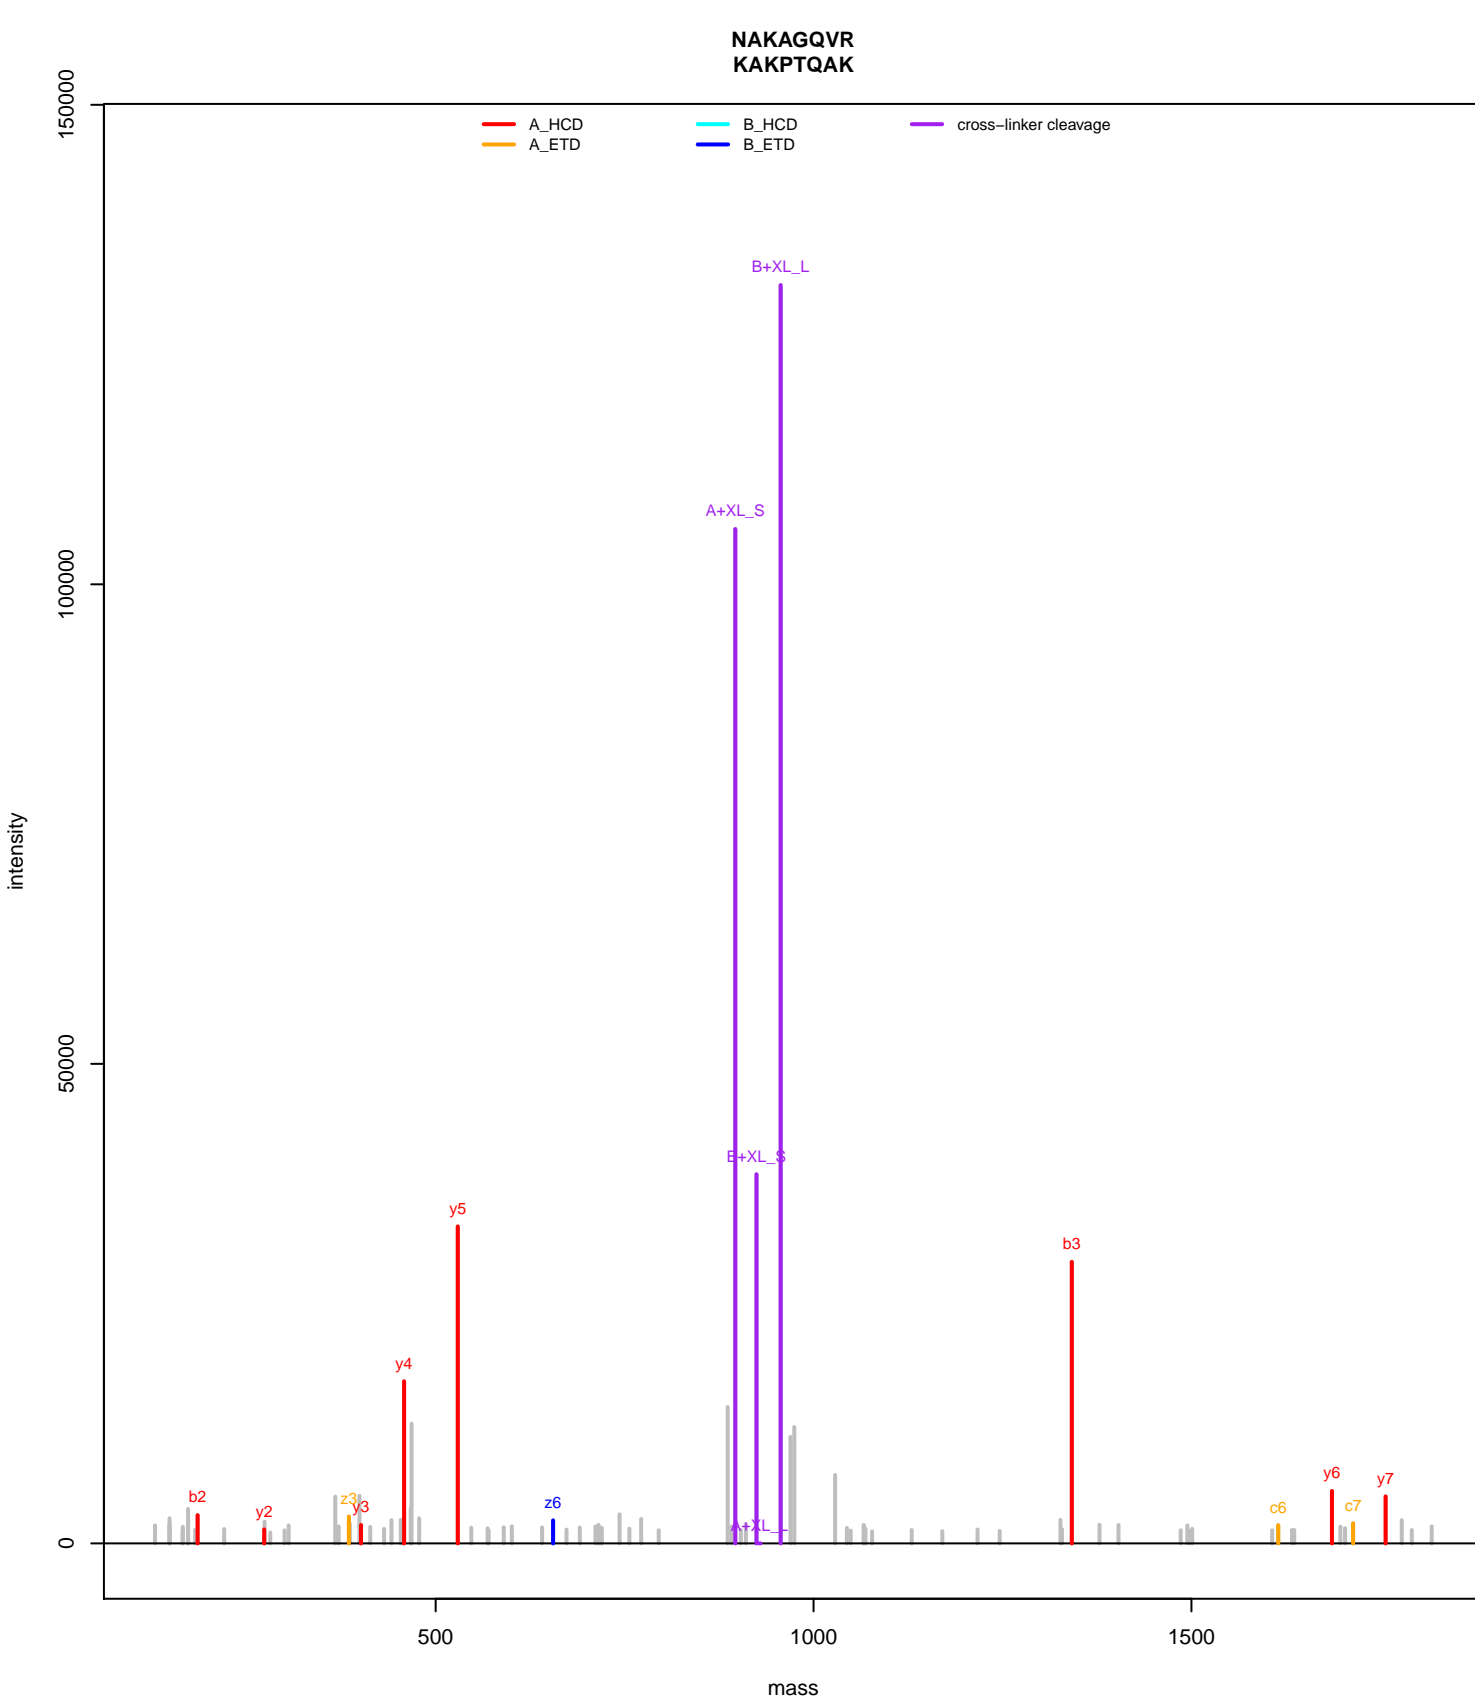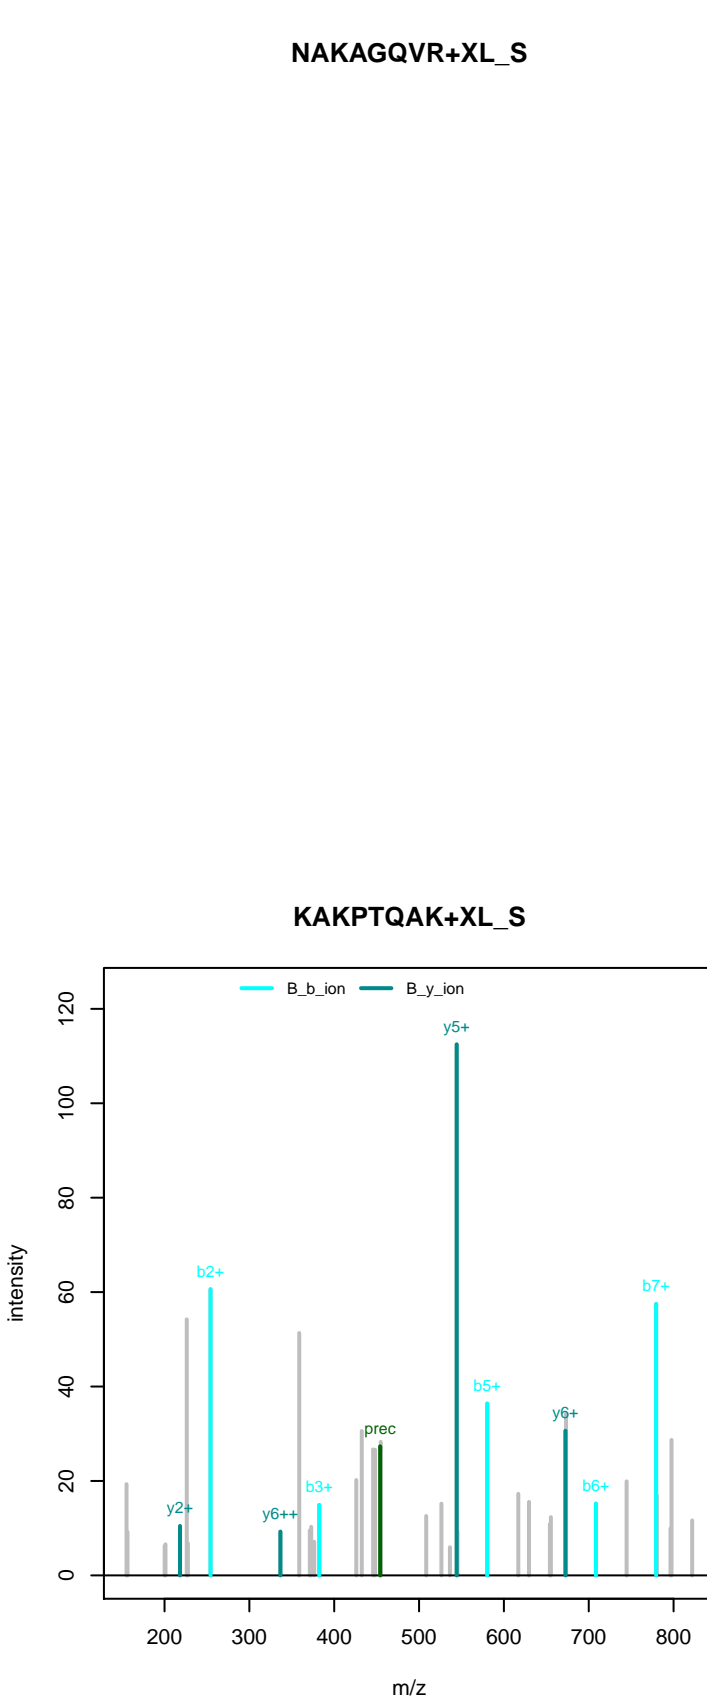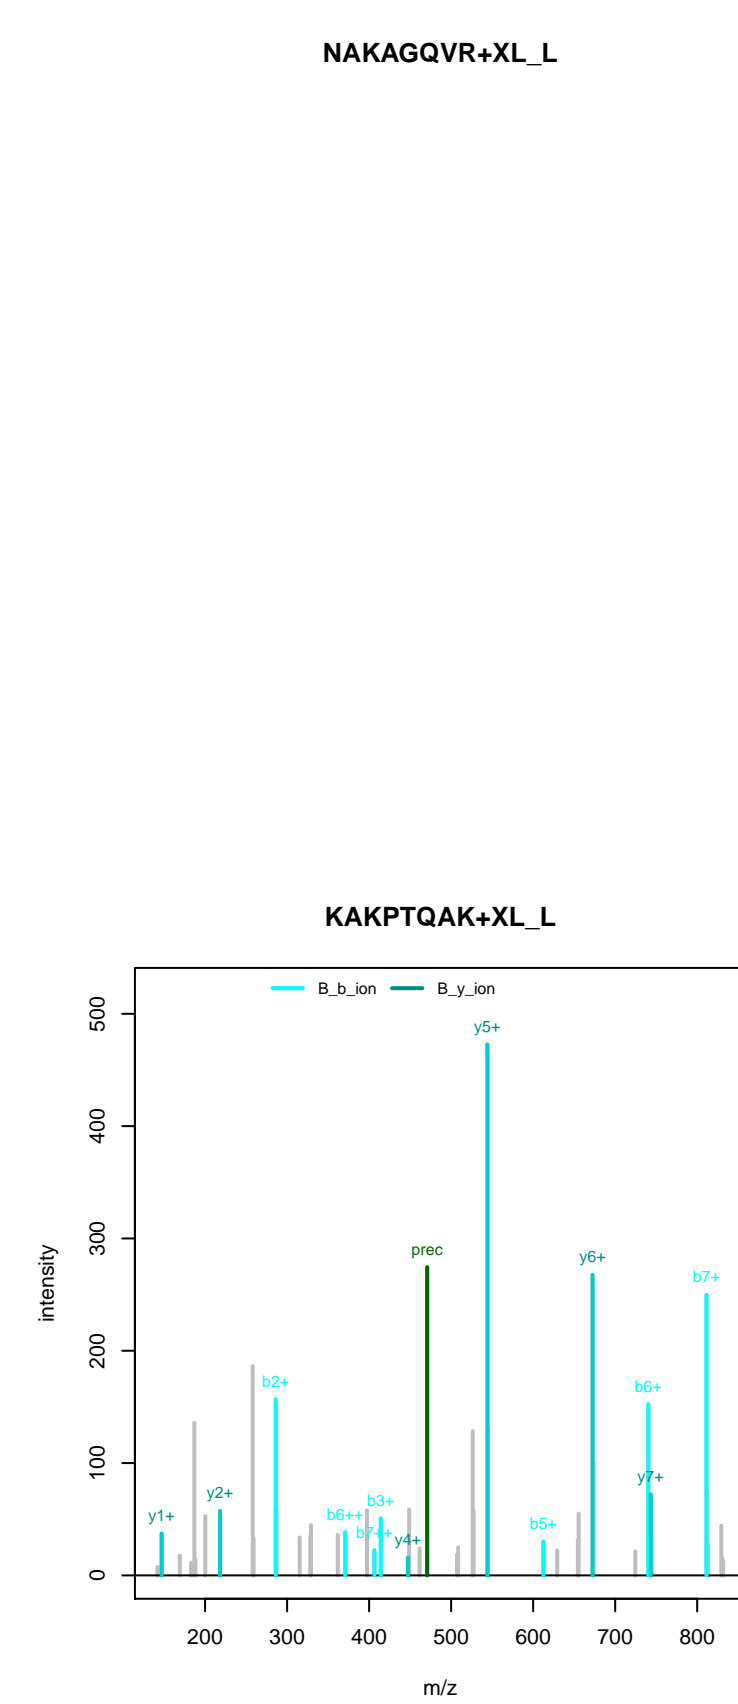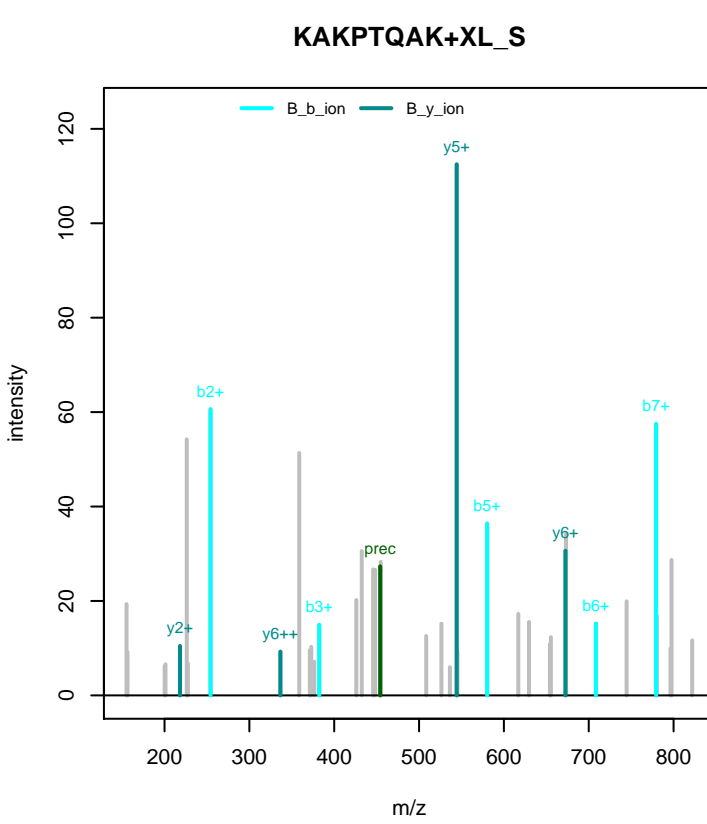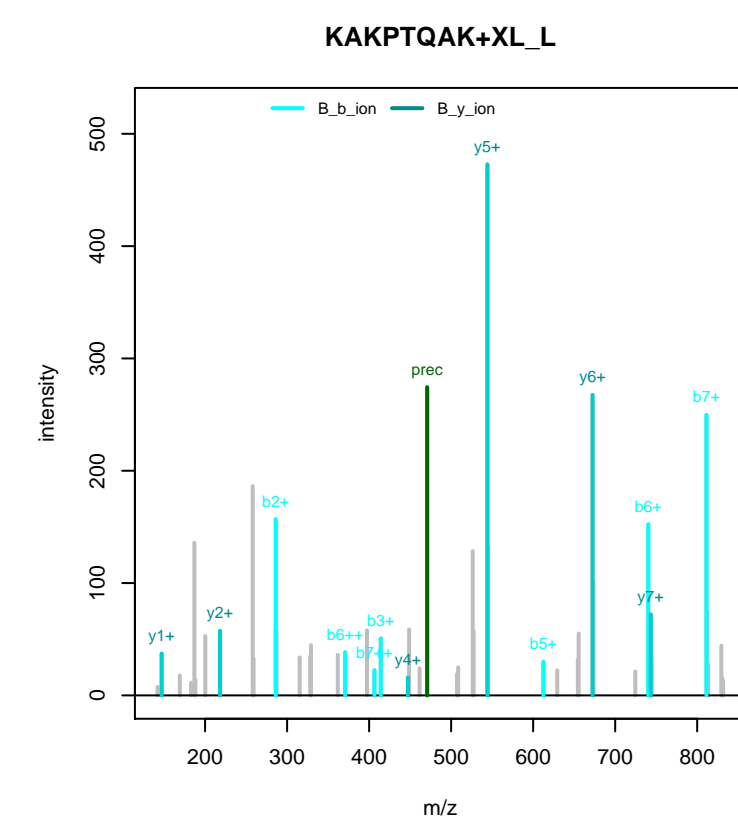

AKQAQVPK  
TAKDGATSK

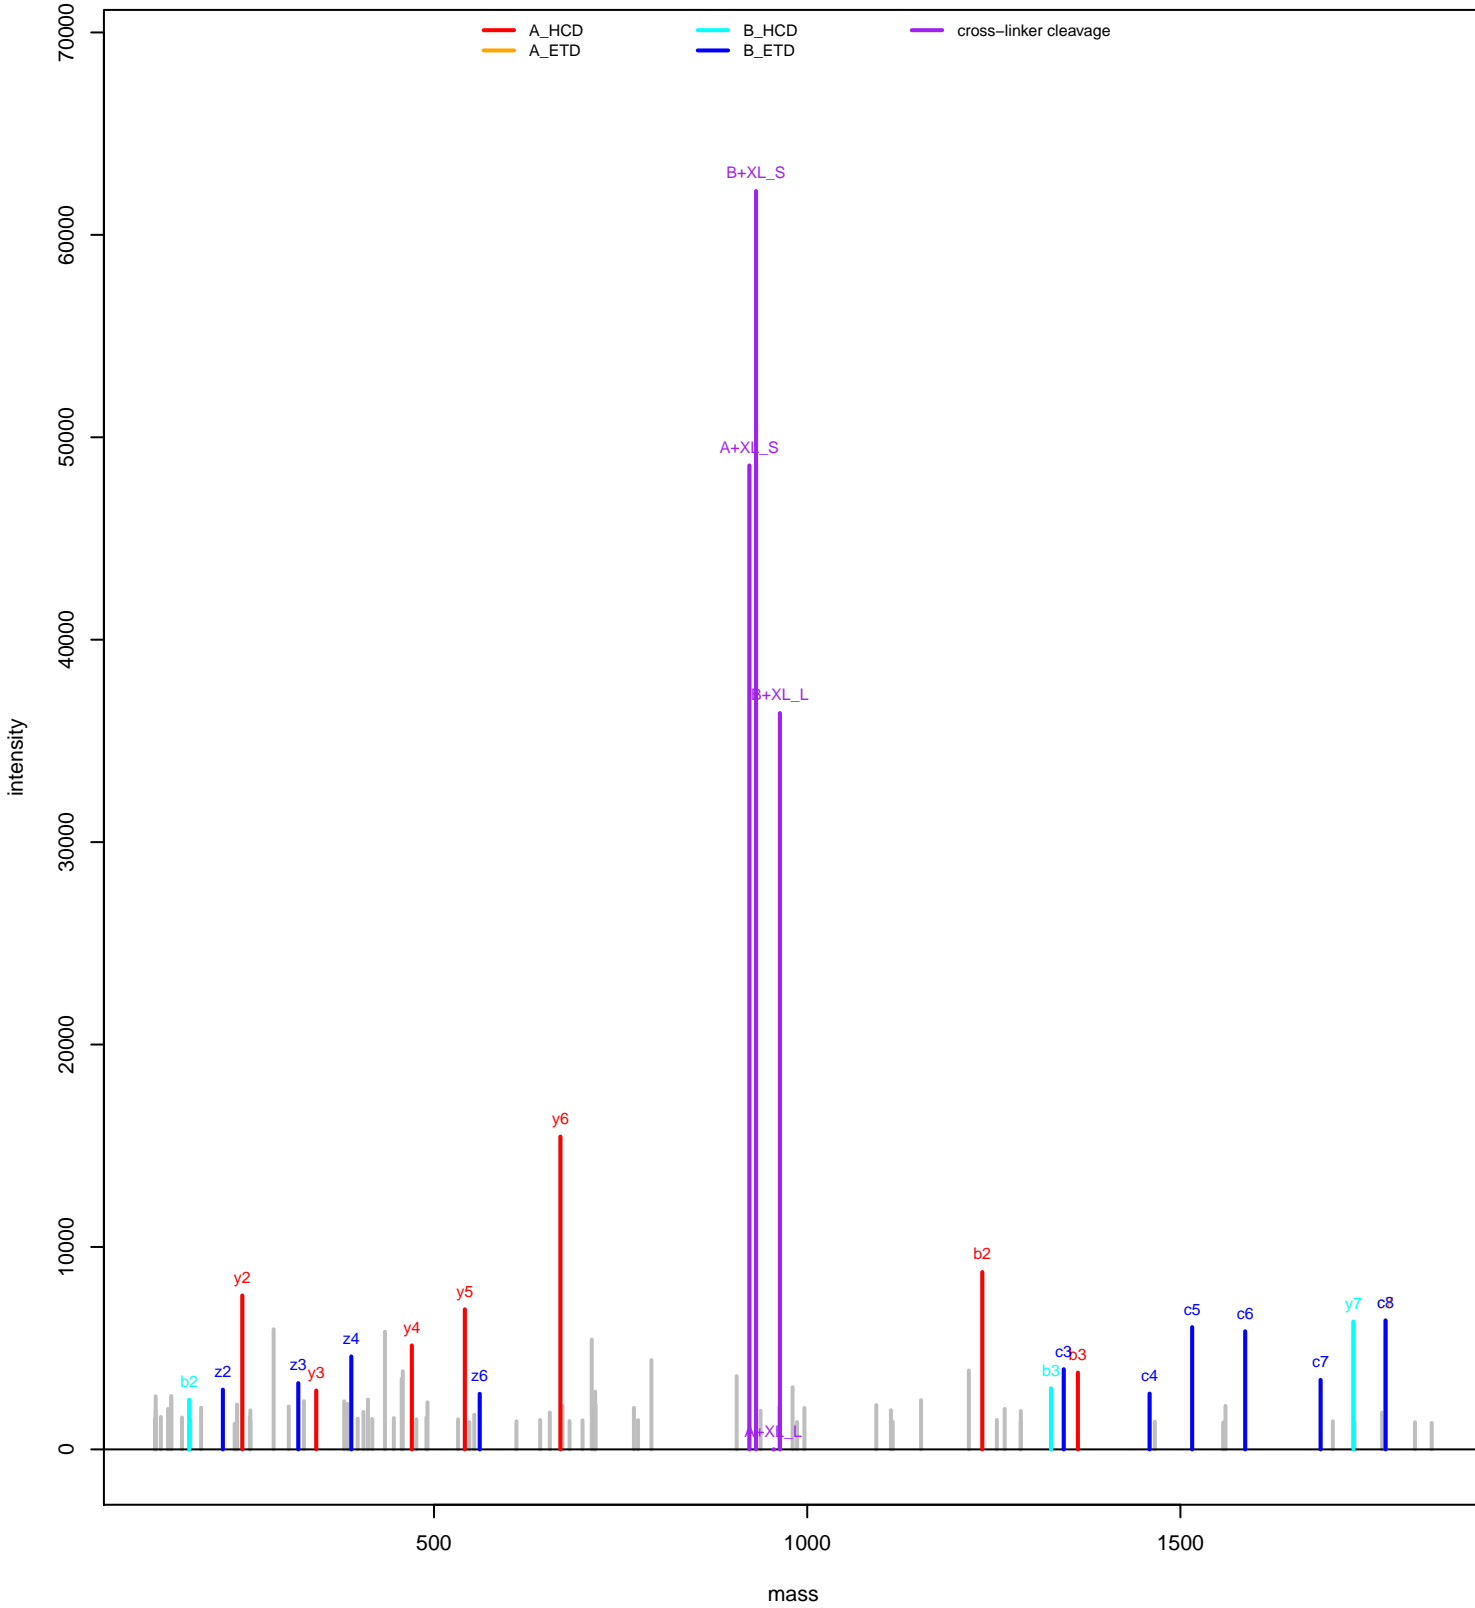

AKQAQVPK+XL\_S

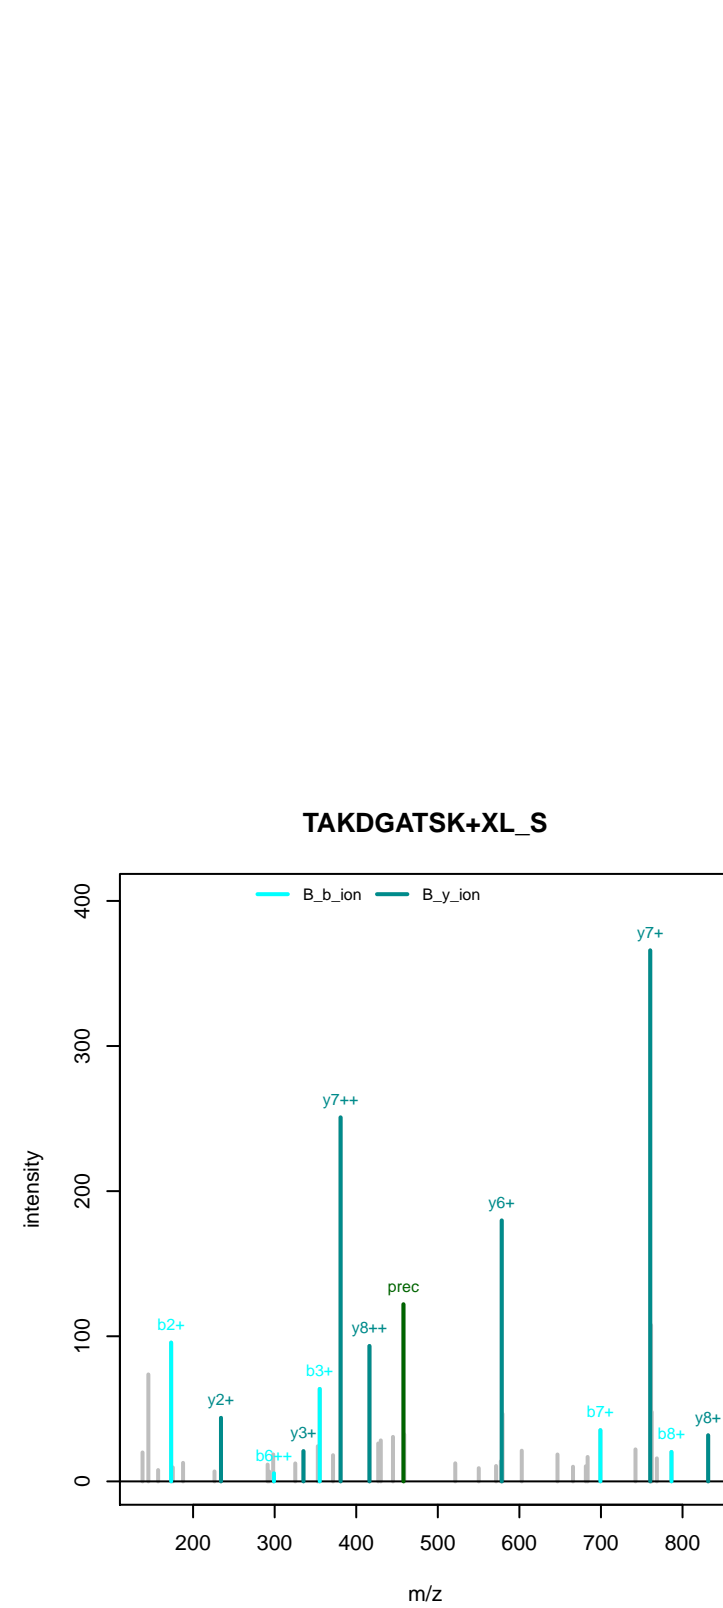

AKQAQVPK+XL\_L

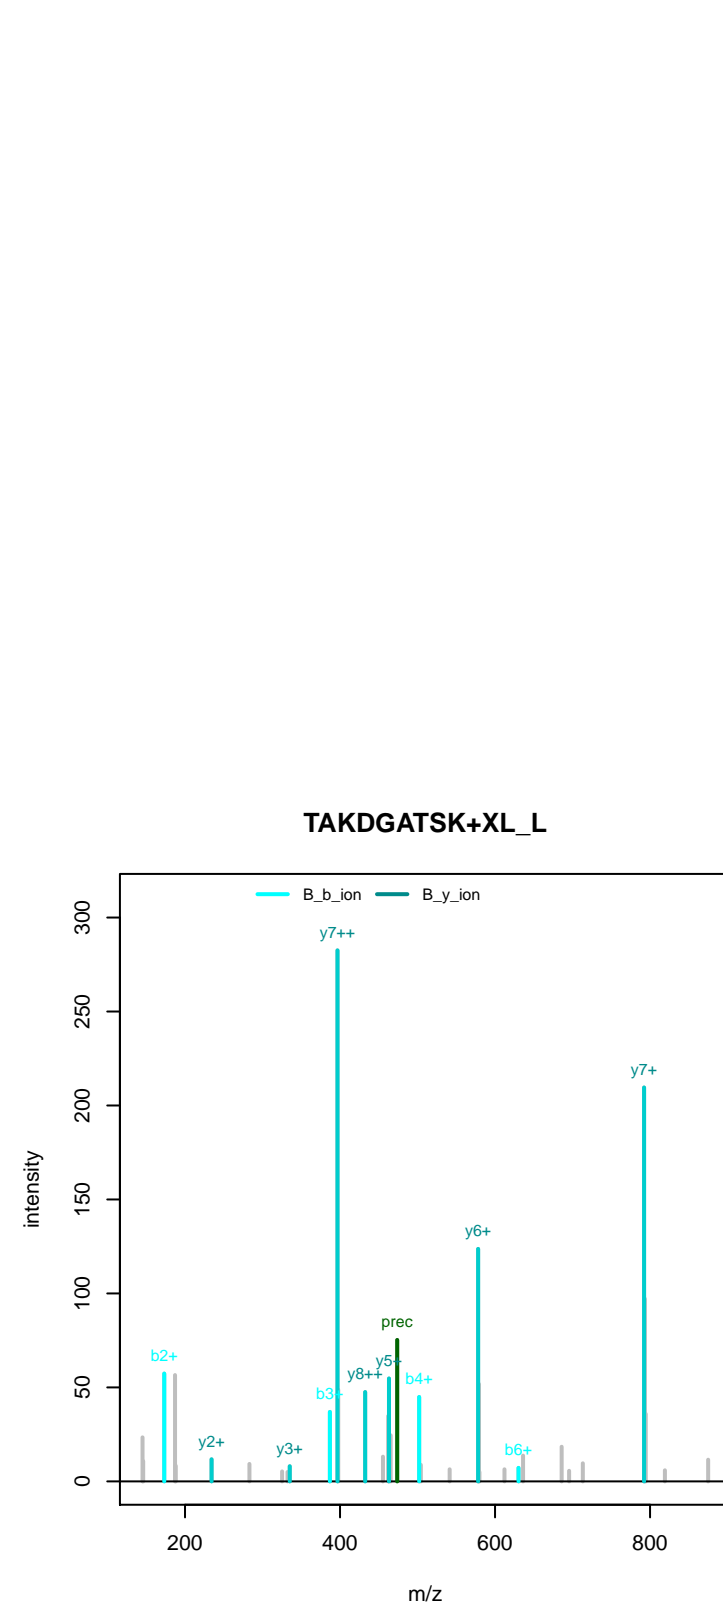

TAKDGATSK+XL\_S

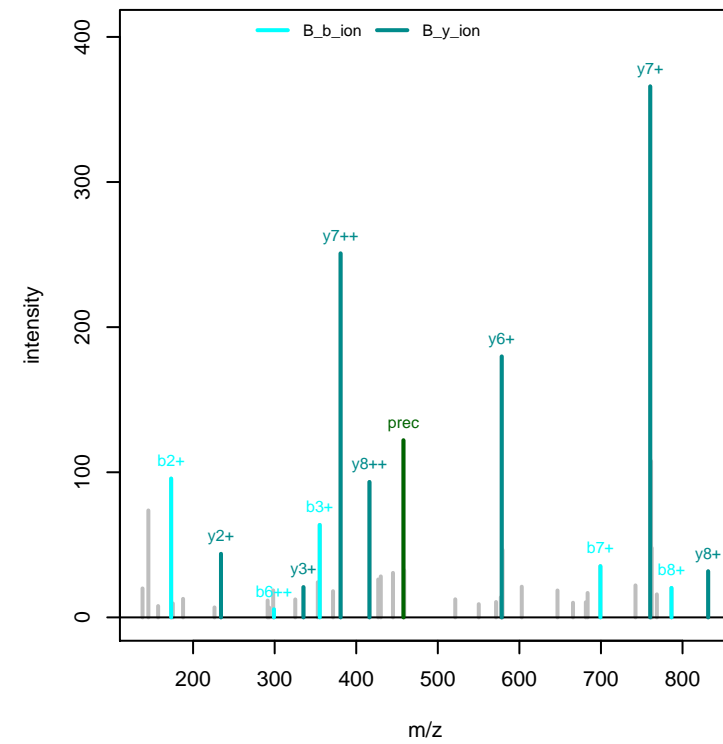

TAKDGATSK+XL\_L

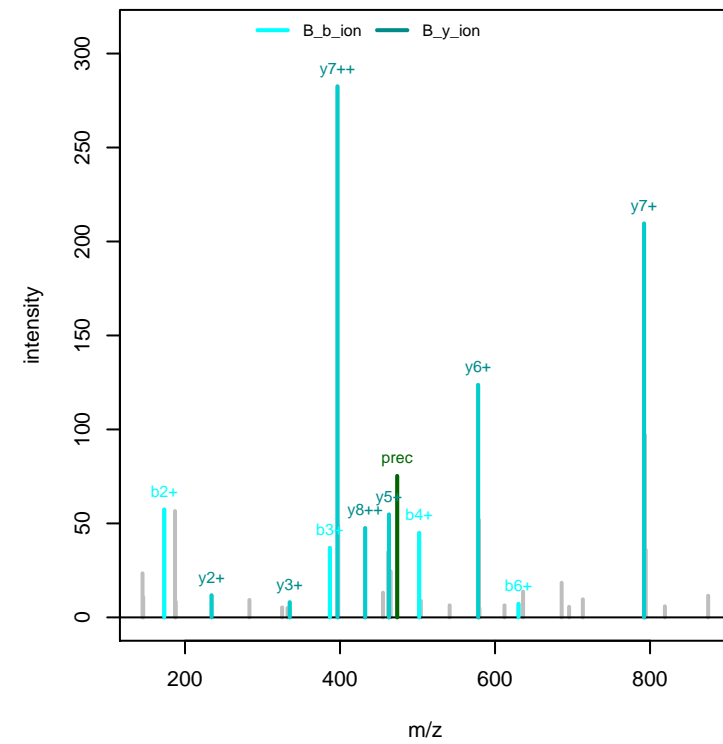

GVSEAKAAGK  
AAAVANQGKAK

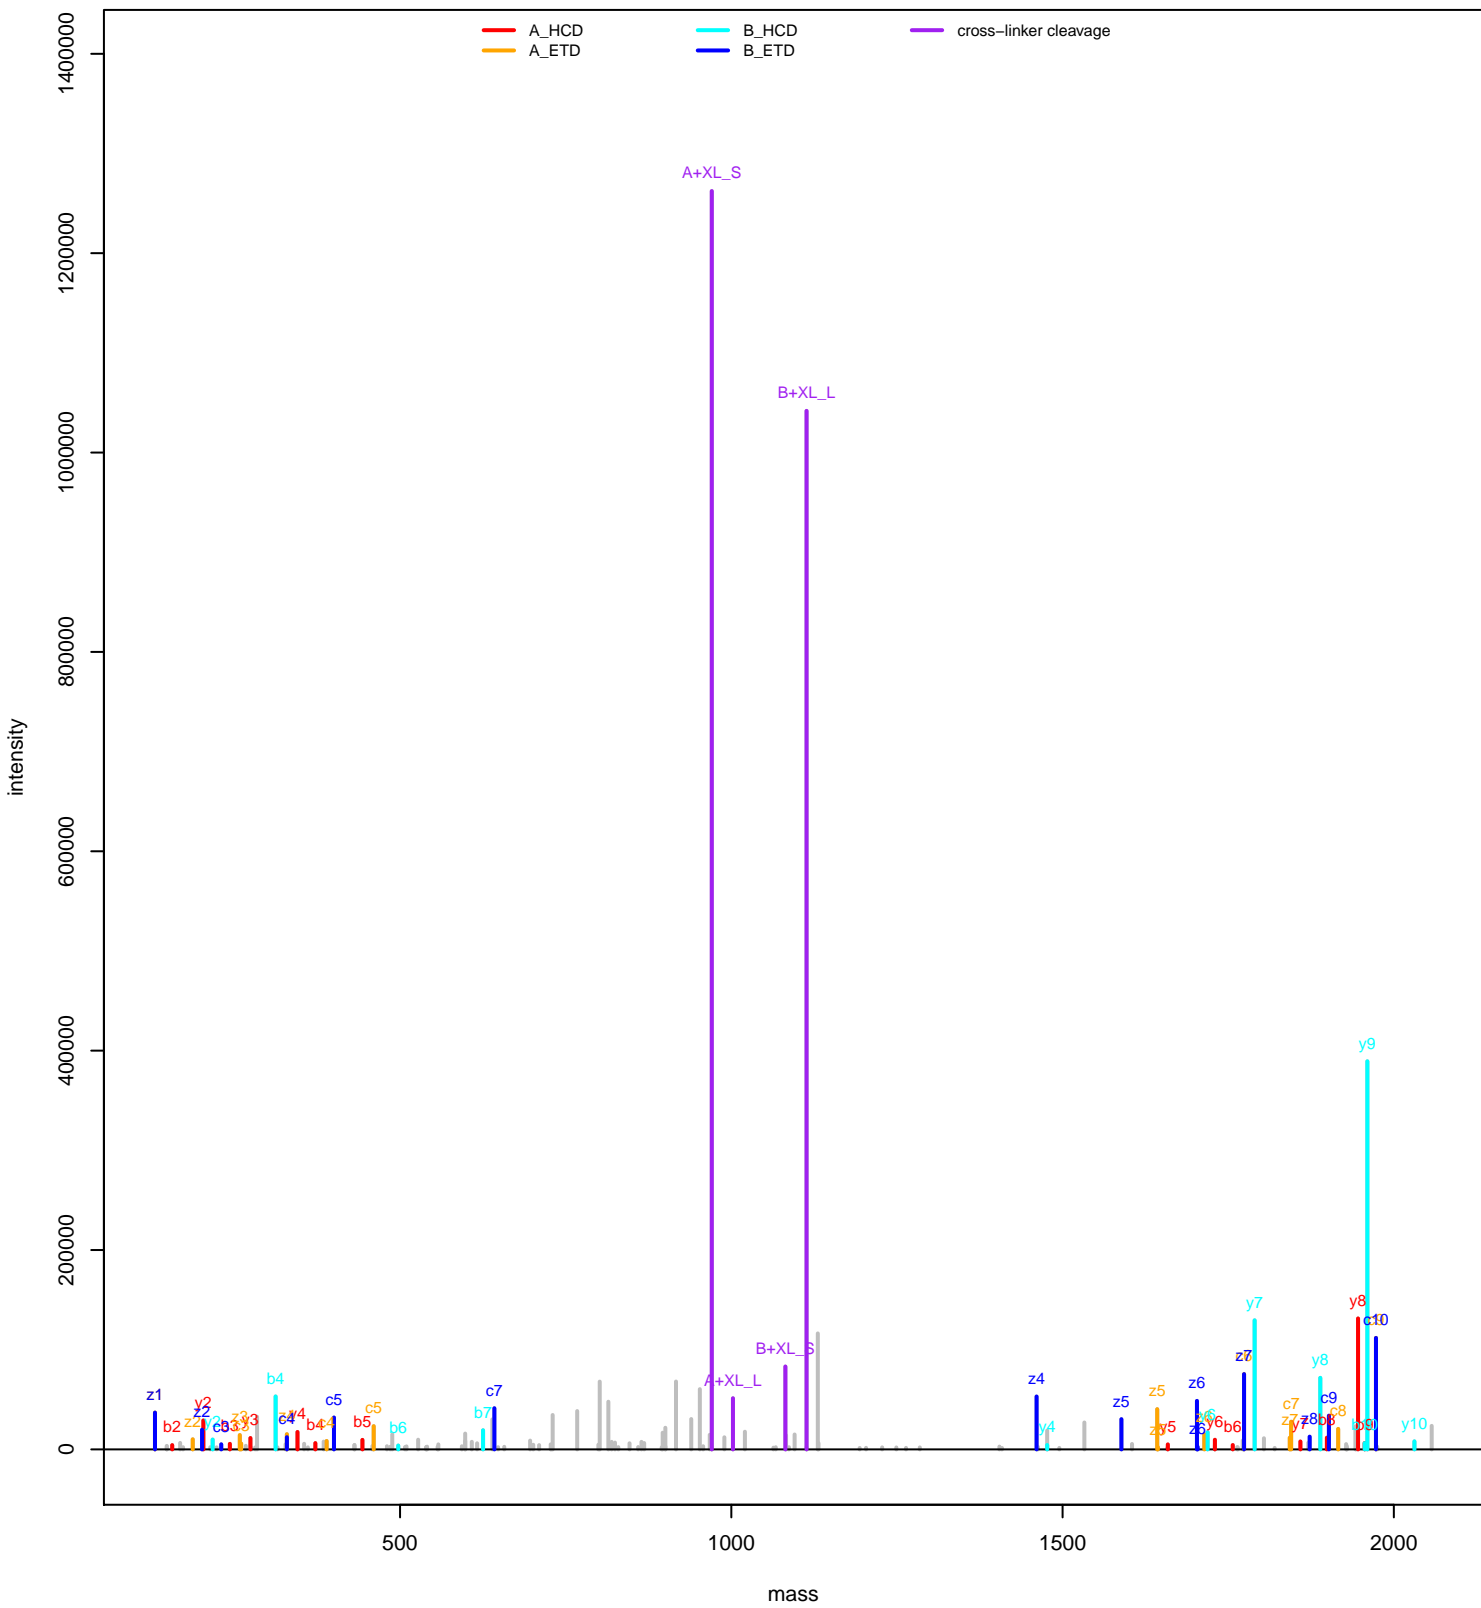

GVSEAKAAGK+XL\_S

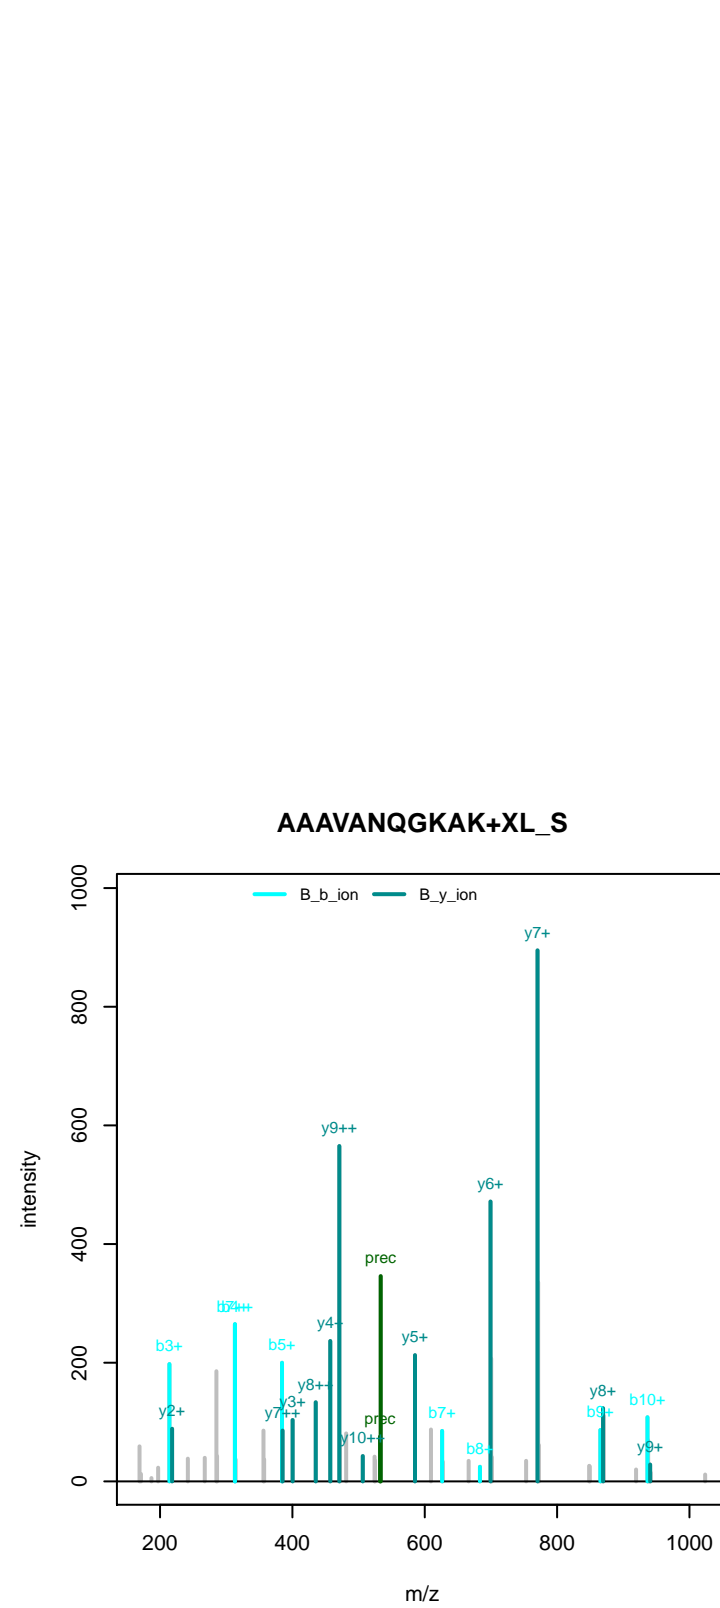

GVSEAKAAGK+XL\_L

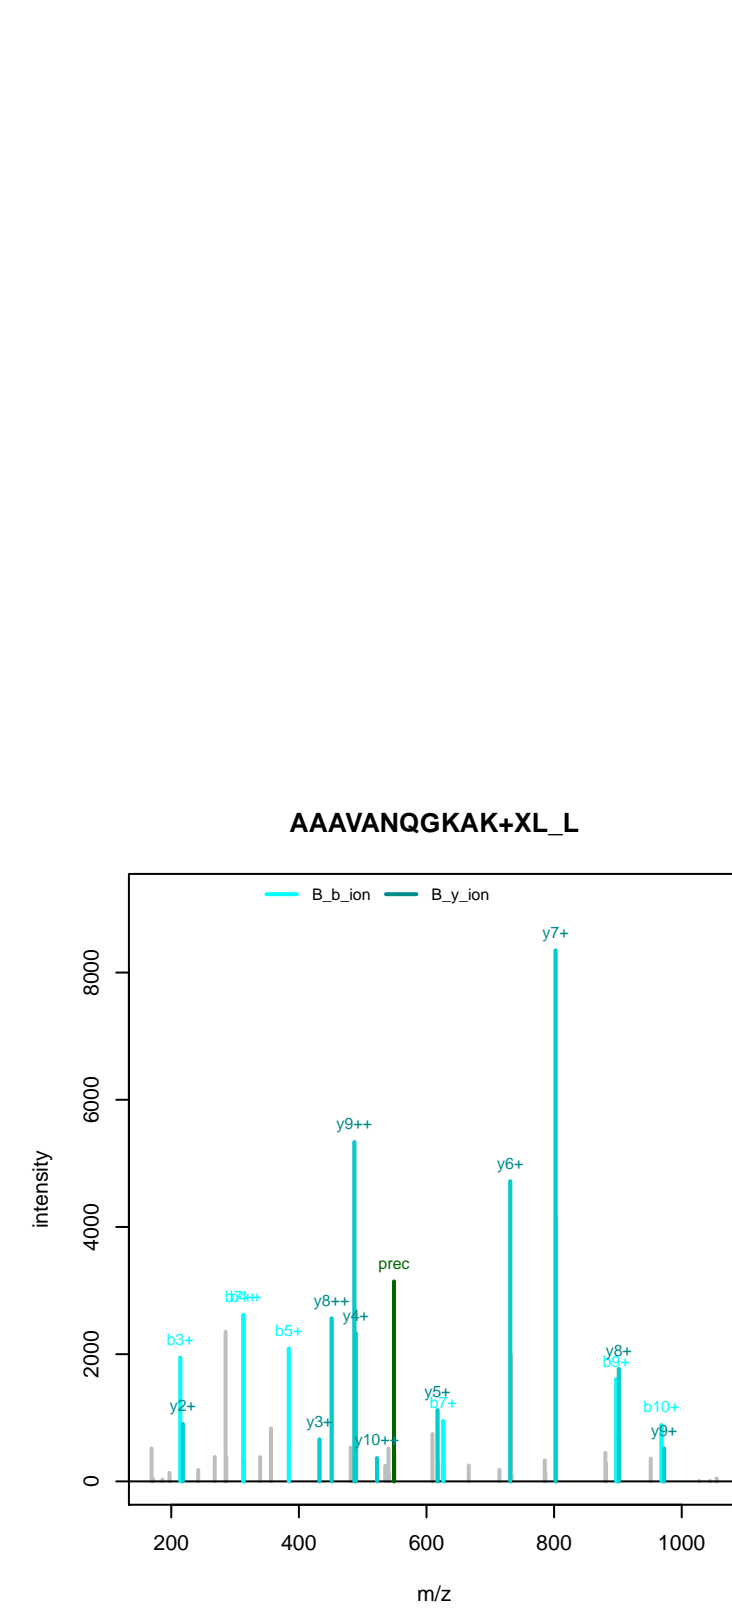

AAAVANQGKAK+XL\_S

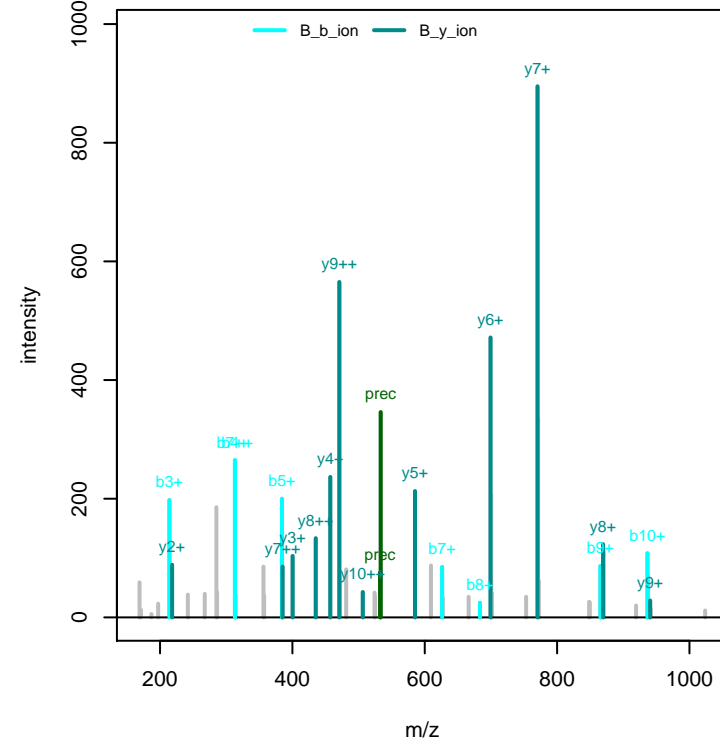

AAAVANQGKAK+XL\_L

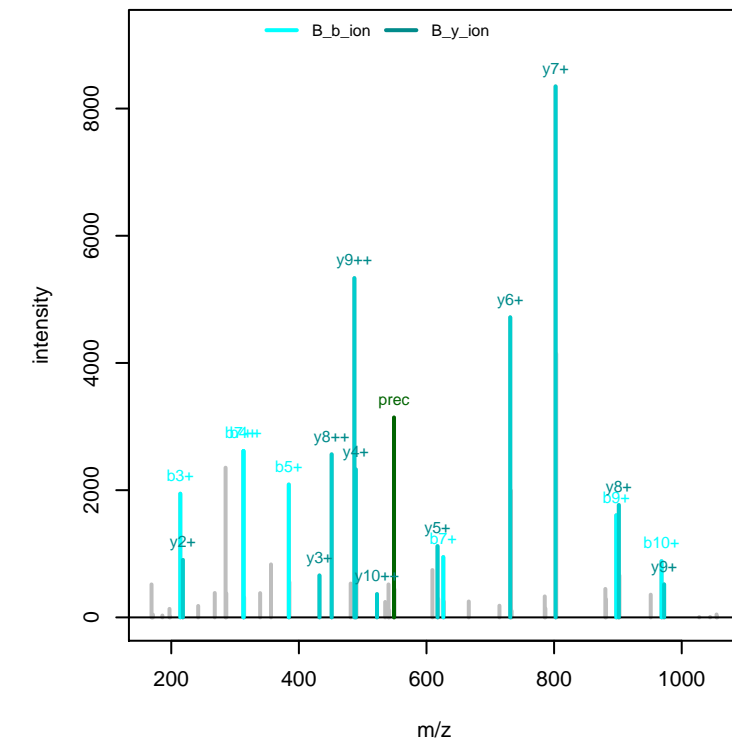

EAAPAKAEK  
DYVEGETAAKK

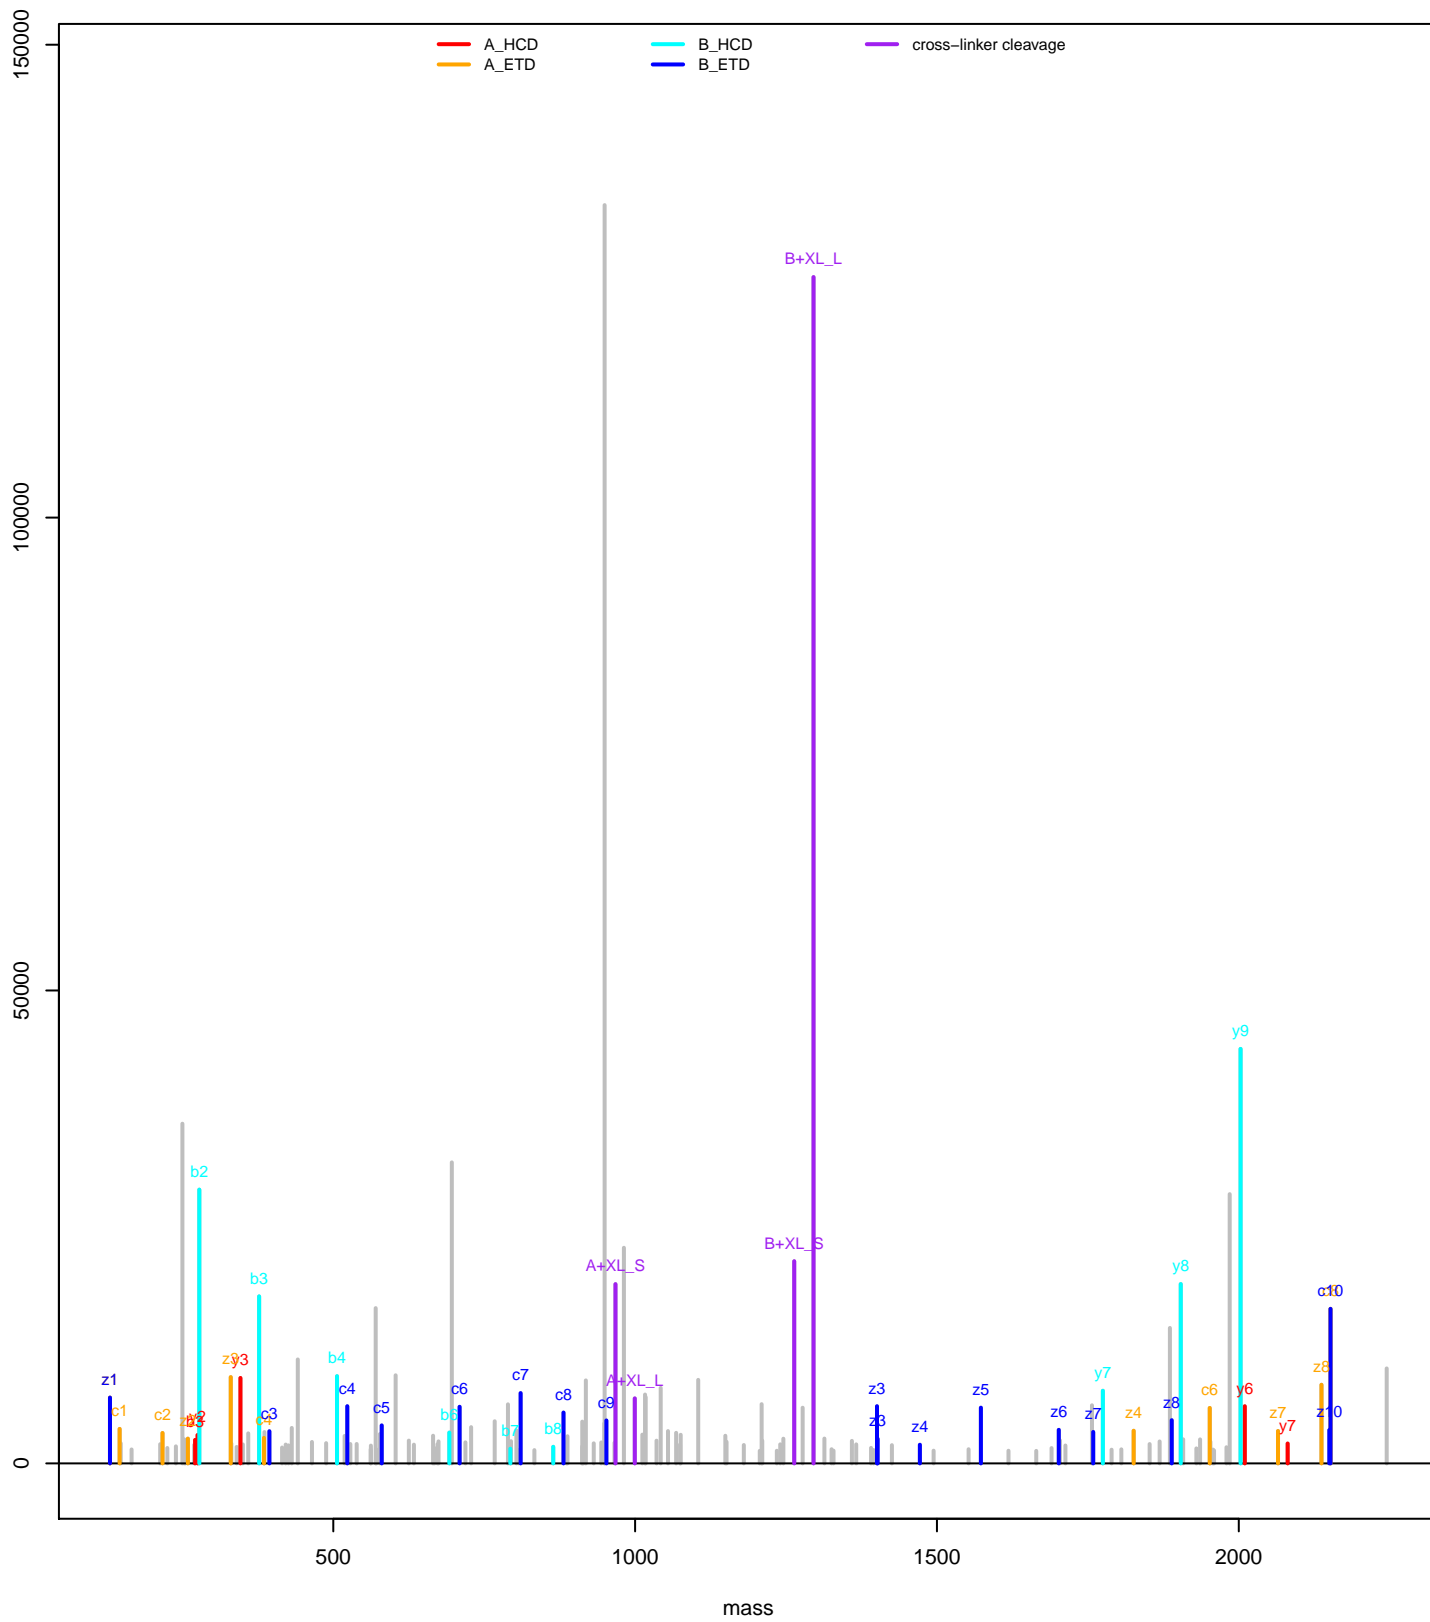

EAAPAKAEK+XL\_S

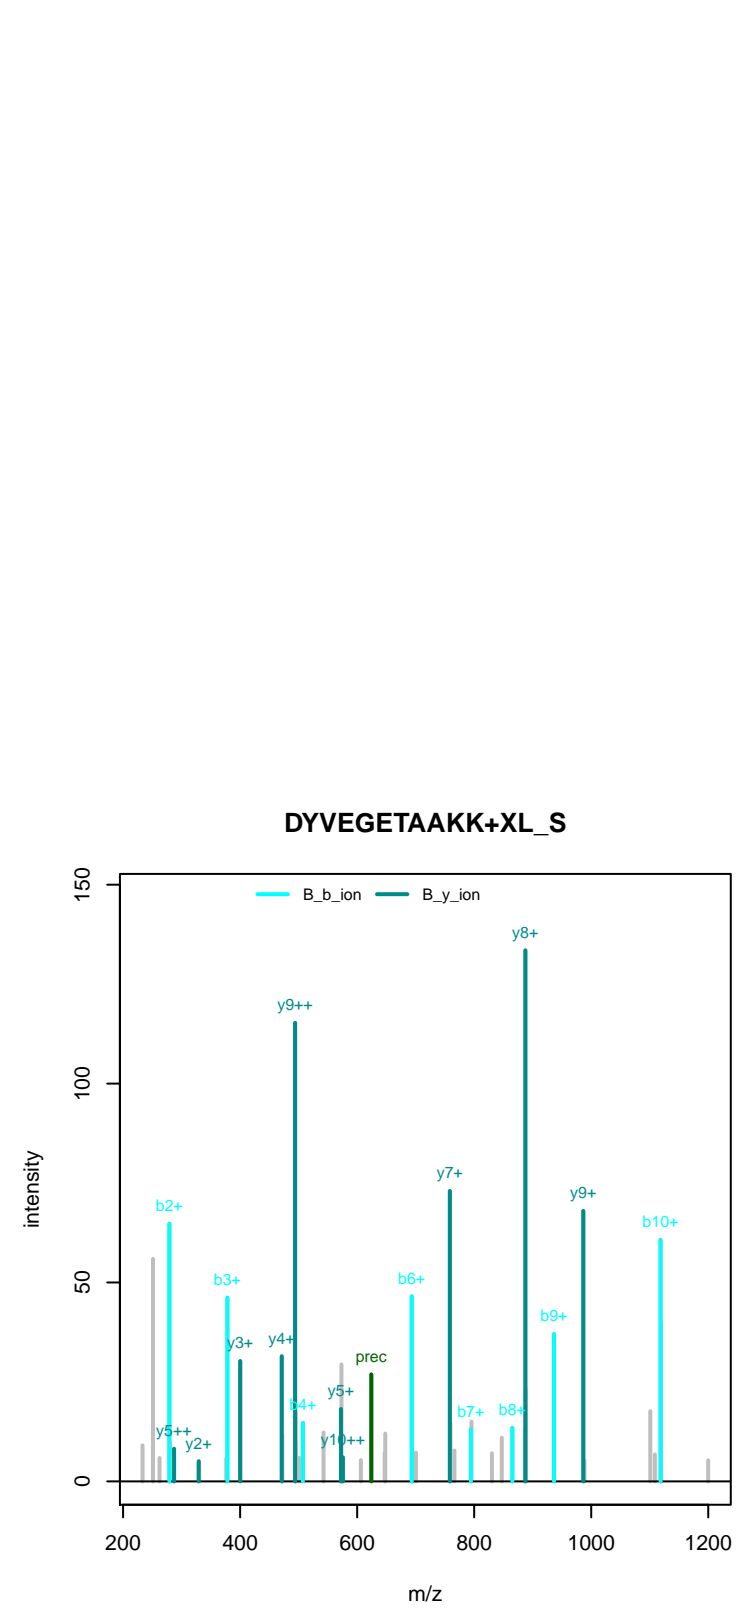

EAAPAKAEK+XL\_L

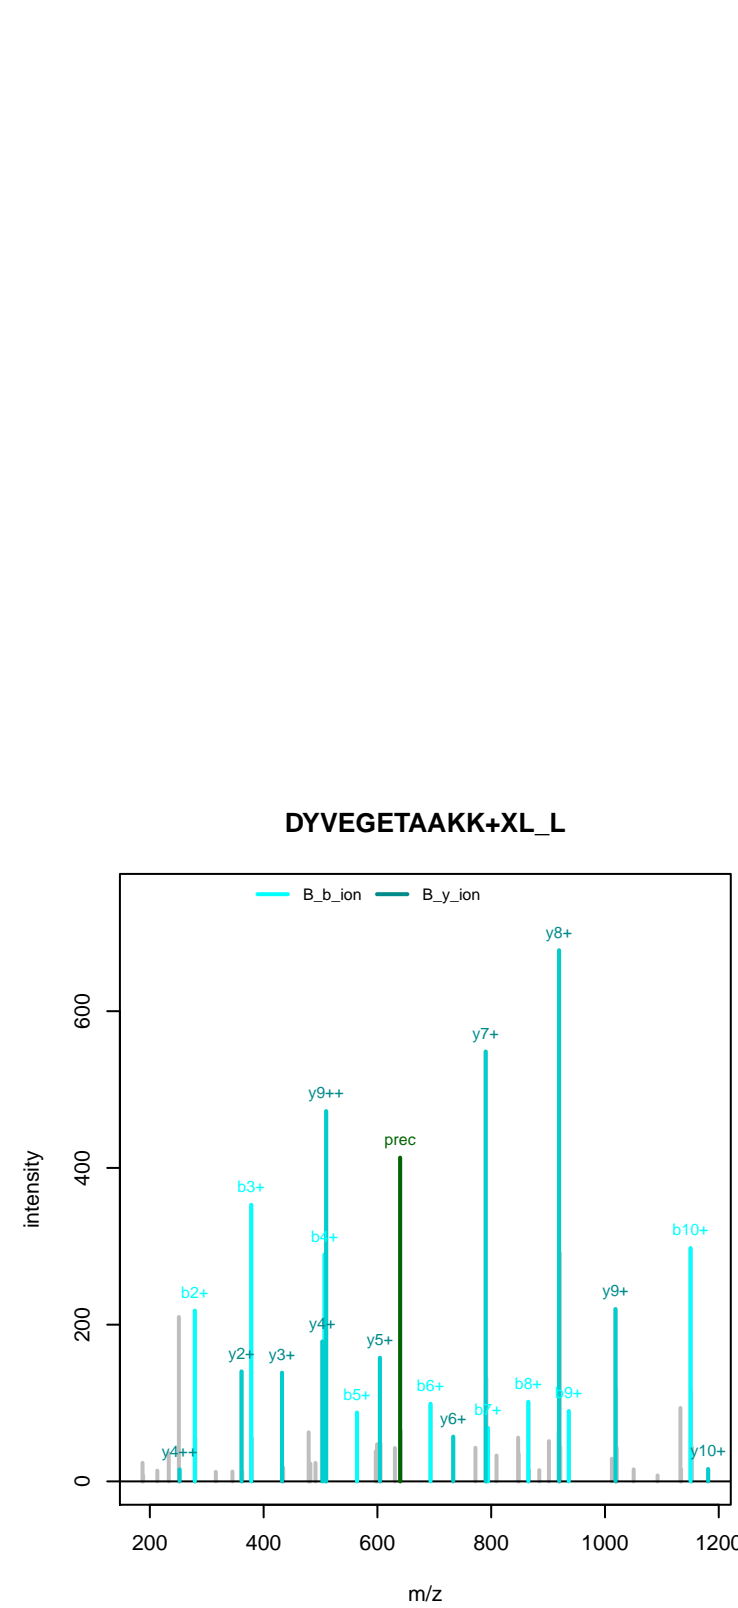

DYVEGETAAKK+XL\_S

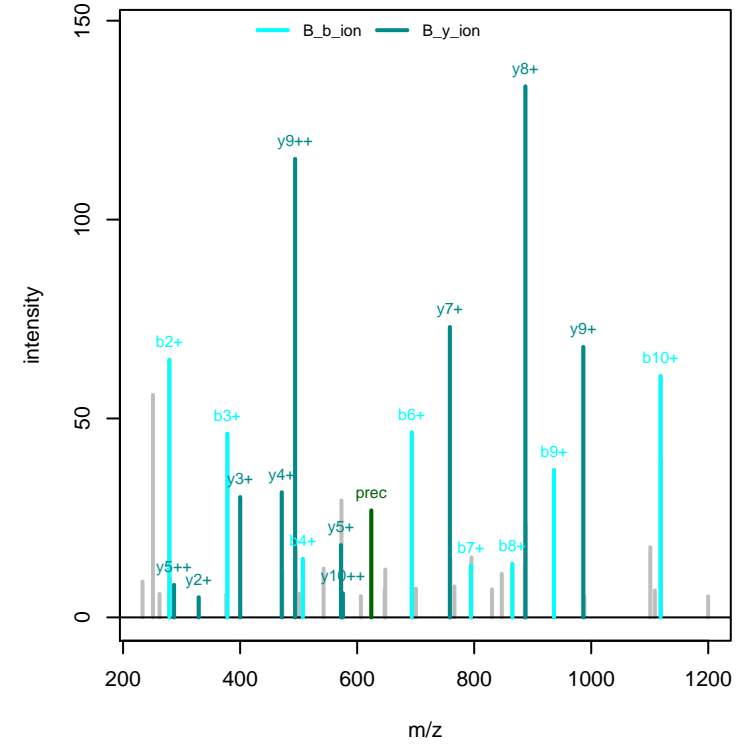

DYVEGETAAKK+XL\_L

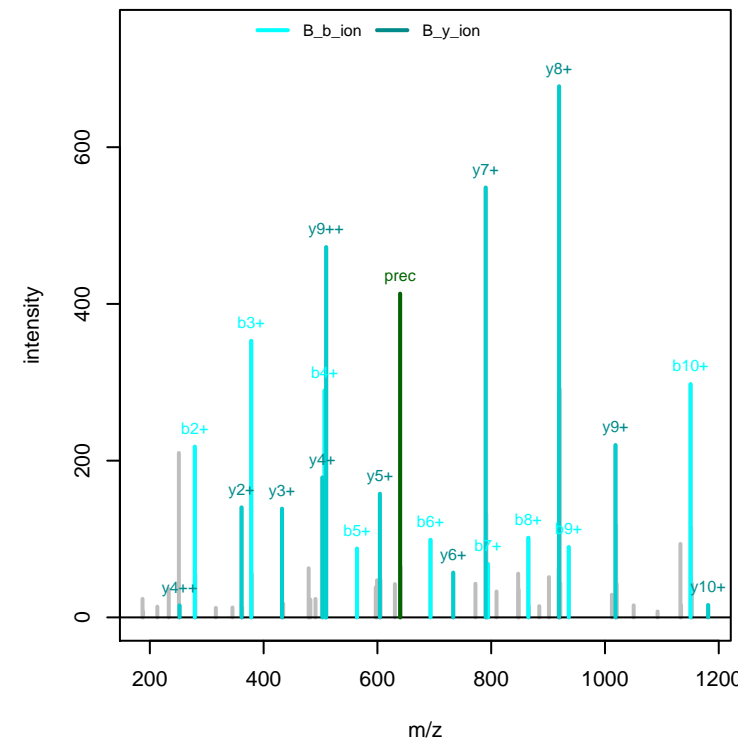

NAQAEKAR  
REAAEKDK

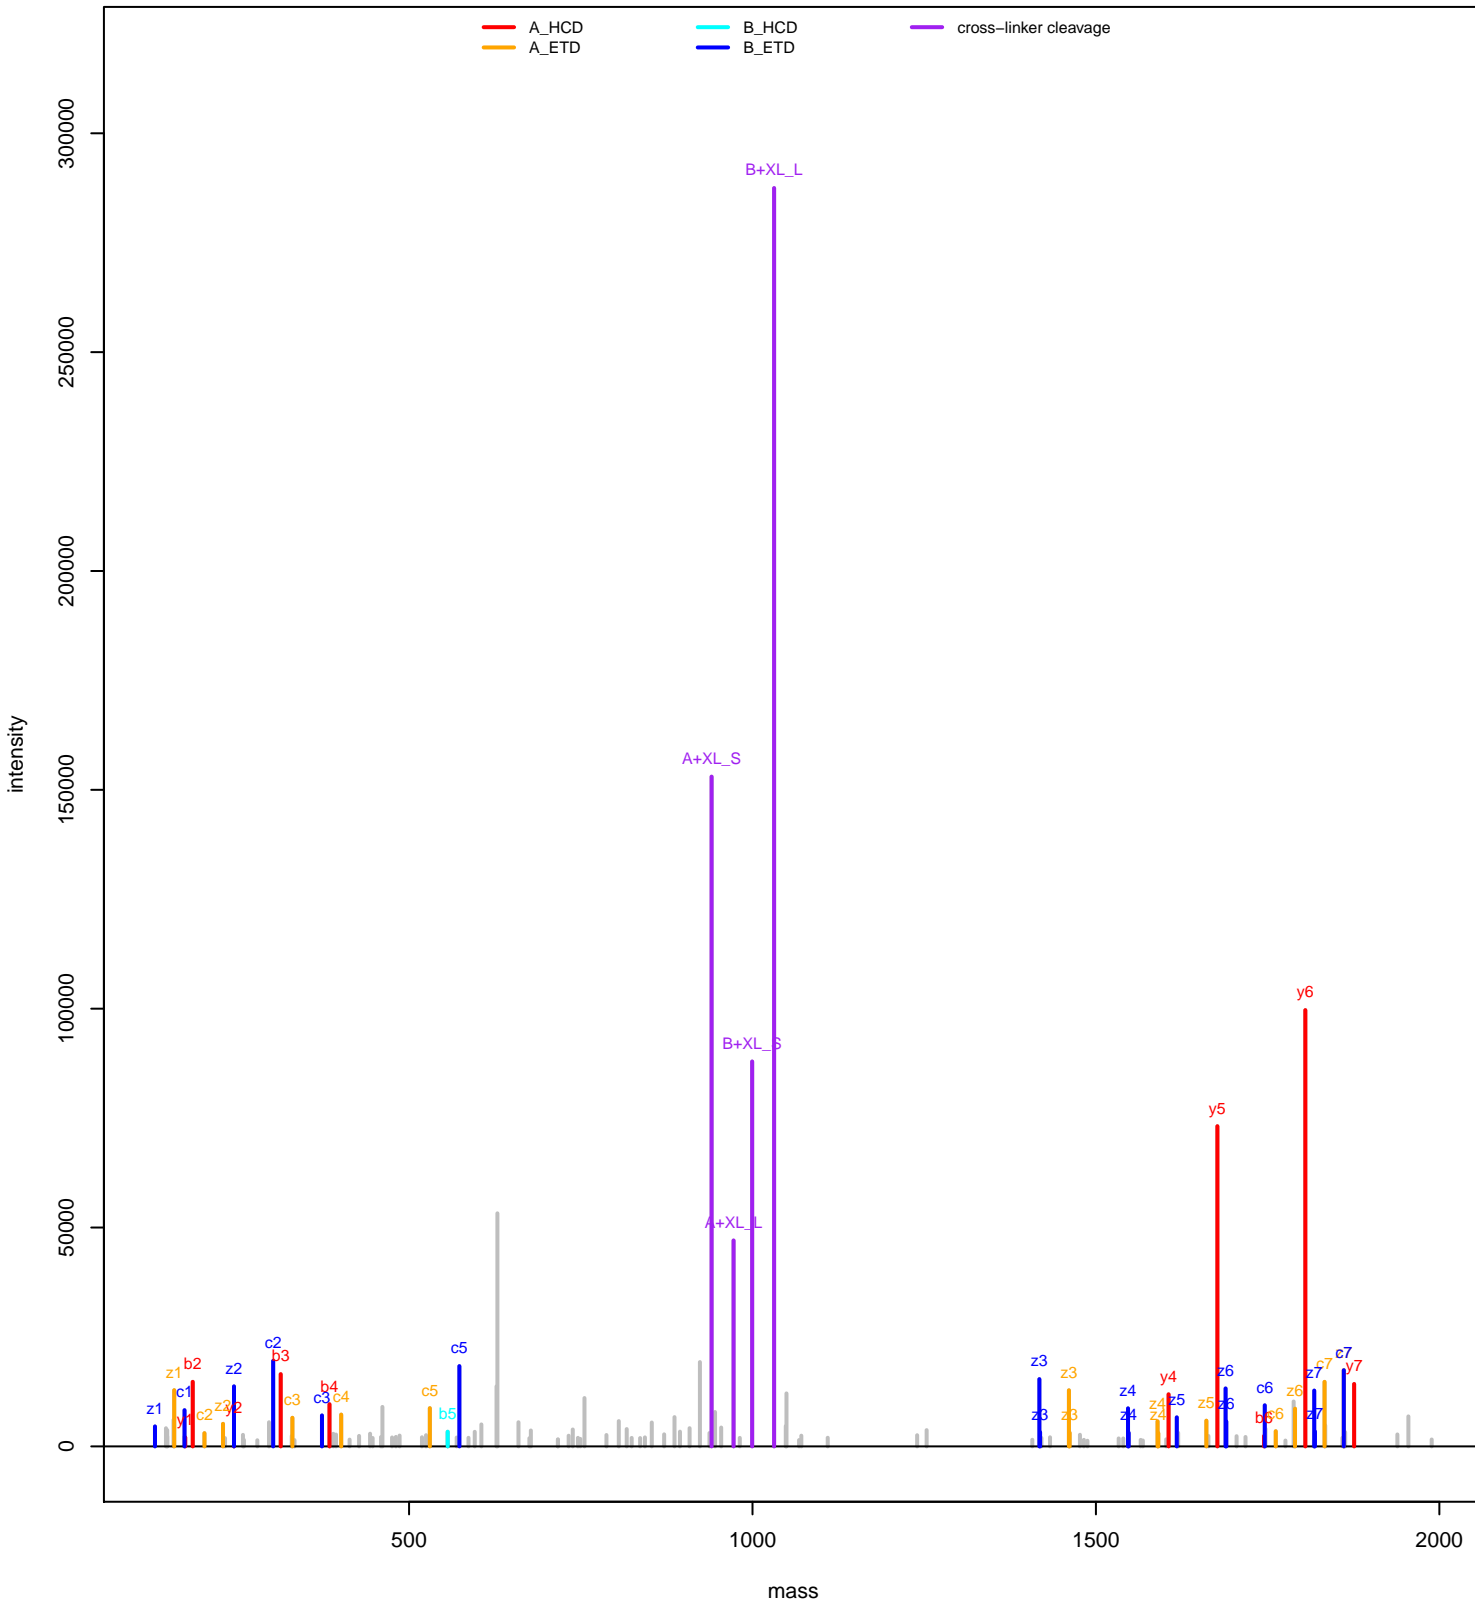

NAQAEKAR+XL\_S

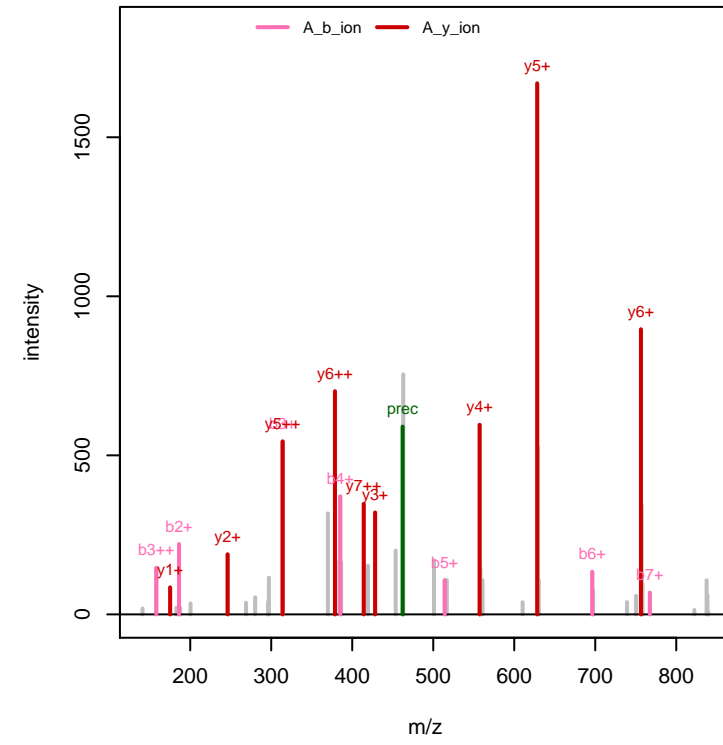

NAQAEKAR+XL\_L

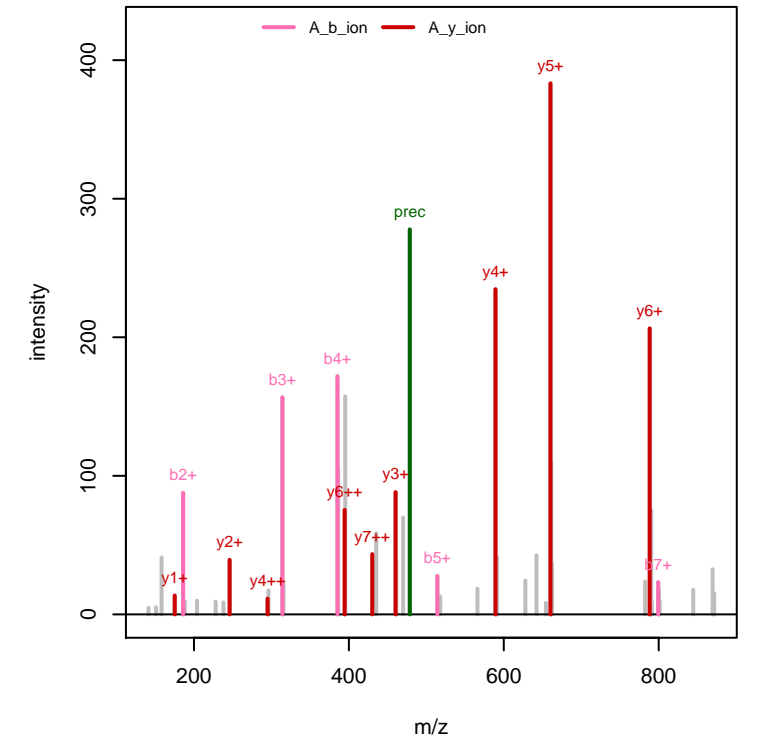

REAAEKDK+XL\_S

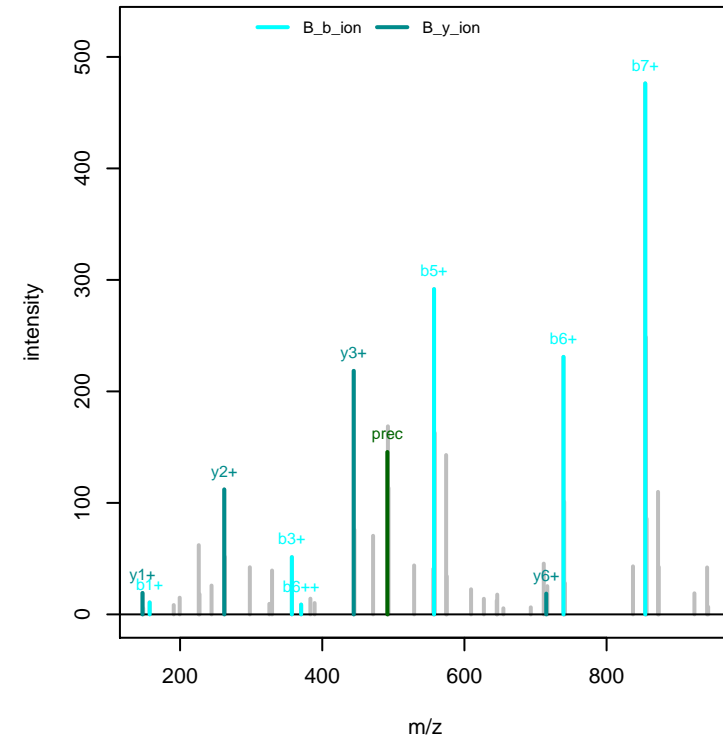

REAAEKDK+XL\_L

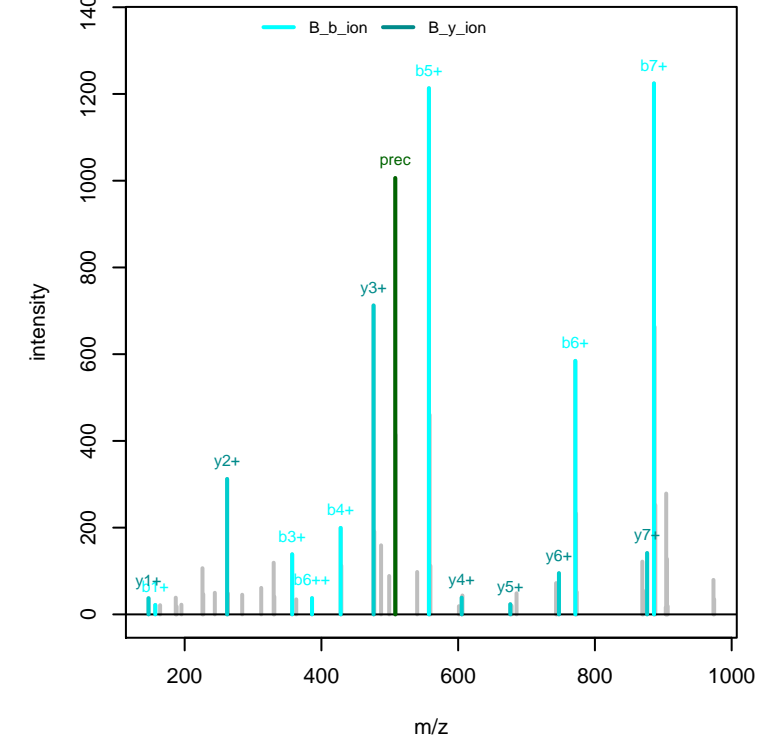



AKPTQAK  
KSDQNVR

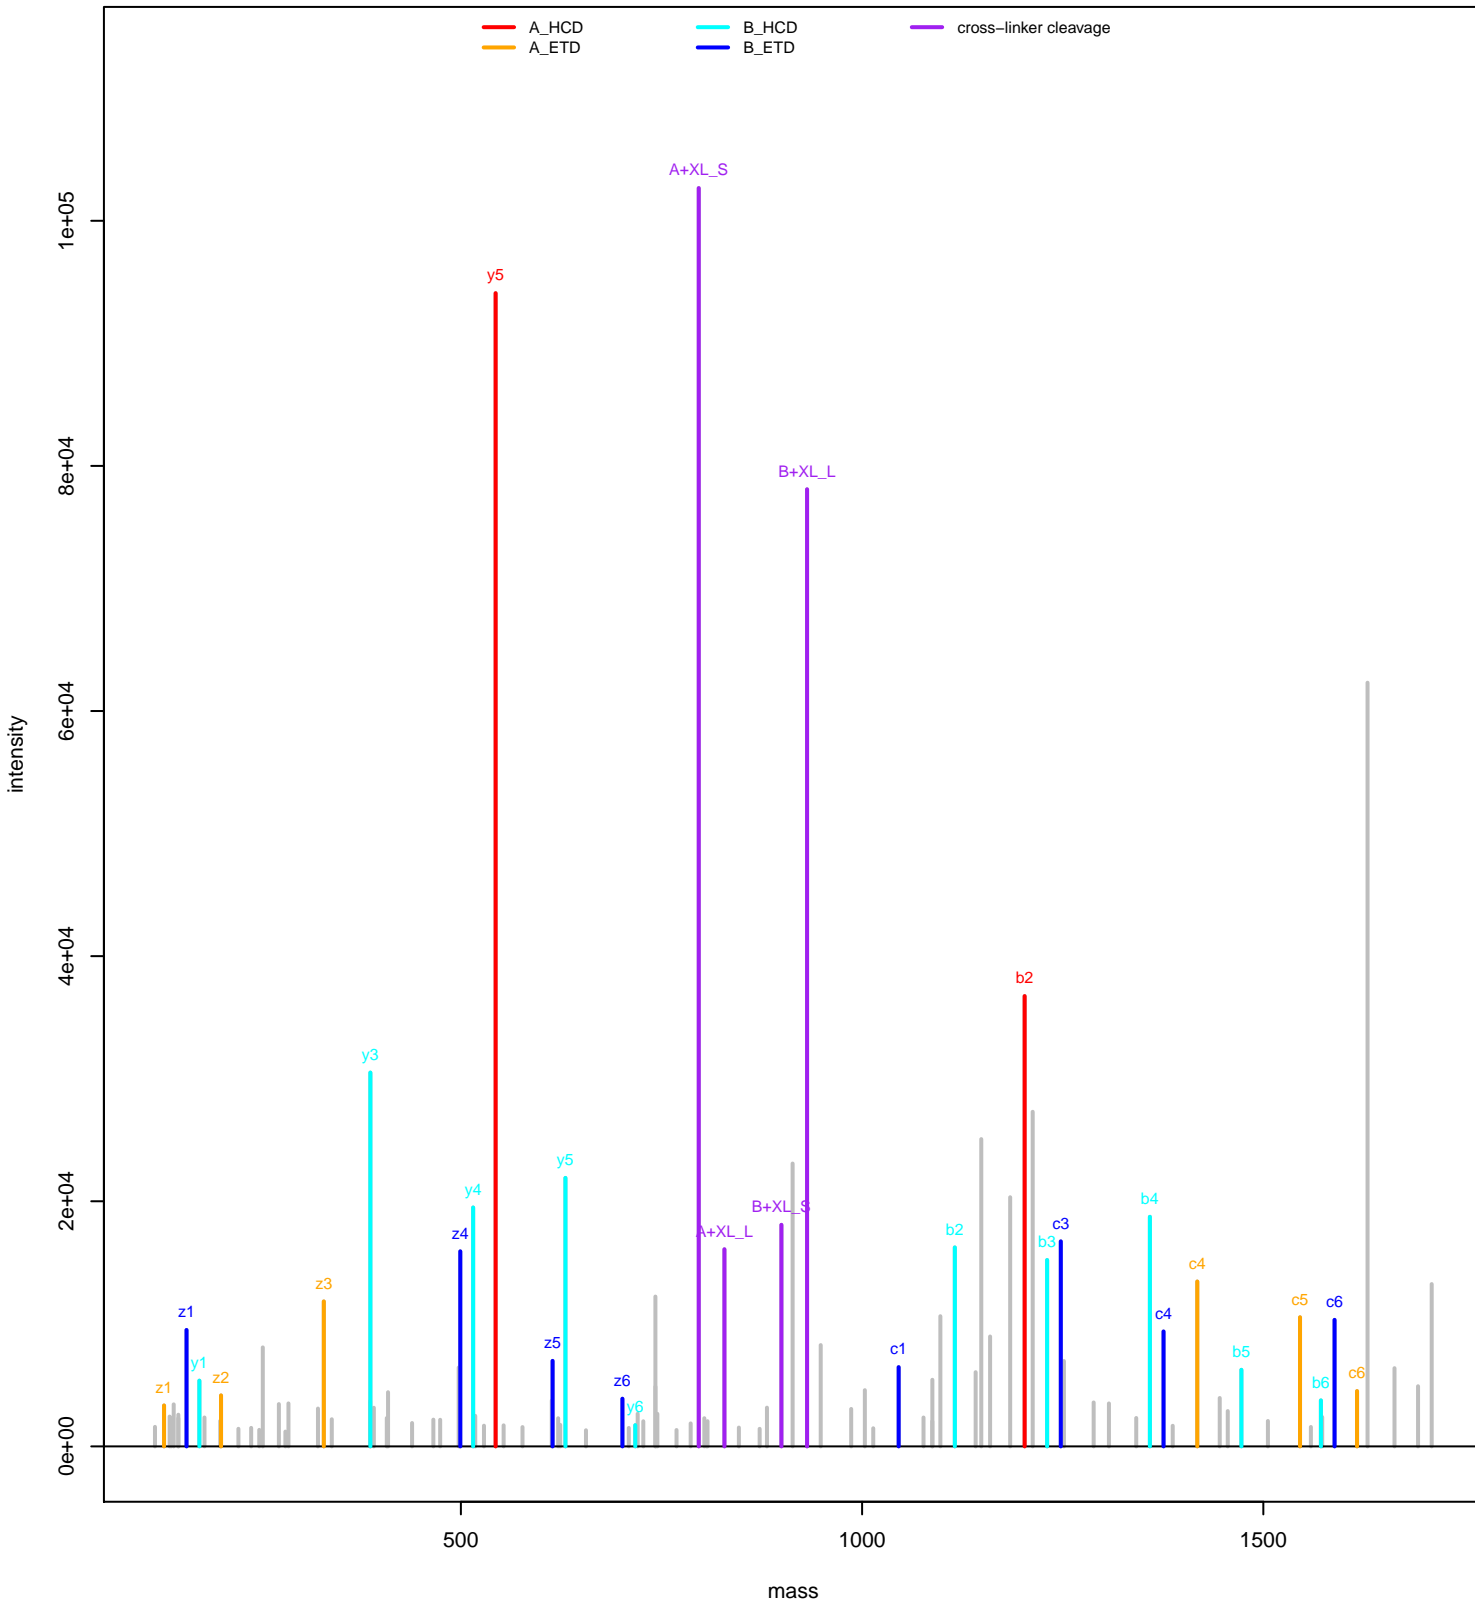

AKPTQAK+XL\_S

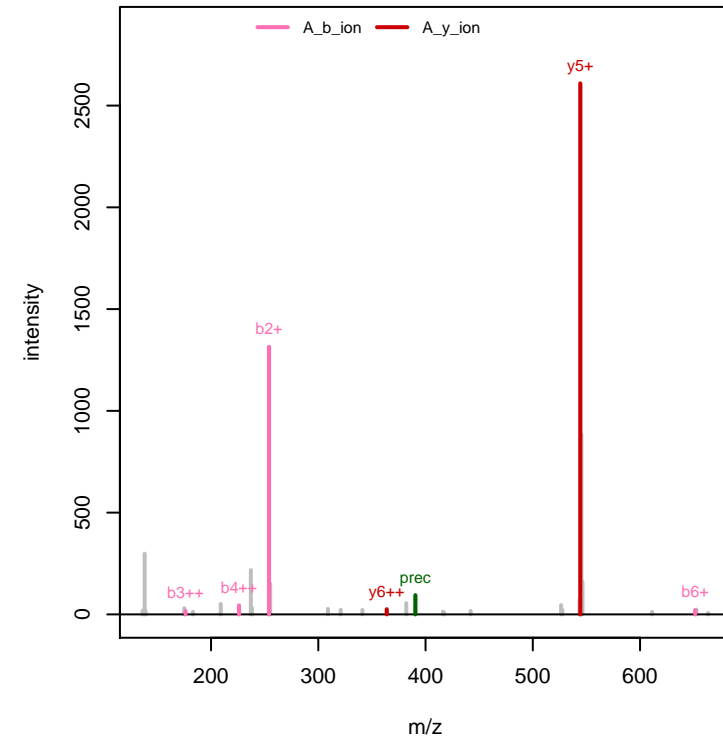

AKPTQAK+XL\_L

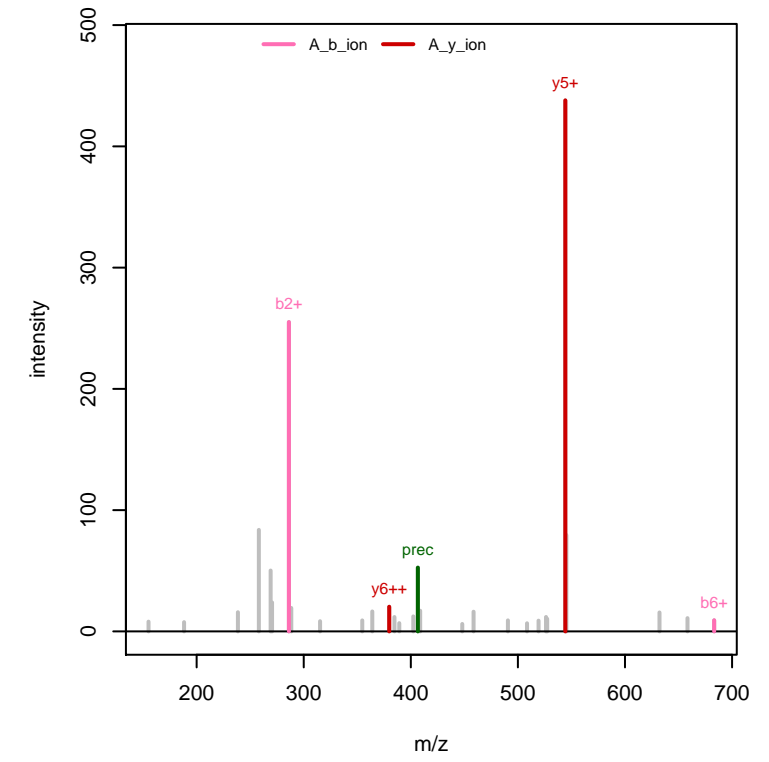

KSDQNVR+XL\_S

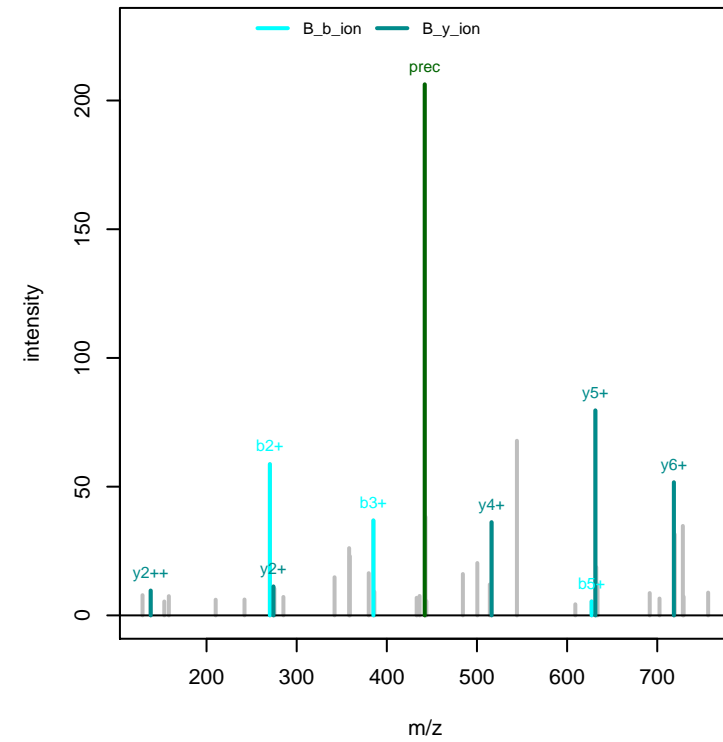

KSDQNVR+XL\_L

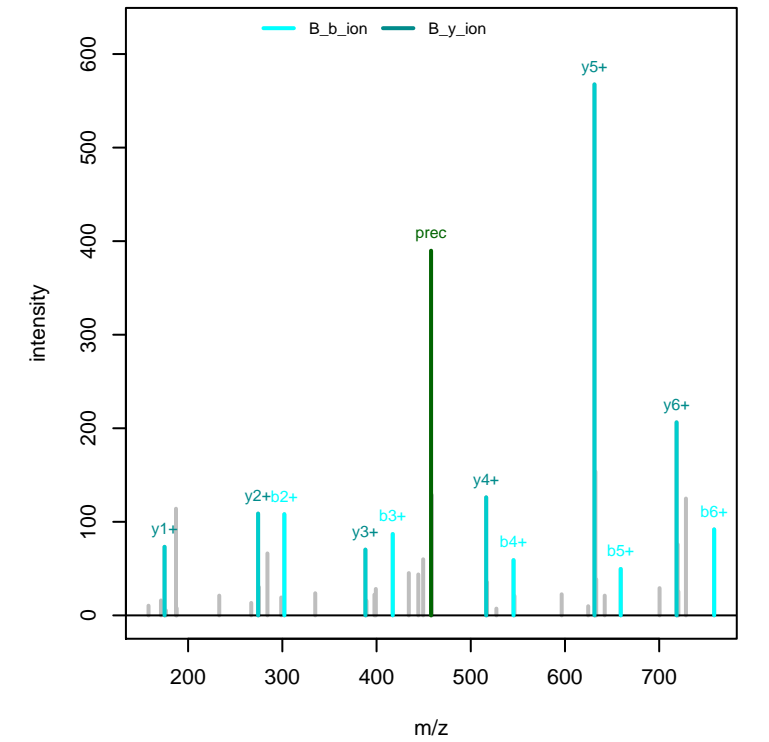

GHAADKK  
KVEADCR

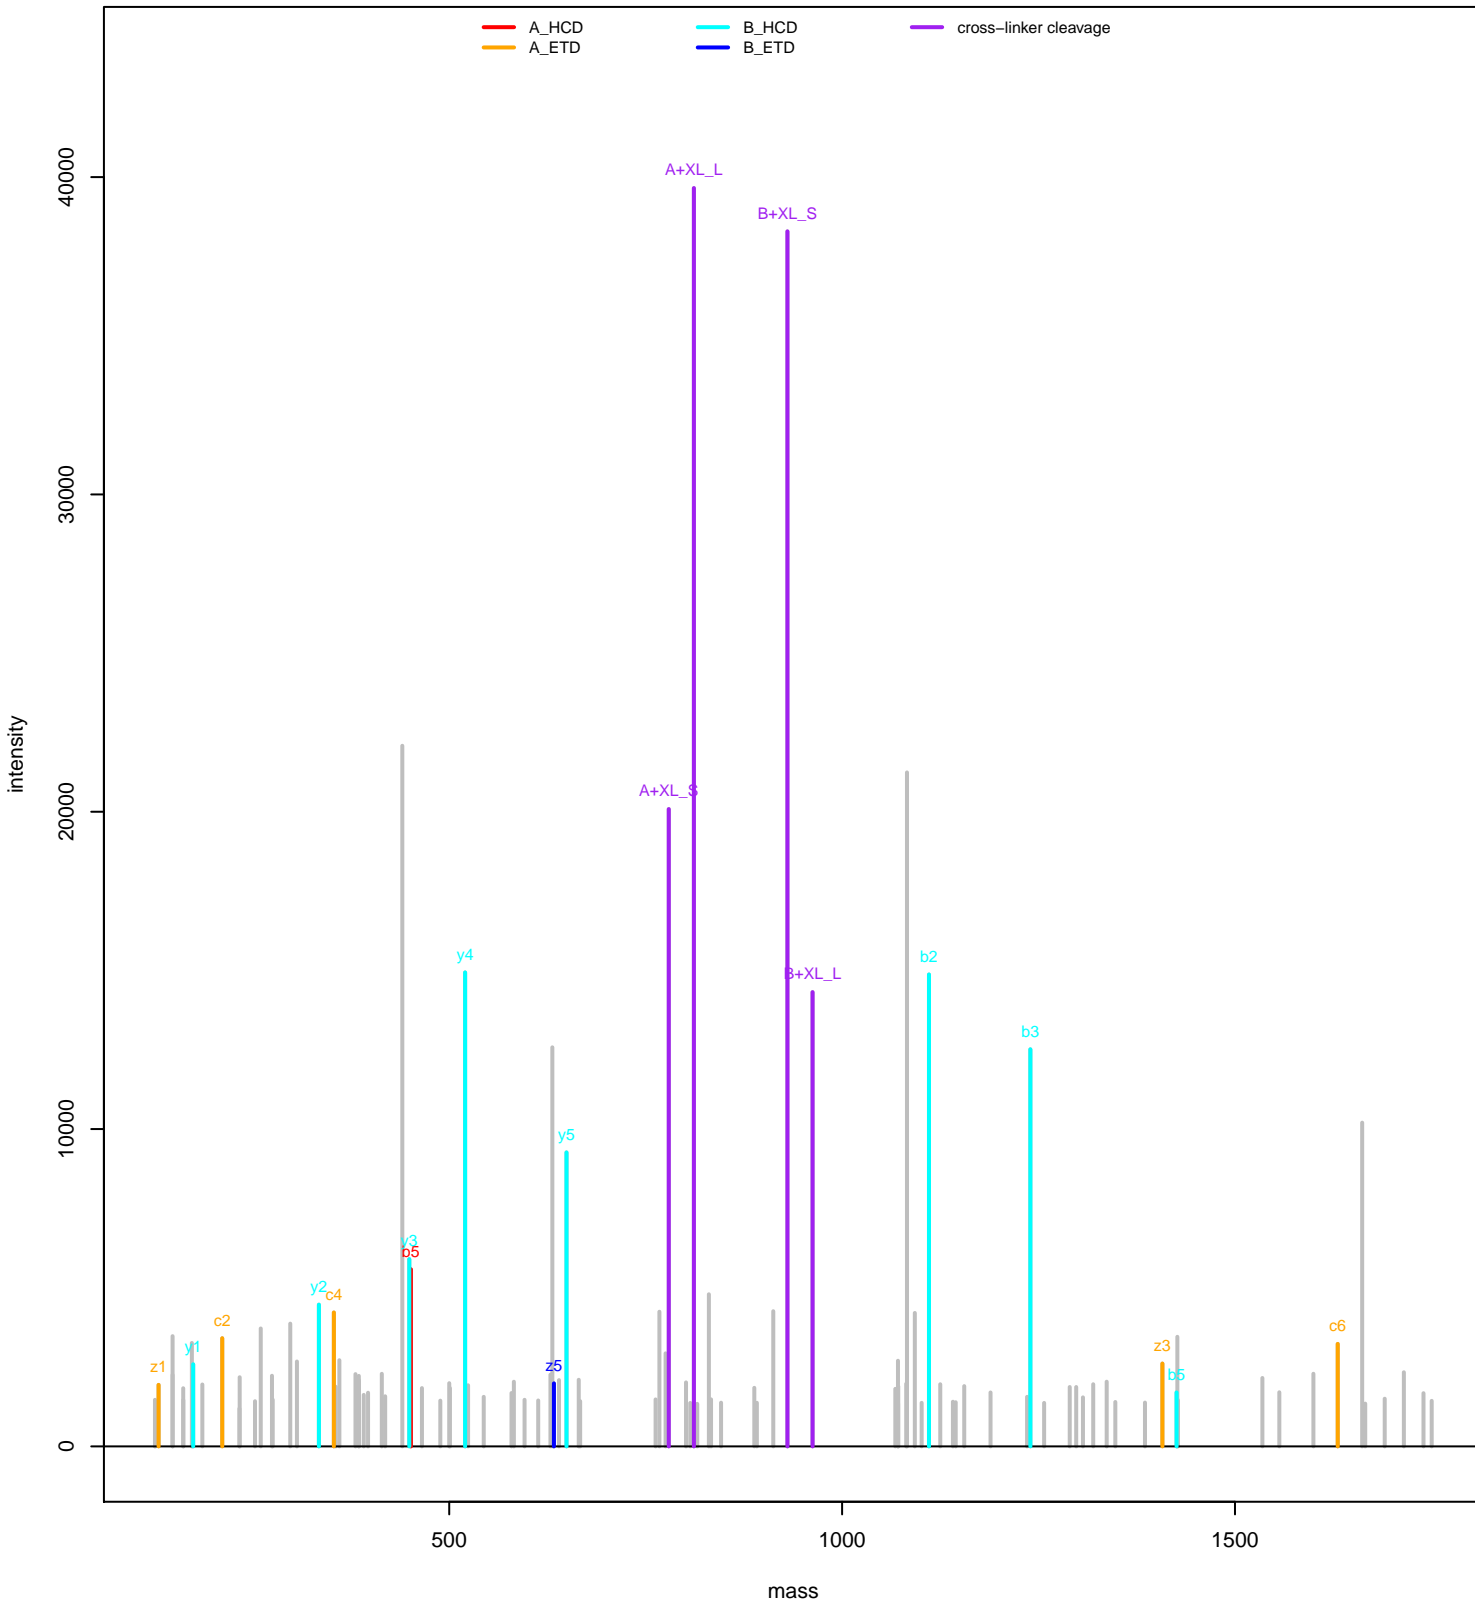

GHAADKK+XL\_S

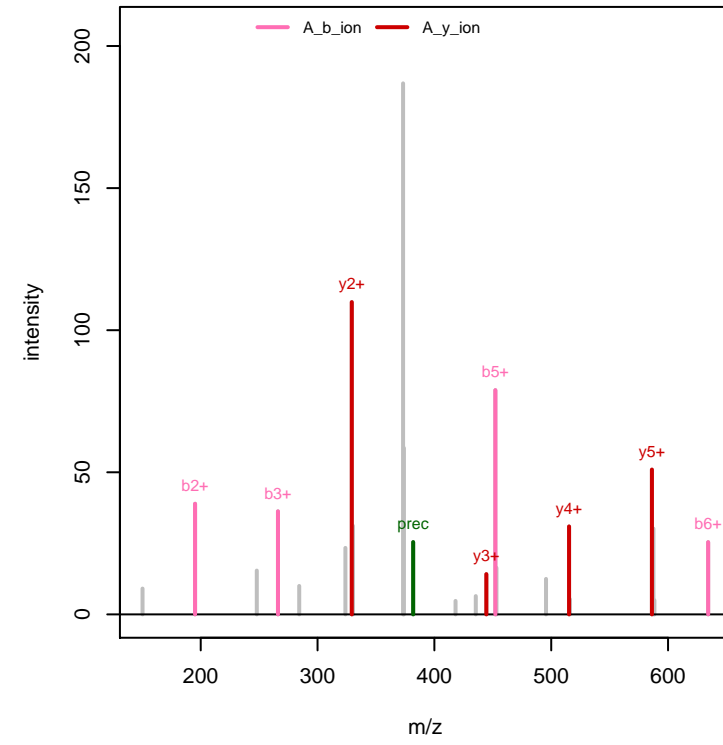

GHAADKK+XL\_L

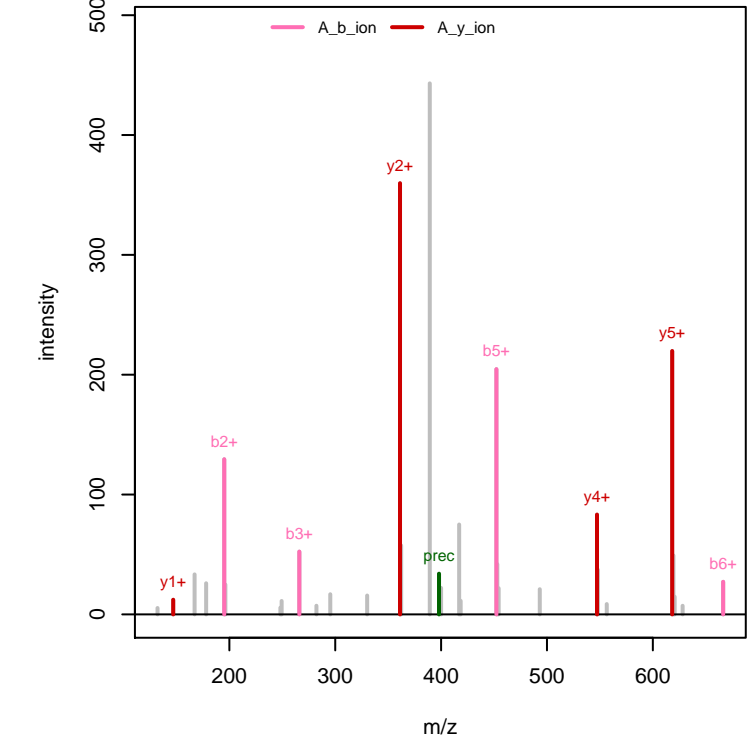

KVEADCR+XL\_S

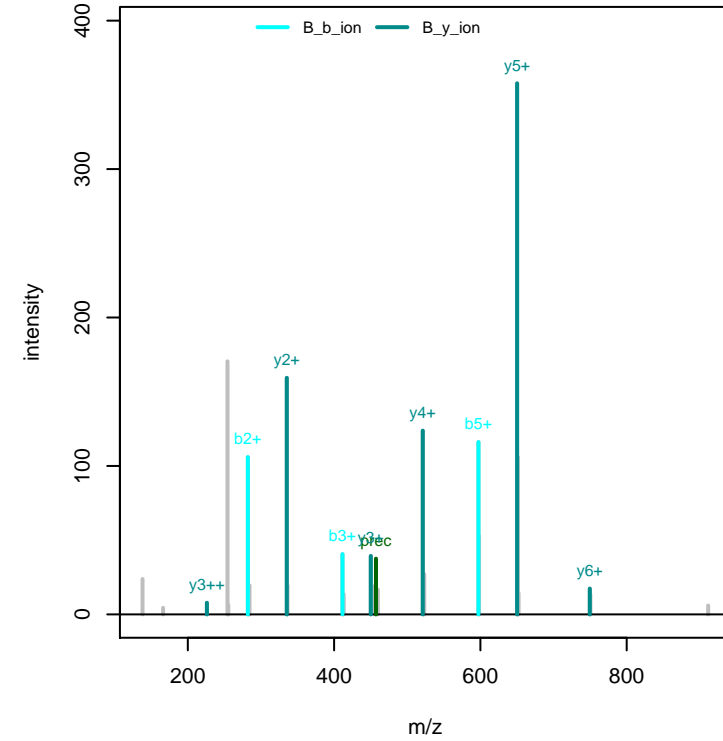

KVEADCR+XL\_L

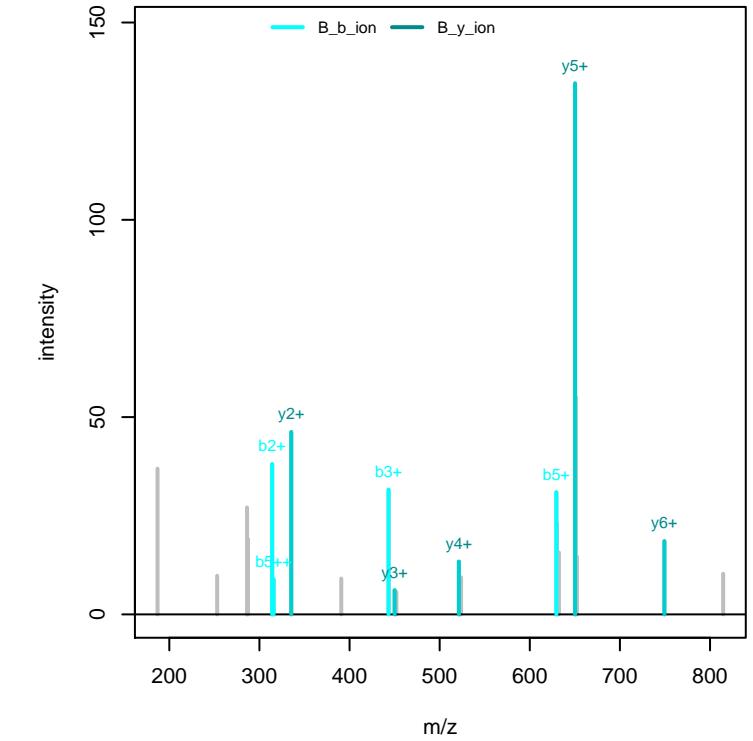

**NAQAEKAR  
RKAEEEAR**

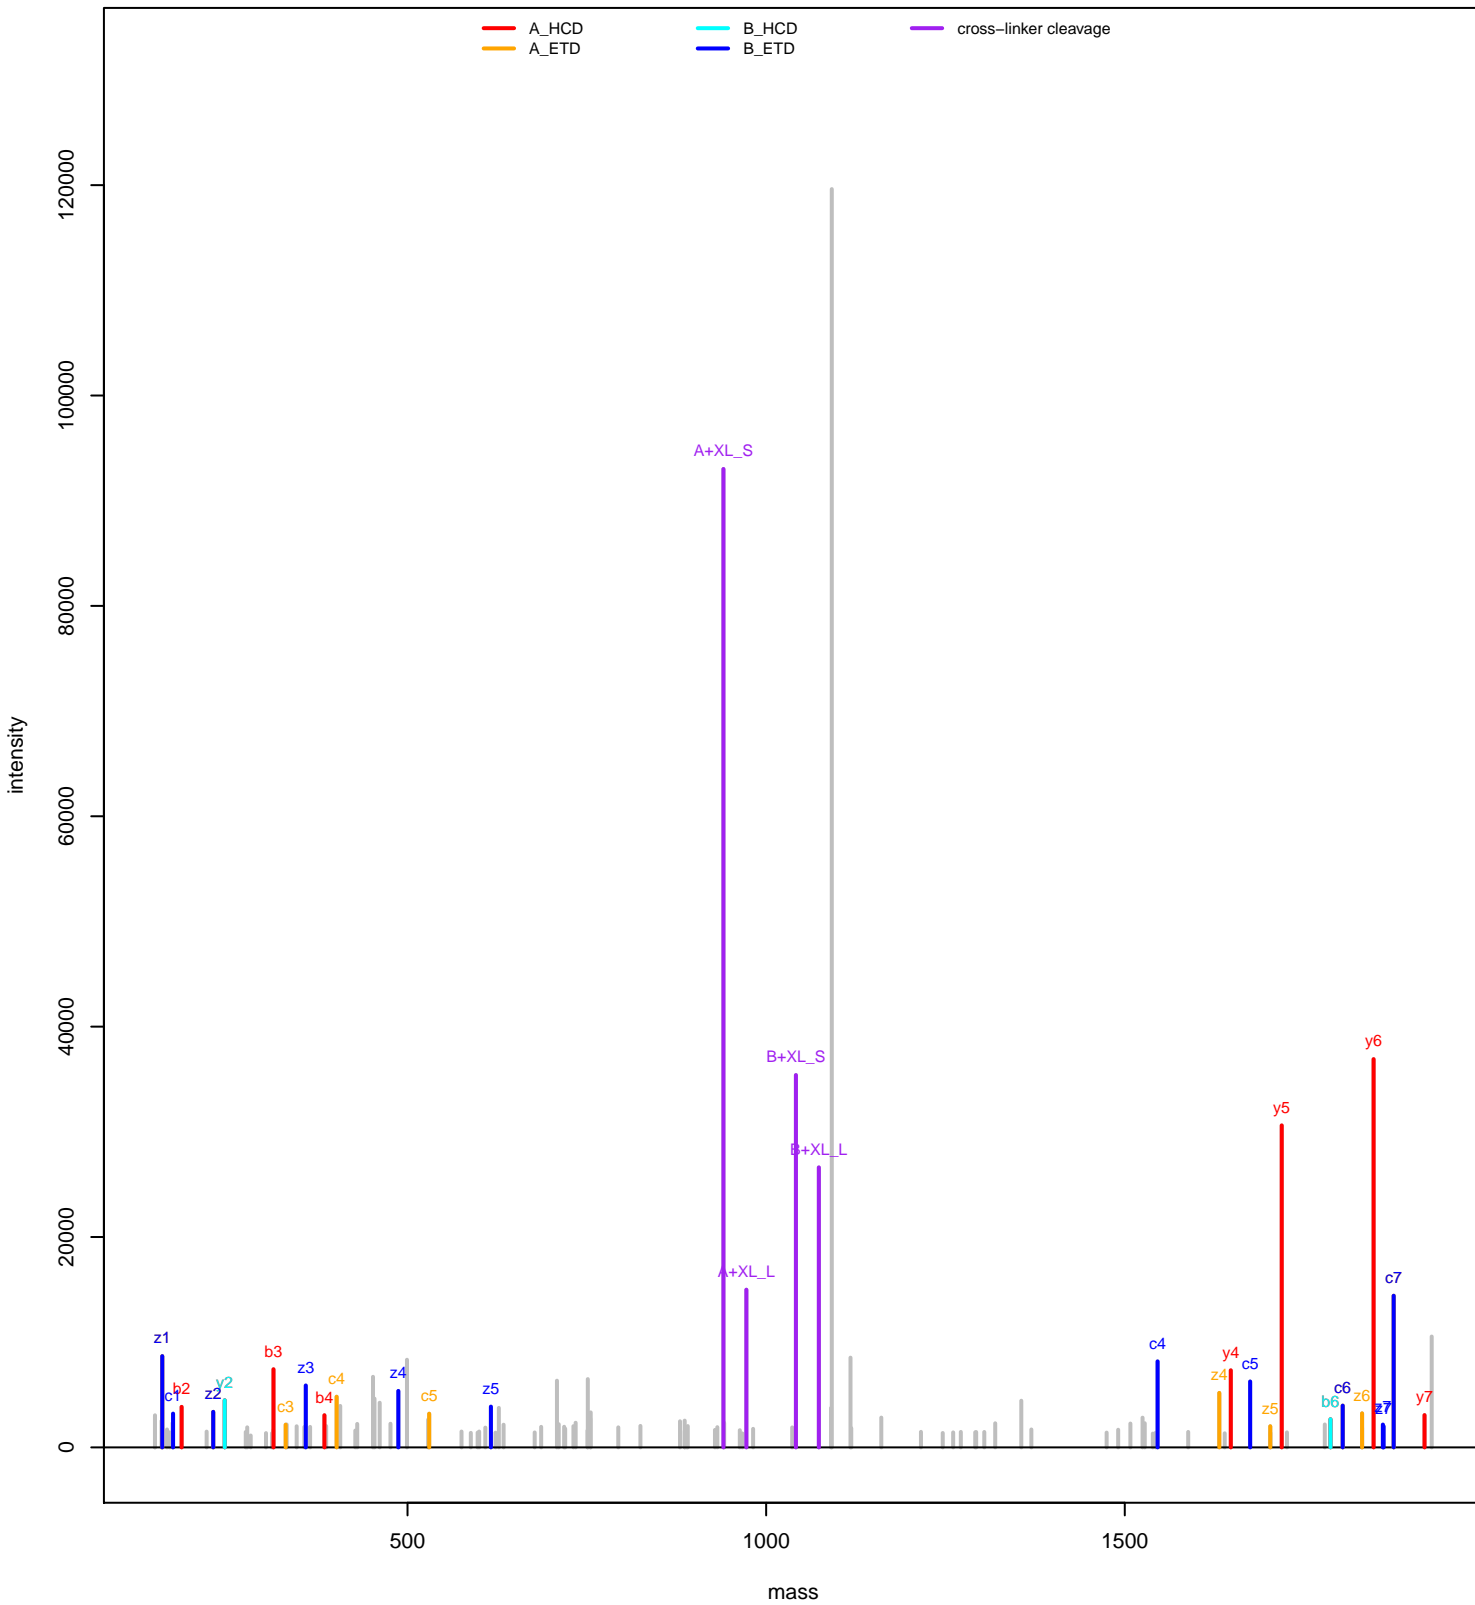

**NAQAEKAR+XL\_S**

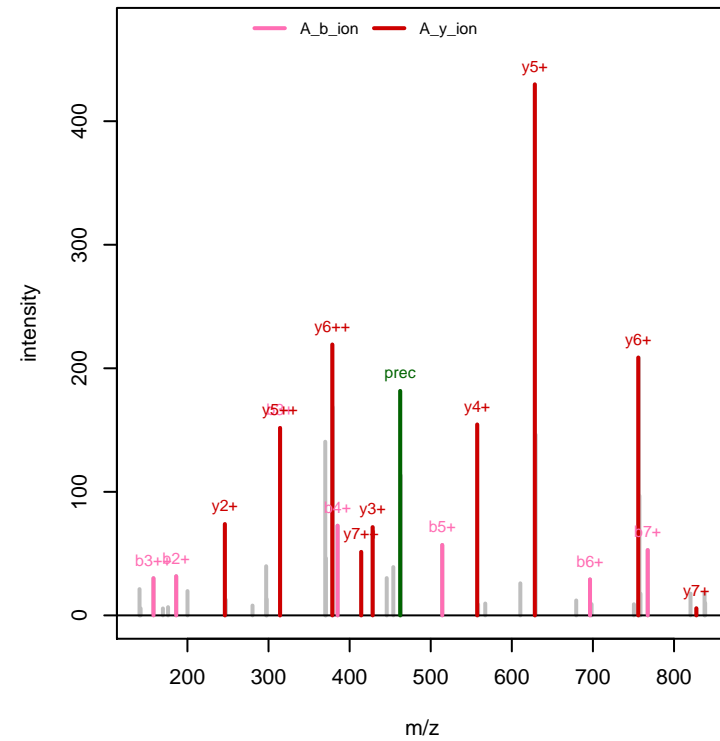

**NAQAEKAR+XL\_L**

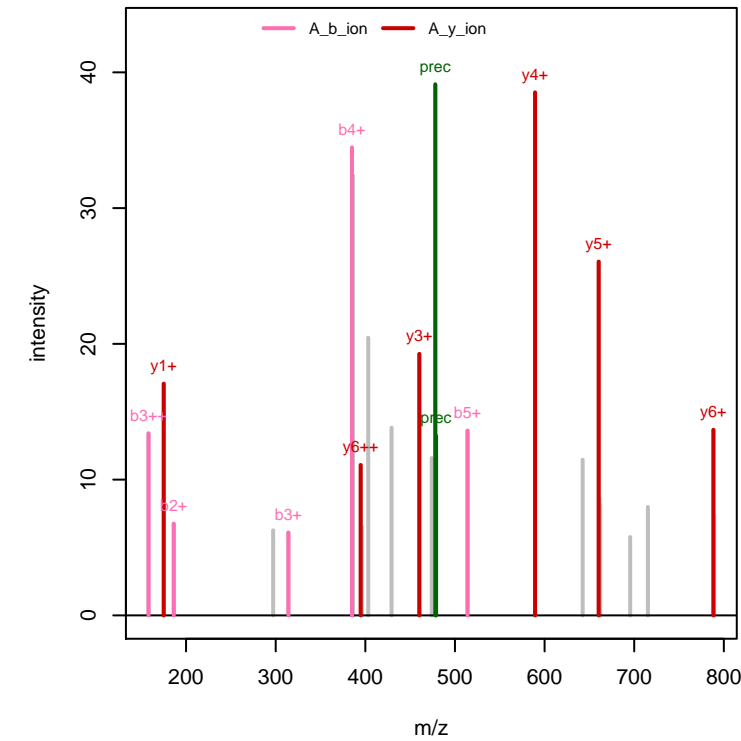

**RKAEEEAR+XL\_S**

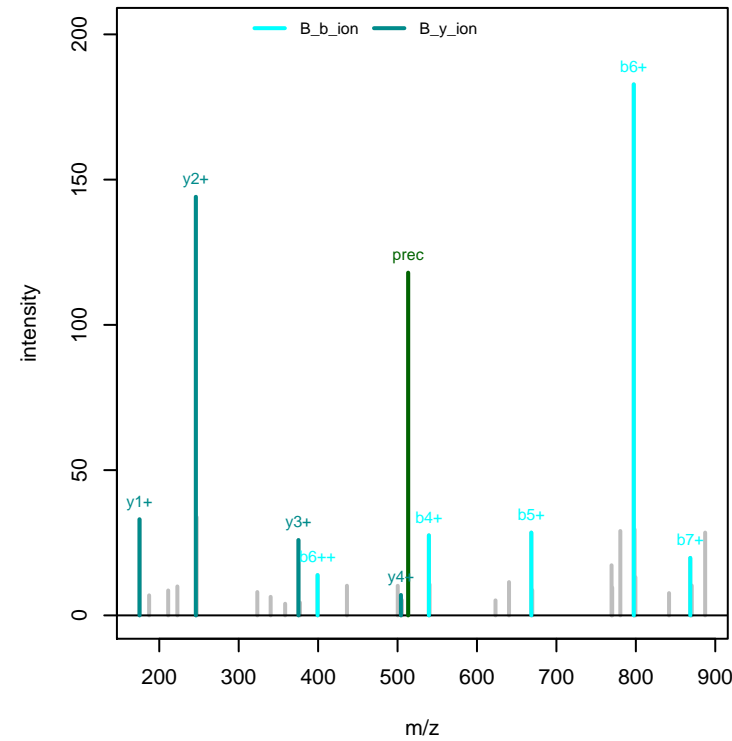

**RKAEEEAR+XL\_L**

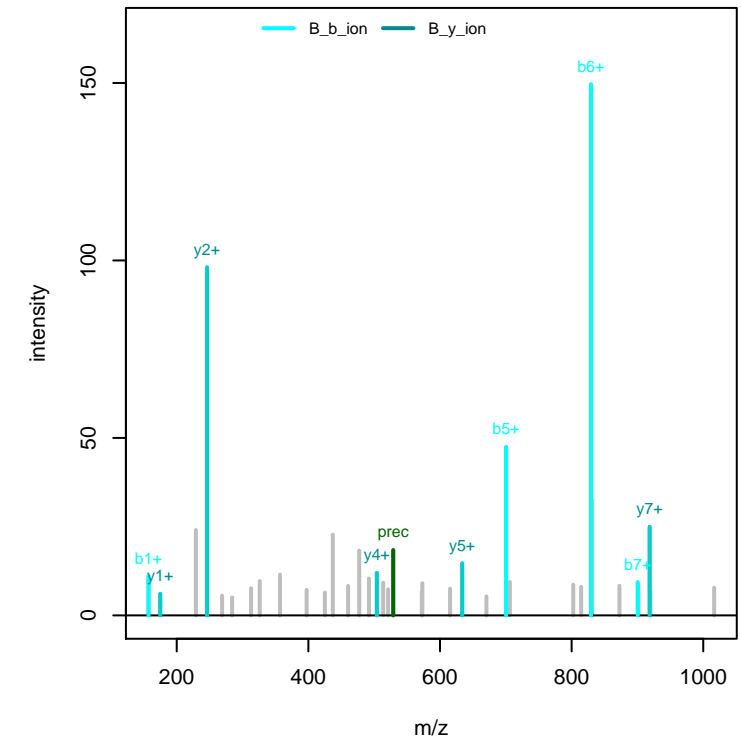

KDAEVR  
DANDKVK

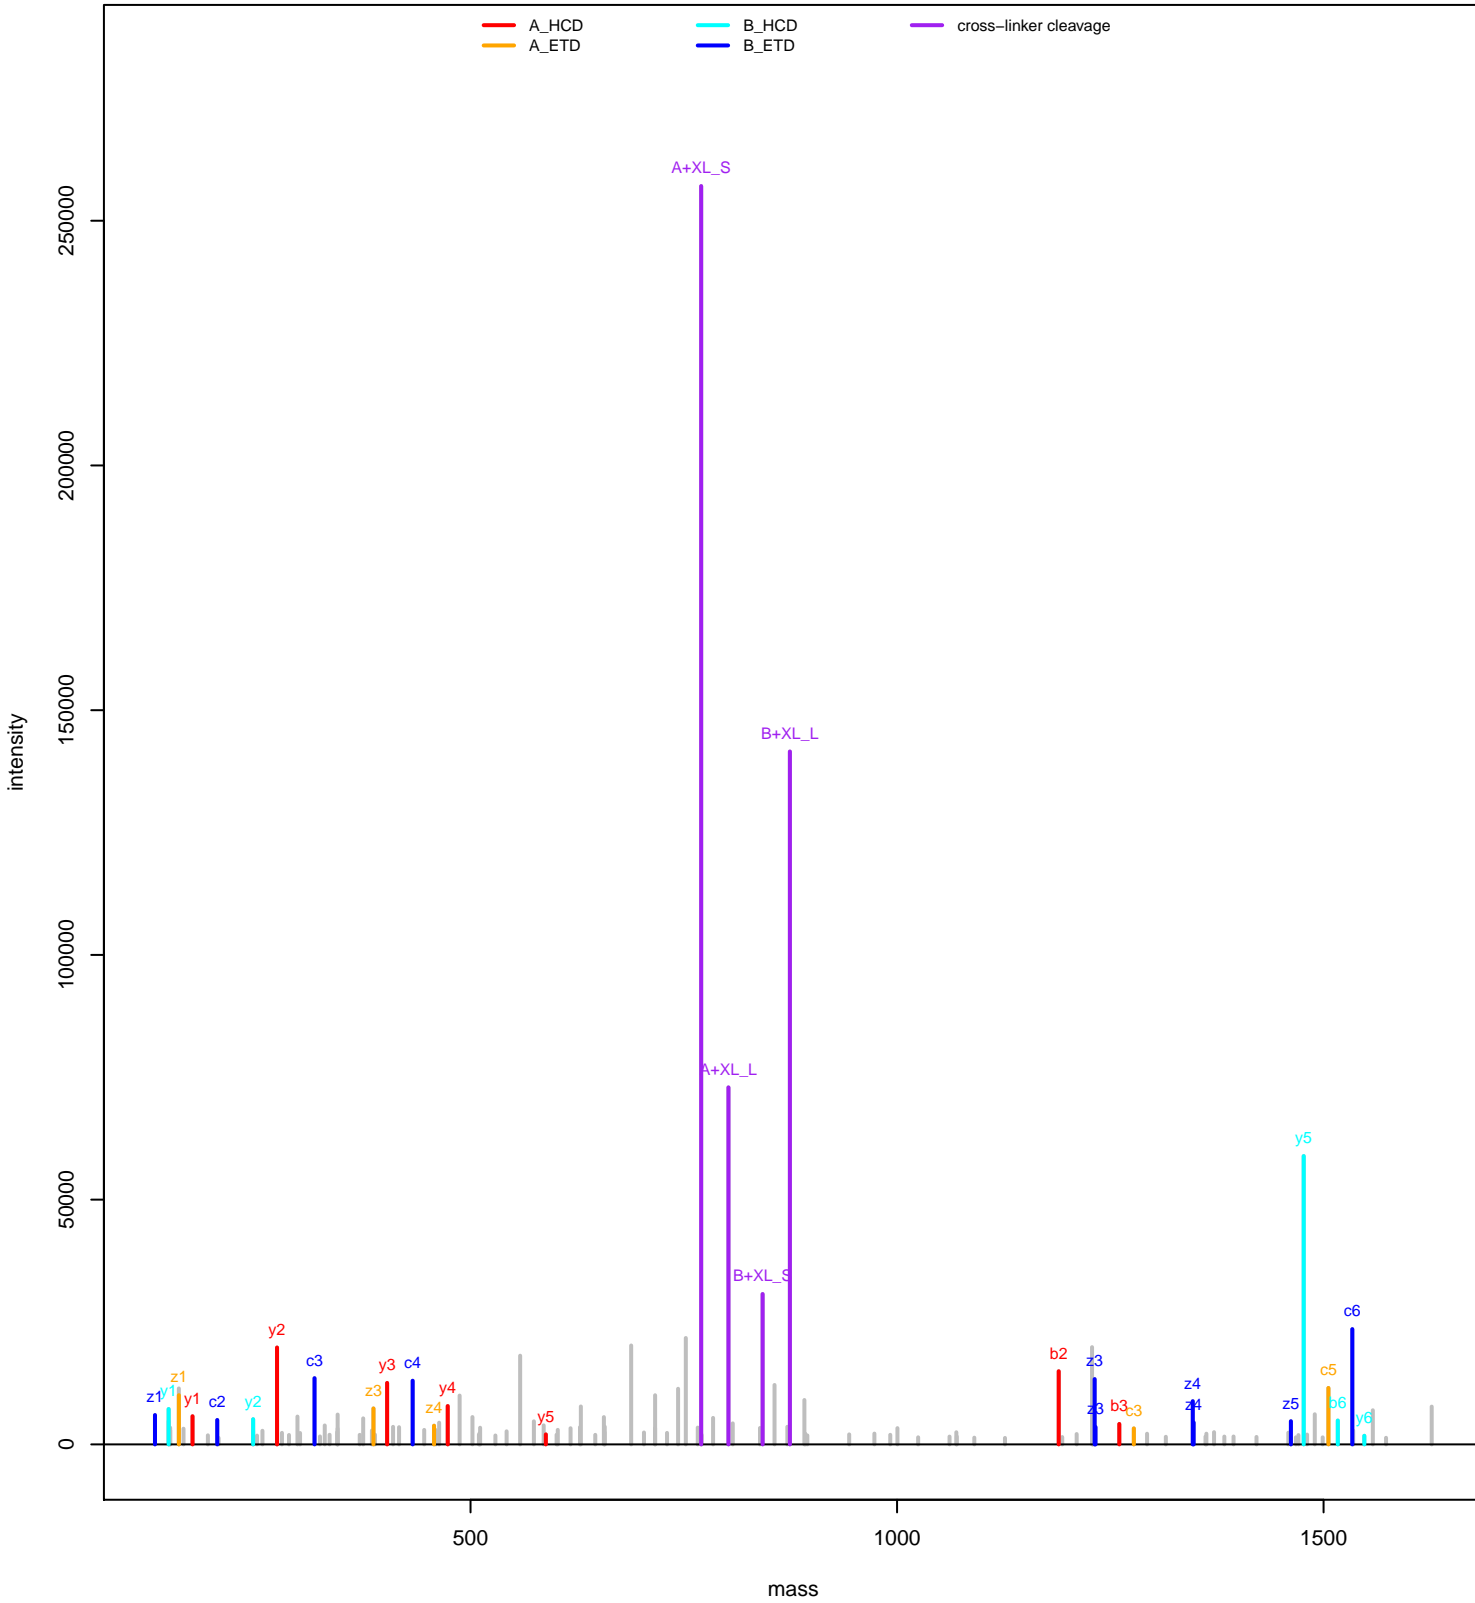

KDAEVR+XL\_S

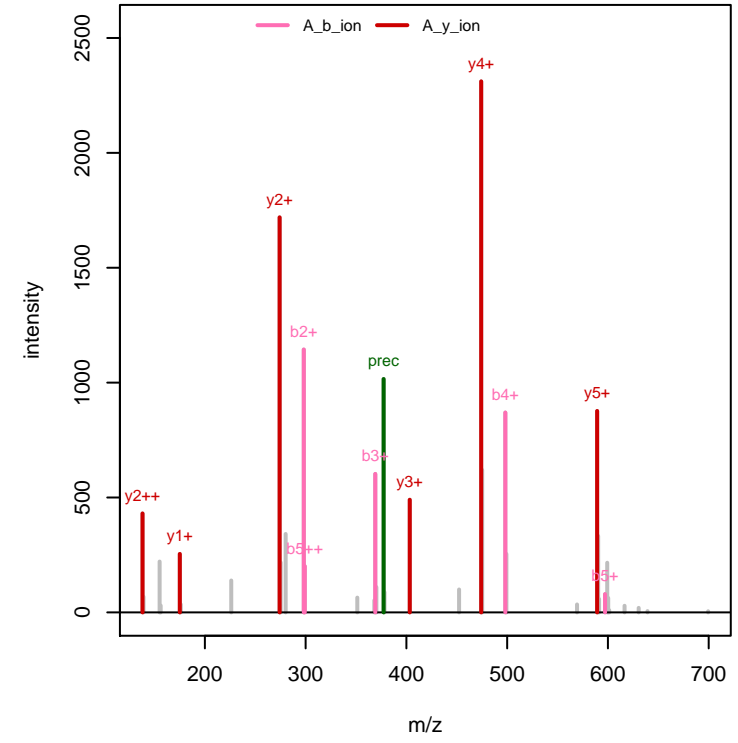

KDAEVR+XL\_L

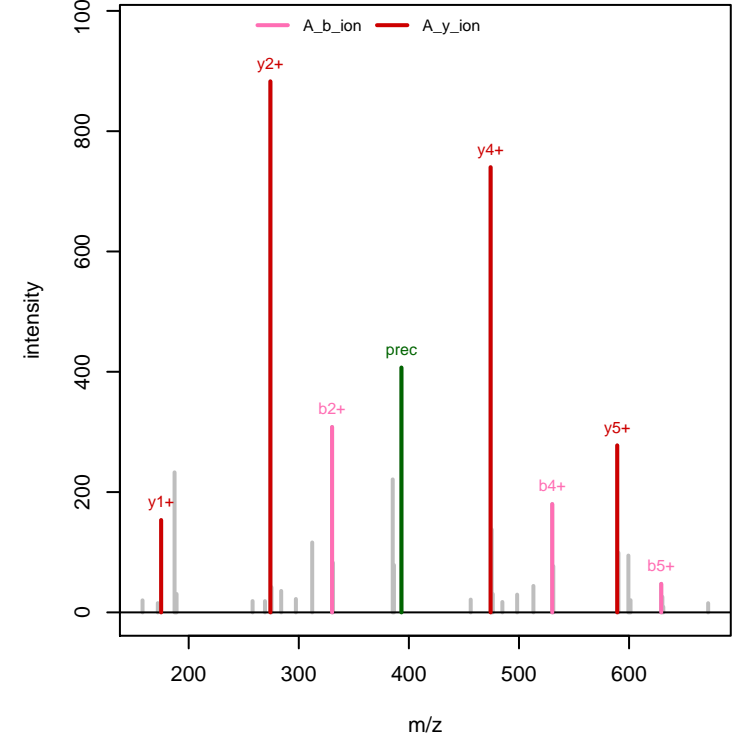

DANDKVK+XL\_S

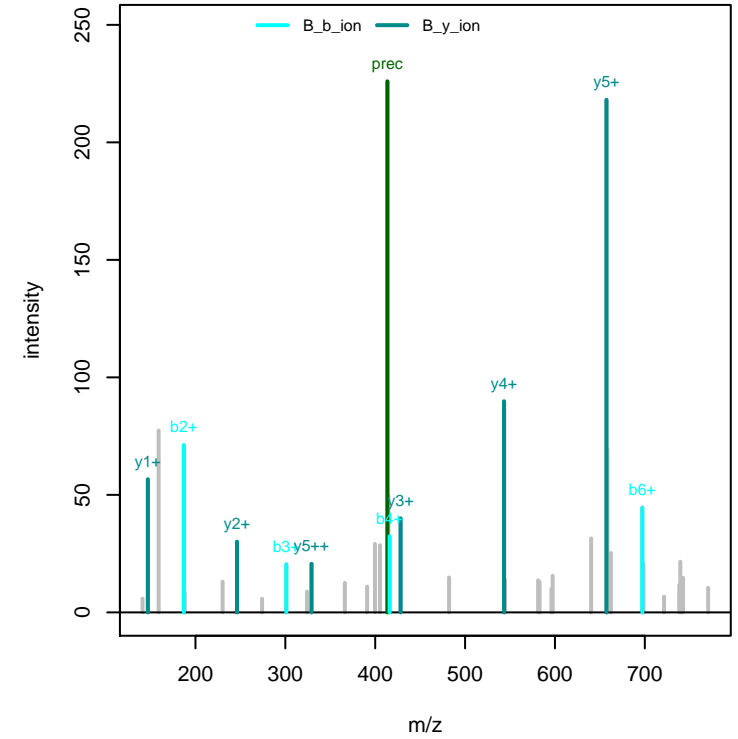

DANDKVK+XL\_L

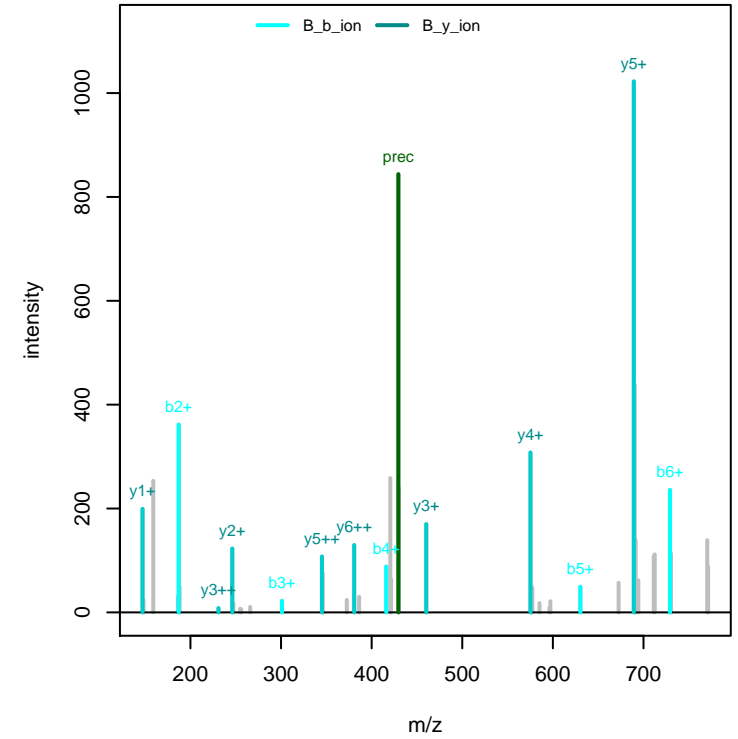

PAAQPKK  
KGEDVEK

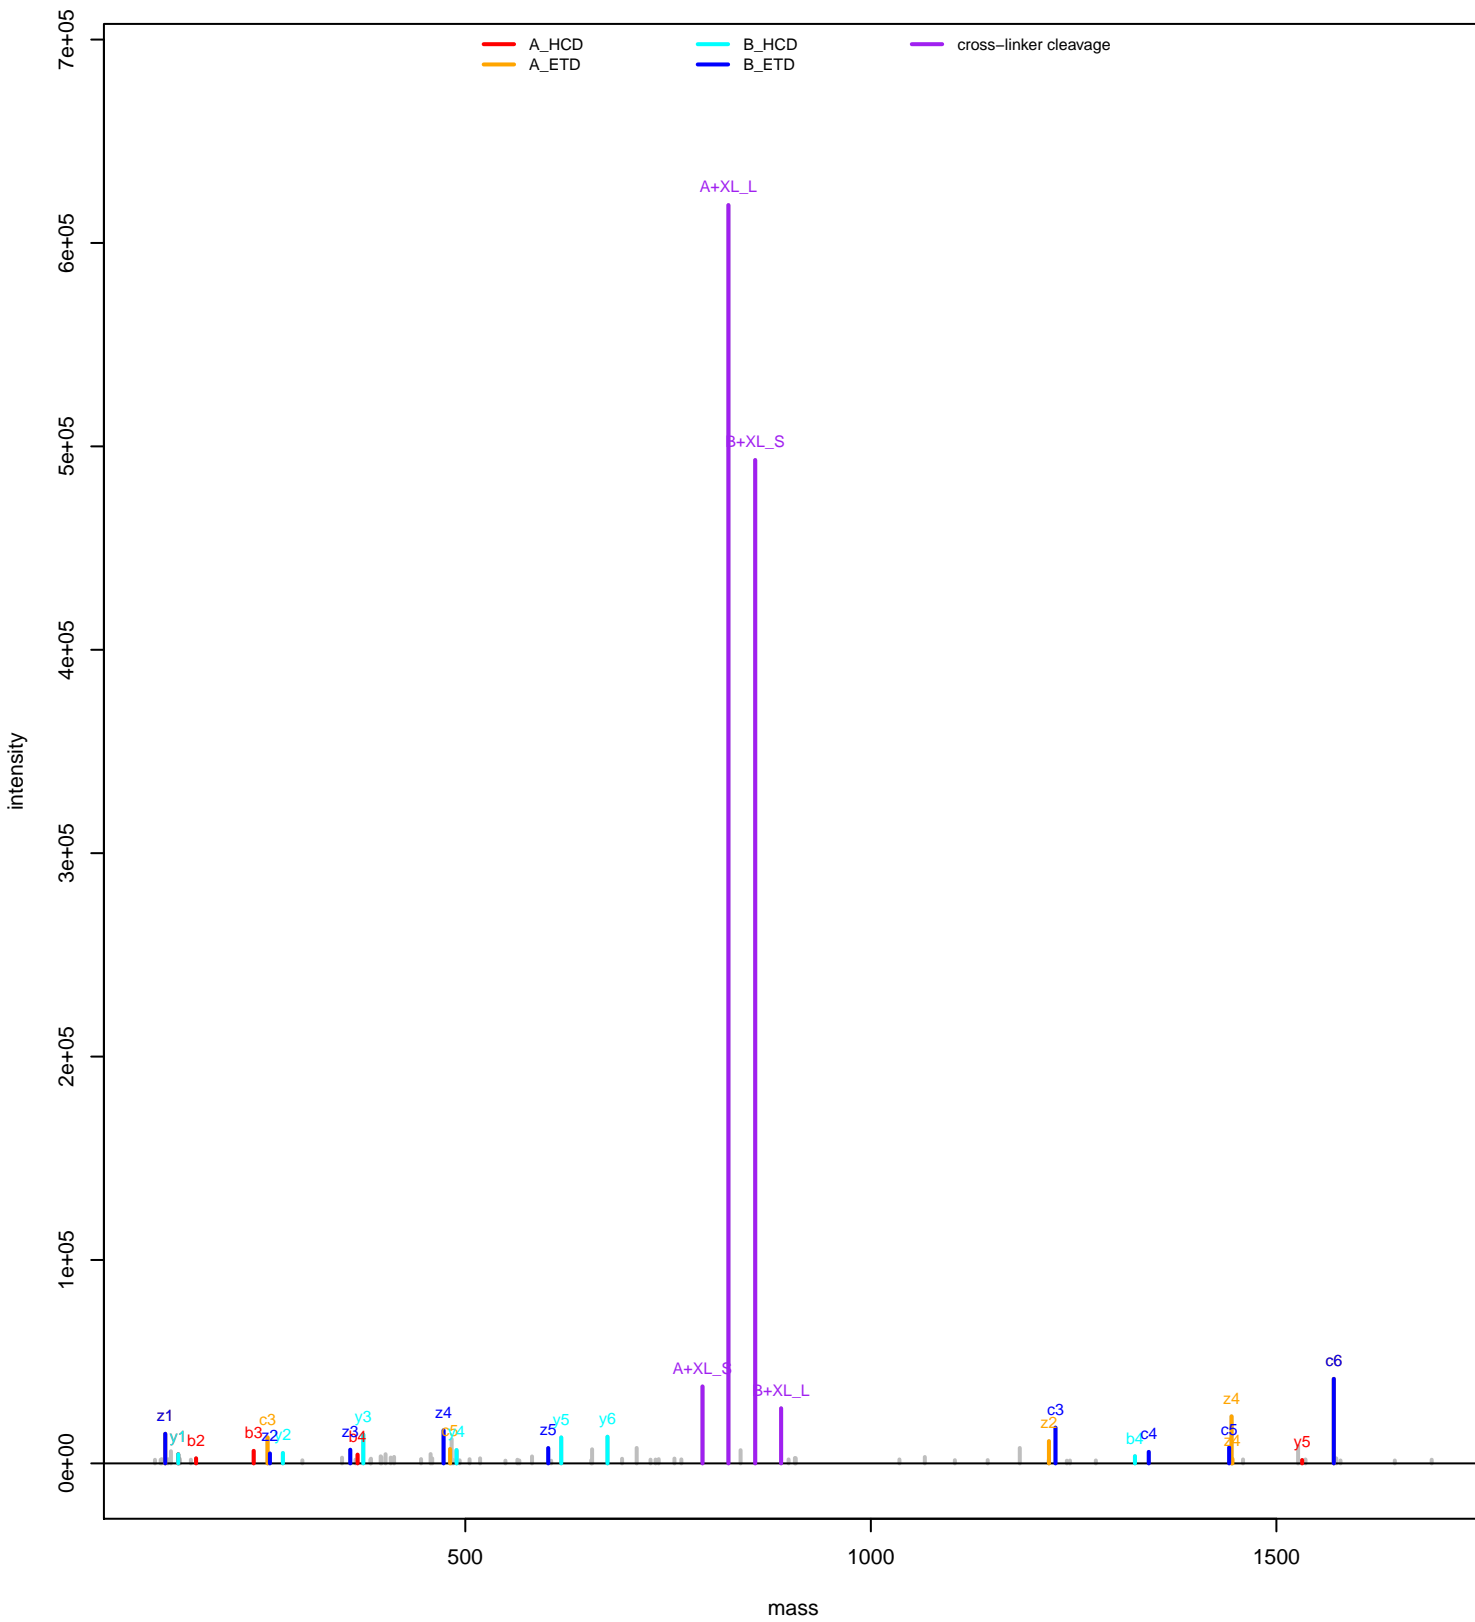

PAAQPKK+XL\_S

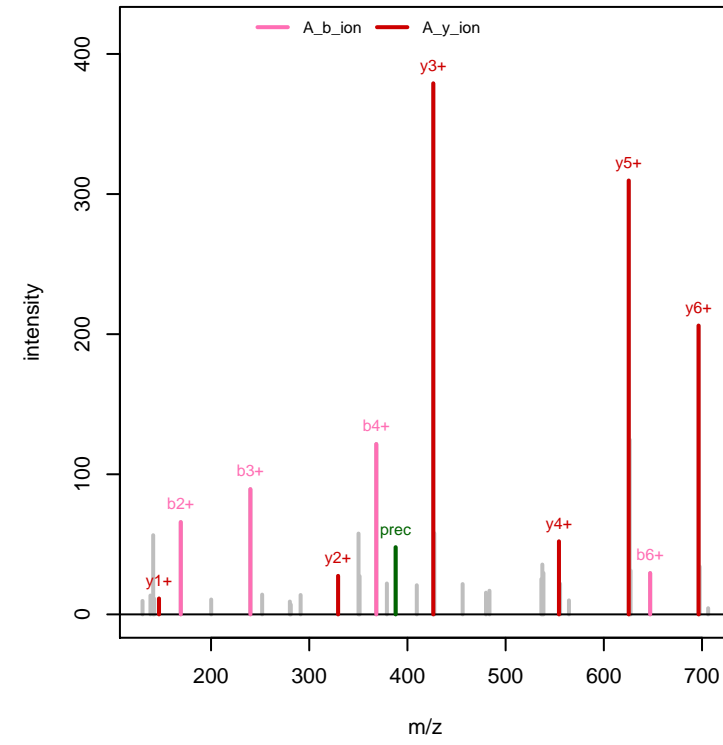

PAAQPKK+XL\_L

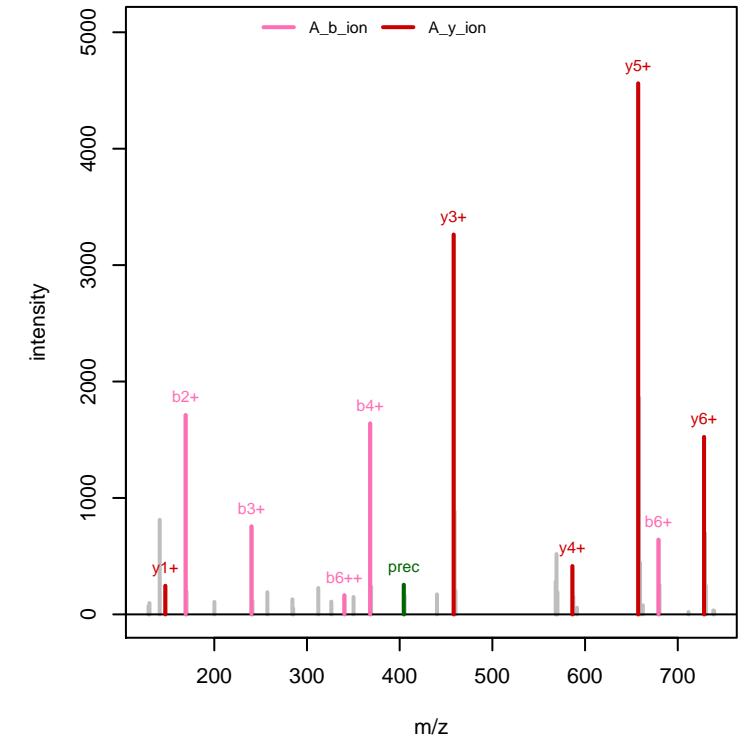

KGEDVEK+XL\_S

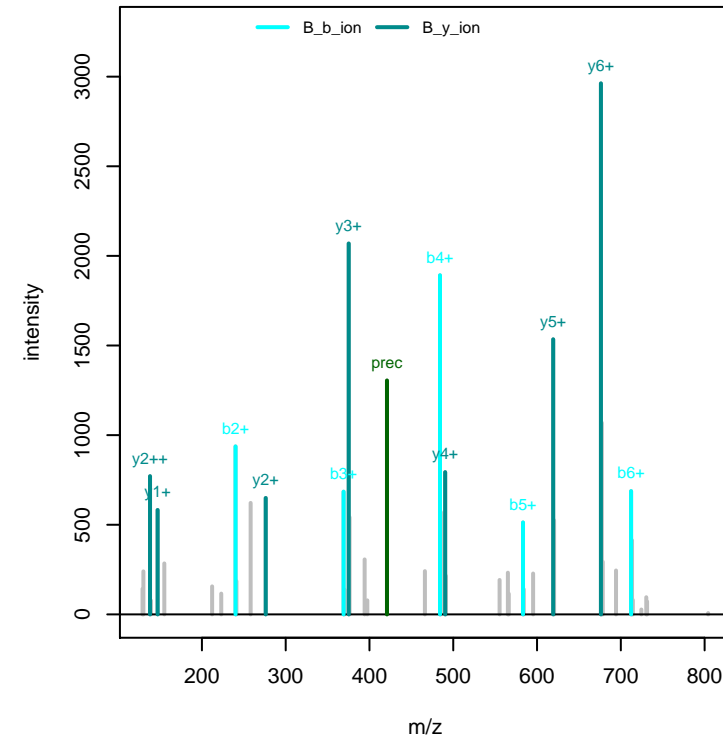

KGEDVEK+XL\_L

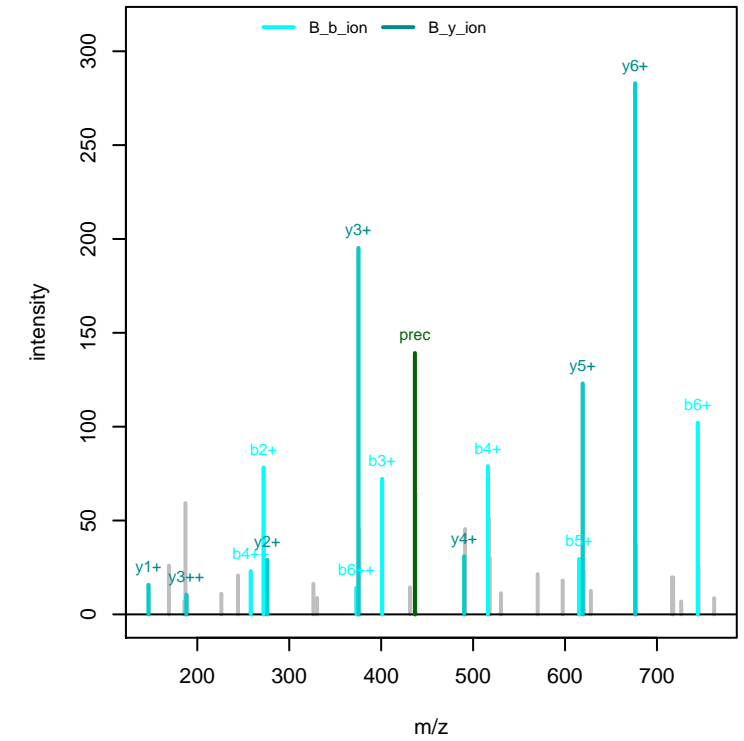

**AAVEENKK  
DKQLSEQQK**

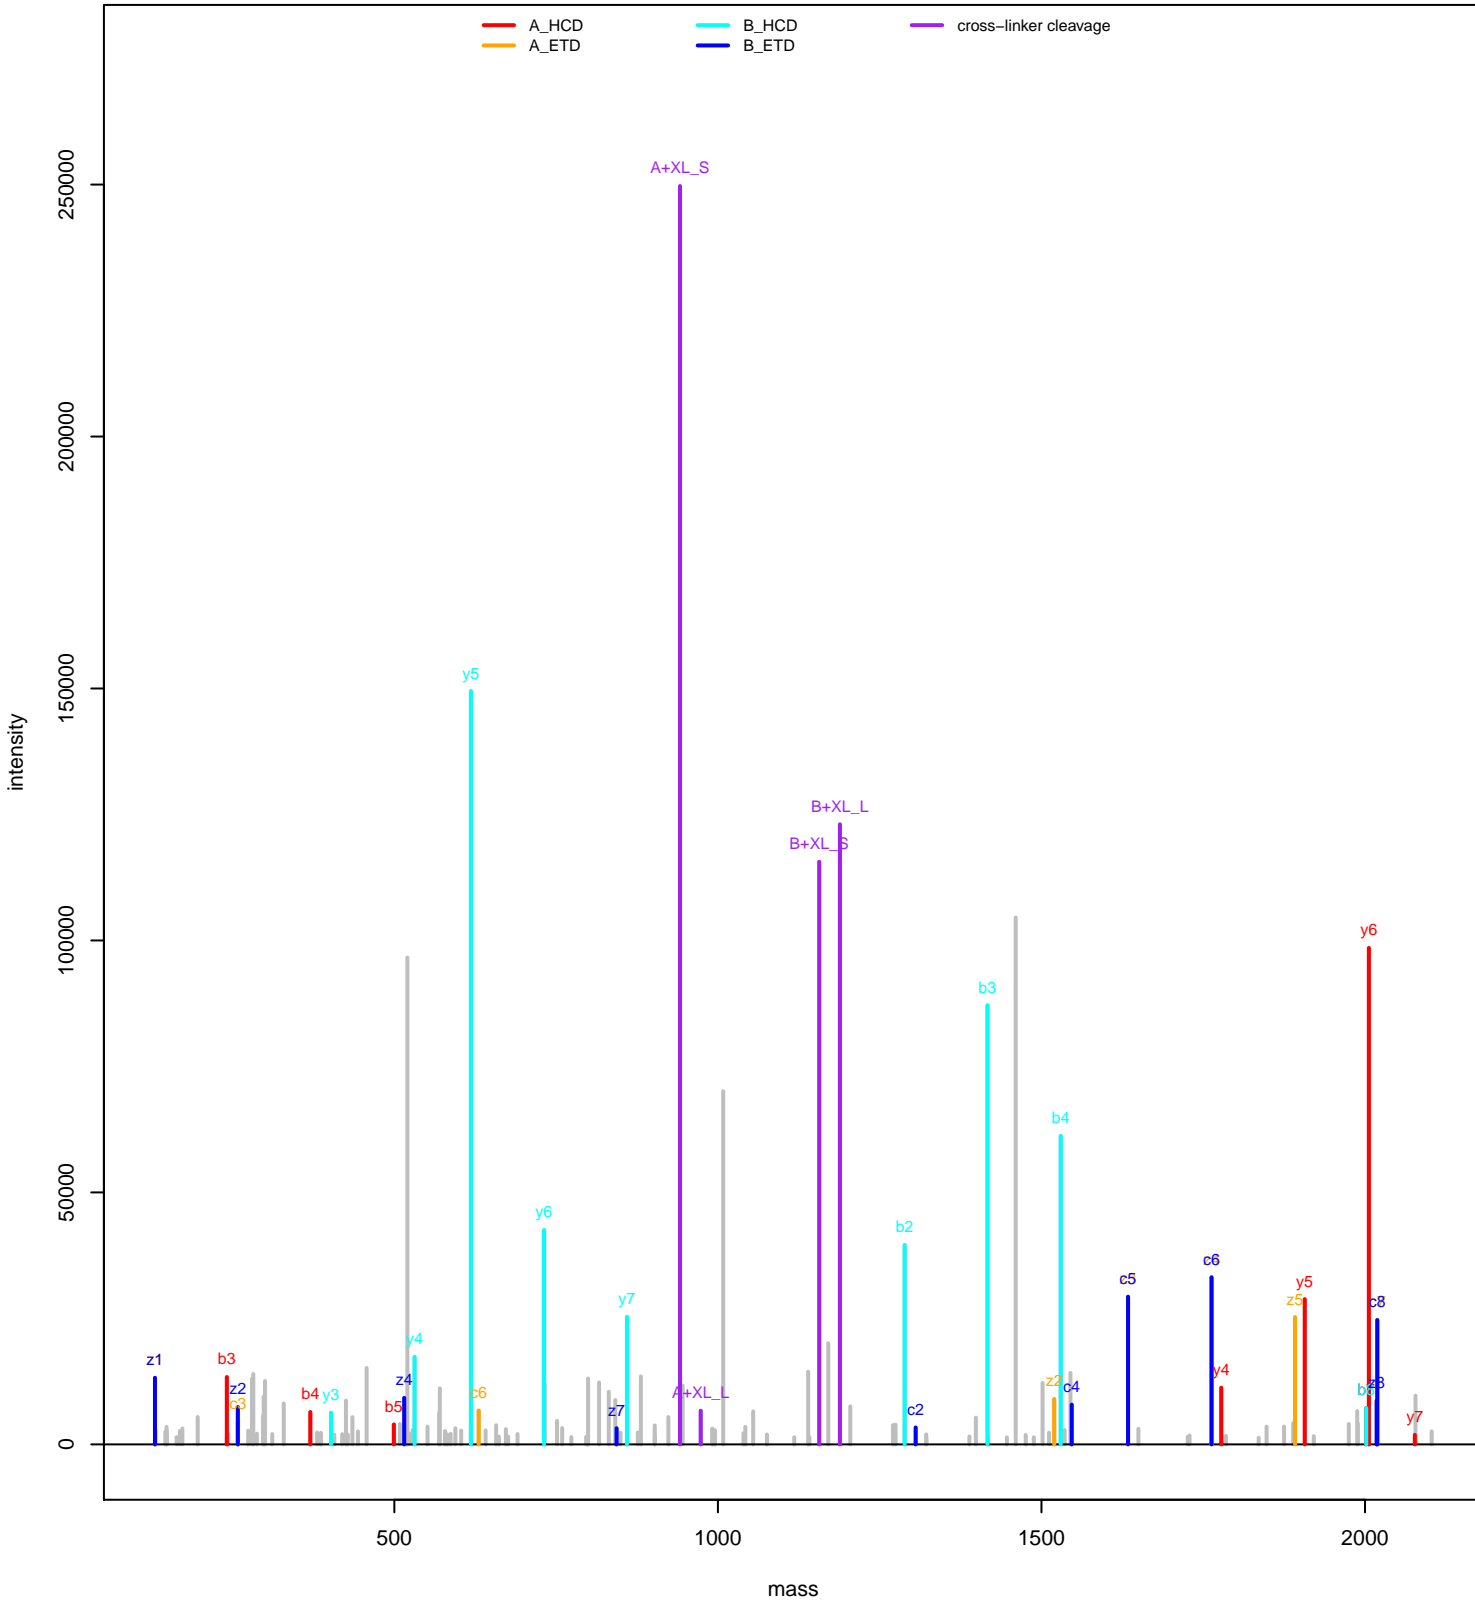

**AAVEENKK+XL\_S**

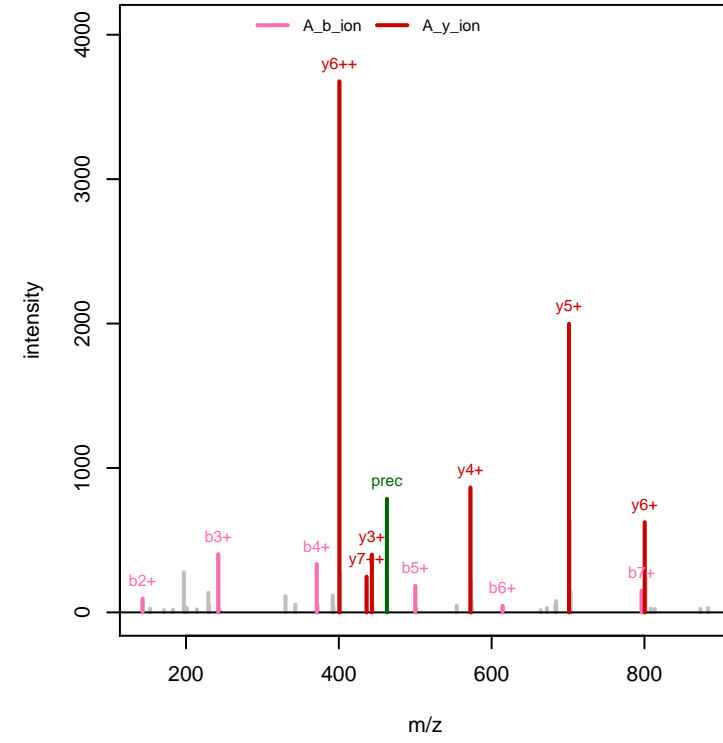

**AAVEENKK+XL\_L**

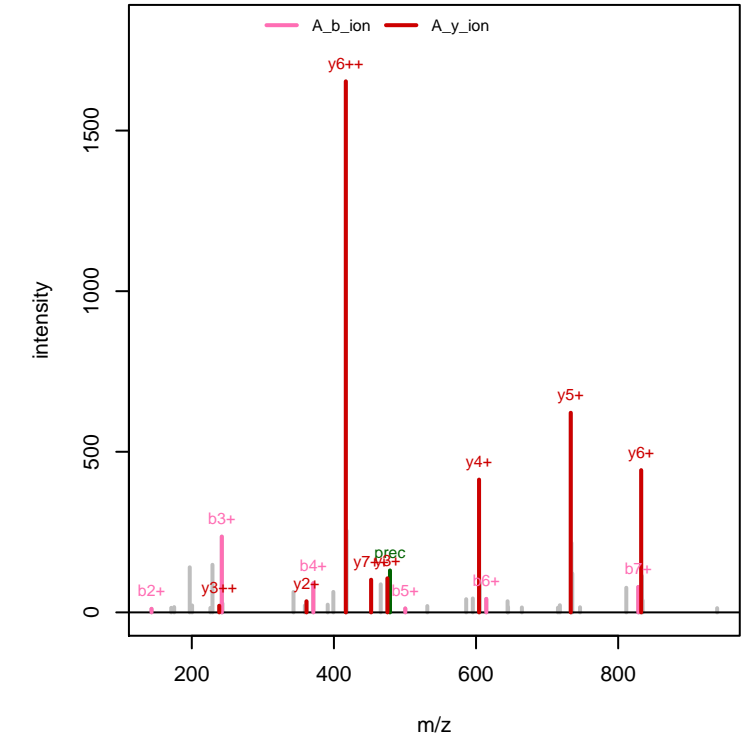

**DKQLSEQQK+XL\_S**

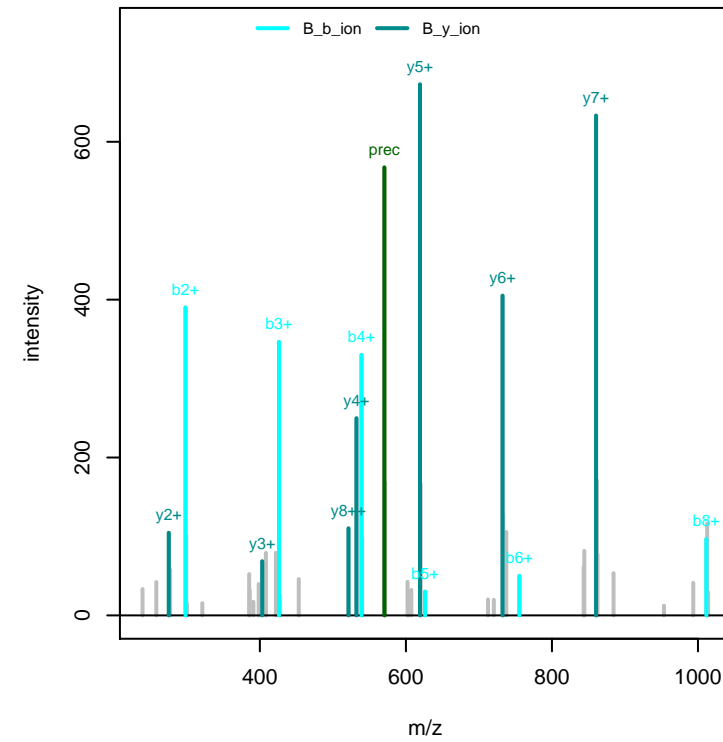

**DKQLSEQQK+XL\_L**

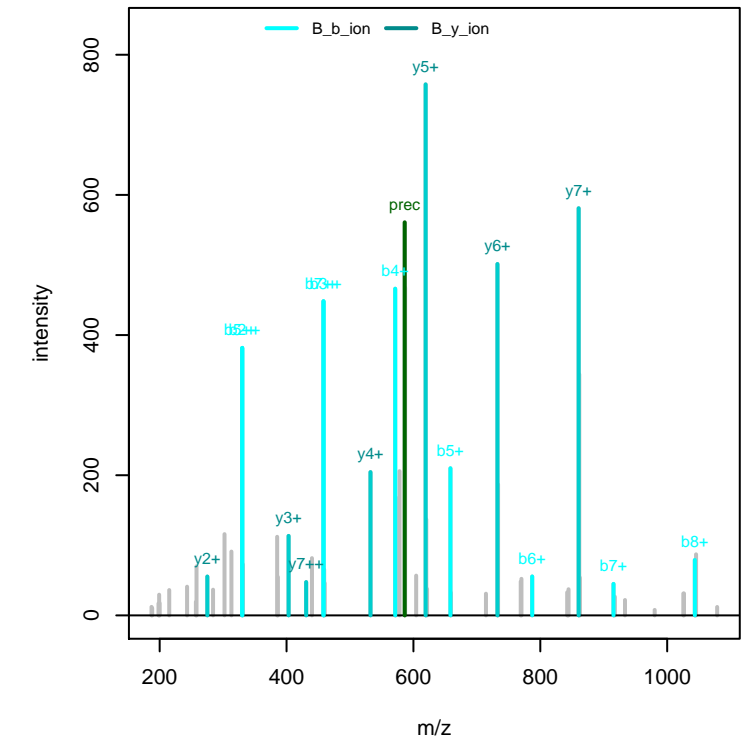

**QKGTGR**  
**TRAEVTGSGKK**

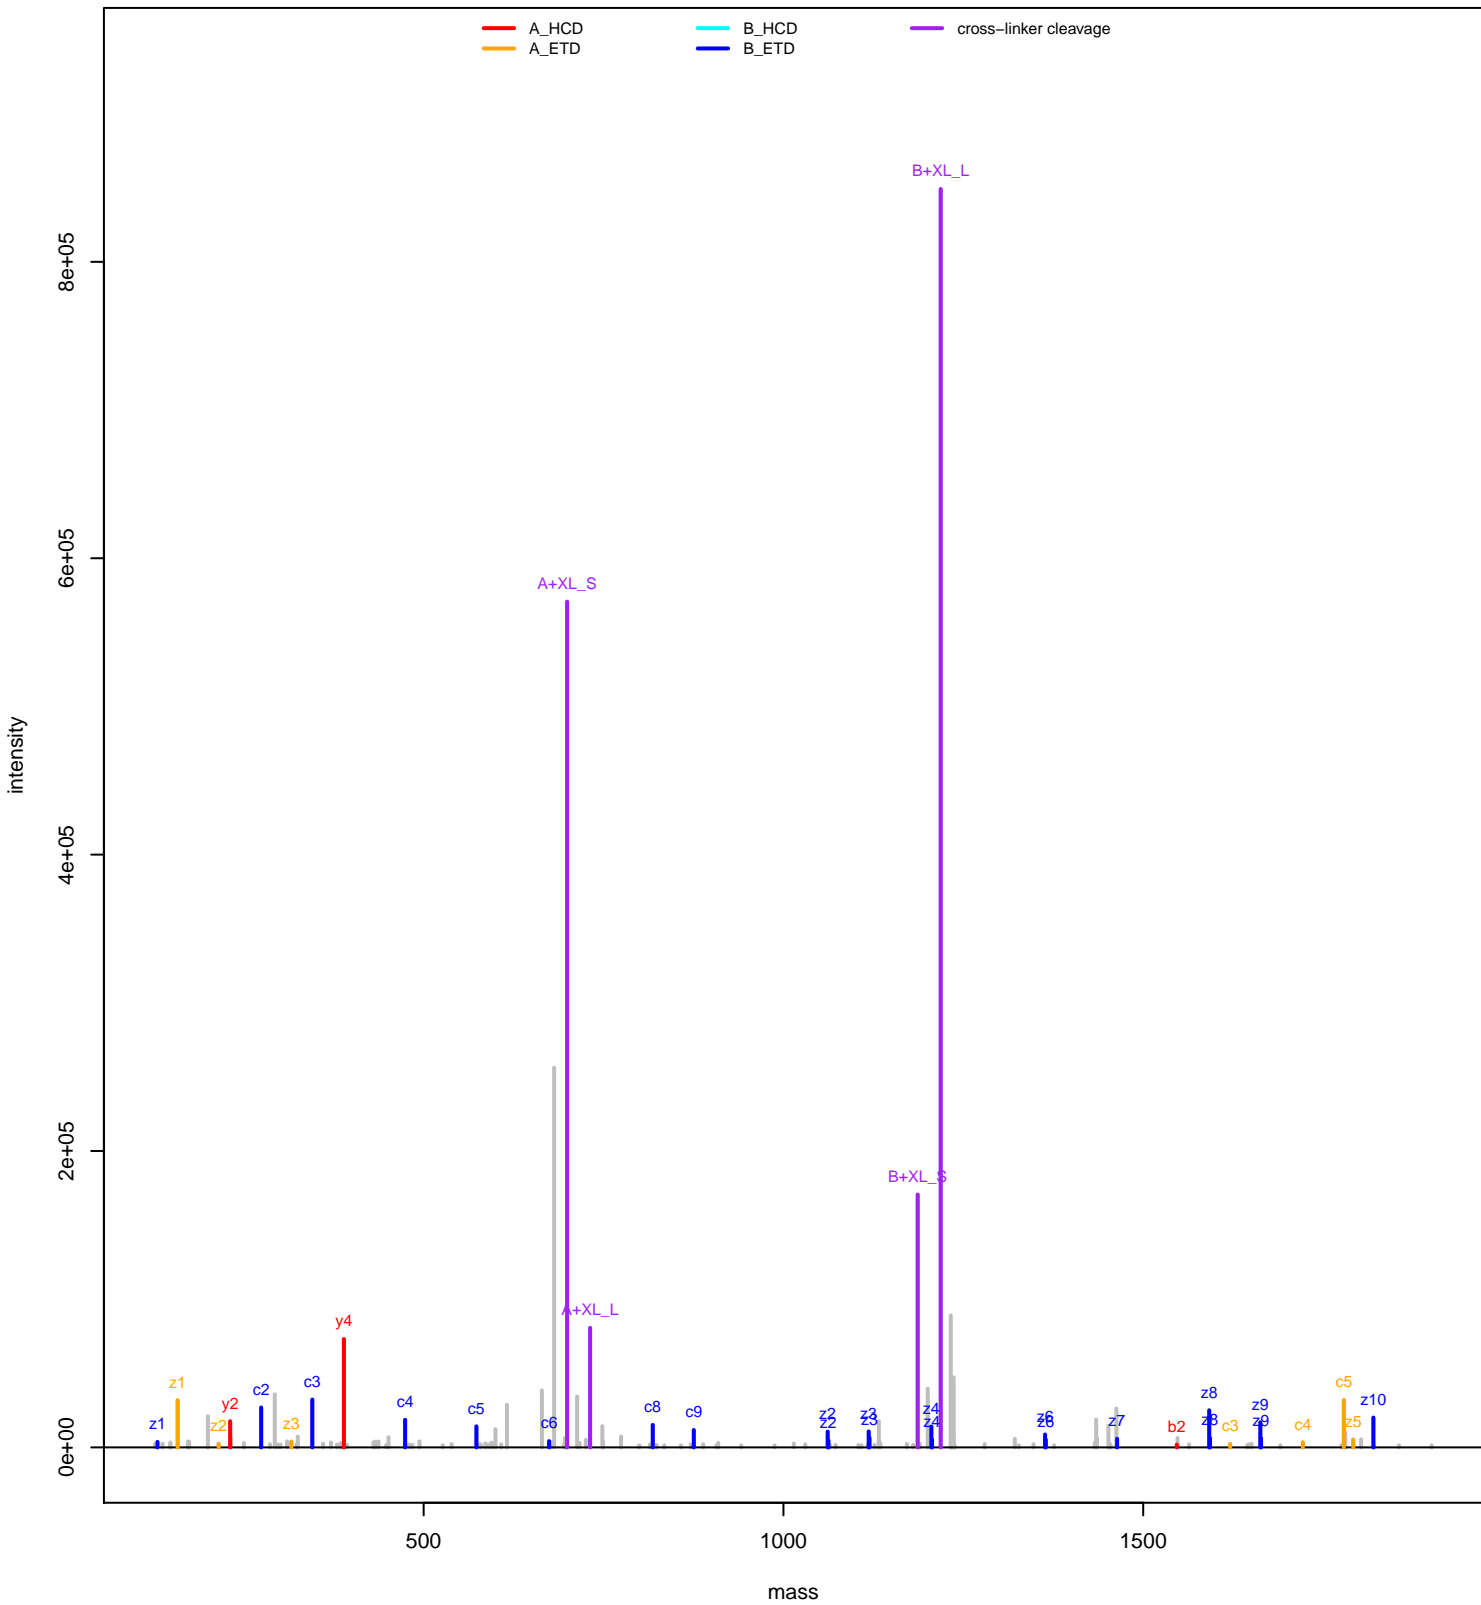

**QKGTGR+XL\_S**

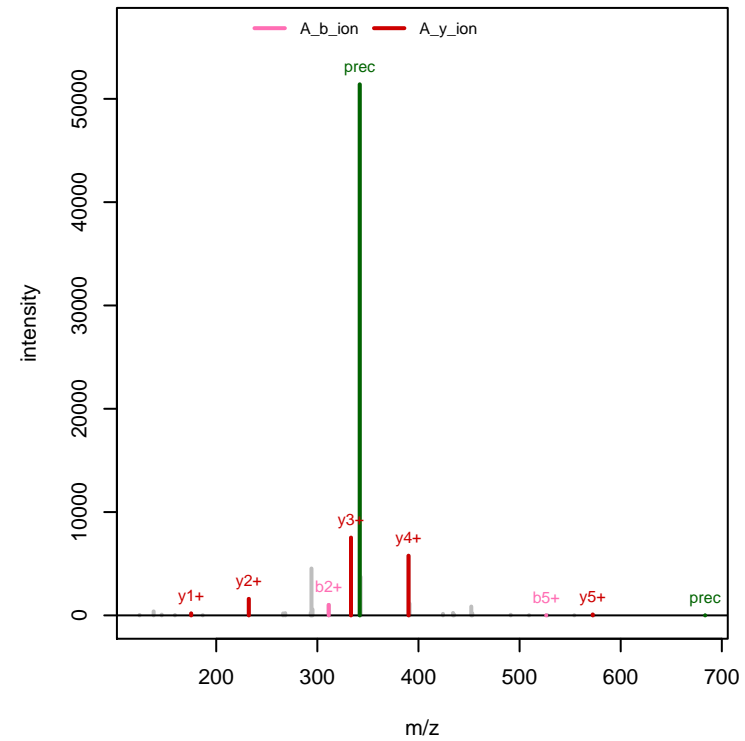

**QKGTGR+XL\_L**

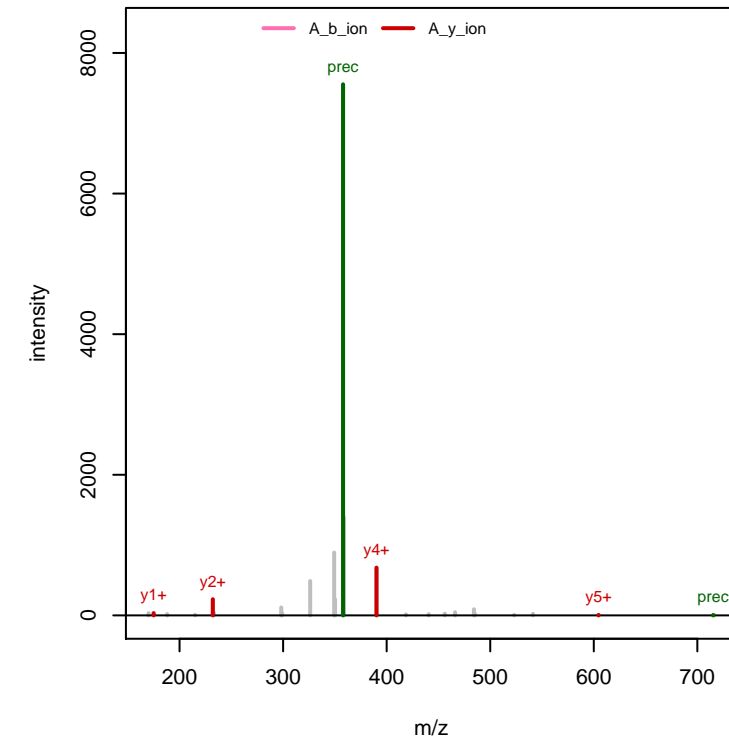

**TRAEVTGSGKK+XL\_S**

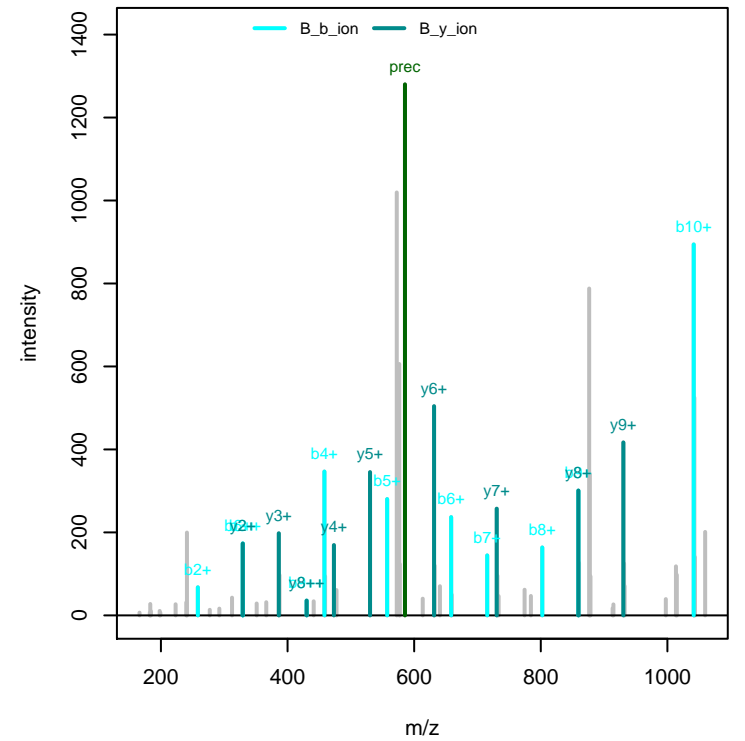

**TRAEVTGSGKK+XL\_L**

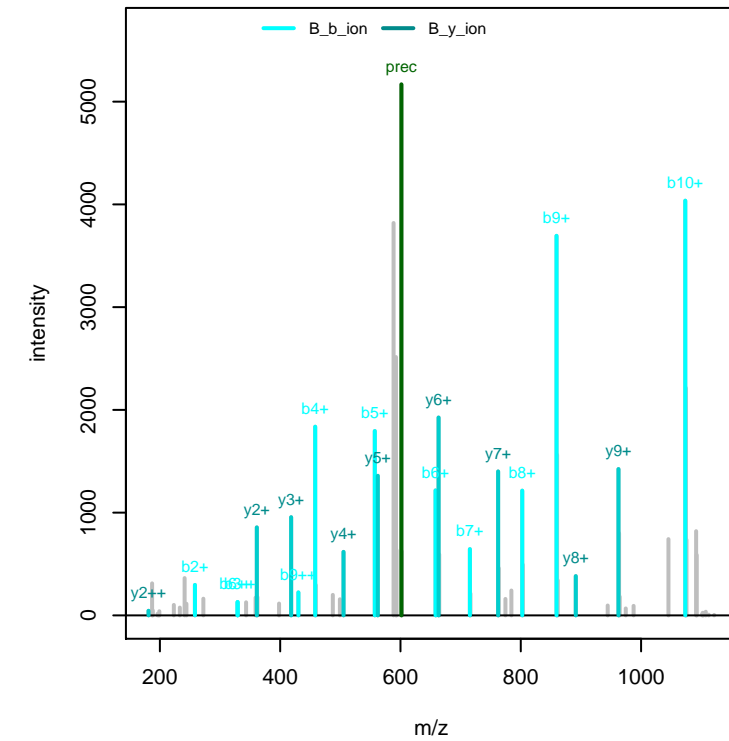

EAAEKDK  
REAAEQAKR

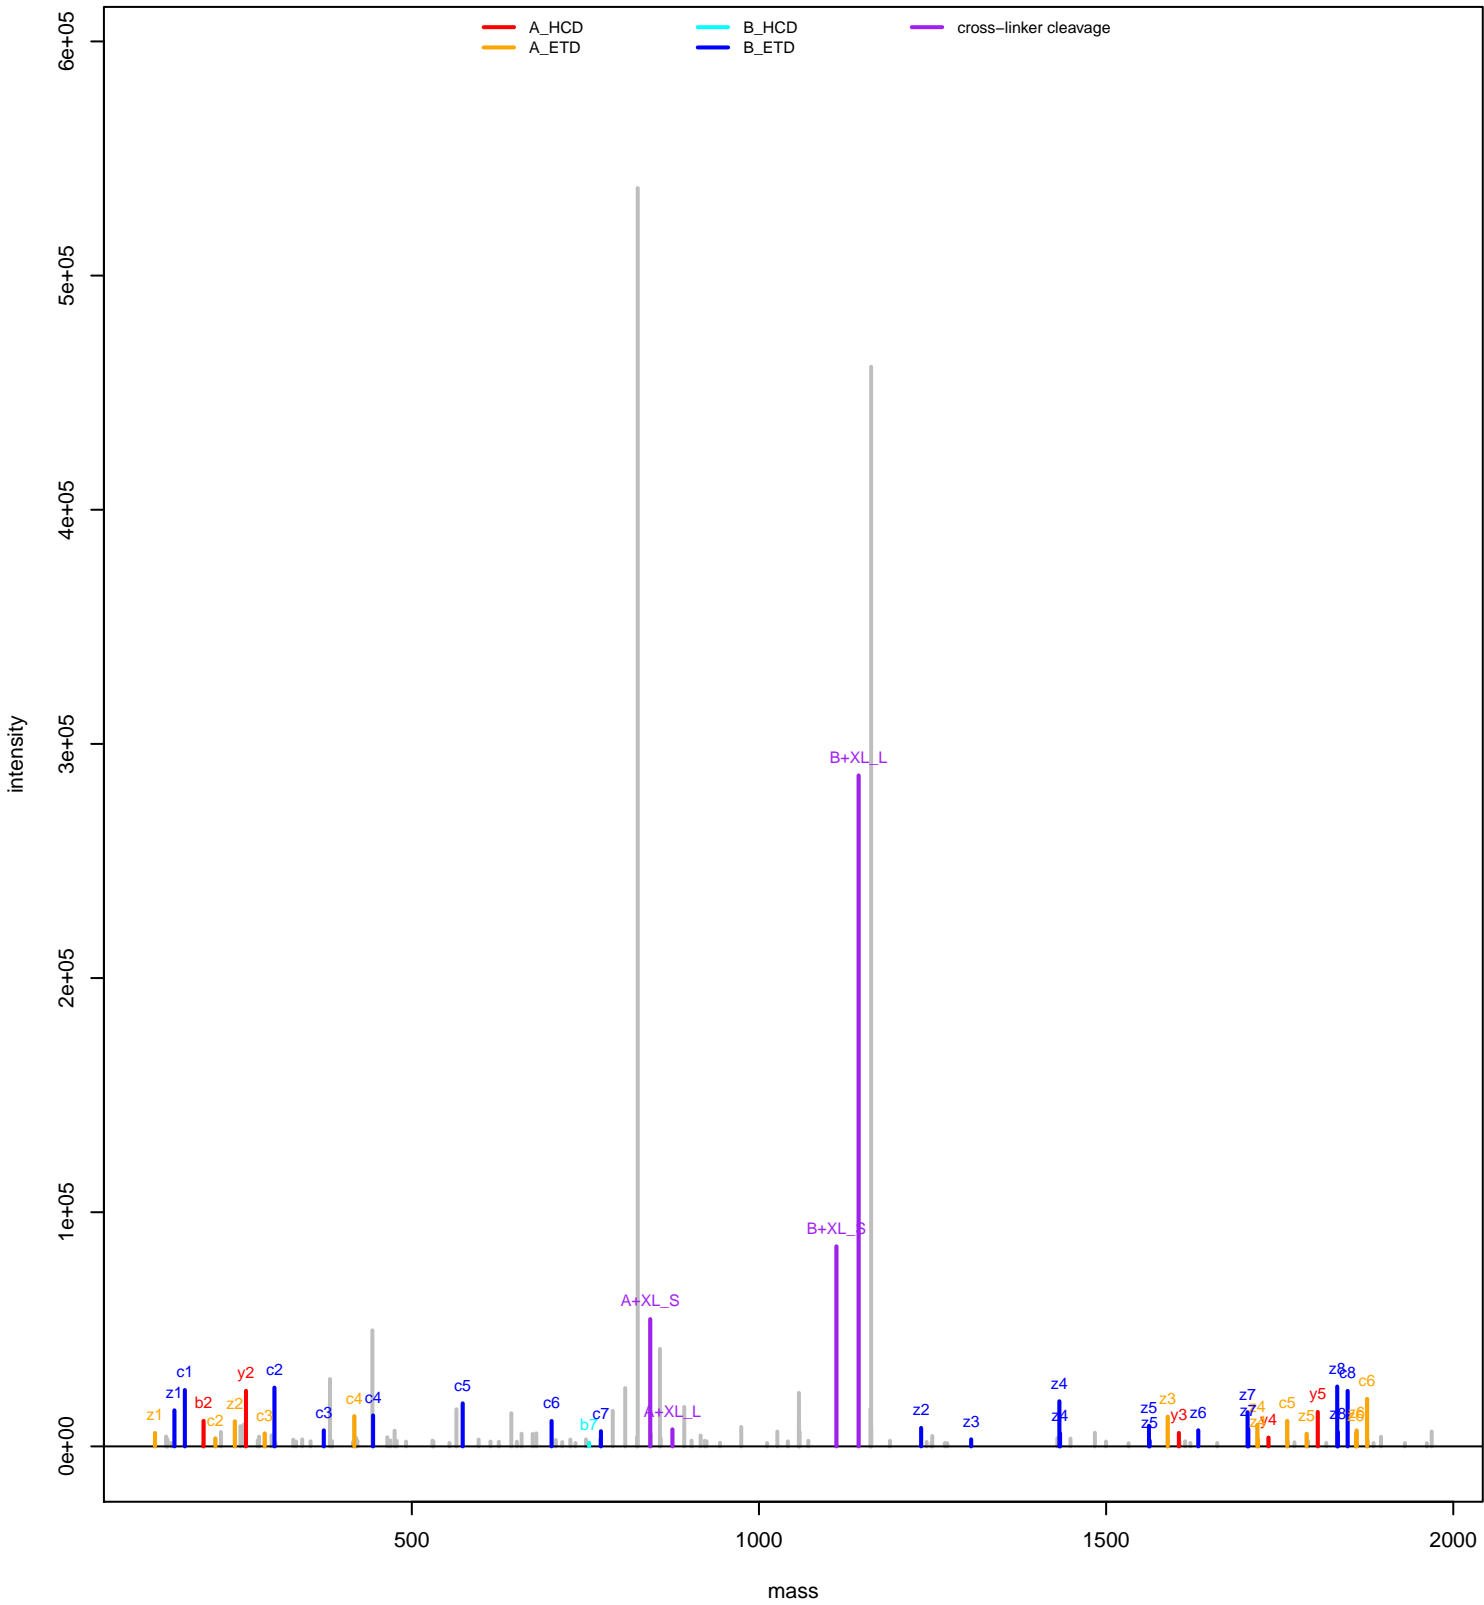

EAAEKDK+XL\_S

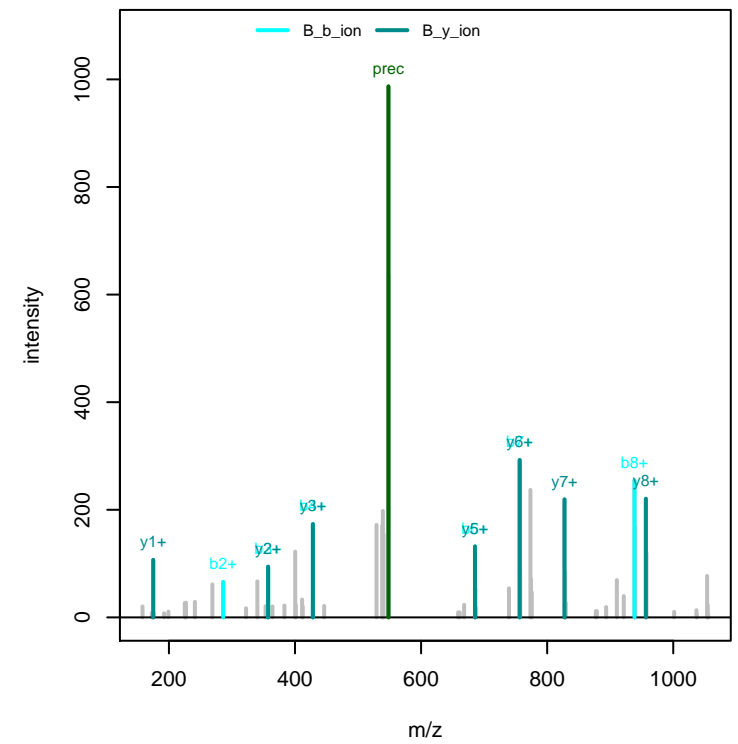

EAAEKDK+XL\_L

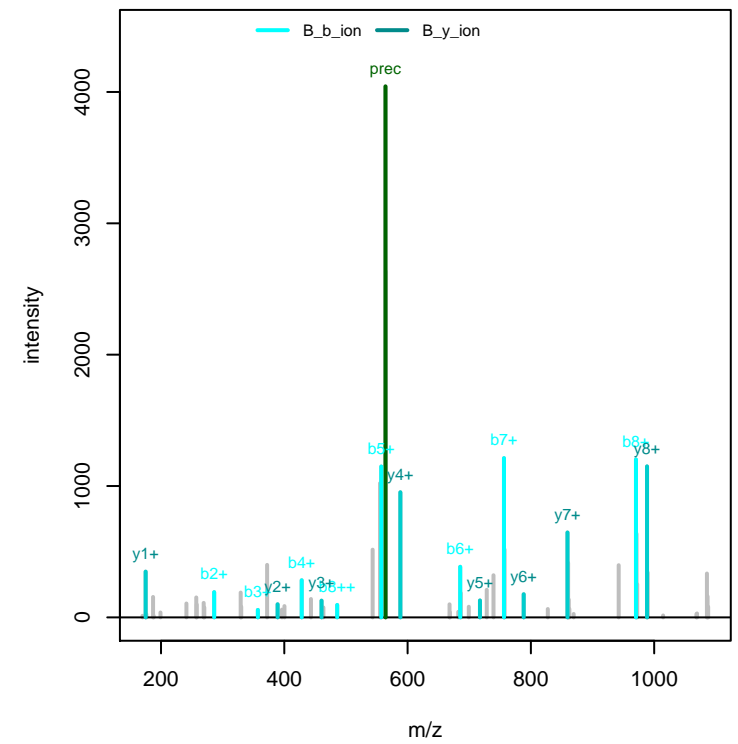

REAAEQAKR+XL\_S



REAAEQAKR+XL\_L





VGKISR  
SGSGKPNKDK

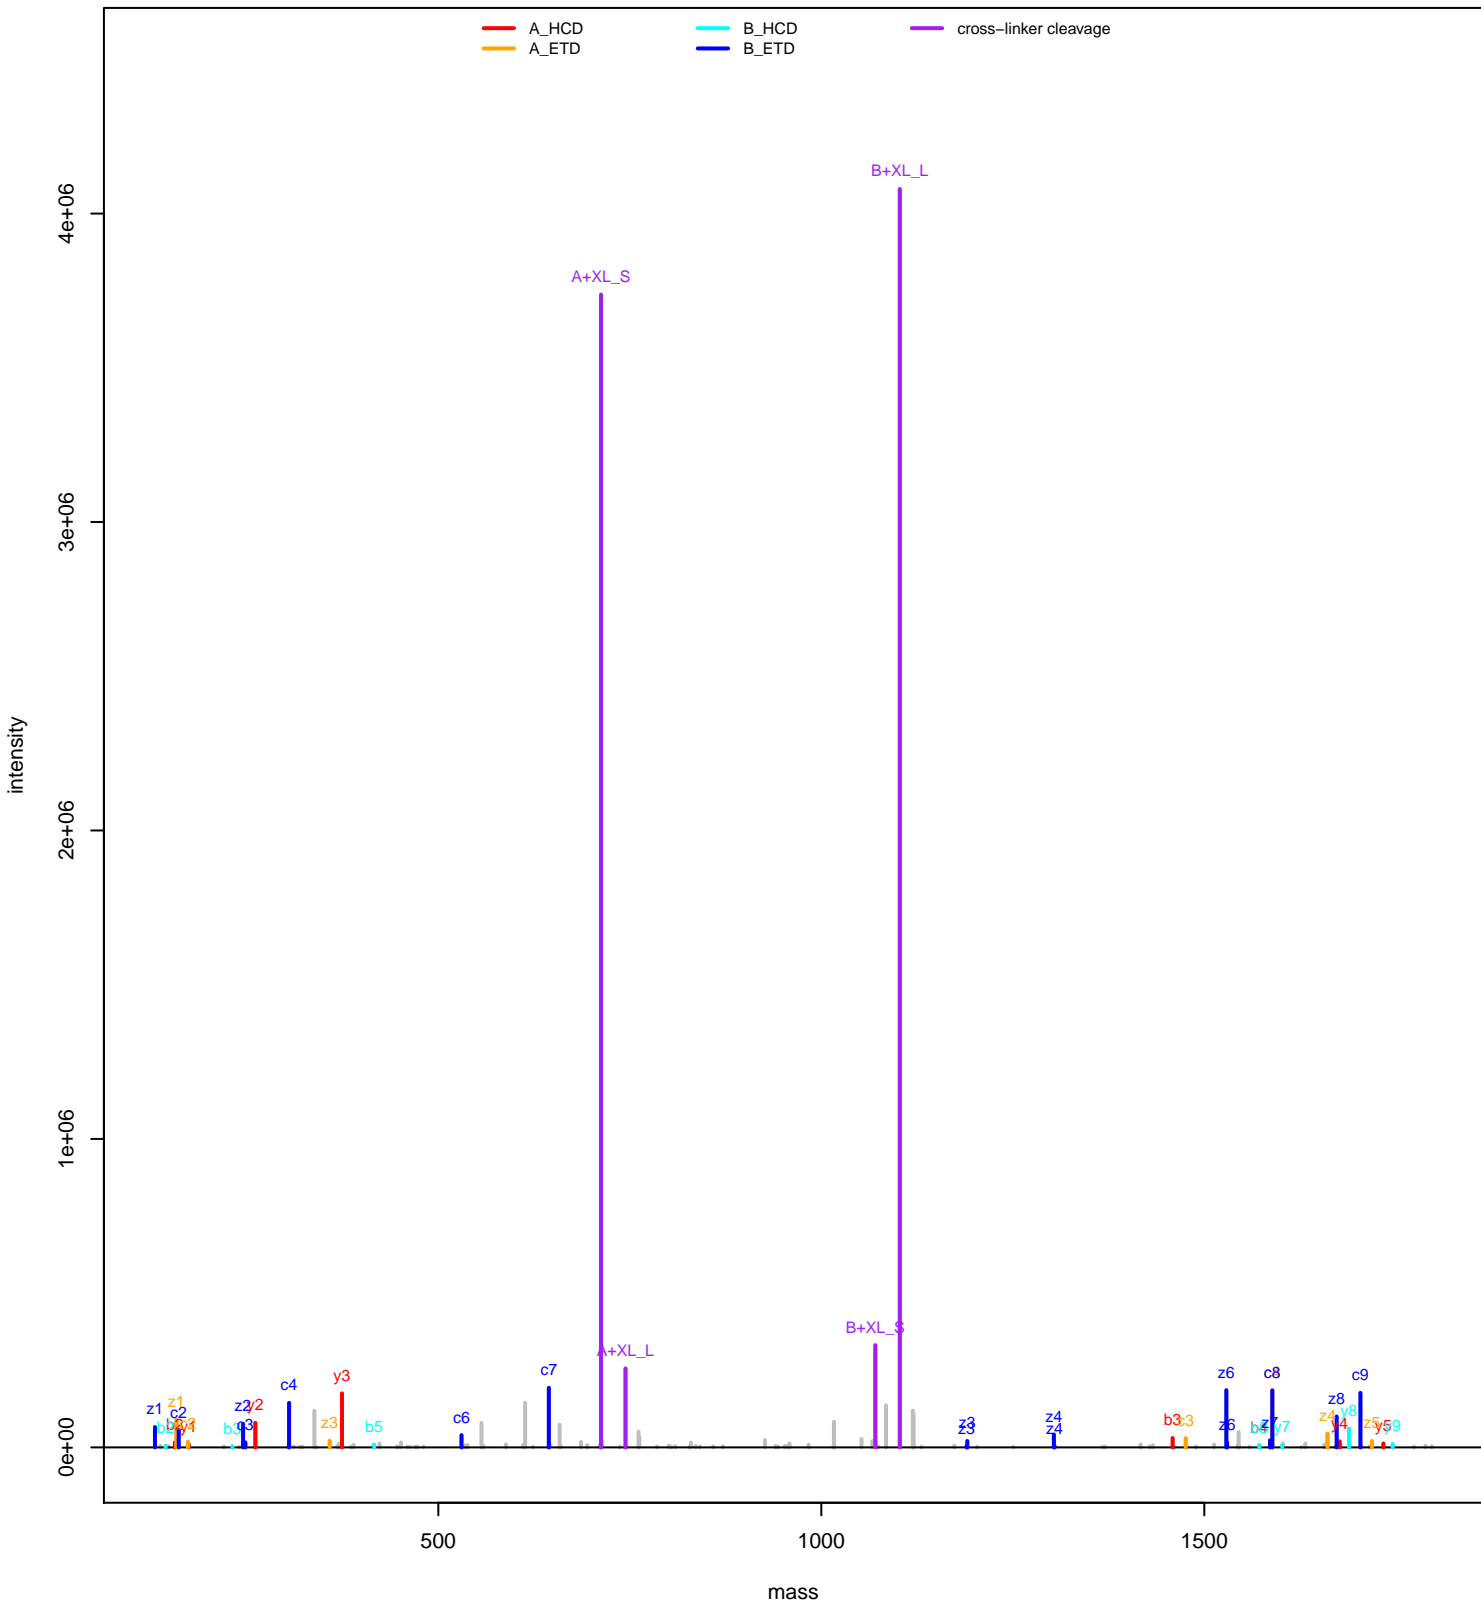

VGKISR+XL\_S

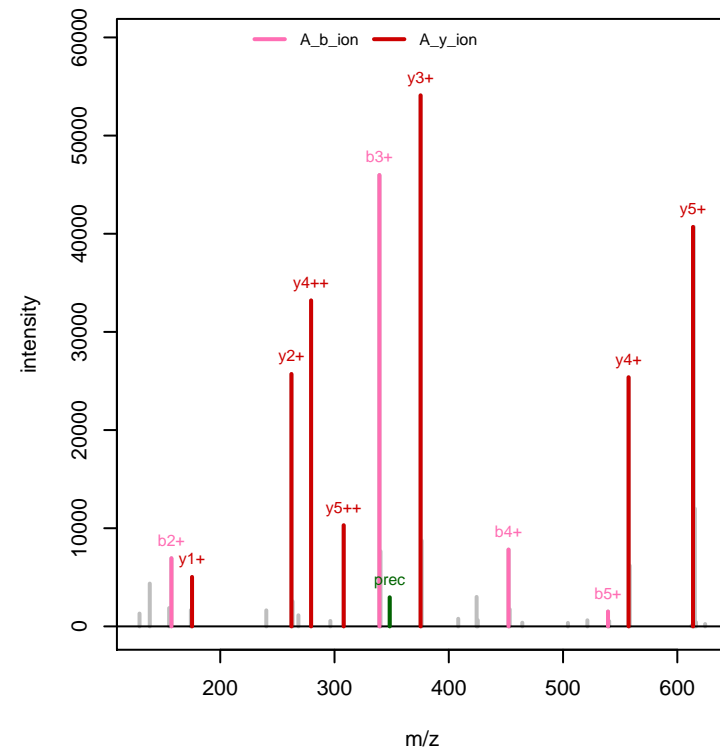

VGKISR+XL\_L

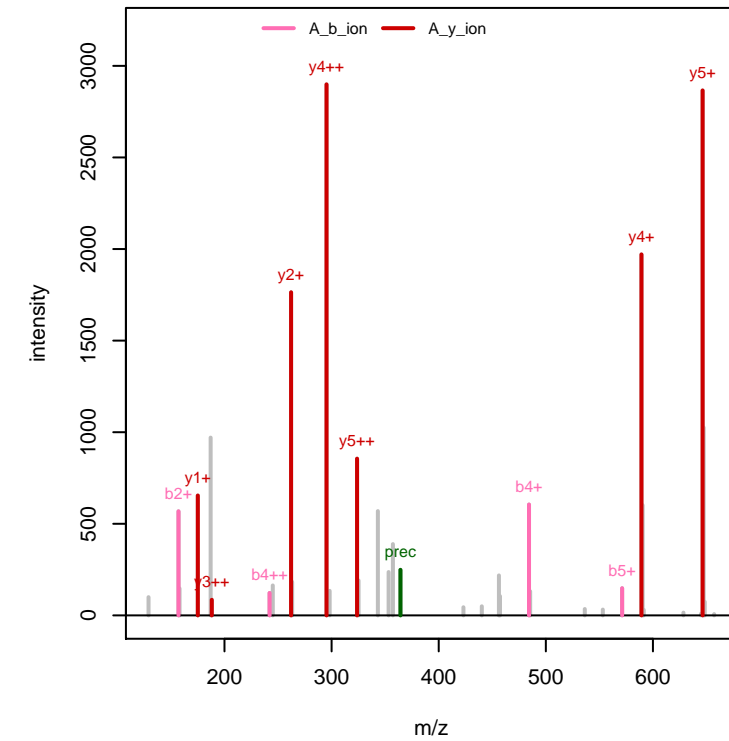

SGSGKPNKDK+XL\_S

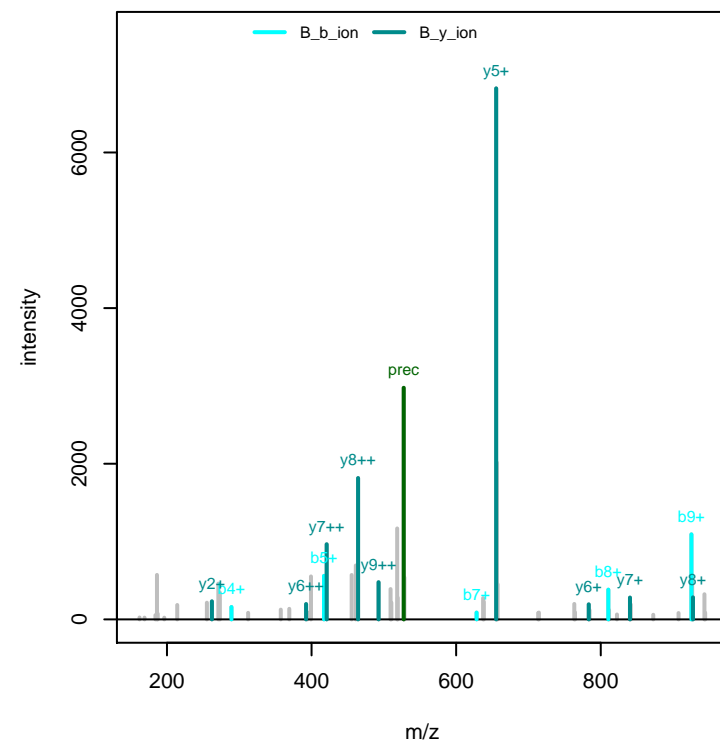

SGSGKPNKDK+XL\_L

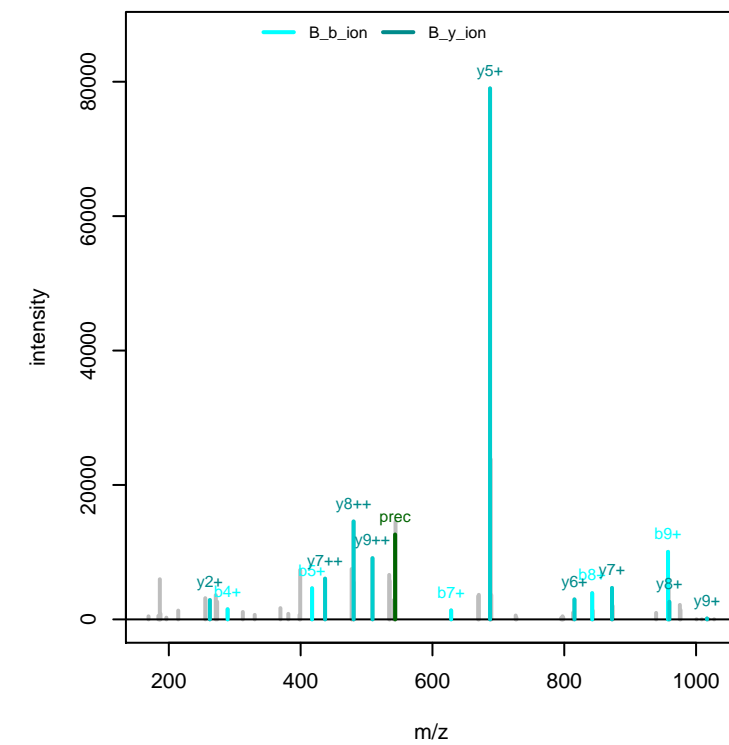

TAAKIEK  
EAAPAKAEK

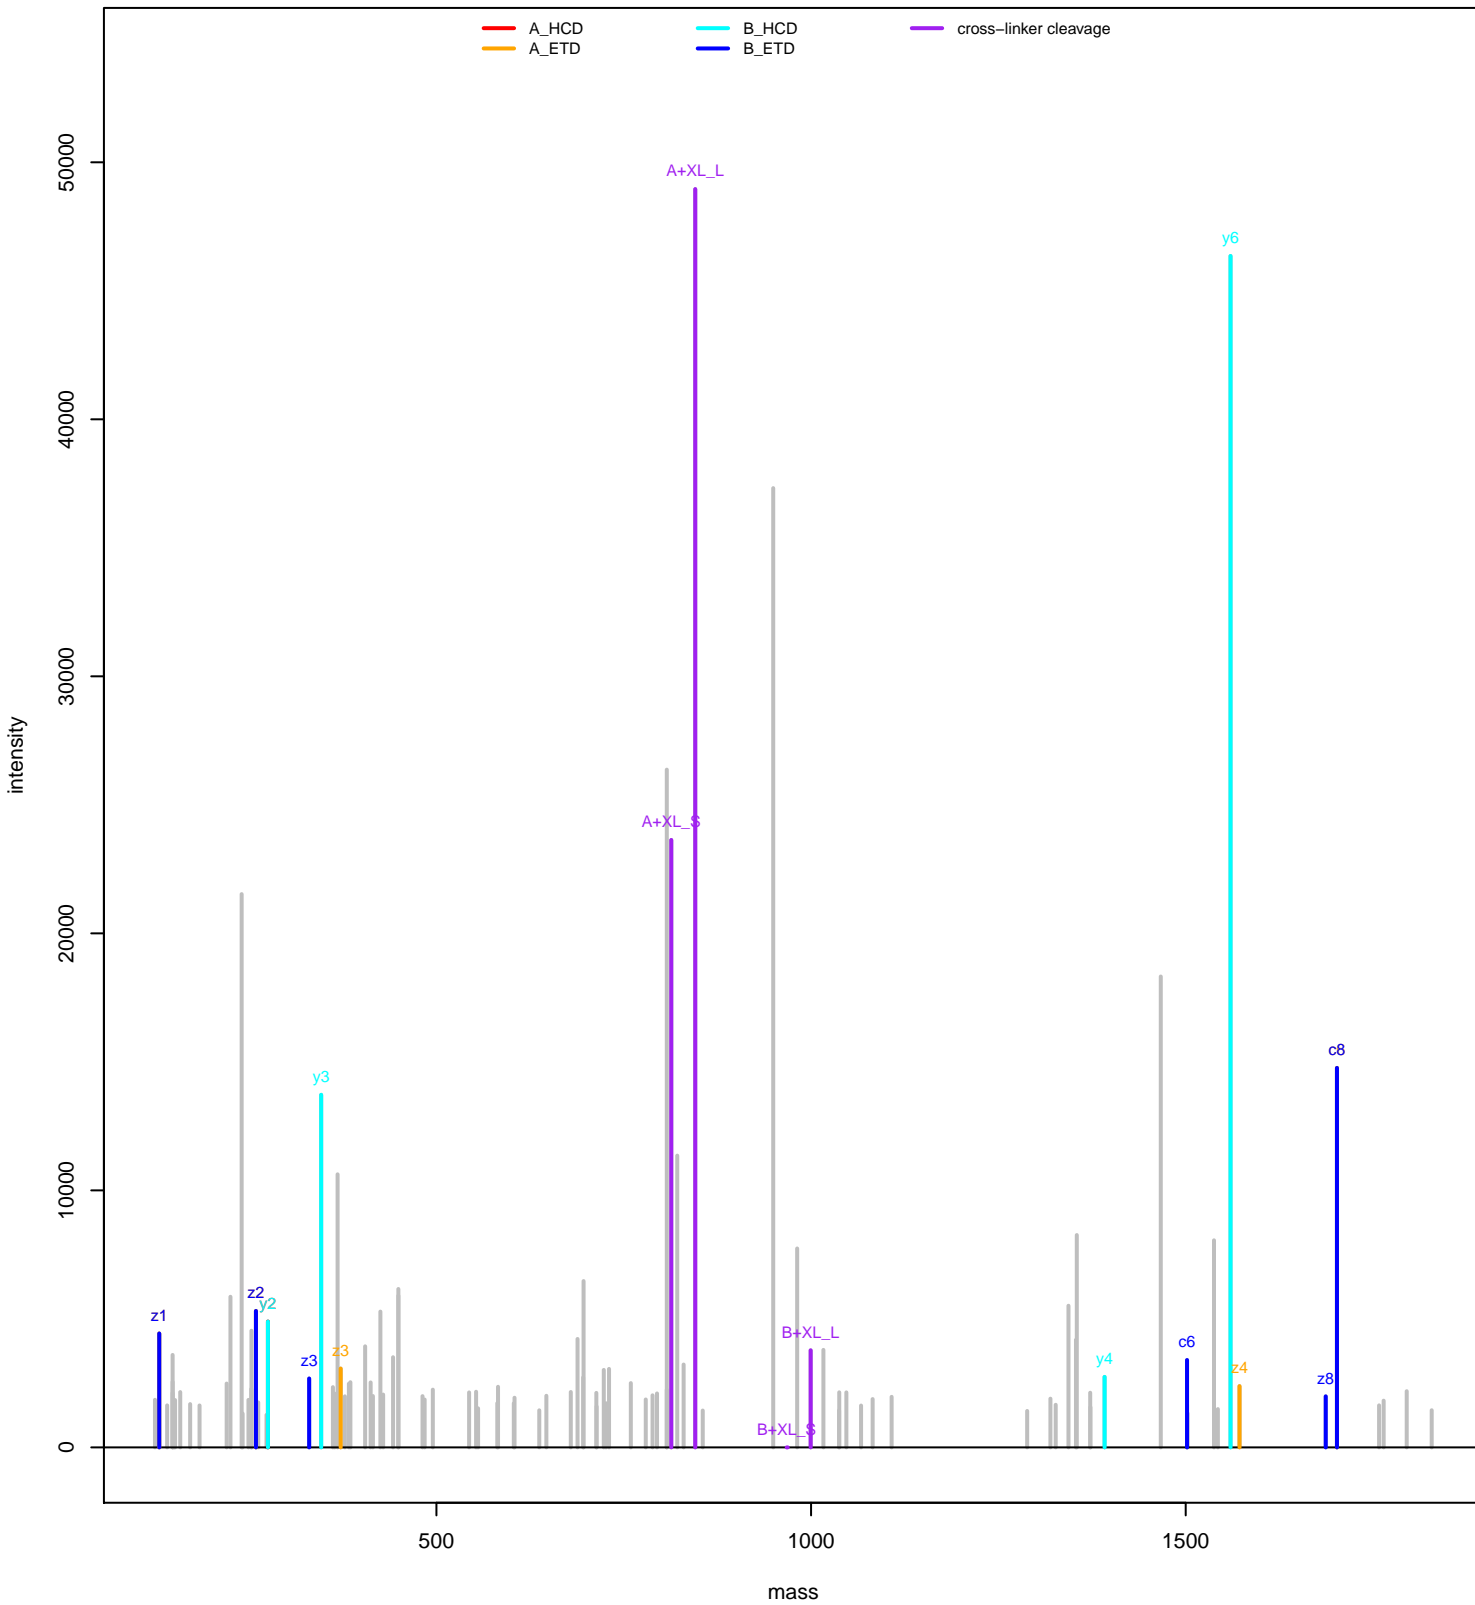

TAAKIEK+XL\_S

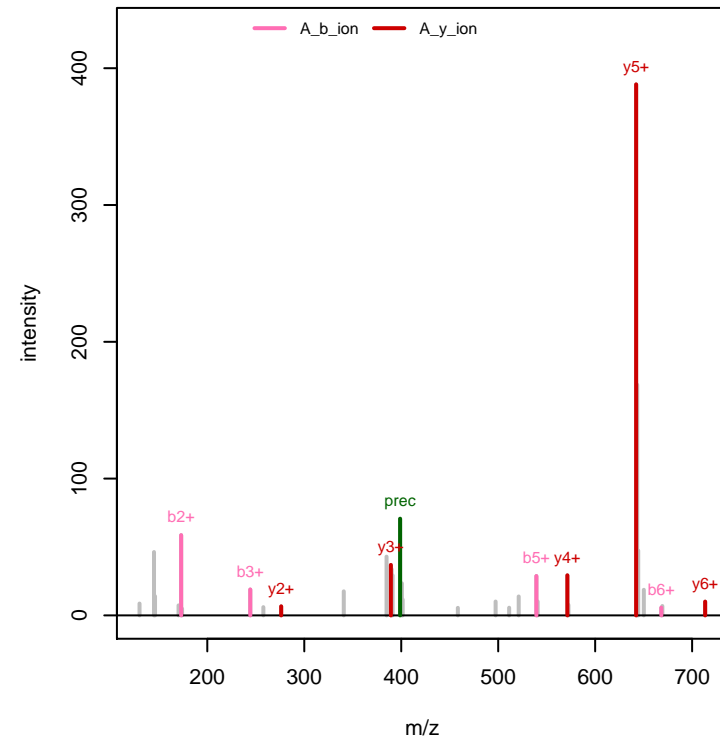

EAAPAKAEK+XL\_S

TAAKIEK+XL\_L

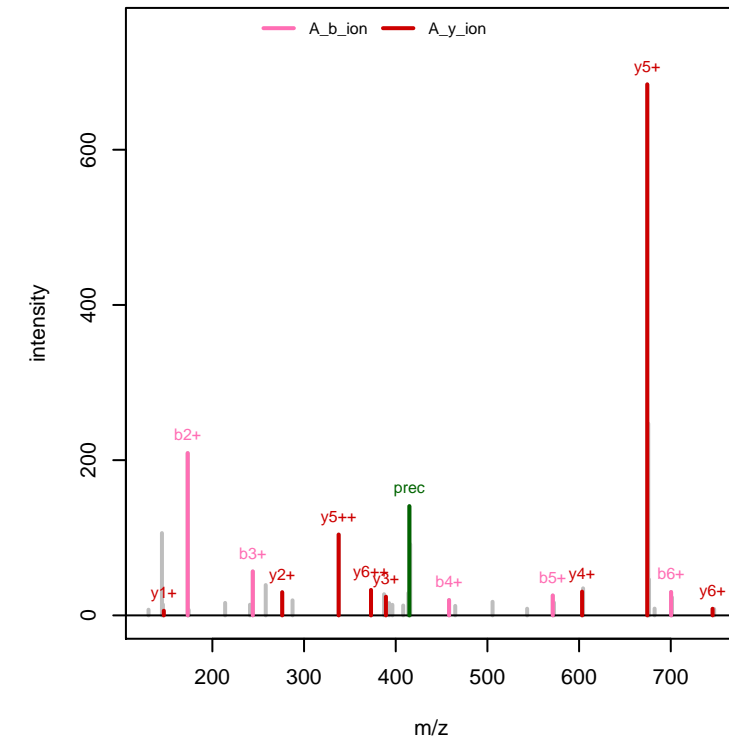

EAAPAKAEK+XL\_L

EAAEQAKR  
AERAAEQAKR

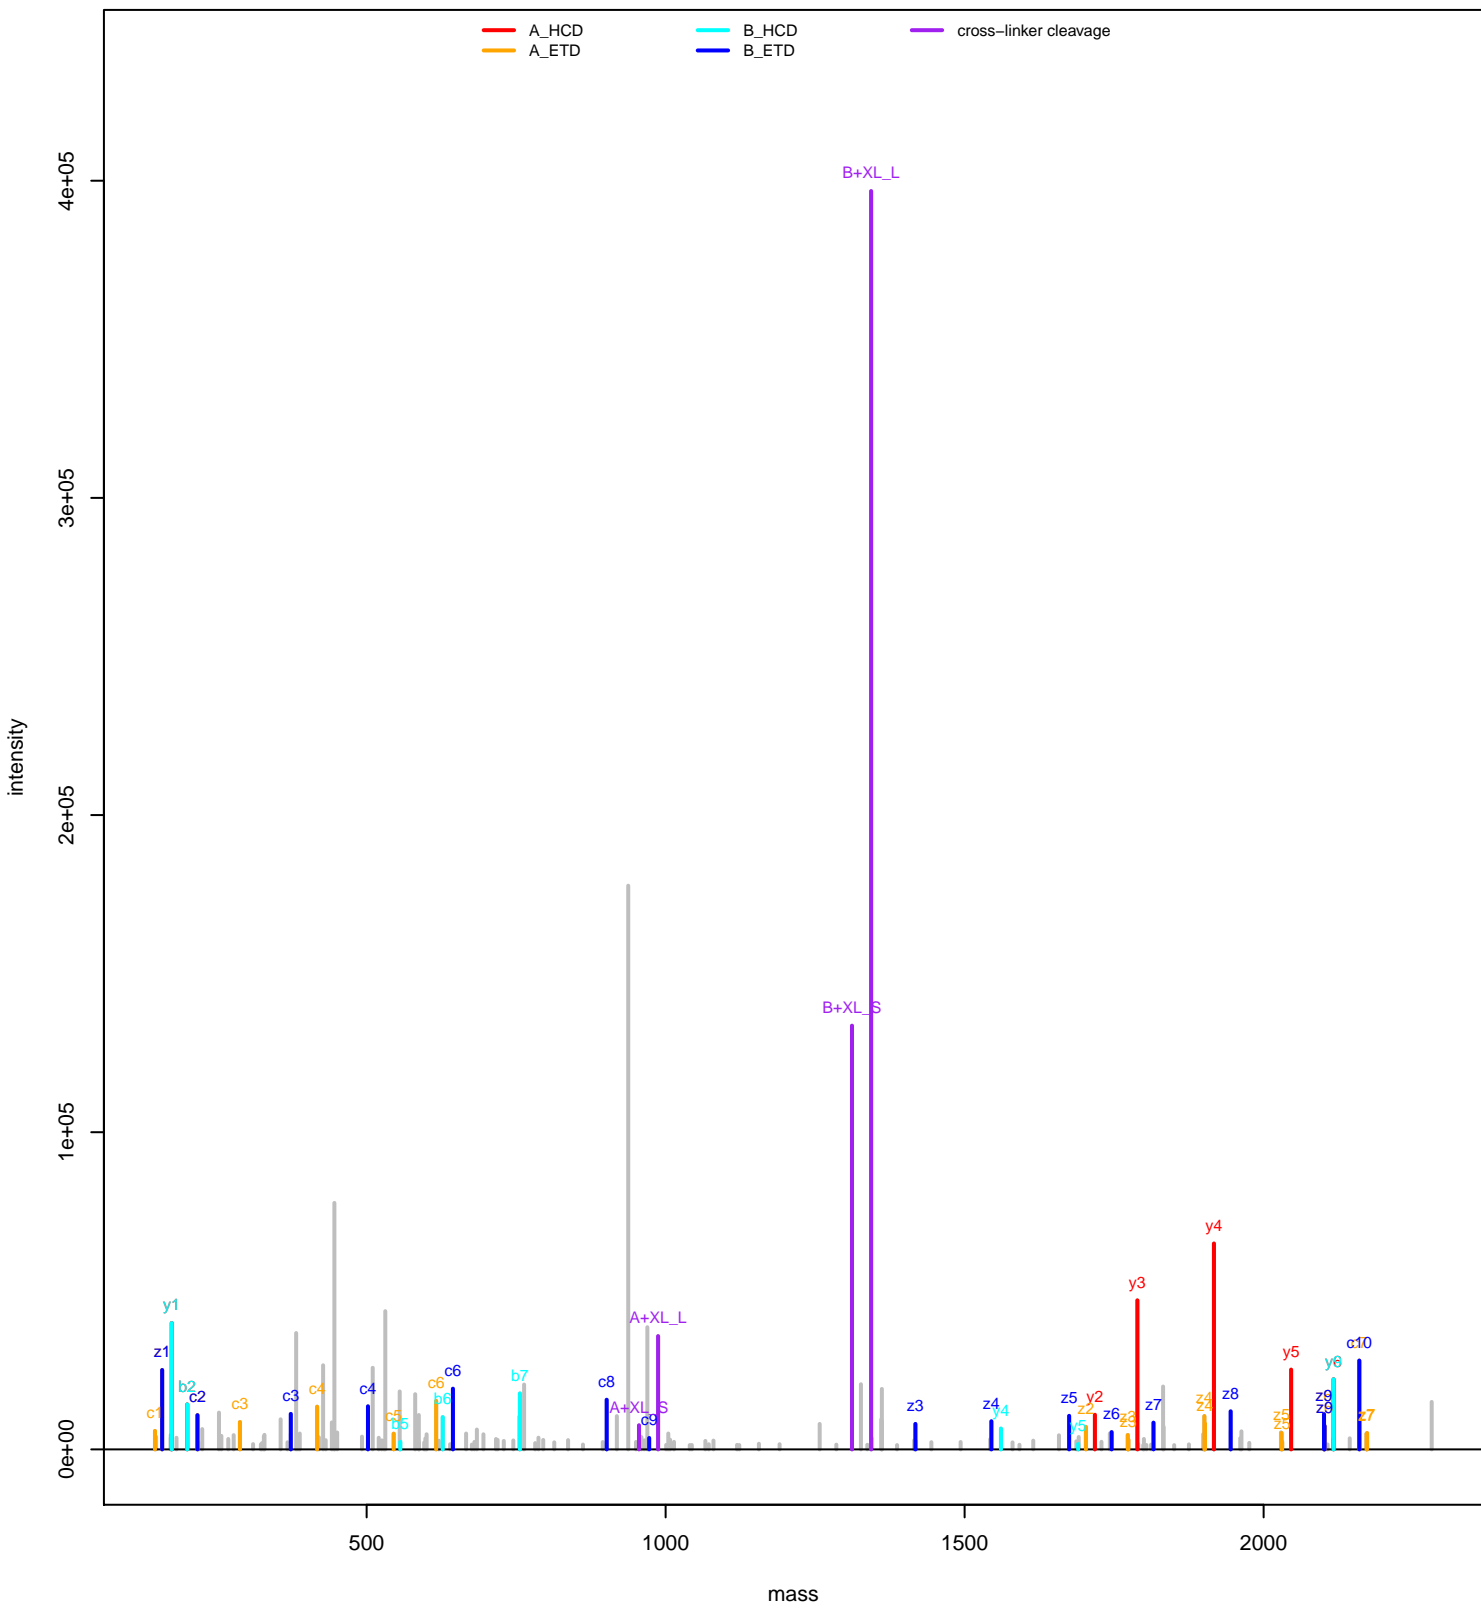

EAAEQAKR+XL\_S

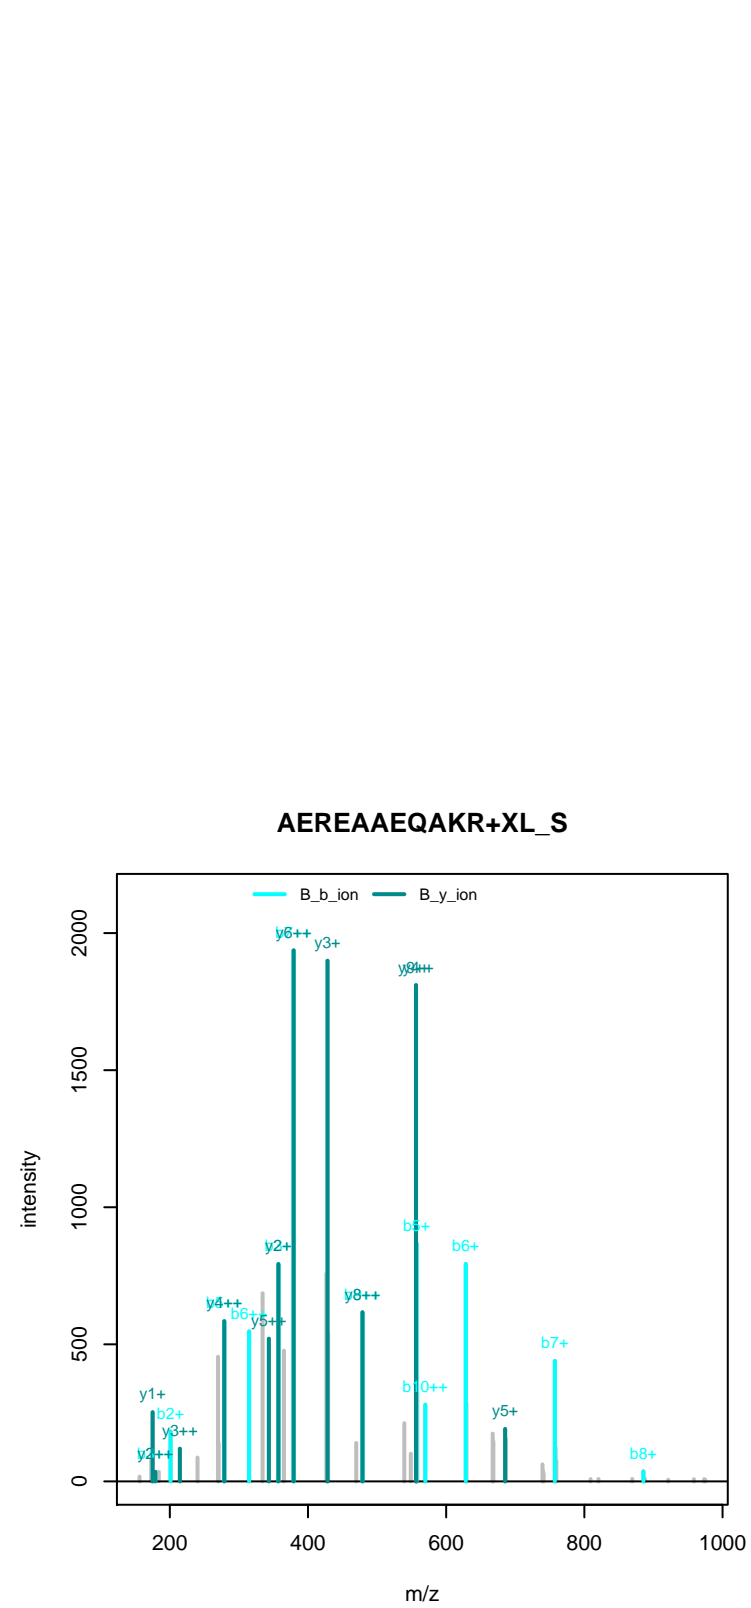

EAAEQAKR+XL\_L

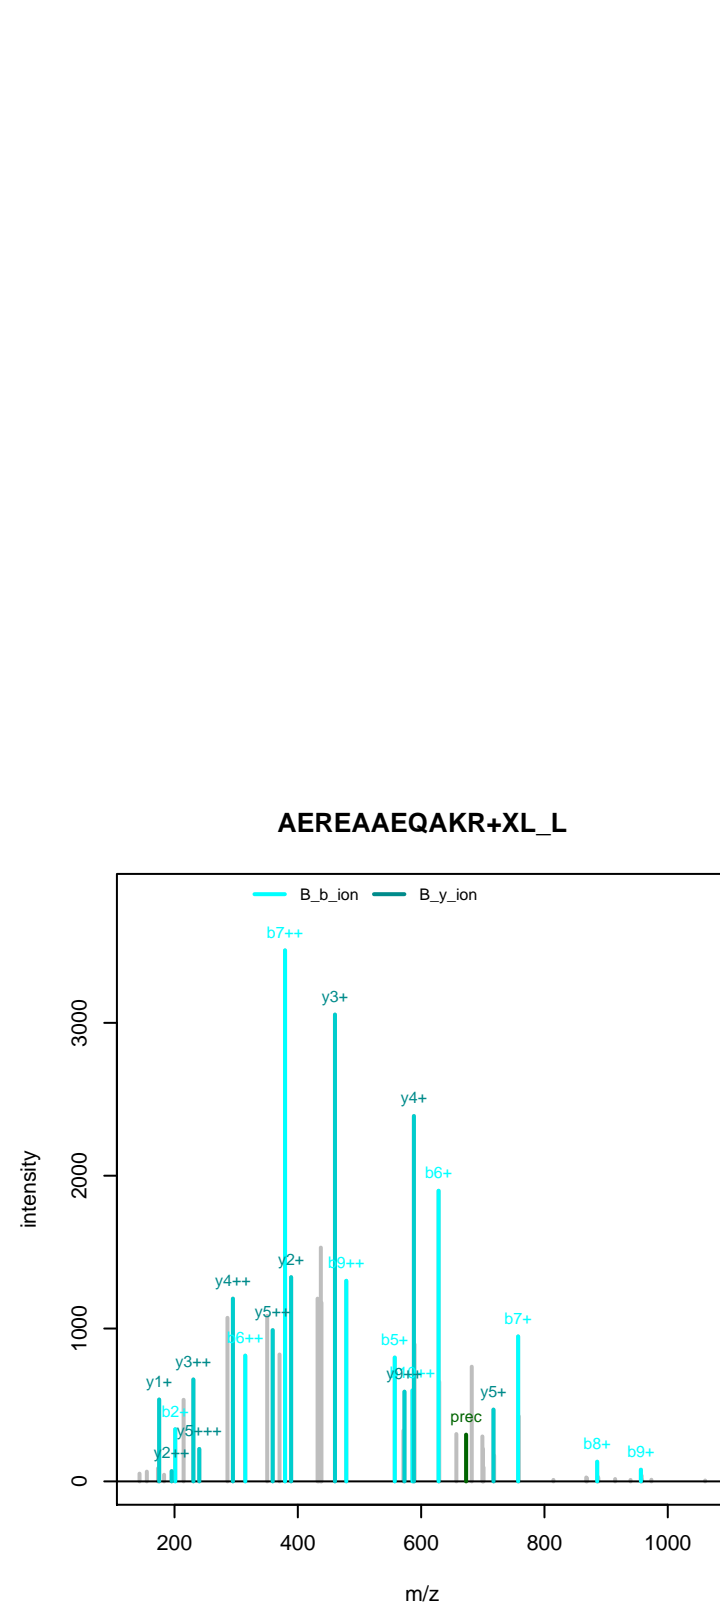

AERAAEQAKR+XL\_S

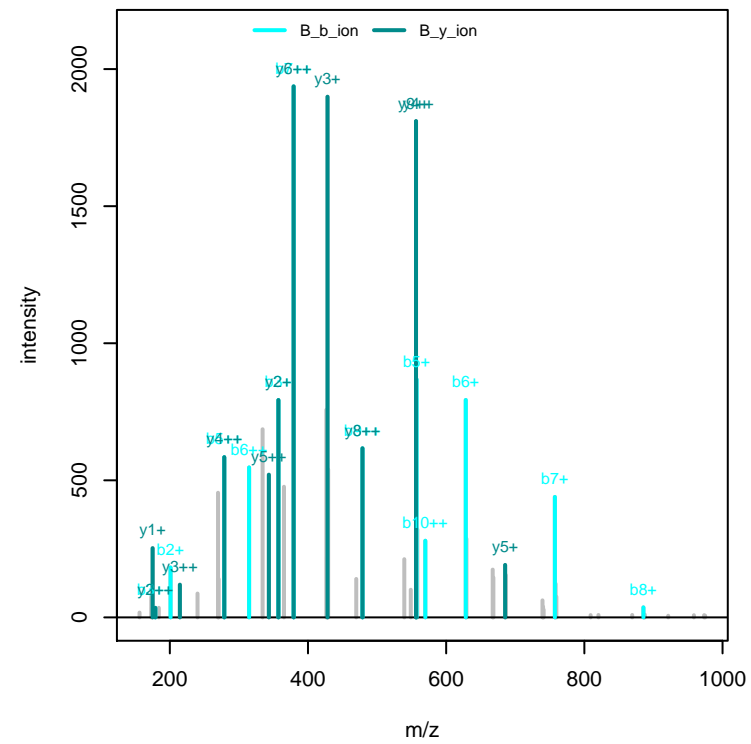

AERAAEQAKR+XL\_L

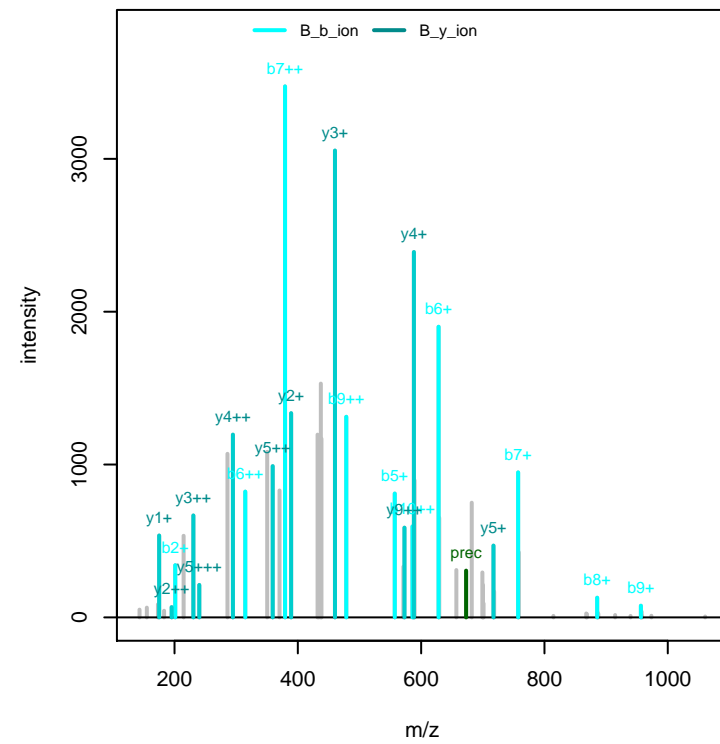

**AQKPVEK  
RKEGAER**

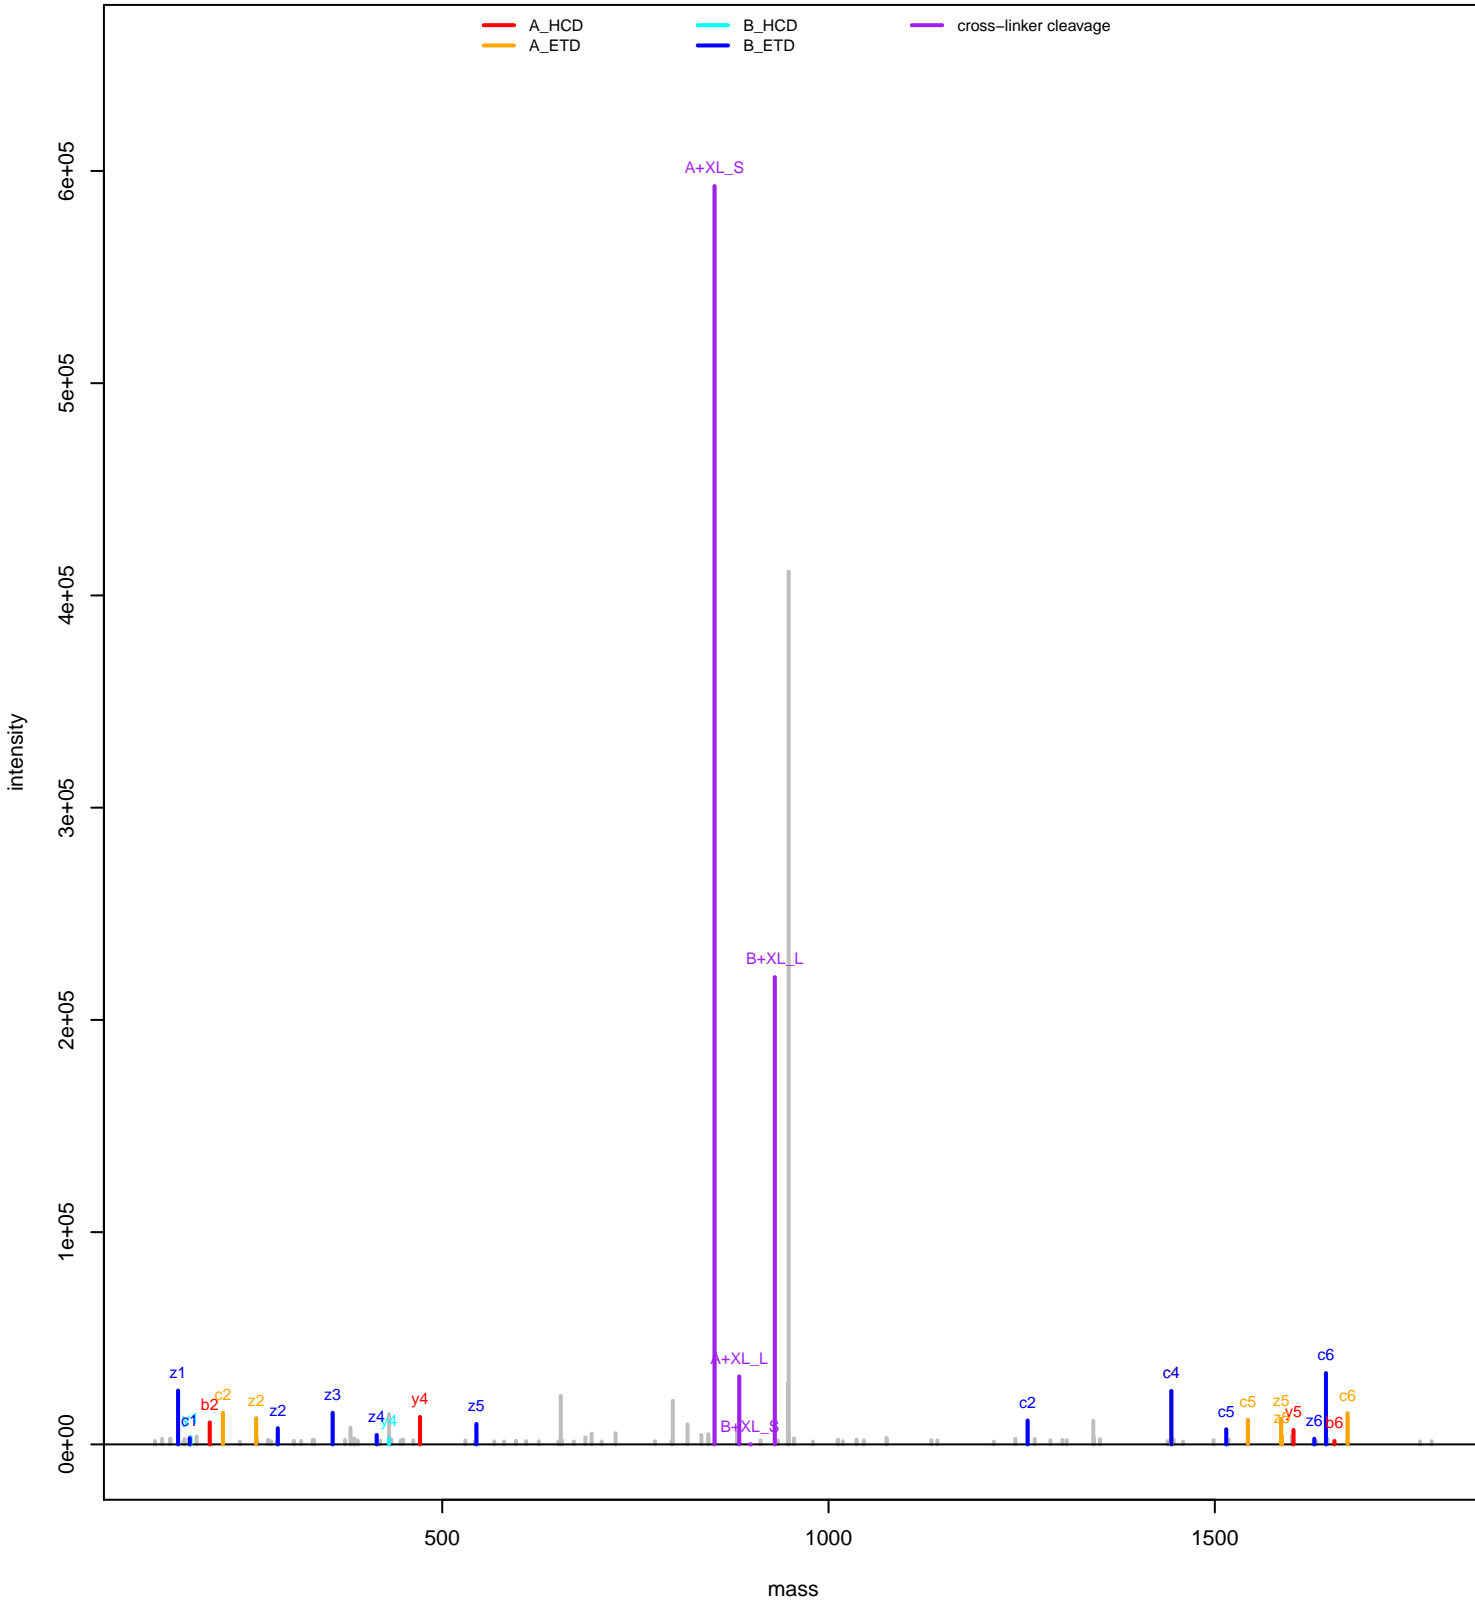

**AQKPVEK+XL\_S**

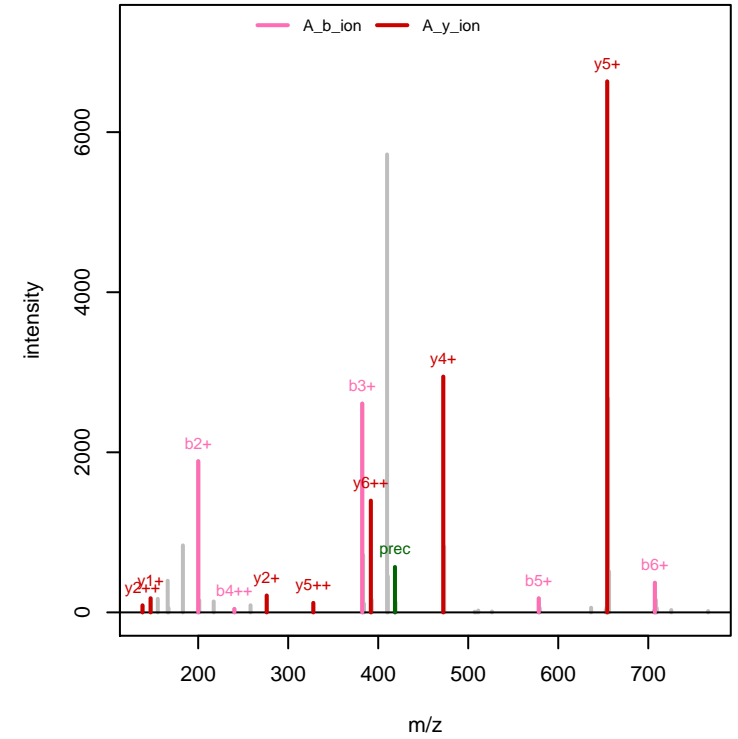

**RKEGAER+XL\_S**

**AQKPVEK+XL\_L**

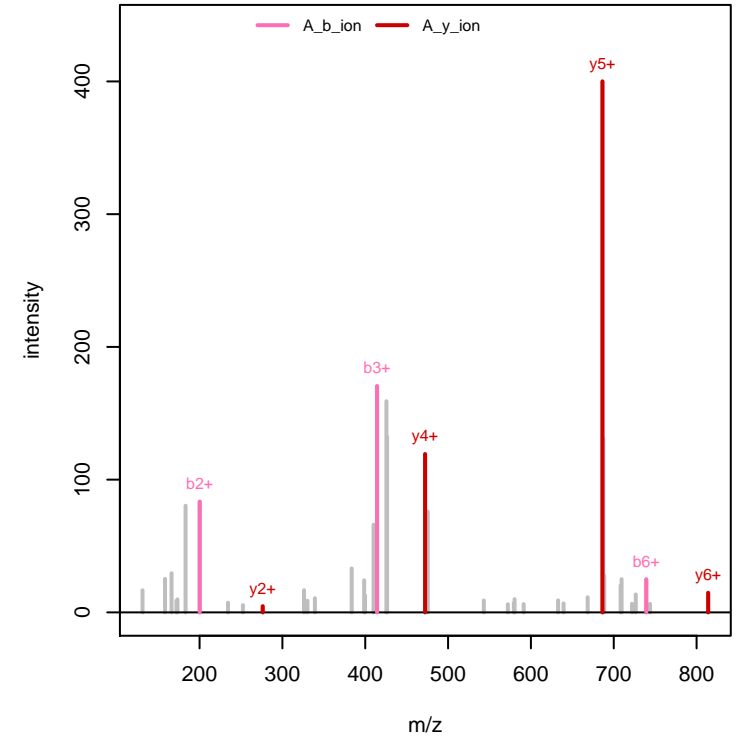

**RKEGAER+XL\_L**

LTSKGR  
CQGKGGCQGGDK

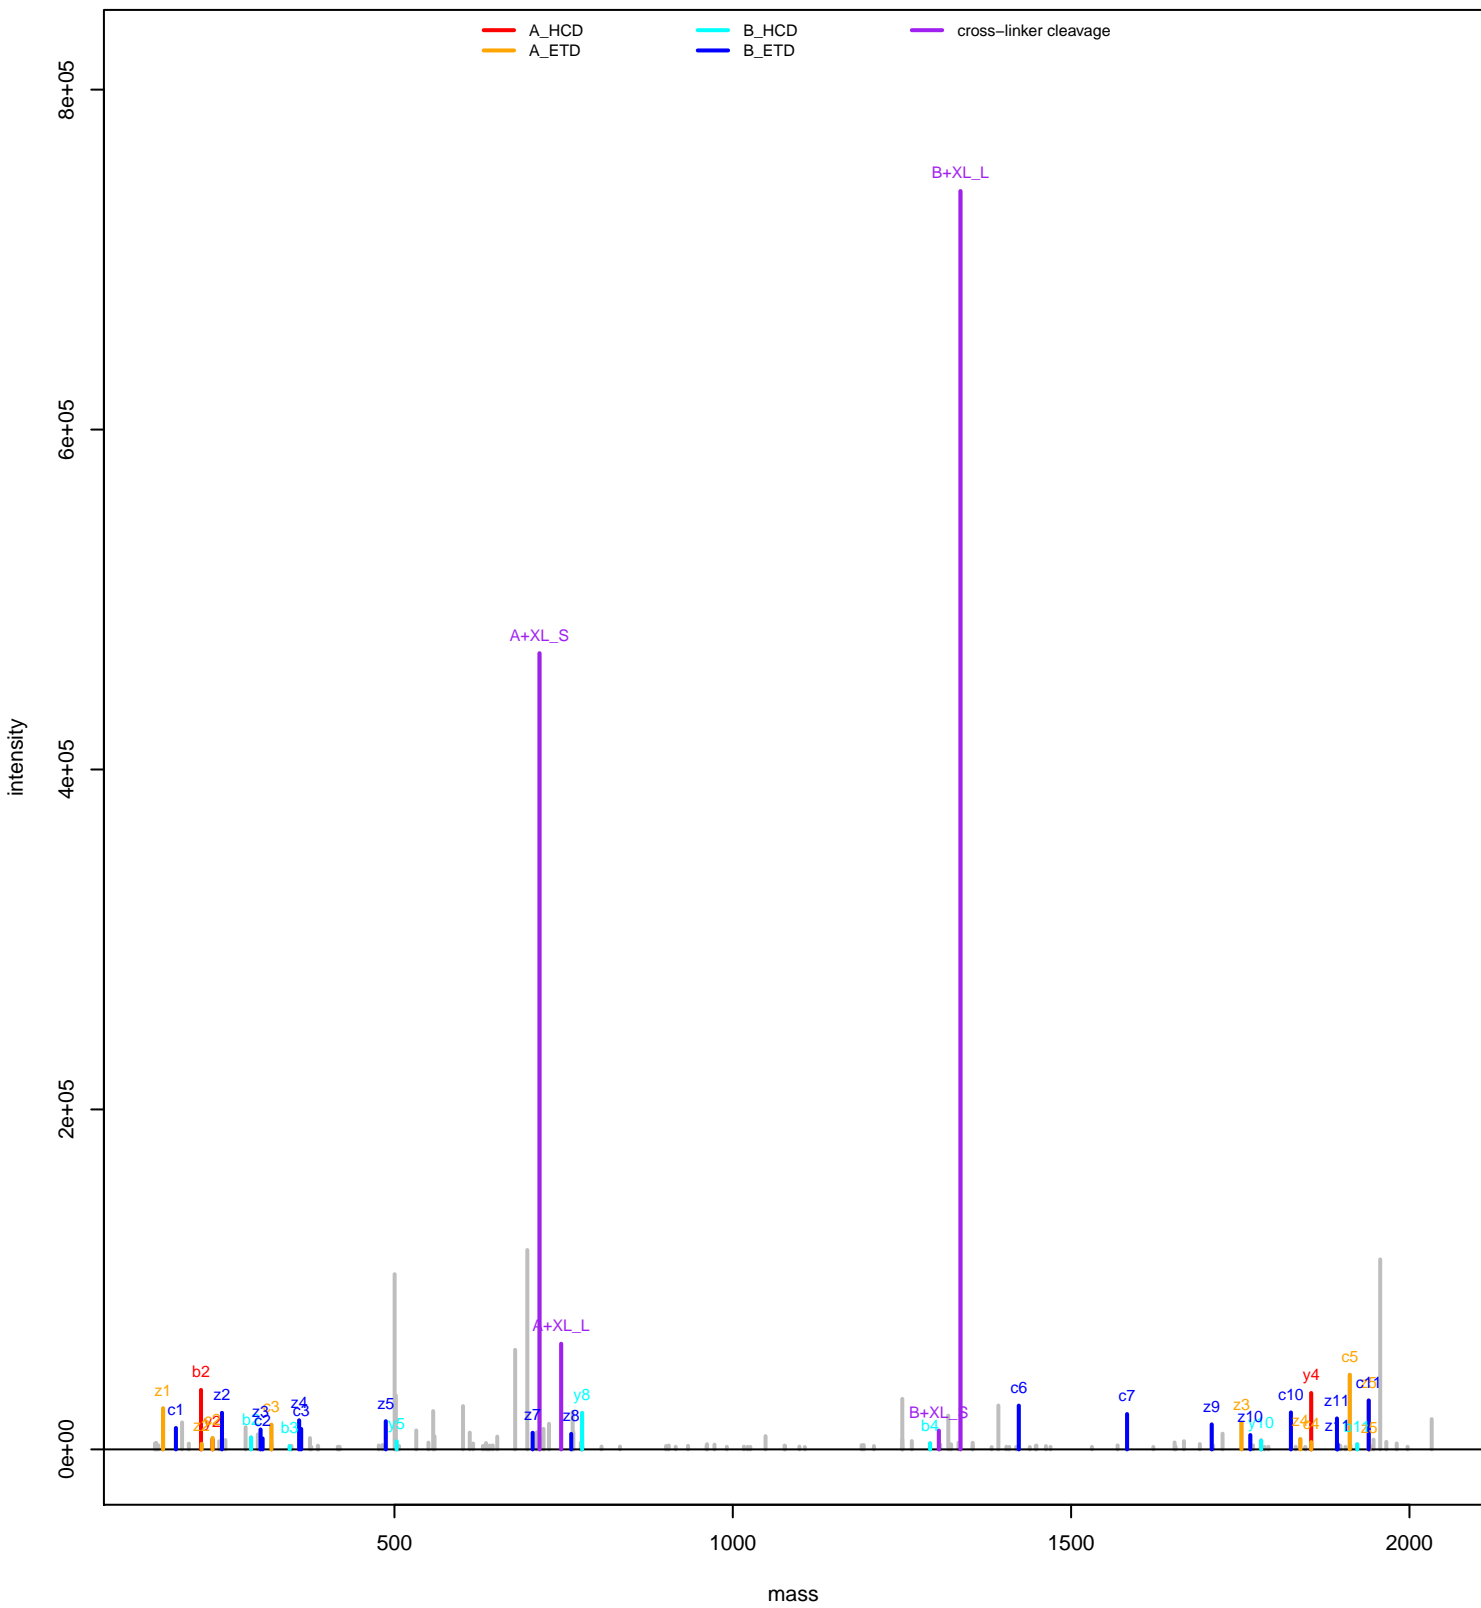

LTSKGR+XL\_S

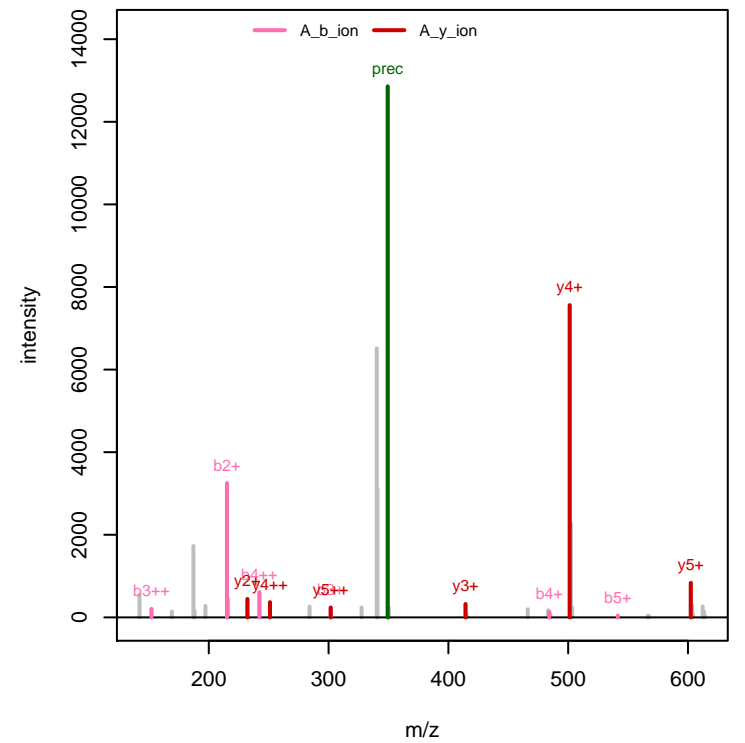

LTSKGR+XL\_L

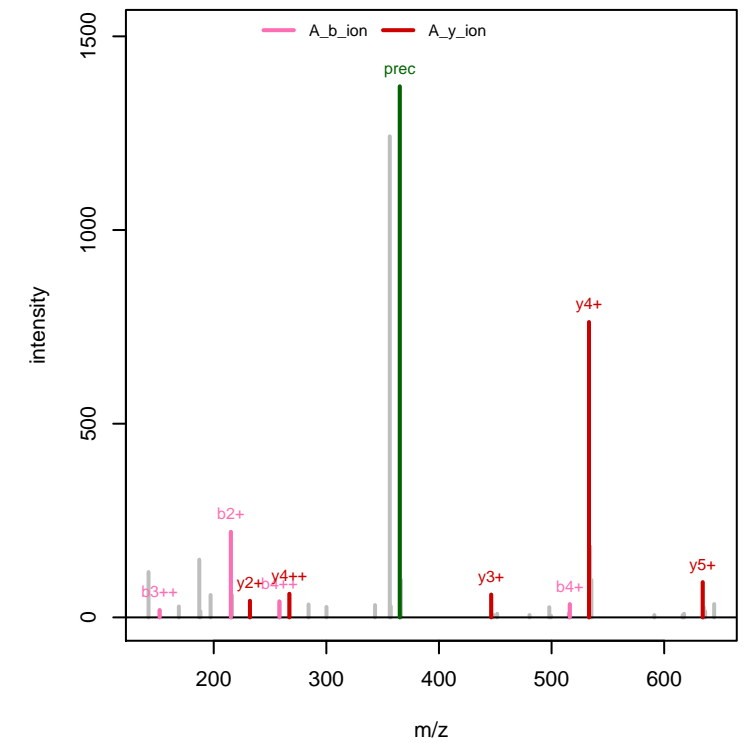

CQGKGGCQGGDK+XL\_S

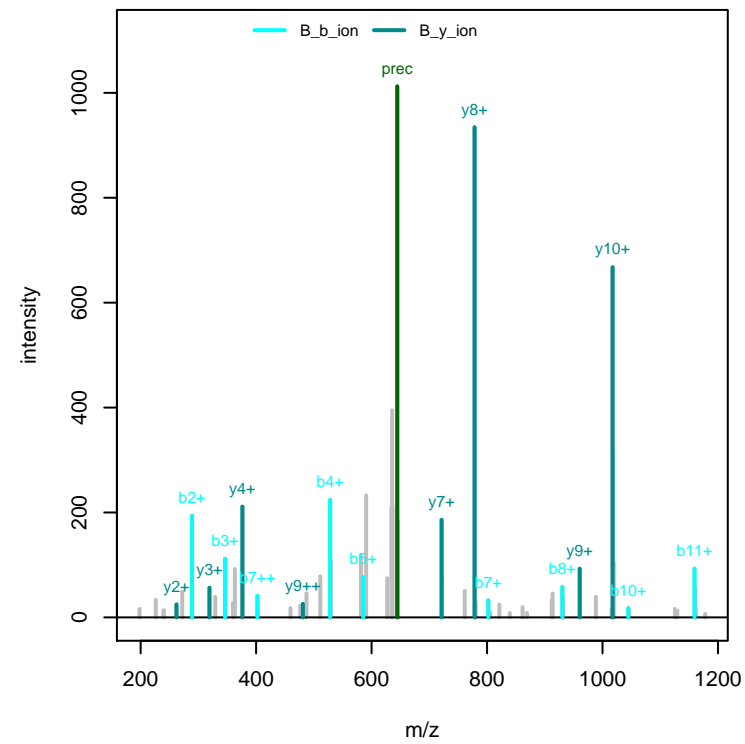

CQGKGGCQGGDK+XL\_L

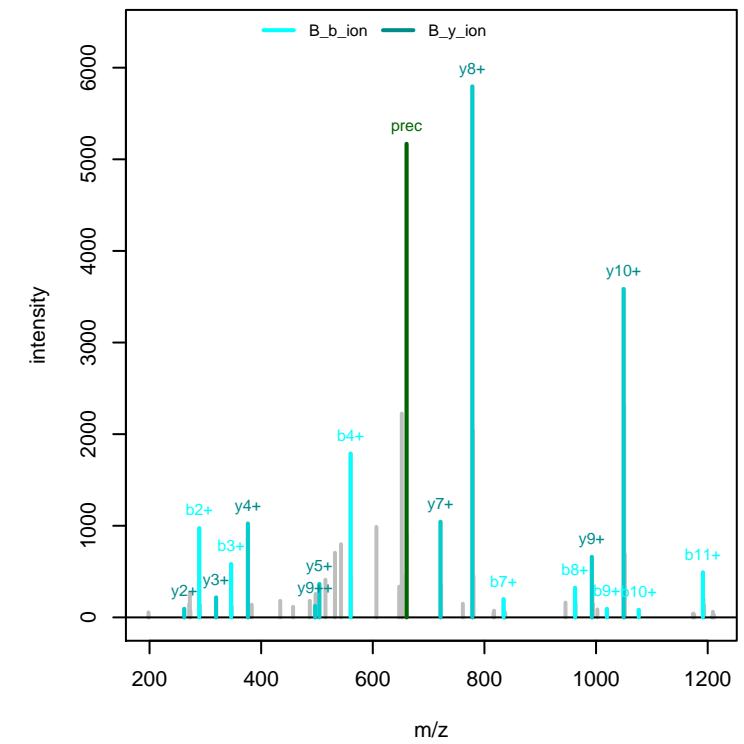

EAAEQAKR  
VSNQQDDMTKNAQAEK

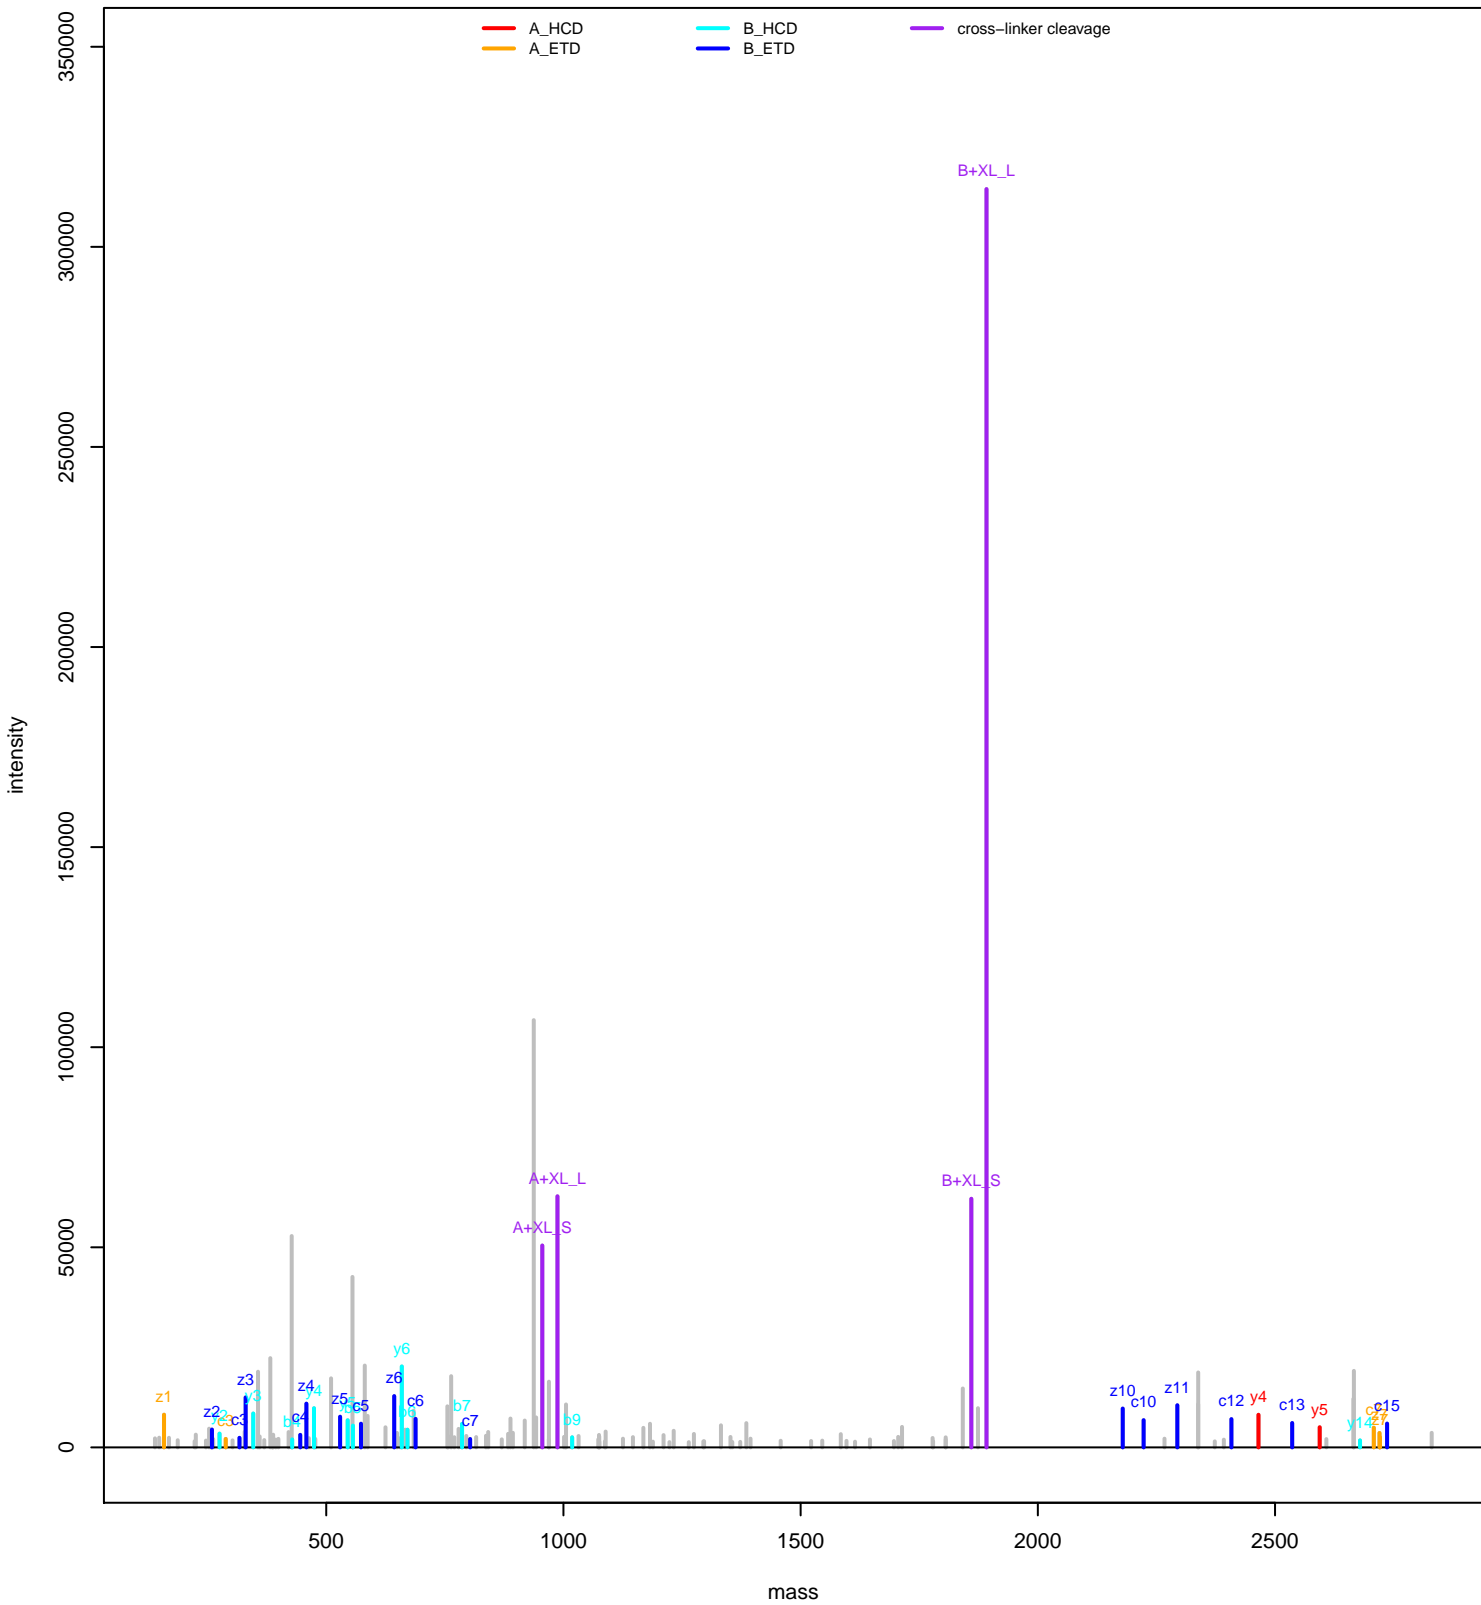

EAAEQAKR+XL\_S

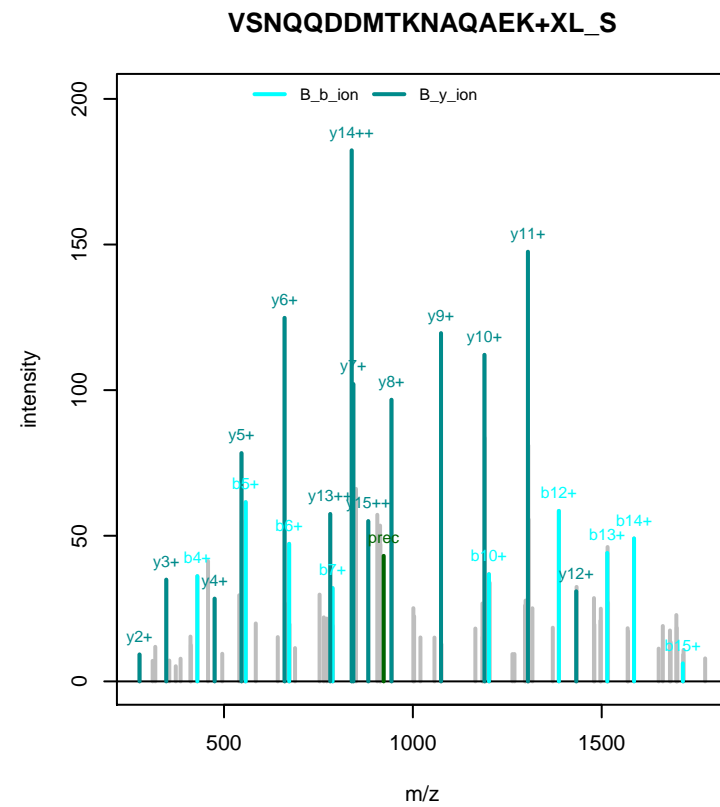

EAAEQAKR+XL\_L

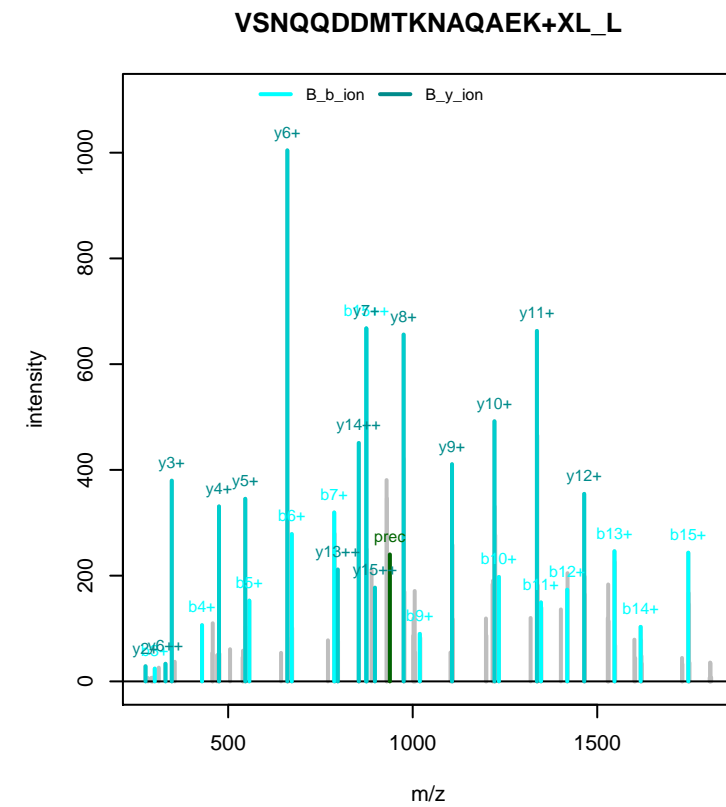

VSNQQDDMTKNAQAEK+XL\_S

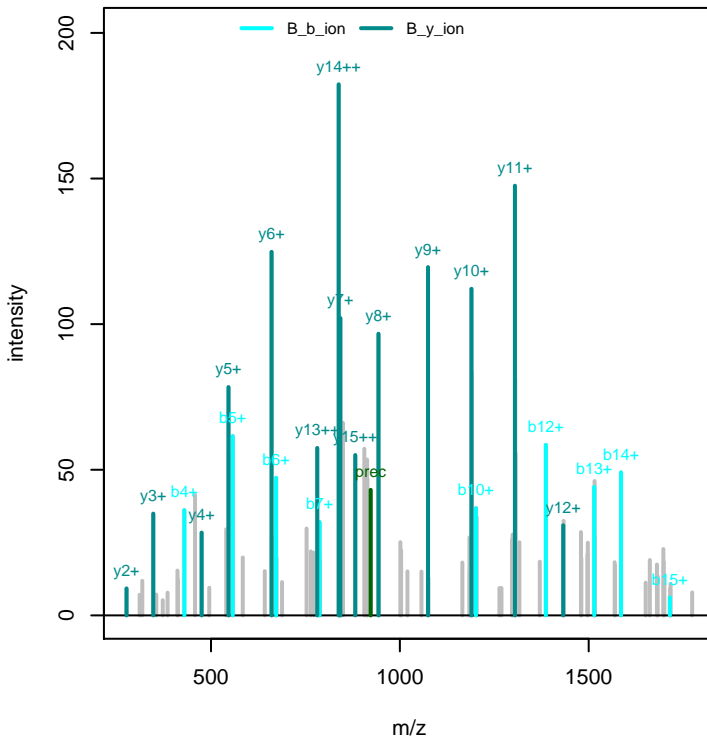

VSNQQDDMTKNAQAEK+XL\_L

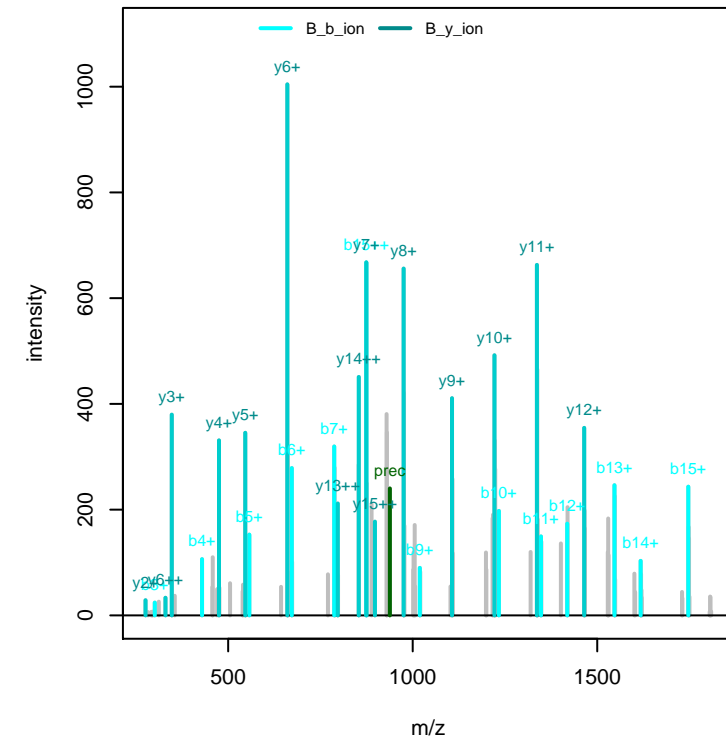

### HLAKAPAK ETSAKSEEK

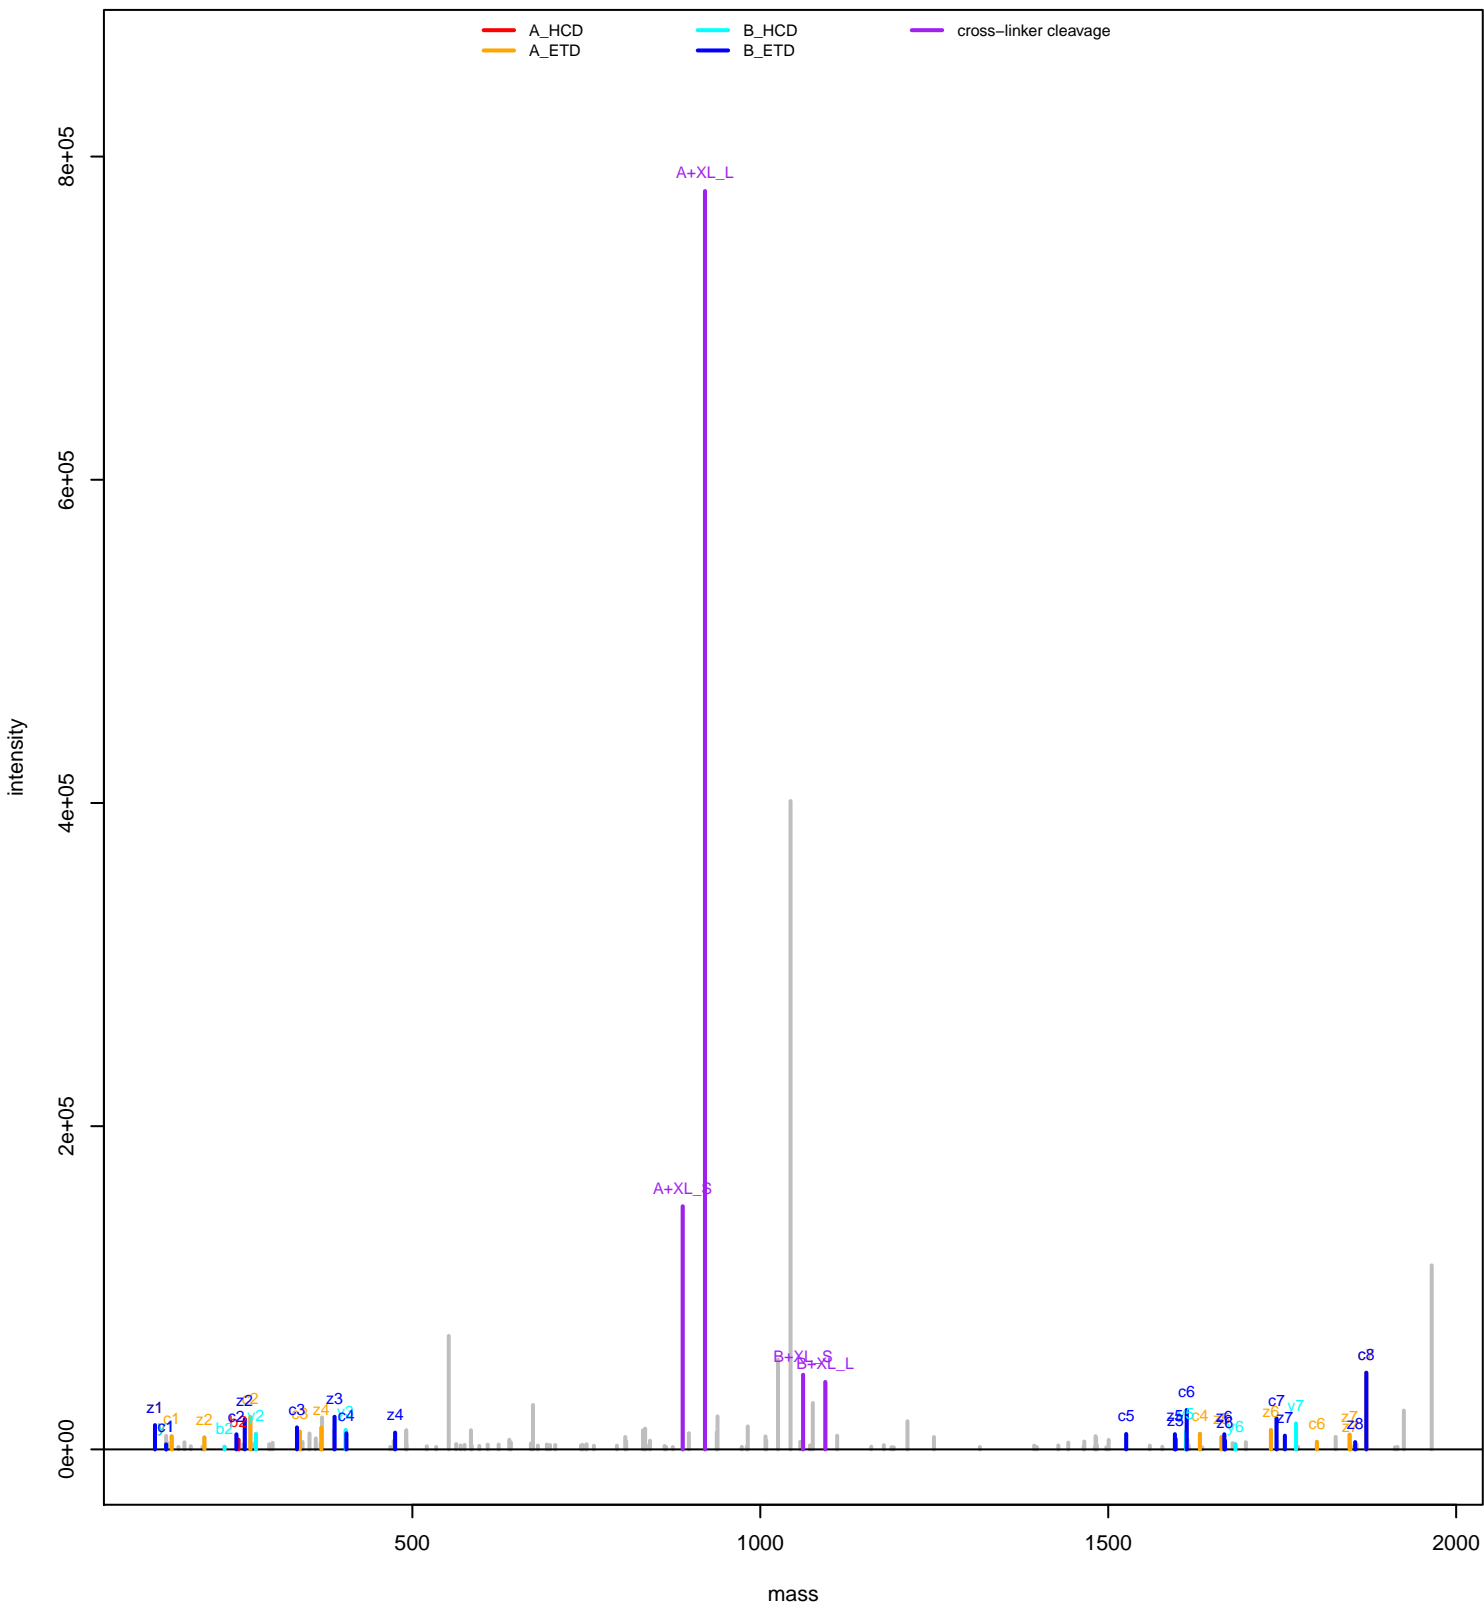

### HLAKAPAK+XL\_S

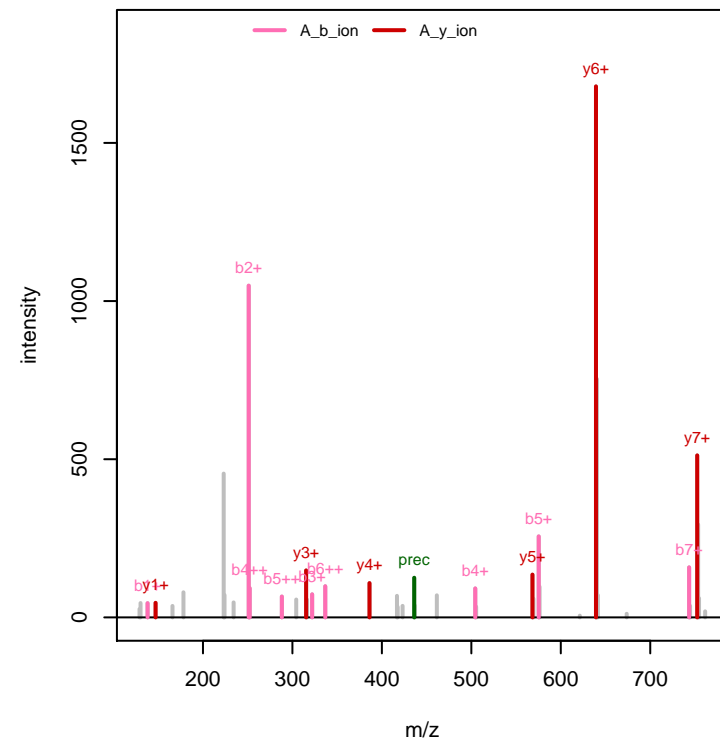

### HLAKAPAK+XL\_L

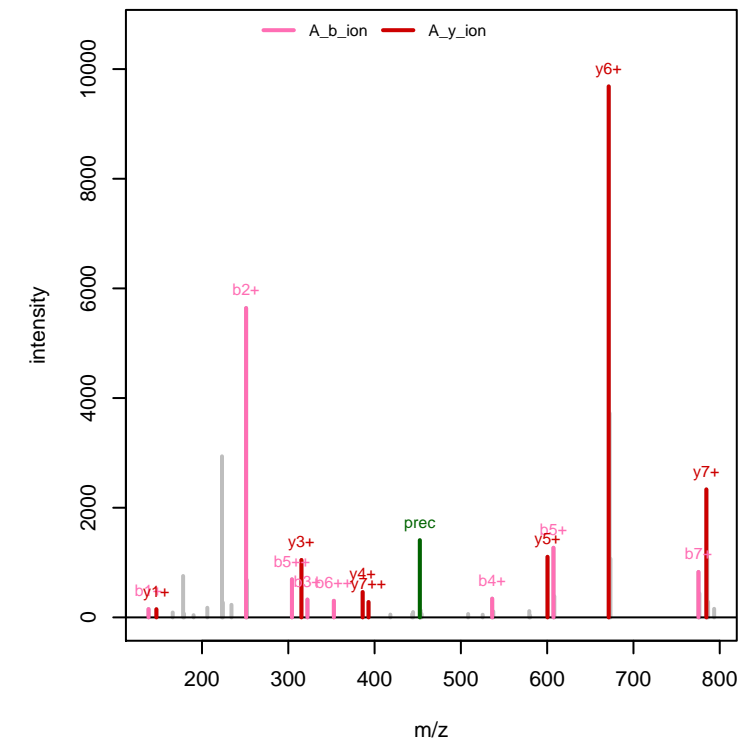

### ETSAKSEEK+XL\_S

### ETSAKSEEK+XL\_L

EKVDATK  
KSDQNVR

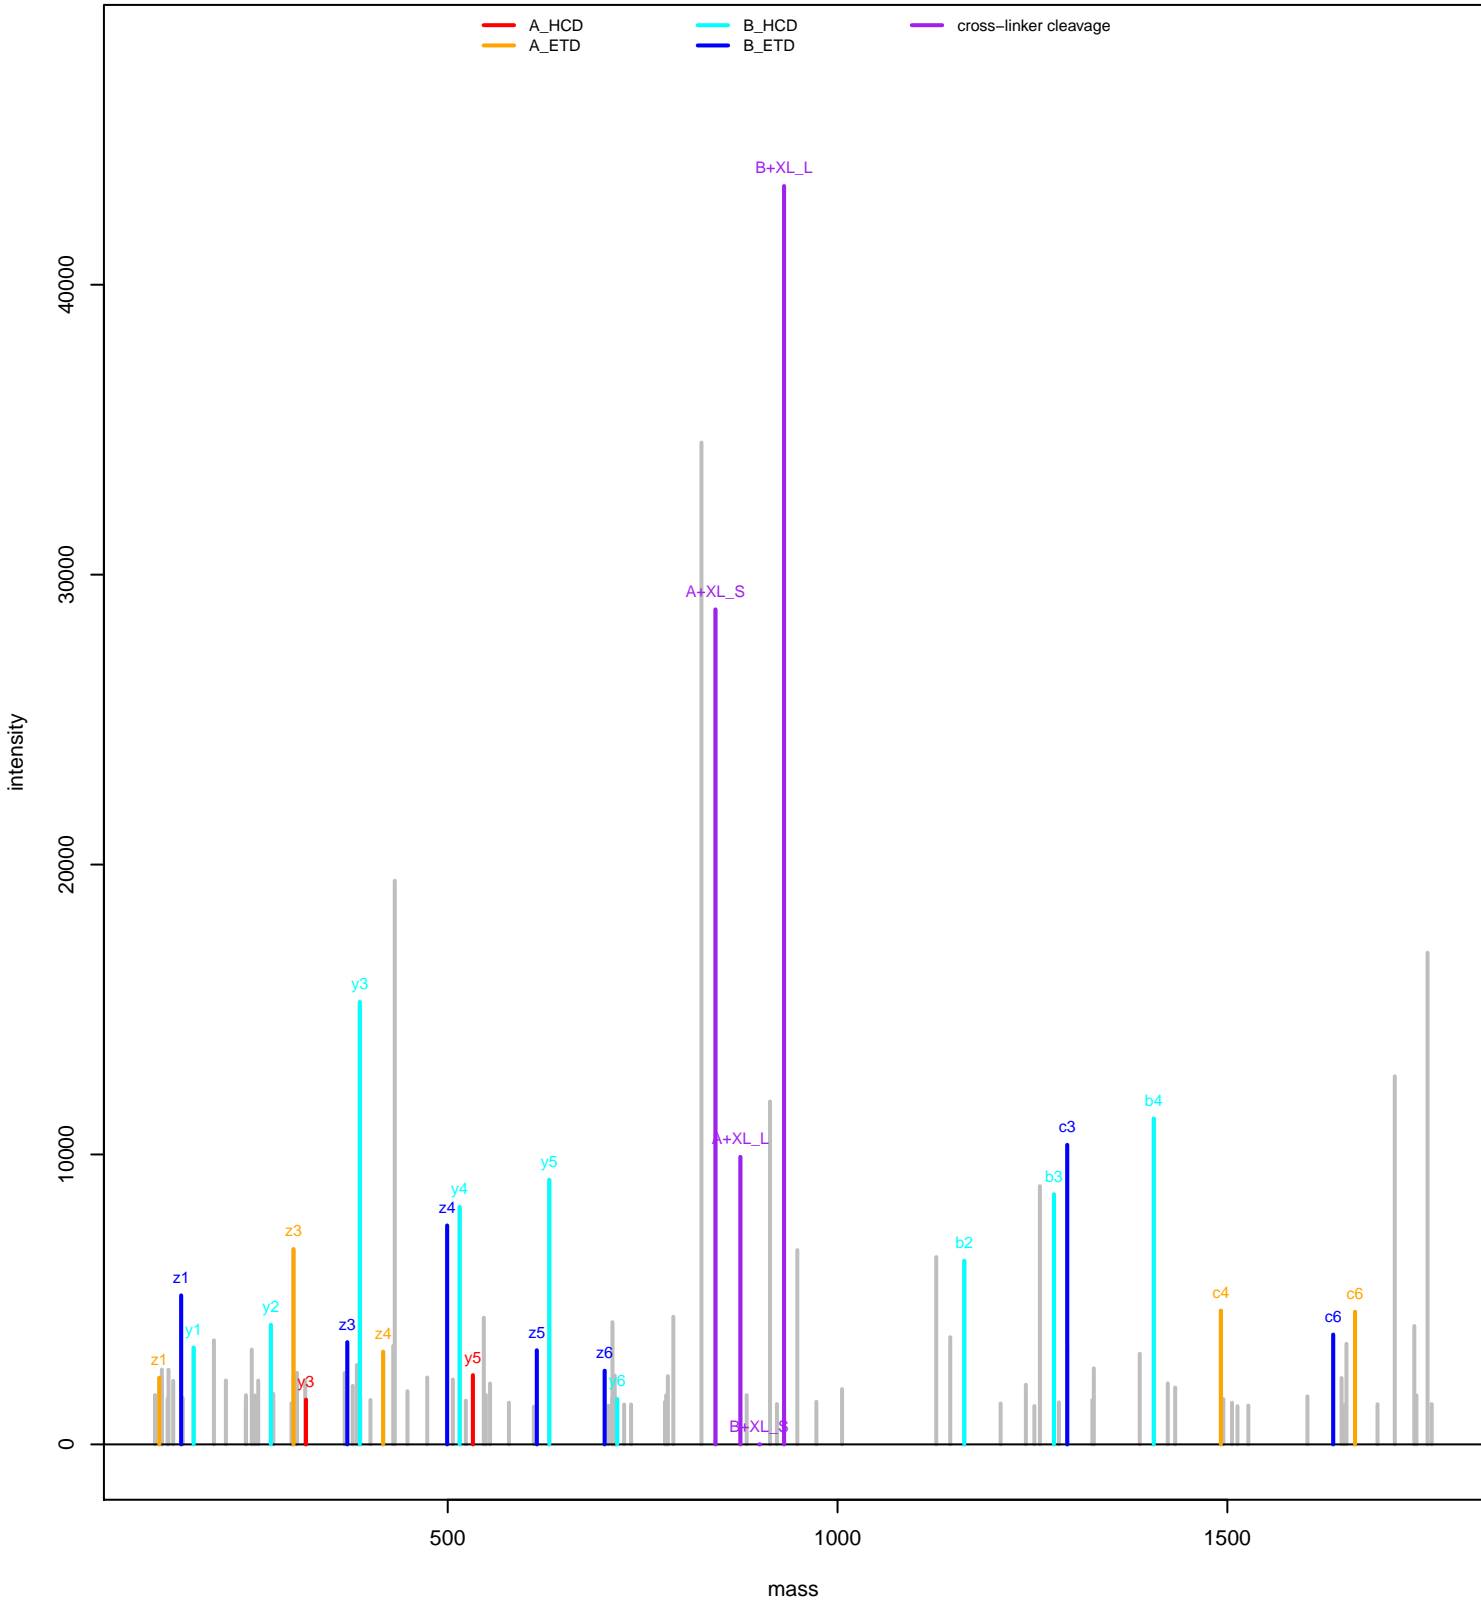

EKVDATK+XL\_S

KSDQNVR+XL\_S

EKVDATK+XL\_L

KSDQNVR+XL\_L



NTKSGLR  
KREEQEQK

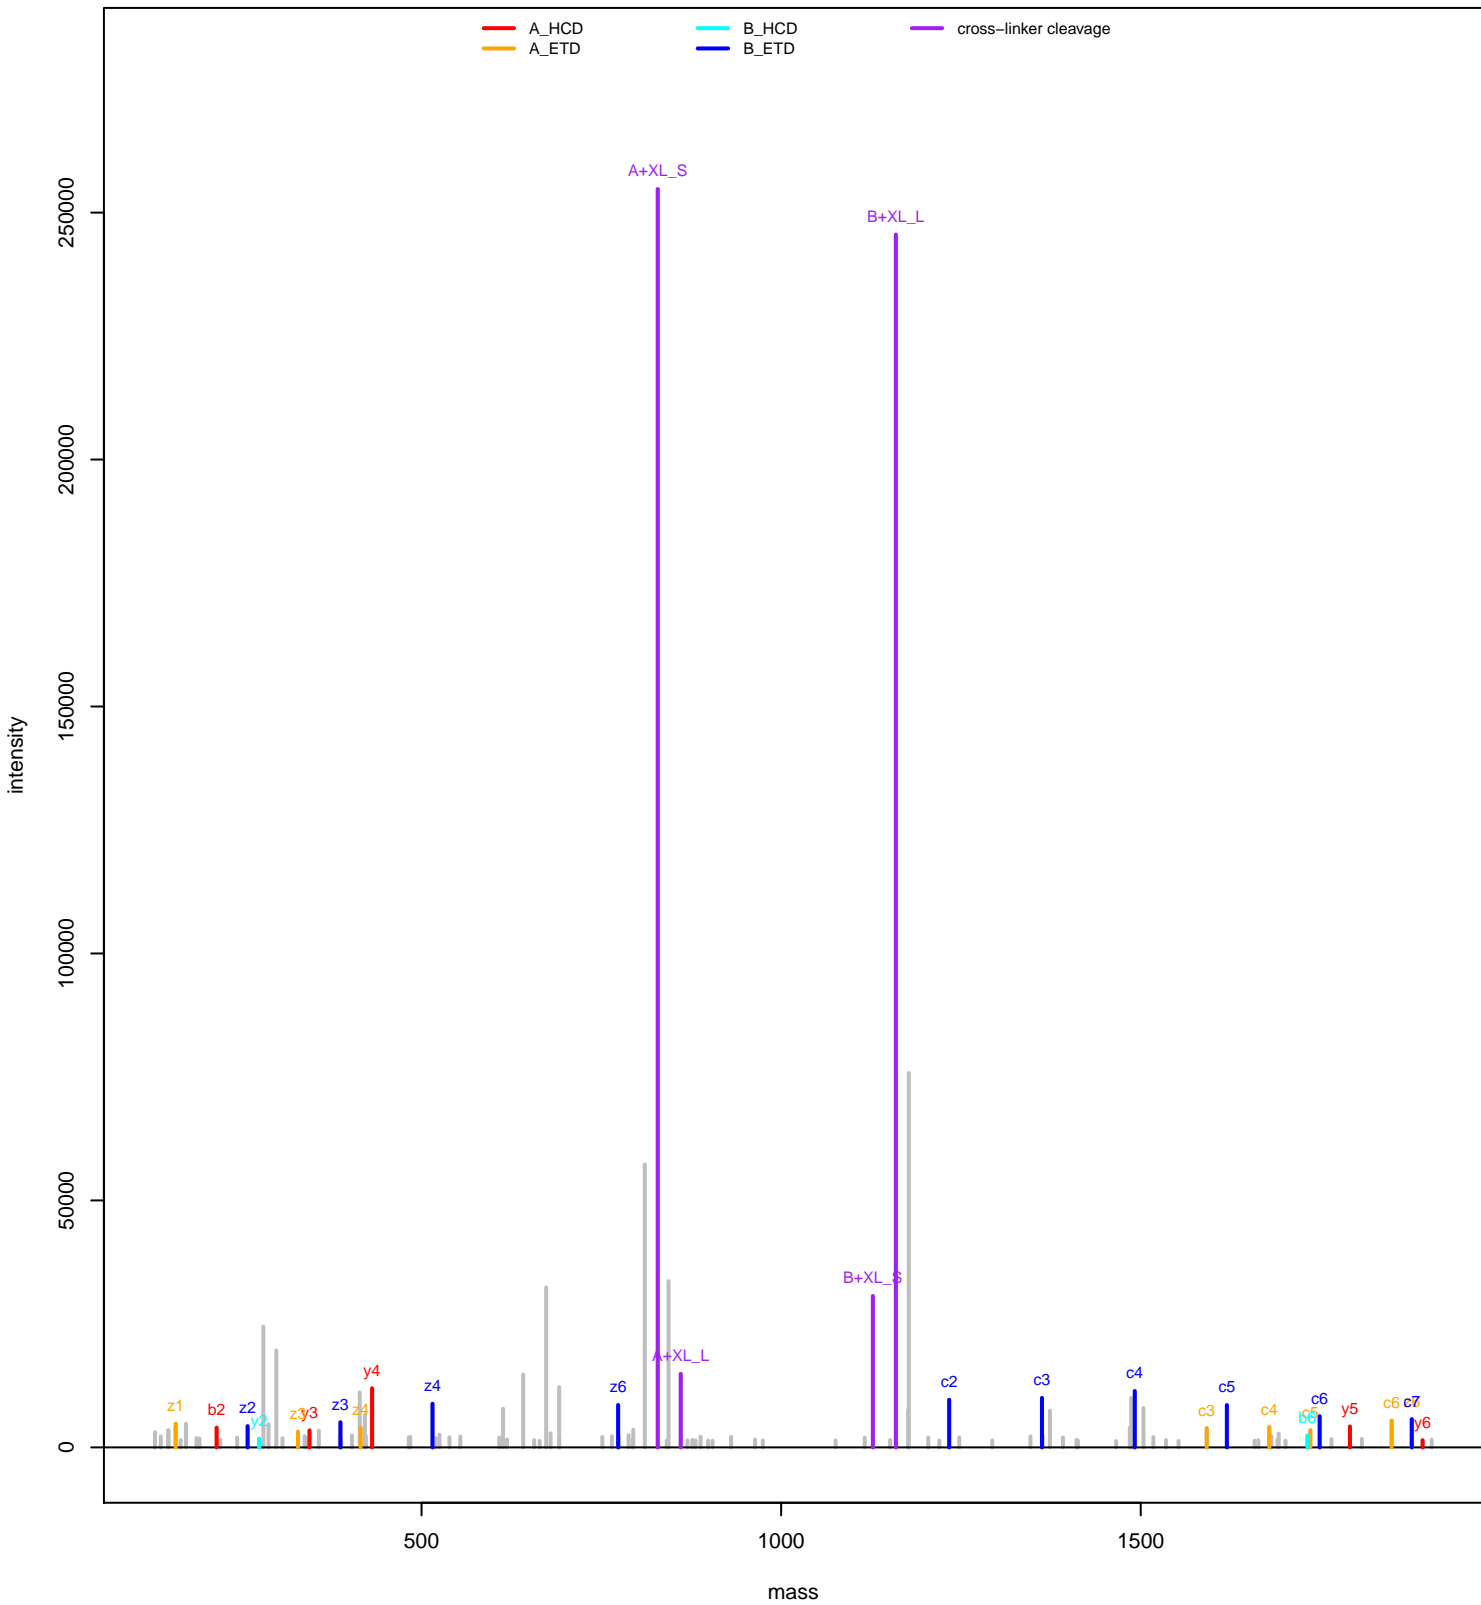

NTKSGLR+XL\_S

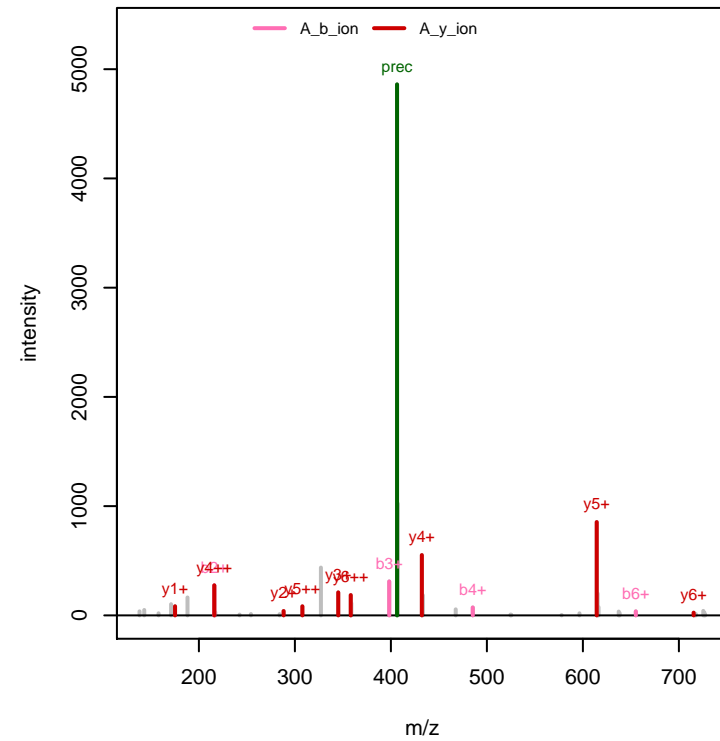

NTKSGLR+XL\_L

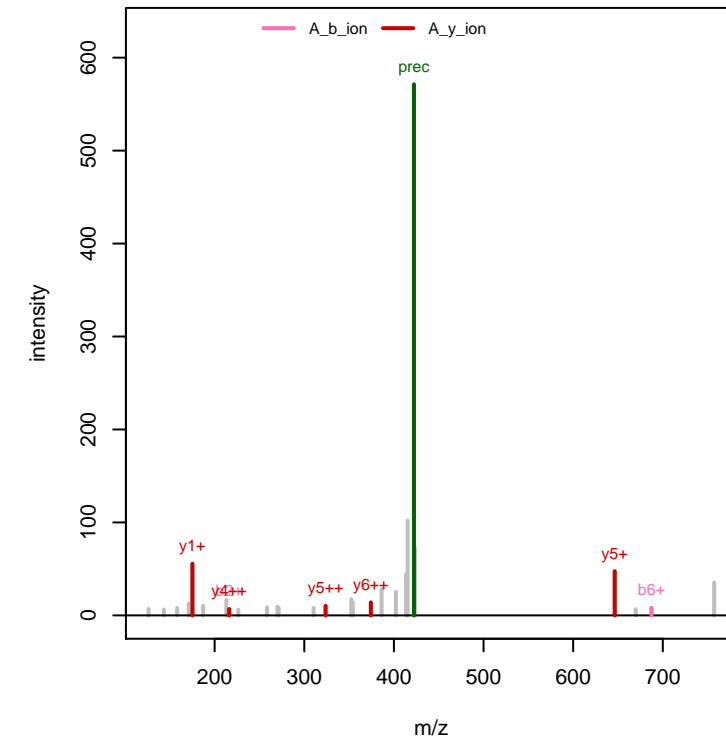

KREEQEQK+XL\_S

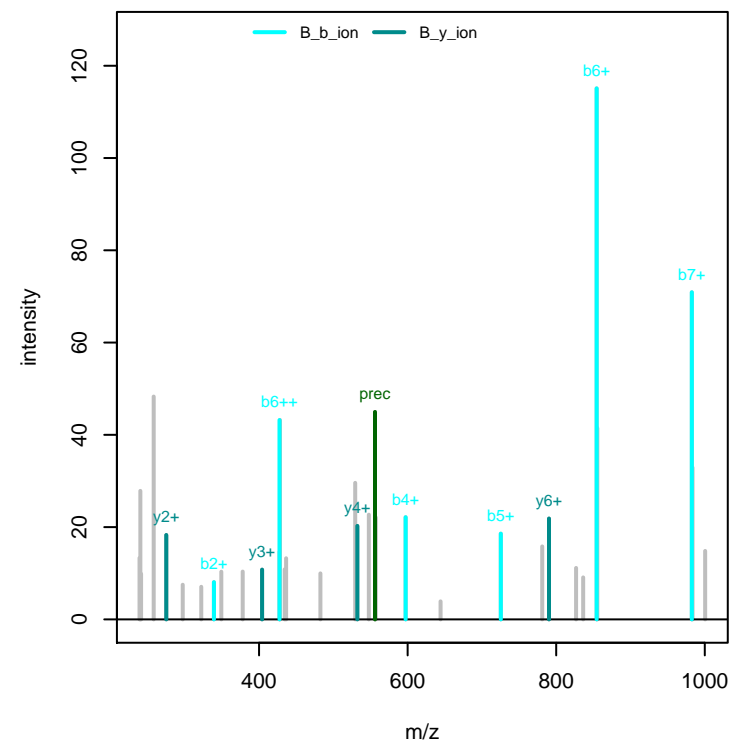

KREEQEQK+XL\_L

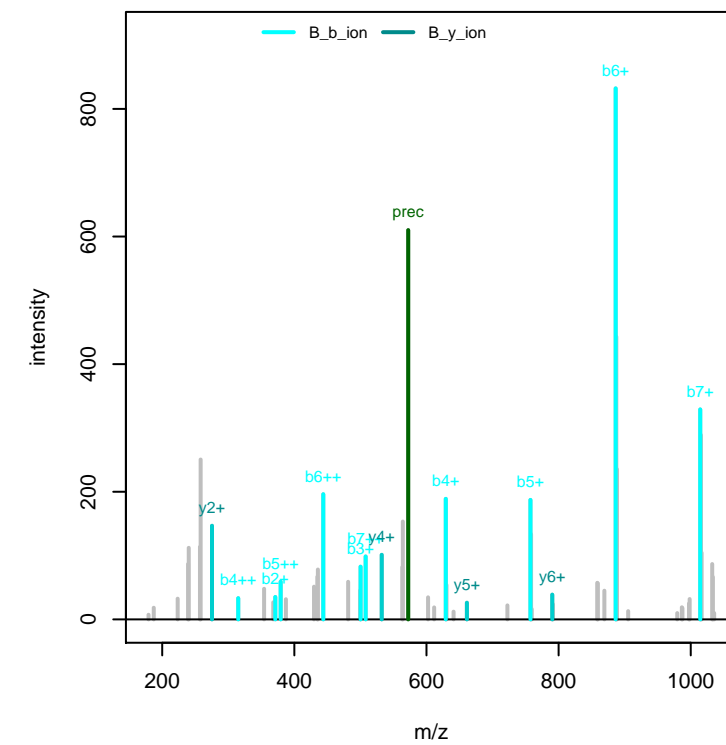

**ADHQKK  
IAKQKDEVAER**

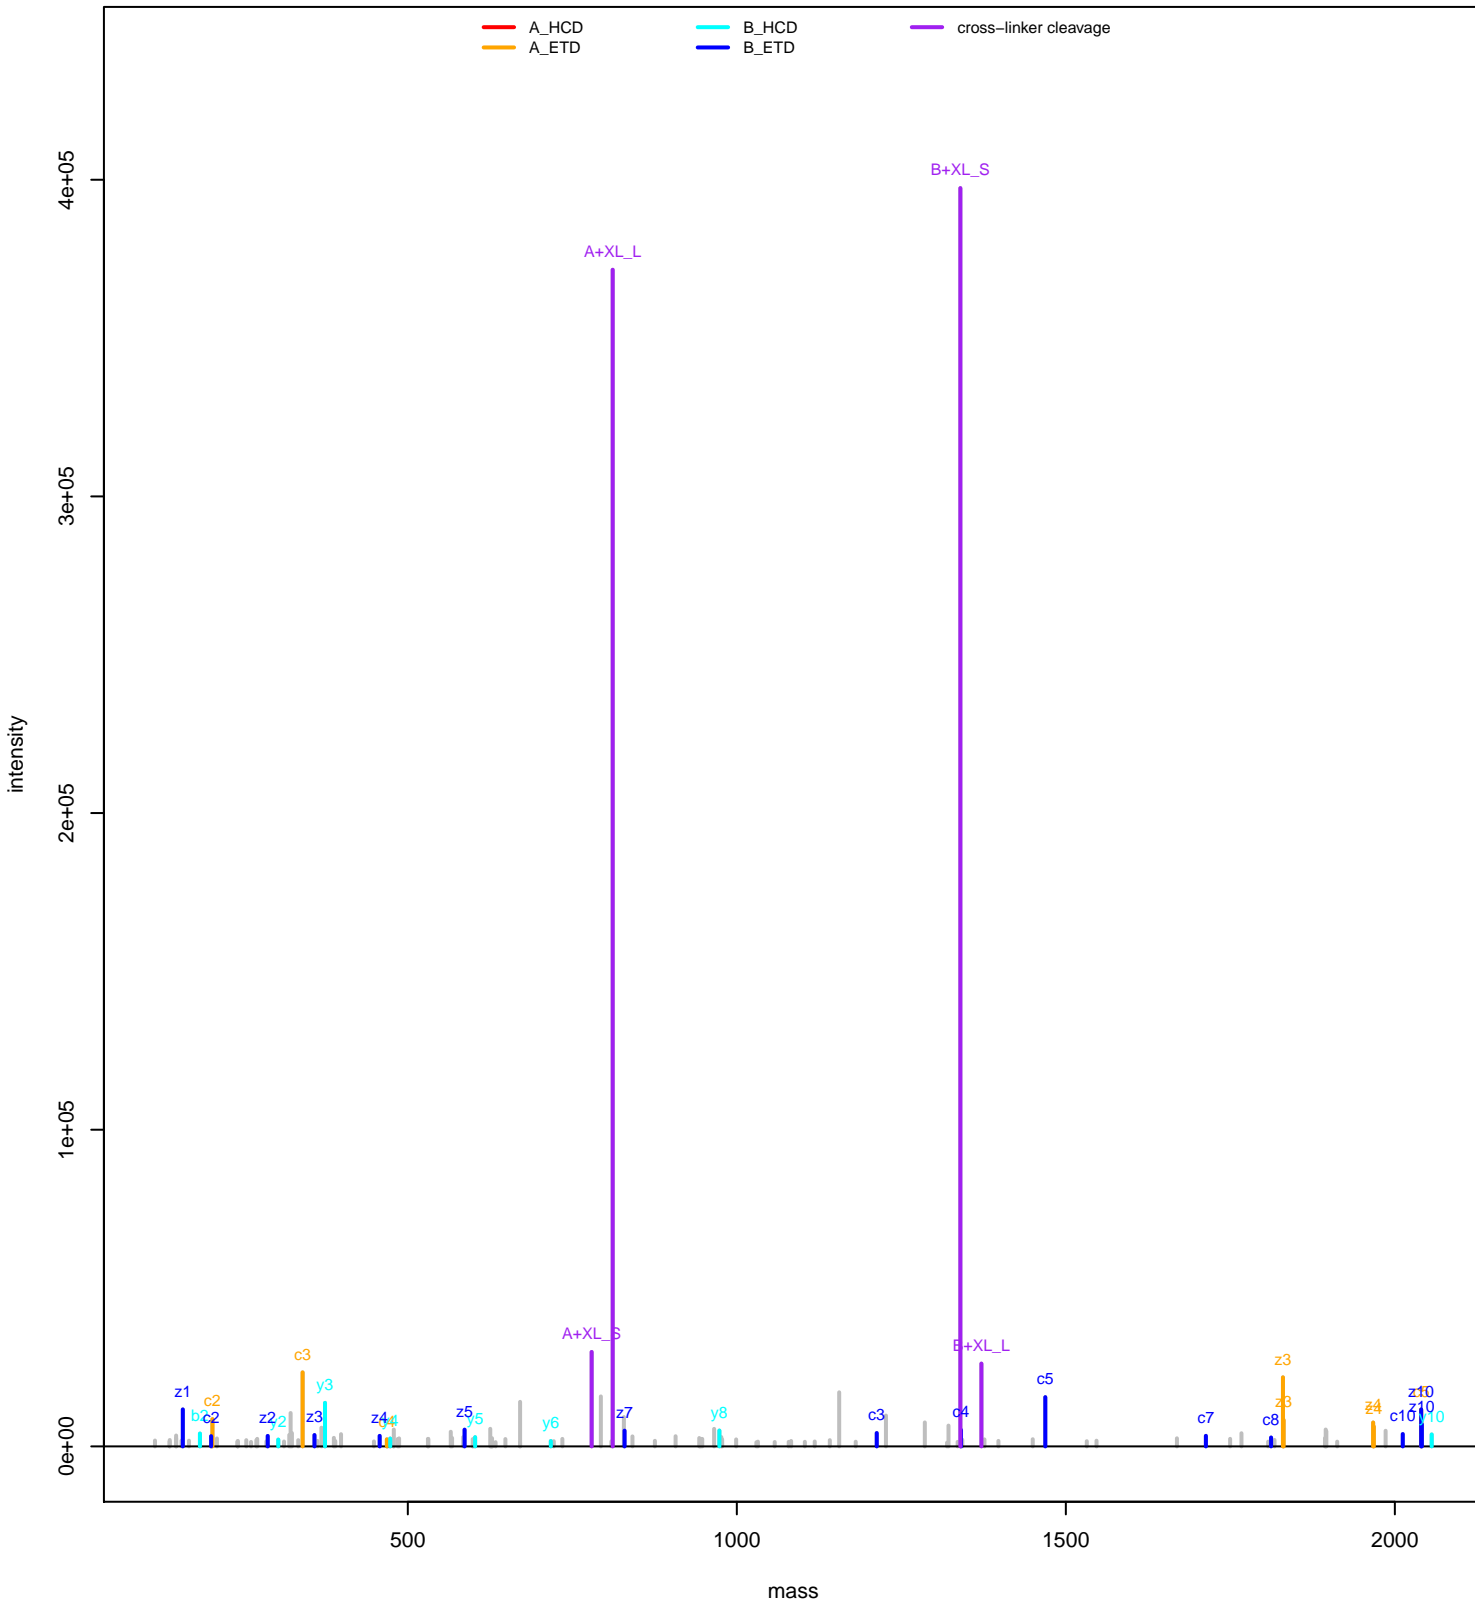

**ADHQKK+XL\_S**

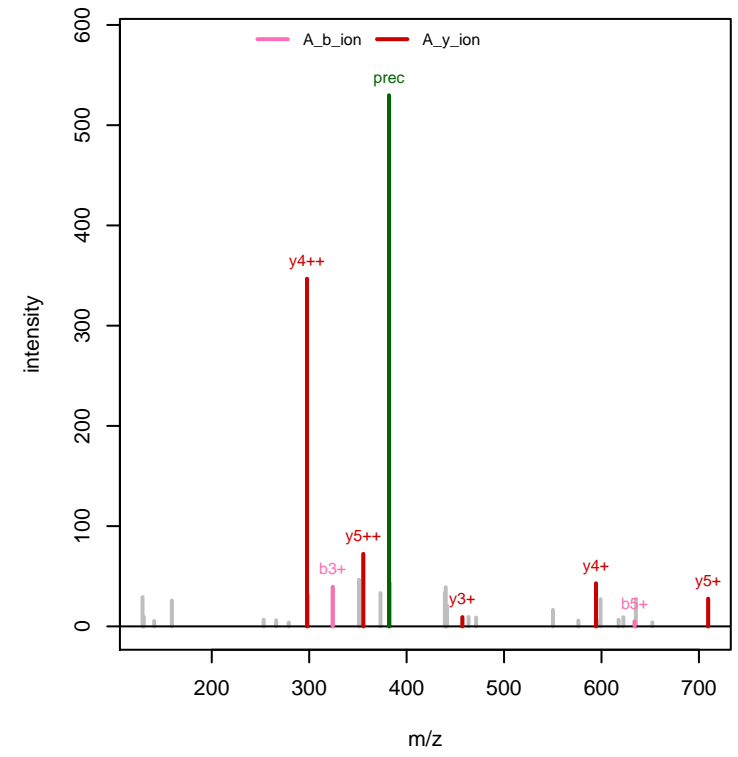

**ADHQKK+XL\_L**

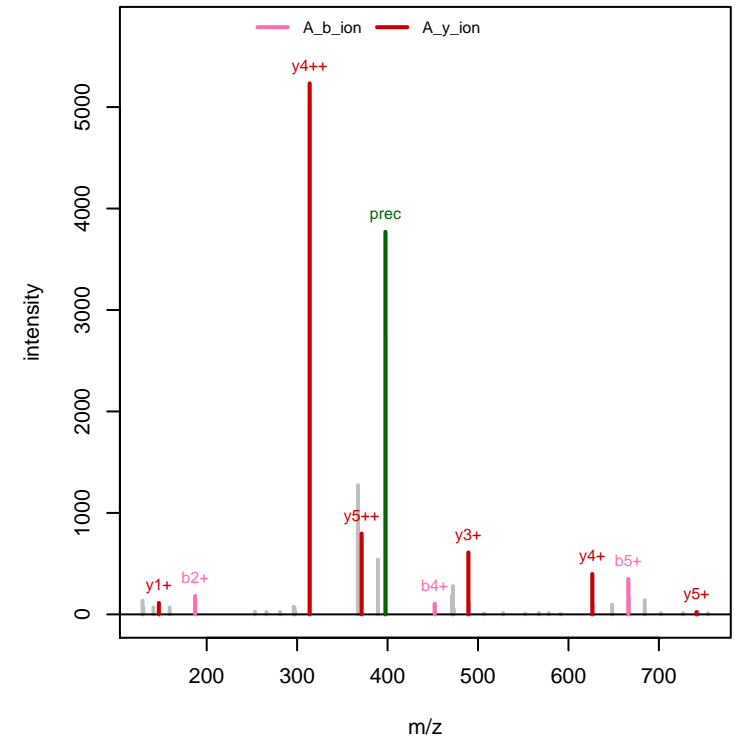

**IAKQKDEVAER+XL\_S**

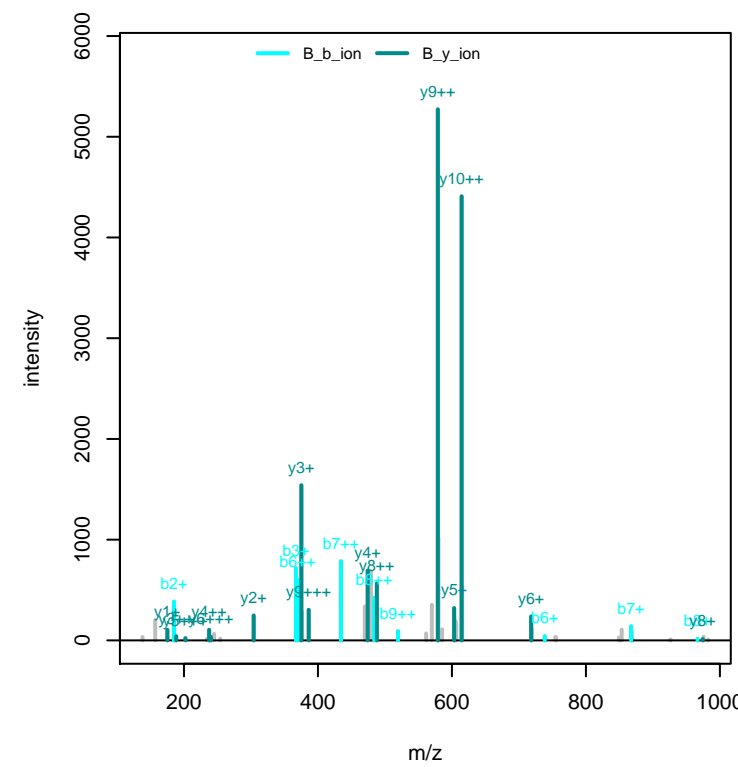

**IAKQKDEVAER+XL\_L**

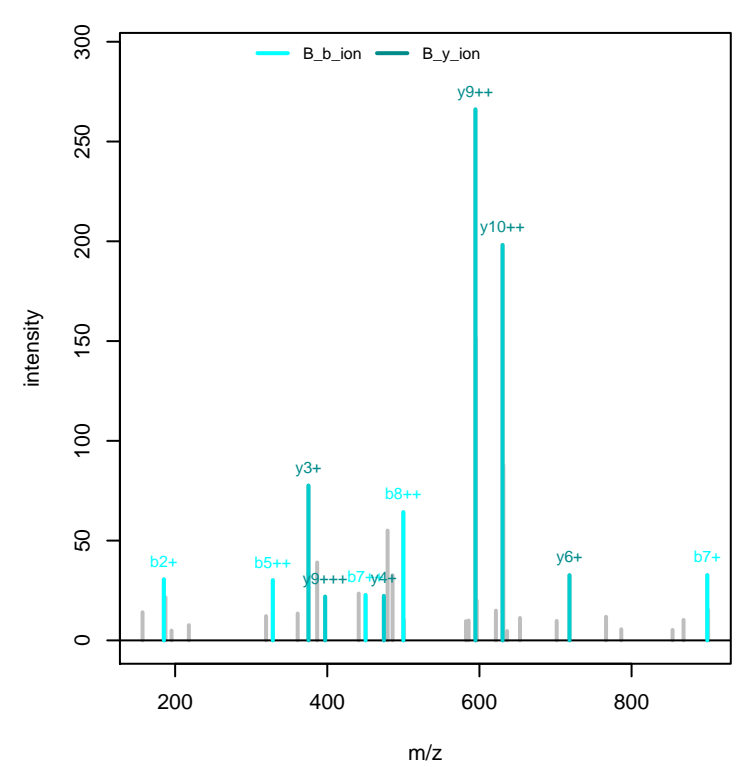

KAAGIK  
SGSGKPNK

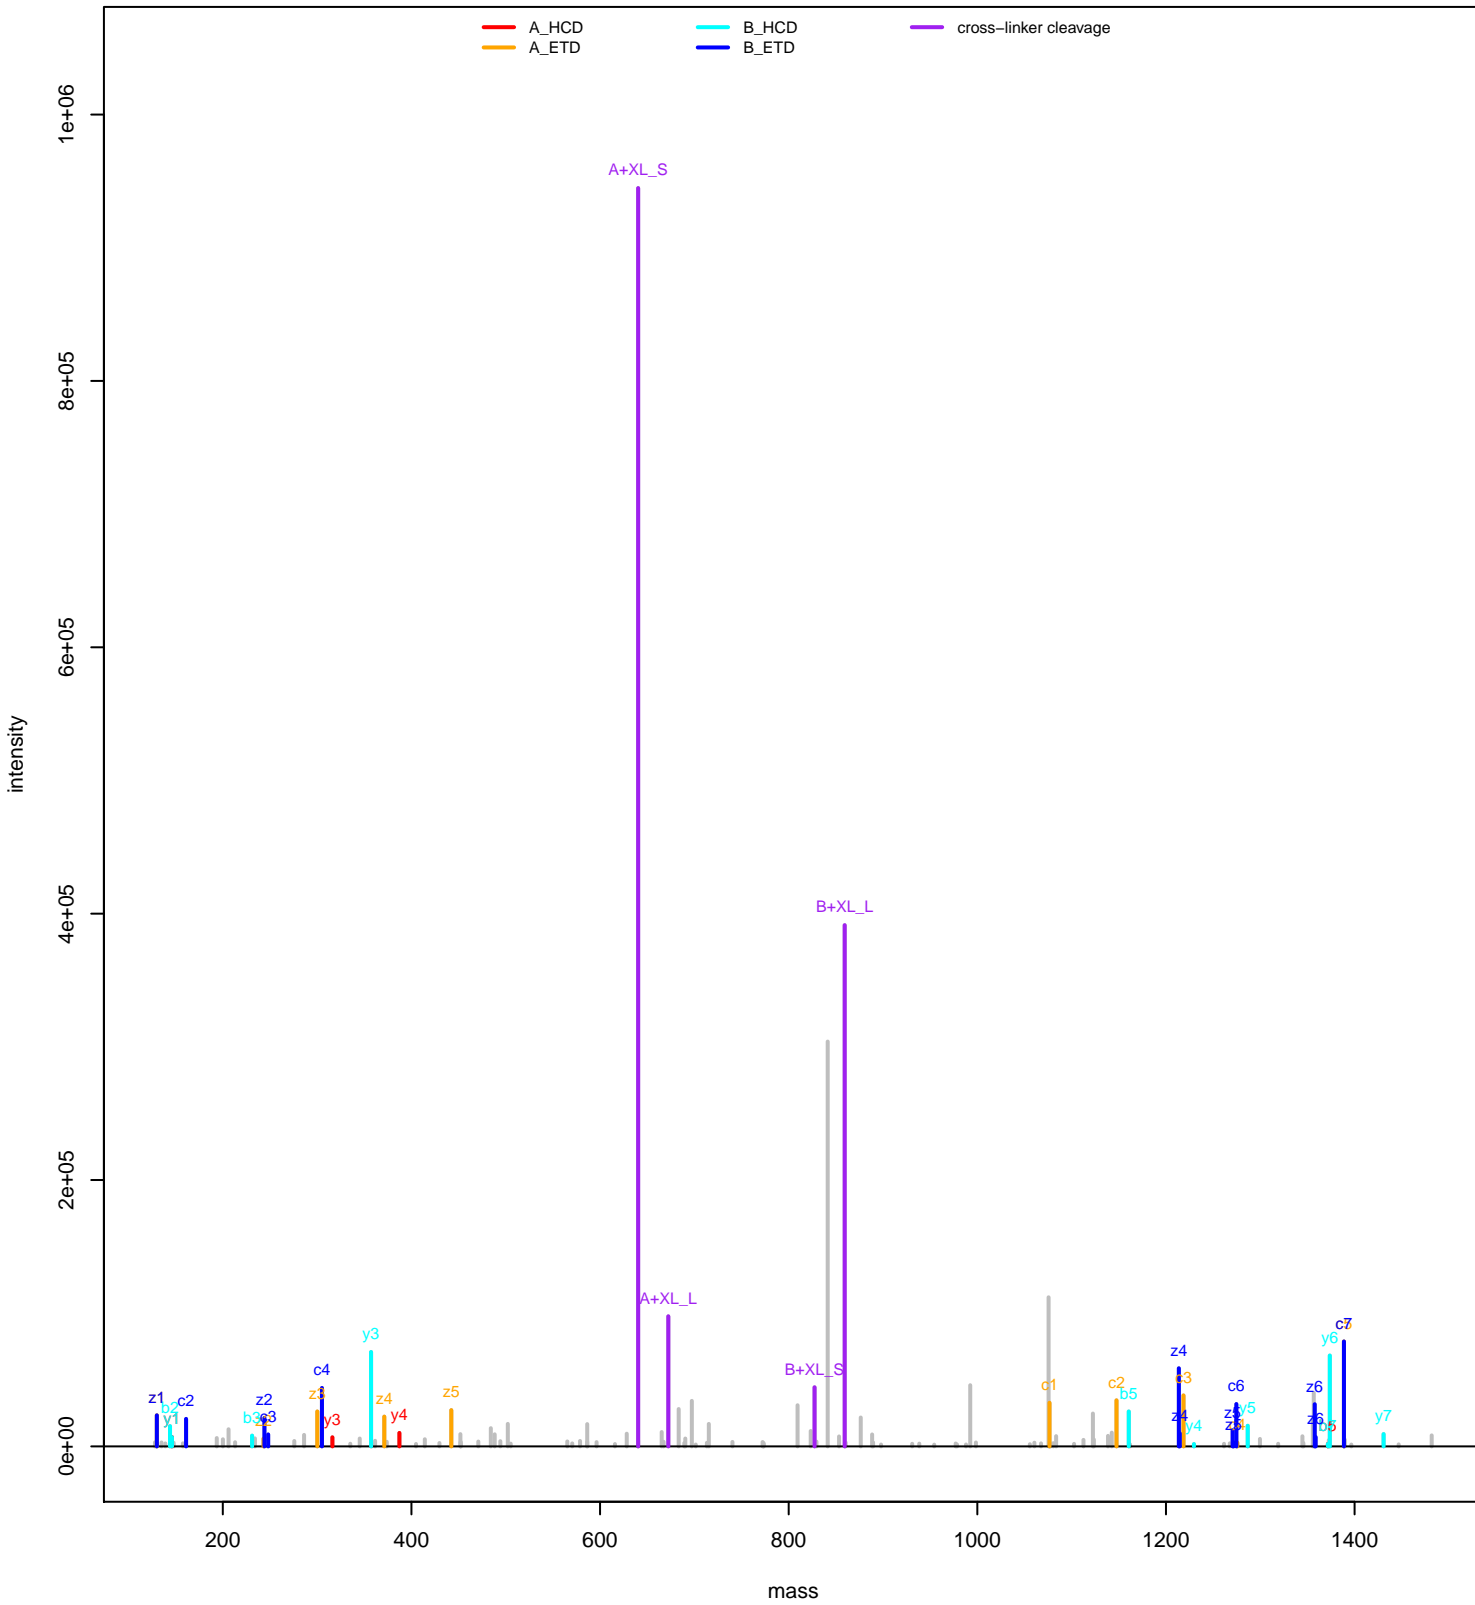

KAAGIK+XL\_S

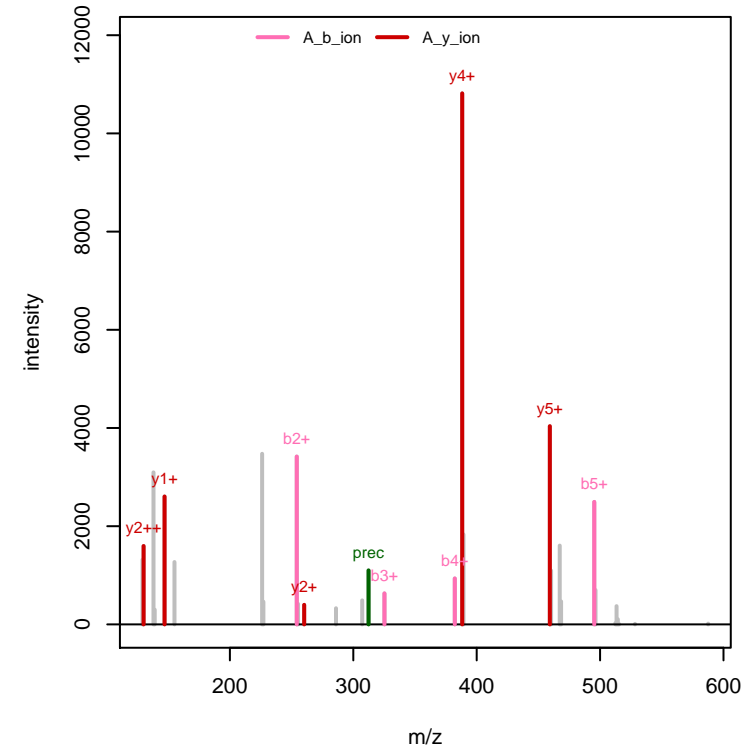

KAAGIK+XL\_L

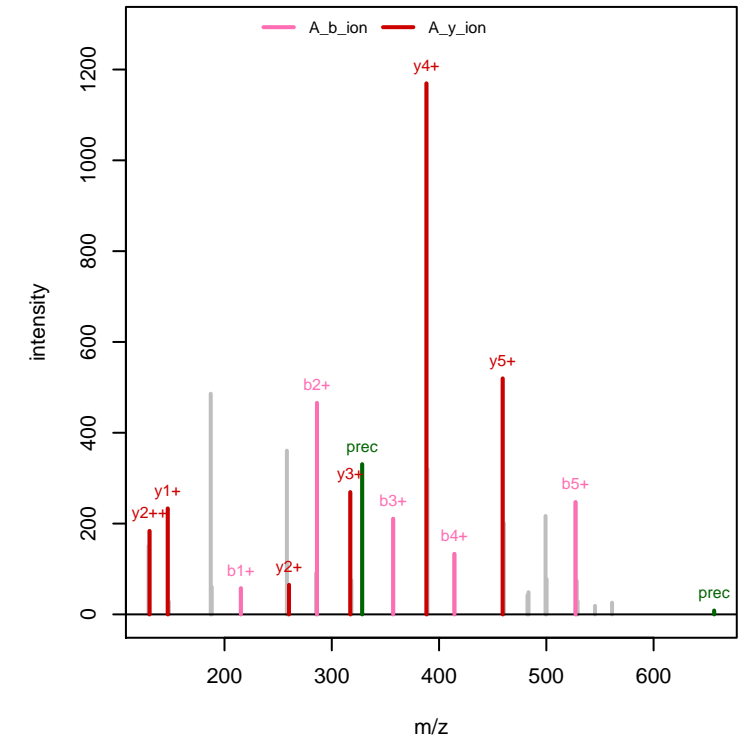

SGSGKPNK+XL\_S

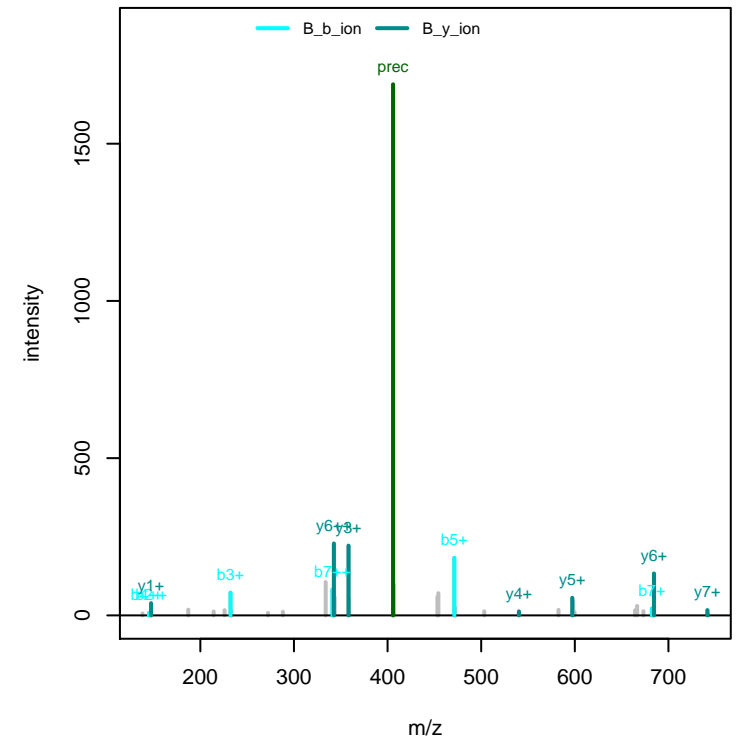

SGSGKPNK+XL\_L

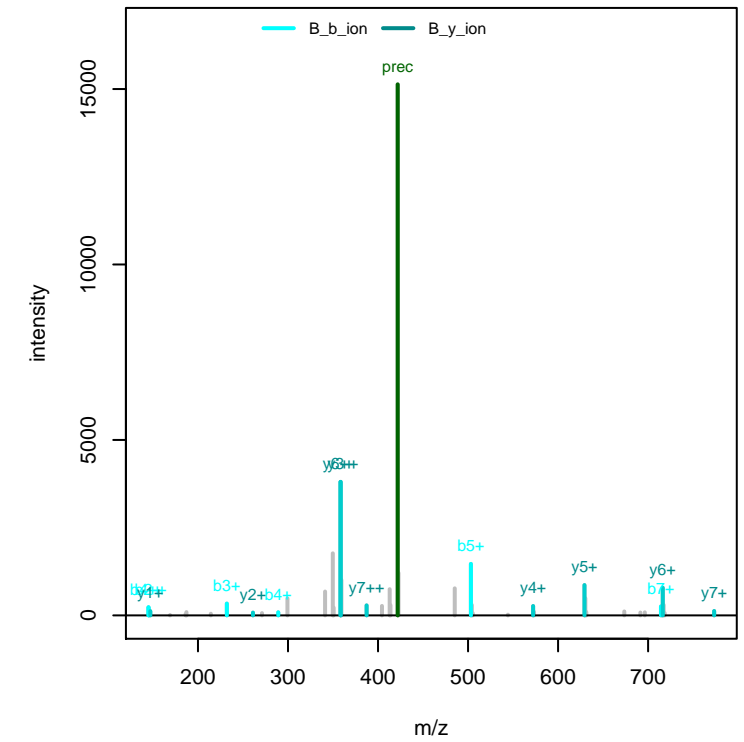

NAQAEKAR  
REAAEQAKR

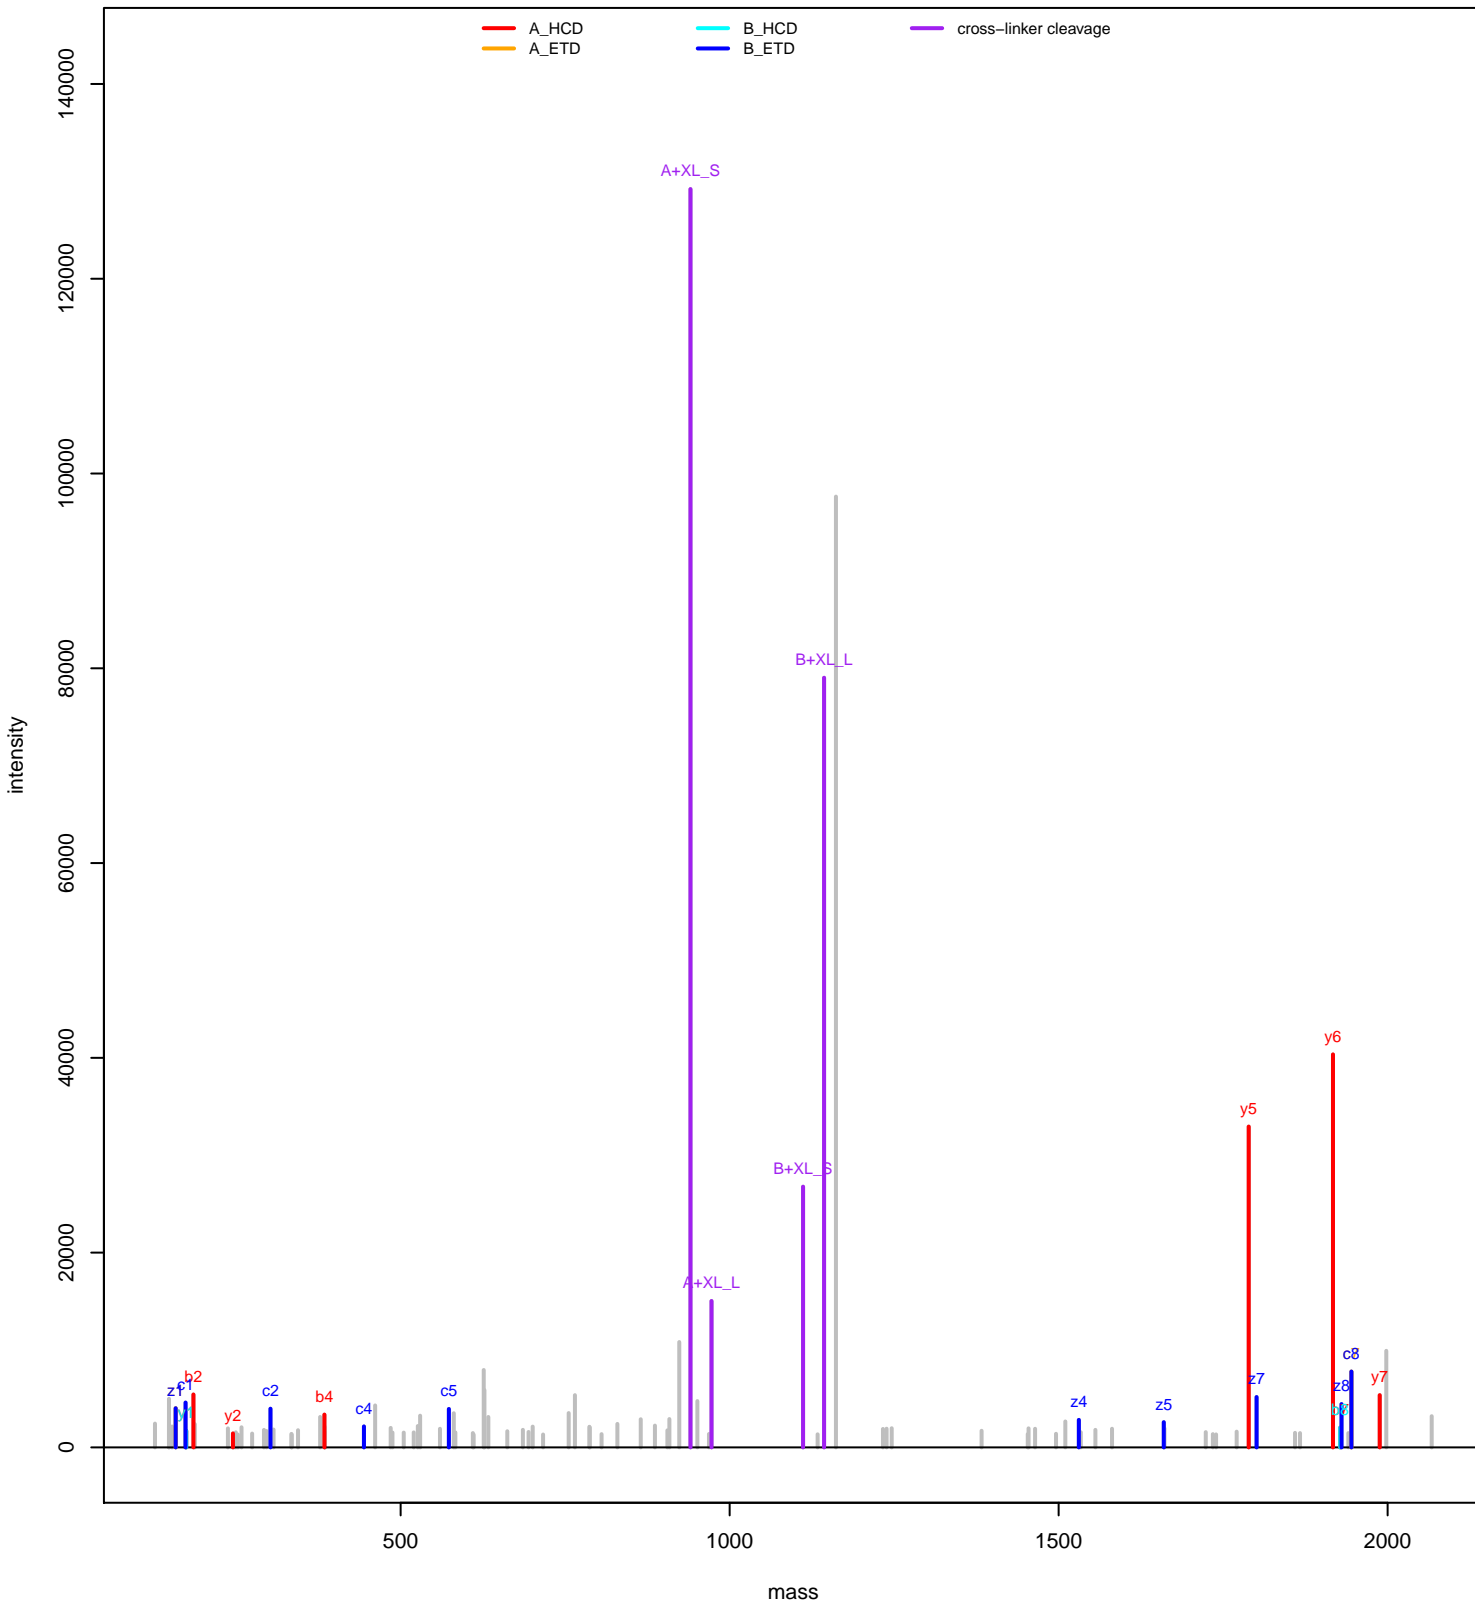

VQGATKAK  
KSEPAAATR

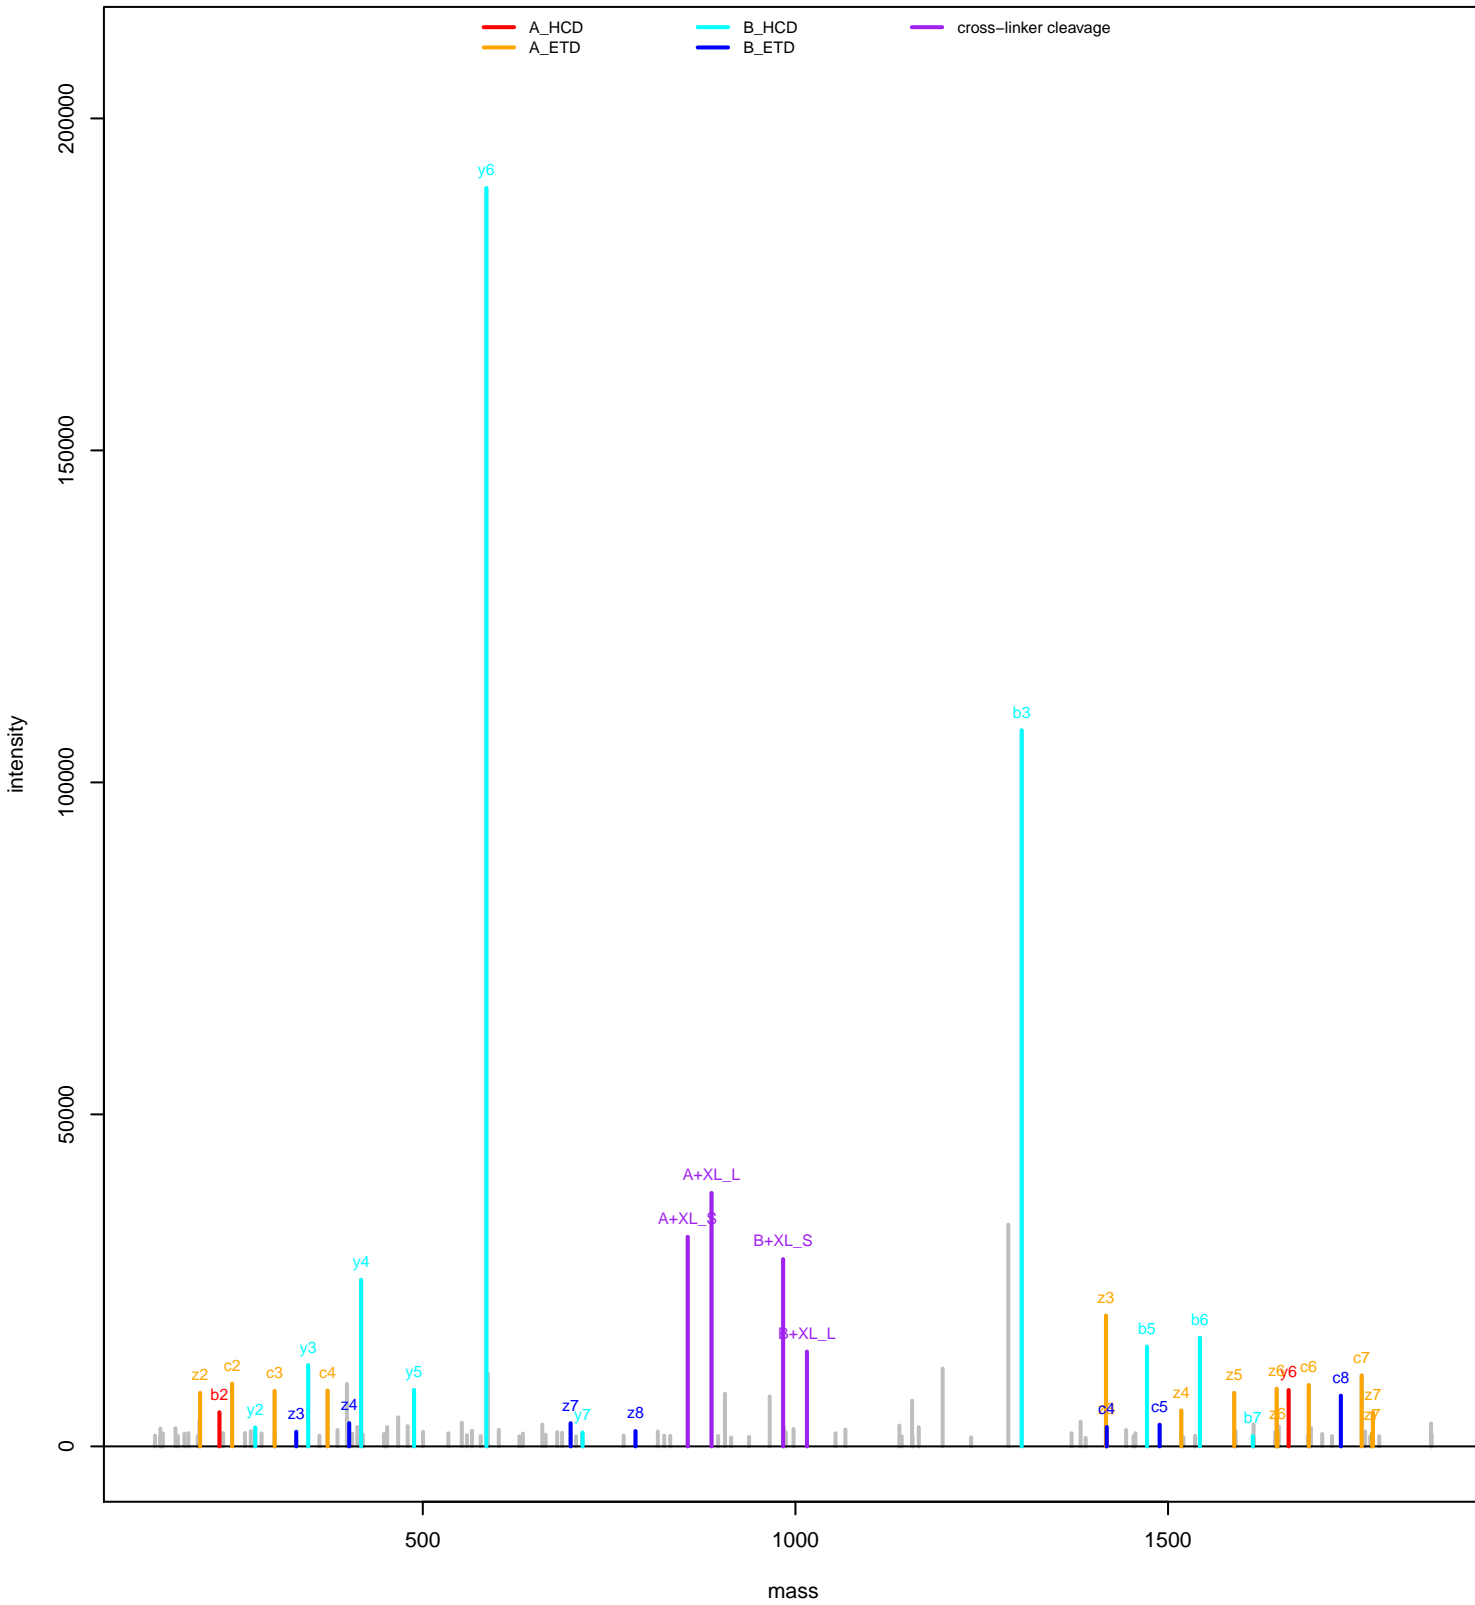

VQGATKAK+XL\_S

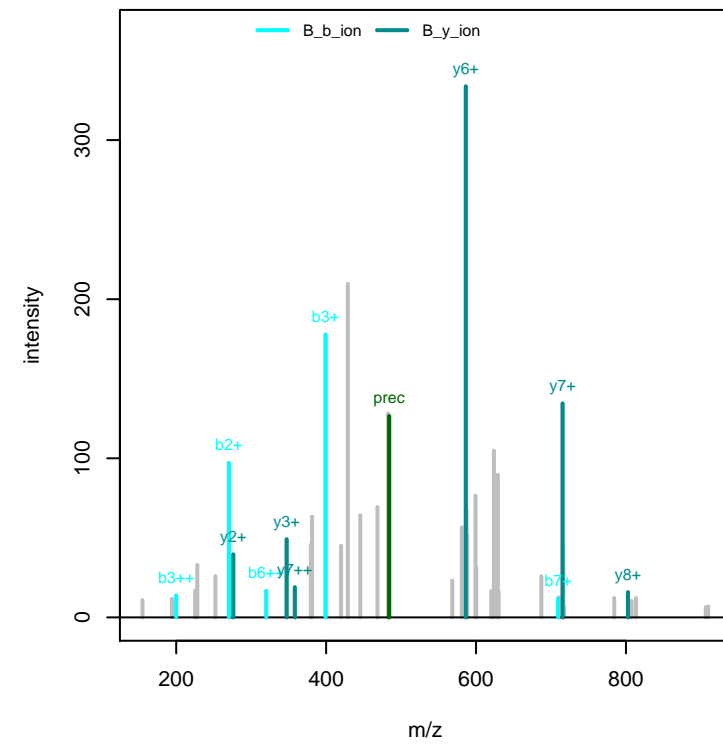

VQGATKAK+XL\_L

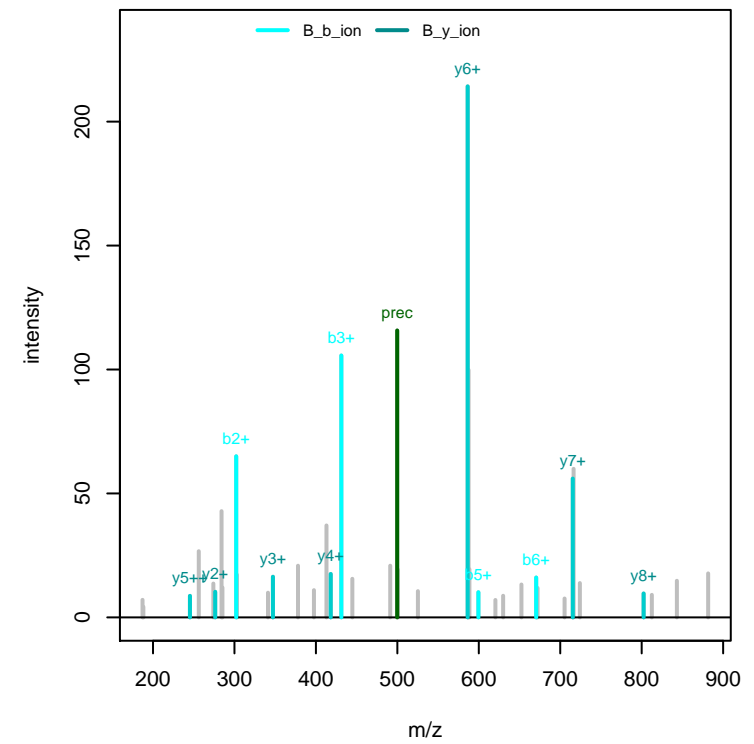

KSEPAAATR+XL\_S



KSEPAAATR+XL\_L



VKSSAQAK  
ADAKPEADAKAADSAKK

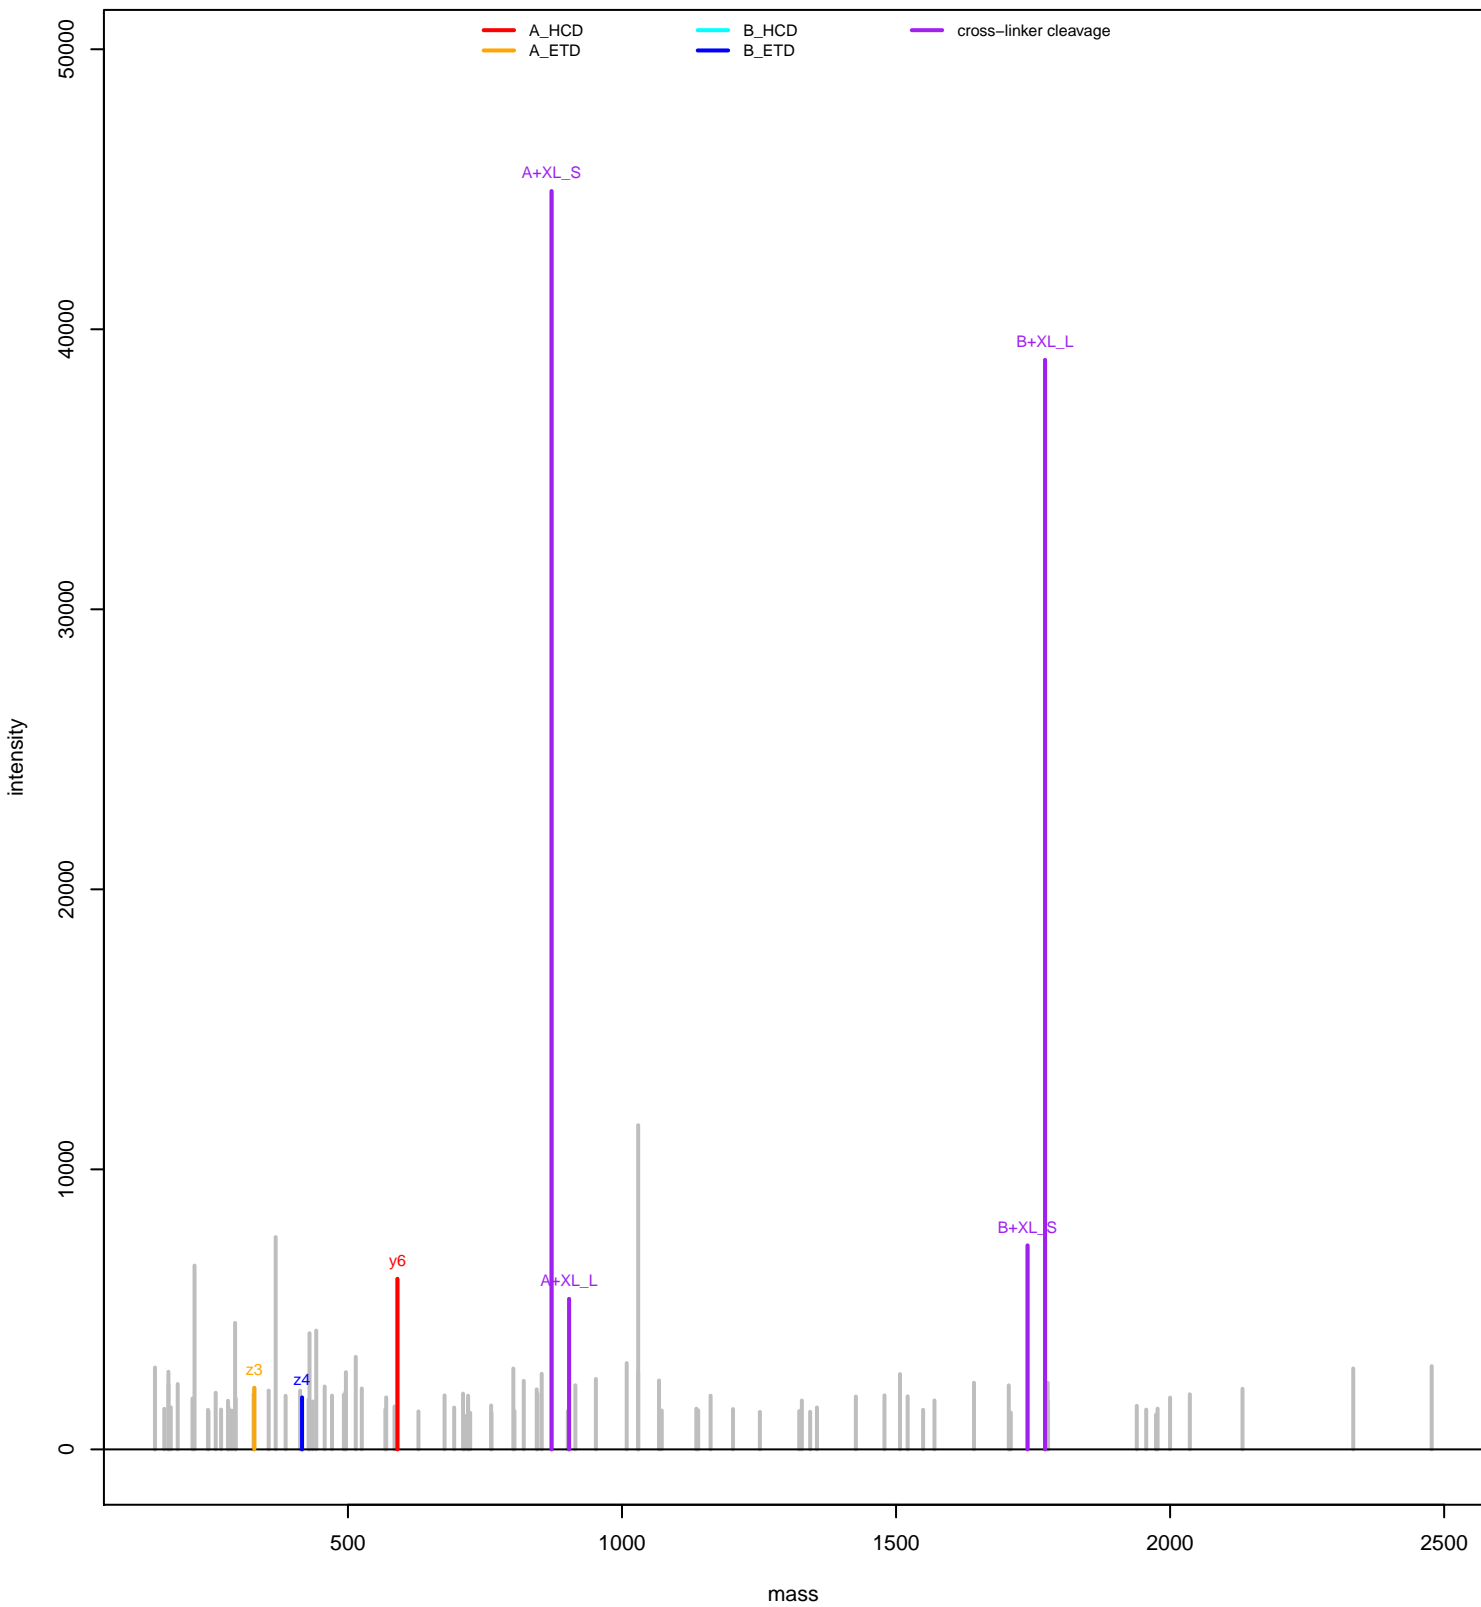

VKSSAQAK+XL\_S

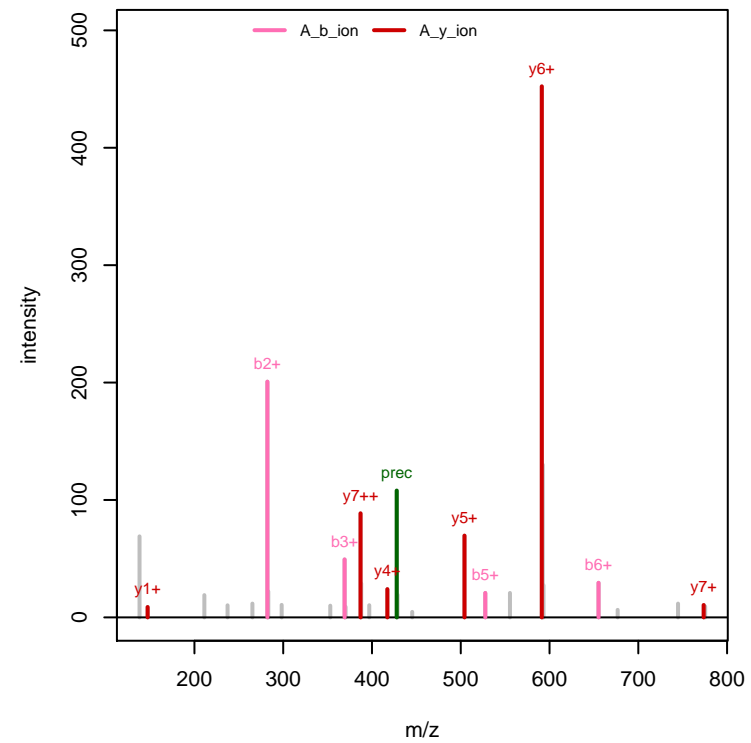

VKSSAQAK+XL\_L

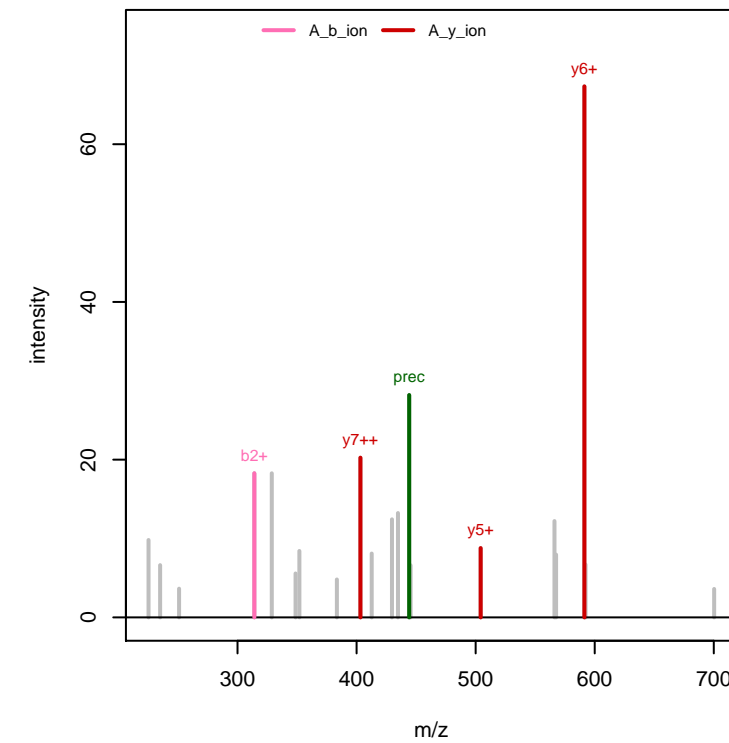

ADAKPEADAKAADSAKK+XL\_S

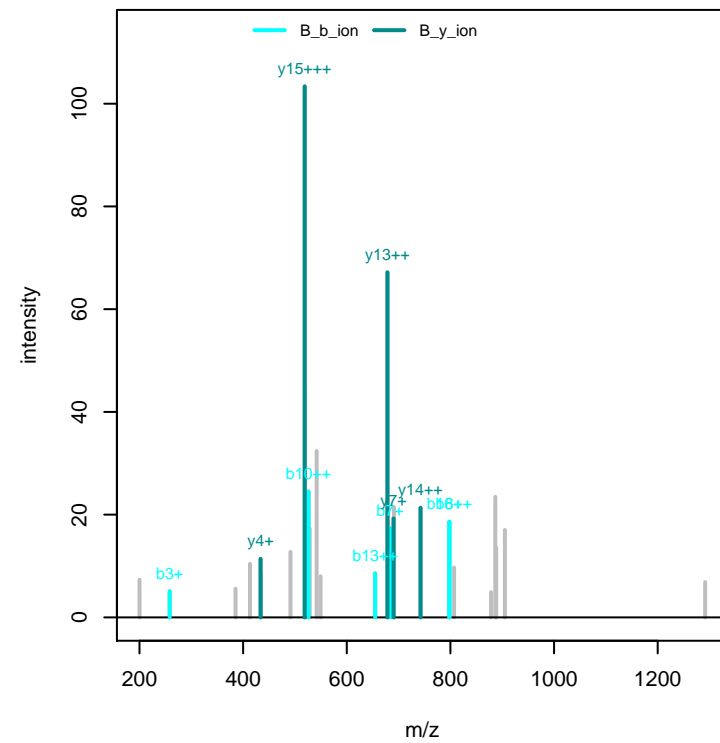

ADAKPEADAKAADSAKK+XL\_L

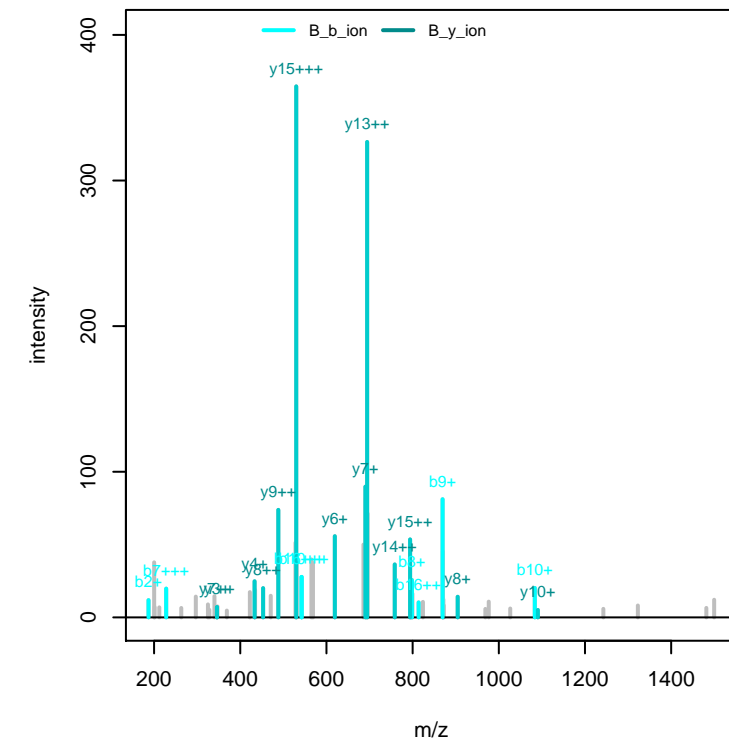

TKTNAR  
KPNSALRK

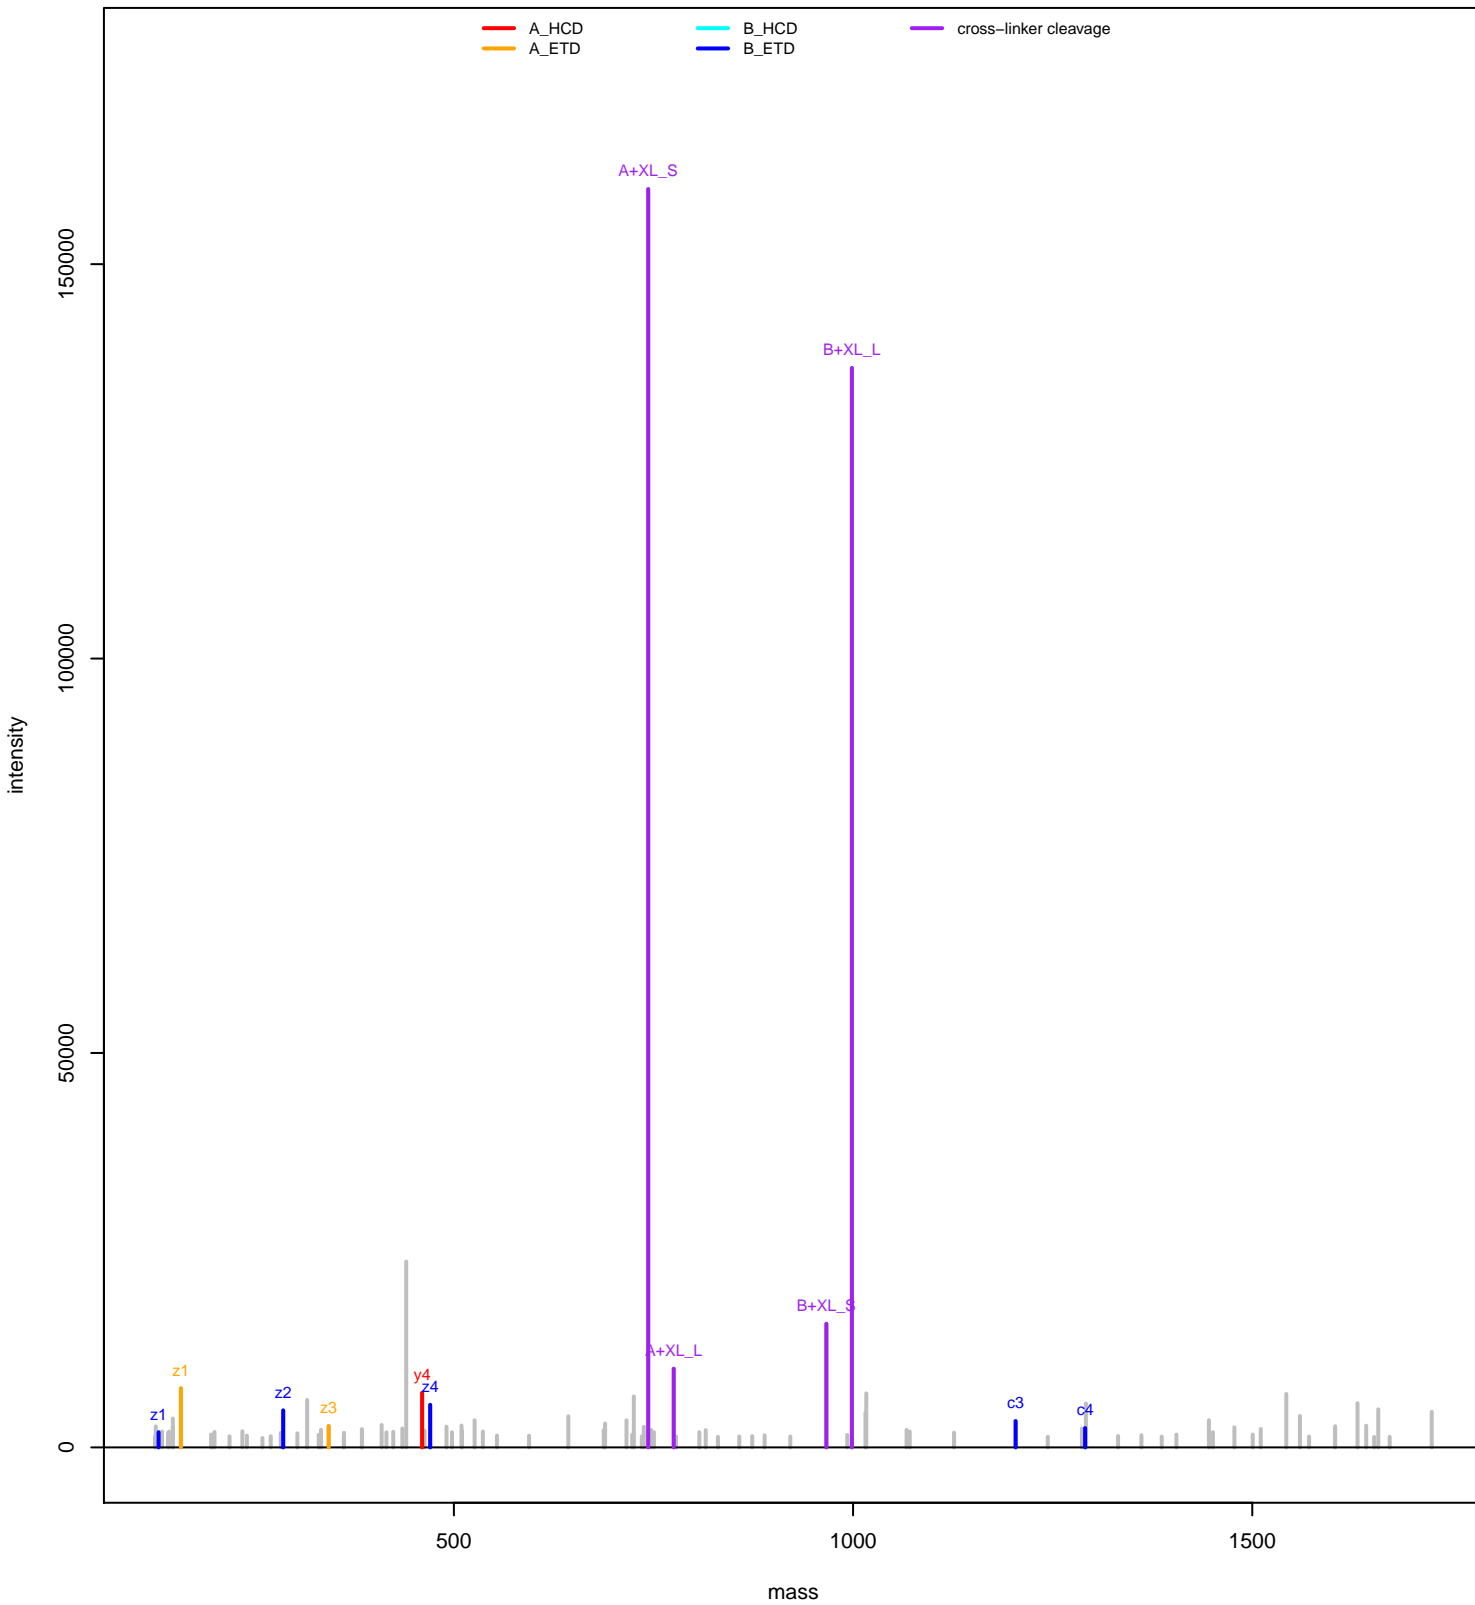

TKTNAR+XL\_S

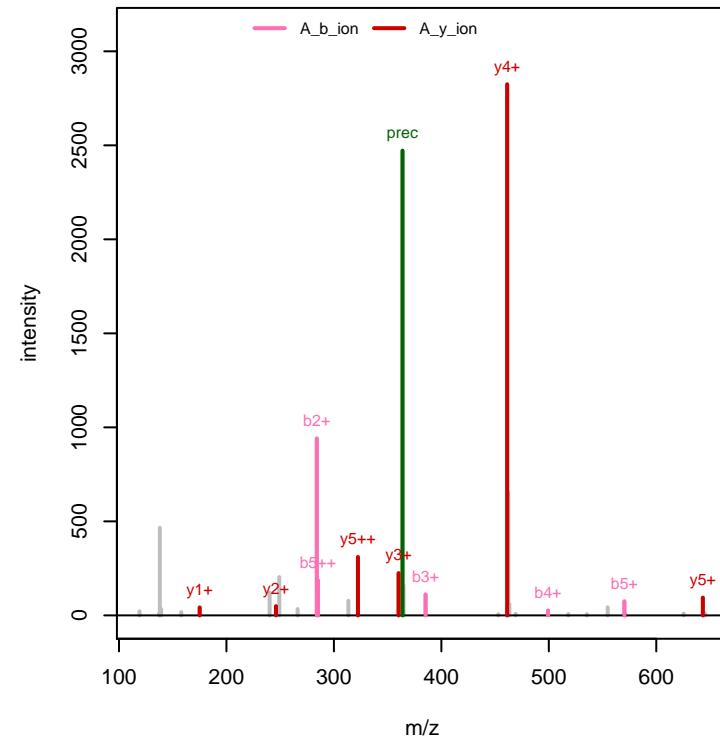

TKTNAR+XL\_L

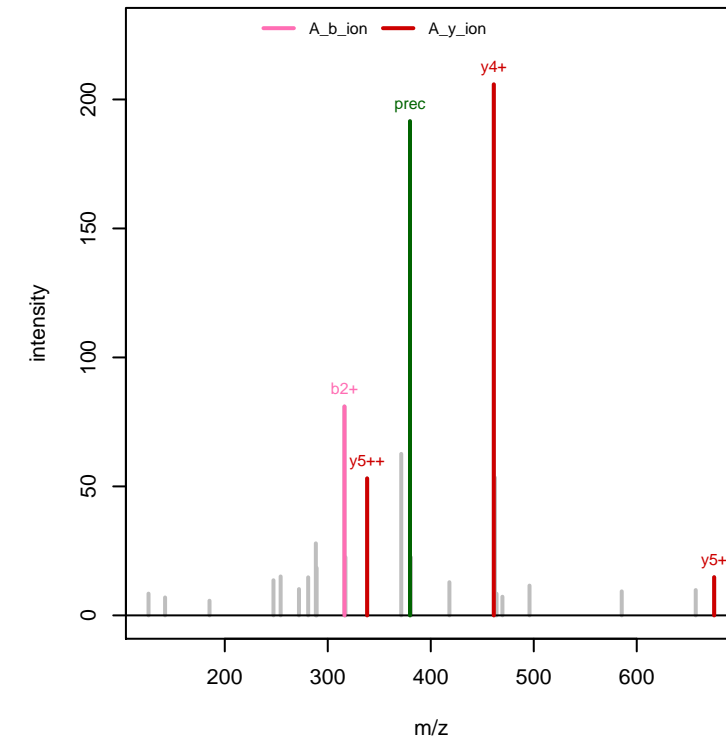

KPNSALRK+XL\_S

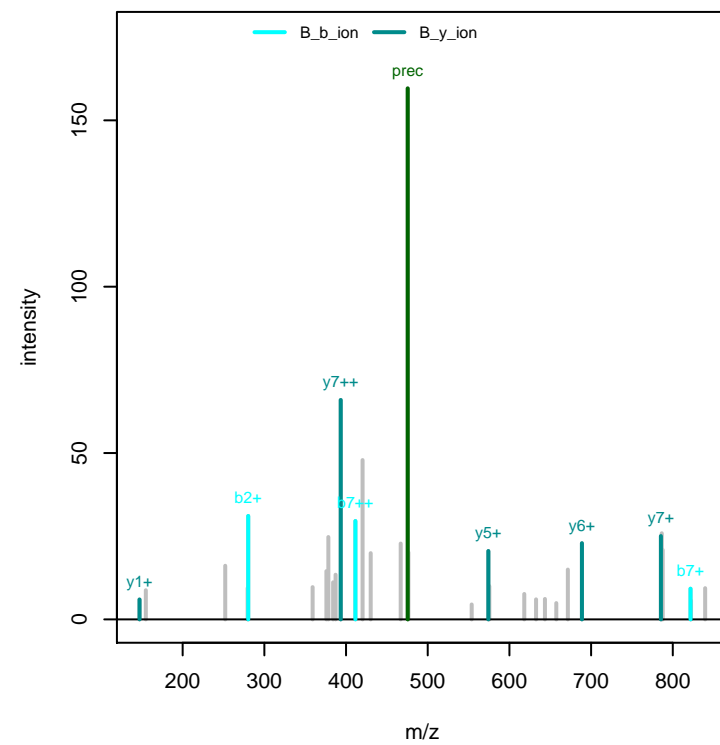

KPNSALRK+XL\_L

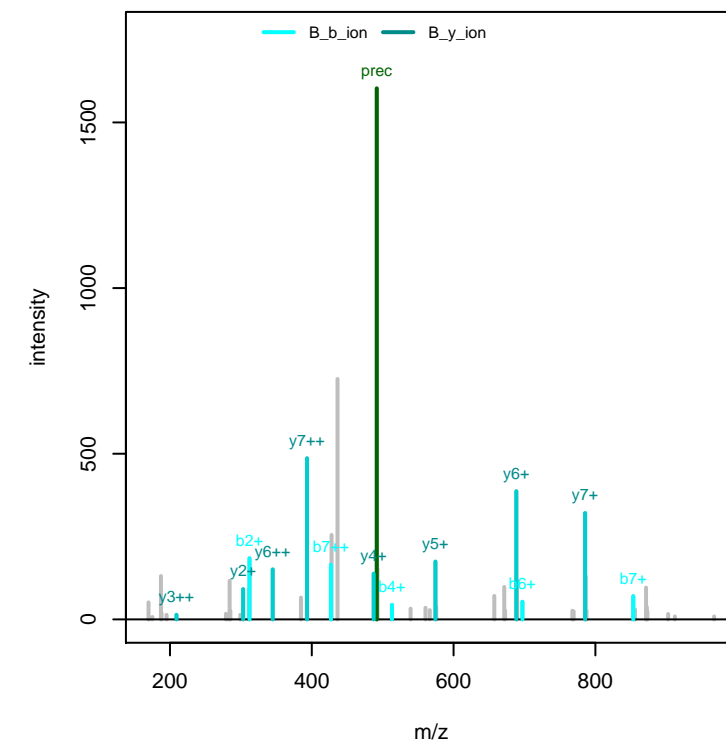

NAQAEKAR  
DKVSNQQDDMTK

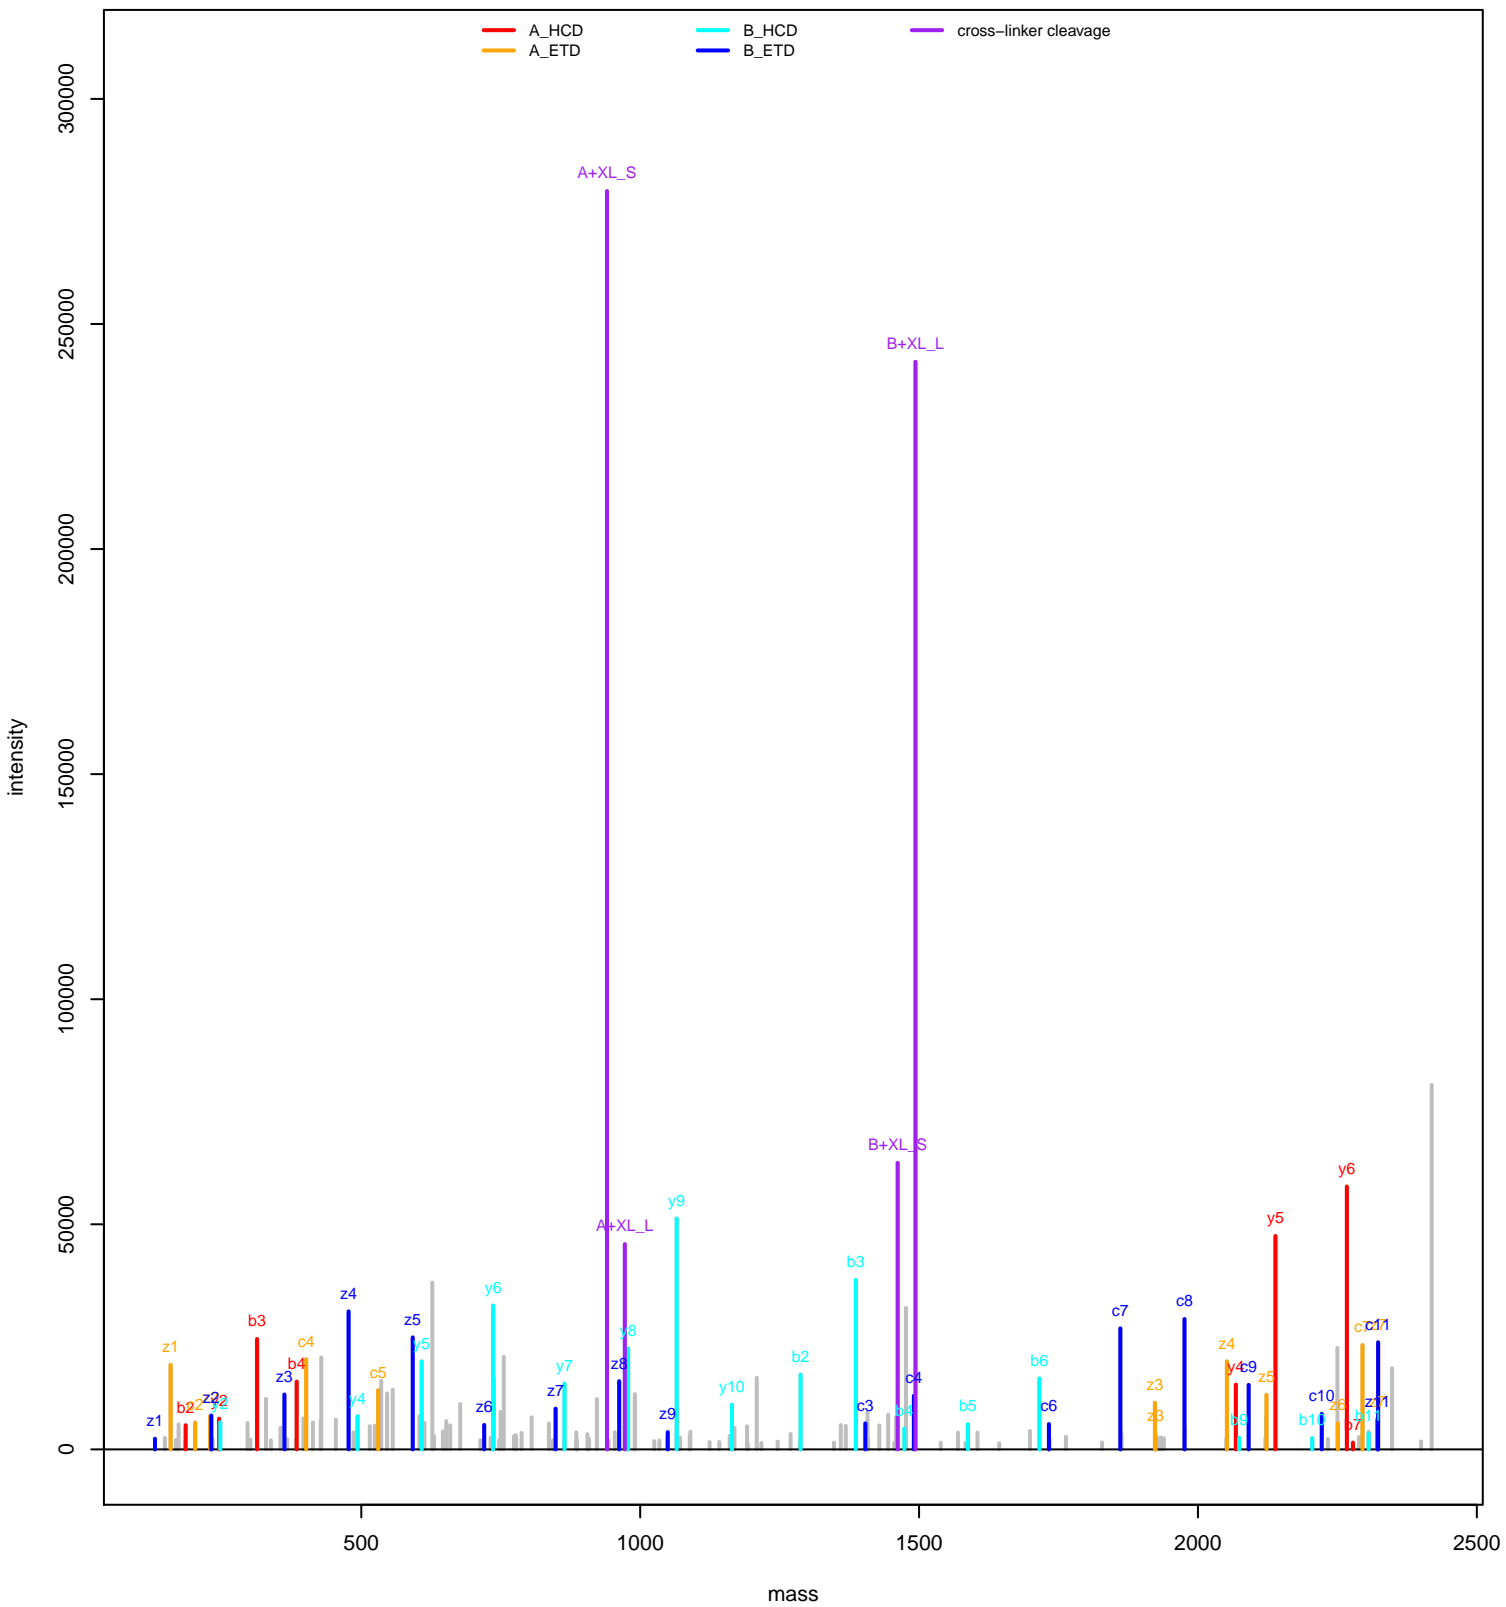

NAQAEKAR+XL\_S

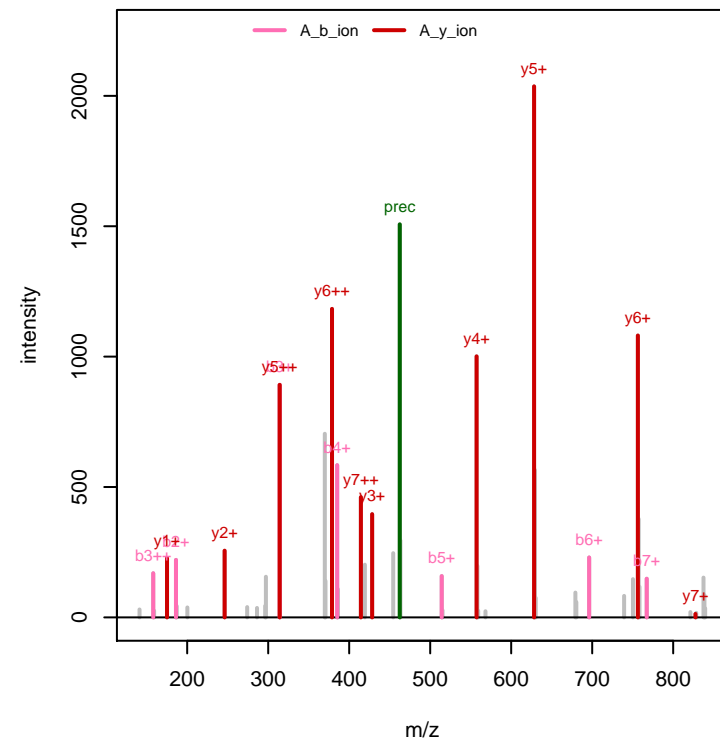

NAQAEKAR+XL\_L

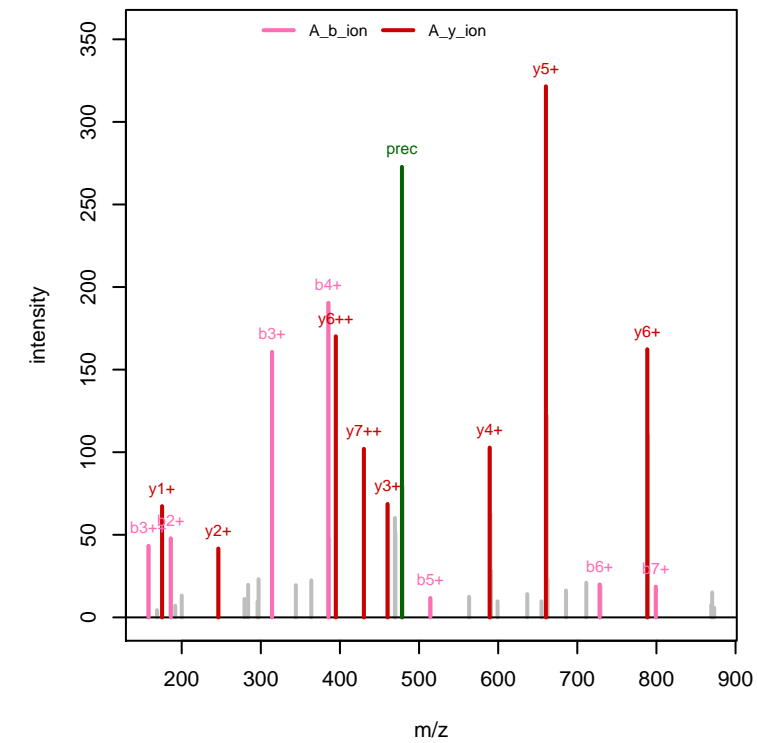

DKVSNQQDDMTK+XL\_S

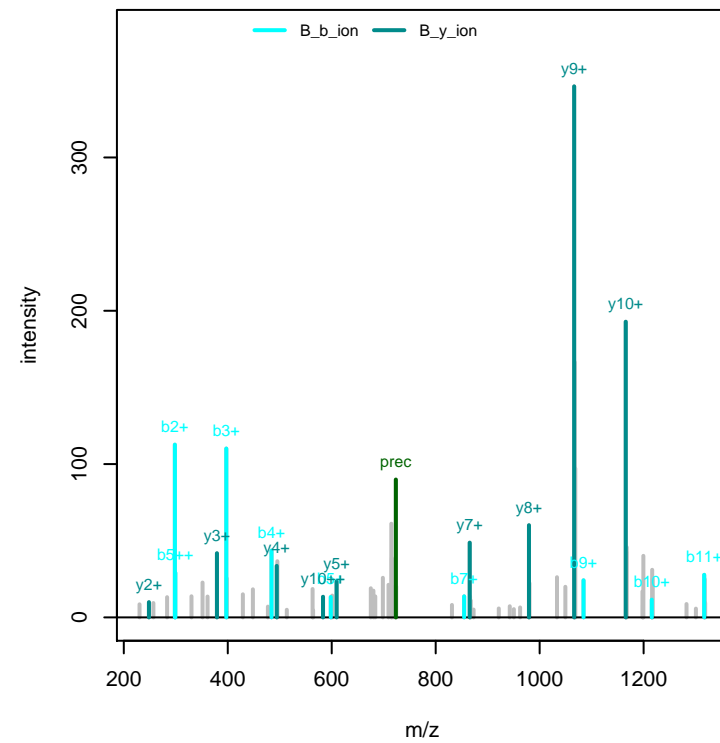

DKVSNQQDDMTK+XL\_L

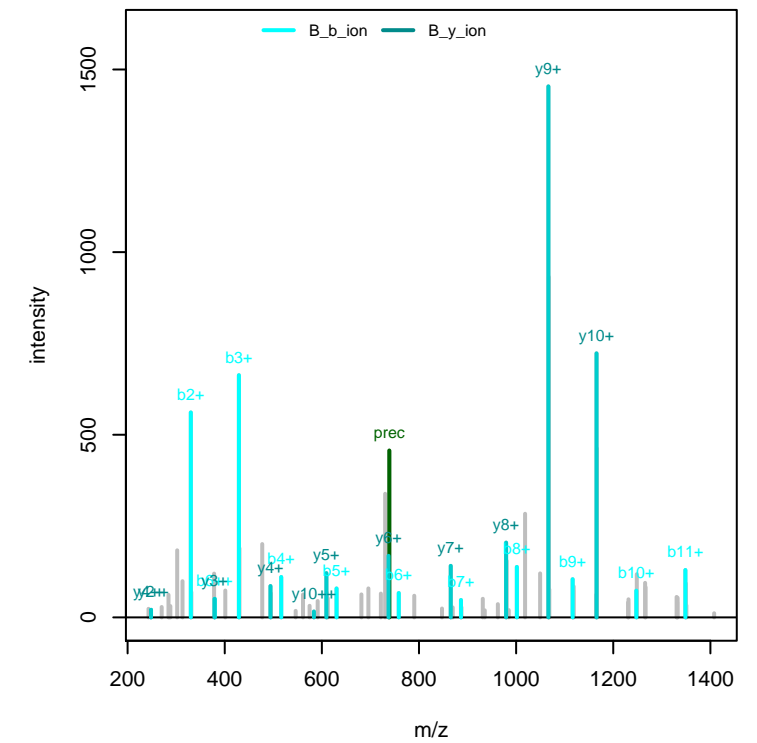



GVSEAKAAGK  
GVSEAKAAGK

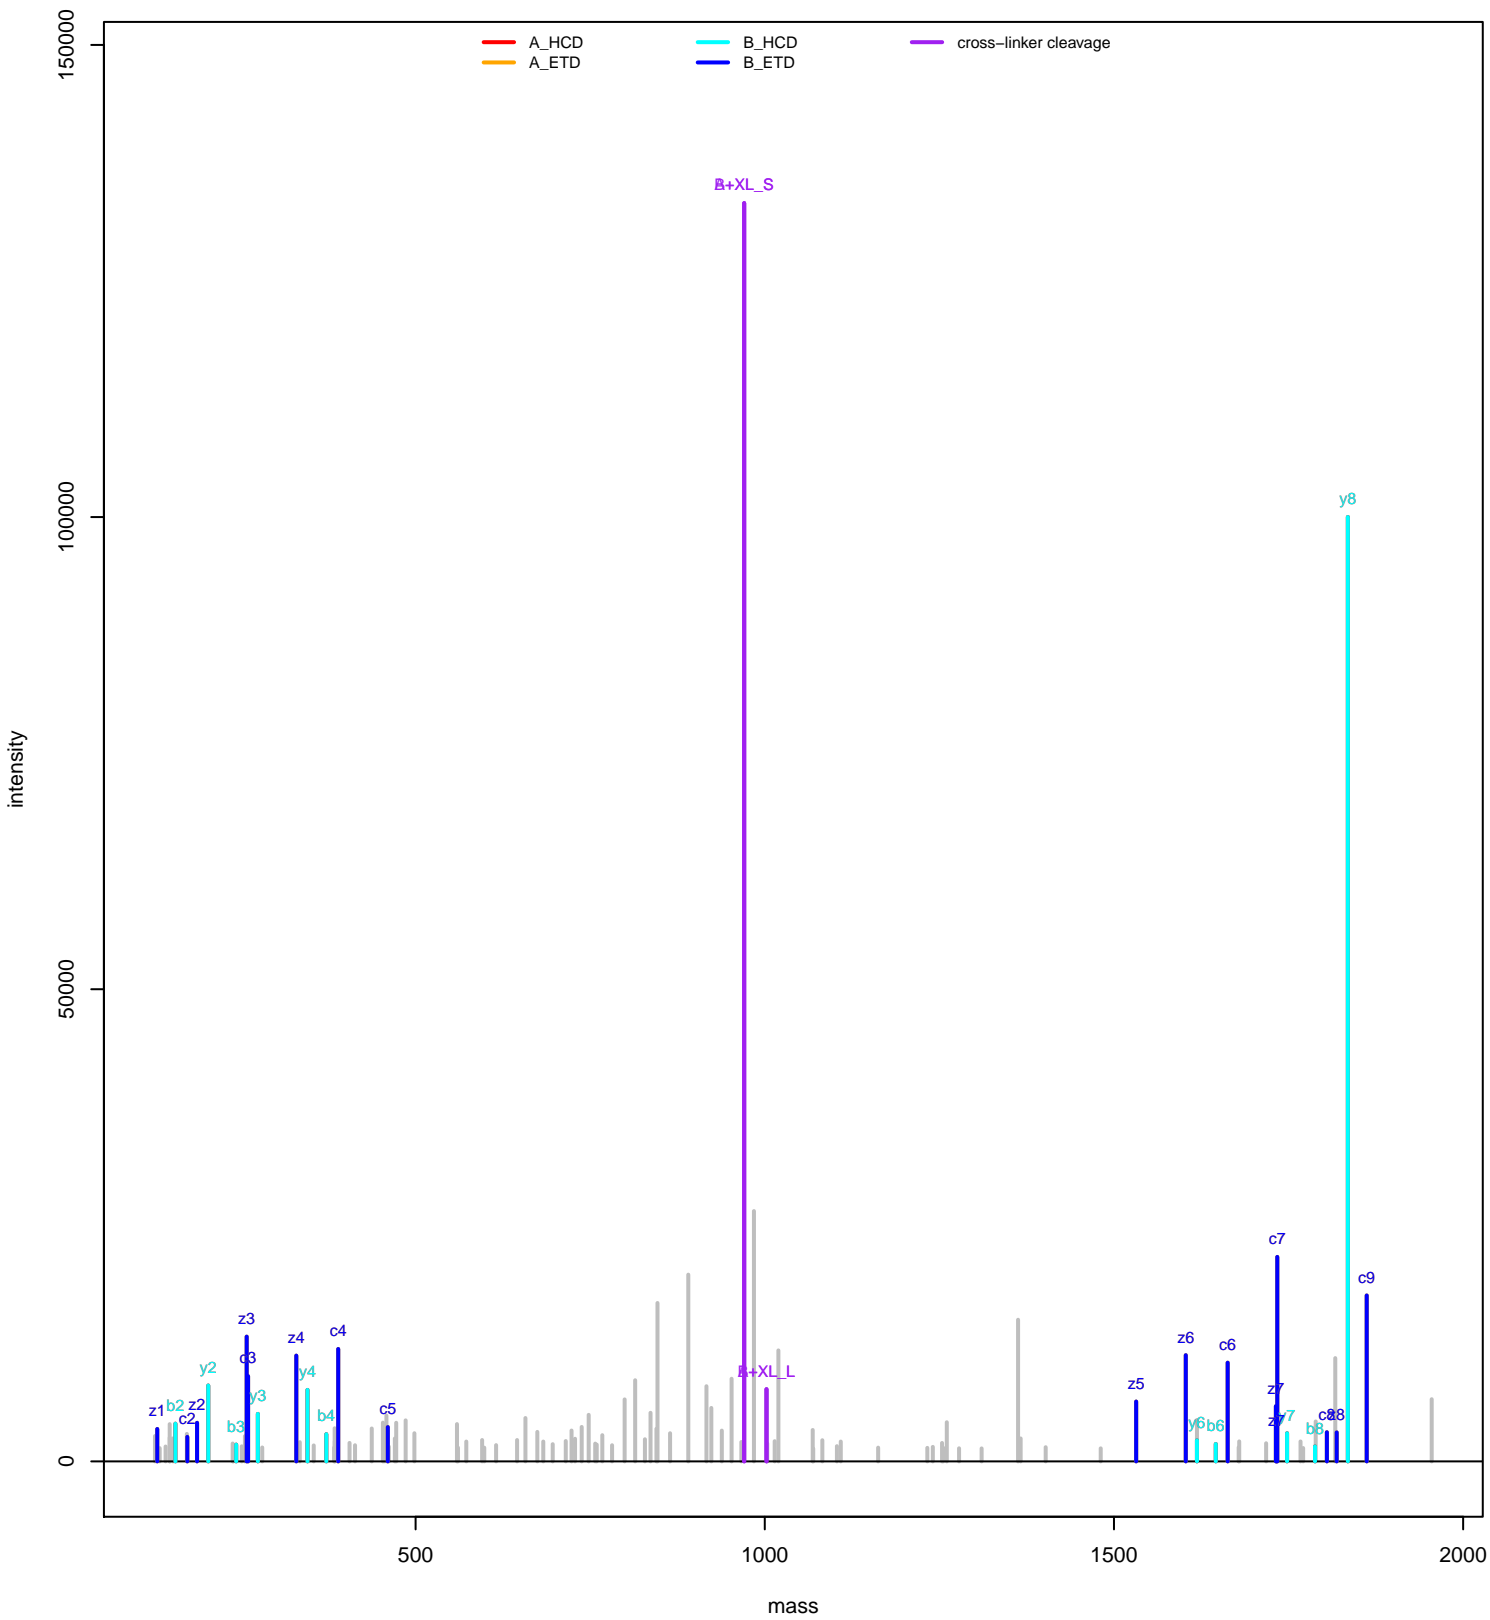

GVSEAKAAGK+XL\_S

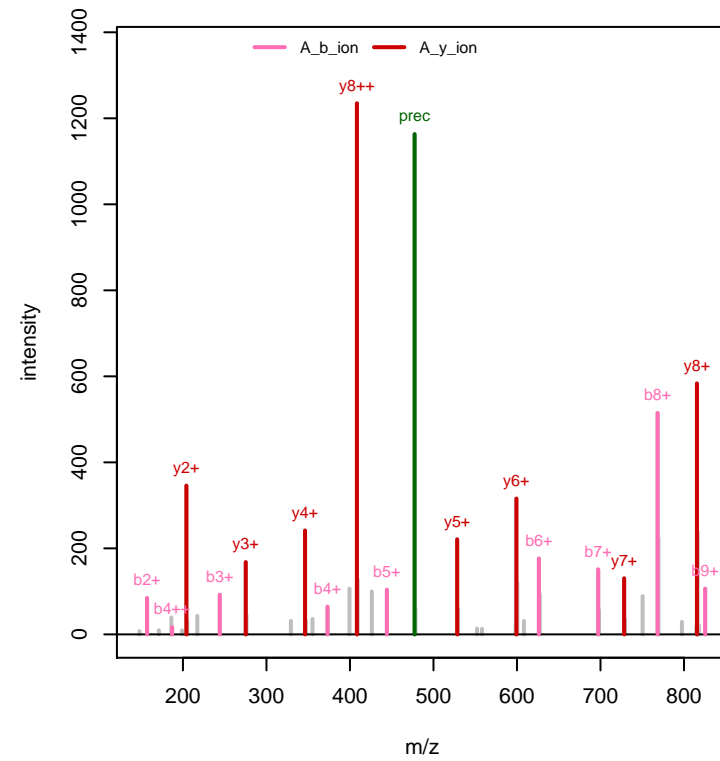

GVSEAKAAGK+XL\_L

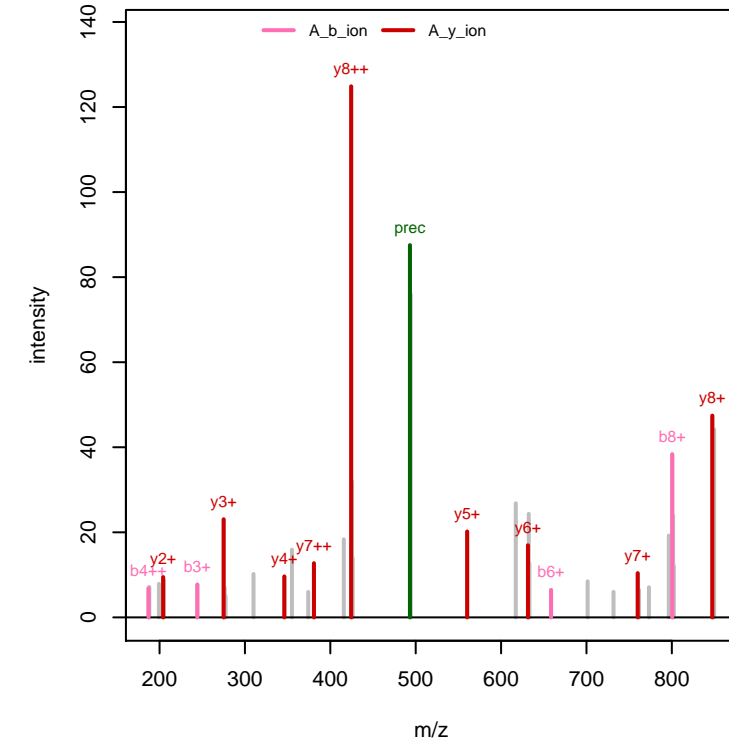

GVSEAKAAGK+XL\_S

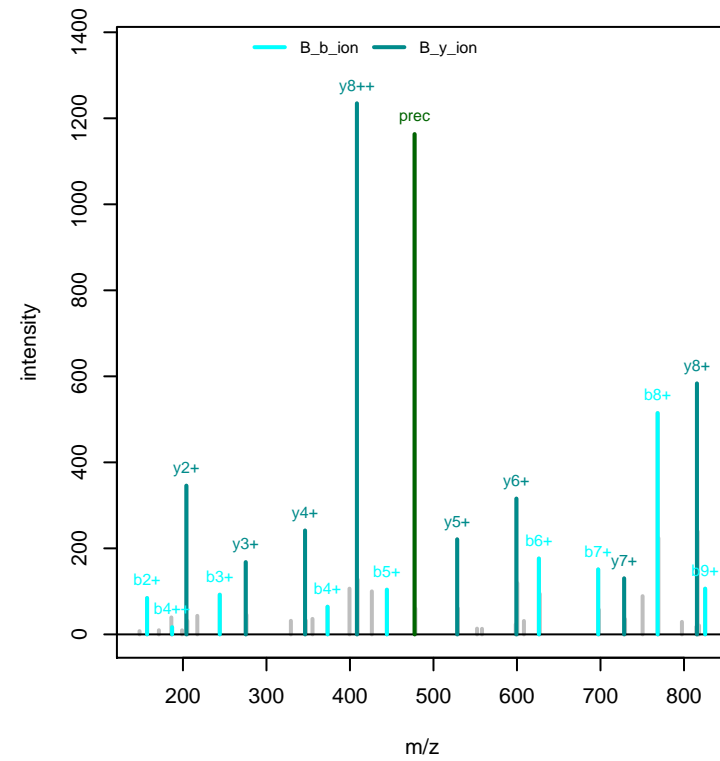

GVSEAKAAGK+XL\_L

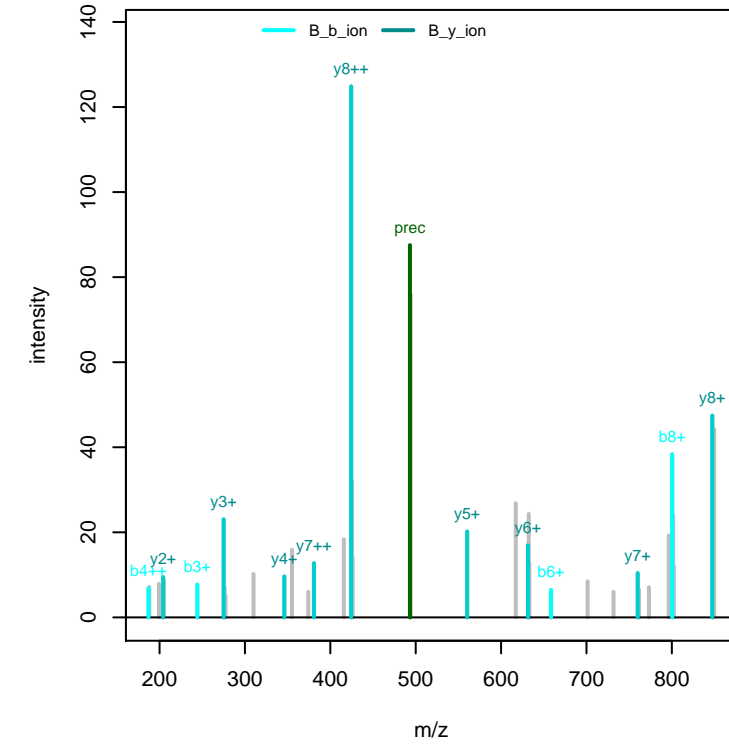

AEQQAKK  
REAAATAGEKEDAPR

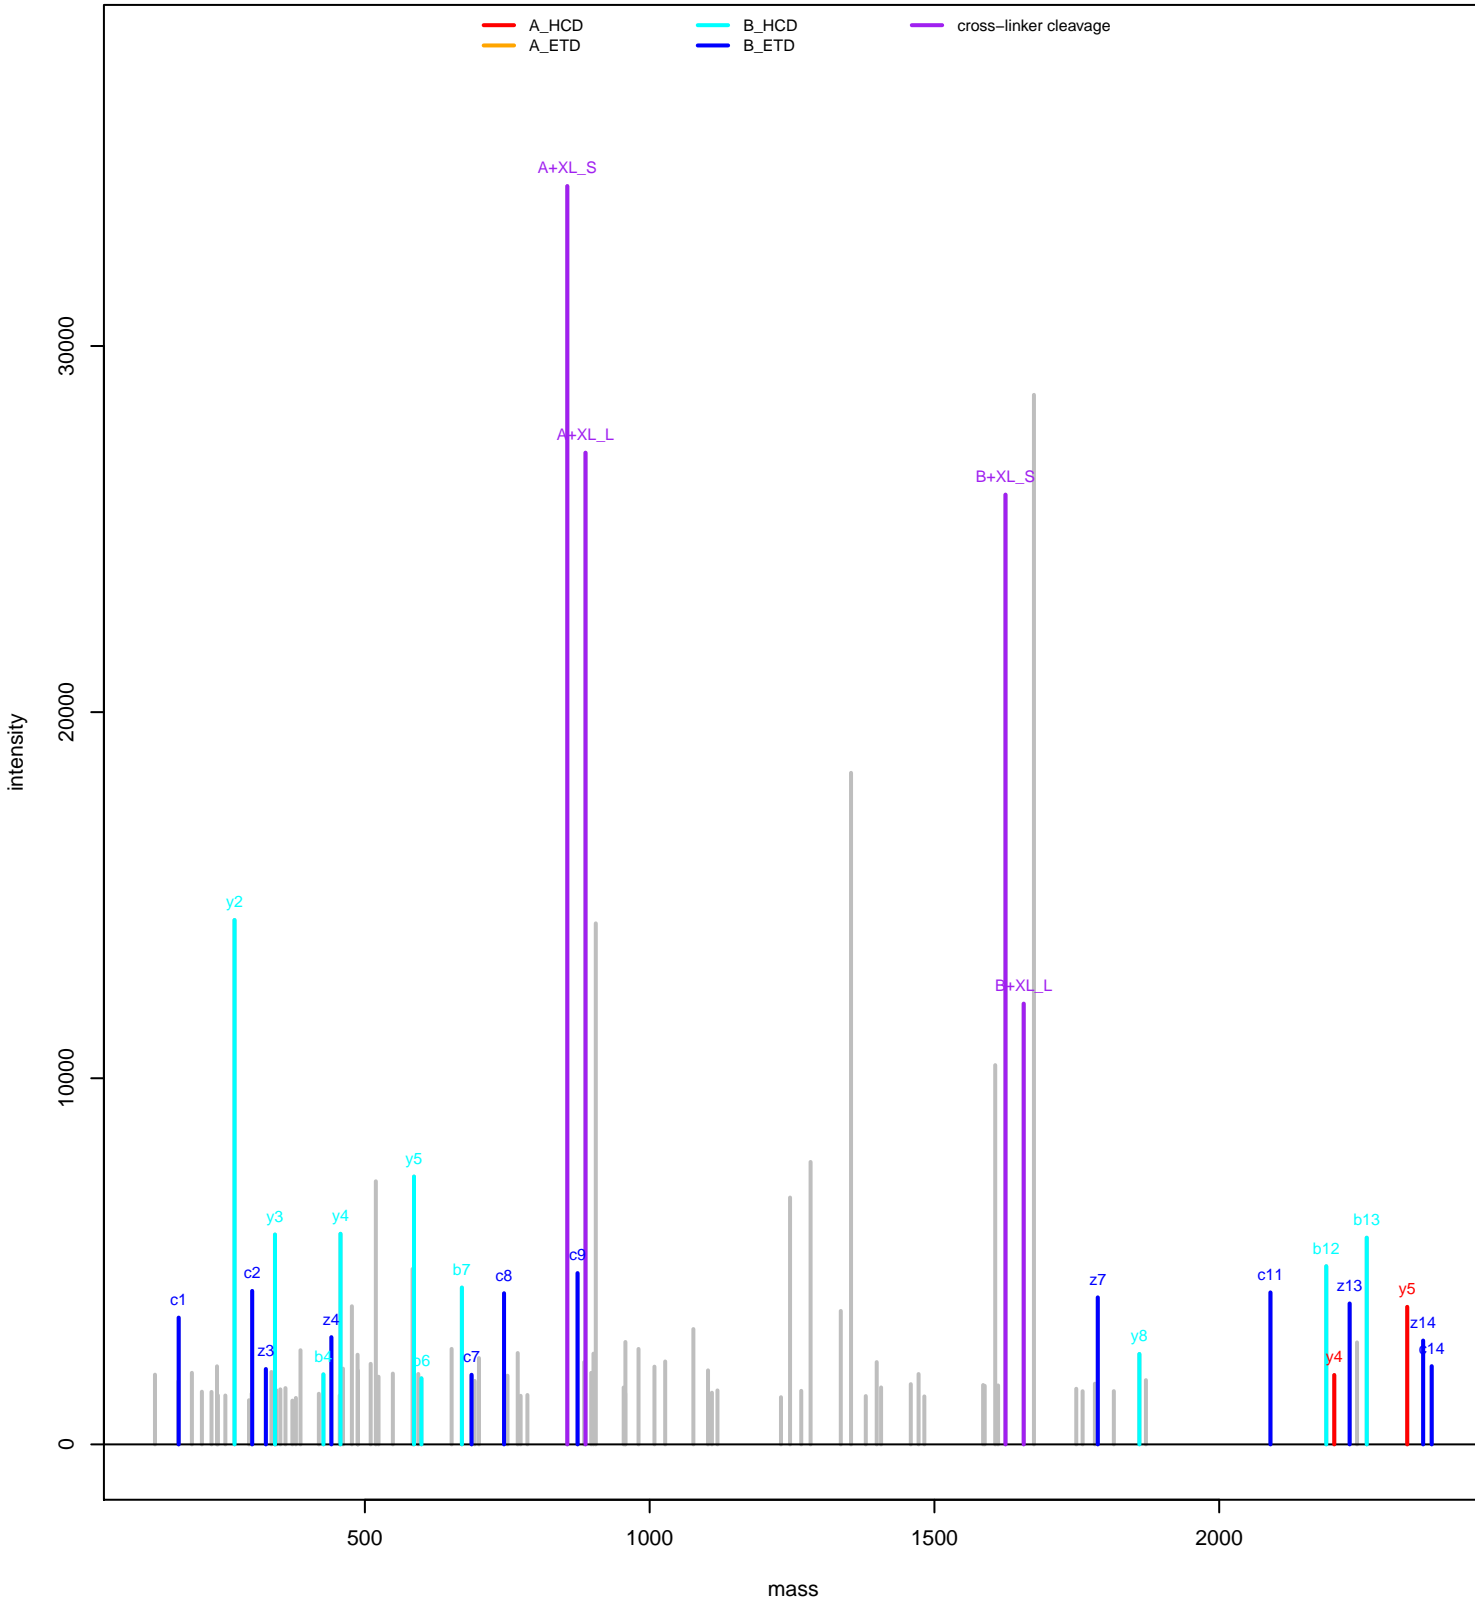

AEQQAKK+XL\_S

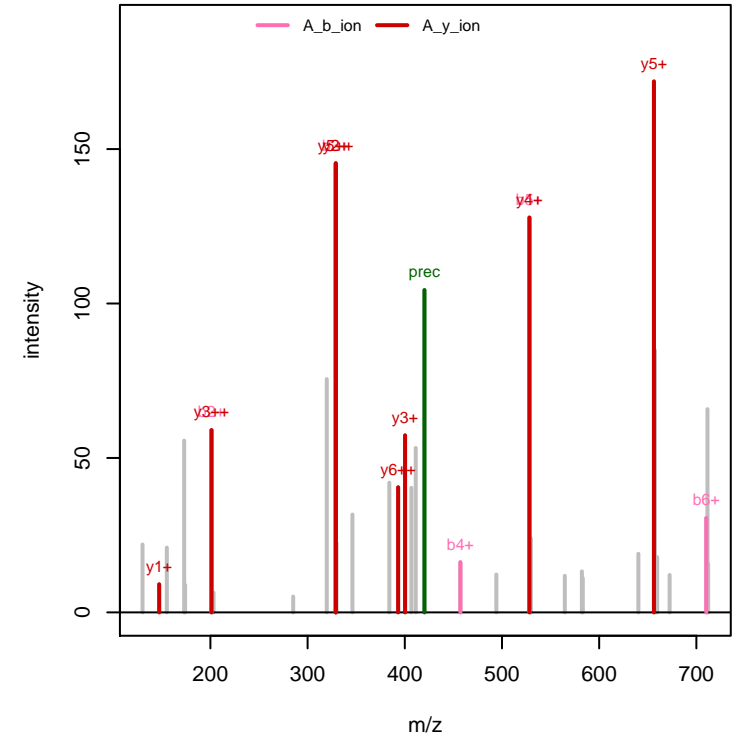

AEQQAKK+XL\_L

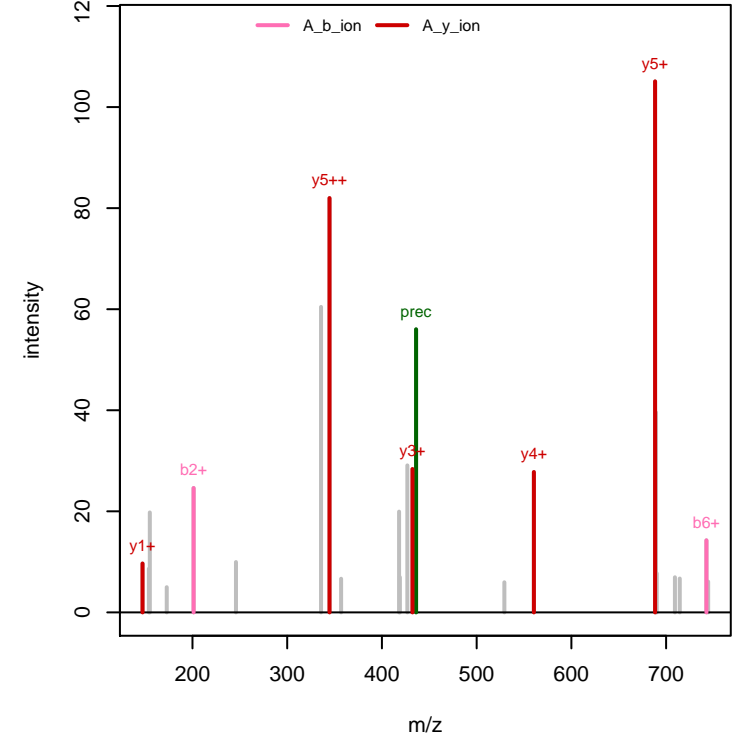

REAAATAGEKEDAPR+XL\_S

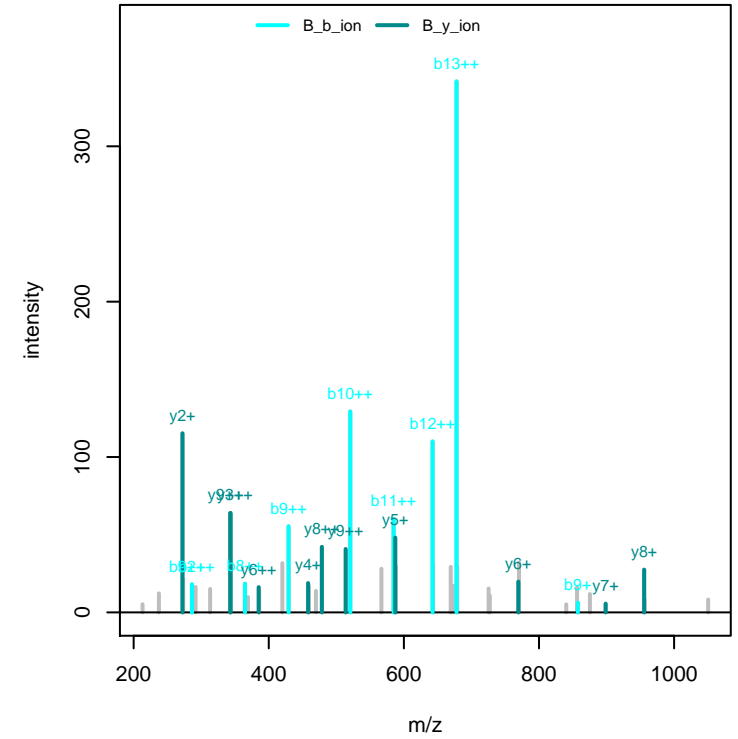

REAAATAGEKEDAPR+XL\_L

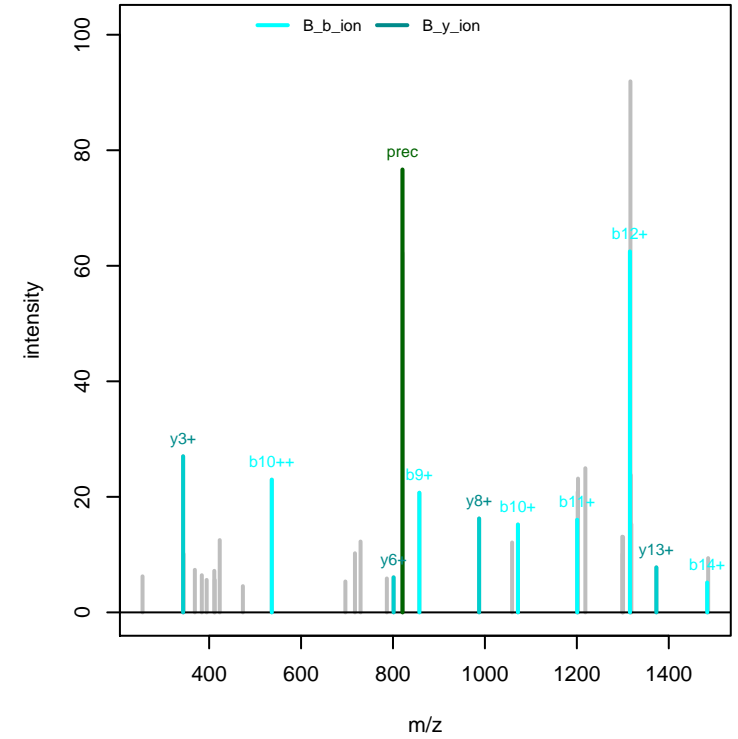

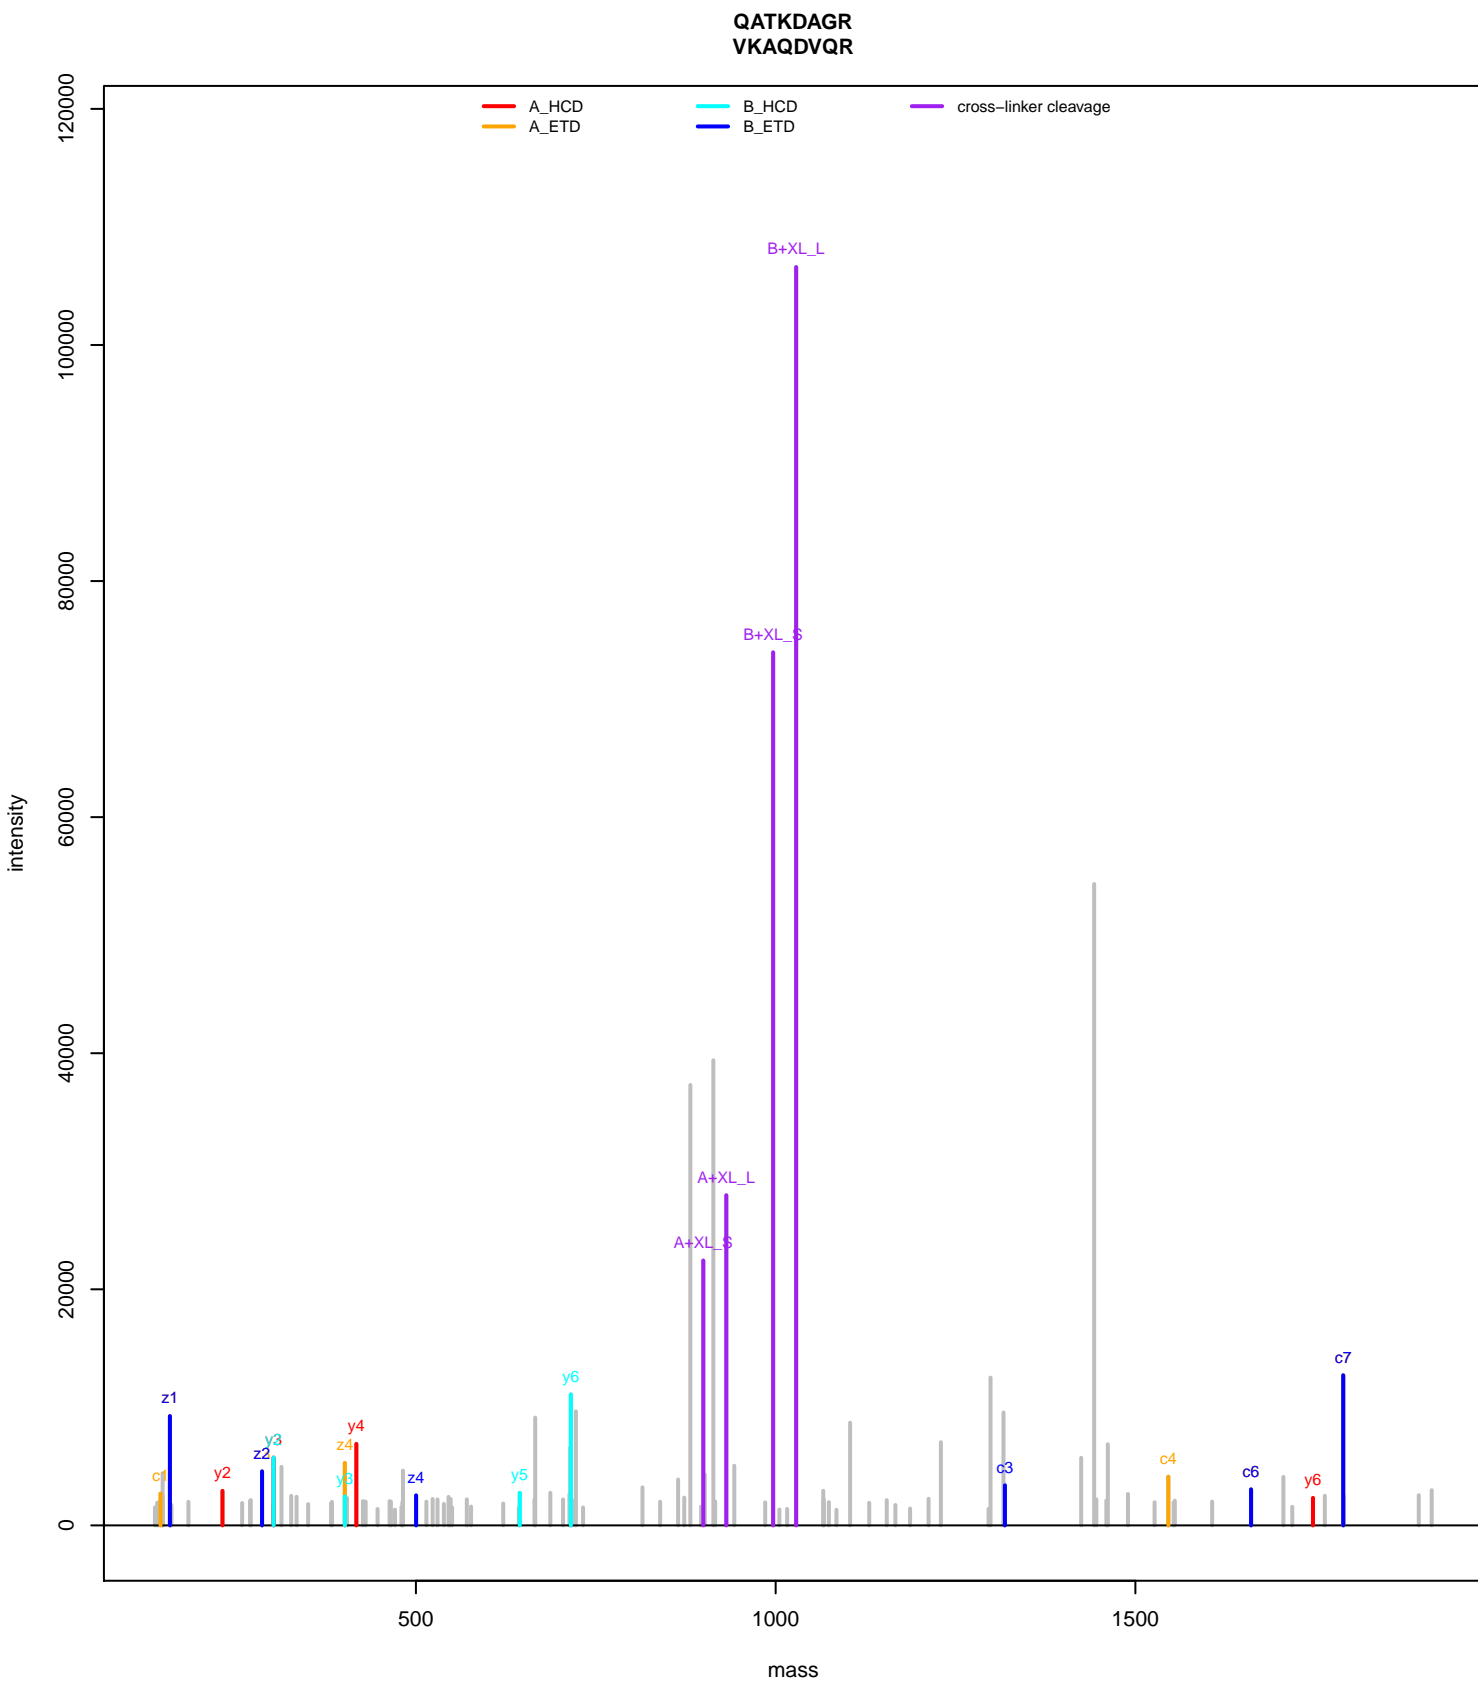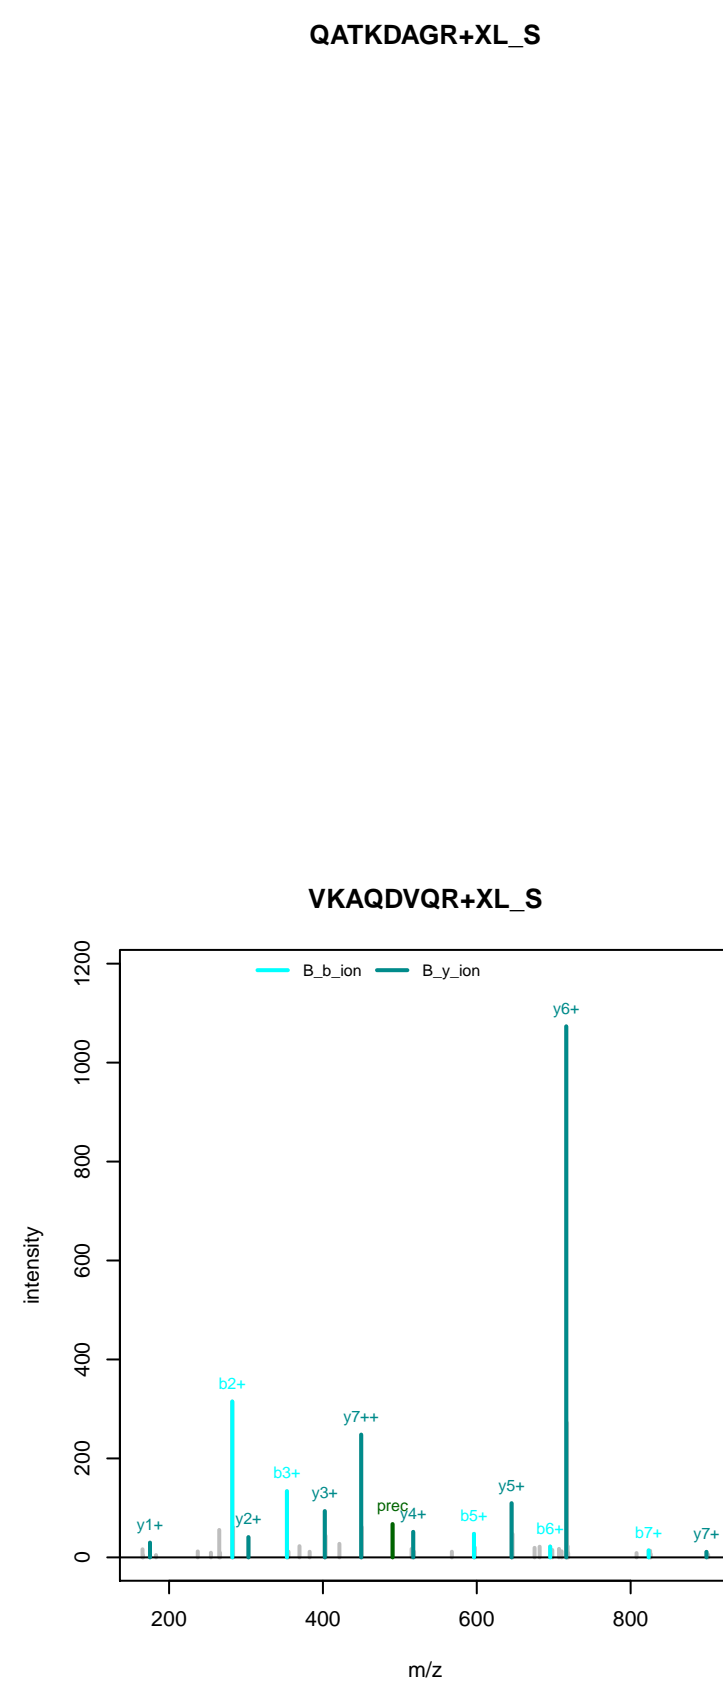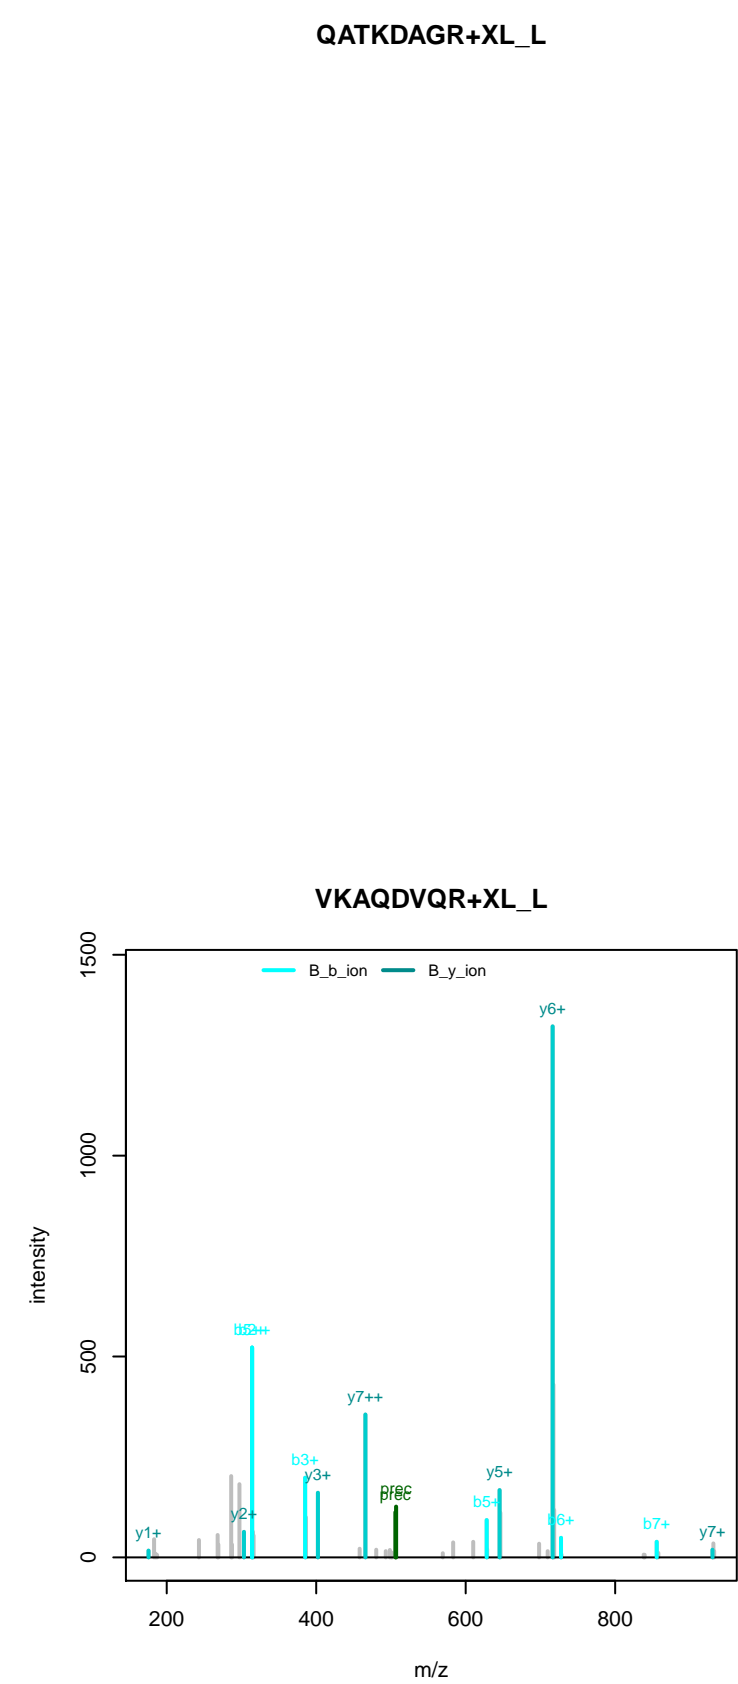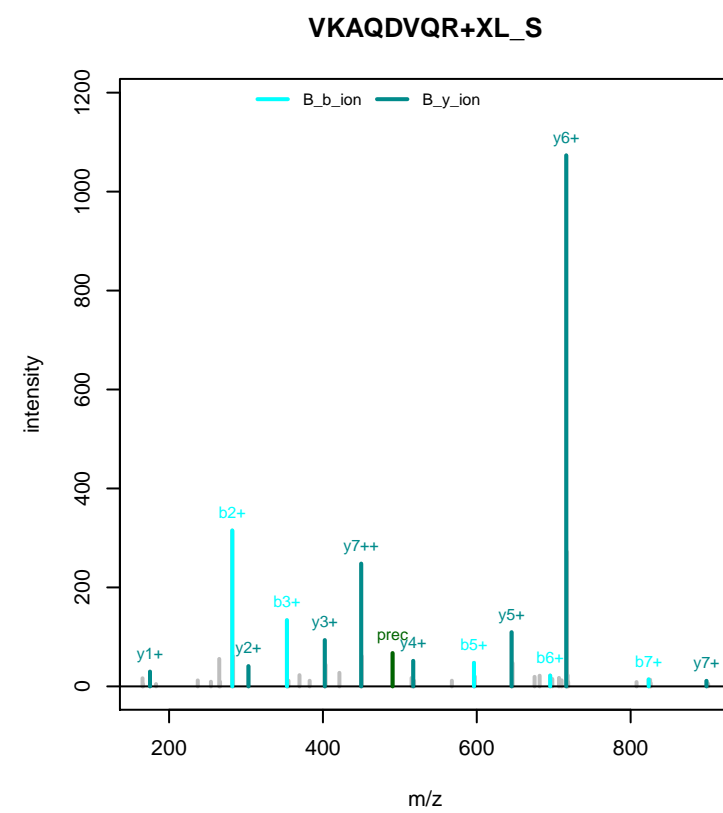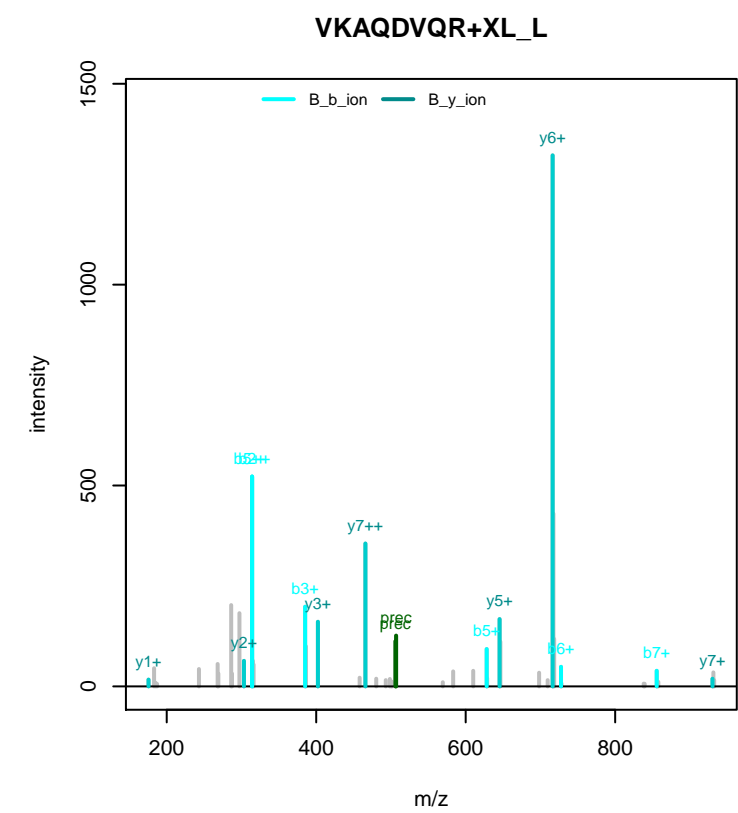

EAVKQR  
EAVKQR

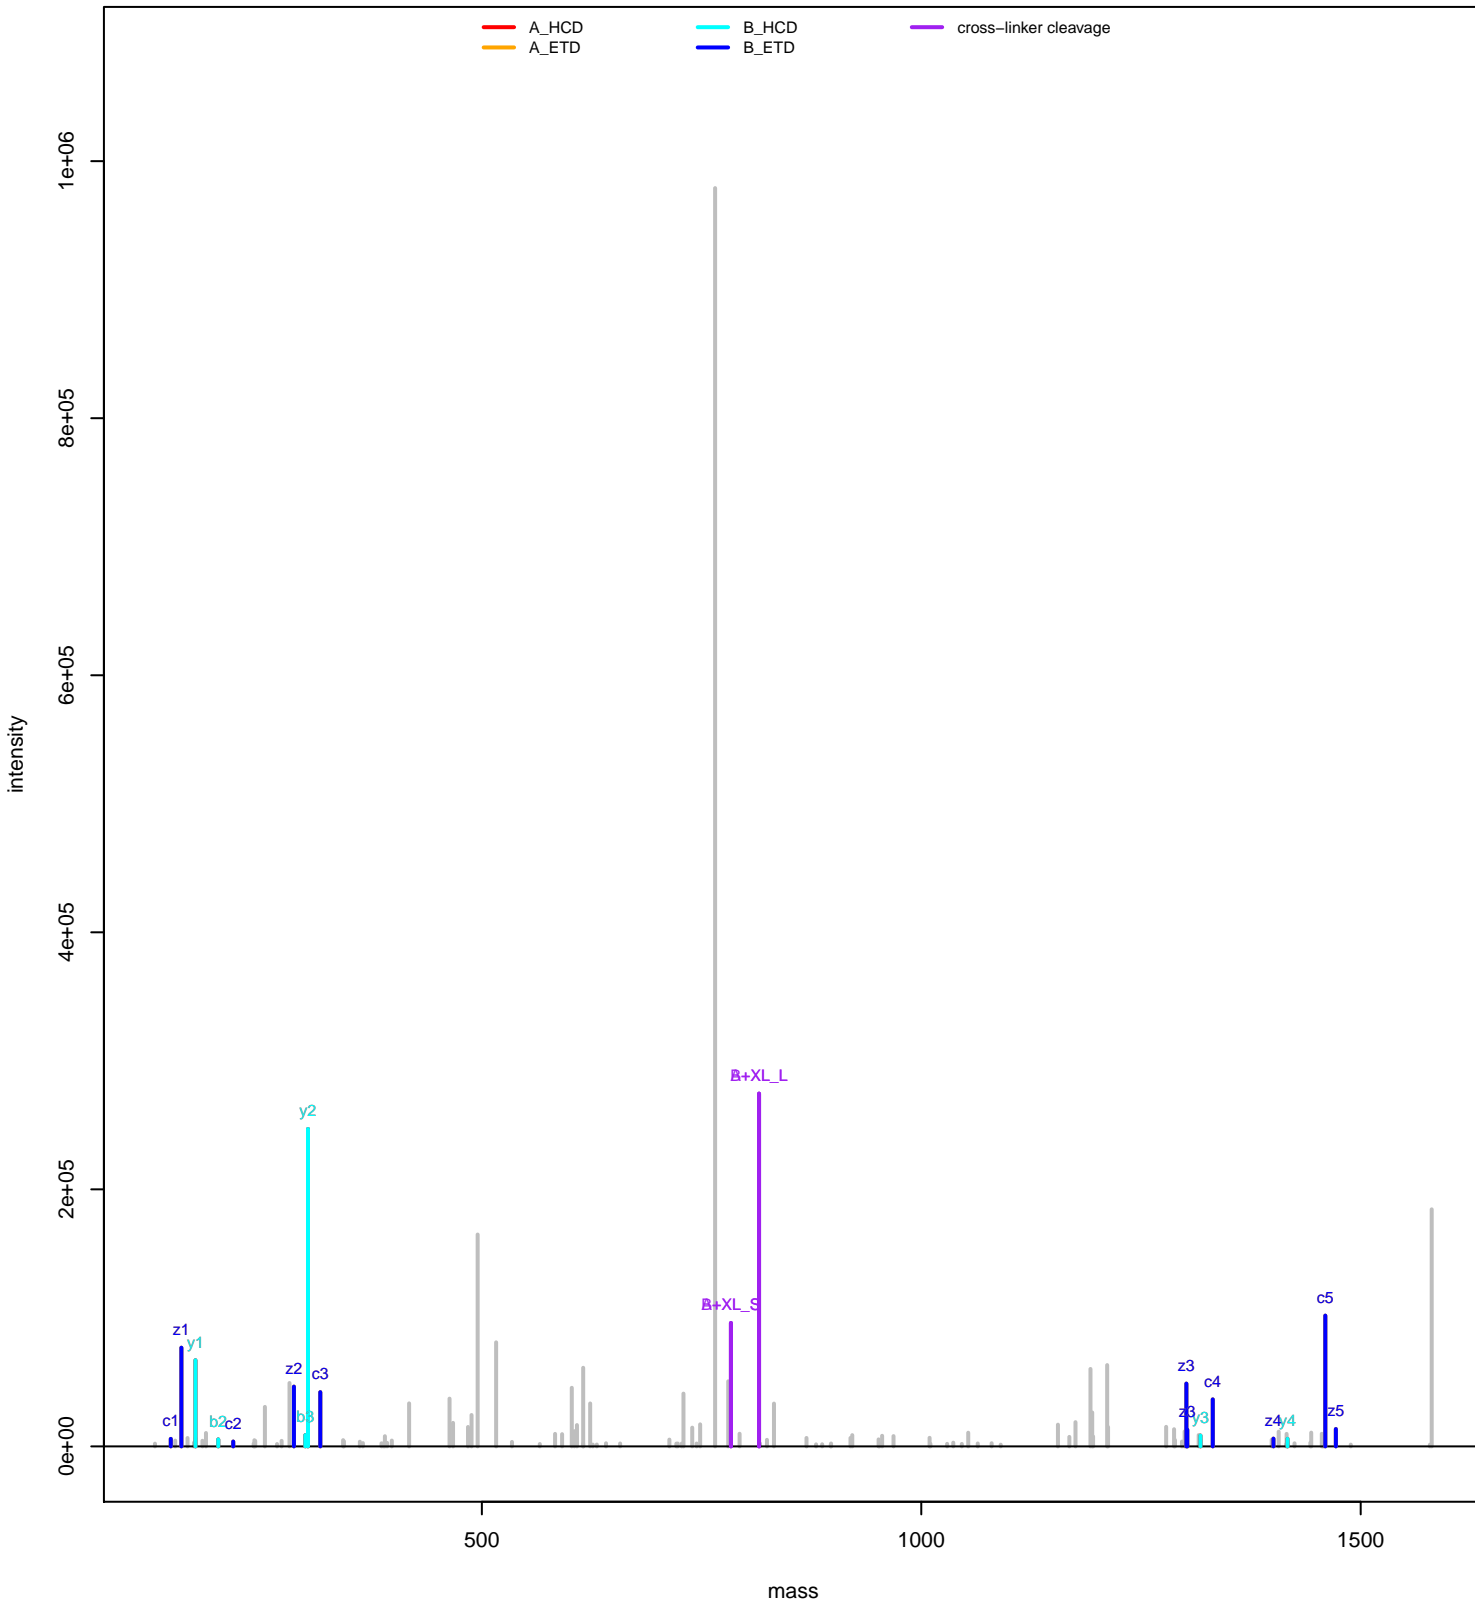

EAVKQR+XL\_S

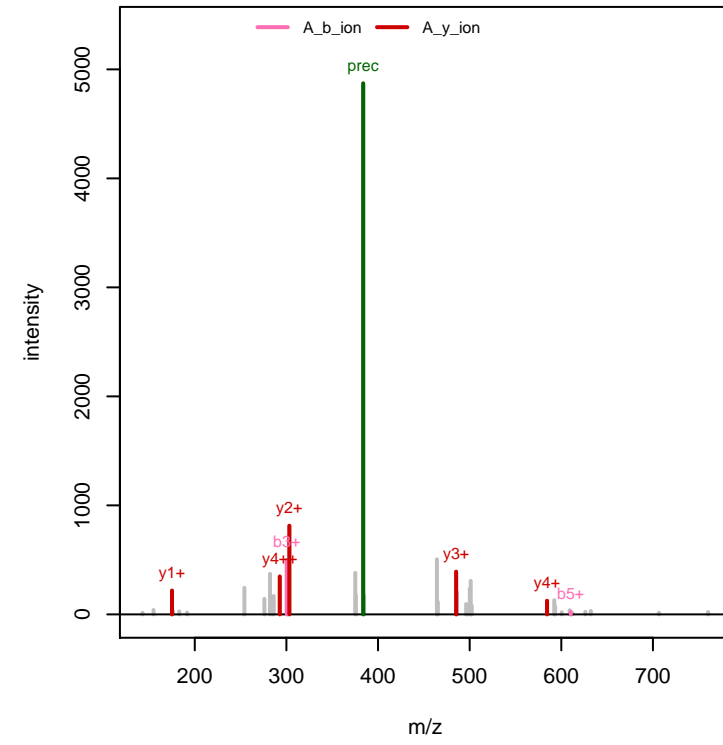

EAVKQR+XL\_L

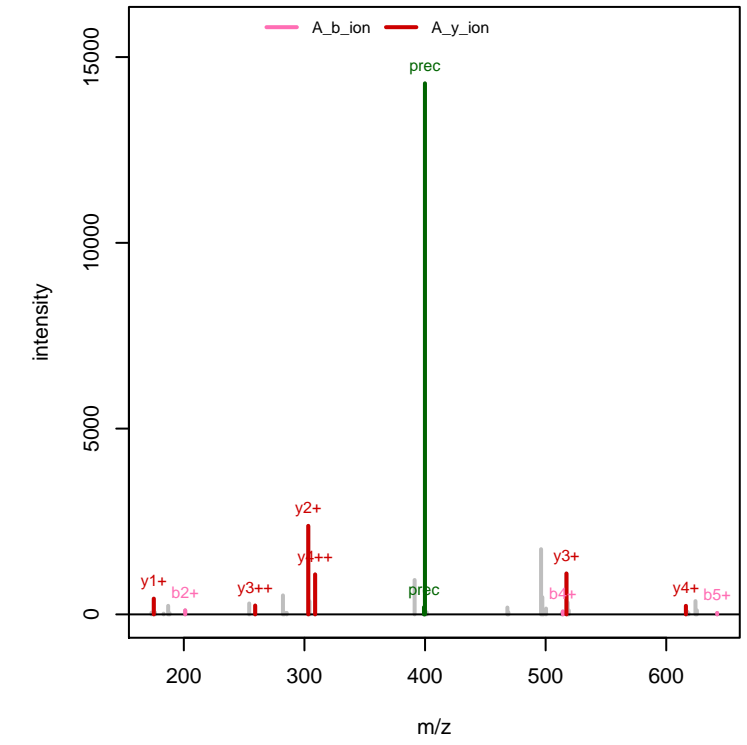

EAVKQR+XL\_S

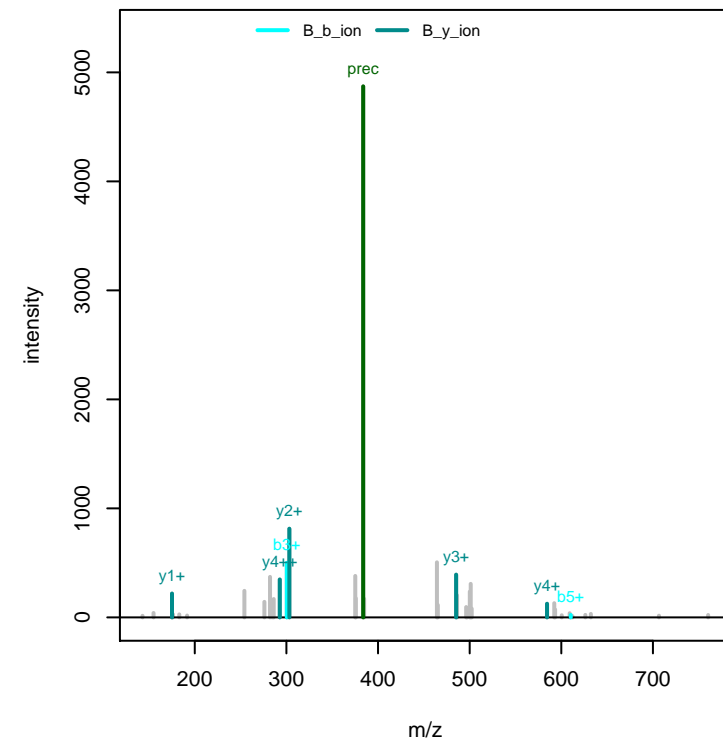

EAVKQR+XL\_L

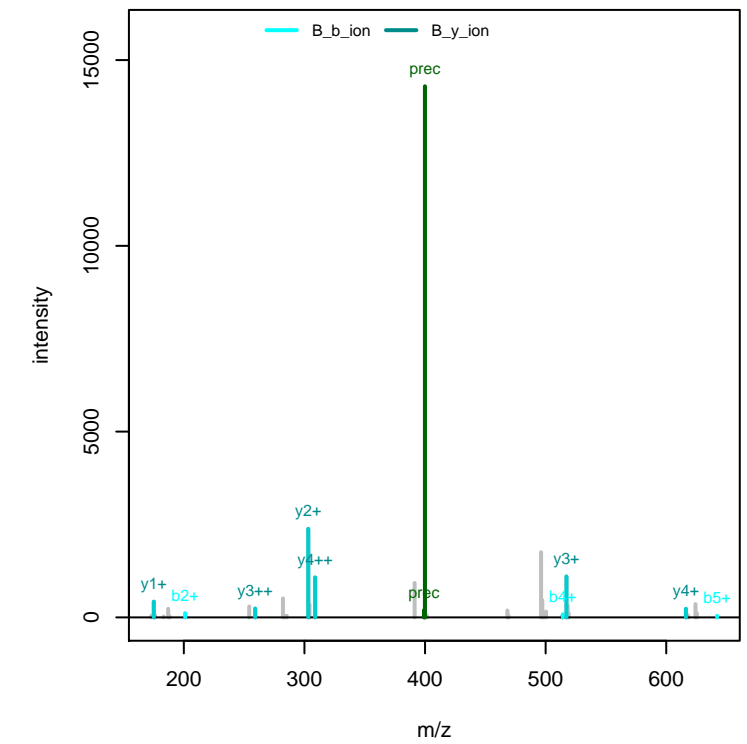

**AADAPKPTAEK  
GKENADSTLNR**

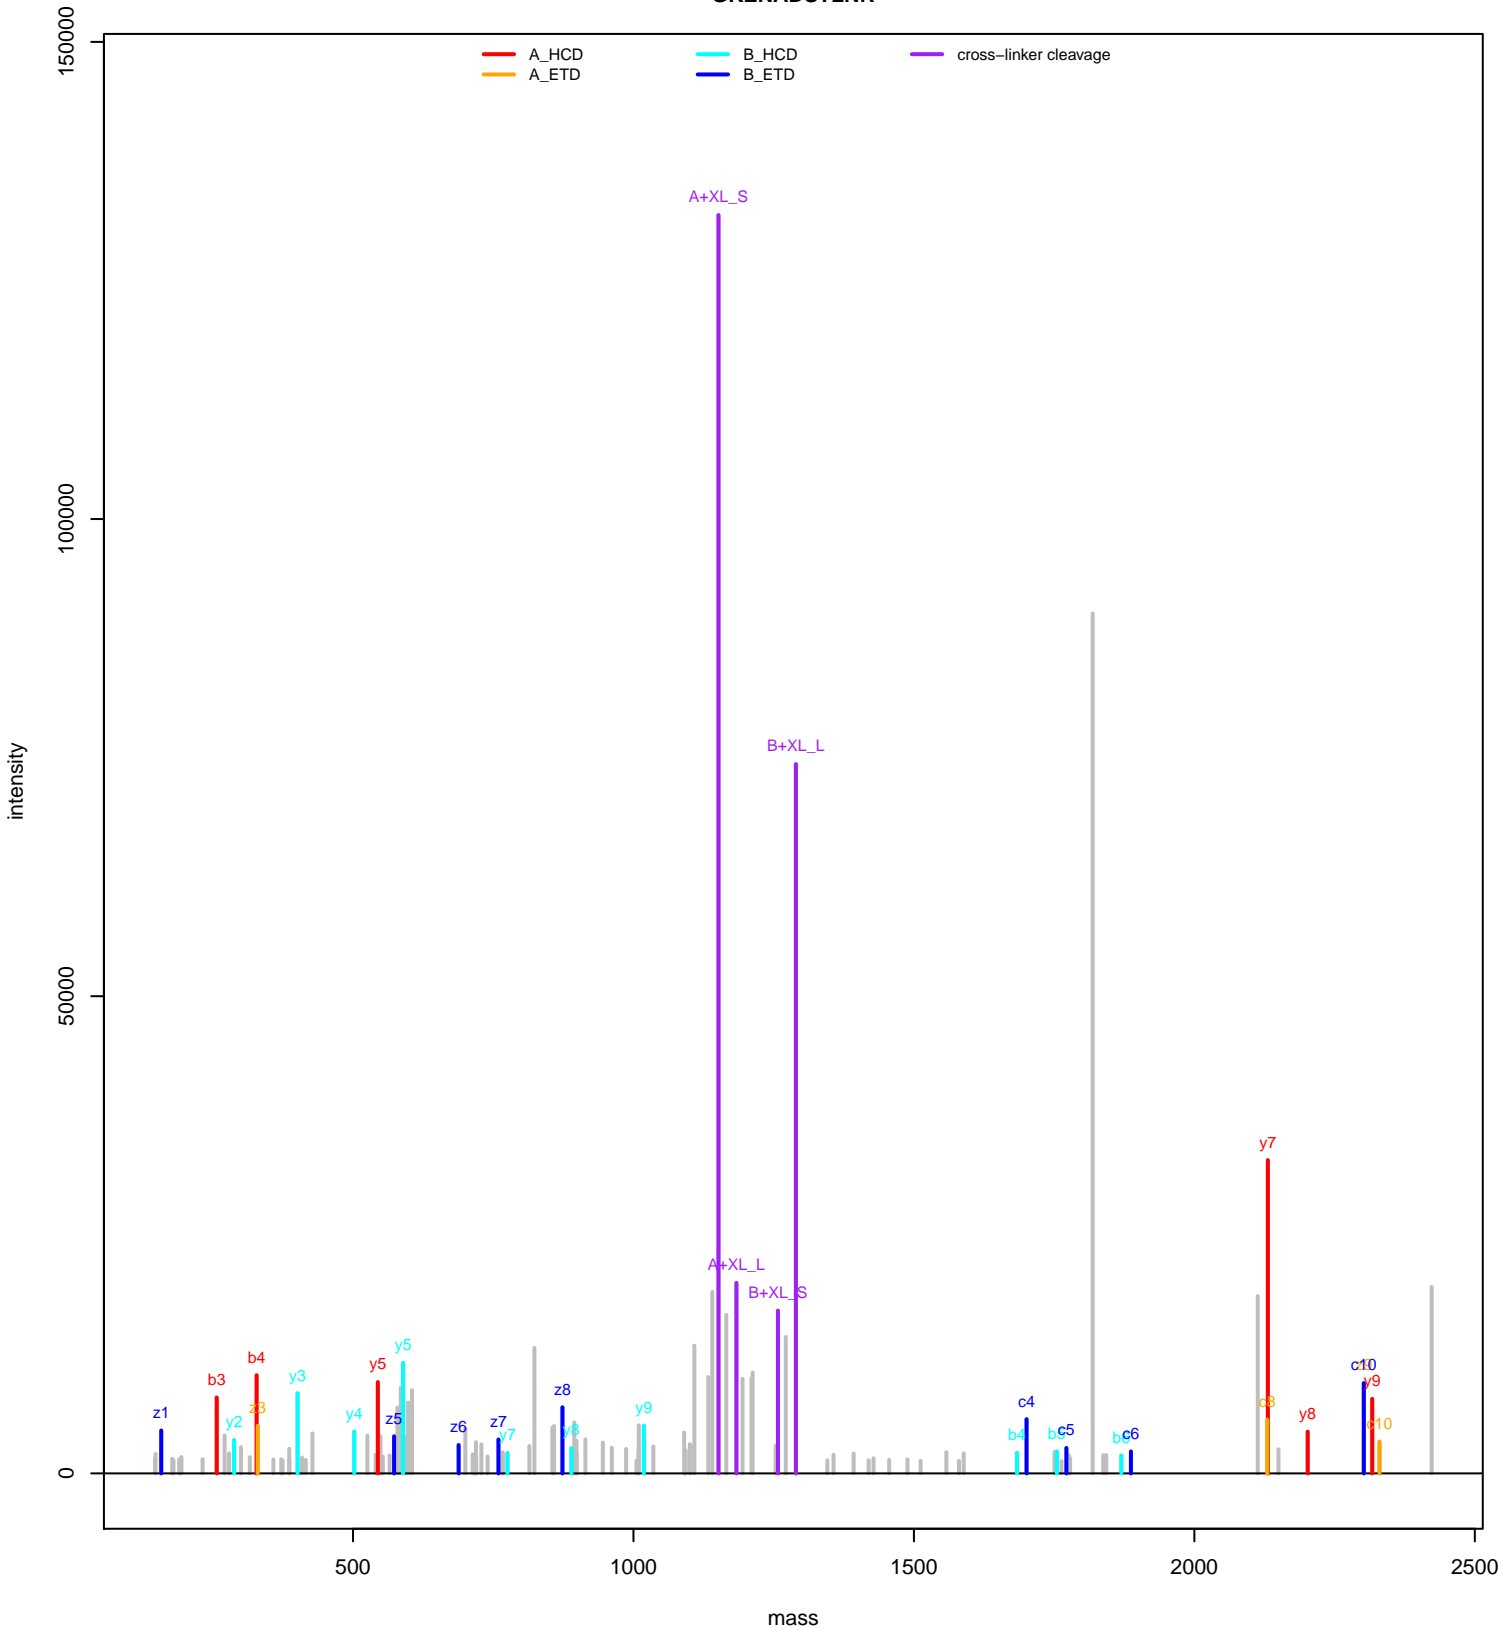

**AADAPKPTAEK+XL\_S**

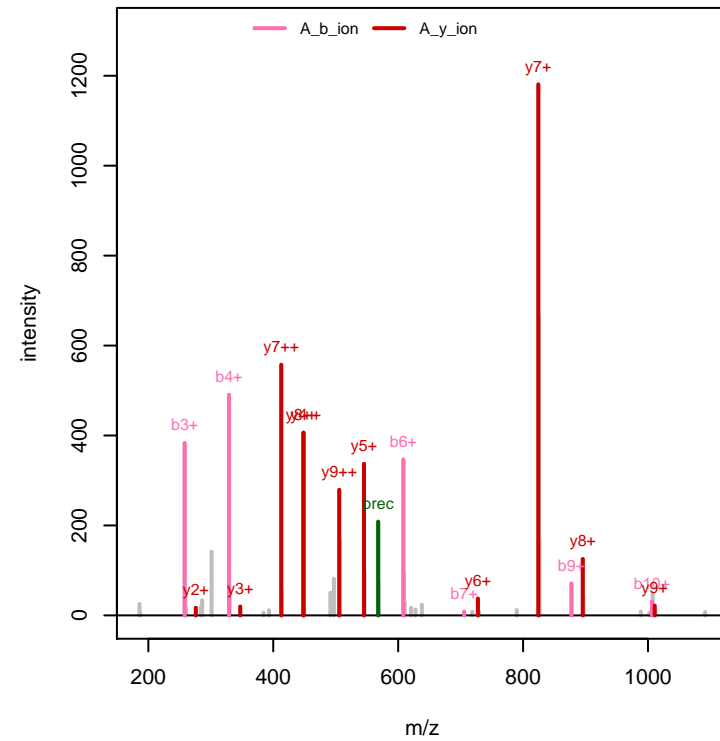

**AADAPKPTAEK+XL\_L**

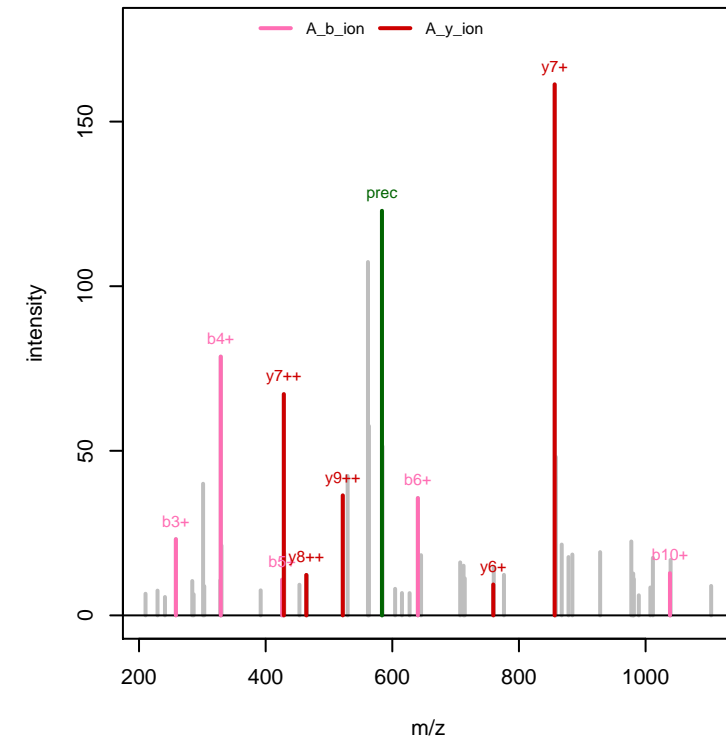

**GKENADSTLNR+XL\_S**

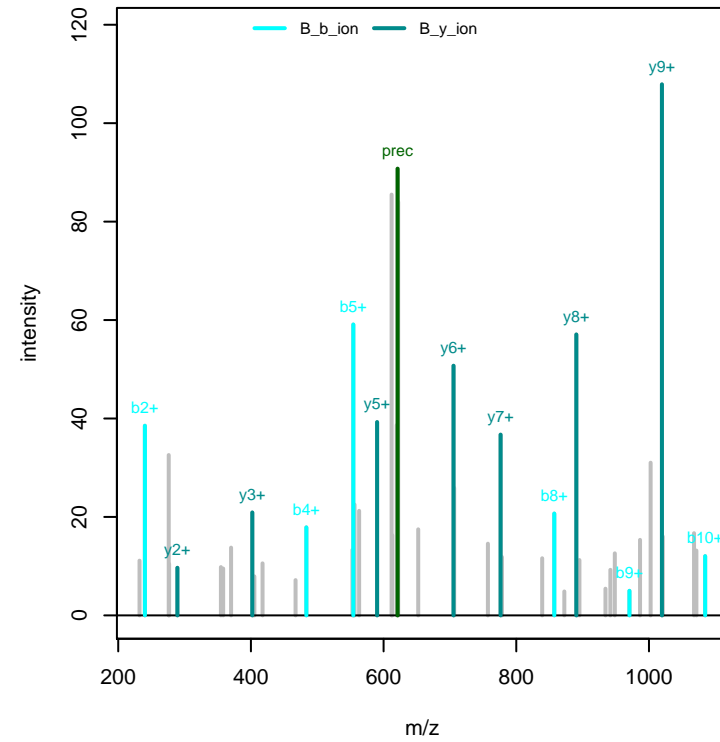

**GKENADSTLNR+XL\_L**

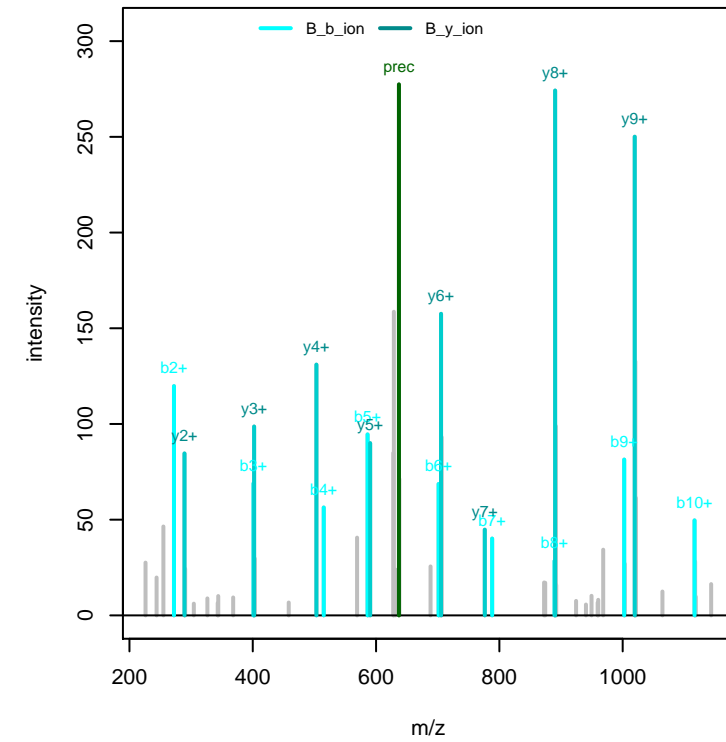

**KGAIVTGGK  
KGEDVEK**

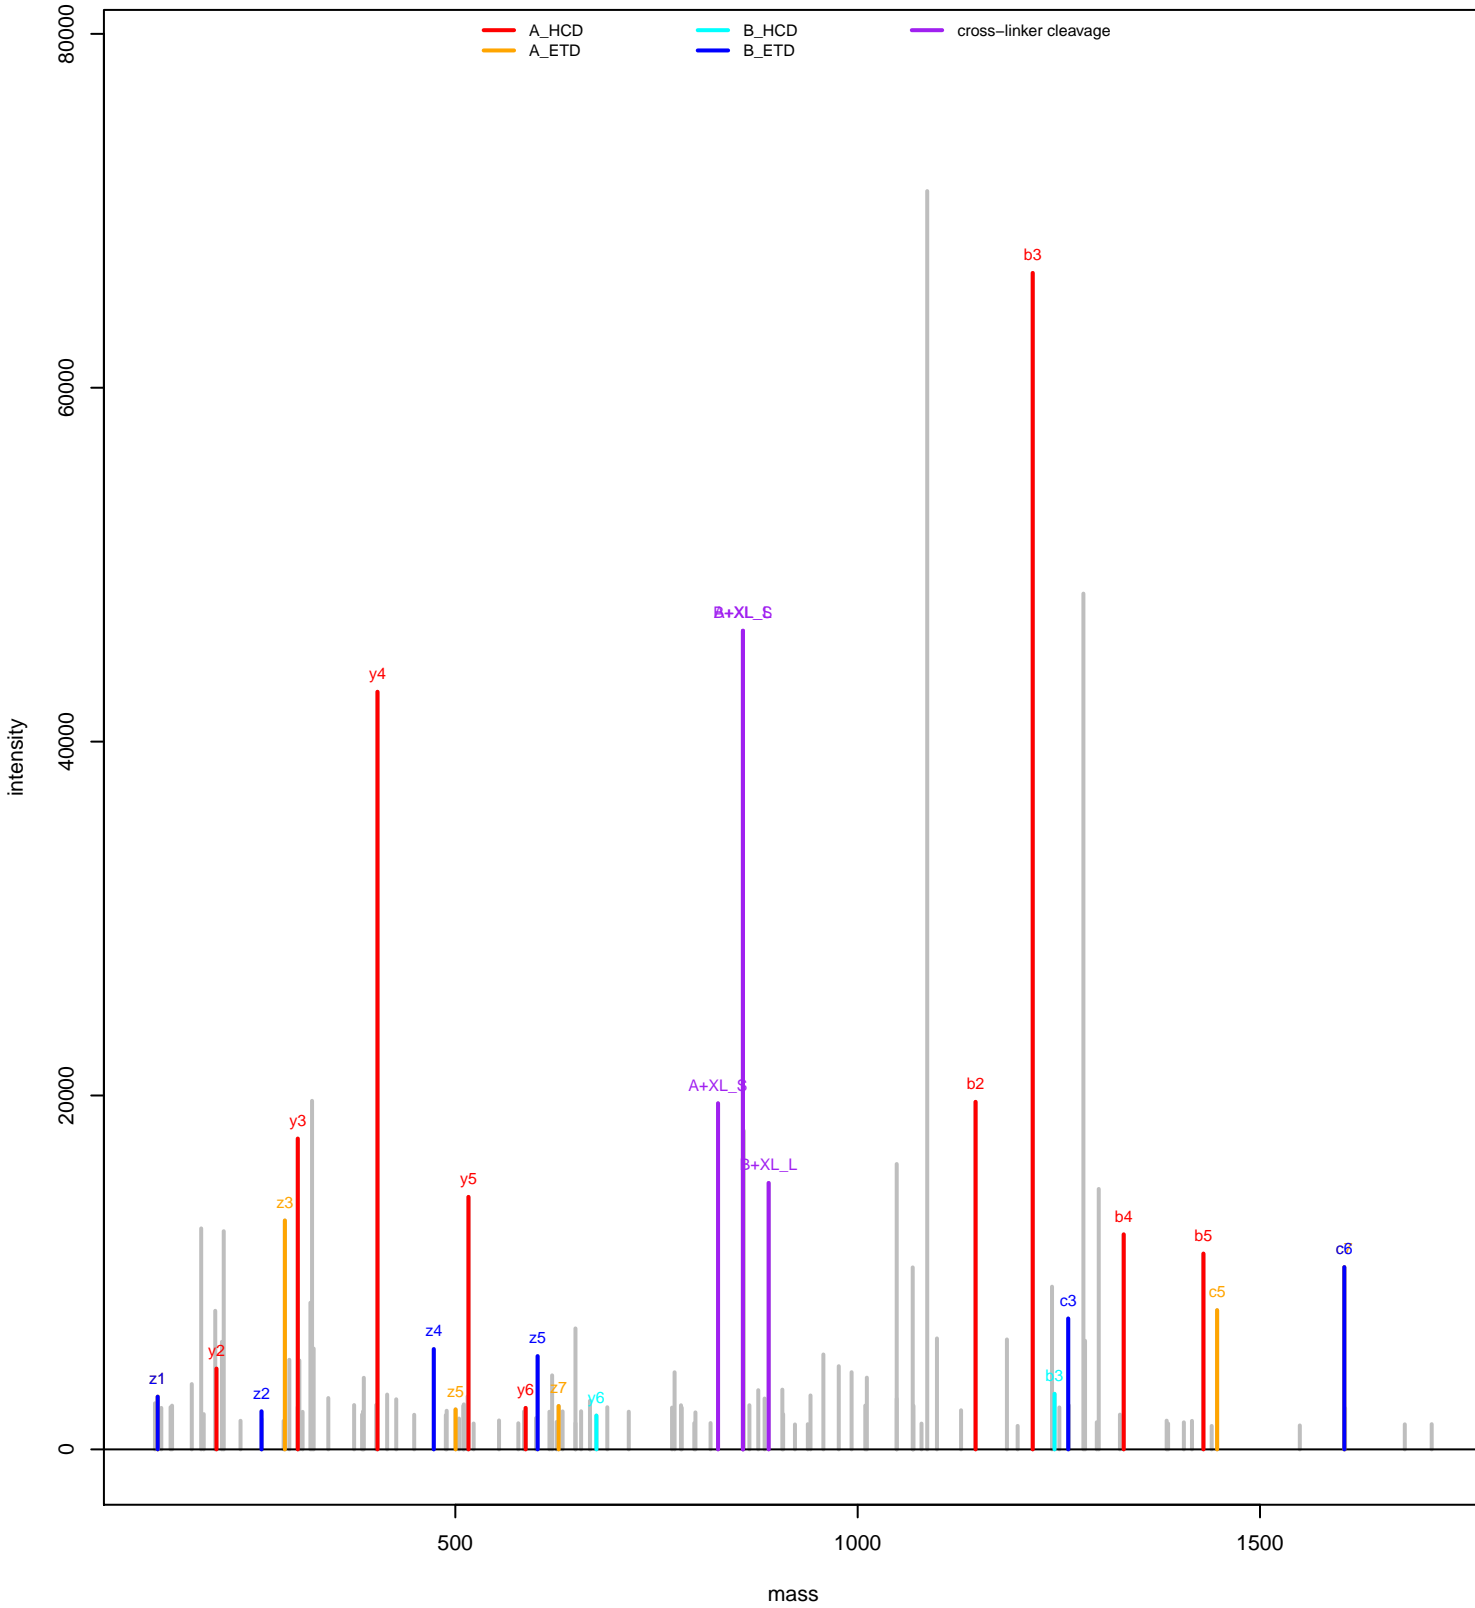

**KGAIVTGGK+XL\_S**

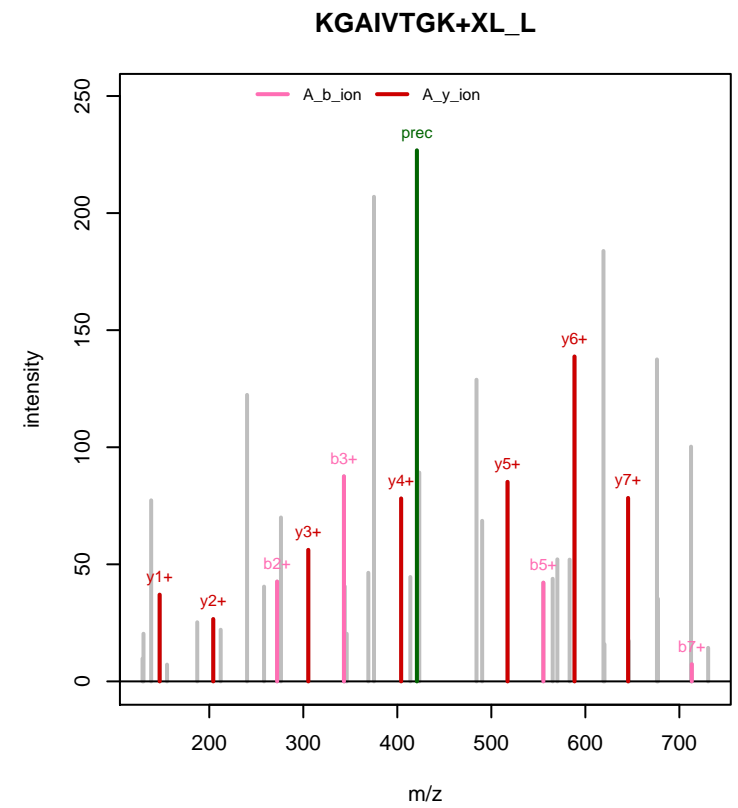

**KGEDVEK+XL\_S**

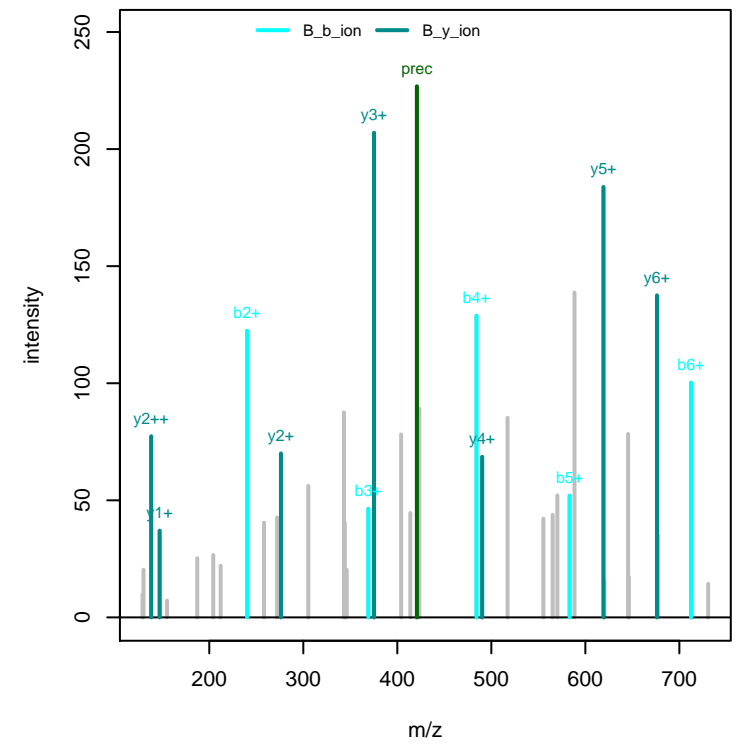

**KGAIVTGGK+XL\_L**

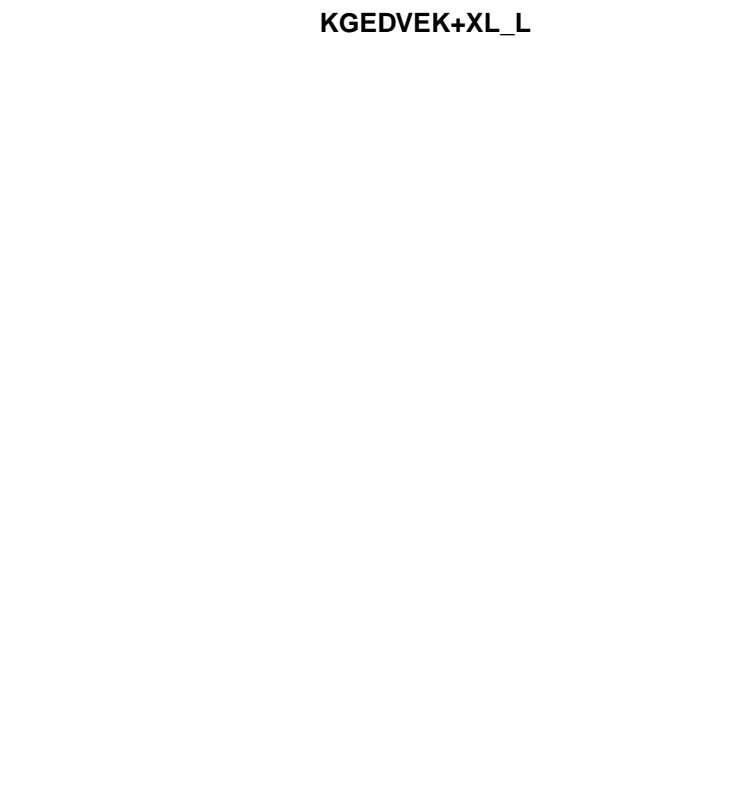

**KGEDVEK+XL\_L**

**GGQQSGGNKSGKS  
NDPQRASEAGKK**

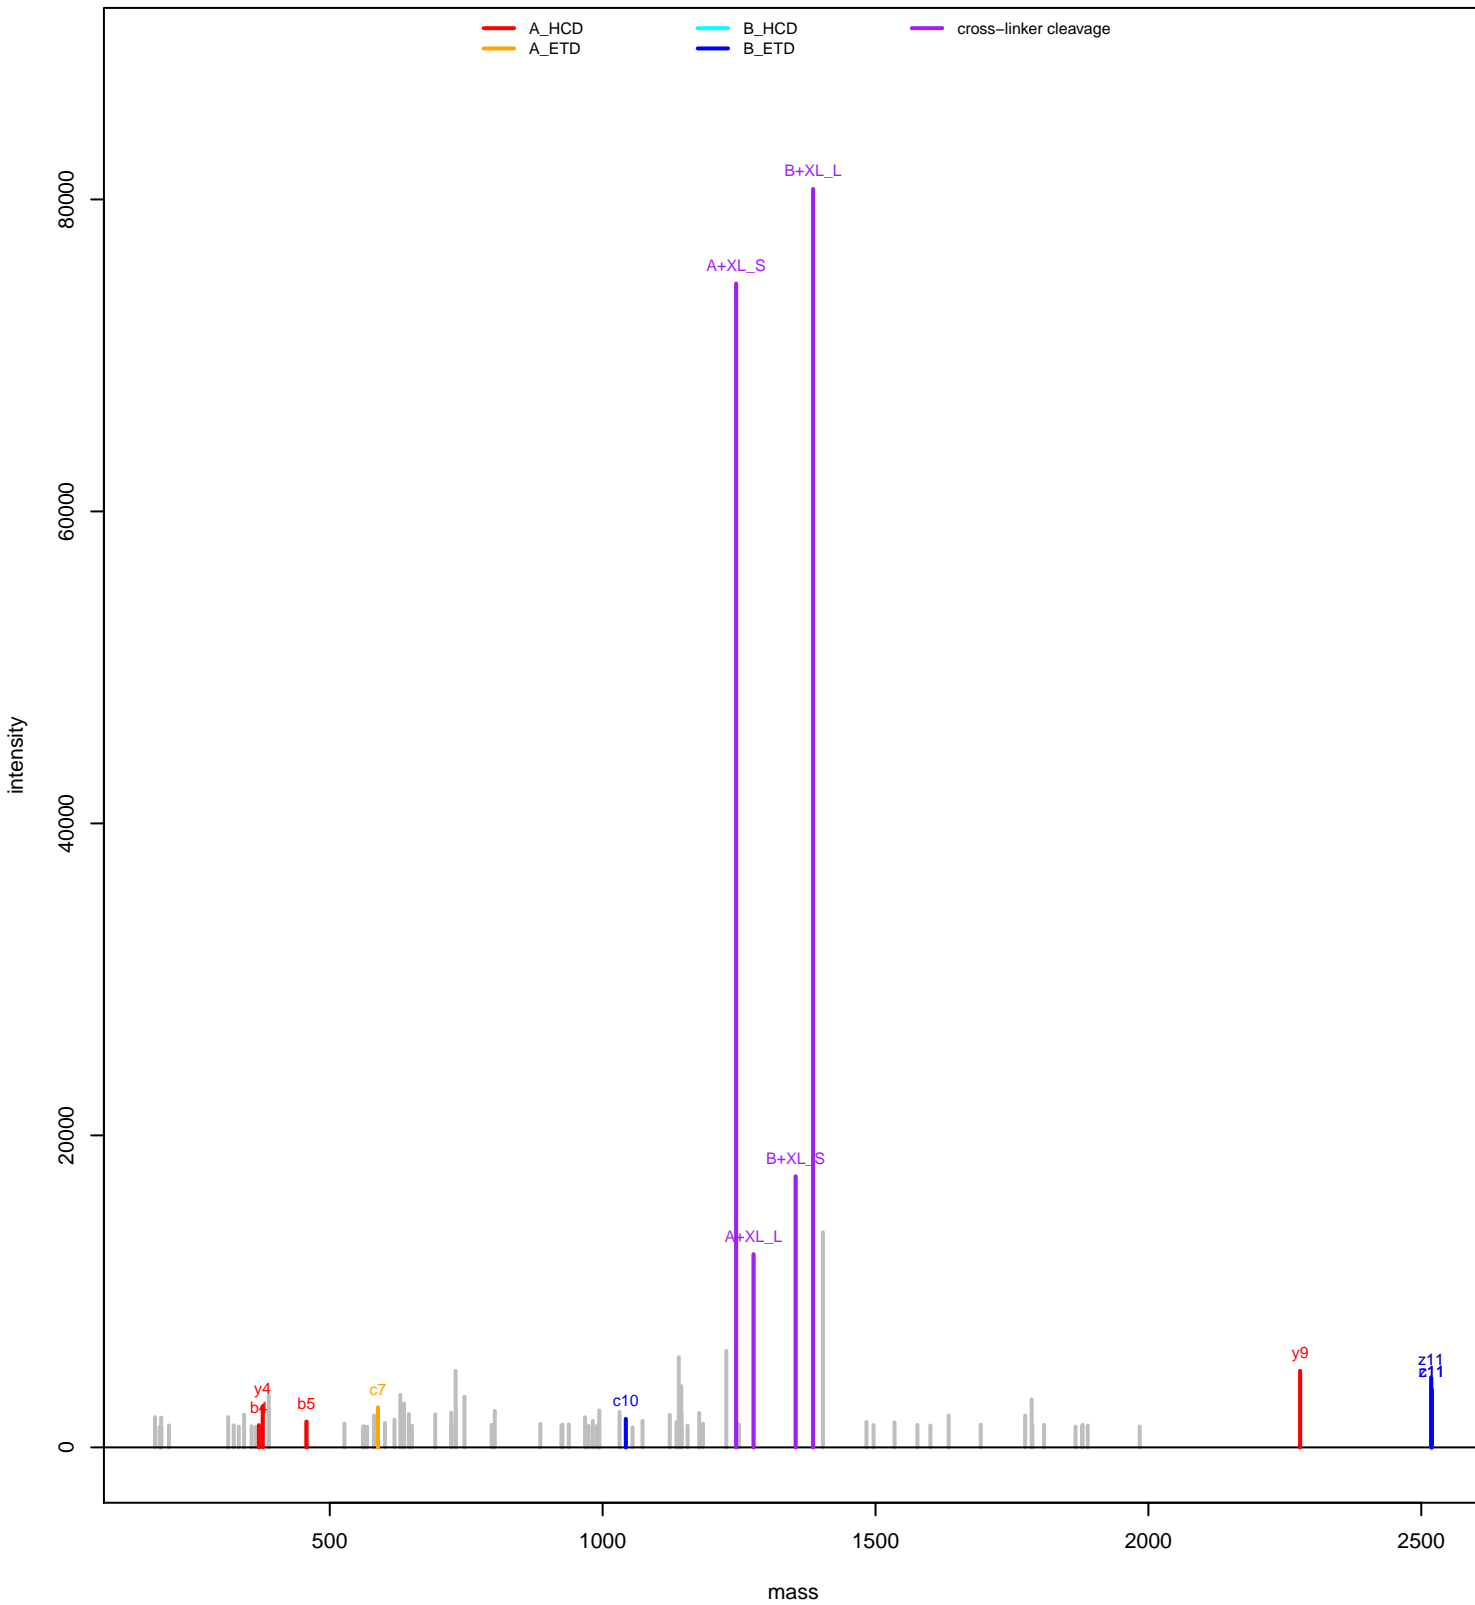

**GGQQSGGNKSGKS+XL\_S**

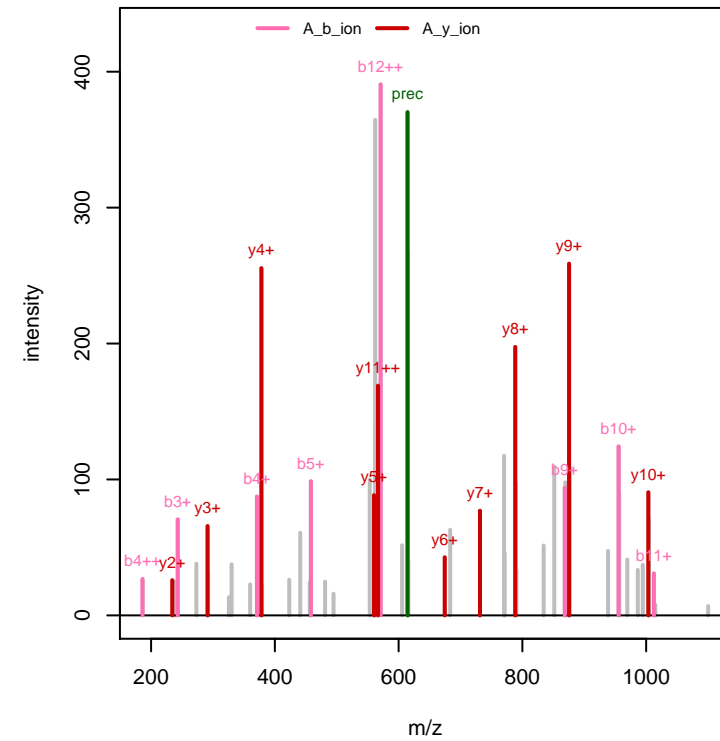

**GGQQSGGNKSGKS+XL\_L**

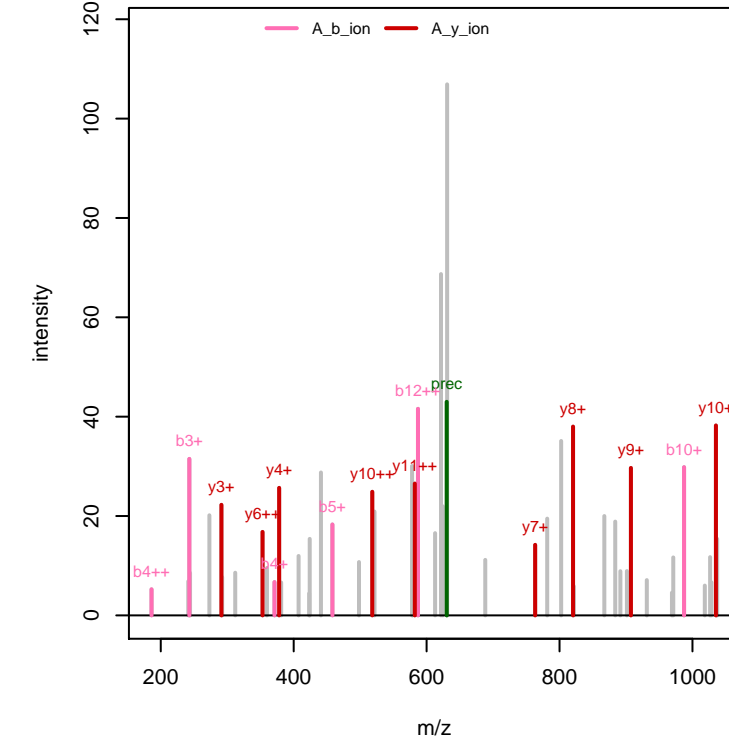

**NDPQRASEAGKK+XL\_S**

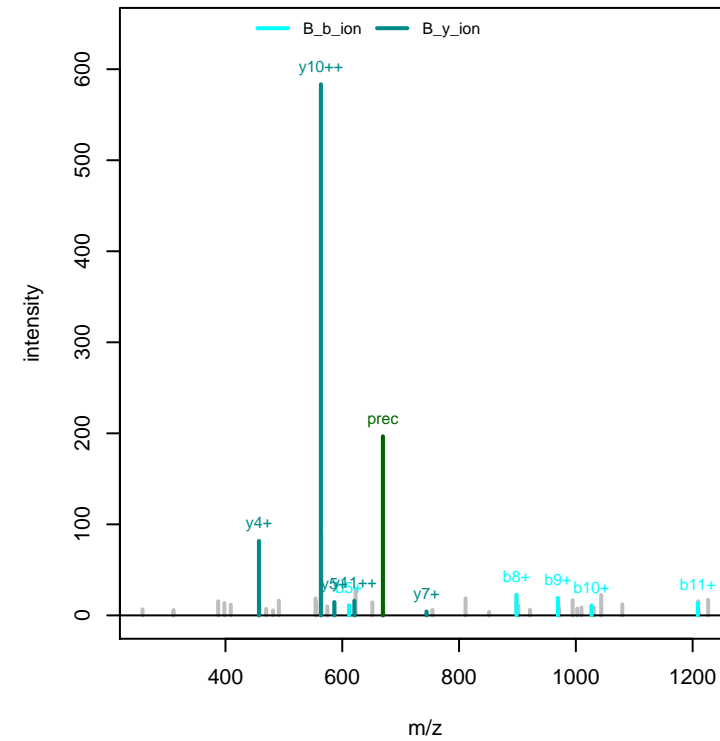

**NDPQRASEAGKK+XL\_L**

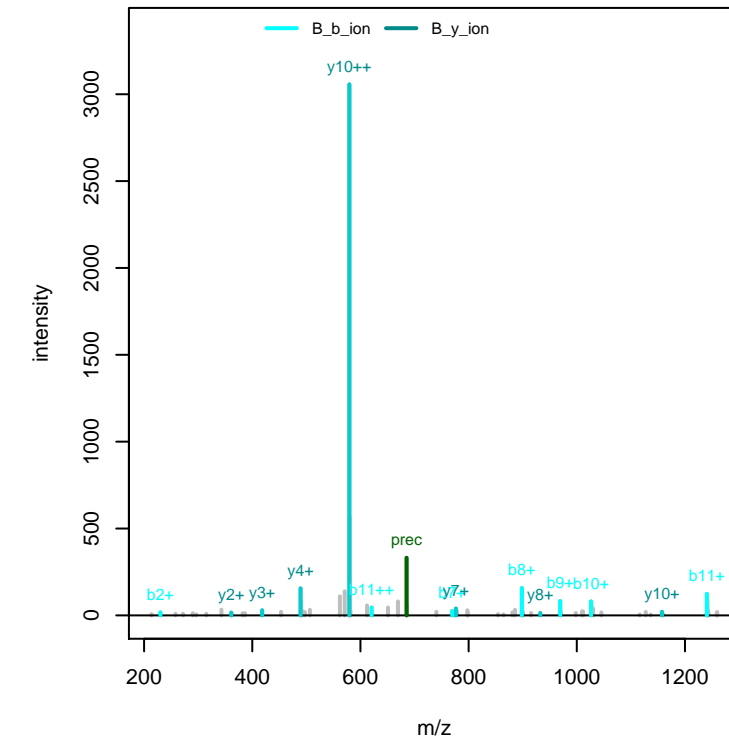

DAKEGSVK  
AVDGVKSVK

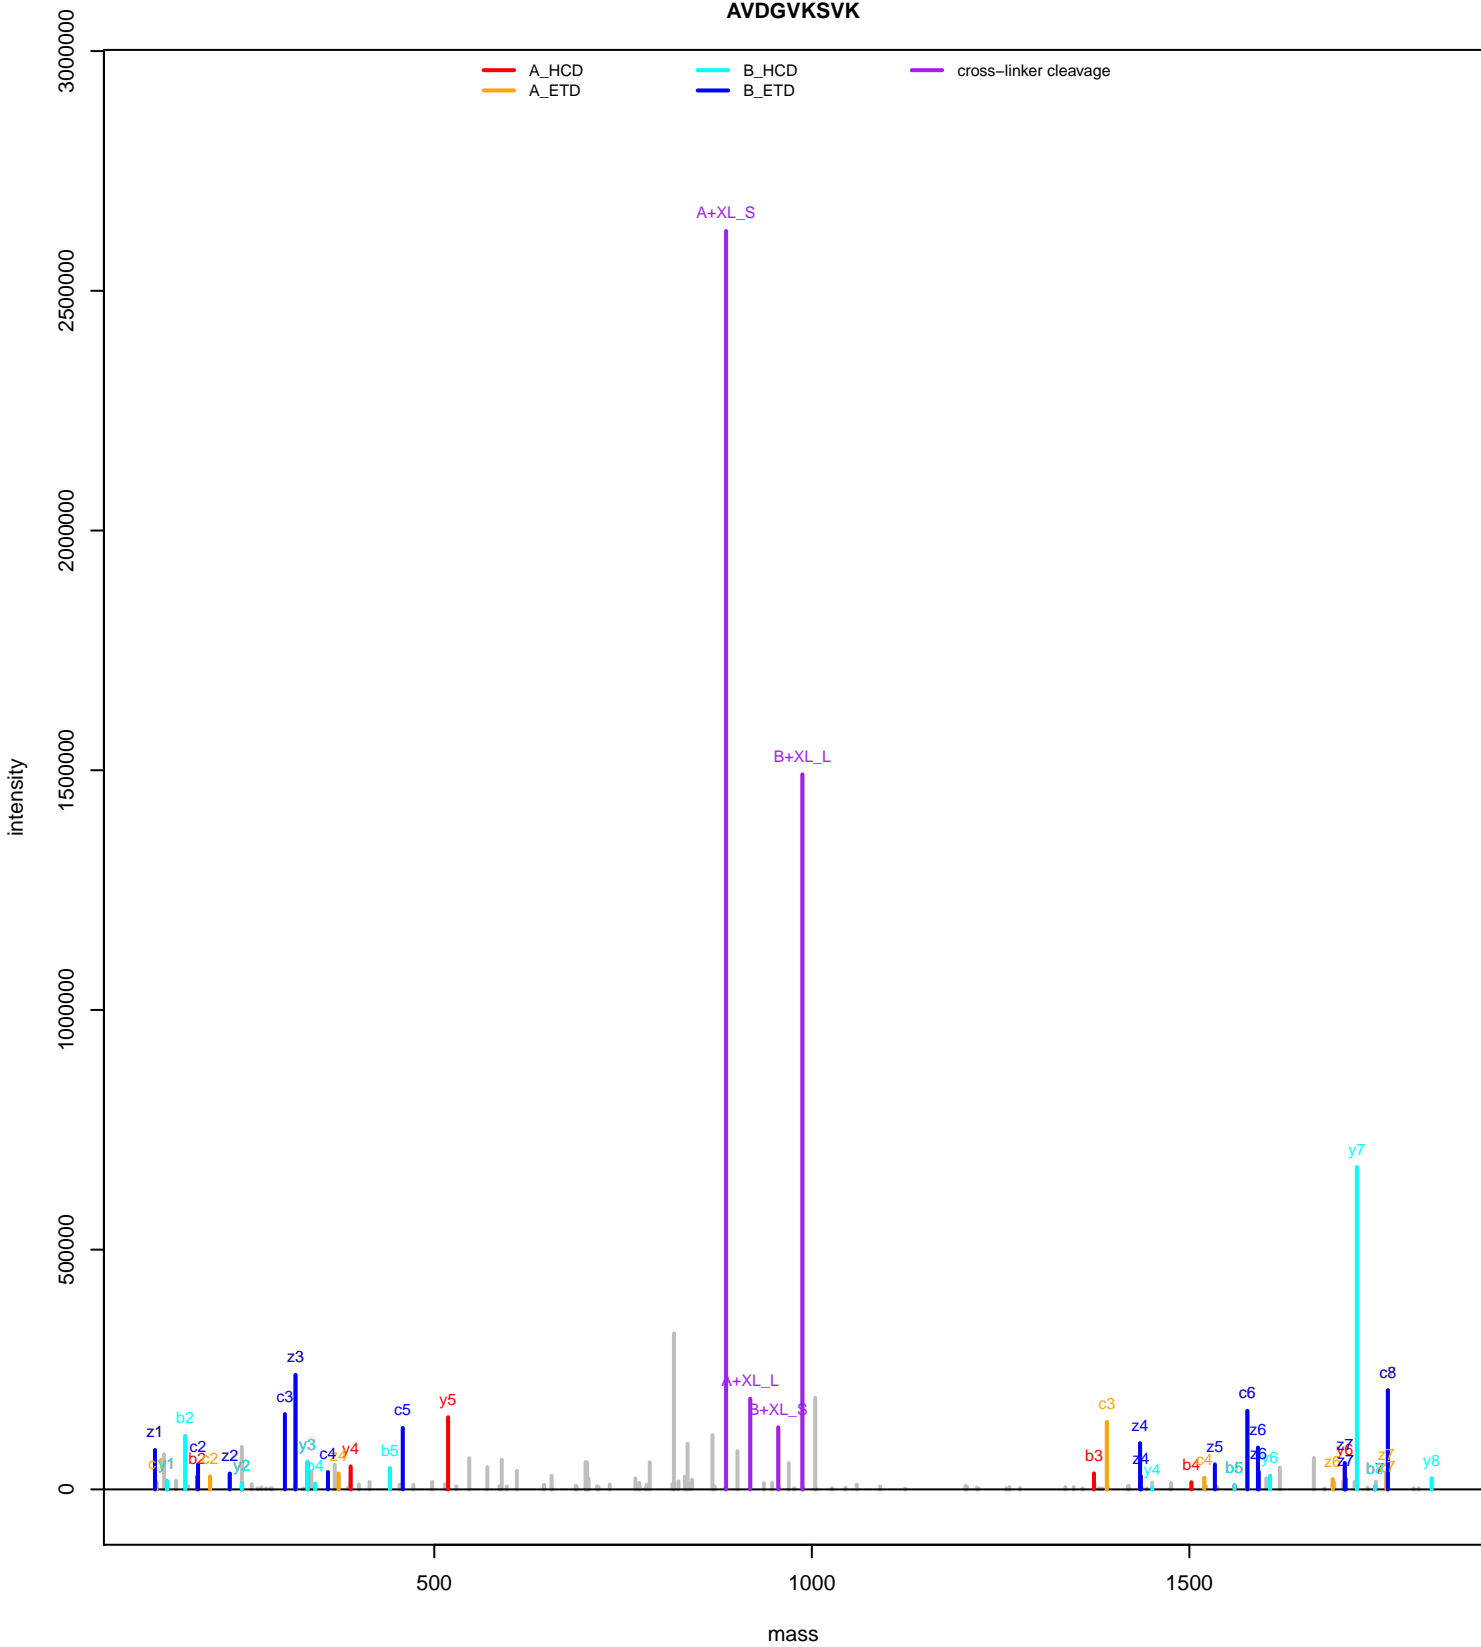

DAKEGSVK+XL\_S

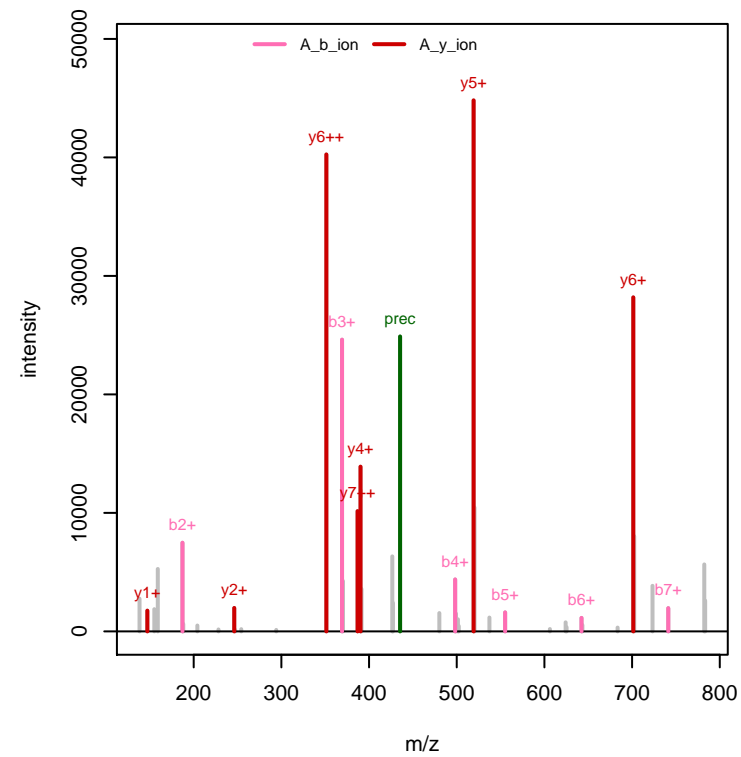

DAKEGSVK+XL\_L

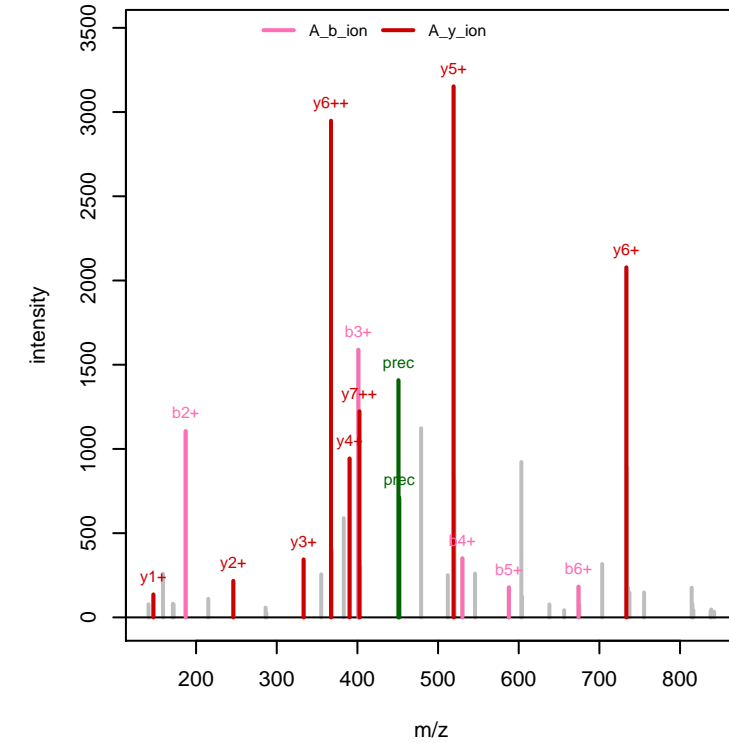

AVDGVKSVK+XL\_S

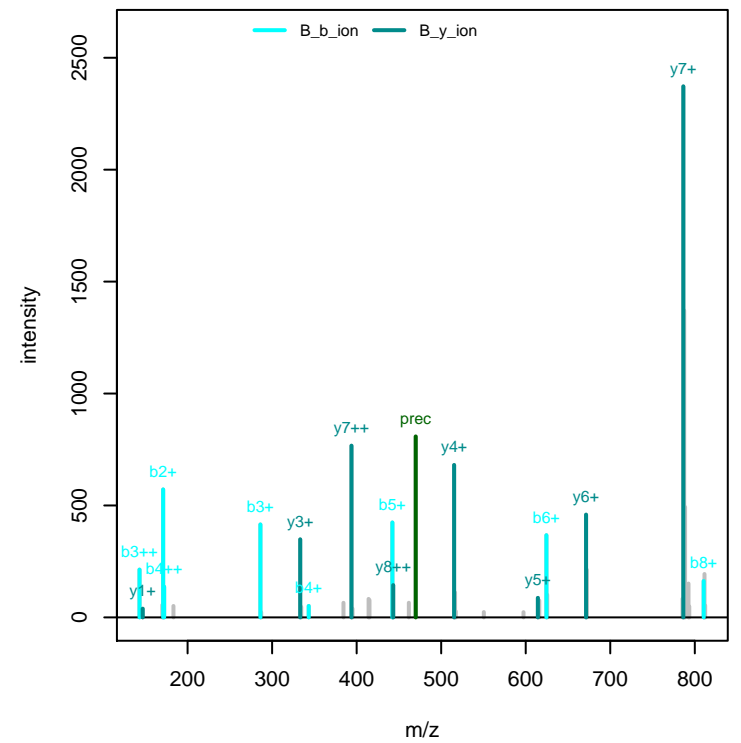

AVDGVKSVK+XL\_L

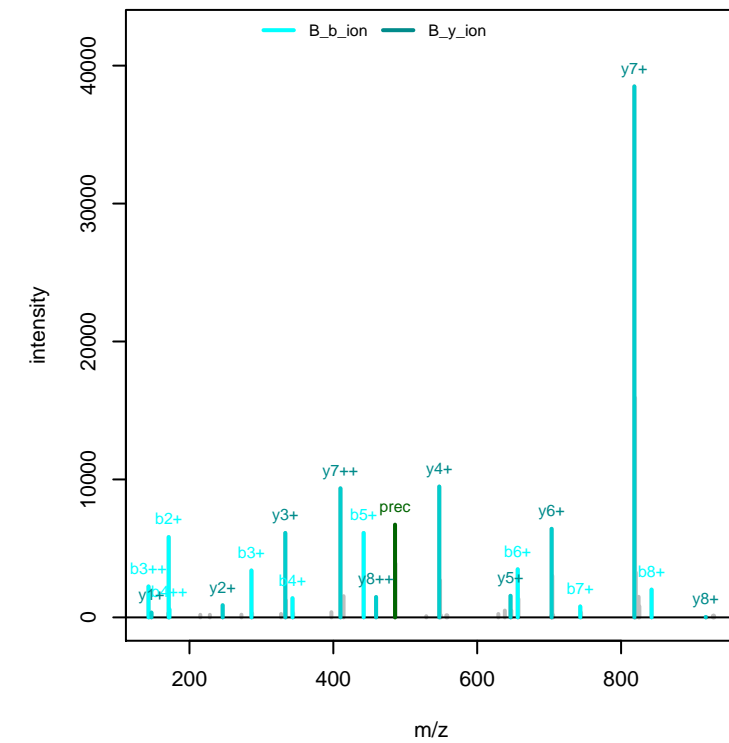



AAAVANQGKAK  
AETAEKYGDEQVK

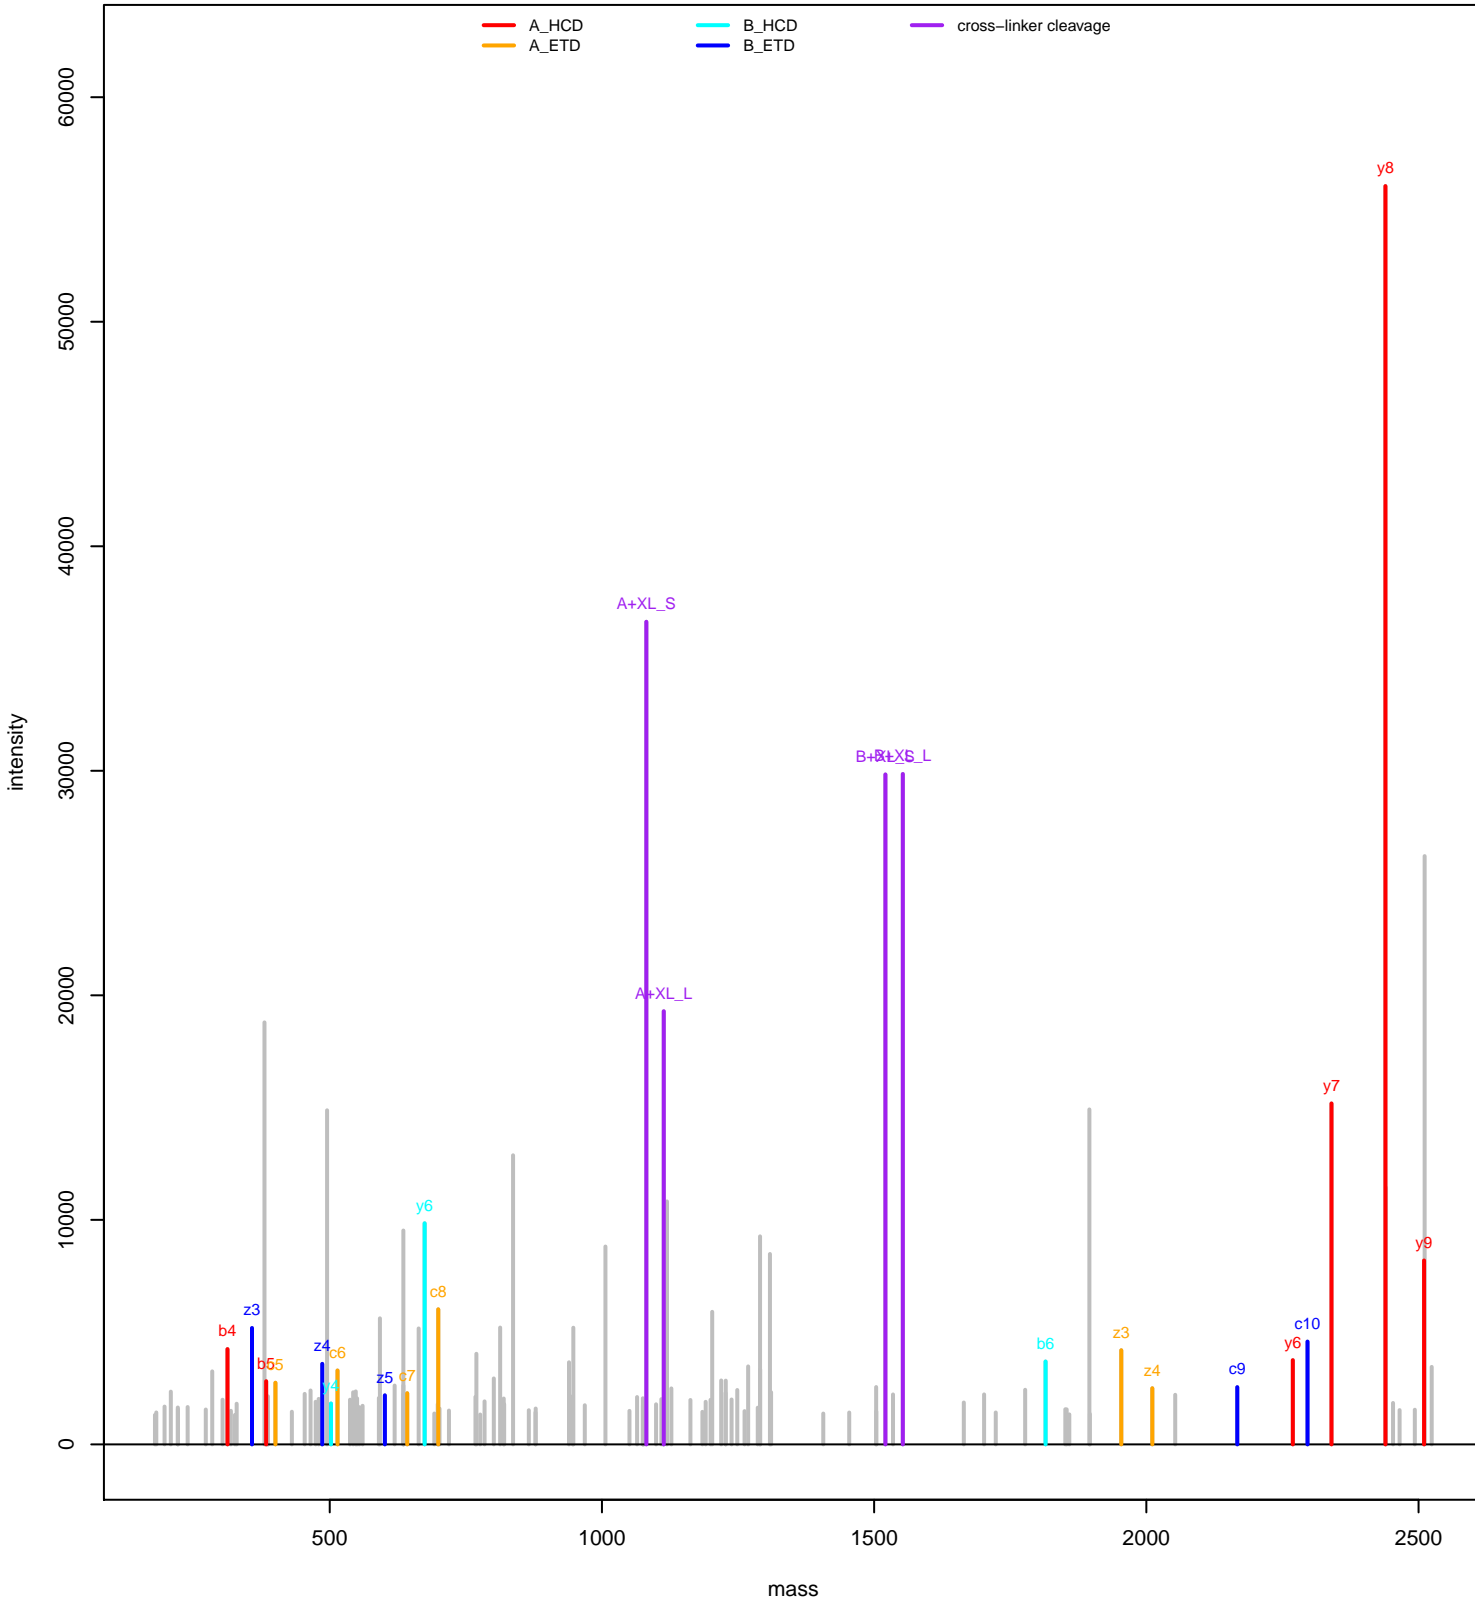

AAIVANQGKAK+XL\_S

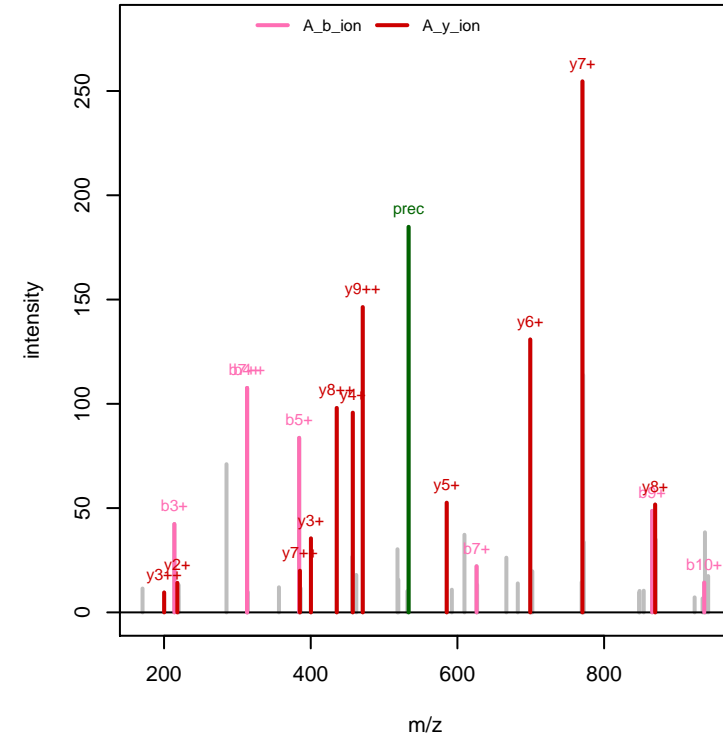

AAIVANQGKAK+XL\_L

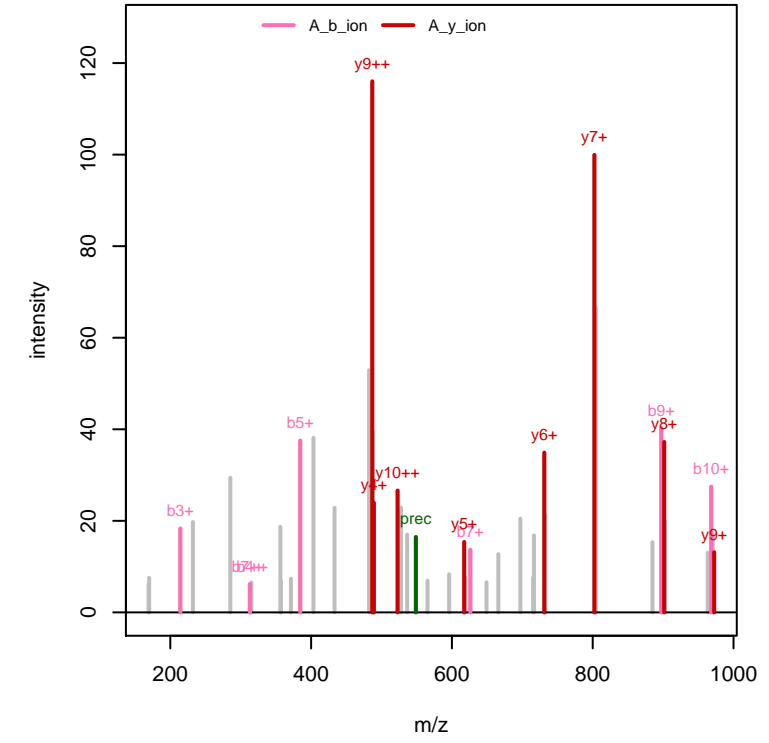

AETAEKYGDEQVK+XL\_S

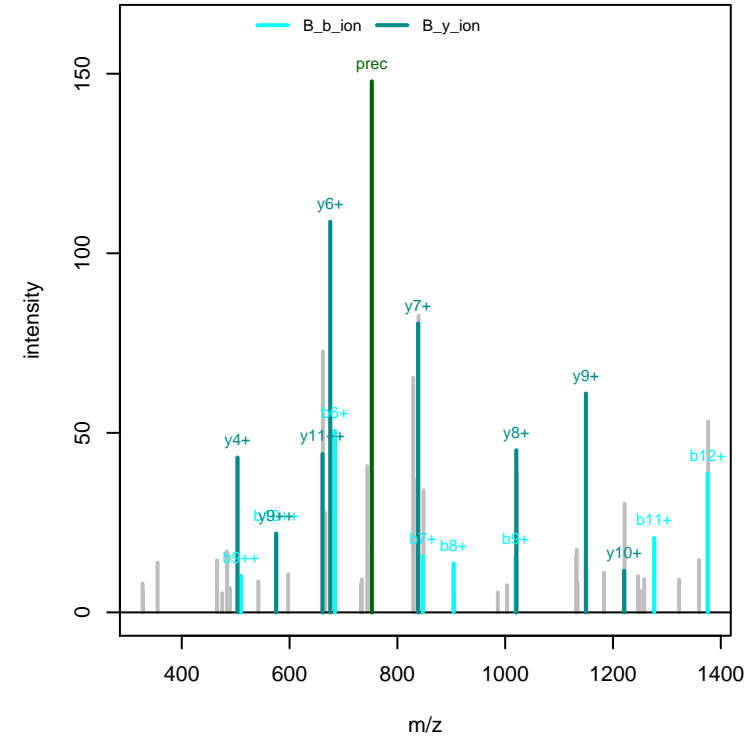

AETAEKYGDEQVK+XL\_L

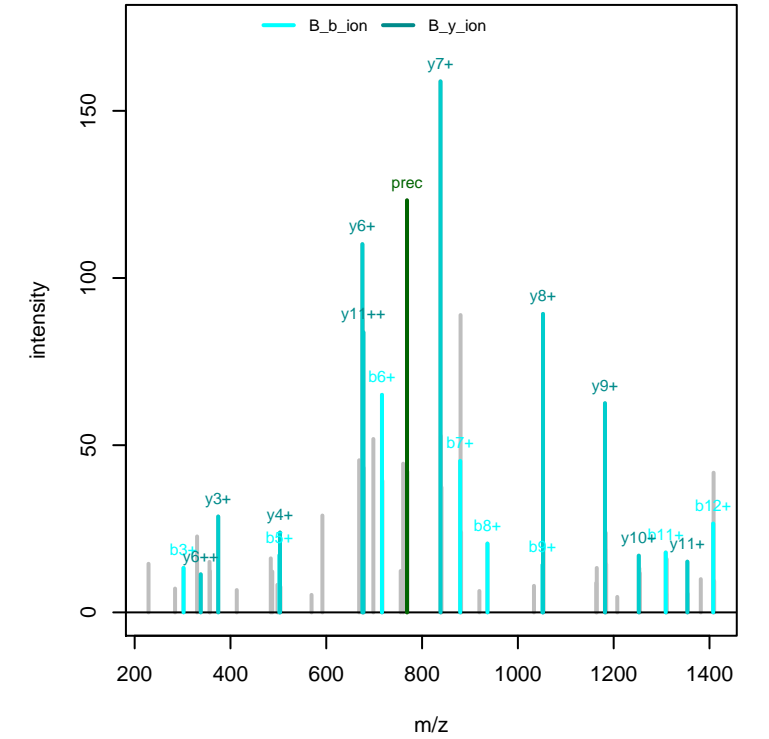

AADSAKK  
ADAKPEADAK

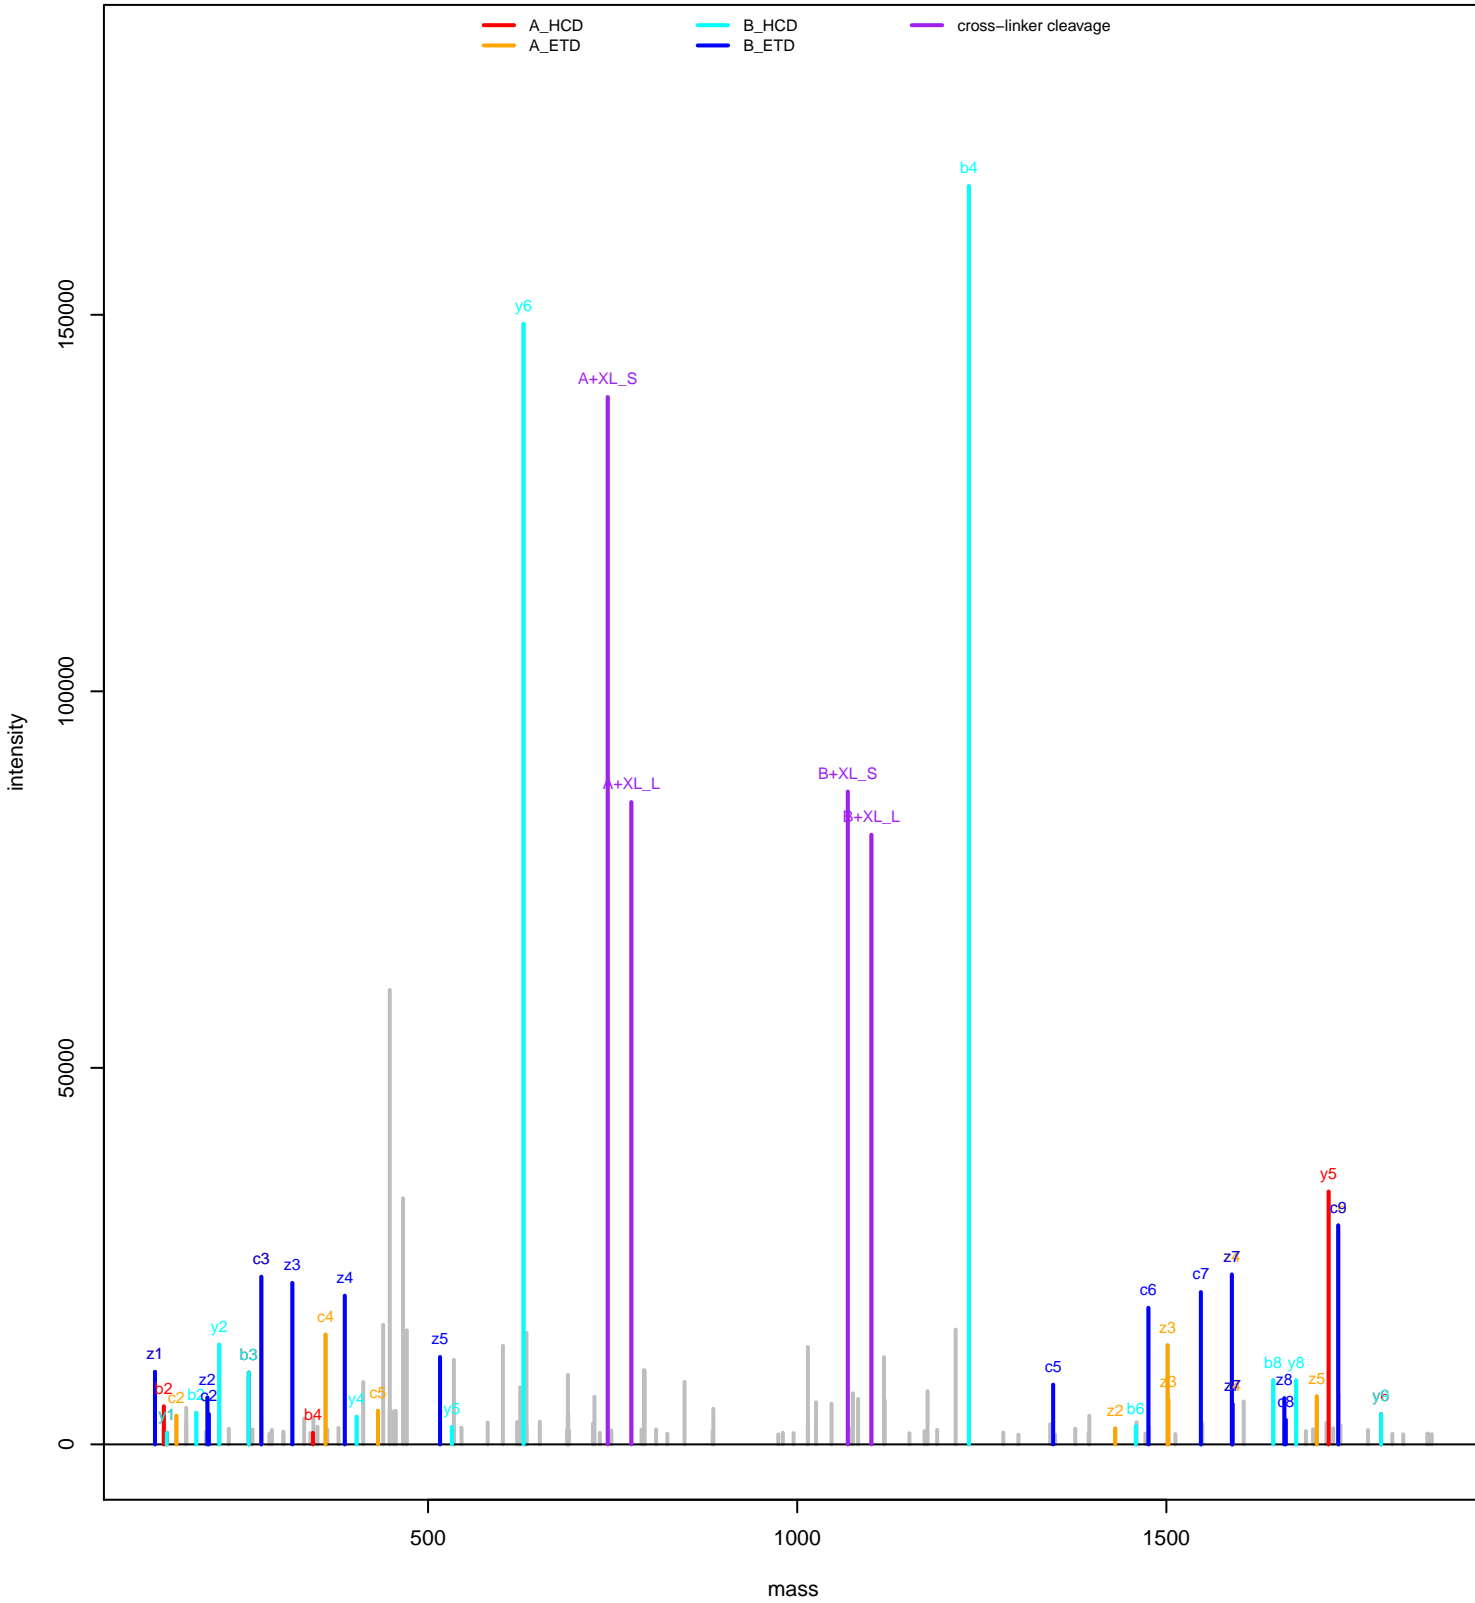

AADSAKK+XL\_S

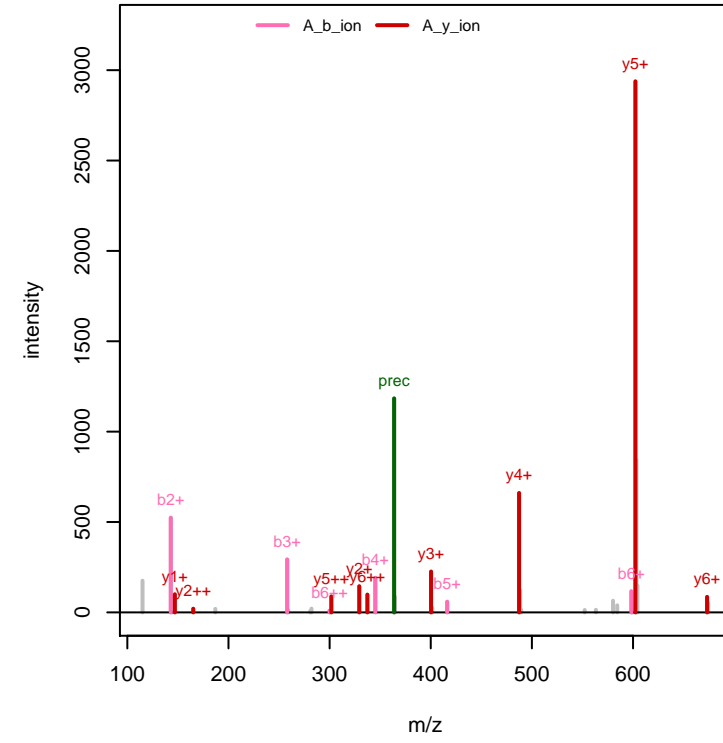

AADSAKK+XL\_L

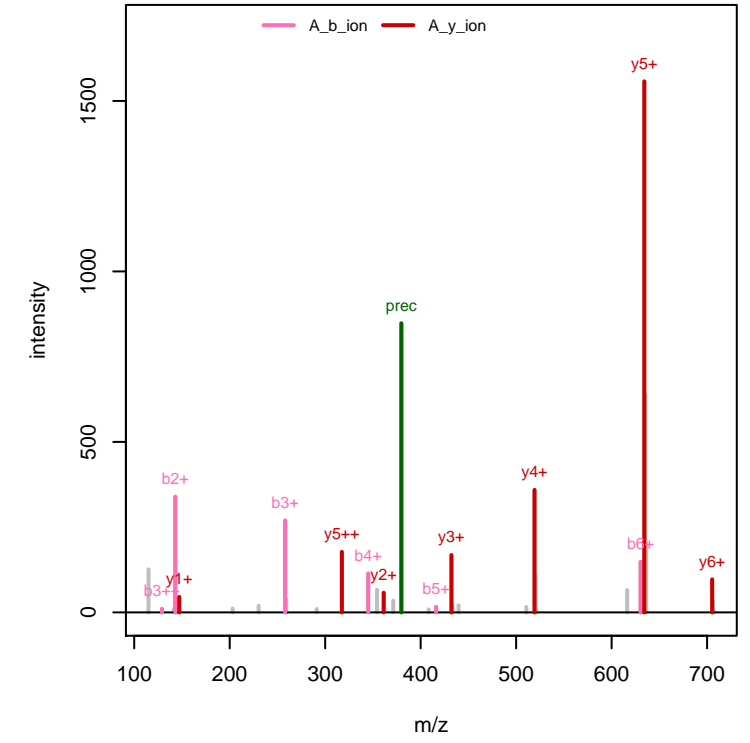

ADAKPEADAK+XL\_S

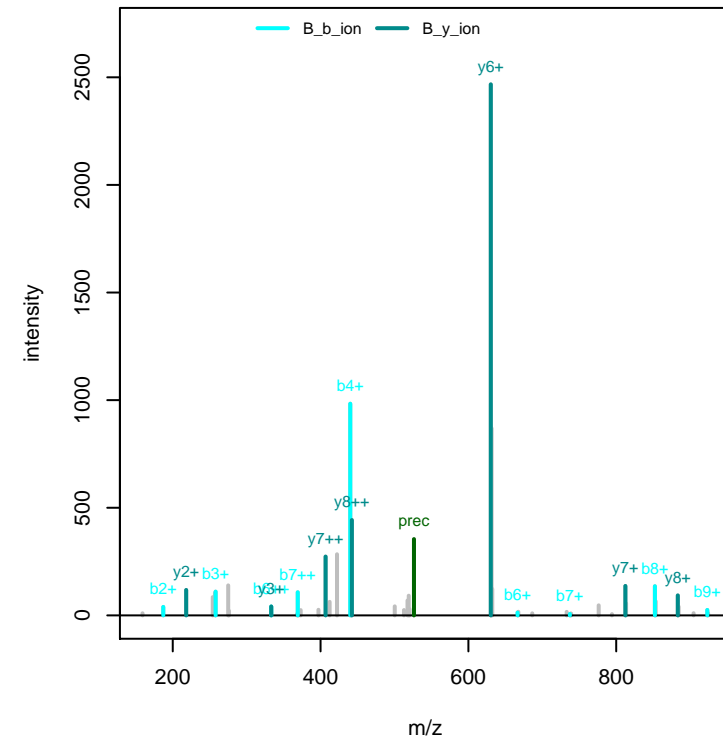

ADAKPEADAK+XL\_L

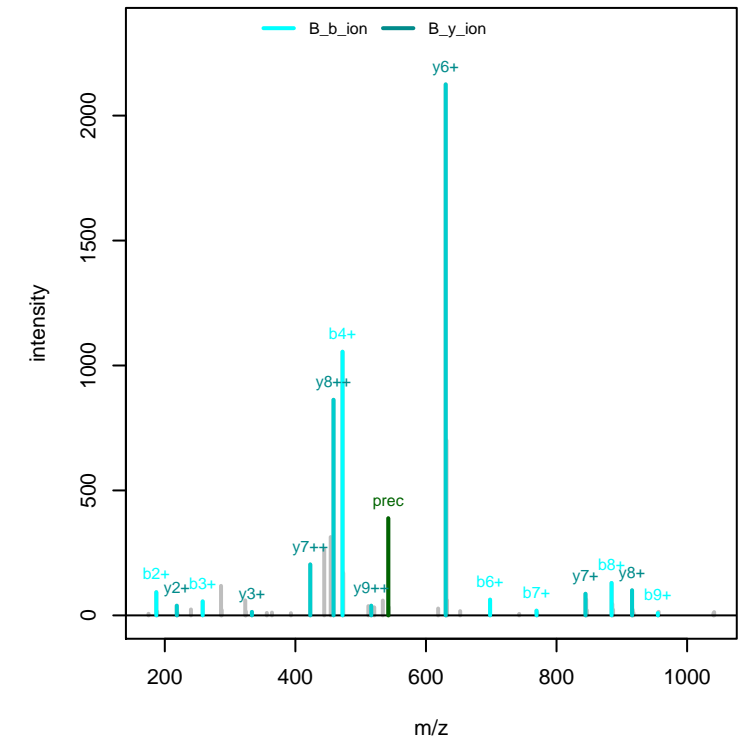



SSHGKSDN  
NDPQRASEAGKK

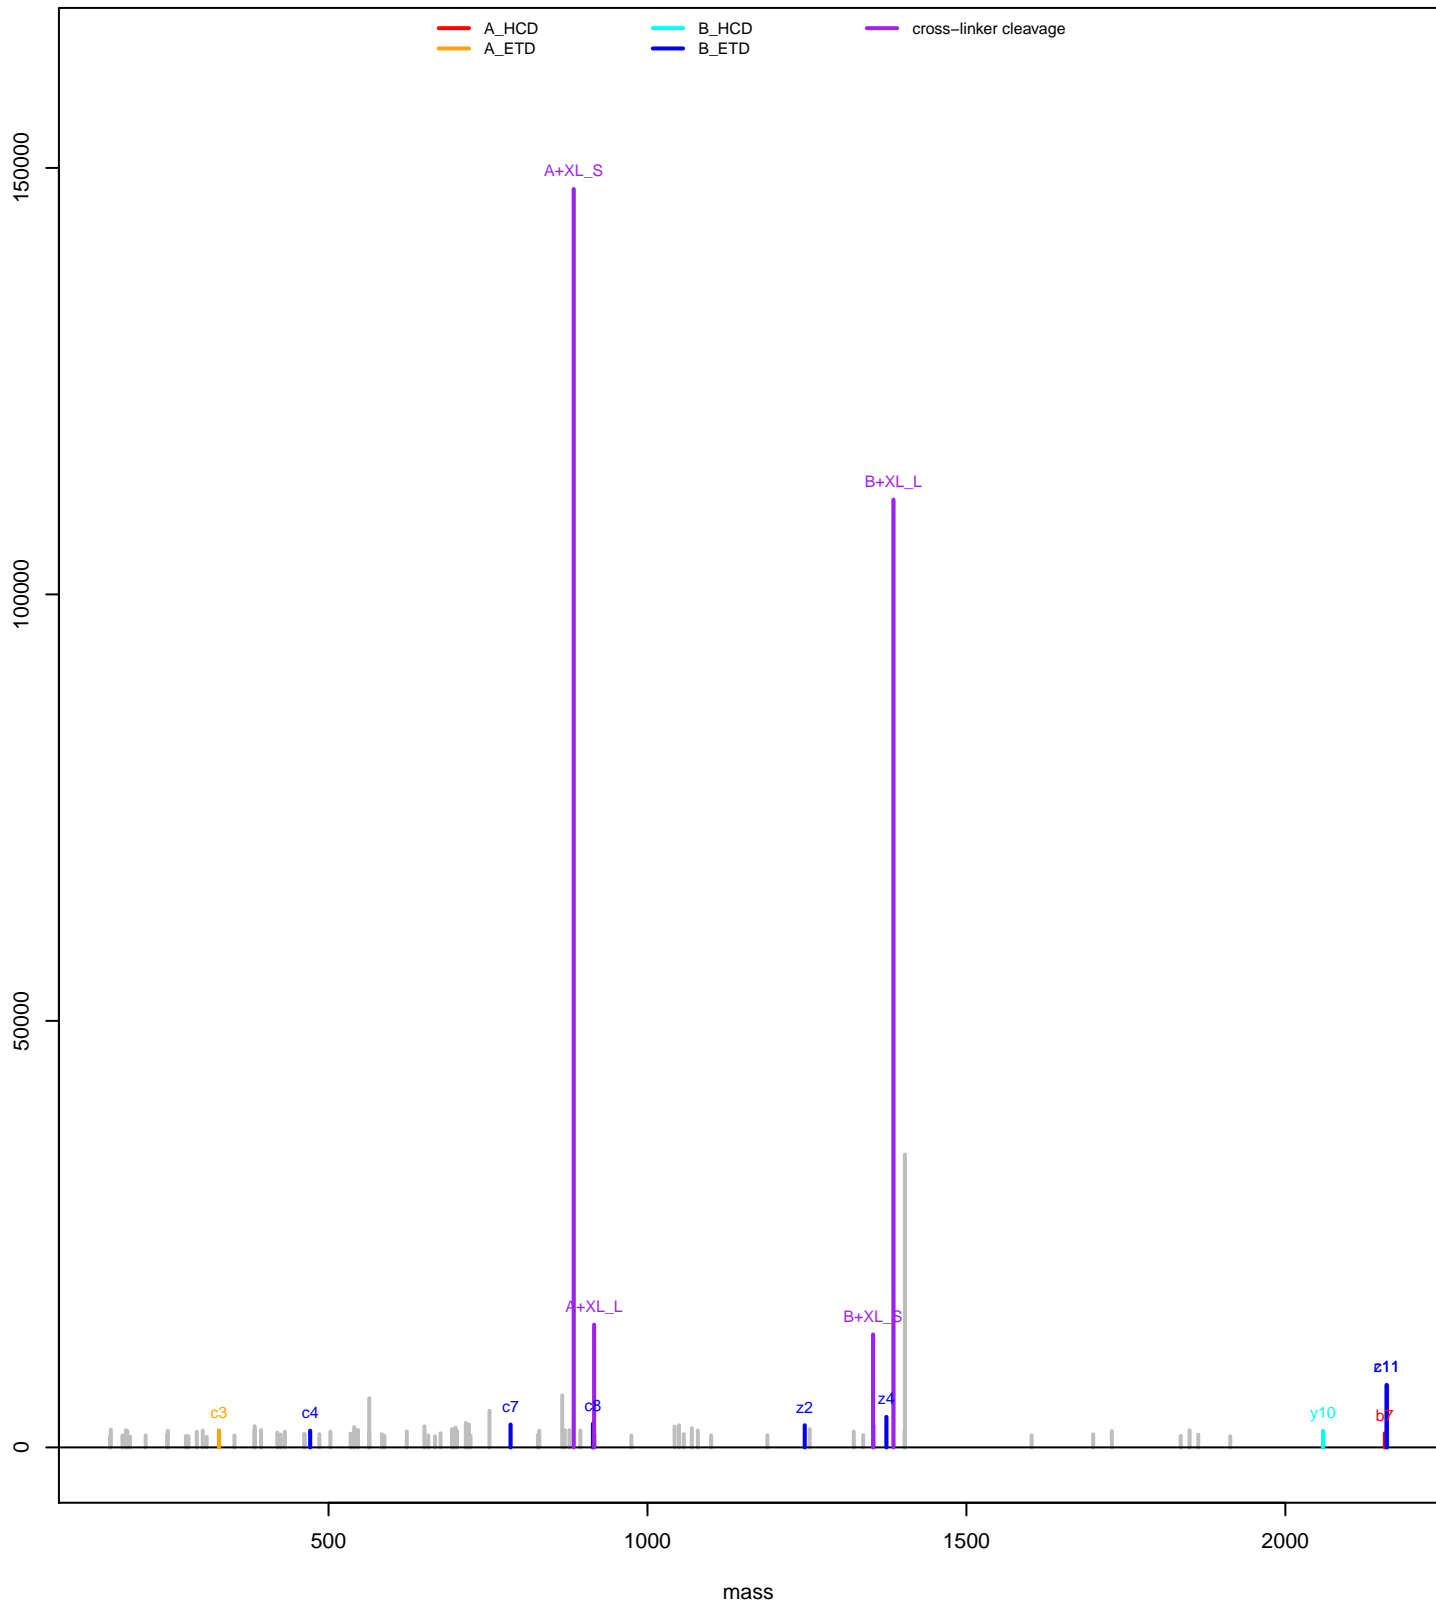

SSHGKSDN+XL\_S

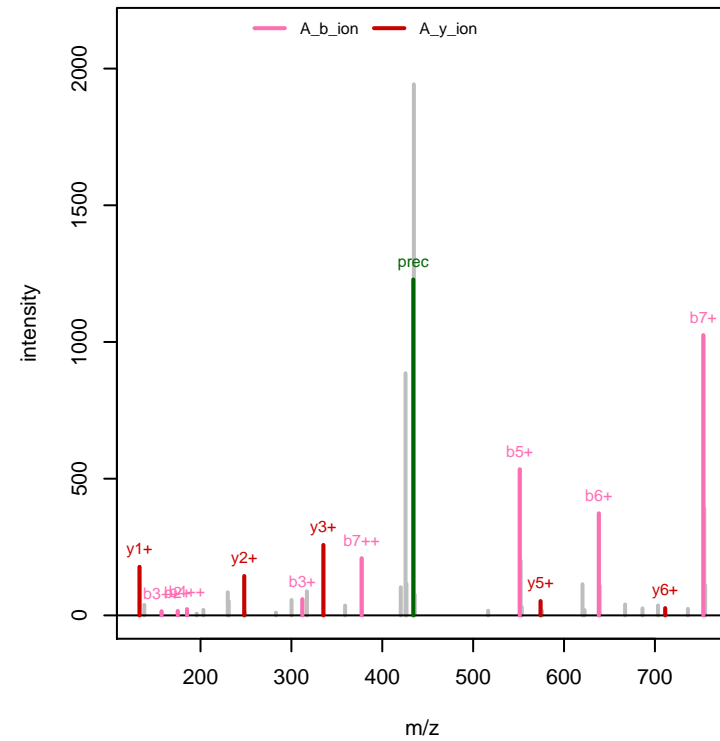

SSHGKSDN+XL\_L

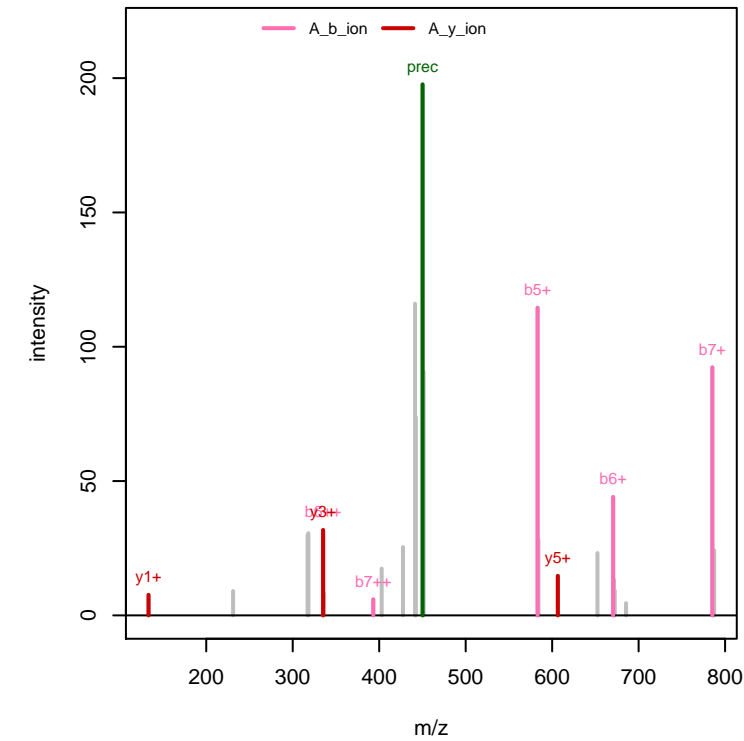

NDPQRASEAGKK+XL\_S

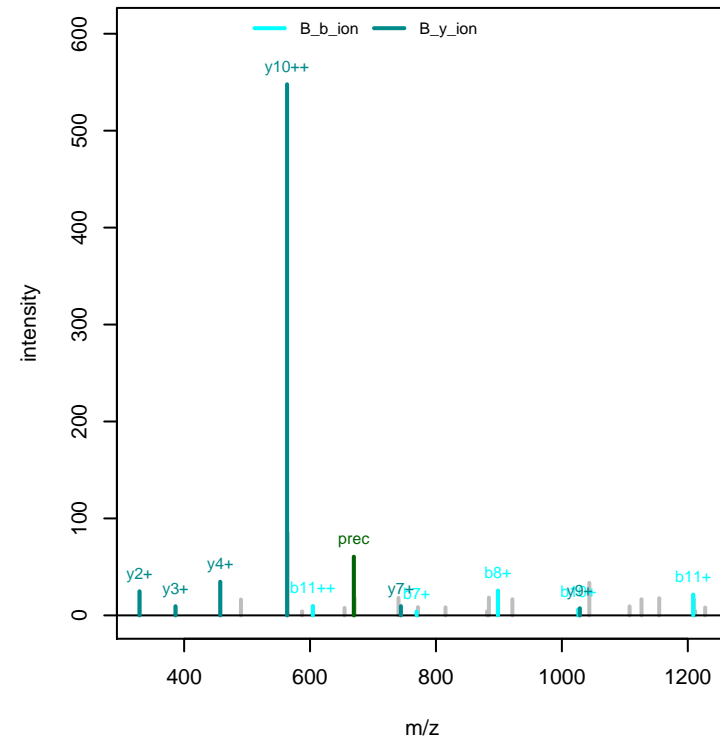

NDPQRASEAGKK+XL\_L

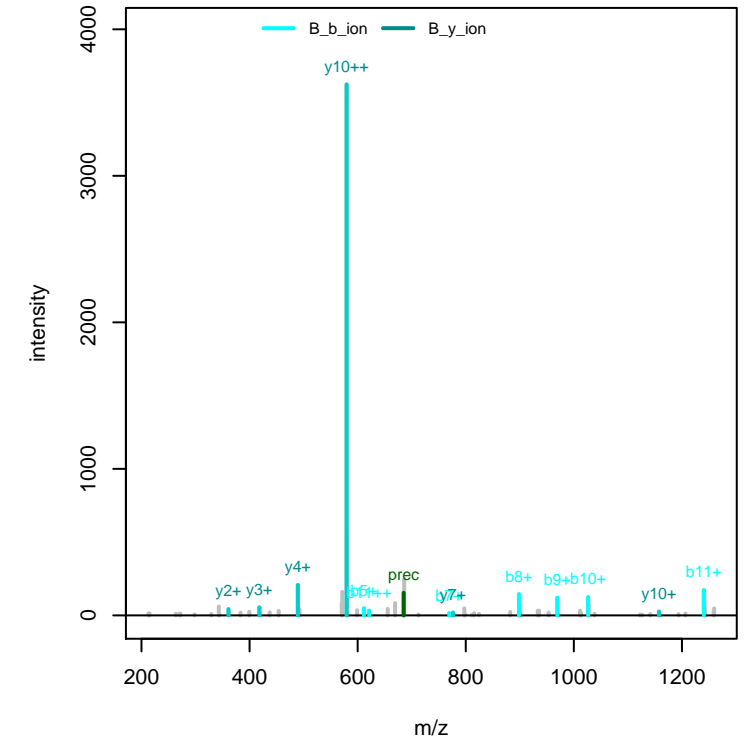

AASGGKK  
NLVKESQK

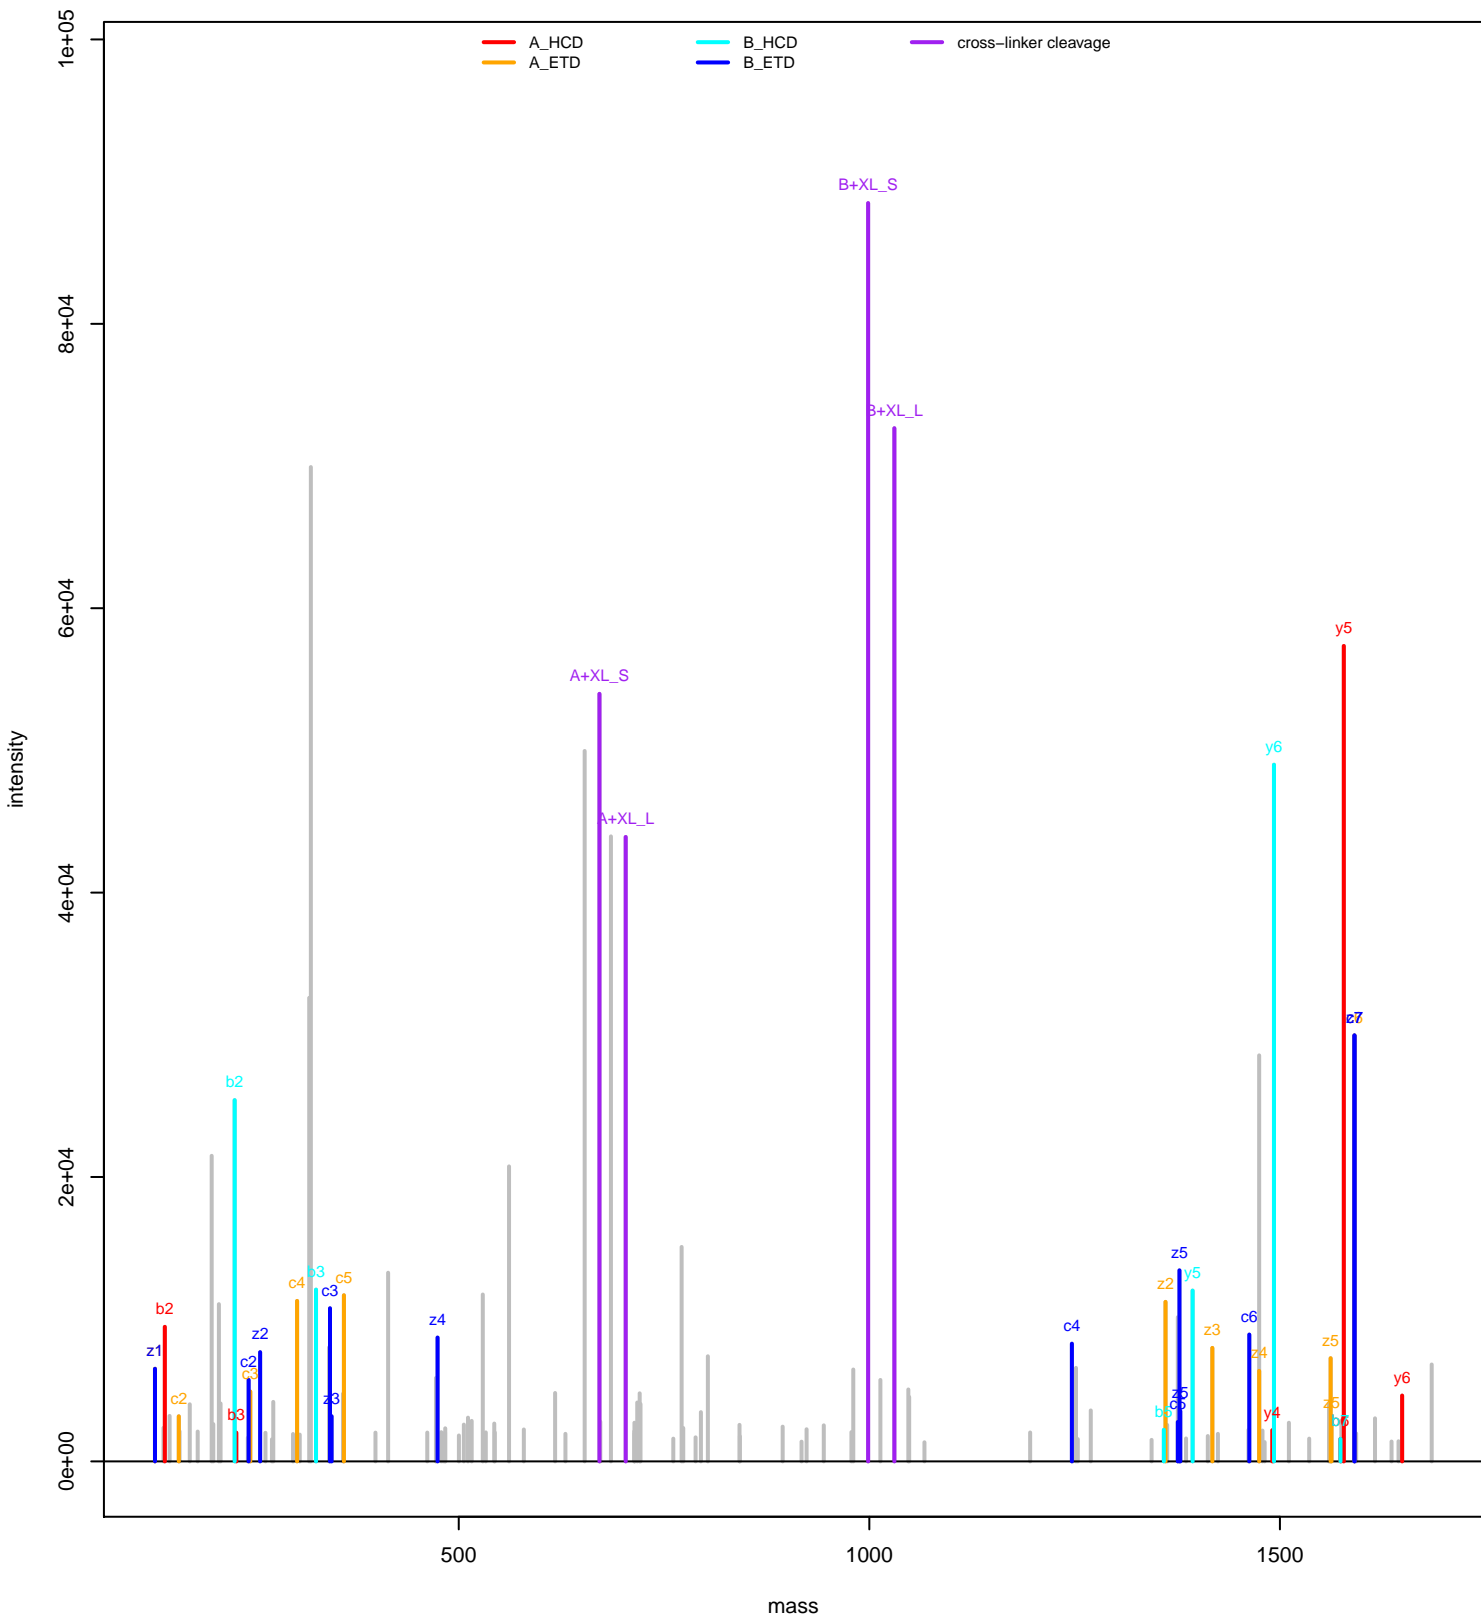

AASGGKK+XL\_S

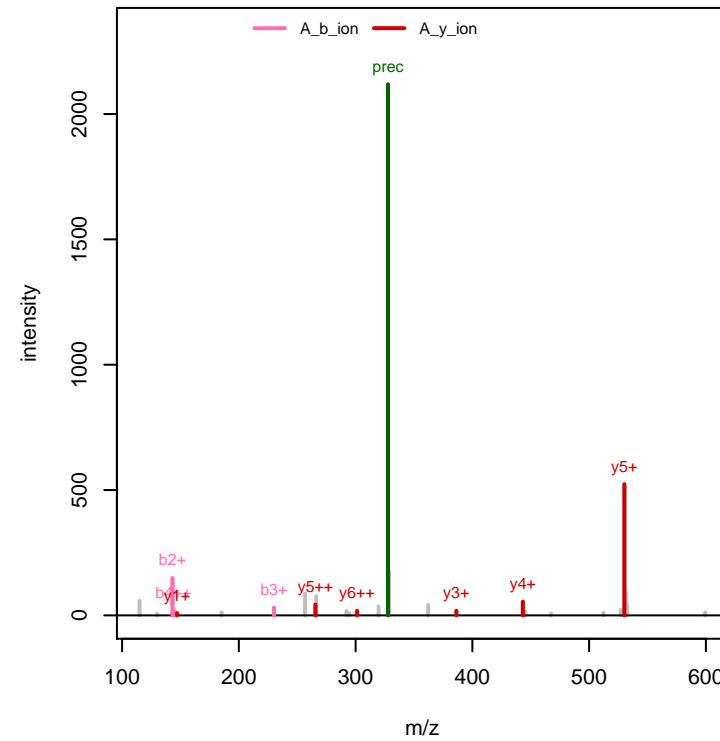

AASGGKK+XL\_L

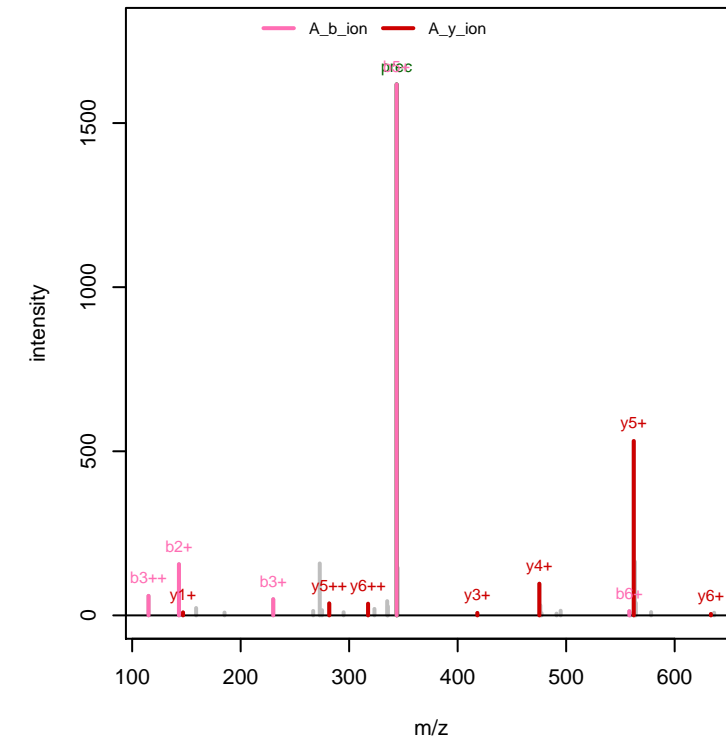

NLVKESQK+XL\_S

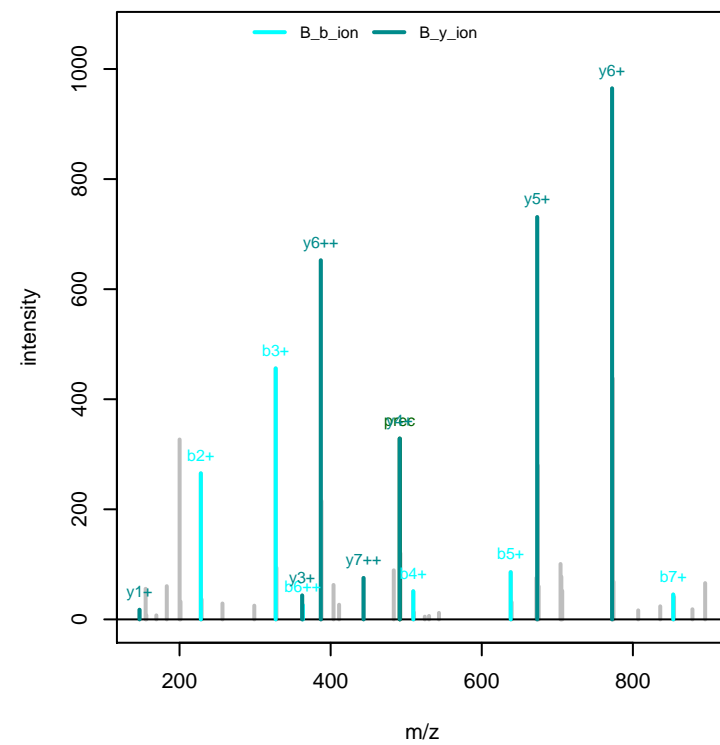

NLVKESQK+XL\_L

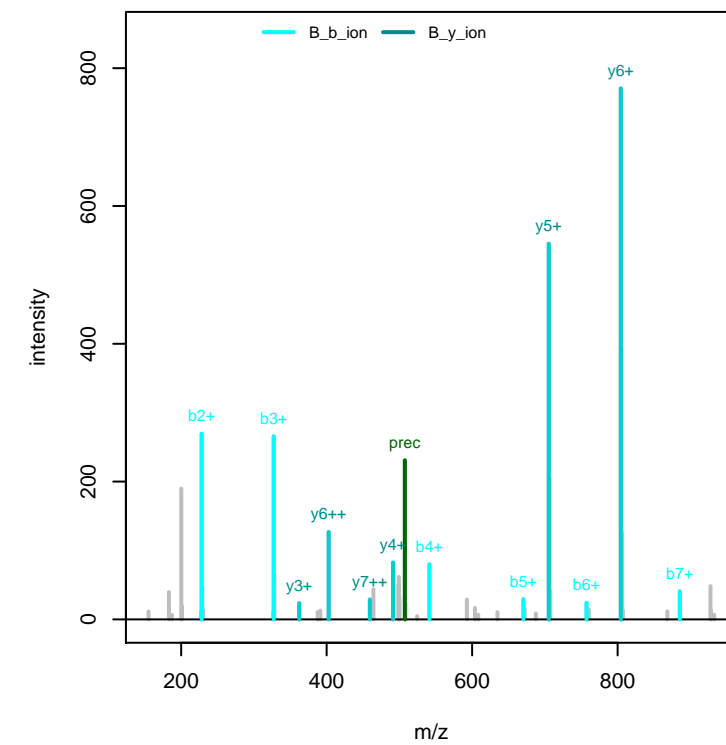

SGSELGKQAK  
KDDQEETVRK

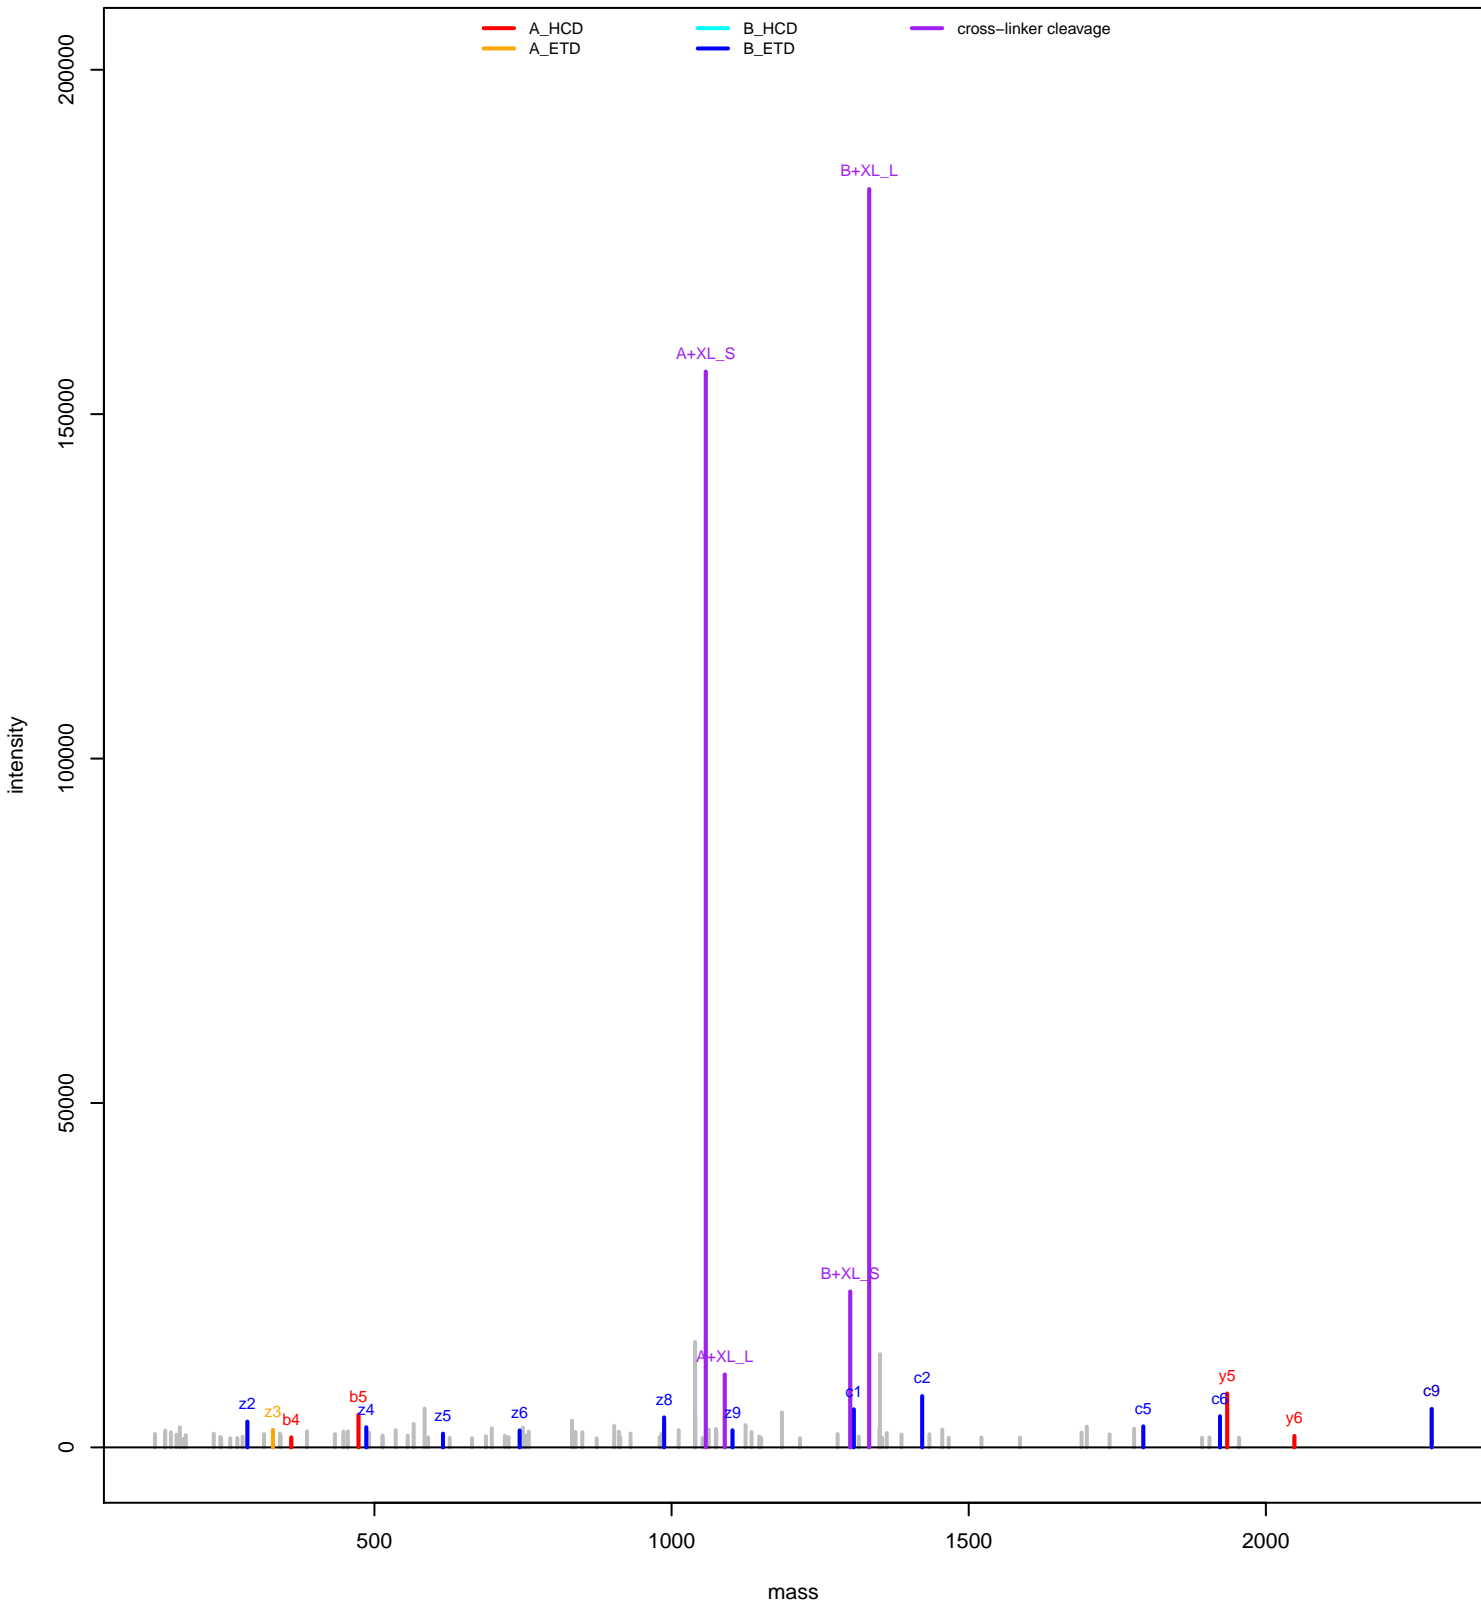

SGSELGKQAK+XL\_S

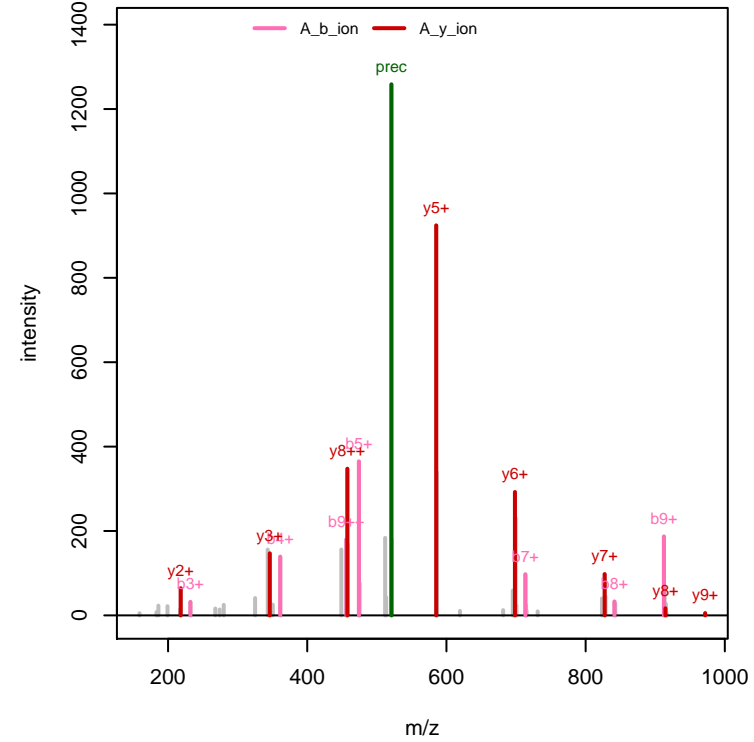

SGSELGKQAK+XL\_L

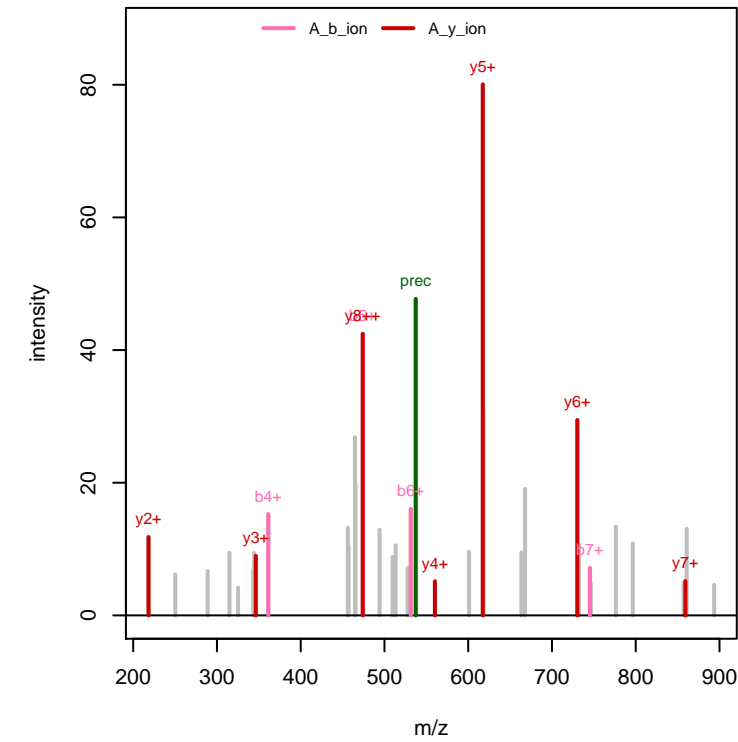

KDDQEETVRK+XL\_S

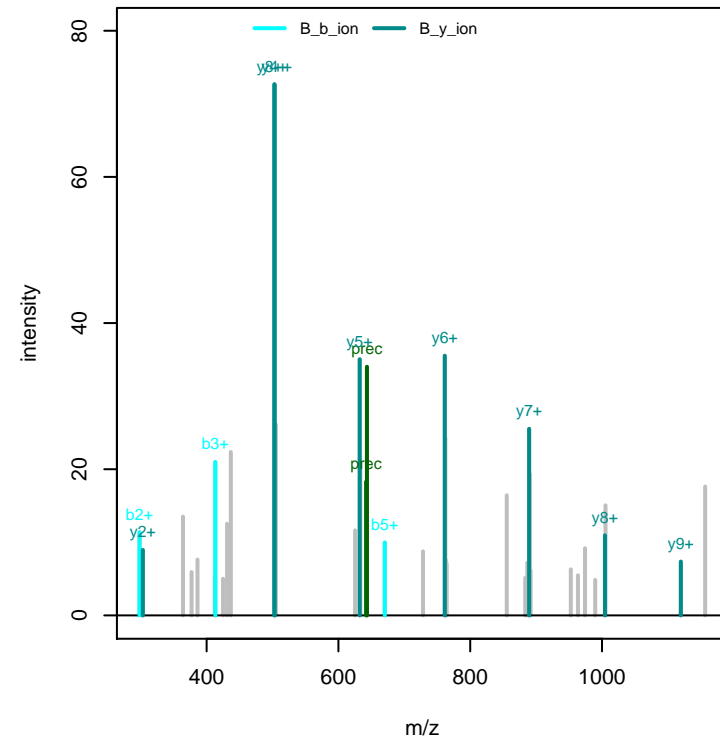

KDDQEETVRK+XL\_L

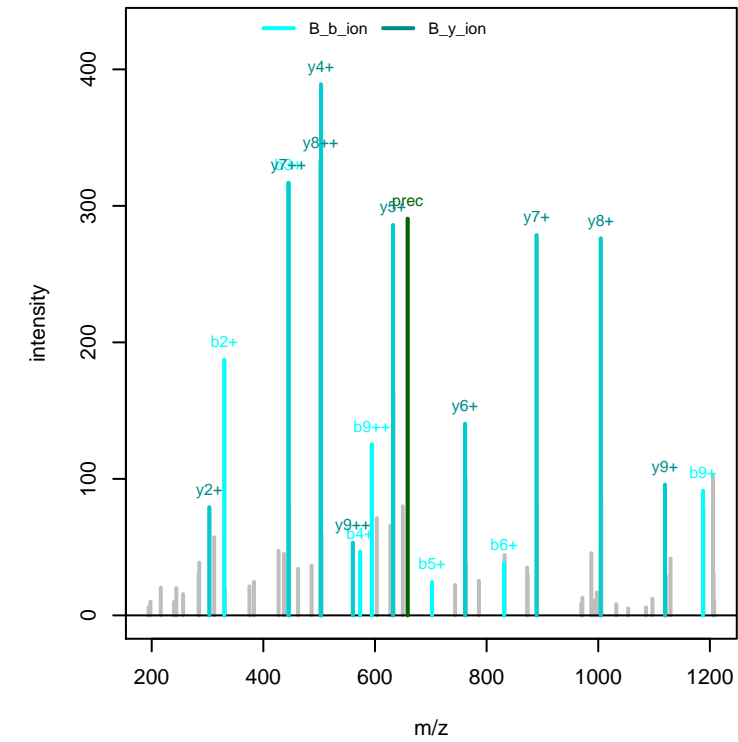

AEQQAKK  
QLEEKAR

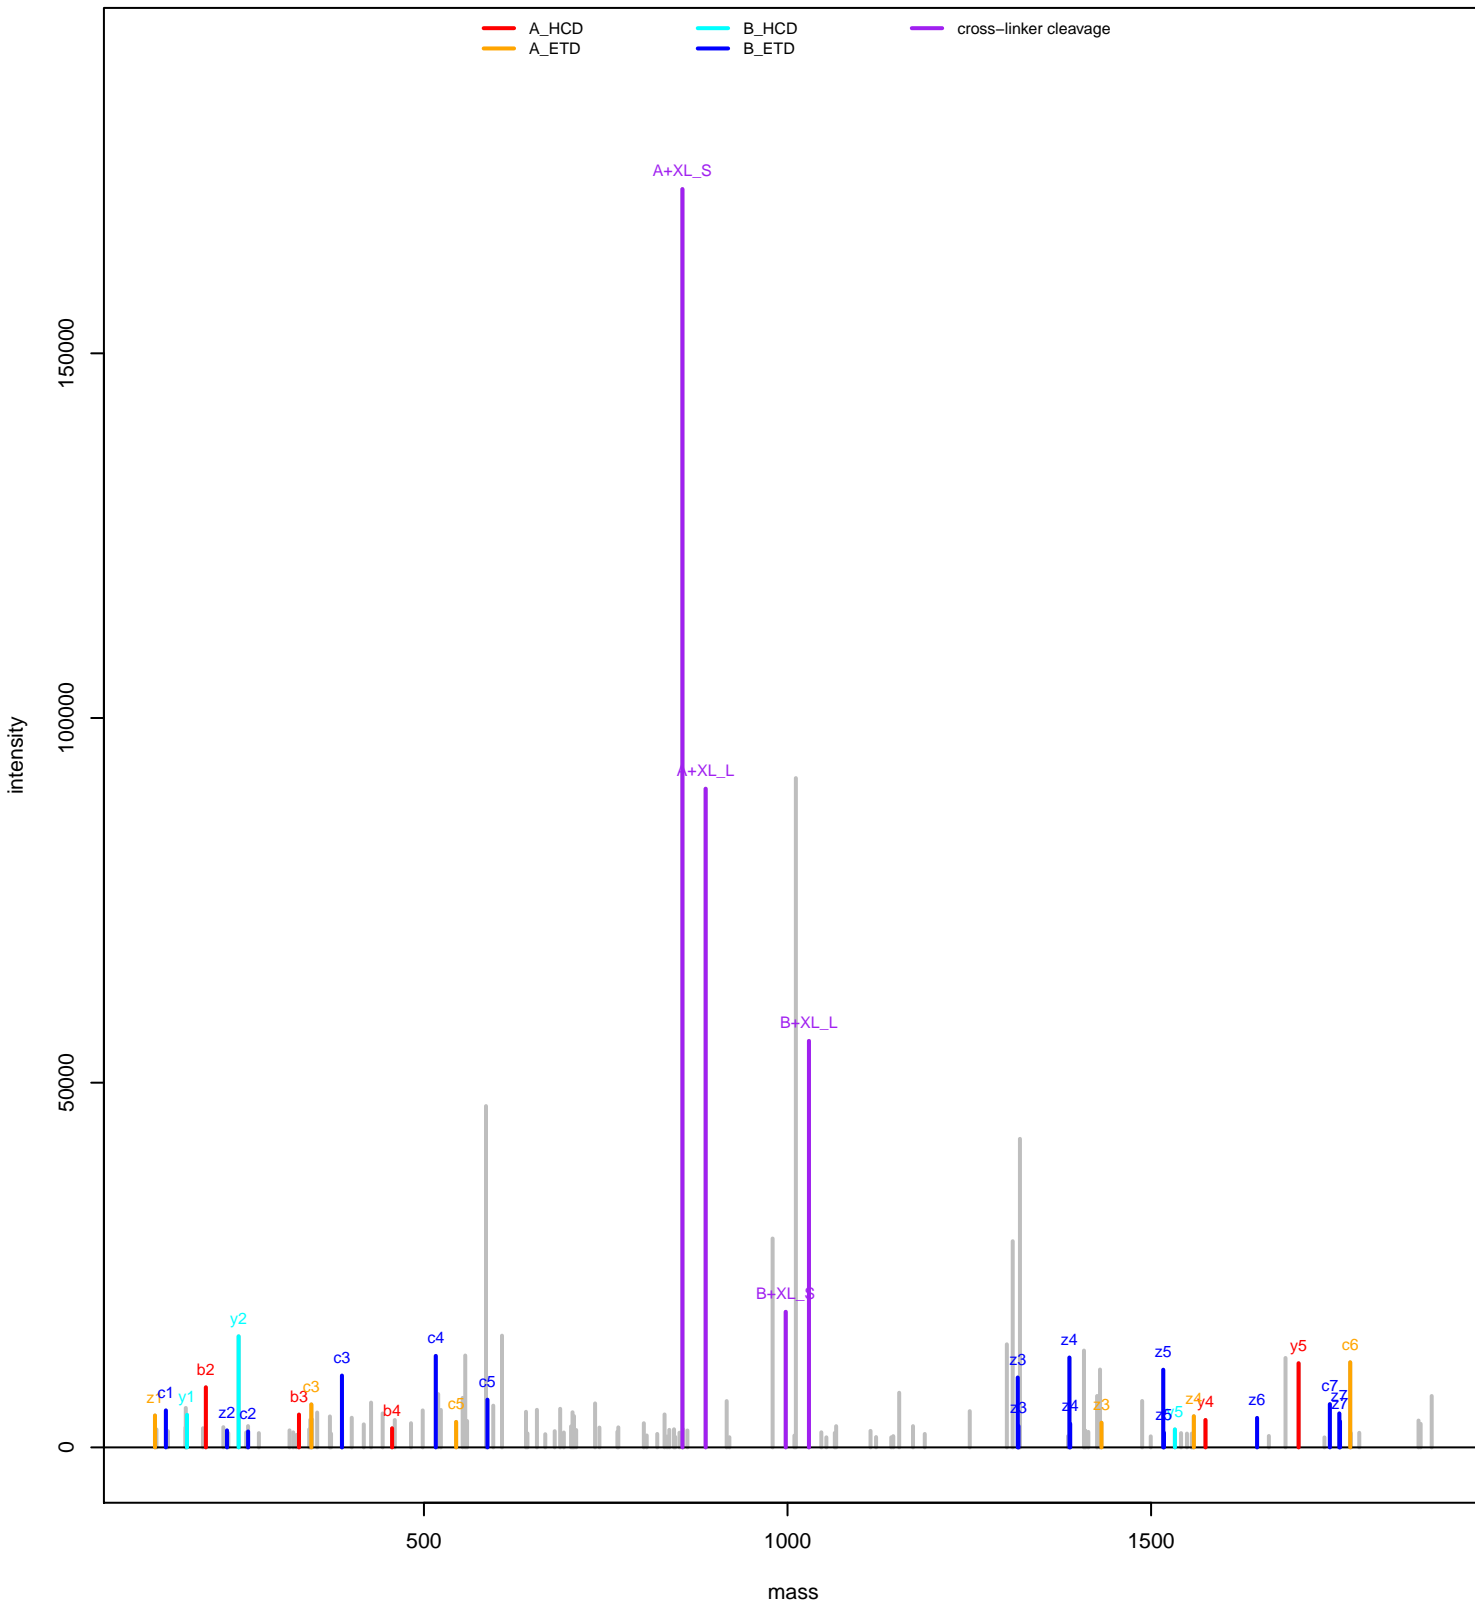

AEQQAKK+XL\_S

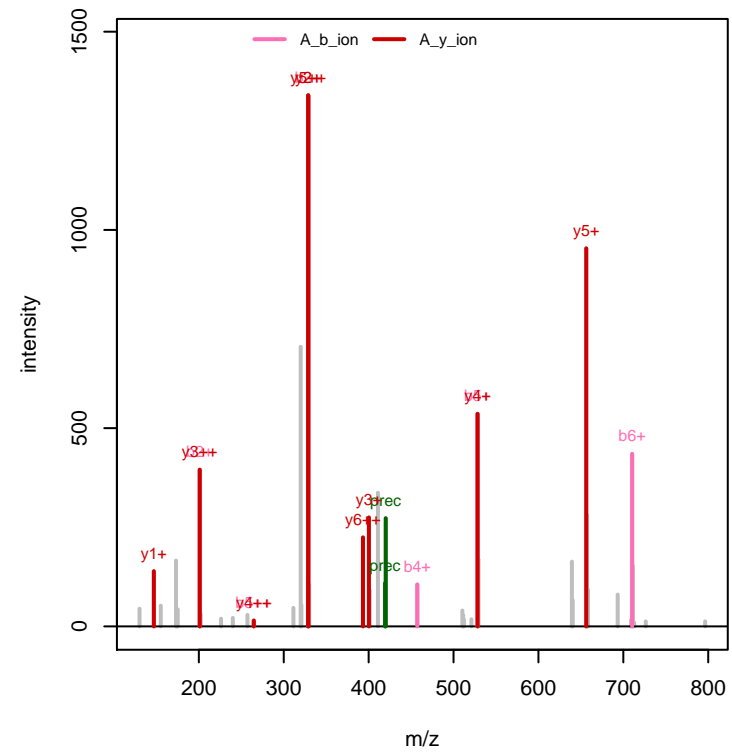

AEQQAKK+XL\_L

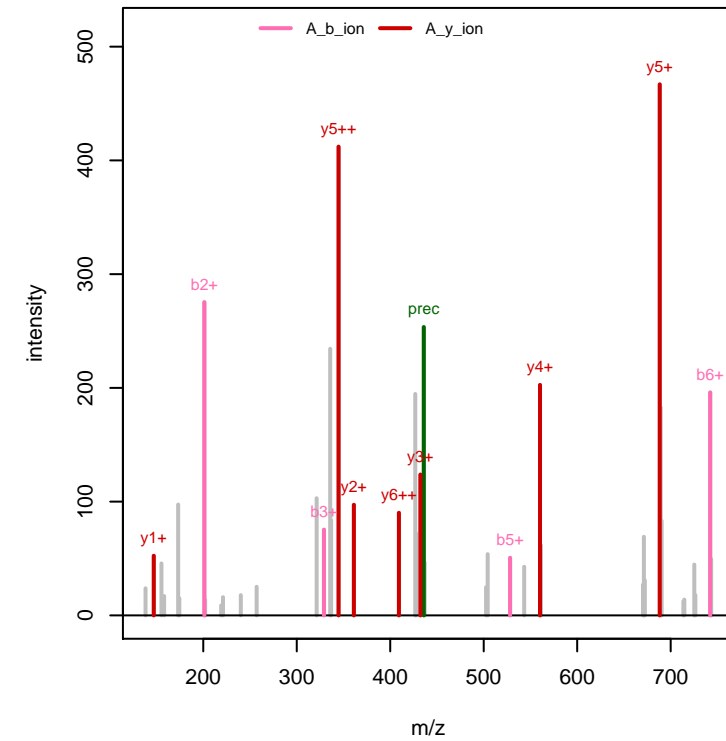

QLEEKAR+XL\_S

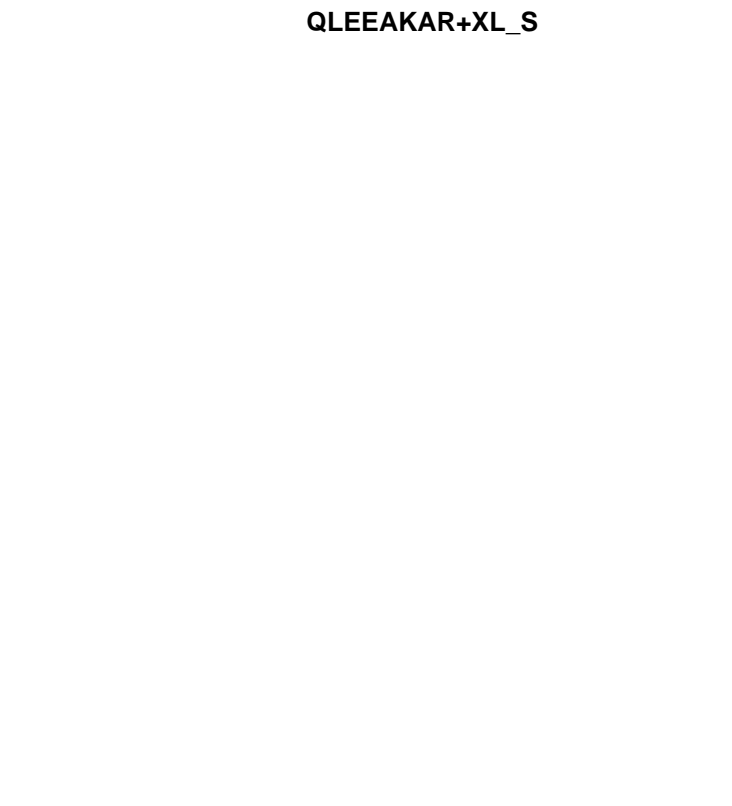

QLEEKAR+XL\_L

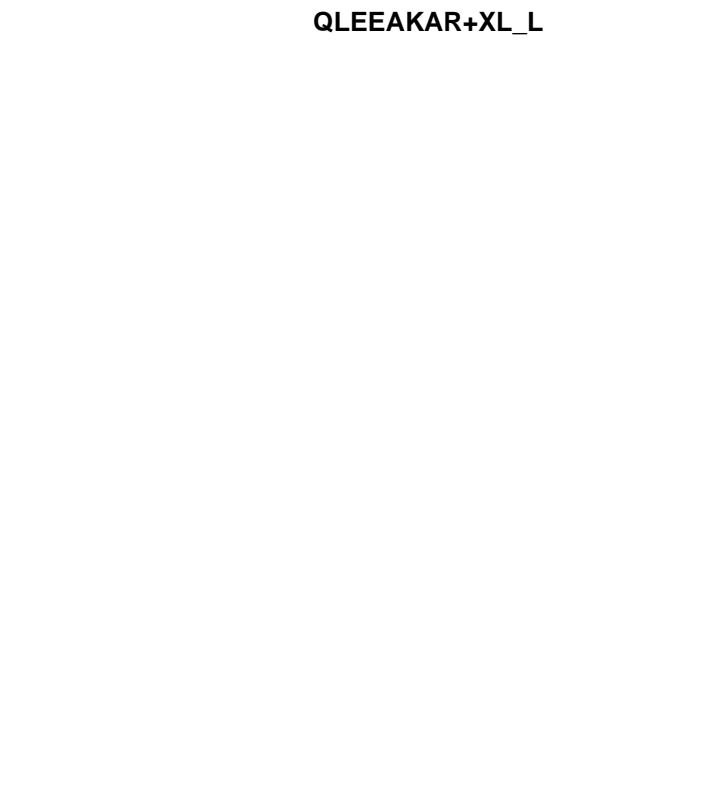

APKTVK  
AQKPVEK

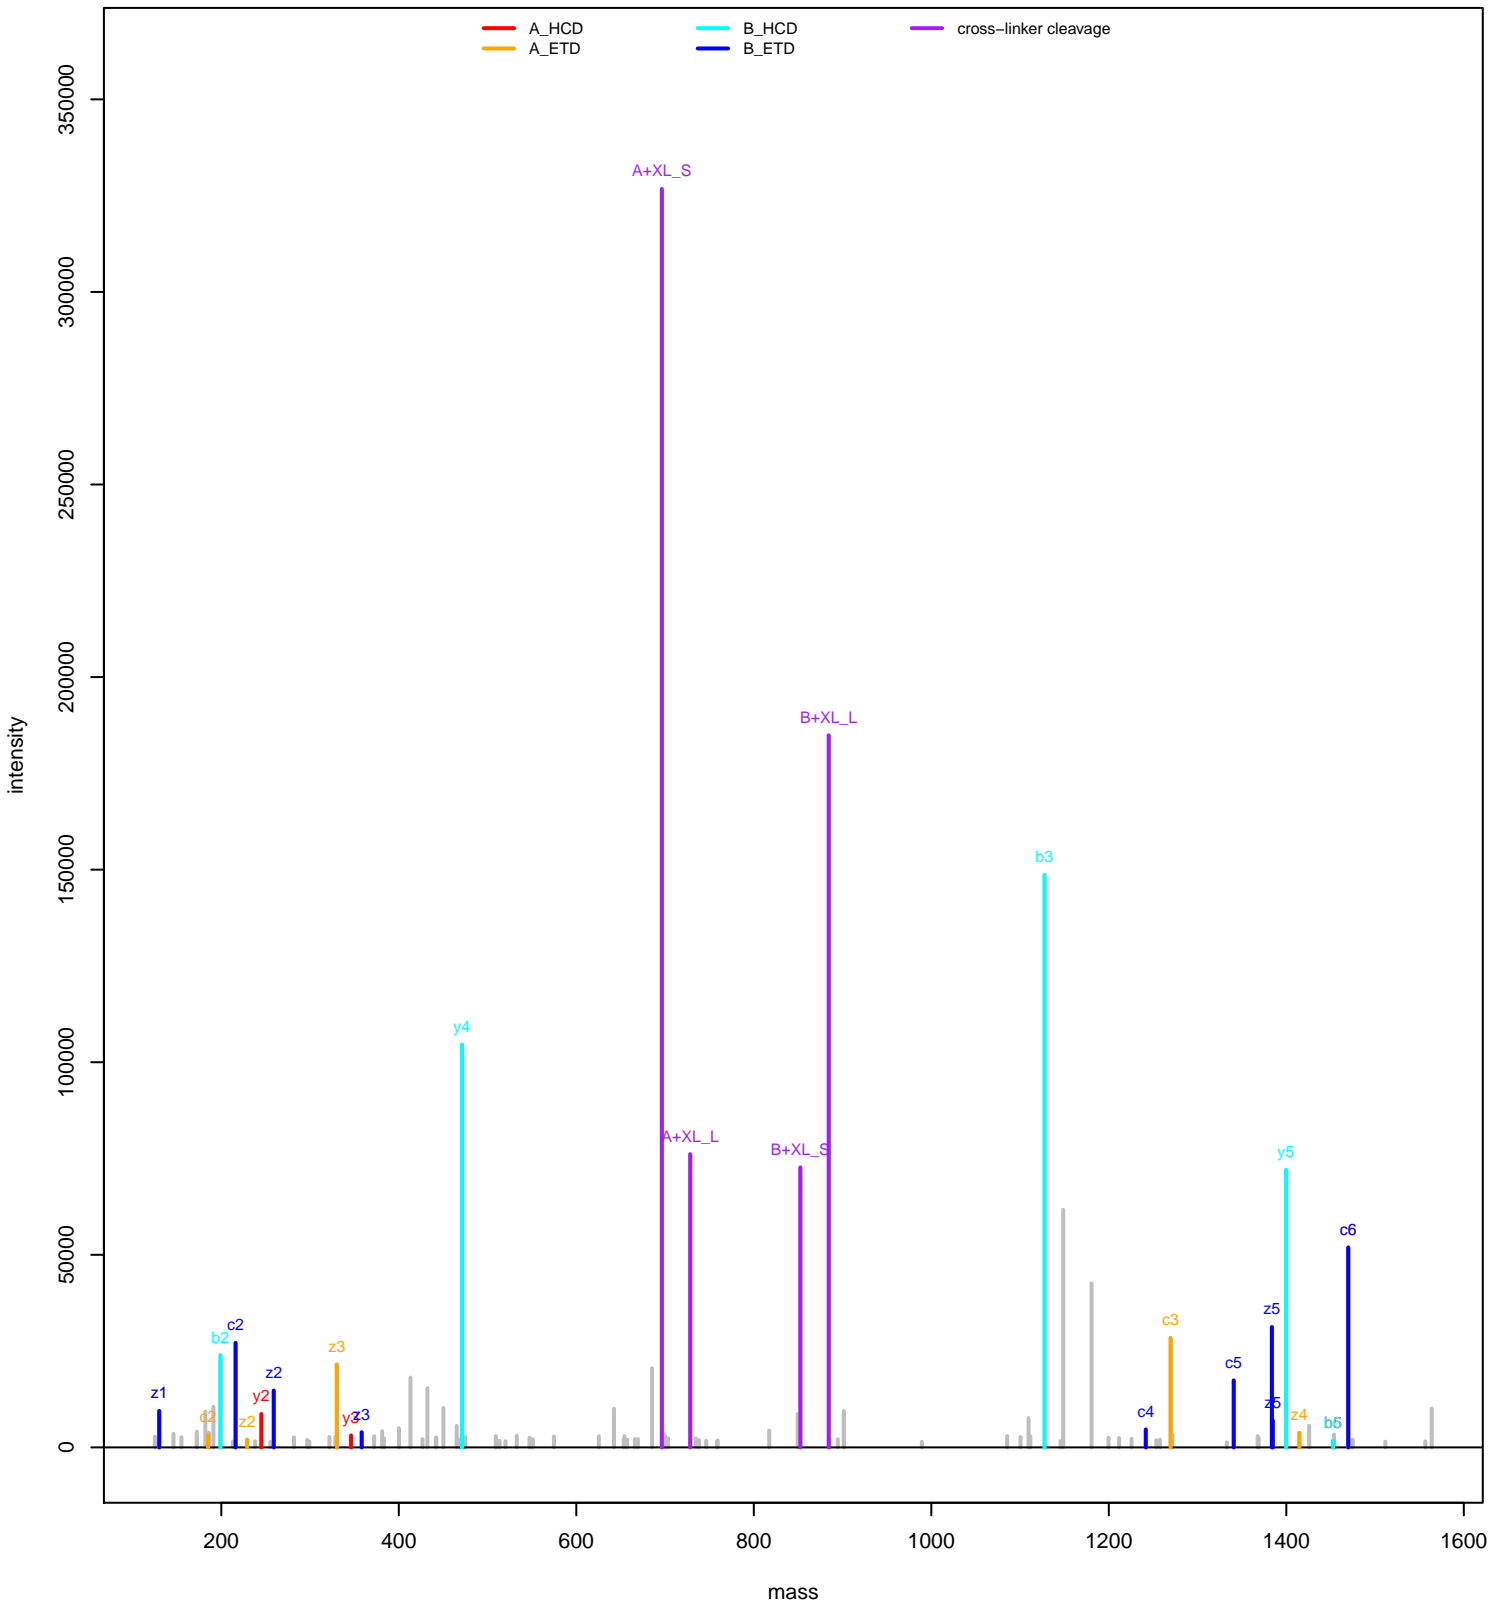

APKTVK+XL\_S

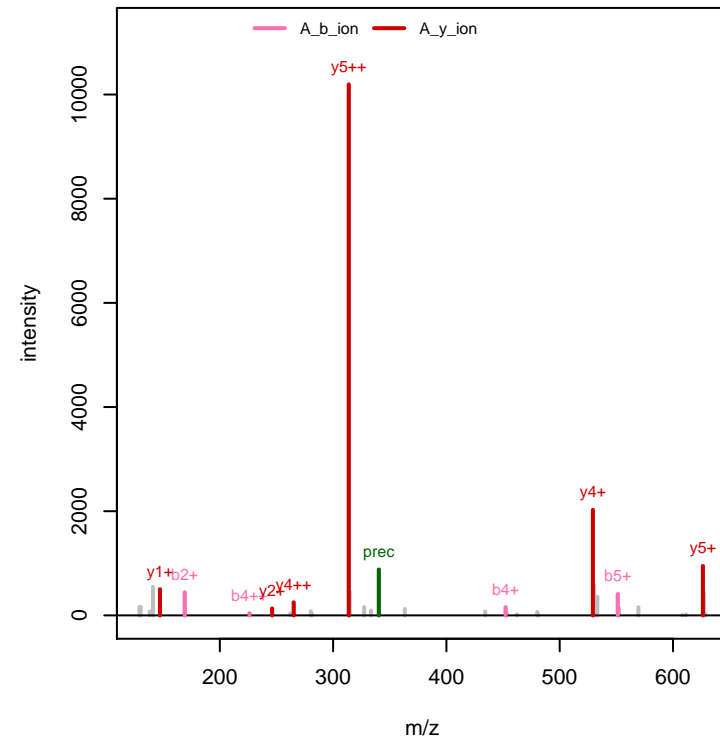

APKTVK+XL\_L

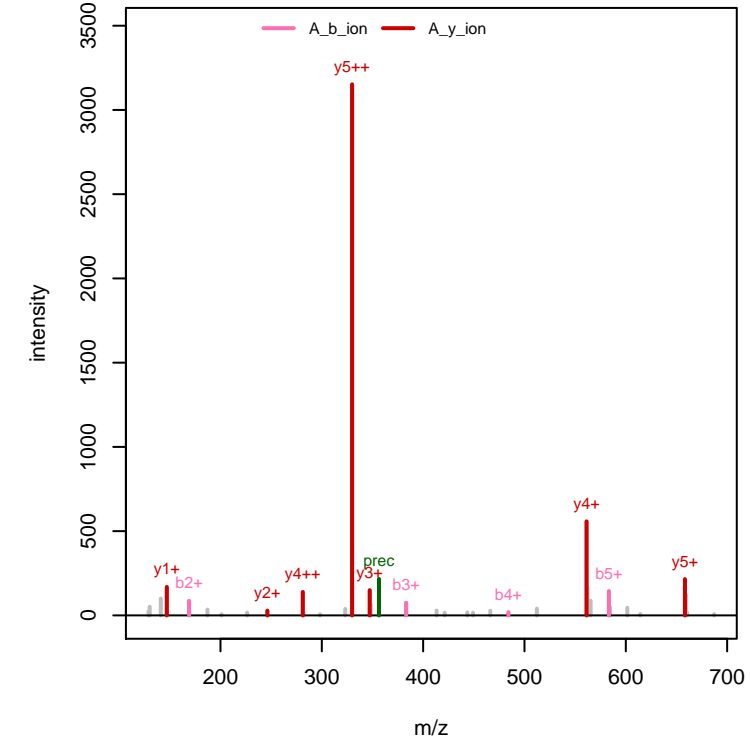

AQKPVEK+XL\_S

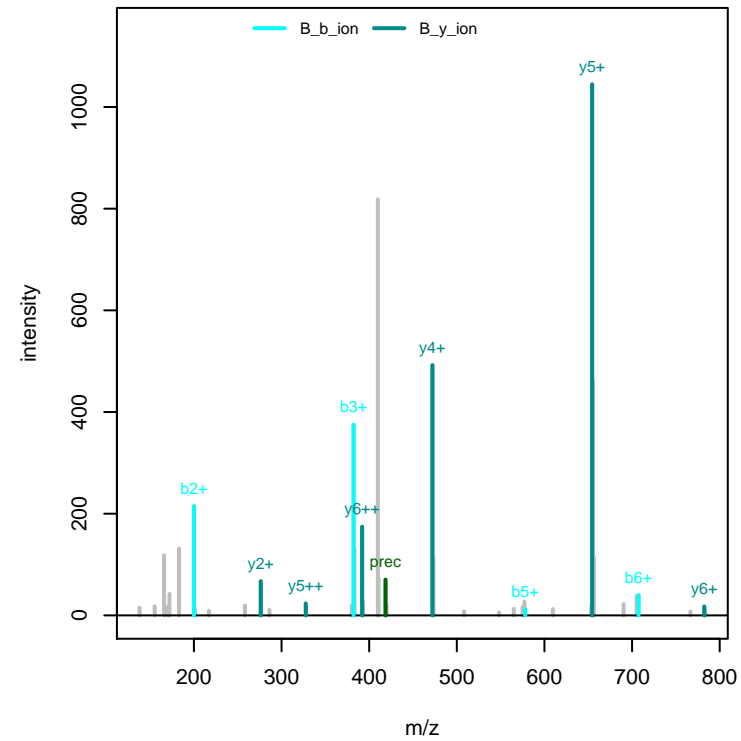

AQKPVEK+XL\_L

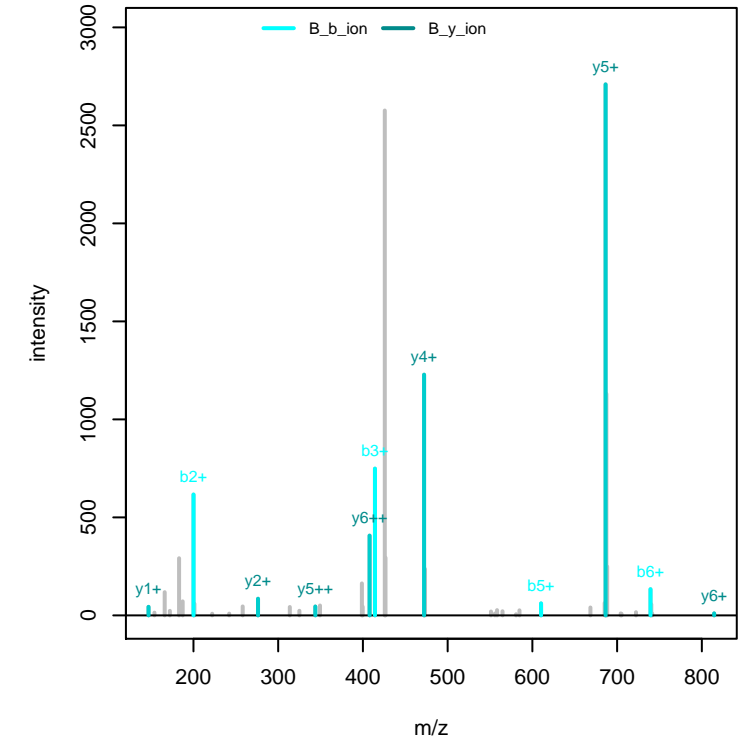



**KLEEEAR  
KAEEEARR**

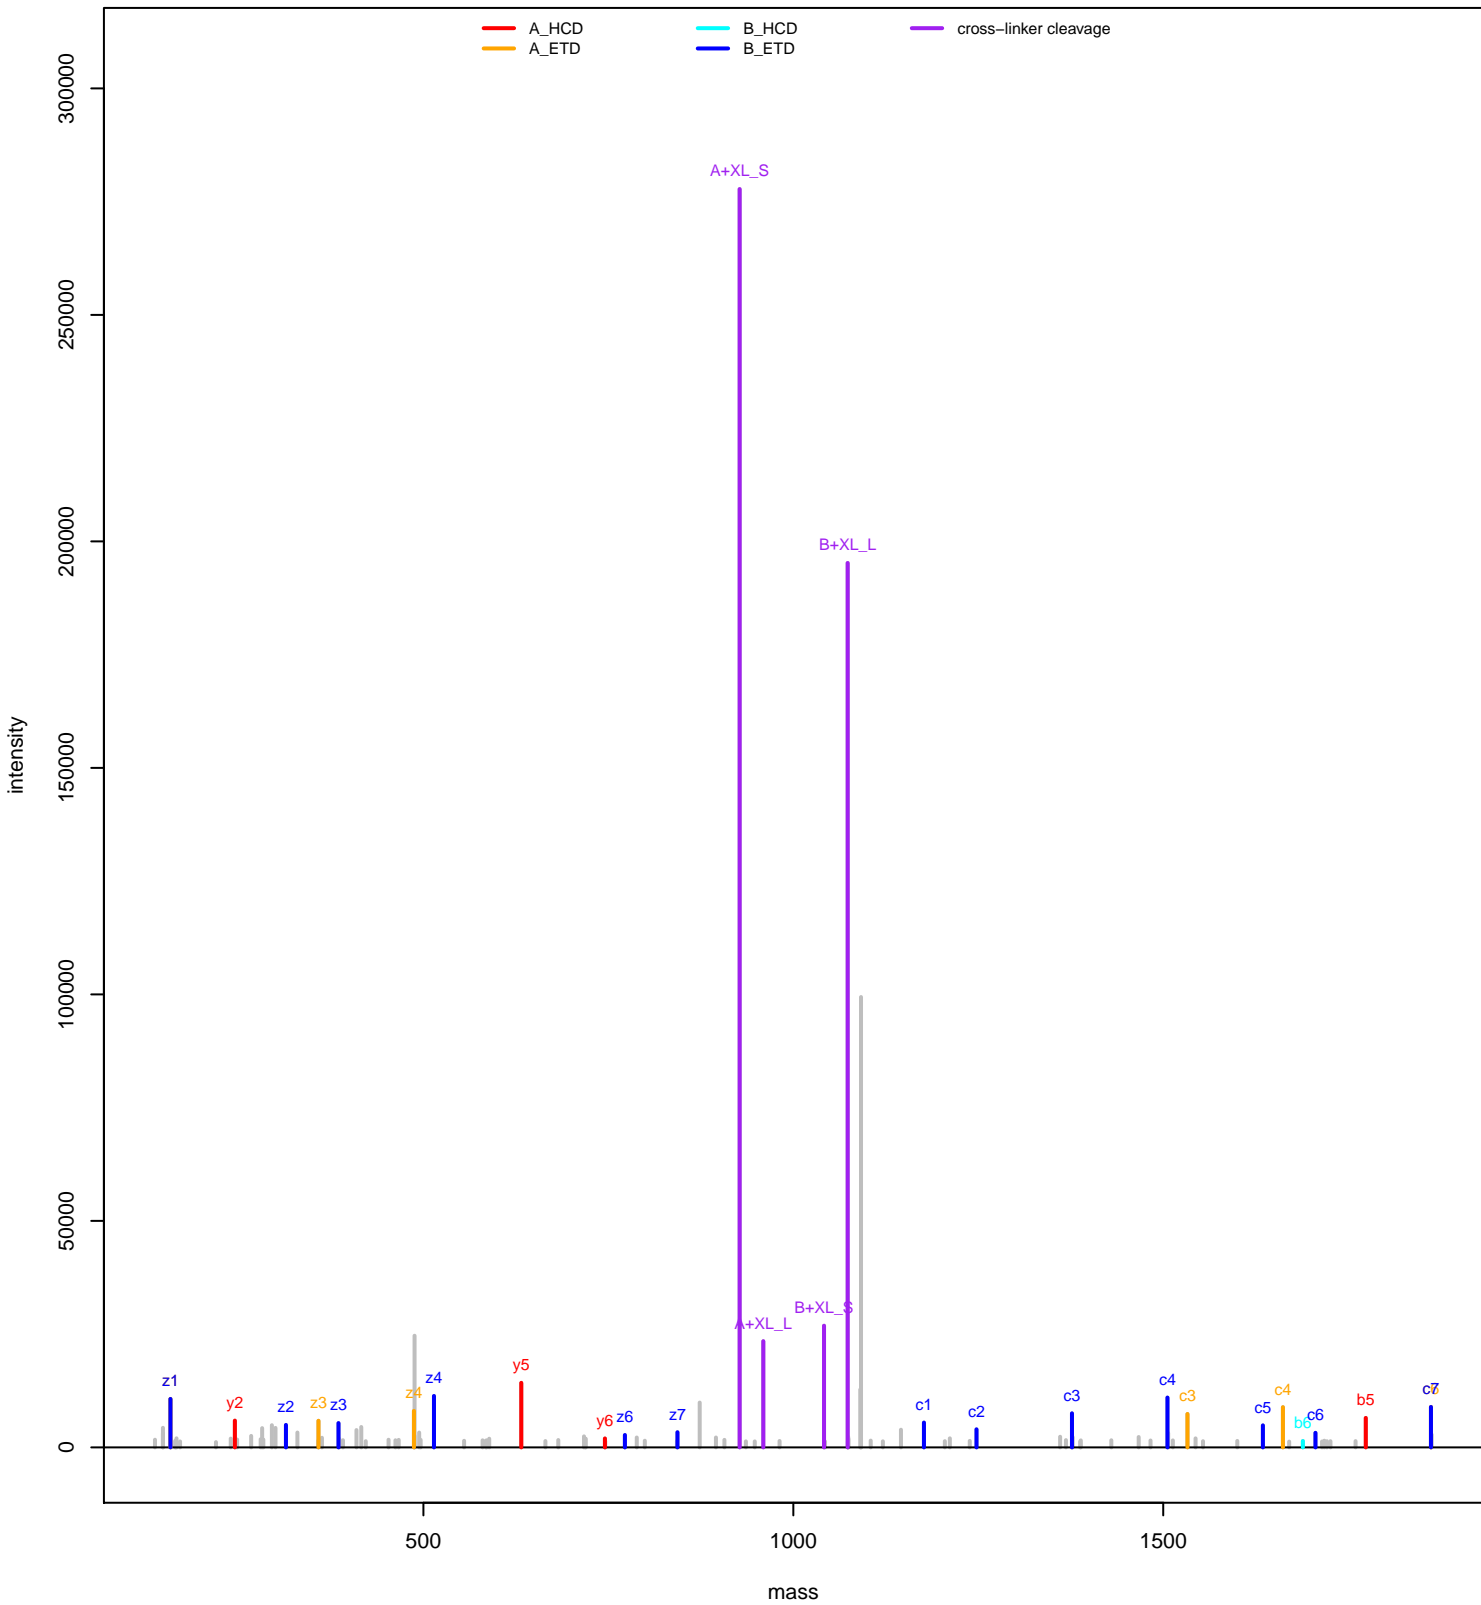

**KLEEEAR+XL\_S**

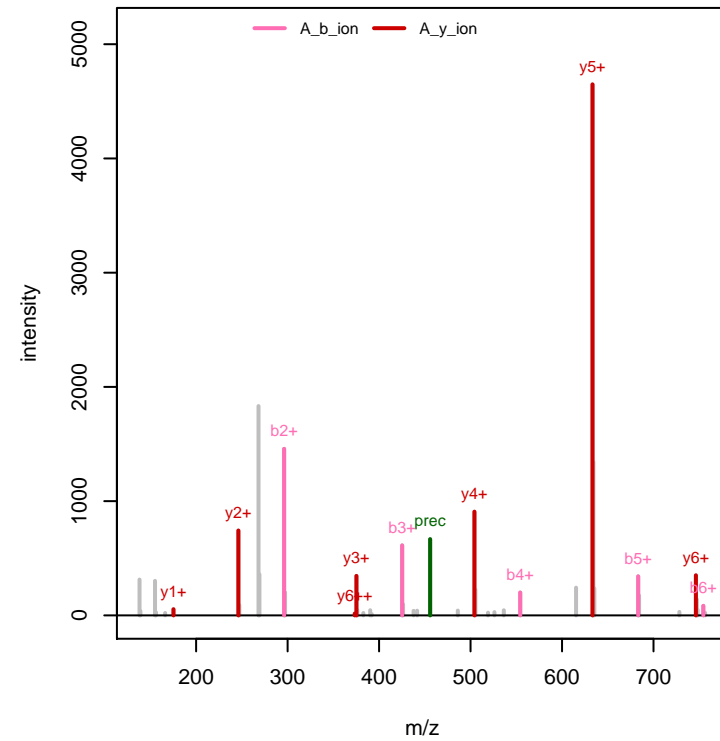

**KLEEEAR+XL\_L**

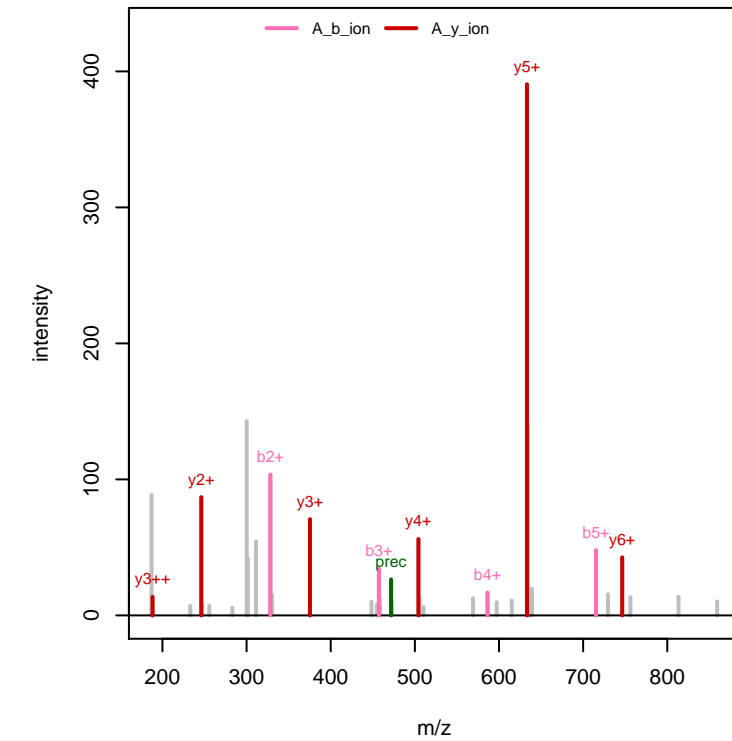

**KAEEEARR+XL\_S**

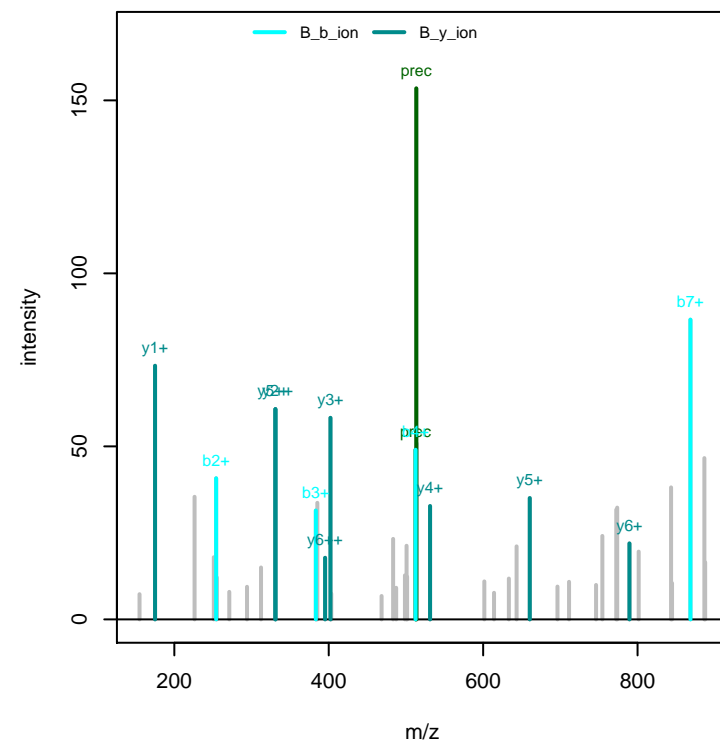

**KAEEEARR+XL\_L**

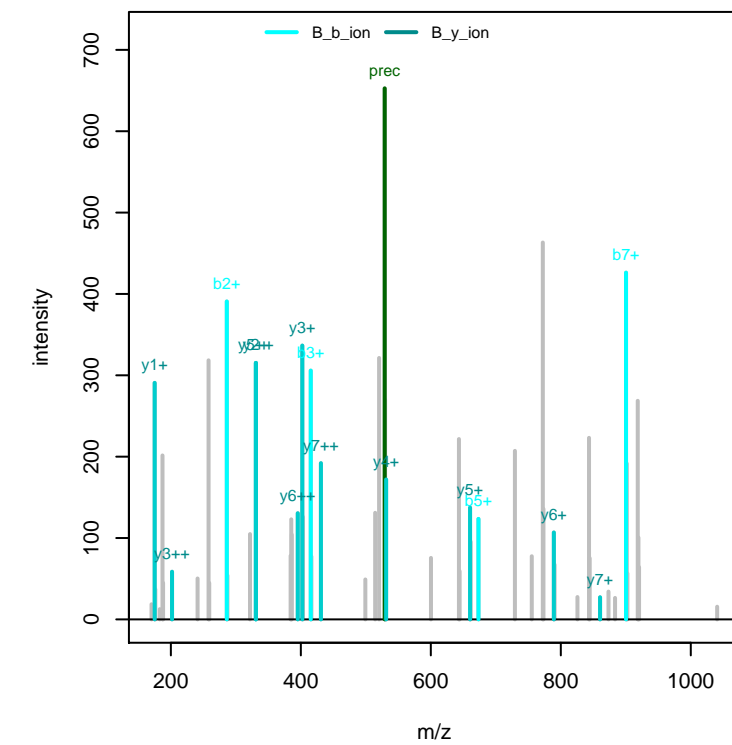

VAKDATK  
AEIKAAVQK

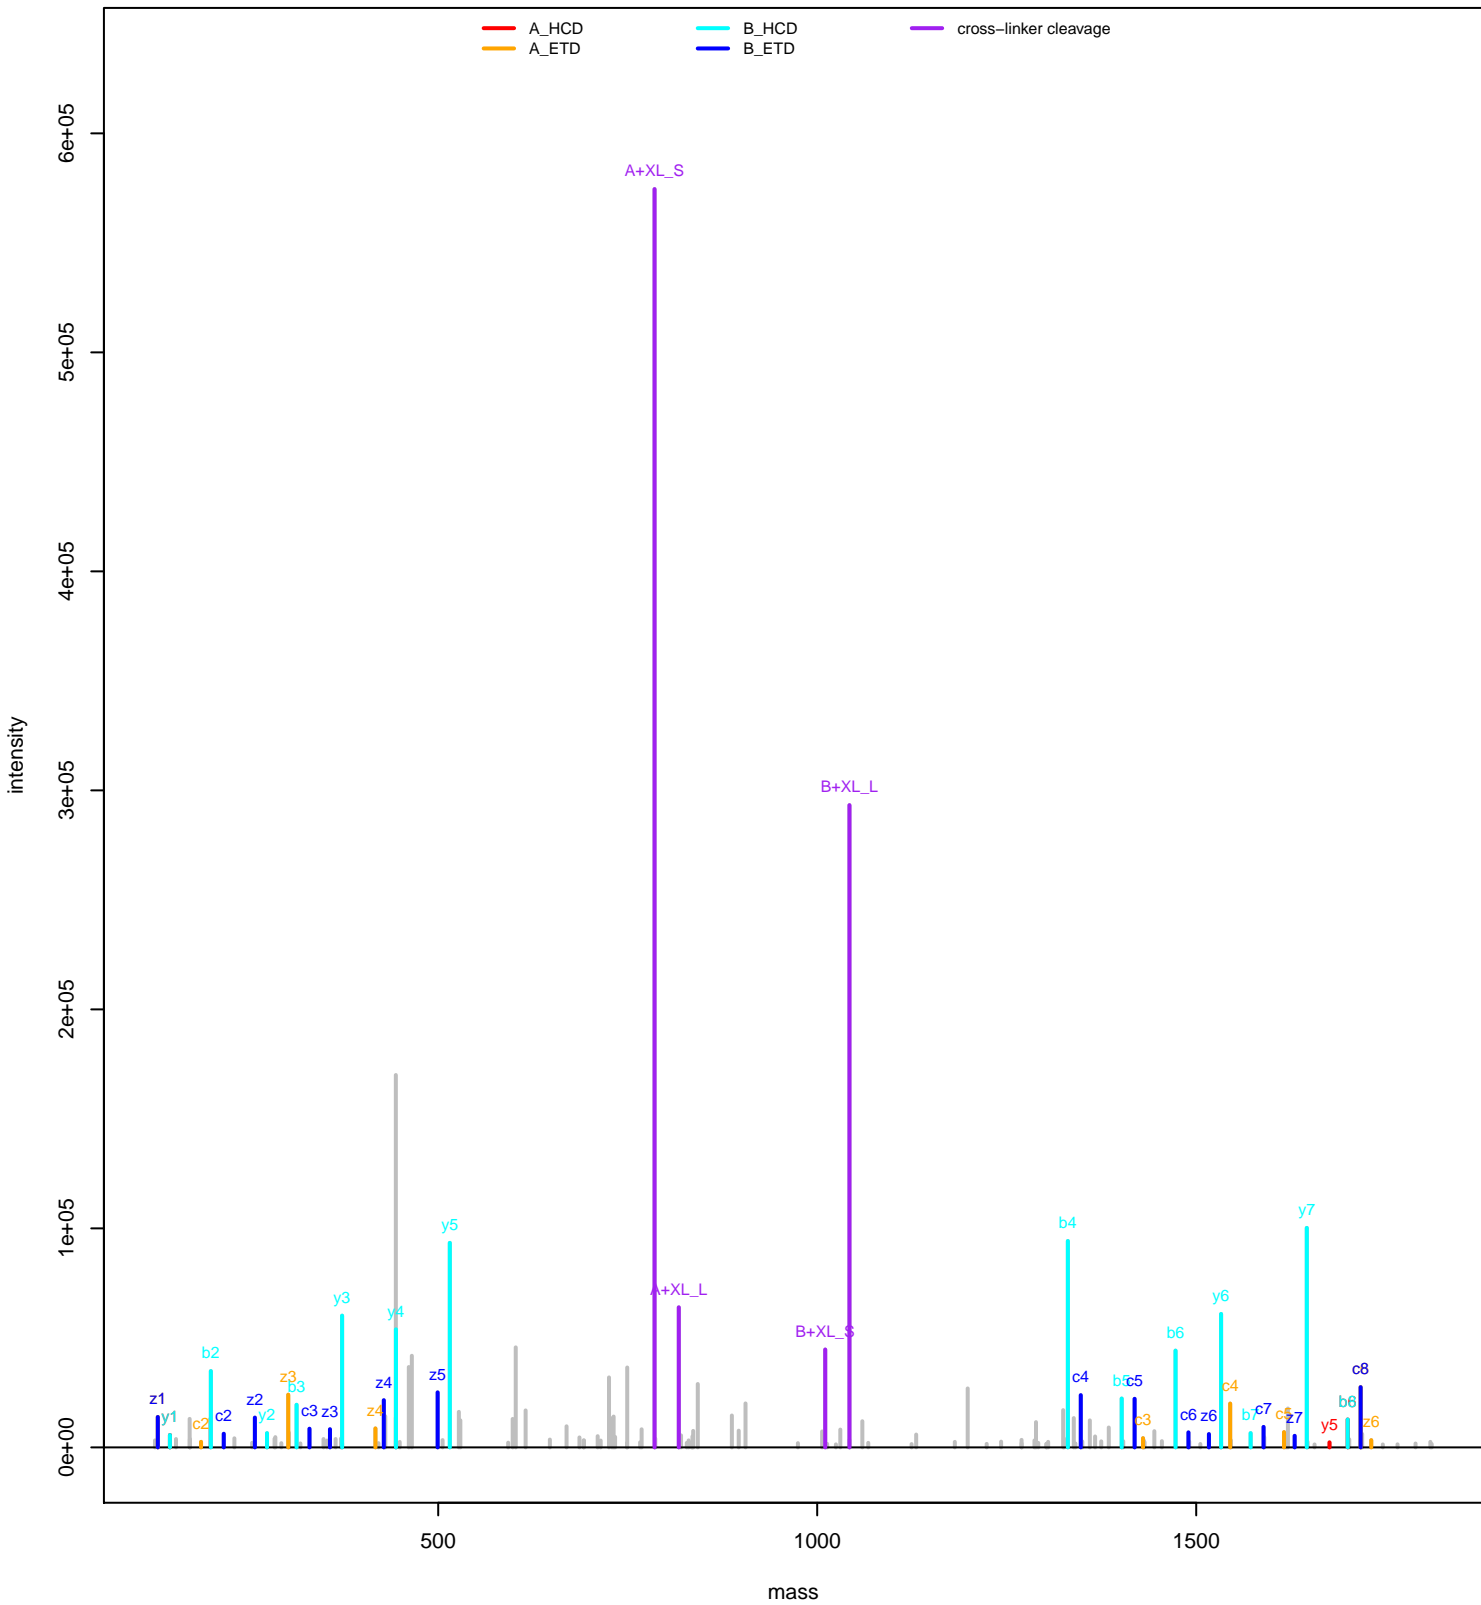

VAKDATK+XL\_S

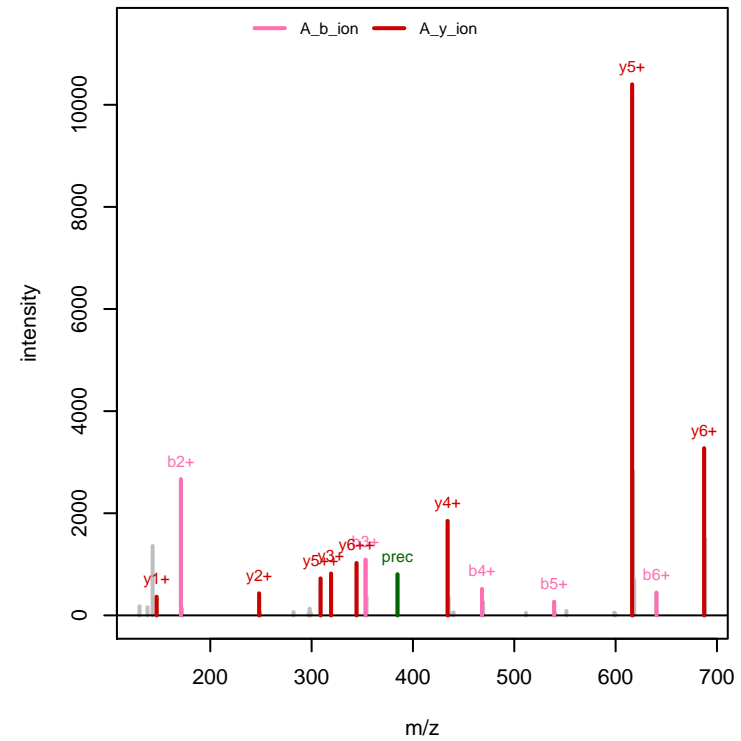

VAKDATK+XL\_L

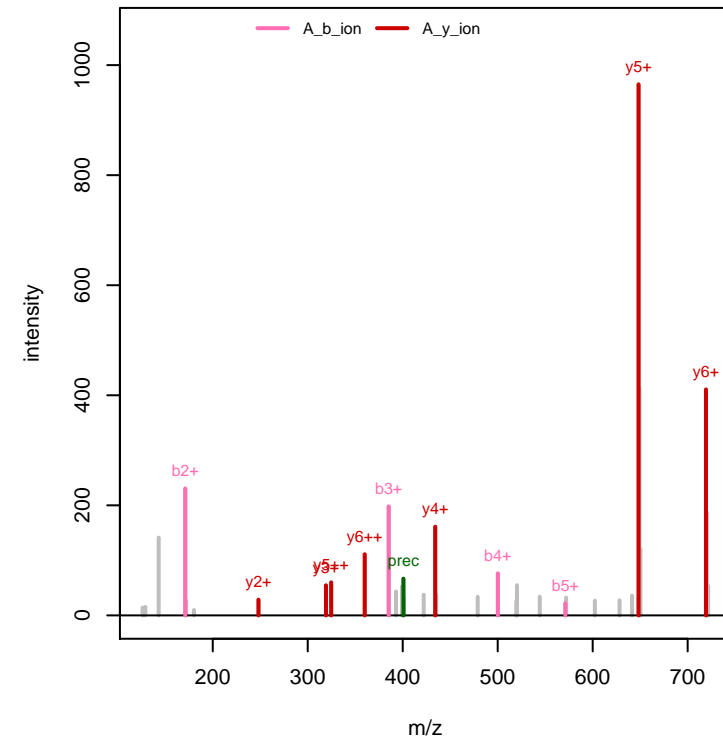

AEIKAAVQK+XL\_S

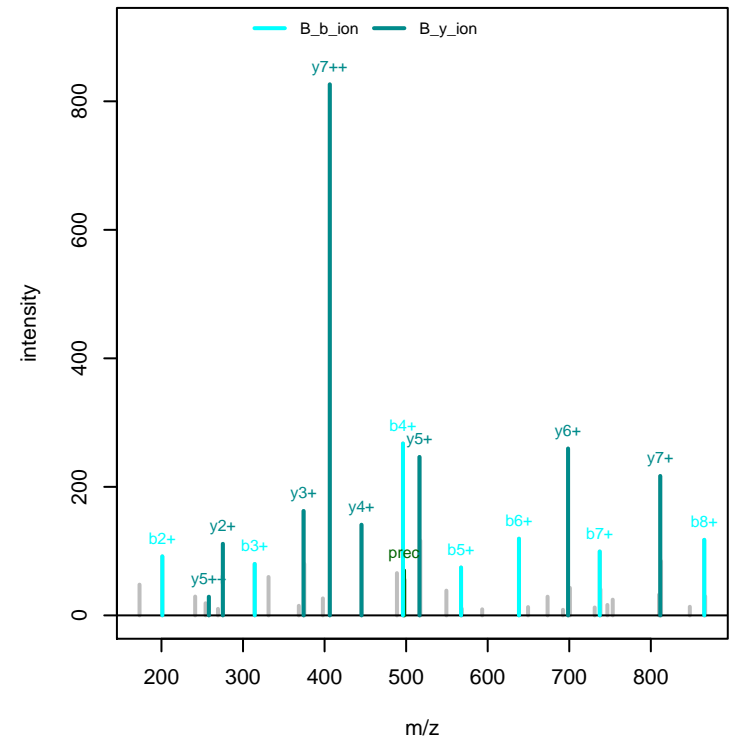

AEIKAAVQK+XL\_L

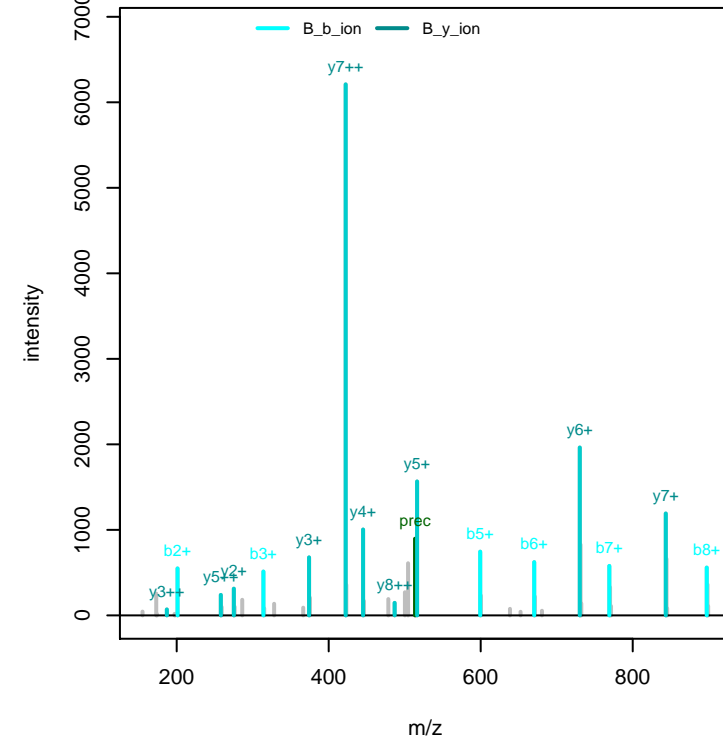

HLAKAPAK  
SEEKASTPAQR

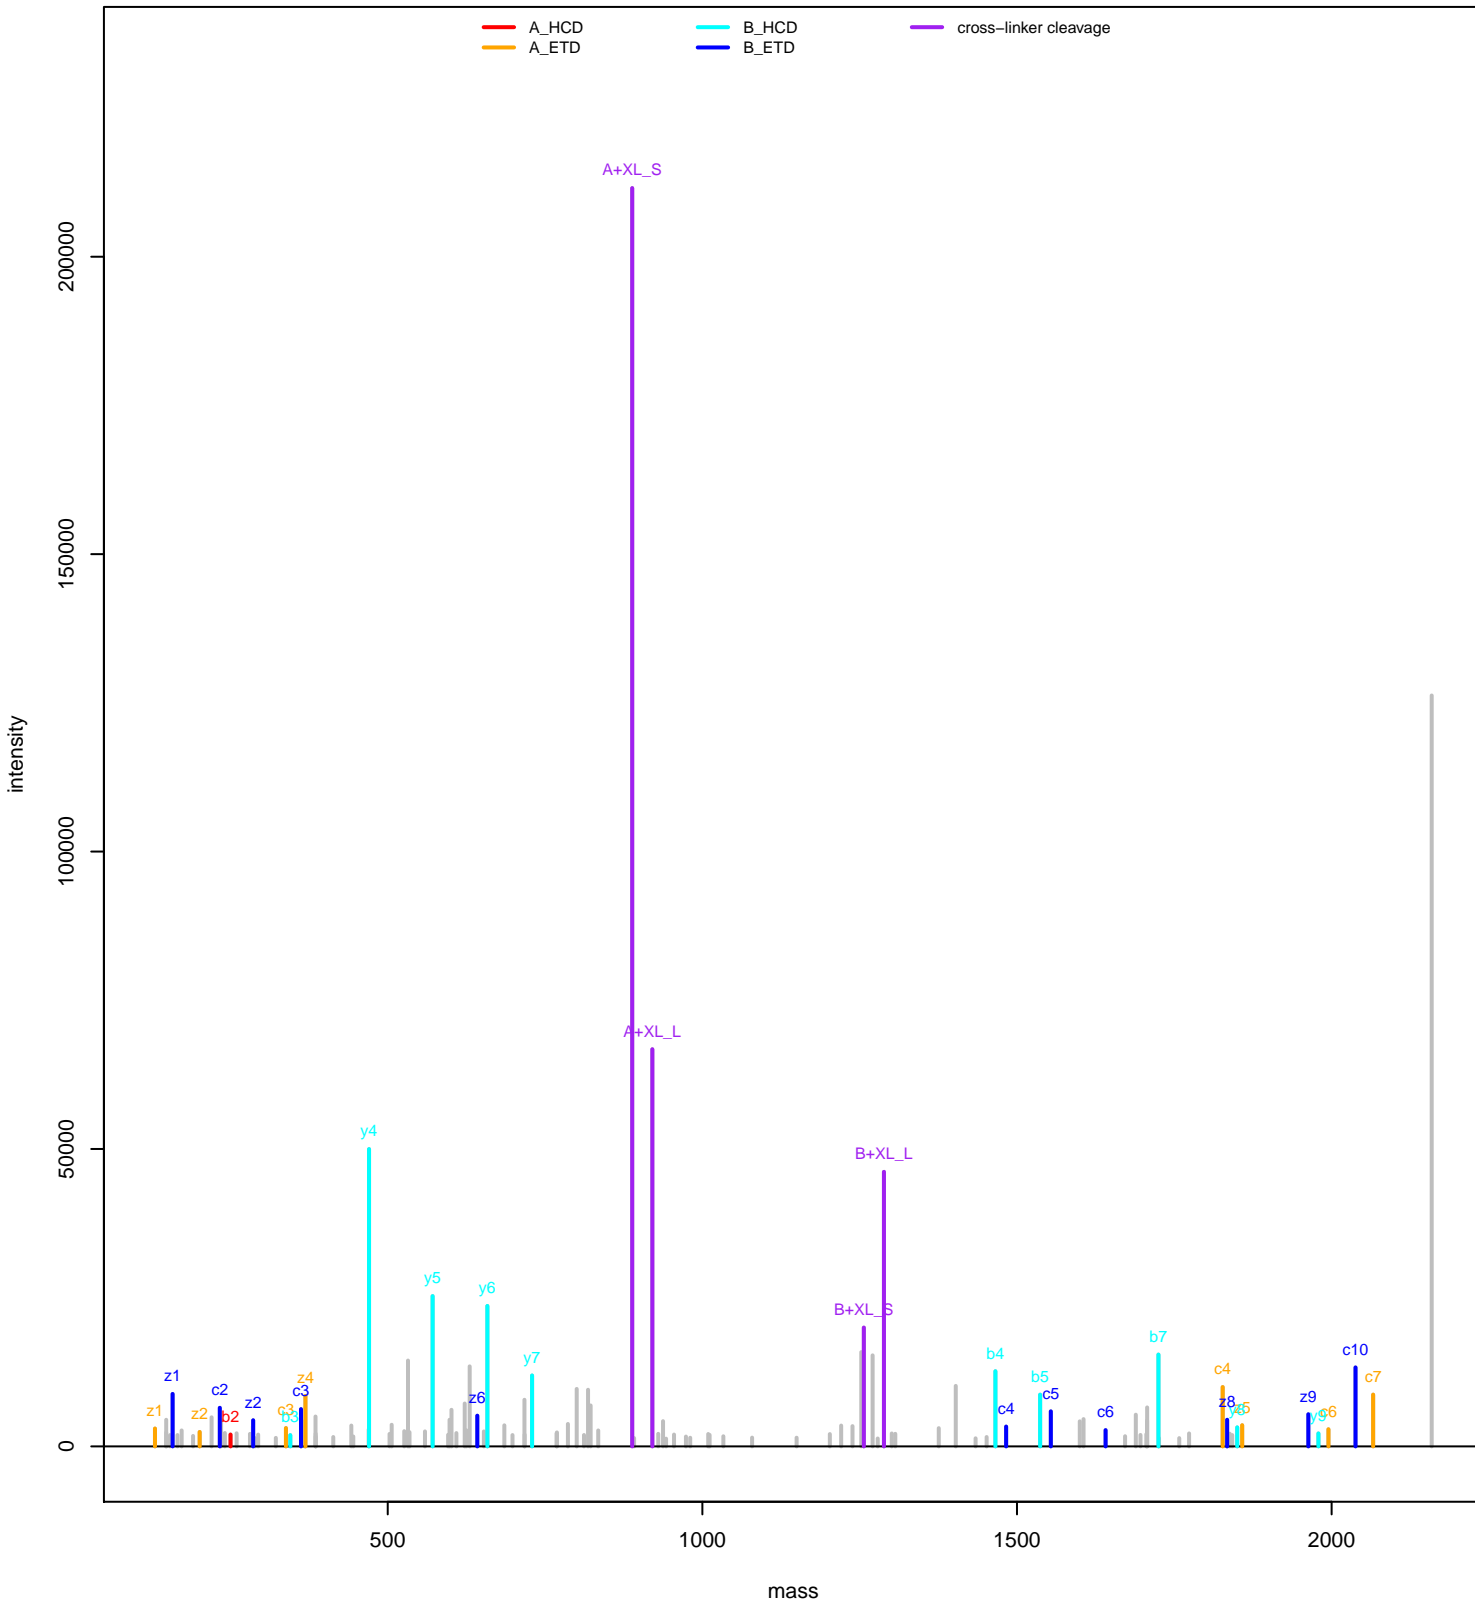

HLAKAPAK+XL\_S

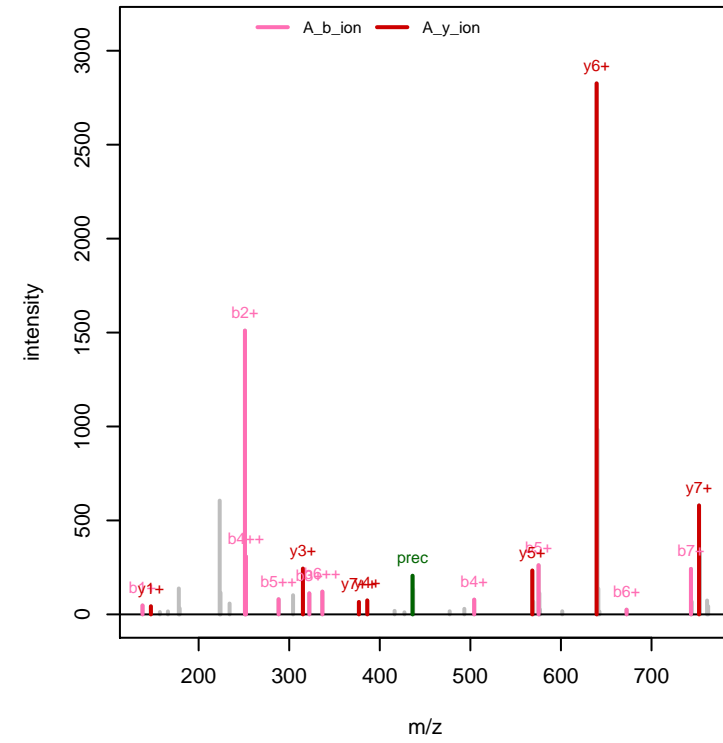

HLAKAPAK+XL\_L

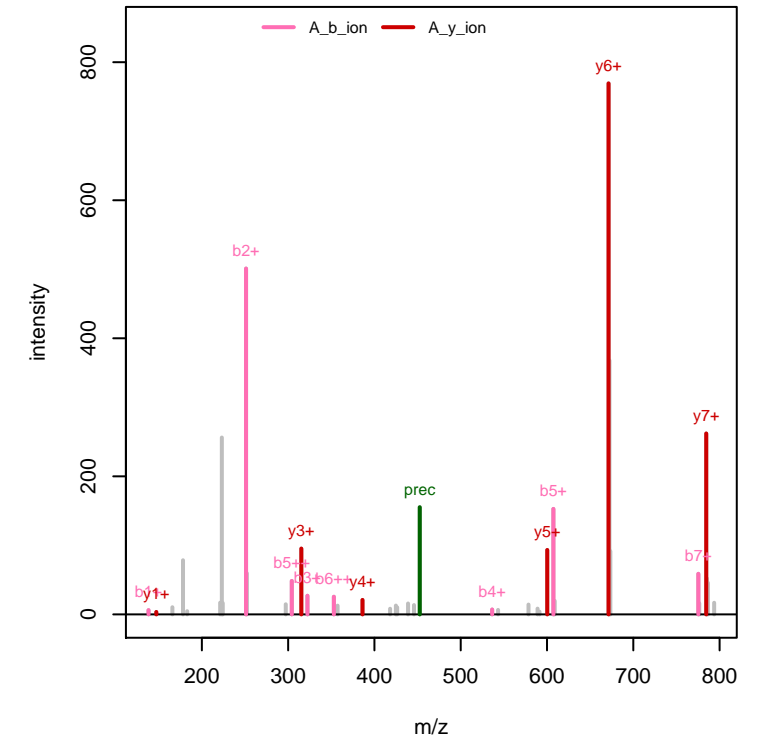

SEEKASTPAQR+XL\_S

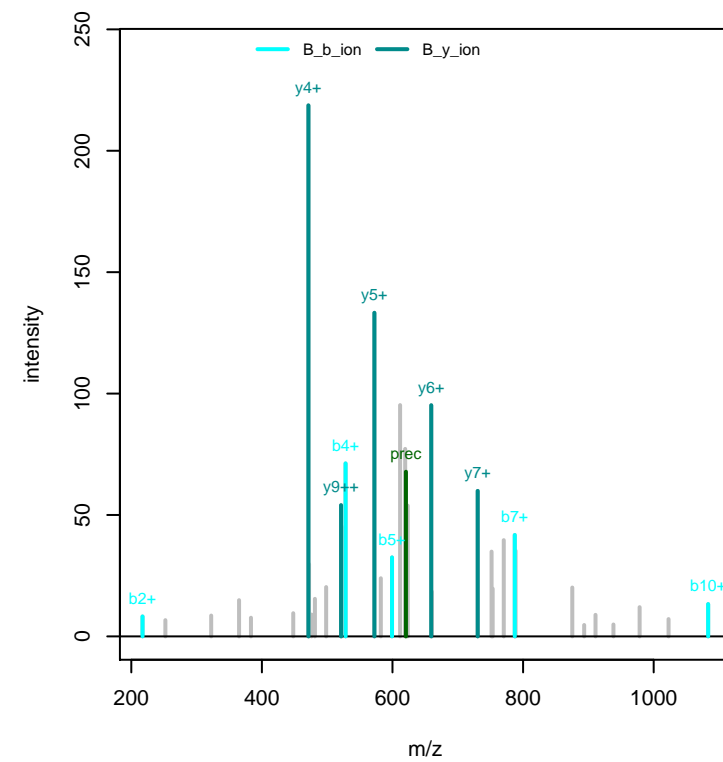

SEEKASTPAQR+XL\_L

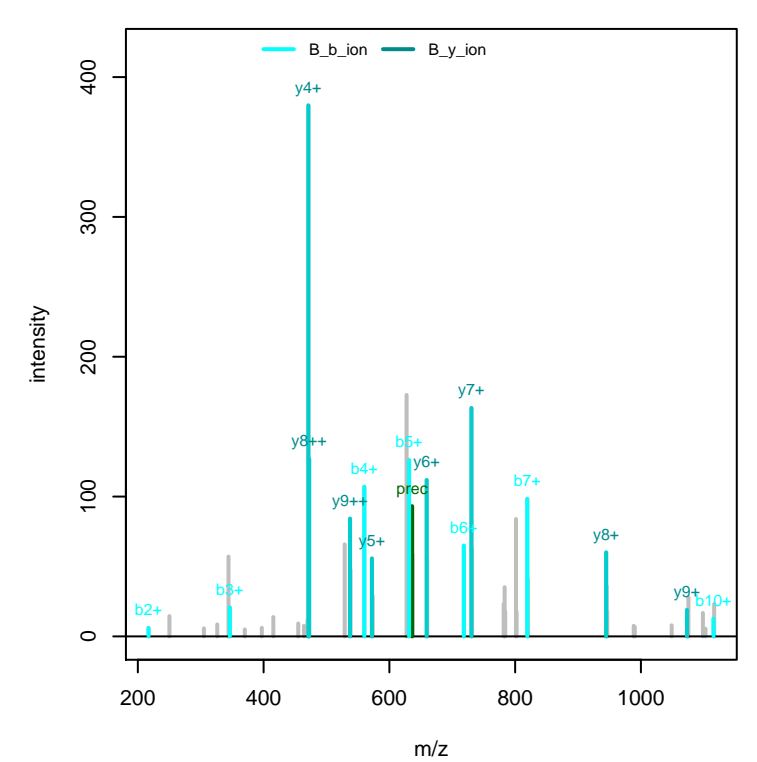

TVKAPR  
AQKPVEKAPK

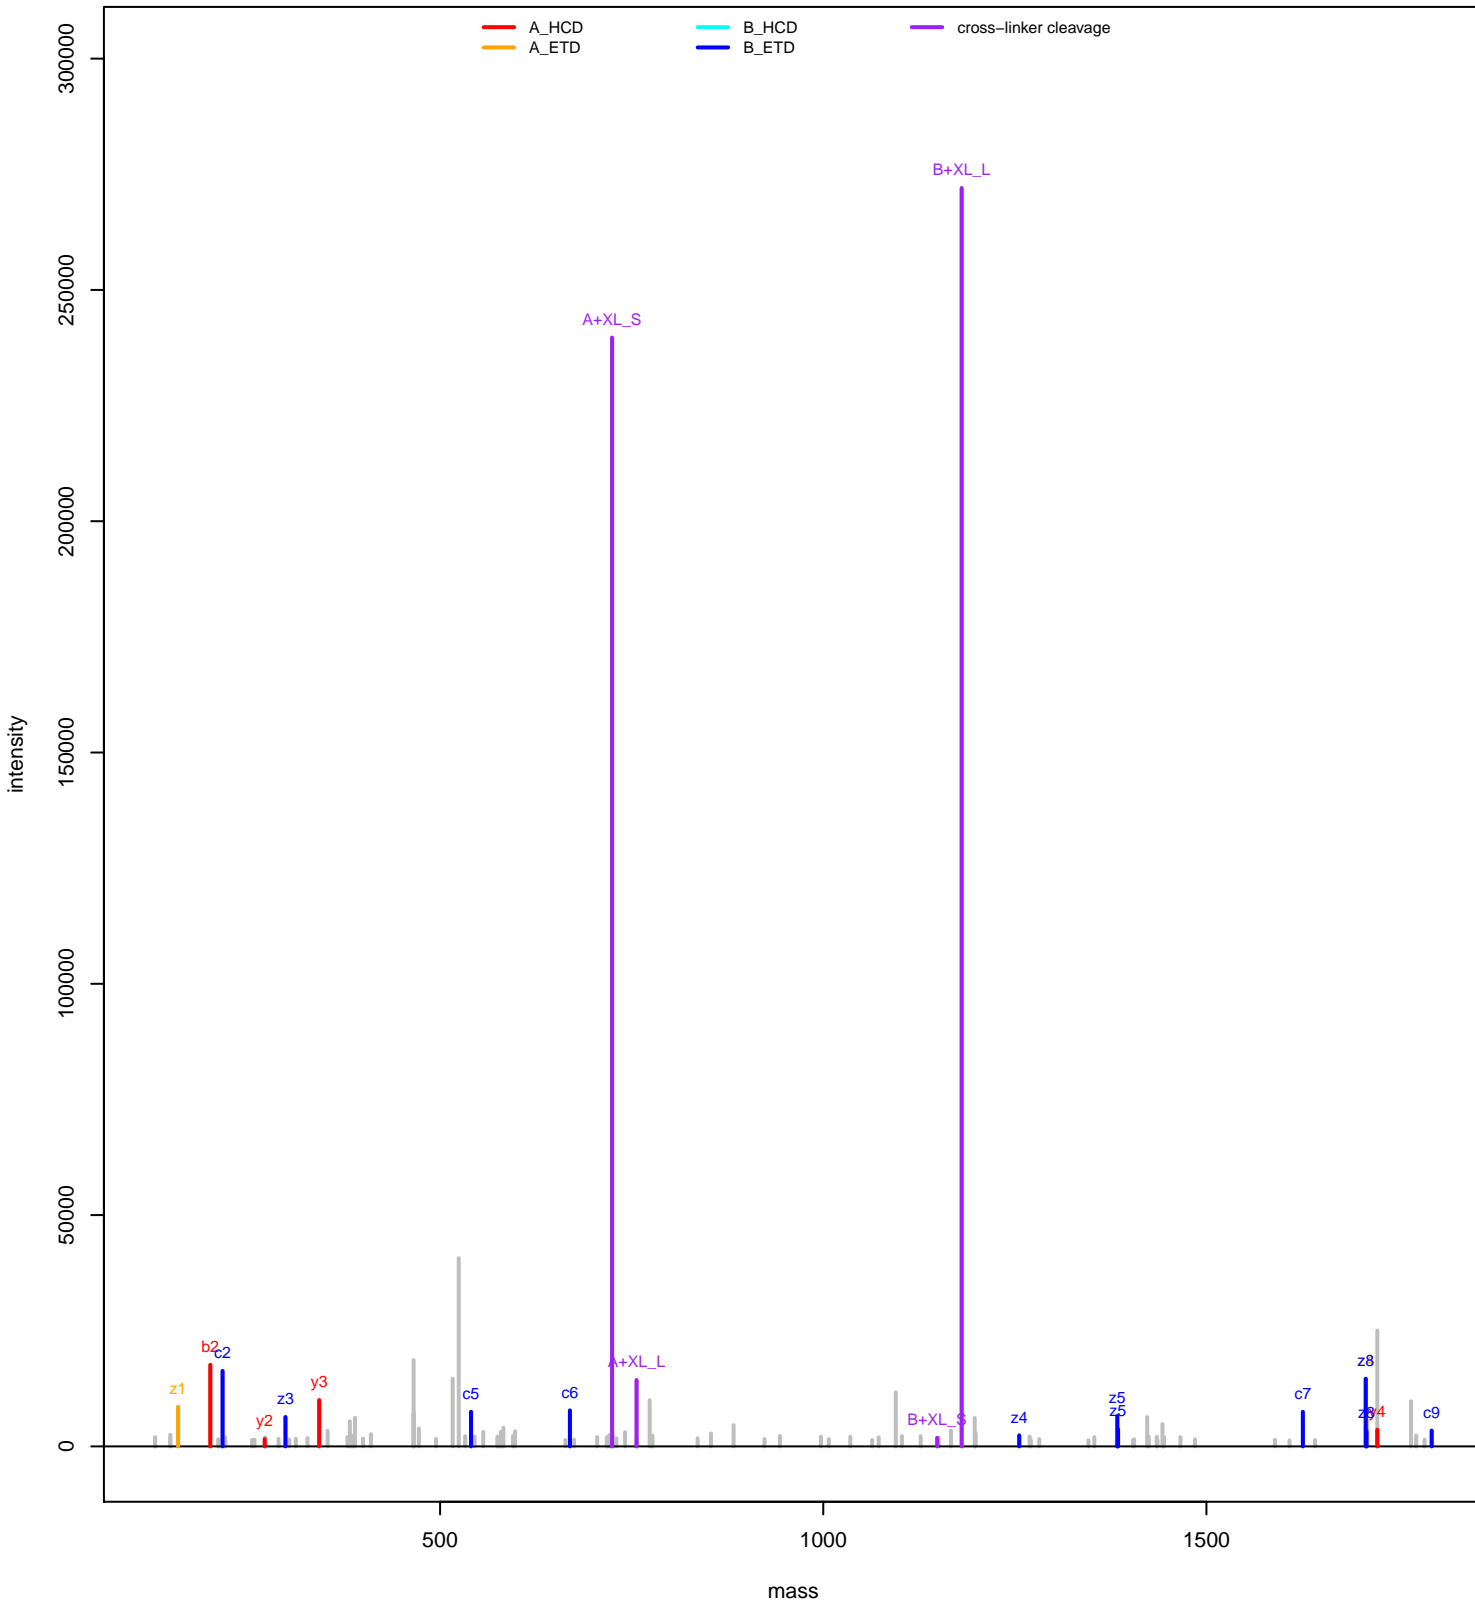

TVKAPR+XL\_S

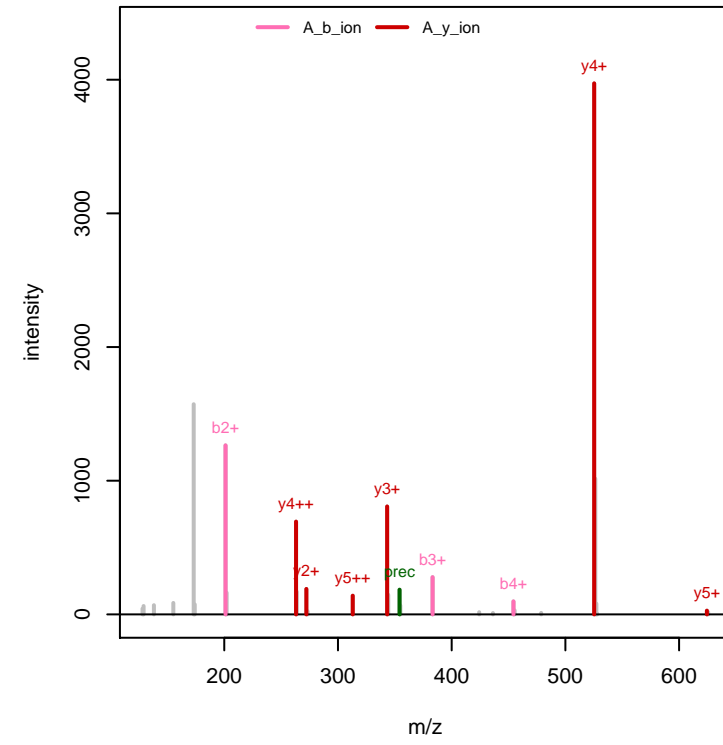

TVKAPR+XL\_L

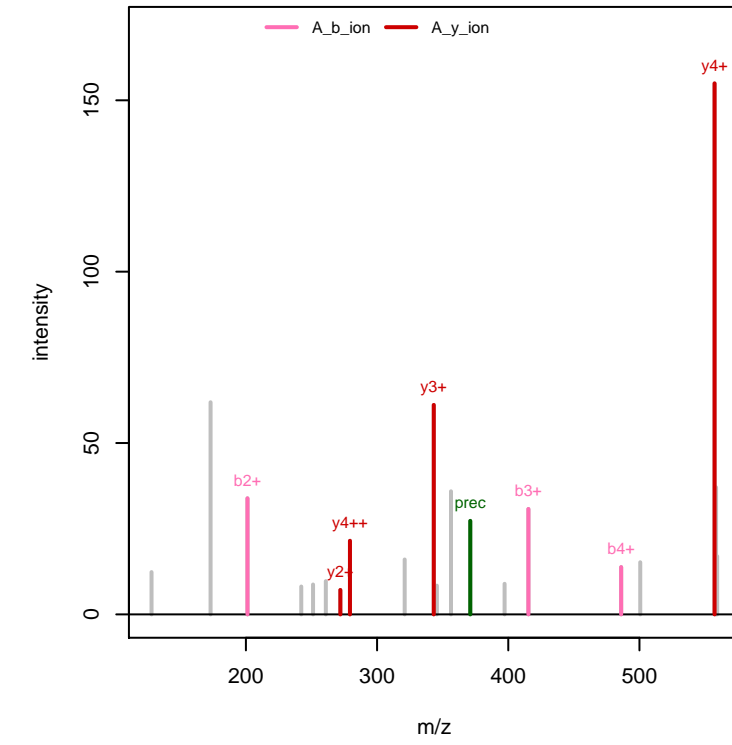

AQKPVEKAPK+XL\_S

AQKPVEKAPK+XL\_L

VKSSAQAK  
MEKDAADNEAK

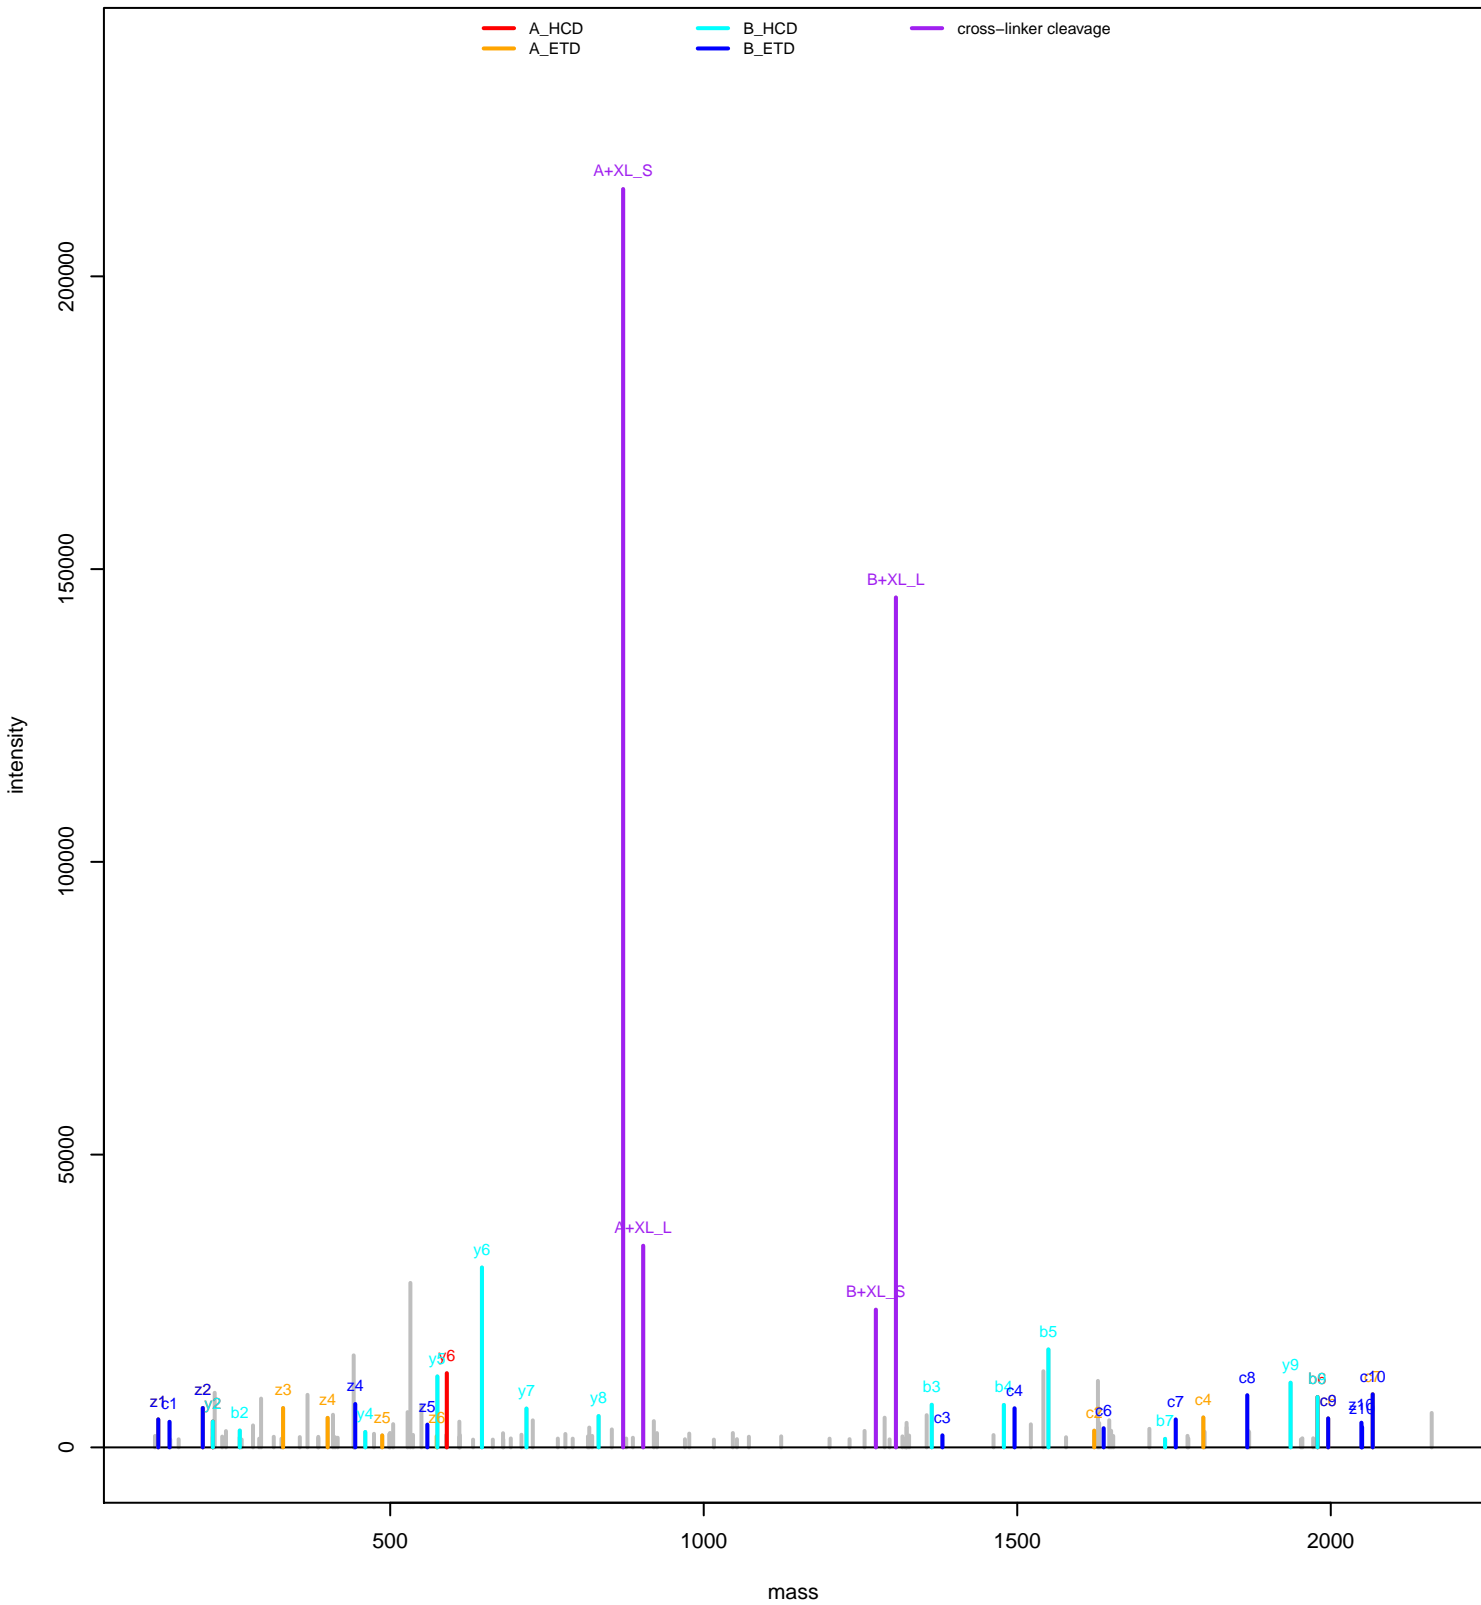

VKSSAQAK+XL\_S

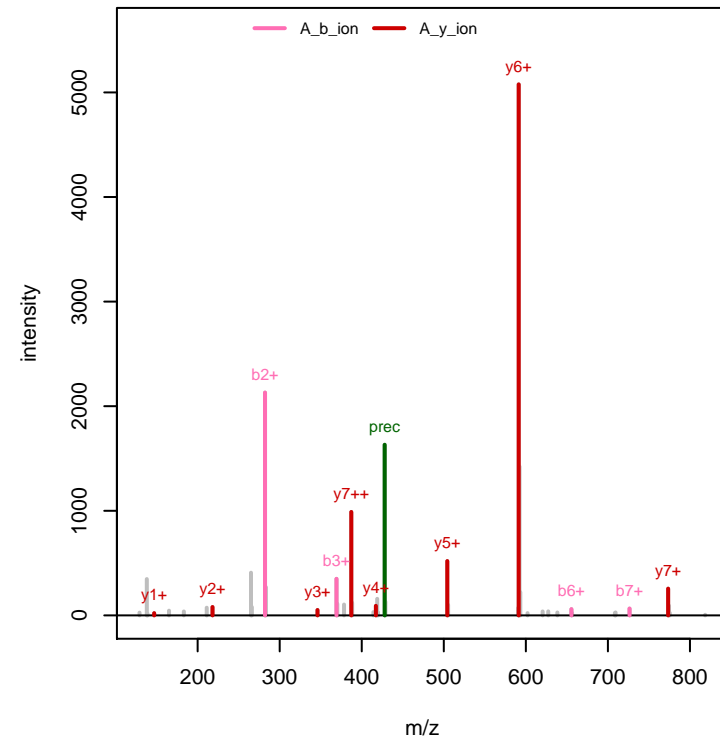

VKSSAQAK+XL\_L

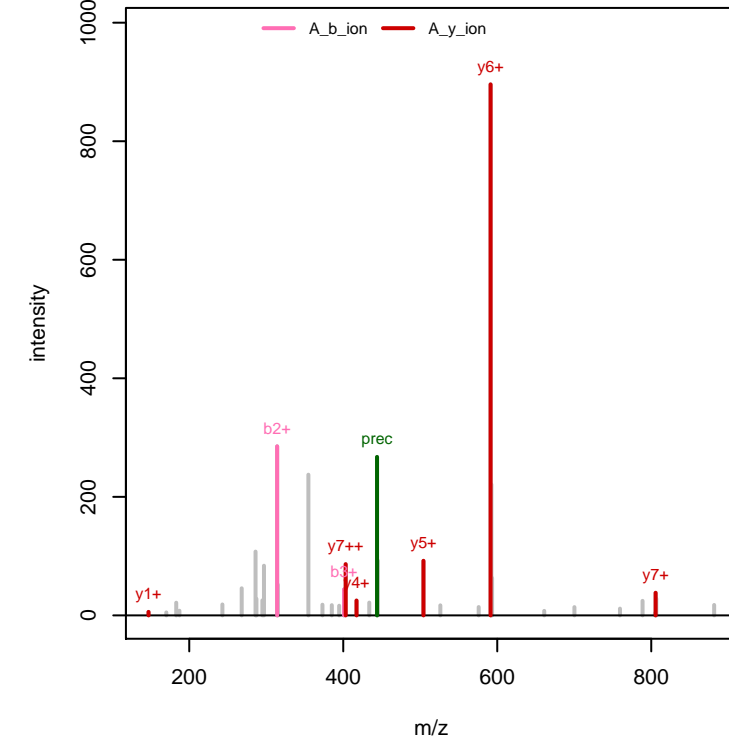

MEKDAADNEAK+XL\_S

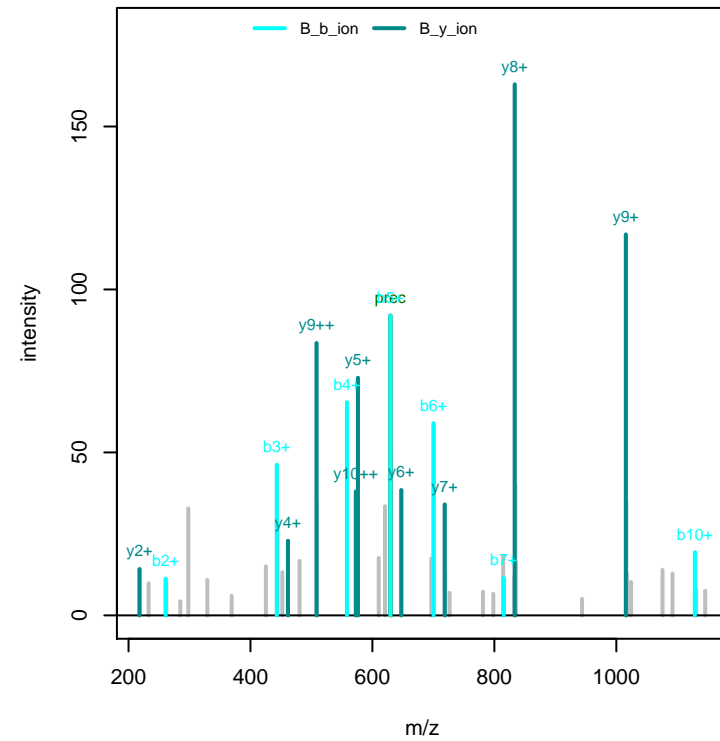

MEKDAADNEAK+XL\_L

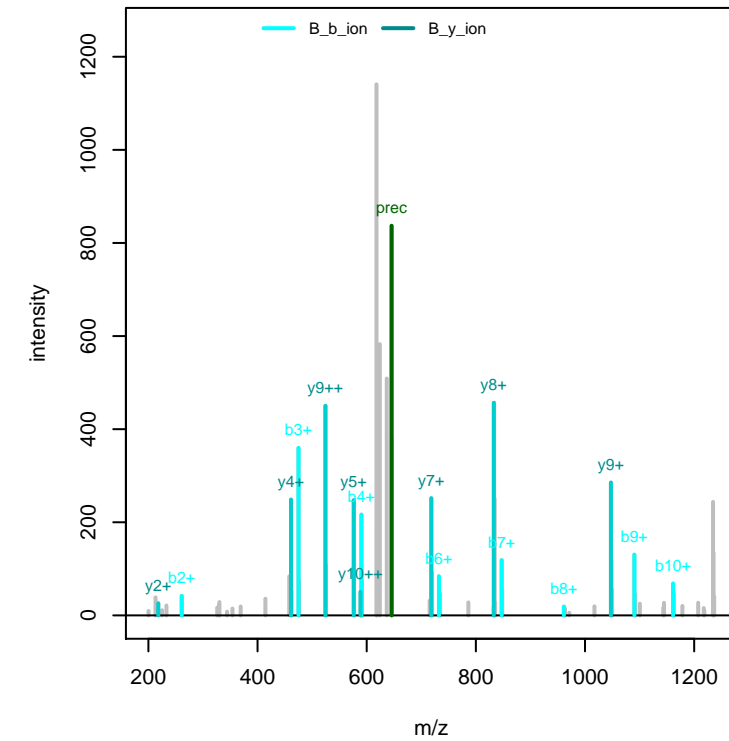

AAVKS<sub>G</sub>SELGK  
QAKDIM<sub>o</sub>DAGK

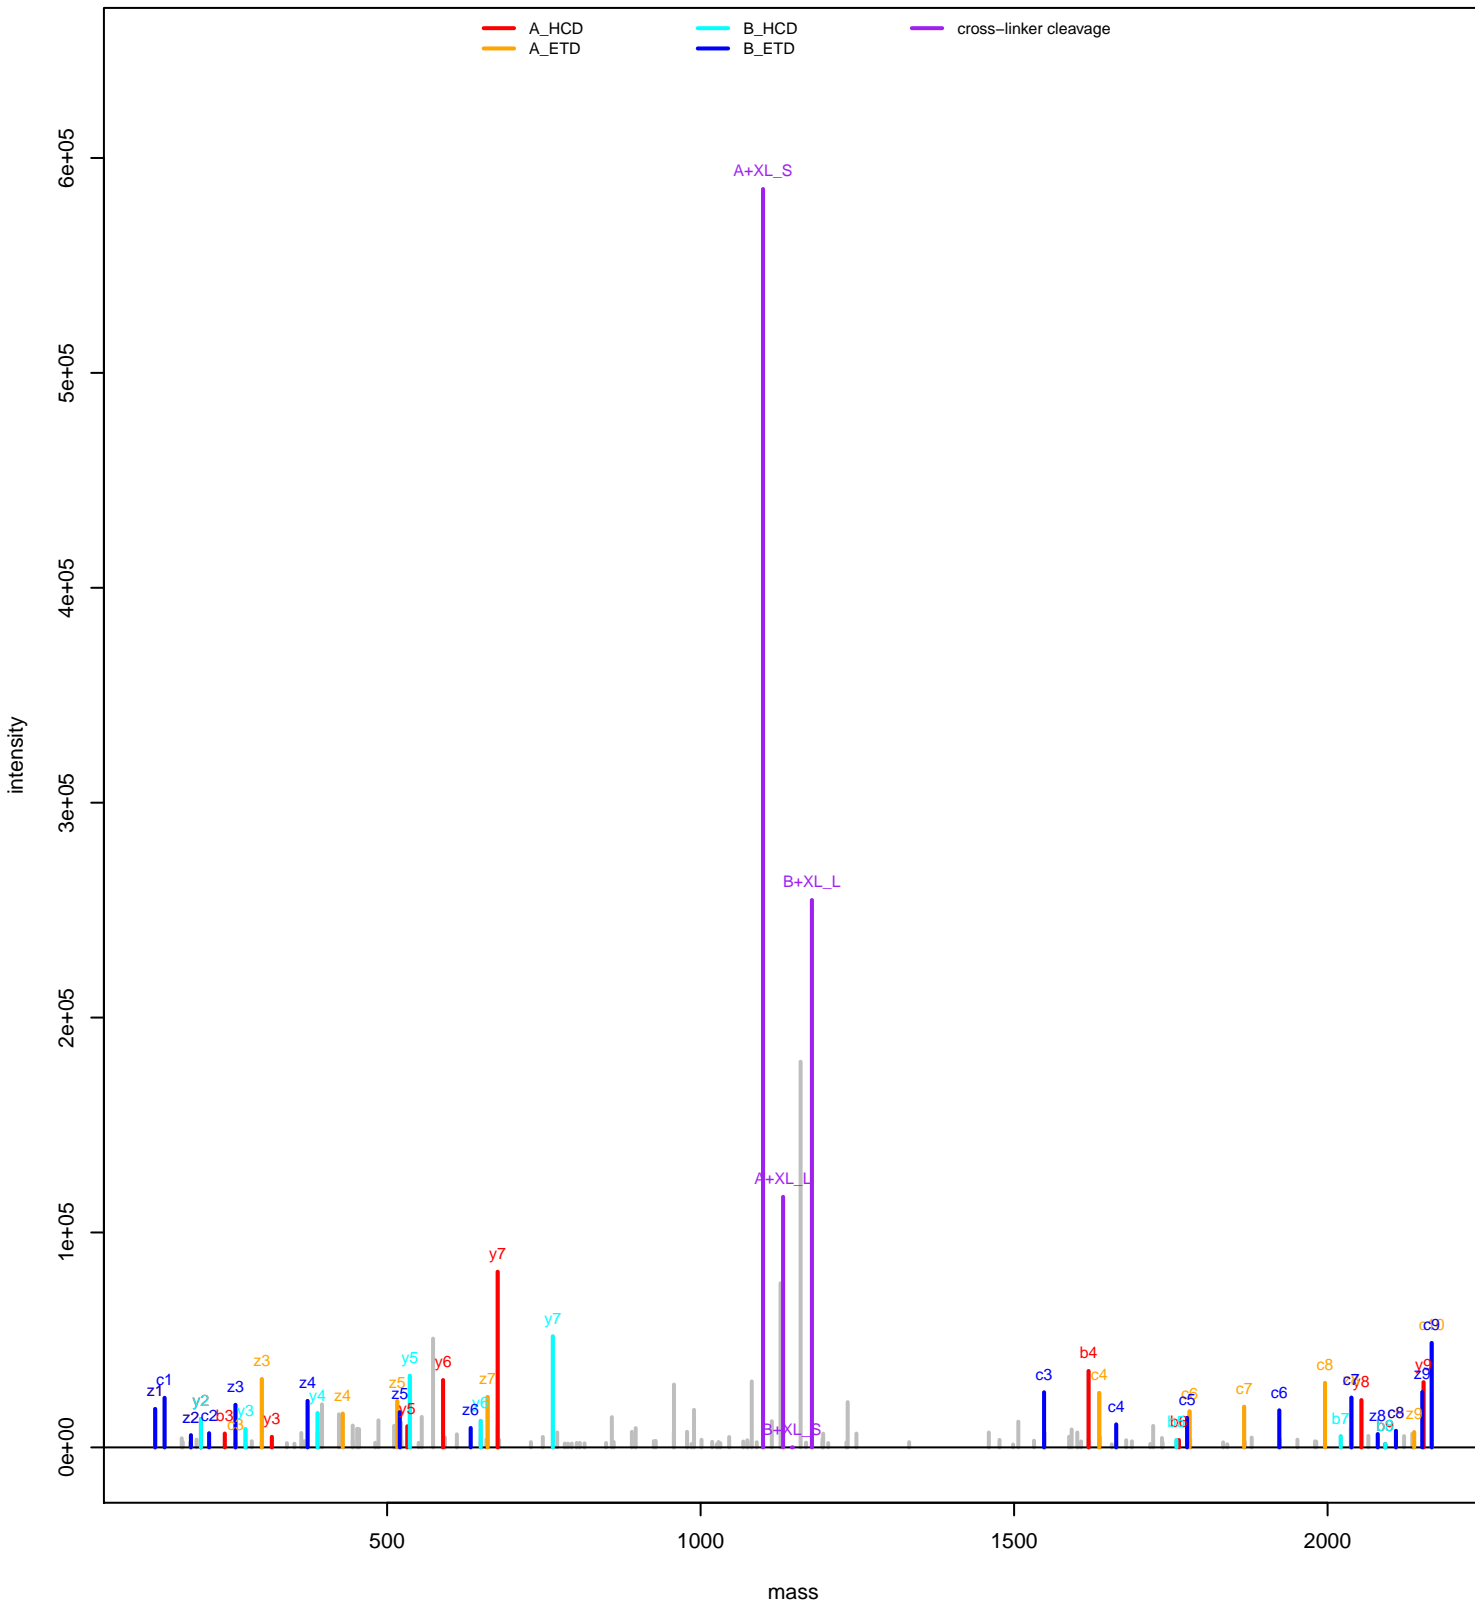

AAVKS<sub>G</sub>SELGK+XL\_S

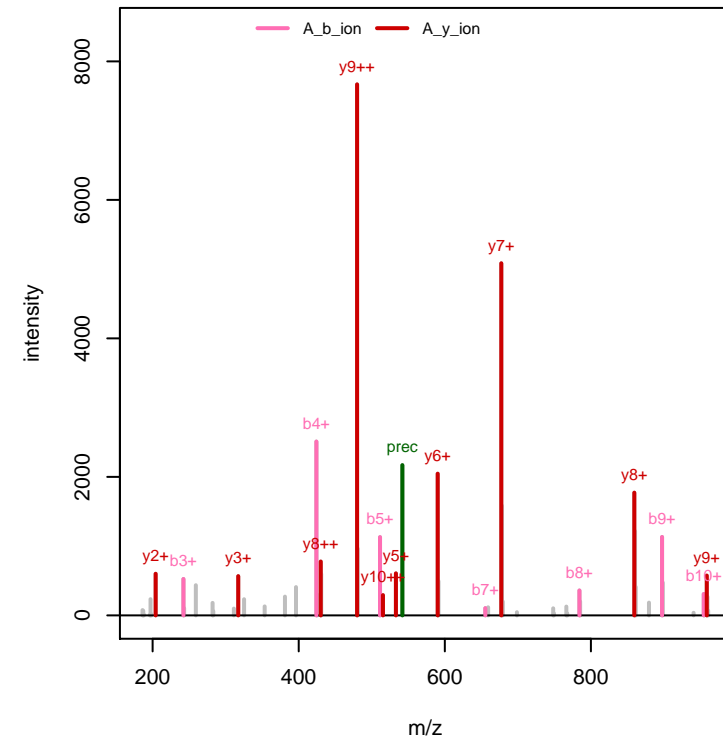

AAVKS<sub>G</sub>SELGK+XL\_L

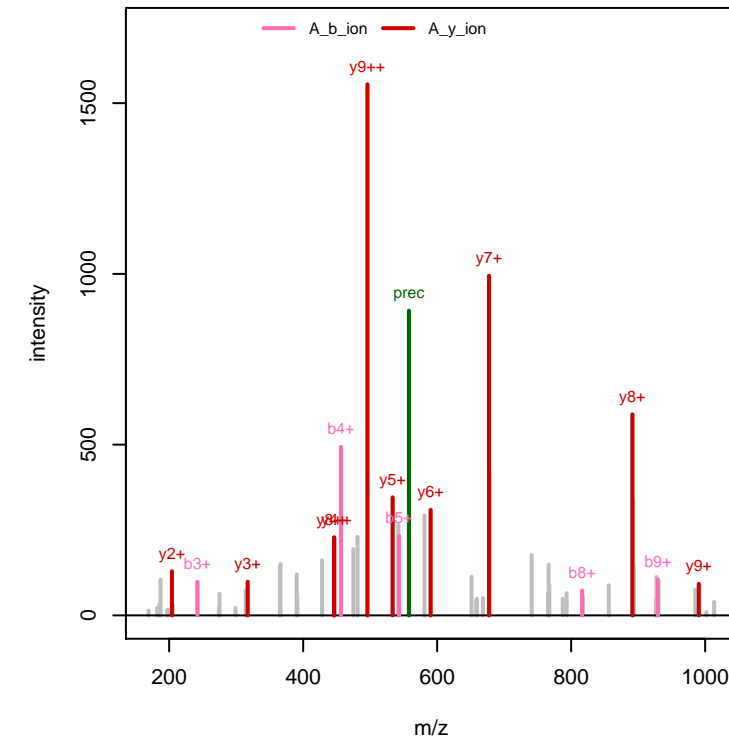

QAKDIM<sub>o</sub>DAGK+XL\_S

QAKDIM<sub>o</sub>DAGK+XL\_L

AGAKSVR  
KQGKIR

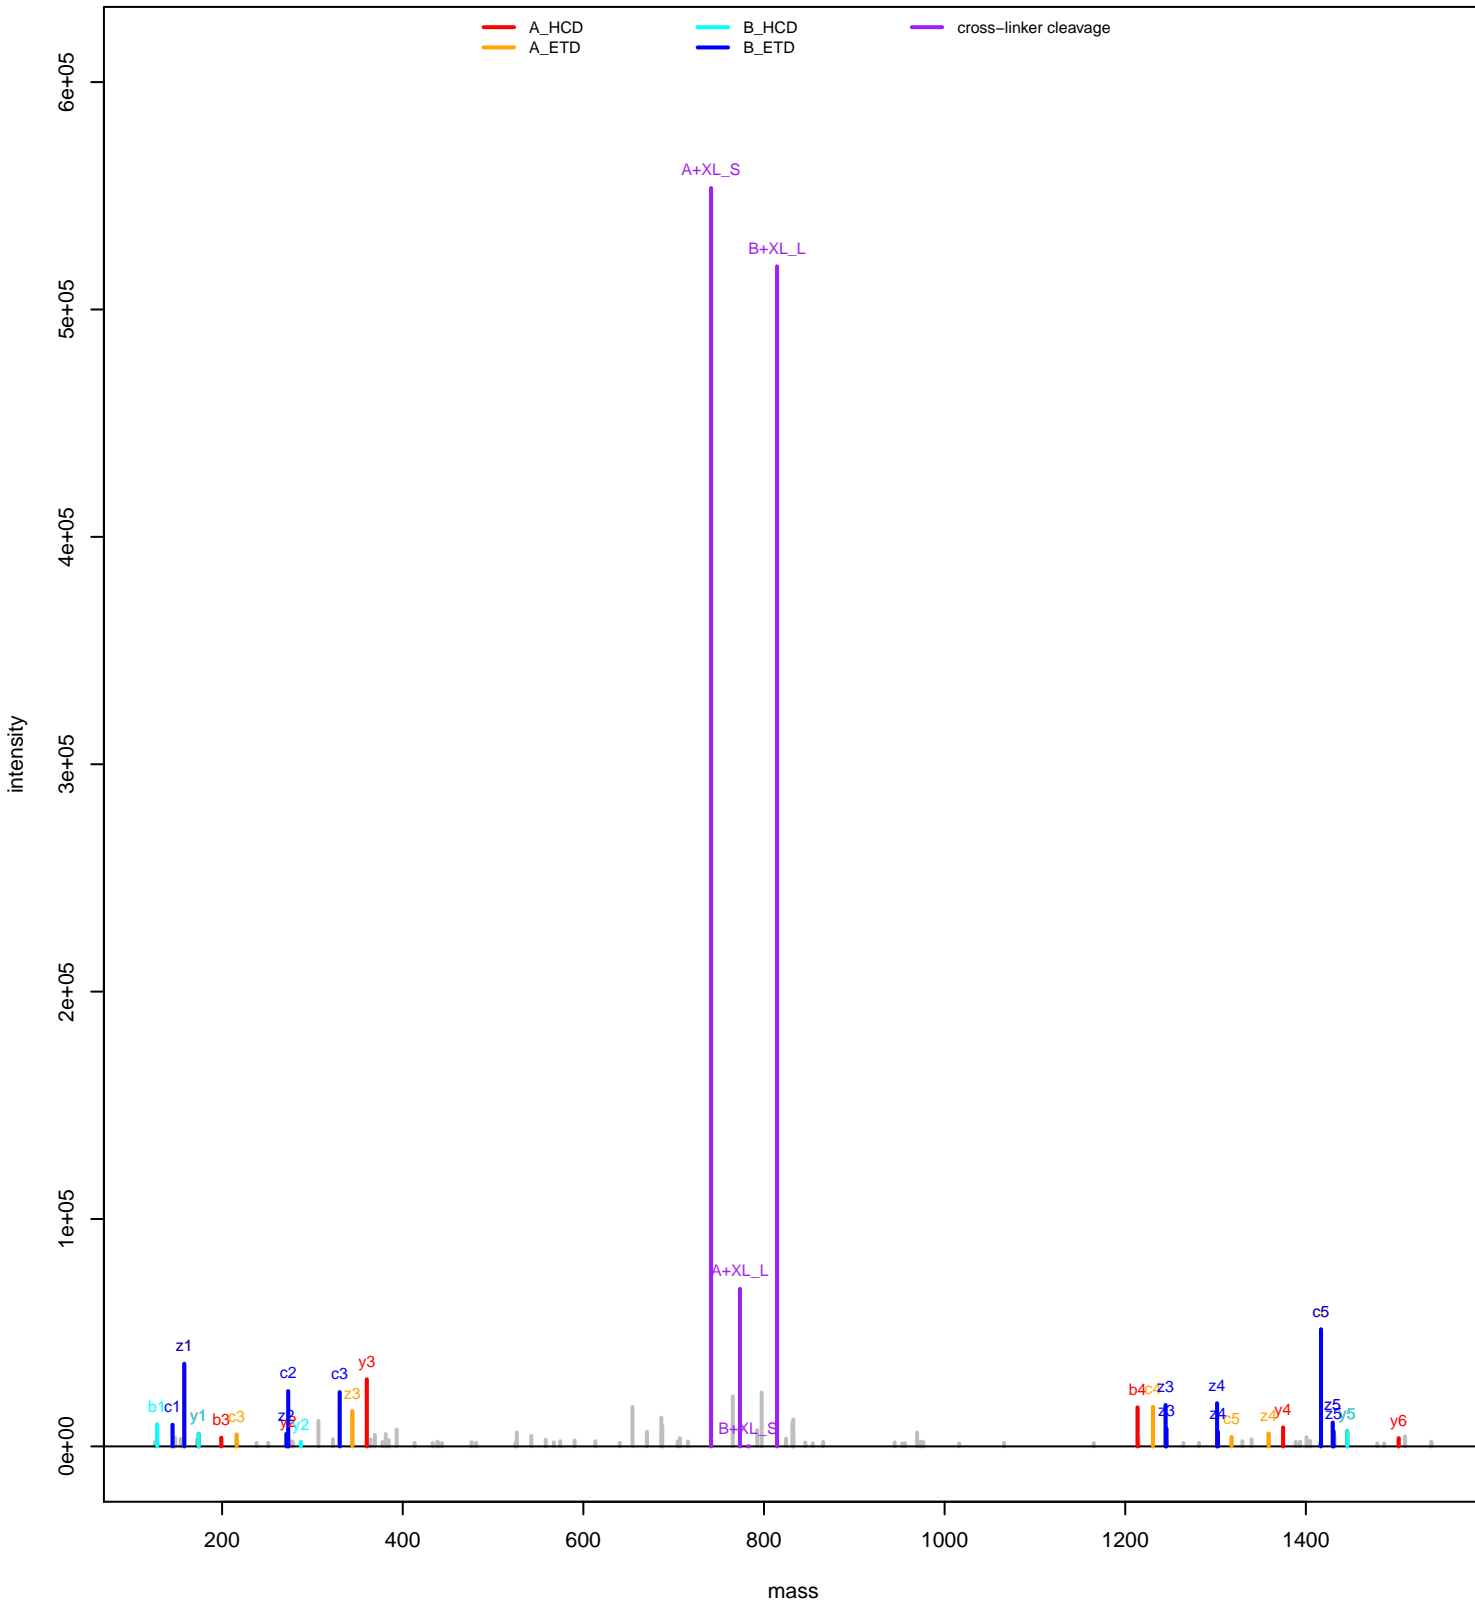

AGAKSVR+XL\_S

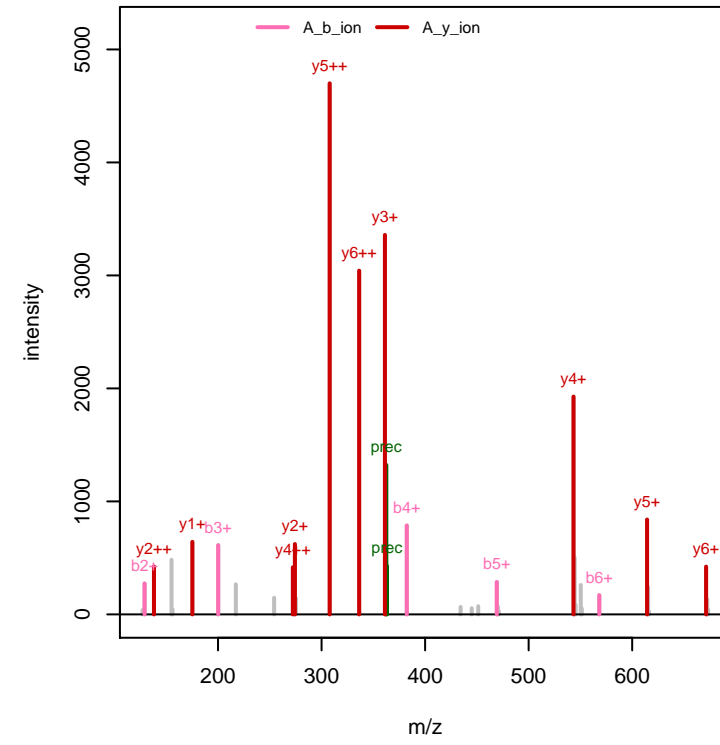

AGAKSVR+XL\_L

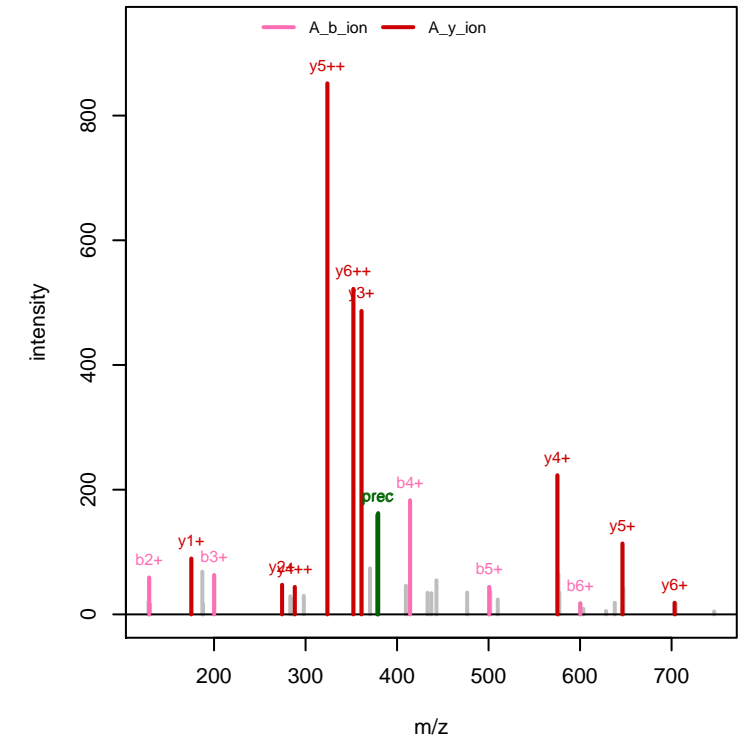

KQGKIR+XL\_S

KQGKIR+XL\_S

KQGKIR+XL\_L

KQGKIR+XL\_L

EIKVSVGDK  
KEAAPAAPAAAAAK

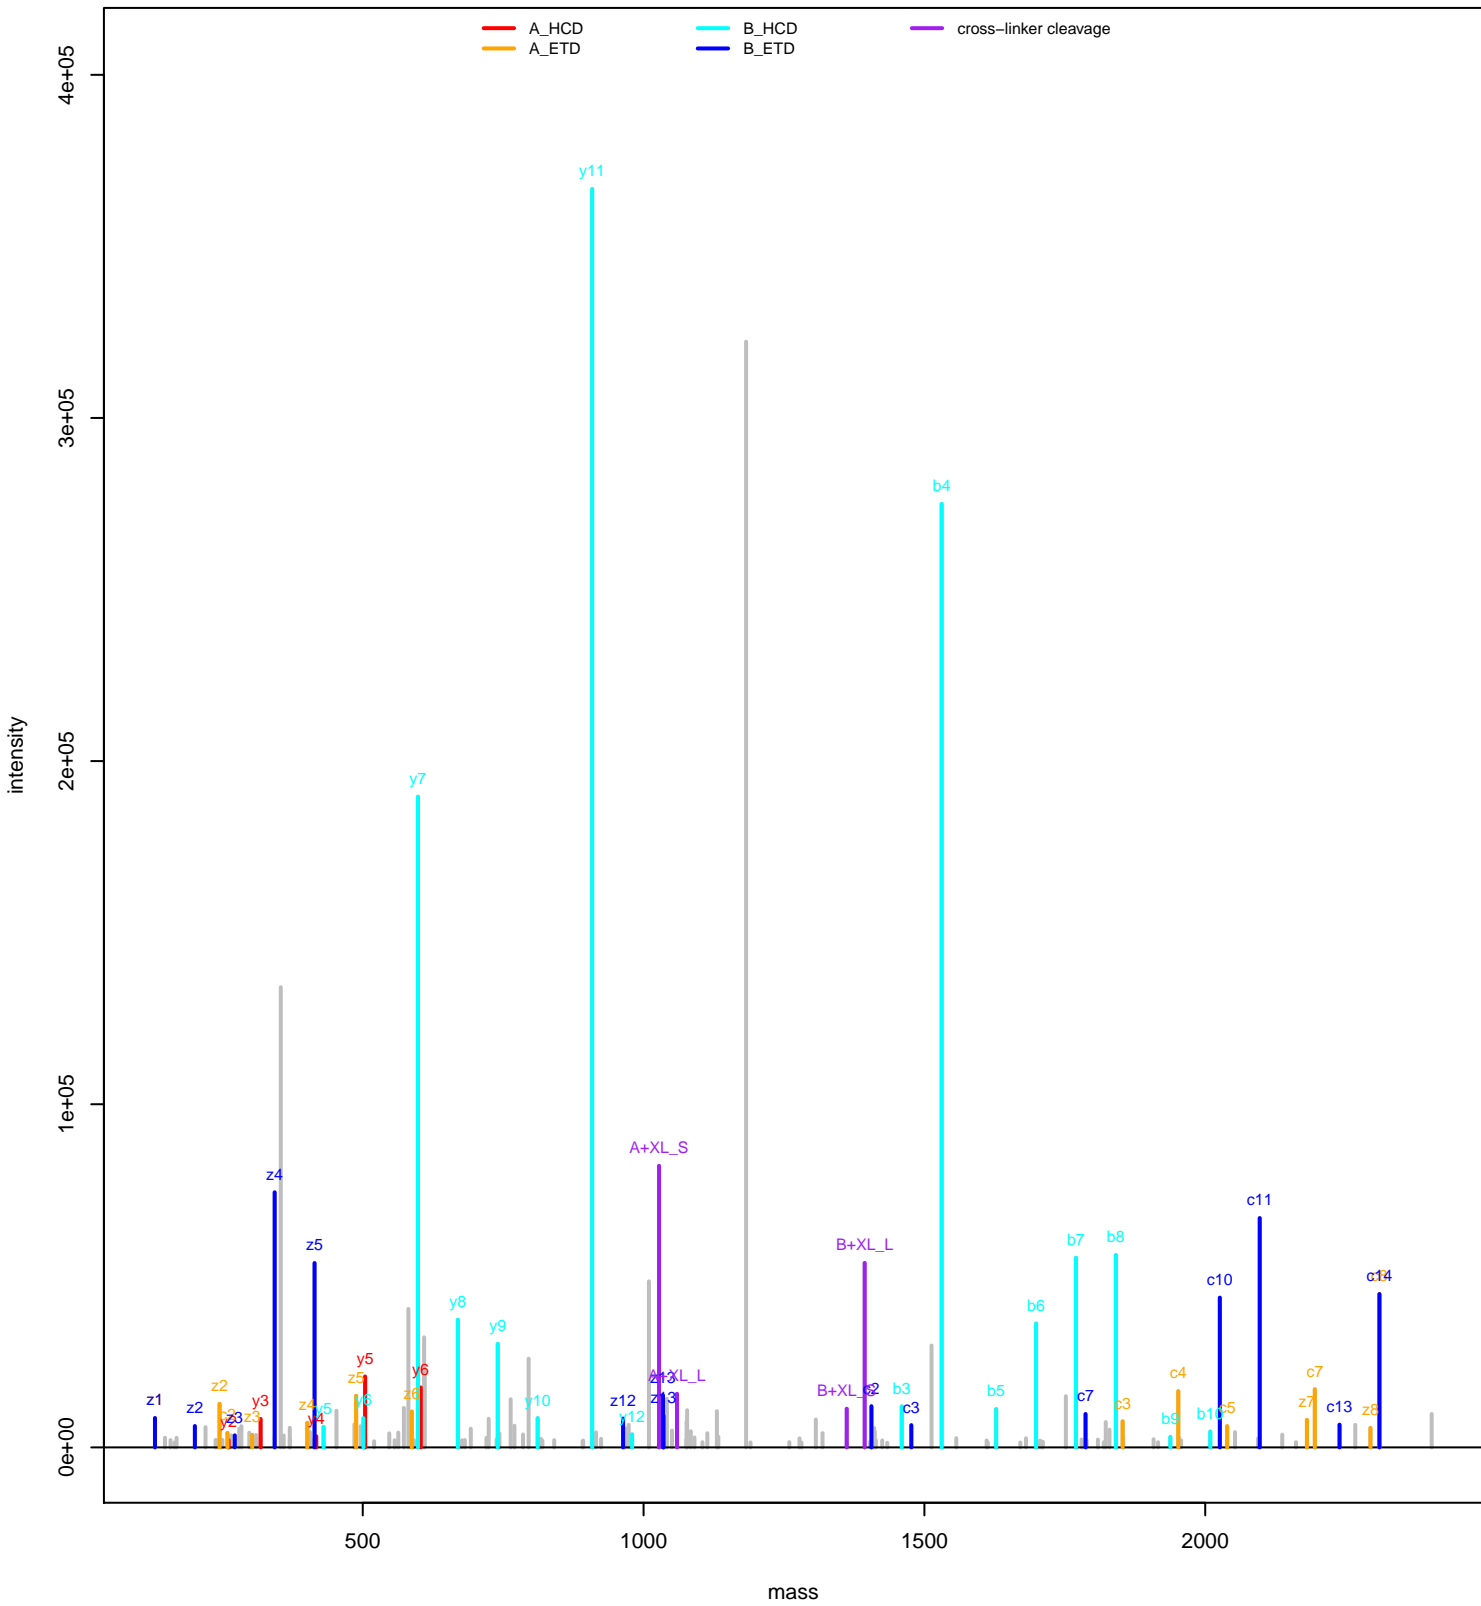

EIKVSVGDK+XL\_S

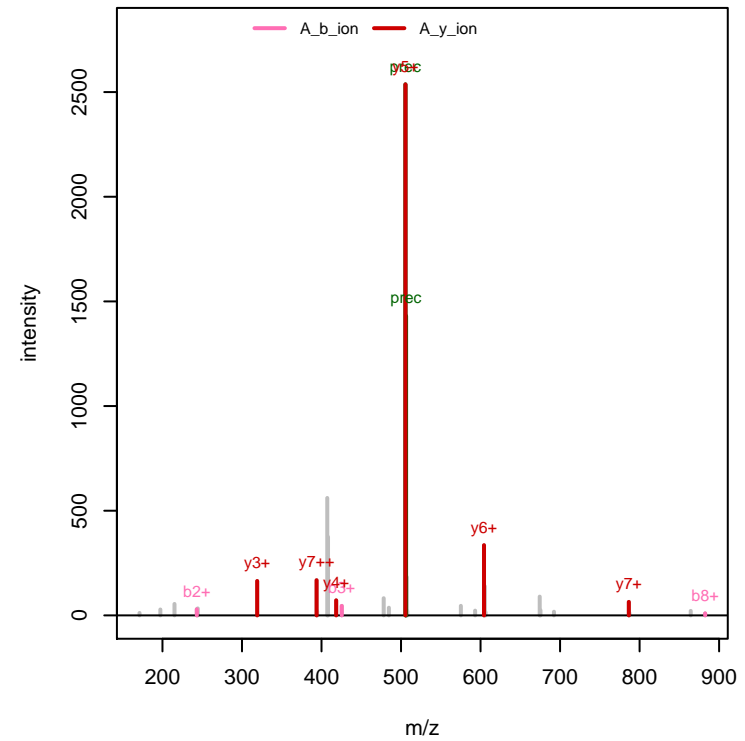

EIKVSVGDK+XL\_L

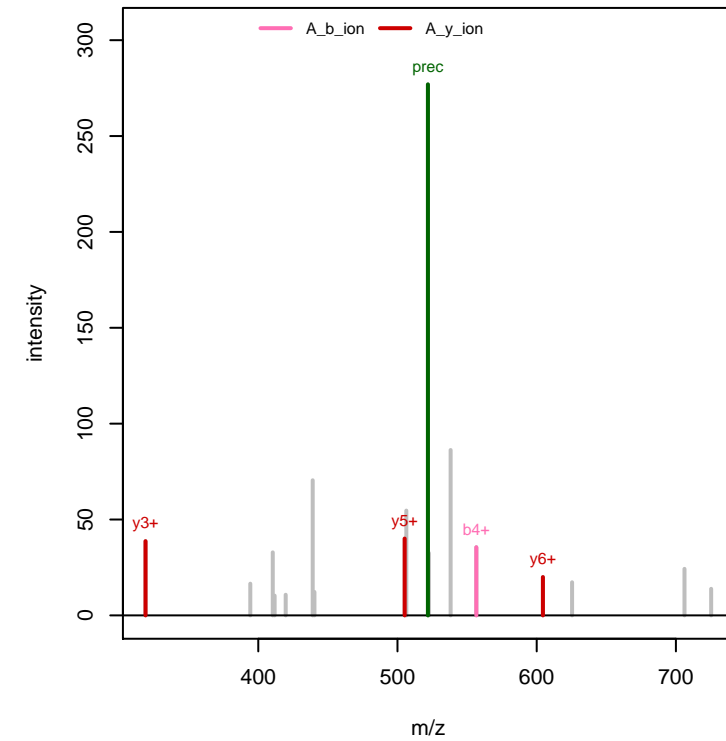

KEAAPAAPAAAAAK+XL\_S

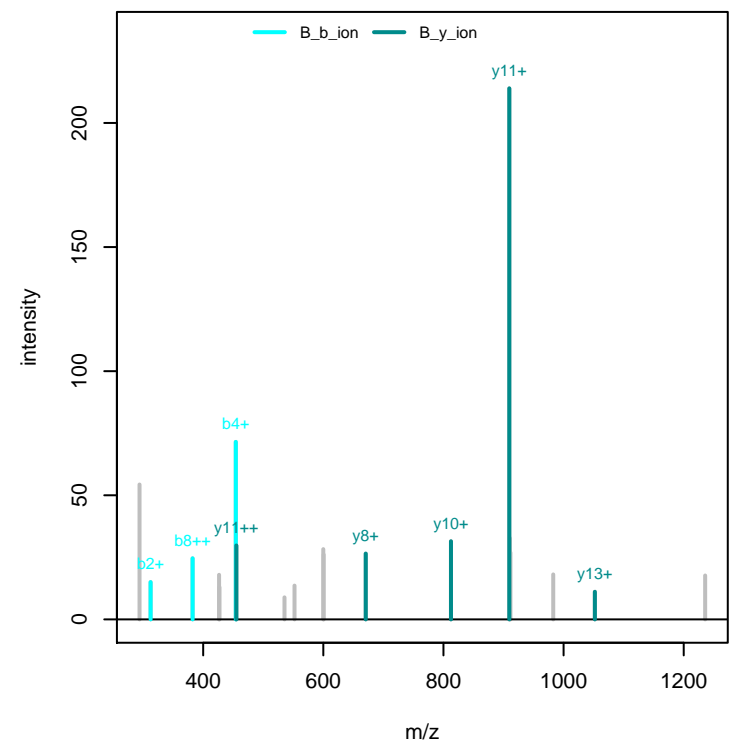

KEAAPAAPAAAAAK+XL\_L

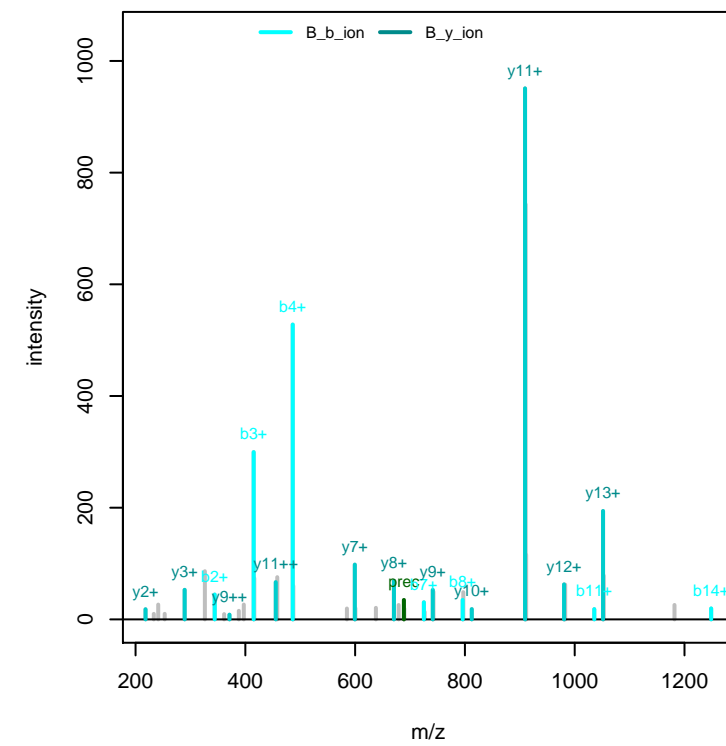



REAAEKDK  
VSNQQDDMTKNAQAEK

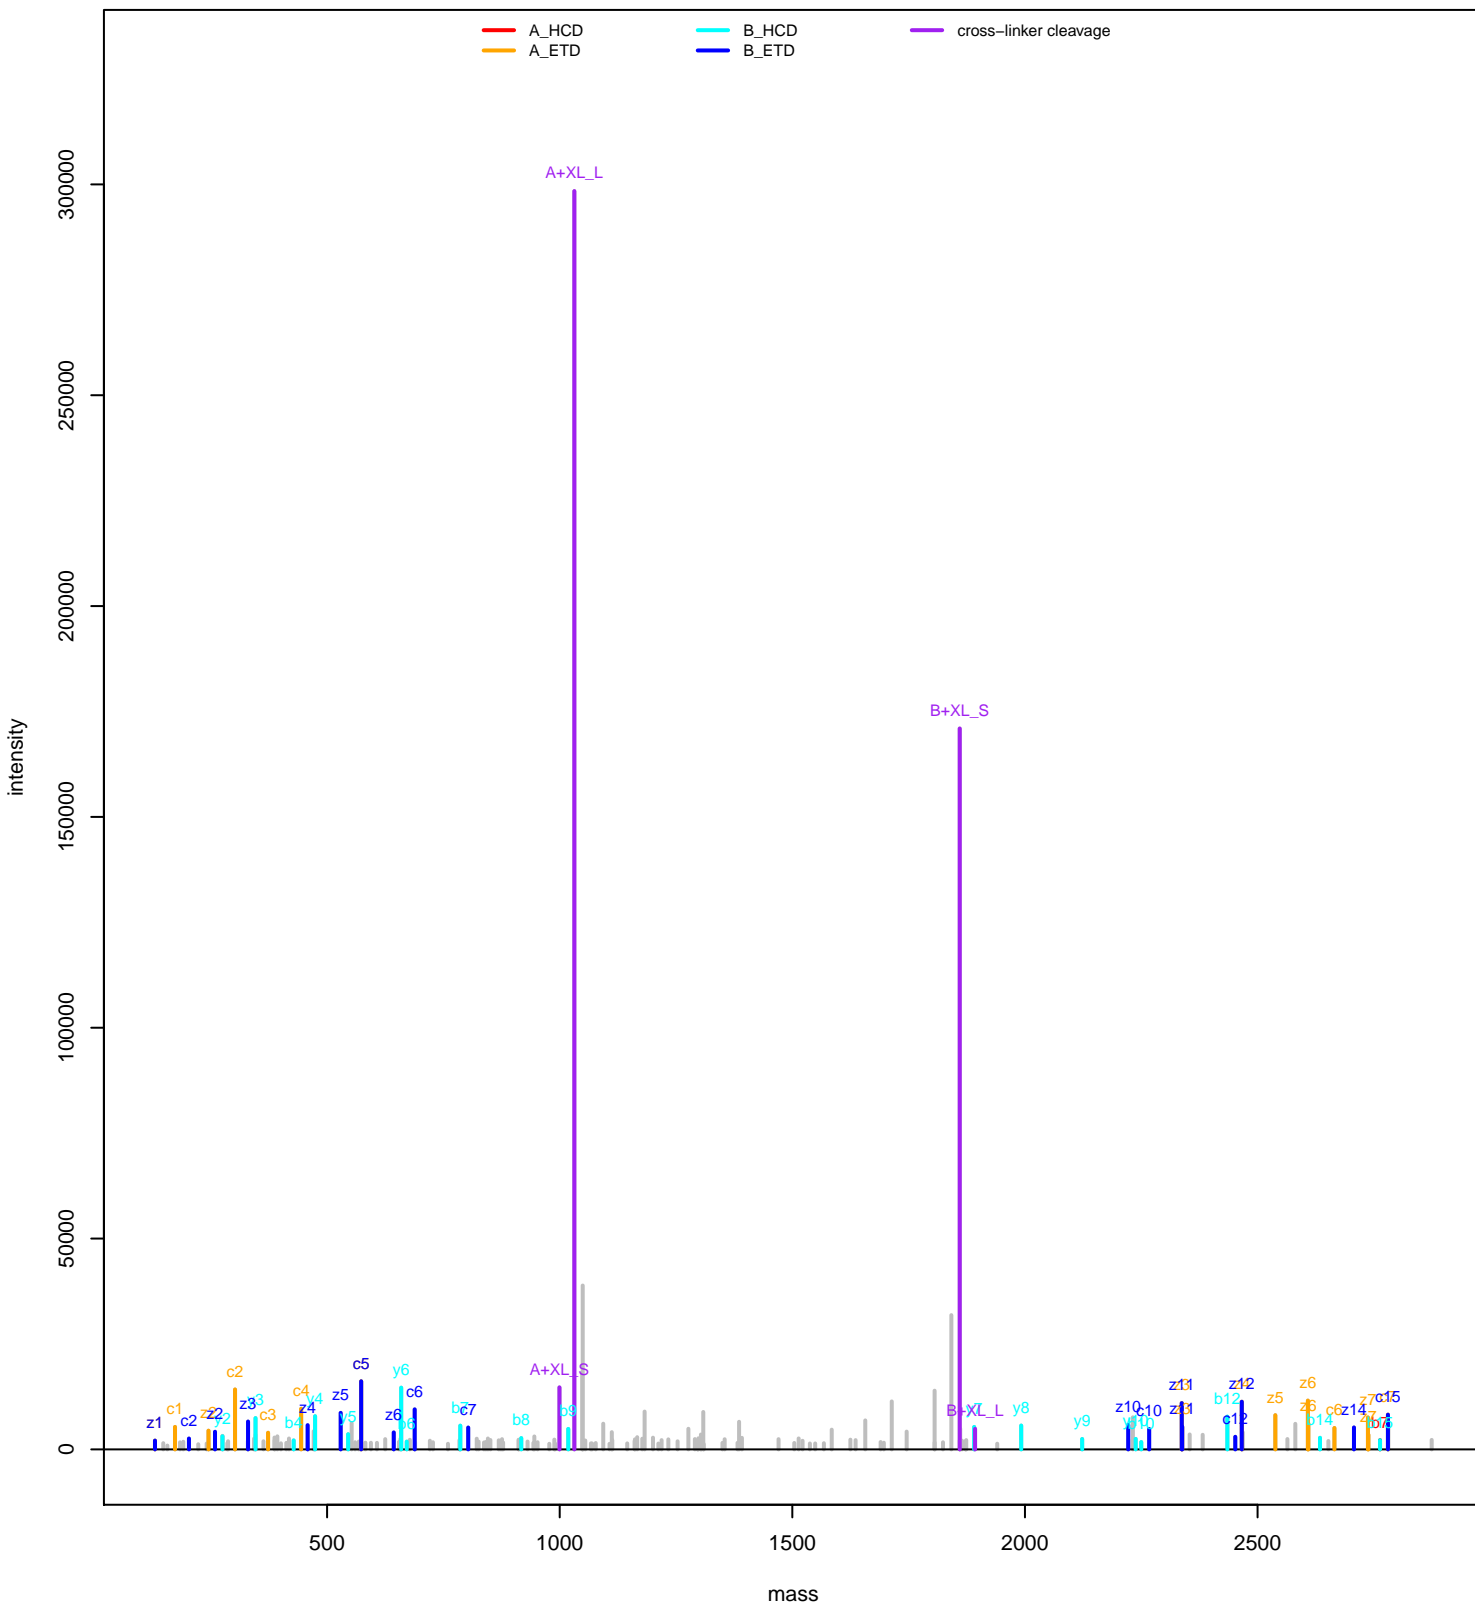

REAAEKDK+XL\_S

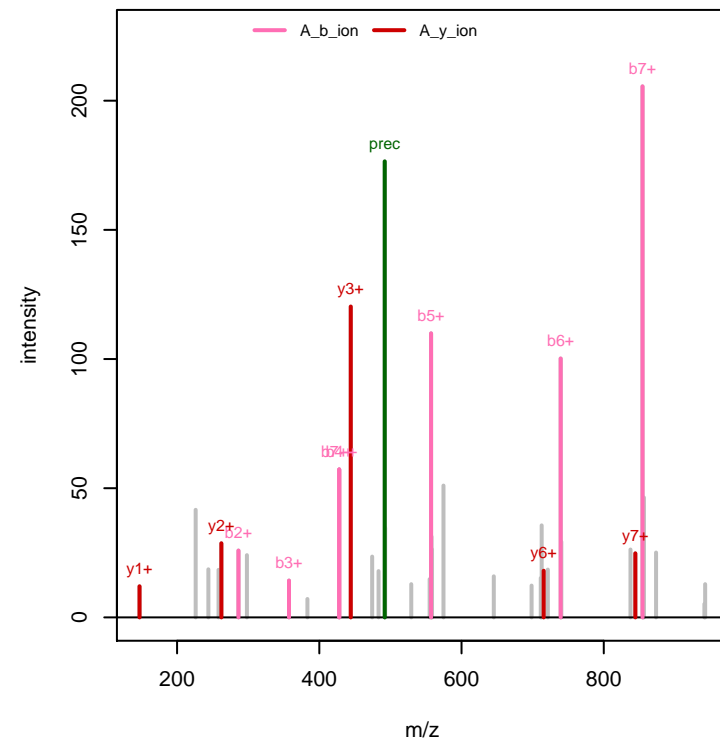

VSNQQDDMTKNAQAEK+XL\_S

REAAEKDK+XL\_L

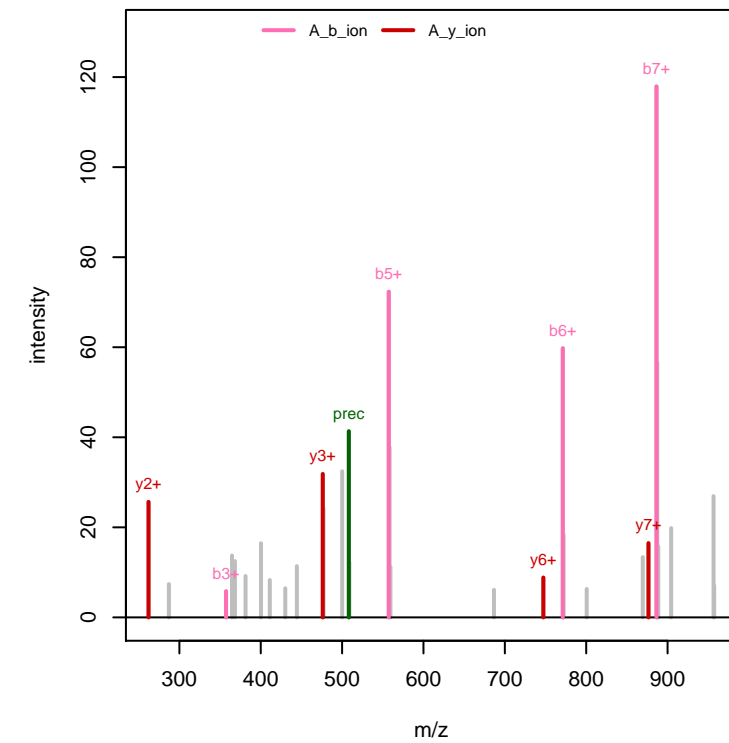

VSNQQDDMTKNAQAEK+XL\_L

LGAKGIK  
LGAKGIK

A\_HCD    B\_HCD  
A\_ETD    B\_ETD    cross-linker cleavage

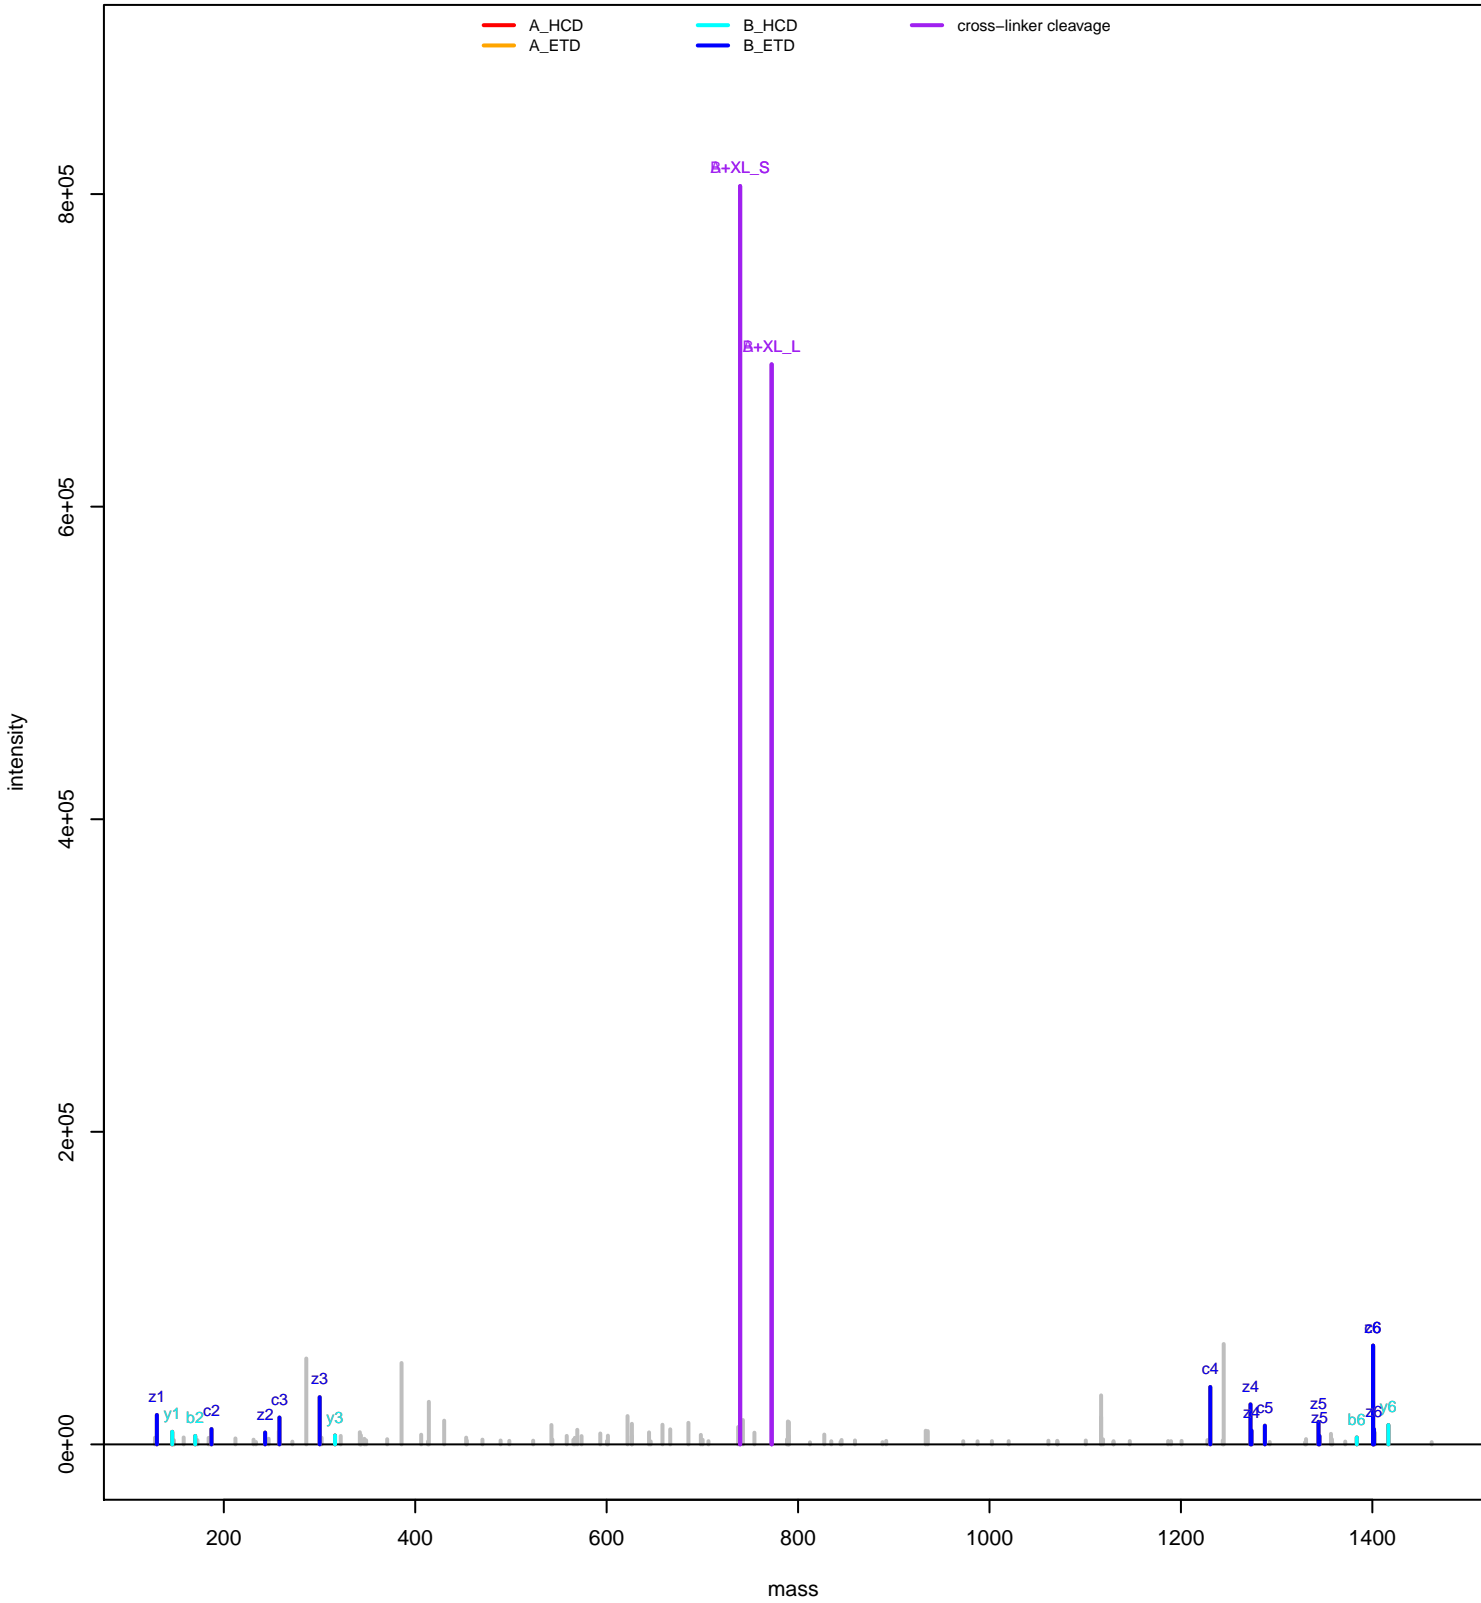

LGAKGIK+XL\_S

LGAKGIK+XL\_L

LGAKGIK+XL\_S

LGAKGIK+XL\_L

MEGKNSK  
TAASKQPELAQK

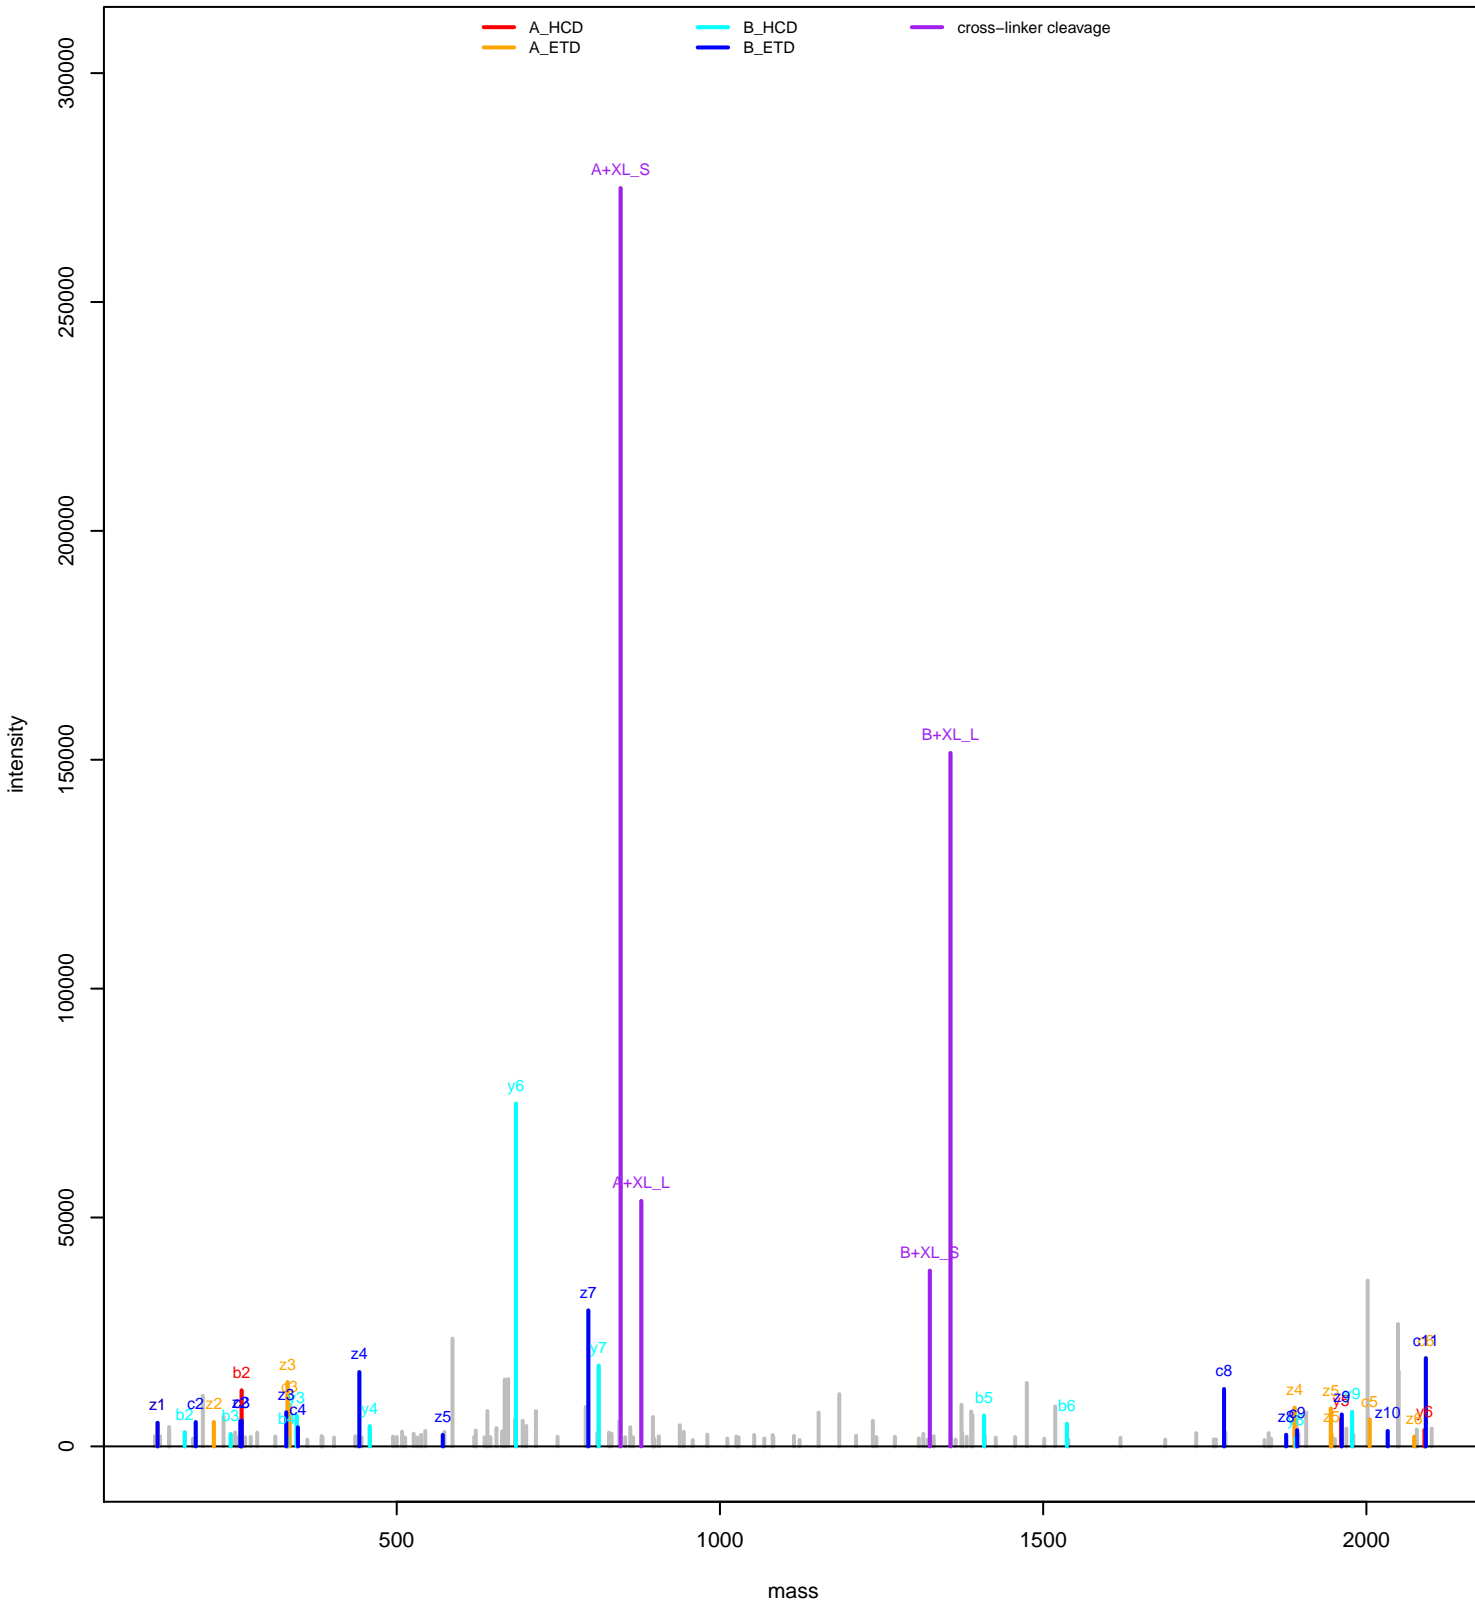

MEGKNSK+XL\_S

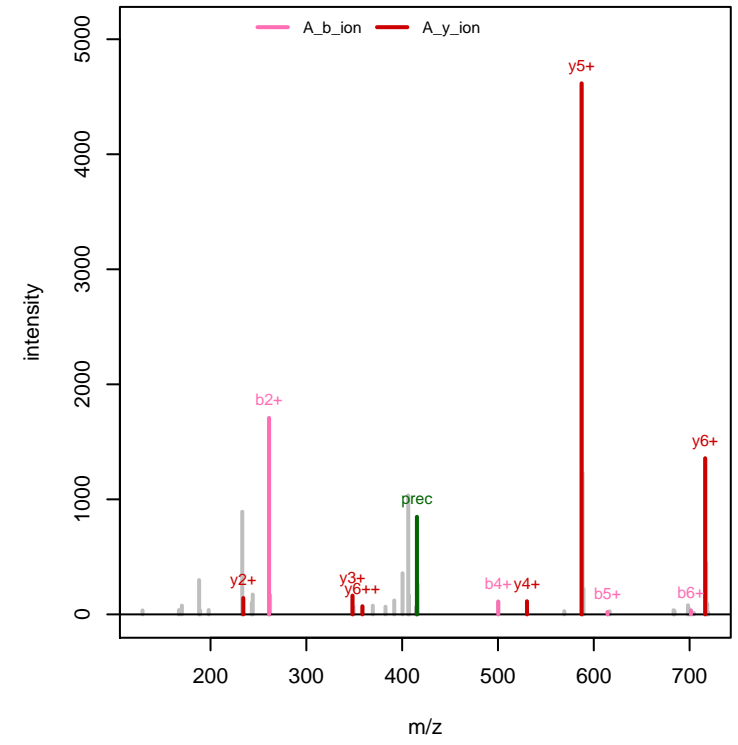

MEGKNSK+XL\_L

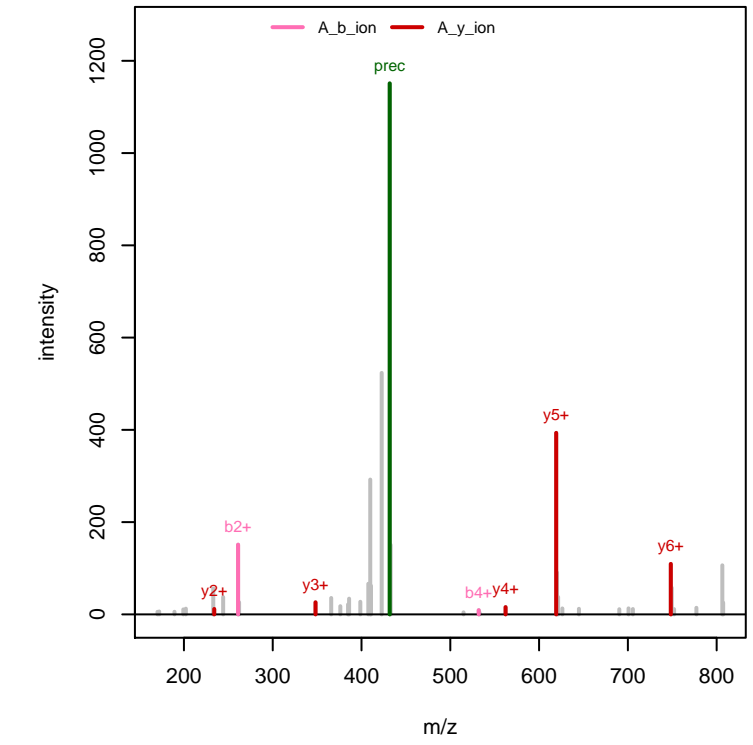

TAASKQPELAQK+XL\_S

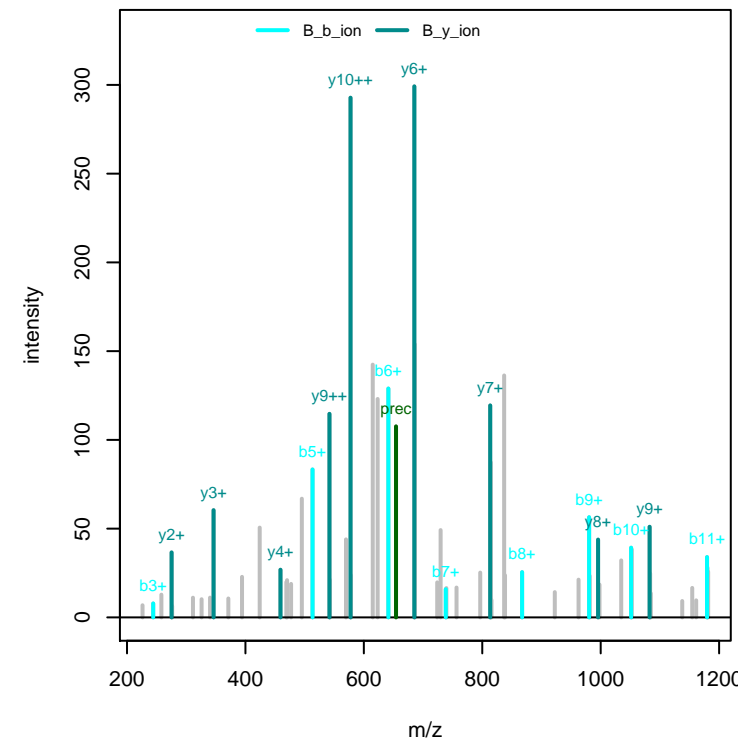

TAASKQPELAQK+XL\_L

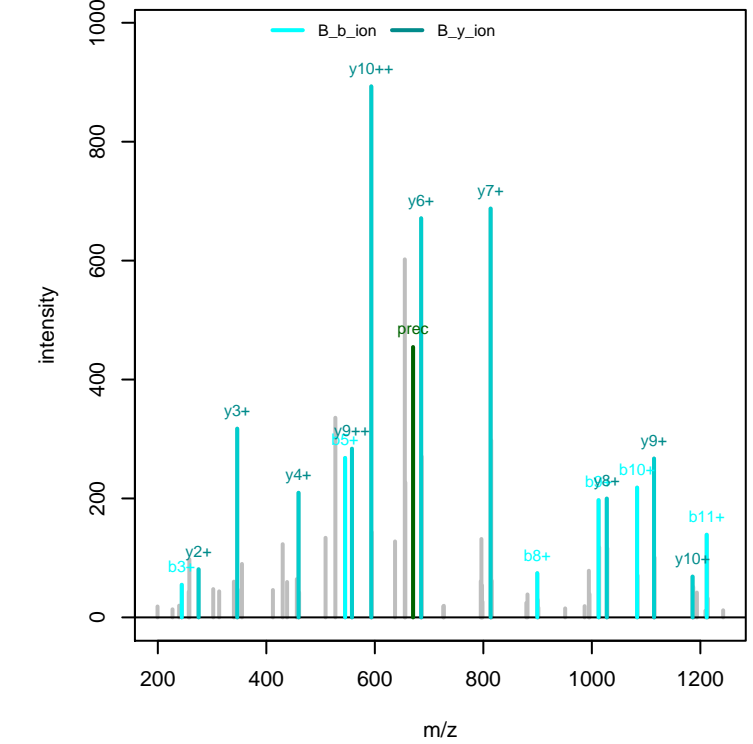

AADSAKK  
ADAKPEADAK

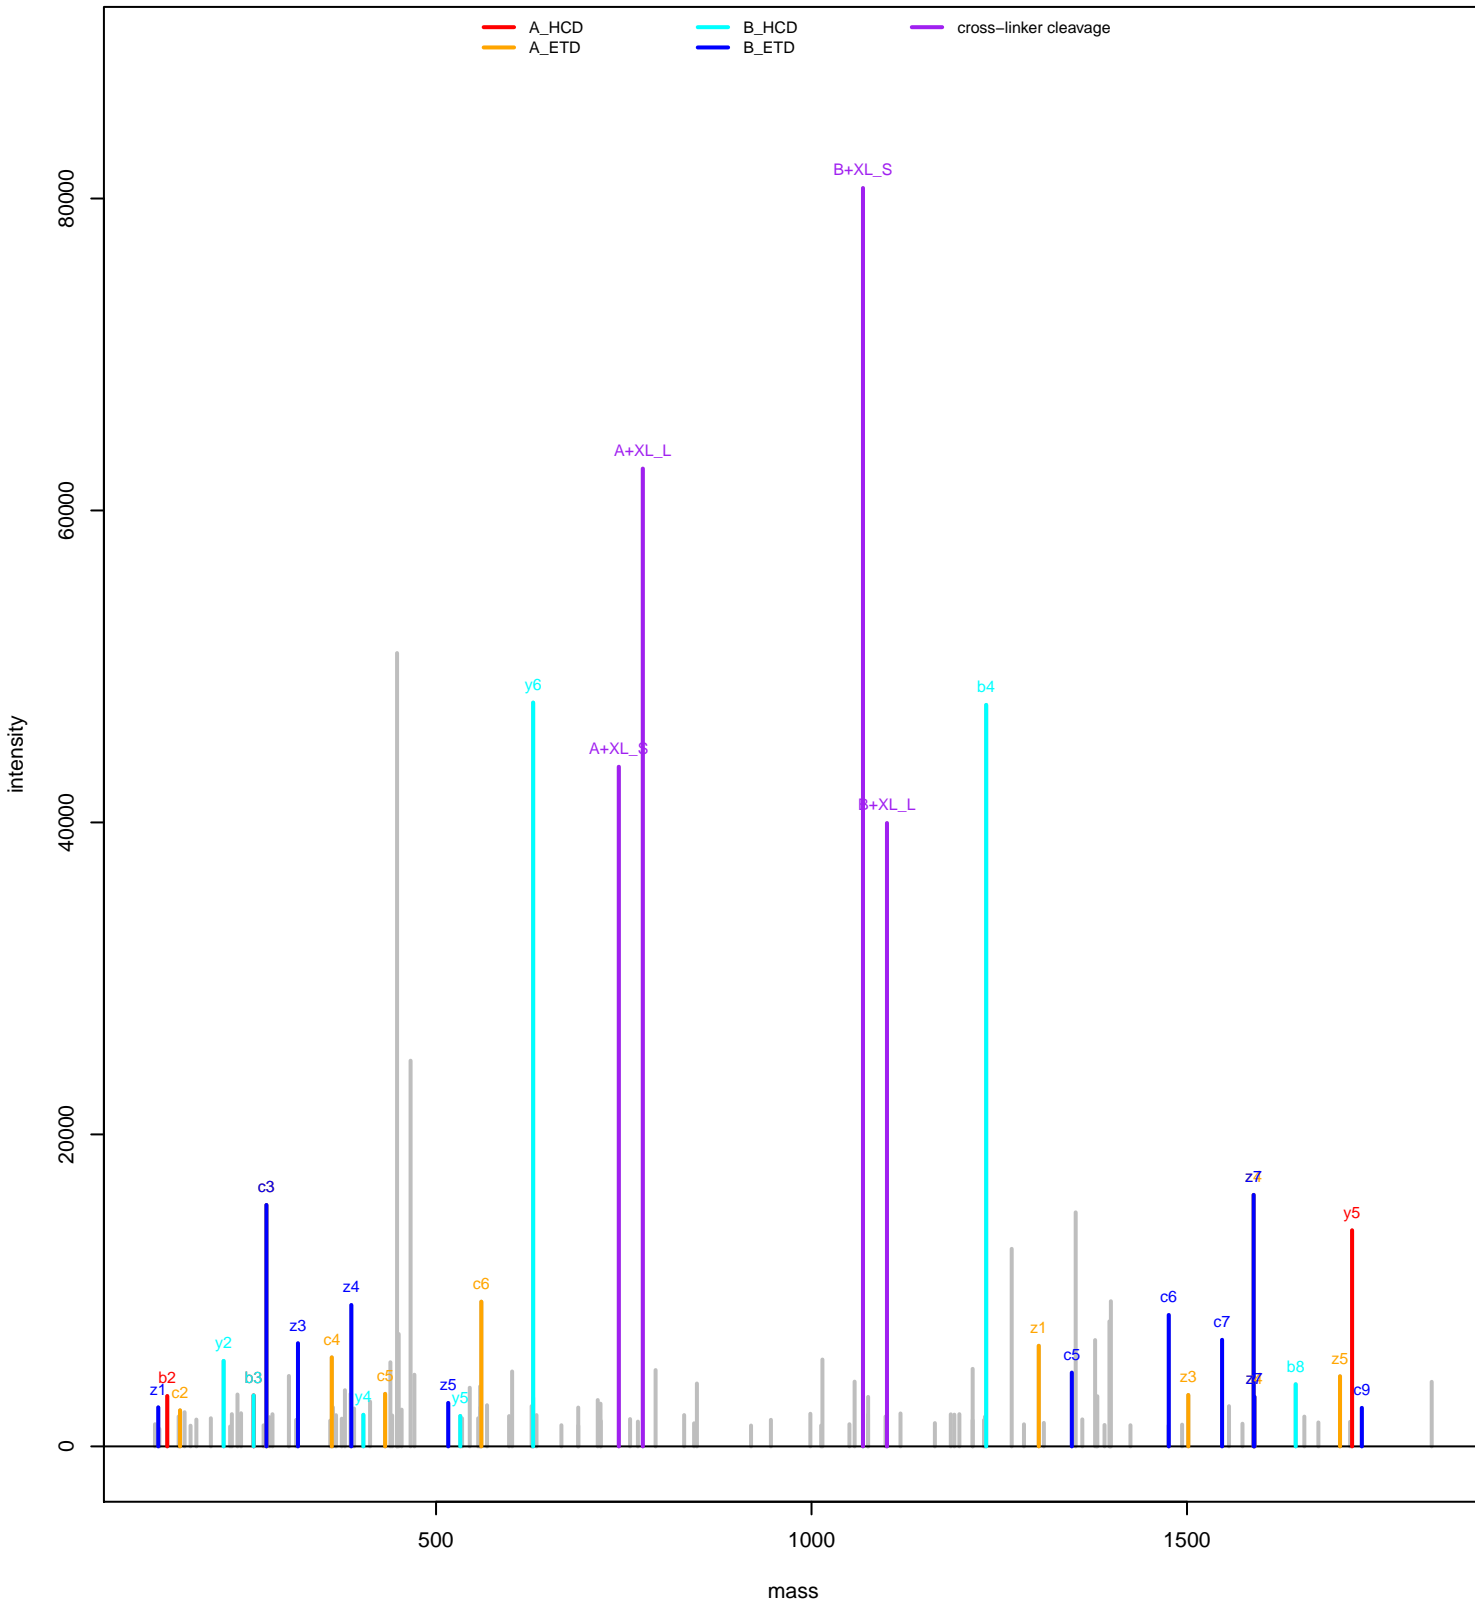

AADSAKK+XL\_S

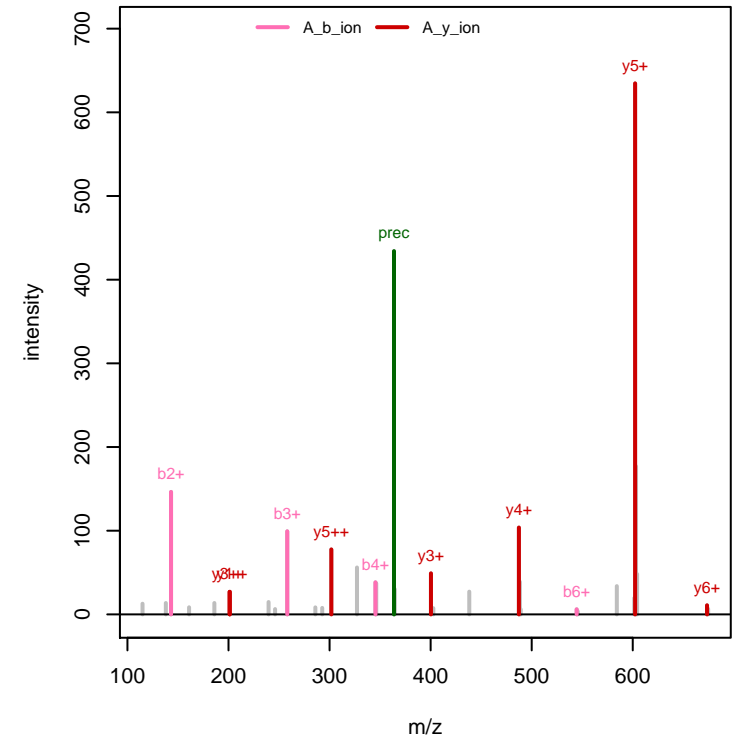

AADSAKK+XL\_L

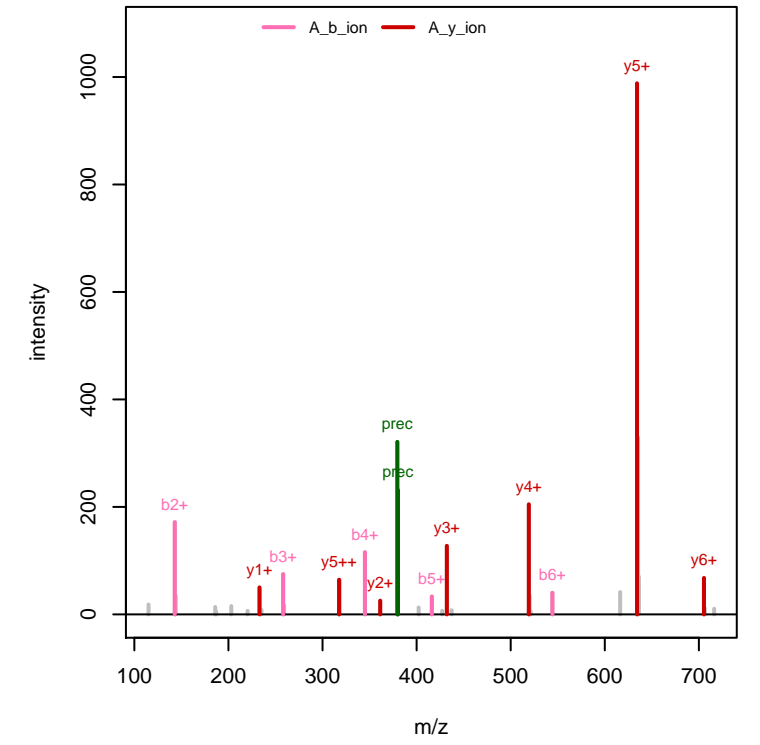

ADAKPEADAK+XL\_S

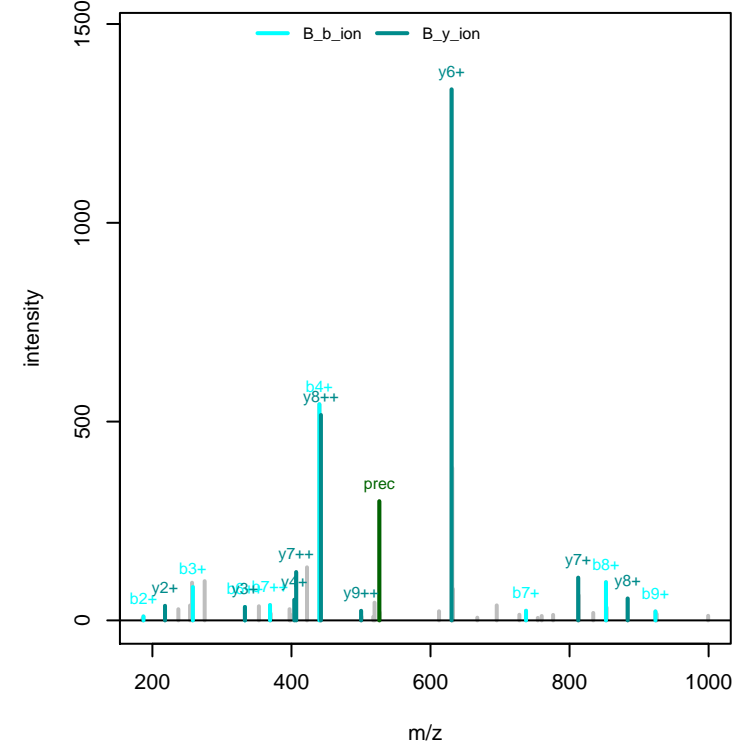

ADAKPEADAK+XL\_L

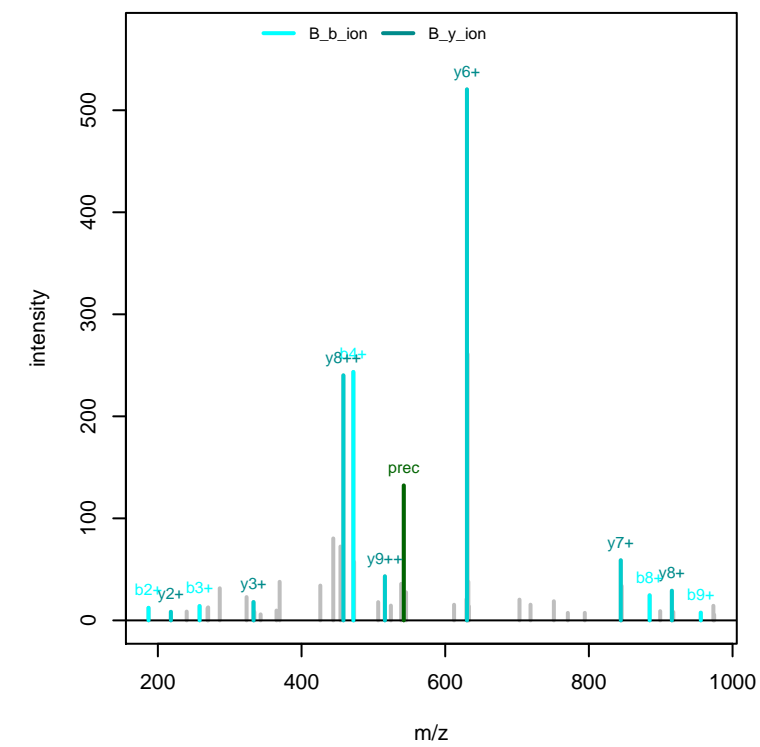

HAKQSGGR  
QKVTDVEGK

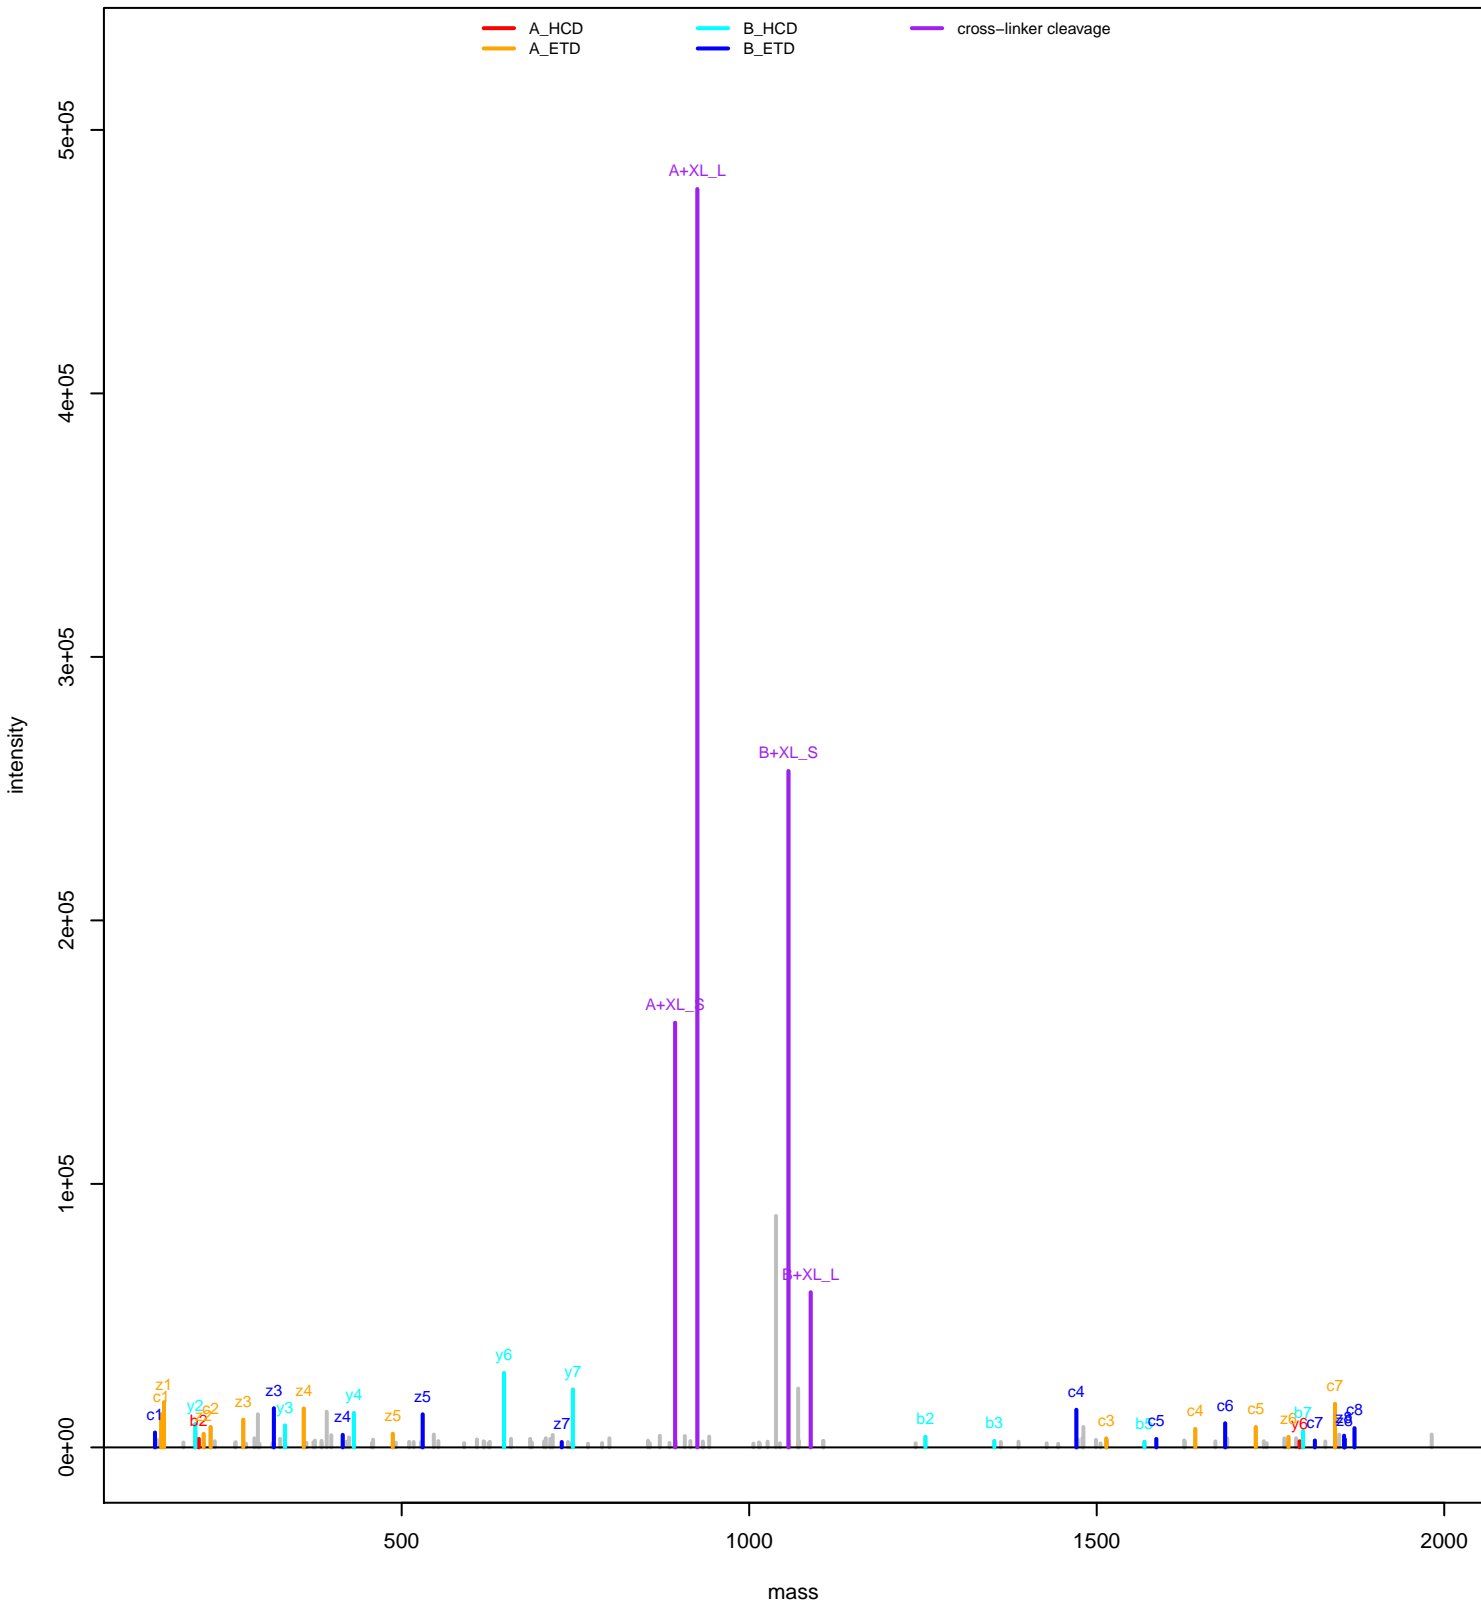

HAKQSGGR+XL\_S

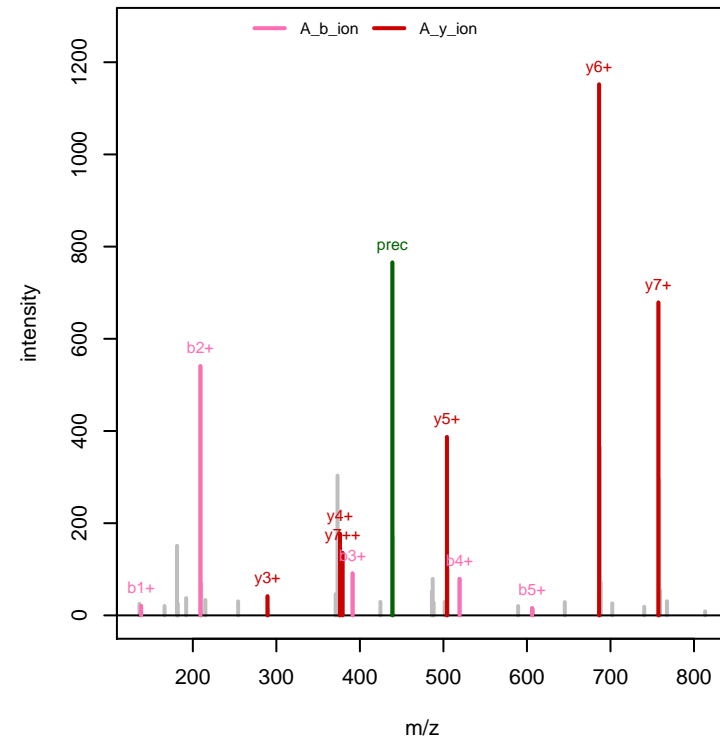

HAKQSGGR+XL\_L

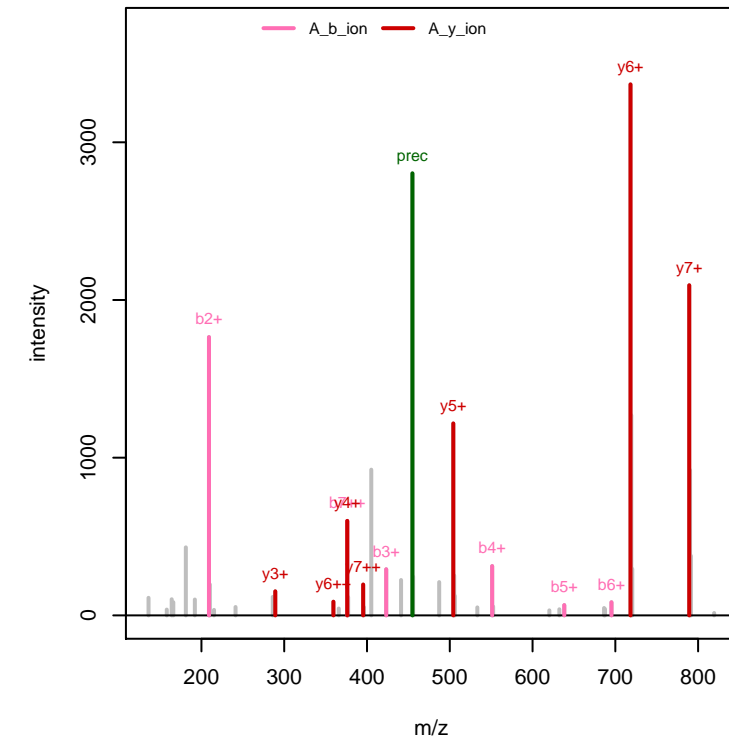

QKVTDVEGK+XL\_S

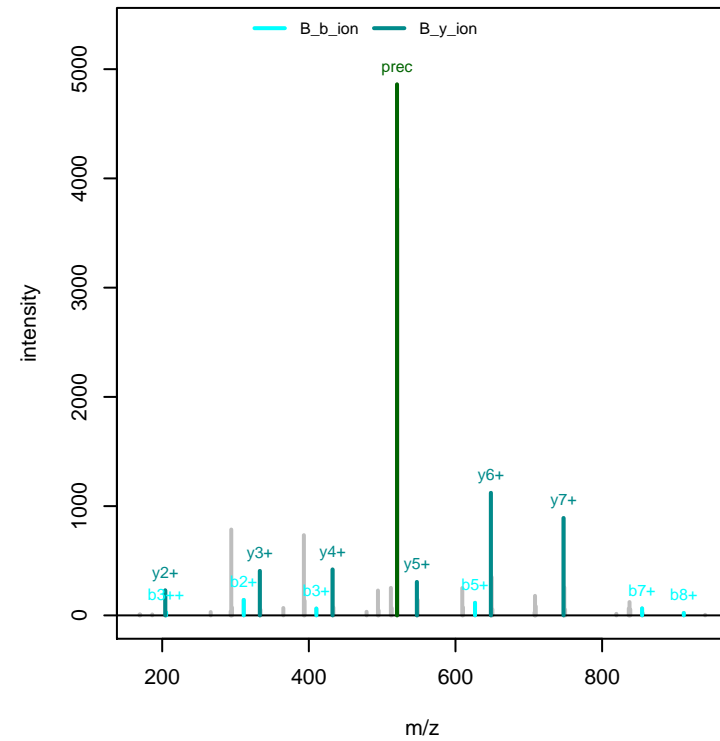

QKVTDVEGK+XL\_L

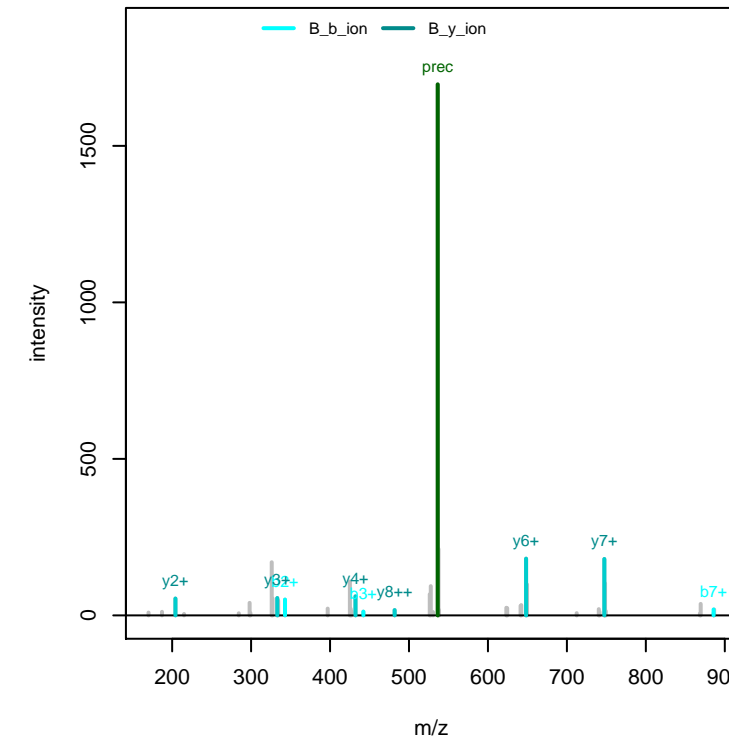

**KAKPTQAK**  
**QHVIYKEAK**

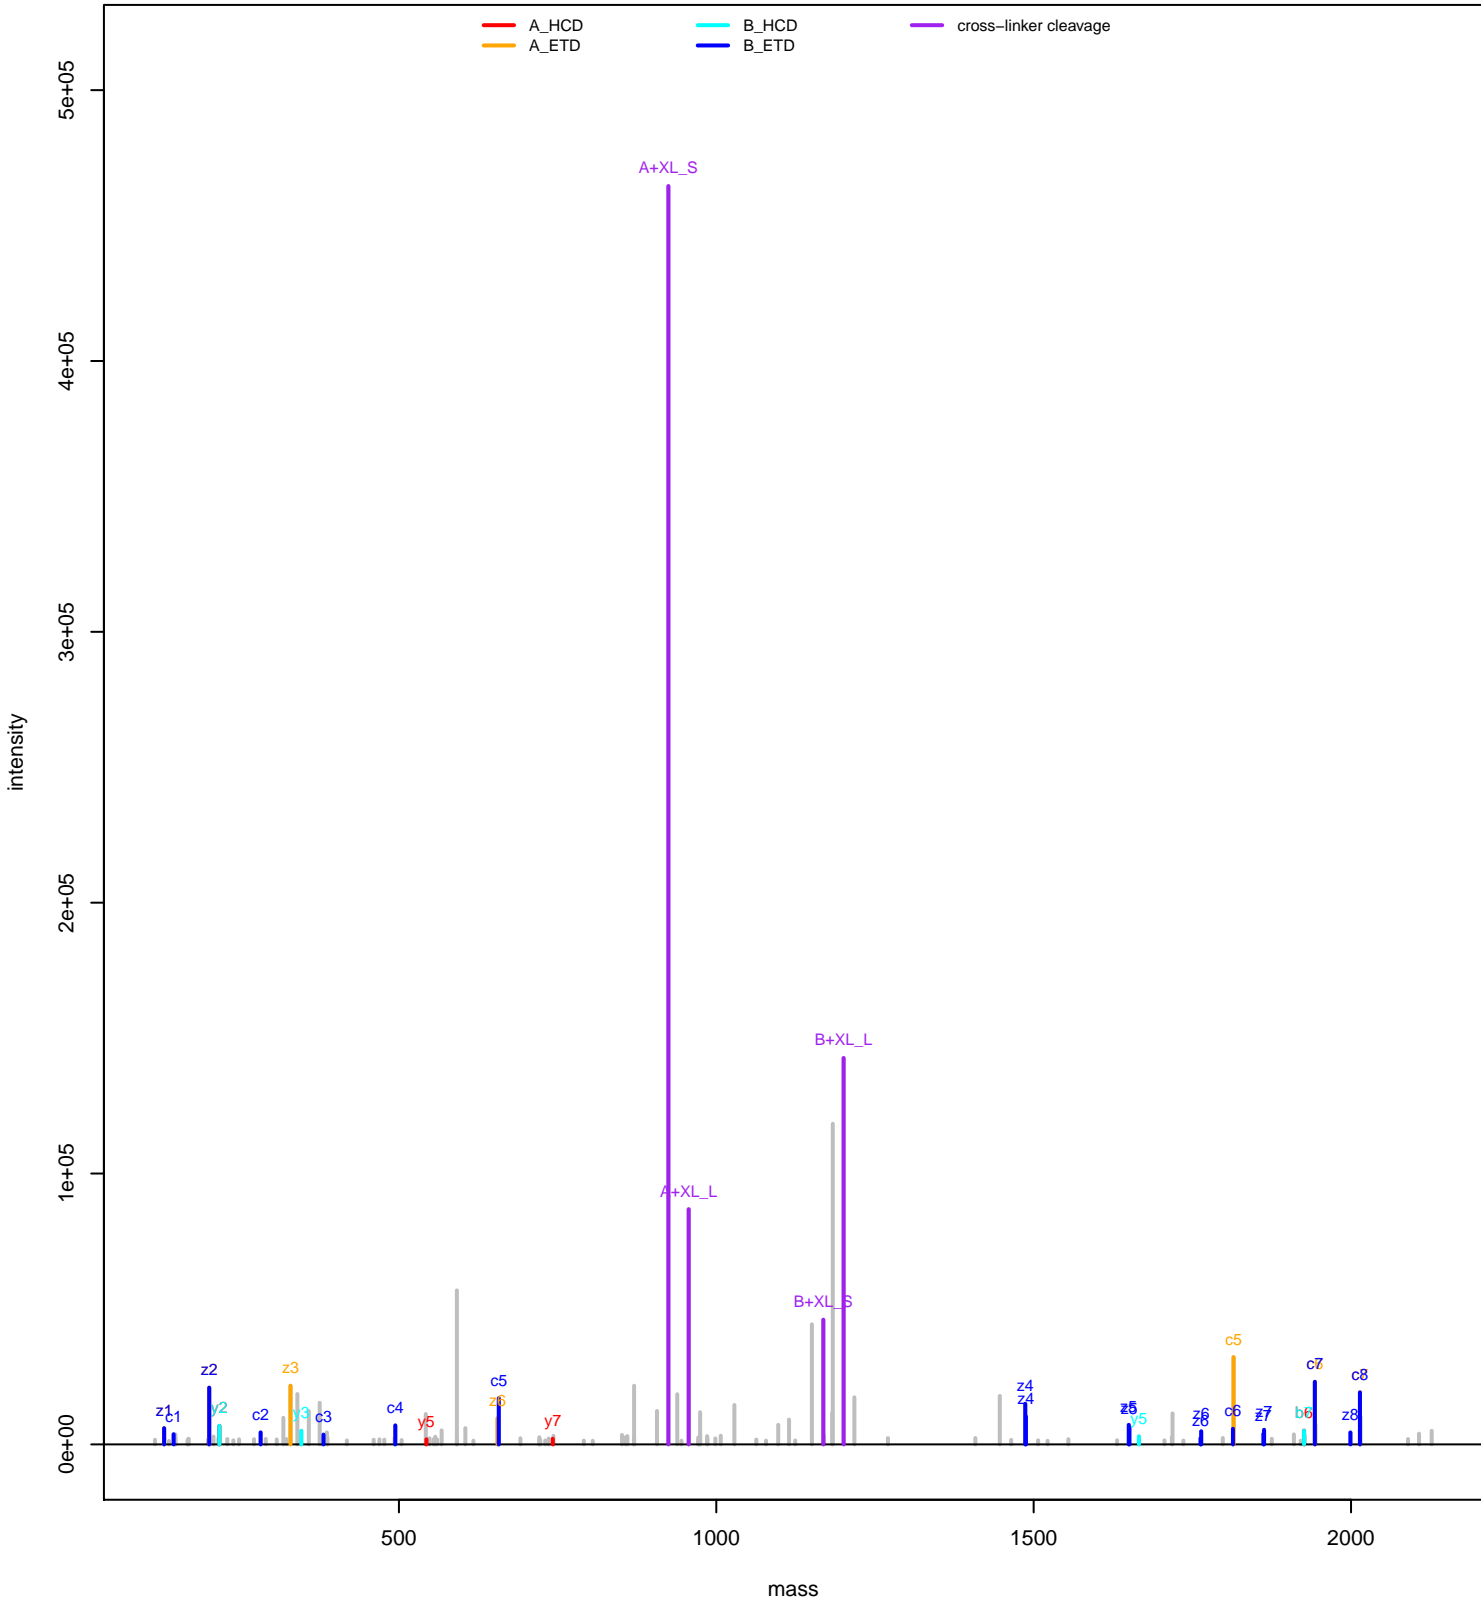

**KAKPTQAK+XL\_S**

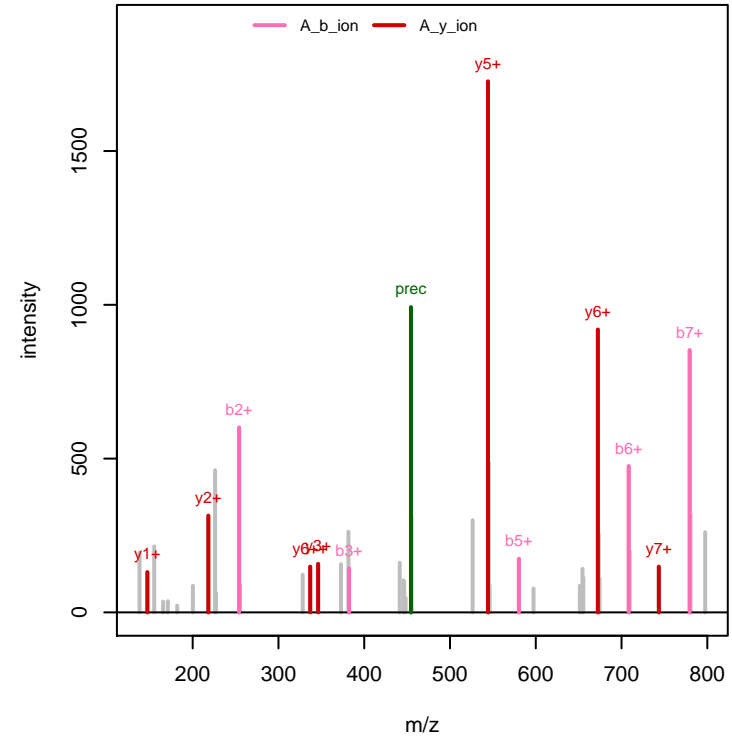

**KAKPTQAK+XL\_L**

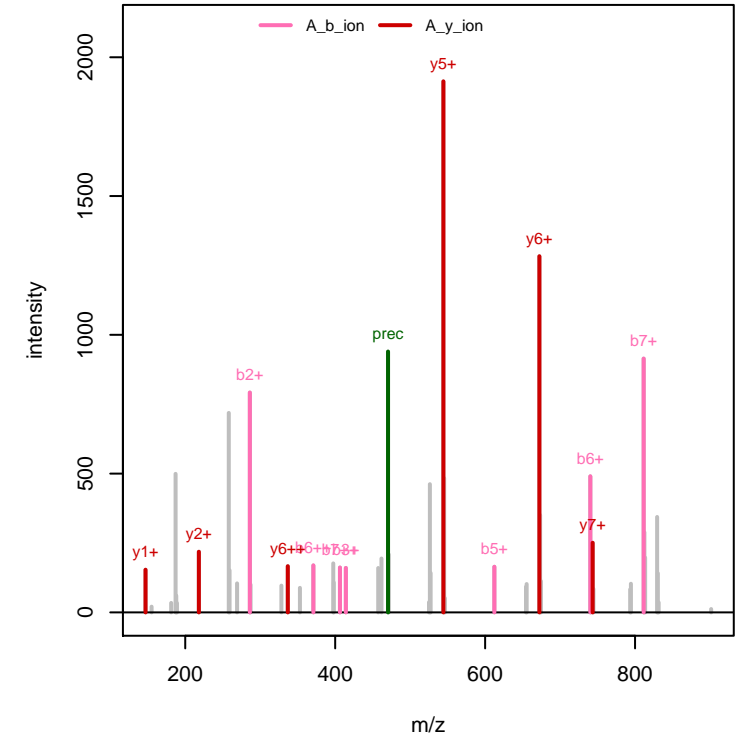

**QHVIYKEAK+XL\_S**

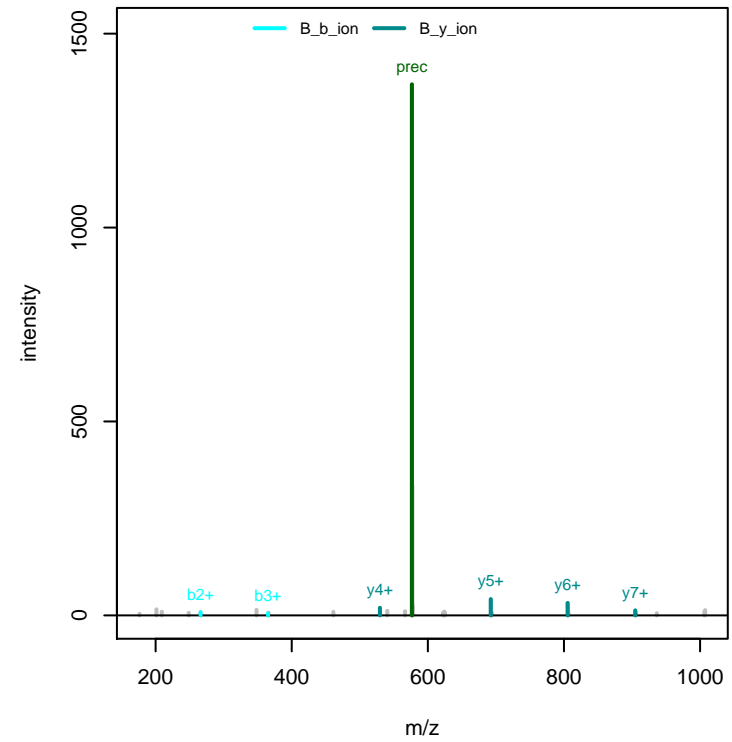

**QHVIYKEAK+XL\_L**

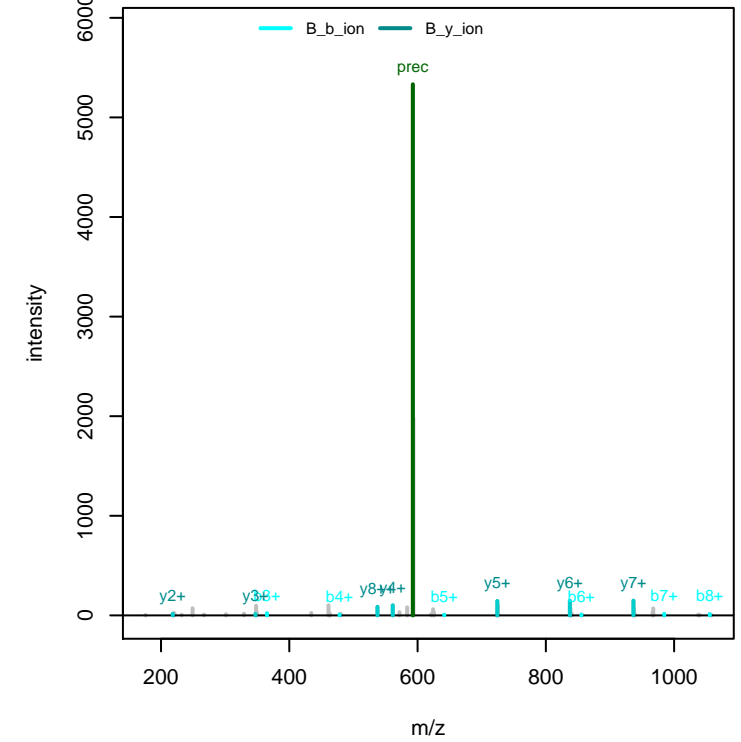

VITGGEKR  
VGKAVEEAK

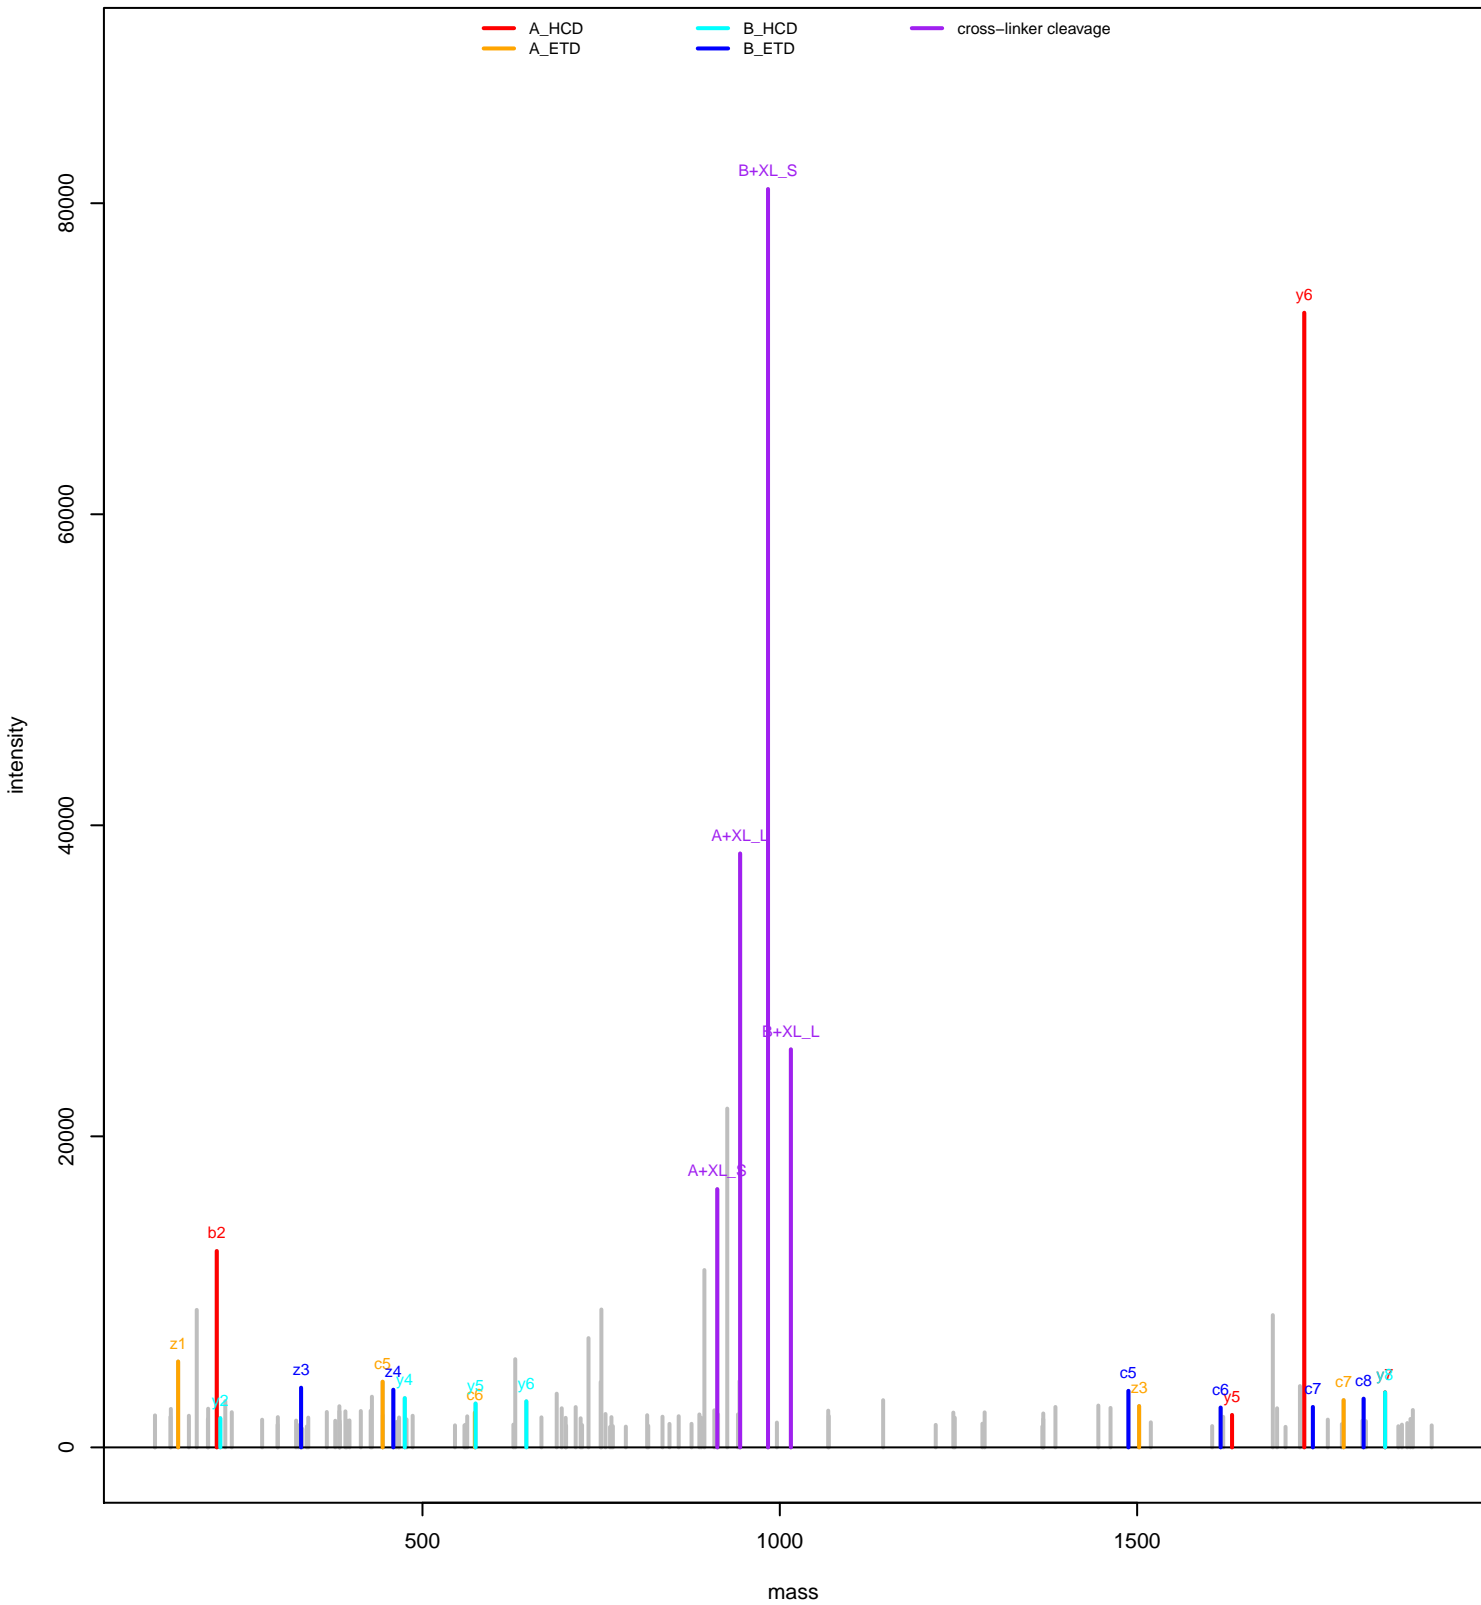

VITGGEKR+XL\_S

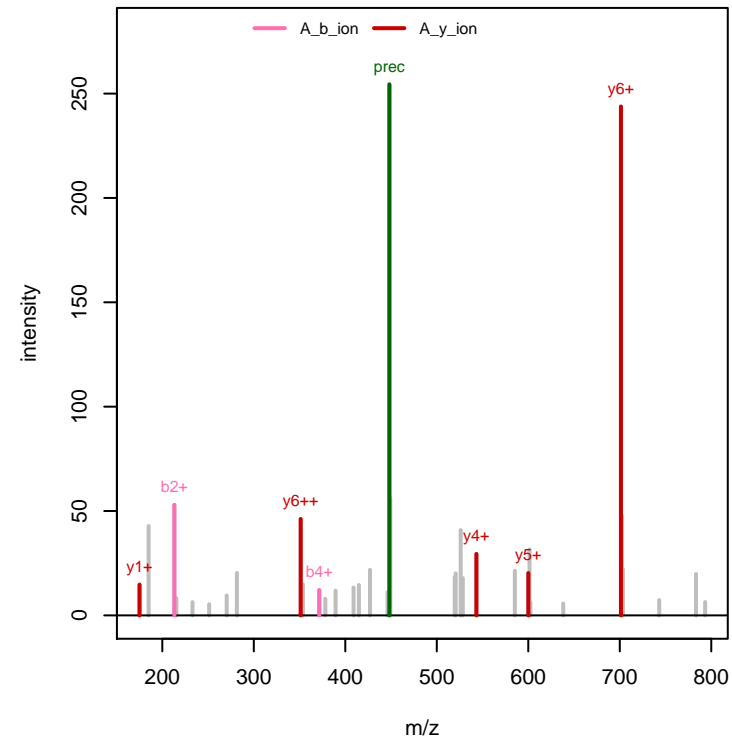

VITGGEKR+XL\_L

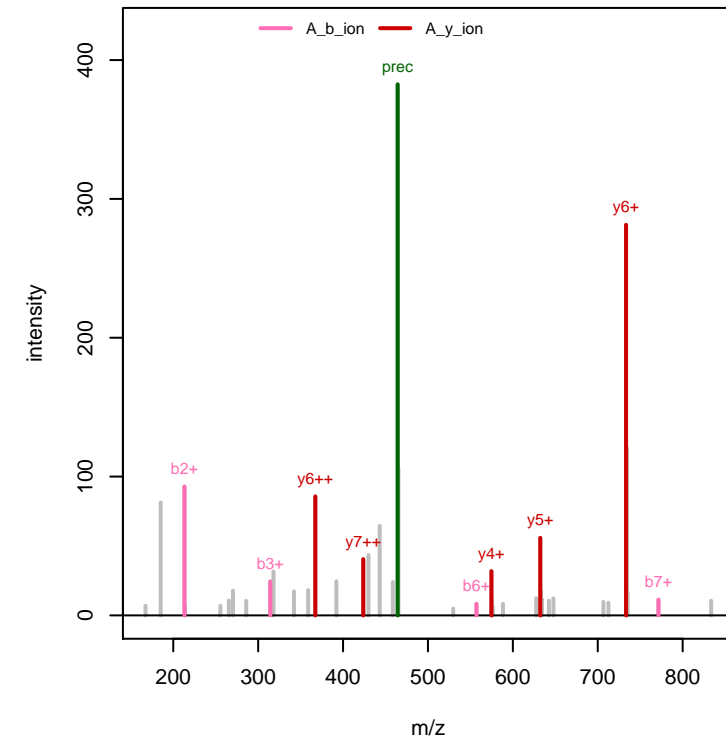

VGKAVEEAK+XL\_S

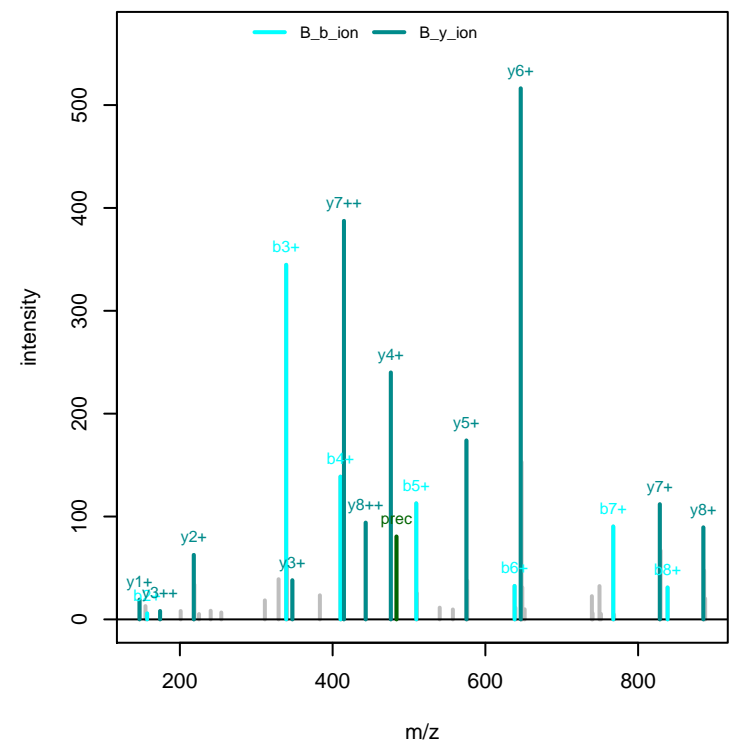

VGKAVEEAK+XL\_L

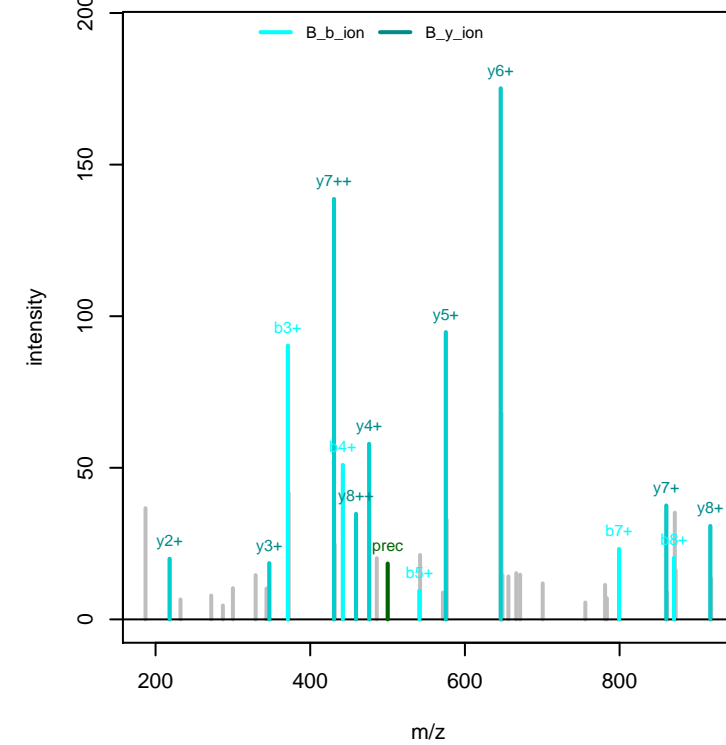

VAKGVEGVTSVSDK  
EGSVKGYAGDTATTSEIK

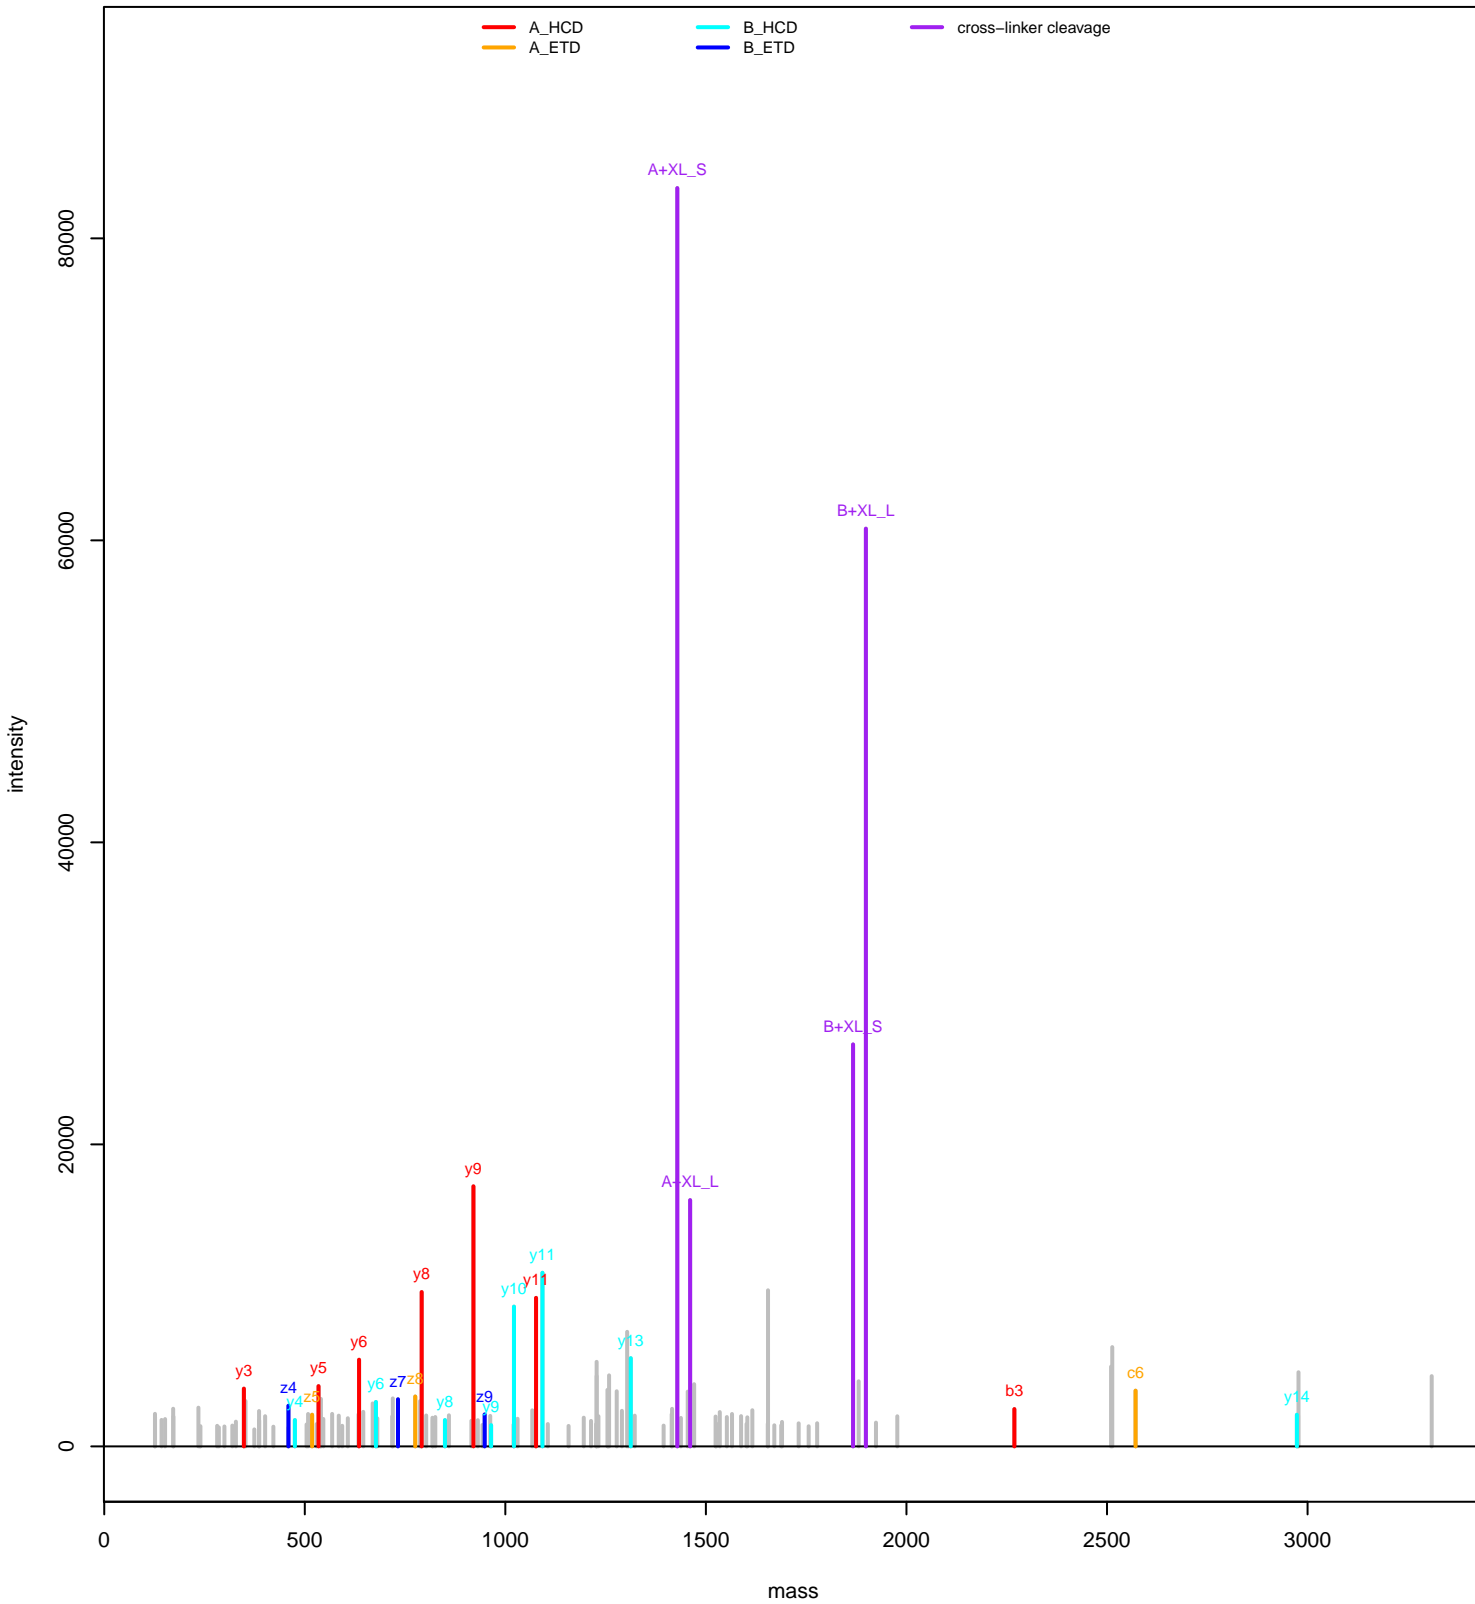

VAKGVEGVTSVSDK+XL\_S

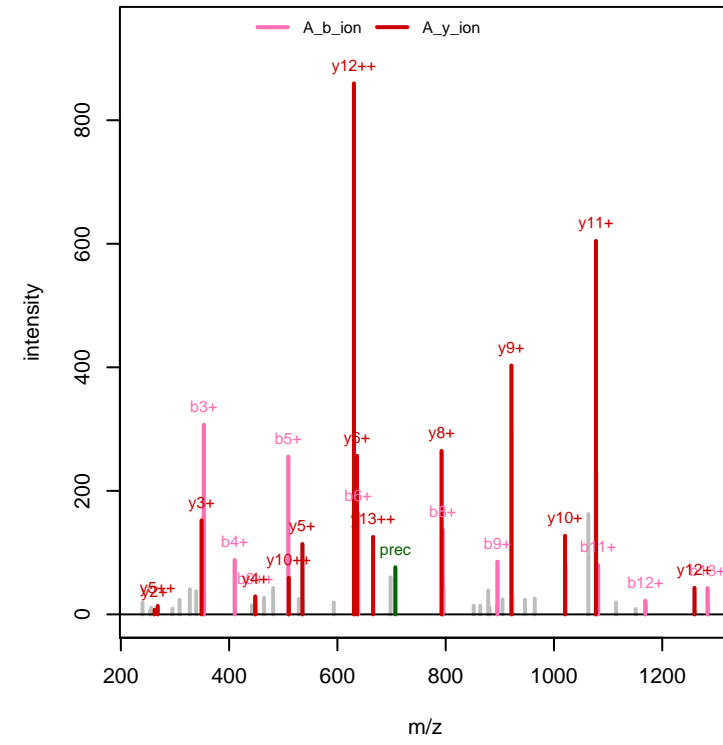

VAKGVEGVTSVSDK+XL\_L

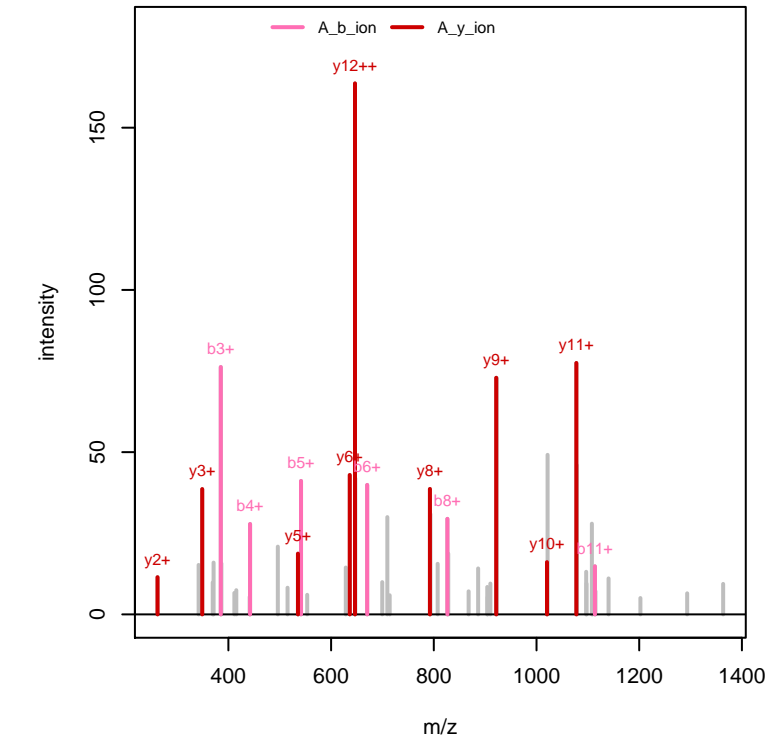

EGSVKGYAGDTATTSEIK+XL\_S

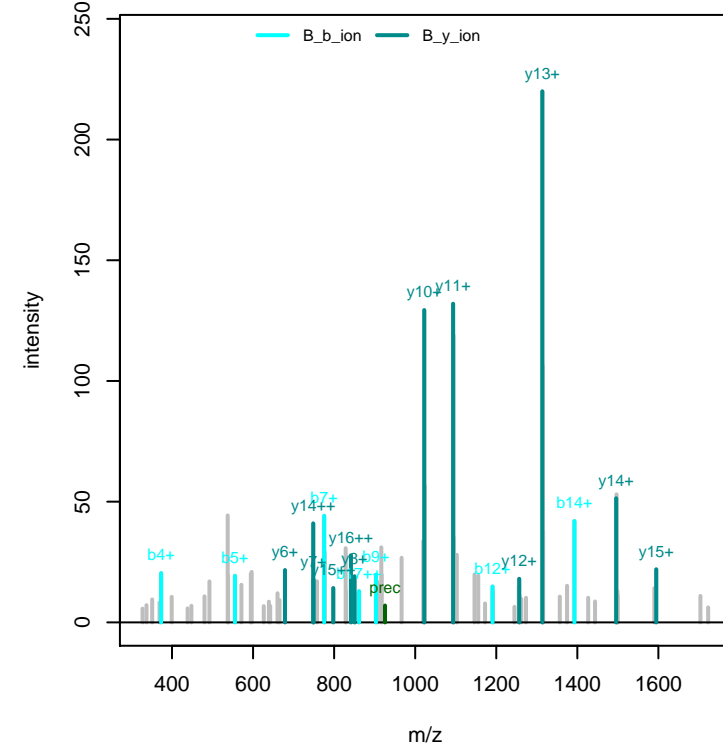

EGSVKGYAGDTATTSEIK+XL\_L

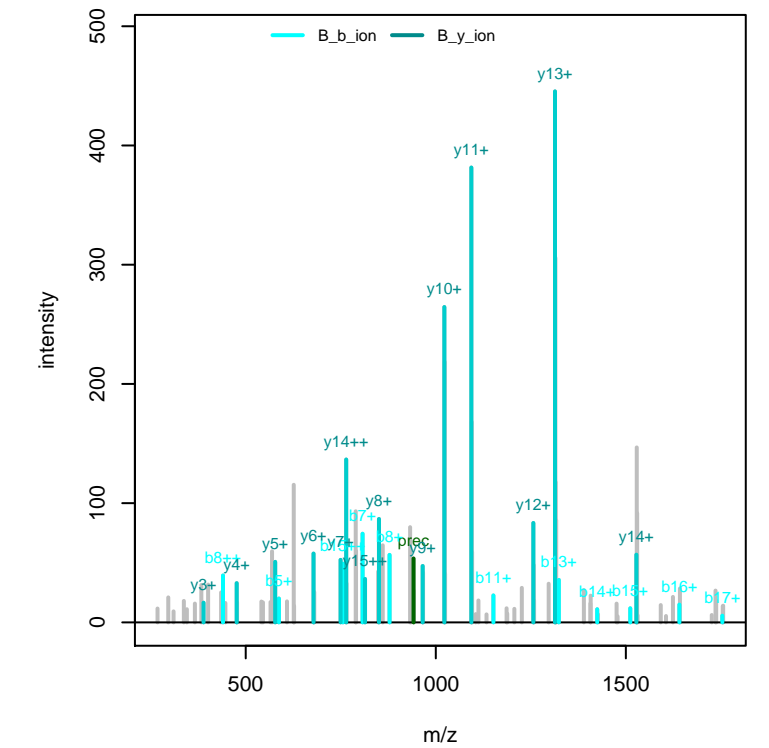



FKSSVNR  
QKTNGTPGDKR

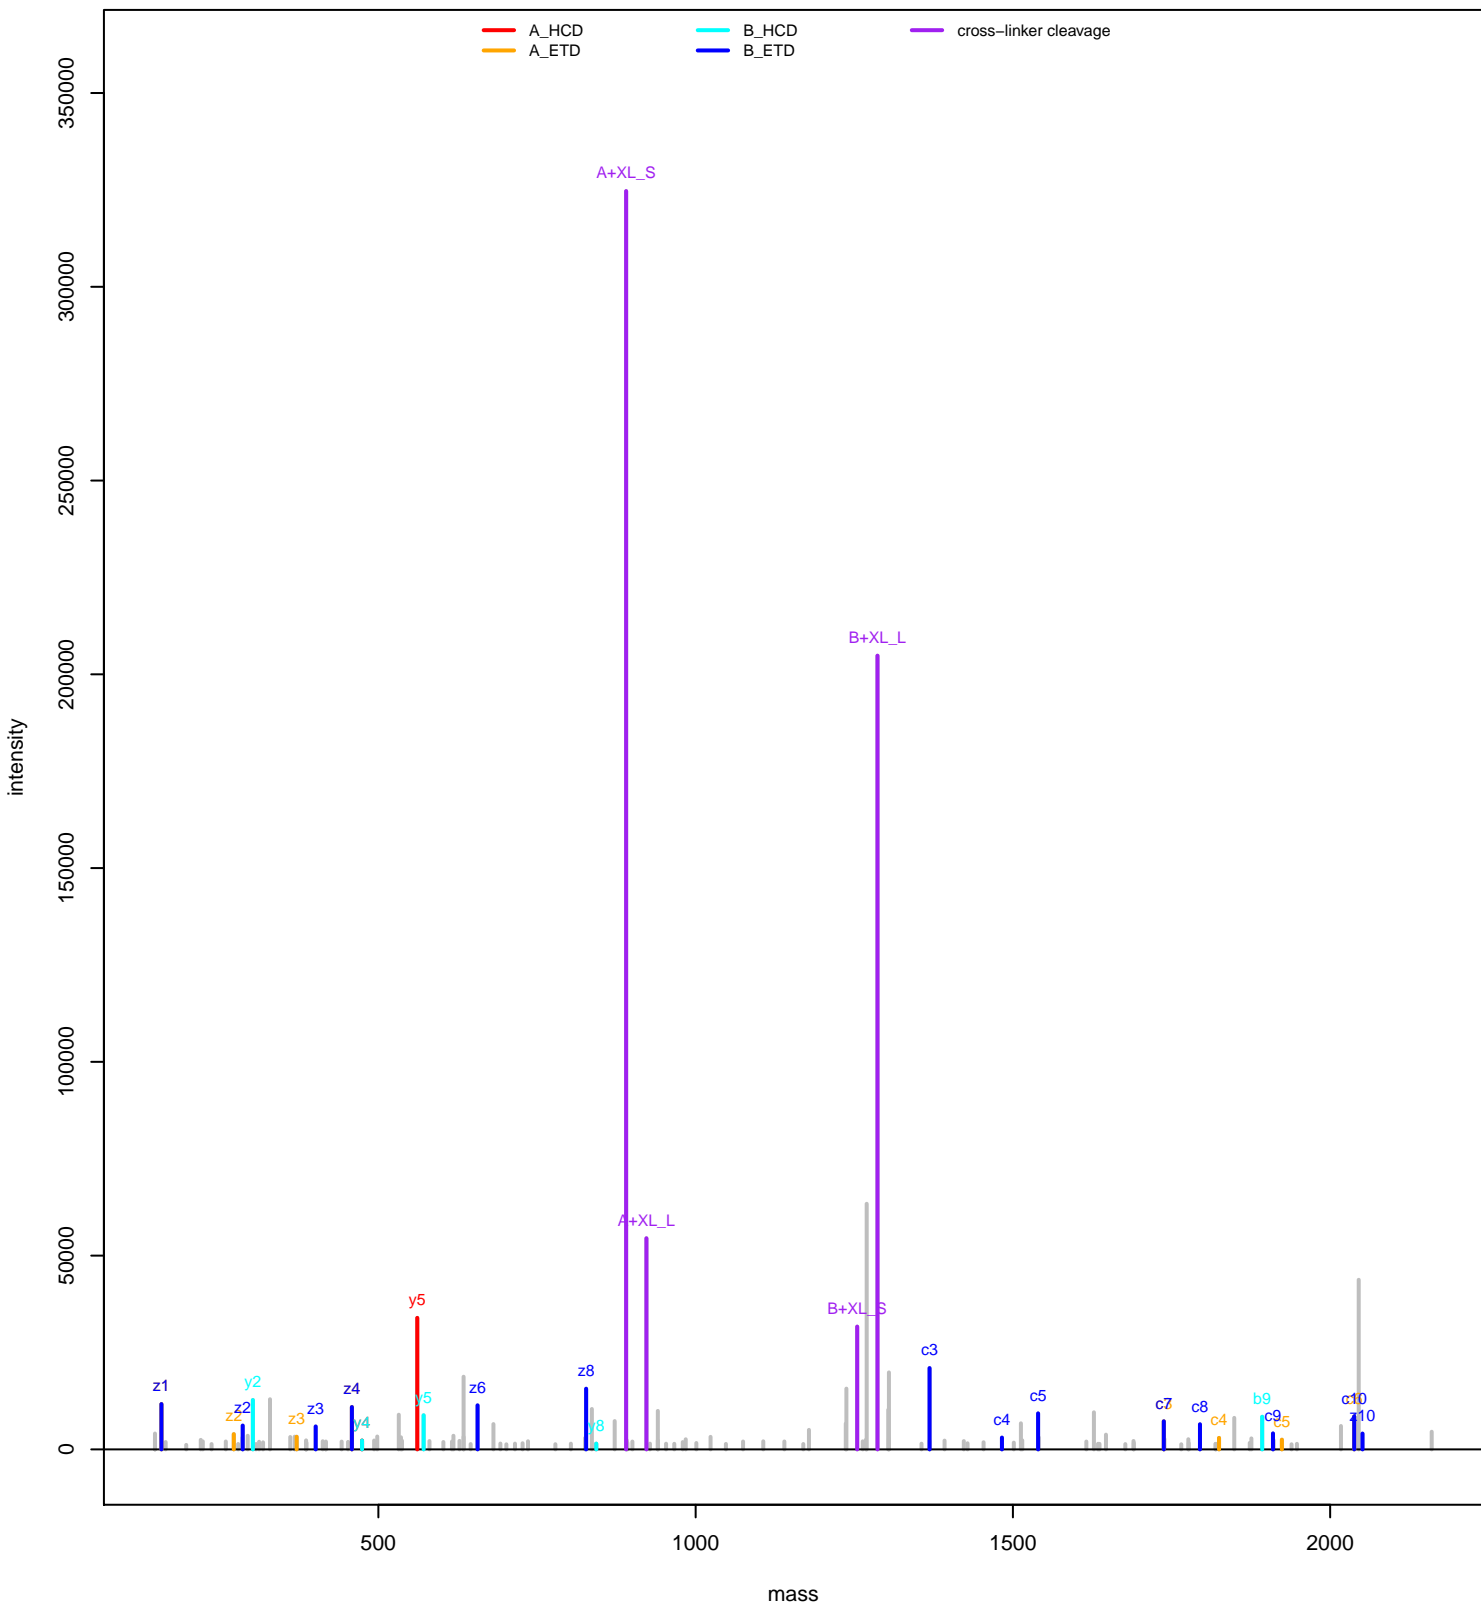

FKSSVNR+XL\_S

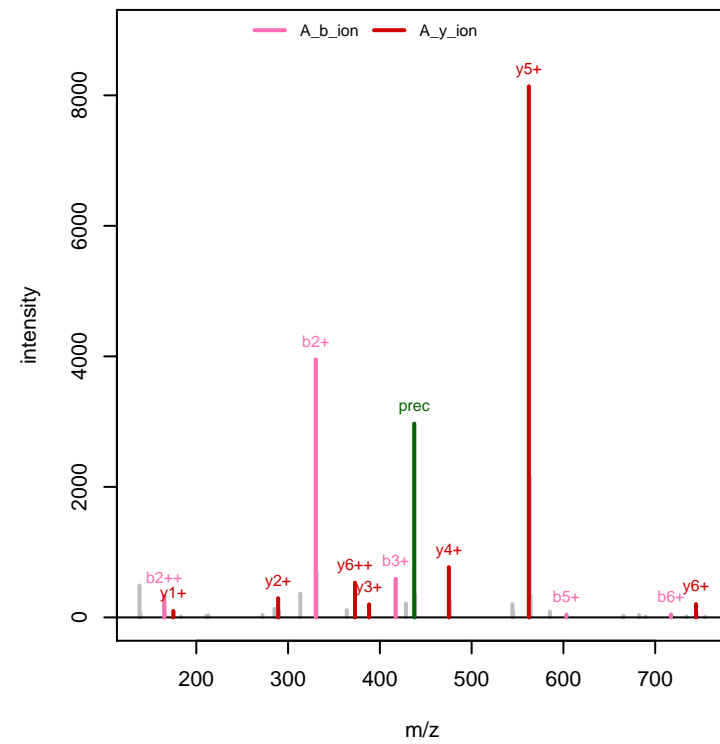

FKSSVNR+XL\_L

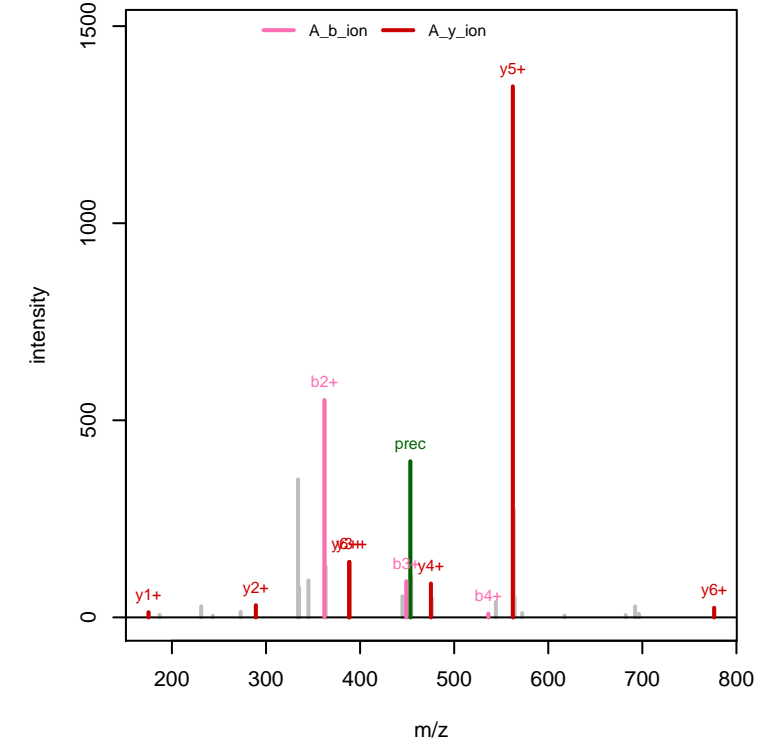

QKTNGTPGDKR+XL\_S

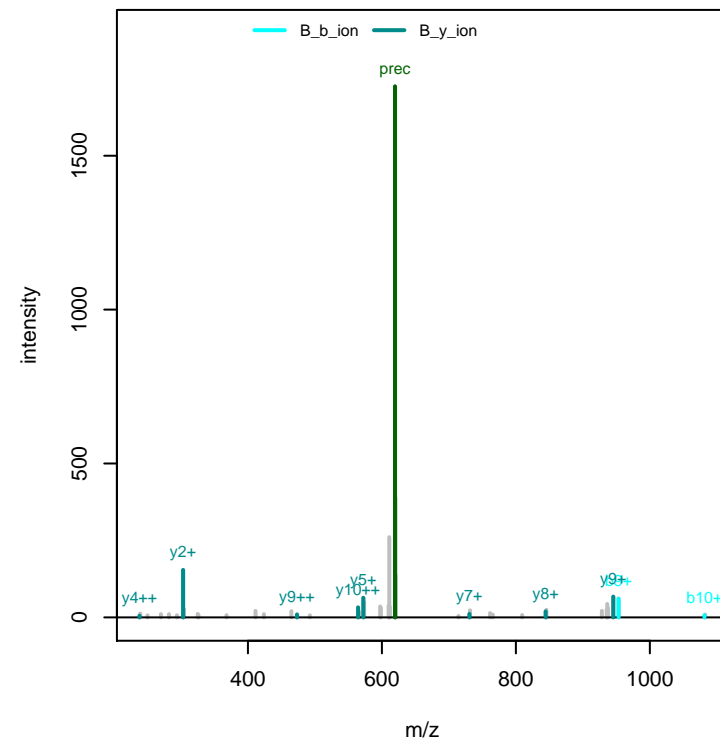

QKTNGTPGDKR+XL\_L

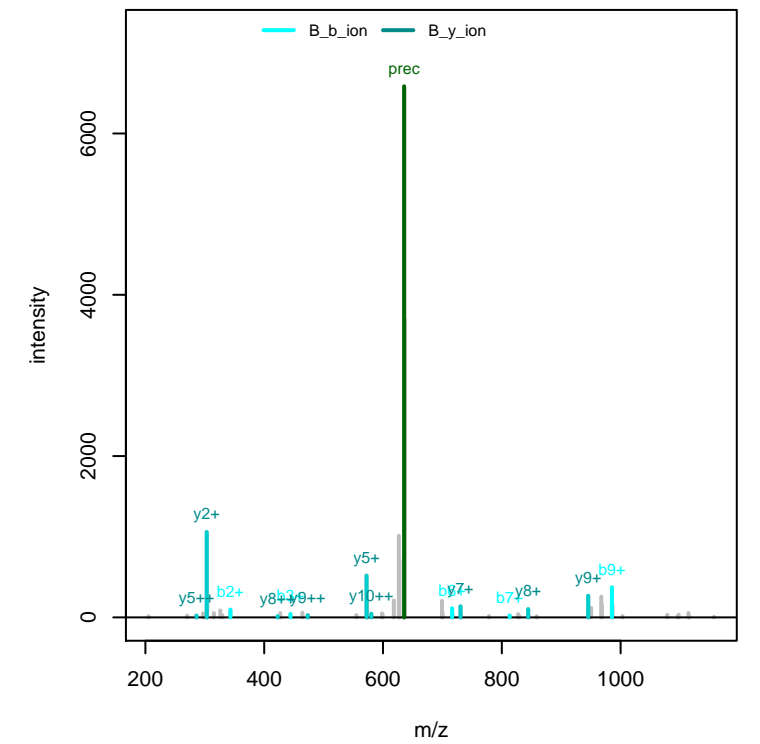

**MNLSTKQK**  
**SGSGKPNKDK**

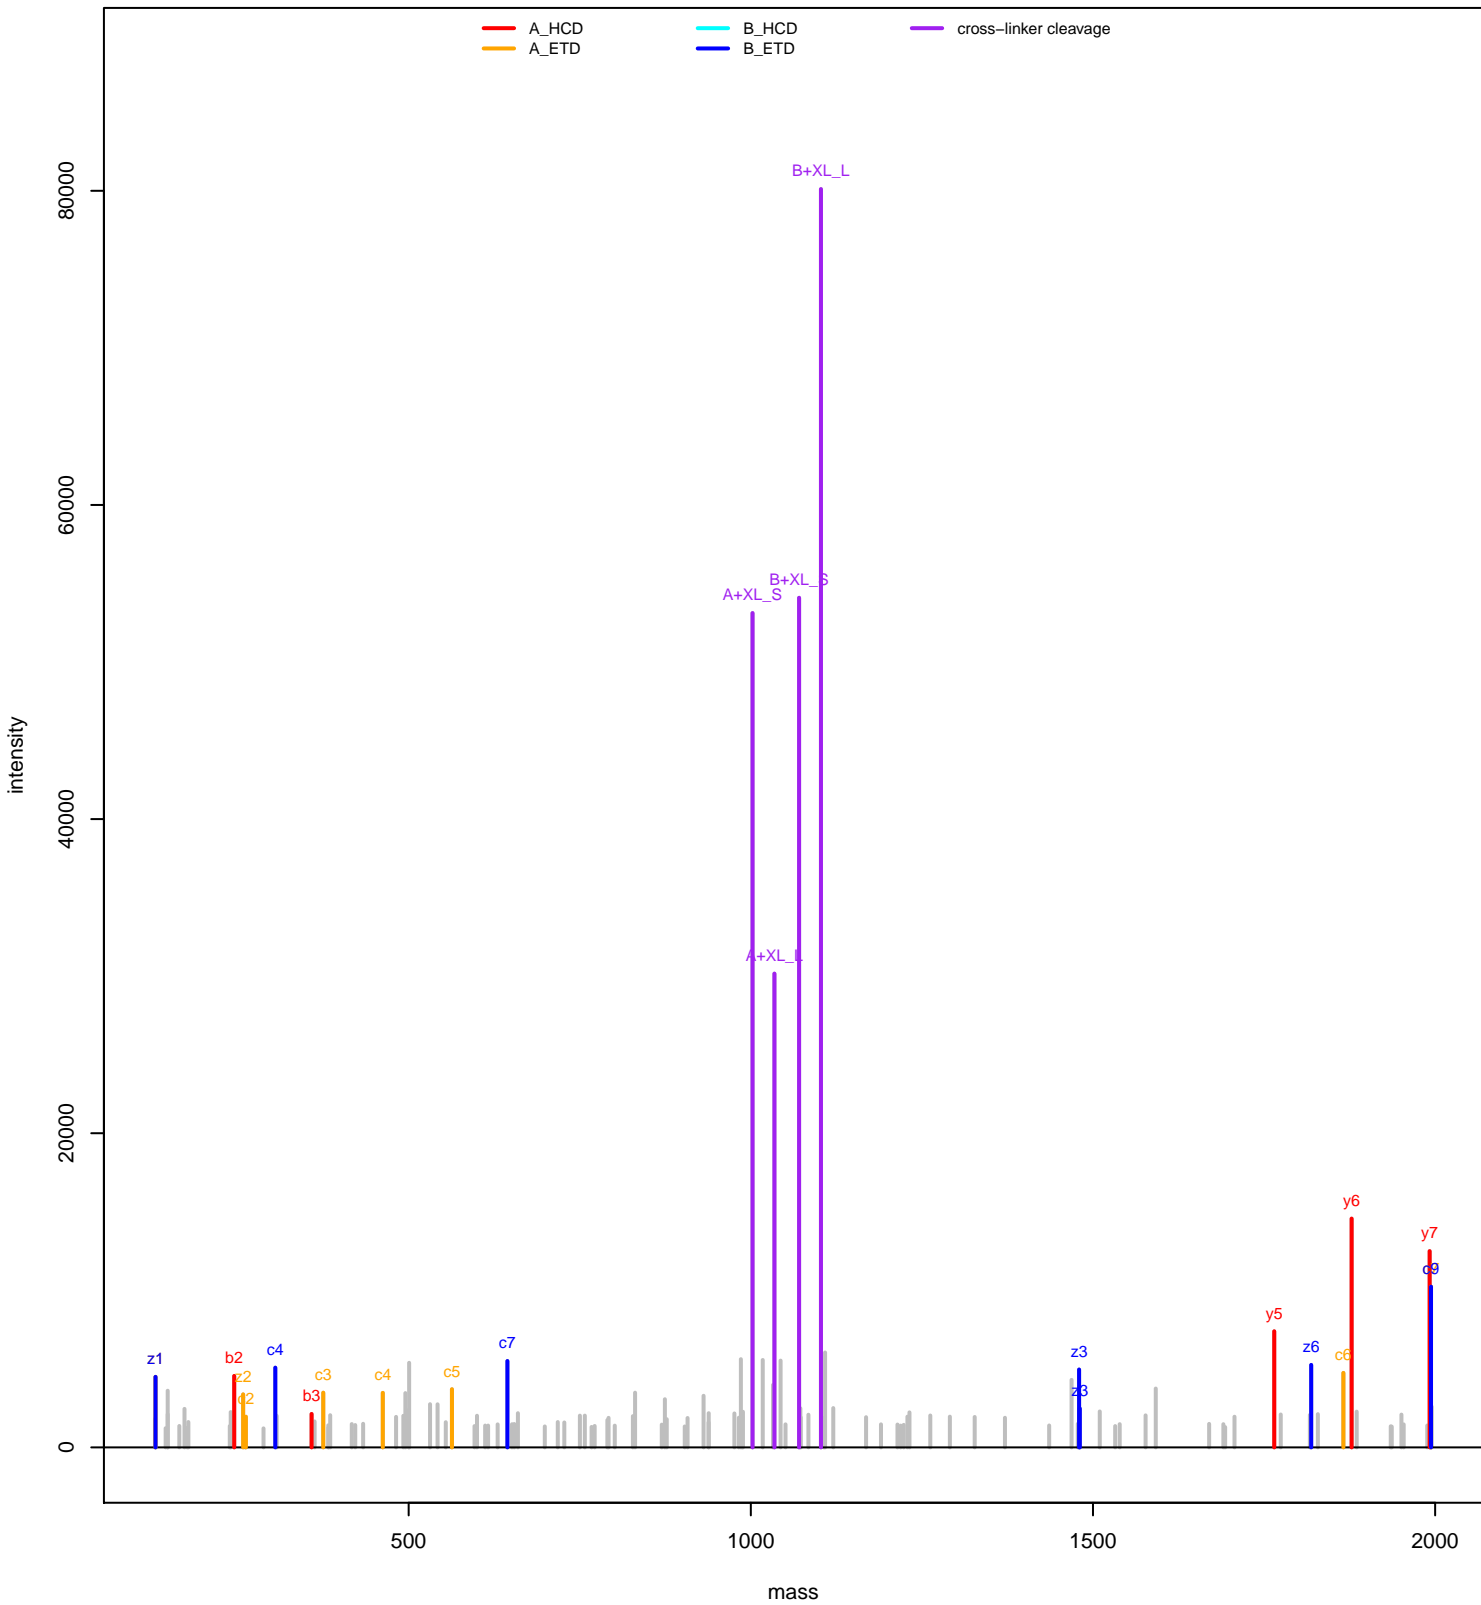

**MNLSTKQK+XL\_S**

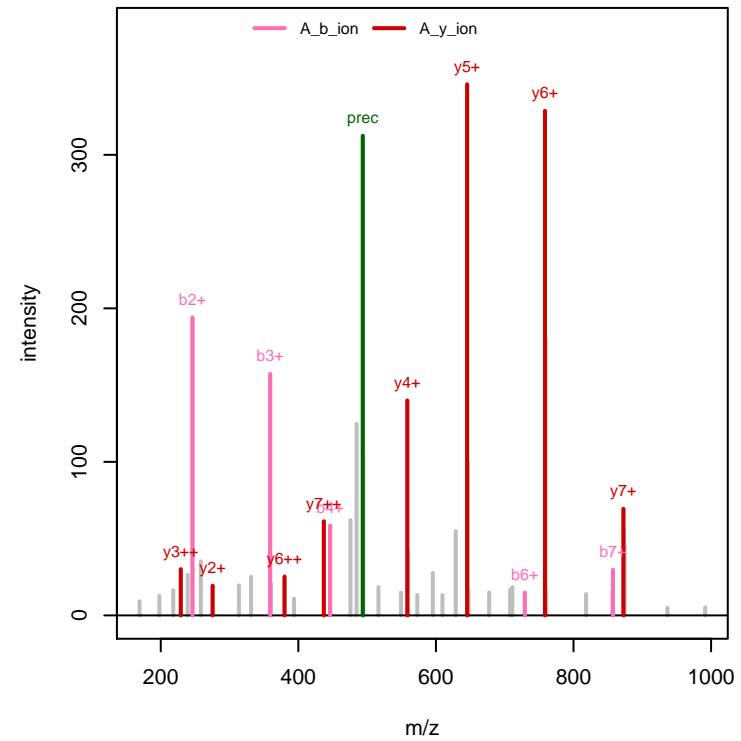

**MNLSTKQK+XL\_L**

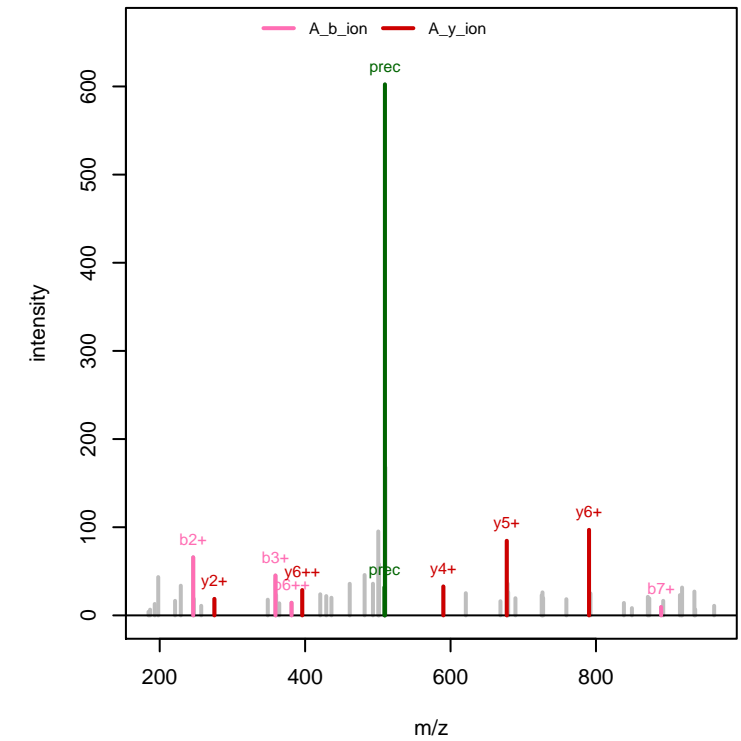

**SGSGKPNKDK+XL\_S**

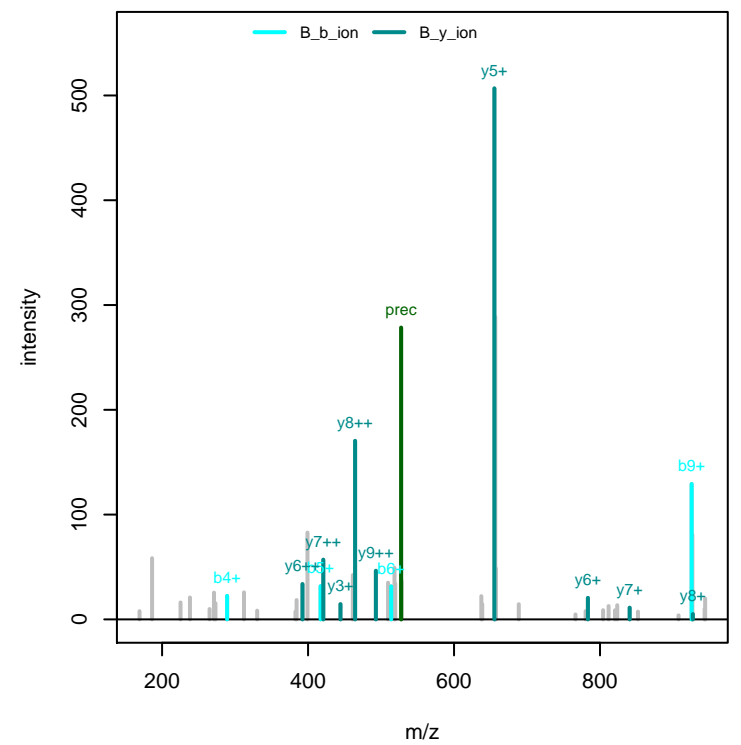

**SGSGKPNKDK+XL\_L**

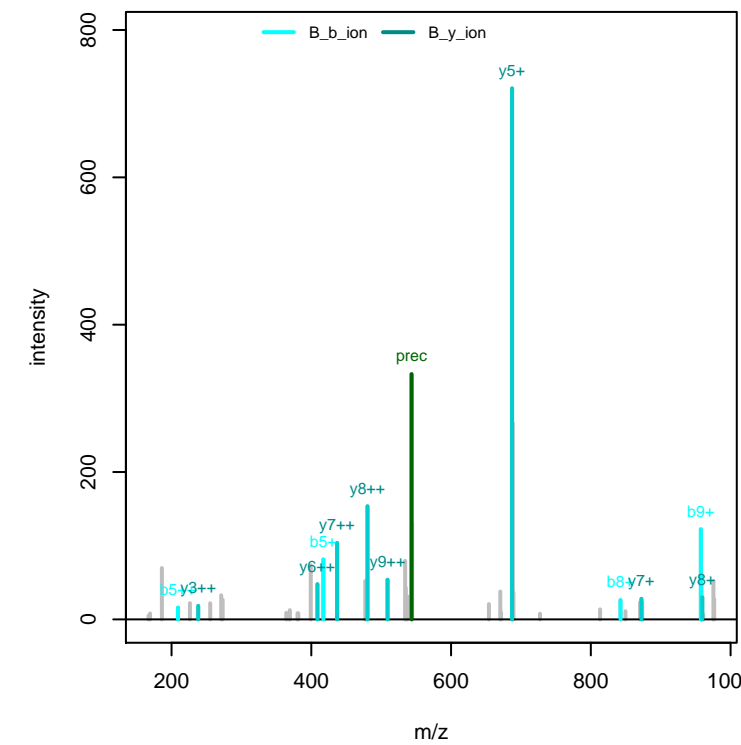

VPNGKNLDAGK  
SEEKASTPAQR

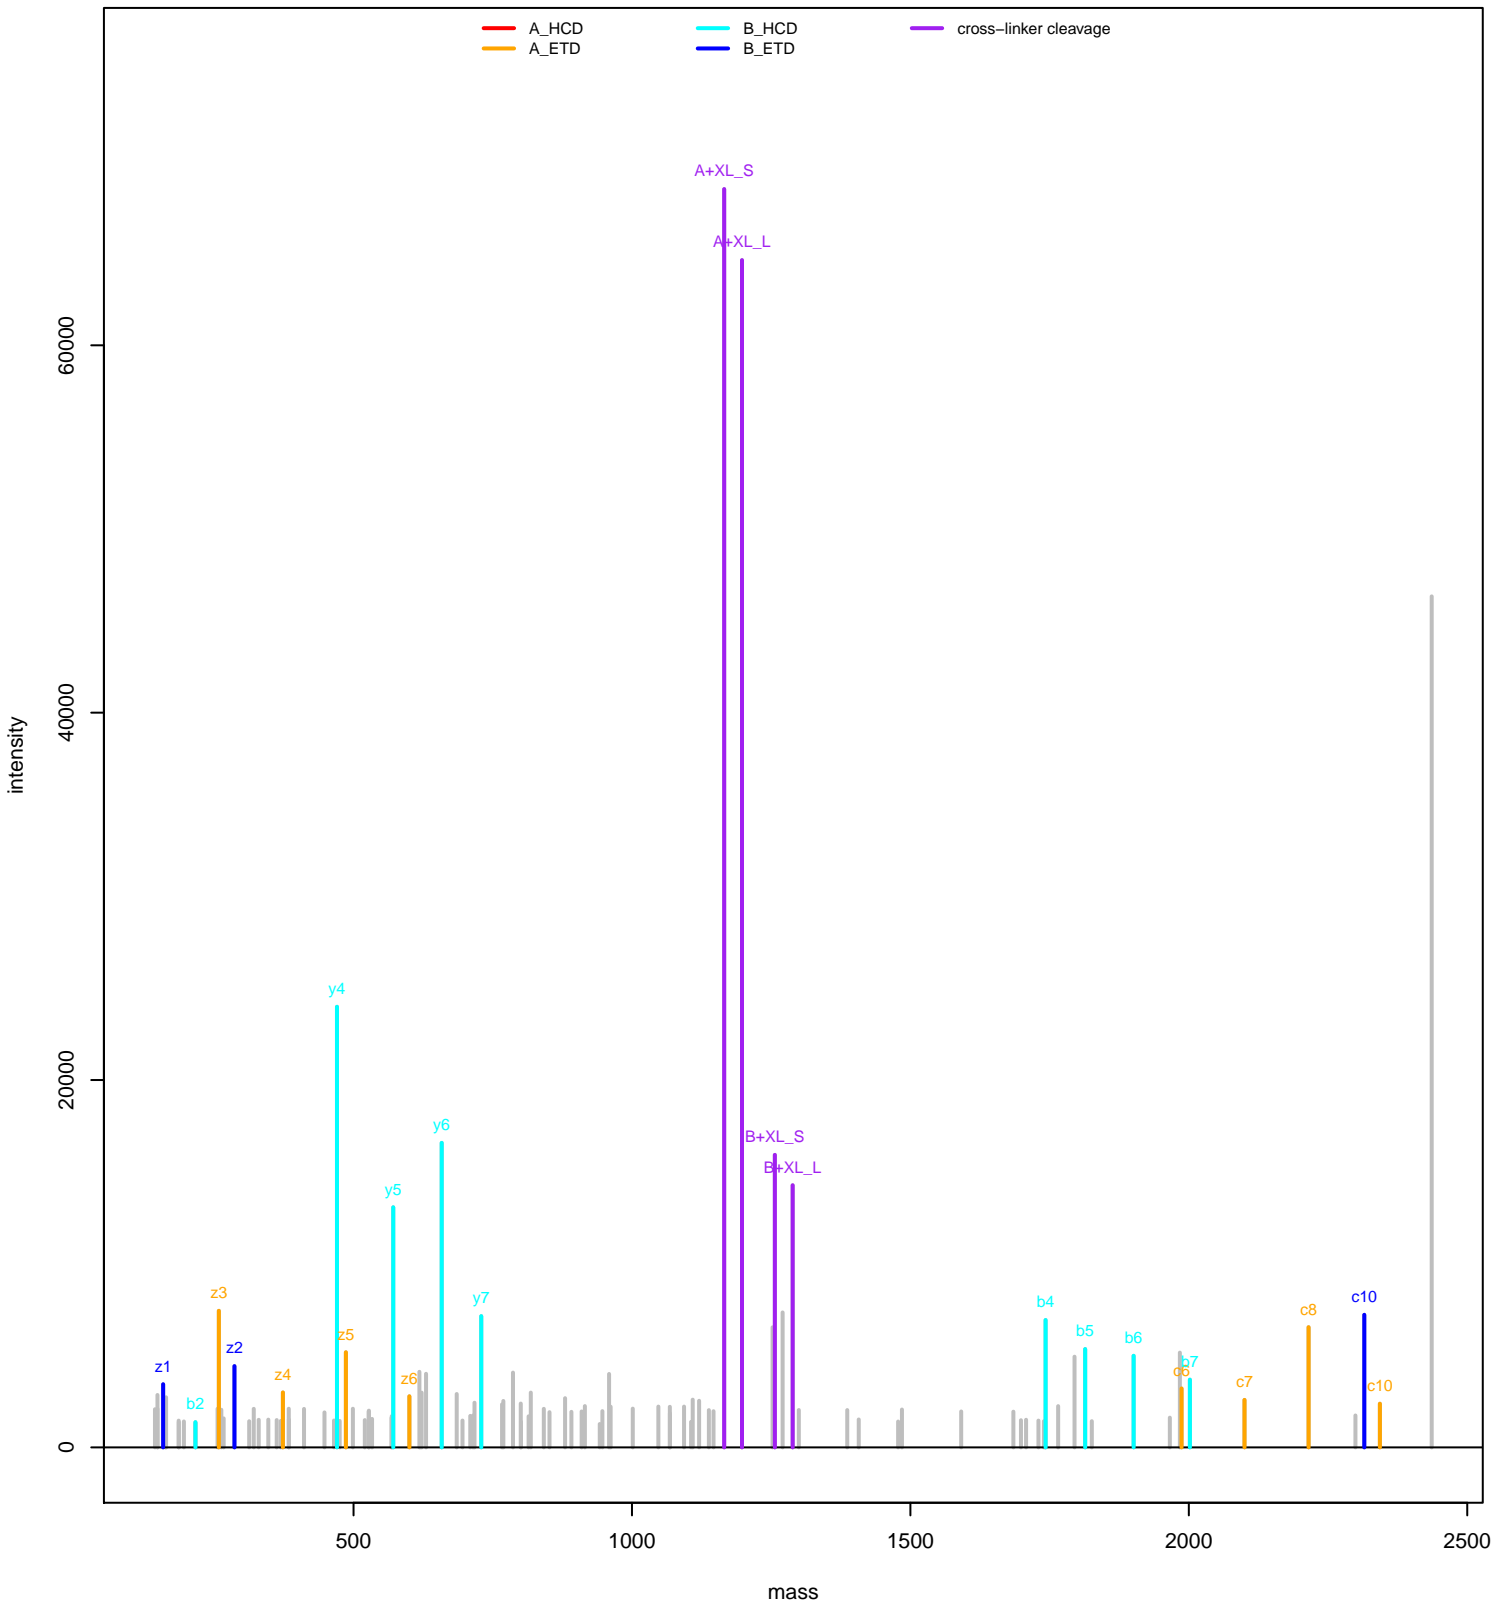

VPNGKNLDAGK+XL\_S

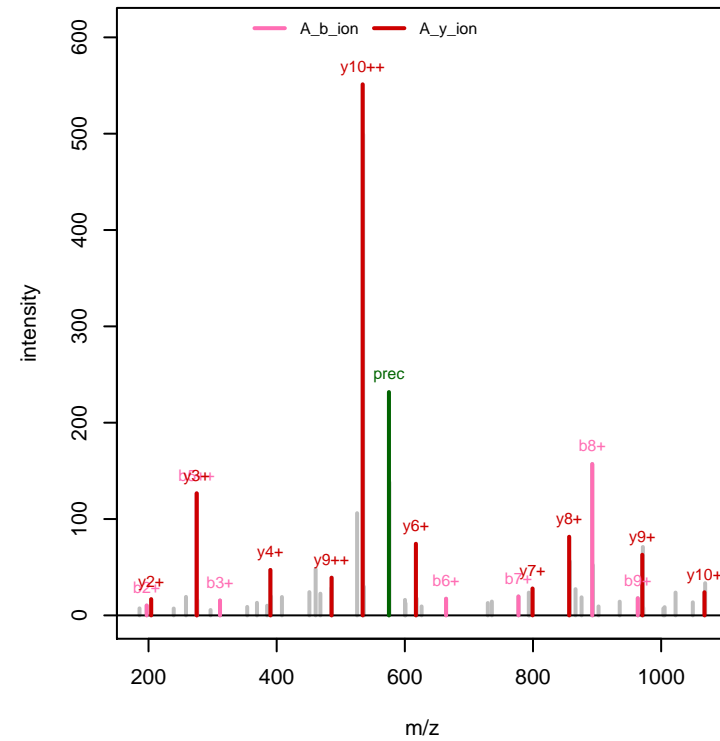

VPNGKNLDAGK+XL\_L

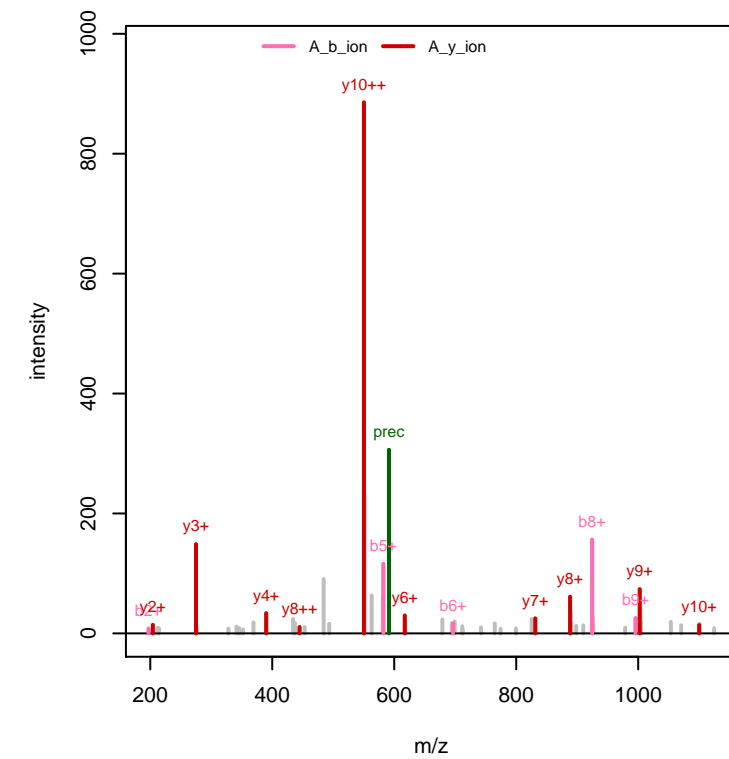

SEEKASTPAQR+XL\_S

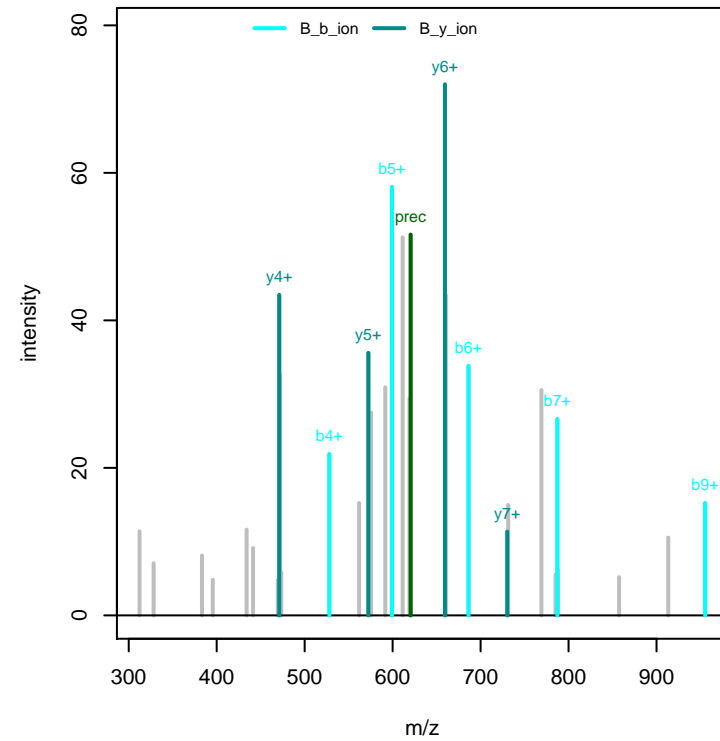

SEEKASTPAQR+XL\_L

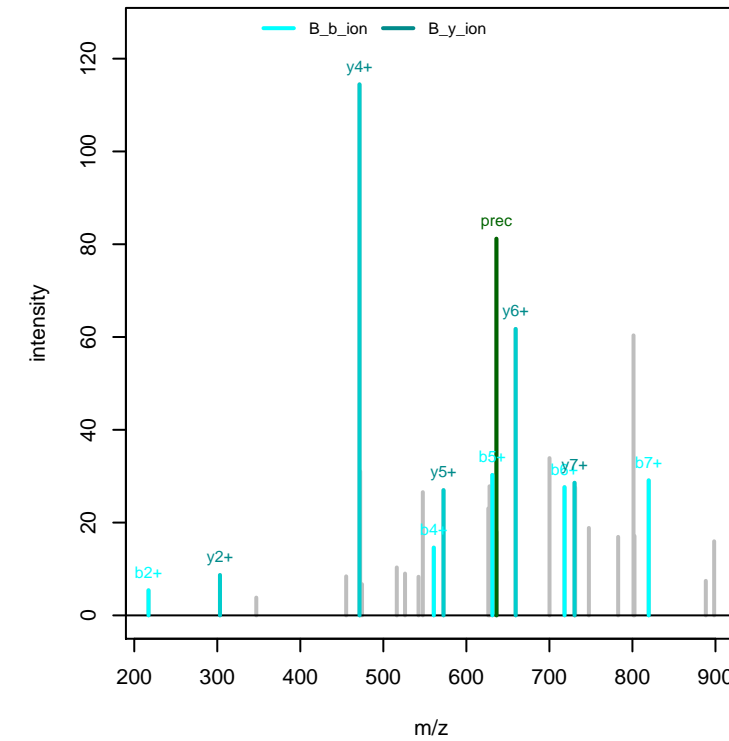

SGTKAK  
TPAVIKK

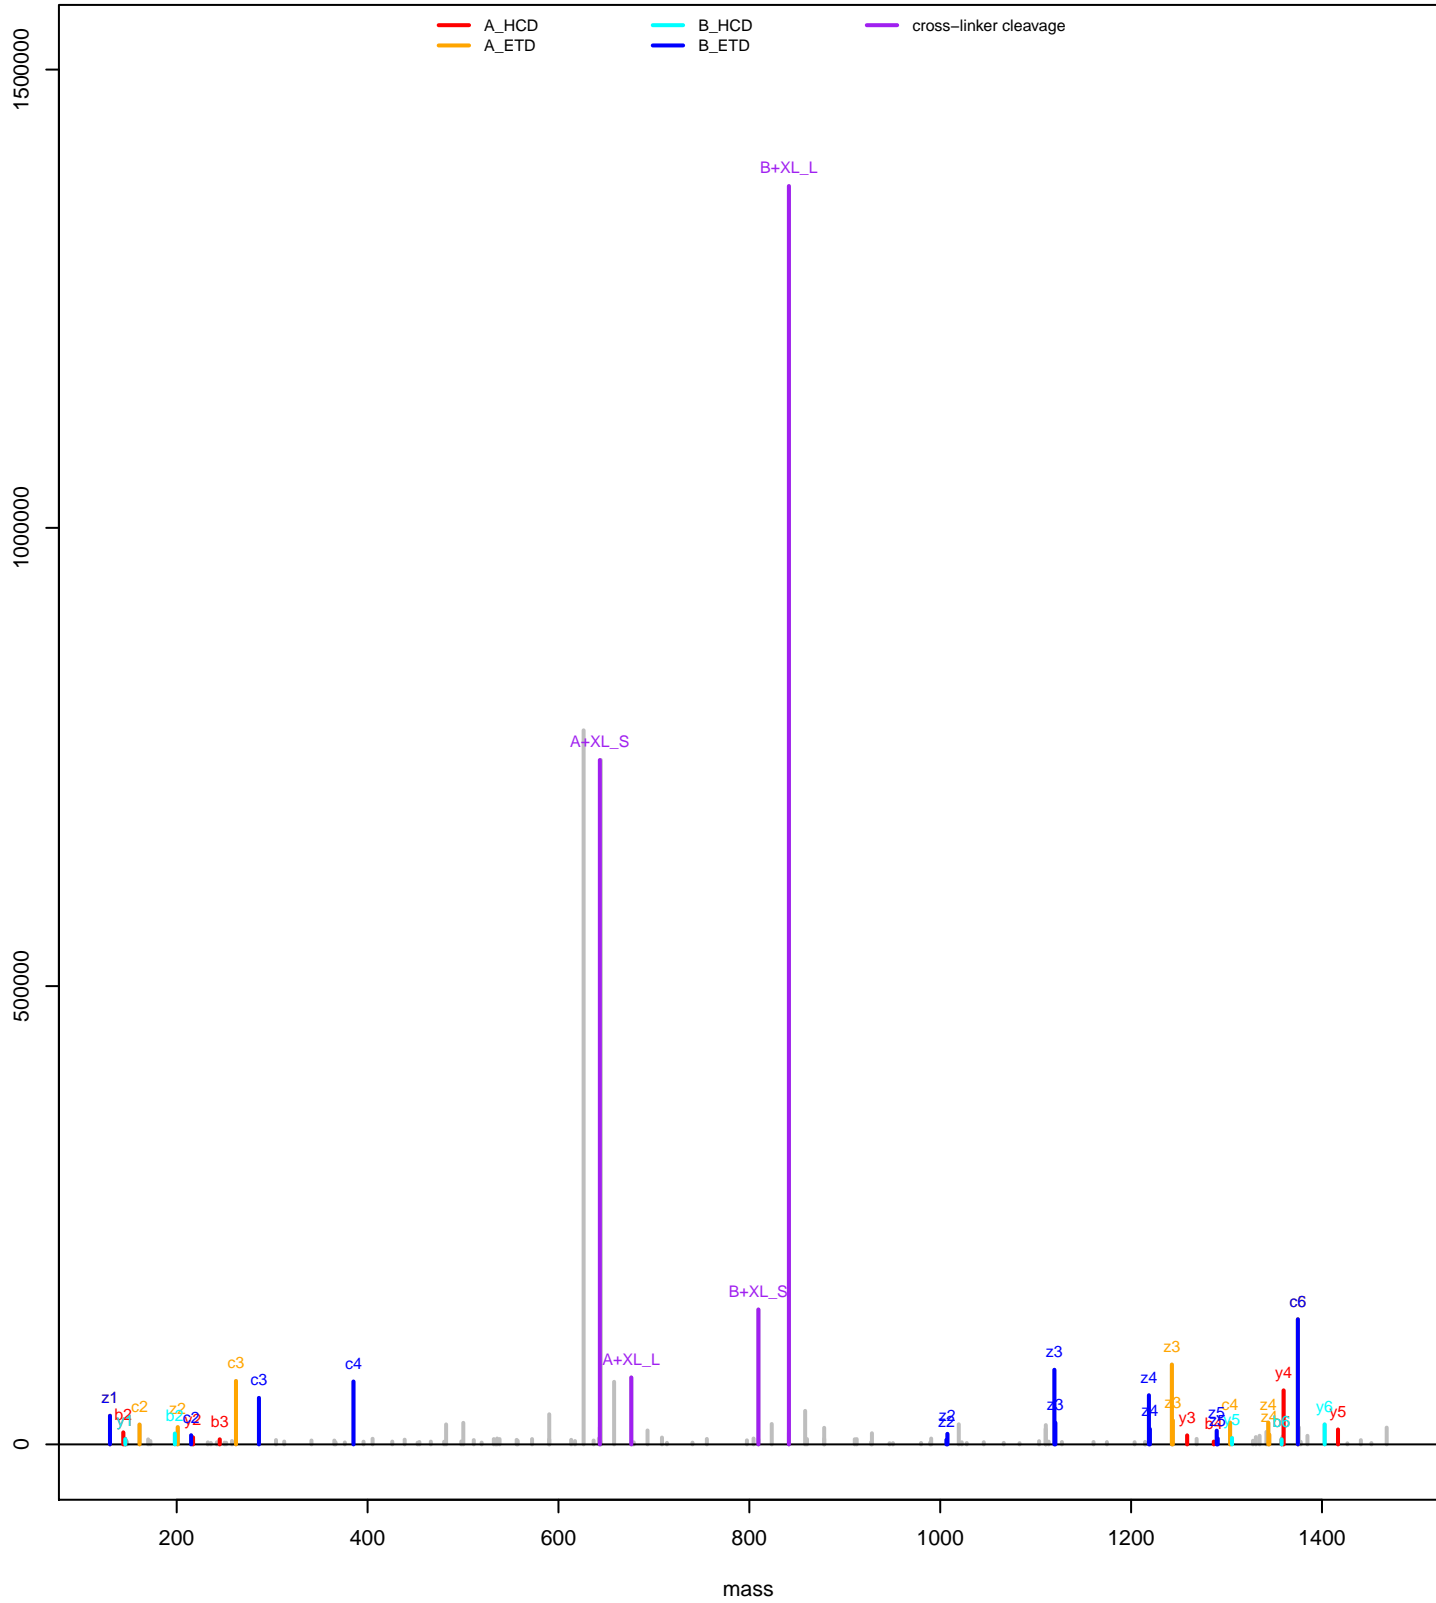

SGTKAK+XL\_S

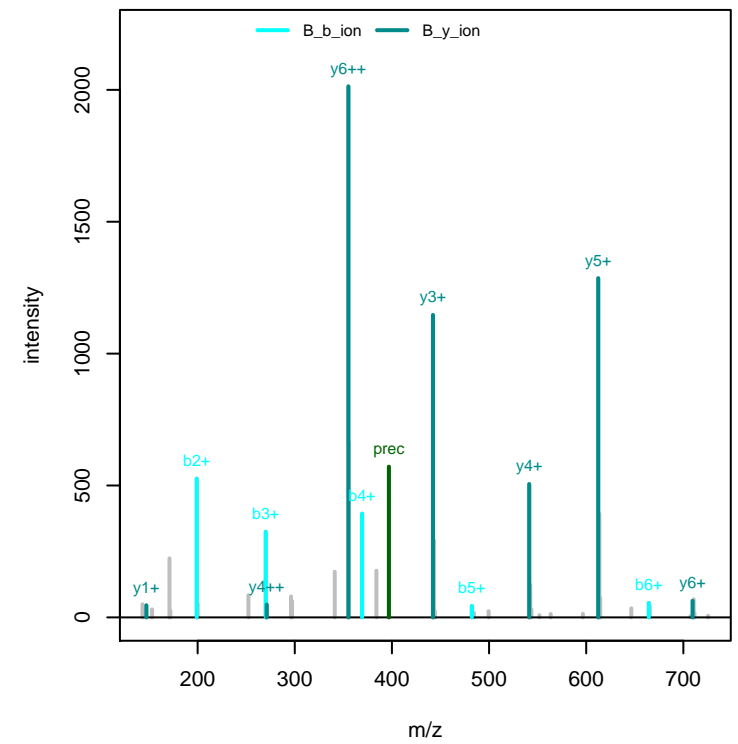

SGTKAK+XL\_L

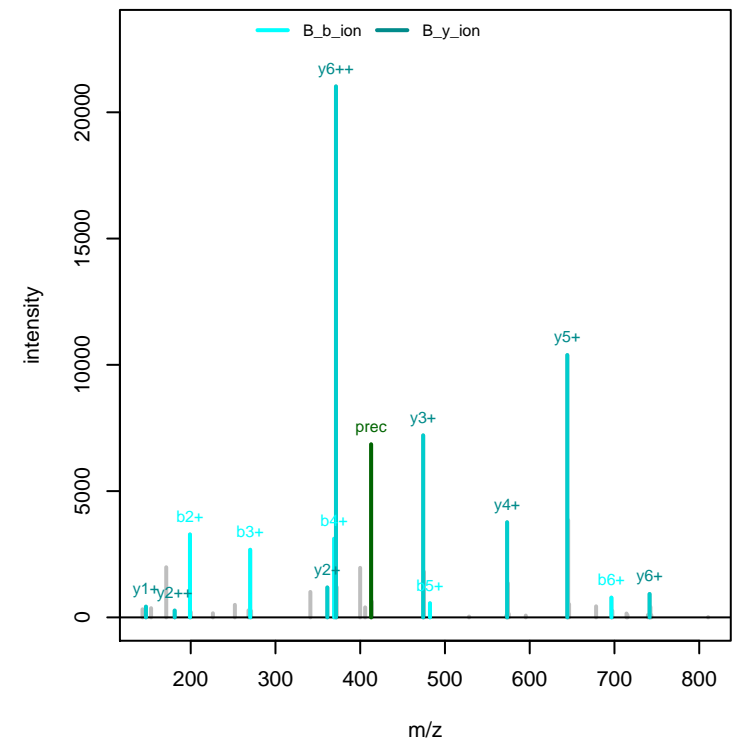

TPAVIKK+XL\_S



TPAVIKK+XL\_L



**KSDQNVR**  
**TGRNPQTGKEIK**

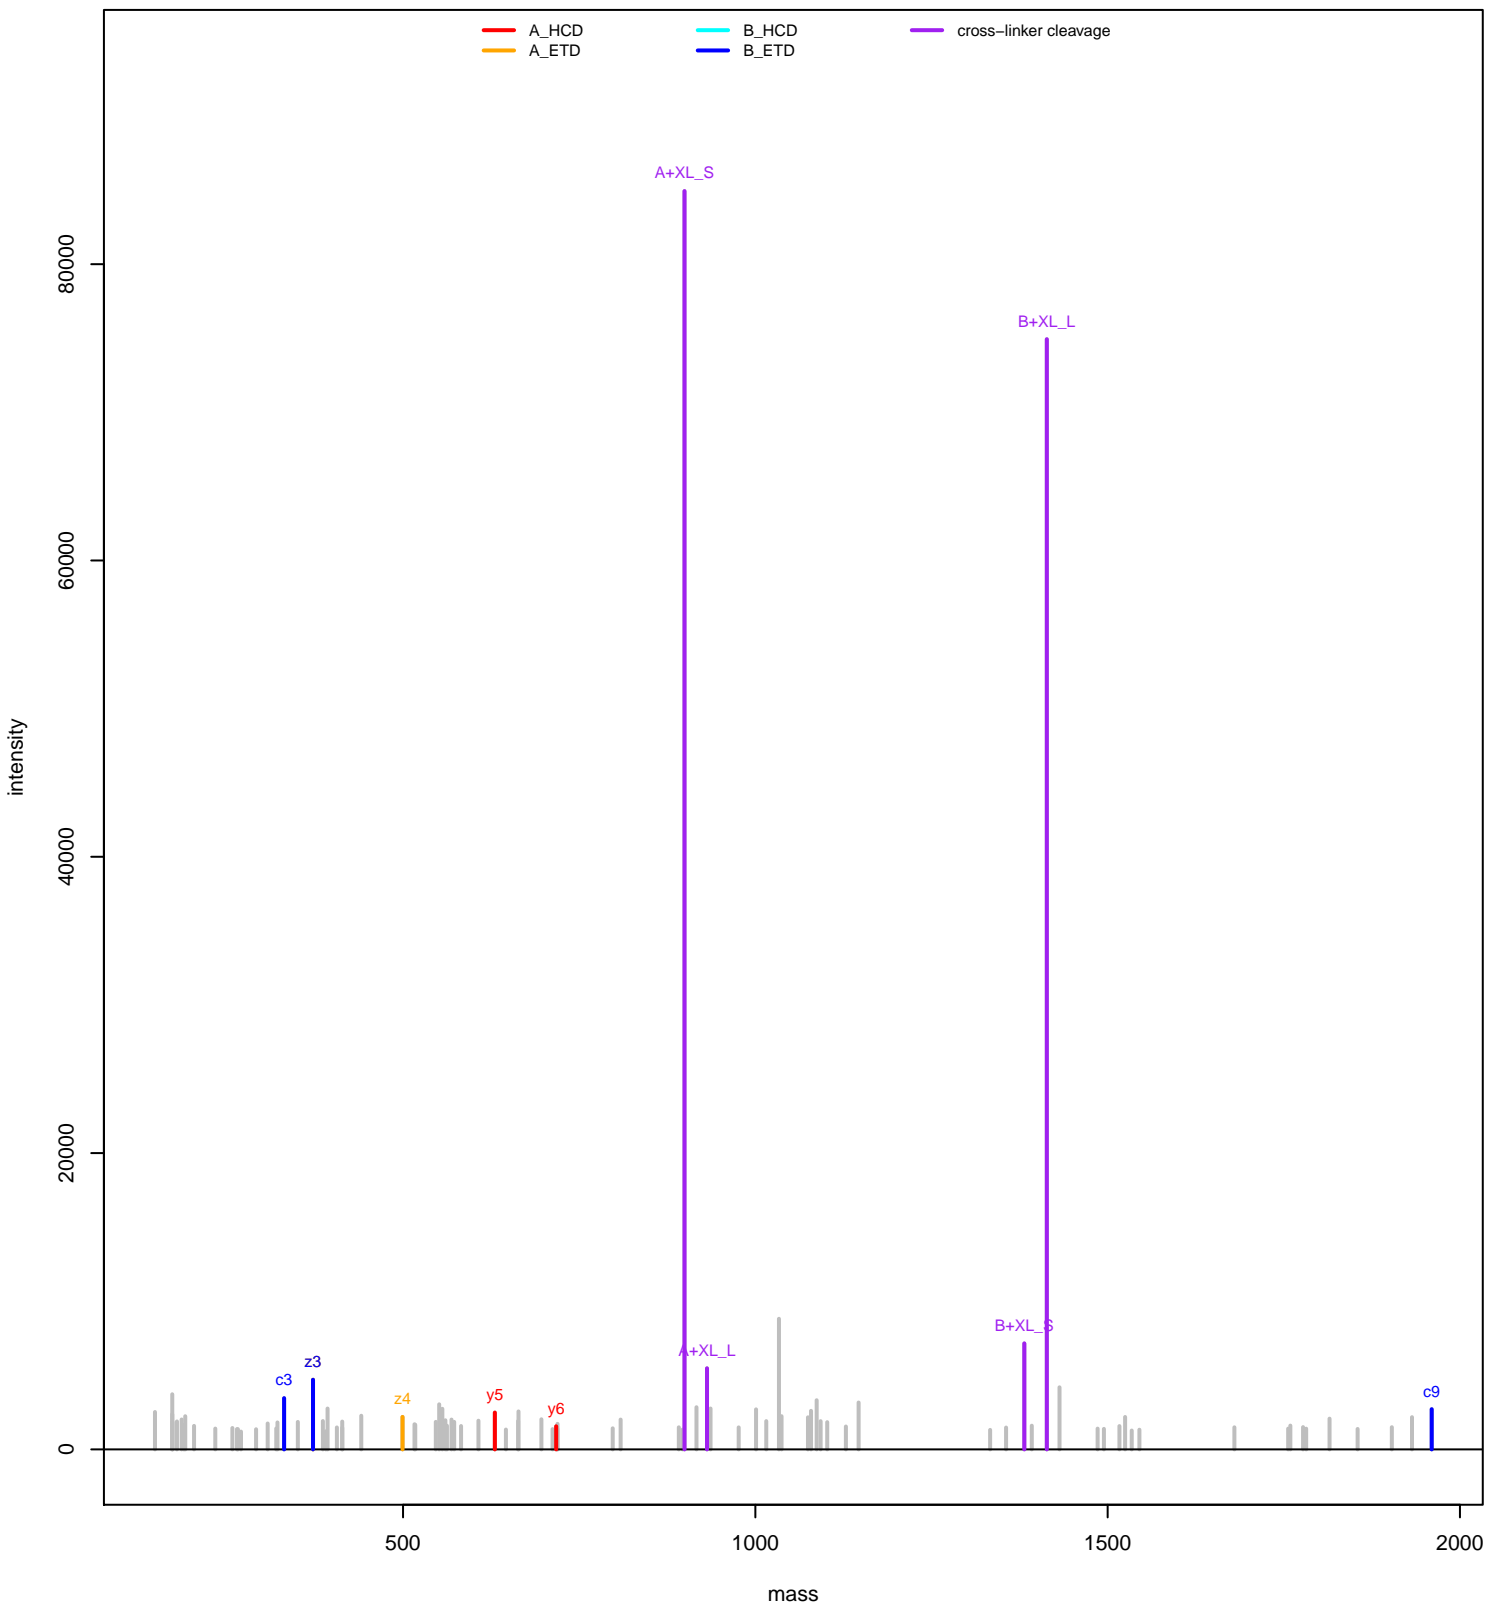

**KSDQNVR+XL\_S**

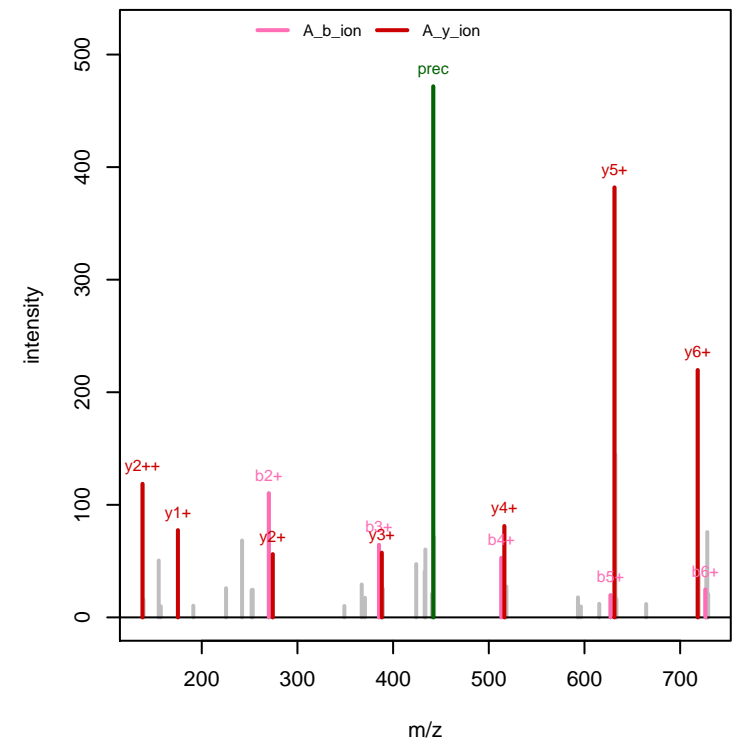

**KSDQNVR+XL\_L**

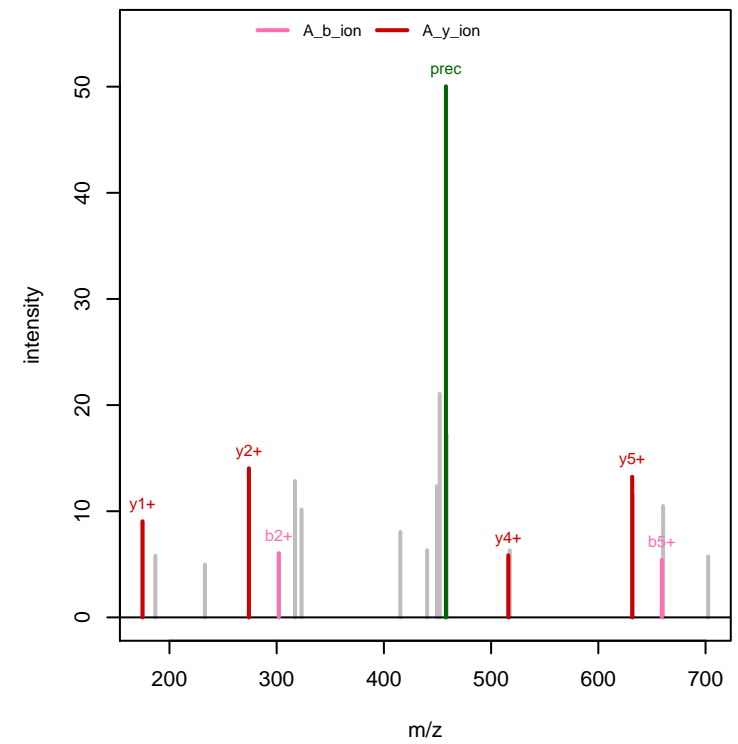

**TGRNPQTGKEIK+XL\_S**

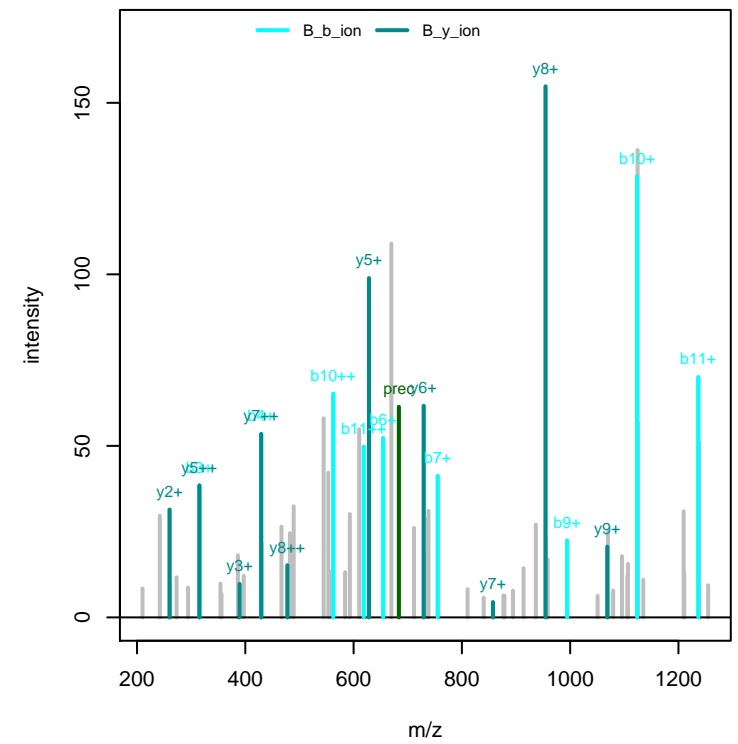

**TGRNPQTGKEIK+XL\_L**

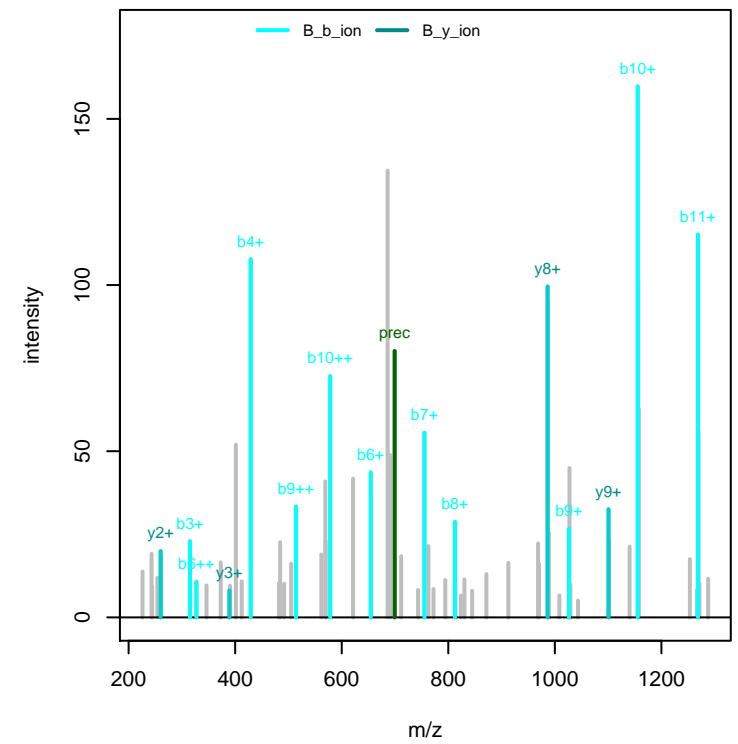

VTGKSR  
MIKDSK

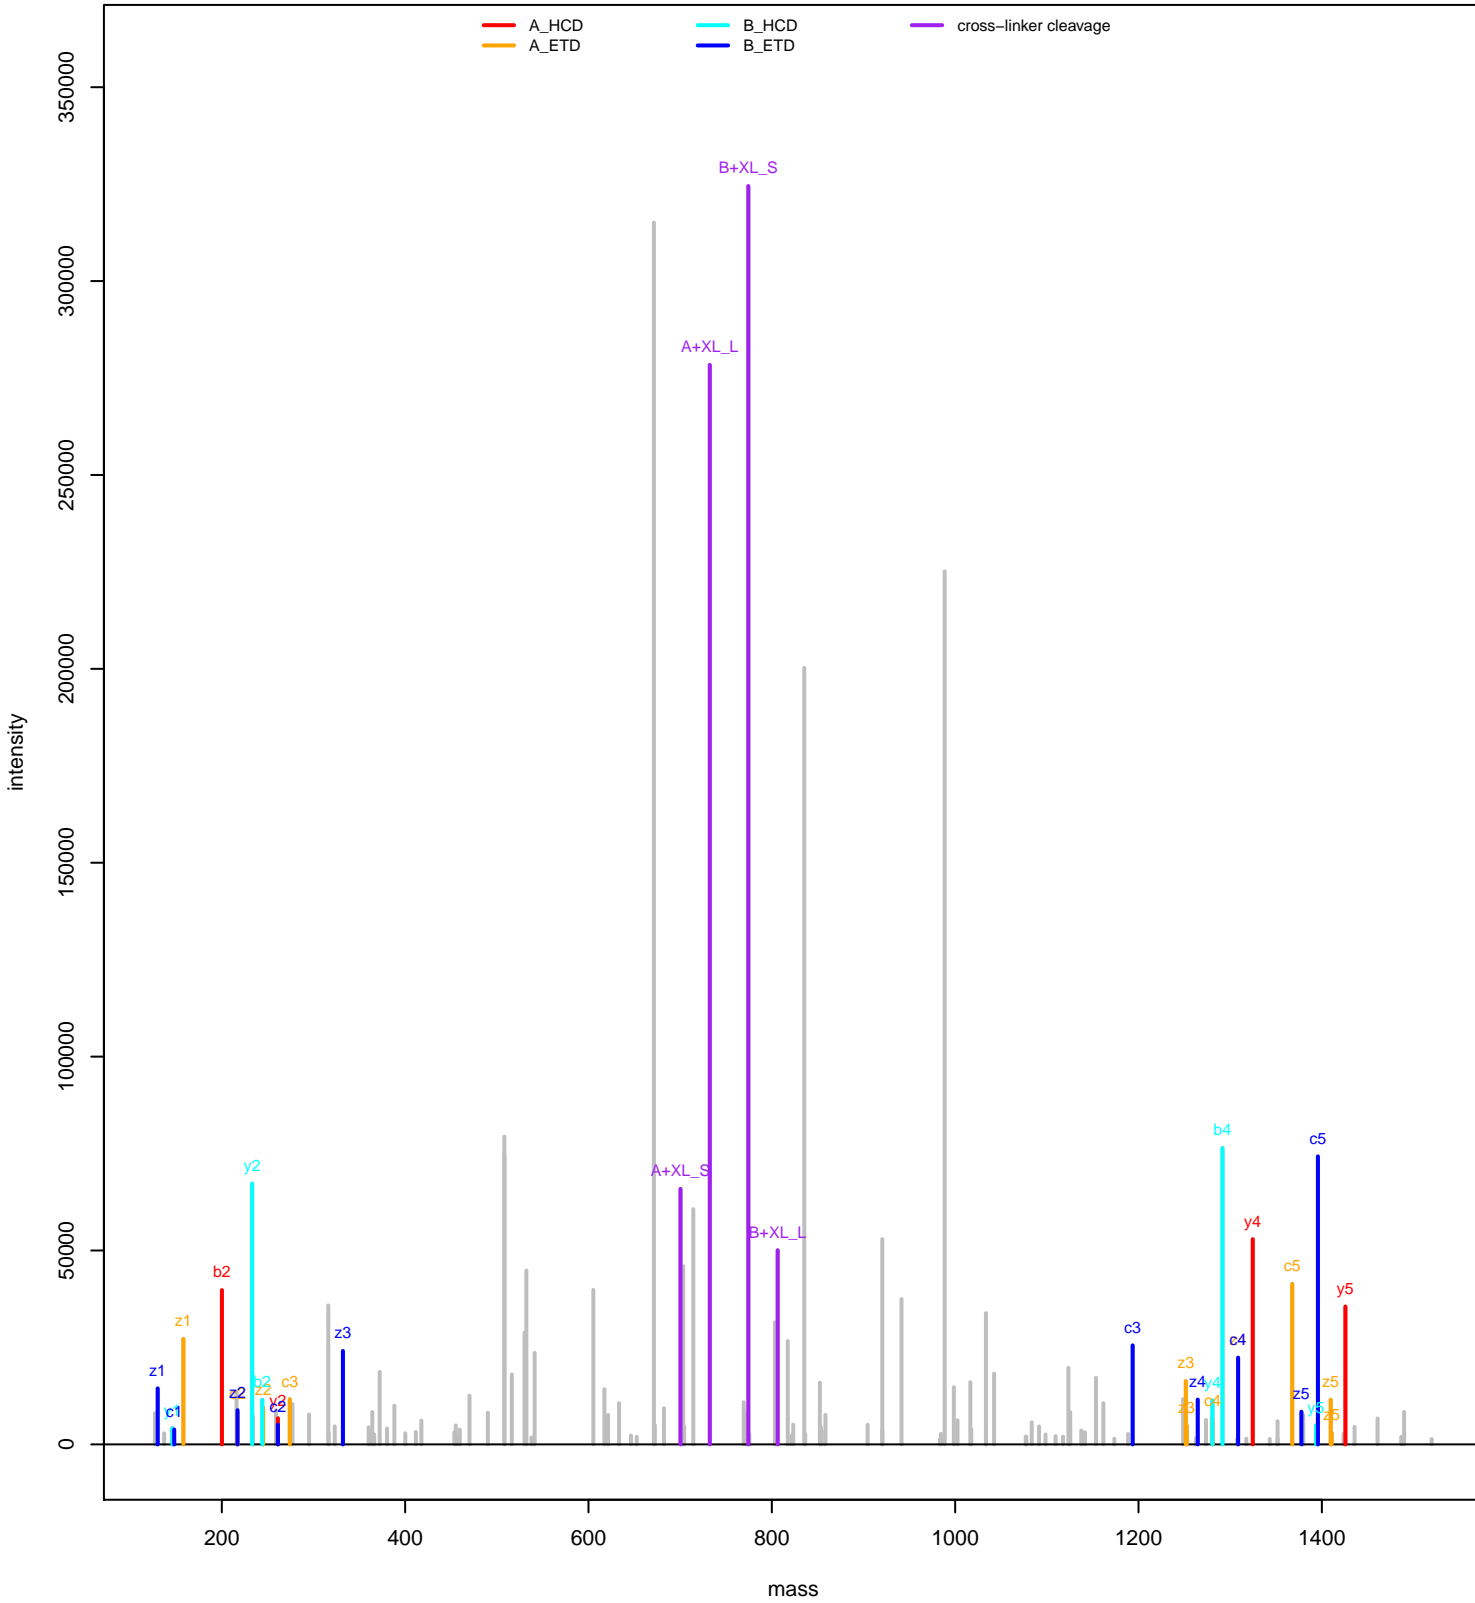

VTGKSR+XL\_S

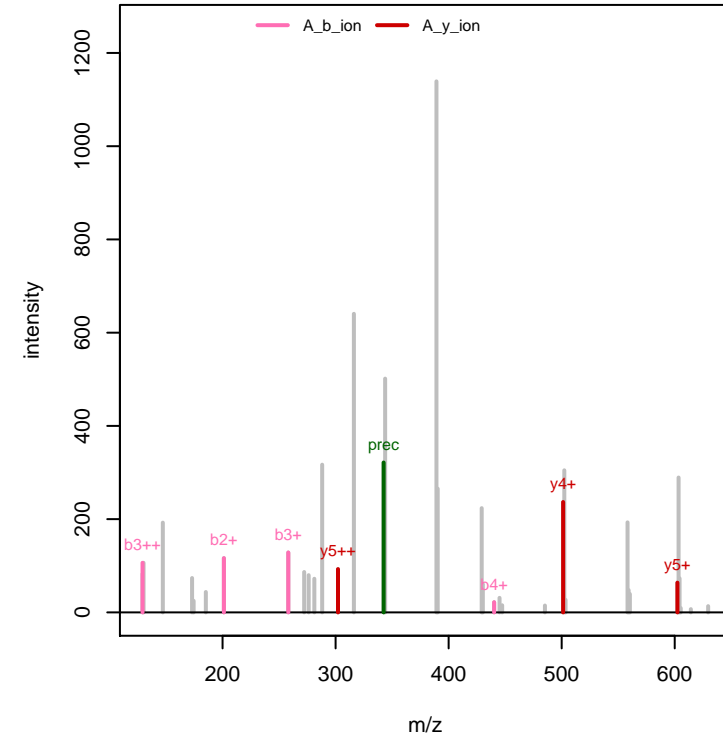

VTGKSR+XL\_L

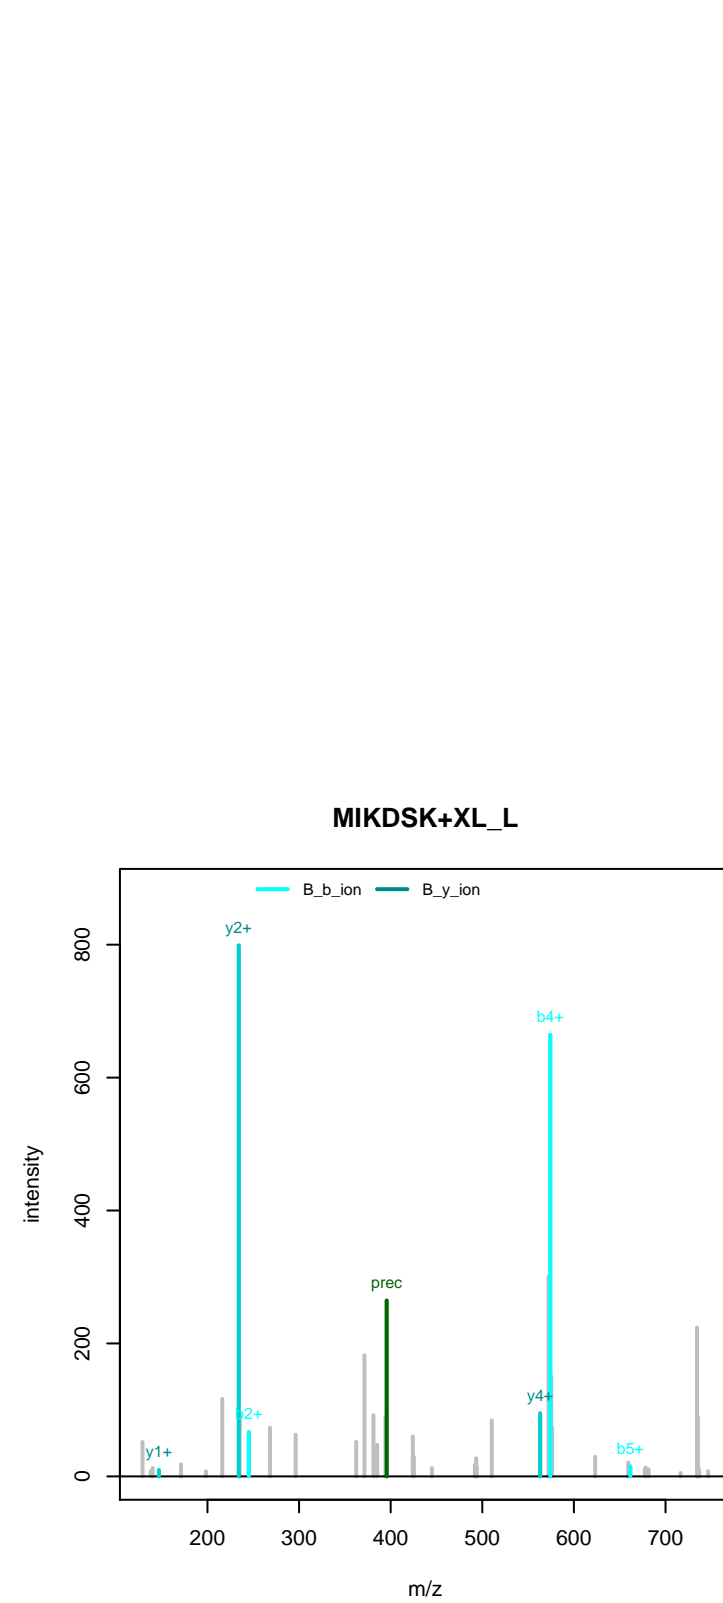

MIKDSK+XL\_S

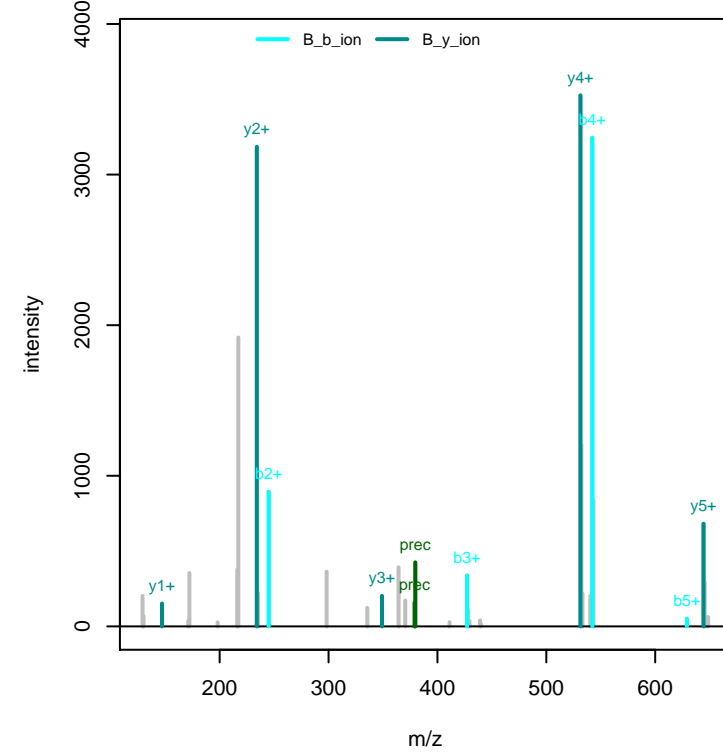

MIKDSK+XL\_L

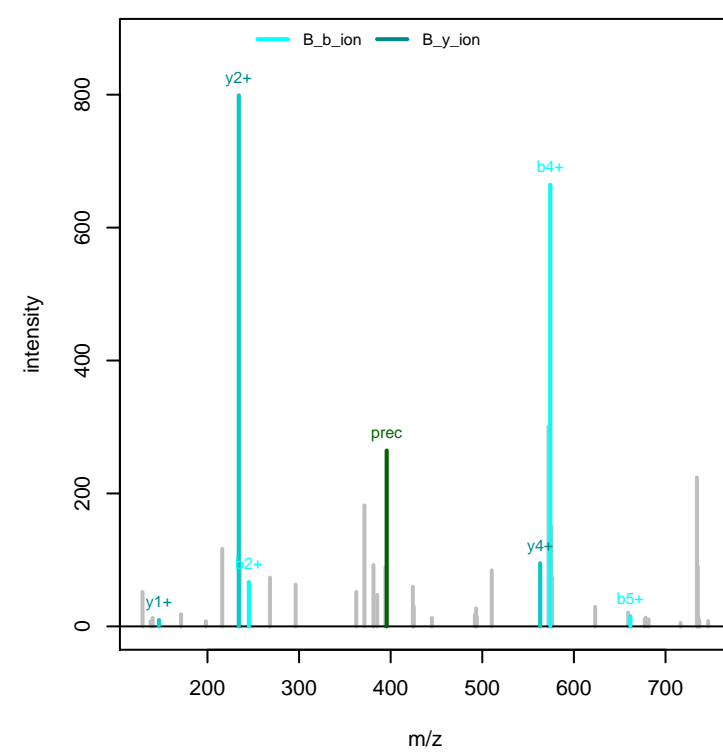

**KAALAAER  
KREEQEQK**

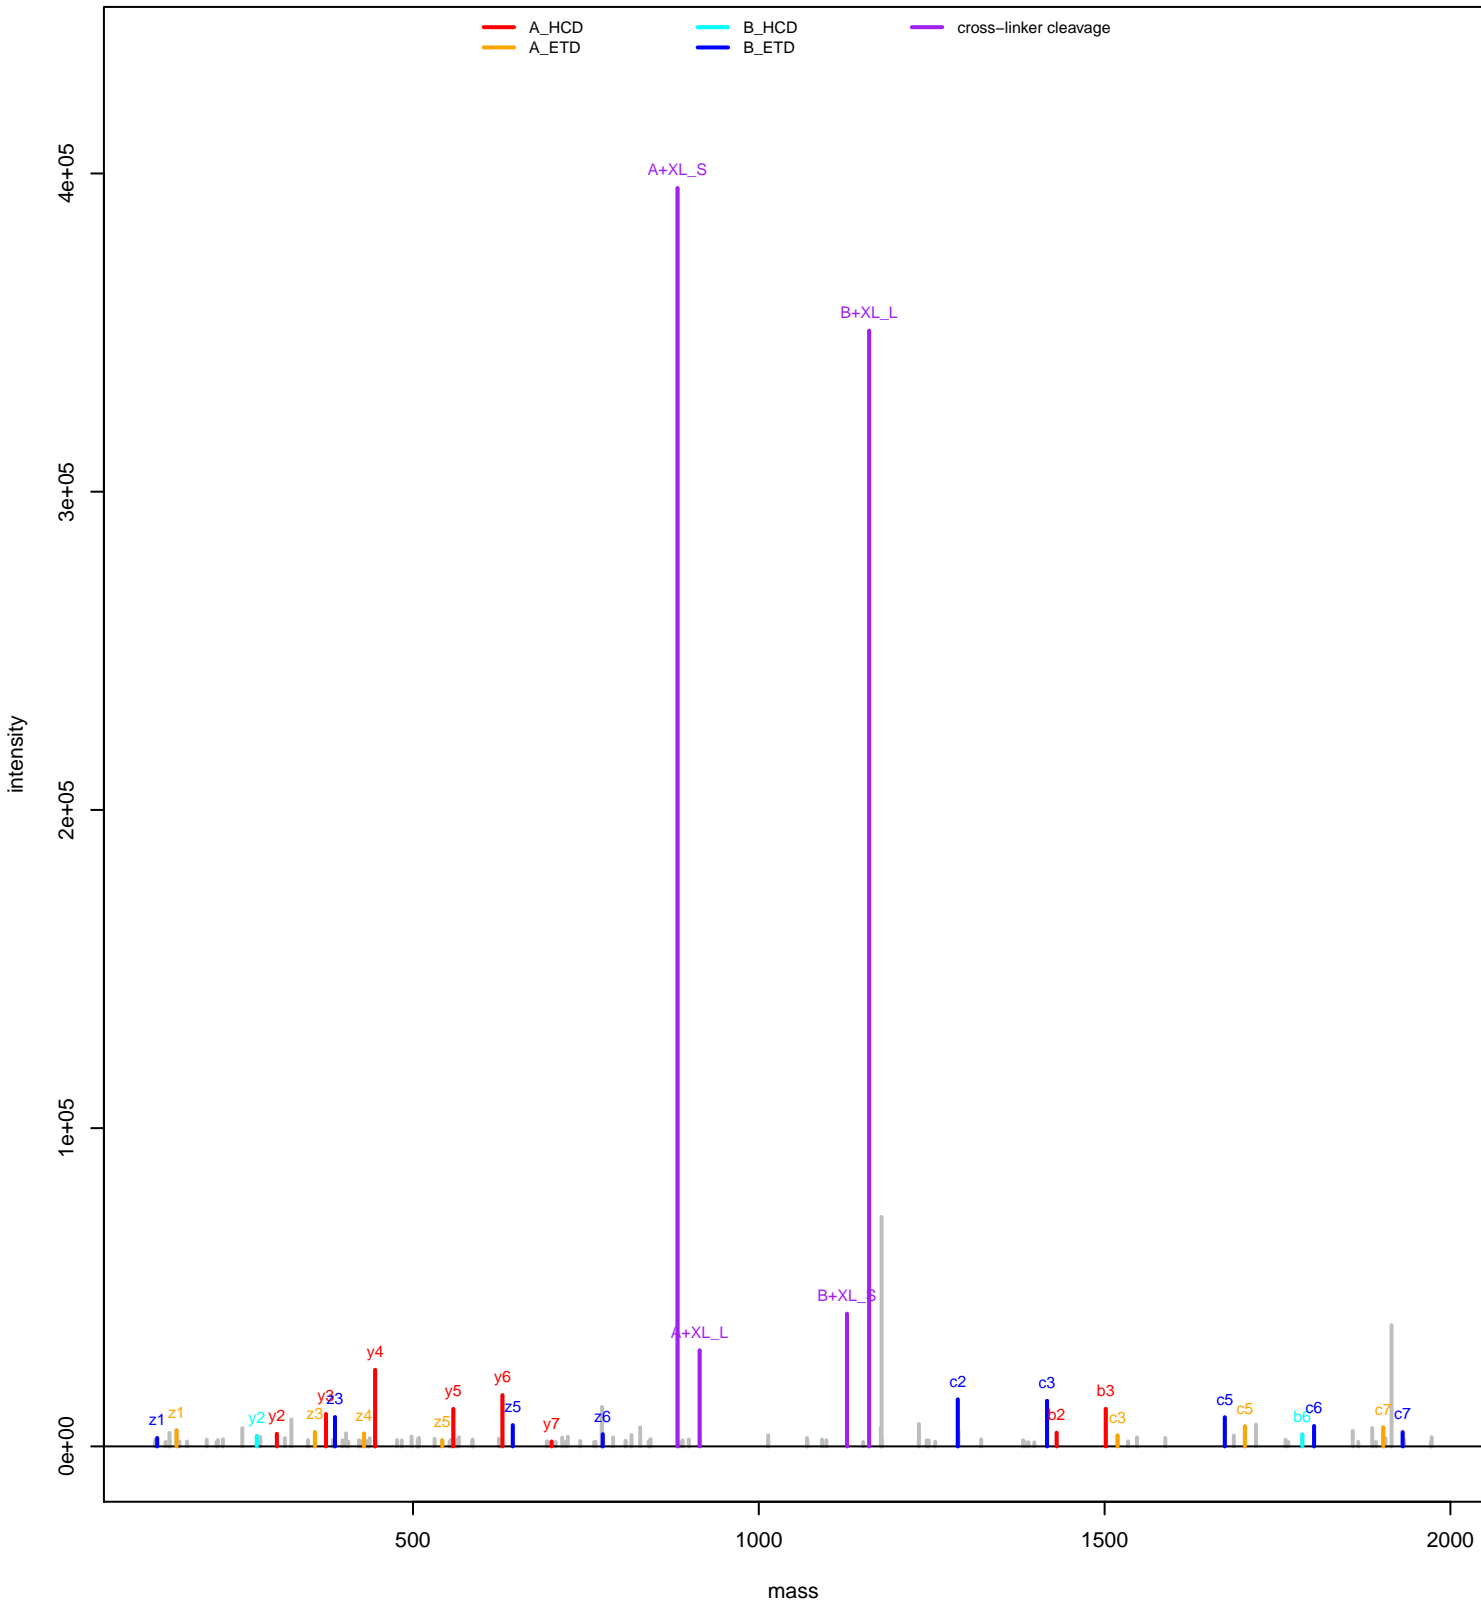

**KAALAAER+XL\_S**

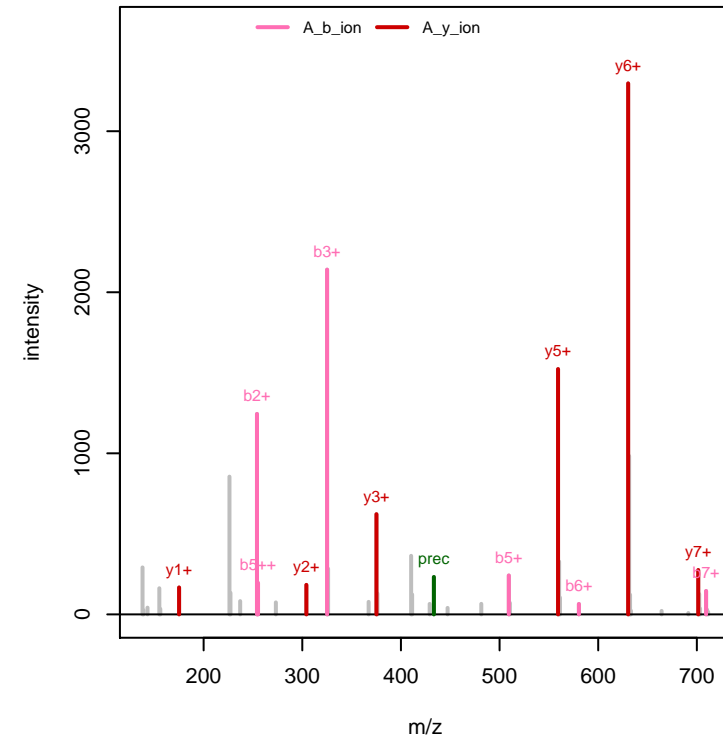

**KAALAAER+XL\_L**

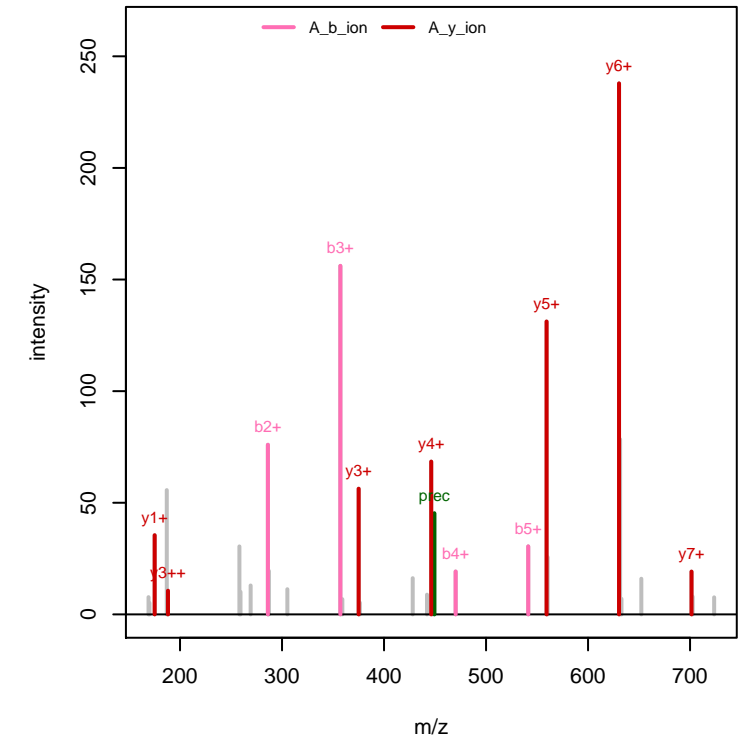

**KREEQEQK+XL\_S**

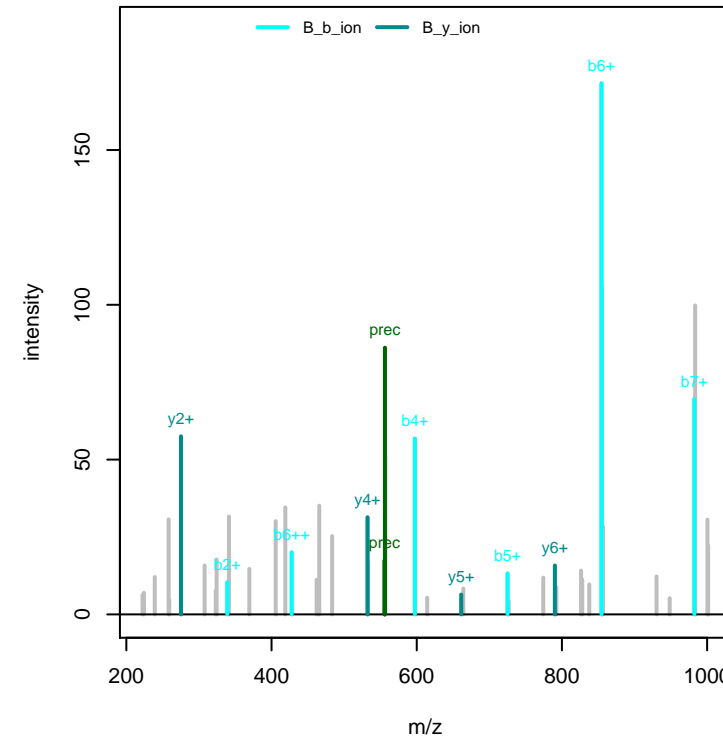

**KREEQEQK+XL\_L**

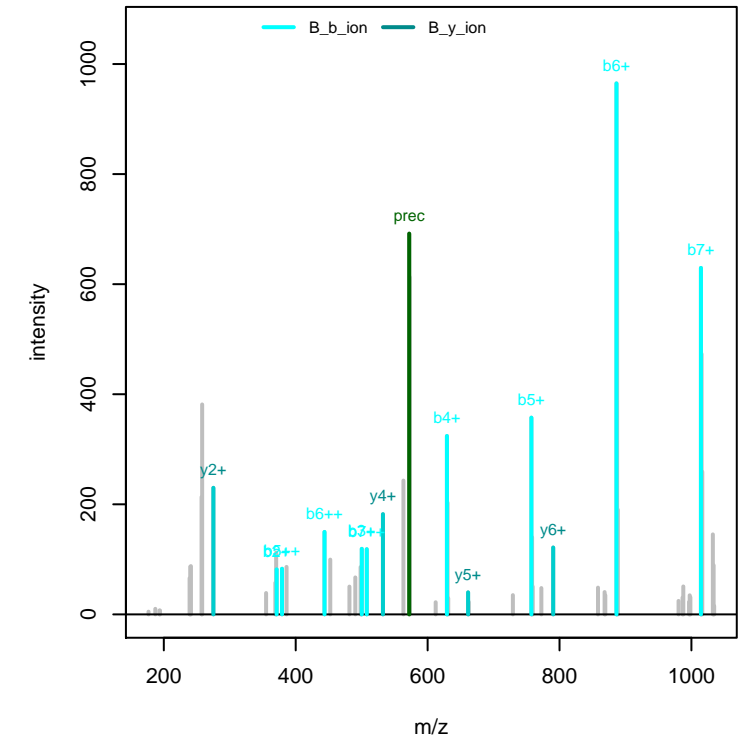

SSAQAKMEK  
DAADNEAKGK

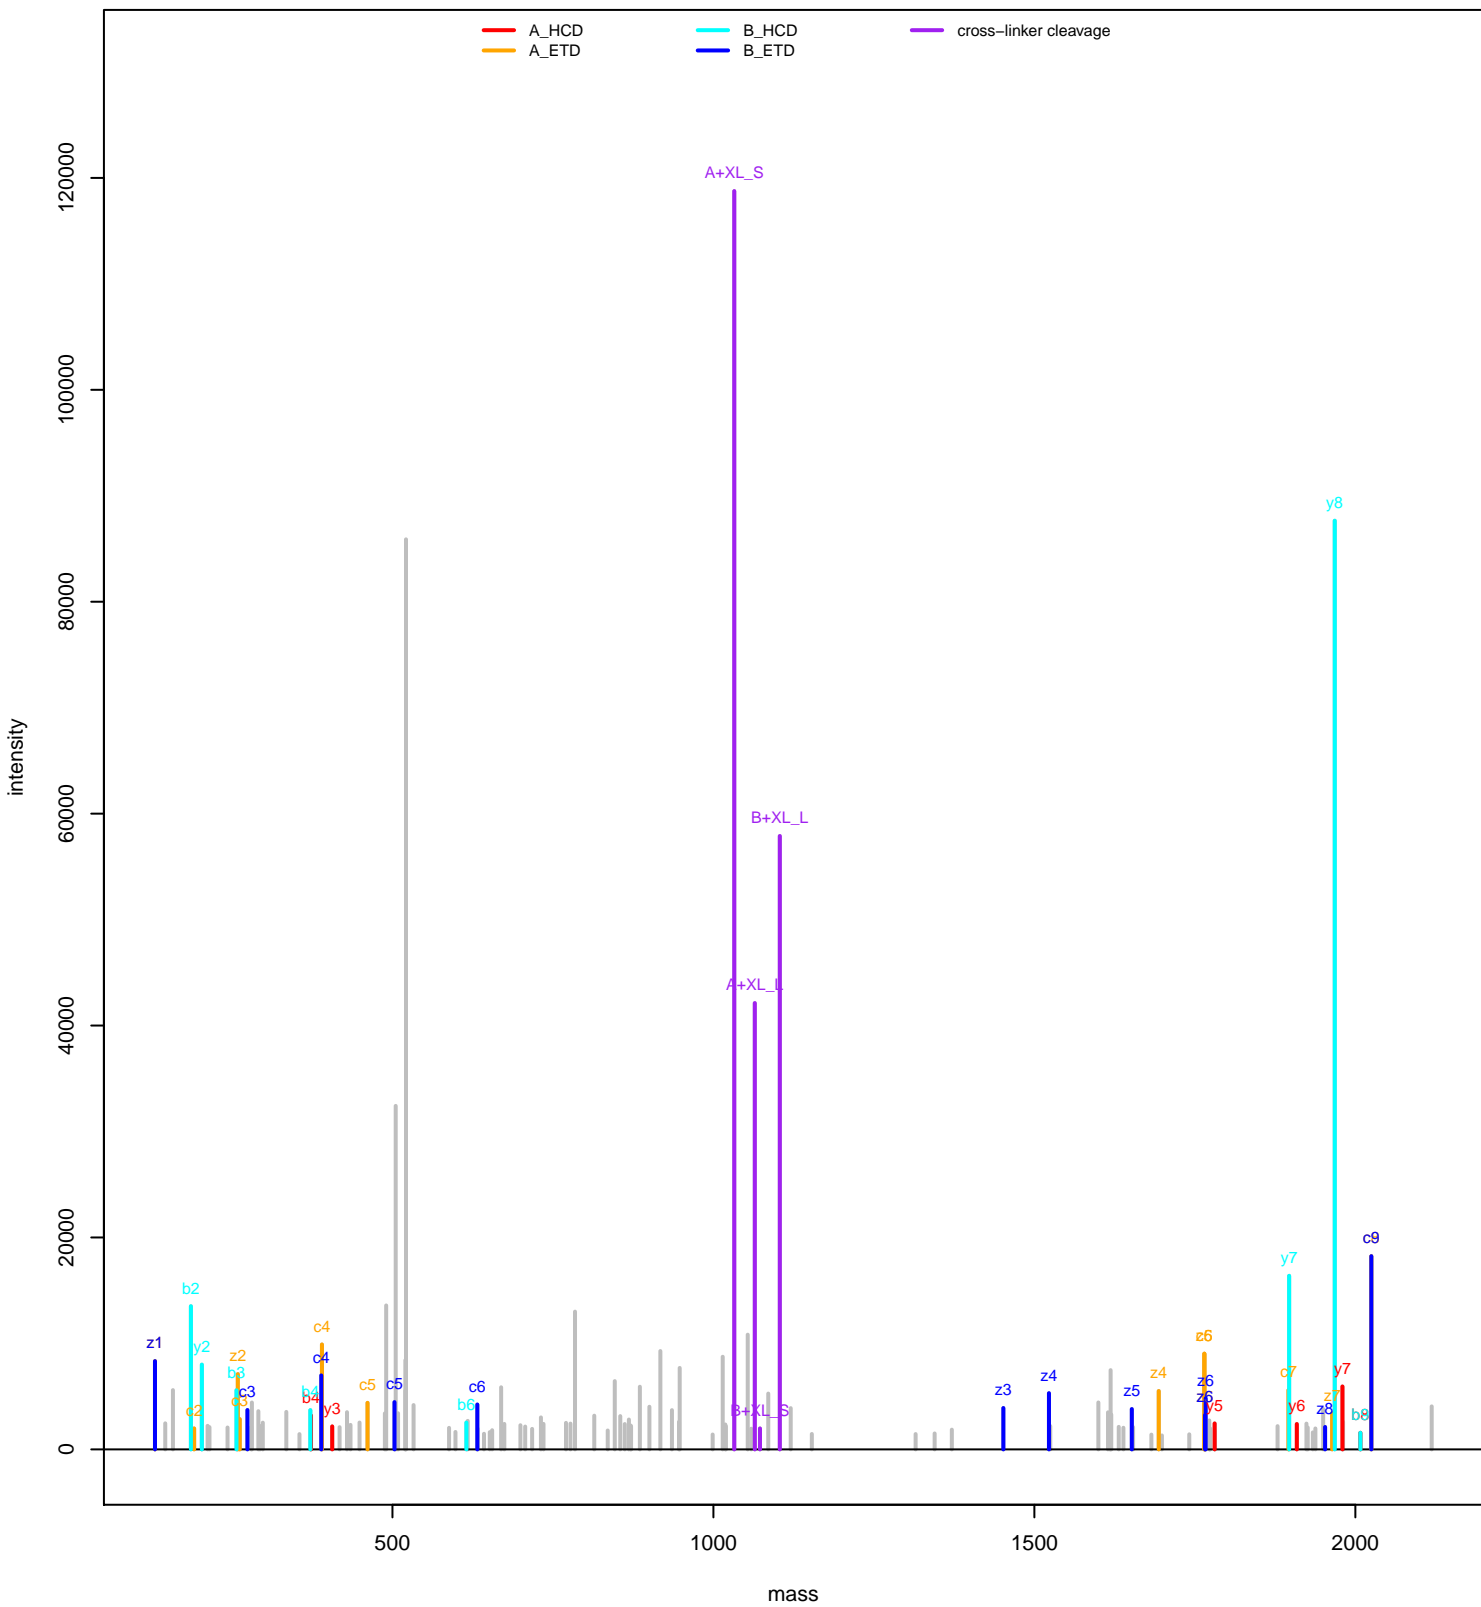

SSAQAKMEK+XL\_S

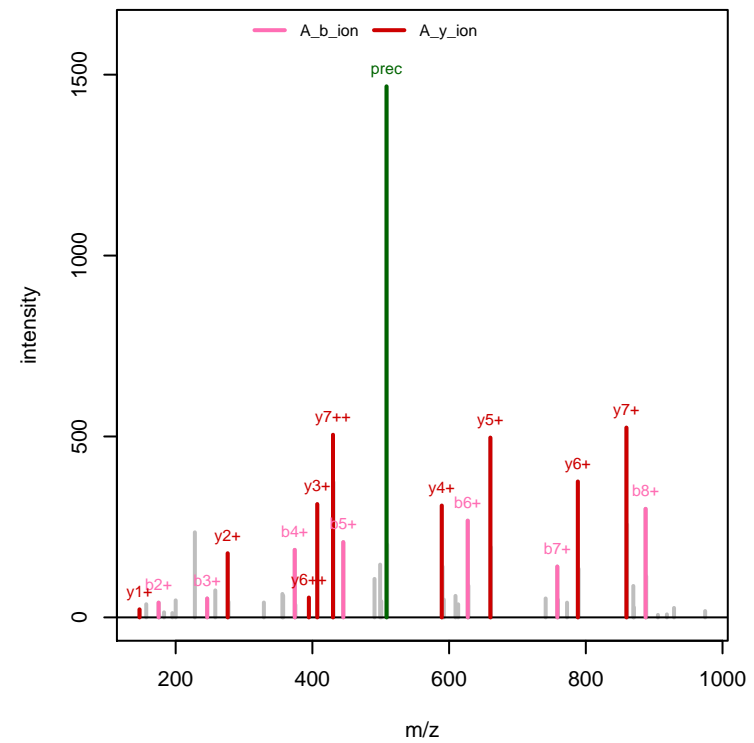

SSAQAKMEK+XL\_L

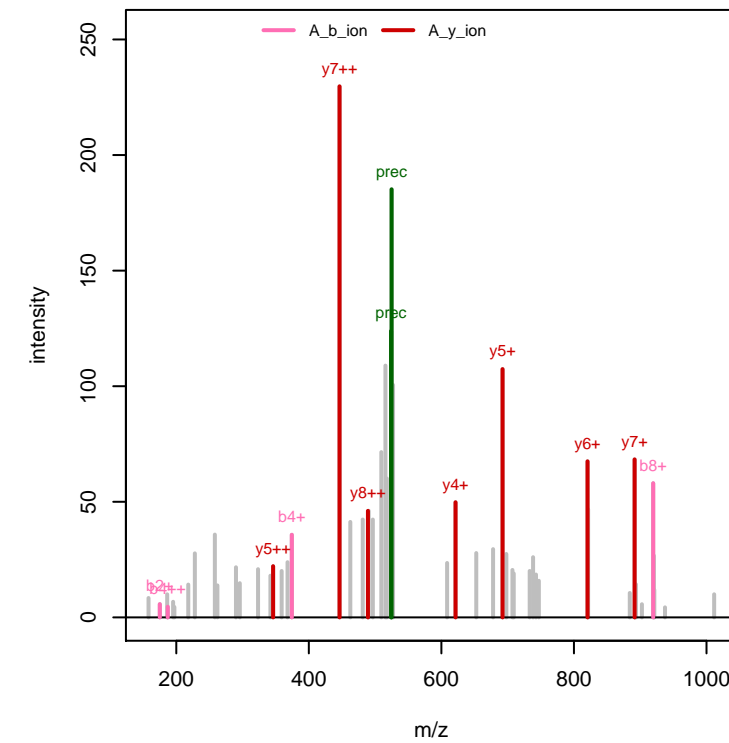

DAADNEAKGK+XL\_S

DAADNEAKGK+XL\_L



STDISVKTDQK  
EGSVKGYAGDTATTSEIK

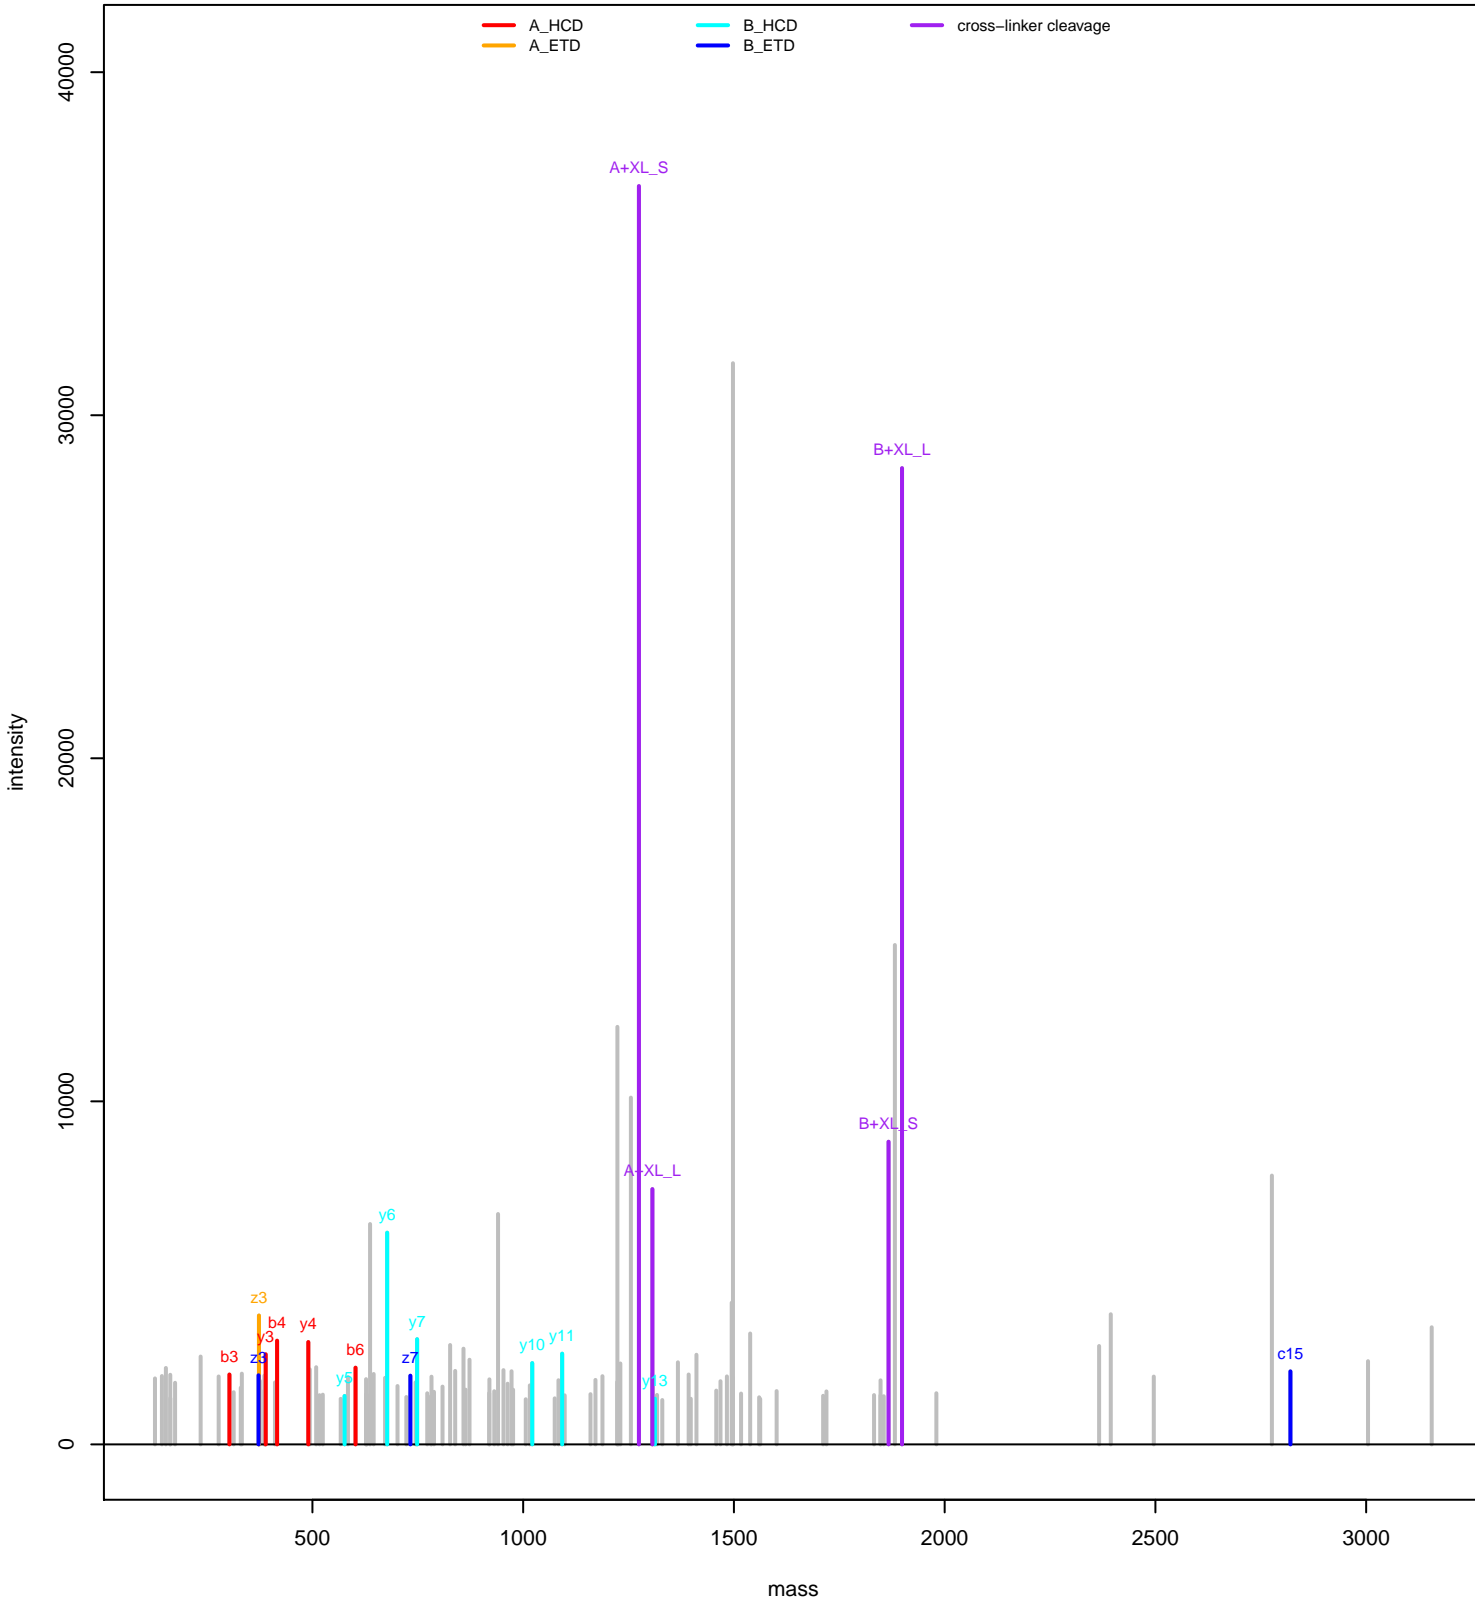

STDISVKTDQK+XL\_S

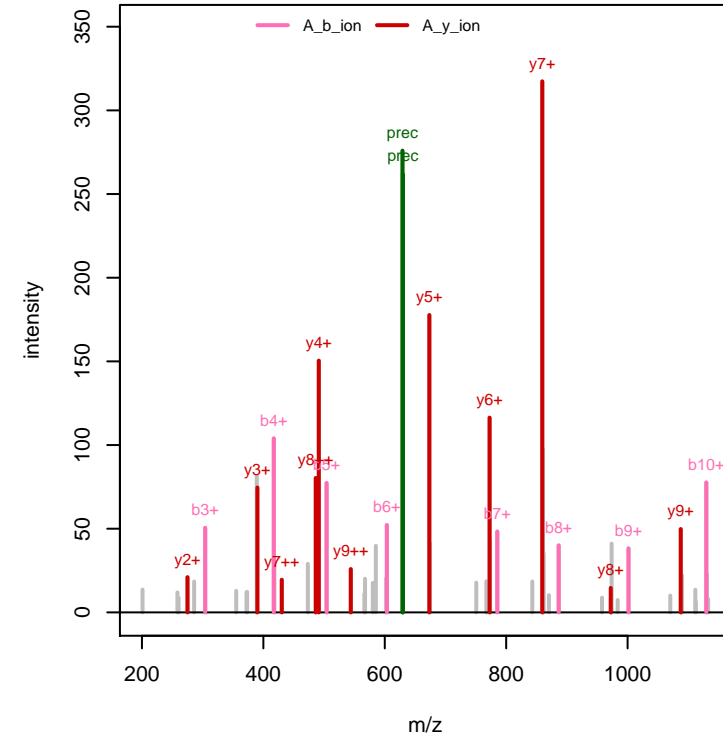

STDISVKTDQK+XL\_L

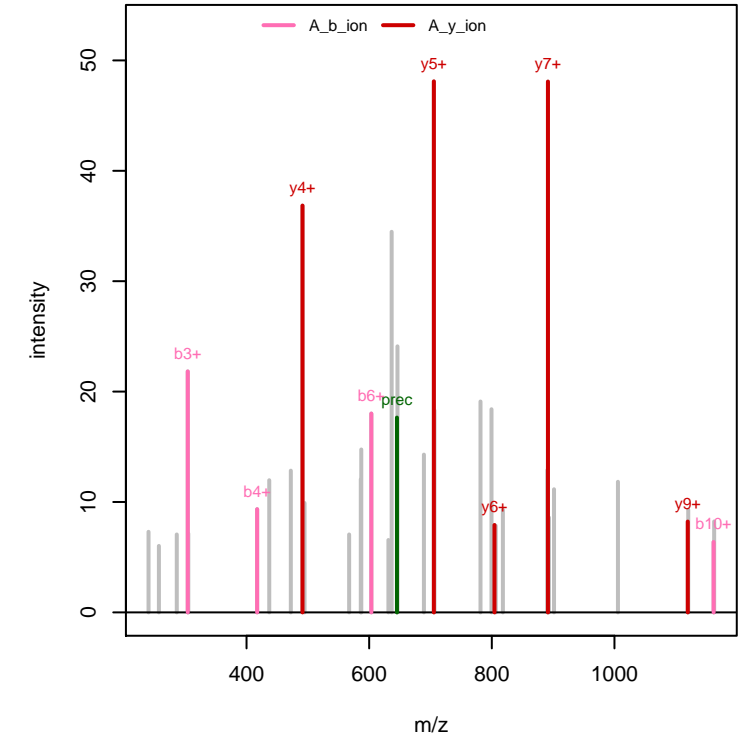

EGSVKGYAGDTATTSEIK+XL\_S

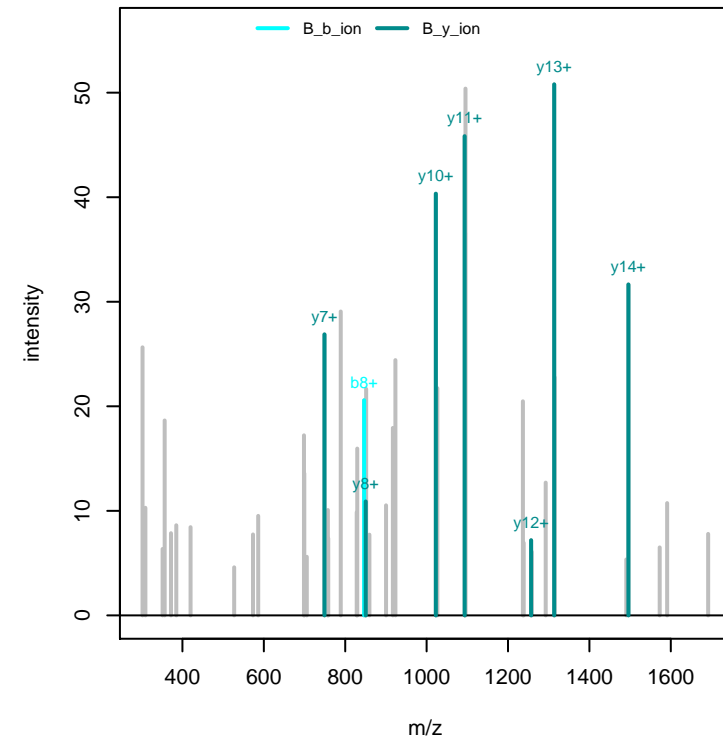

EGSVKGYAGDTATTSEIK+XL\_L

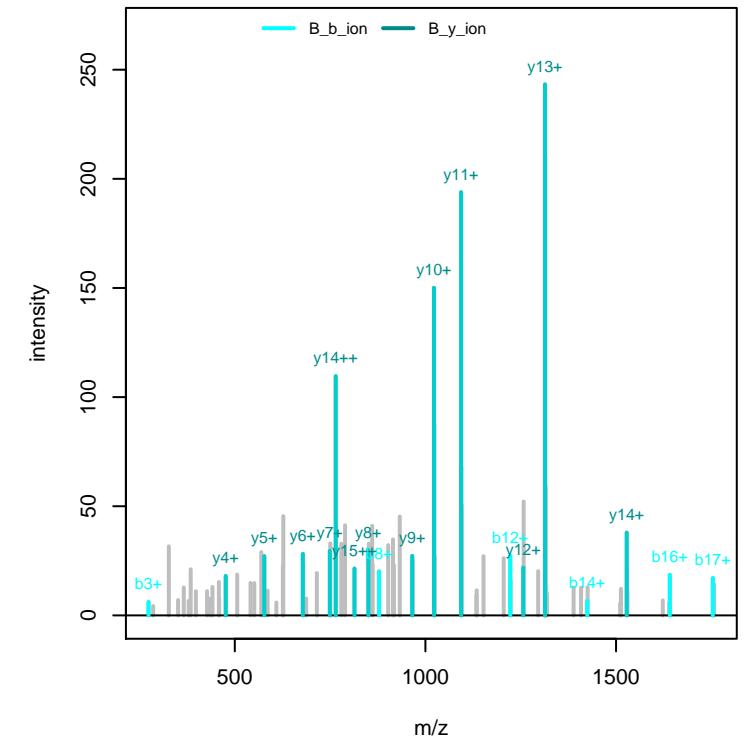

**VDKQLR**  
**AEAPAAAPAAKAEGK**

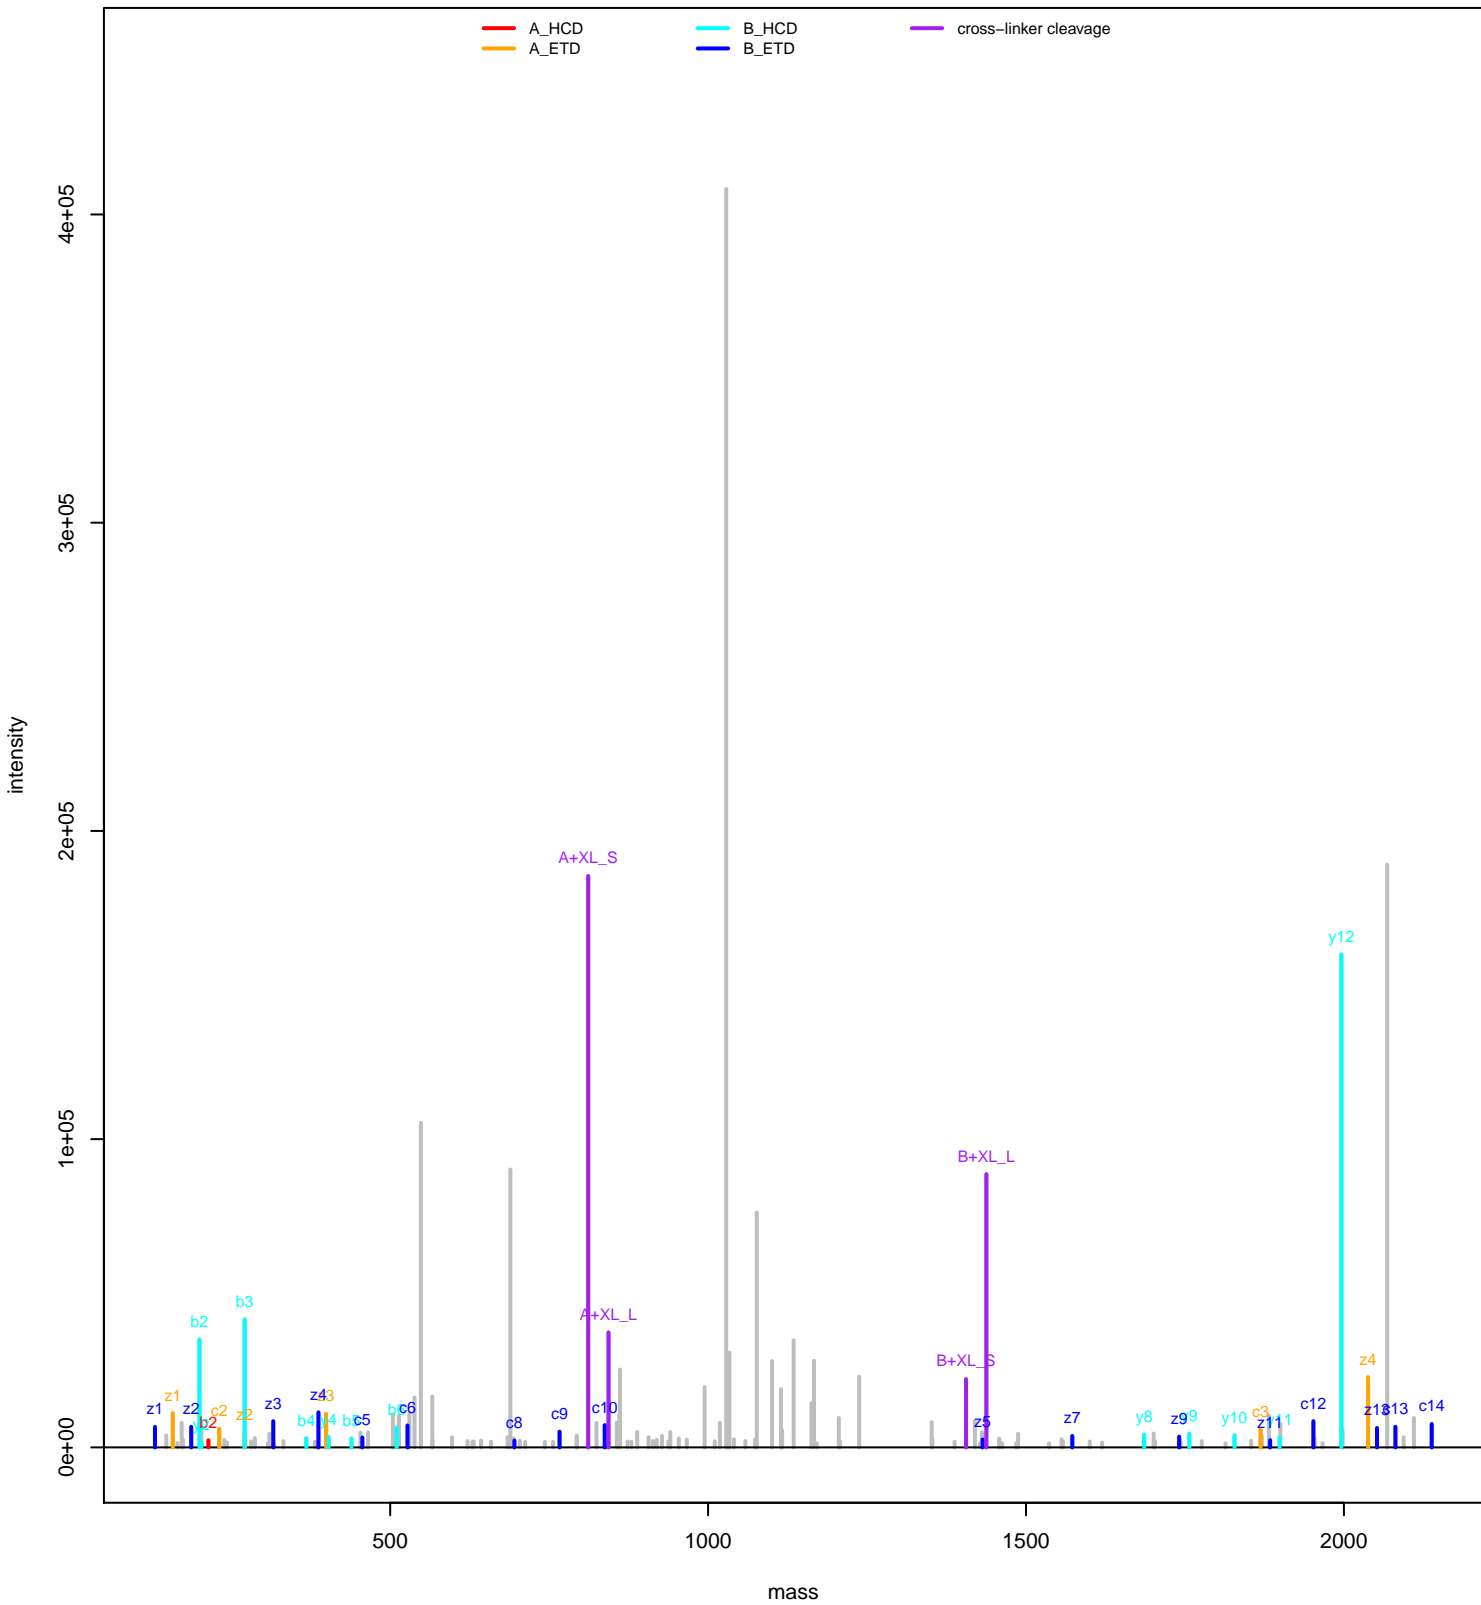

**VDKQLR+XL\_S**

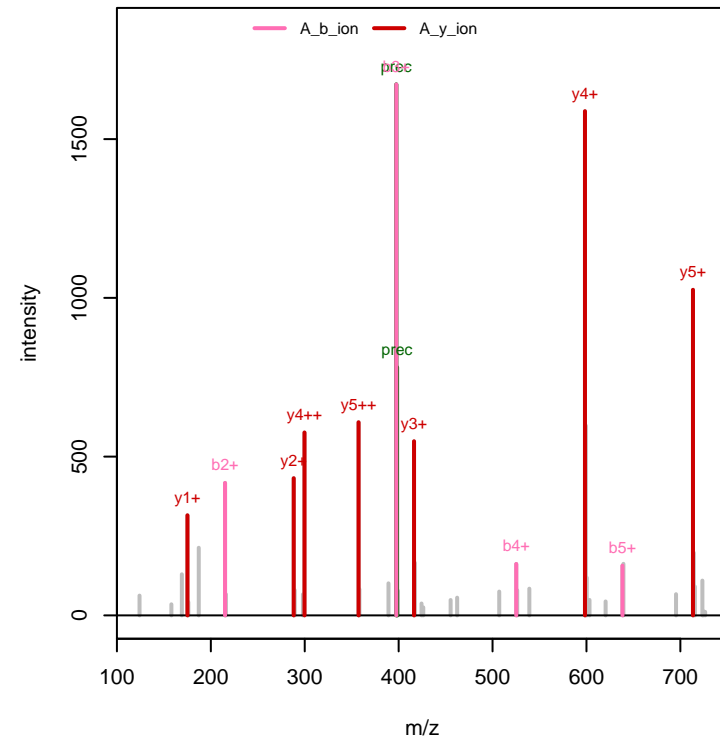

**VDKQLR+XL\_L**

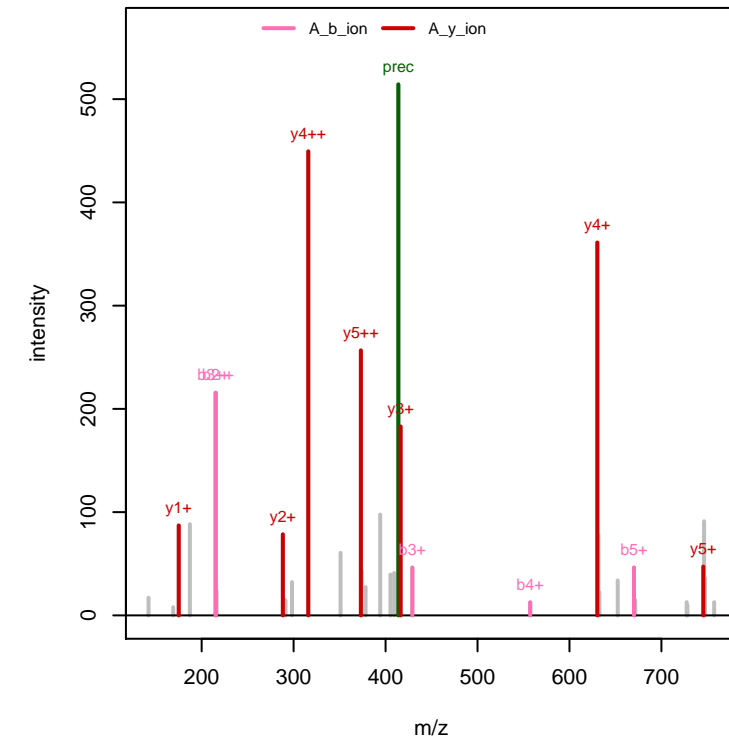

**AEAPAAAPAAKAEGK+XL\_S**

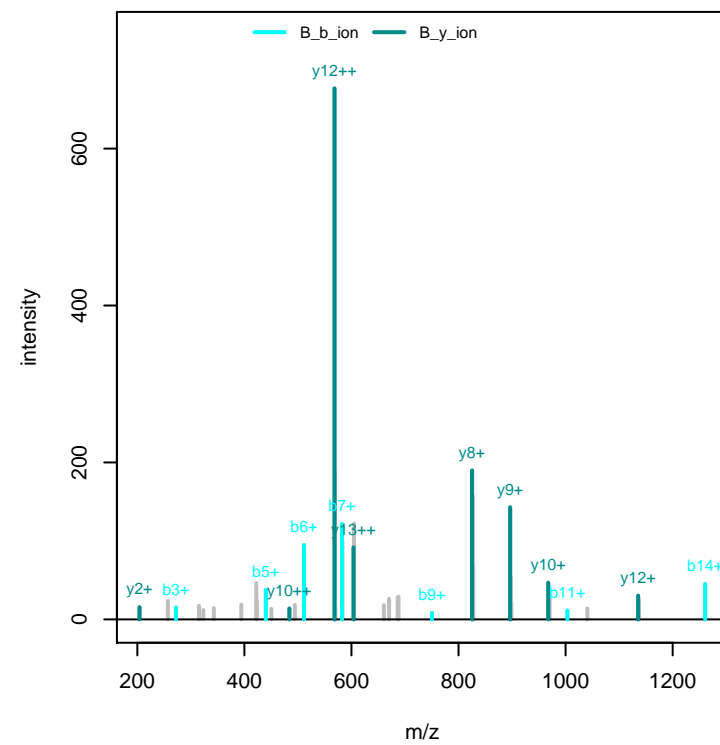

**AEAPAAAPAAKAEGK+XL\_L**

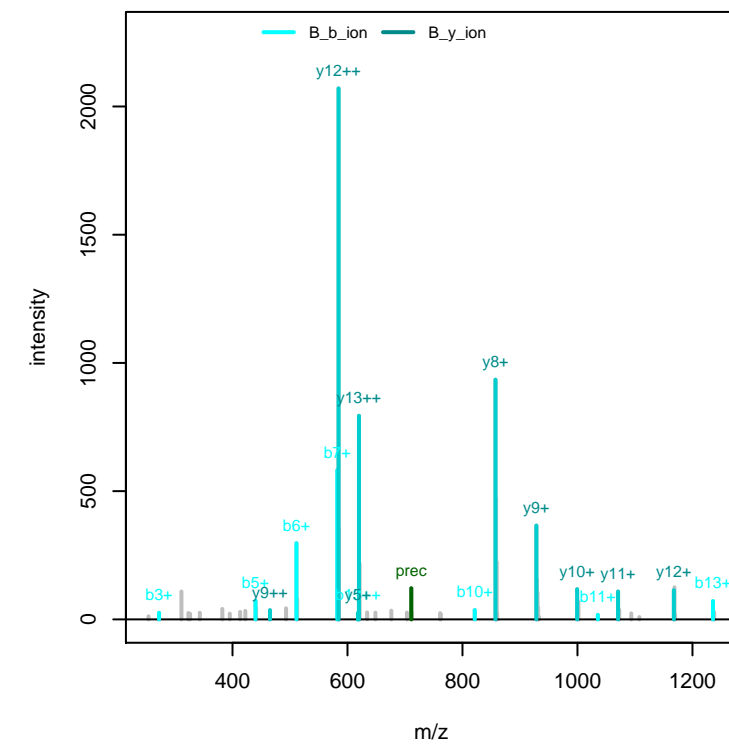

VGKISR  
SGSGKPNK

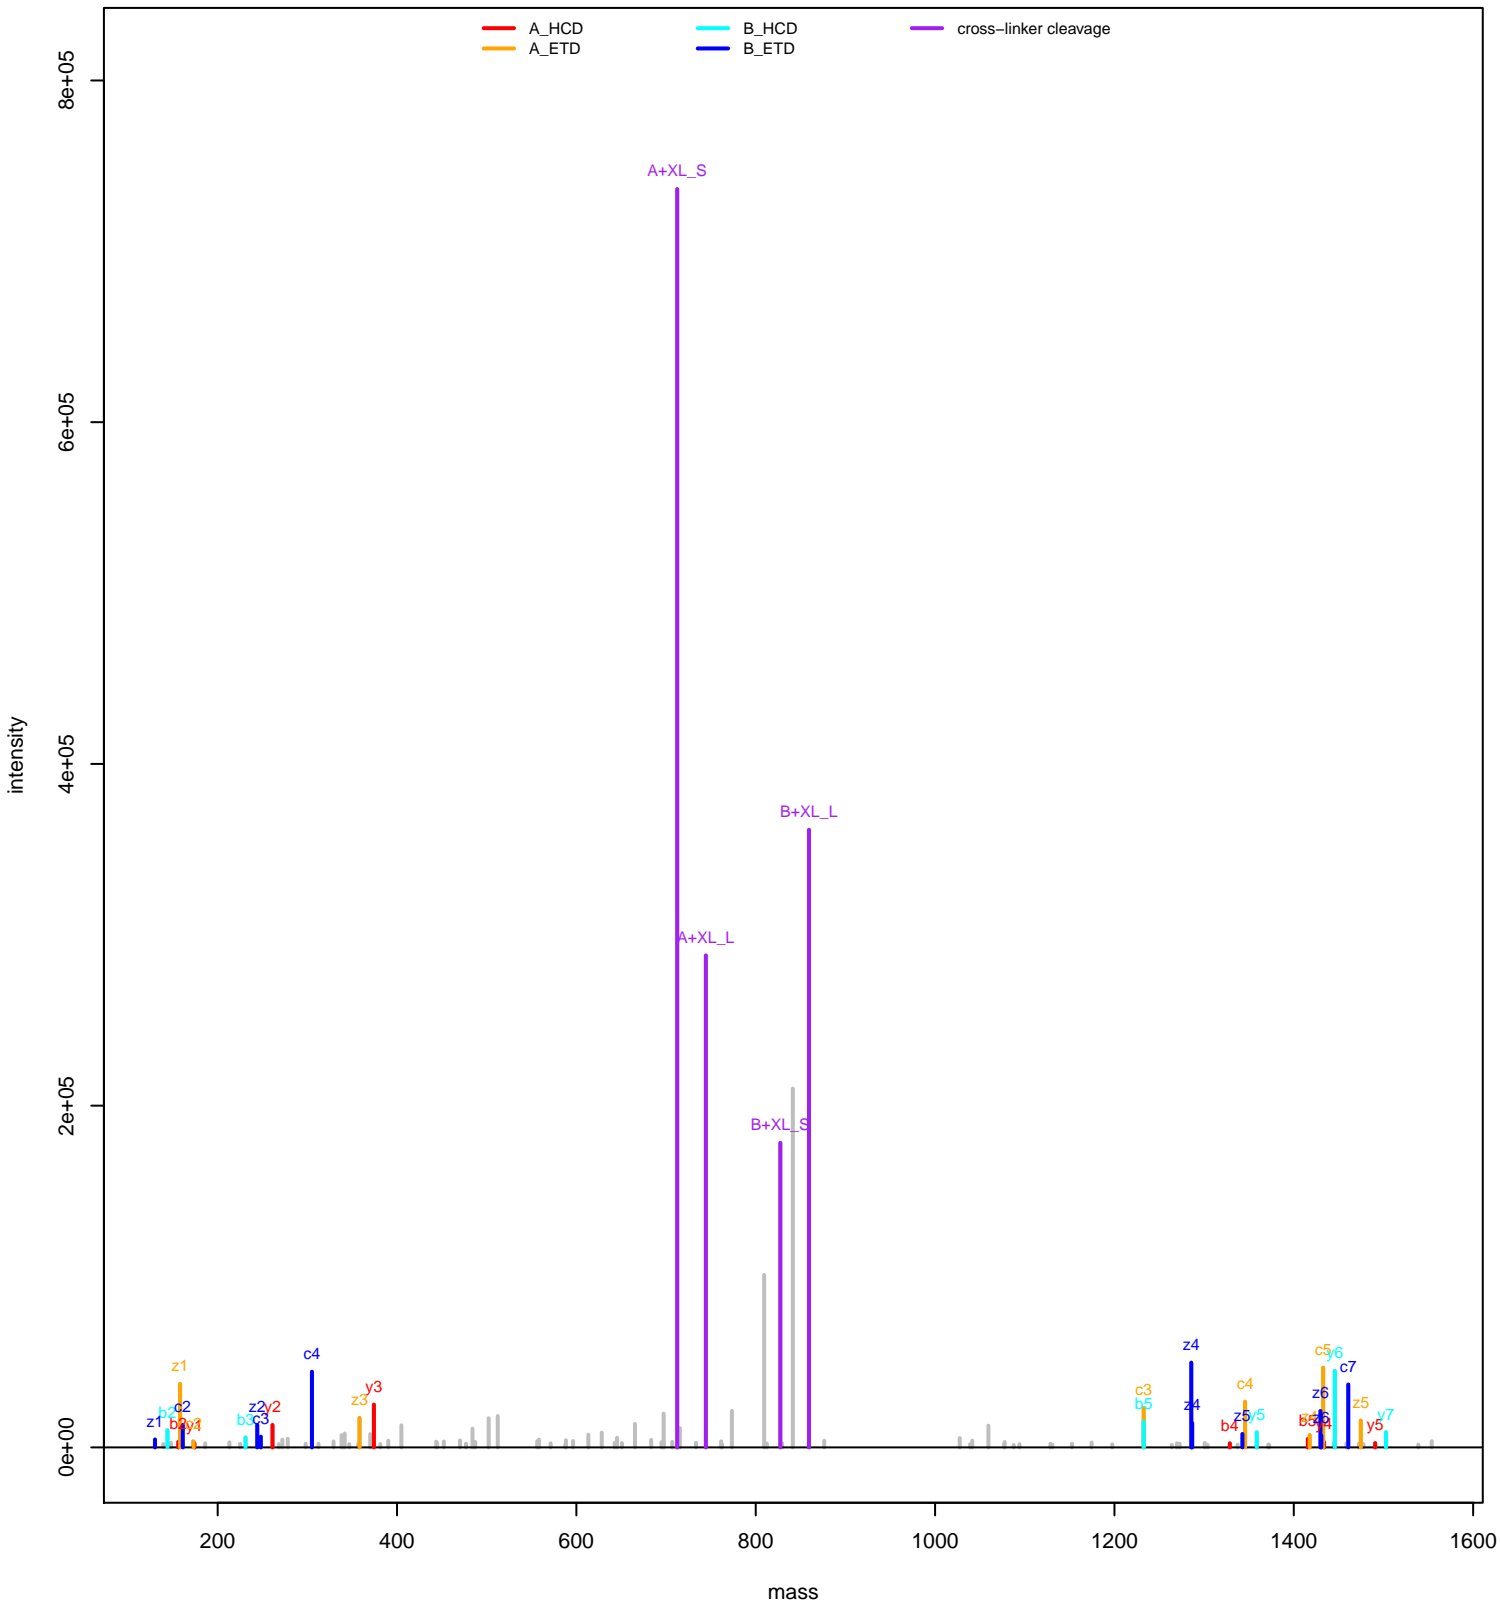

VGKISR+XL\_S

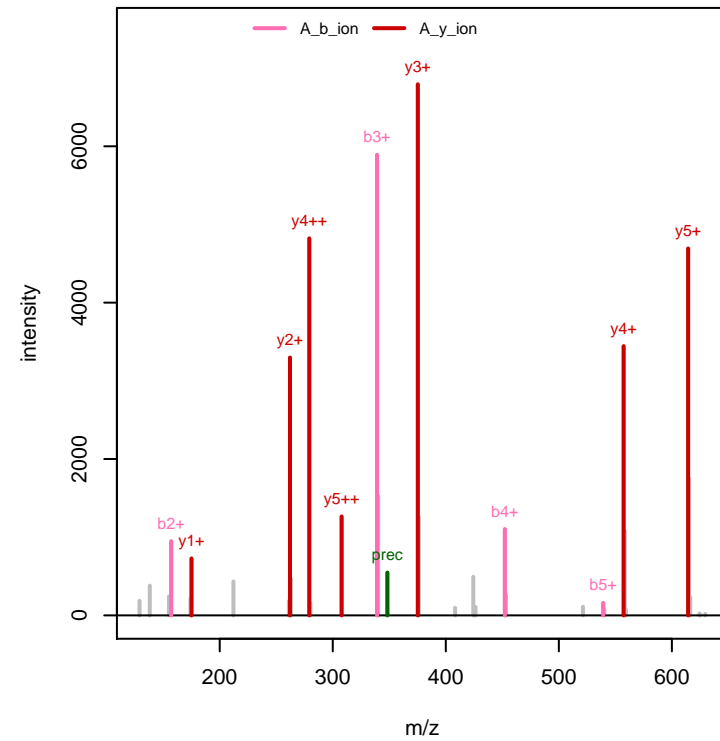

VGKISR+XL\_L

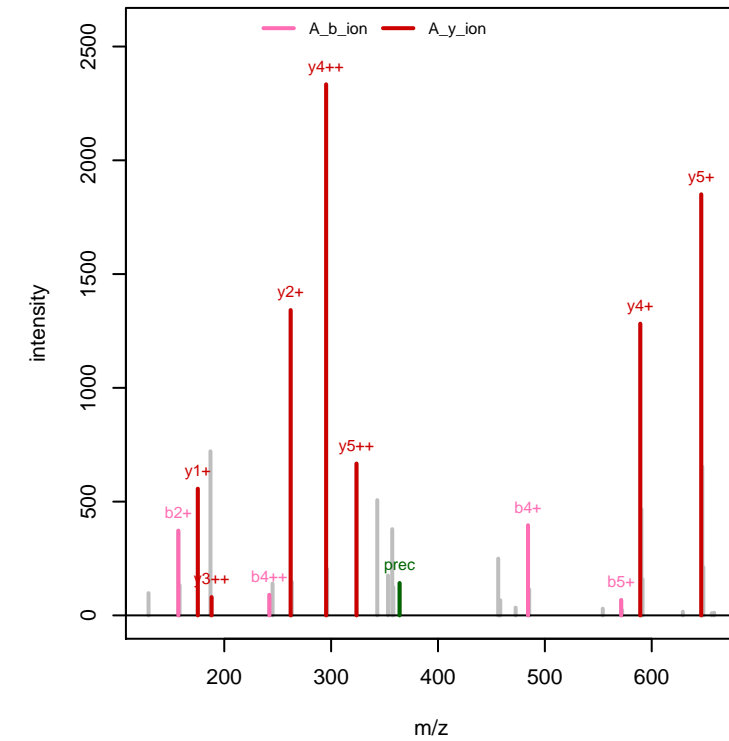

SGSGKPNK+XL\_S

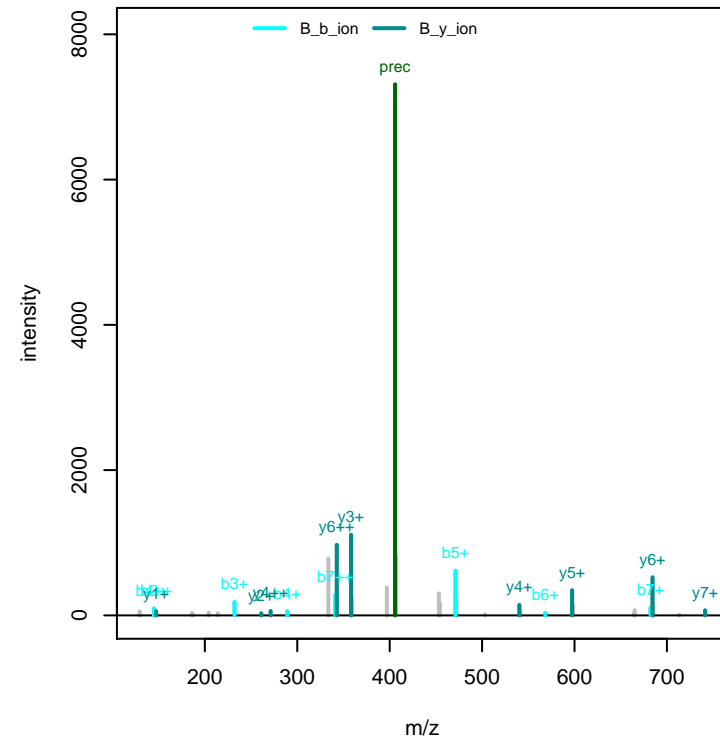

SGSGKPNK+XL\_L

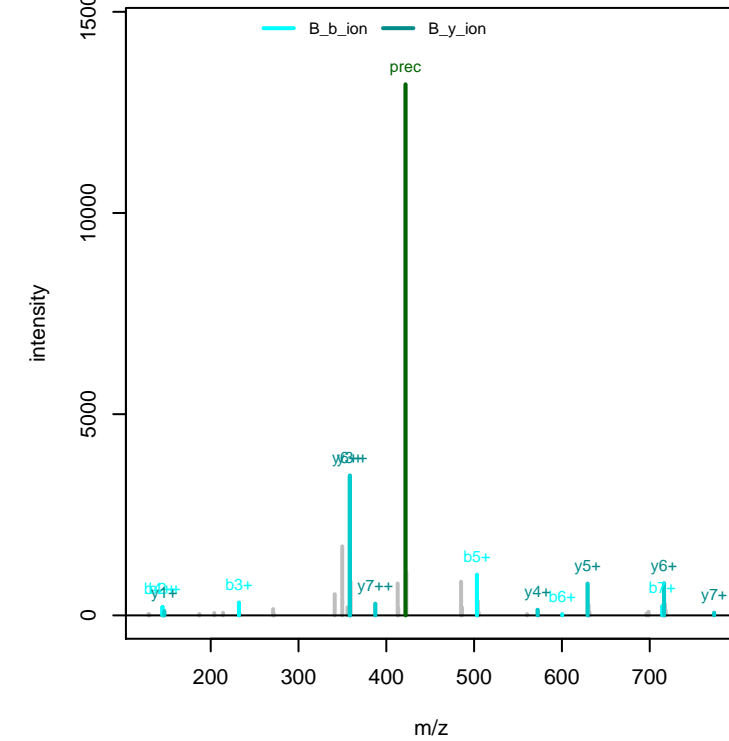

EAEESAKR  
EAQQKAEREAAEQAK

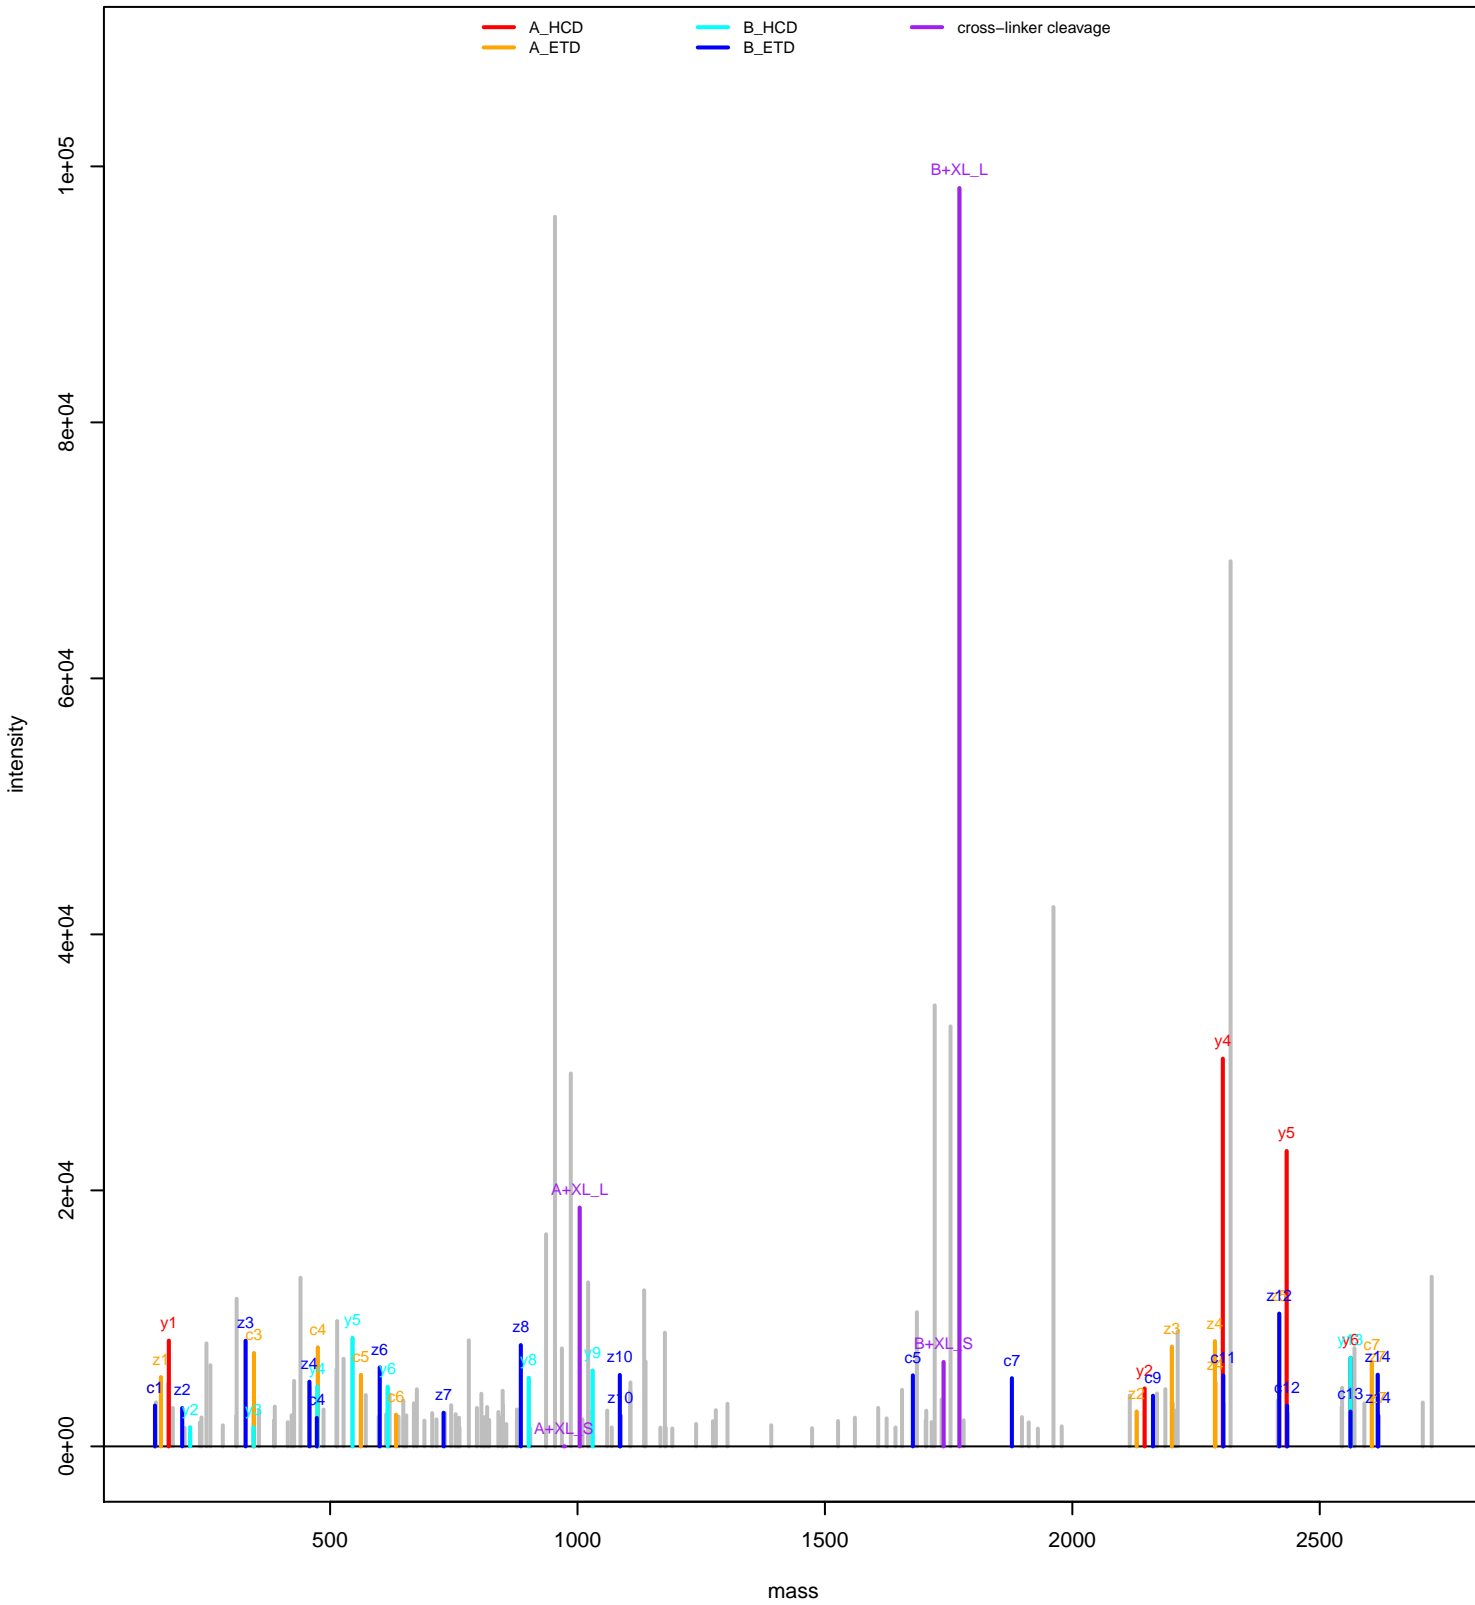

EAEESAKR+XL\_S

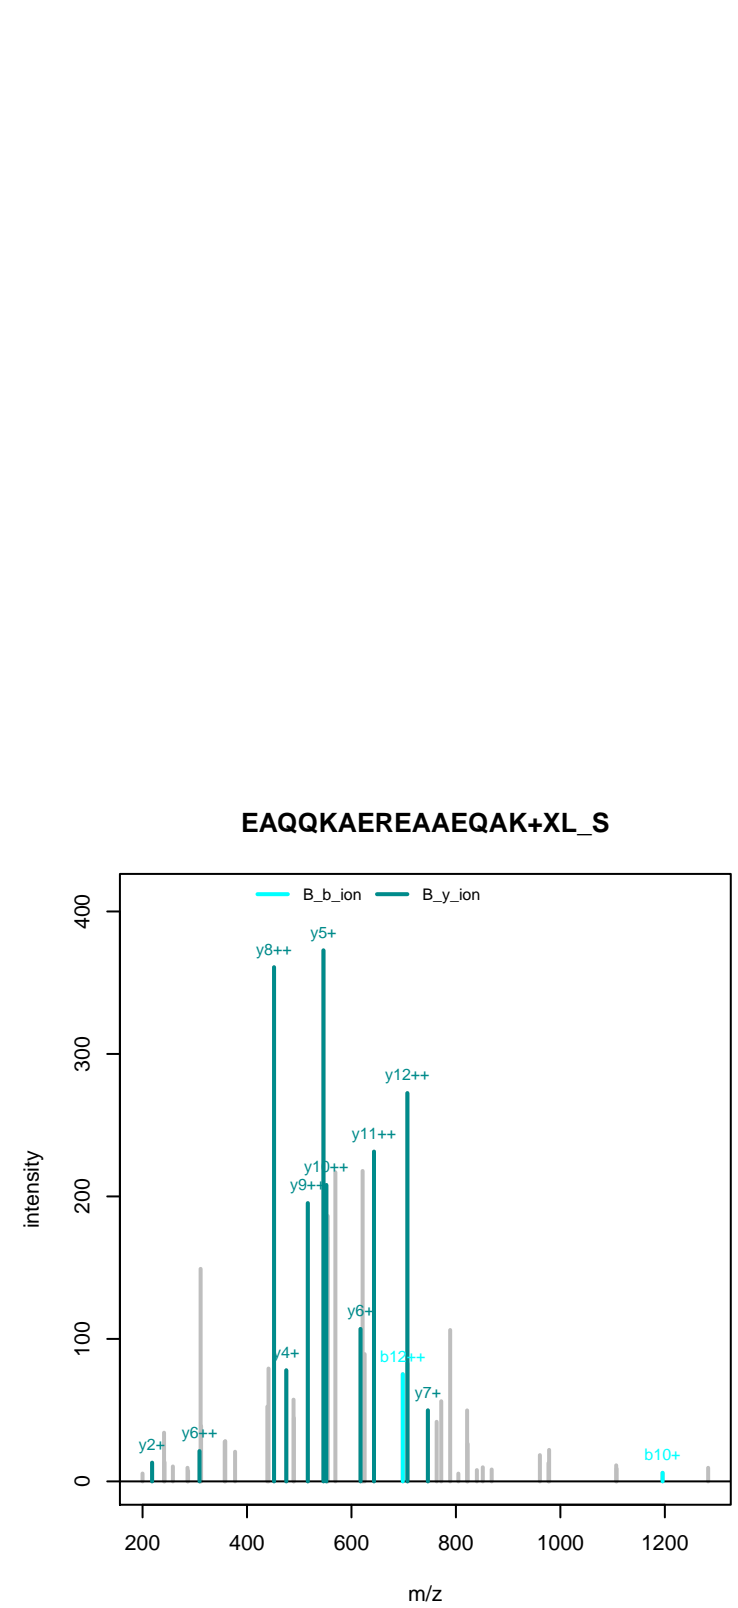

EAEESAKR+XL\_L

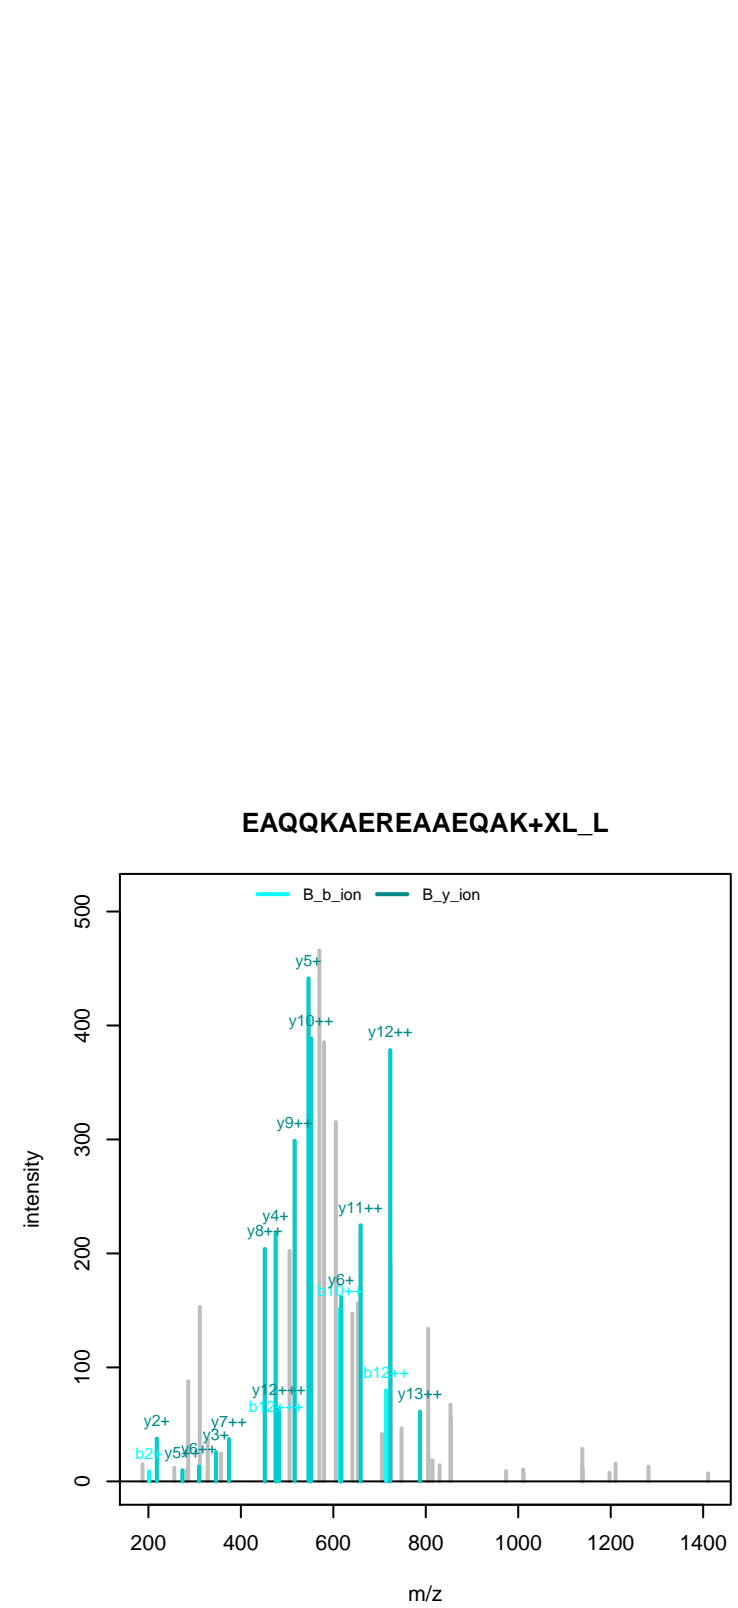

### KHPTPR KIYADK

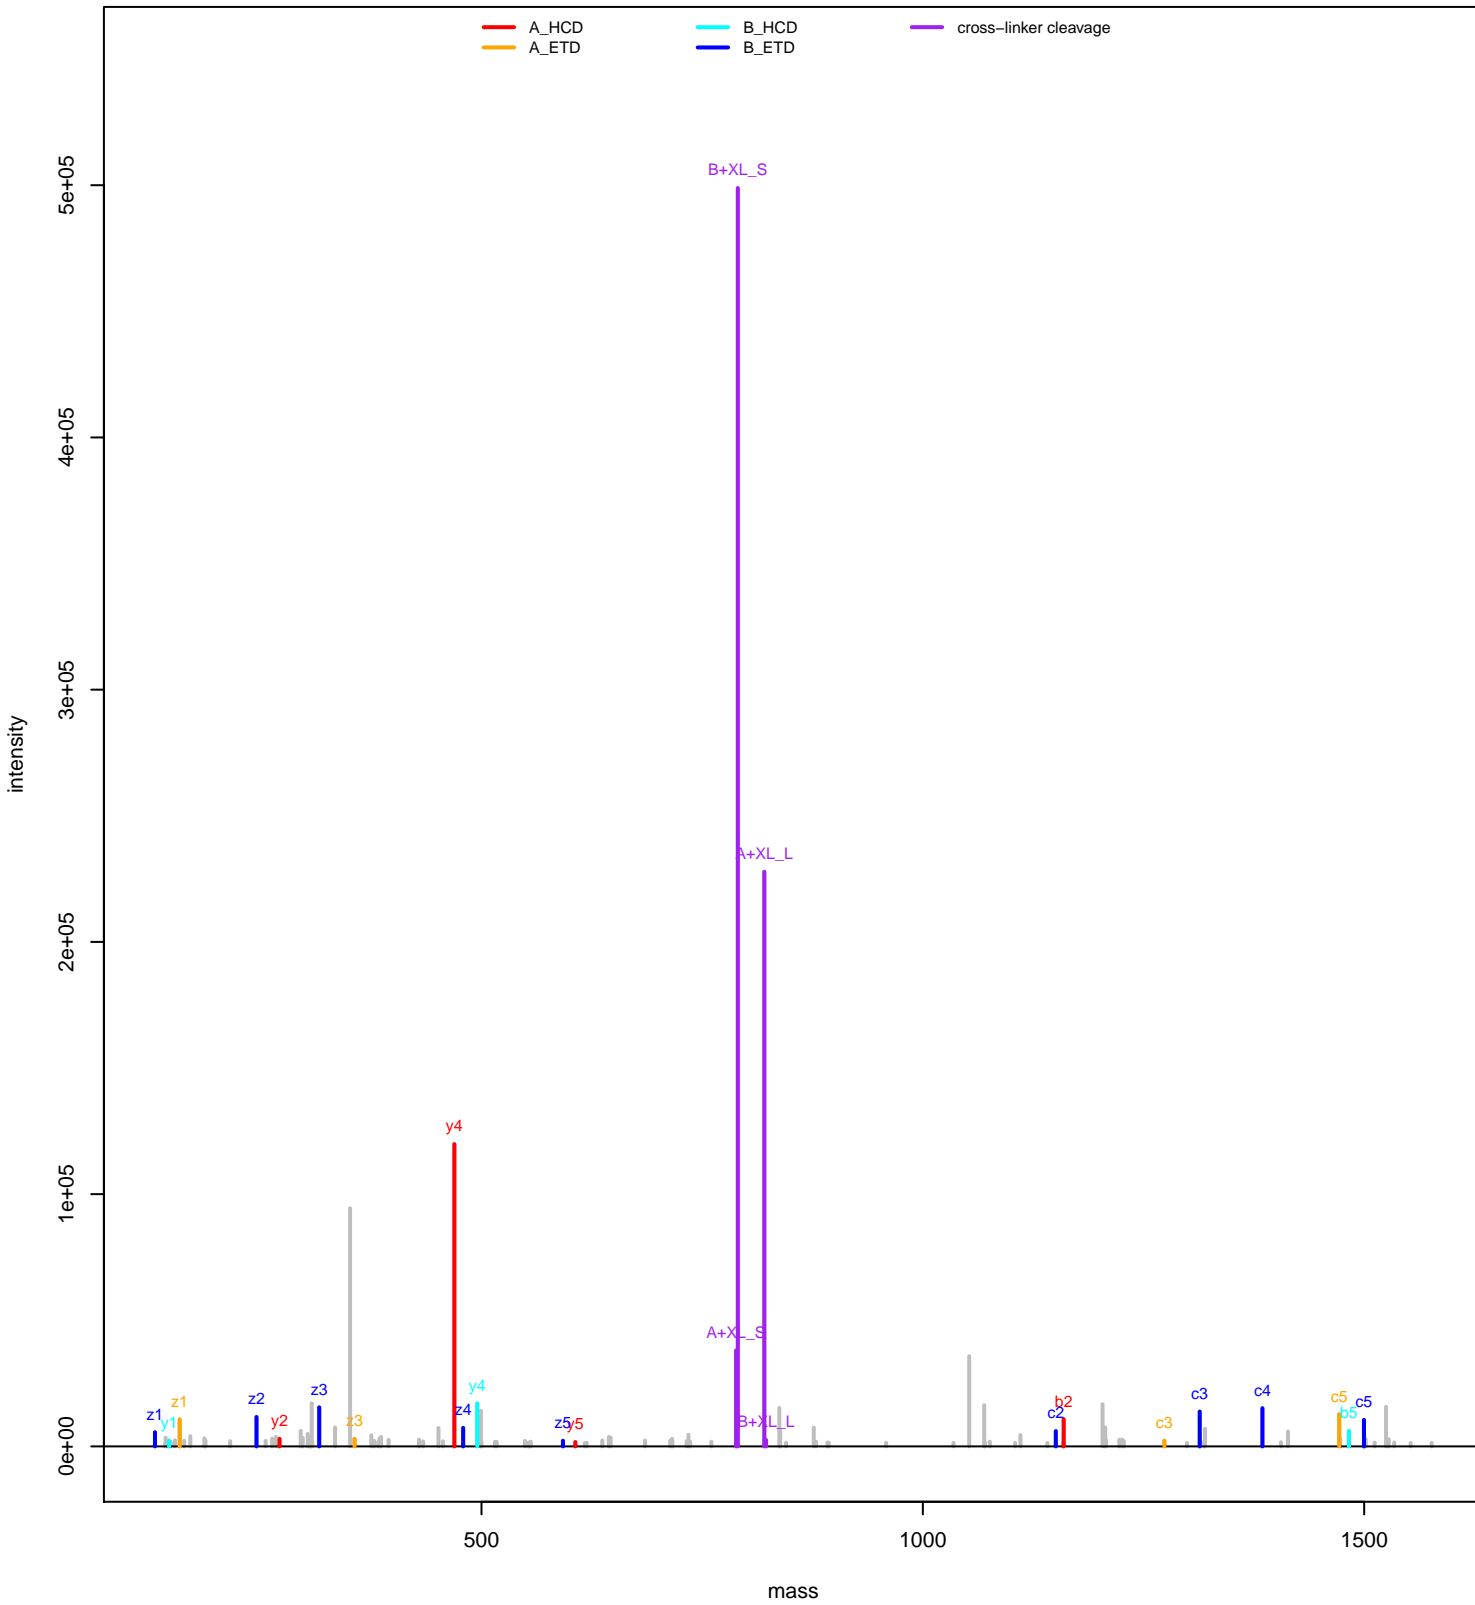

### KHPTPR+XL\_S

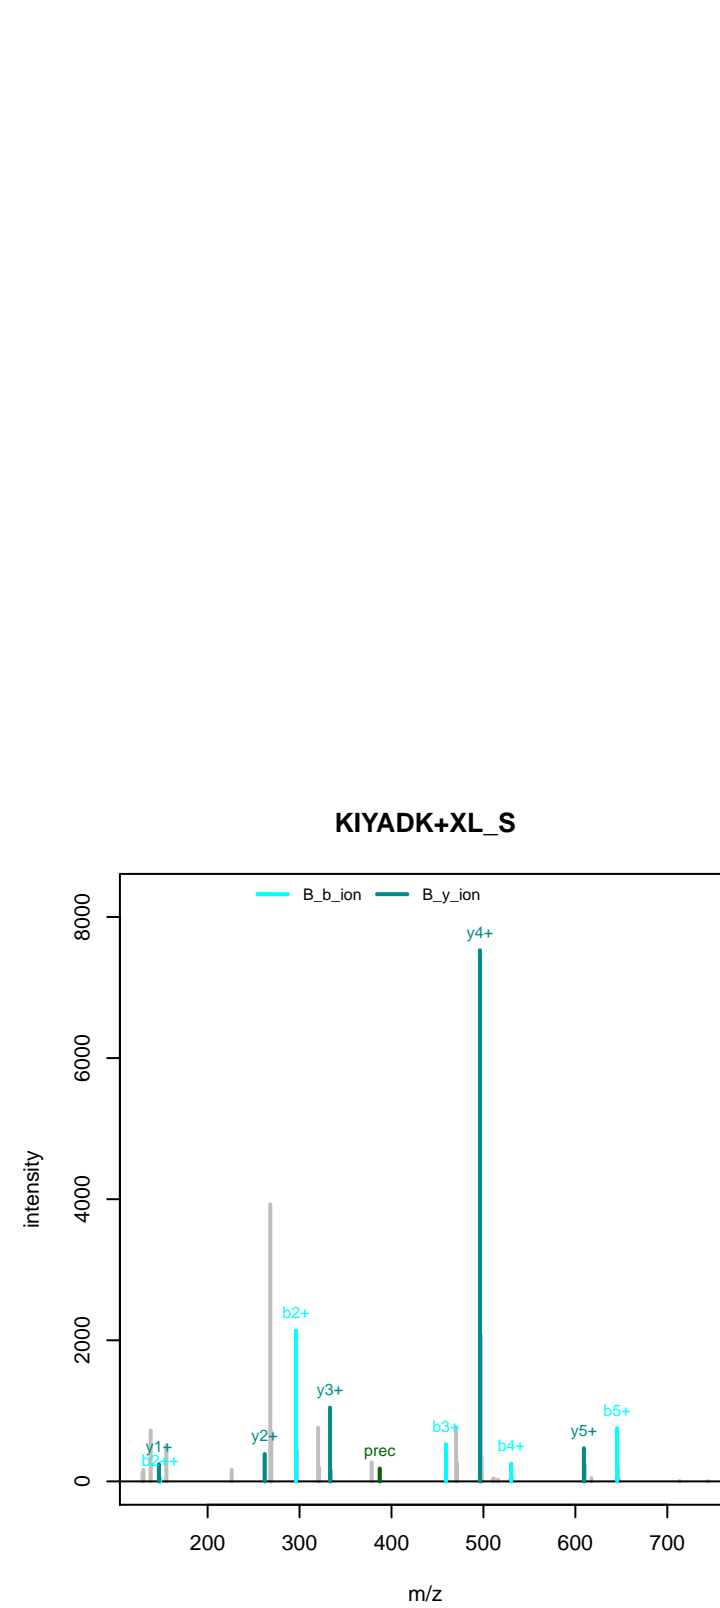

### KHPTPR+XL\_L

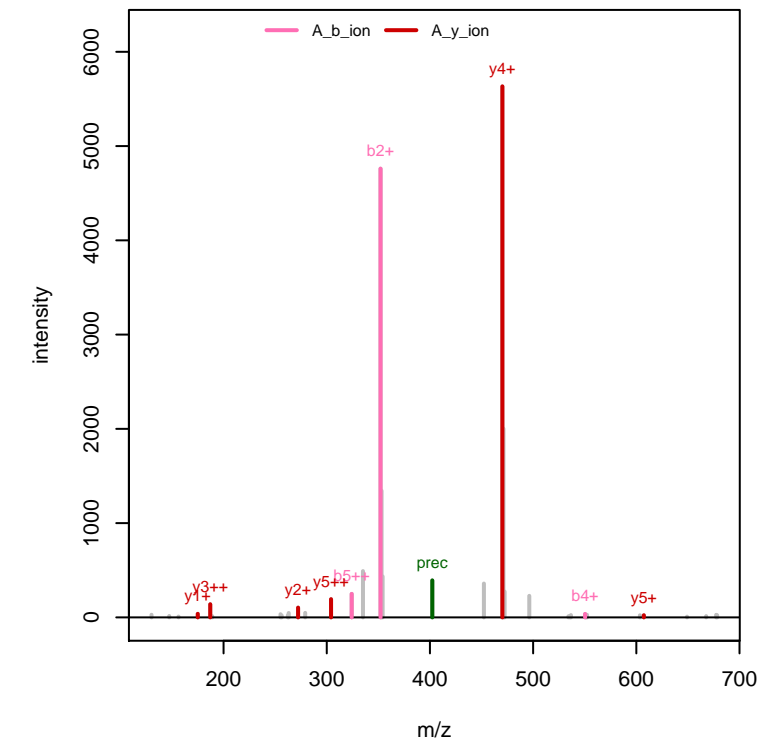

### KIYADK+XL\_S

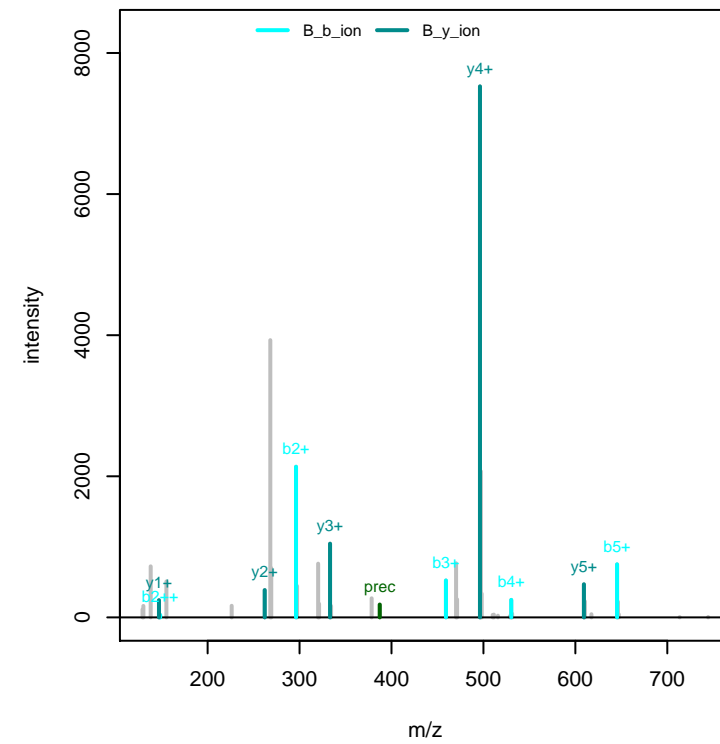

### KIYADK+XL\_L

### SKYGVK DRKQAR

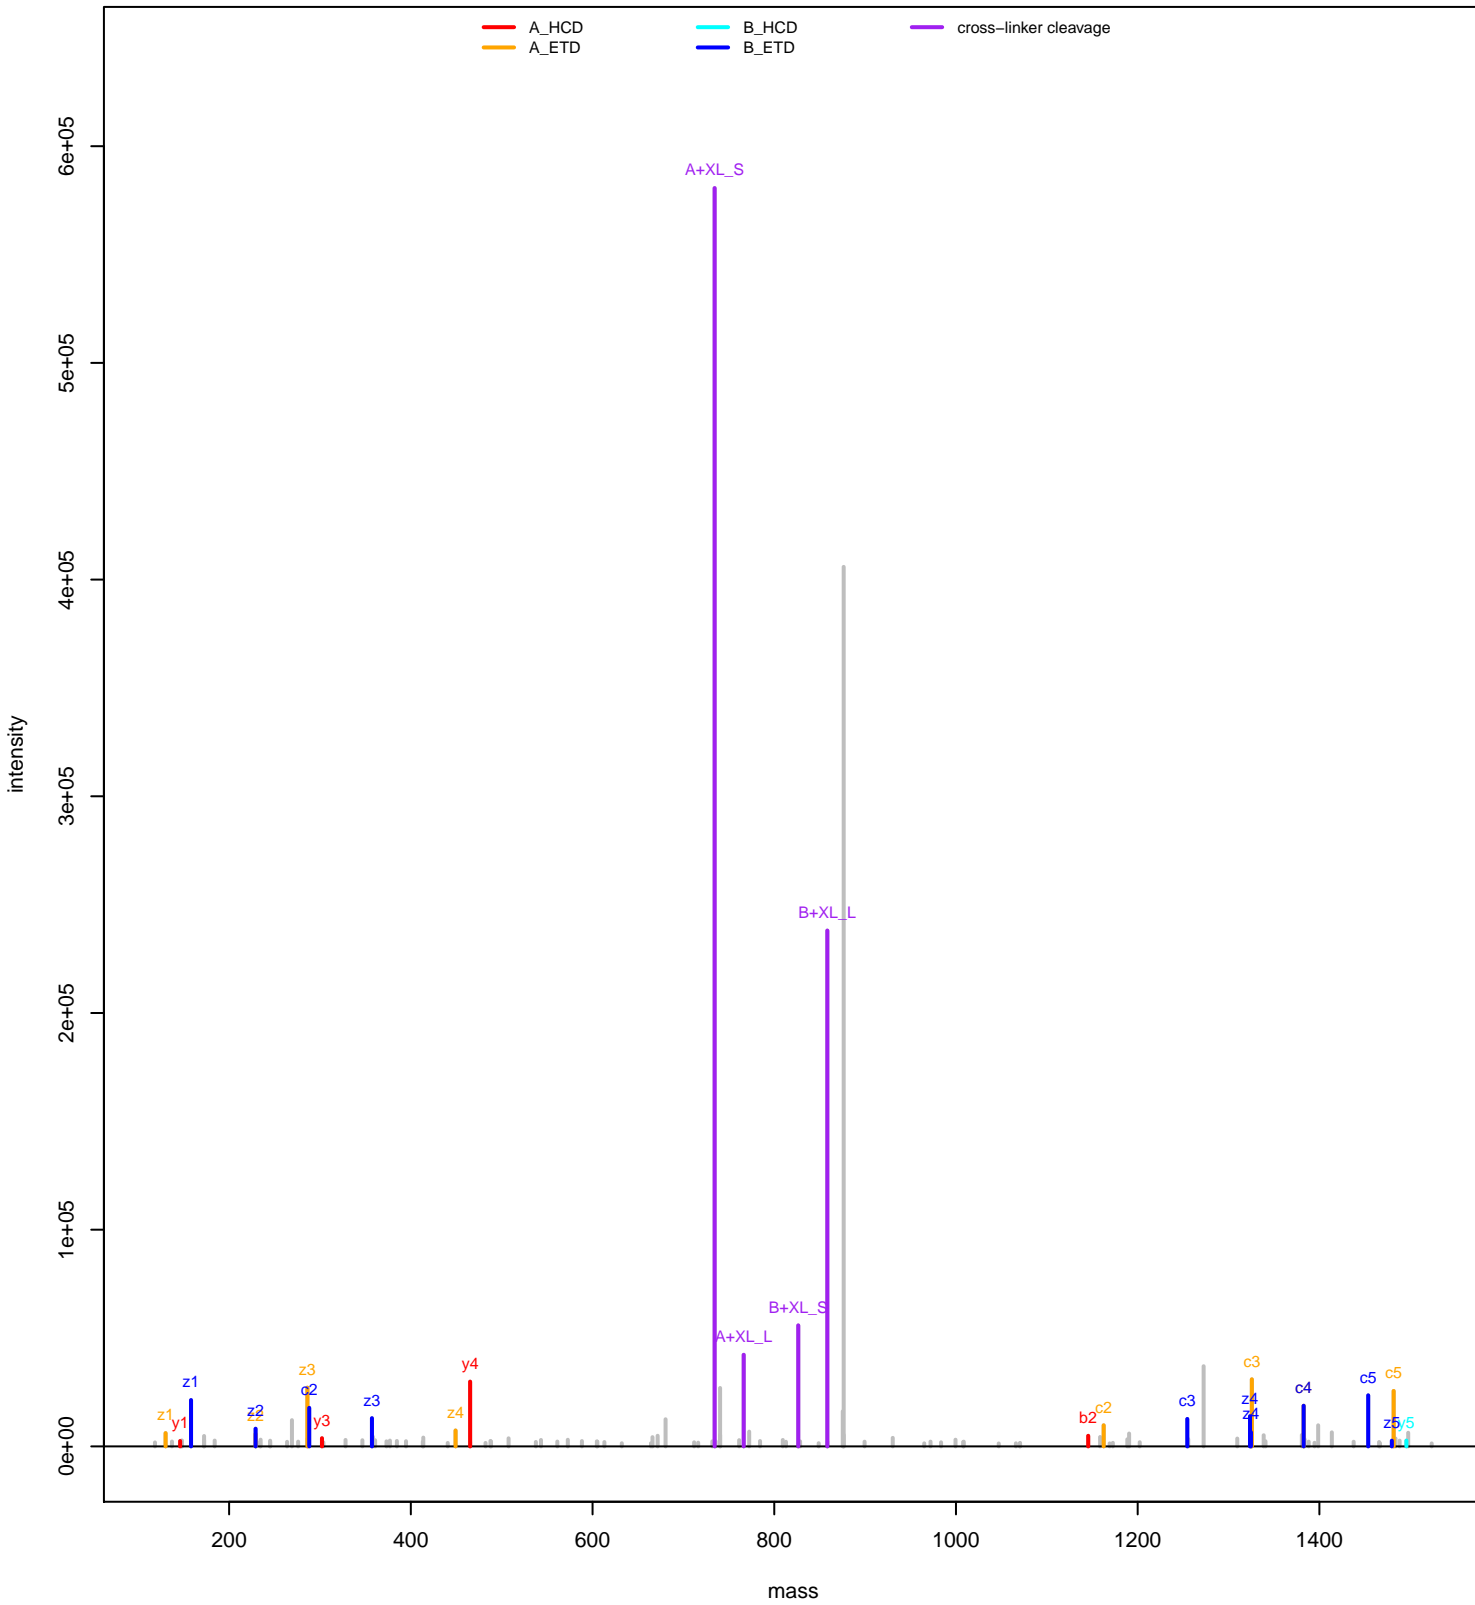

### SKYGVK+XL\_S

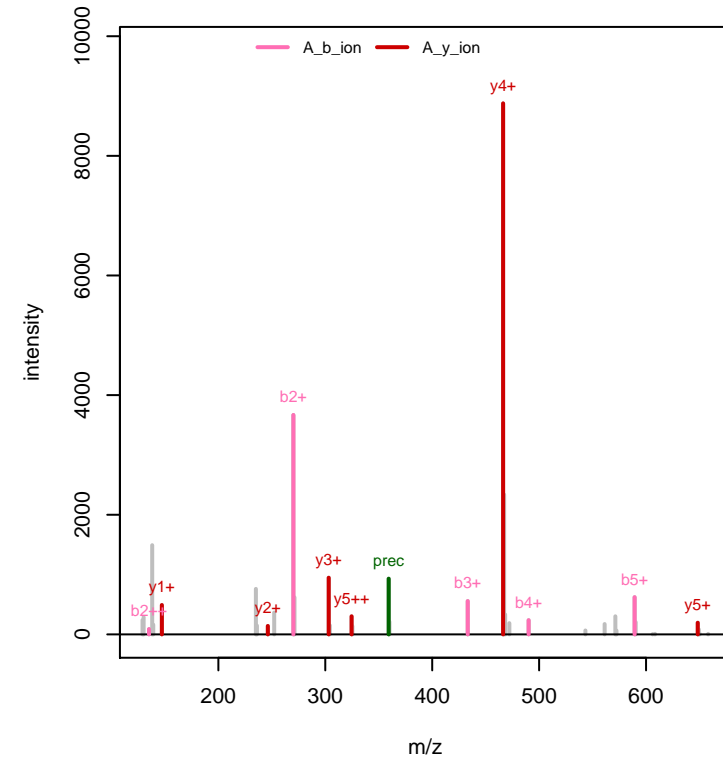

### SKYGVK+XL\_L

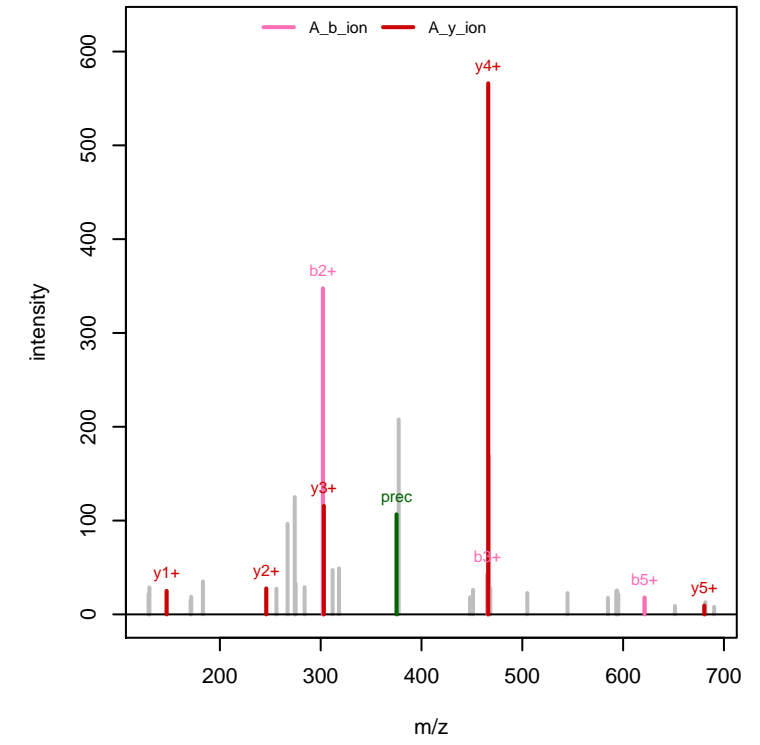

### DRKQAR+XL\_S

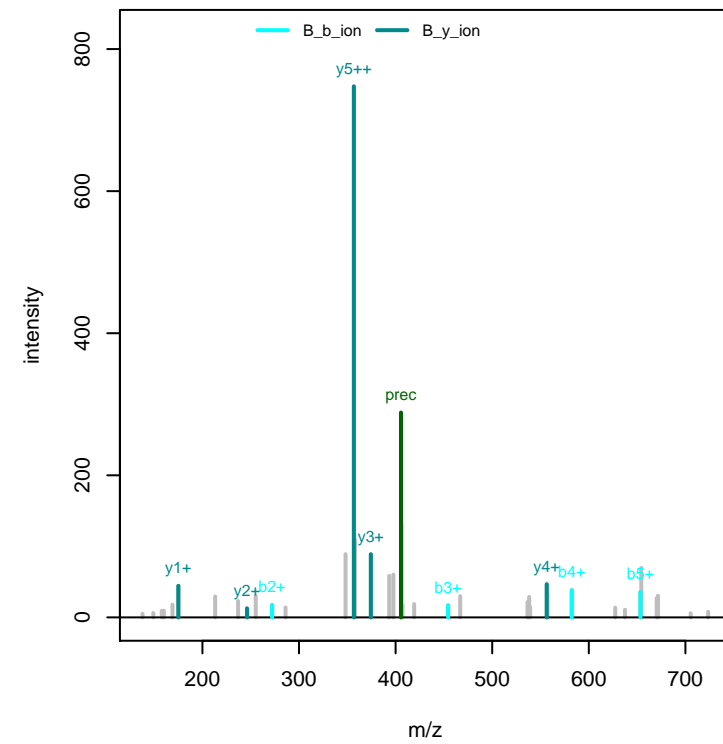

### DRKQAR+XL\_L

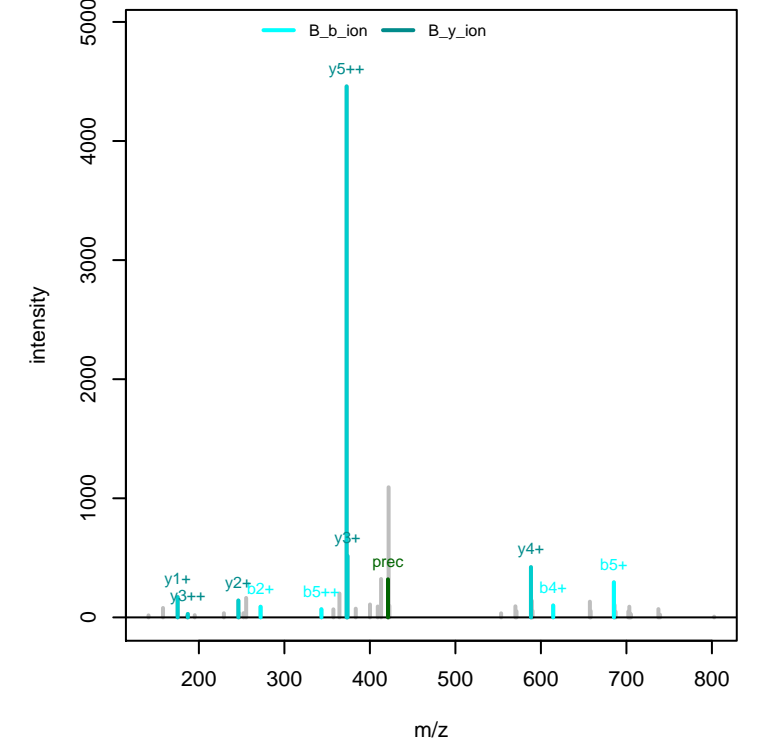

**KSRVQAR  
AAVEENKK**

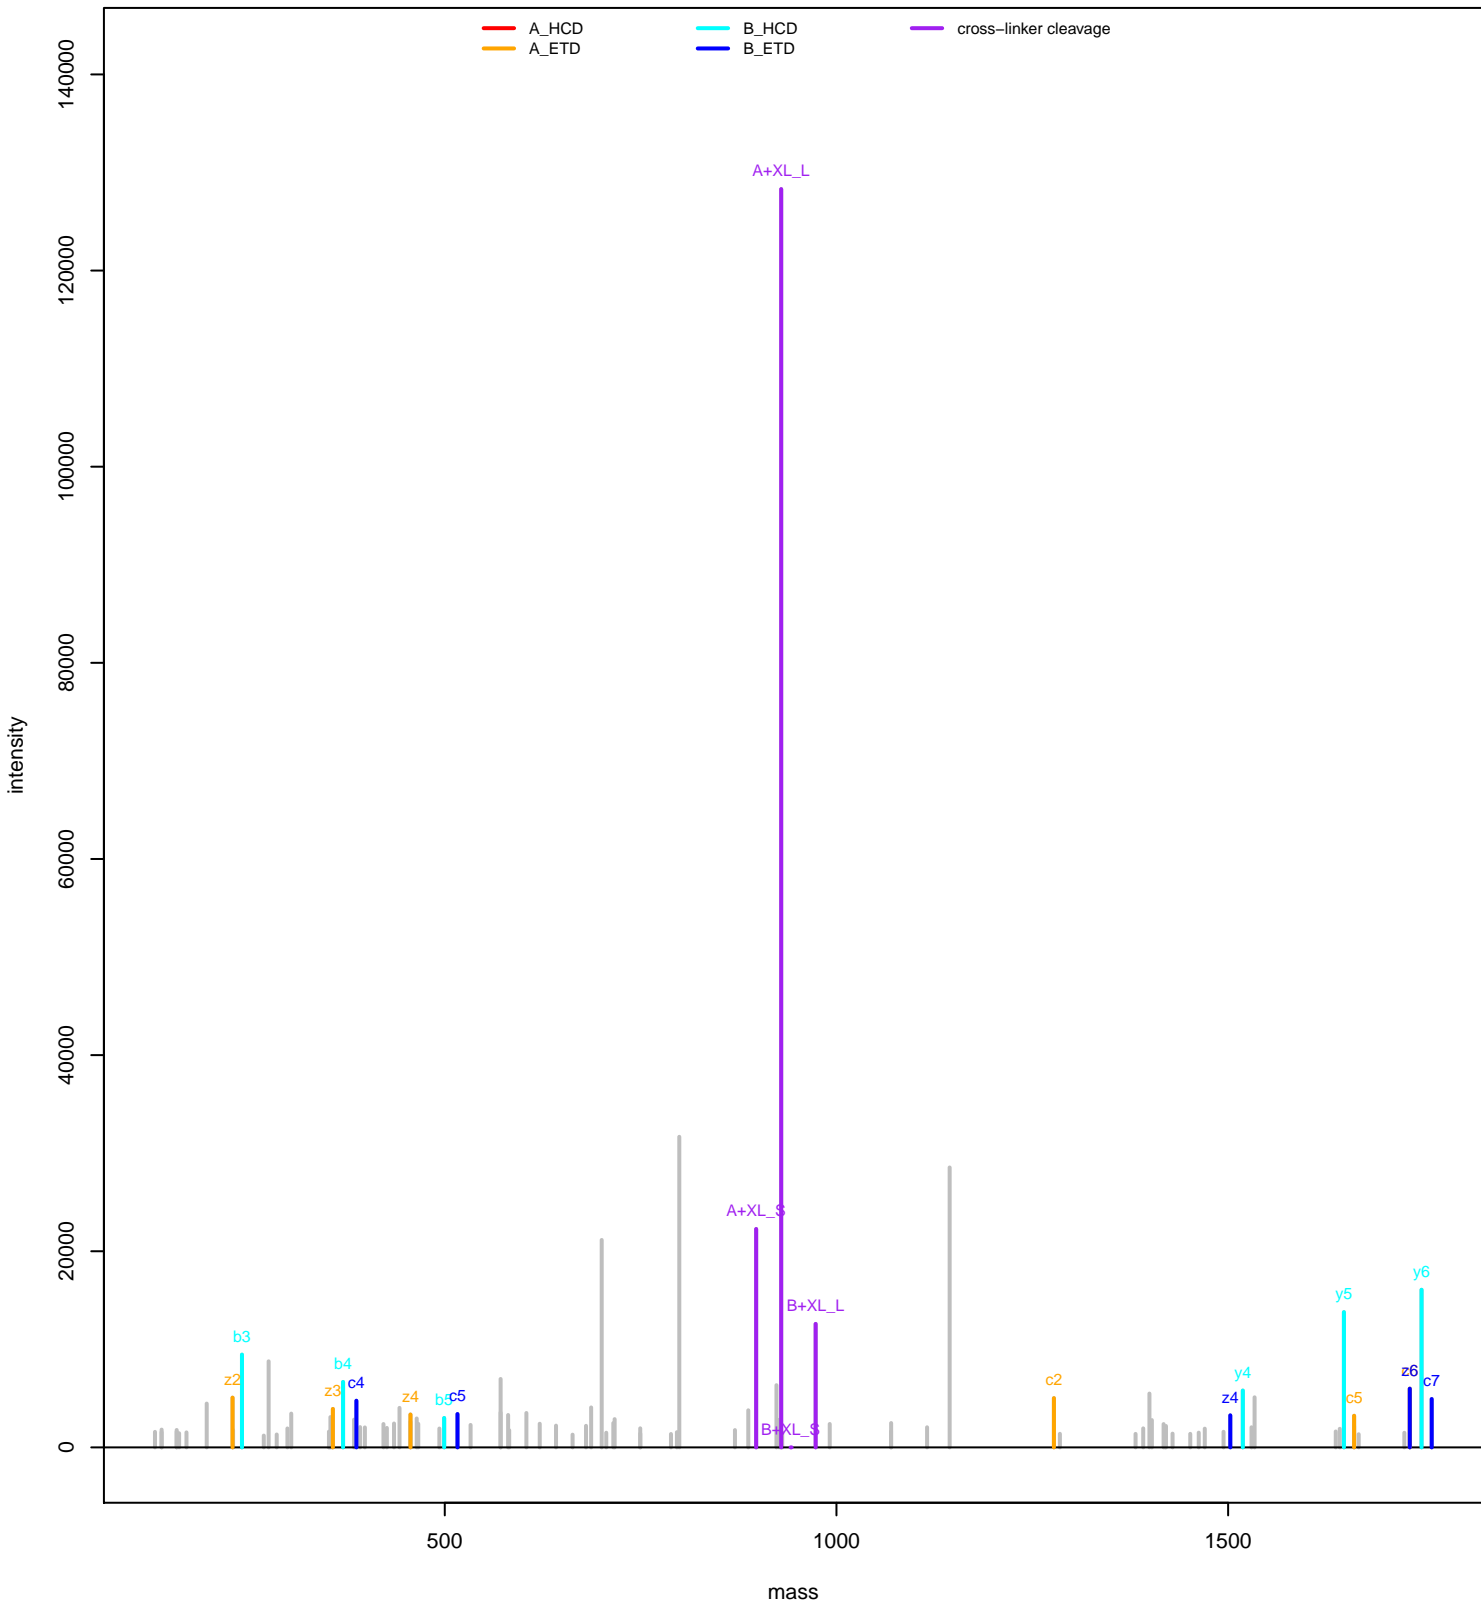

**KSRVQAR+XL\_S**

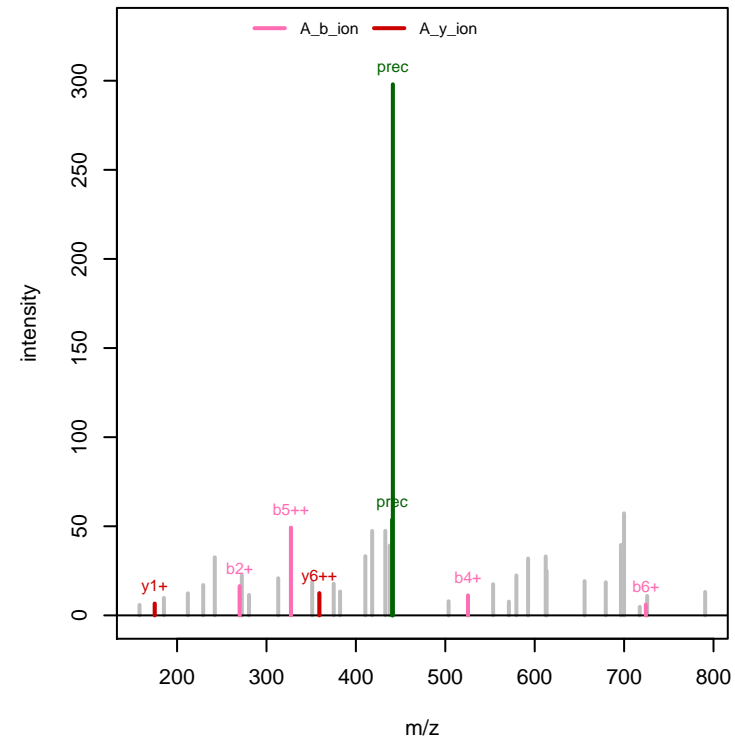

**KSRVQAR+XL\_L**

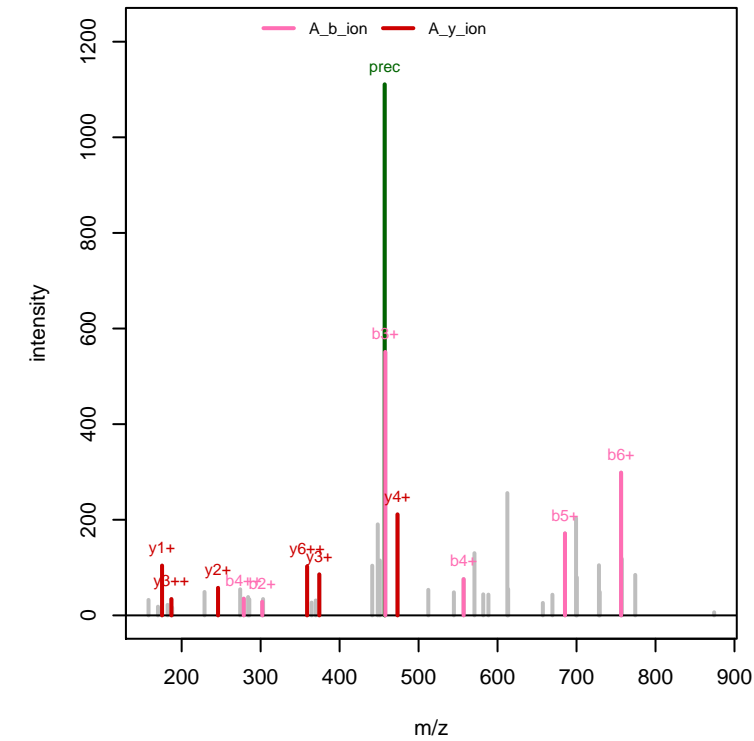

**AAVEENKK+XL\_S**

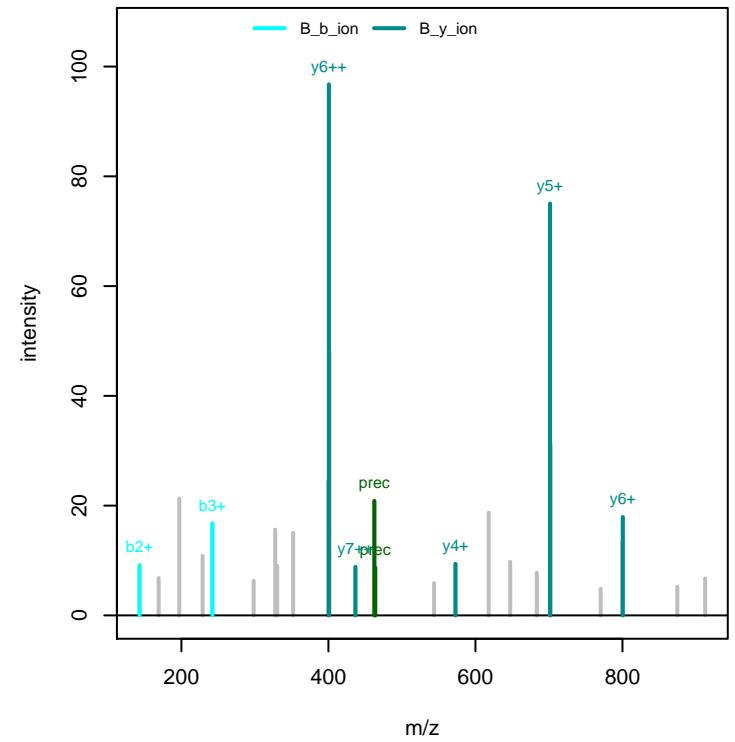

**AAVEENKK+XL\_L**

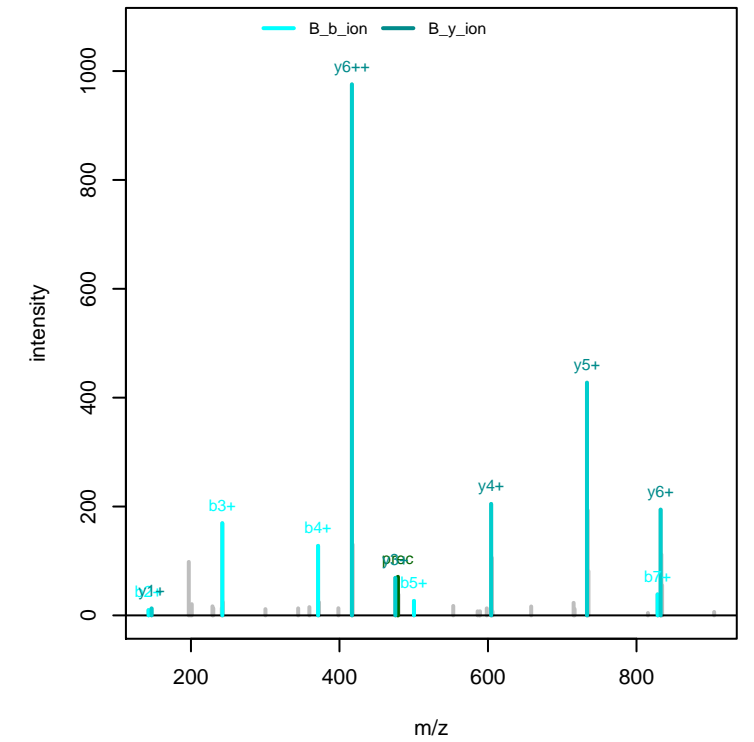

### IKSNIPTTR LASAQKETGEK

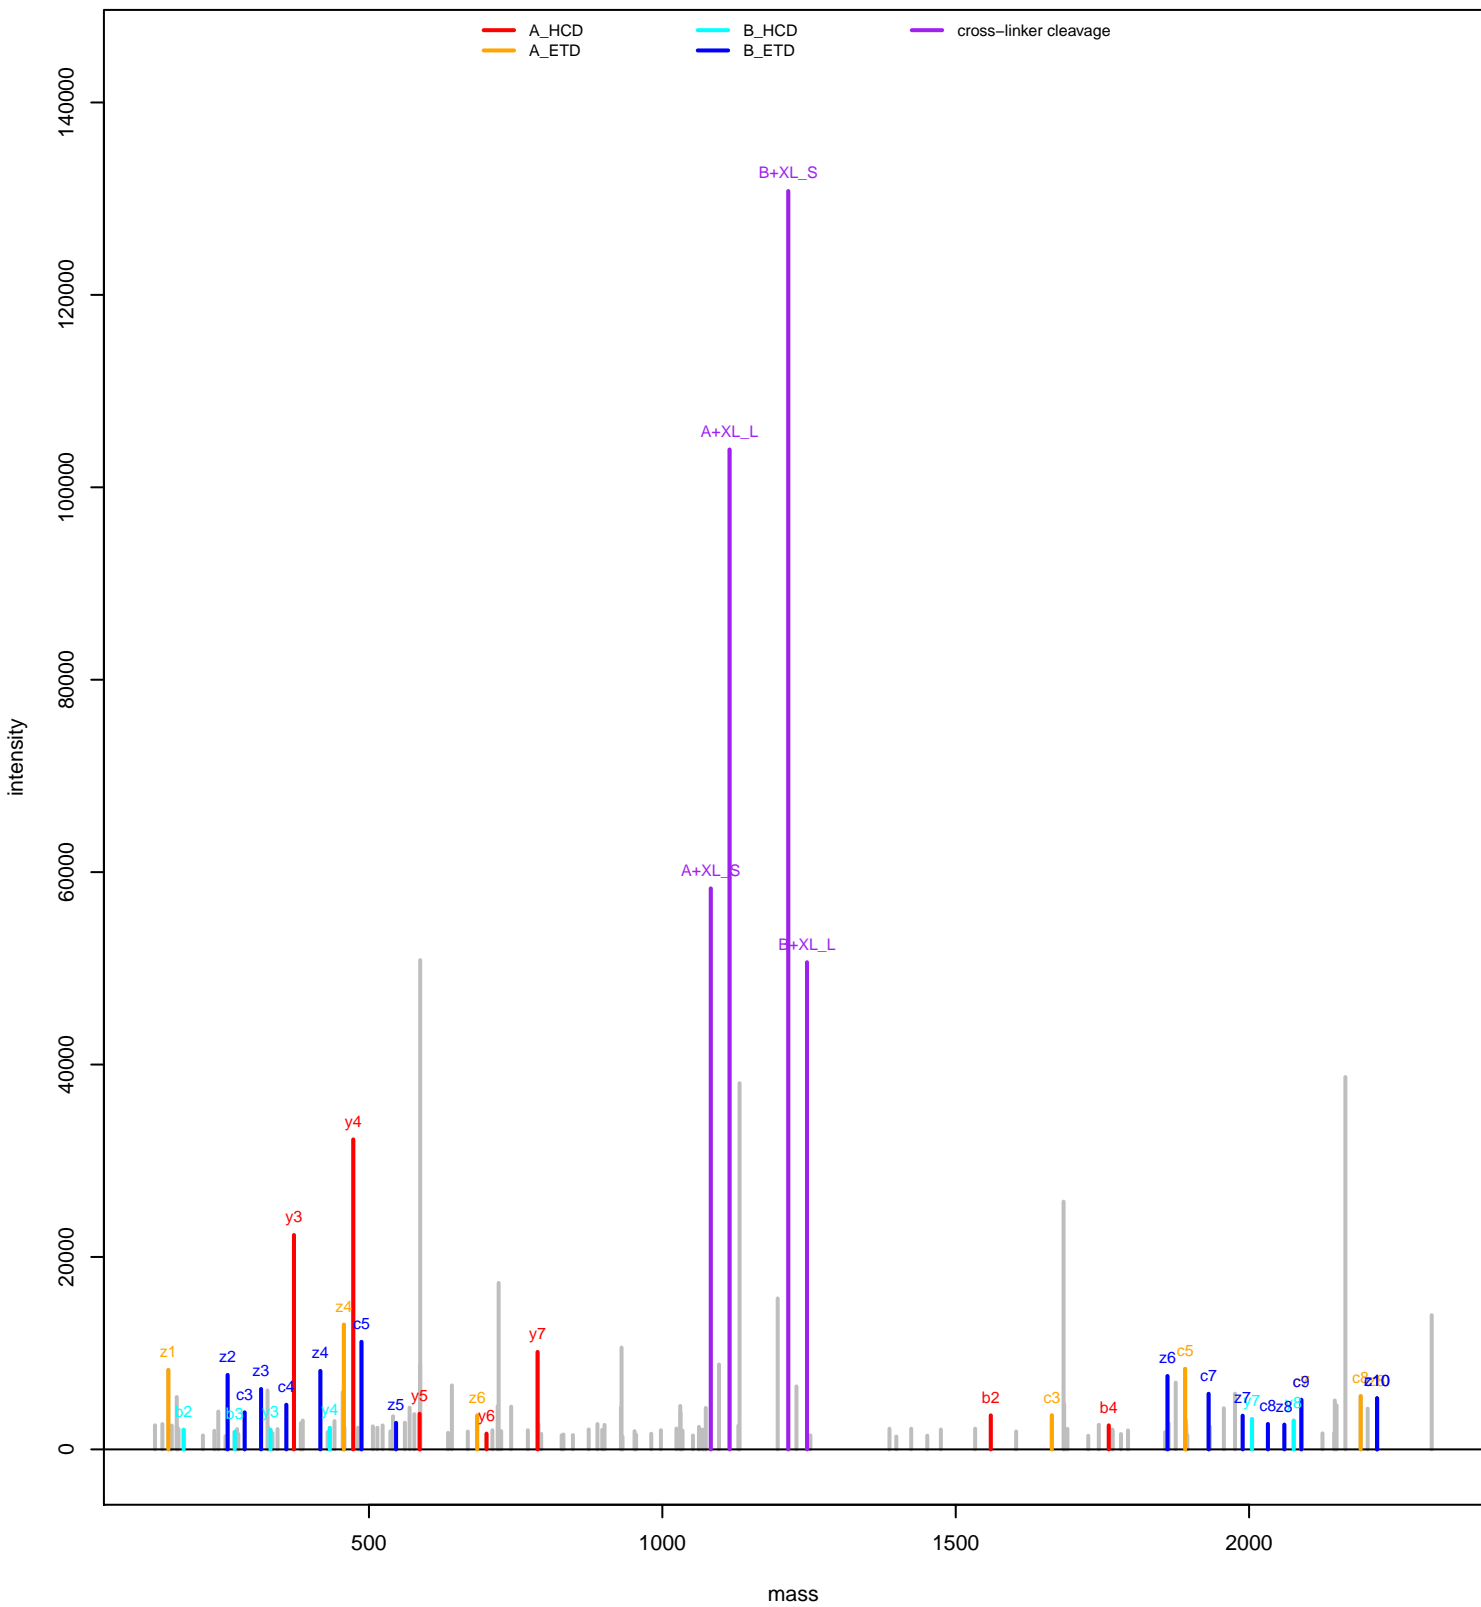

### IKSNIPTTR+XL\_S

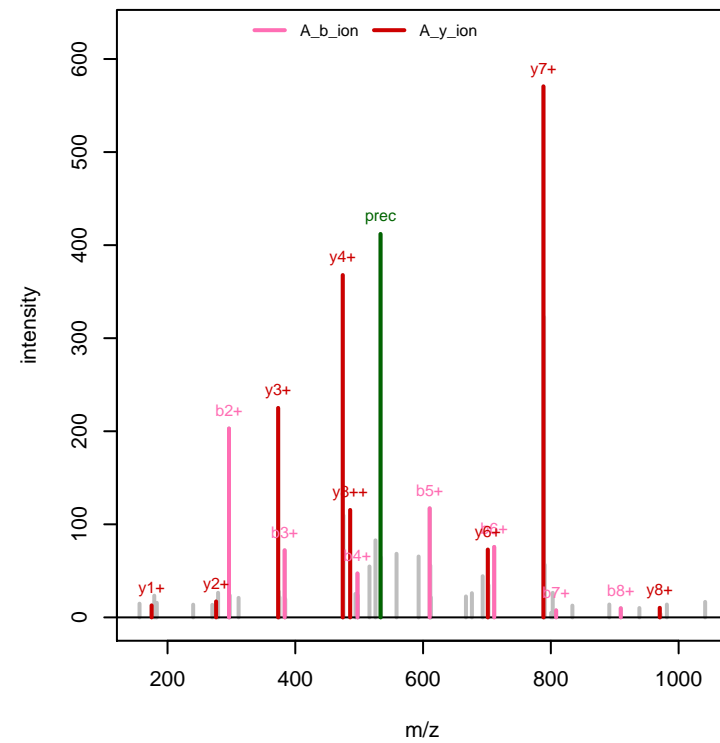

### IKSNIPTTR+XL\_L

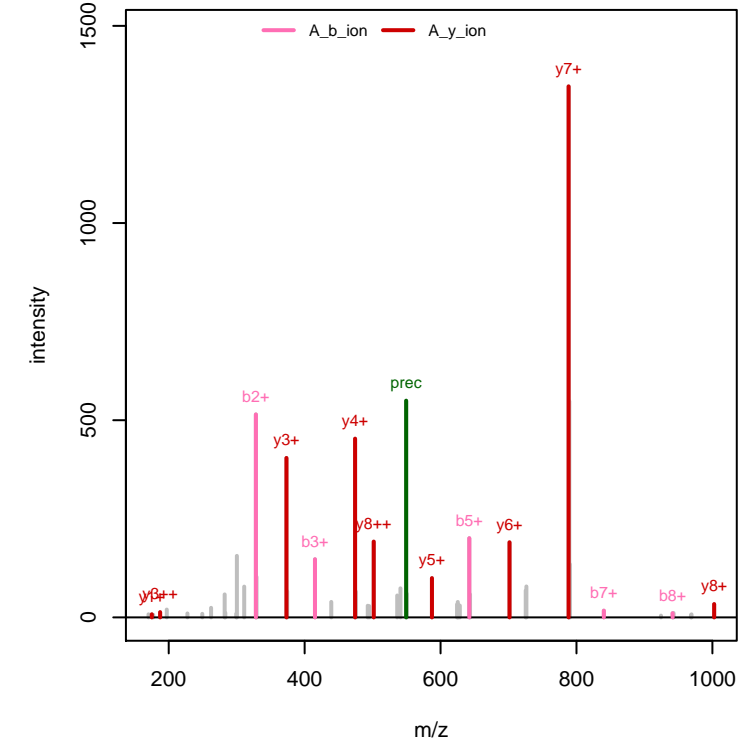

### LASAQKETGEK+XL\_S

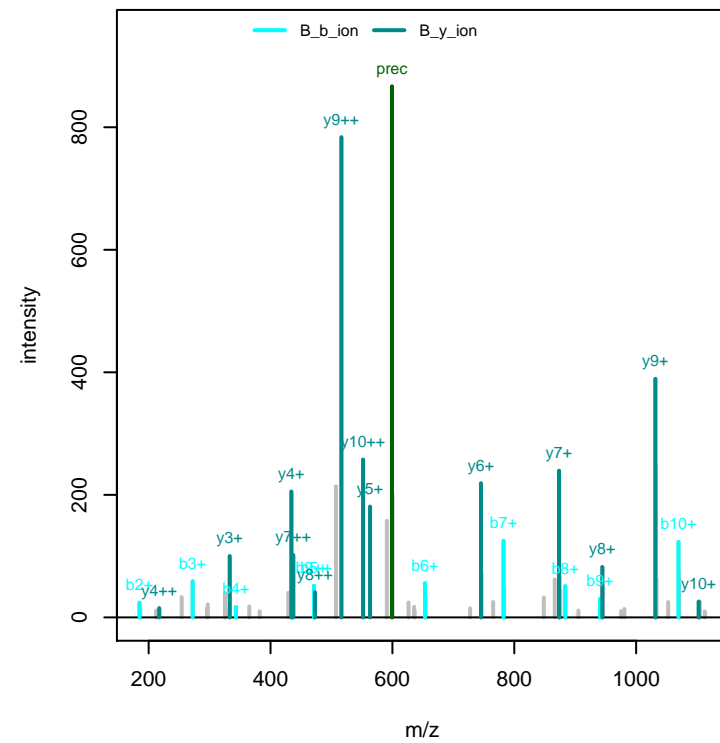

### LASAQKETGEK+XL\_L

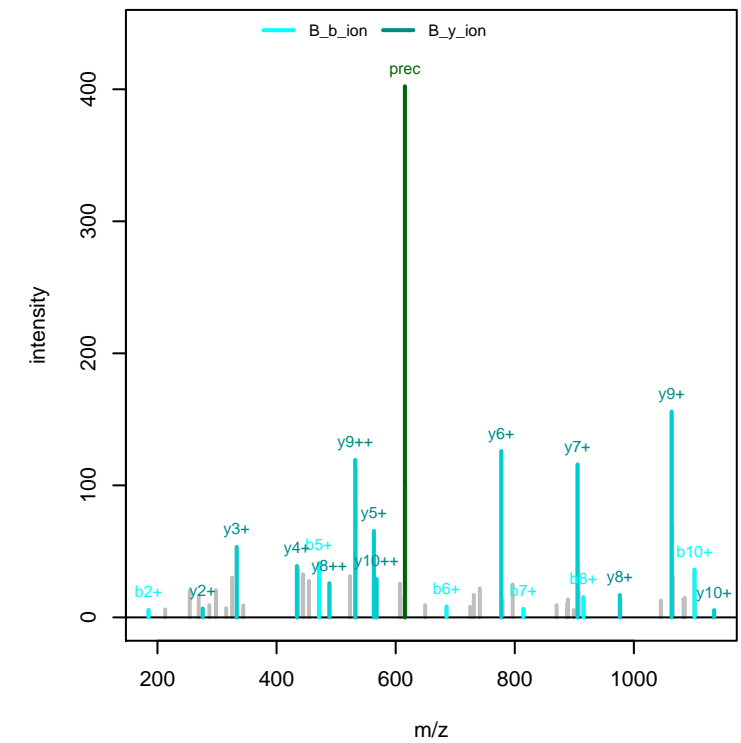



ASDVKDSSLR  
VTPKGETQLTPEEK

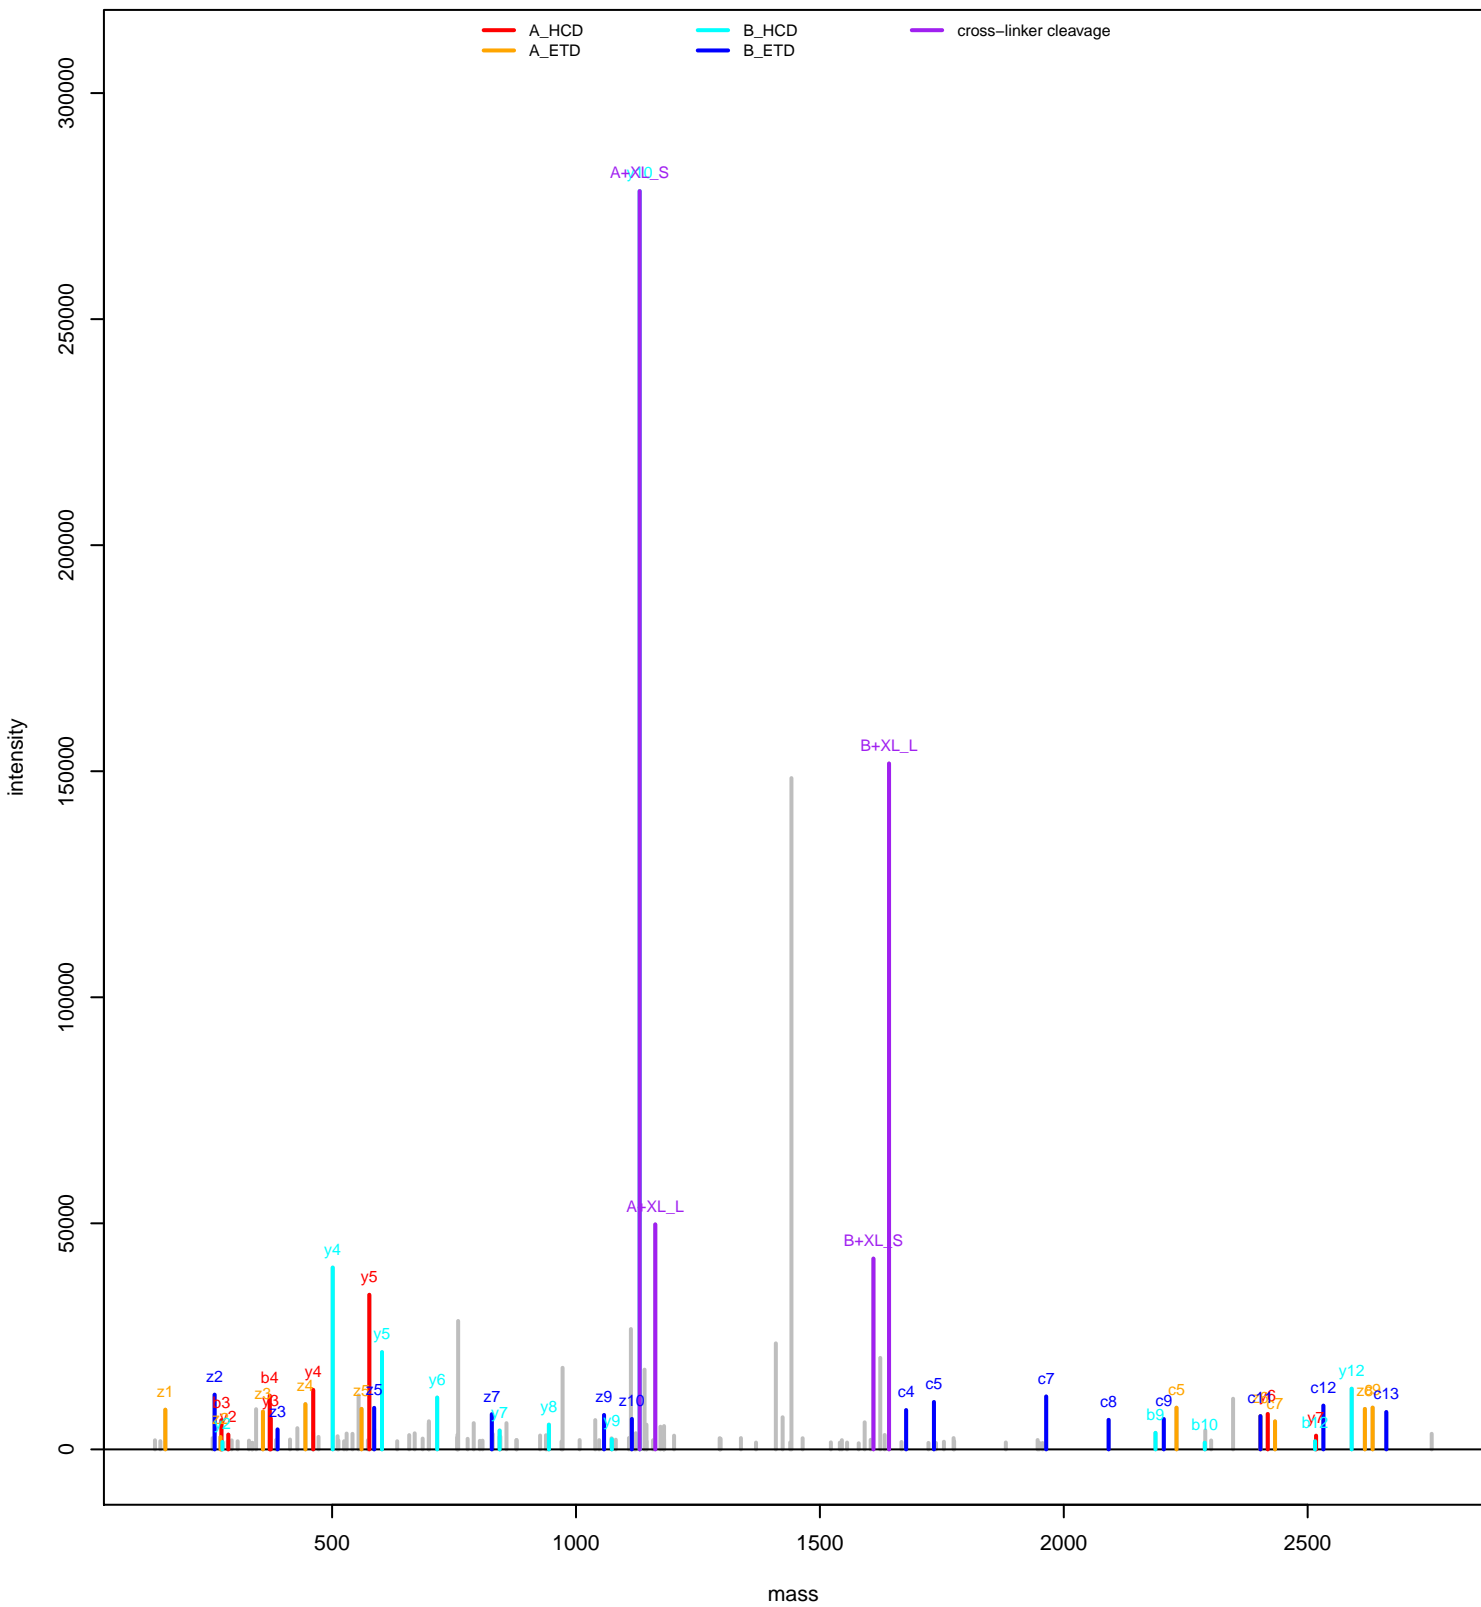

ASDVKDSSLR+XL\_S

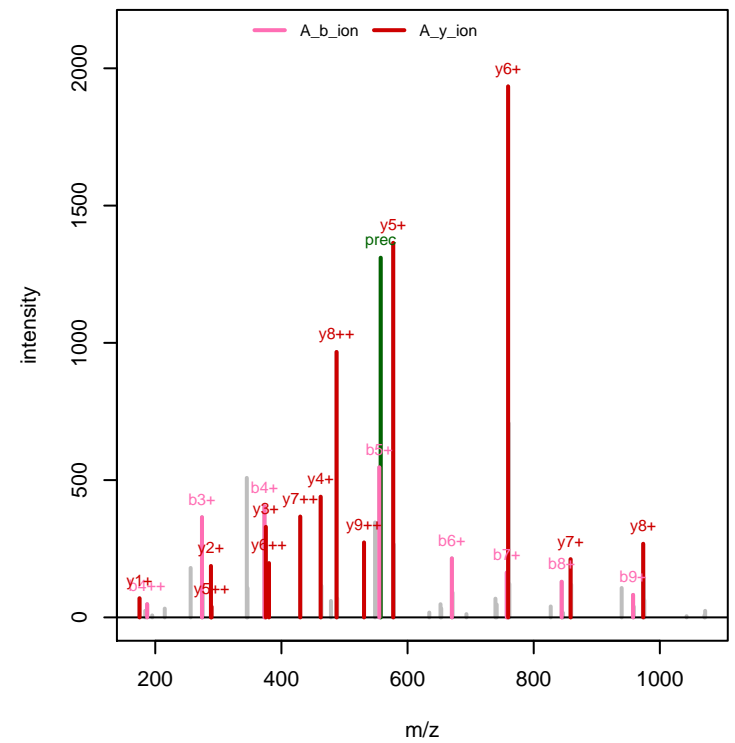

ASDVKDSSLR+XL\_L

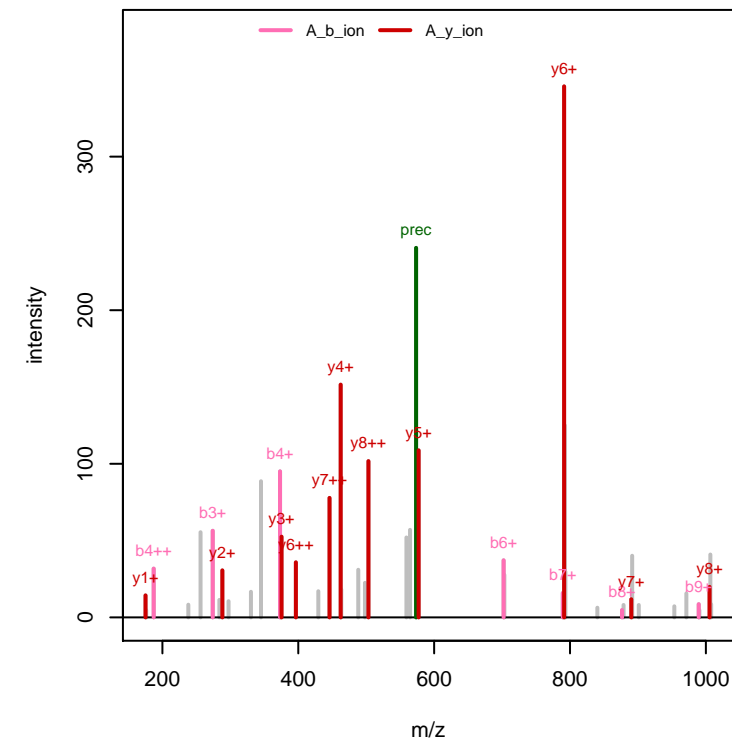

VTPKGETQLTPEEK+XL\_S

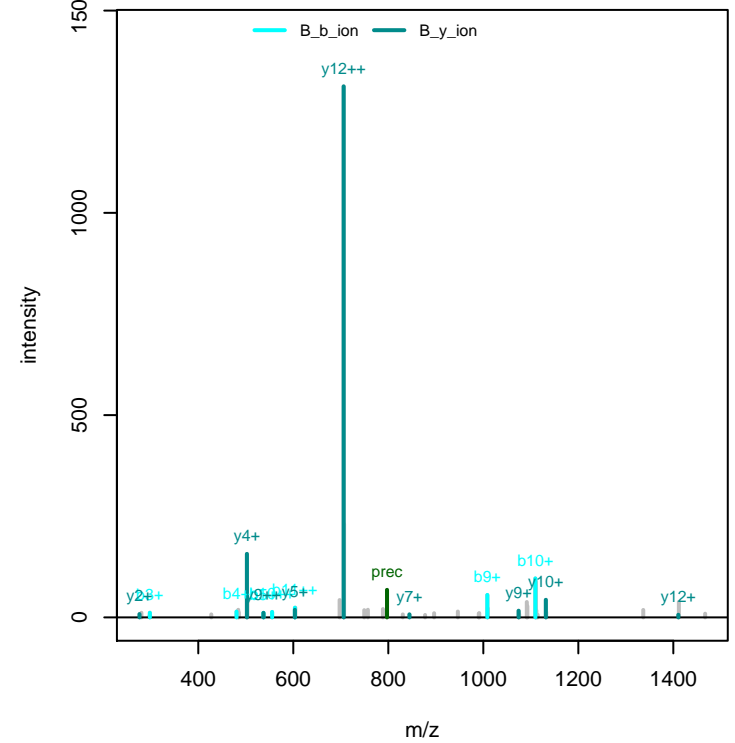

VTPKGETQLTPEEK+XL\_L

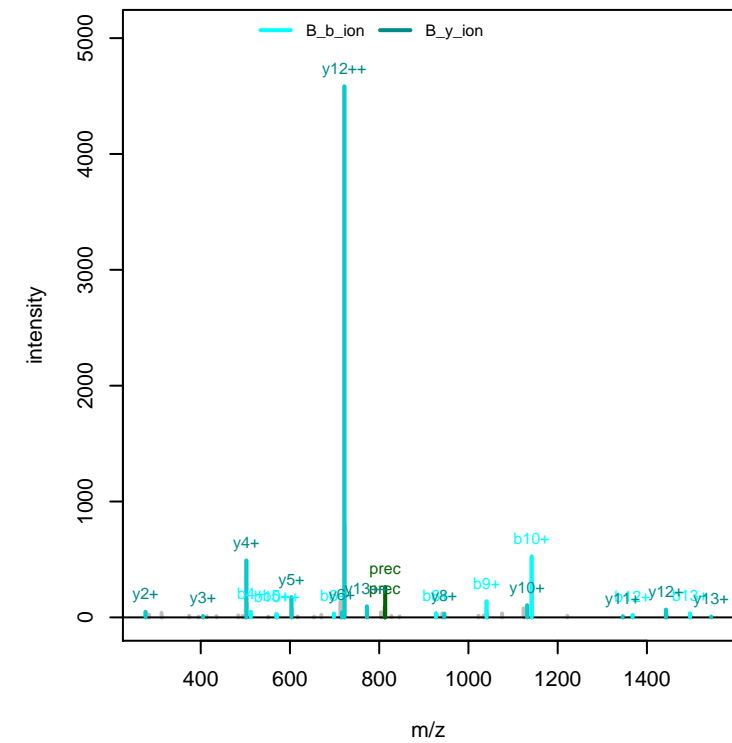

LDEISPGDKQK  
AEQAAAEQALKK

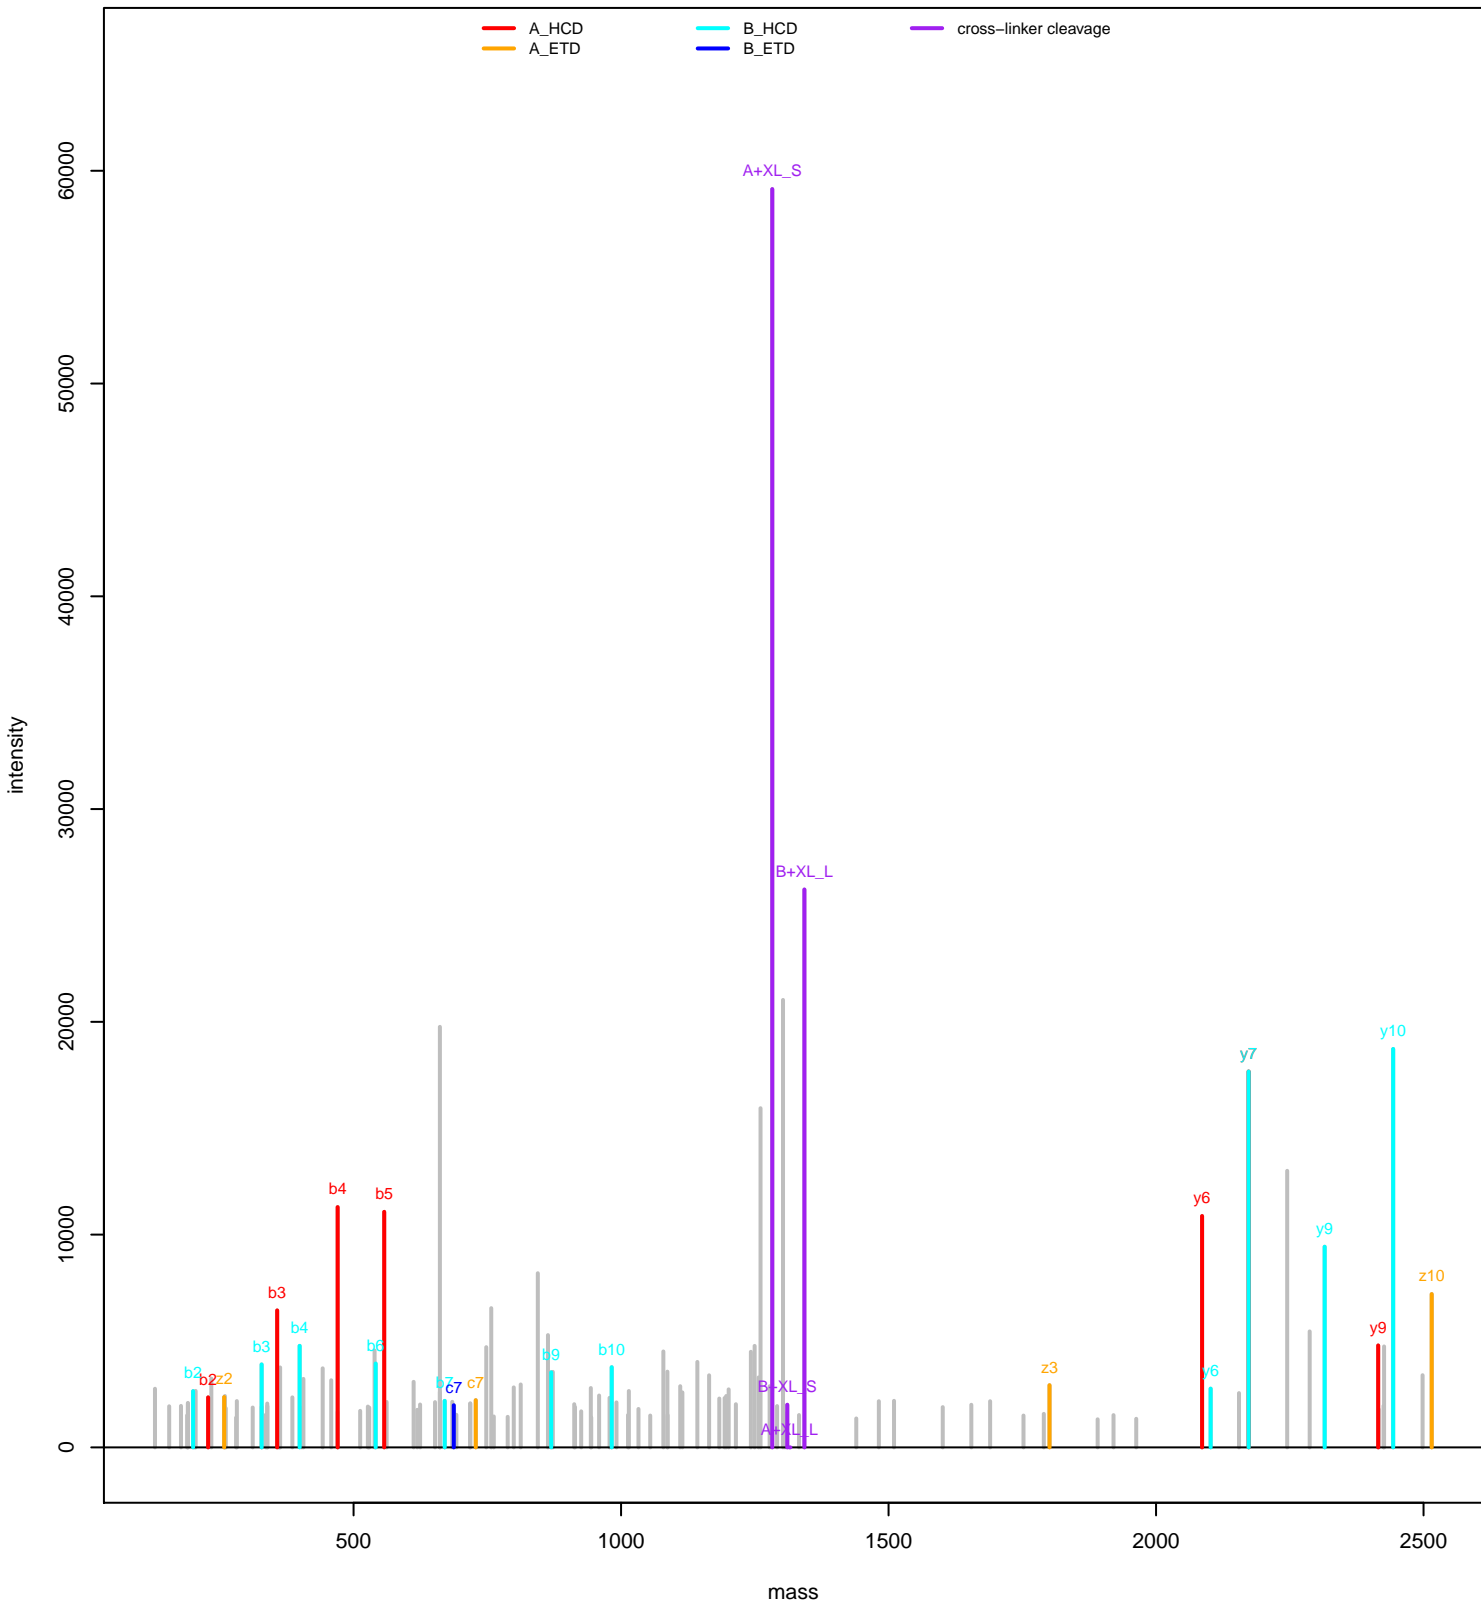

LDEISPGDKQK+XL\_S

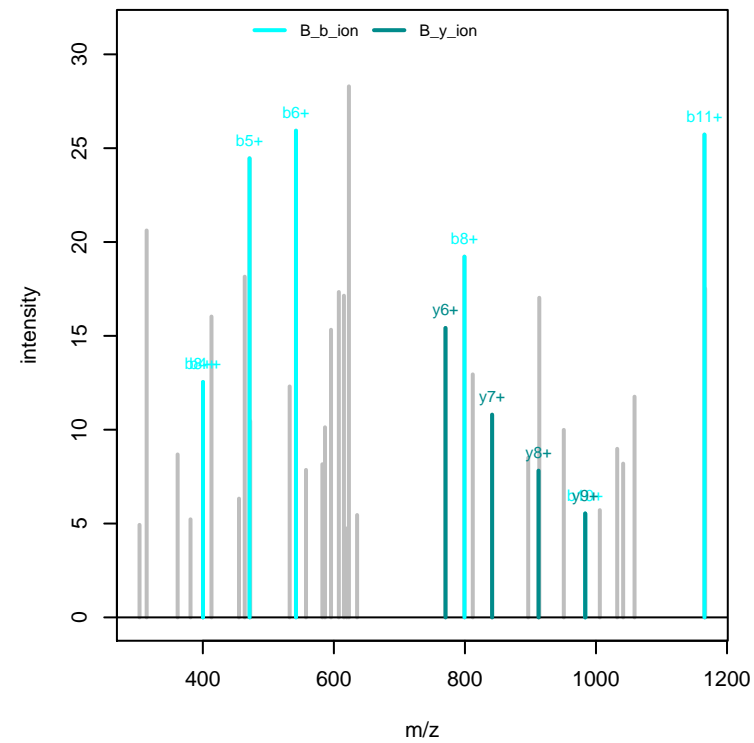

LDEISPGDKQK+XL\_L

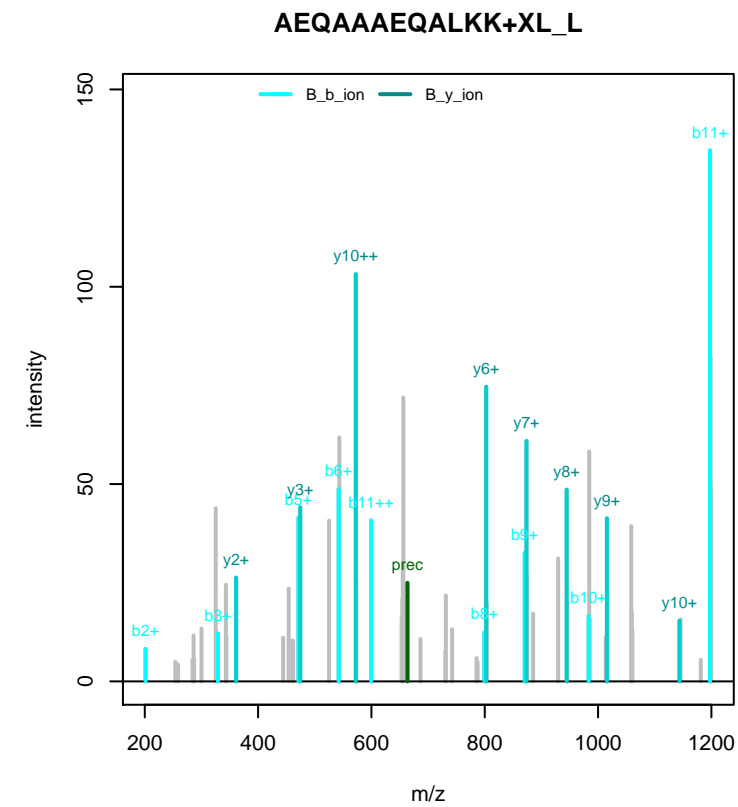

PAAQPKK  
KGAIVTGK

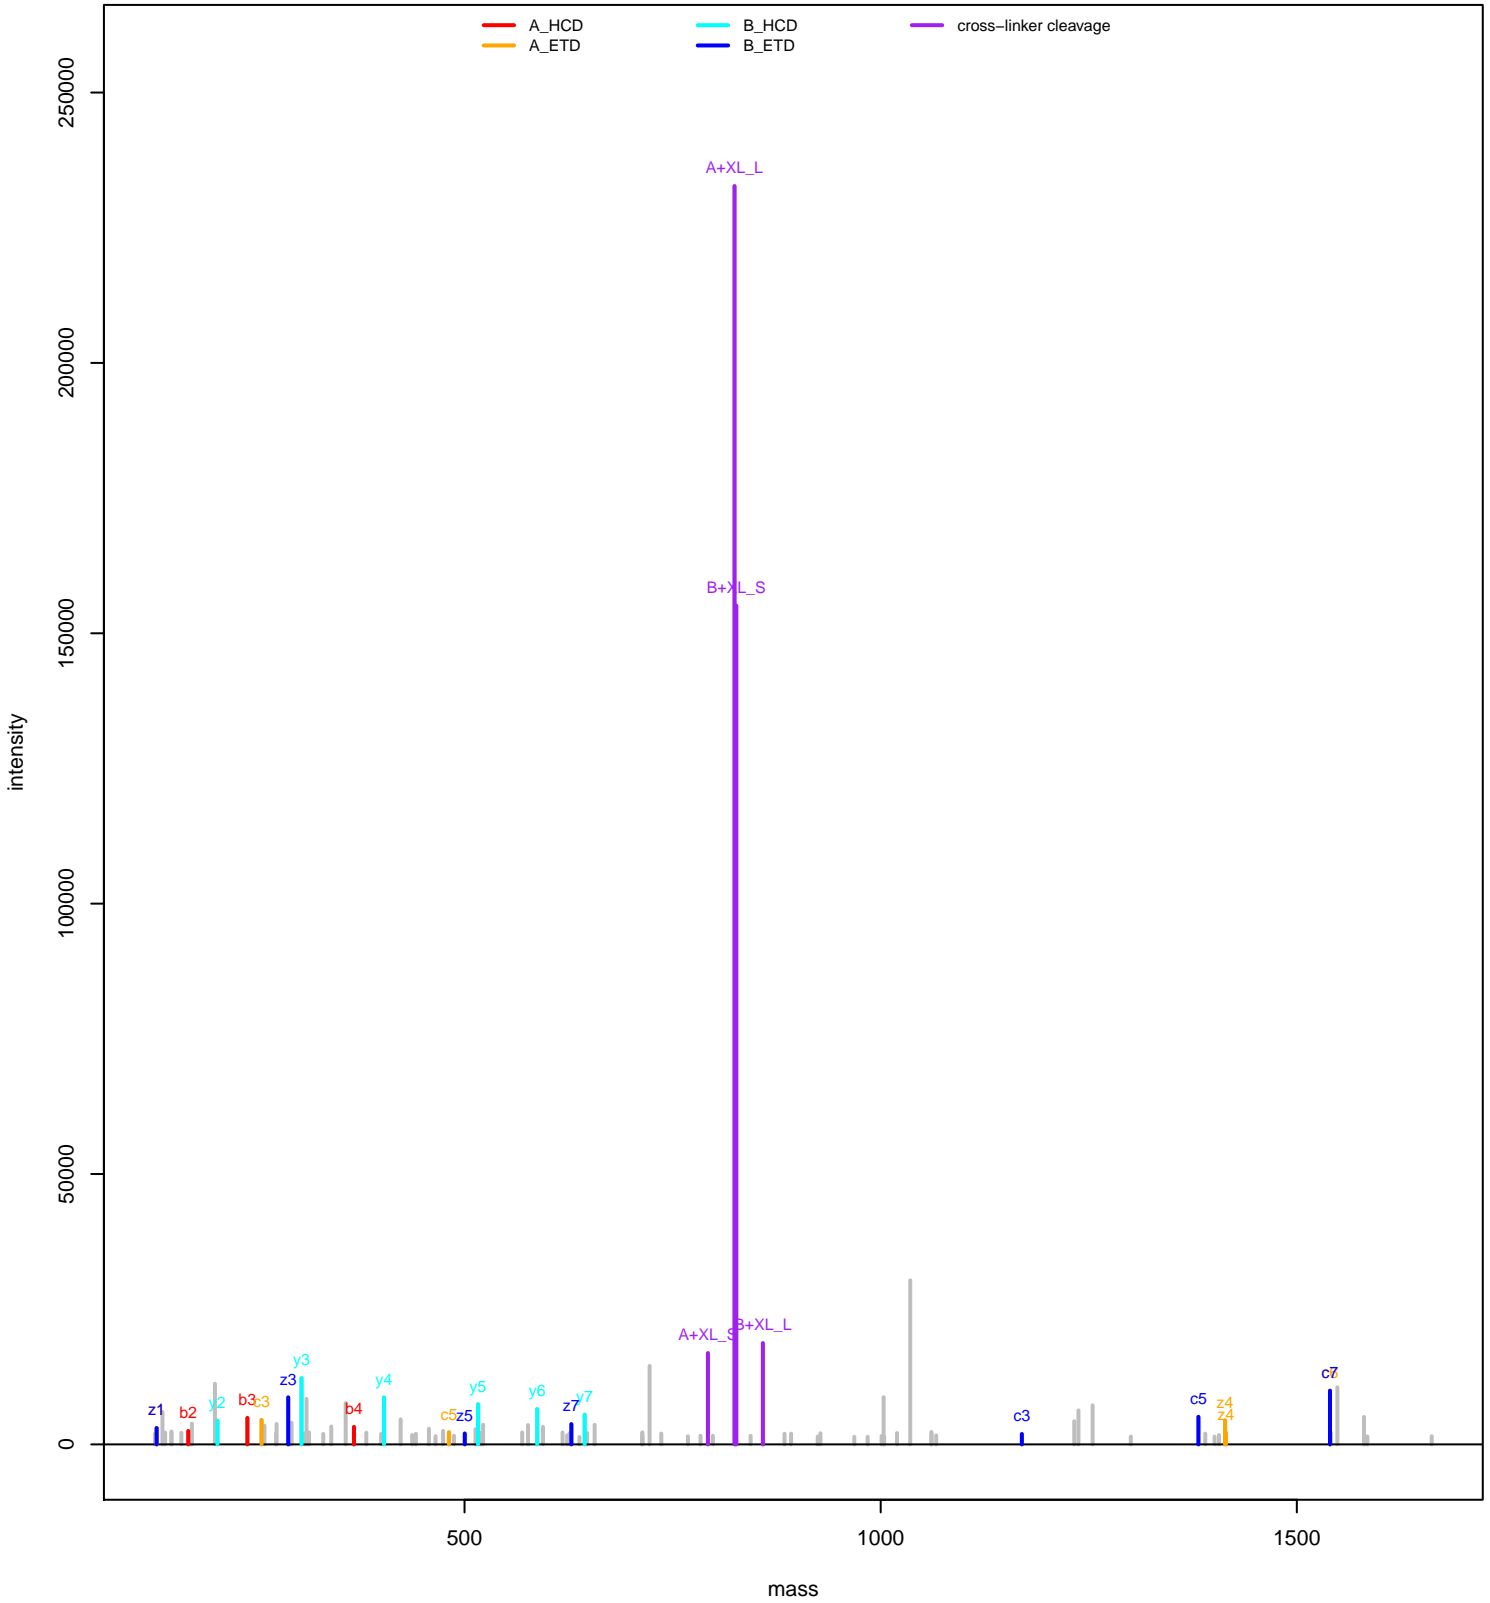

PAAQPKK+XL\_S

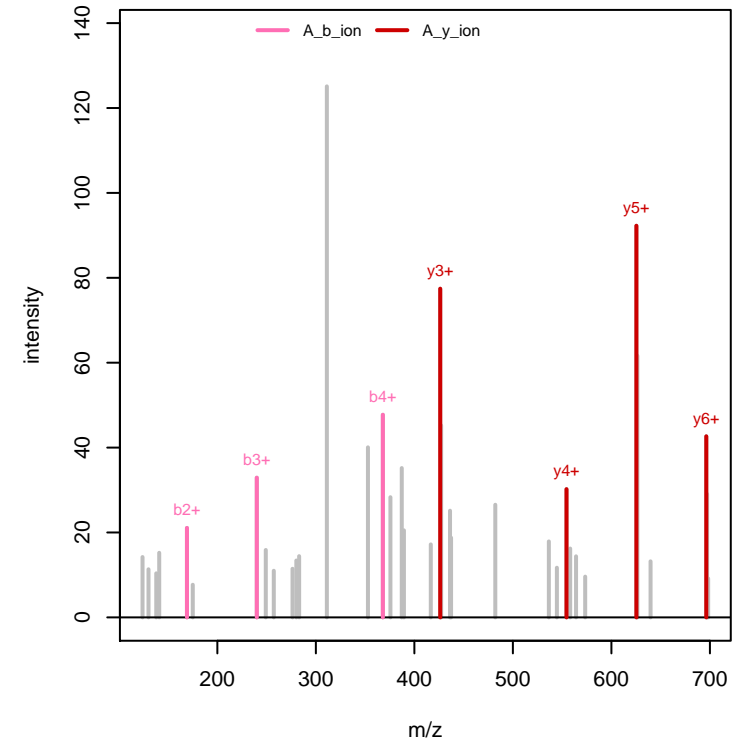

PAAQPKK+XL\_L

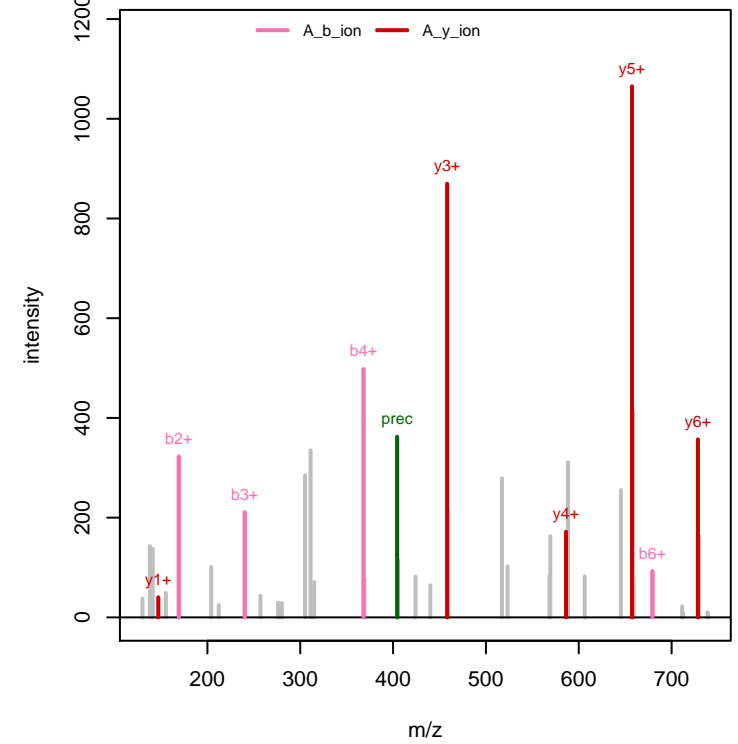

KGAIVTGK+XL\_S

KGAIVTGK+XL\_L

**VGKISR**  
**AAGIKSGSGKPNK**

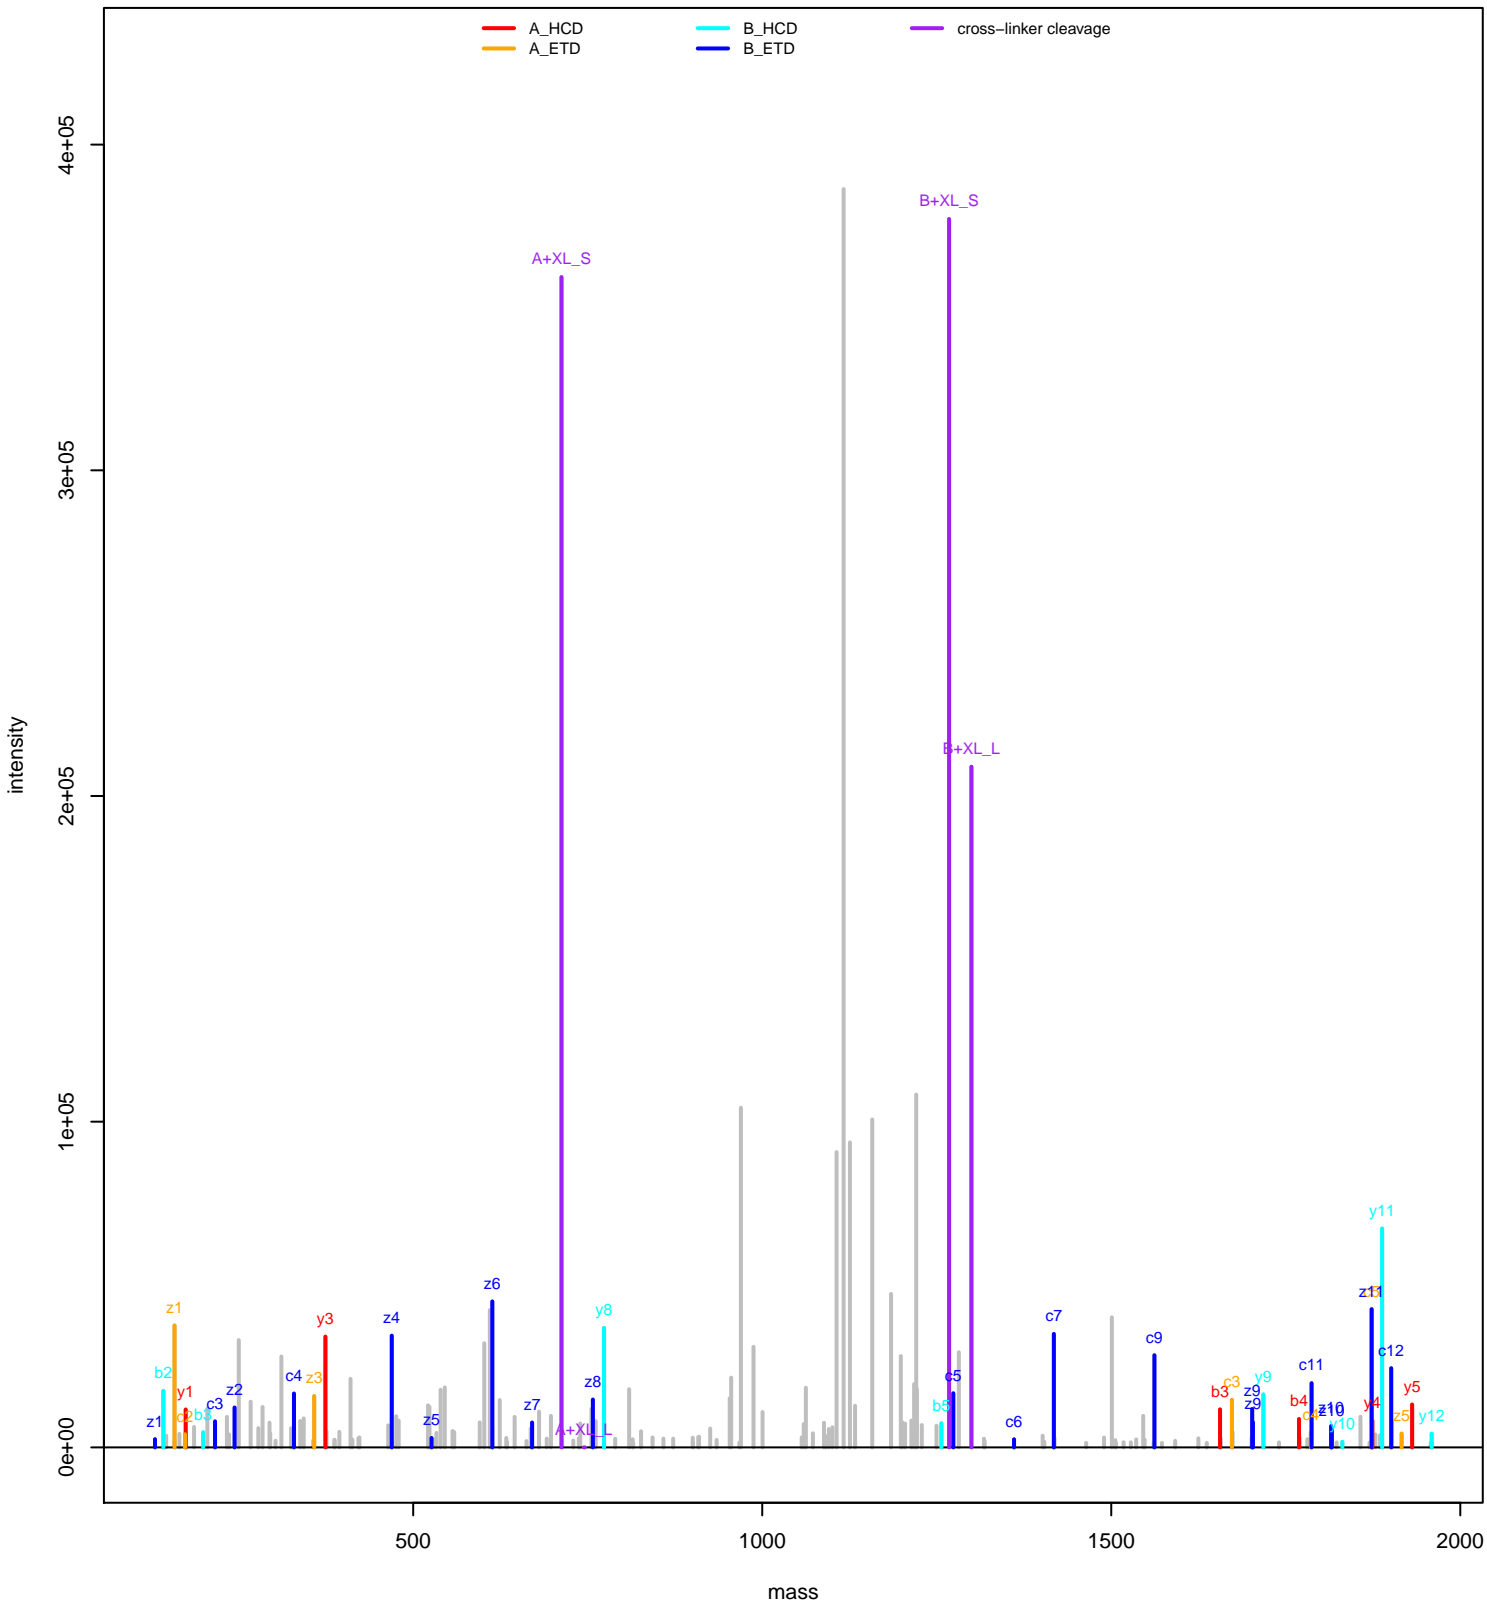

**VGKISR+XL\_S**

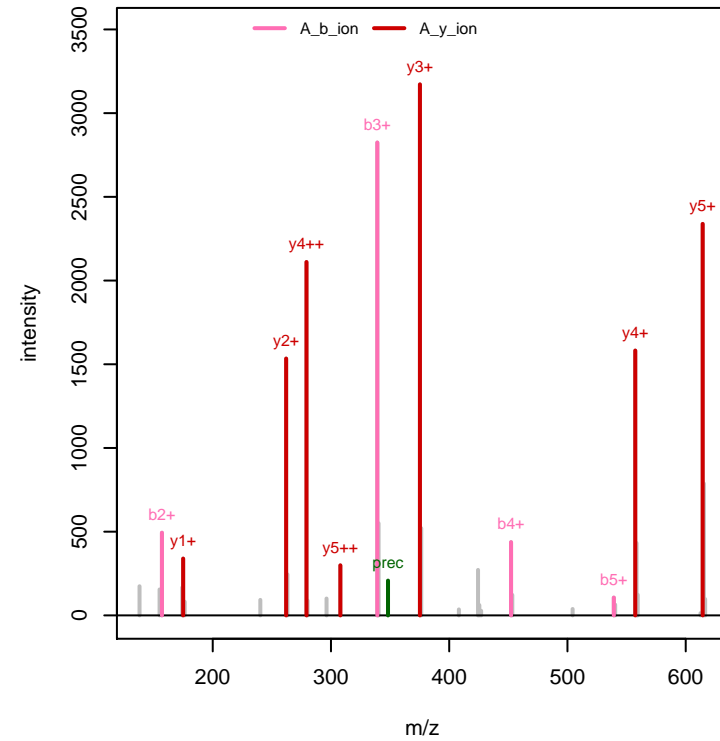

**VGKISR+XL\_L**

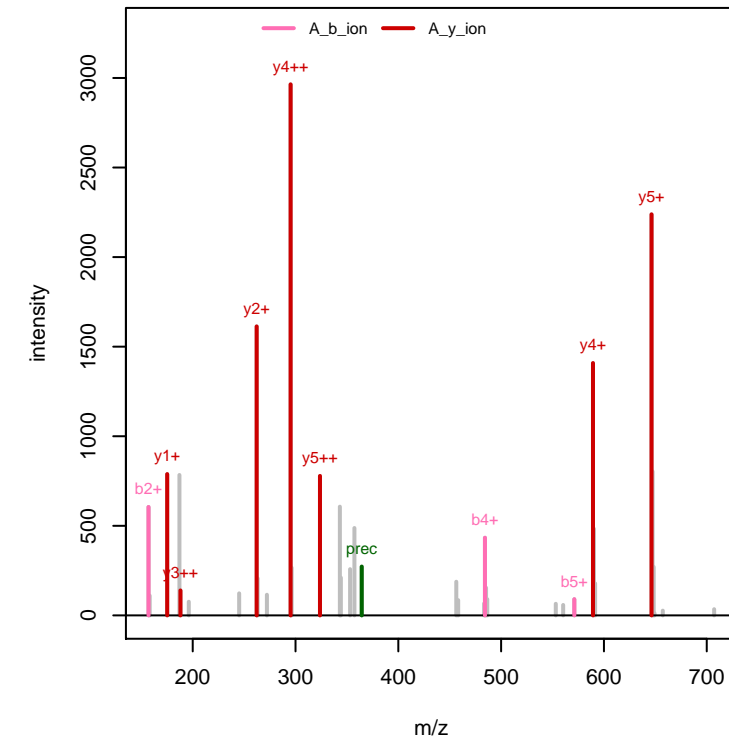

**AAGIKSGSGKPNK+XL\_S**

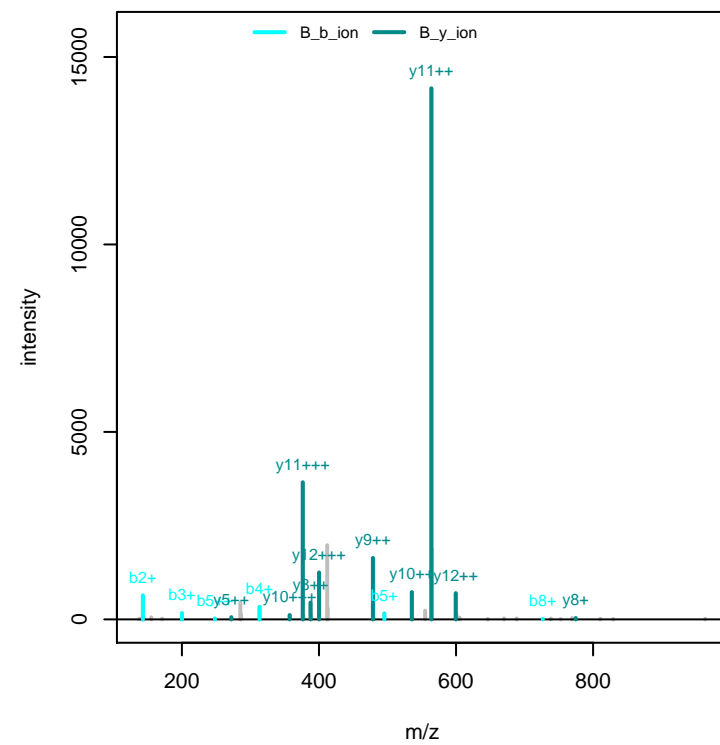

**AAGIKSGSGKPNK+XL\_L**

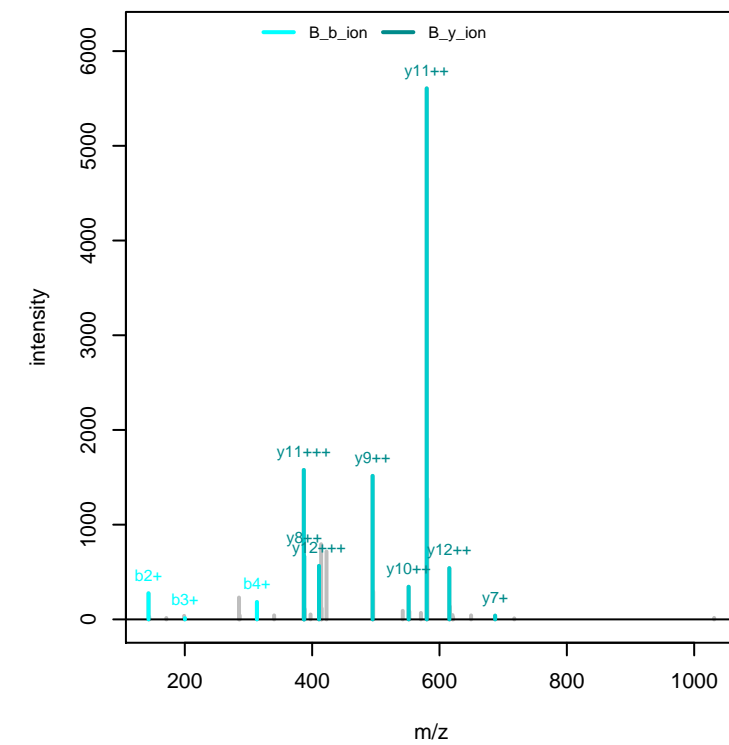

**KGAIVTGK  
AKDEADEK**

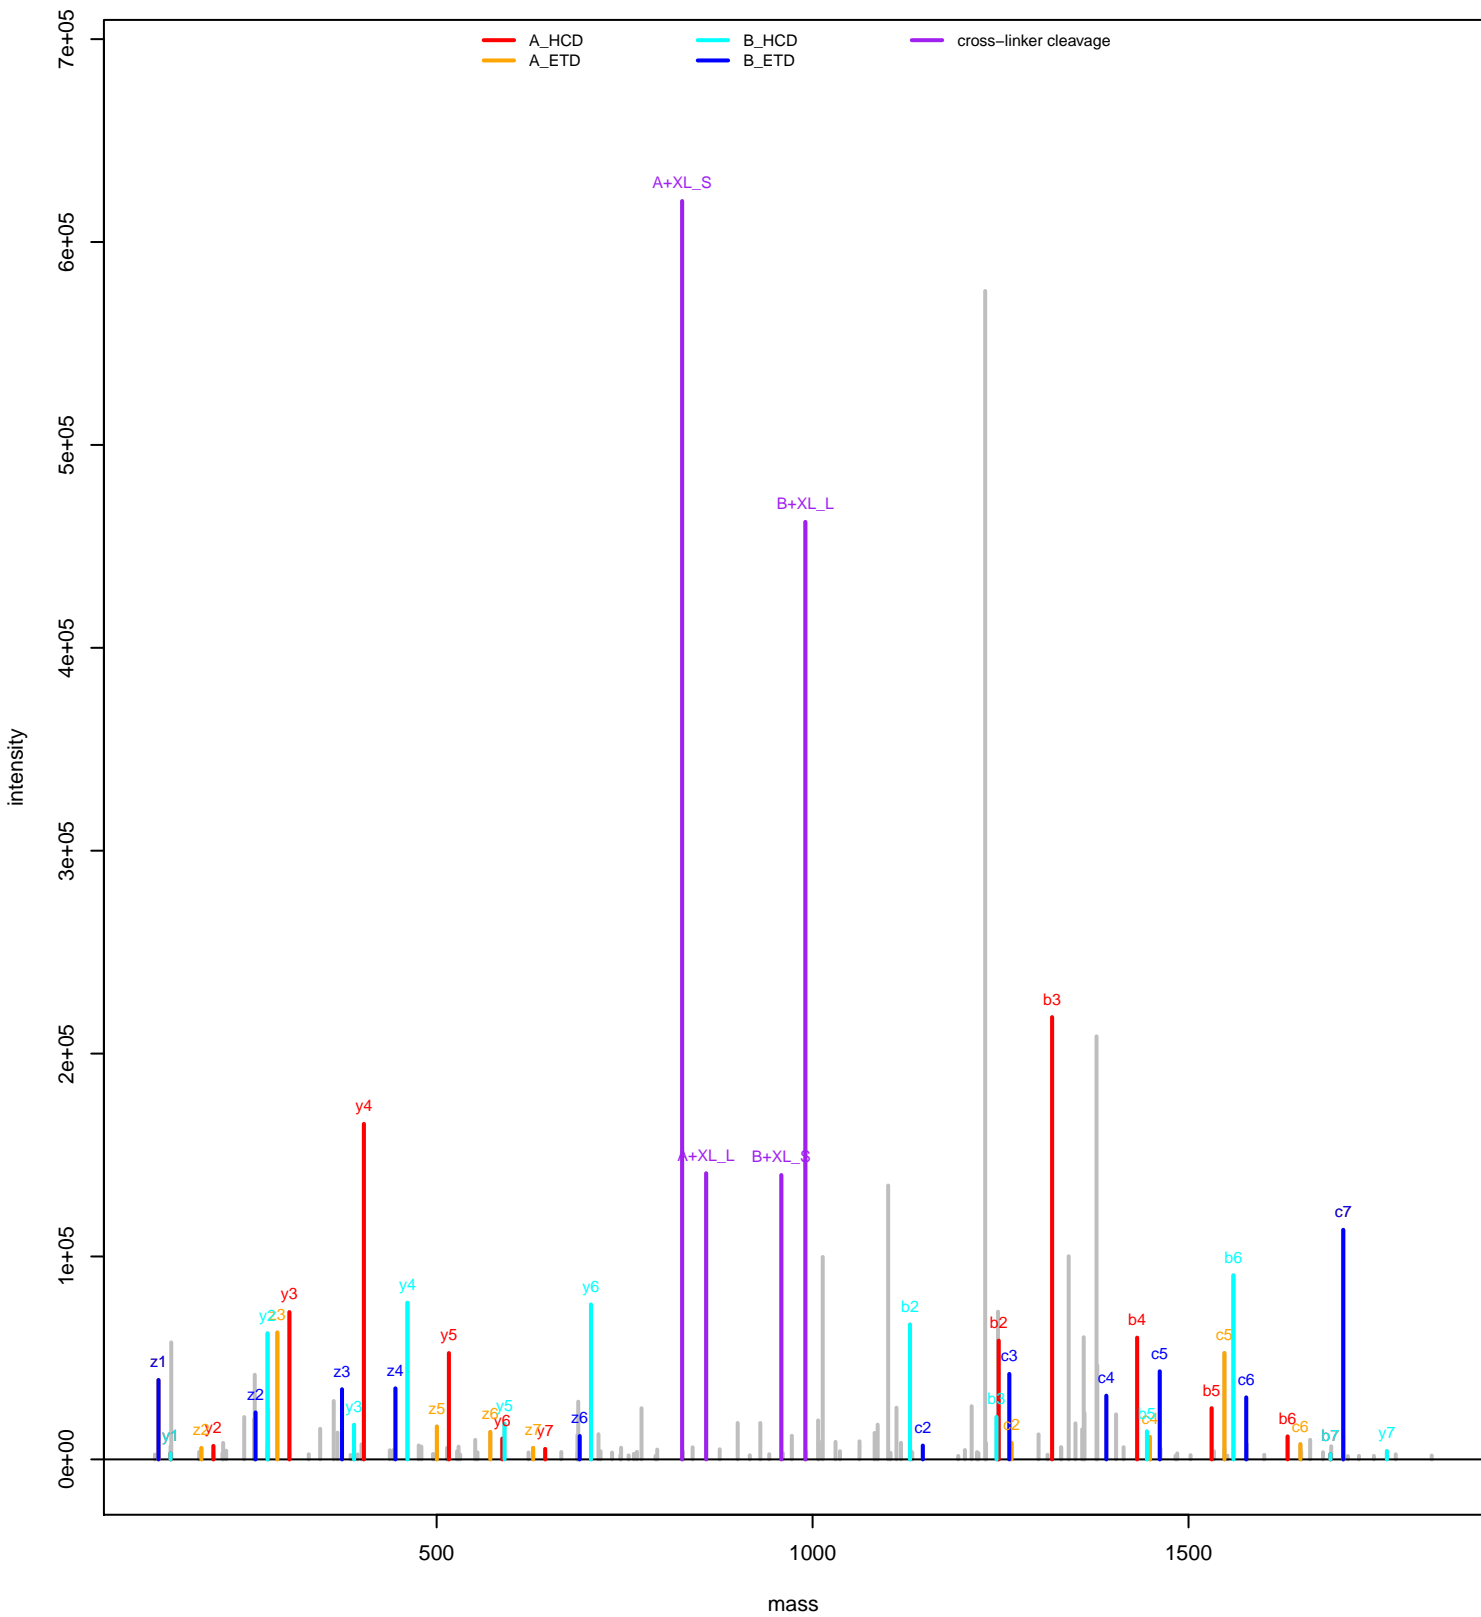

**KGAIVTGK+XL\_S**

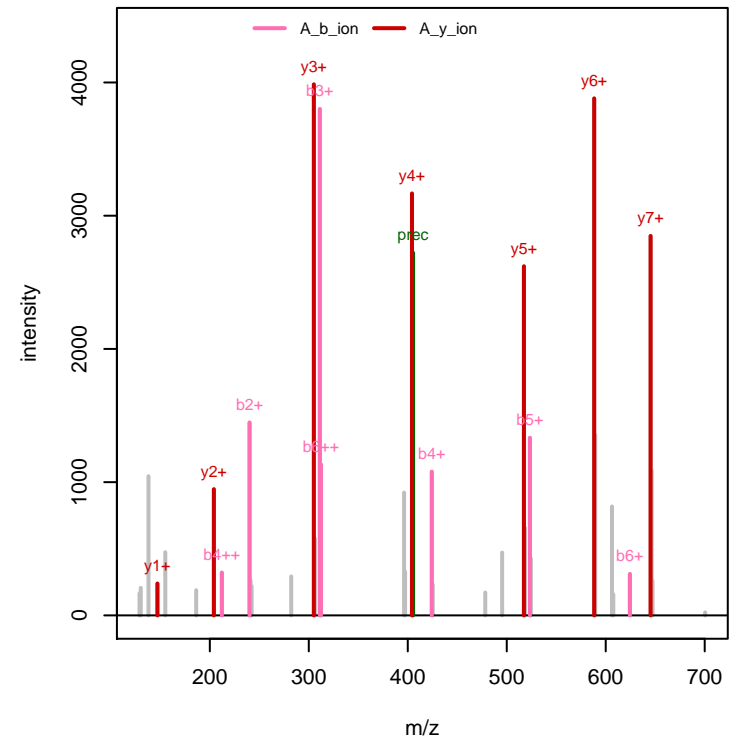

**KGAIVTGK+XL\_L**

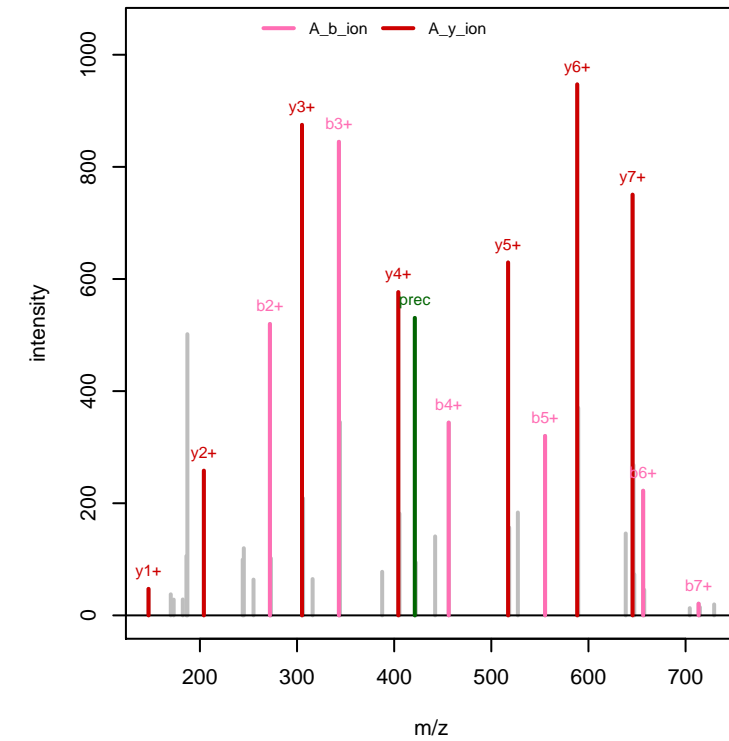

**AKDEADEK+XL\_S**

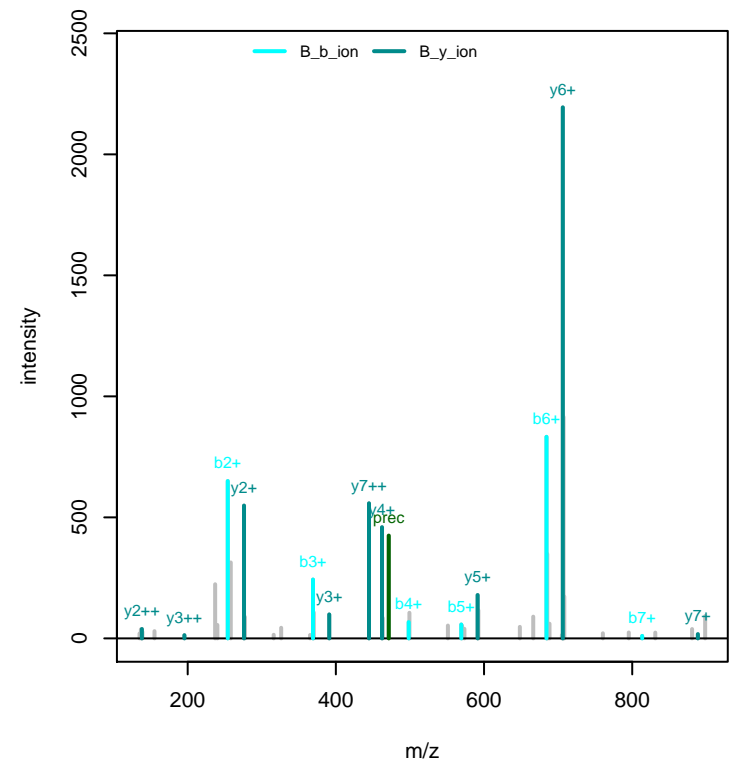

**AKDEADEK+XL\_L**

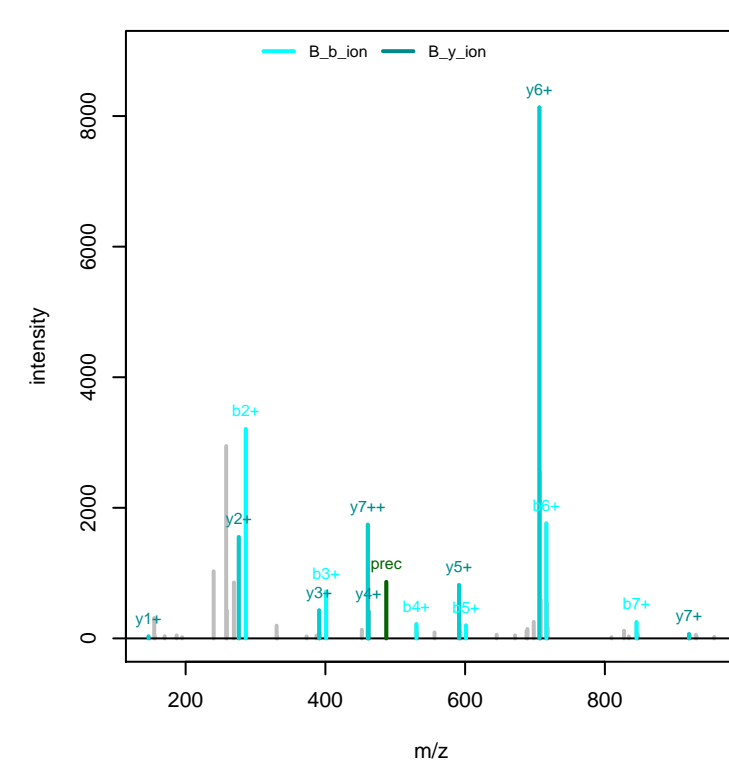

REAAEQAKR  
DKVSNQQDDMTK

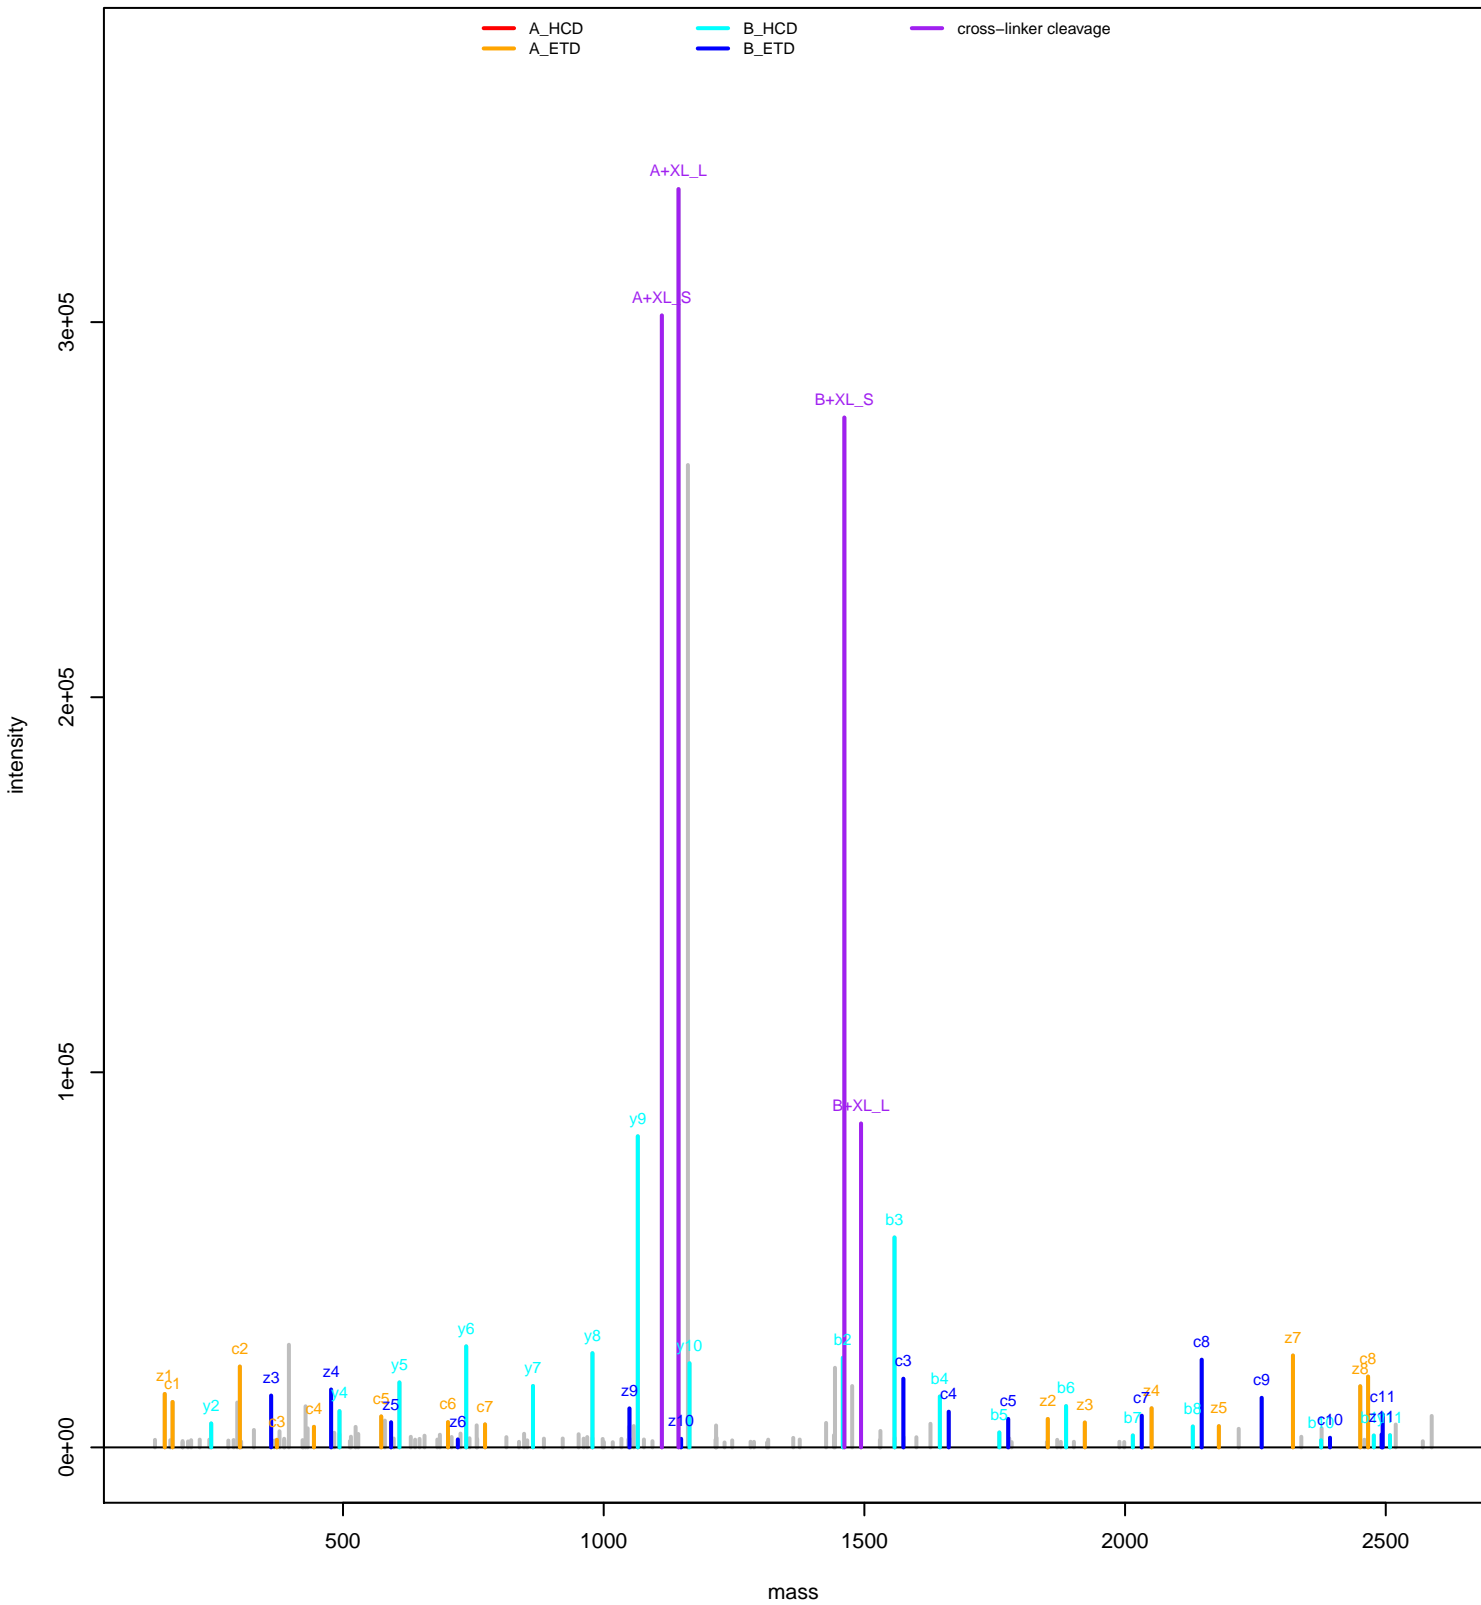

REAAEQAKR+XL\_S

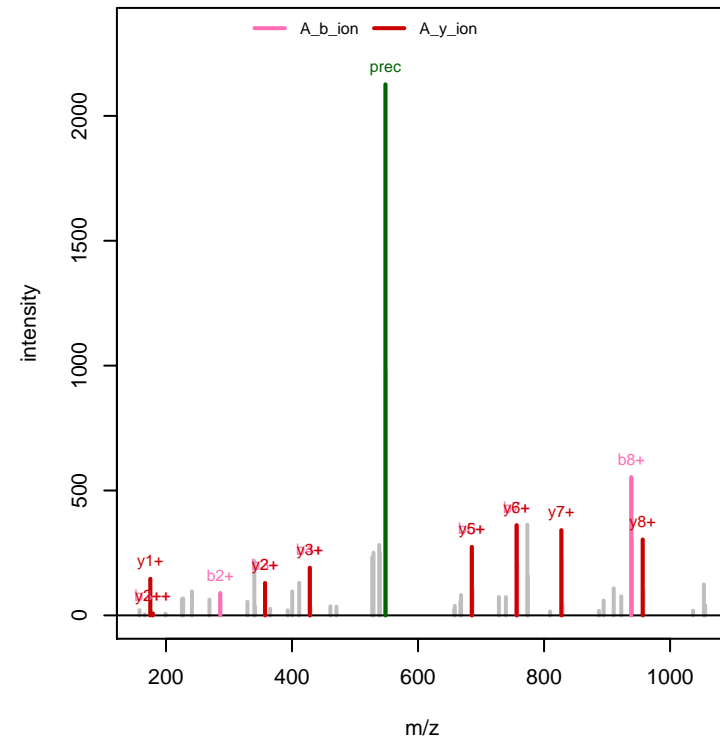

REAAEQAKR+XL\_L

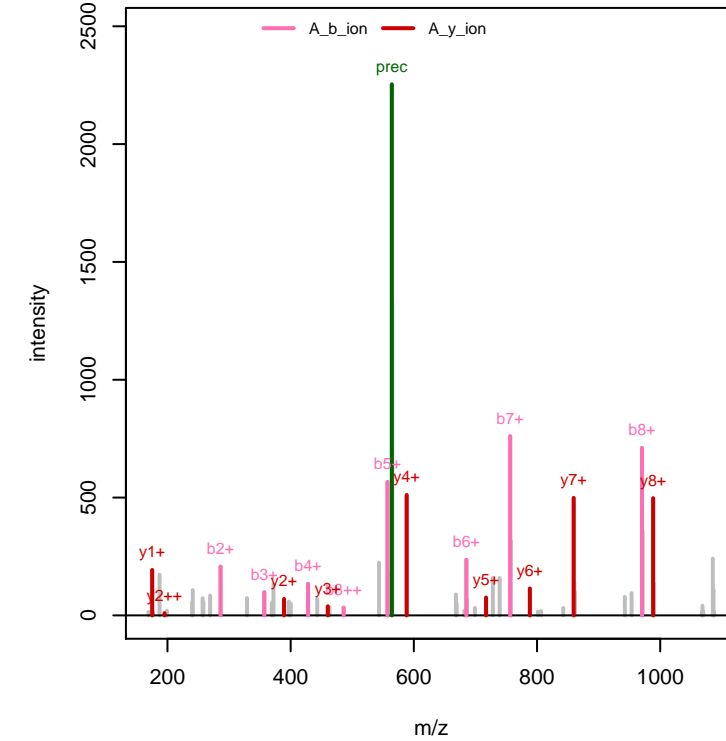

DKVSNQQDDMTK+XL\_S

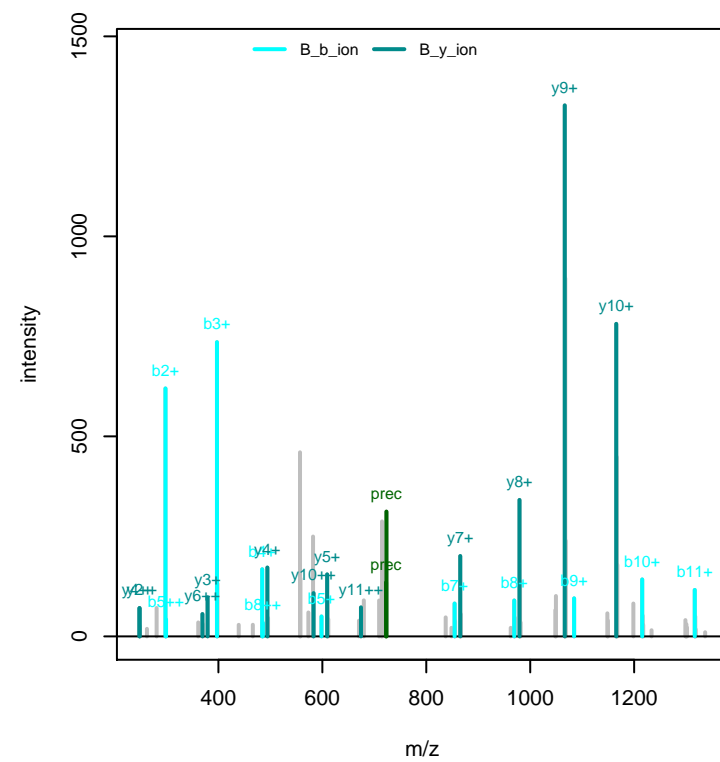

DKVSNQQDDMTK+XL\_L

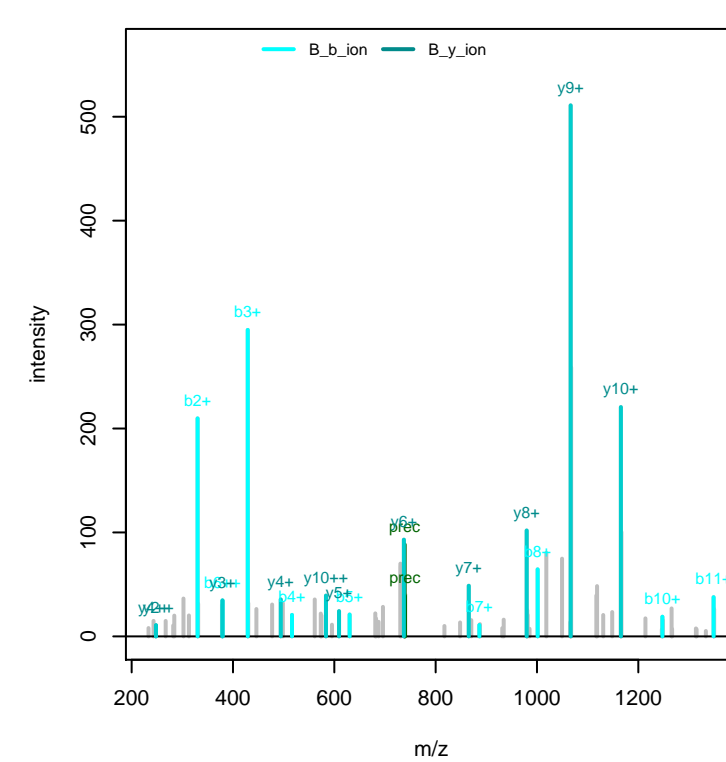

STDISVKTDQK  
GYAGDTATTSEIKAK

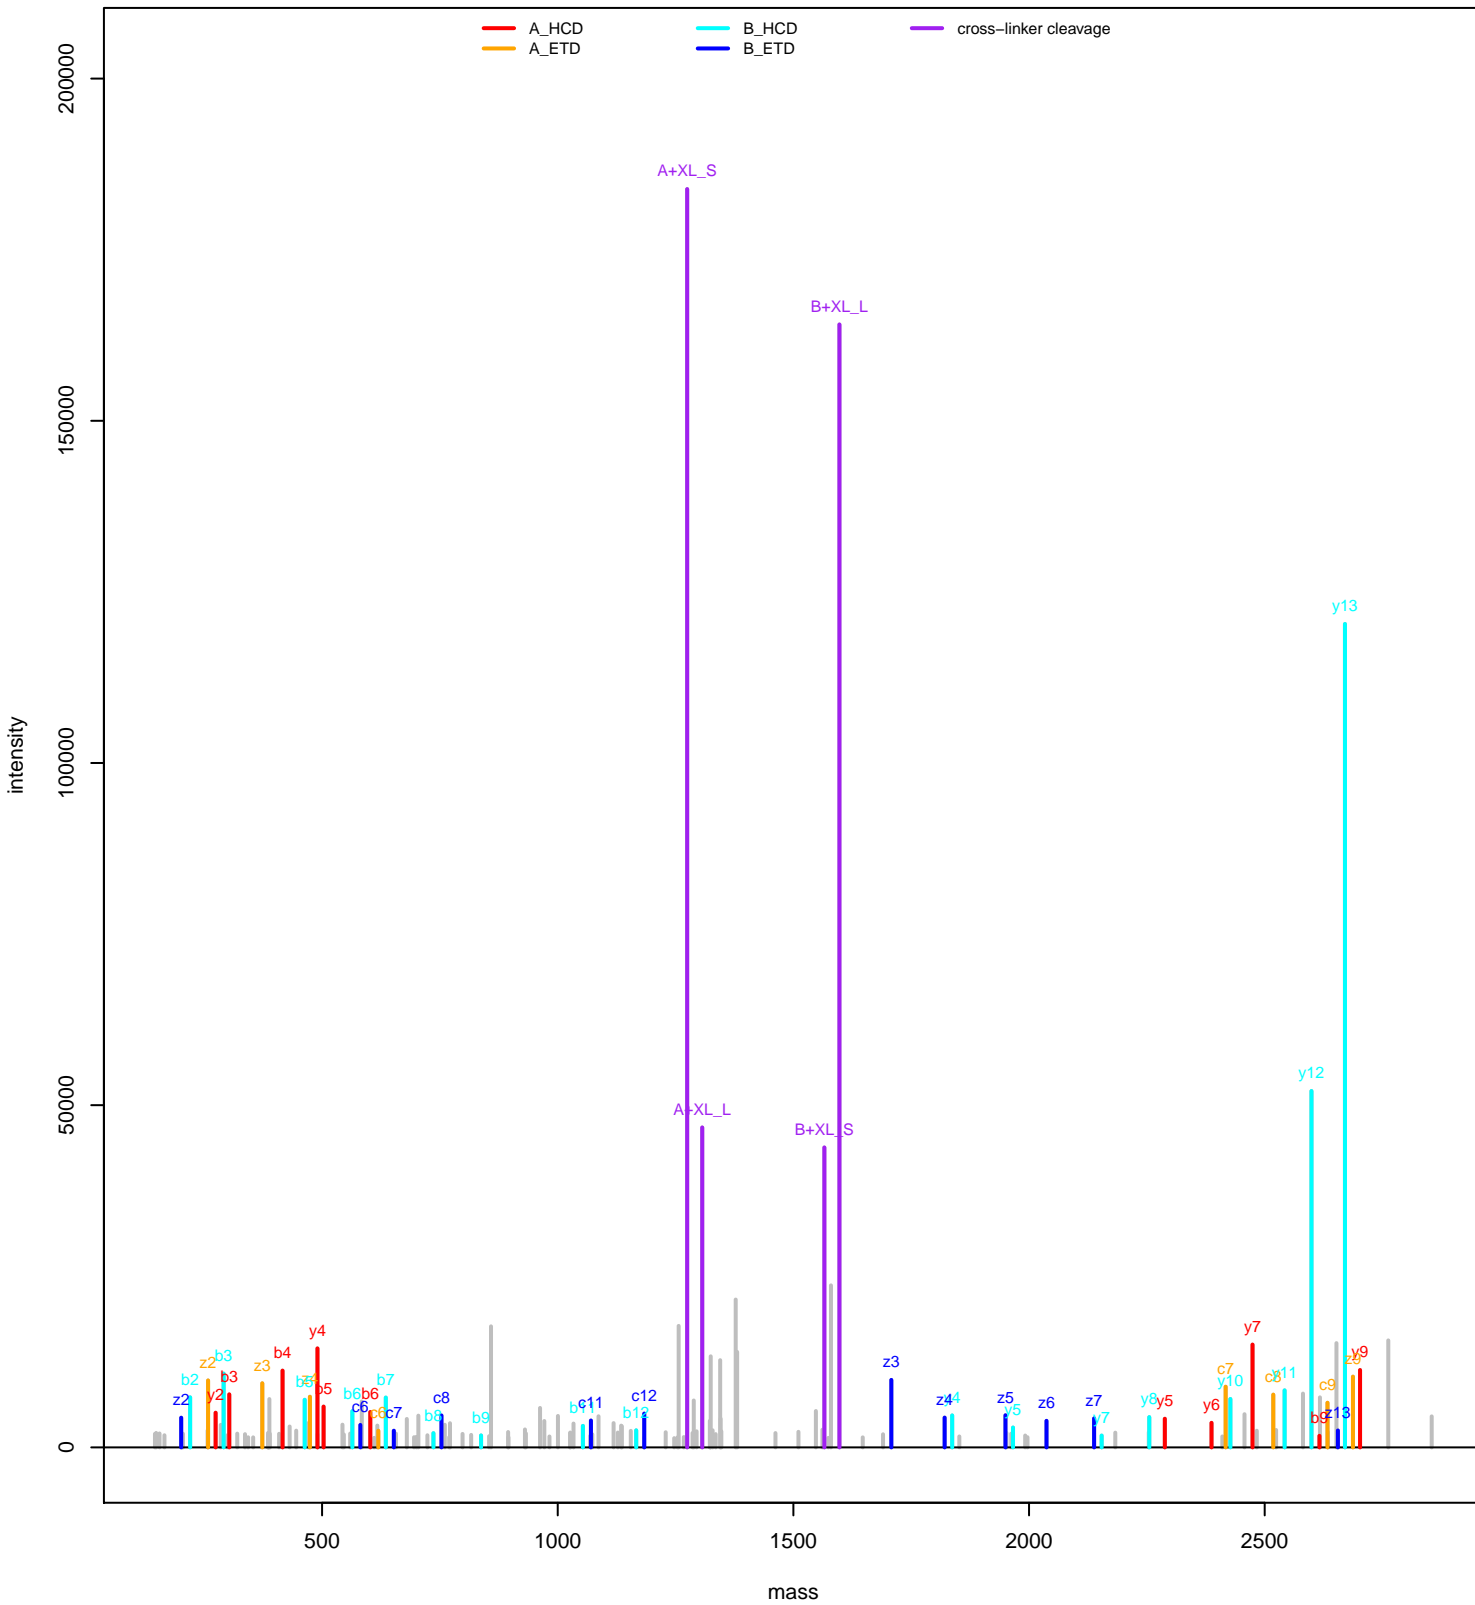

STDISVKTDQK+XL\_S

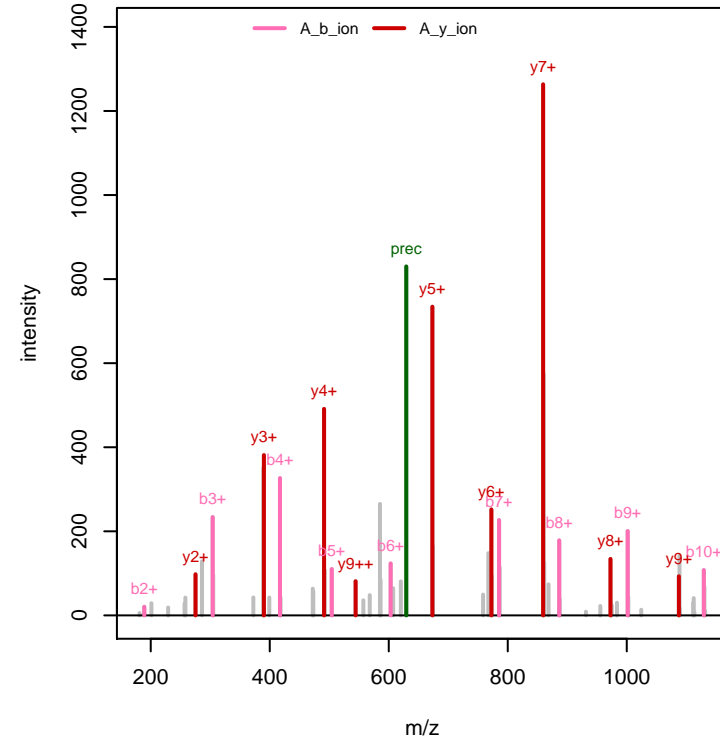

STDISVKTDQK+XL\_L

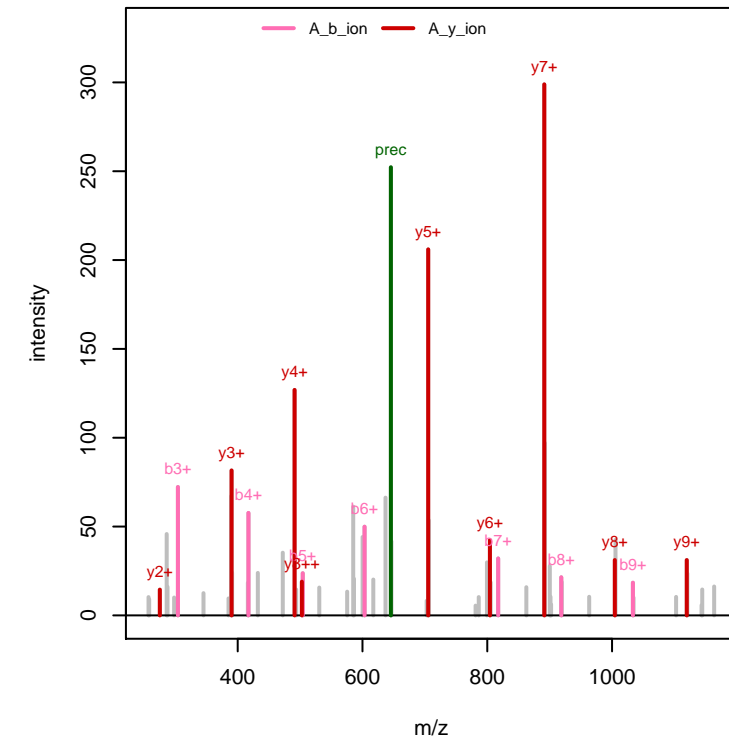

GYAGDTATTSEIKAK+XL\_S

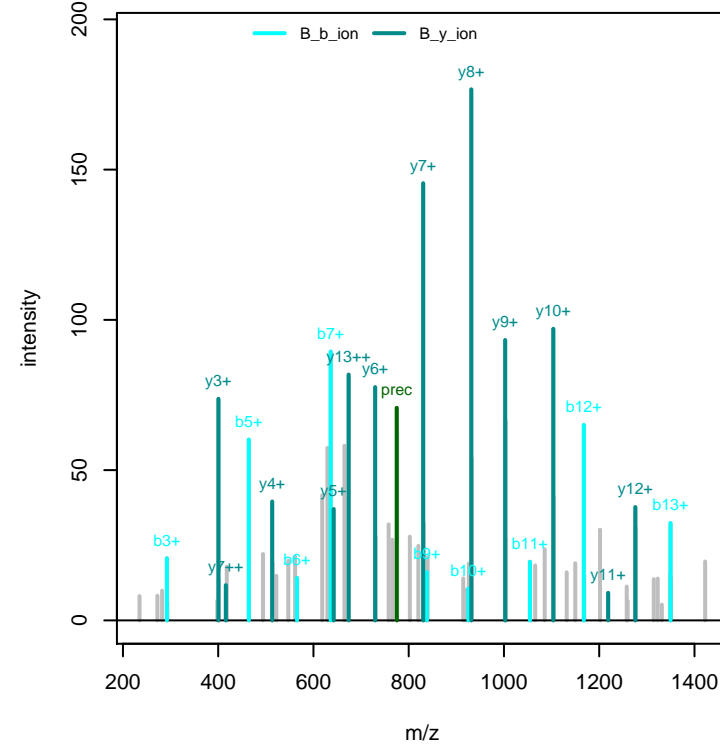

GYAGDTATTSEIKAK+XL\_L

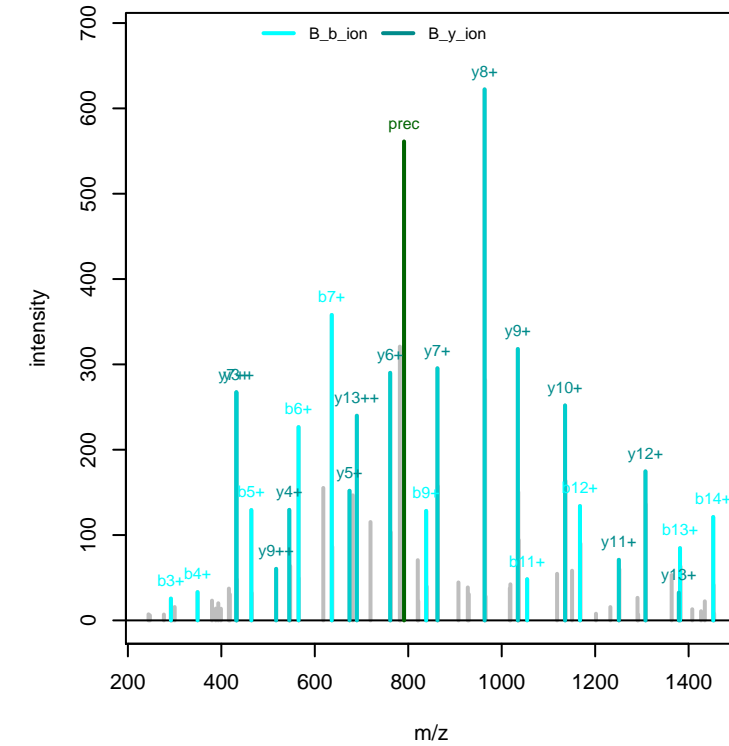

TGKAAR  
KISNGEGVER

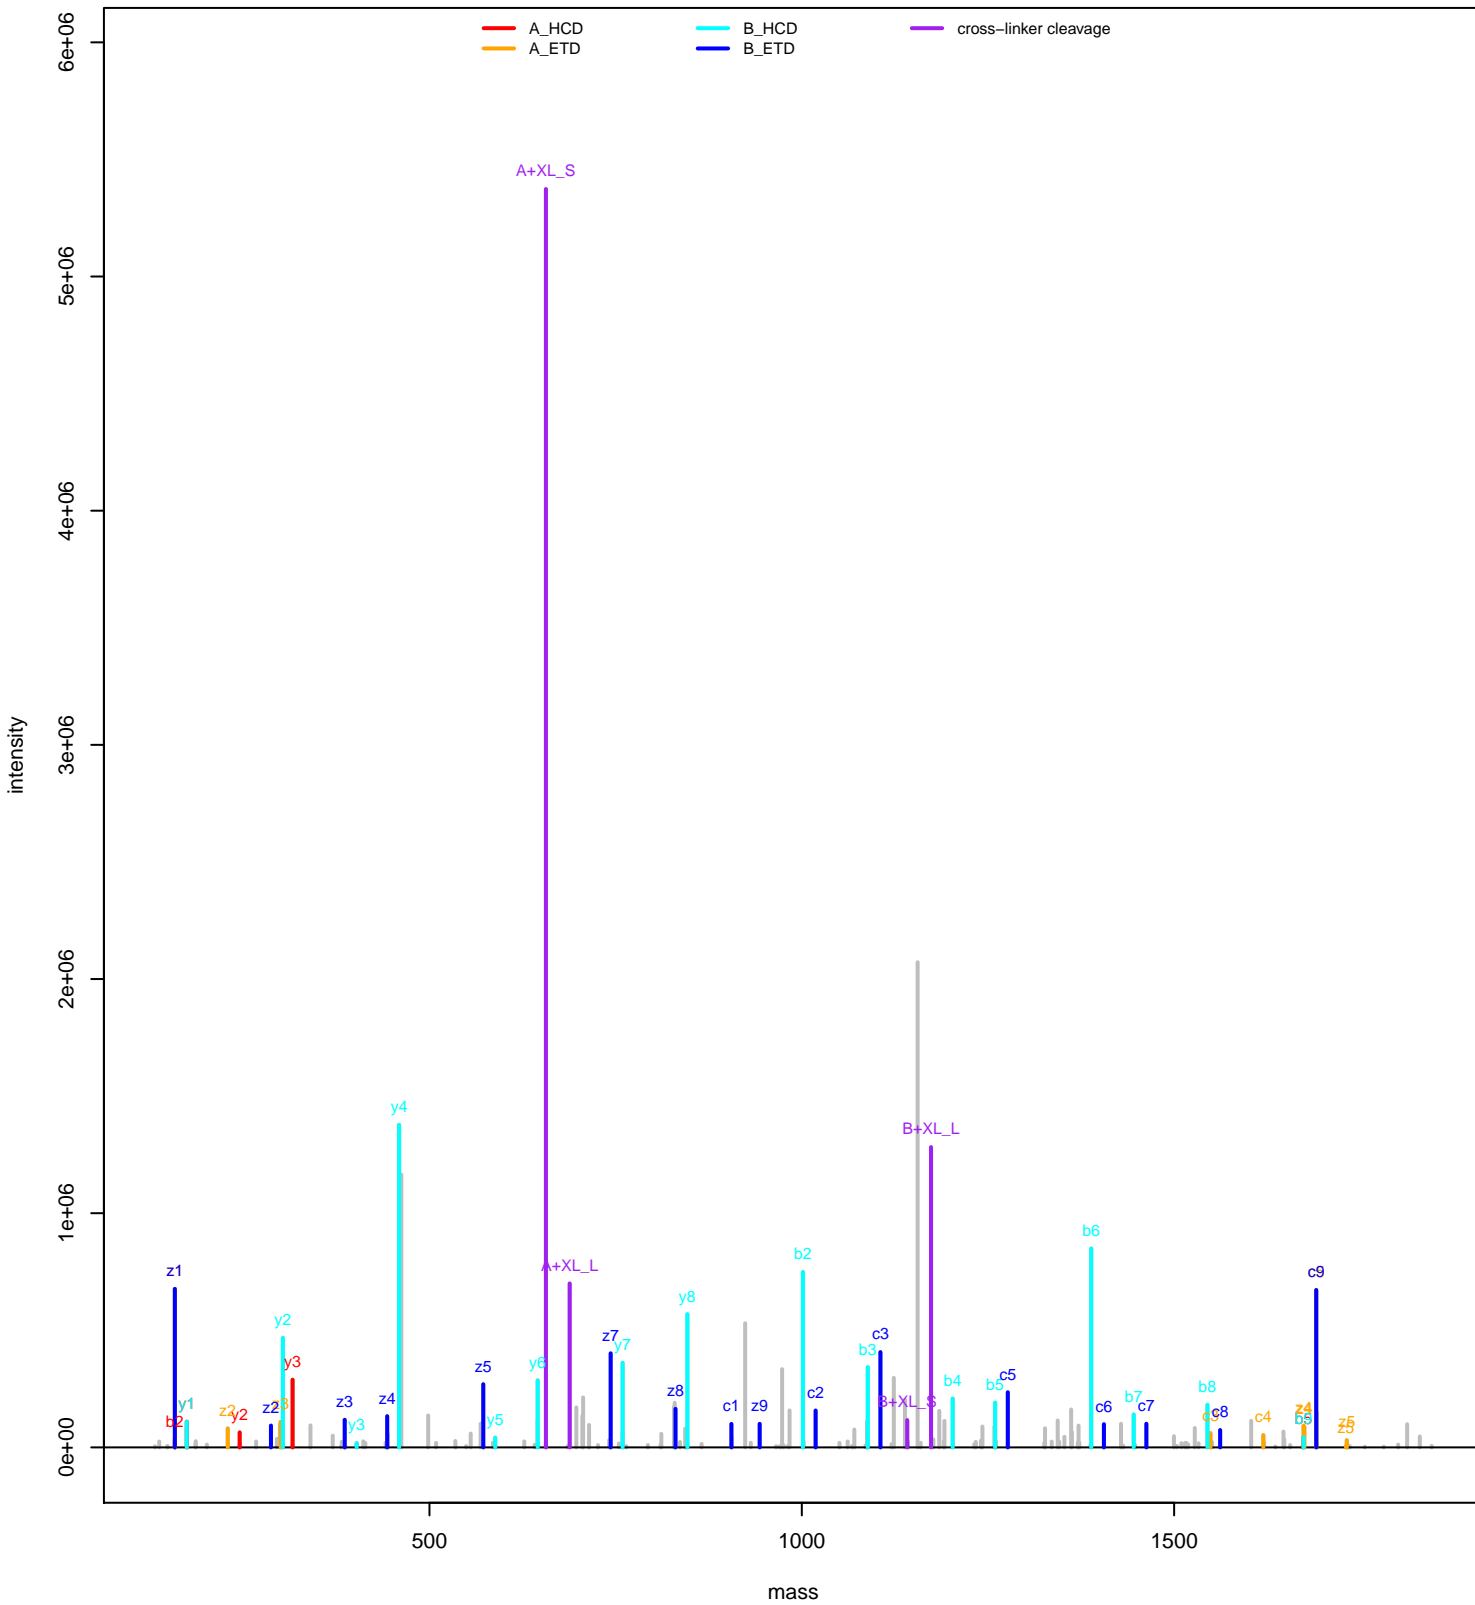

TGKAAR+XL\_S

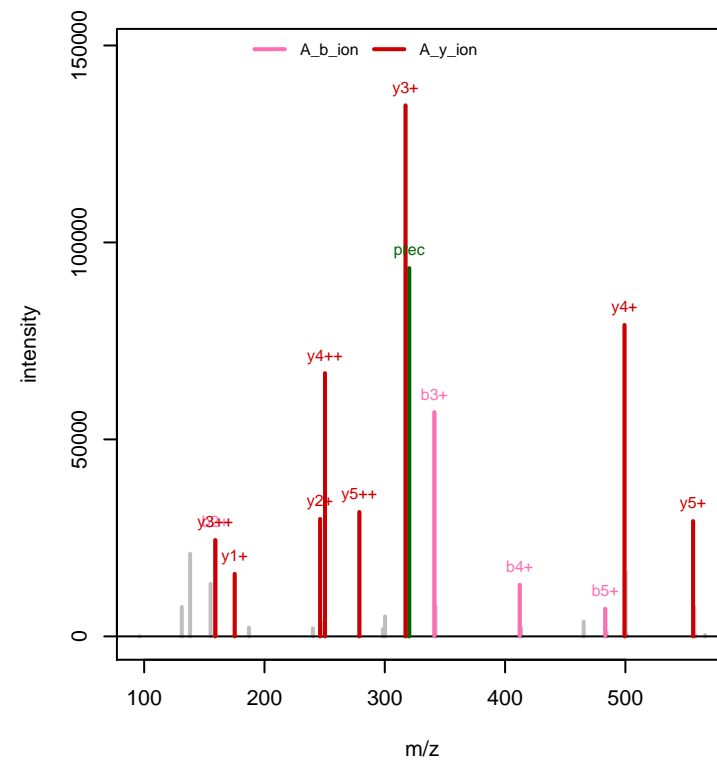

TGKAAR+XL\_L

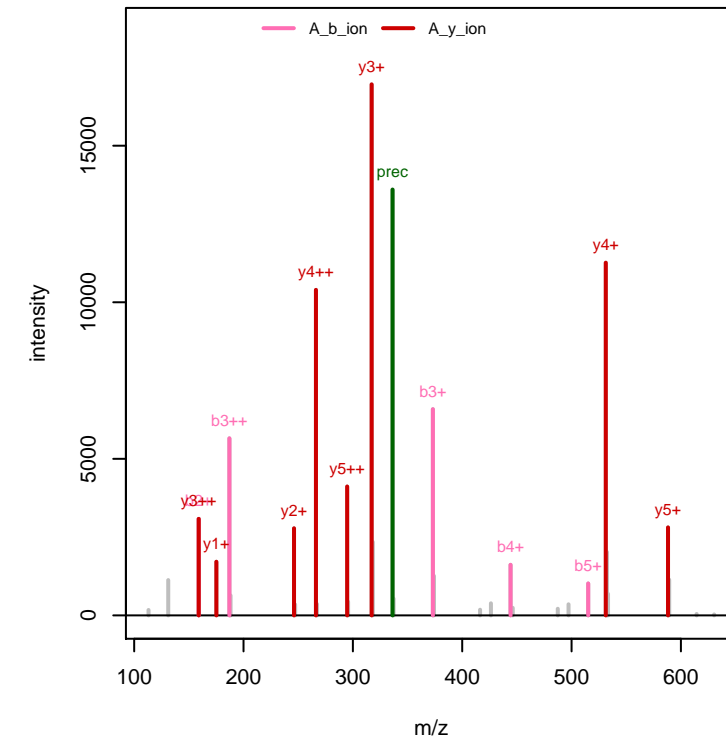

KISNGEGVER+XL\_S

KISNGEGVER+XL\_L





SVKNDLK  
DAKEGSVK

SVKNDLK+XL\_S

SVKNDLK+XL\_L

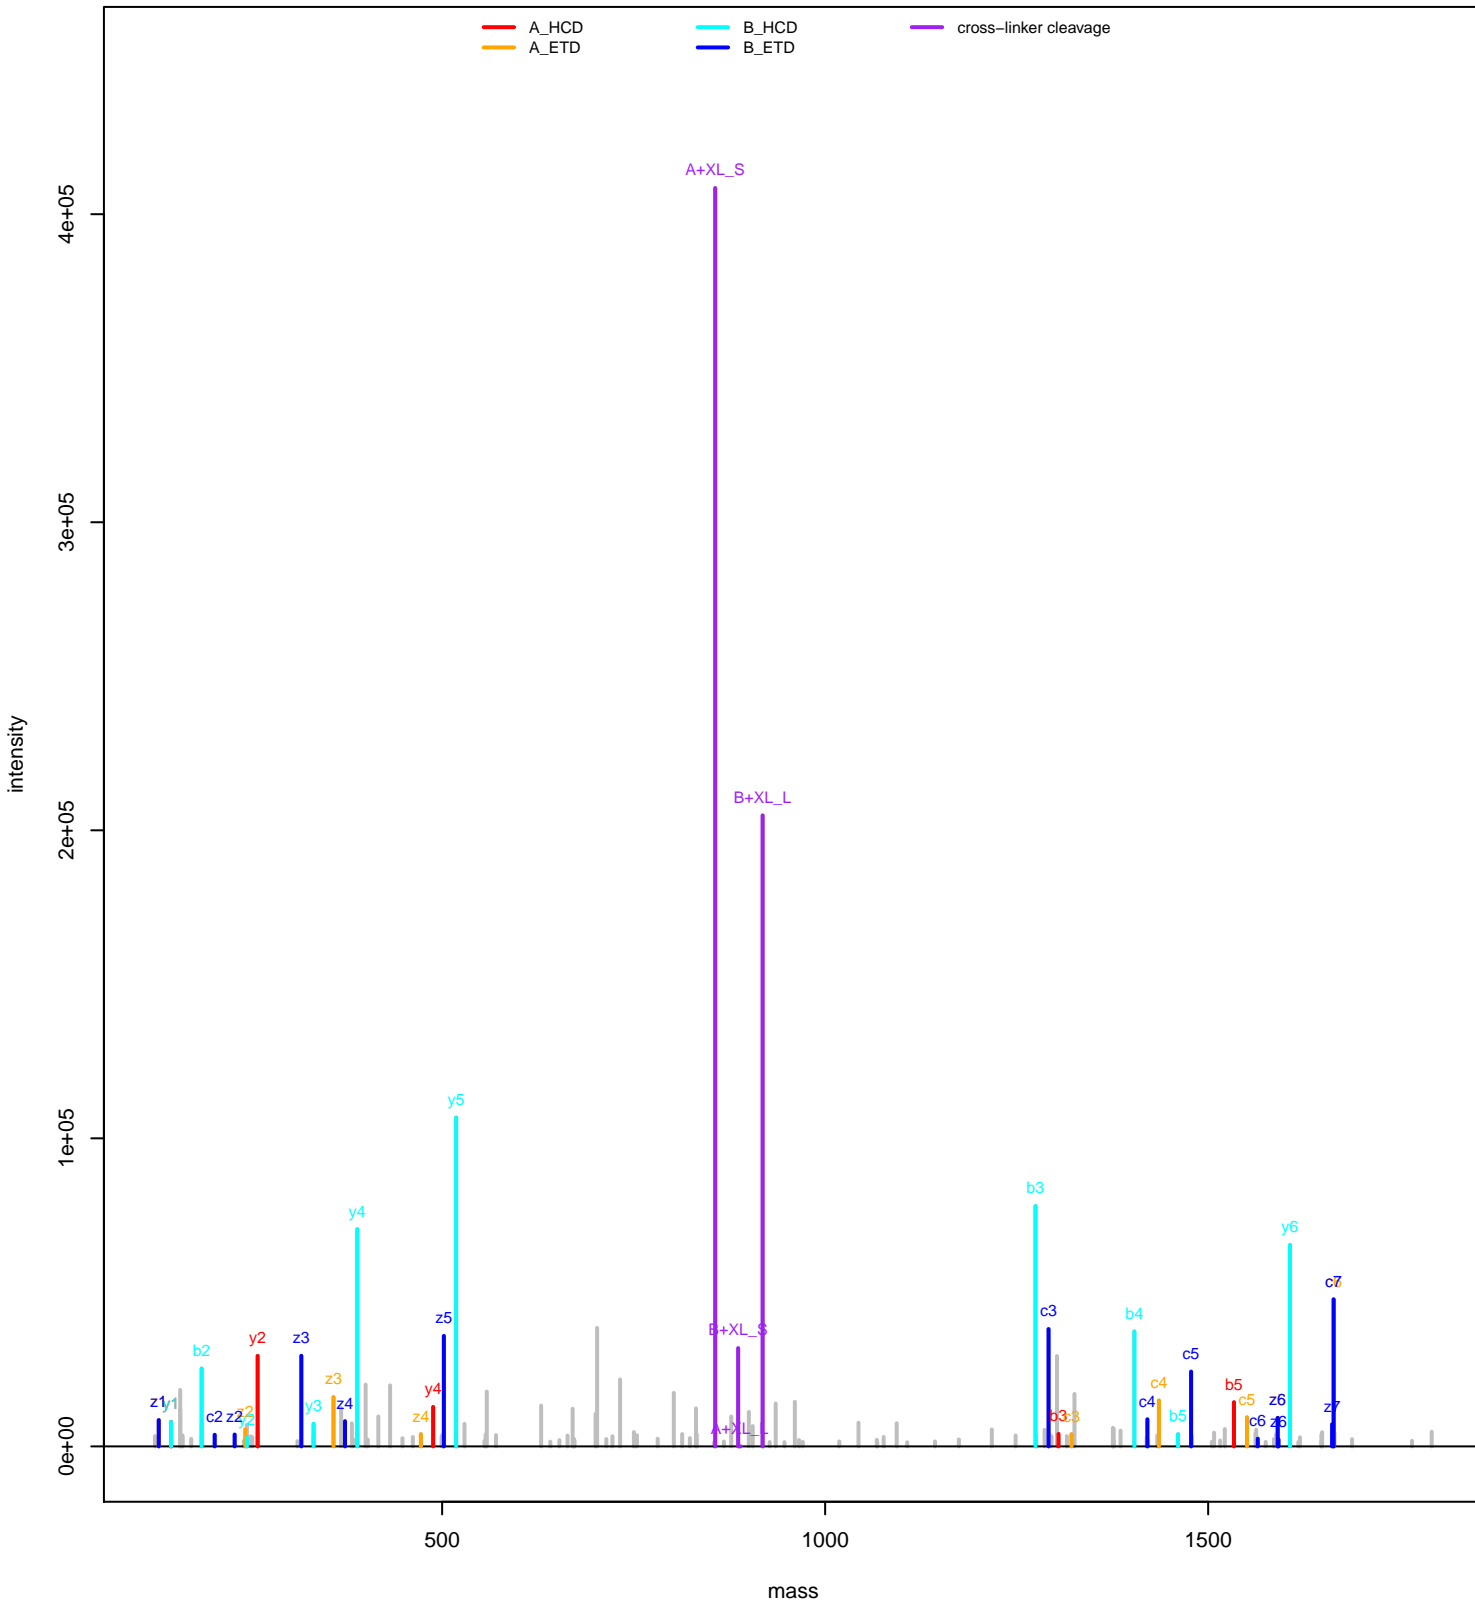

DAKEGSVK+XL\_S

DAKEGSVK+XL\_L

ADAKPEADAK  
ADAKPEADAKAADSAKK

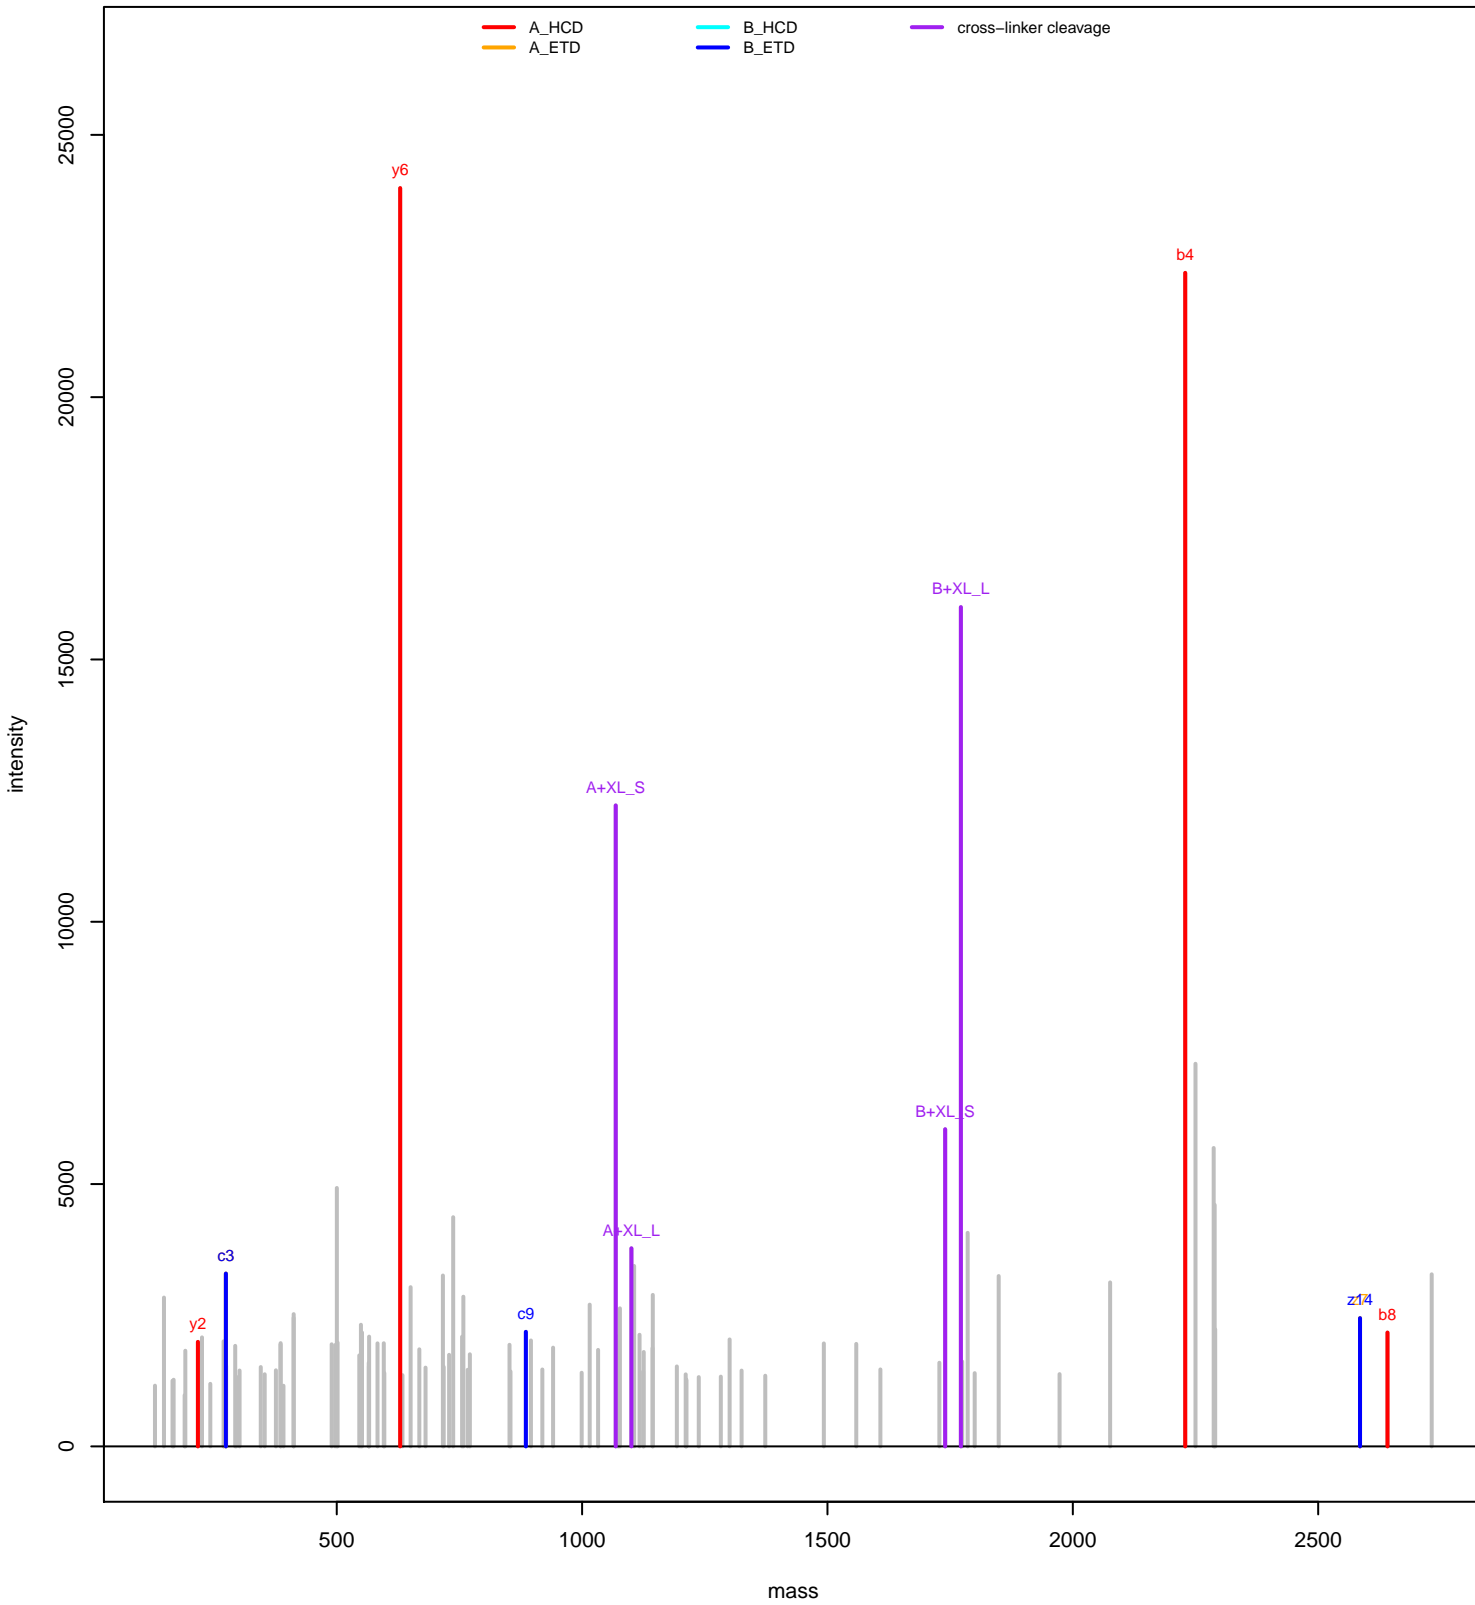

ADAKPEADAK+XL\_S

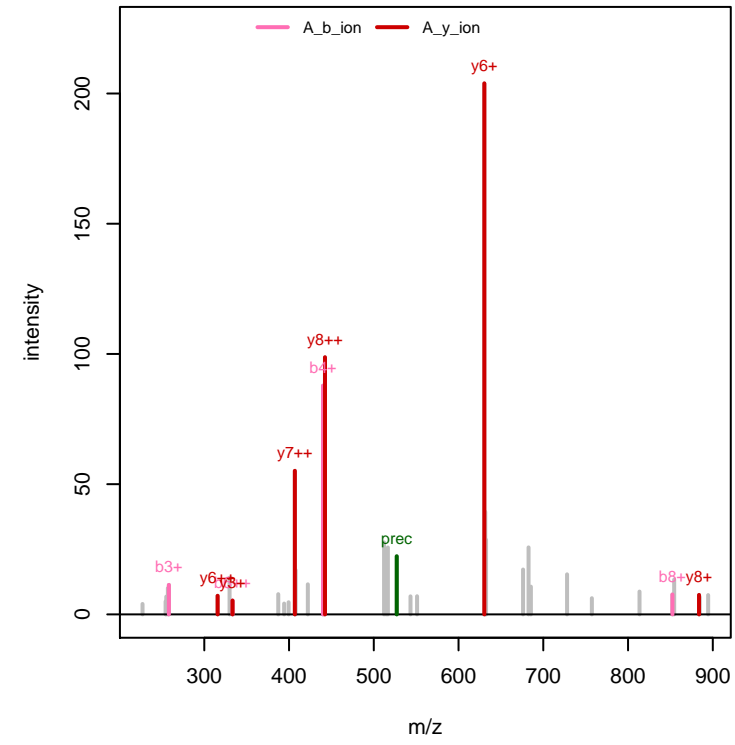

ADAKPEADAK+XL\_L

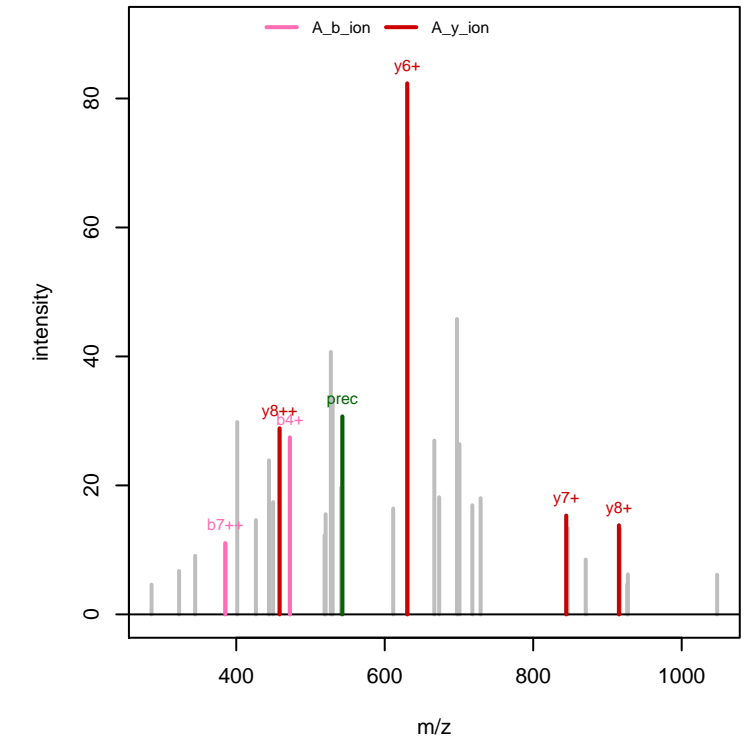

ADAKPEADAKAADSAKK+XL\_S

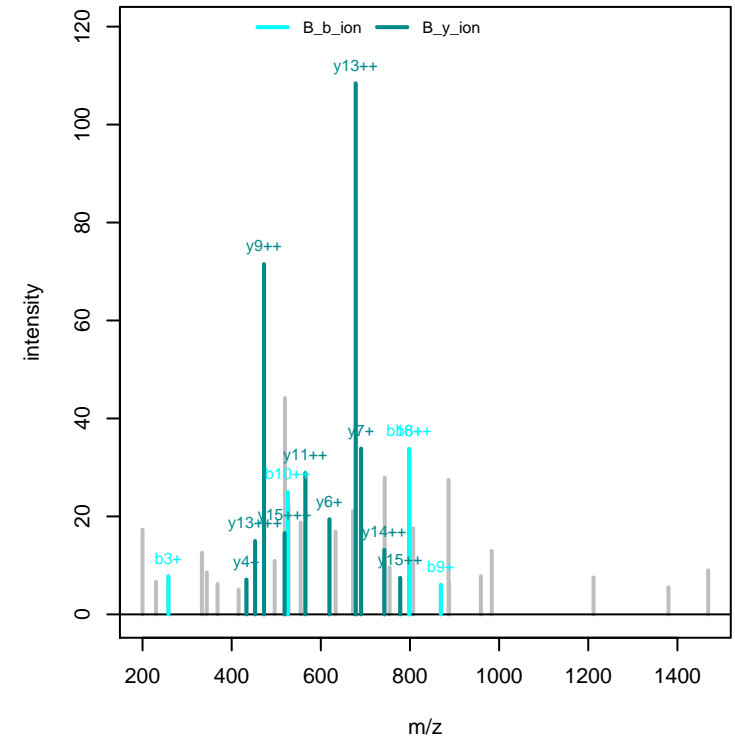

ADAKPEADAKAADSAKK+XL\_L

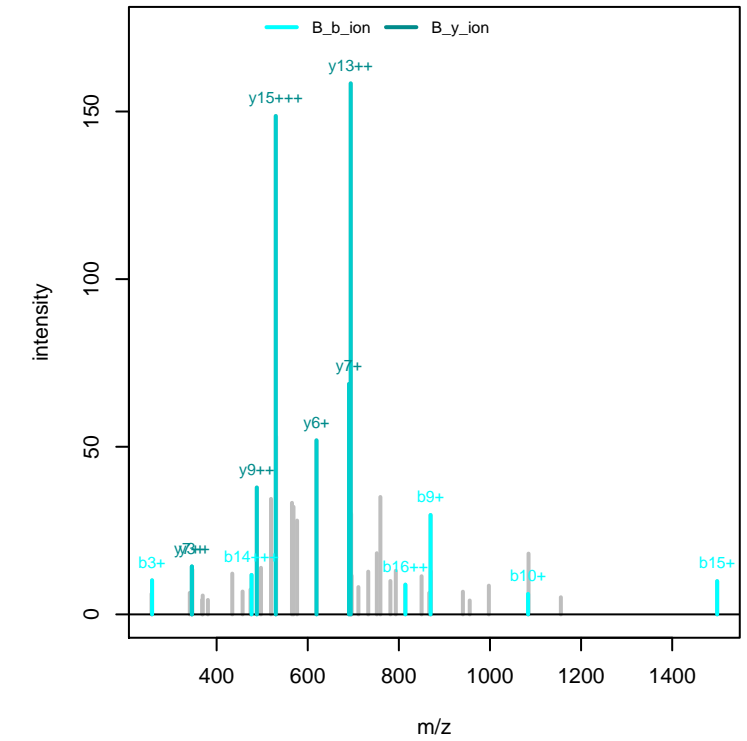

TEDAKRHDK  
TIADKQADTNQEQAQK

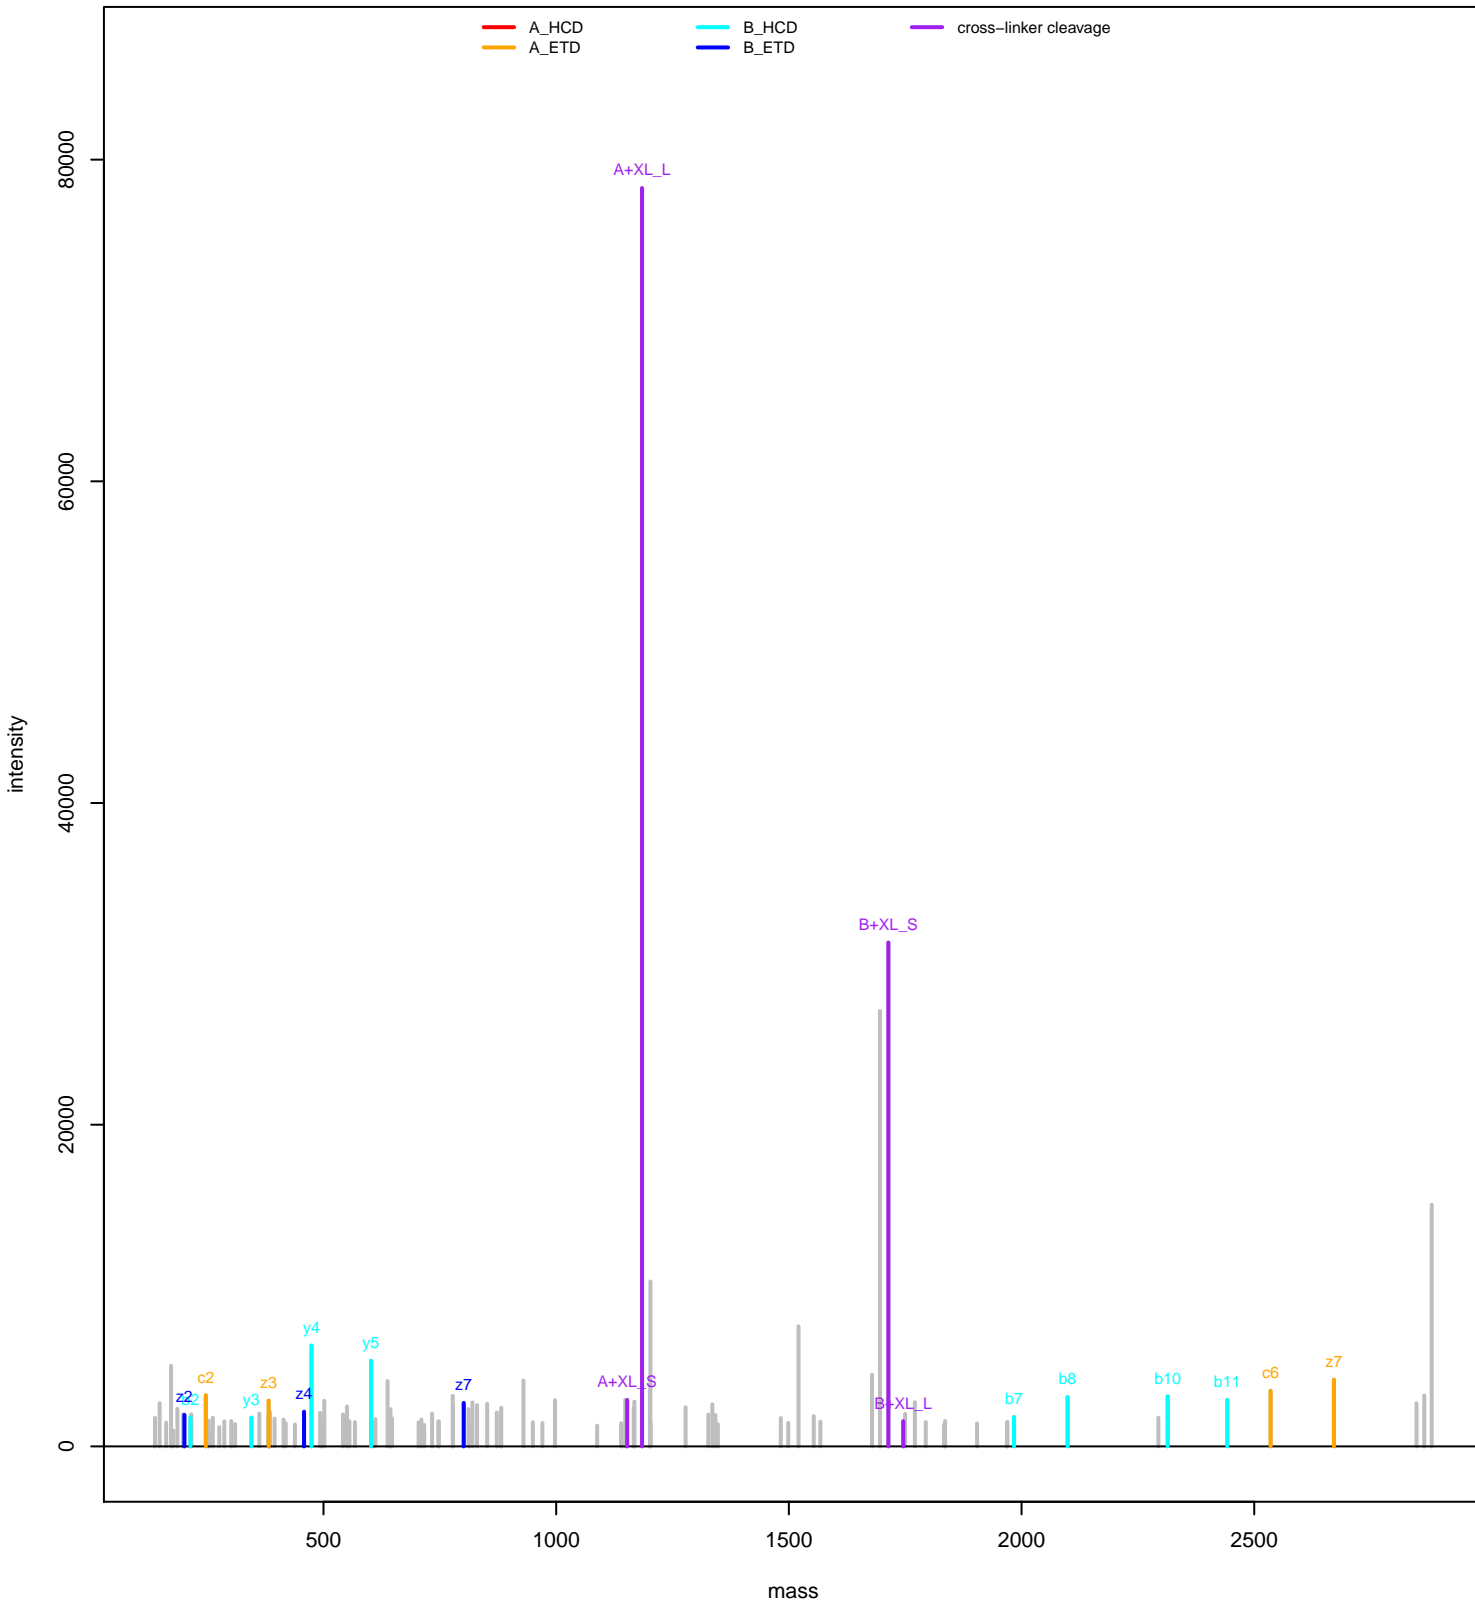

TEDAKRHDK+XL\_S

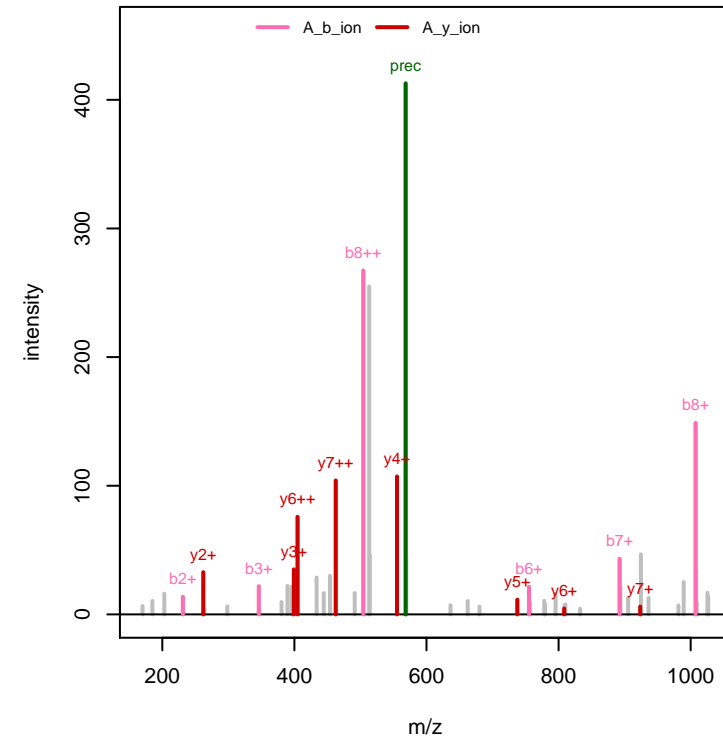

TEDAKRHDK+XL\_L

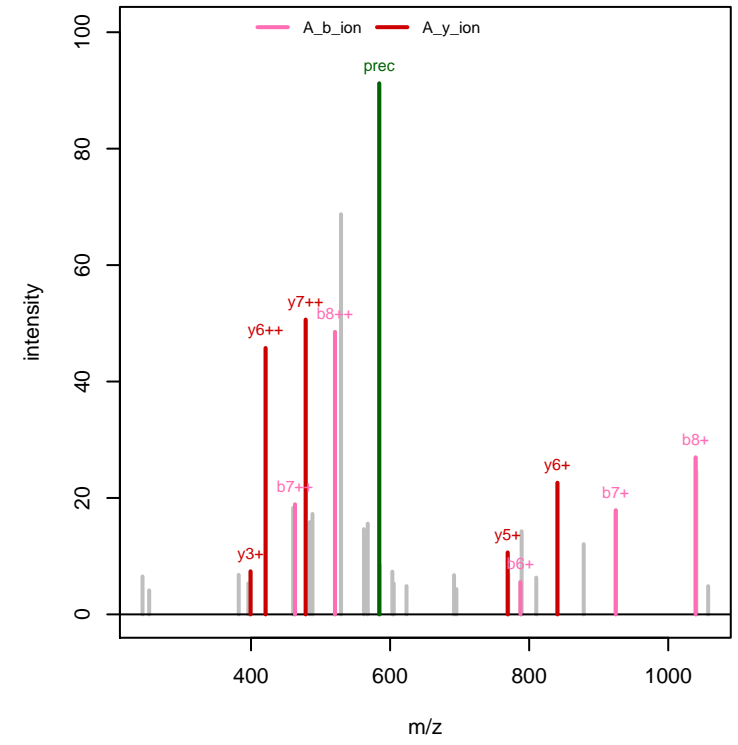

TIADKQADTNQEQAQK+XL\_S

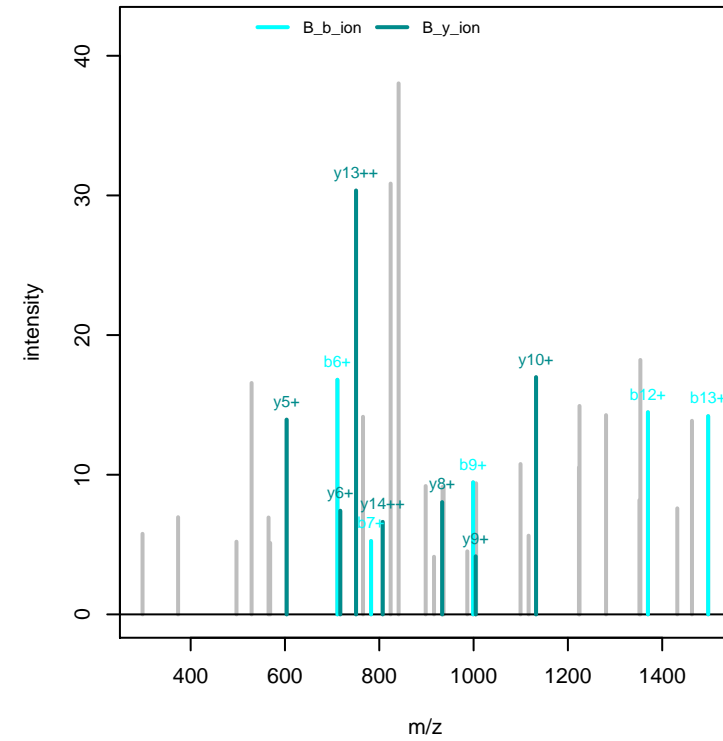

TIADKQADTNQEQAQK+XL\_L

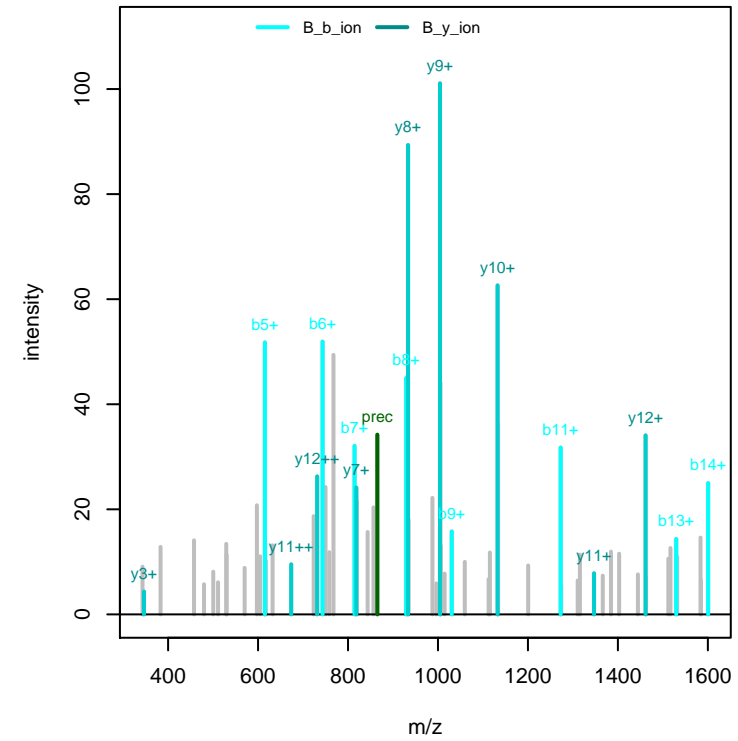



AADSAKK  
ADAKPEADAKAADSAKK

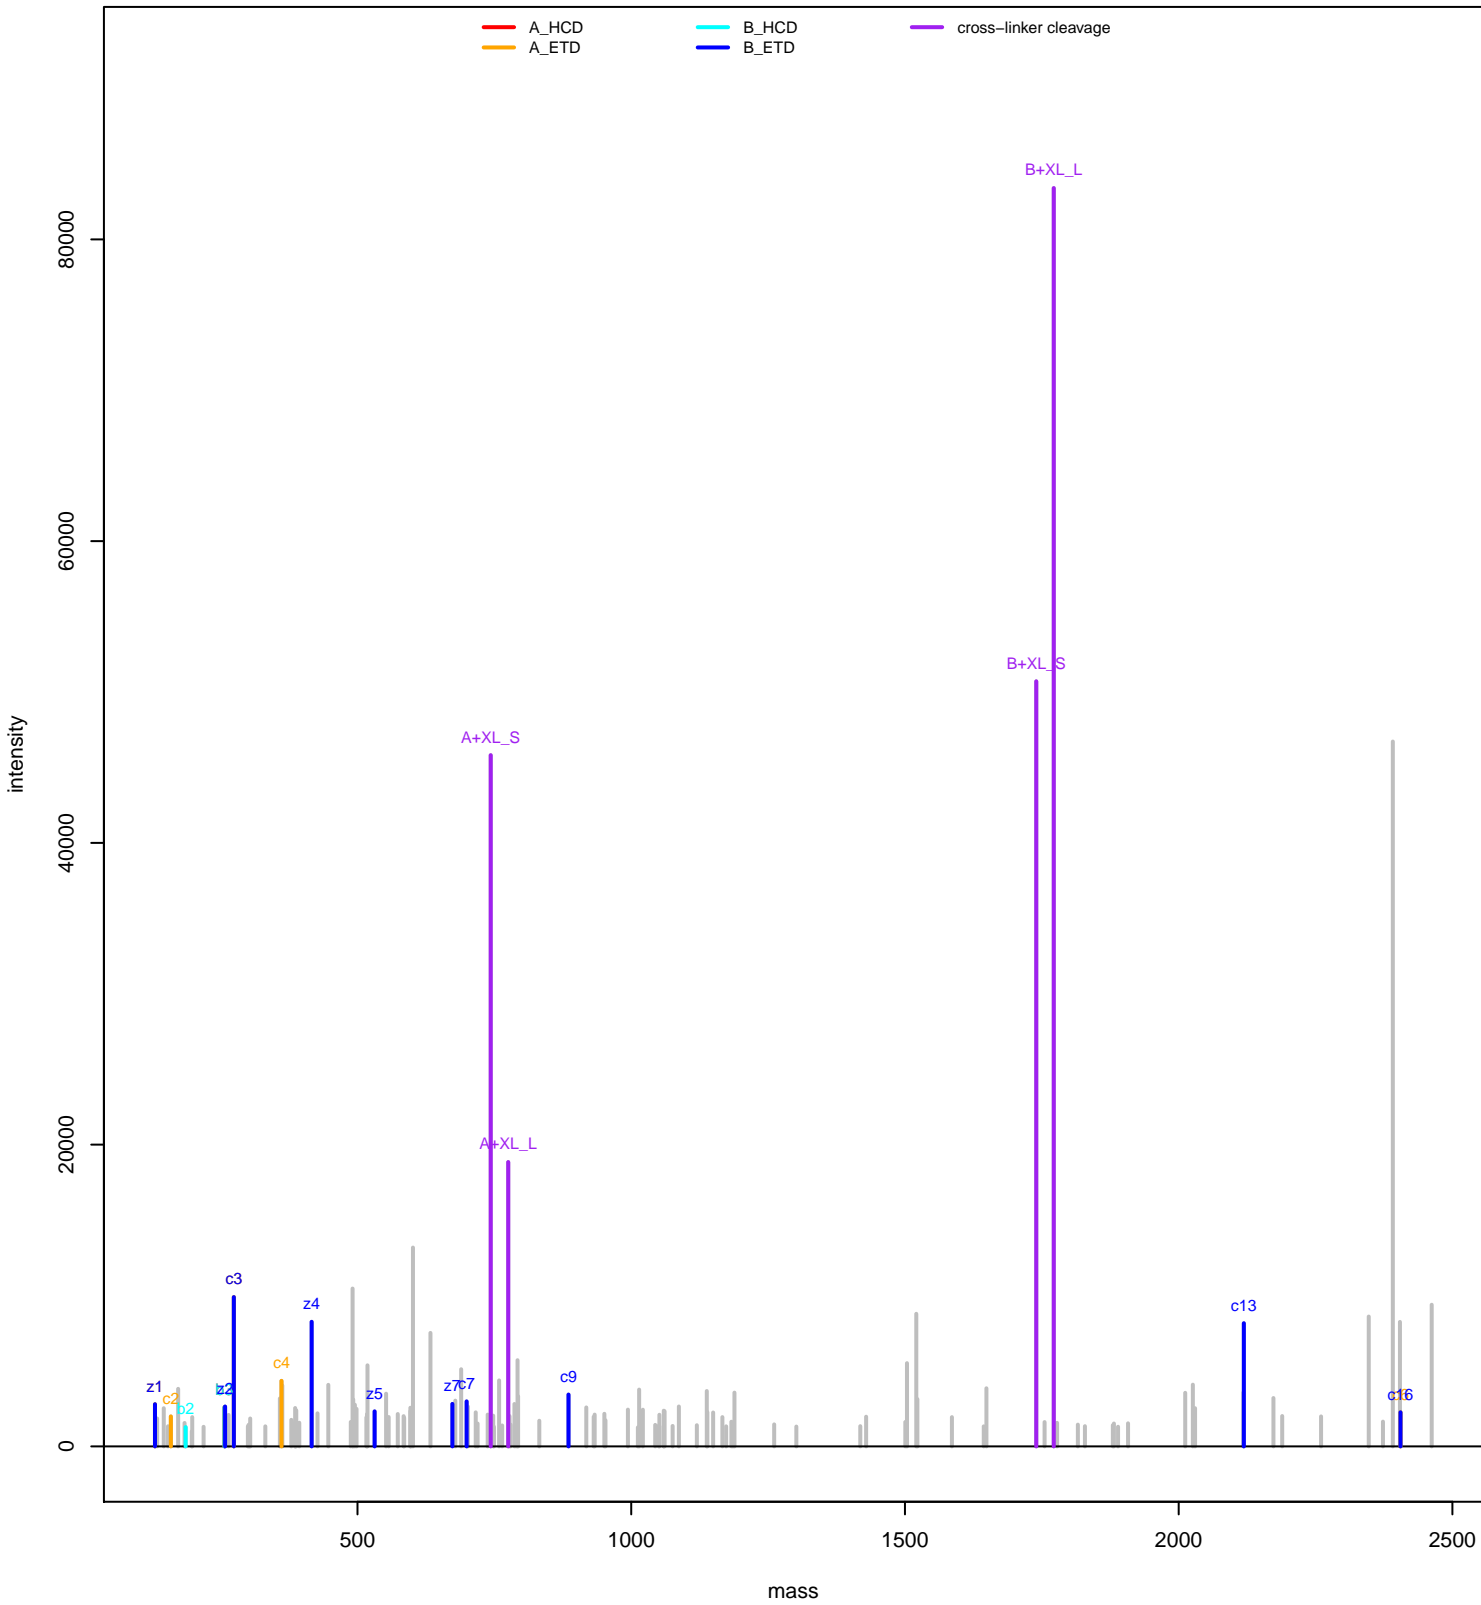

AADSAKK+XL\_S

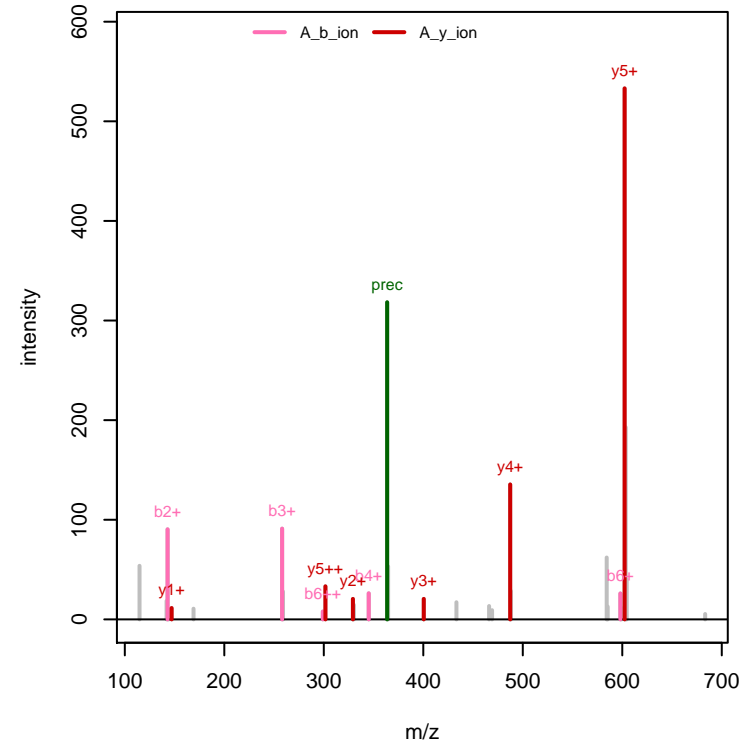

AADSAKK+XL\_L

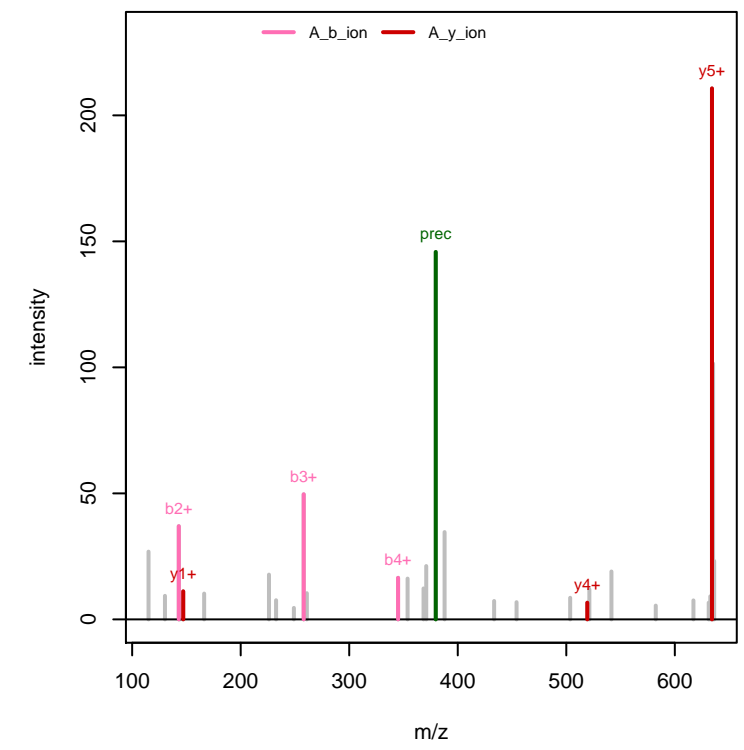

ADAKPEADAKAADSAKK+XL\_S

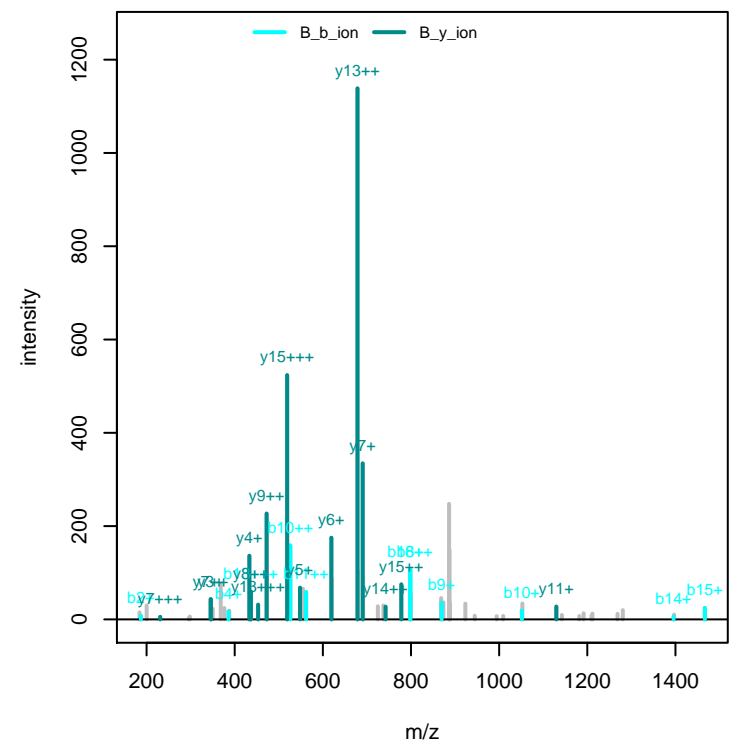

ADAKPEADAKAADSAKK+XL\_L

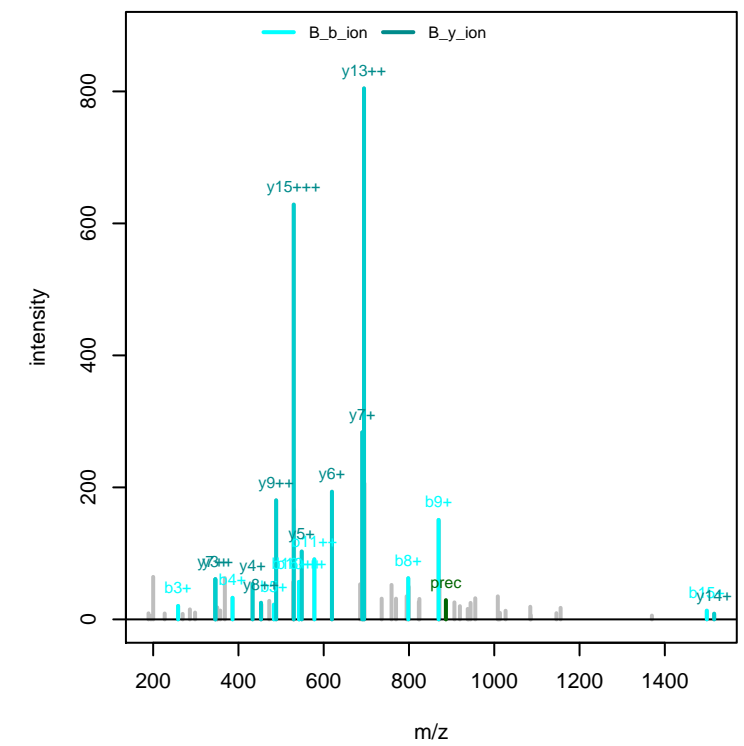

ALLKDK  
DANDKVK

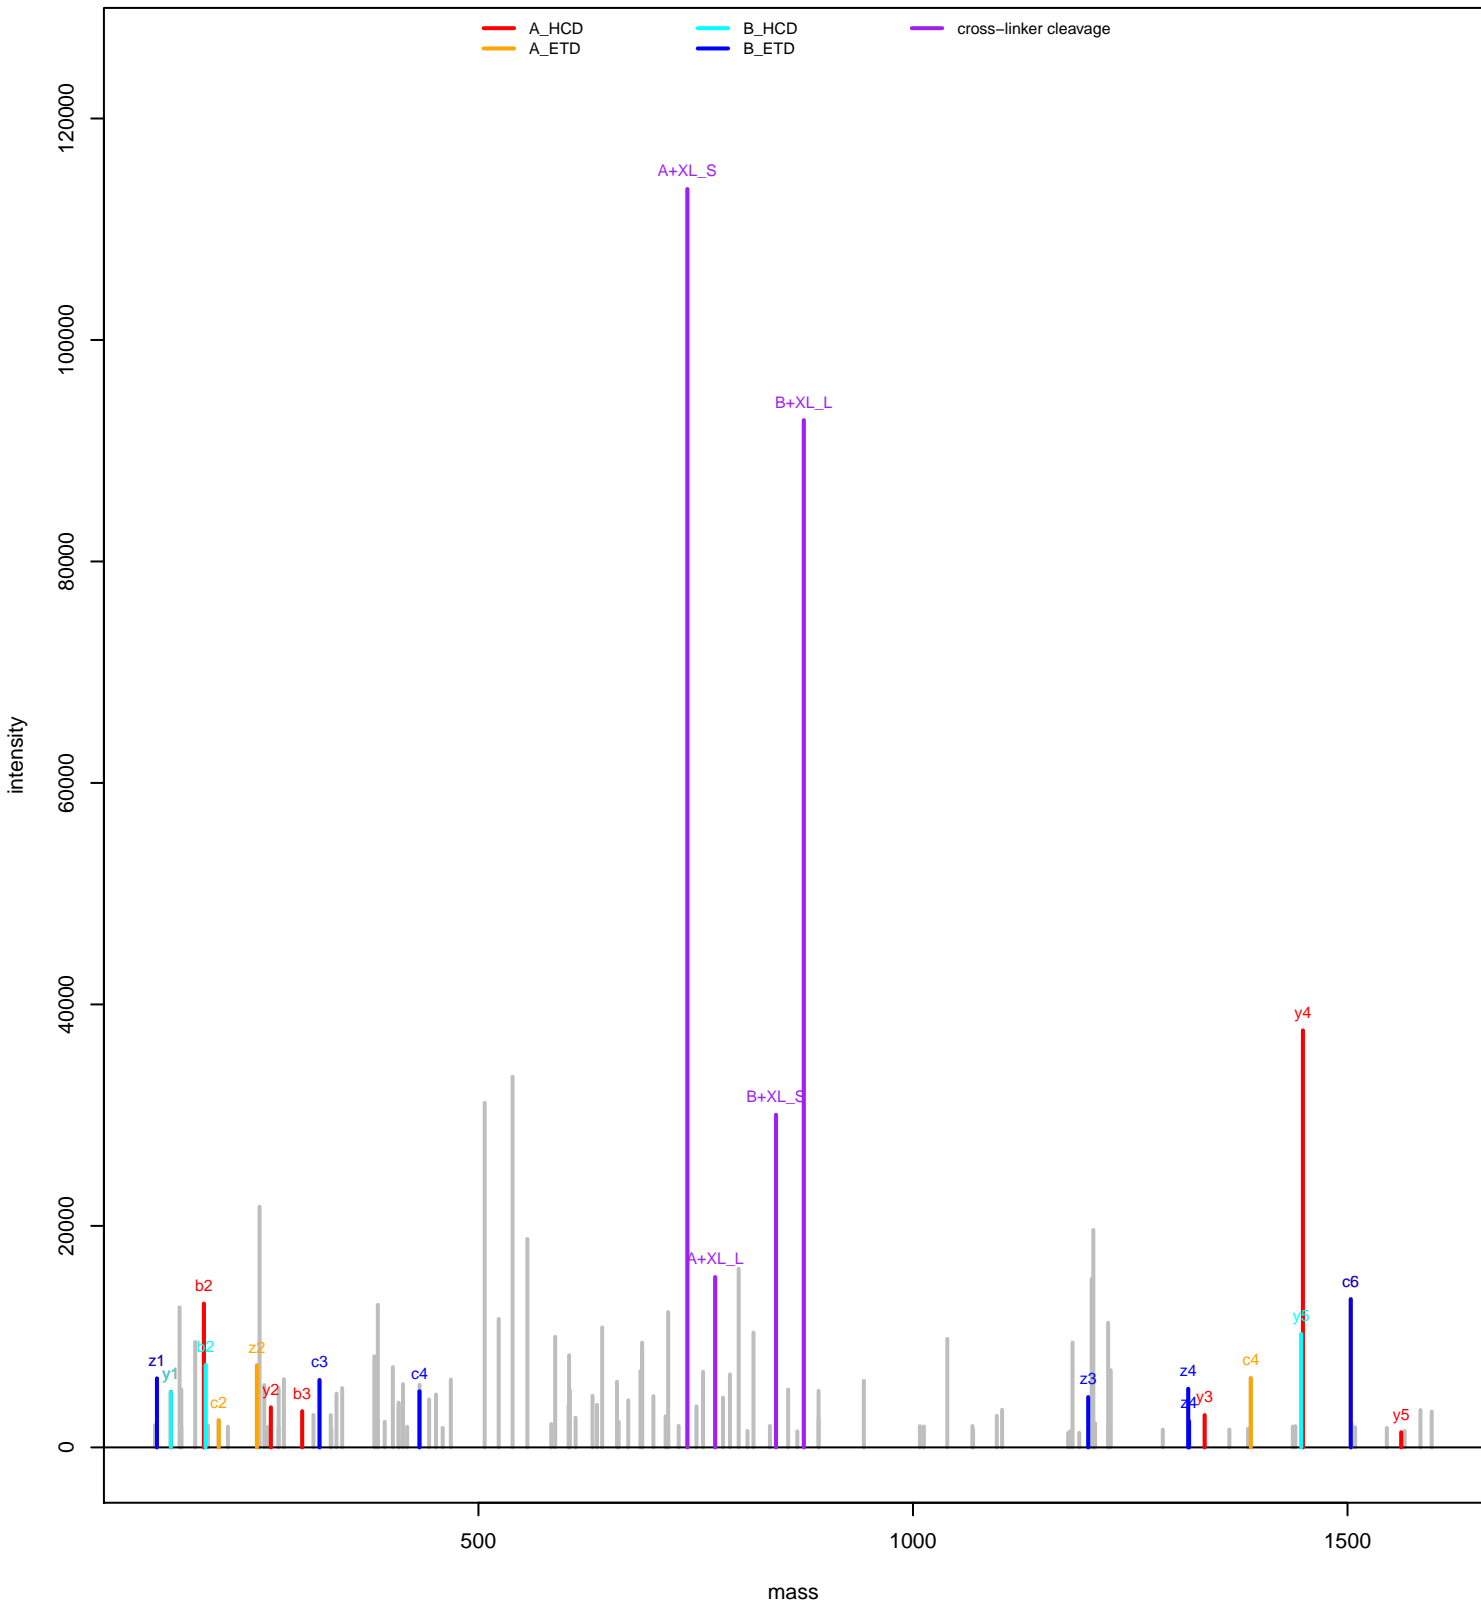

ALLKDK+XL\_S

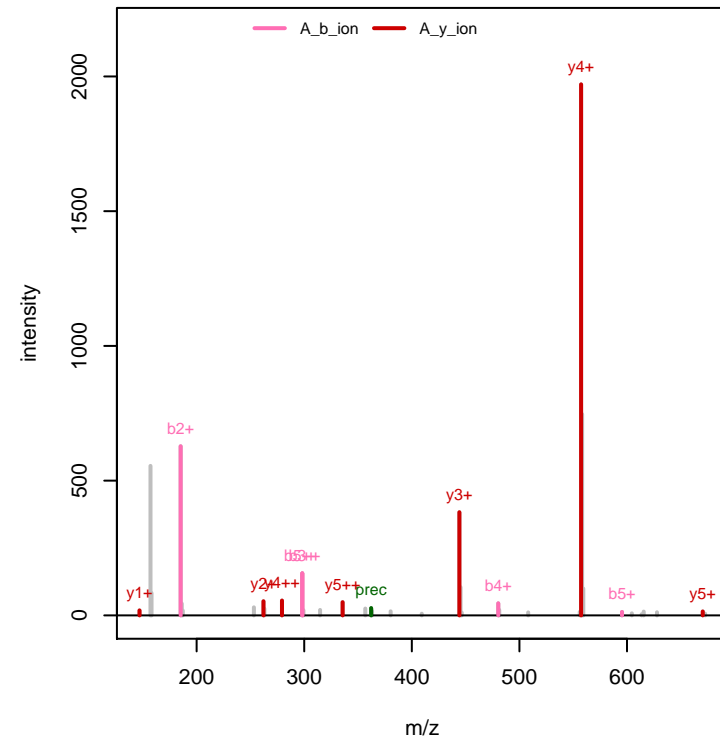

ALLKDK+XL\_L

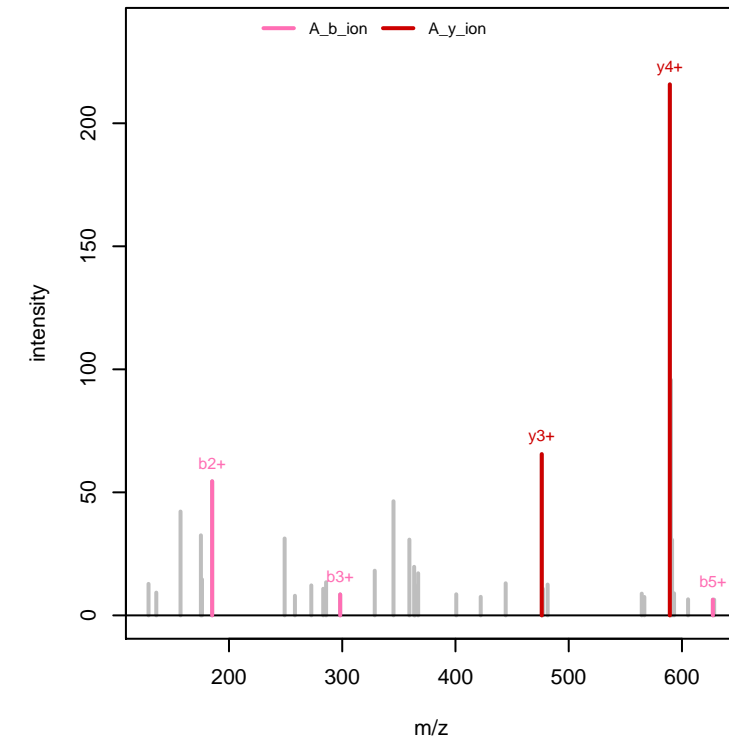

DANDKVK+XL\_S

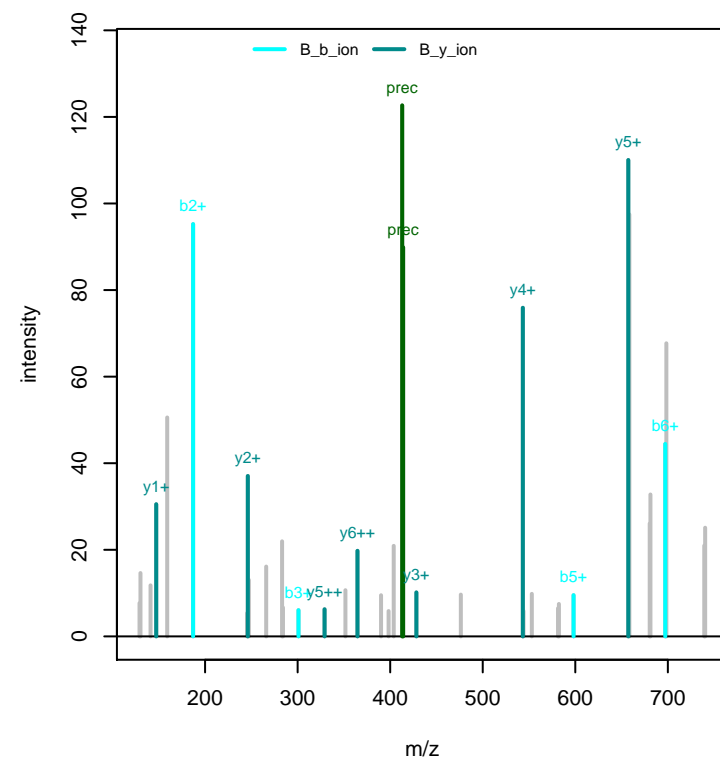

DANDKVK+XL\_L

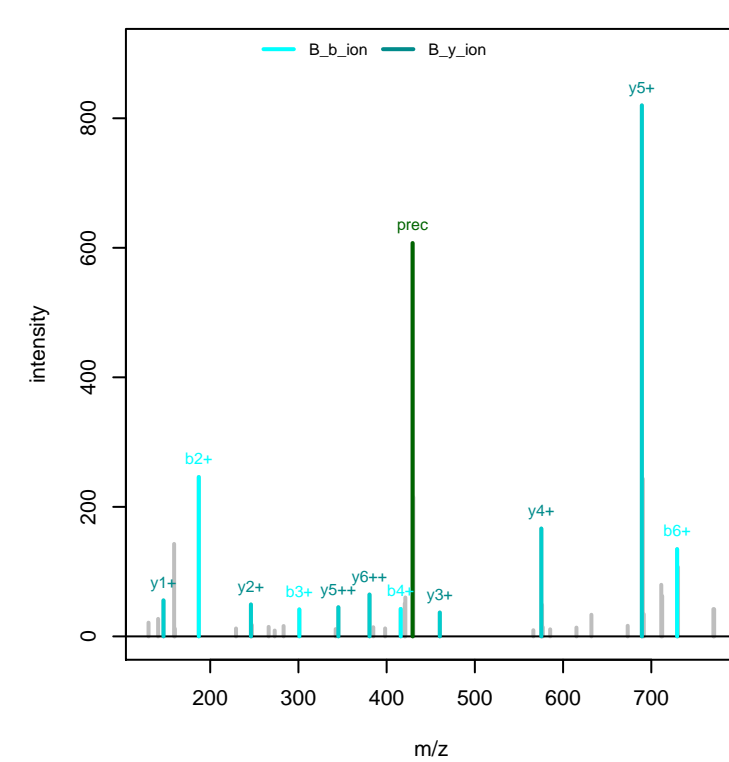

**SGTKAK  
KLQQYR**

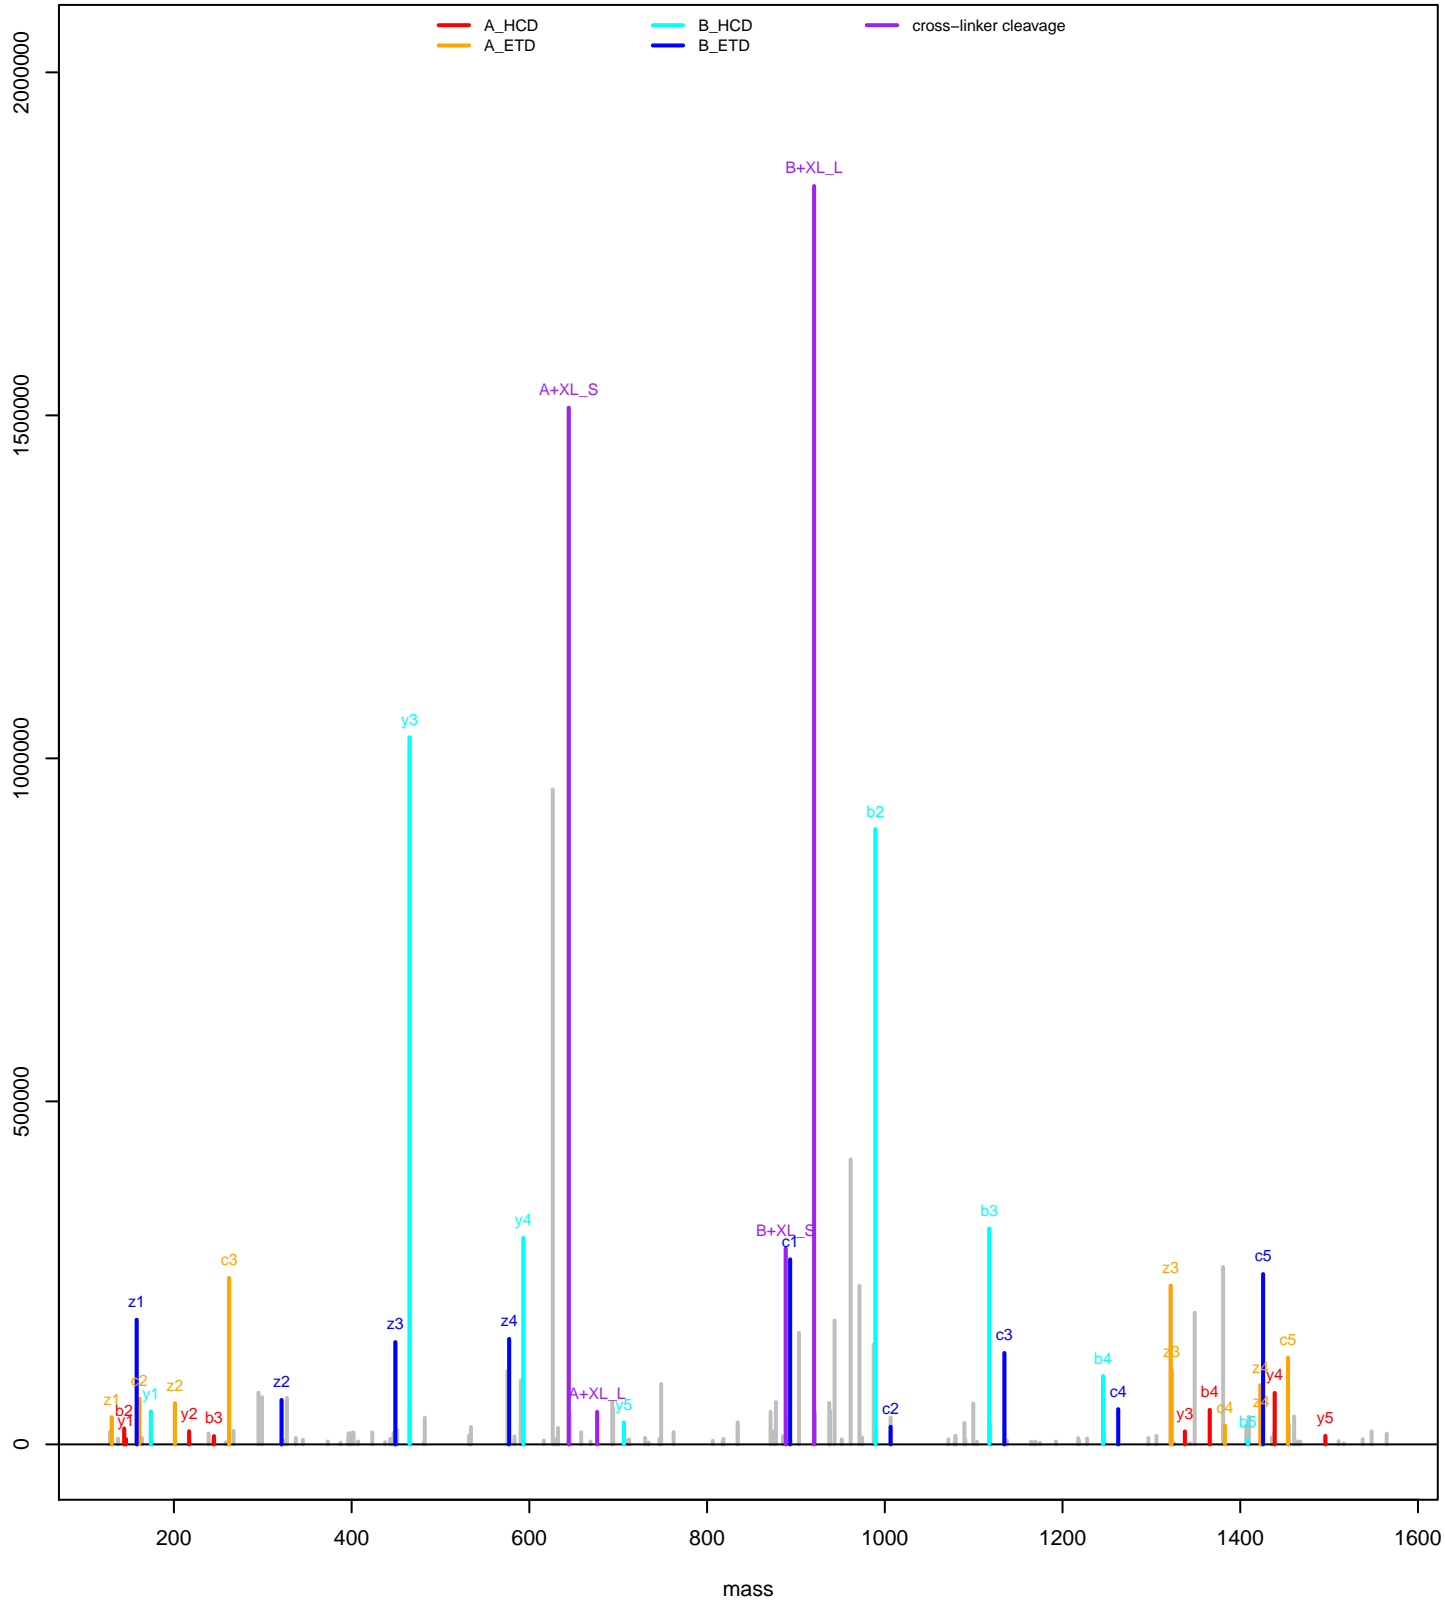

**SGTKAK+XL\_S**

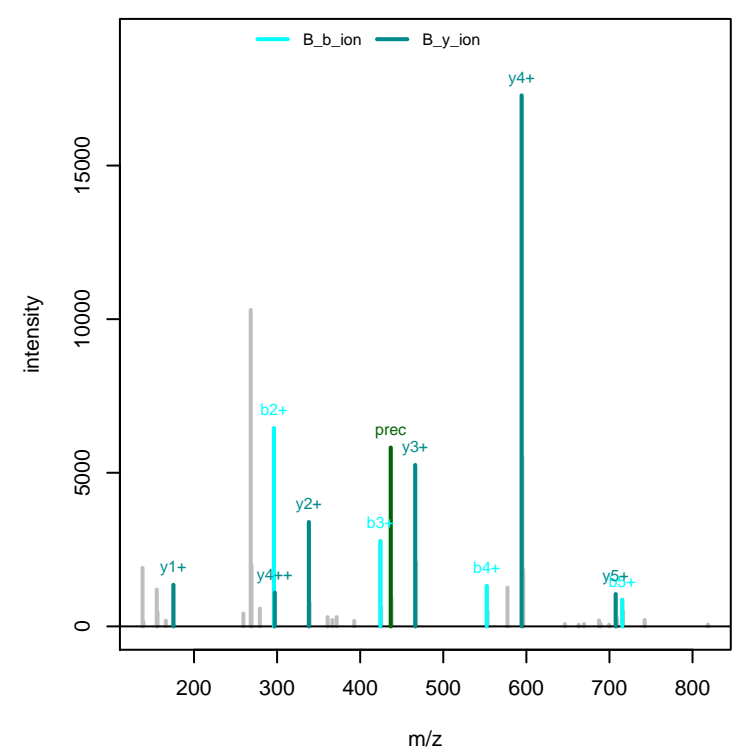

**SGTKAK+XL\_L**

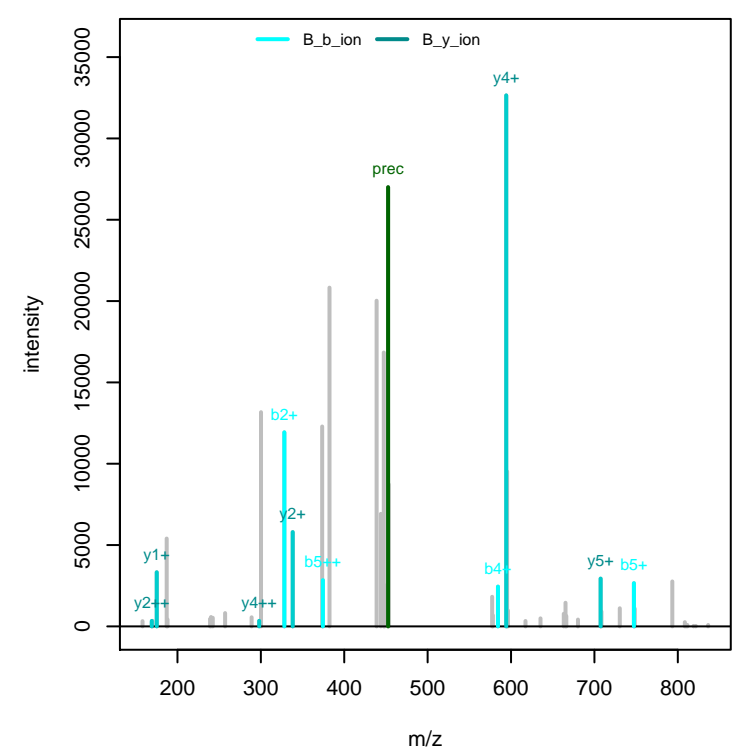

**KLQQYR+XL\_S**



**KLQQYR+XL\_L**





TVKAPR  
AQKPVEK

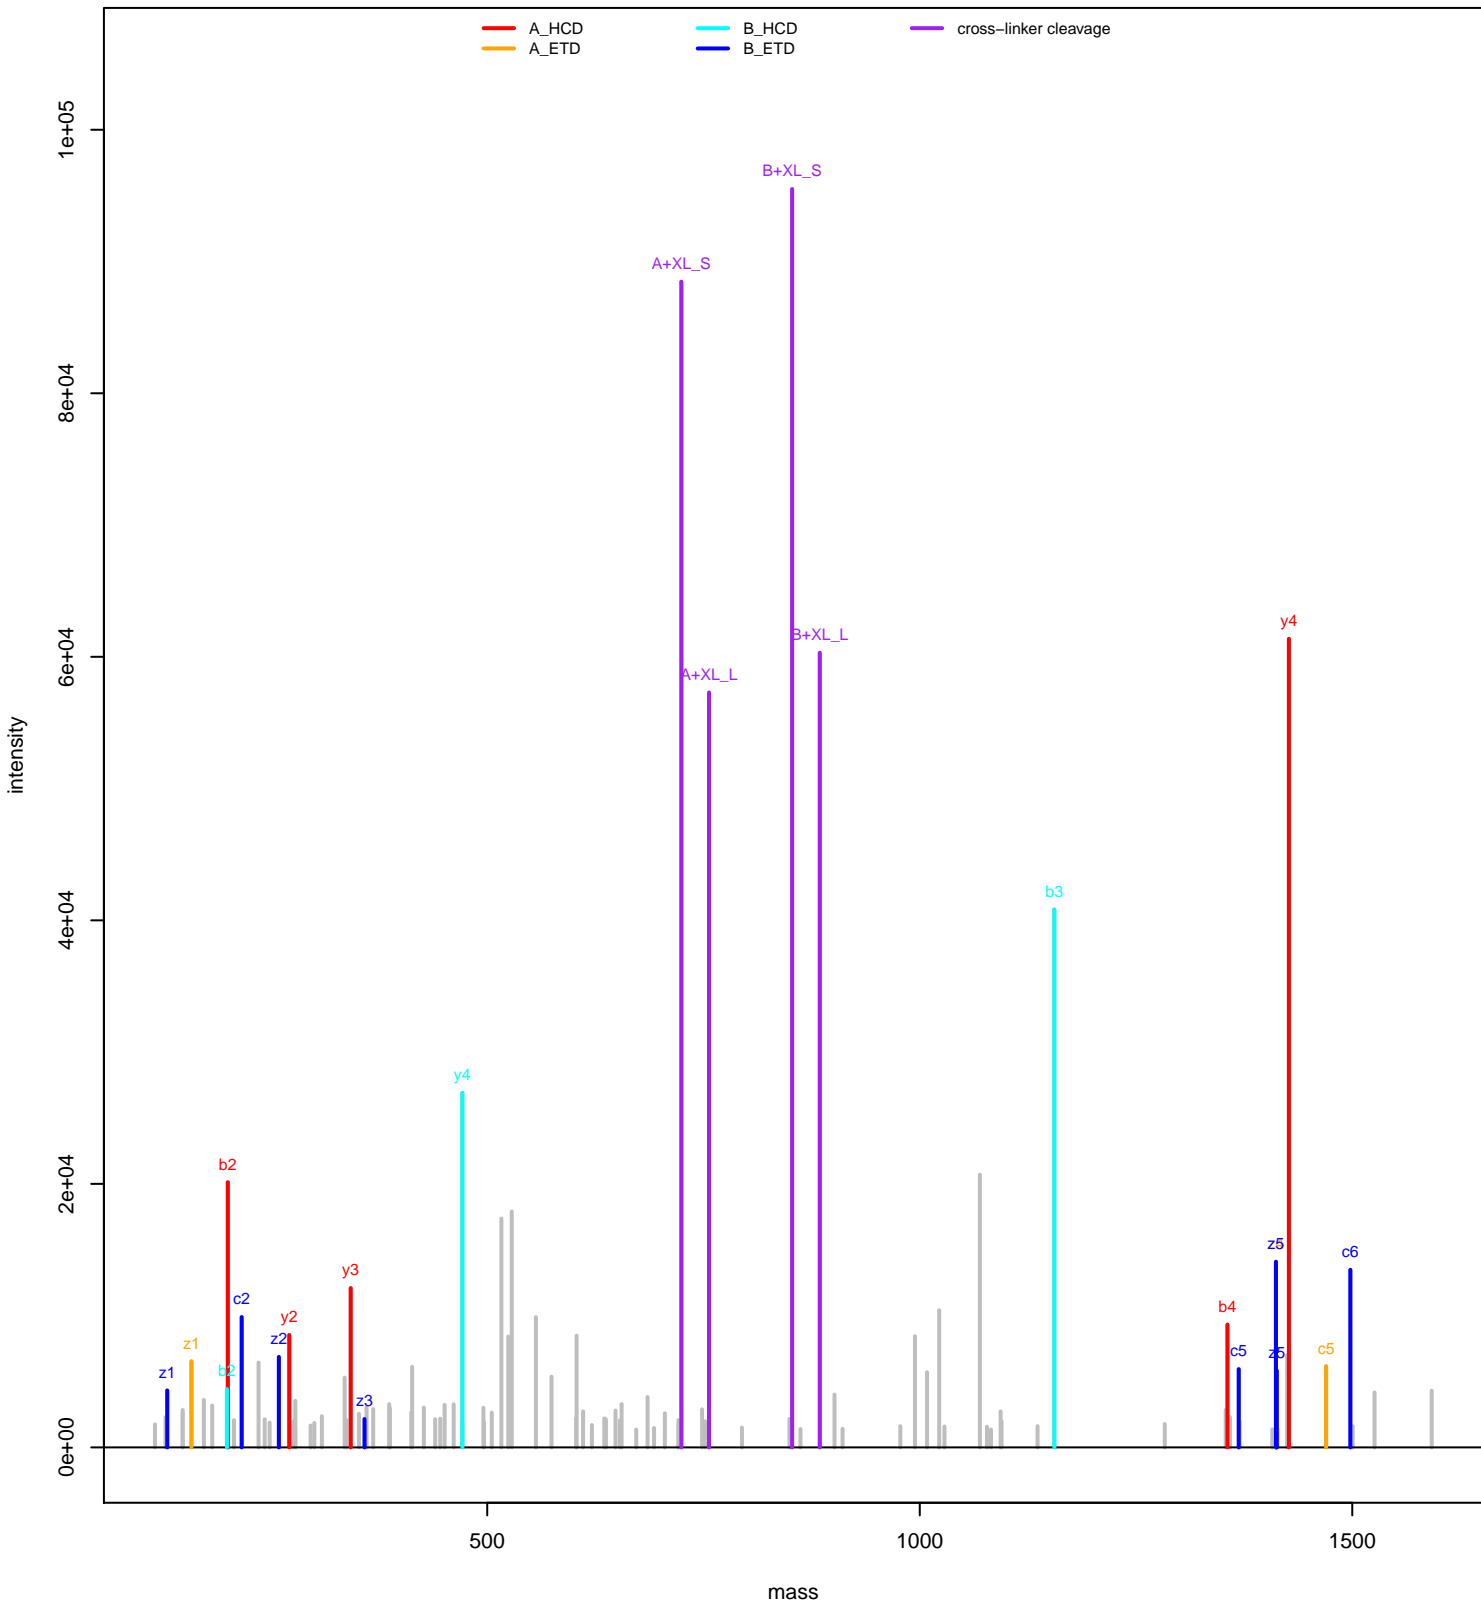

TVKAPR+XL\_S

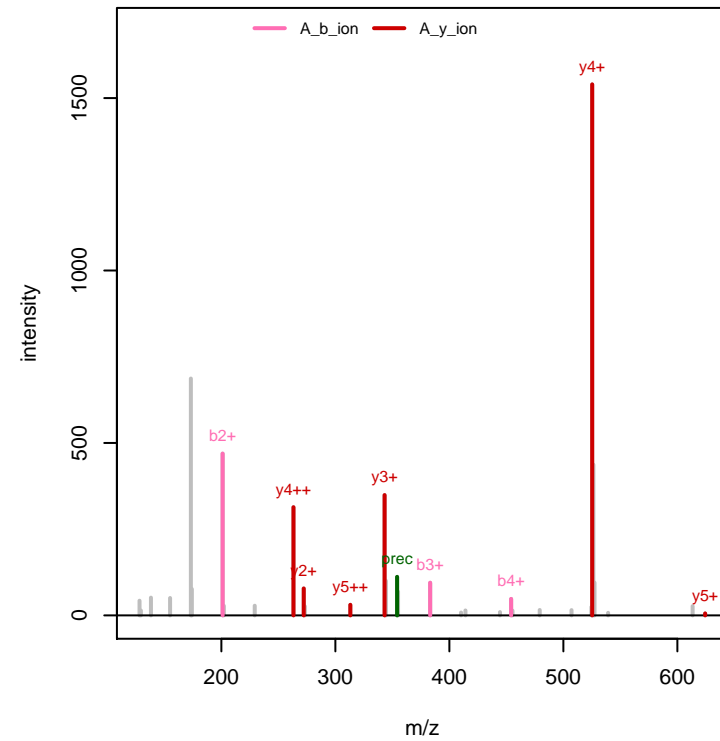

TVKAPR+XL\_L

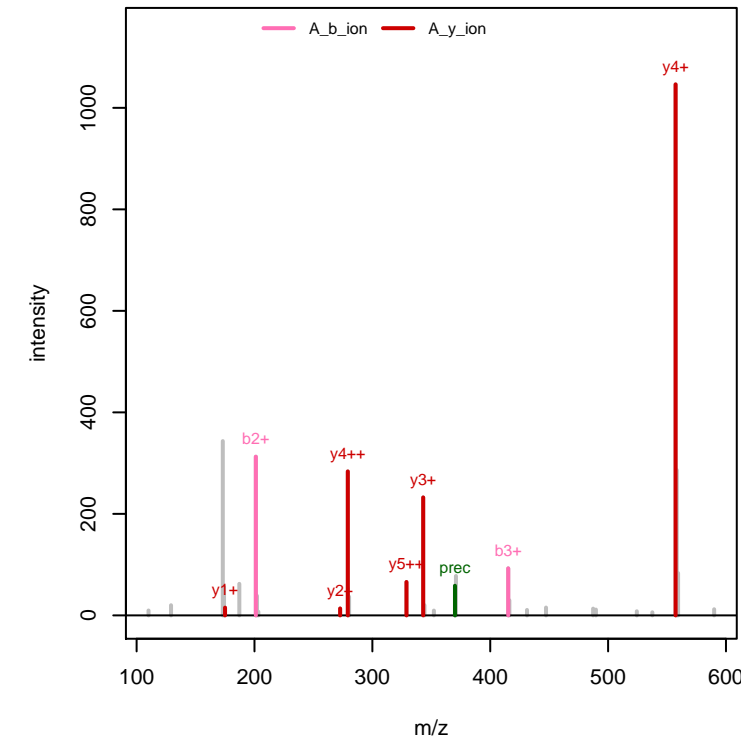

AQKPVEK+XL\_S

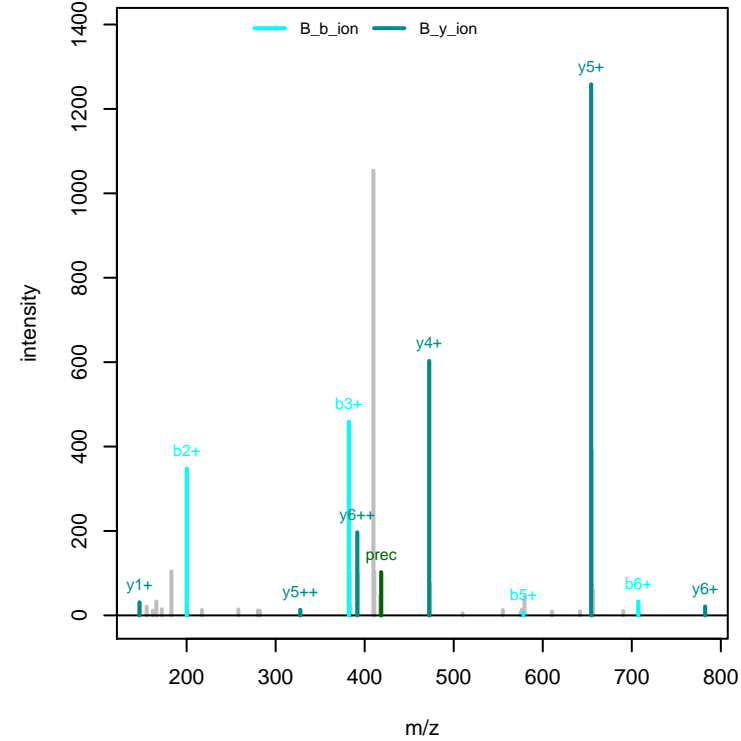

AQKPVEK+XL\_L

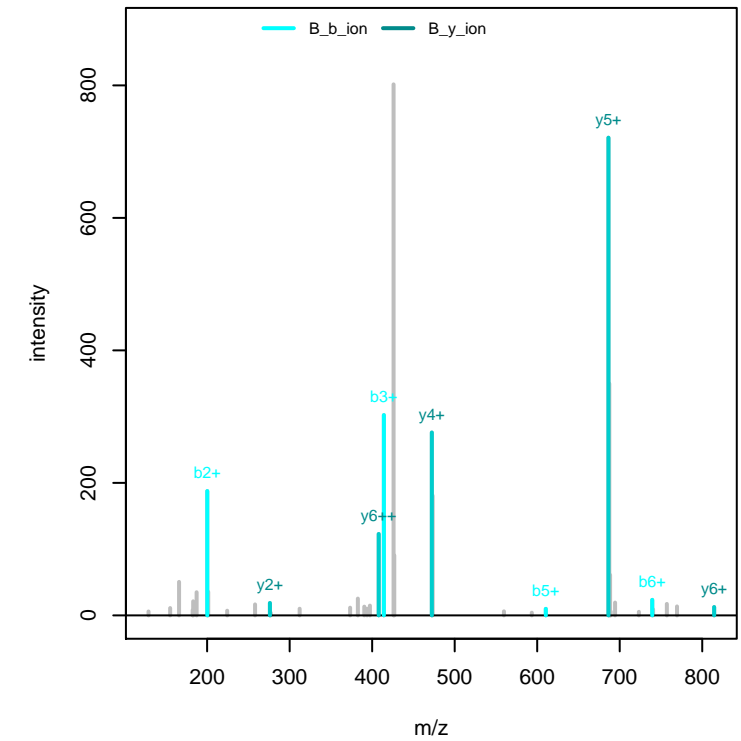

**AAGKLLK**  
**AAAVANQGKAK**

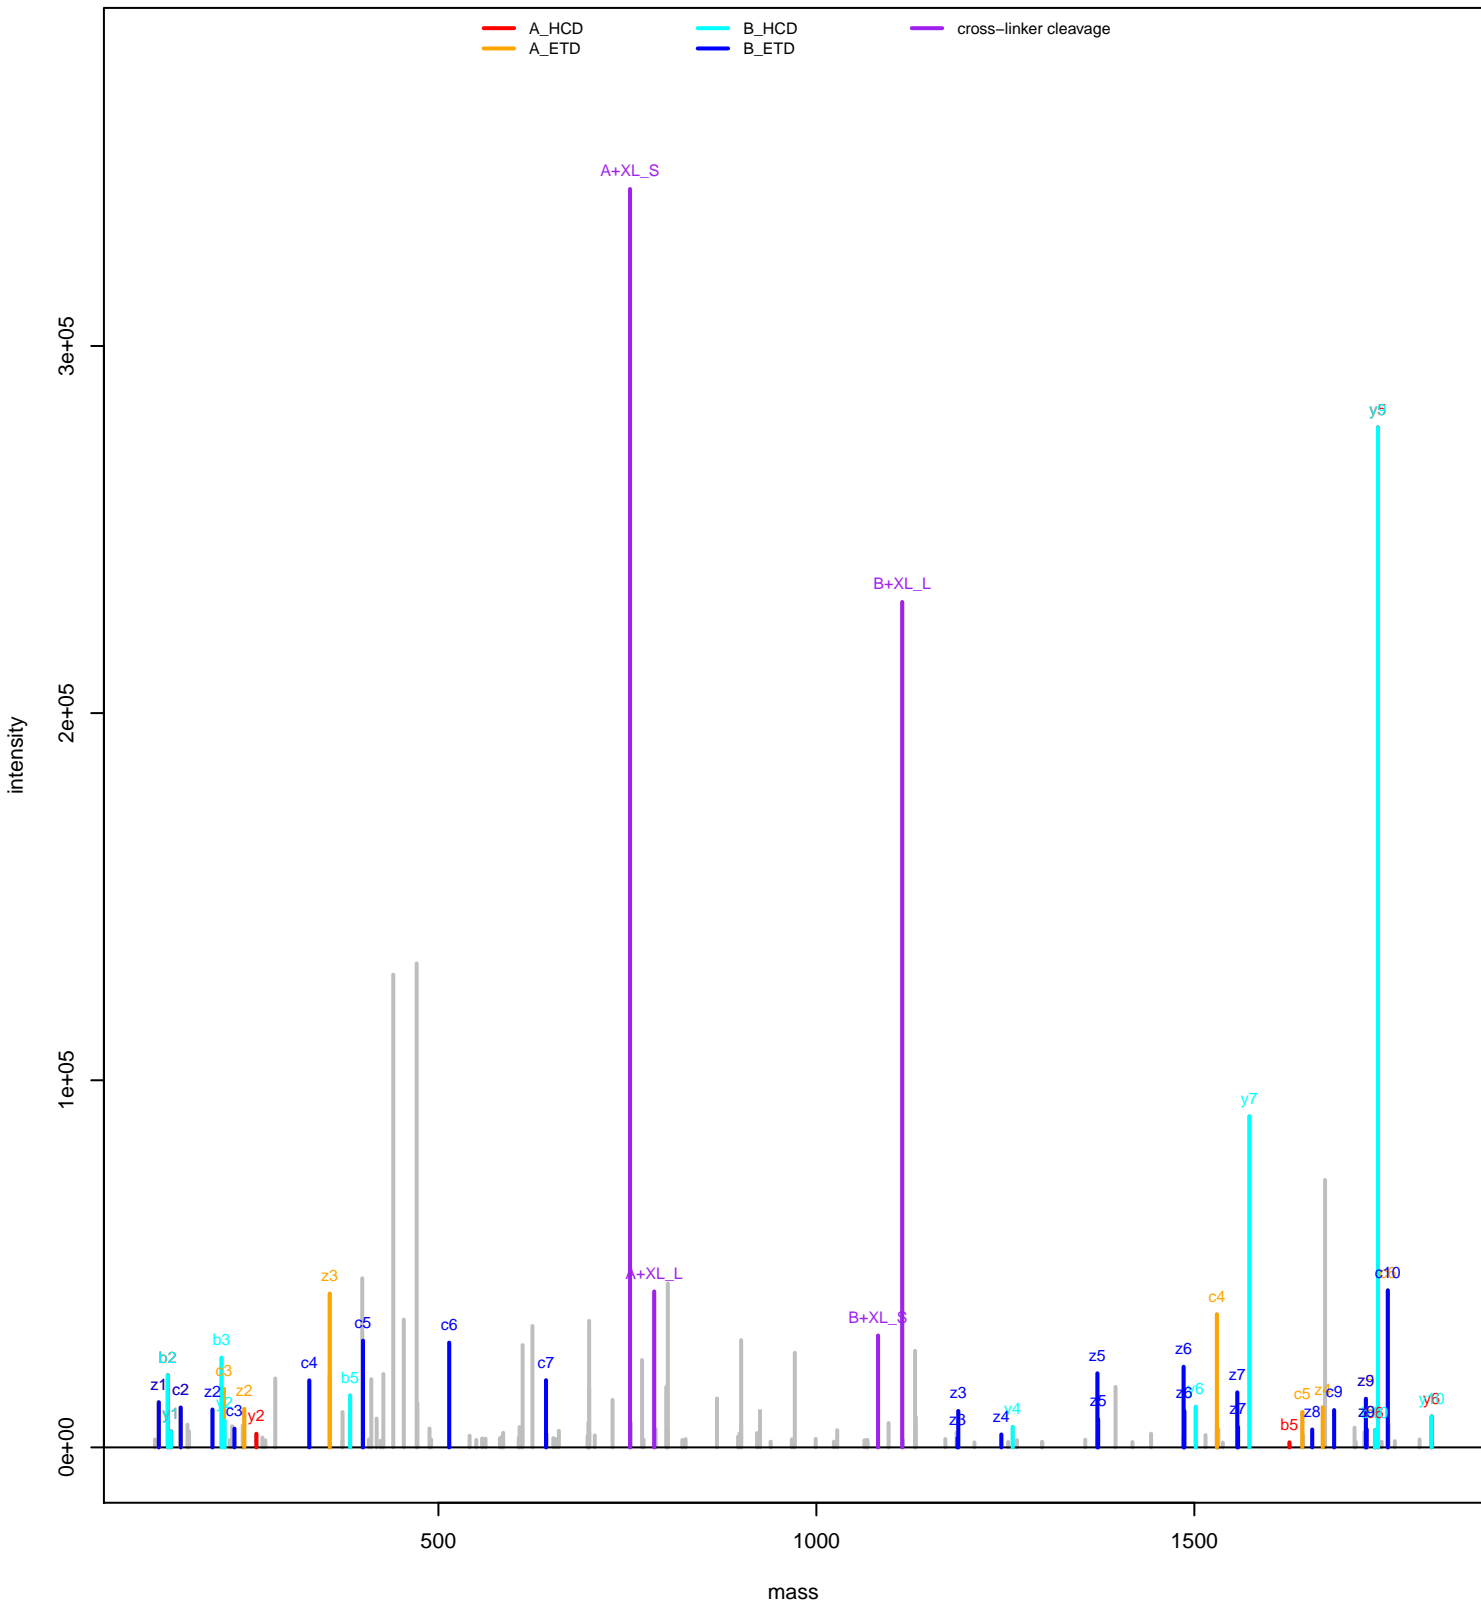

**AAGKLLK+XL\_S**

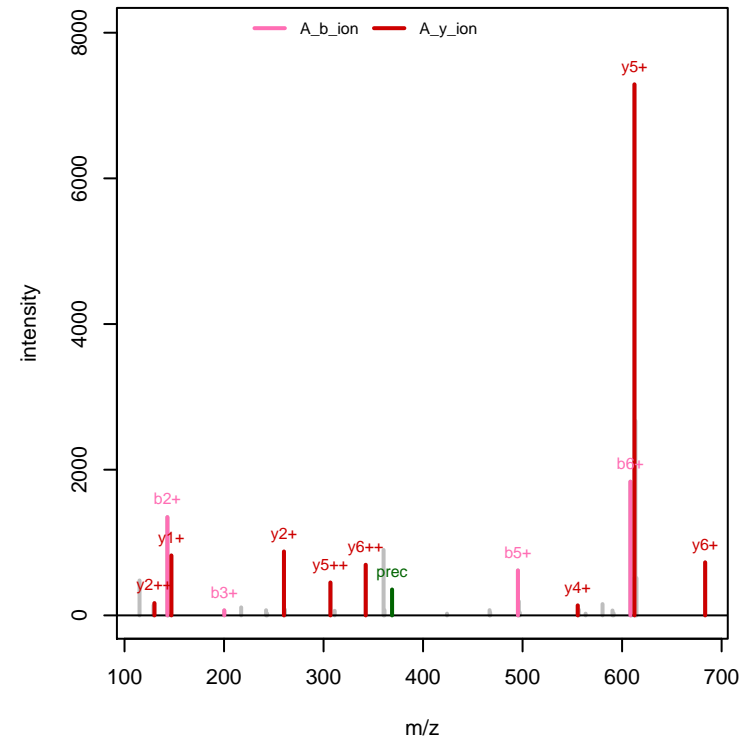

**AAGKLLK+XL\_L**

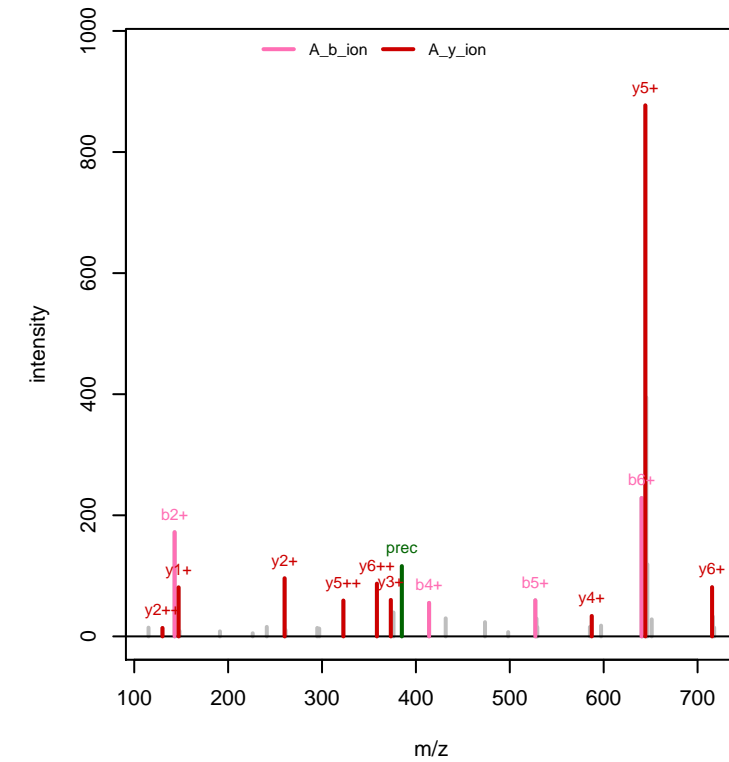

**AAAVANQGKAK+XL\_S**

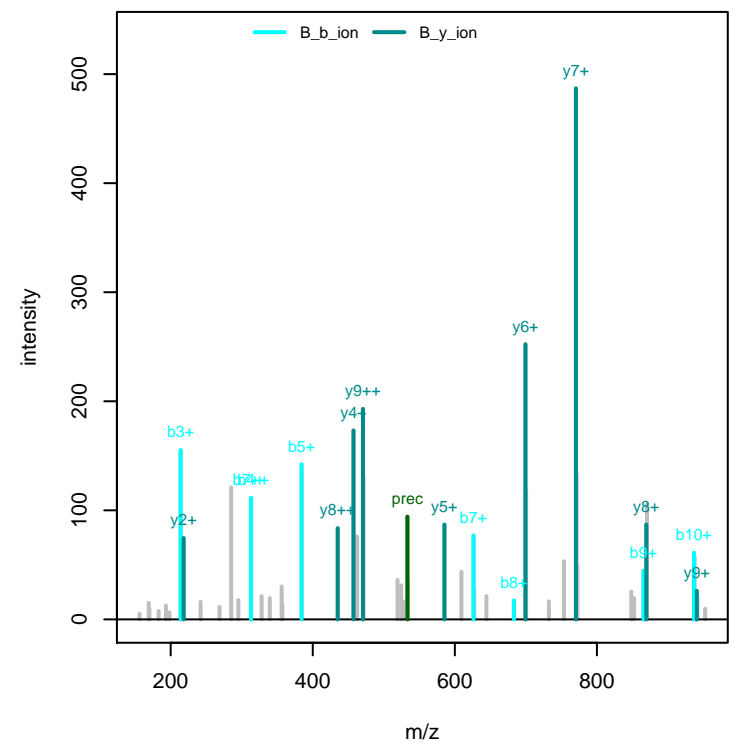

**AAHAVANQGKAK+XL\_L**

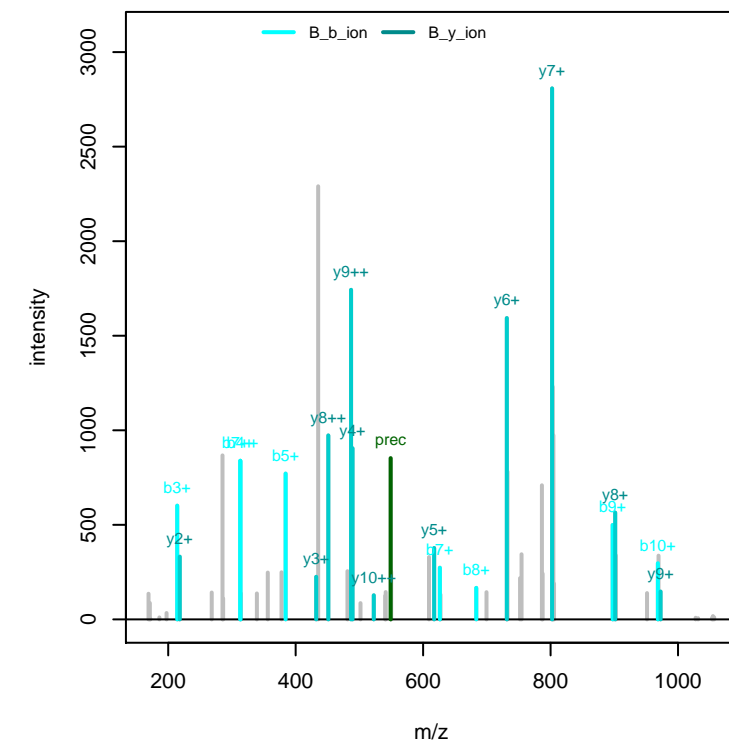

AVDGVKSVK  
STDISVKTDQK

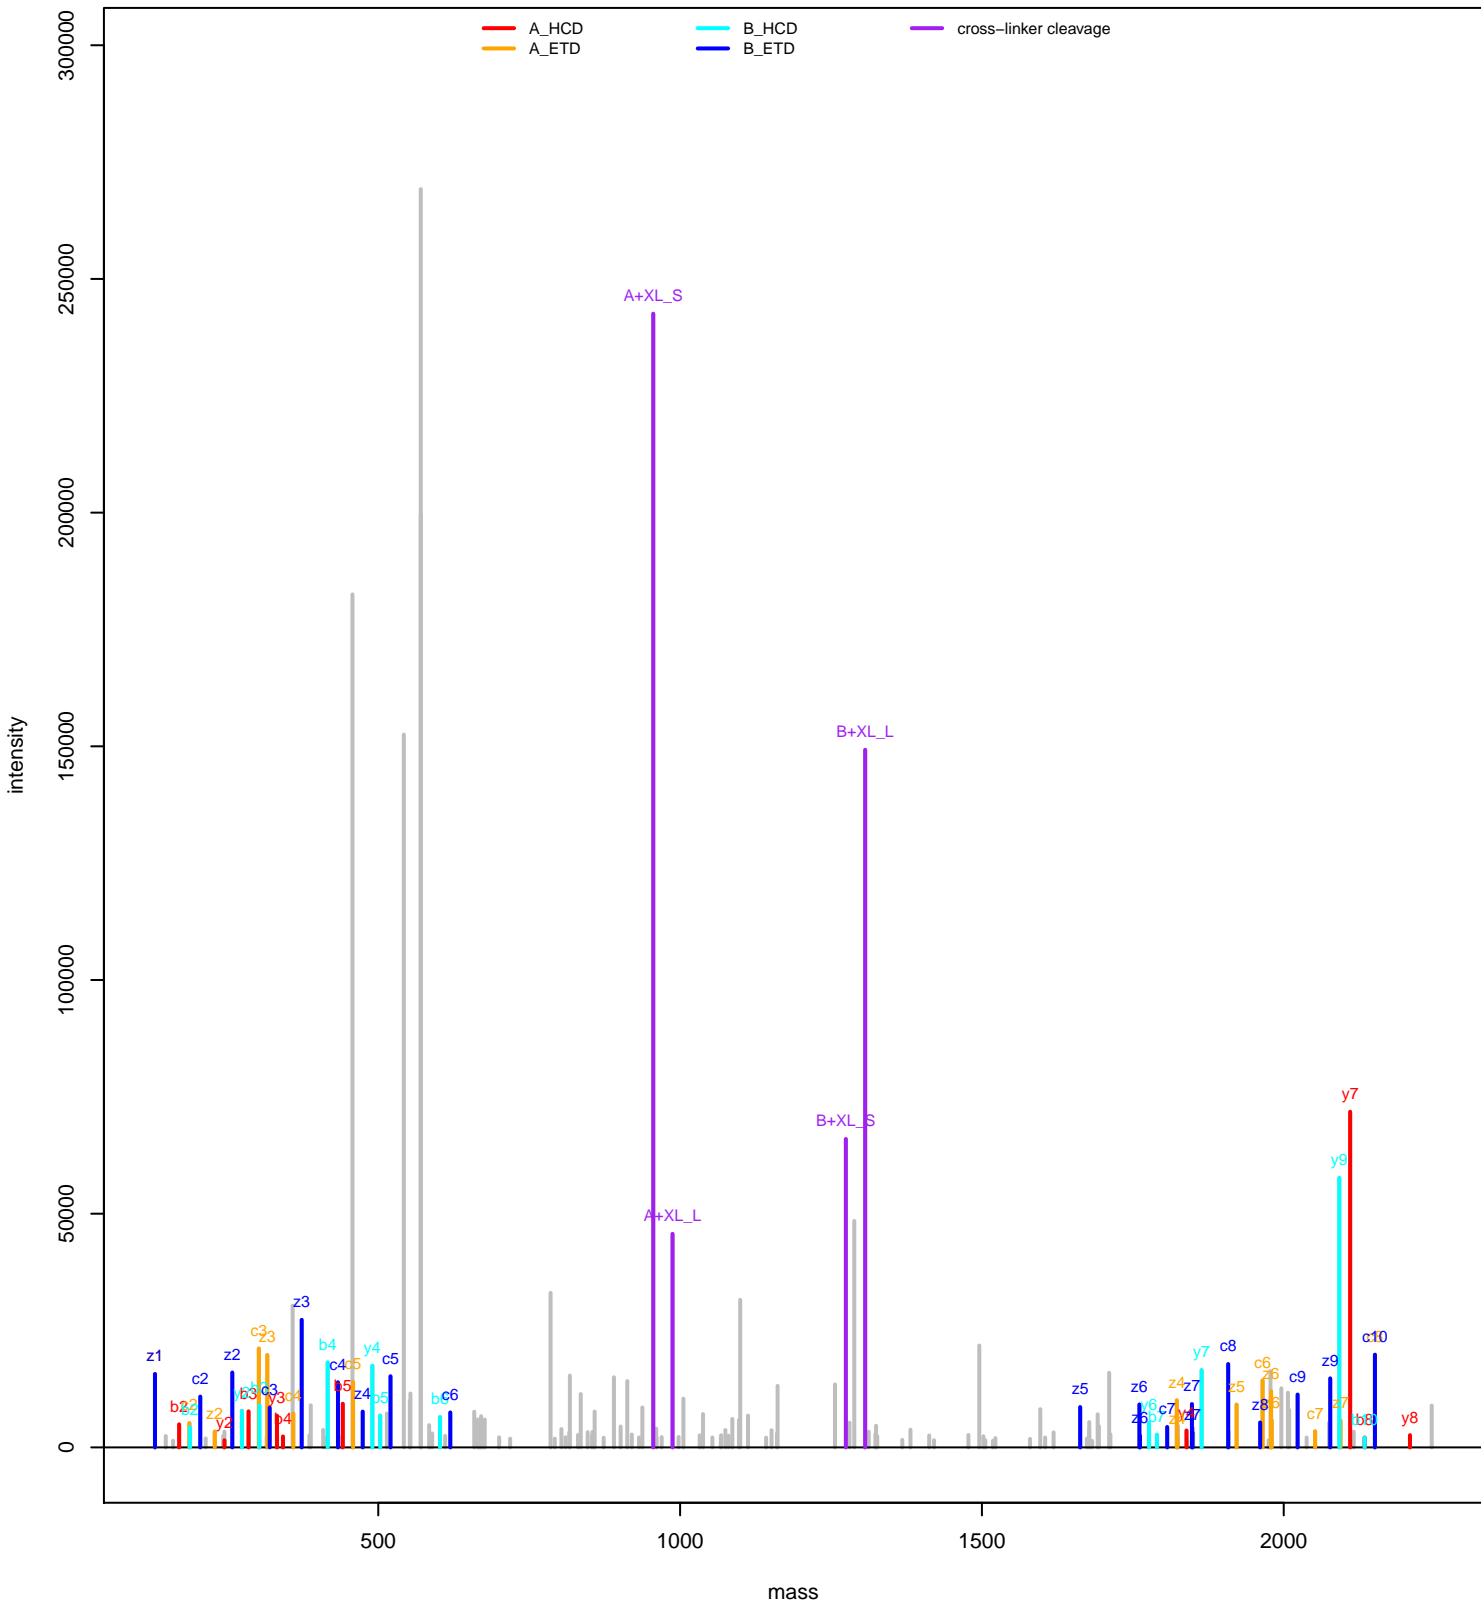

AVDGVKSVK+XL\_S

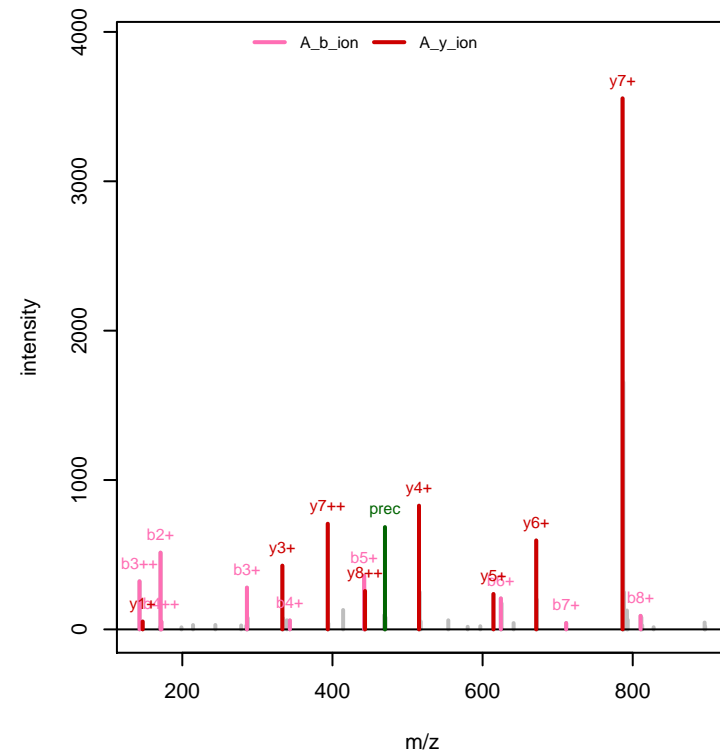

AVDGVKSVK+XL\_L

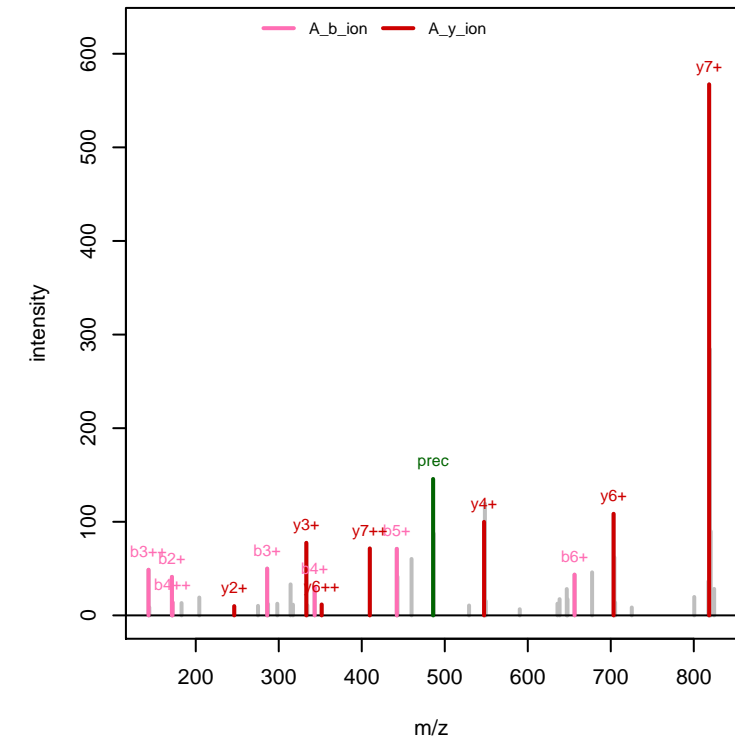

STDISVKTDQK+XL\_S

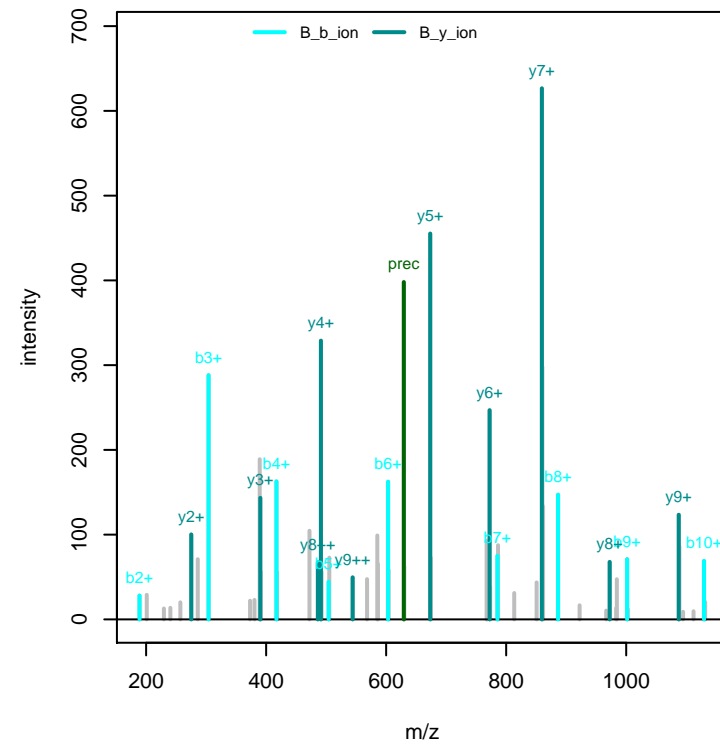

STDISVKTDQK+XL\_L

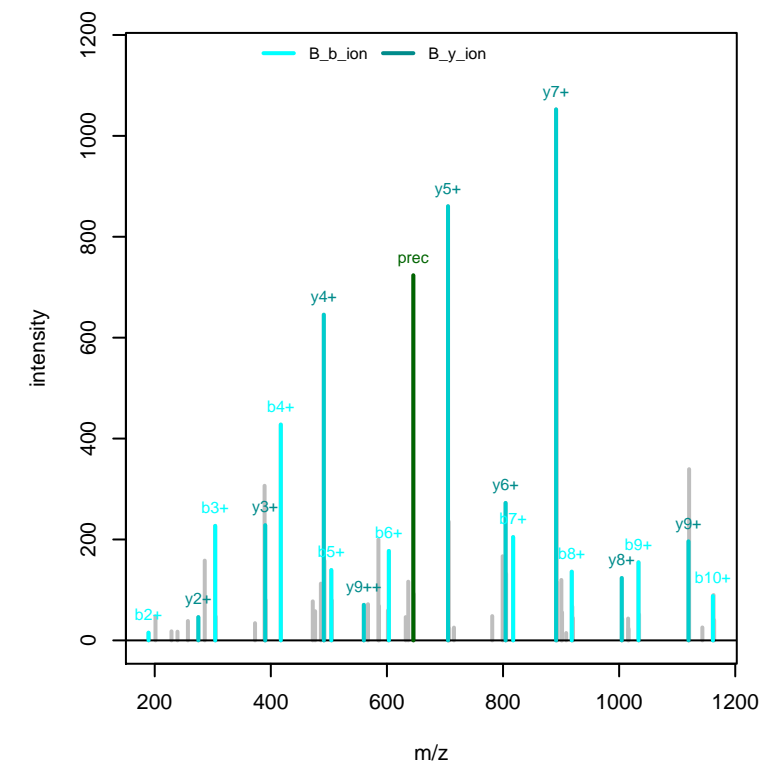

TKESYK  
AAAESSIQVKNK

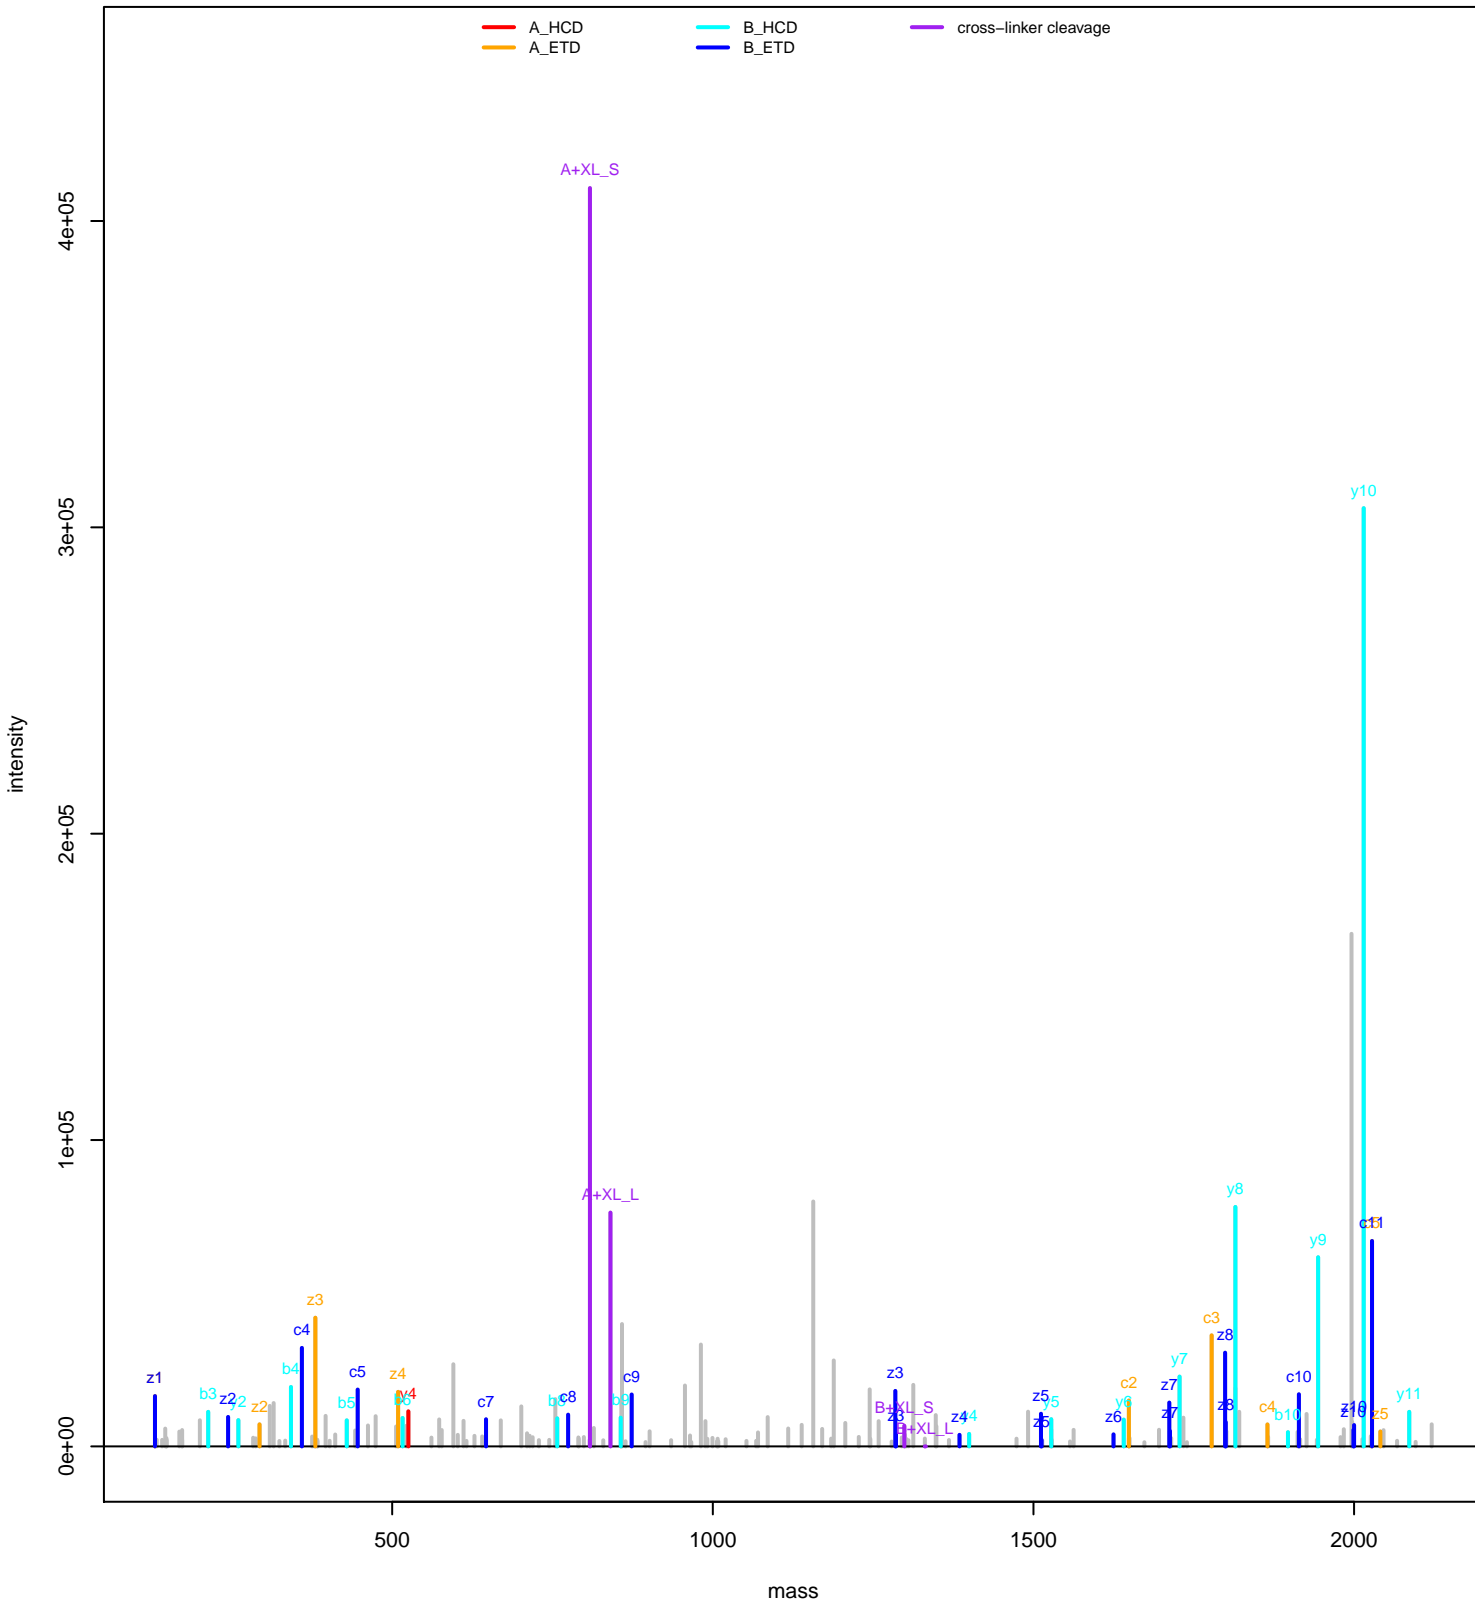

TKESYK+XL\_S

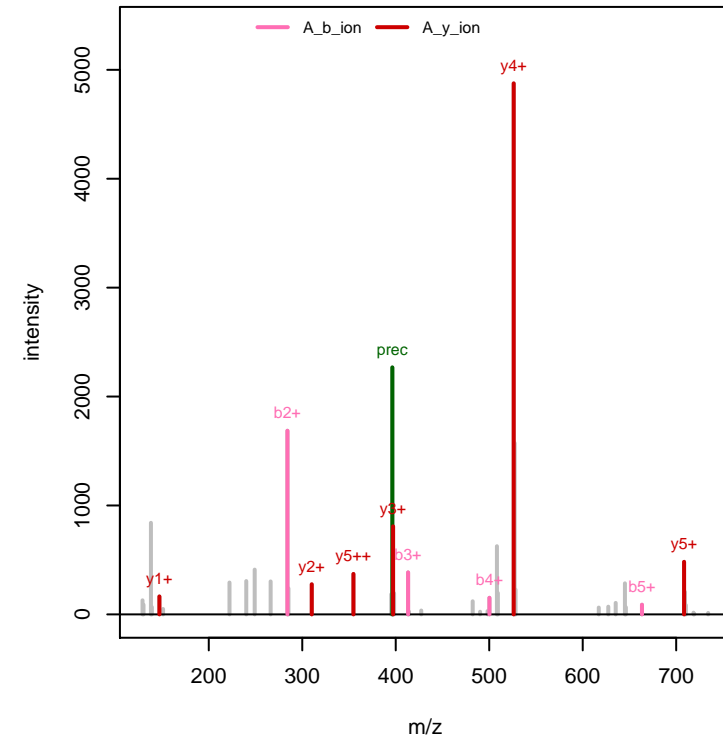

TKESYK+XL\_L

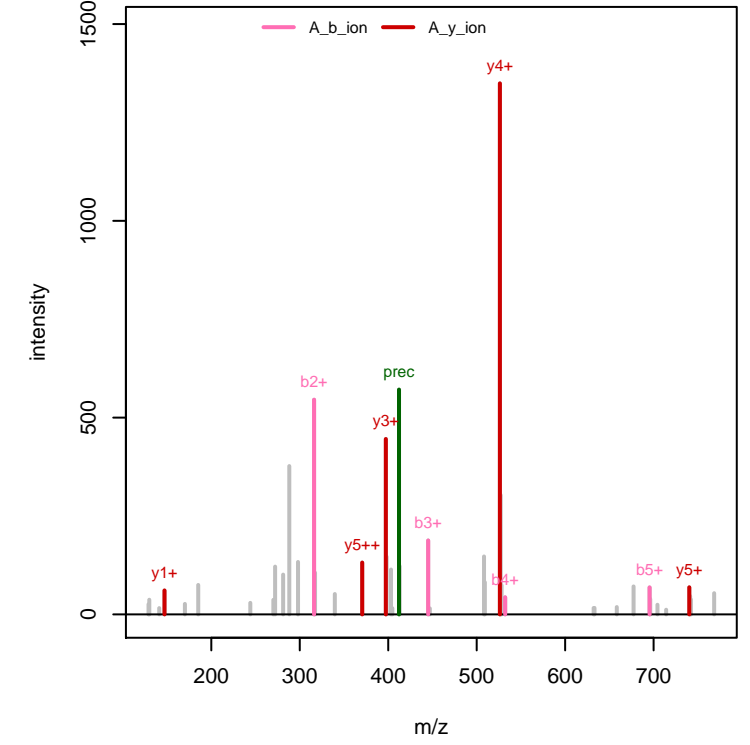

AAAESSIQVKNK+XL\_S

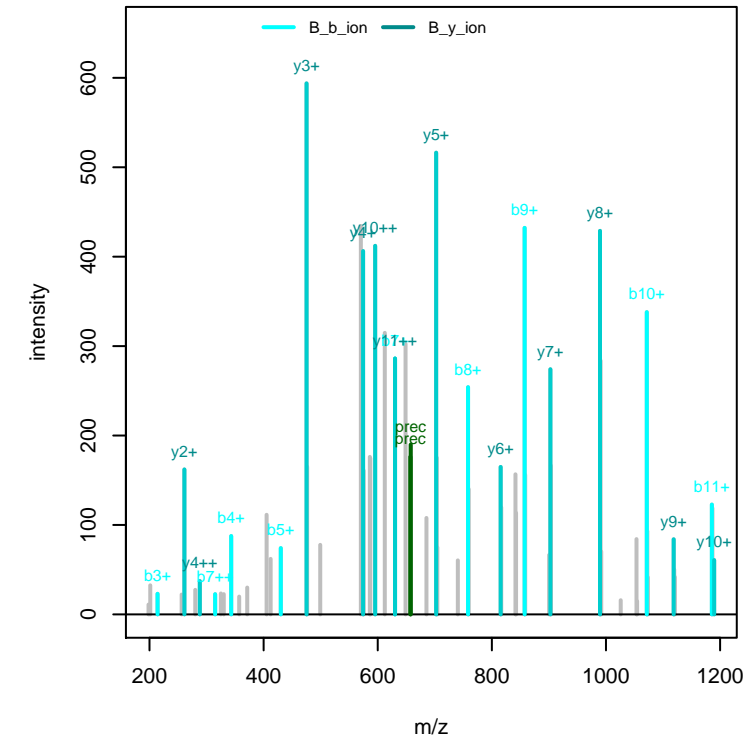

**GEKIGQGK  
AIDENKQK**

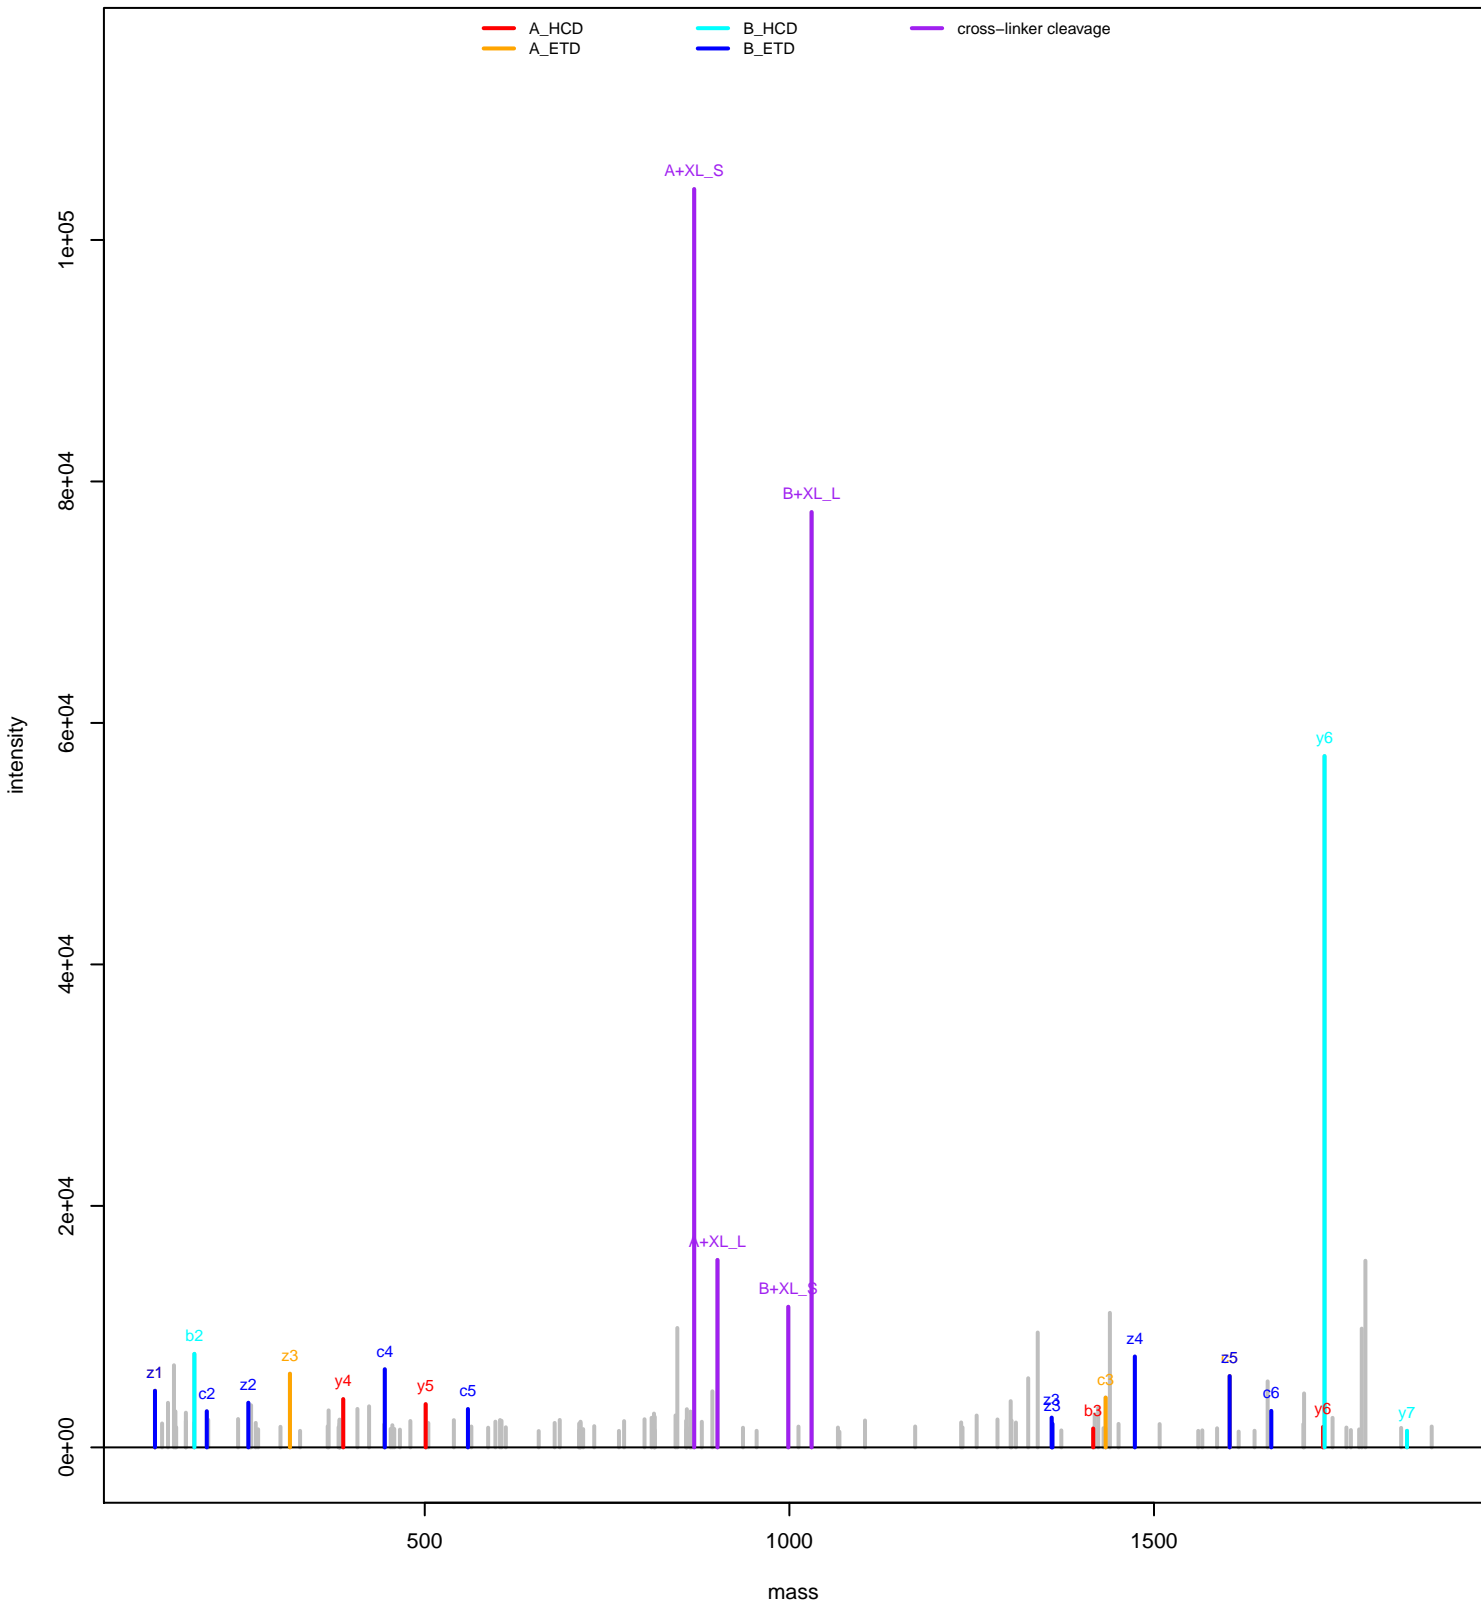

**GEKIGQGK+XL\_S**

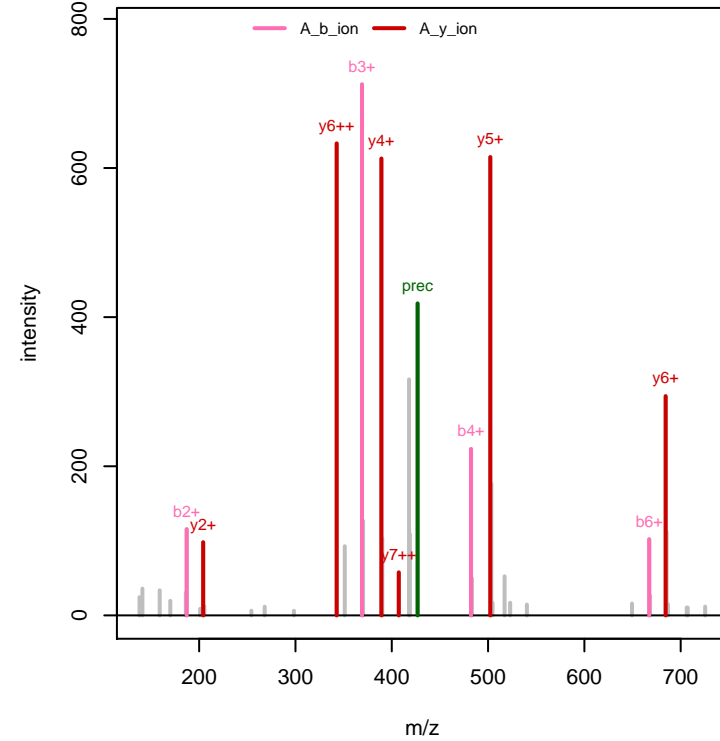

**GEKIGQGK+XL\_L**

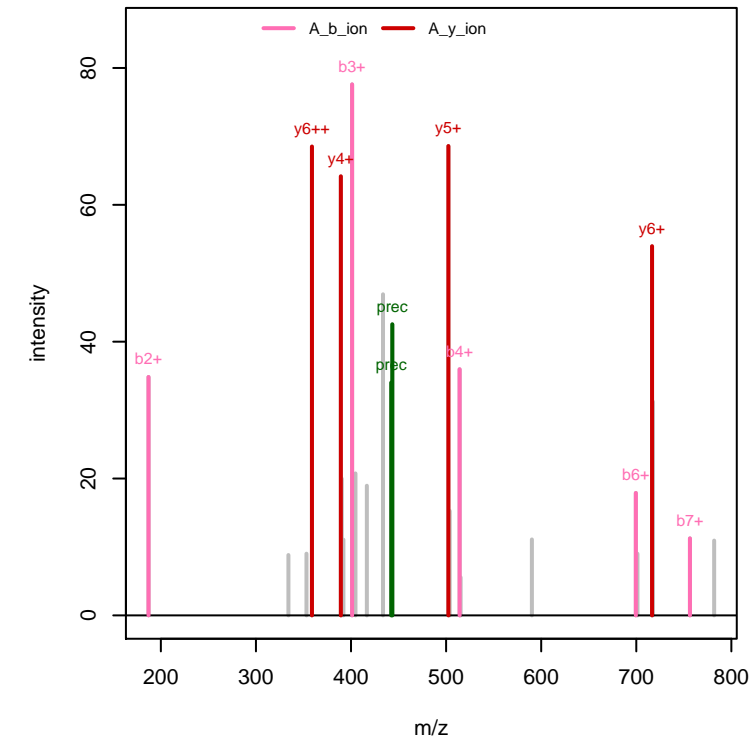

**AIDENKQK+XL\_S**

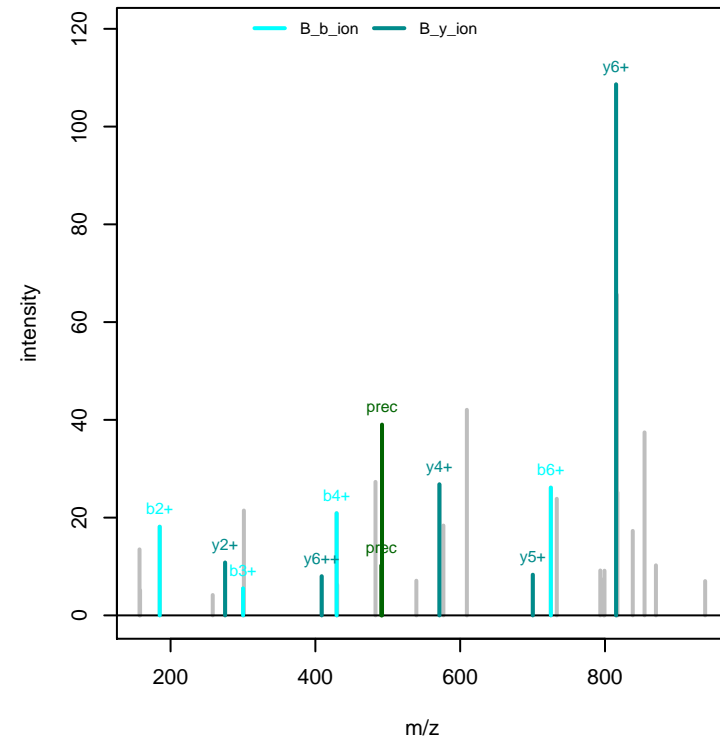

**AIDENKQK+XL\_L**

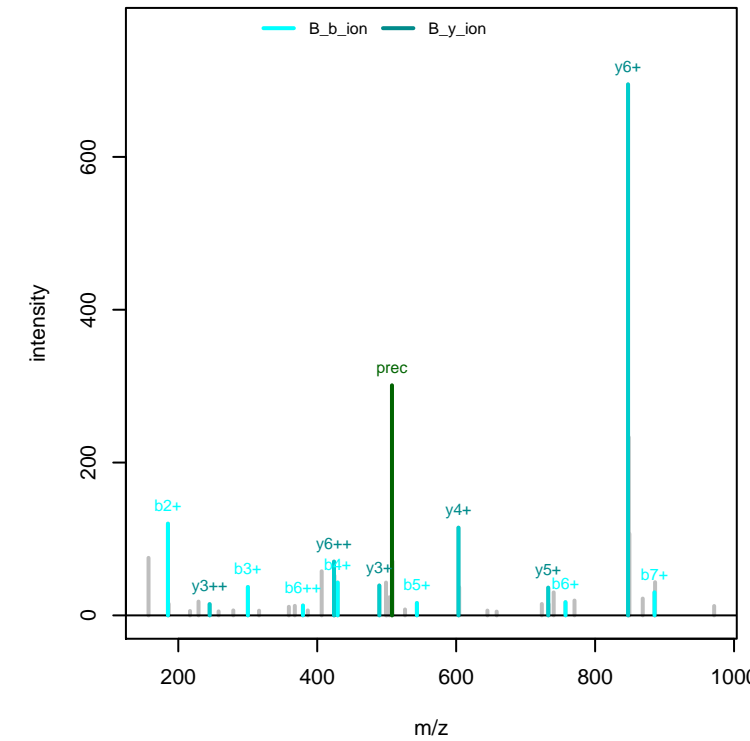

AEQALKQSR  
AEQALKQSR

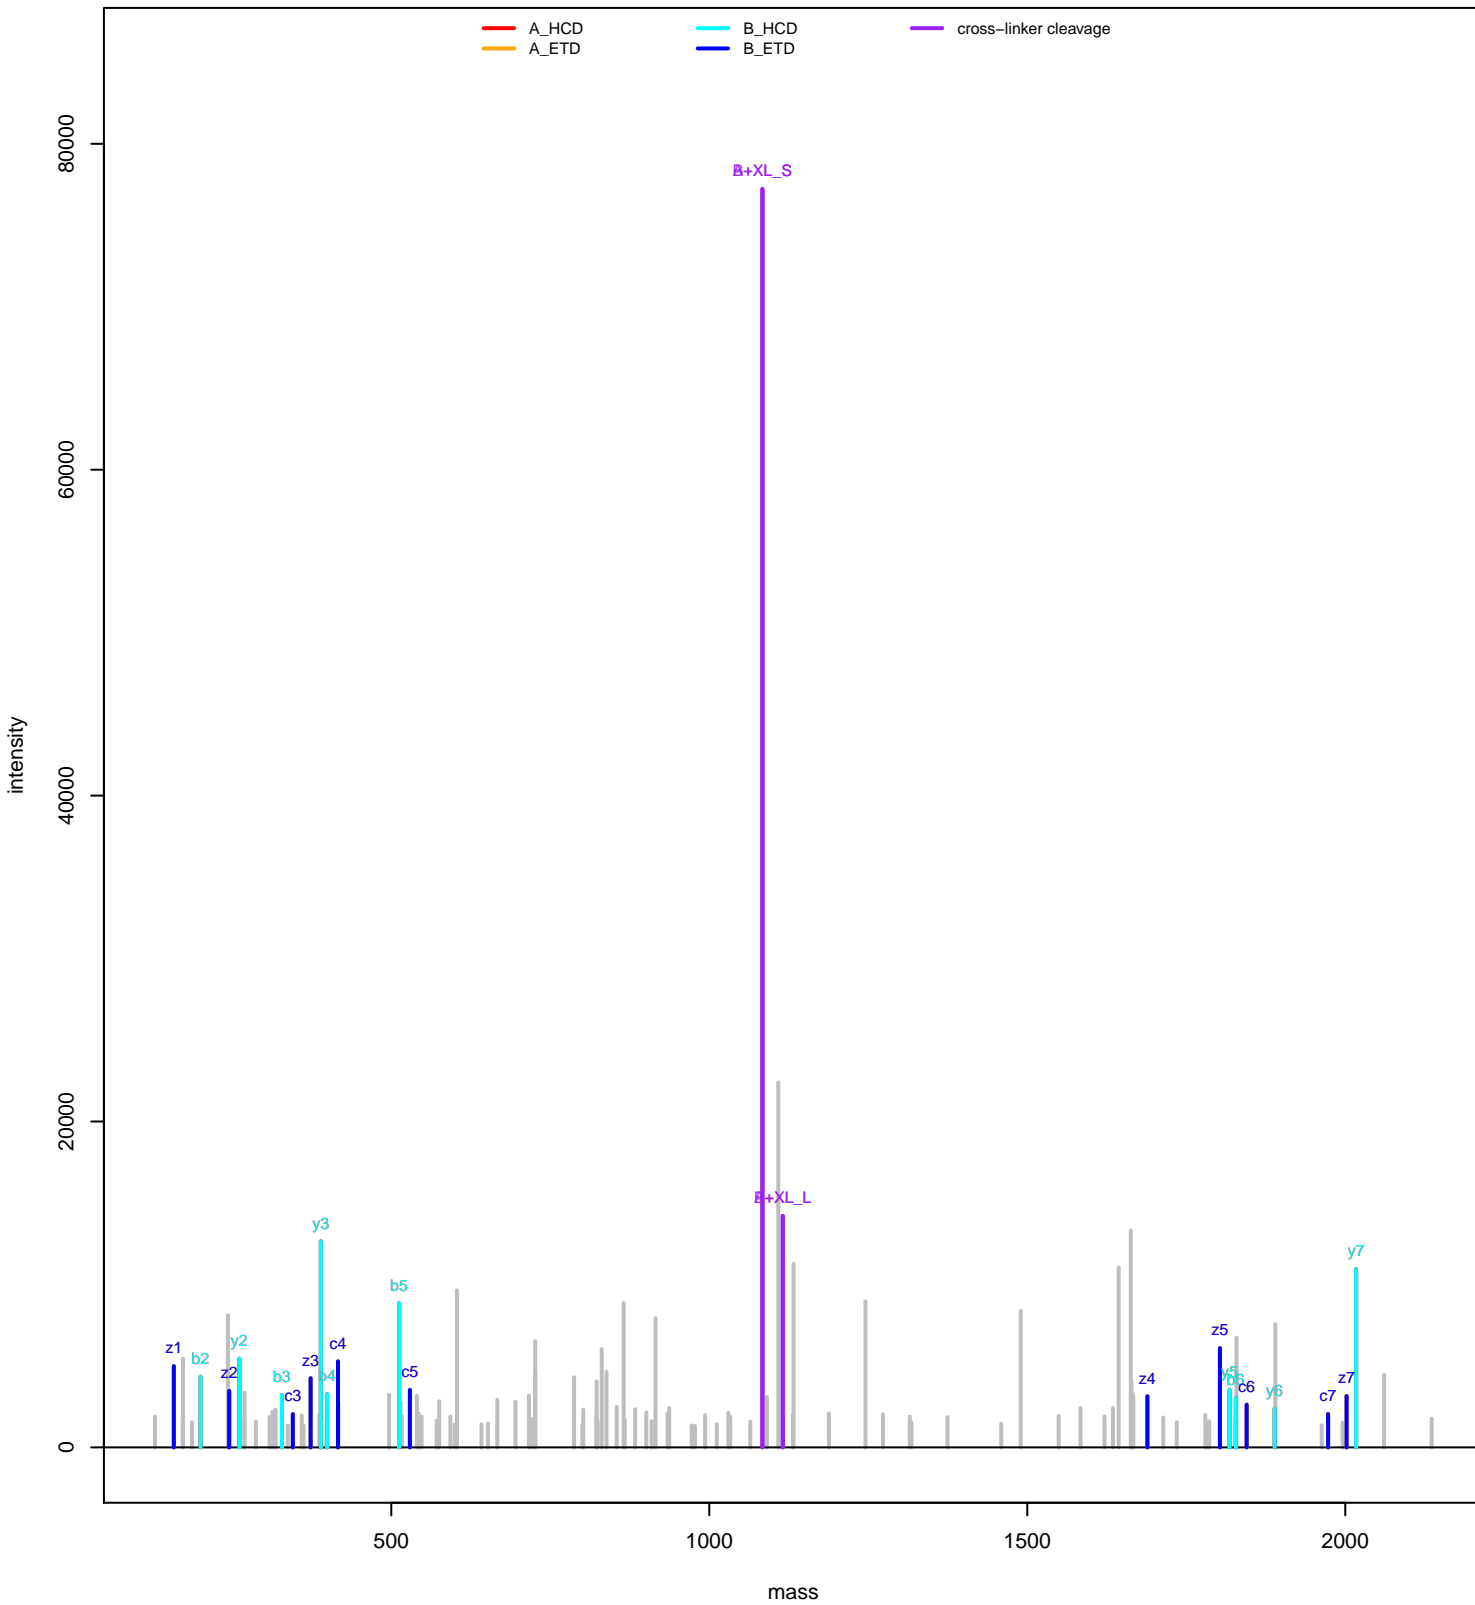

AEQALKQSR+XL\_S

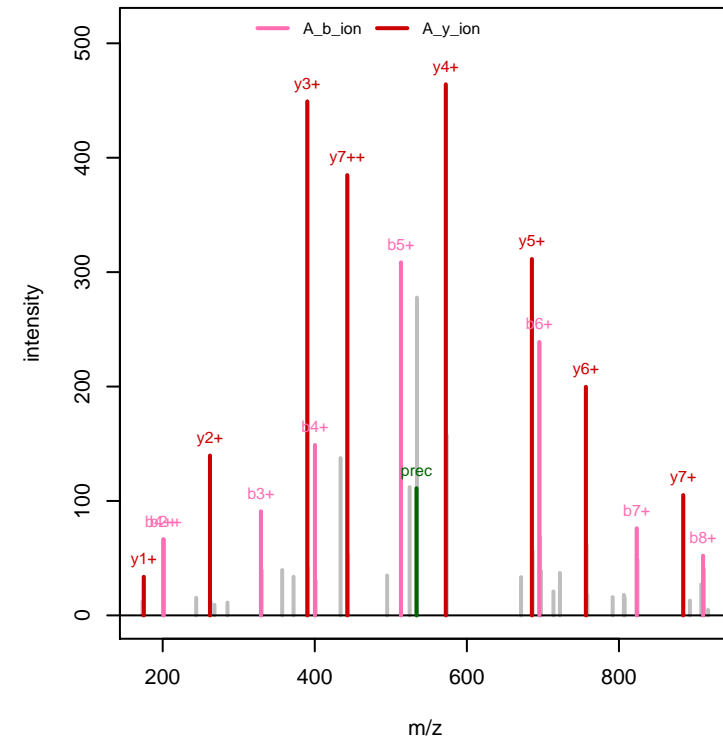

AEQALKQSR+XL\_L

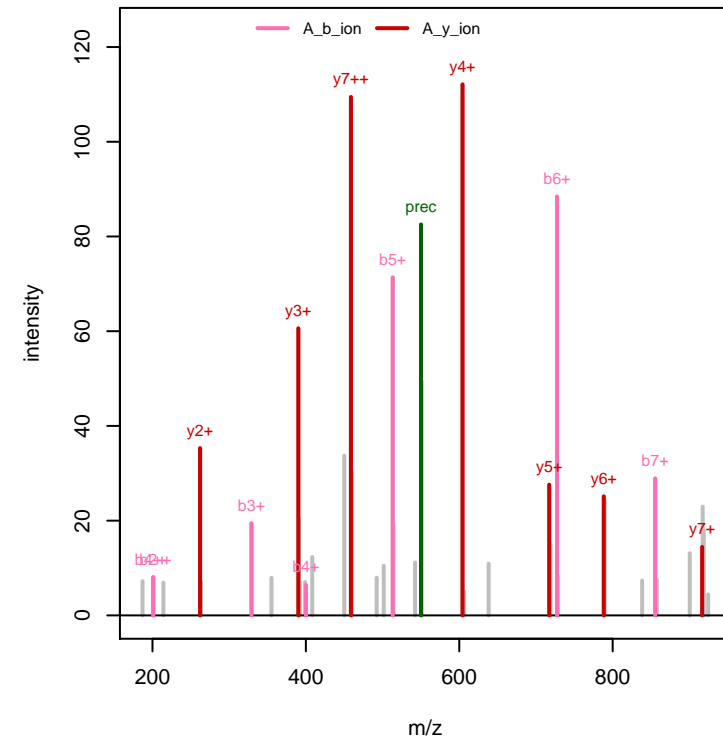

AEQALKQSR+XL\_S

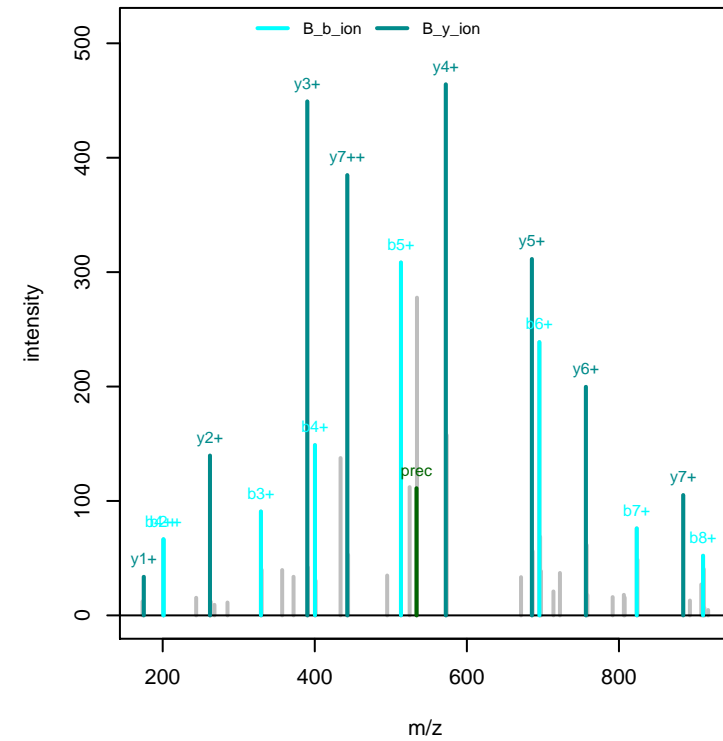

AEQALKQSR+XL\_L

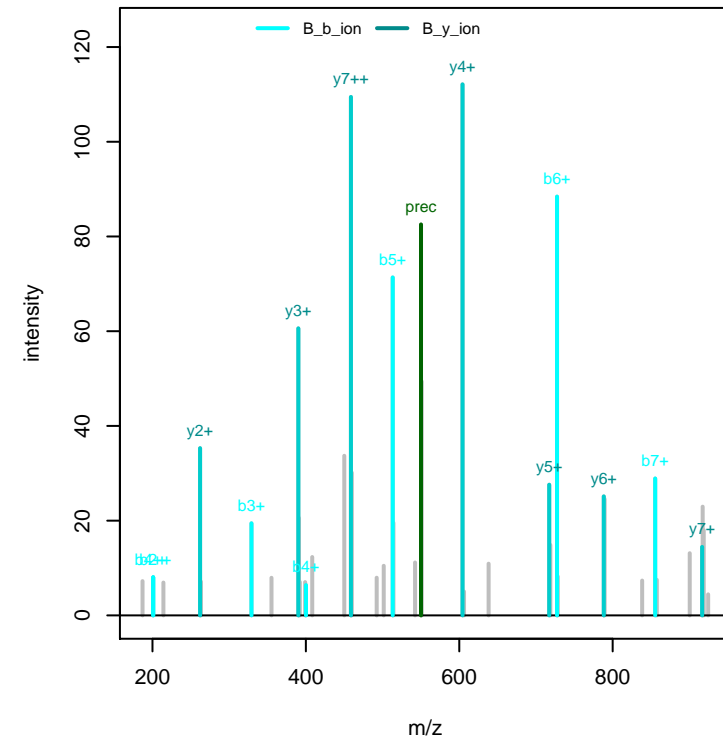

NAKAARPK  
EQEAAELKR

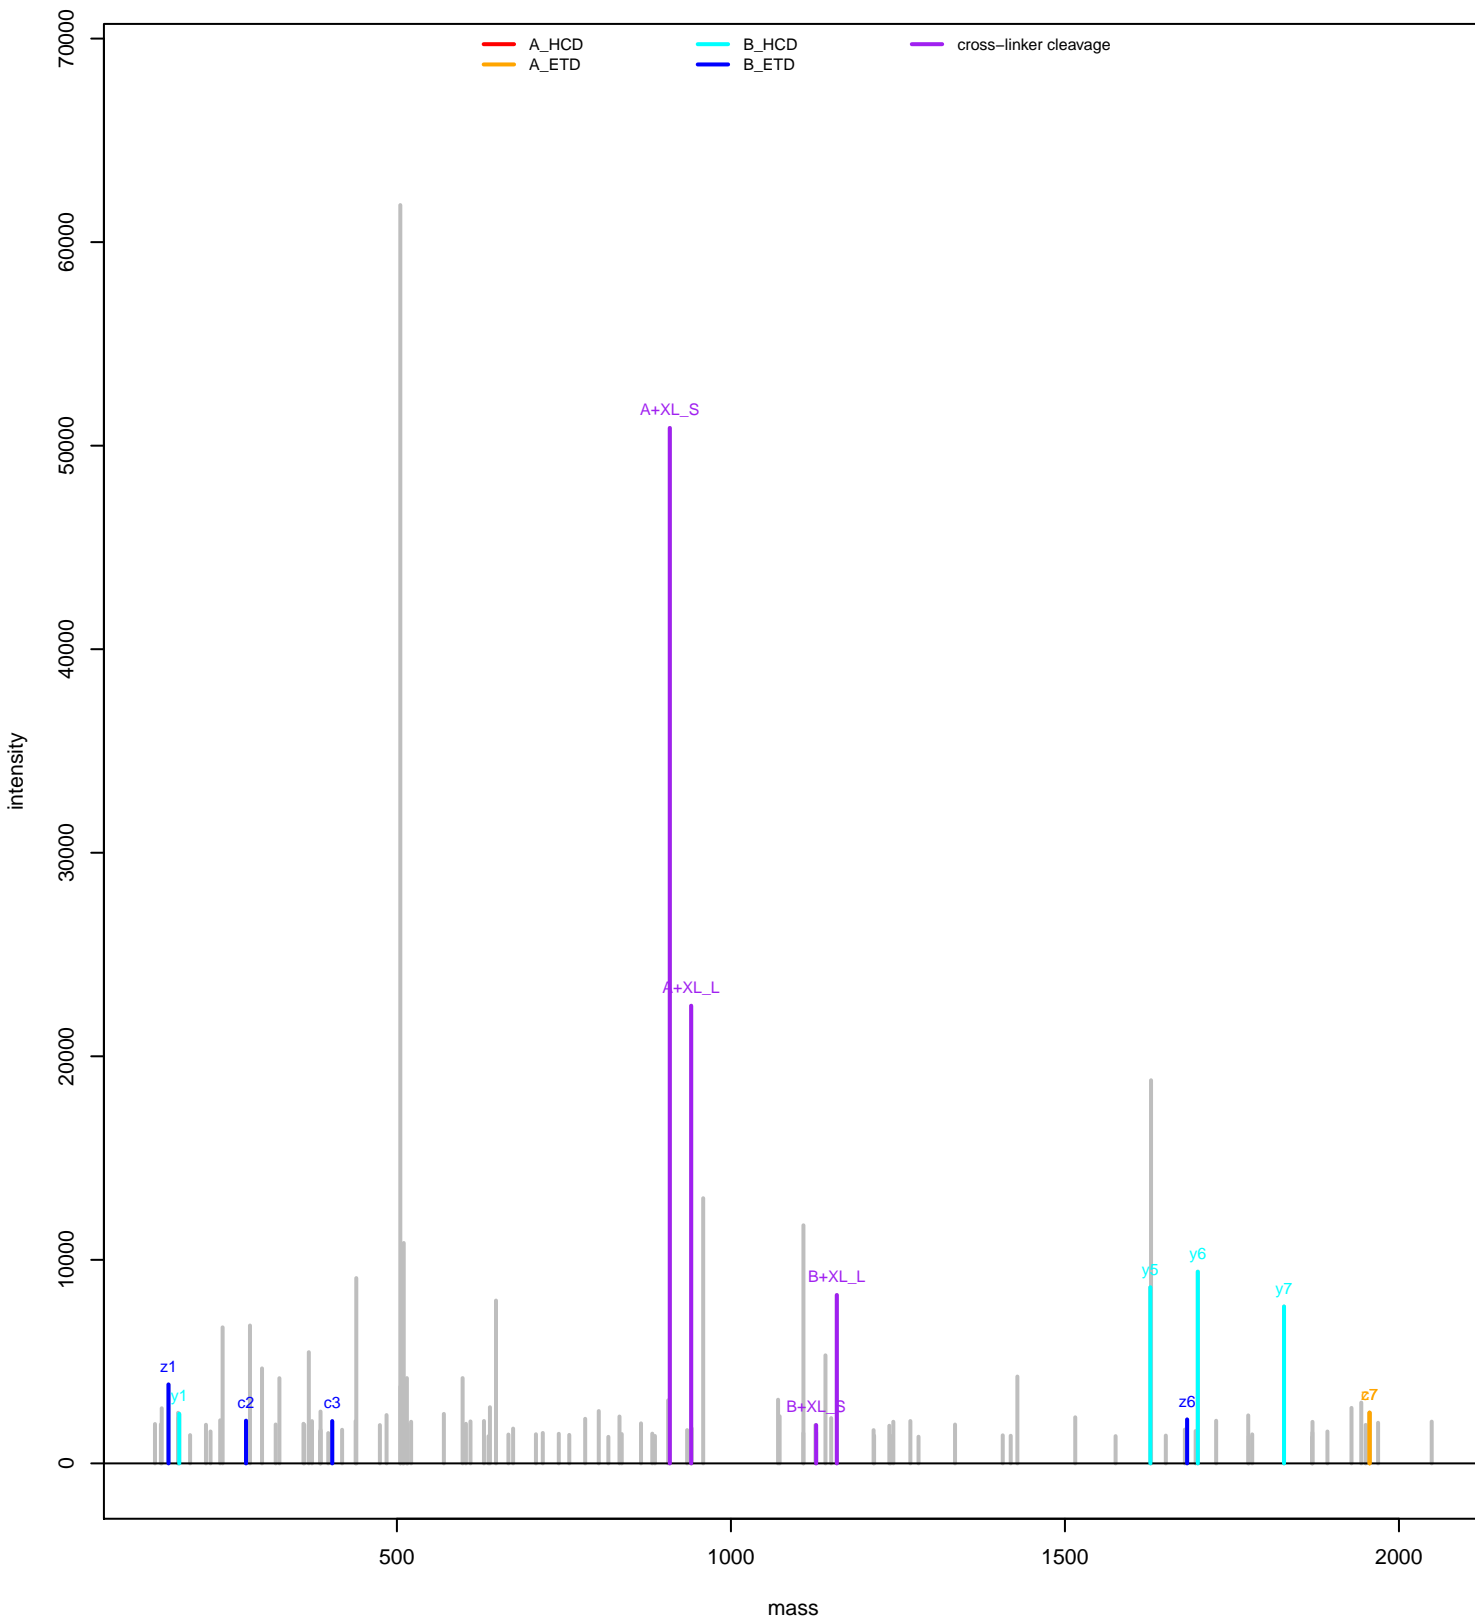

NAKAARPK+XL\_S

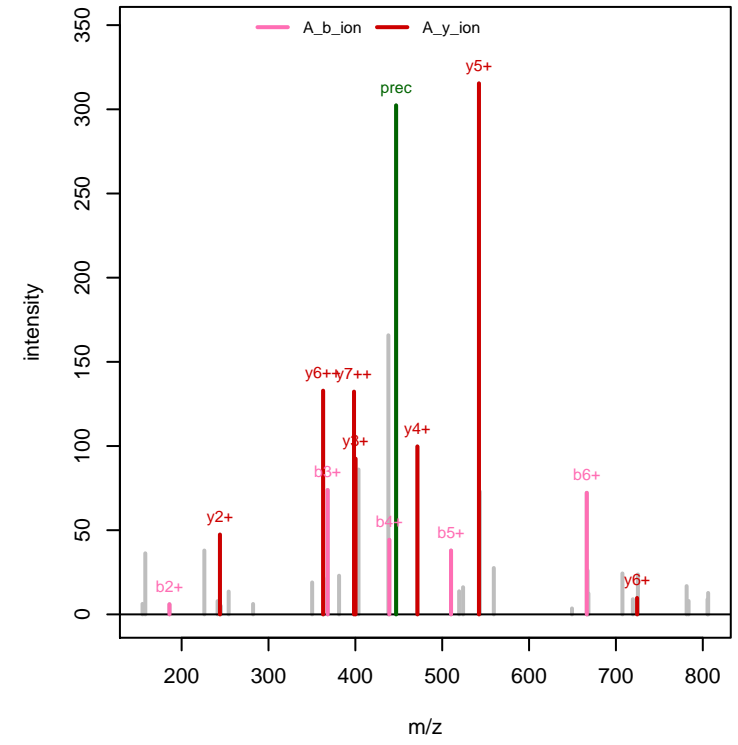

NAKAARPK+XL\_L

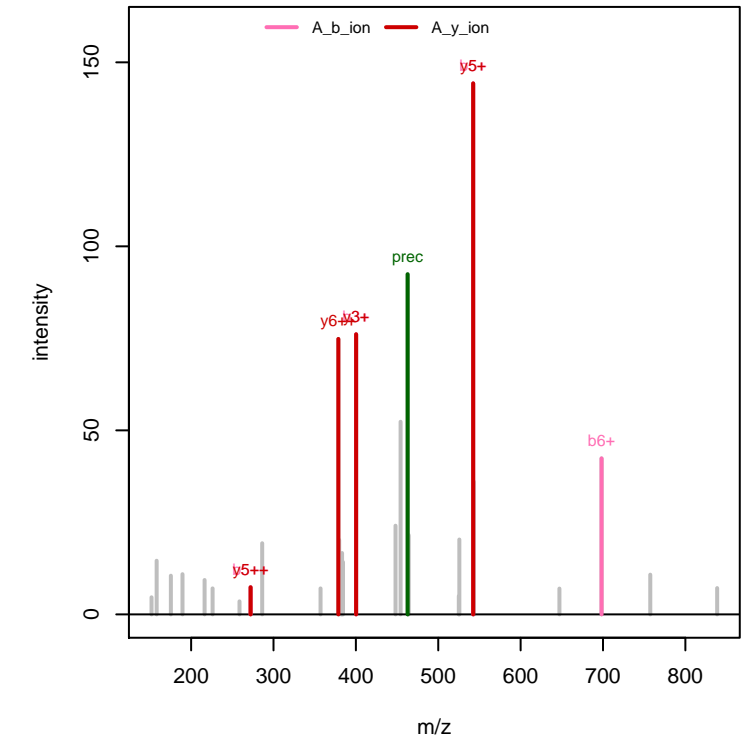

EQEAAELKR+XL\_S

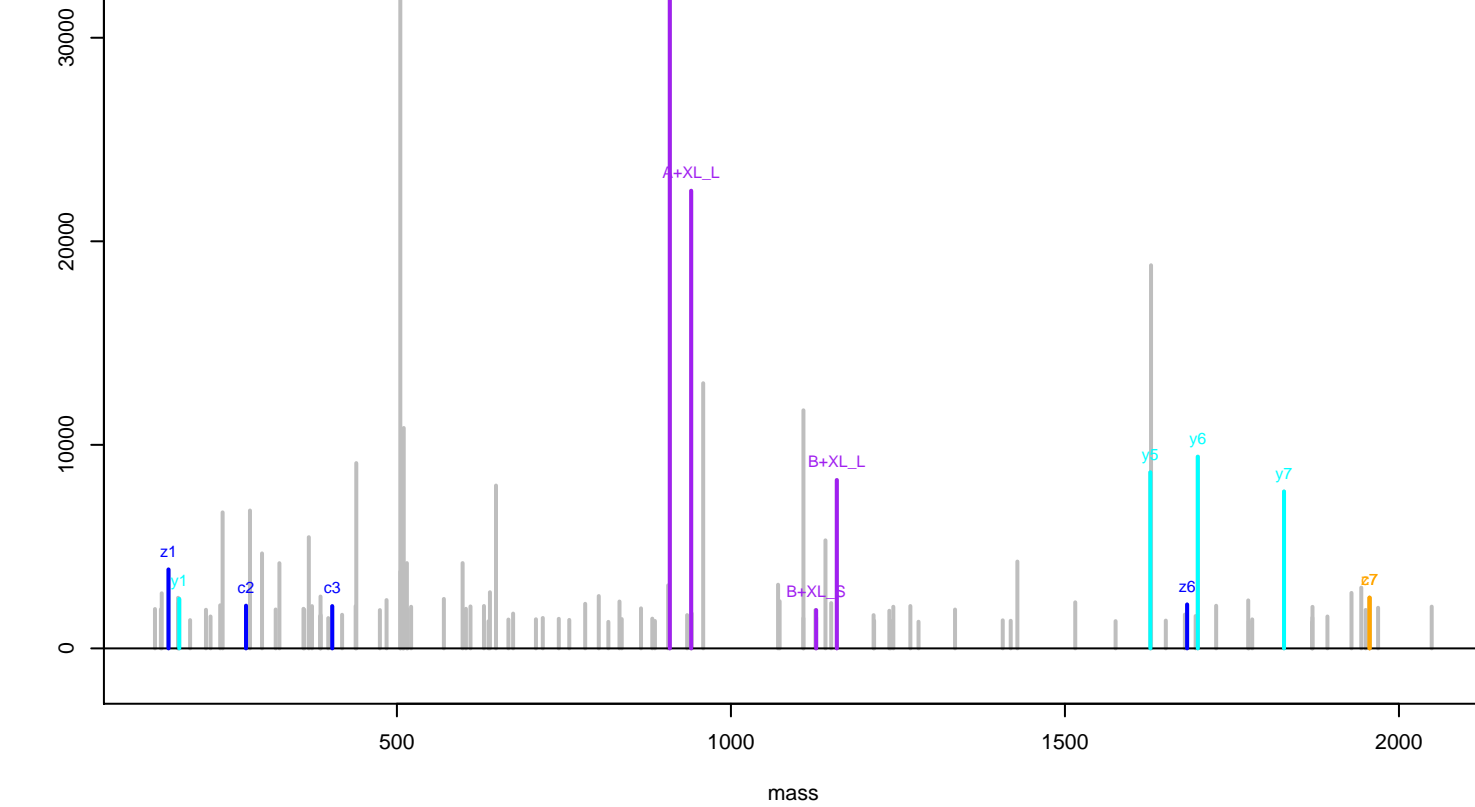

EQEAAELKR+XL\_L

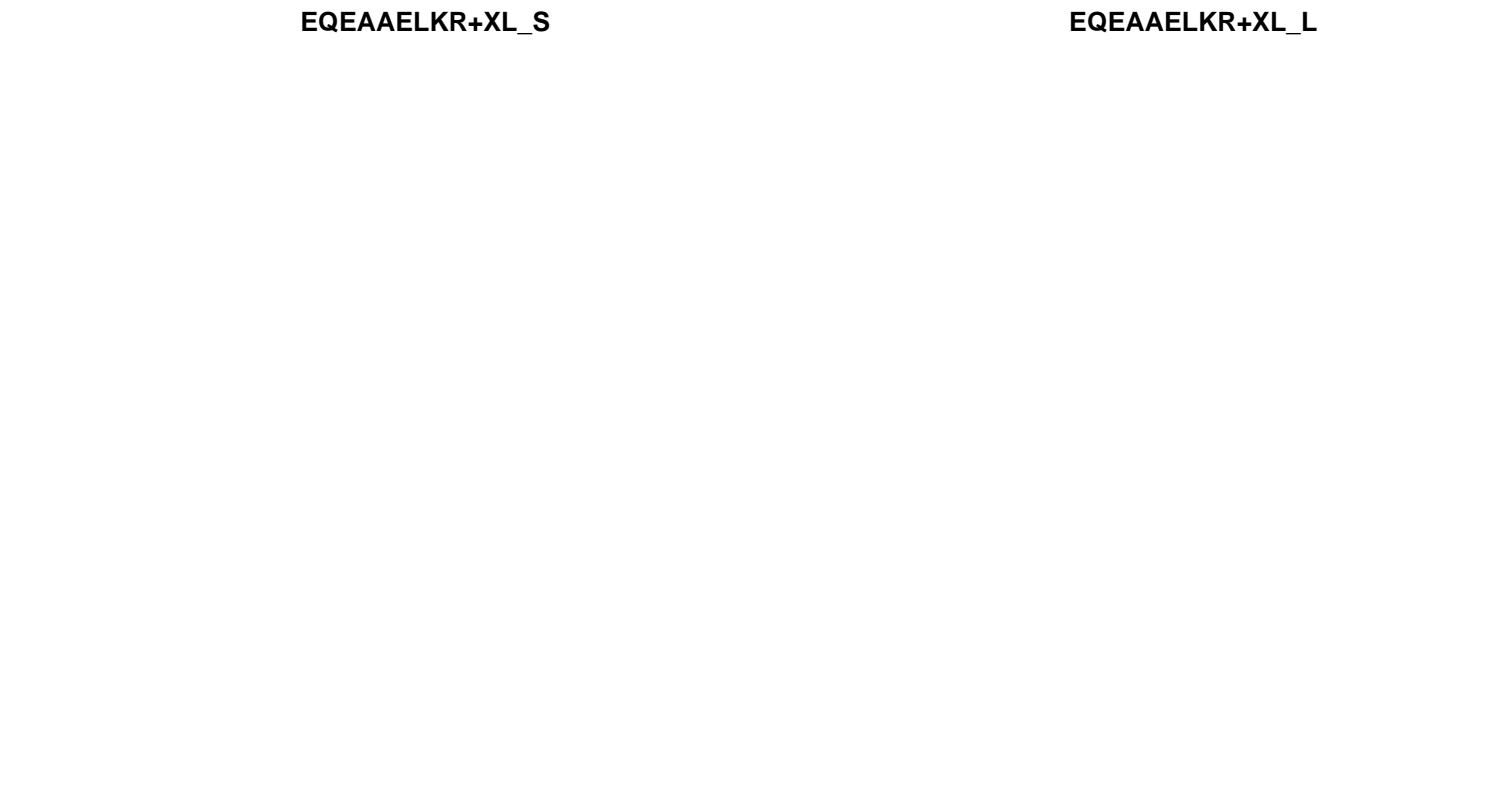

TKADQEK  
VVNQIKTR

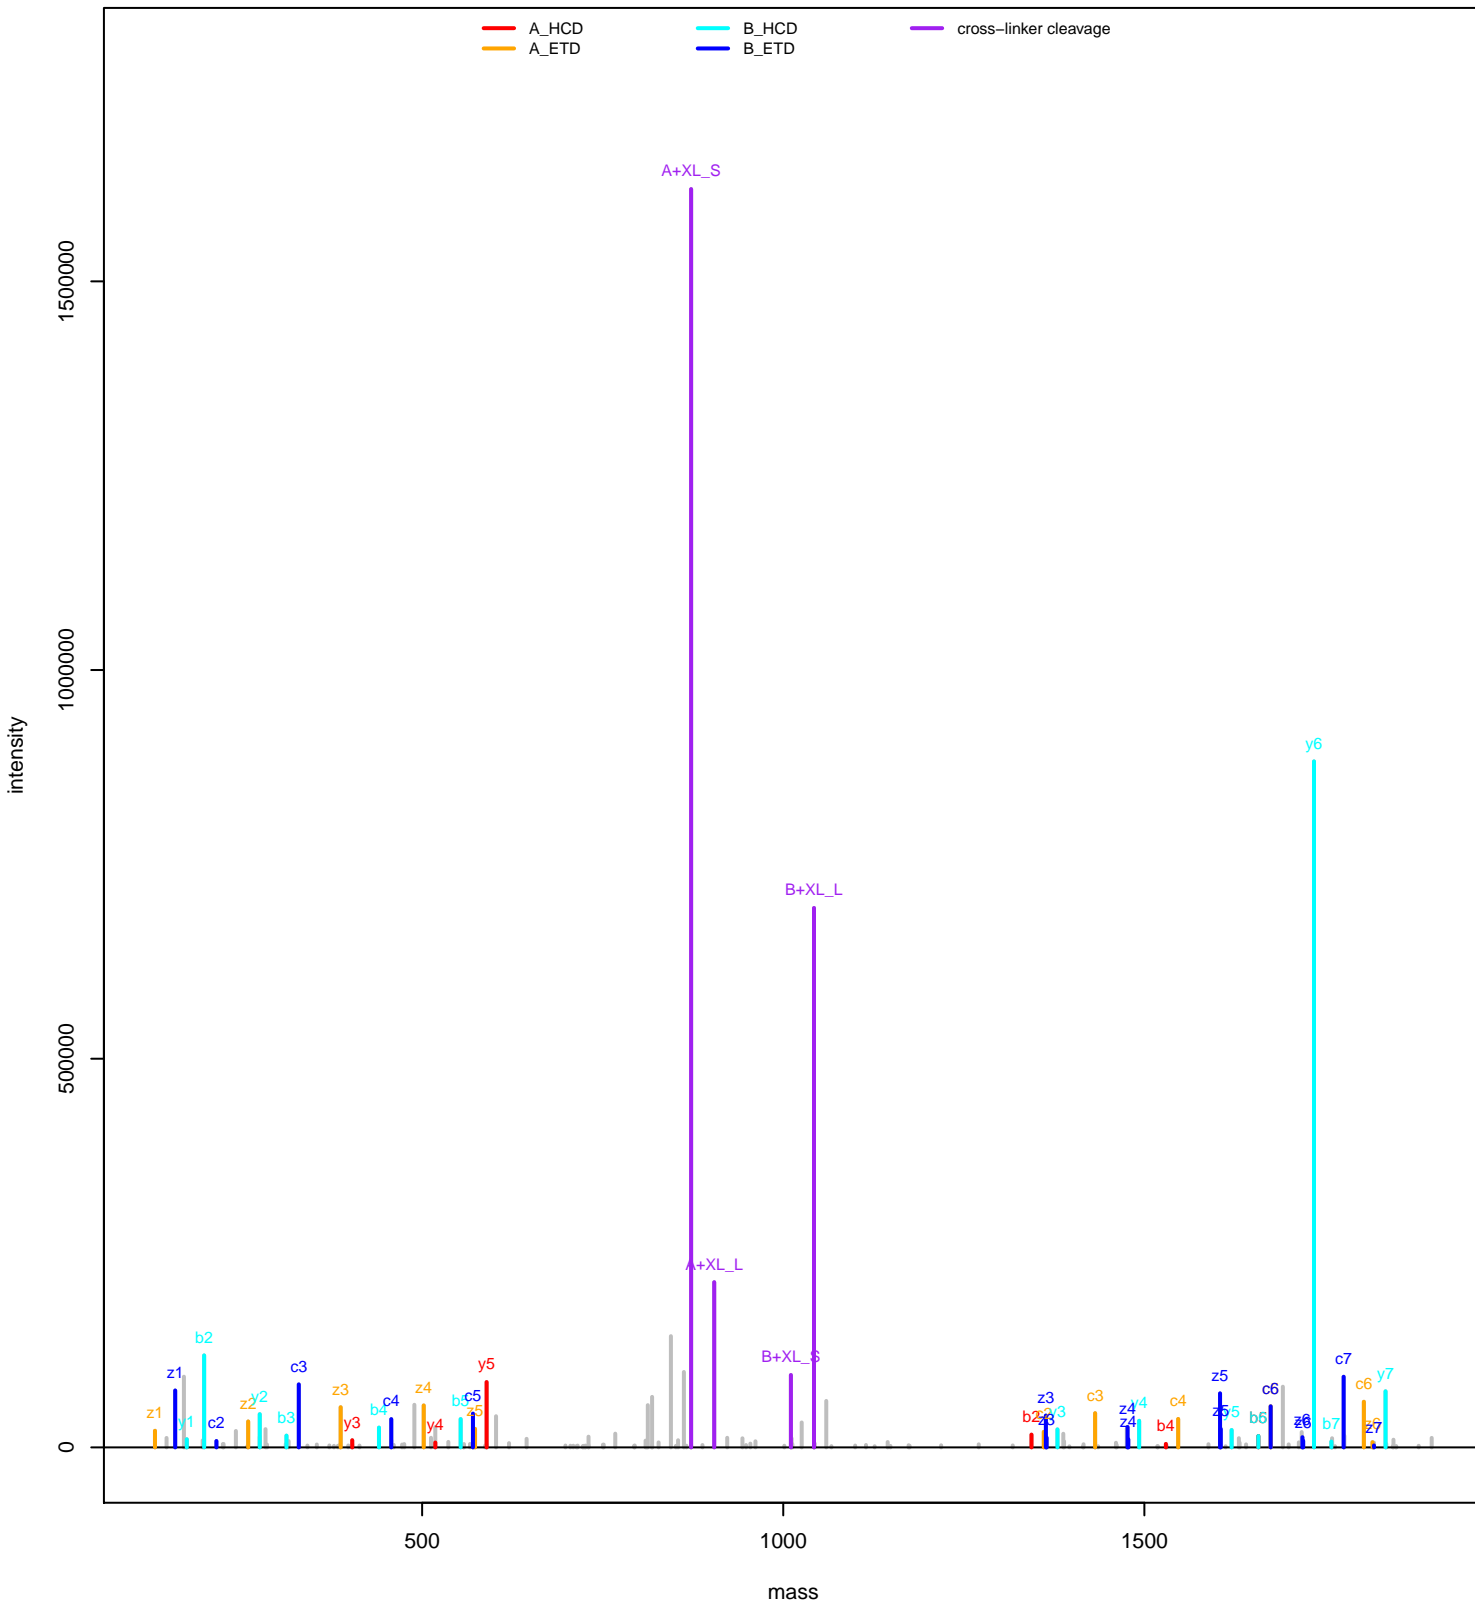

TKADQEK+XL\_S

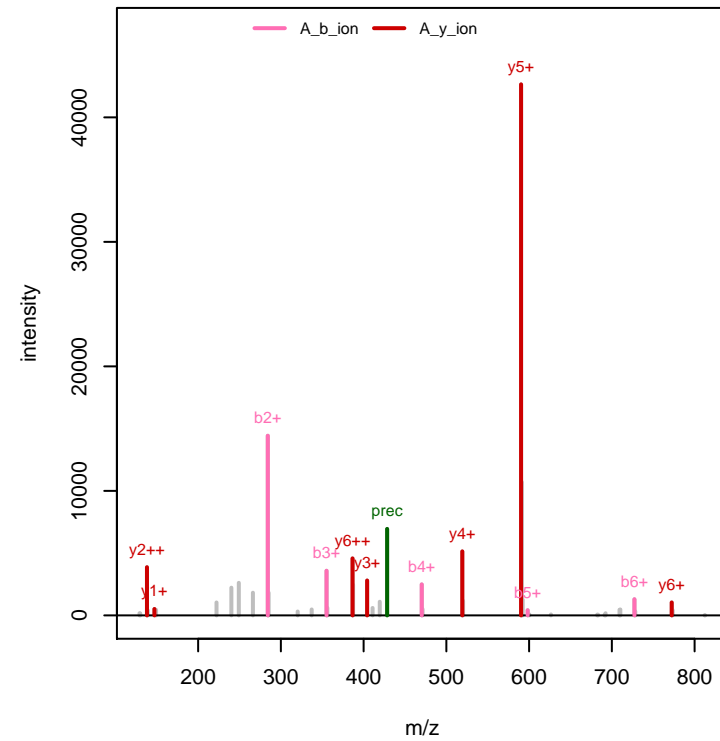

TKADQEK+XL\_L

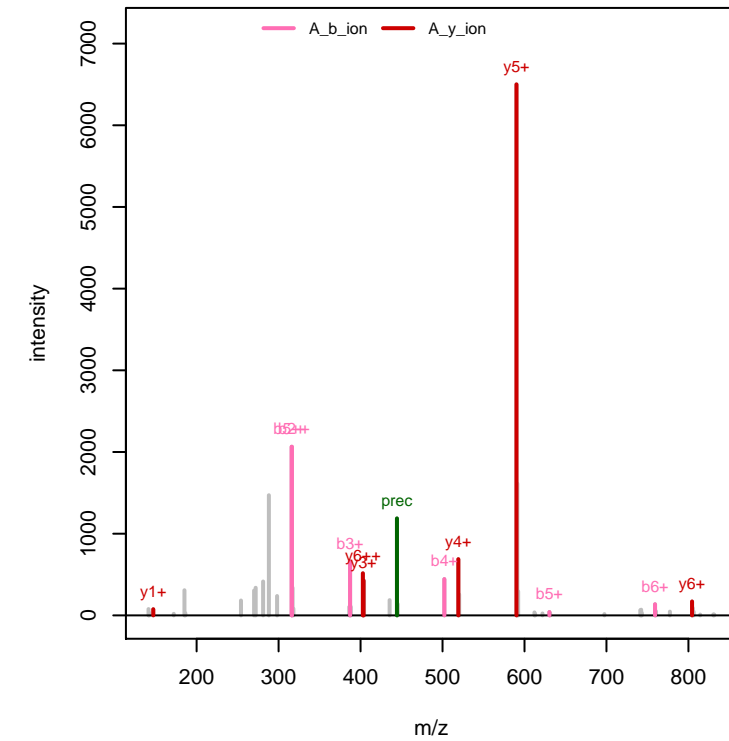

VVNQIKTR+XL\_S

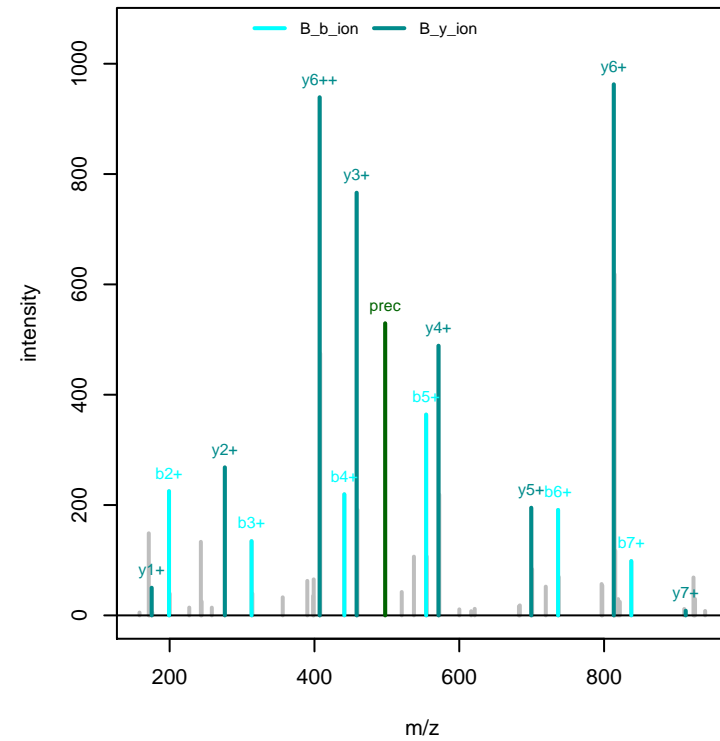

VVNQIKTR+XL\_L

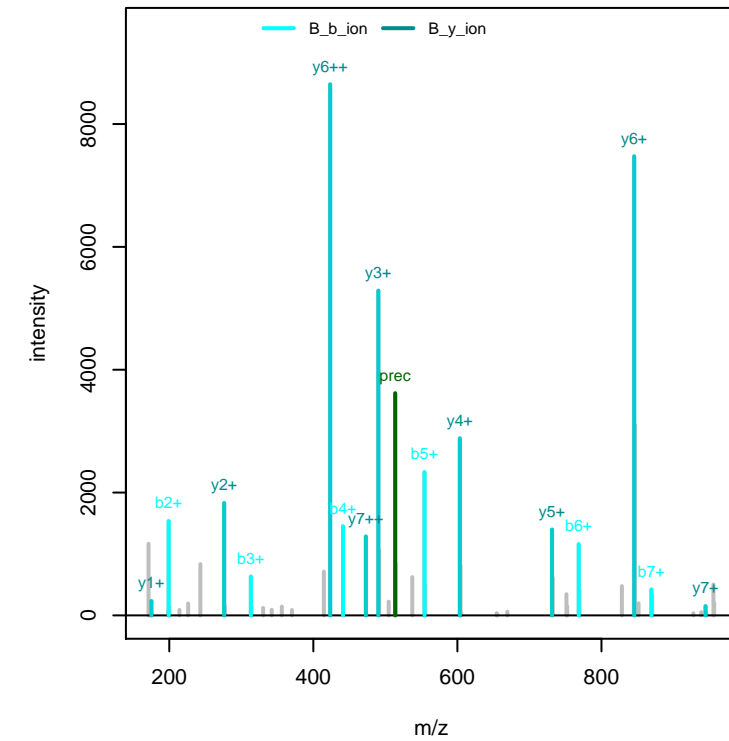



**IGSKTPIPLGVTEK  
AAGGNTTSGSKGQNAPK**

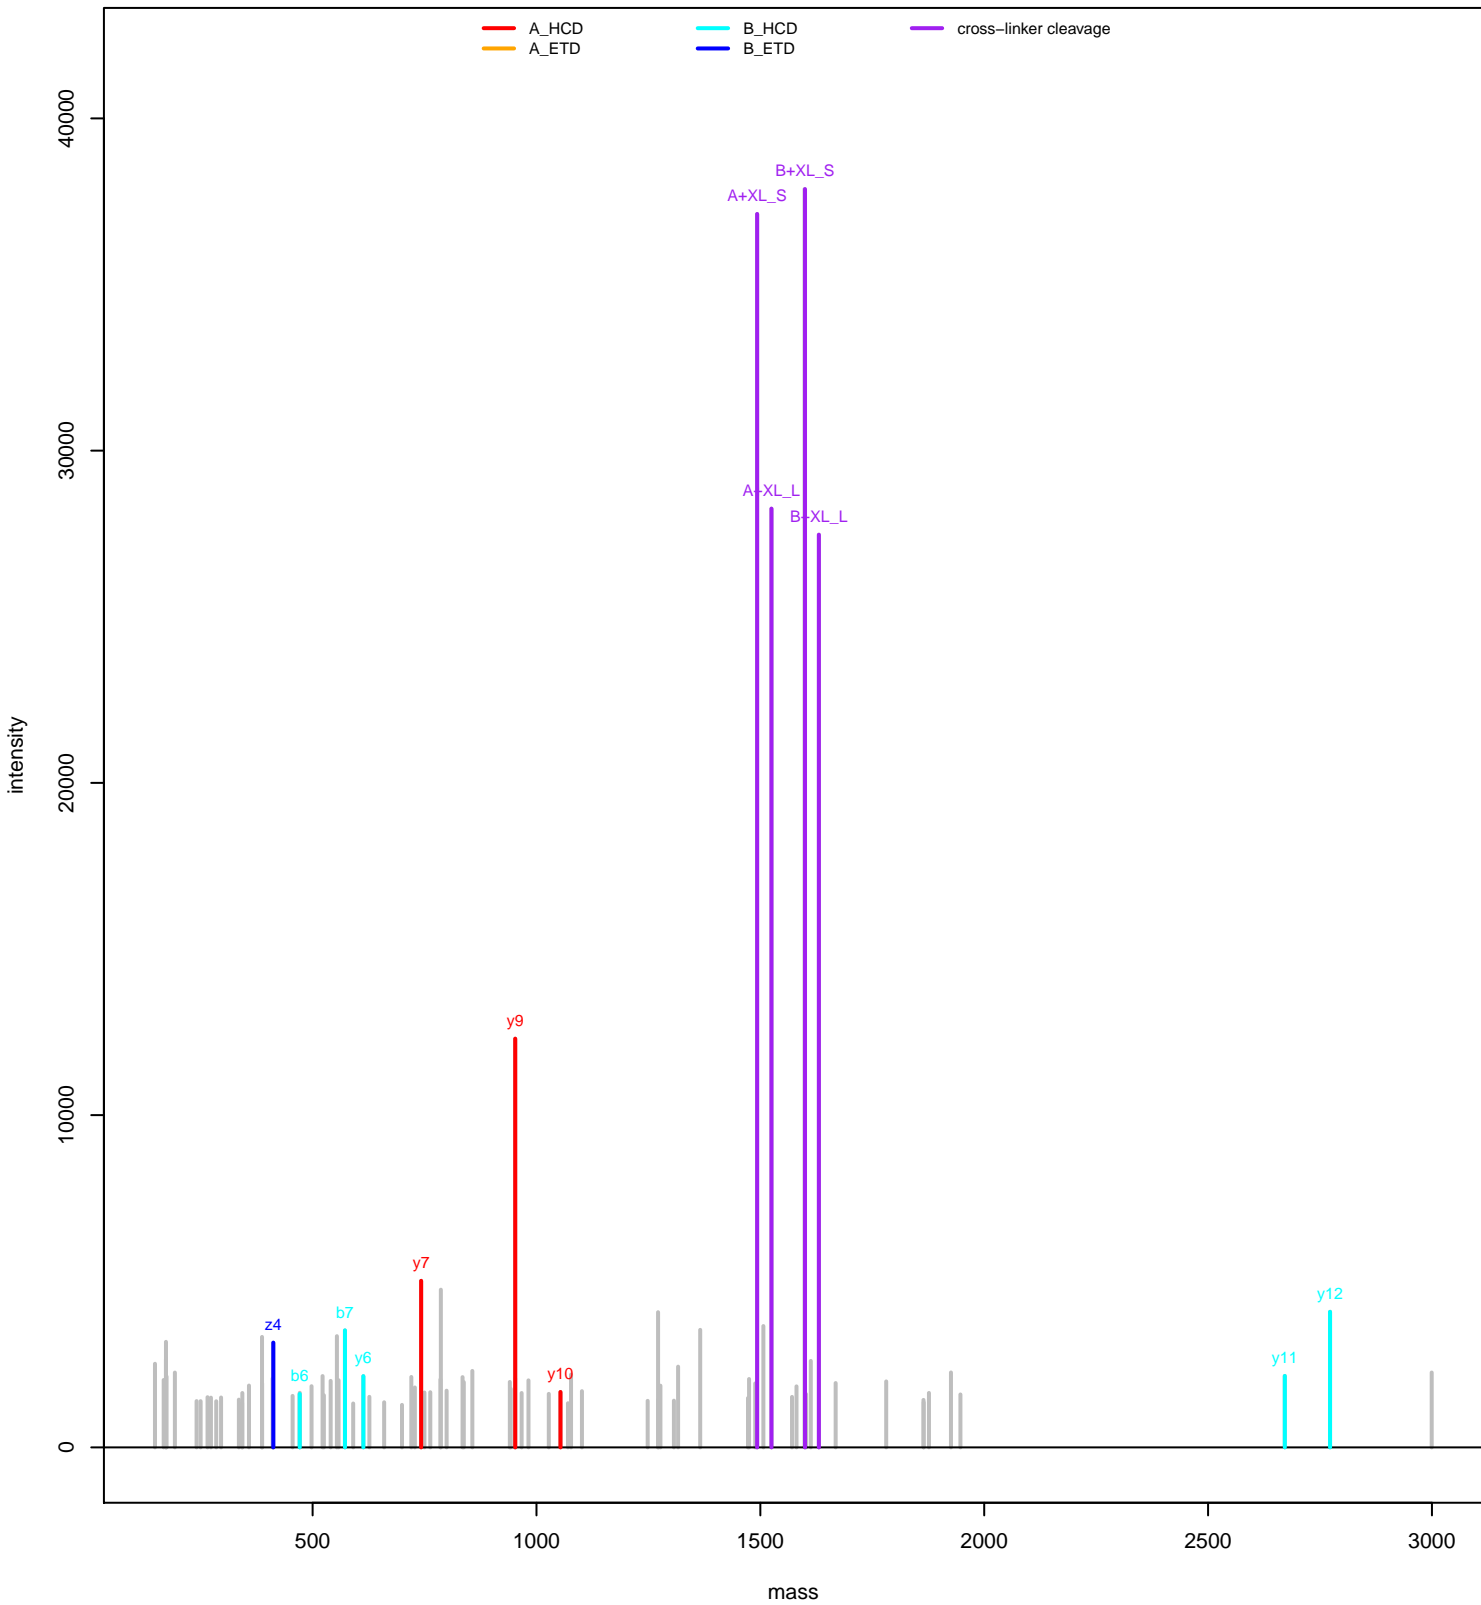

**IGSKTPIPLGVTEK+XL\_S**

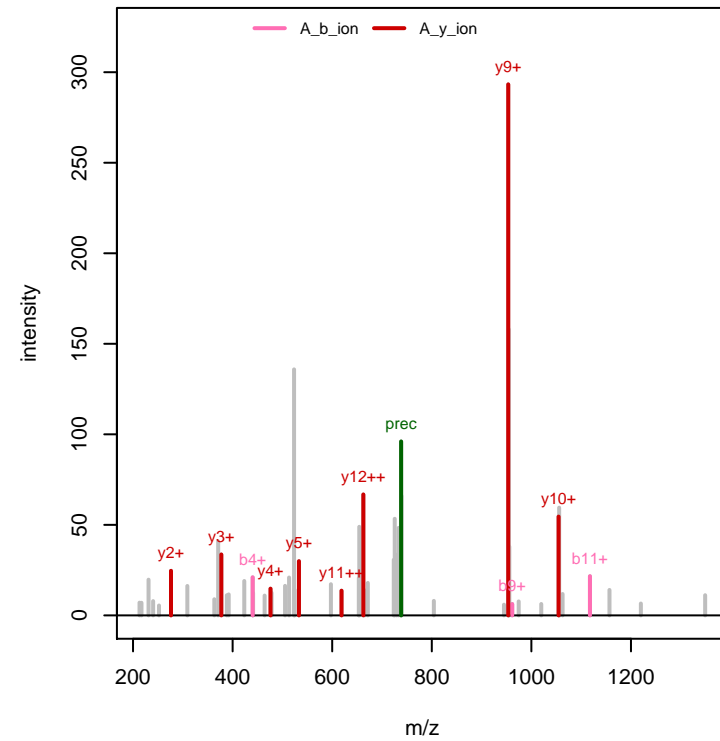

**IGSKTPIPLGVTEK+XL\_L**

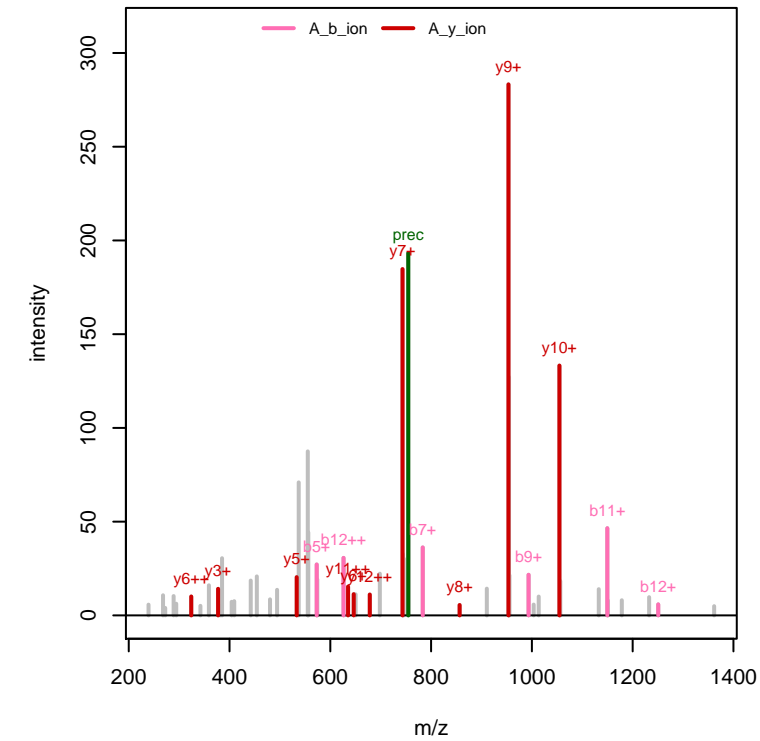

**AAGGNTTSGSKGQNAPK+XL\_S**

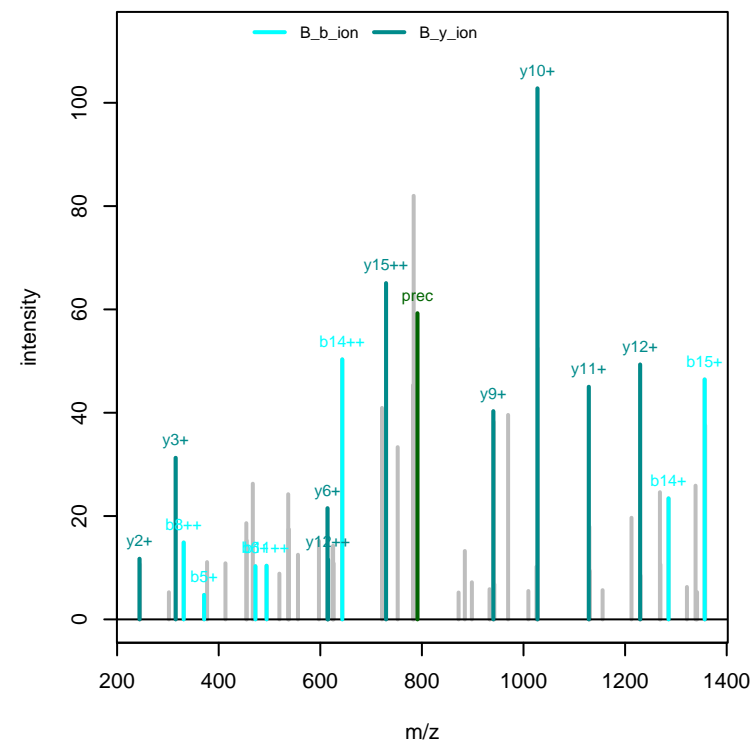

**AAGGNTTSGSKGQNAPK+XL\_L**

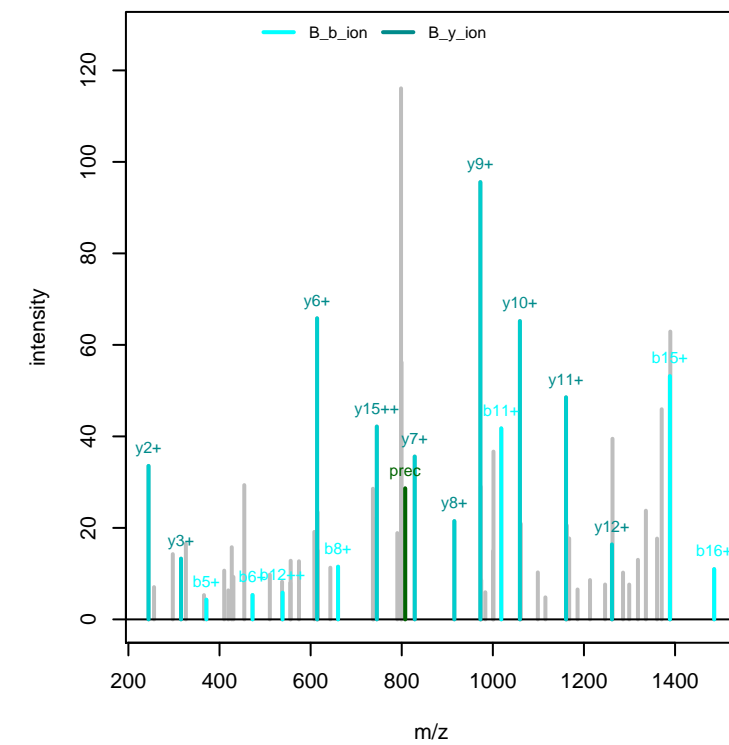

VAKGVEGVTSVSDK  
GYAGDTATTSEIKAK

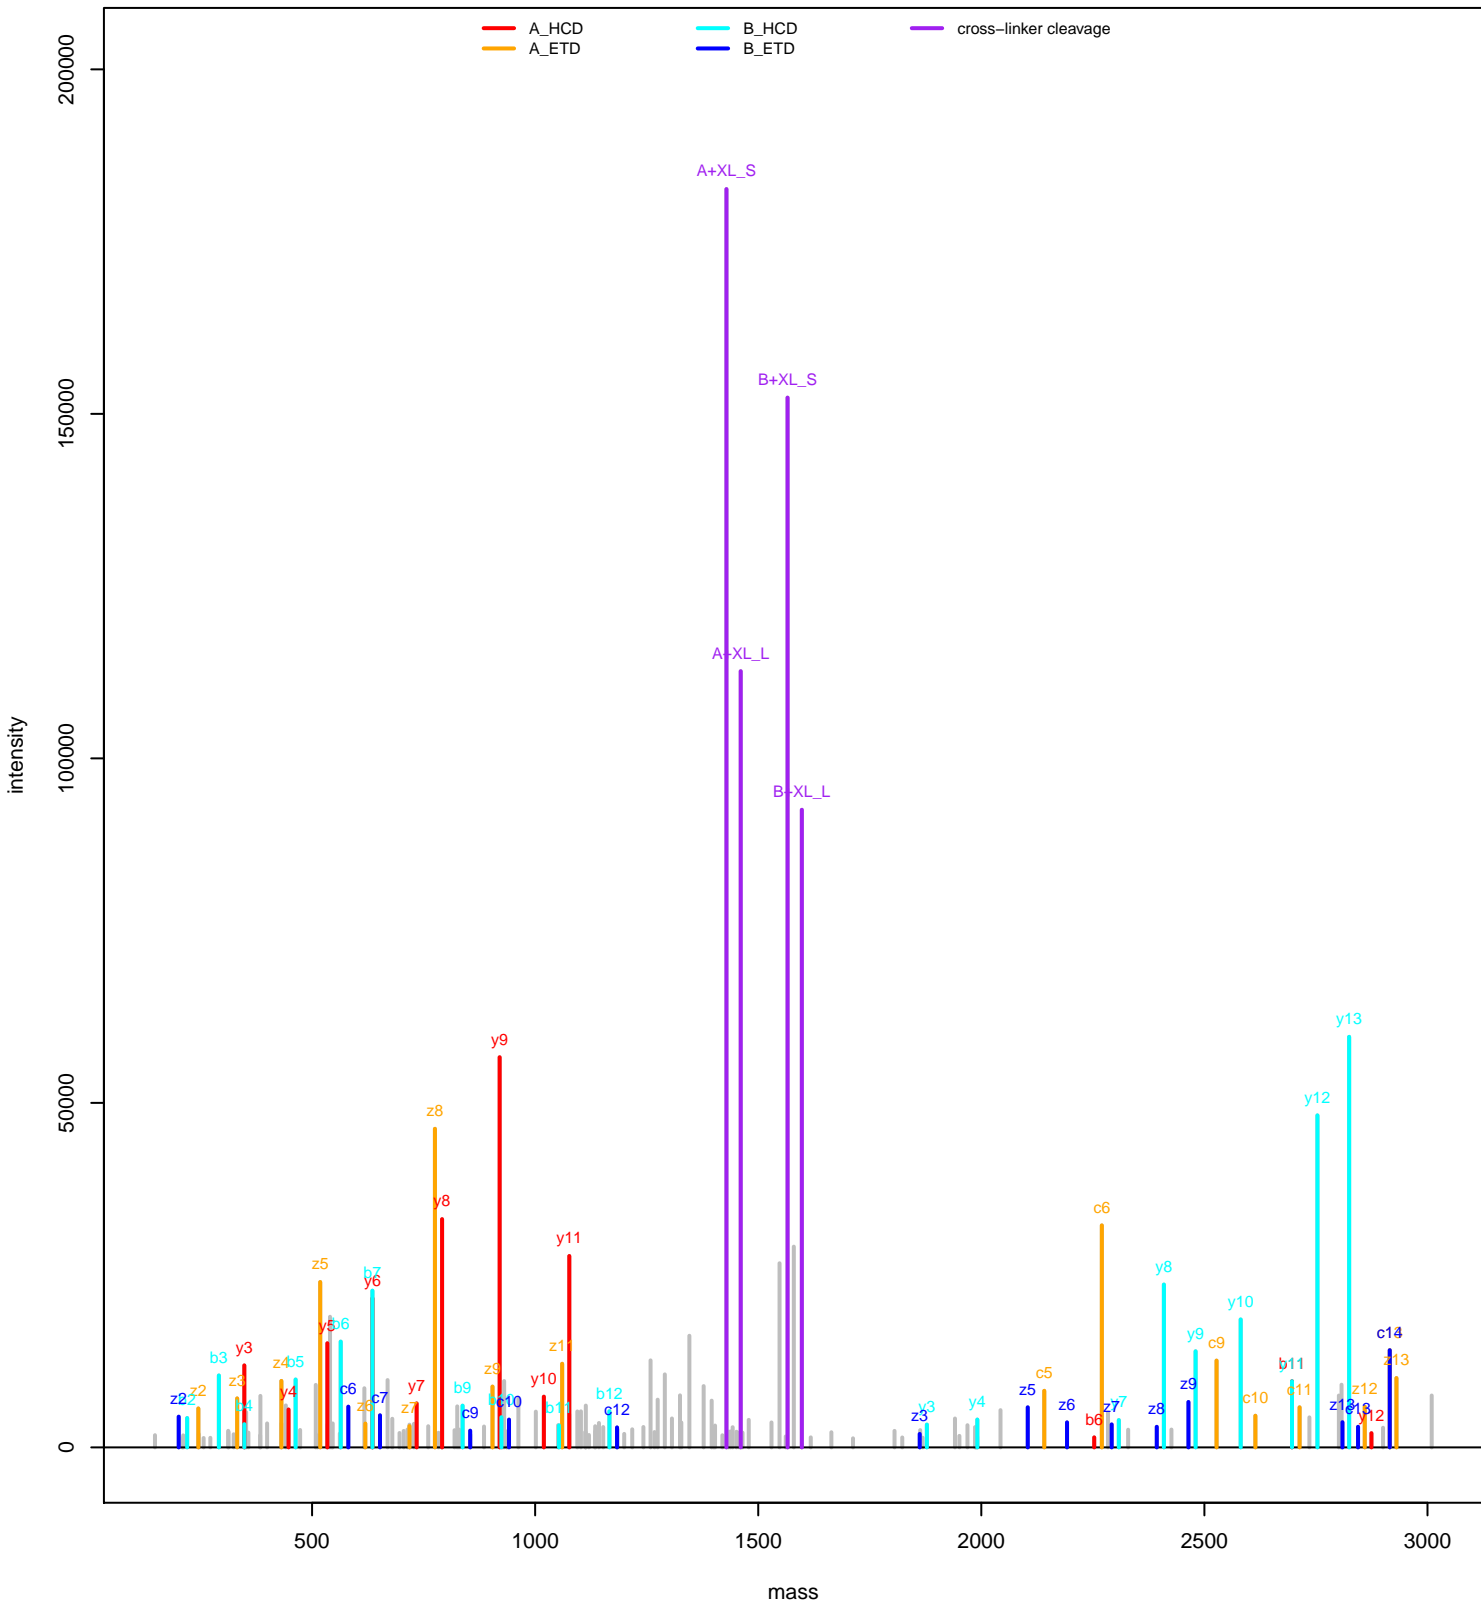

VAKGVEGVTSVSDK+XL\_S

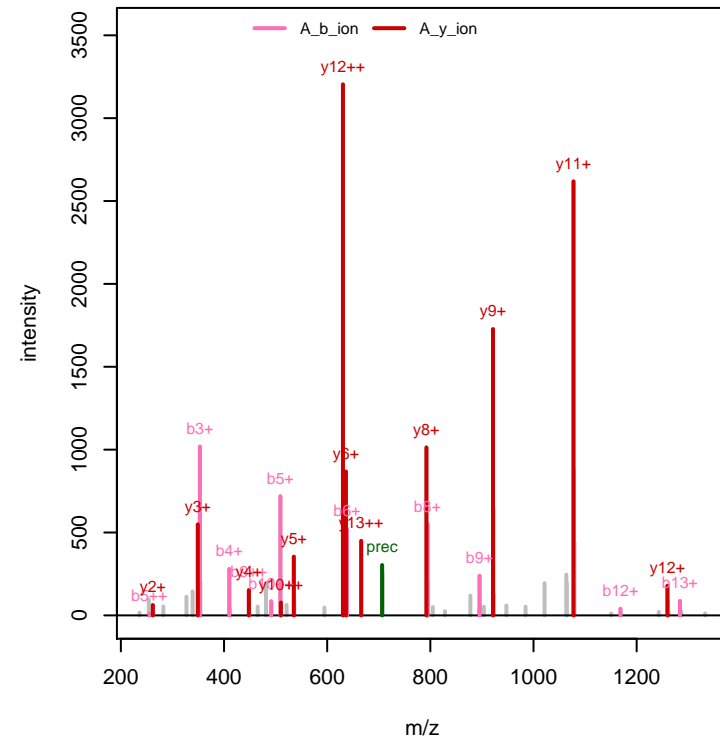

VAKGVEGVTSVSDK+XL\_L

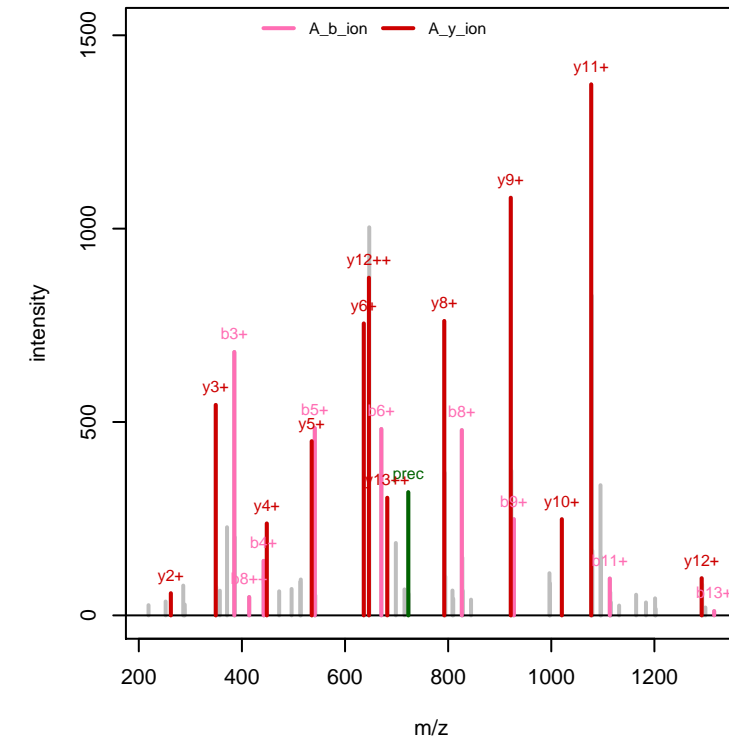

GYAGDTATTSEIKAK+XL\_S

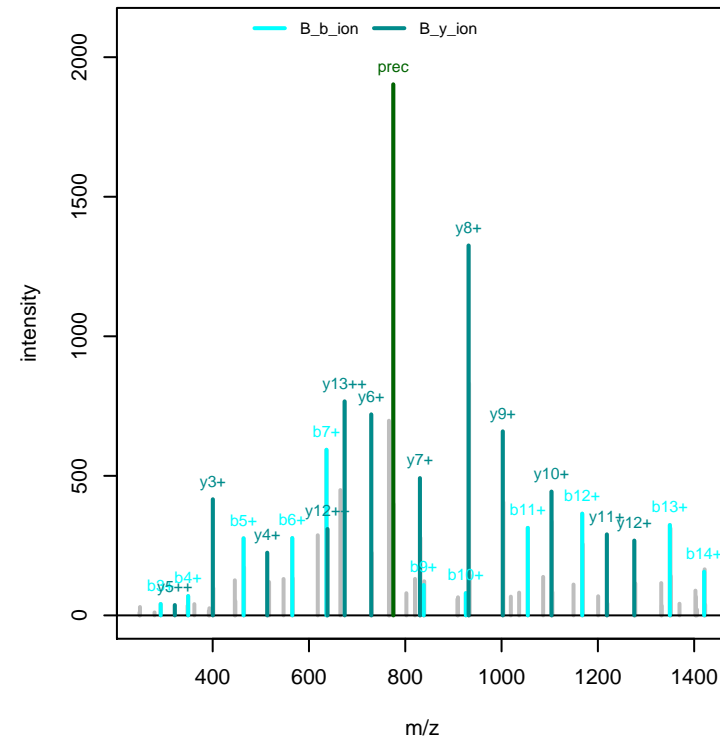

GYAGDTATTSEIKAK+XL\_L

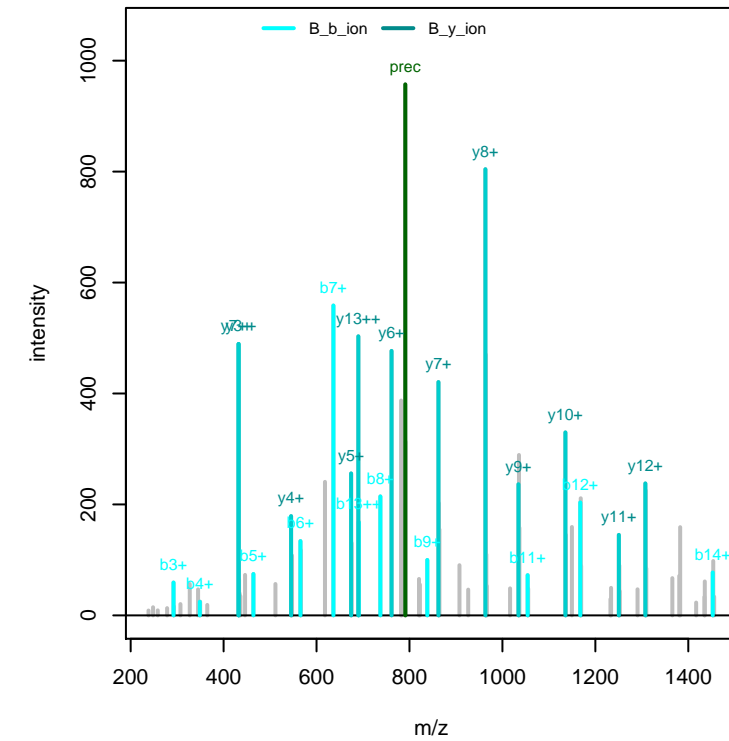

### AMoEKAR KPNSALRK

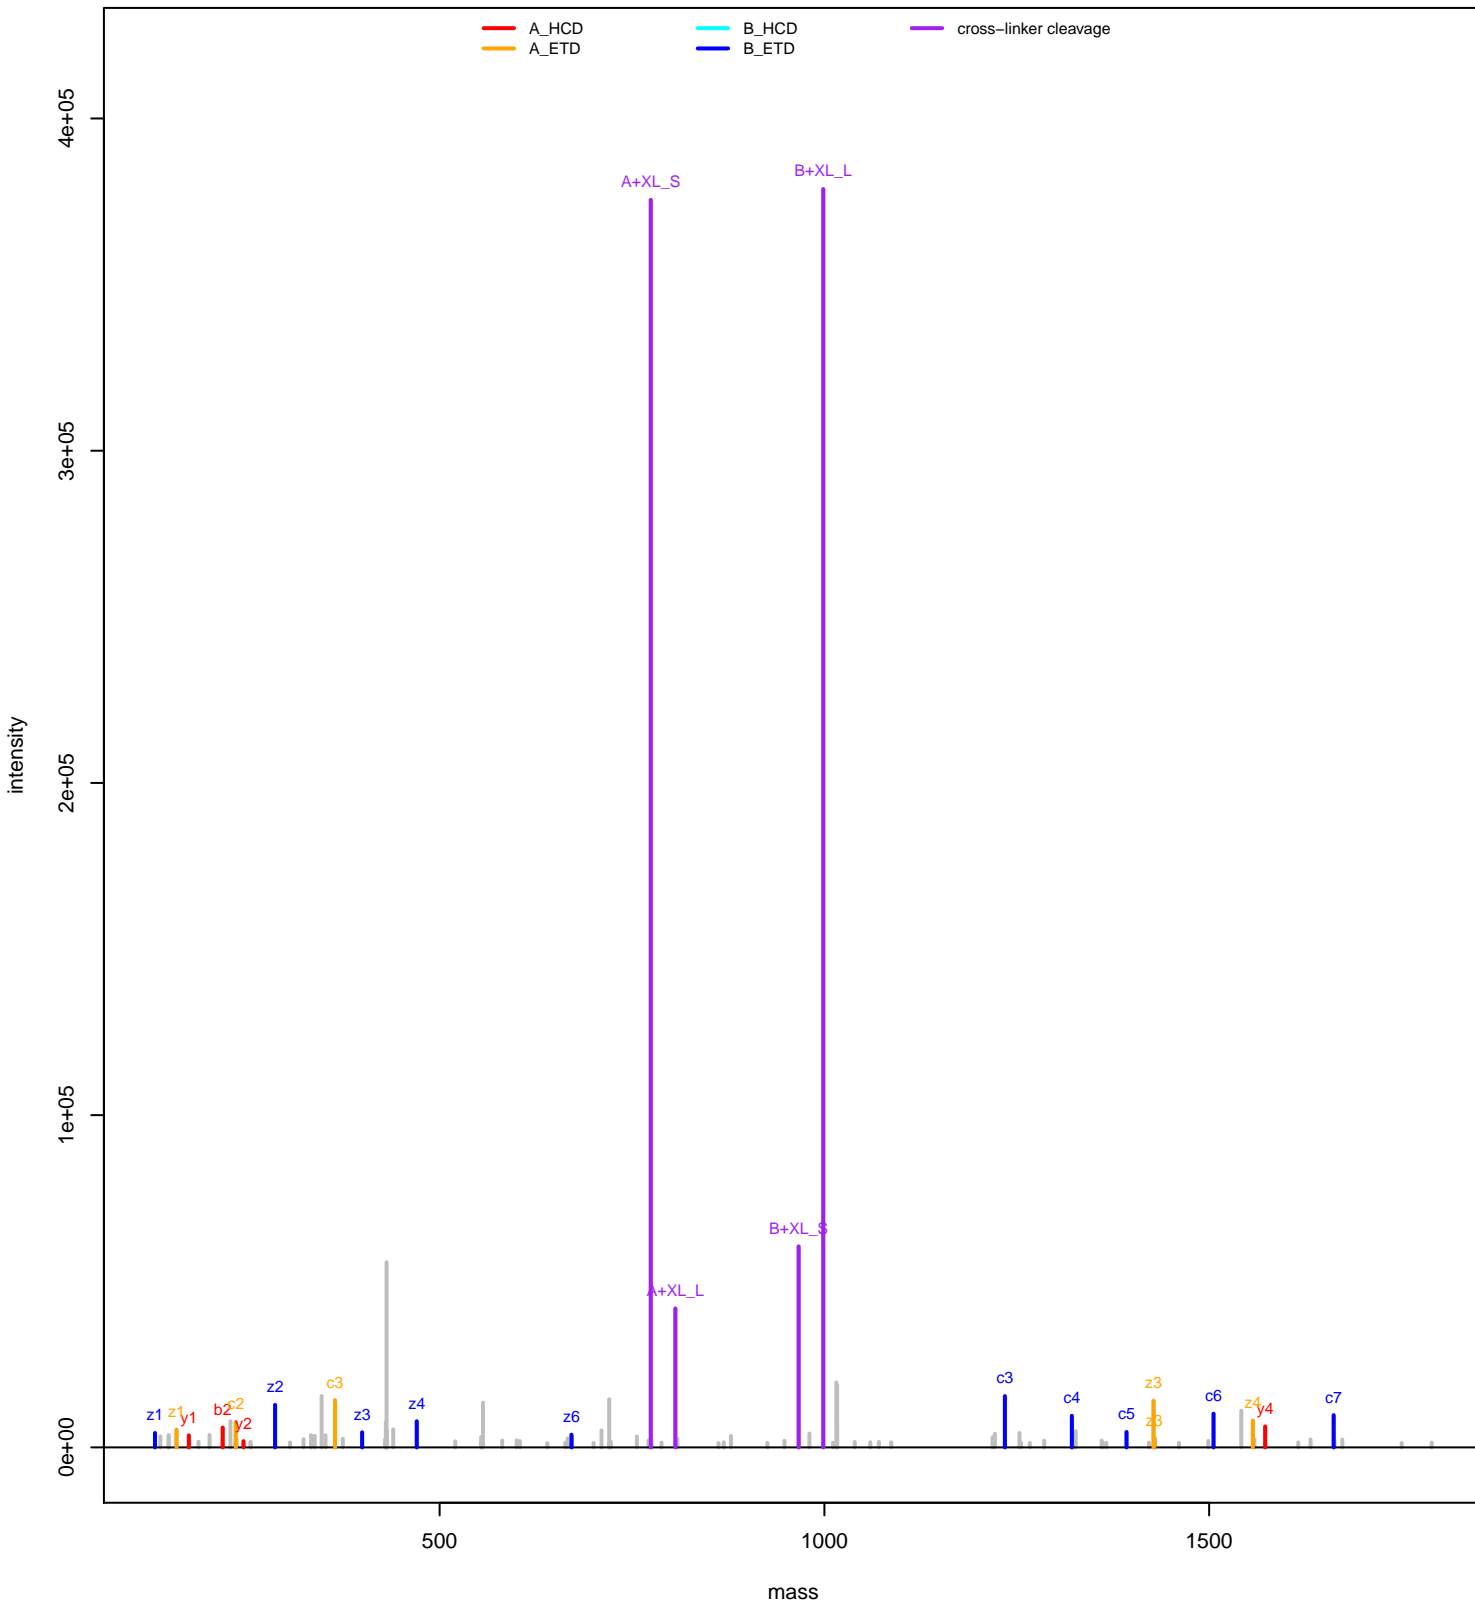

### AMoEKAR+XL\_S

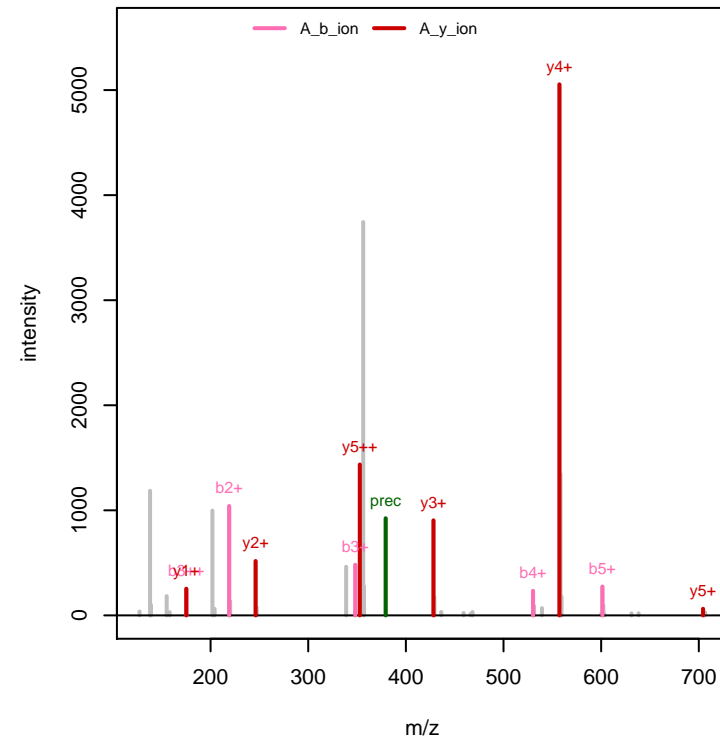

### AMoEKAR+XL\_L

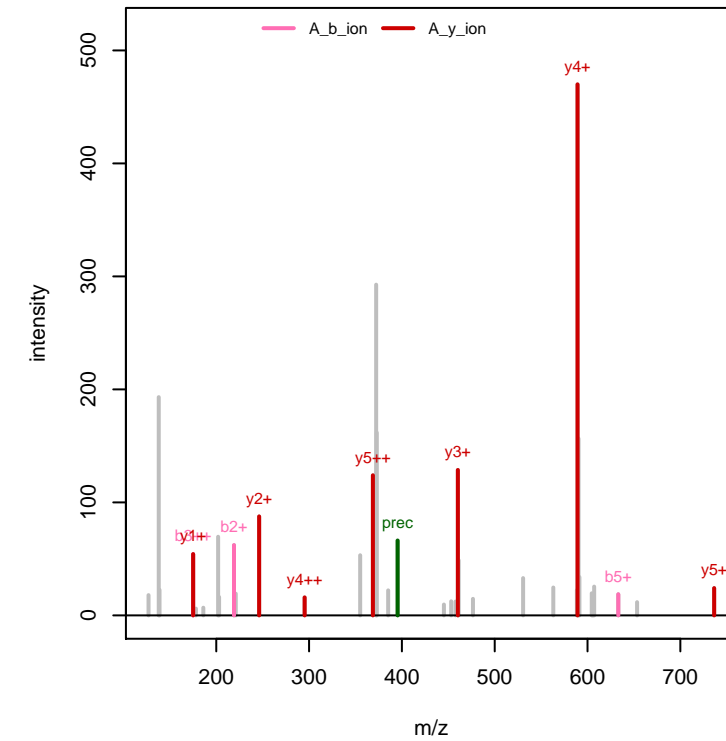

### KPNSALRK+XL\_S

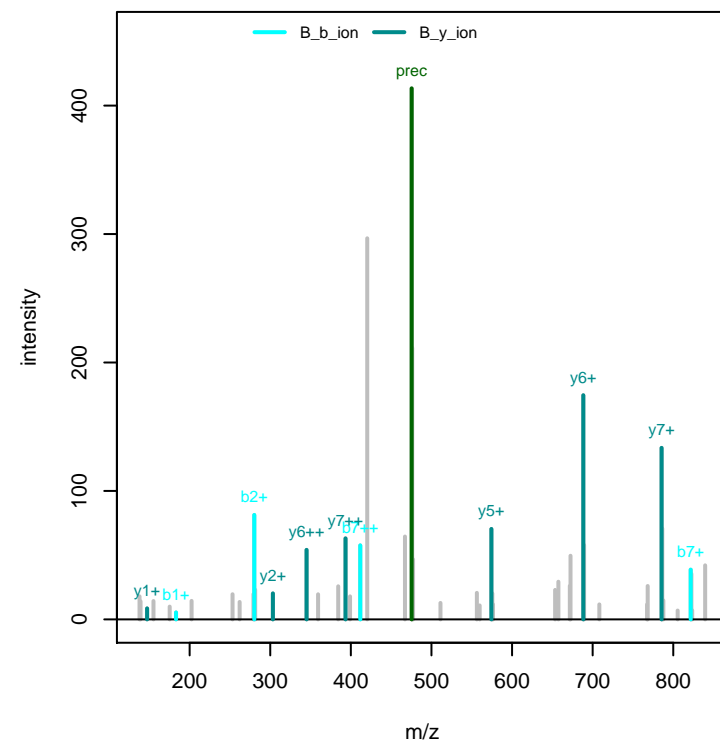

### KPNSALRK+XL\_L

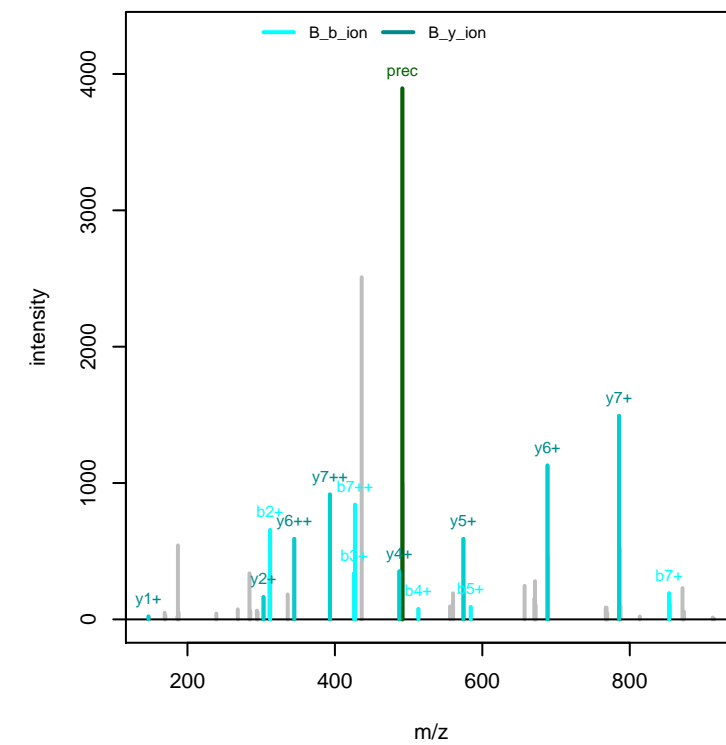

SDSNSR  
LAAELKKK

SDSNSR+XL\_S

SDSNSR+XL\_L

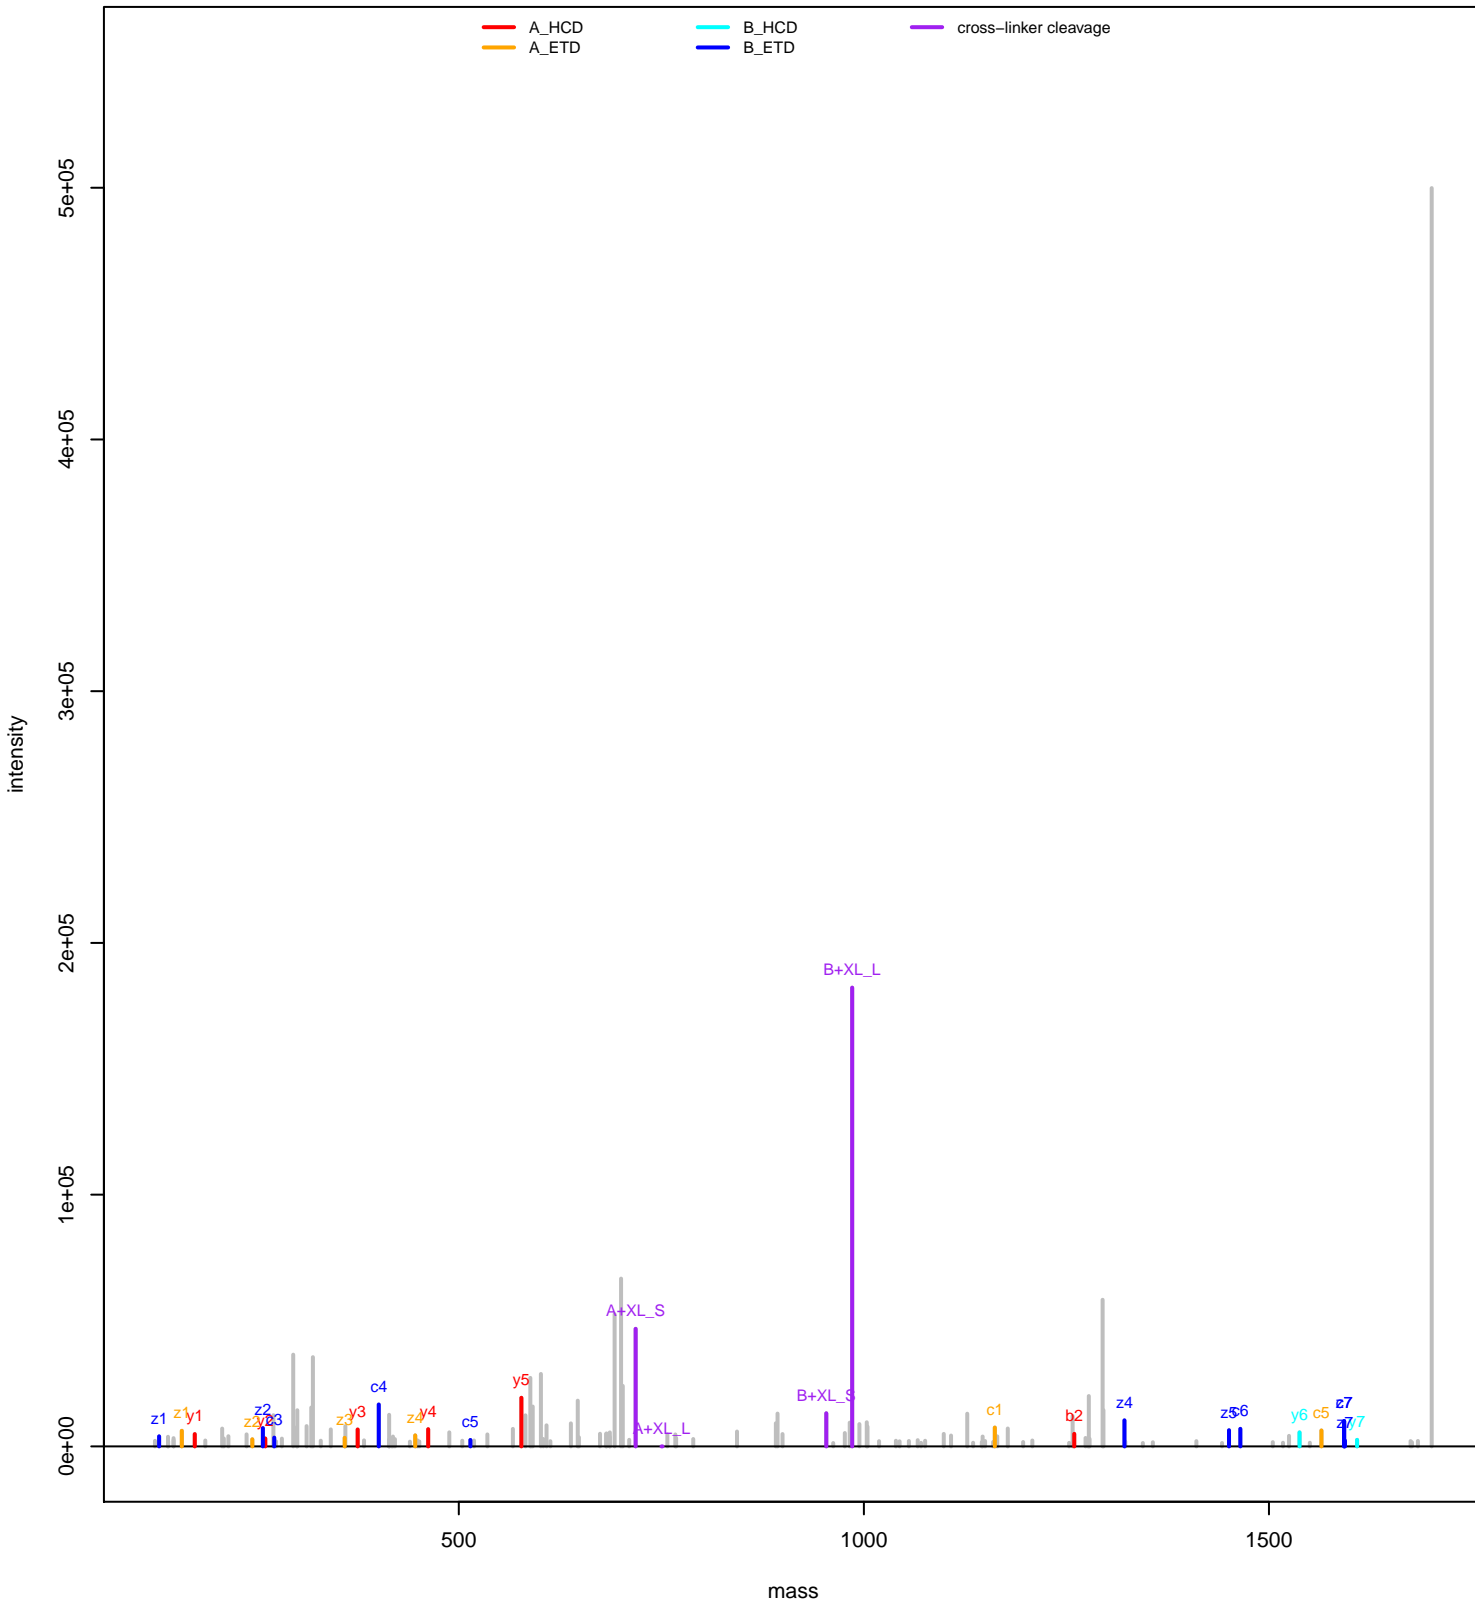

LAAELKKK+XL\_S

LAAELKKK+XL\_L

VYTGKVTR  
IAATDGEKAK

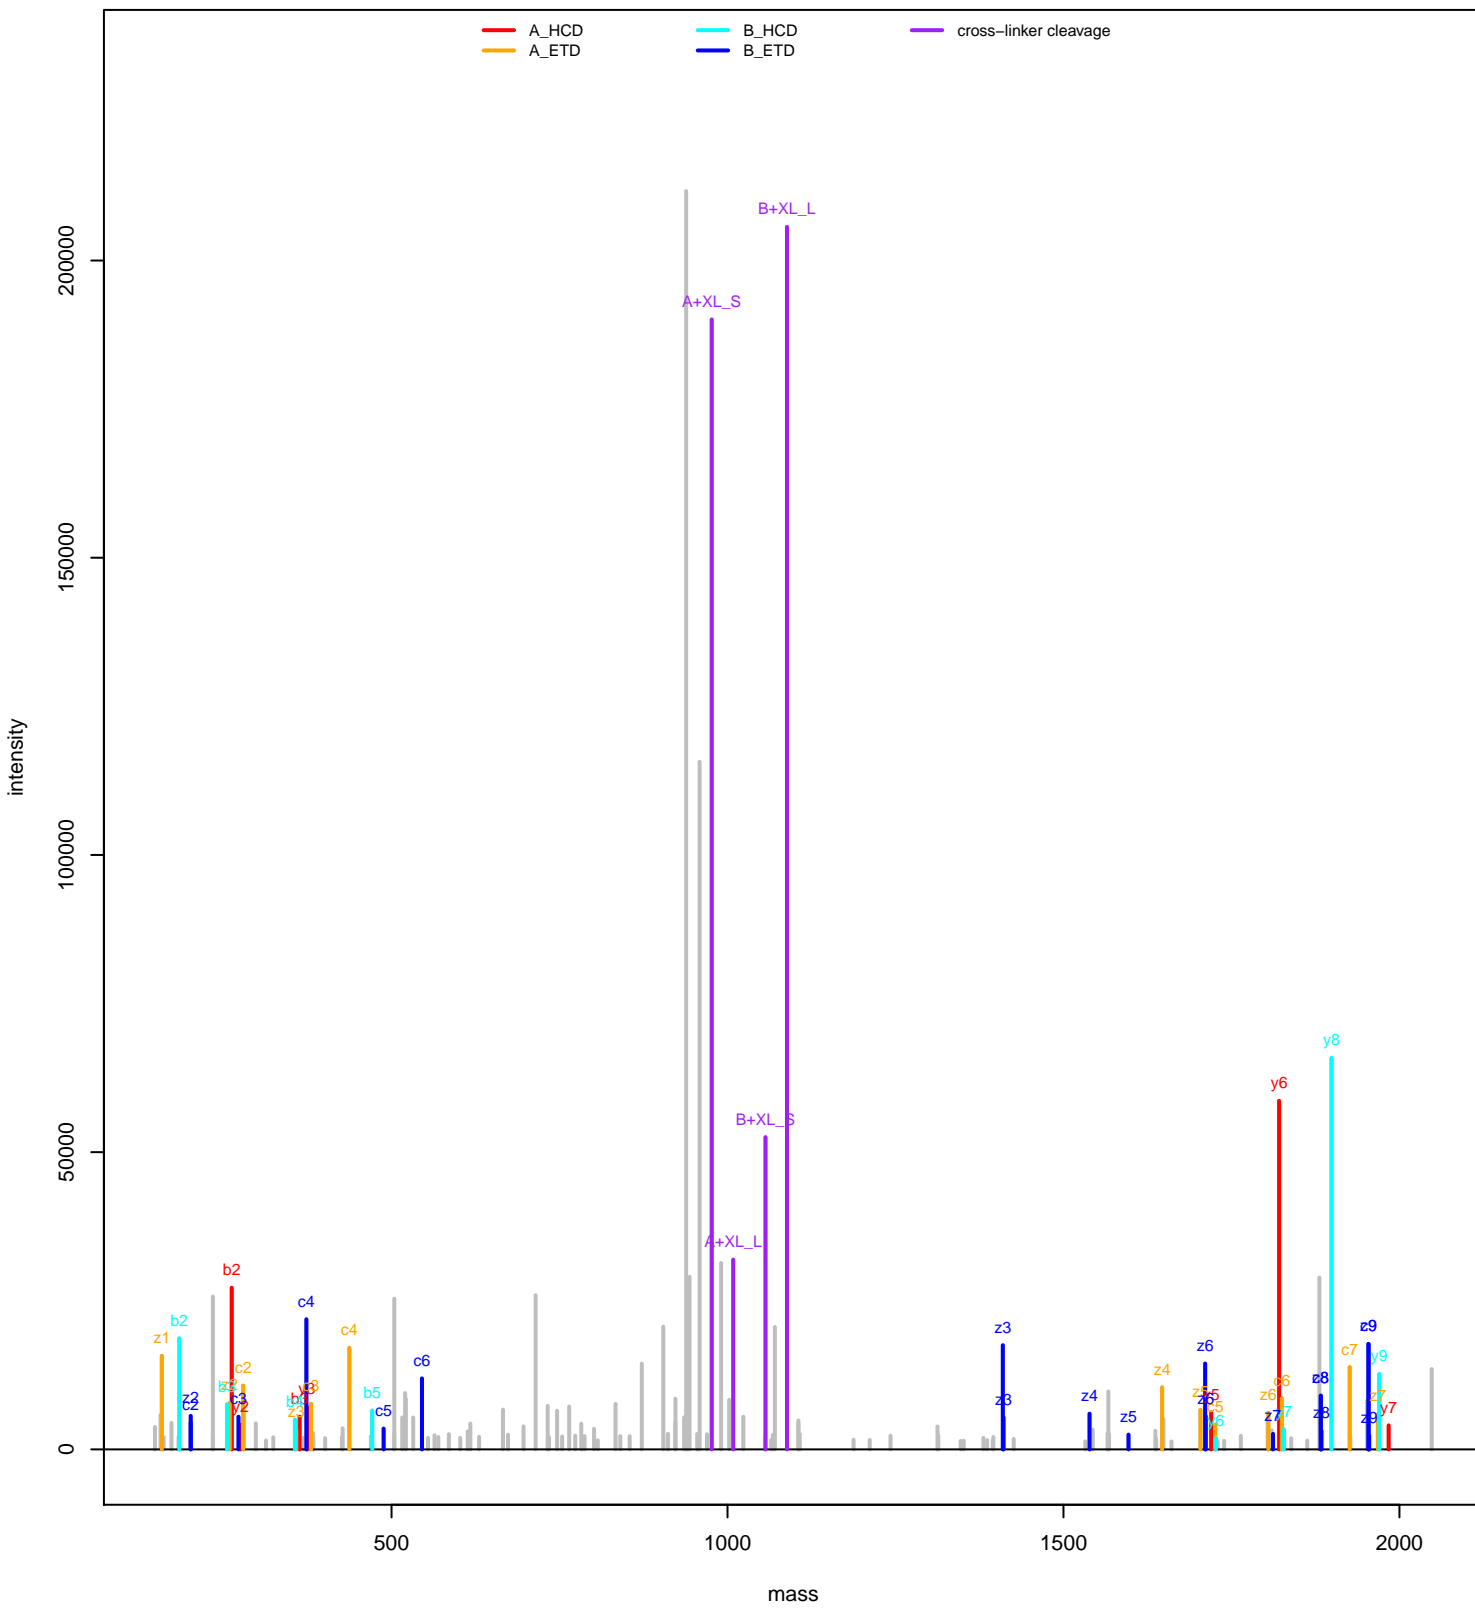

VYTGKVTR+XL\_S

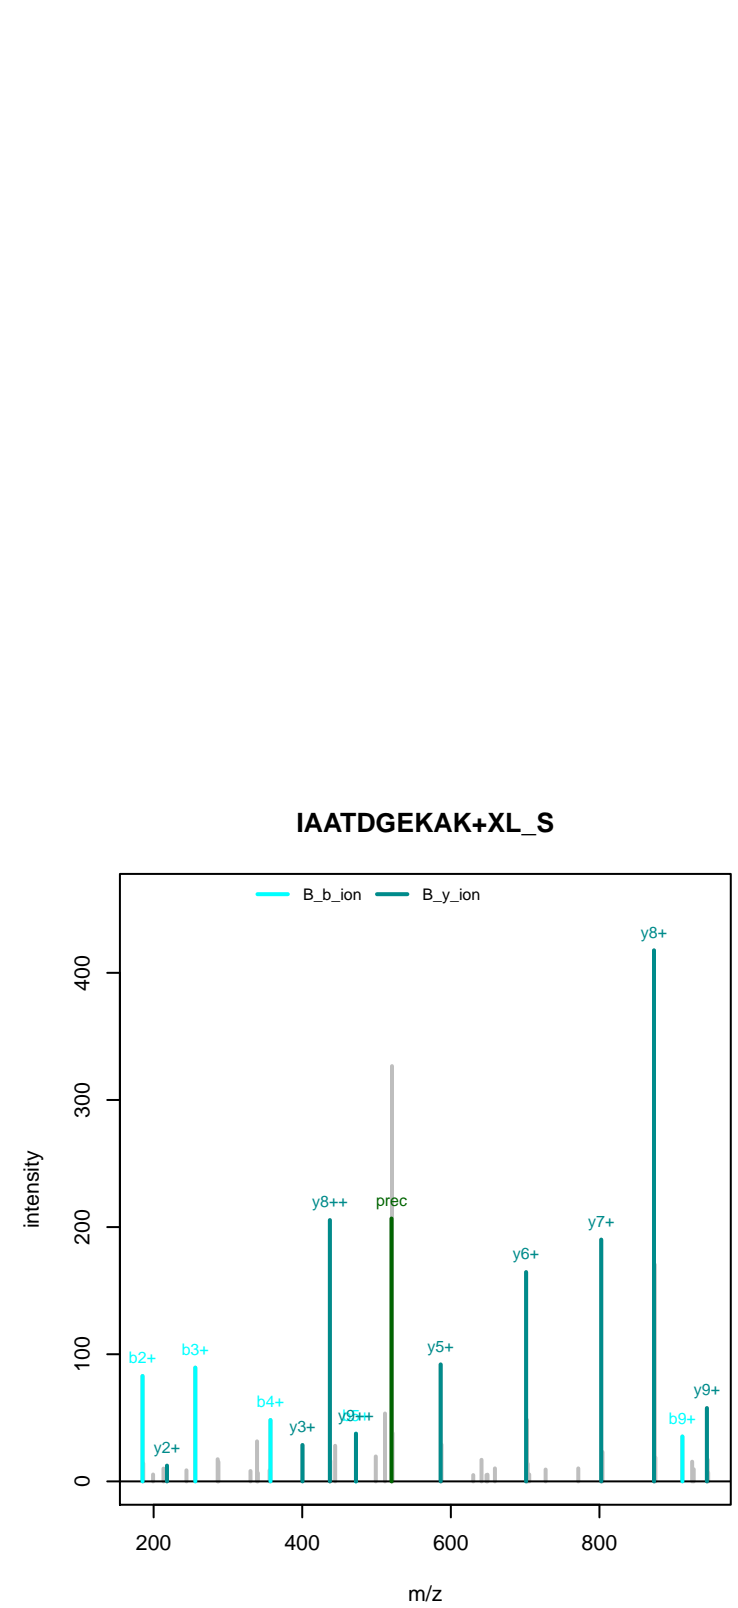

VYTGKVTR+XL\_L

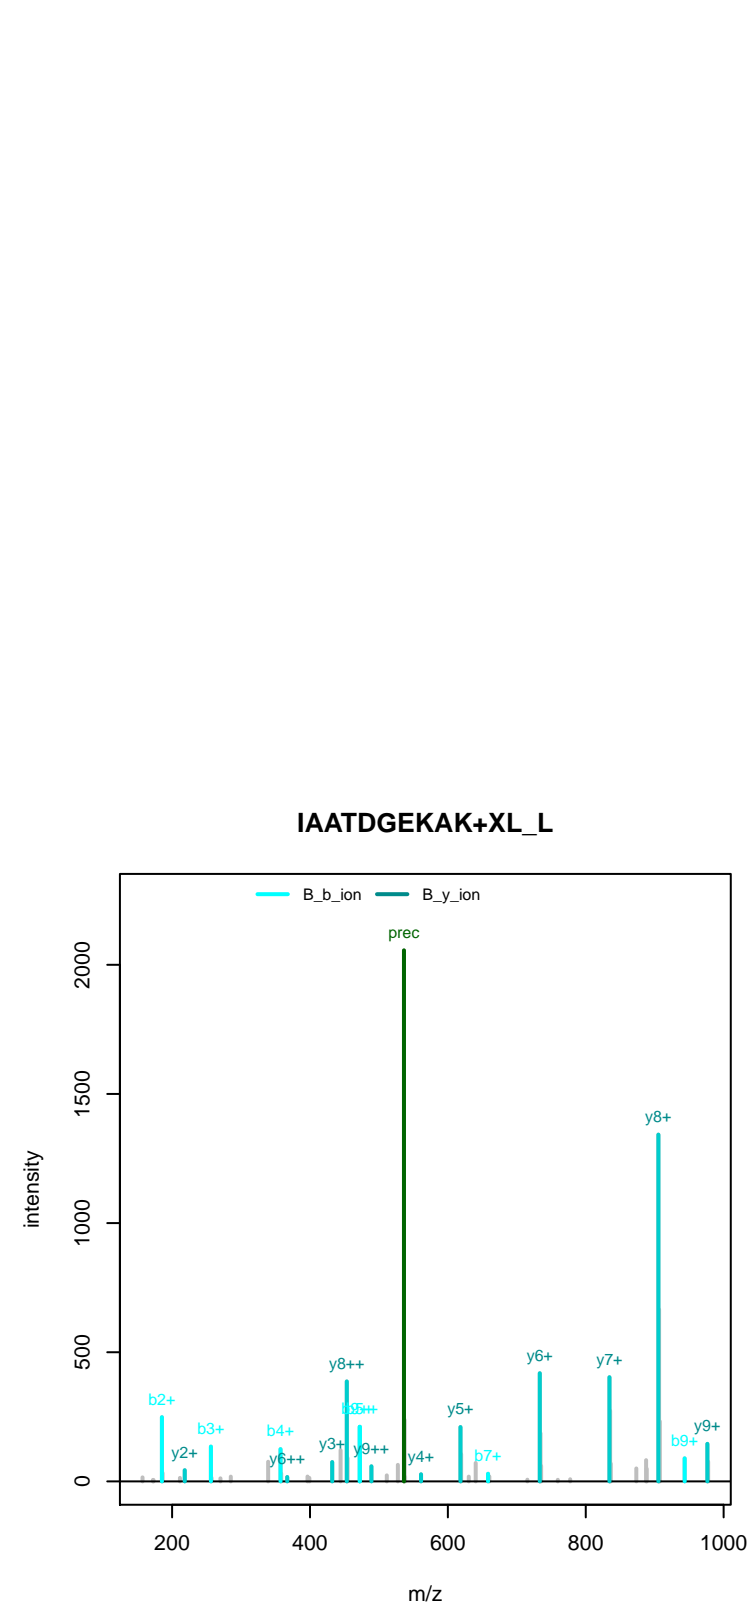

IAATDGEKAK+XL\_S

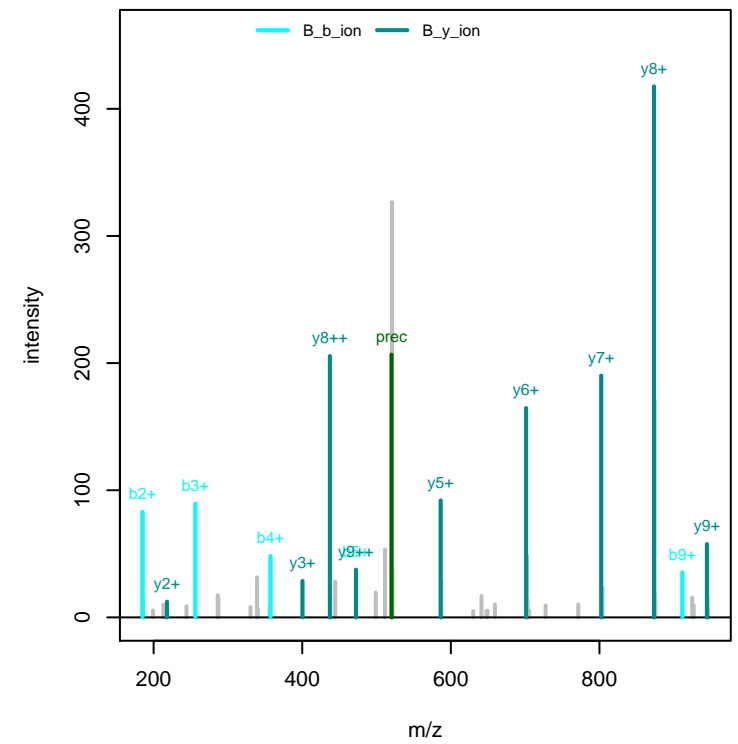

IAATDGEKAK+XL\_L

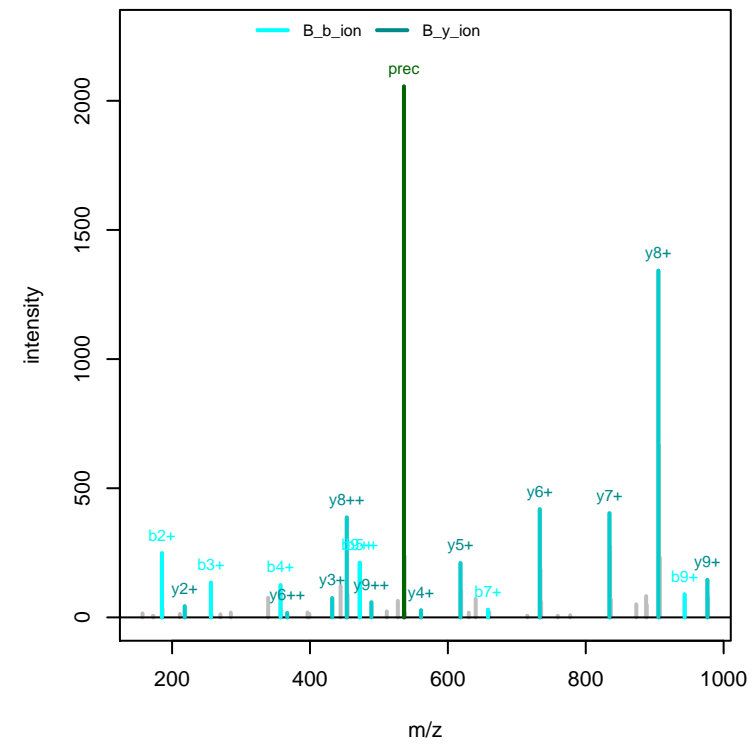

**KGEDVEK  
ELAKASVSR**

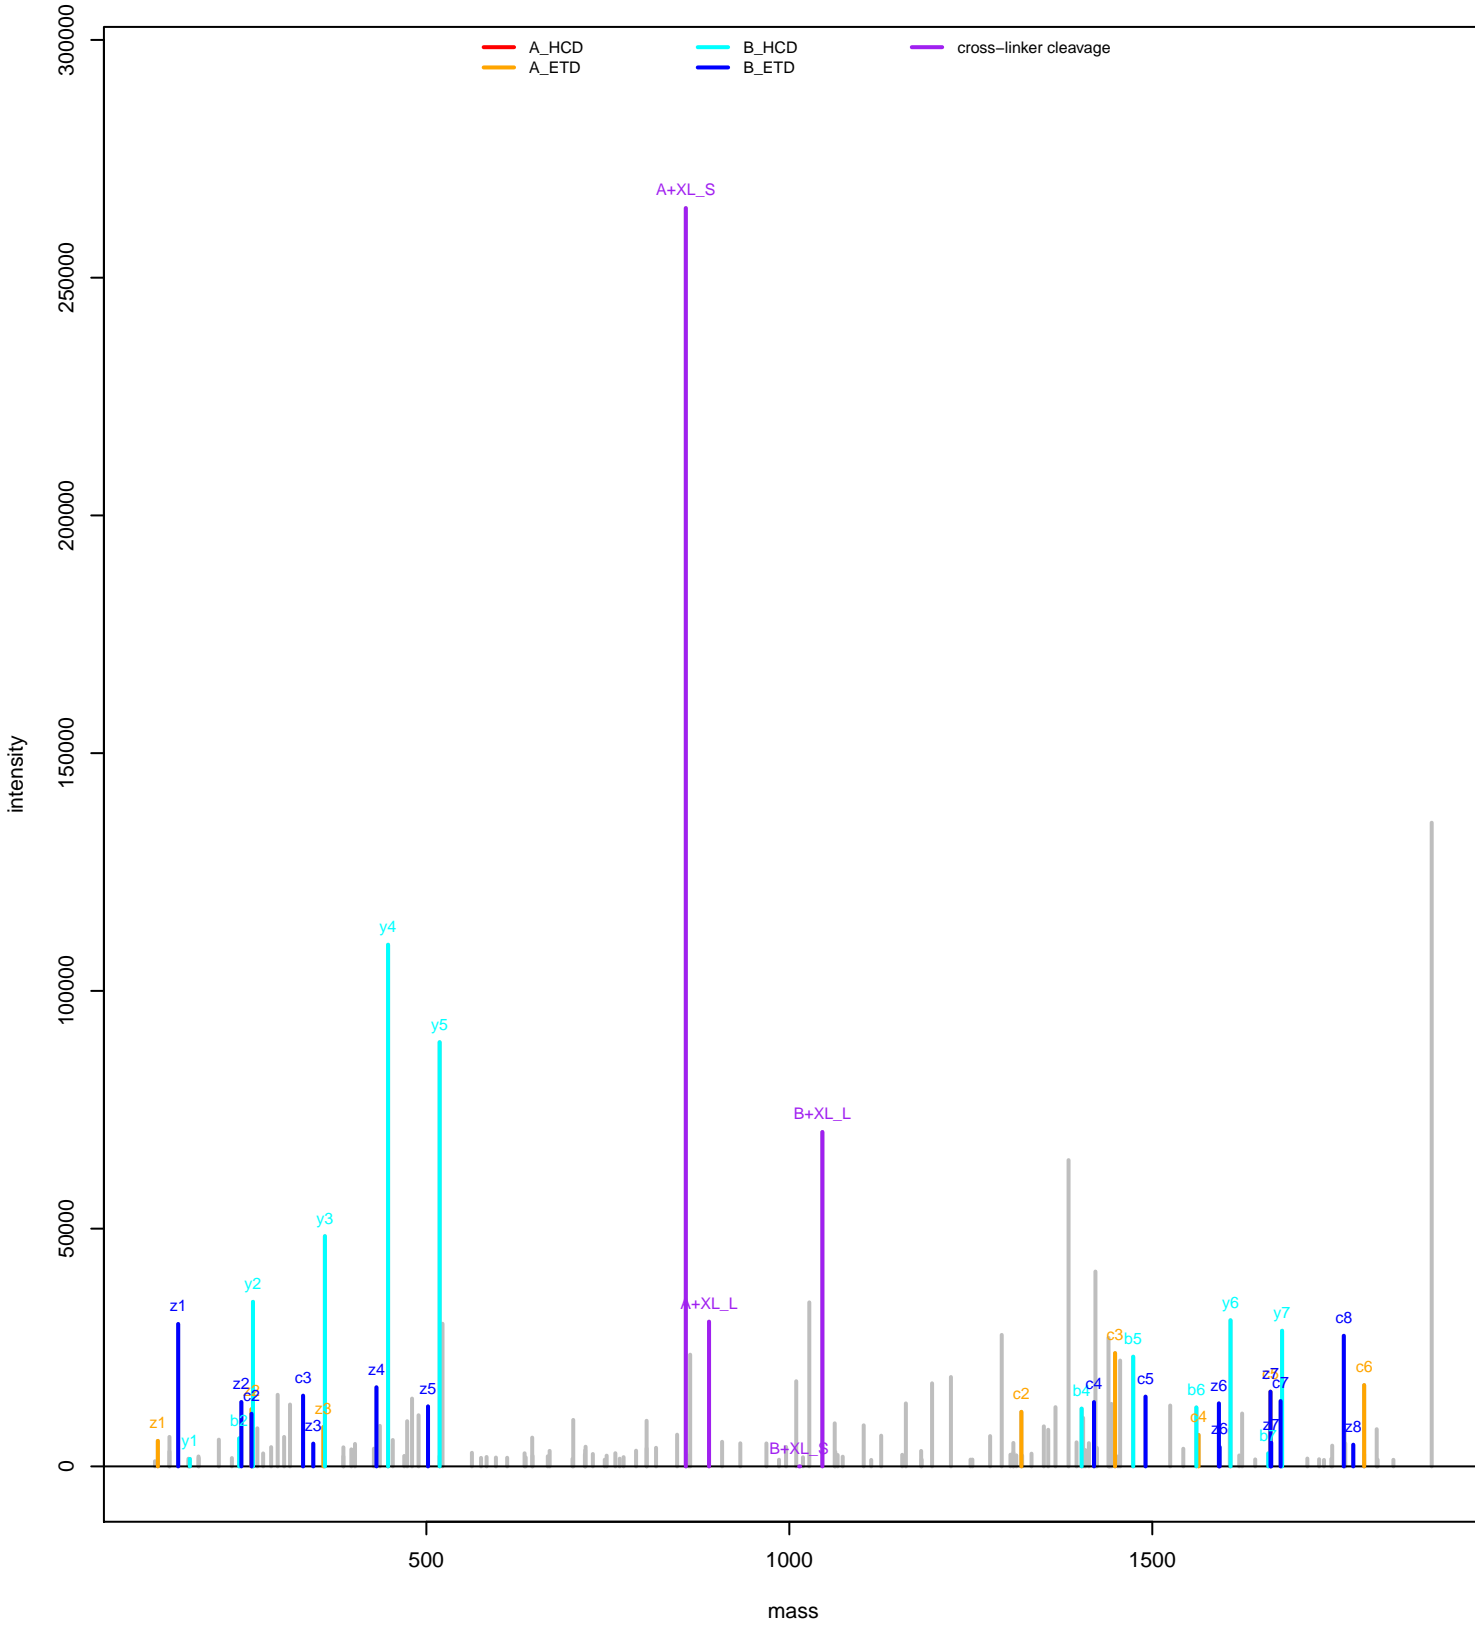

**KGEDVEK+XL\_S**

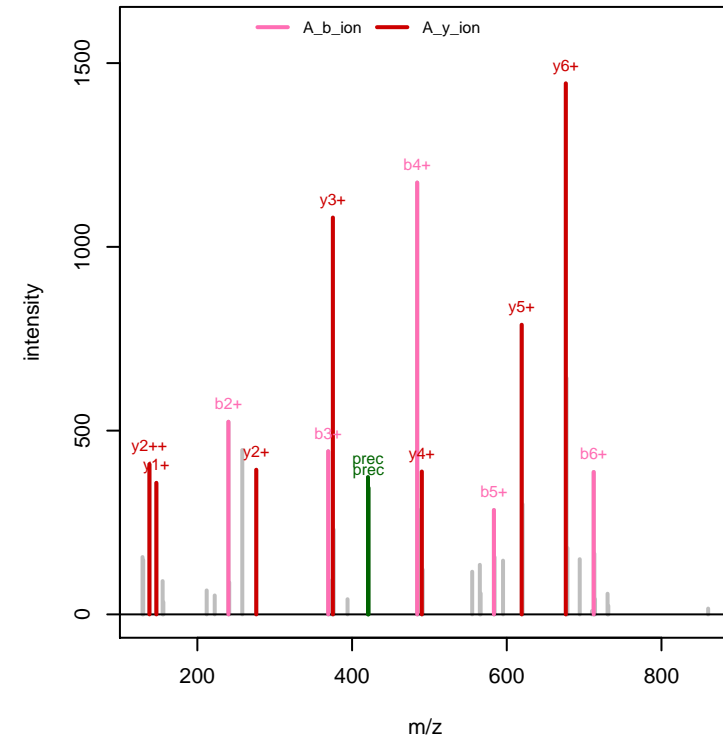

**KGEDVEK+XL\_L**

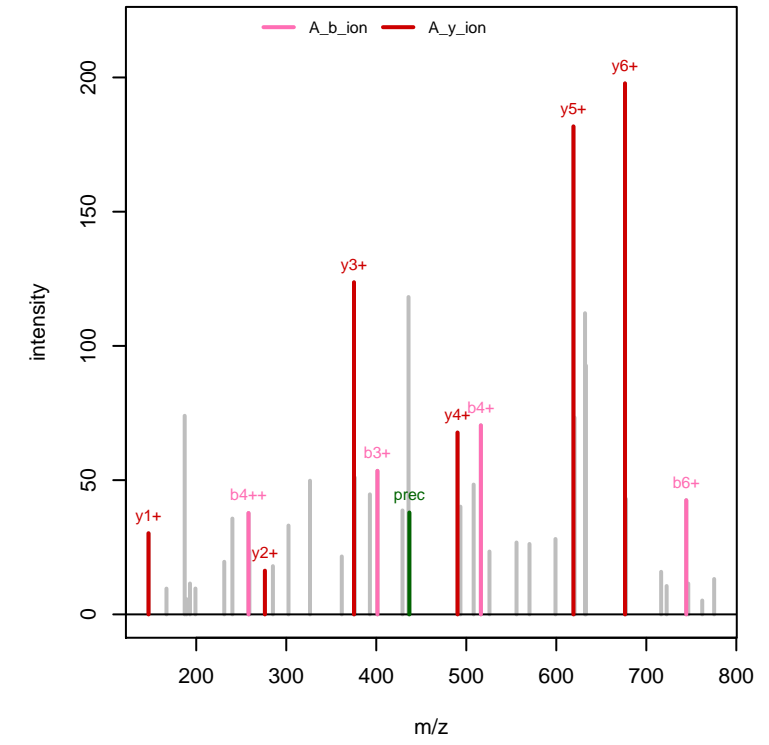

**ELAKASVSR+XL\_S**

**ELAKASVSR+XL\_L**

NDLKTK  
STDISVKTDQK

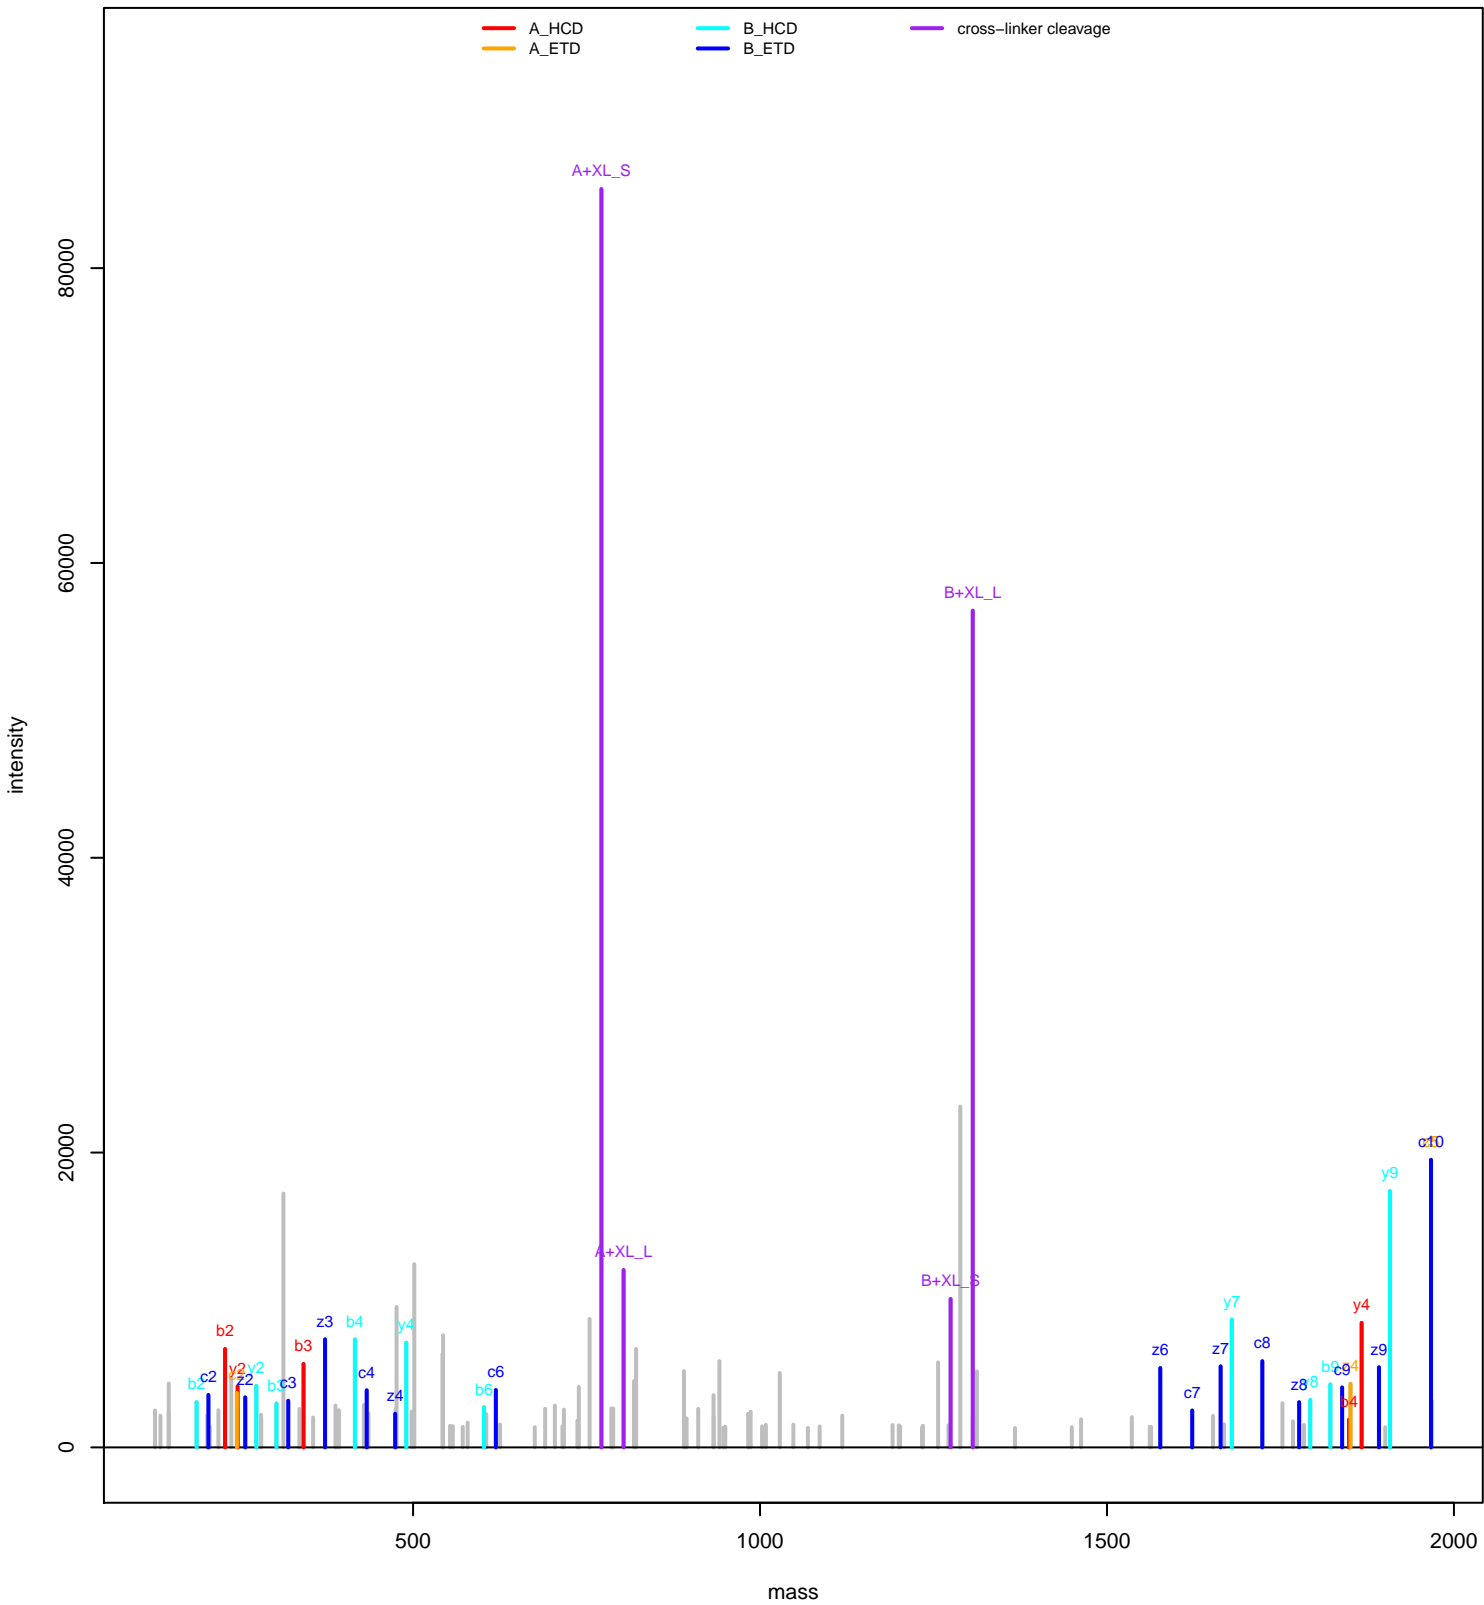

NDLKTK+XL\_S

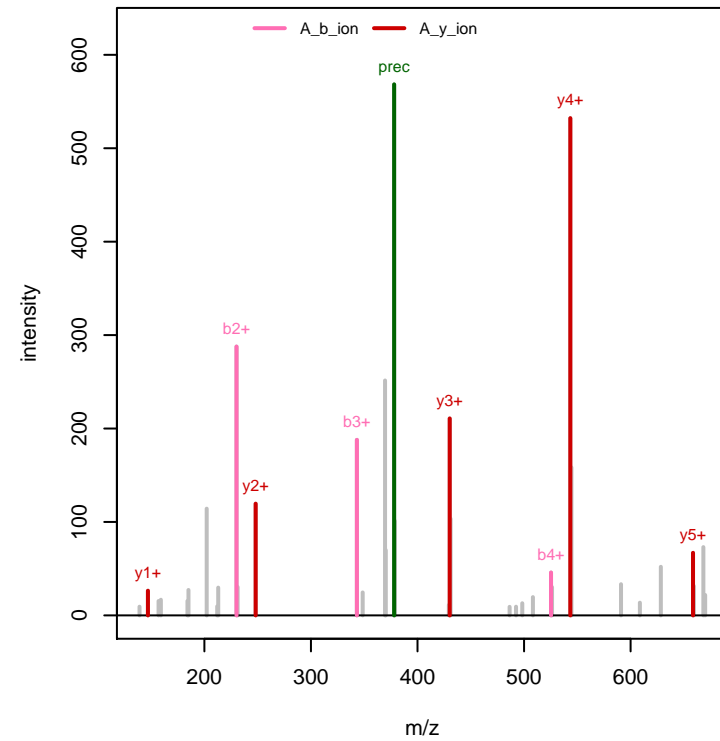

NDLKTK+XL\_L

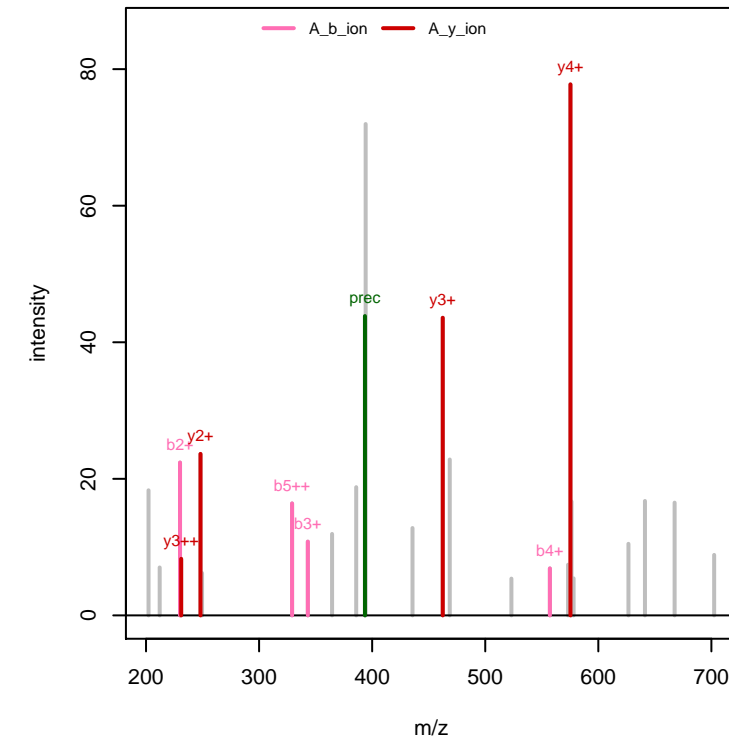

STDISVKTDQK+XL\_S

STDISVKTDQK+XL\_L

**ANIKTK  
SVKDLDGK**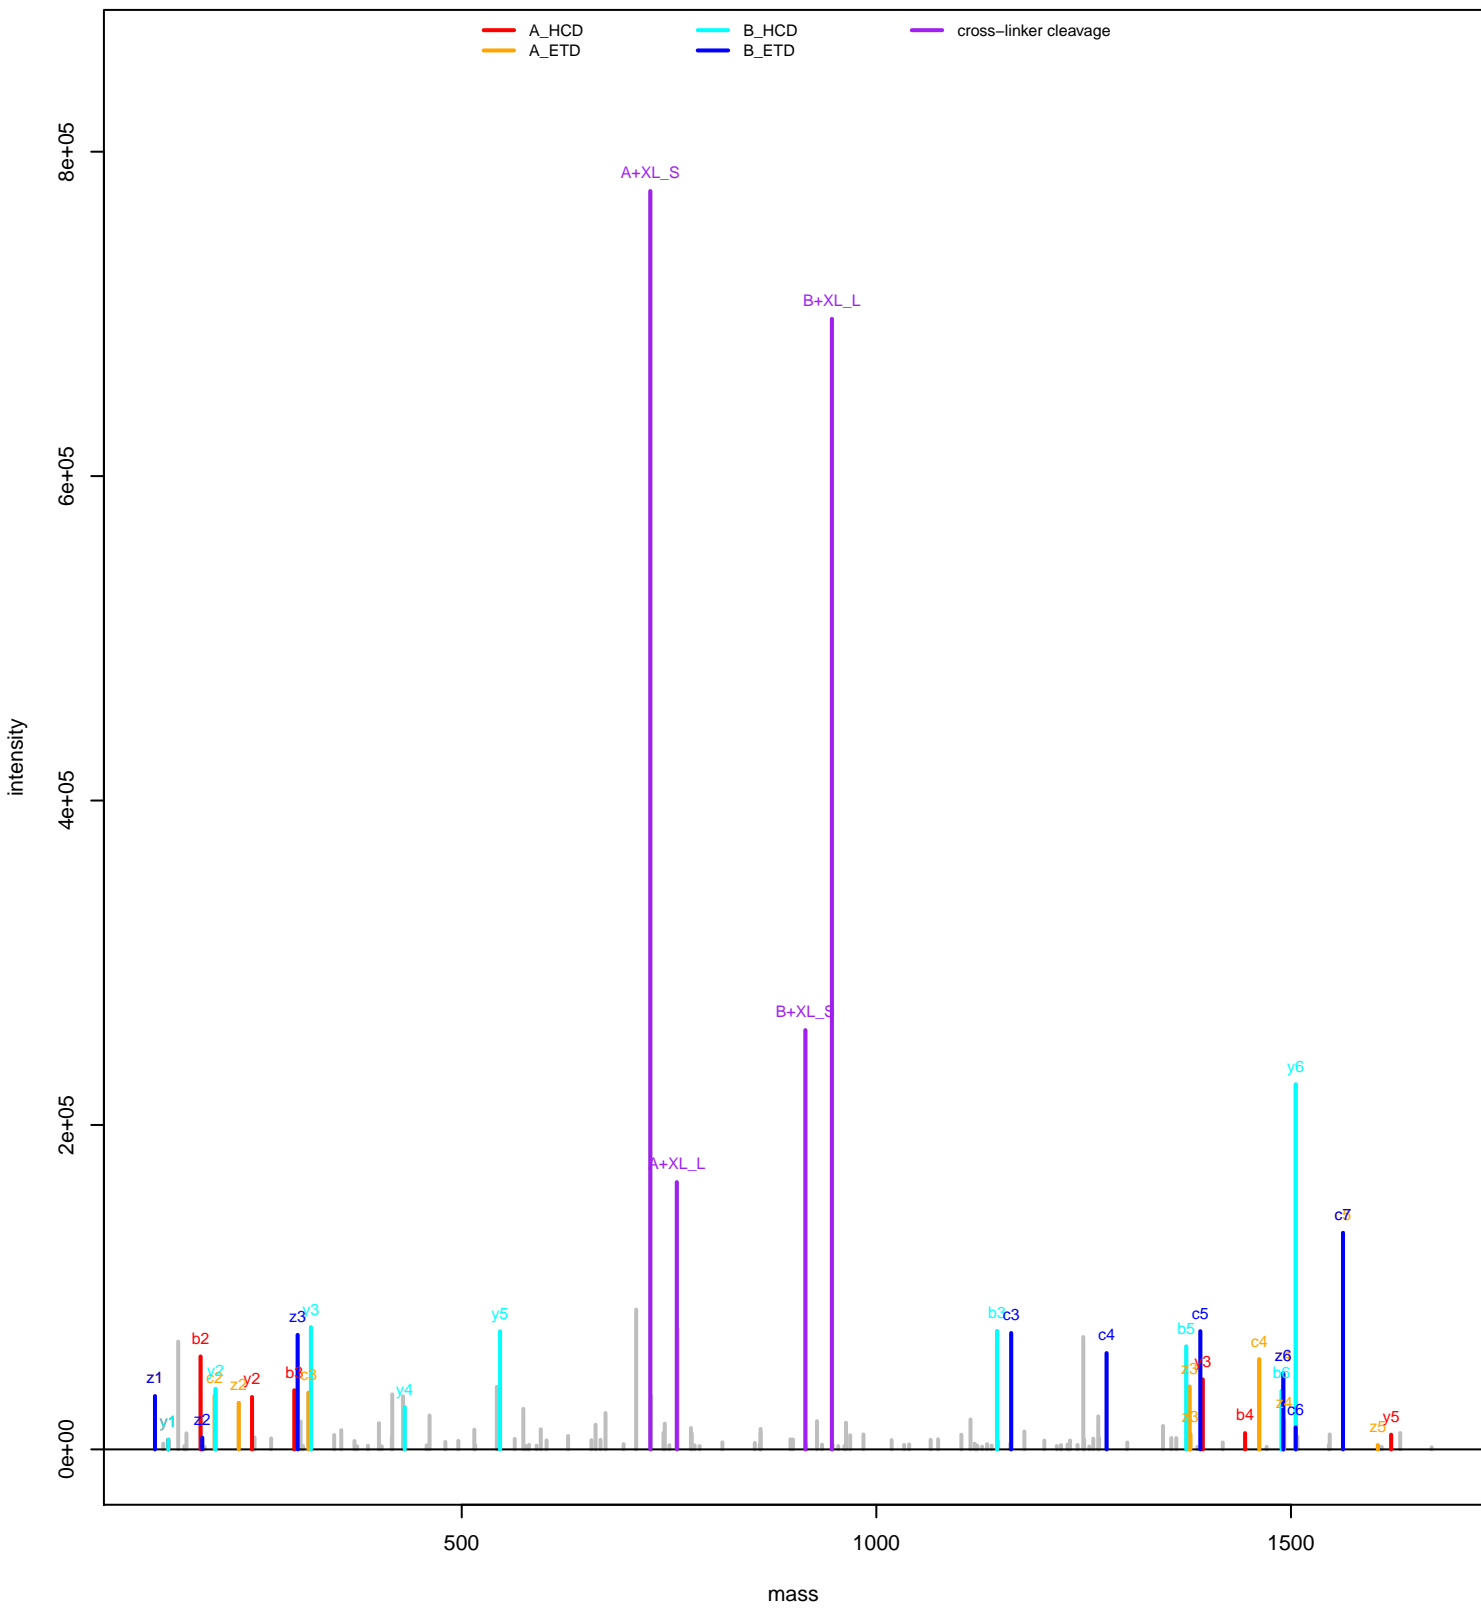**ANIKTK+XL\_S**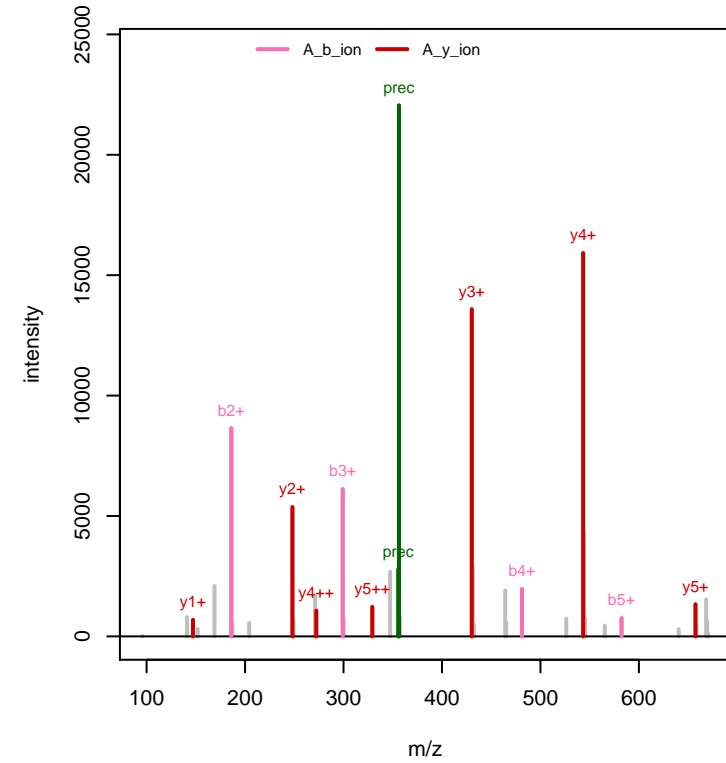**ANIKTK+XL\_L**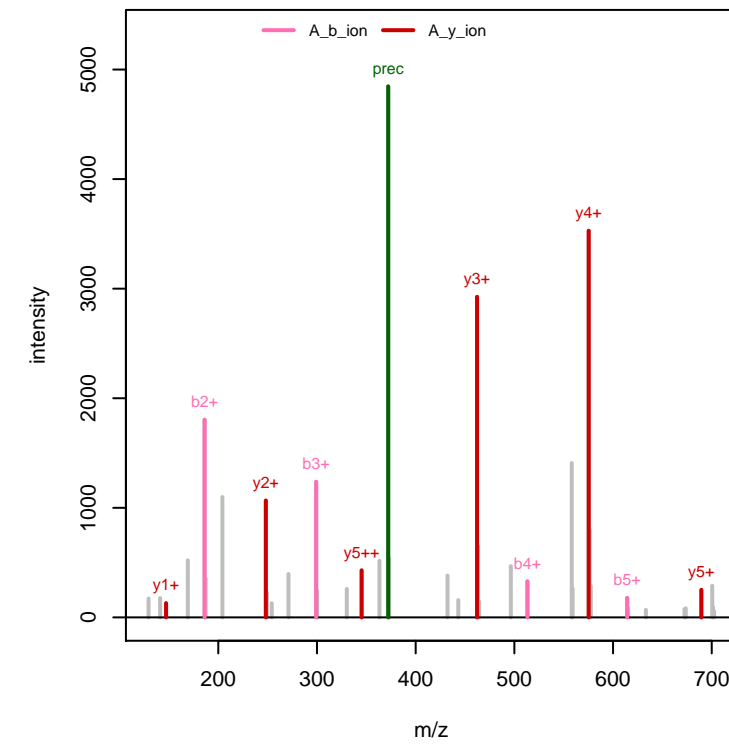**SVKDLDGK+XL\_S**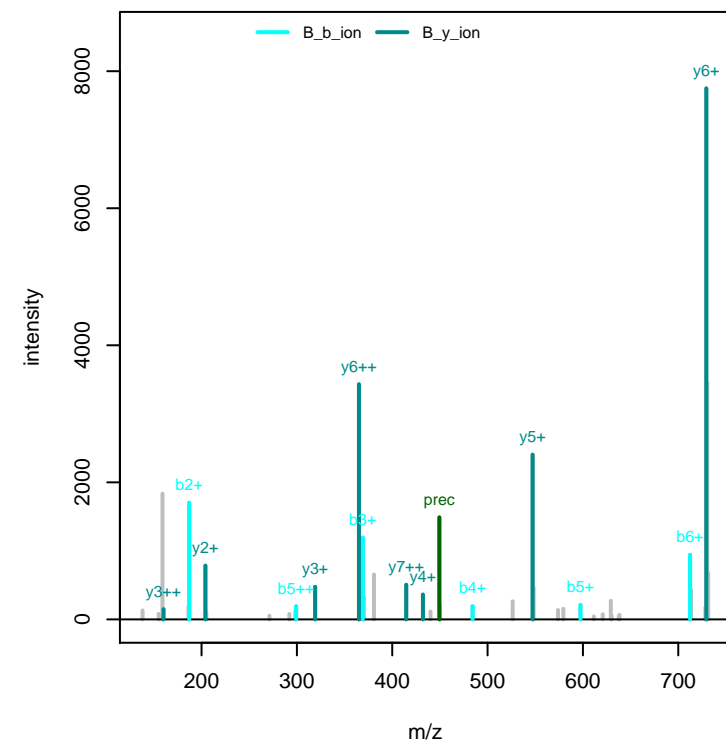**SVKDLDGK+XL\_L**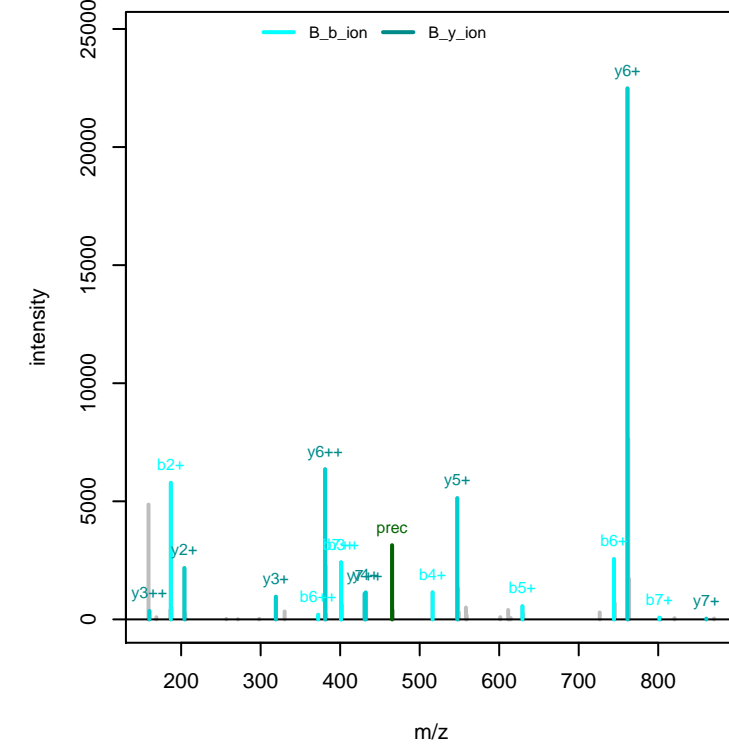



**IKELAVK**  
**APAKESAPAAAAAPAAQPALAAR**

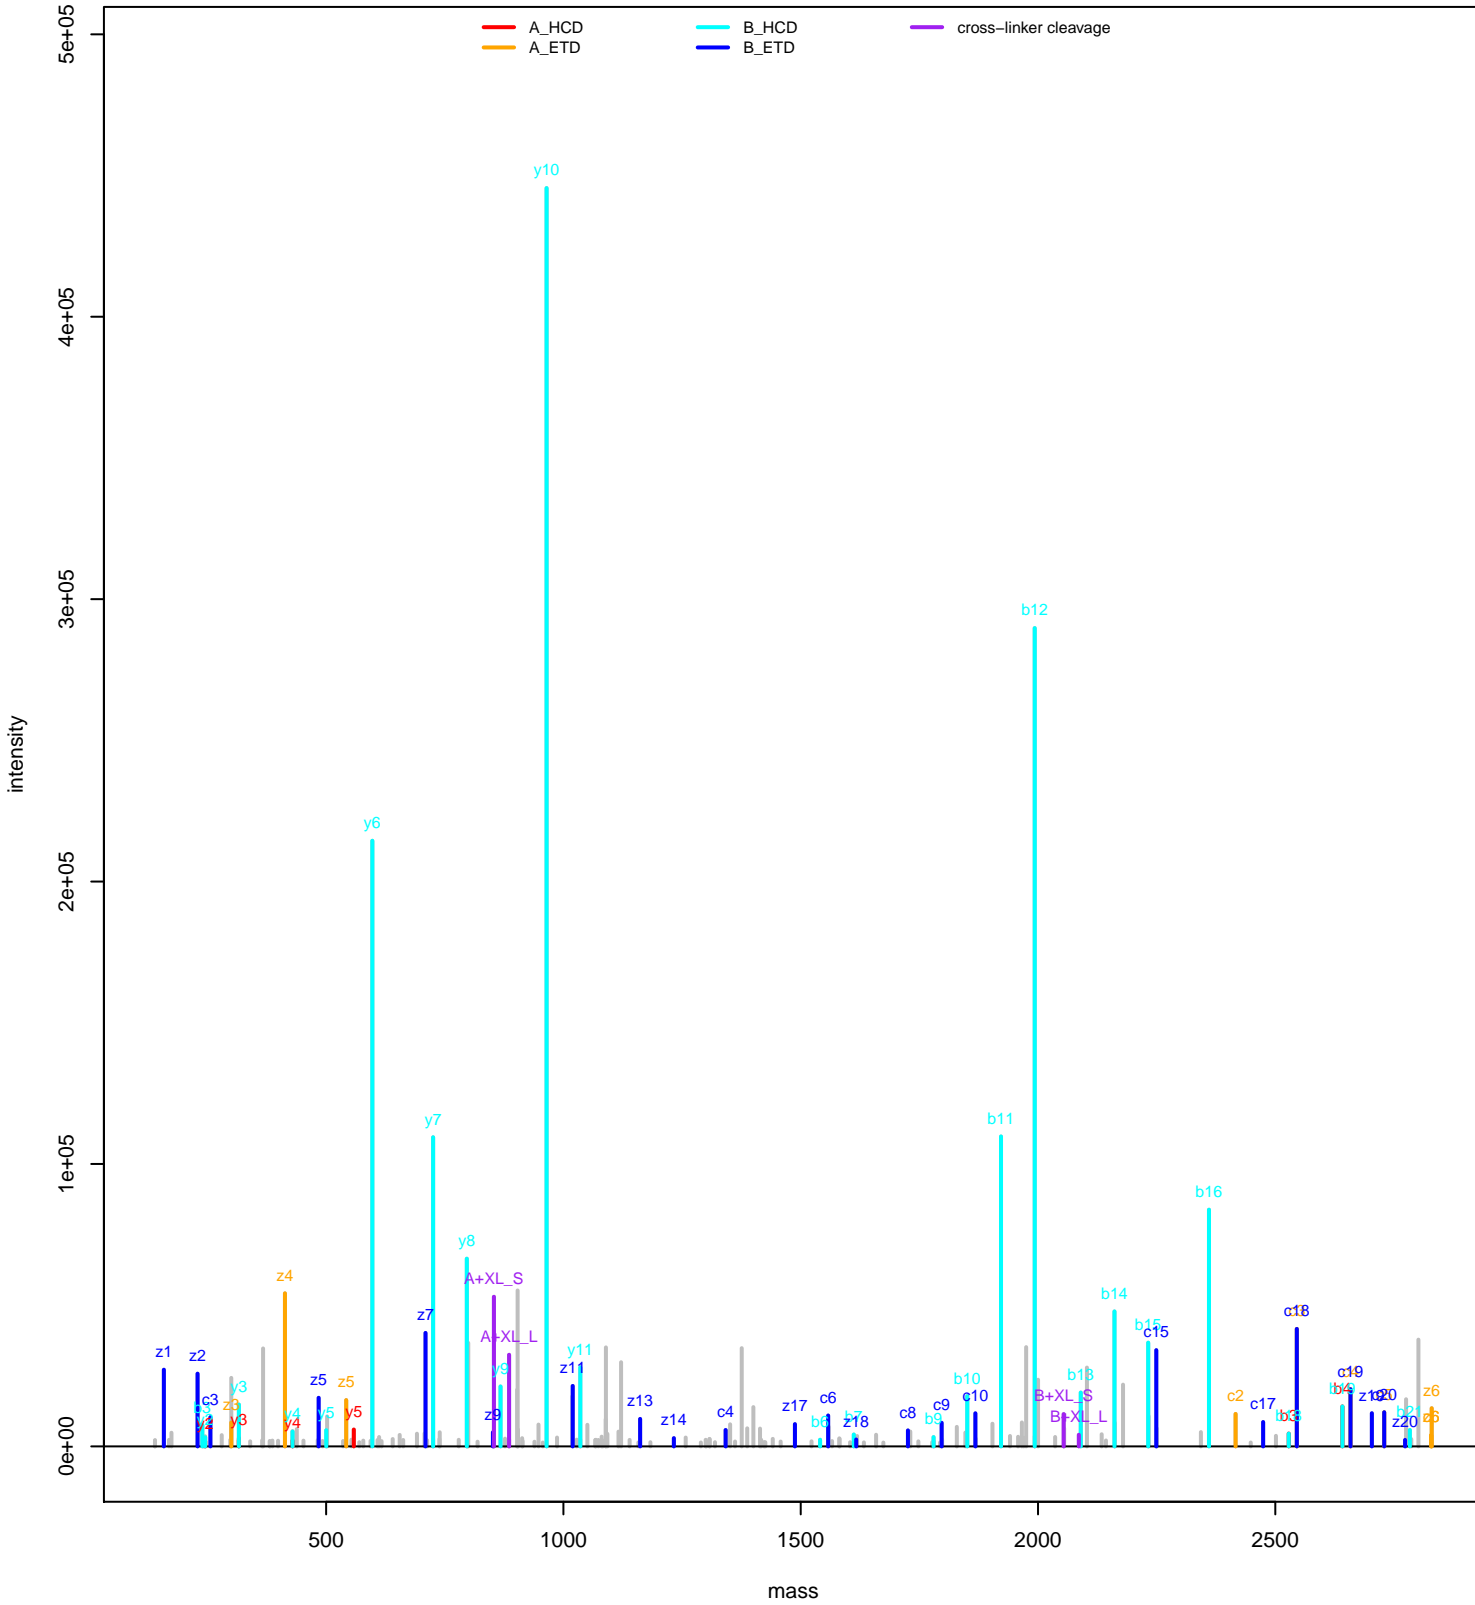

**IKELAVK+XL\_S**

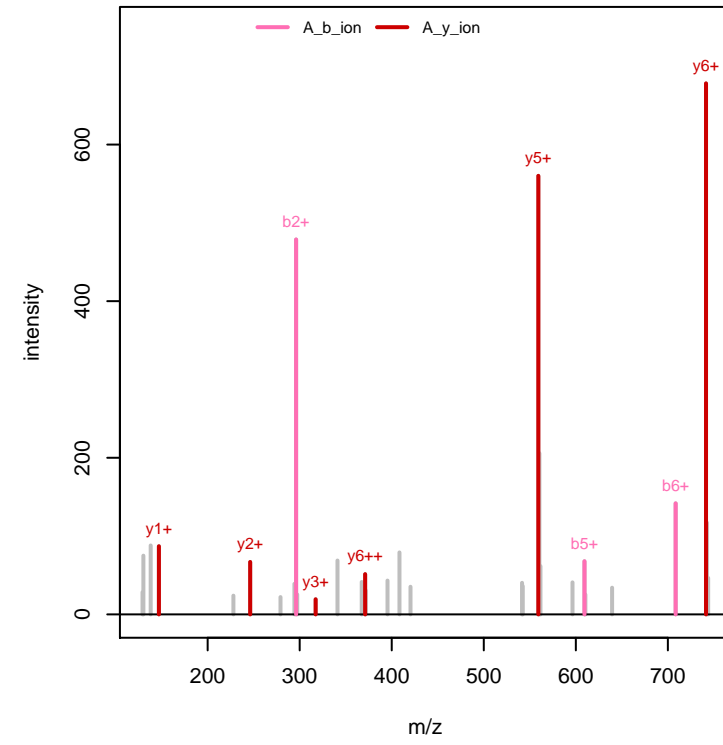

**IKELAVK+XL\_L**

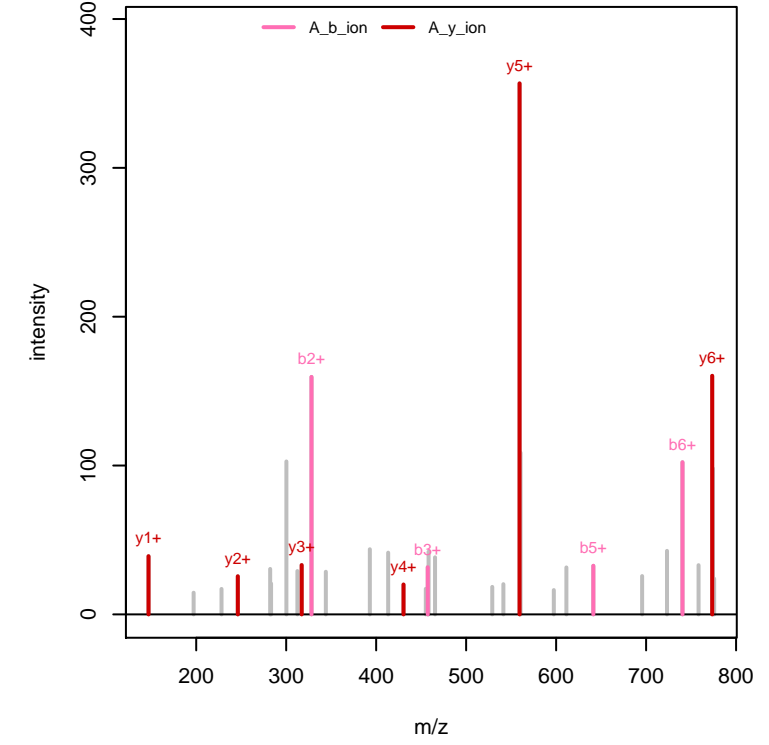

**APAKESAPAAAAAPAAQPALAAR+XL\_S**

**APAKESAPAAAAAPAAQPALAAR+XL\_L**

**KLDSEHNK  
NAQQGYEKVK**

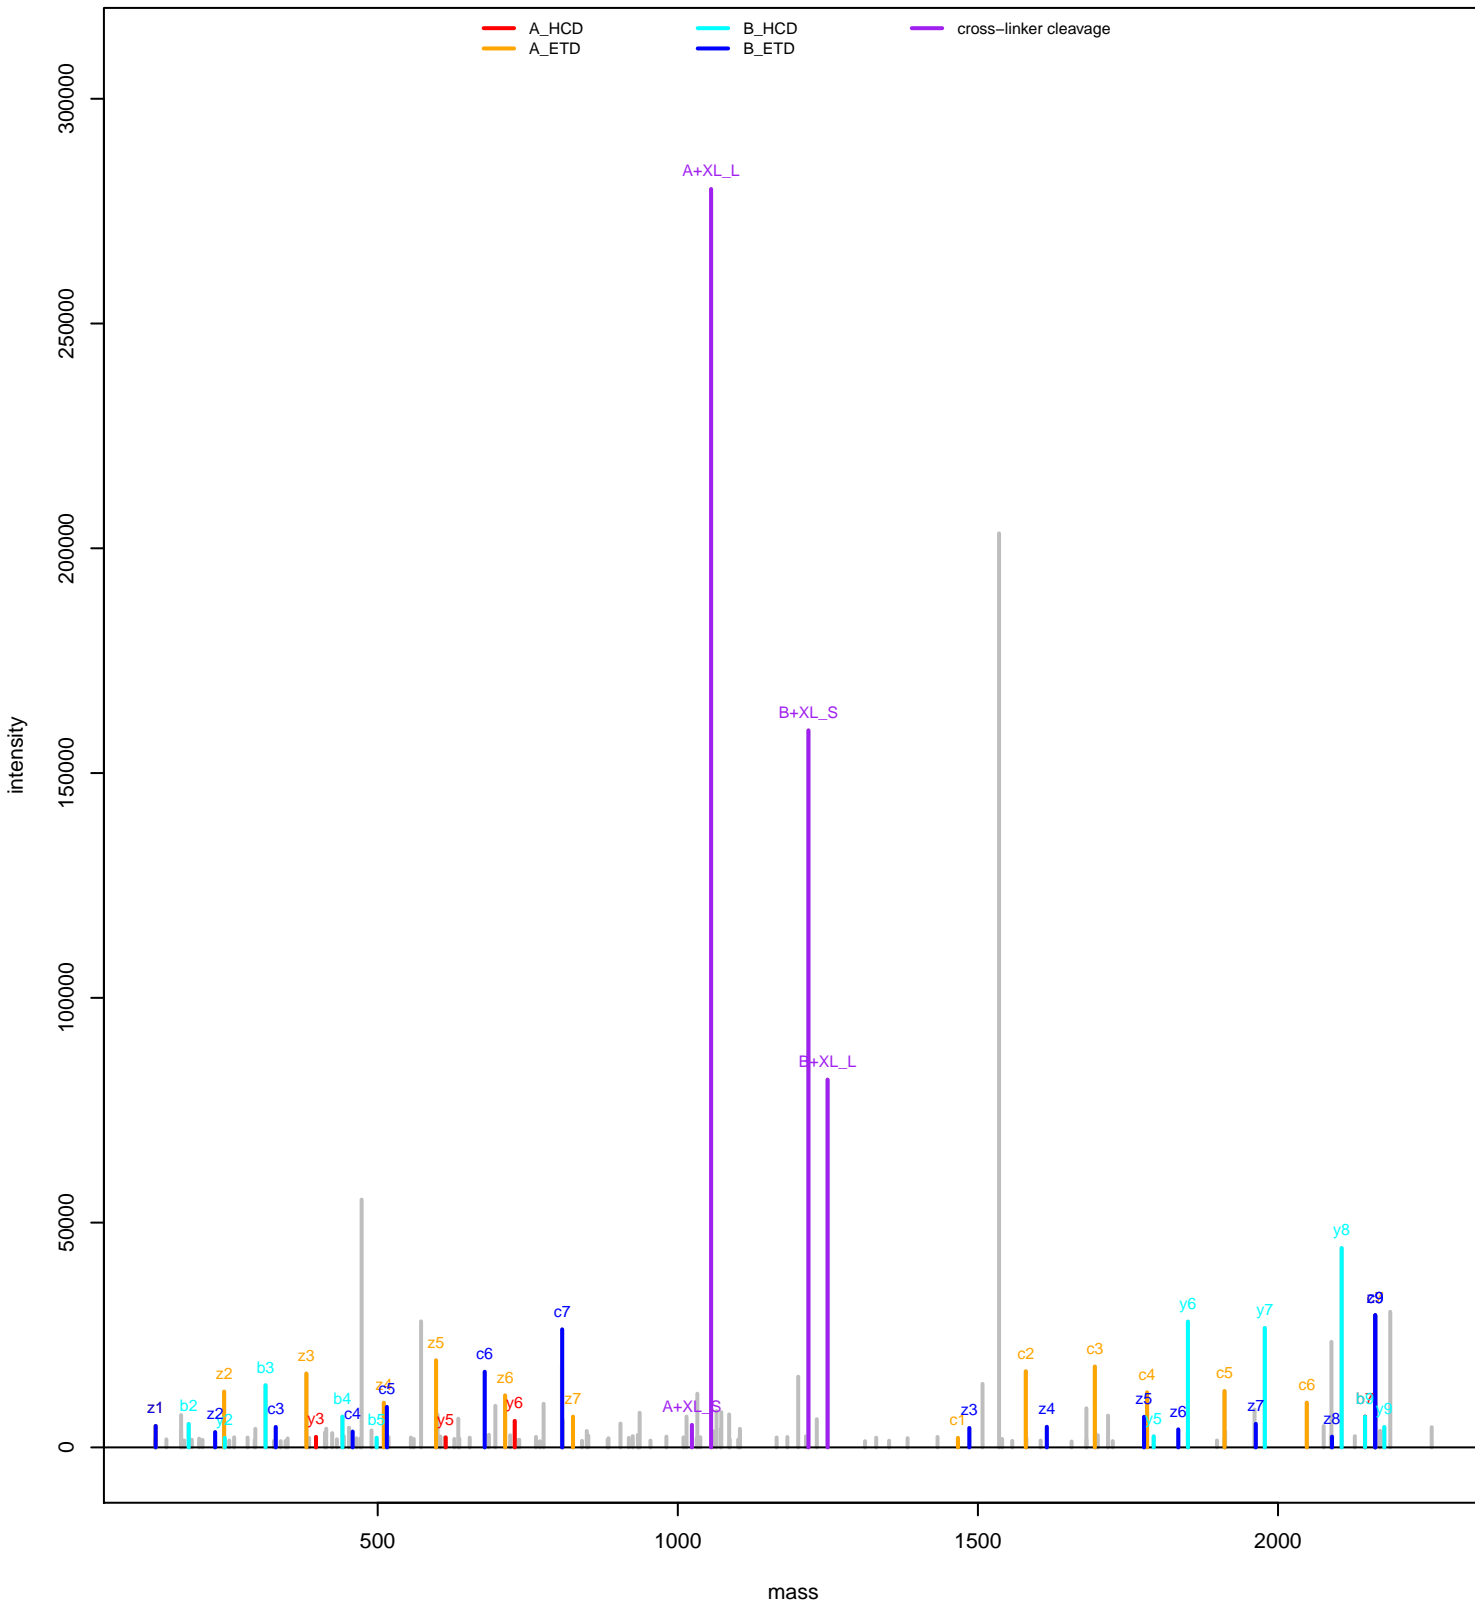

**KLDSEHNK+XL\_S**

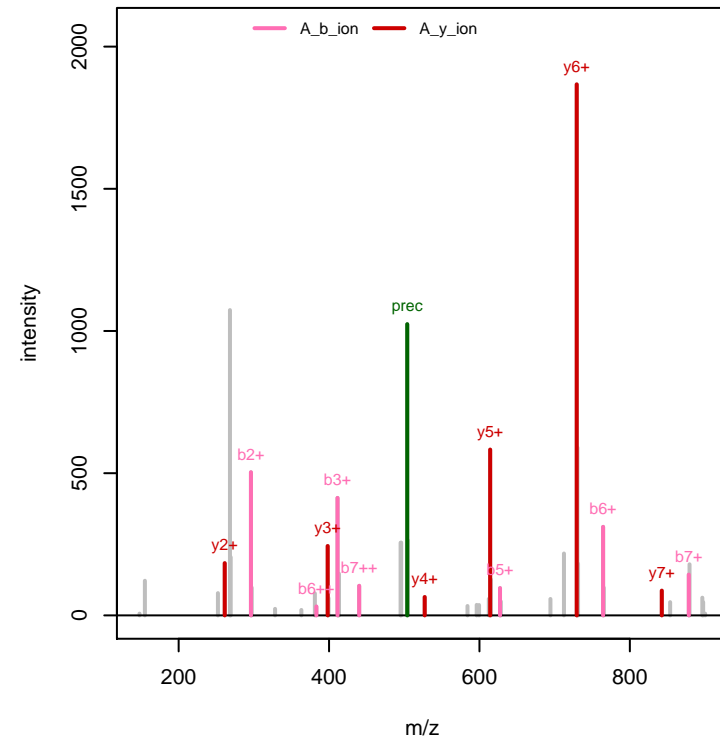

**KLDSEHNK+XL\_L**

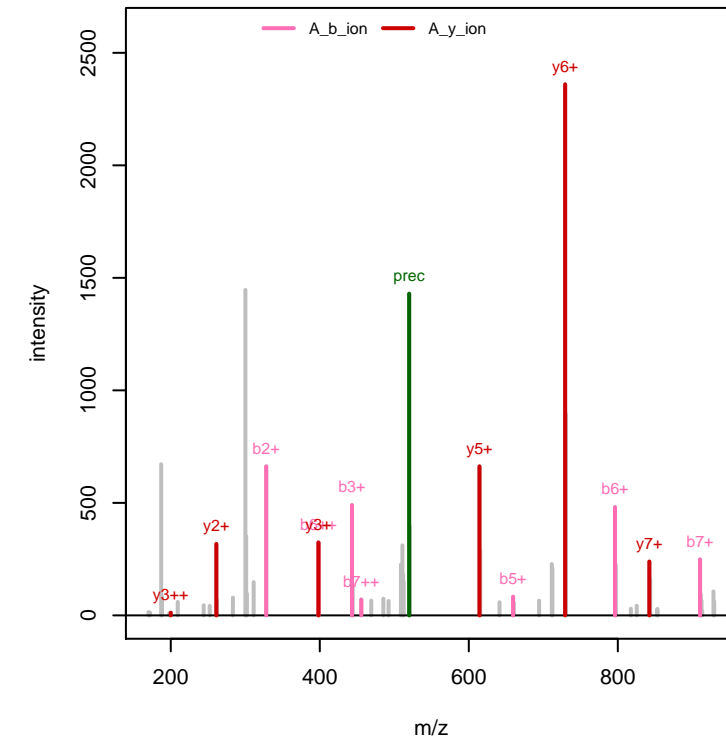

**NAQQGYEKVK+XL\_S**

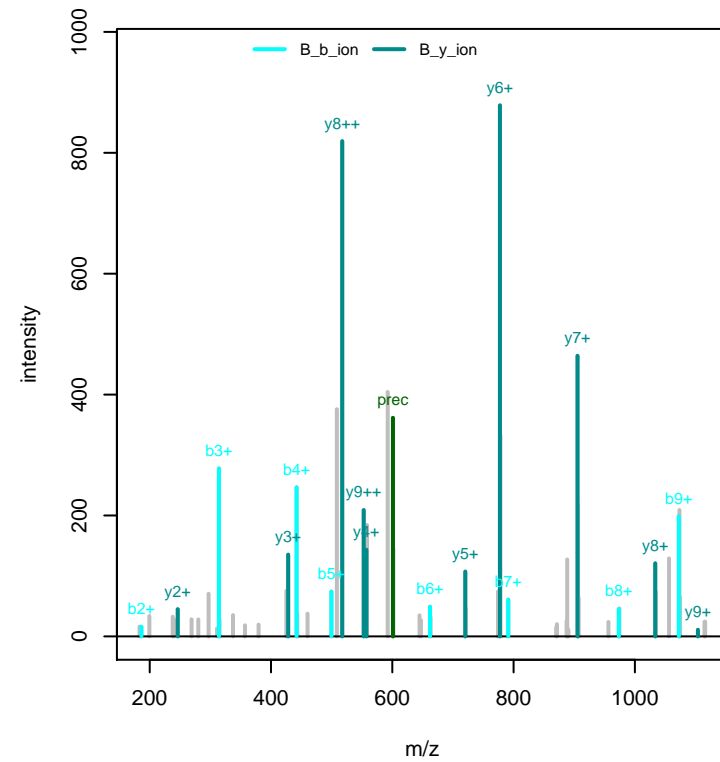

**NAQQGYEKVK+XL\_L**

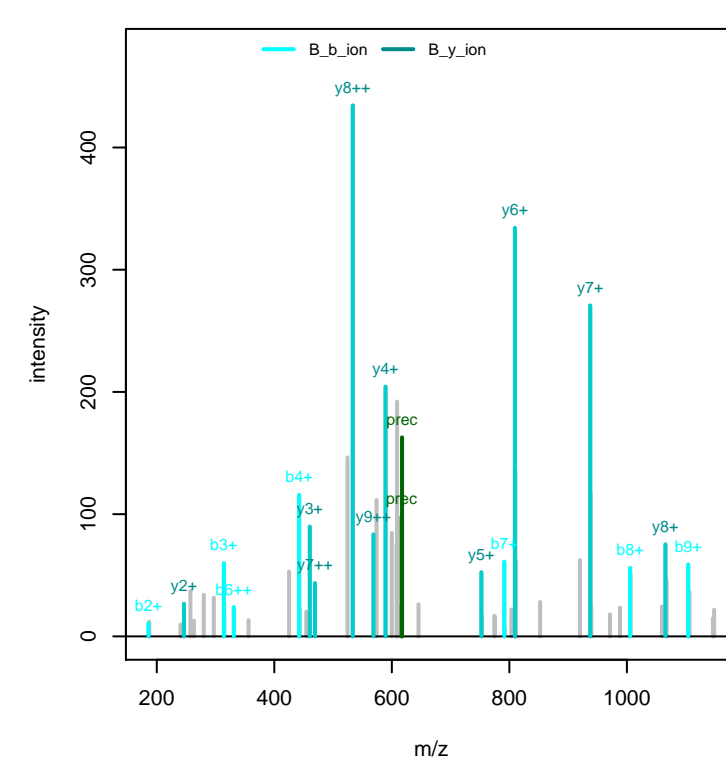

**IKELAVK  
EGNSAGKETSAK**

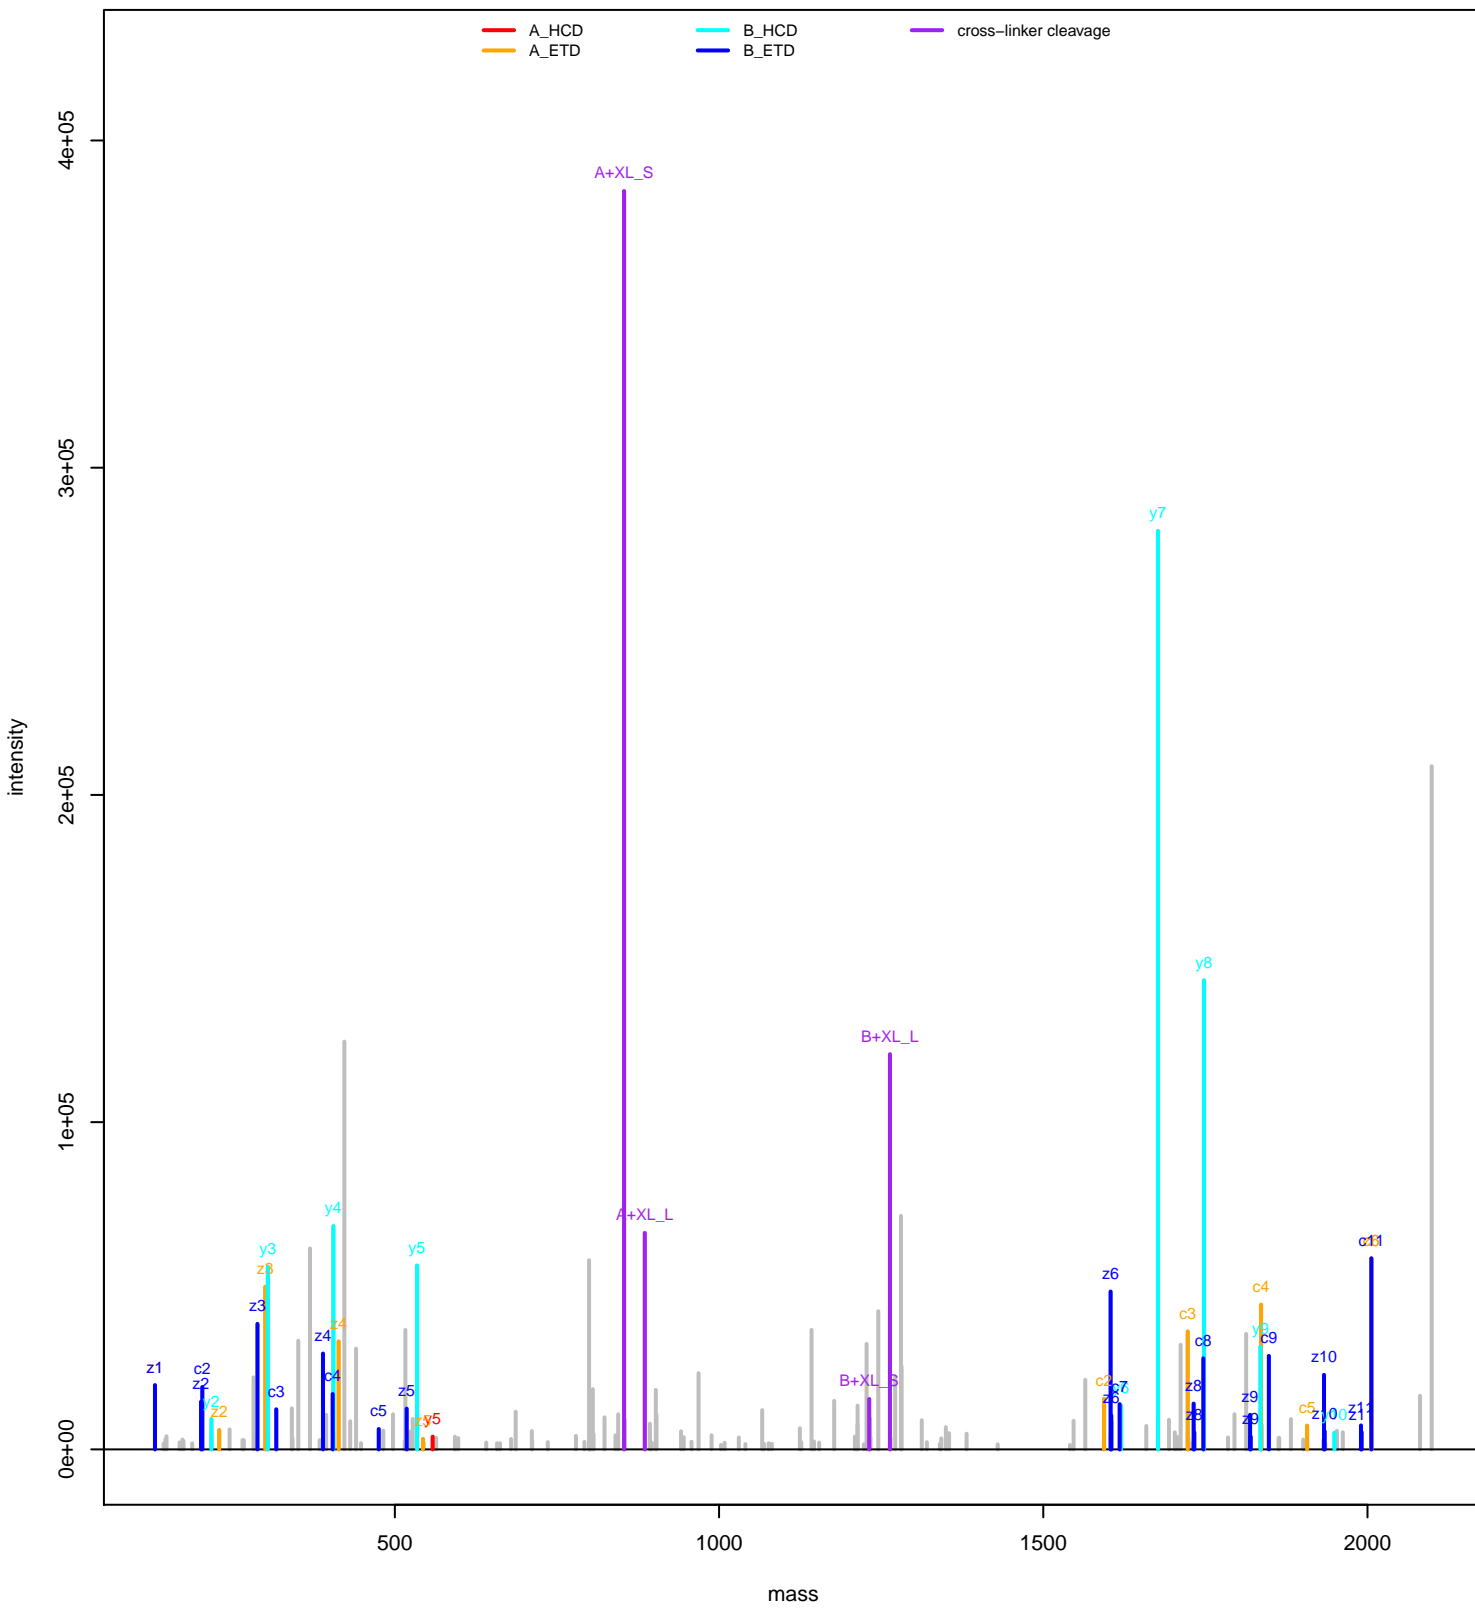

**IKELAVK+XL\_S**

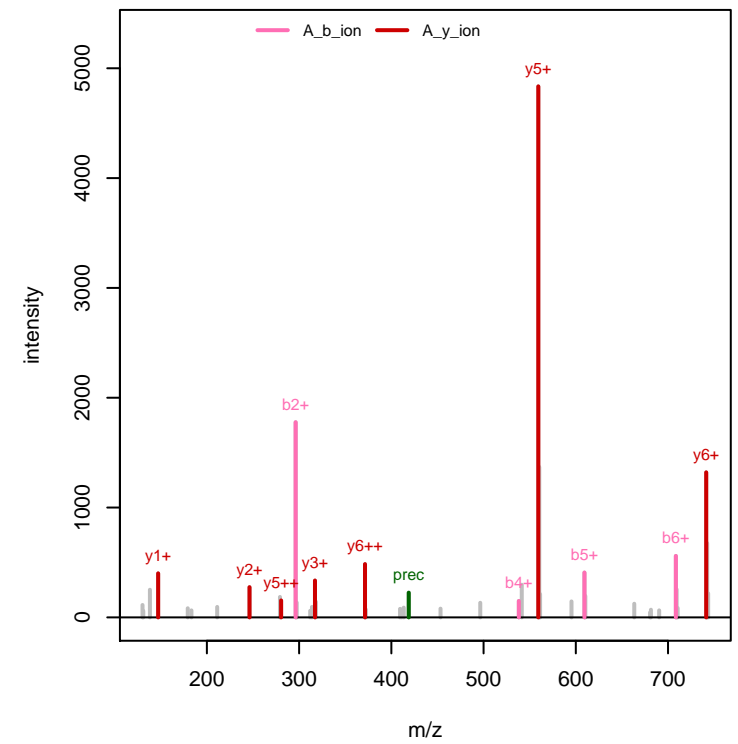

**IKELAVK+XL\_L**

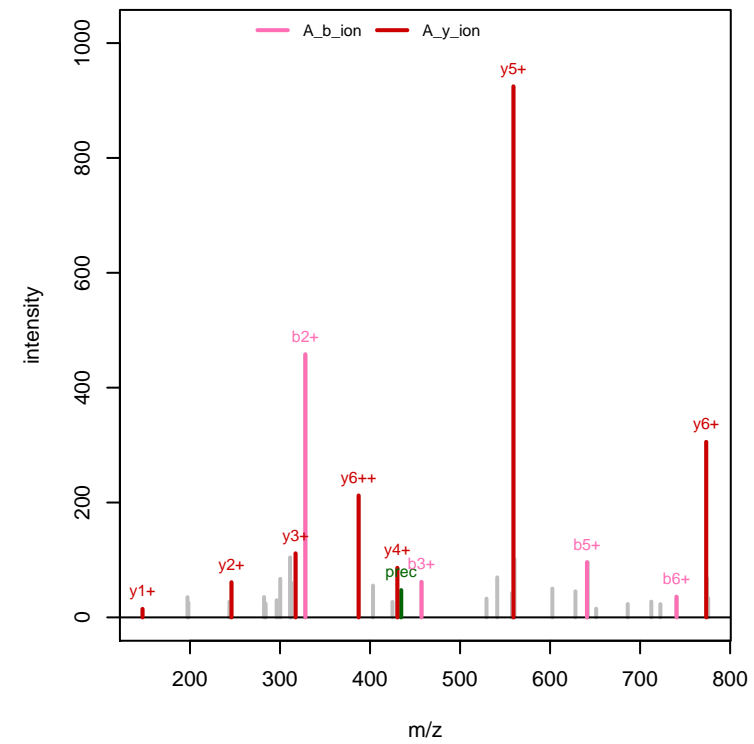

**EGNSAGKETSAK+XL\_S**

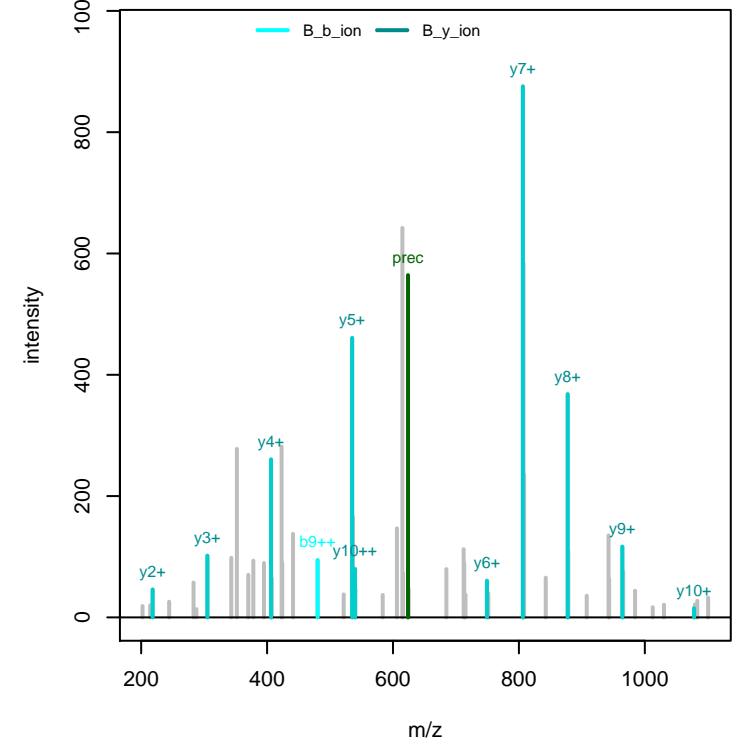

AAVKSGSELGK  
KDDQEETVRK

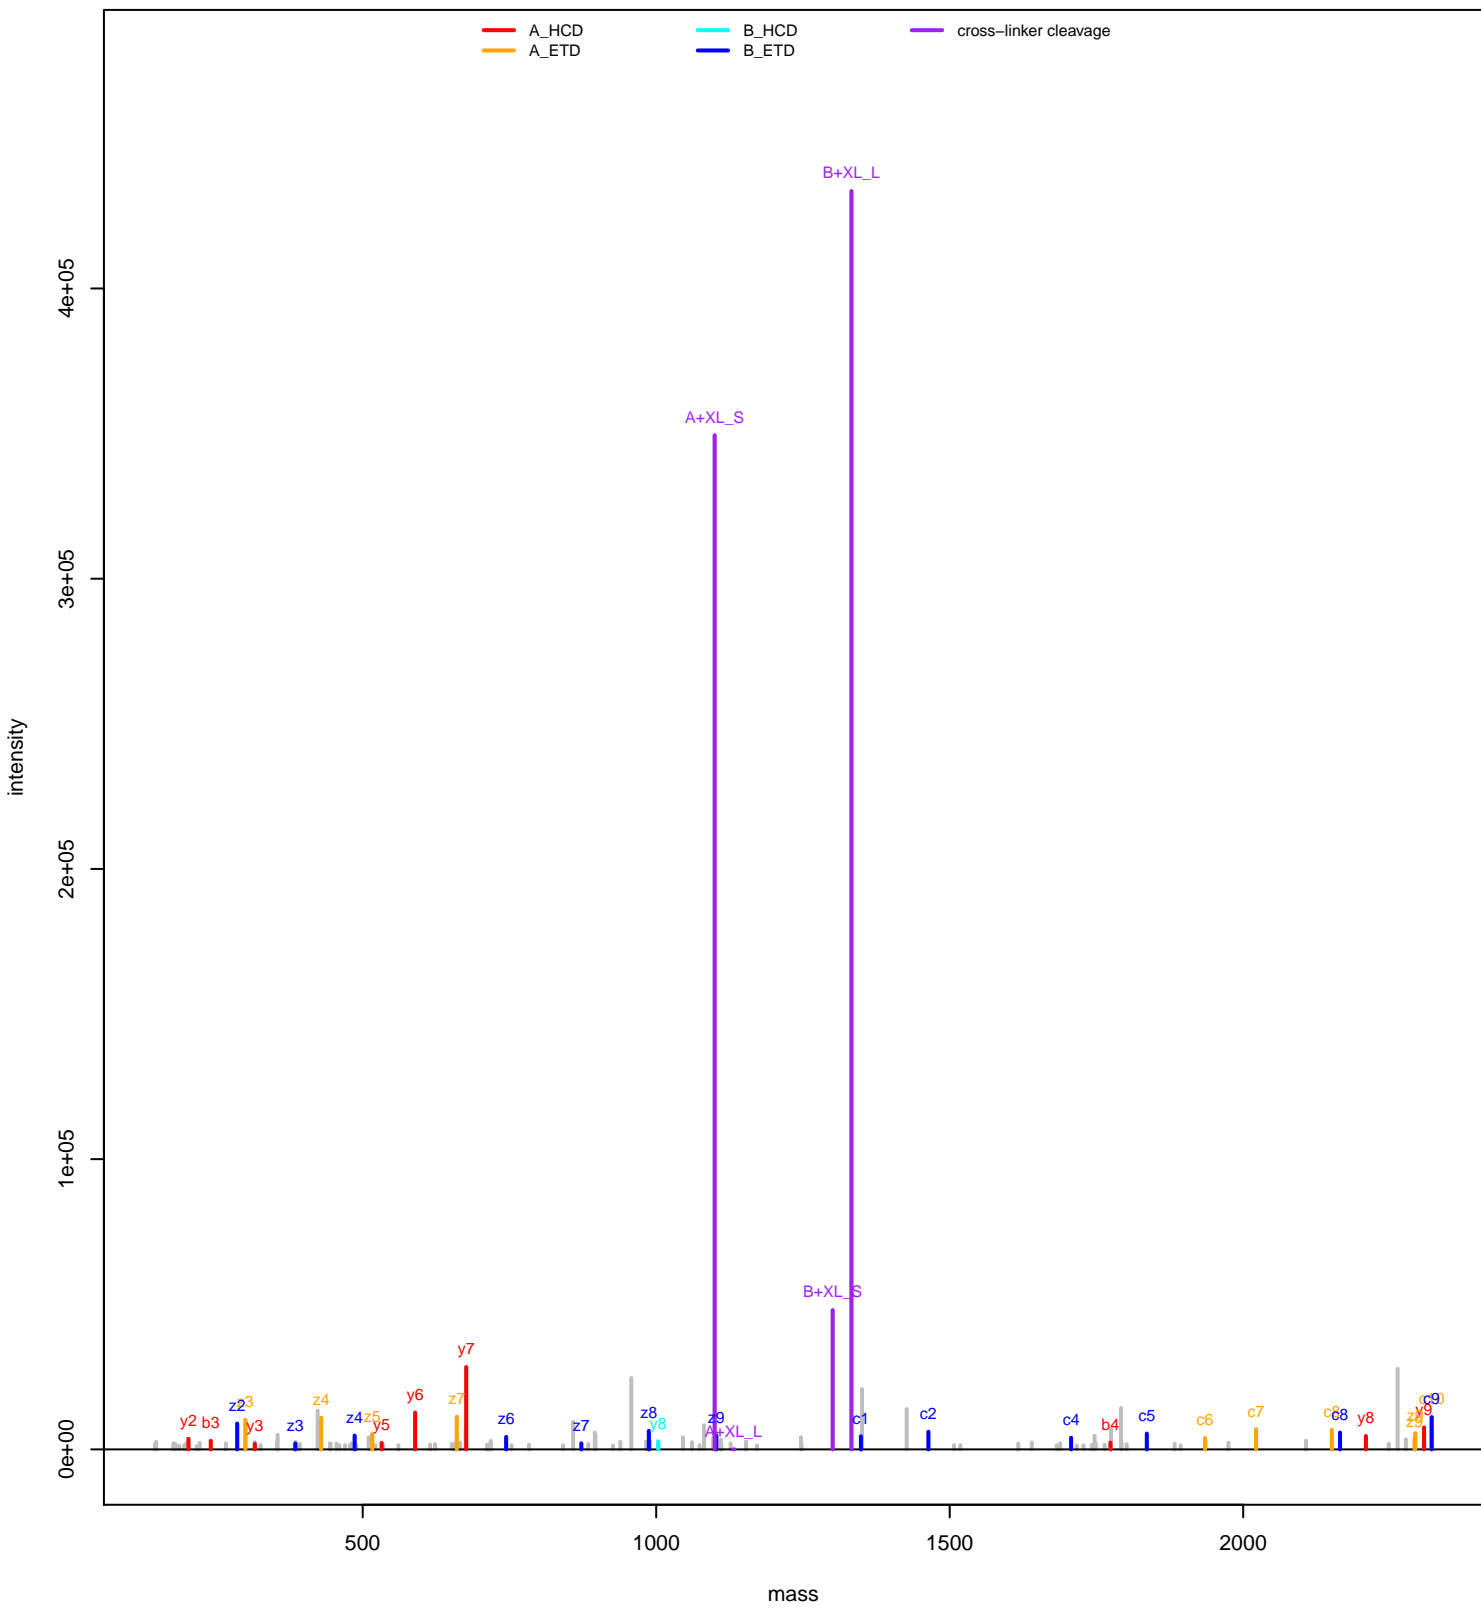

AAVKSGSELGK+XL\_S

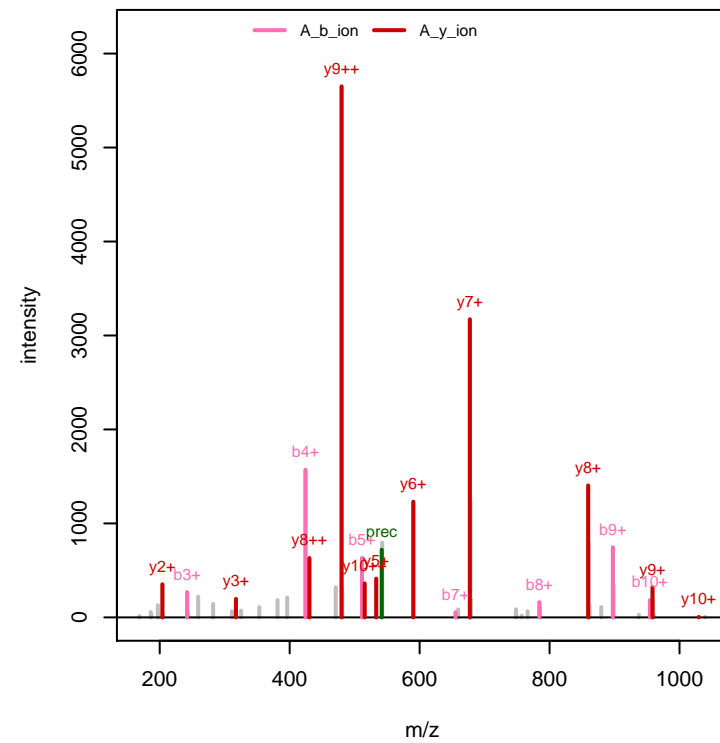

AAVKSGSELGK+XL\_L

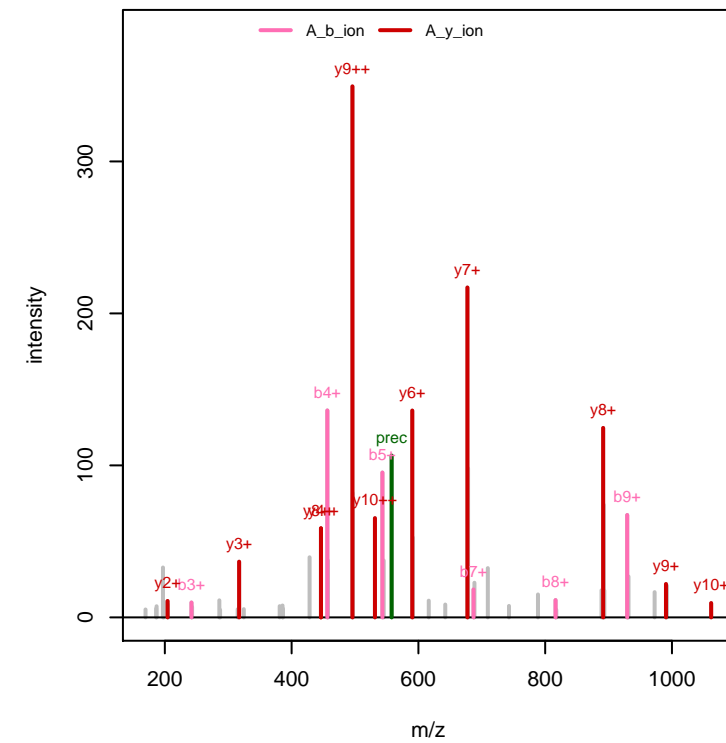

KDDQEETVRK+XL\_S

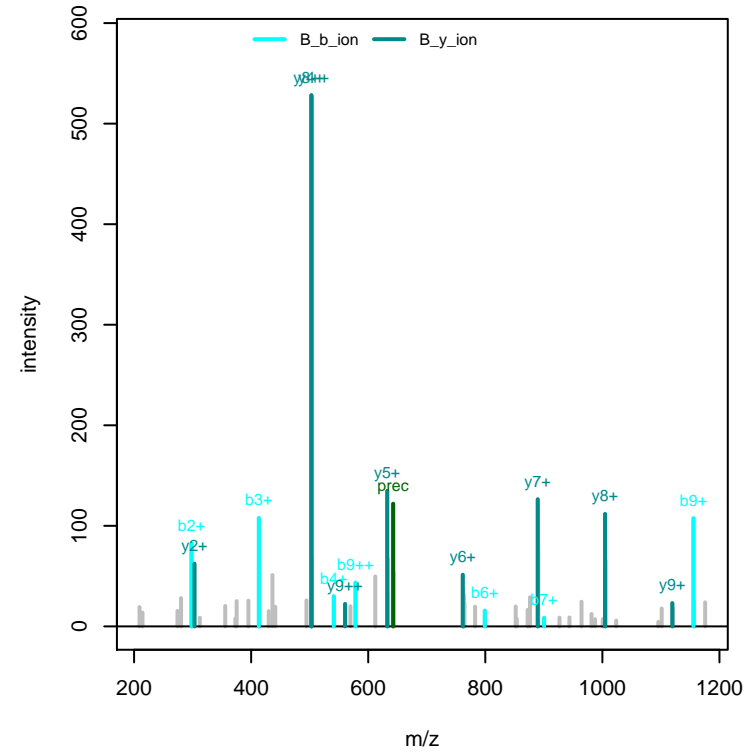

KDDQEETVRK+XL\_L

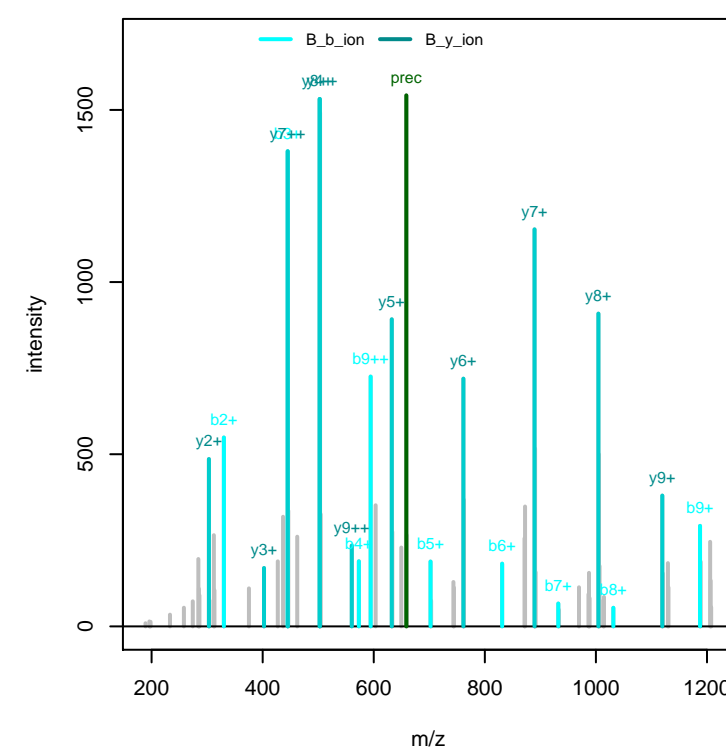

AANDKGR  
HSTKAFDASK

AANDKGR+XL\_S

AANDKGR+XL\_L

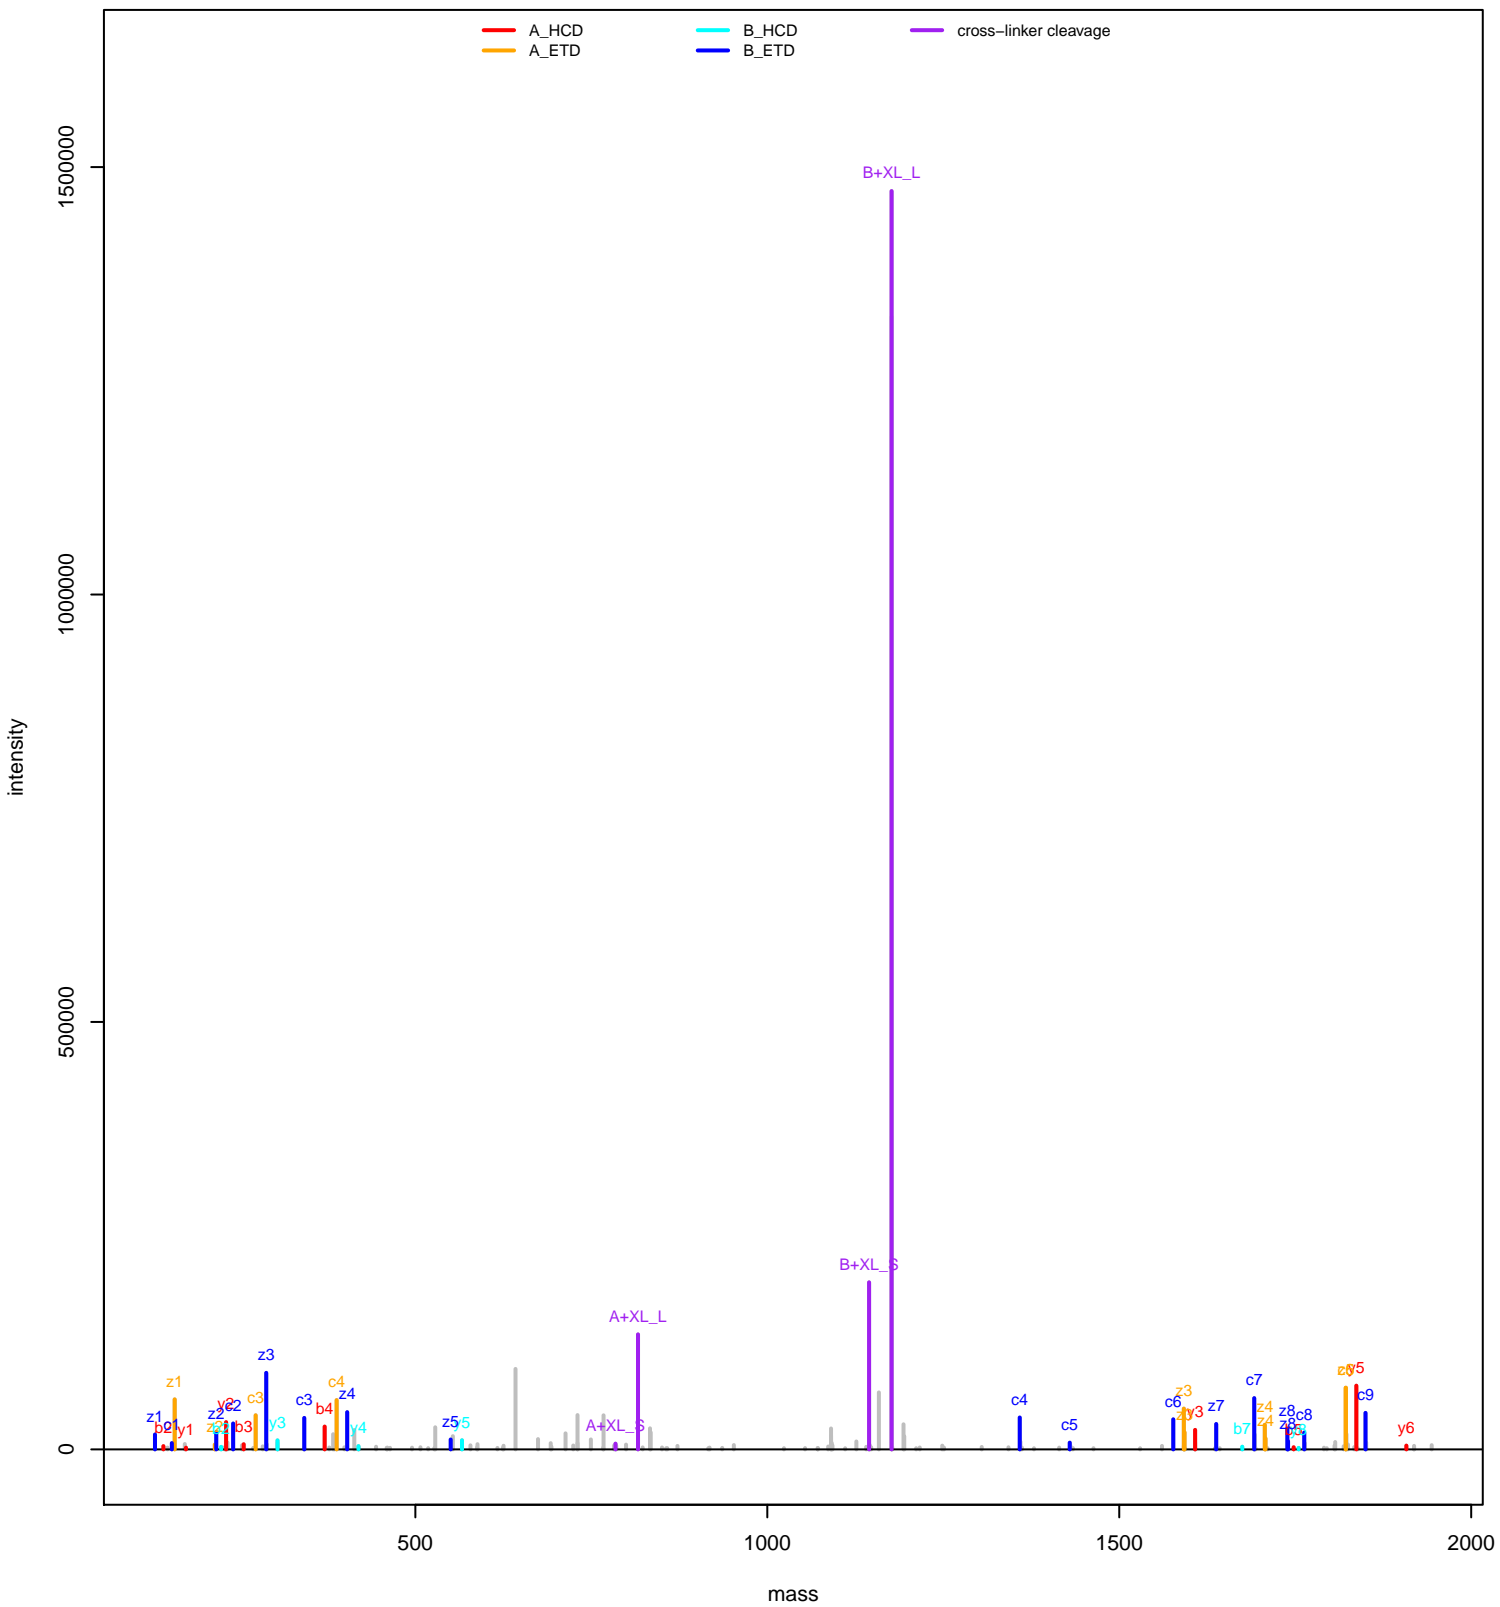

HSTKAFDASK+XL\_S

HSTKAFDASK+XL\_L

DRANKMATATK  
SATTQPSTKEAQPTP

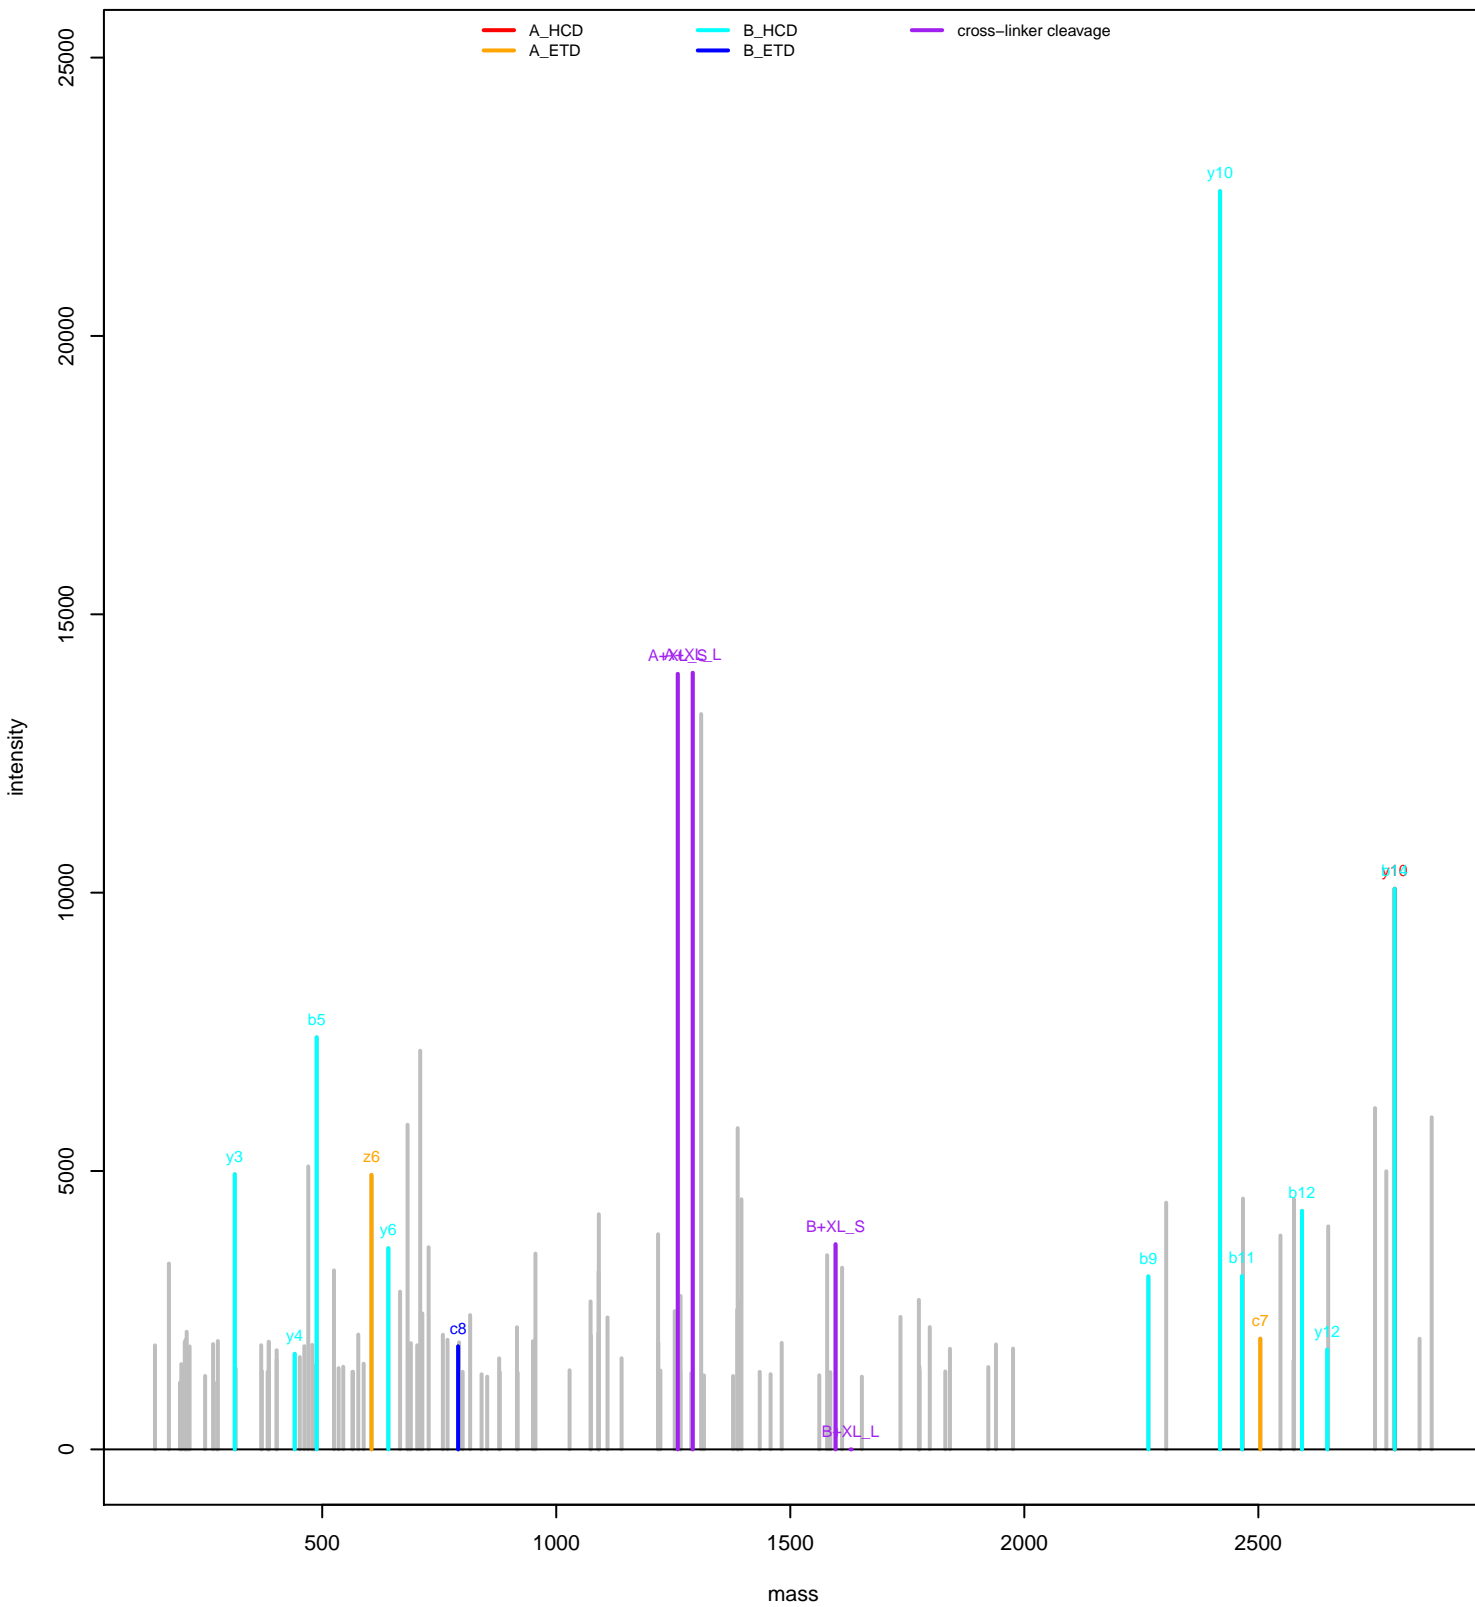

DRANKMATATK+XL\_S

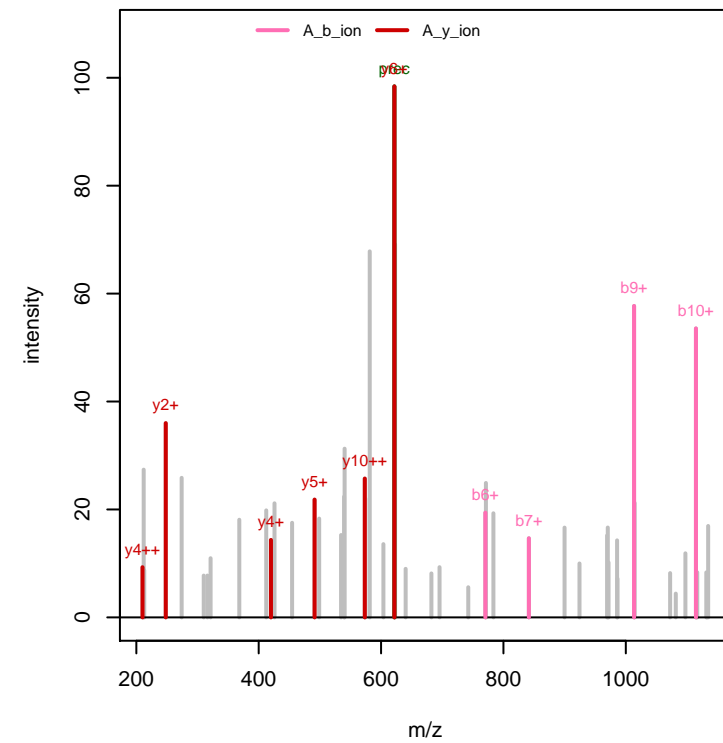

DRANKMATATK+XL\_L

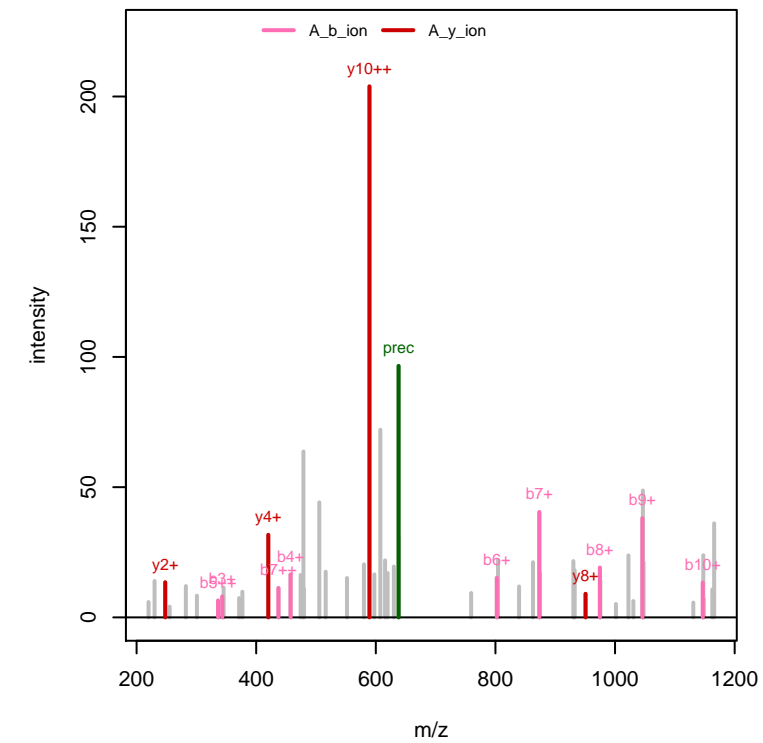

SATTQPSTKEAQPTP+XL\_S

SATTQPSTKEAQPTP+XL\_L

**GKENADSTLNR**  
**AADAPKPTAEKK**

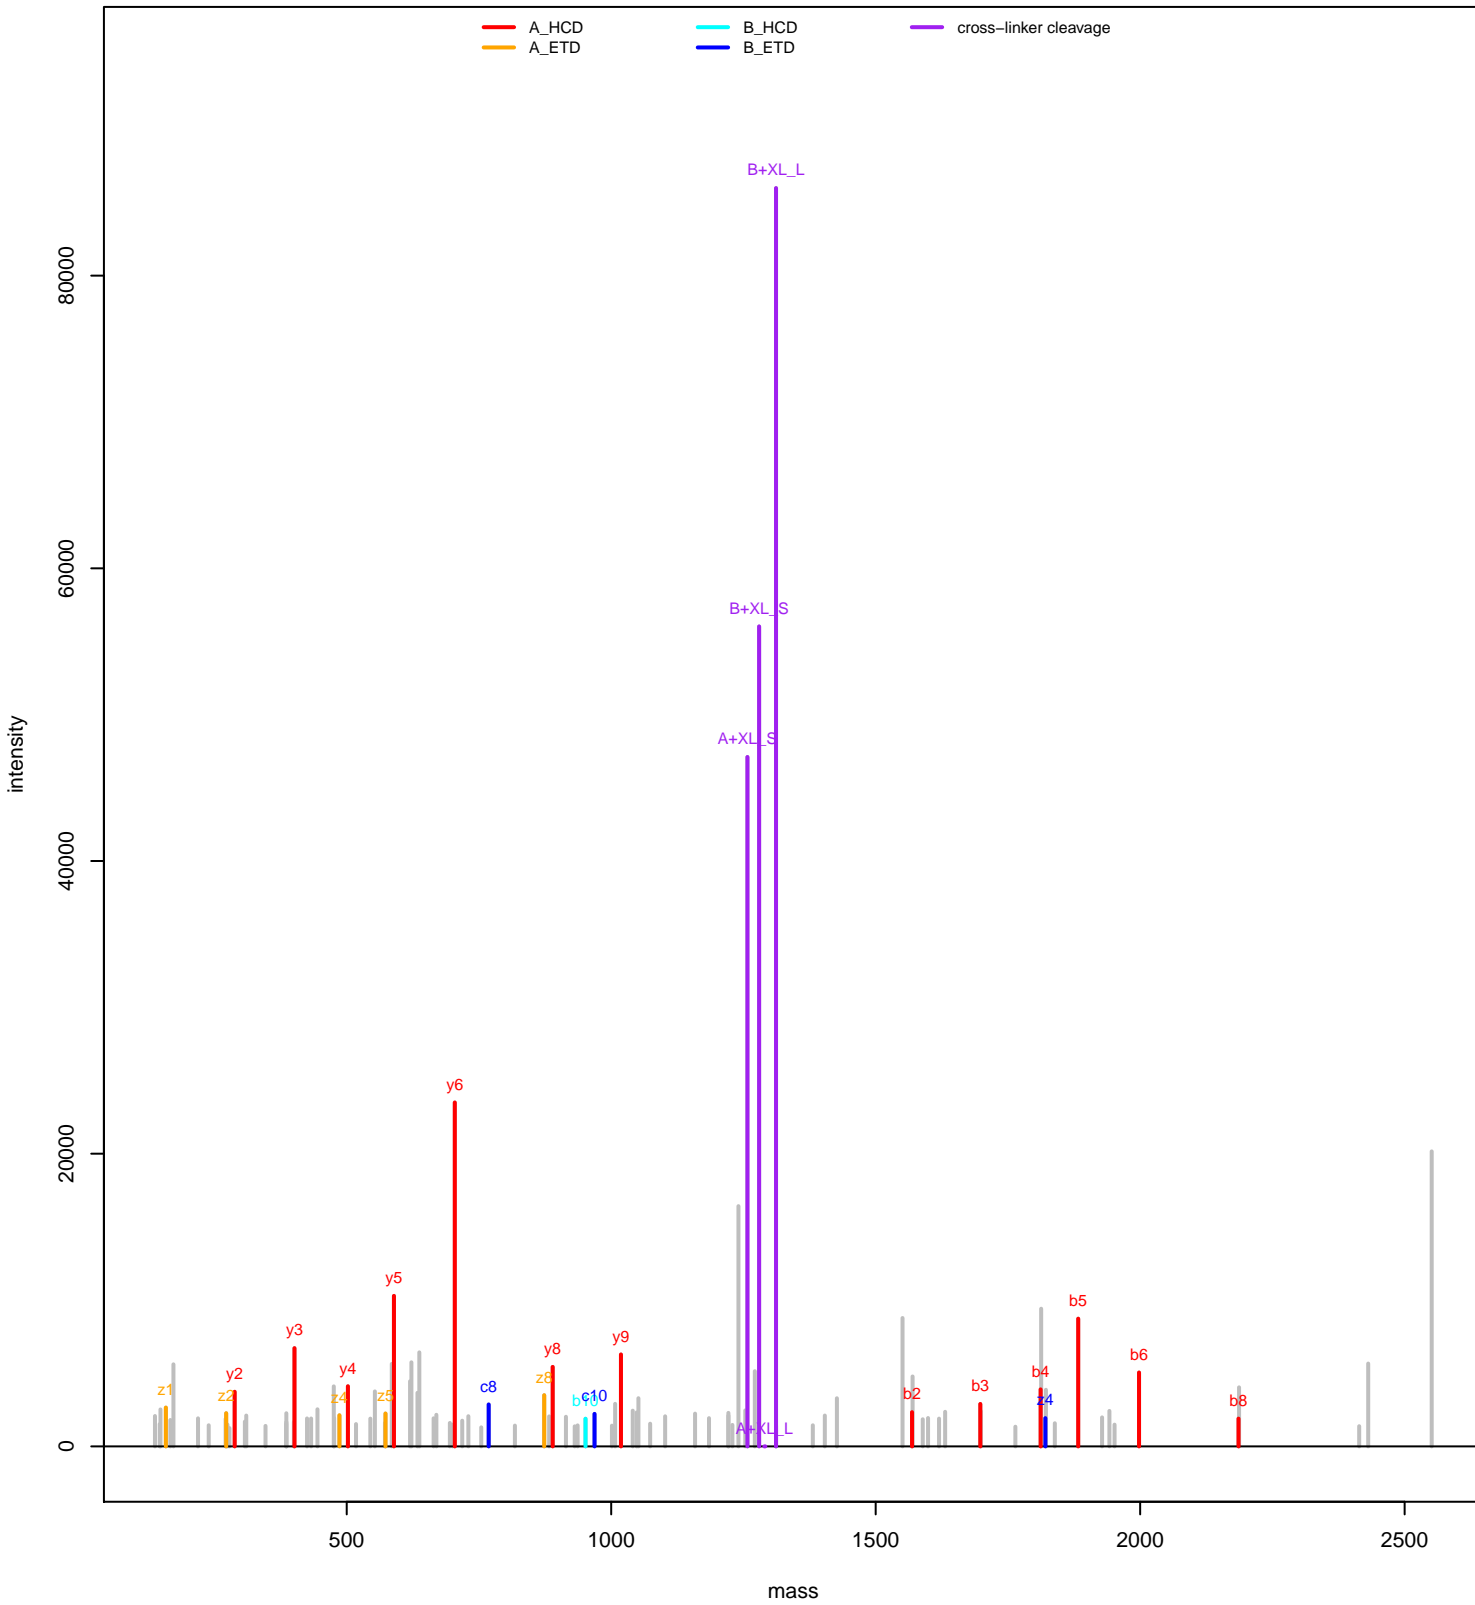

**GKENADSTLNR+XL\_S**

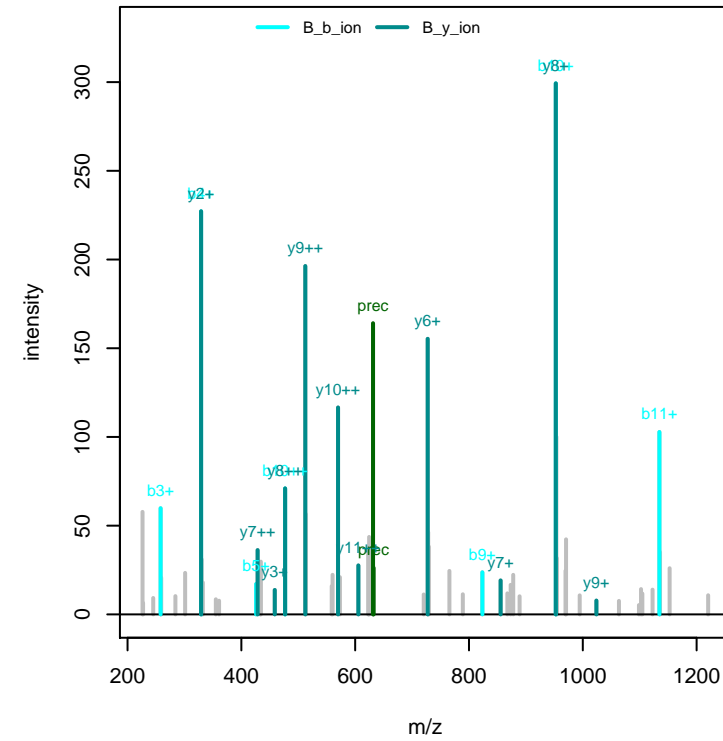

**GKENADSTLNR+XL\_L**

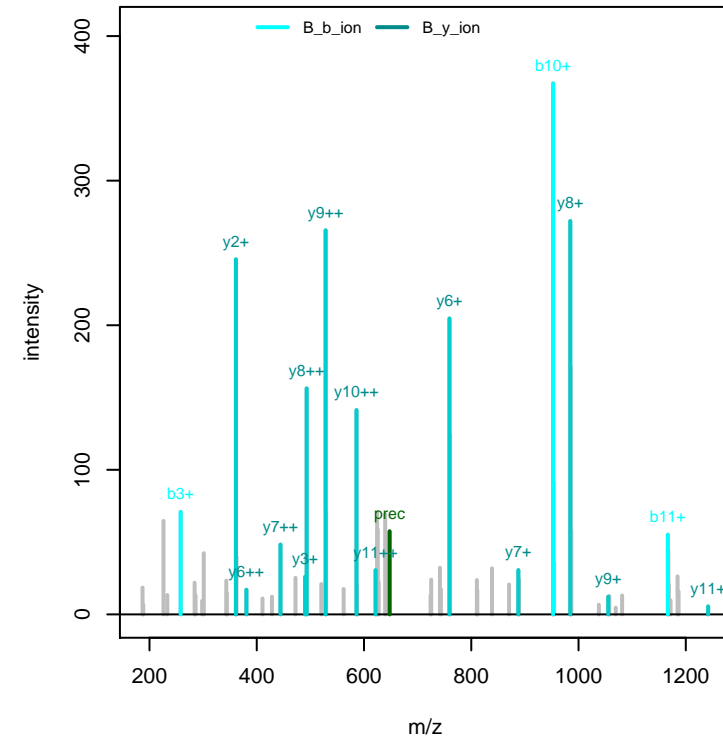

**AADAPKPTAEKK+XL\_S**

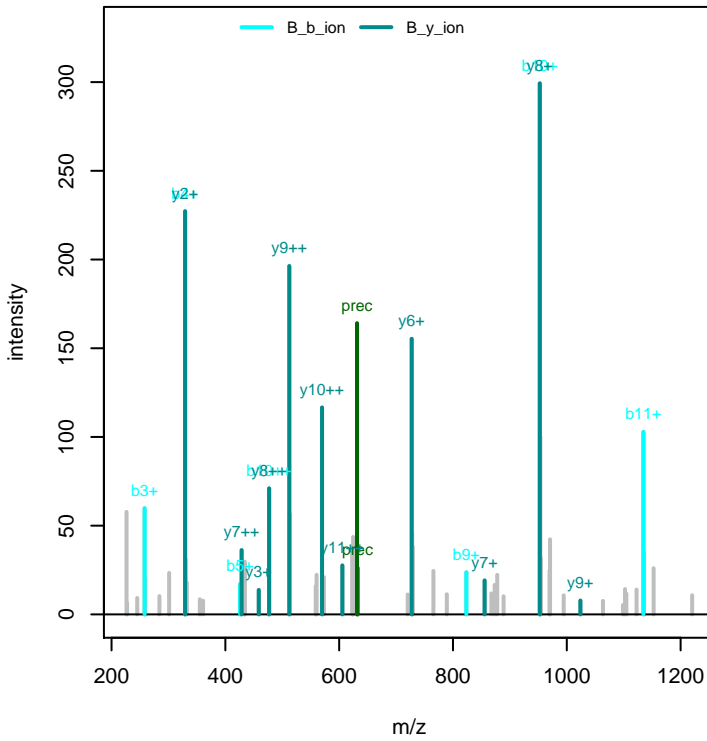

**AADAPKPTAEKK+XL\_L**



**AGKALK**  
**TGRNPQTGKEIK**

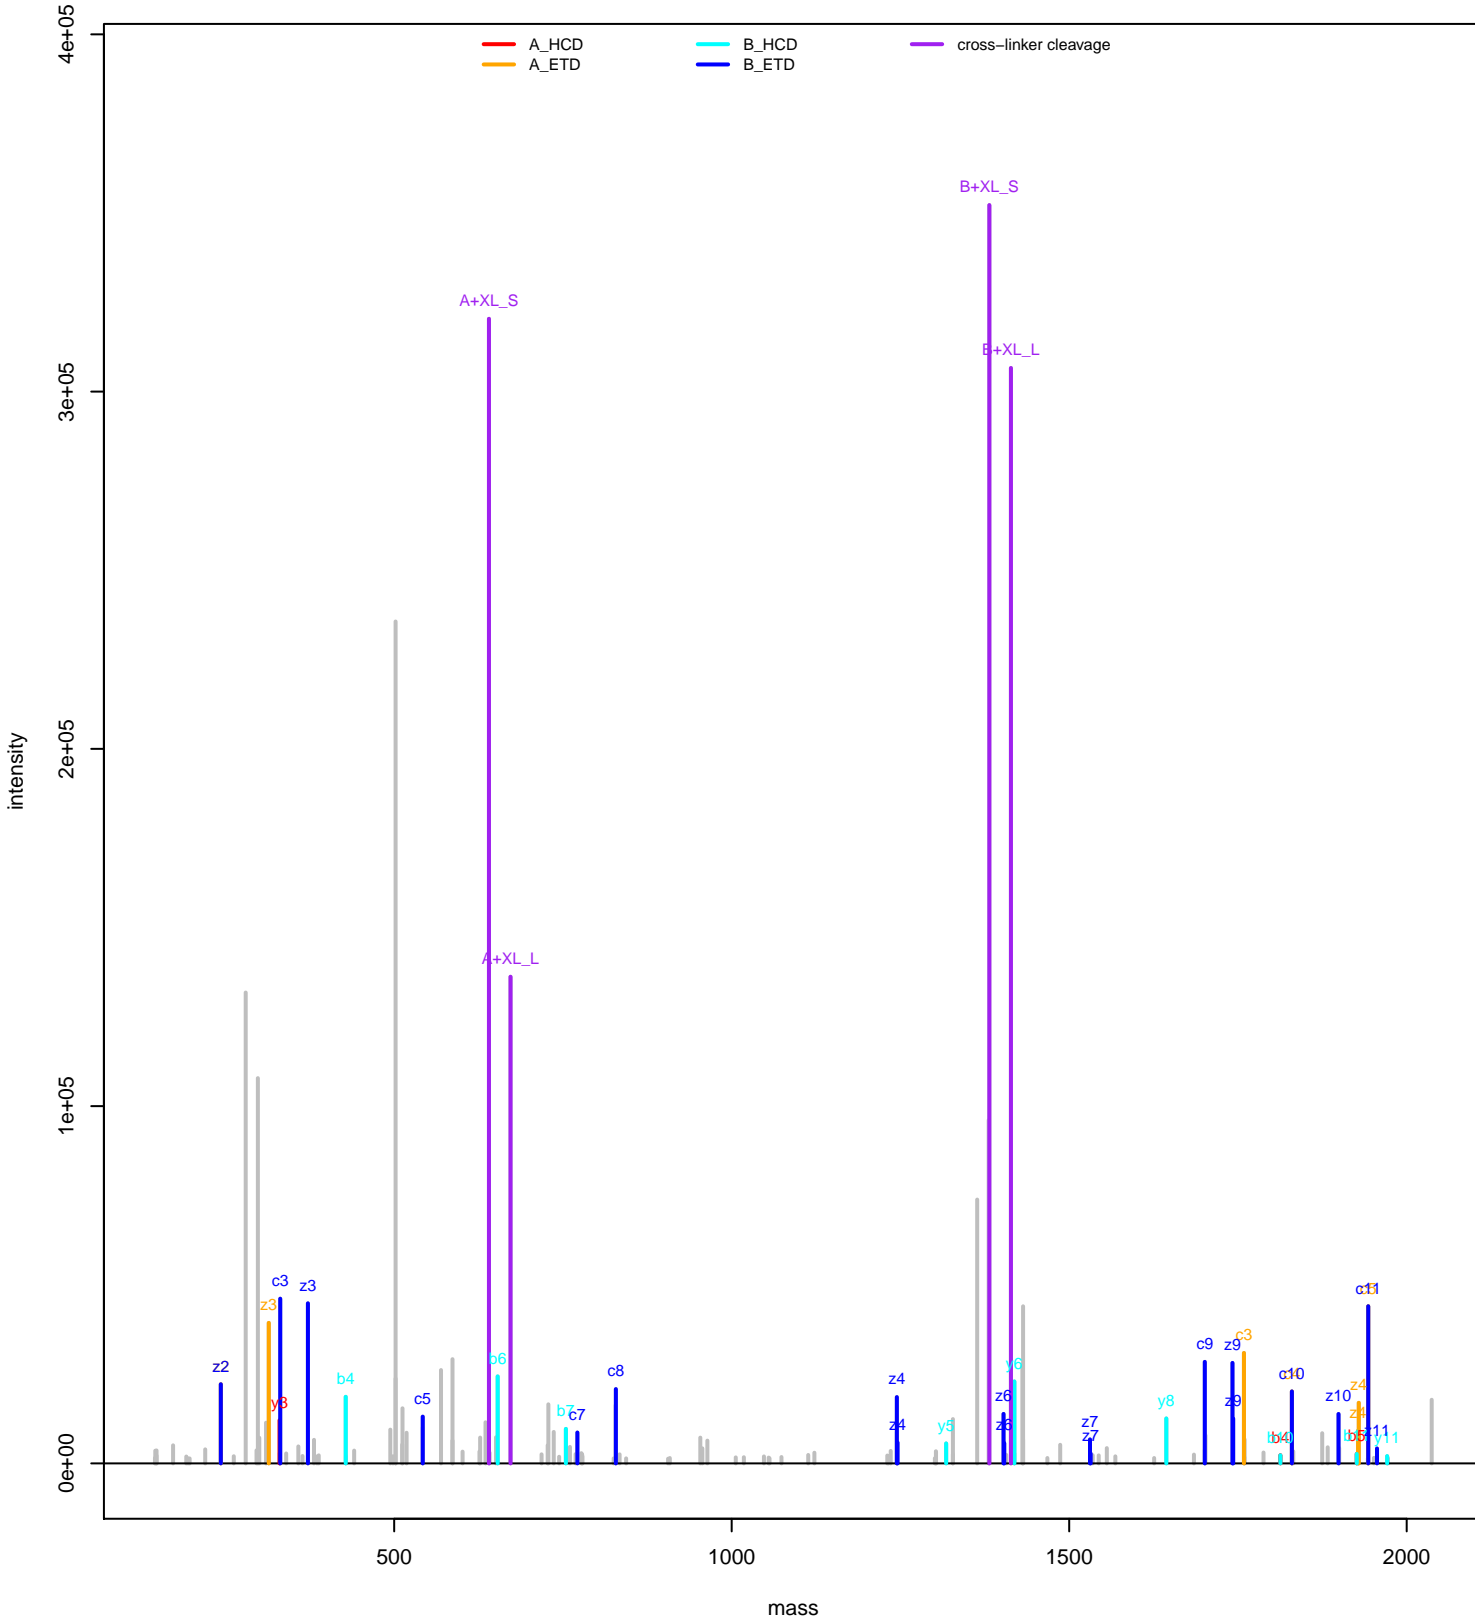

**AGKALK+XL\_S**

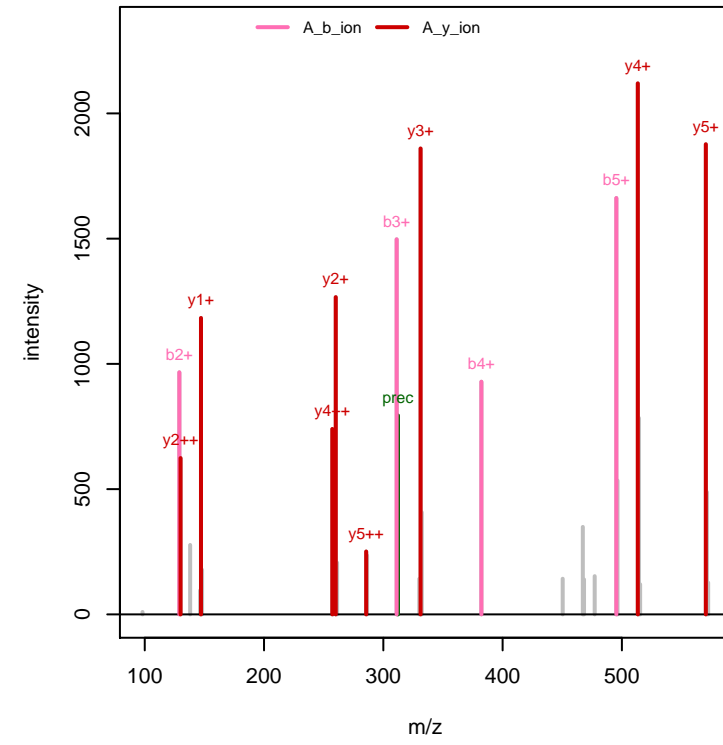

**AGKALK+XL\_L**

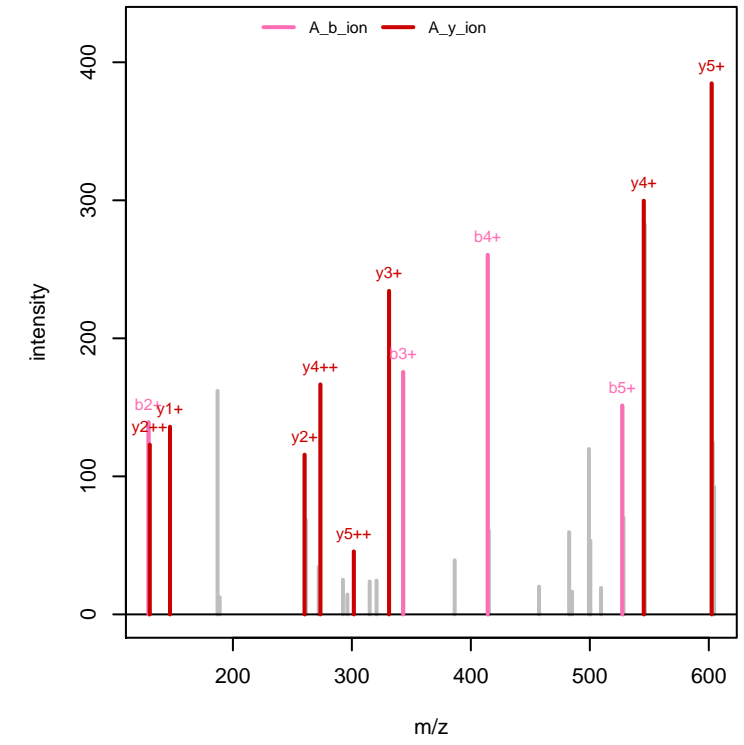

**TGRNPQTGKEIK+XL\_S**

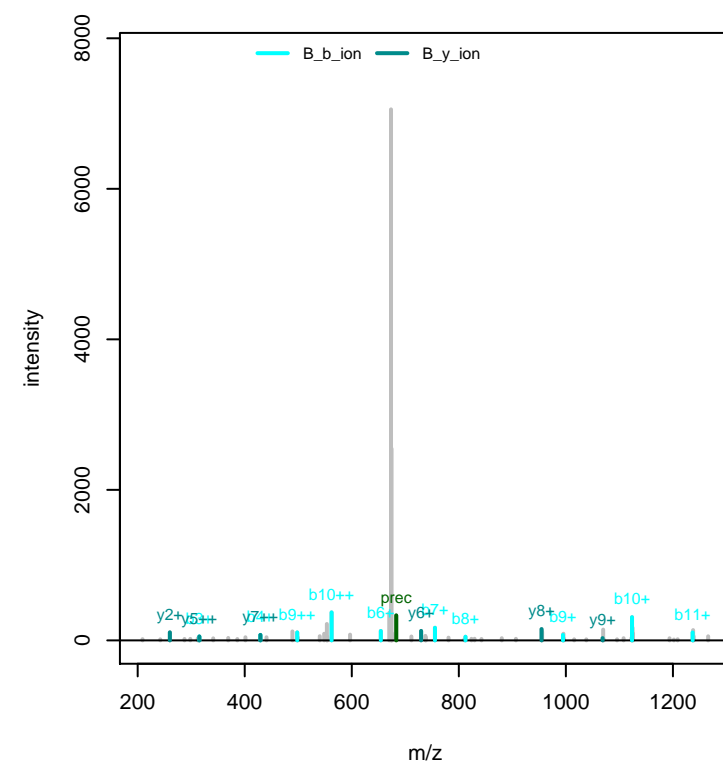

**TGRNPQTGKEIK+XL\_L**

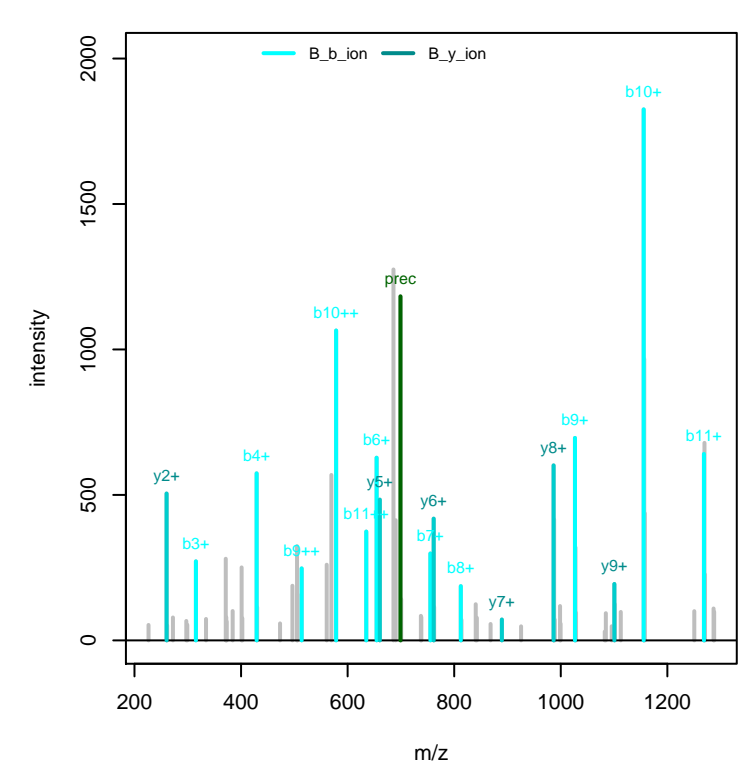



STDISVKTDQK  
VDSSMNKVGNFMoDDSAITAK

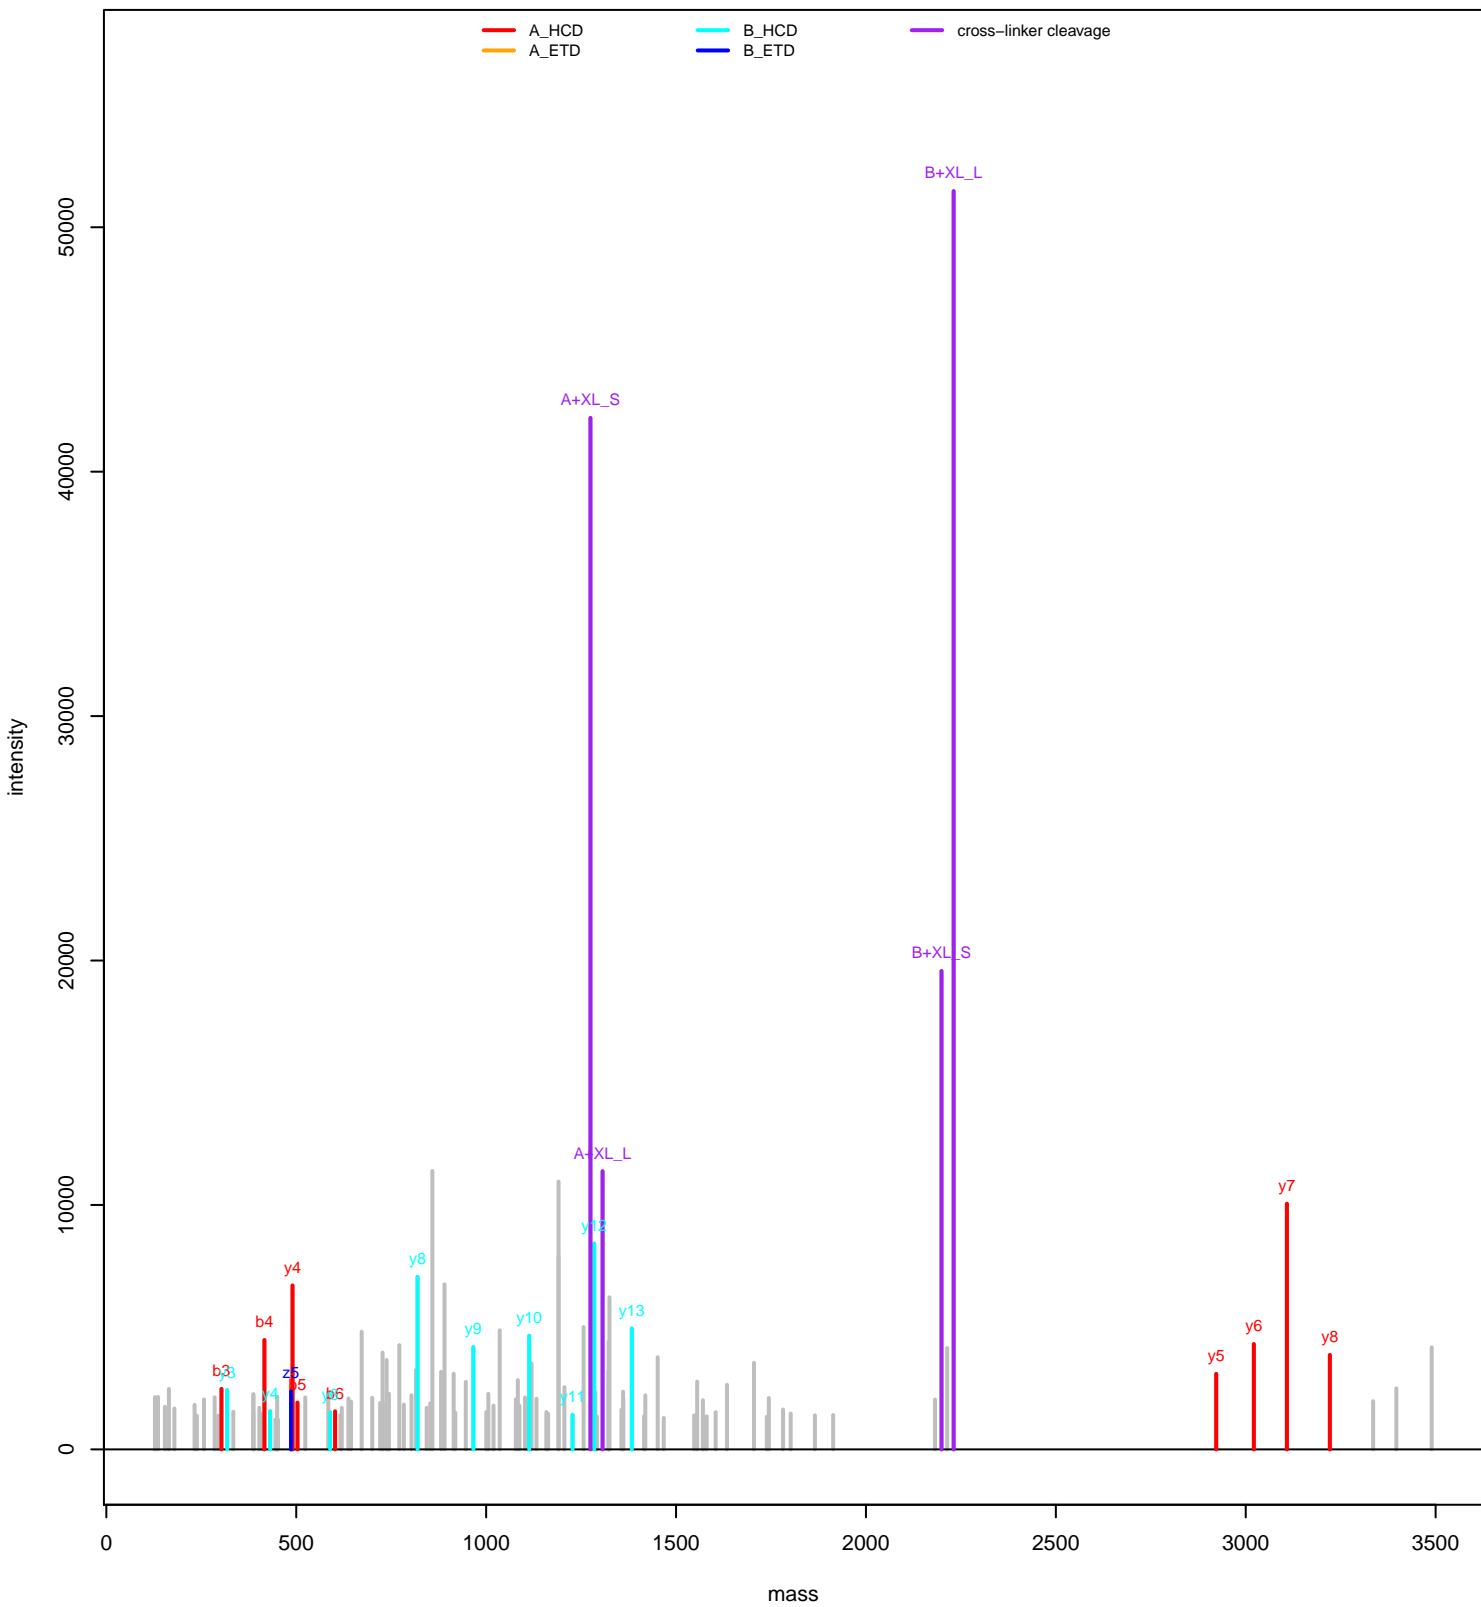

STDISVKTDQK+XL\_S

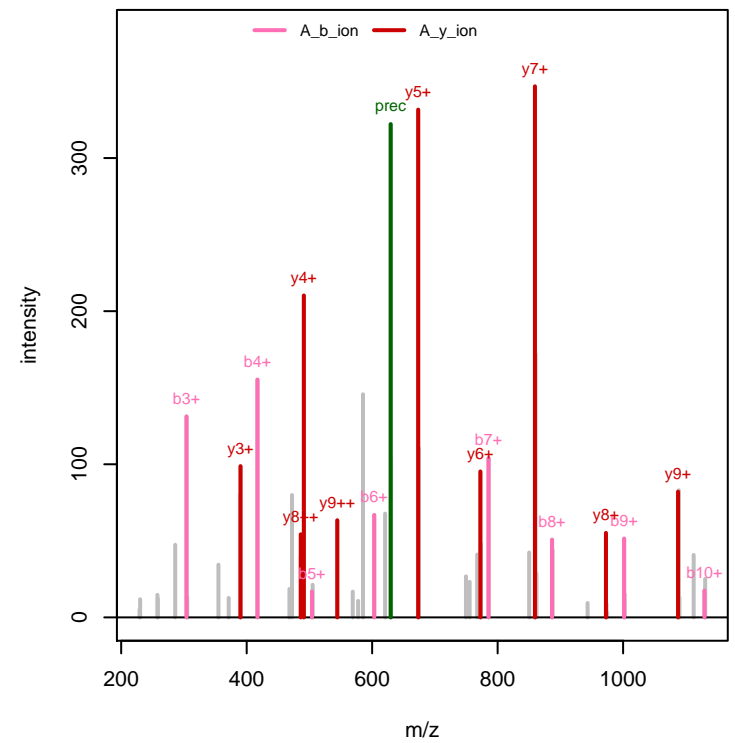

STDISVKTDQK+XL\_L

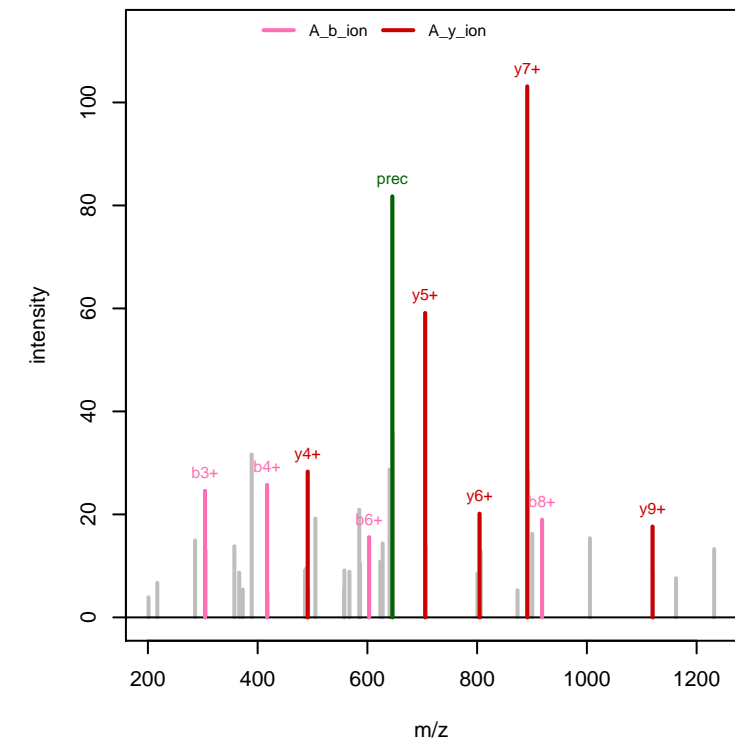

VDSSMNKVGNFMoDDSAITAK+XL\_S

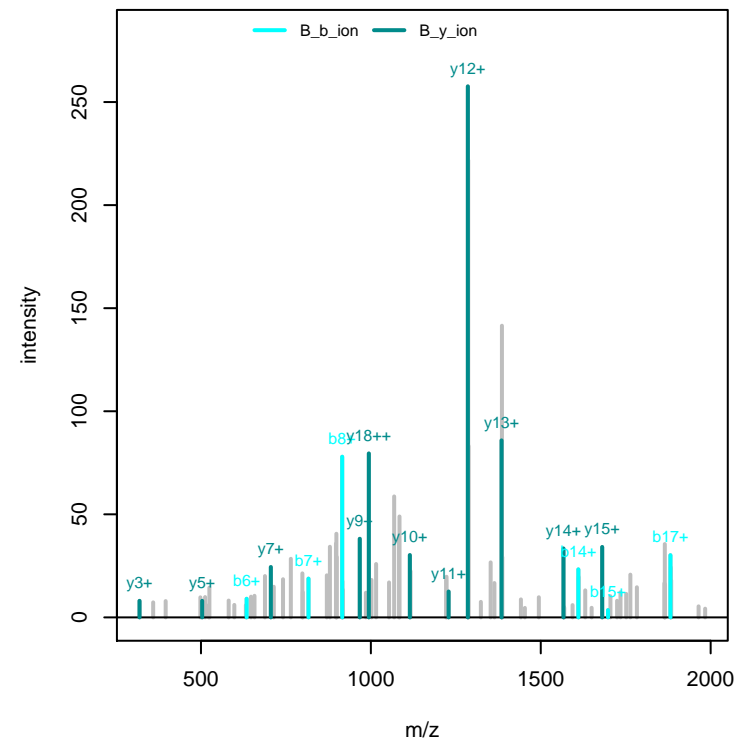

VDSSMNKVGNFMoDDSAITAK+XL\_L

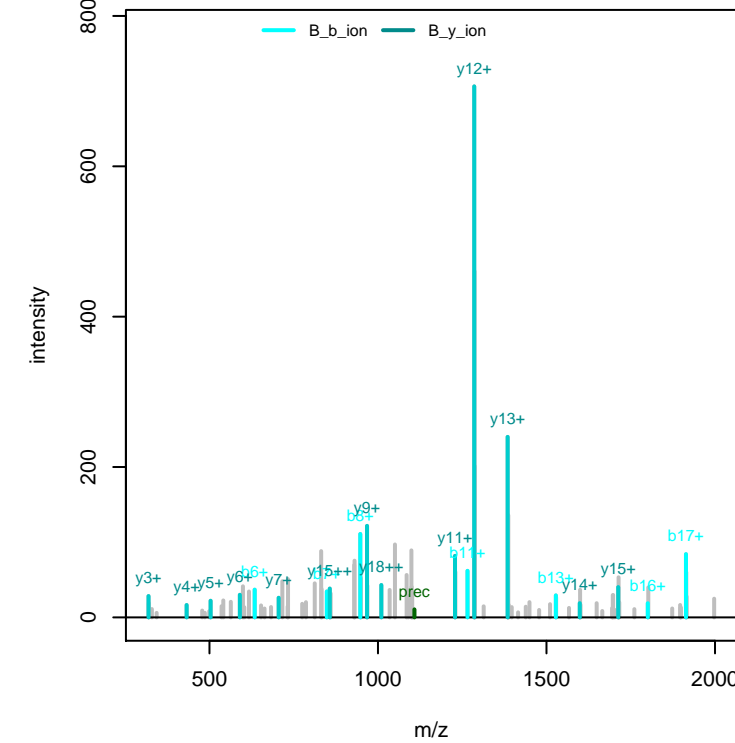

**KSADSTSTK  
KDERGALVNR**

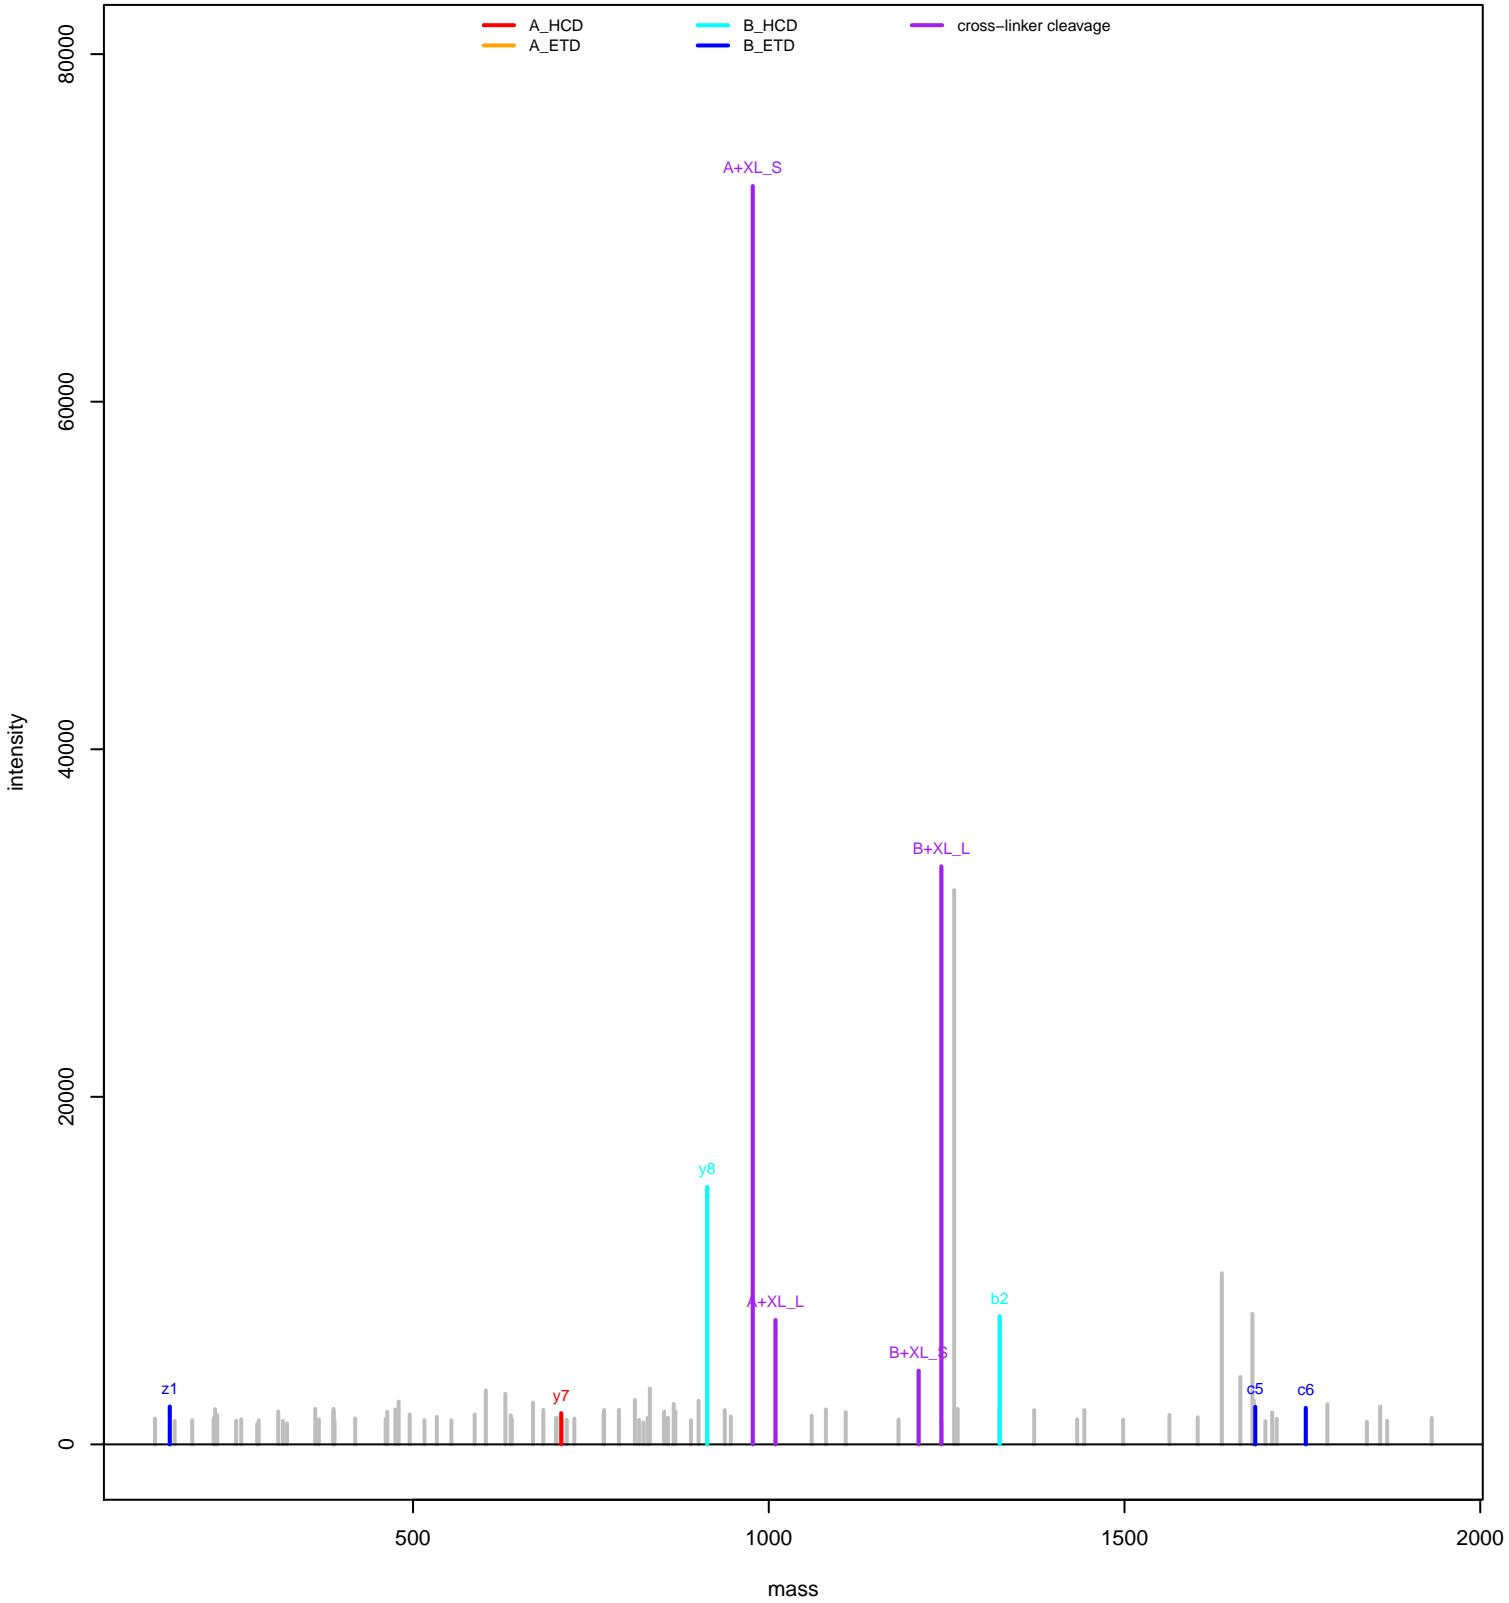

**KSADSTSTK+XL\_S**

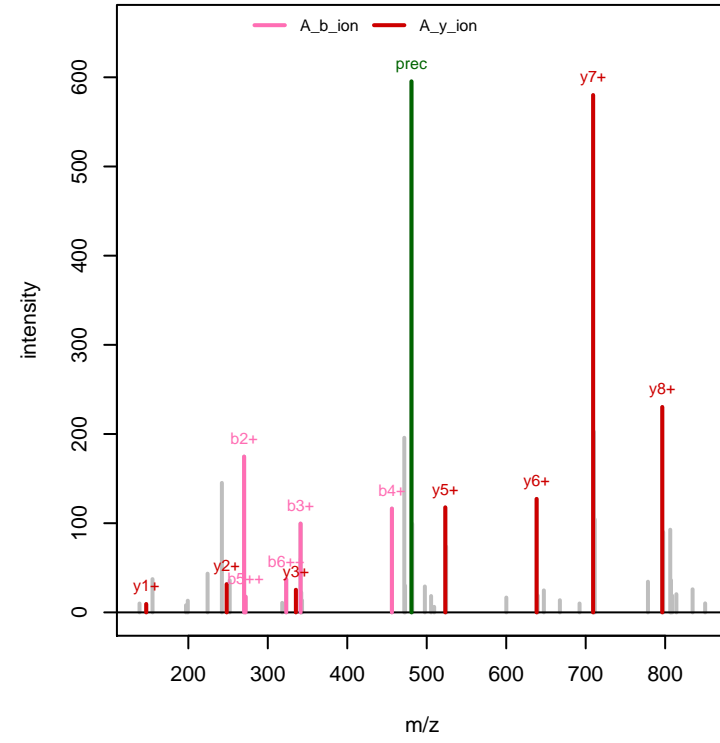

**KSADSTSTK+XL\_L**

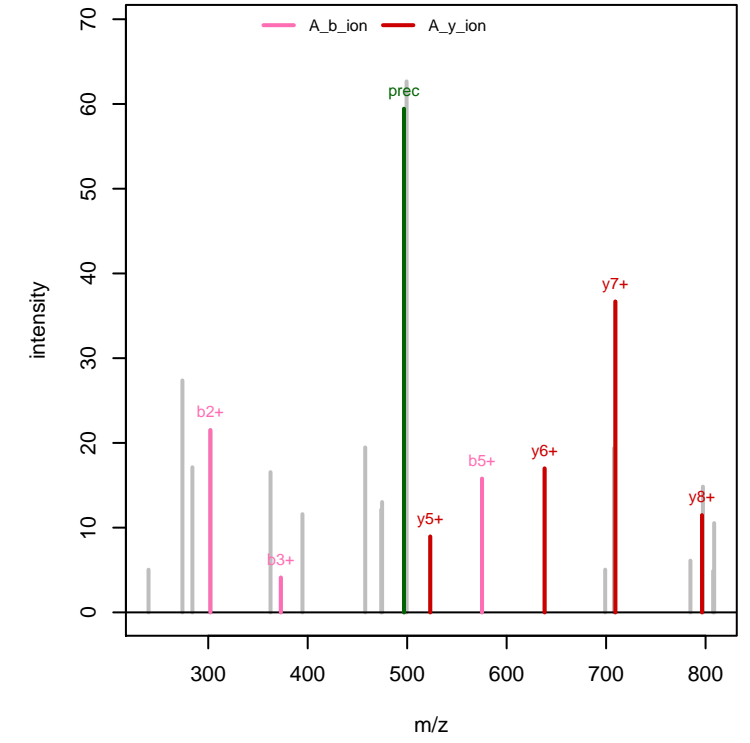

**KDERGALVNR+XL\_S**

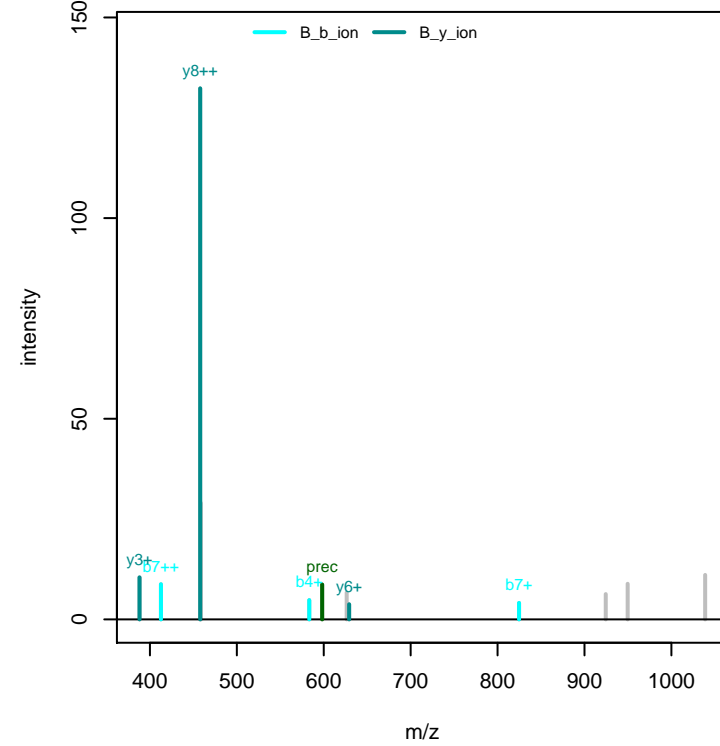

**KDERGALVNR+XL\_L**

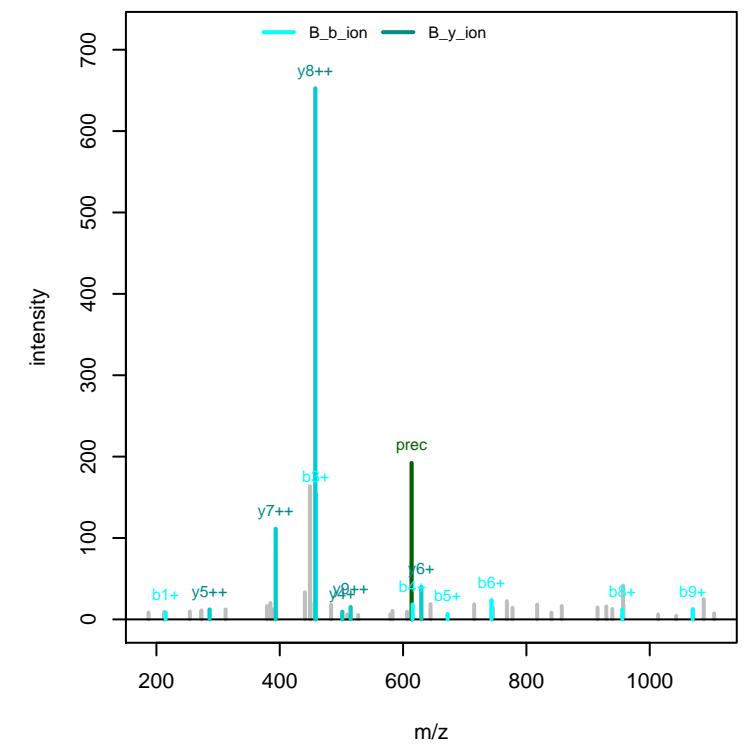

NSKSGGR  
VLGKAGAAR

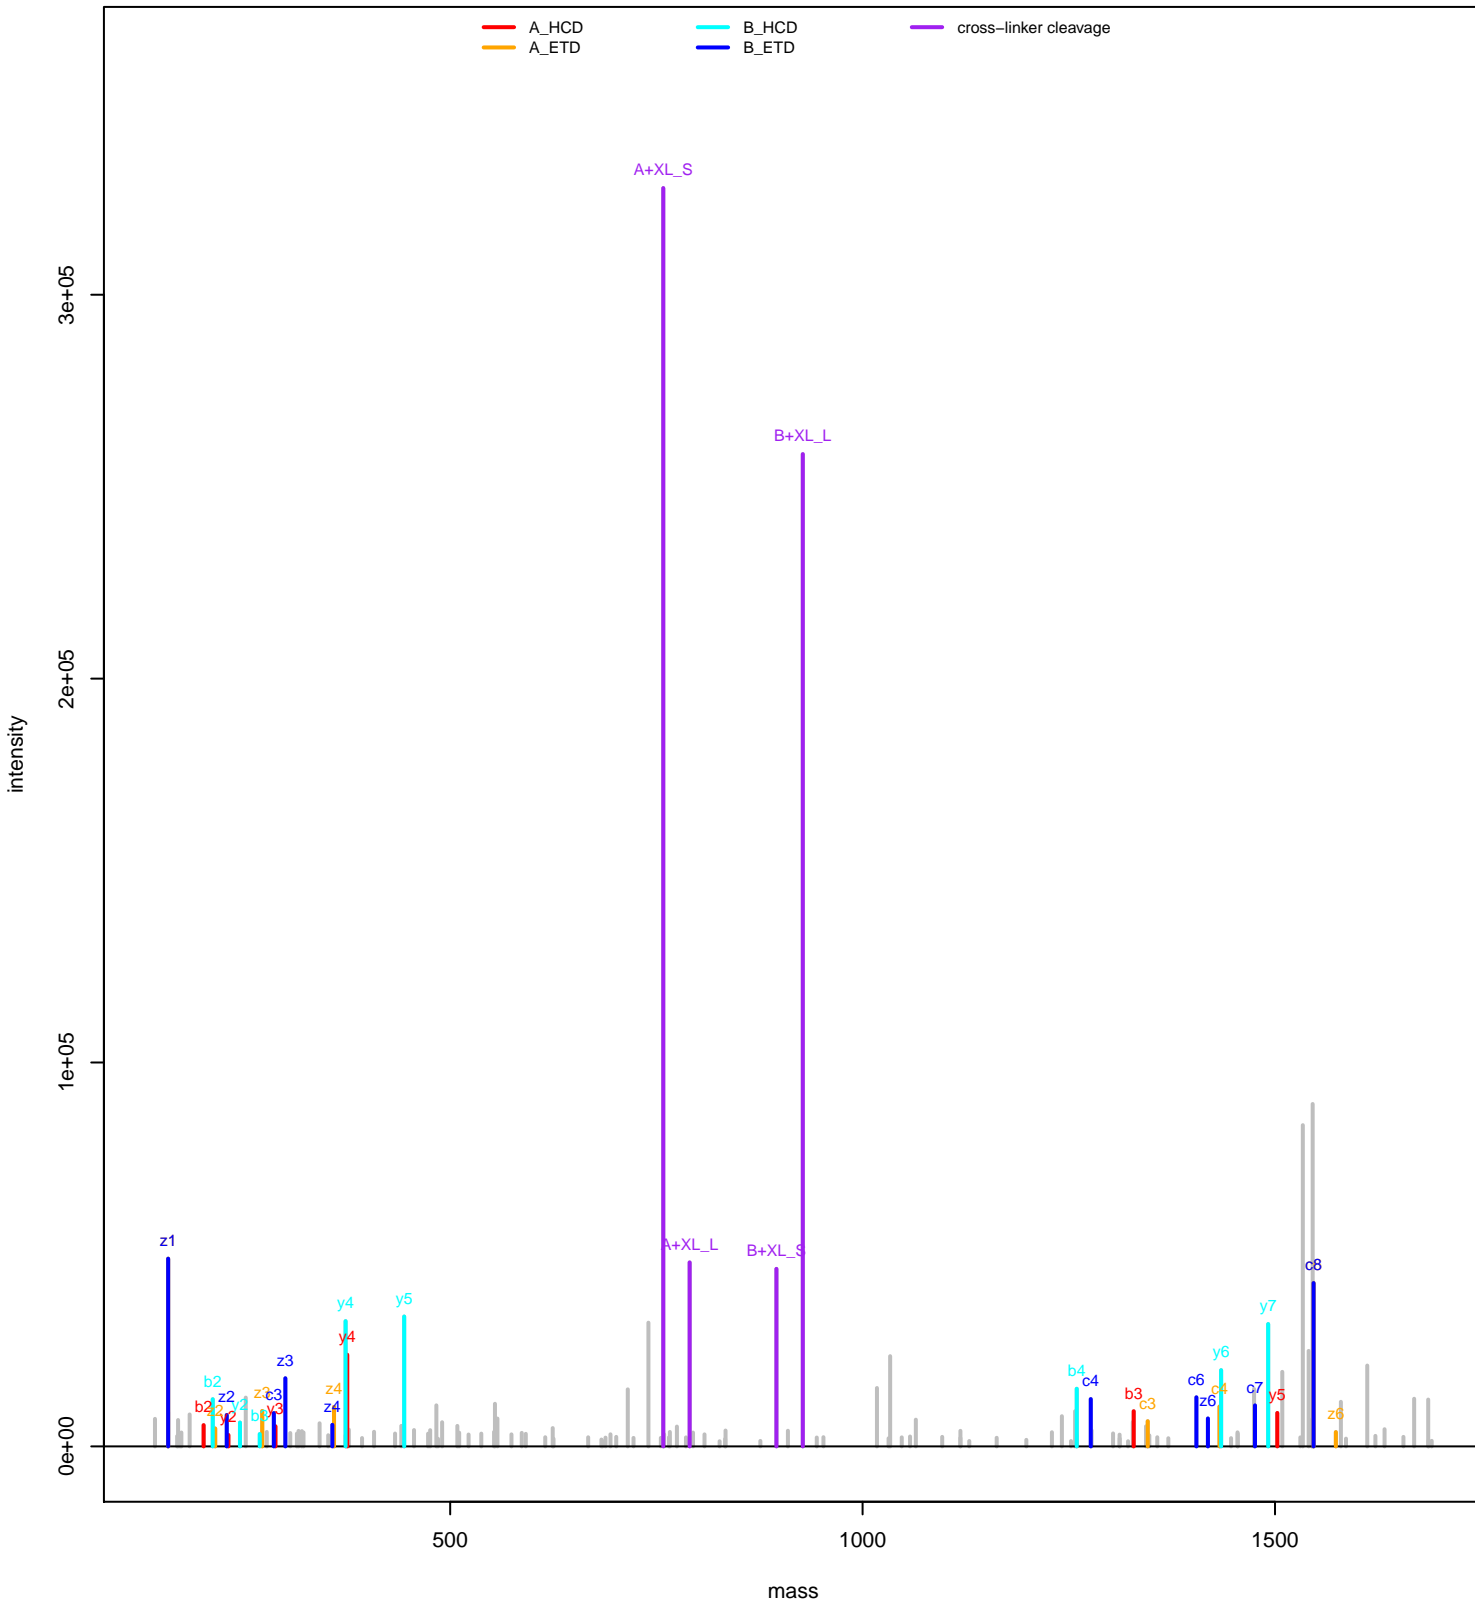

NSKSGGR+XL\_S

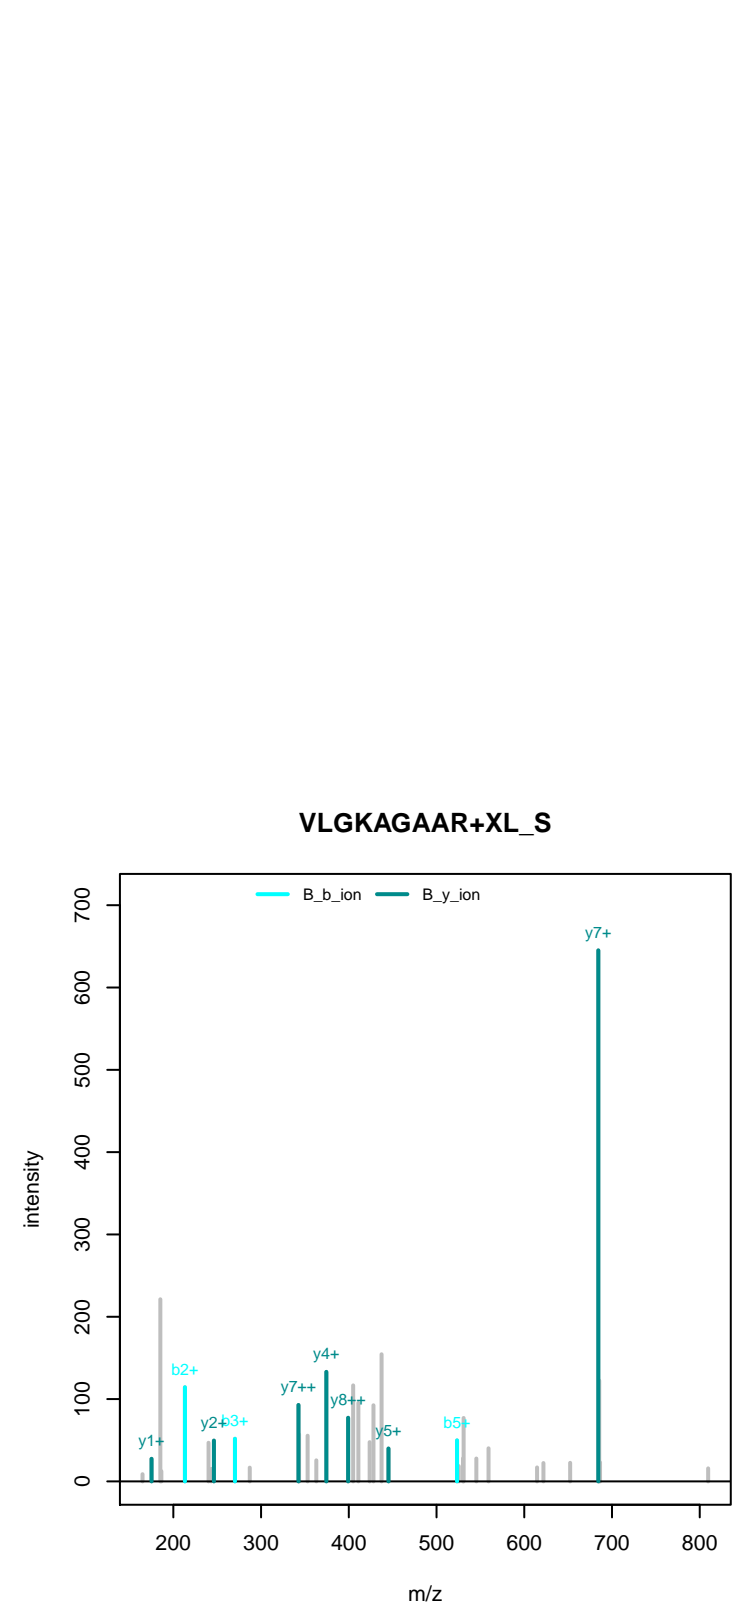

NSKSGGR+XL\_L

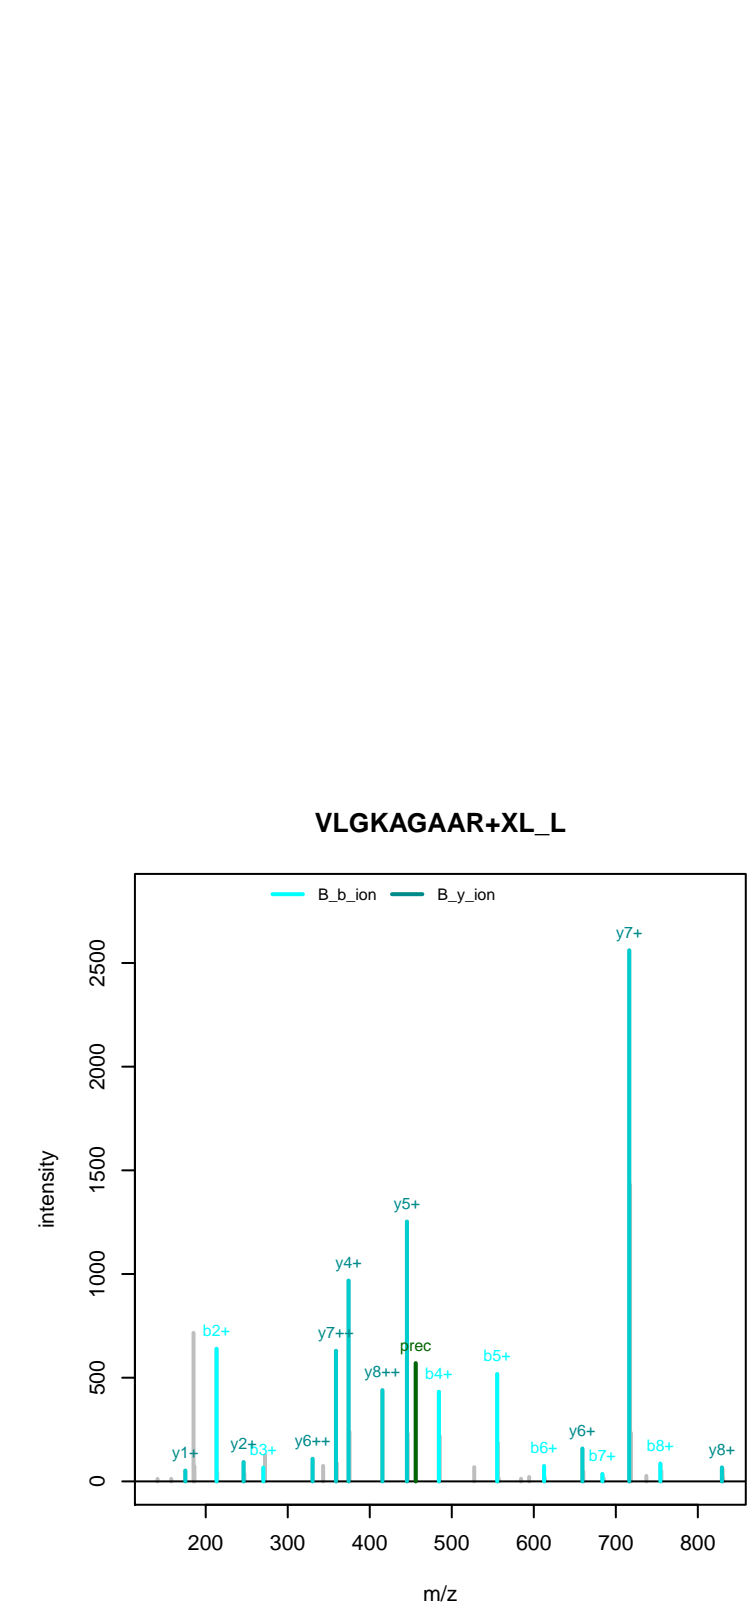

VLGKAGAAR+XL\_S

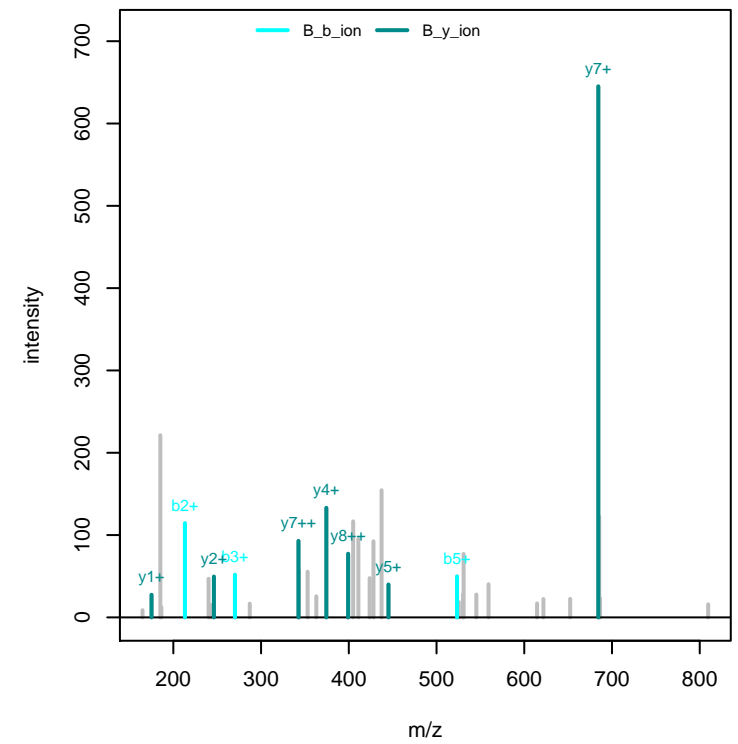

VLGKAGAAR+XL\_L

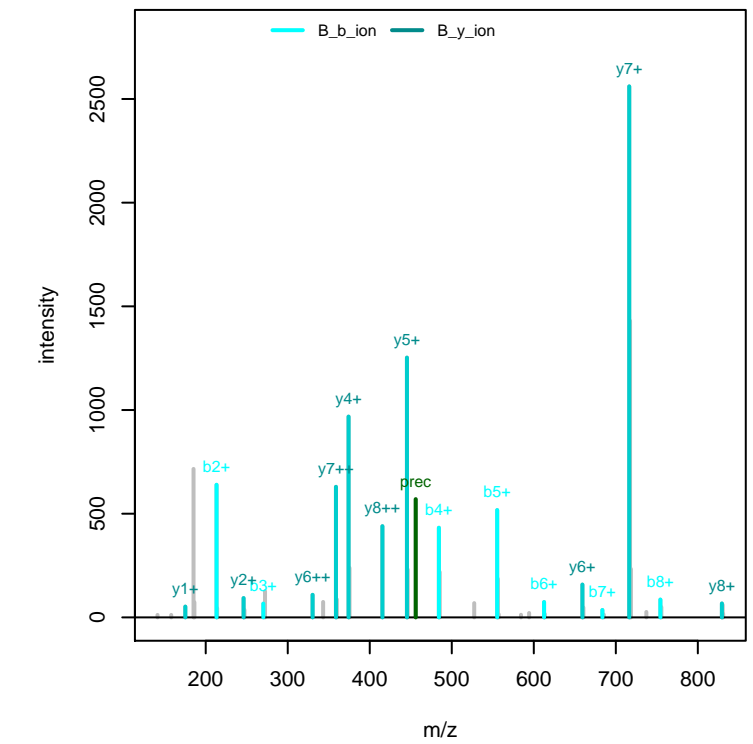

KAAQDAK  
AGHSKWANTR

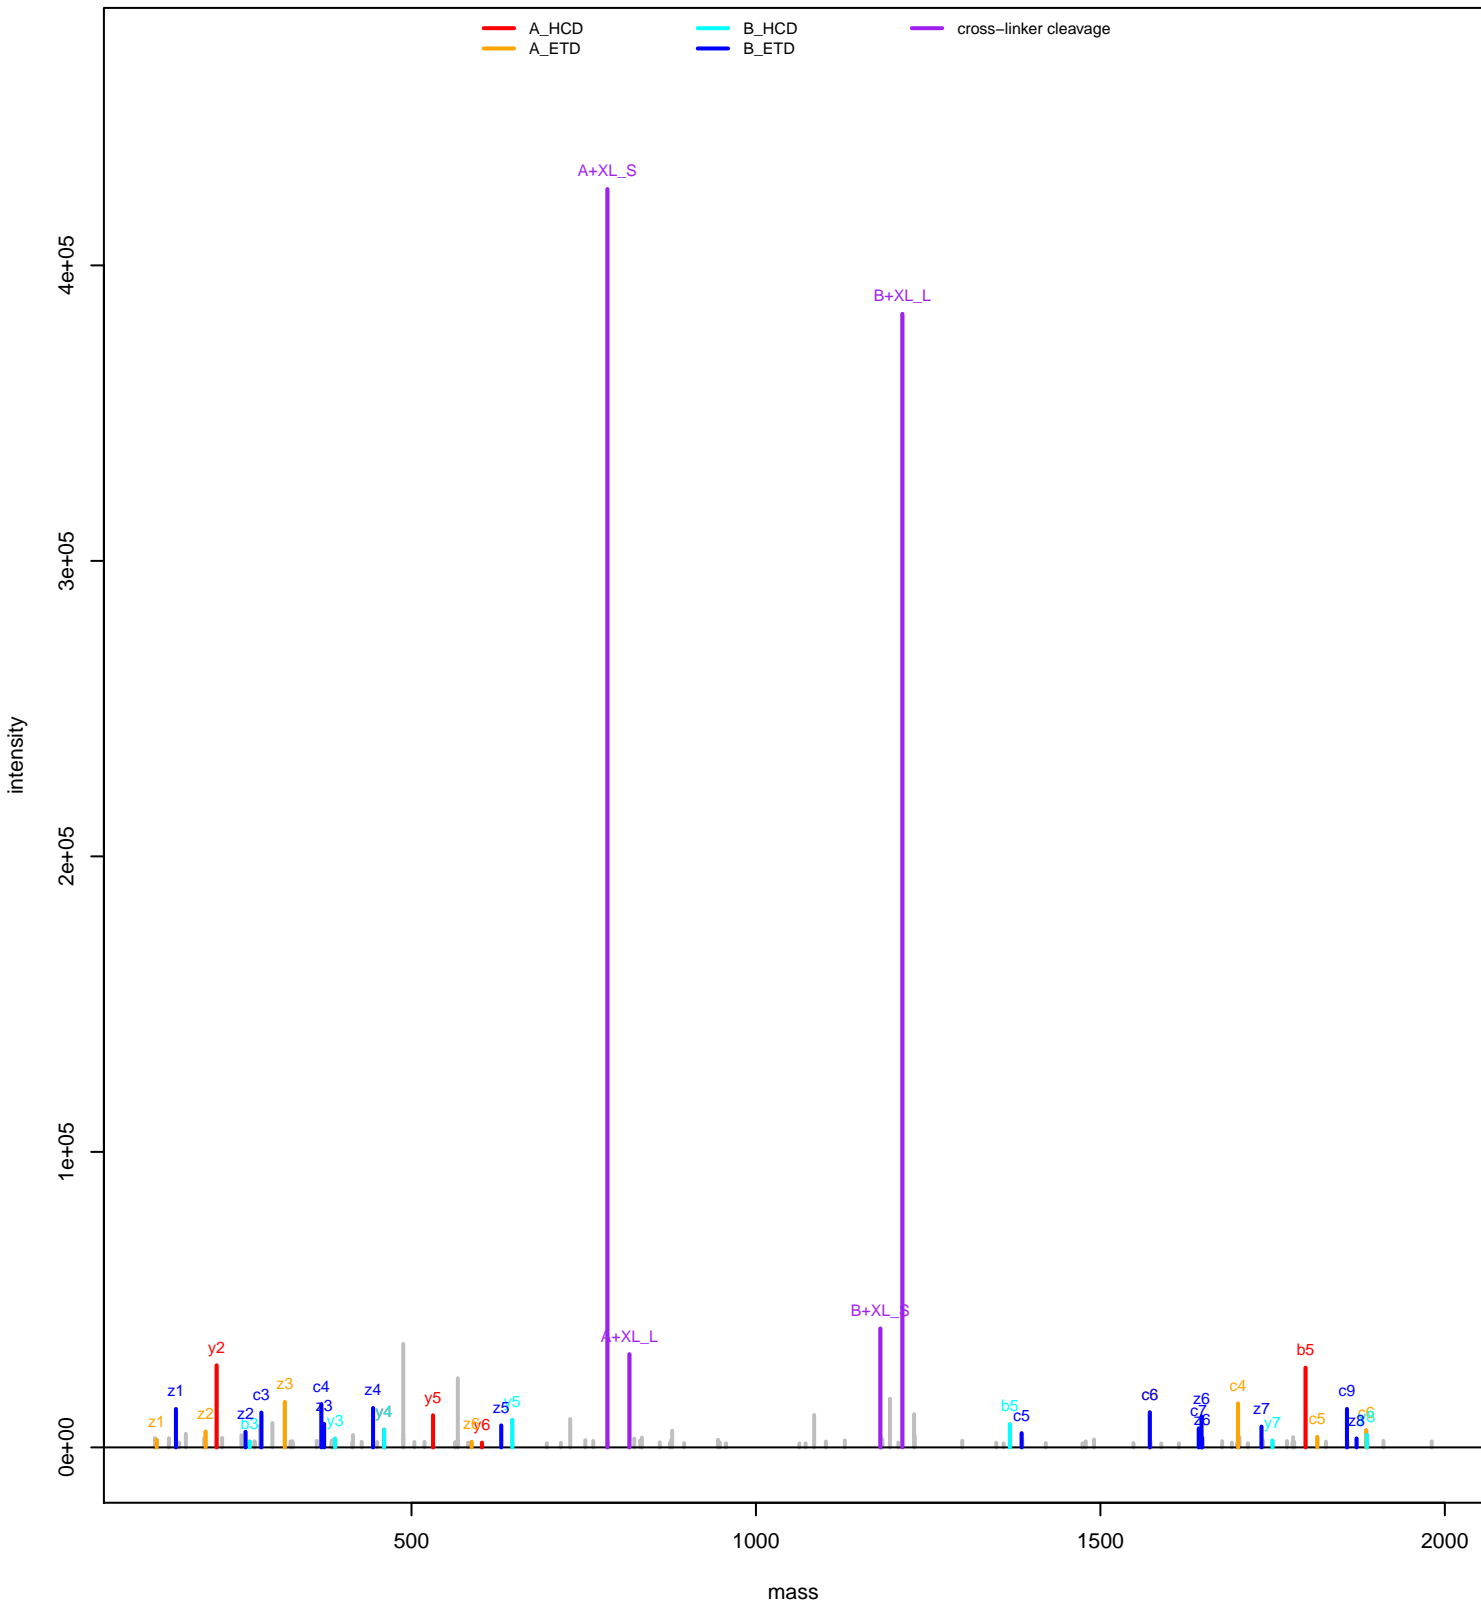

KAAQDAK+XL\_S

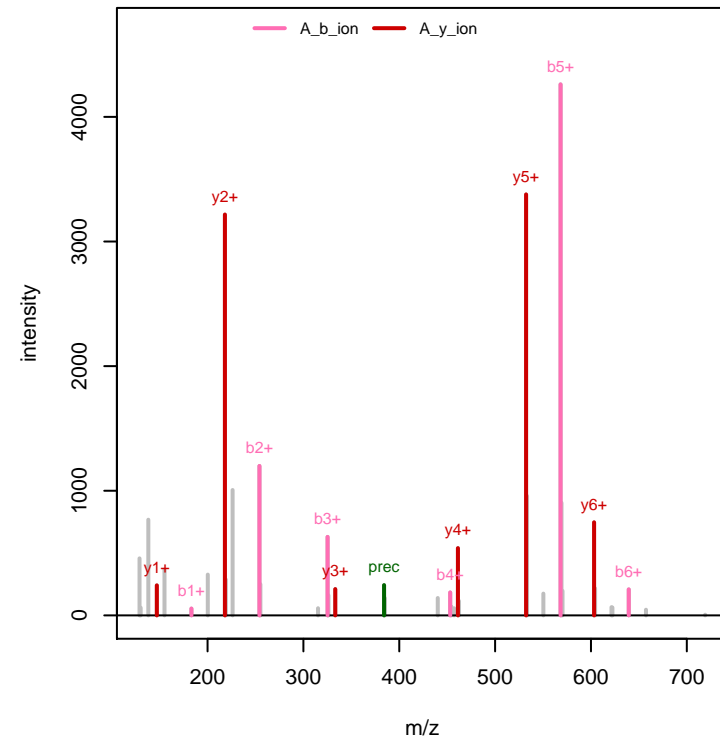

KAAQDAK+XL\_L

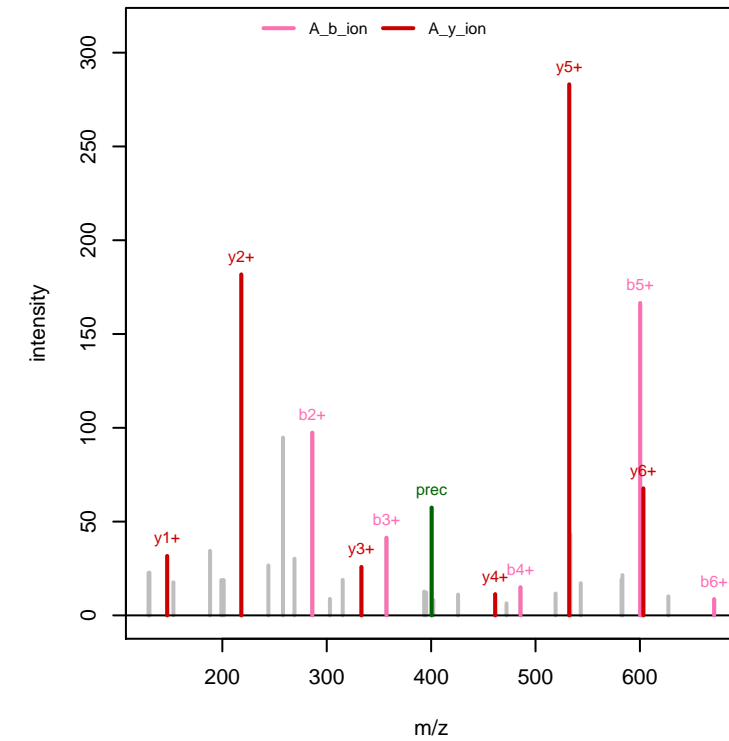

AGHSKWANTR+XL\_S

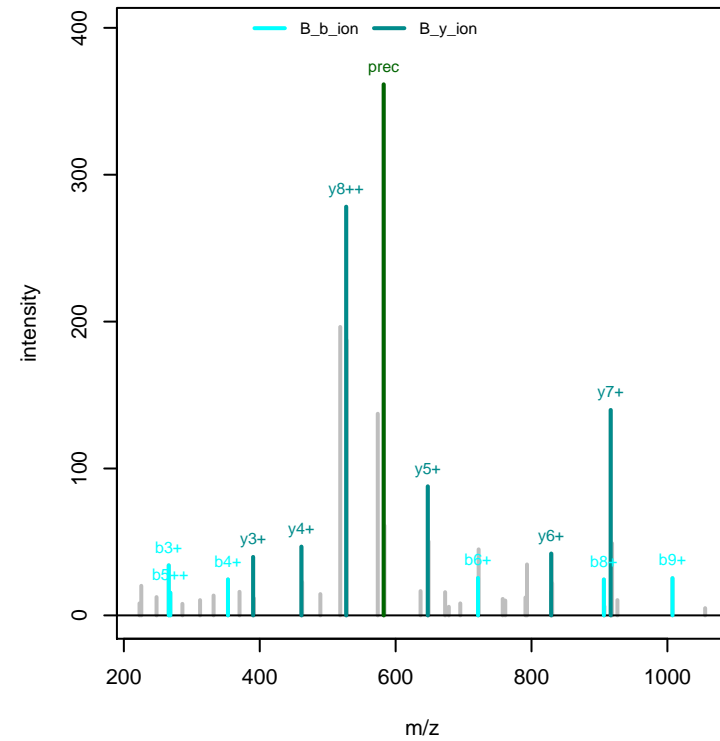

AGHSKWANTR+XL\_L

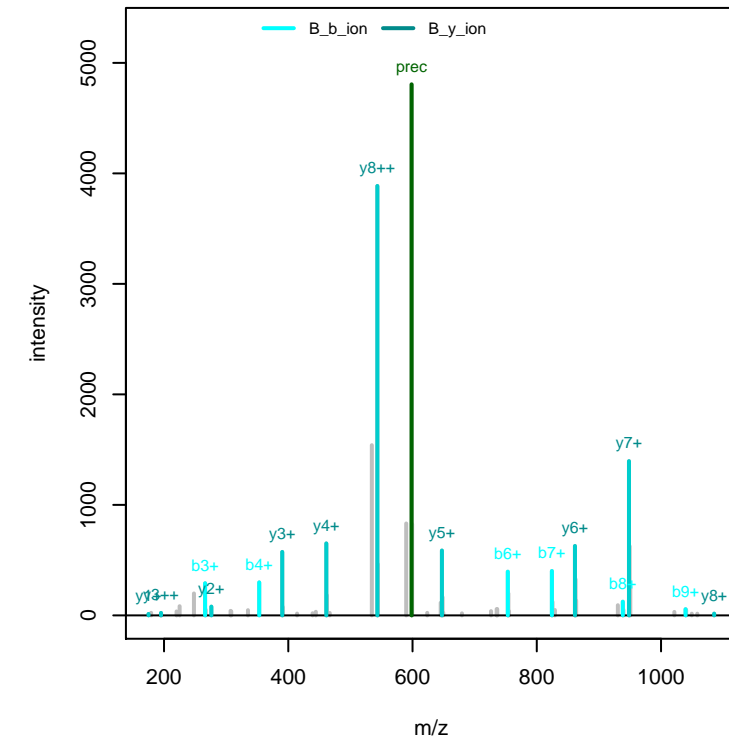

VAKDATK  
APHVSEKASTAMEK

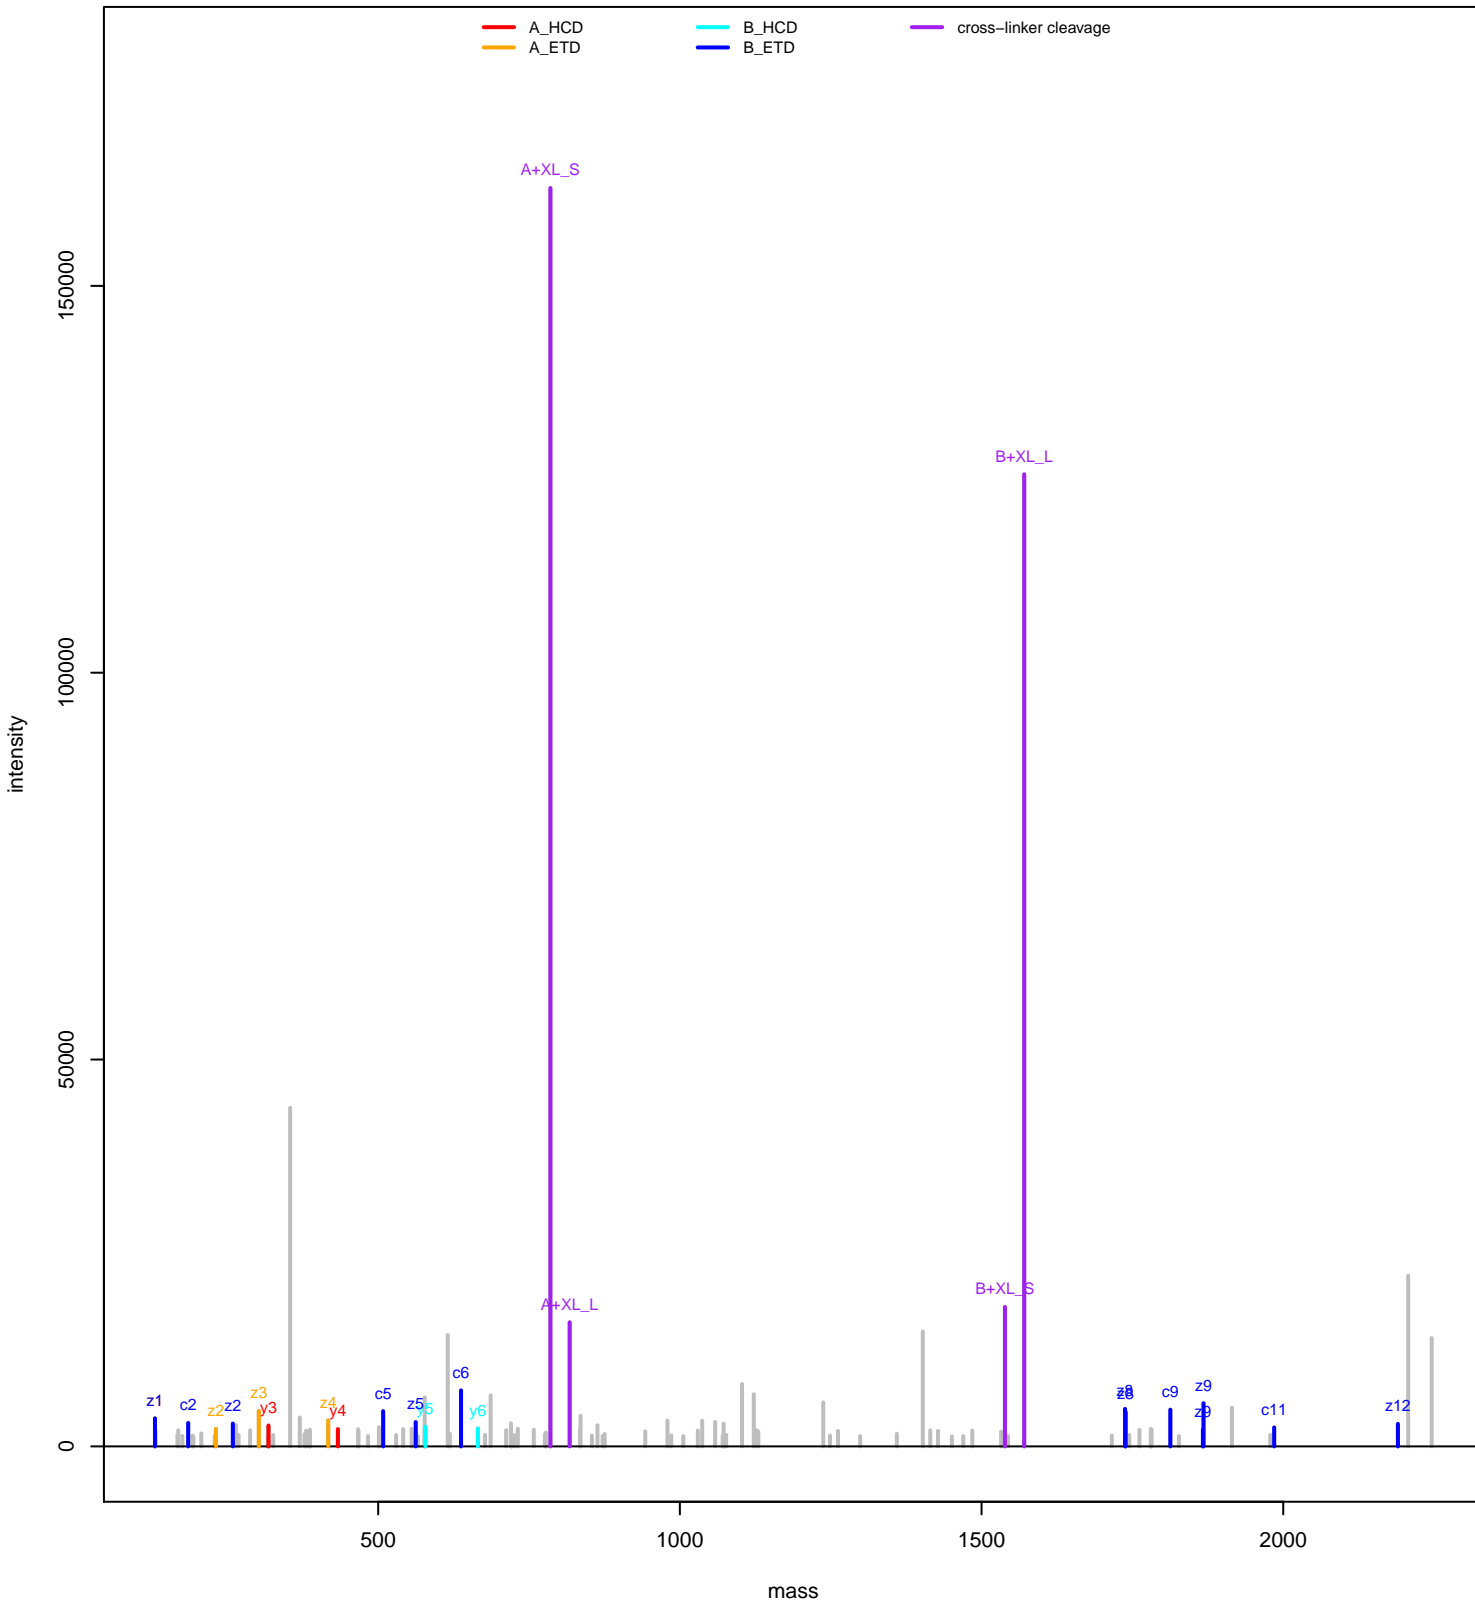

VAKDATK+XL\_S

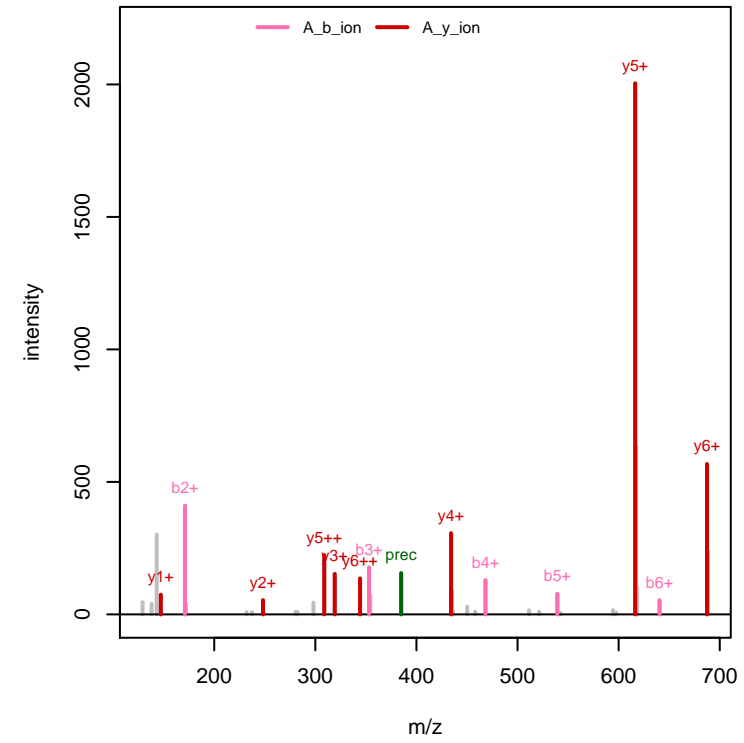

VAKDATK+XL\_L

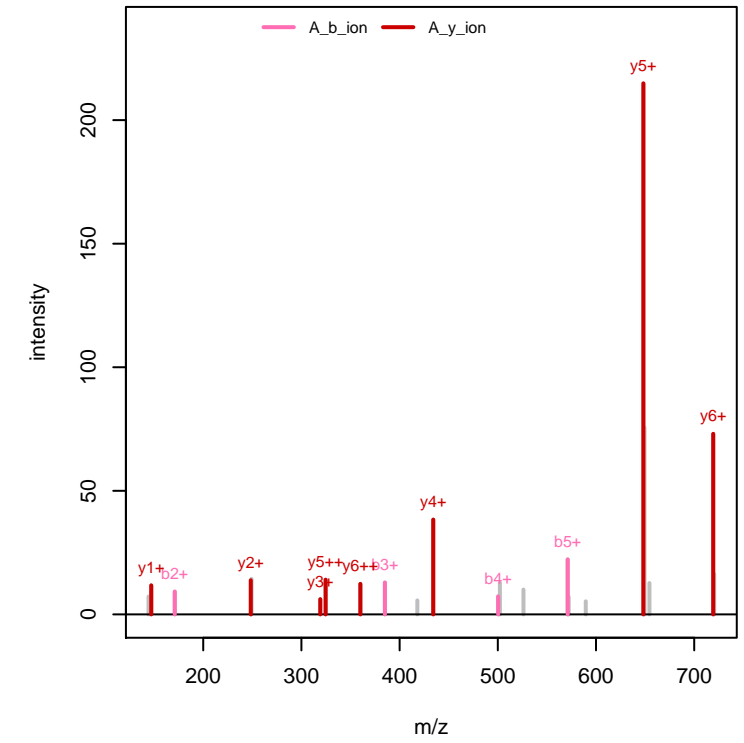

APHVSEKASTAMEK+XL\_S

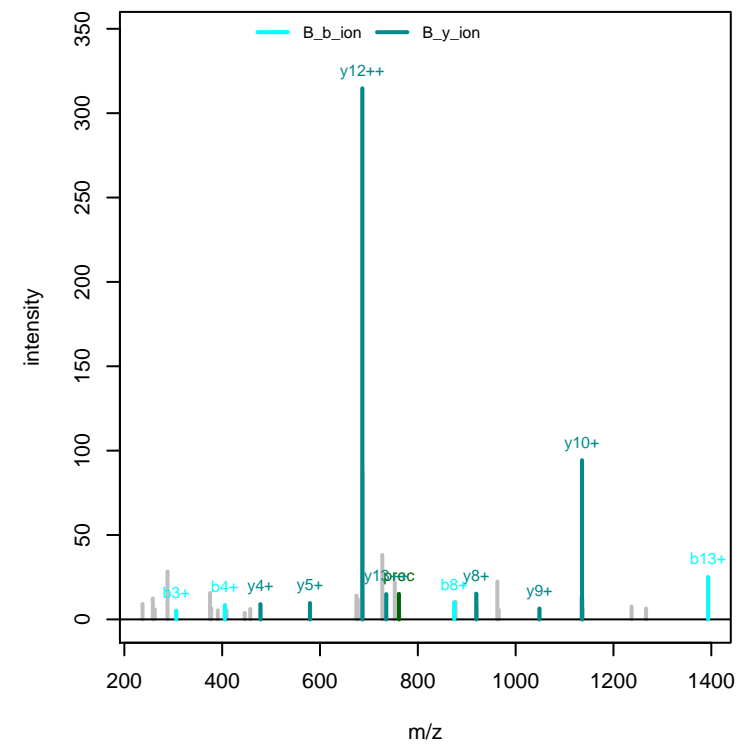

APHVSEKASTAMEK+XL\_L

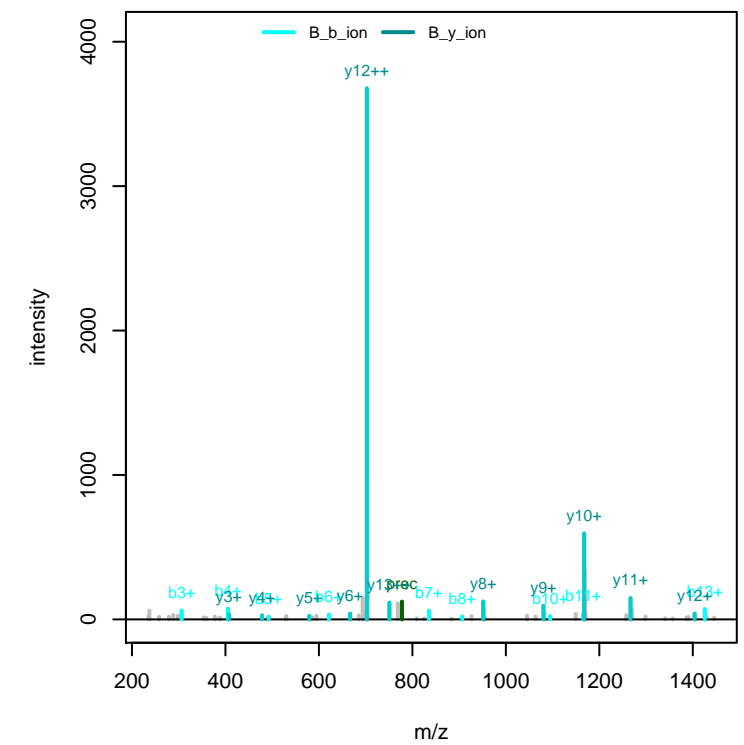

EGYSKK  
AKVSATGDDAR

EGYSKK+XL\_S

EGYSKK+XL\_L

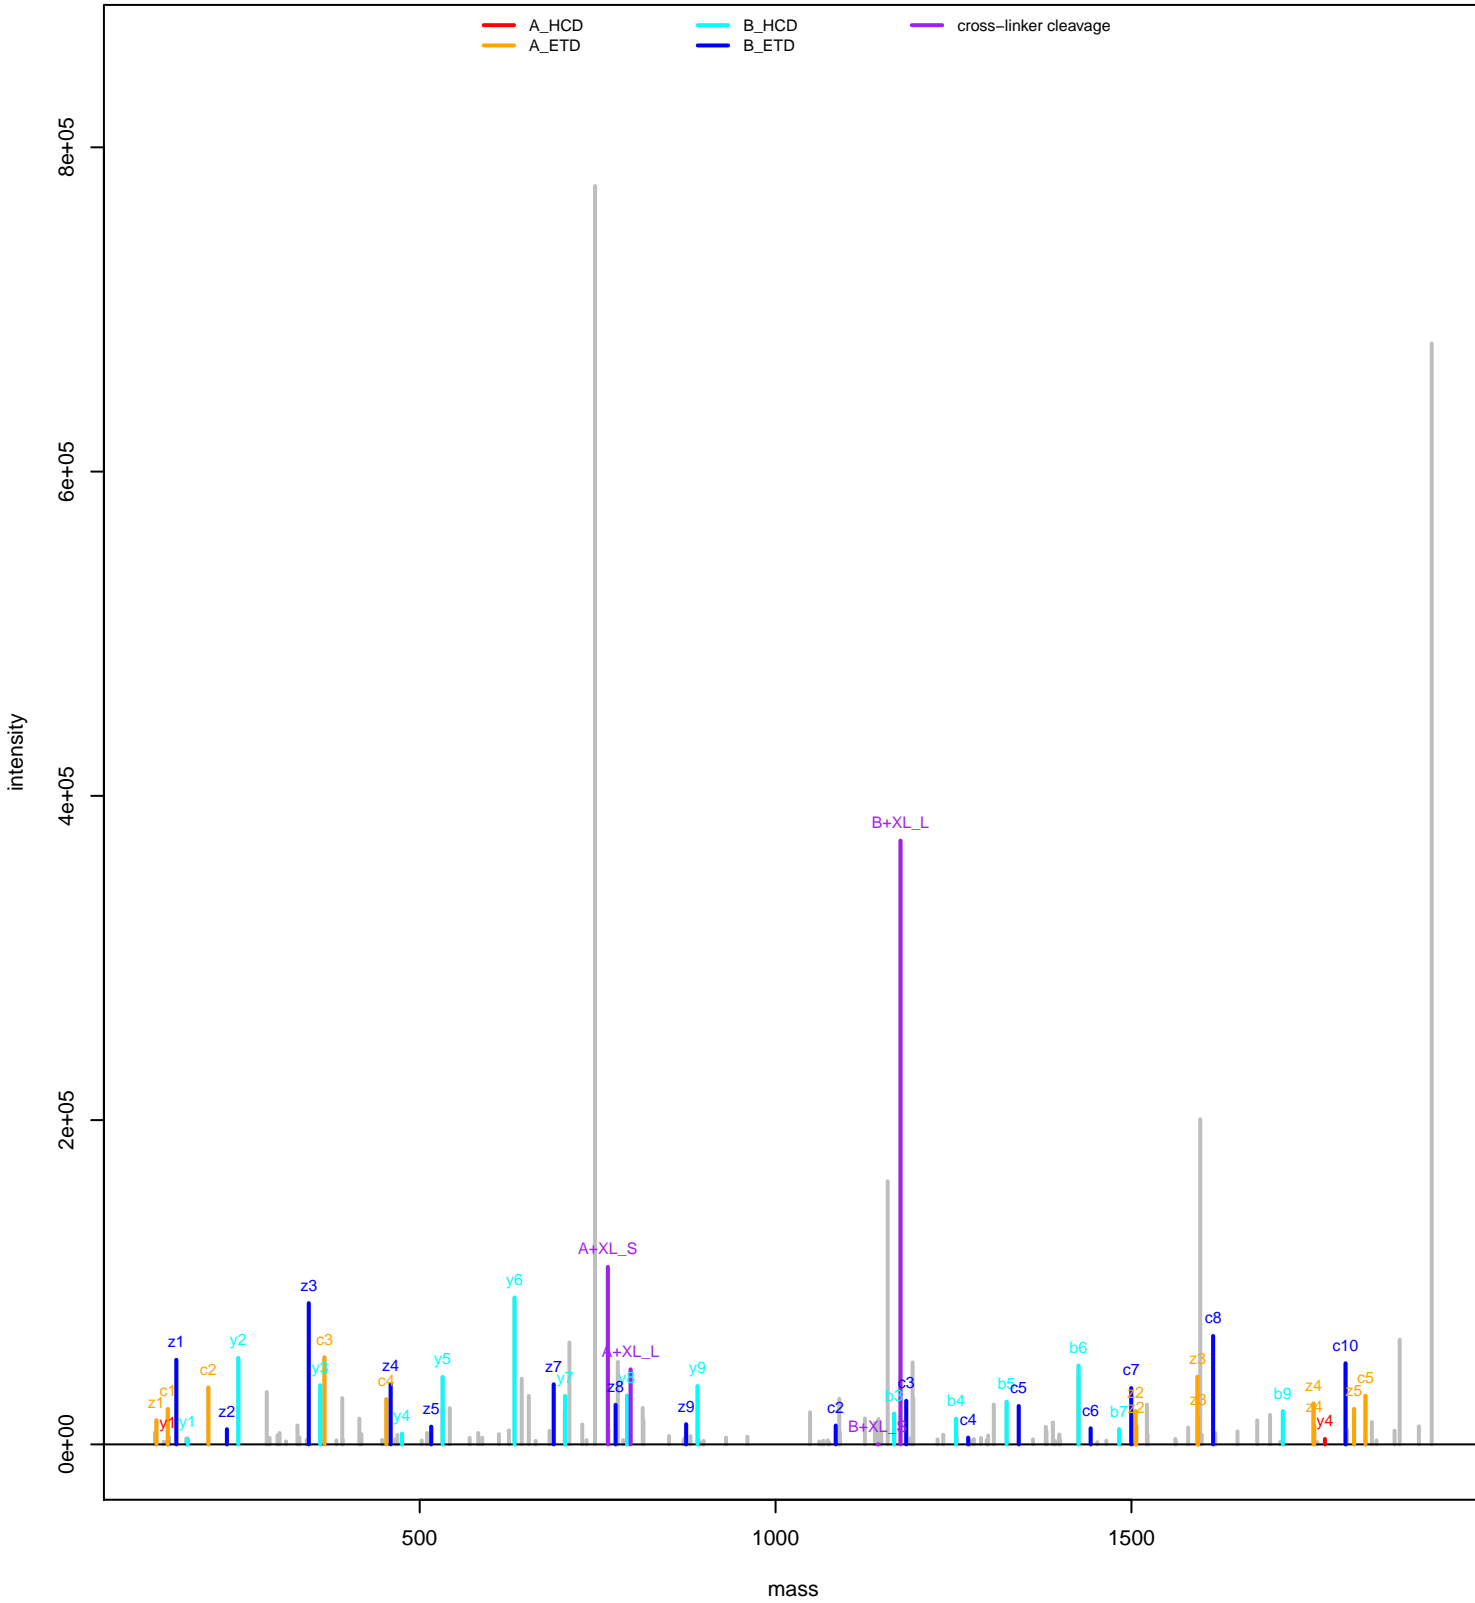

AKVSATGDDAR+XL\_S

AKVSATGDDAR+XL\_L

FRDSKK  
LASAQKETGEK

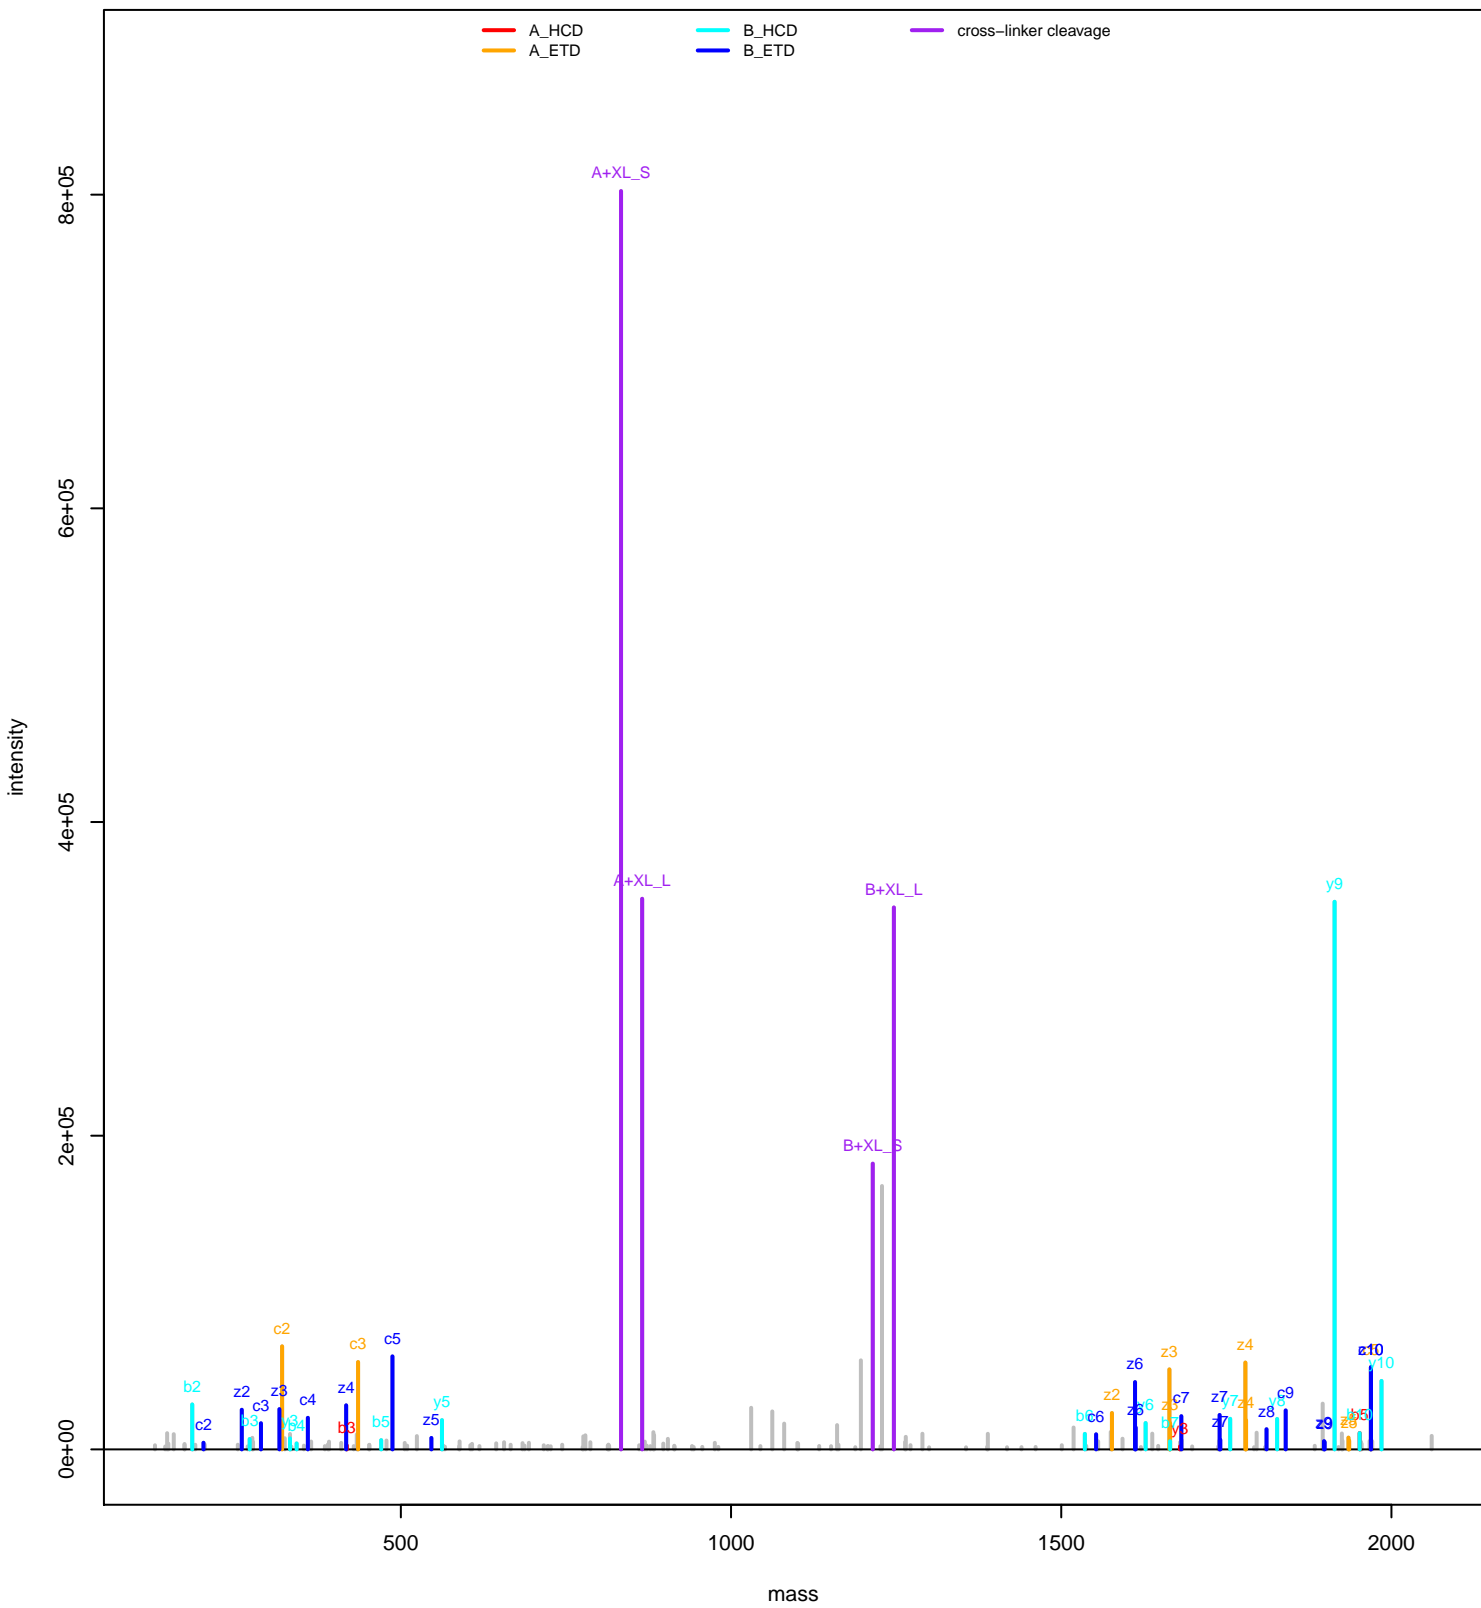

FRDSKK+XL\_S

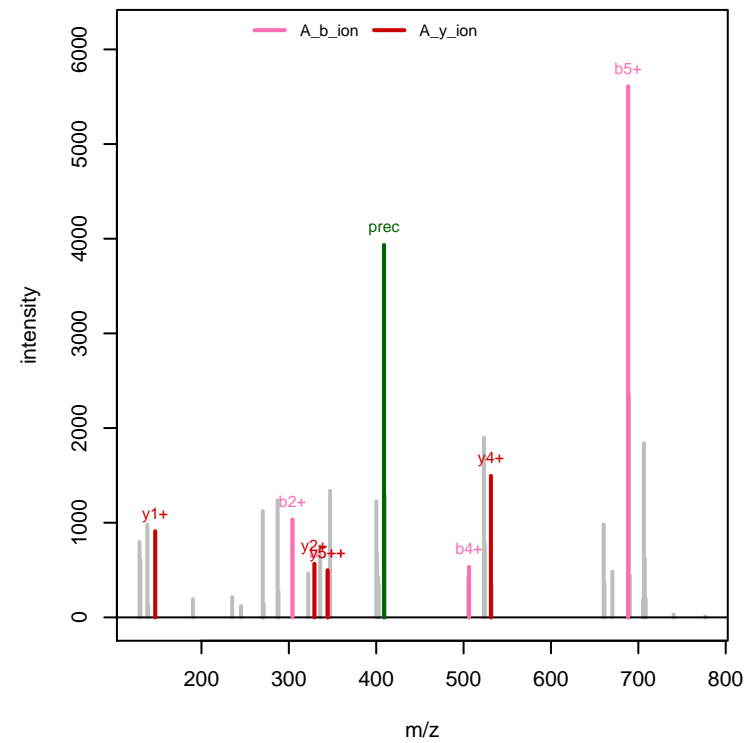

FRDSKK+XL\_L

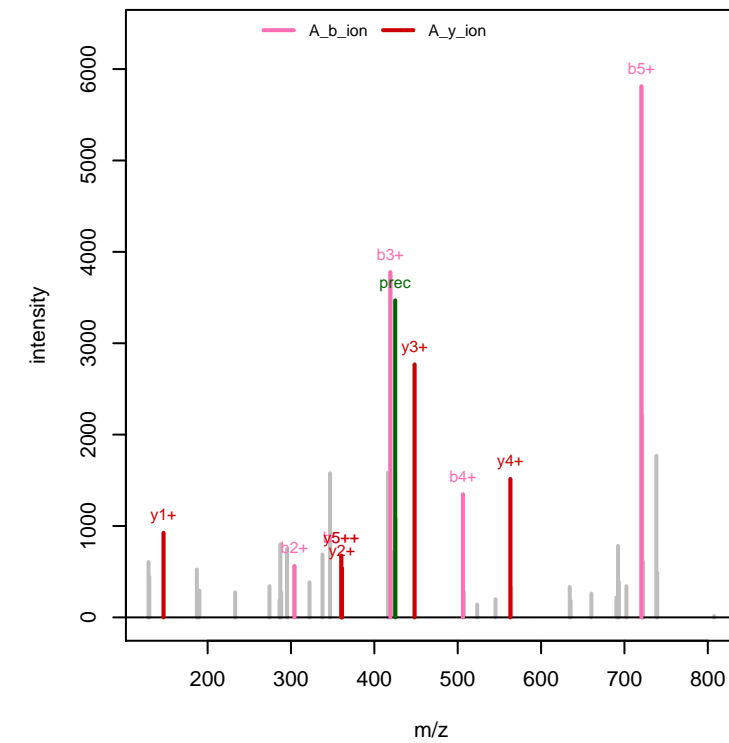

LASAQKETGEK+XL\_S

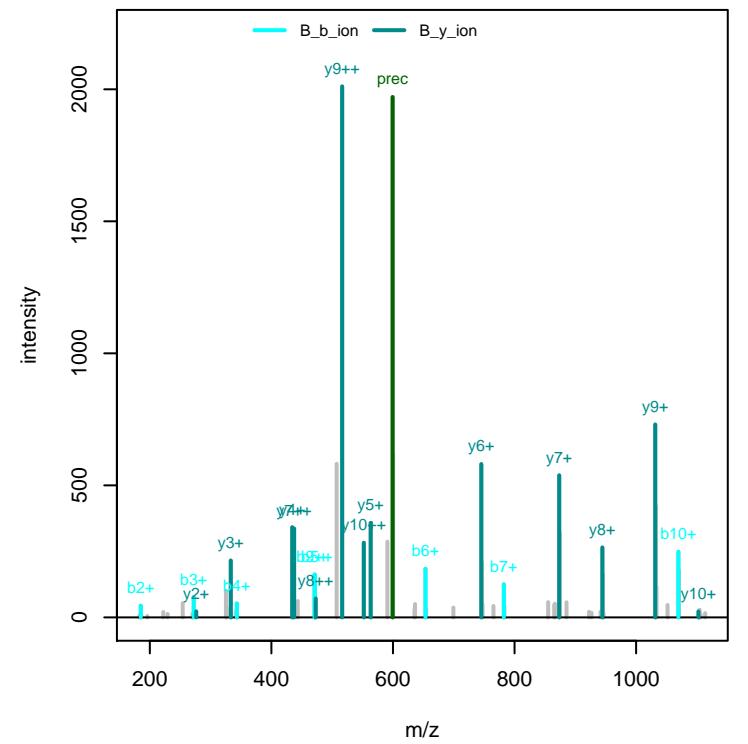

LASAQKETGEK+XL\_L

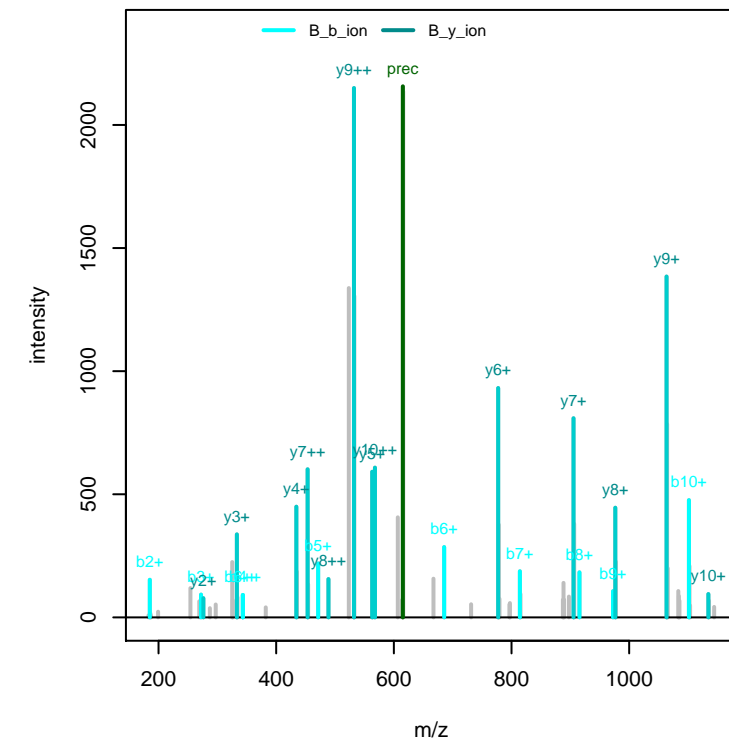

SASSKHNER  
KAEQAAAEQALK

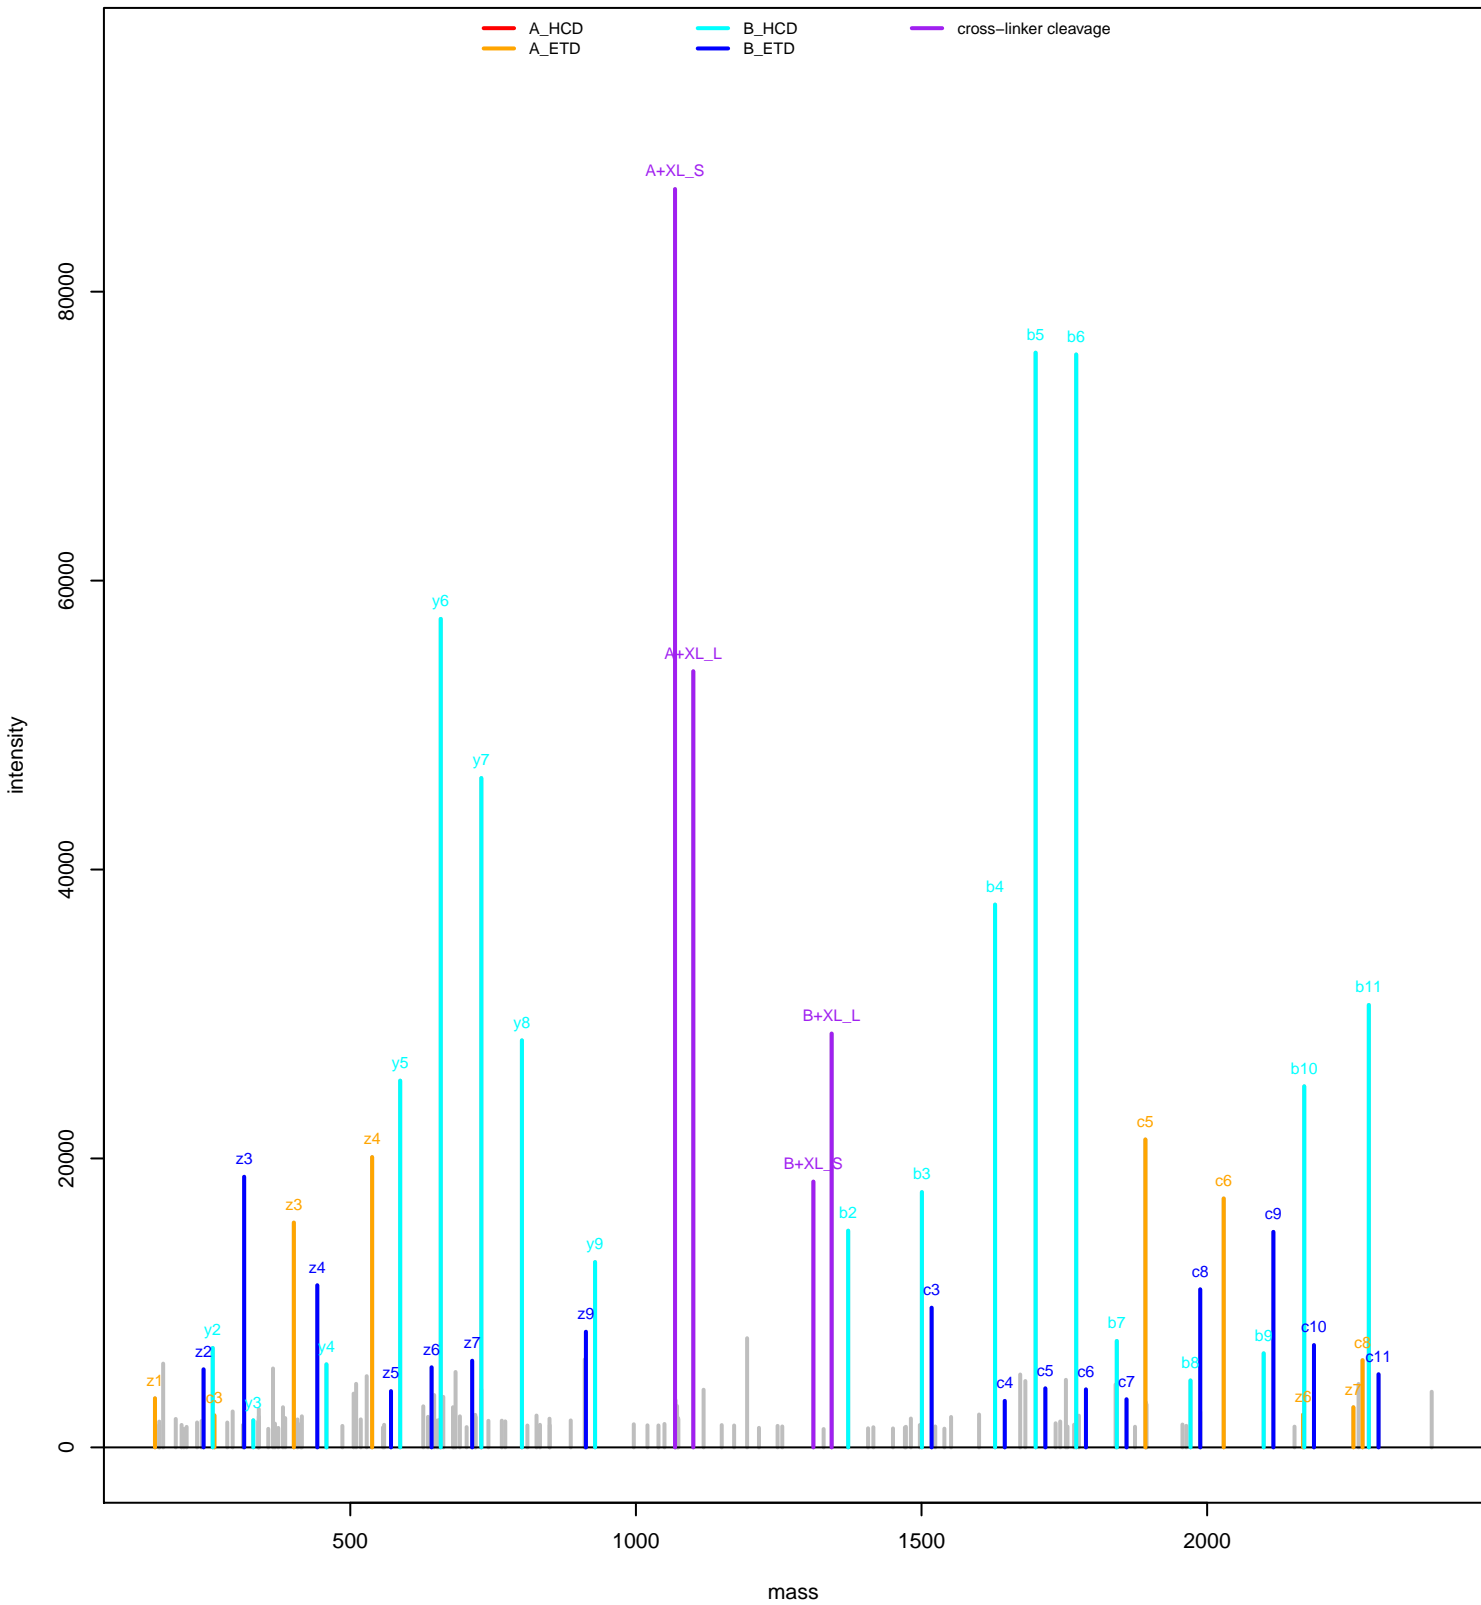

SASSKHNER+XL\_S

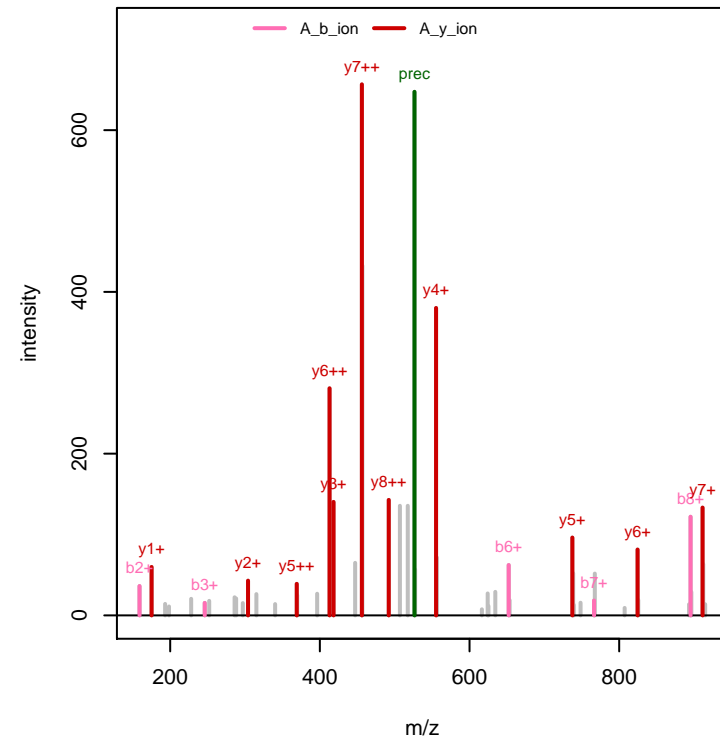

SASSKHNER+XL\_L

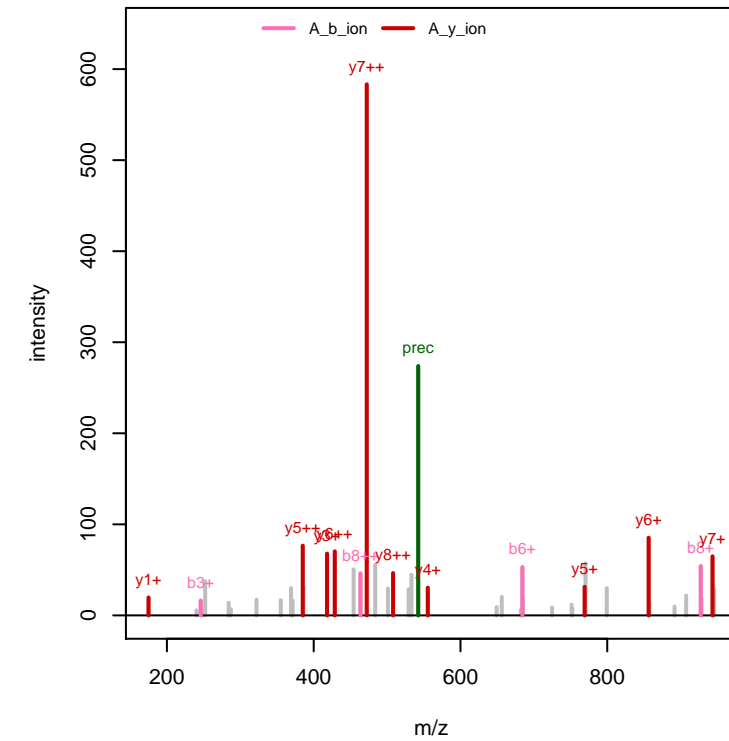

KAEQAAAEQALK+XL\_S

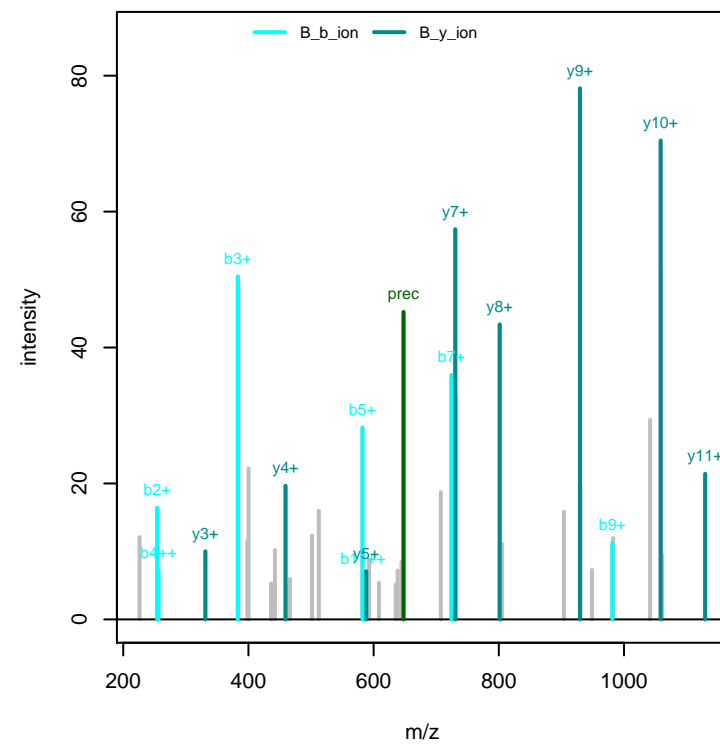

KAEQAAAEQALK+XL\_L

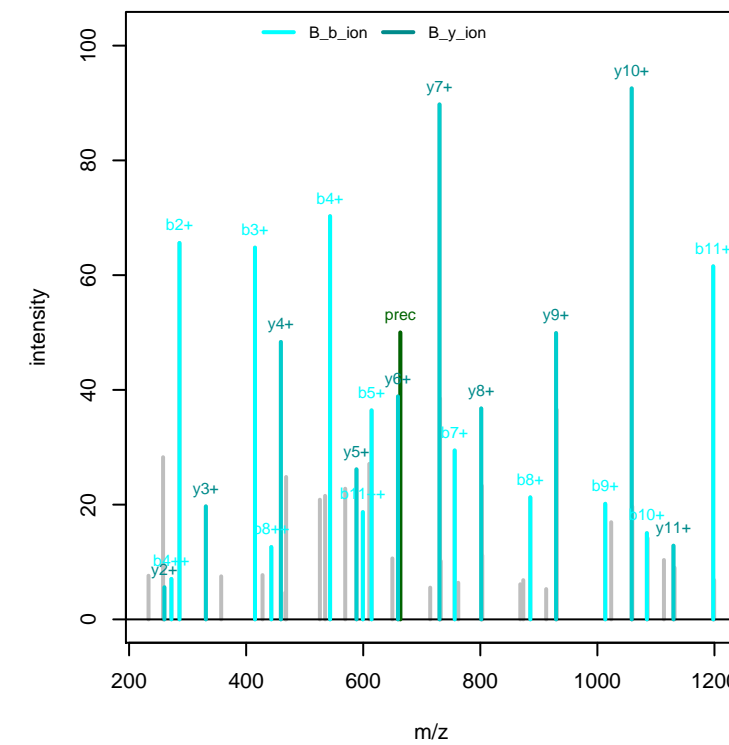



**KPELDAK**  
**GEILGGM<sub>o</sub>AAVEQPEKPAAPK**

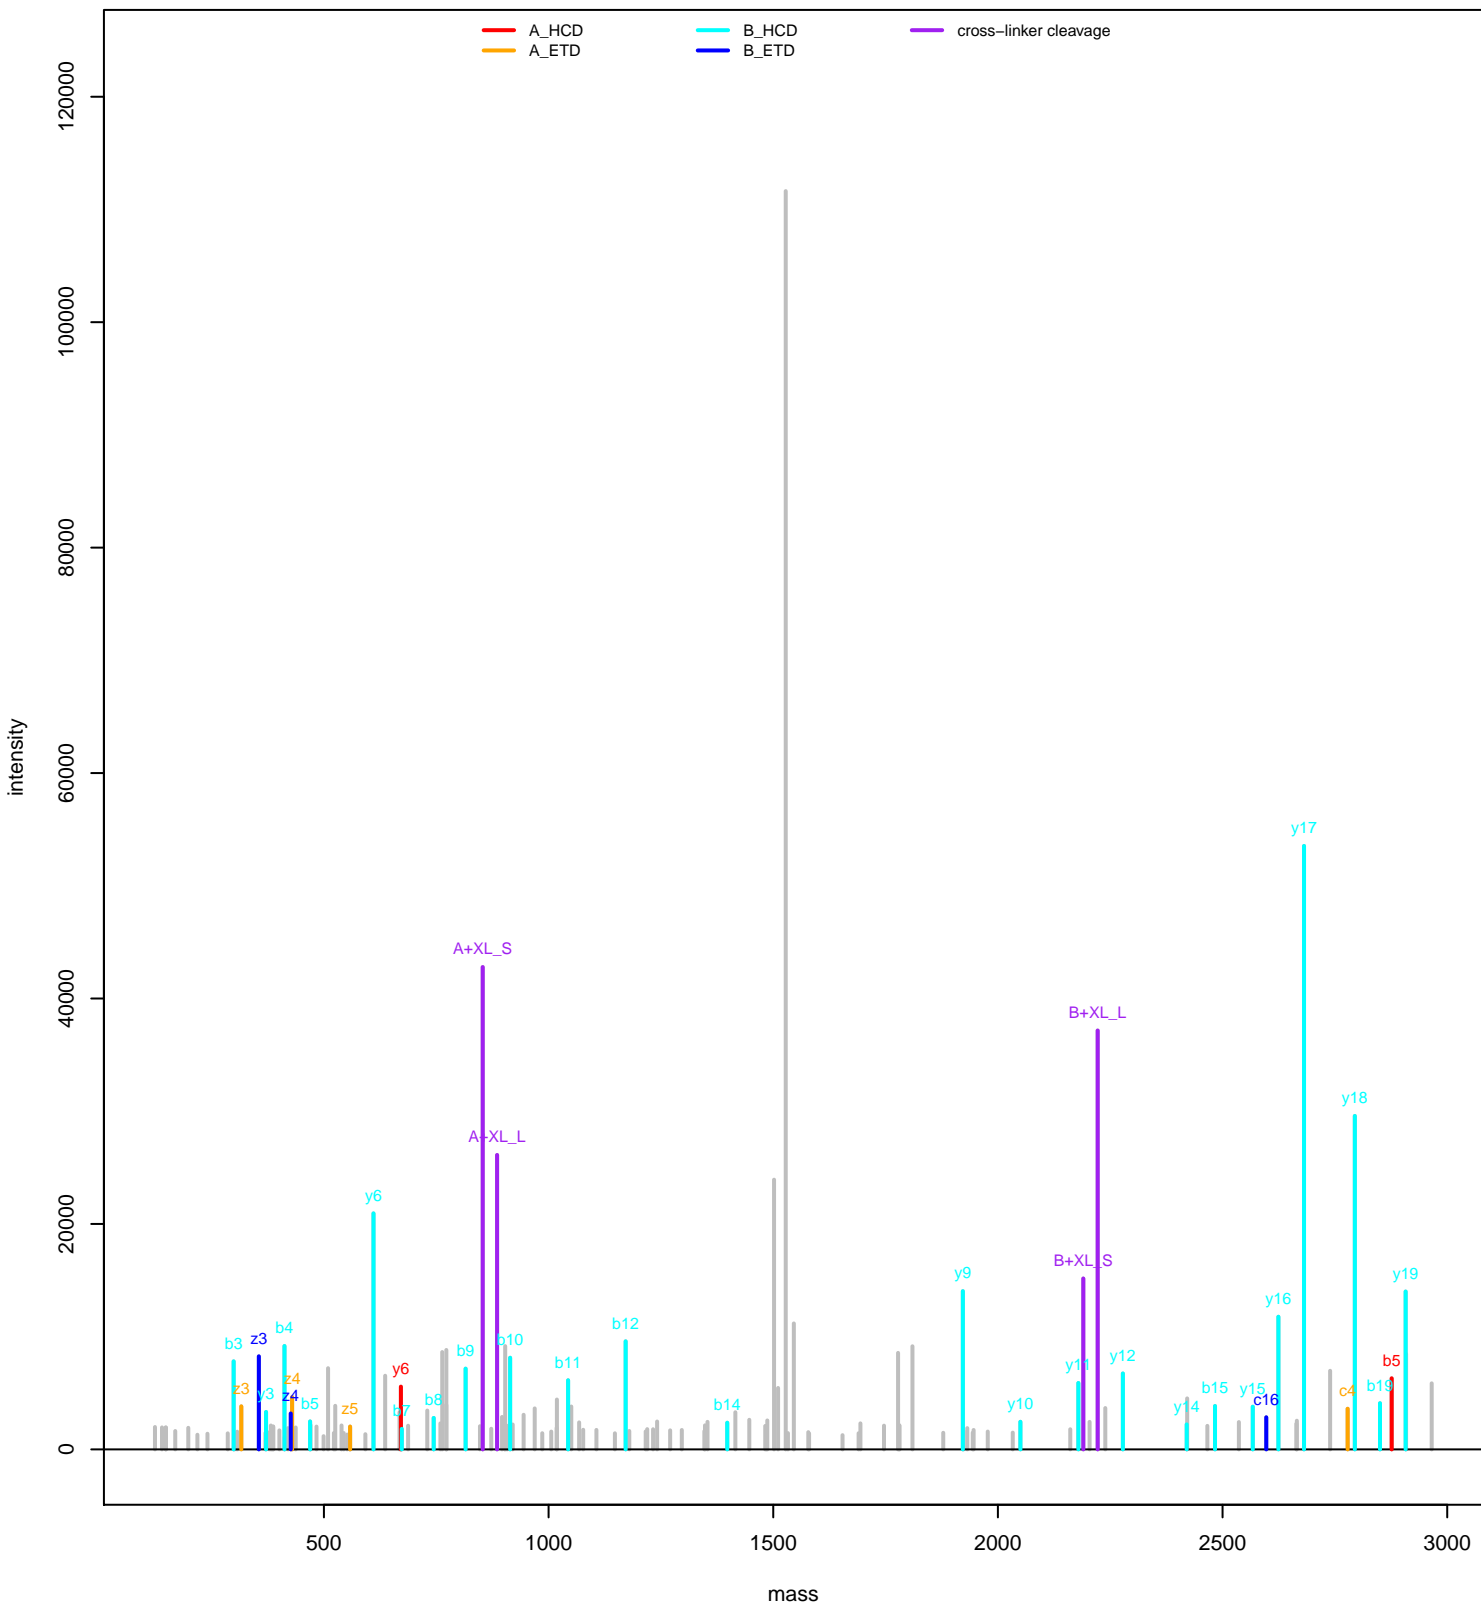

**KPELDAK+XL\_S**

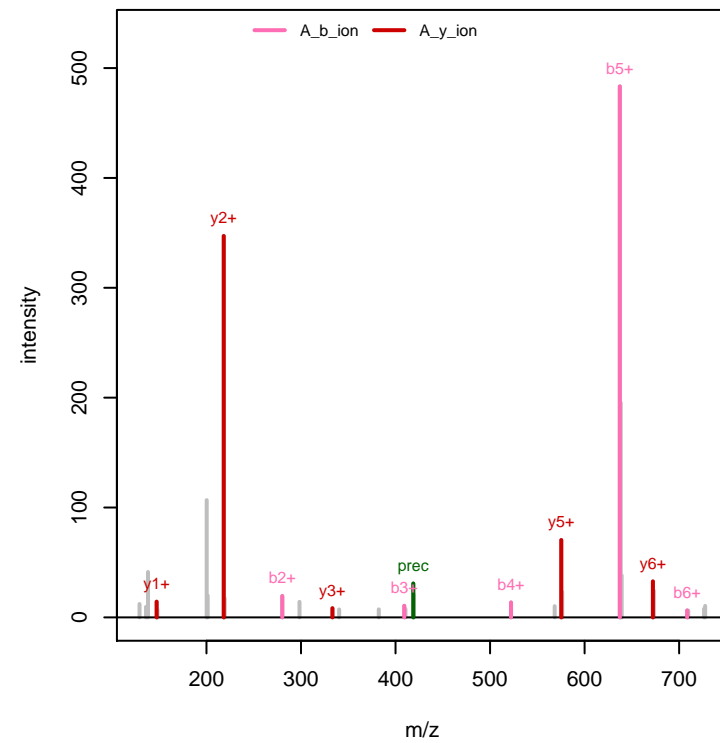

**KPELDAK+XL\_L**

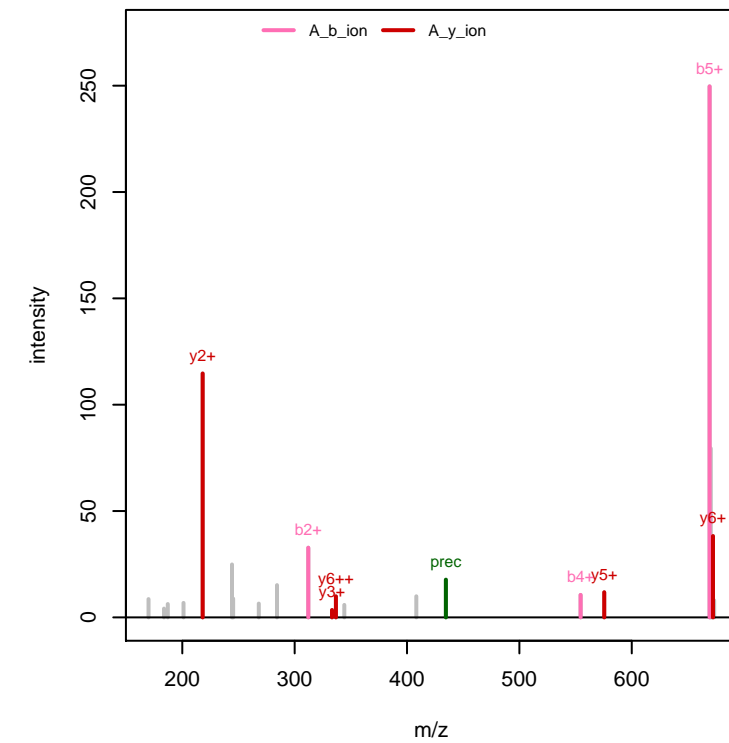

**GEILGGM<sub>o</sub>AAVEQPEKPAAPK+XL\_S**

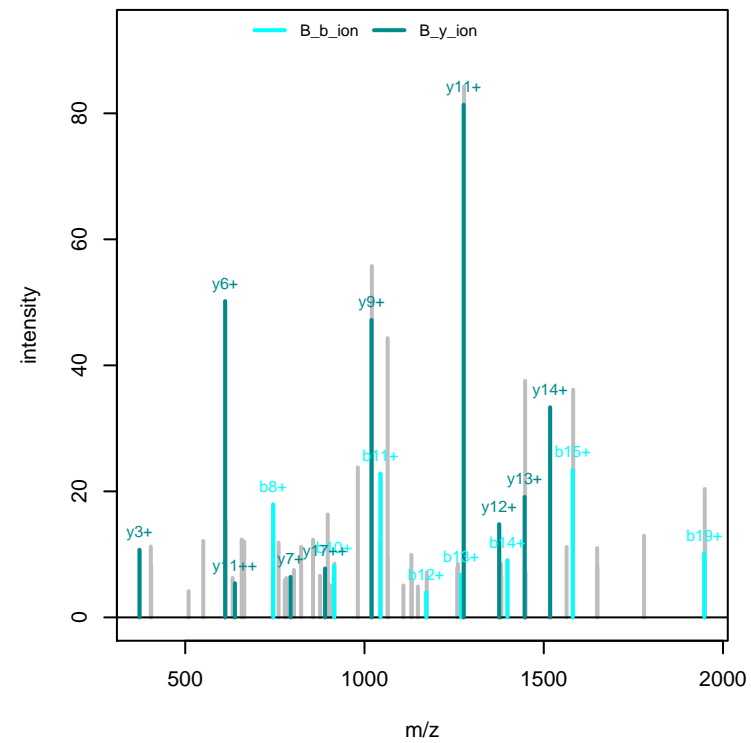

**GEILGGM<sub>o</sub>AAVEQPEKPAAPK+XL\_L**

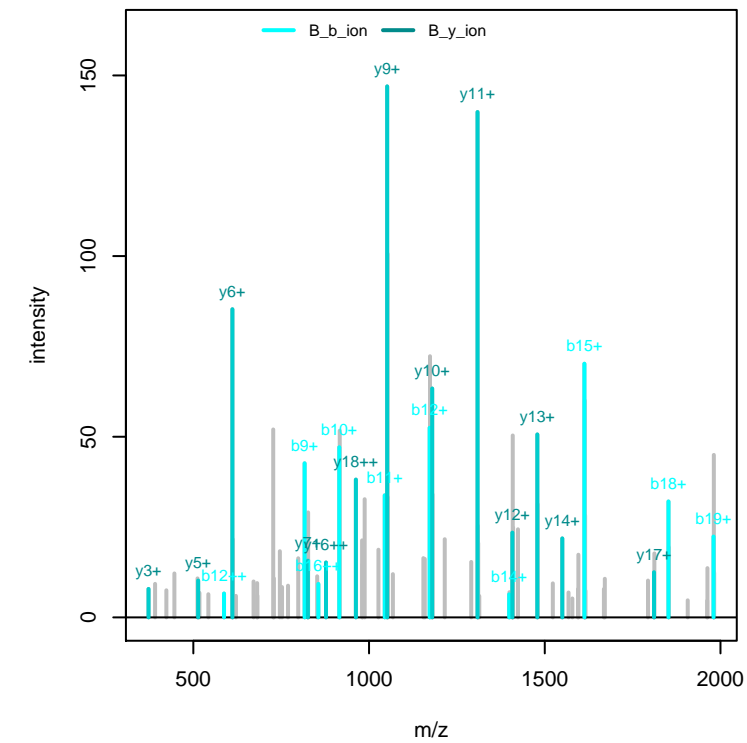

KSMoADGVK  
EALSRHNSKK

KSMoADGVK+XL\_S

KSMoADGVK+XL\_L

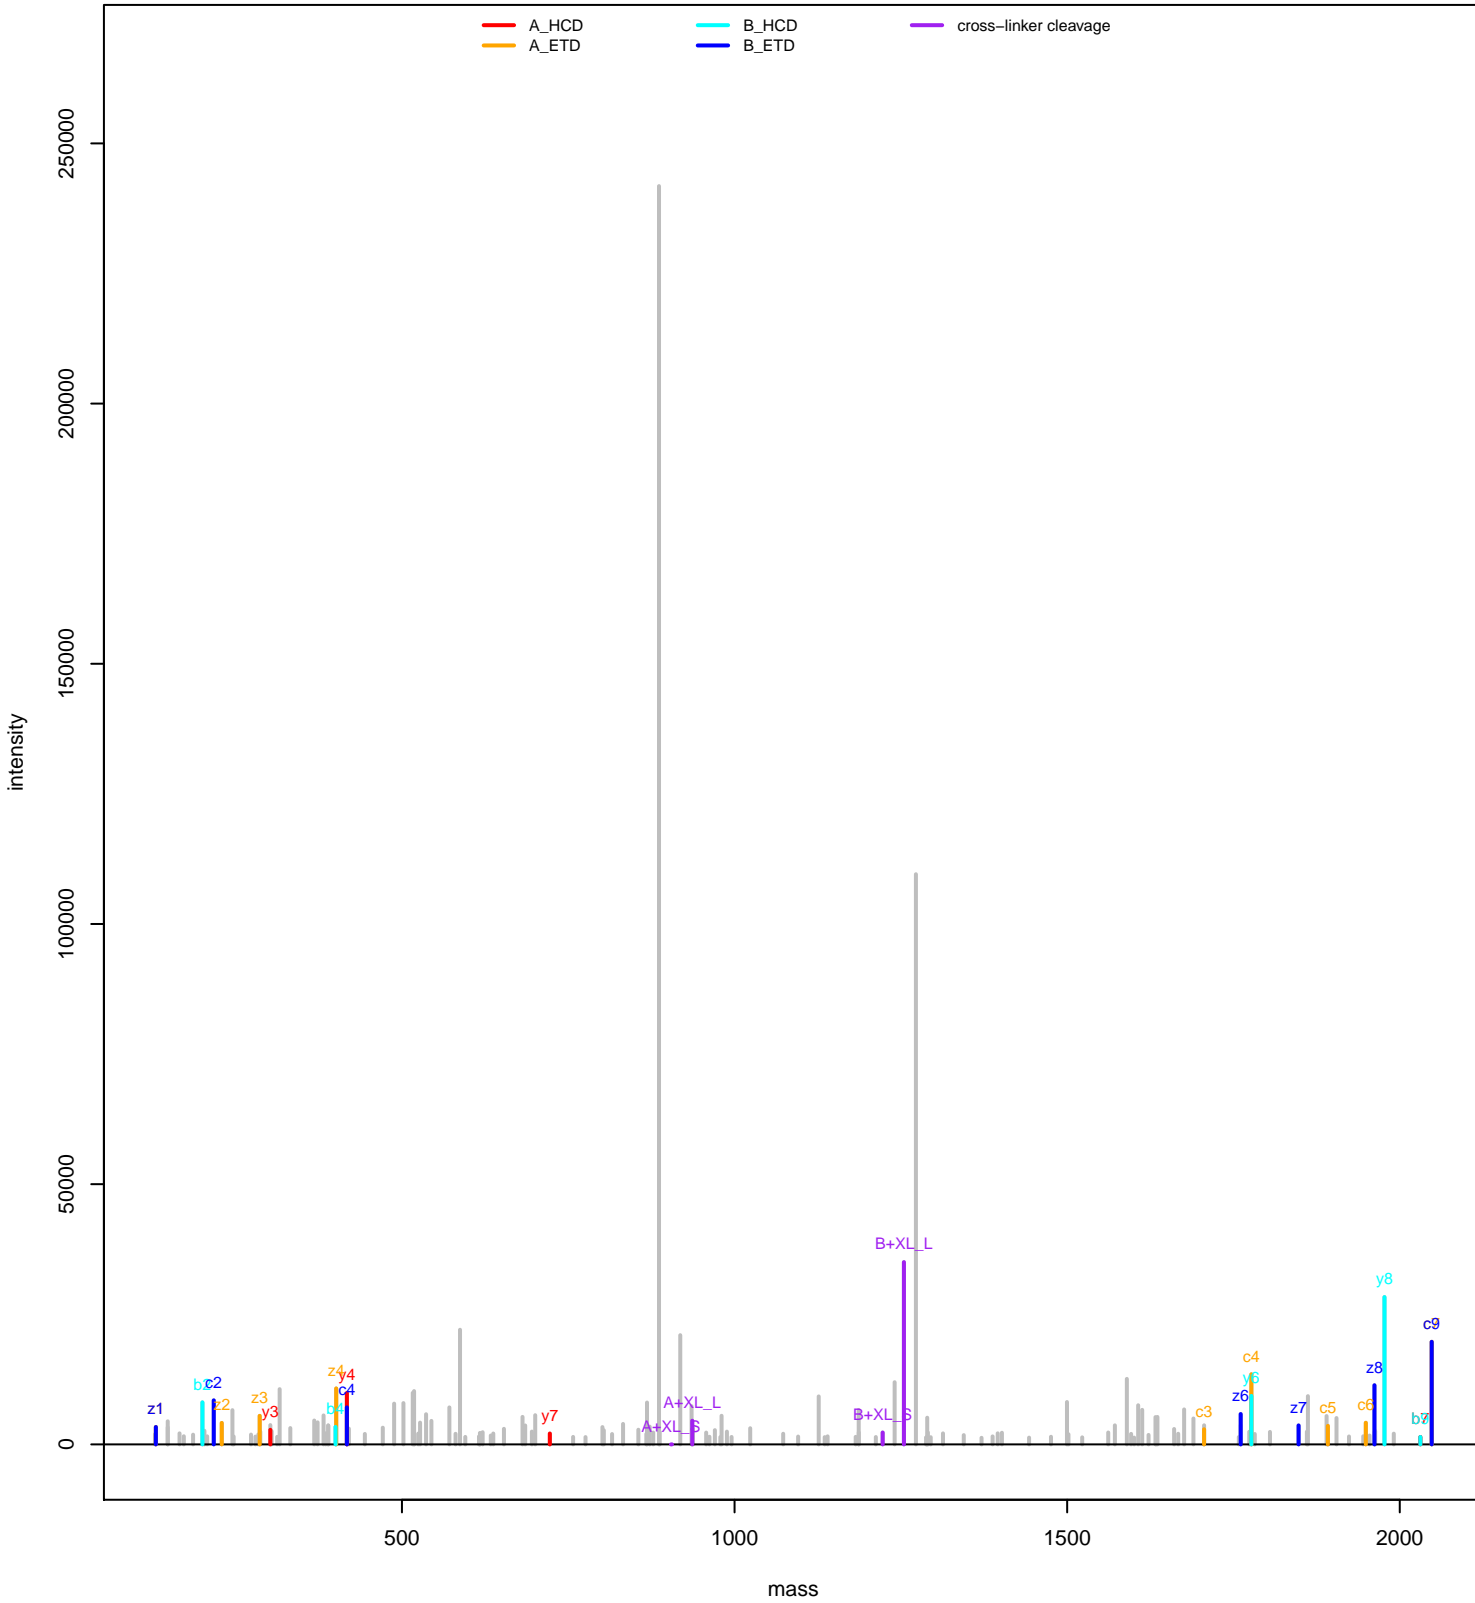

EALSRHNSKK+XL\_S

EALSRHNSKK+XL\_L

DAKEGSVK  
AESIAKAVDGVK

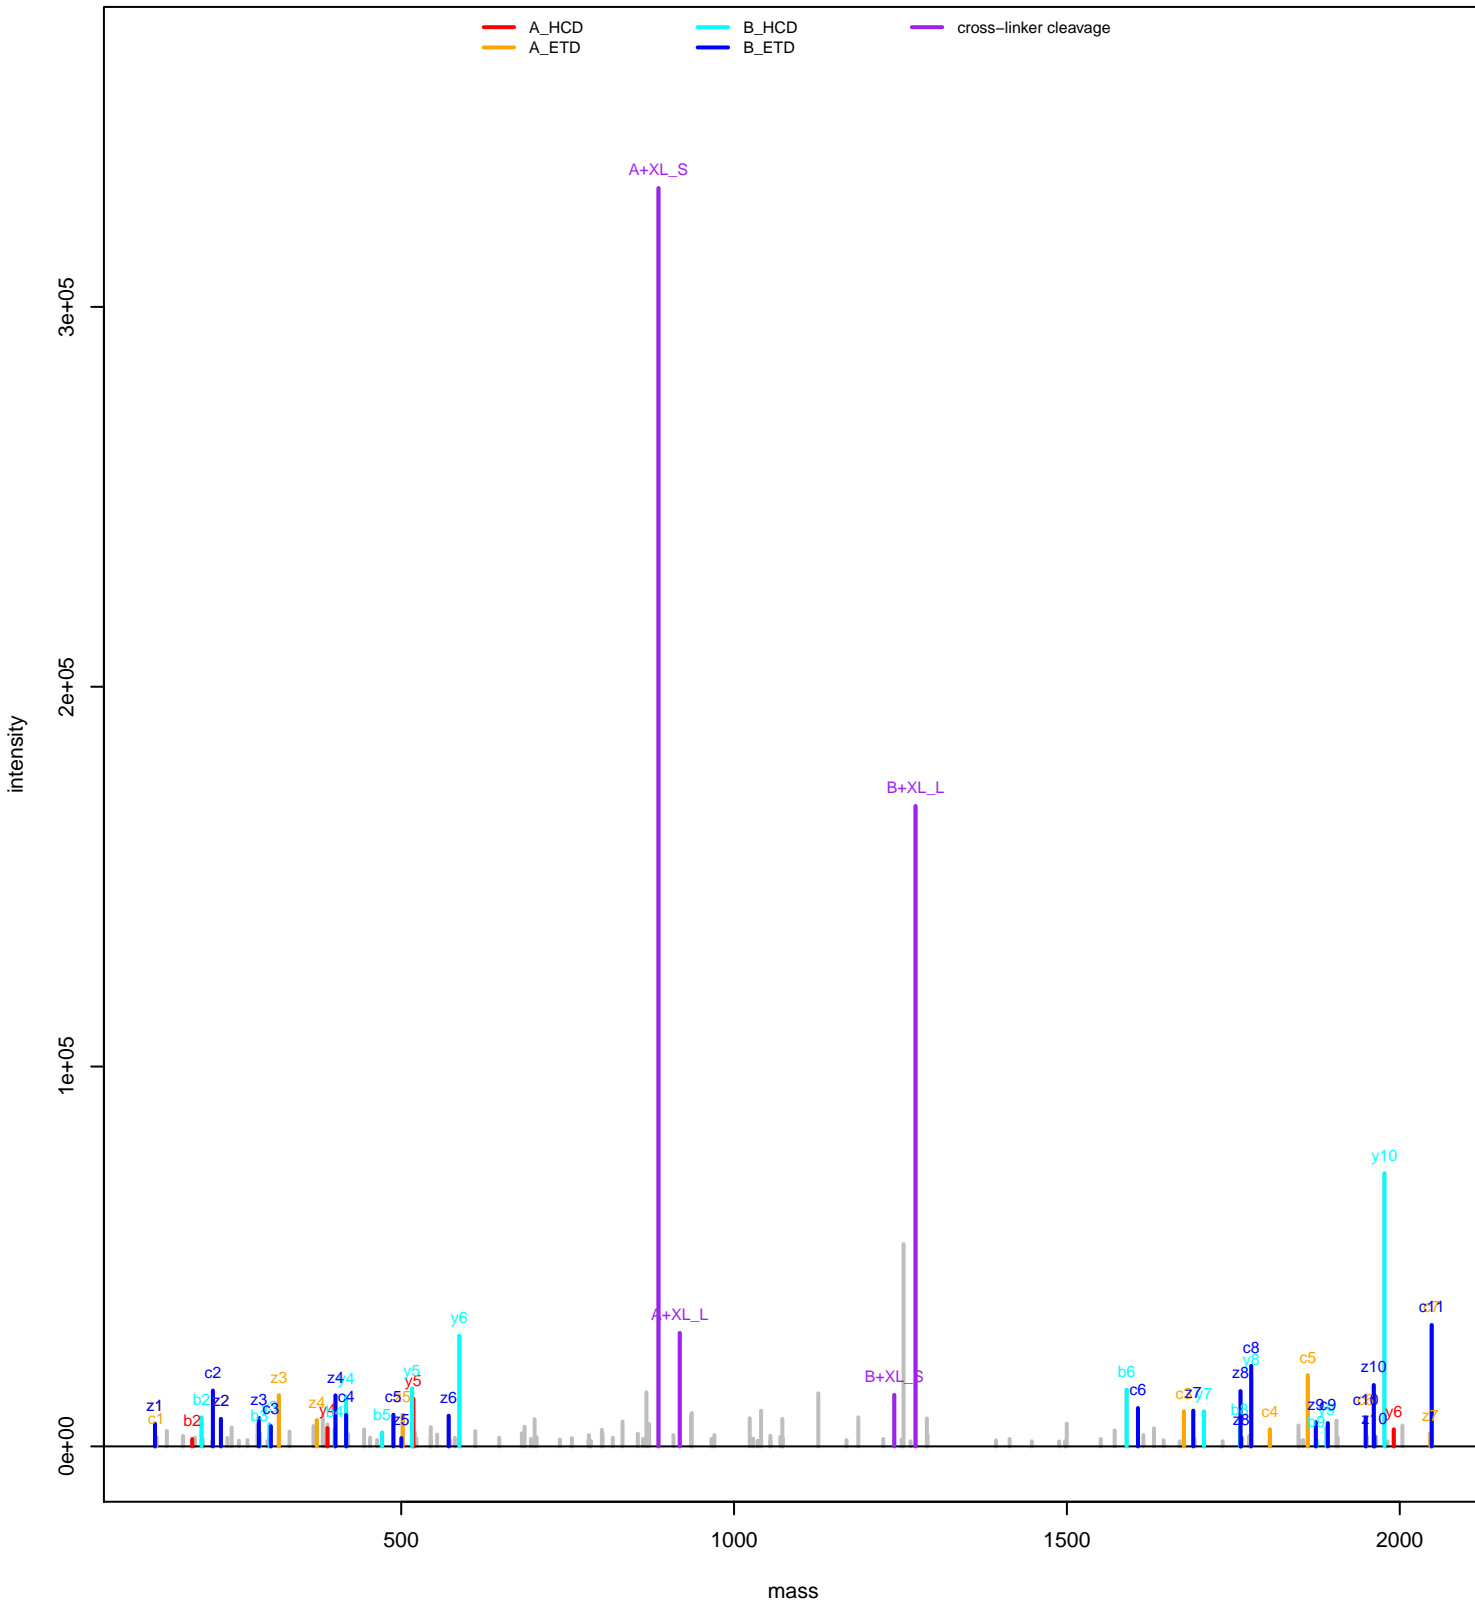

DAKEGSVK+XL\_S

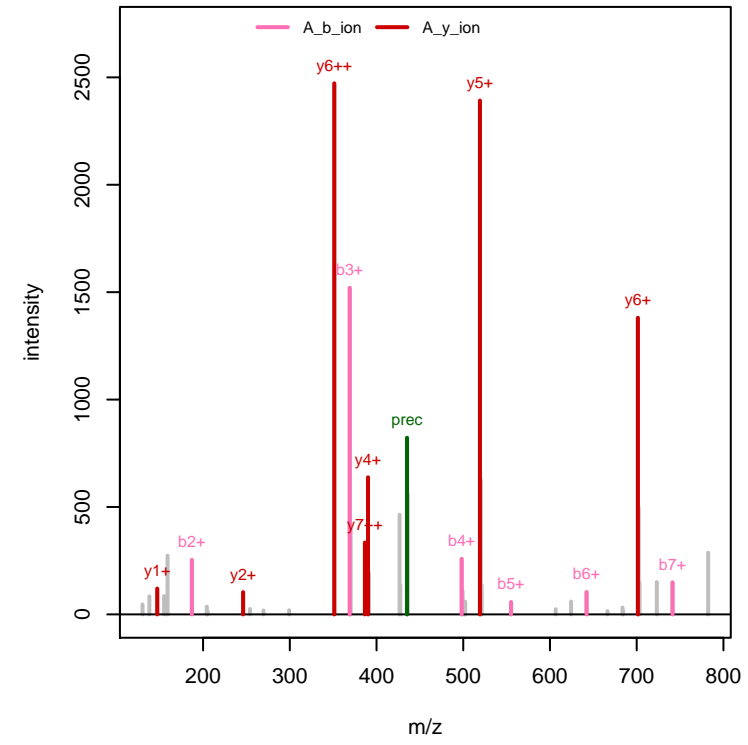

DAKEGSVK+XL\_L

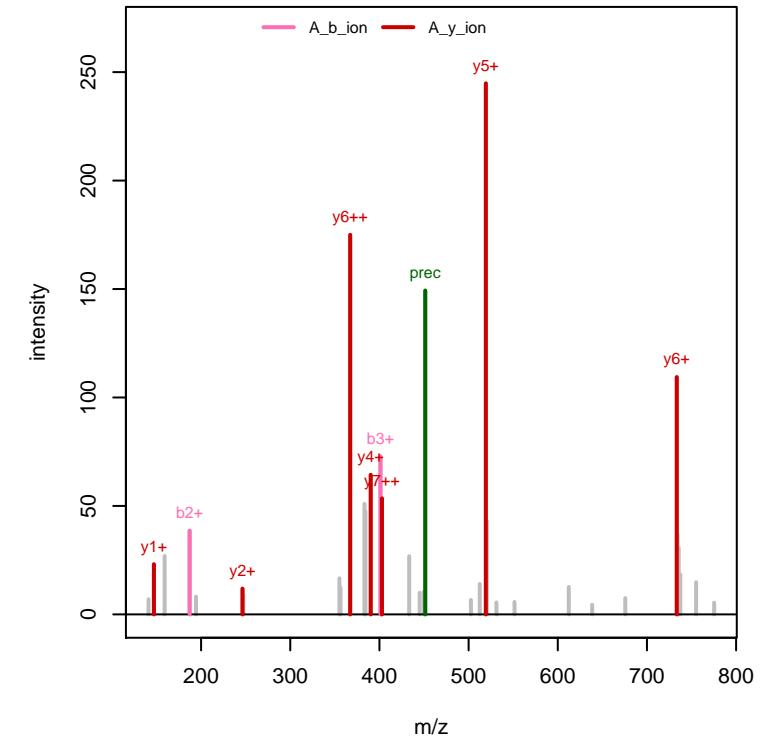

AESIAKAVDGVK+XL\_S

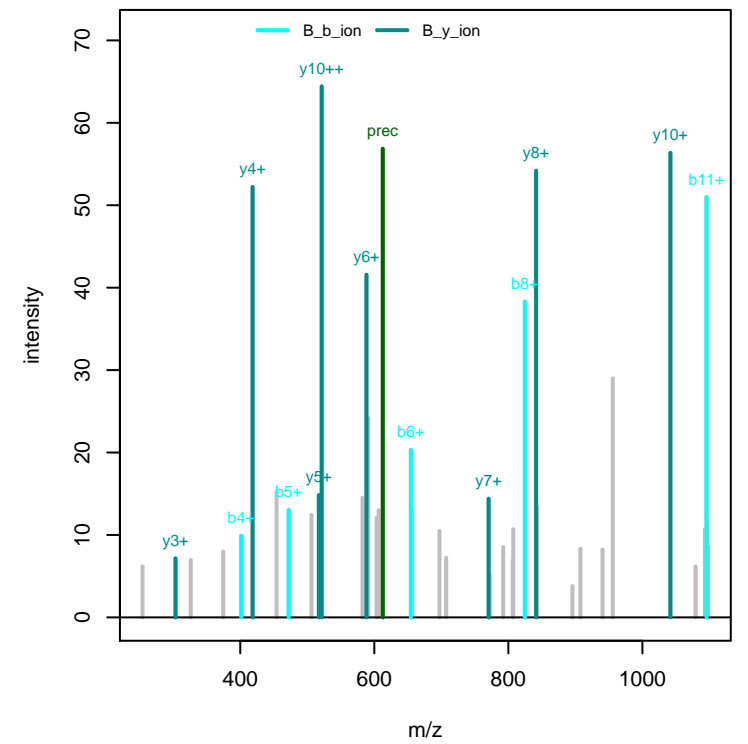

AESIAKAVDGVK+XL\_L

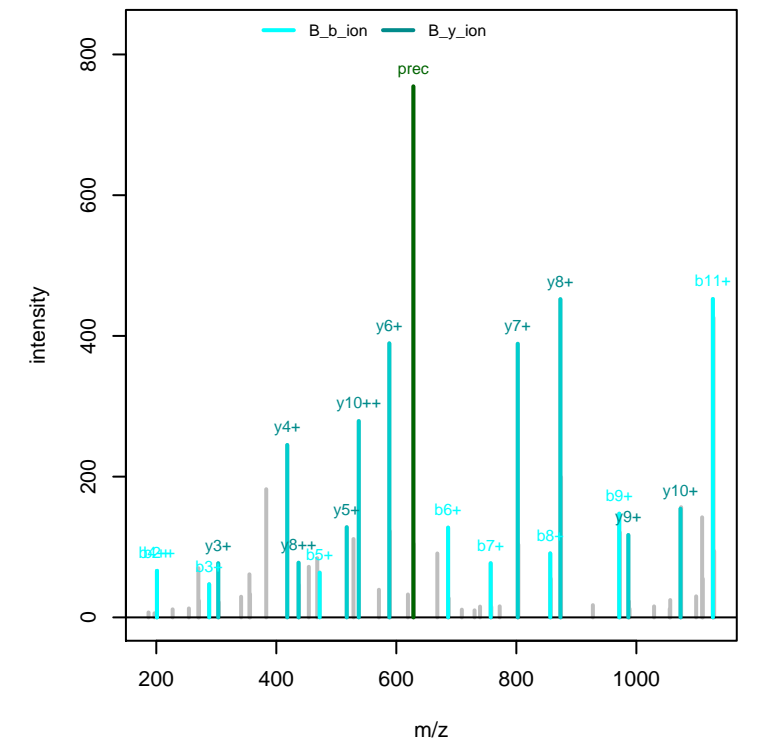

**MTQDELKK**  
**GQIEGAVSSSDASTEKLK**

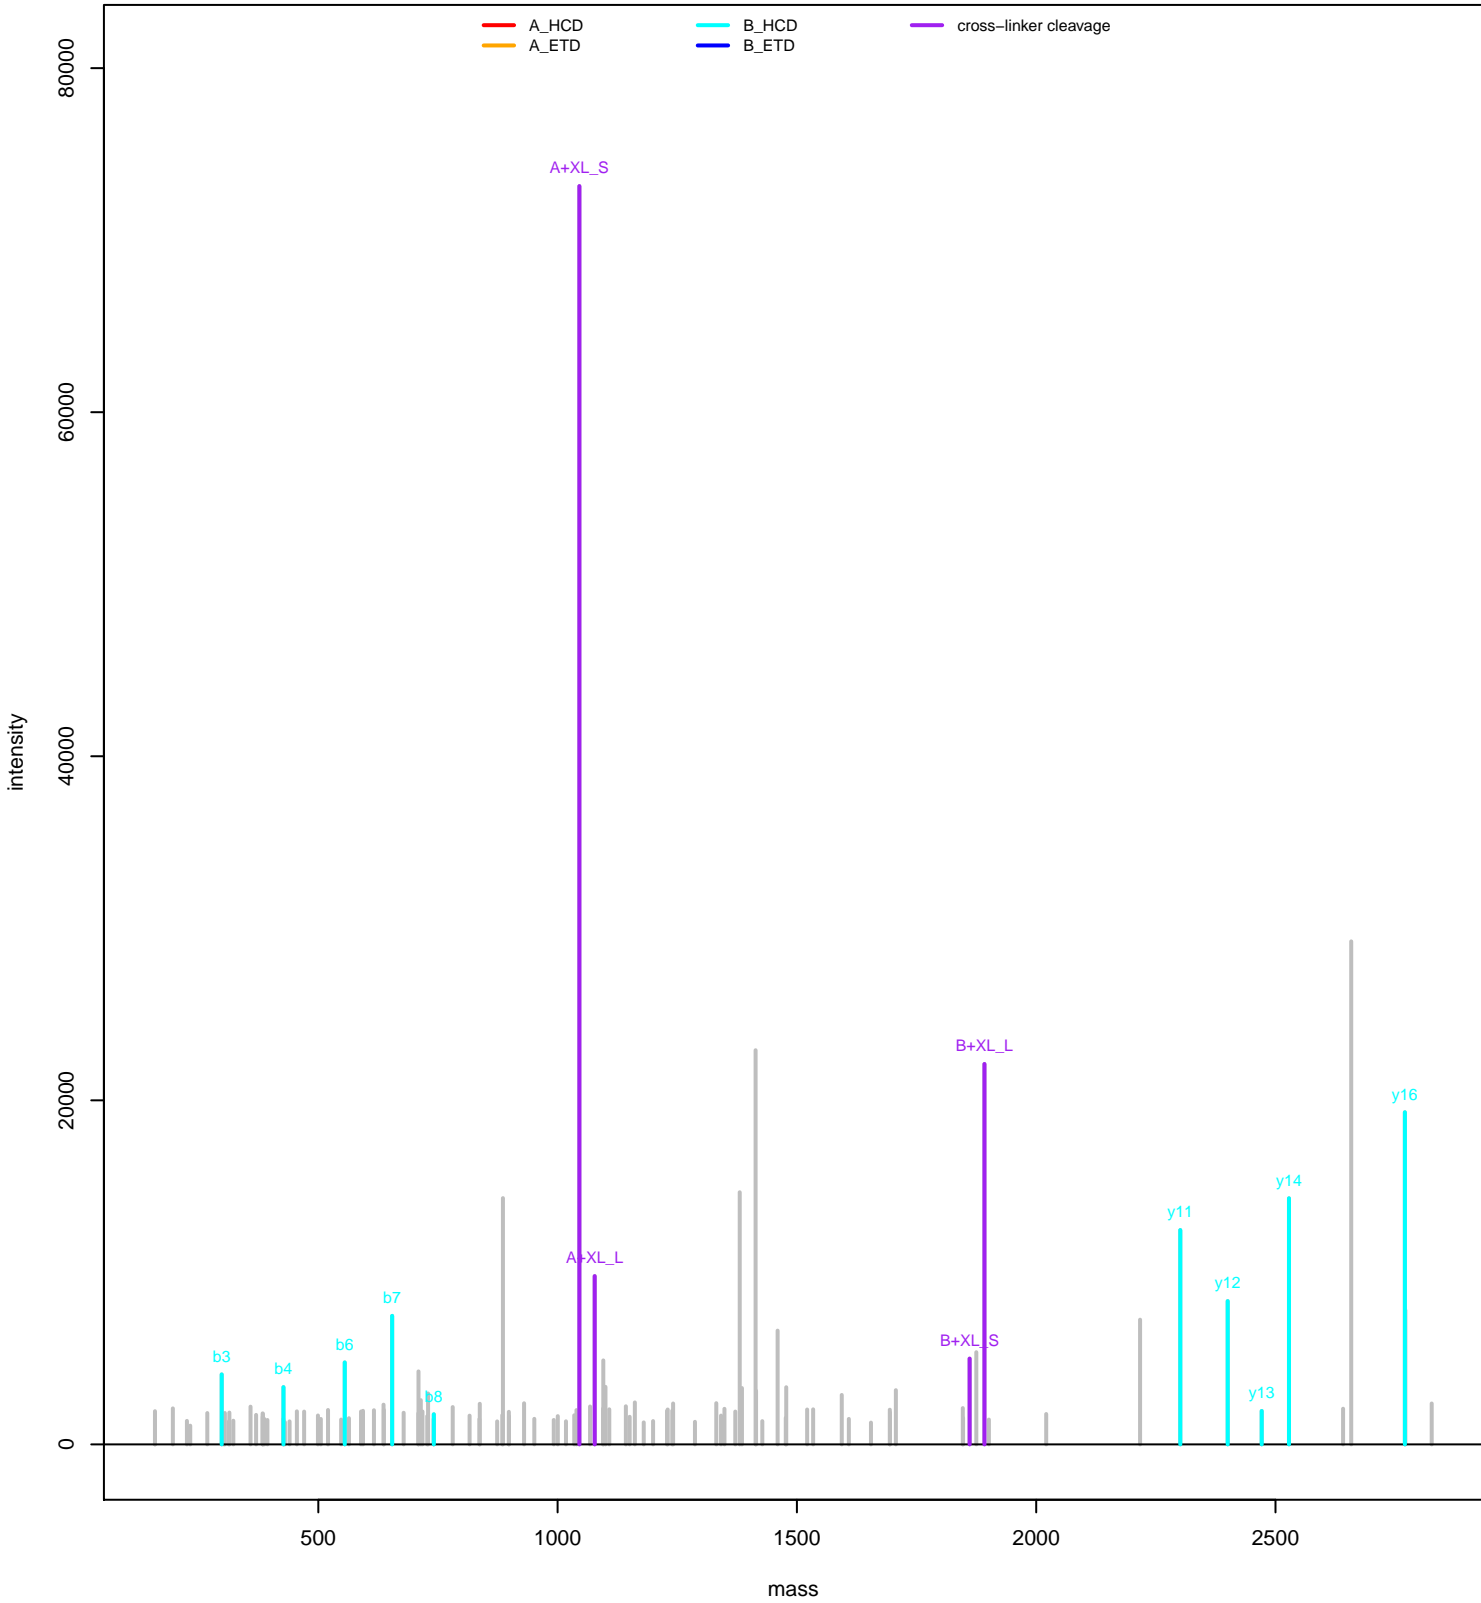

**MTQDELKK+XL\_S**

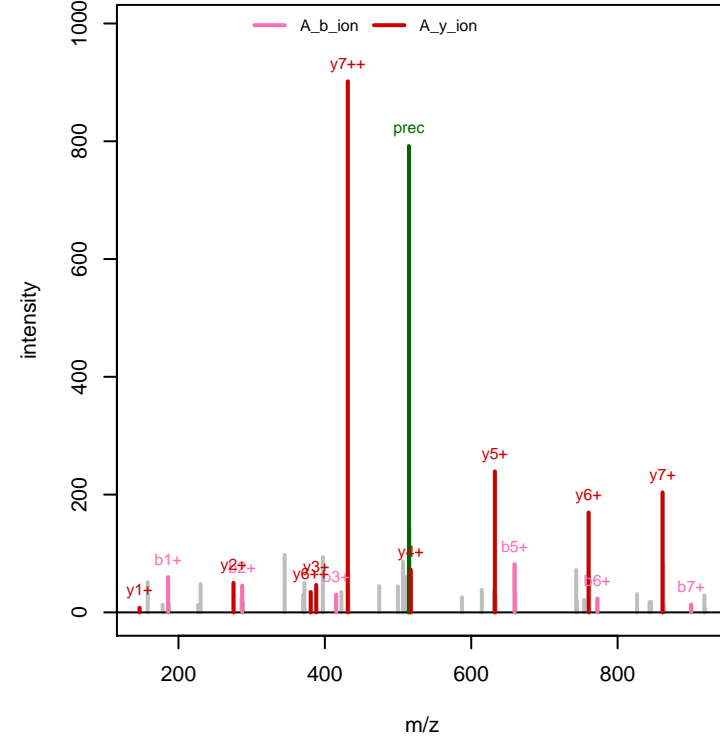

**MTQDELKK+XL\_L**

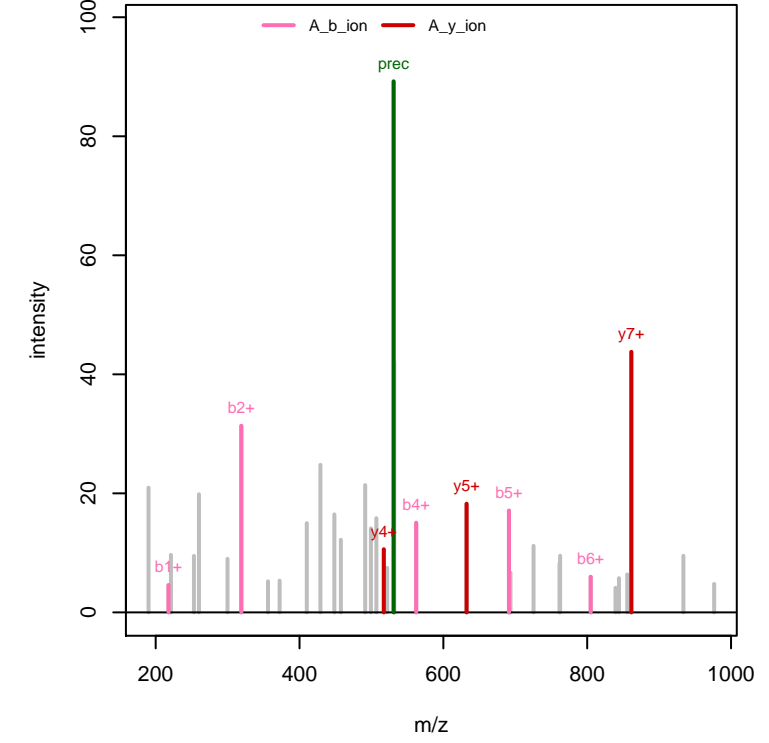

**GQIEGAVSSSDASTEKLK+XL\_S**

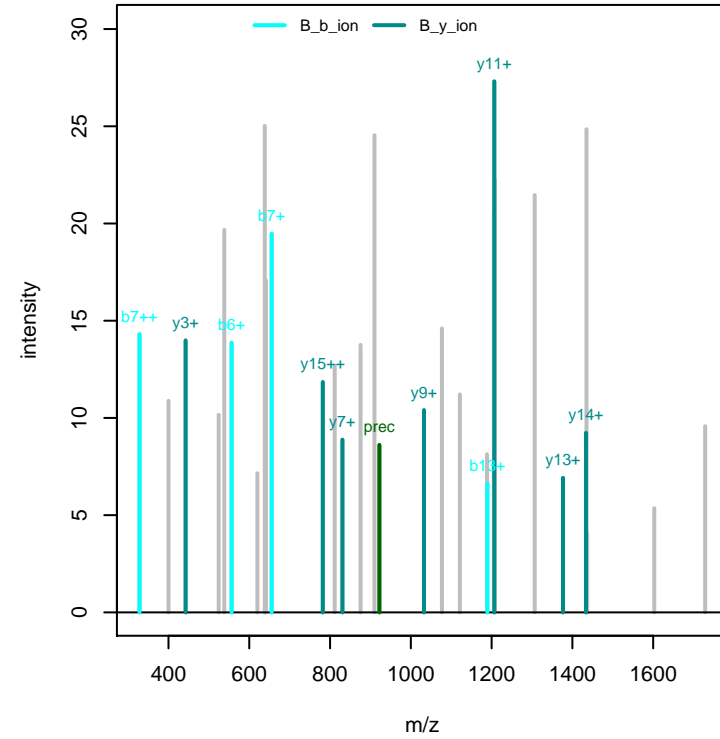

**GQIEGAVSSSDASTEKLK+XL\_L**

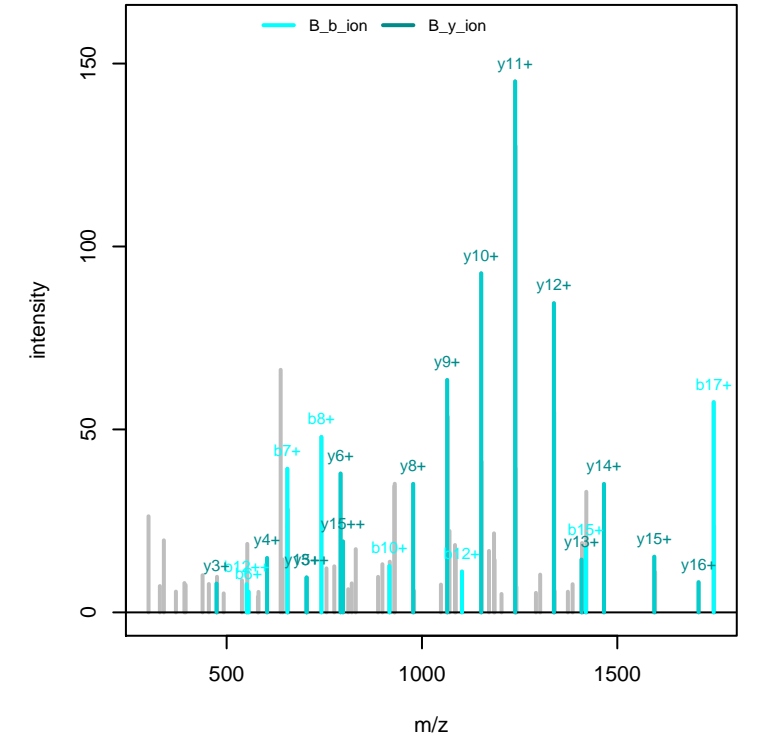

**RDISKK  
NAELSKER**

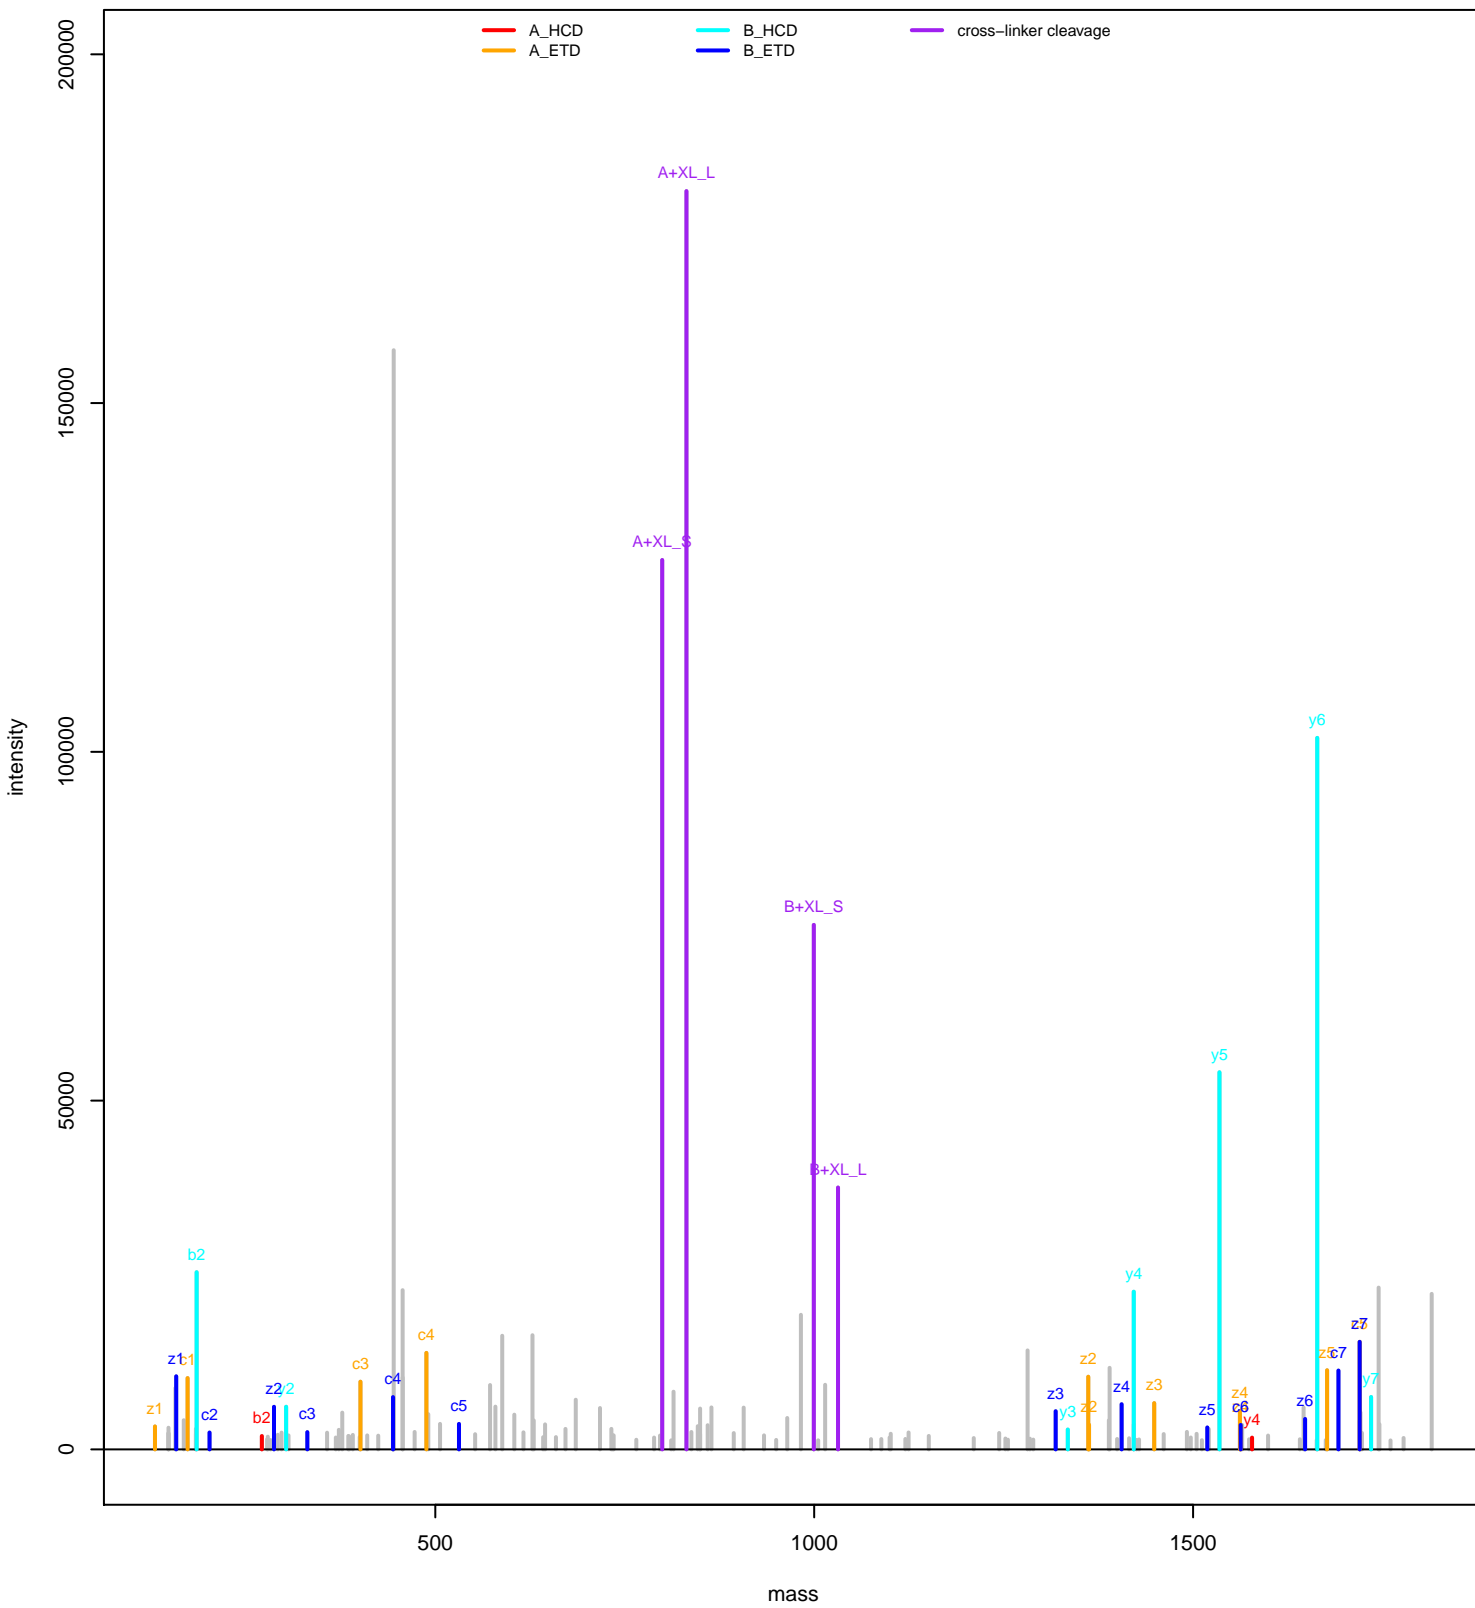

**RDISKK+XL\_S**

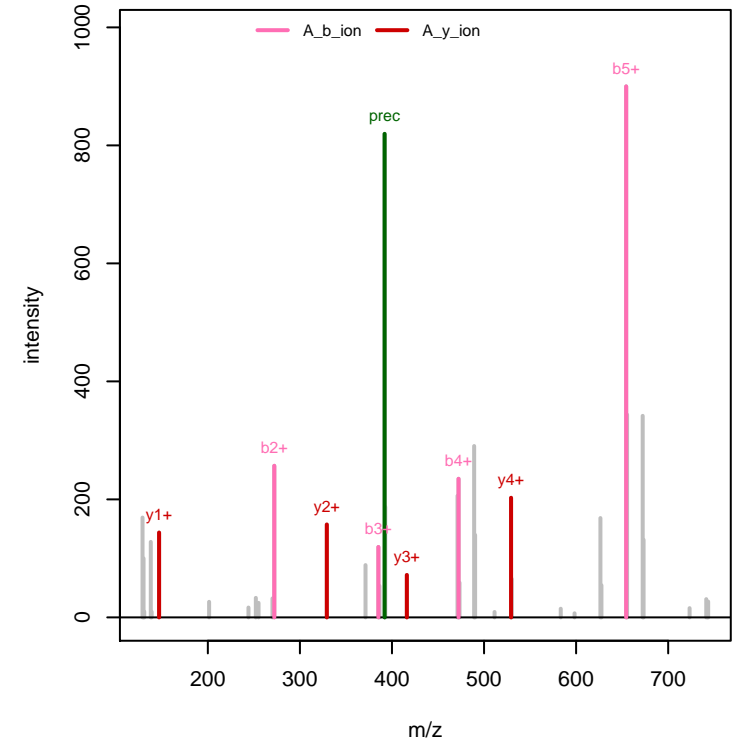

**RDISKK+XL\_L**

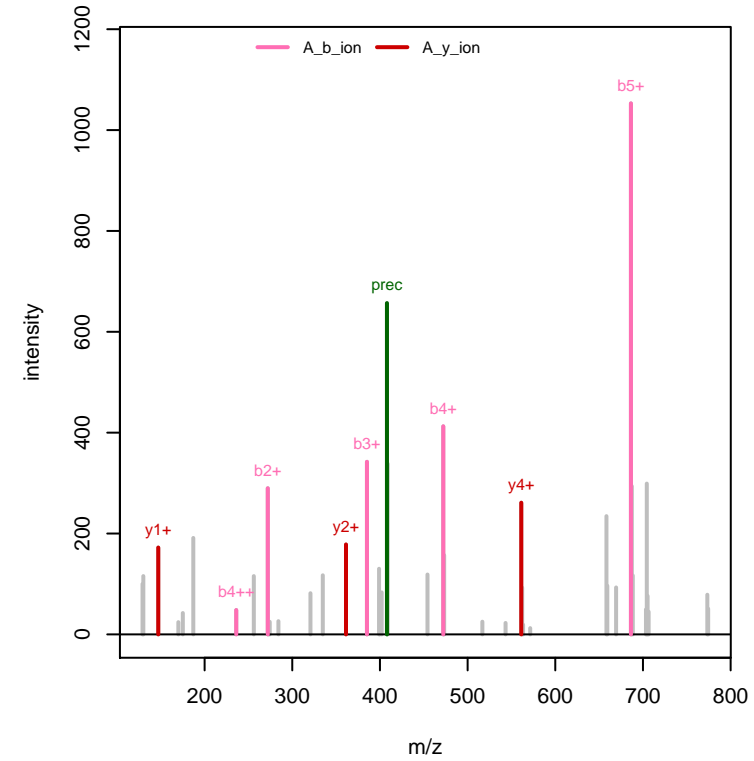

**NAELSKER+XL\_S**

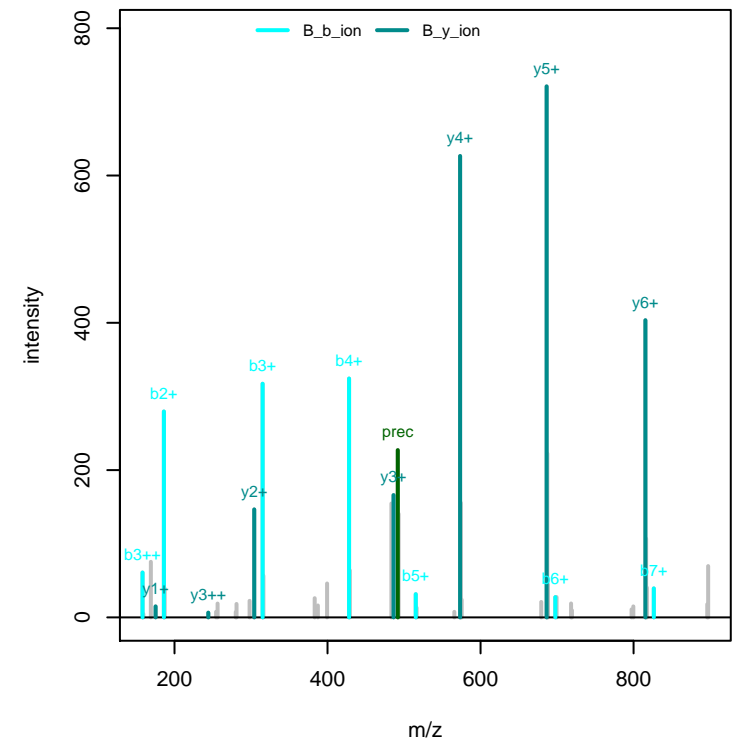

**NAELSKER+XL\_L**

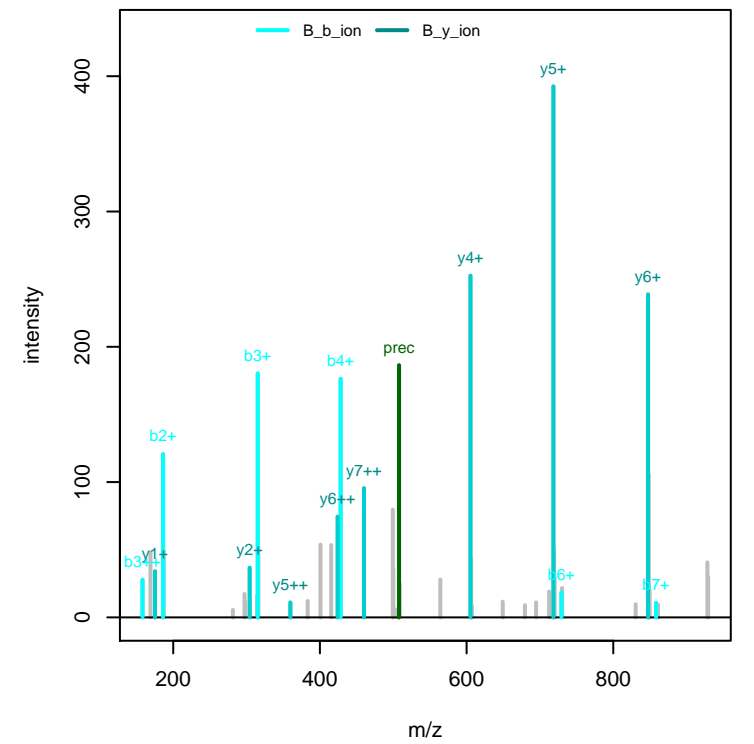

KGDVIIGANQQAVK  
DQGVVVNNVKTGTPAAQIGLK

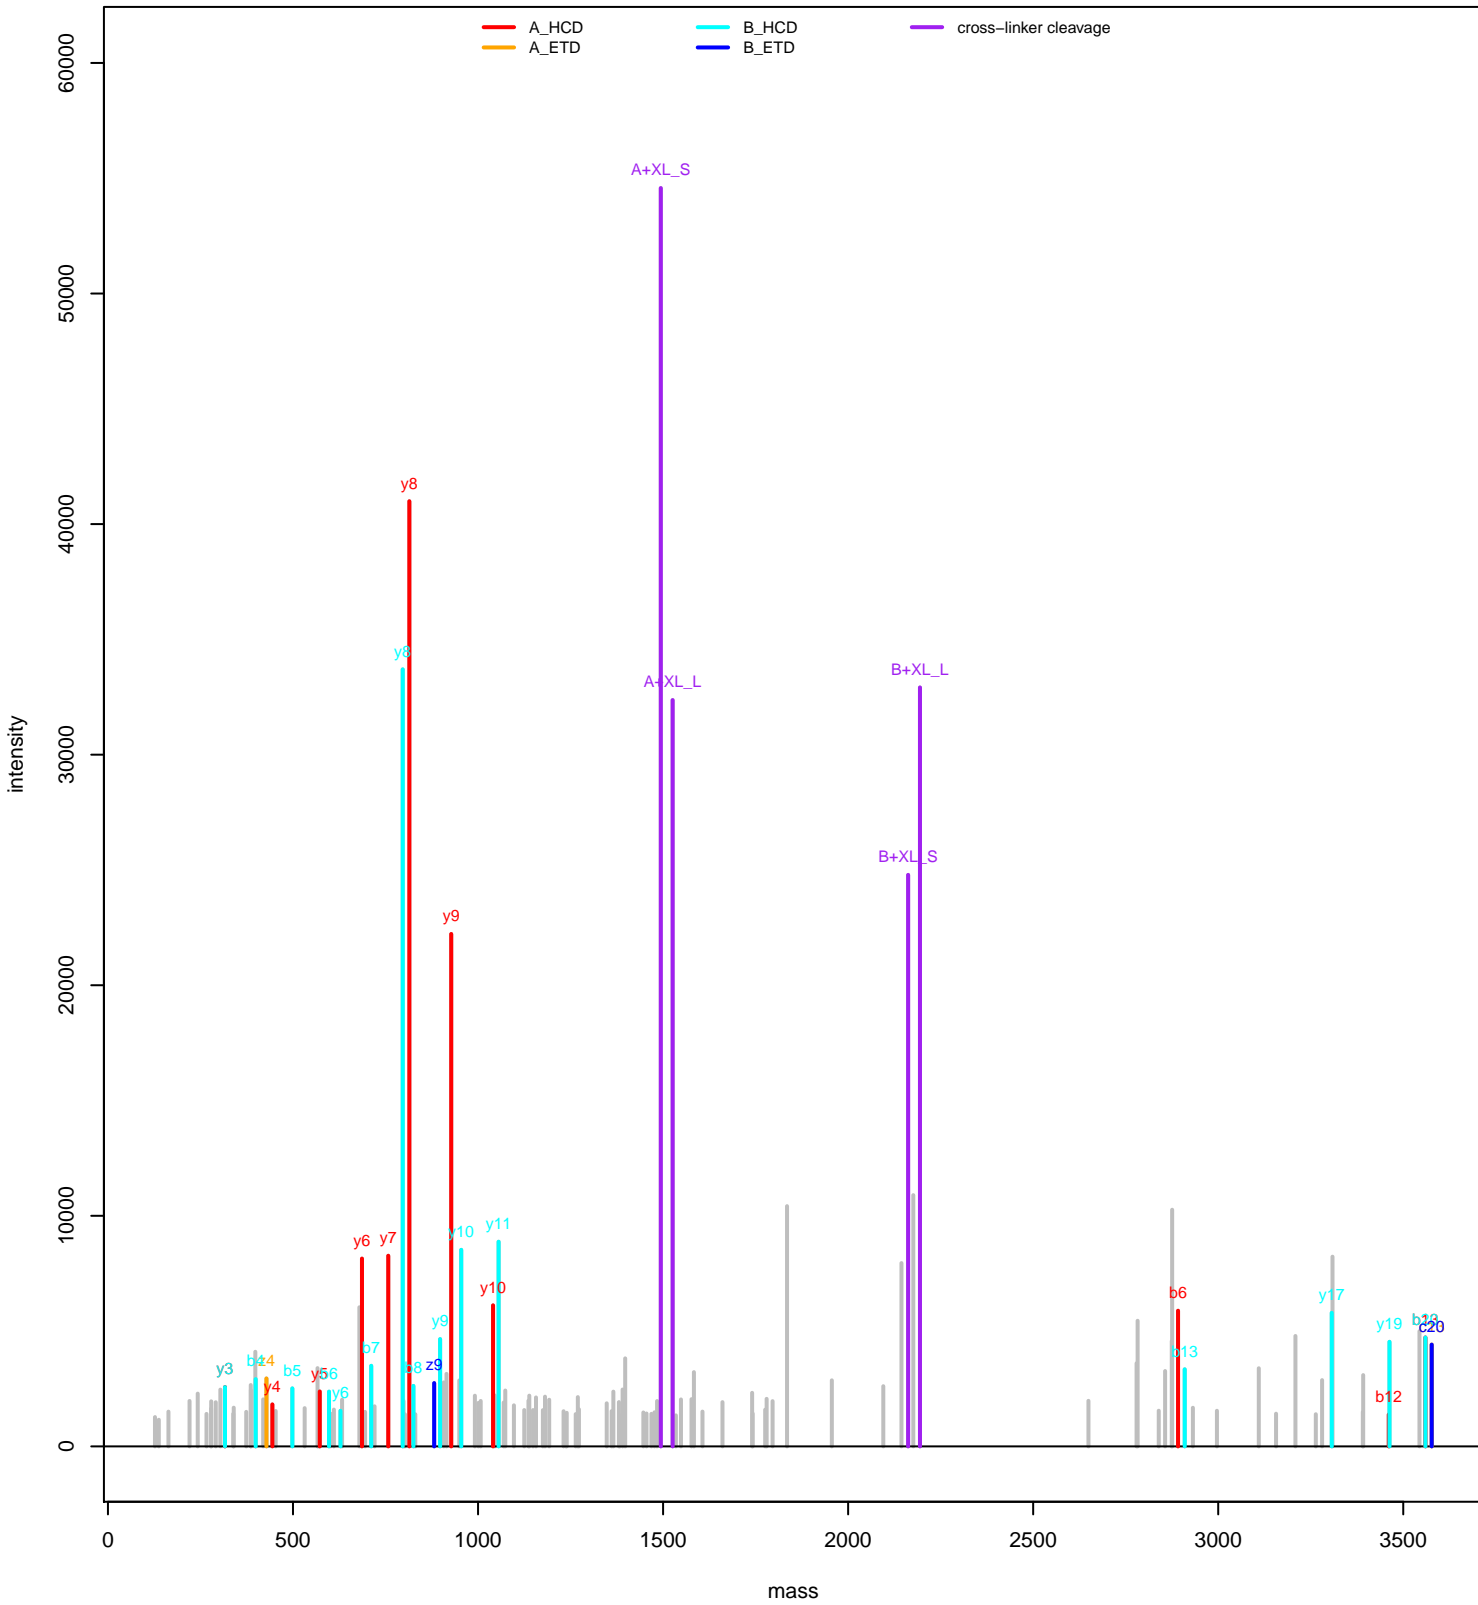

KGDVIIGANQQAVK+XL\_S

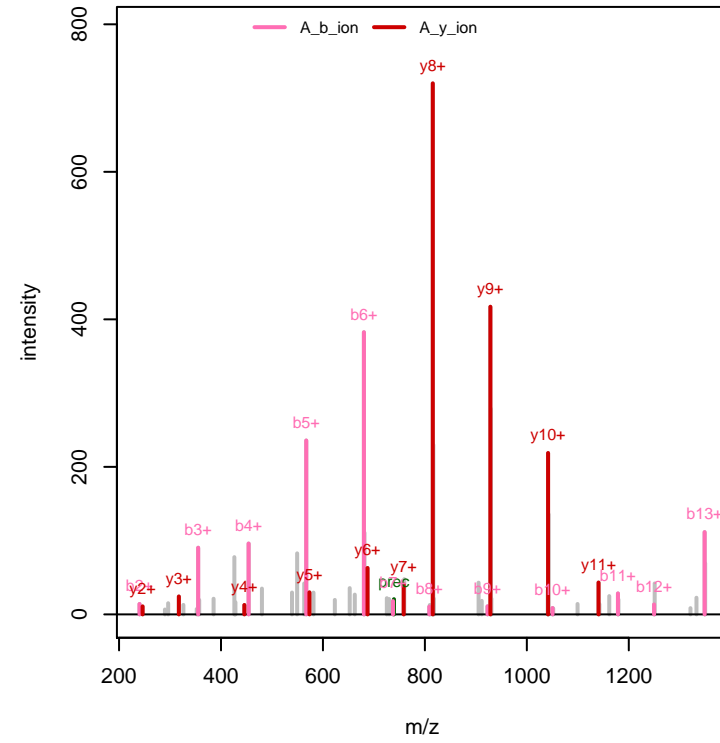

KGDVIIGANQQAVK+XL\_L

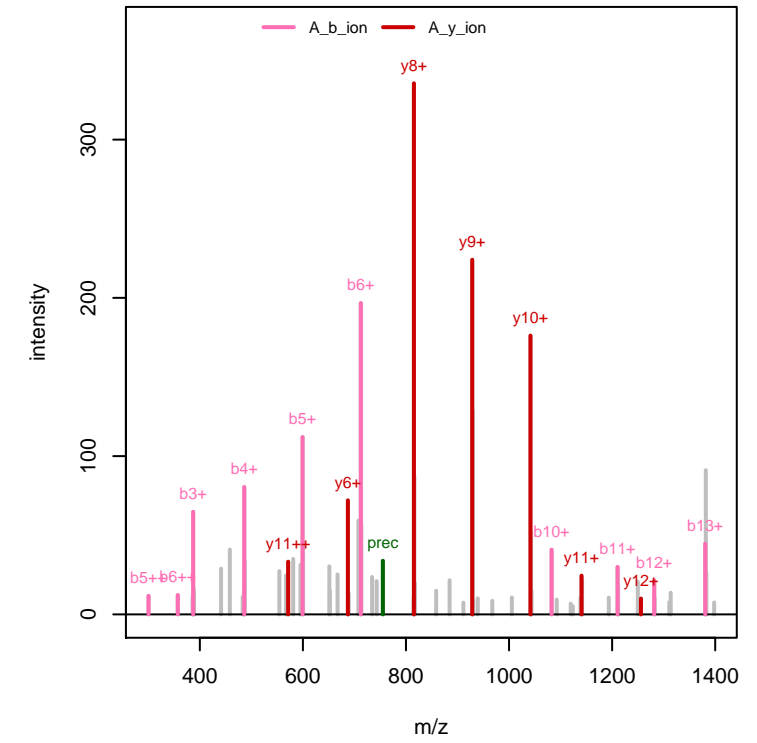

DQGVVVNNVKTGTPAAQIGLK+XL\_S

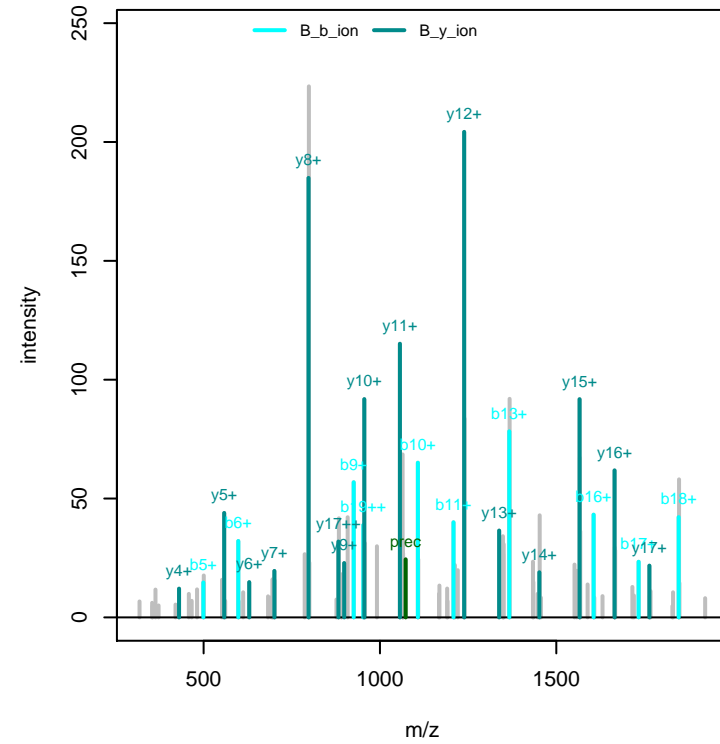

DQGVVVNNVKTGTPAAQIGLK+XL\_L

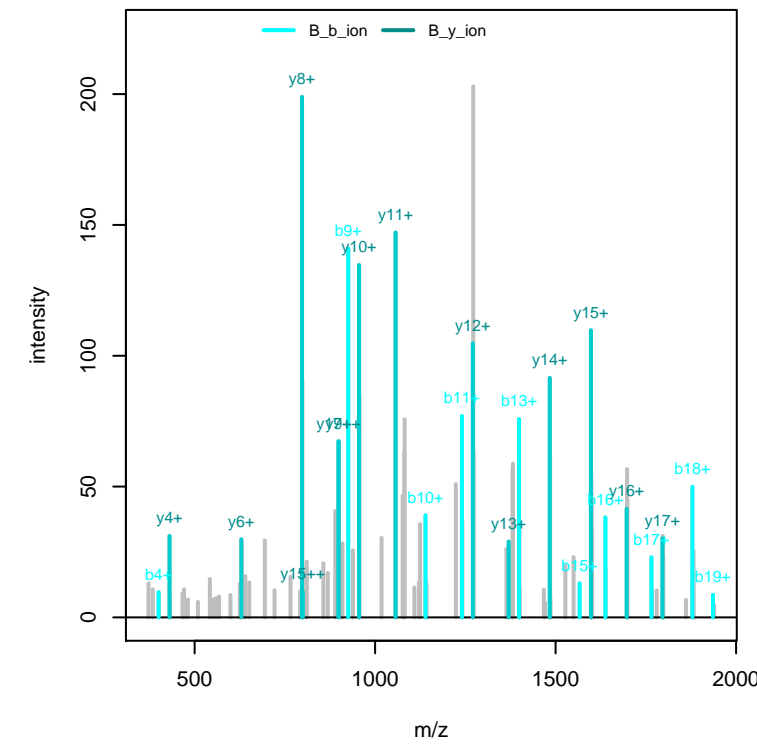

SEEKASTPAQR  
LREGNSAGKETSAK

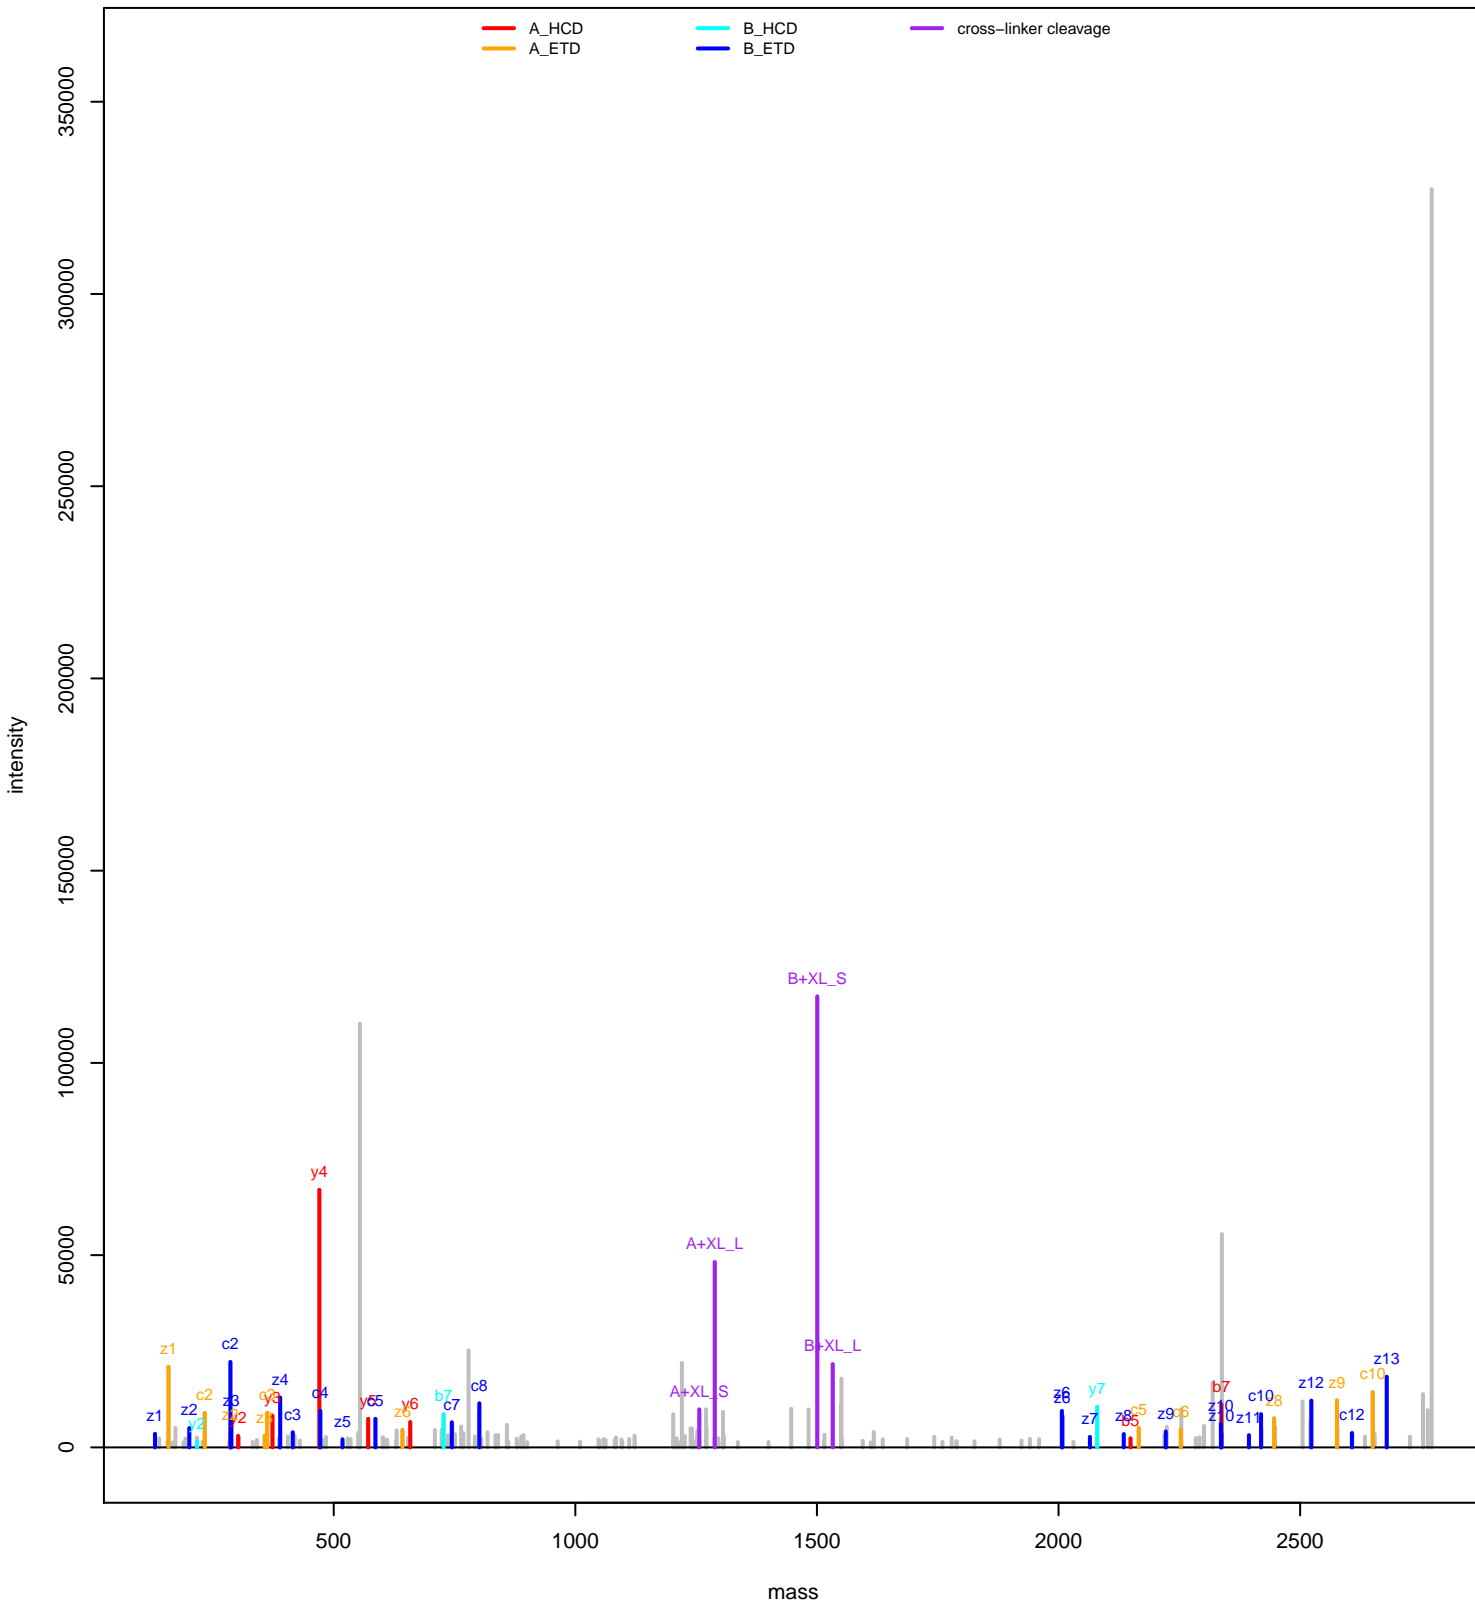

SEEKASTPAQR+XL\_S

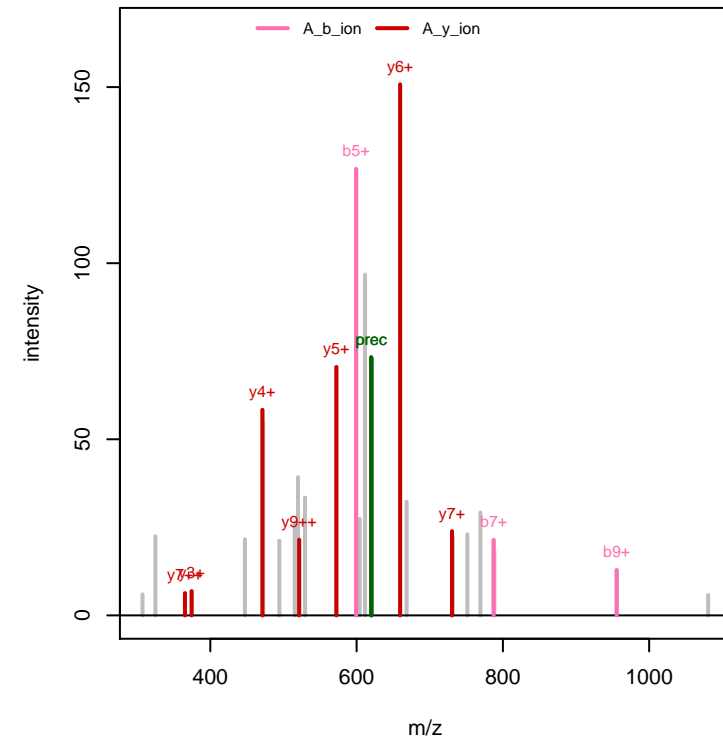

SEEKASTPAQR+XL\_L

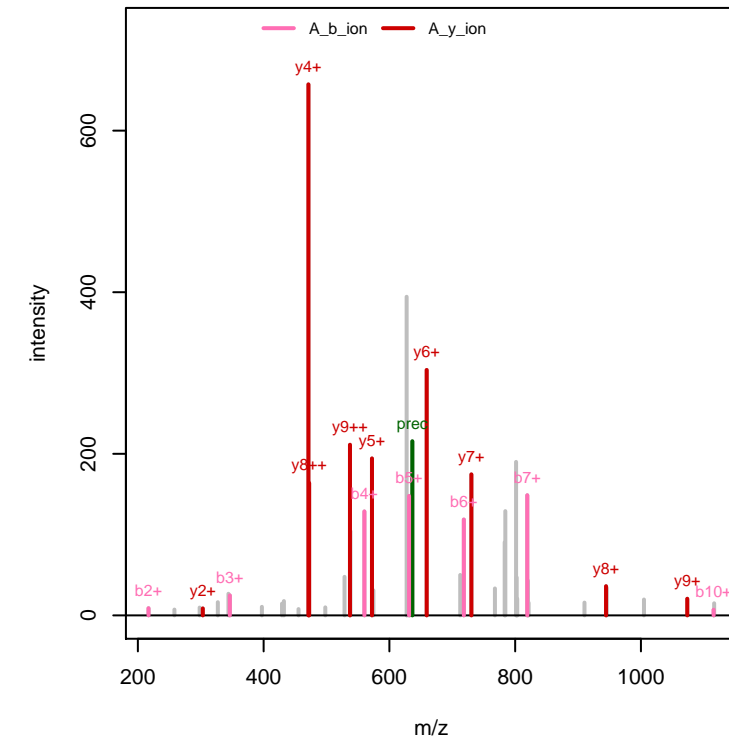

LREGNSAGKETSAK+XL\_S

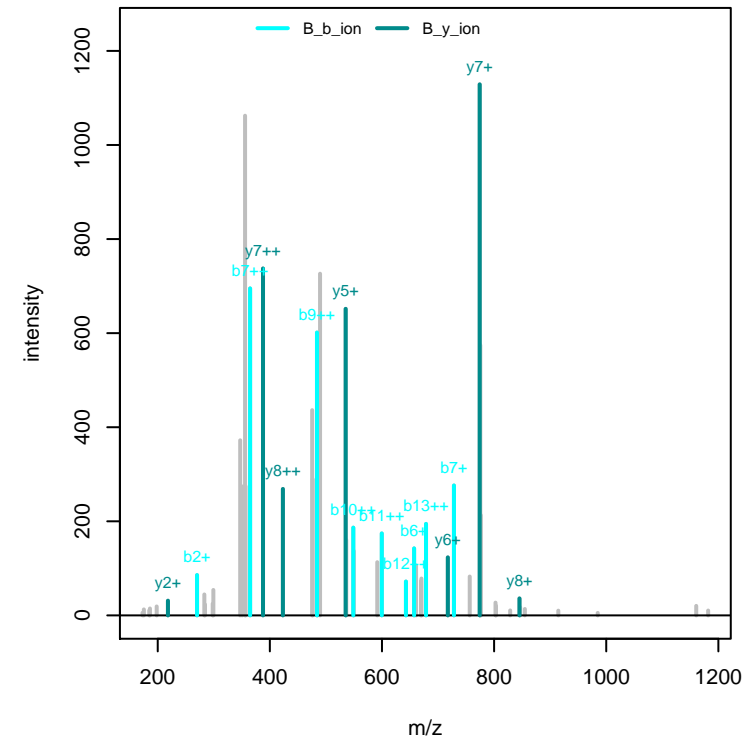

LREGNSAGKETSAK+XL\_L

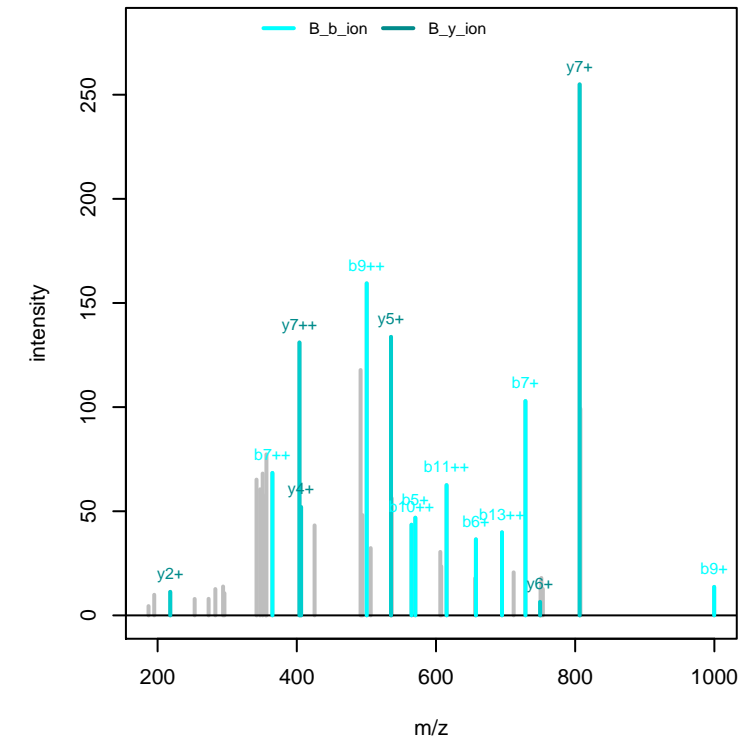

AKDERR  
TKHAVTEASPMoVK

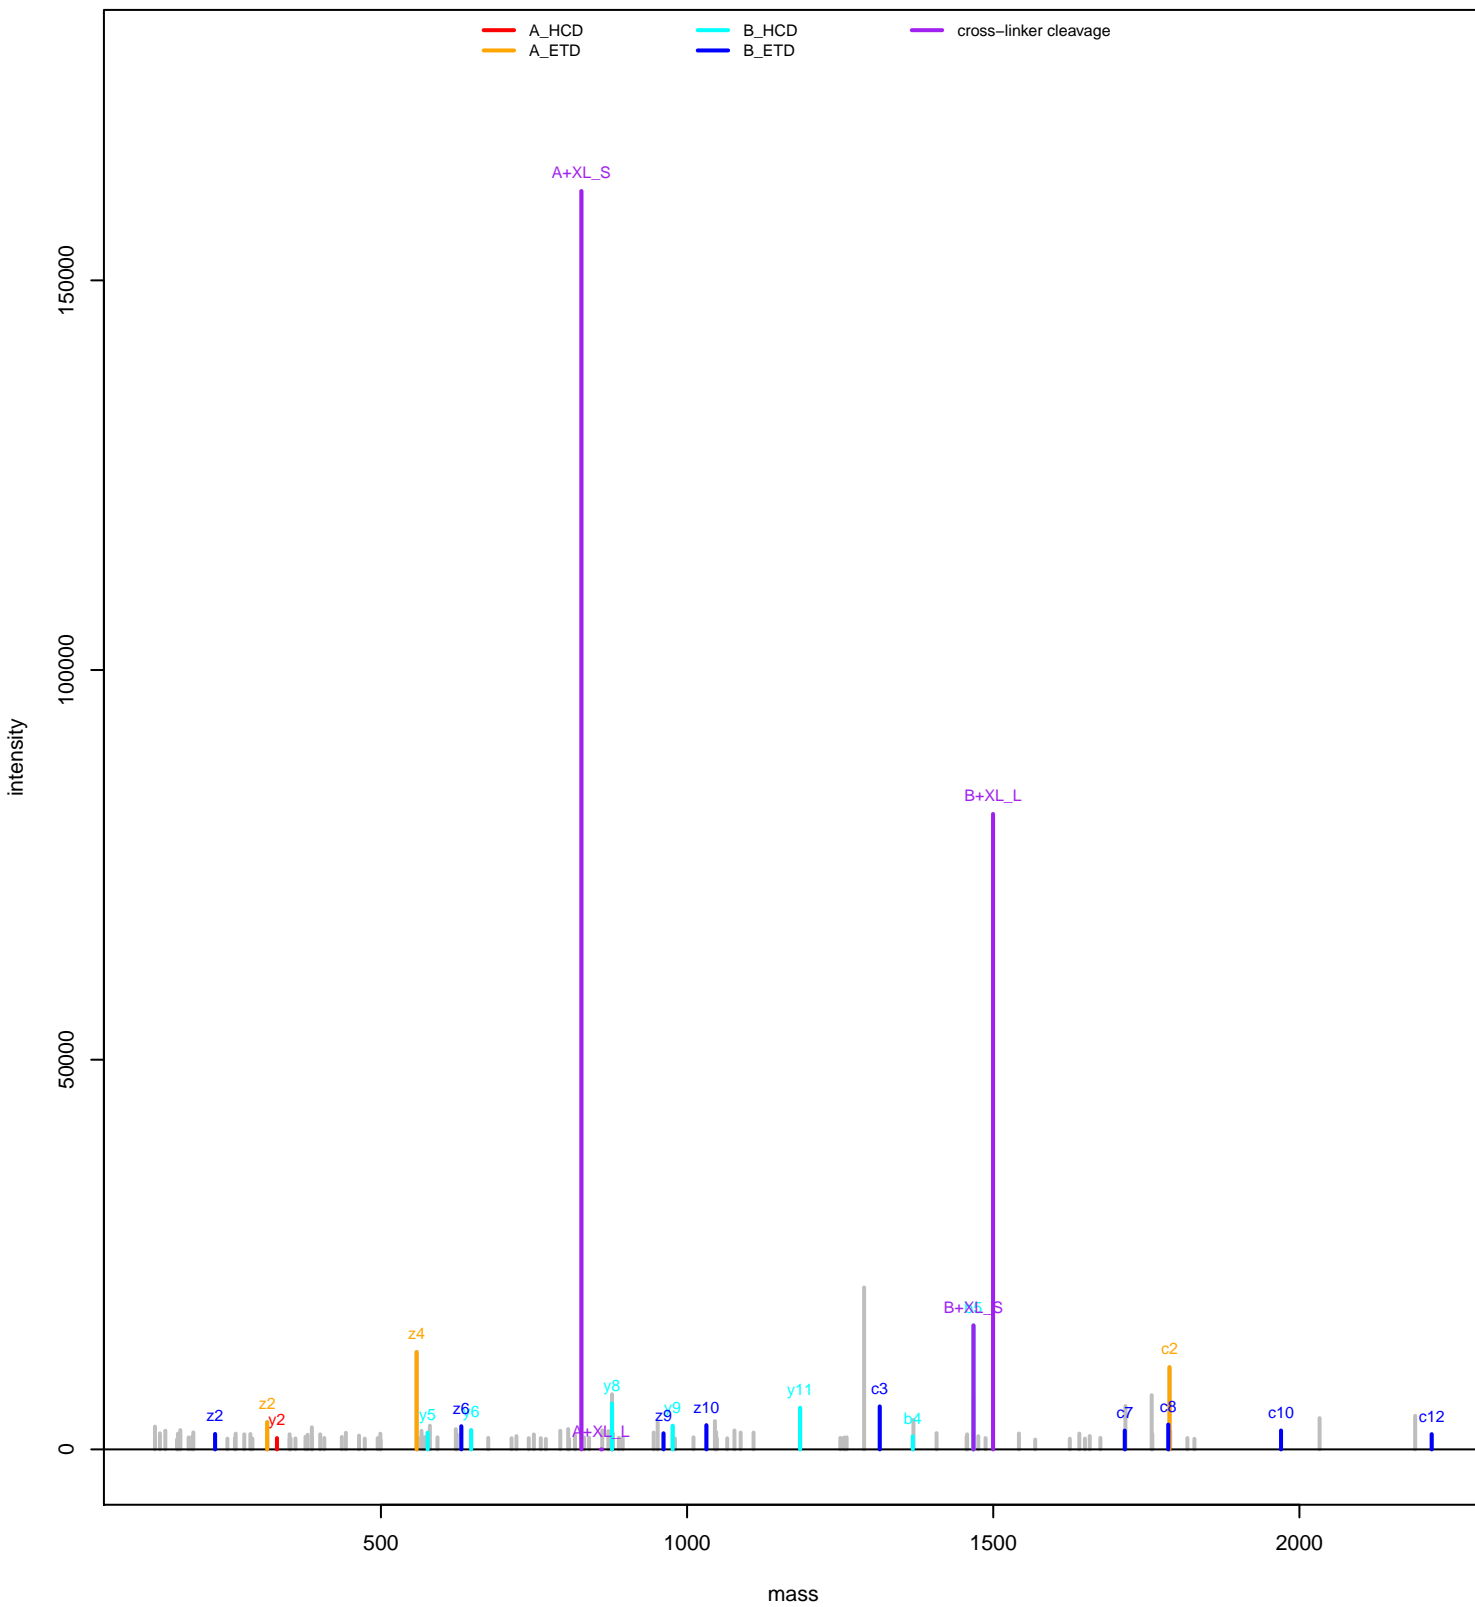

AKDERR+XL\_S

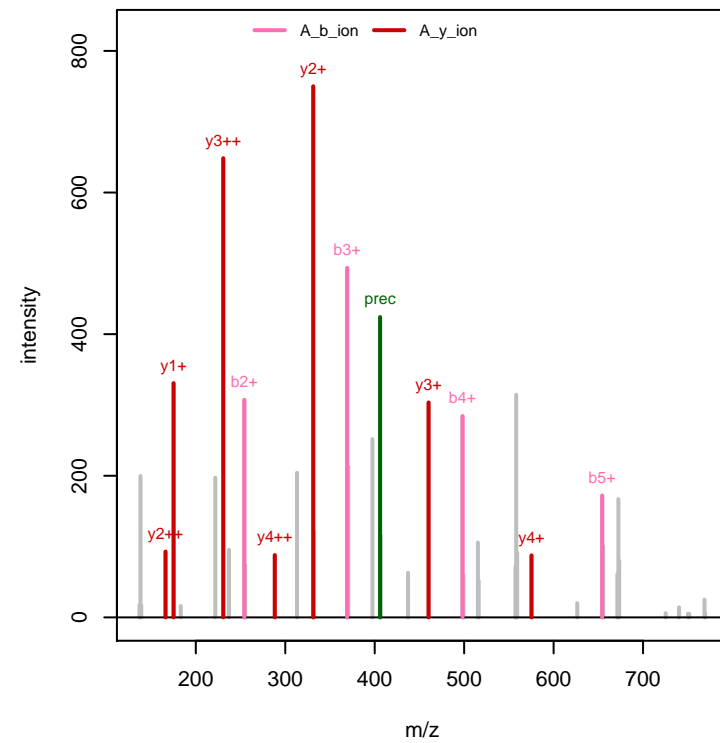

AKDERR+XL\_L

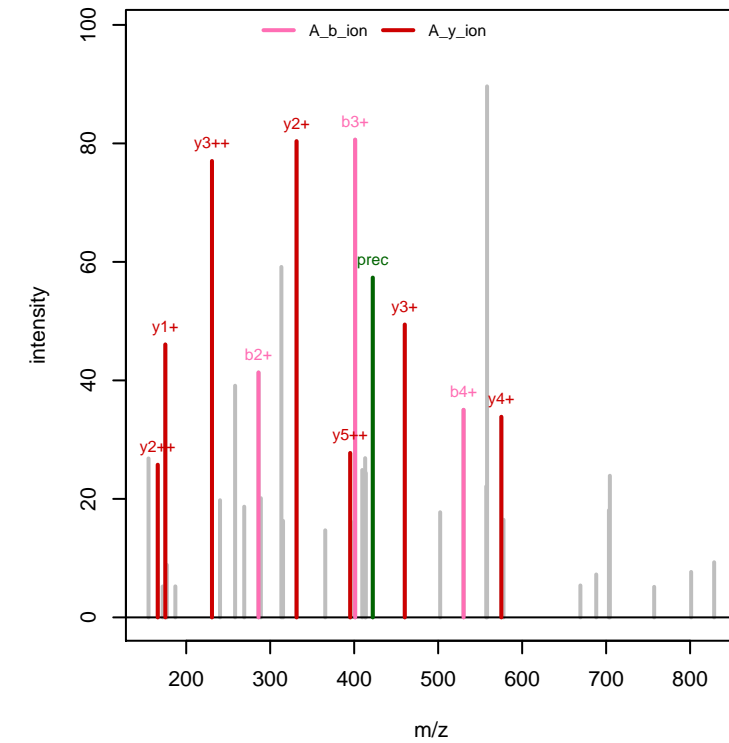

TKHAVTEASPMoVK+XL\_S

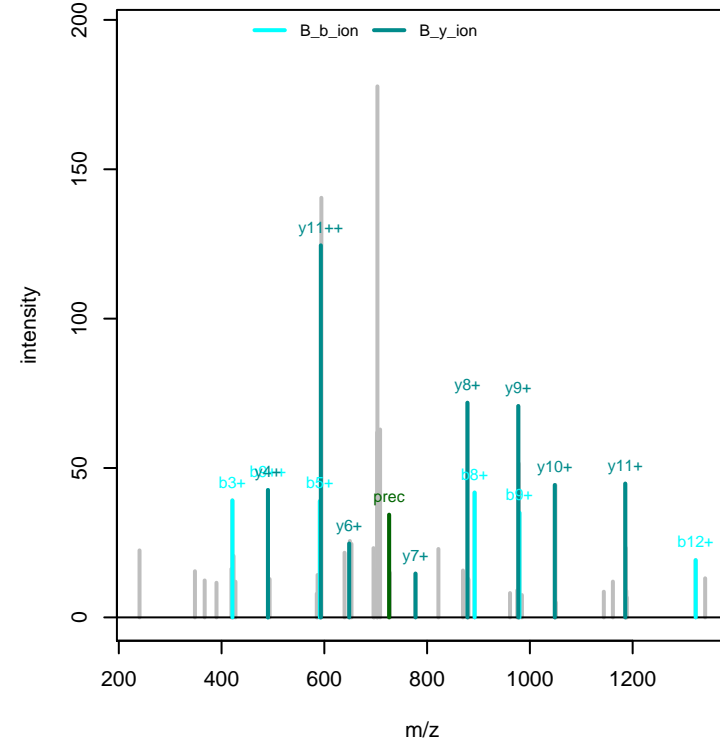

TKHAVTEASPMoVK+XL\_L

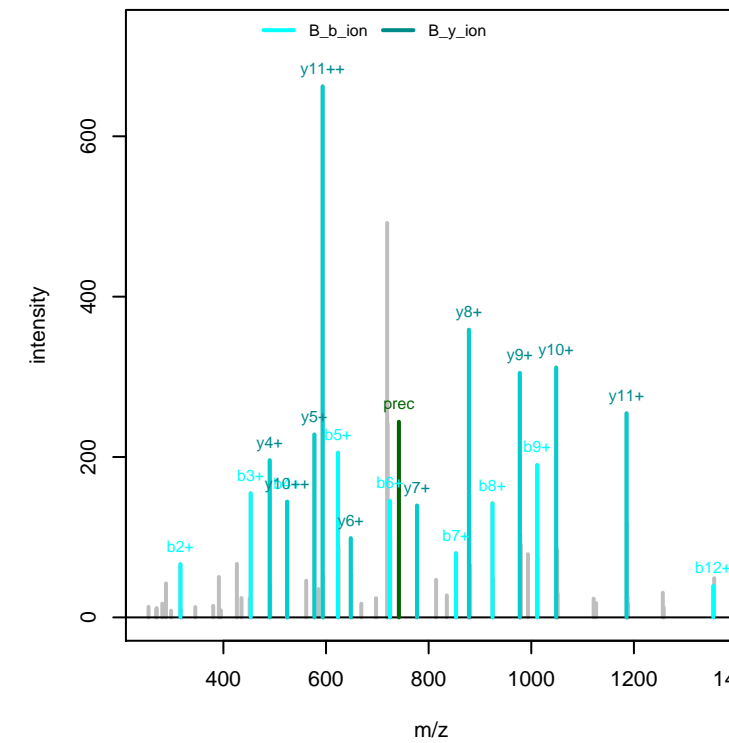



**KTGNTPDGR  
DQKGAVASLTSVAK**

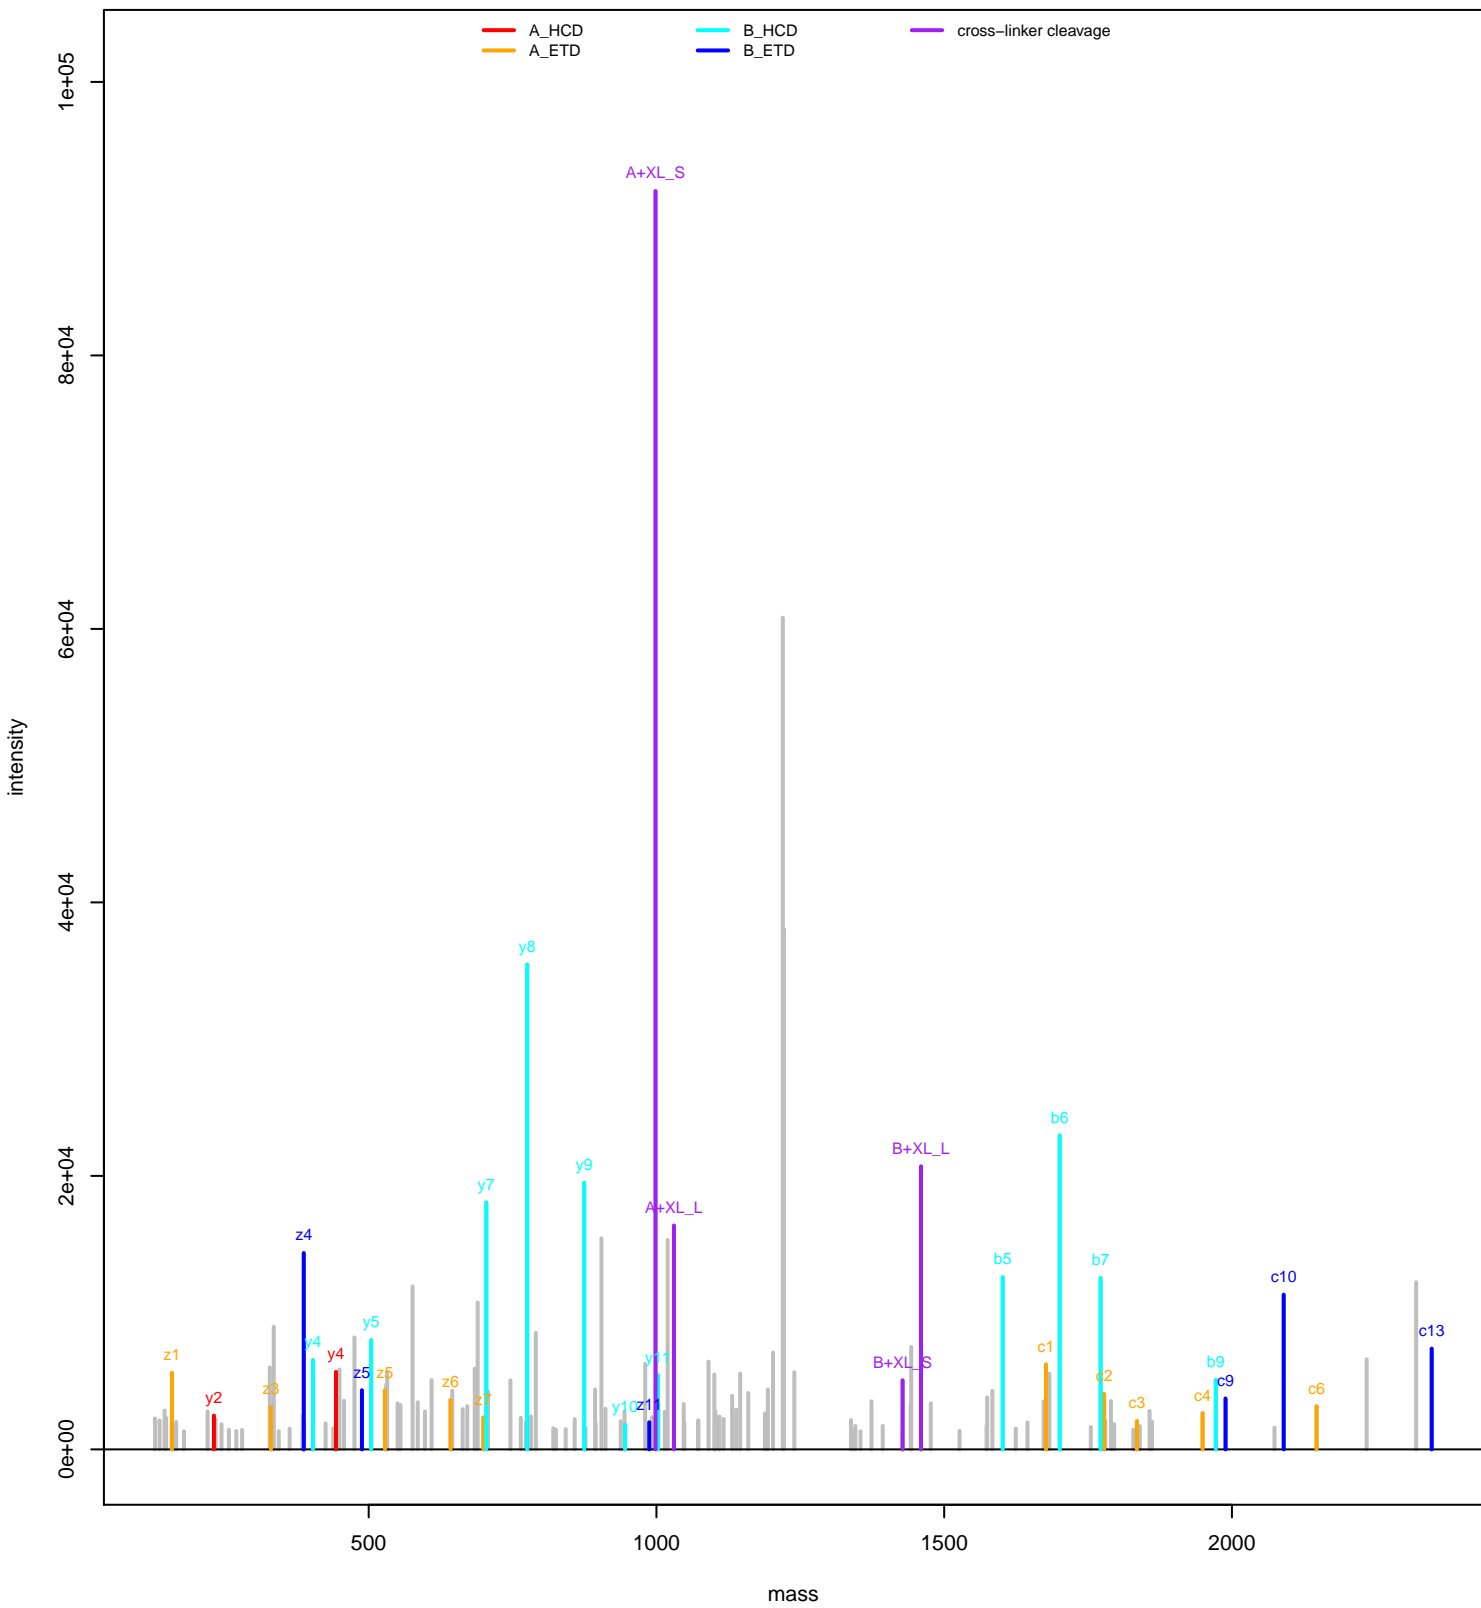

**KTGNTPDGR+XL\_S**

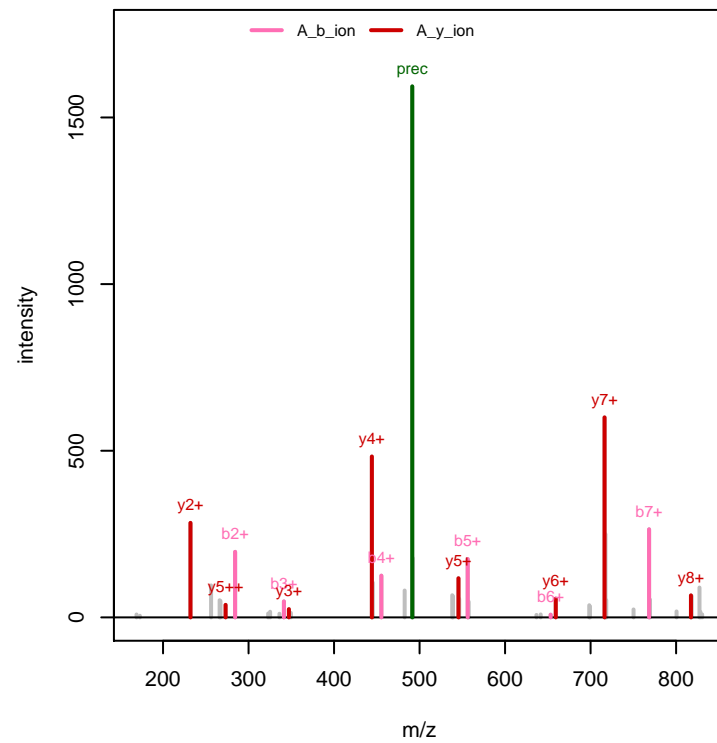

**KTGNTPDGR+XL\_L**

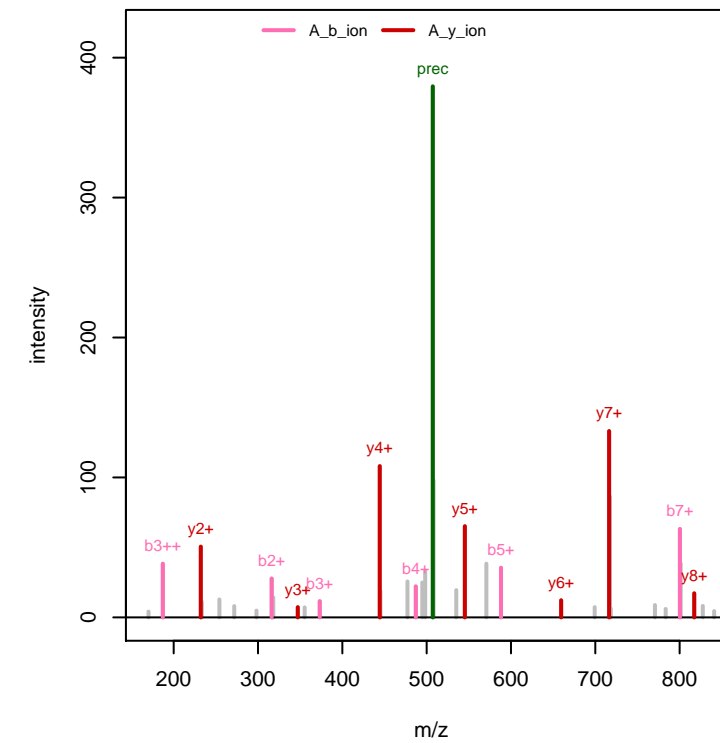

**DQKGAVASLTSVAK+XL\_S**

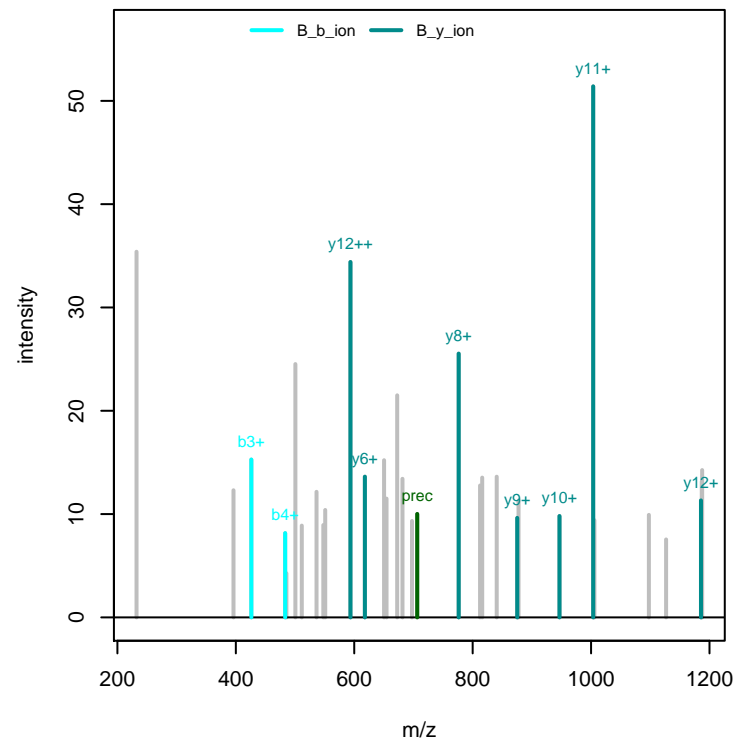

**DQKGAVASLTSVAK+XL\_L**

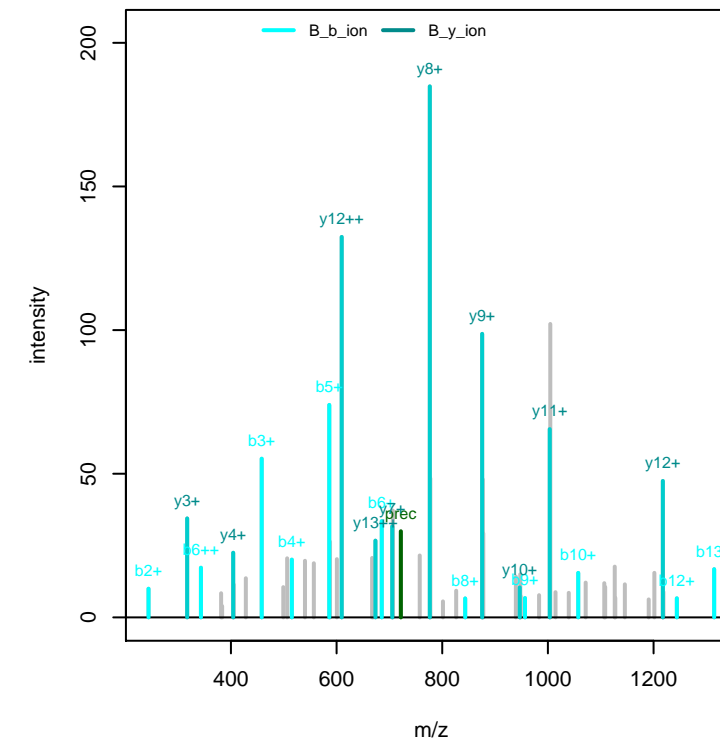

DANDKVK  
EGDKFRK

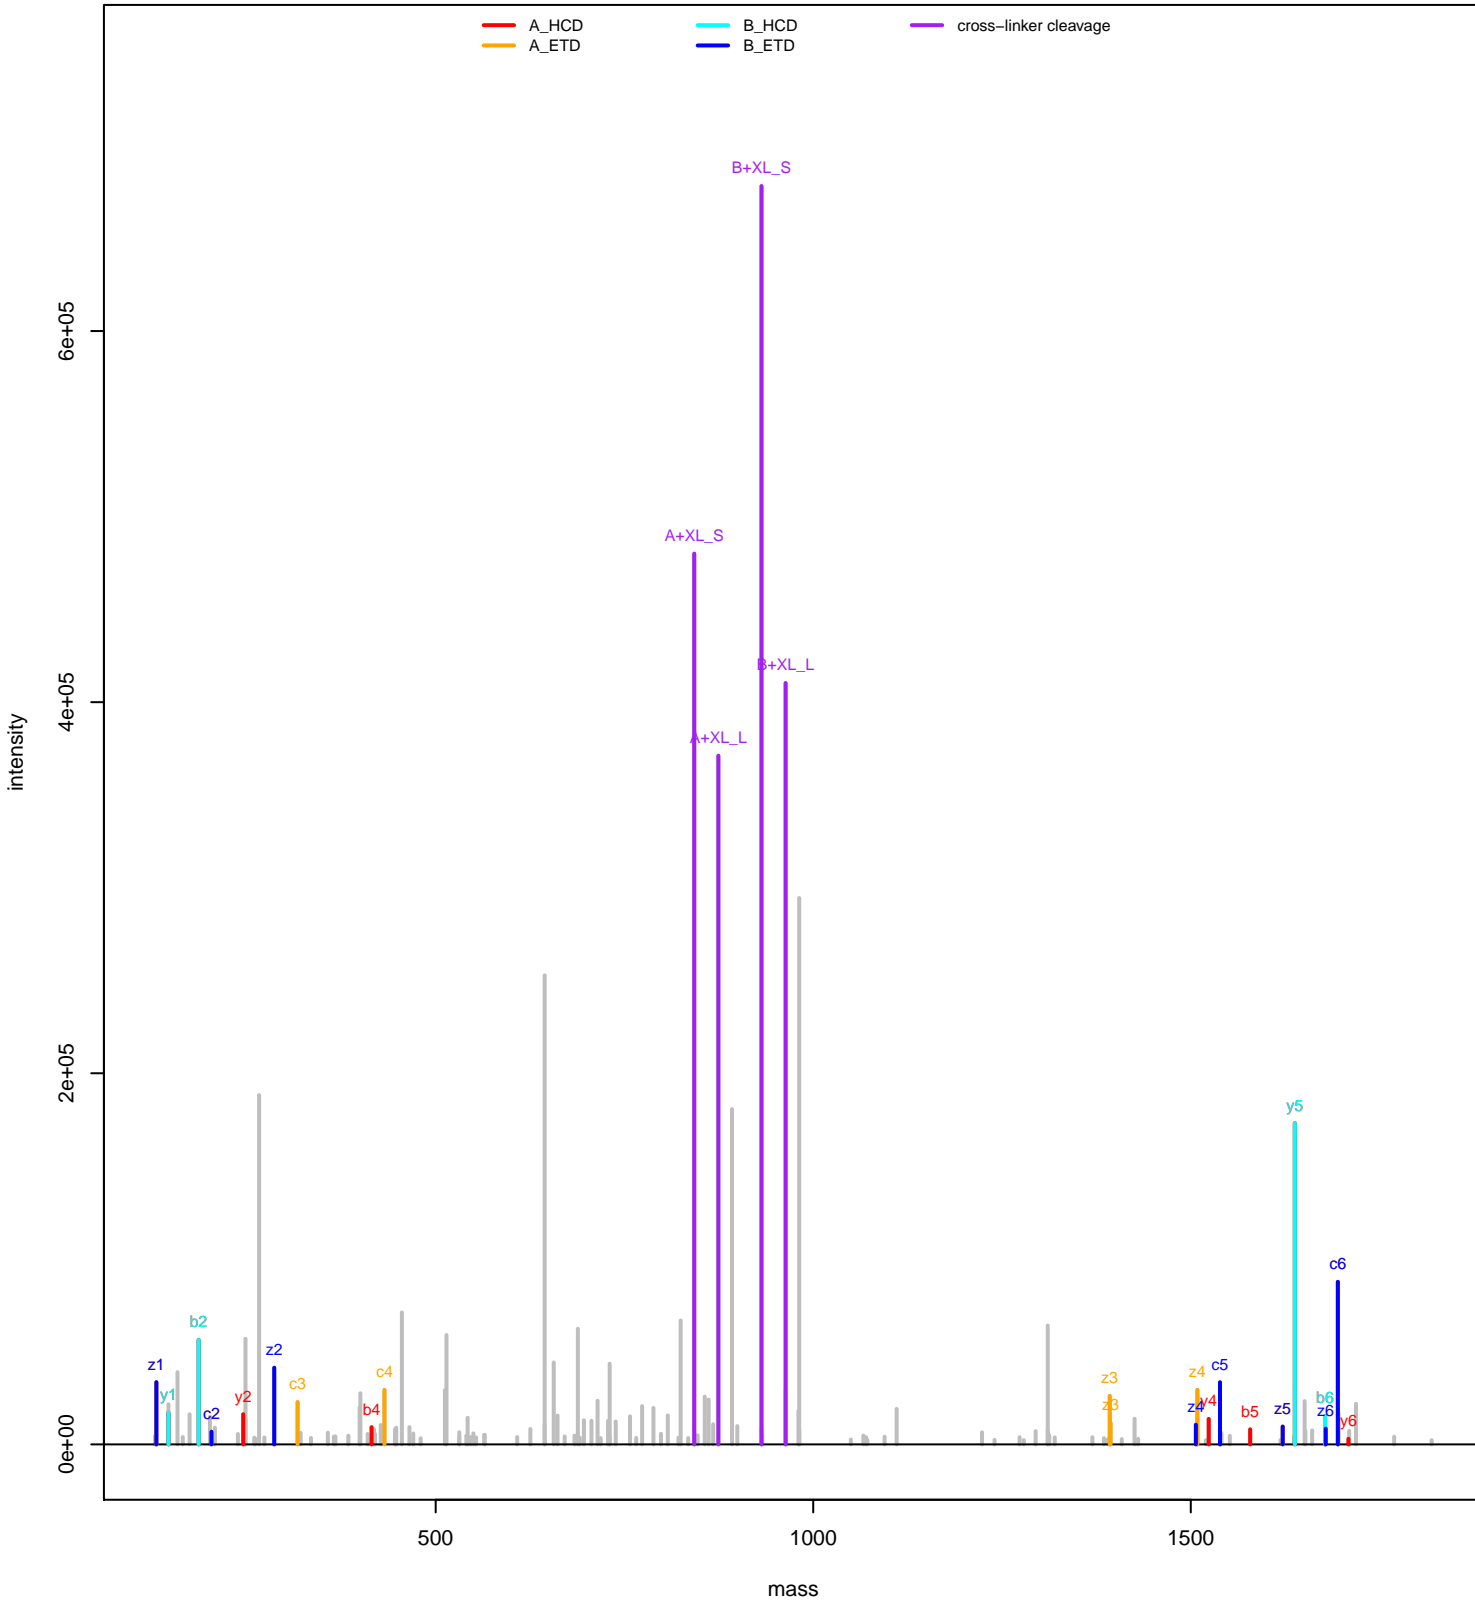

DANDKVK+XL\_S

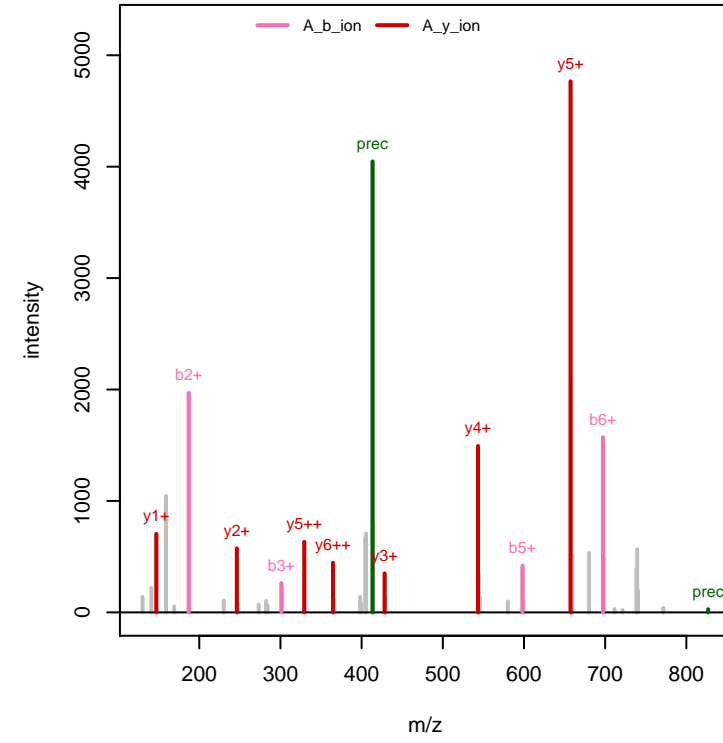

DANDKVK+XL\_L

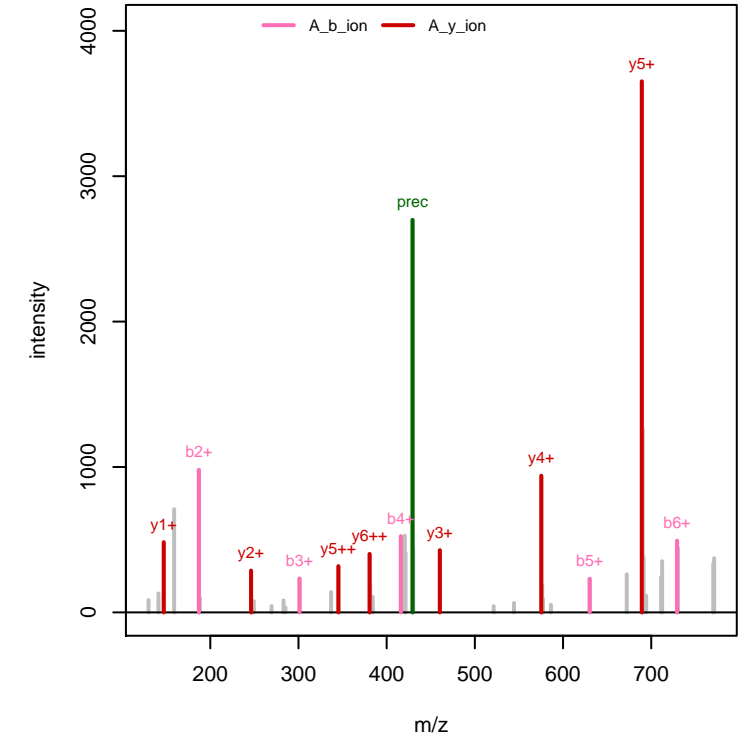

EGDKFRK+XL\_S

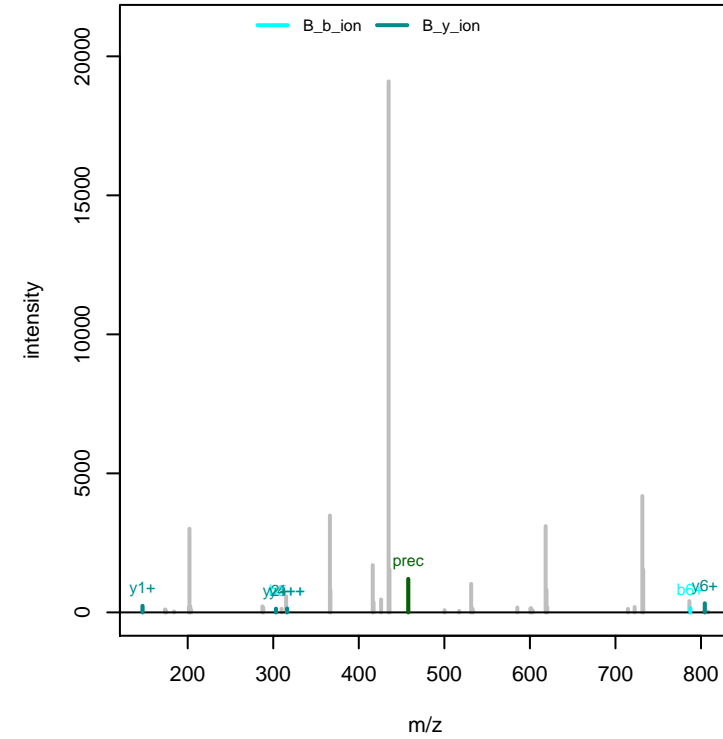

EGDKFRK+XL\_L

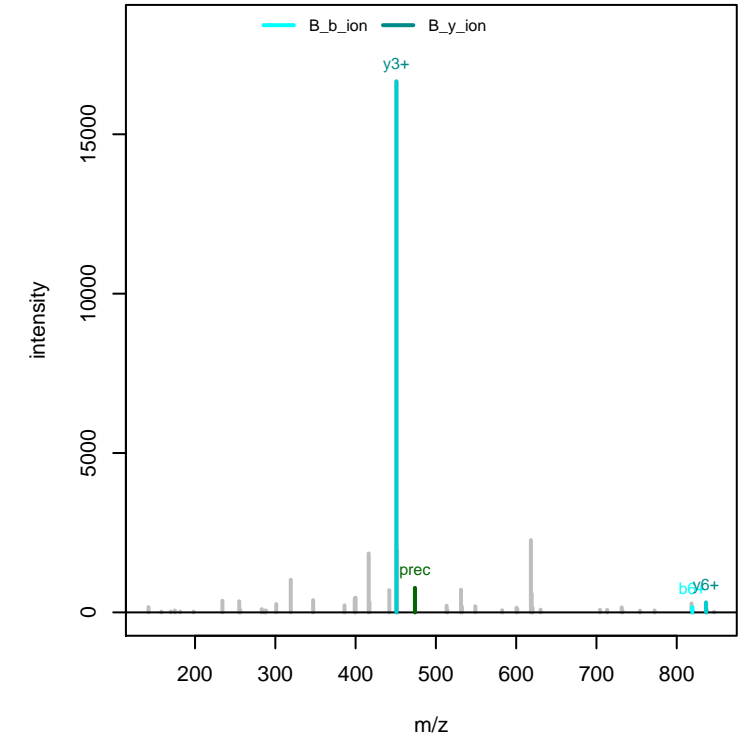

TTLPKAK  
KPNSALRK

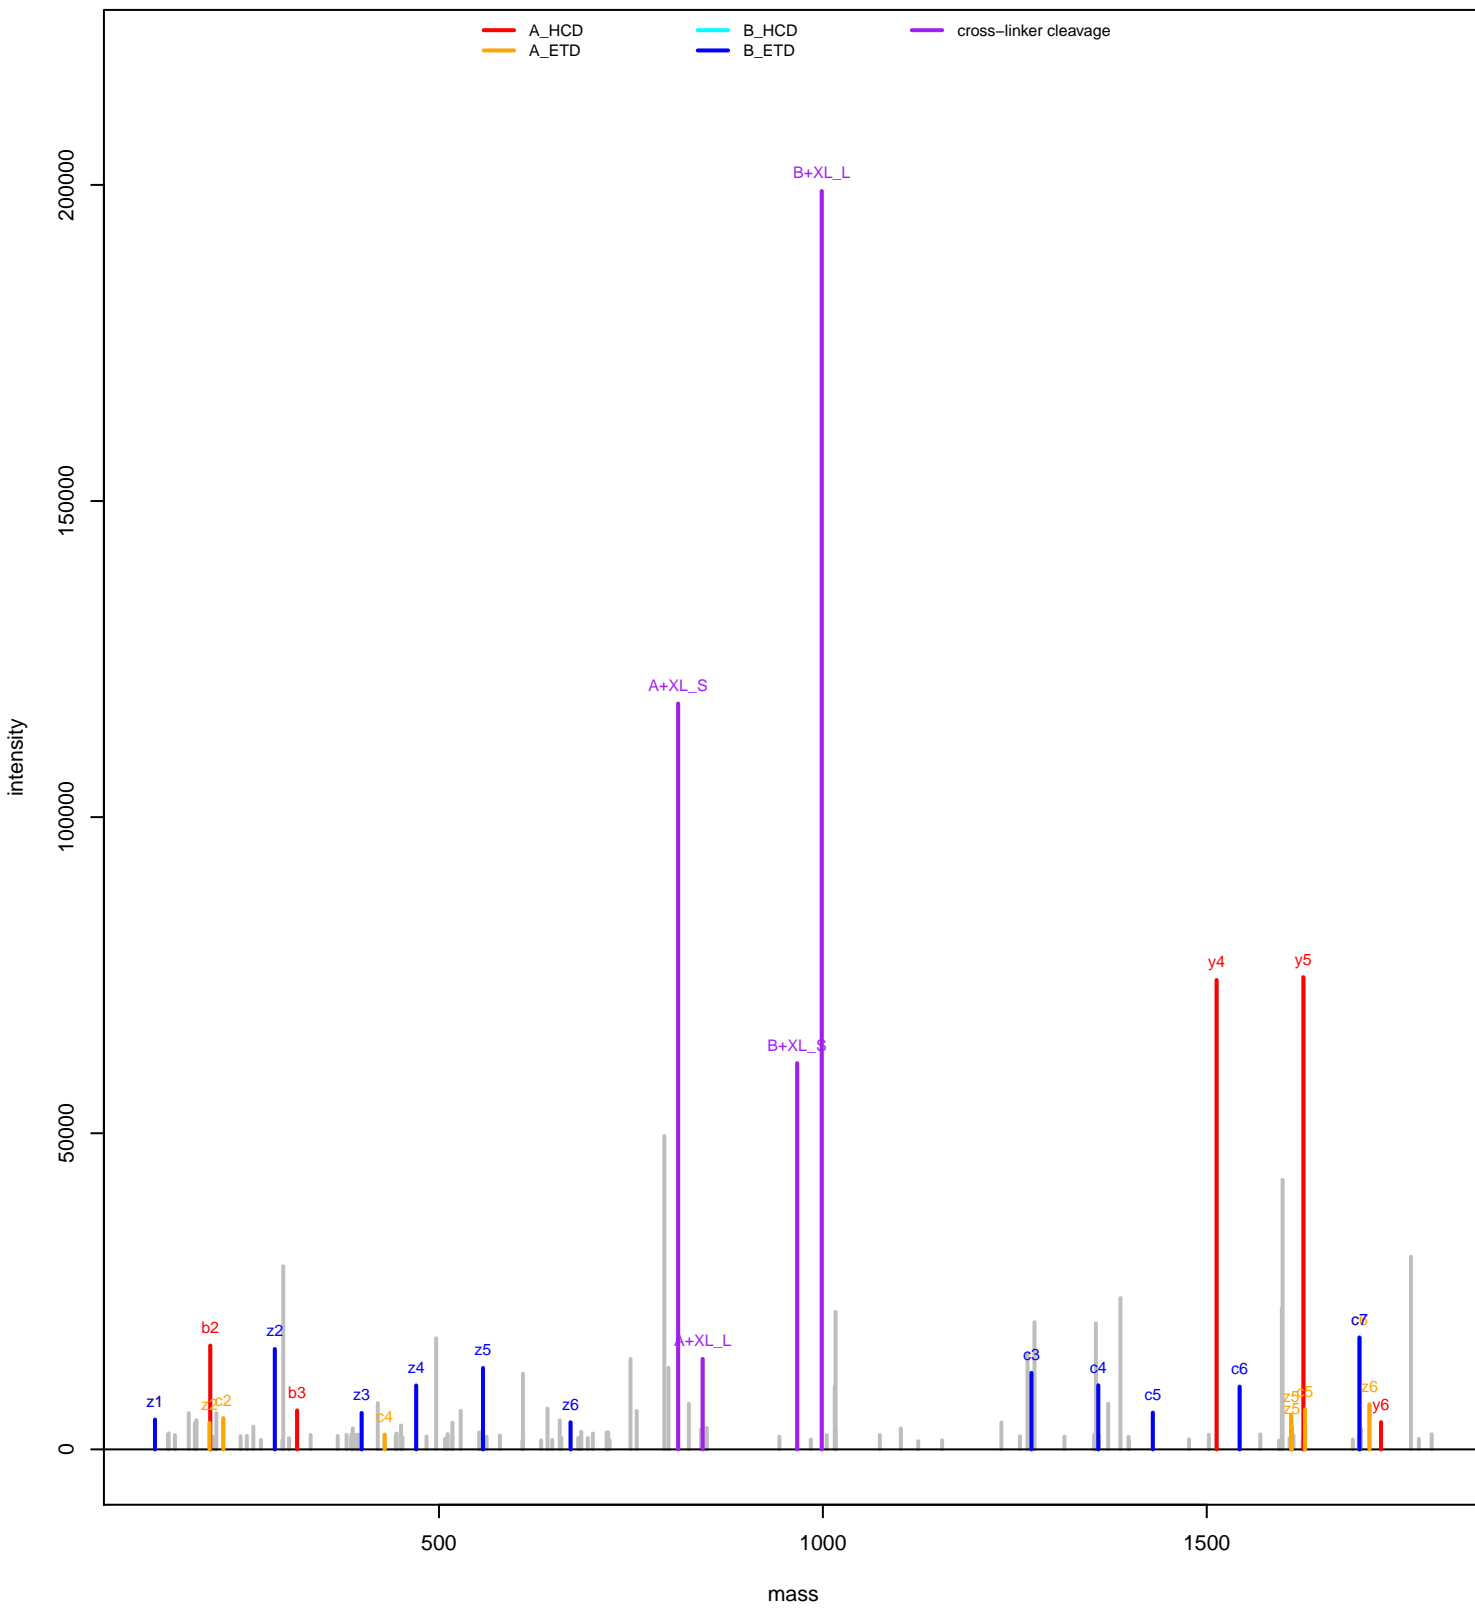

TTLPKAK+XL\_S

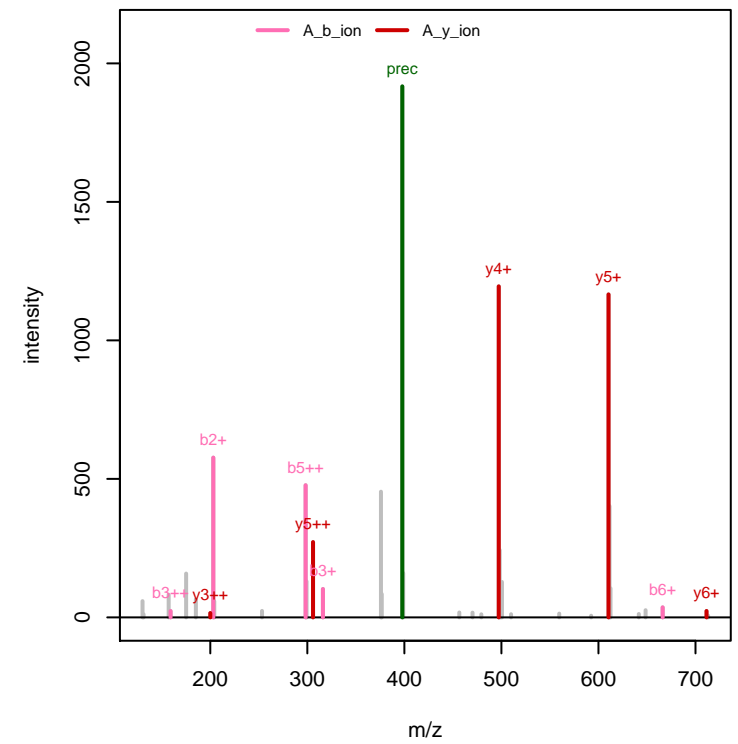

TTLPKAK+XL\_L

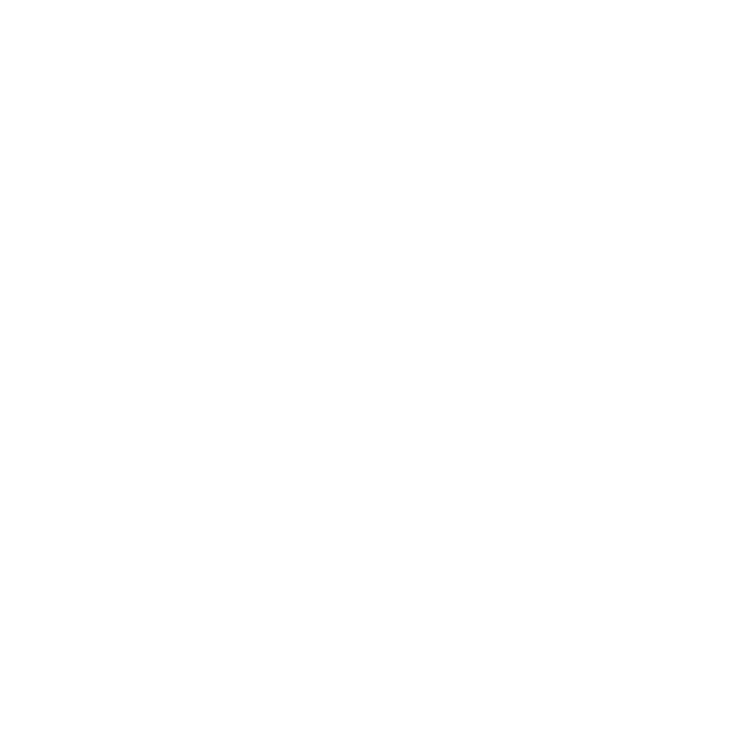

KPNSALRK+XL\_S

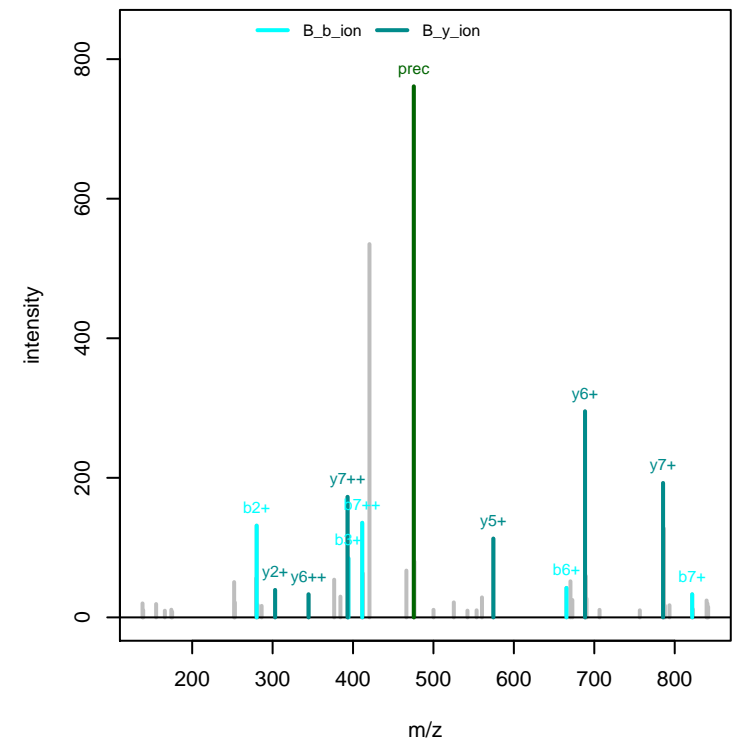

KPNSALRK+XL\_L

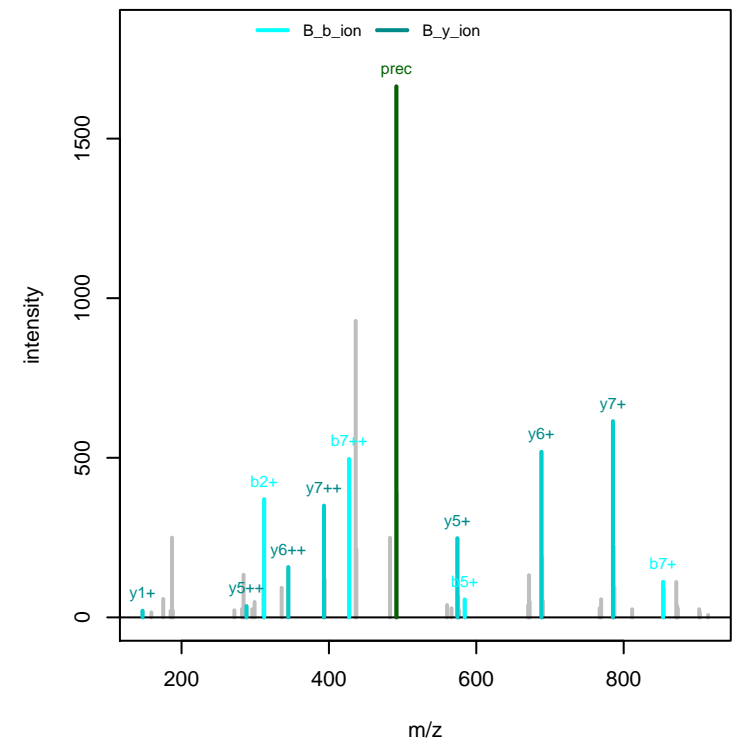

ITTQTAKQVIVQK  
VTPKGETQLTPEEK

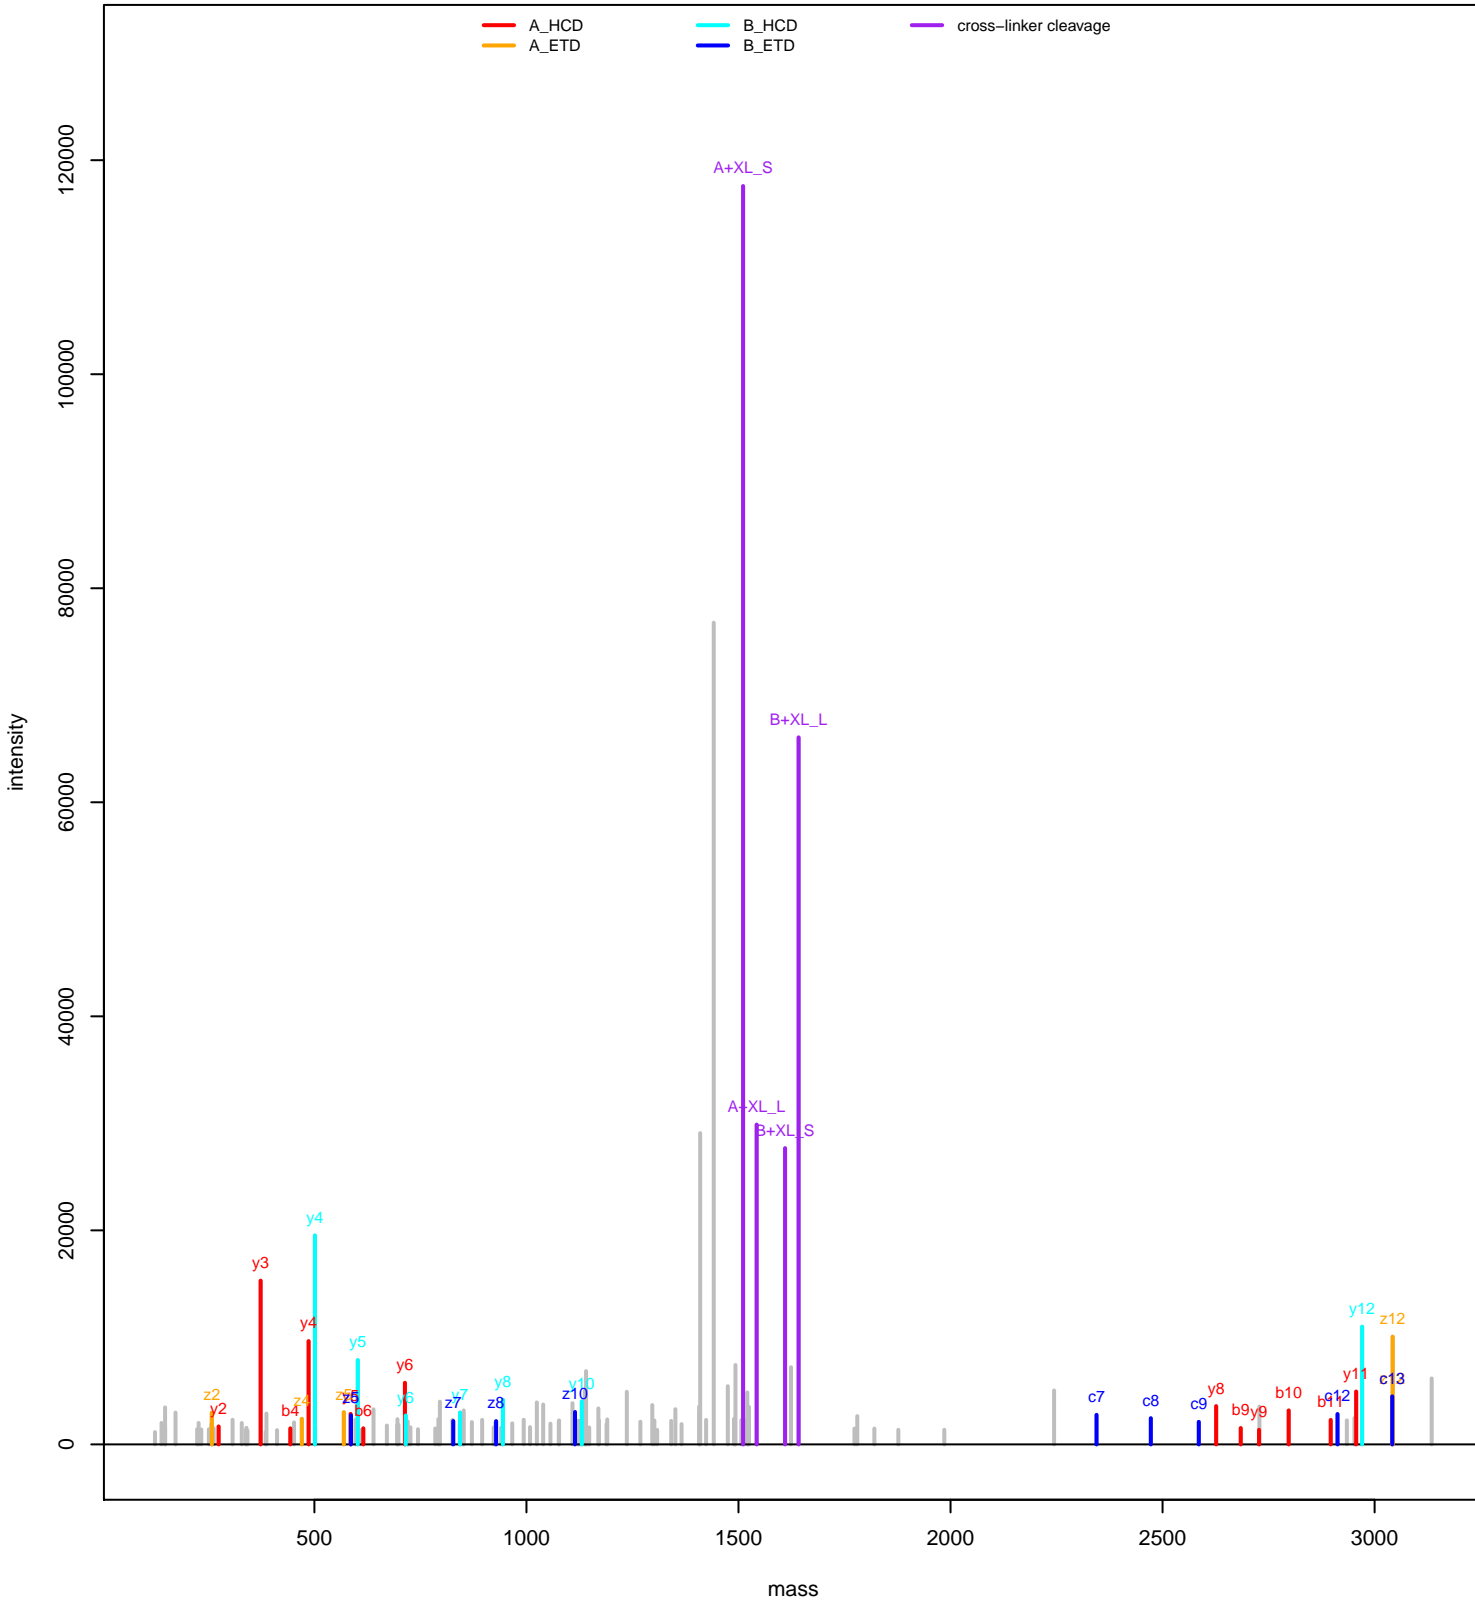

ITTQTAKQVIVQK+XL\_S

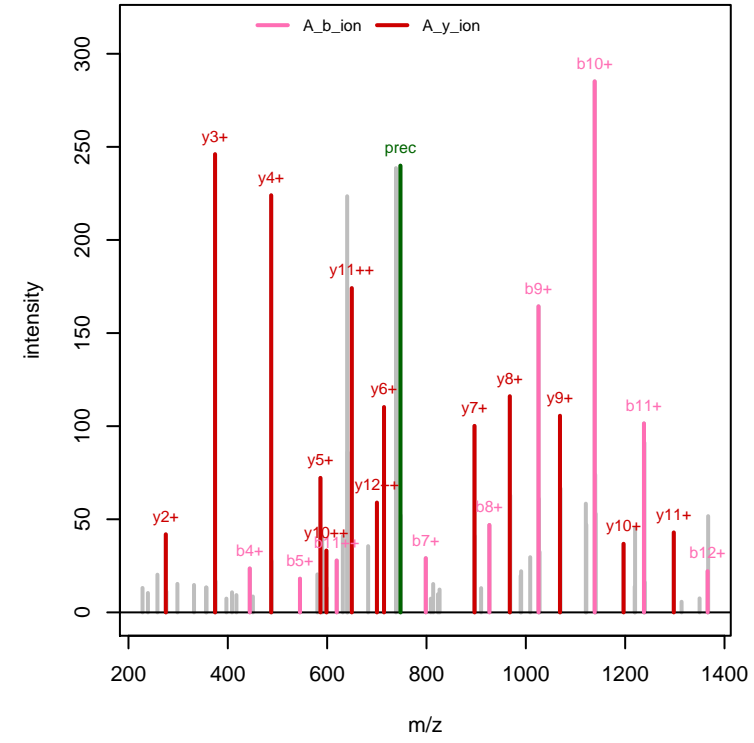

ITTQTAKQVIVQK+XL\_L

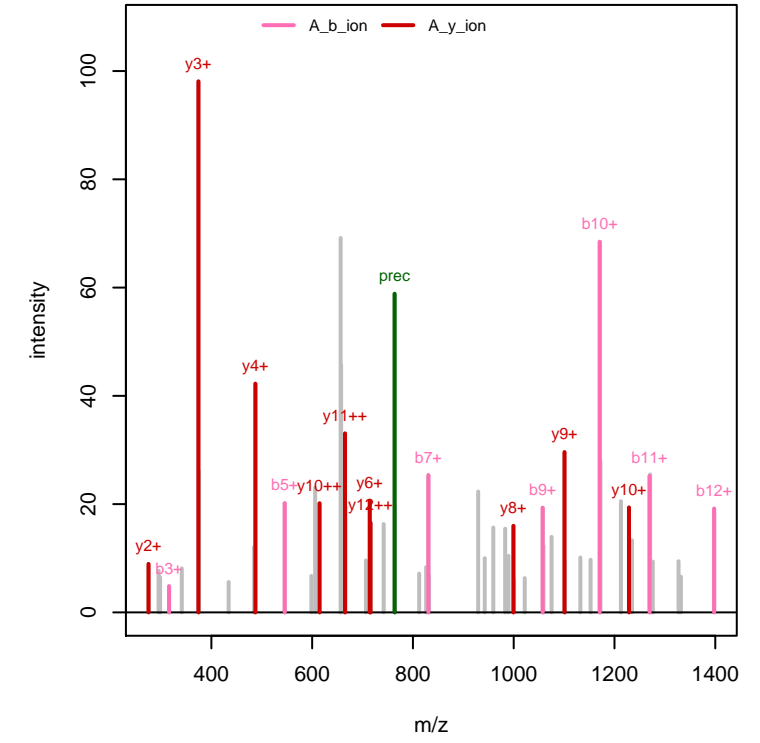

VTPKGETQLTPEEK+XL\_S

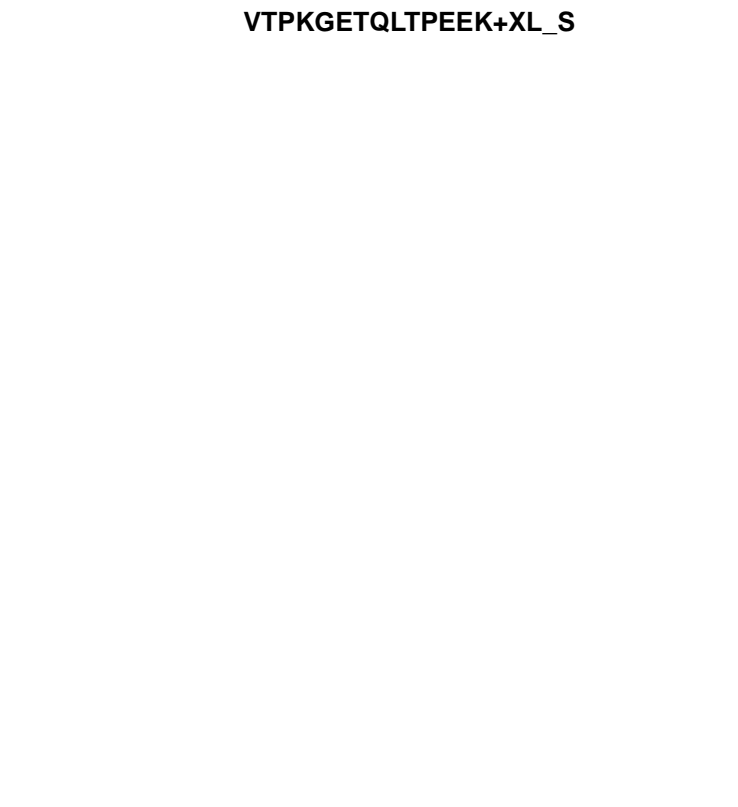

VTPKGETQLTPEEK+XL\_L

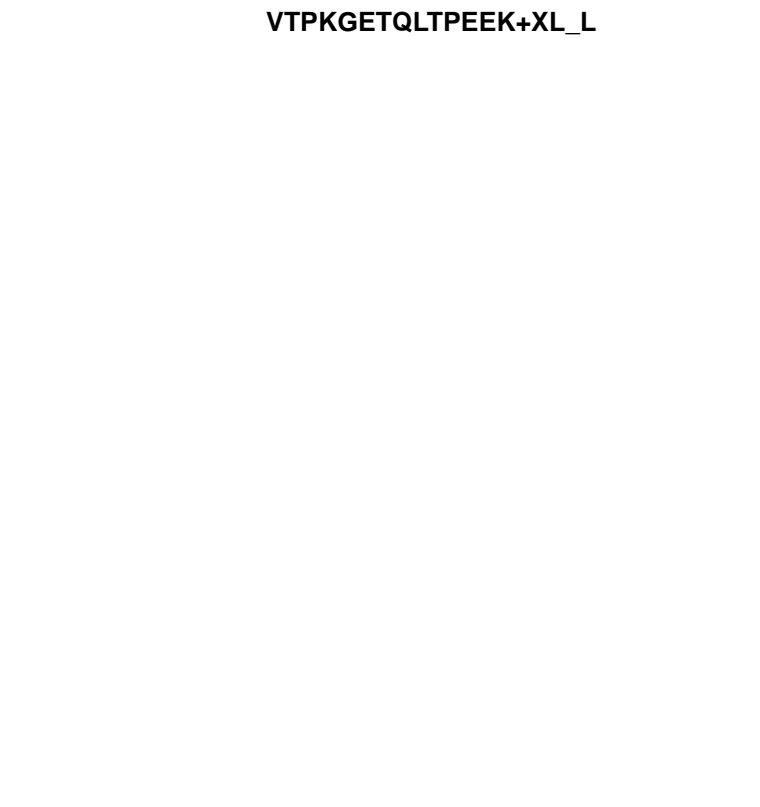

**DATKAEIK**  
**ASTAMEKSNTIVLK**

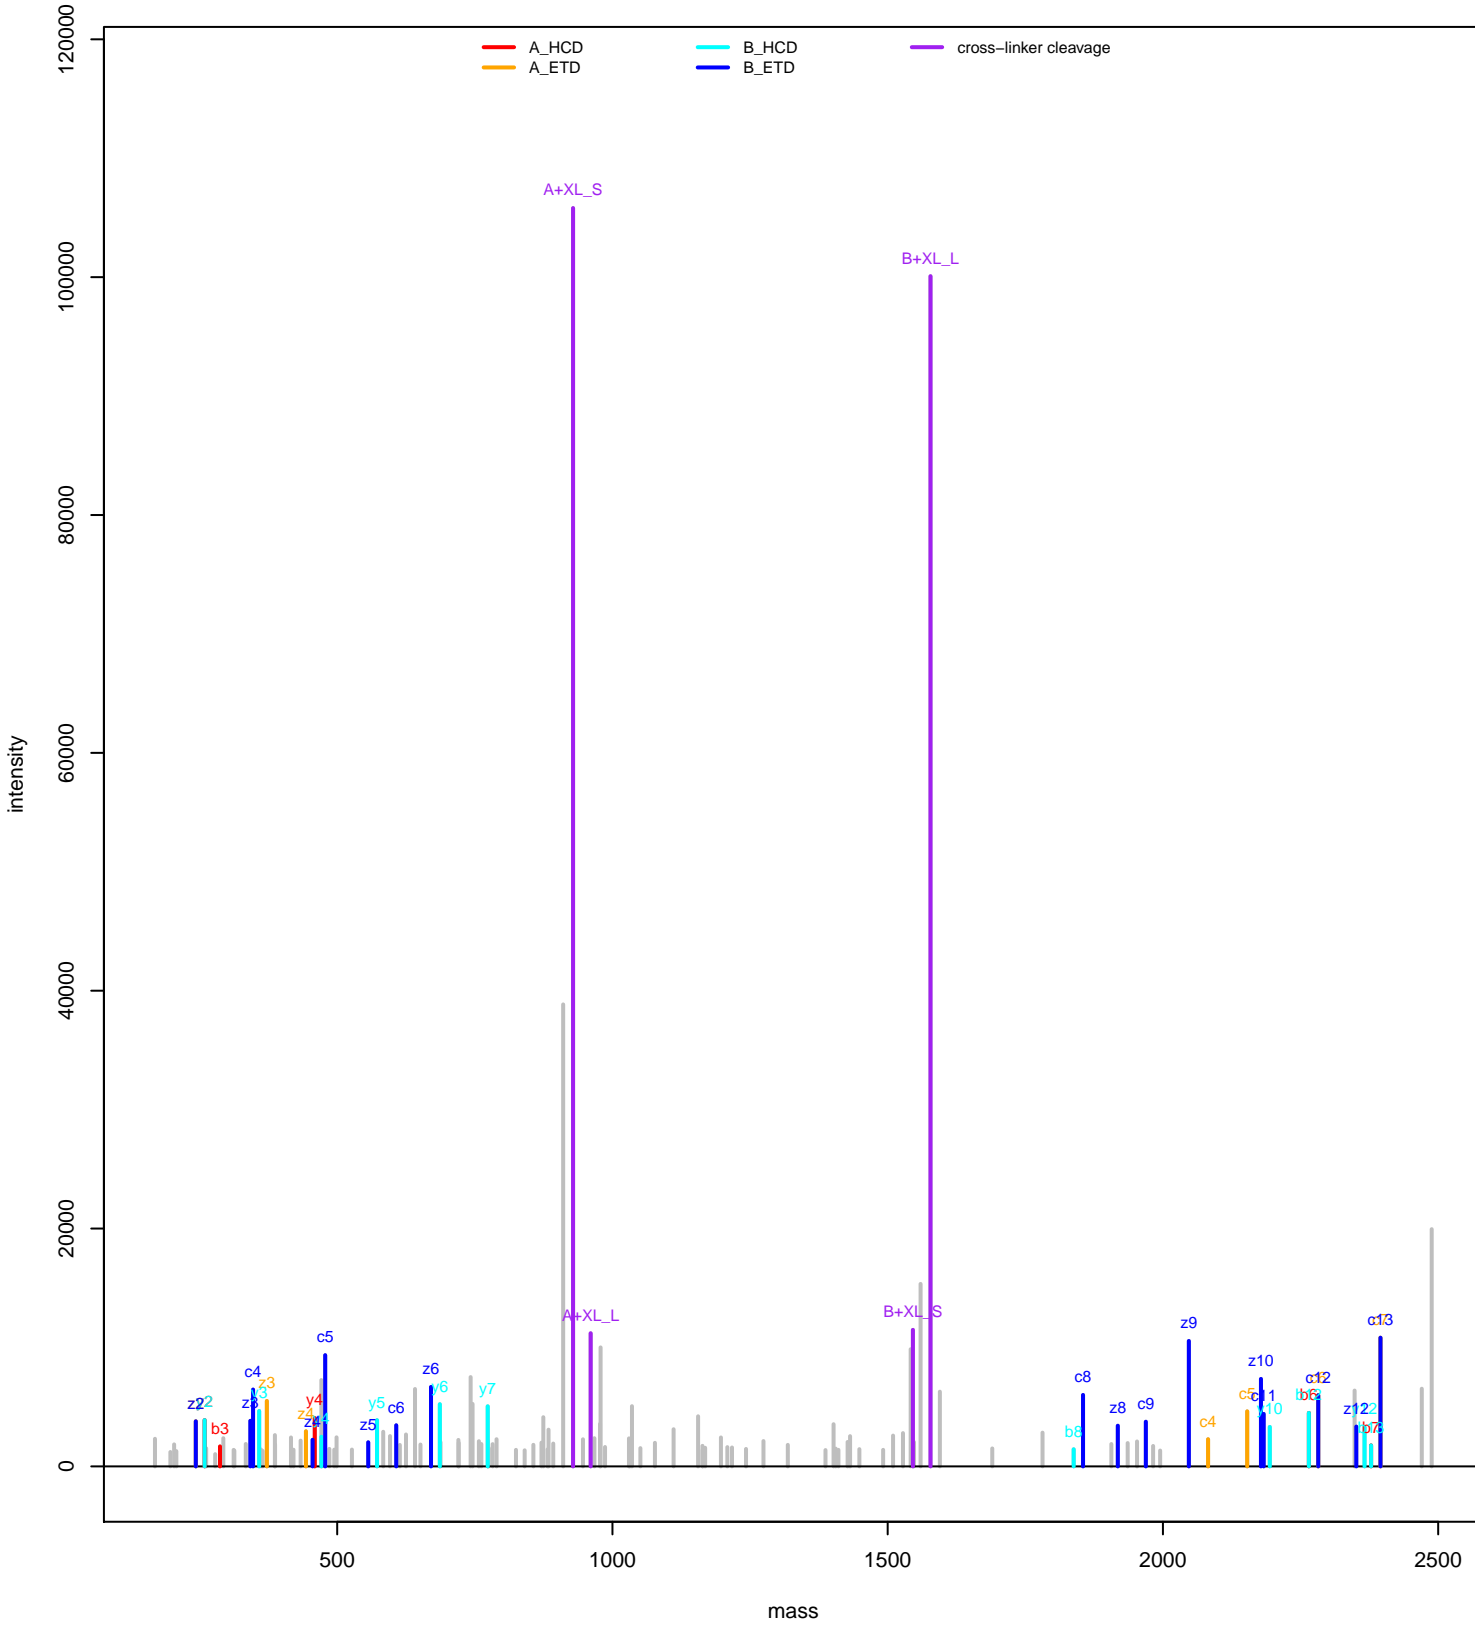

**DATKAEIK+XL\_S**

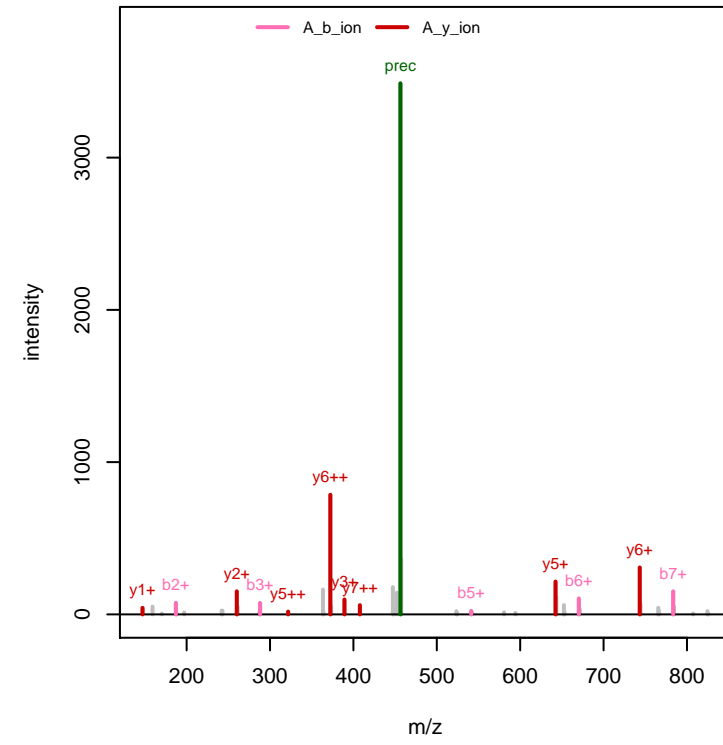

**DATKAEIK+XL\_L**

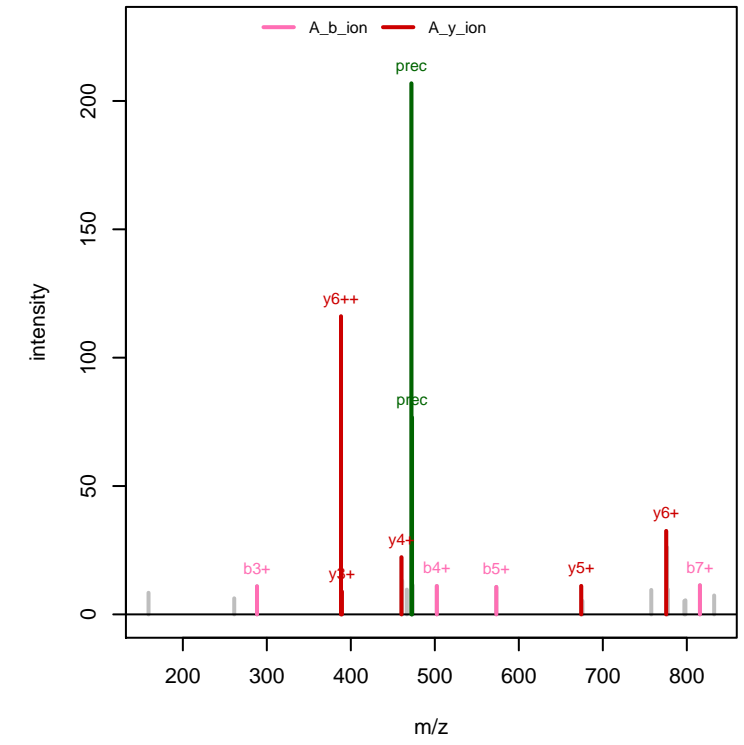

**ASTAMEKSNTIVLK+XL\_S**

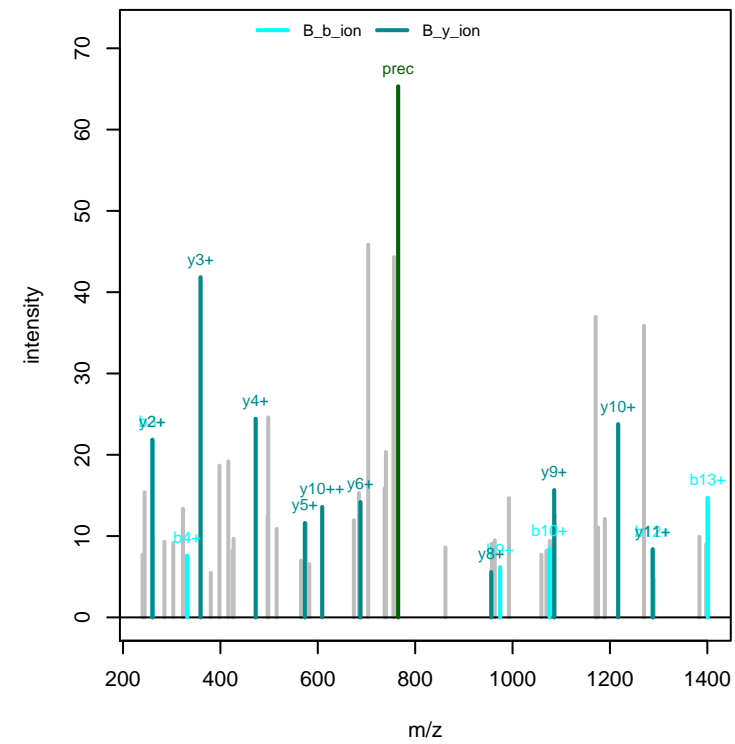

**ASTAMEKSNTIVLK+XL\_L**

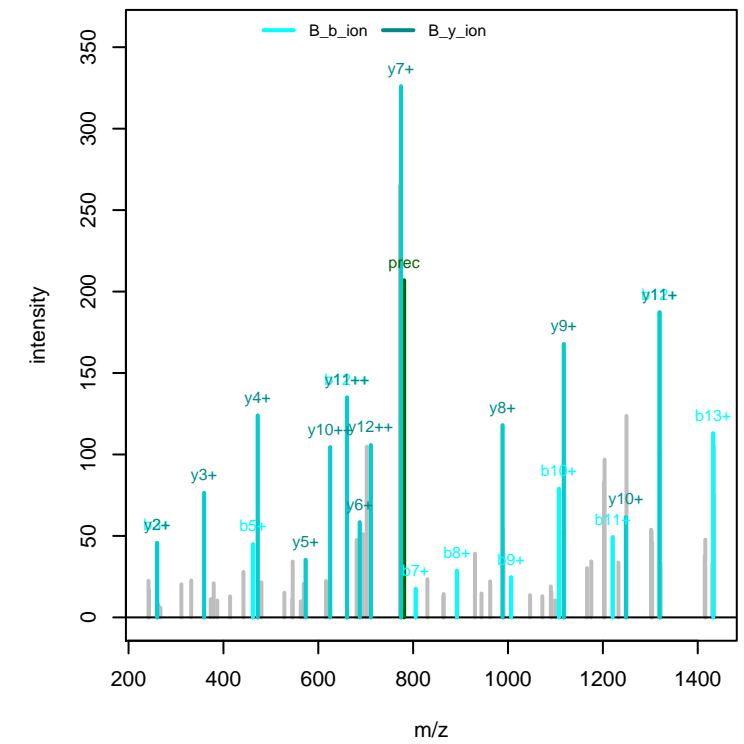

VEQKVAR  
KSGIGGADGK

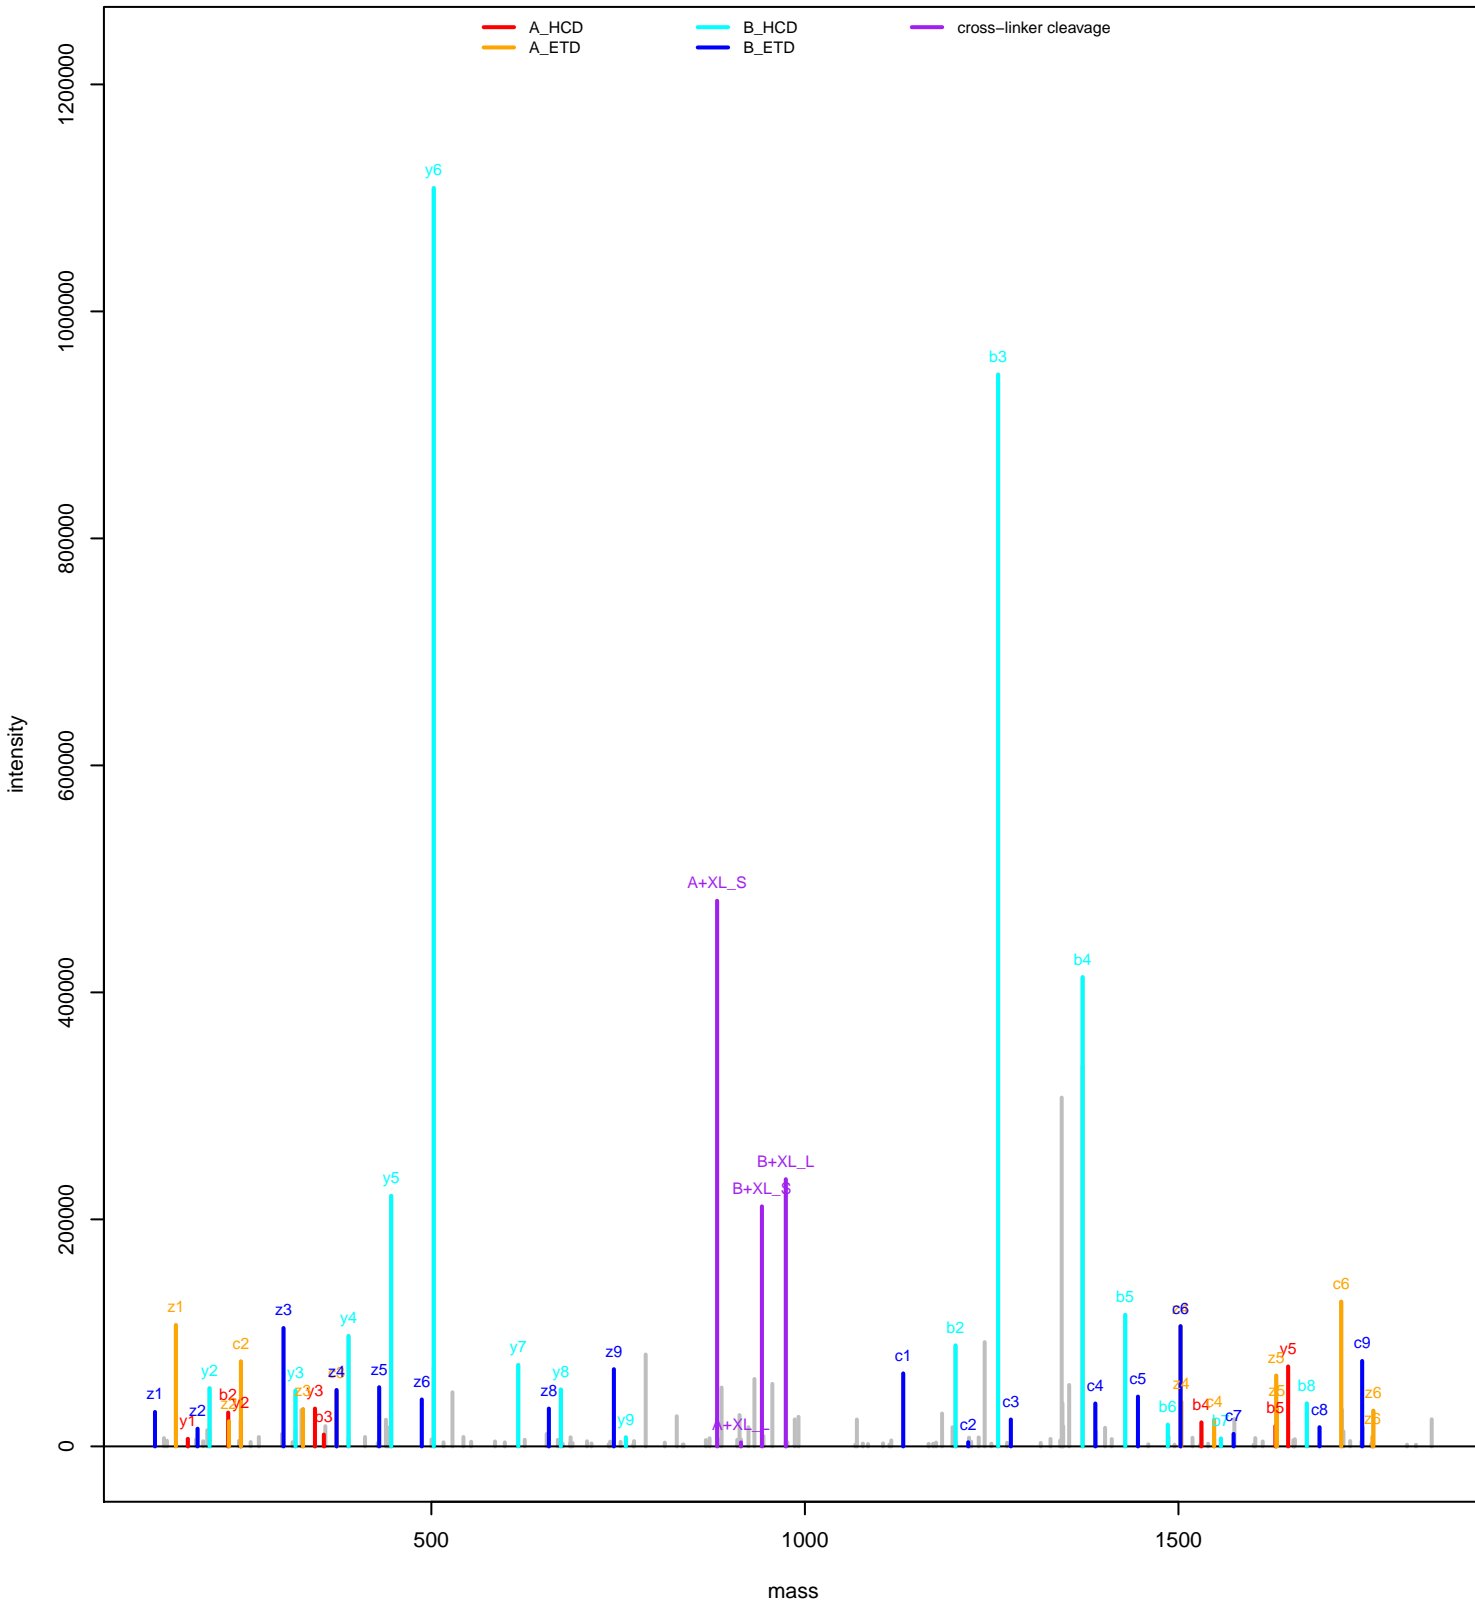

VEQKVAR+XL\_S

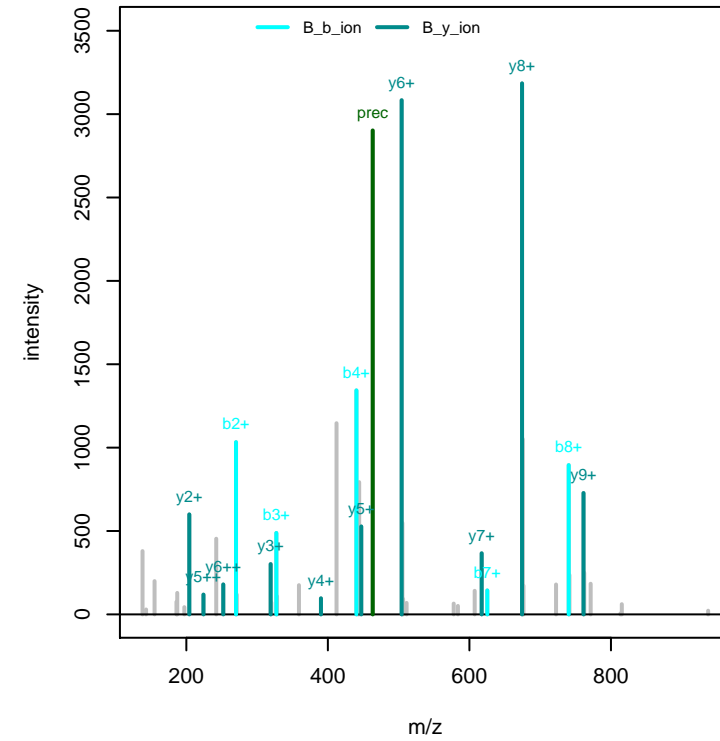

VEQKVAR+XL\_L

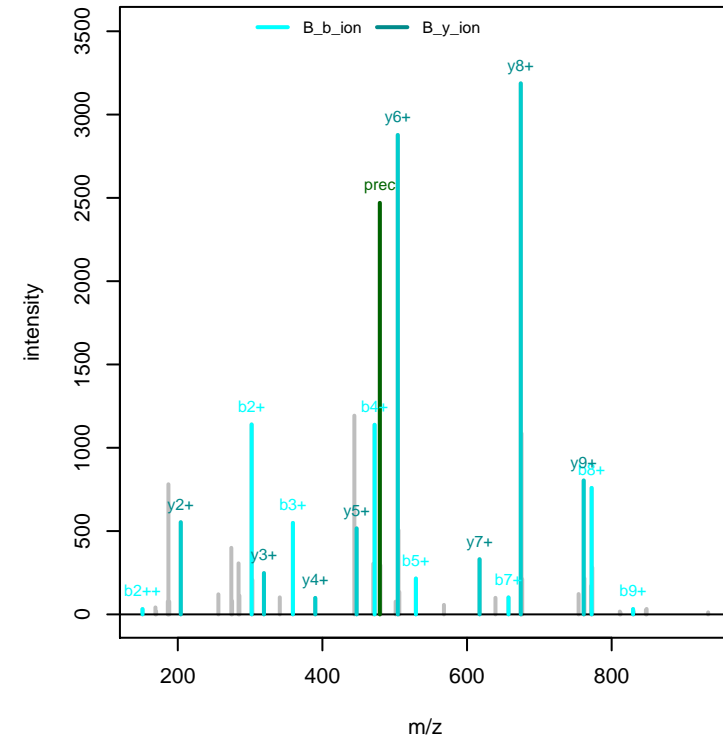

KSGIGGADGK+XL\_S



KSGIGGADGK+XL\_L



ALEEAGAEVEVK  
EGVSKDDAEALKK

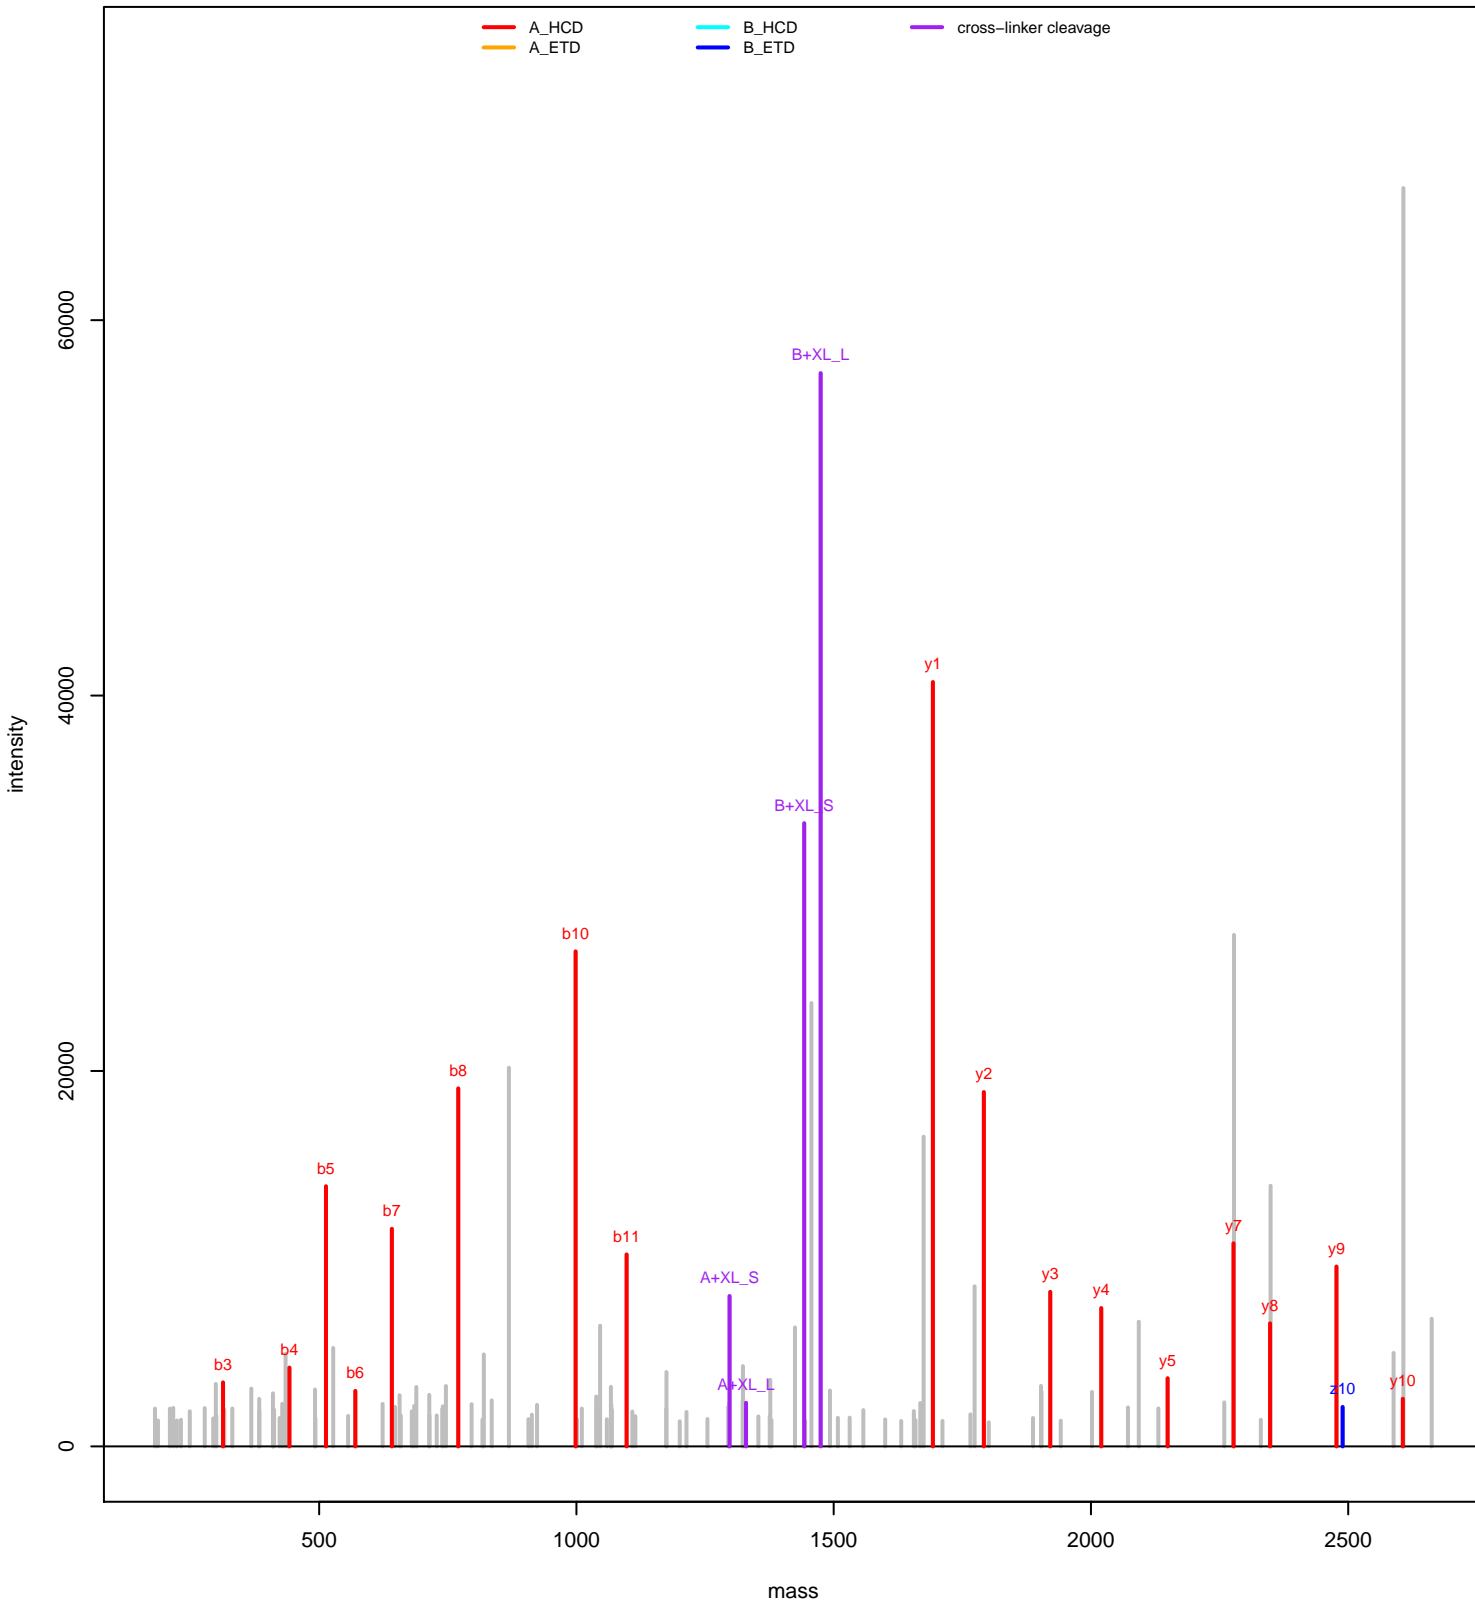

ALEEAGAEVEVK+XL\_S

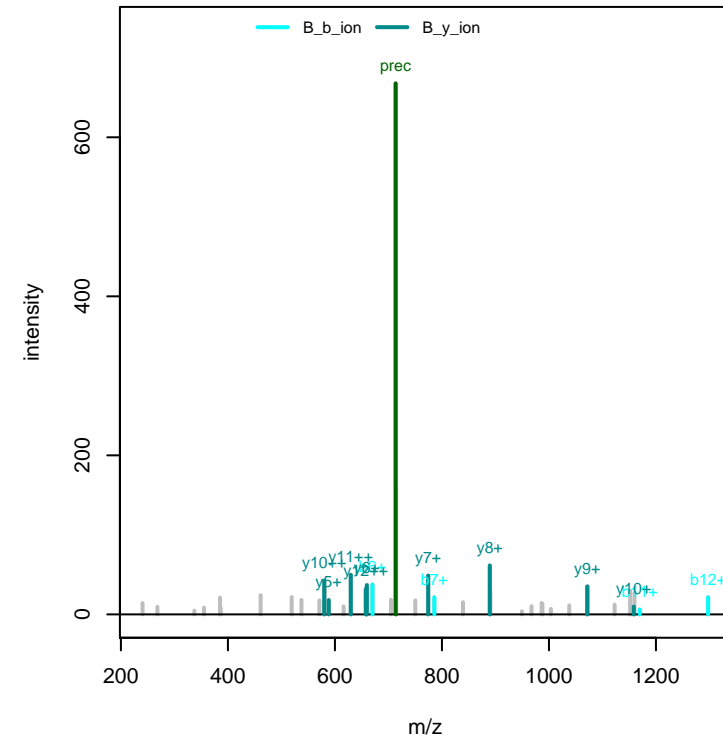

ALEEAGAEVEVK+XL\_L

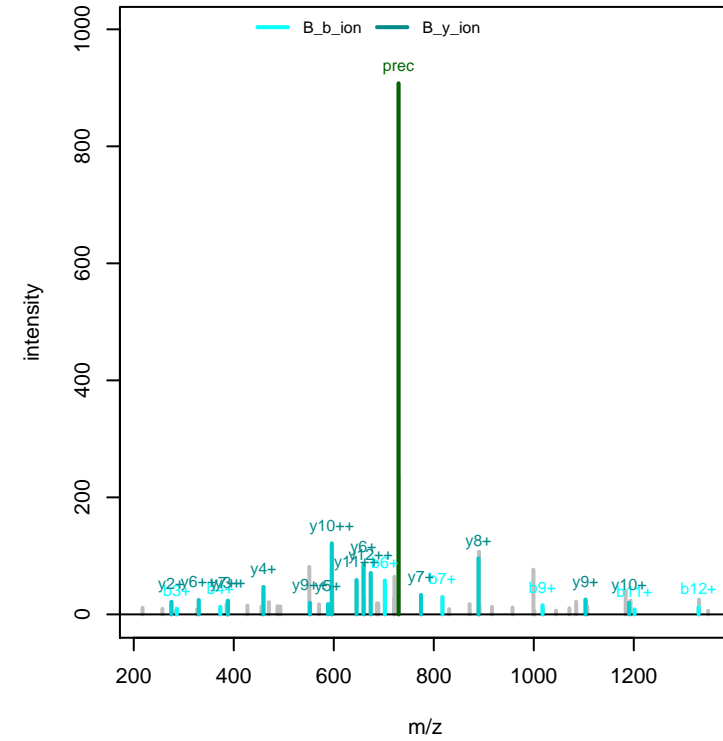

EGVSKDDAEALKK+XL\_S

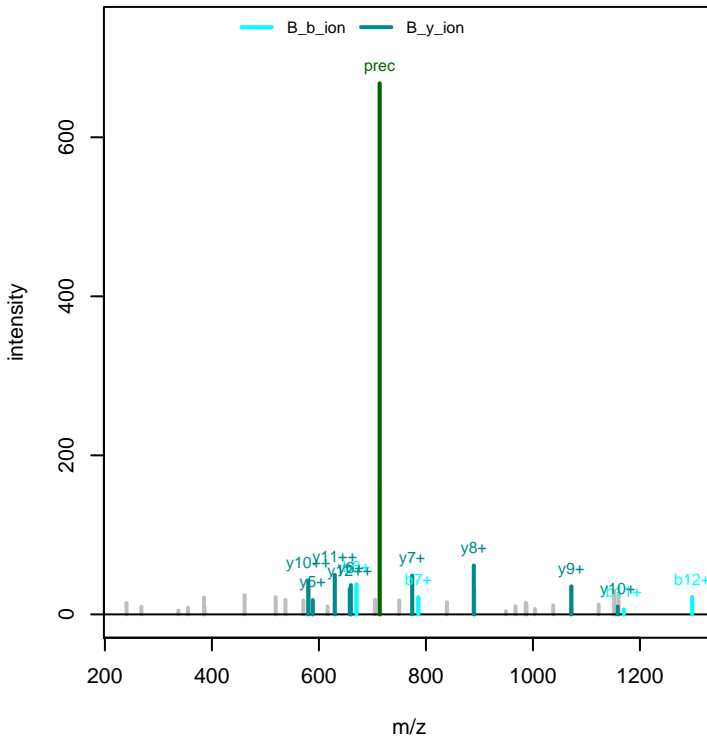

EGVSKDDAEALKK+XL\_L



SAQKPGLHPR  
EMAQQGKQSR

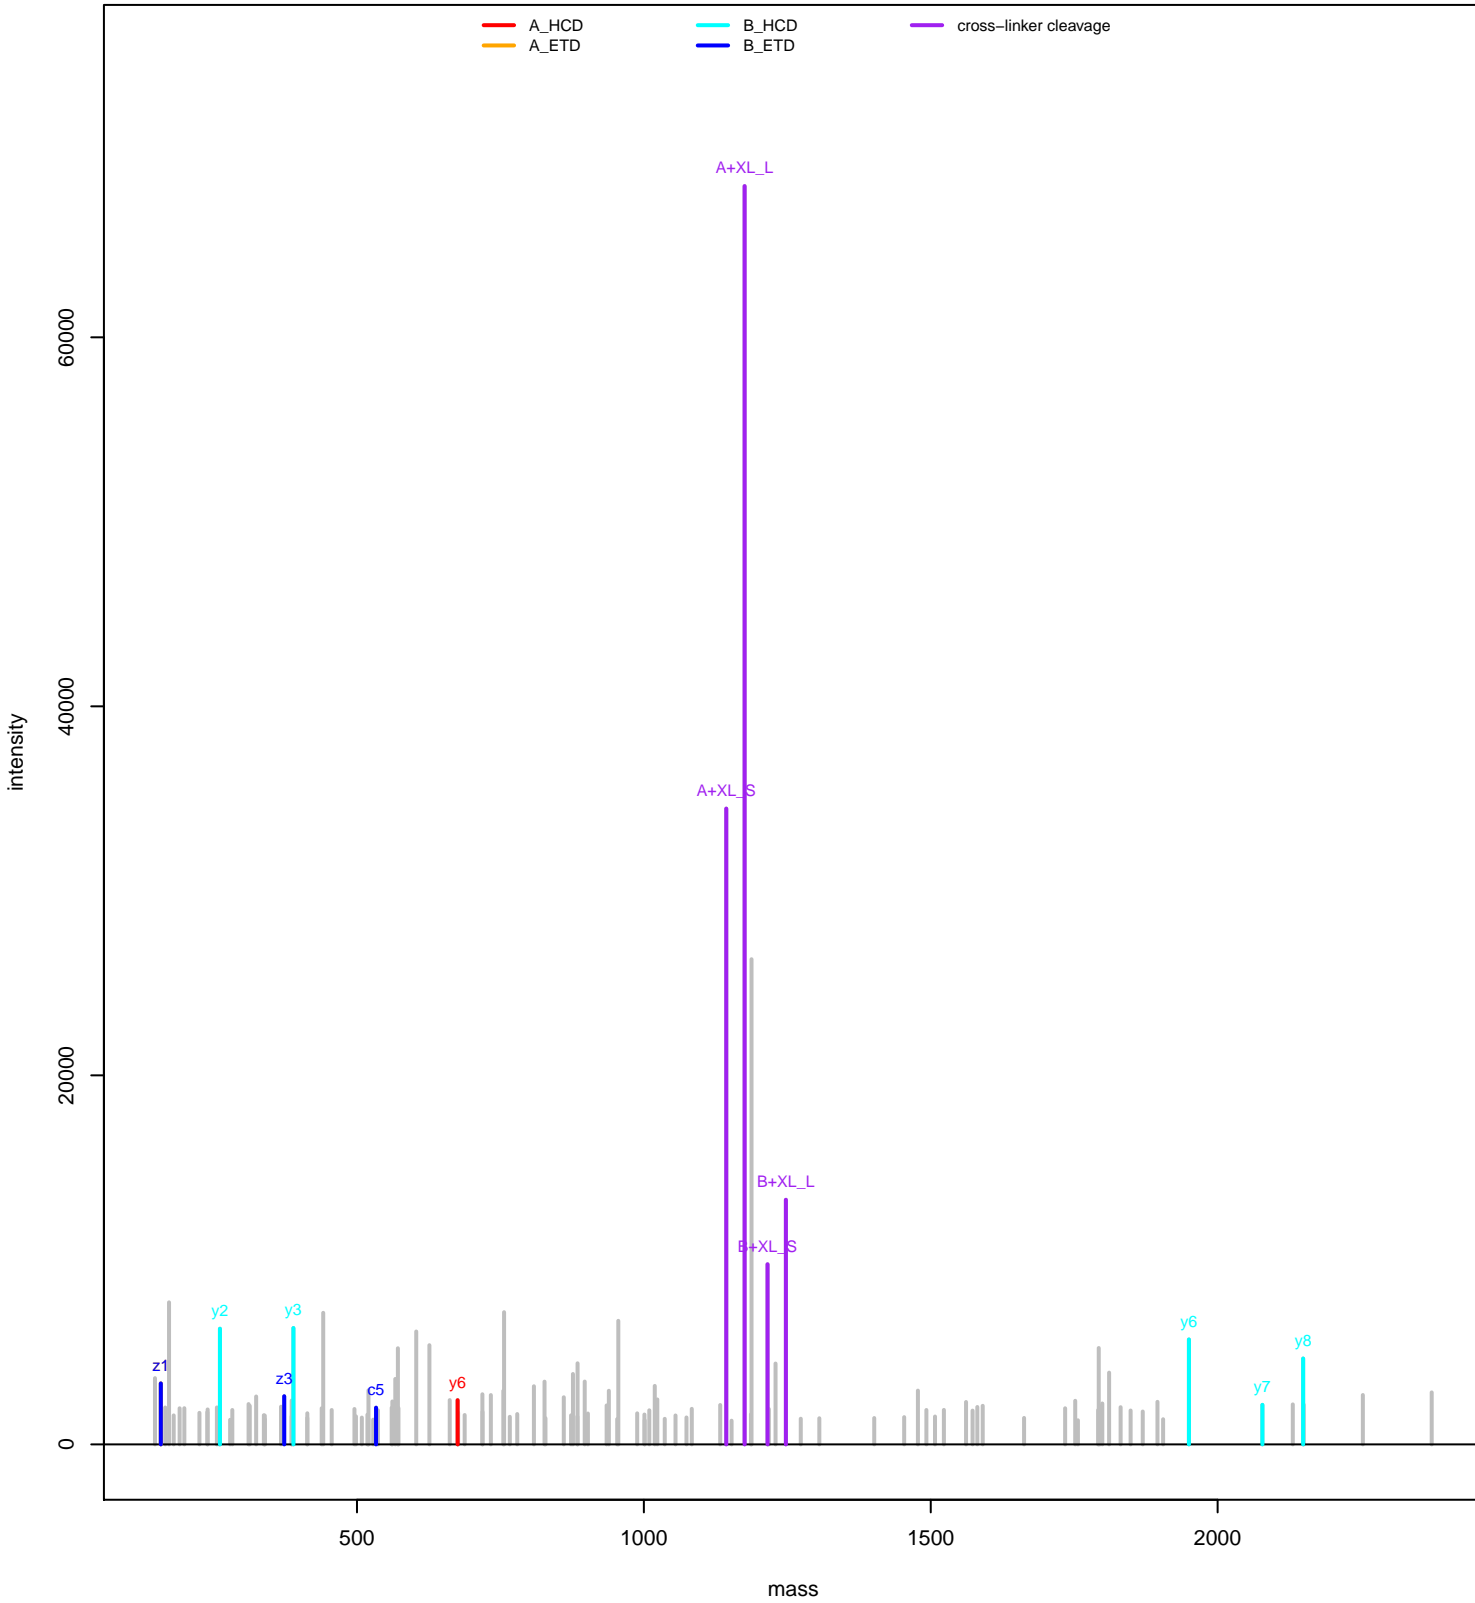

SAQKPGLHPR+XL\_S

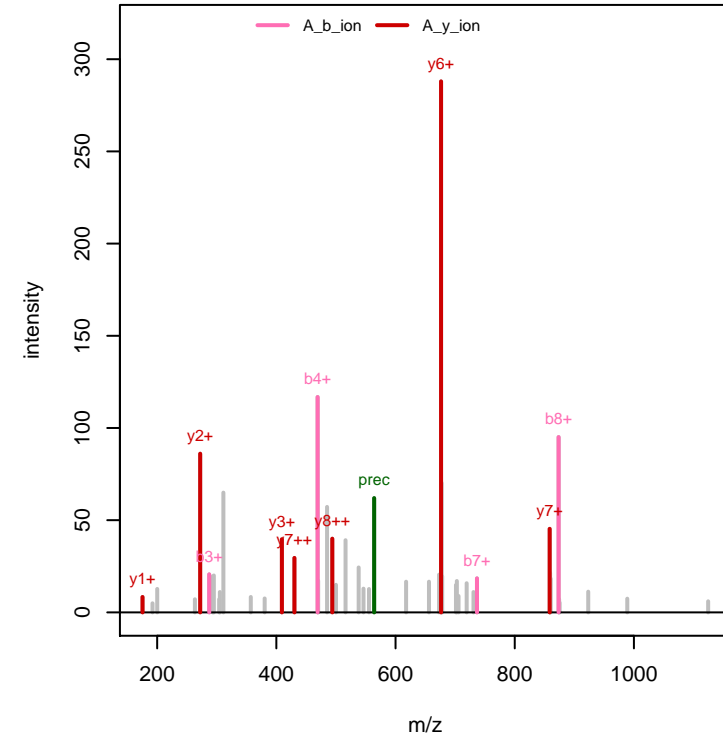

SAQKPGLHPR+XL\_L

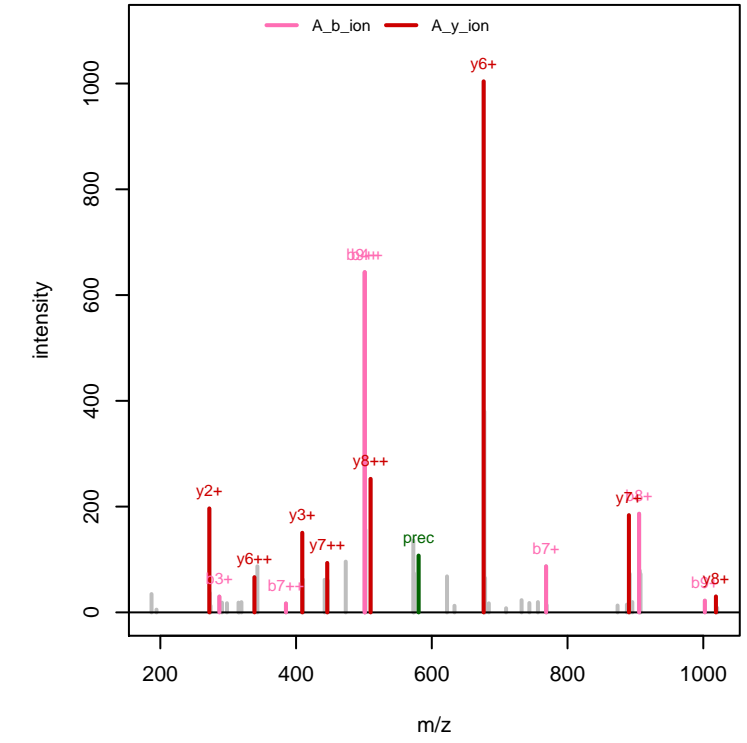

EMAQQGKQSR+XL\_S

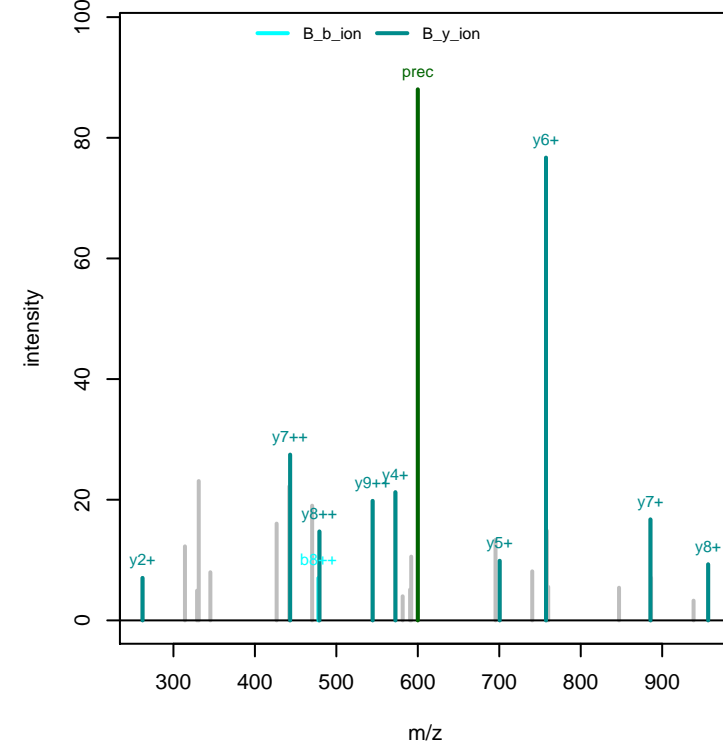

EMAQQGKQSR+XL\_L

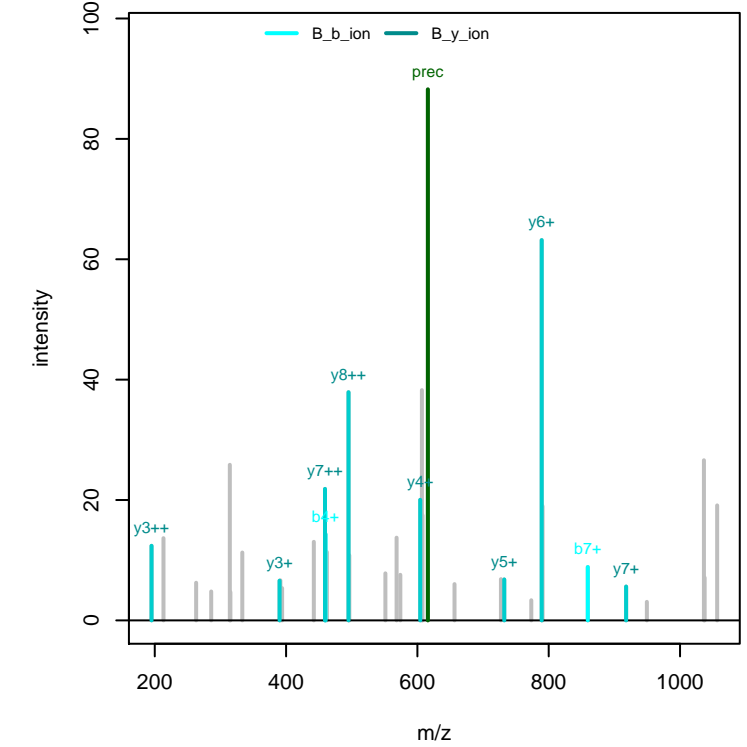



**AELSKTQAK**  
**TGRNPQTGKEIK**

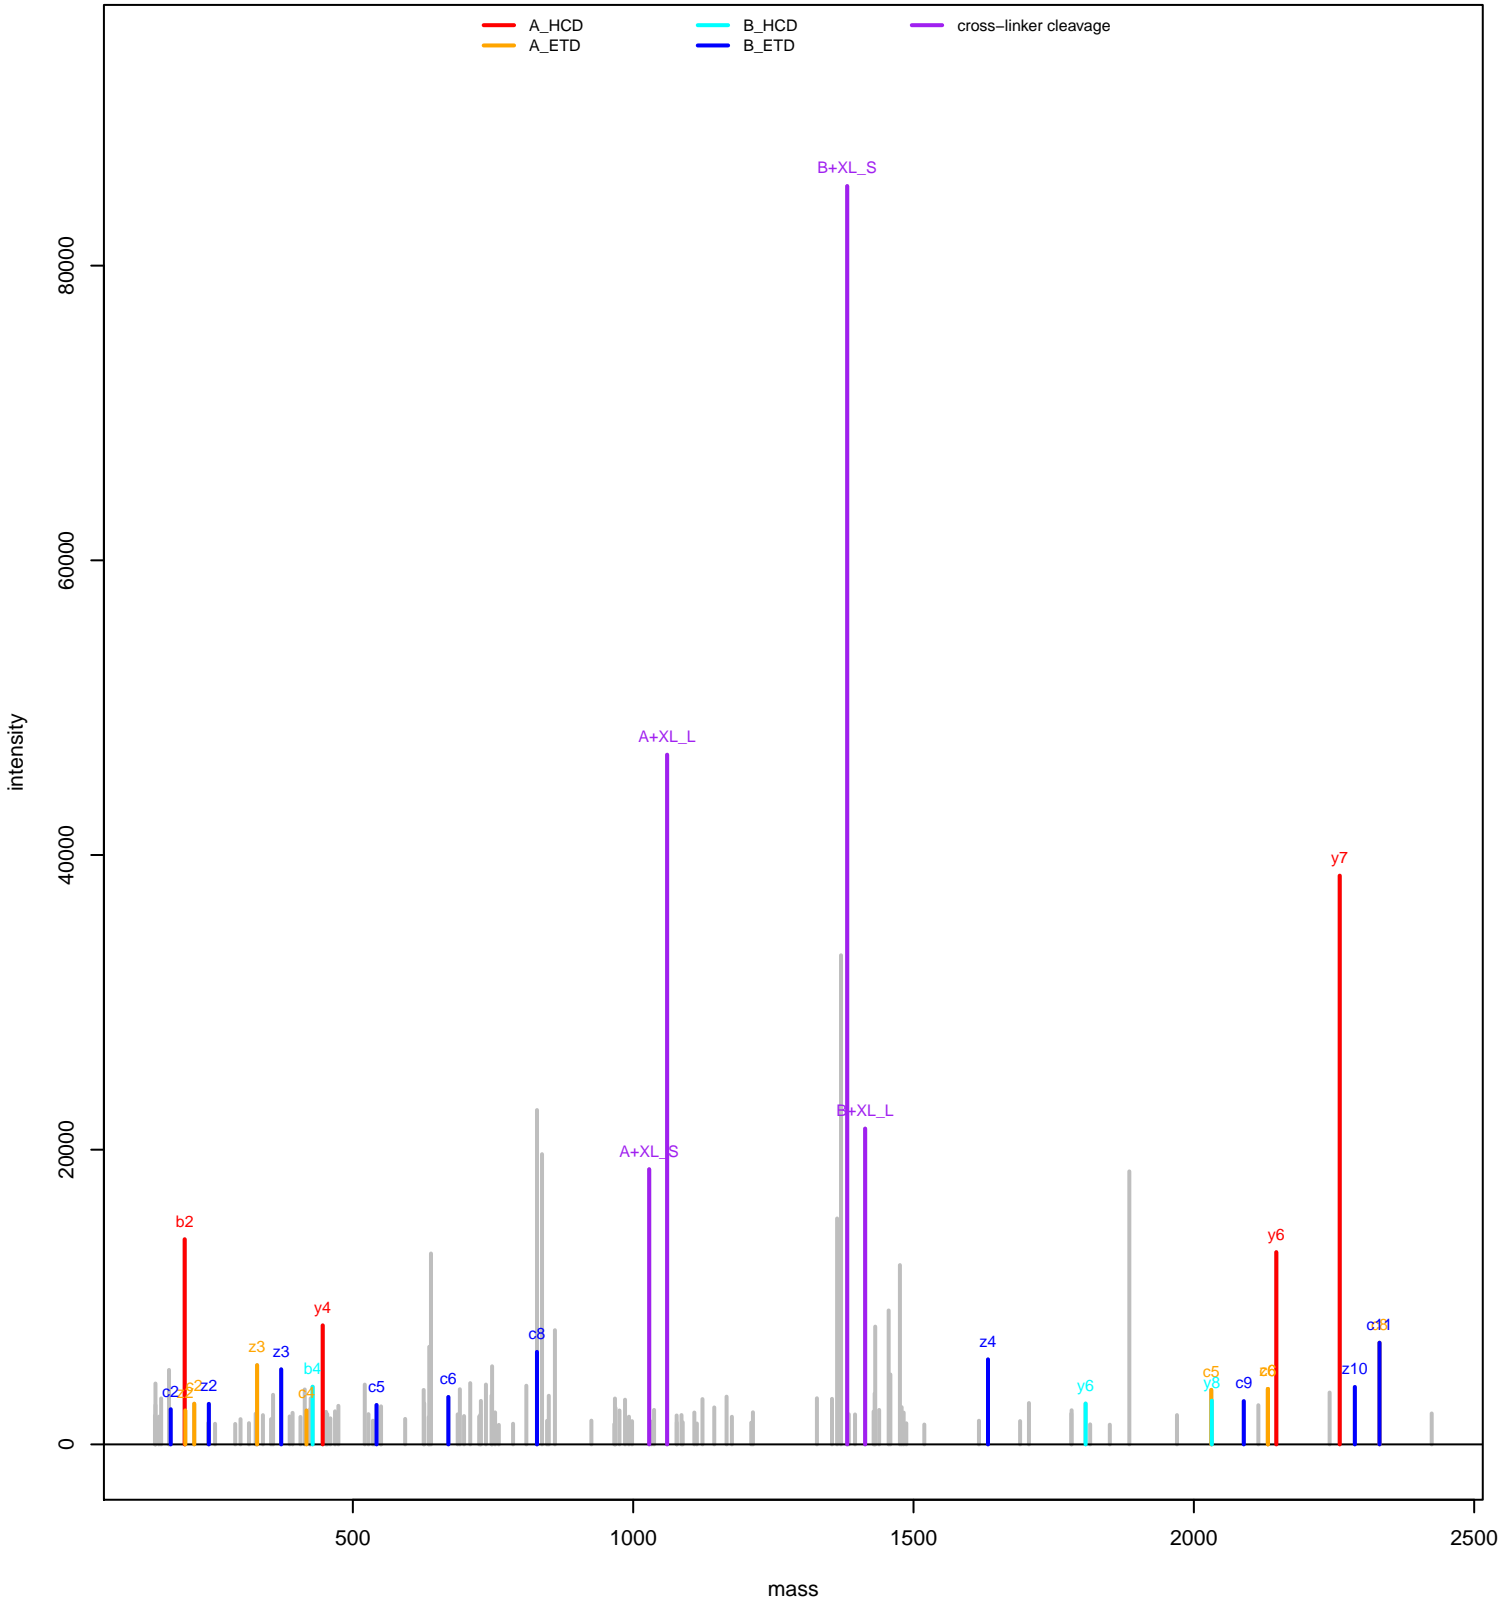

**AELSKTQAK+XL\_S**

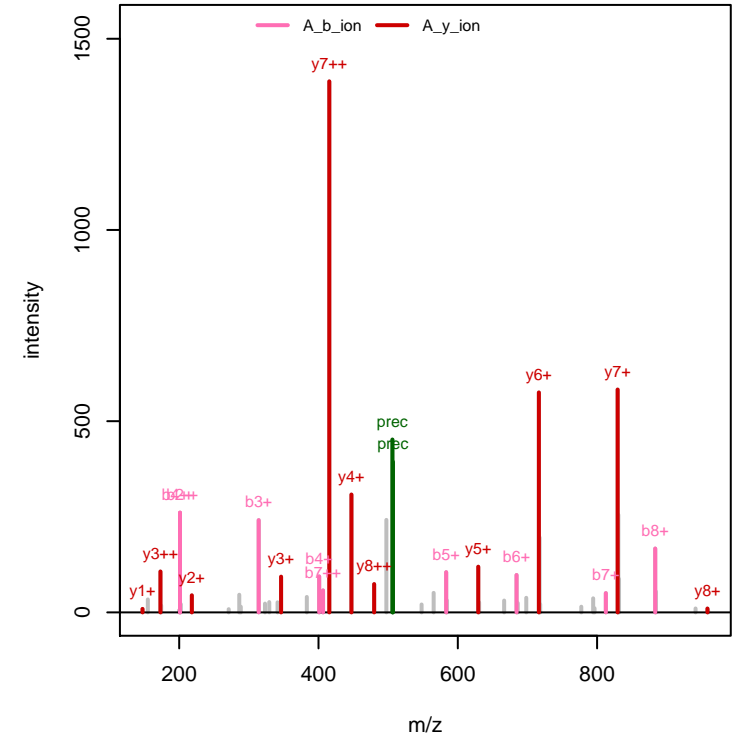

**AELSKTQAK+XL\_L**

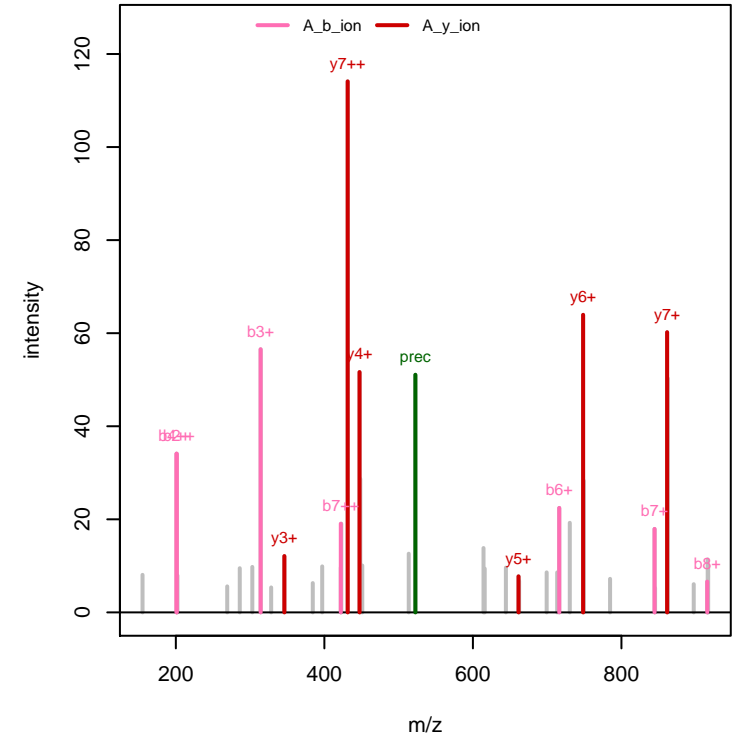

**TGRNPQTGKEIK+XL\_S**

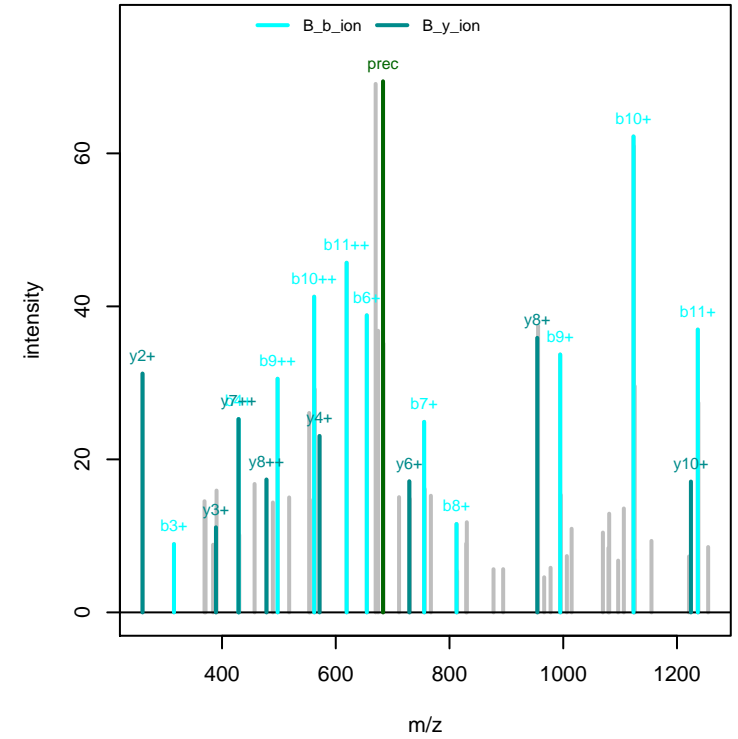

**TGRNPQTGKEIK+XL\_L**

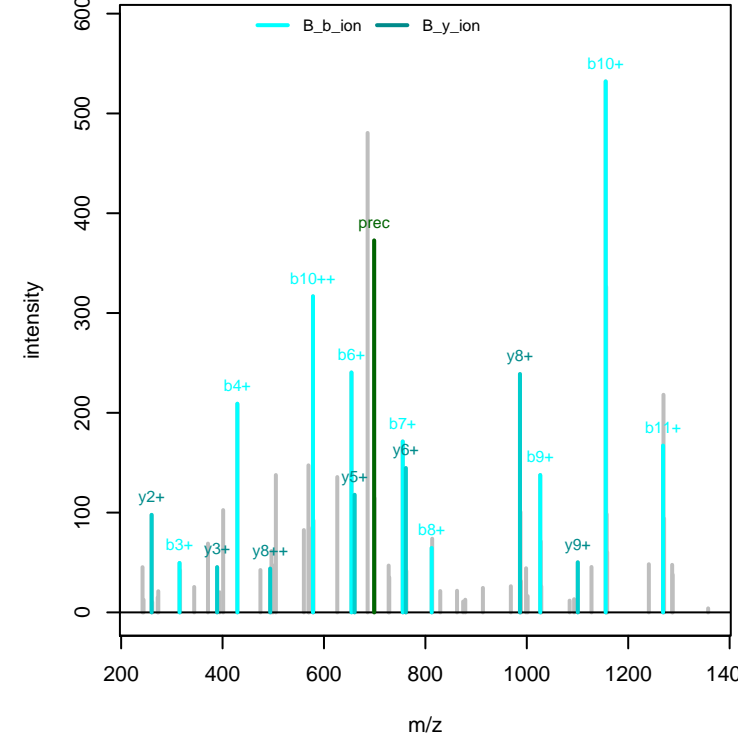

**SGAIKAAK**  
**KAGNVAADGVIK**

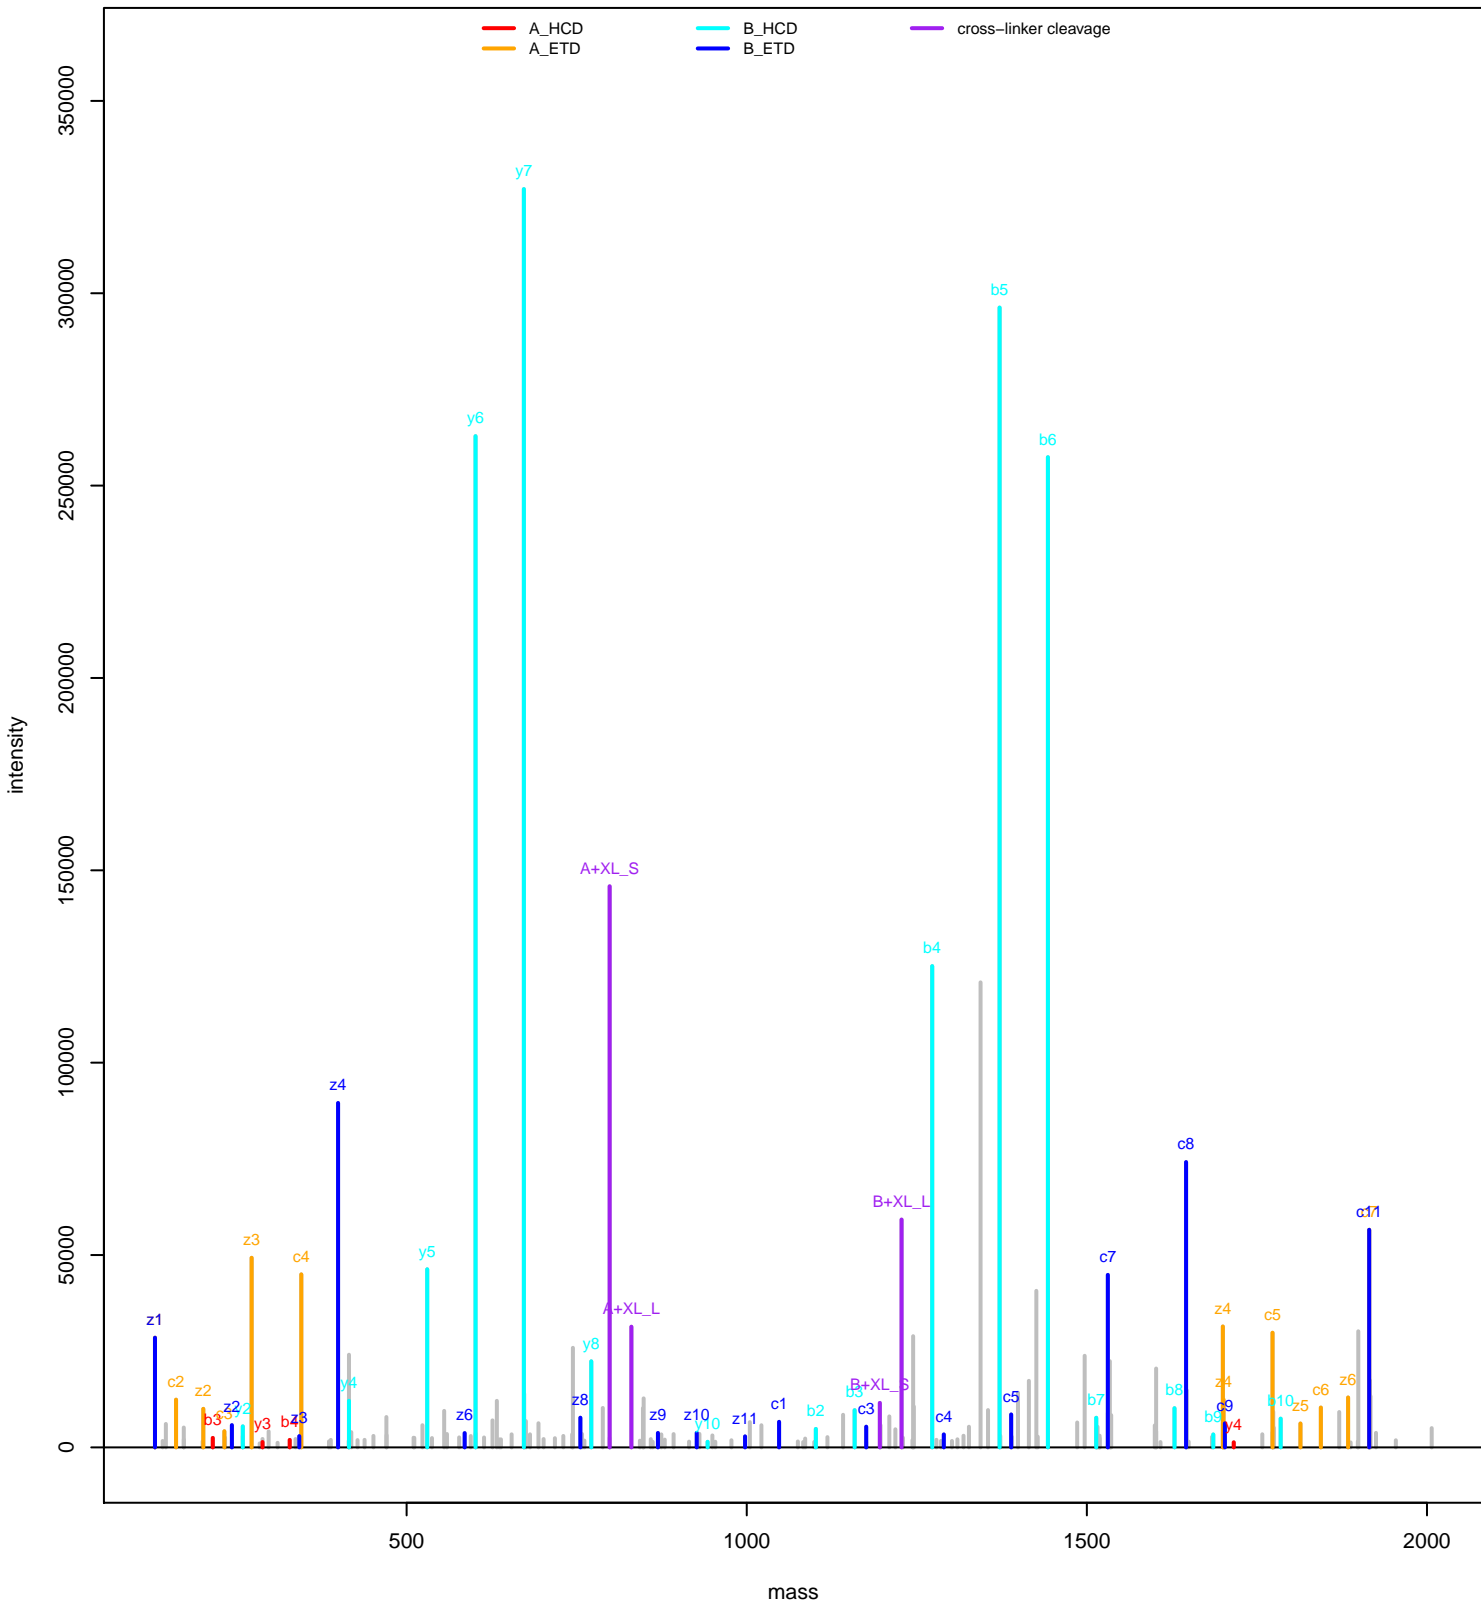

**SGAIKAAK+XL\_S**

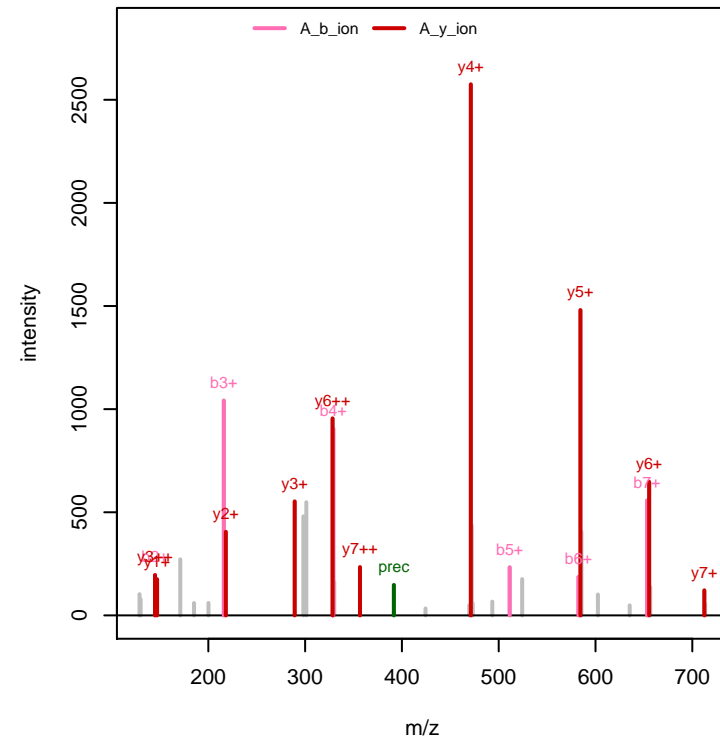

**SGAIKAAK+XL\_L**

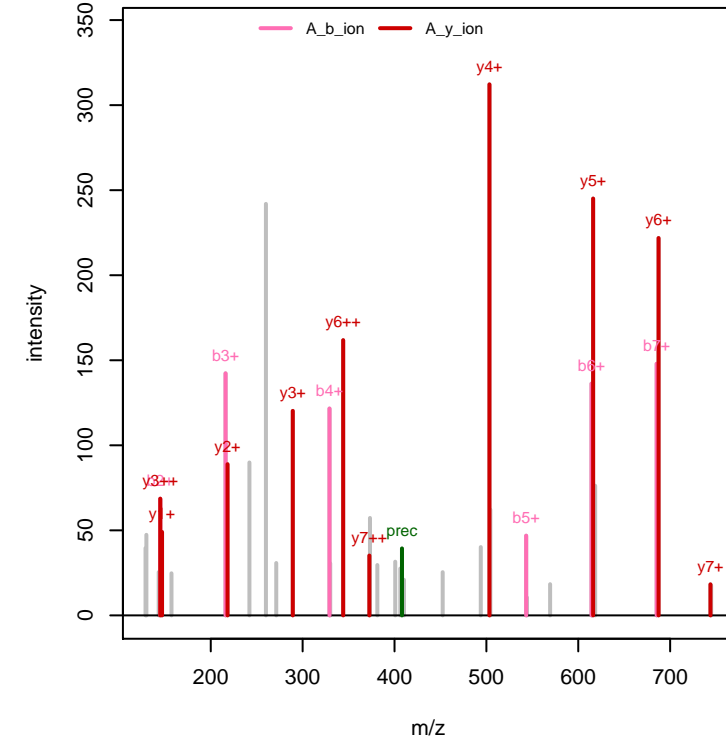

**KAGNVAADGVIK+XL\_S**

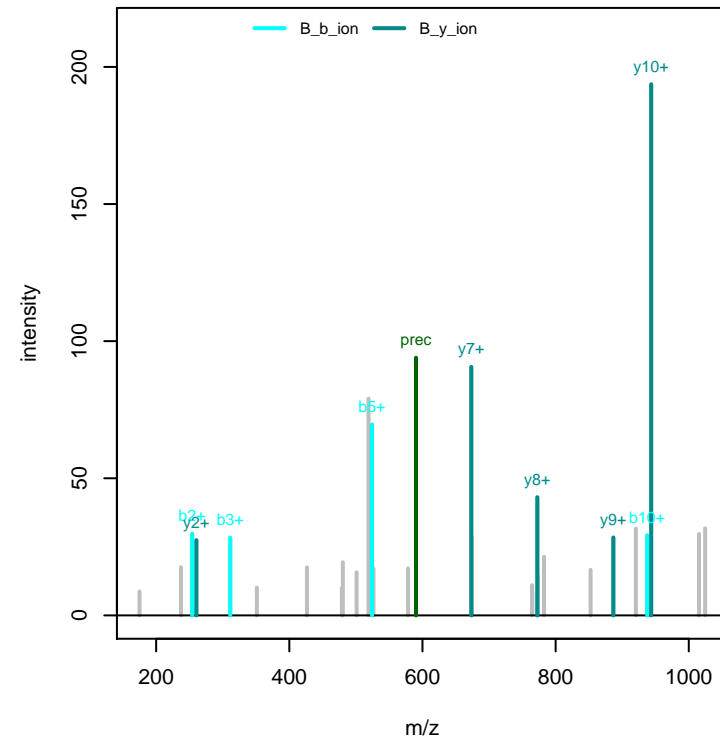

**KAGNVAADGVIK+XL\_L**

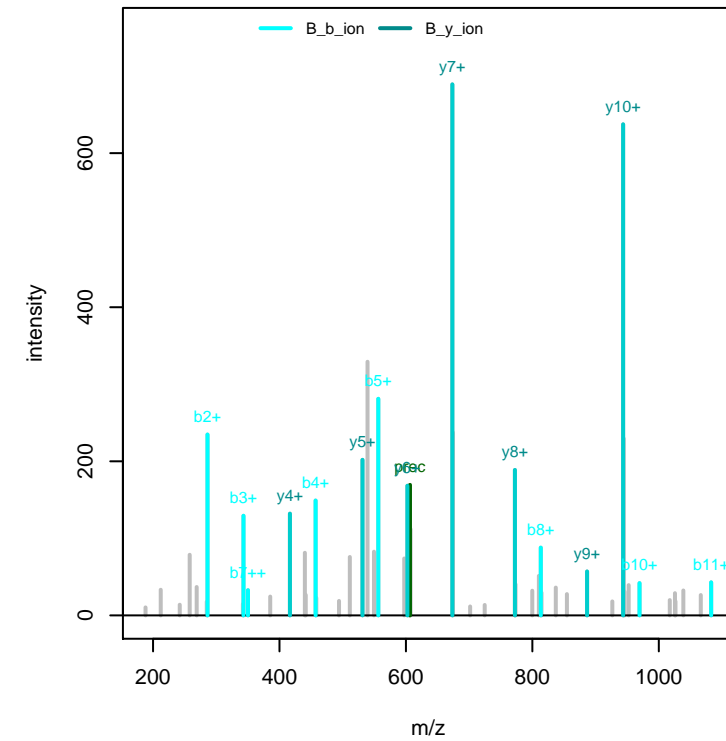

TSKTPGR  
ADKLASGAR

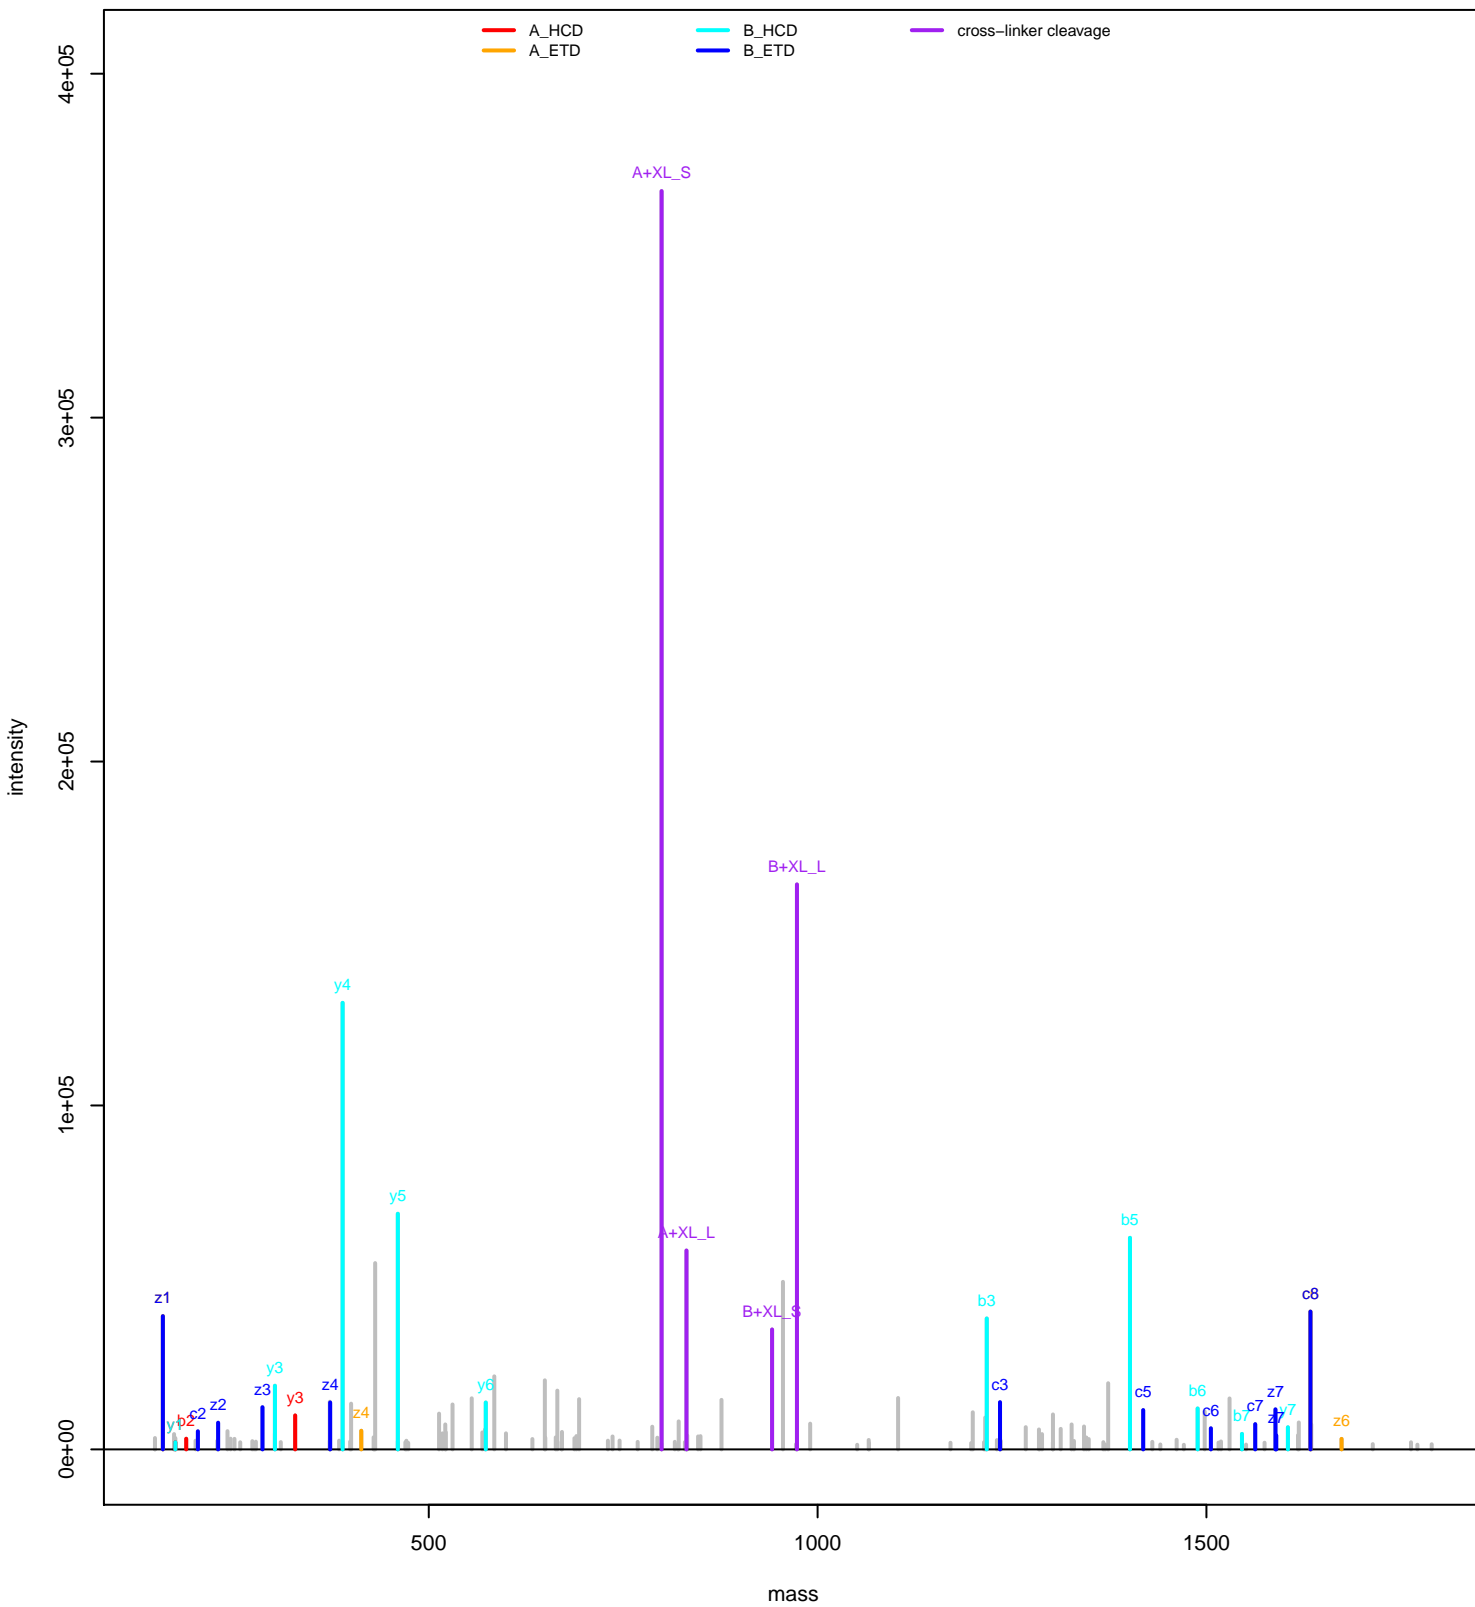

TSKTPGR+XL\_S

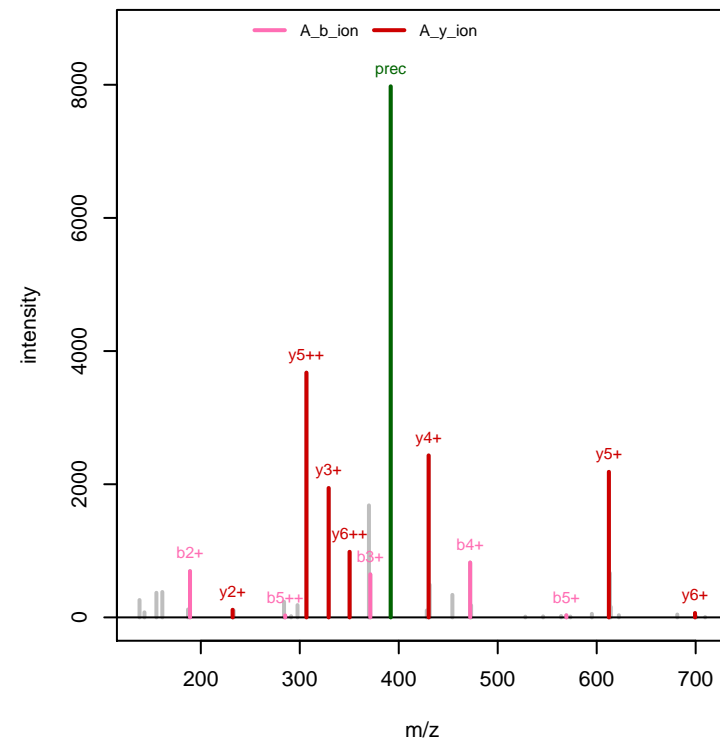

TSKTPGR+XL\_L

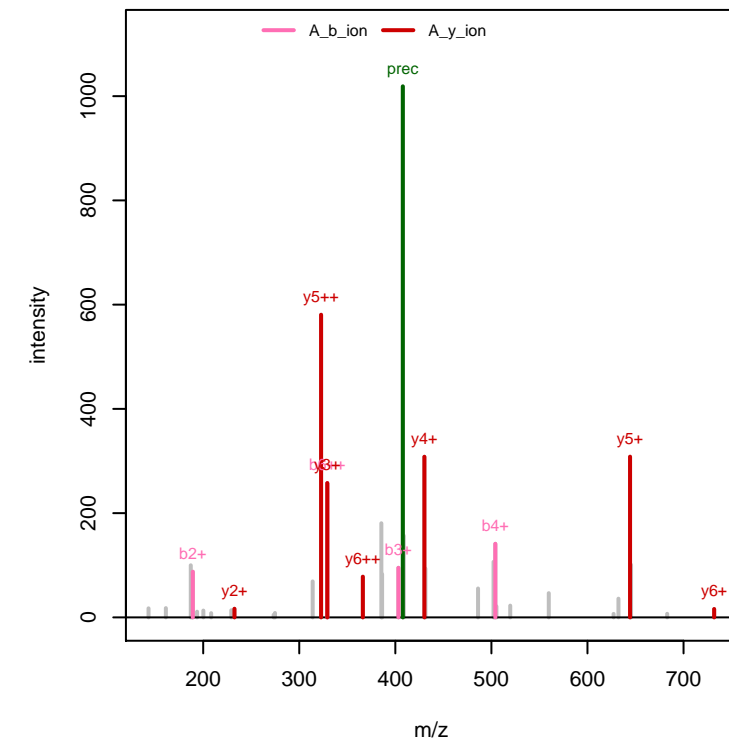

ADKLASGAR+XL\_S

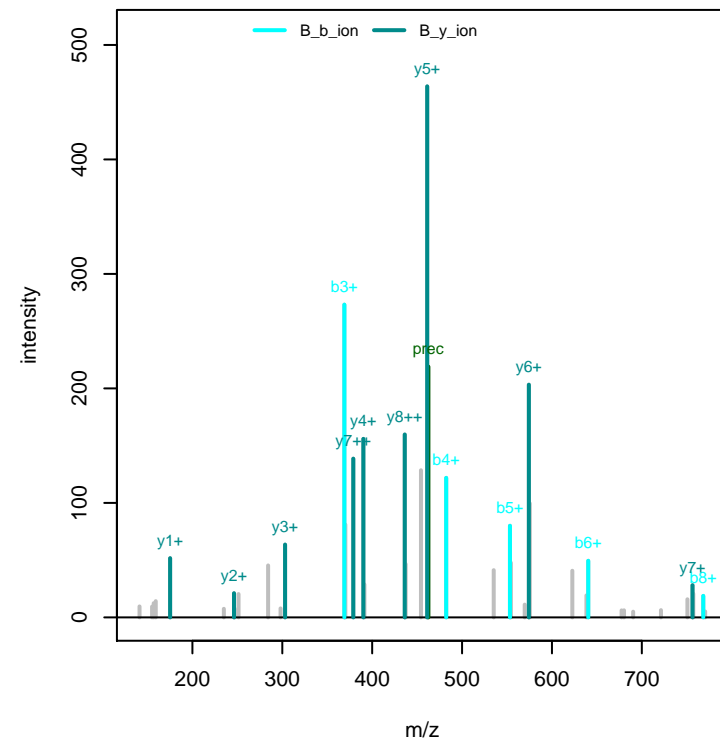

ADKLASGAR+XL\_L

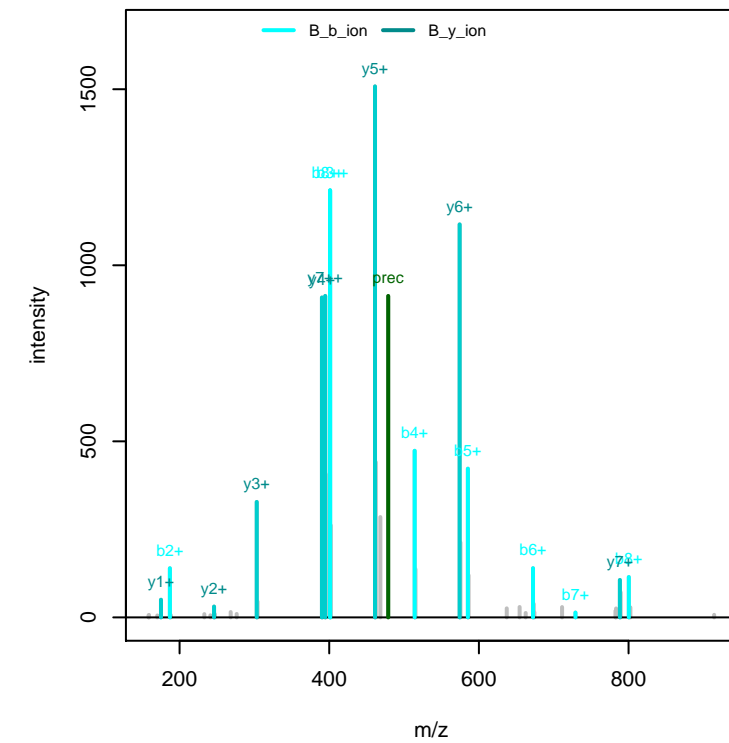

DKDALTR  
IIVVTSGKGGVGK

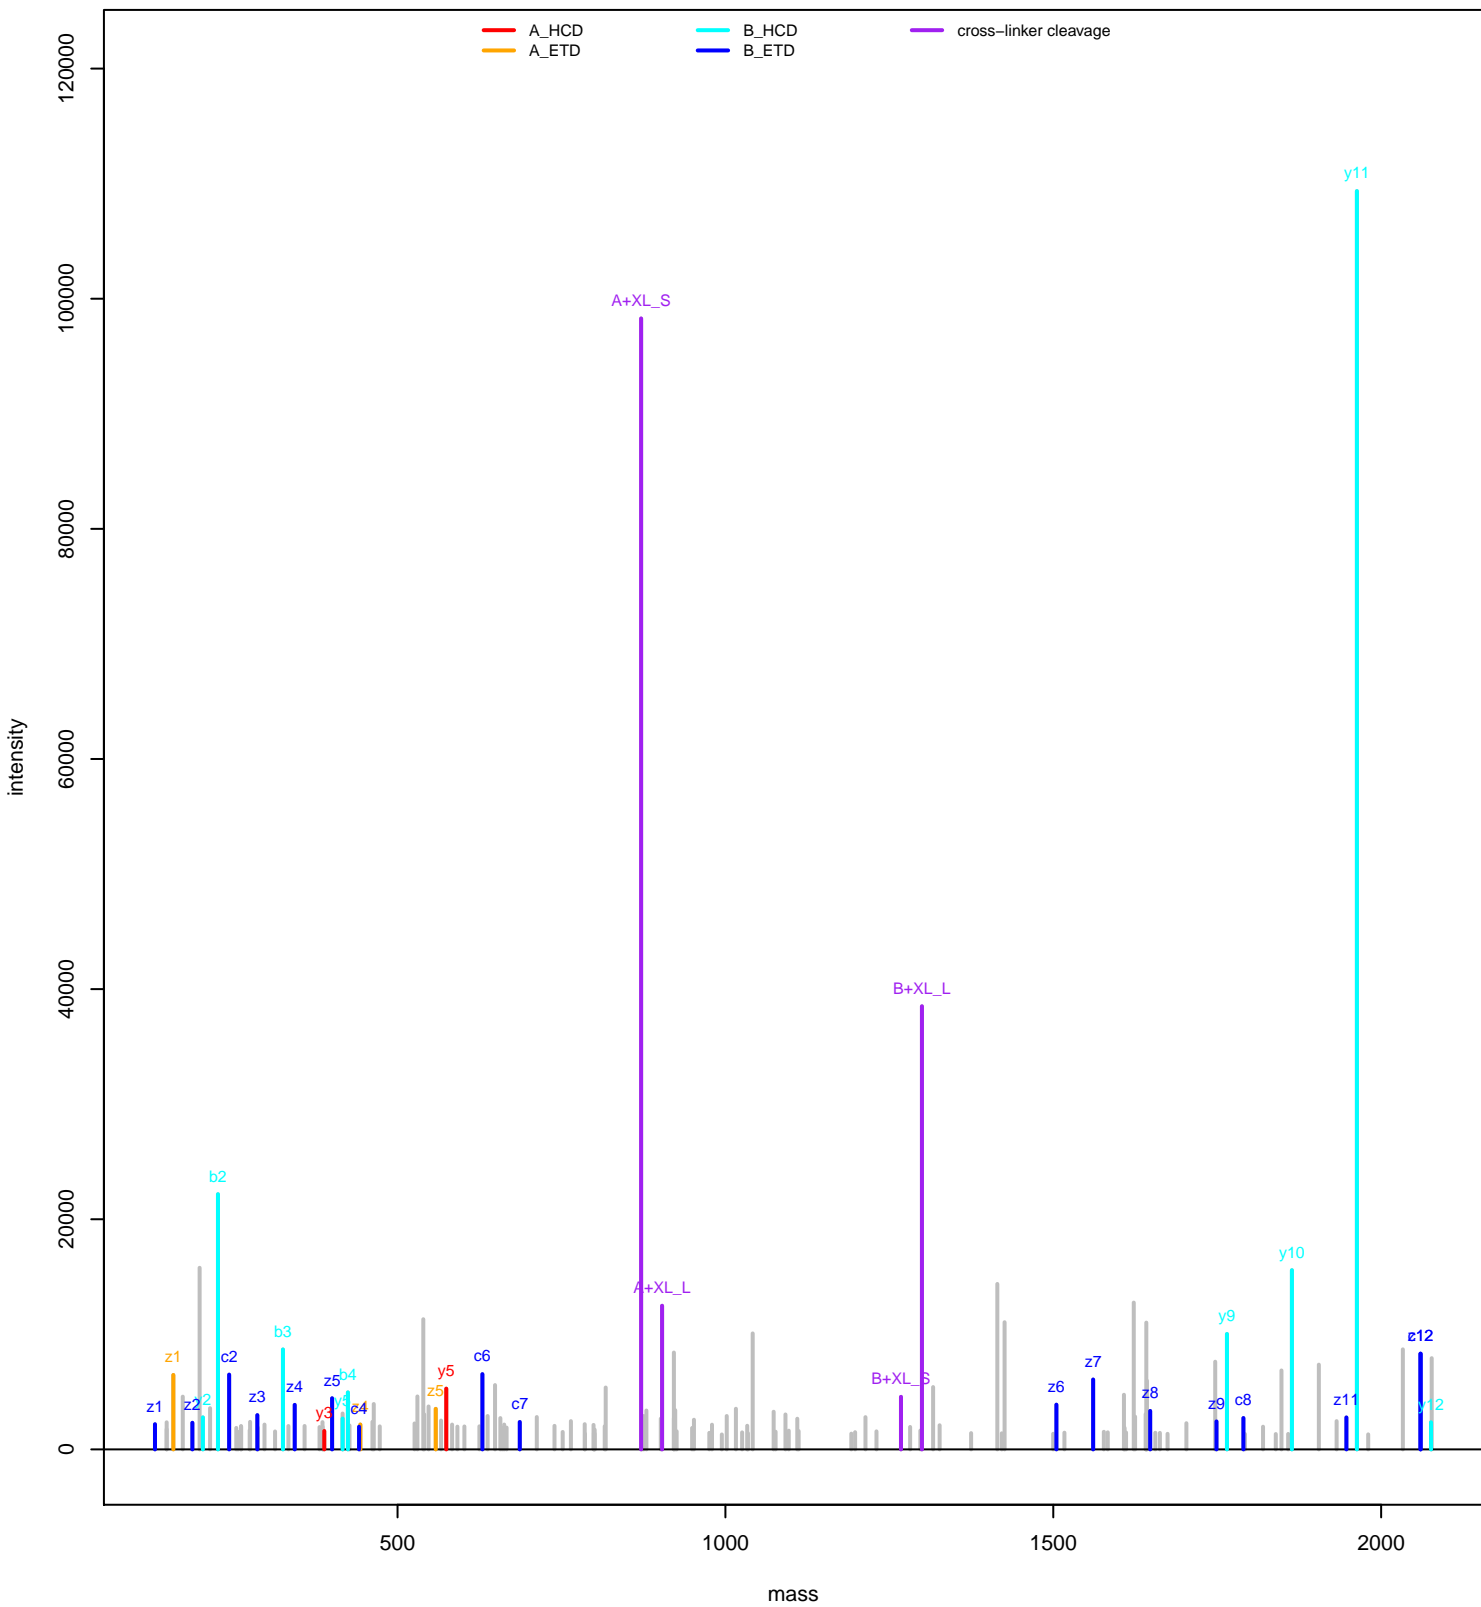

DKDALTR+XL\_S

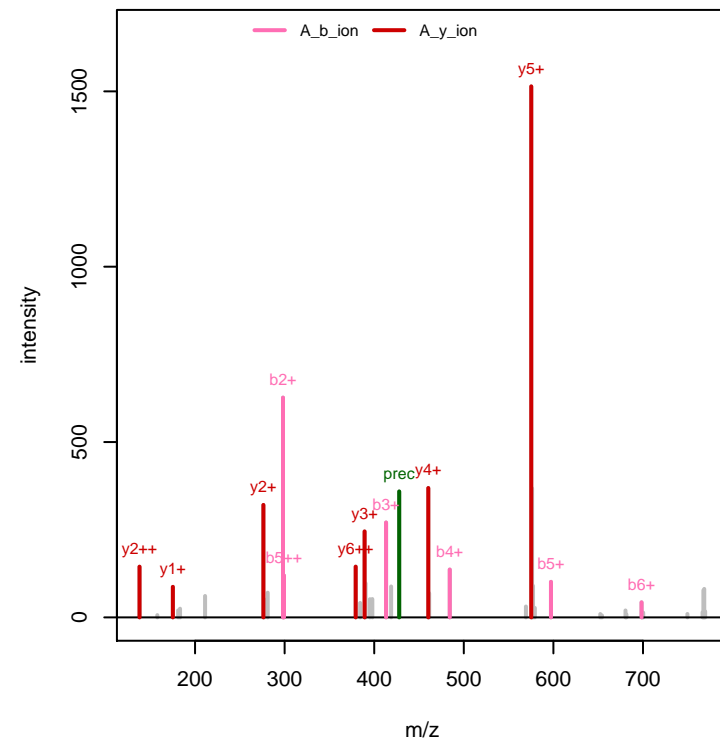

DKDALTR+XL\_L

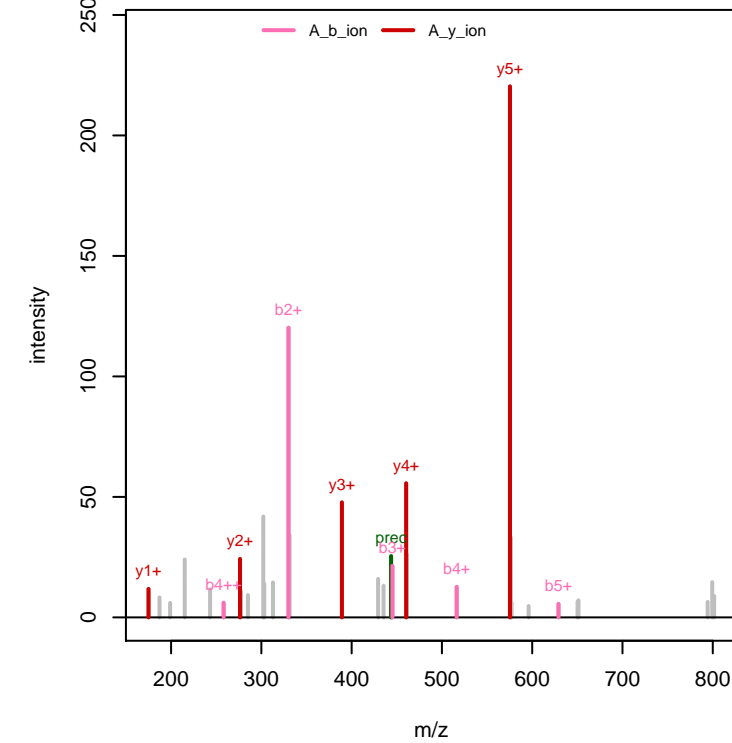

IIVVTSGKGGVGK+XL\_S

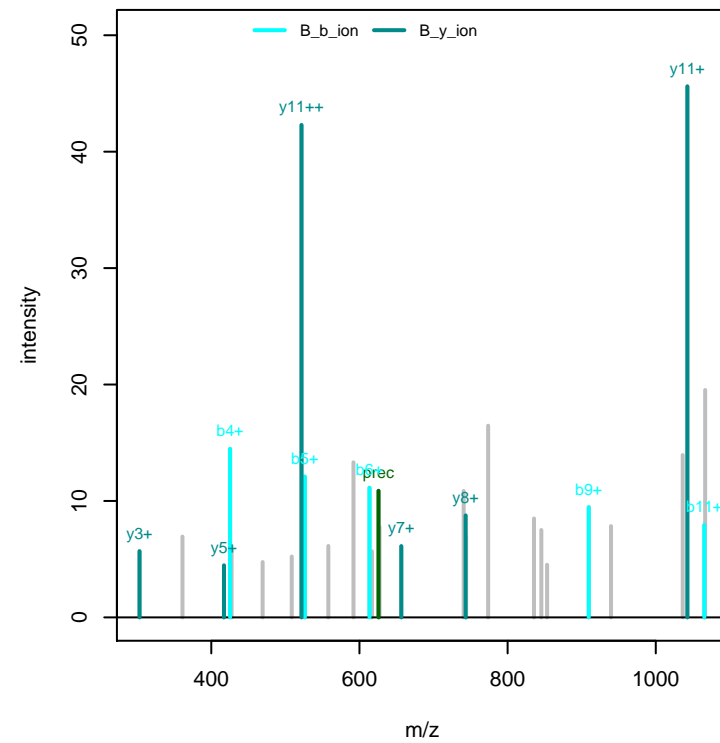

IIVVTSGKGGVGK+XL\_L

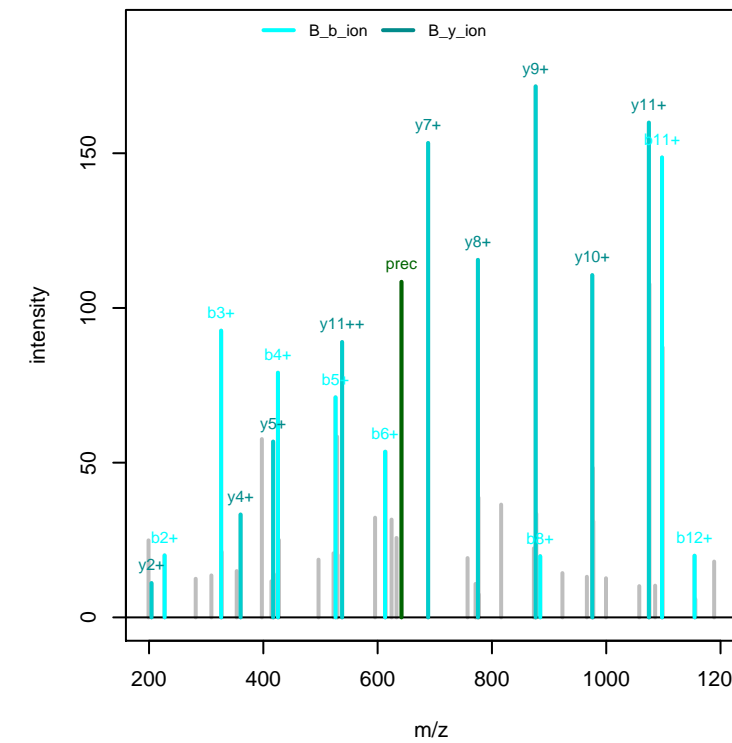

**KAQHNENNK  
AAEVEKELQR**

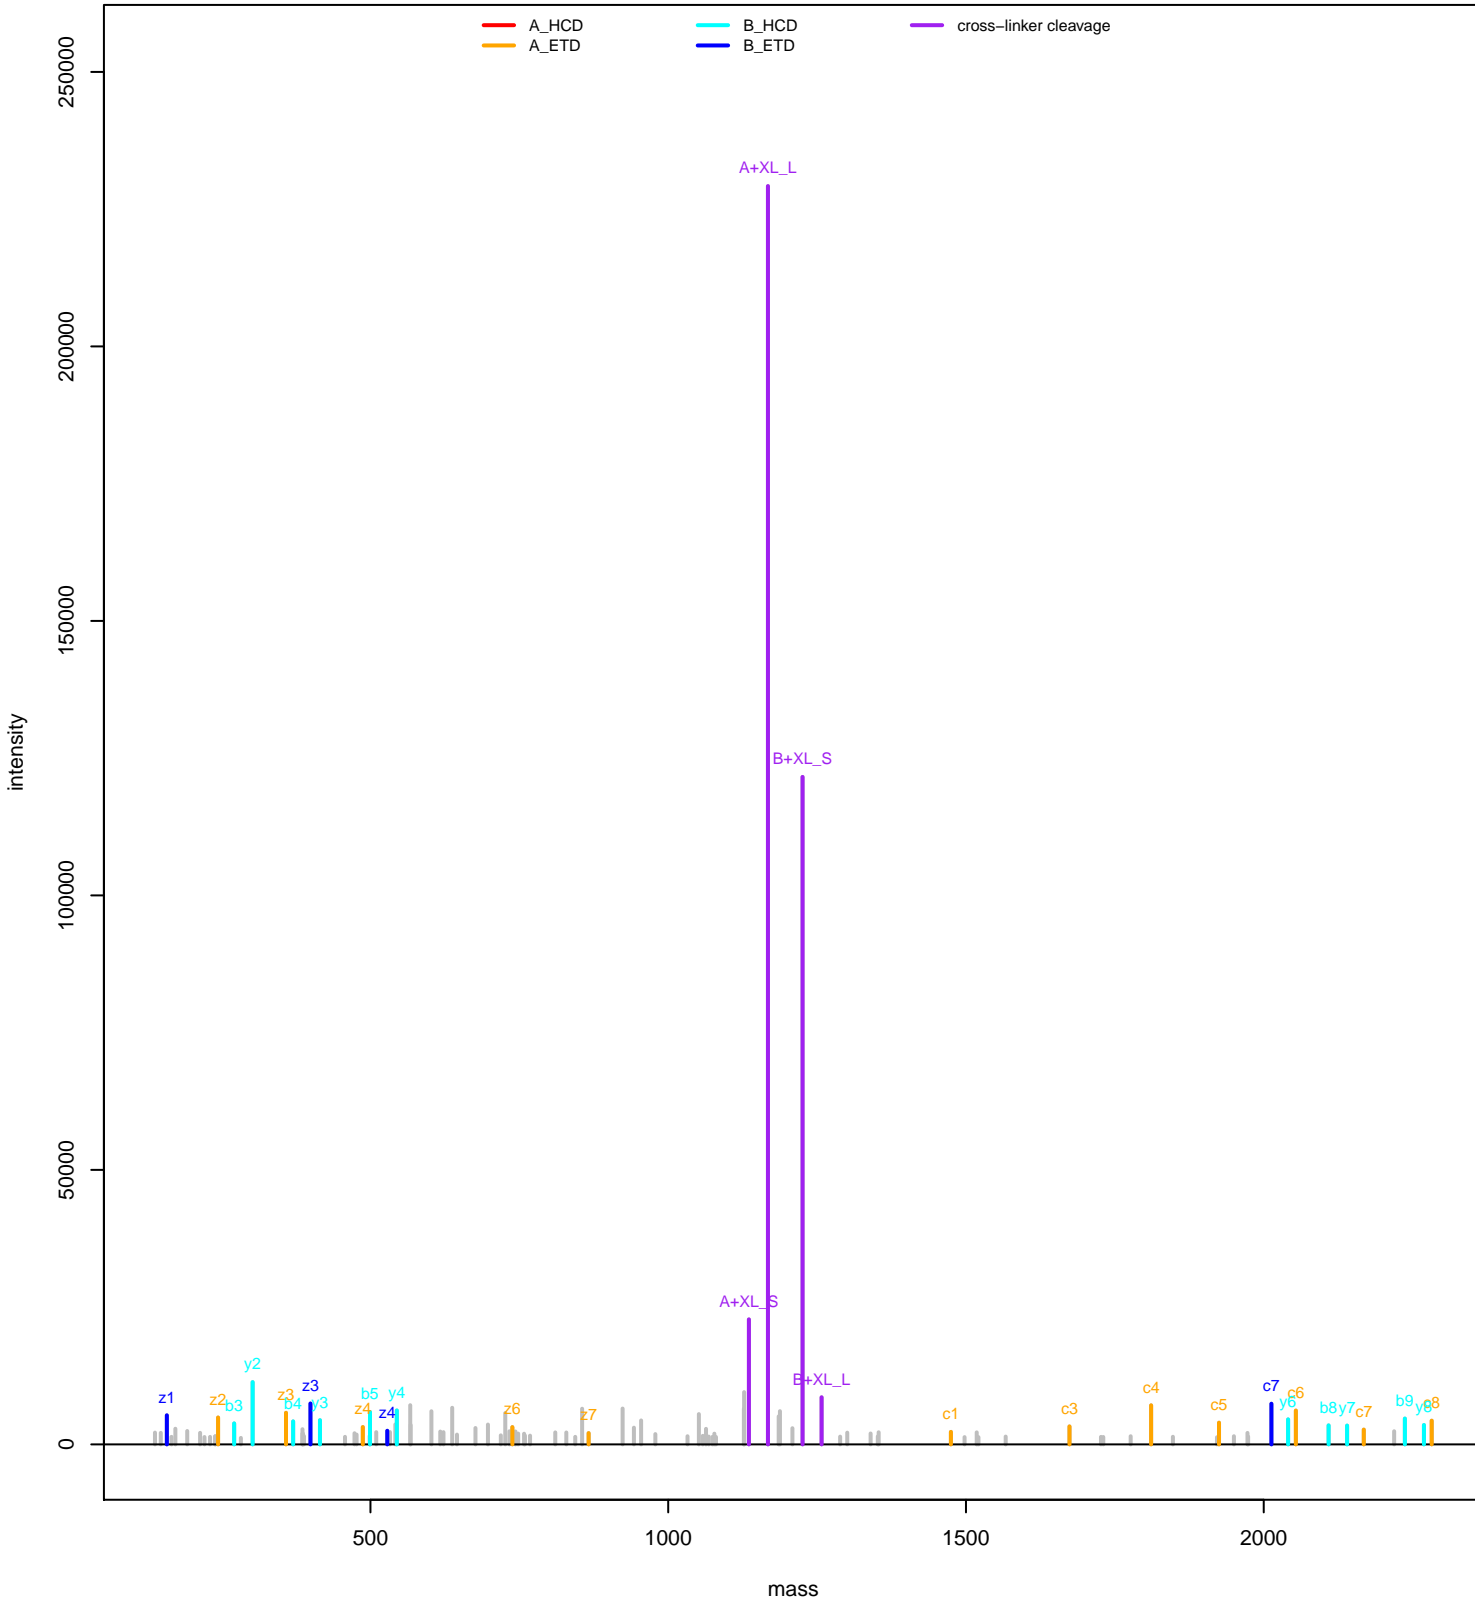

**KAQHNENNK+XL\_S**

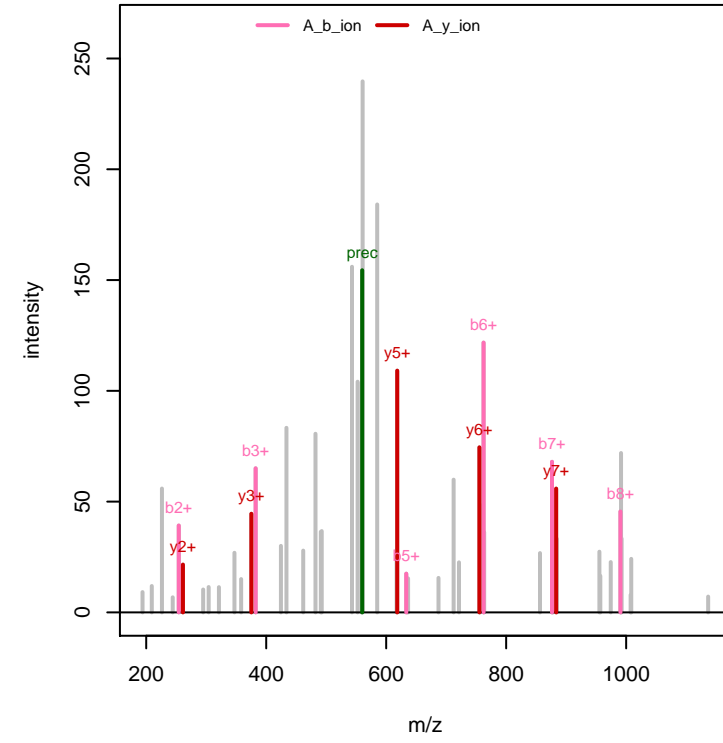

**KAQHNENNK+XL\_L**

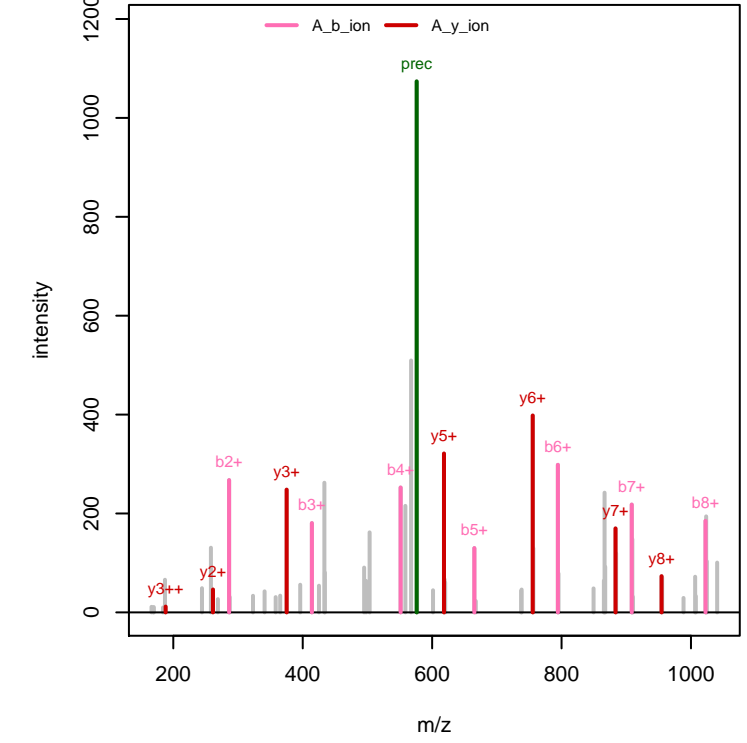

**AAEVEKELQR+XL\_S**

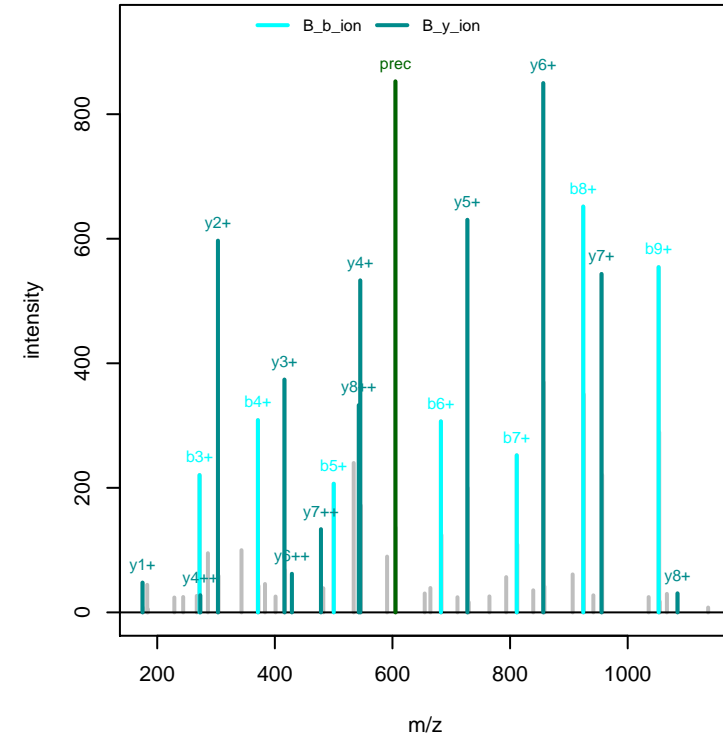

**AAEVEKELQR+XL\_L**

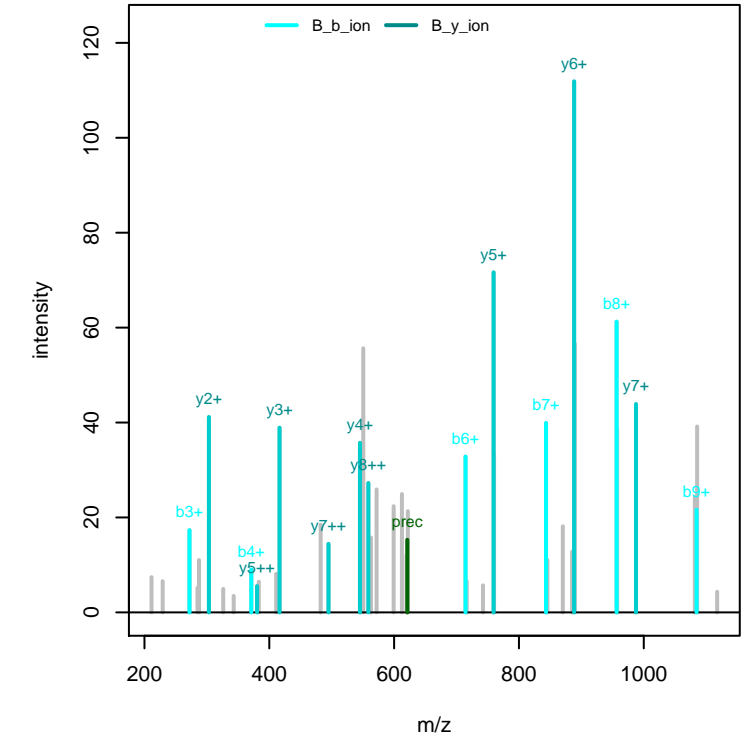

LAKAPTDGEQDR  
AKITVPVDATEEQVR

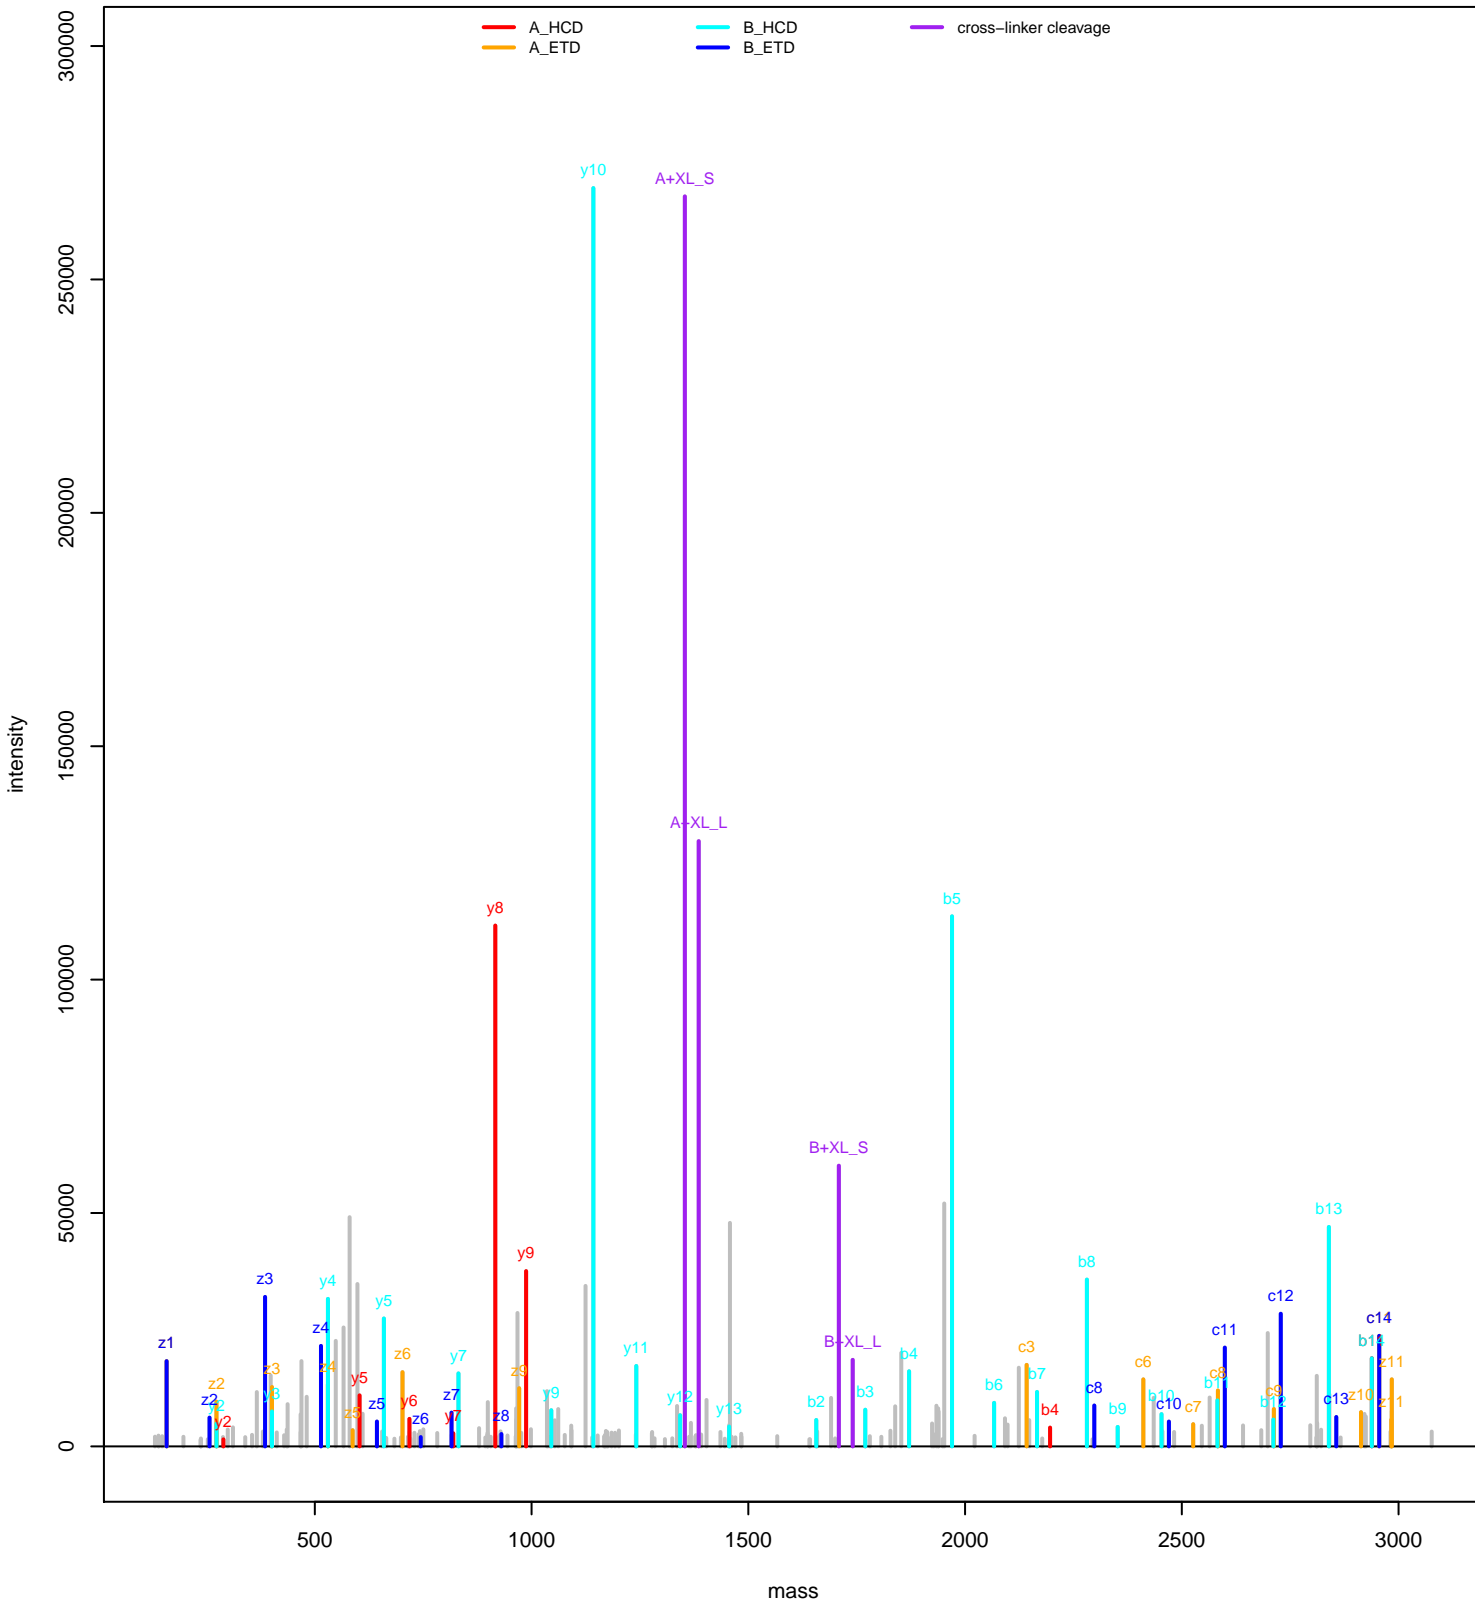

LAKAPTDGEQDR+XL\_S

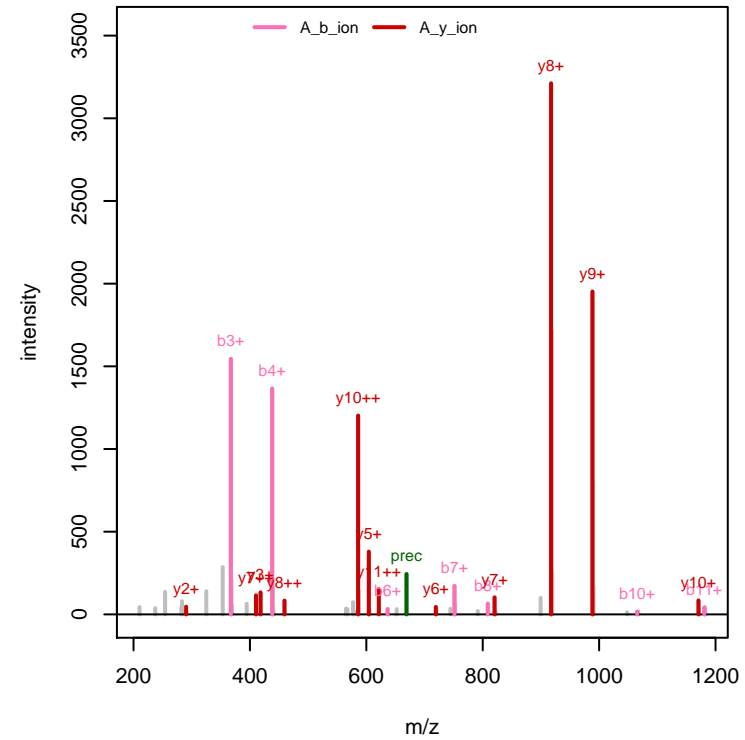

LAKAPTDGEQDR+XL\_L

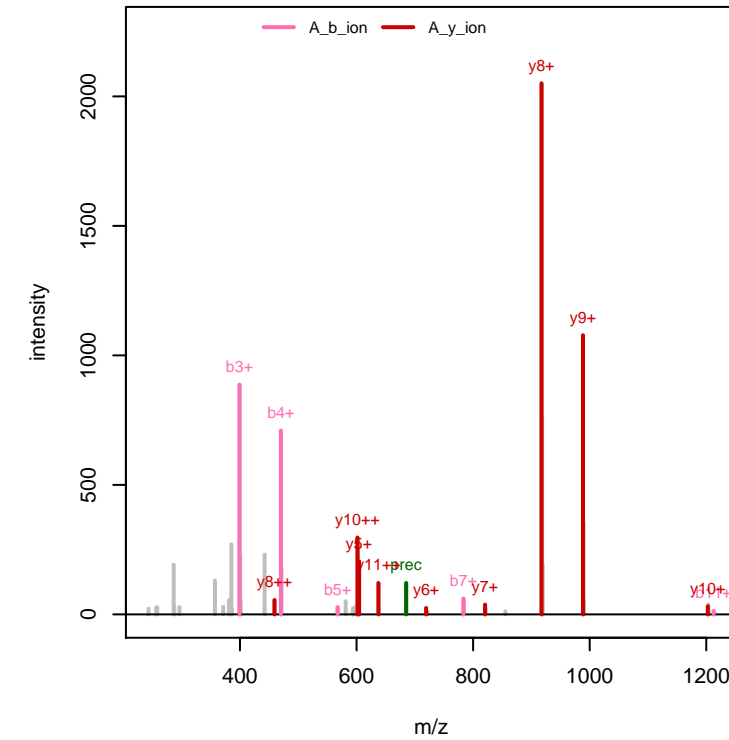

AKITVPVDATEEQVR+XL\_S

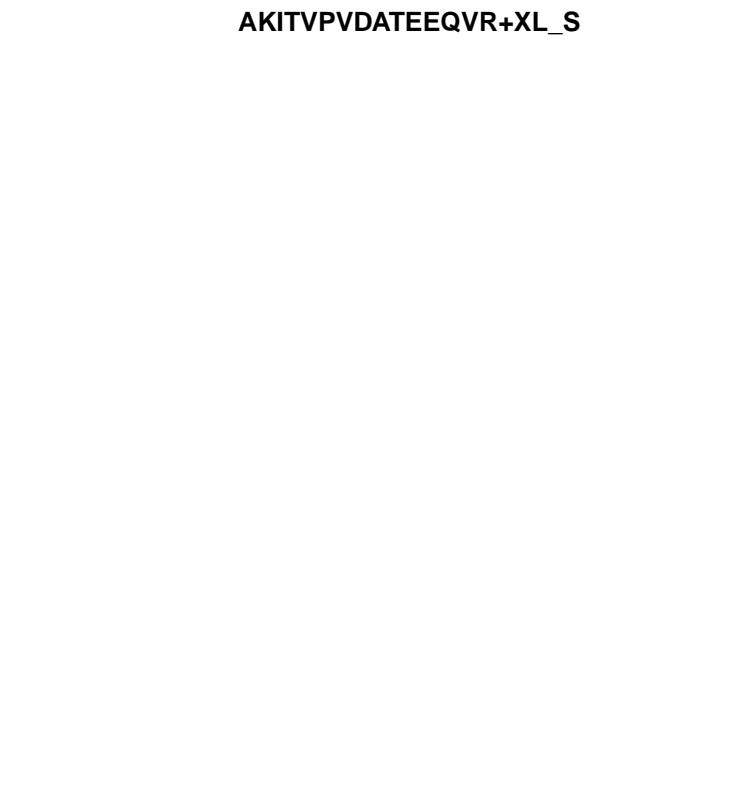

AKITVPVDATEEQVR+XL\_L

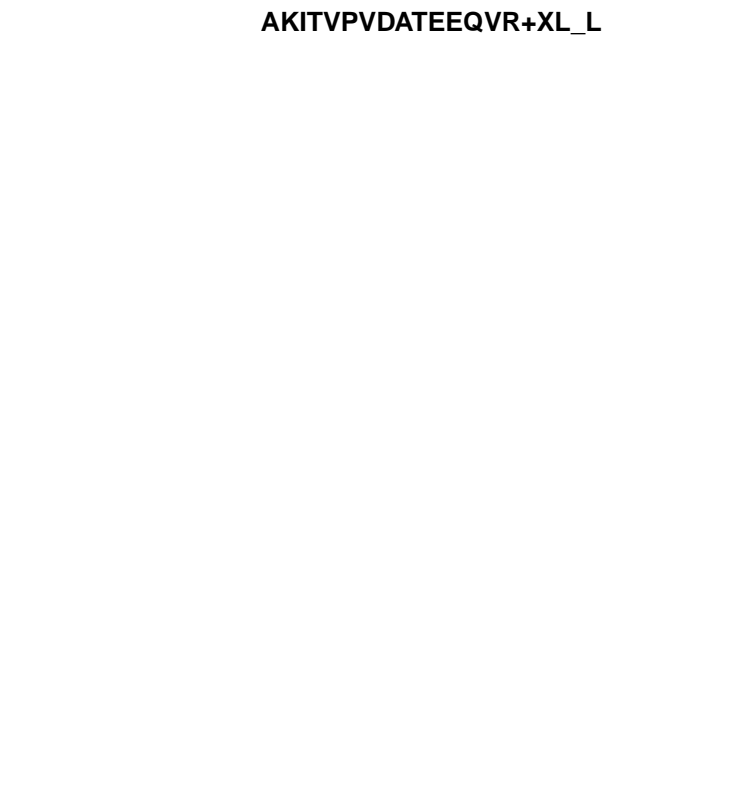

GEGDKEK  
VSTFKEGK

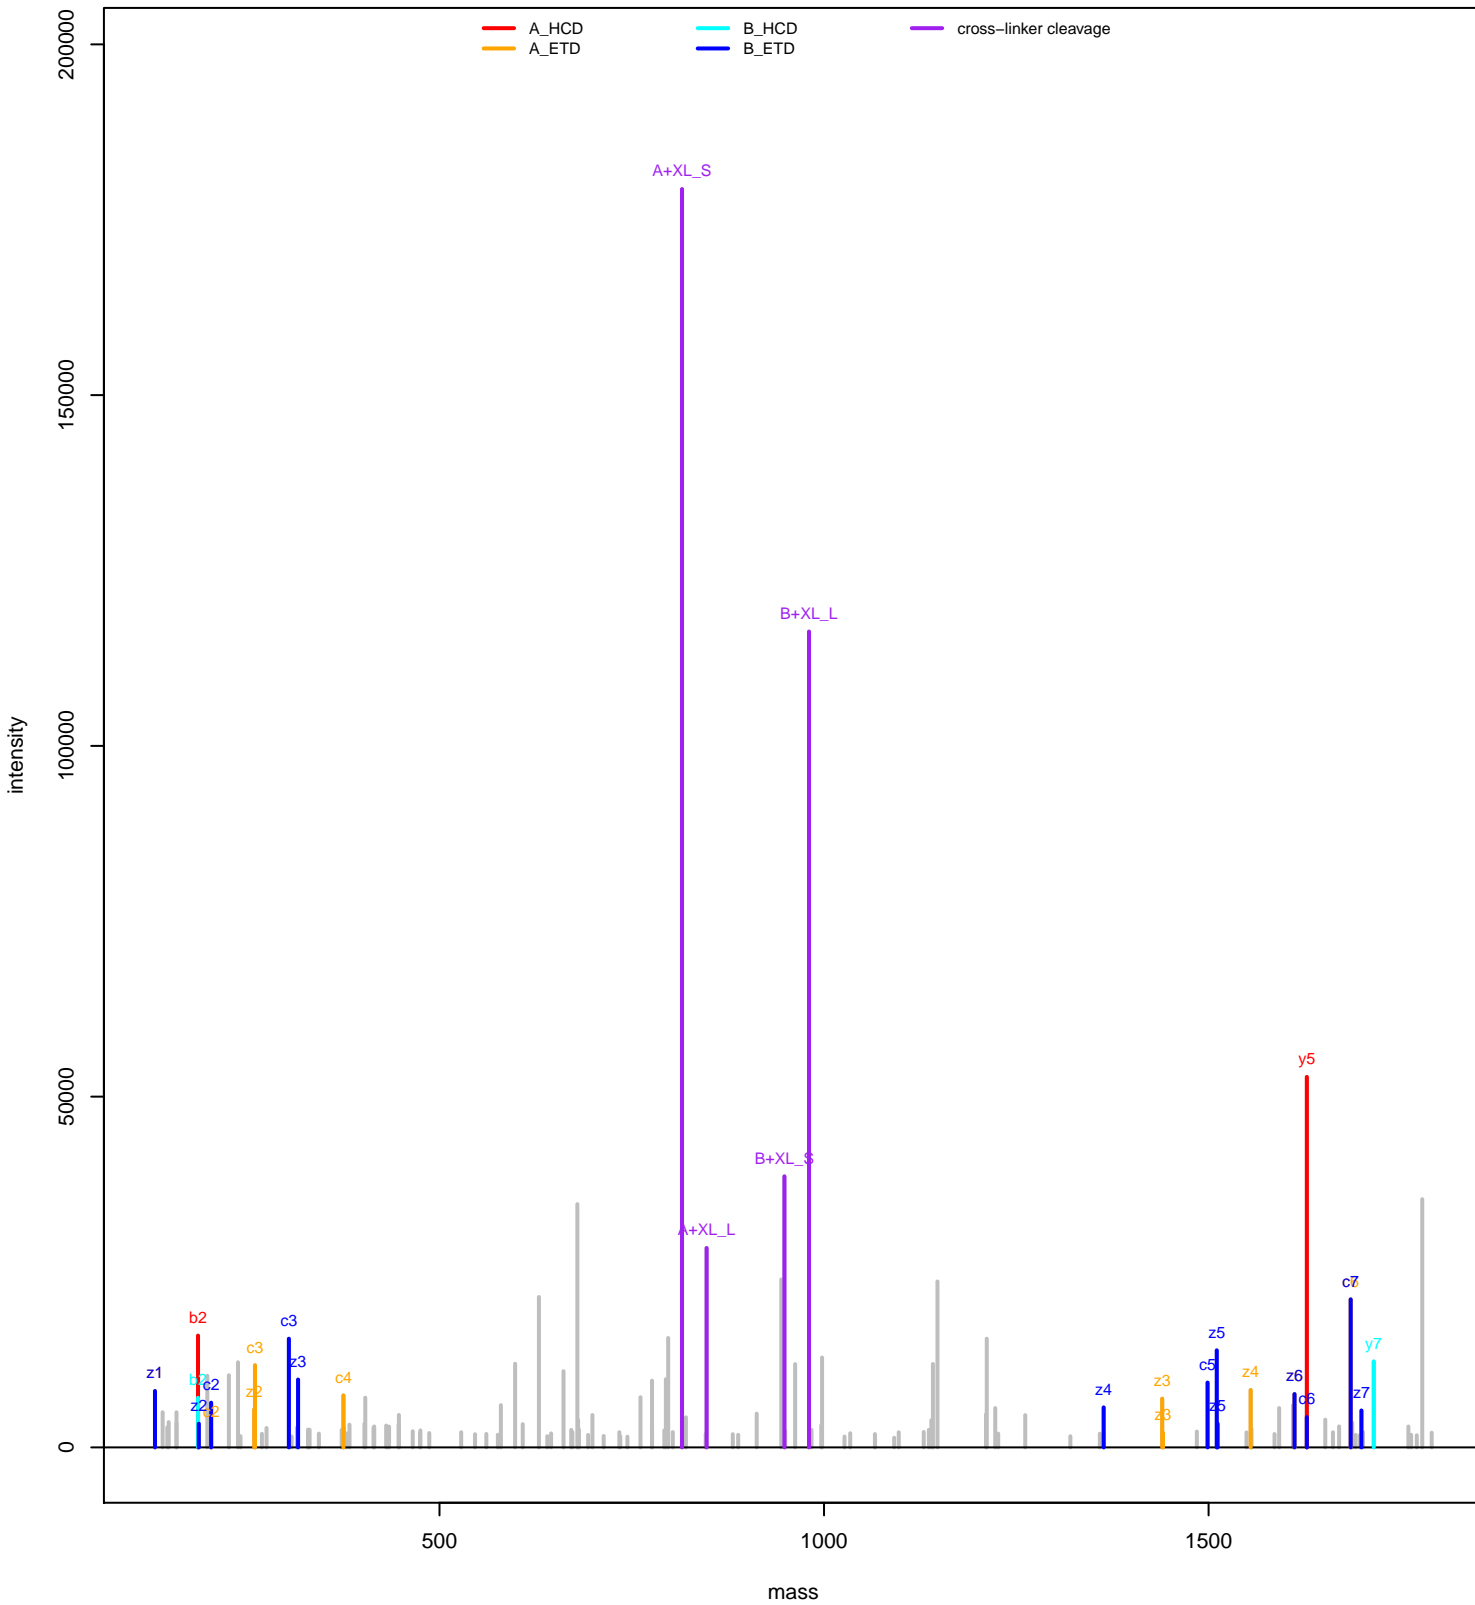

GEGDKEK+XL\_S

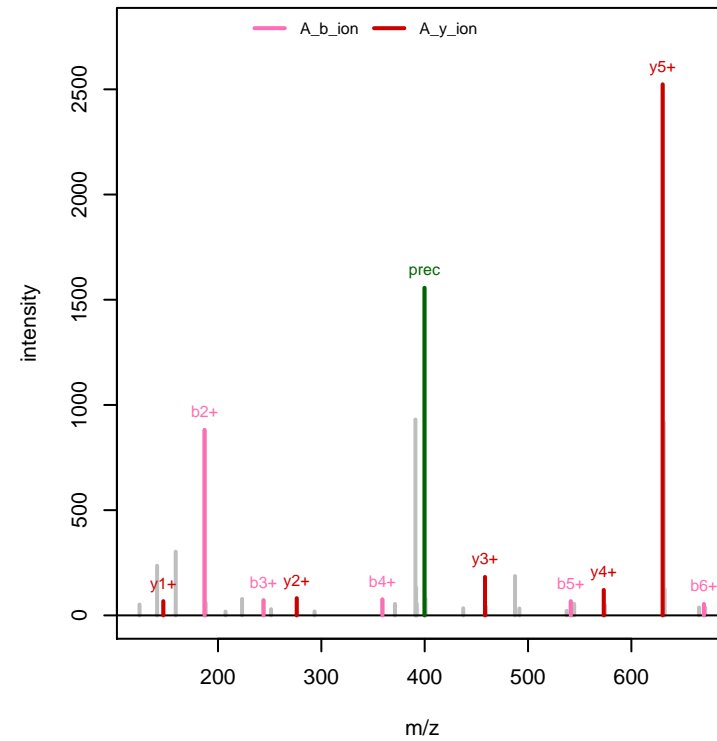

GEGDKEK+XL\_L

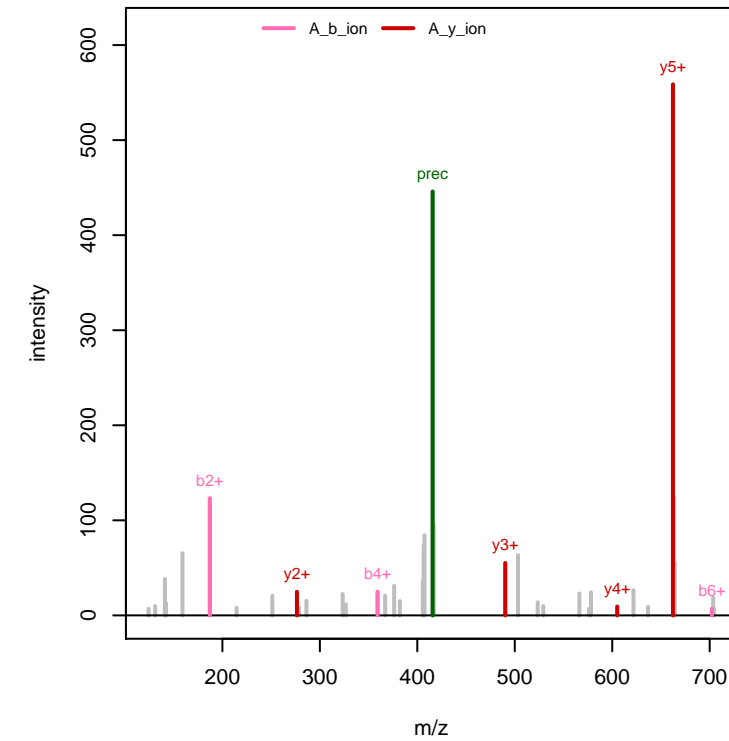

VSTFKEGK+XL\_S

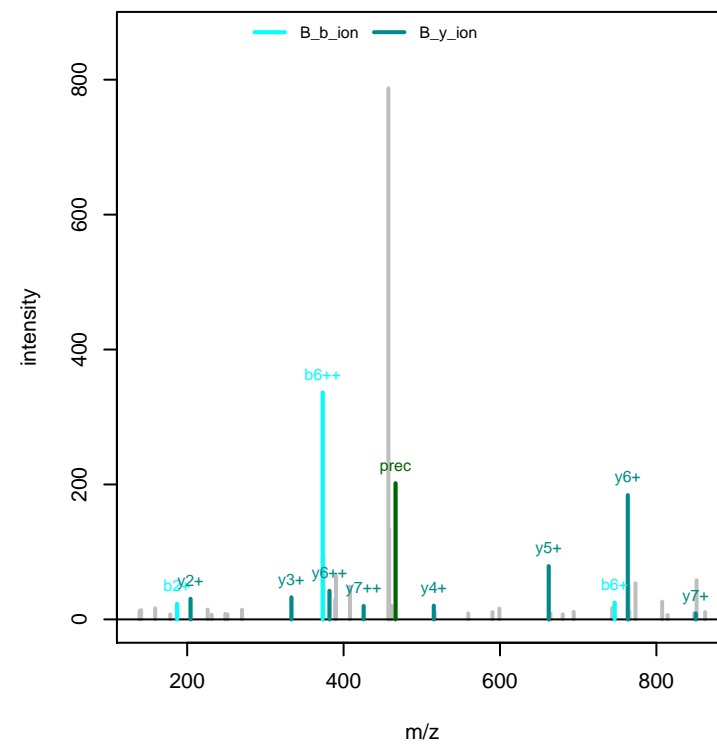

VSTFKEGK+XL\_L

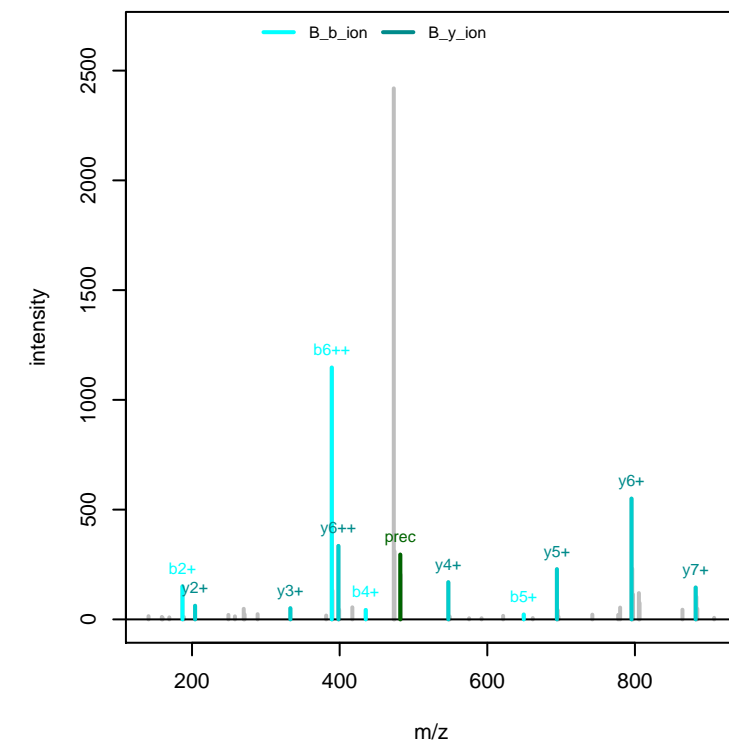

DFQKAER  
KPNACKDEQGR

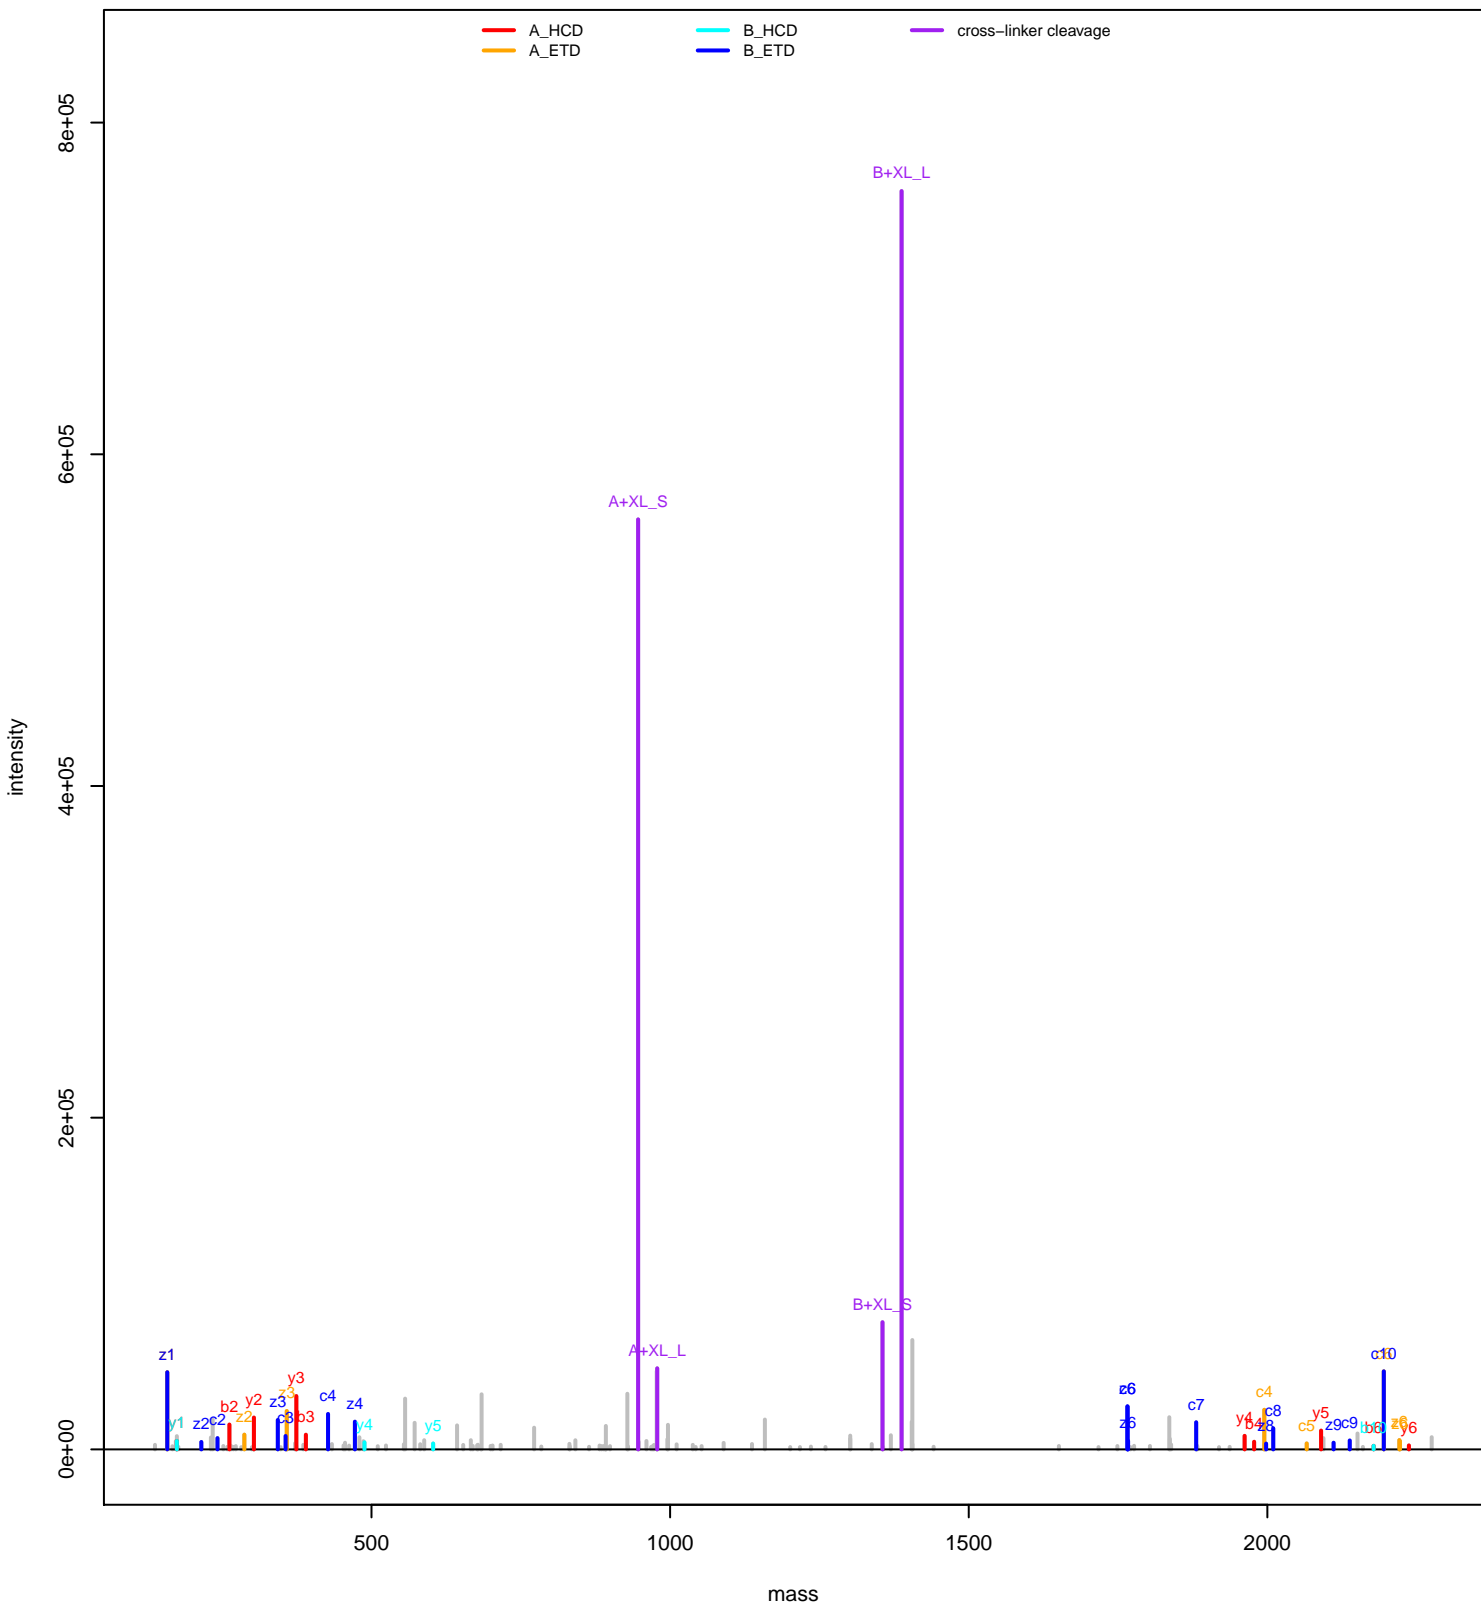

DFQKAER+XL\_S

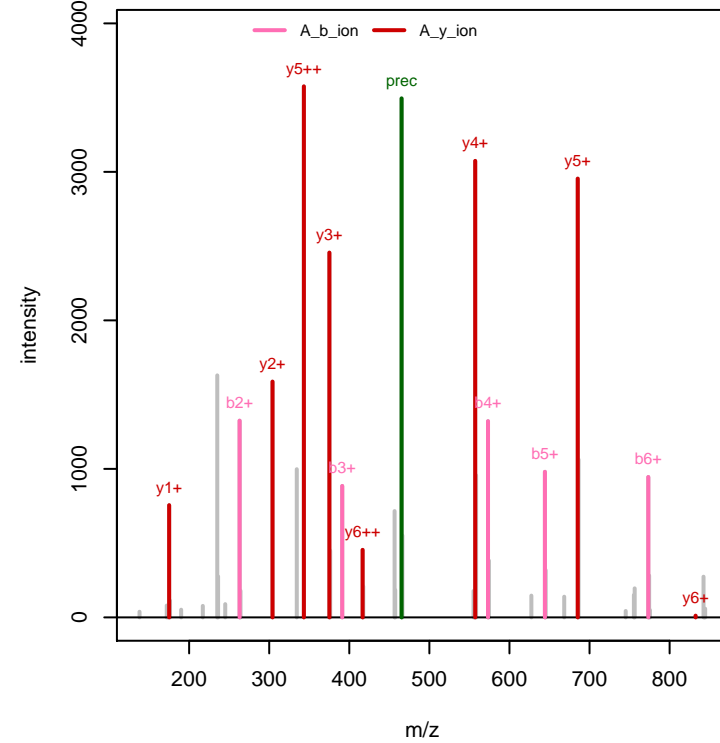

DFQKAER+XL\_L

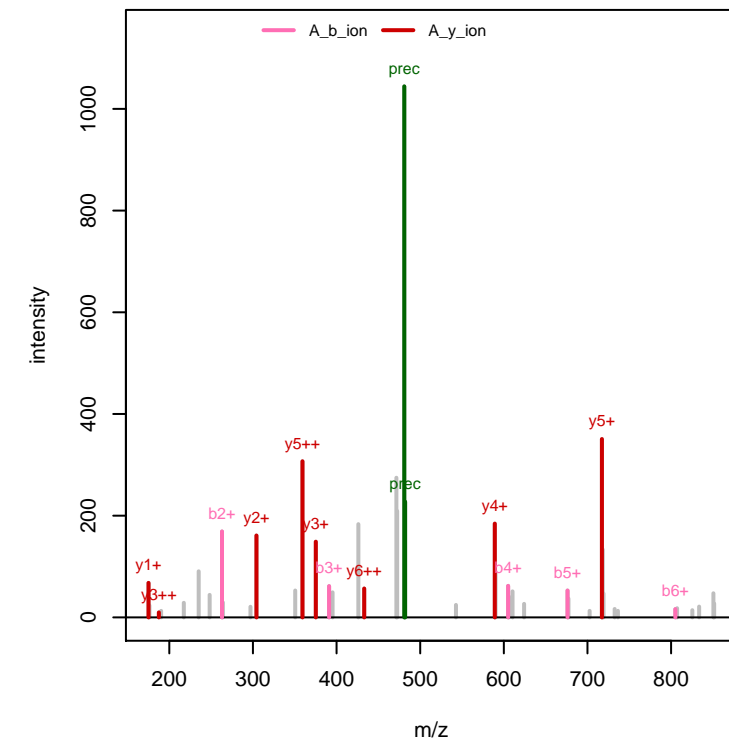

KPNACKDEQGR+XL\_S

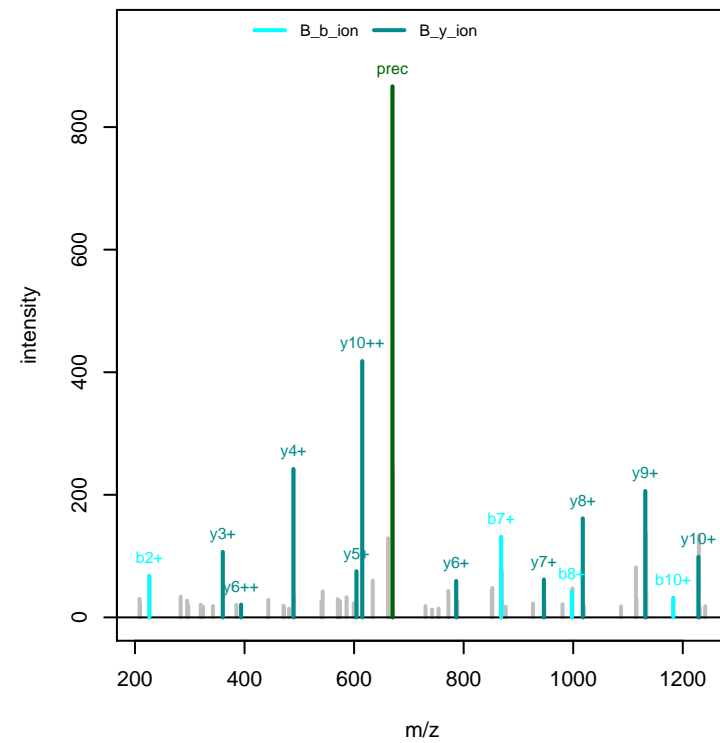

KPNACKDEQGR+XL\_L

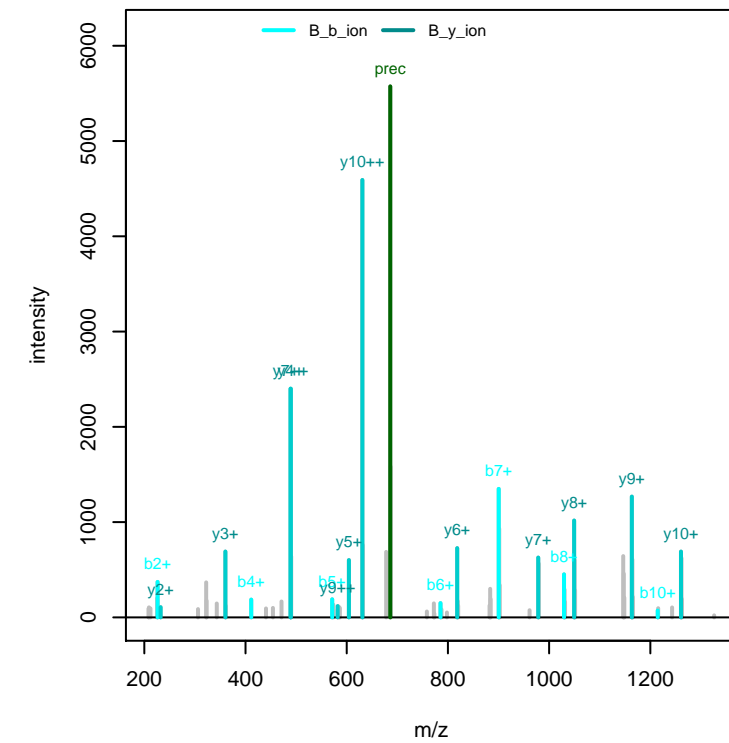



NTMCKDGR  
KVQTGDGINNDVDTK

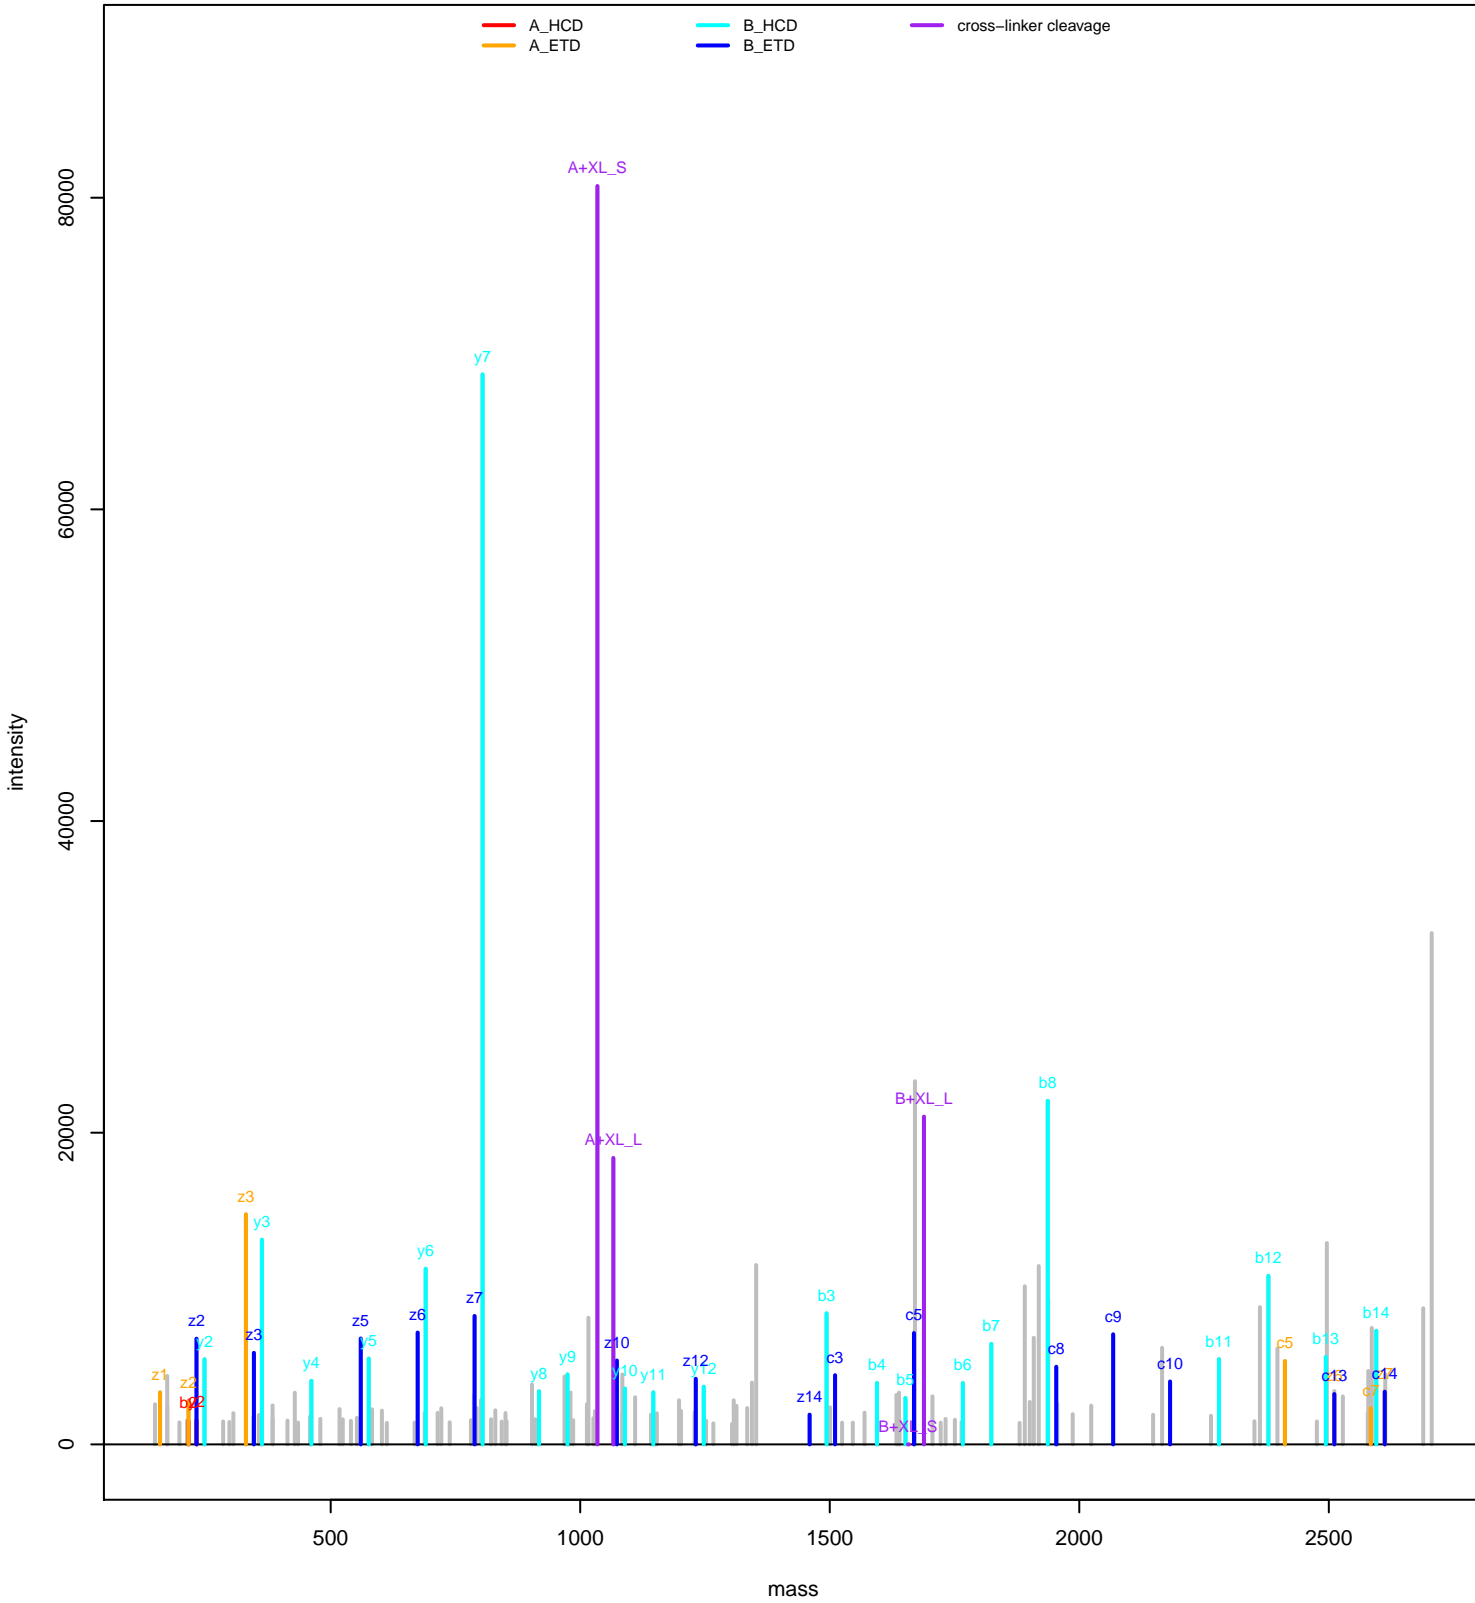

NTMCKDGR+XL\_S

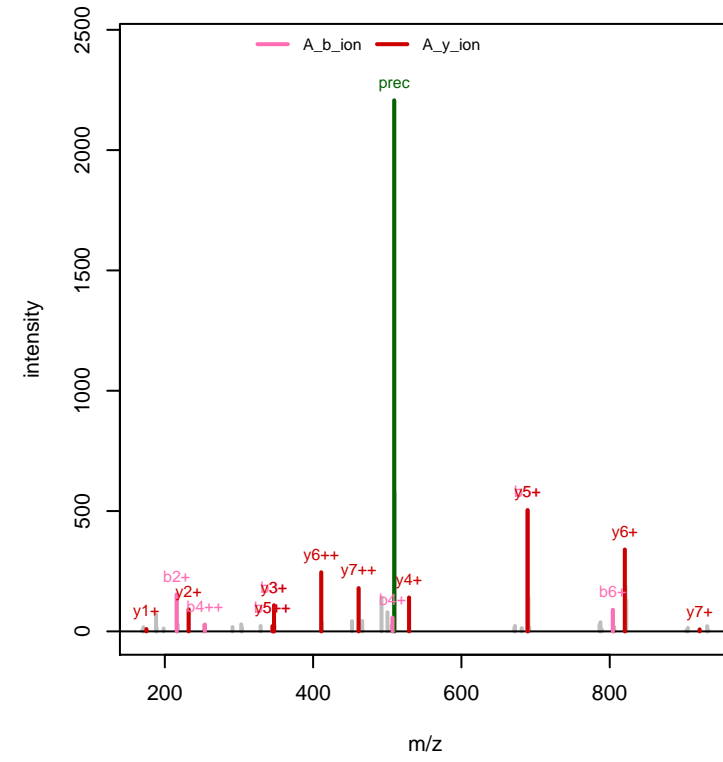

NTMCKDGR+XL\_L

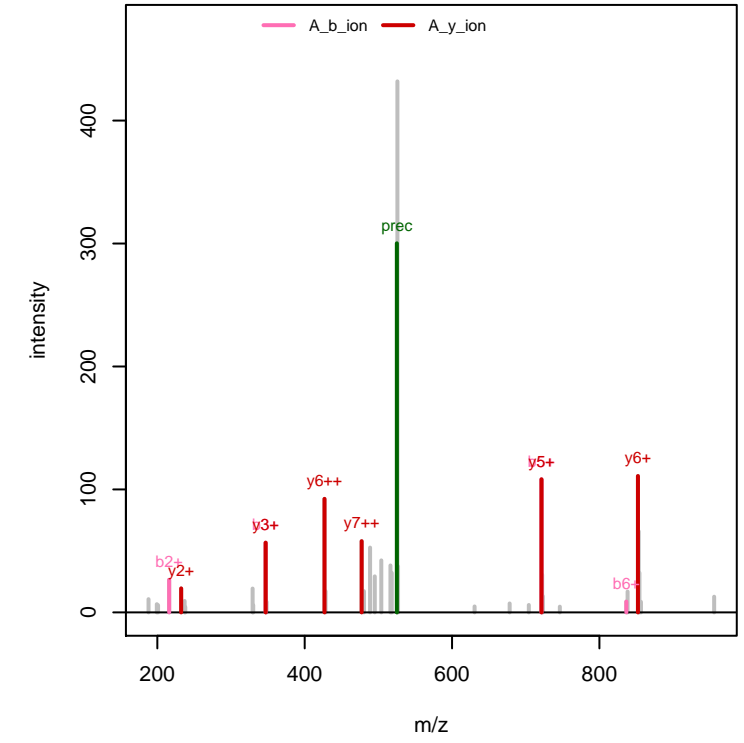

KVQTGDGINNDVDTK+XL\_S

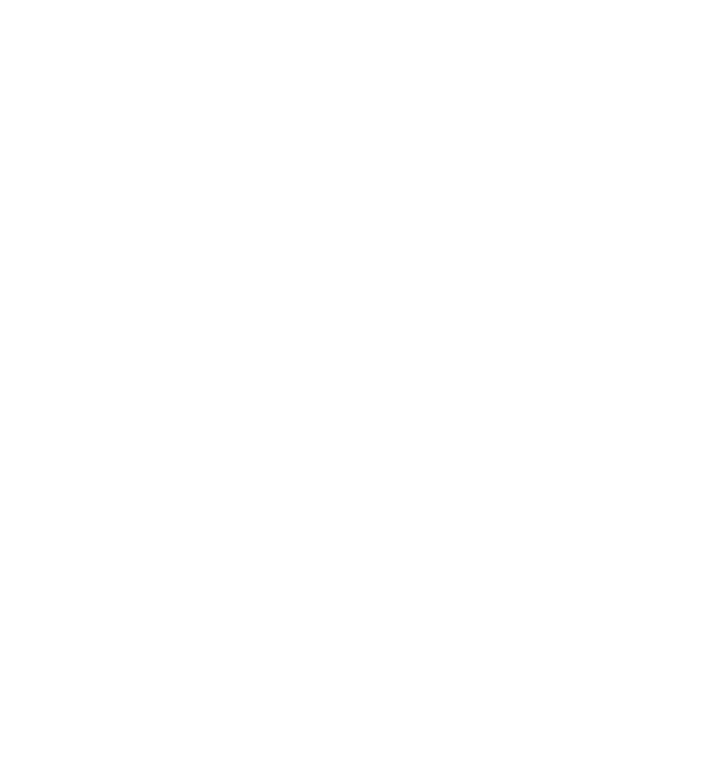

KVQTGDGINNDVDTK+XL\_L

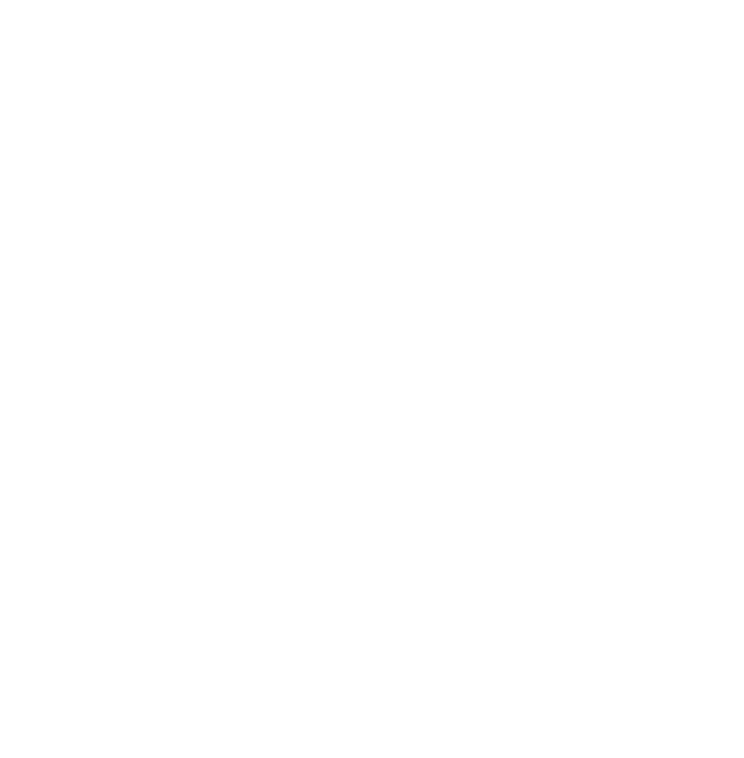

NSKSAPGEK  
KTYMSDCLK

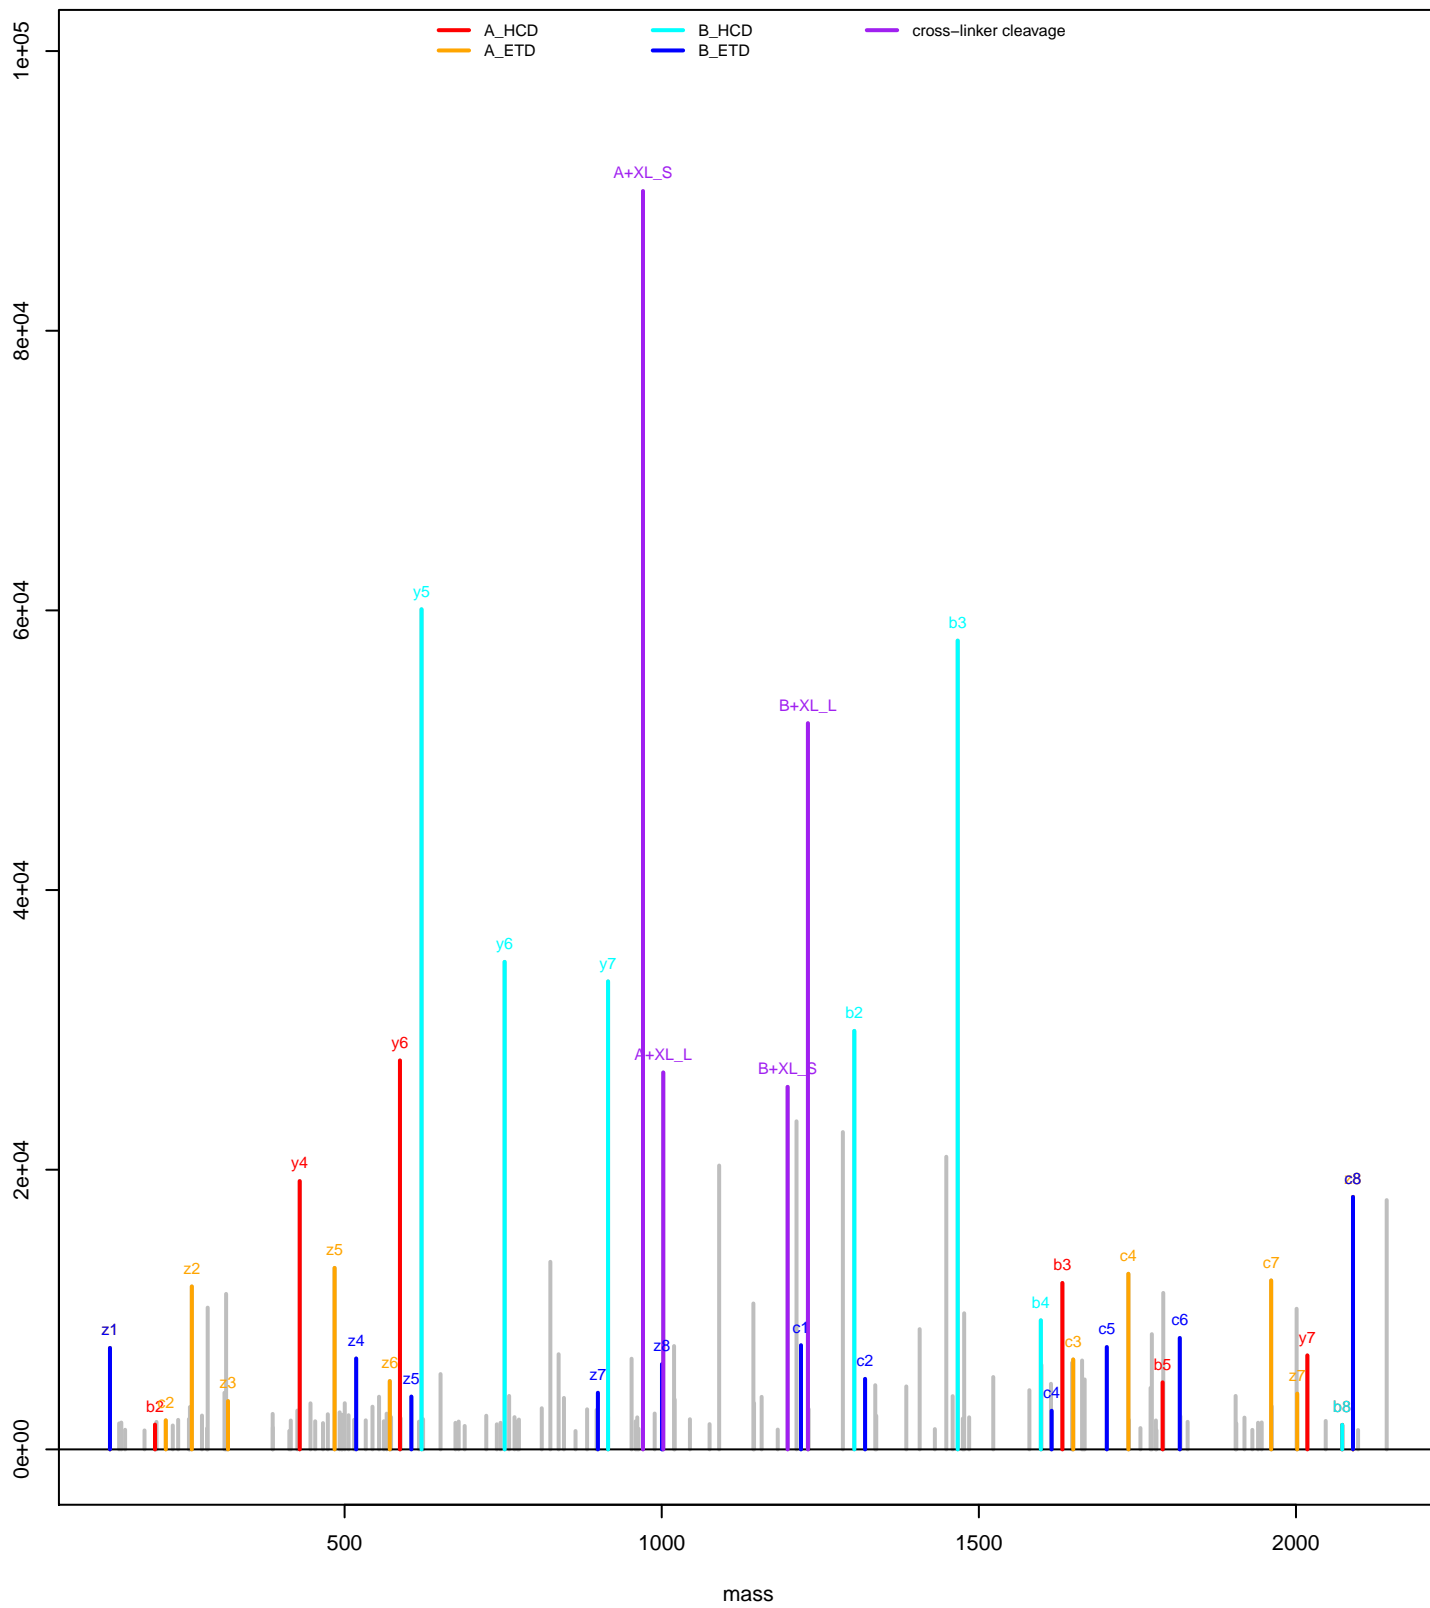

NSKSAPGEK+XL\_S

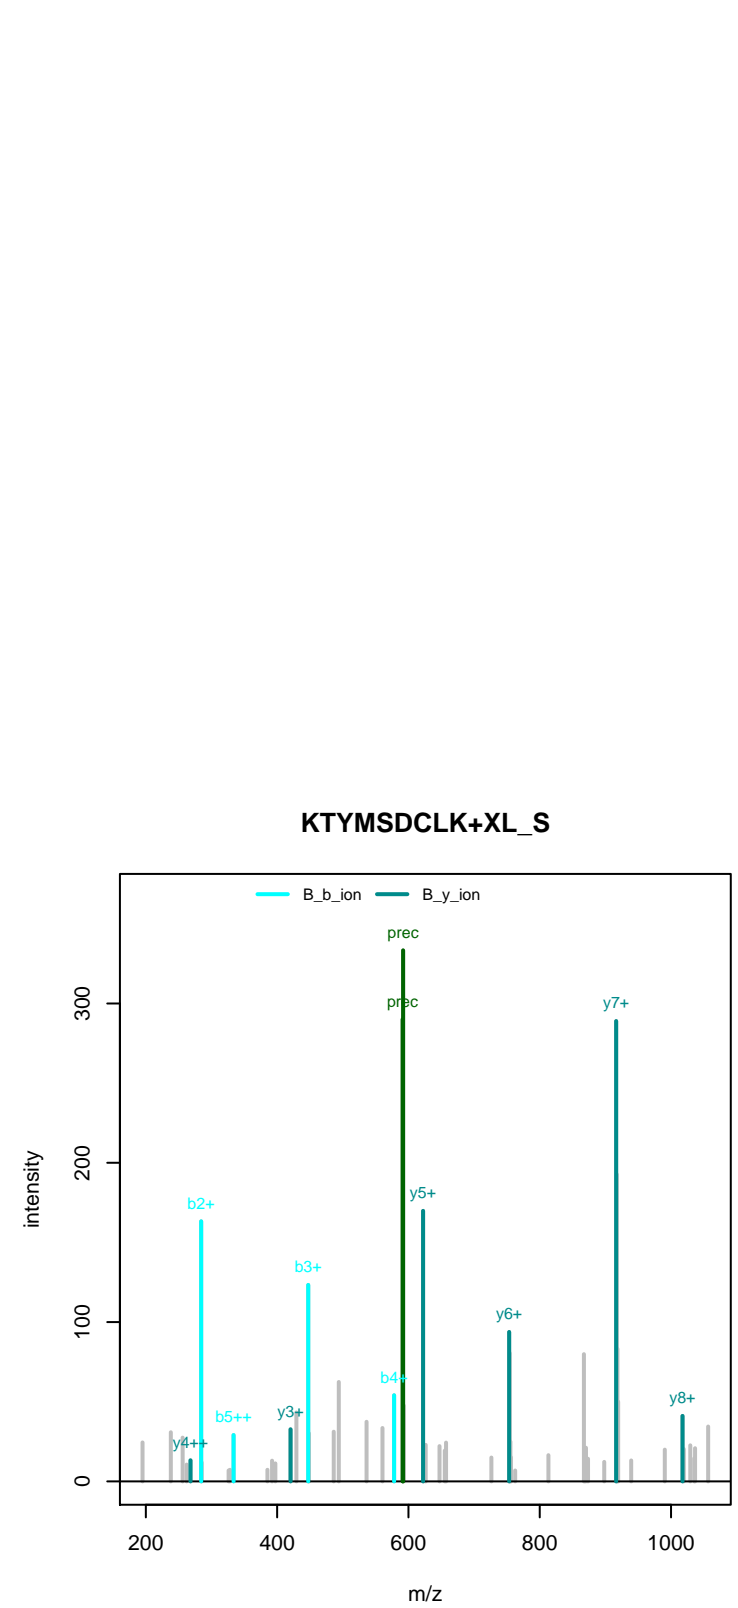

NSKSAPGEK+XL\_L

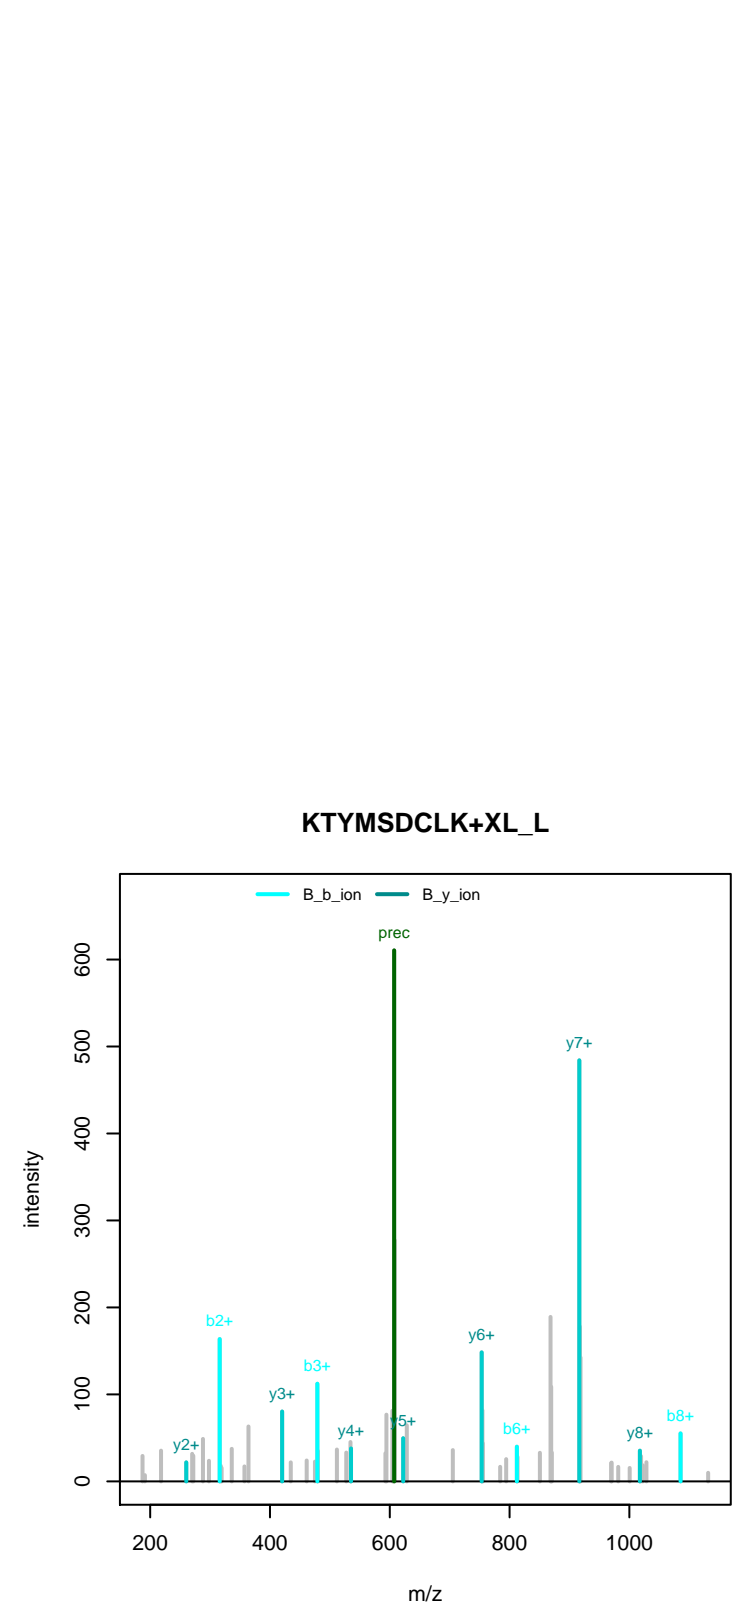

KTYMSDCLK+XL\_S

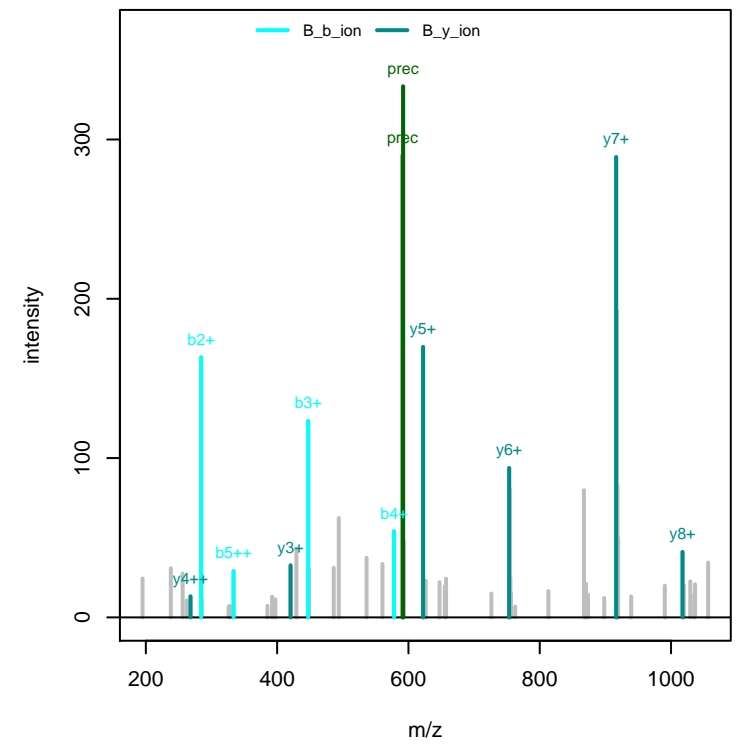

KTYMSDCLK+XL\_L

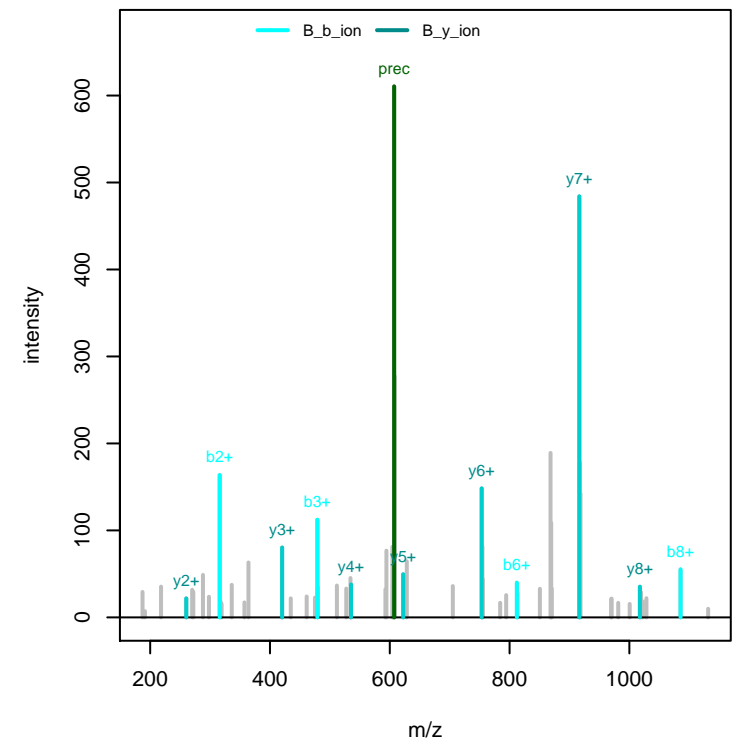

EGVSKDDAEALK  
KALEEAGAEVEVK

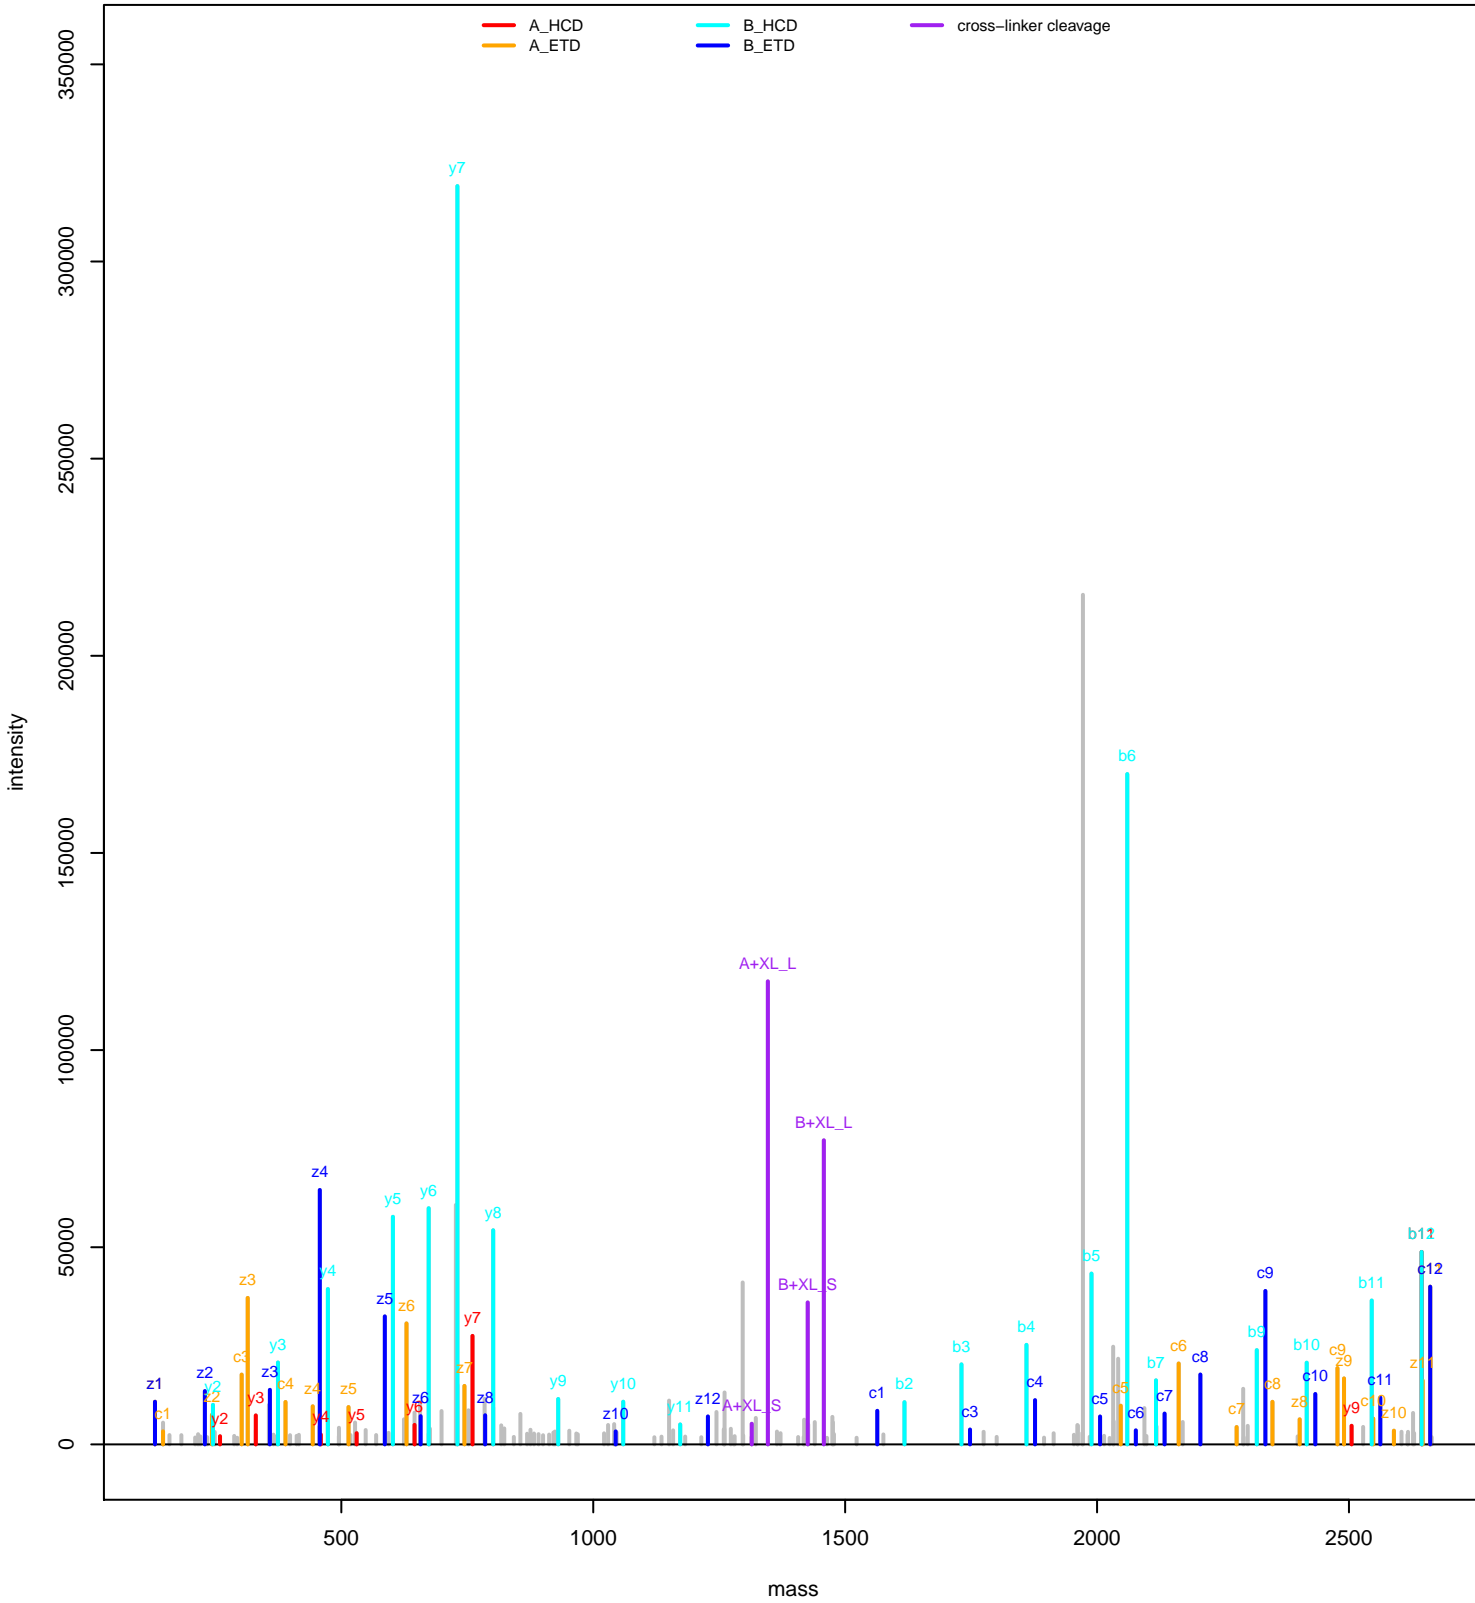

EGVSKDDAEALK+XL\_S

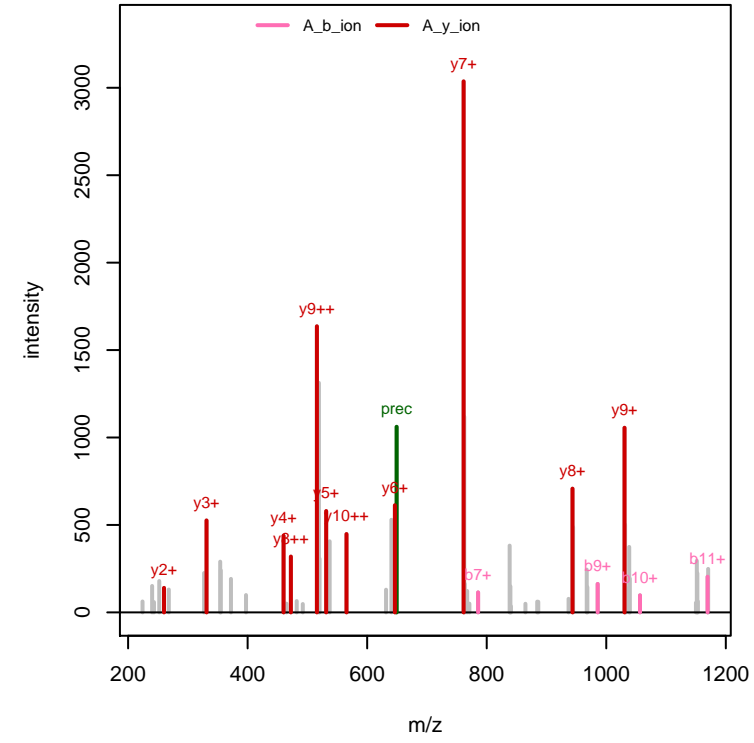

EGVSKDDAEALK+XL\_L

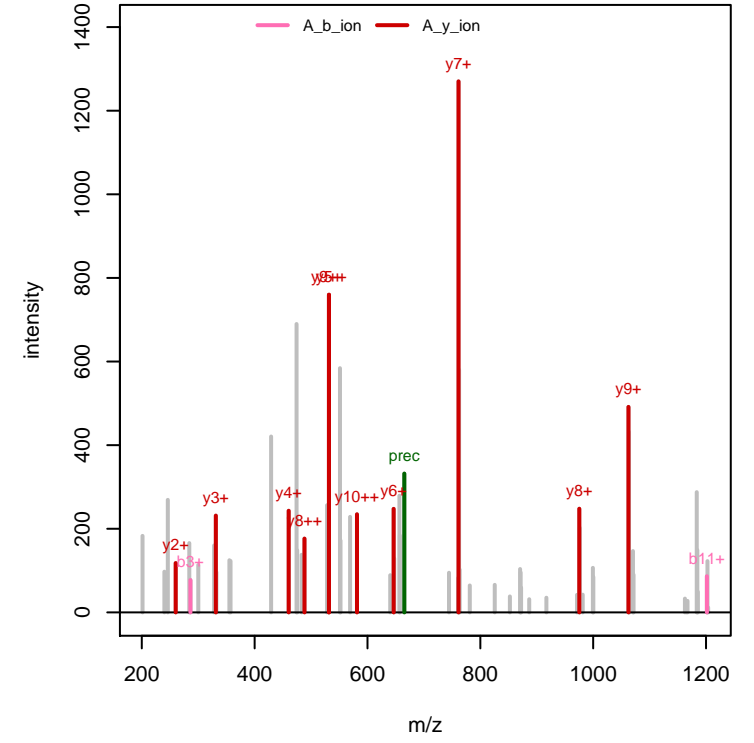

KALEEAGAEVEVK+XL\_S

KALEEAGAEVEVK+XL\_L

NRVEKAAR  
AKVSTATVSR

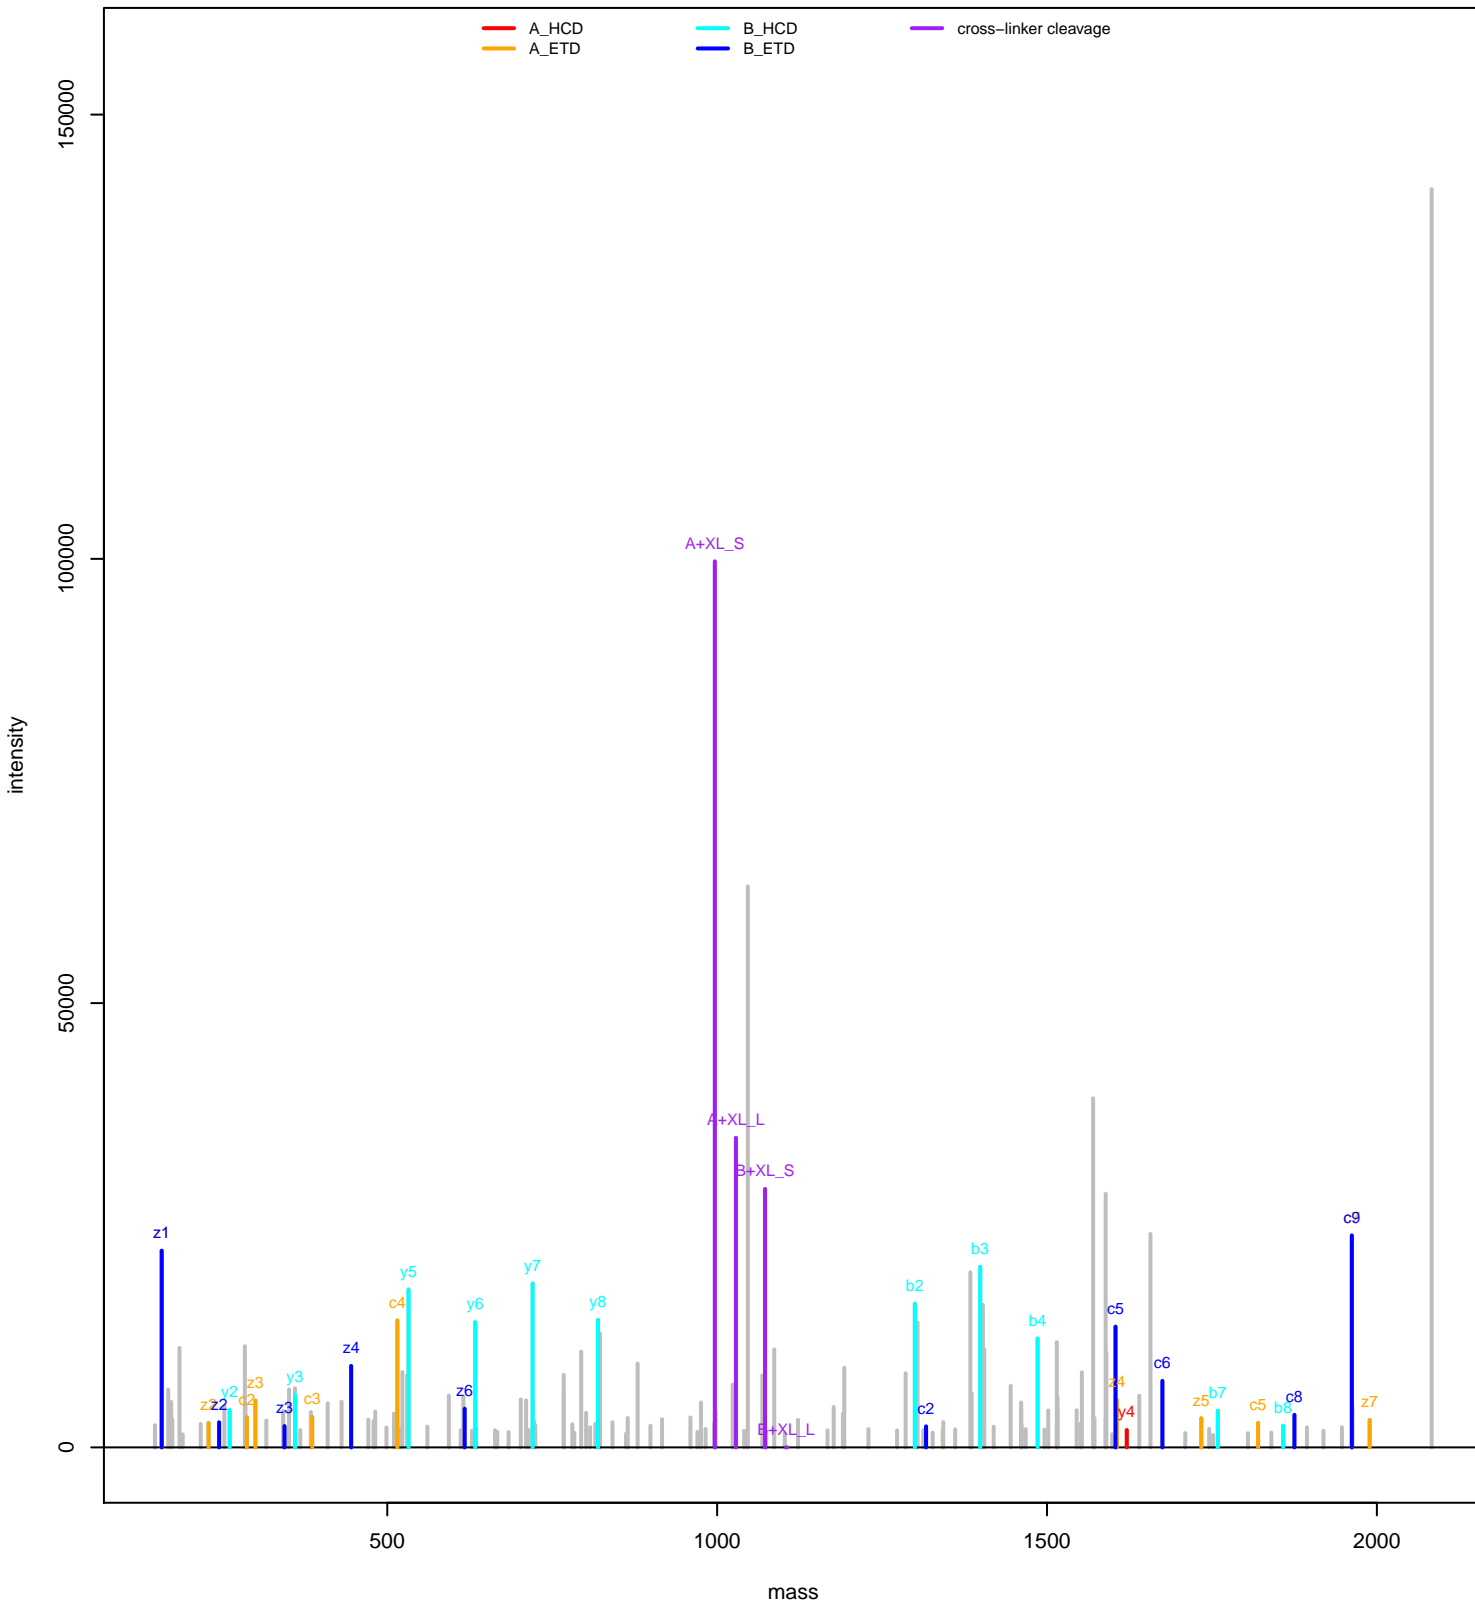

NRVEKAAR+XL\_S

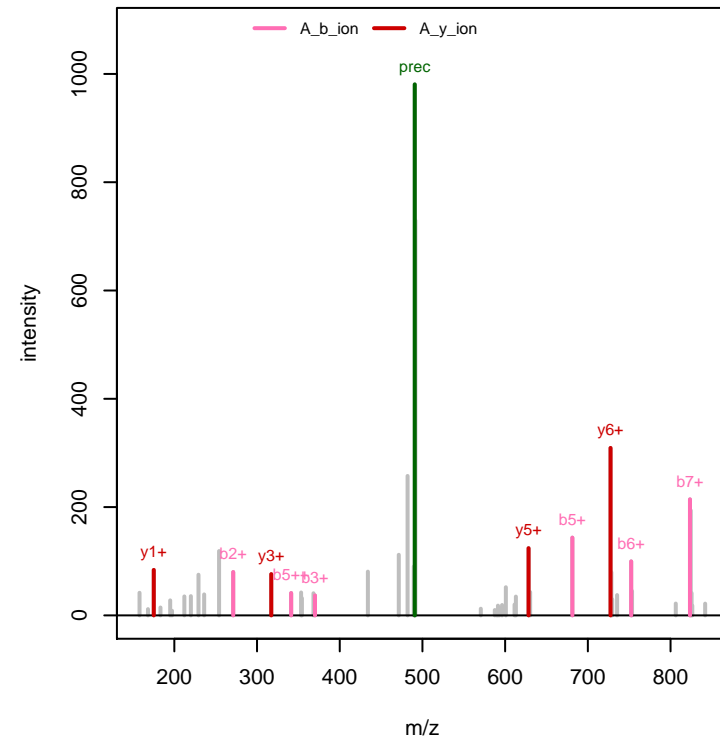

NRVEKAAR+XL\_L

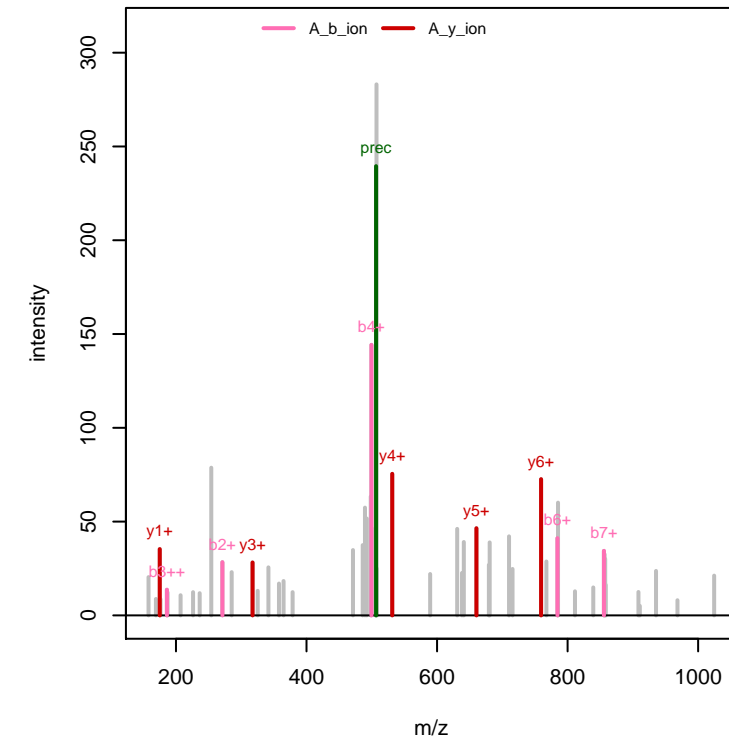

AKVSTATVSR+XL\_S

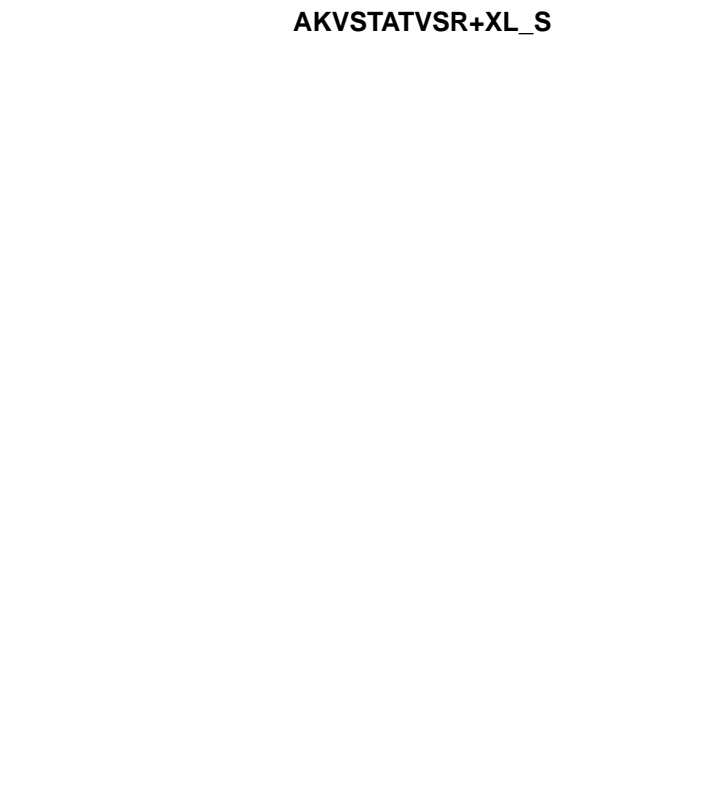

AKVSTATVSR+XL\_L

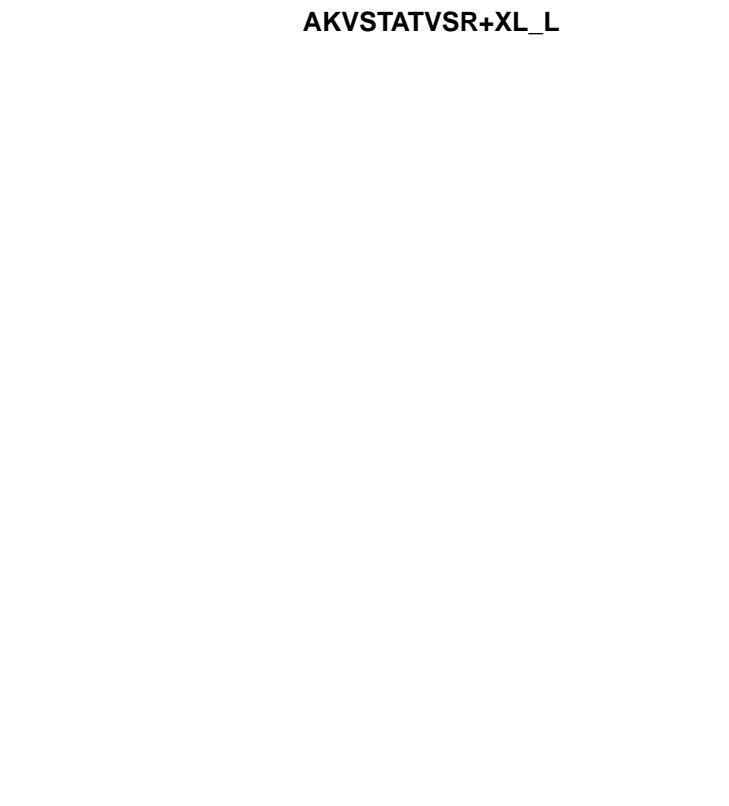

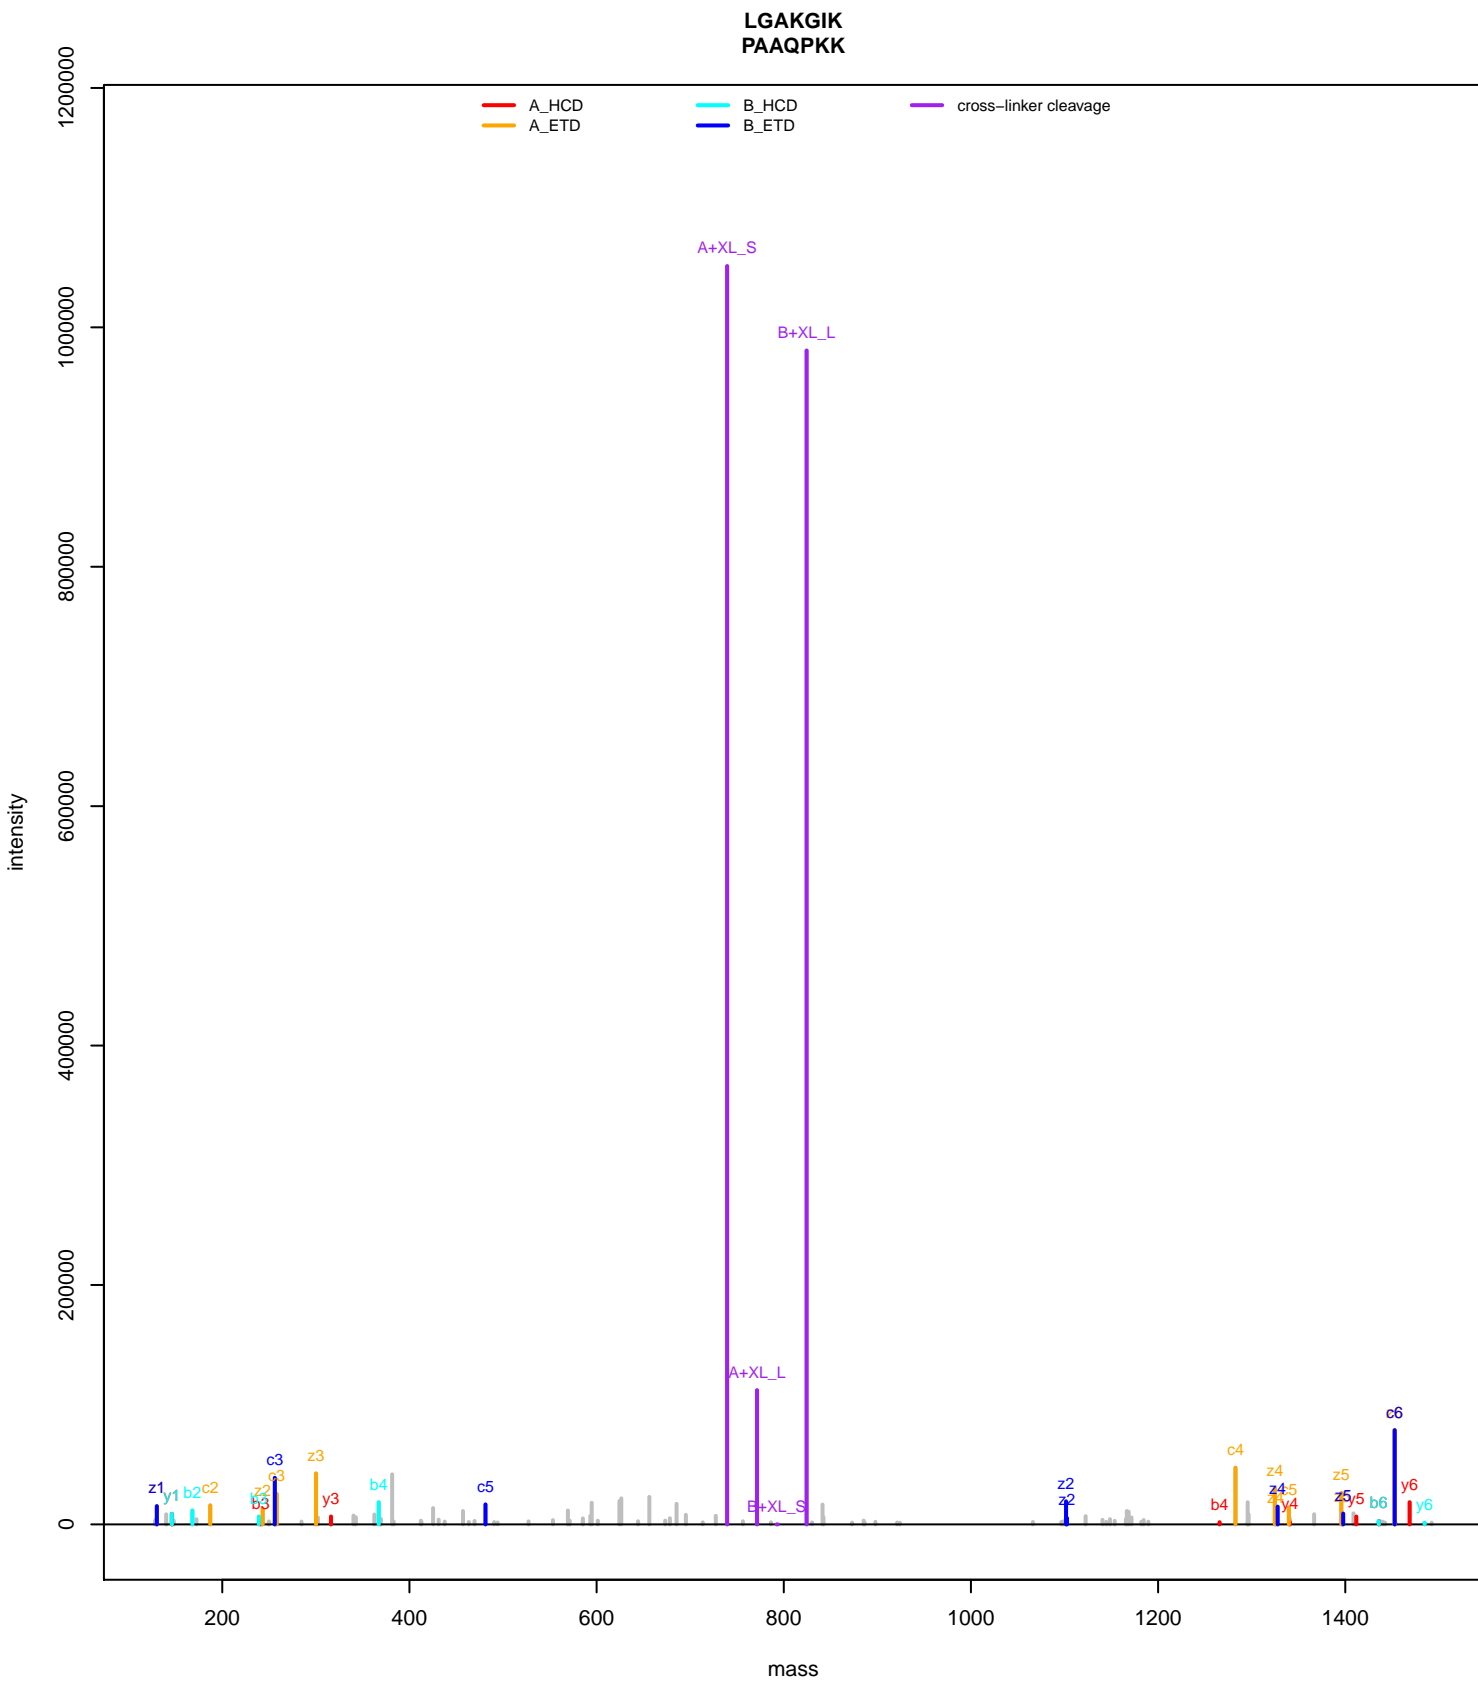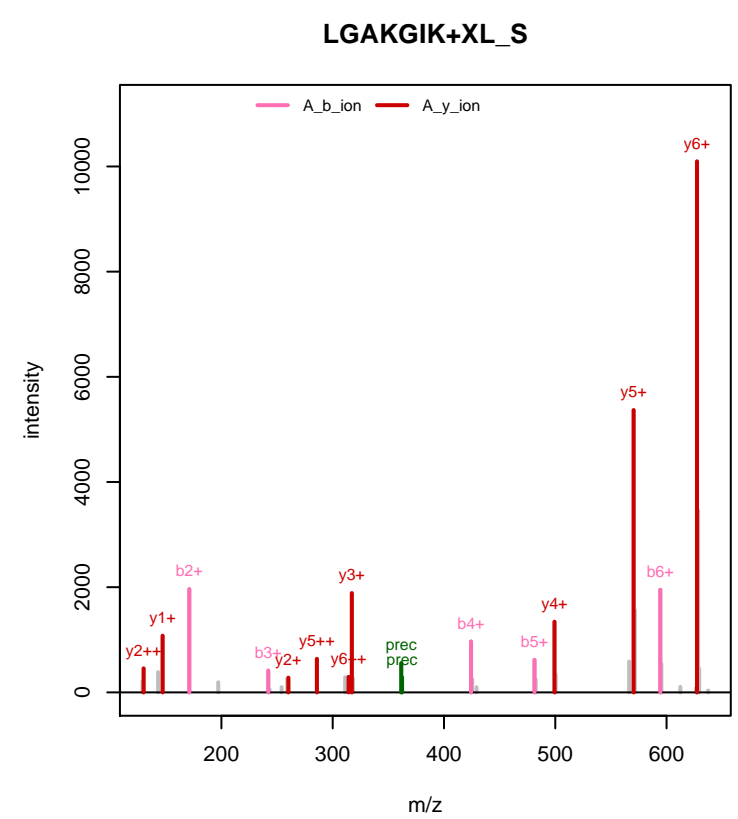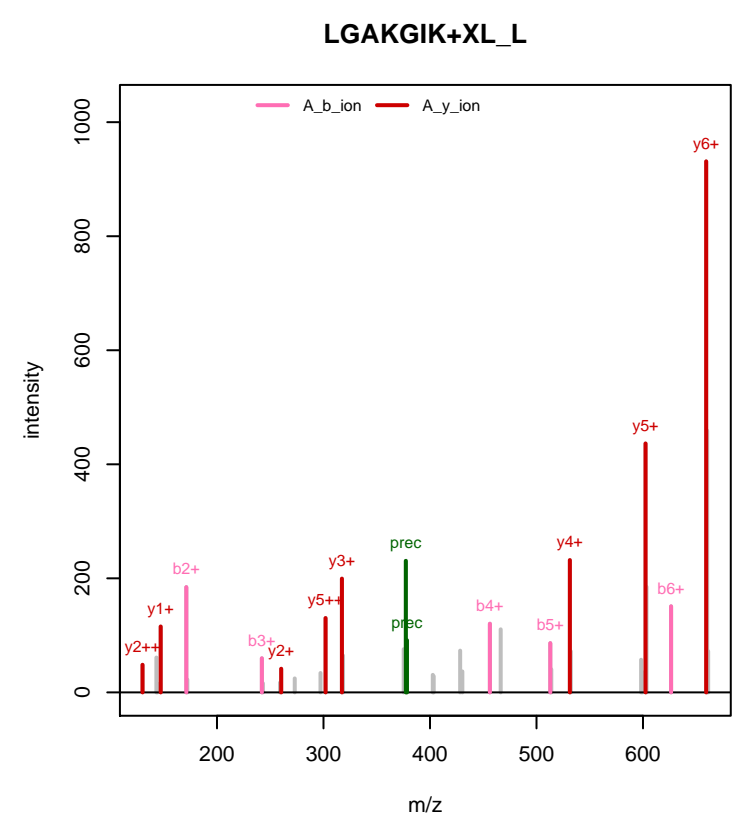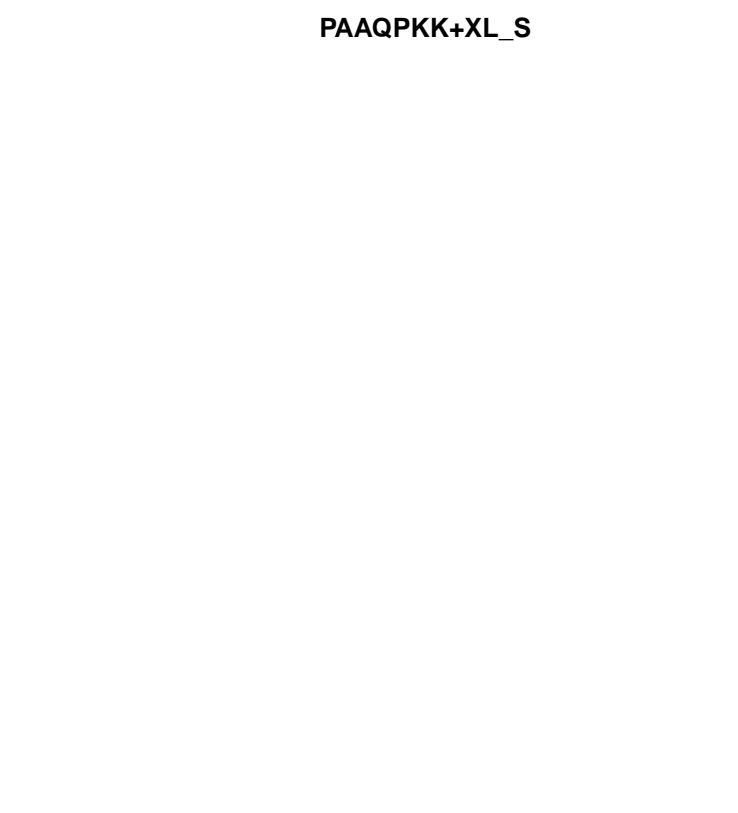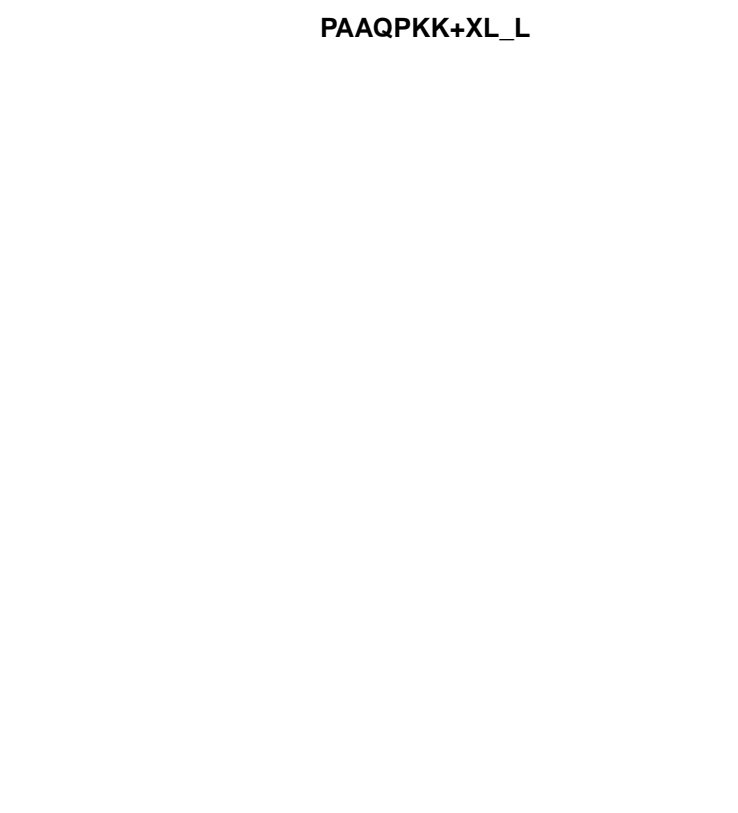

**KDHHSR  
SLSTEATAK**

A\_HCD    B\_HCD    cross-linker cleavage  
A\_ETD    B\_ETD

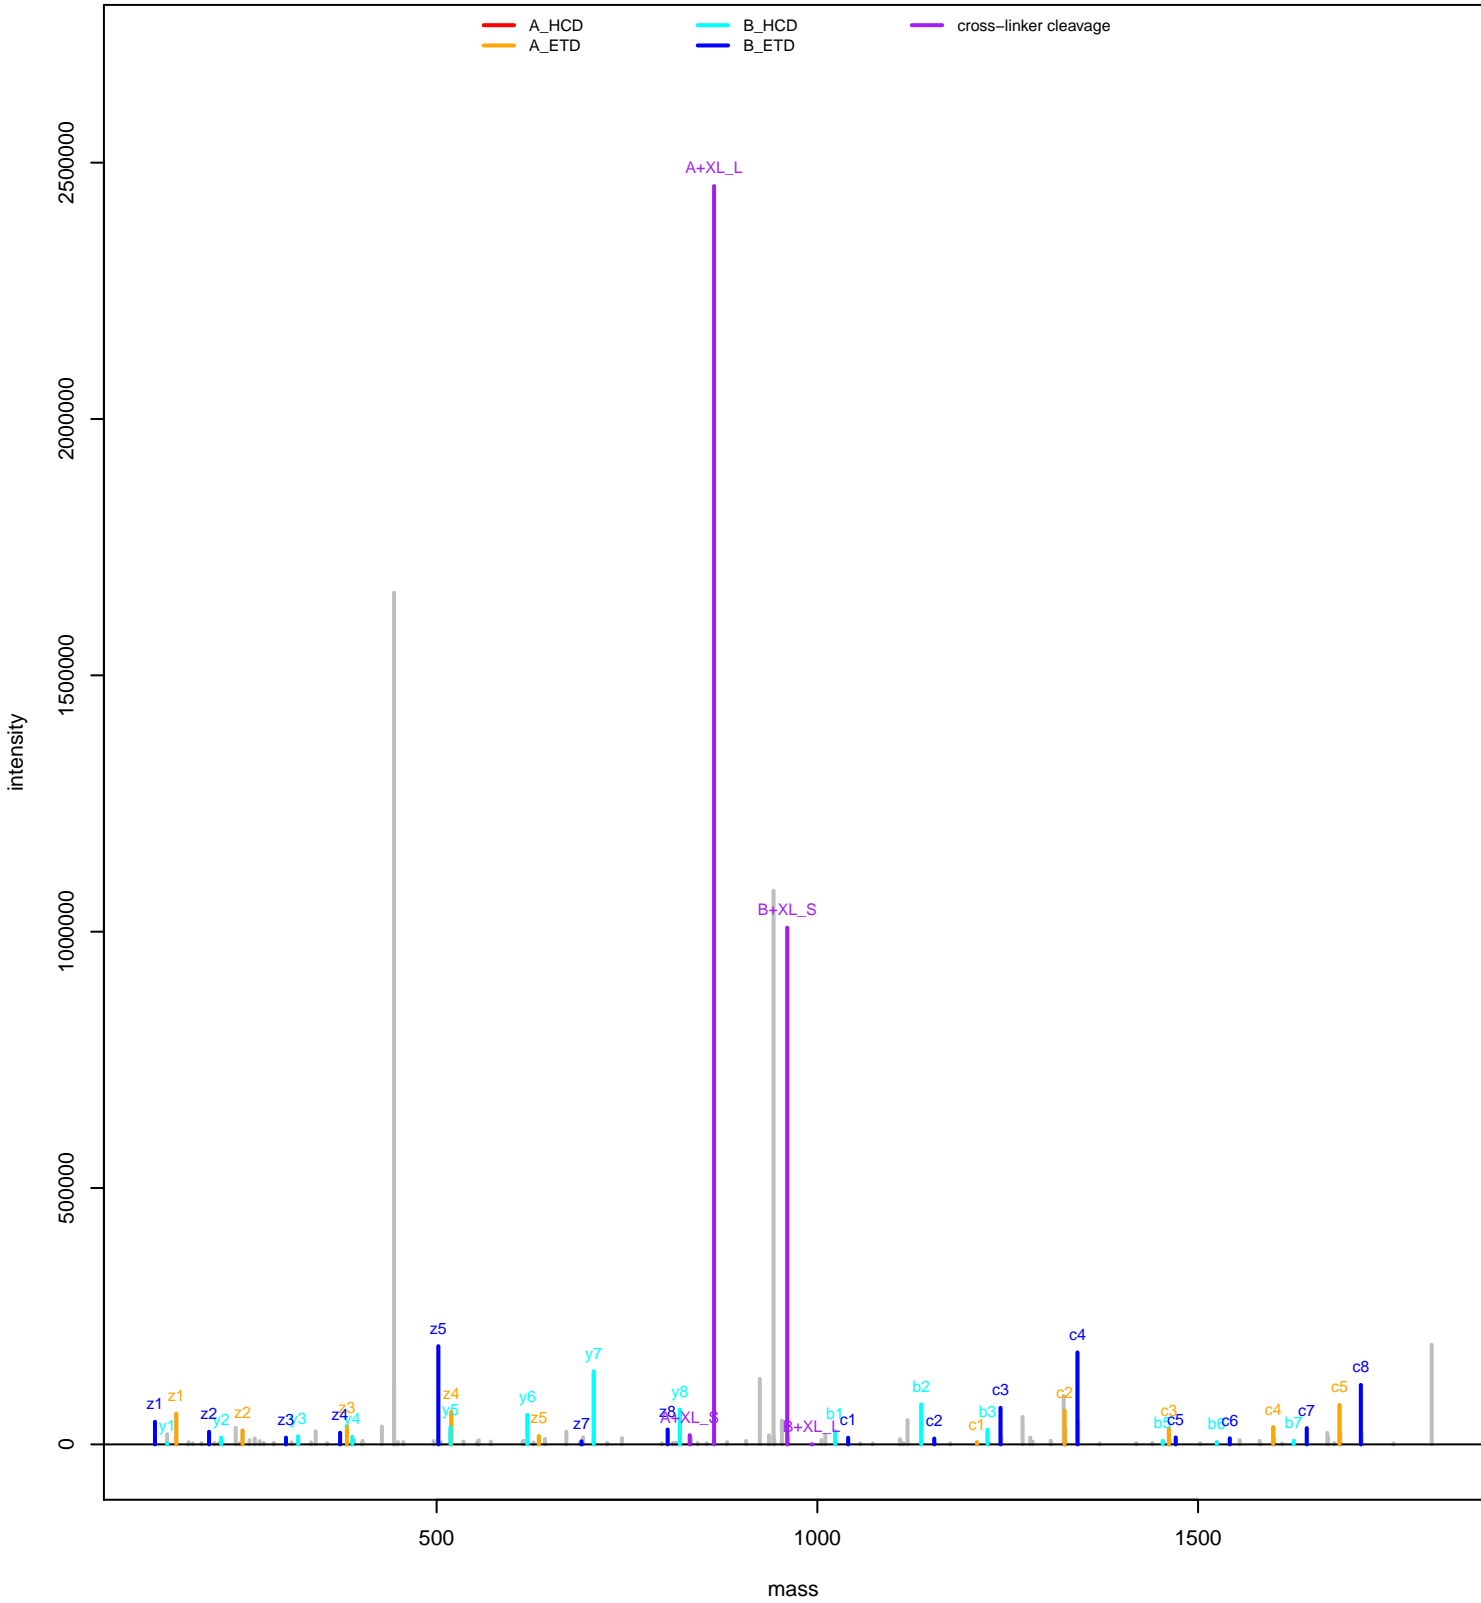

**KDHHSR+XL\_S**

**KDHHSR+XL\_L**

**SLSTEATAK+XL\_S**

**SLSTEATAK+XL\_L**

**KAKPTQAK  
TKPEKLELK**

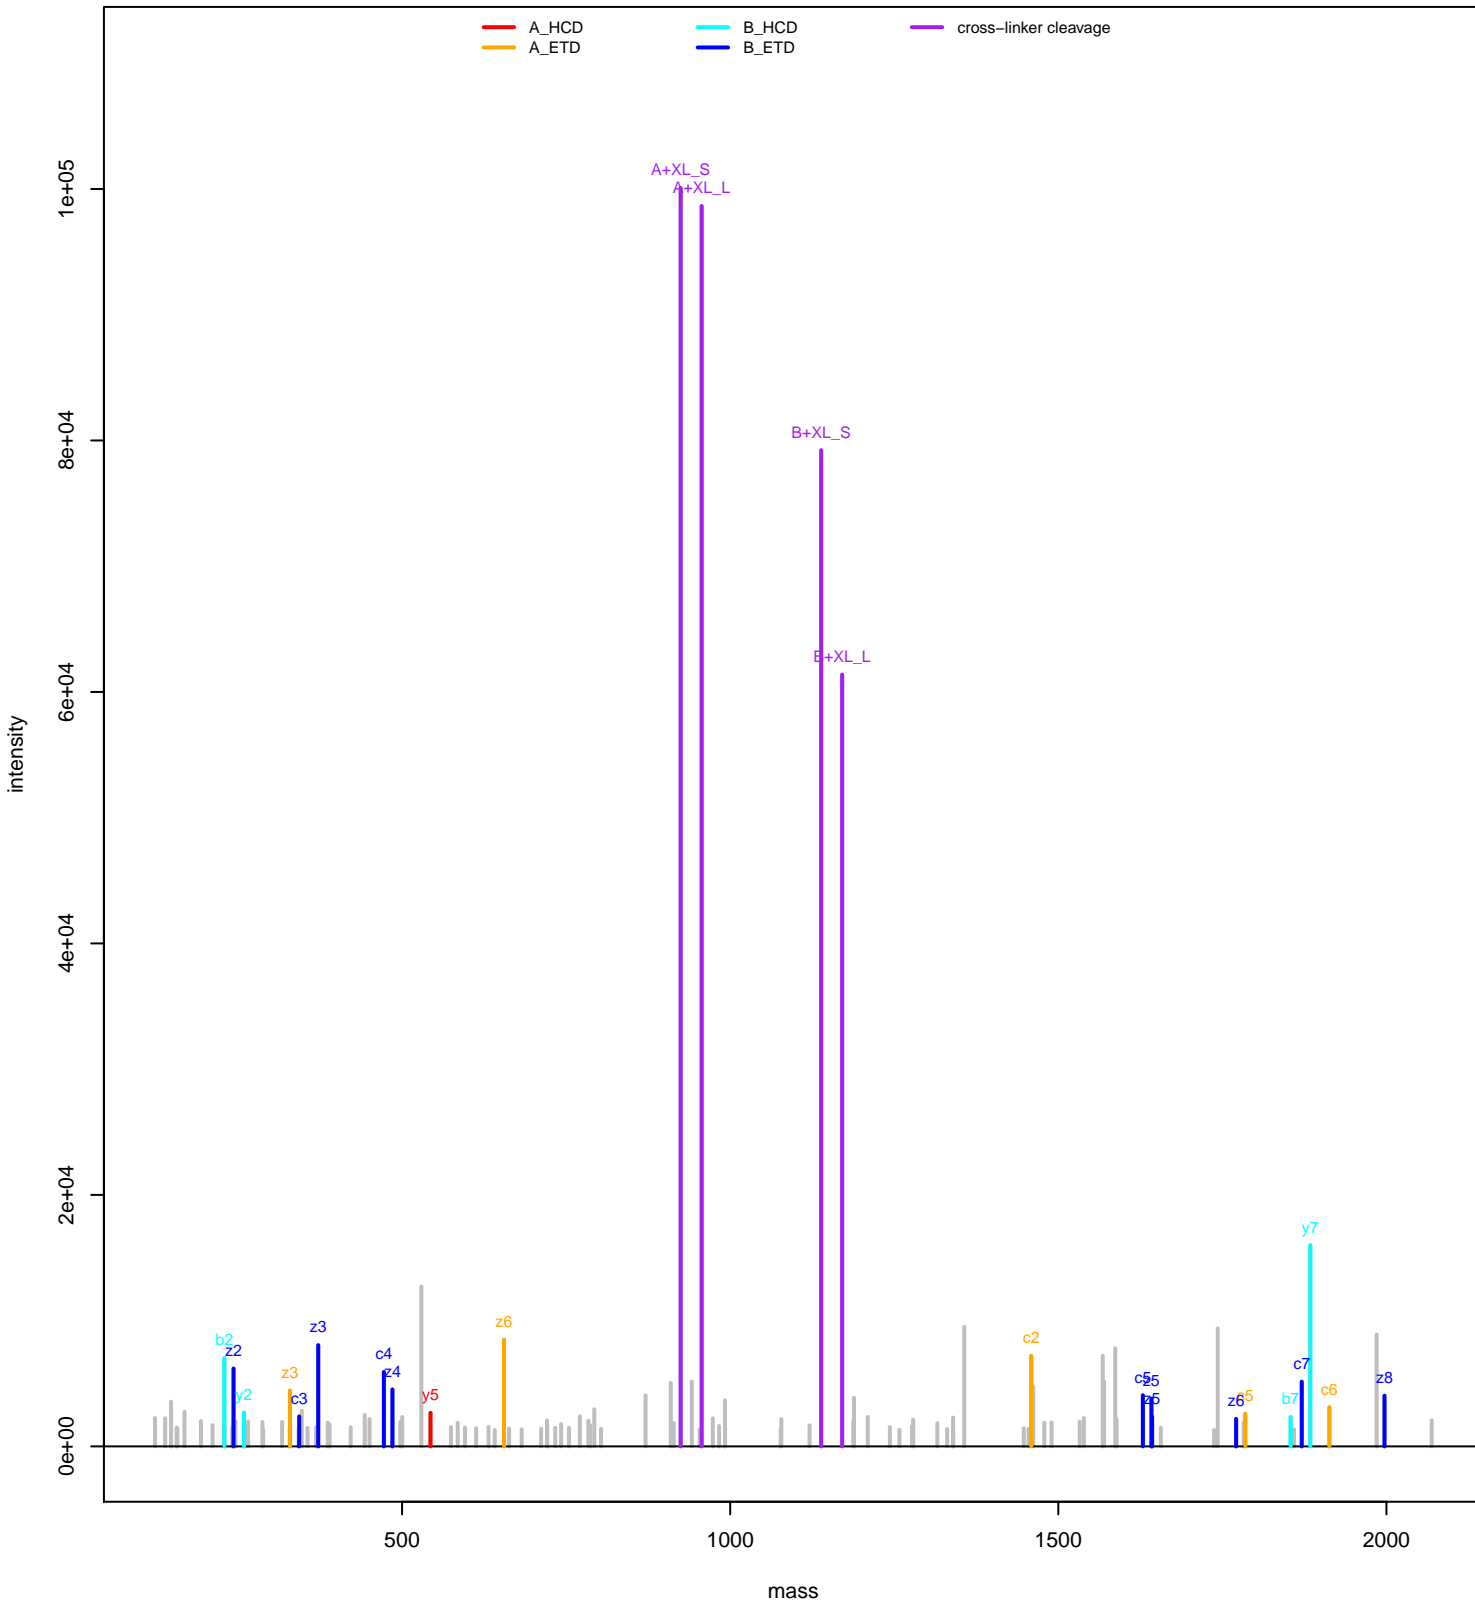

**KAKPTQAK+XL\_S**

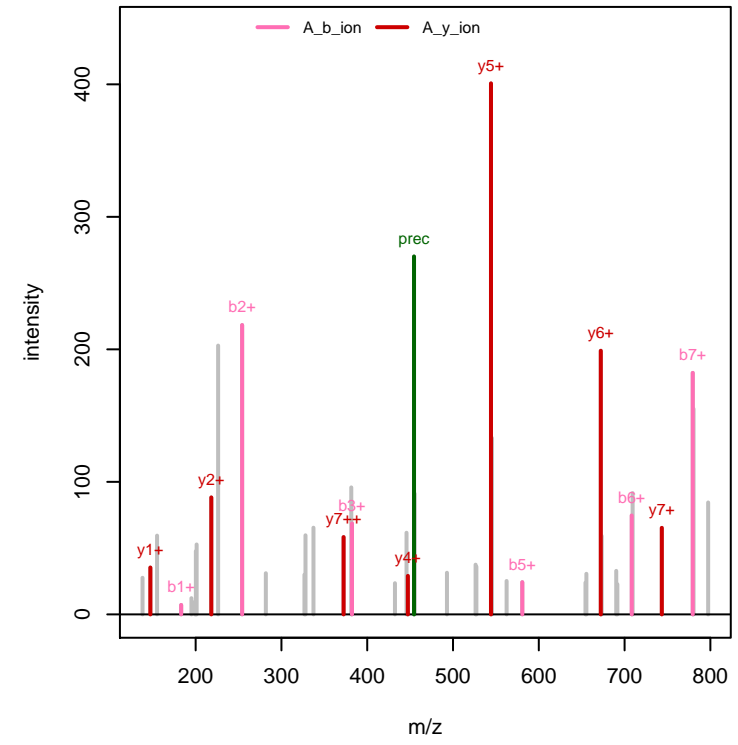

**KAKPTQAK+XL\_L**

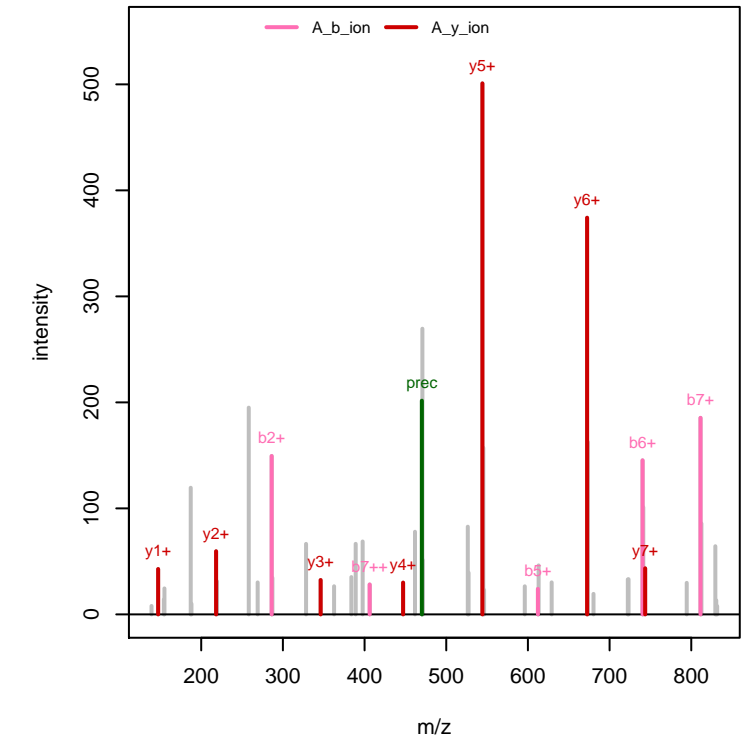

**TKPEKLELK+XL\_S**

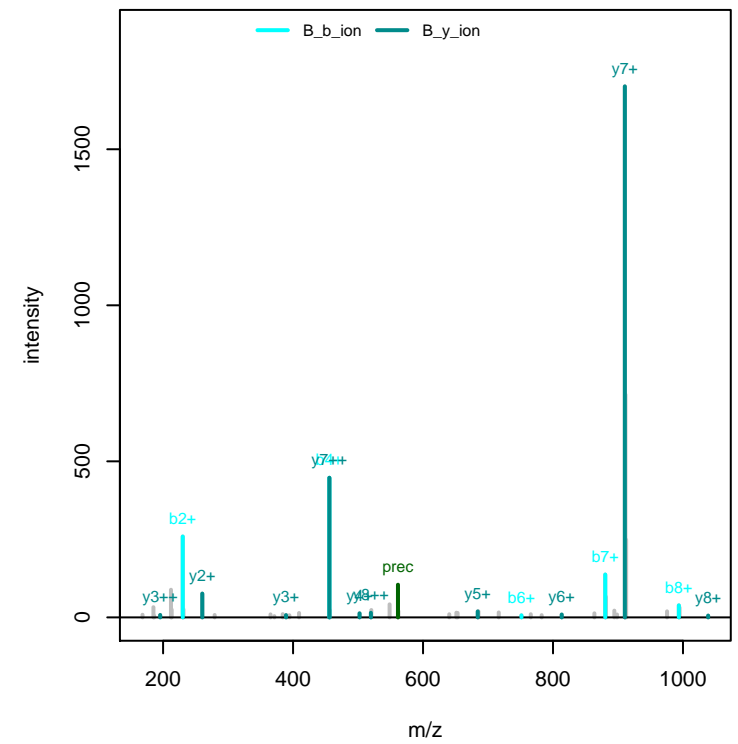

**TKPEKLELK+XL\_L**

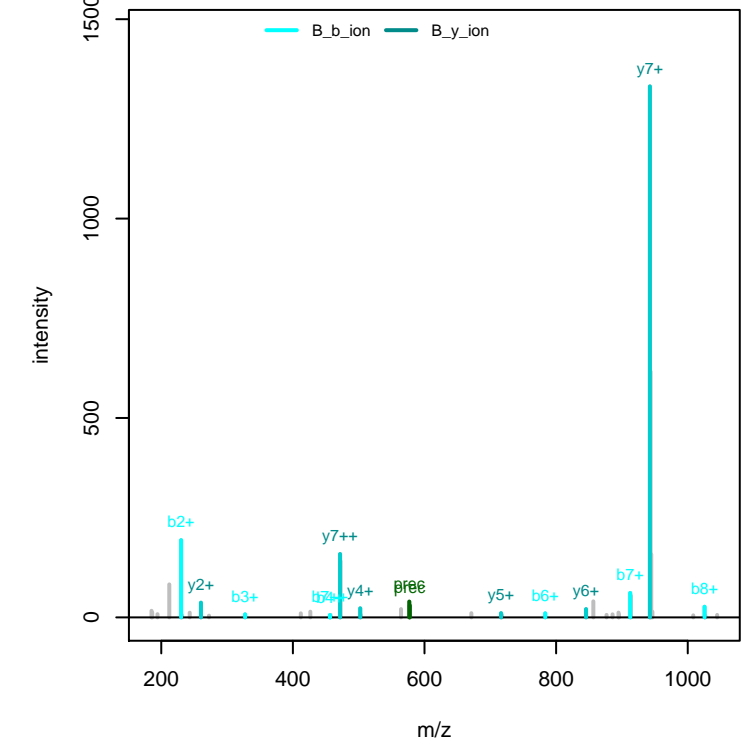

KAAQDAK  
RGKIFTK

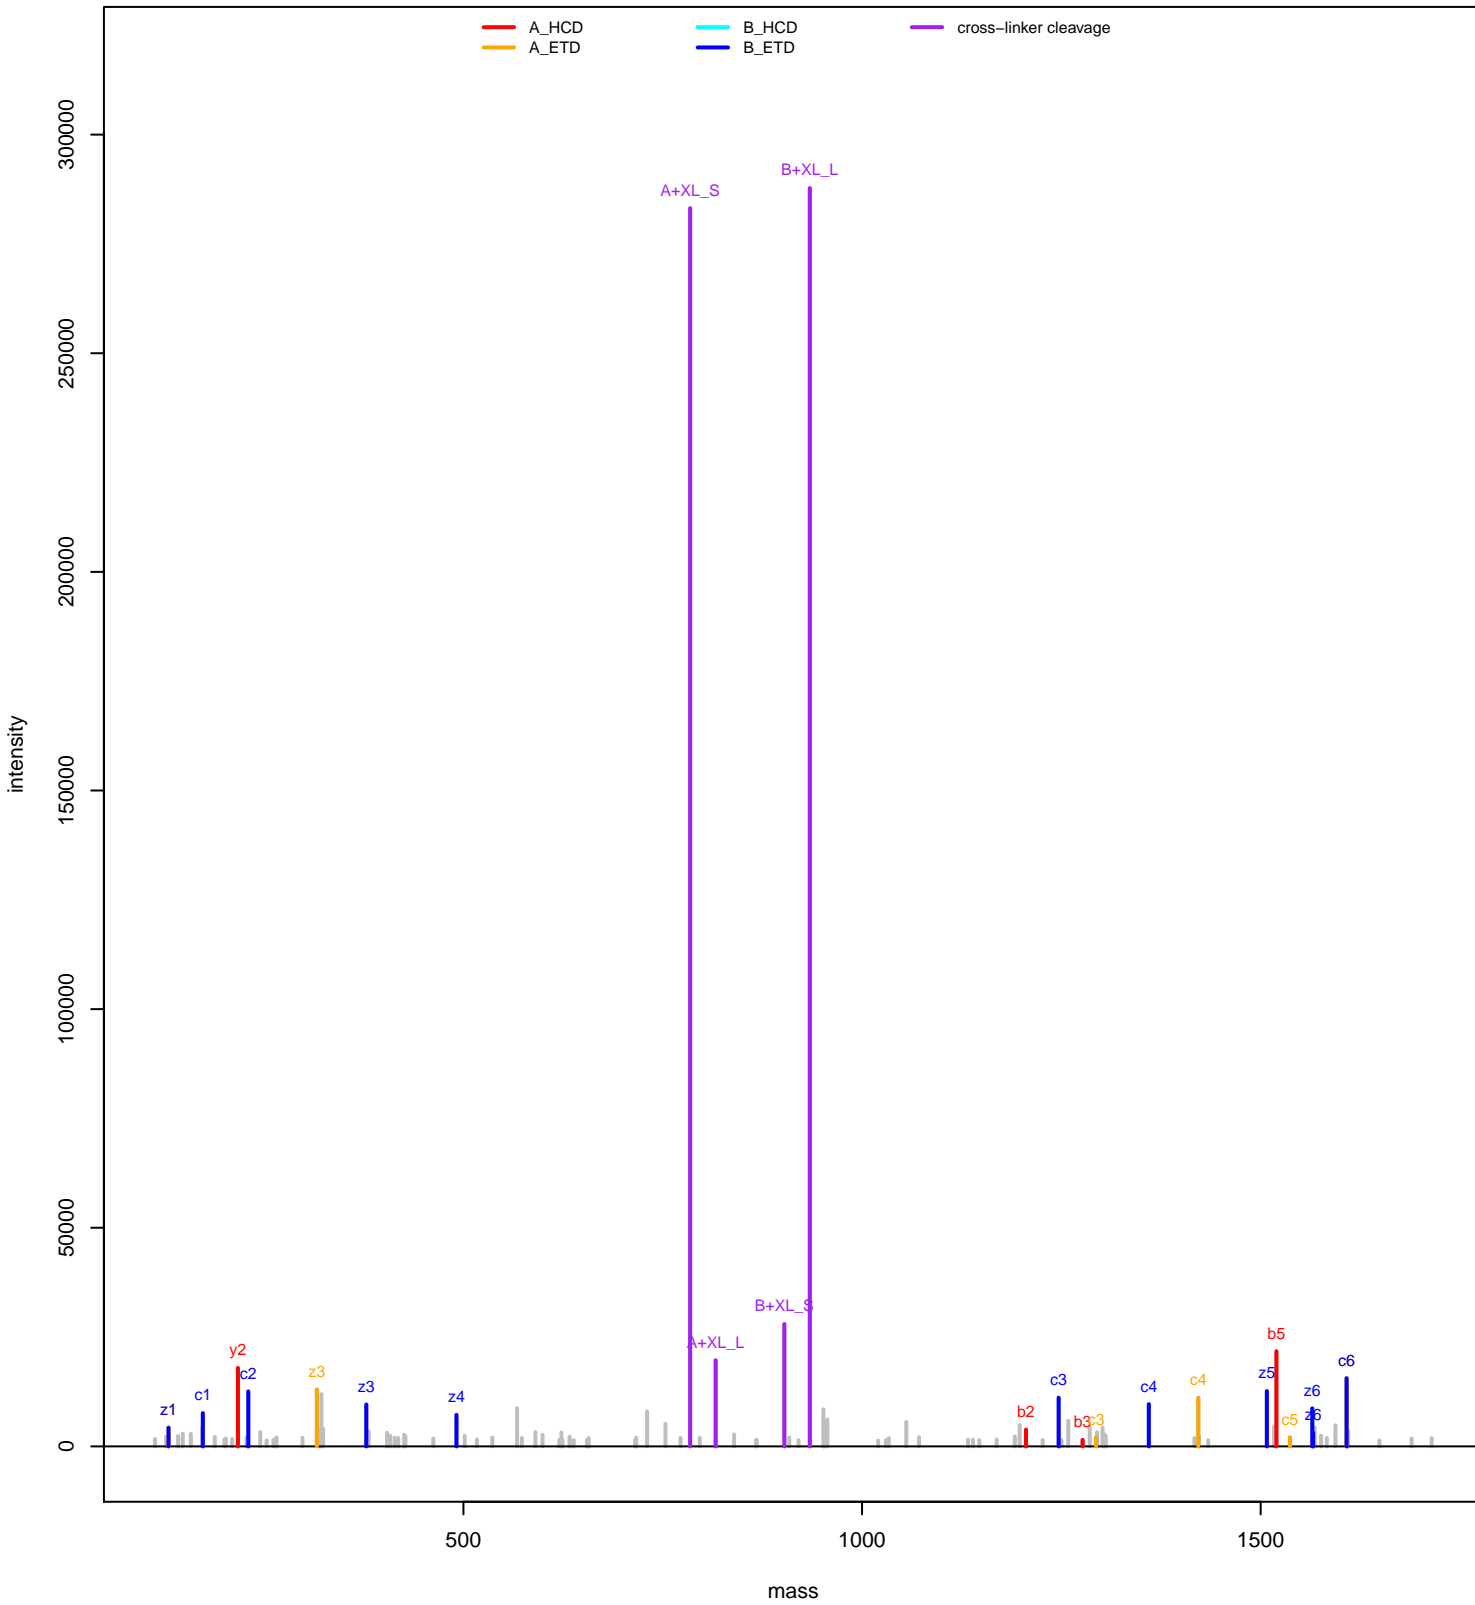

KAAQDAK+XL\_S

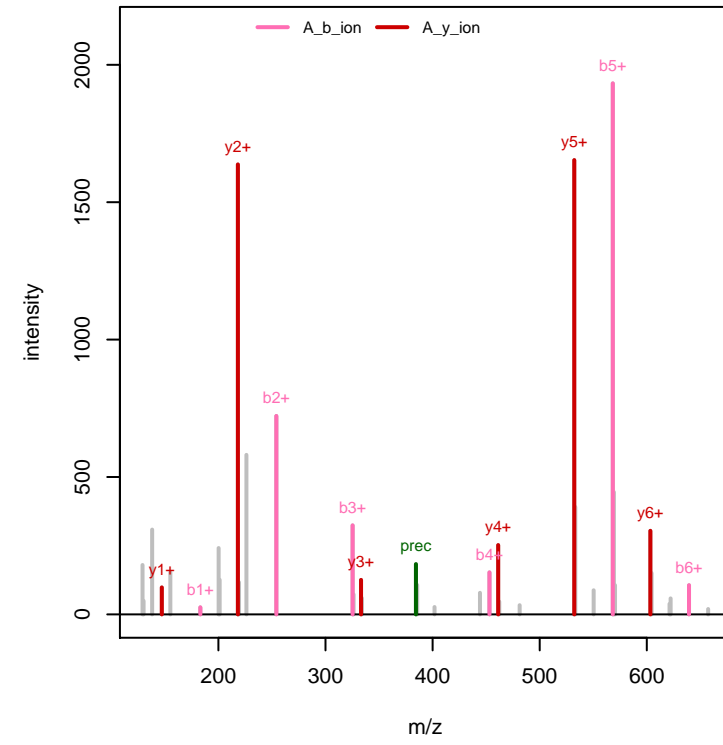

KAAQDAK+XL\_L

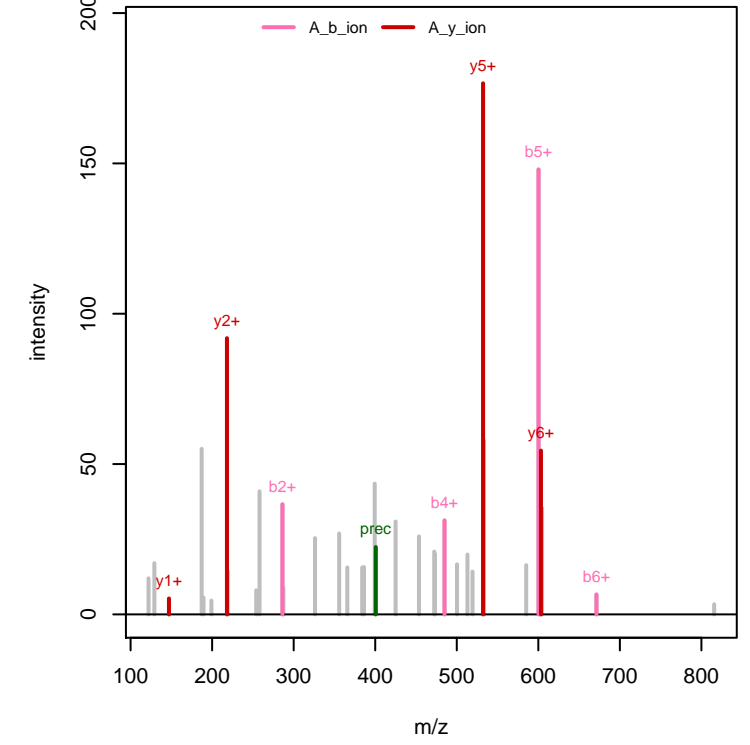

RGKIFTK+XL\_S

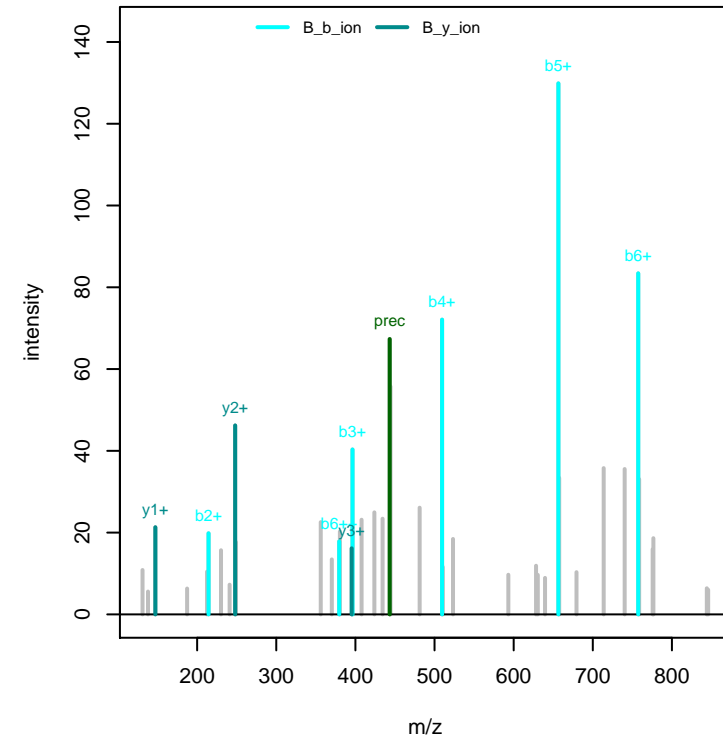

RGKIFTK+XL\_L

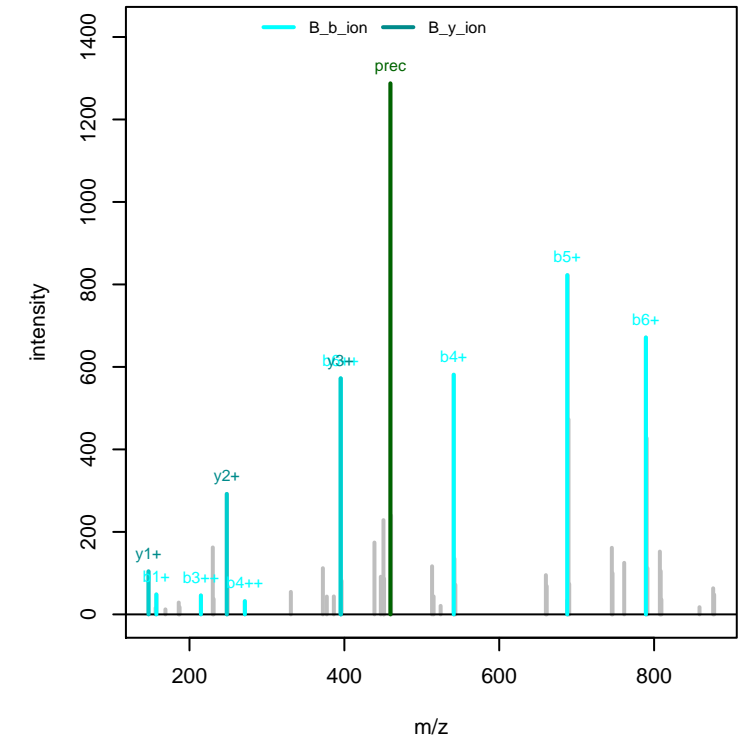



DGAQKEADK  
LAATIAQLPDQIGAKGVETADK

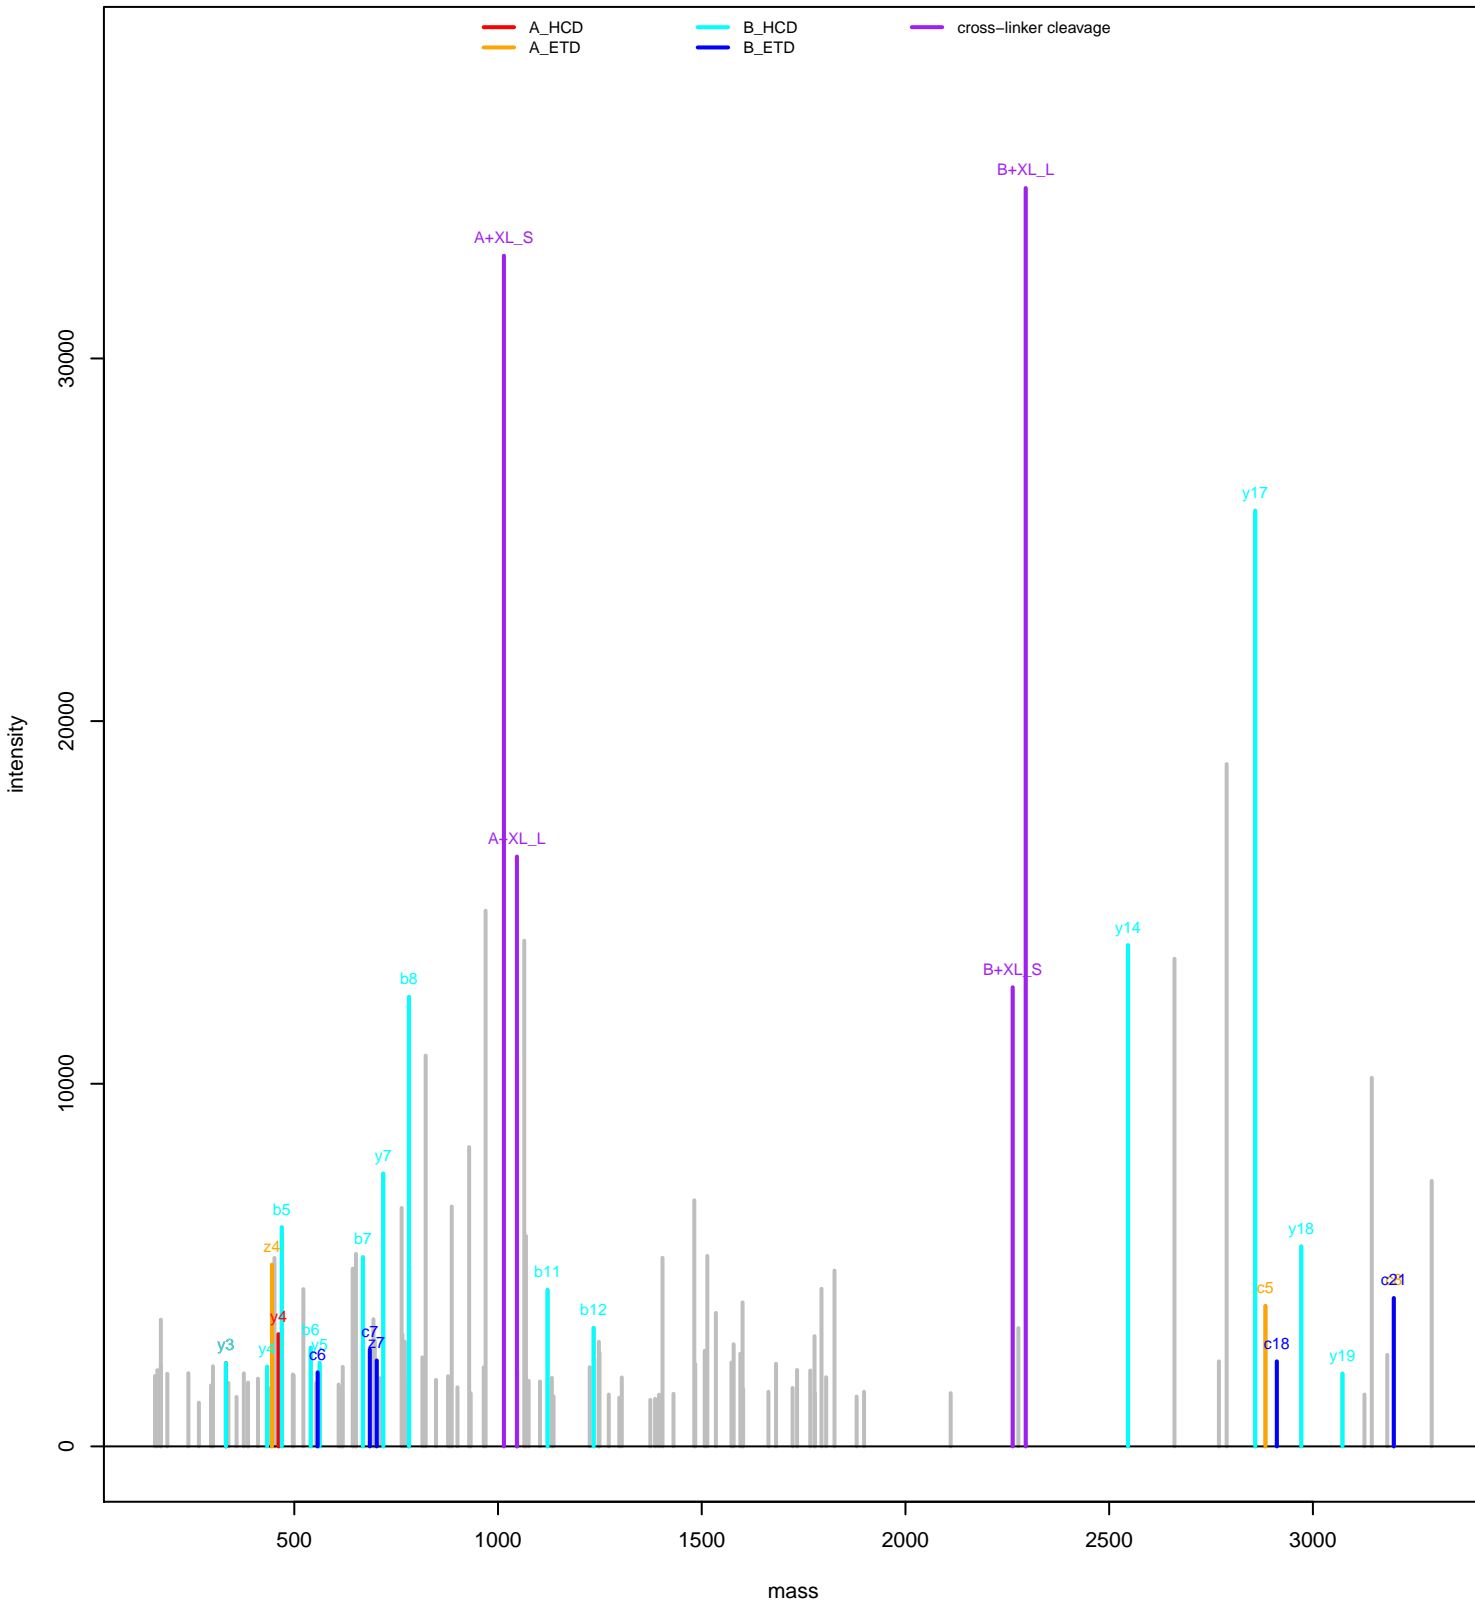

DGAQKEADK+XL\_S

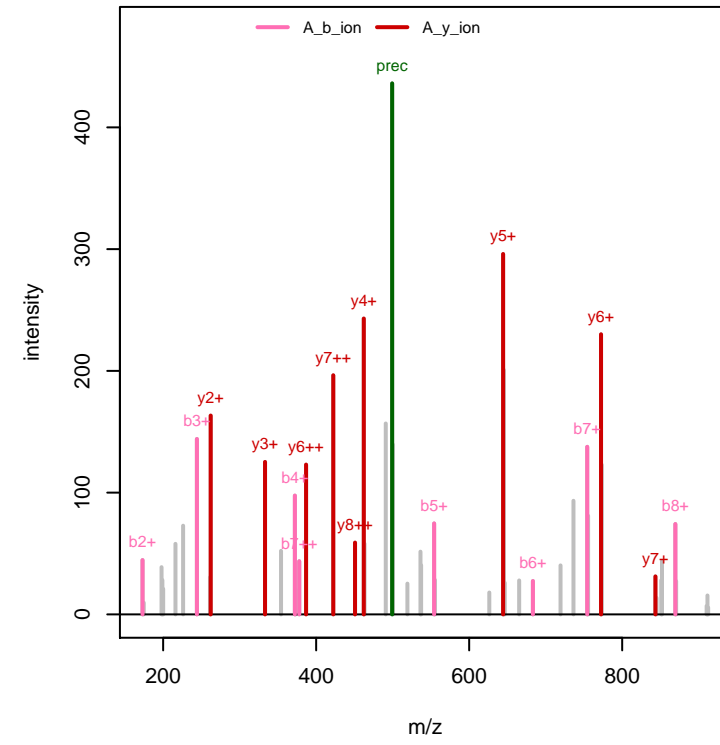

DGAQKEADK+XL\_L

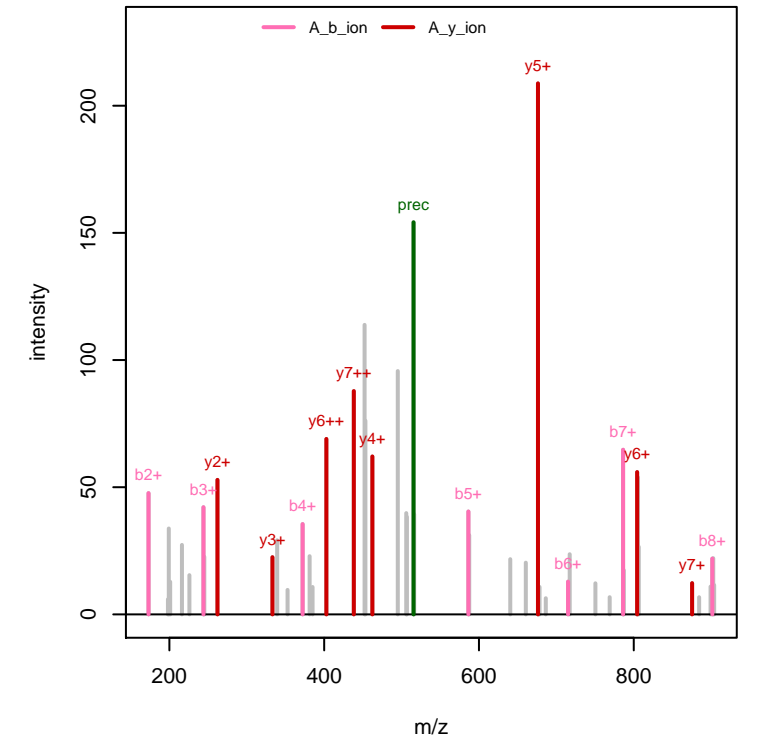

LAATIAQLPDQIGAKGVETADK+XL\_S

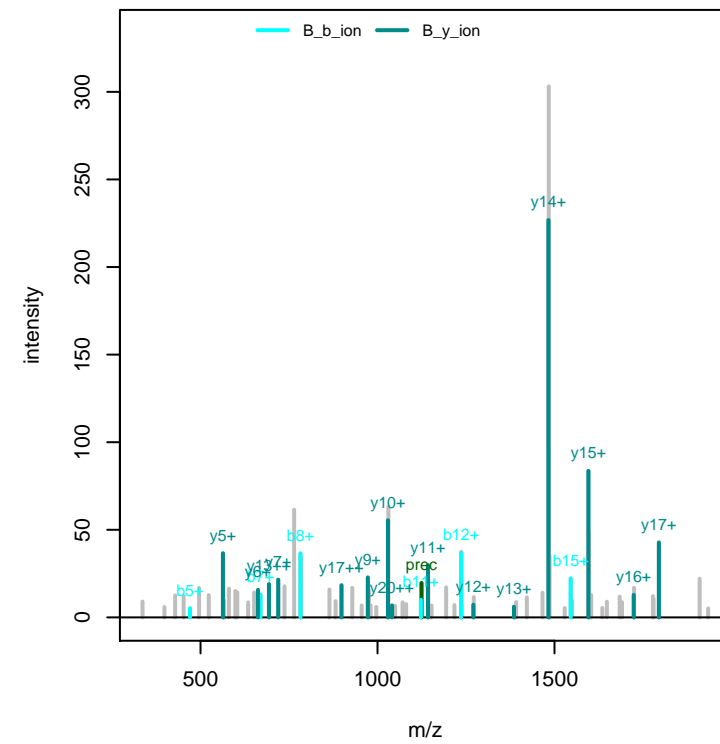

LAATIAQLPDQIGAKGVETADK+XL\_L

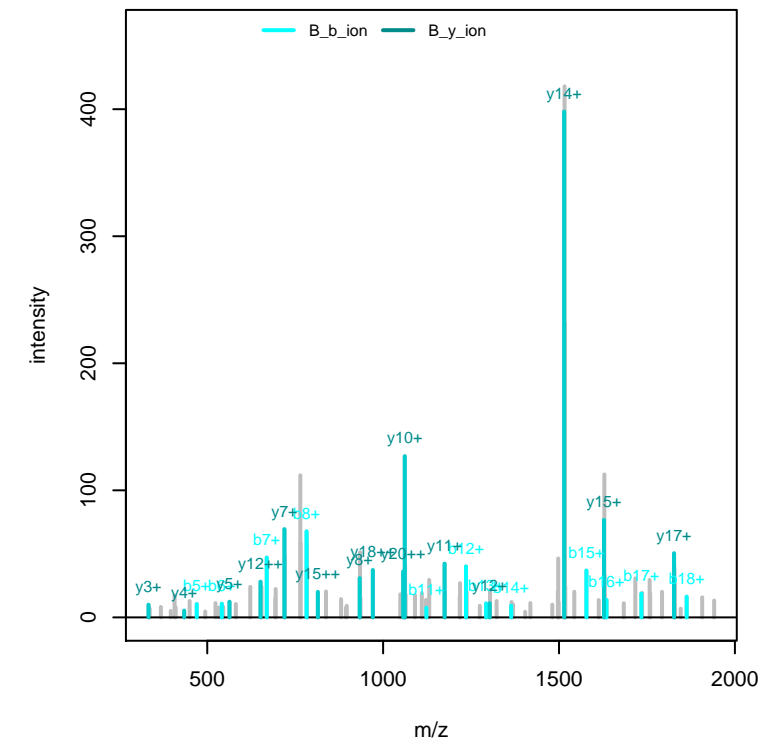

**KLQSMK  
AGSDRTKLEK**

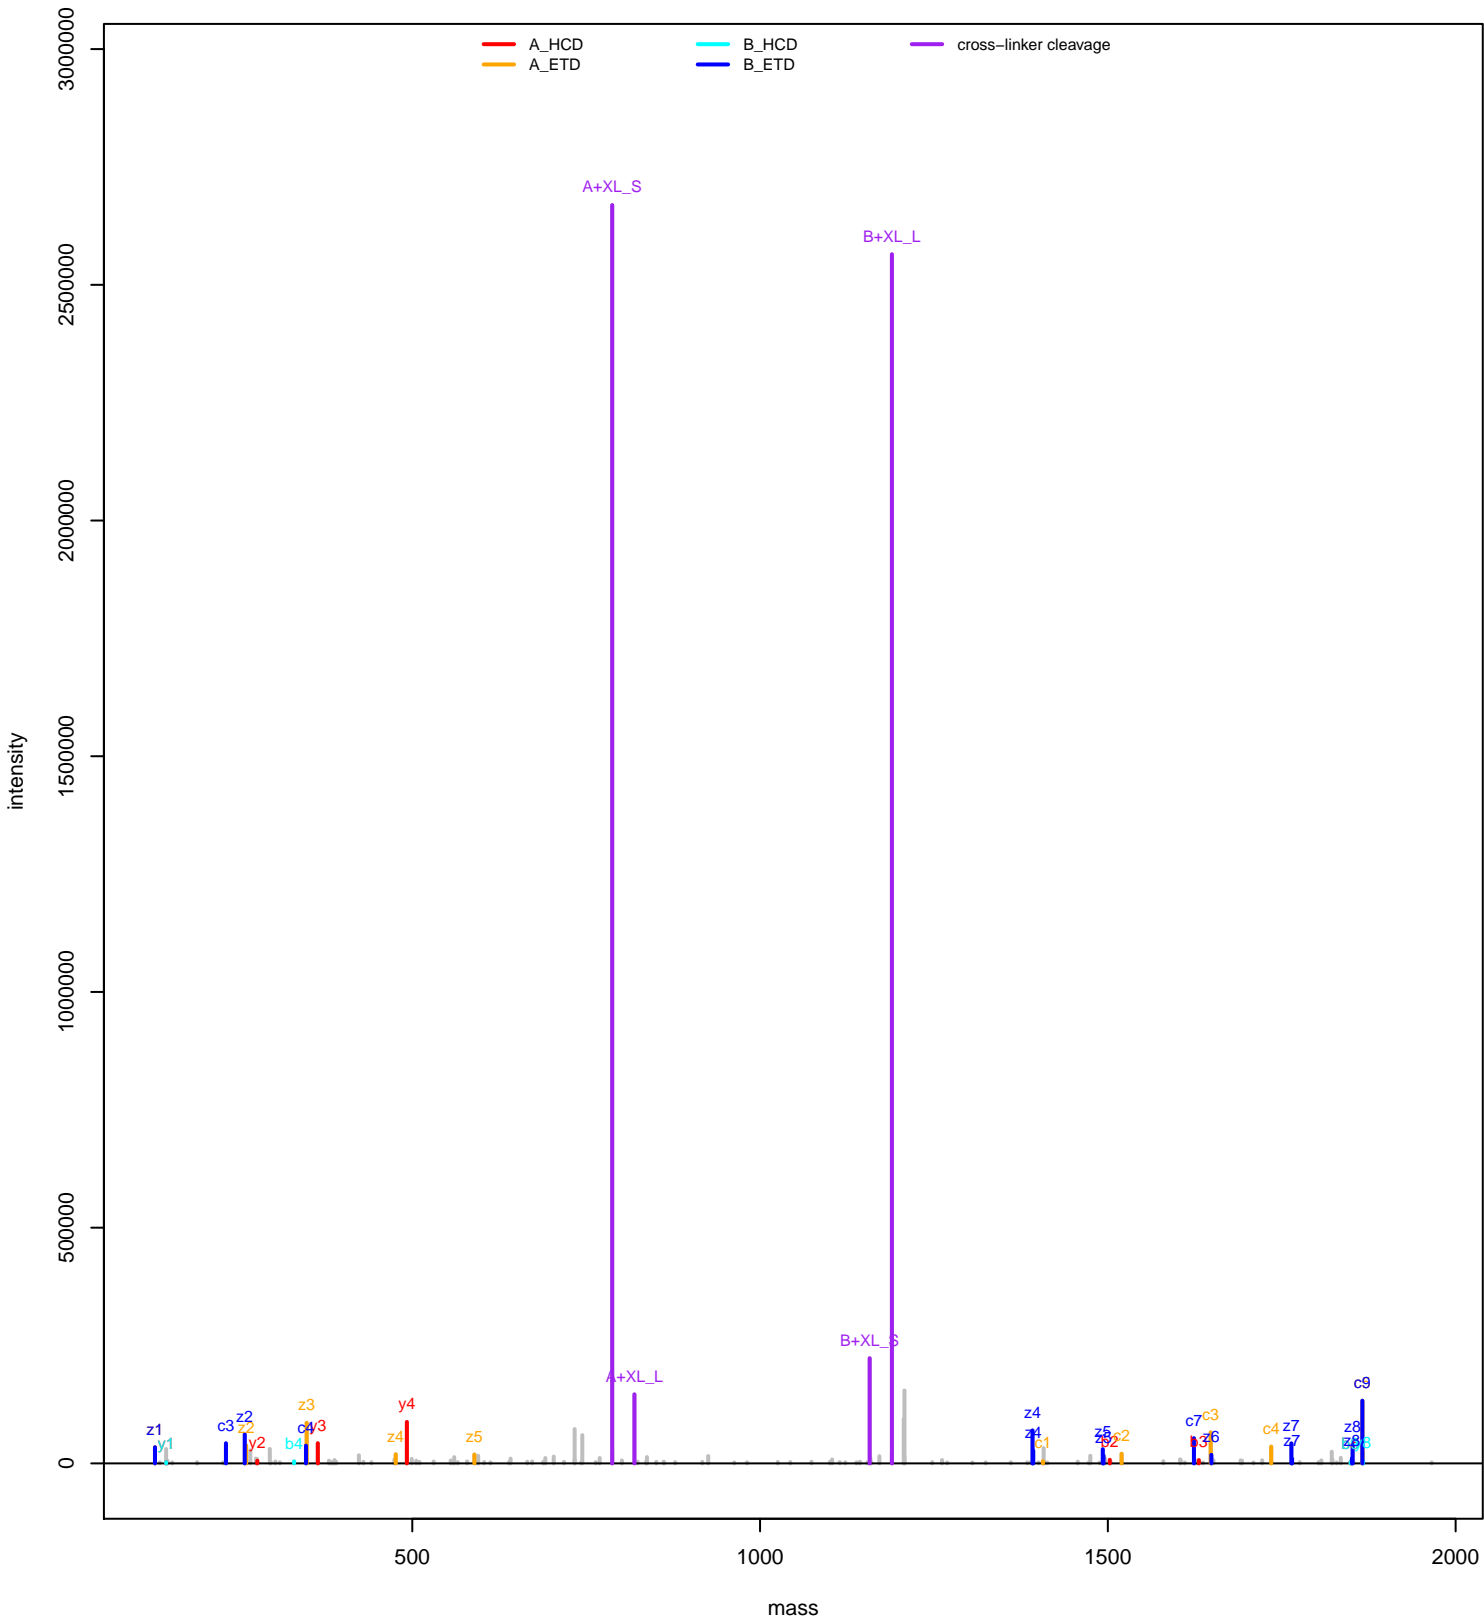

**KLQSMK+XL\_S**

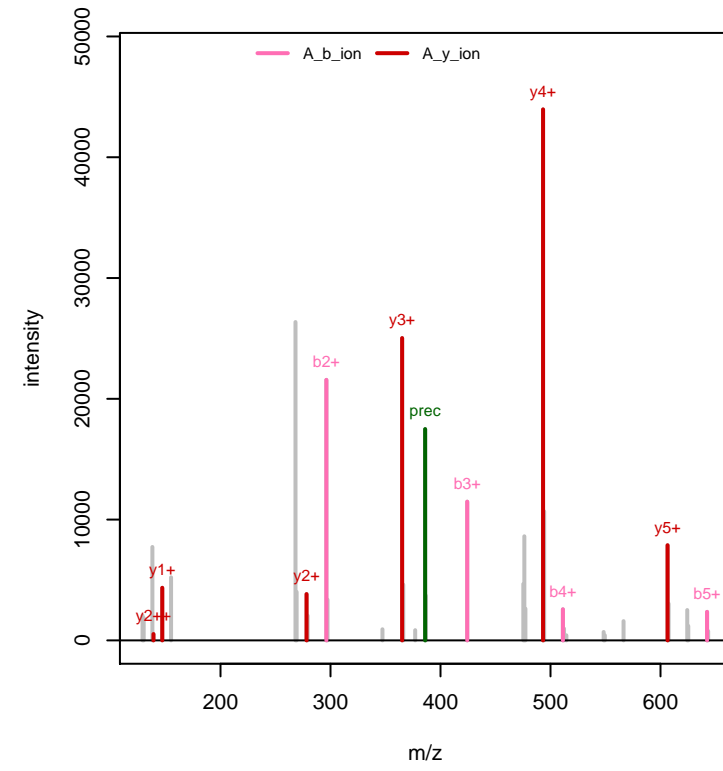

**KLQSMK+XL\_L**

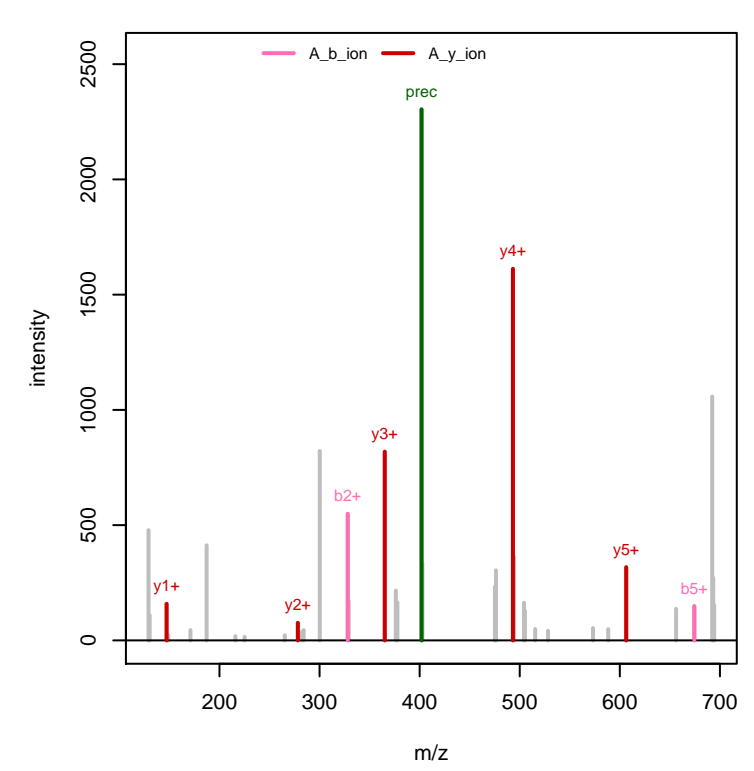

**AGSDRTKLEK+XL\_S**

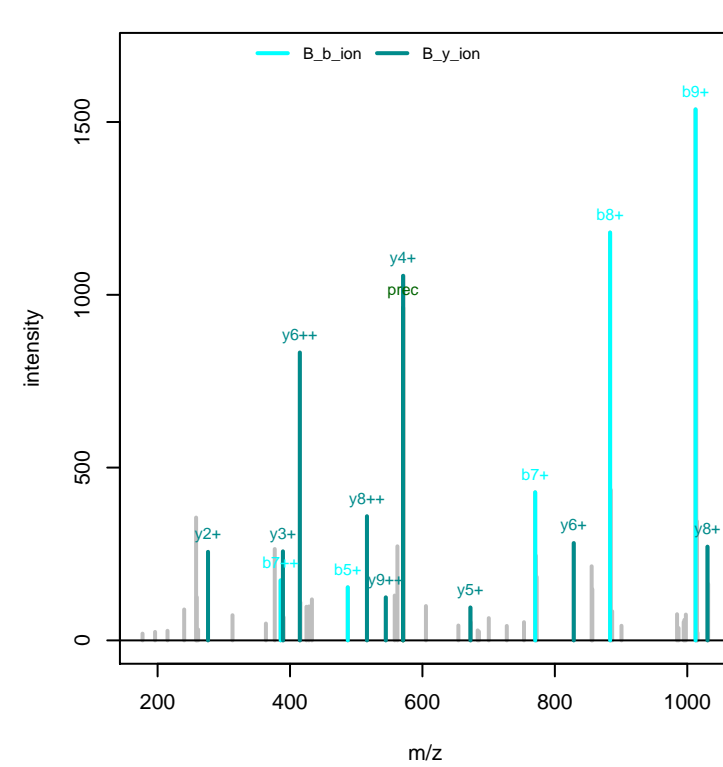

**AGSDRTKLEK+XL\_L**

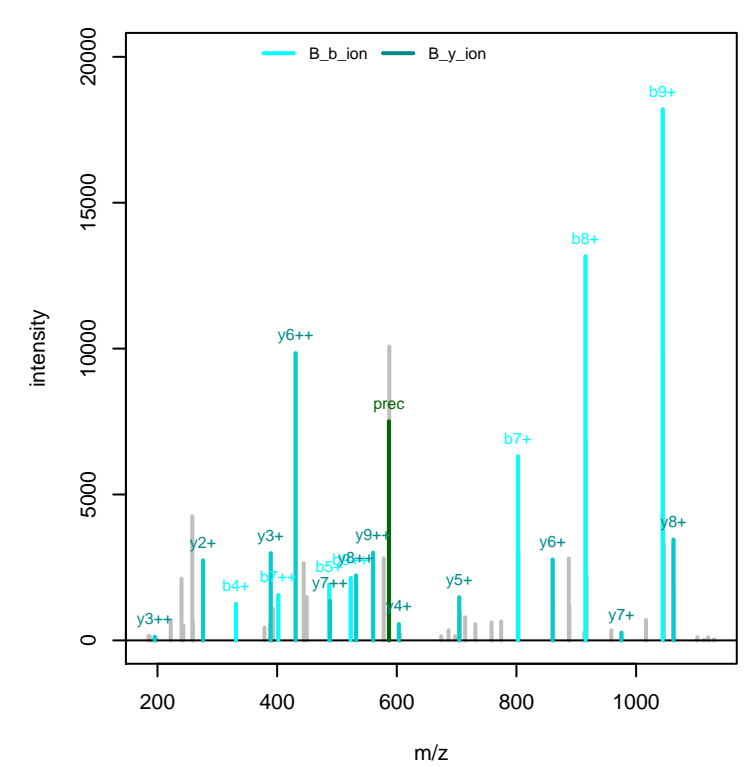

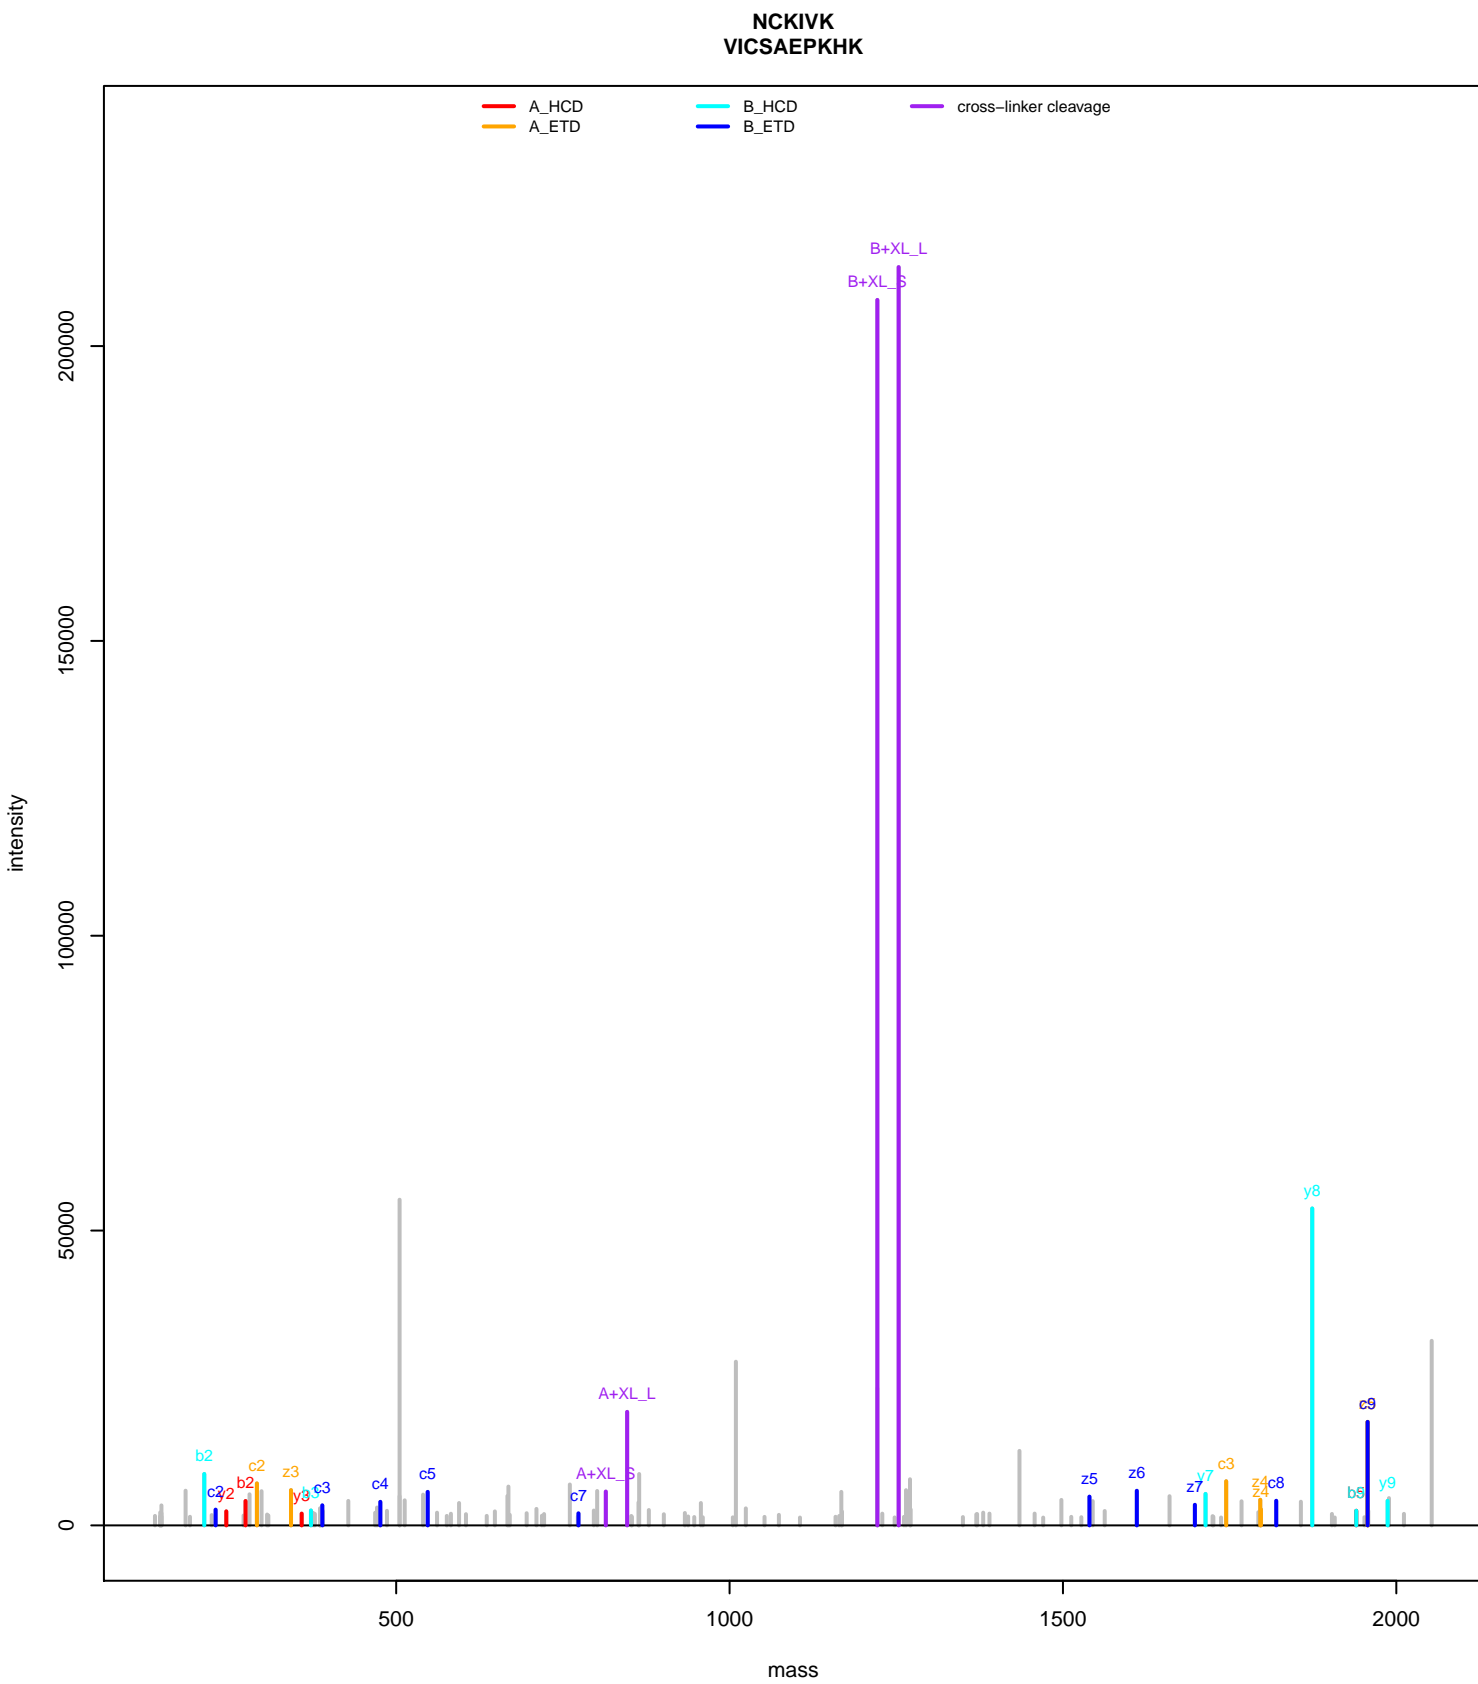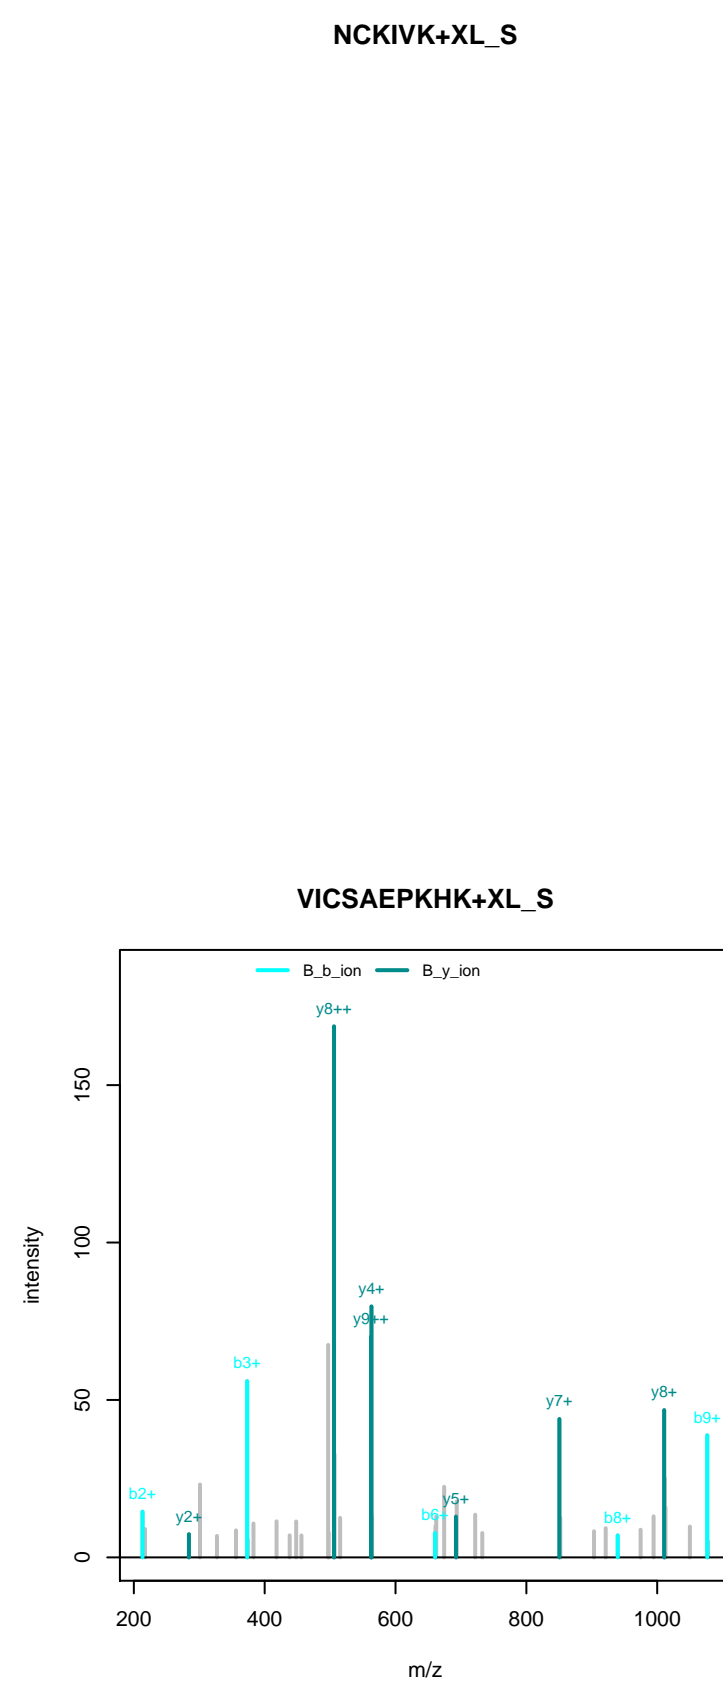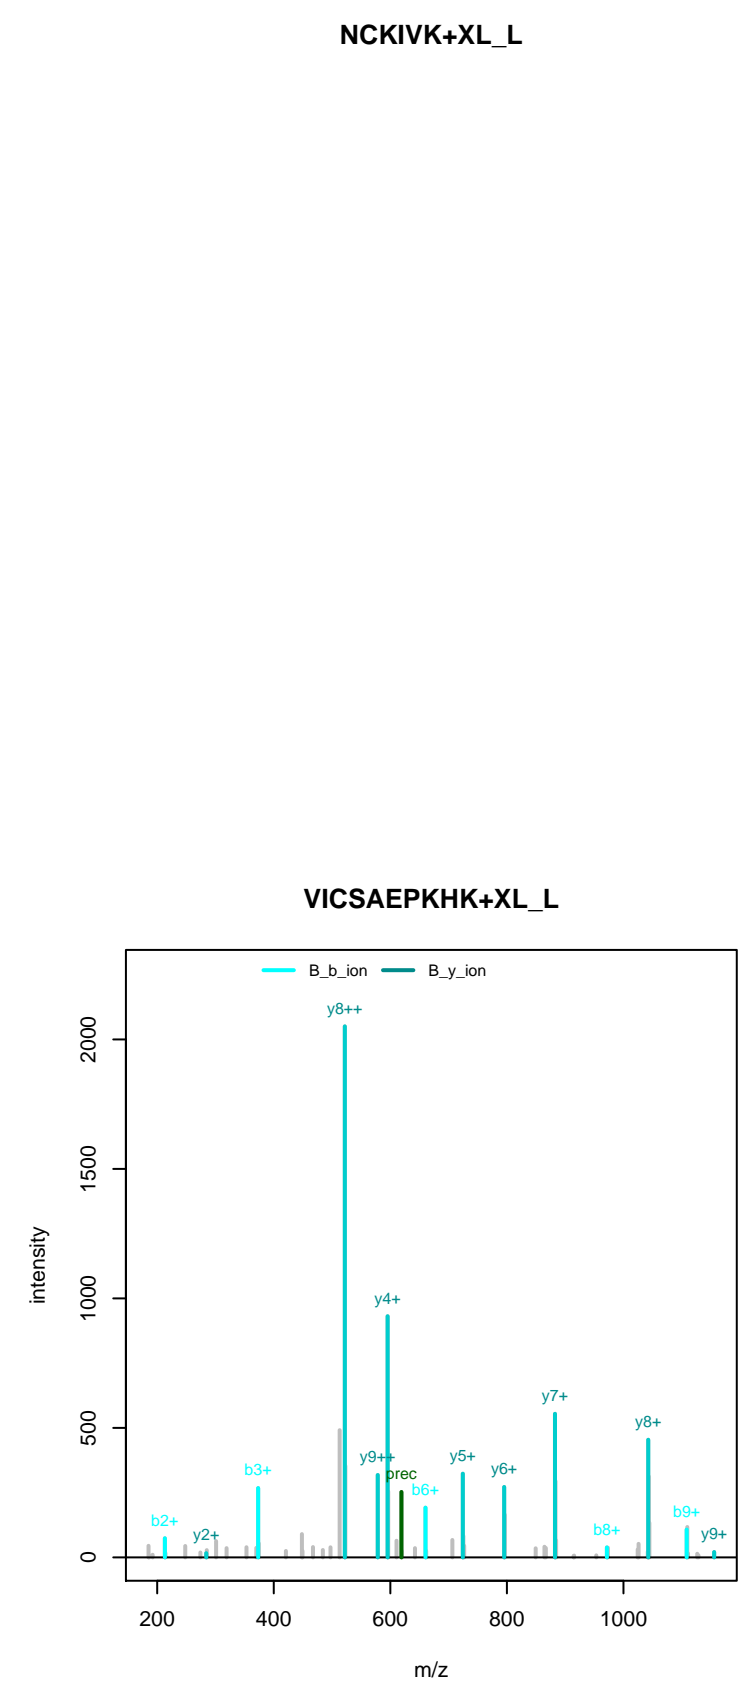

SEKRVPMTR  
SEEKASTPAQR

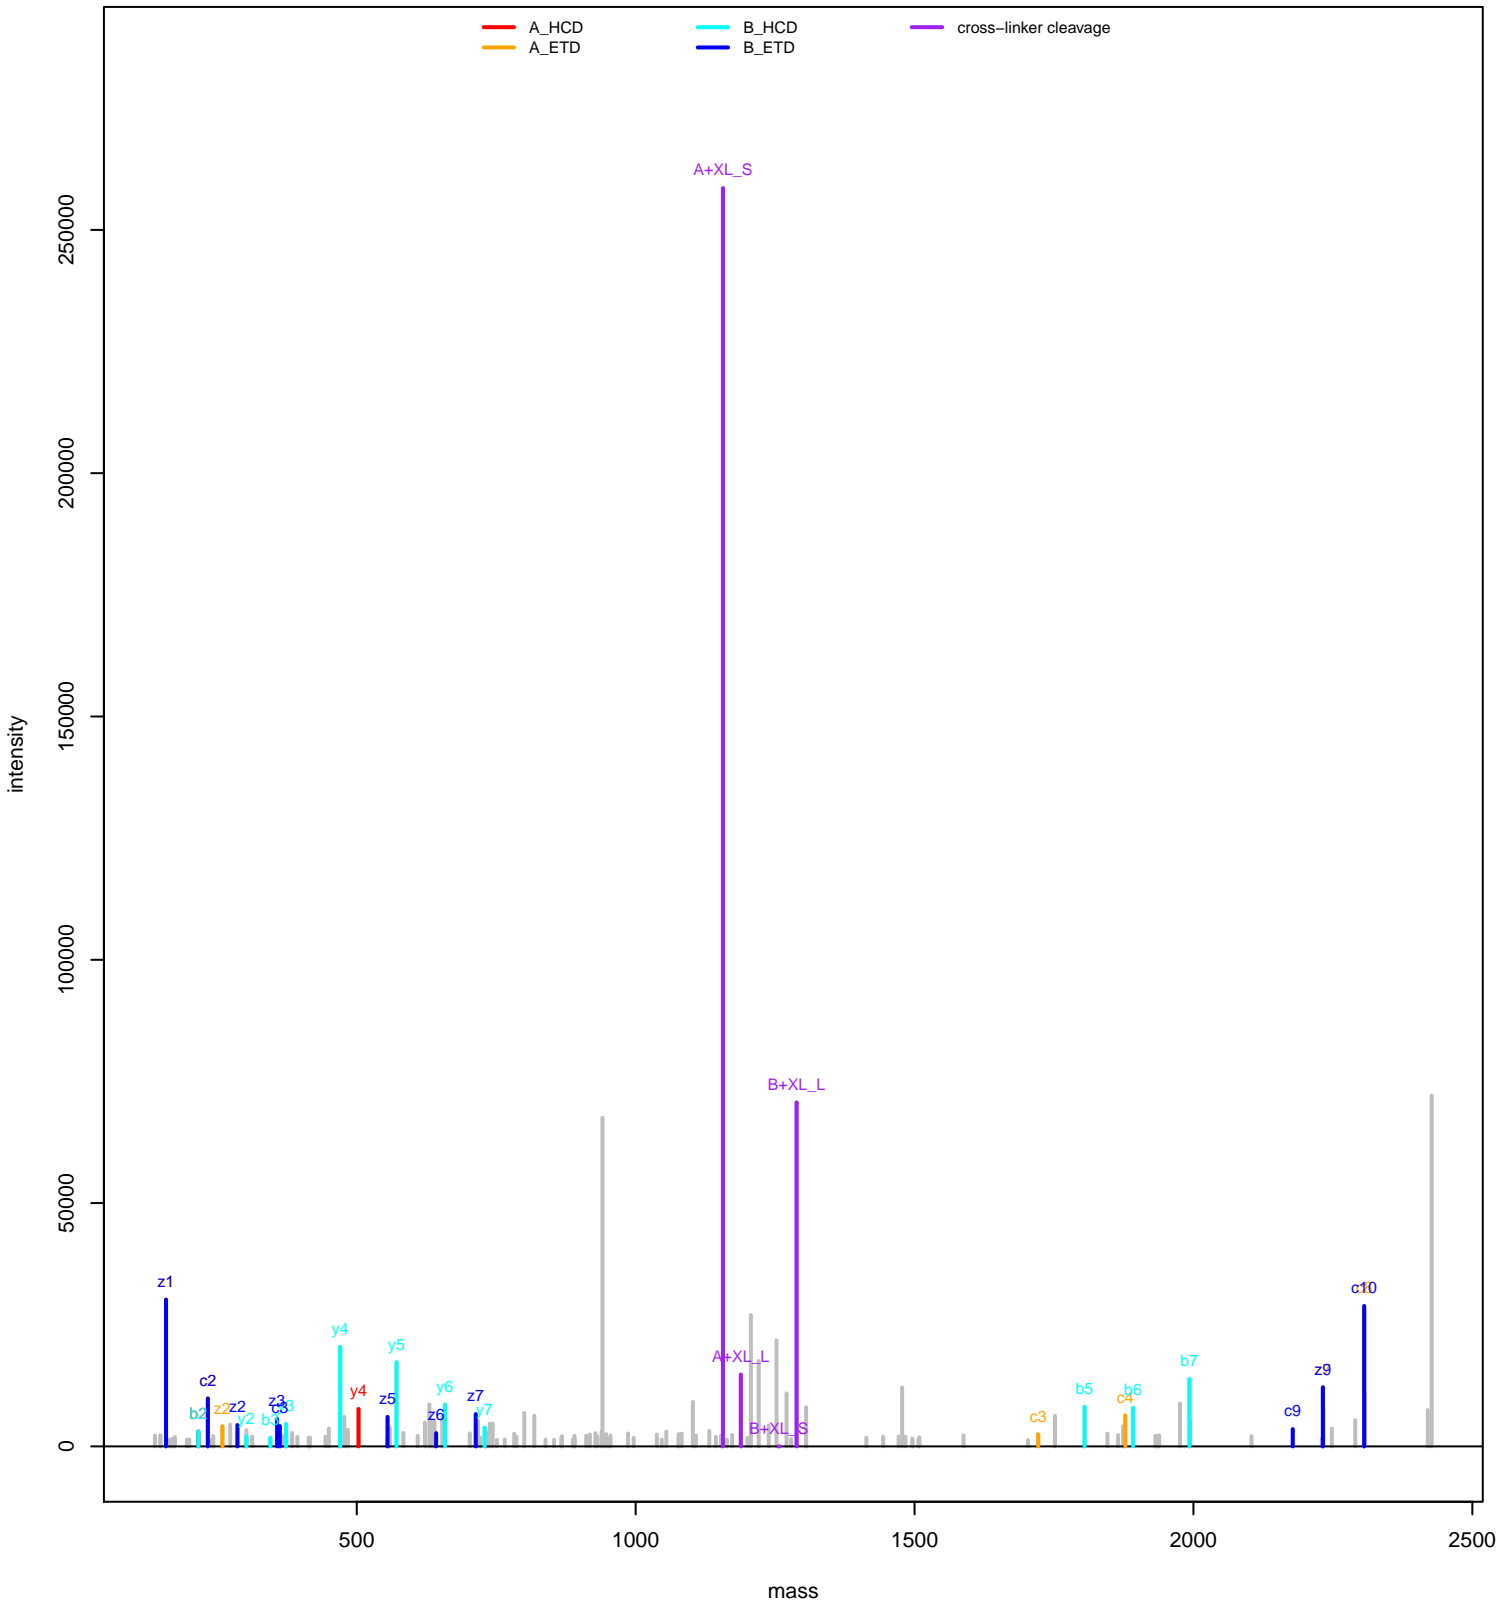

SEKRVPMTR+XL\_S

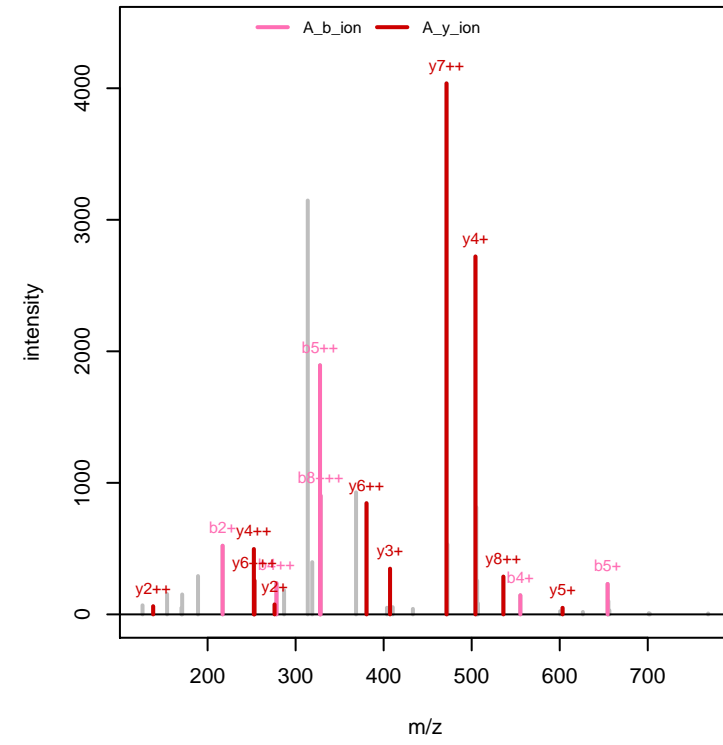

SEKRVPMTR+XL\_L

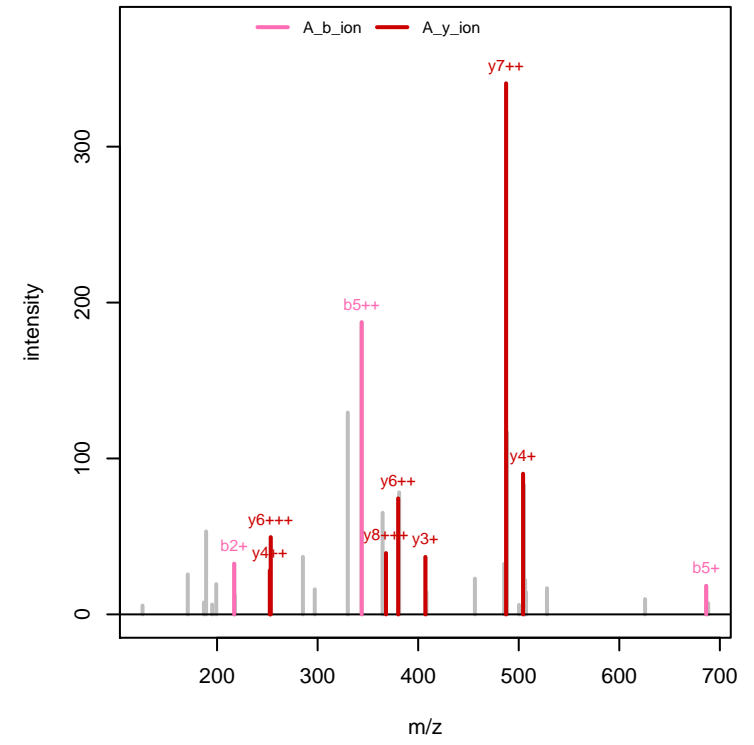

SEEKASTPAQR+XL\_S

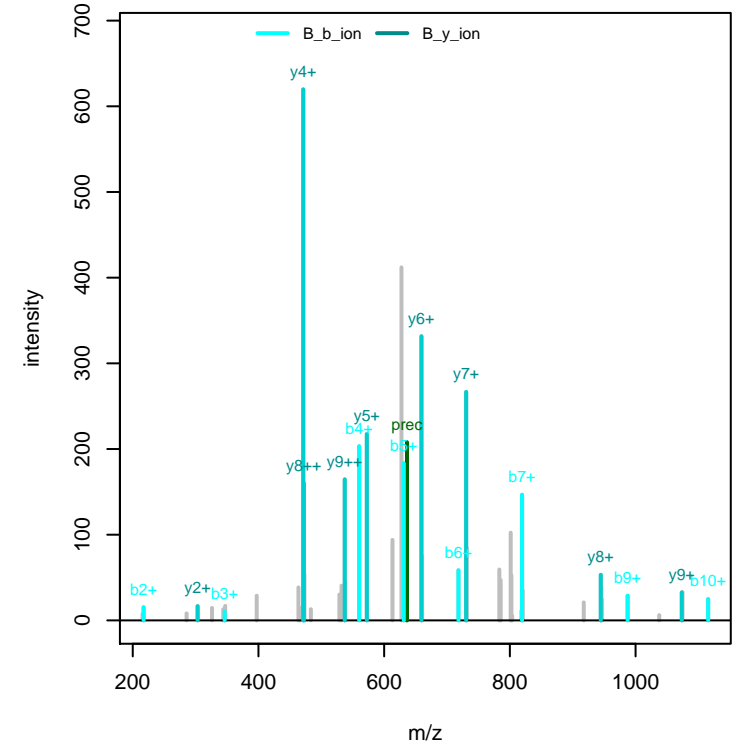

AEQALKQSR  
LGETGDAIAKQTR

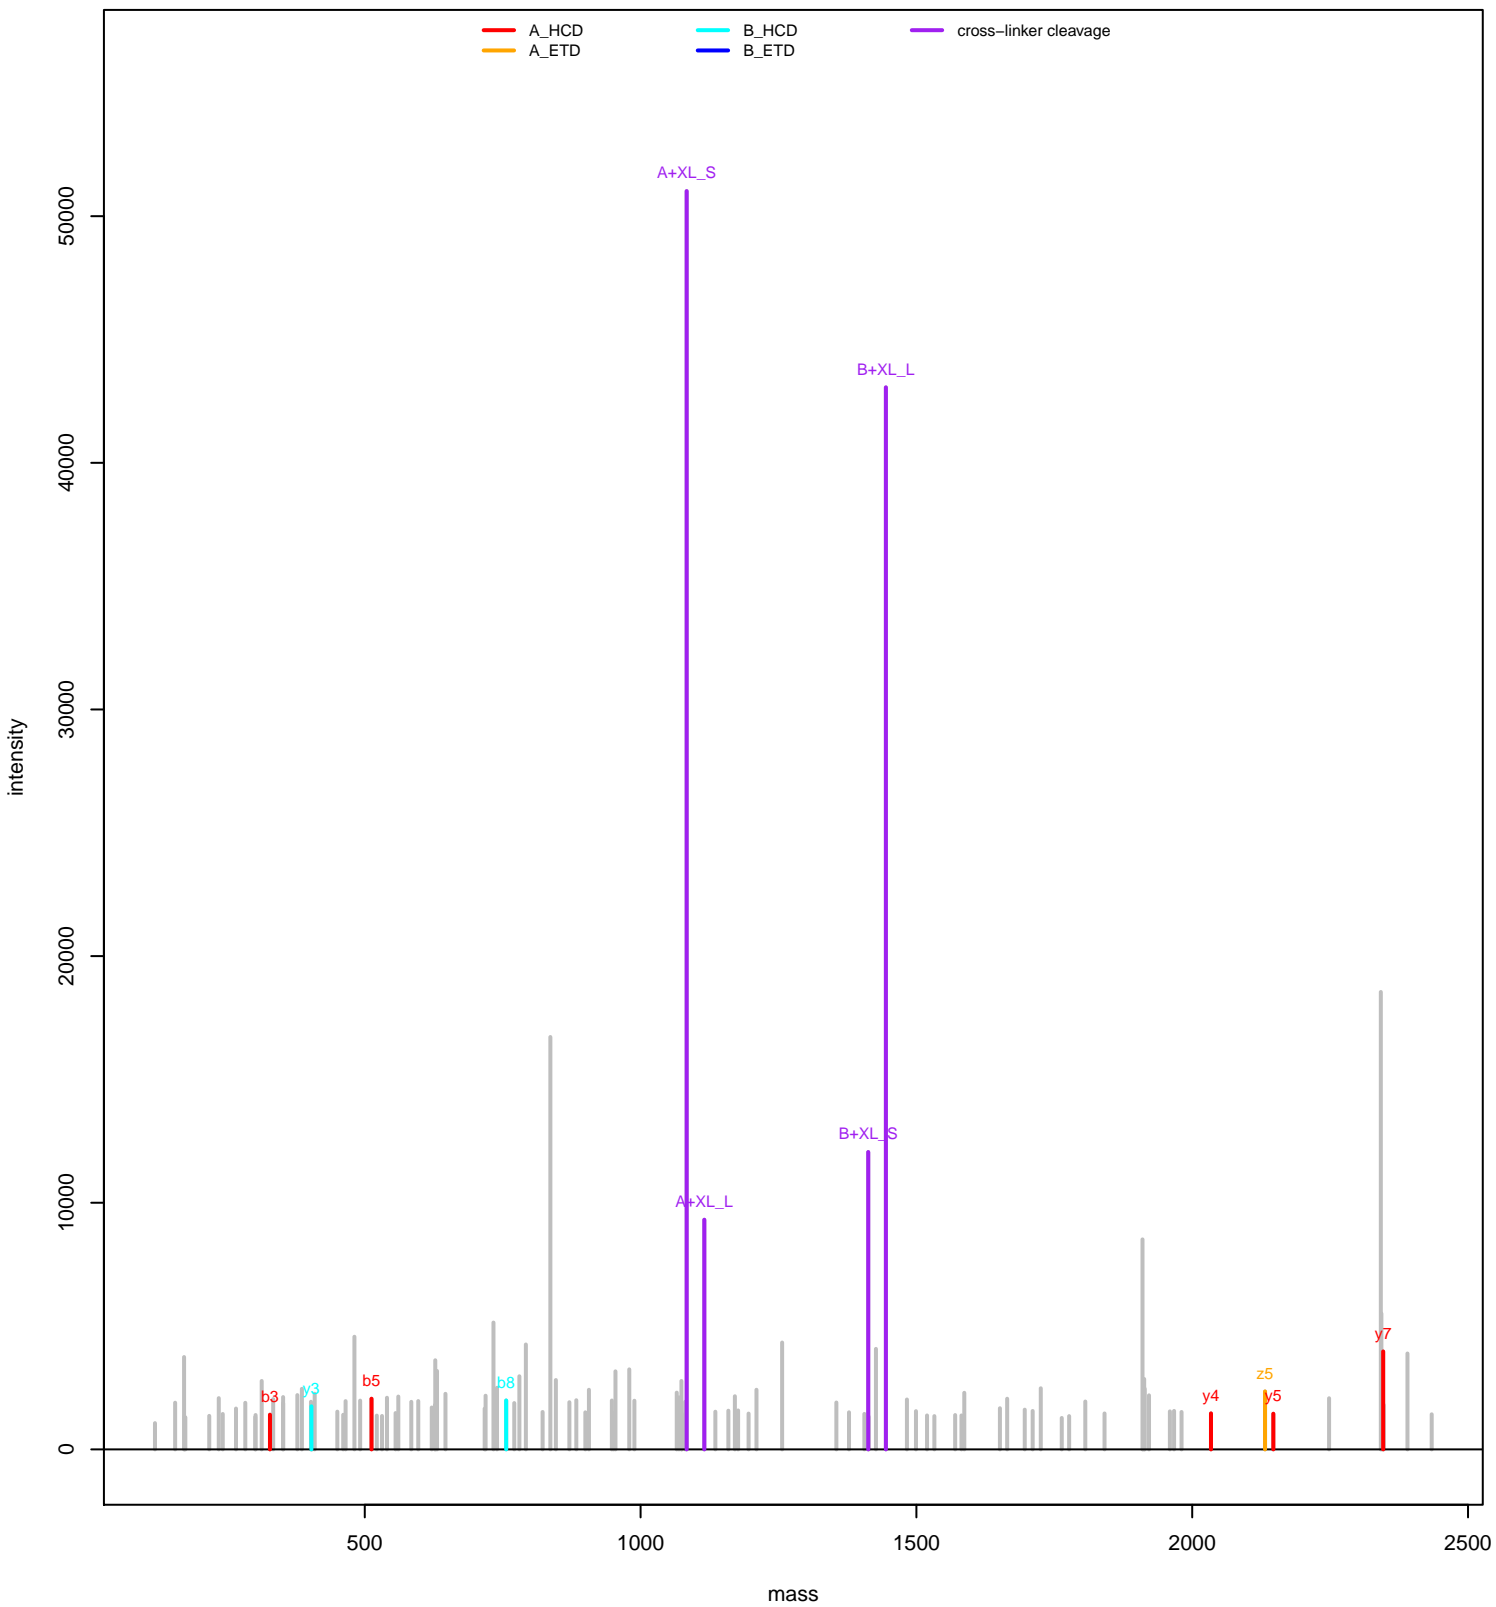

AEQALKQSR+XL\_S

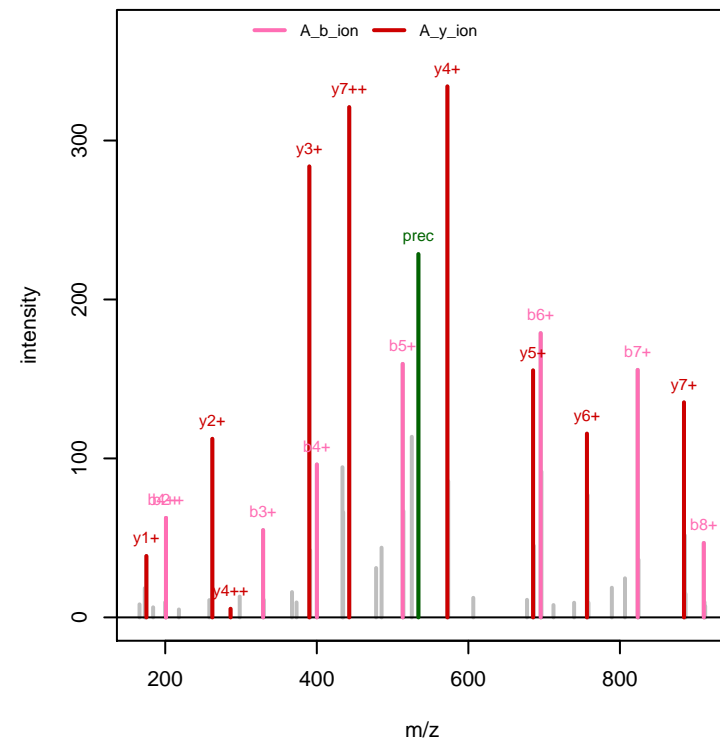

AEQALKQSR+XL\_L

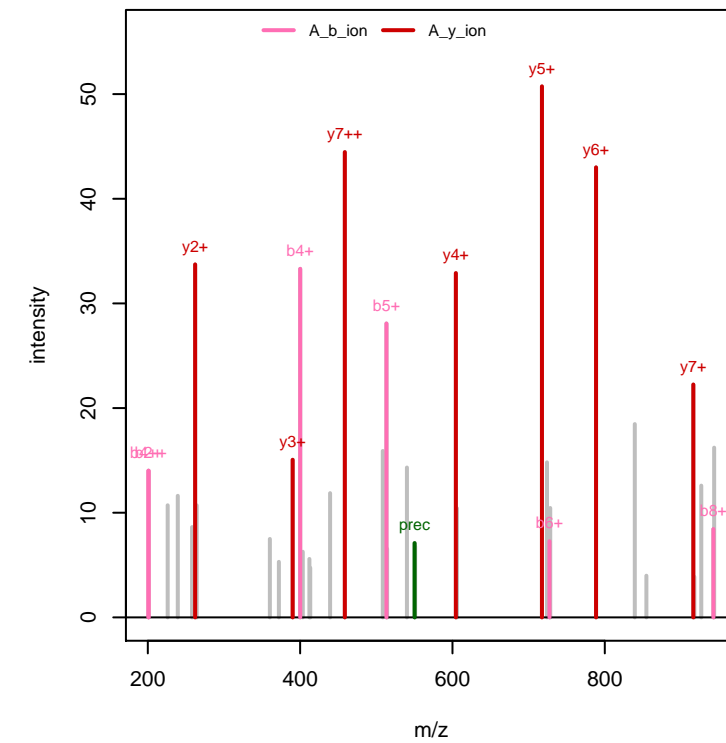

LGETGDAIAKQTR+XL\_S

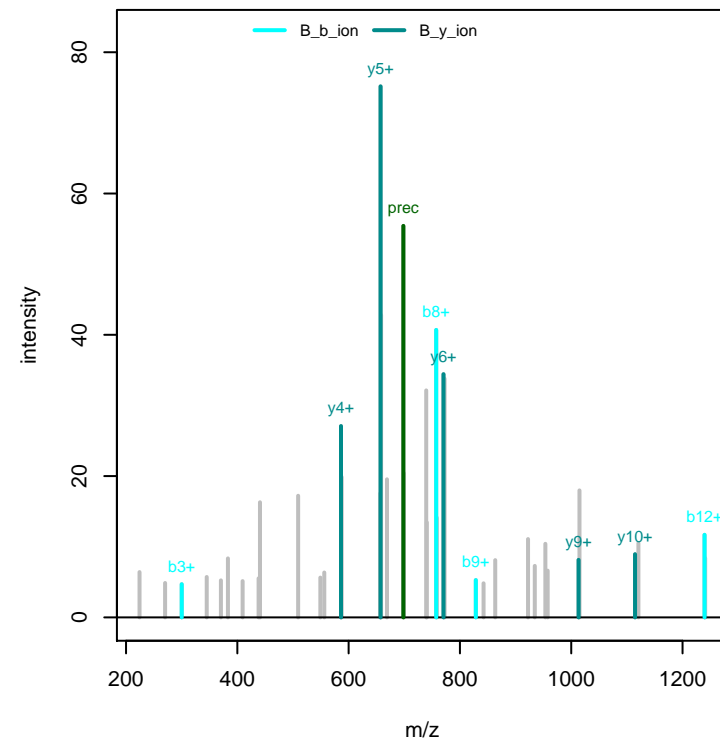

LGETGDAIAKQTR+XL\_L

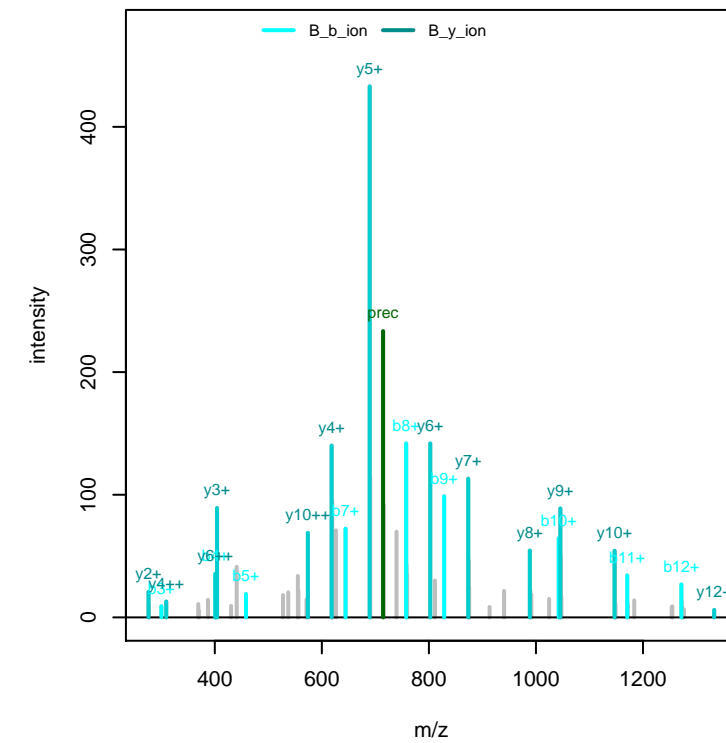

SPTVKAVK  
SKIEAEEEEK

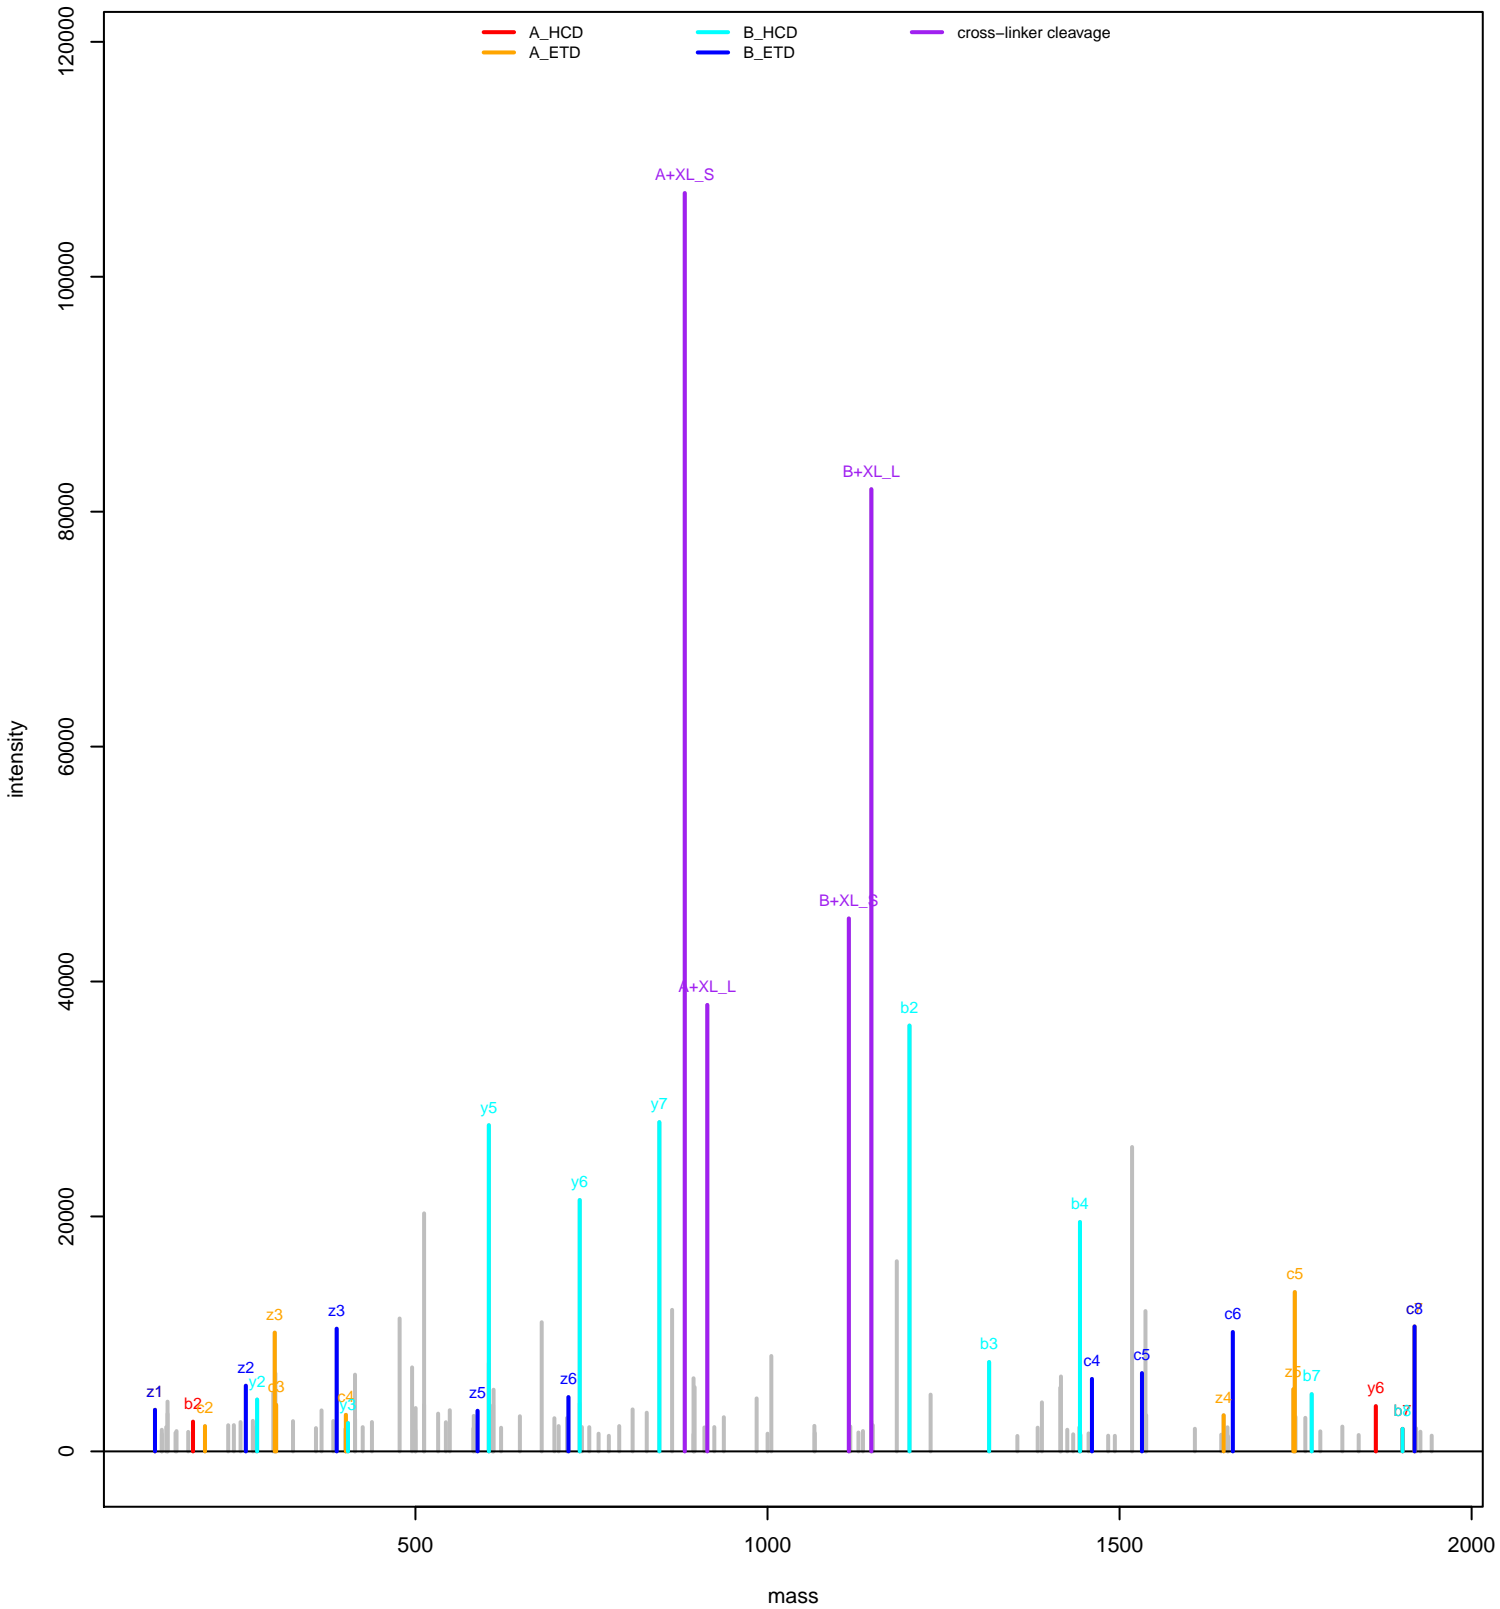

SPTVKAVK+XL\_S

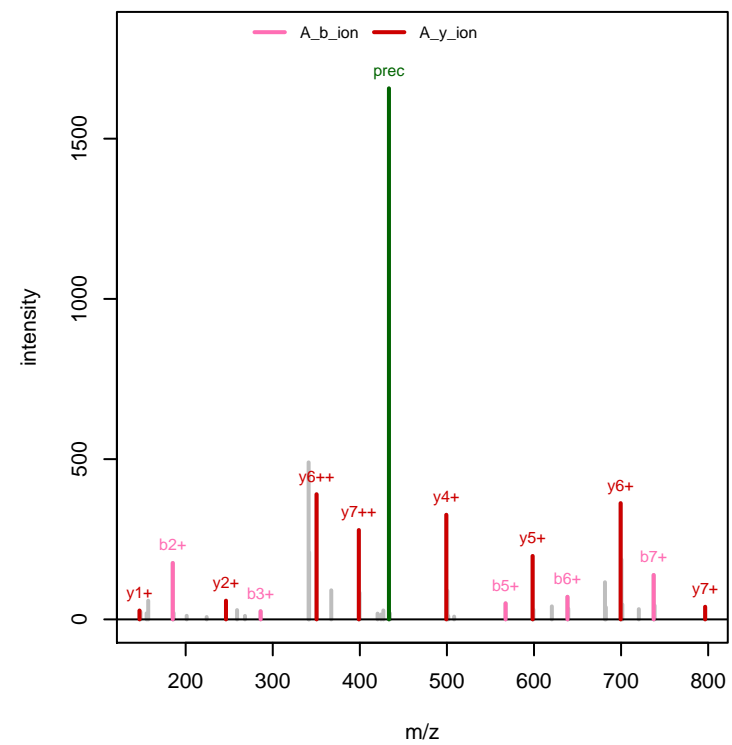

SPTVKAVK+XL\_L

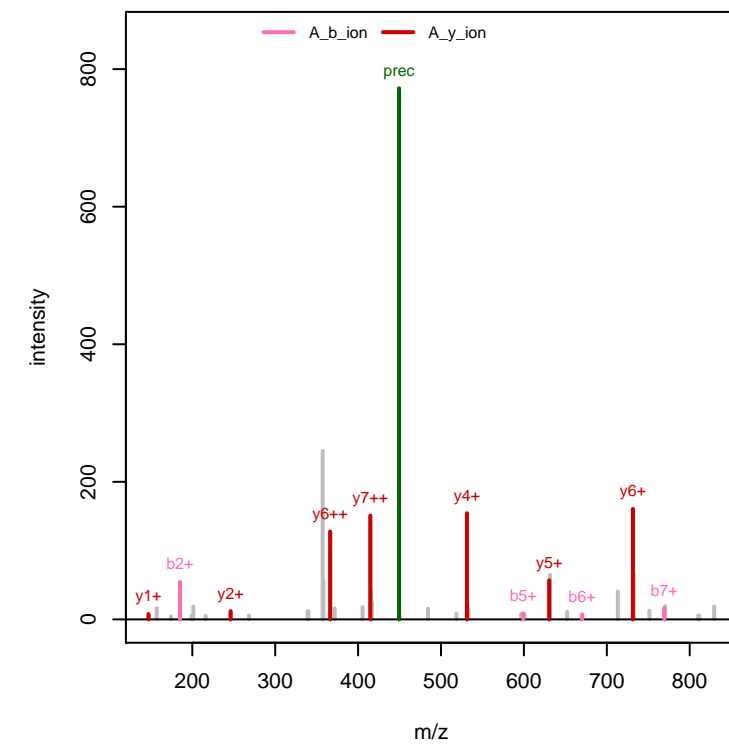

SKIEAEEEEK+XL\_S

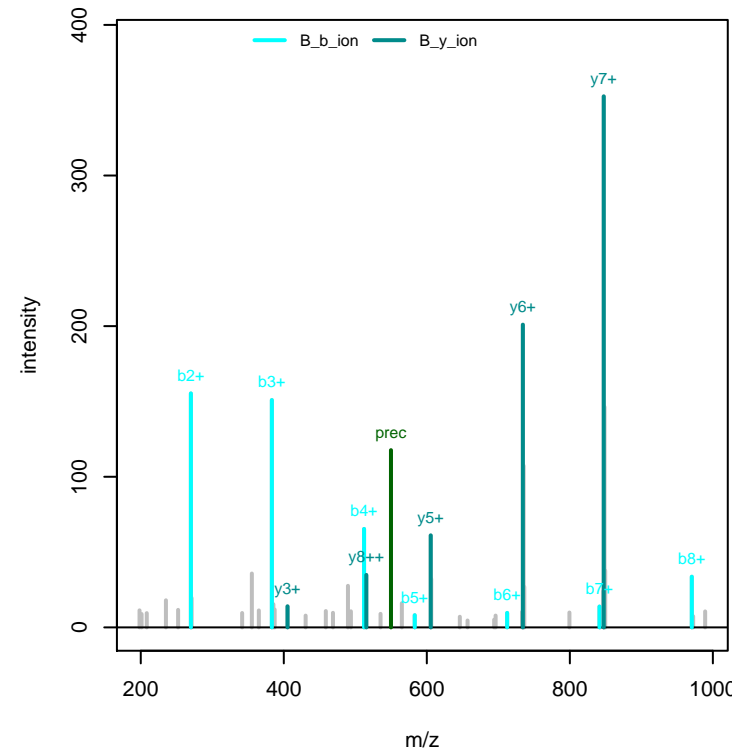

SKIEAEEEEK+XL\_L

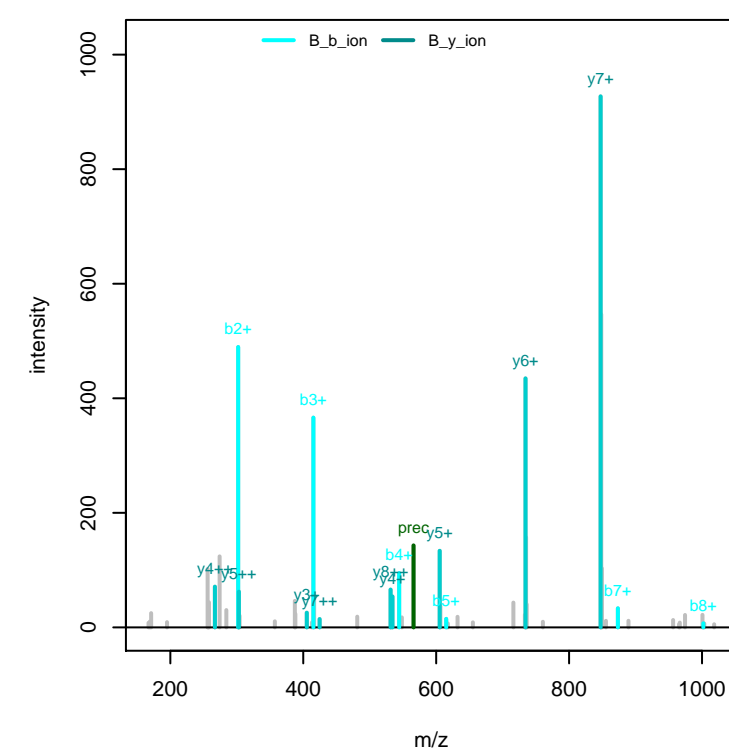

**GEKVQAK  
GVETADKVLK**

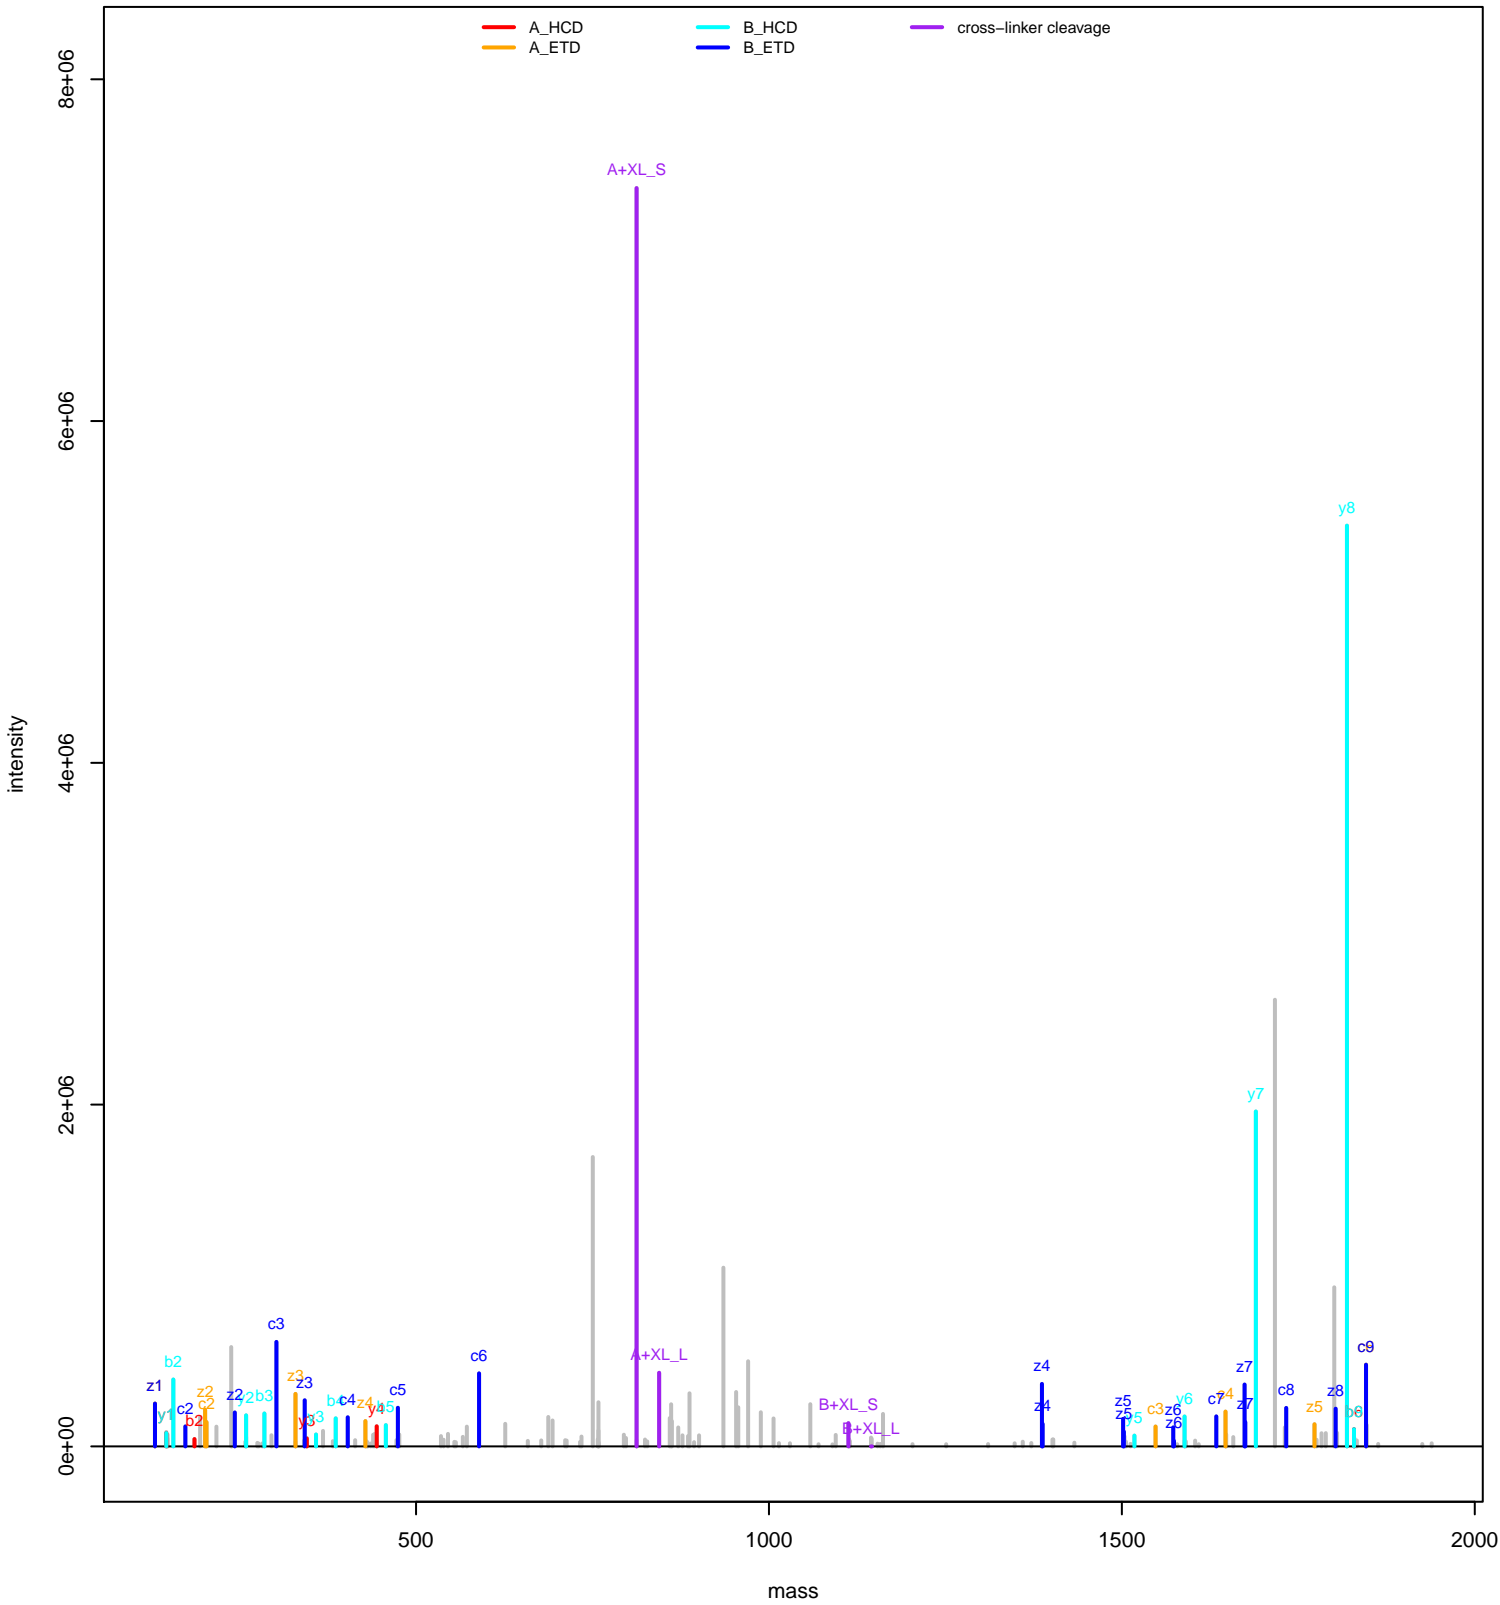

**GEKVQAK+XL\_S**

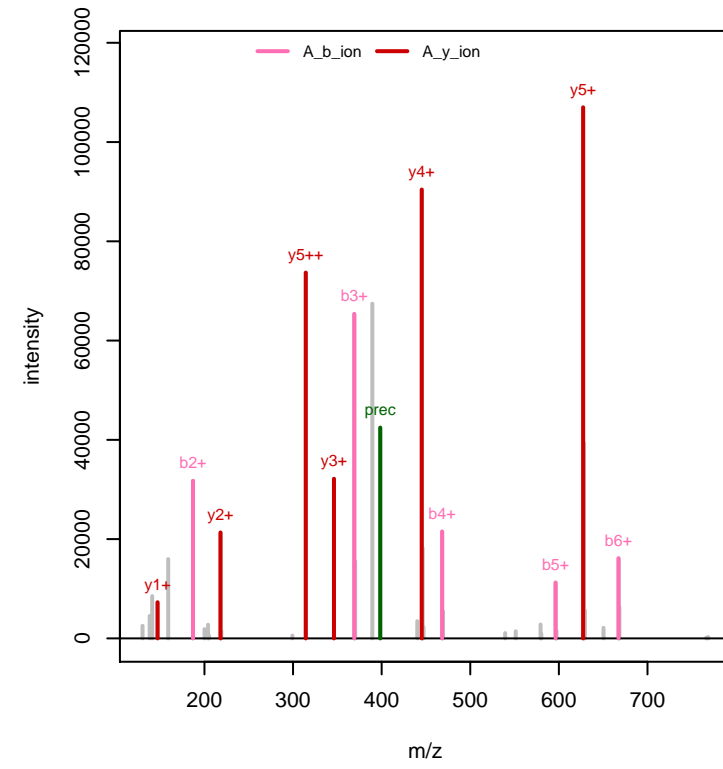

**GEKVQAK+XL\_L**

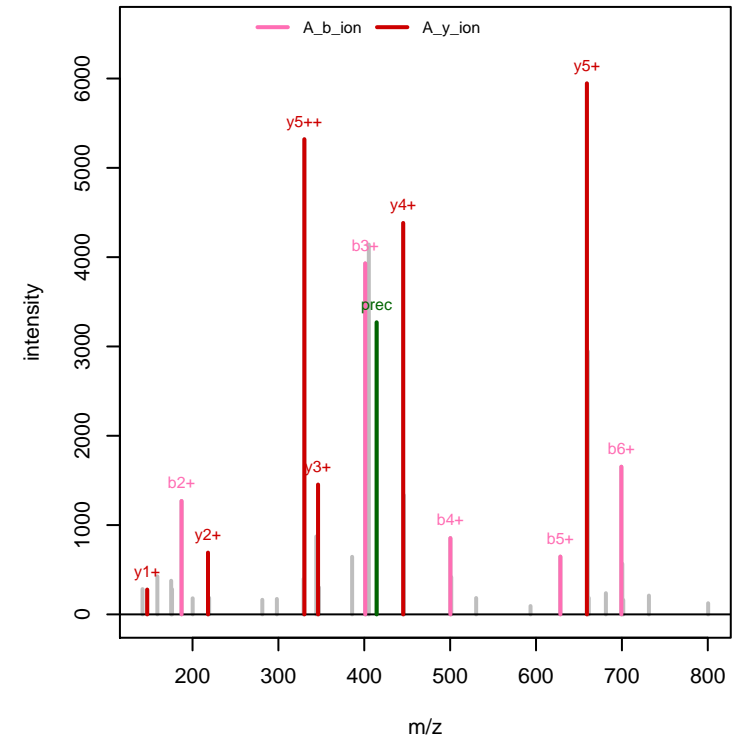

**GVETADKVLK+XL\_S**

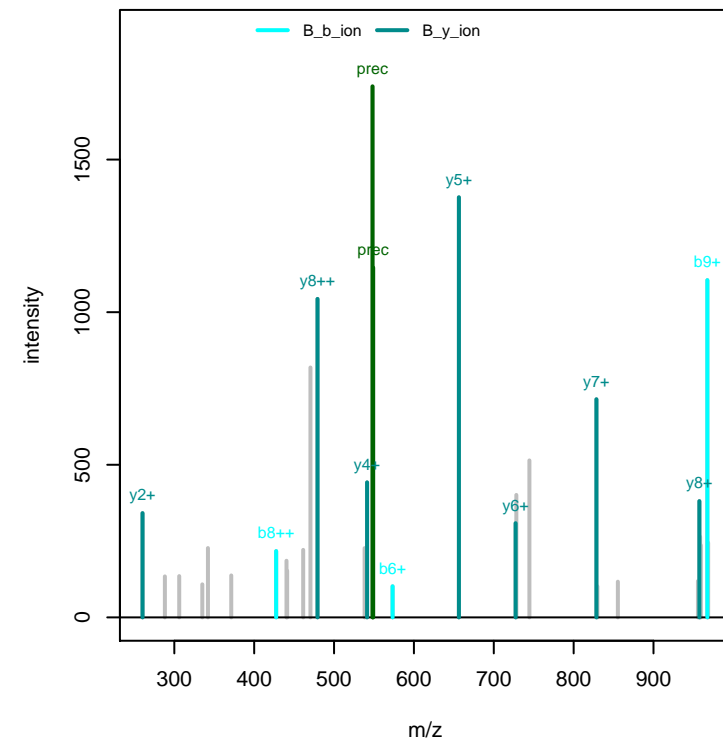

**GVETADKVLK+XL\_L**

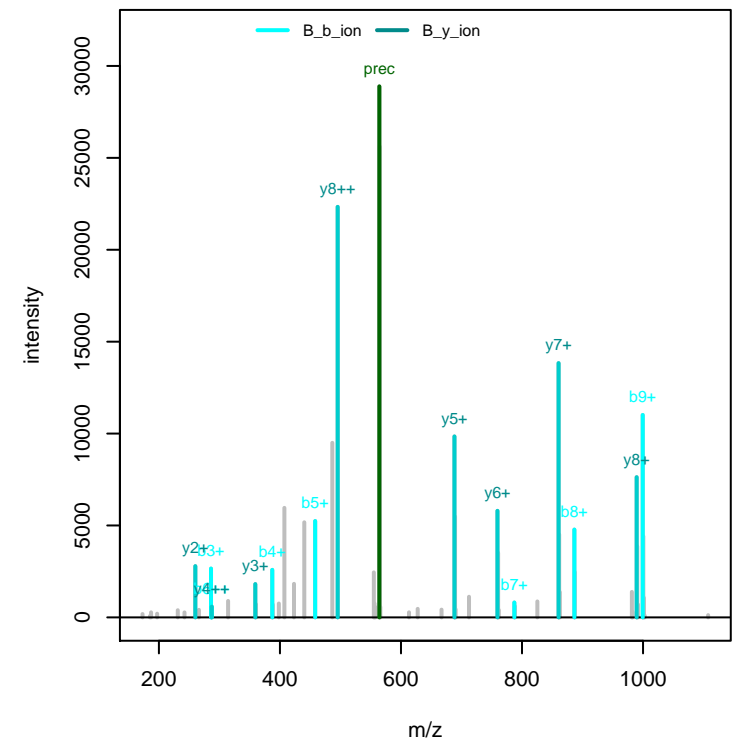

SSKEQKK  
QKVIQVK

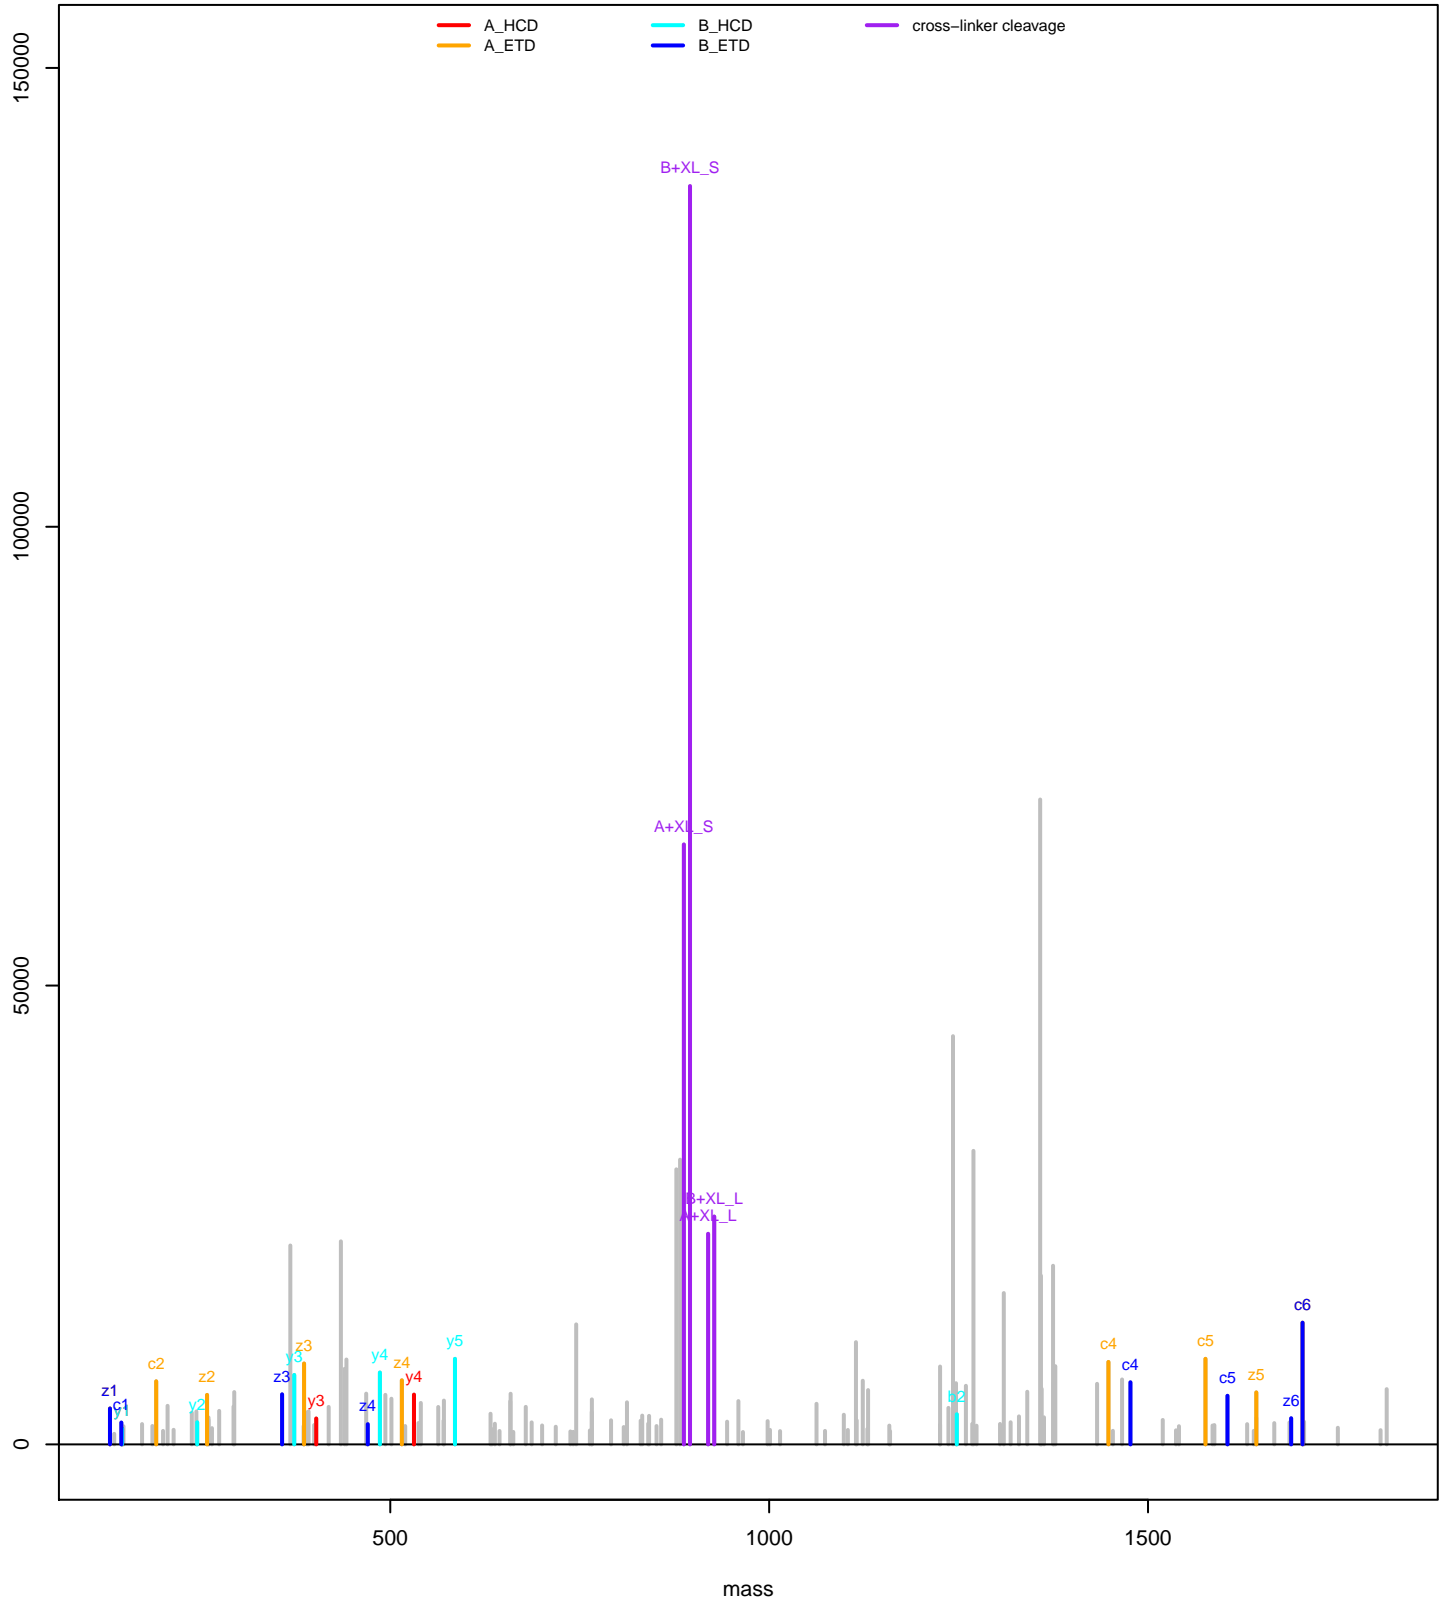

SSKEQKK+XL\_S

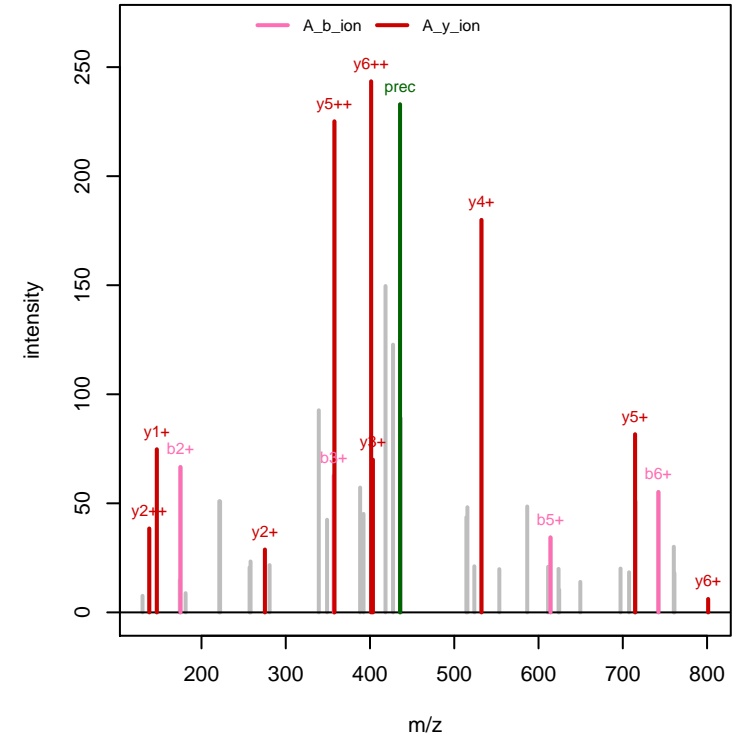

SSKEQKK+XL\_L

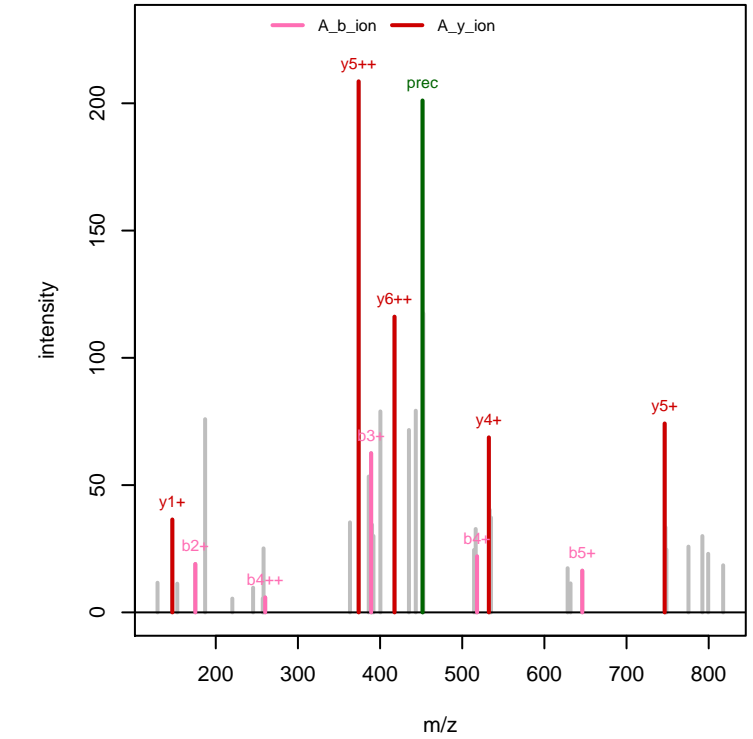

QKVIQVK+XL\_S

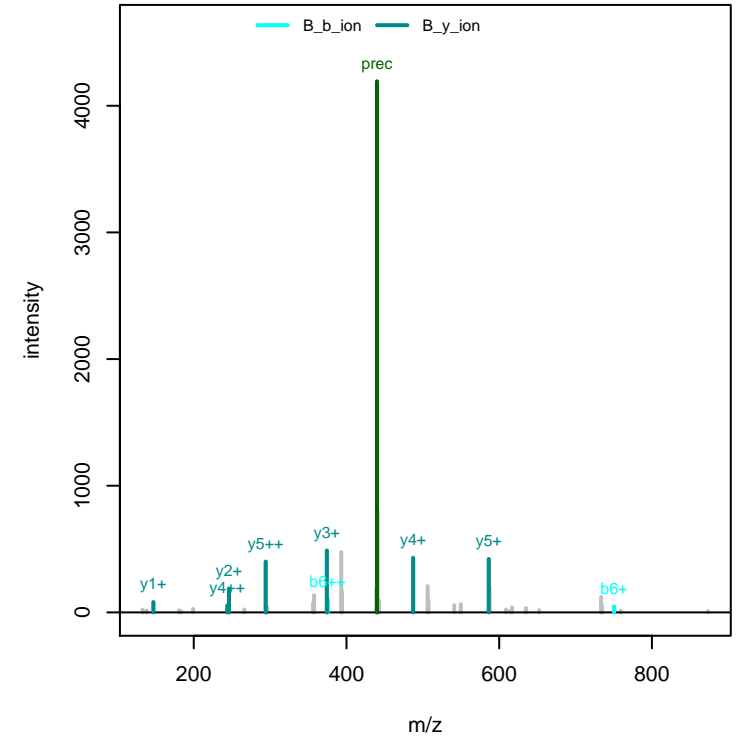

QKVIQVK+XL\_L

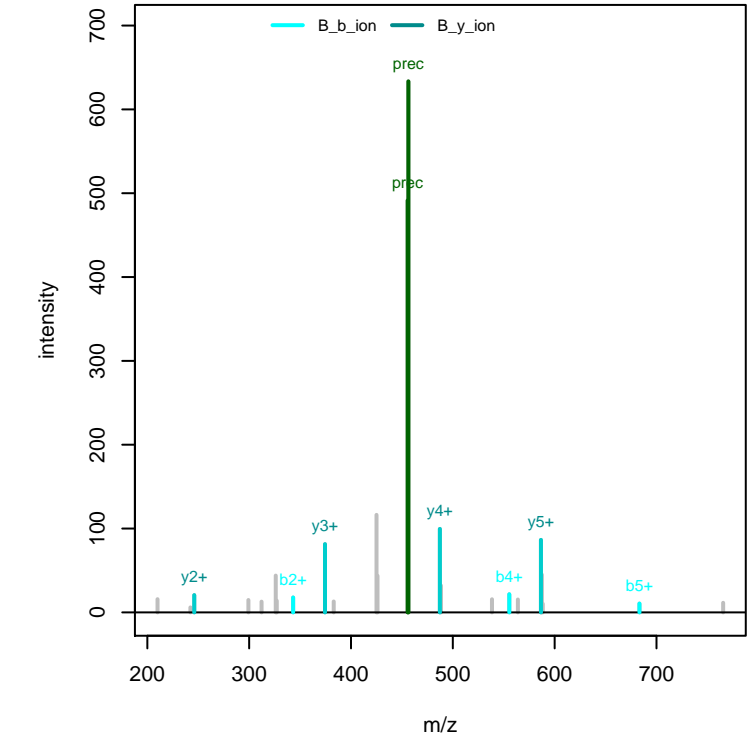



SEKLSK  
SEKLSKS

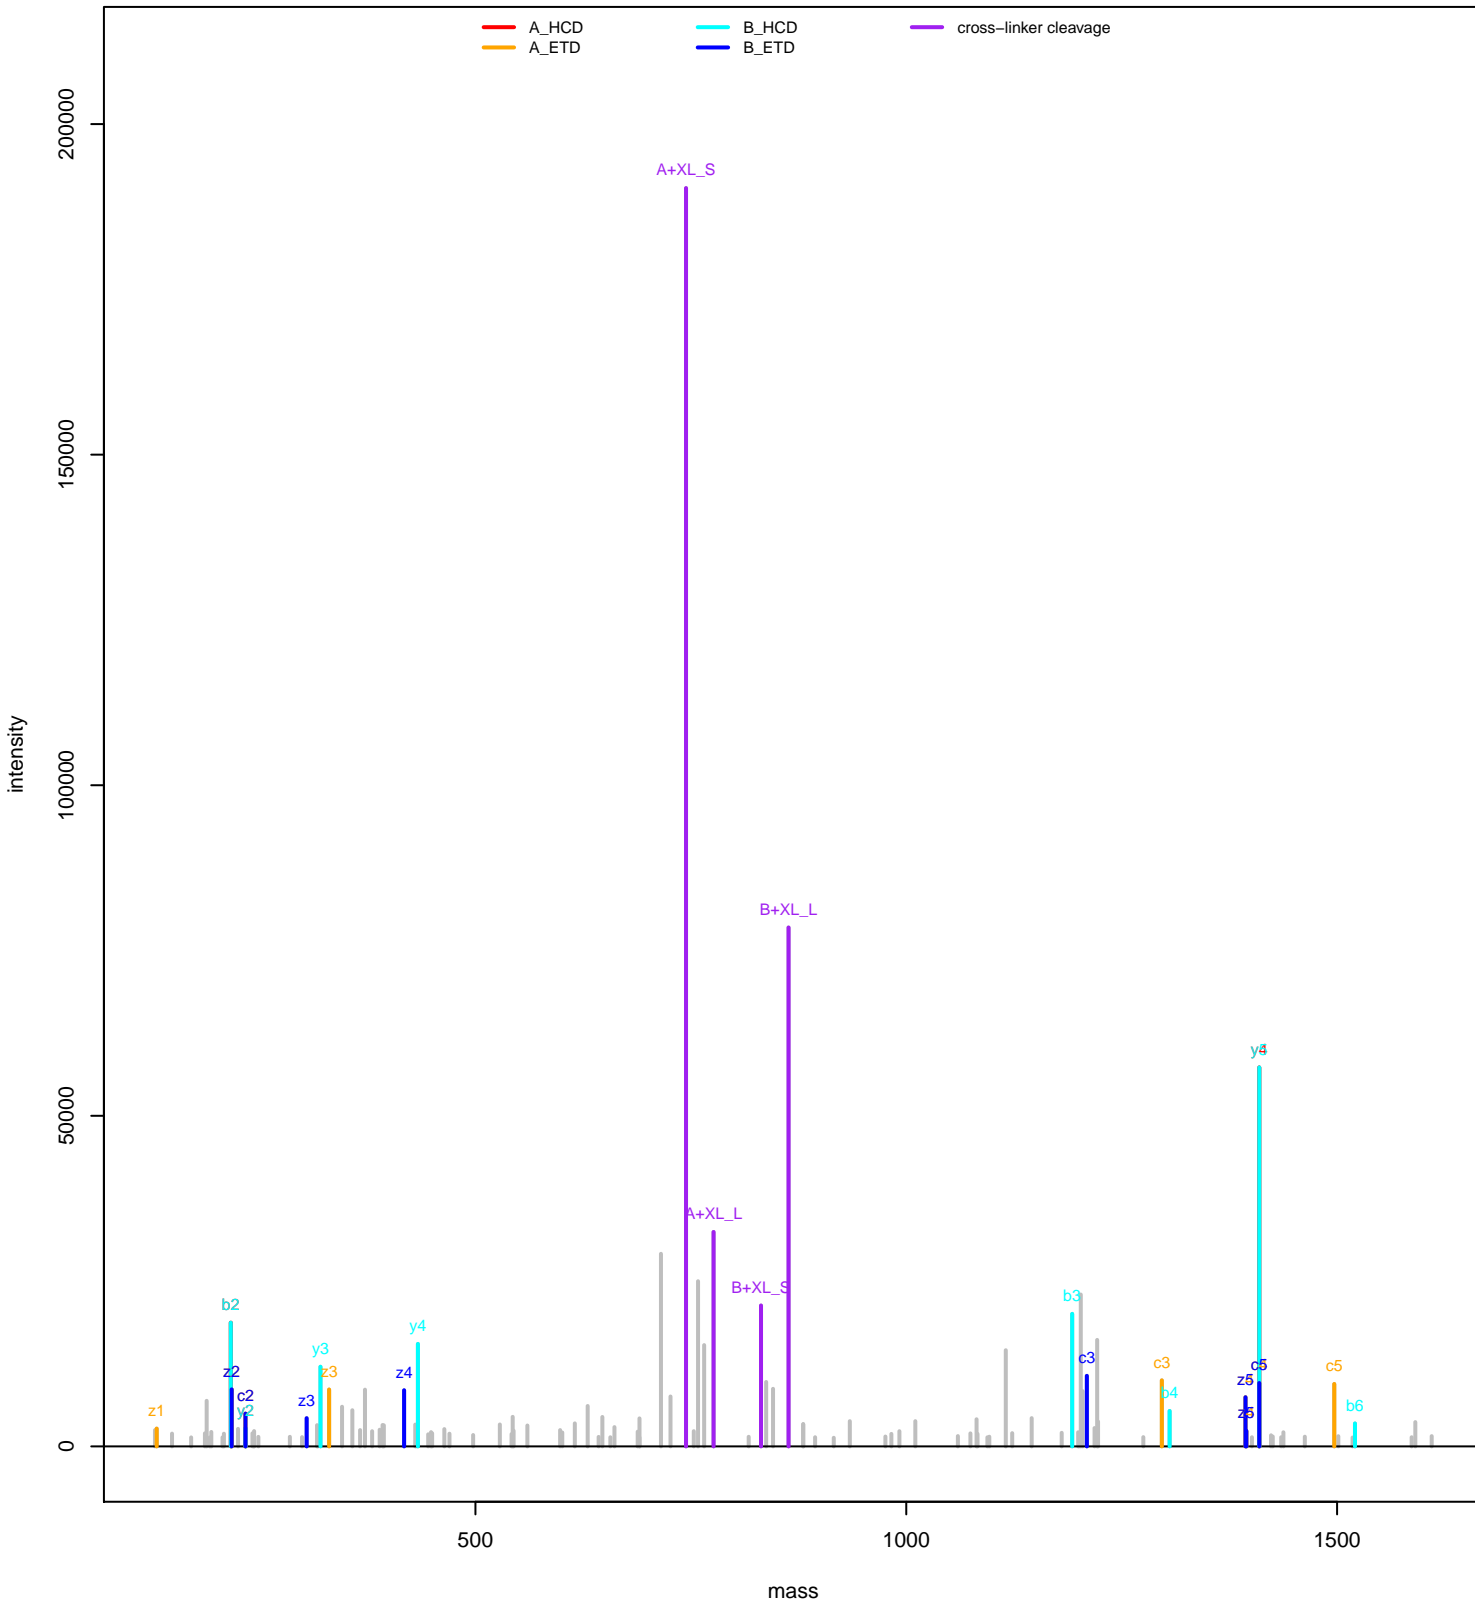

SEKLSK+XL\_S

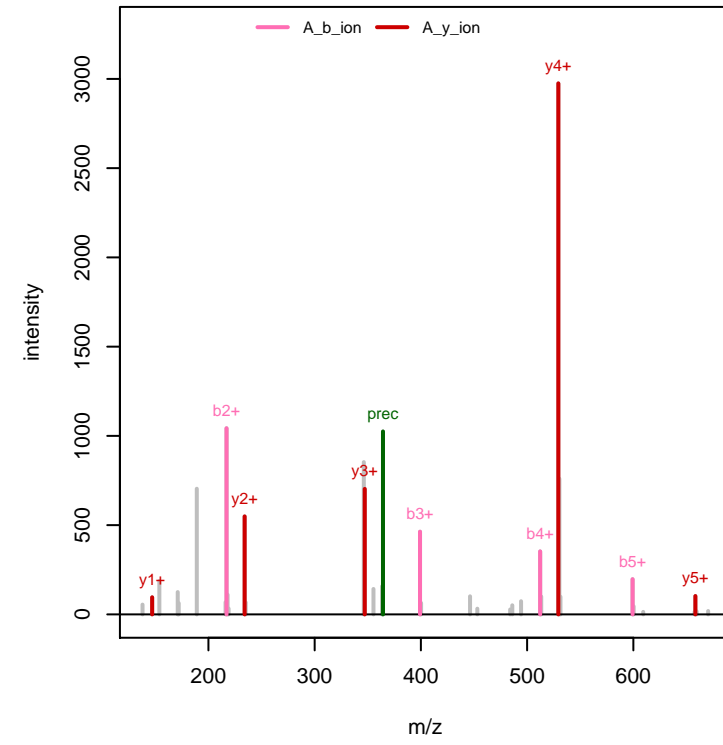

SEKLSK+XL\_L

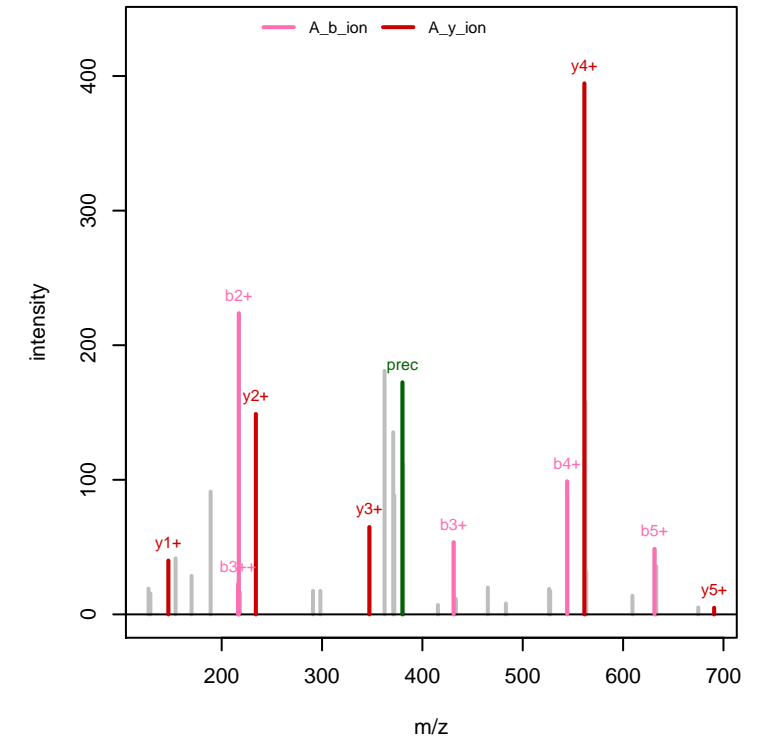

SEKLSKS+XL\_S

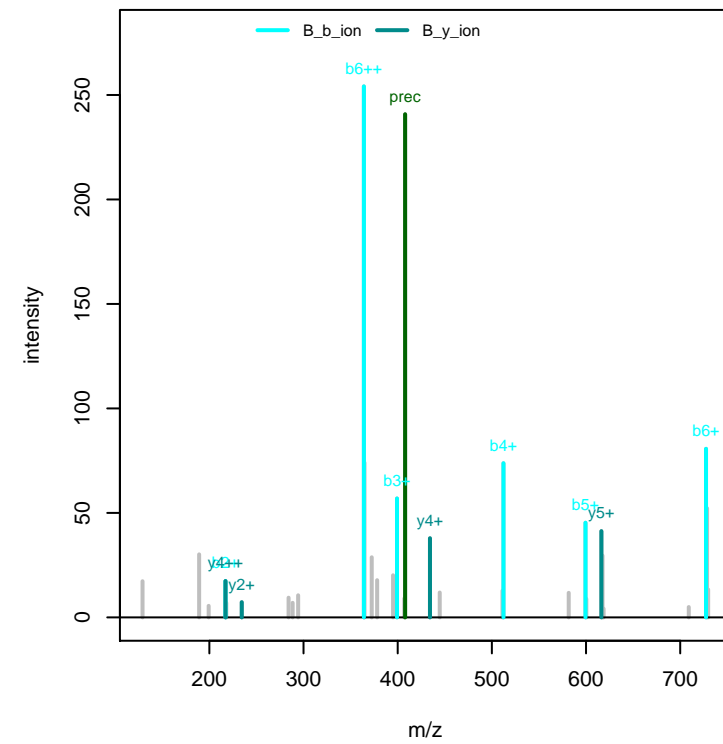

SEKLSKS+XL\_L

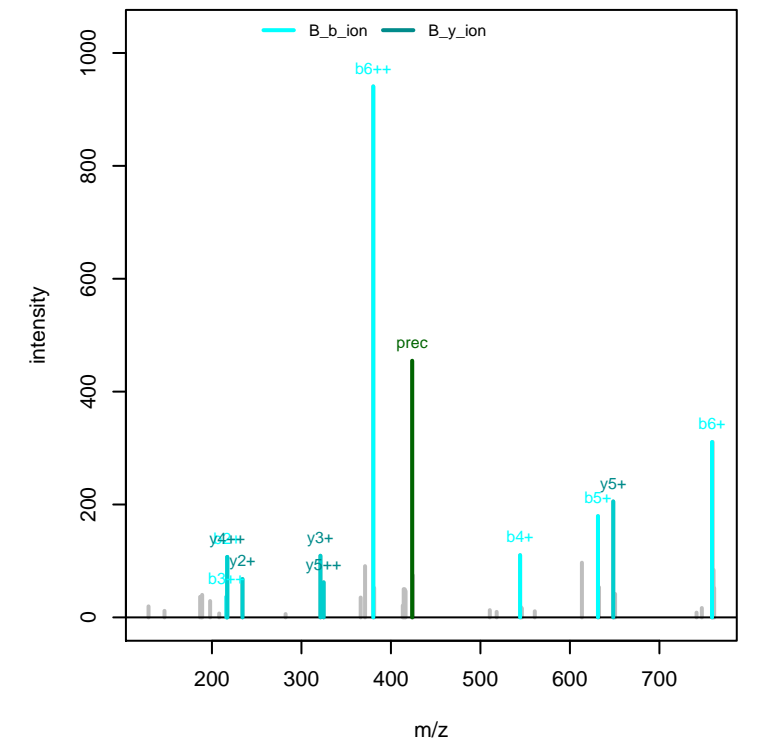

APKGTRK  
KVEVMNTDAEGR

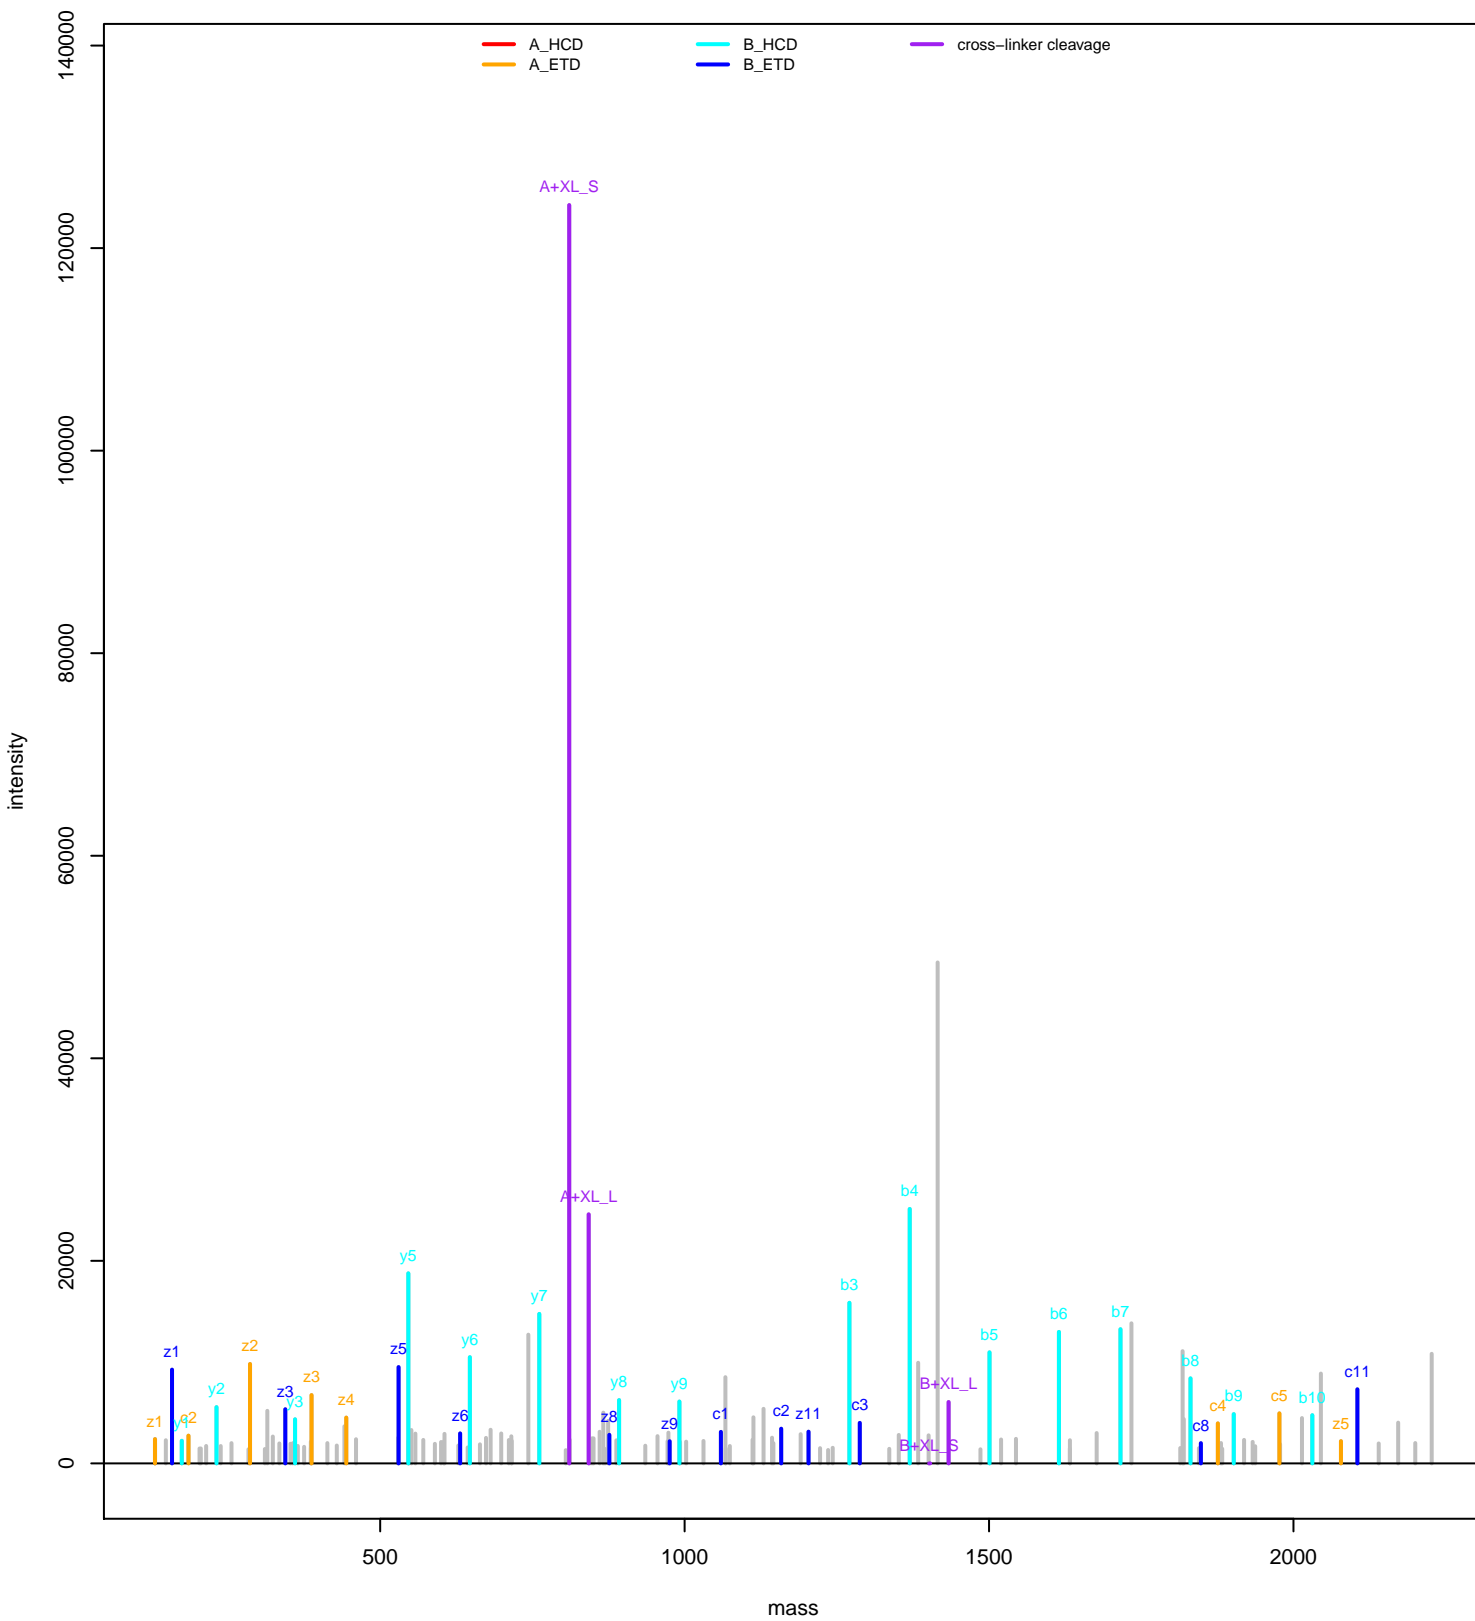

APKGTRK+XL\_S

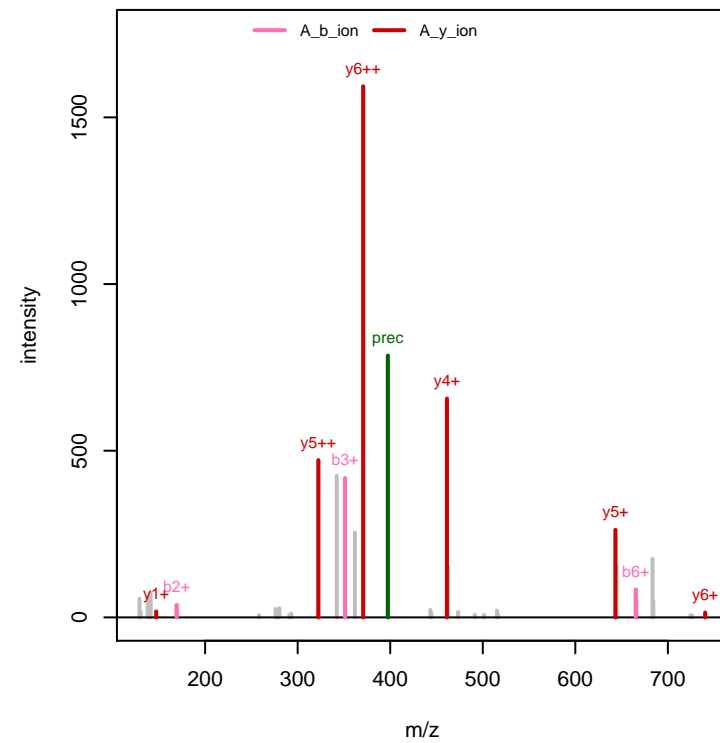

APKGTRK+XL\_L

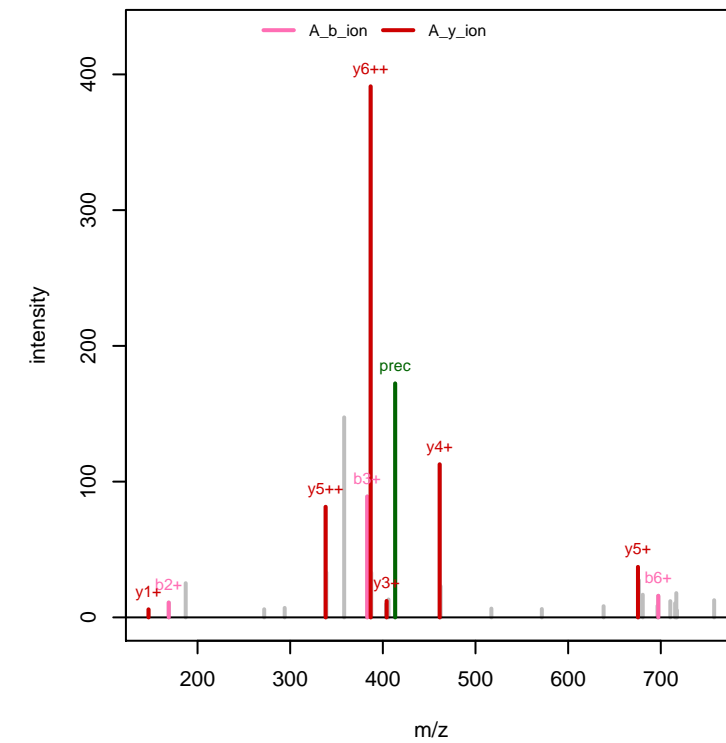

KVEVMNTDAEGR+XL\_S

KVEVMNTDAEGR+XL\_L

VSAKGMoR  
SHALNATKR

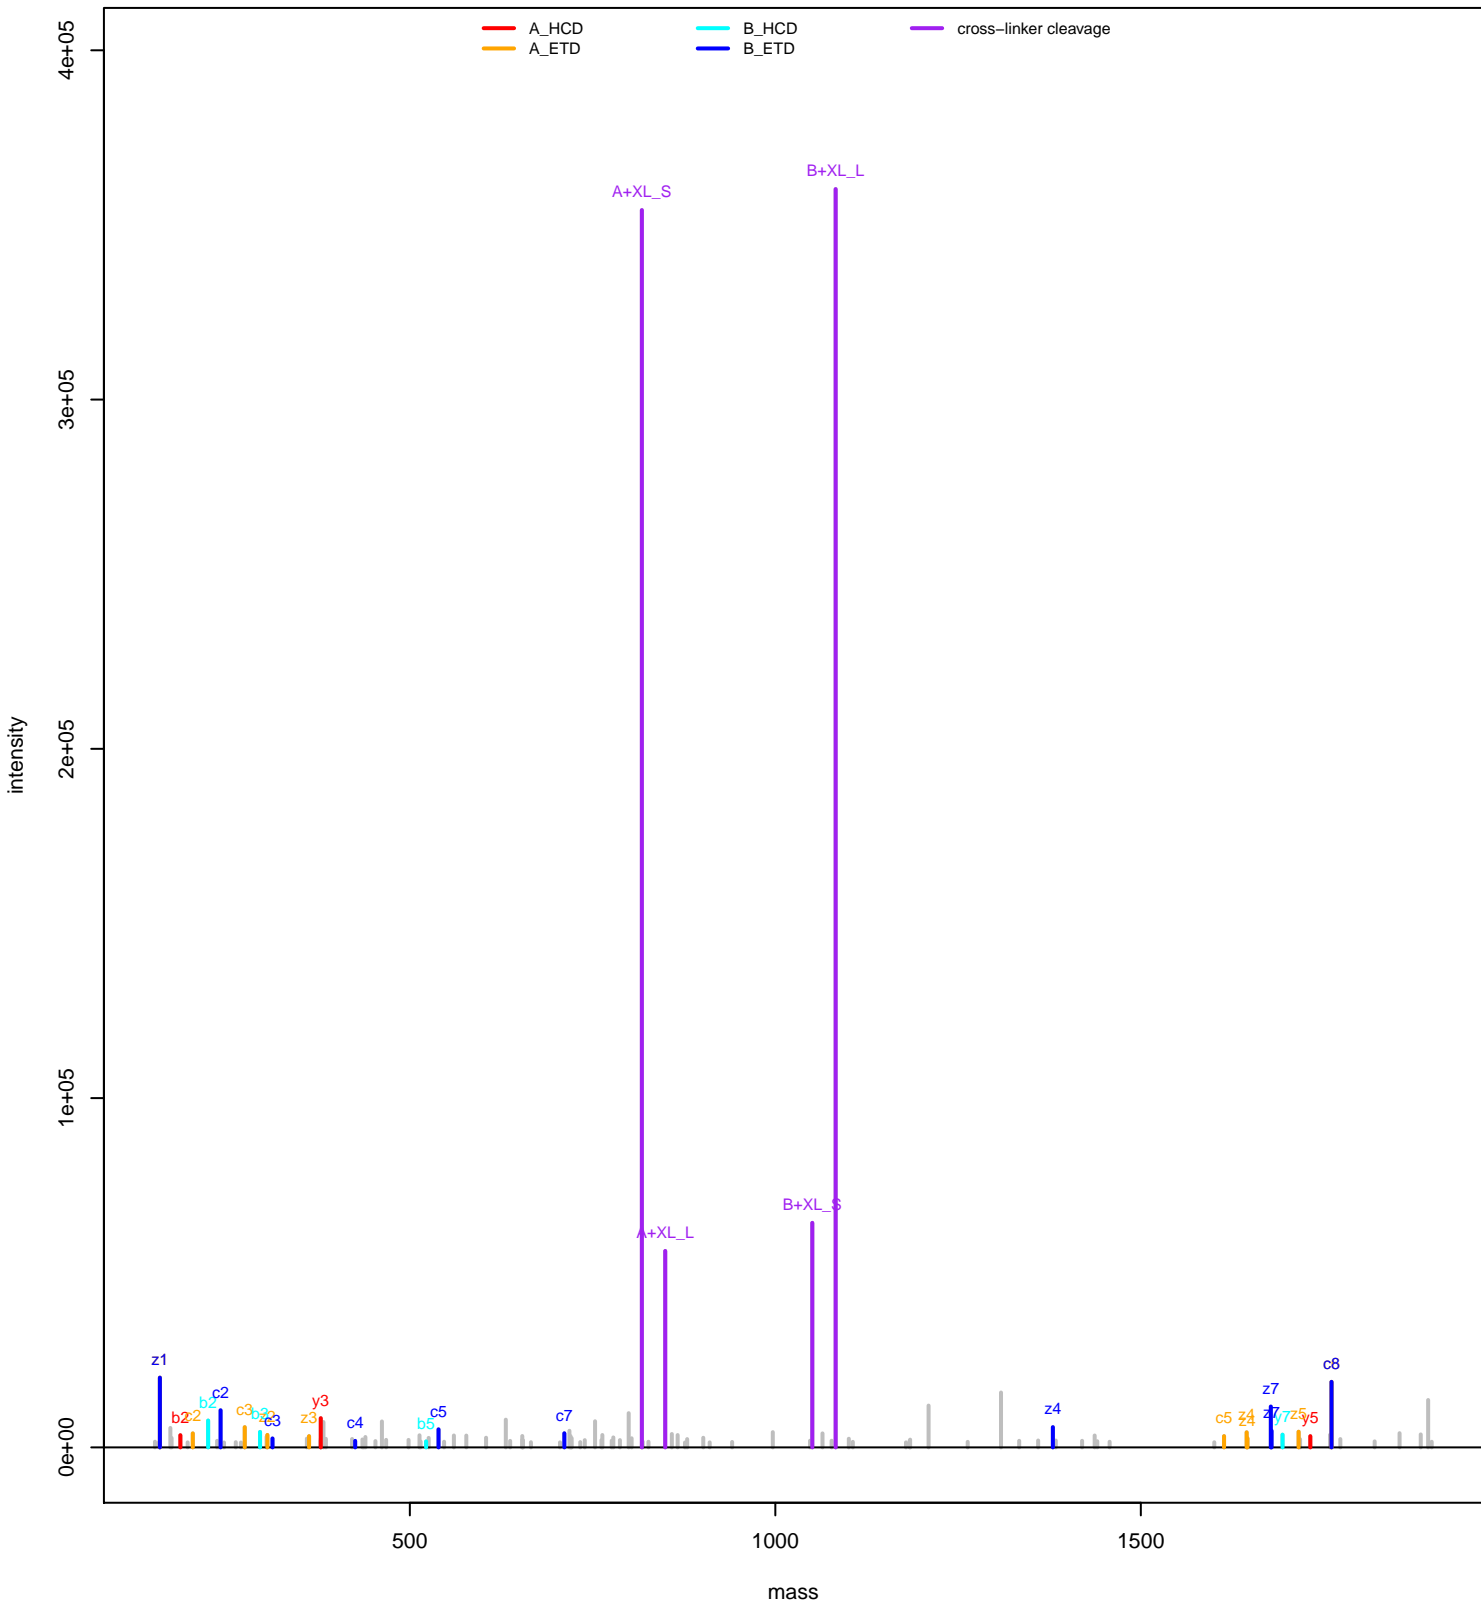

VSAKGMoR+XL\_S

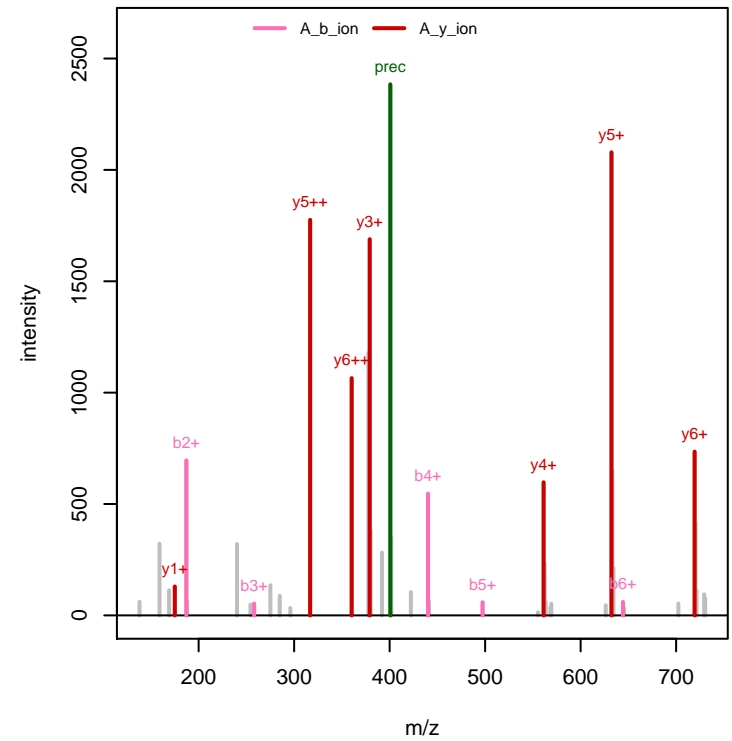

VSAKGMoR+XL\_L

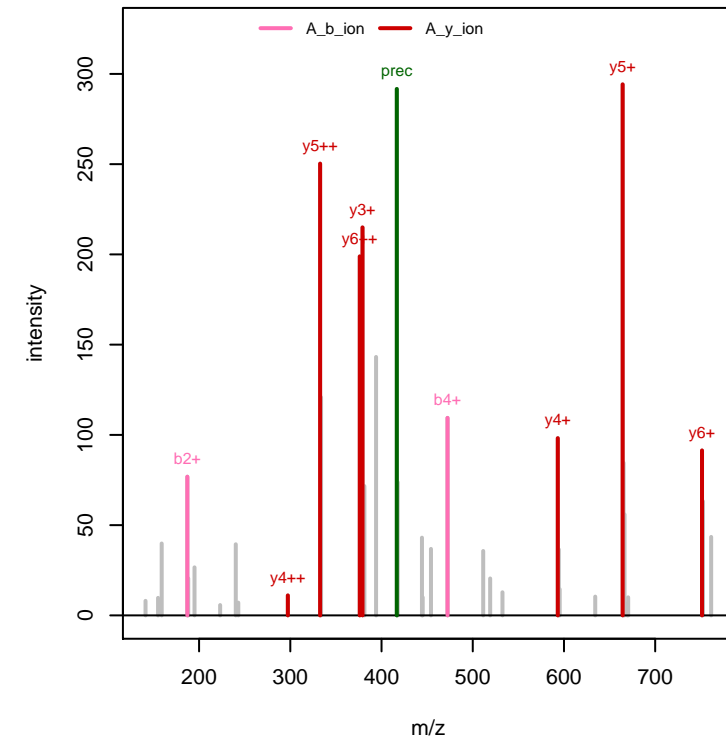

SHALNATKR+XL\_S

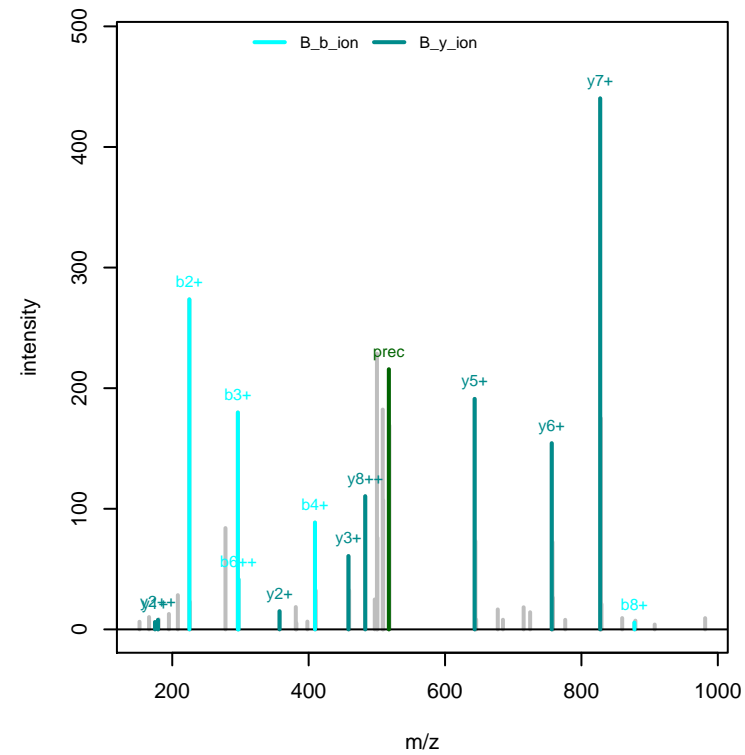

SHALNATKR+XL\_L

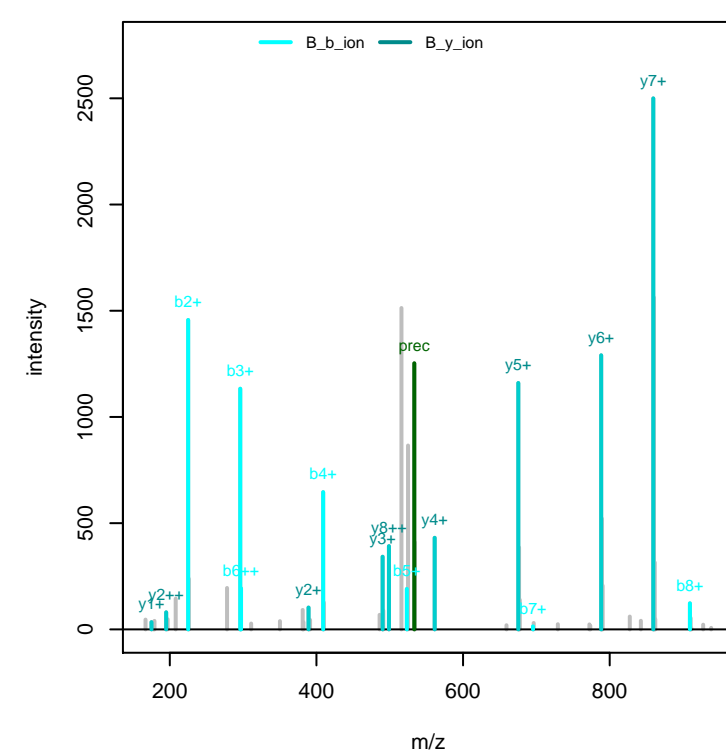

EKSIEK  
NGKTQEQVVAACDK

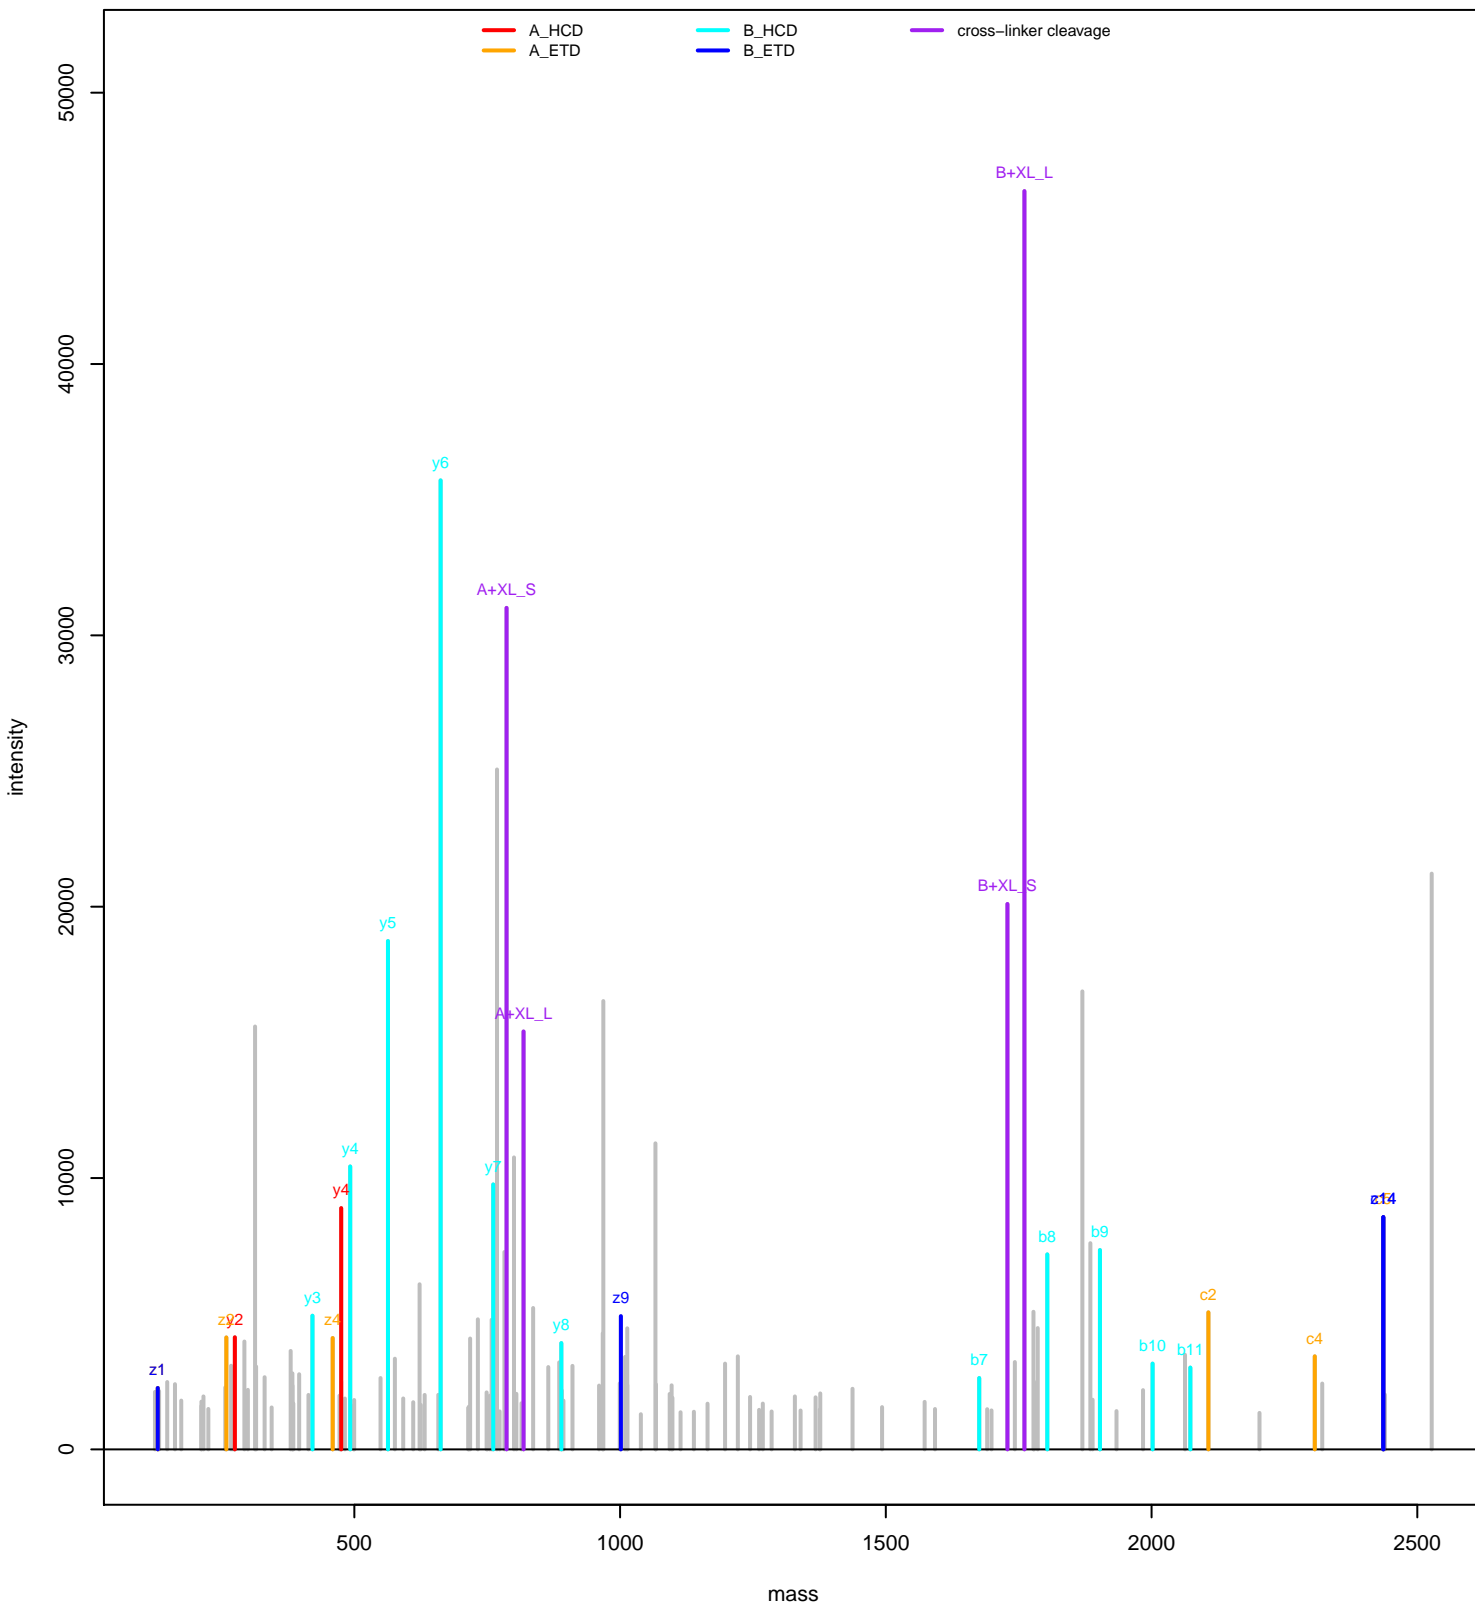

EKSIEK+XL\_S

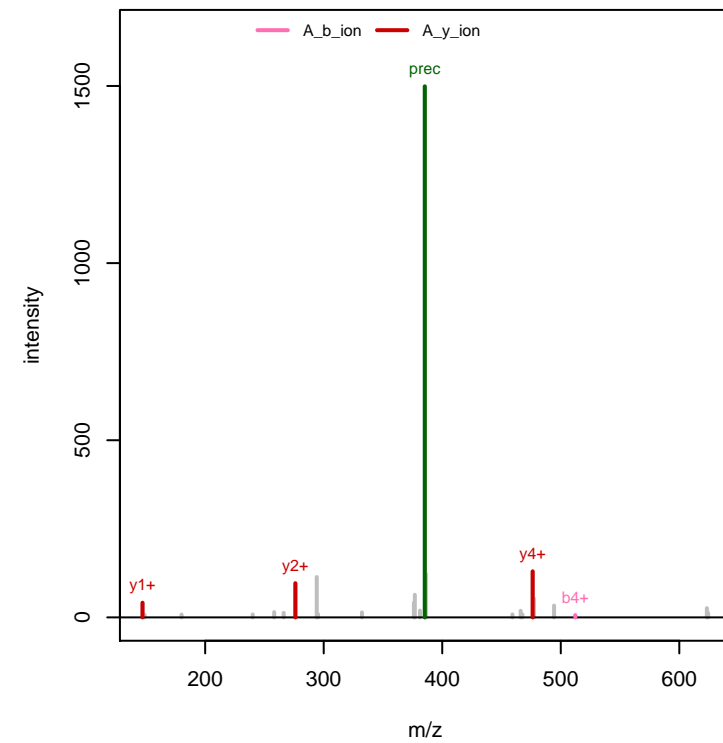

EKSIEK+XL\_L

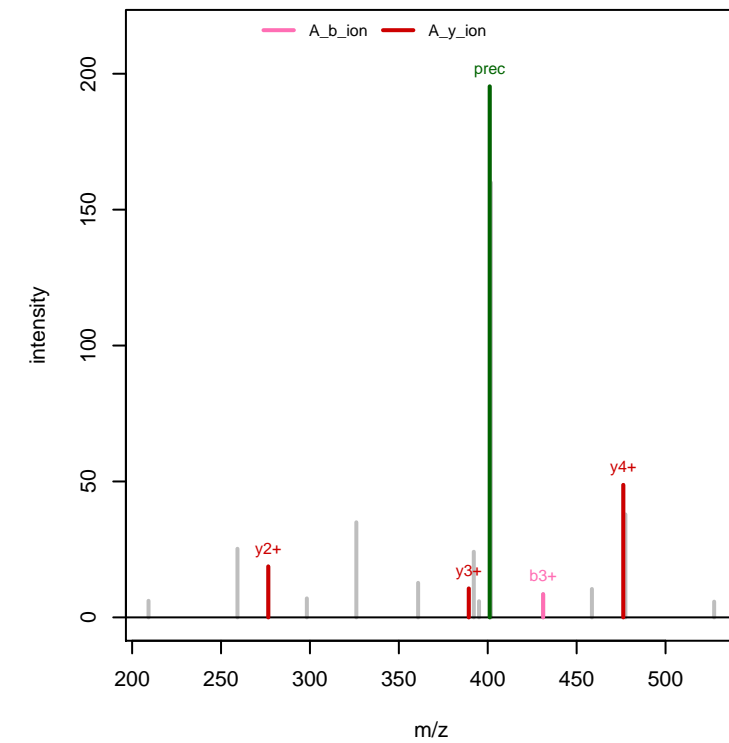

NGKTQEQVVAACDK+XL\_S

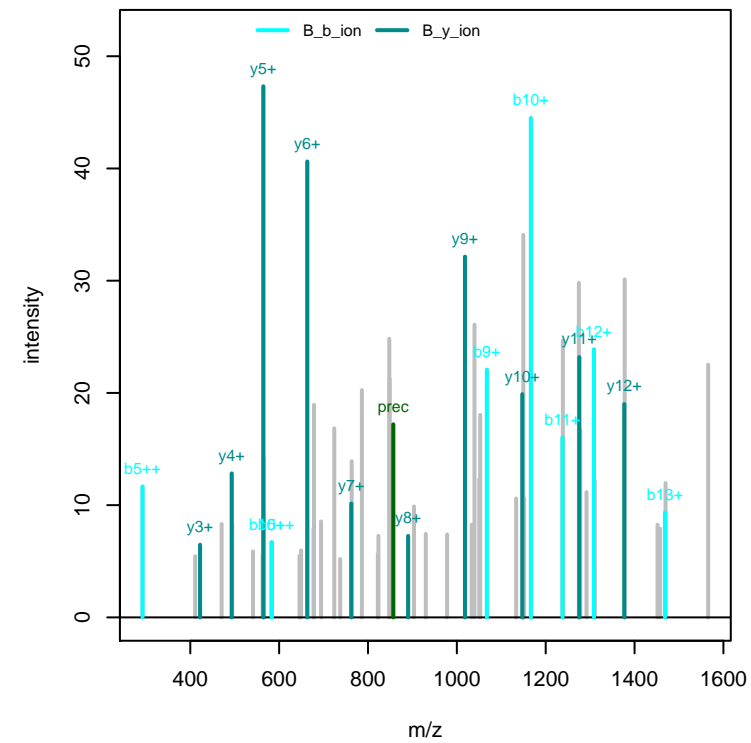

NGKTQEQVVAACDK+XL\_L

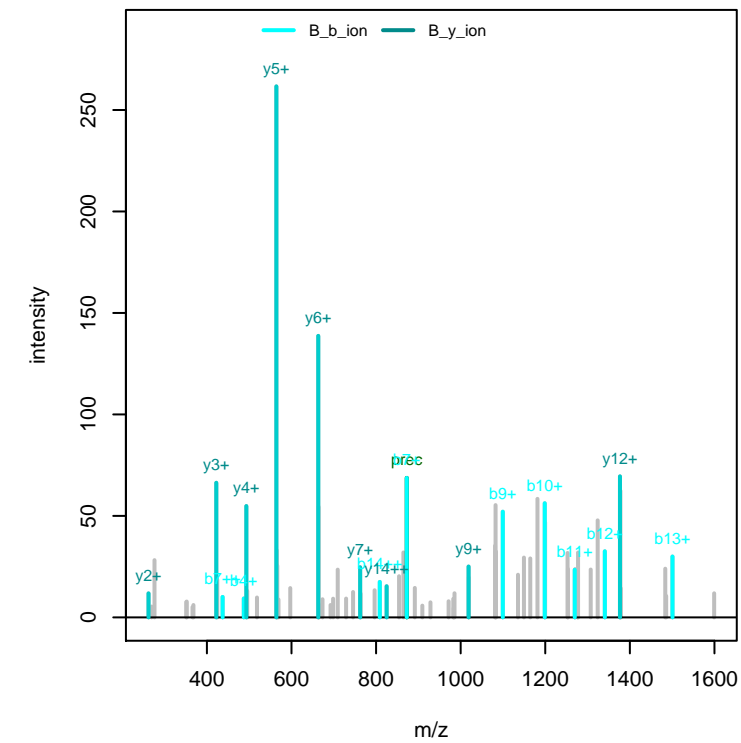

**KVGMTR  
KVDVTGTSK GK**

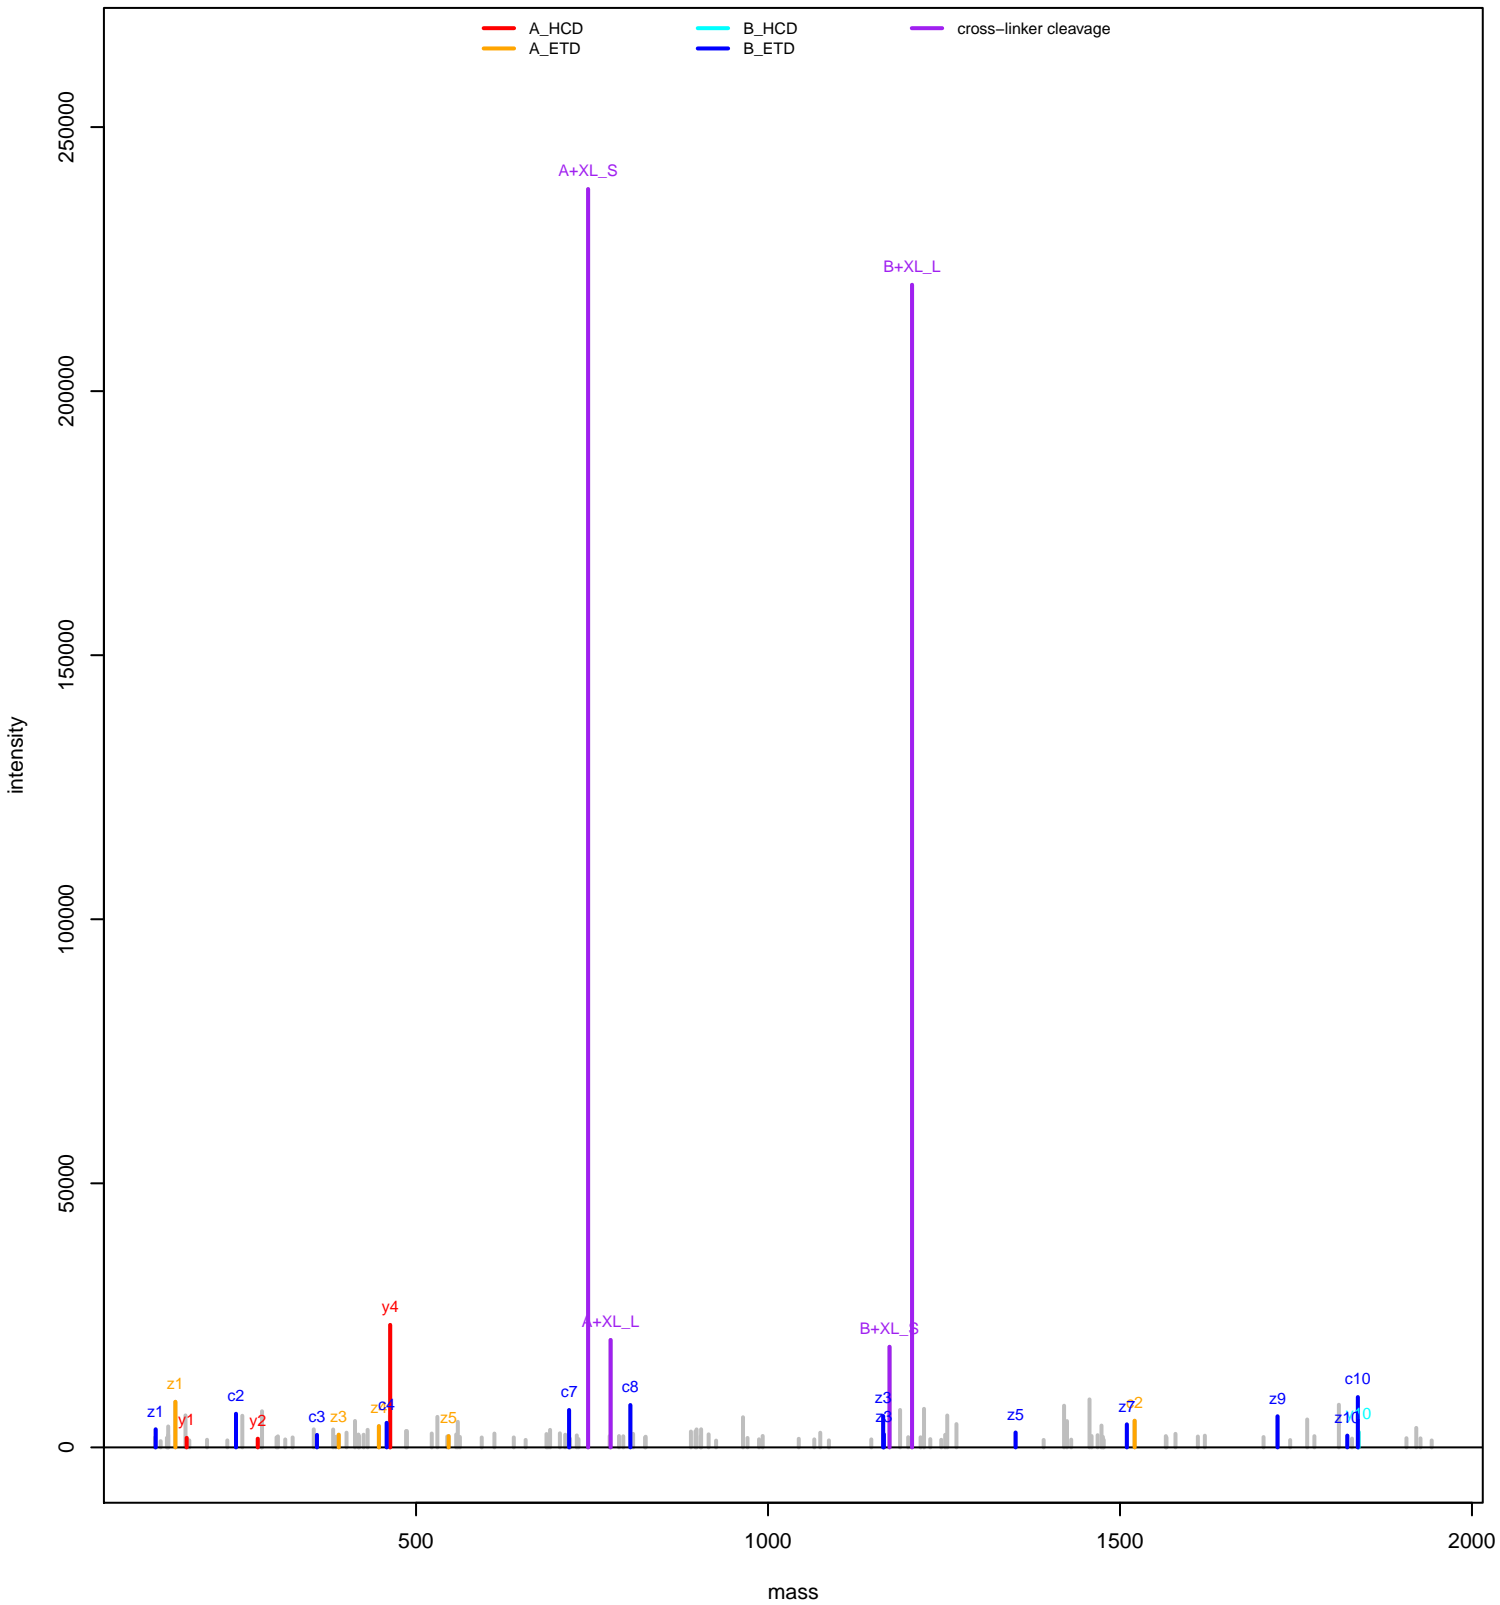

**KVGMTR+XL\_S**

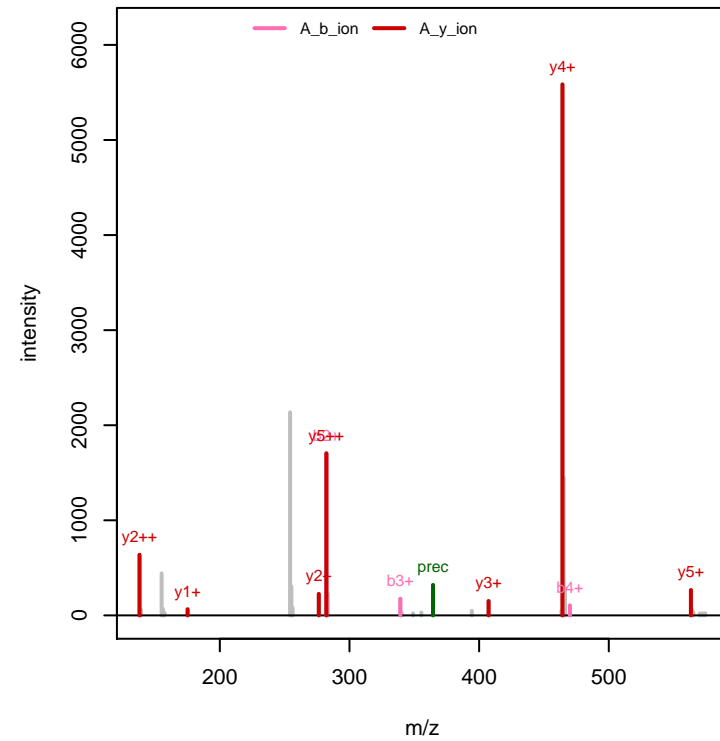

**KVGMTR+XL\_L**

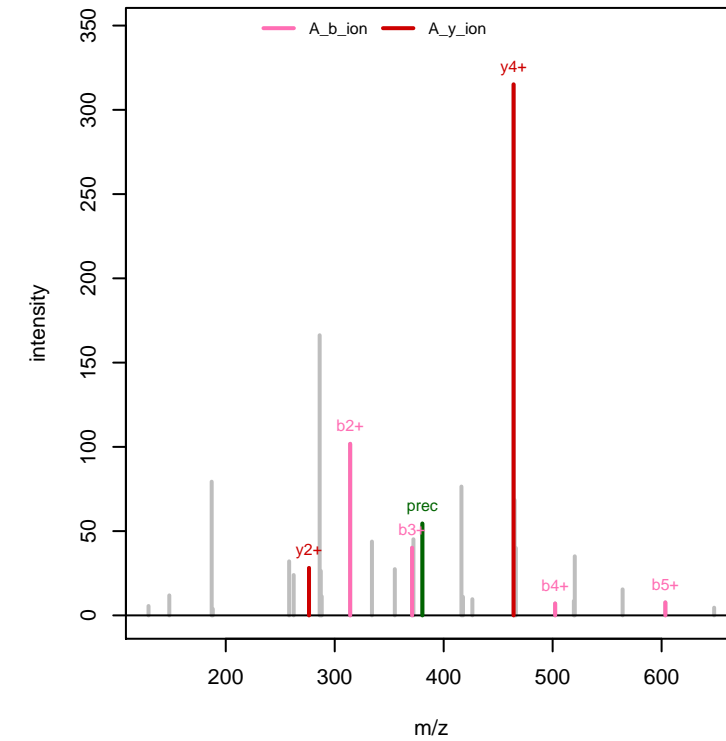

**KVDVTGTSK GK+XL\_S**

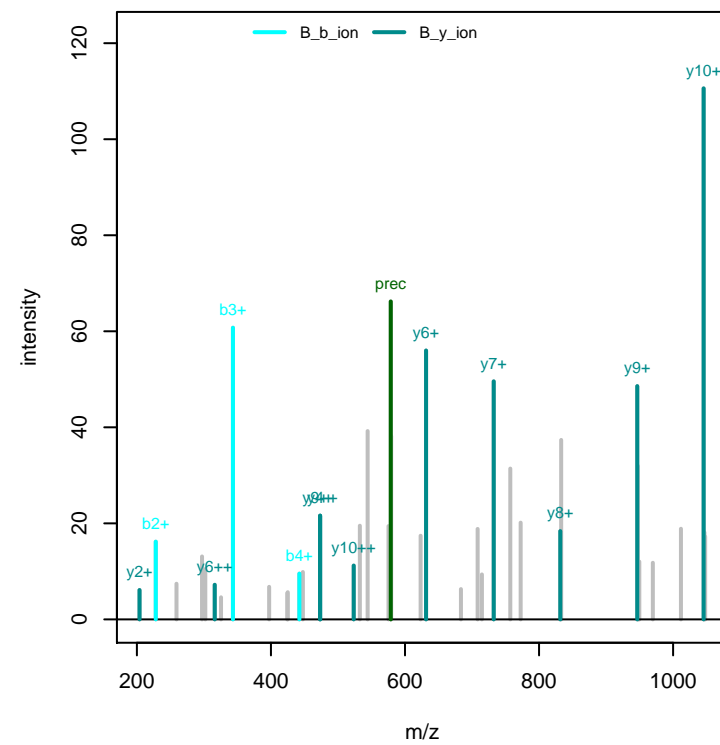

**KVDVTGTSK GK+XL\_L**

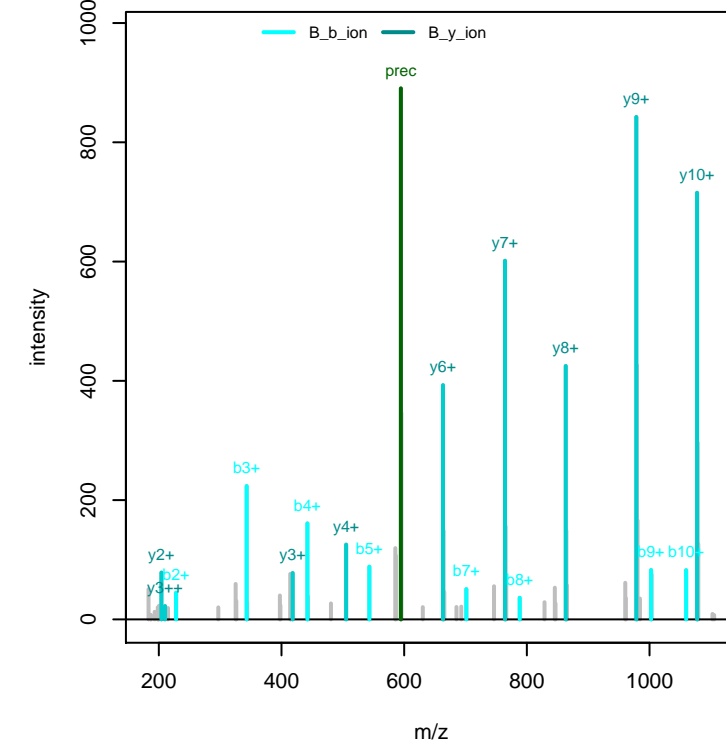

DGDKSR  
TVKEAIR

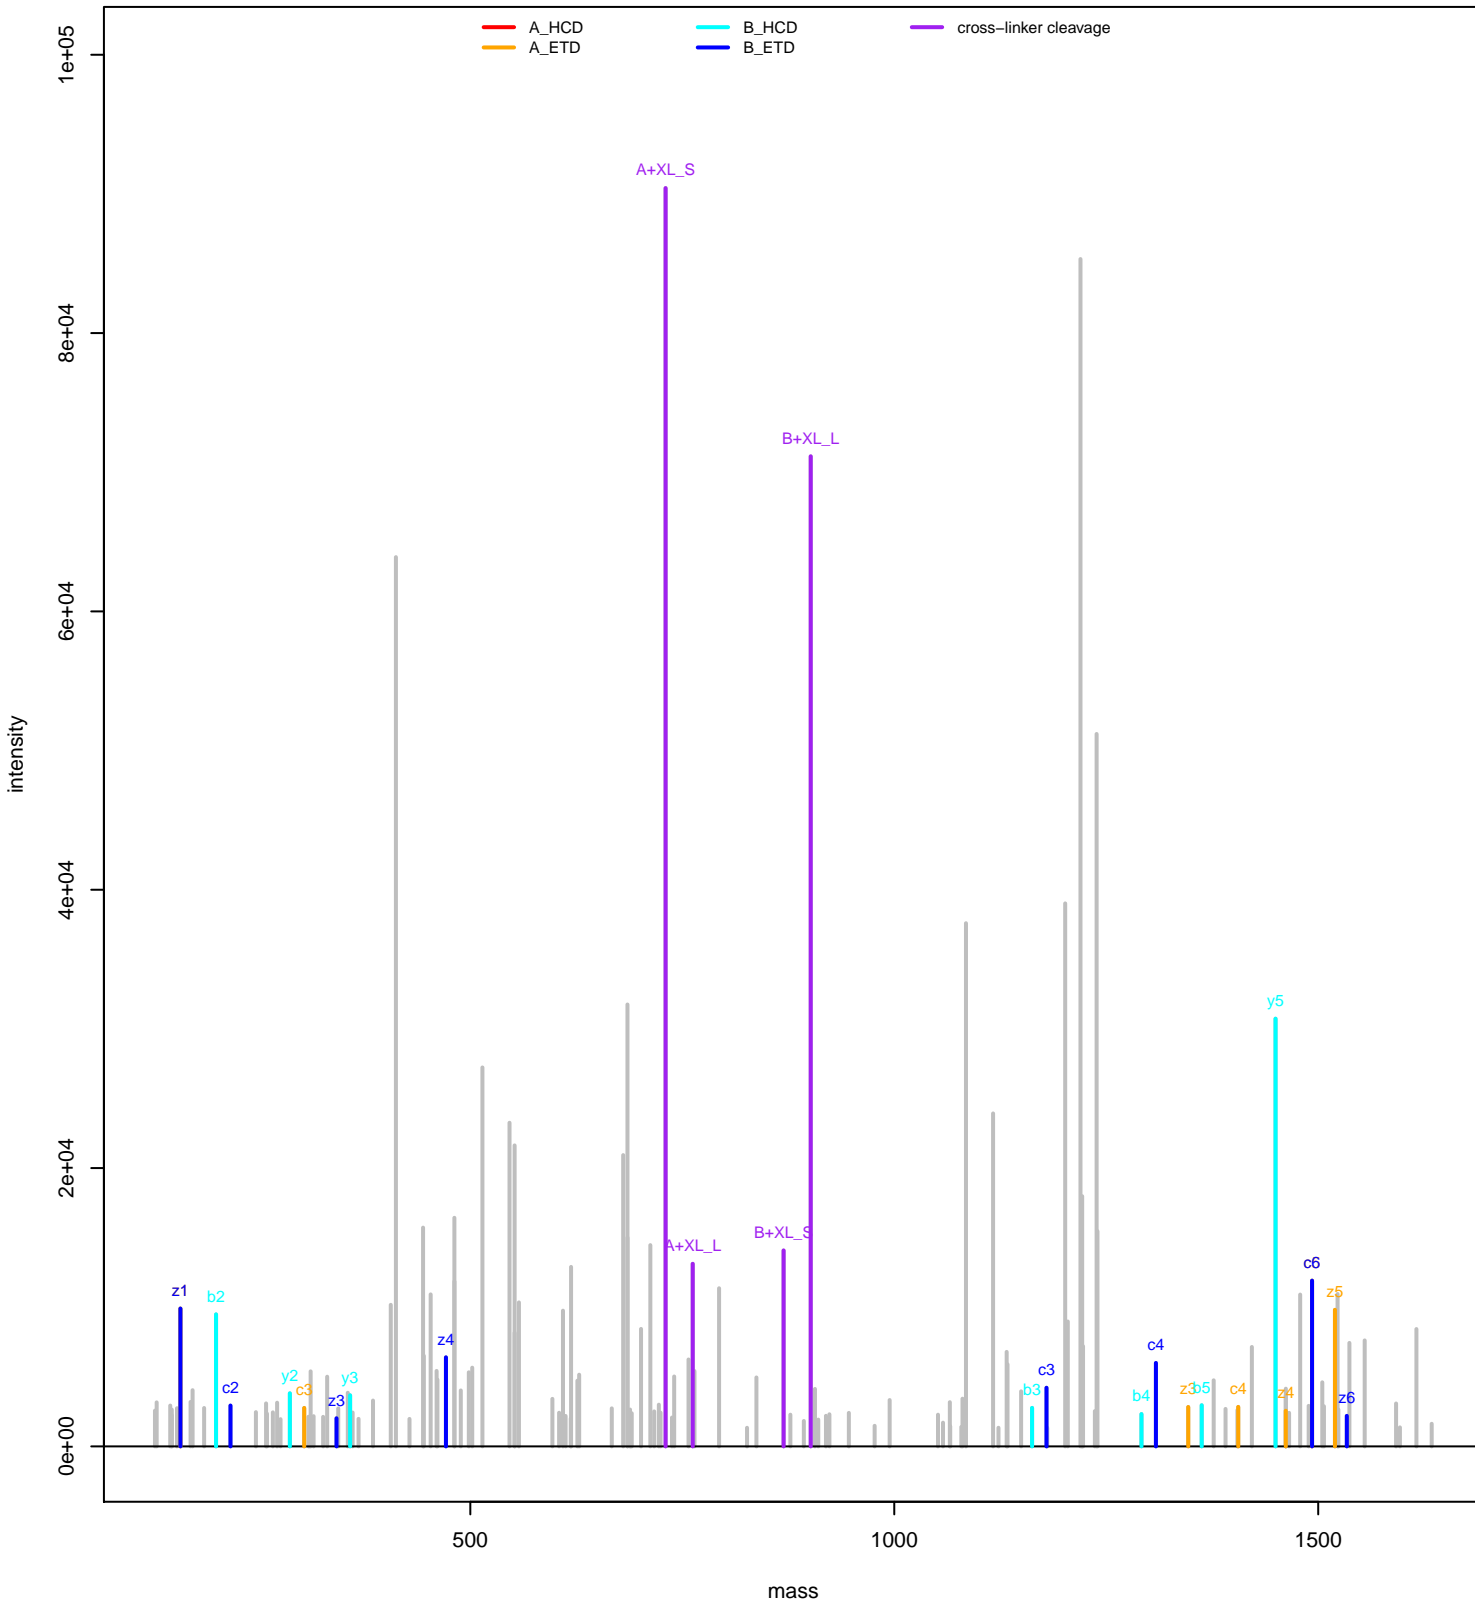

DGDKSR+XL\_S

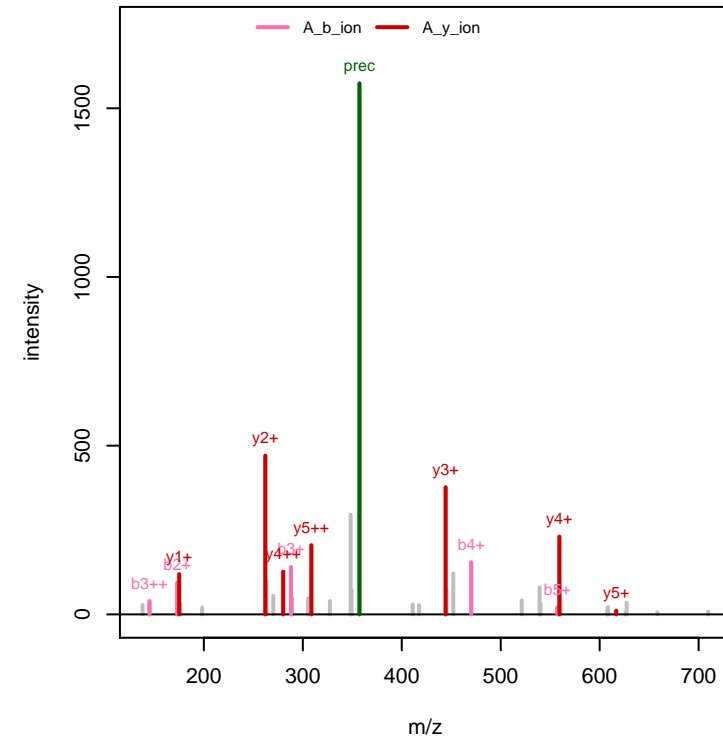

DGDKSR+XL\_L

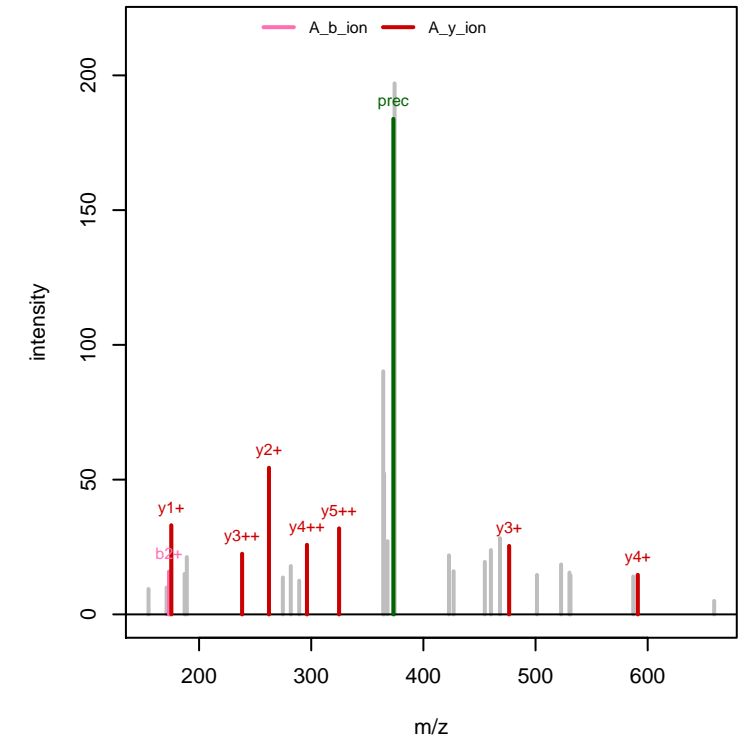

TVKEAIR+XL\_S

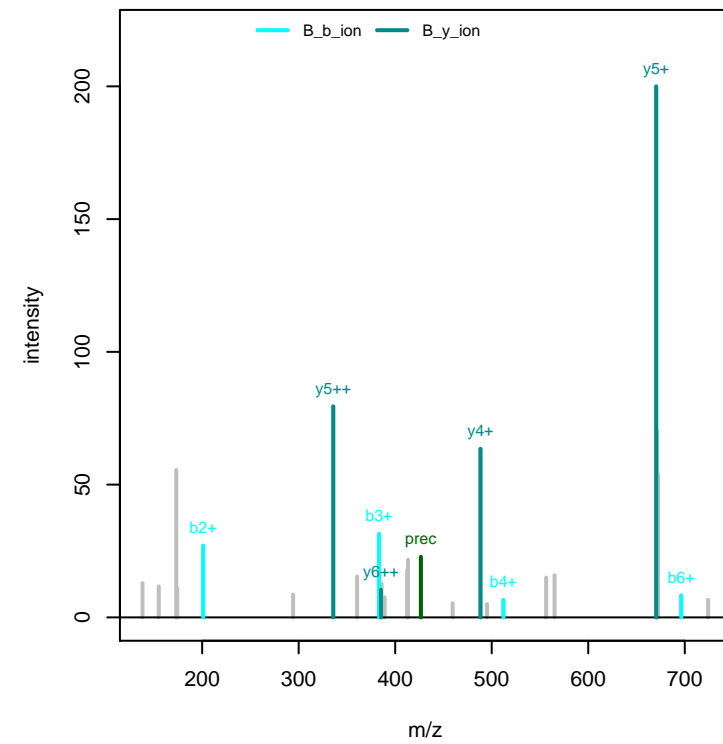

TVKEAIR+XL\_L

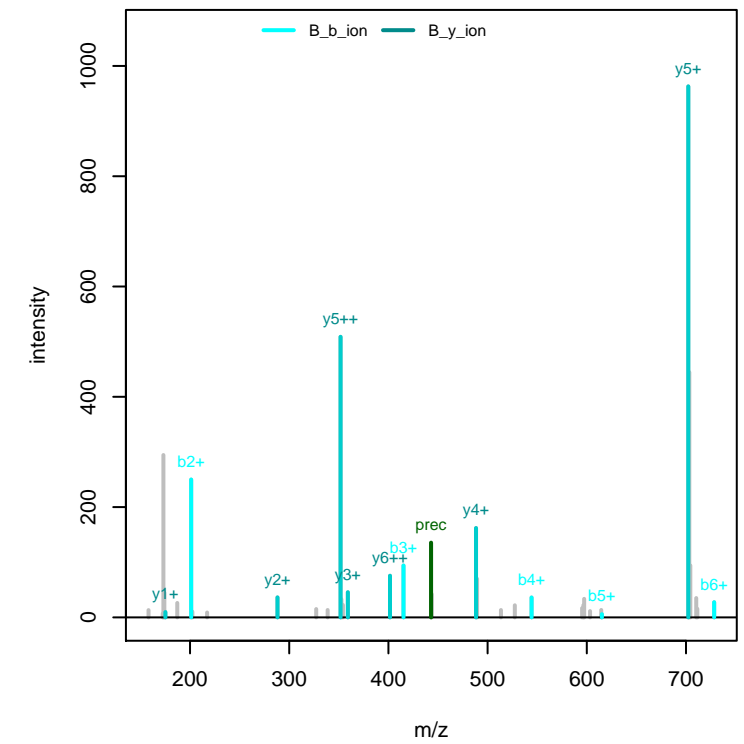

SEKLQK  
VAVEKDR

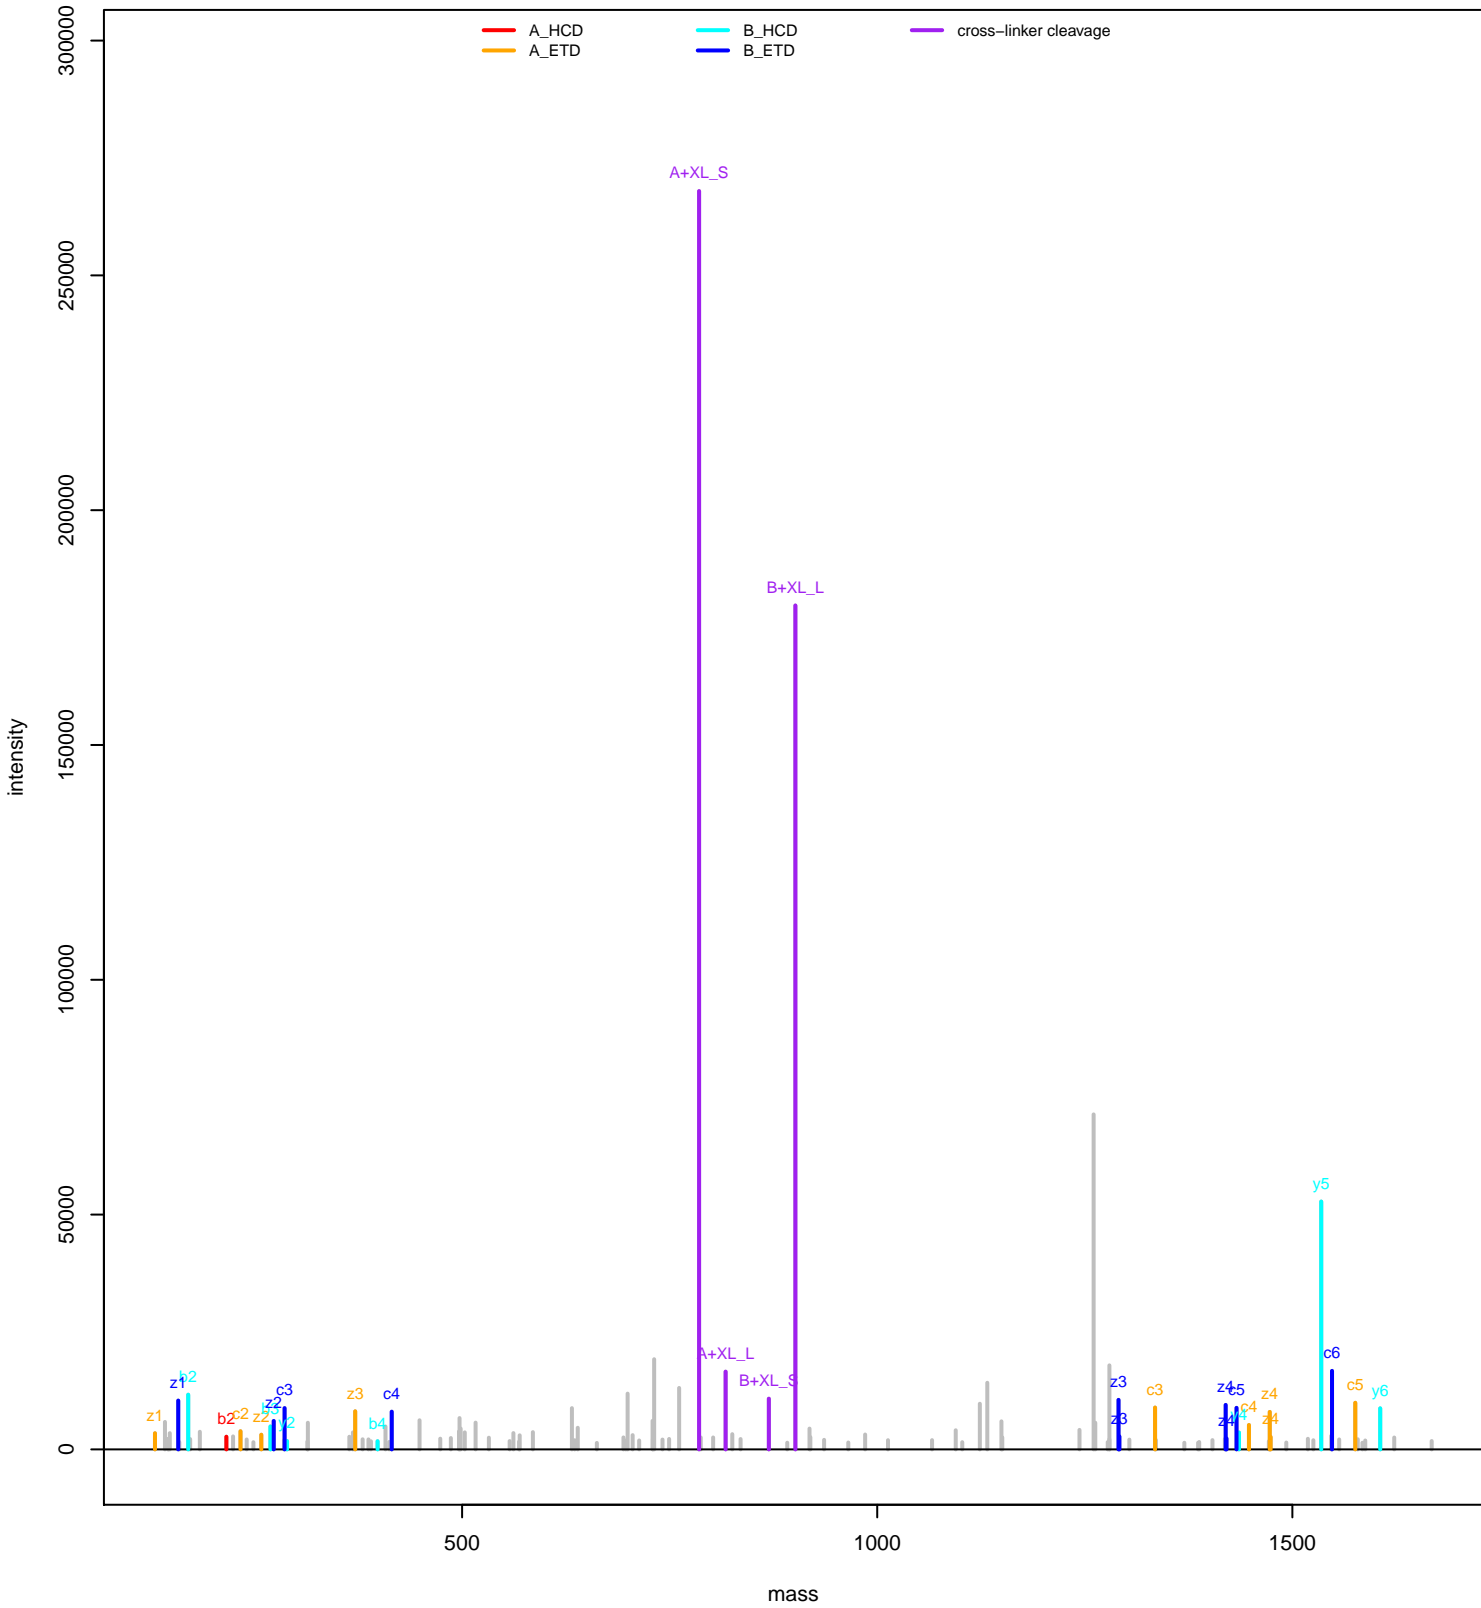

SEKLQK+XL\_S

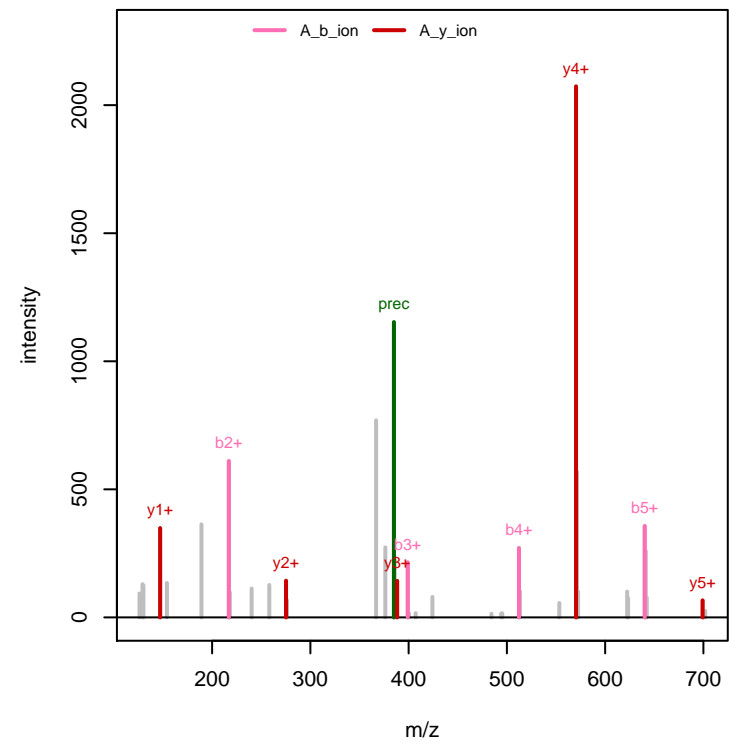

SEKLQK+XL\_L

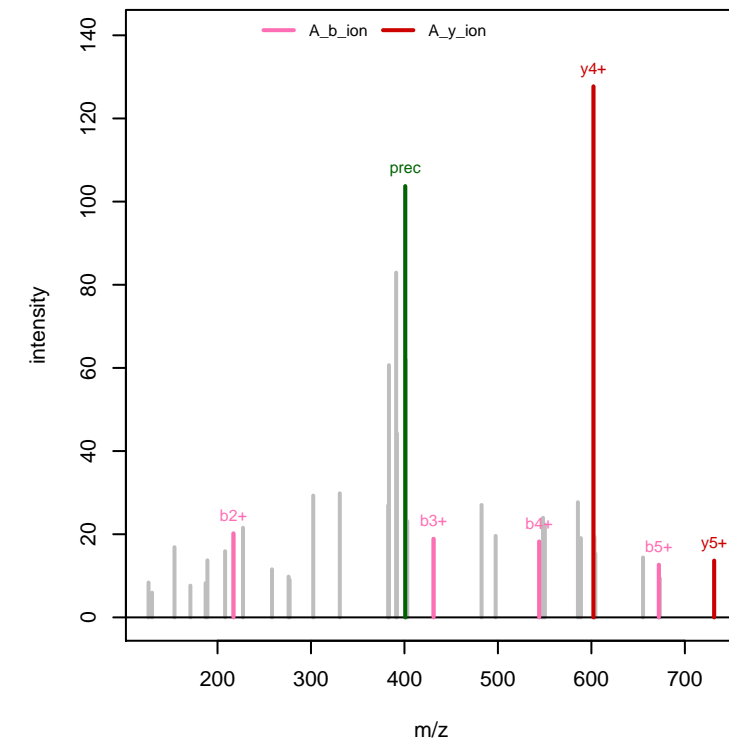

VAVEKDR+XL\_S

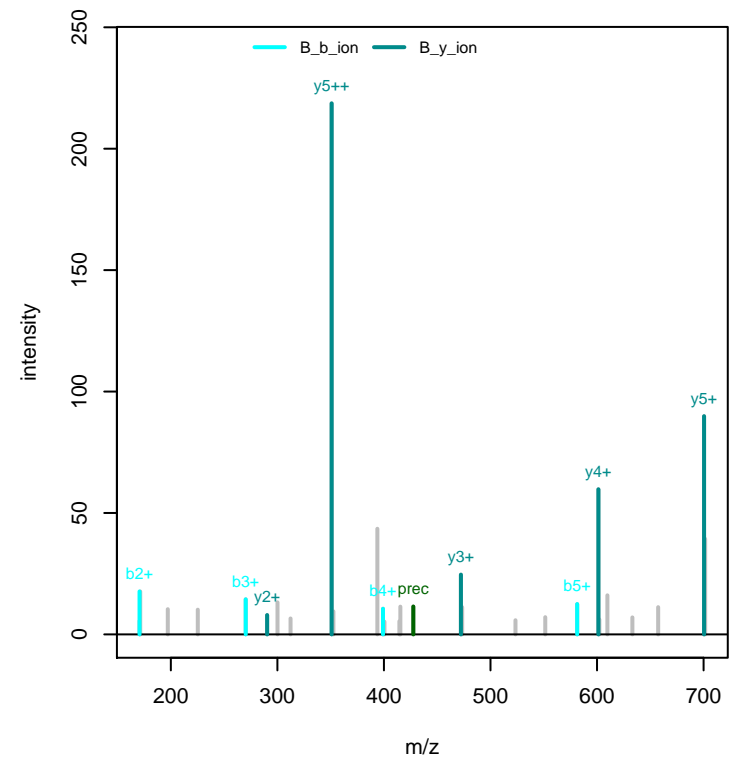

VAVEKDR+XL\_L

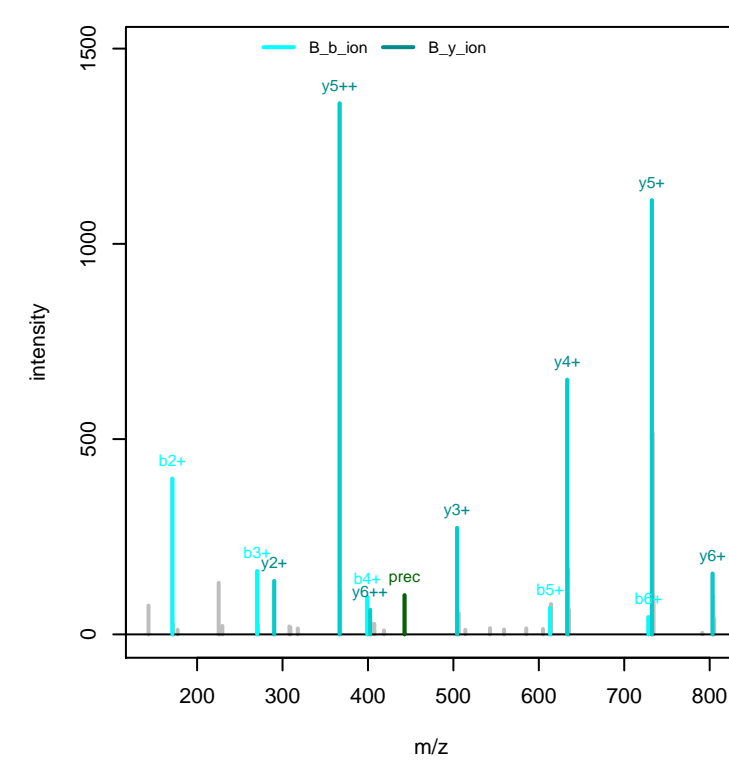

**IKELAVK  
ETSAKSEEK**

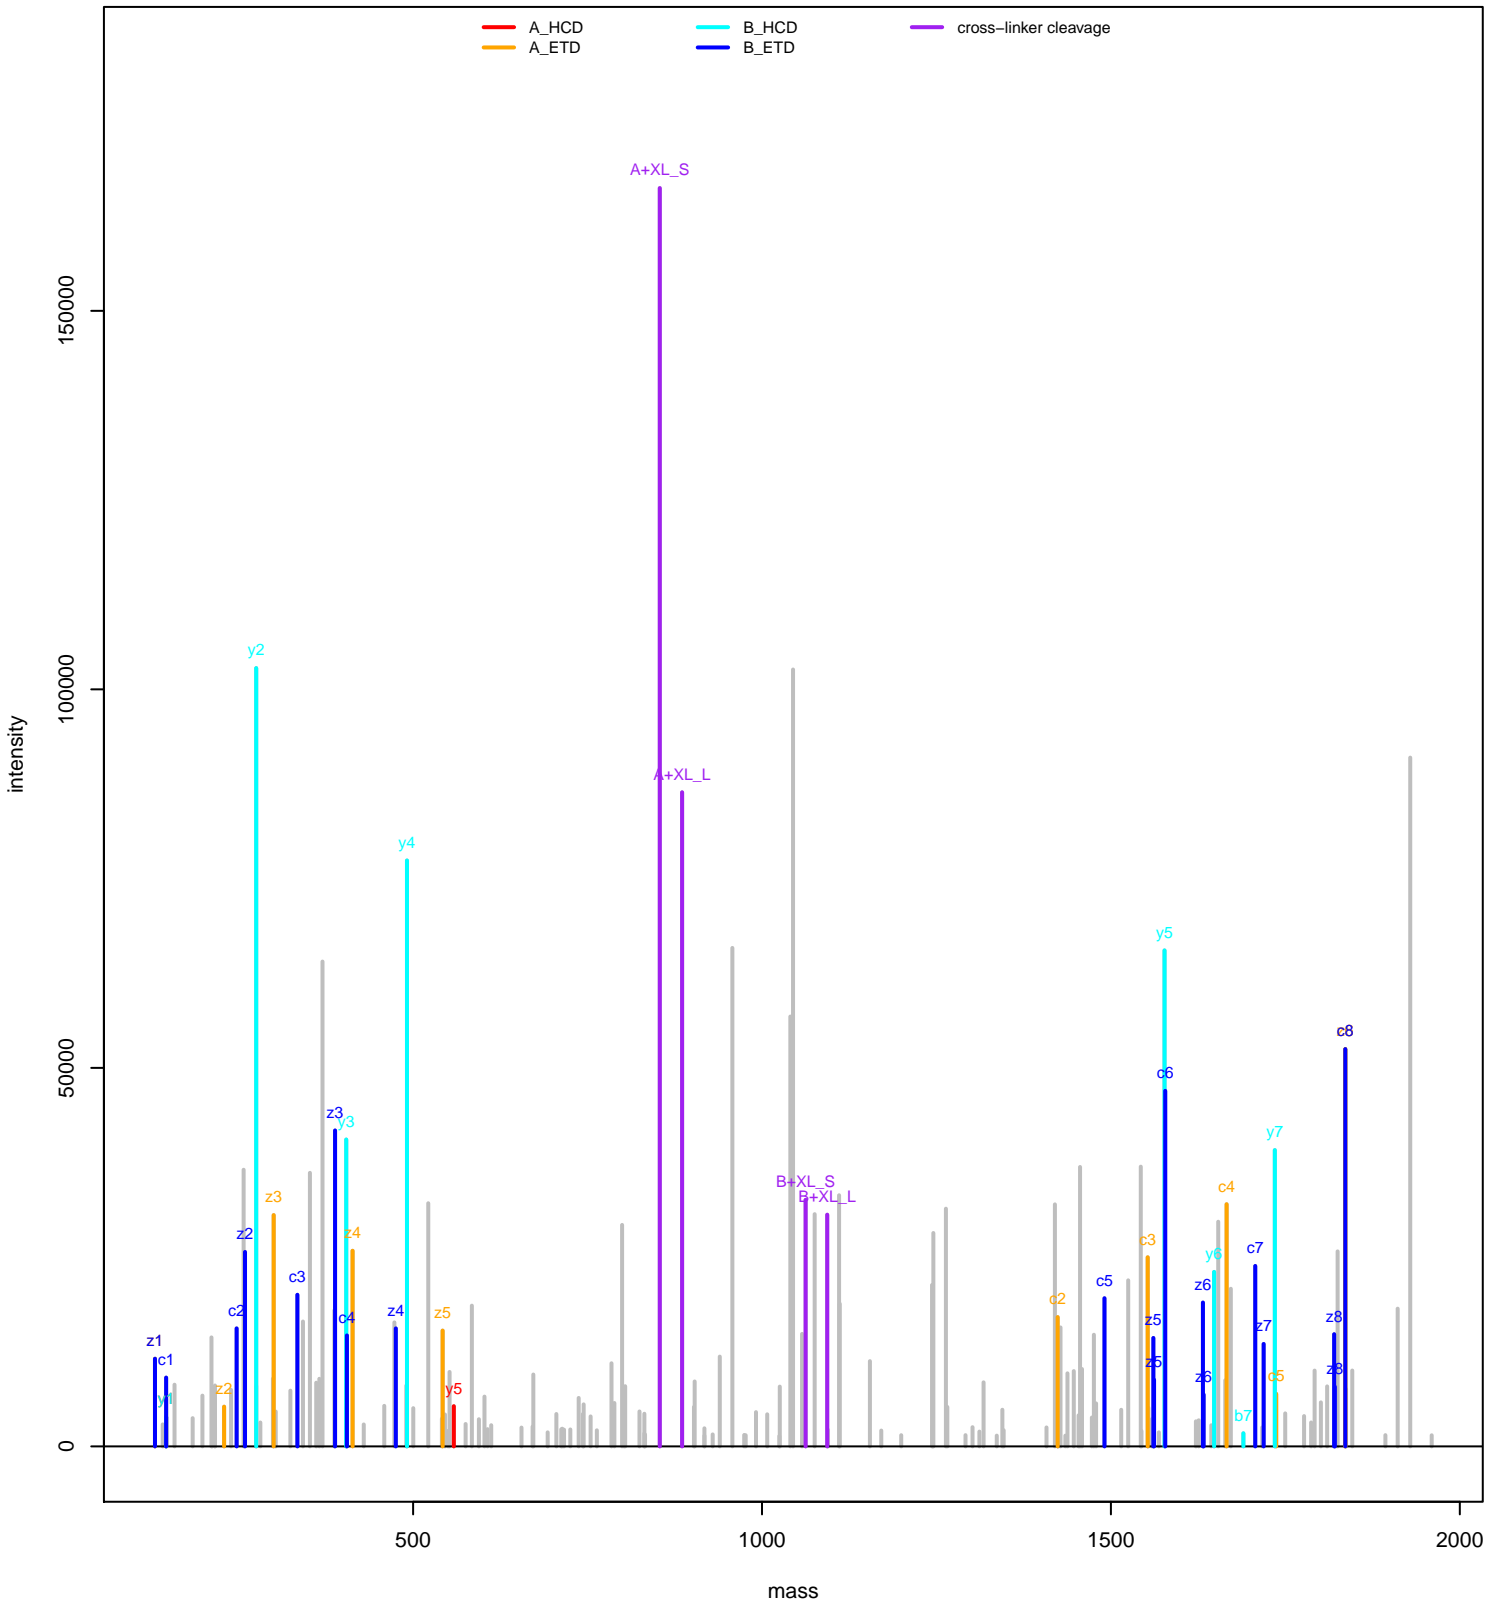

**IKELAVK+XL\_S**

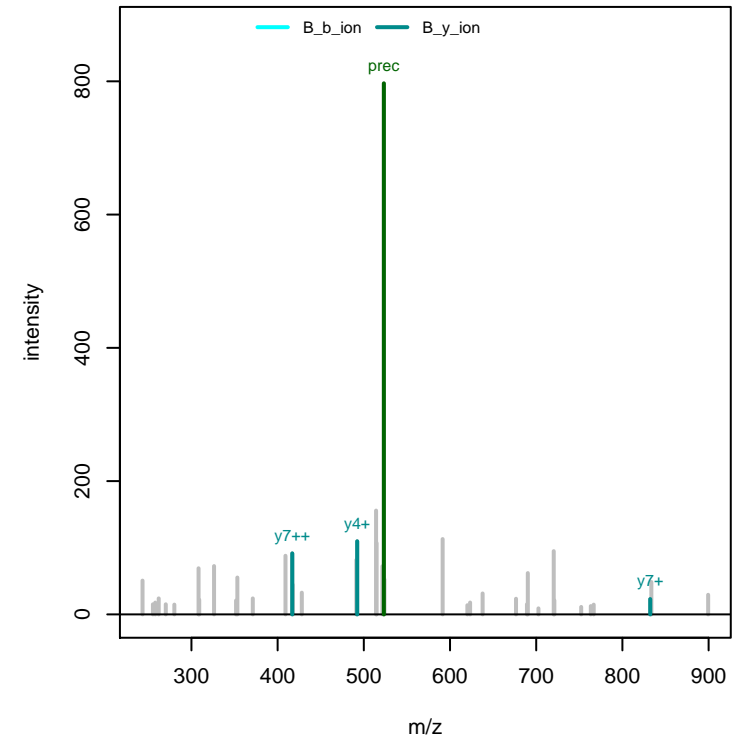

**IKELAVK+XL\_L**

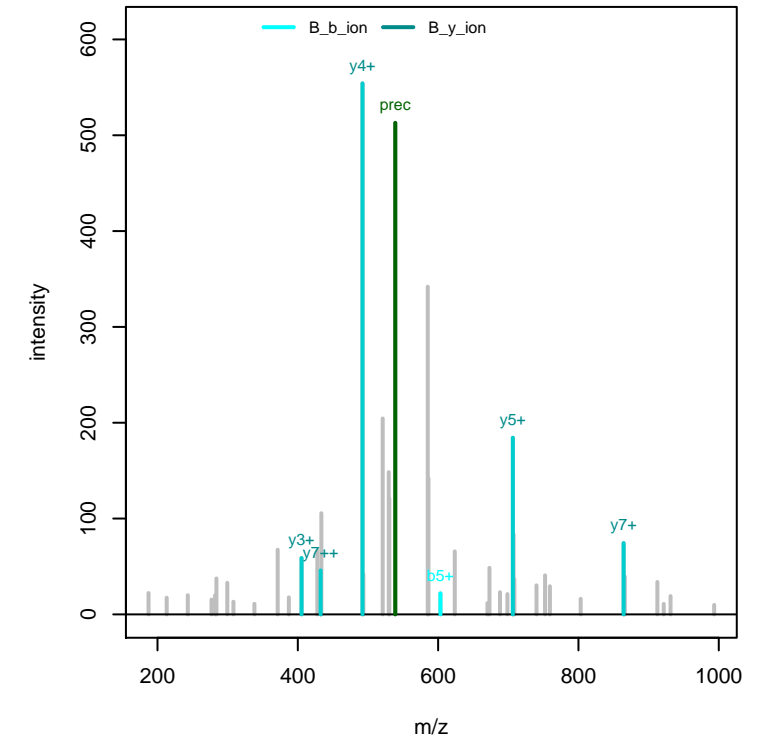

**ETSAKSEEK+XL\_S**



**ETSAKSEEK+XL\_L**





LDEISPGDKQK  
KAEQAAAEQALK

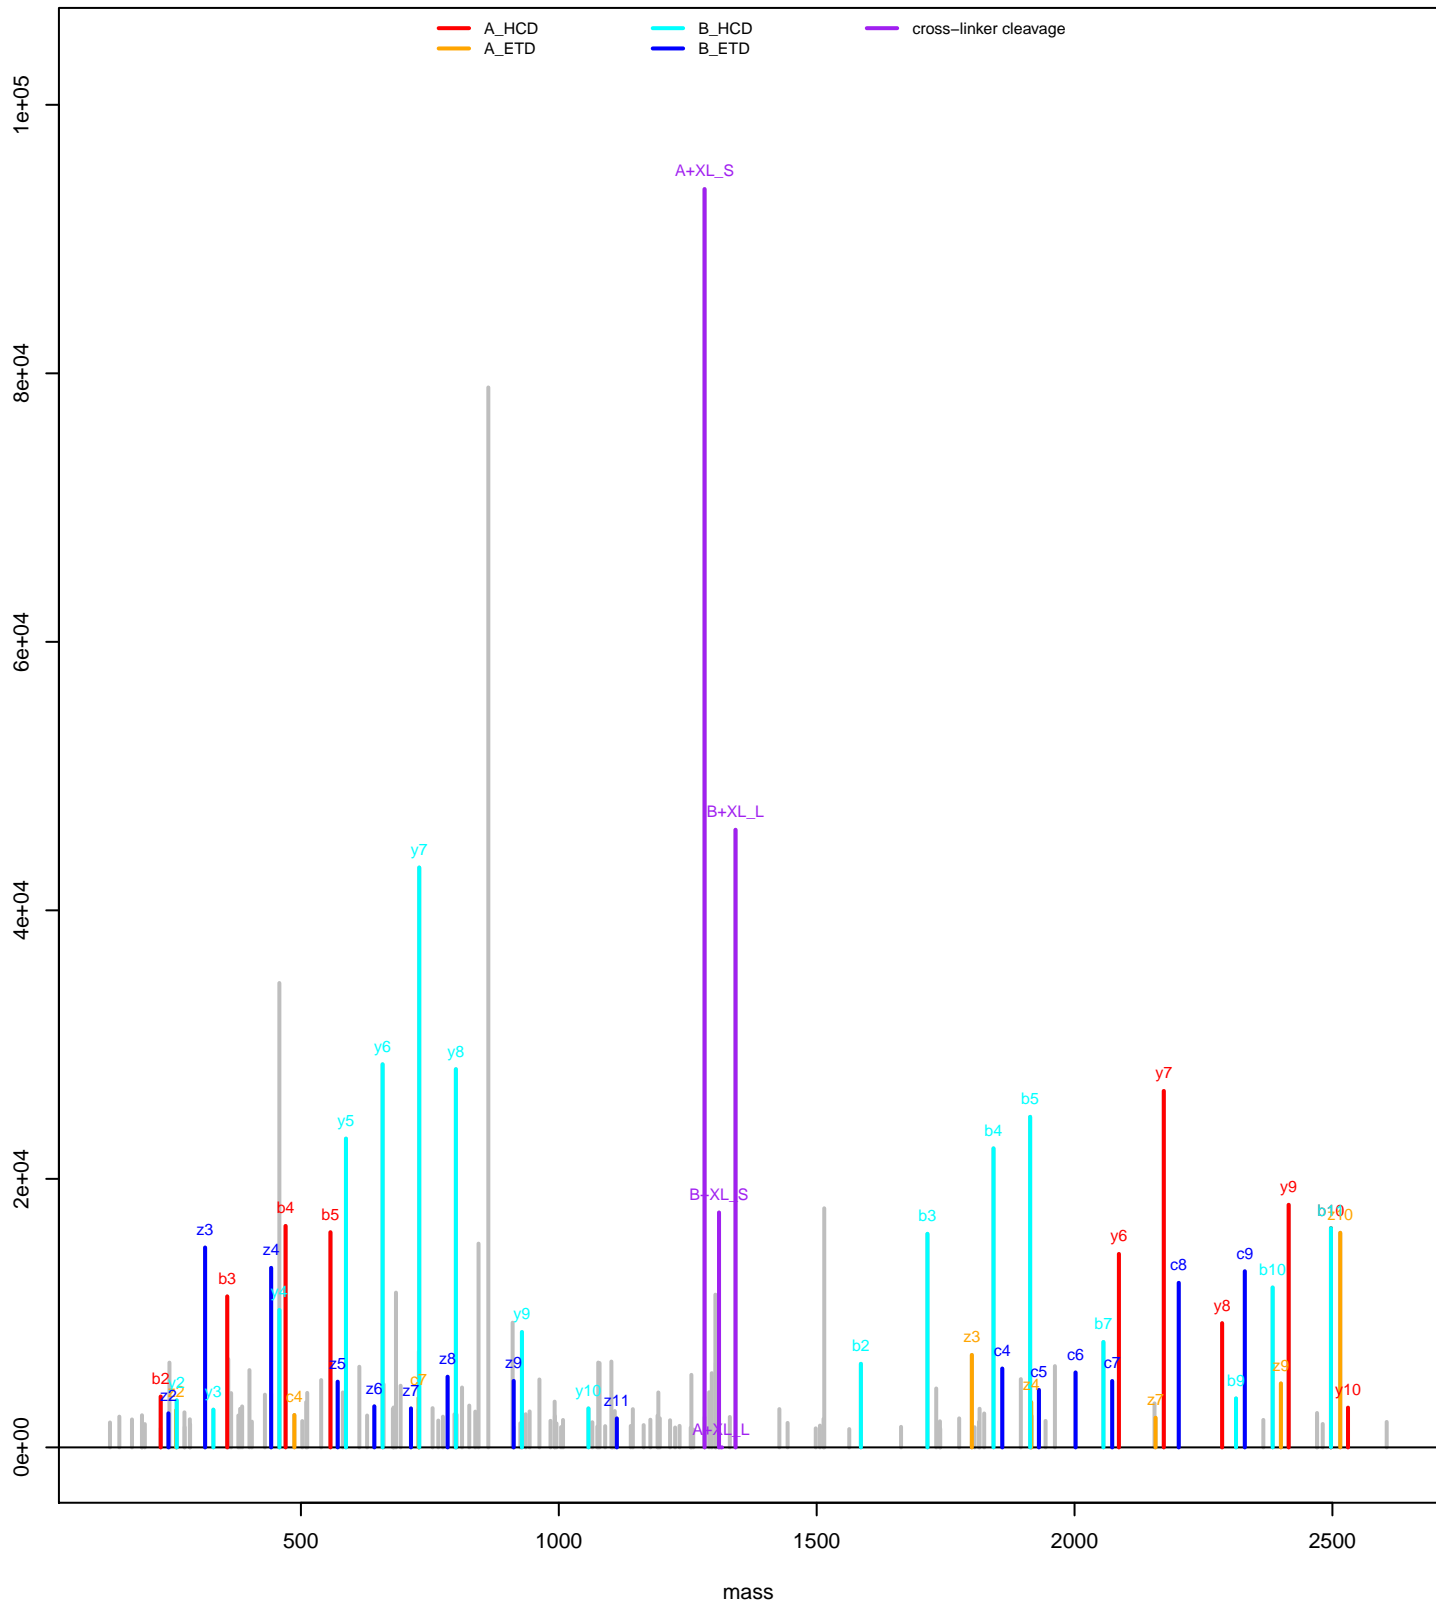

LDEISPGDKQK+XL\_S

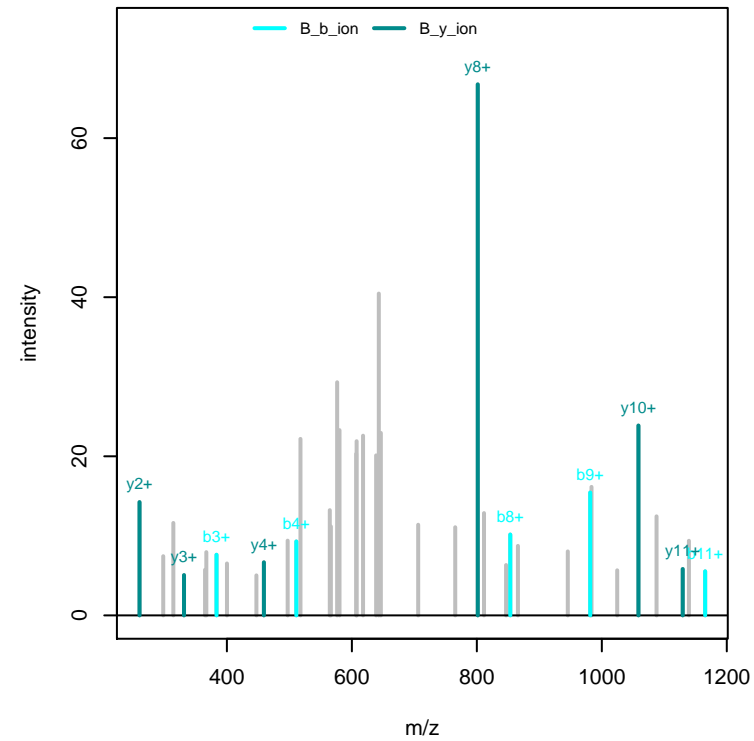

LDEISPGDKQK+XL\_L

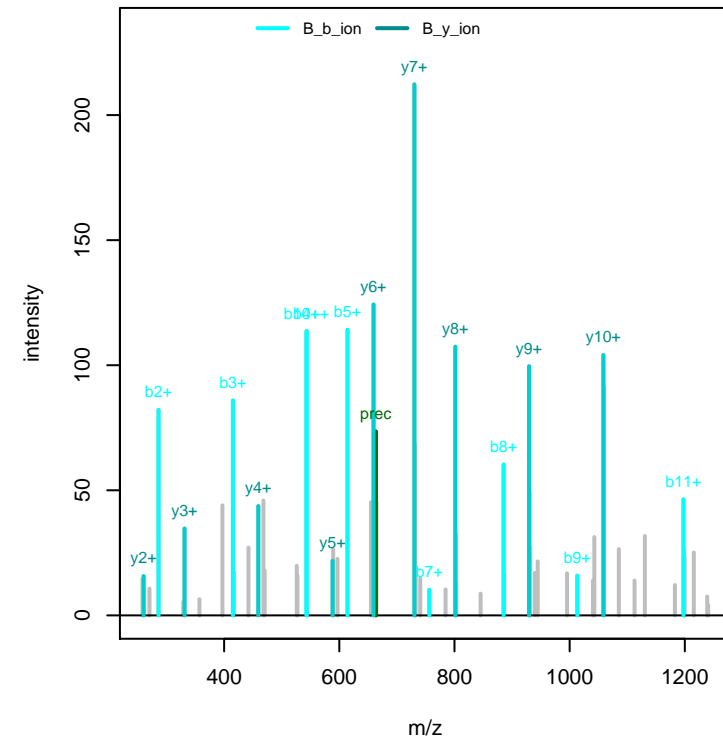

KAEQAAAEQALK+XL\_S

KAEQAAAEQALK+XL\_L

**AQALGKER  
DQAMKQMK**

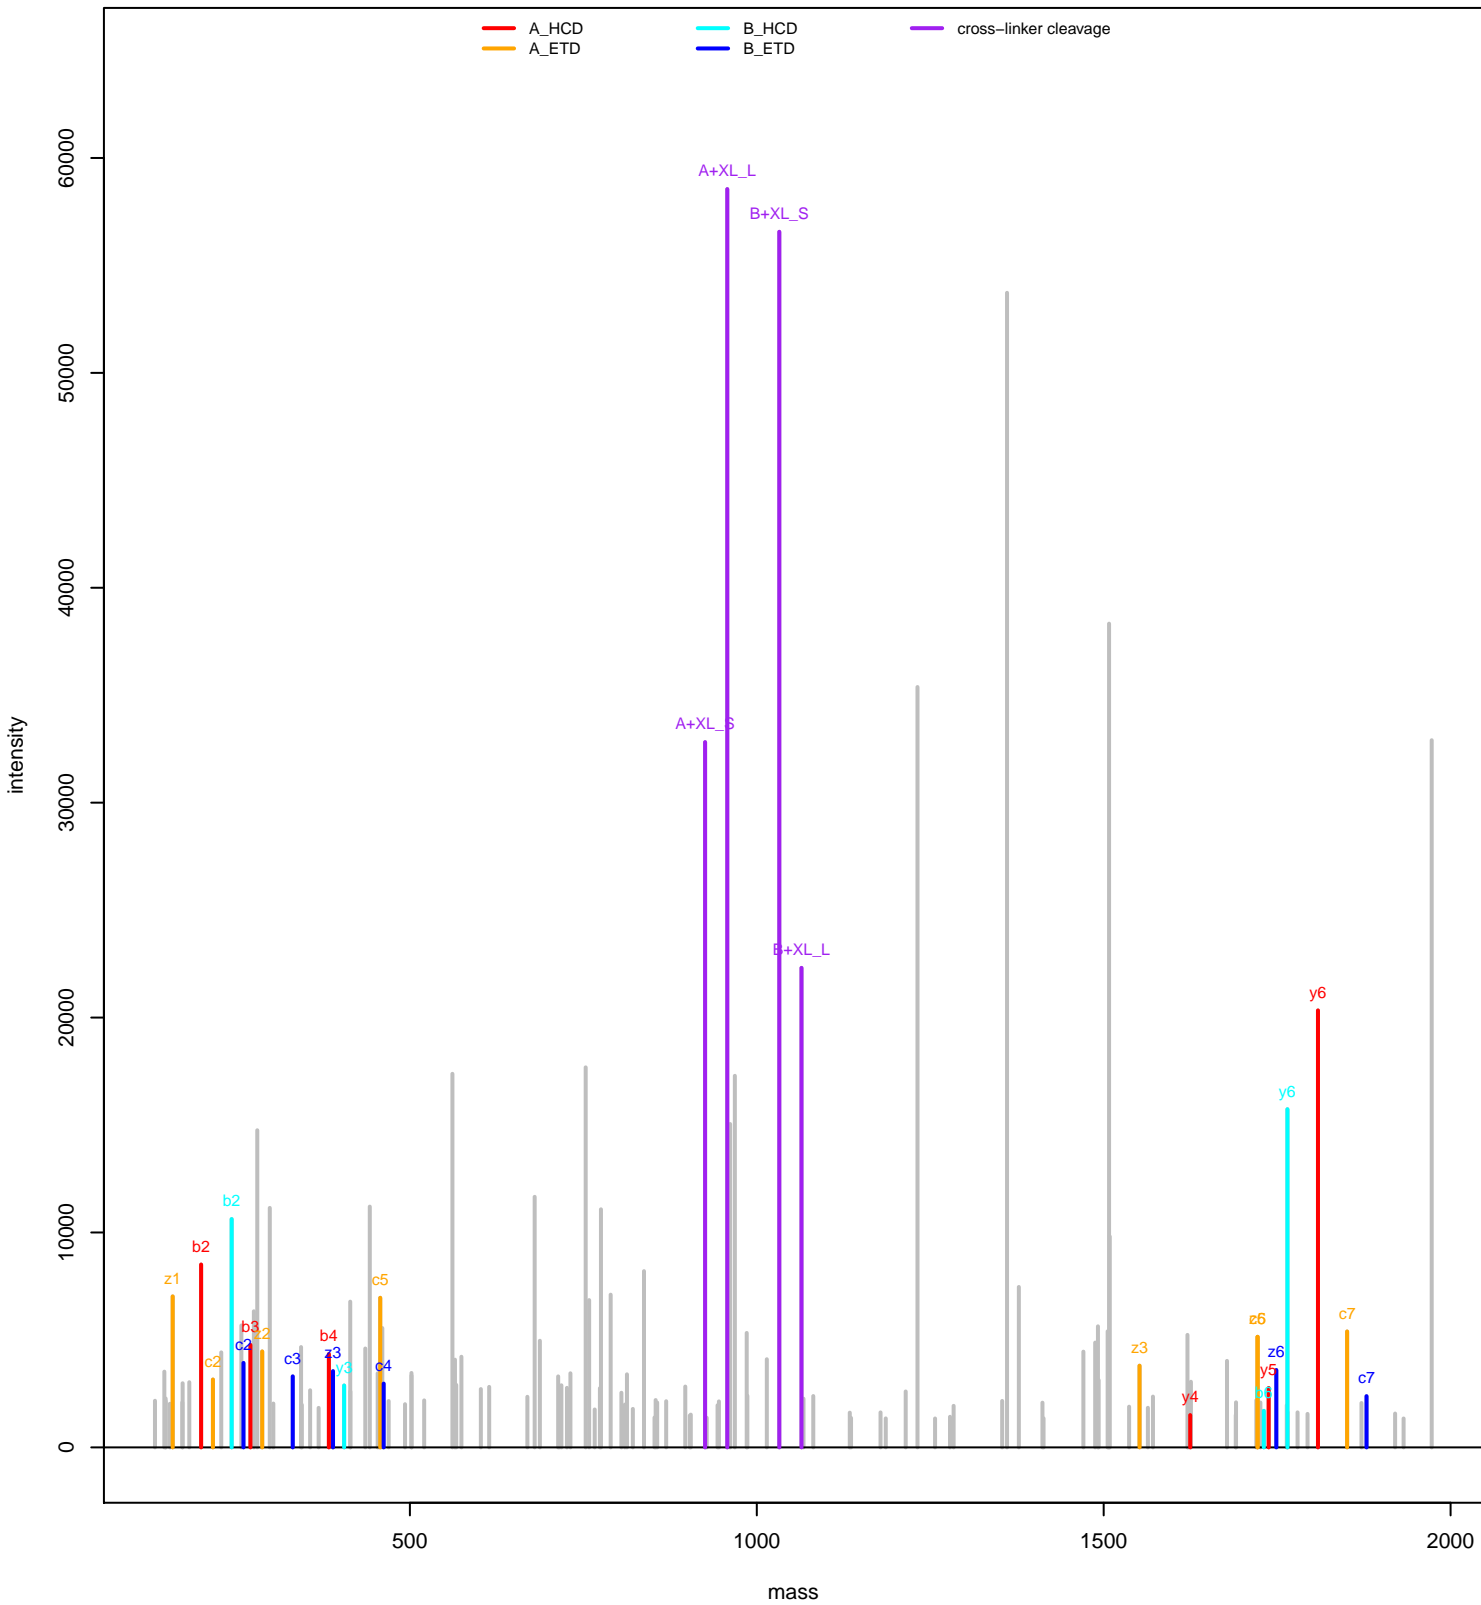

**AQALGKER+XL\_S**

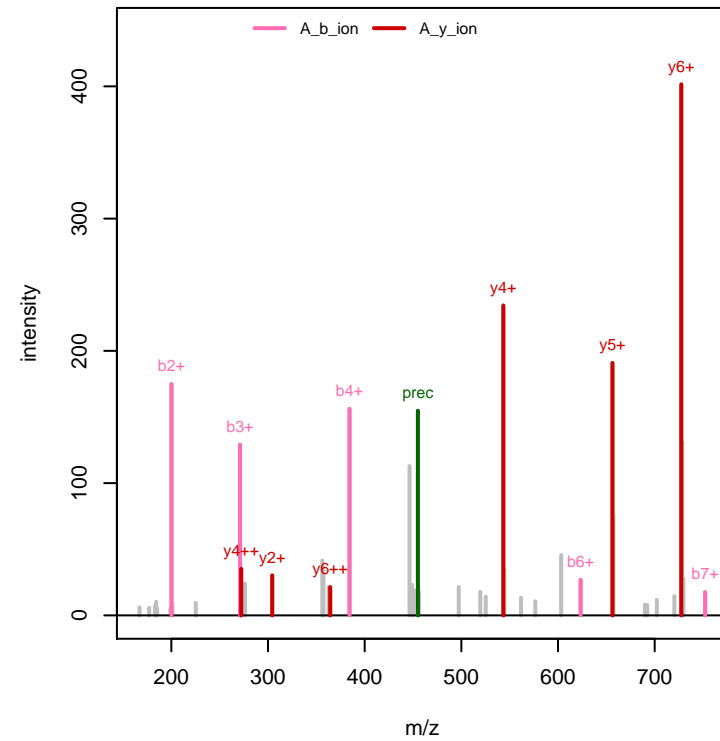

**AQALGKER+XL\_L**

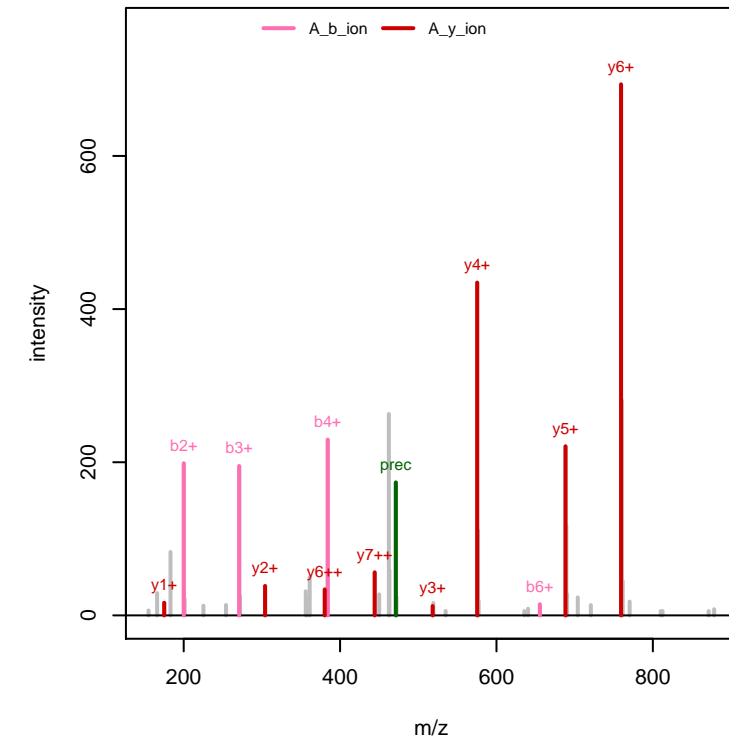

**DQAMKQMK+XL\_S**

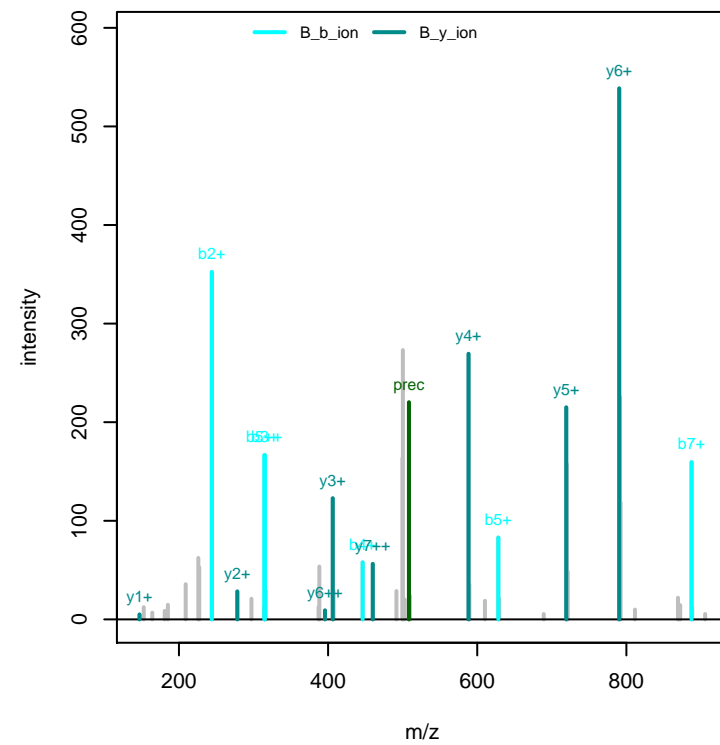

**DQAMKQMK+XL\_L**

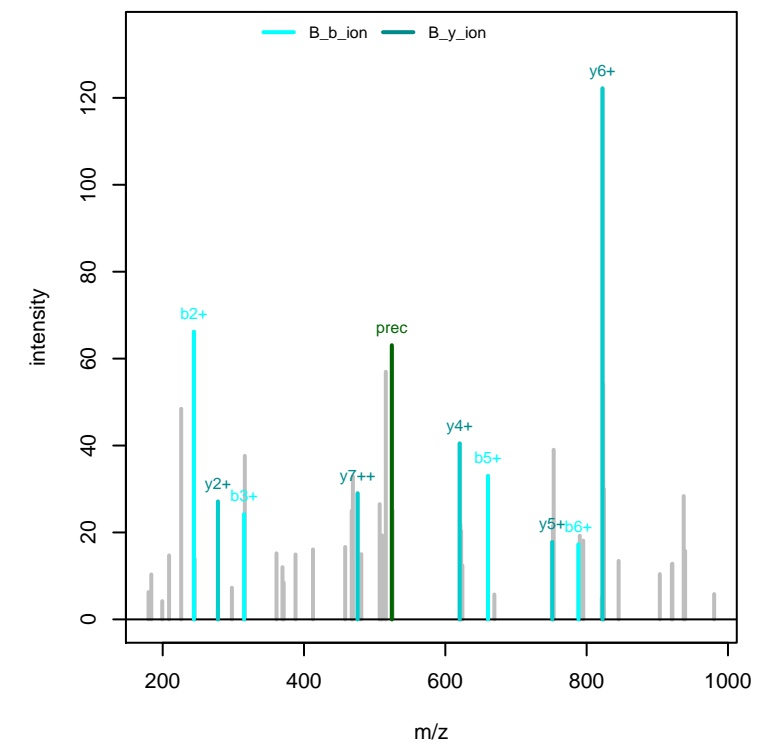

AIQVTTGAKK  
KVDVTGTSK GK

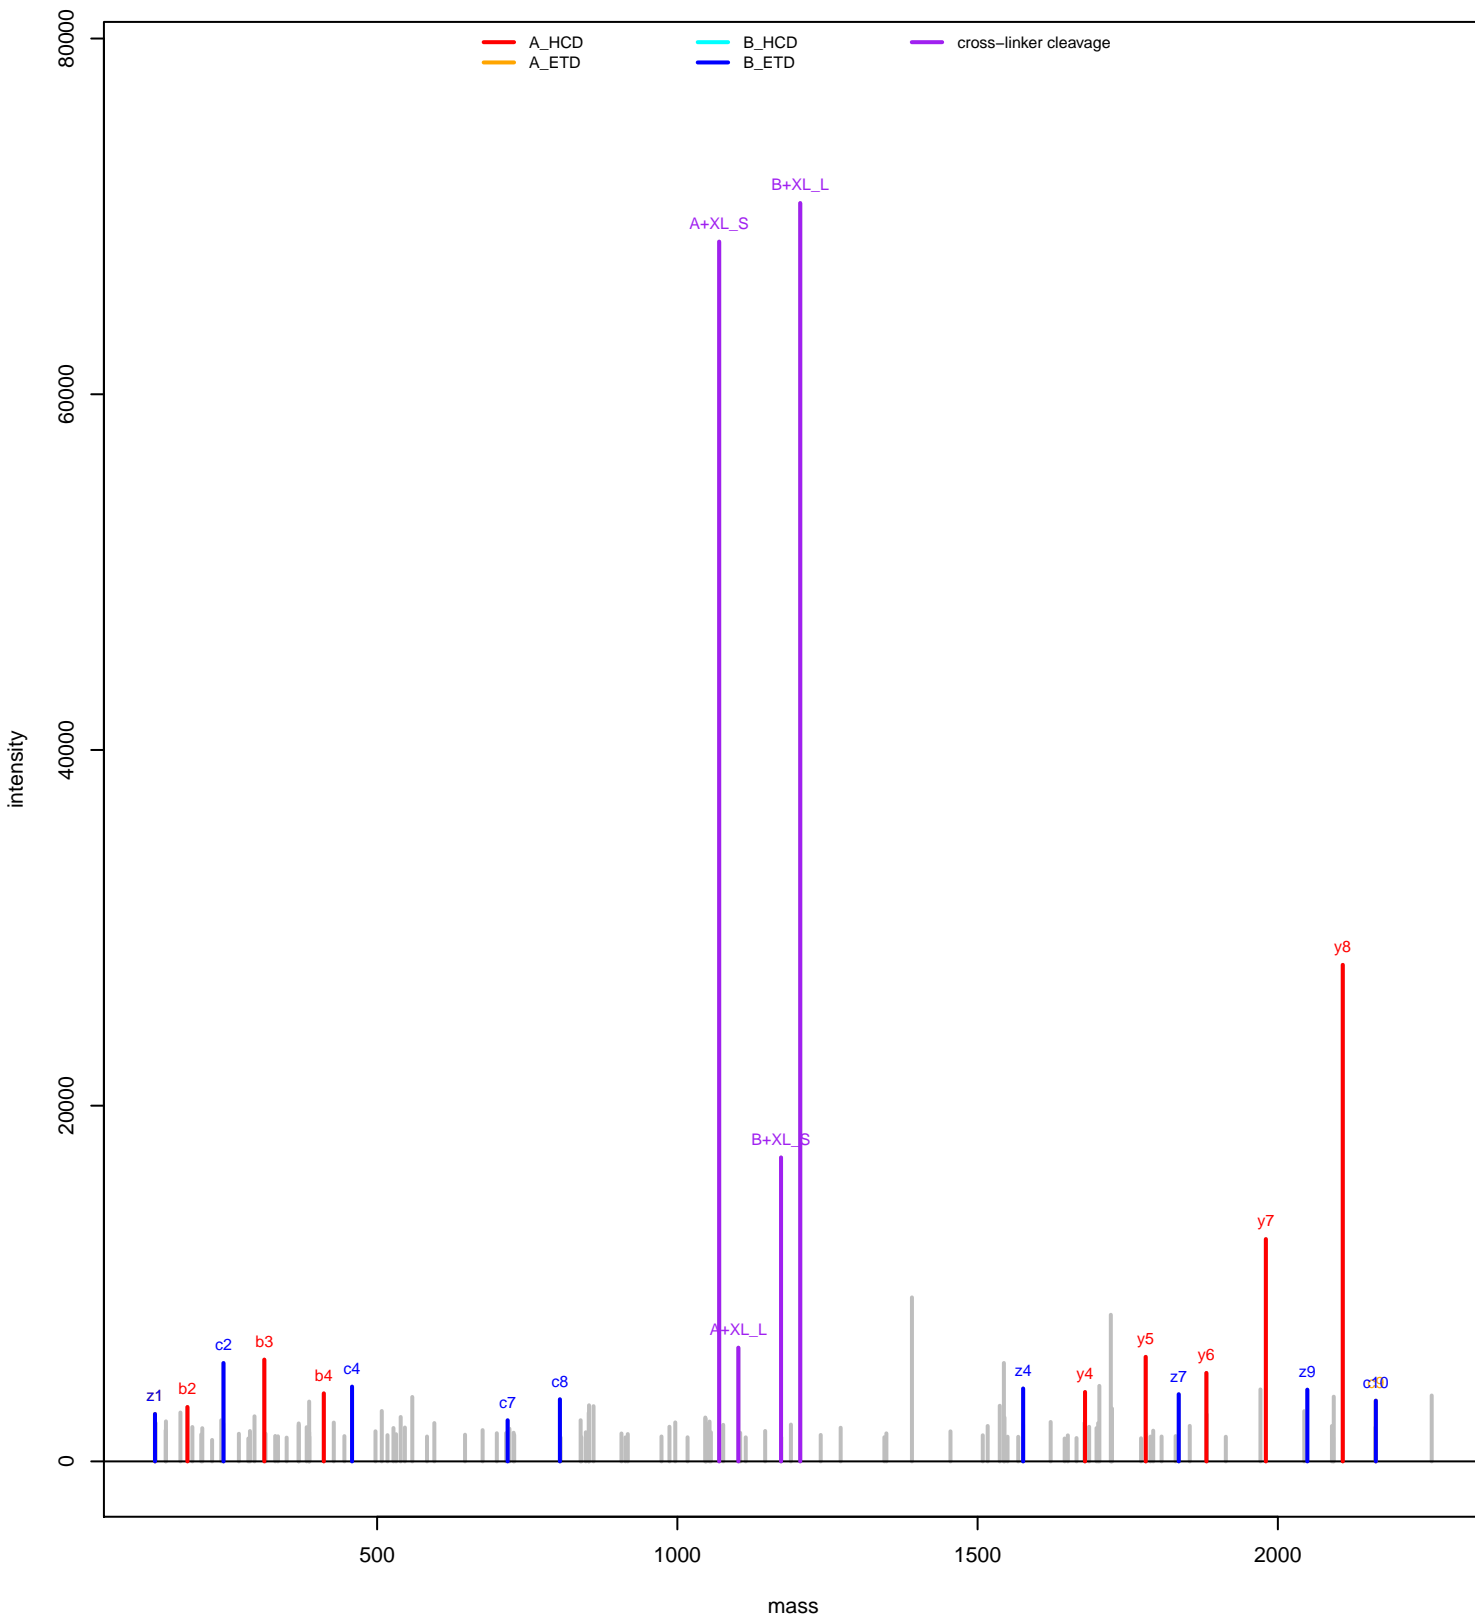

AIQVTTGAKK+XL\_S

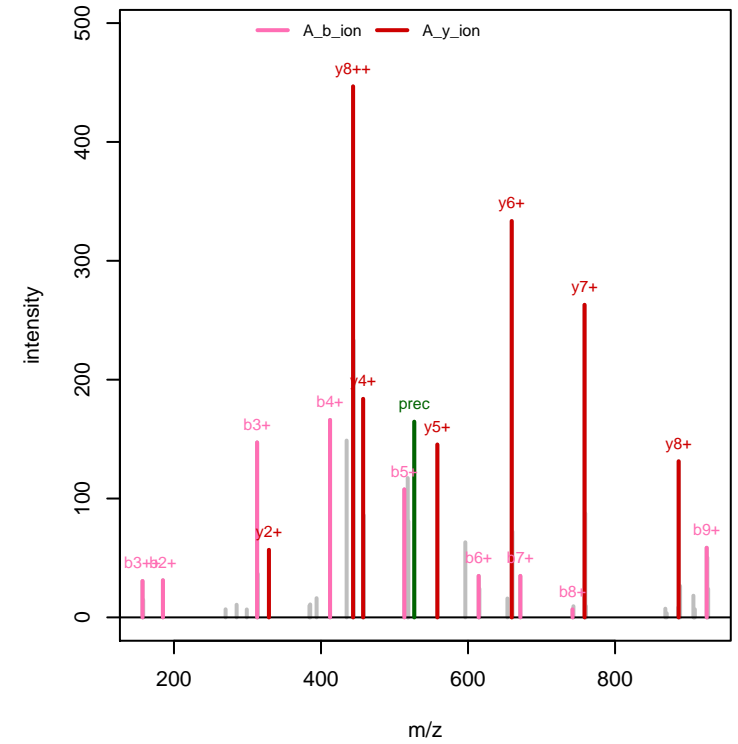

AIQVTTGAKK+XL\_L

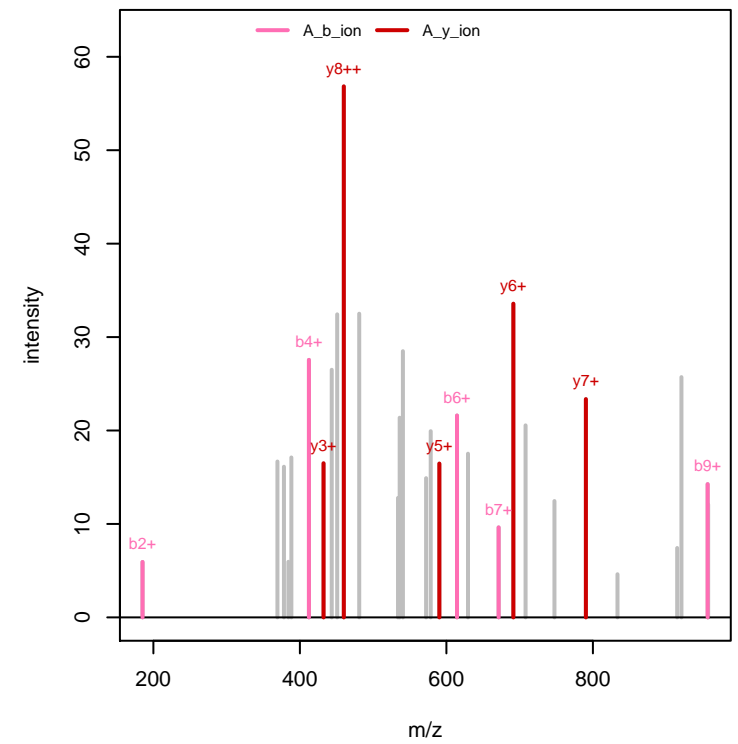

KVDVTGTSK GK+XL\_S

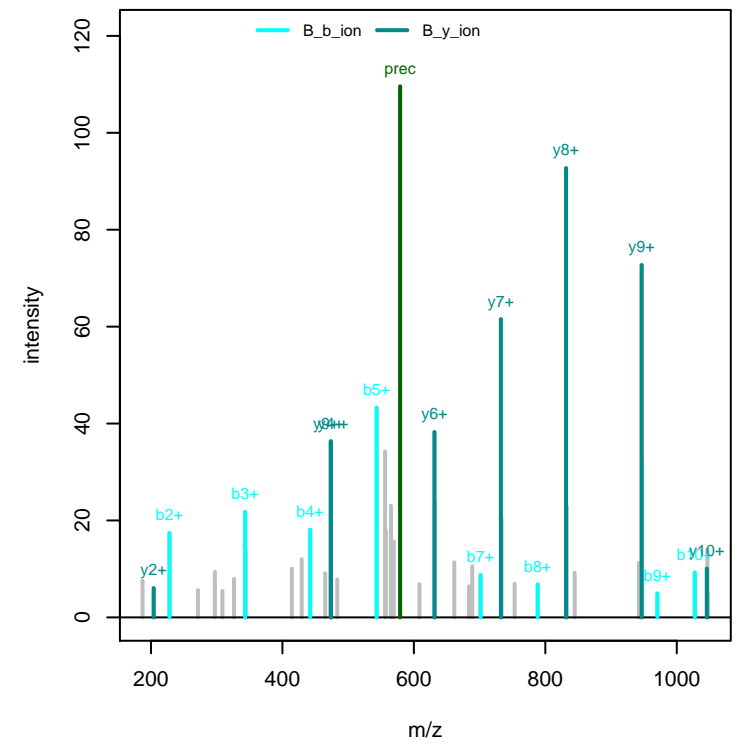

KVDVTGTSK GK+XL\_L

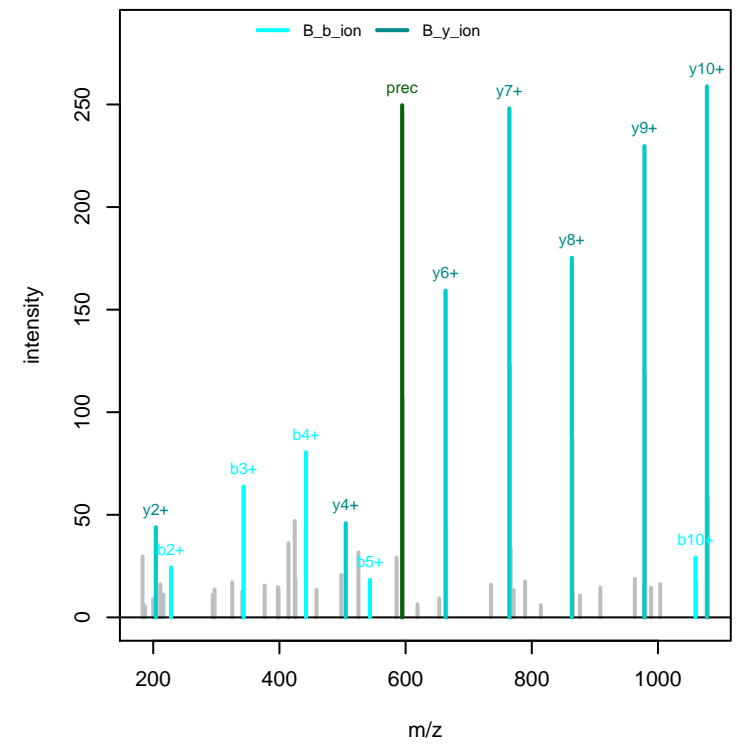

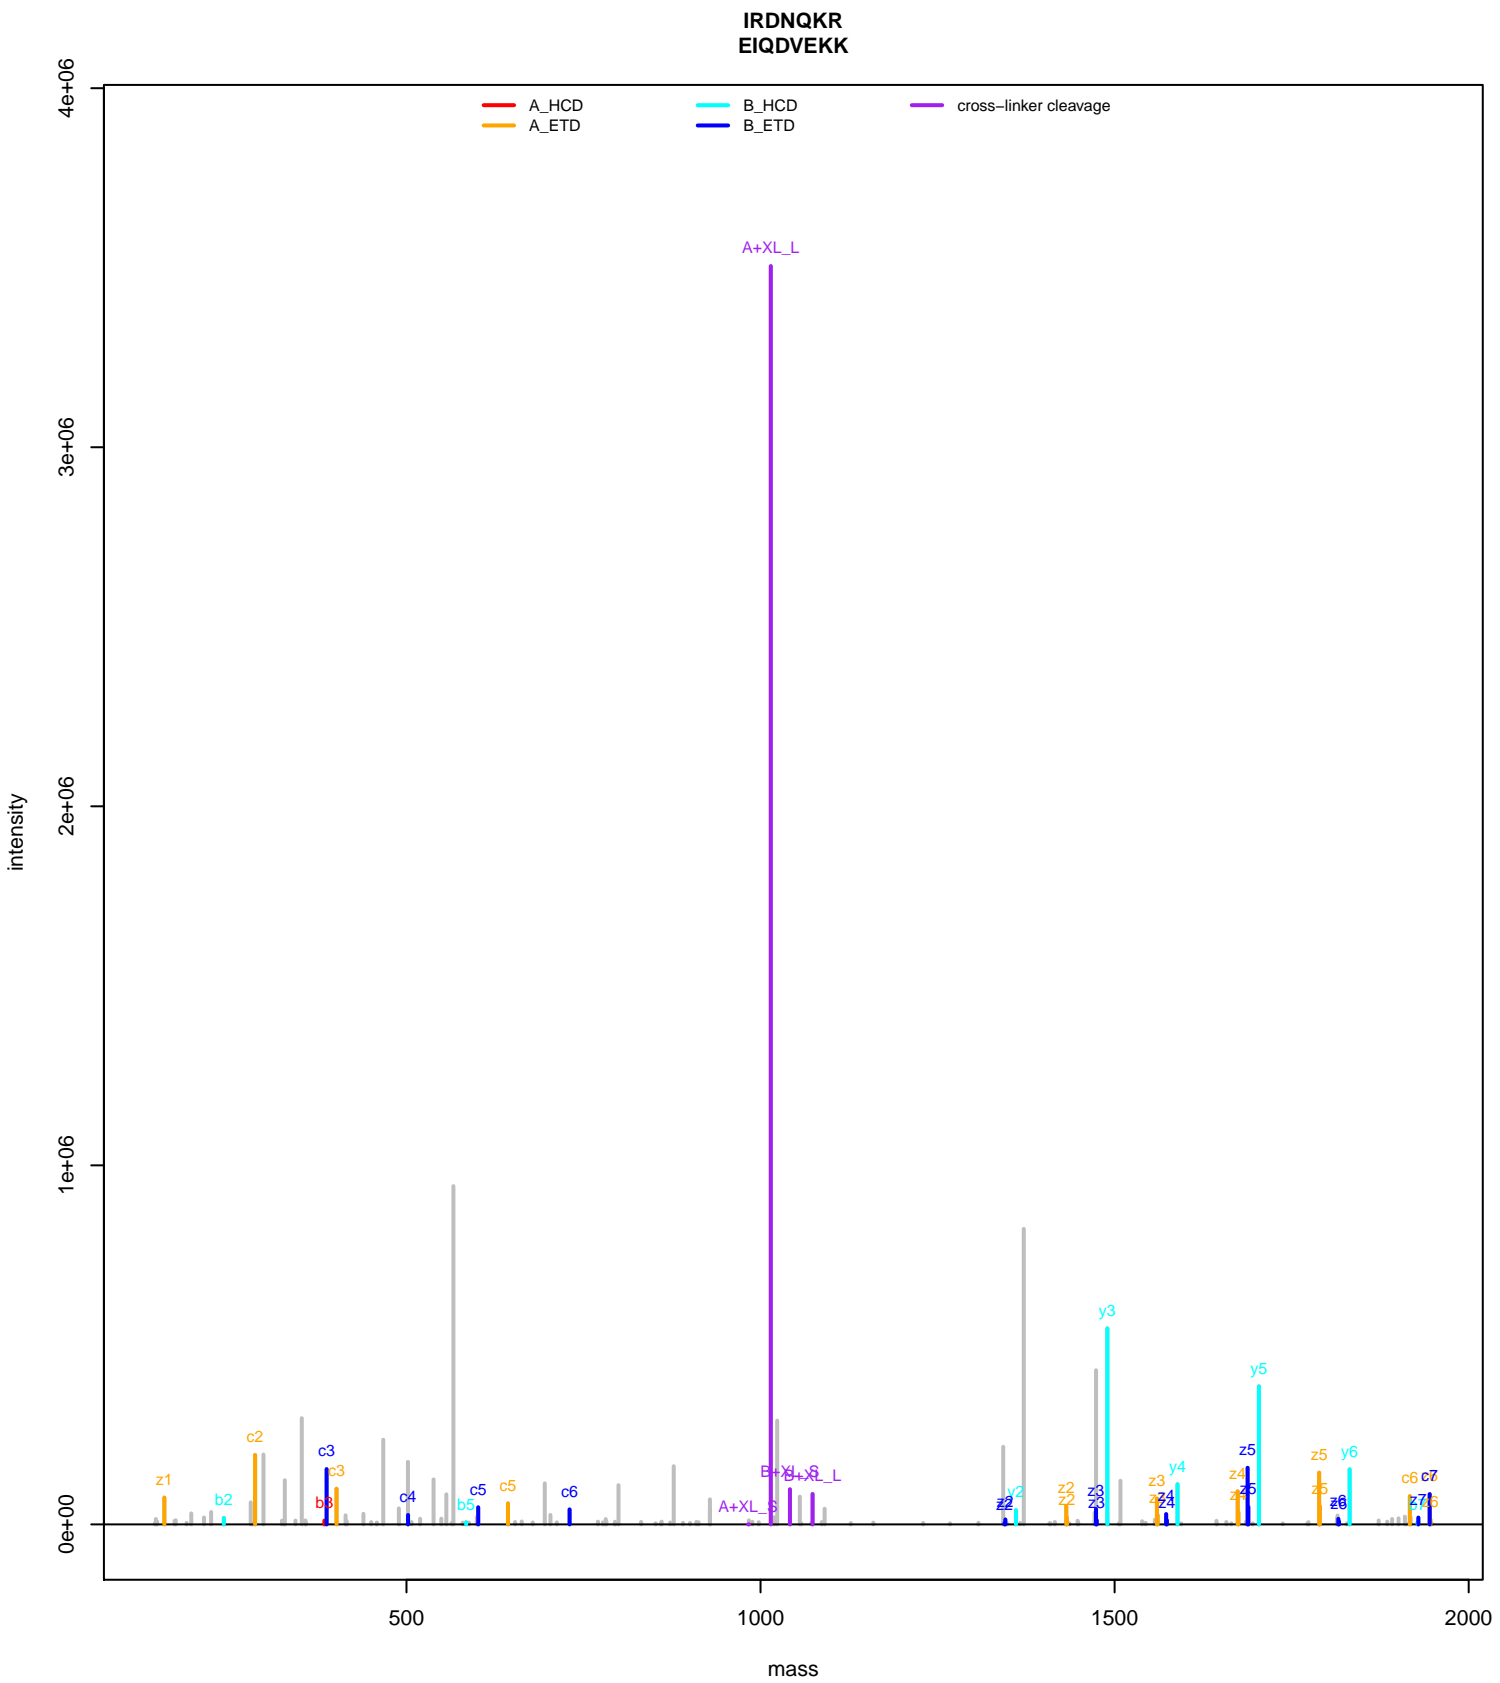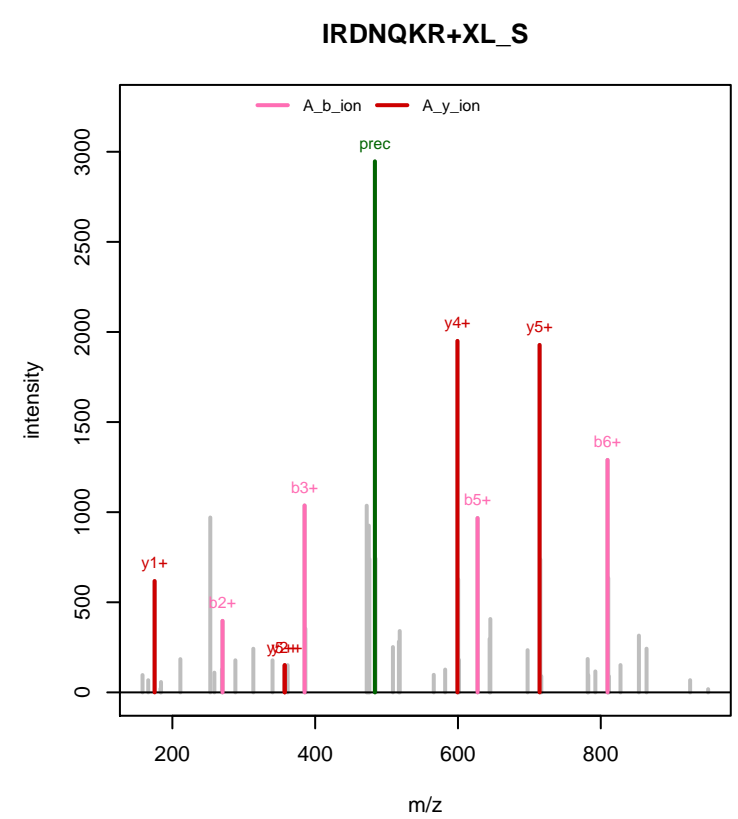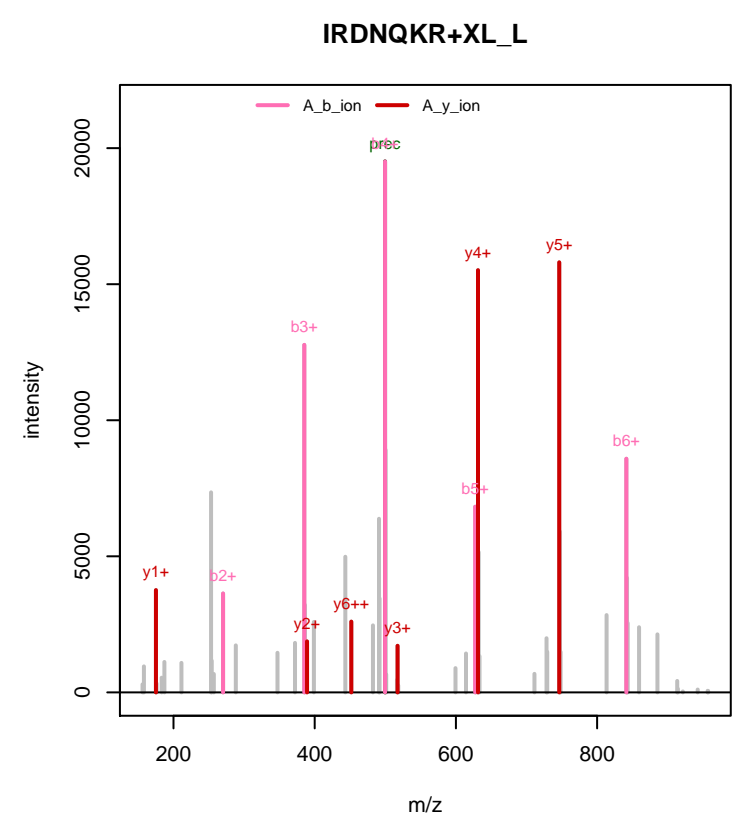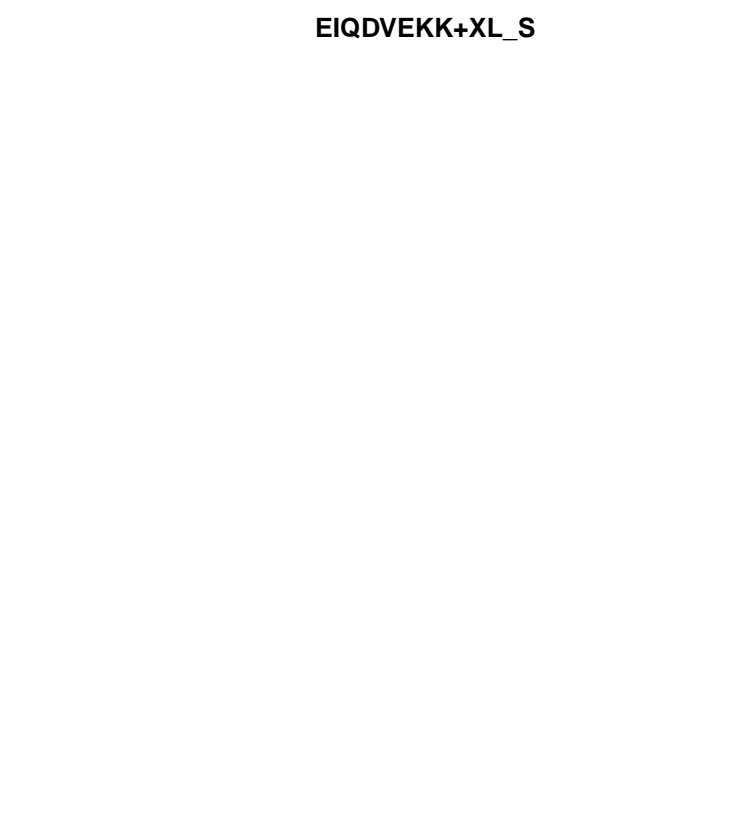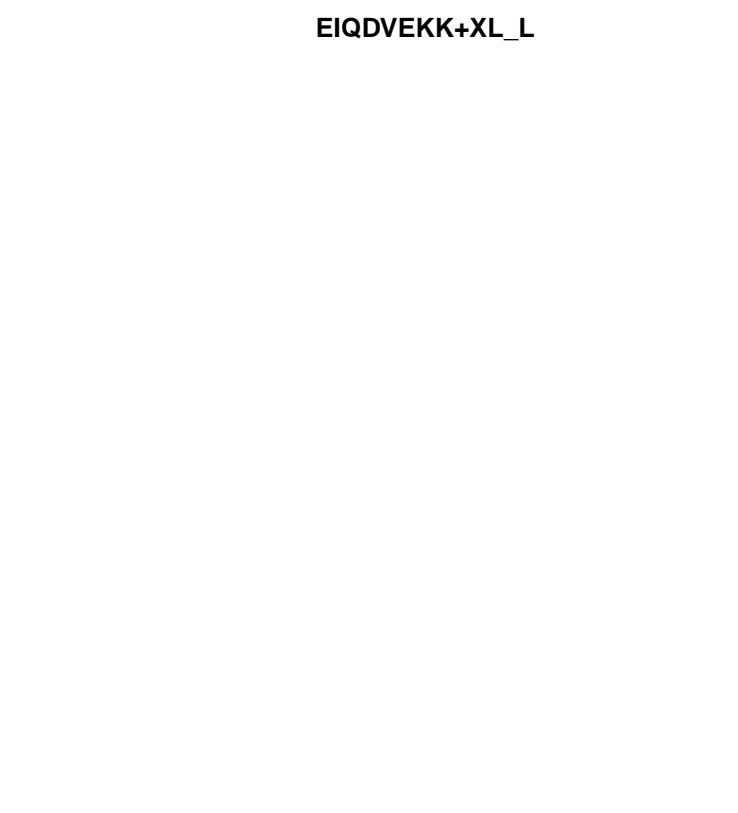

**AIDKAR  
CEENHKVPR**

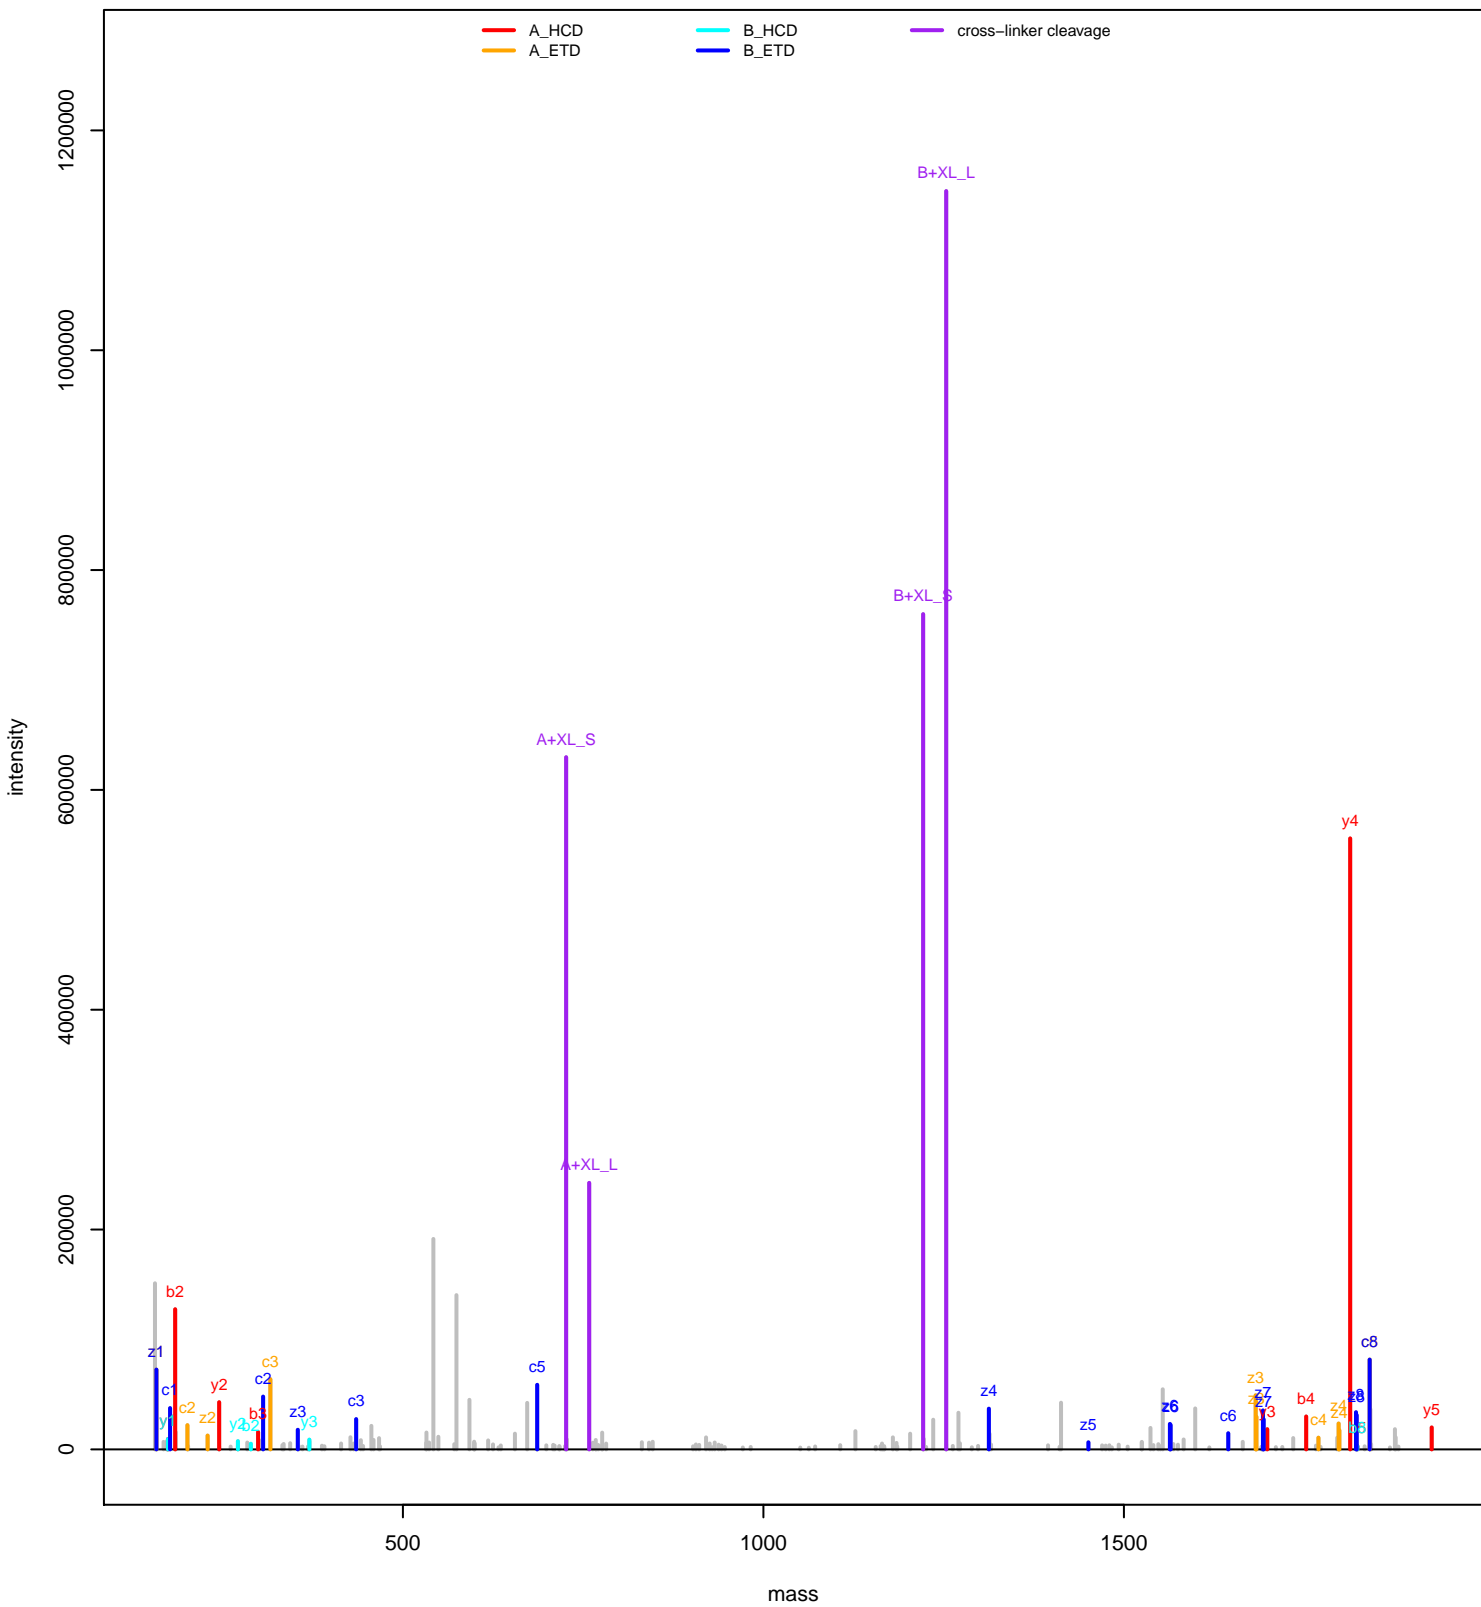

**AIDKAR+XL\_S**

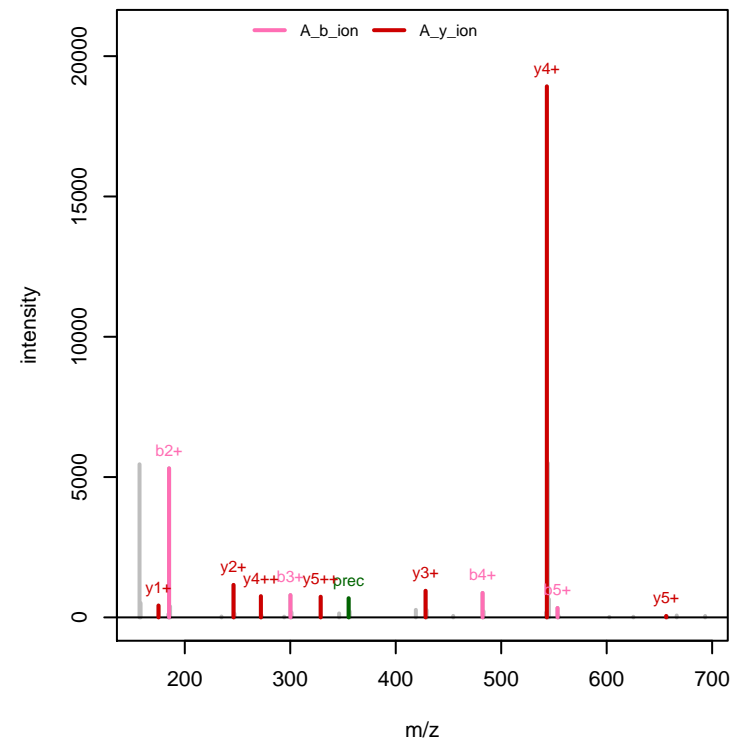

**AIDKAR+XL\_L**

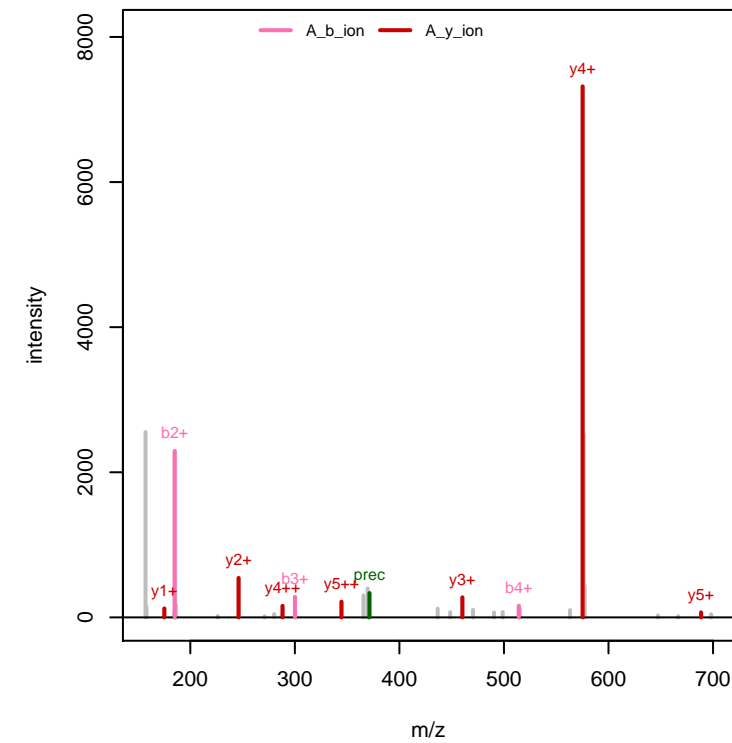

**CEENHKVPR+XL\_S**

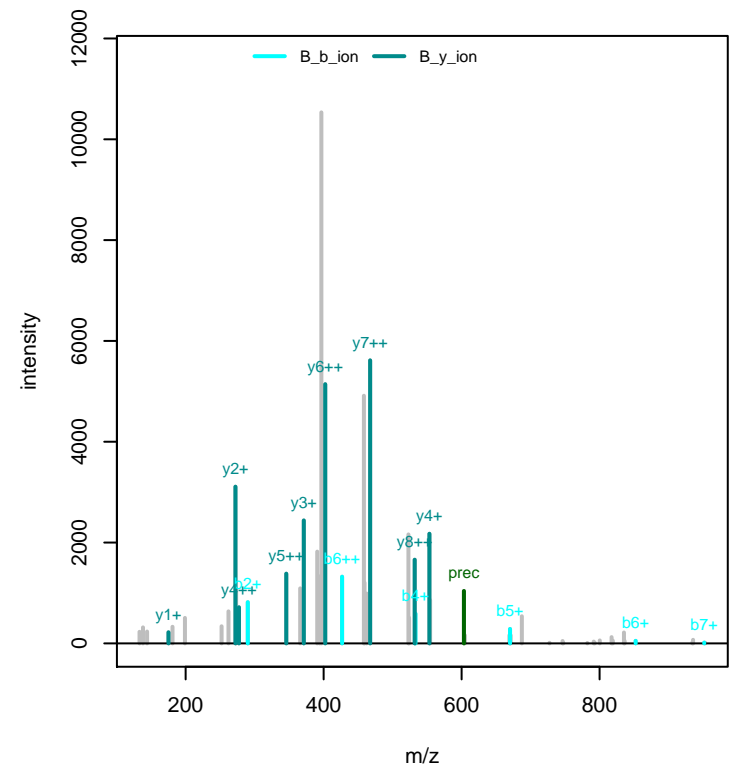

**CEENHKVPR+XL\_L**

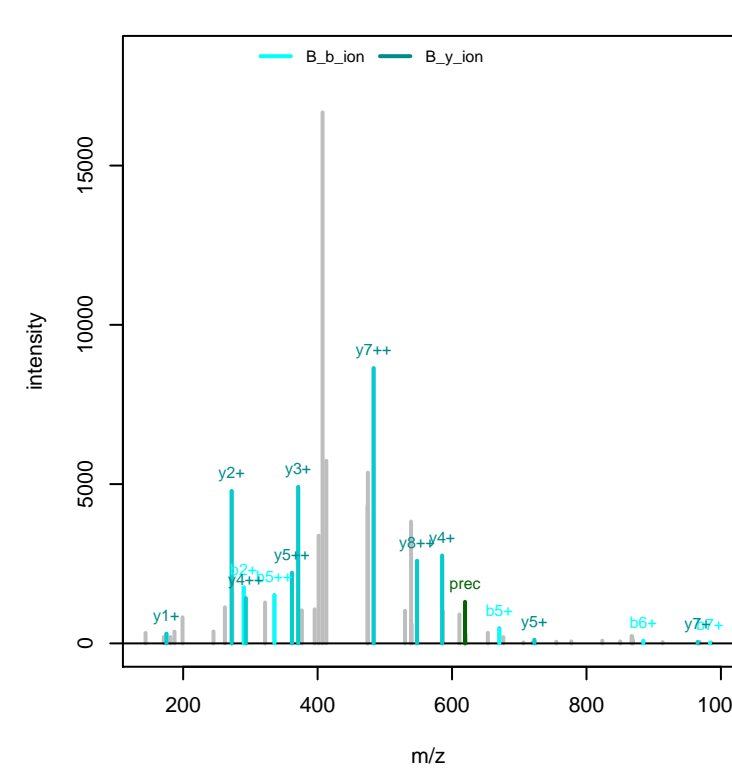

### KPNACK DFQKAER

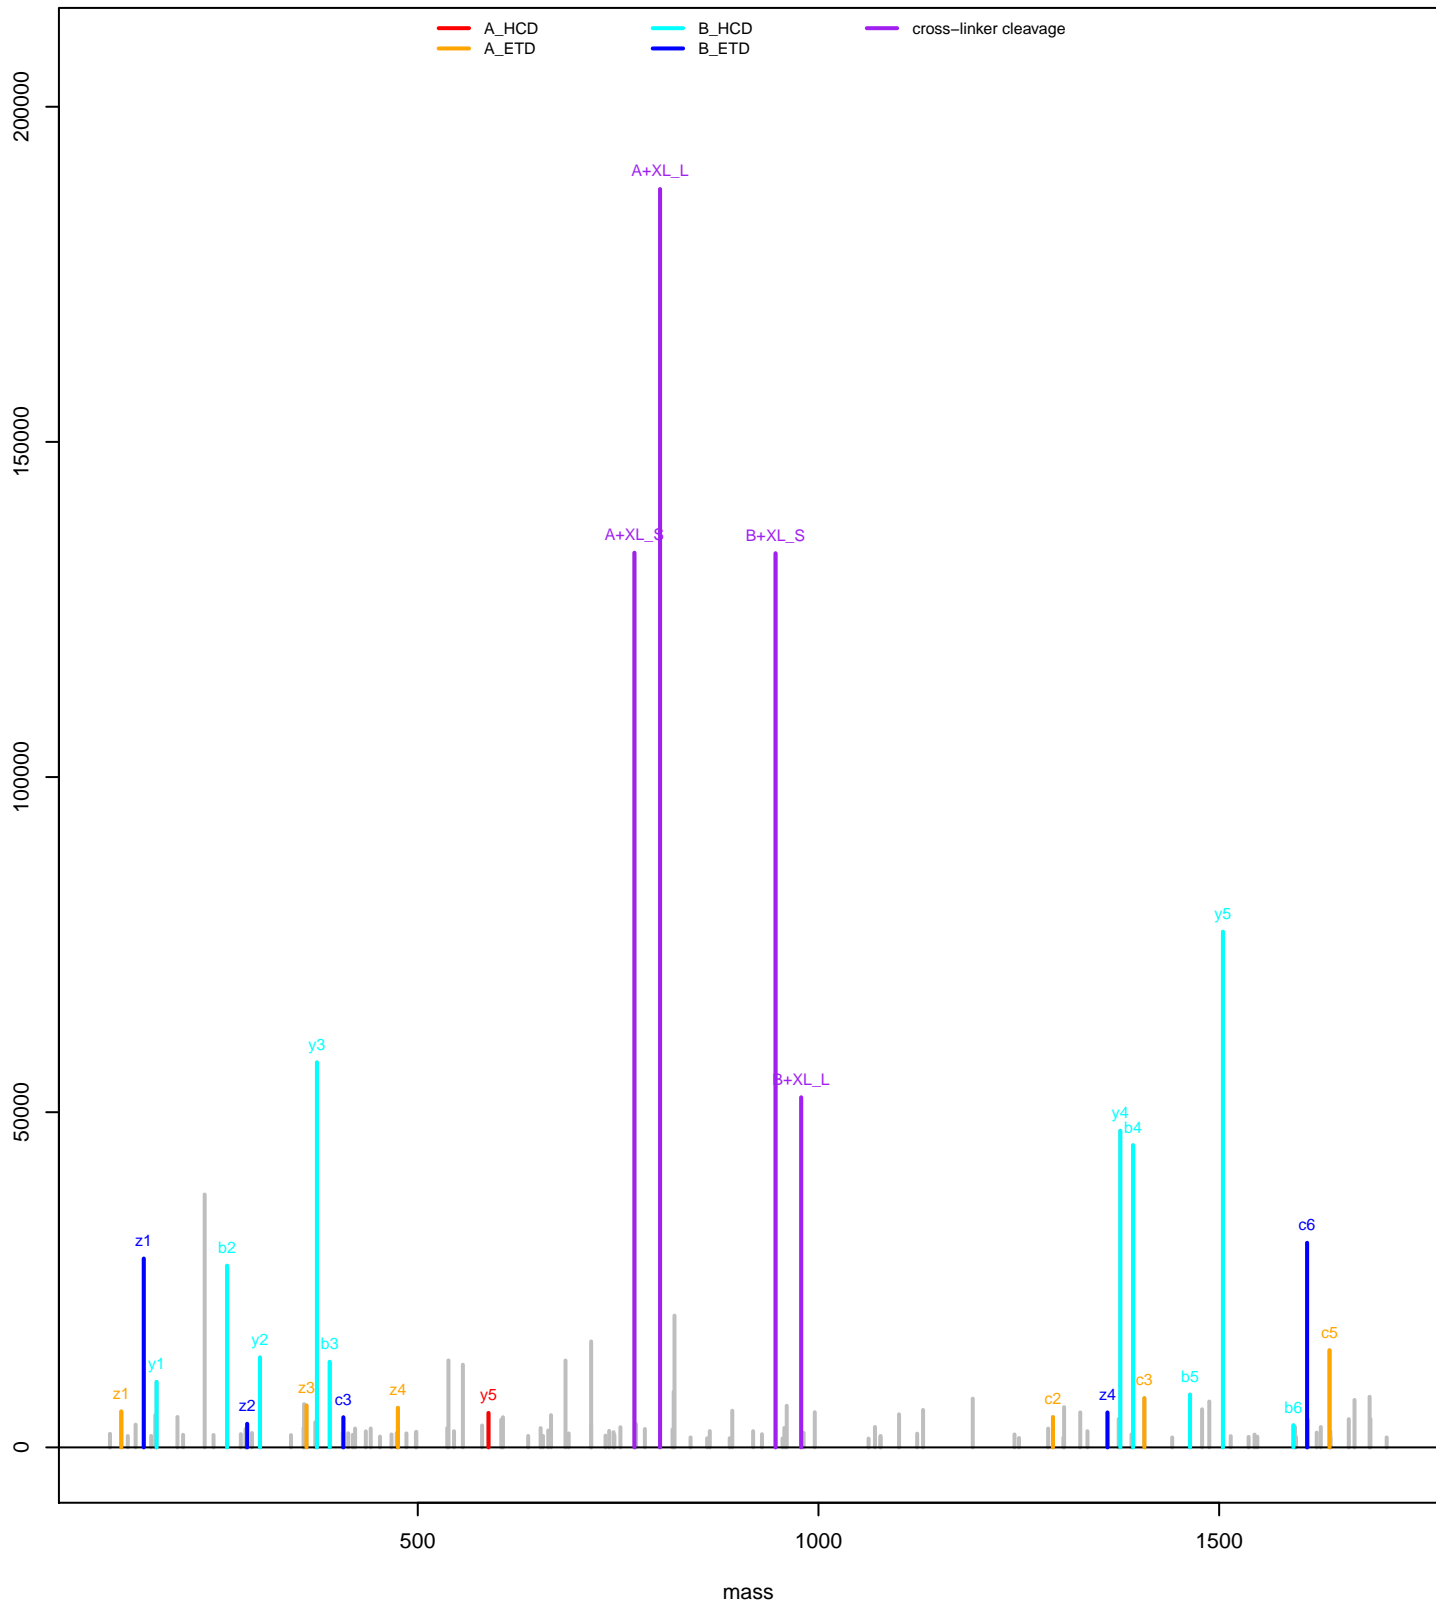

### KPNACK+XL\_S

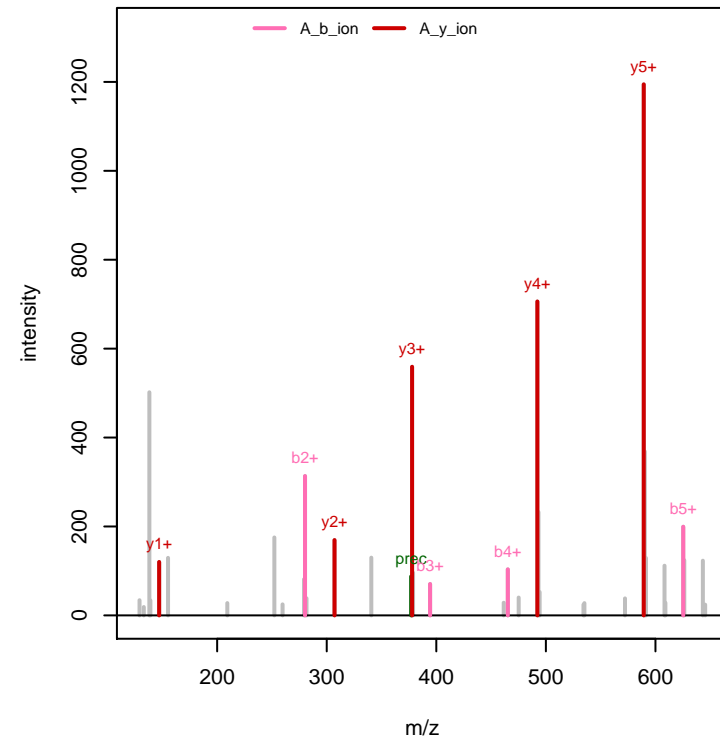

### KPNACK+XL\_L

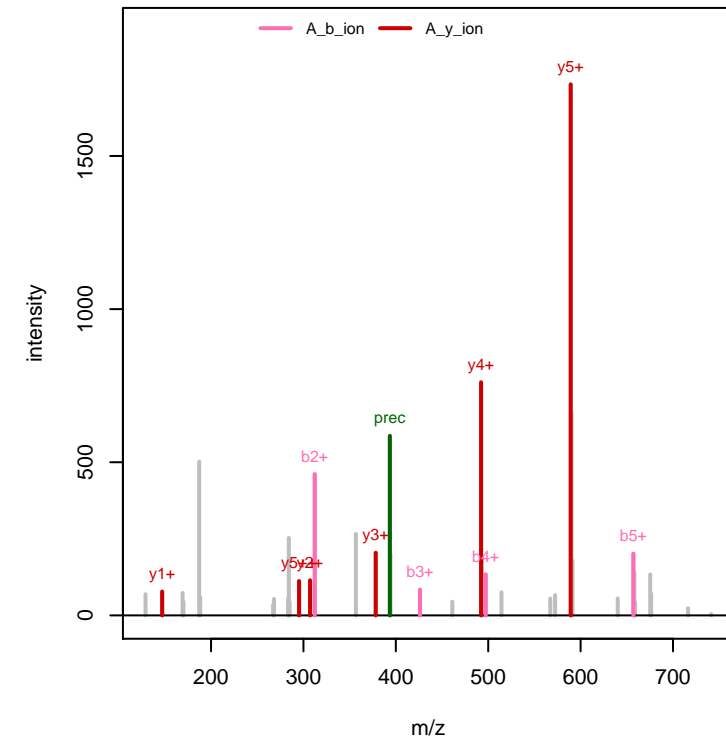

### DFQKAER+XL\_S

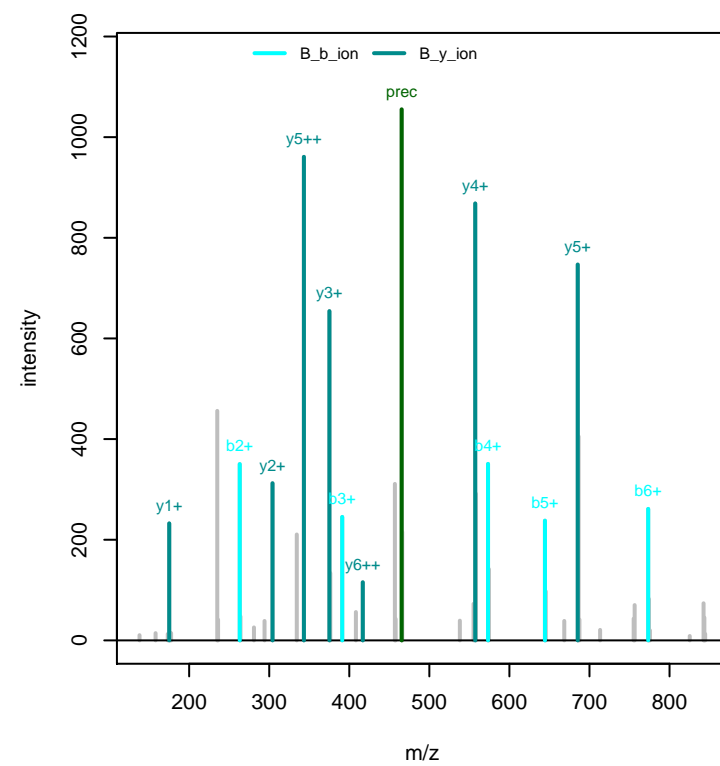

### DFQKAER+XL\_L

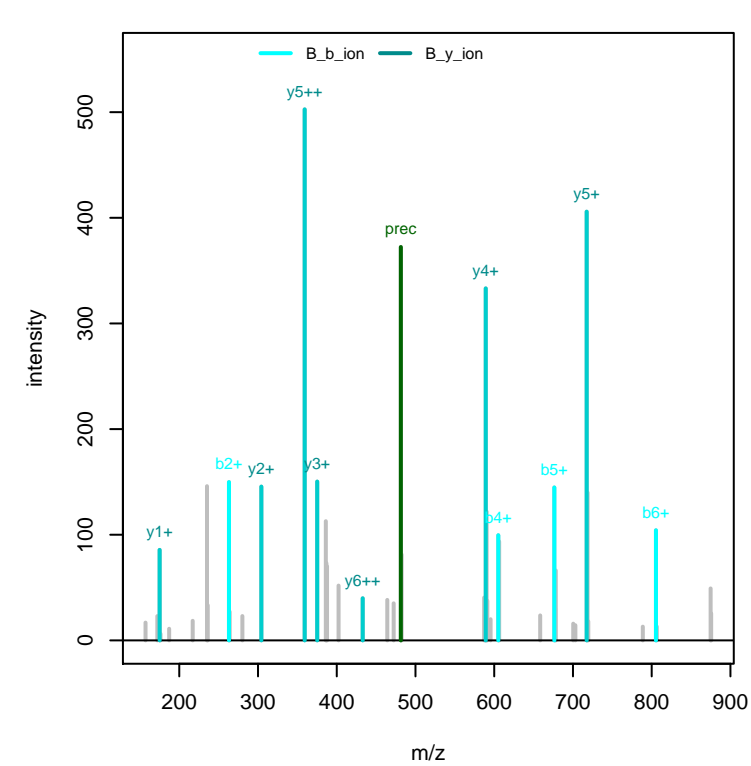

HPYKPK  
VKAQDVQR

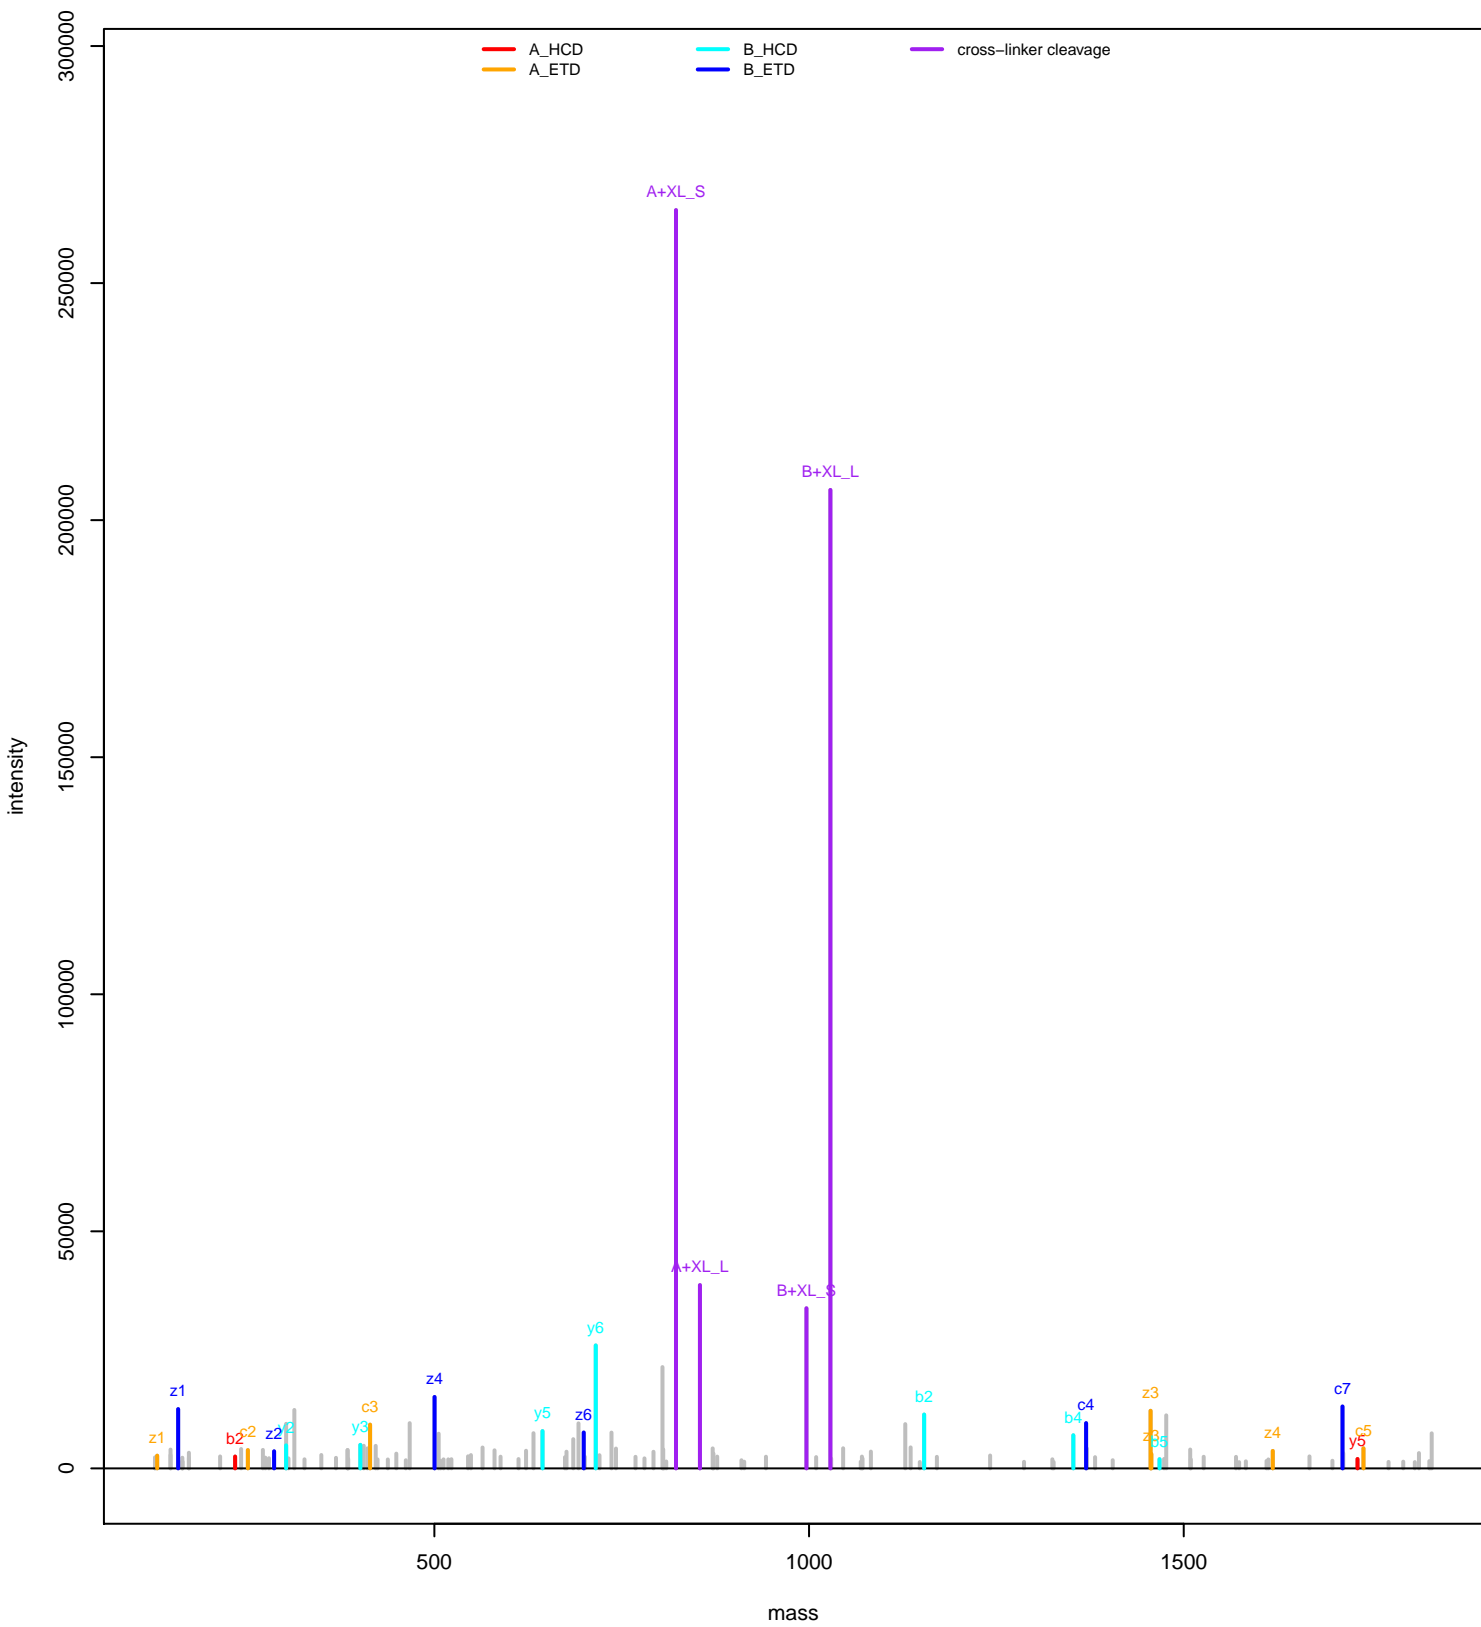

HPYKPK+XL\_S

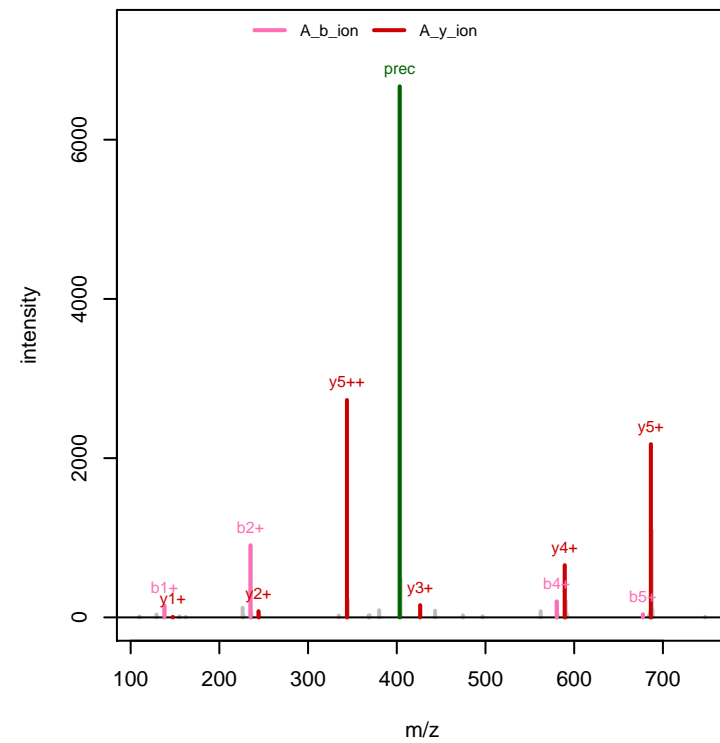

HPYKPK+XL\_L

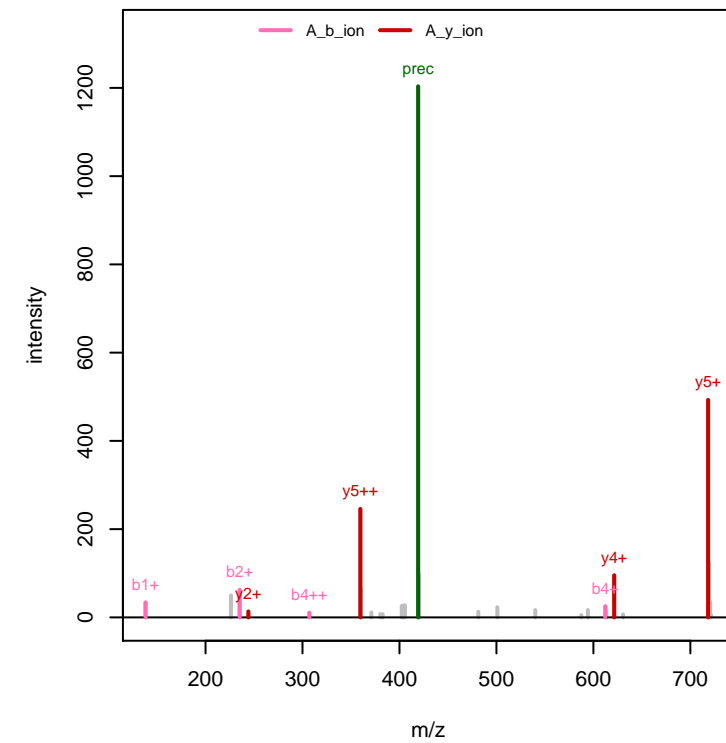

VKAQDVQR+XL\_S

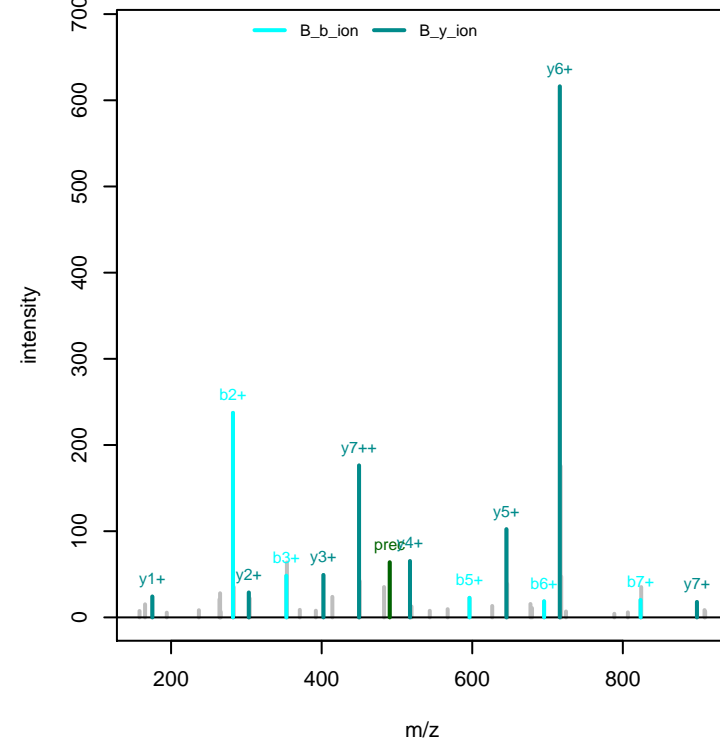

VKAQDVQR+XL\_L

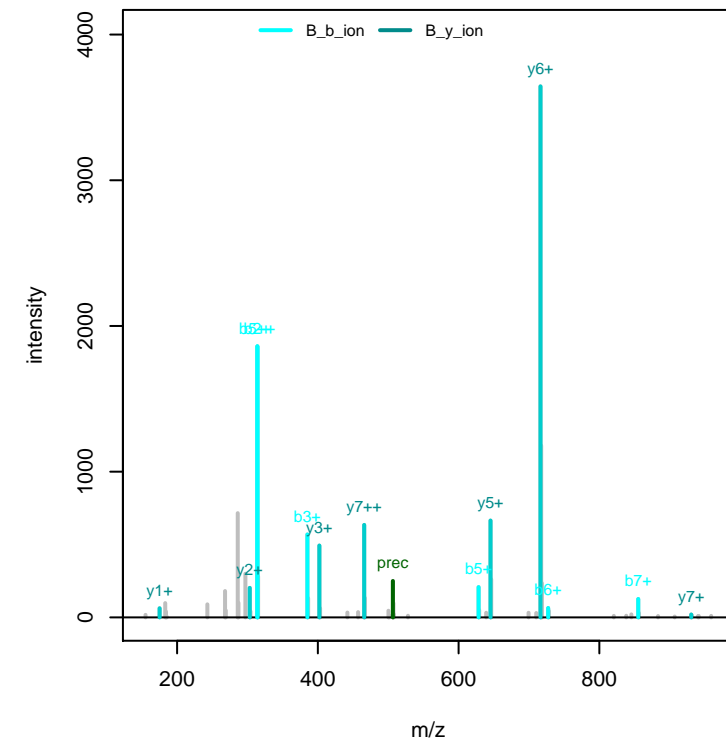

AESIAKAVDGVK  
VAKGVEGVTSVSDK

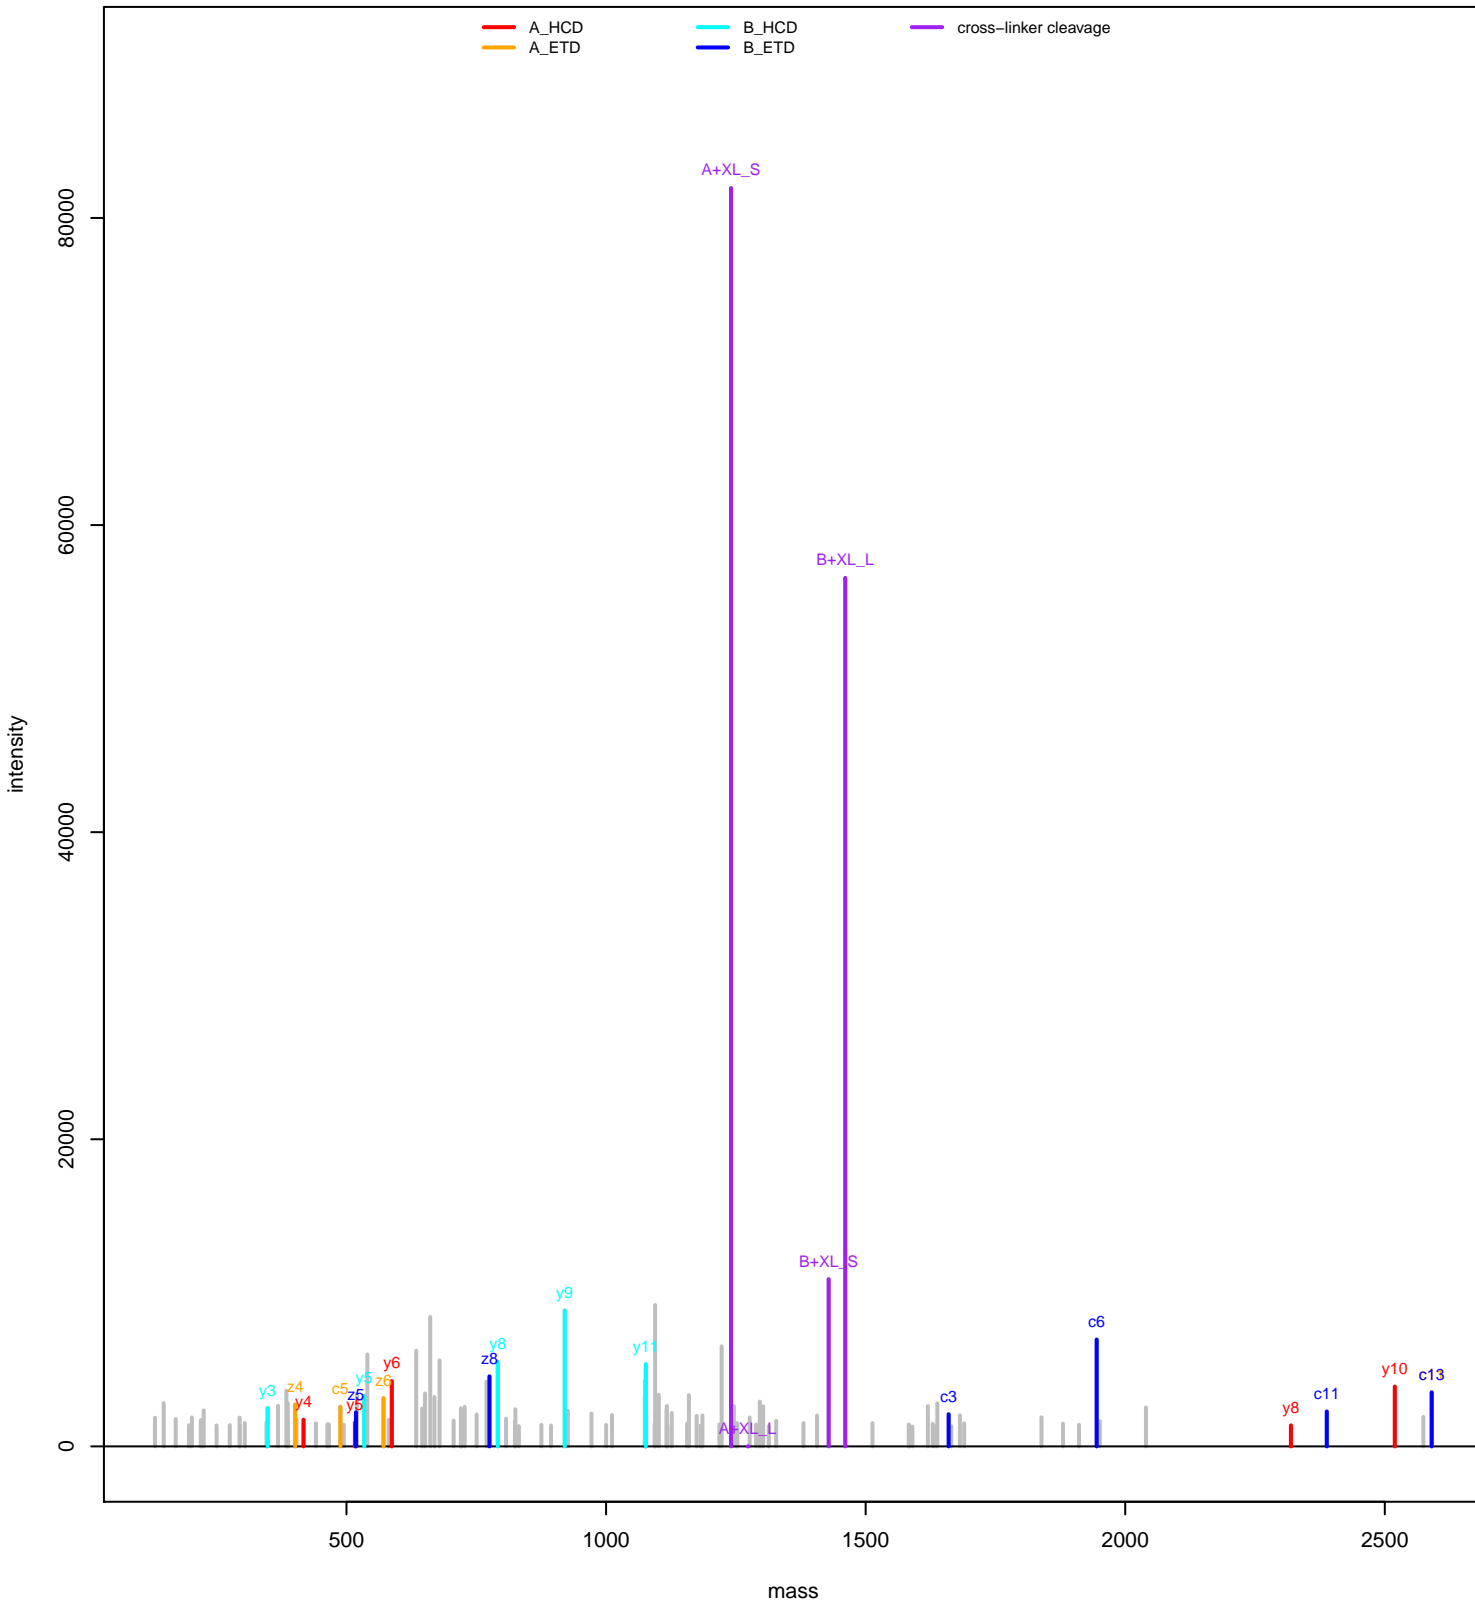

AESIAKAVDGVK+XL\_S

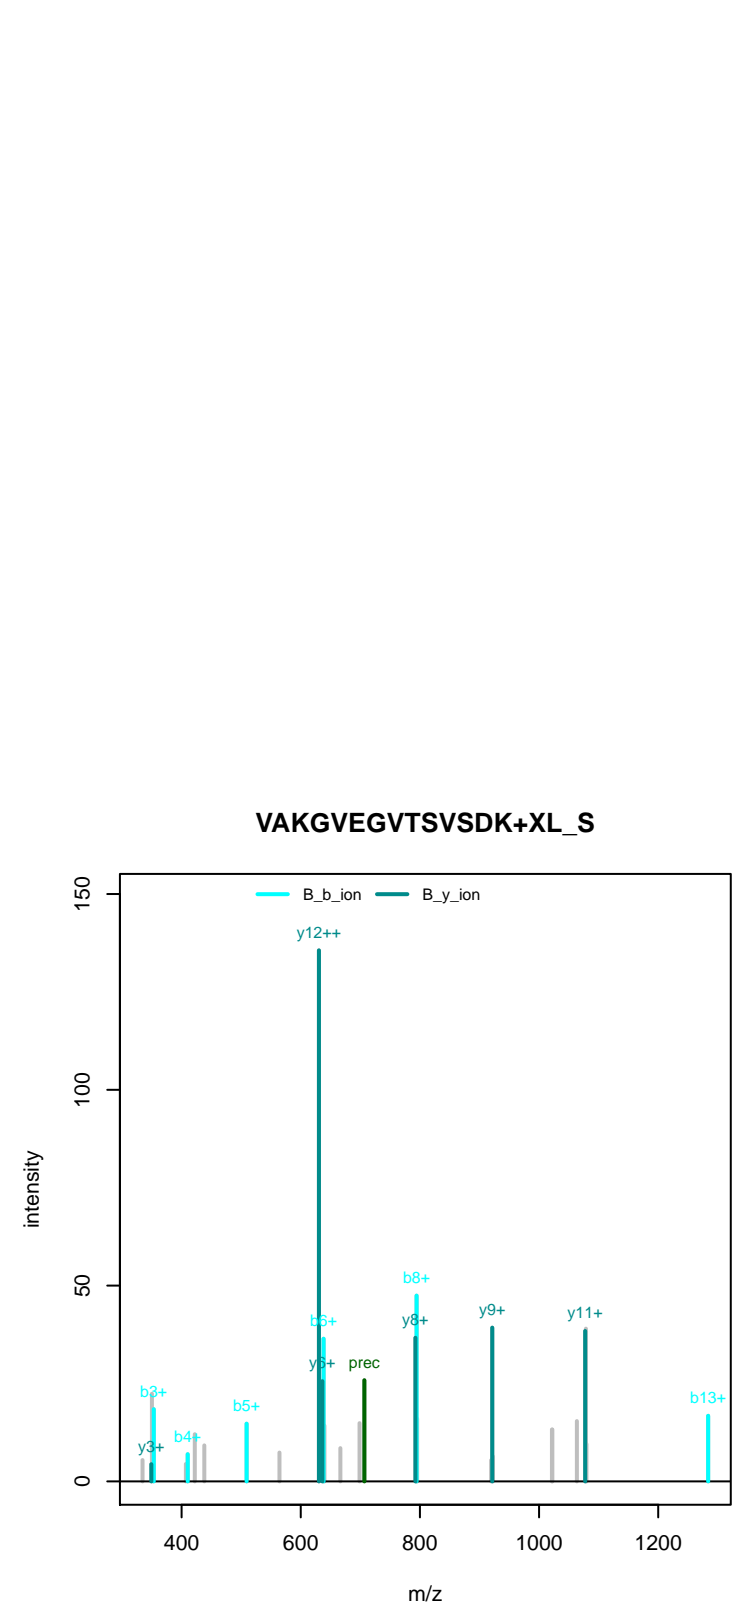

AESIAKAVDGVK+XL\_L

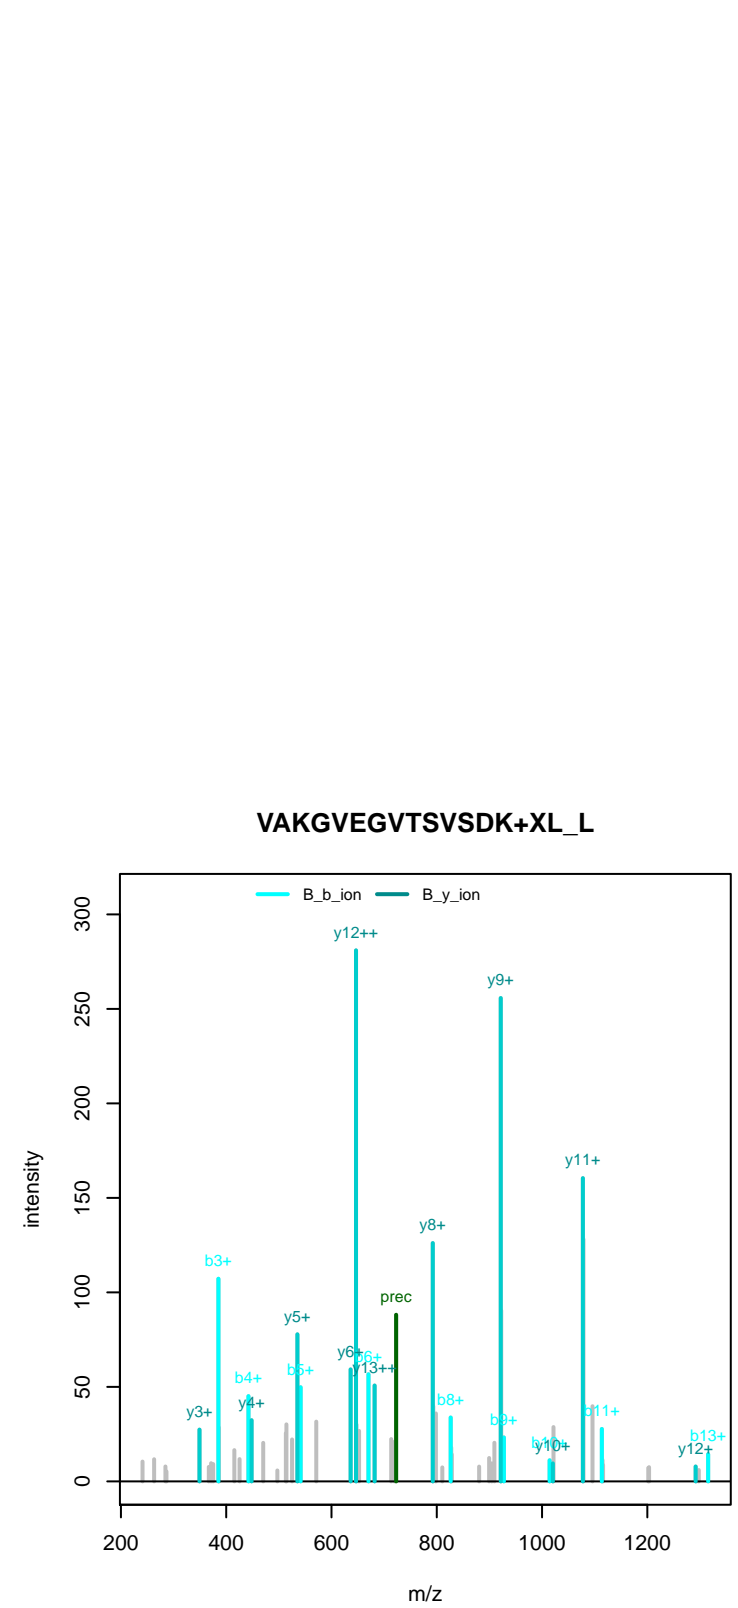

VAKGVEGVTSVSDK+XL\_S

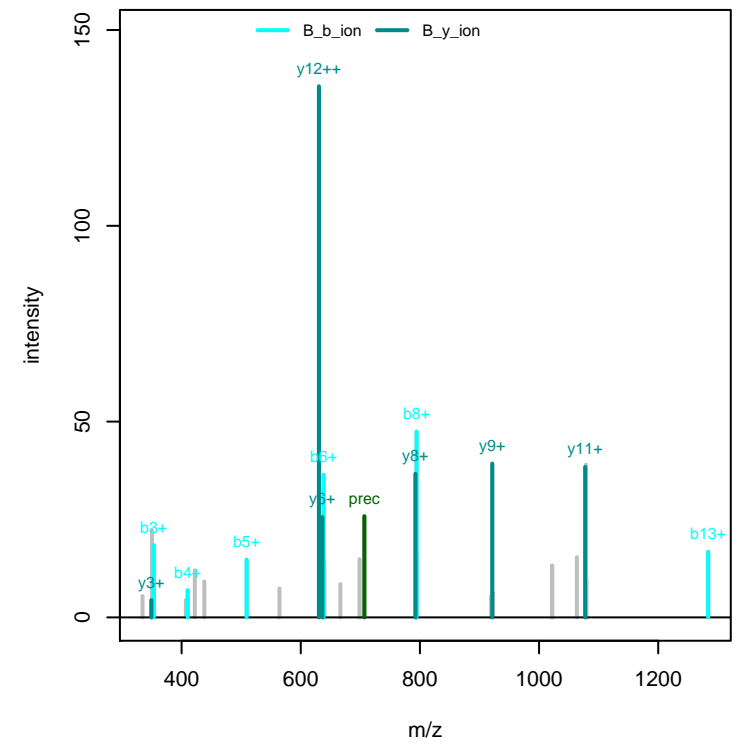

VAKGVEGVTSVSDK+XL\_L

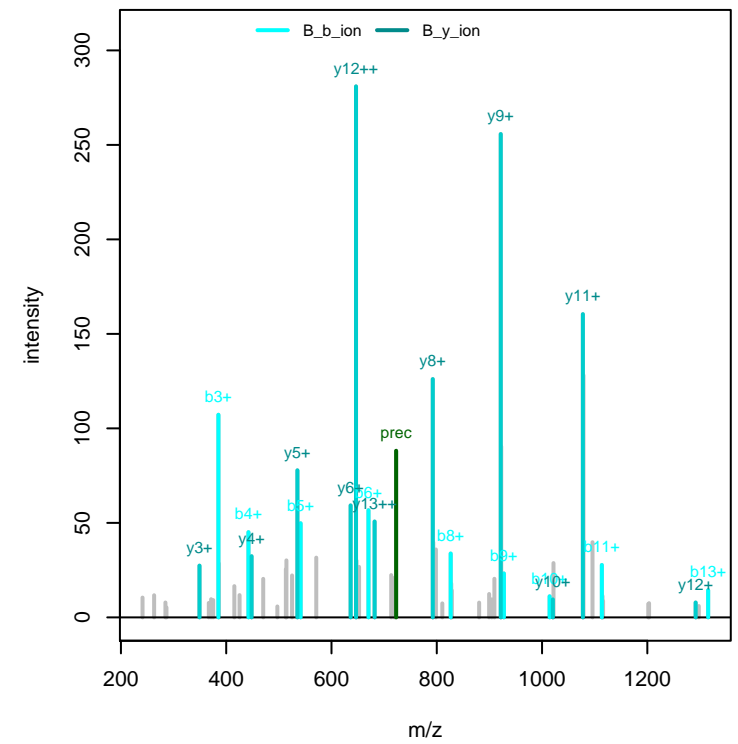



QGFVKNR  
RKLNANR

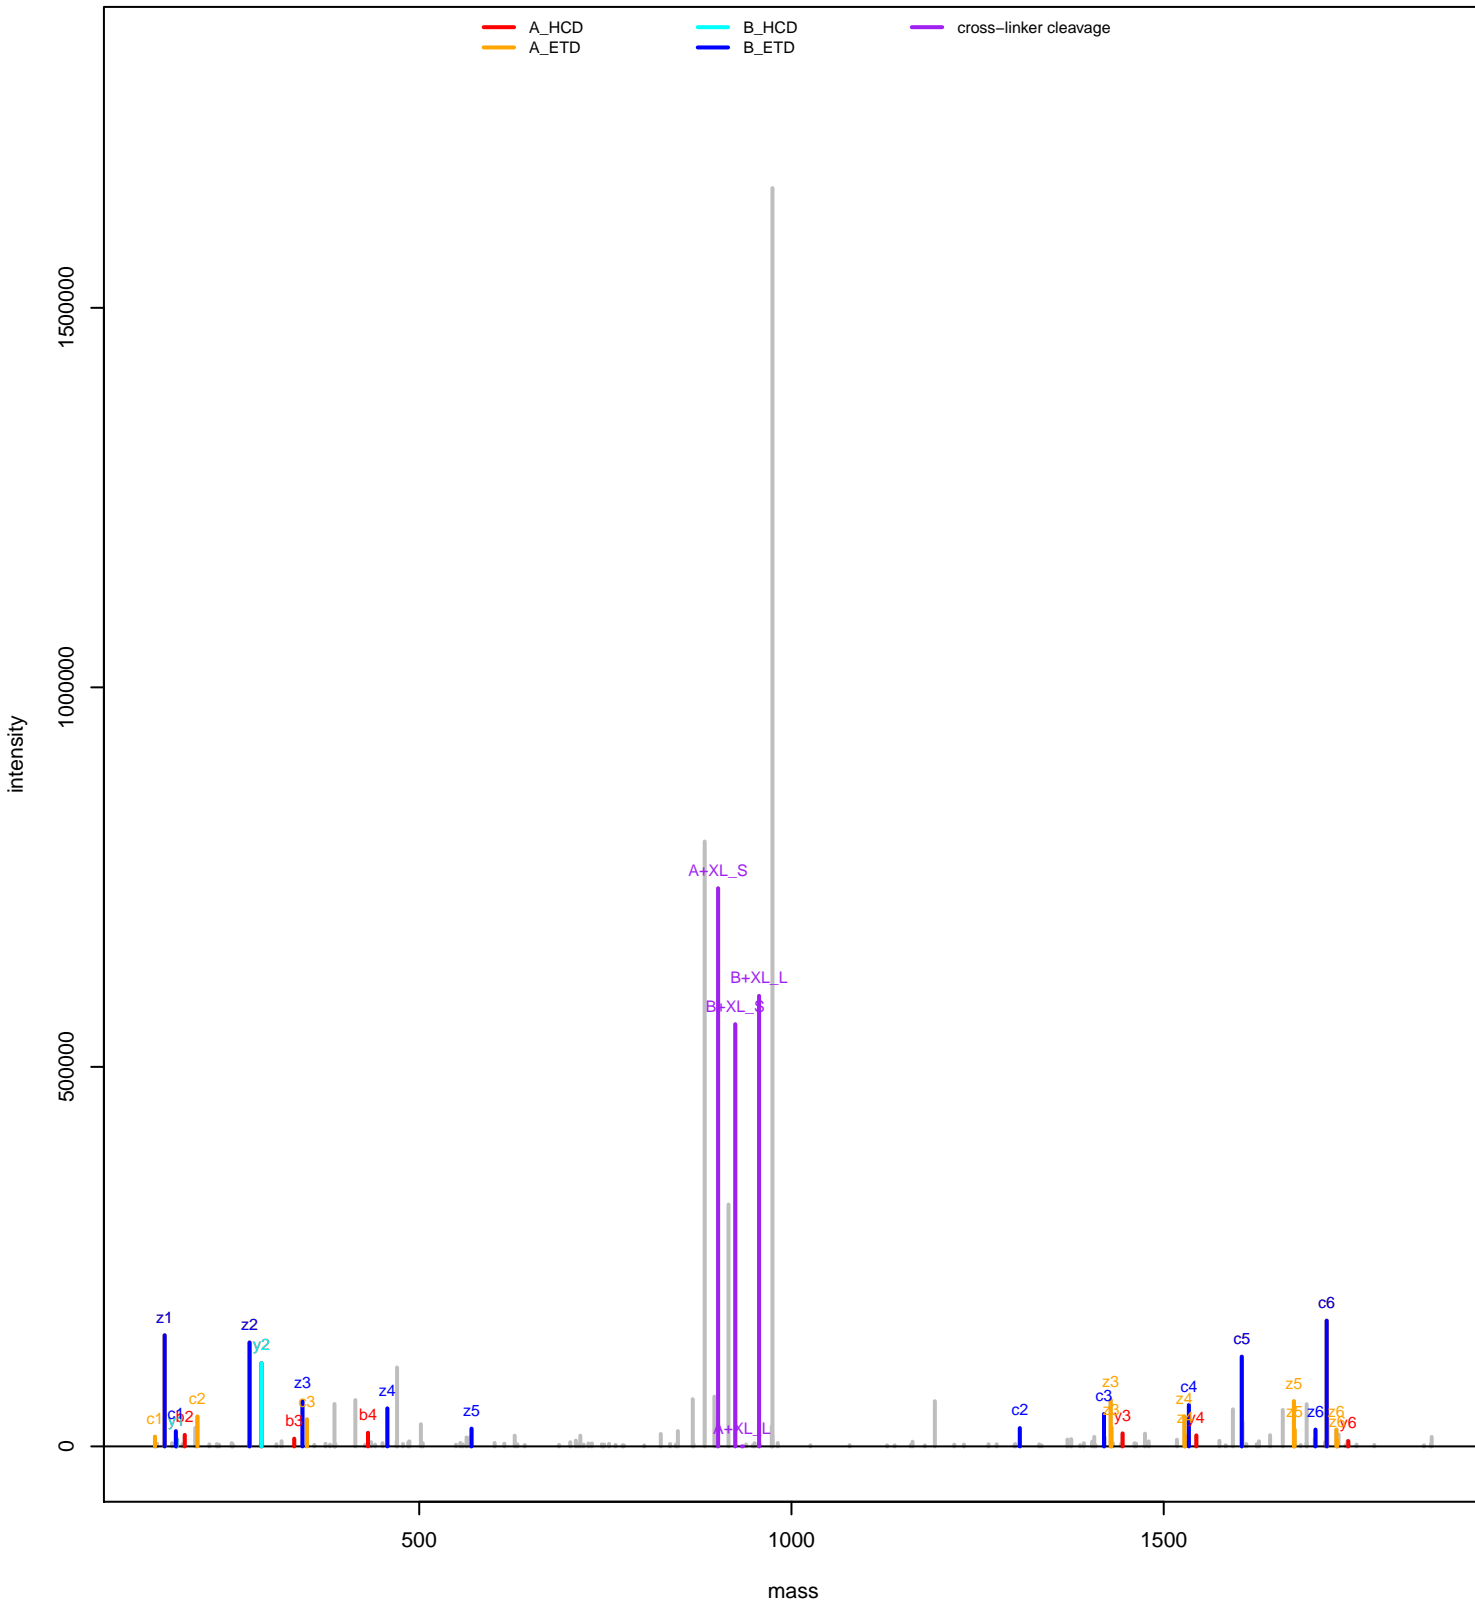

QGFVKNR+XL\_S

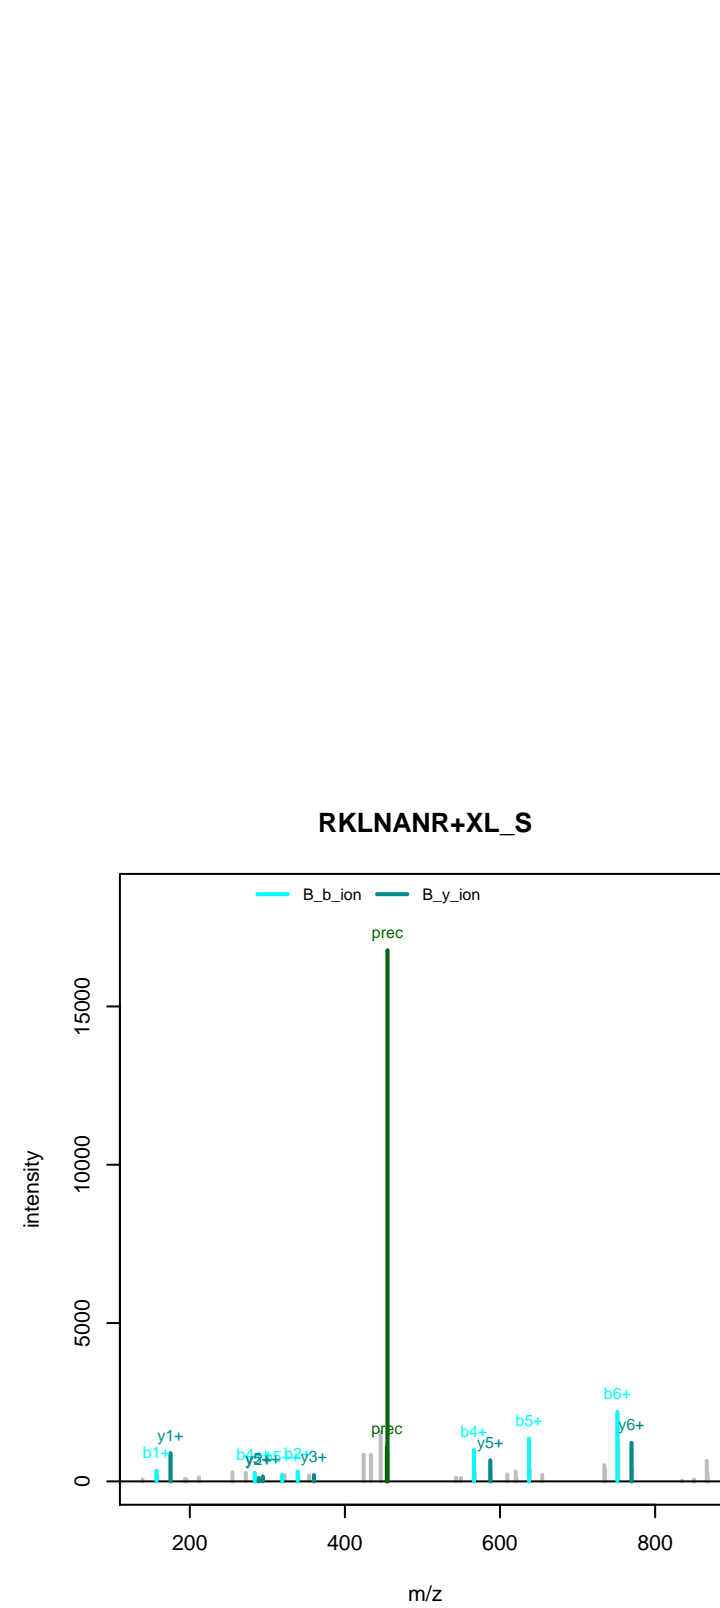

QGFVKNR+XL\_L

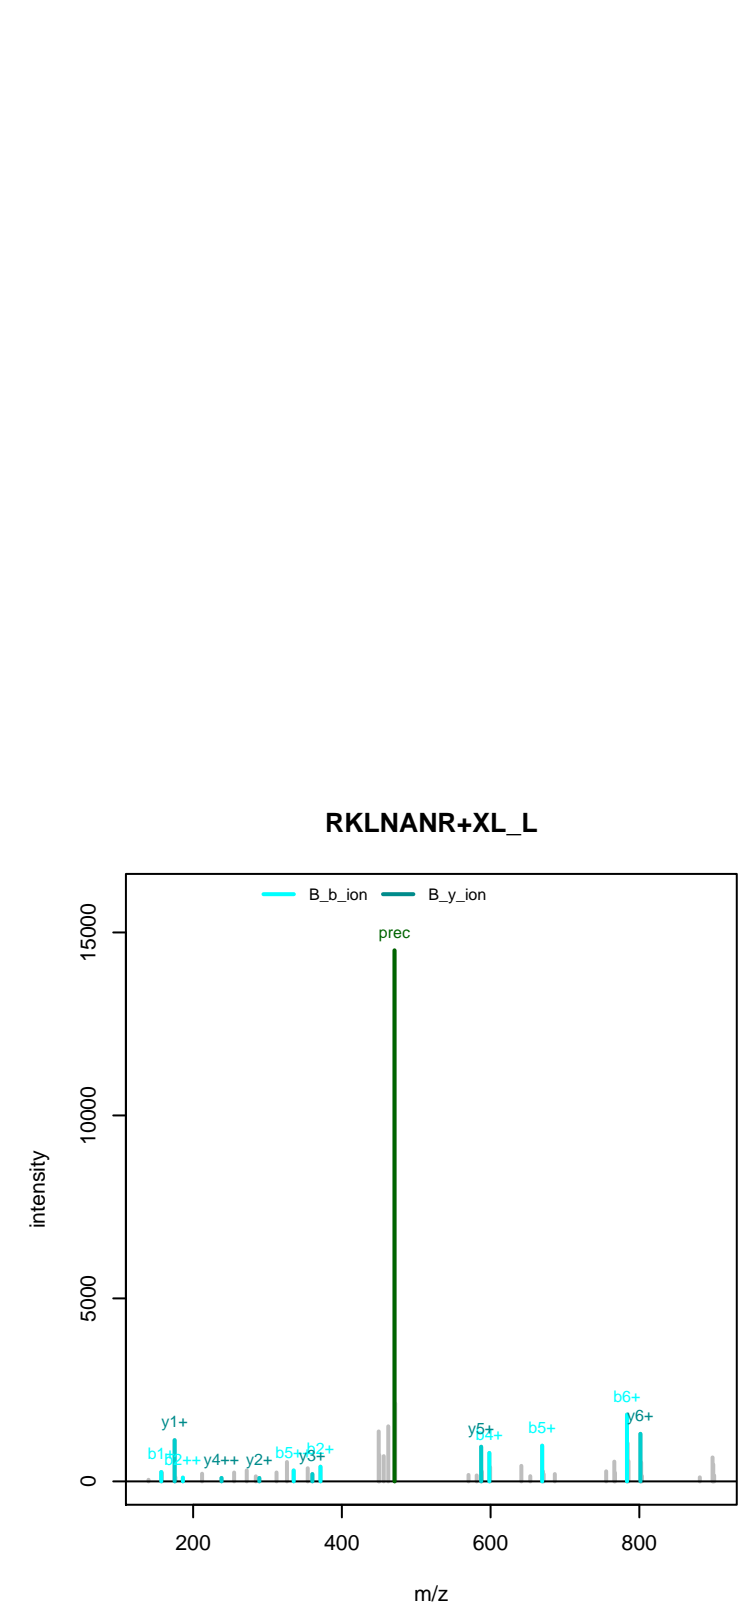

RKLNANR+XL\_S

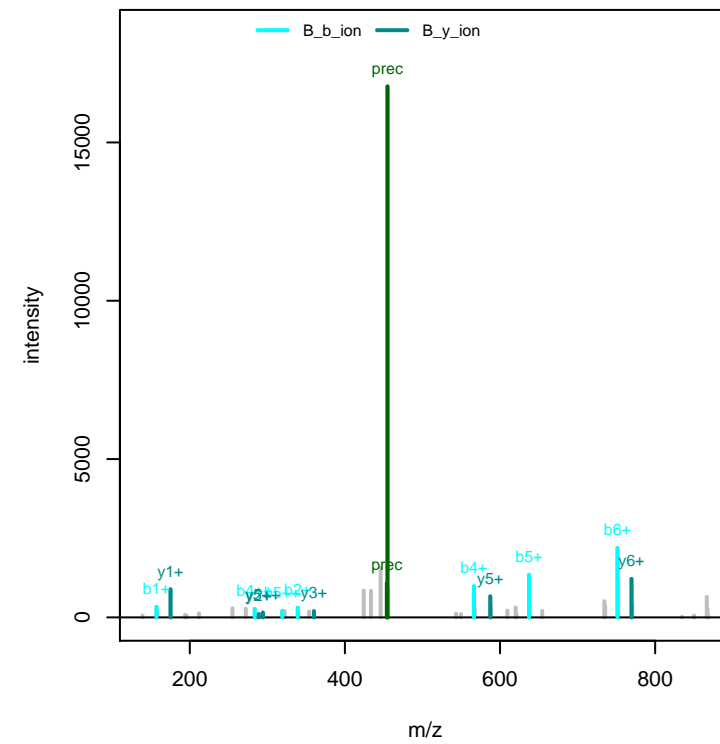

RKLNANR+XL\_L

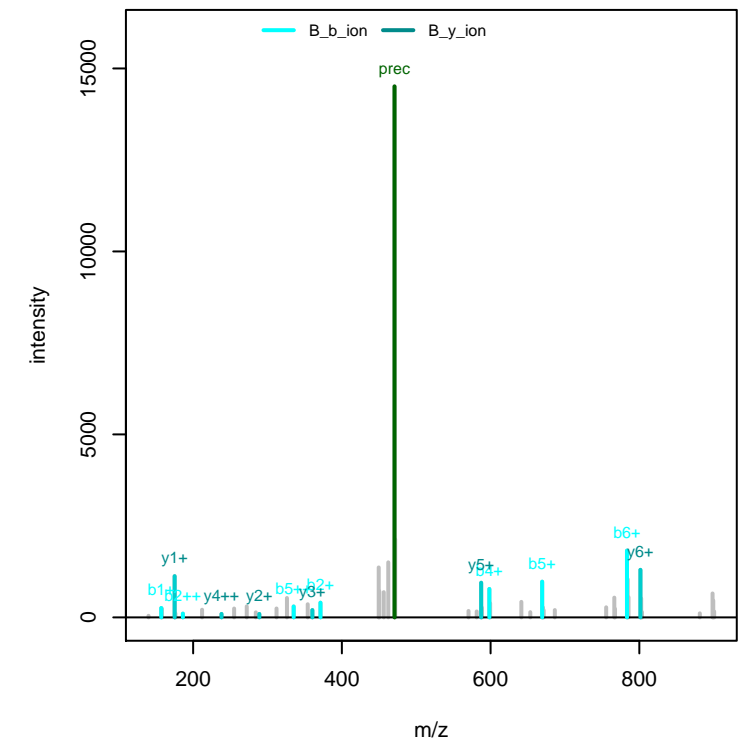

KTEEAAAAK  
GQQEQYVALKQPAVK

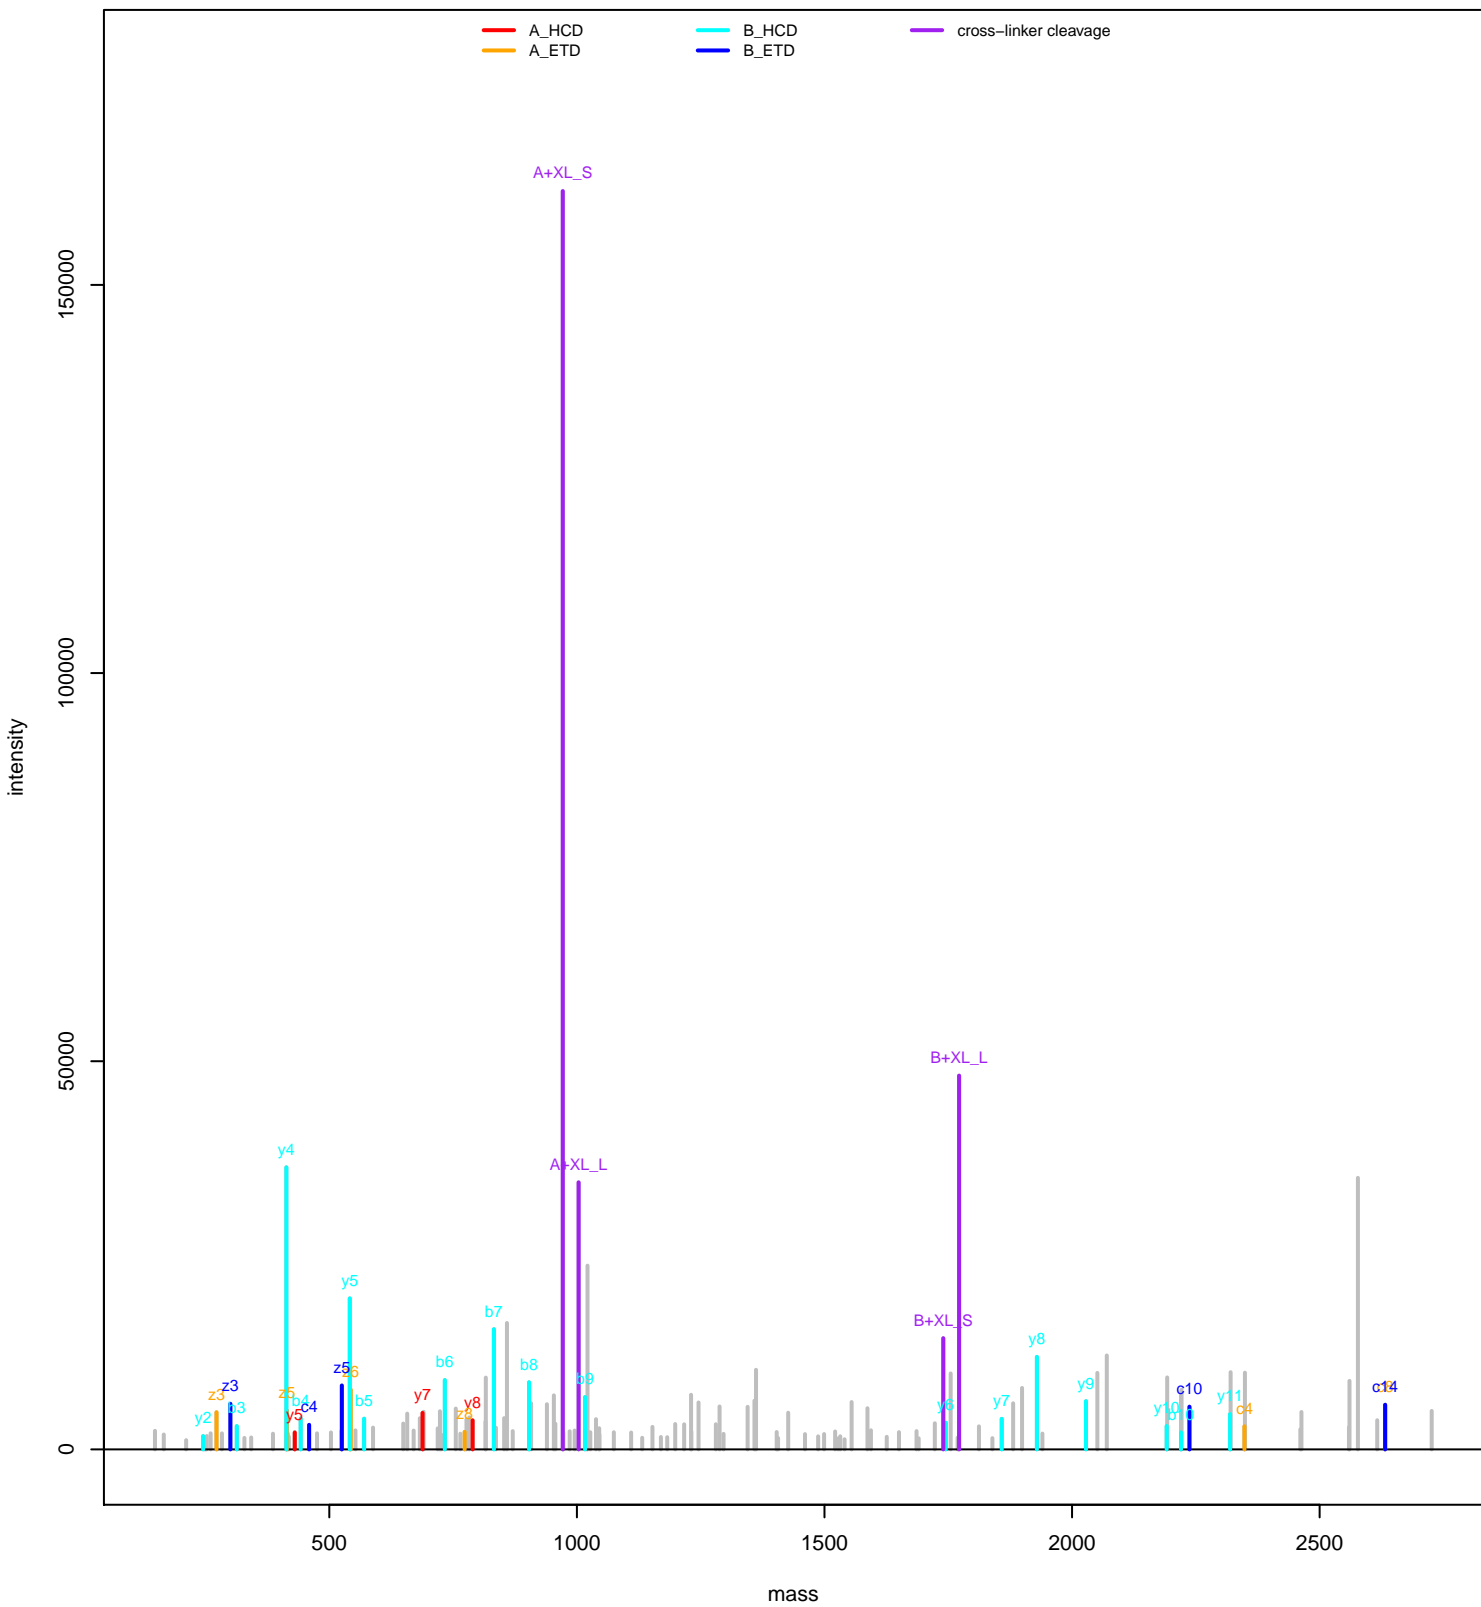

KTEEAAAAK+XL\_S

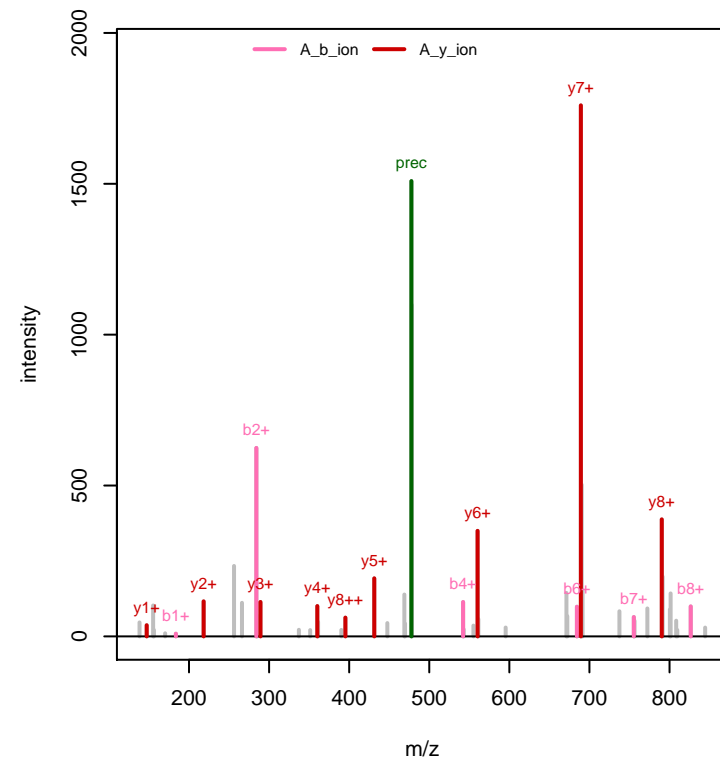

KTEEAAAAK+XL\_L

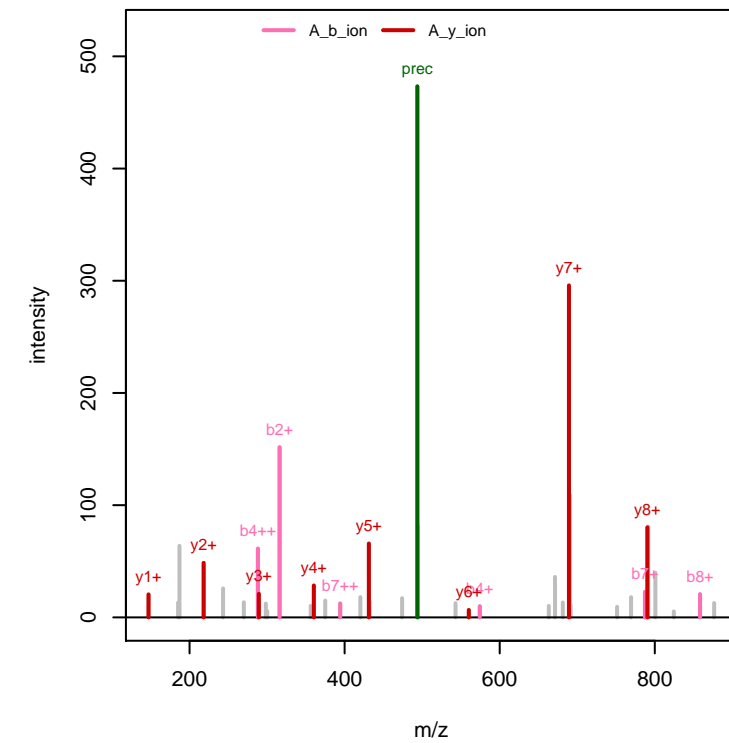

GQQEQYVALKQPAVK+XL\_S

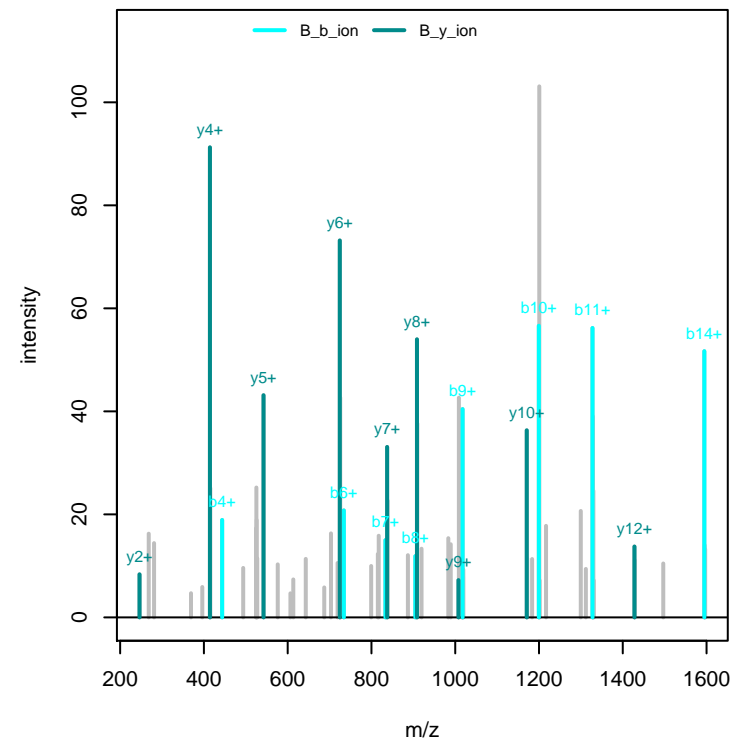

GQQEQYVALKQPAVK+XL\_L

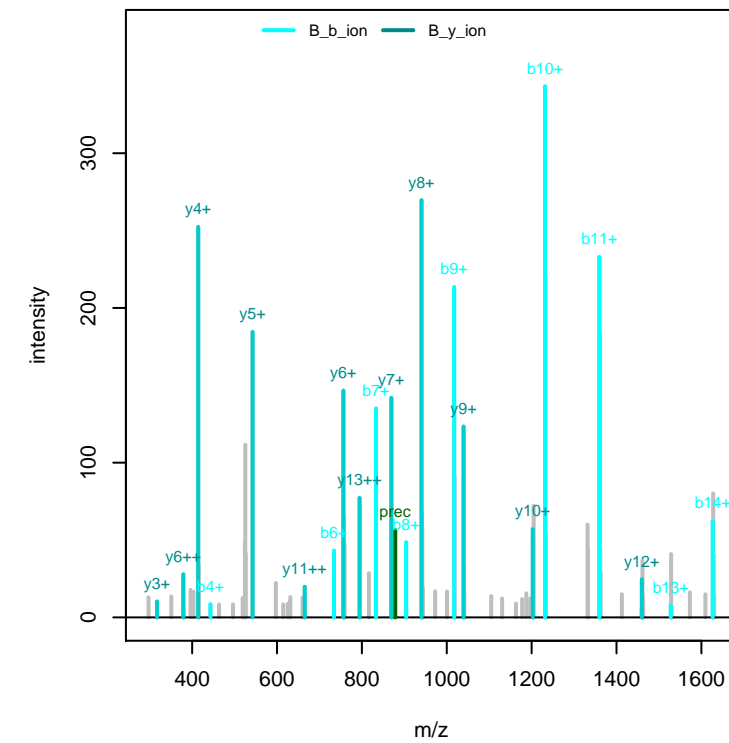

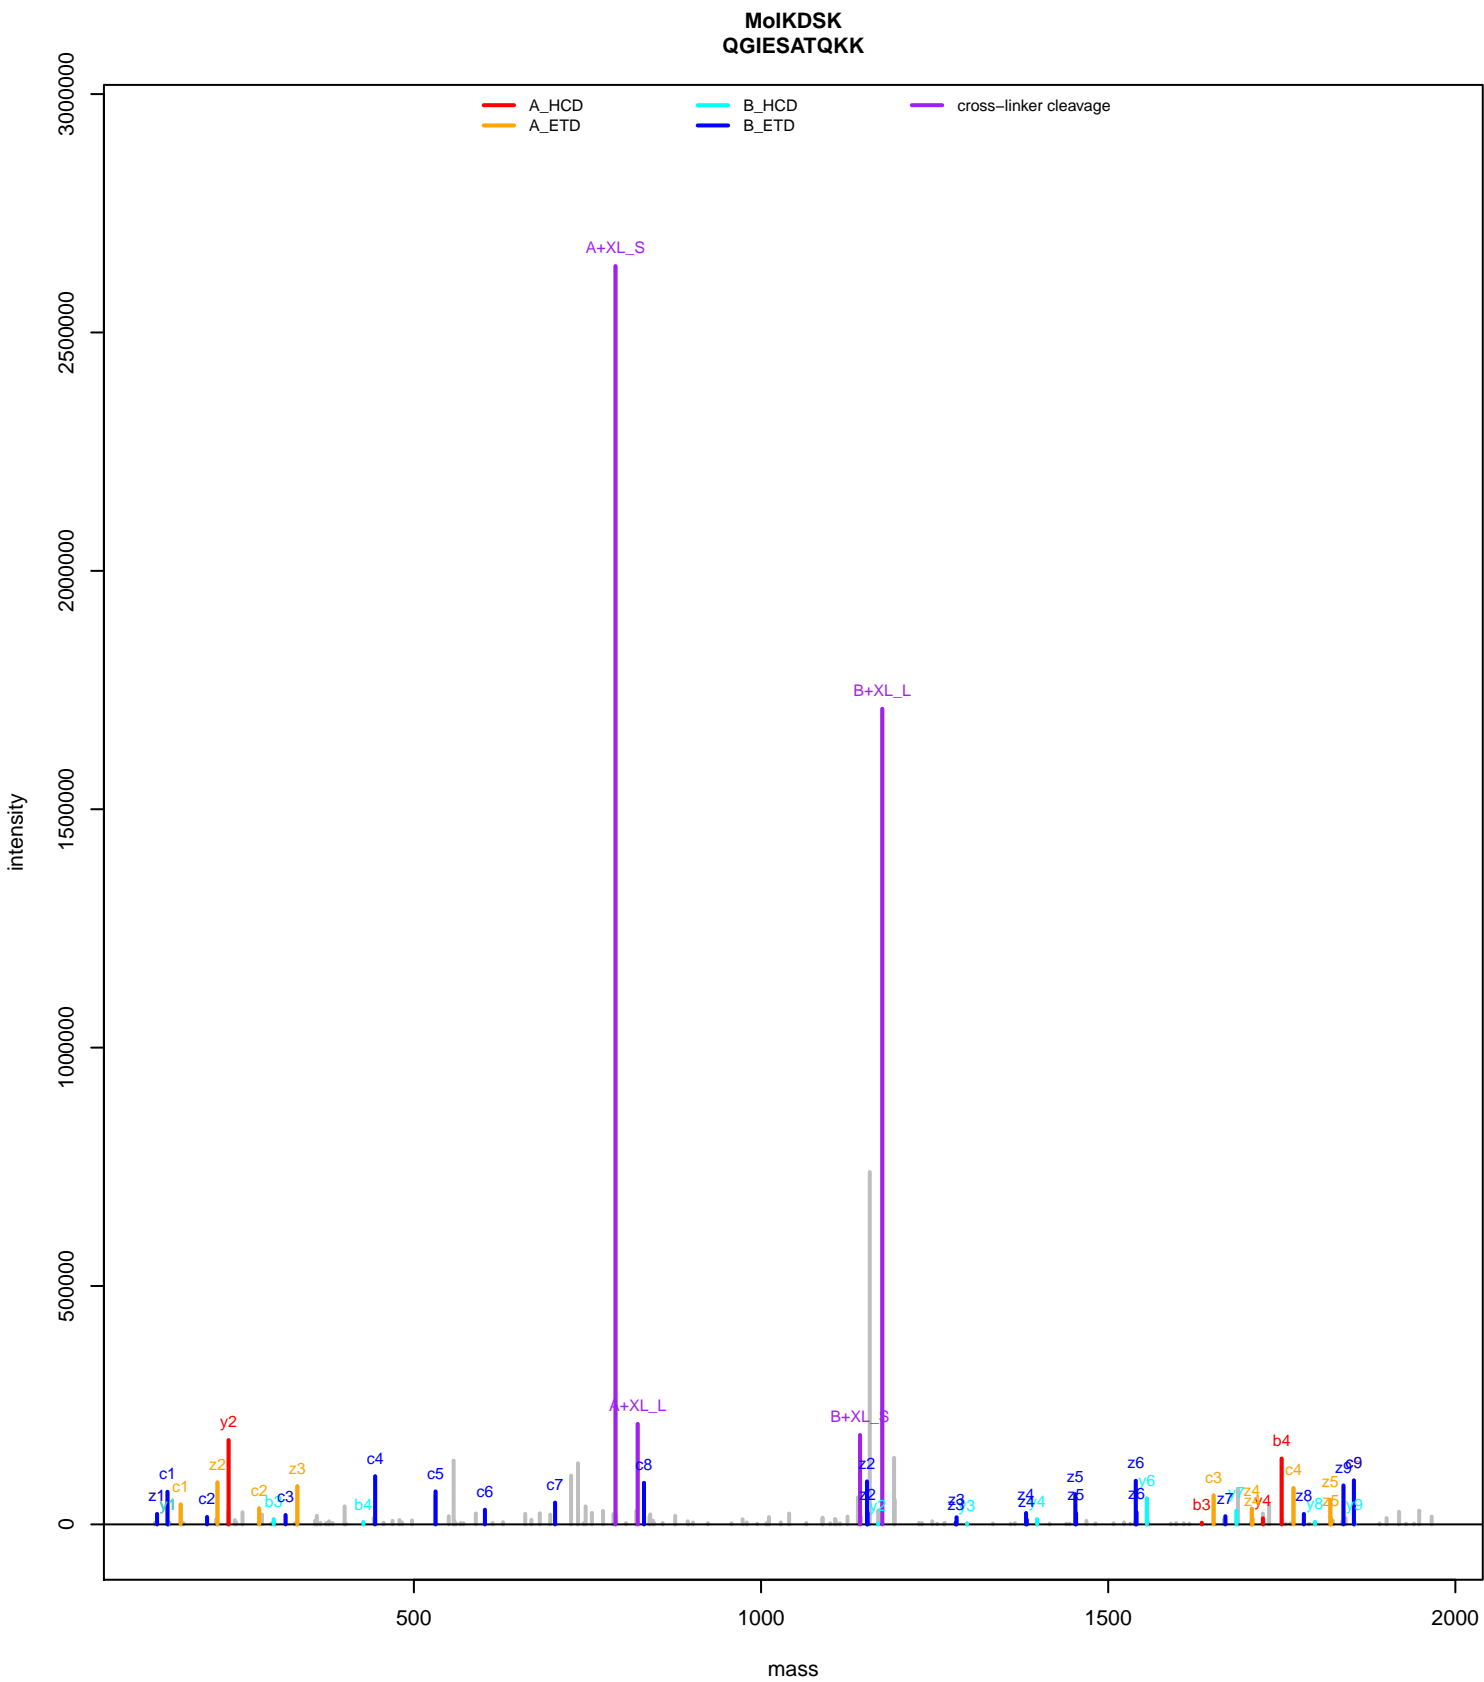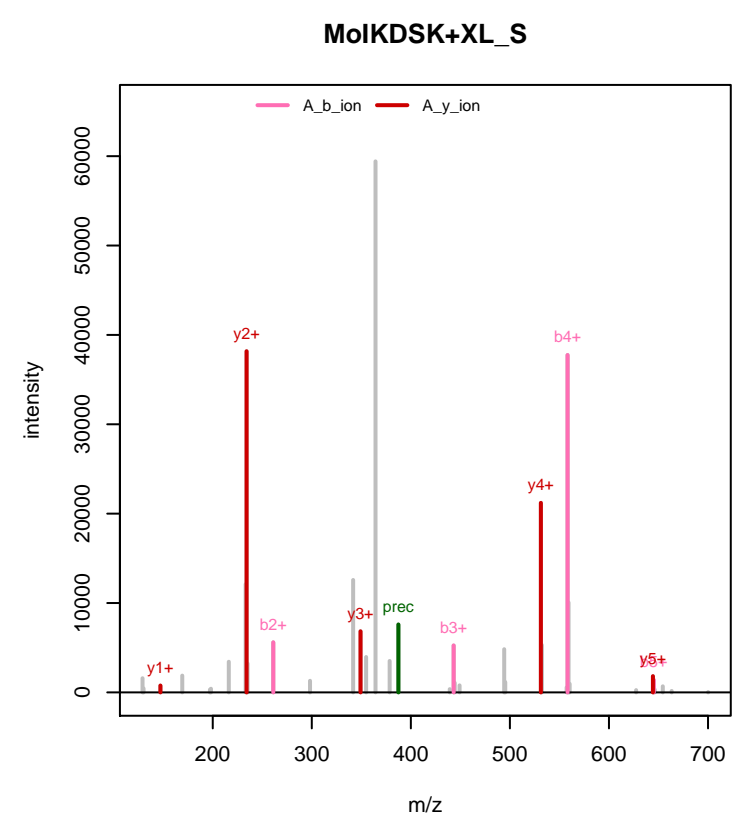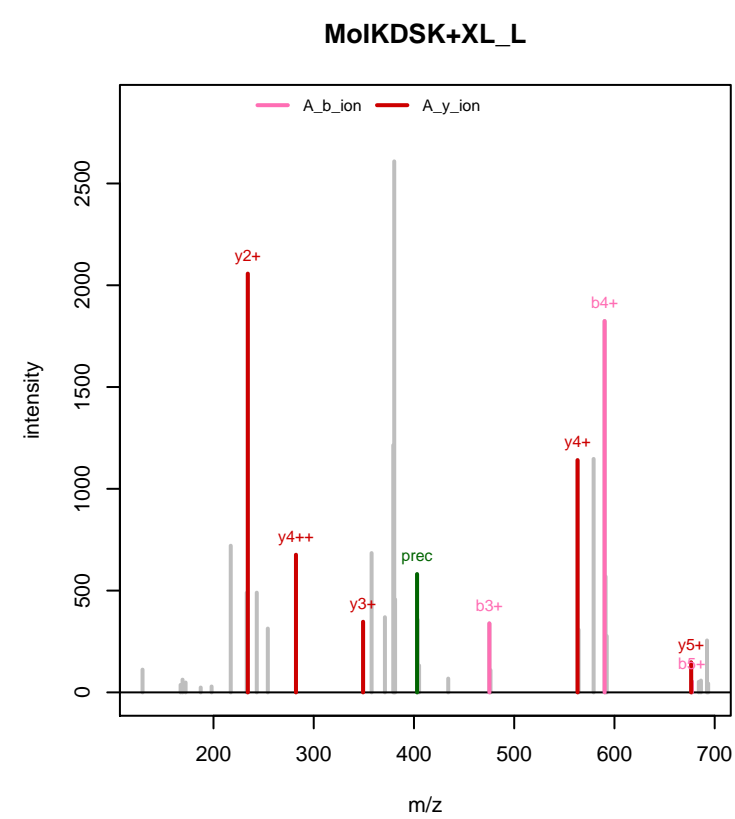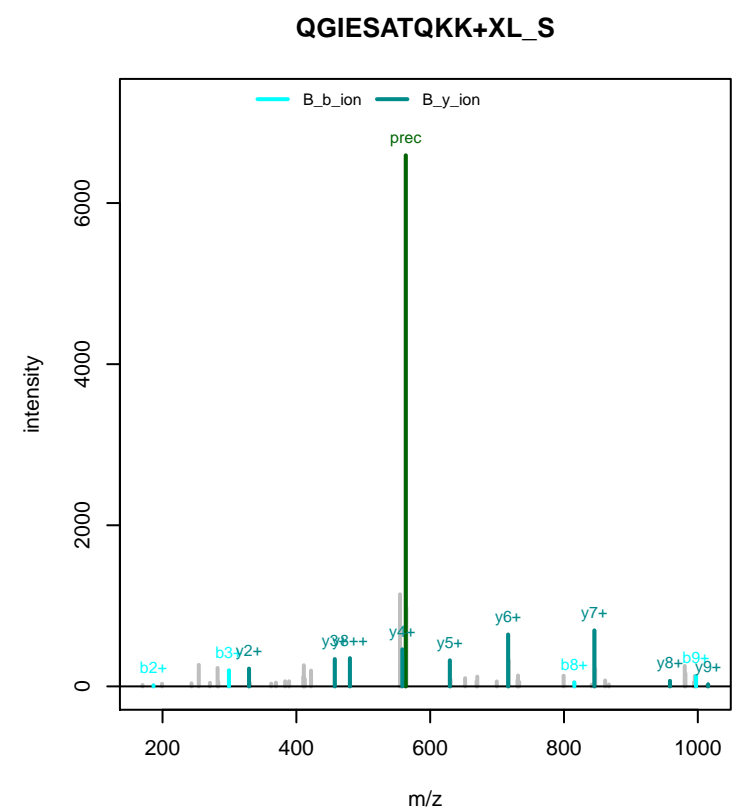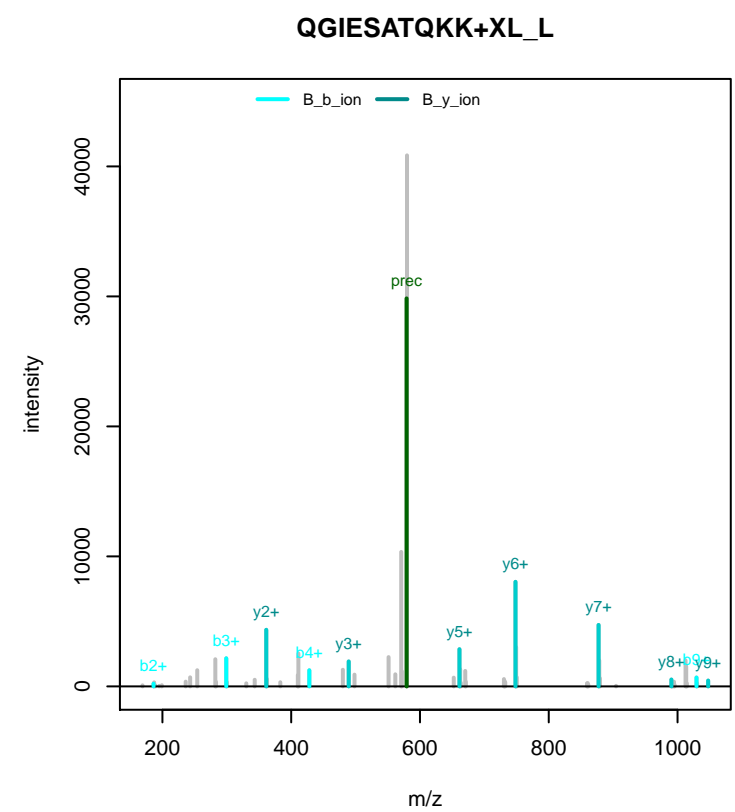

SLENAPDDVK  
KLTRDDEAEK

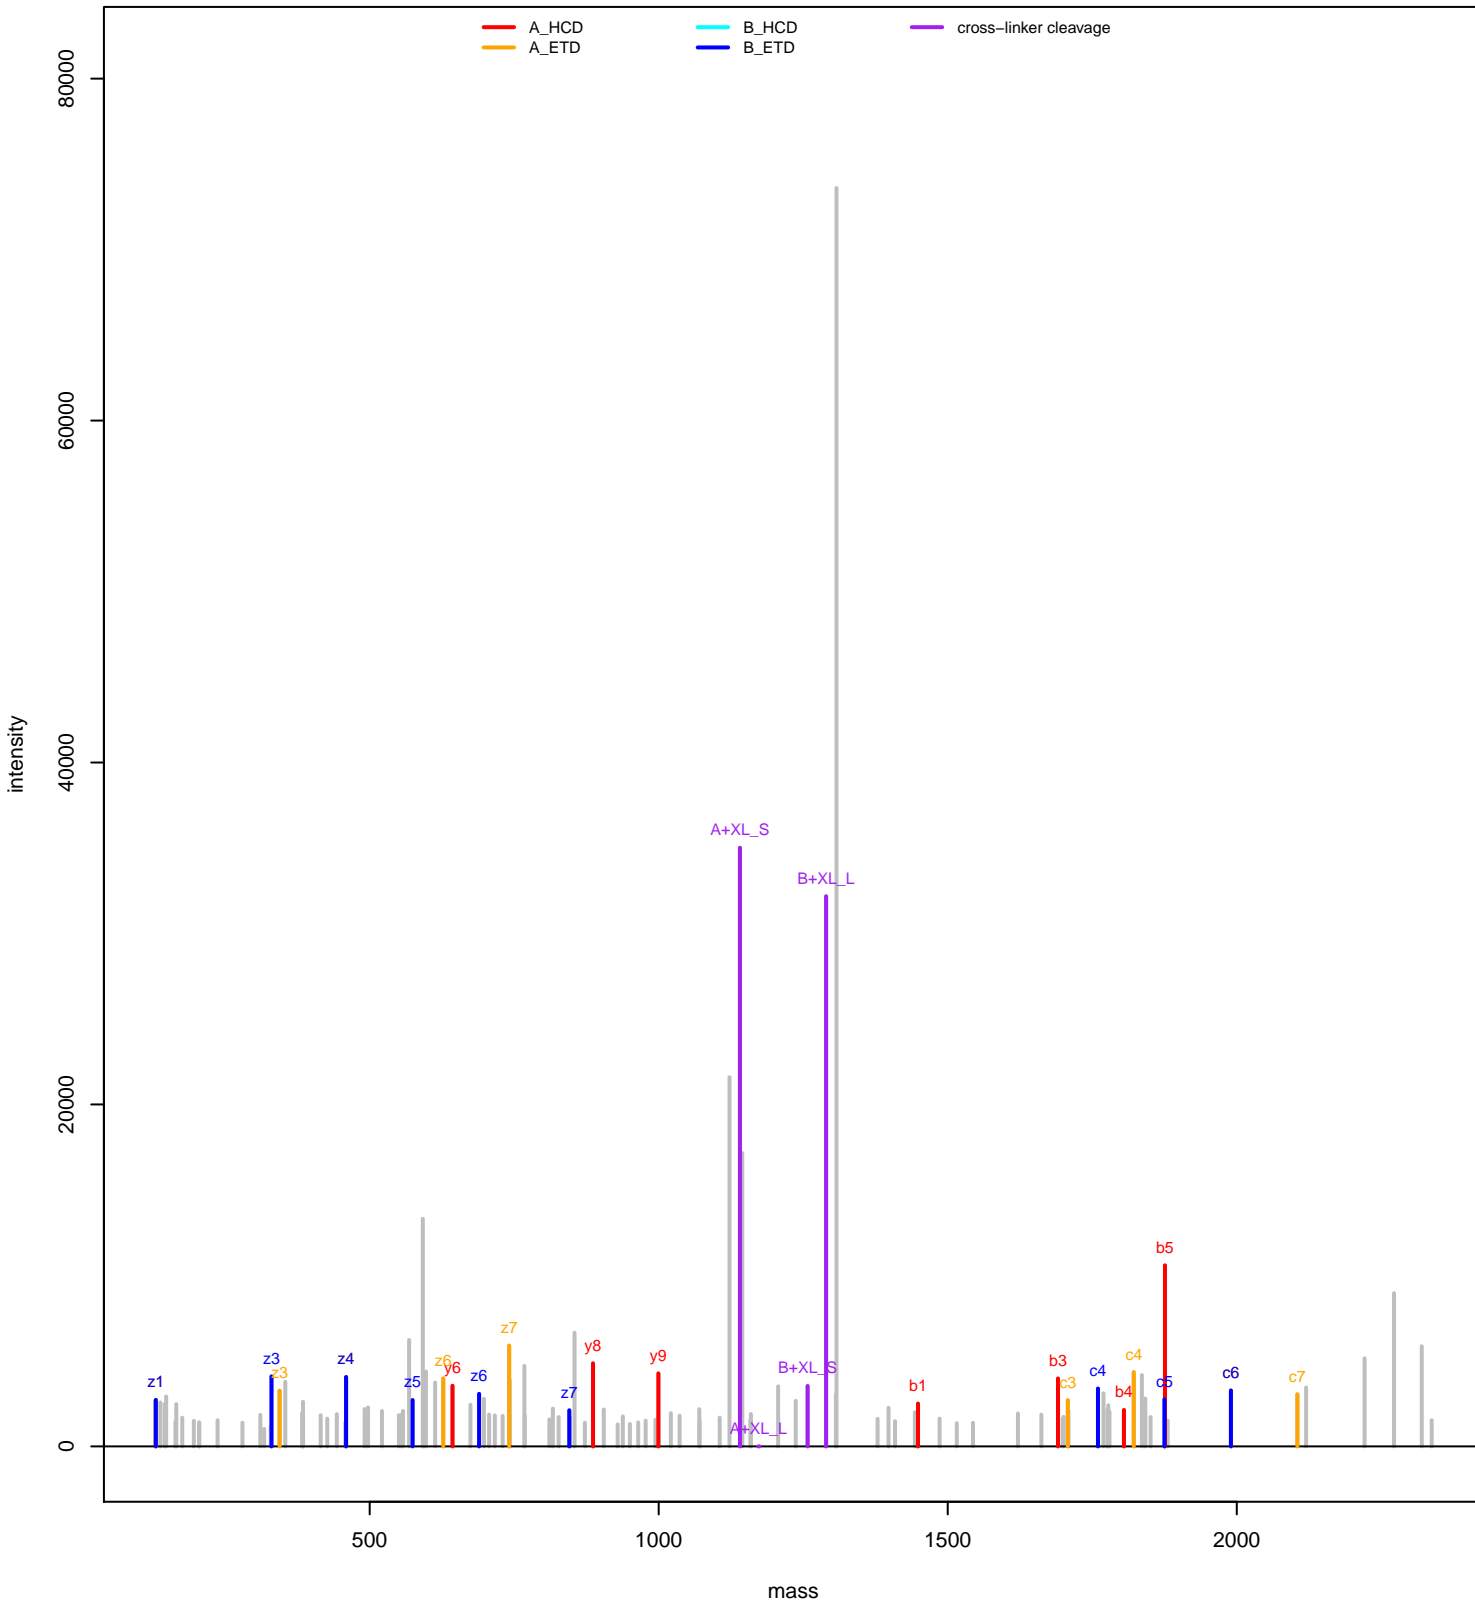

SLENAPDDVK+XL\_S

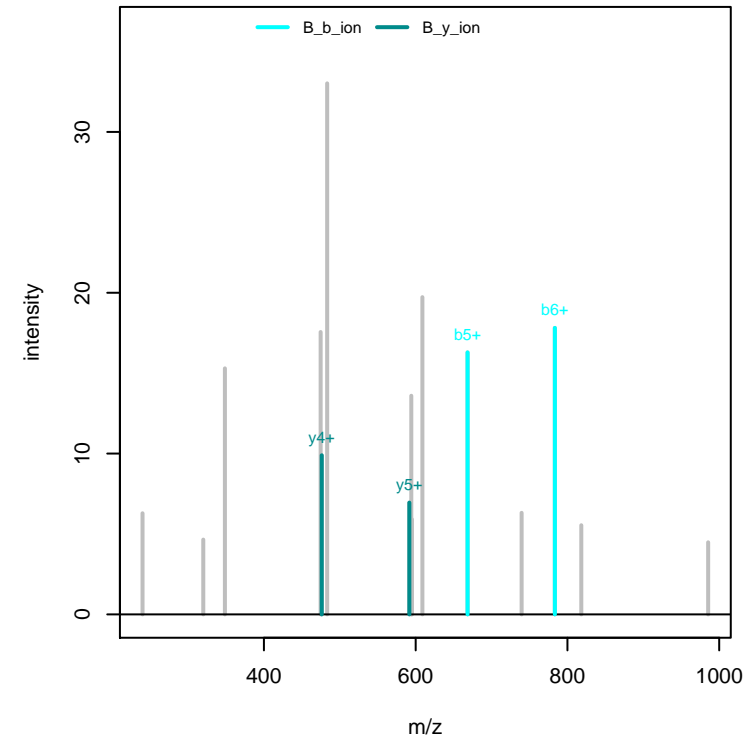

SLENAPDDVK+XL\_L

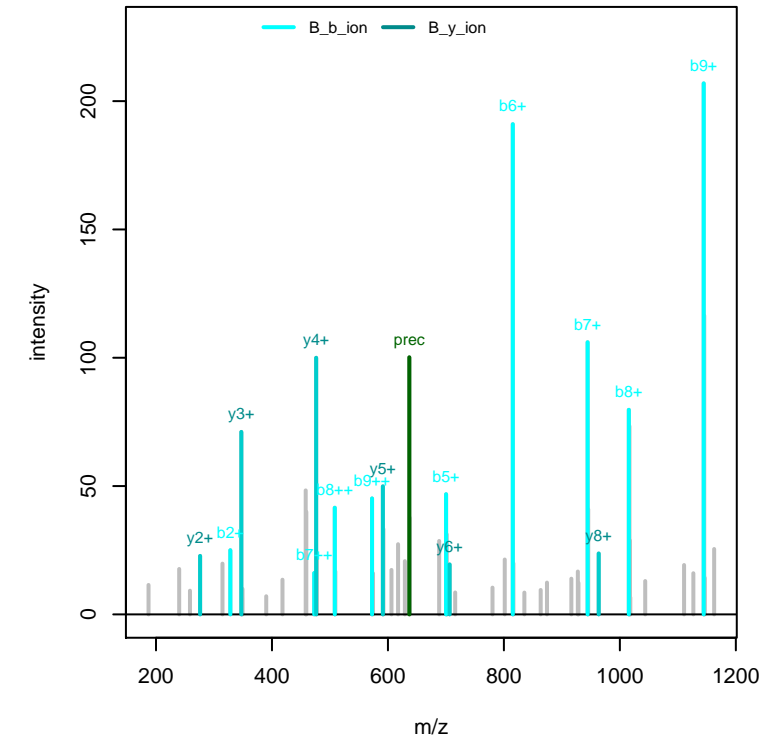

KLTRDDEAEK+XL\_S



KLTRDDEAEK+XL\_L



MoCGNGKMEK  
DNVTDKNELR

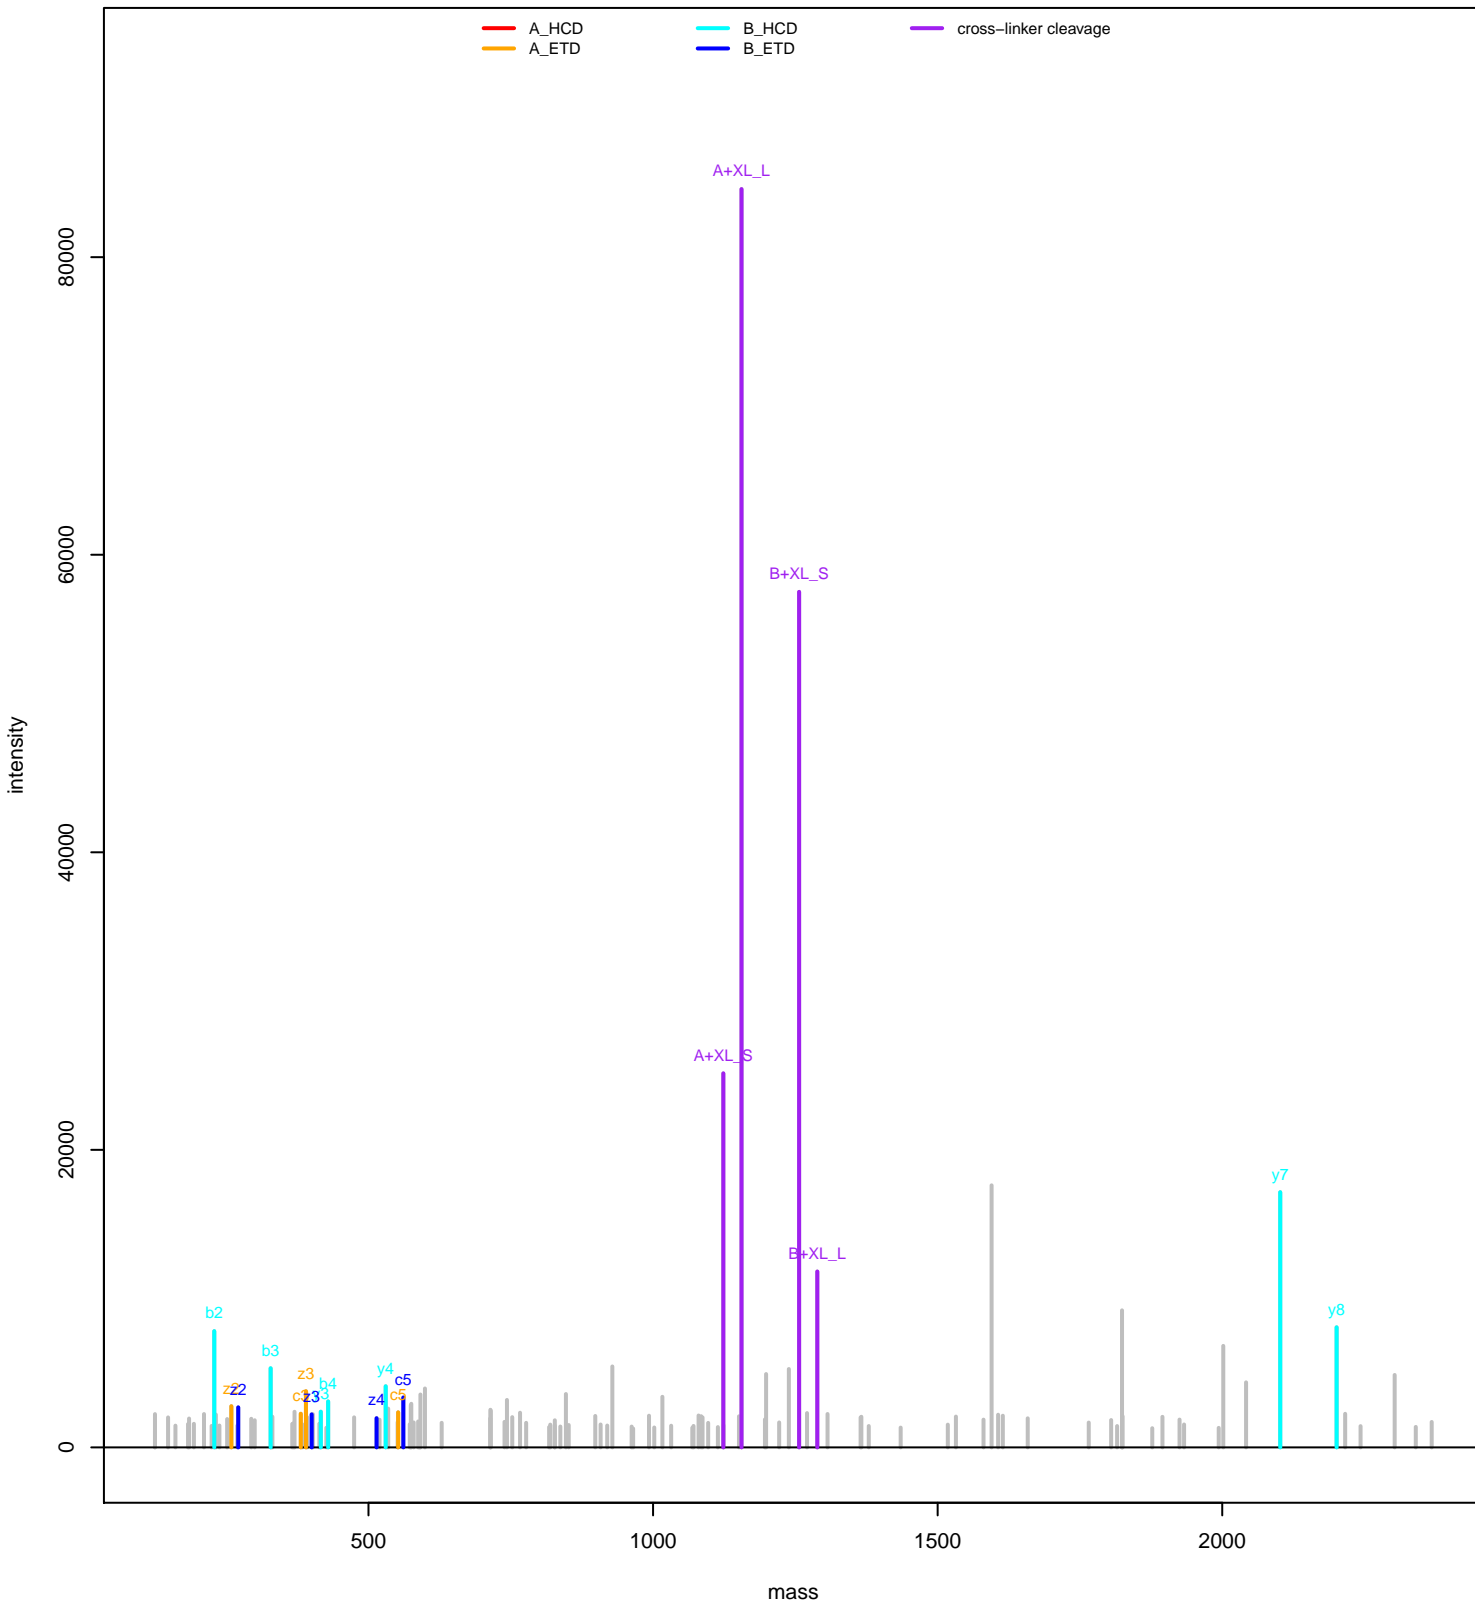

MoCGNGKMEK+XL\_S

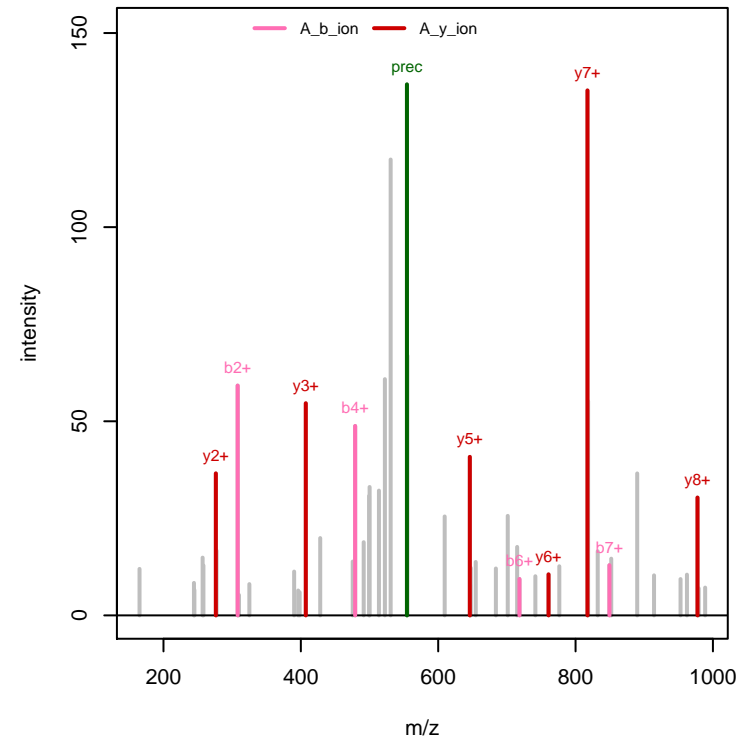

MoCGNGKMEK+XL\_L

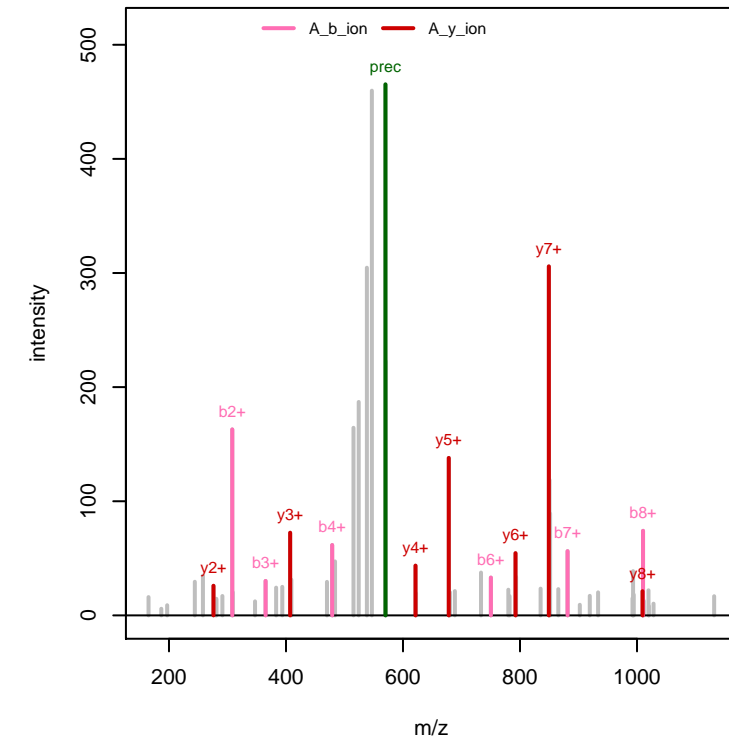

DNVTDKNELR+XL\_S

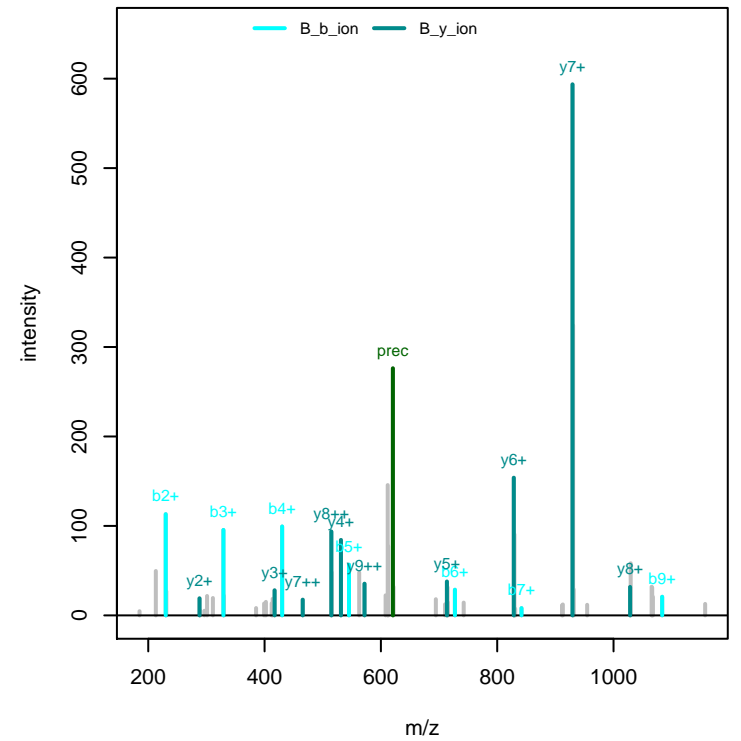

DNVTDKNELR+XL\_L

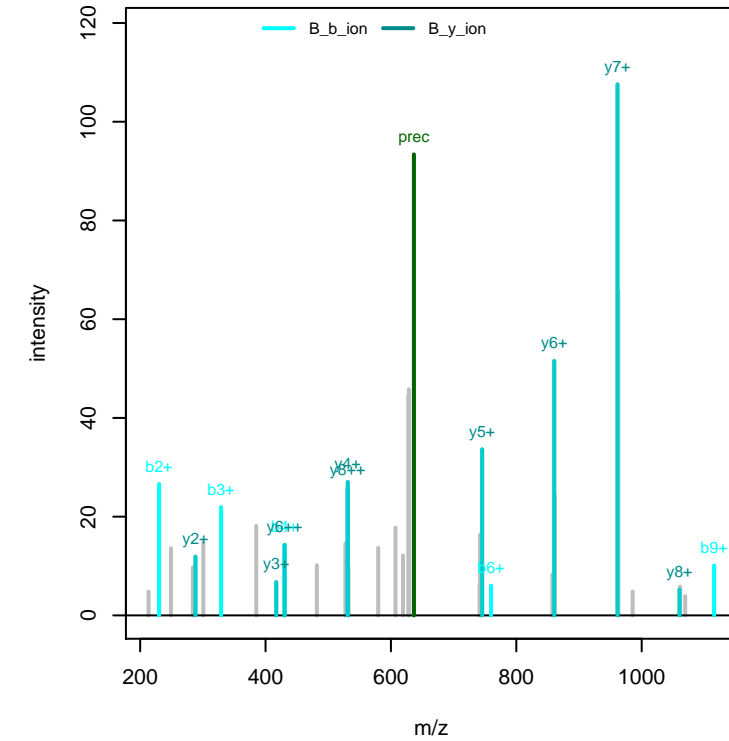

VKGTGRK  
AEAPAAAPAAKAEGK

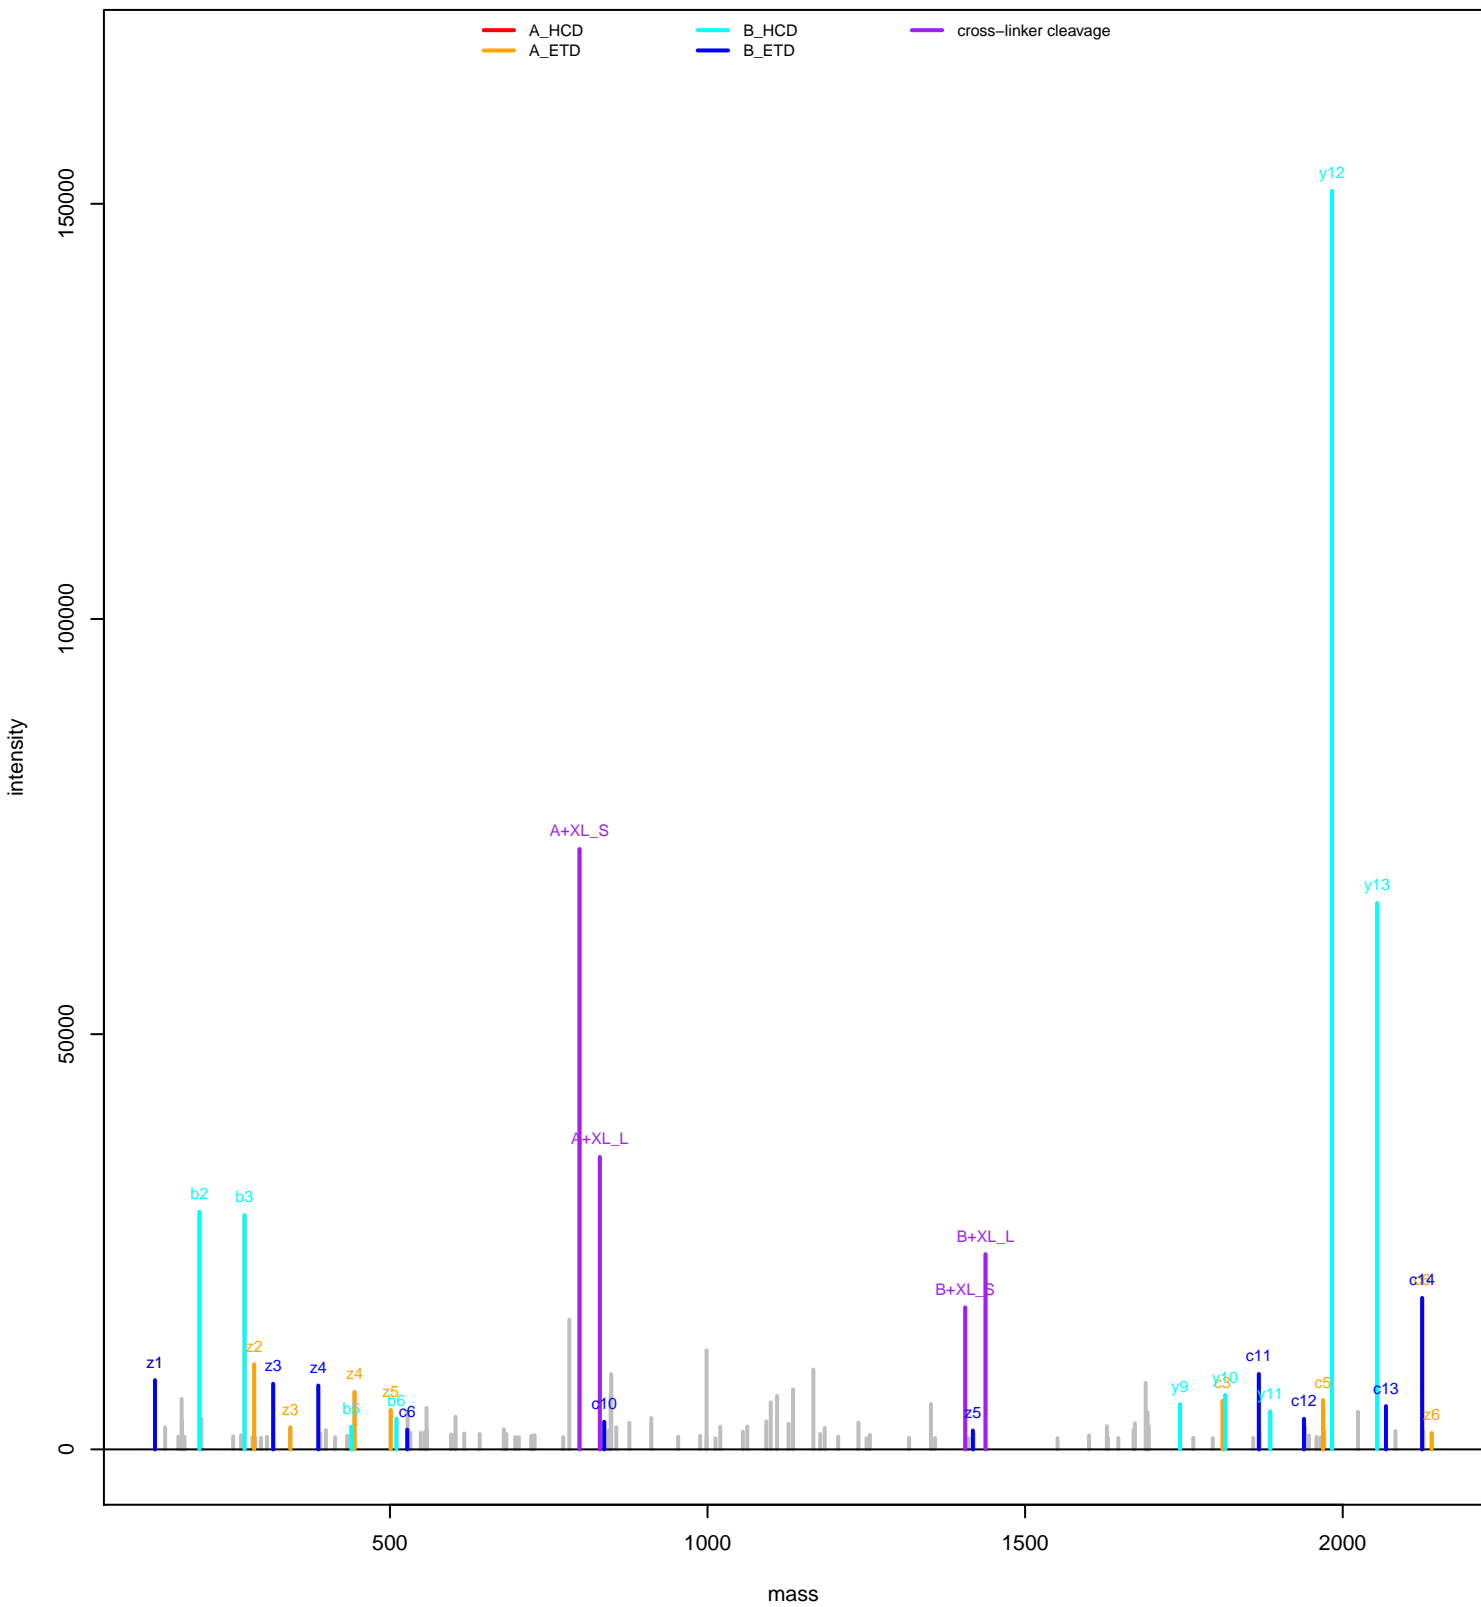

VKGTGRK+XL\_S

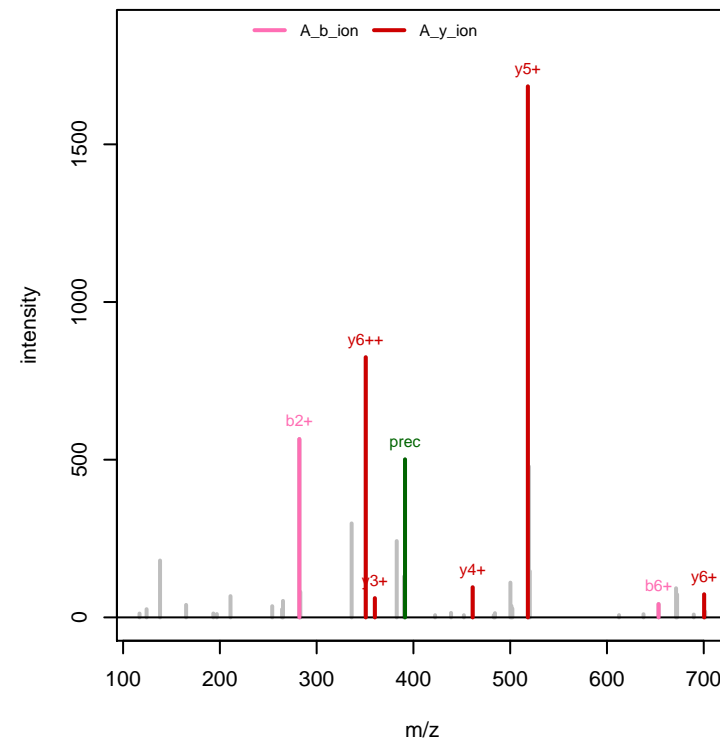

VKGTGRK+XL\_L

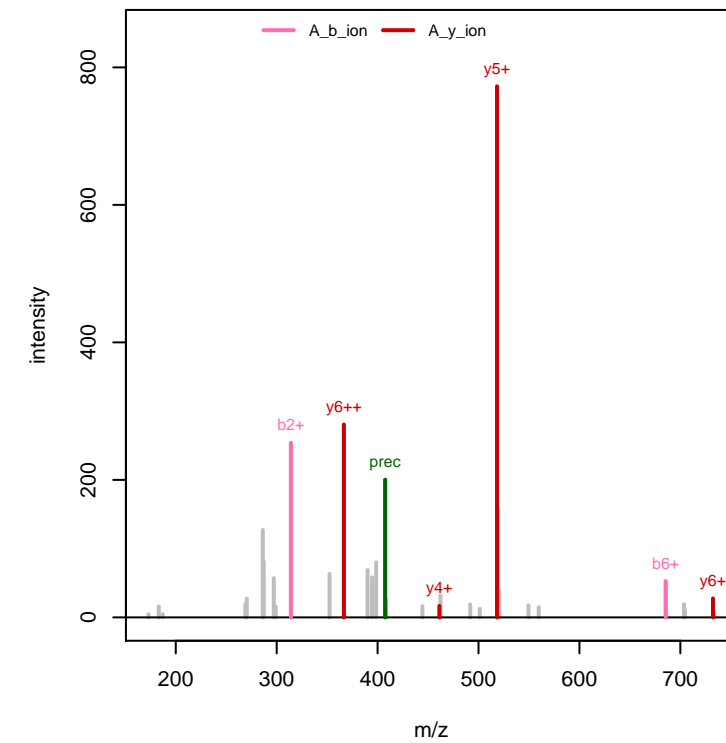

AEAPAAAPAAKAEGK+XL\_S

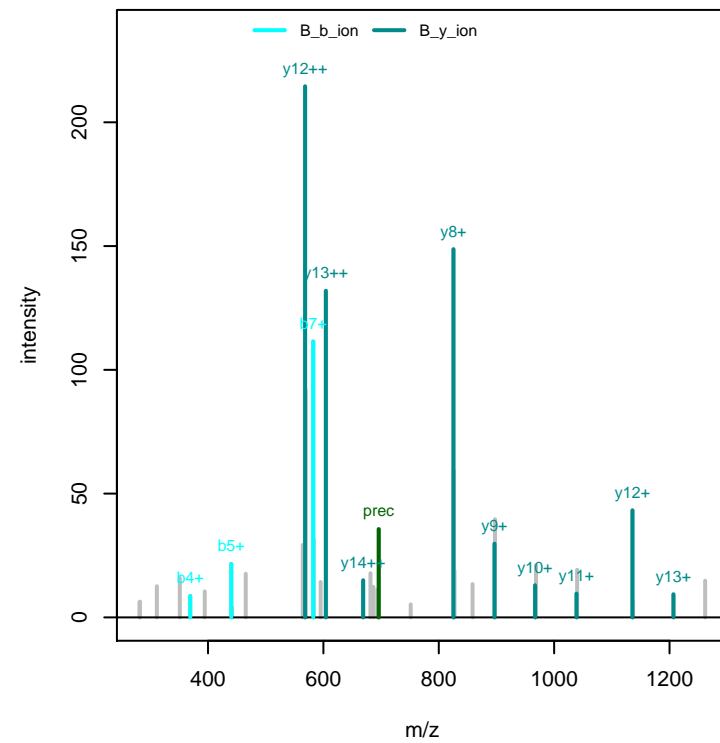

AEAPAAAPAAKAEGK+XL\_L

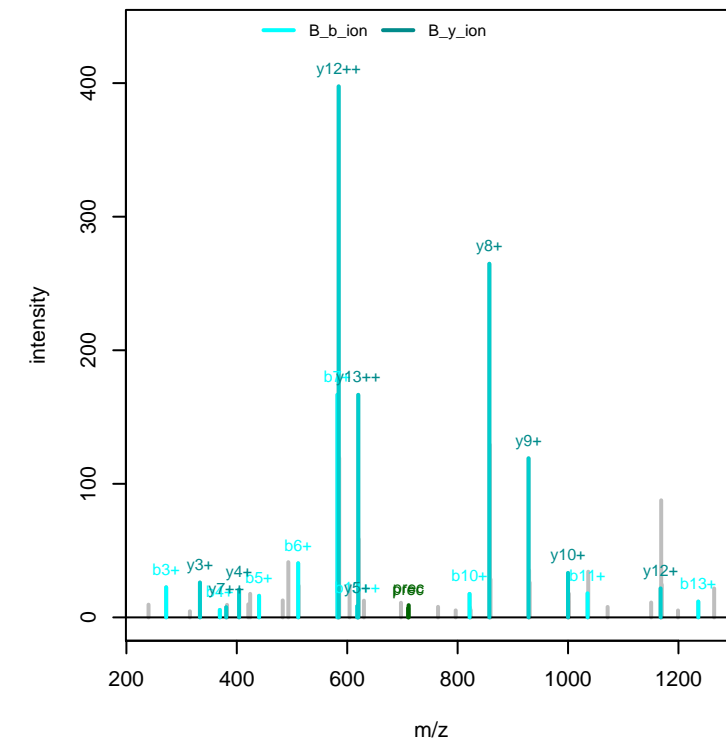

PAAQPKK  
ELAKASVSR

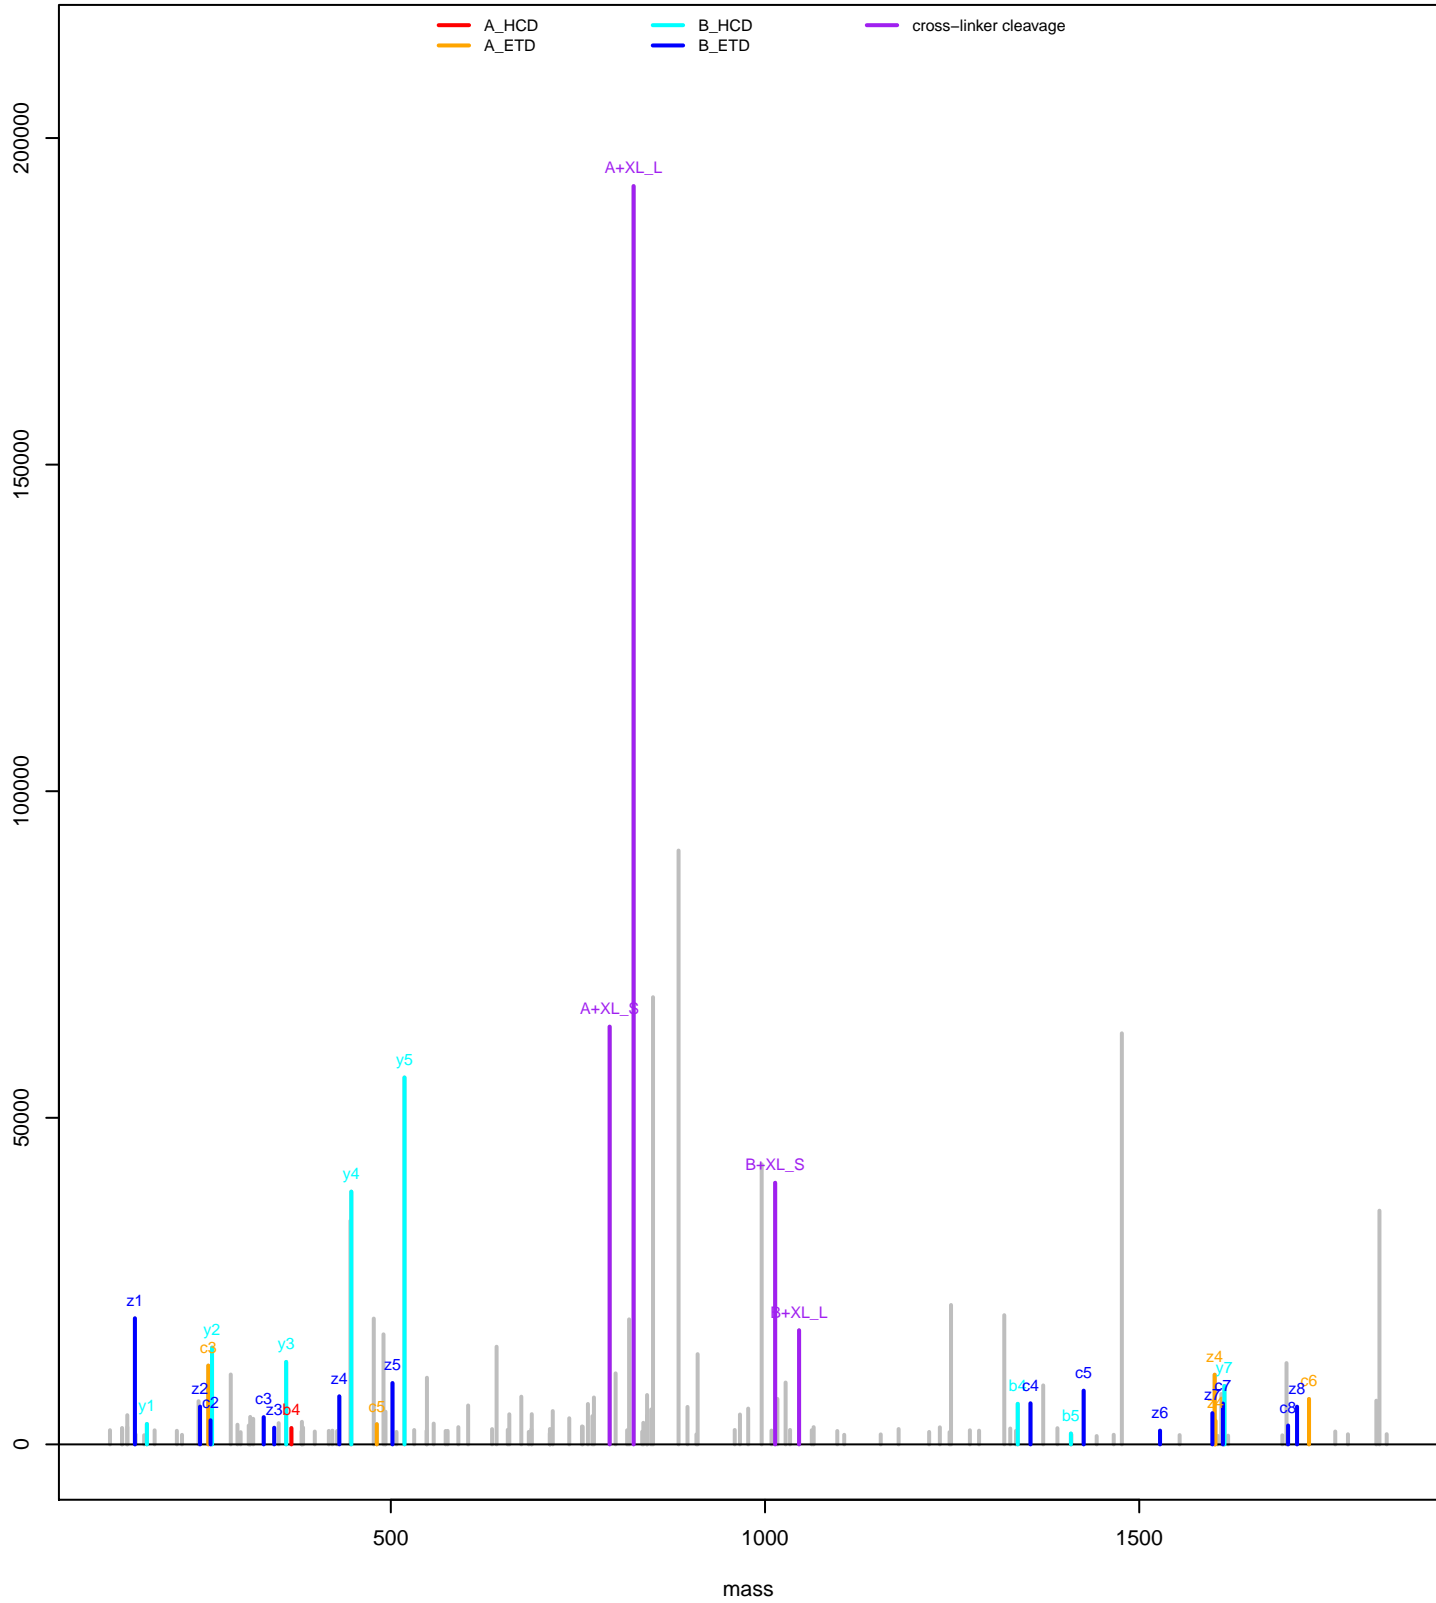

PAAQPKK+XL\_S

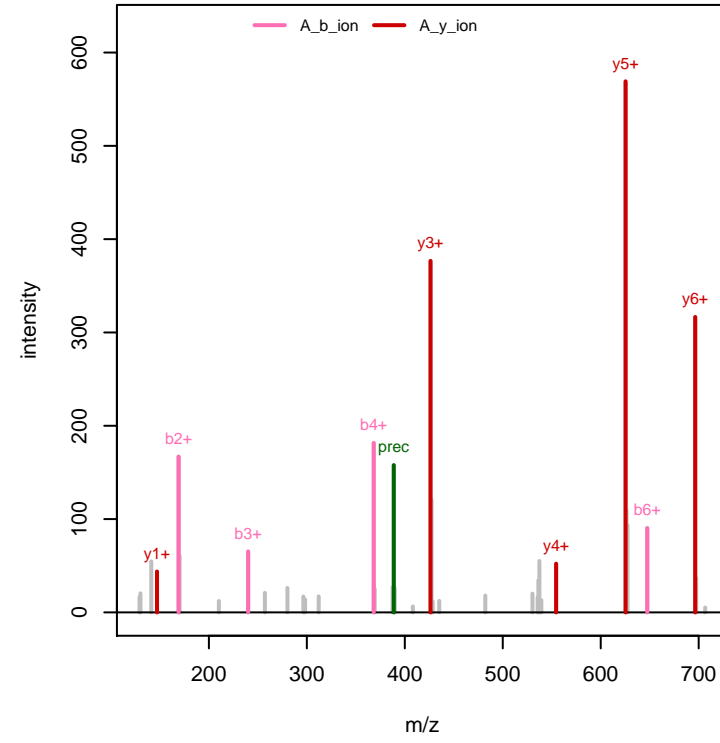

PAAQPKK+XL\_L

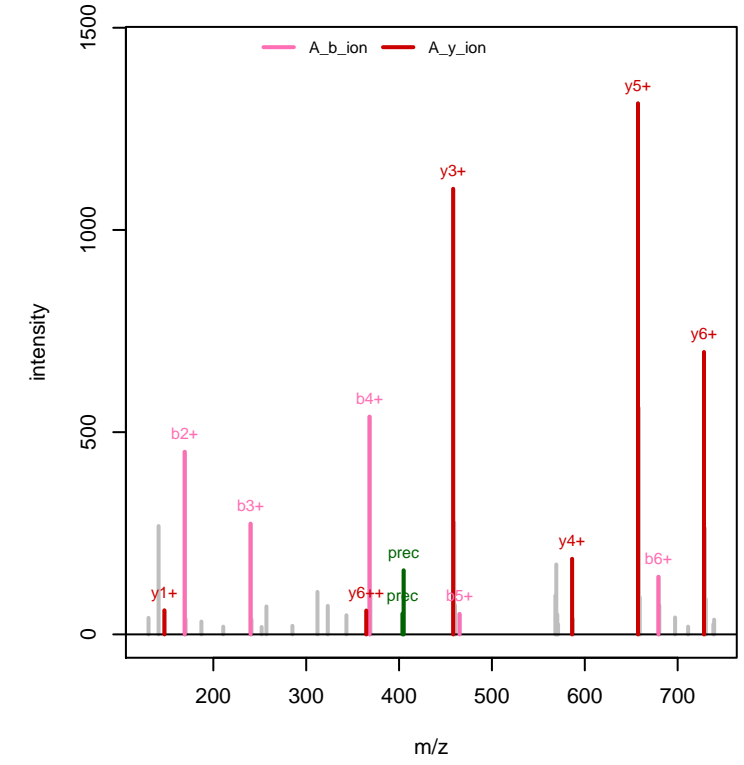

ELAKASVSR+XL\_S

ELAKASVSR+XL\_L

IRDNQKR  
LAGWGASKR

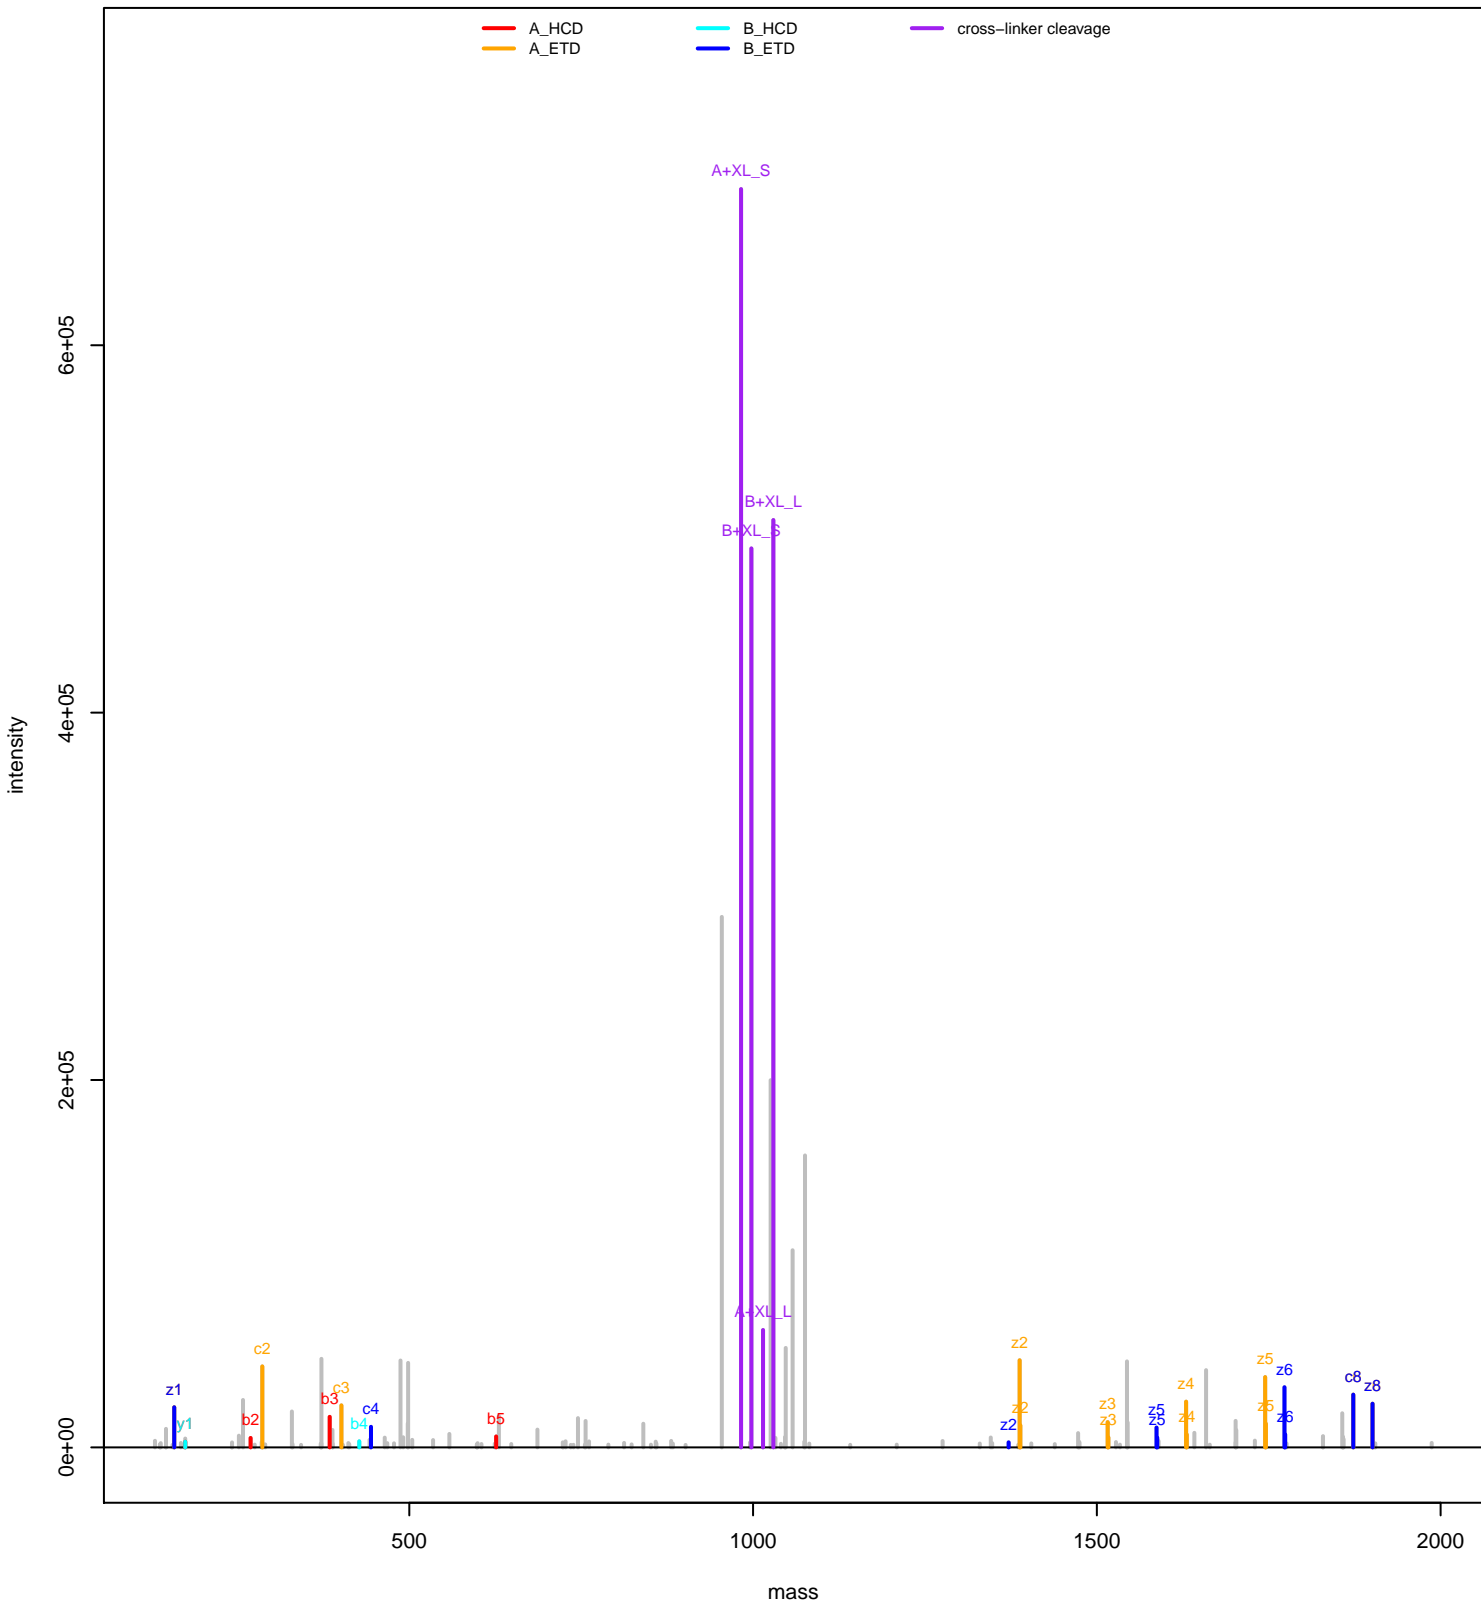

IRDNQKR+XL\_S

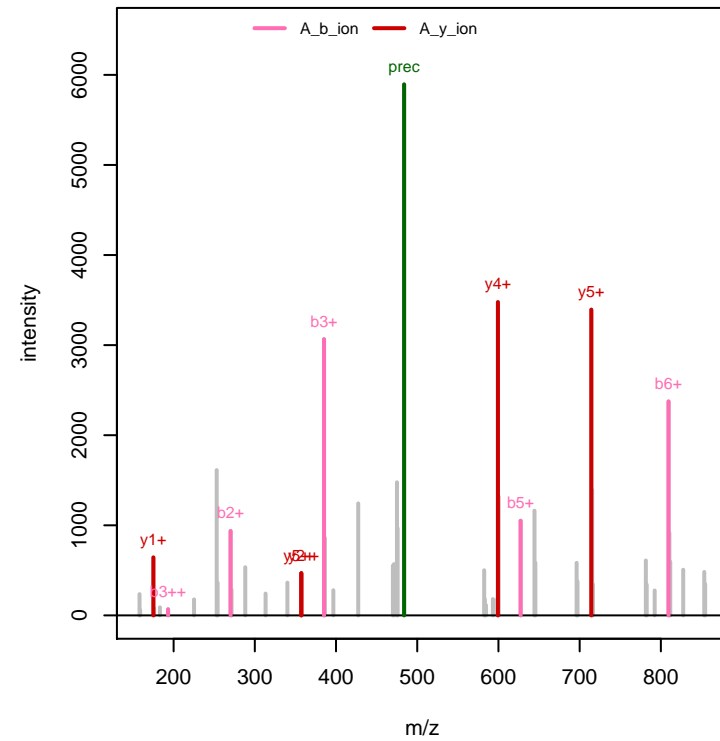

IRDNQKR+XL\_L

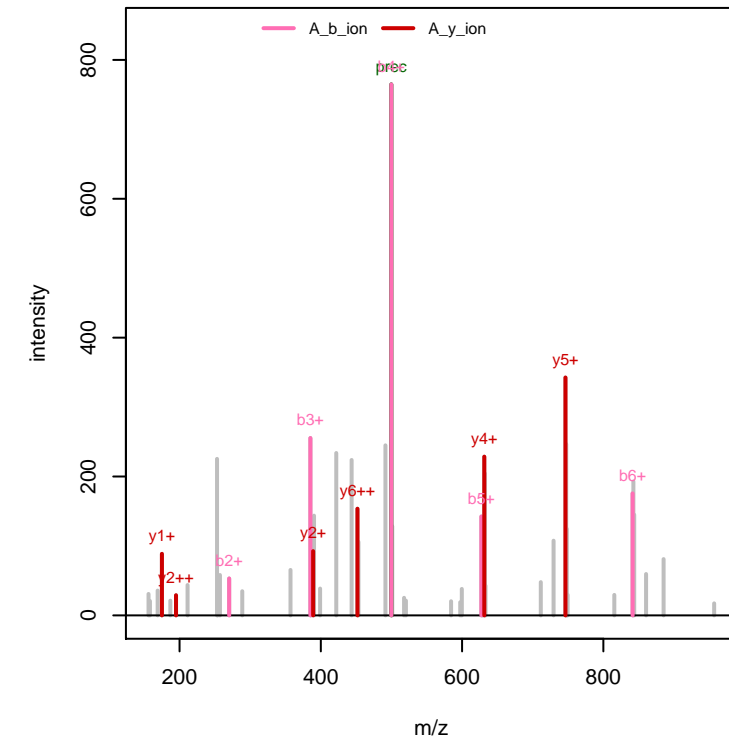

LAGWGASKR+XL\_S

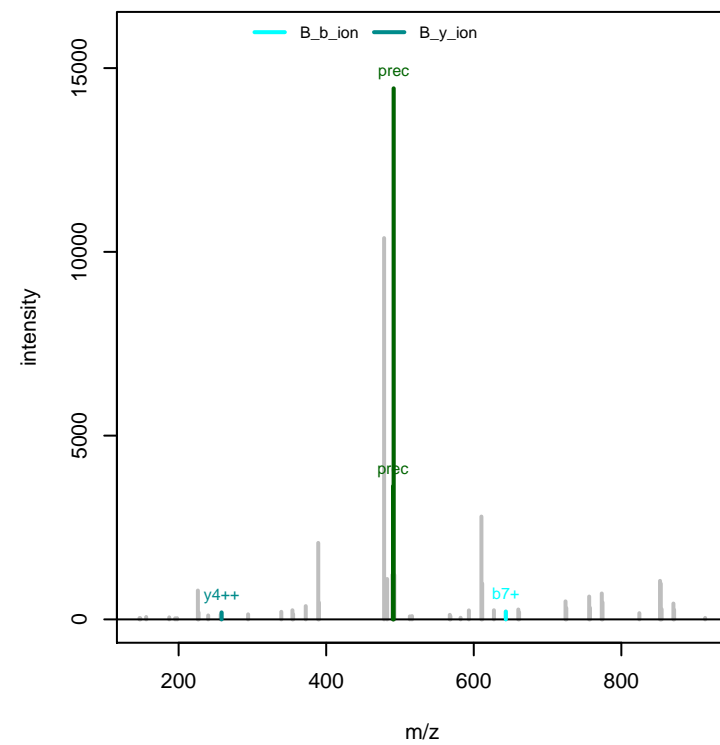

LAGWGASKR+XL\_L

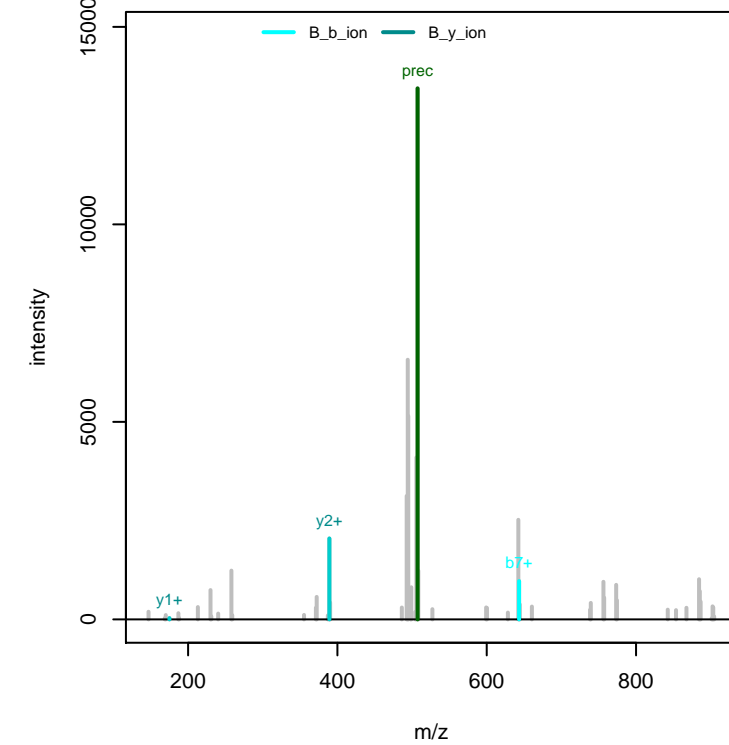



**NQKNASGR  
KLEEKGFR**

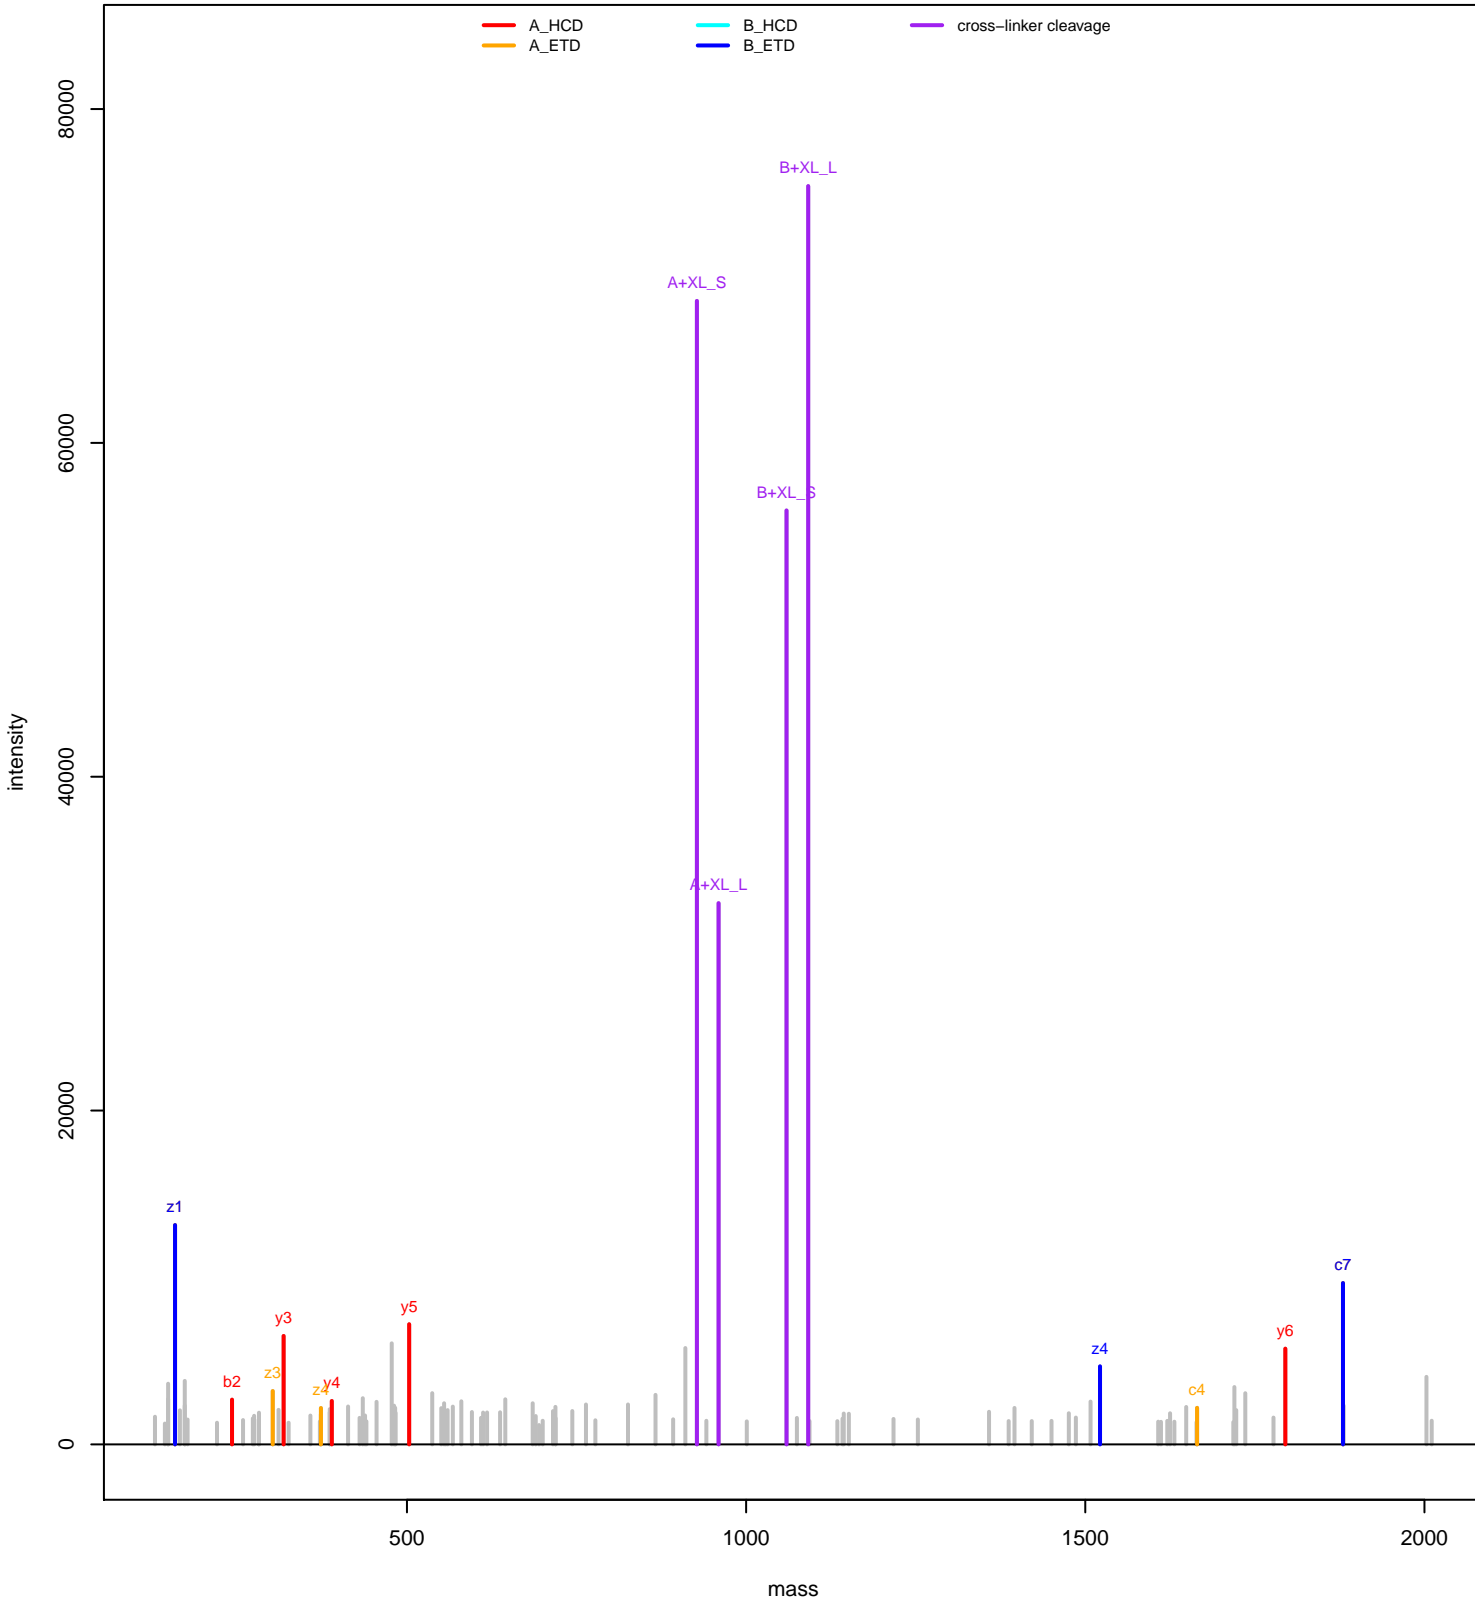

**NQKNASGR+XL\_S**

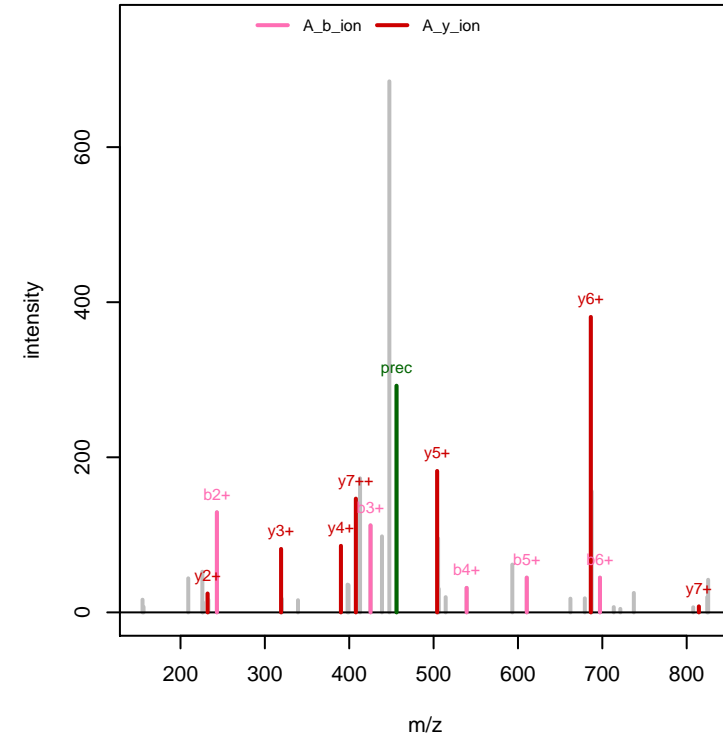

**NQKNASGR+XL\_L**

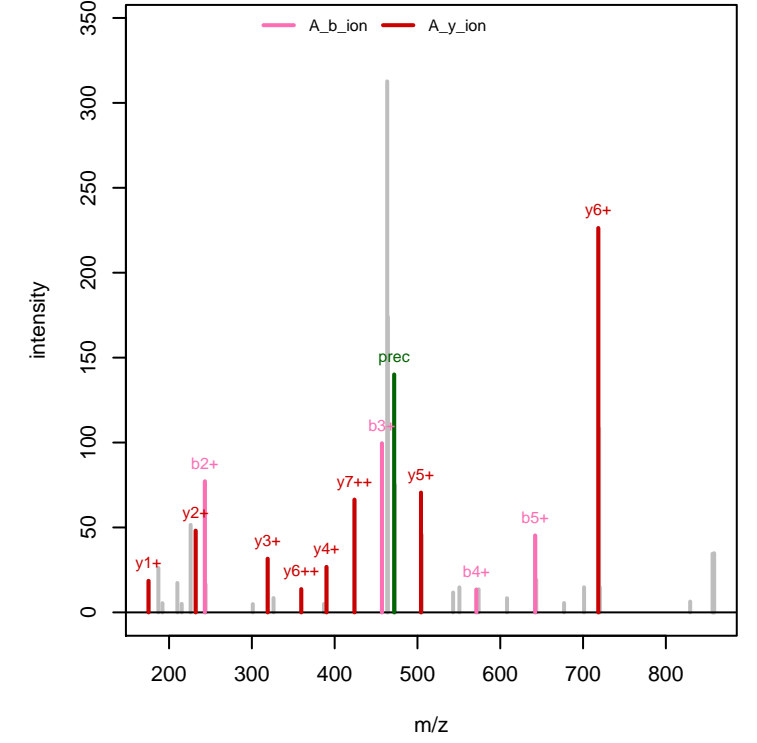

**KLEEKGFR+XL\_S**

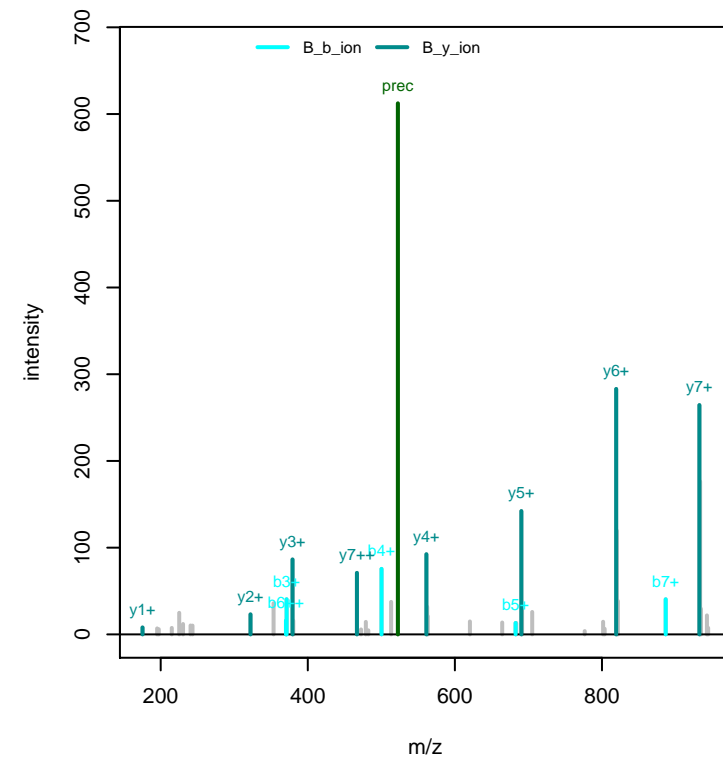

**KLEEKGFR+XL\_L**

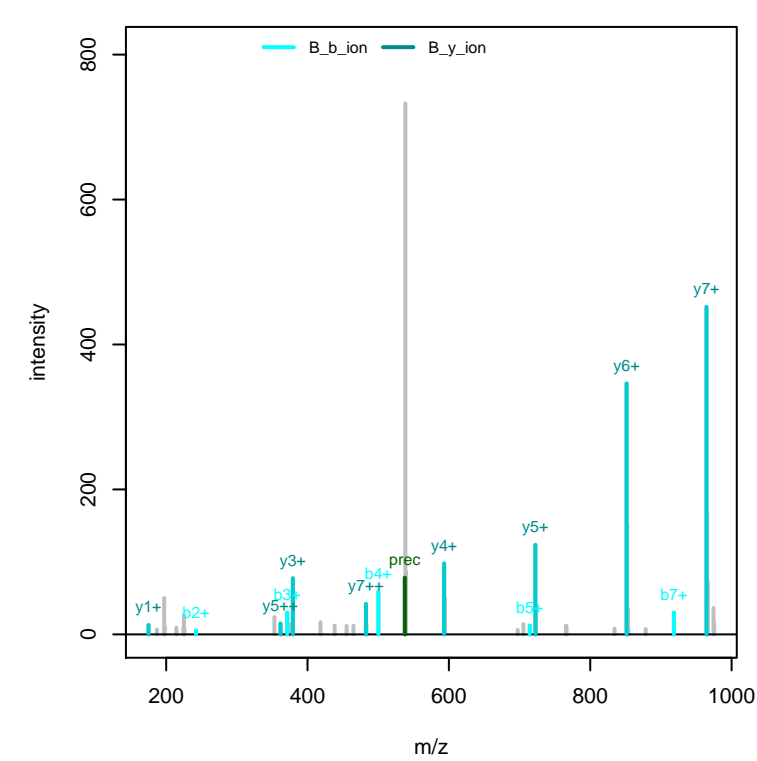

DGRCPDINKK  
VQTGDGINNDVDTKTDGTTQ

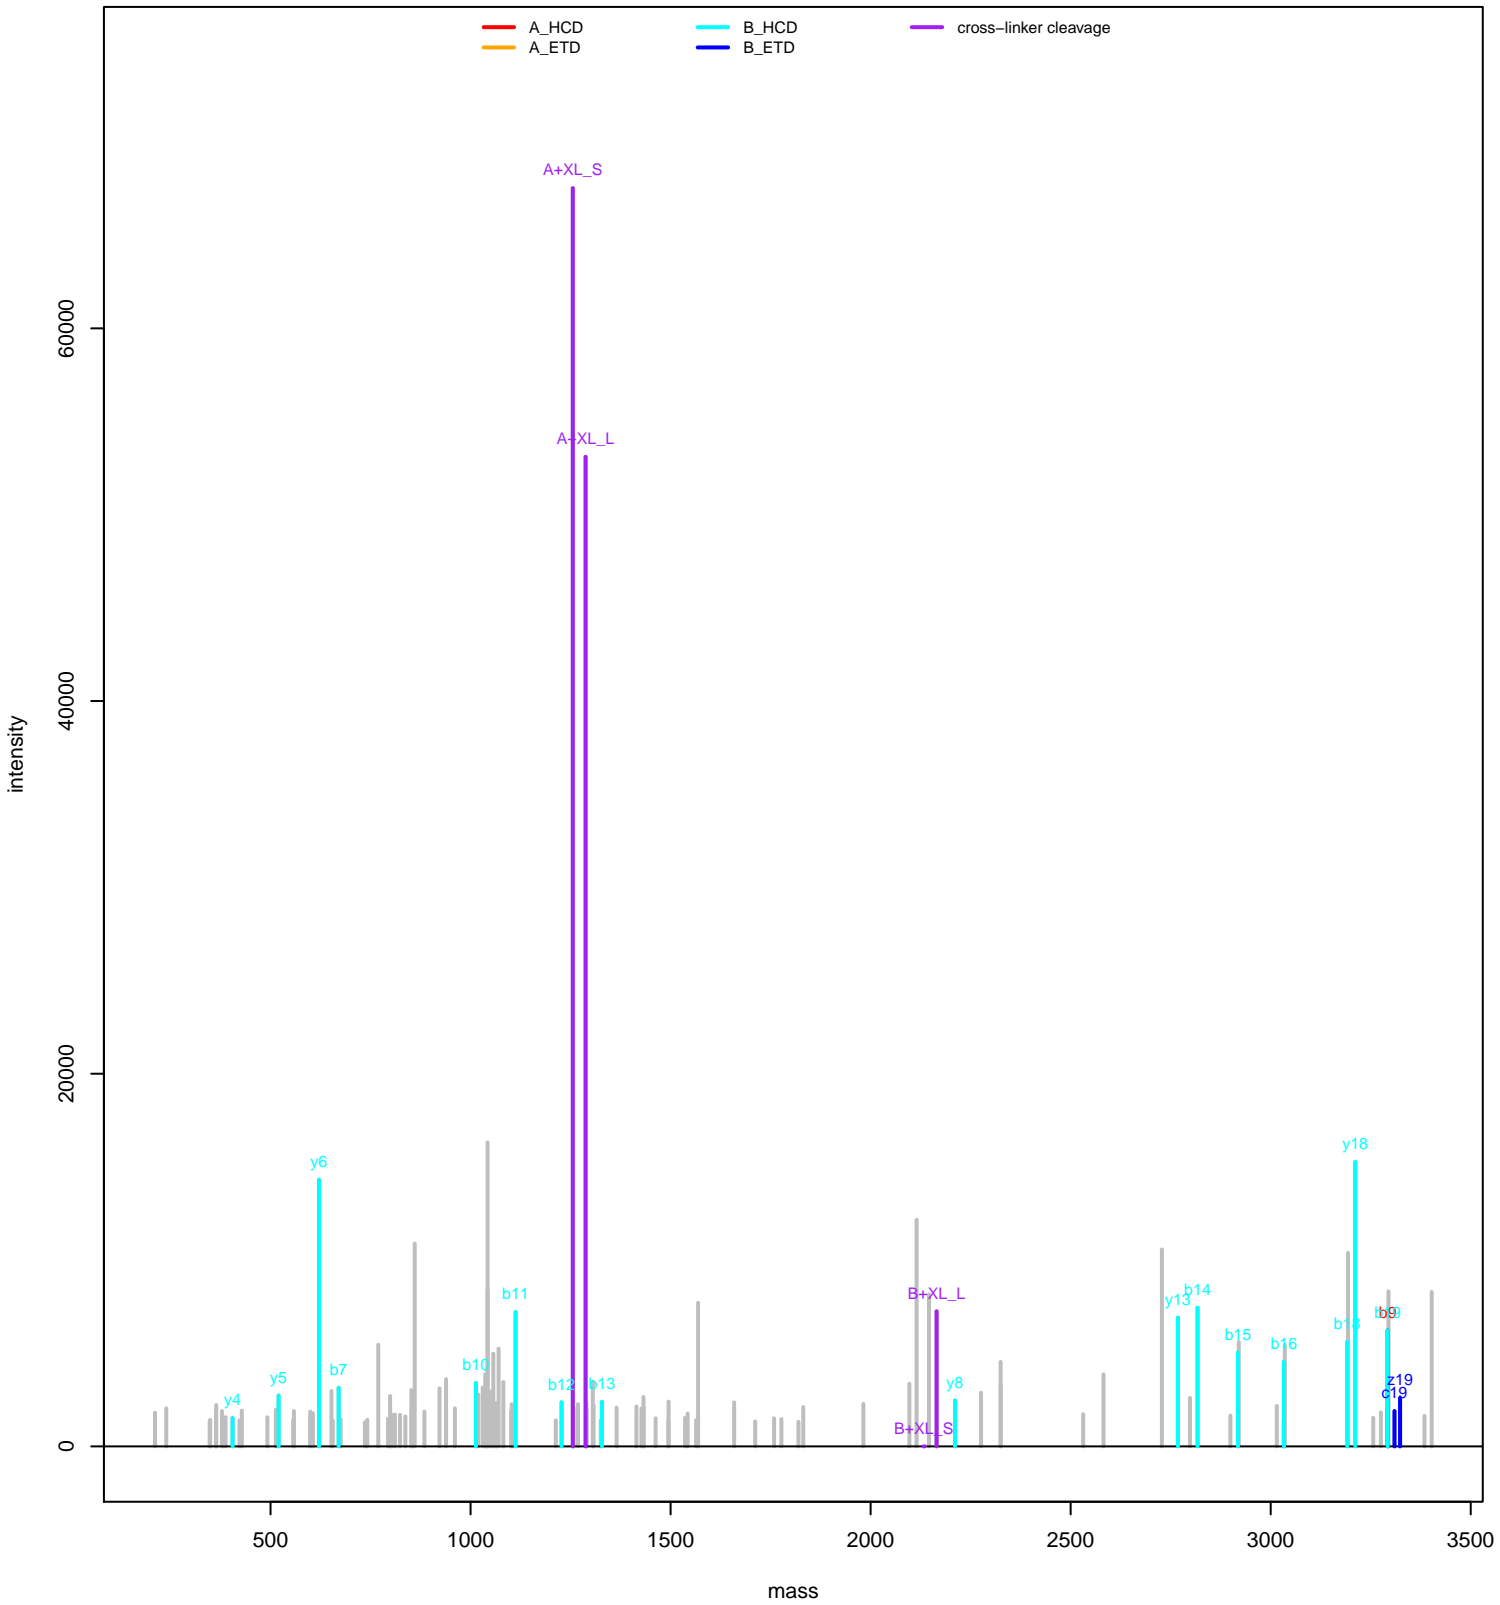

DGRCPDINKK+XL\_S

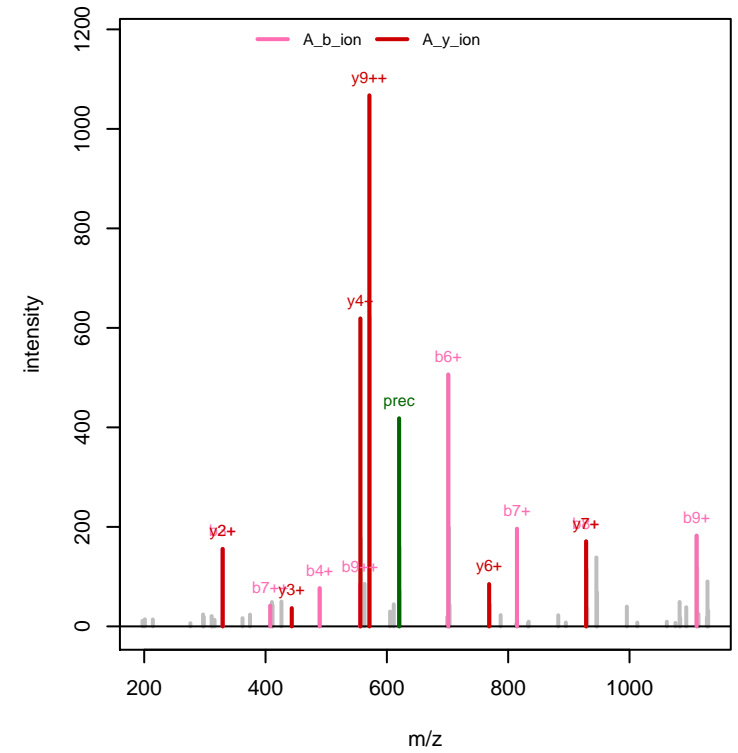

DGRCPDINKK+XL\_L

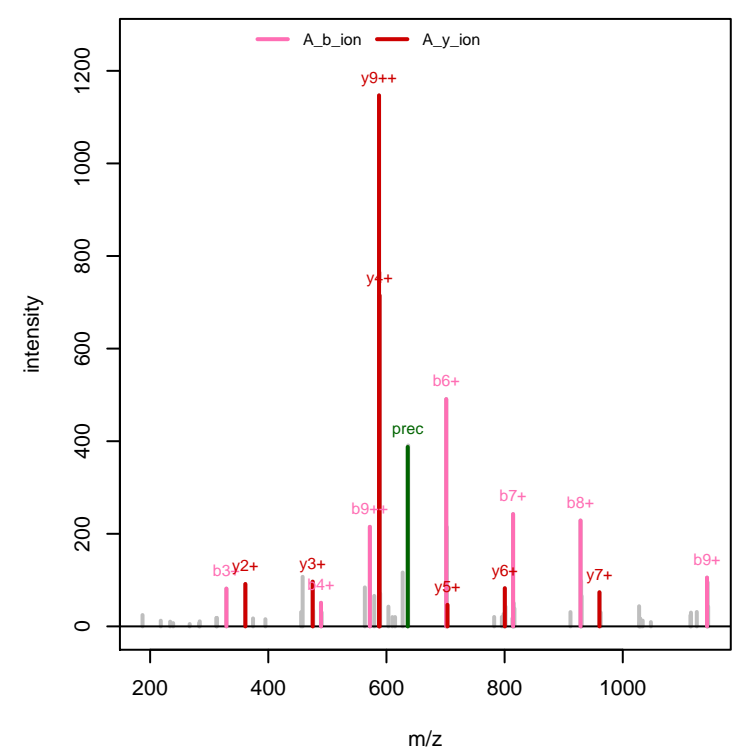

VQTGDGINNDVDTKTDGTTQ+XL\_S

VQTGDGINNDVDTKTDGTTQ+XL\_L

NTKSGLR  
RKAALAAER

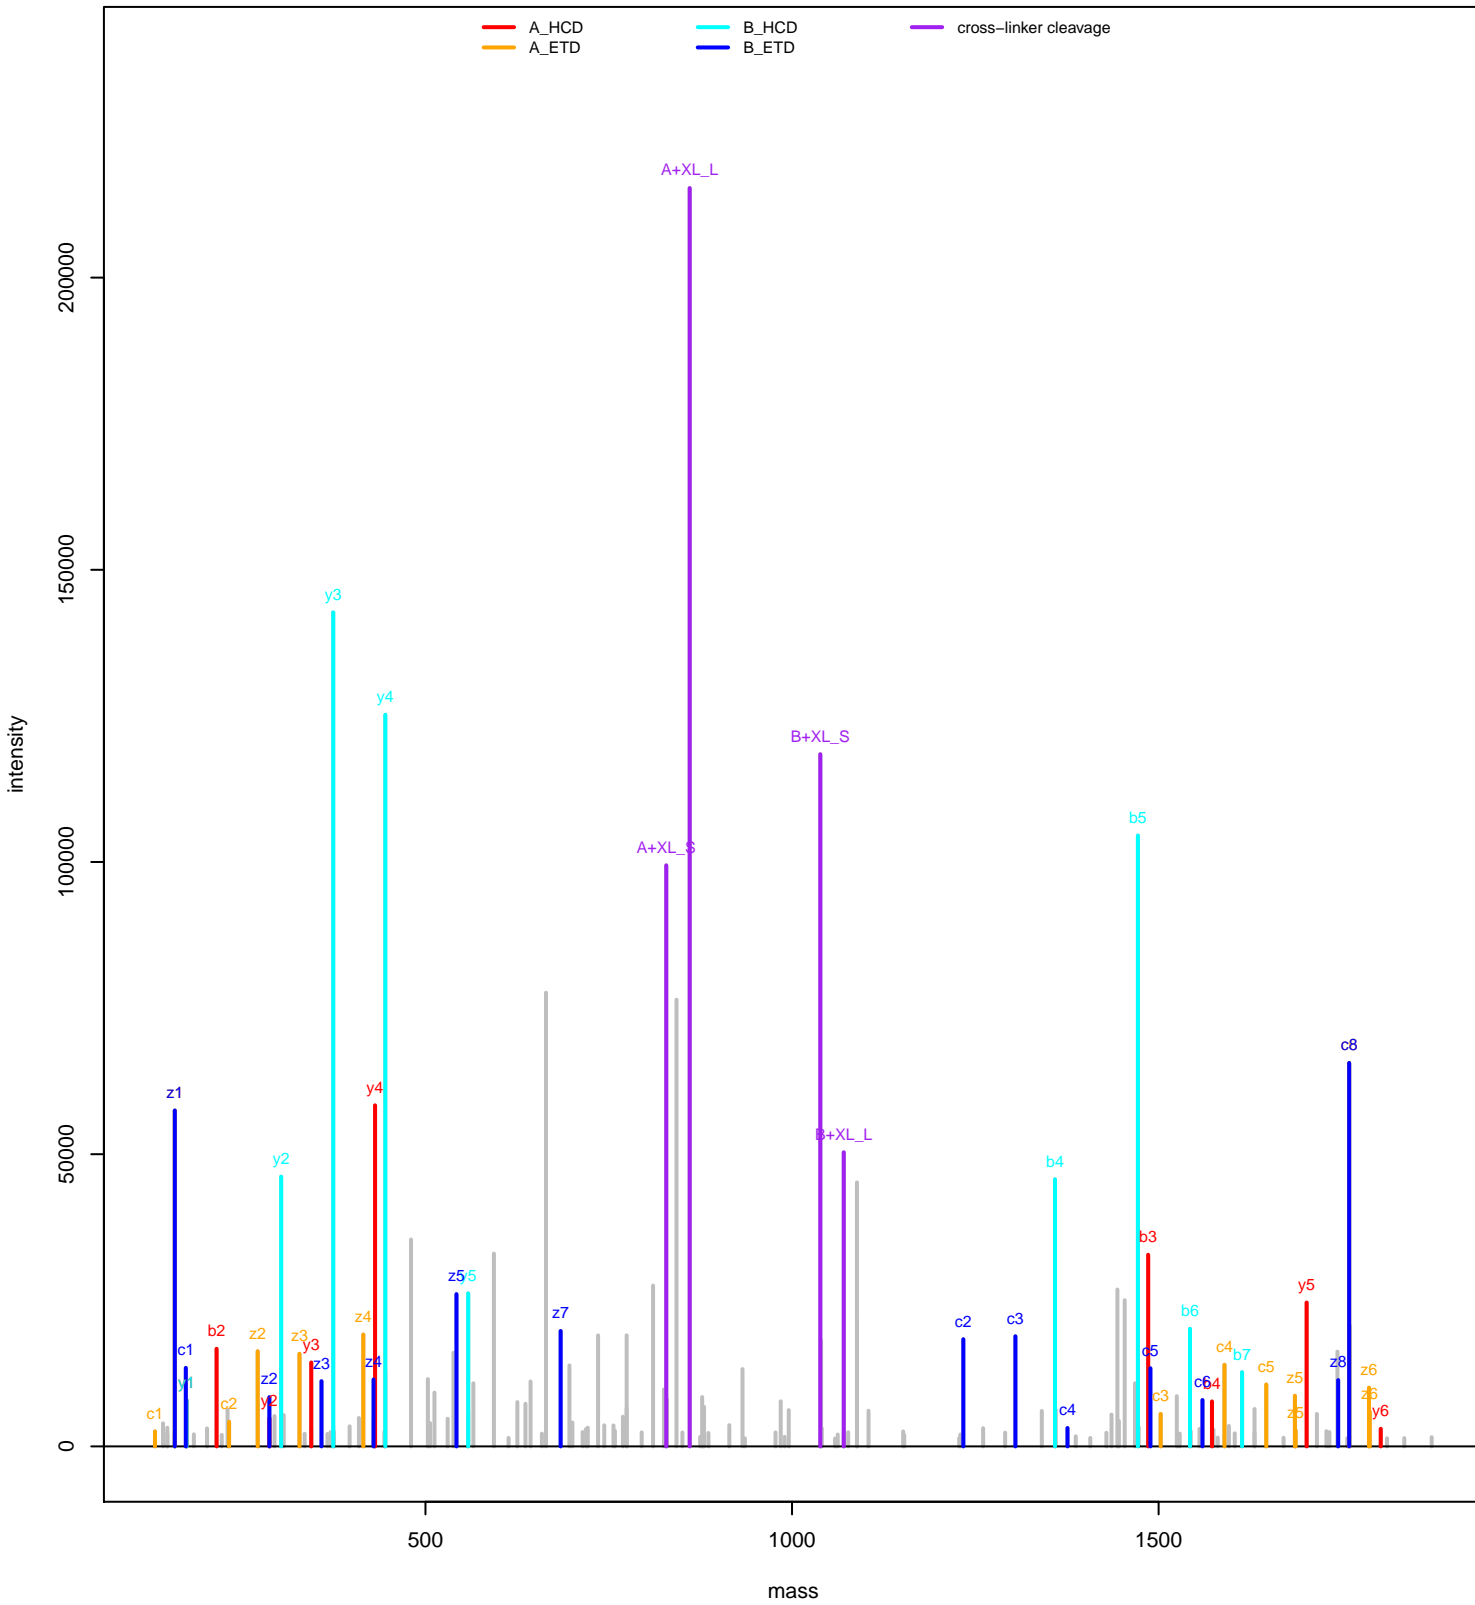

NTKSGLR+XL\_S

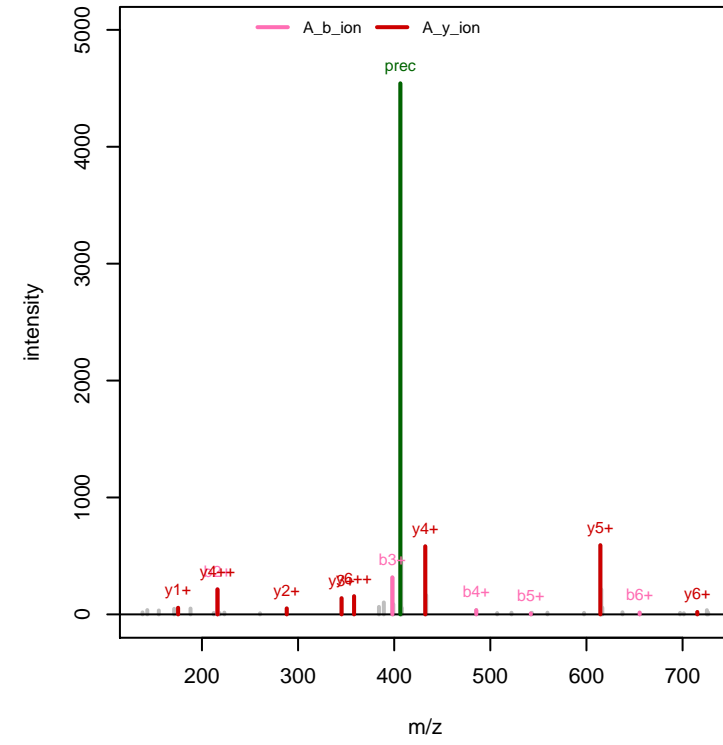

NTKSGLR+XL\_L

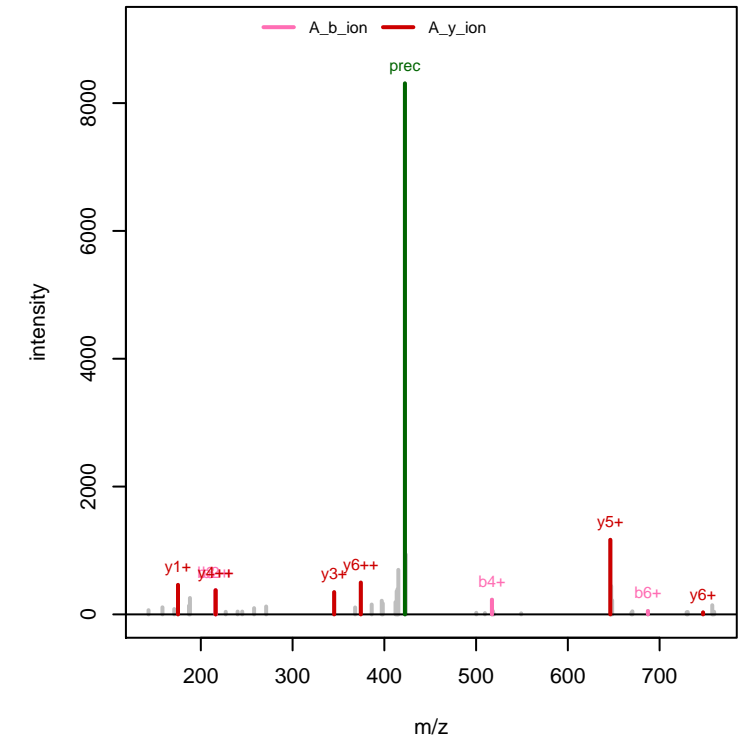

RKAALAAER+XL\_S

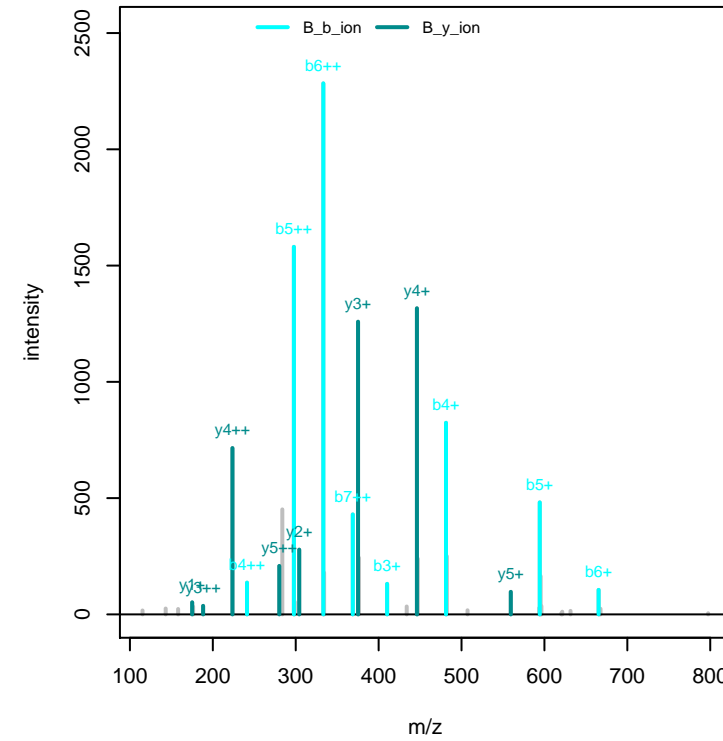

RKAALAAER+XL\_L

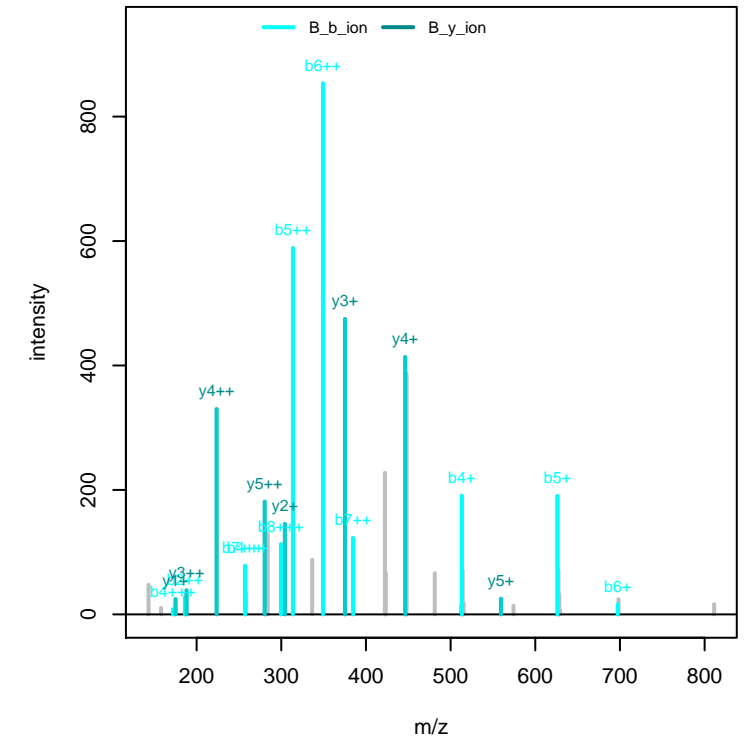

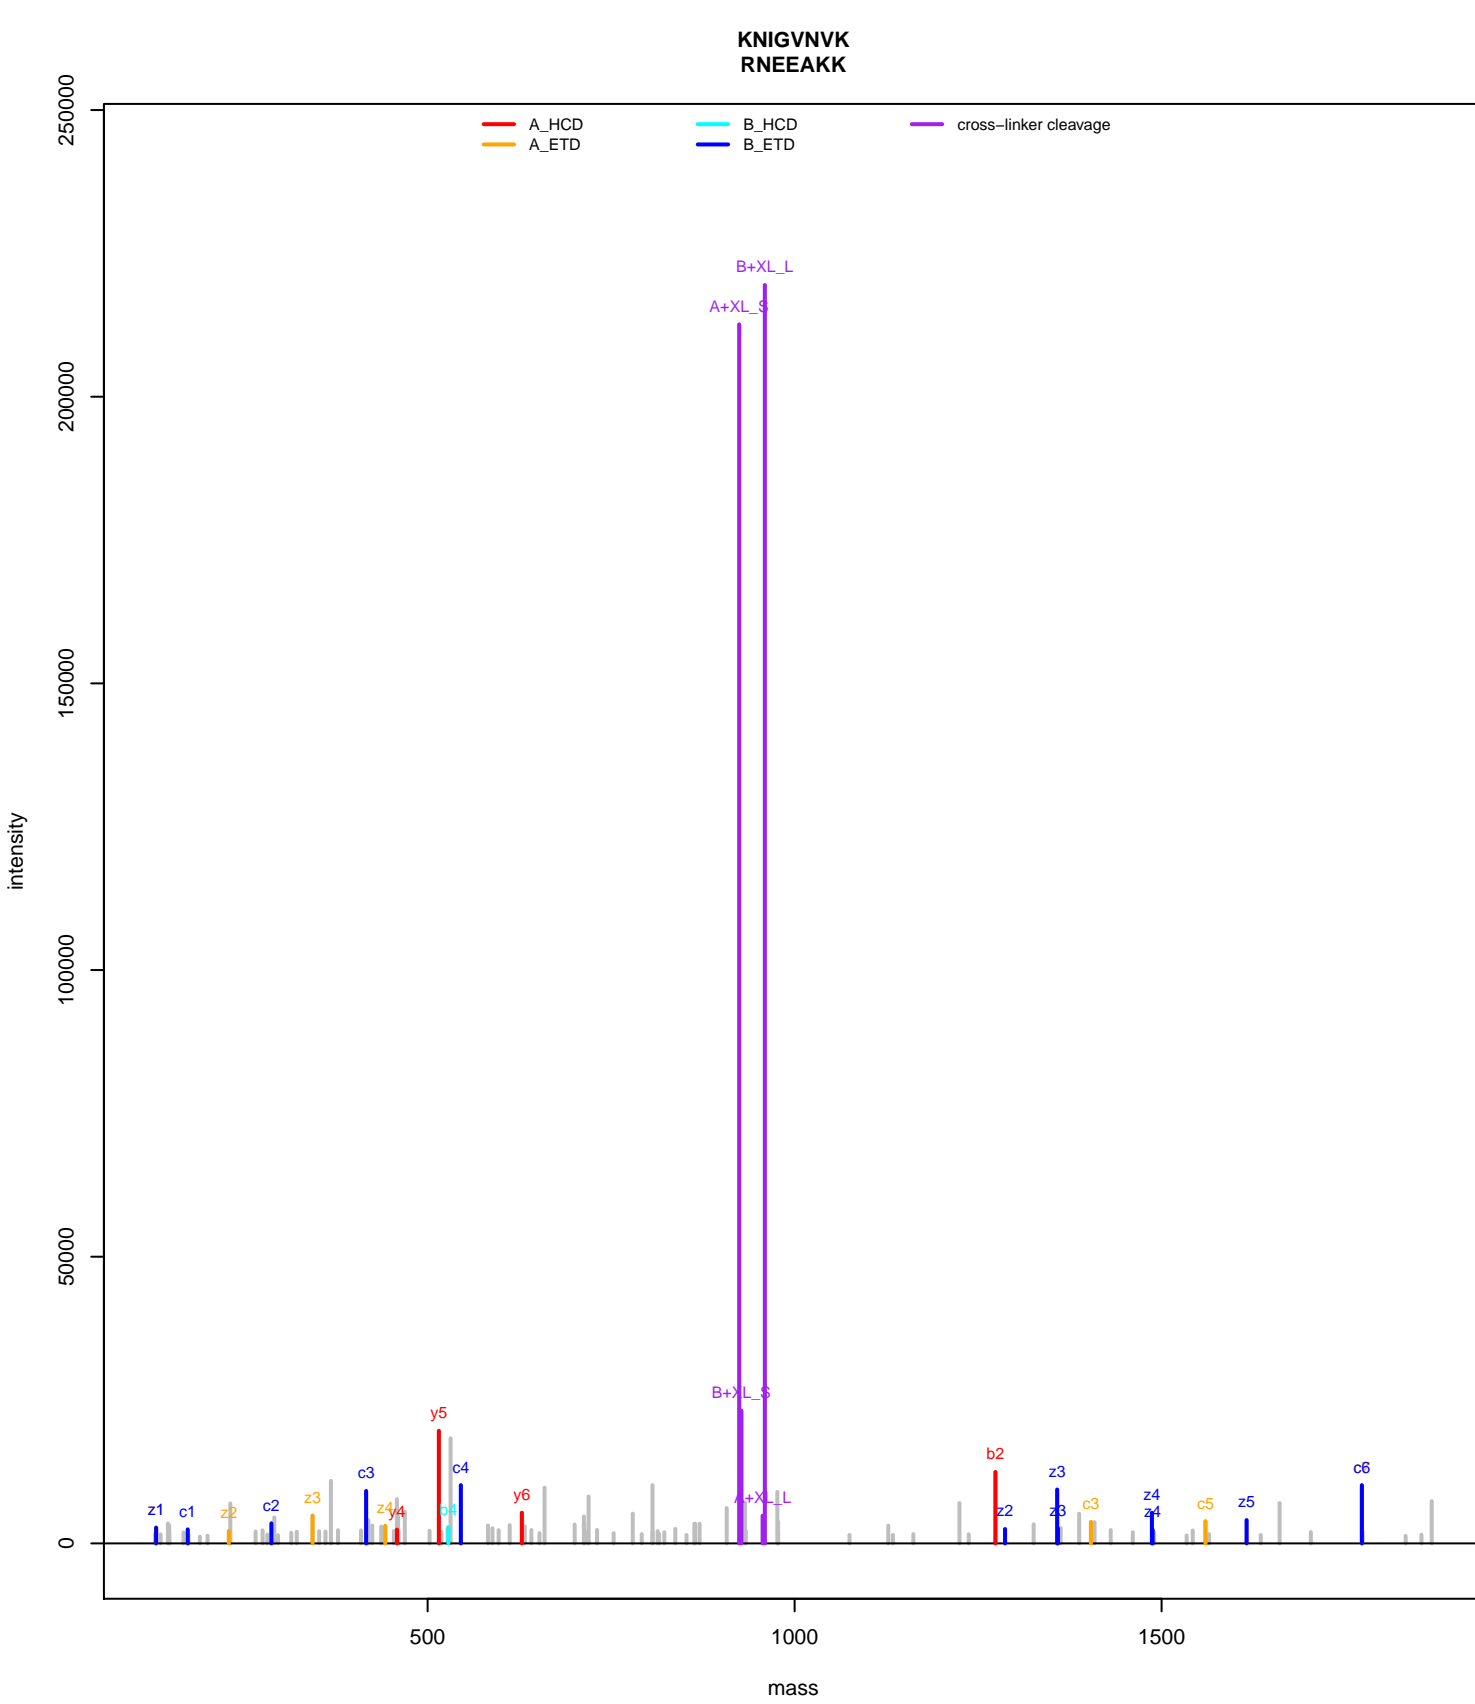

**KNIGVNVK+XL\_S**

**KNIGVNVK+XL\_L**

**RNEEAKK+XL\_S**

**RNEEAKK+XL\_L**

EQEKLGIK  
MEKDAADNEAK

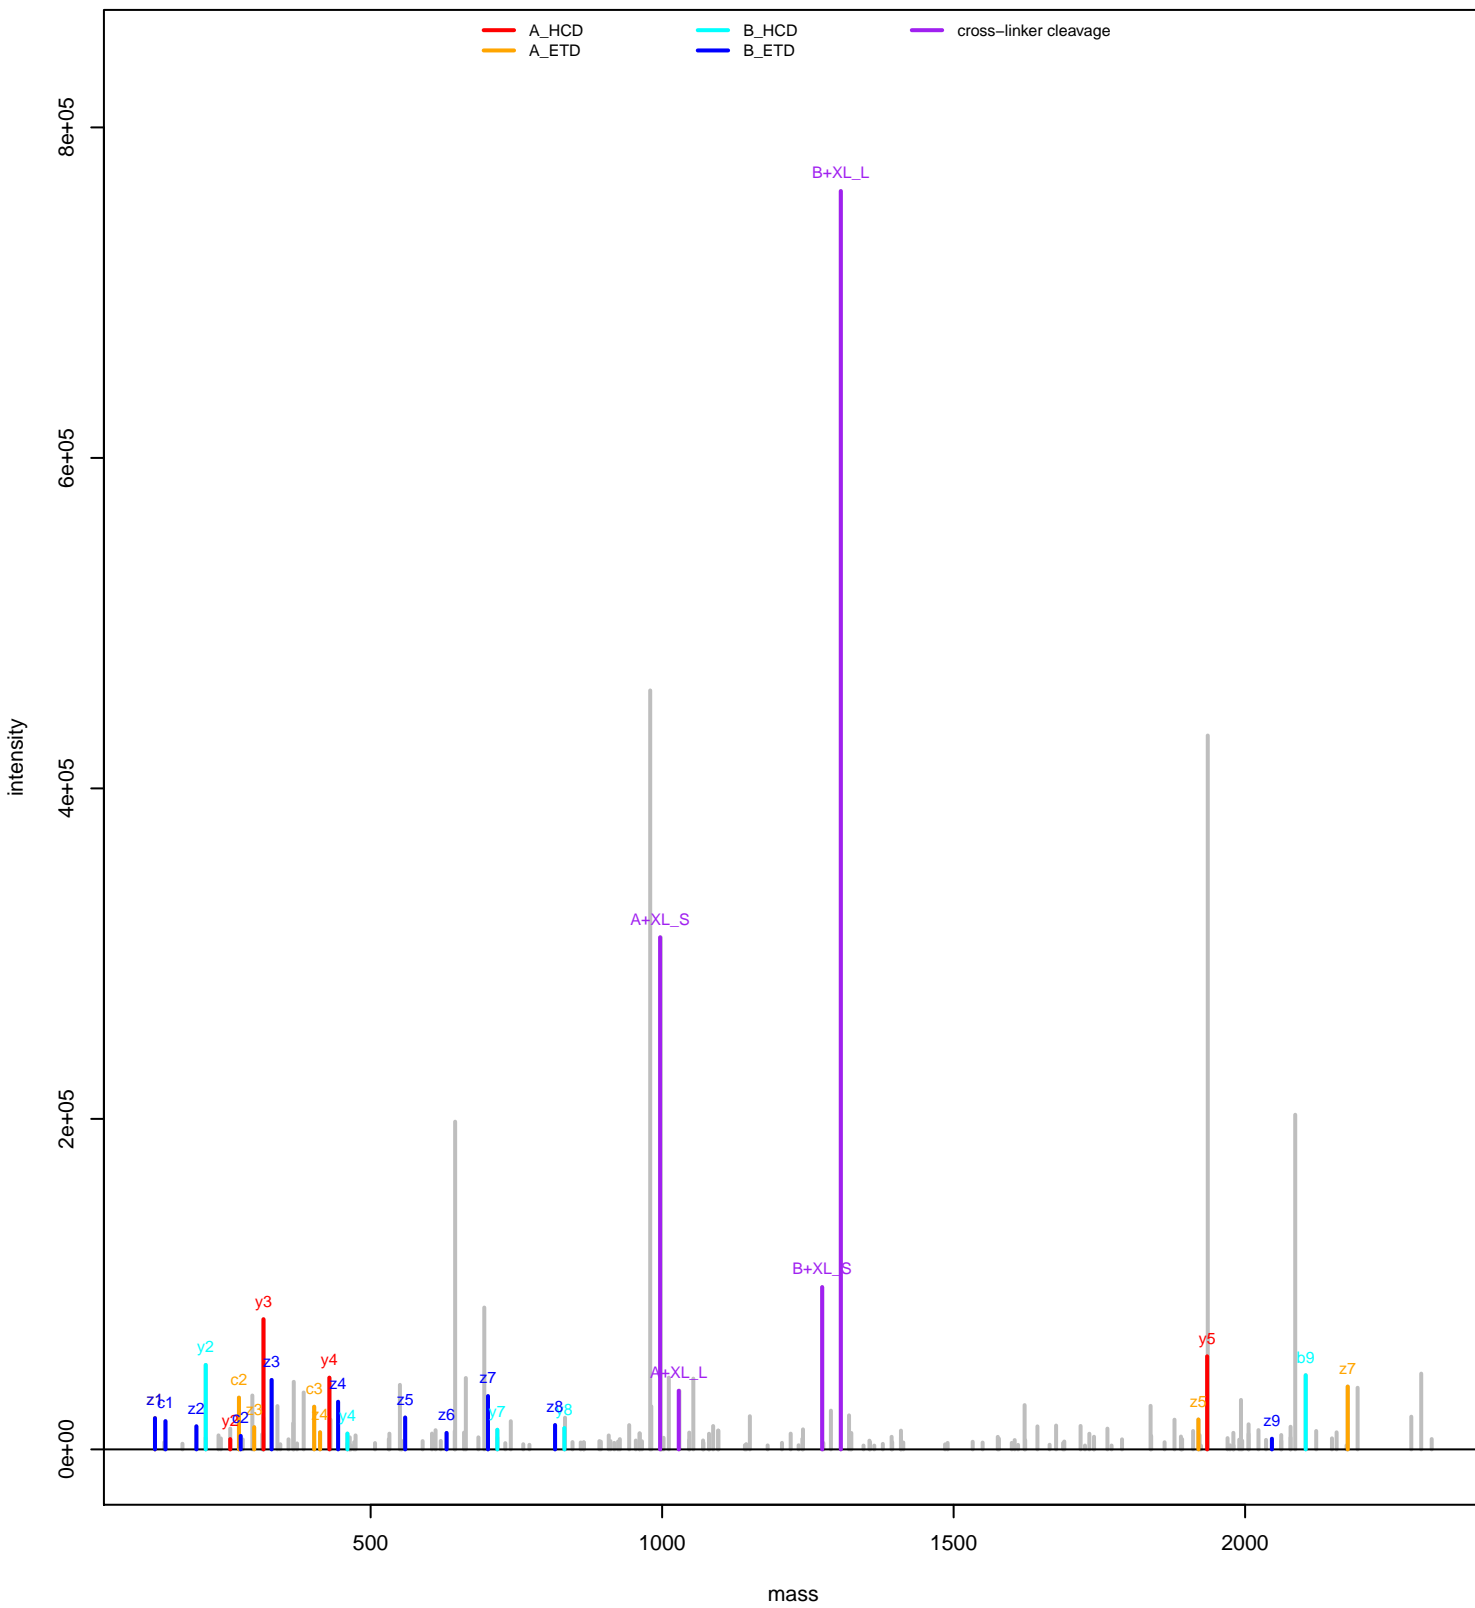

EQEKLGIK+XL\_S

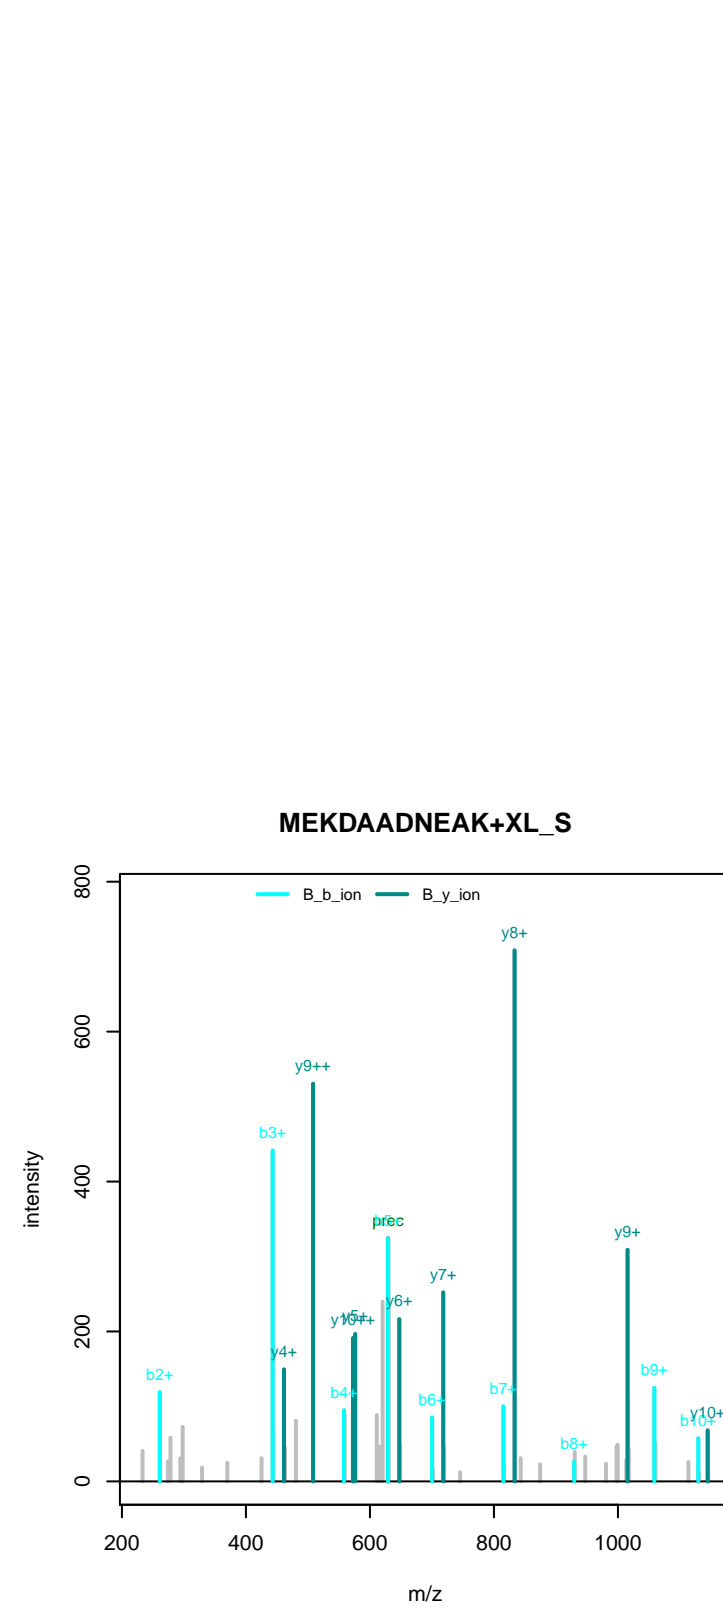

EQEKLGIK+XL\_L

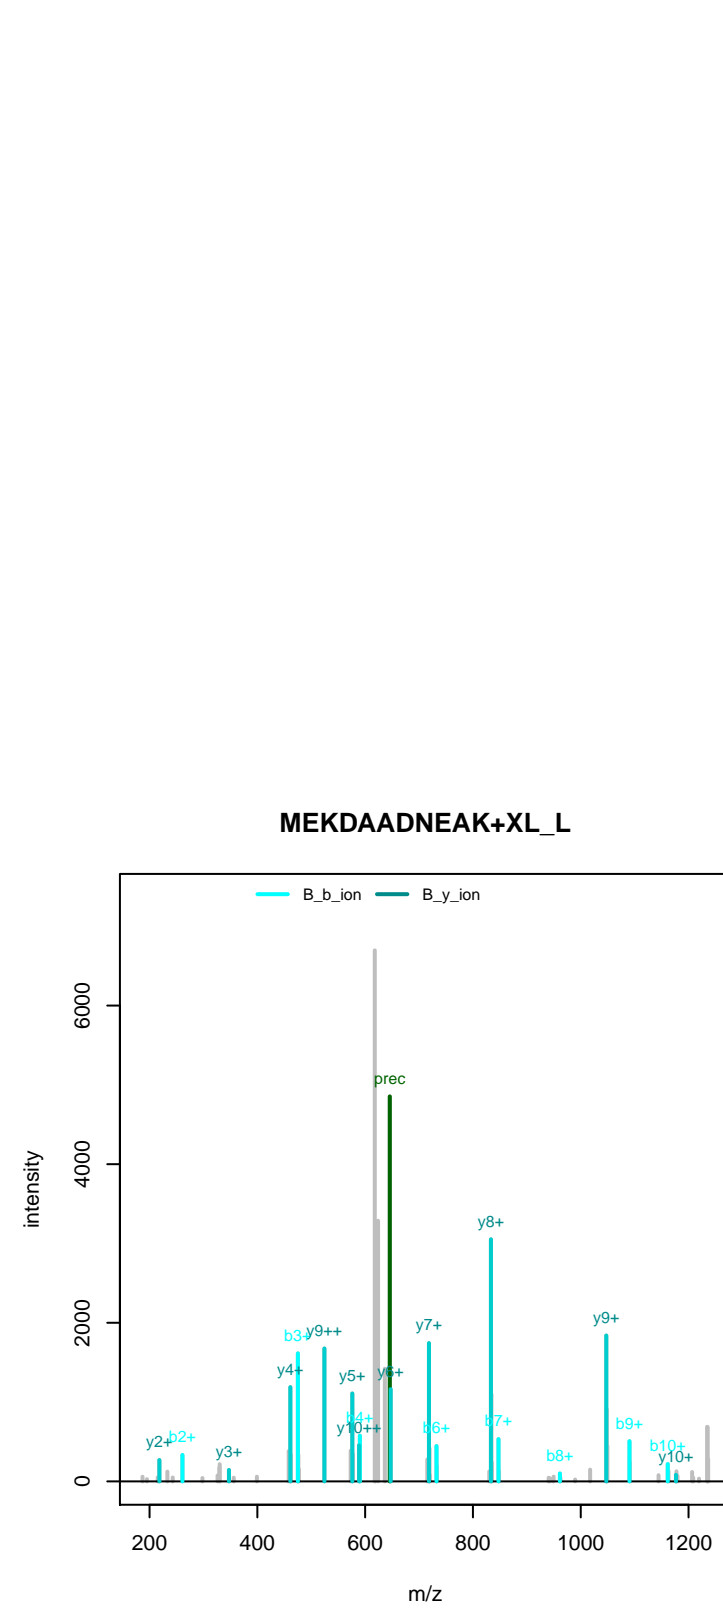

MEKDAADNEAK+XL\_S

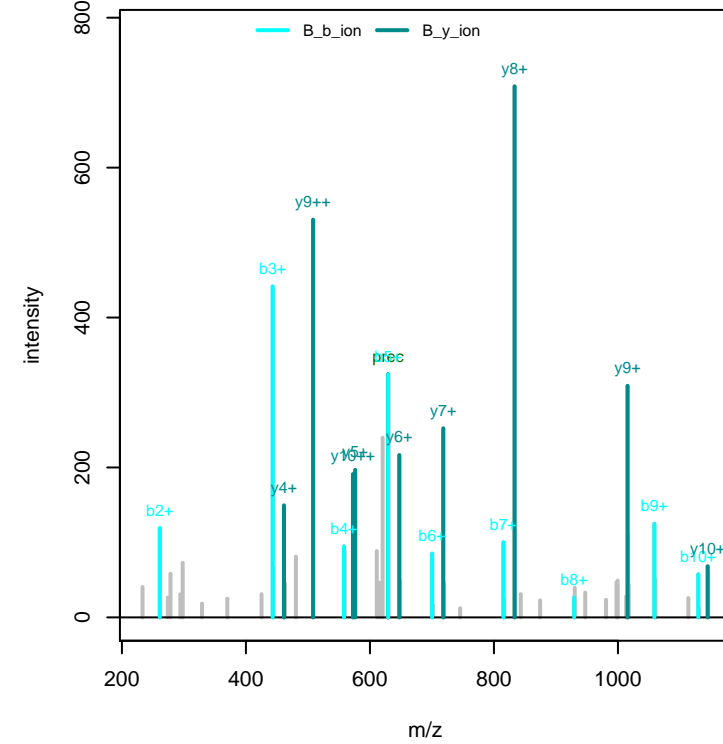

MEKDAADNEAK+XL\_L

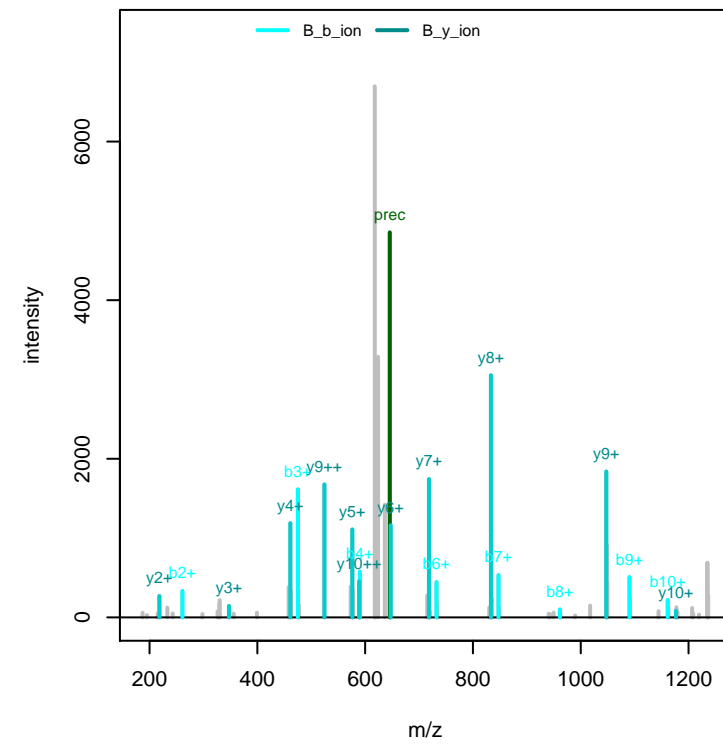

DAADNEAKGK  
EYREKFAK

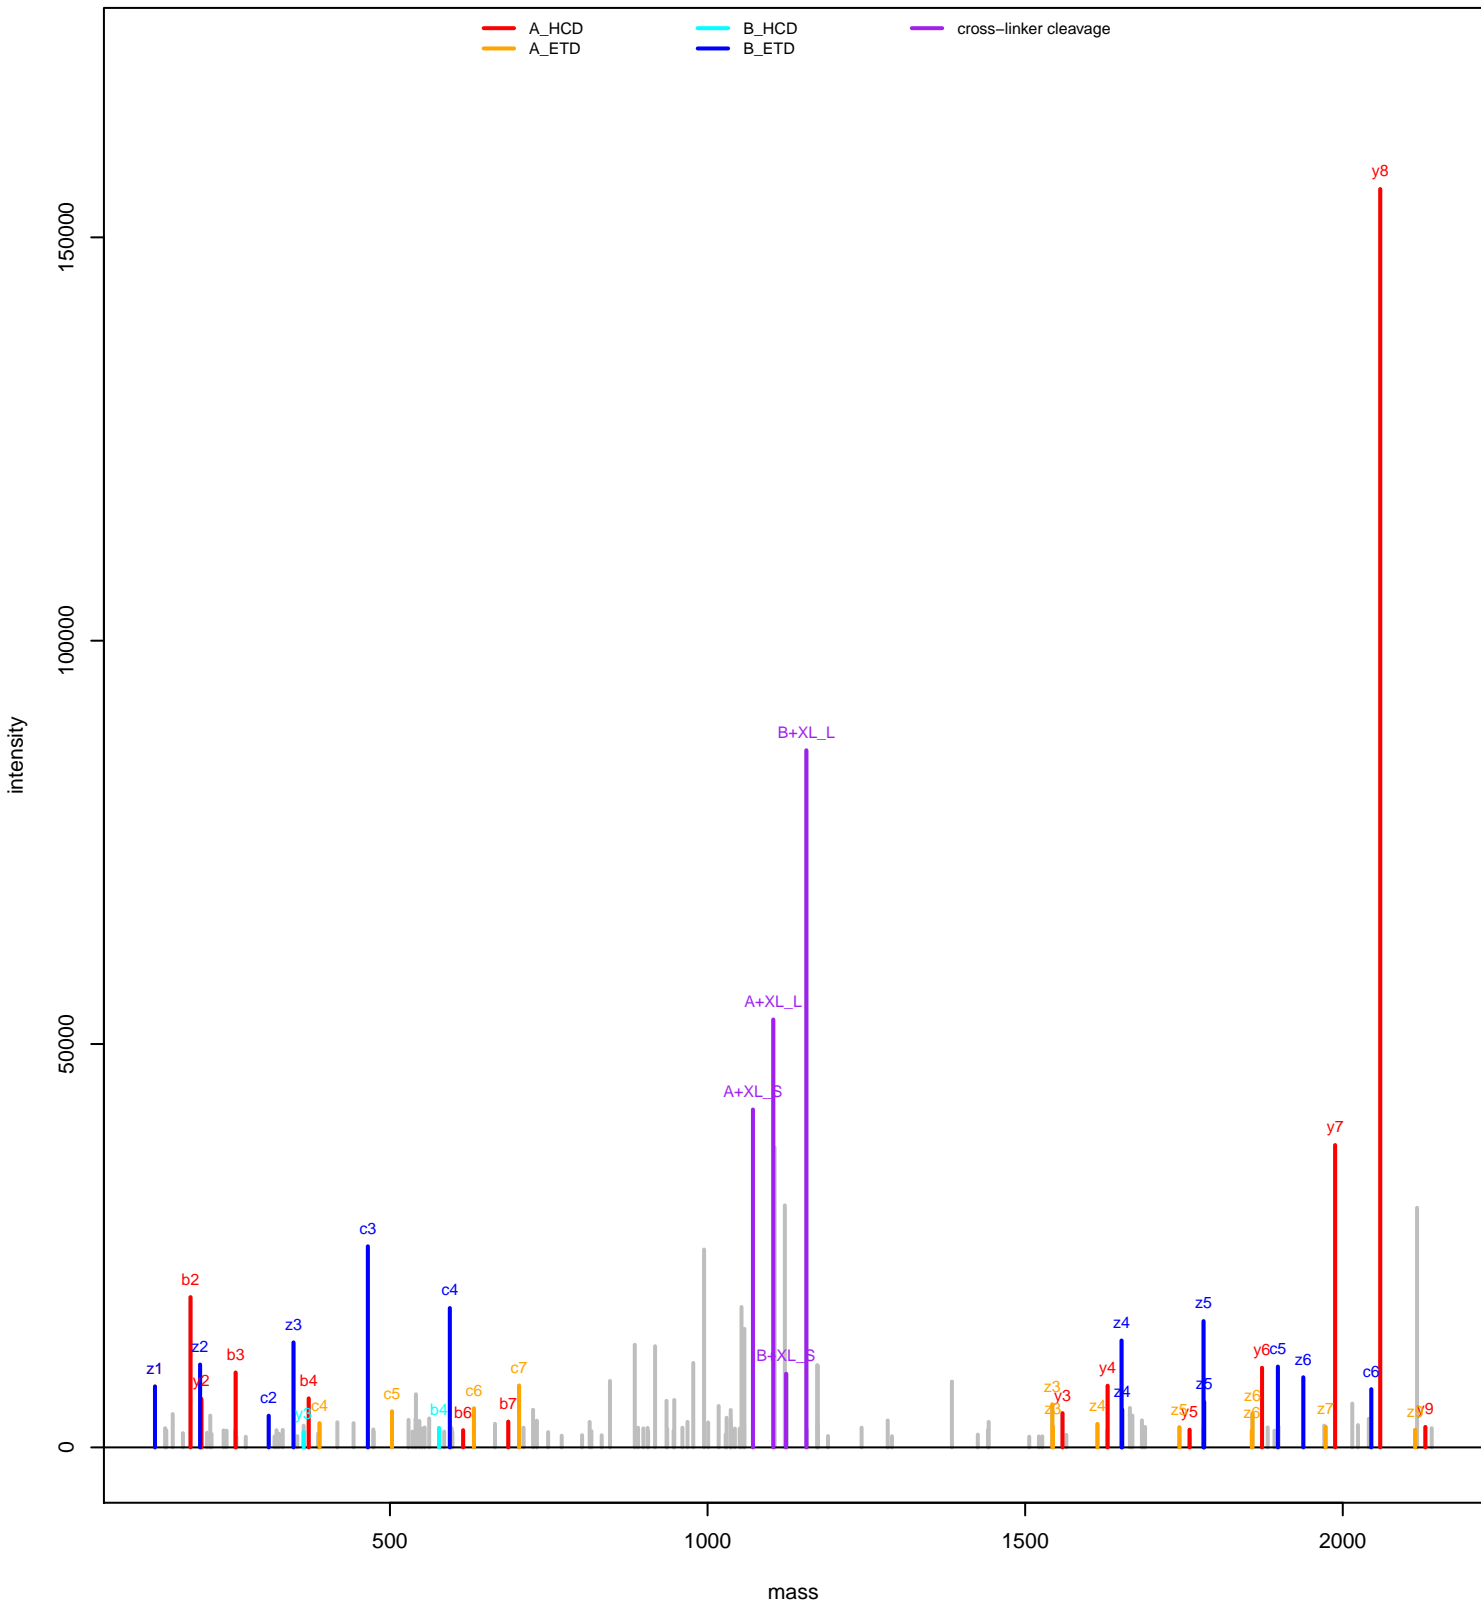

DAADNEAKGK+XL\_S

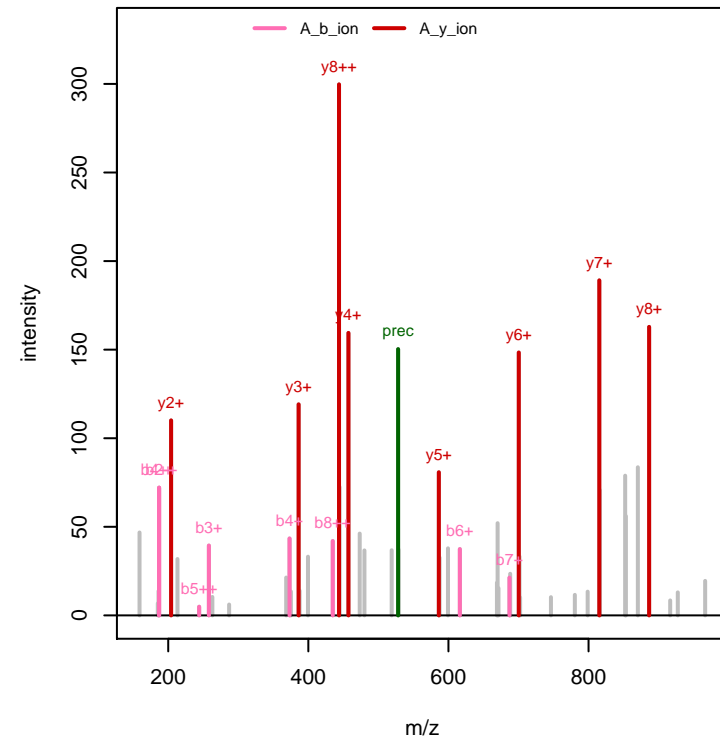

DAADNEAKGK+XL\_L

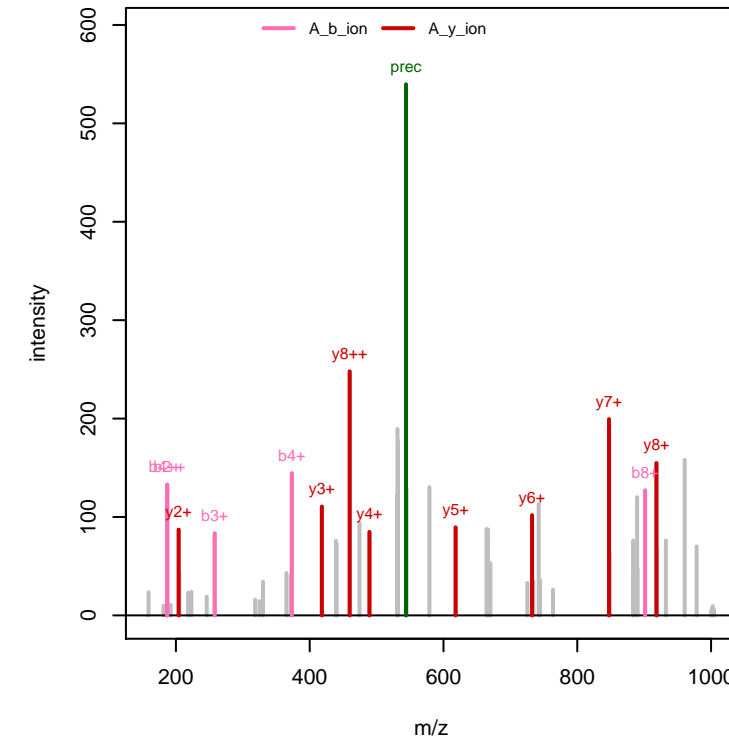

EYREKFAK+XL\_S

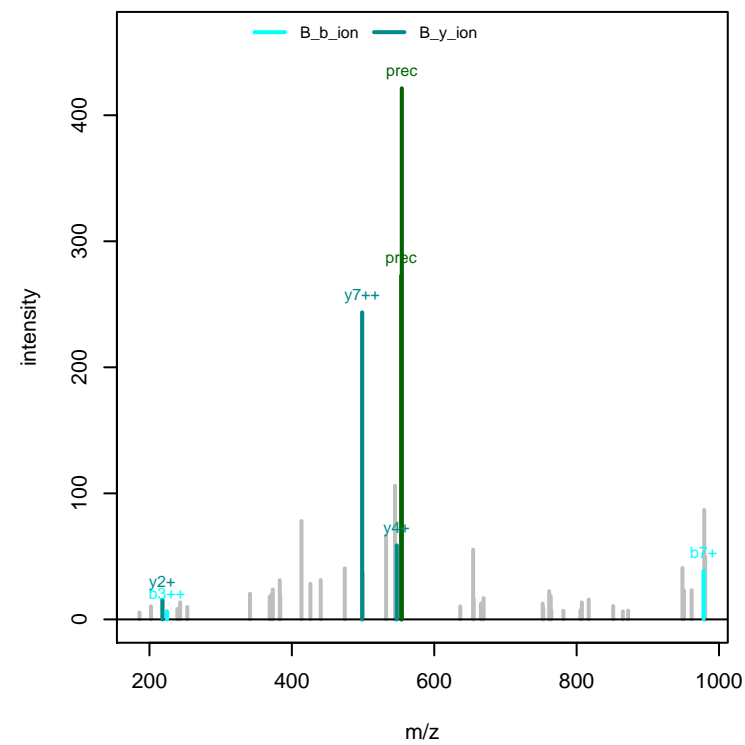

EYREKFAK+XL\_L

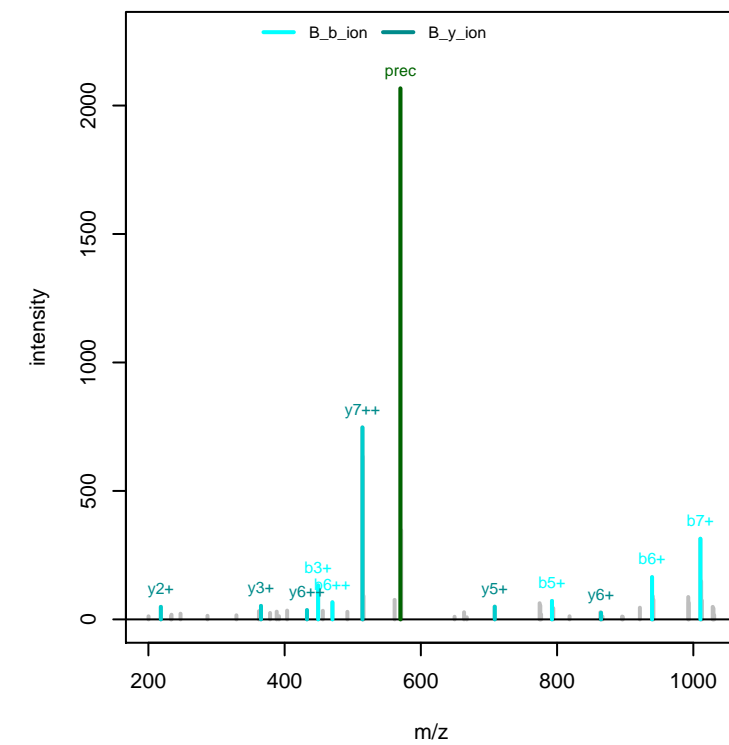

**AKNAGK  
FAALGKGR**

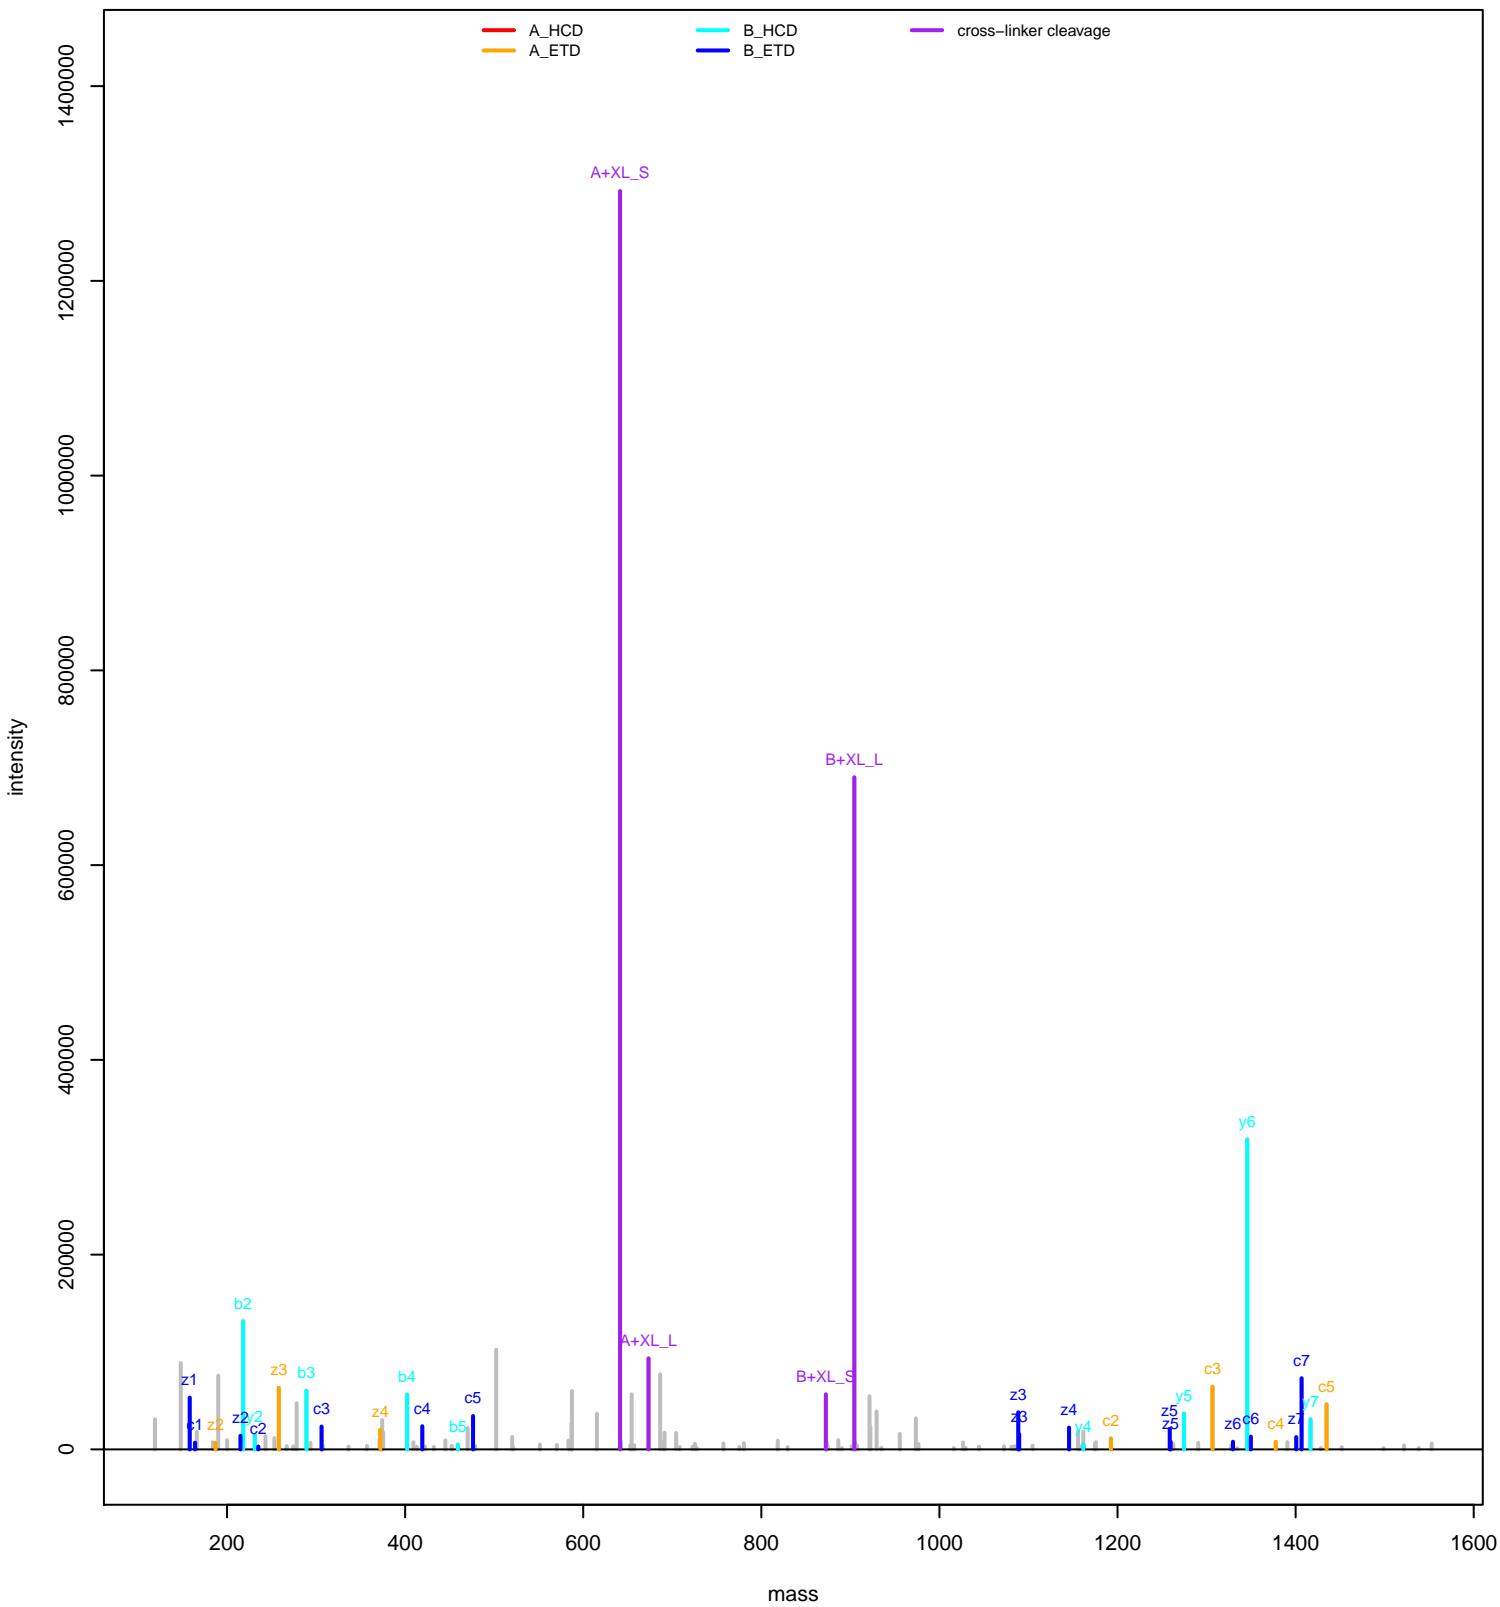

**AKNAGK+XL\_S**

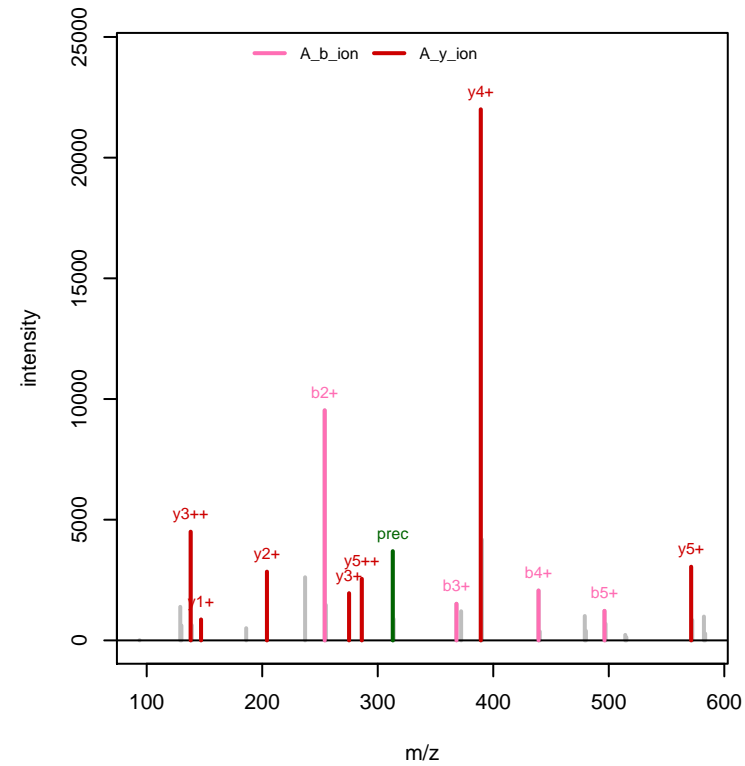

**AKNAGK+XL\_L**

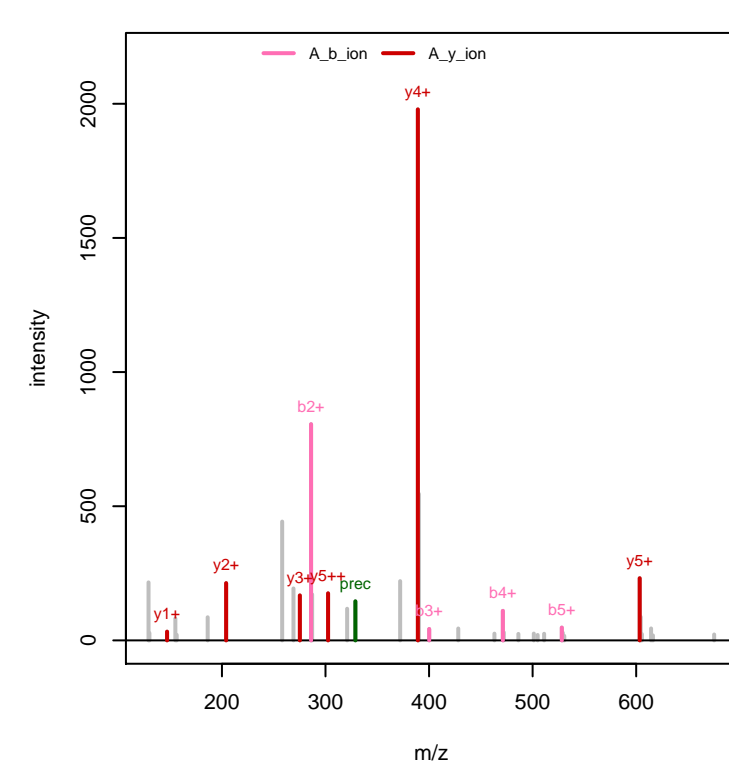

**FAALGKGR+XL\_S**

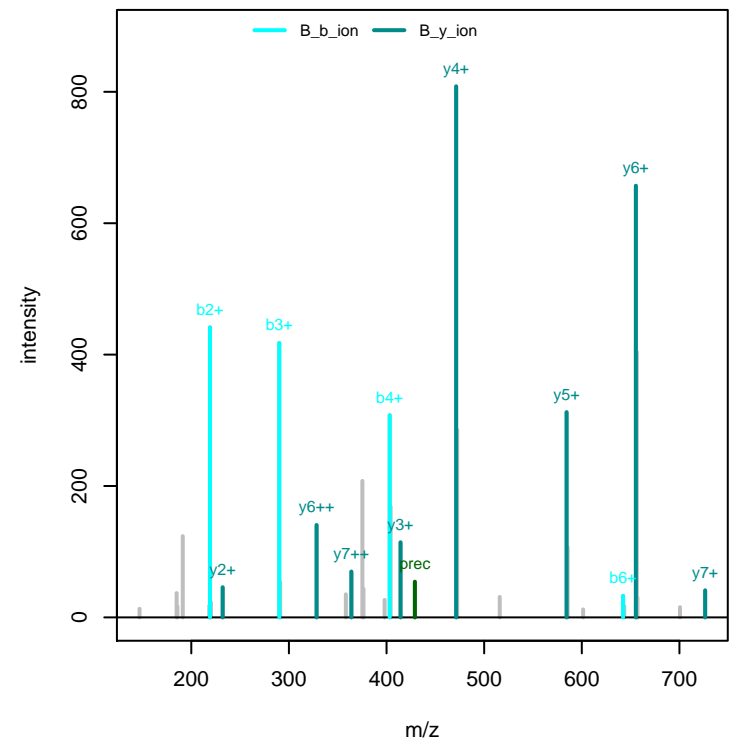

**FAALGKGR+XL\_L**

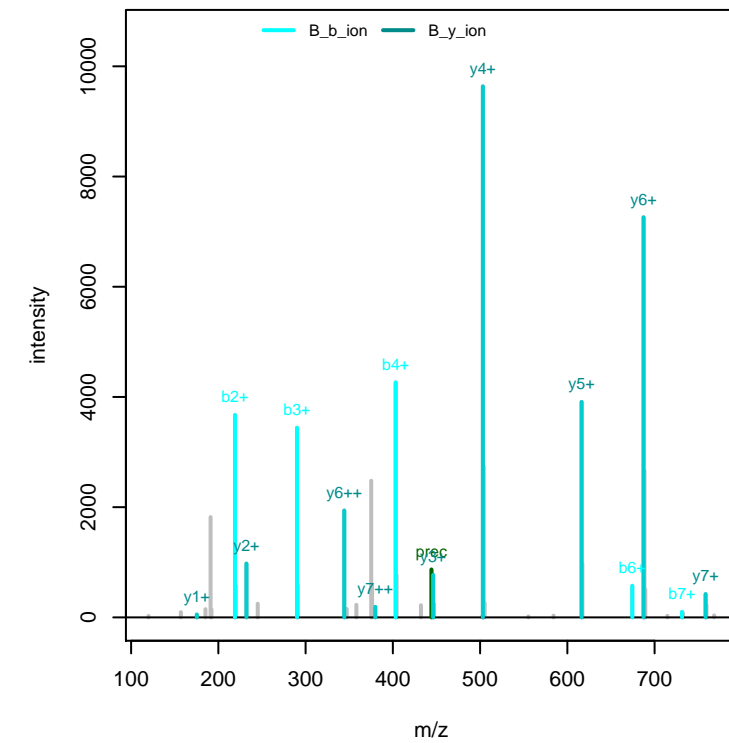

### TAKDGATSK HVIDKAIDK

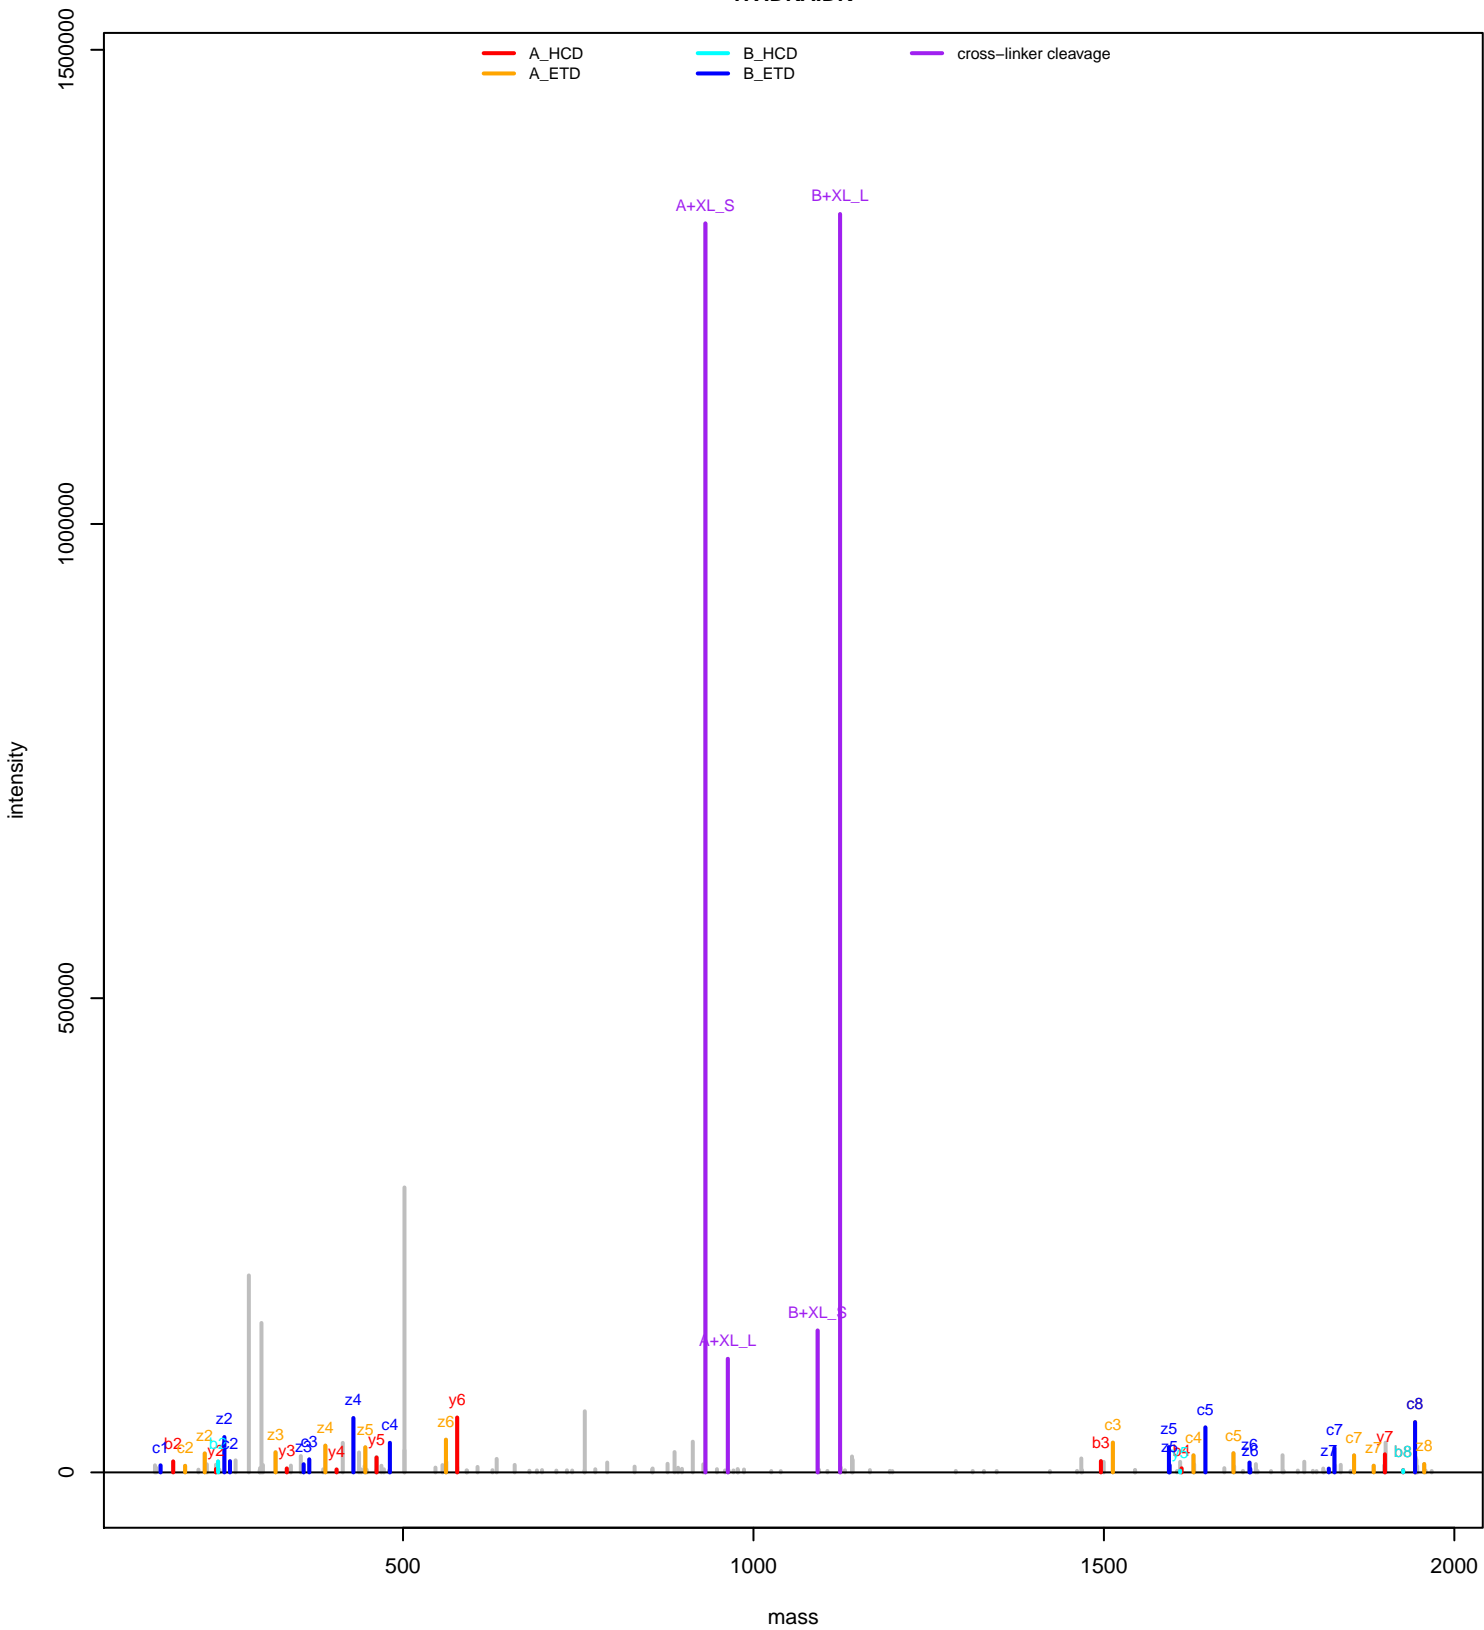

### TAKDGATSK+XL\_S

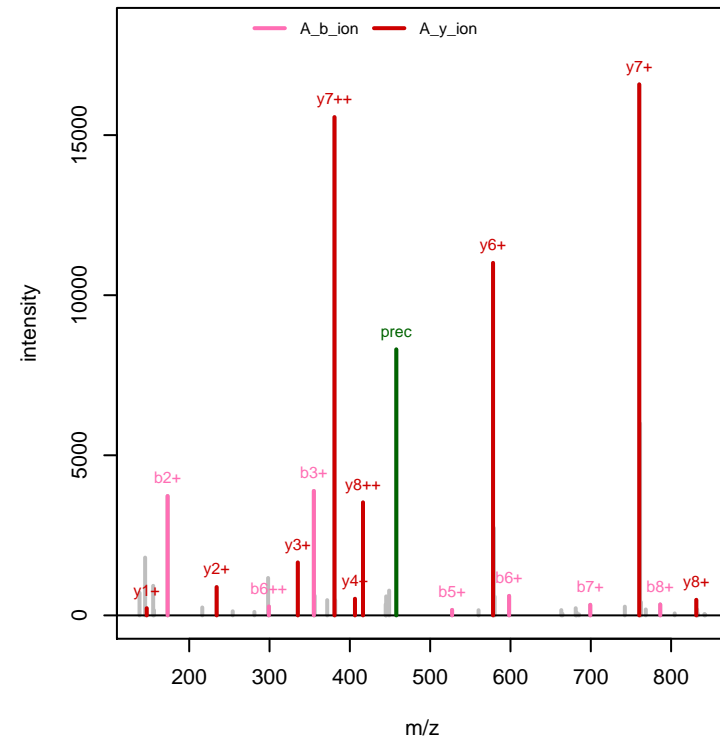

### TAKDGATSK+XL\_L

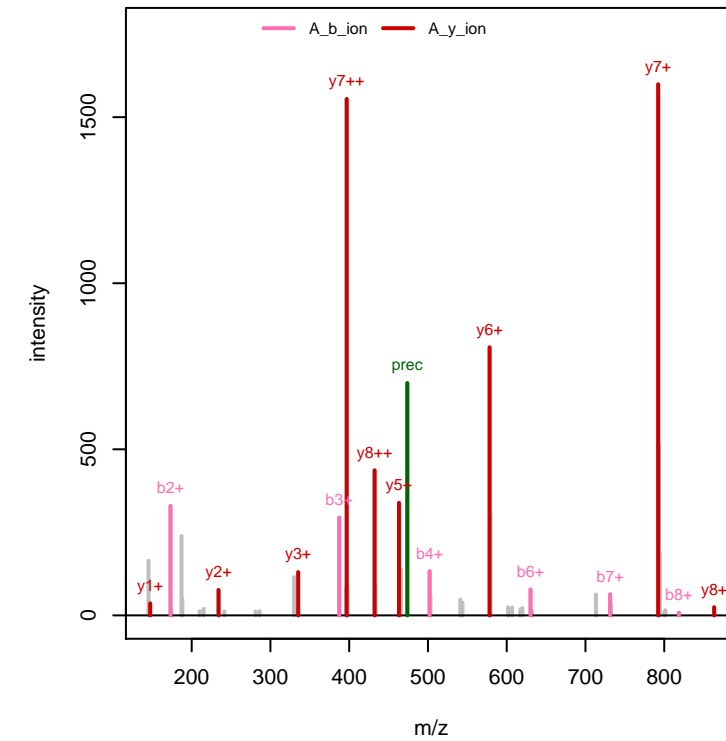

### HVIDKAIDK+XL\_S

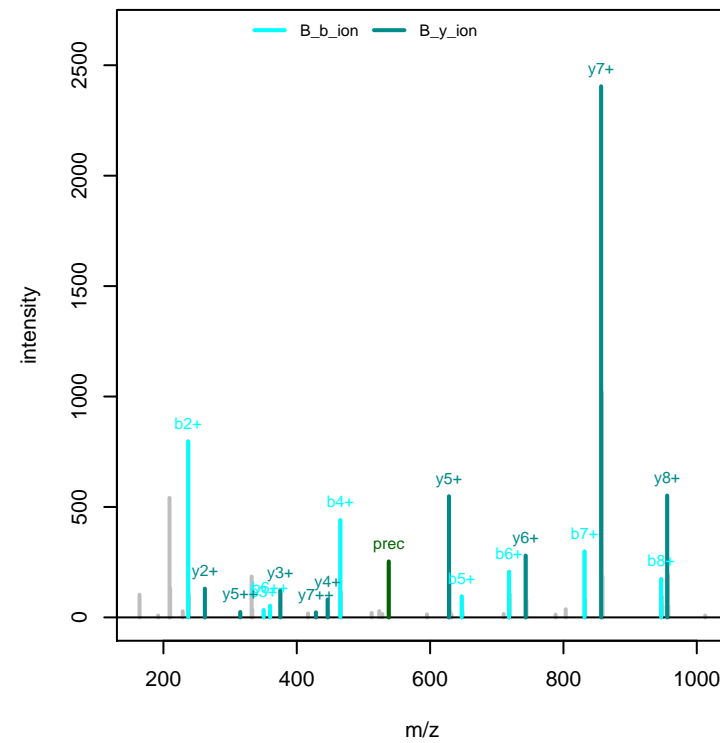

### HVIDKAIDK+XL\_L

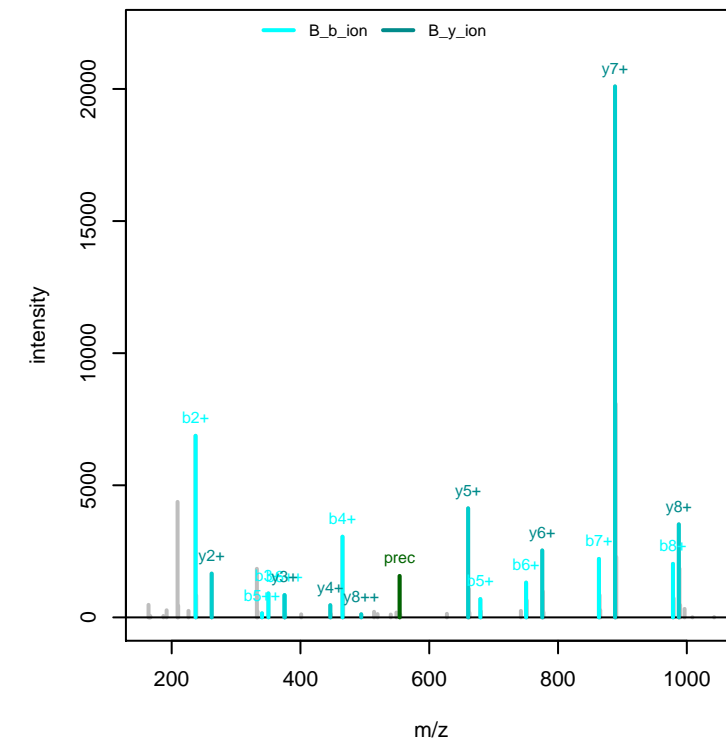



**SGTKAK**  
**AQRPAKYSYVDENGETK**

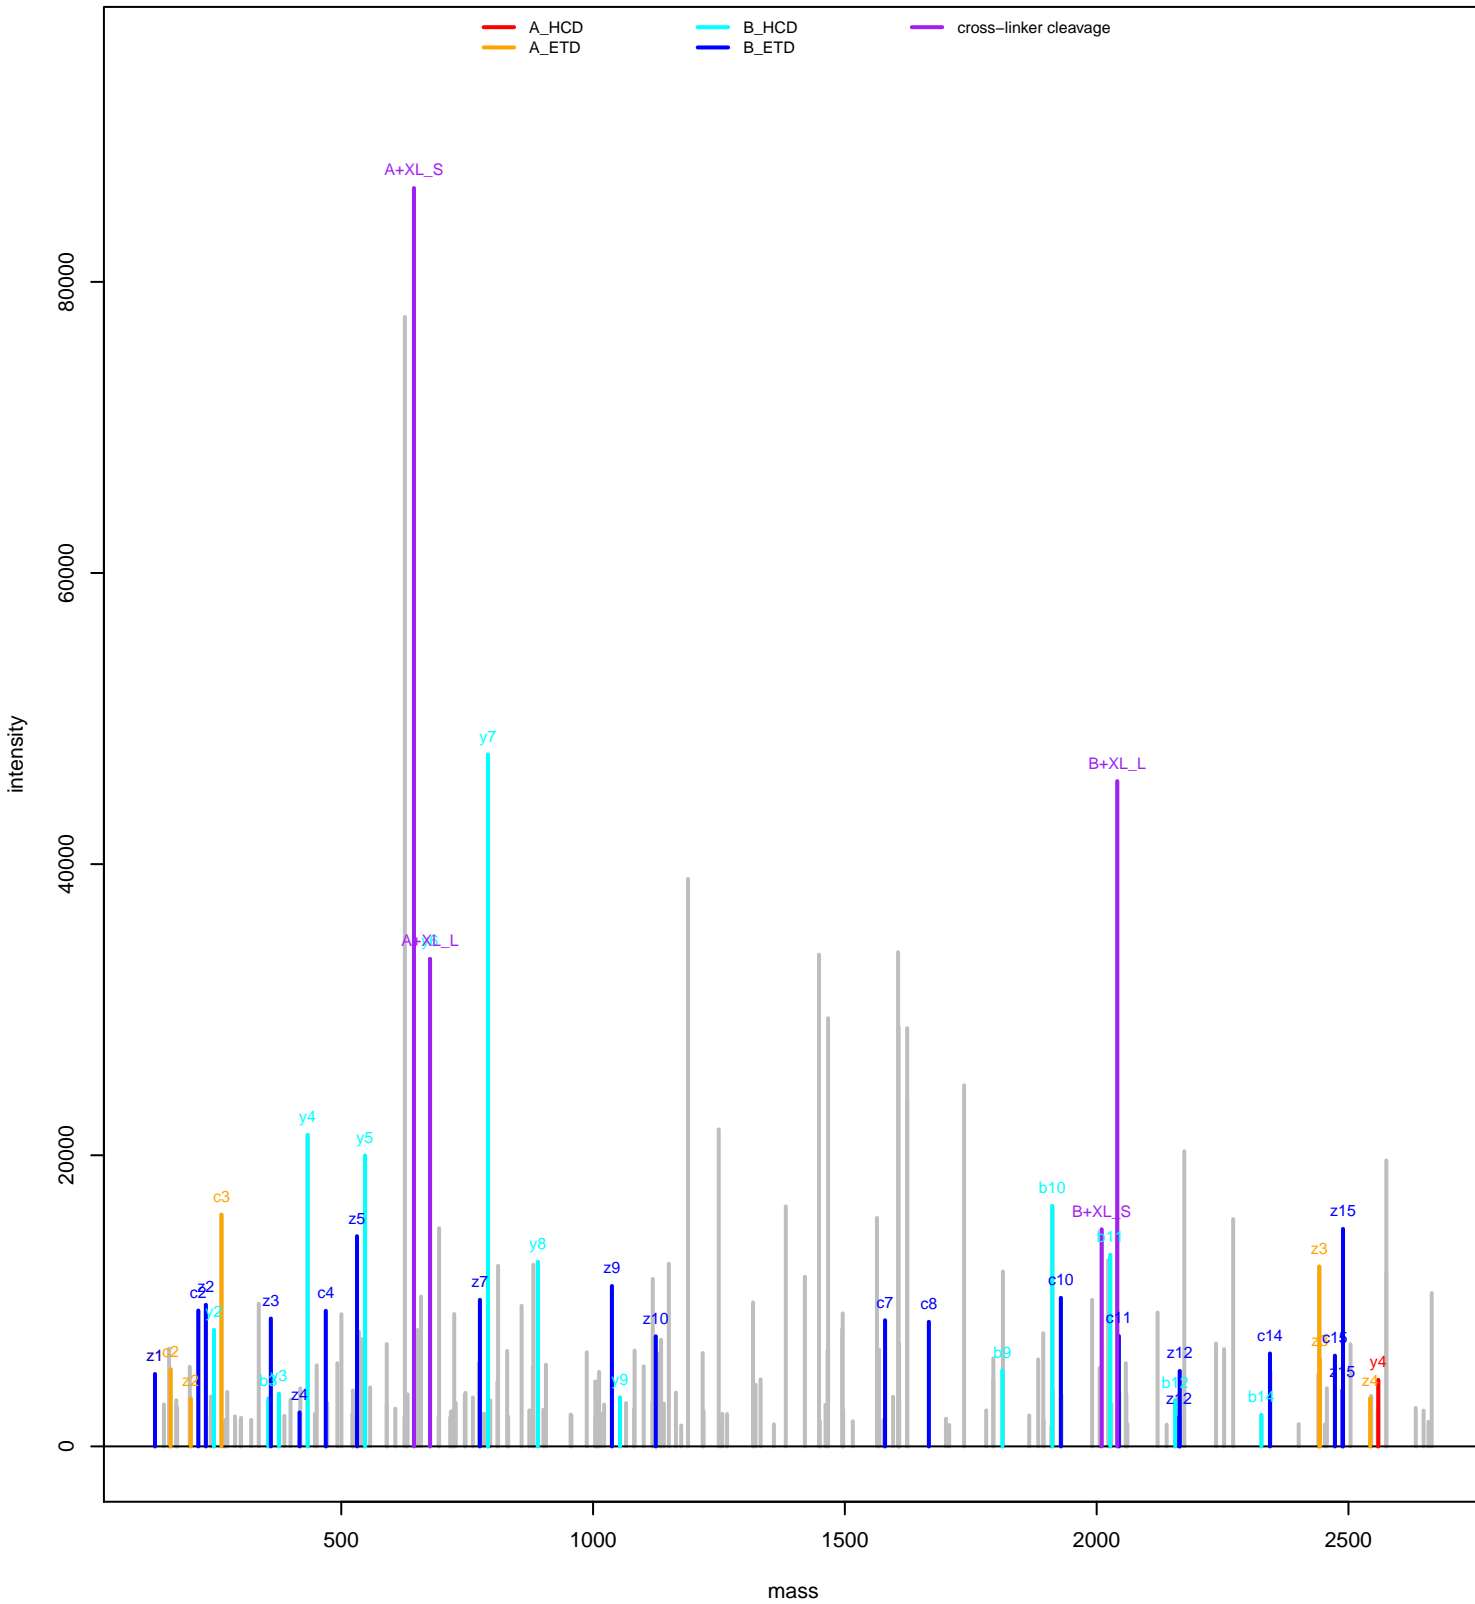

**SGTKAK+XL\_S**

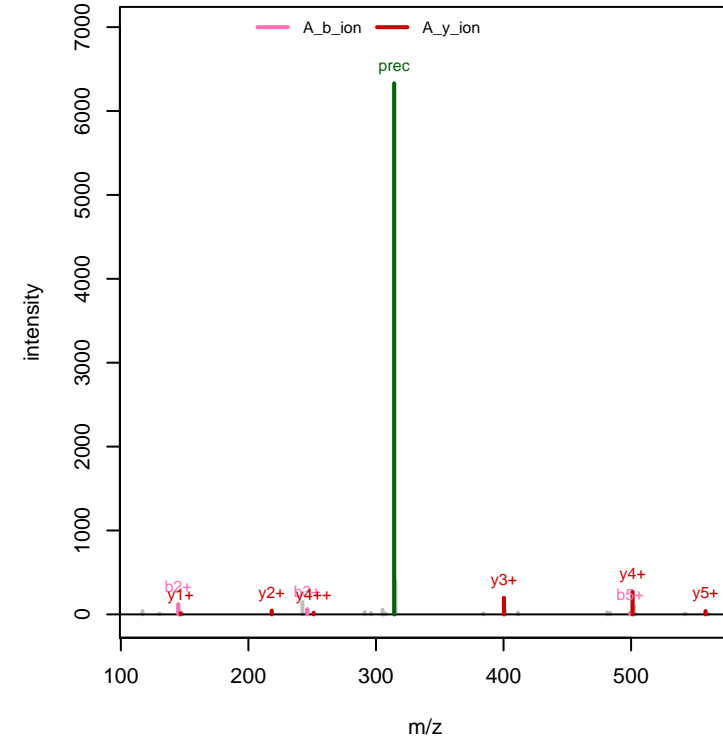

**SGTKAK+XL\_L**

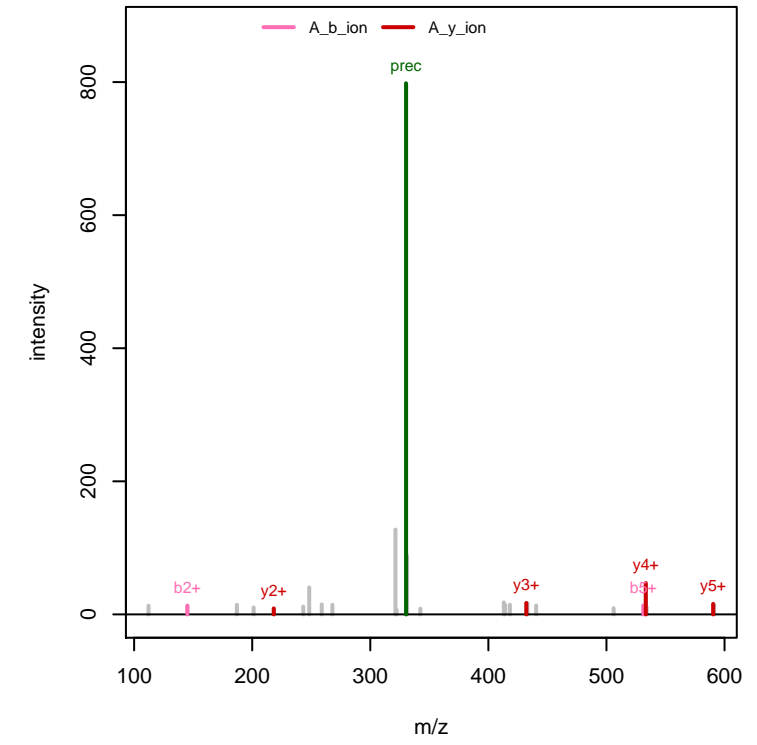

**AQRPAKYSYVDENGETK+XL\_S**

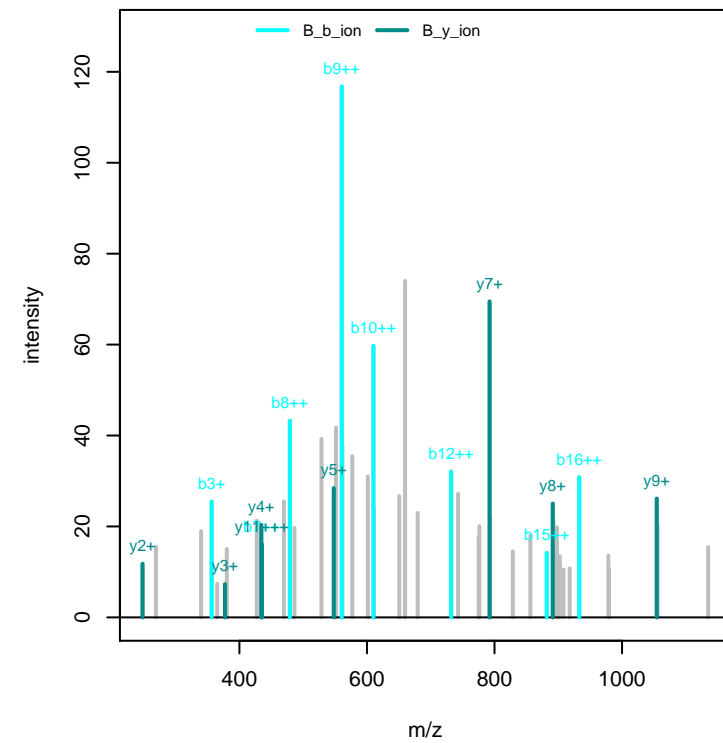

**AQRPAKYSYVDENGETK+XL\_L**

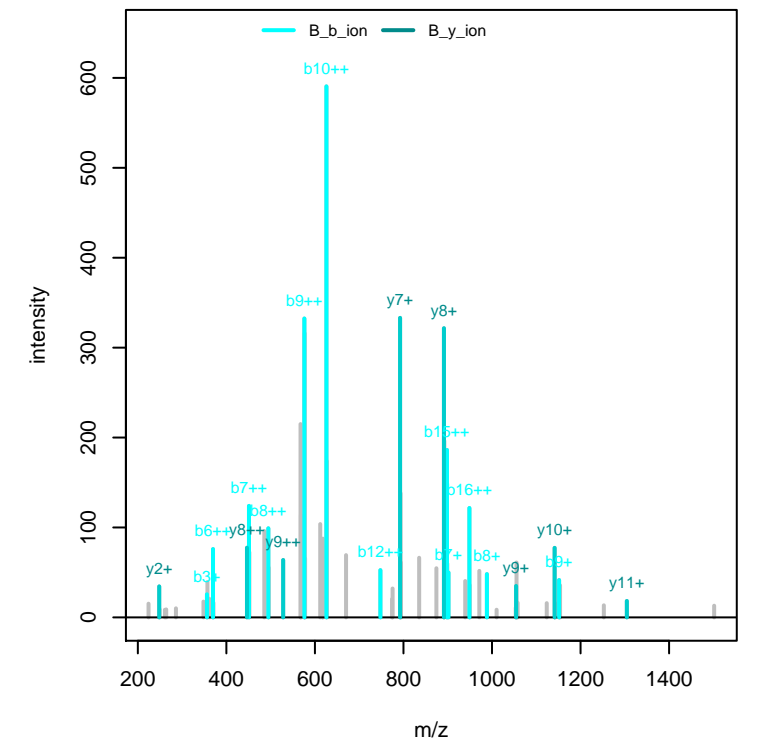

NAQAEKAR  
REQEAAELKR

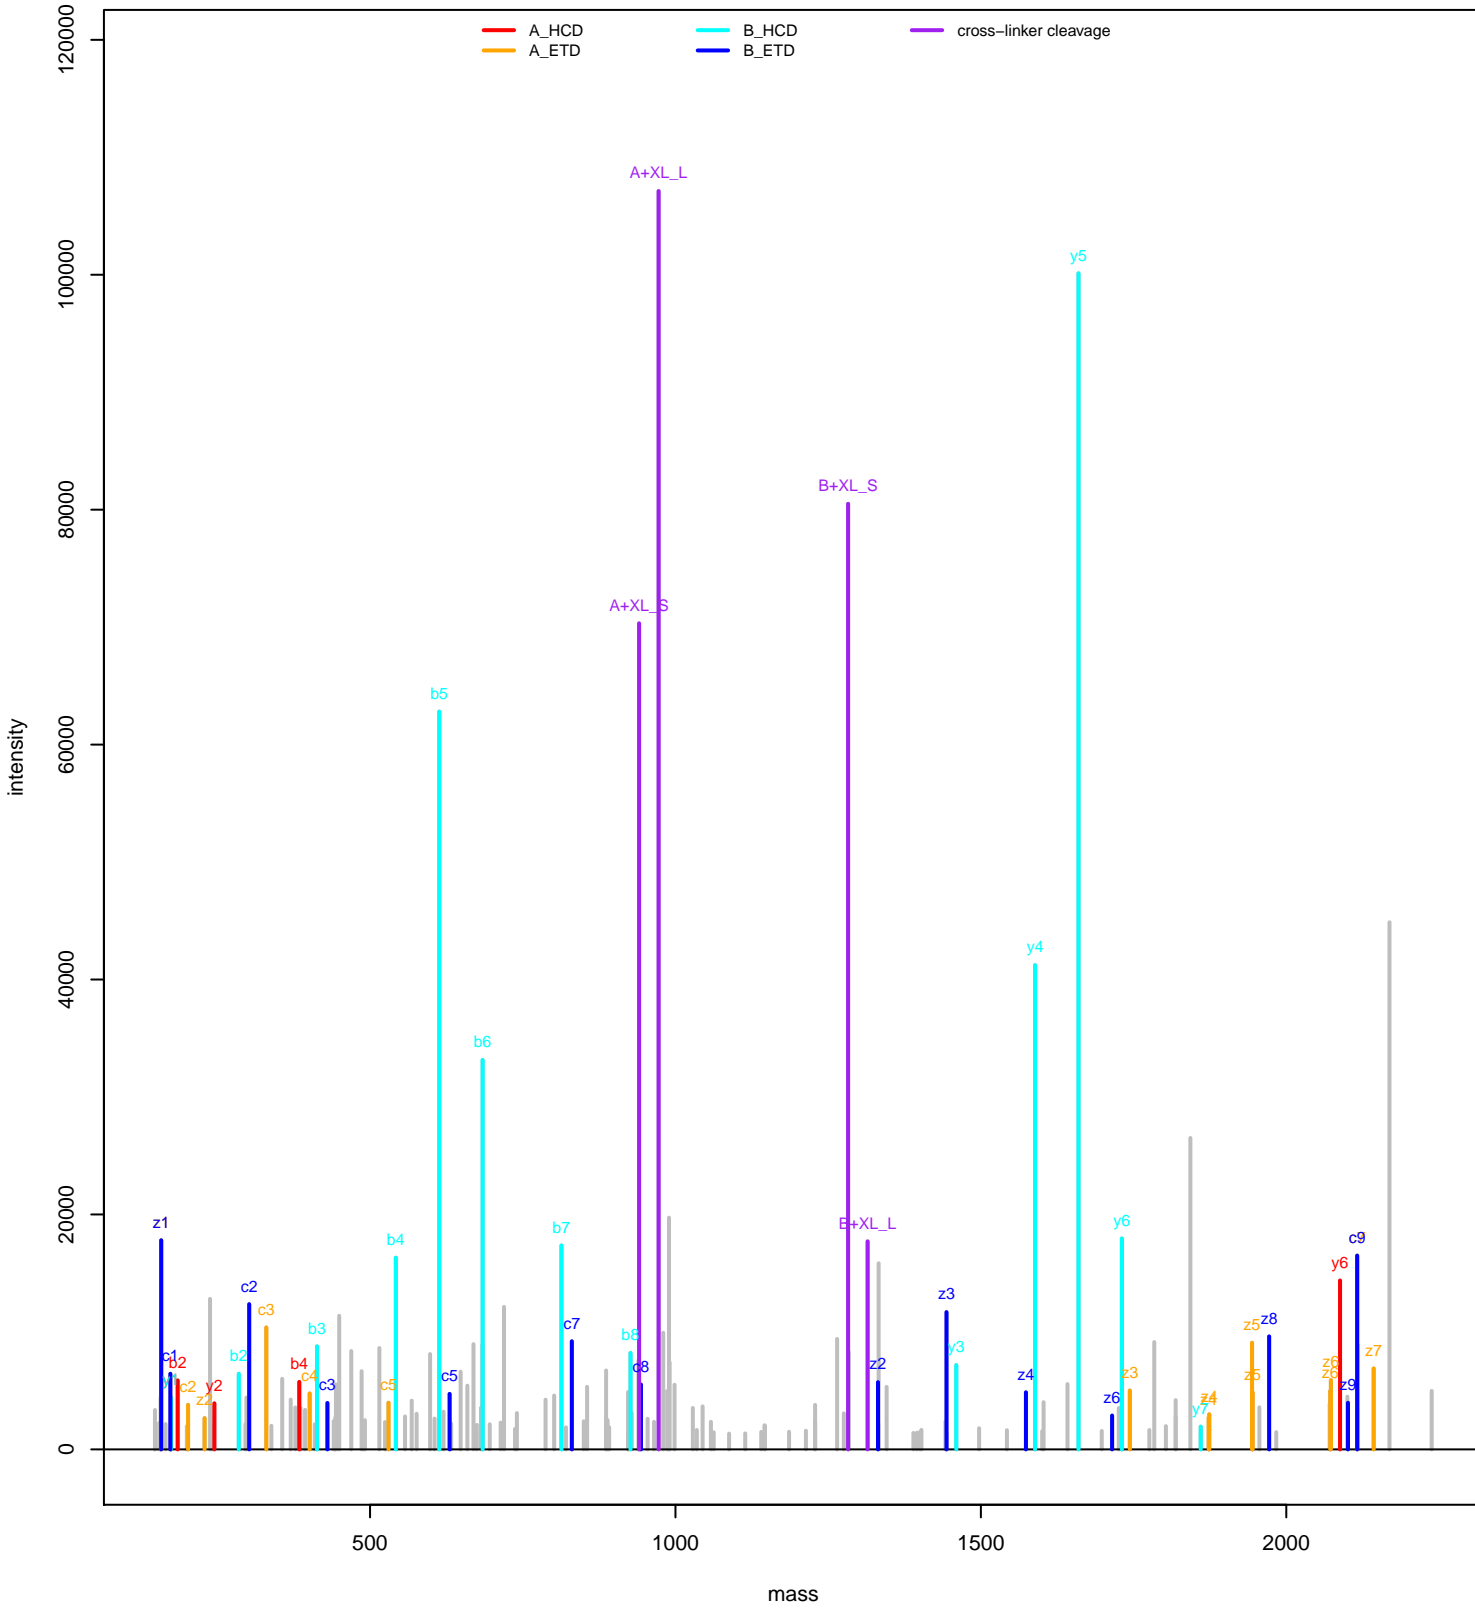

NAQAEKAR+XL\_S

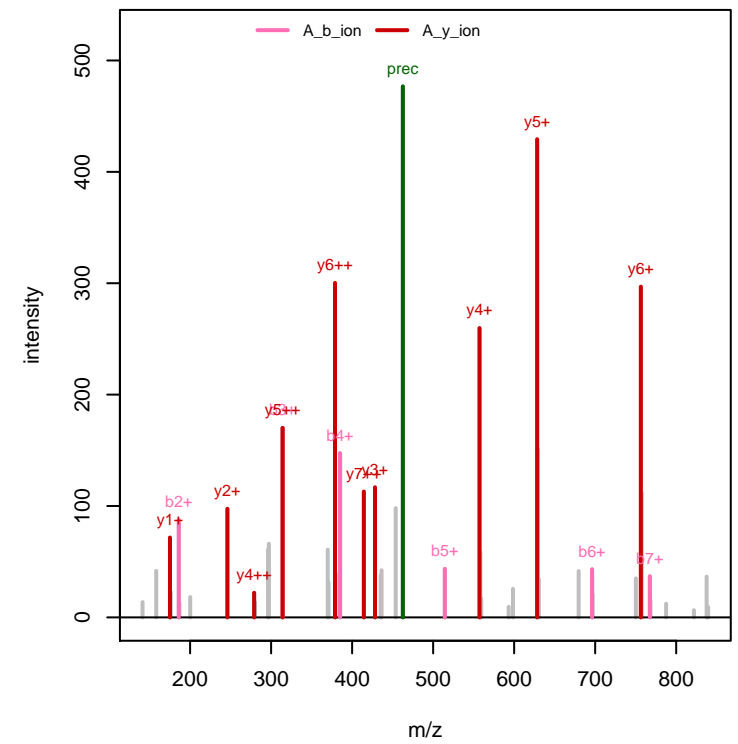

NAQAEKAR+XL\_L

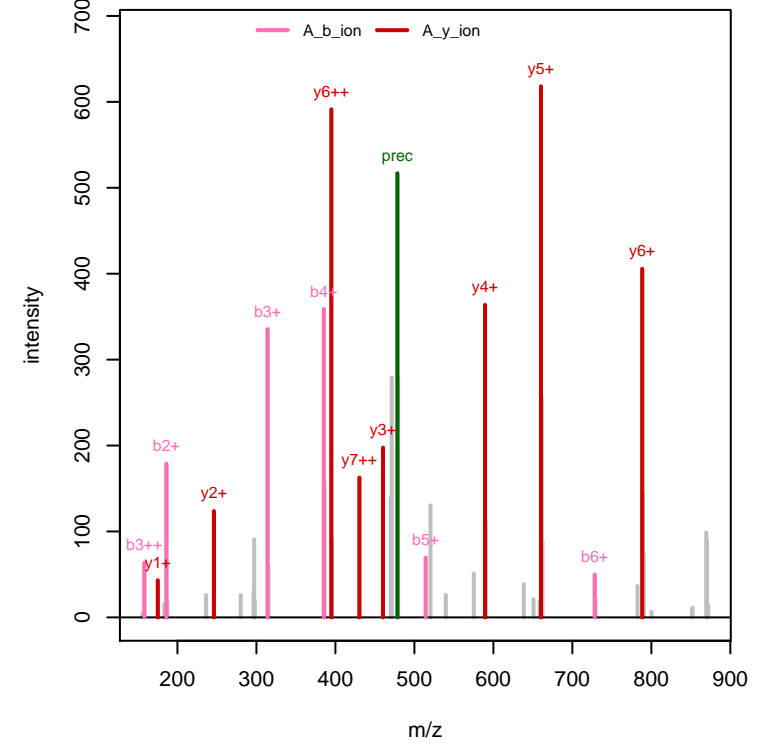

REQEAAELKR+XL\_S

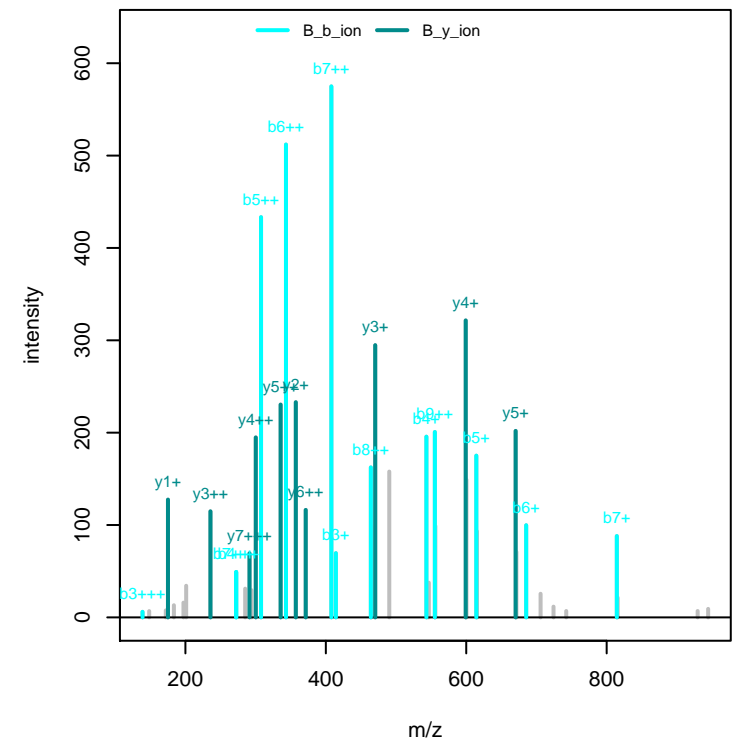

REQEAAELKR+XL\_L

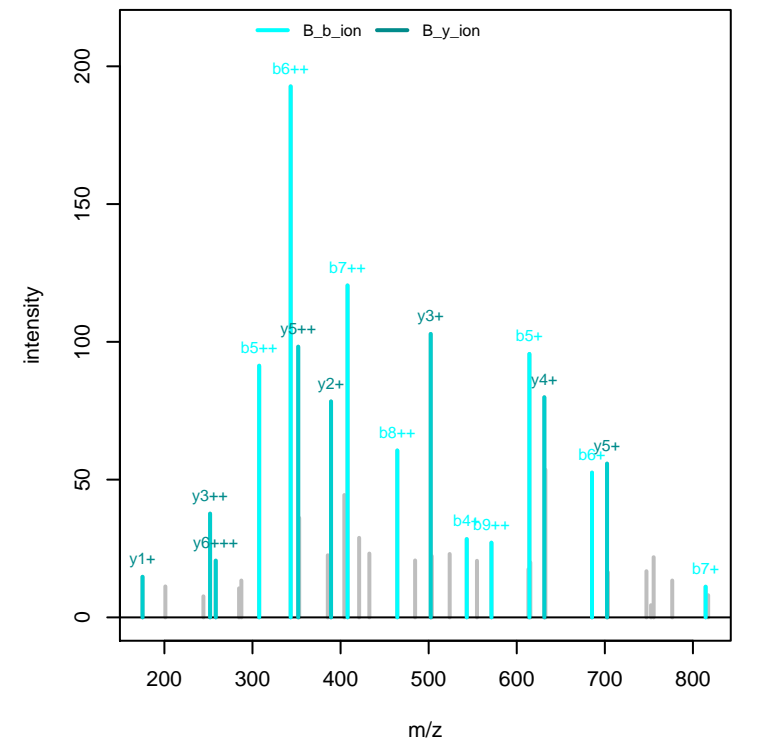

DAADNEAKGK  
GTLIDGKEFDNSYTR

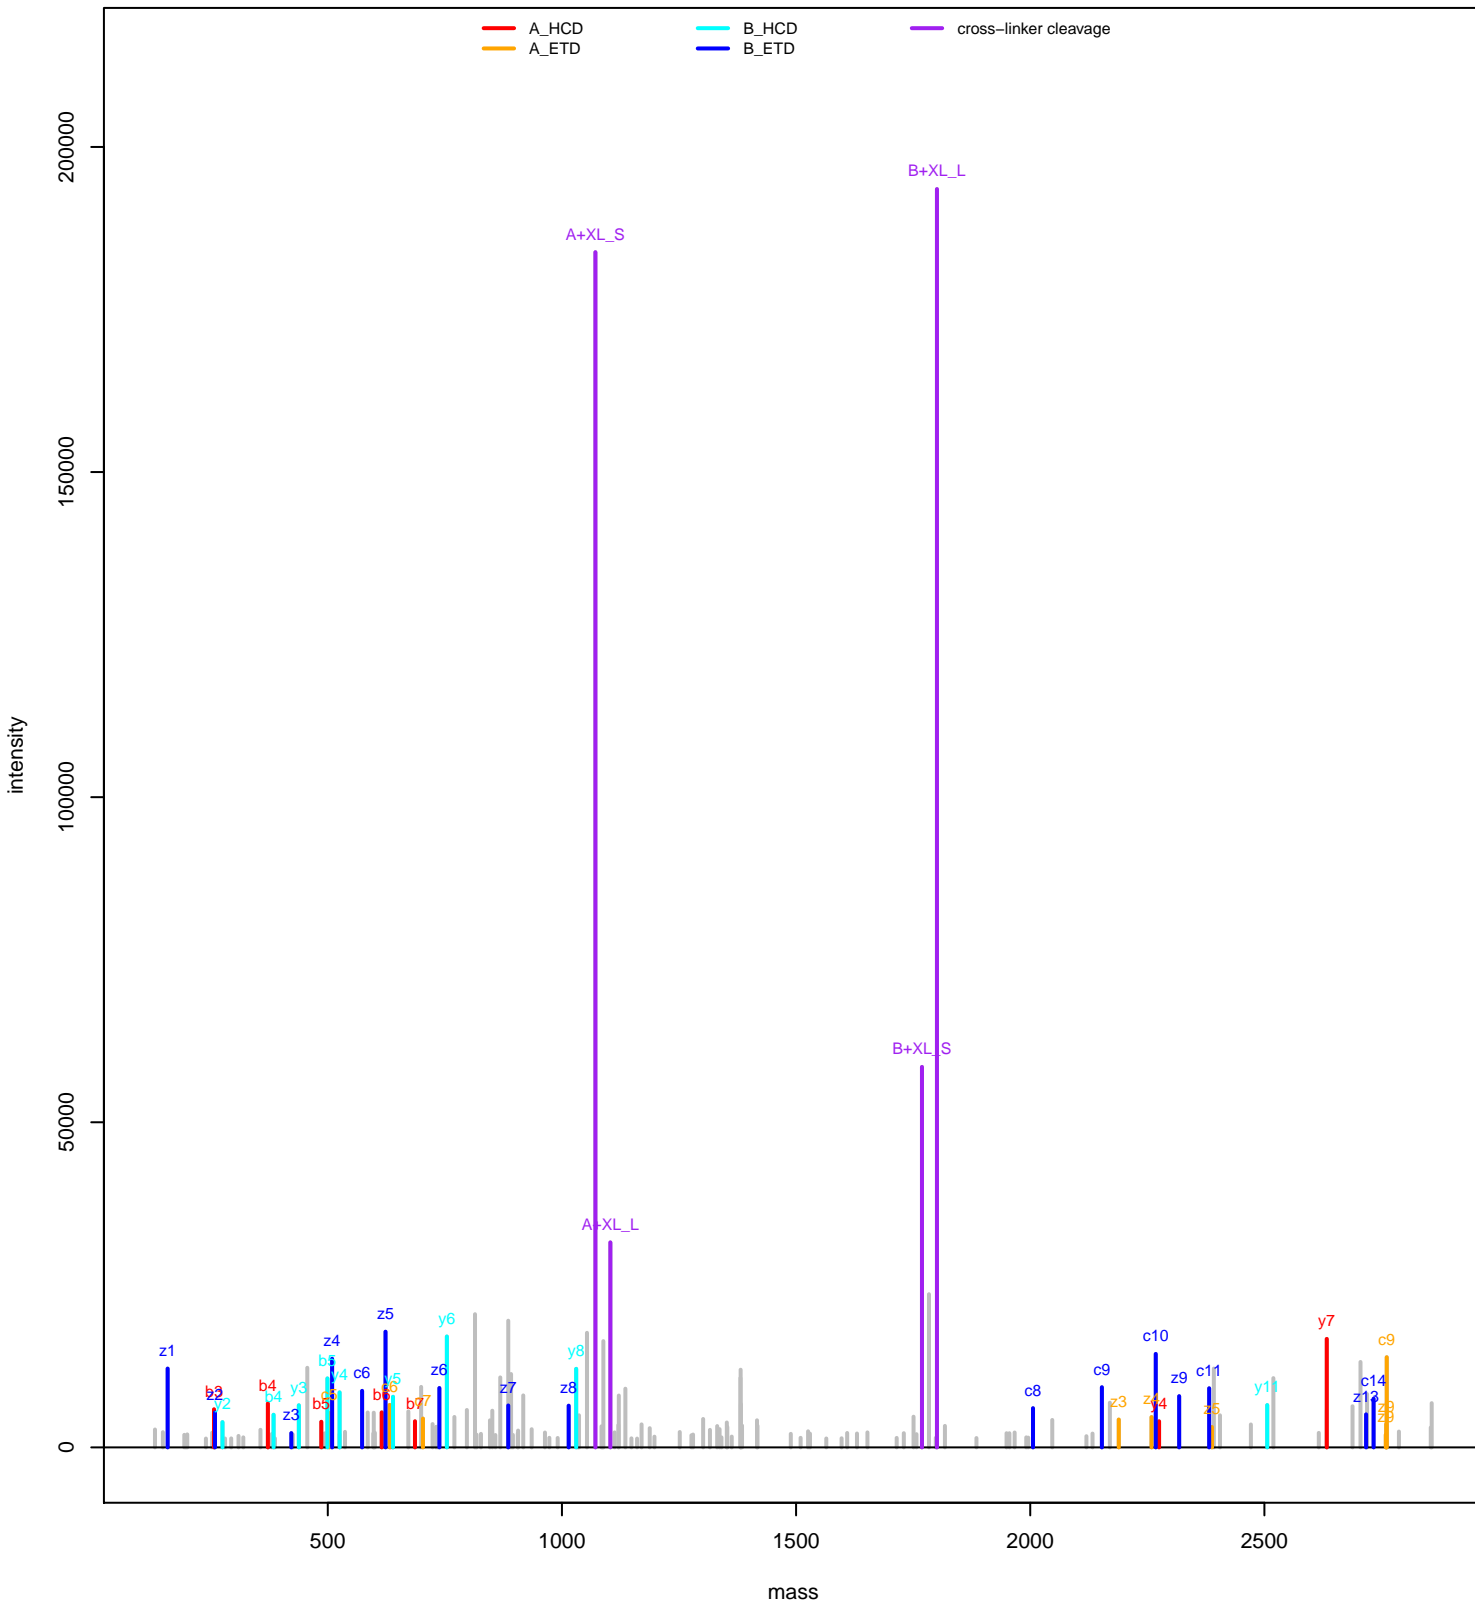

DAADNEAKGK+XL\_S

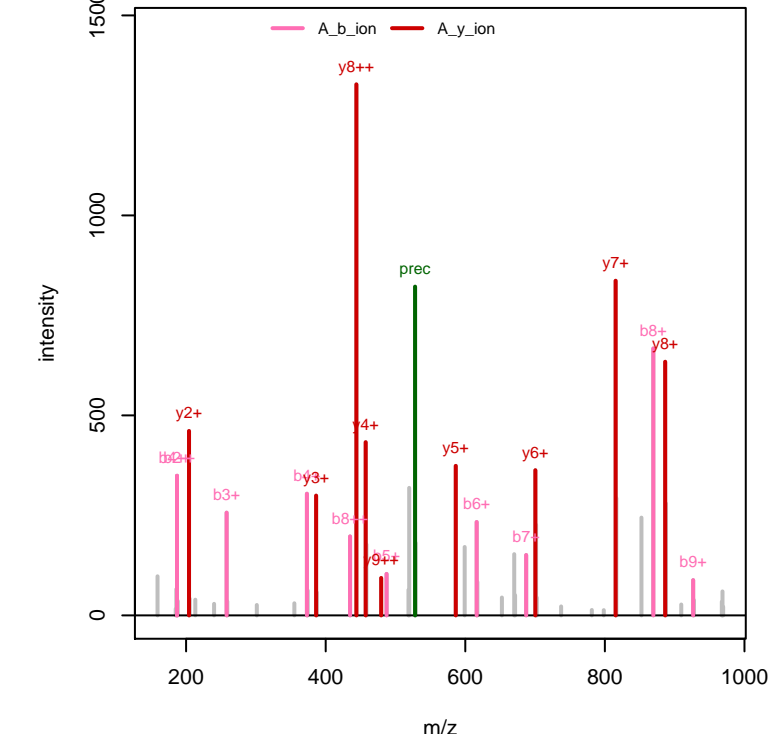

DAADNEAKGK+XL\_L

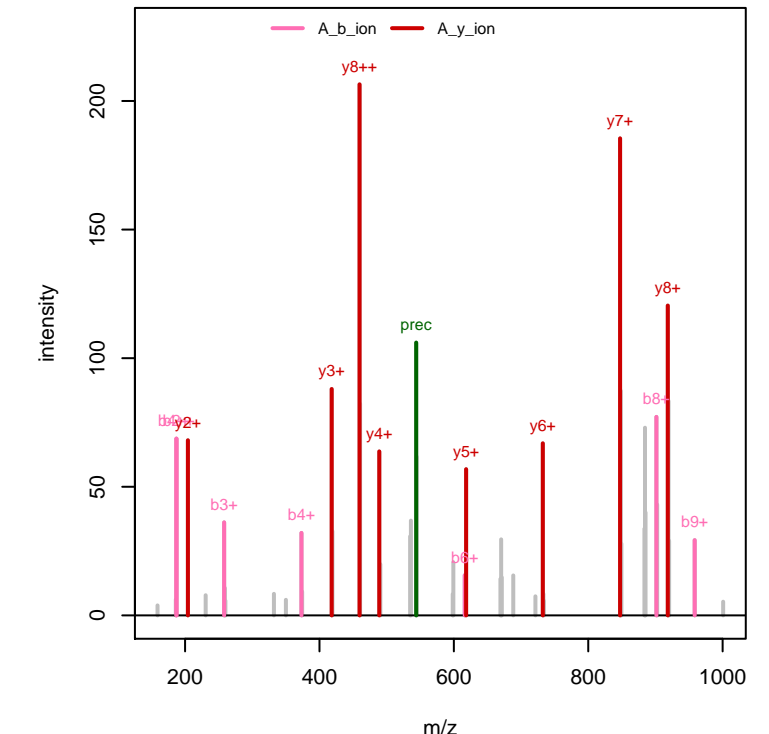

GTLIDGKEFDNSYTR+XL\_S

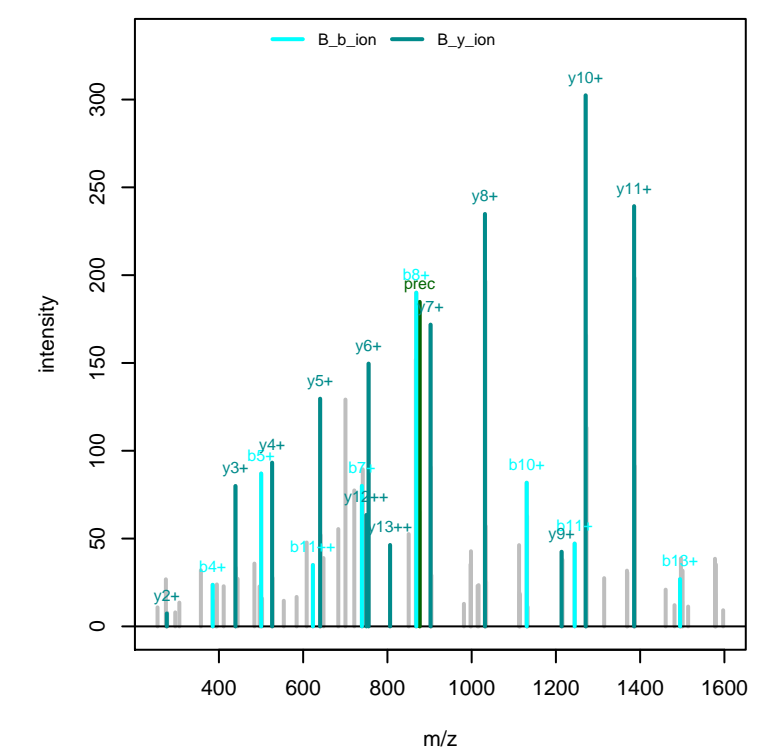

GTLIDGKEFDNSYTR+XL\_L

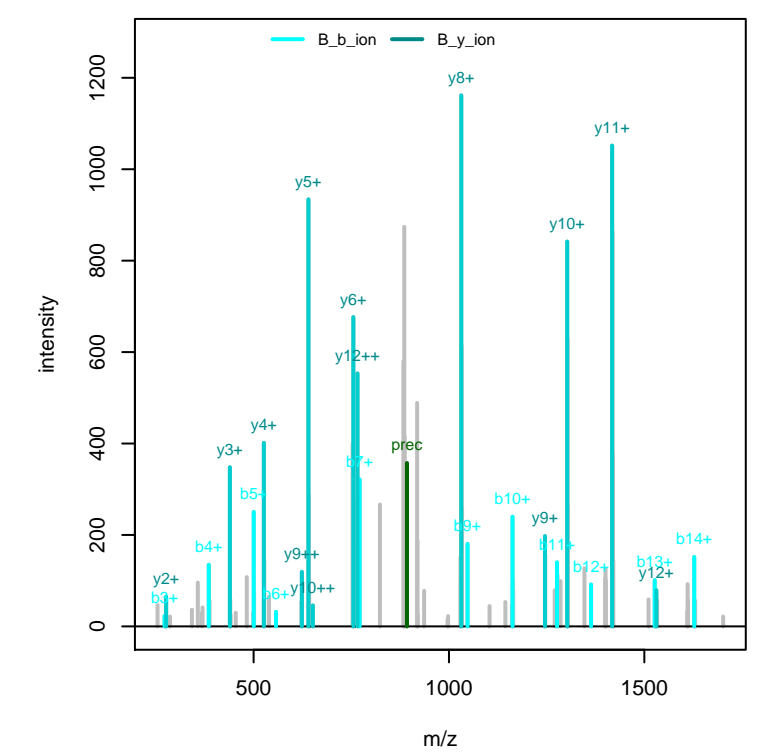

NEANNGLKNTR  
TFDDKAPETVK

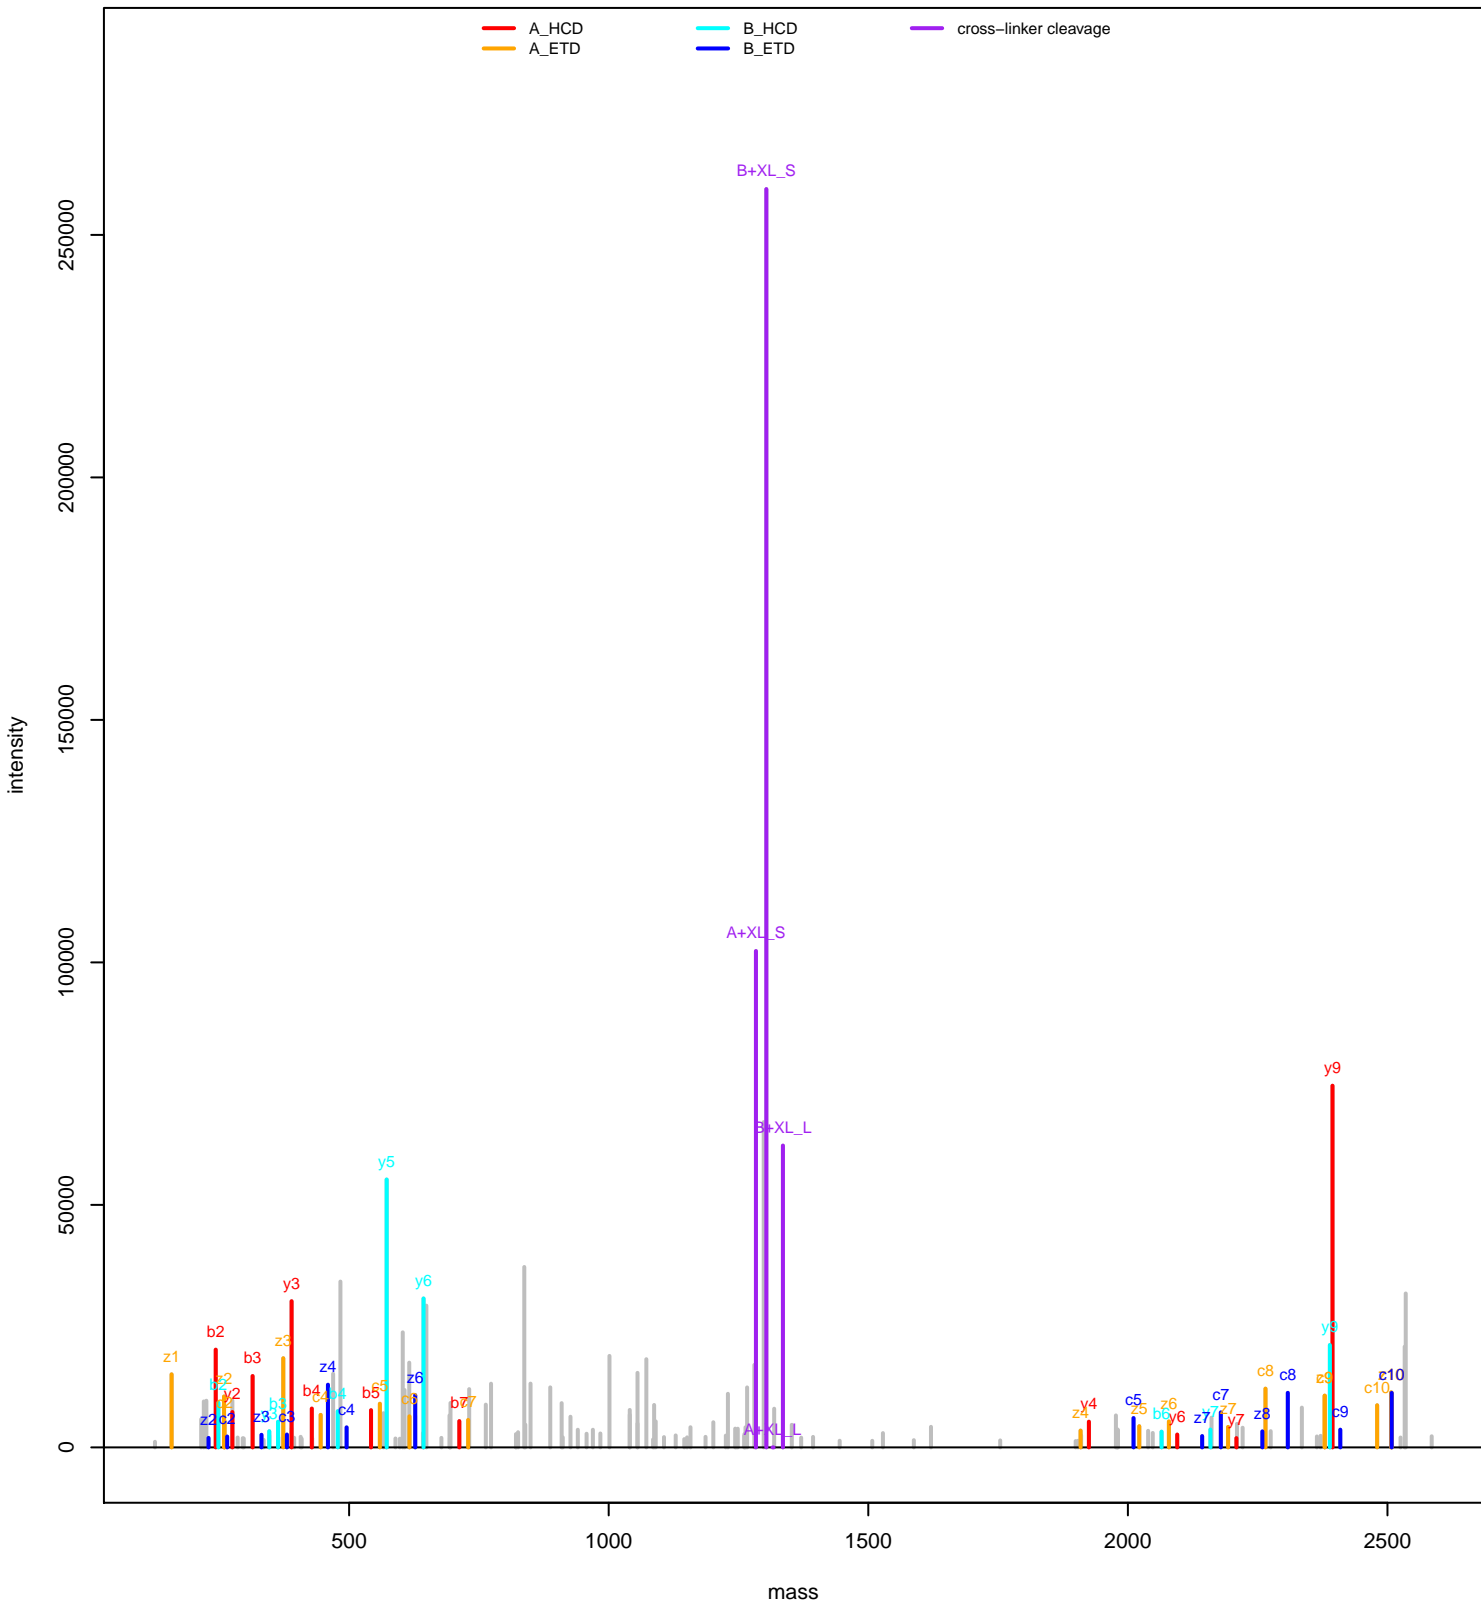

NEANNGLKNTR+XL\_S

TFDDKAPETVK+XL\_S

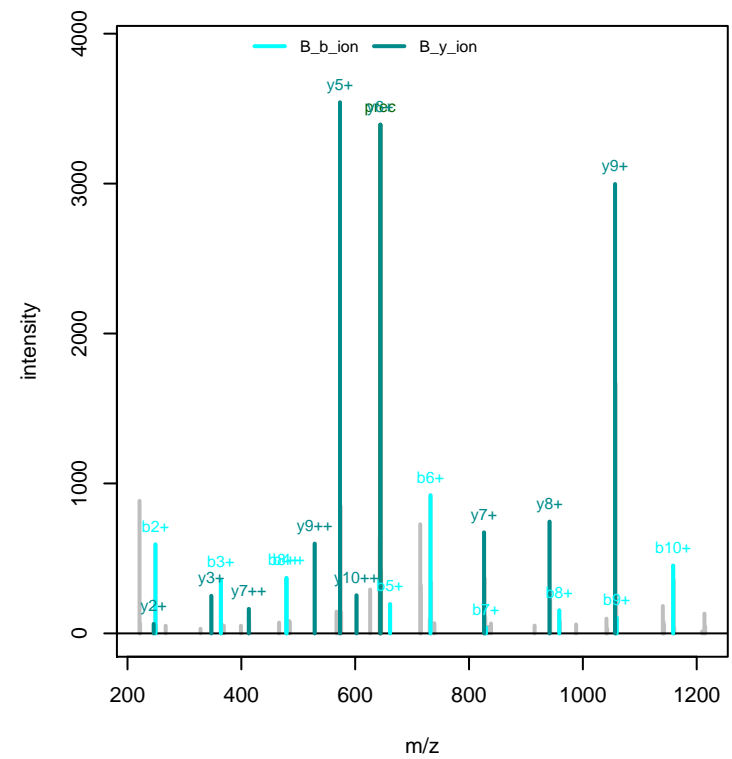

NEANNGLKNTR+XL\_L

TFDDKAPETVK+XL\_L

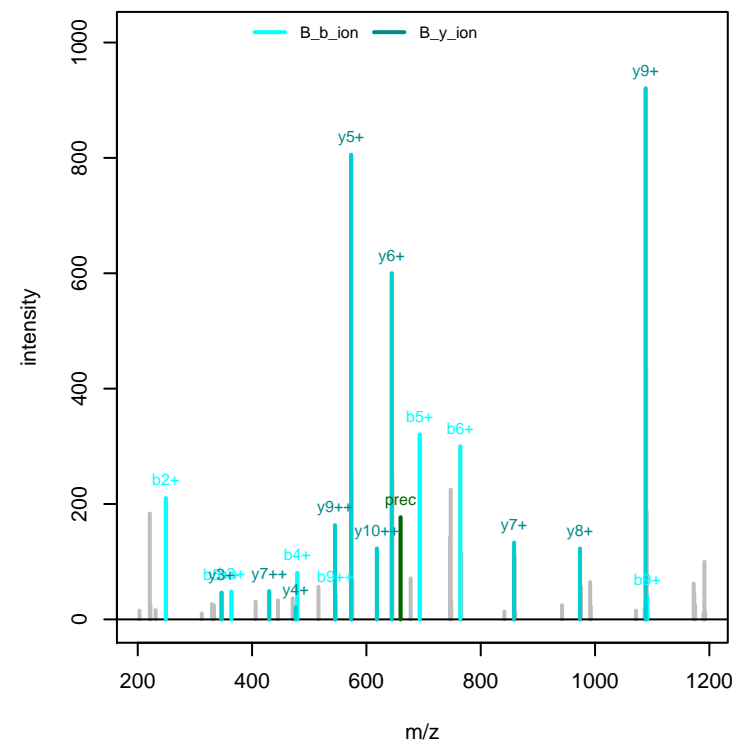

VKAGQR  
GGKLEAGNVK

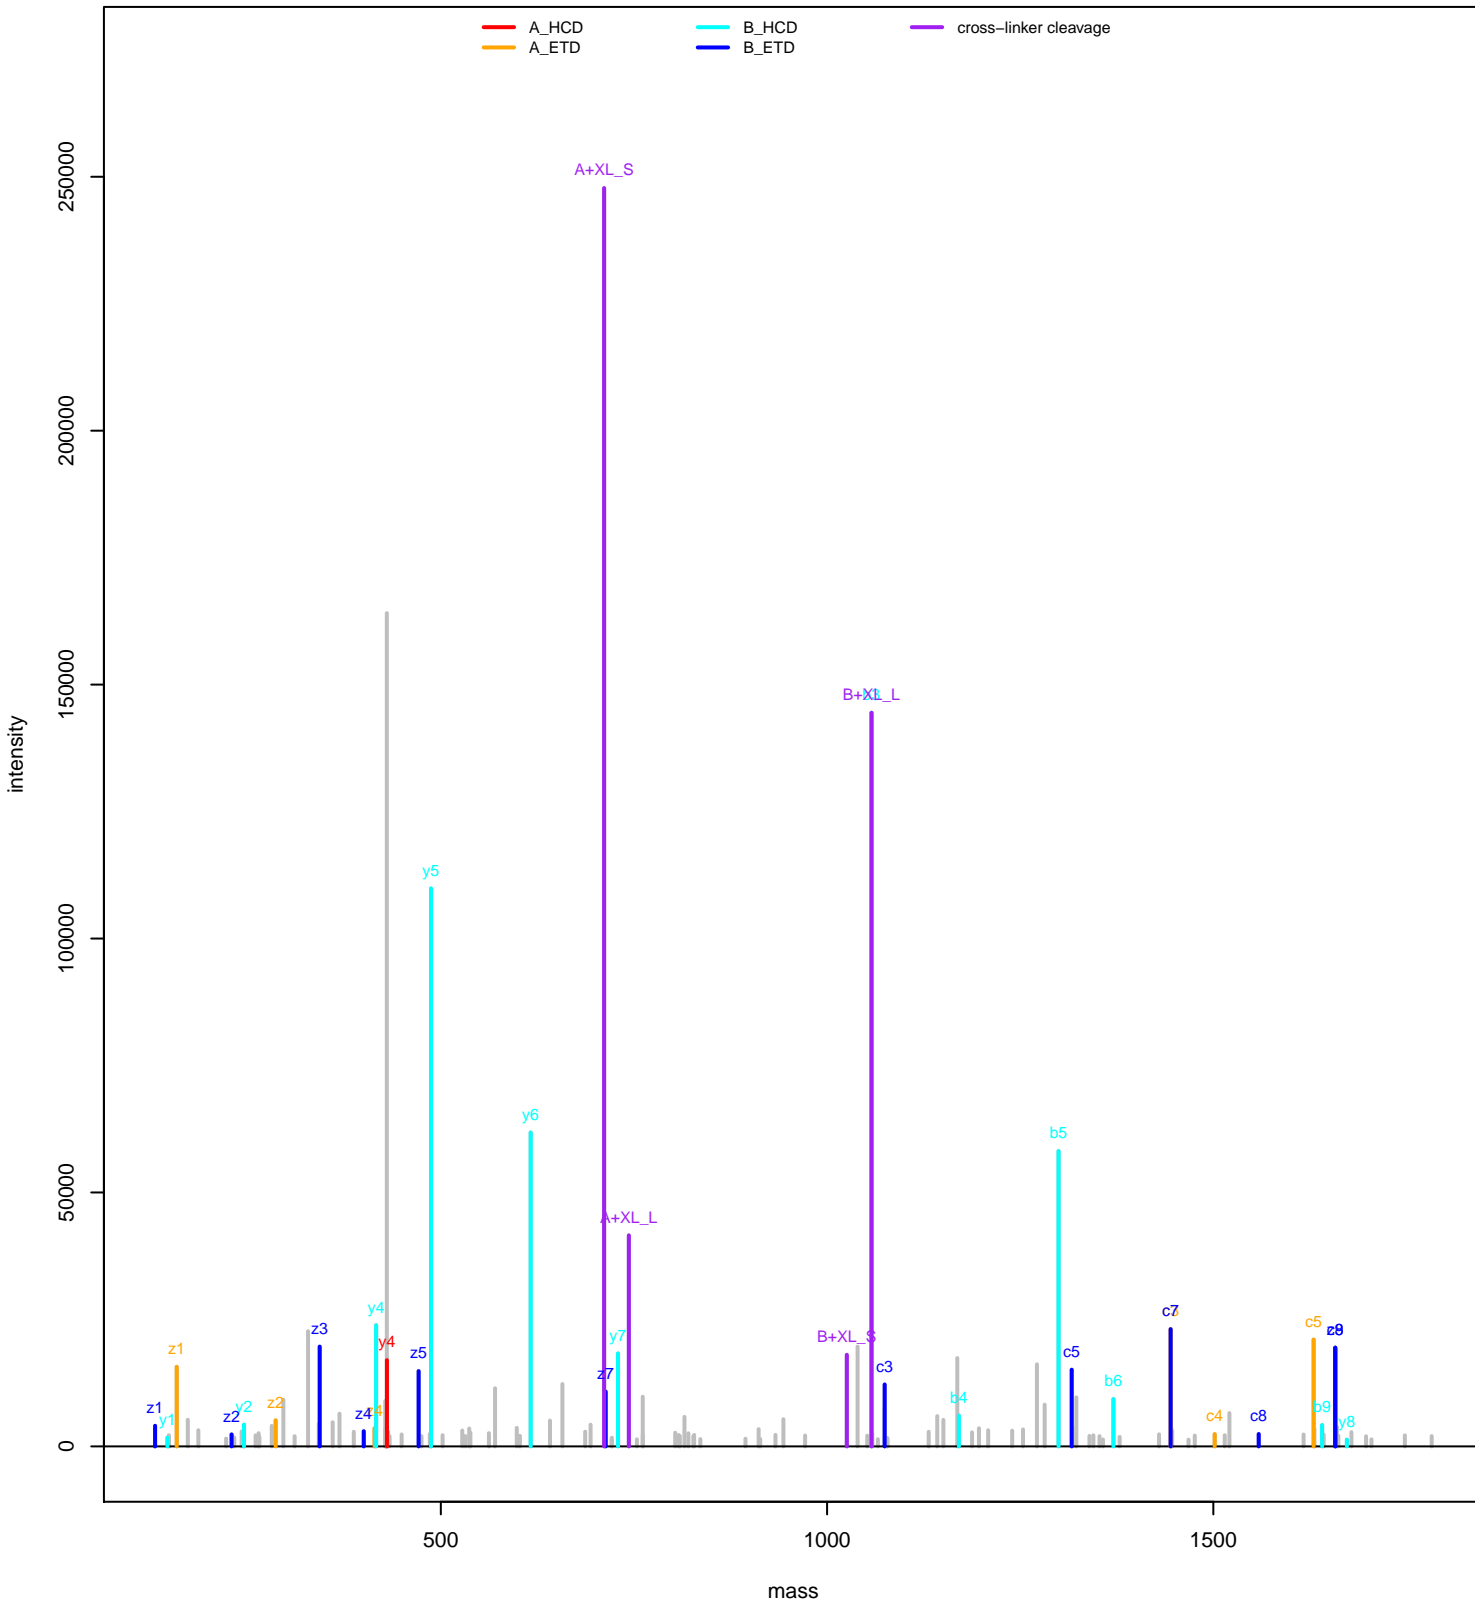

VKAGQR+XL\_S

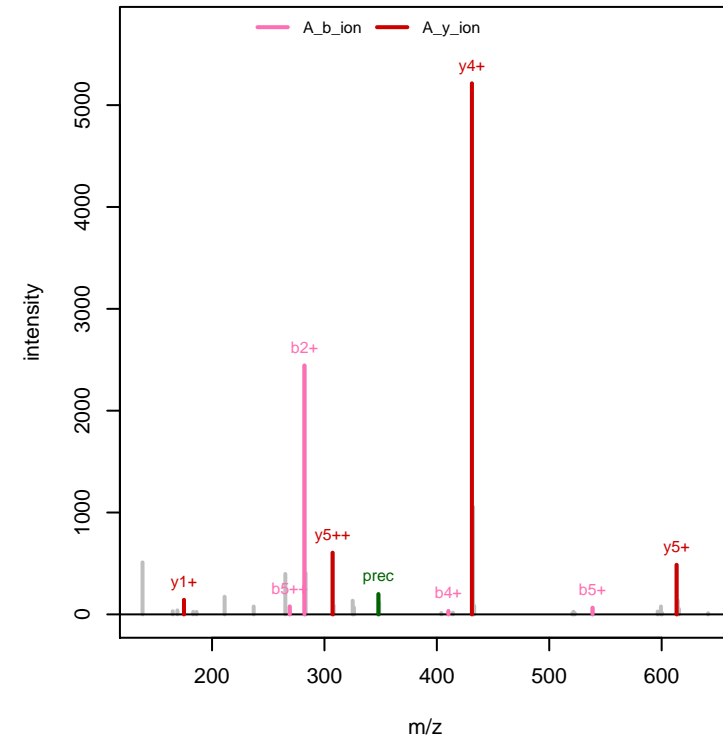

VKAGQR+XL\_L

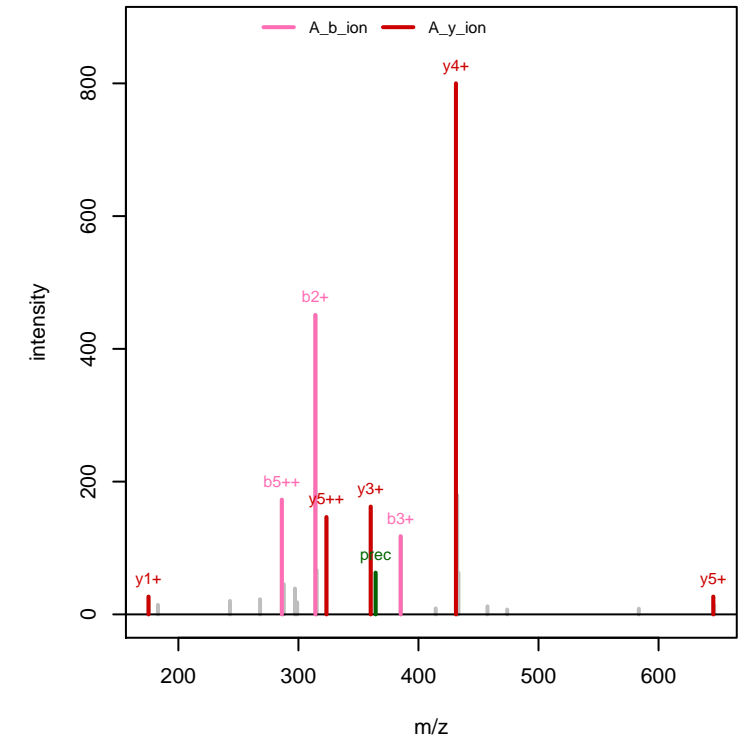

GGKLEAGNVK+XL\_S

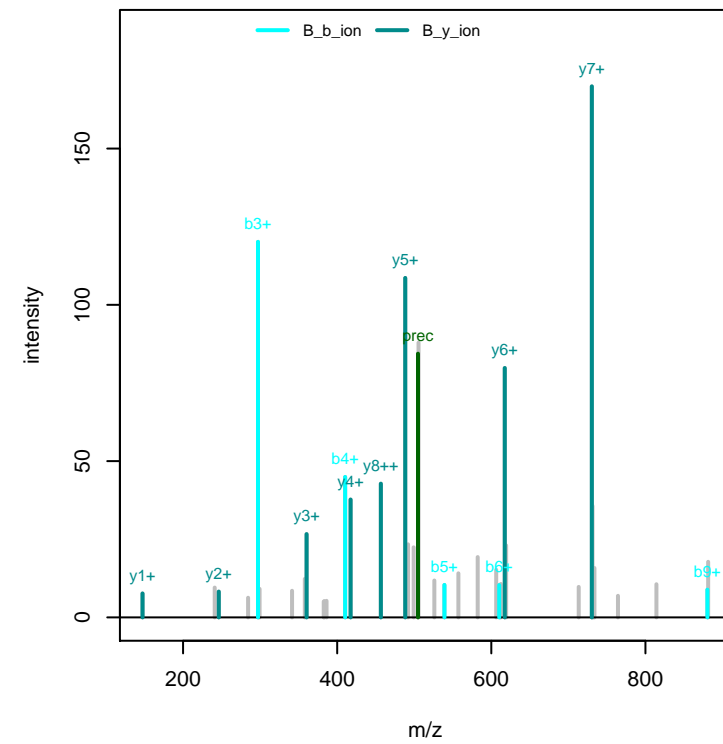

GGKLEAGNVK+XL\_L

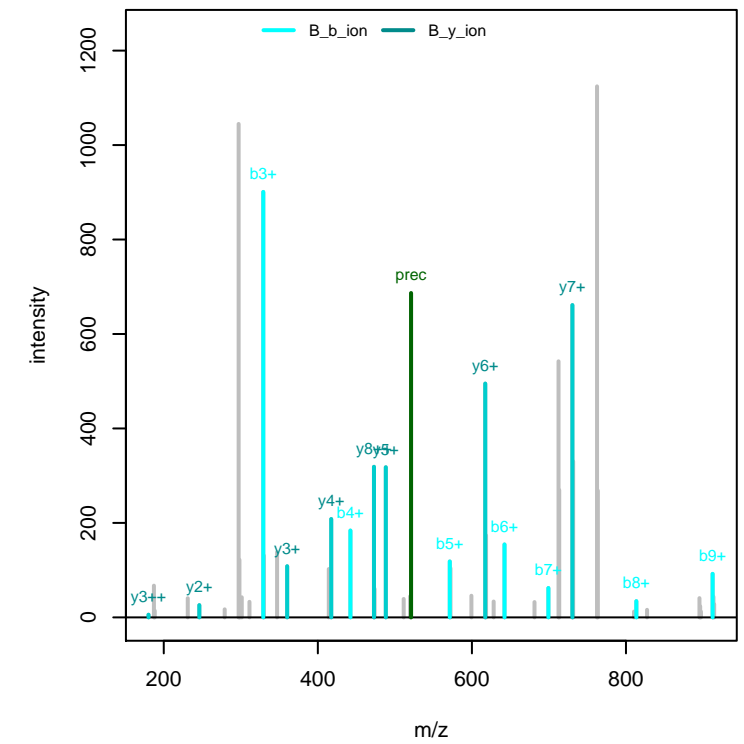

RIEETQKEK  
QAQQMQEKMQK

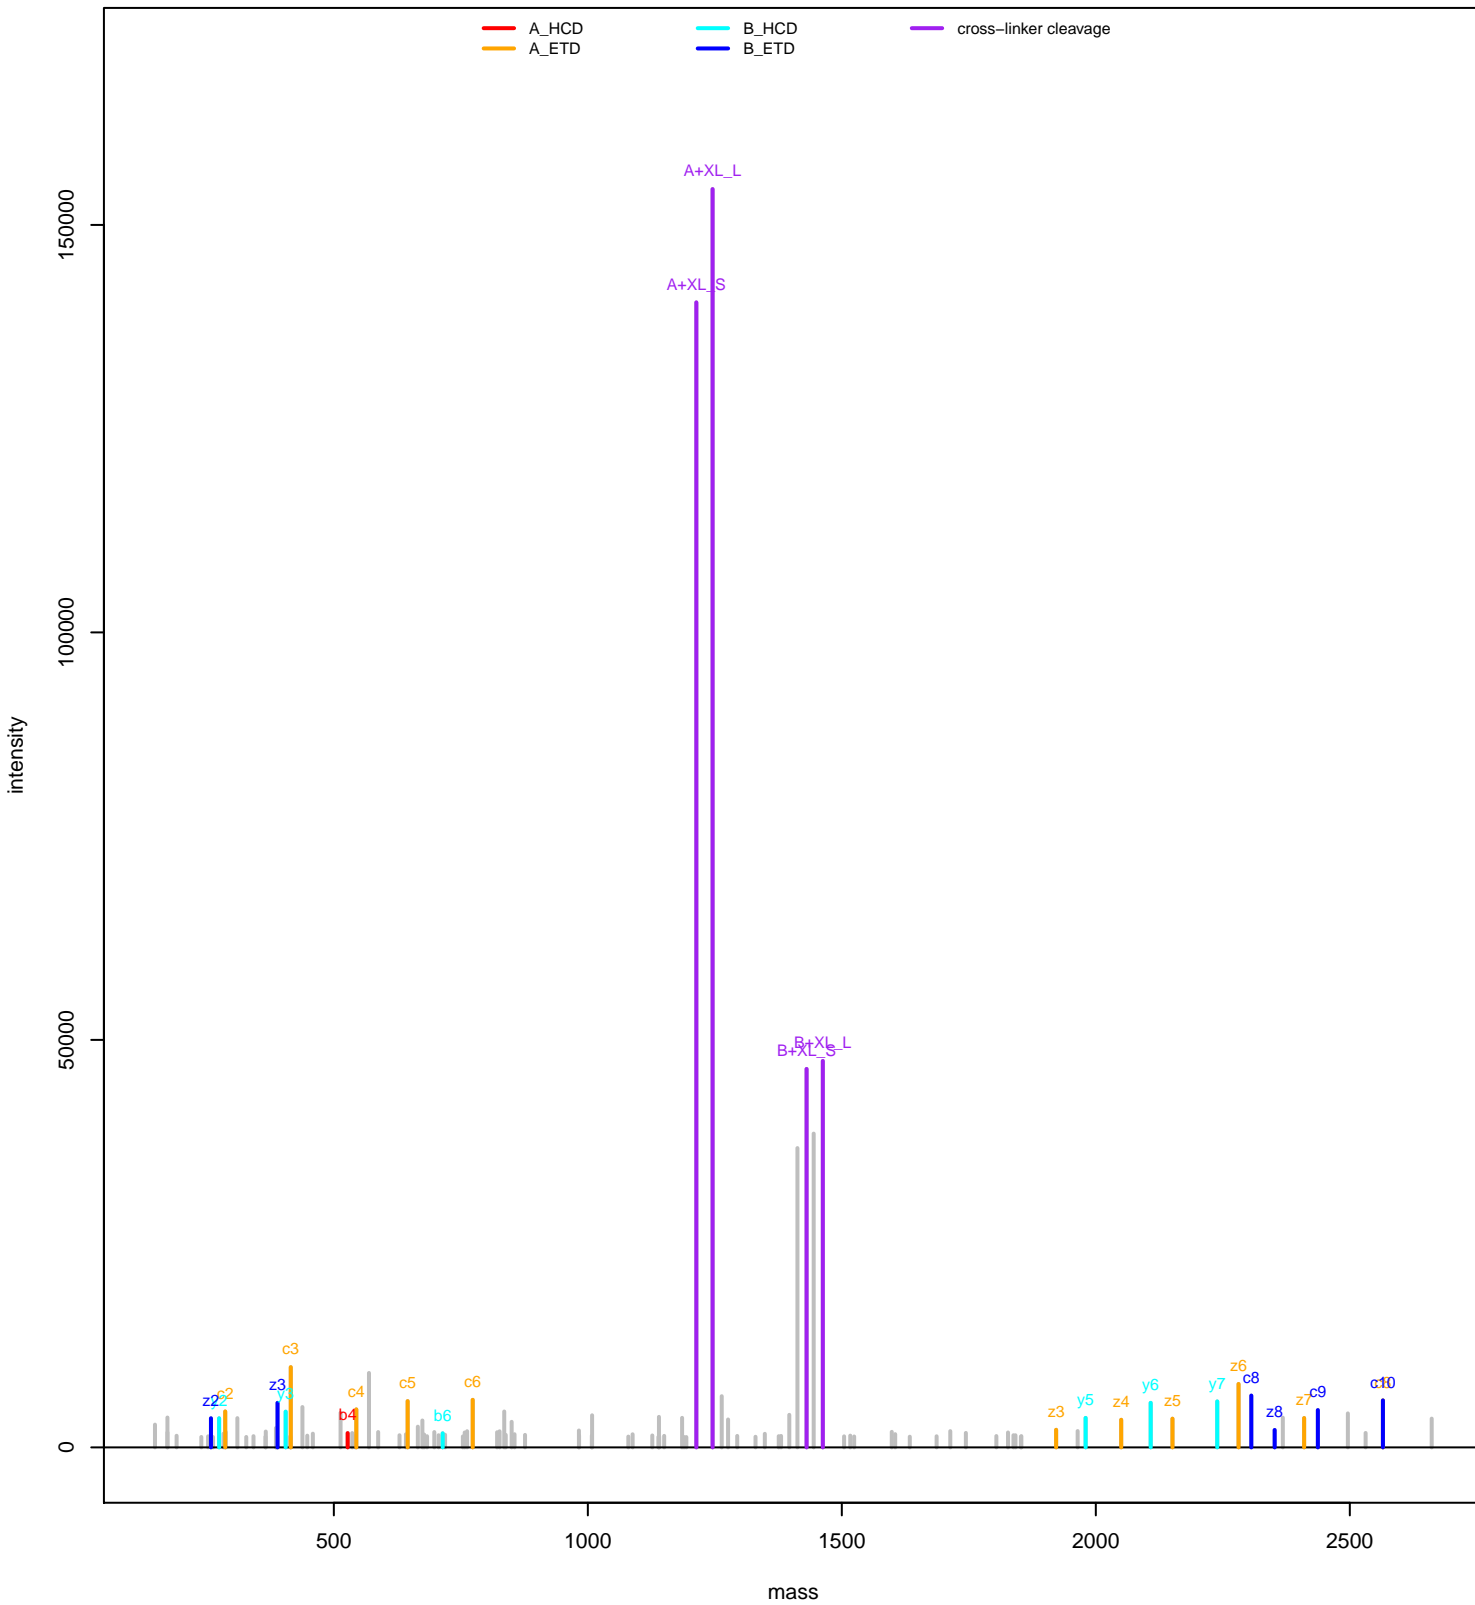

RIEETQKEK+XL\_S

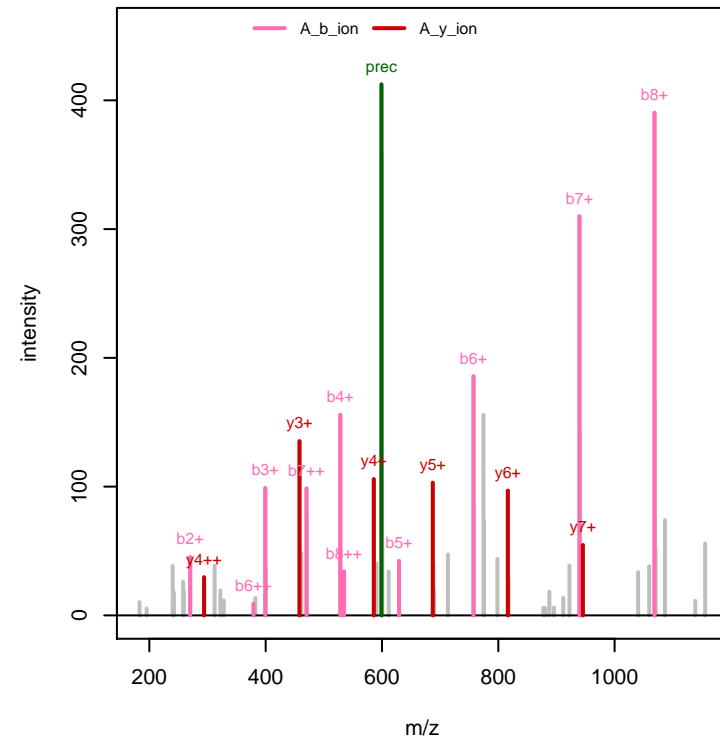

RIEETQKEK+XL\_L

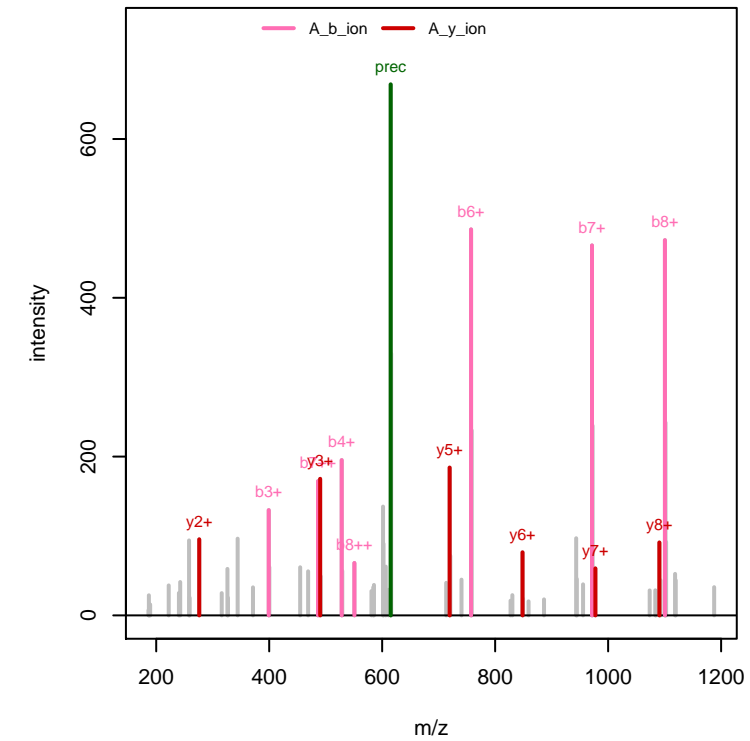

QAQQMQEKMQK+XL\_S

QAQQMQEKMQK+XL\_L

**KGEDVEK**  
**GEILGGMAAVEQPEKPAAQPK**

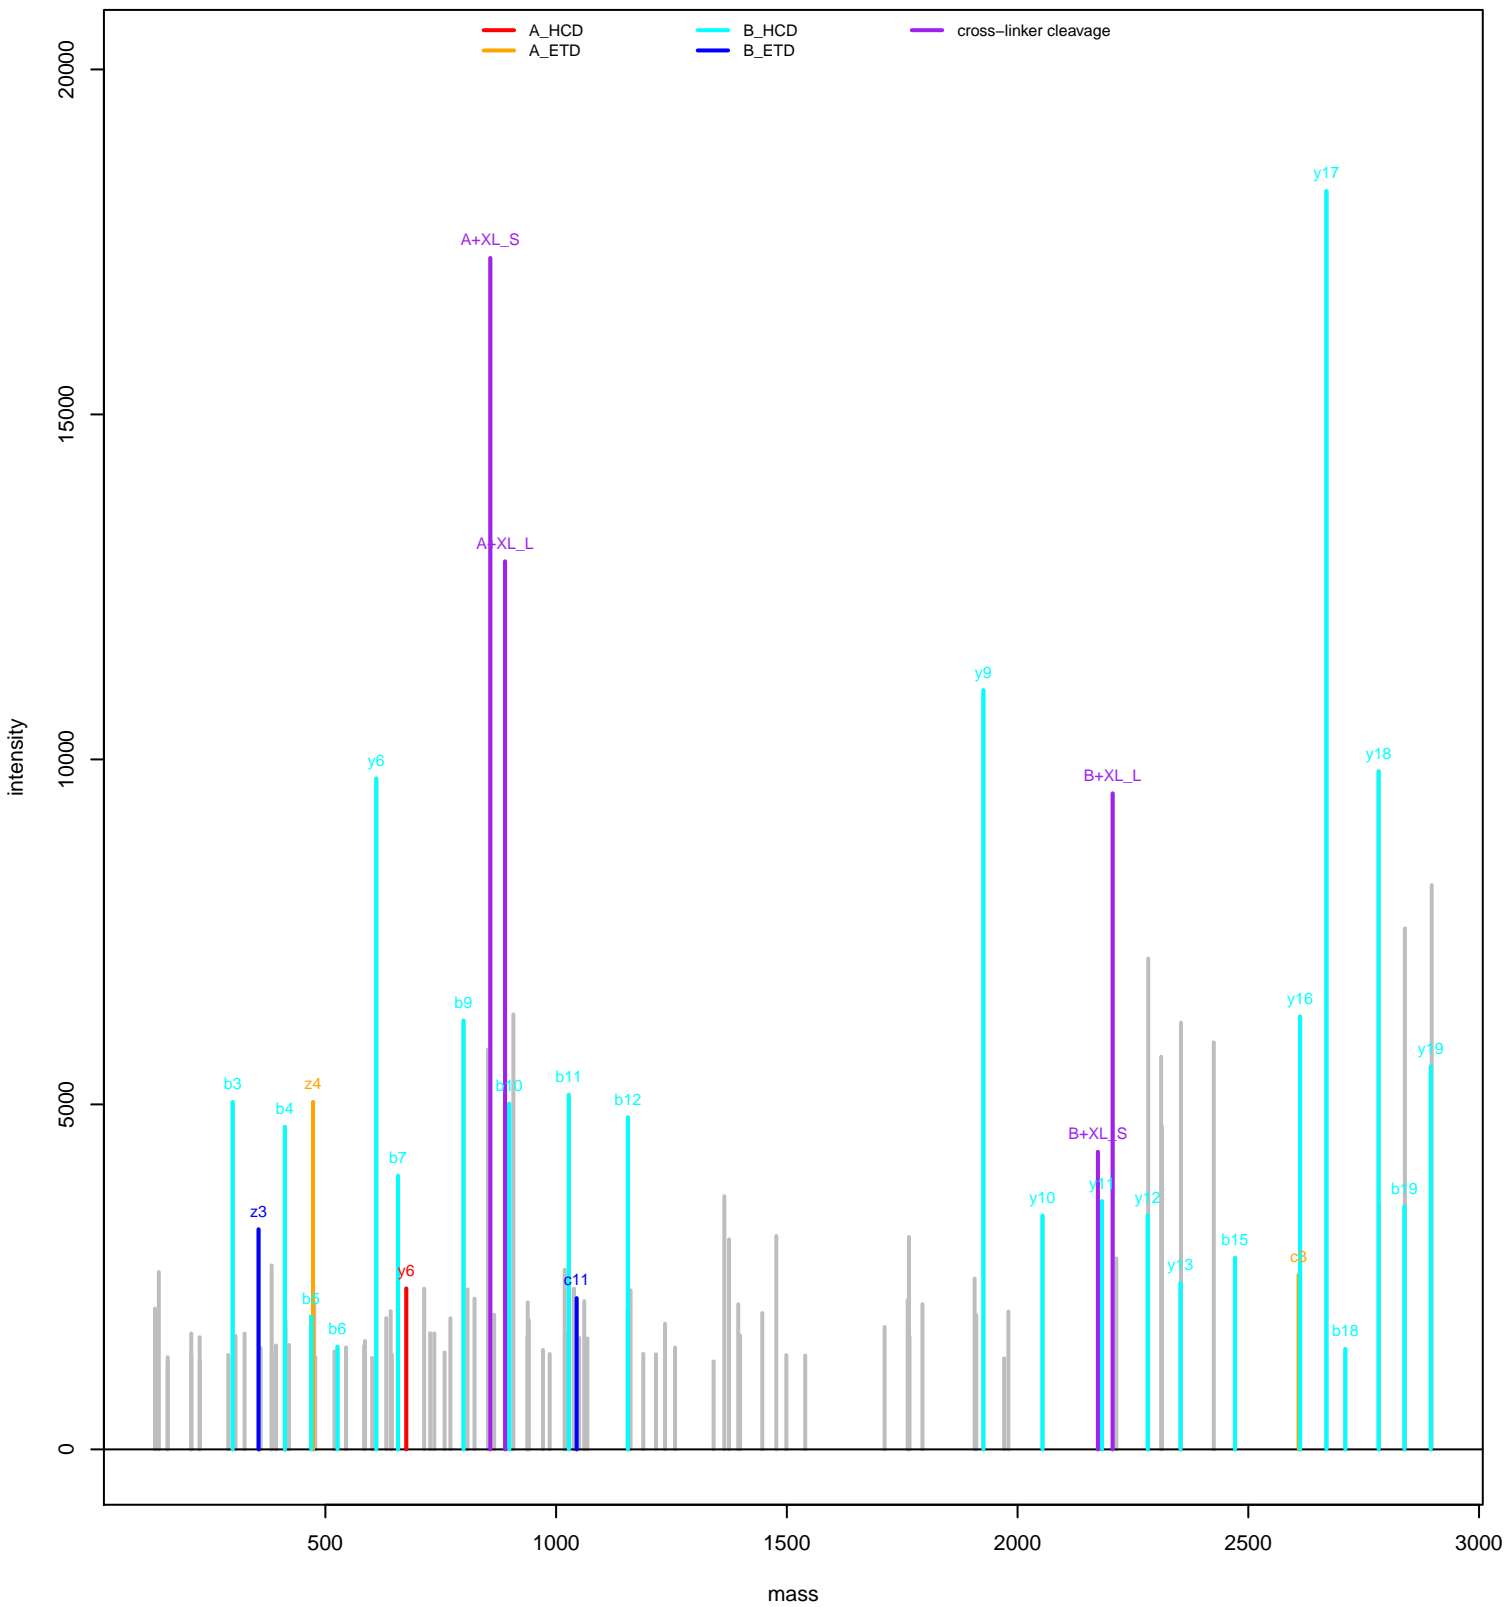

**KGEDVEK+XL\_S**

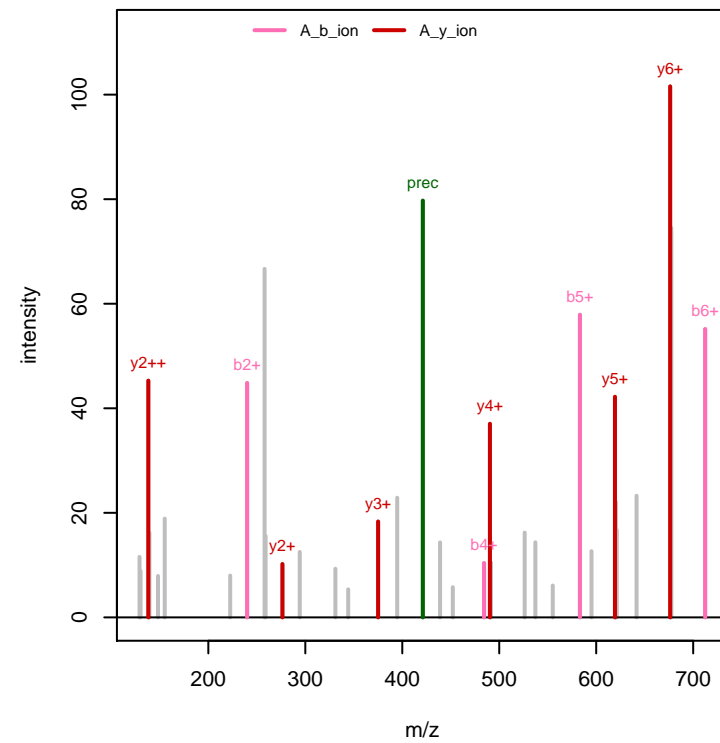

**KGEDVEK+XL\_L**

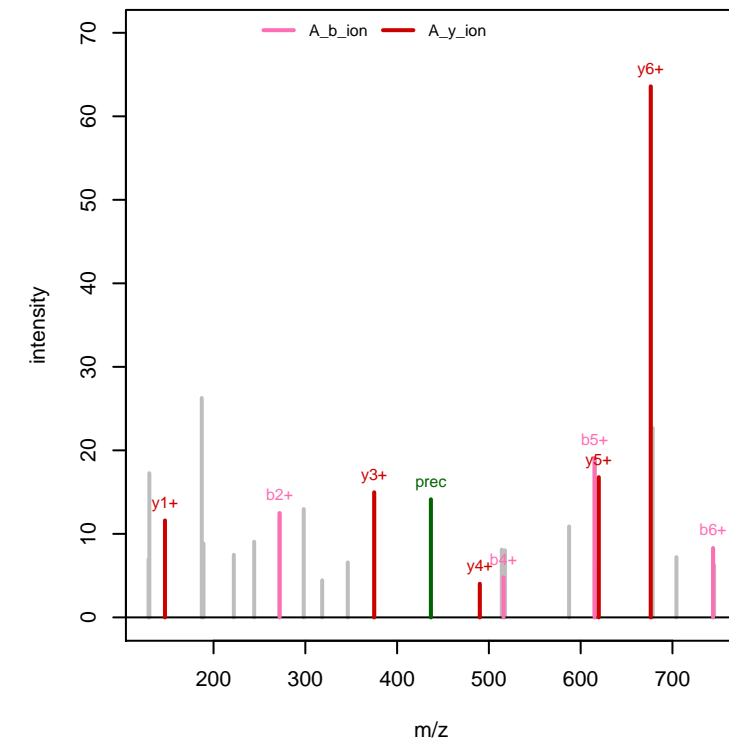

**GEILGGMAAVEQPEKPAAQPK+XL\_S**

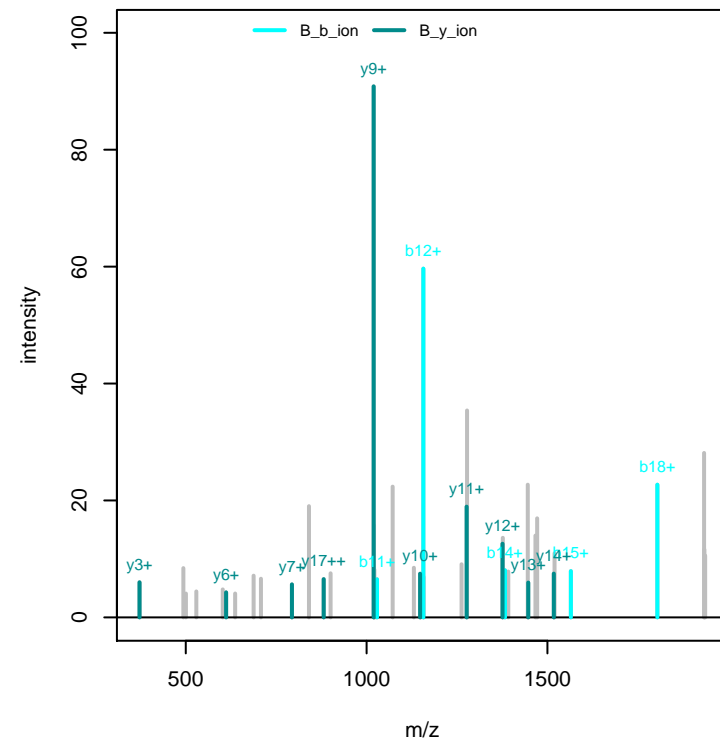

**GEILGGMAAVEQPEKPAAQPK+XL\_L**

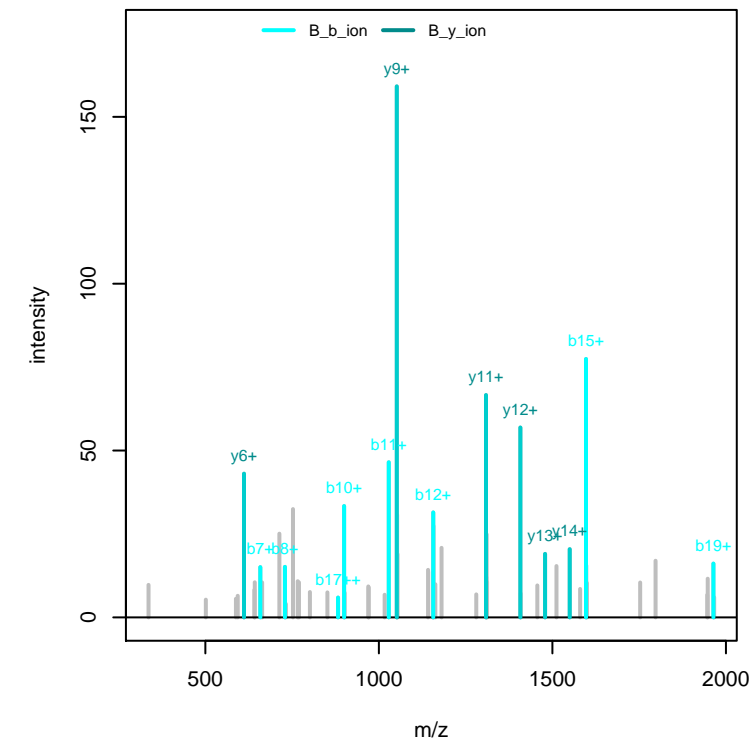

RHDKEQV  
QADTNQEQAKTEDAK

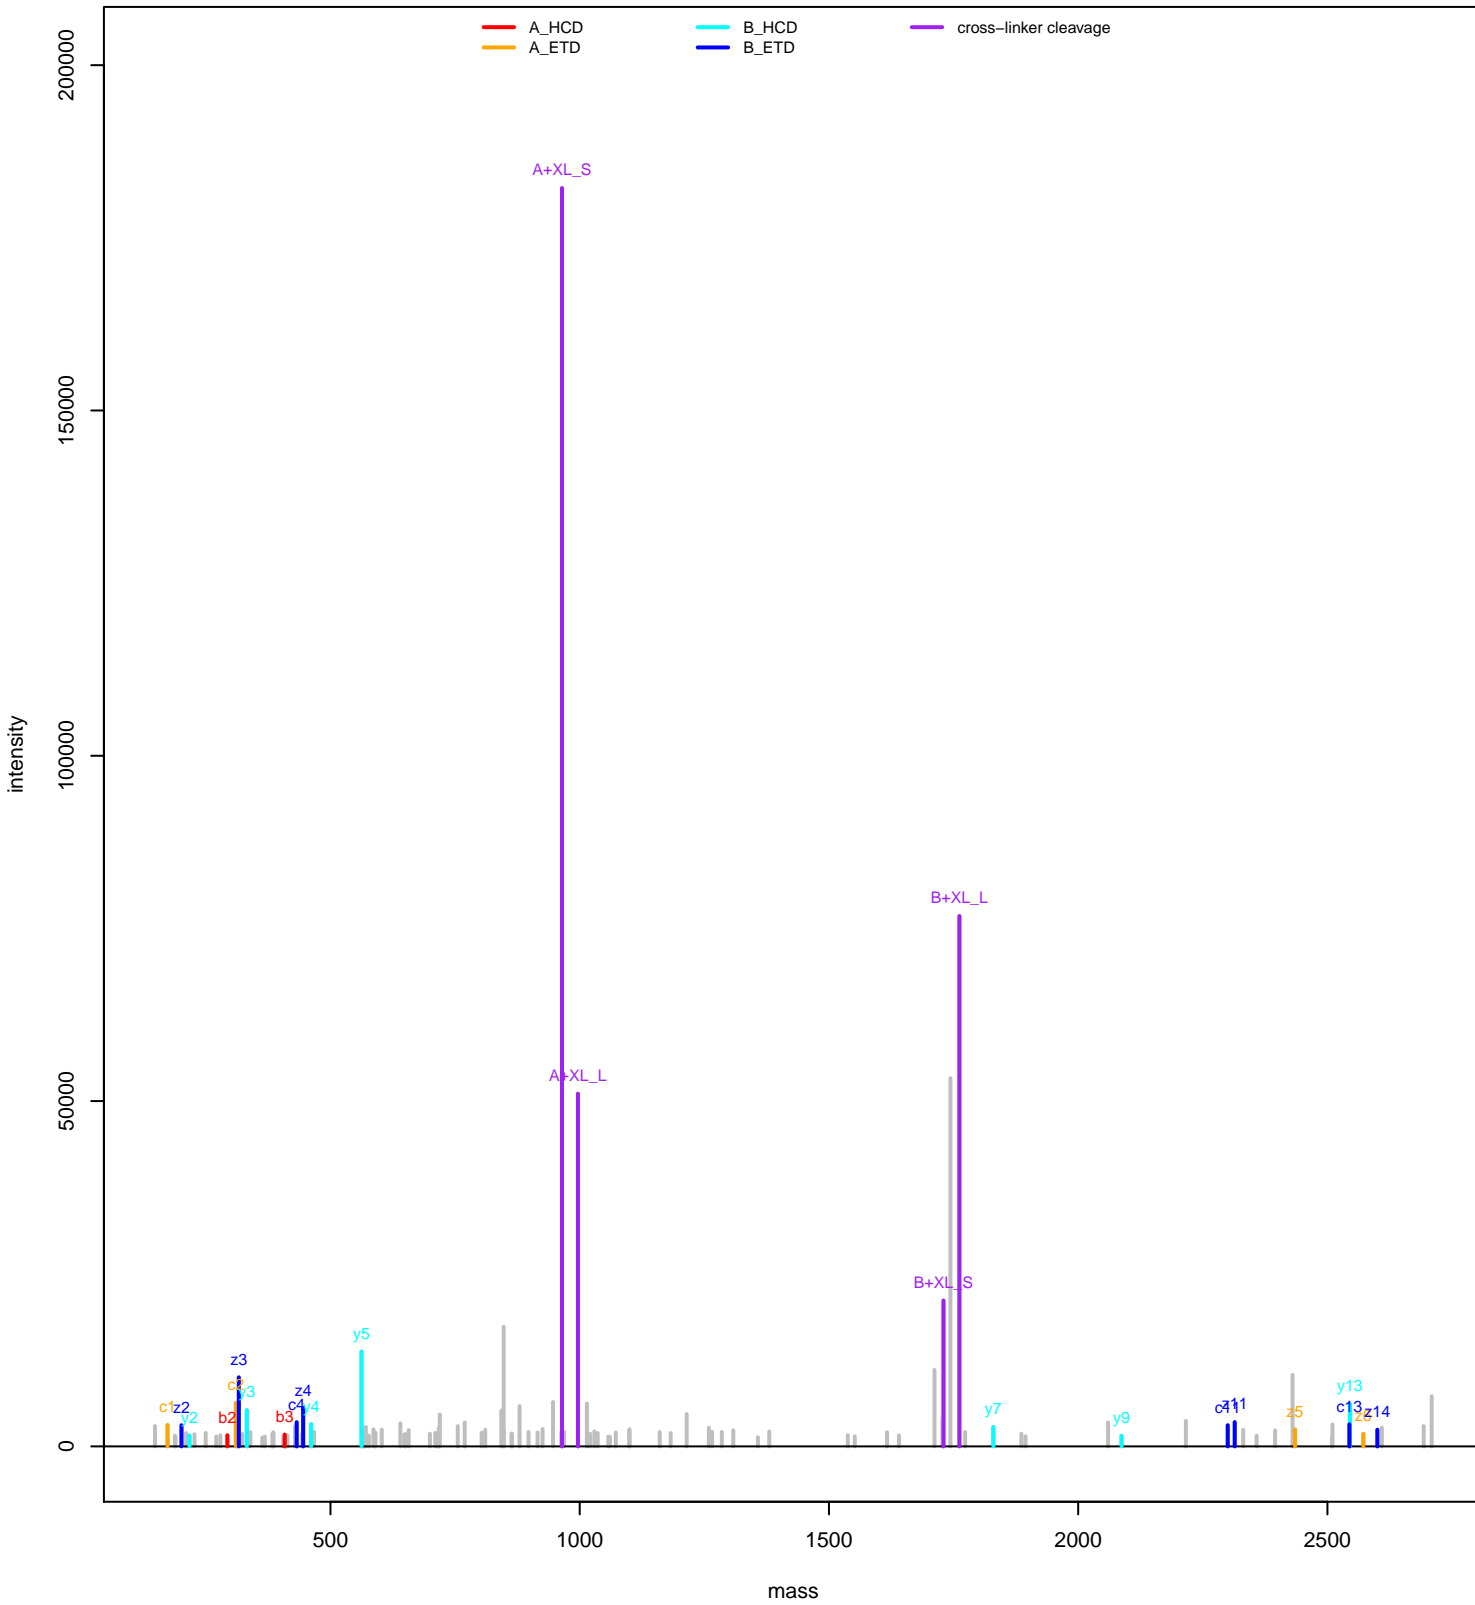

RHDKEQV+XL\_S

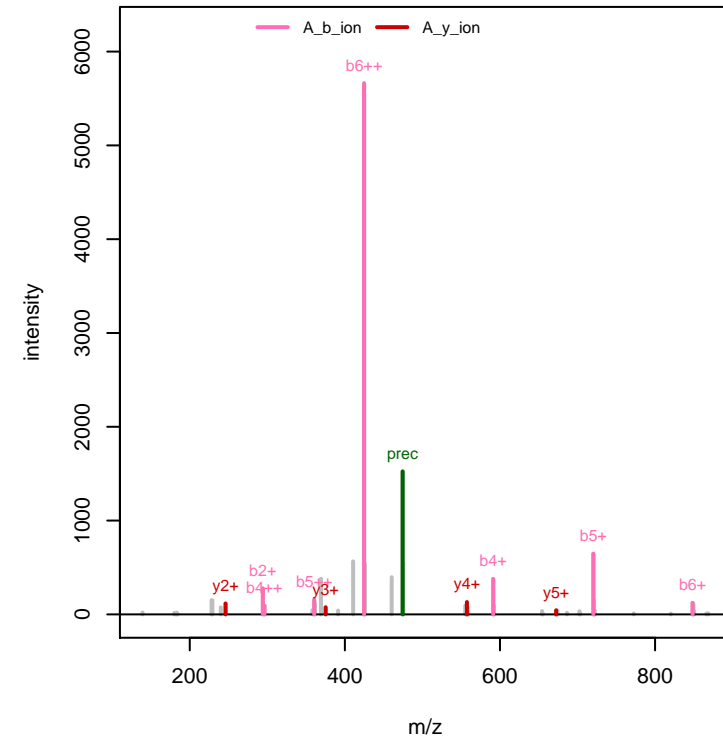

RHDKEQV+XL\_L

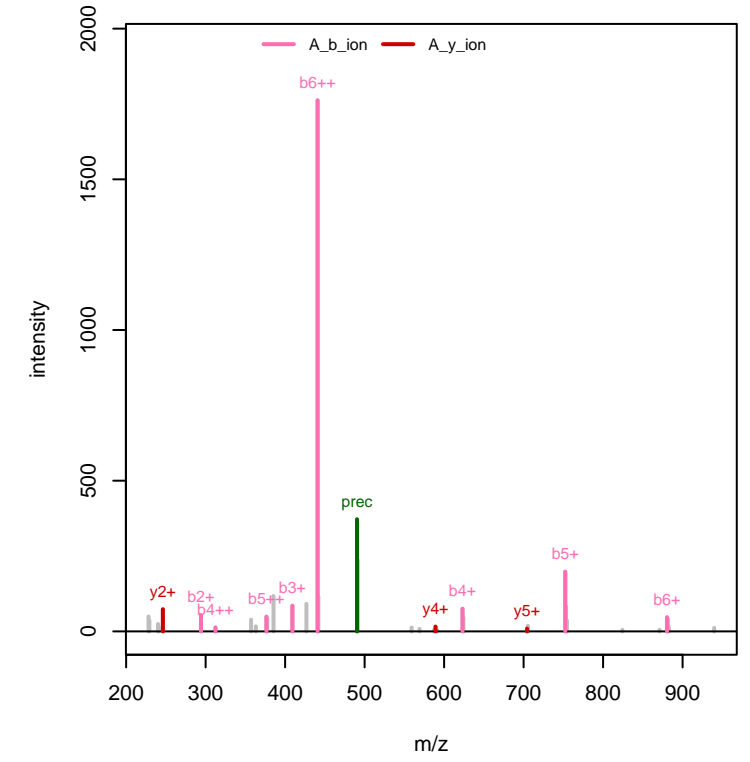

QADTNQEQAKTEDAK+XL\_S

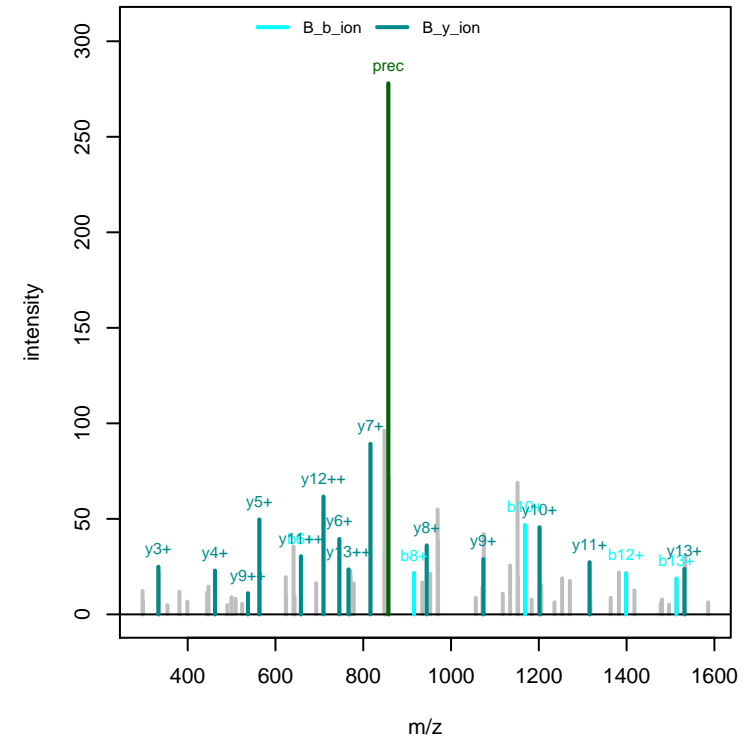

QADTNQEQAKTEDAK+XL\_L

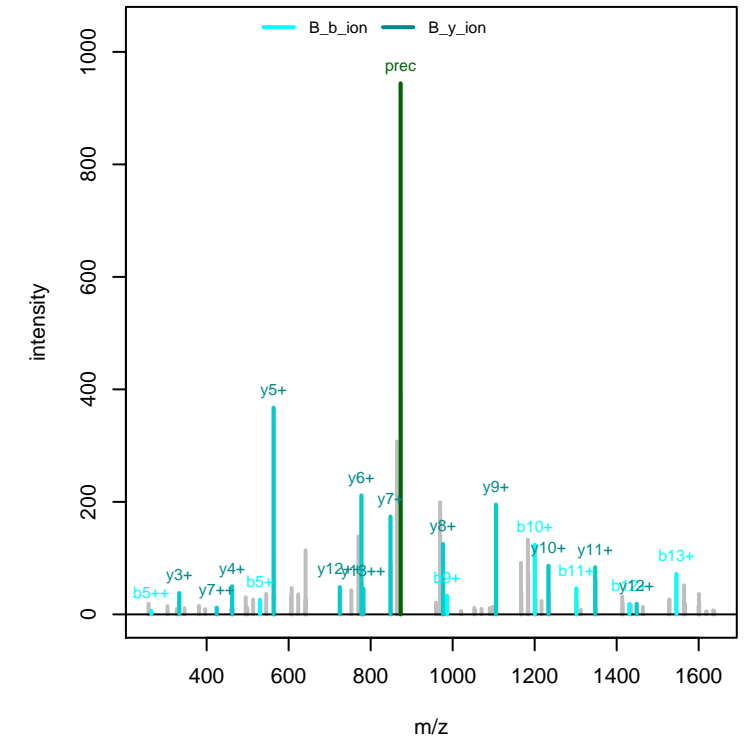



GKTHSSGK  
KGLADTALK

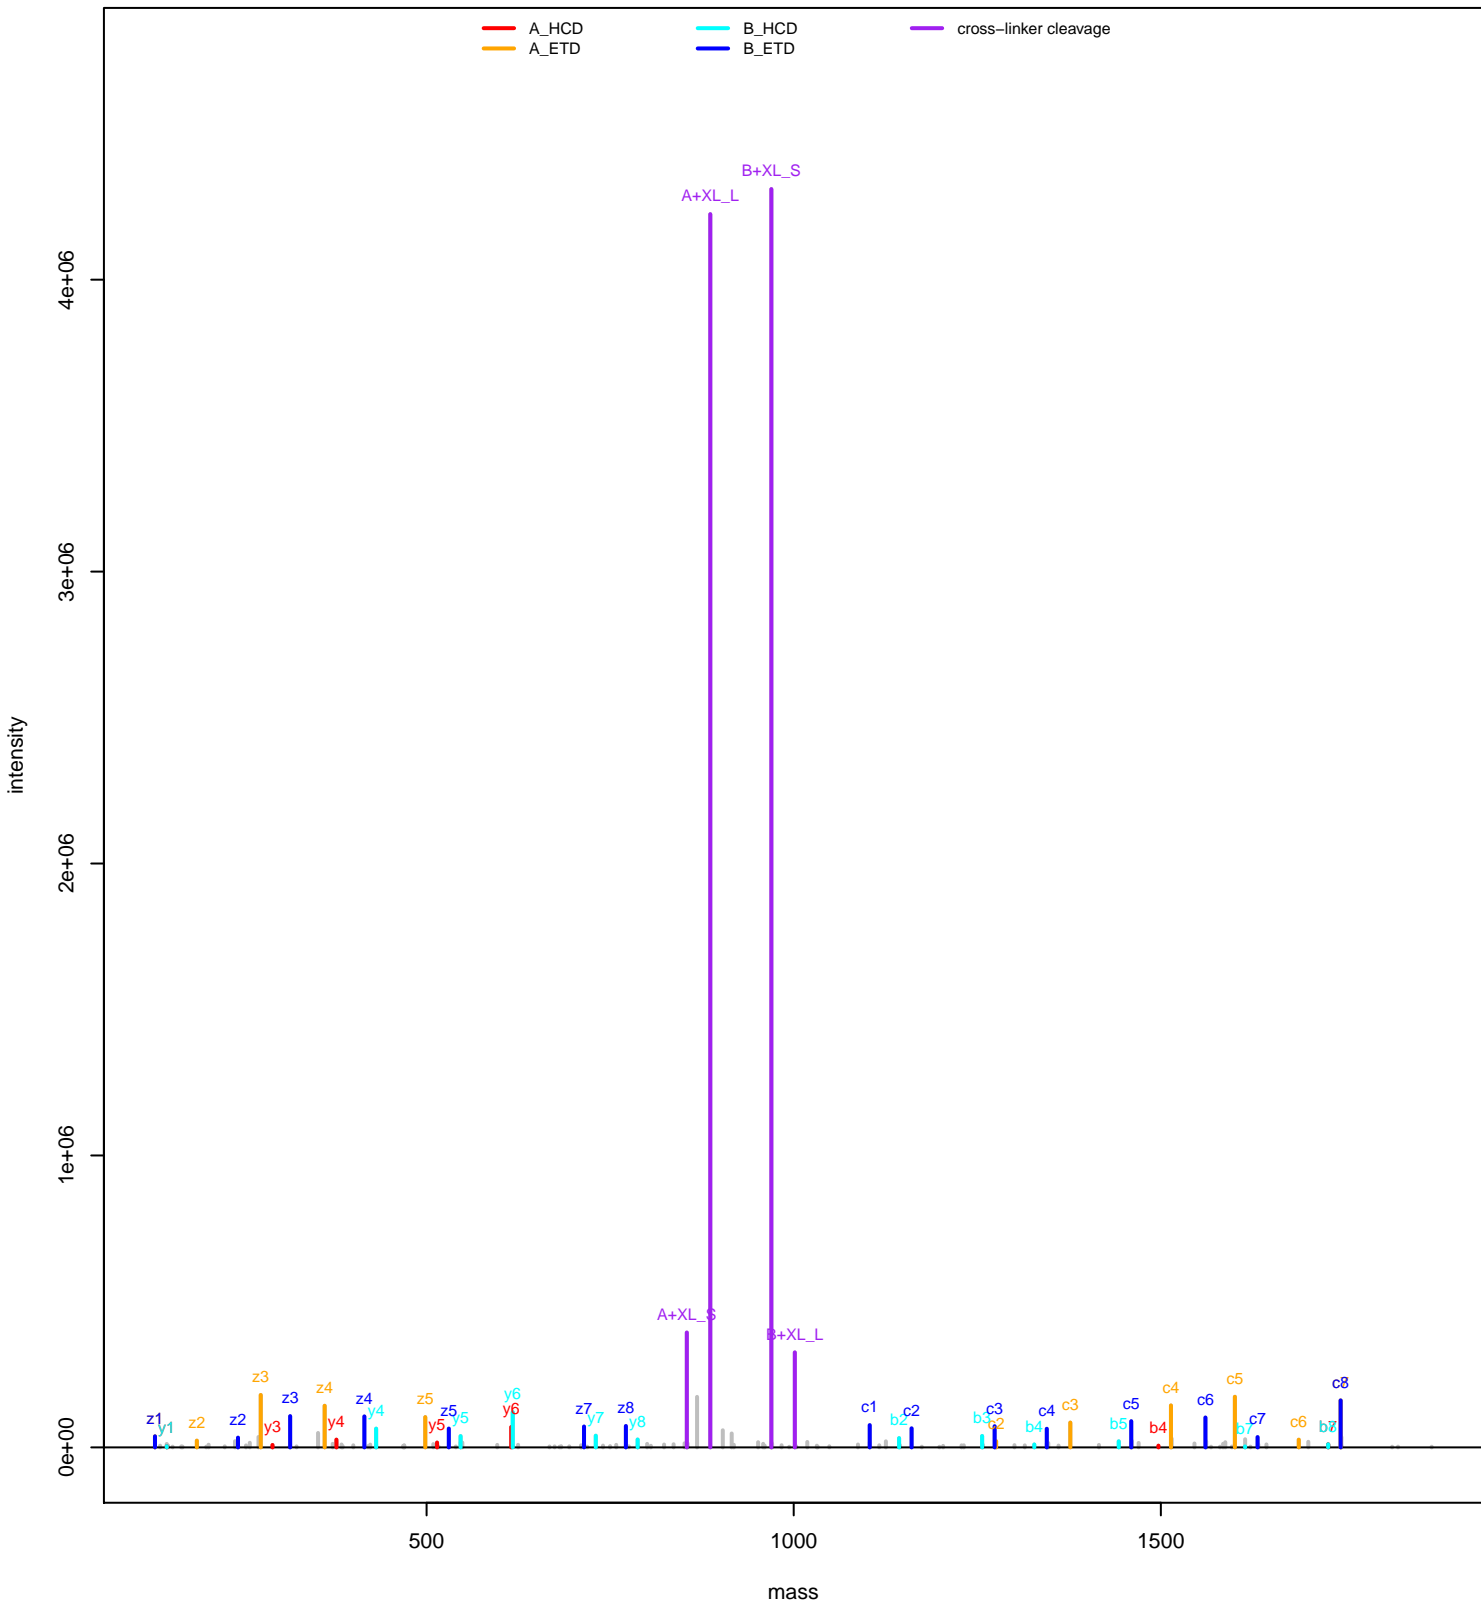

GKTHSSGK+XL\_S

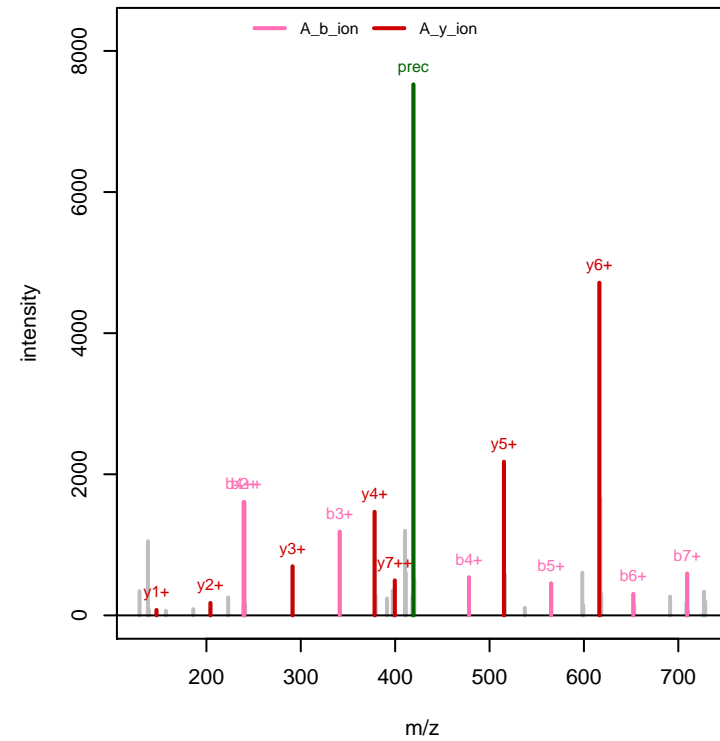

GKTHSSGK+XL\_L

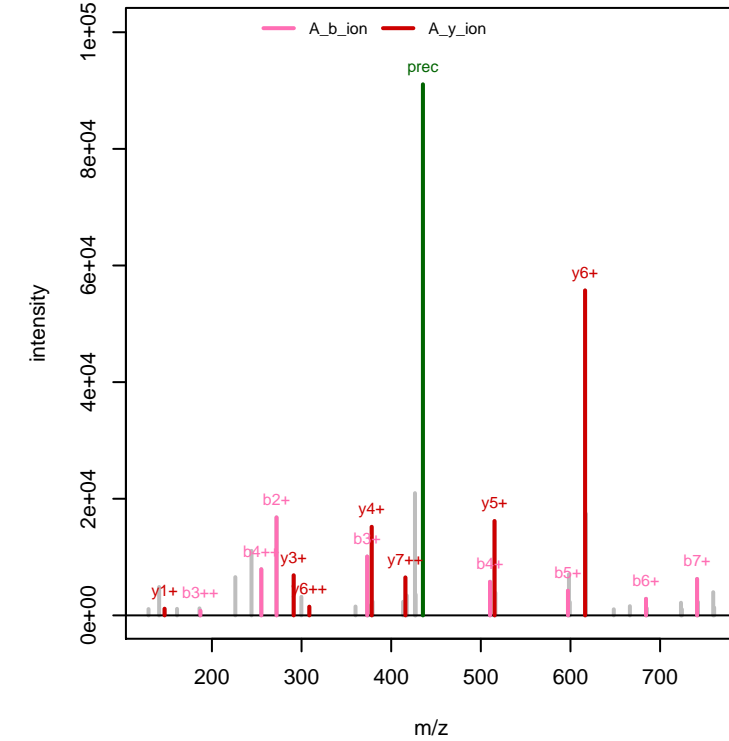

KGLADTALK+XL\_S

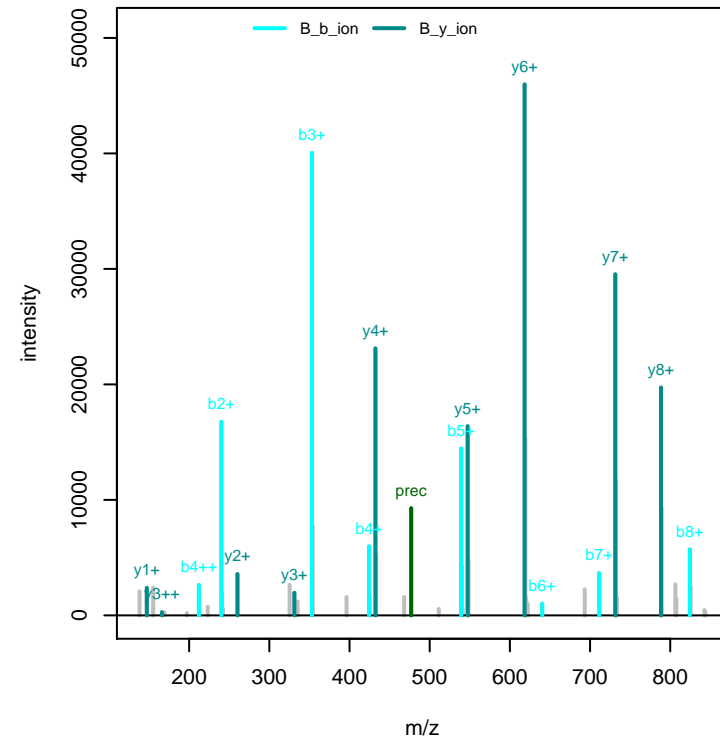

KGLADTALK+XL\_L

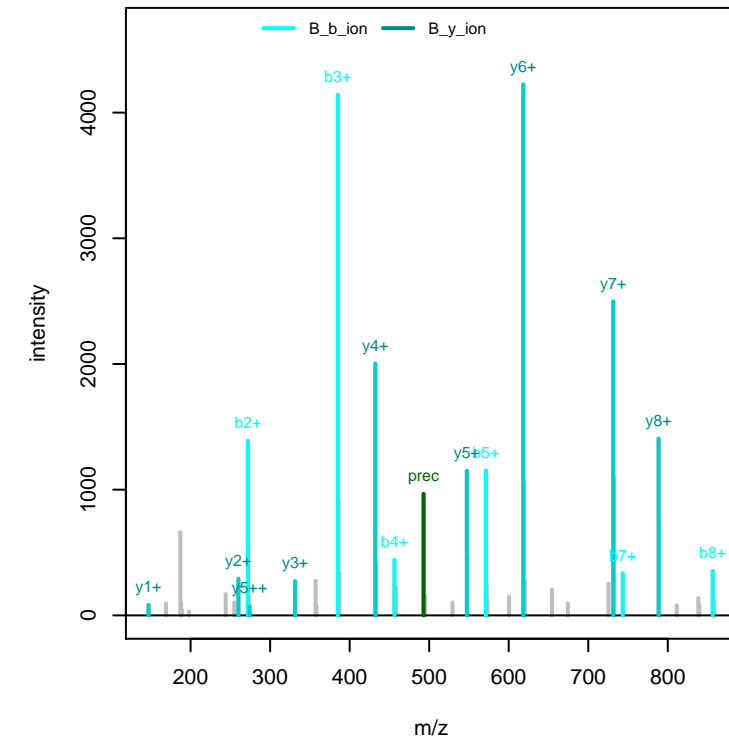

SADSTSTKTAK  
KDERGALVNR

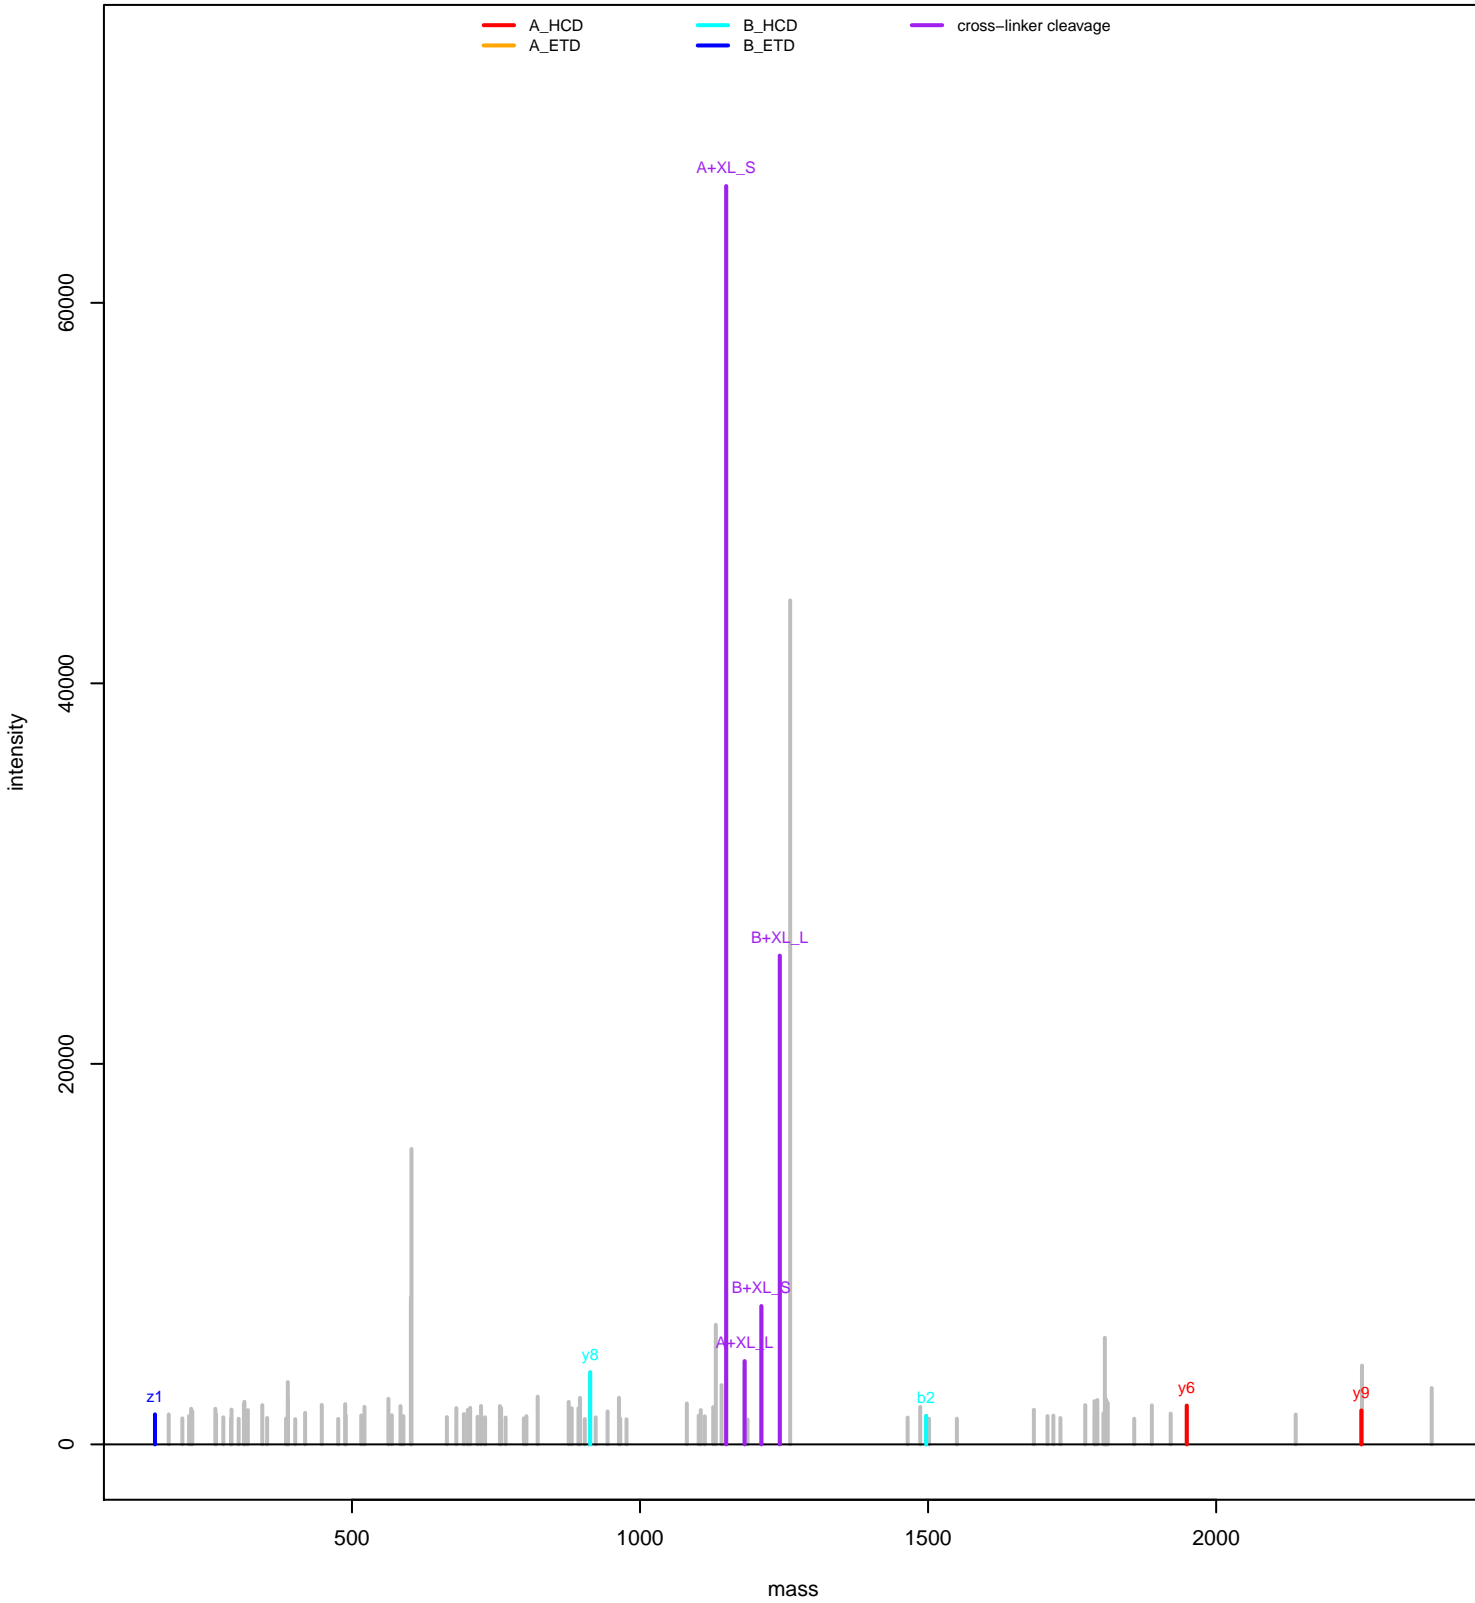

SADSTSTKTAK+XL\_S

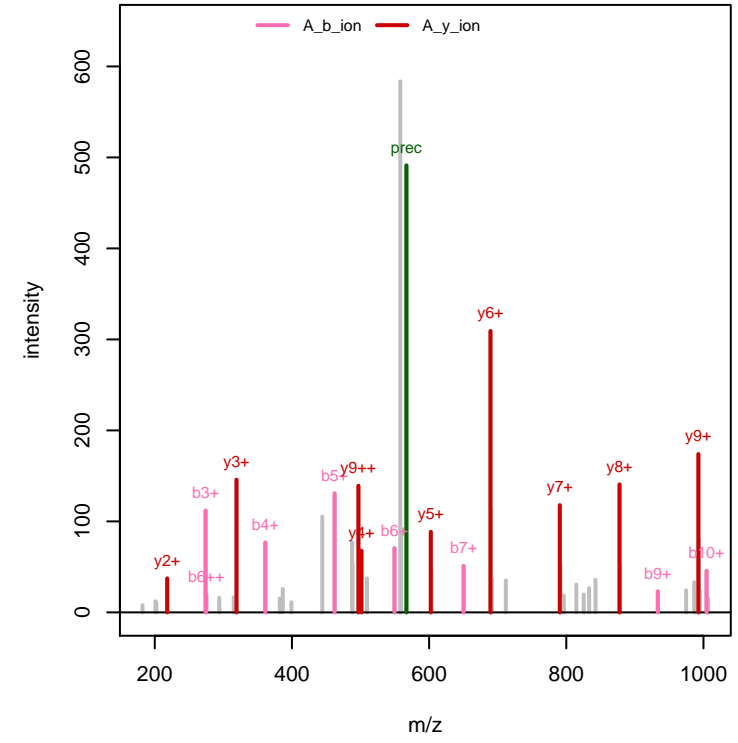

SADSTSTKTAK+XL\_L

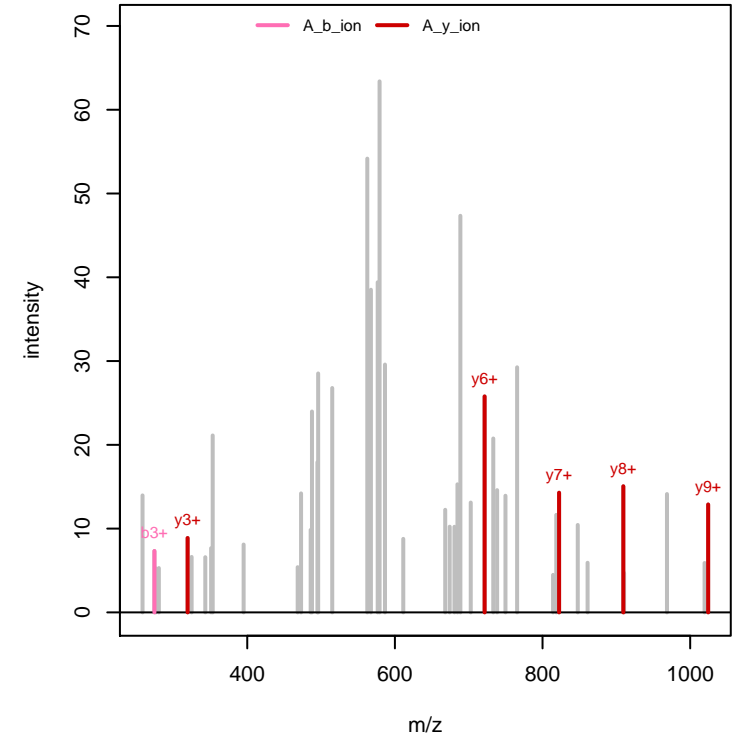

KDERGALVNR+XL\_S

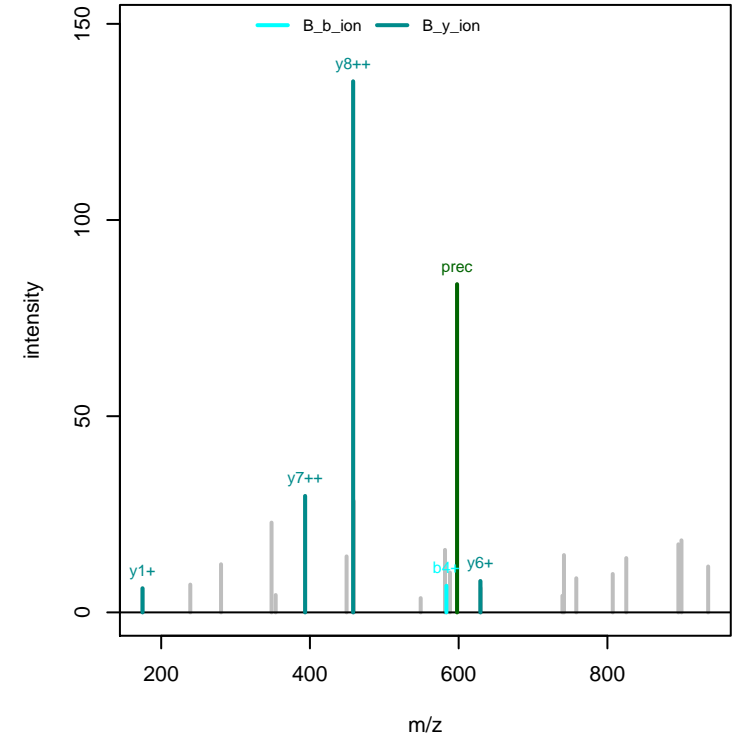

KDERGALVNR+XL\_L

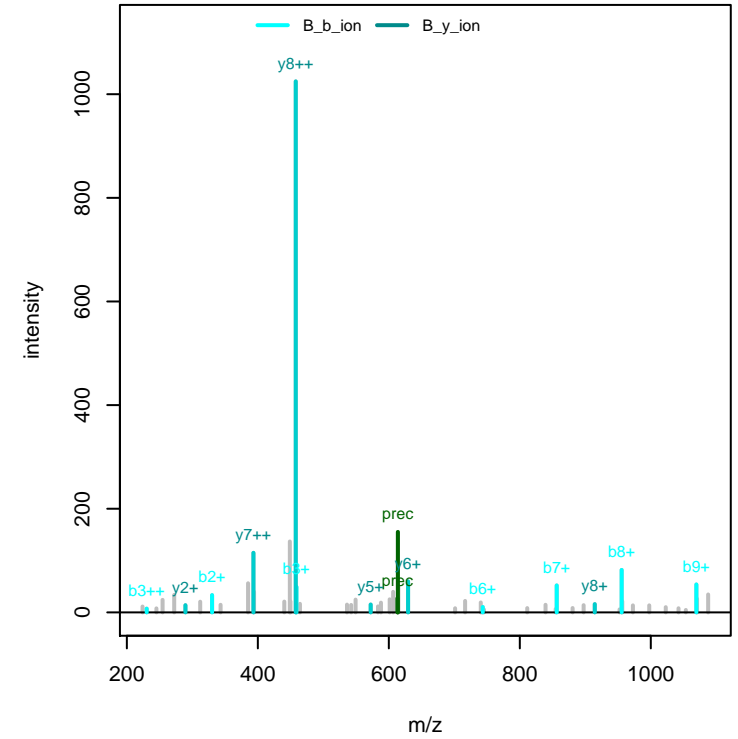

NKSDNK  
LYKLTK

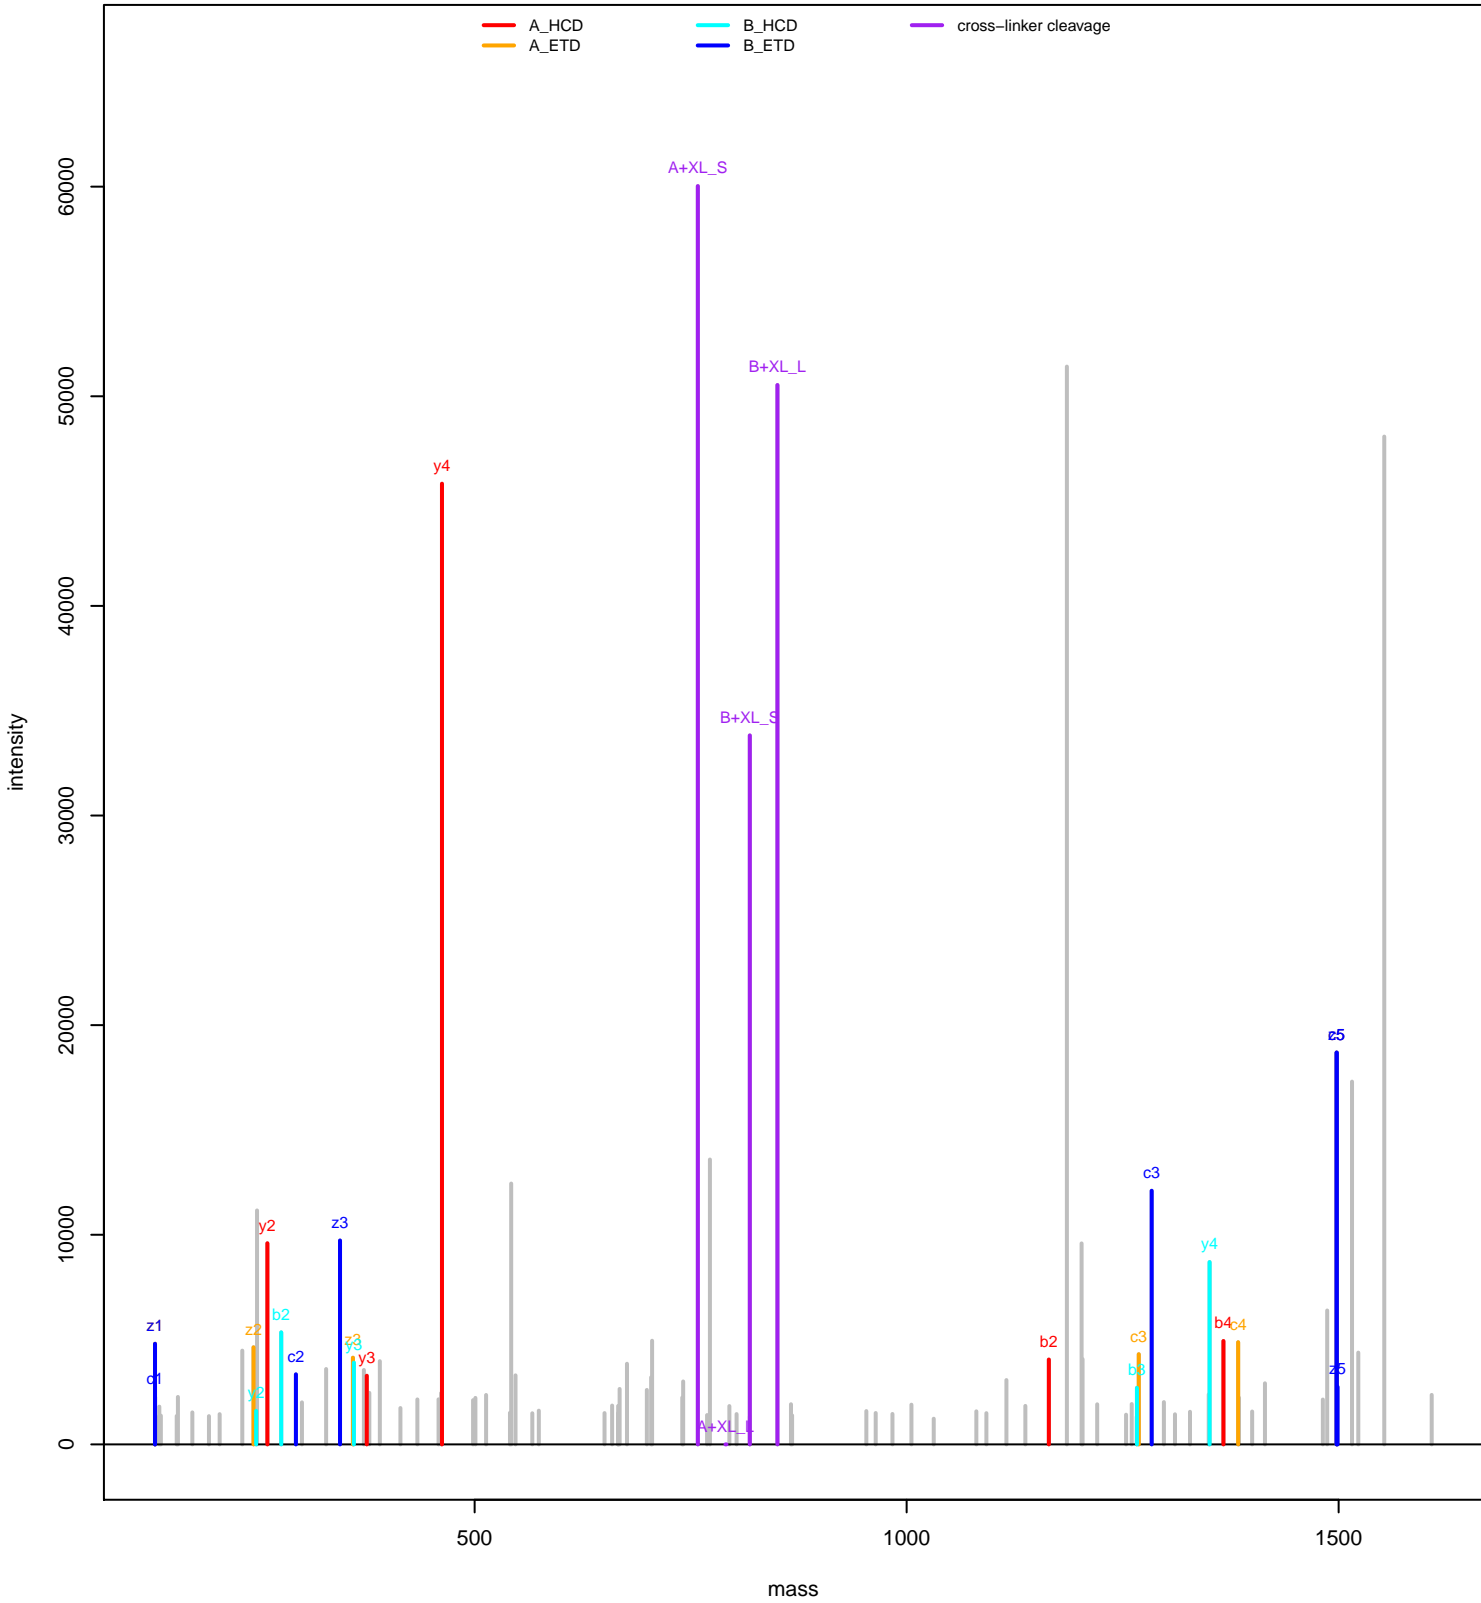

NKSDNK+XL\_S

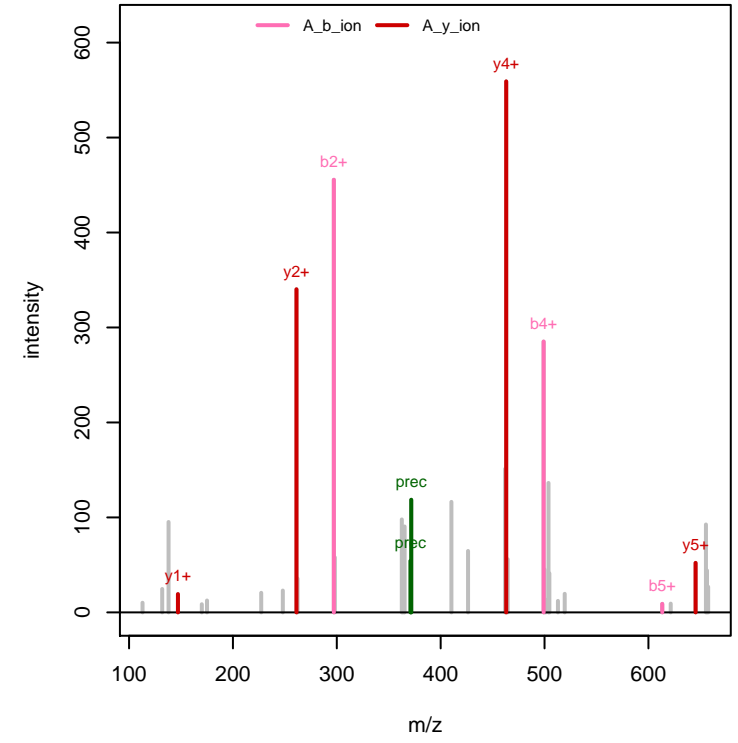

NKSDNK+XL\_L

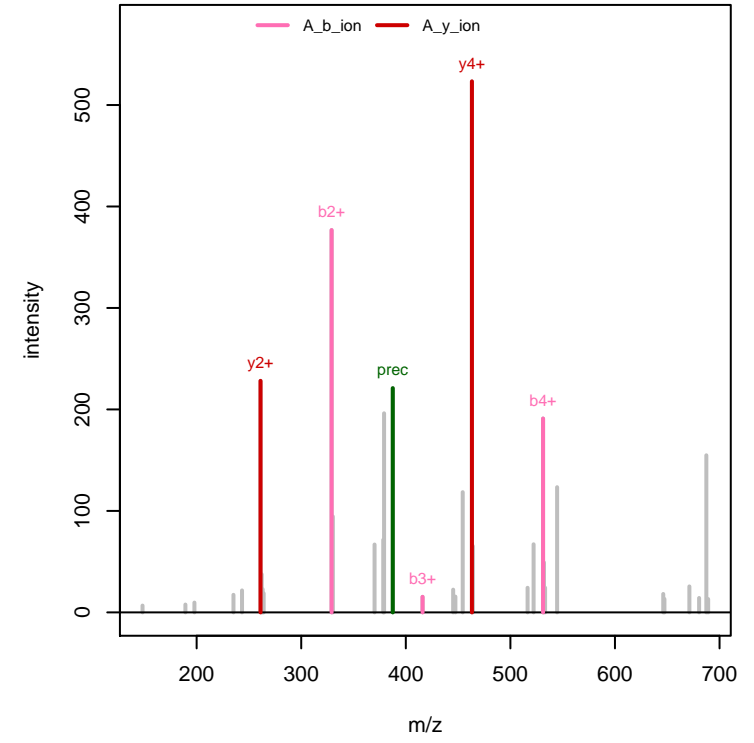

LYKLTK+XL\_S

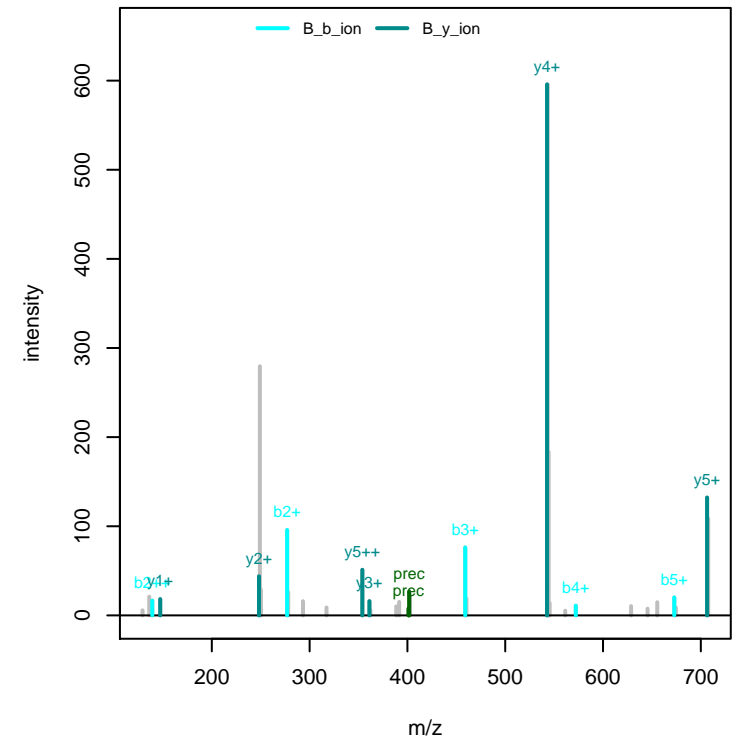

LYKLTK+XL\_L

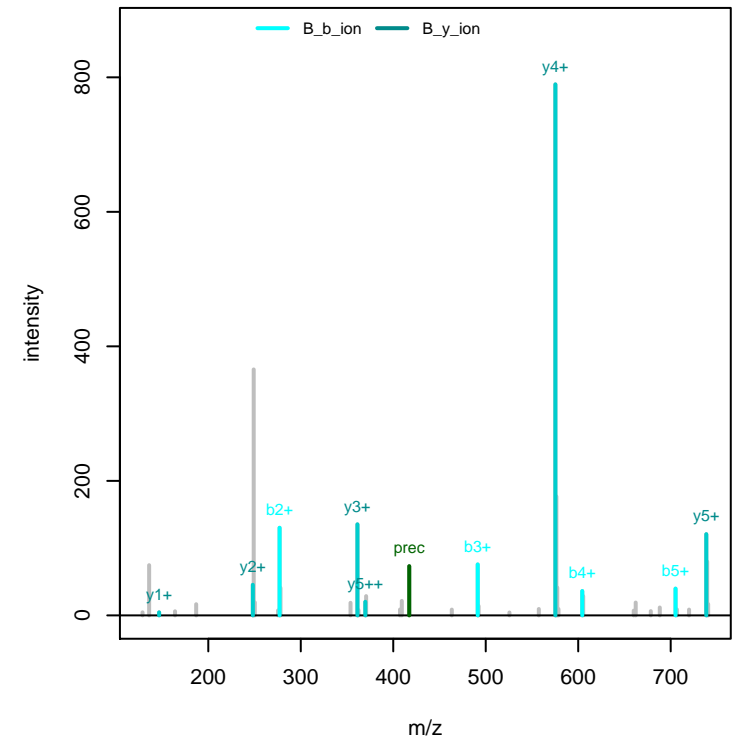

SSKEQK  
QKVIQVK

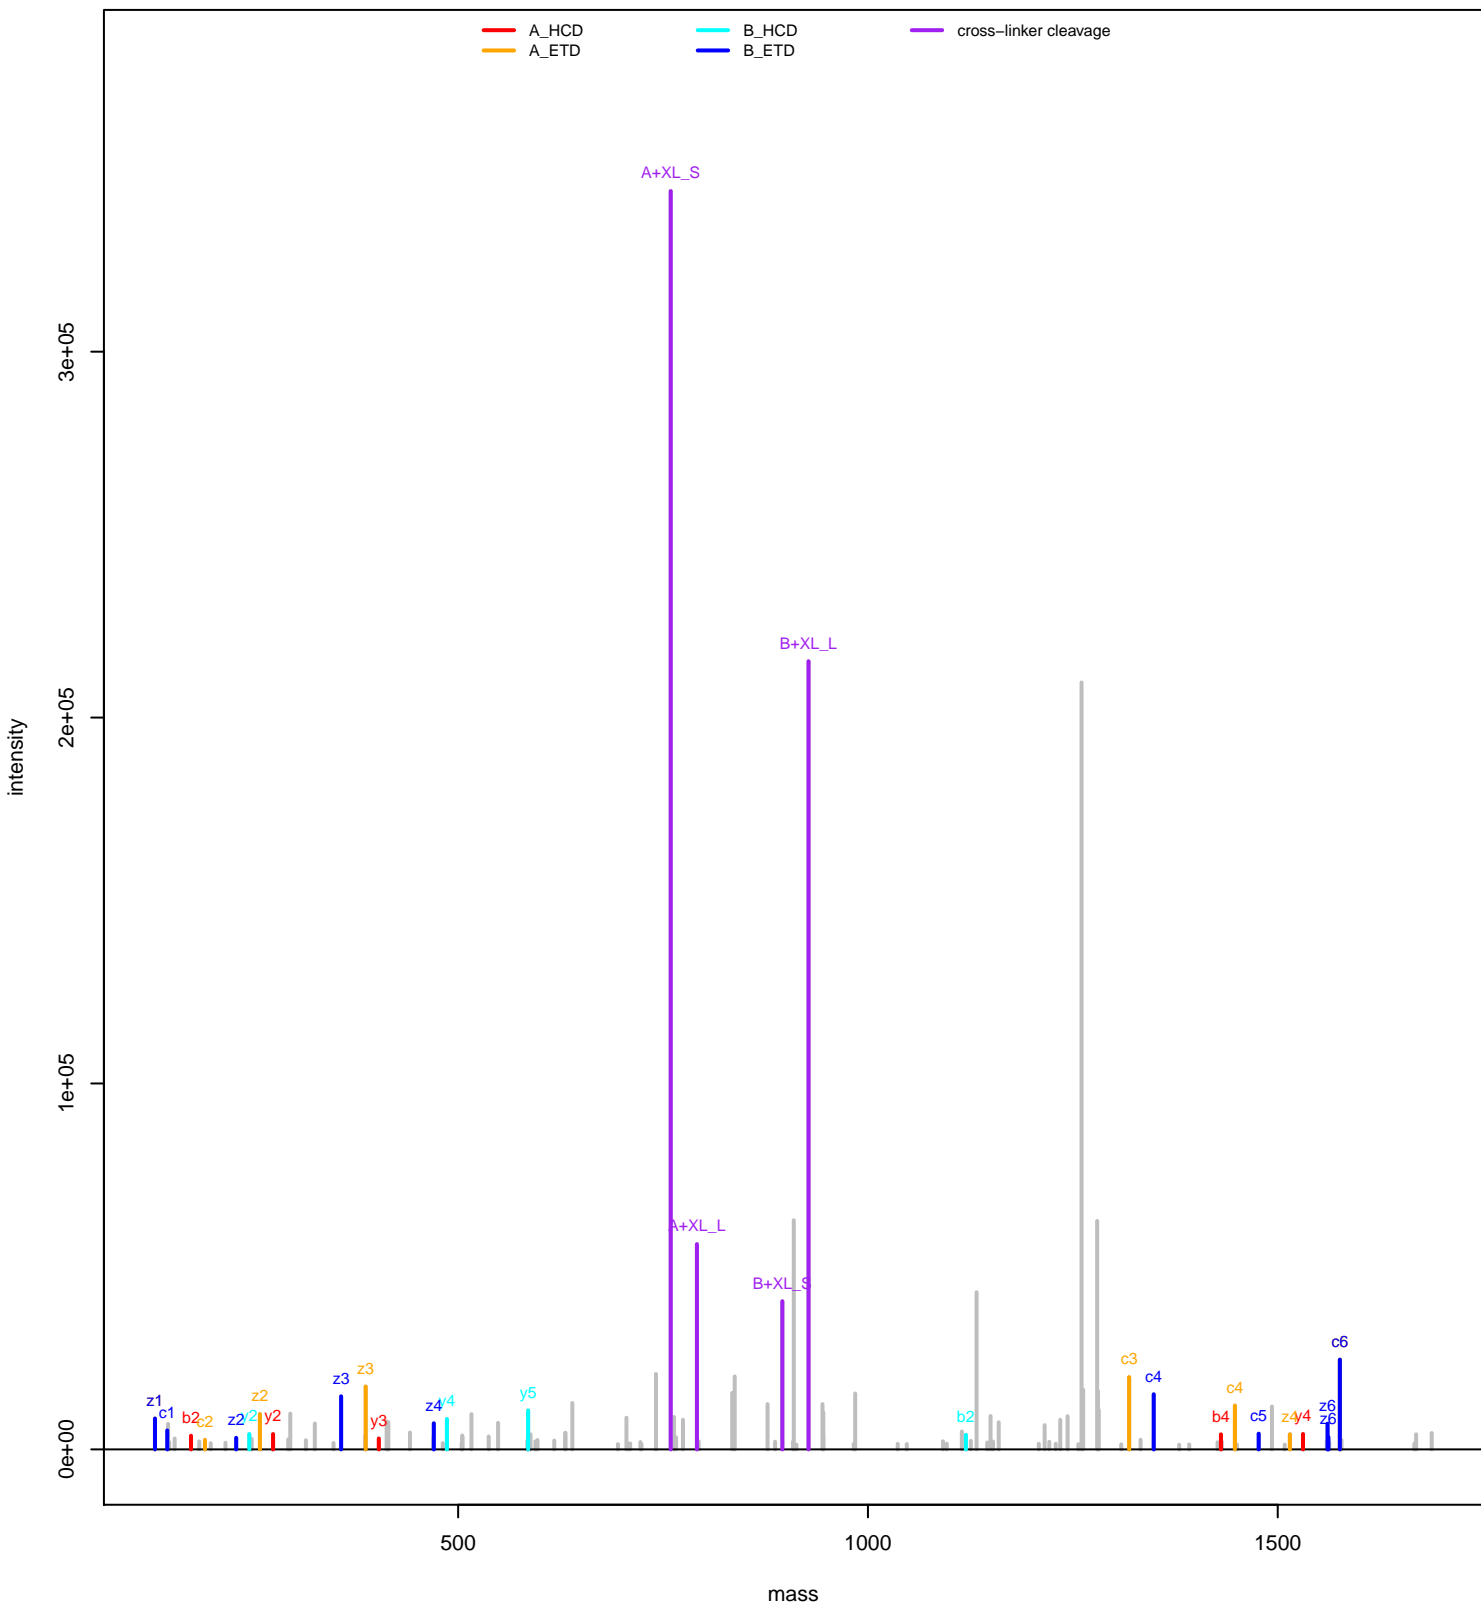

SSKEQK+XL\_S

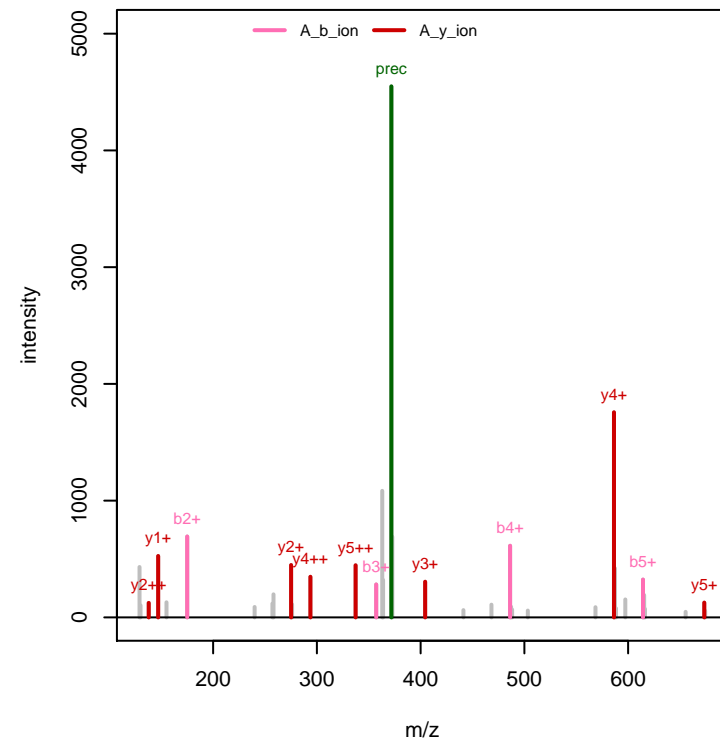

SSKEQK+XL\_L

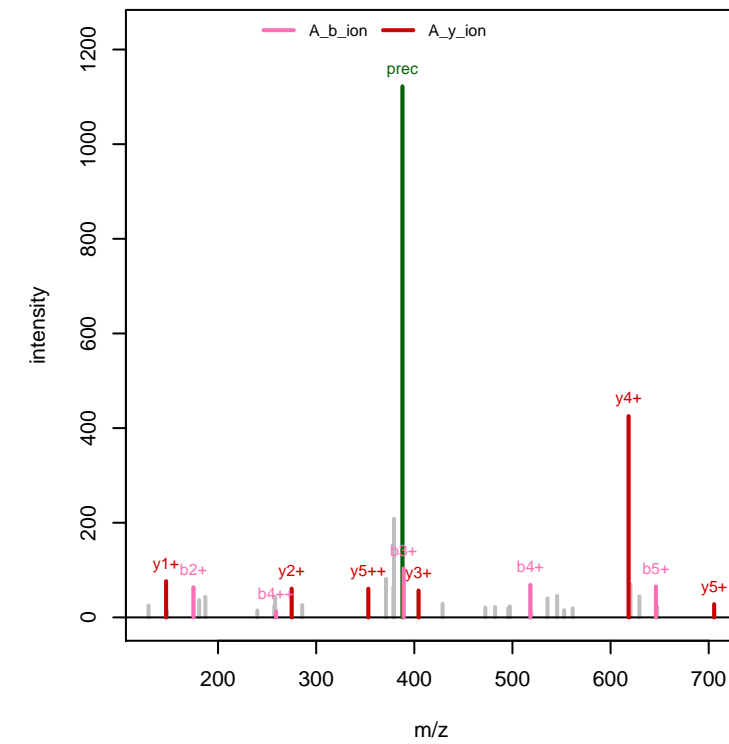

QKVIQVK+XL\_S

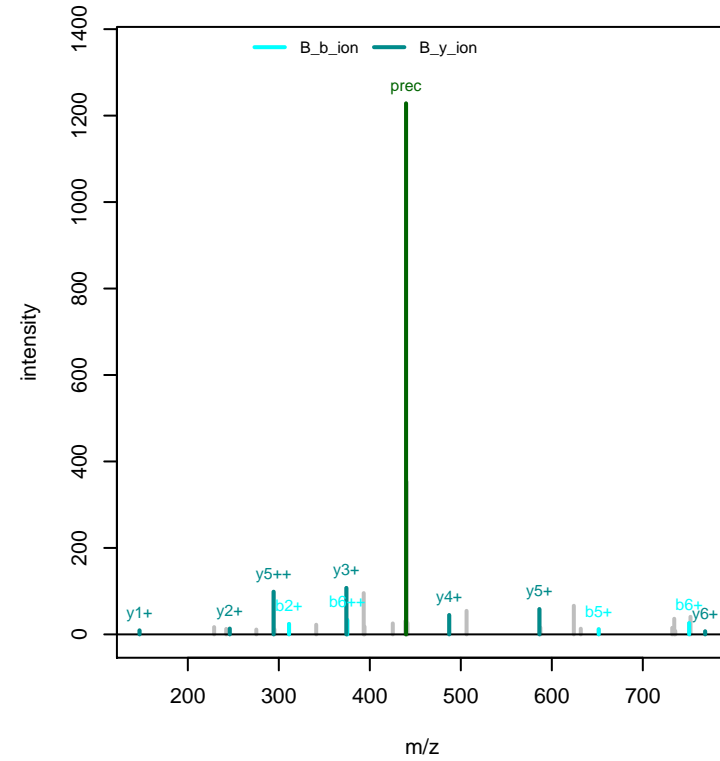

QKVIQVK+XL\_L

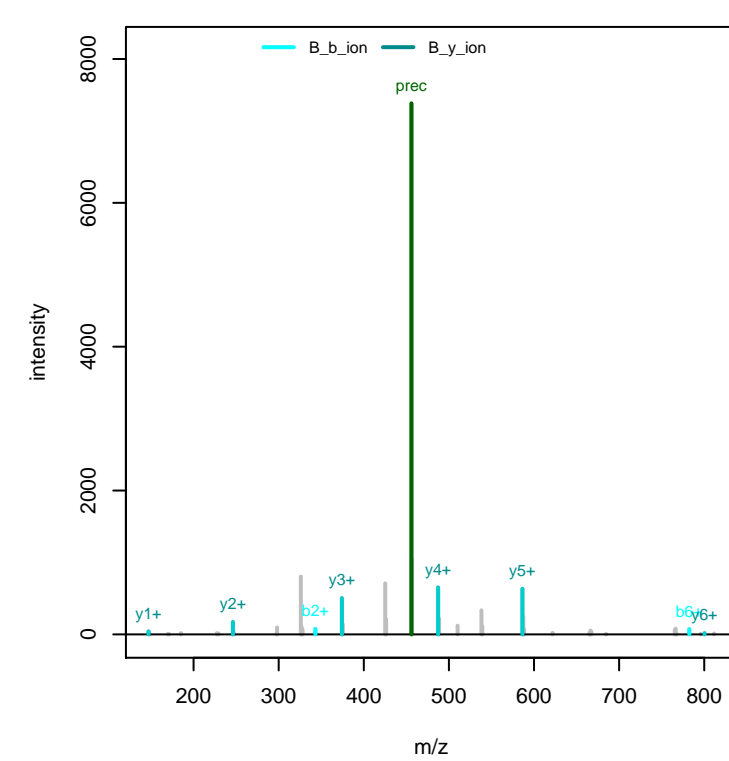

**KAEEEAR  
EQEAAELKR**

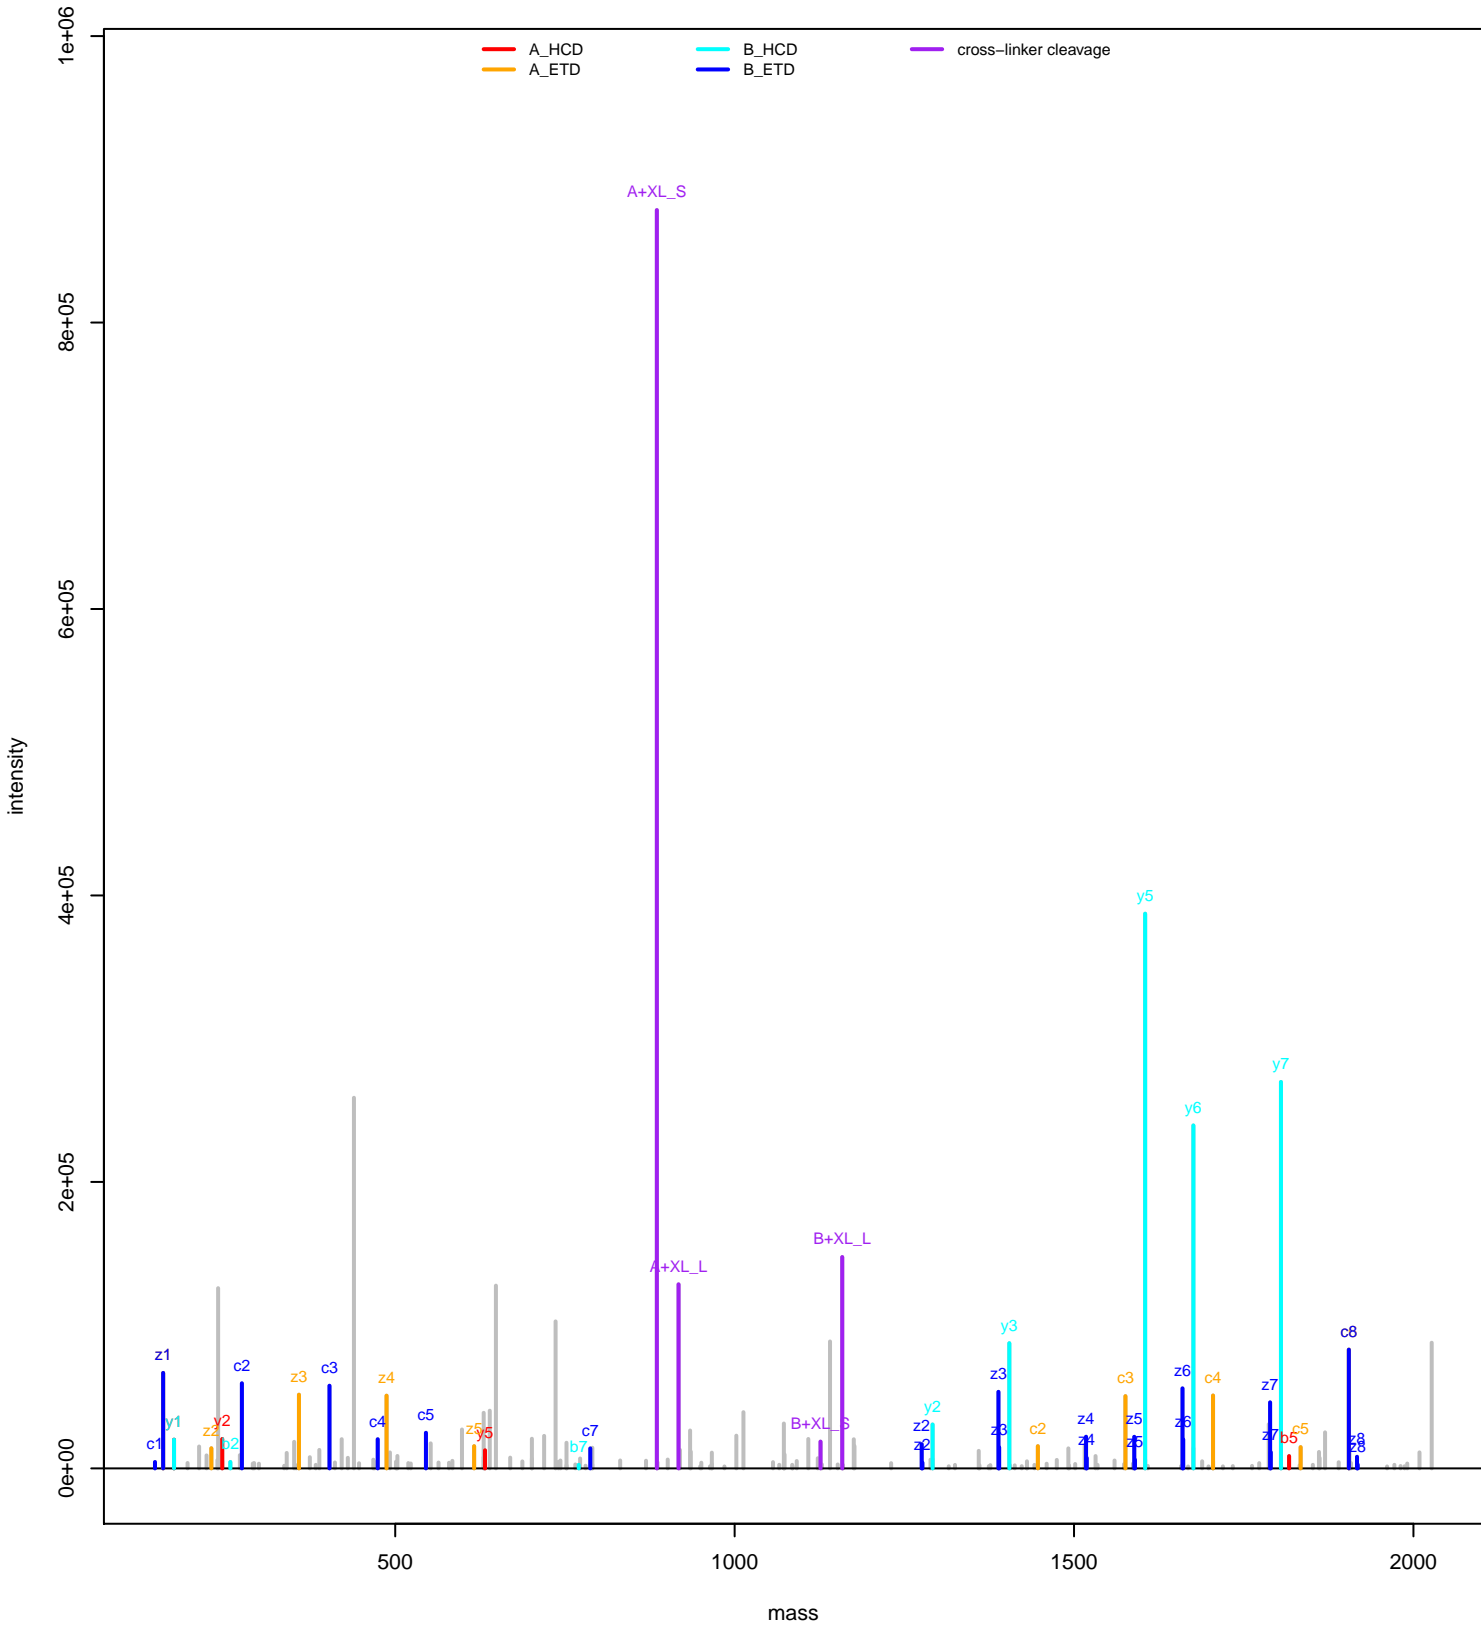

**KAEEEAR+XL\_S**

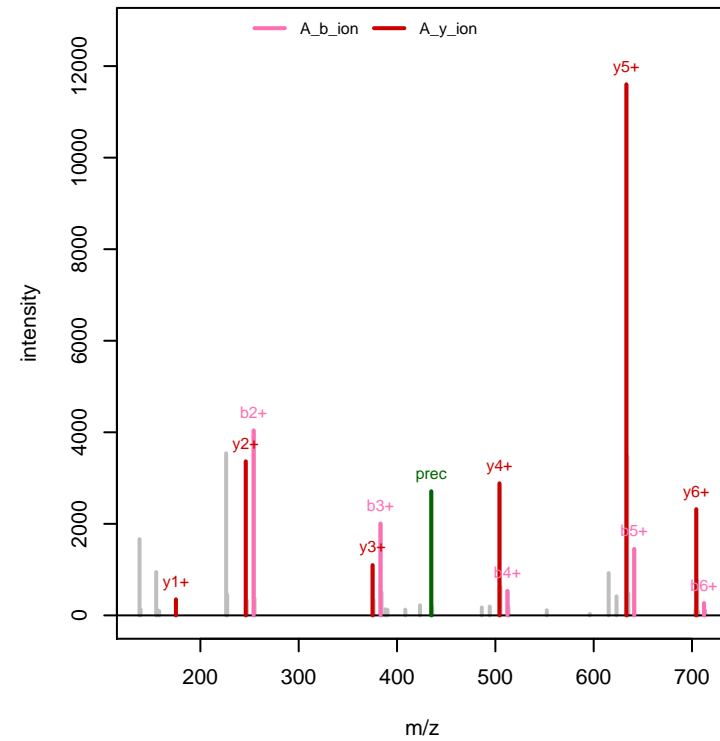

**KAEEEAR+XL\_L**

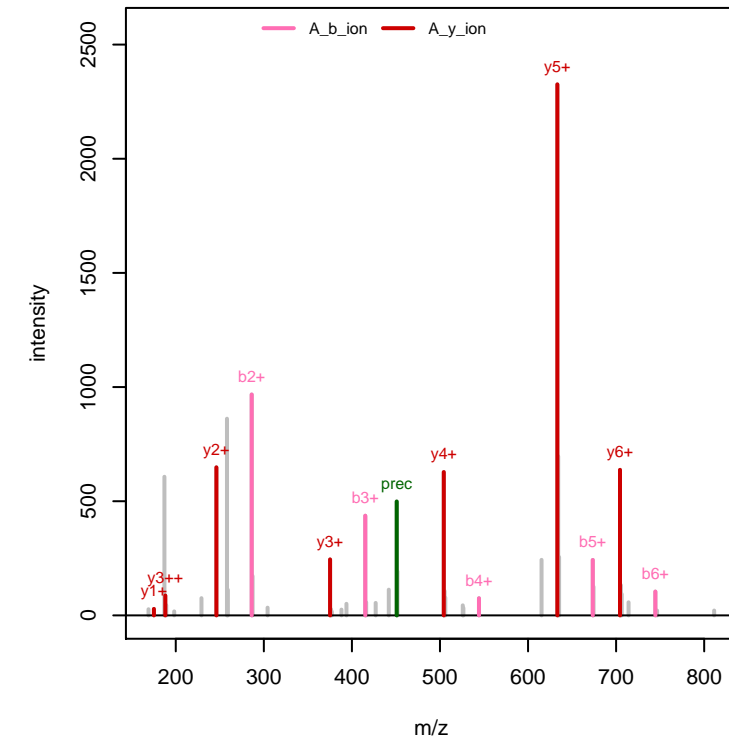

**EQEAAELKR+XL\_S**

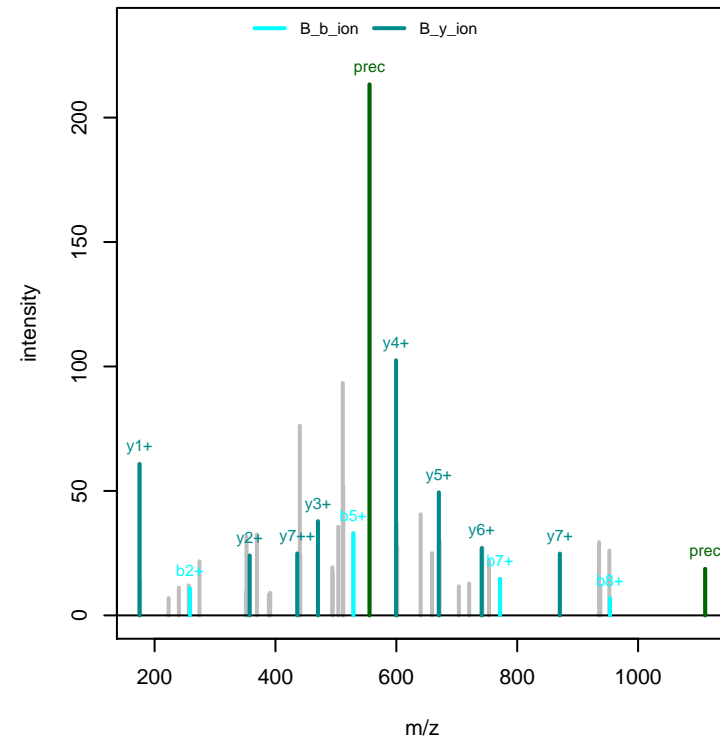

**EQEAAELKR+XL\_L**

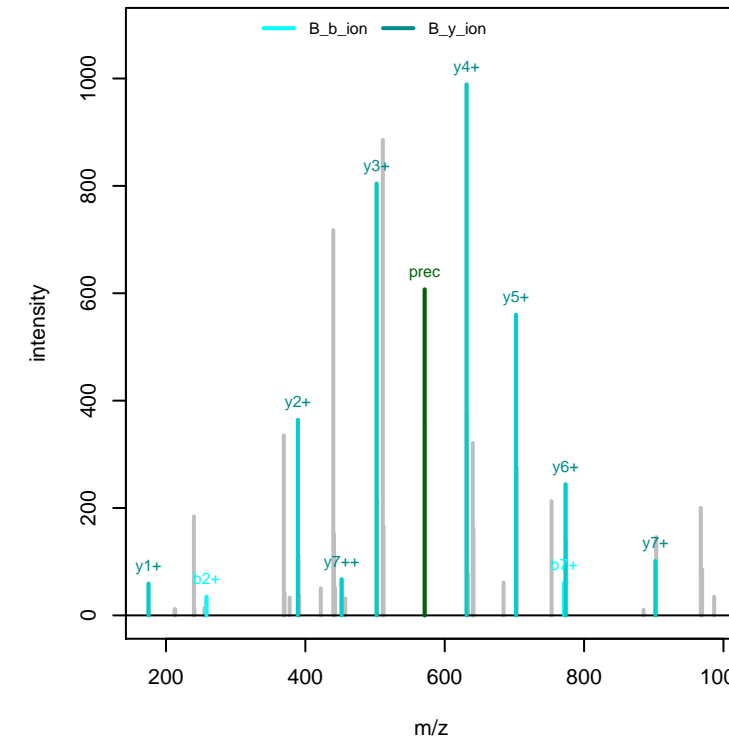

VSAKGMR  
VCQVTGKRPTGNNR

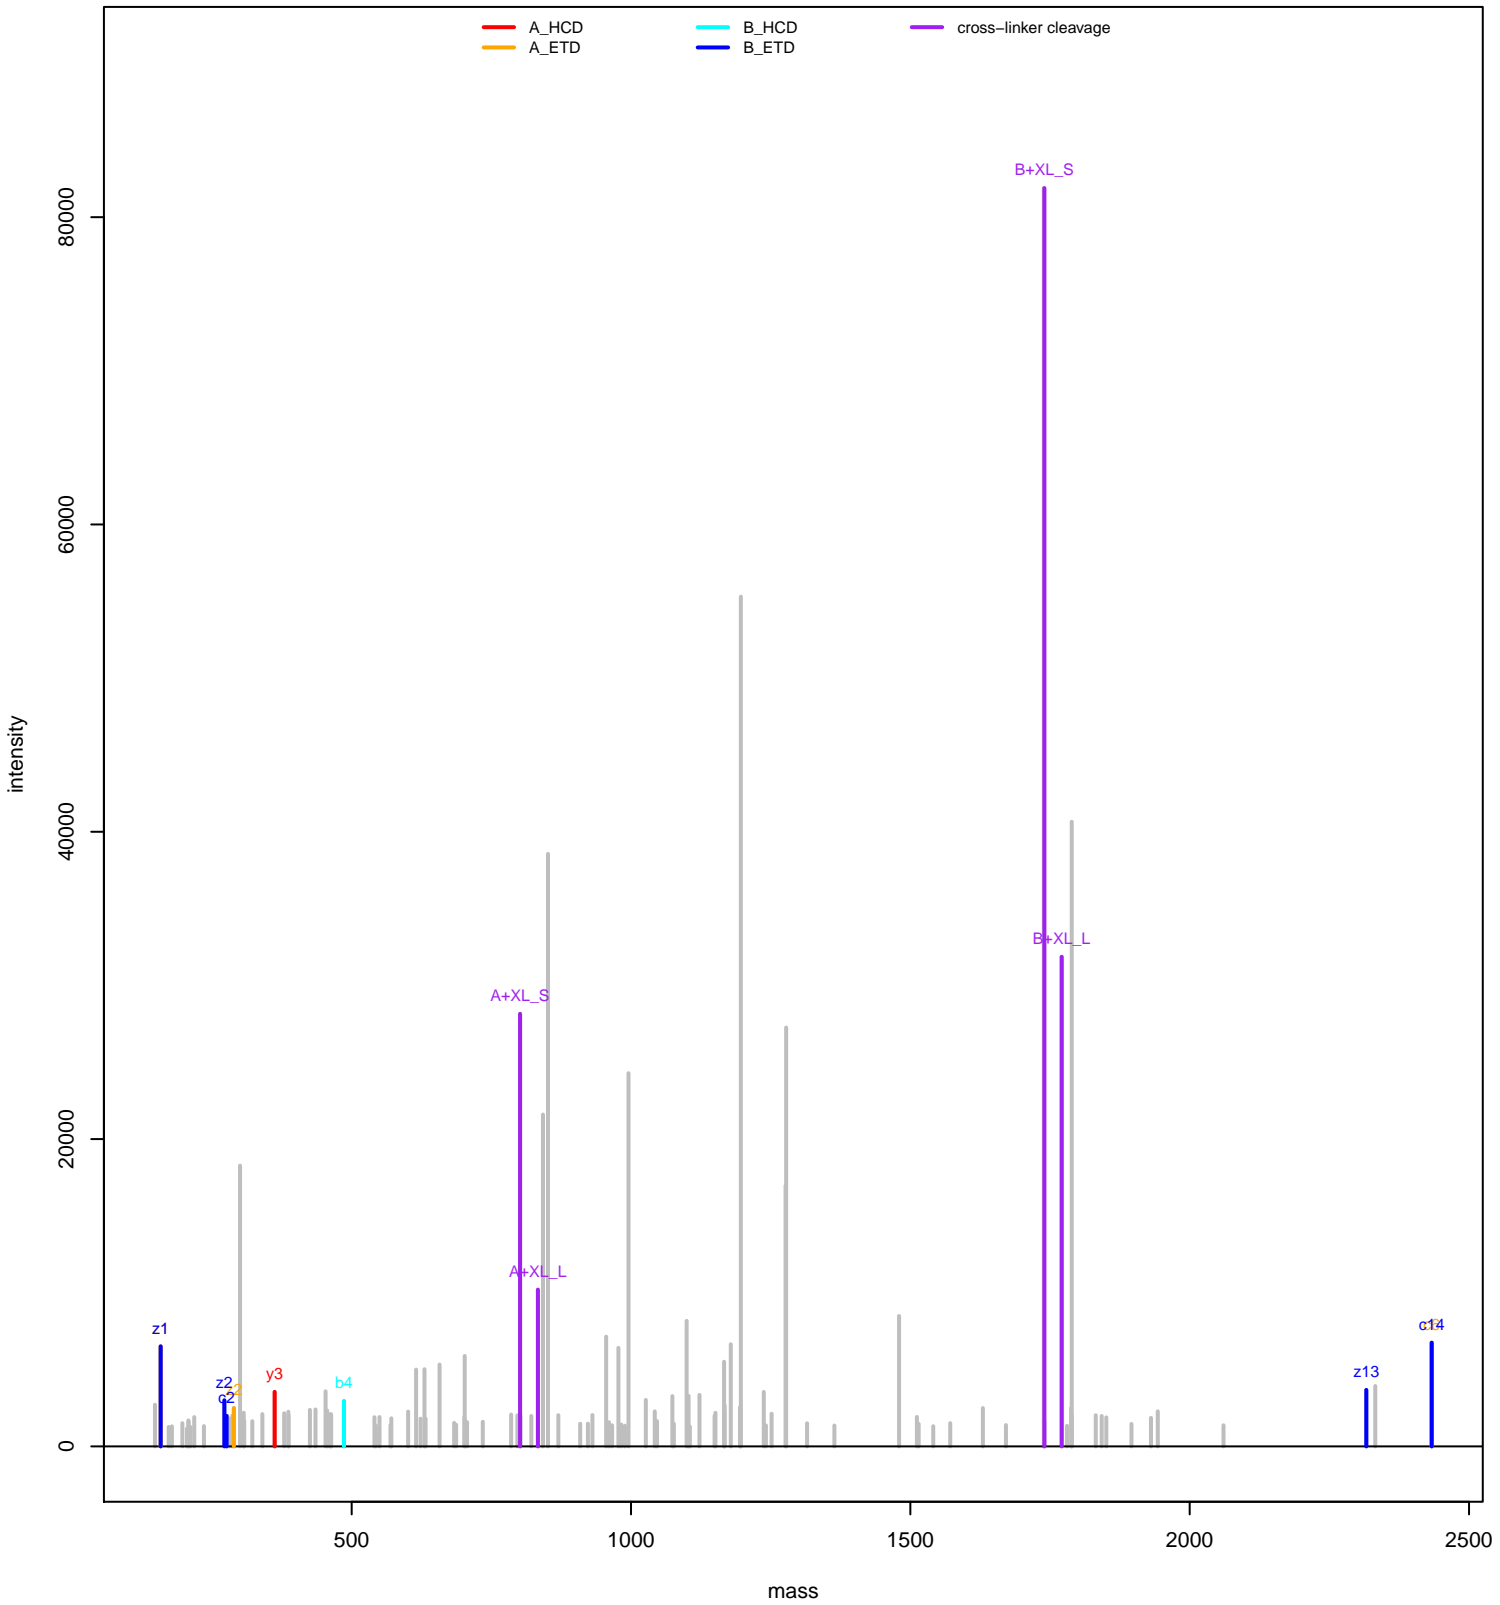

VSAKGMR+XL\_S

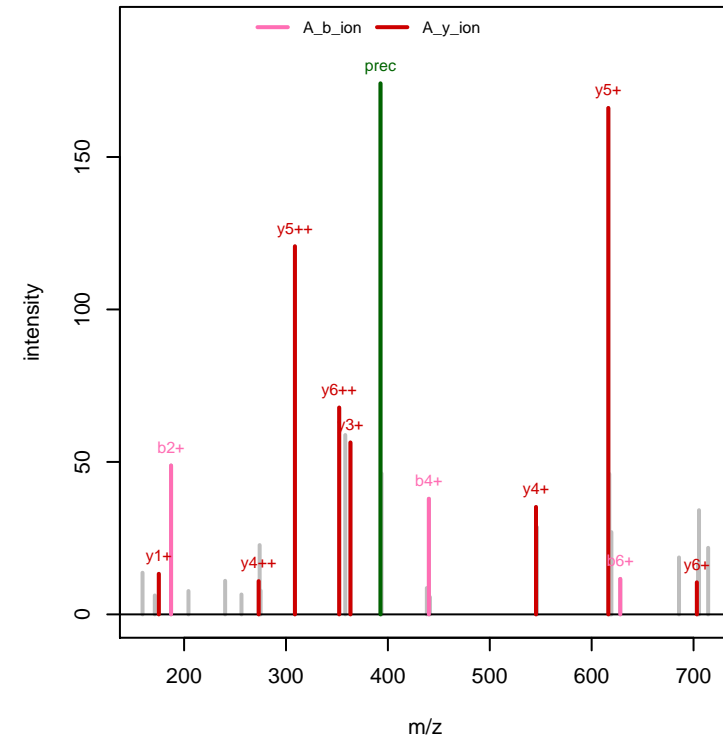

VSAKGMR+XL\_L

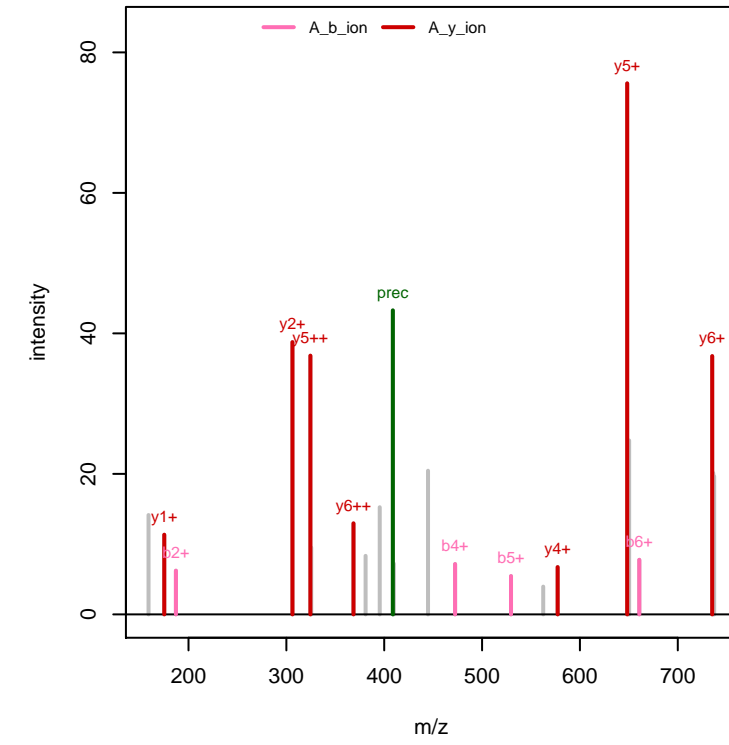

VCQVTGKRPTGNNR+XL\_S

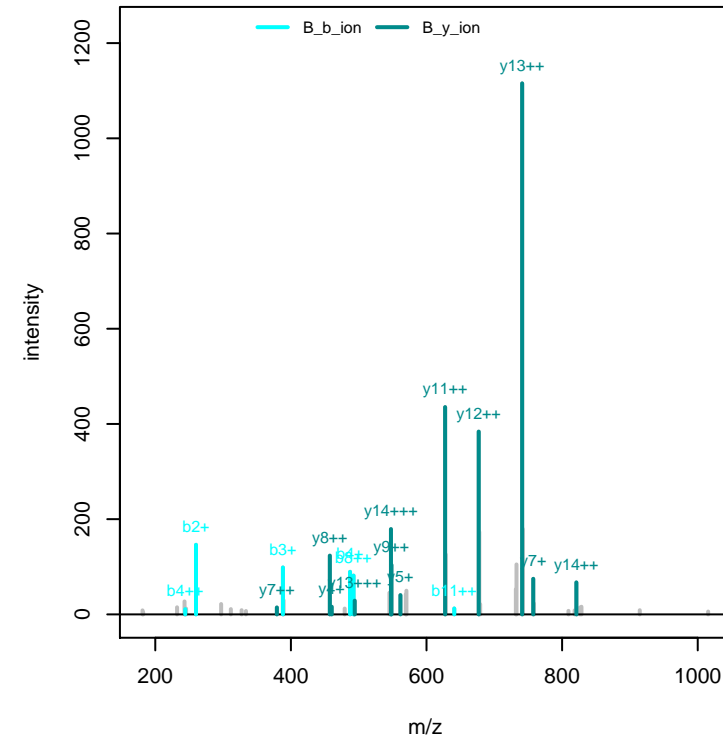

VCQVTGKRPTGNNR+XL\_L

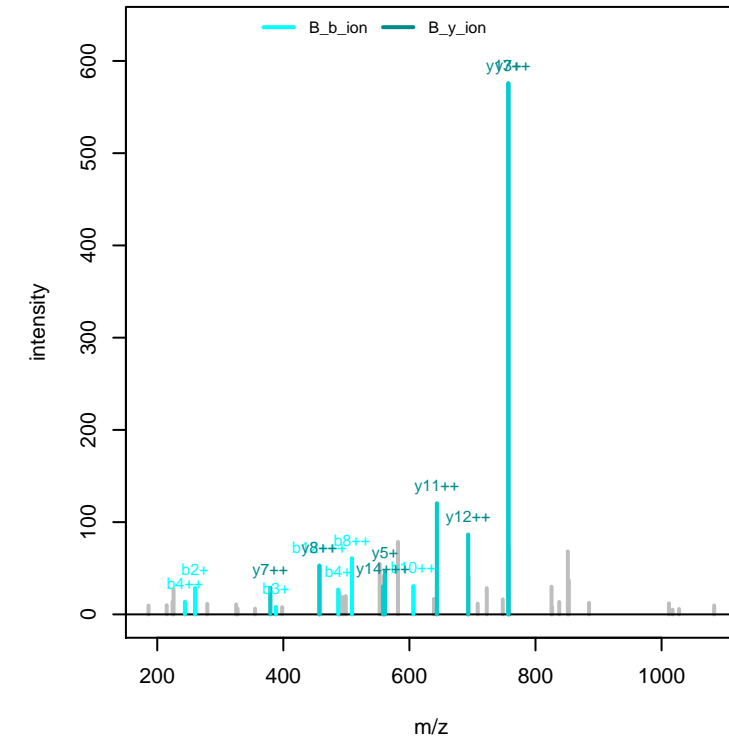

**FNKGEK  
KDETLISK**

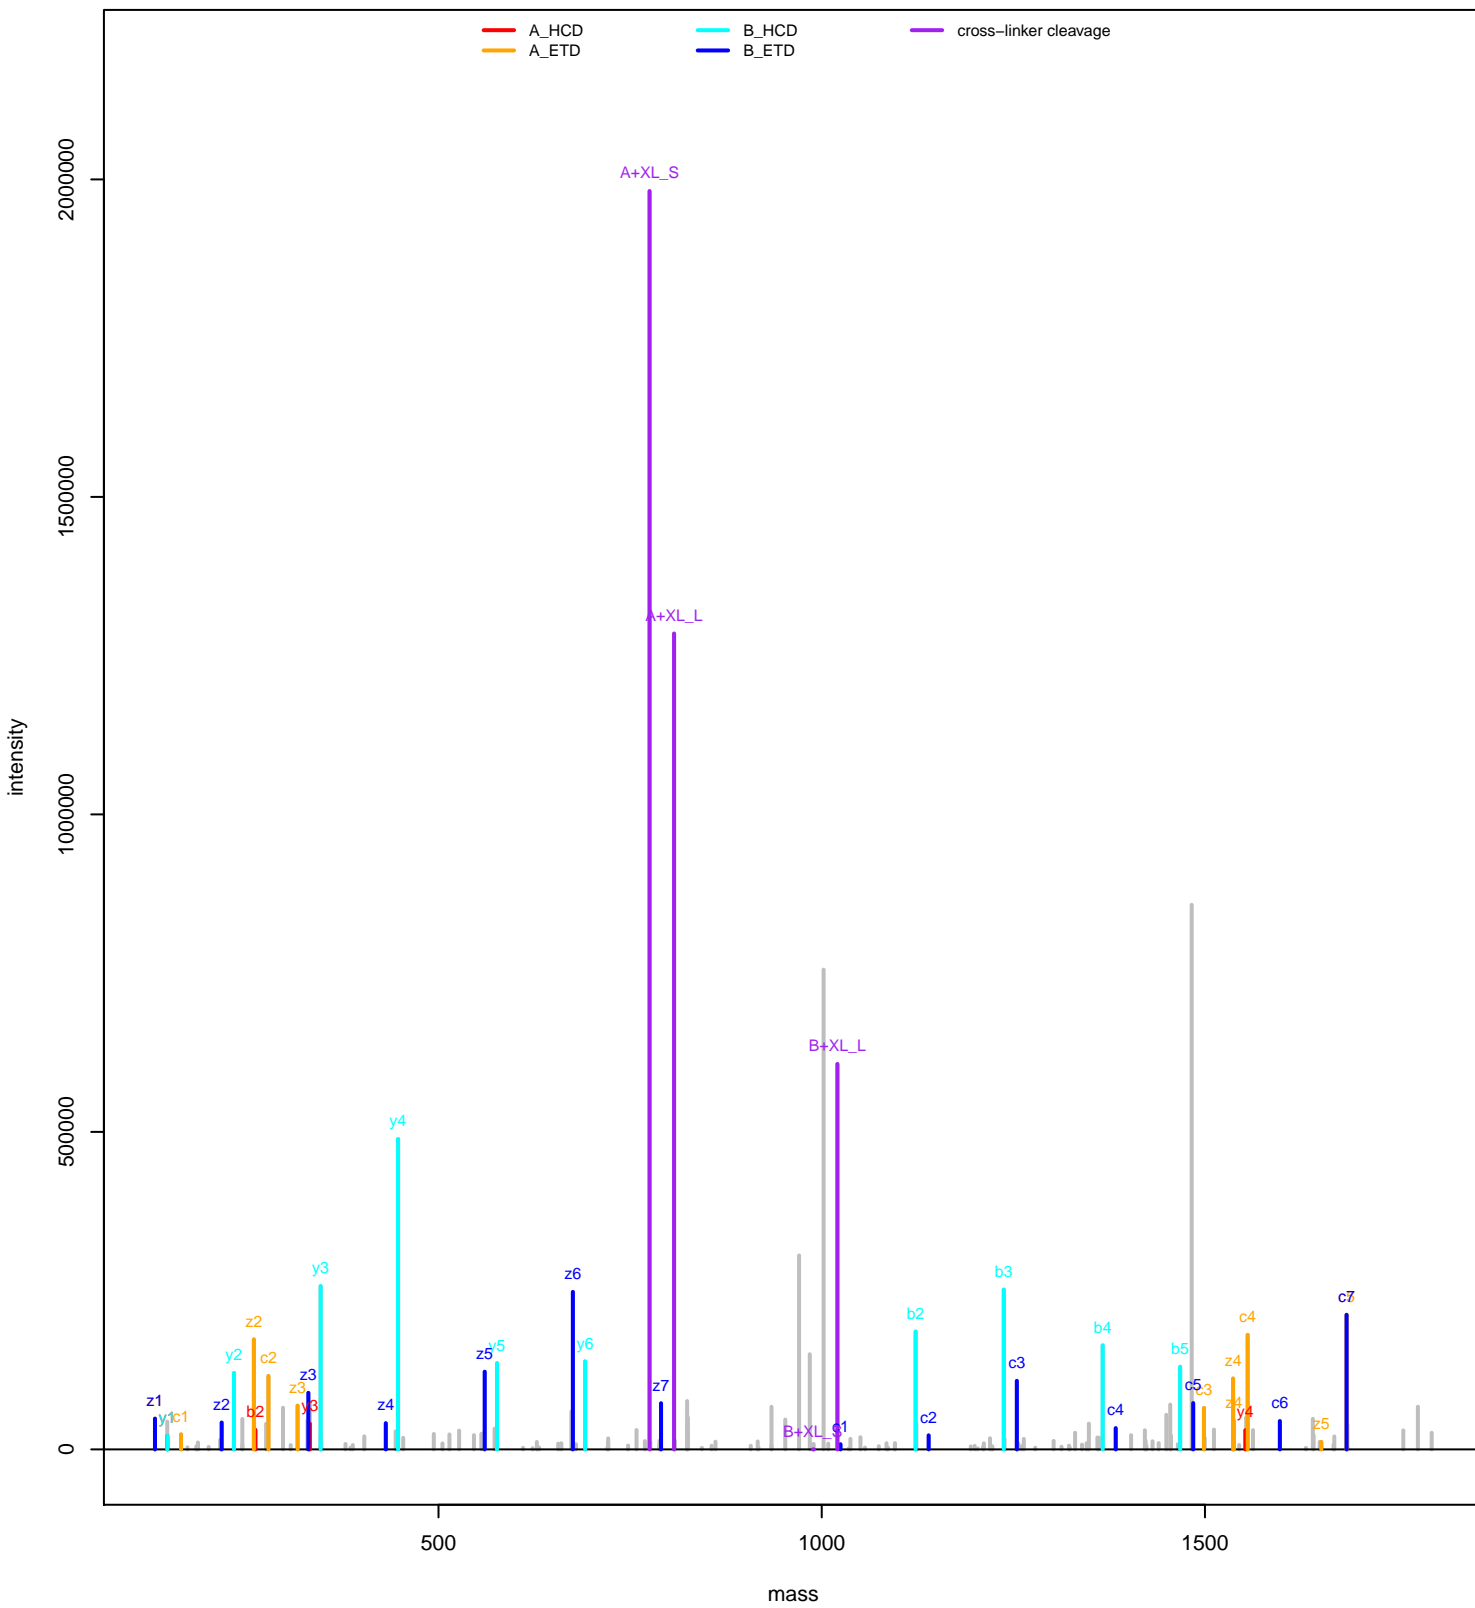

**FNKGEK+XL\_S**

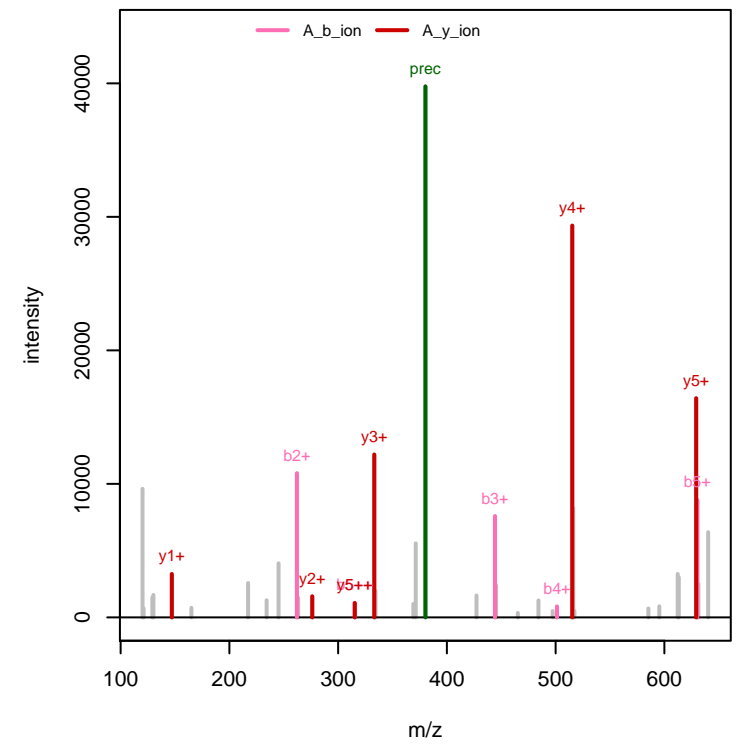

**FNKGEK+XL\_L**

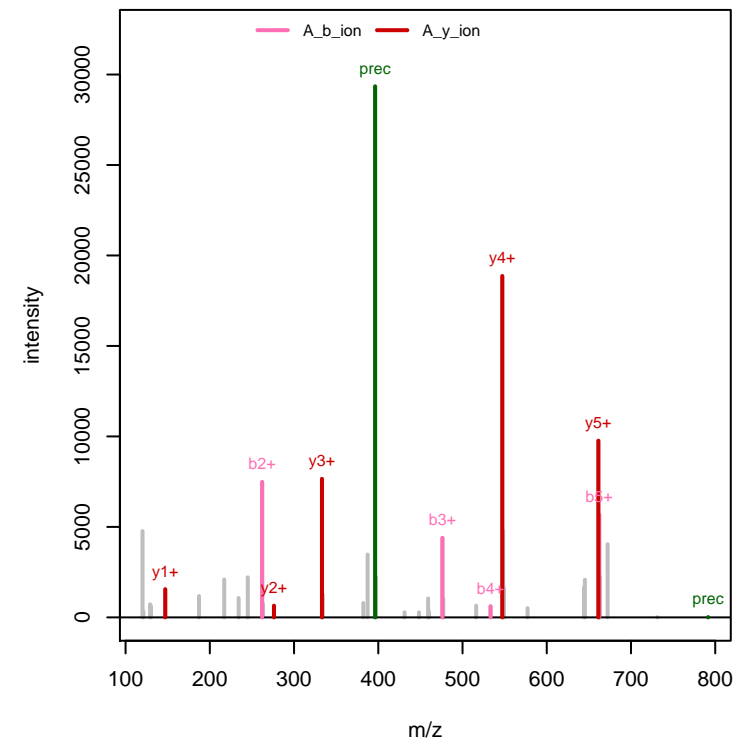

**KDETLISK+XL\_S**

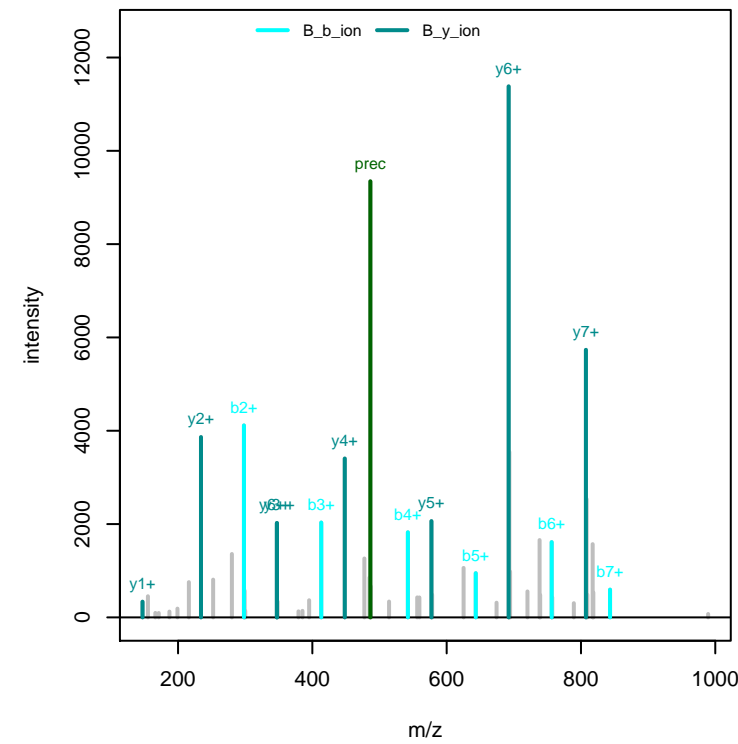

**KDETLISK+XL\_L**

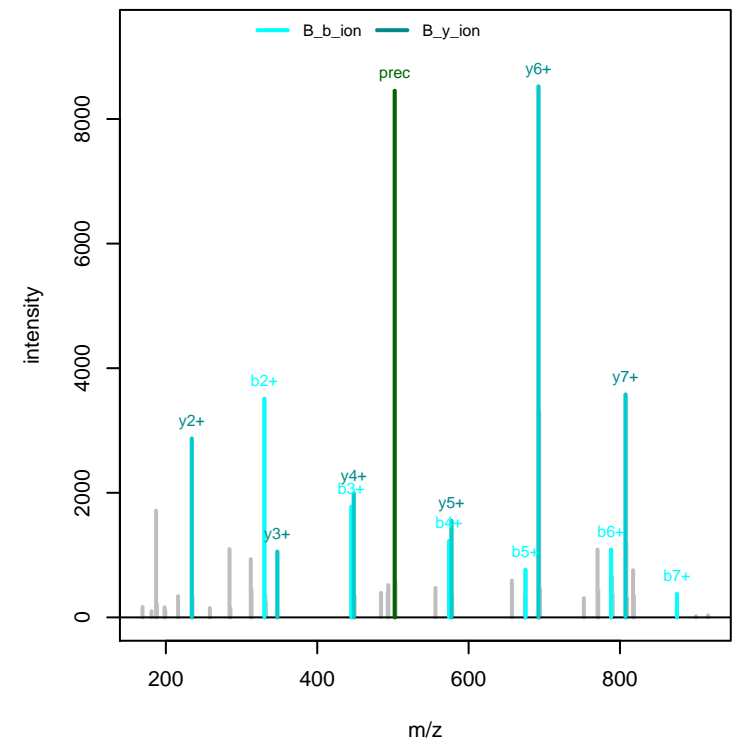

VAKDATK  
ASTAMEKSNTIVLK

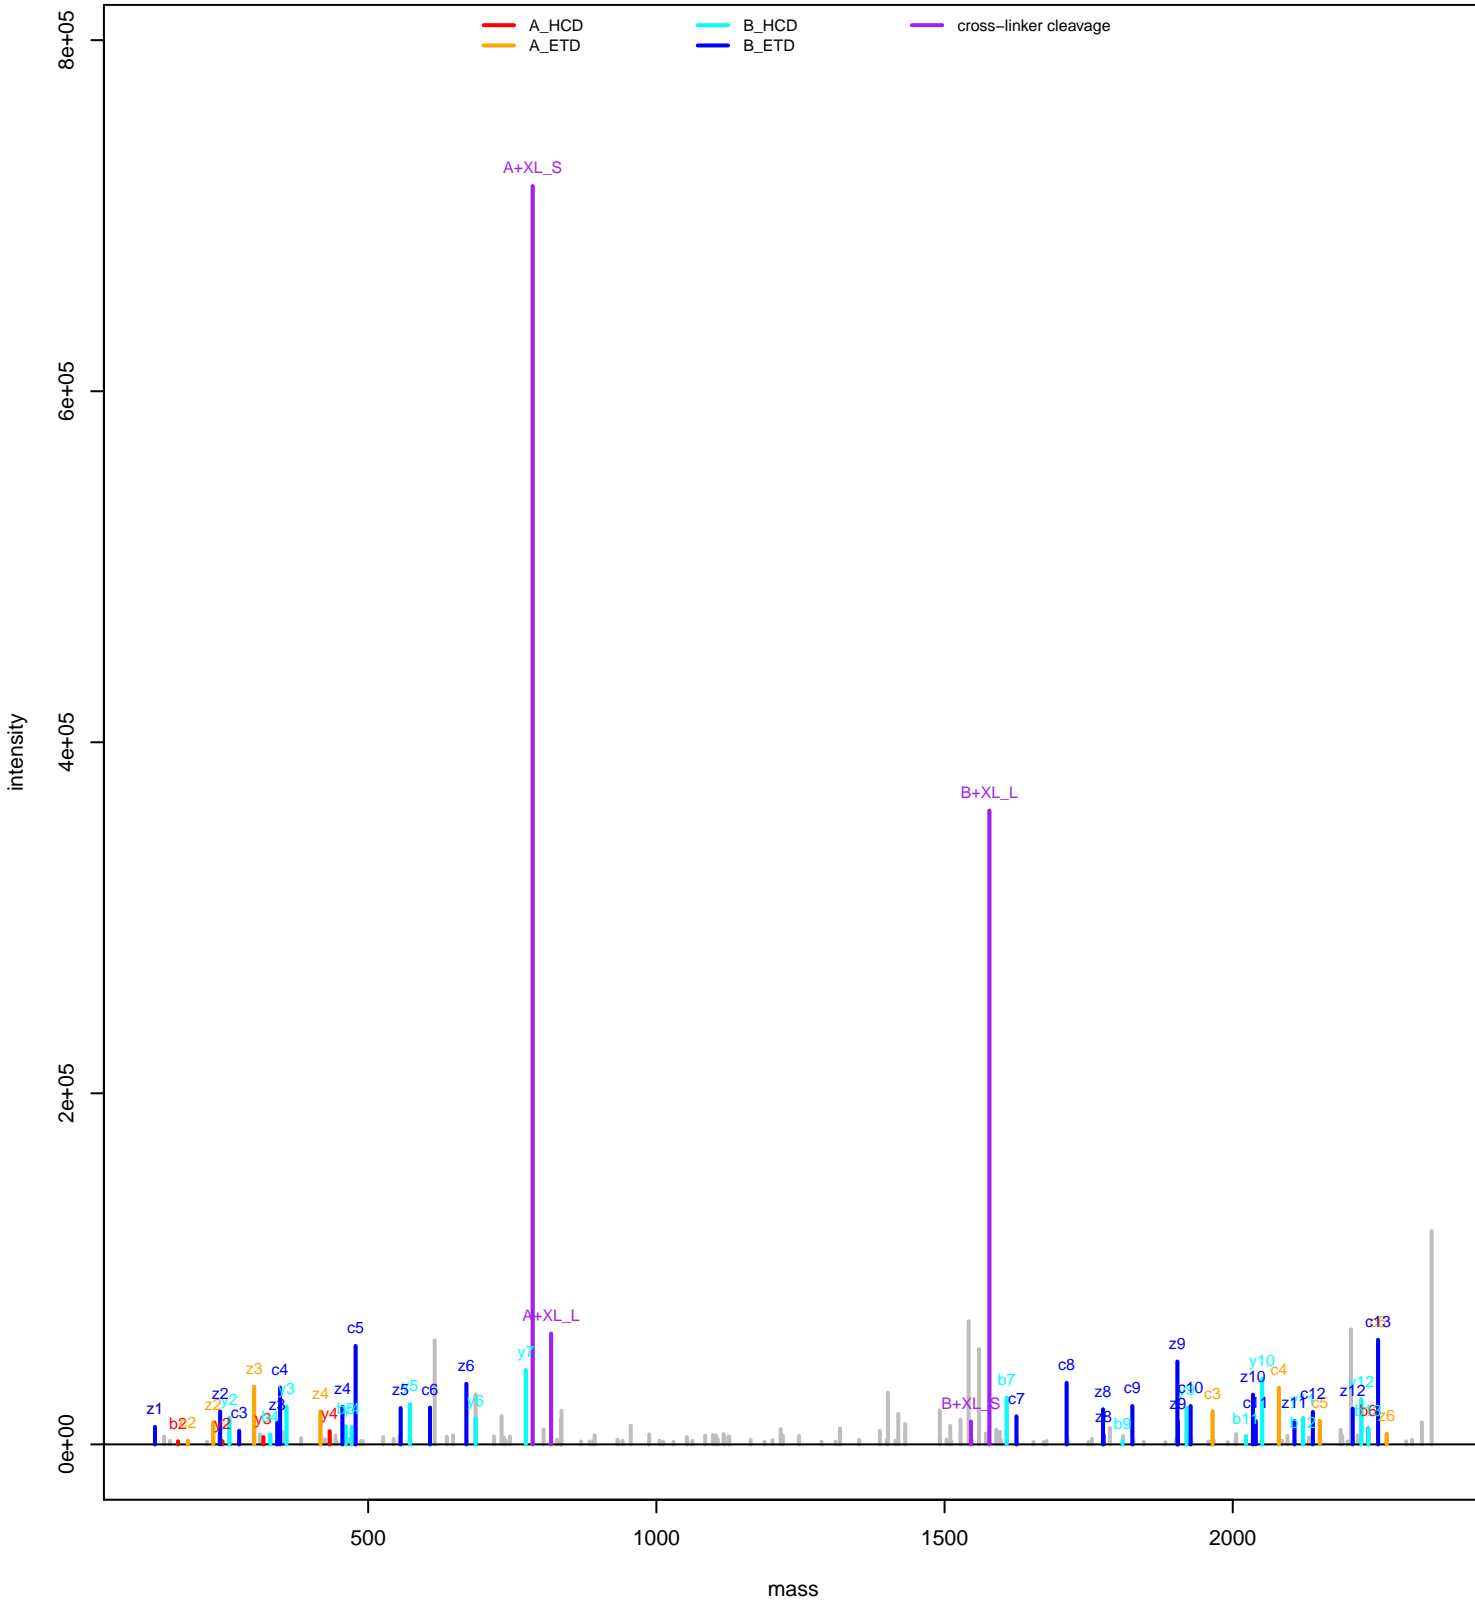

VAKDATK+XL\_S

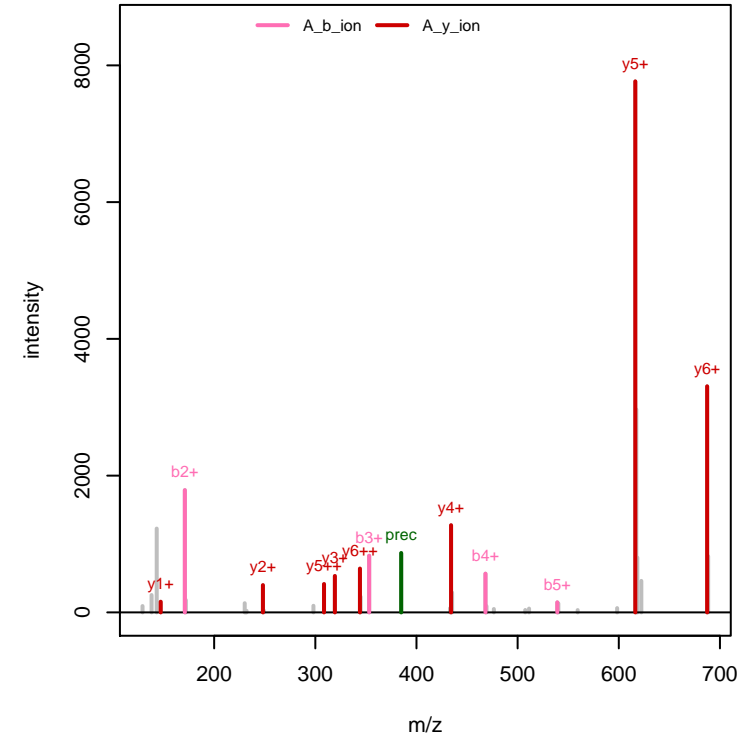

VAKDATK+XL\_L

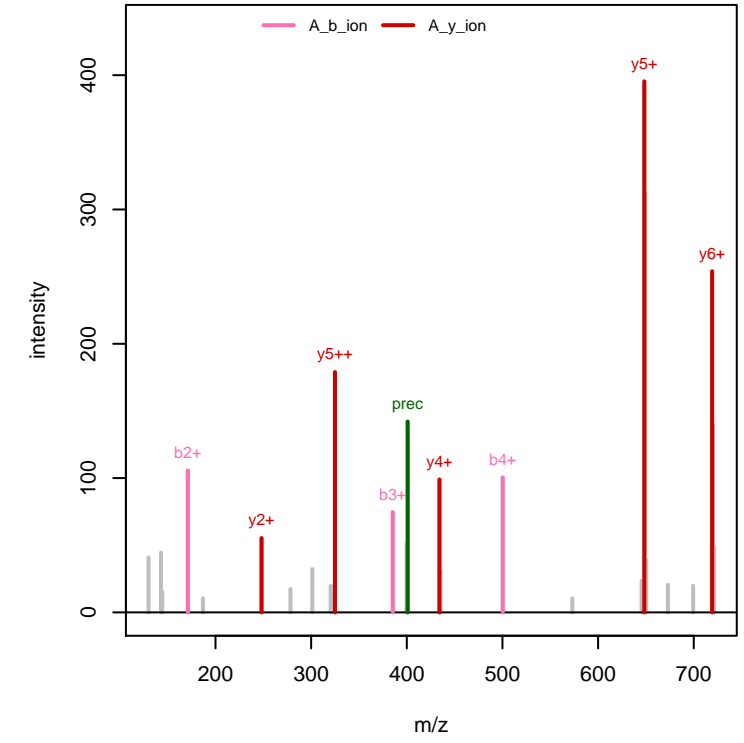

ASTAMEKSNTIVLK+XL\_S

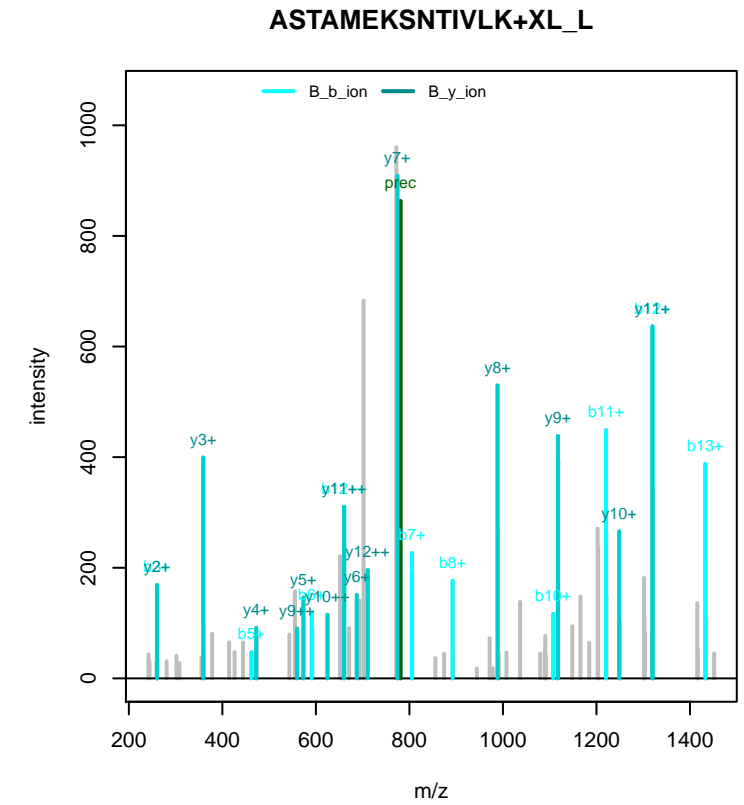



**KAIEQDAK  
DNLAEFSSK**

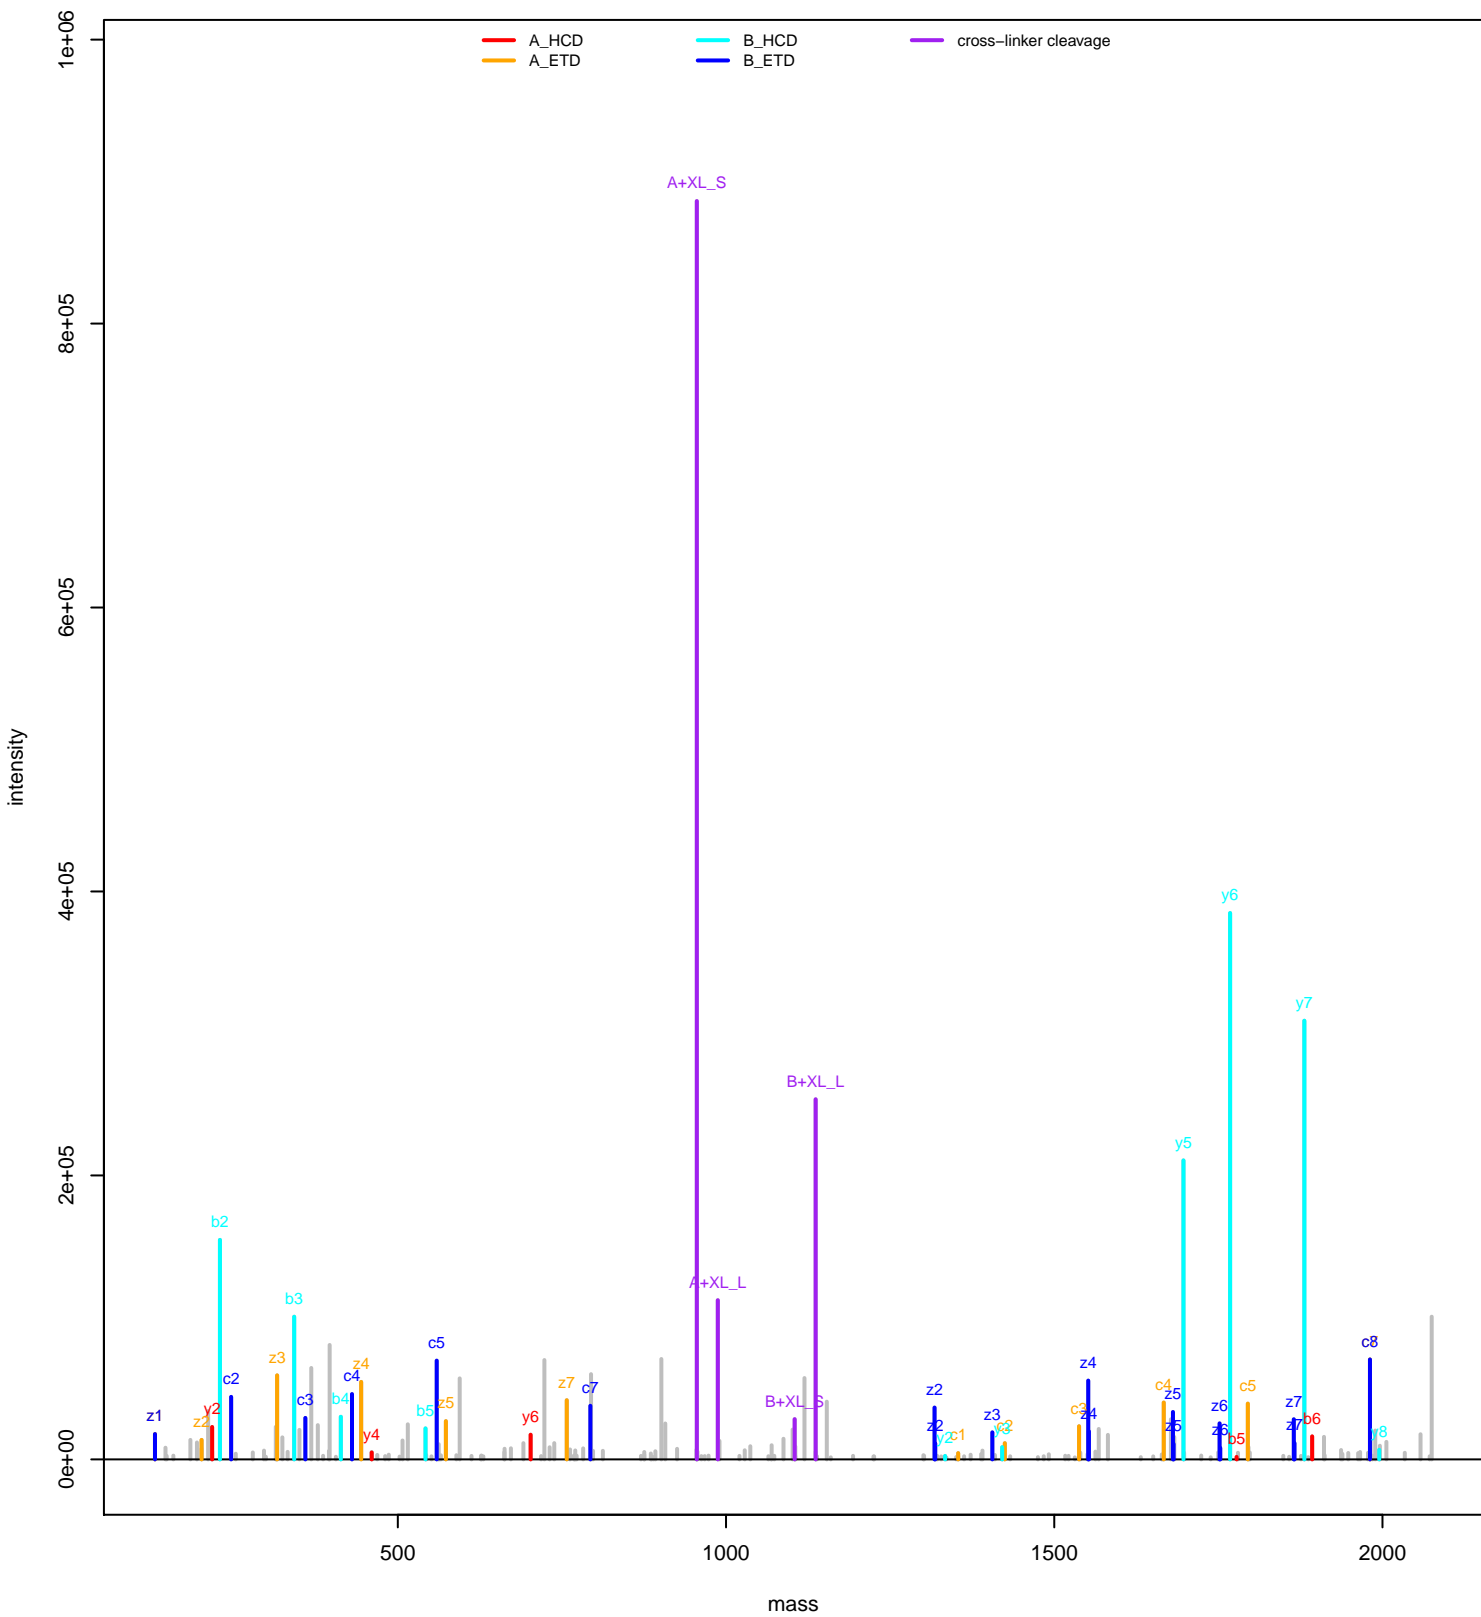

**KAIEQDAK+XL\_S**

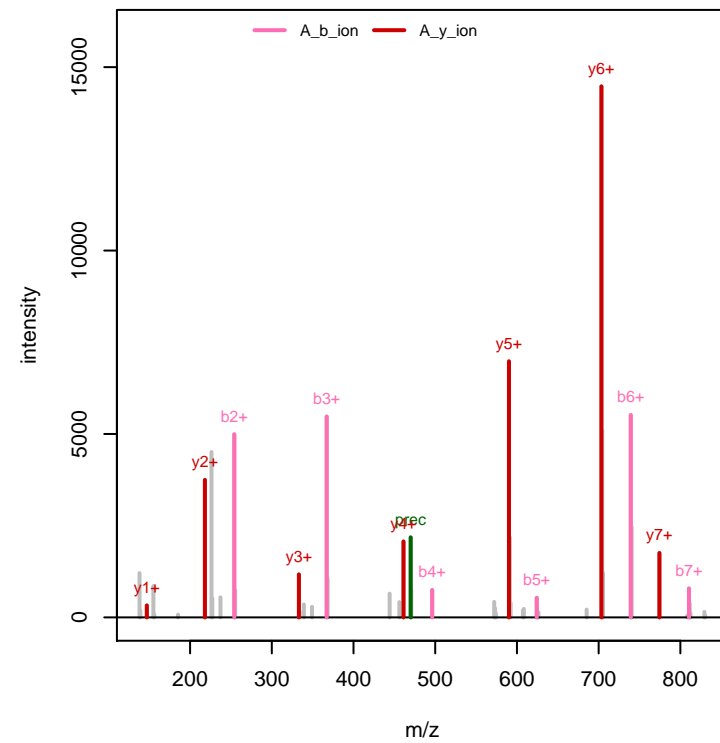

**KAIEQDAK+XL\_L**

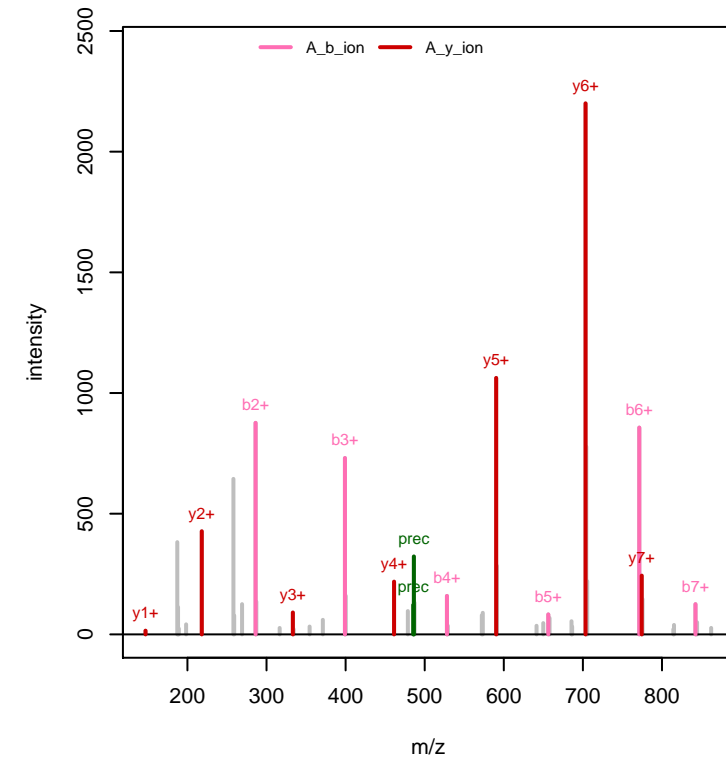

**DNLAEFSSK+XL\_S**

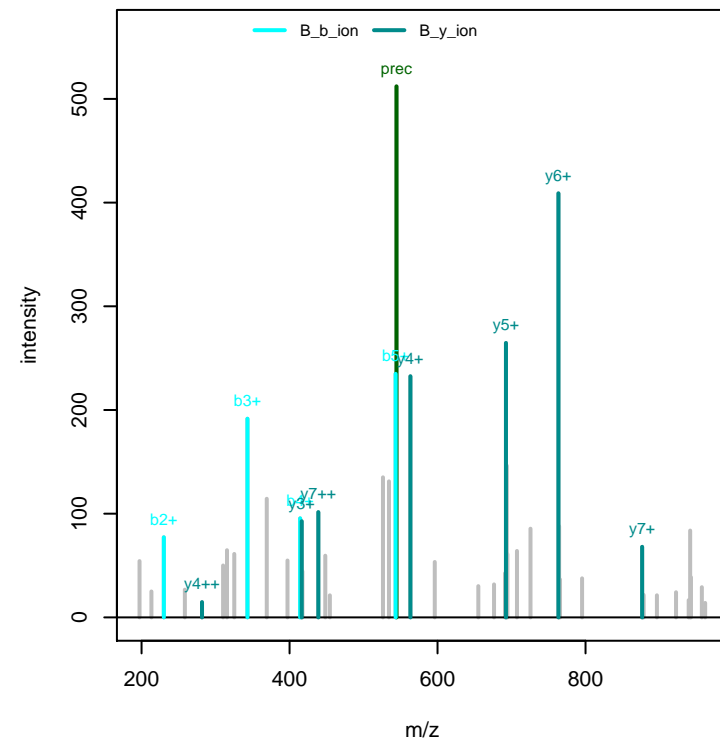

**DNLAEFSSK+XL\_L**

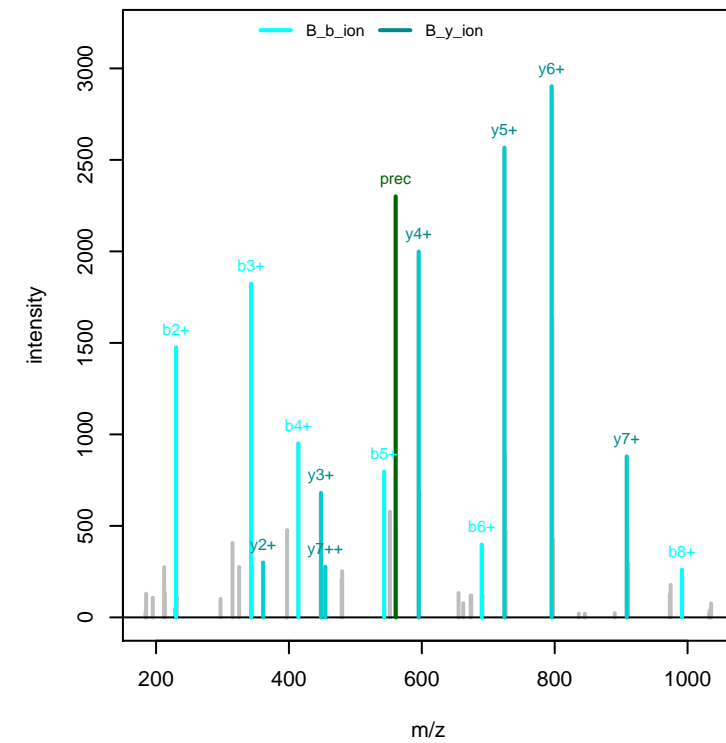

SEAEKR  
KKNMGY

SEAEKR+XL\_S

SEAEKR+XL\_L

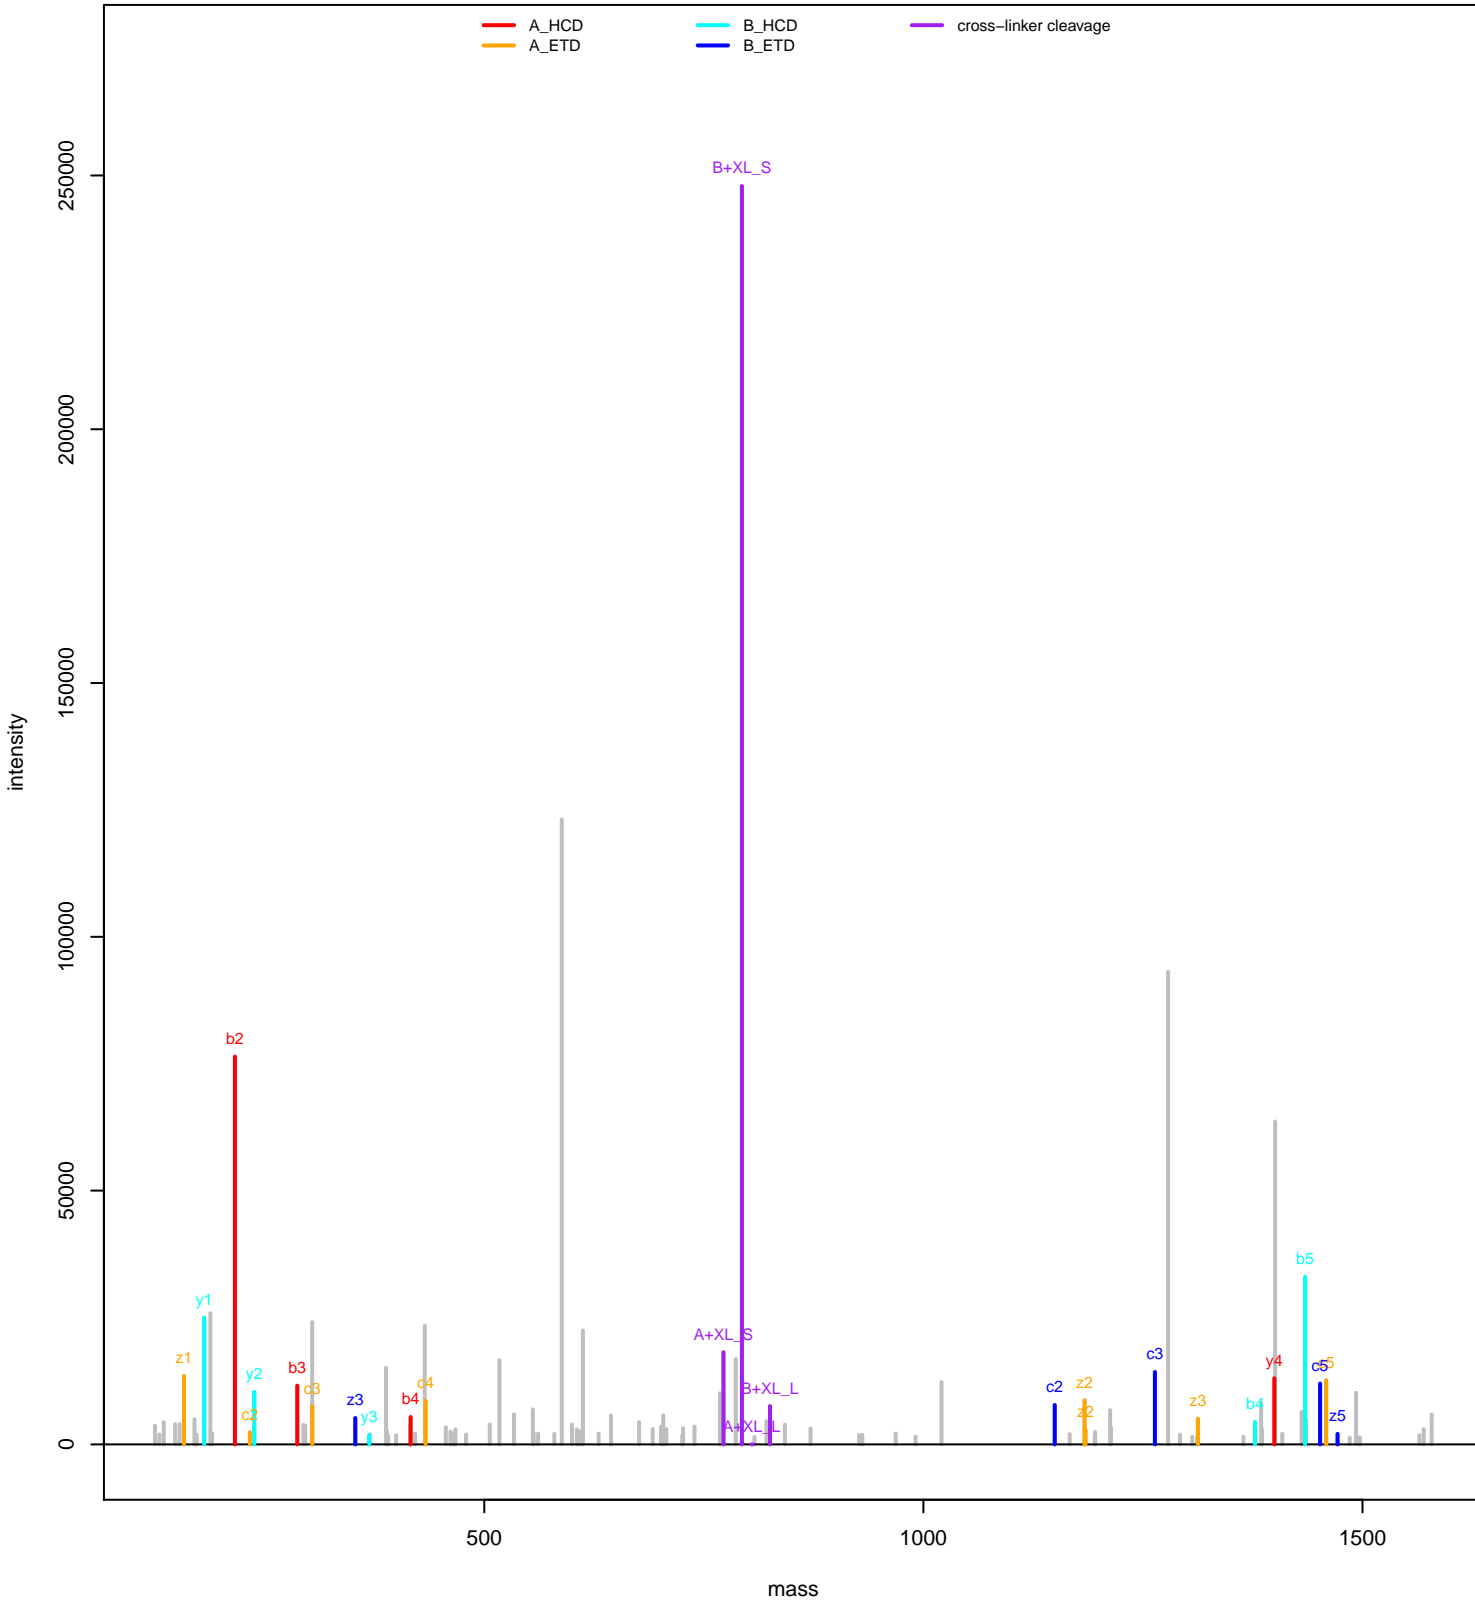

KKNMGY+XL\_S

KKNMGY+XL\_L

### AALIAKSR LAGAKTEAK

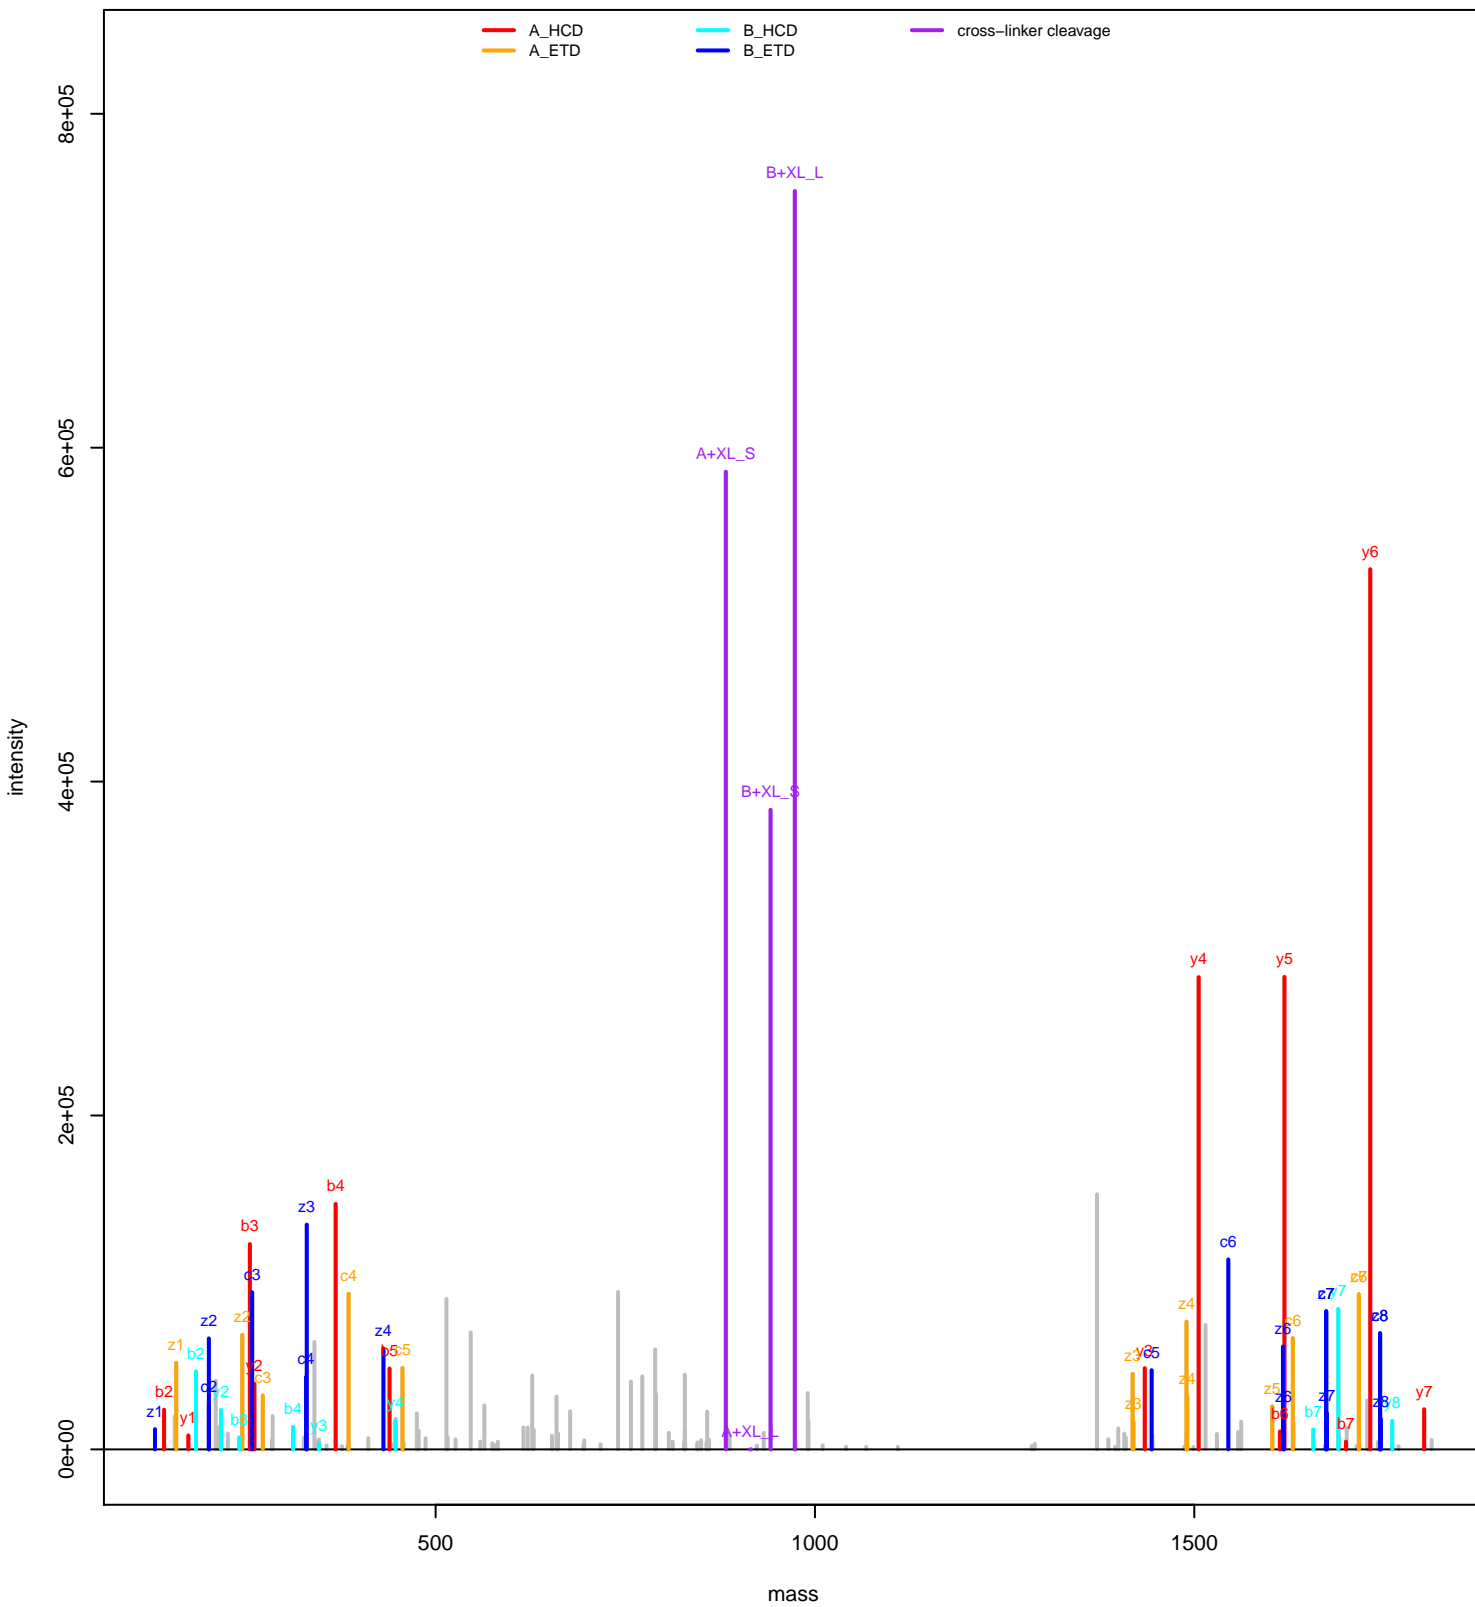

### AALIAKSR+XL\_S

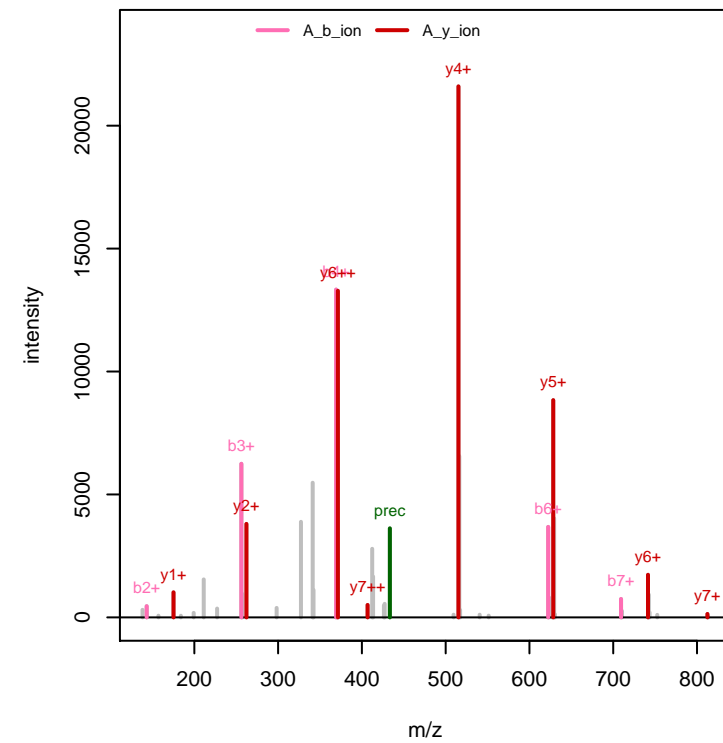

### AALIAKSR+XL\_L

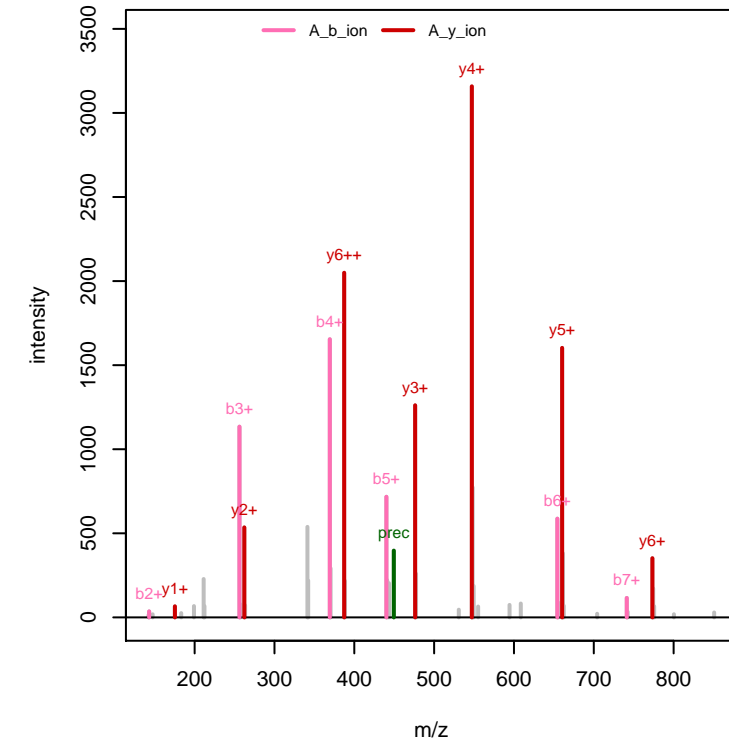

### LAGAKTEAK+XL\_S

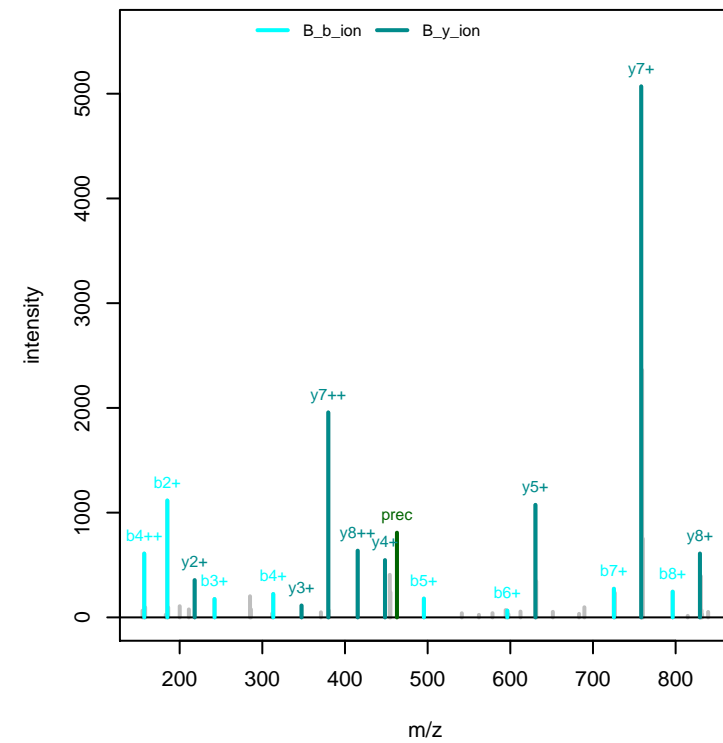

### LAGAKTEAK+XL\_L

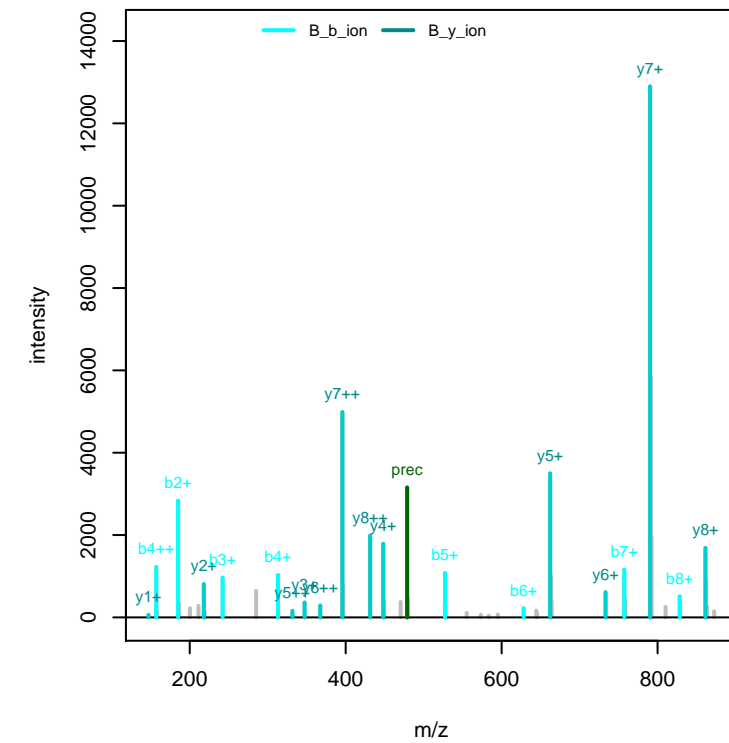

**QKDEVAER  
LAEAQEELKK**

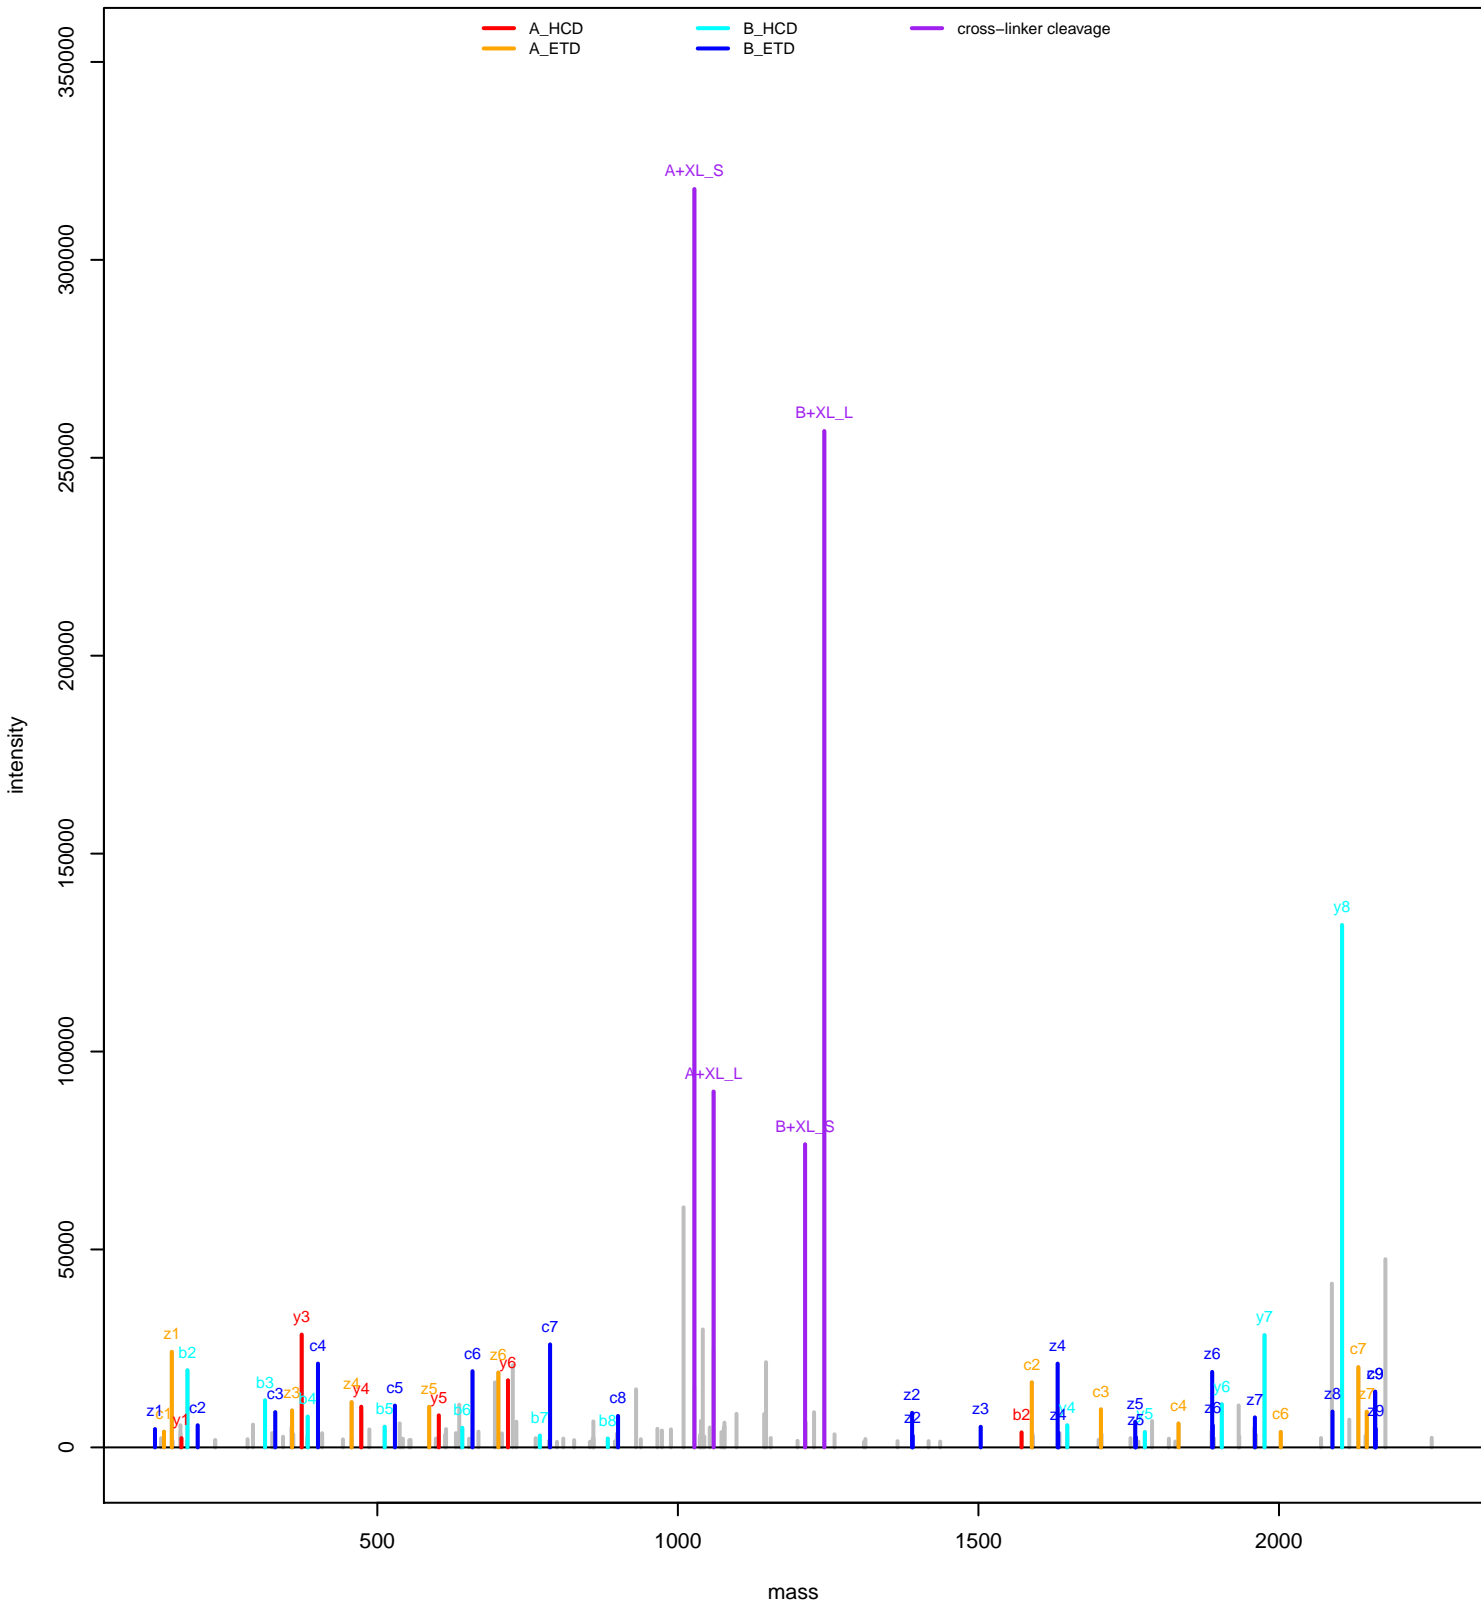

**QKDEVAER+XL\_S**

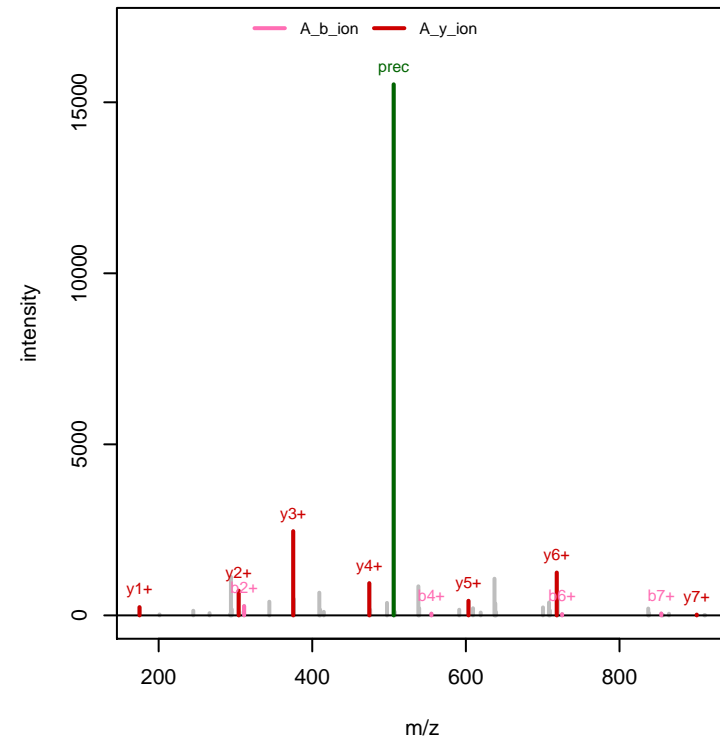

**QKDEVAER+XL\_L**

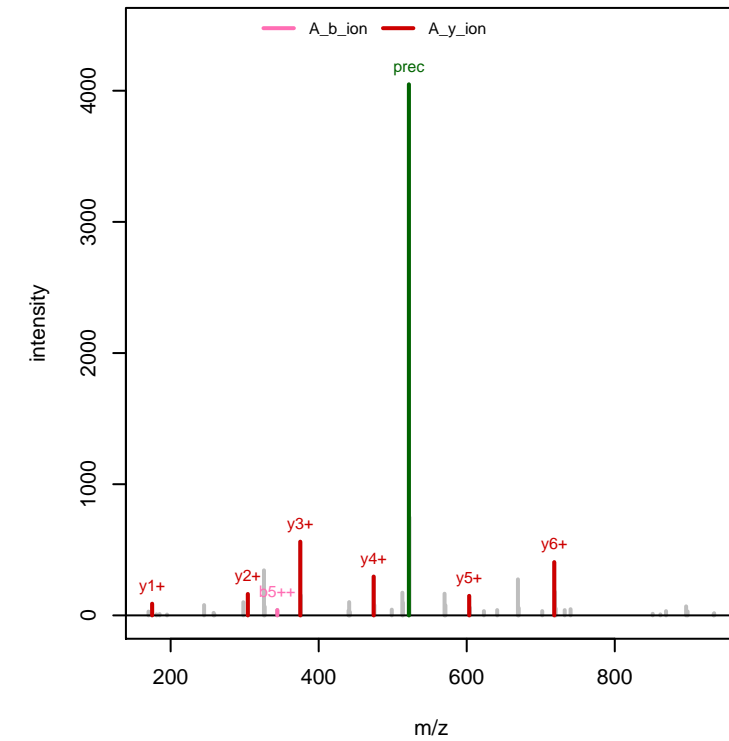

**LAEAQEELKK+XL\_S**

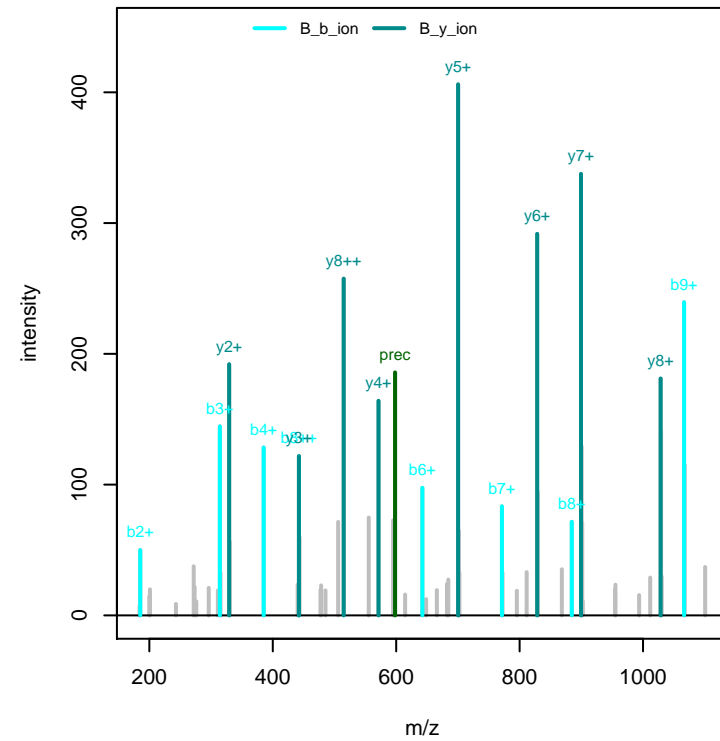

**LAEAQEELKK+XL\_L**

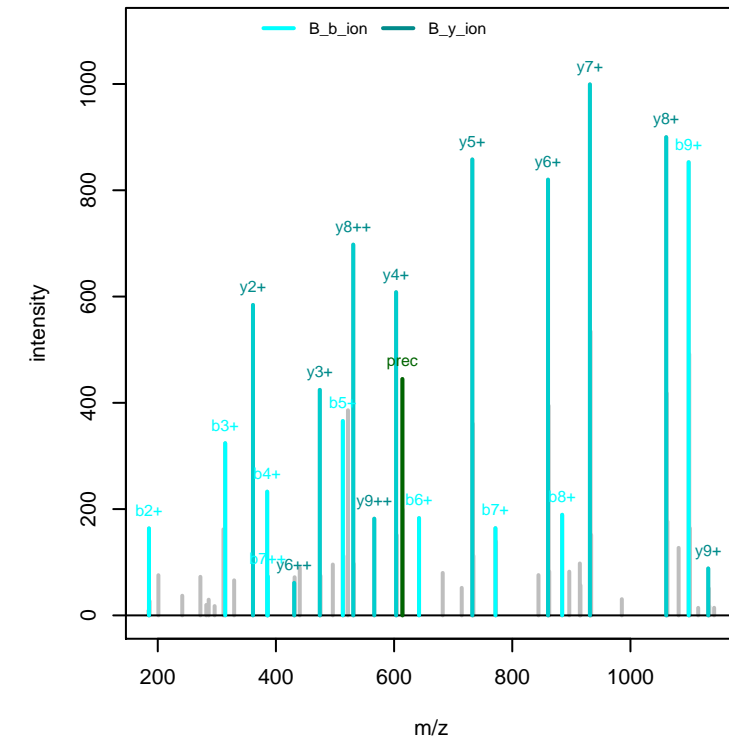

NDLKTK  
VAKGVEGVTSVSDK

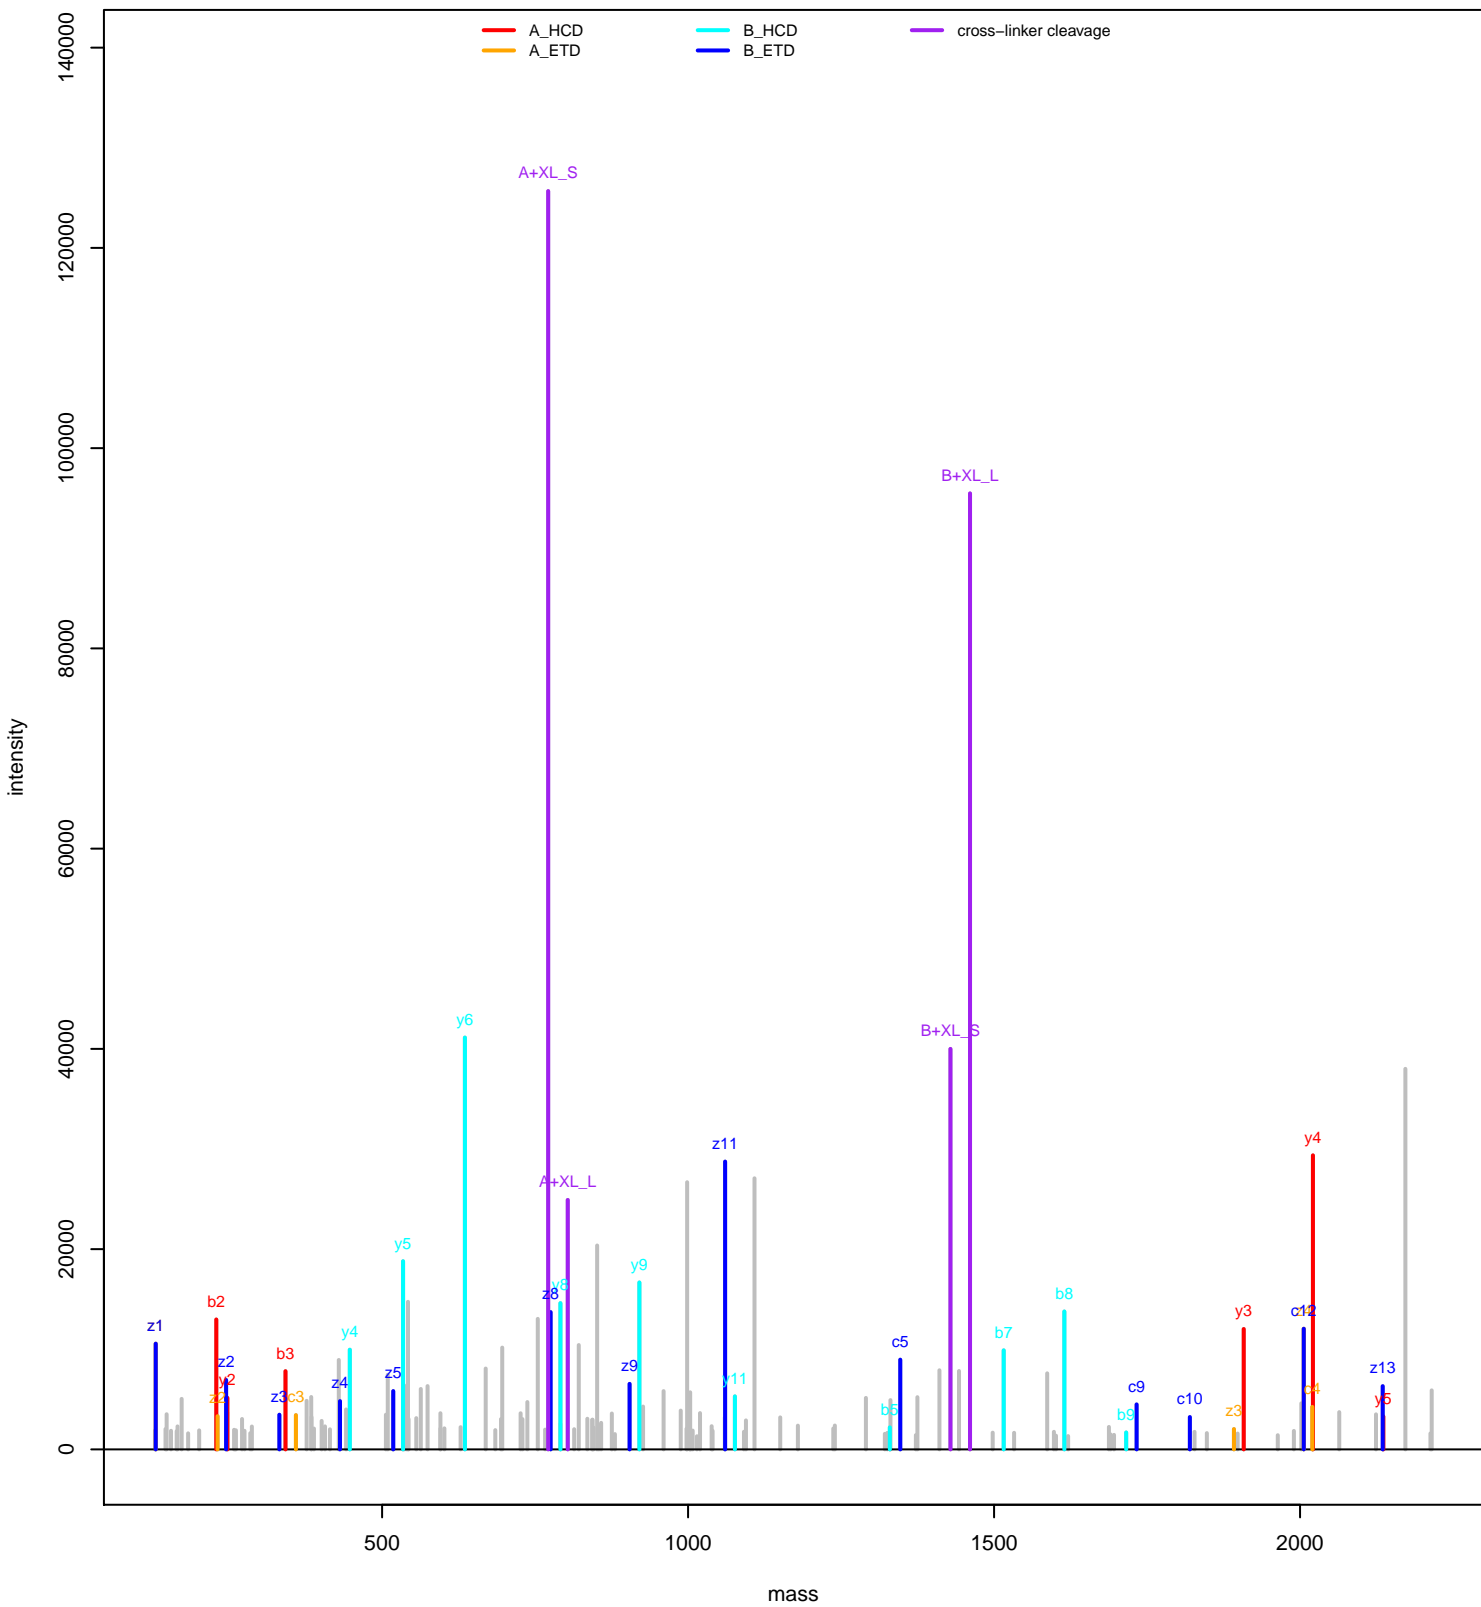

NDLKTK+XL\_S

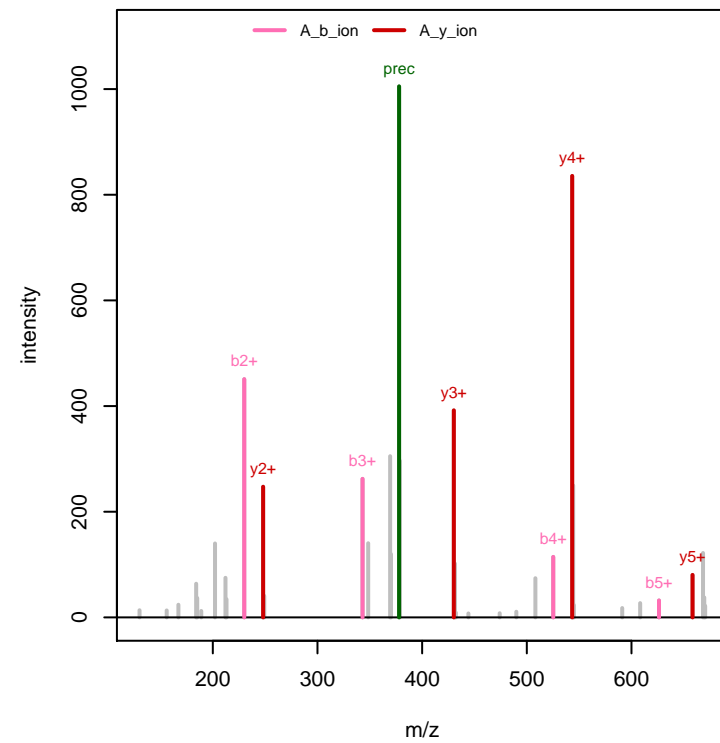

NDLKTK+XL\_L

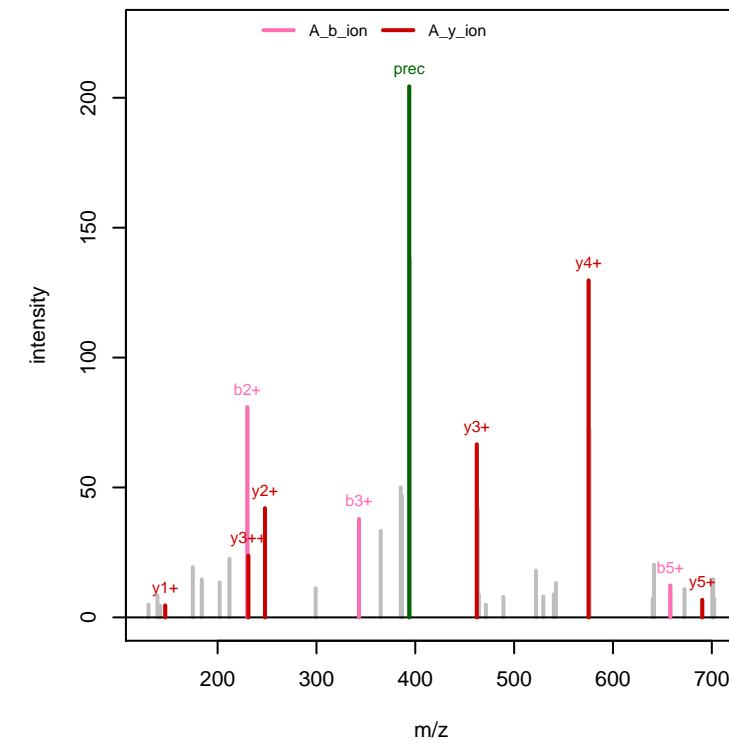

VAKGVEGVTSVSDK+XL\_S

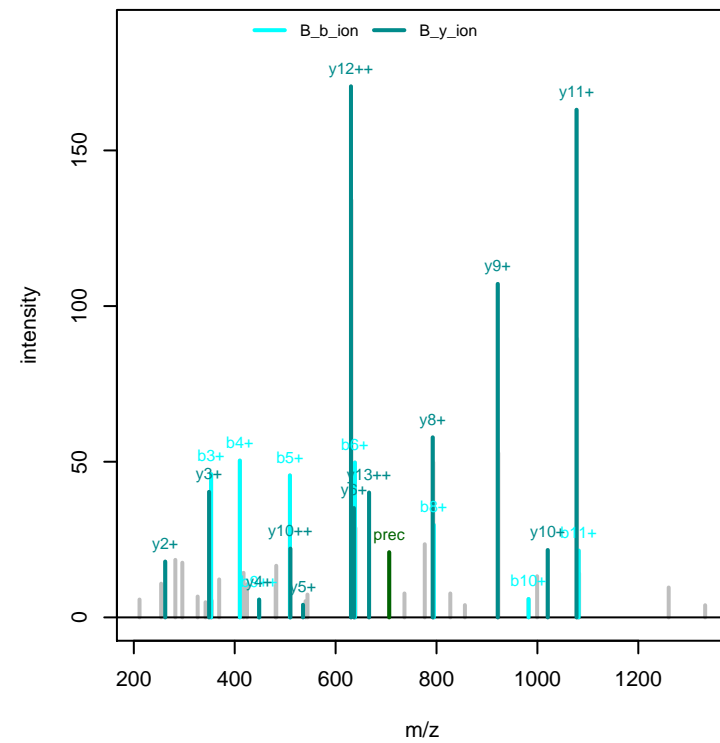

VAKGVEGVTSVSDK+XL\_L

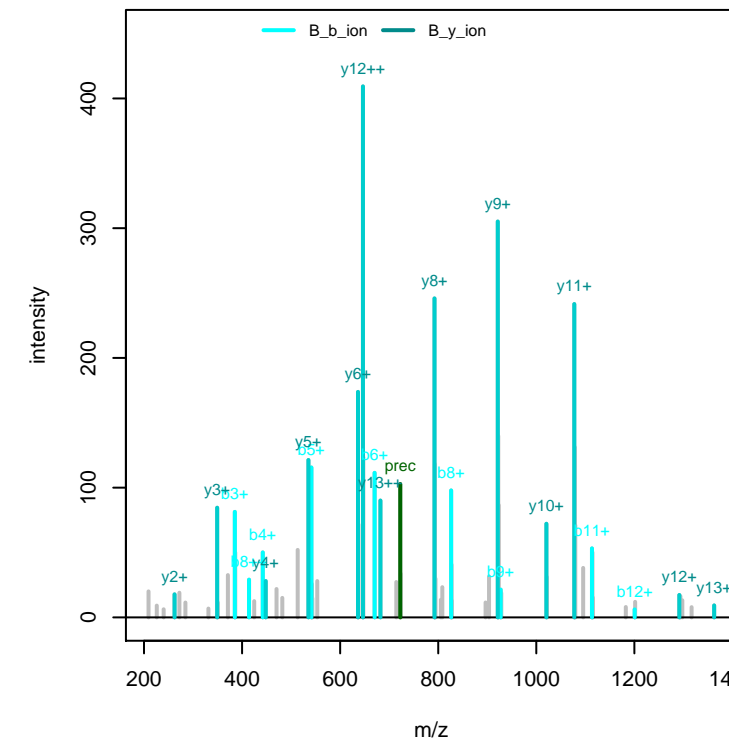

DCTGKR  
GKDVTIK

DCTGKR+XL\_S

DCTGKR+XL\_L

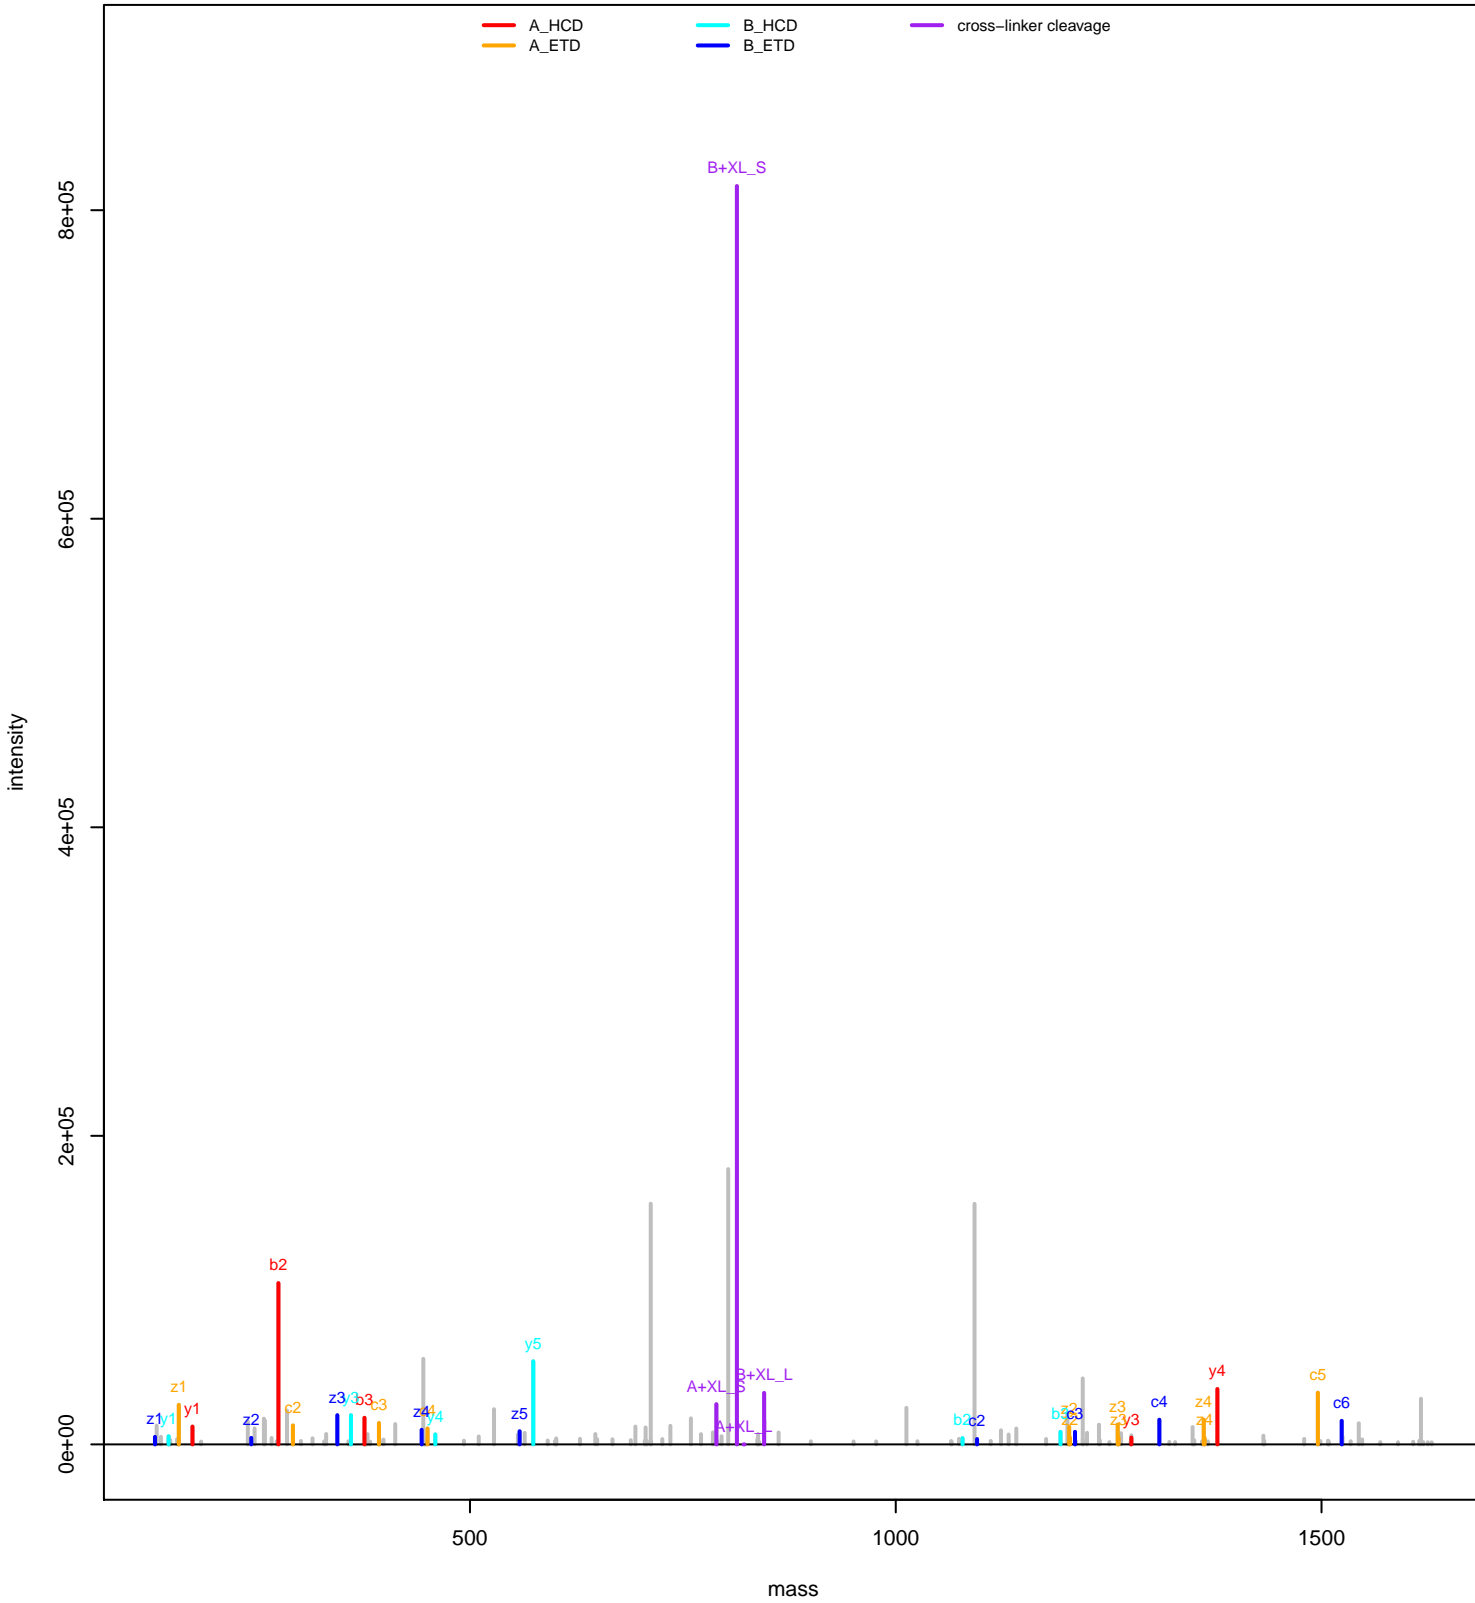

GKDVTIK+XL\_S

GKDVTIK+XL\_L

KGAIVTGG  
KPELDAK

KGAIVTGG+XL\_S

KGAIVTGG+XL\_L

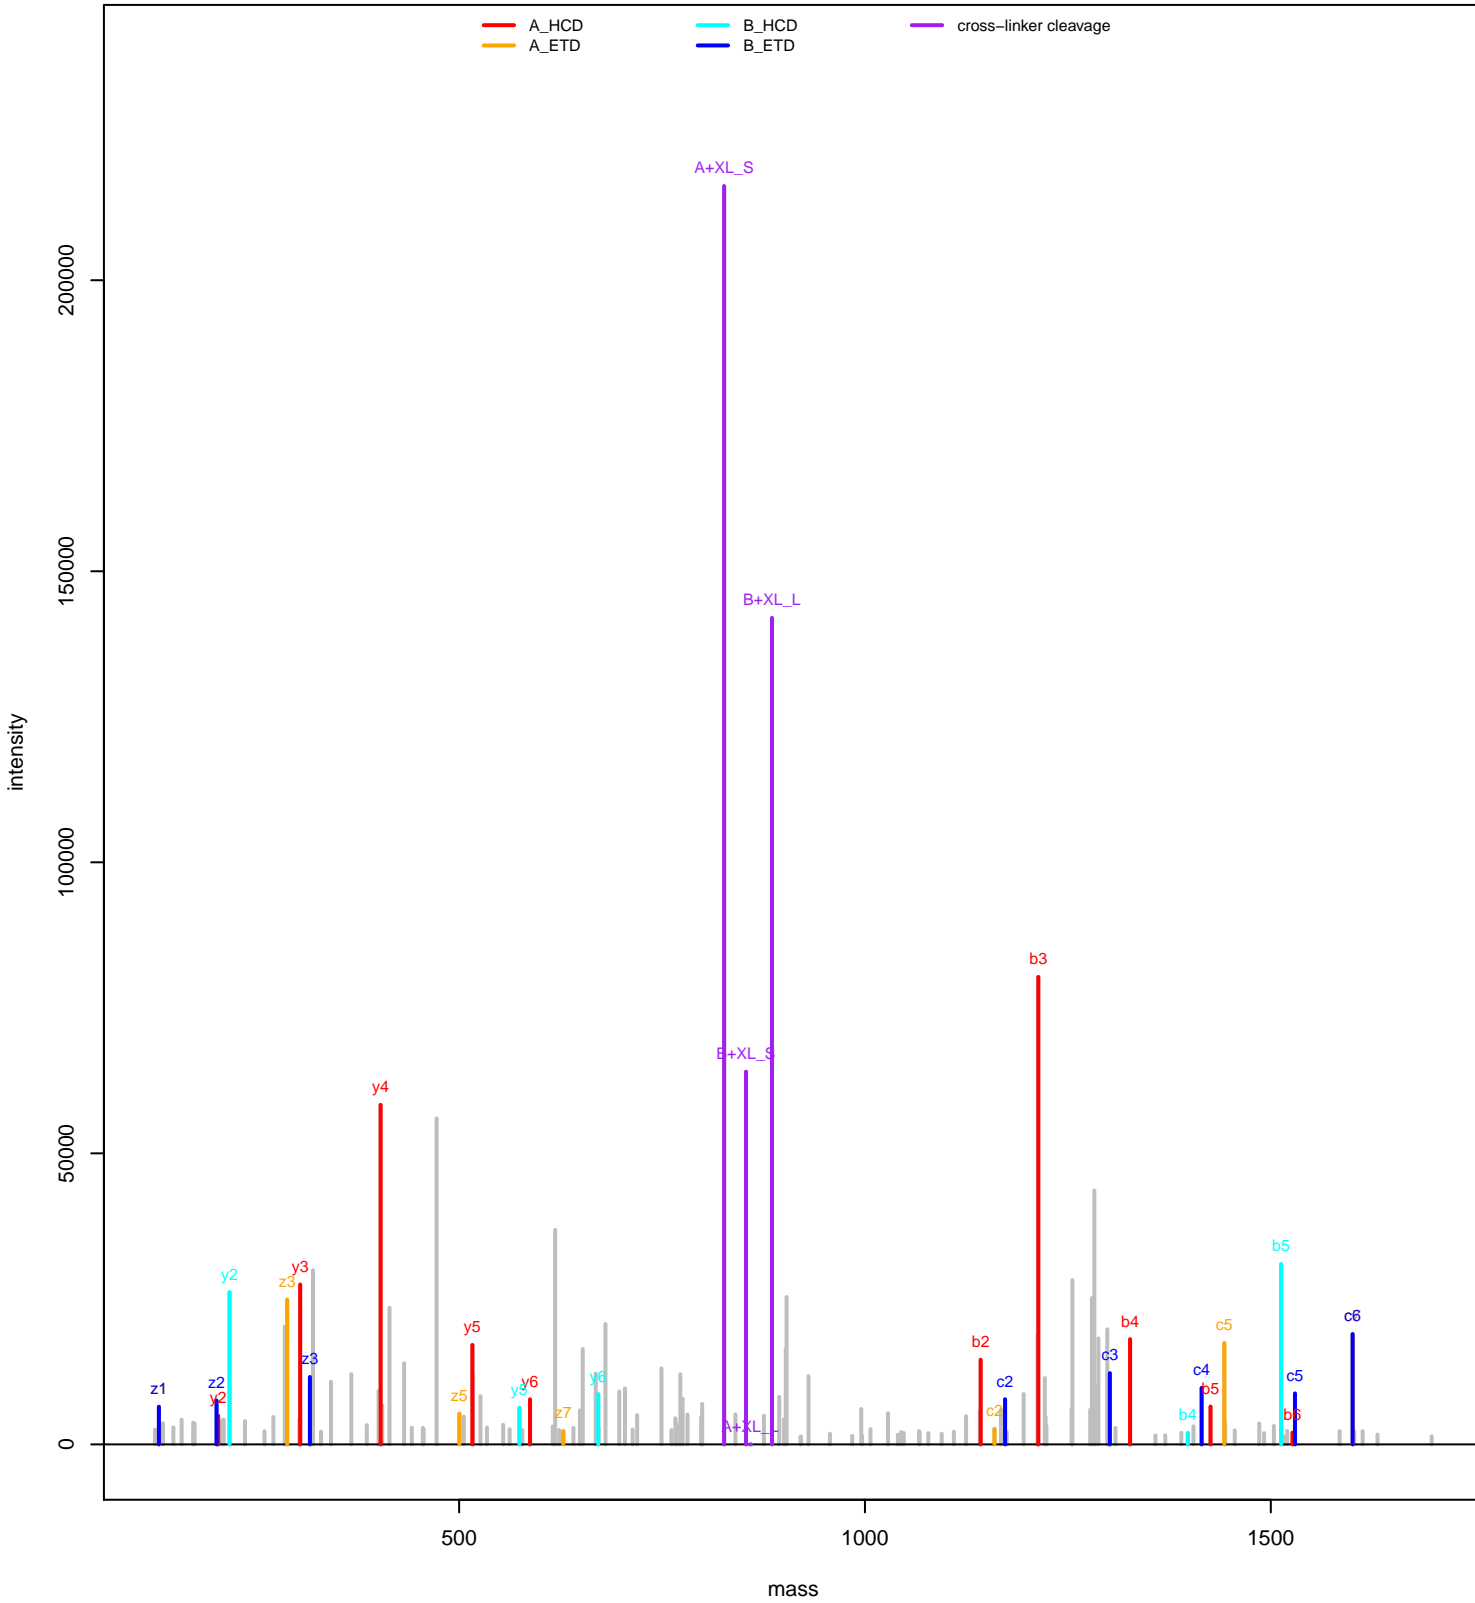

KPELDAK+XL\_S

KPELDAK+XL\_L

**AAGAKR  
DGHLIVNGKK**

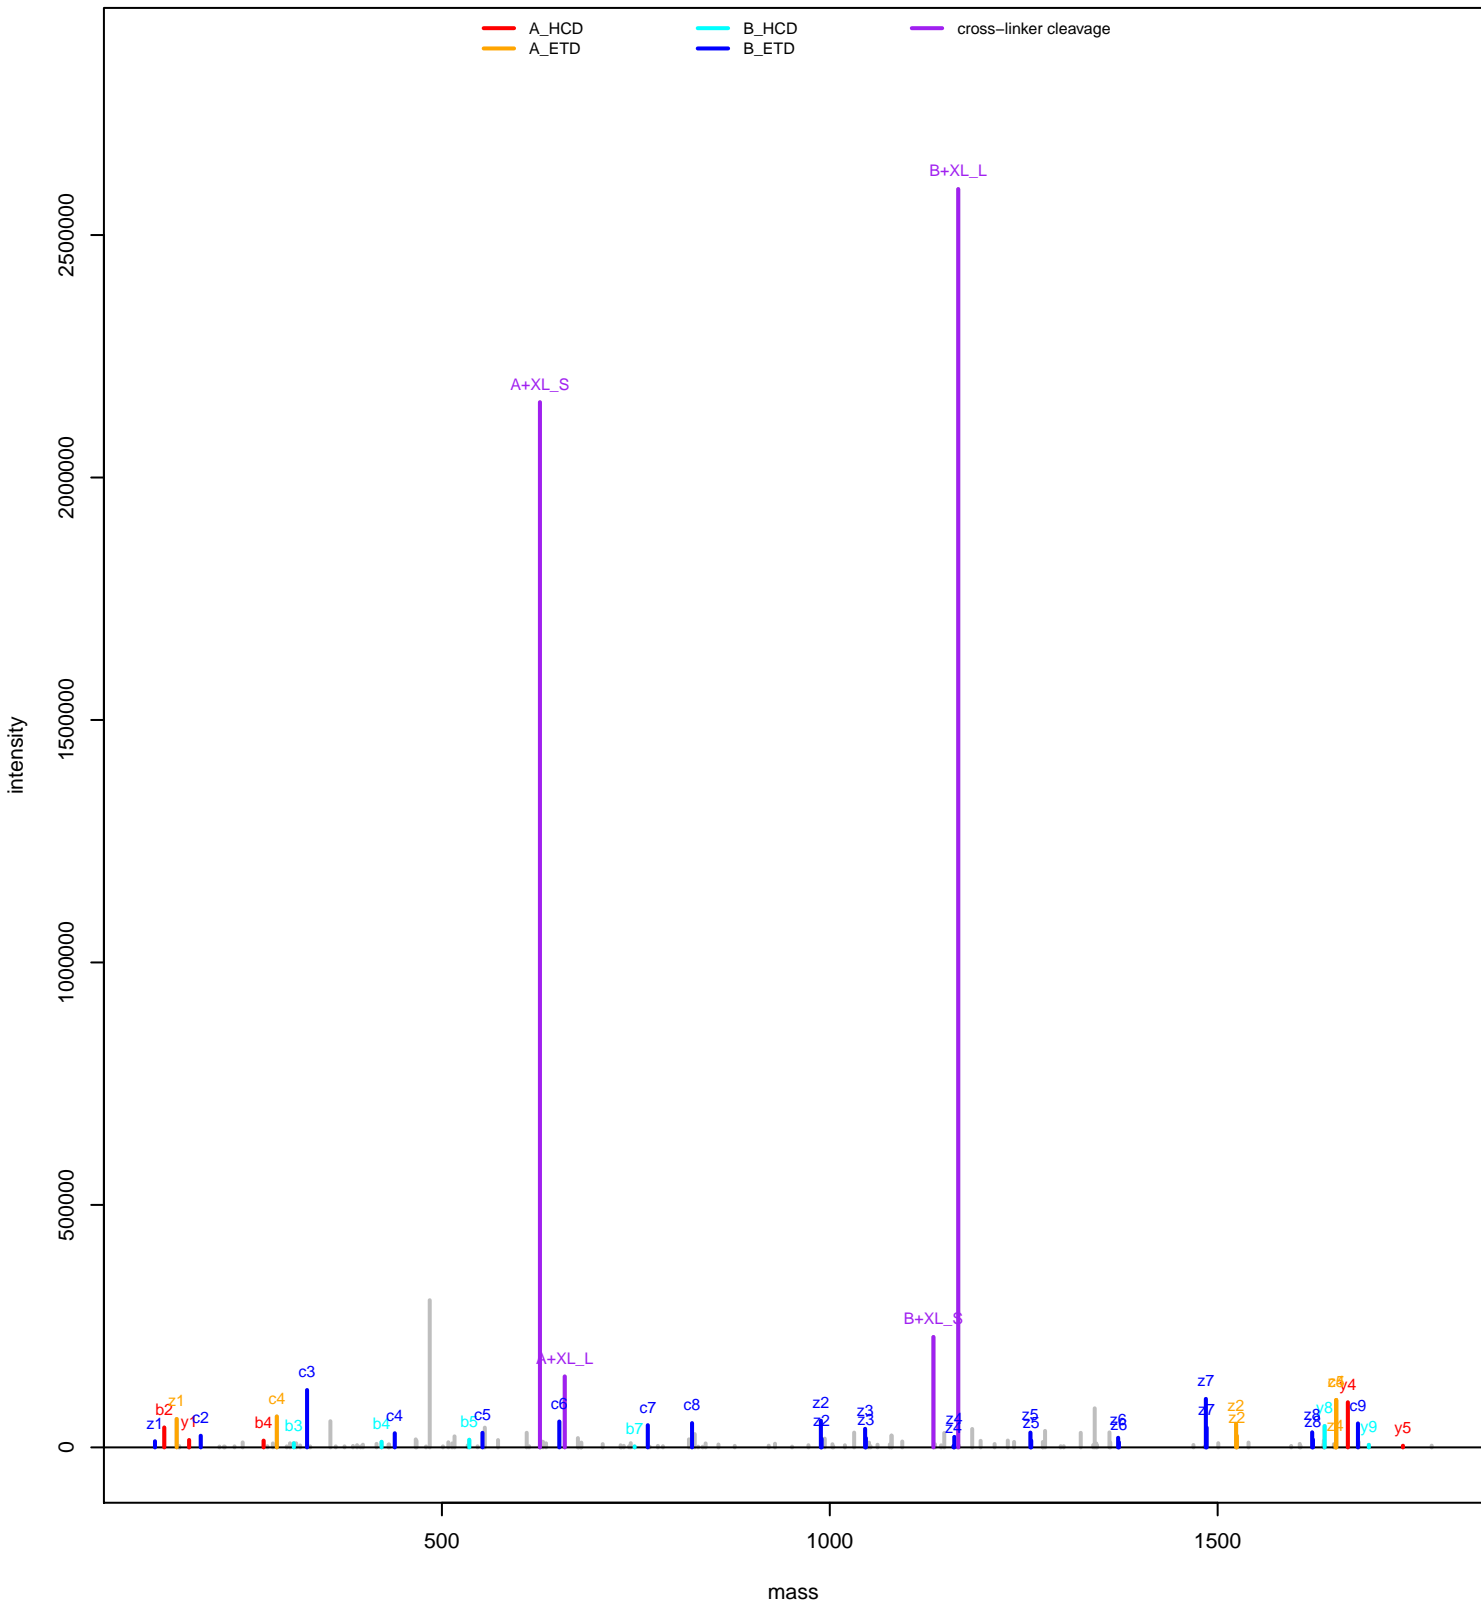

**AAGAKR+XL\_S**

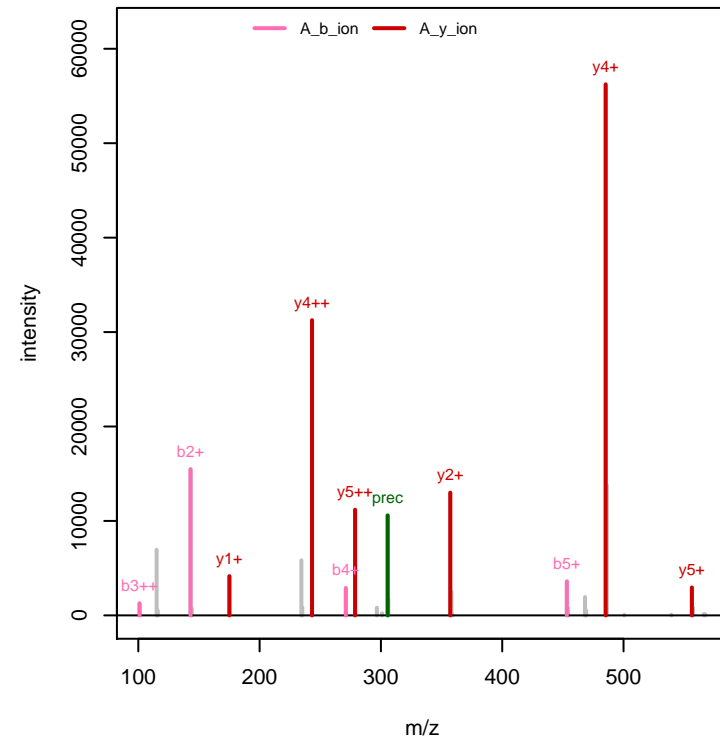

**AAGAKR+XL\_L**

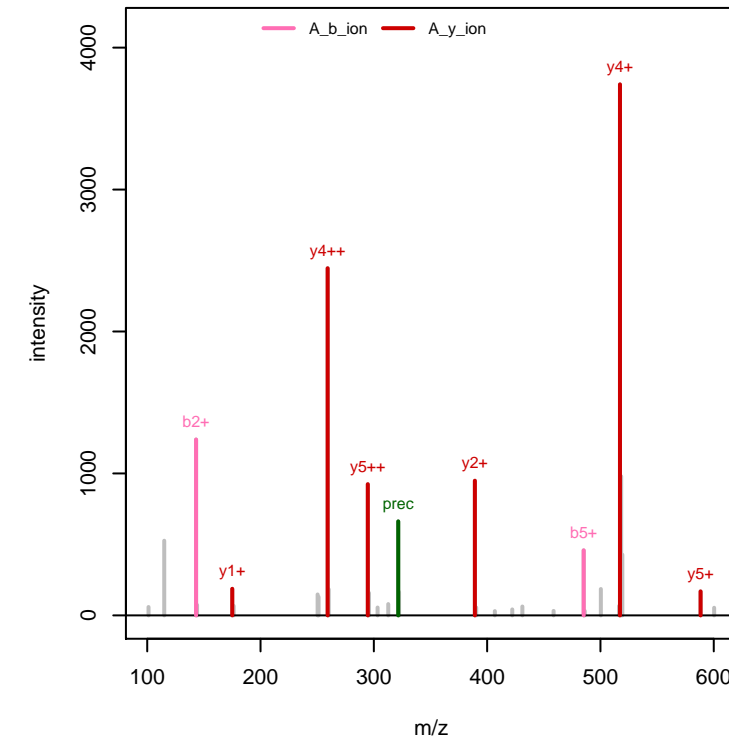

**DGHLIVNGKK+XL\_S**

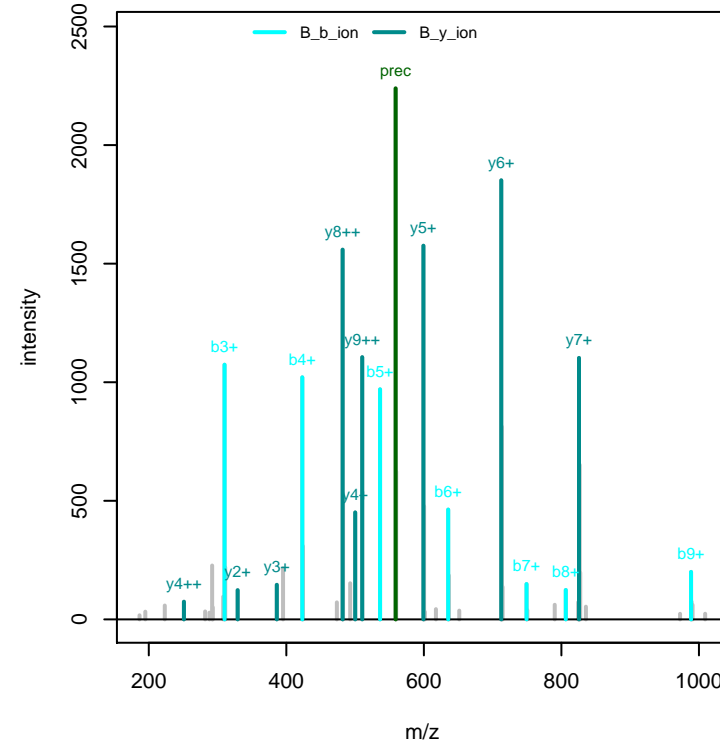

**DGHLIVNGKK+XL\_L**

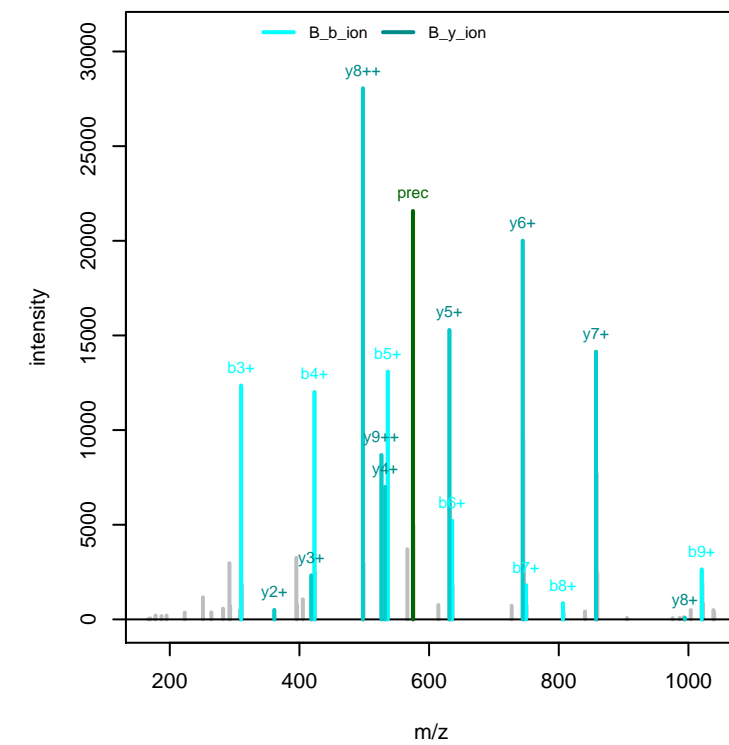



SVKNDLK  
STDISVKTDQK

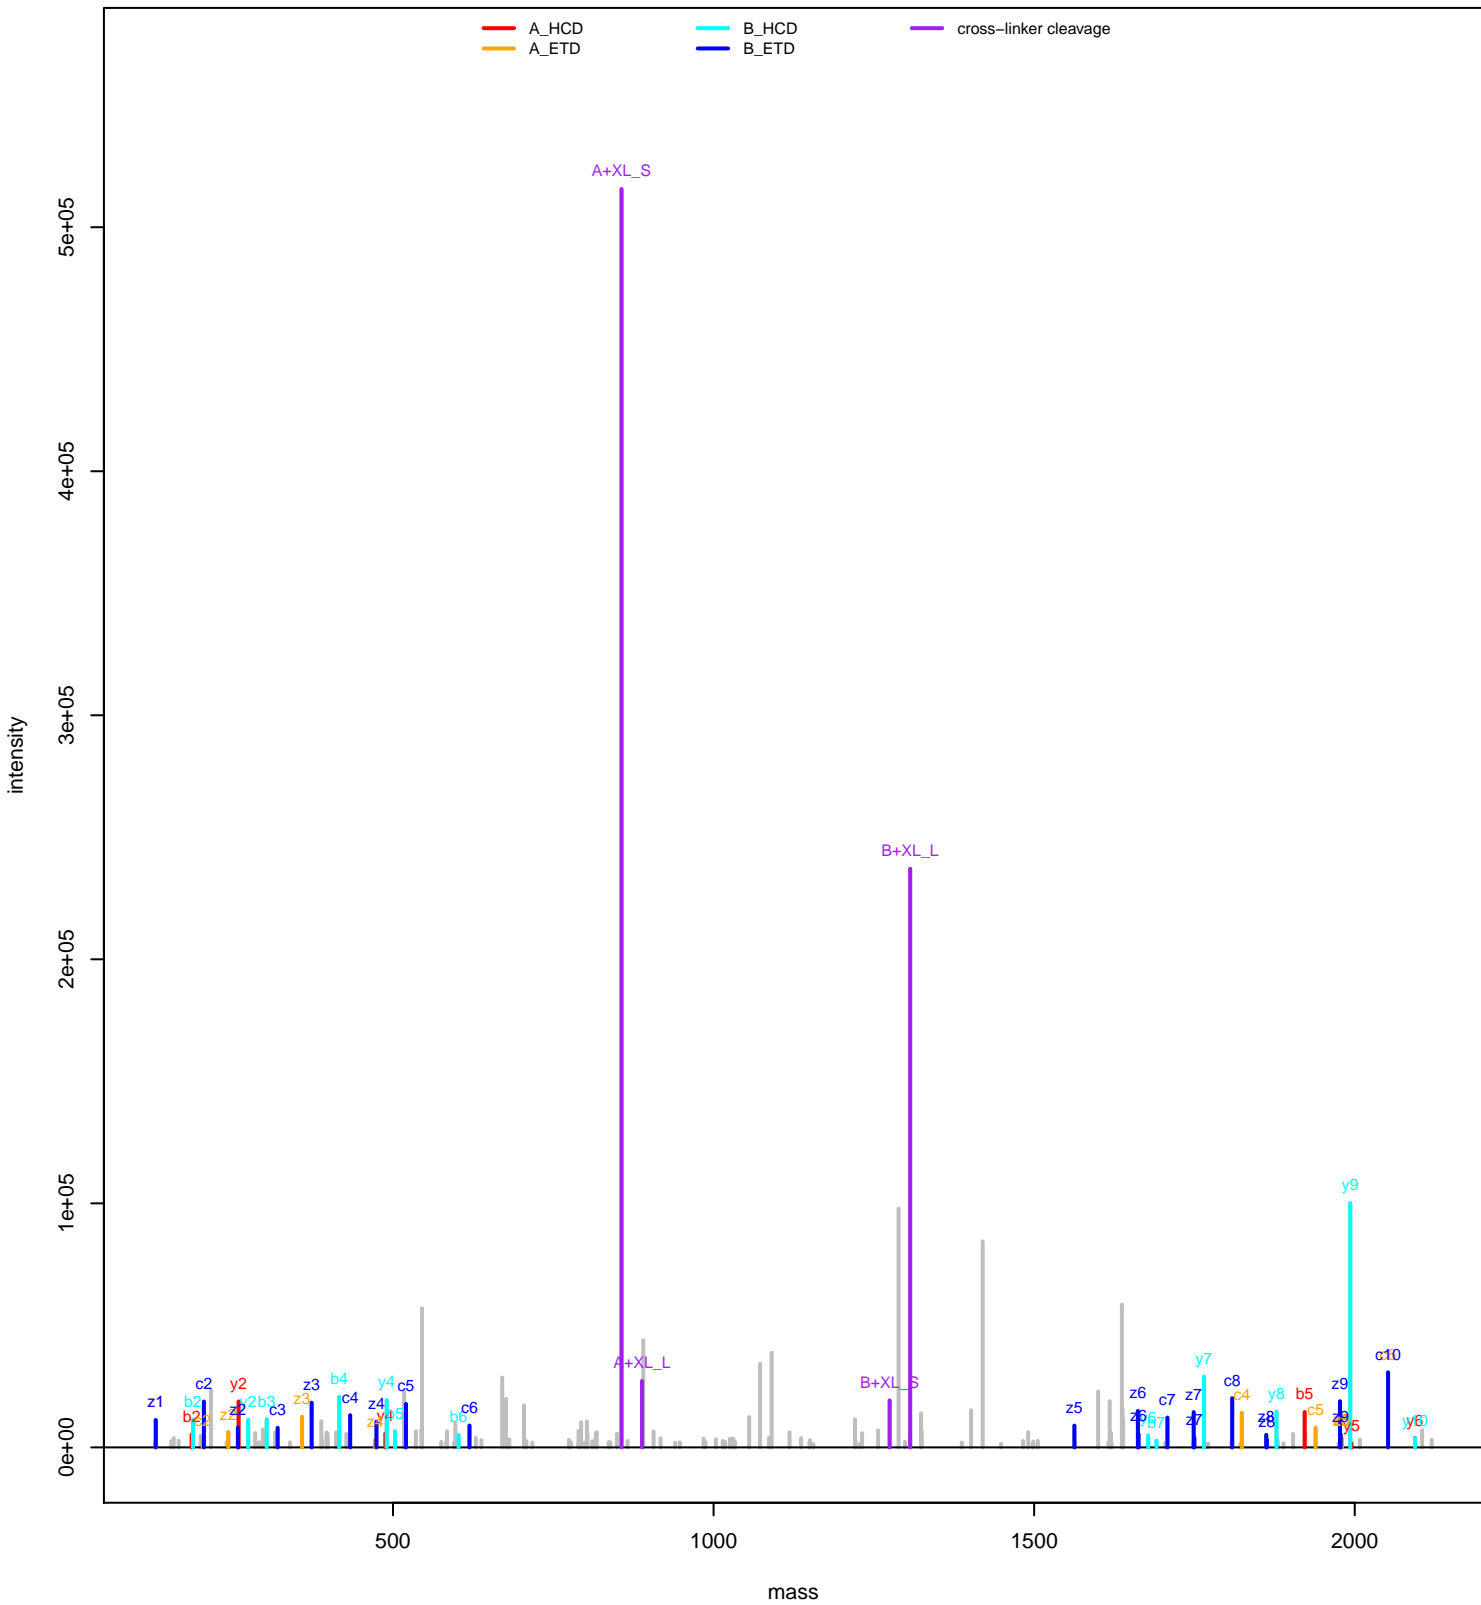

SVKNDLK+XL\_S

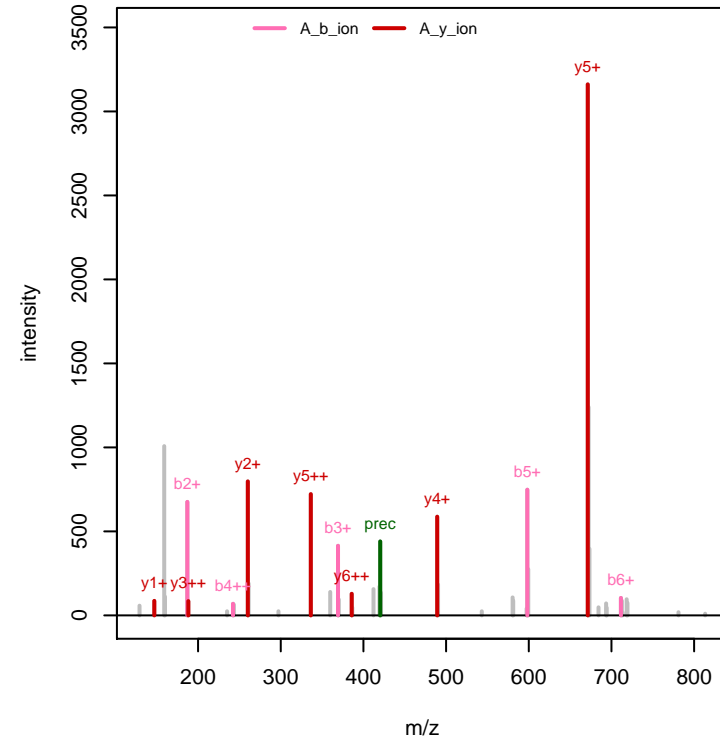

SVKNDLK+XL\_L

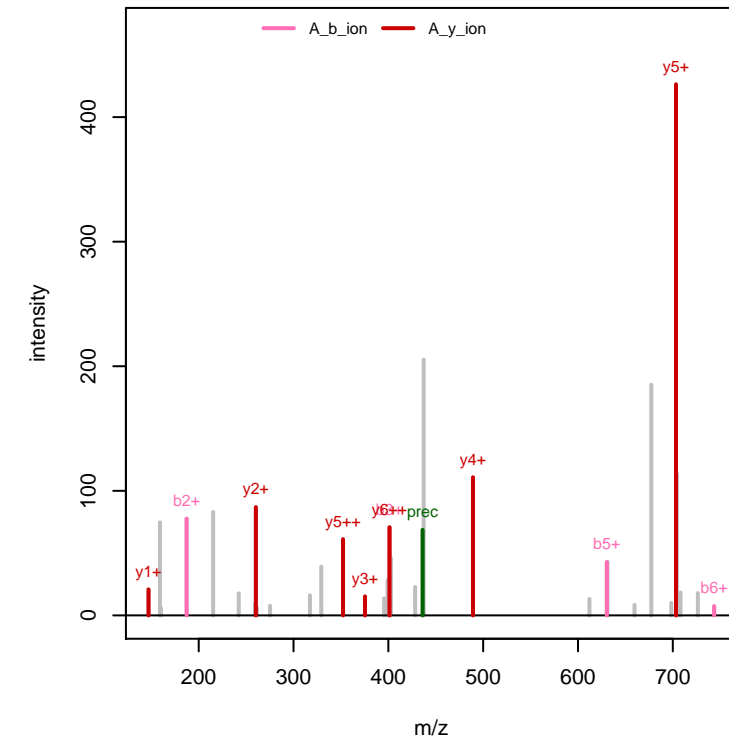

STDISVKTDQK+XL\_S

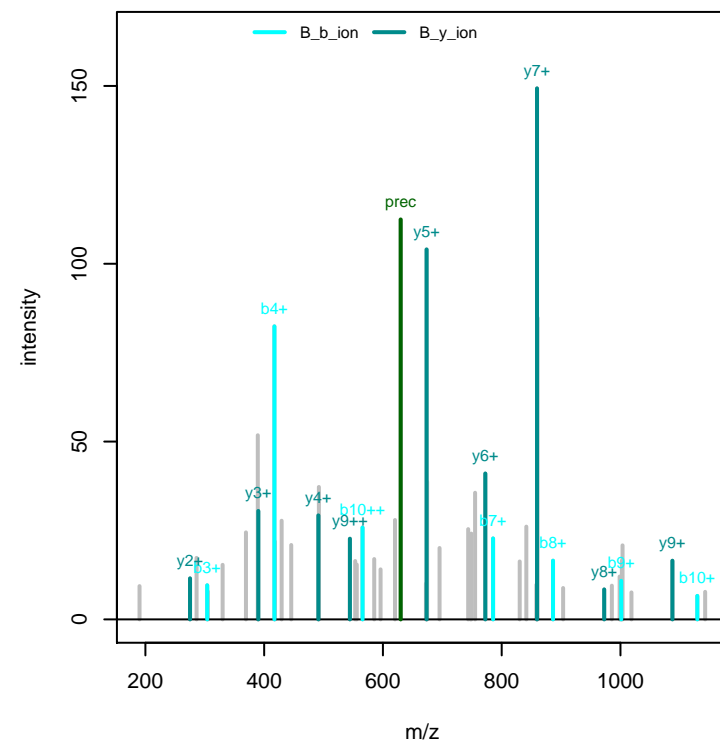

STDISVKTDQK+XL\_L

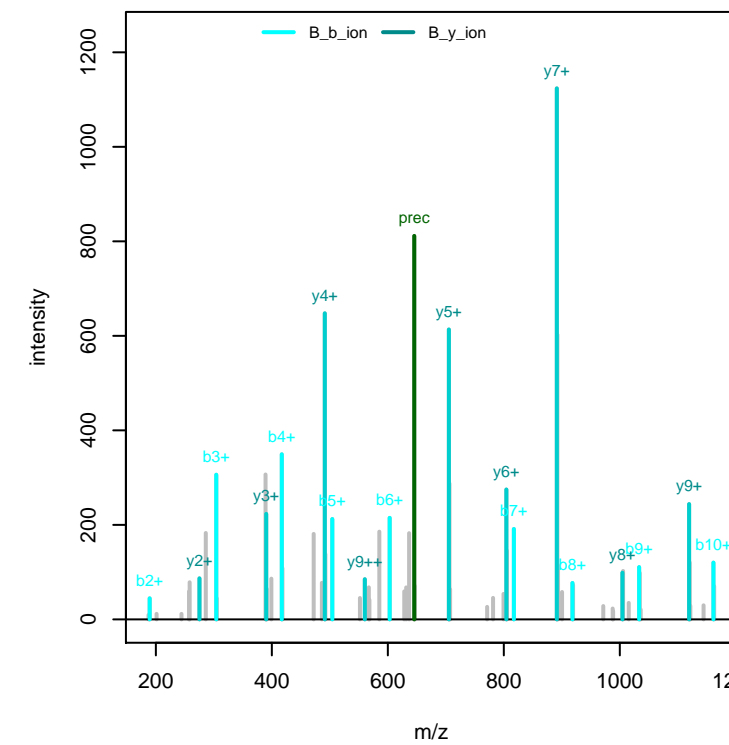

QYTAKADSVAR  
CVSNVAGDGEKRRK

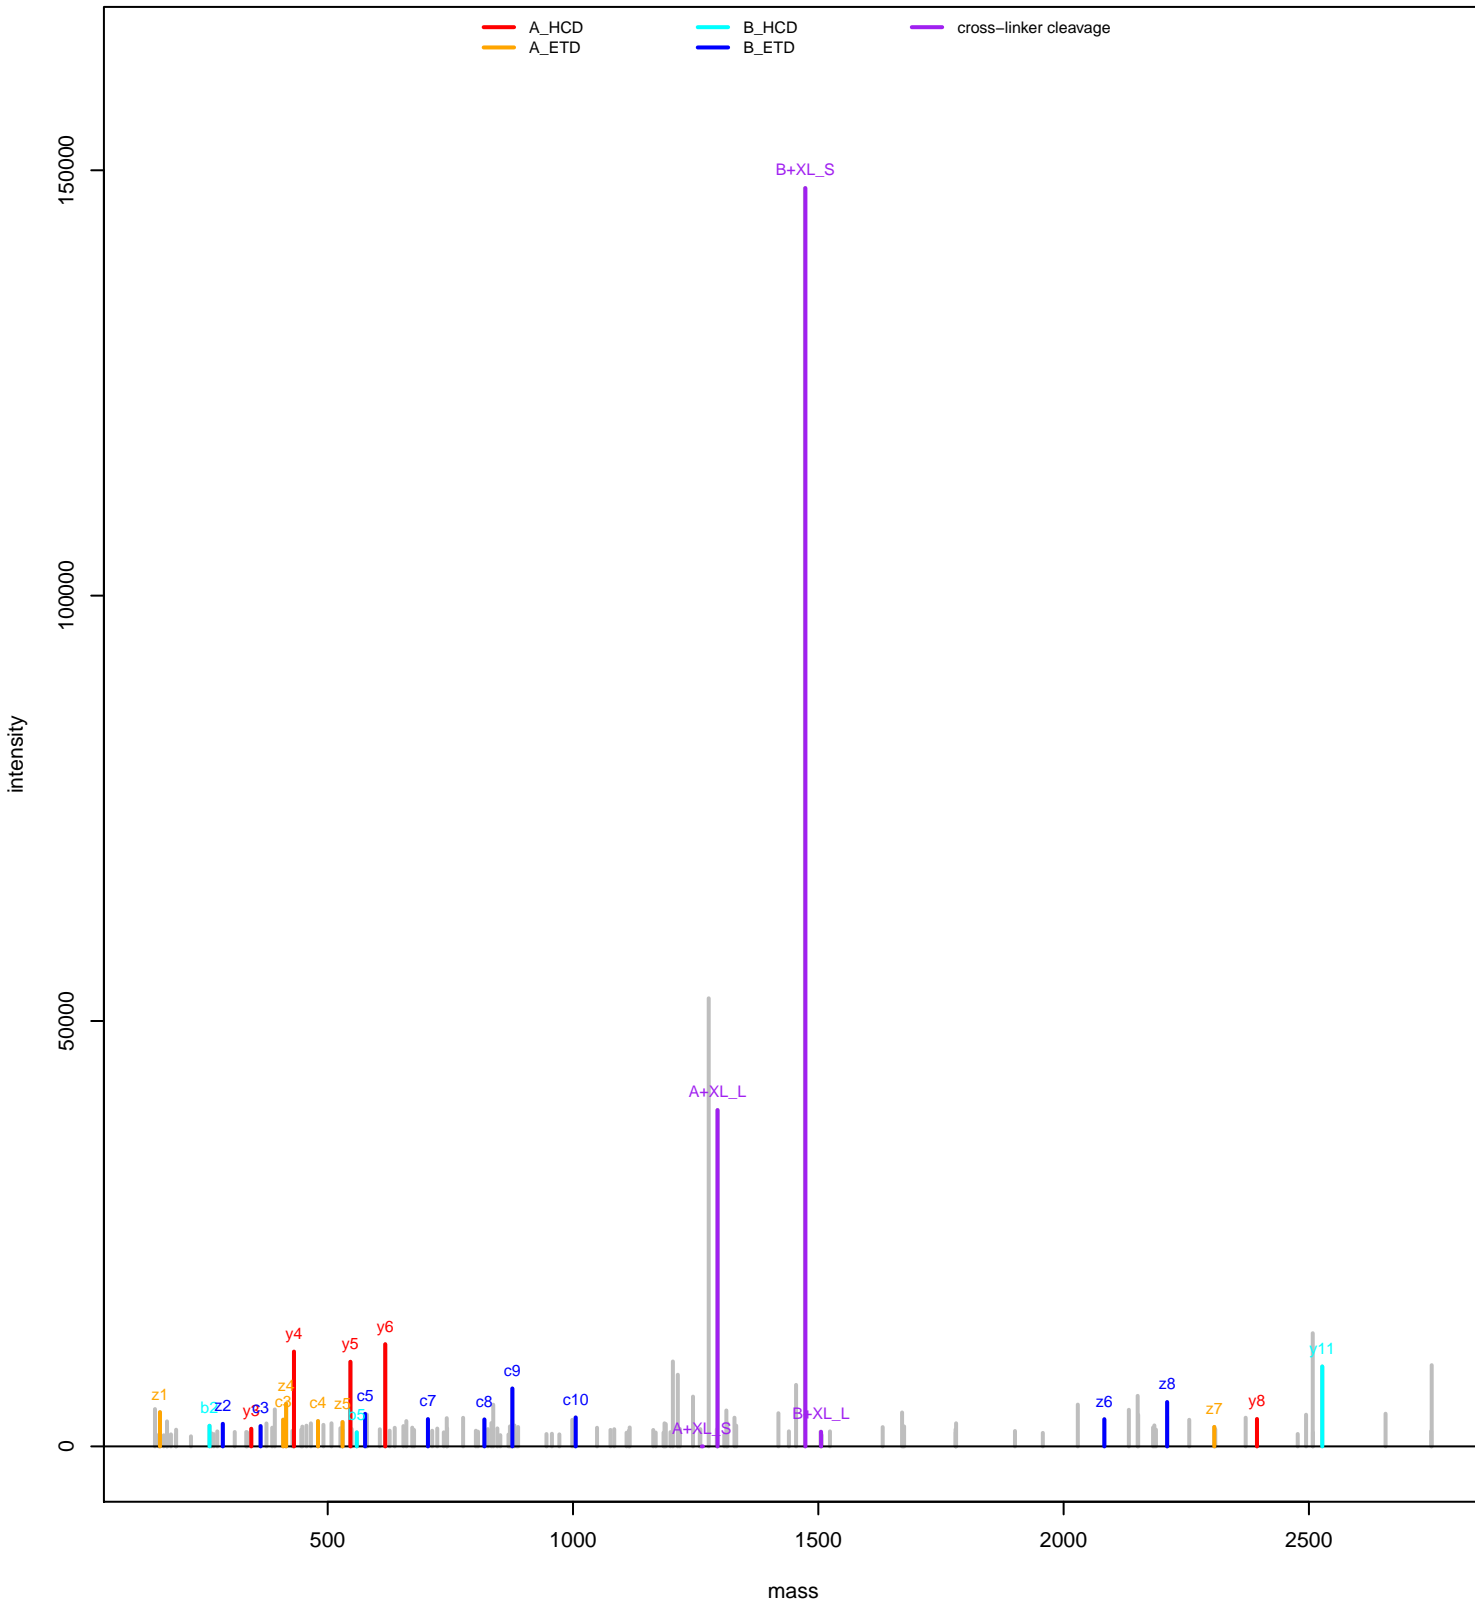

QYTAKADSVAR+XL\_S

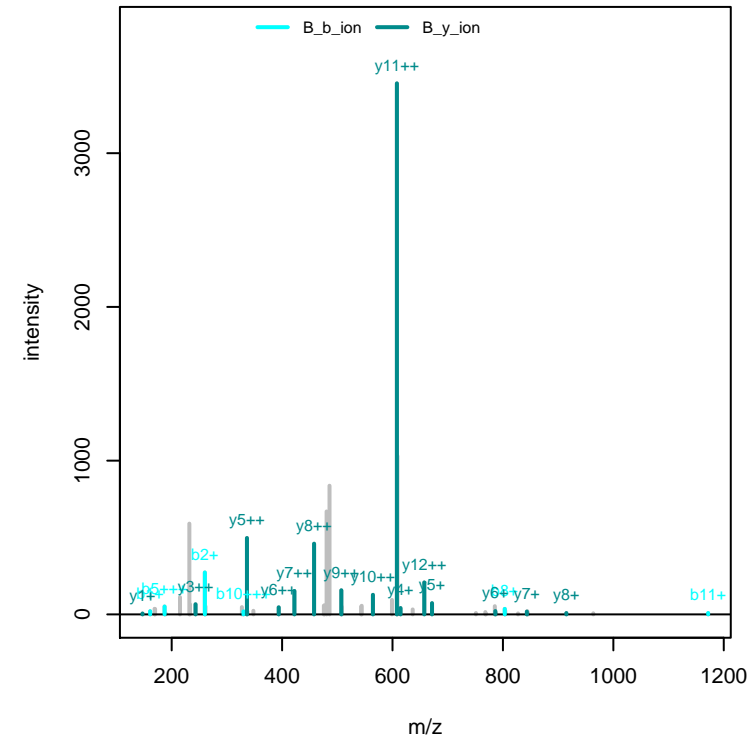

QYTAKADSVAR+XL\_L

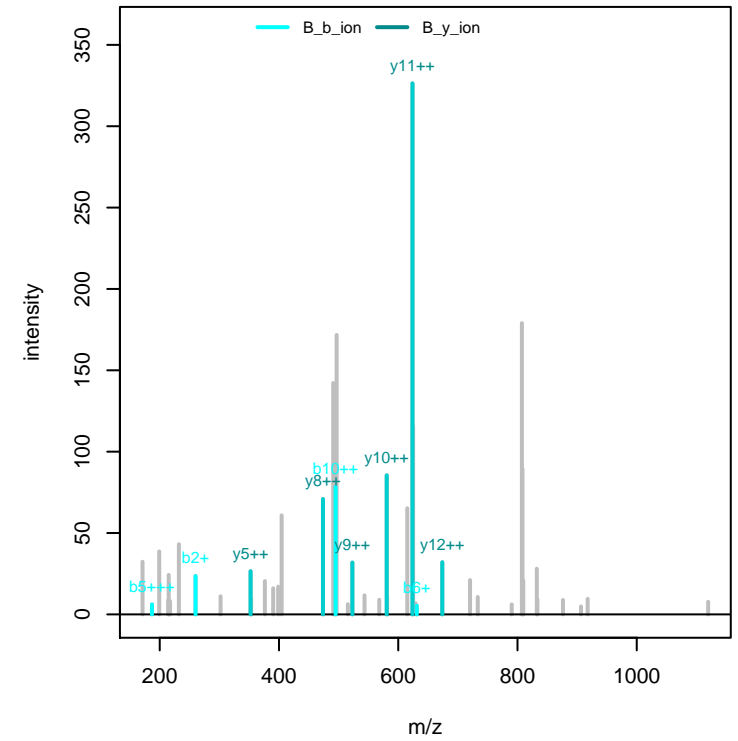

CVSNVAGDGEKRRK+XL\_S



CVSNVAGDGEKRRK+XL\_L



LAKLEK  
LQHKGEAR

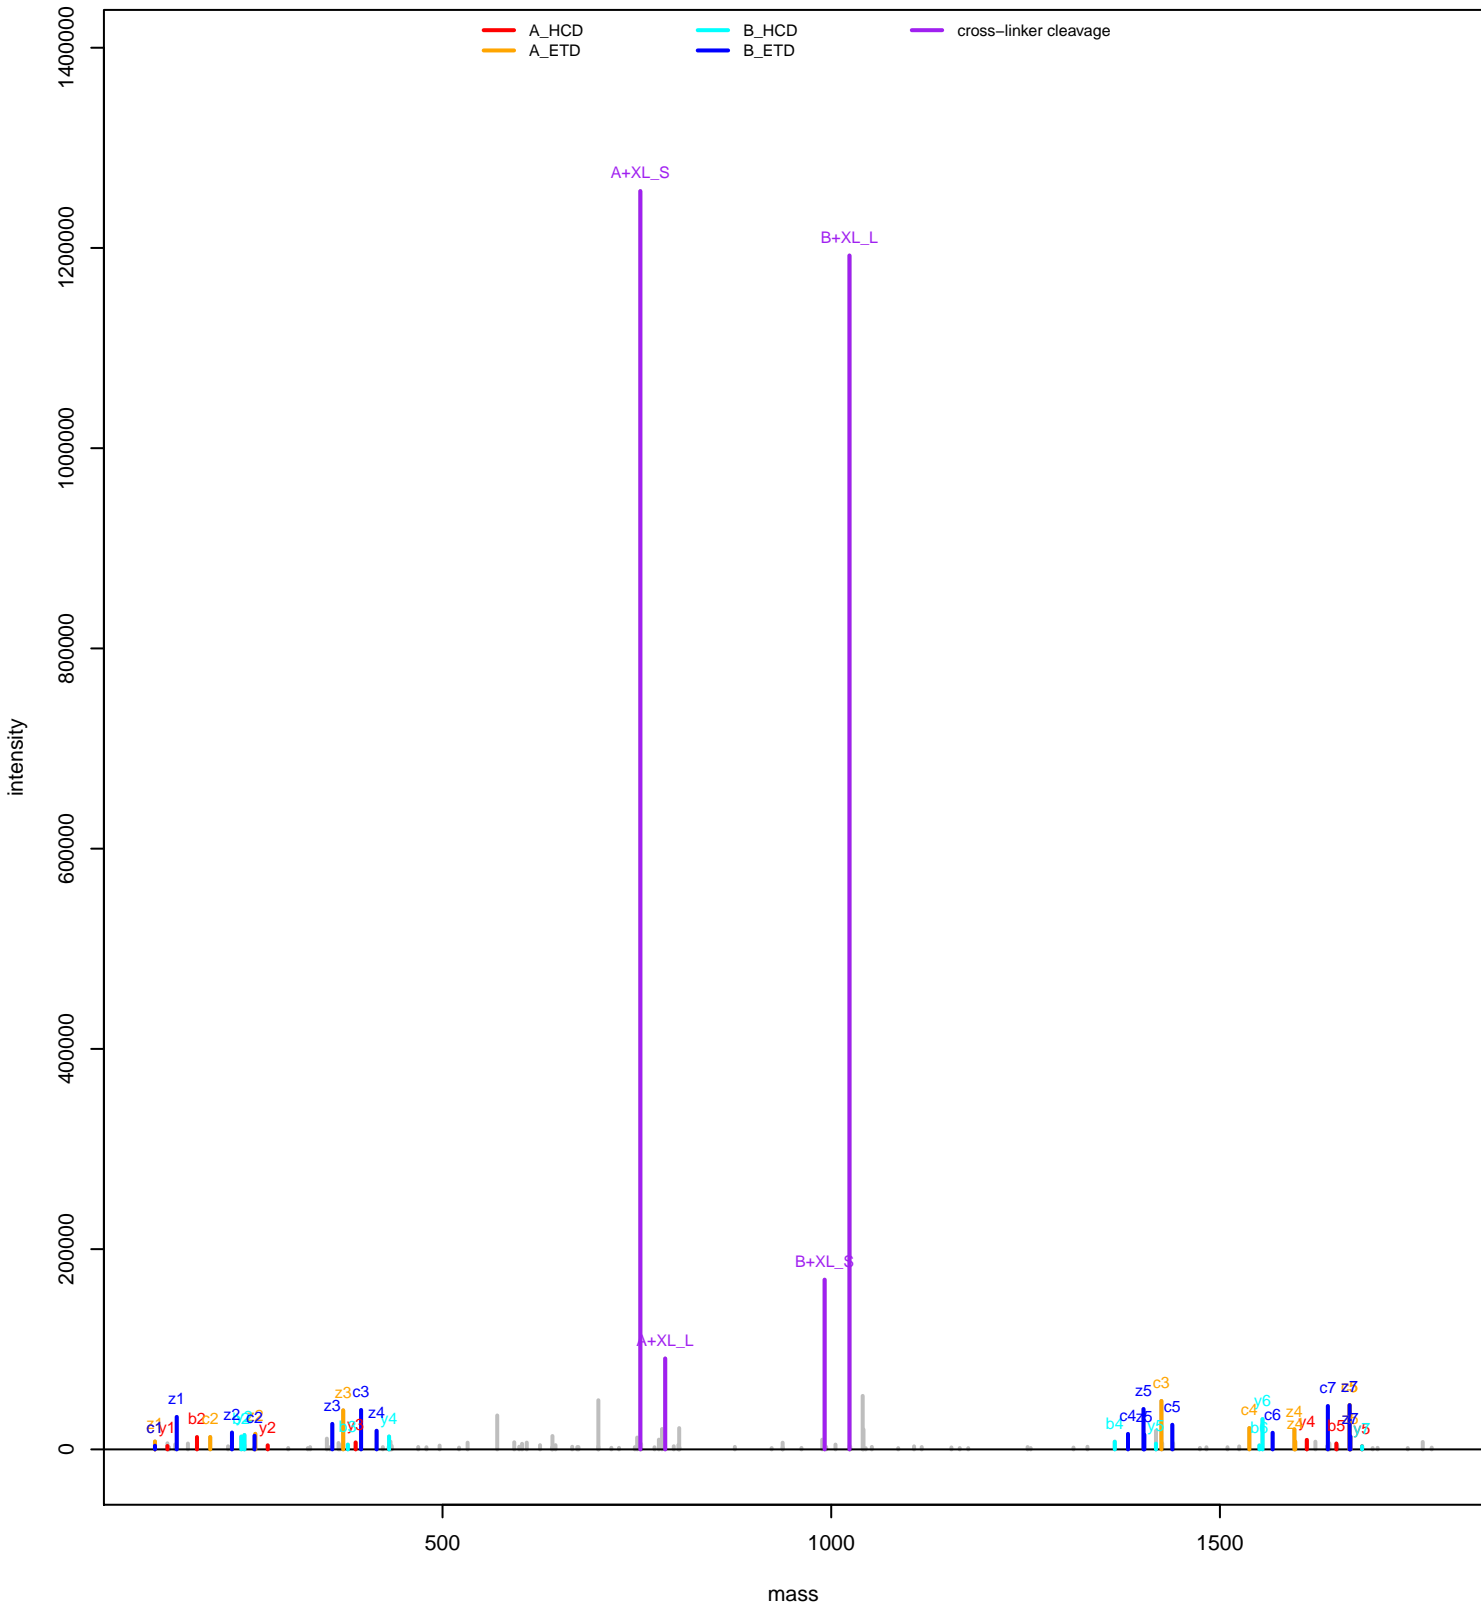

LAKLEK+XL\_S

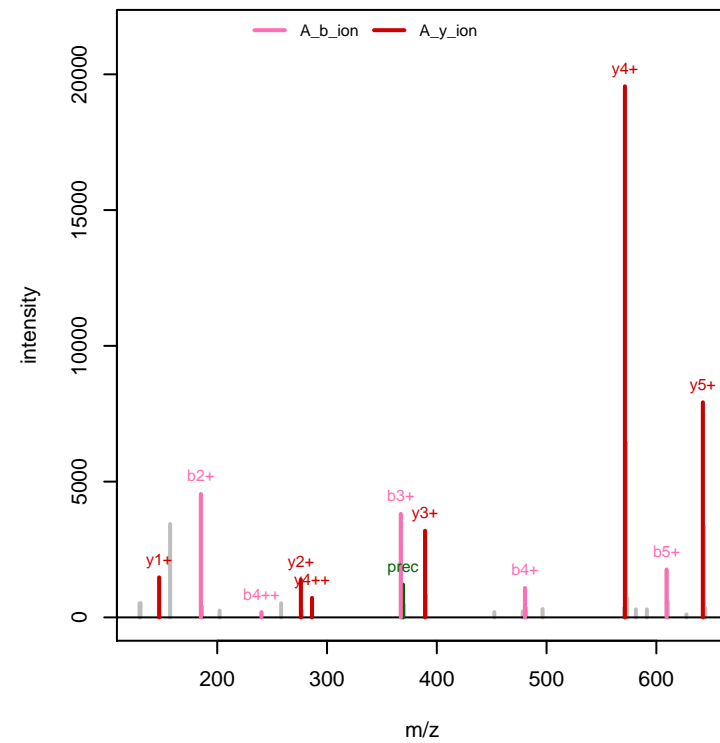

LAKLEK+XL\_L

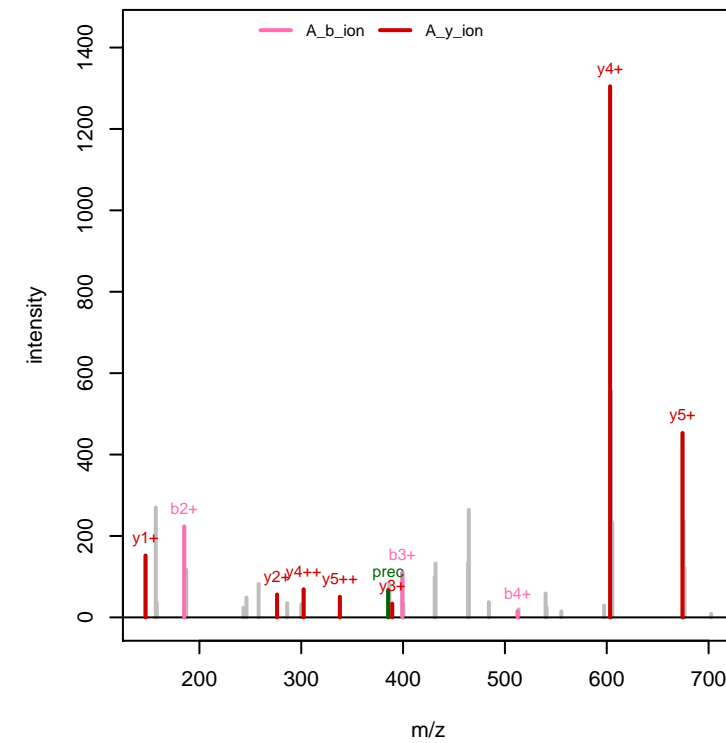

LQHKGEAR+XL\_S

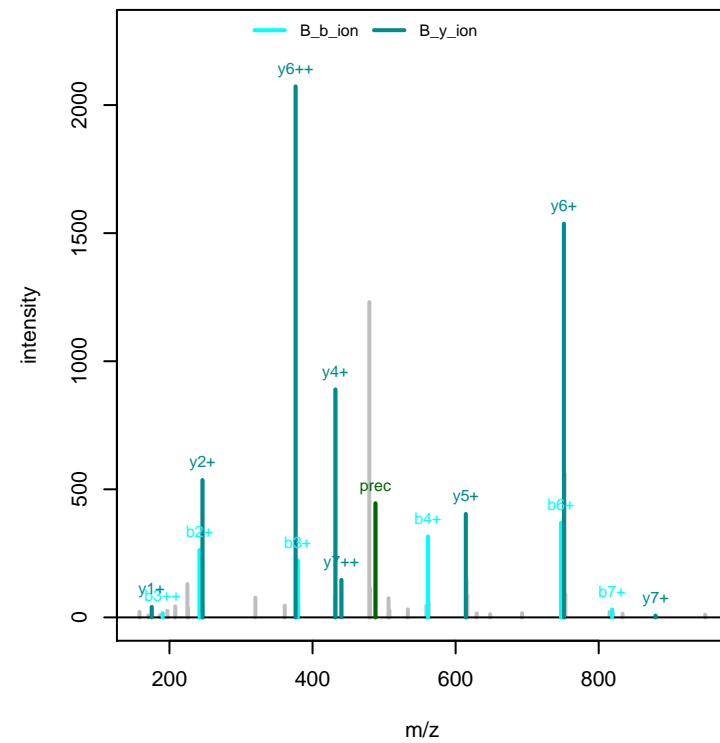

LQHKGEAR+XL\_L

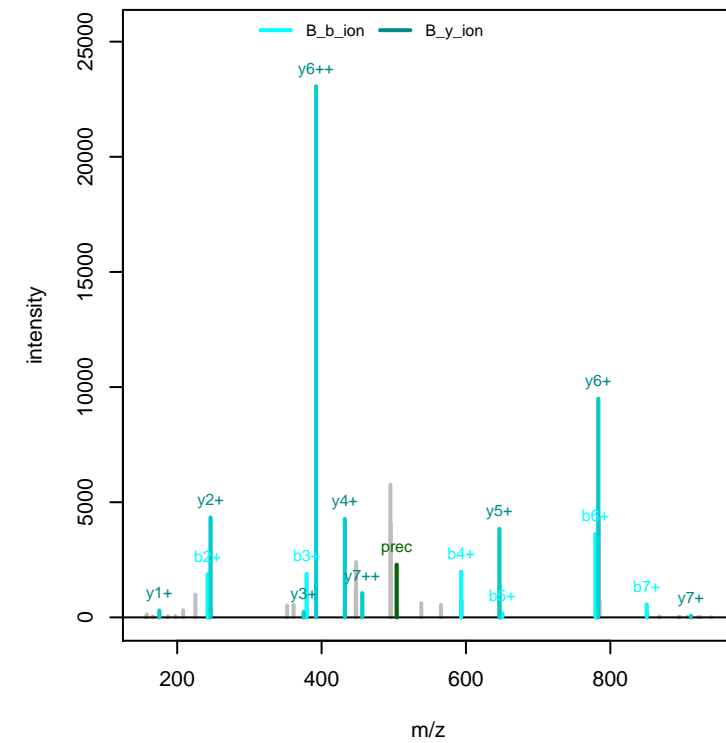

VVNQIKTR  
KMoLNLADEVGK

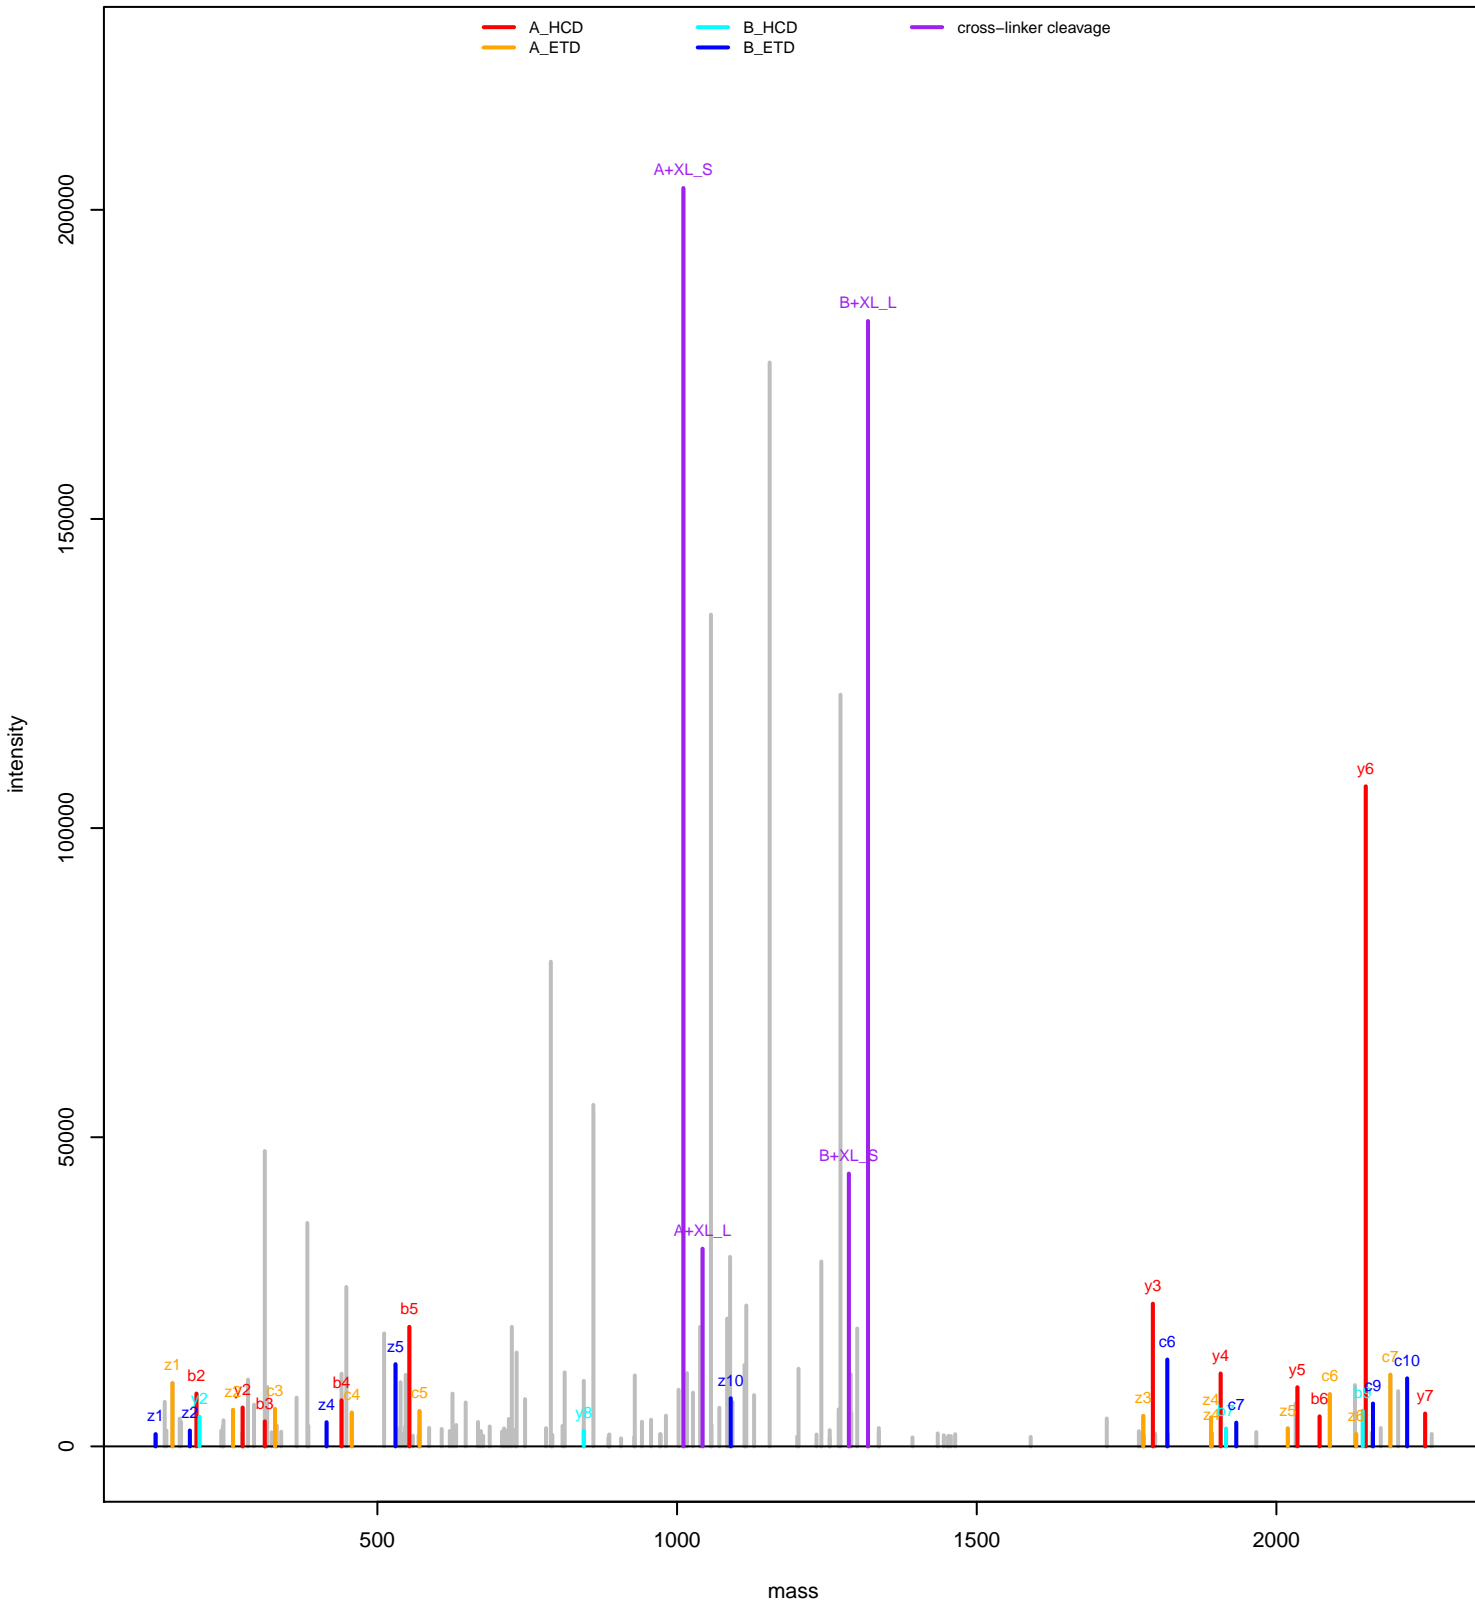

VVNQIKTR+XL\_S

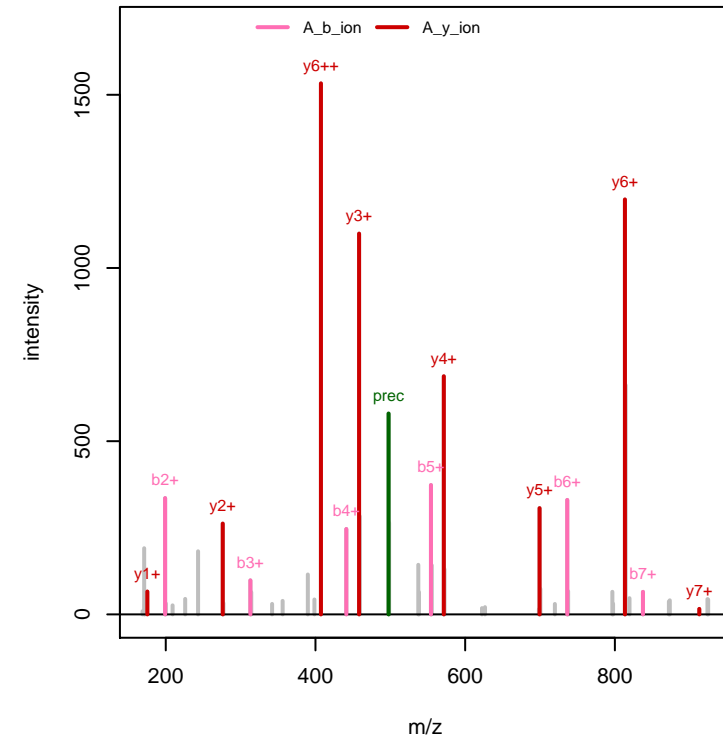

VVNQIKTR+XL\_L

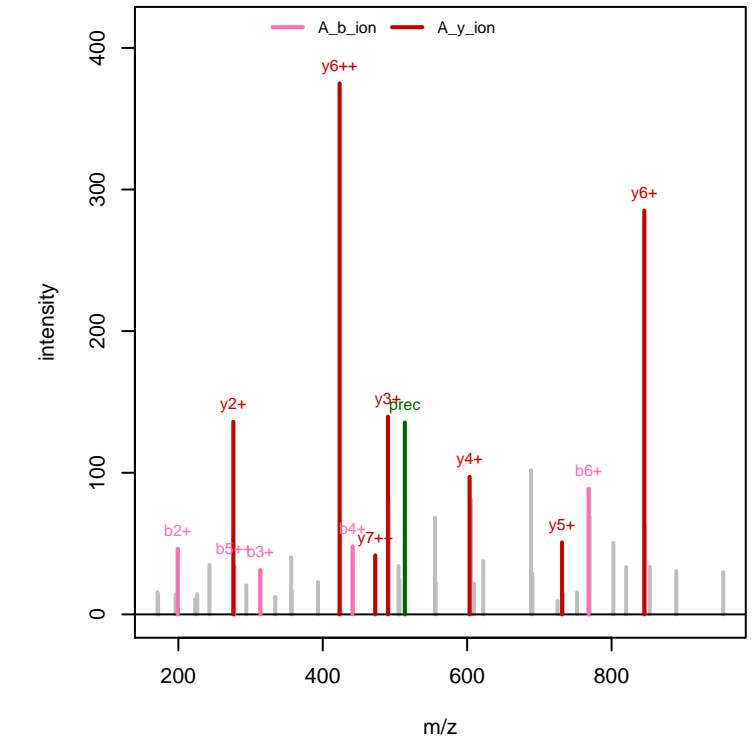

KMoLNLADEVGK+XL\_S

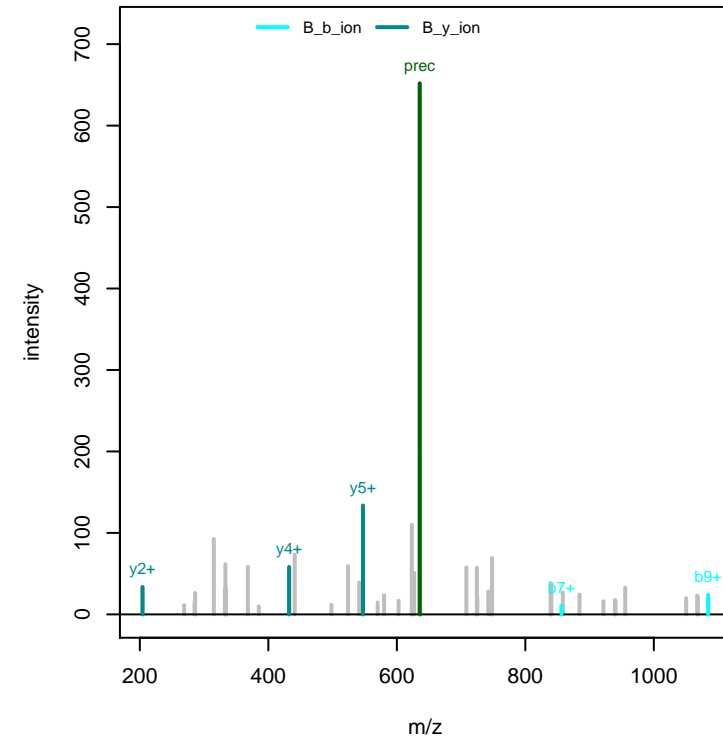

KMoLNLADEVGK+XL\_L

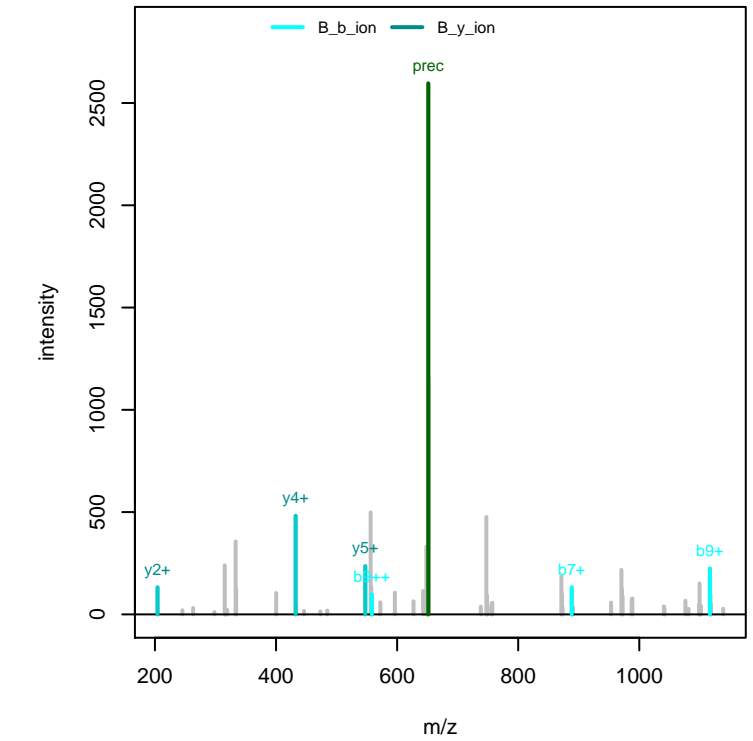

**GGKGGKR**  
**KGSSLQQGFQK**

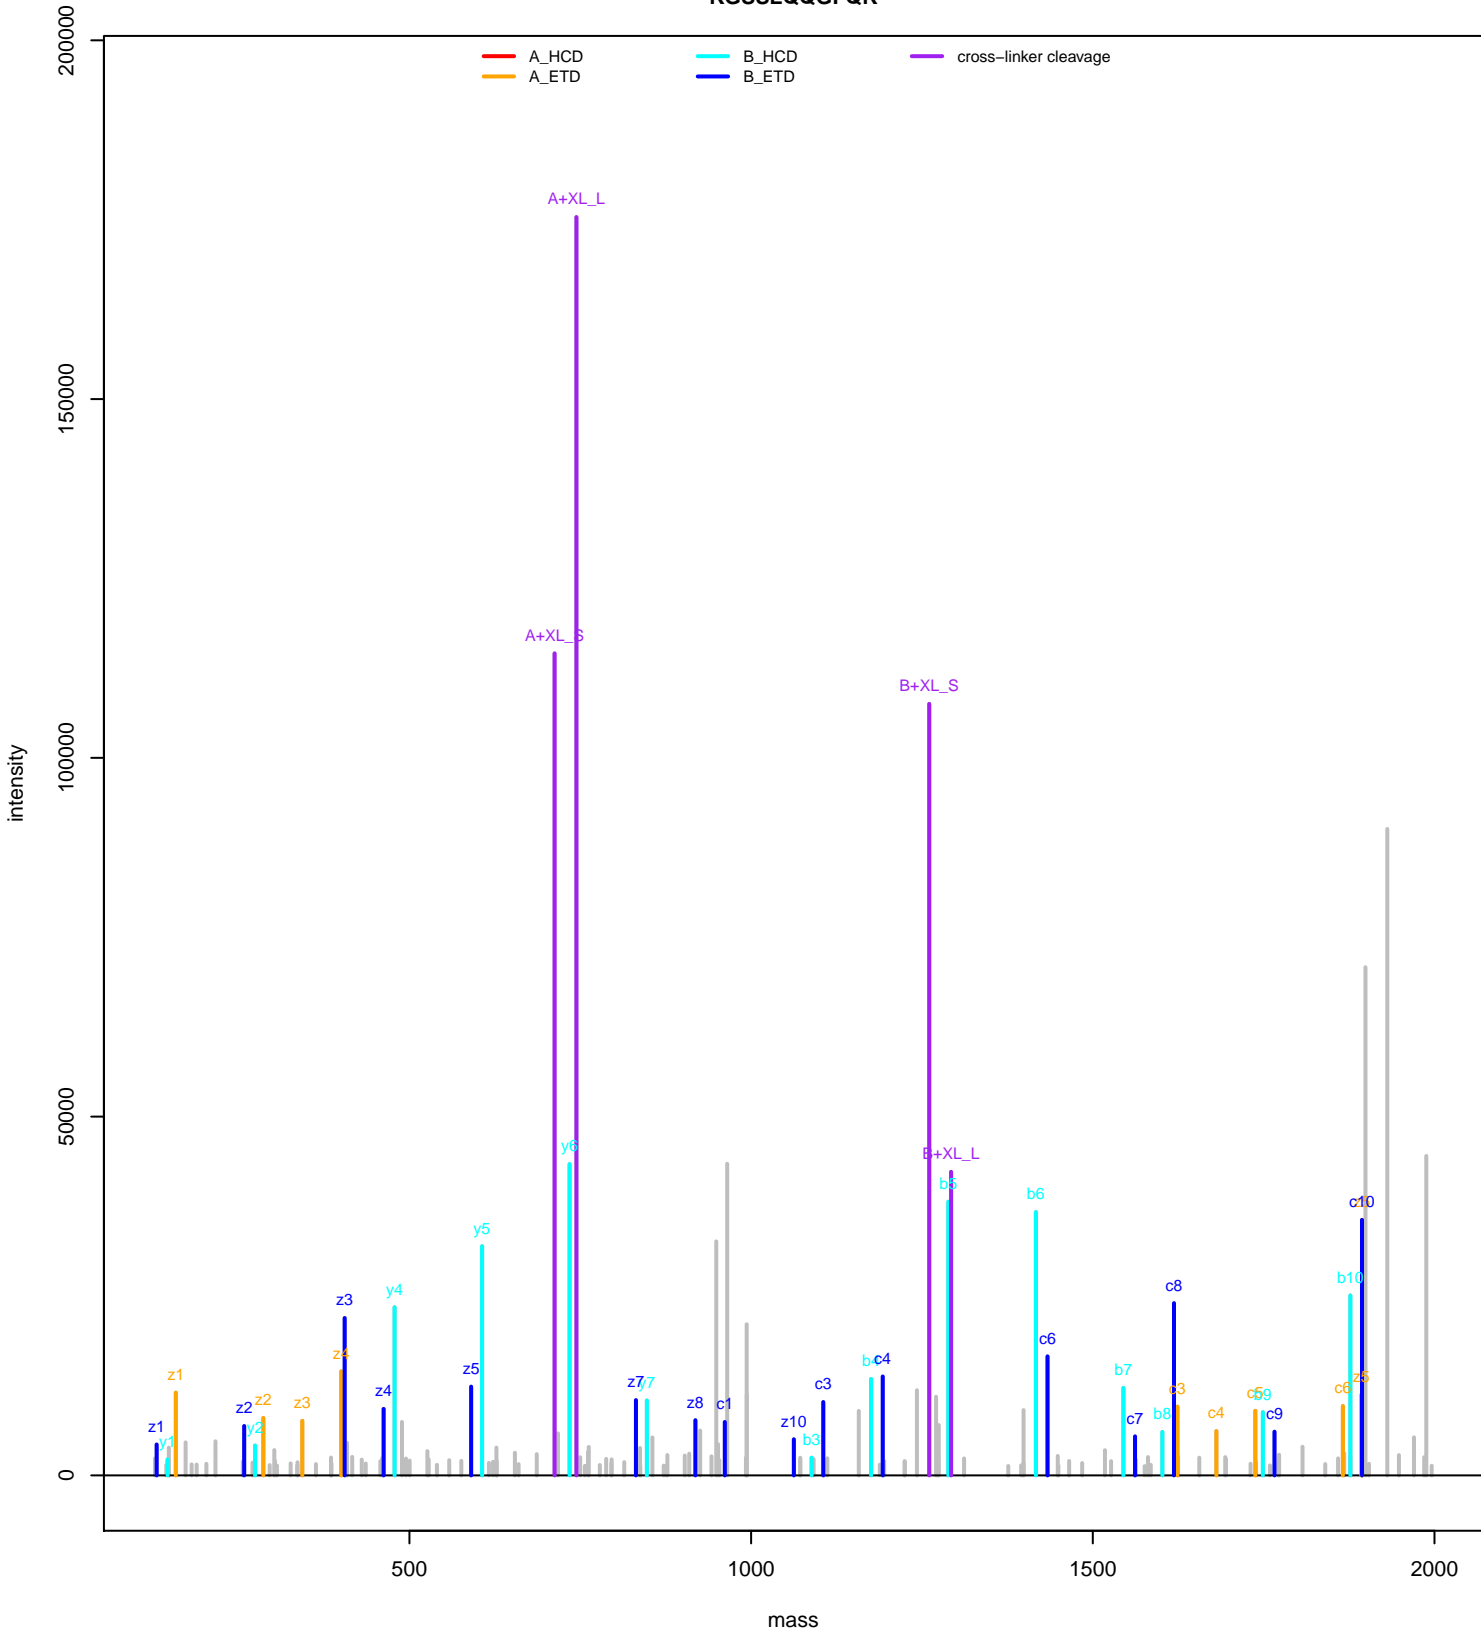

**GGKGGKR+XL\_S**

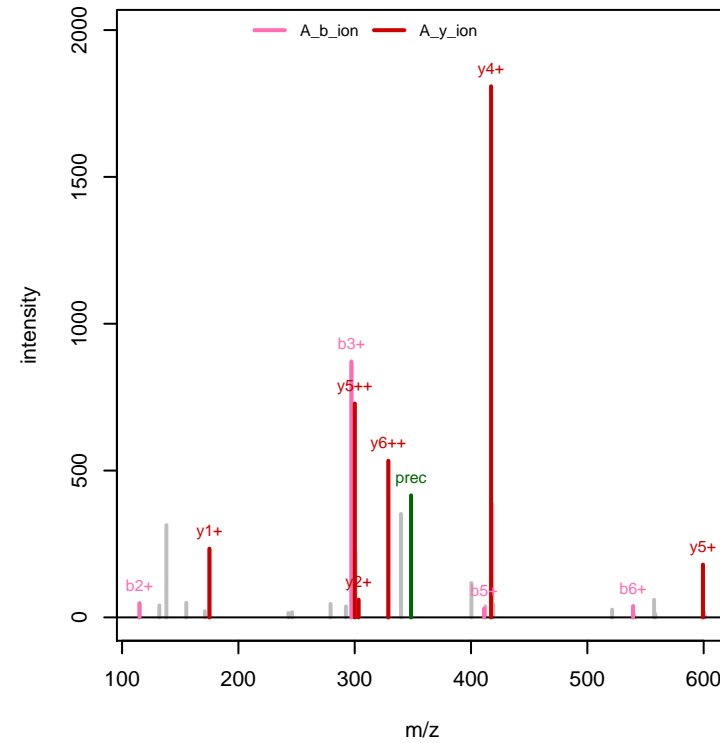

**GGKGGKR+XL\_L**

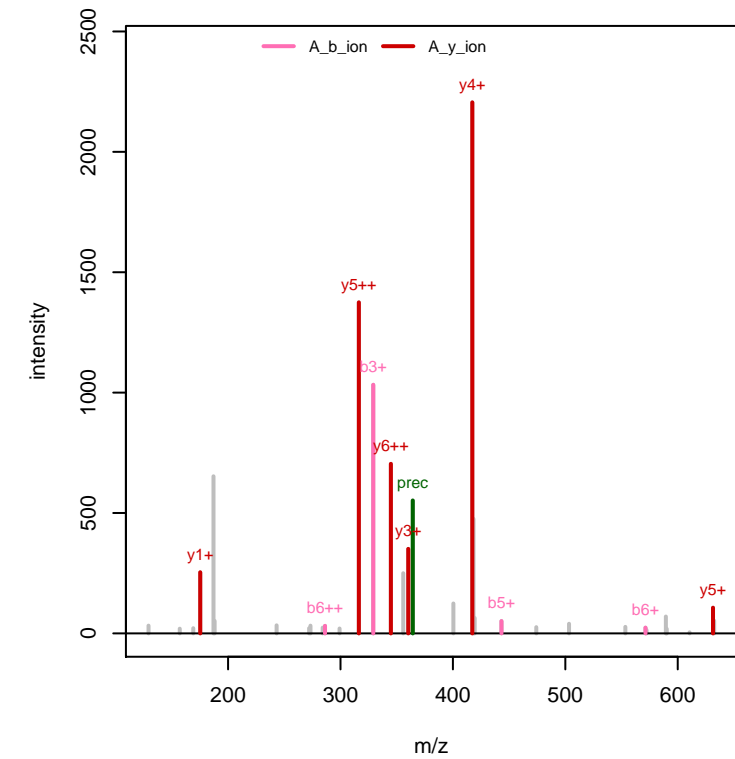

**KGSSLQQGFQK+XL\_S**

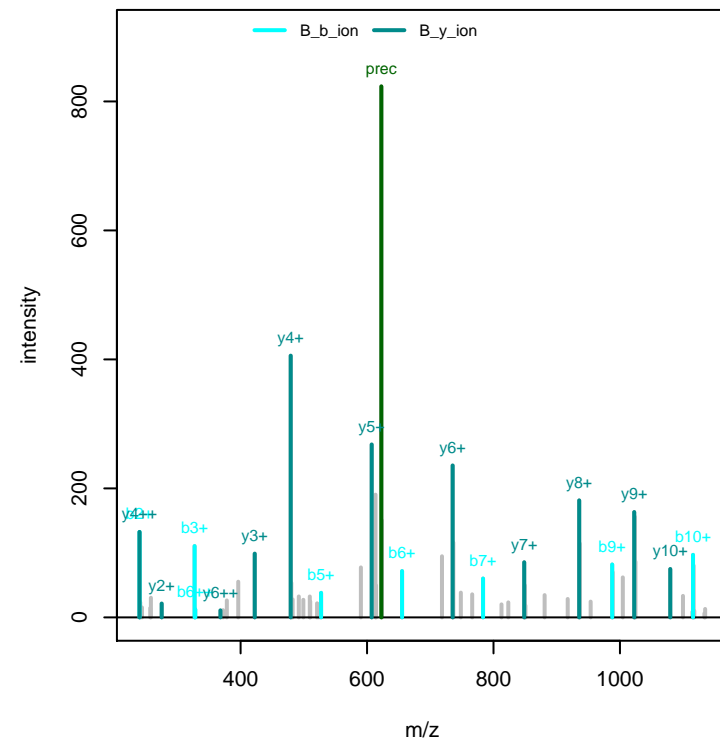

**KGSSLQQGFQK+XL\_L**

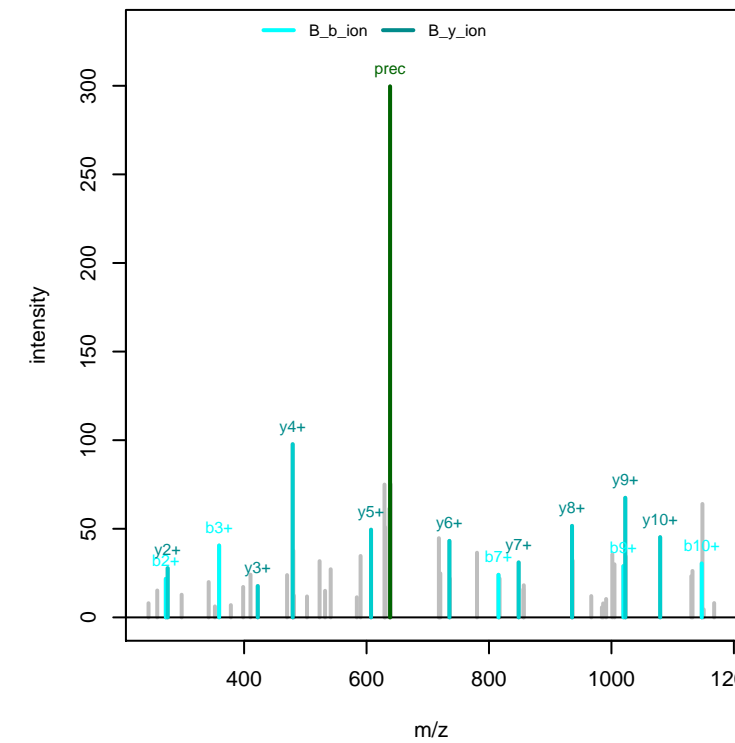

**KSSAAR**  
**AENQYYGTGRR**

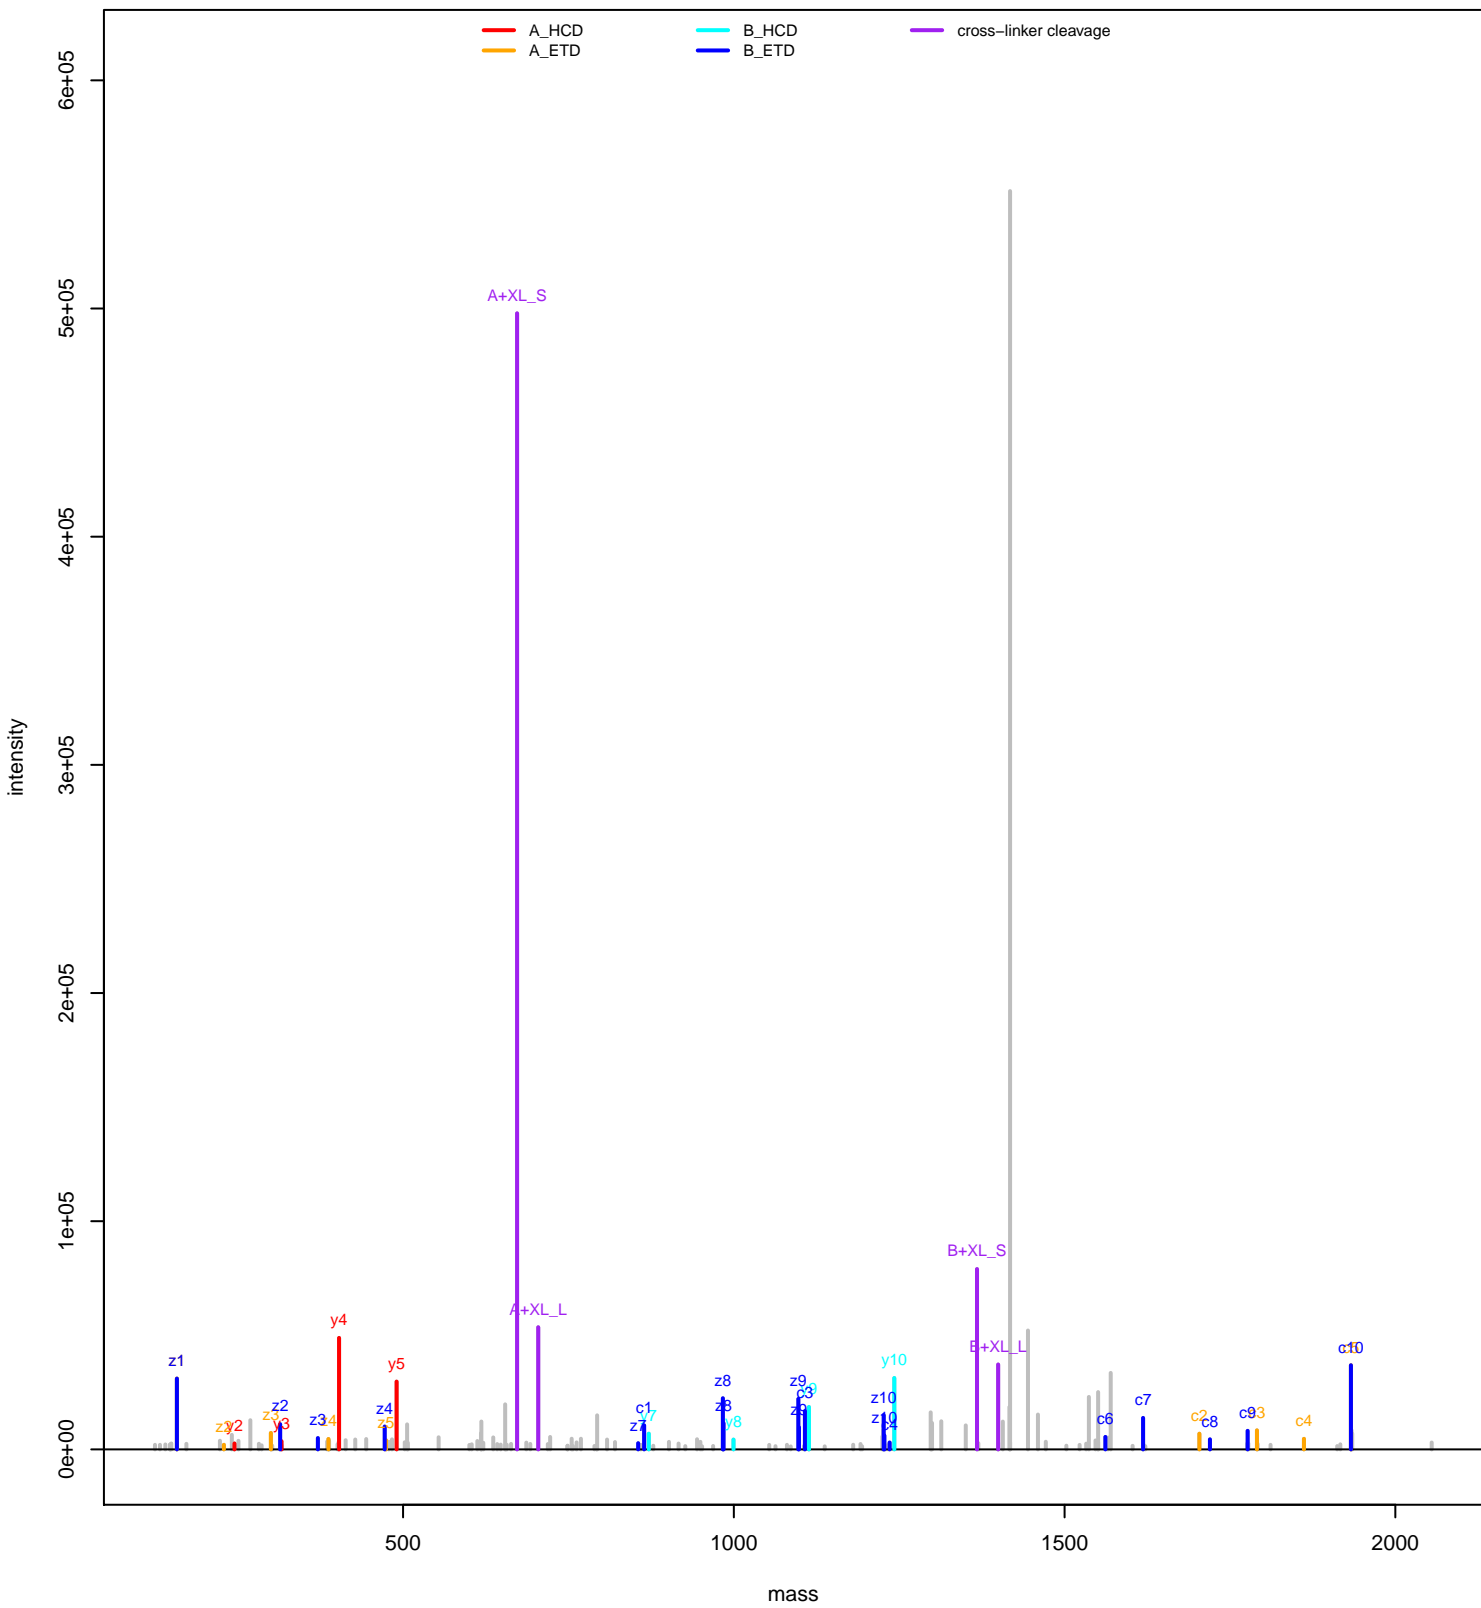

**KSSAAR+XL\_S**

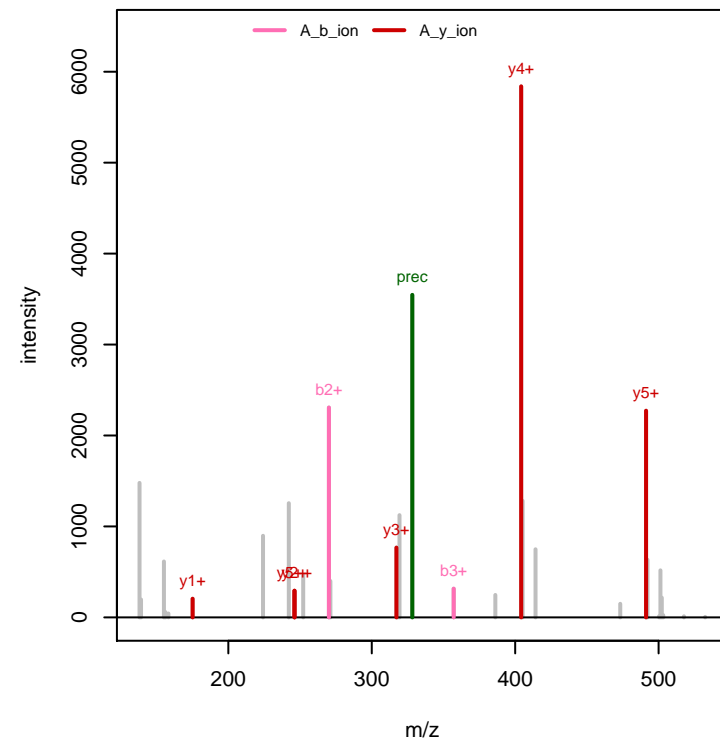

**KSSAAR+XL\_L**

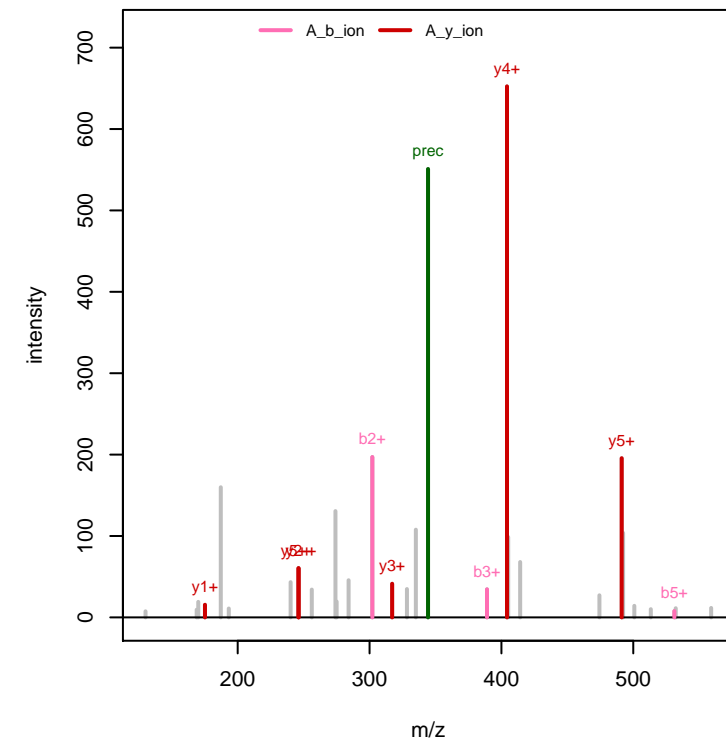

**AENQYYGTGRR+XL\_S**

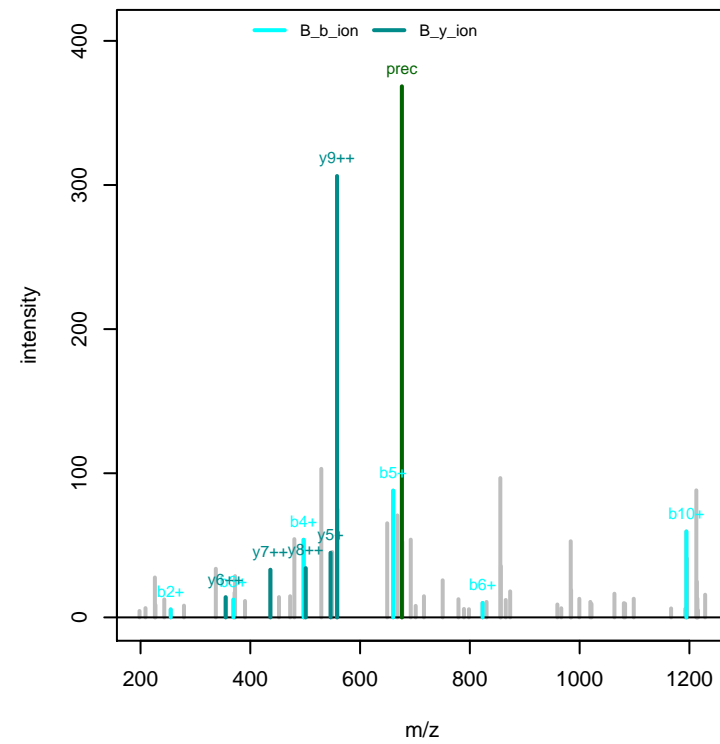

**AENQYYGTGRR+XL\_L**

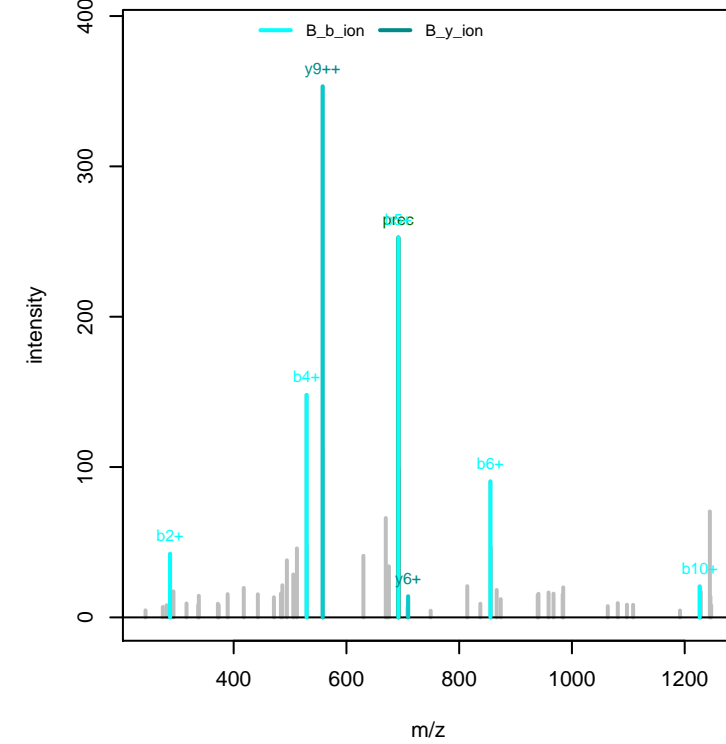

SKDNGR  
QLQQKSYTPQNR

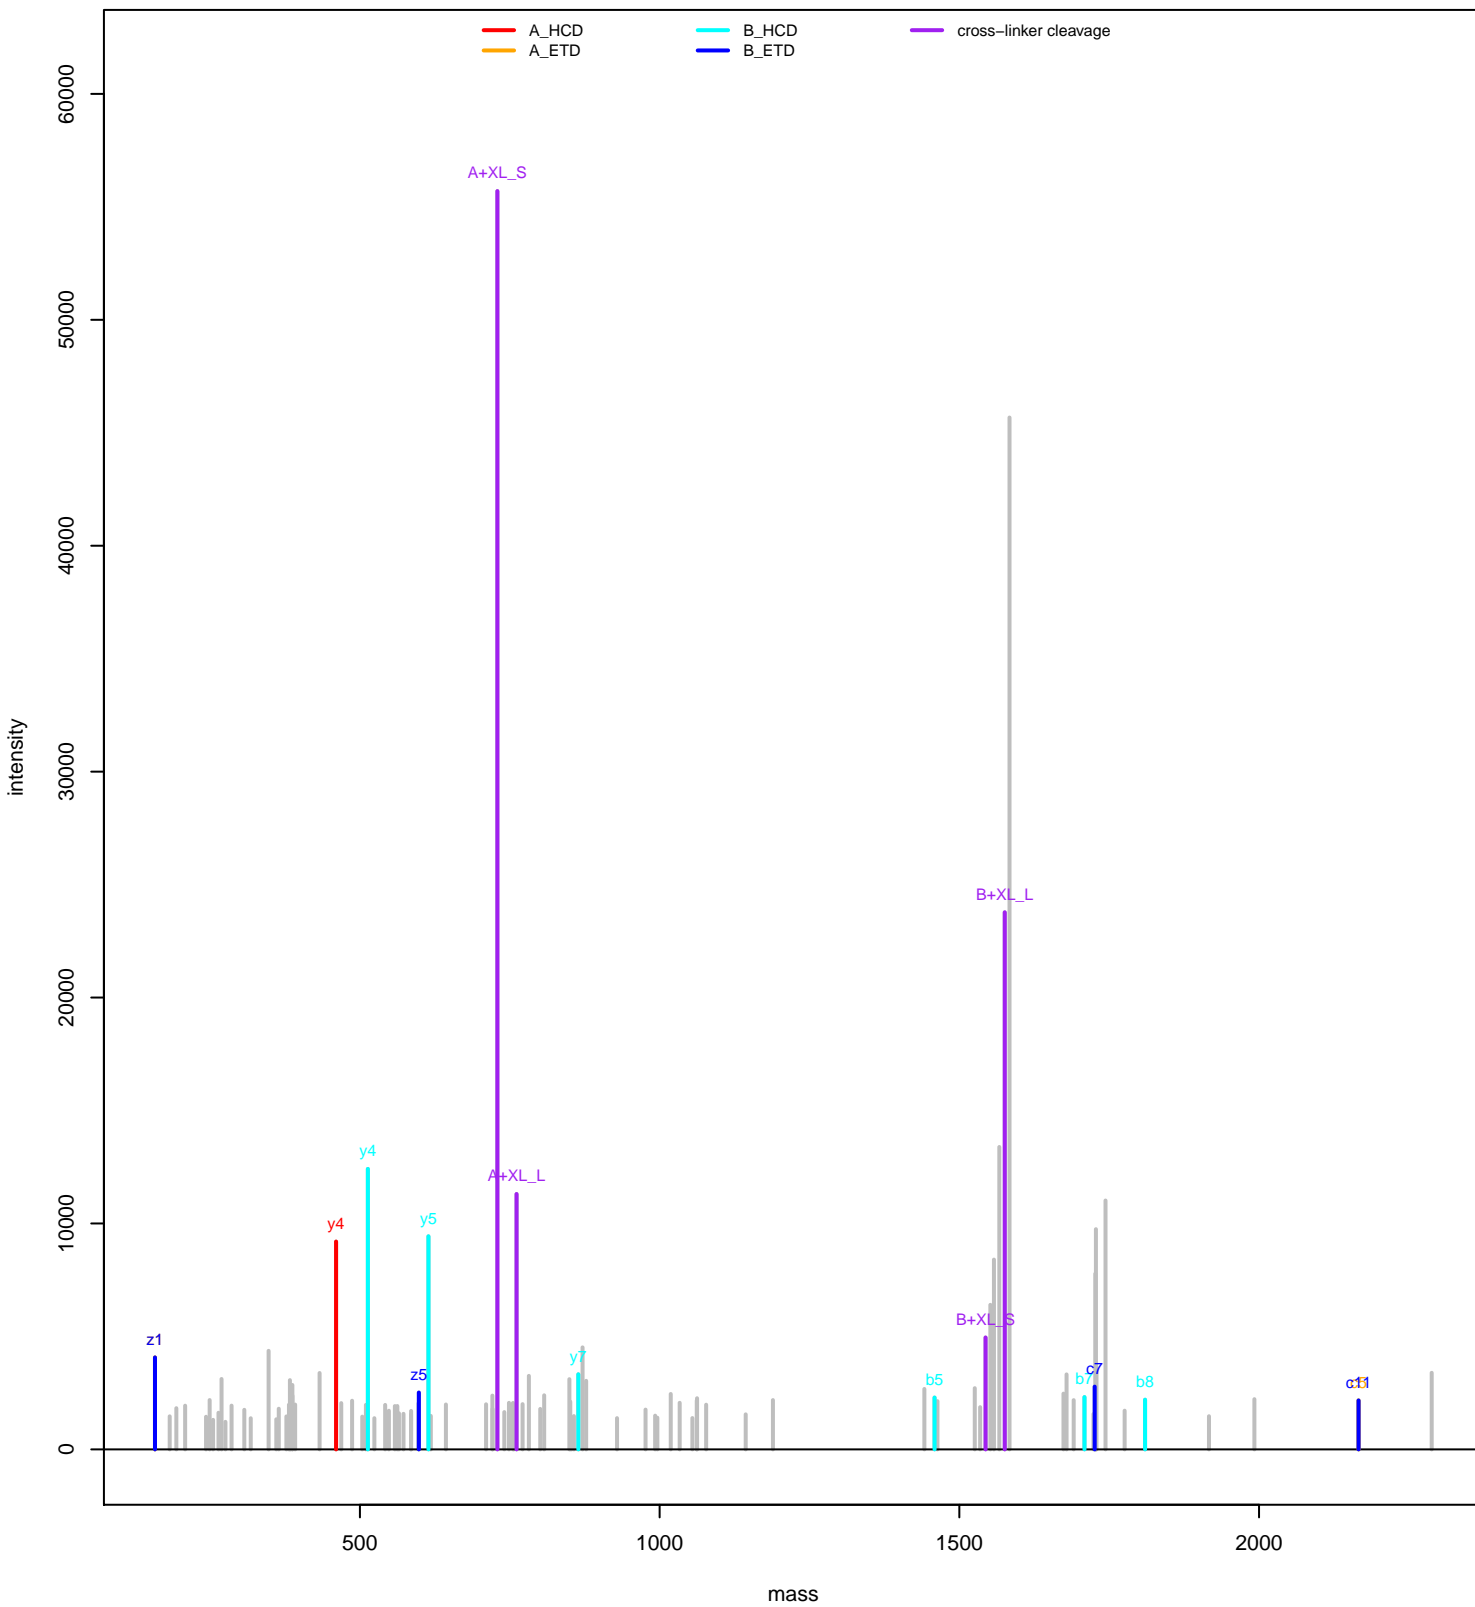

SKDNGR+XL\_S

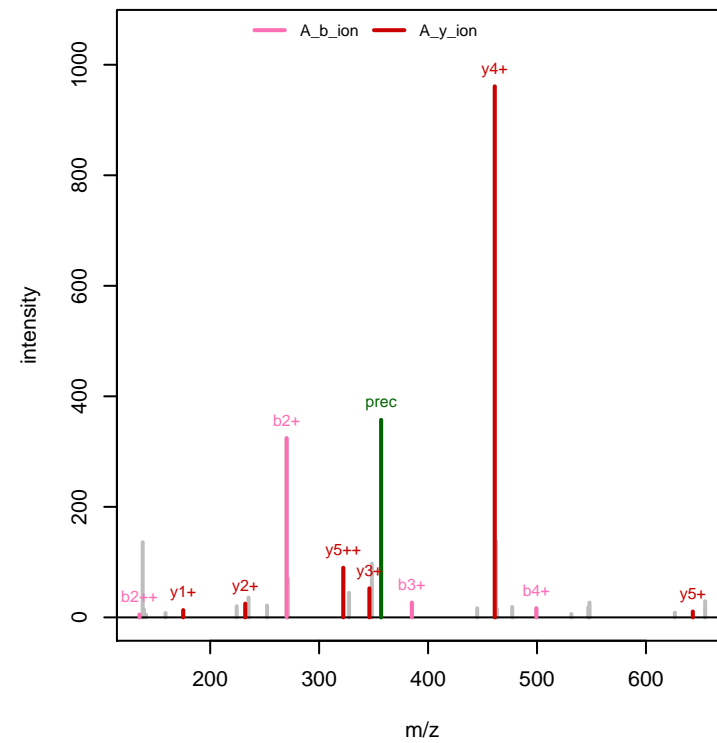

SKDNGR+XL\_L

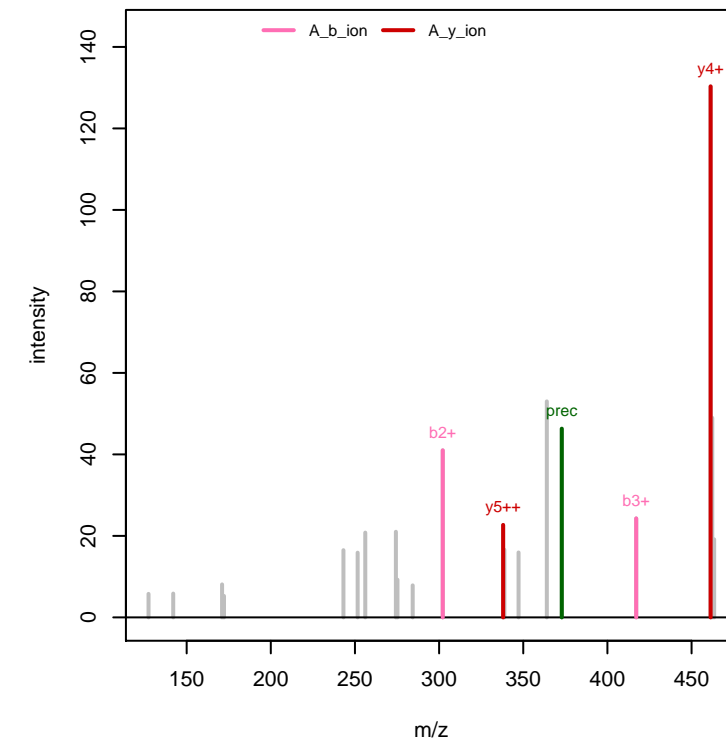

QLQQKSYTPQNR+XL\_S

QLQQKSYTPQNR+XL\_S

QLQQKSYTPQNR+XL\_L

QLQQKSYTPQNR+XL\_L

KAQLER  
DKQLSEQQK

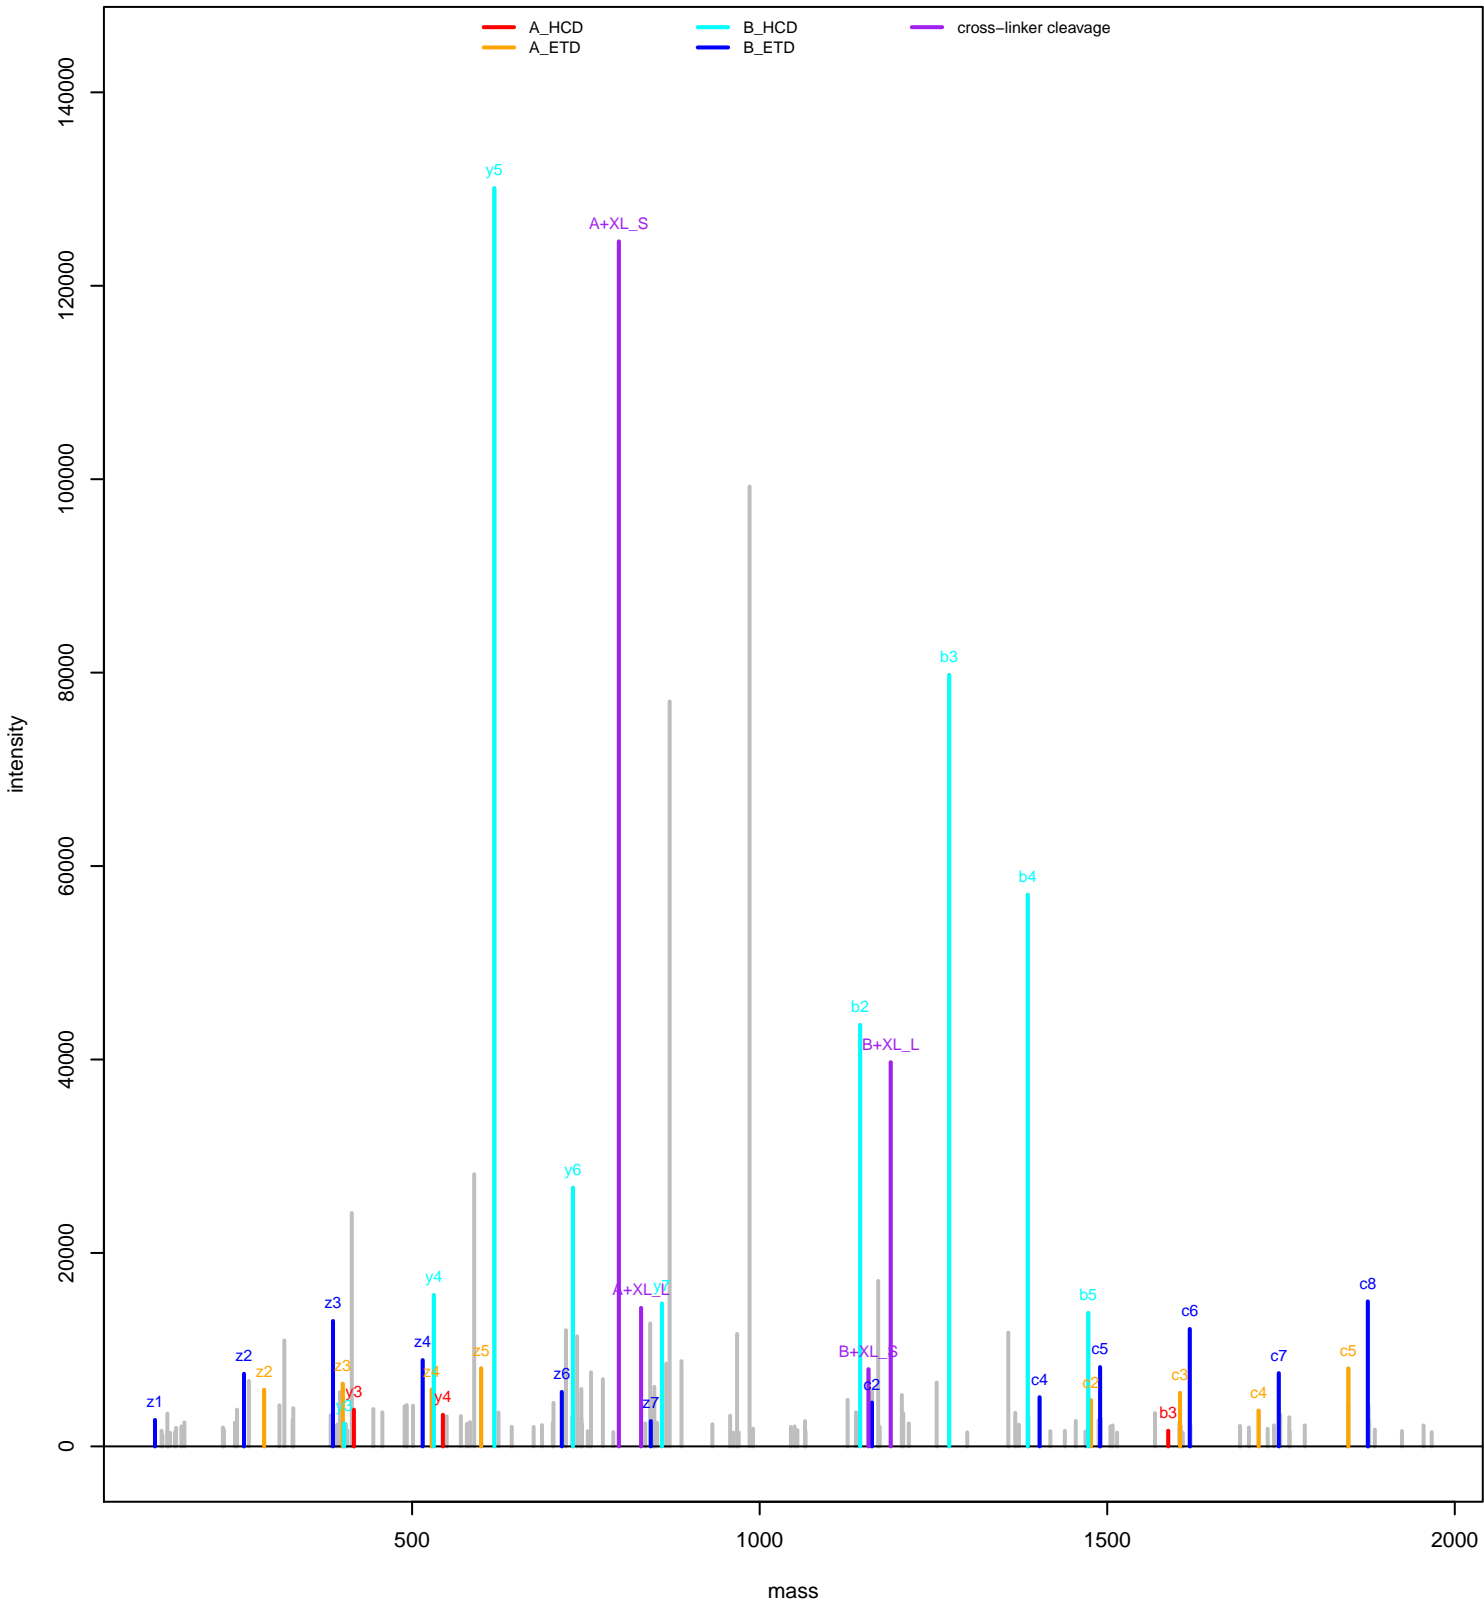

KAQLER+XL\_S

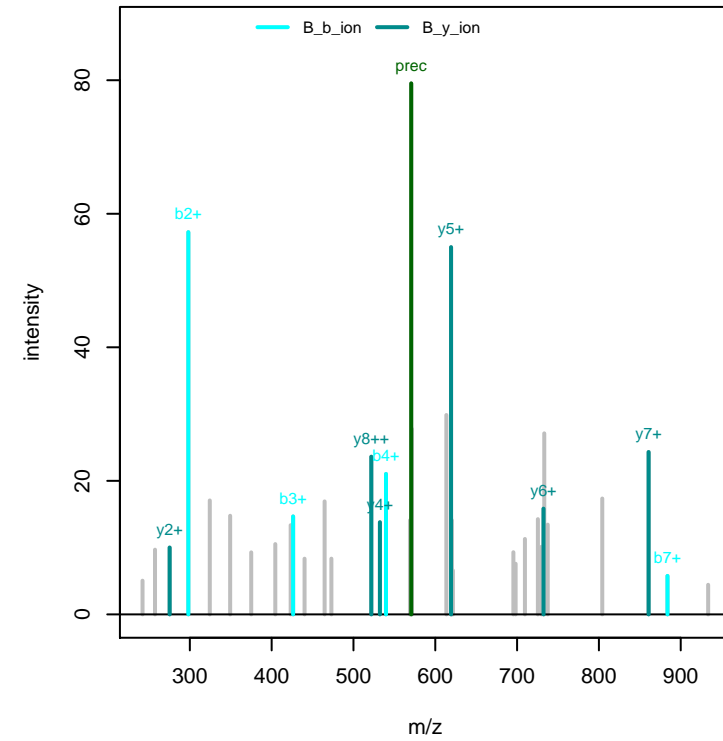

KAQLER+XL\_L

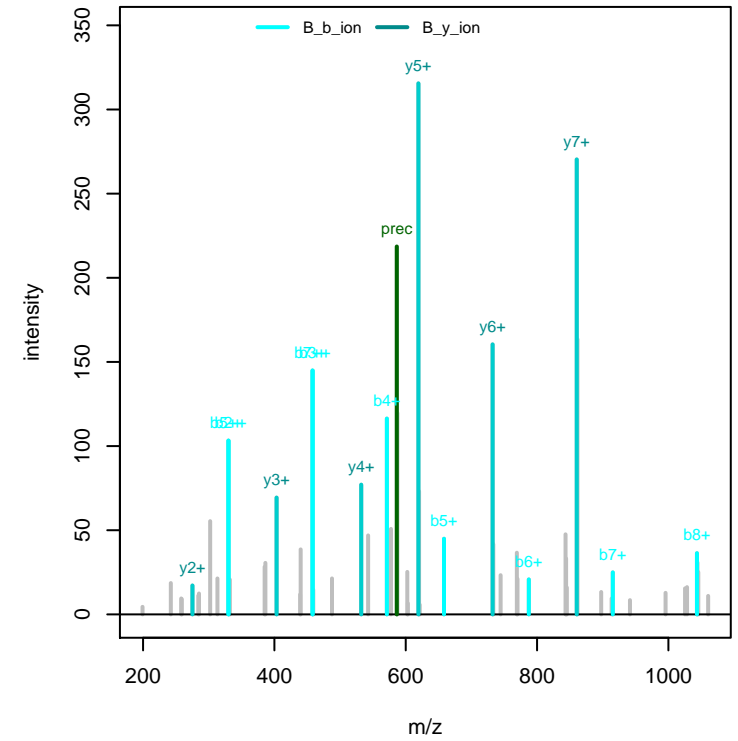

DKQLSEQQK+XL\_S



DKQLSEQQK+XL\_L





AVDGVKSVK  
VAKGVEGVTSVSDK

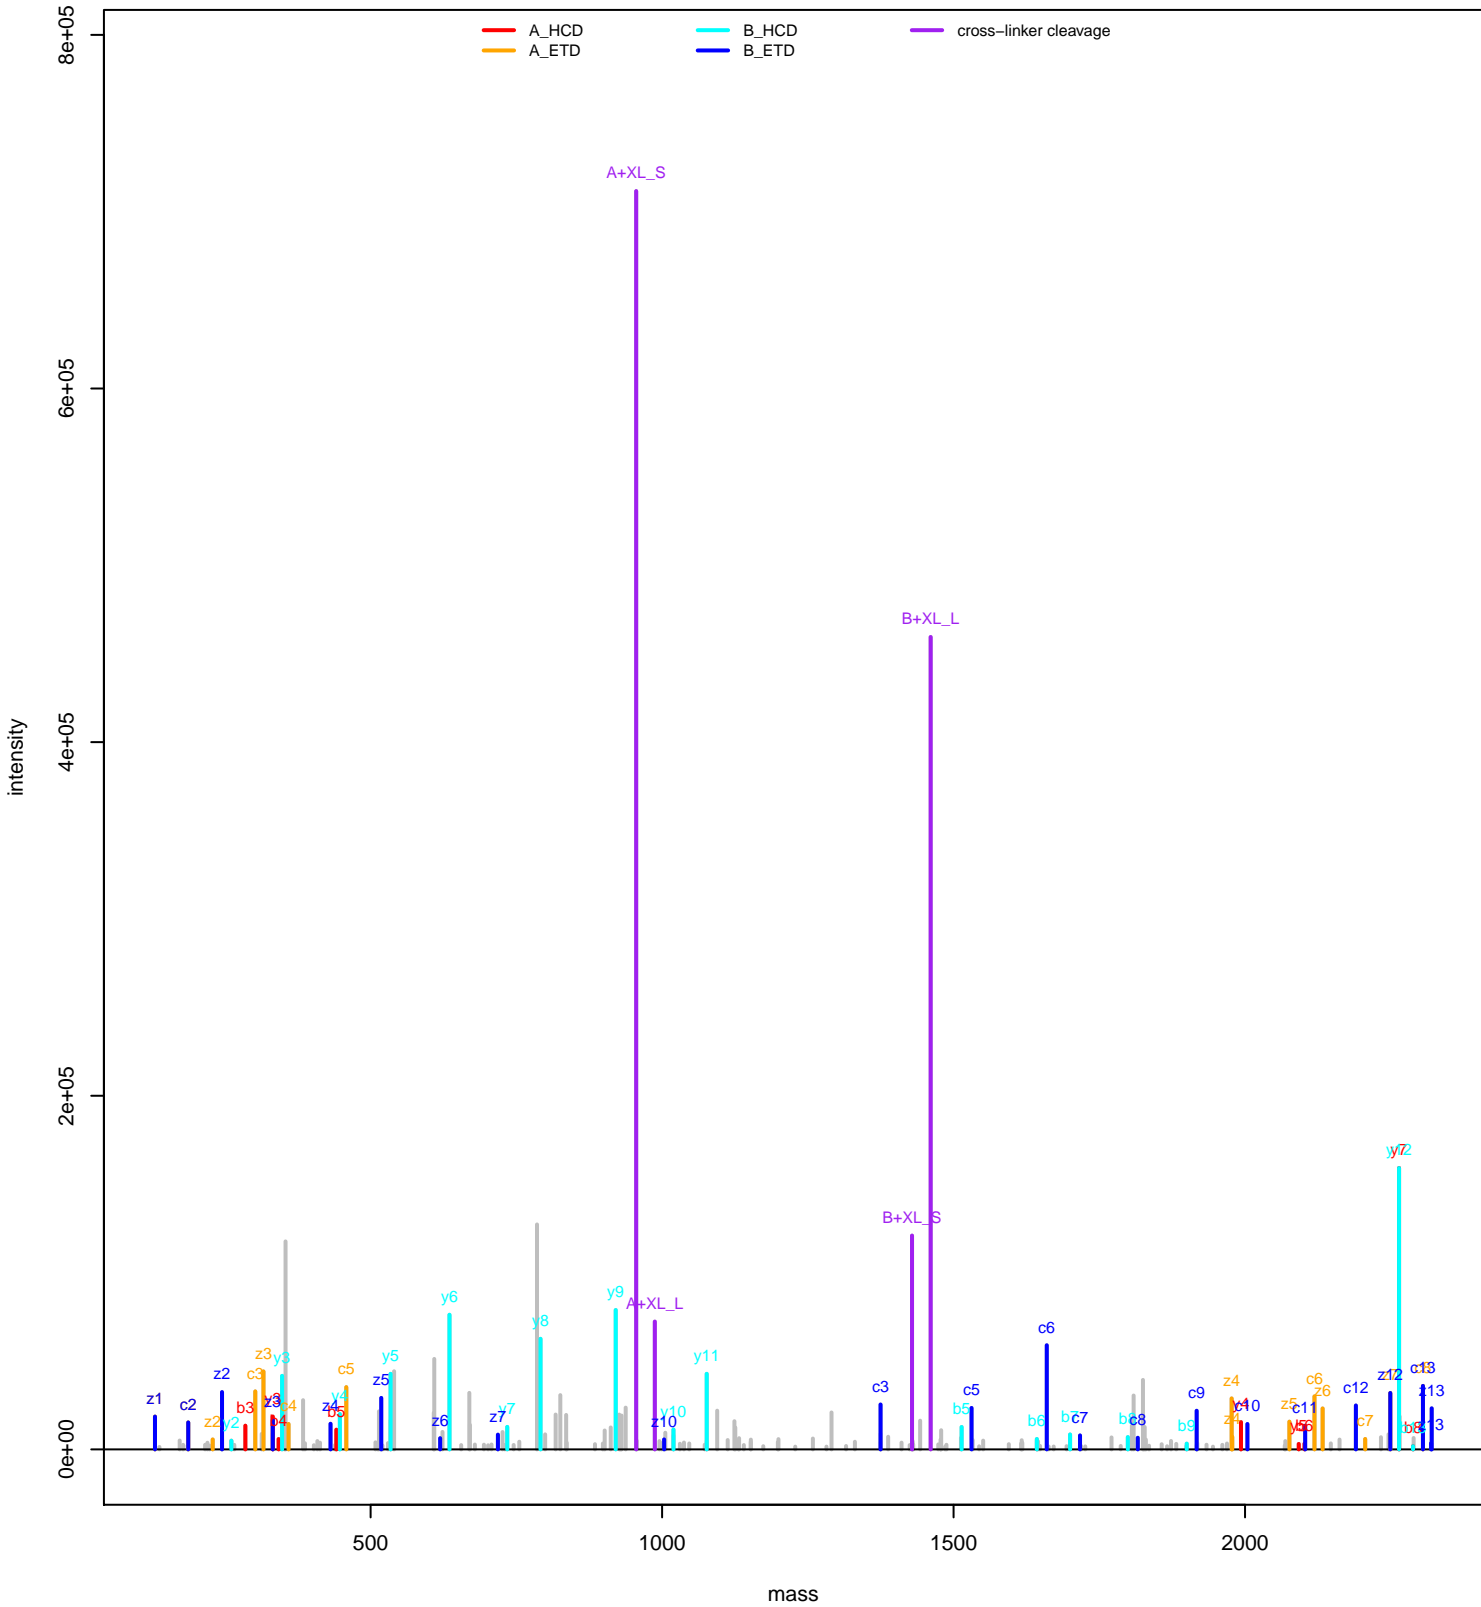

AVDGVKSVK+XL\_S

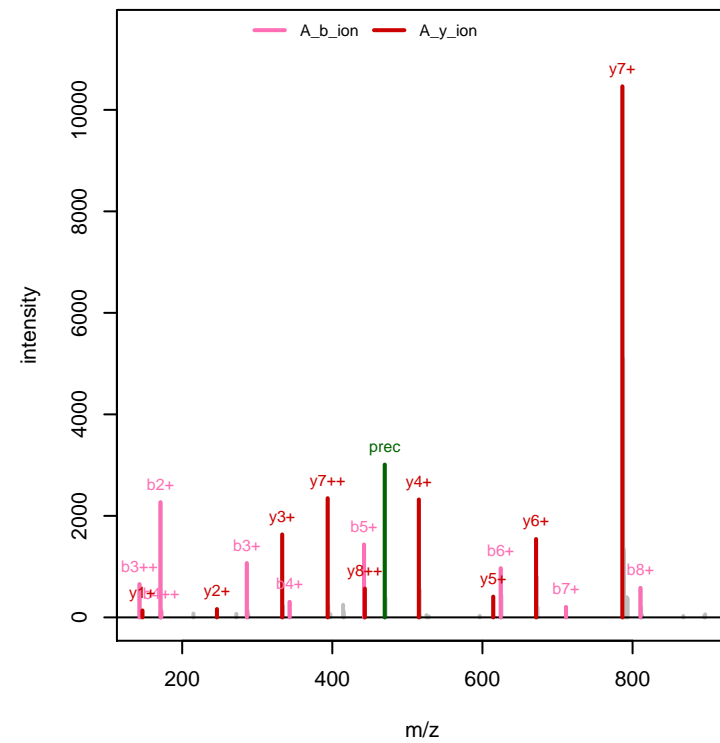

AVDGVKSVK+XL\_L

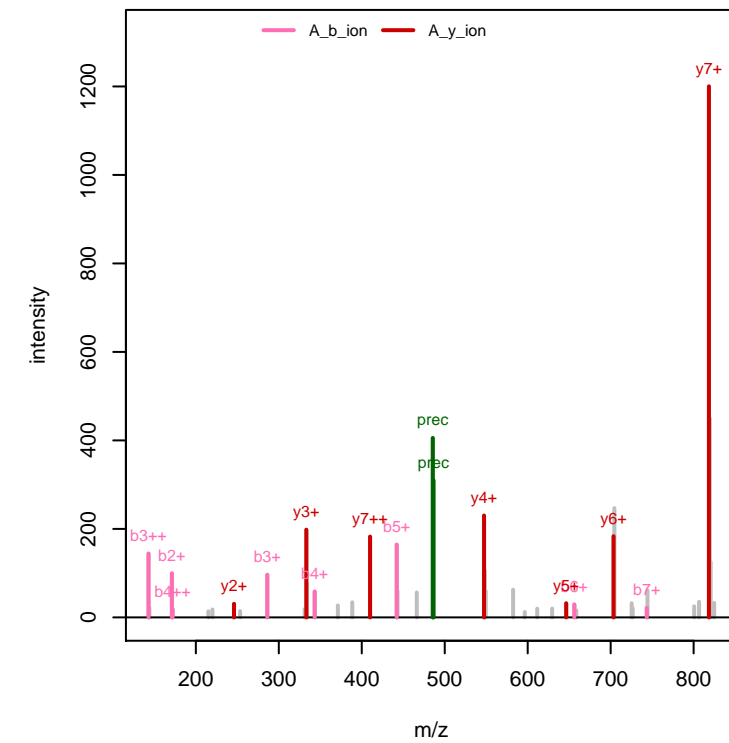

VAKGVEGVTSVSDK+XL\_S

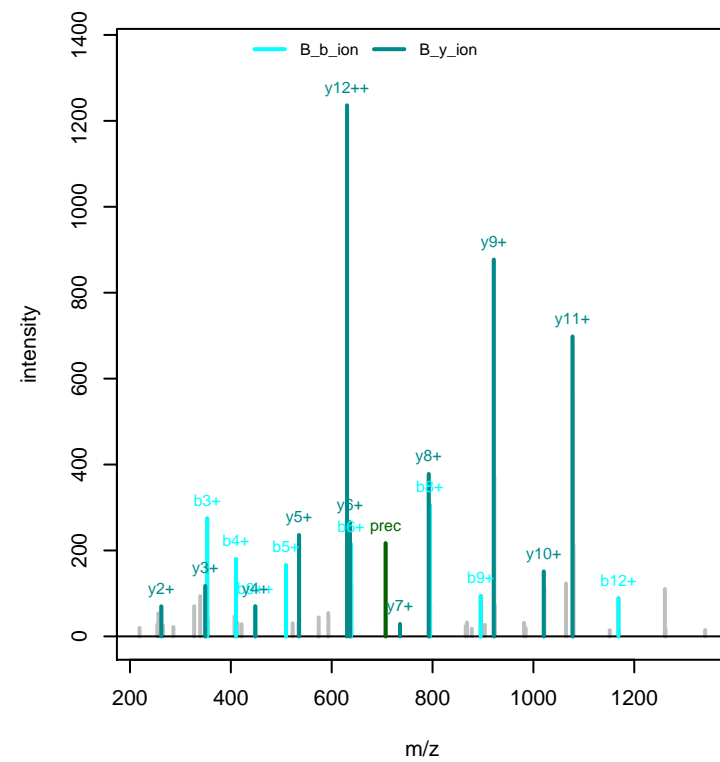

VAKGVEGVTSVSDK+XL\_L

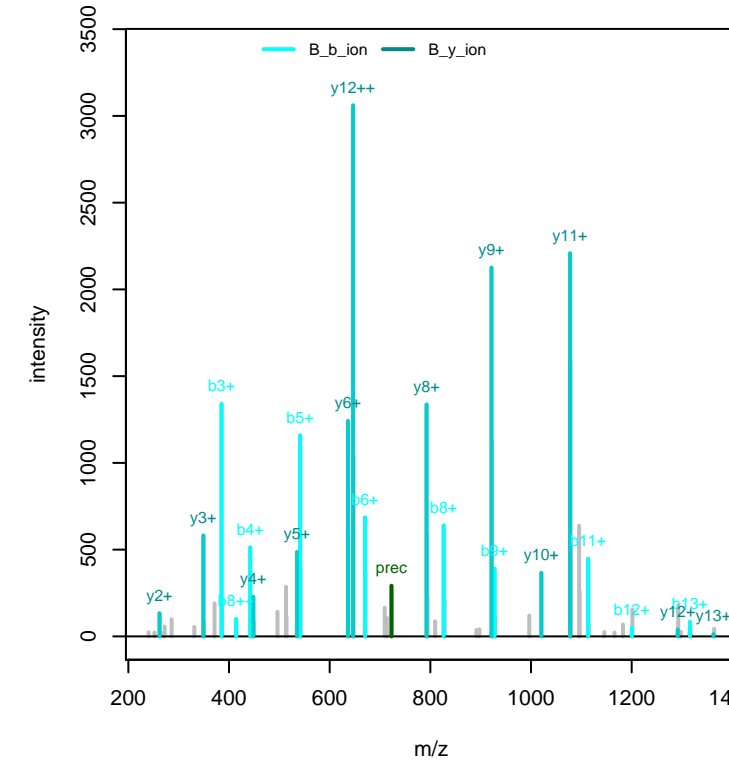

AKVNNVDPK  
TVKAAAICAER

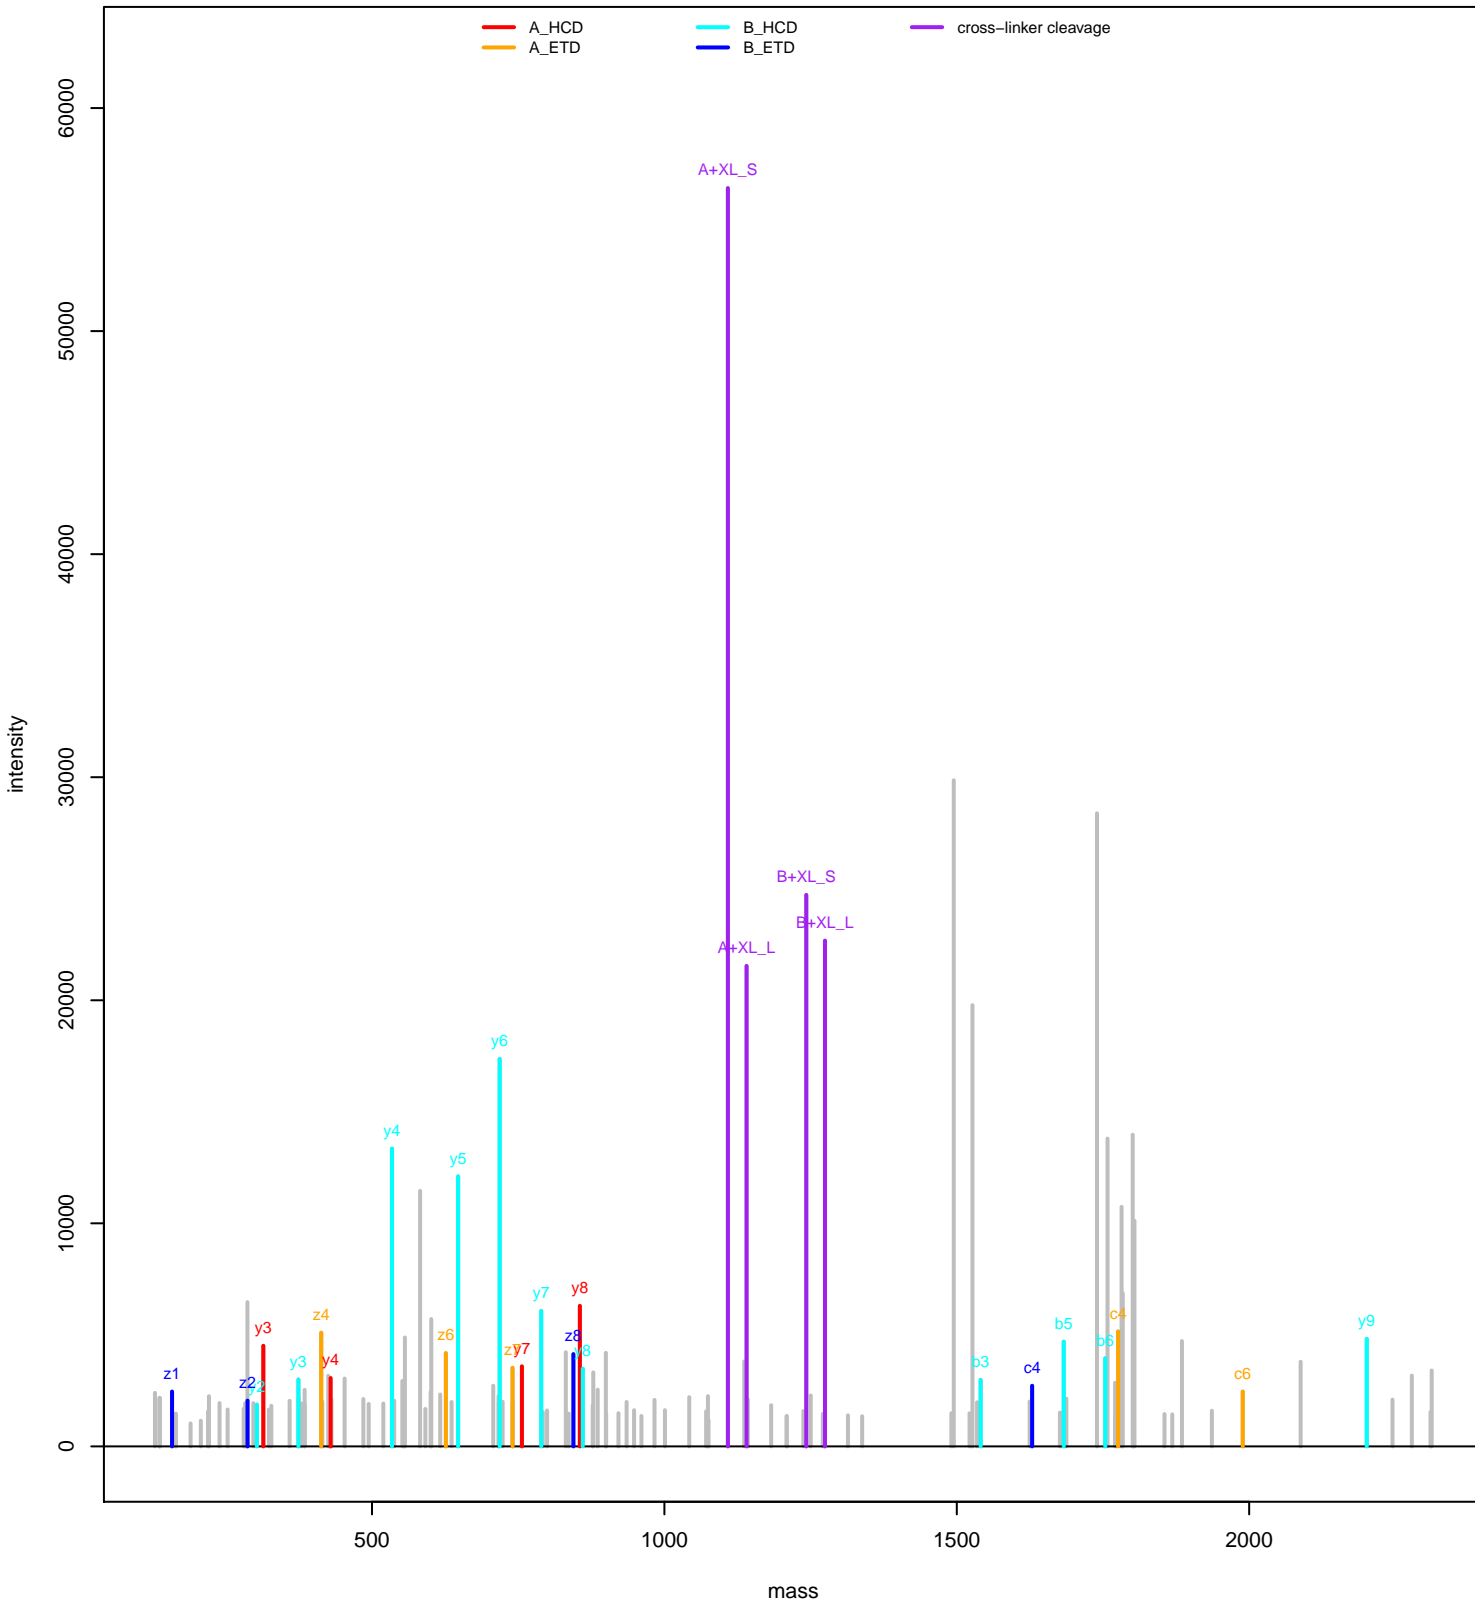

AKVNNVDPK+XL\_S

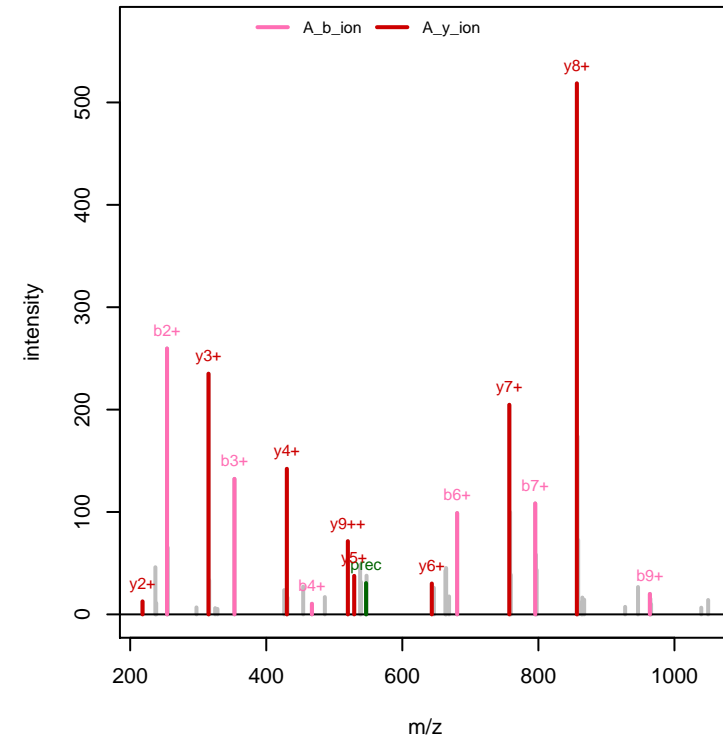

AKVNNVDPK+XL\_L

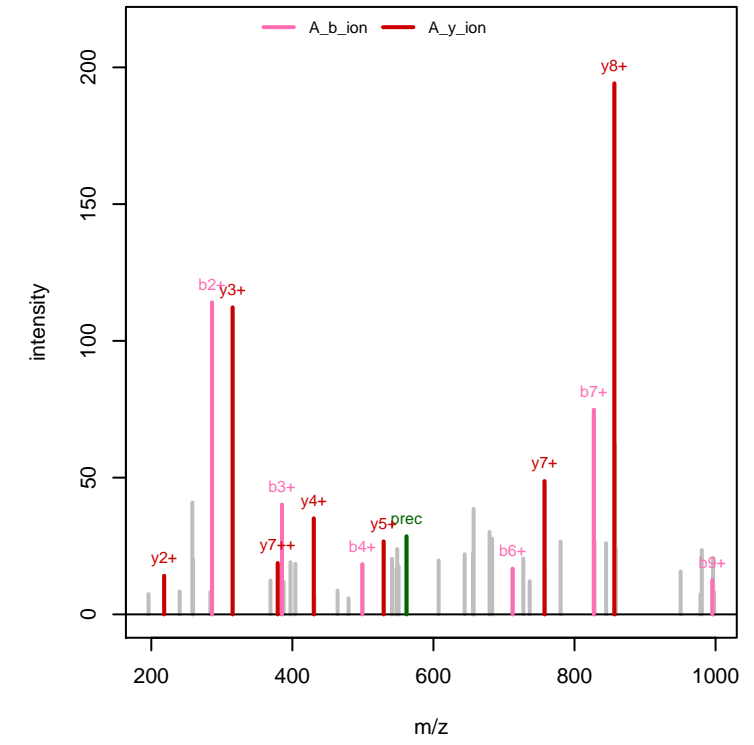

TVKAAAICAER+XL\_S

TVKAAAICAER+XL\_L

**GHKGQK**  
**GIGSGLGKTGGR**

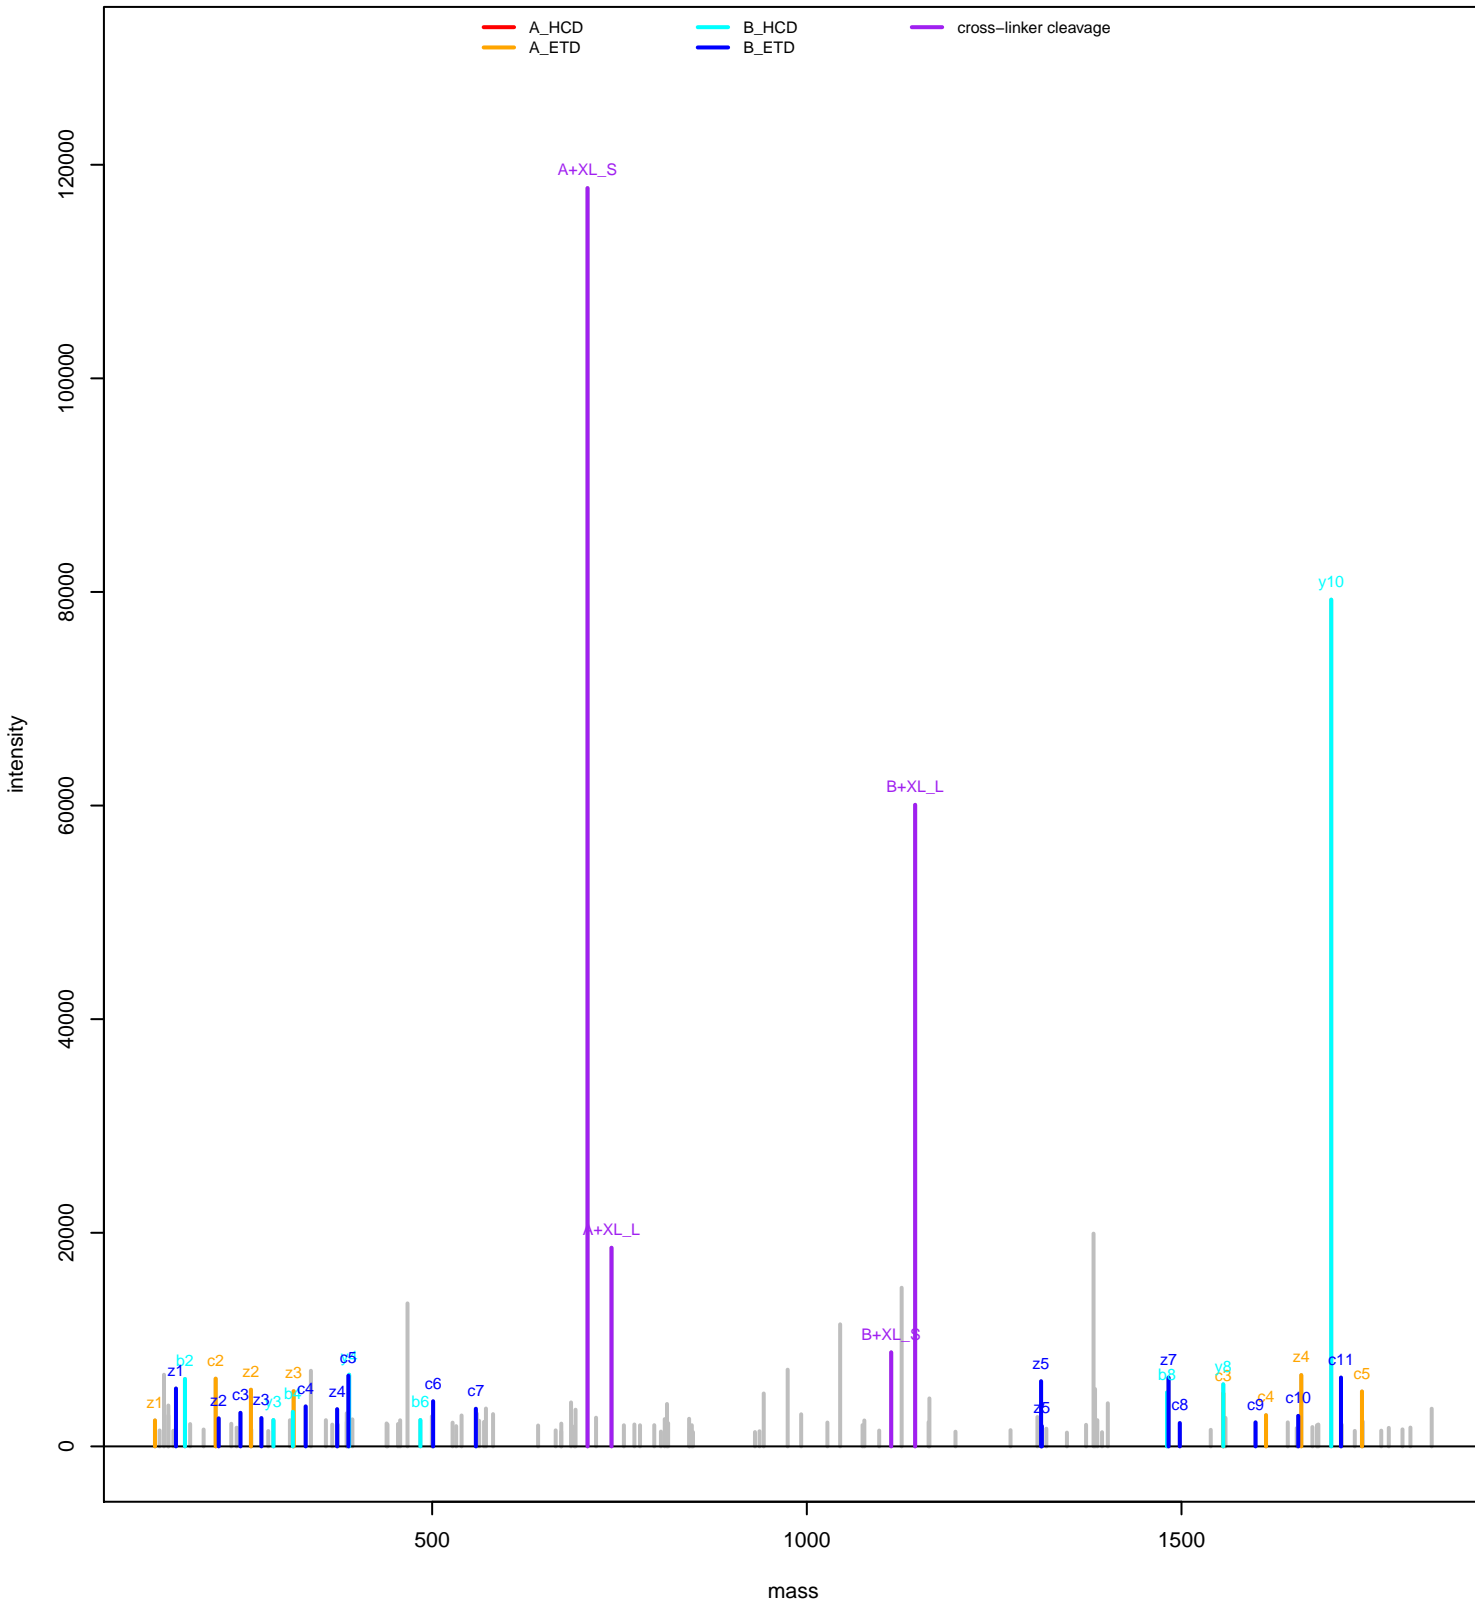

**GHKGQK+XL\_S**

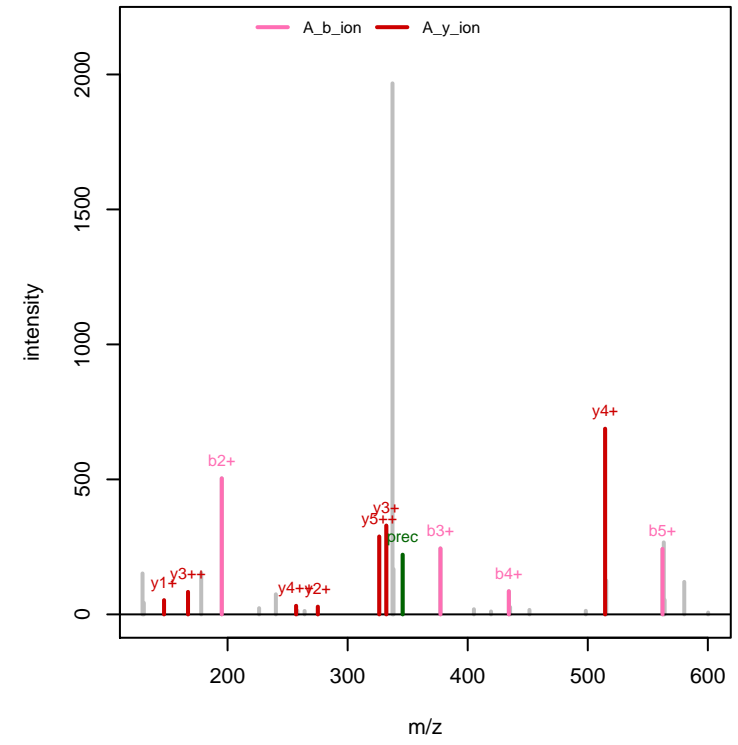

**GHKGQK+XL\_L**

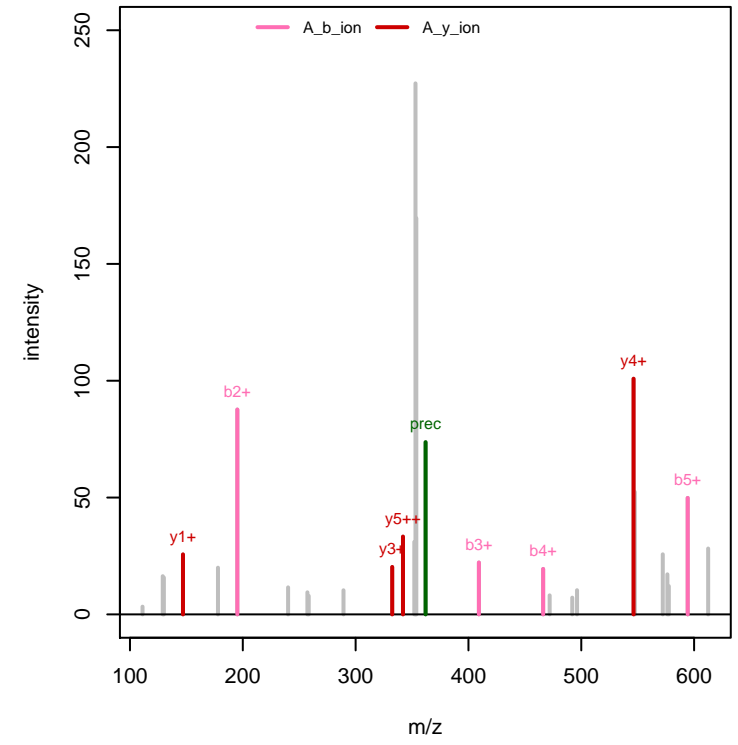

**GIGSGLGKTGGR+XL\_S**

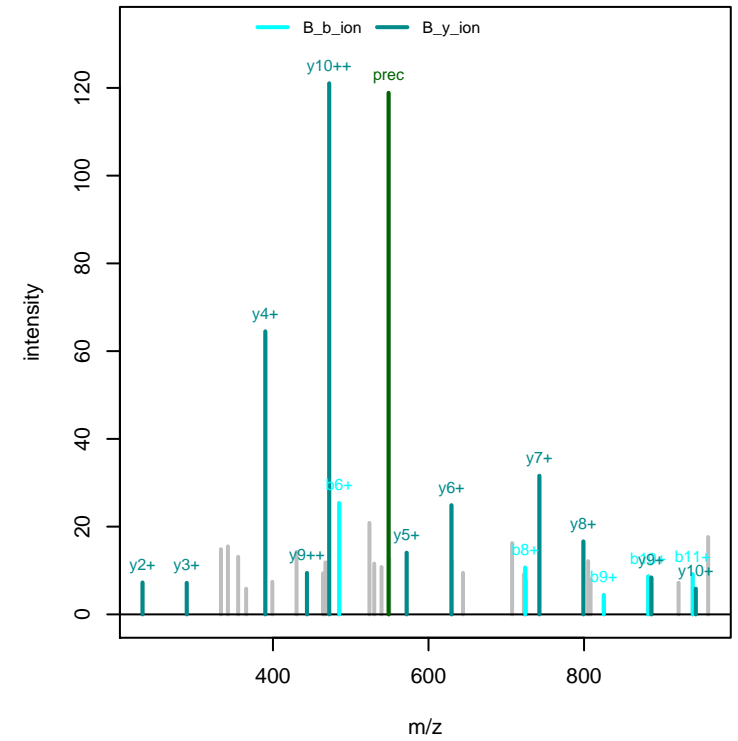

**GIGSGLGKTGGR+XL\_L**

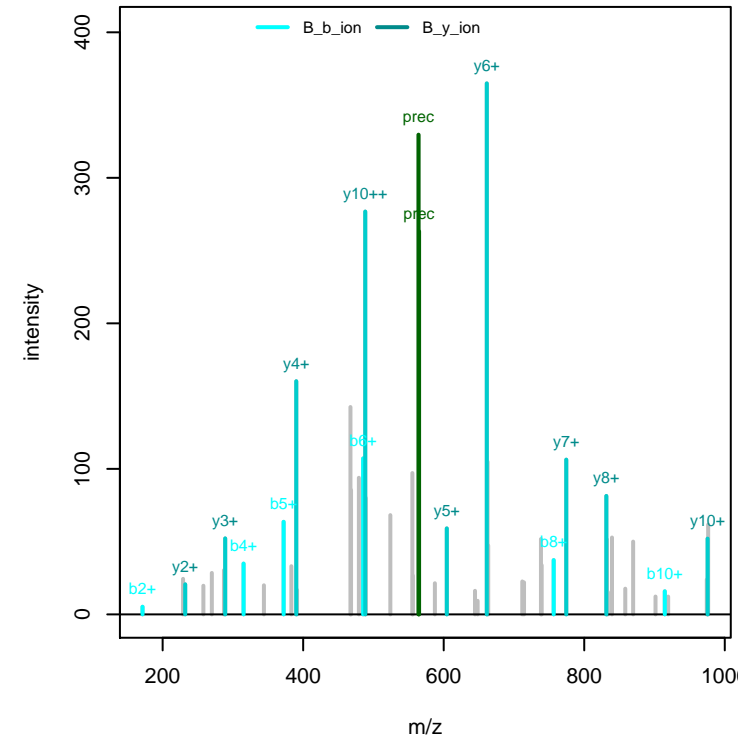

**QANKYK  
QKVTDVEGK**

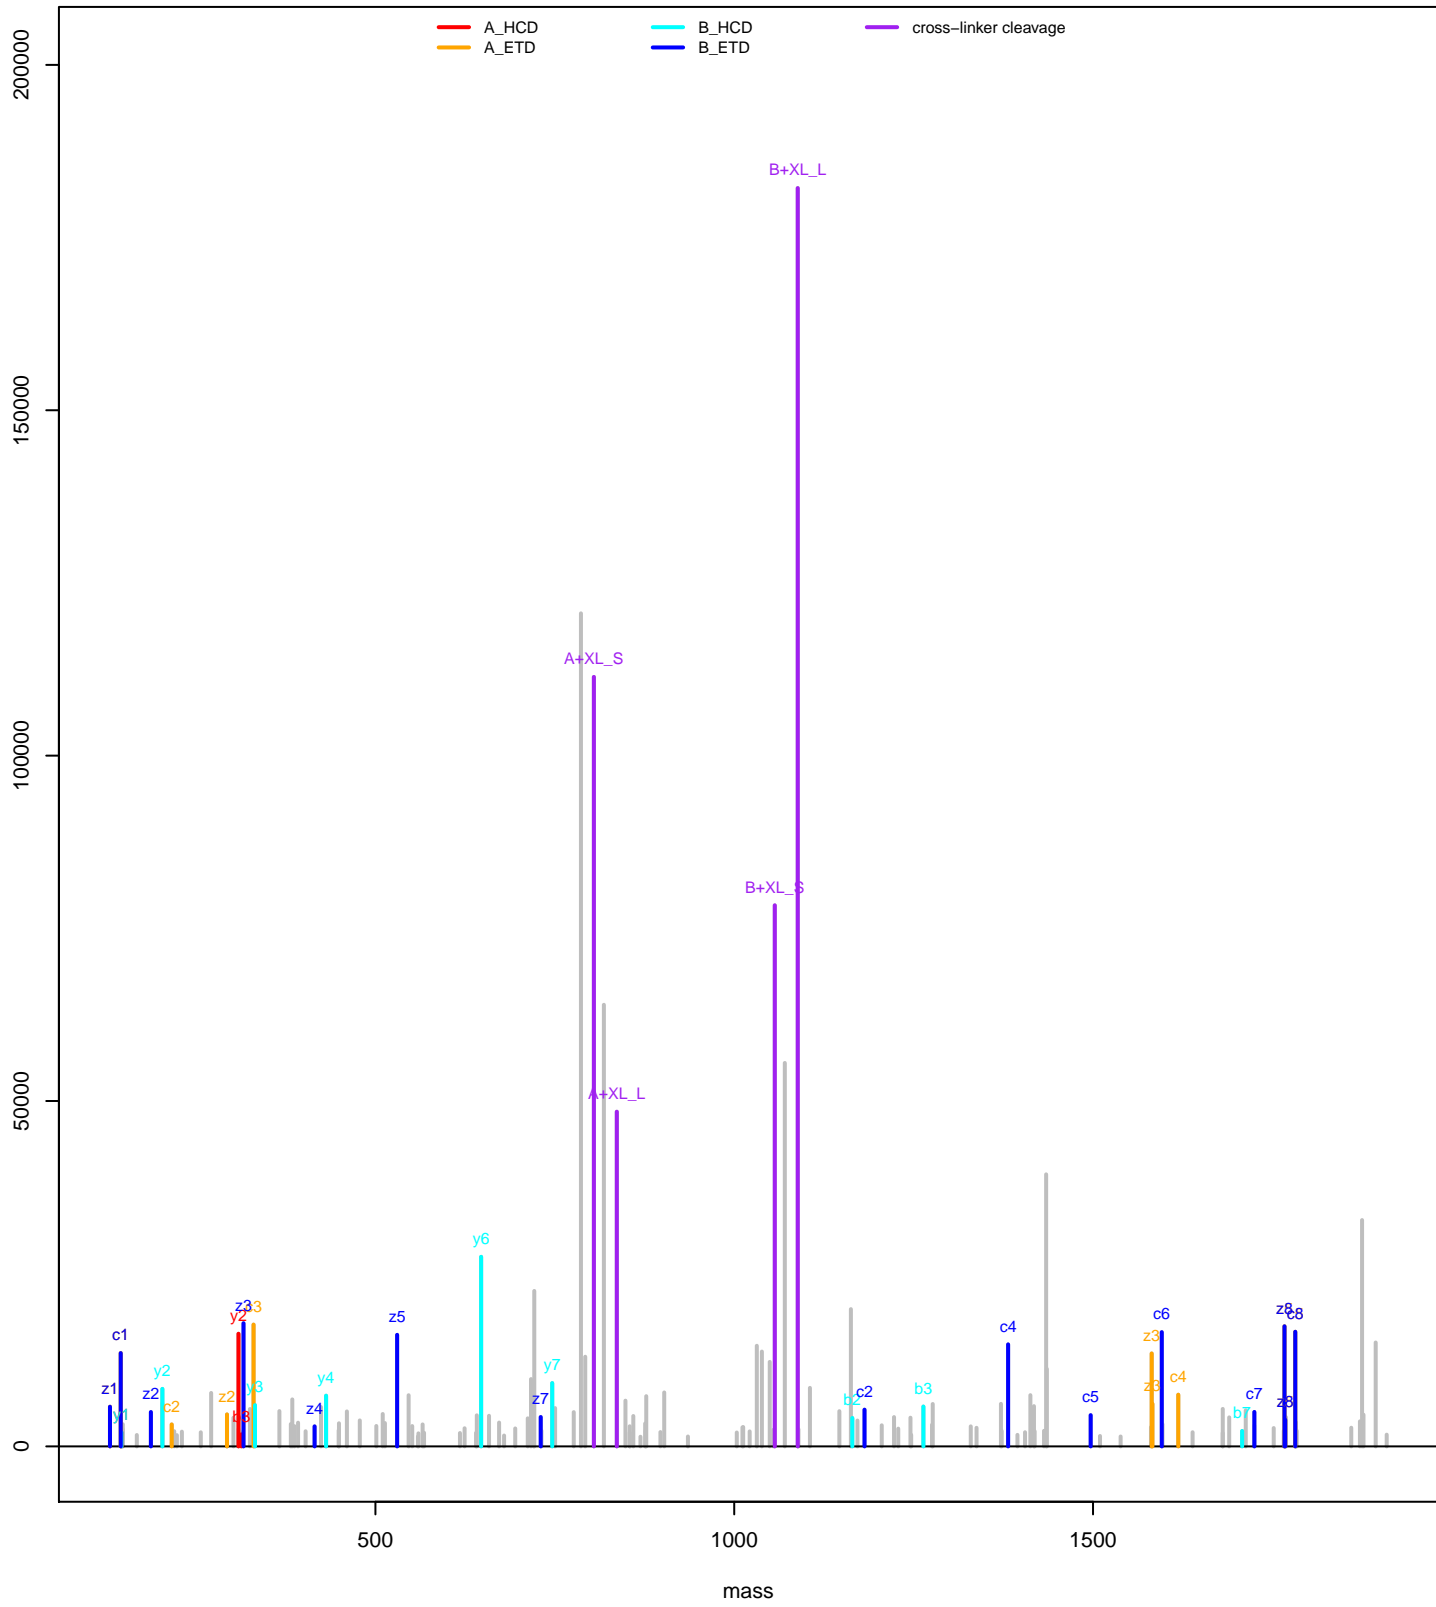

**QANKYK+XL\_S**

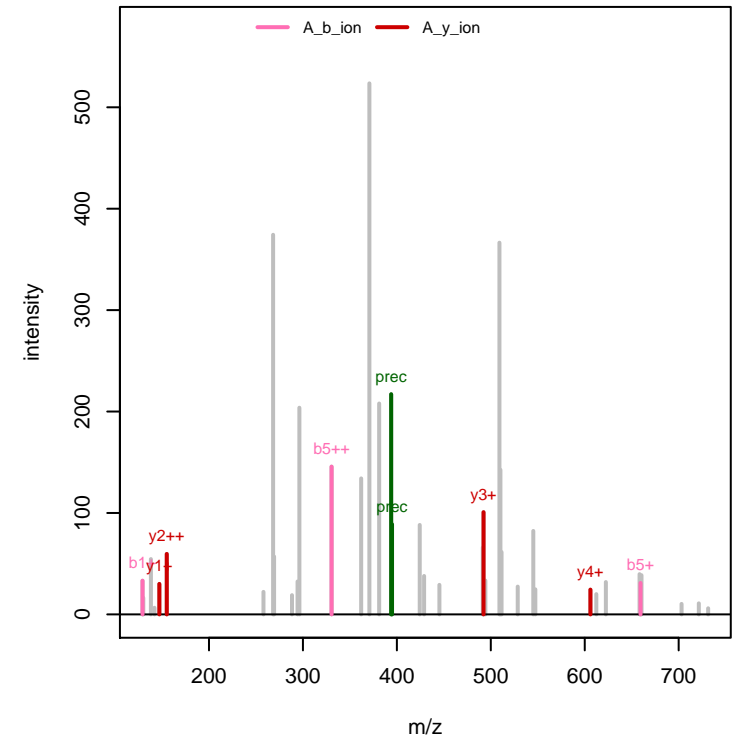

**QANKYK+XL\_L**

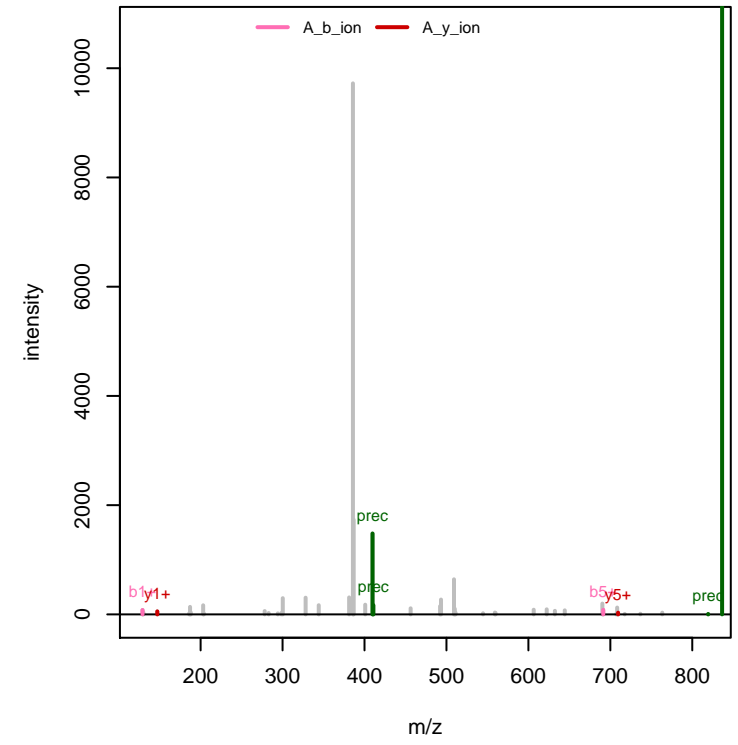

**QKVTDVEGK+XL\_S**

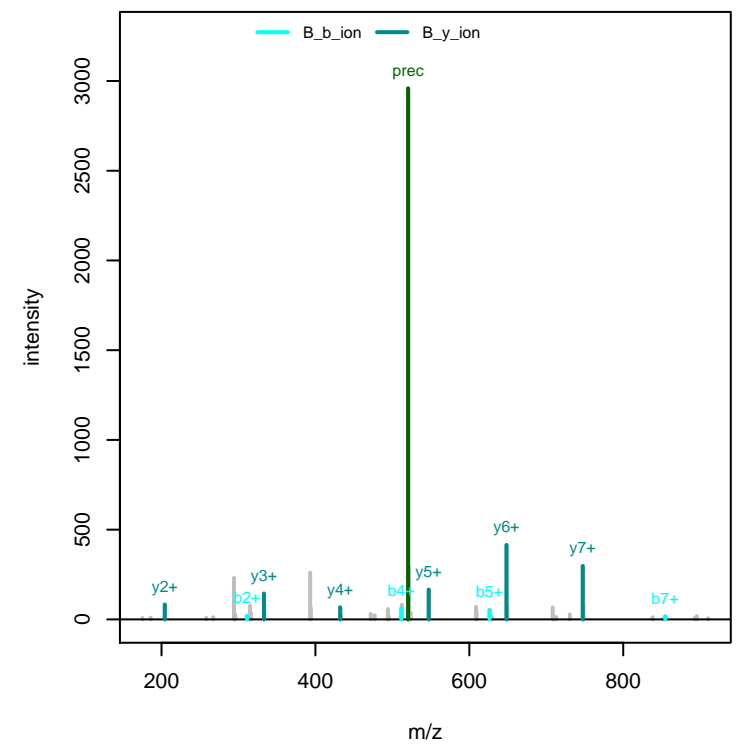

**QKVTDVEGK+XL\_L**

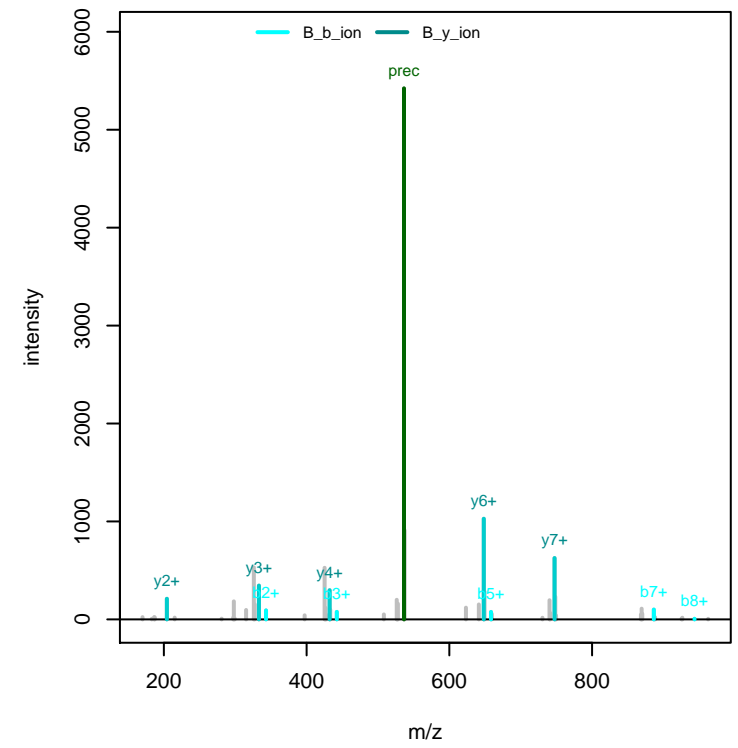

**KSGIGGADGK  
IMATAAKNITK**

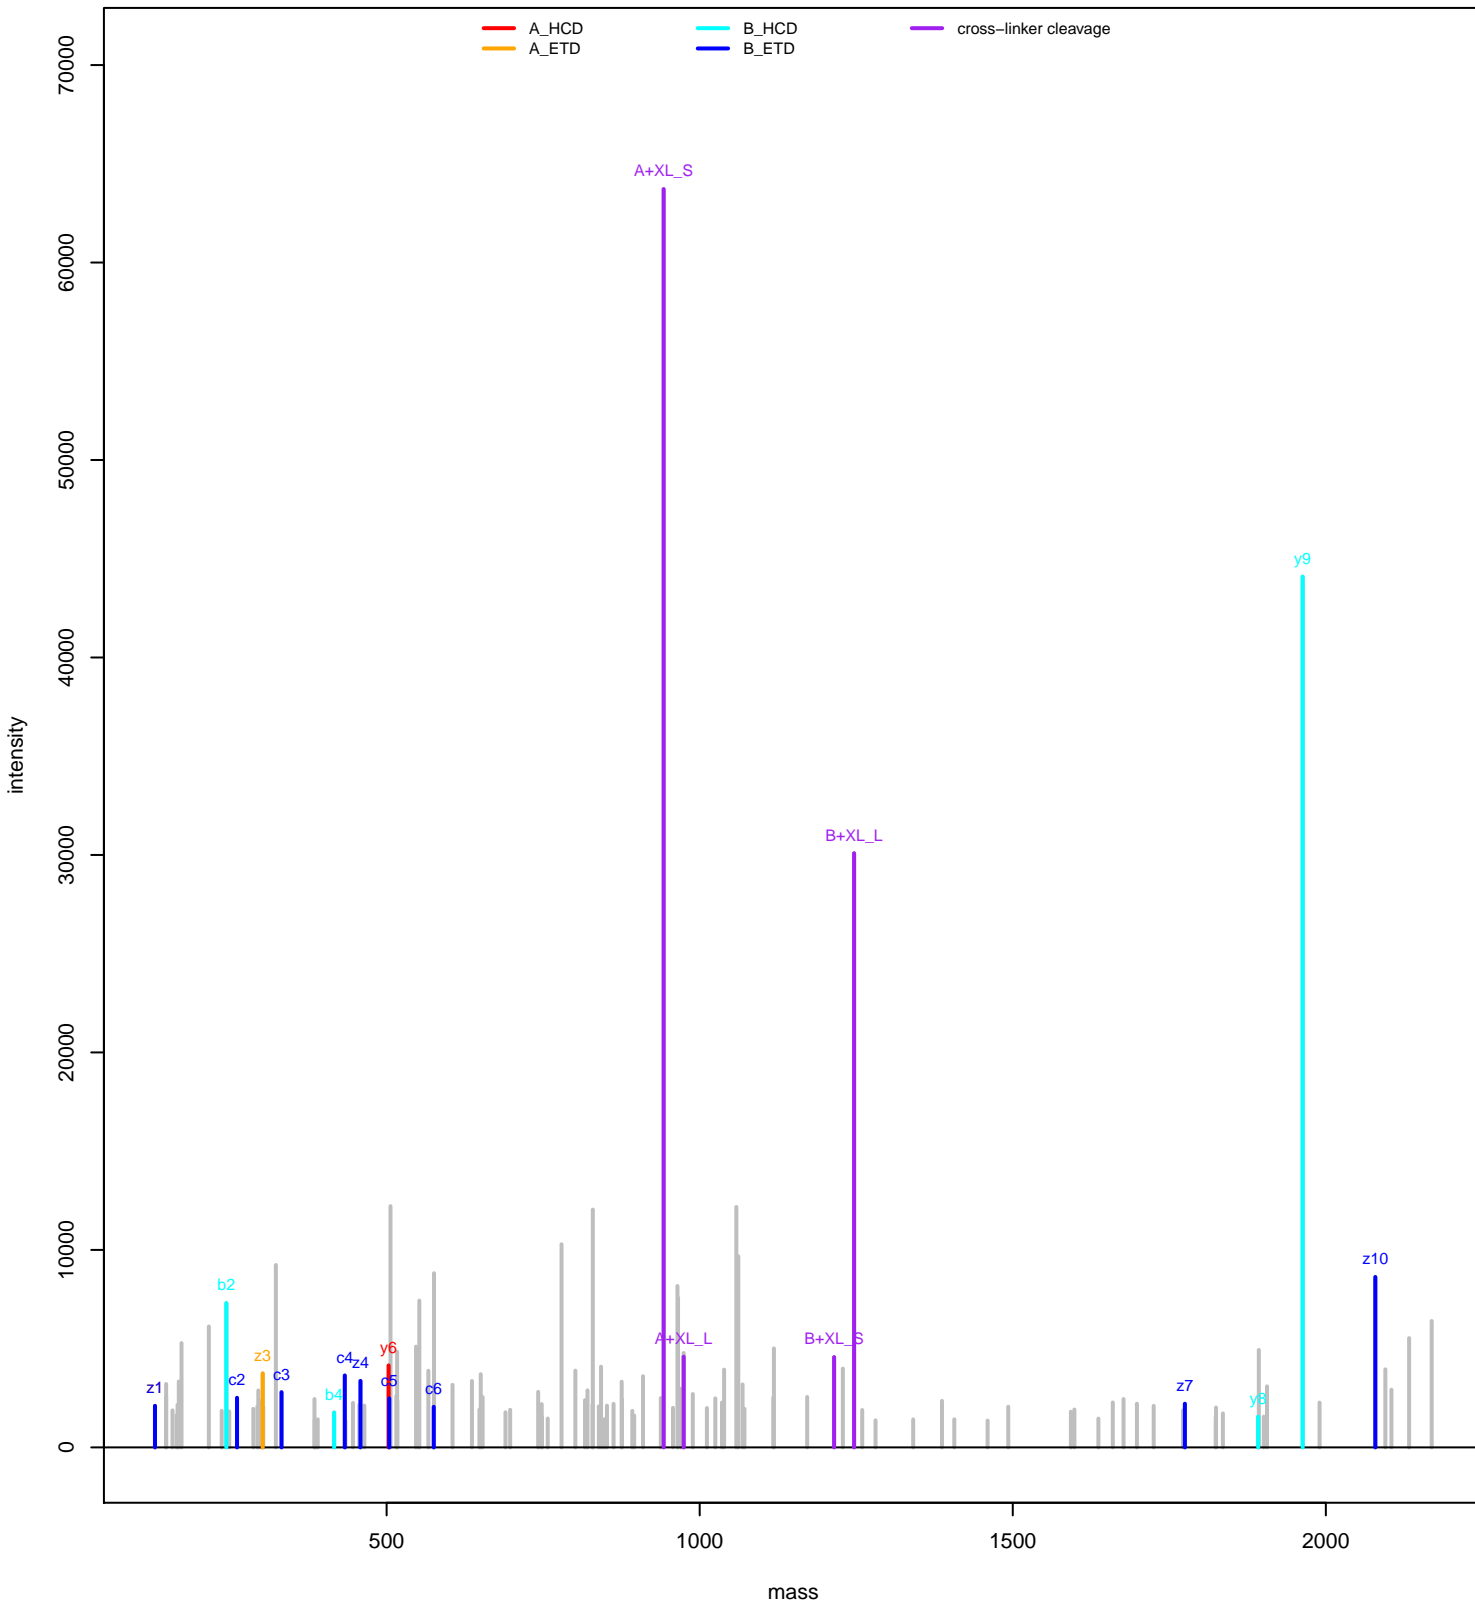

**KSGIGGADGK+XL\_S**

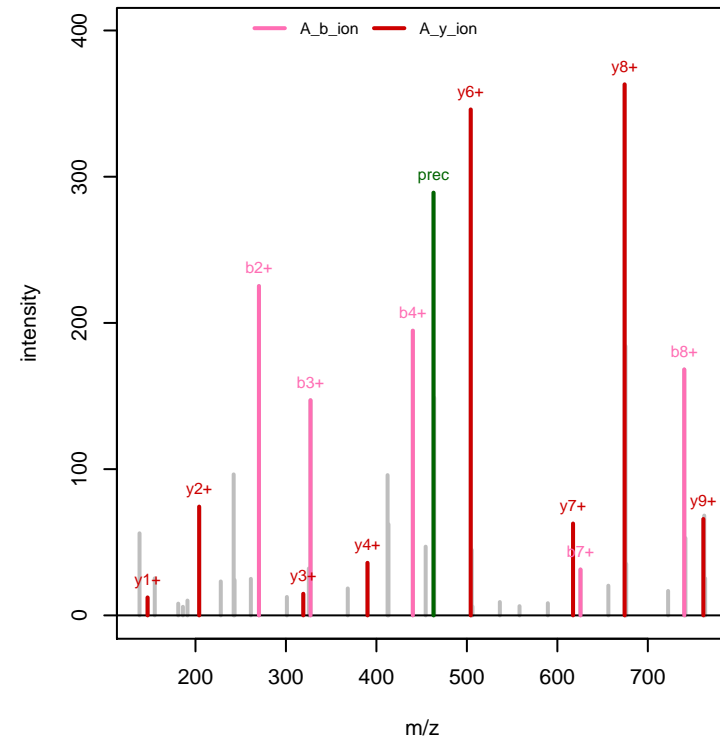

**KSGIGGADGK+XL\_L**

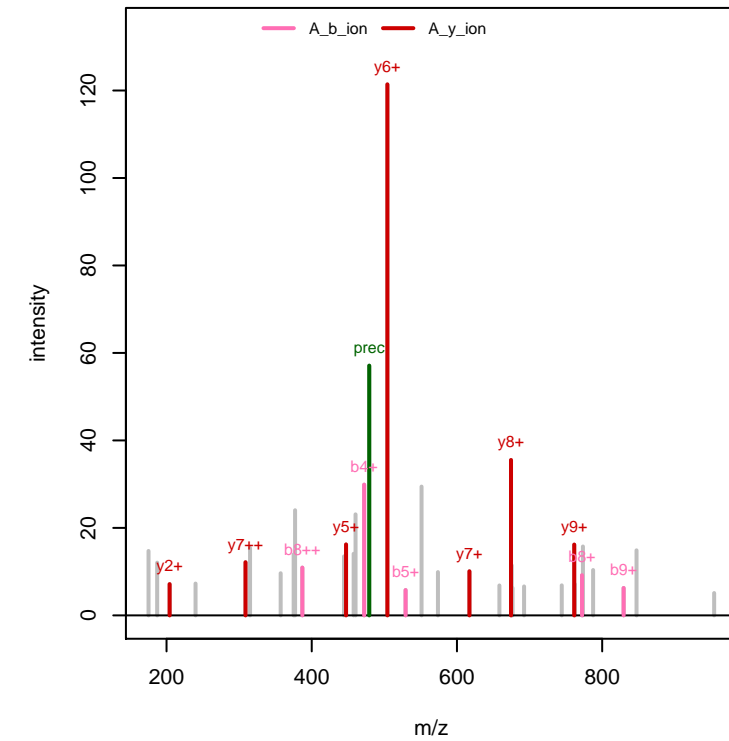

**IMATAAKNITK+XL\_S**

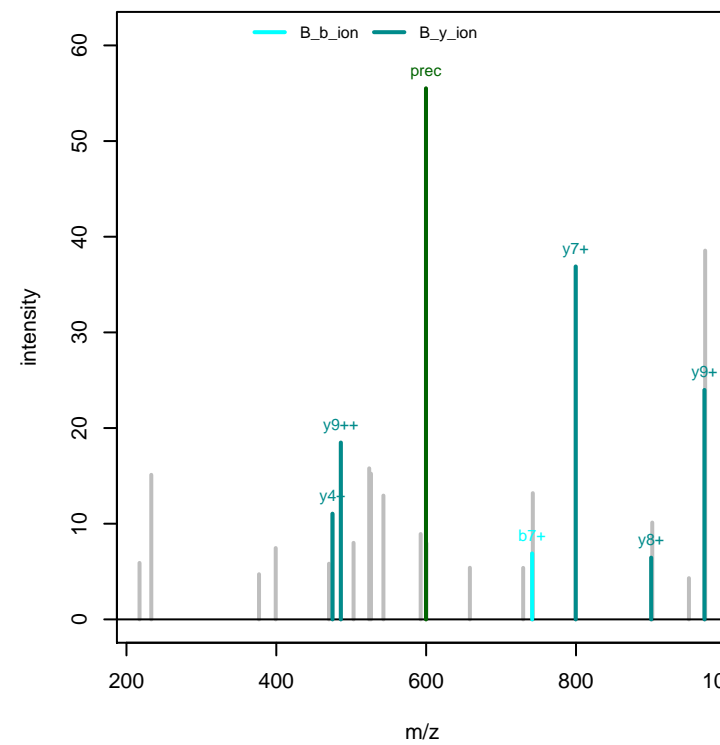

**IMATAAKNITK+XL\_L**

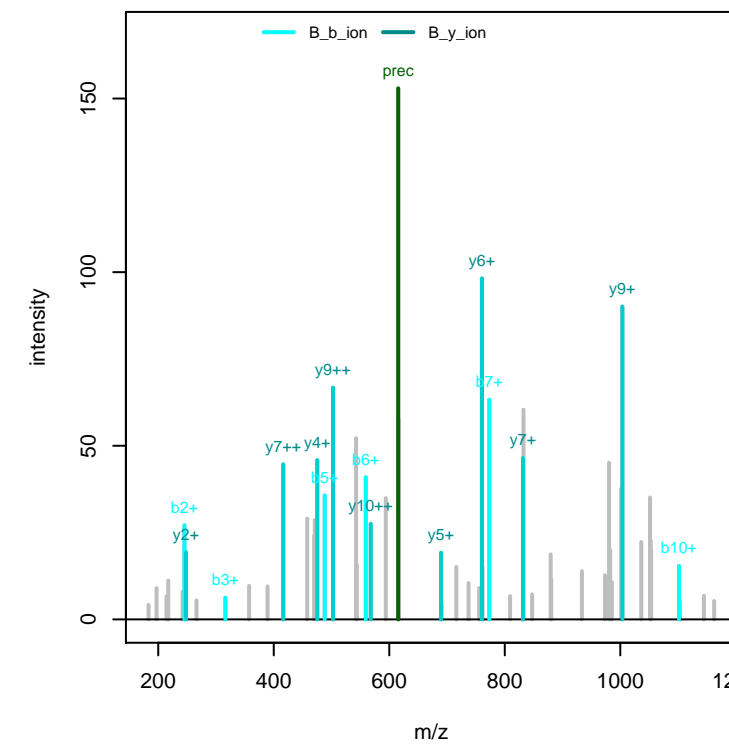

VSKTVK  
AHIEKQAGELQEK

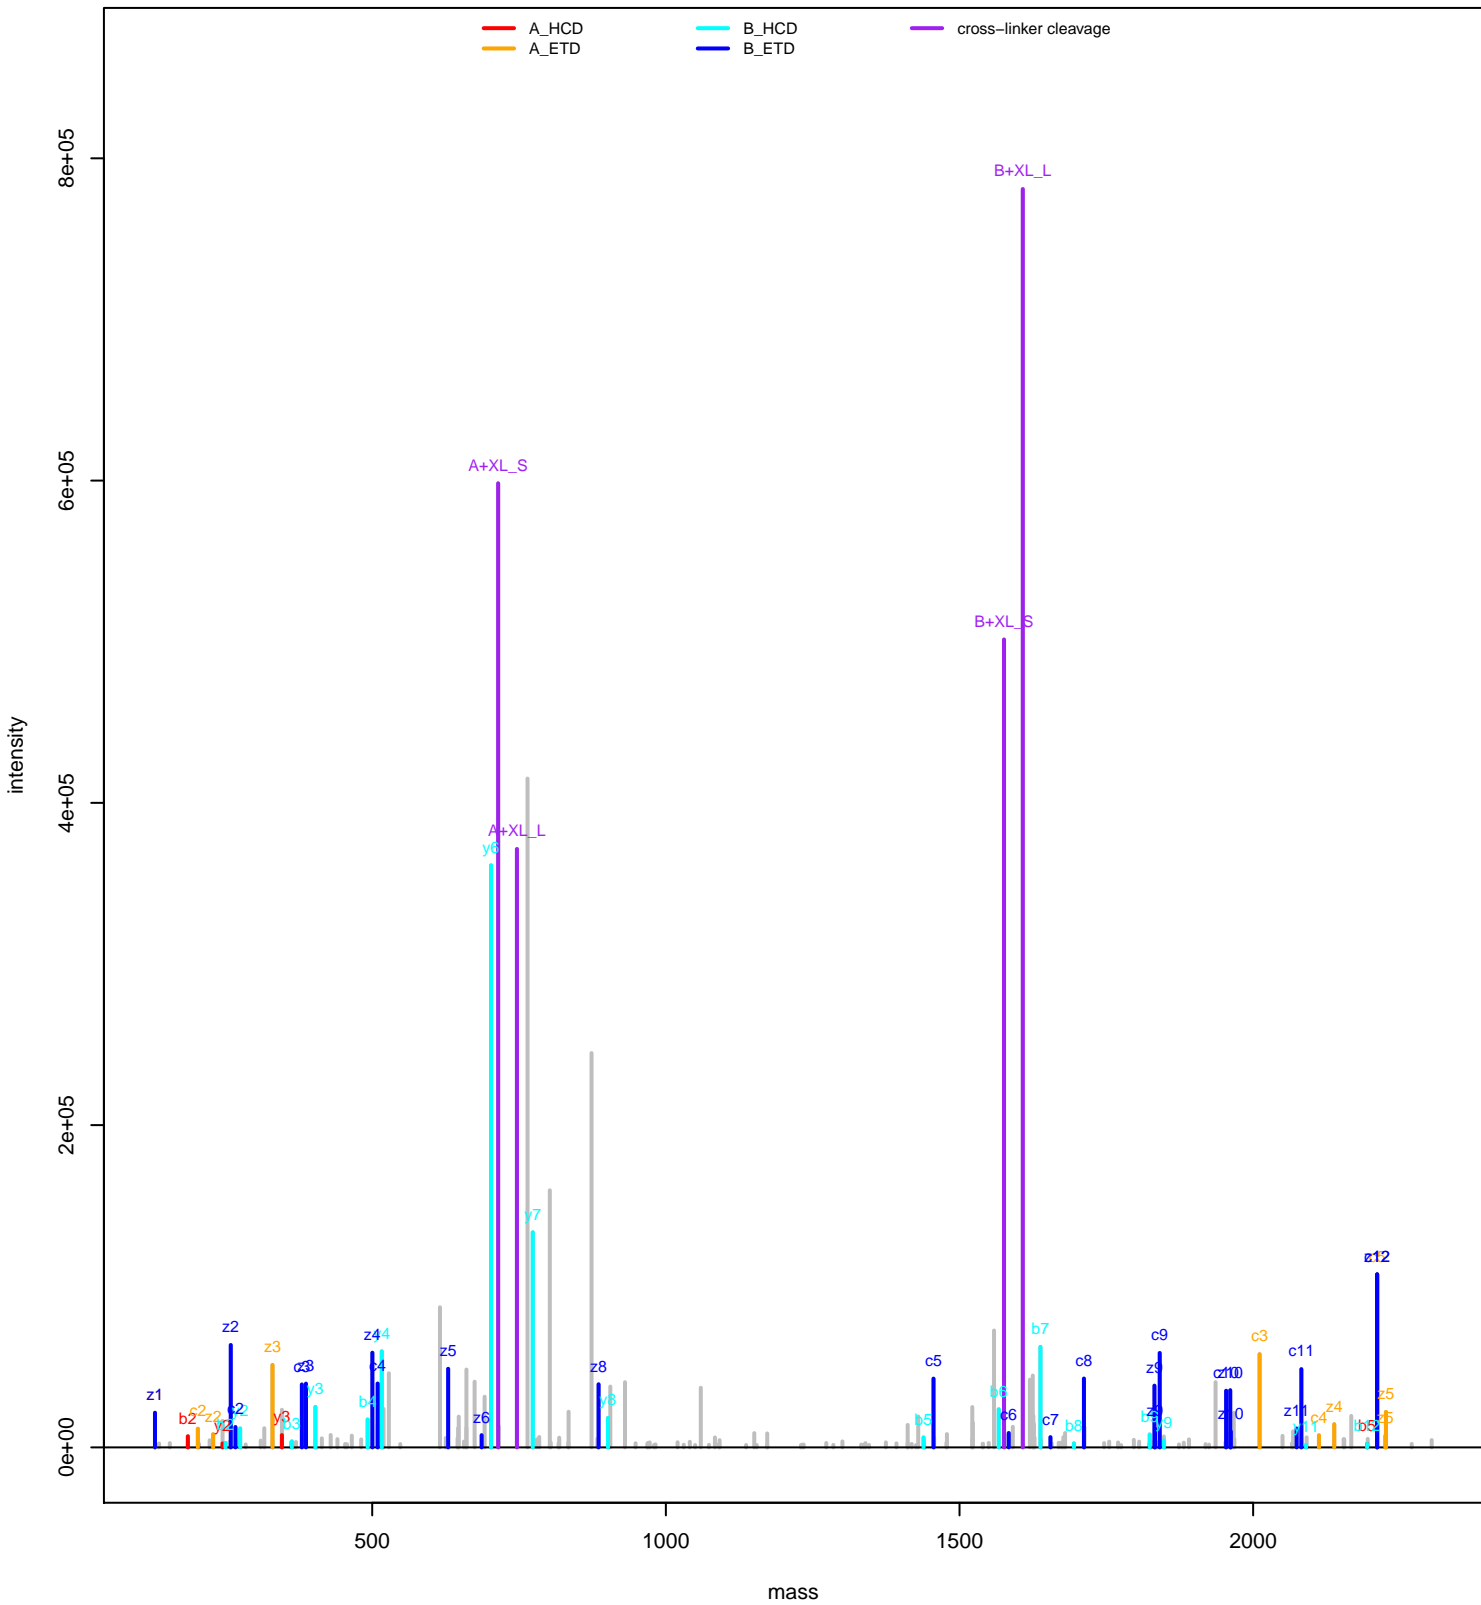

VSKTVK+XL\_S

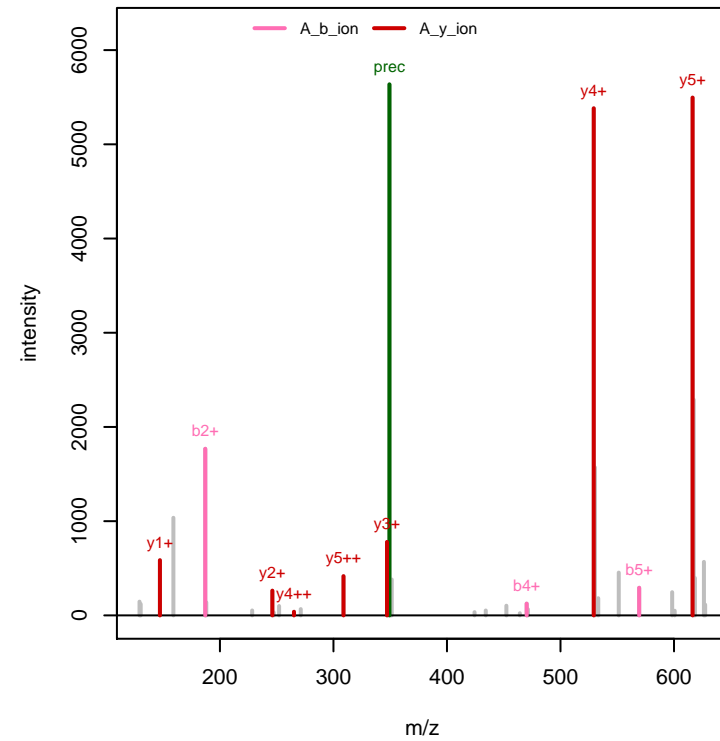

VSKTVK+XL\_L

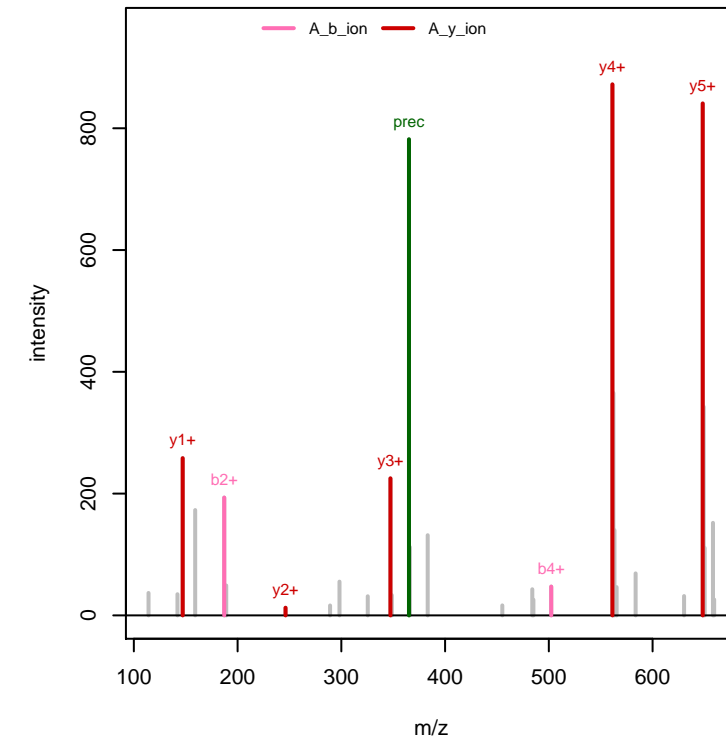

AHIEKQAGELQEK+XL\_S

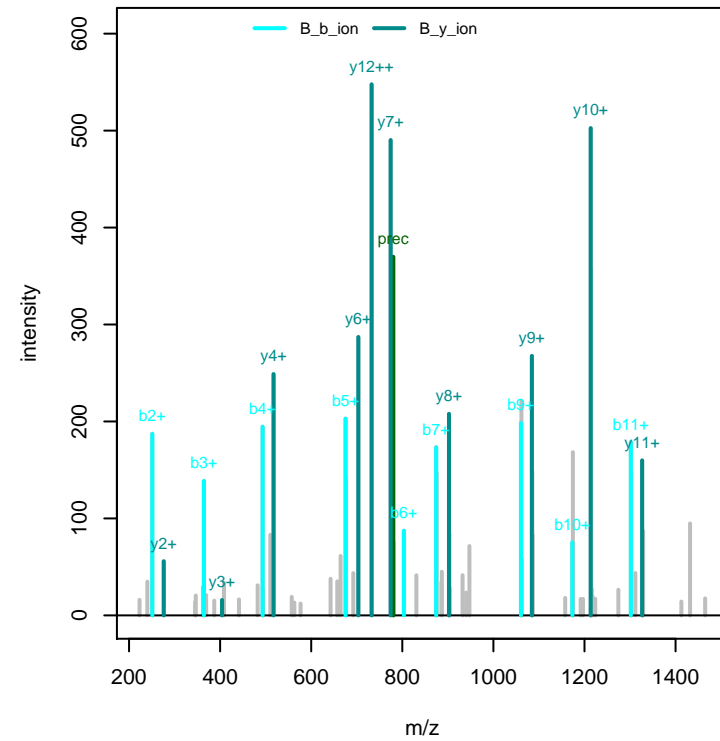

AHIEKQAGELQEK+XL\_L

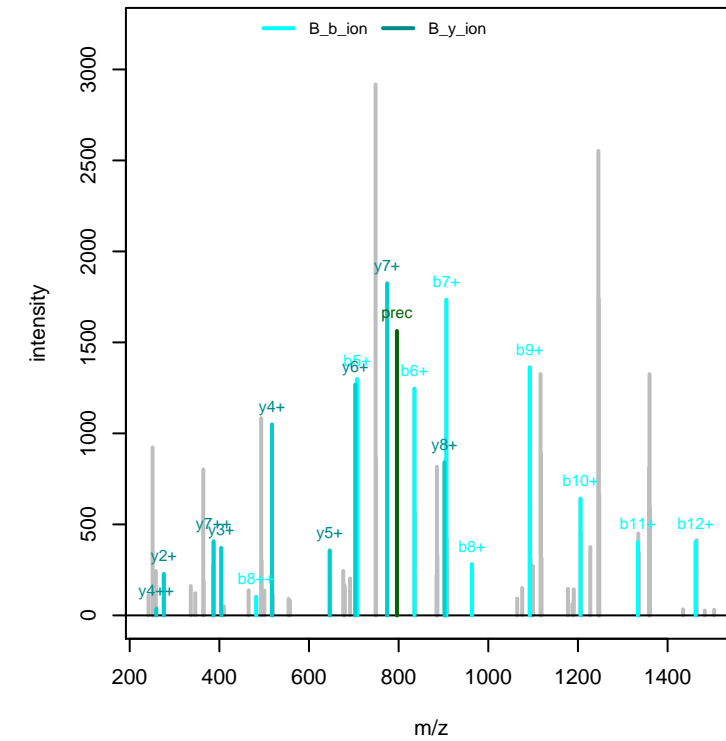

EAAEQAKR  
EQEAAELKR

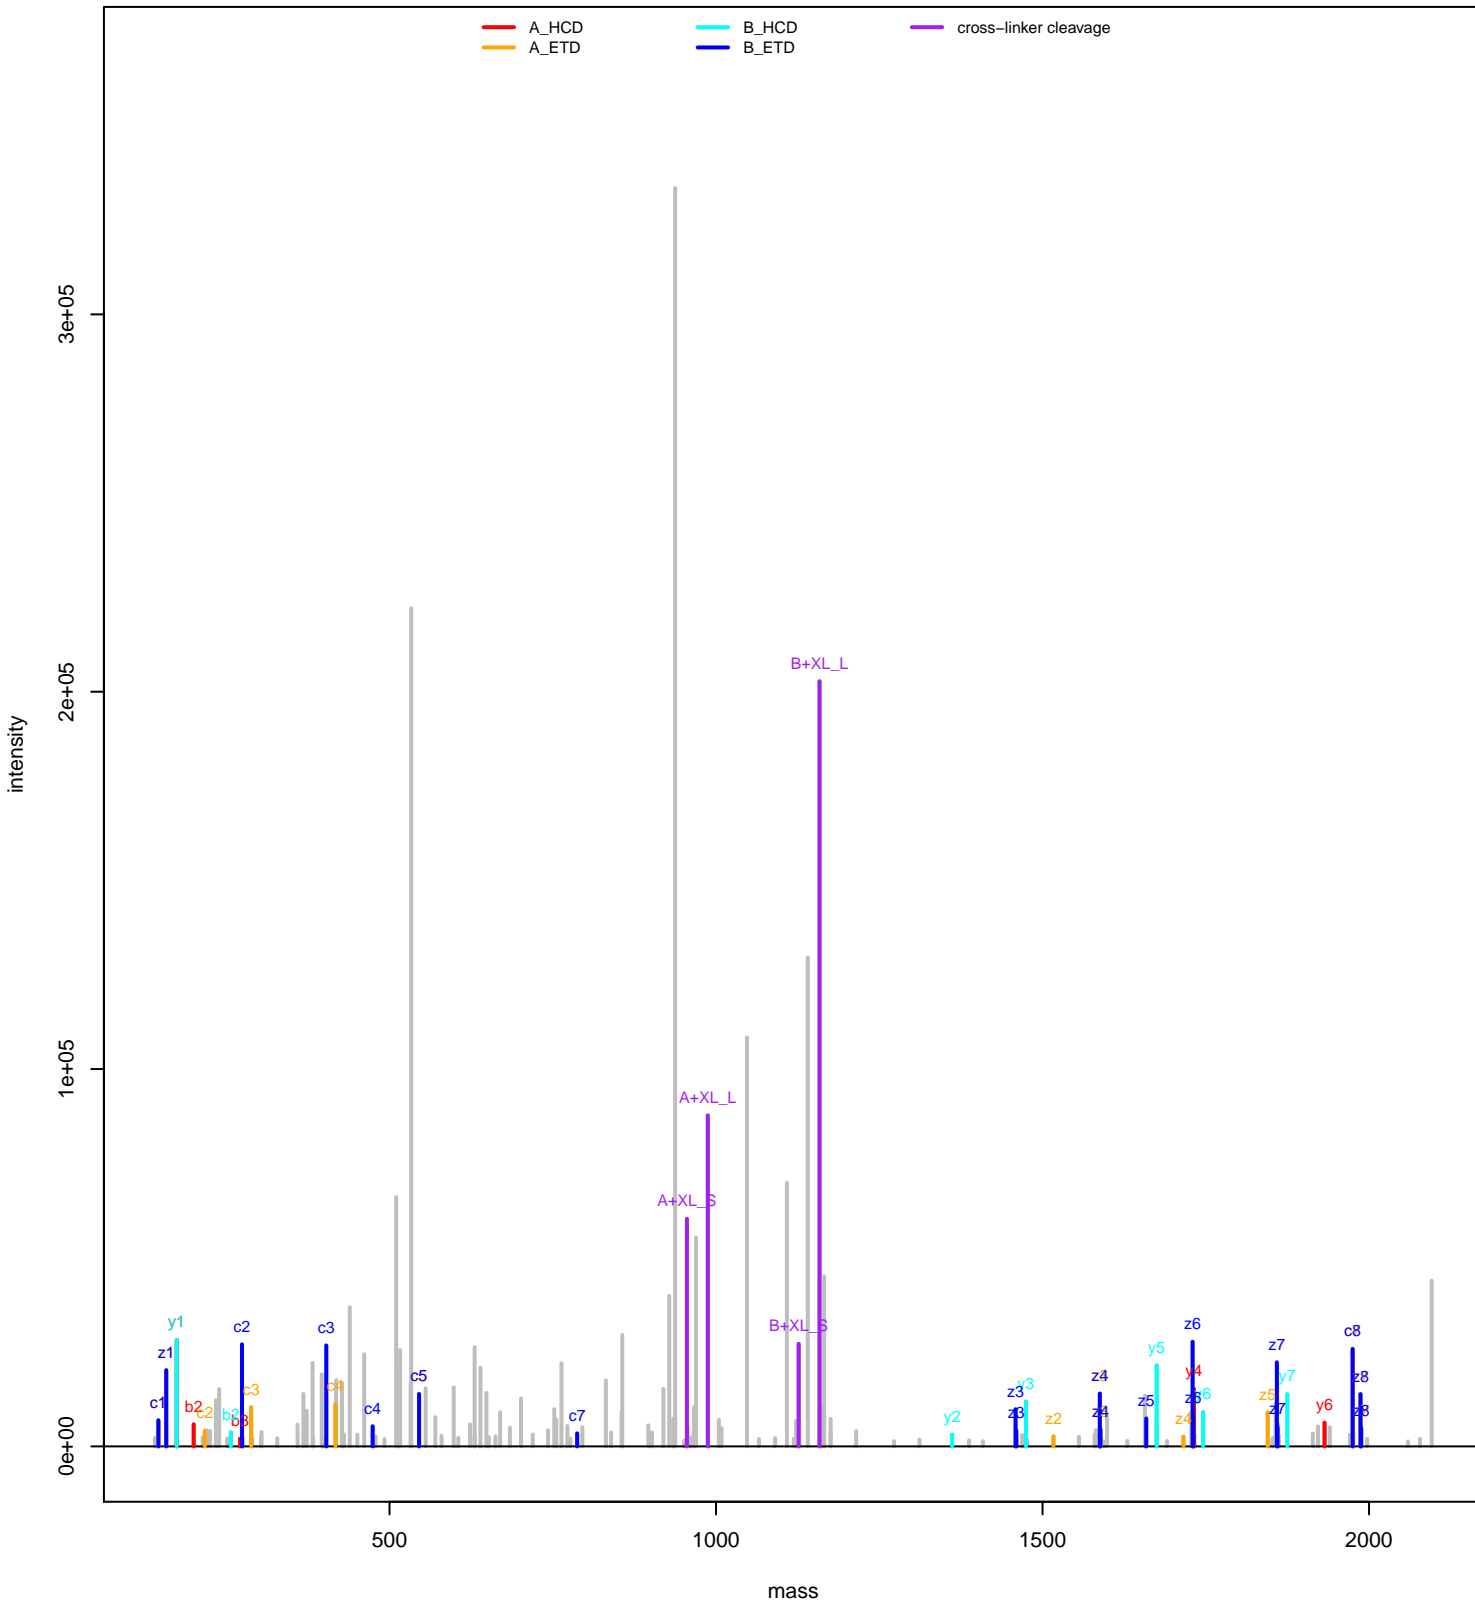

EAAEQAKR+XL\_S

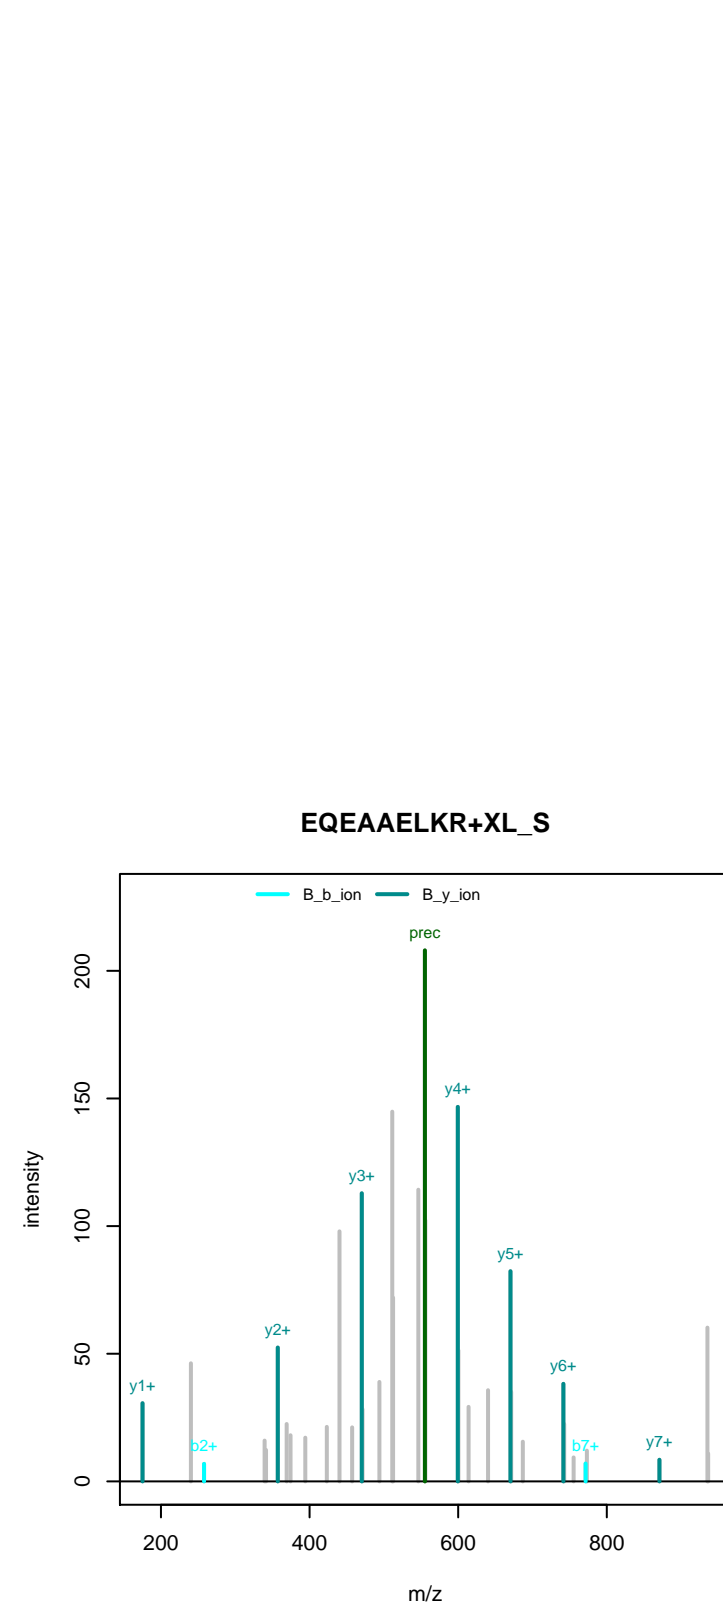

EAAEQAKR+XL\_L

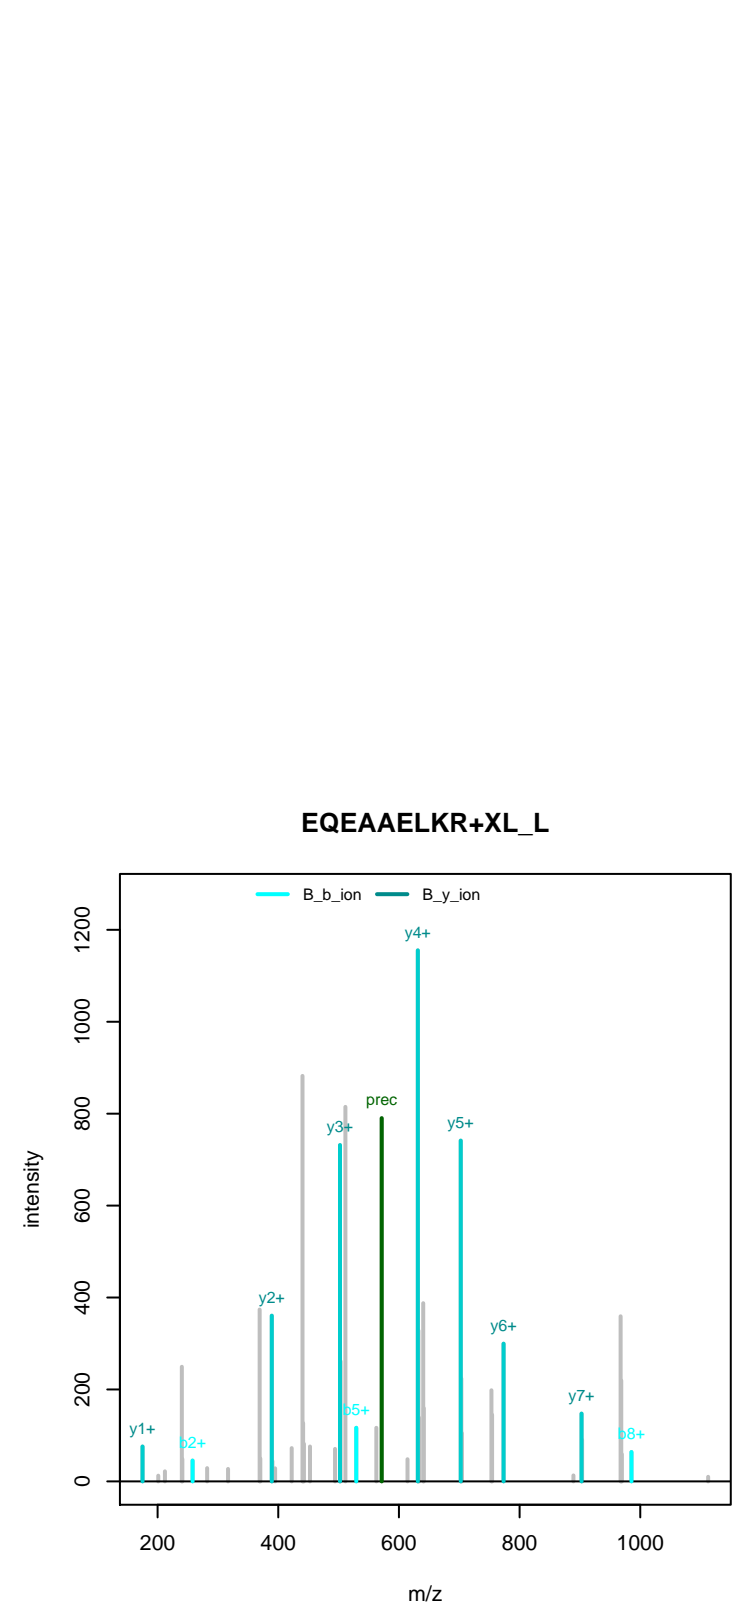

EQEAAELKR+XL\_S

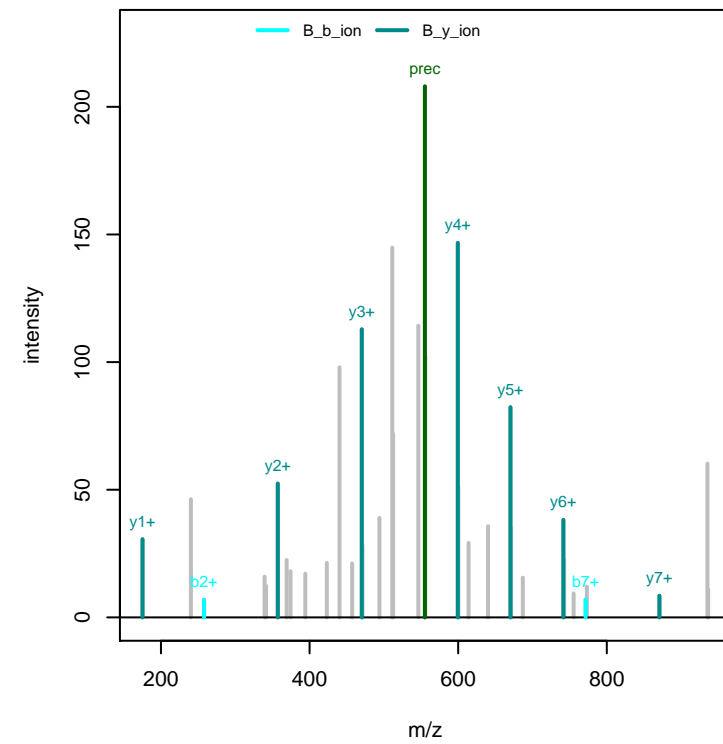

EQEAAELKR+XL\_L

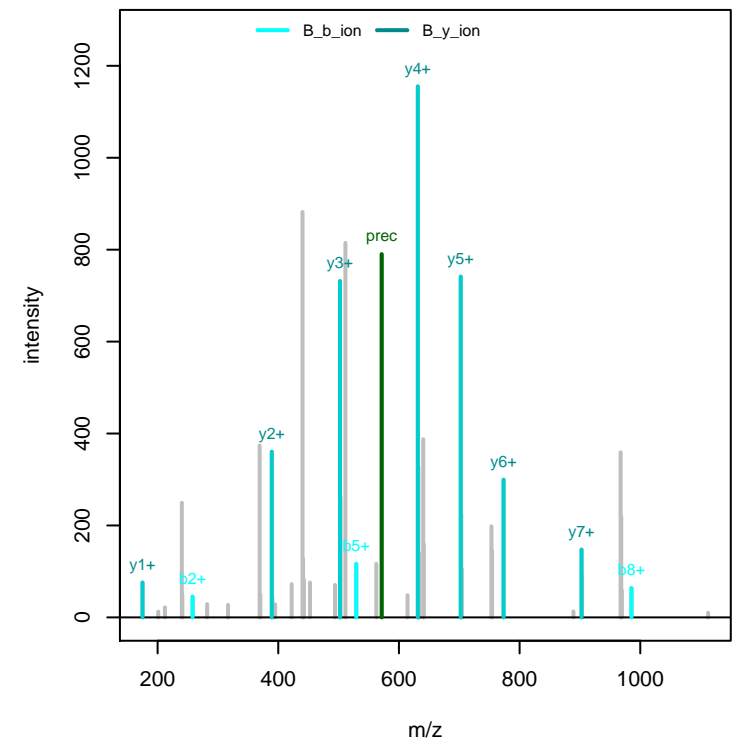

ALKDAVK  
ADLRKAAR

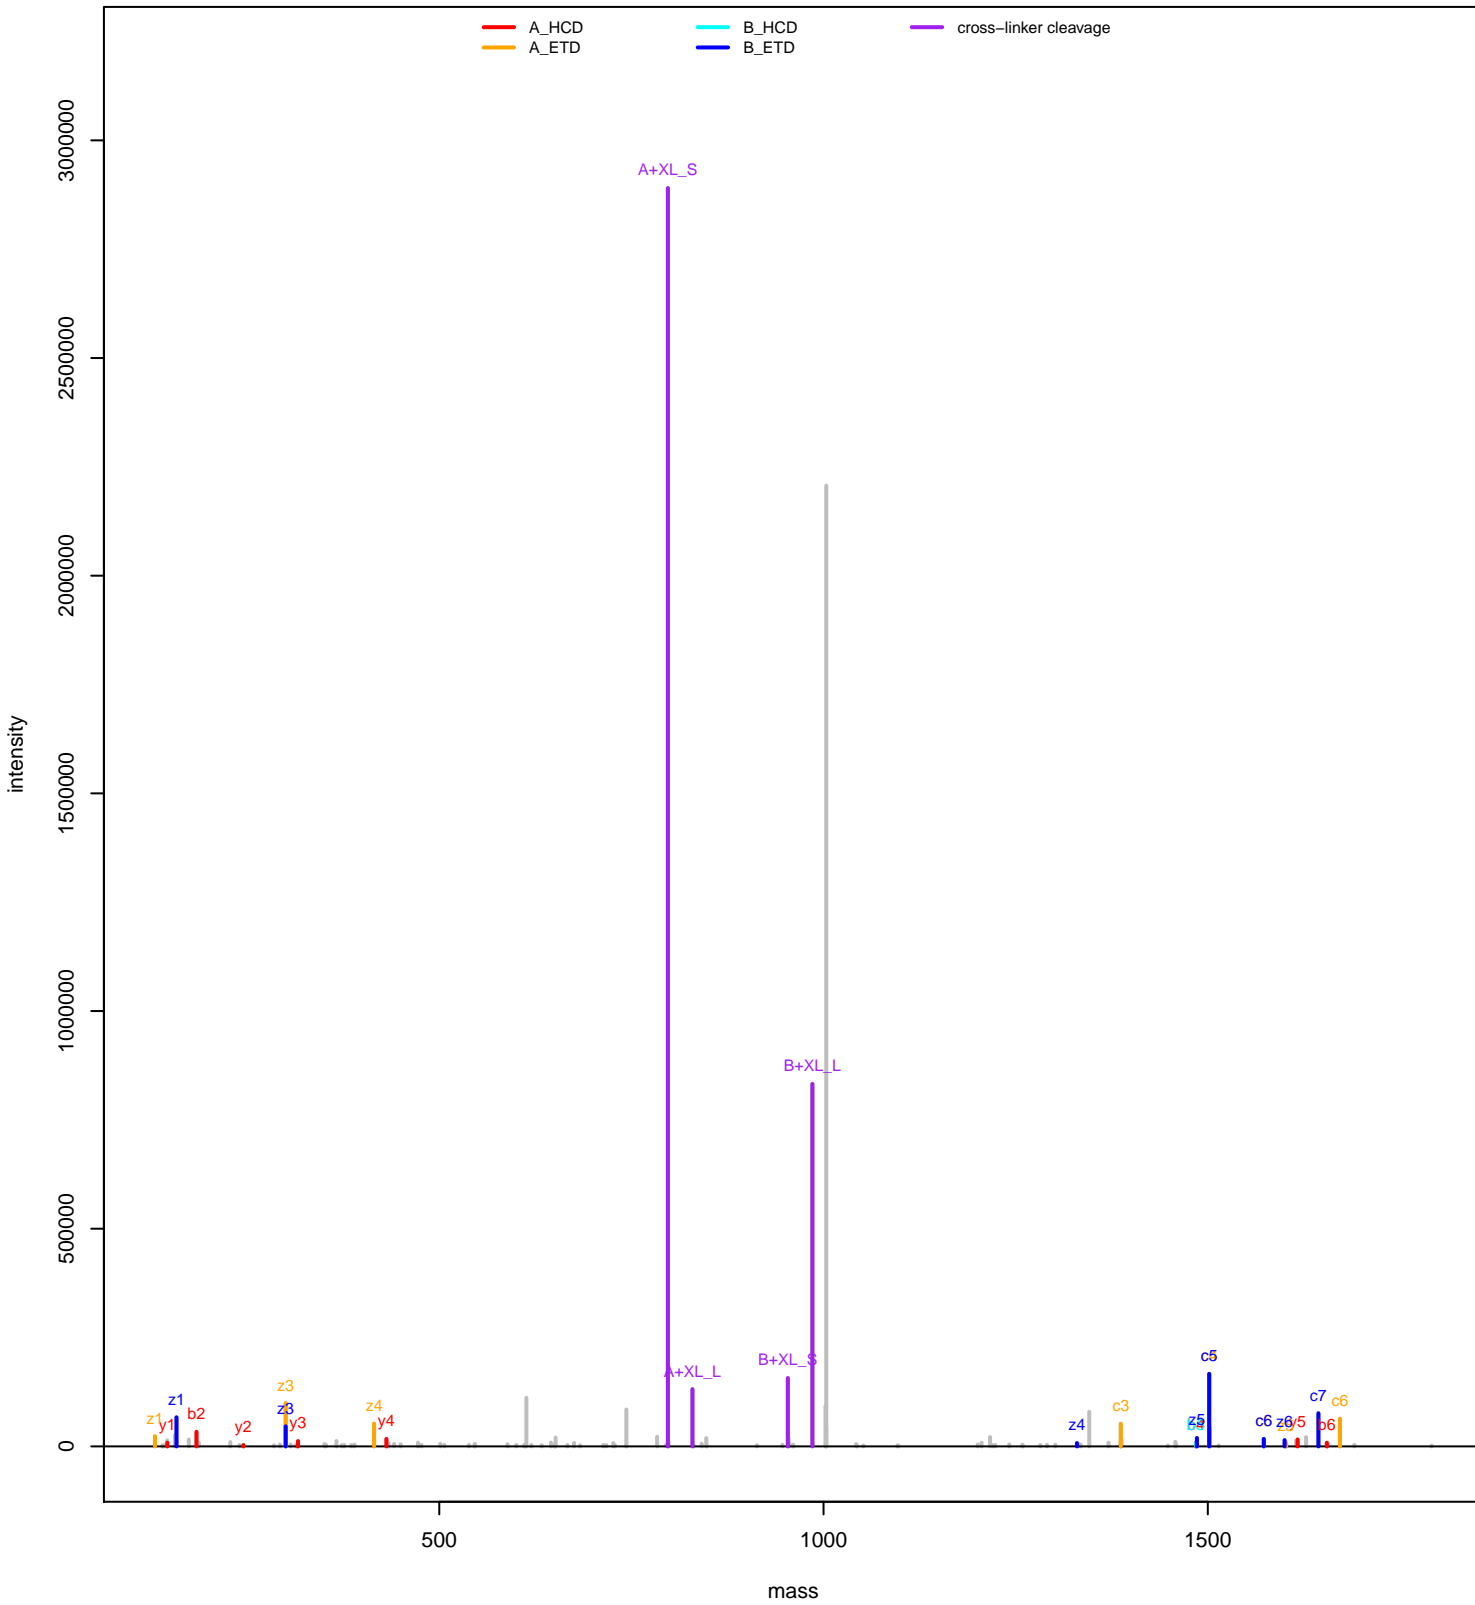

ALKDAVK+XL\_S

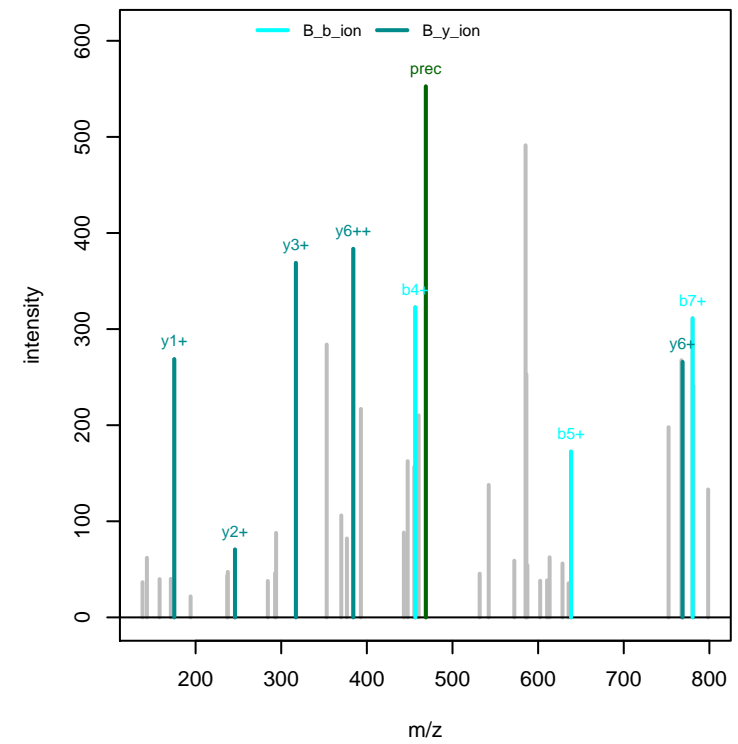

ALKDAVK+XL\_L

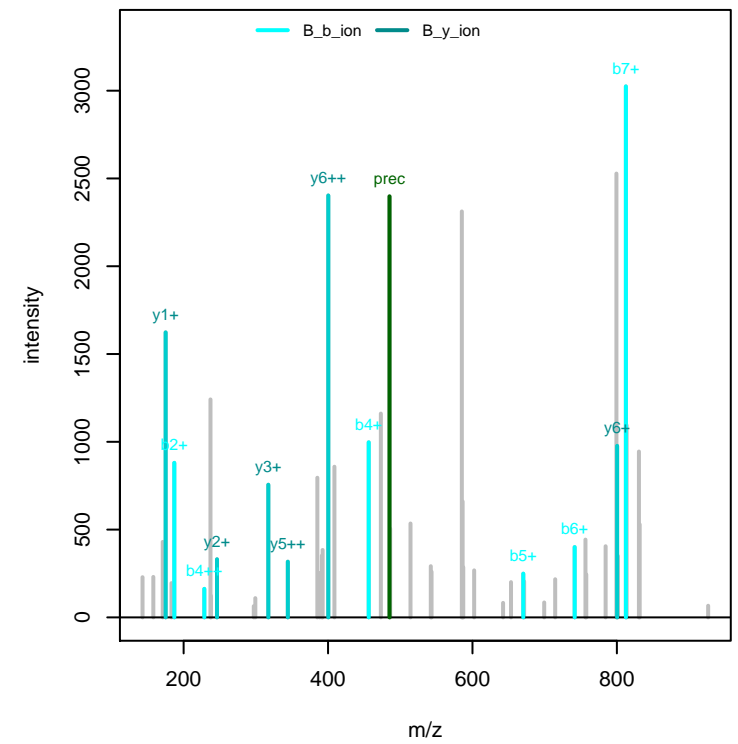

ADLRKAAR+XL\_S



ADLRKAAR+XL\_L





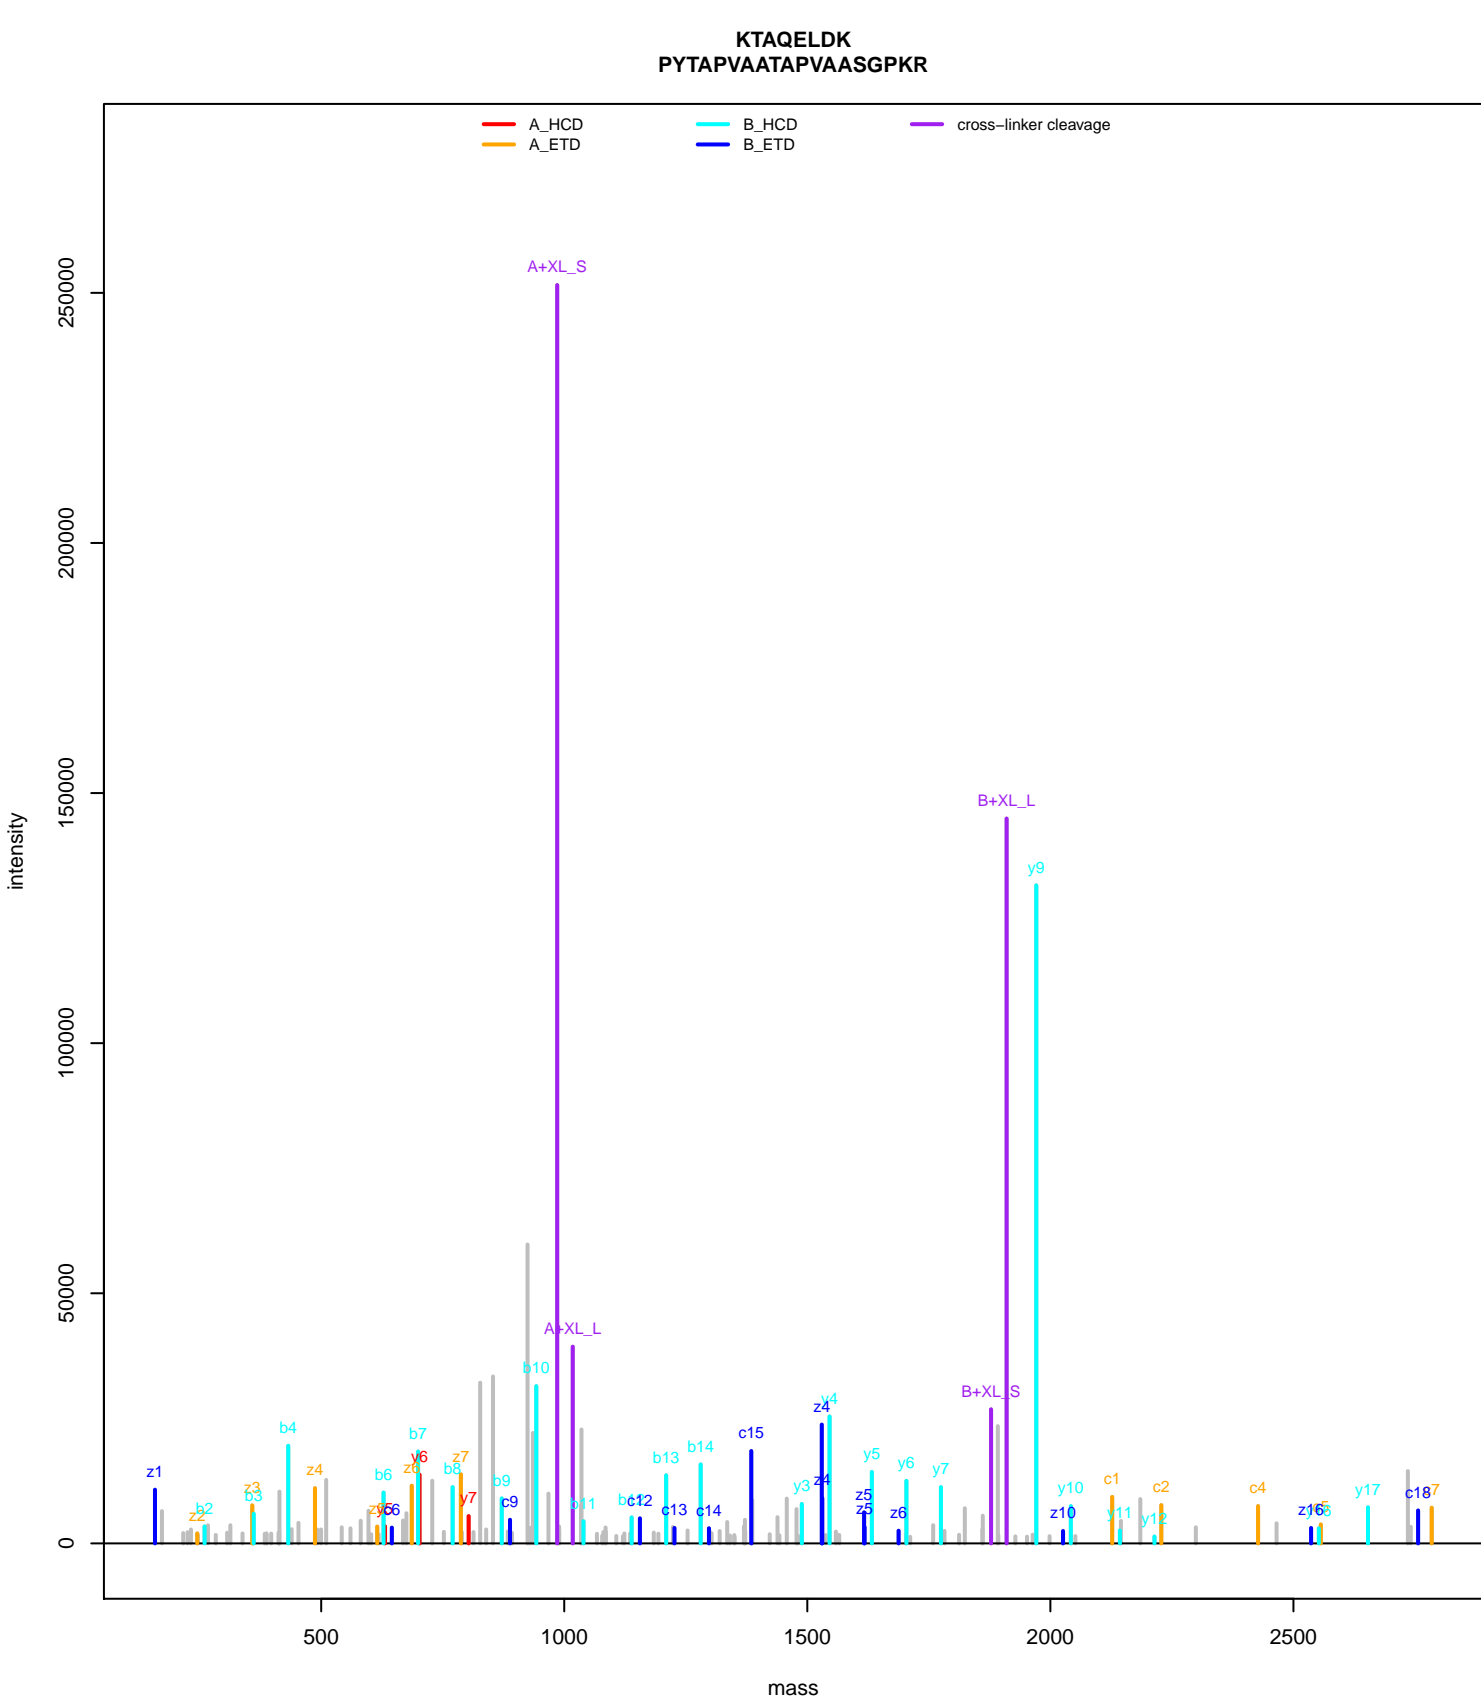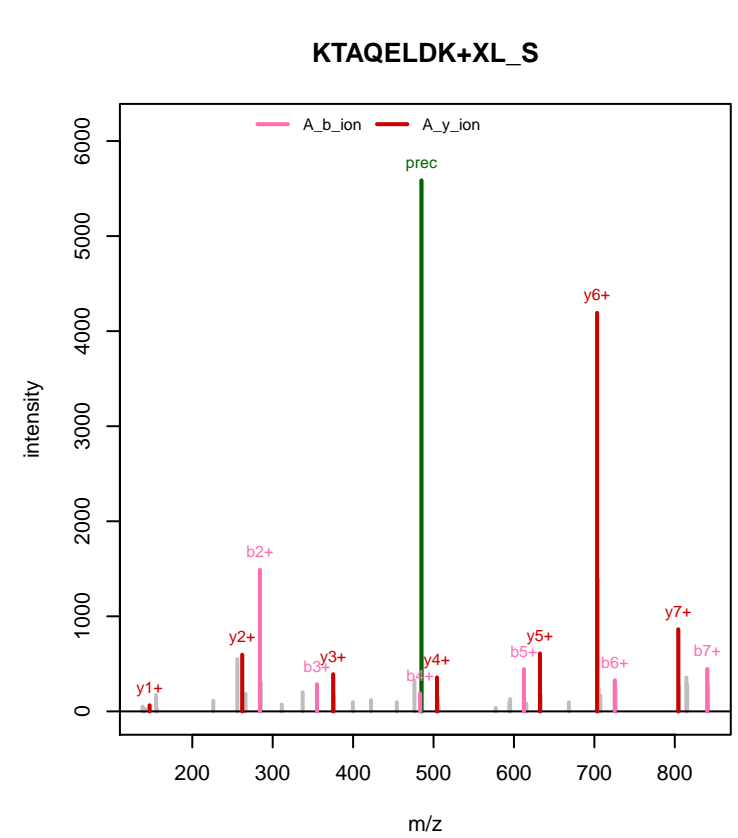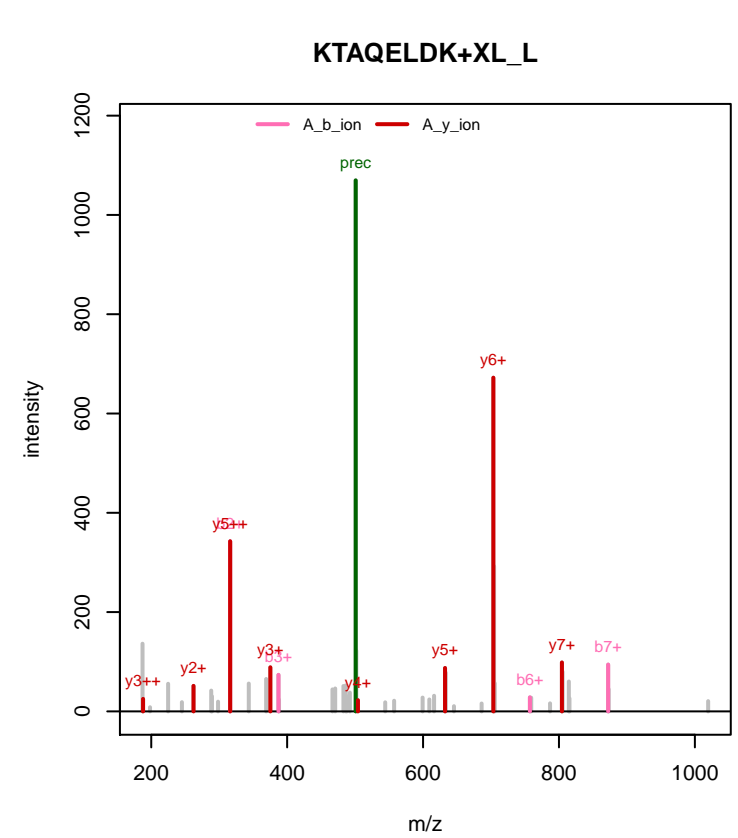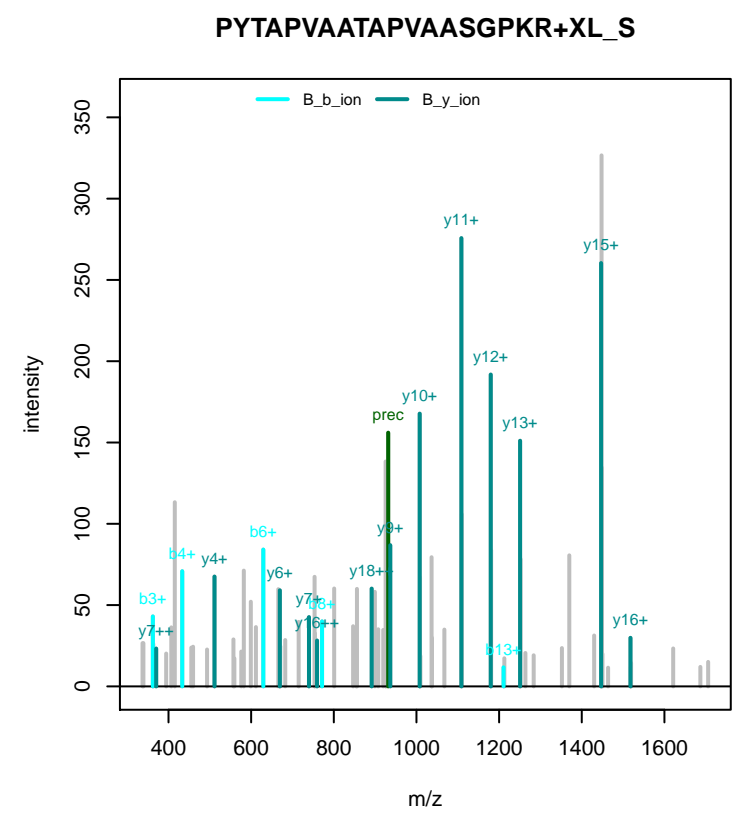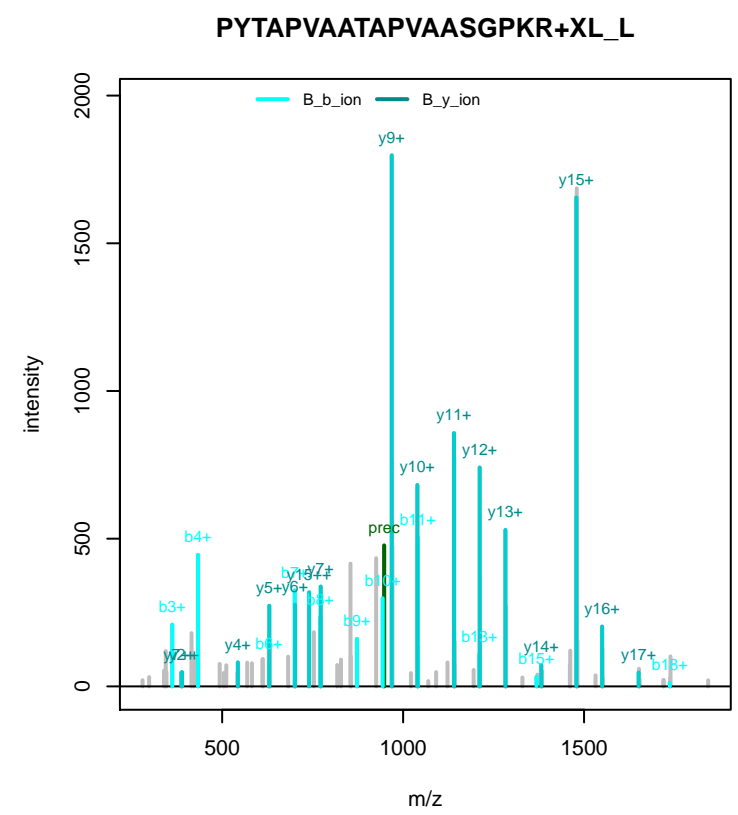

LGAKGIK  
KPNSALRK

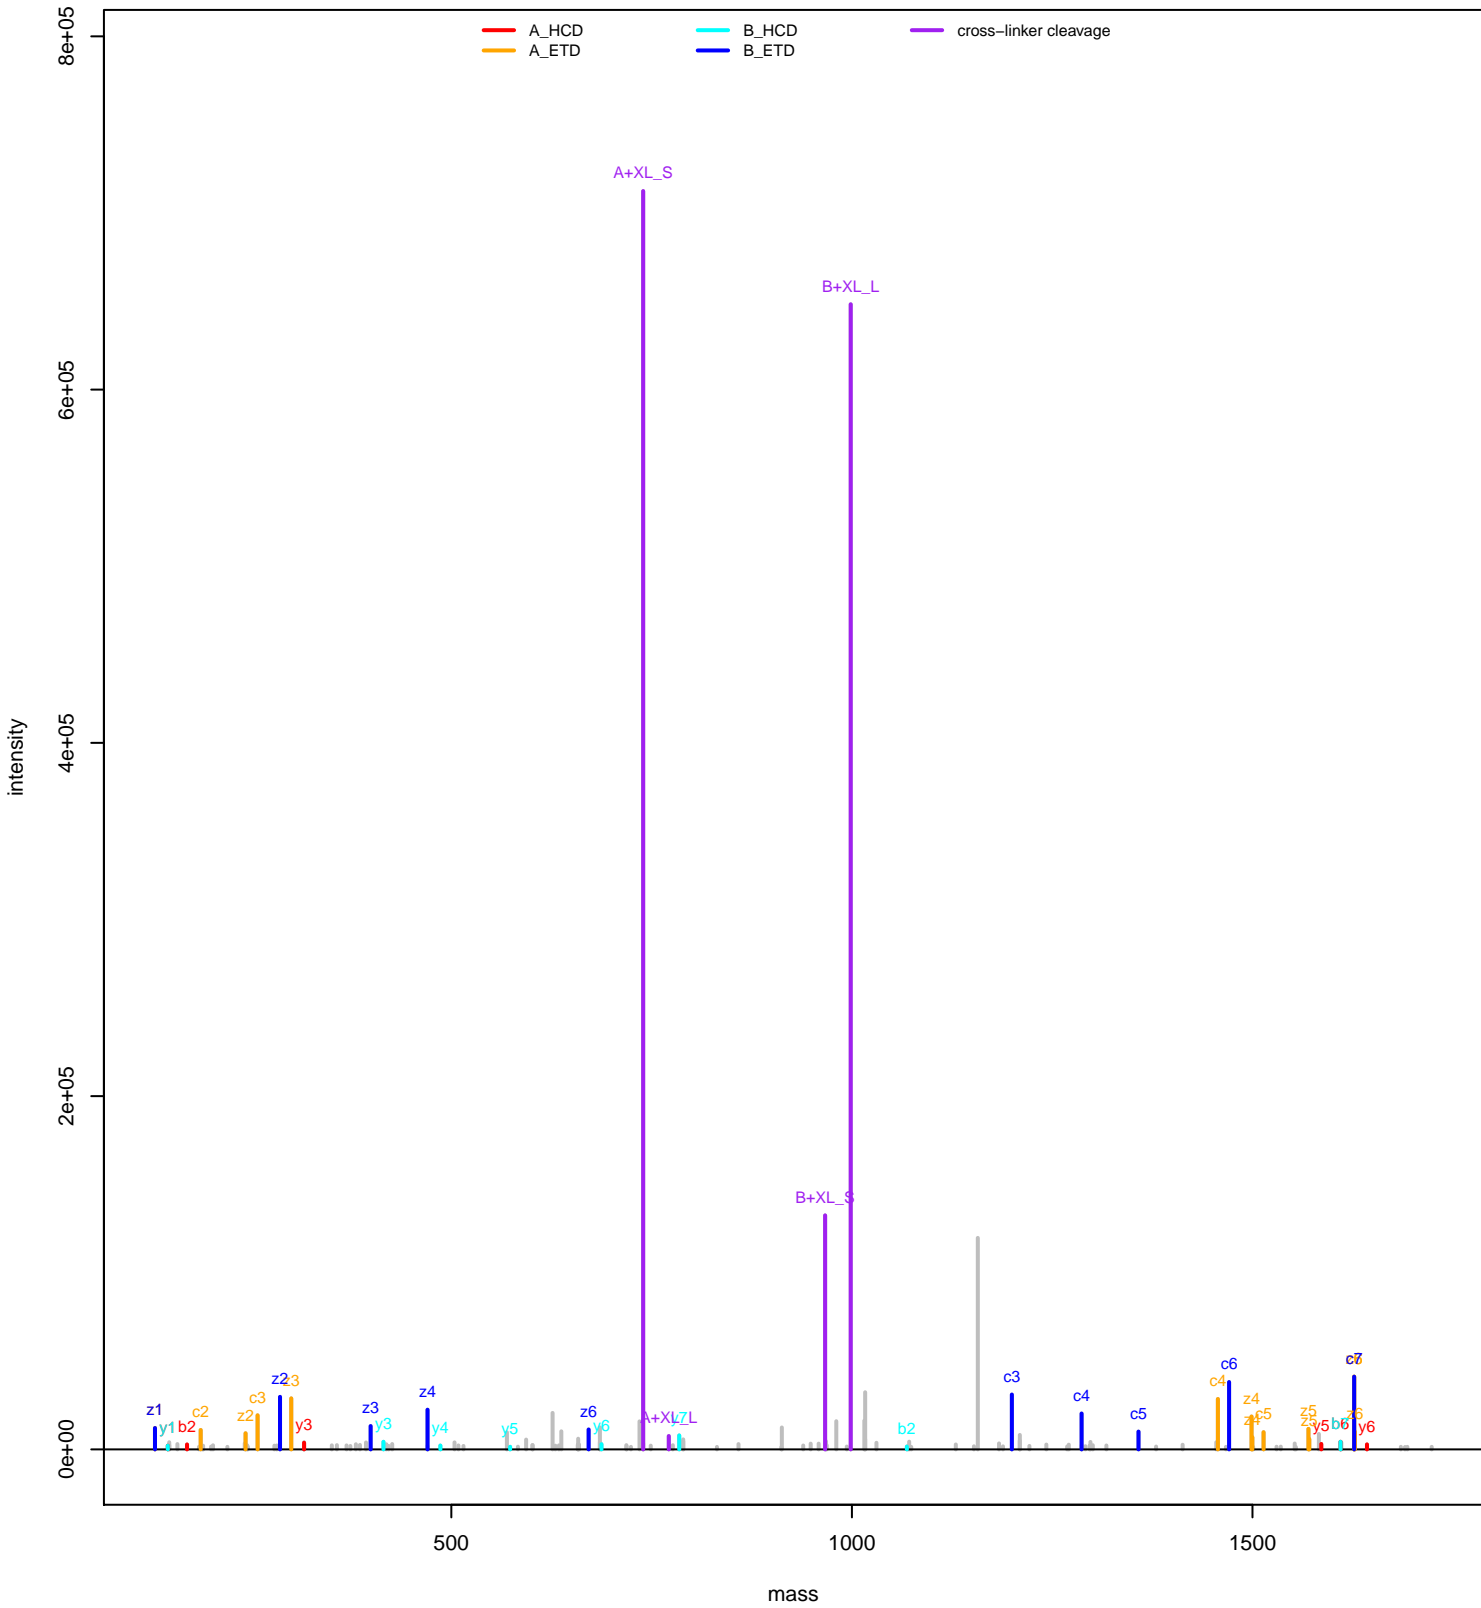

LGAKGIK+XL\_S

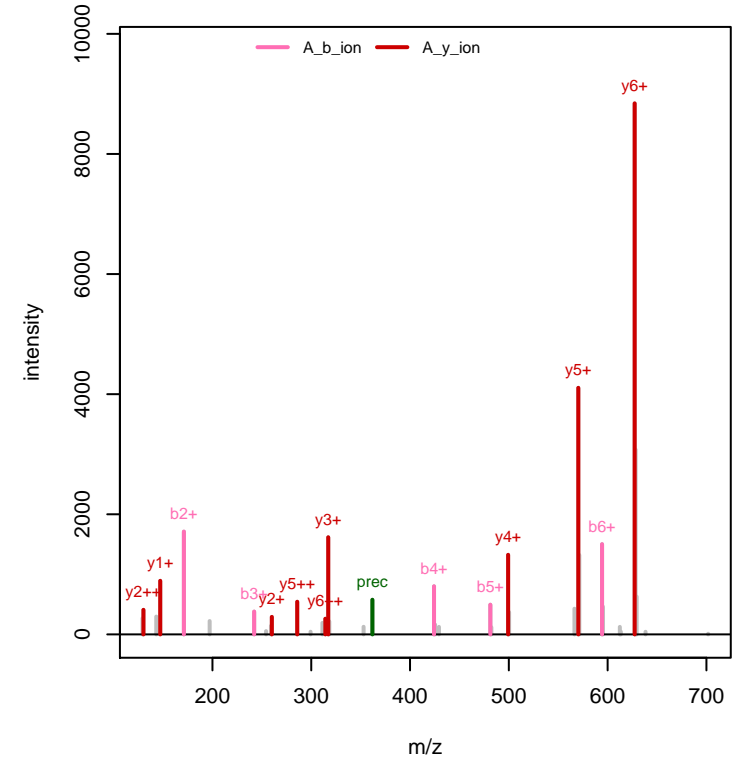

LGAKGIK+XL\_L

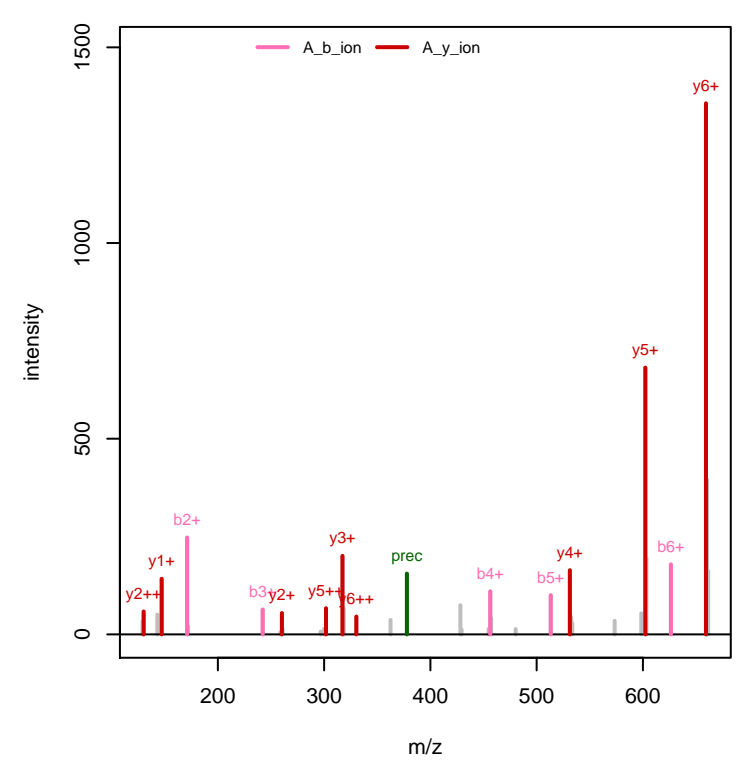

KPNSALRK+XL\_S

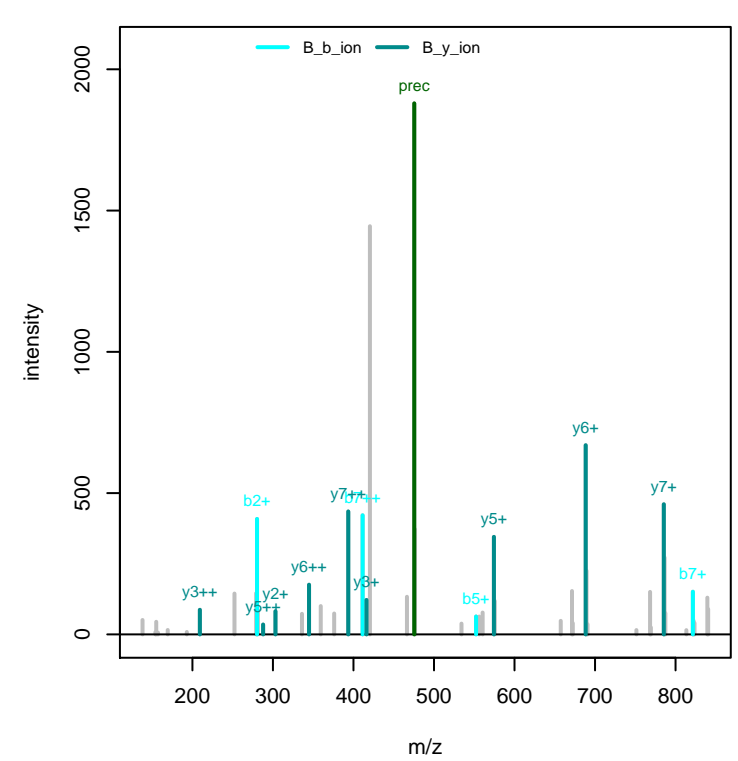

KPNSALRK+XL\_L

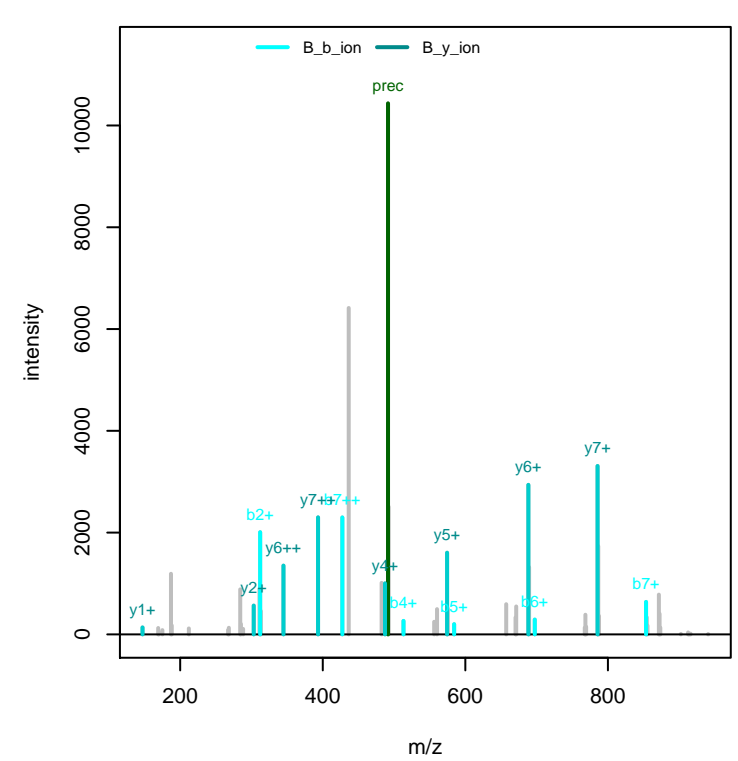

AVDGVKSVK  
EGSVKGYAGDTATTSEIK

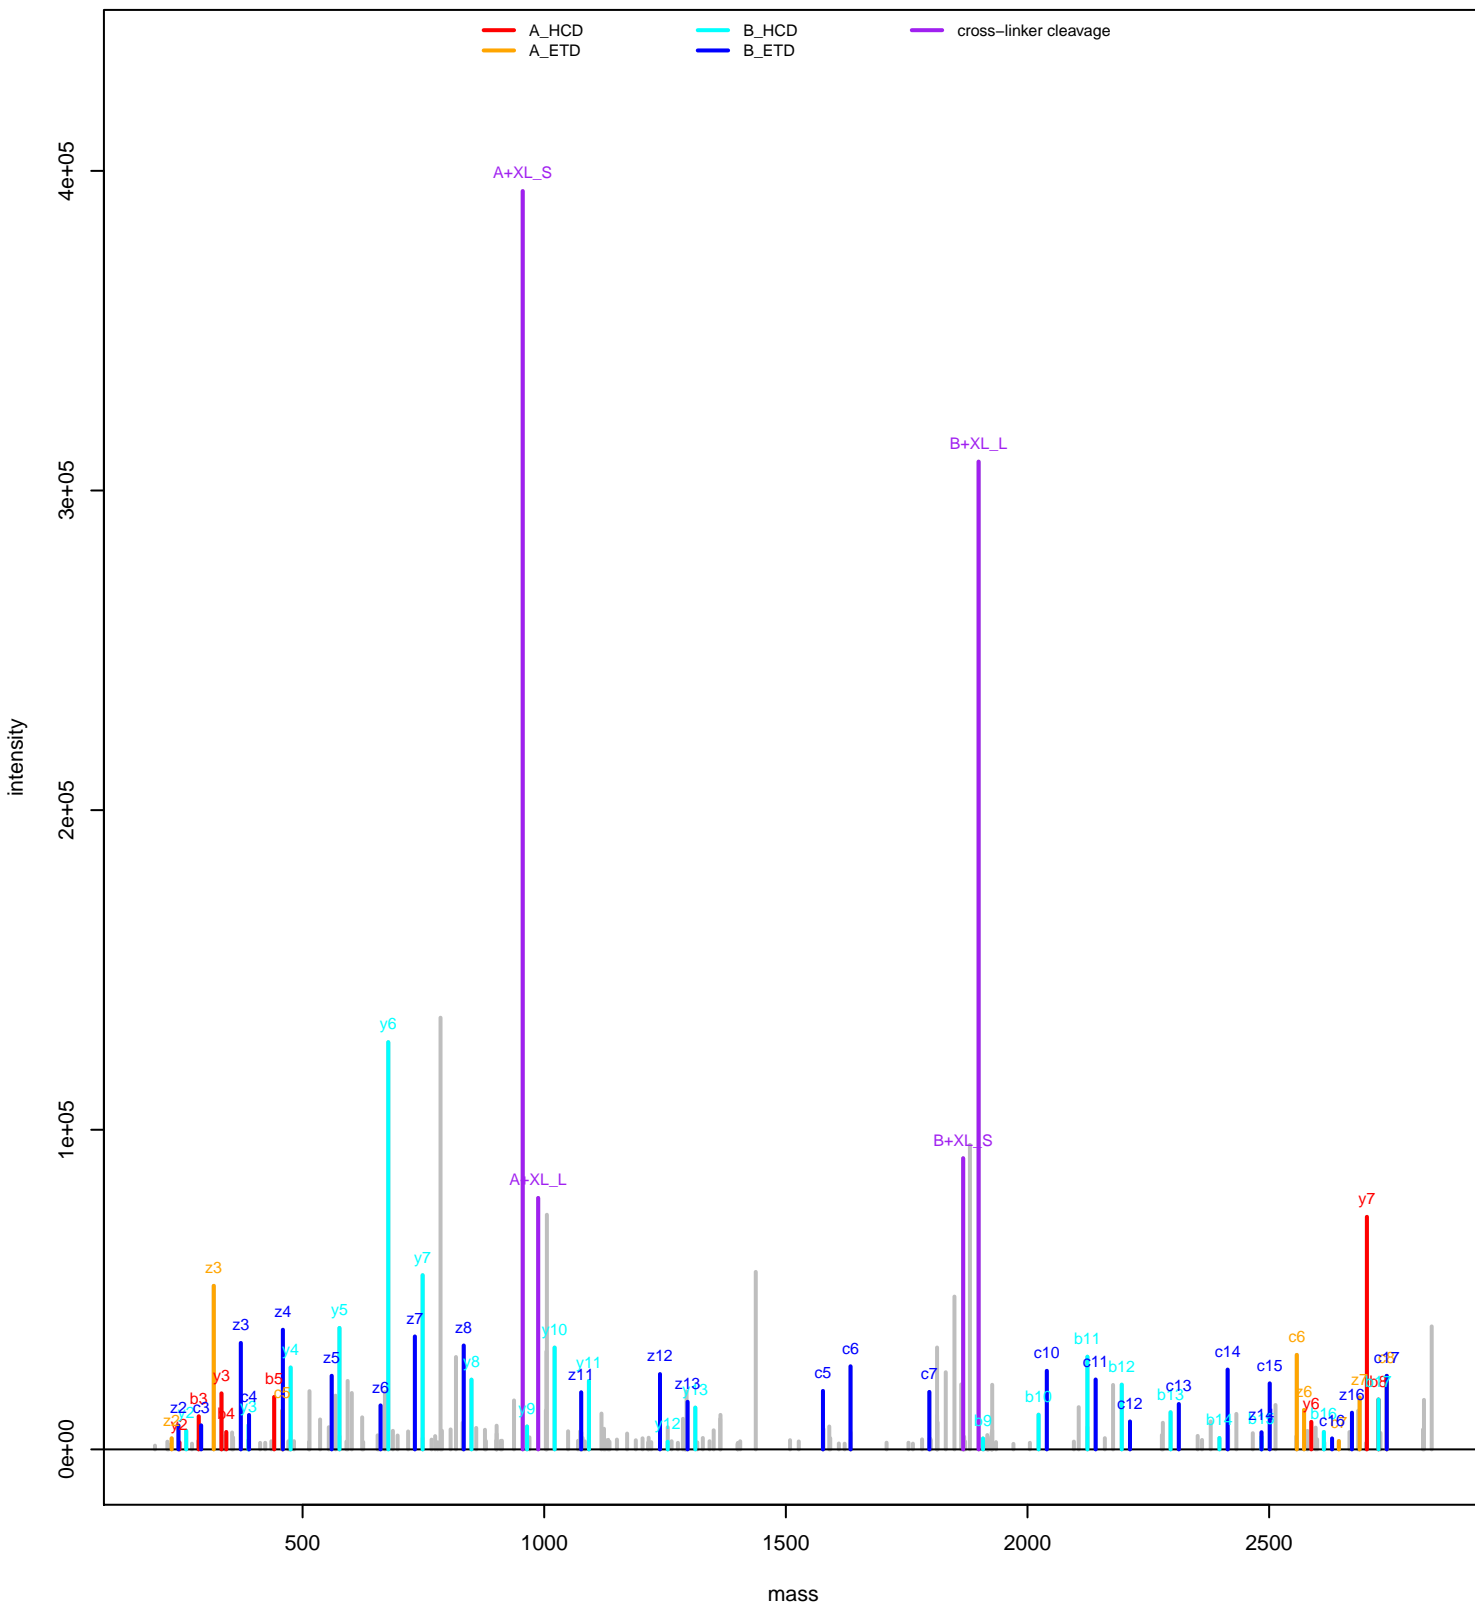

AVDGVKSVK+XL\_S

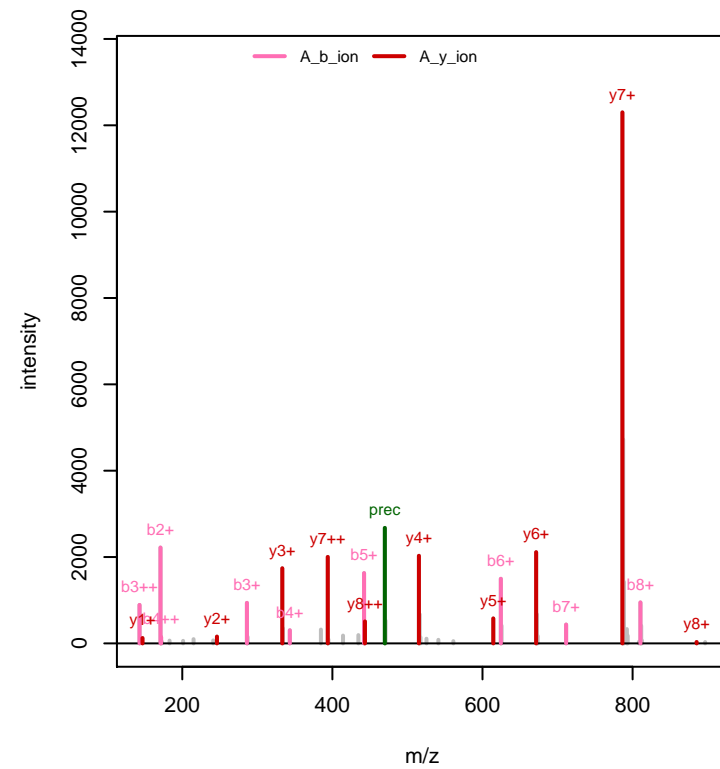

AVDGVKSVK+XL\_L

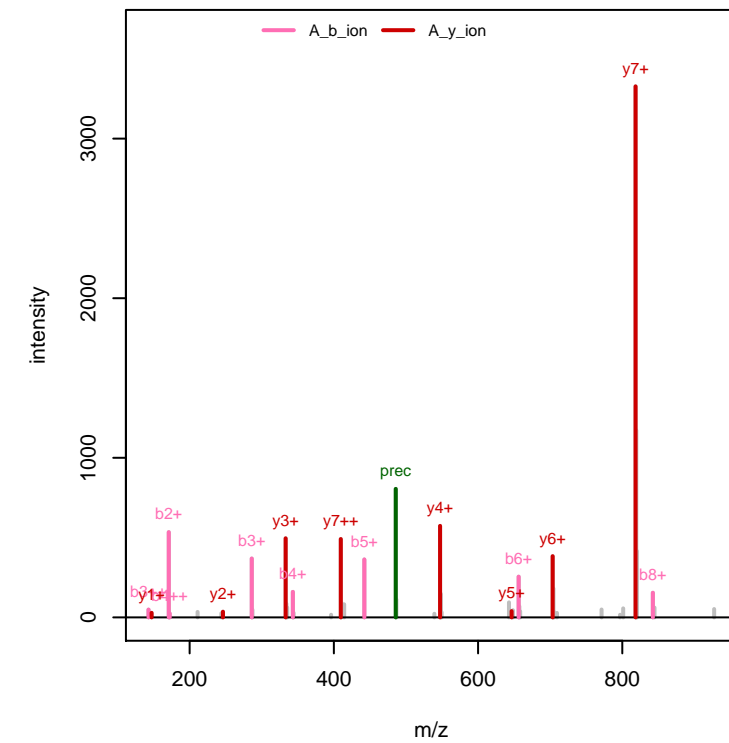

EGSVKGYAGDTATTSEIK+XL\_S

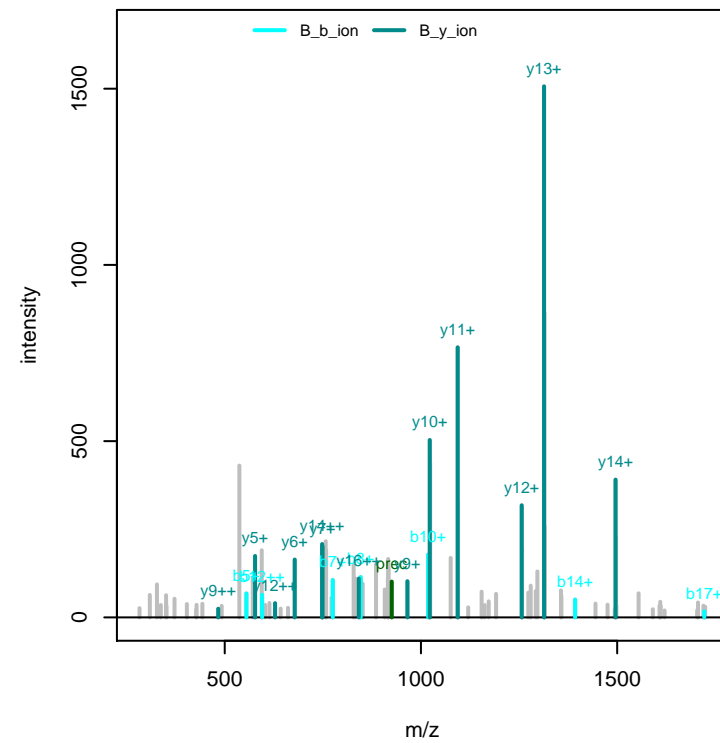

EGSVKGYAGDTATTSEIK+XL\_L

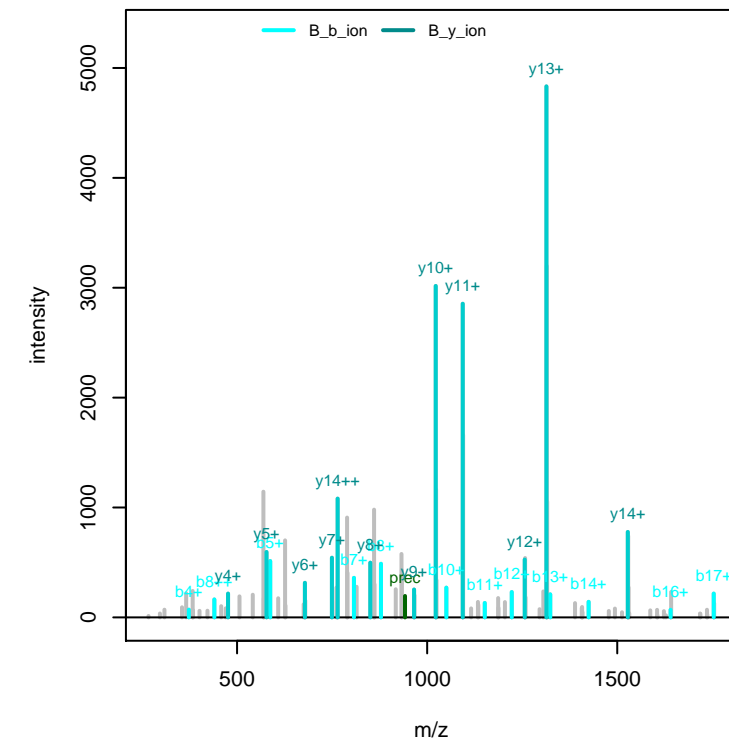

**DLDGKVVAVK**  
**ANNNDVKSVK**

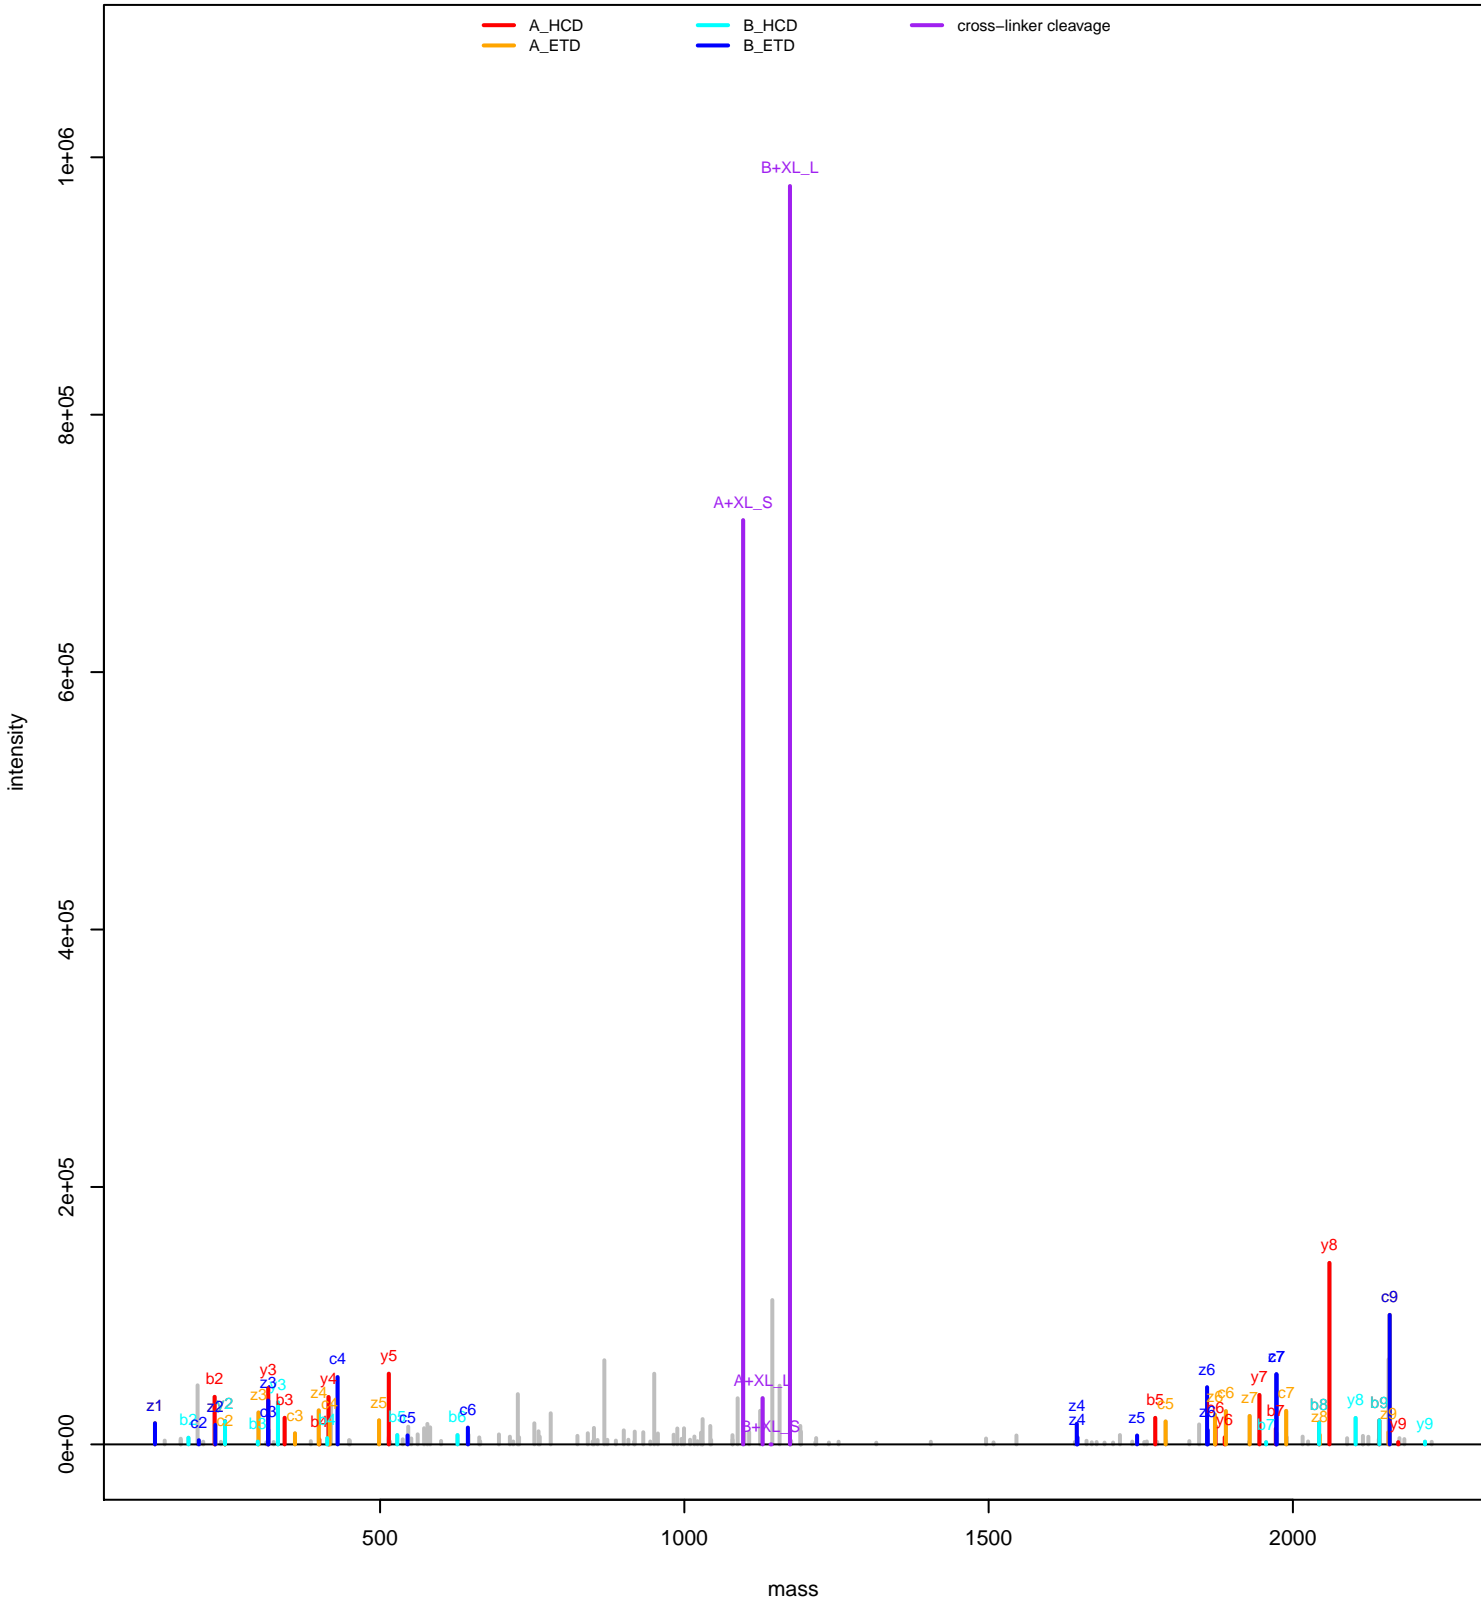

**DLDGKVVAVK+XL\_S**

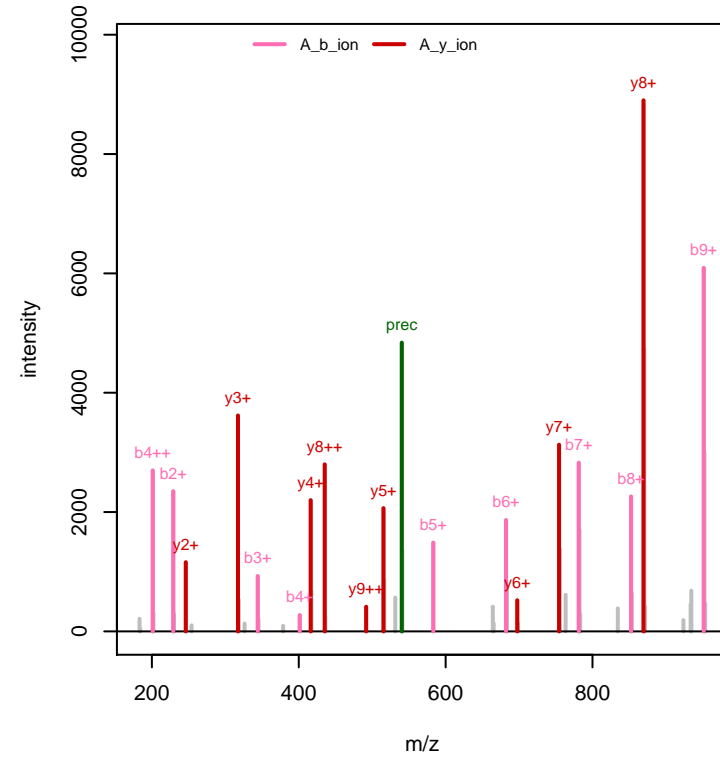

**DLDGKVVAVK+XL\_L**

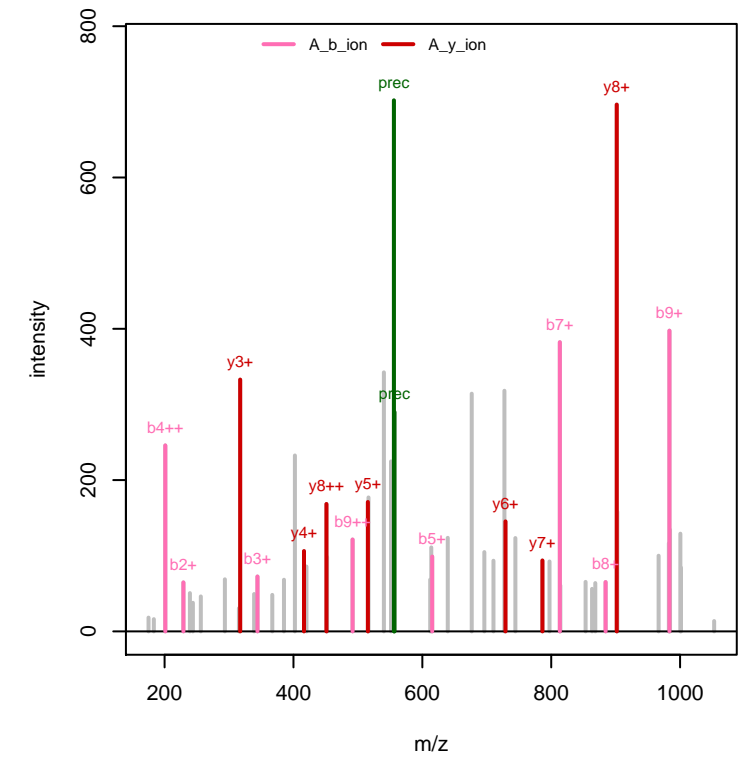

**ANNNDVKSVK+XL\_S**

**ANNNDVKSVK+XL\_L**

GYAGDTATTSEIKAK  
VDSSMNKVGFMDDSAITAK

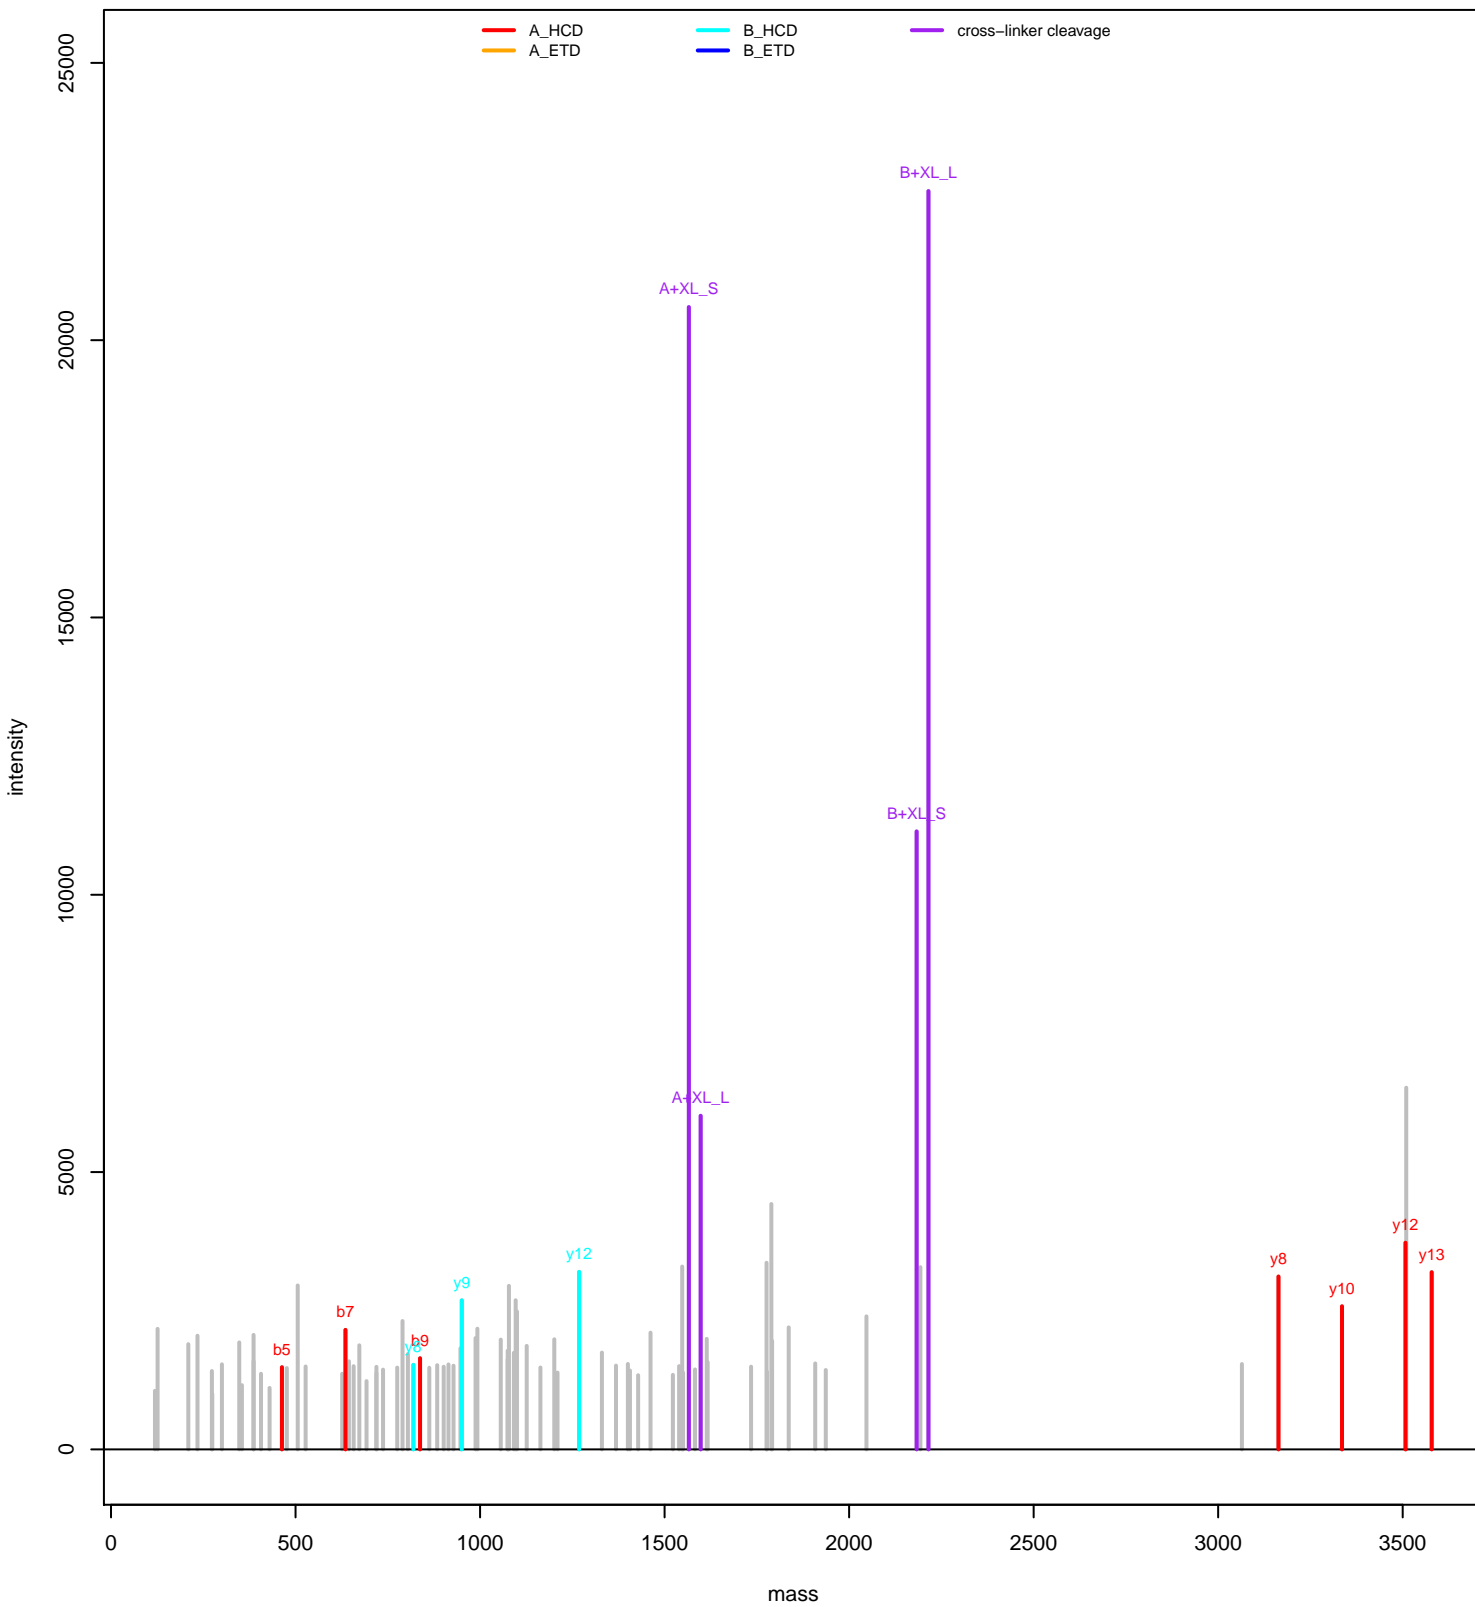

GYAGDTATTSEIKAK+XL\_S

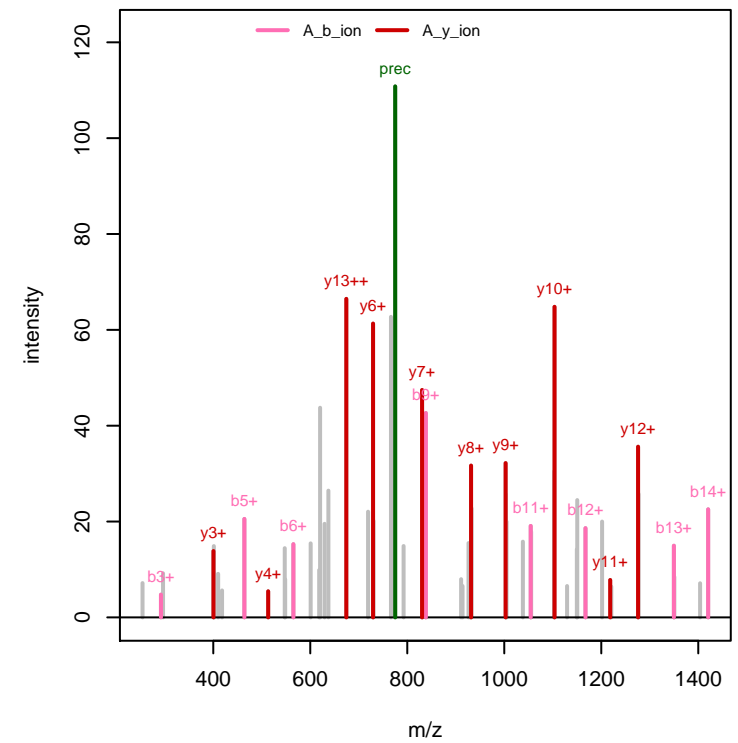

GYAGDTATTSEIKAK+XL\_L

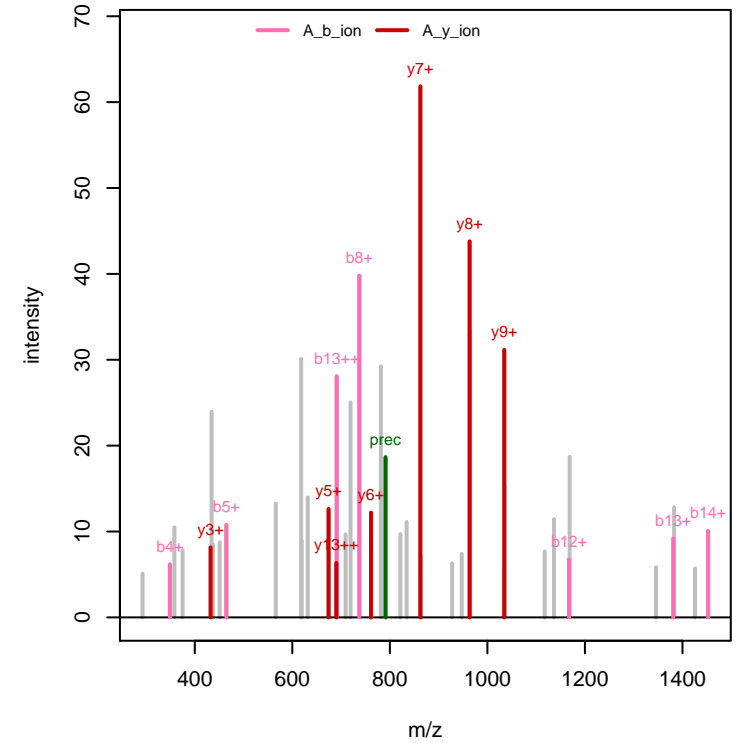

VDSSMNKVGFMDDSAITAK+XL\_S

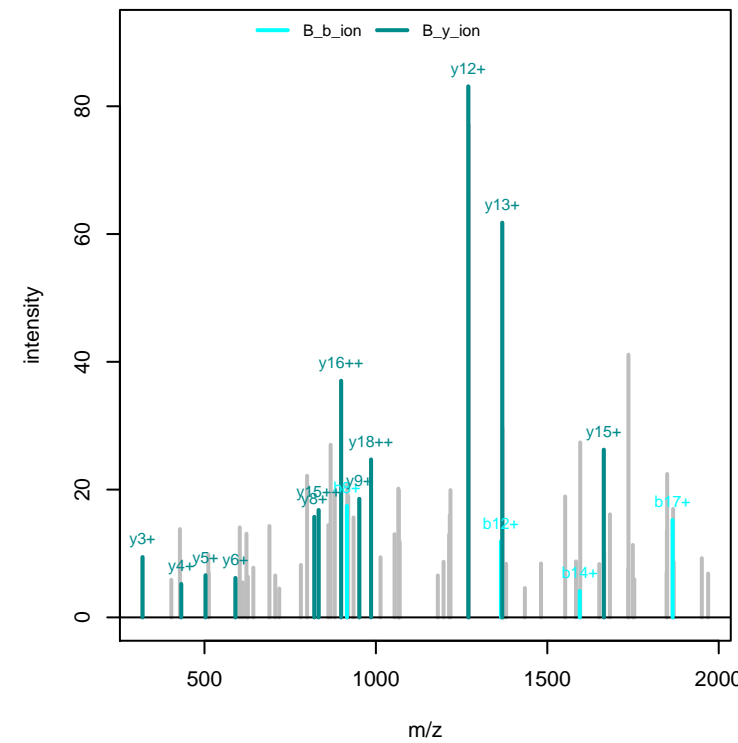

VDSSMNKVGFMDDSAITAK+XL\_L

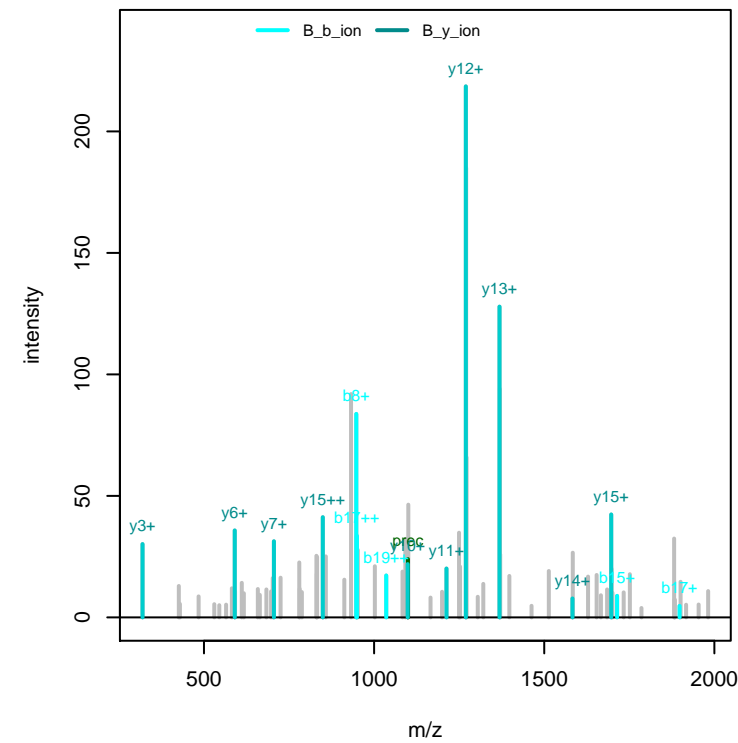

**SVKNDLK**  
**EGSVKGYAGDTATTSEIK**

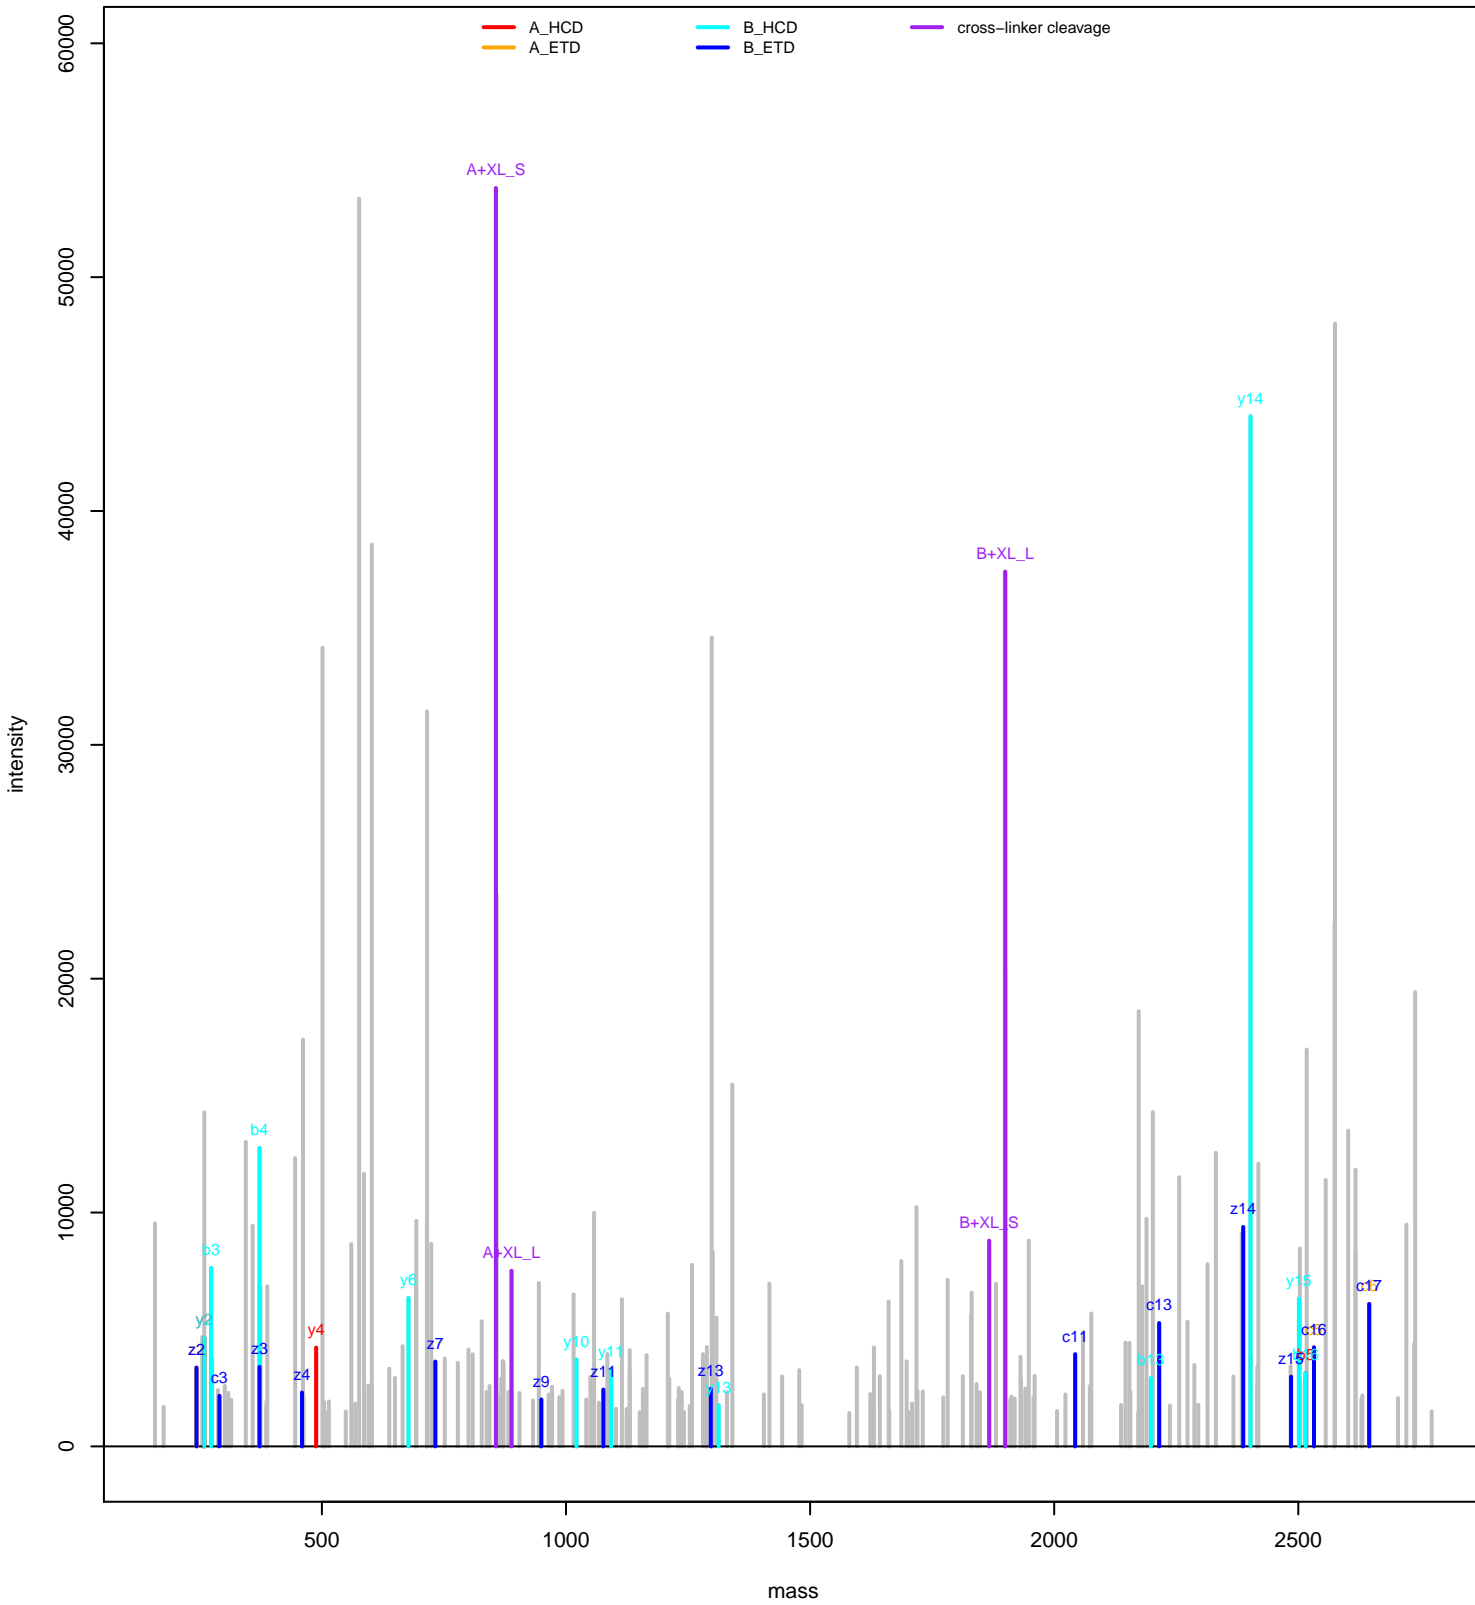

**SVKNDLK+XL\_S**

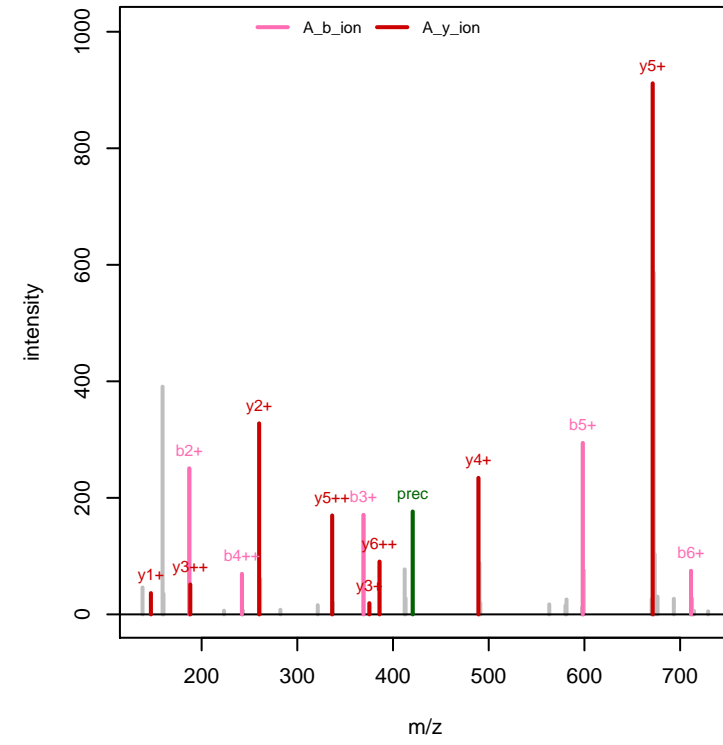

**SVKNDLK+XL\_L**

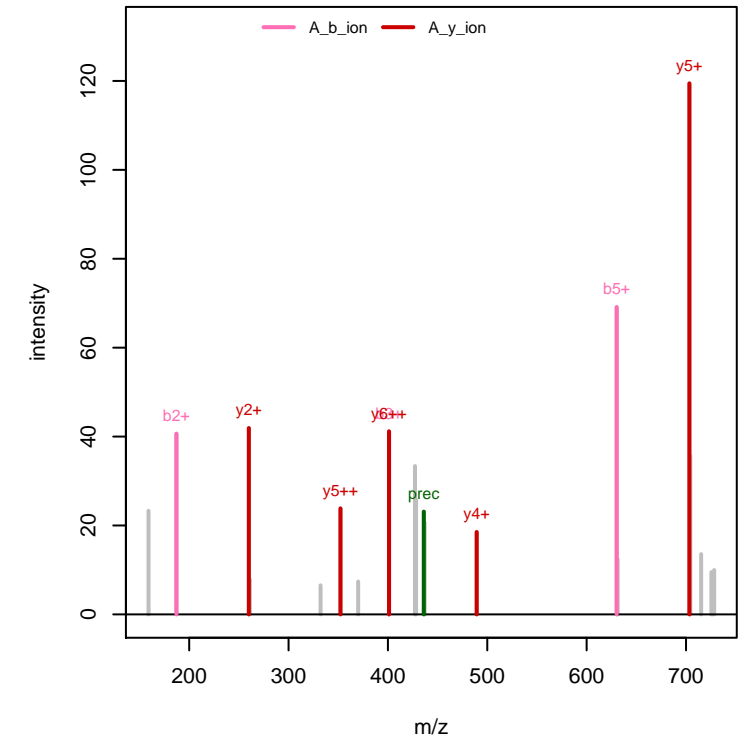

**EGSVKGYAGDTATTSEIK+XL\_S**

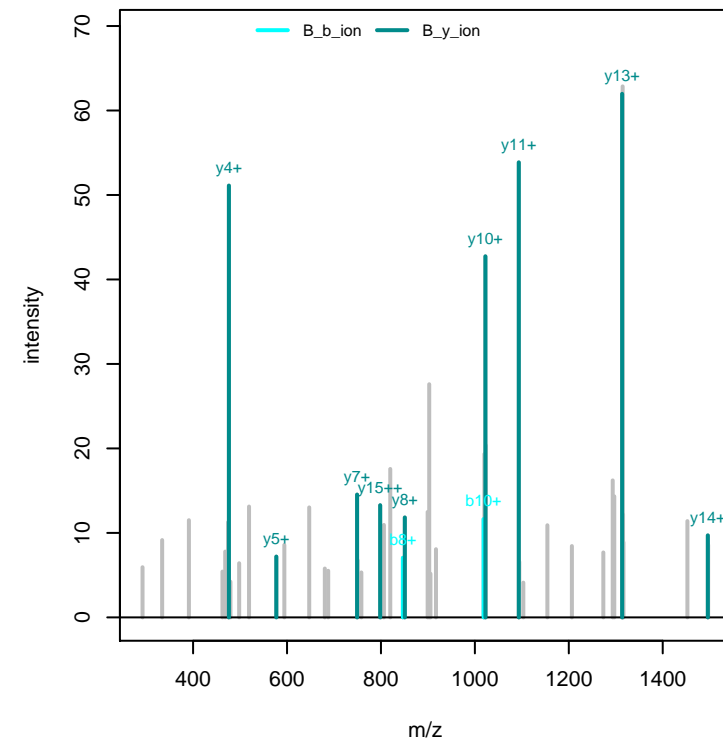

**EGSVKGYAGDTATTSEIK+XL\_L**

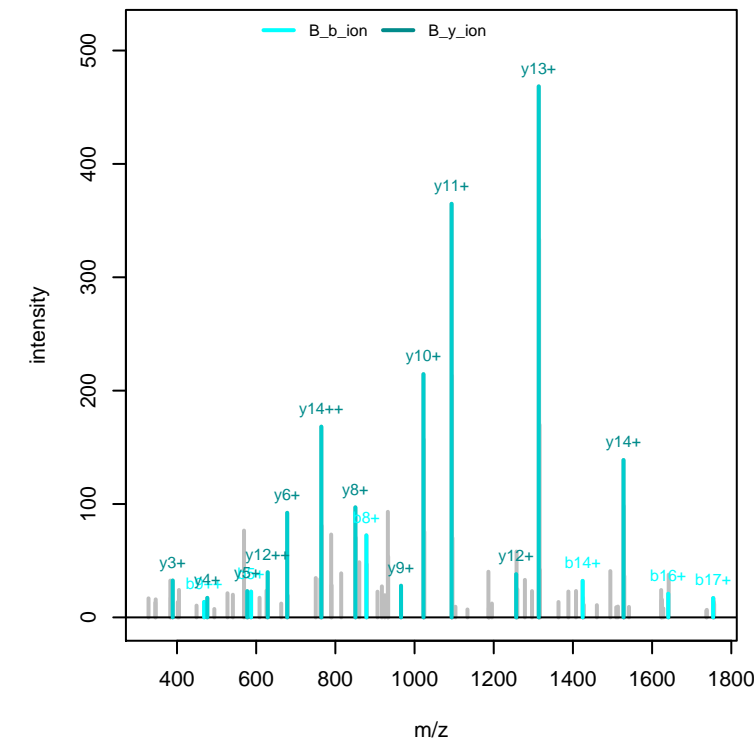

VLGKAGAAR  
KVEADCR

VLGKAGAAR+XL\_S

VLGKAGAAR+XL\_L

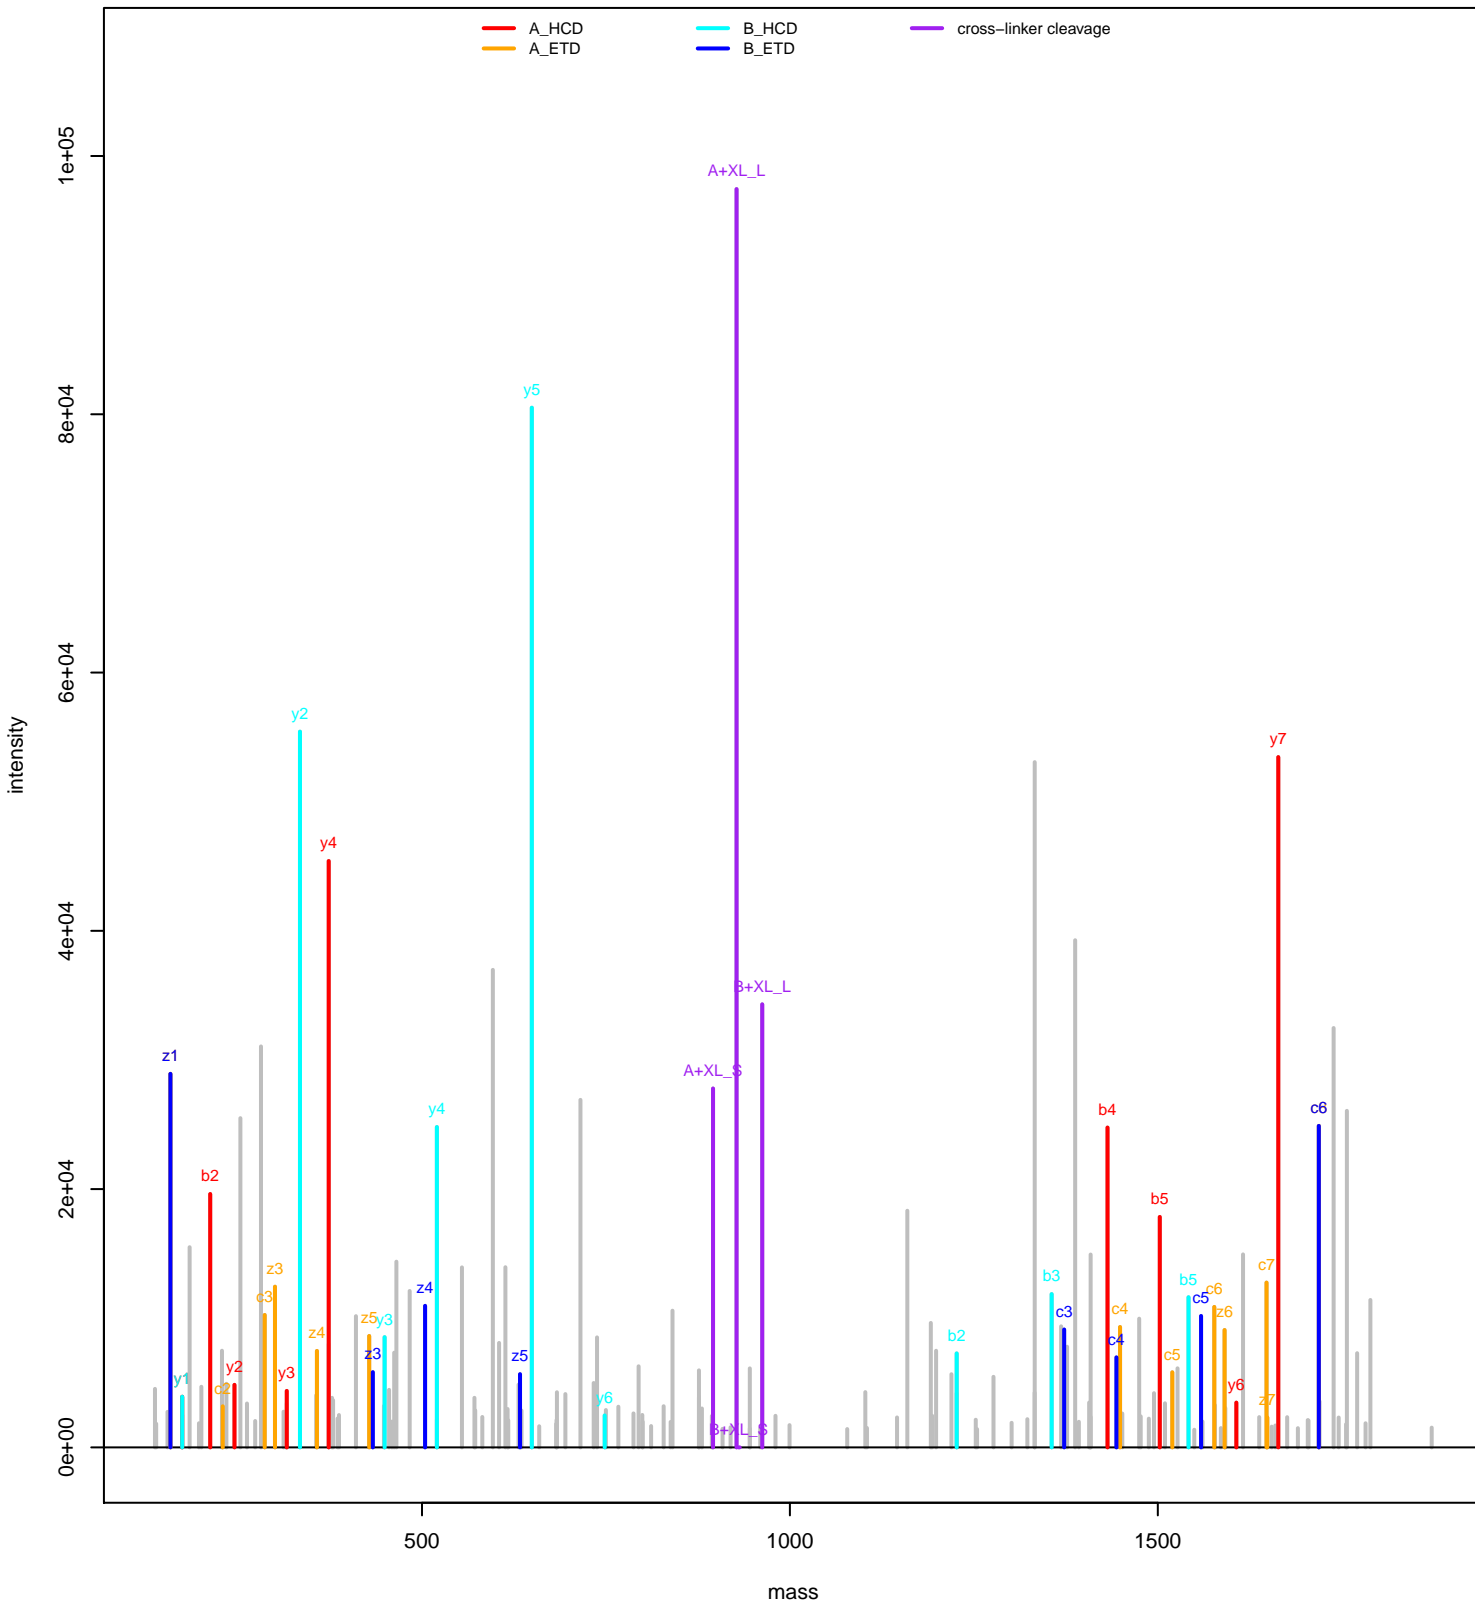

KVEADCR+XL\_S

KVEADCR+XL\_L

IATTEPGTKVK  
GAFVSEVLPGSGSAKAGVK

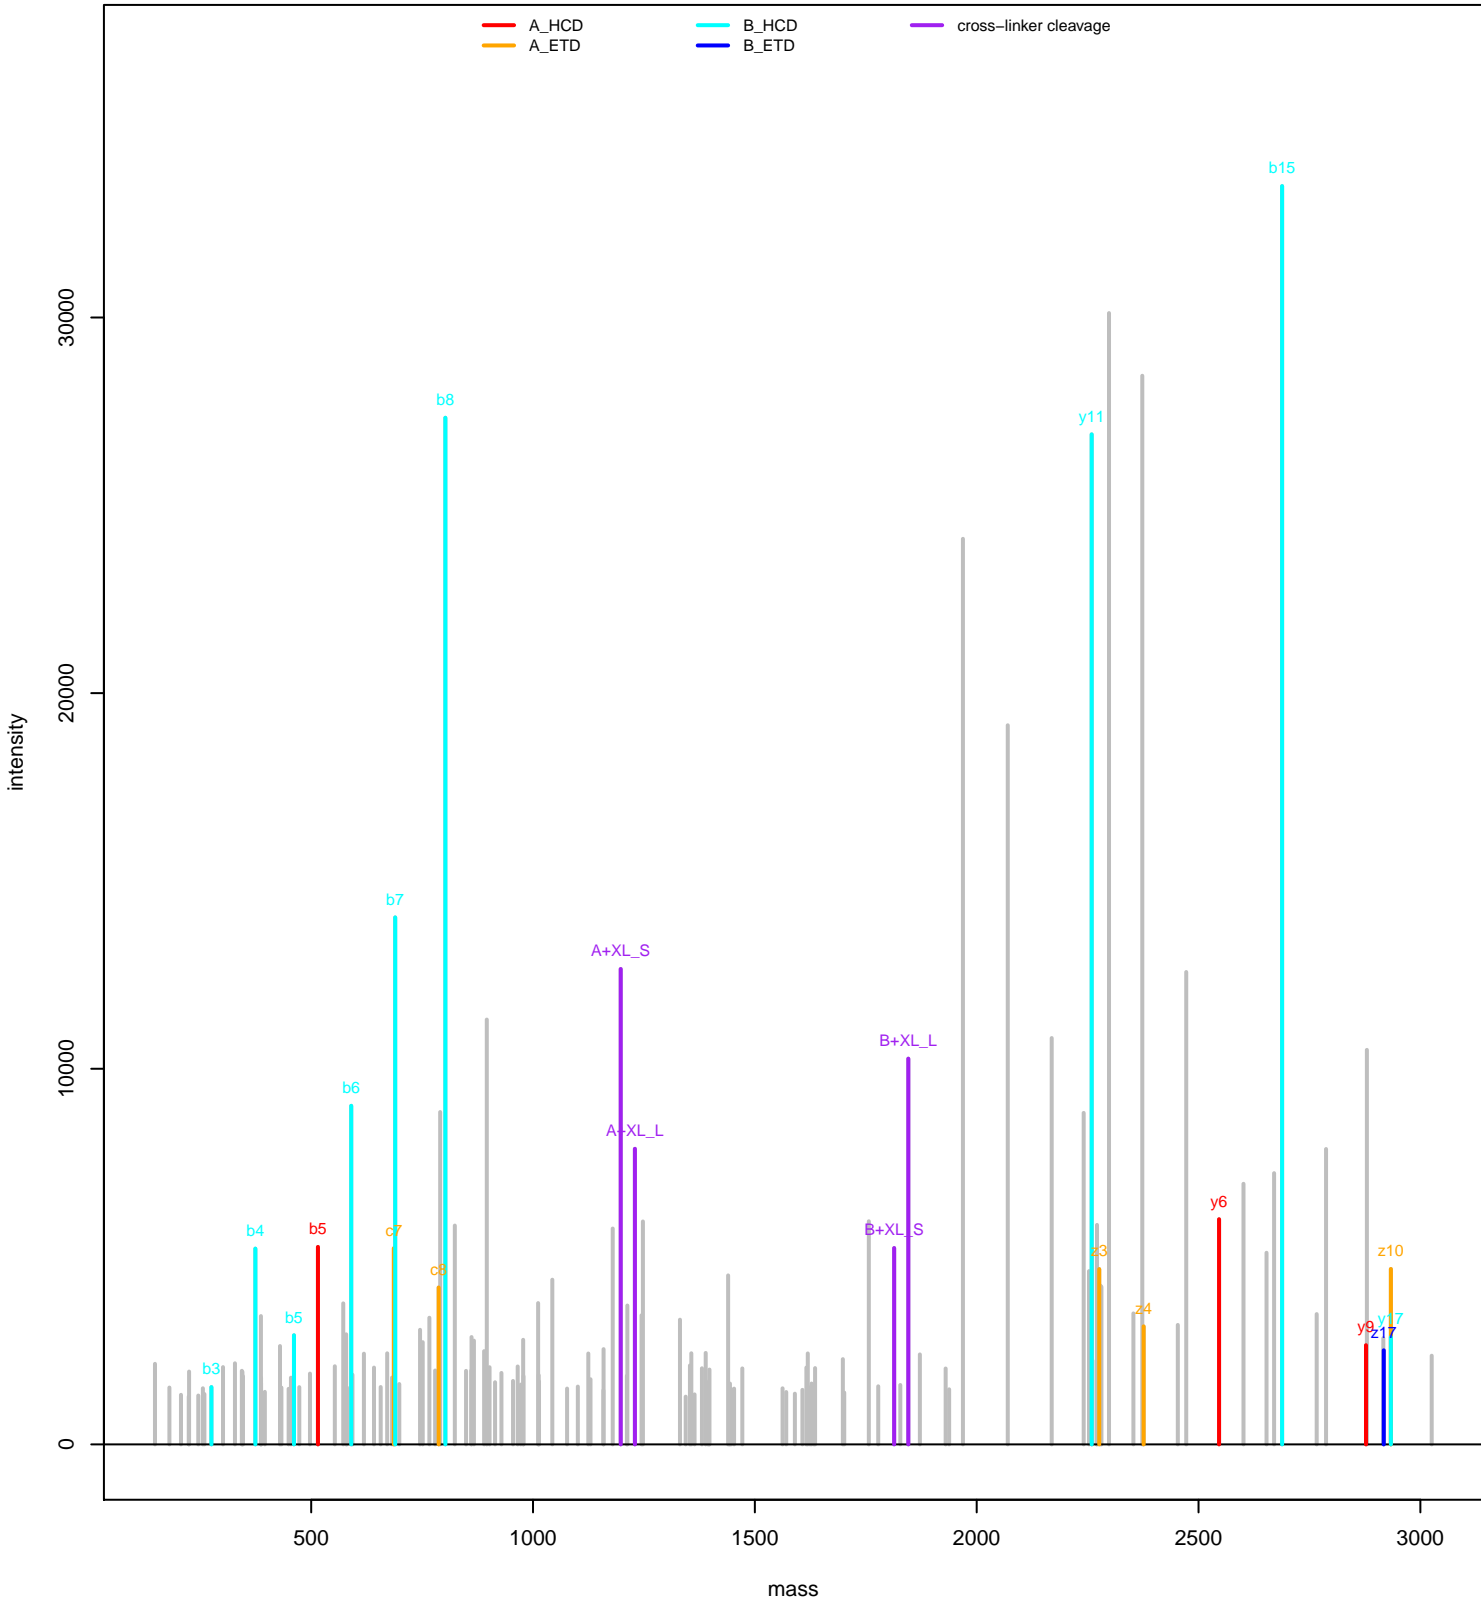

IATTEPGTKVK+XL\_S

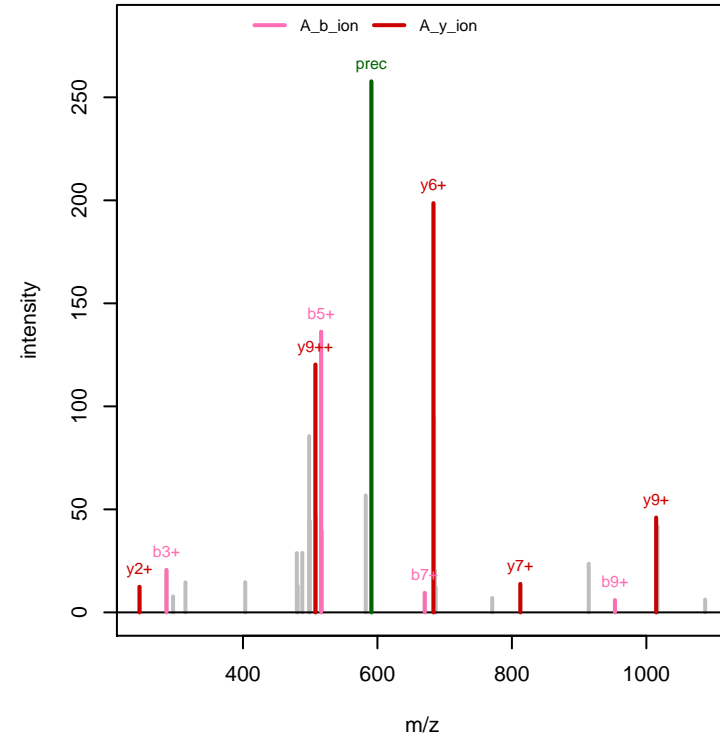

IATTEPGTKVK+XL\_L

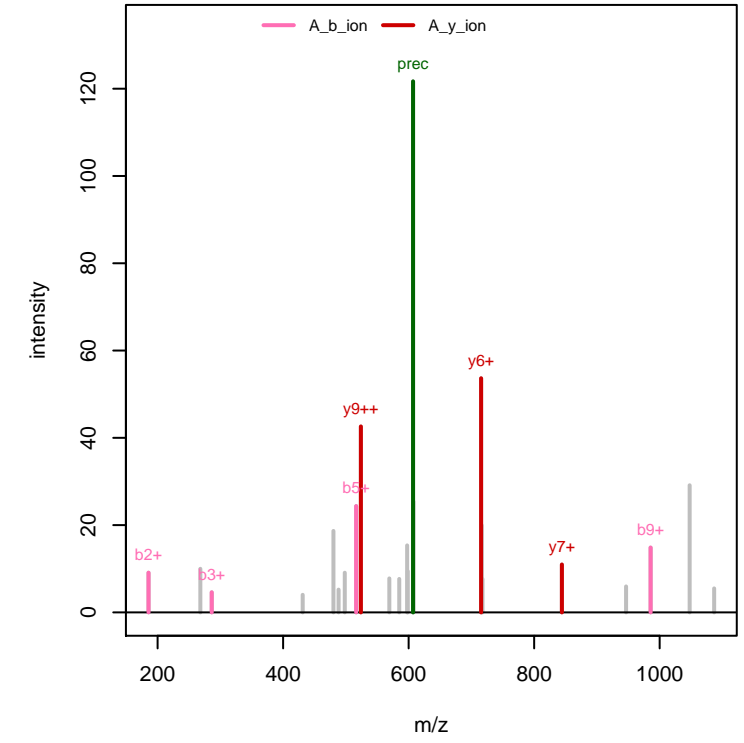

GAFVSEVLPGSGSAKAGVK+XL\_S

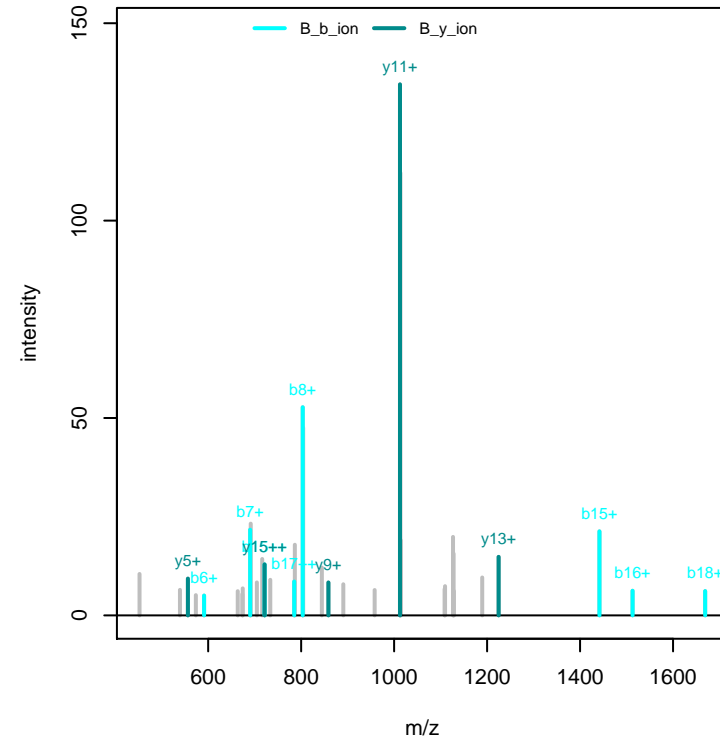

GAFVSEVLPGSGSAKAGVK+XL\_L

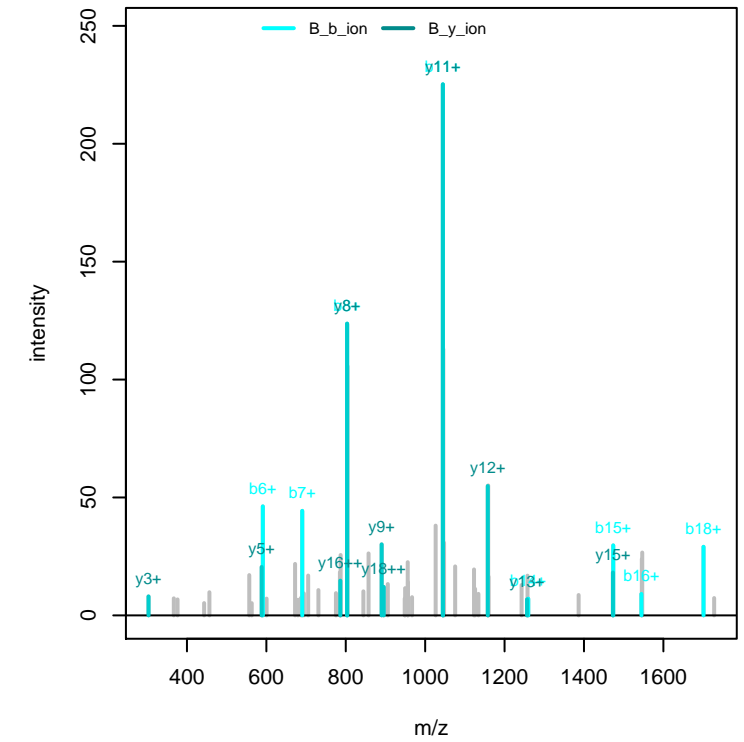



AAAVANQGKAK  
HGESQWNKENR

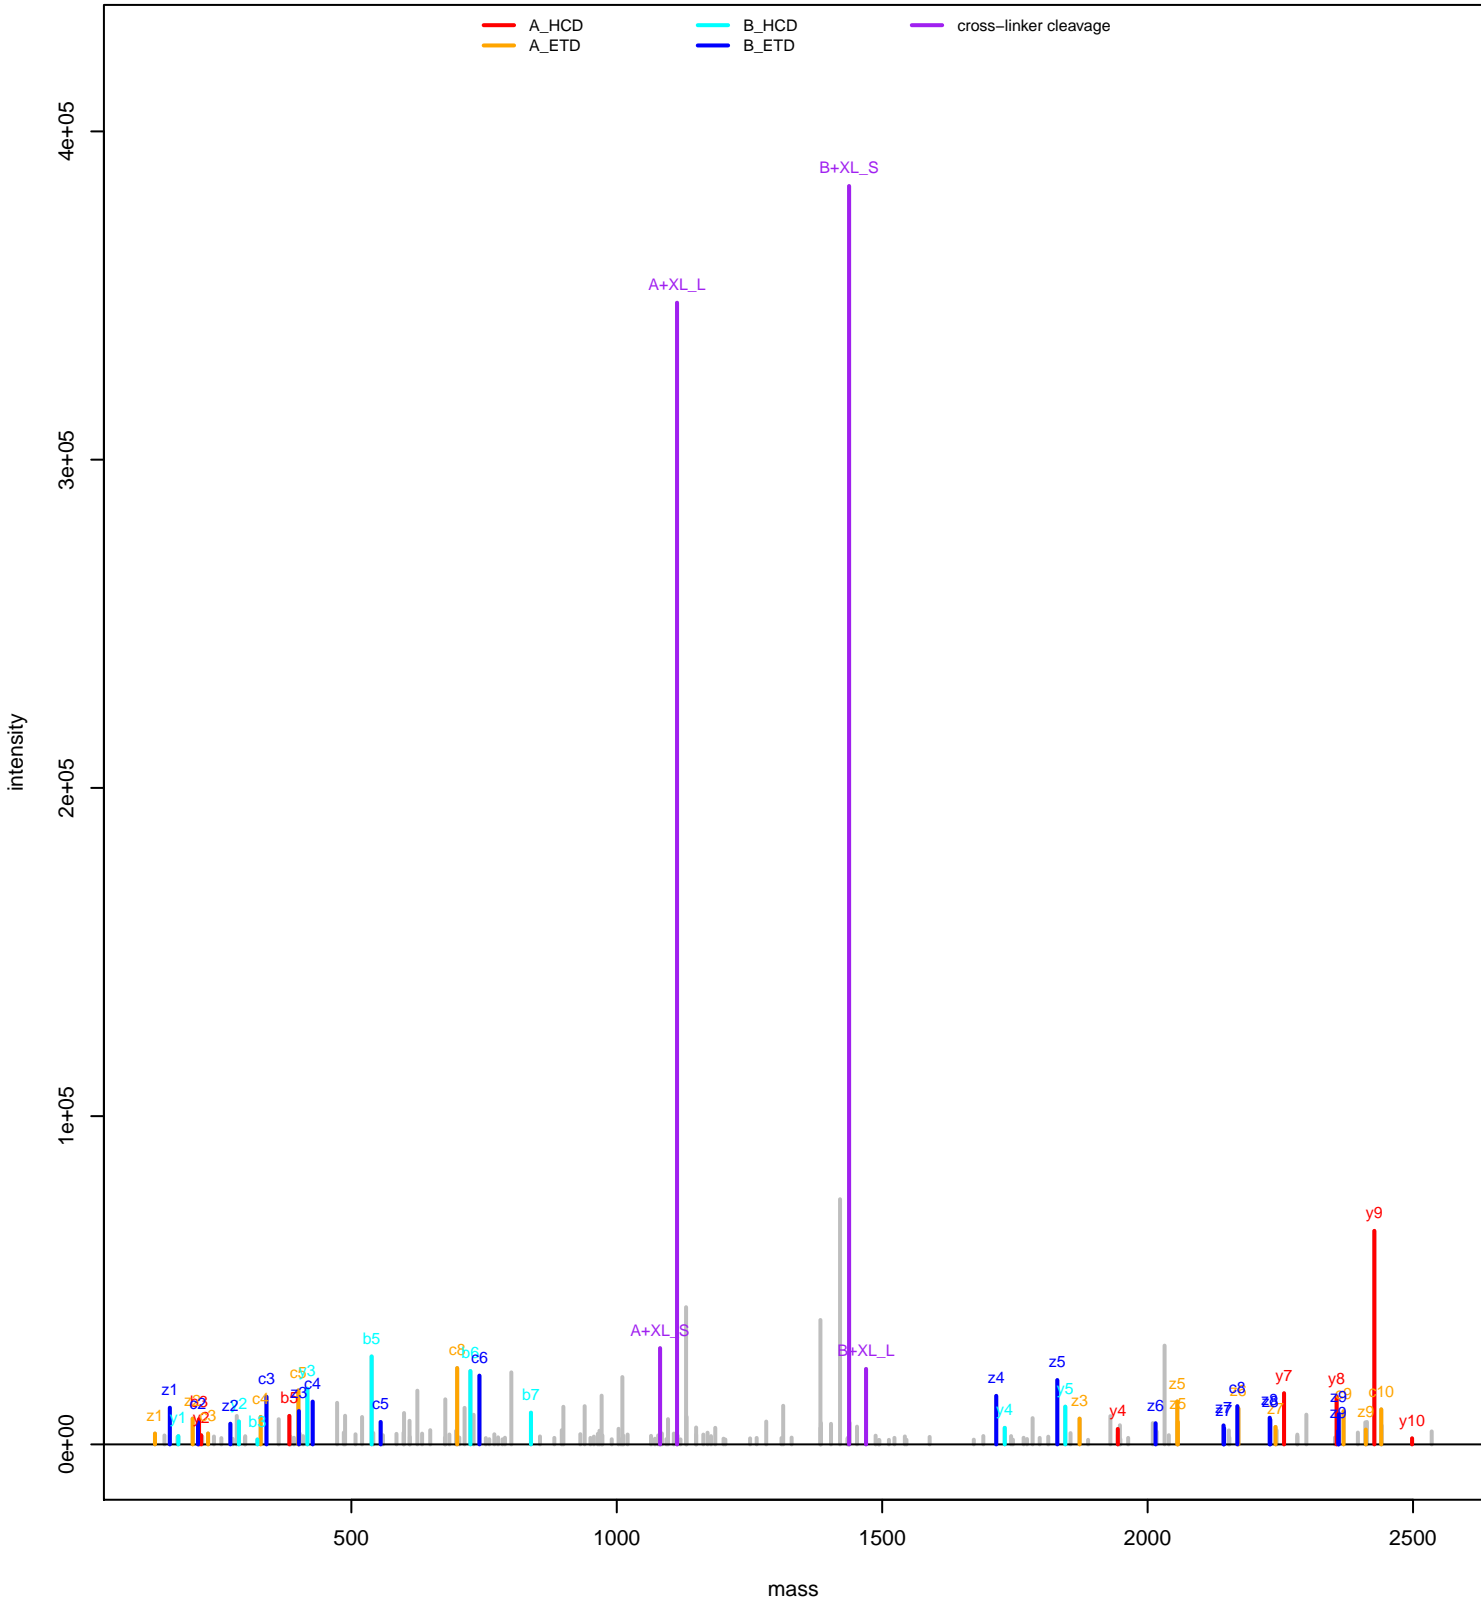

AAAVANQGKAK+XL\_S

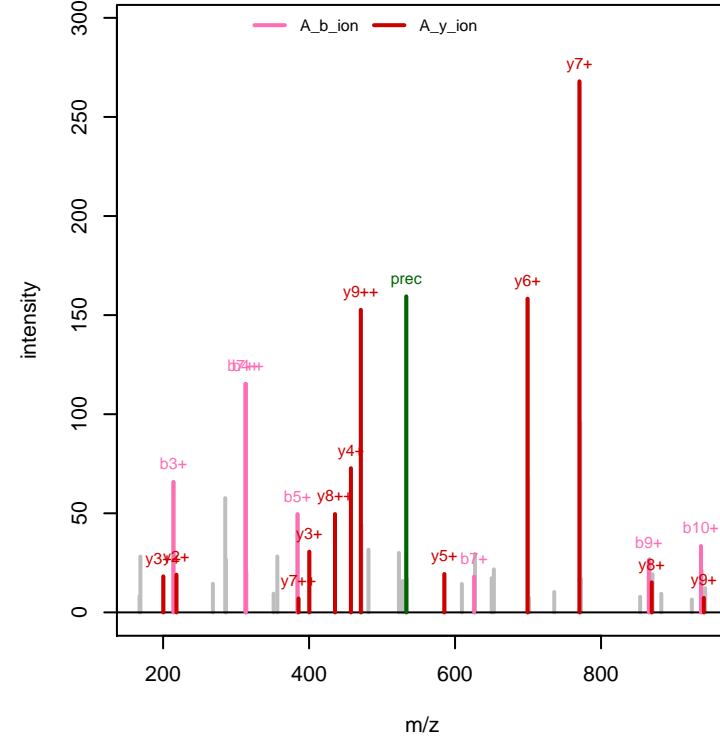

AAAVANQGKAK+XL\_L

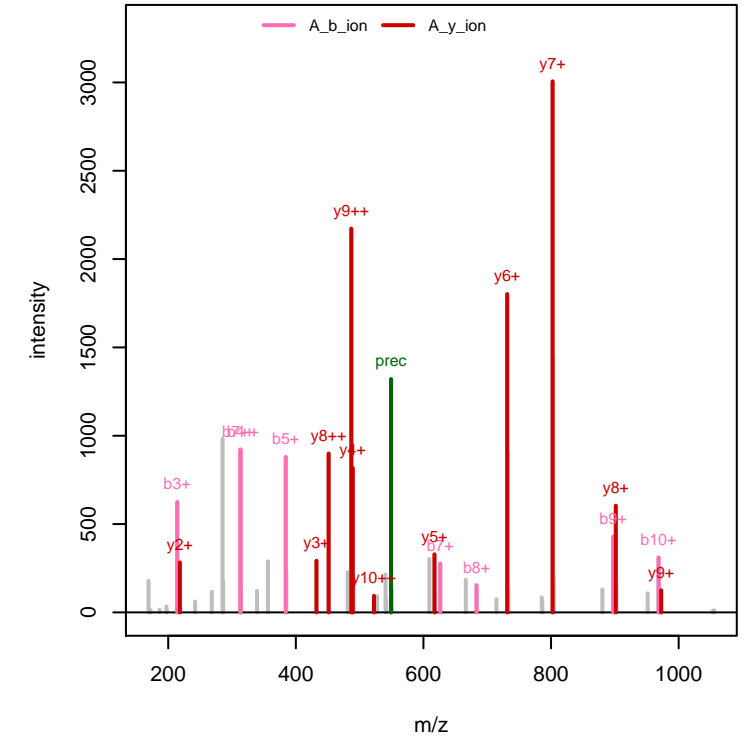

HGESQWNKENR+XL\_S

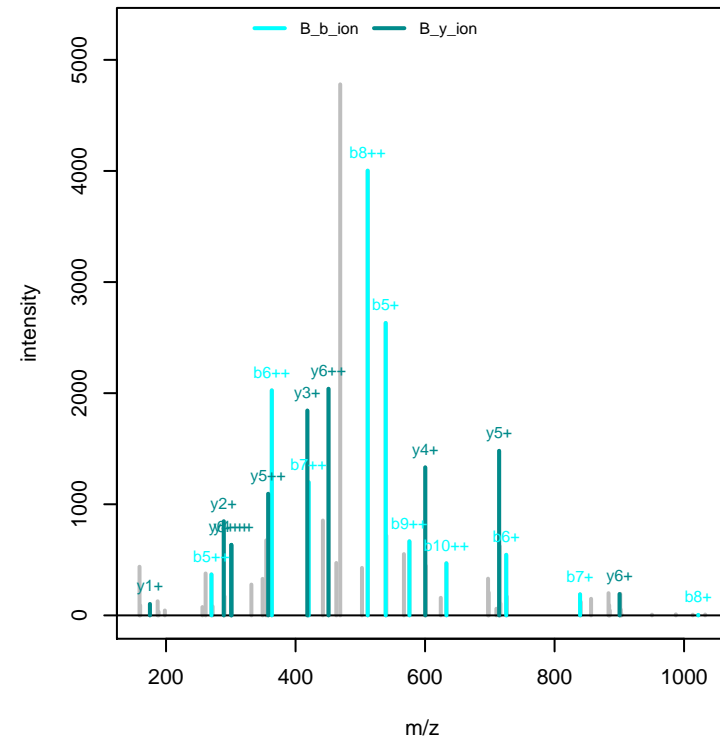

HGESQWNKENR+XL\_L

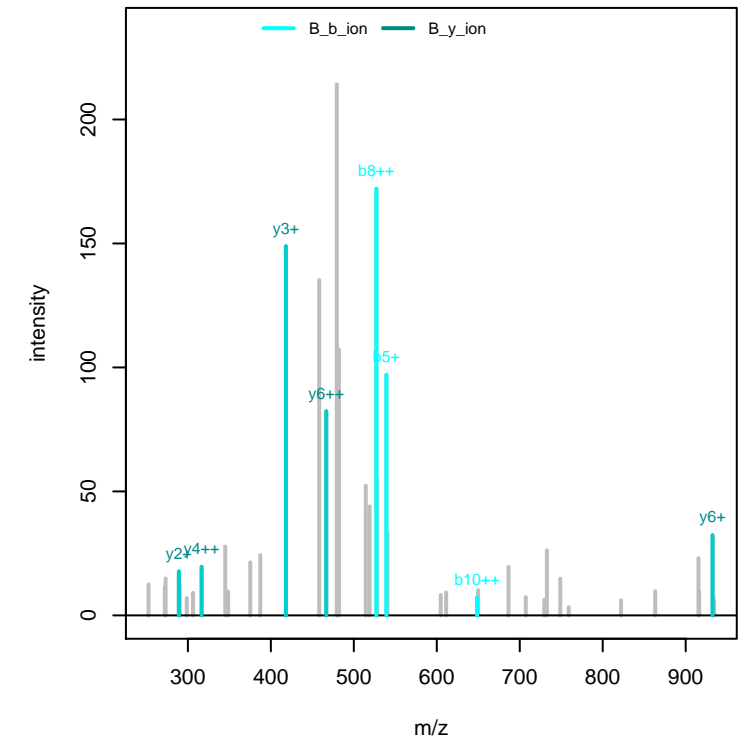

MTQDELKK  
GQIEGAVSSSDASTEKLK

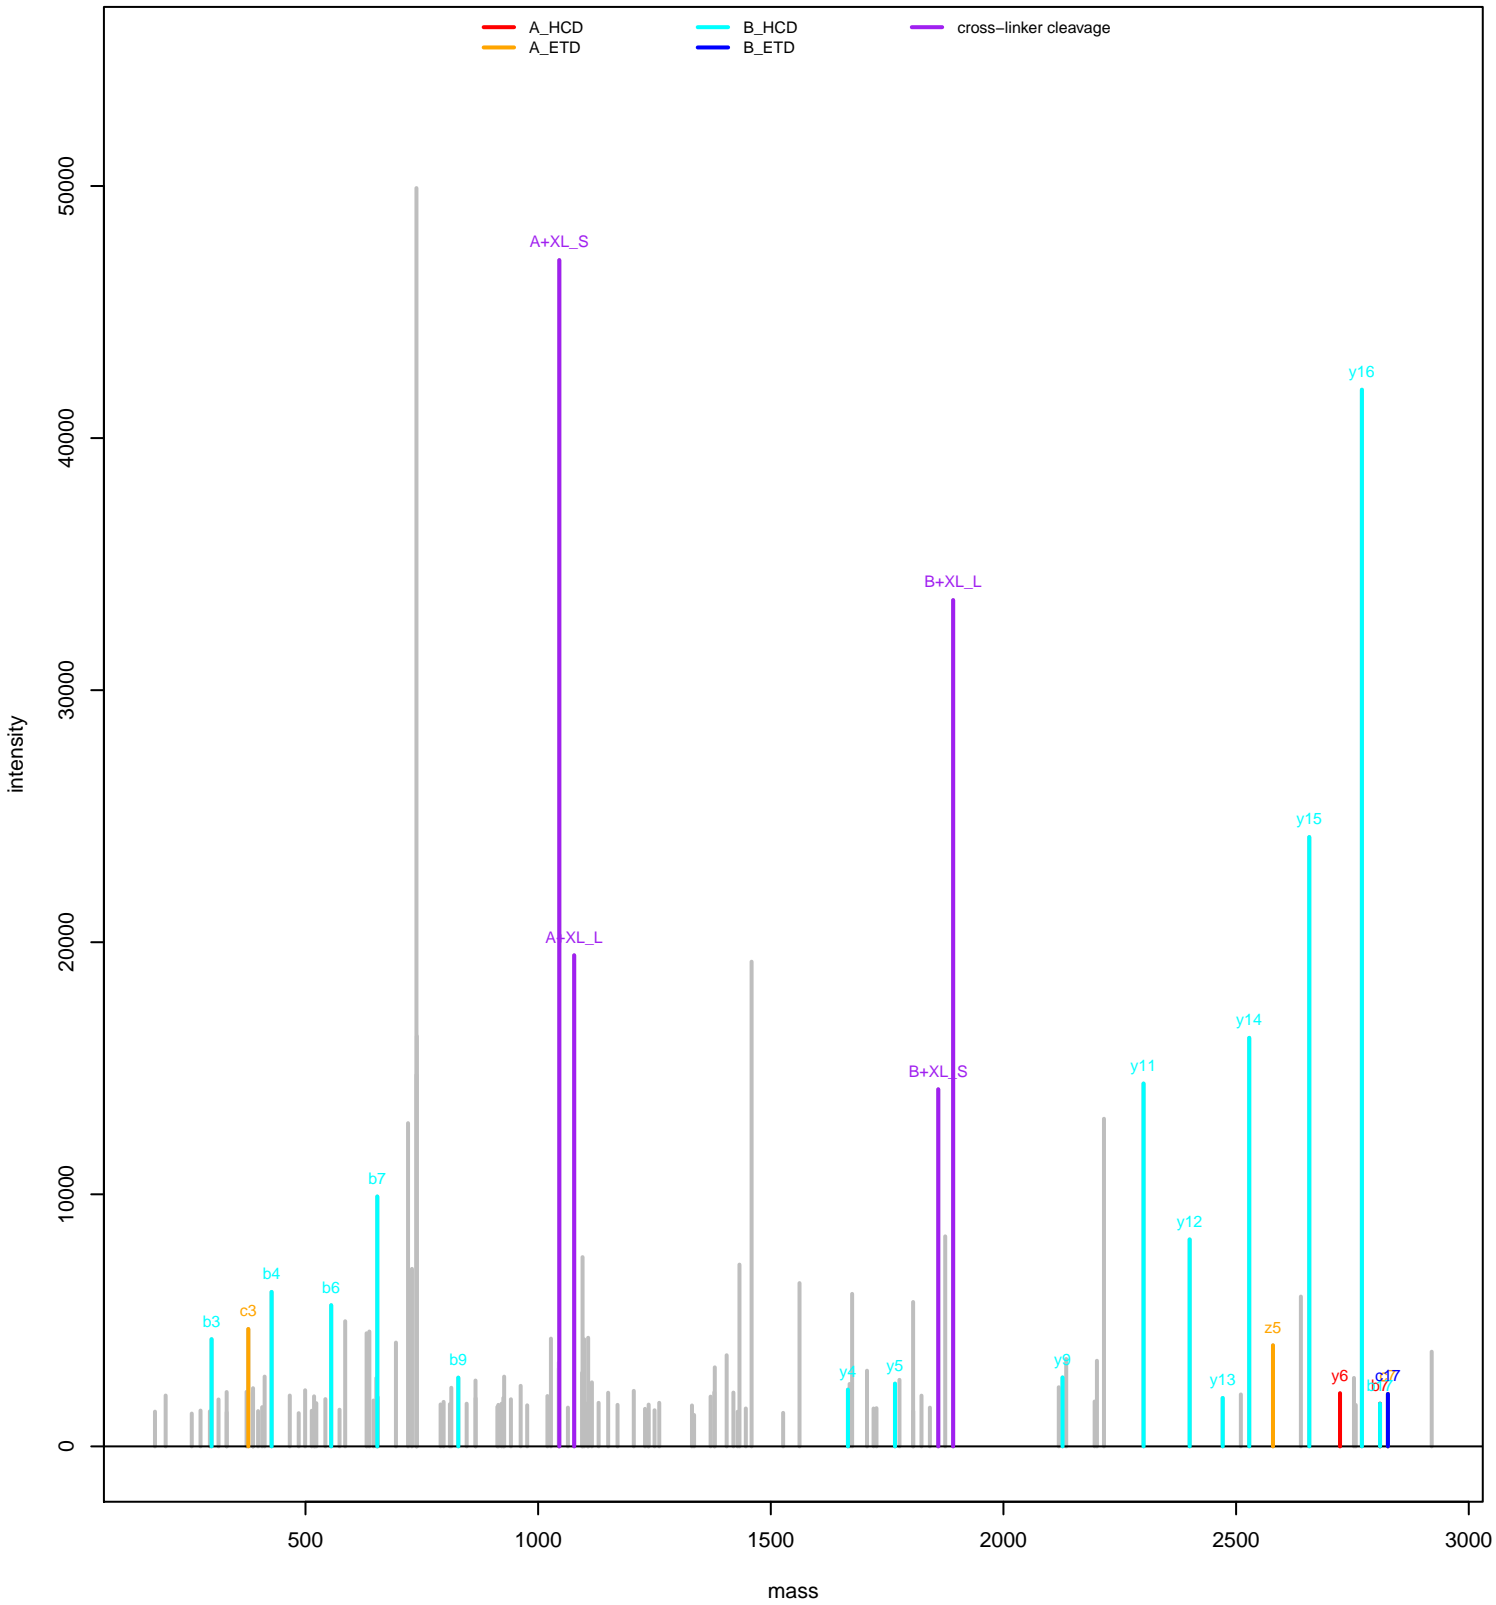

MTQDELKK+XL\_S

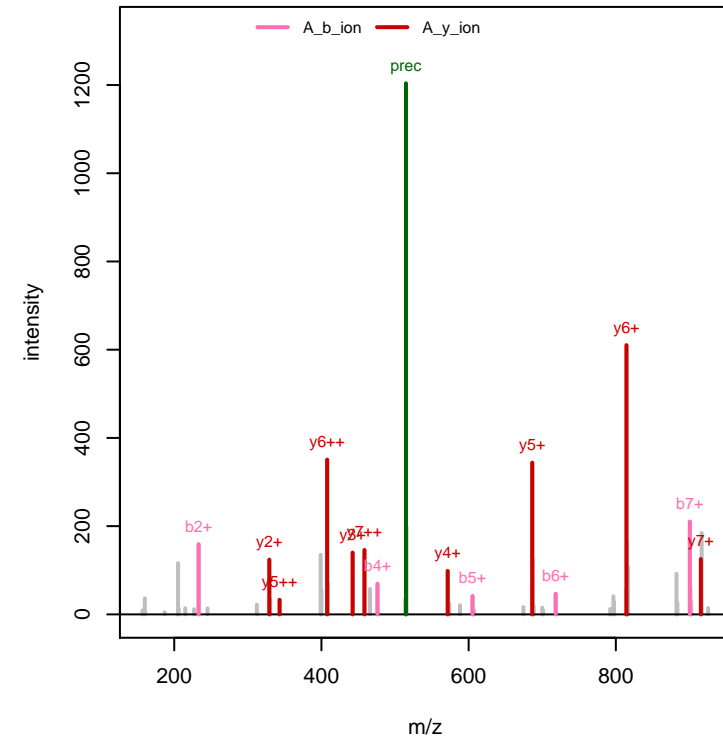

MTQDELKK+XL\_L

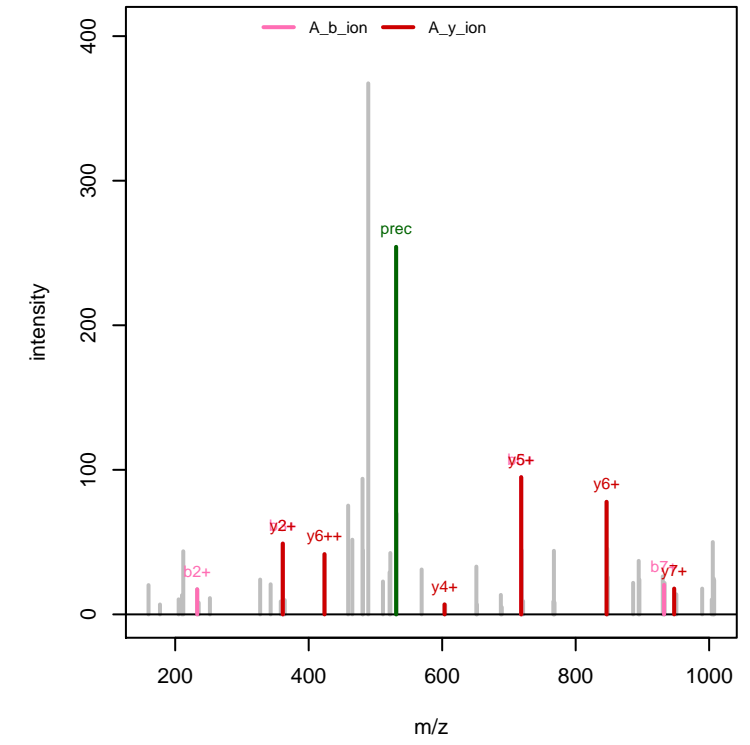

GQIEGAVSSSDASTEKLK+XL\_S

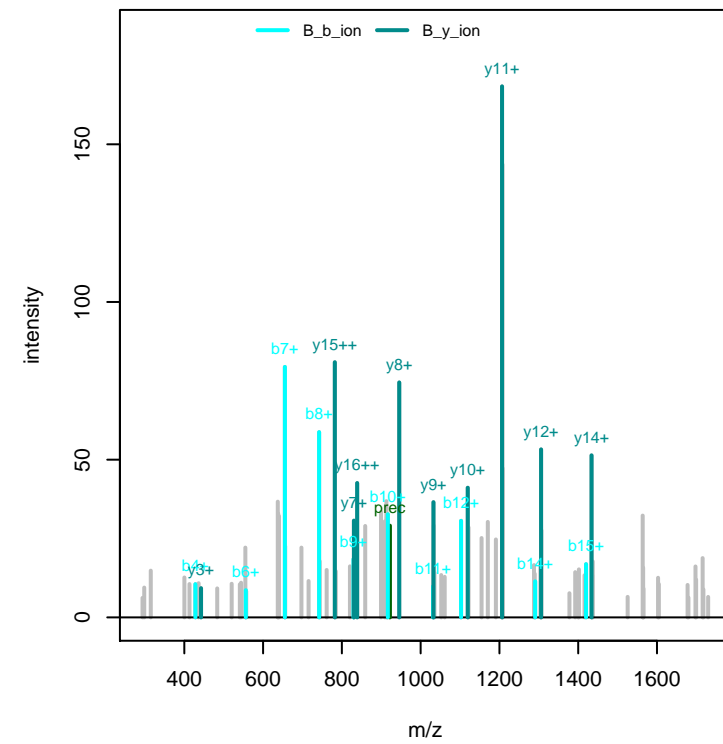

GQIEGAVSSSDASTEKLK+XL\_L

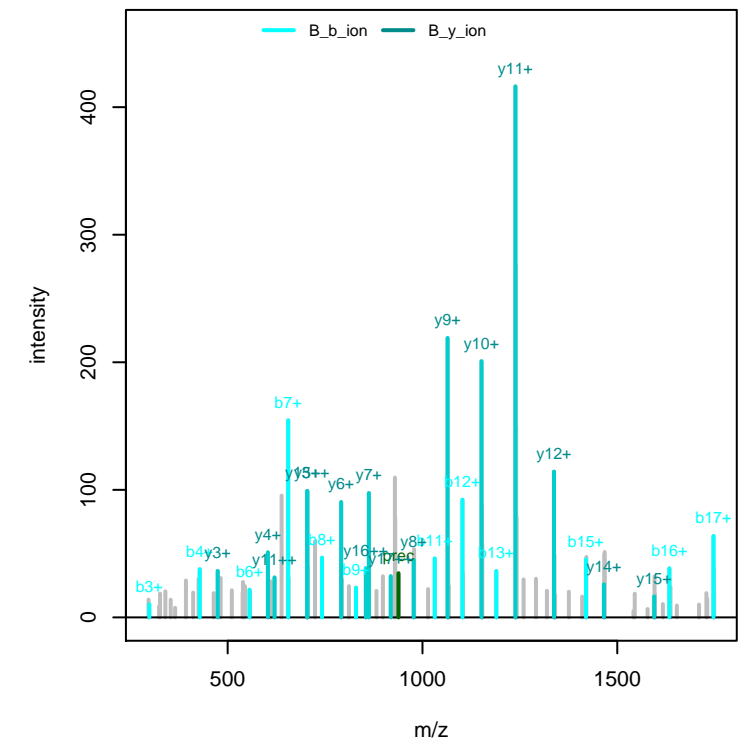

**IIQINSKSGK  
VGSKHNSGYSAAK**

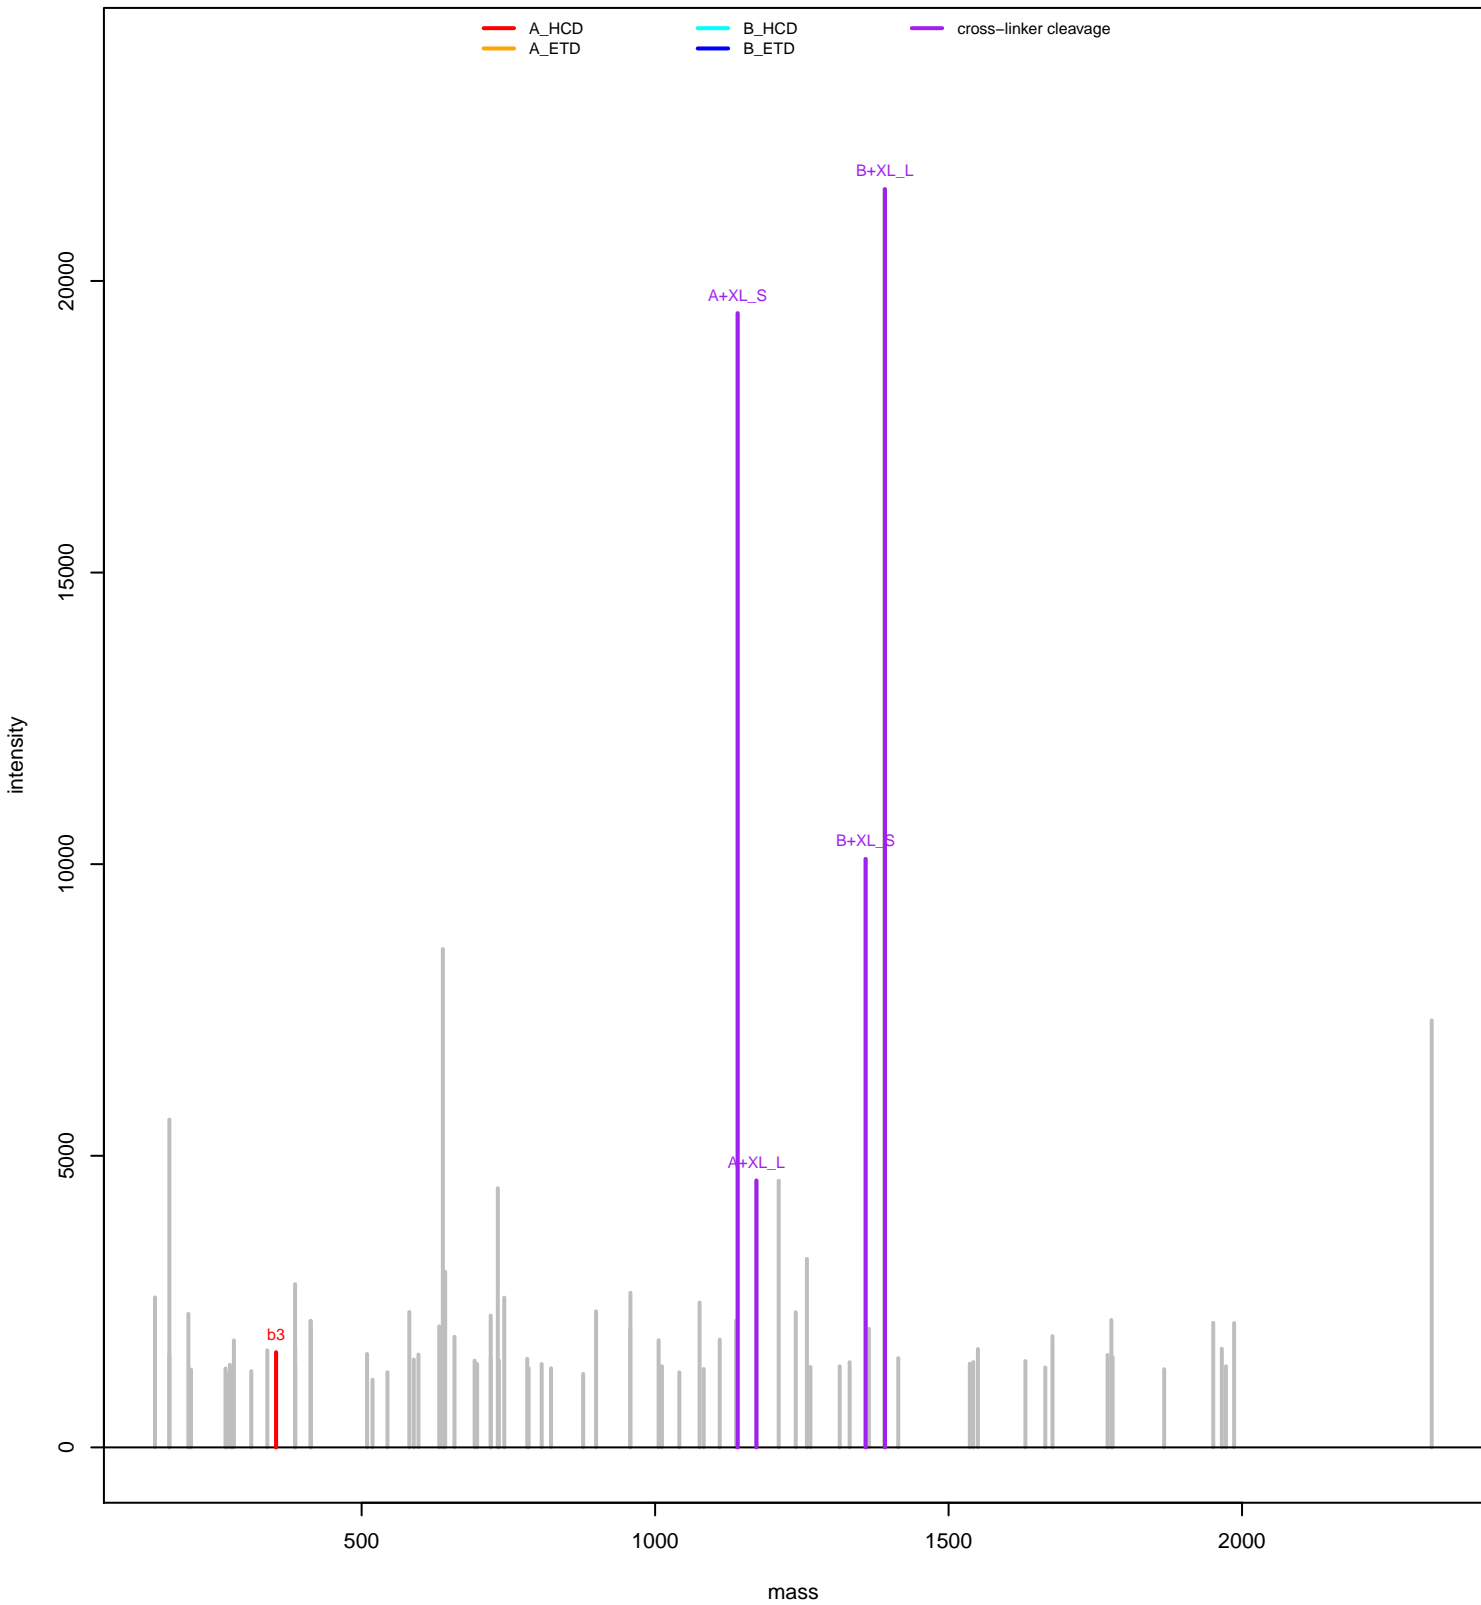

**IIQINSKSGK+XL\_S**

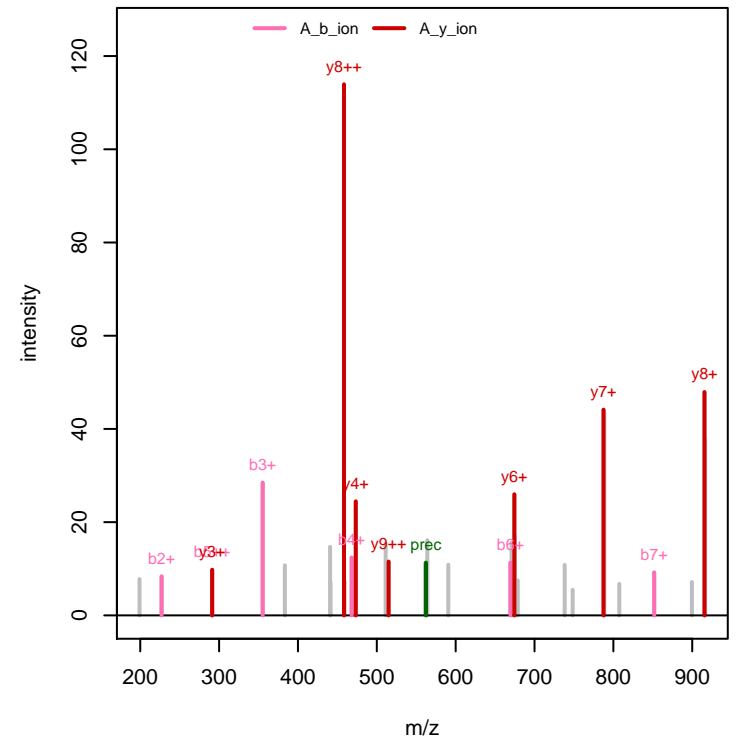

**IIQINSKSGK+XL\_L**

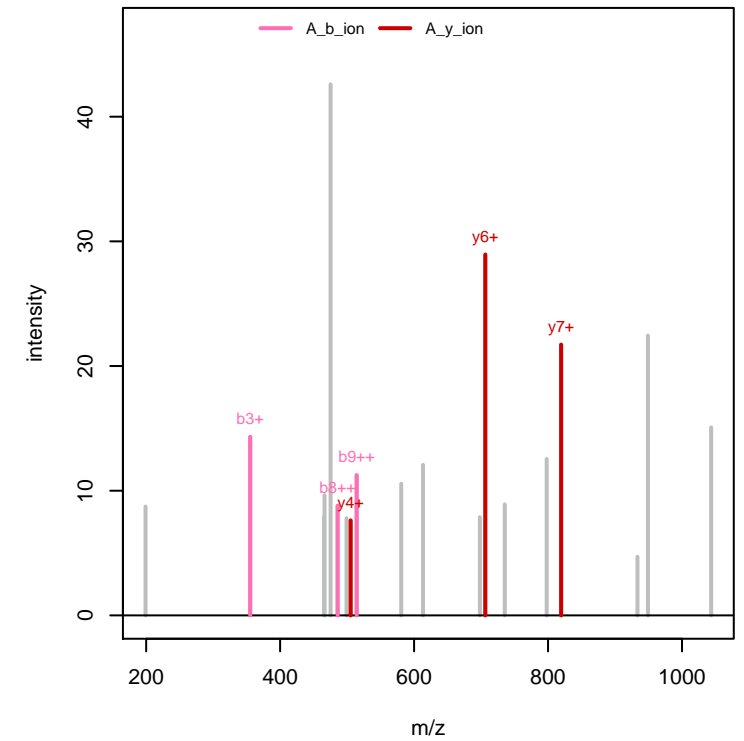

**VGSKHNSGYSAAK+XL\_S**

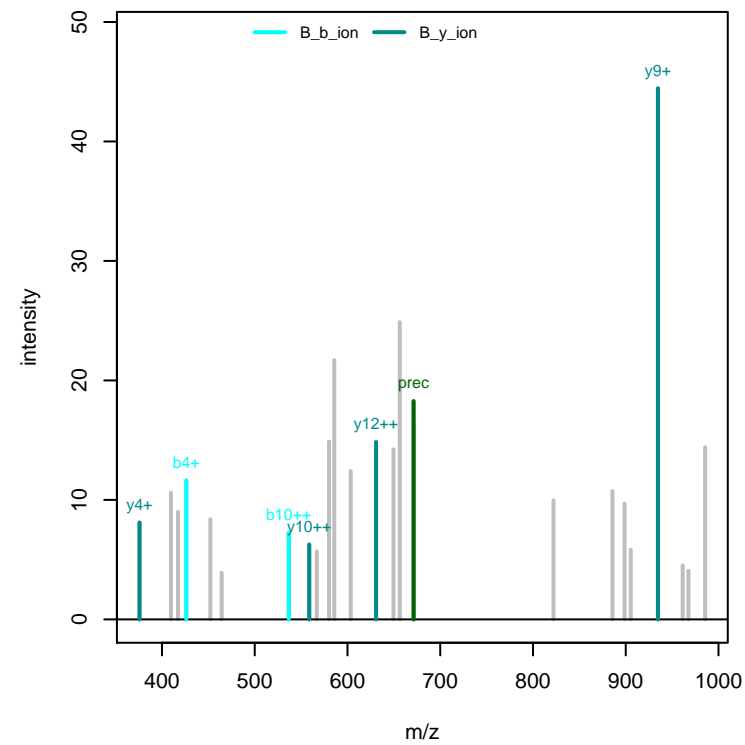

**VGSKHNSGYSAAK+XL\_L**

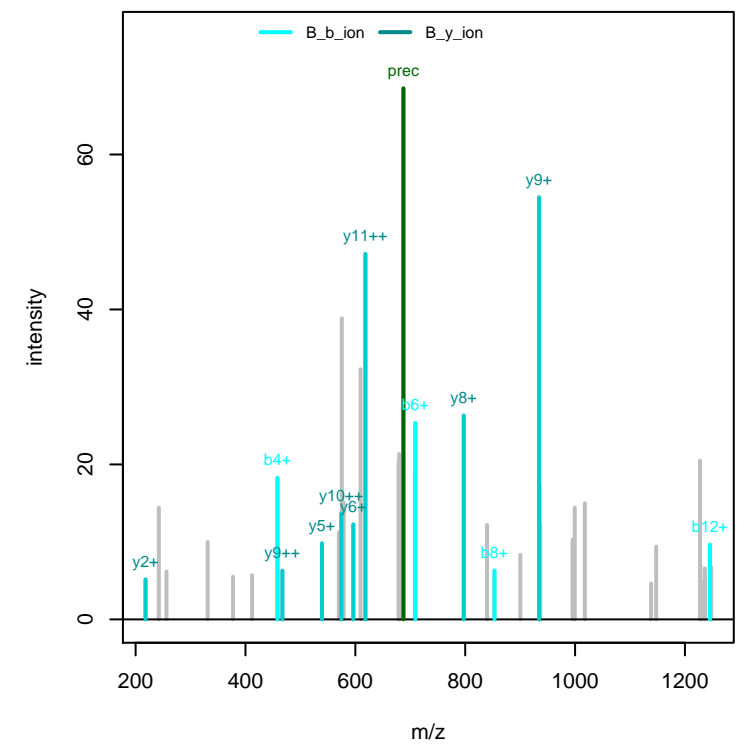

KPELDAK  
KGEDVEK

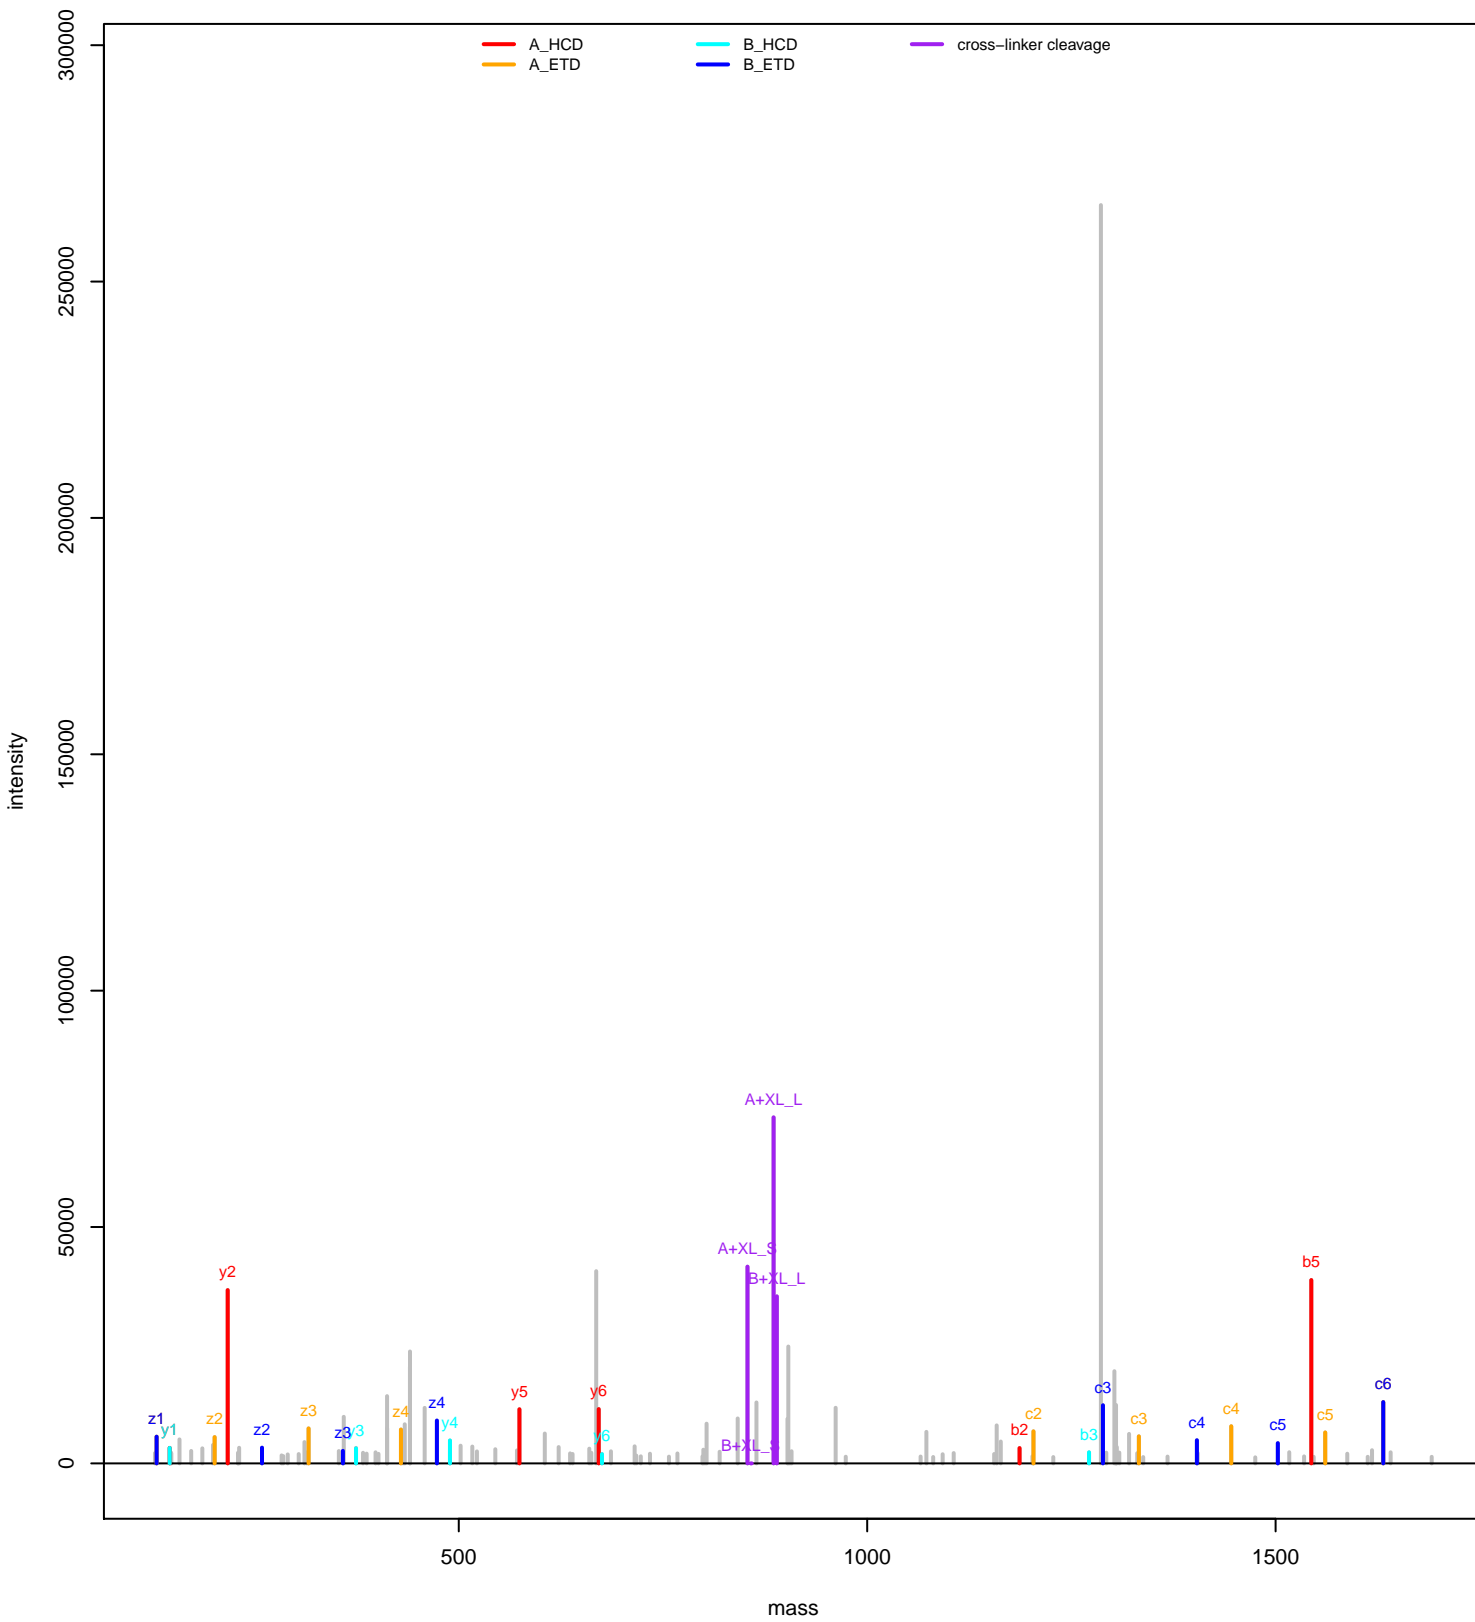

KPELDAK+XL\_S

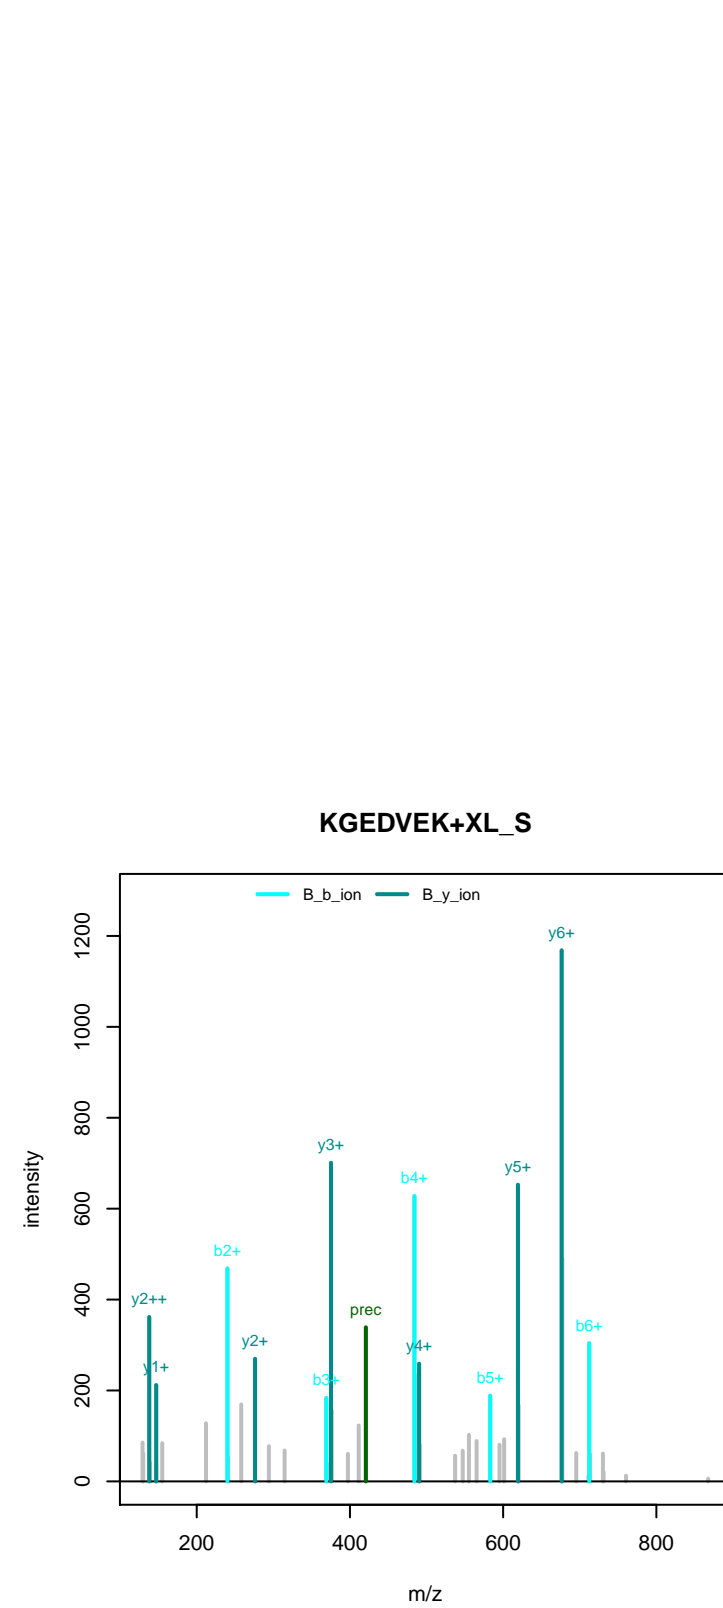

KPELDAK+XL\_L

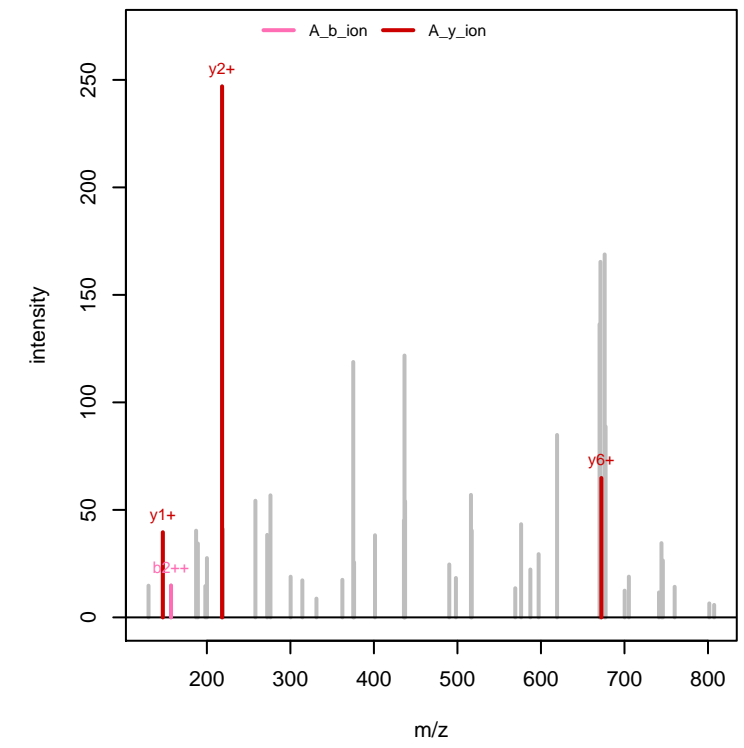

KGEDVEK+XL\_S

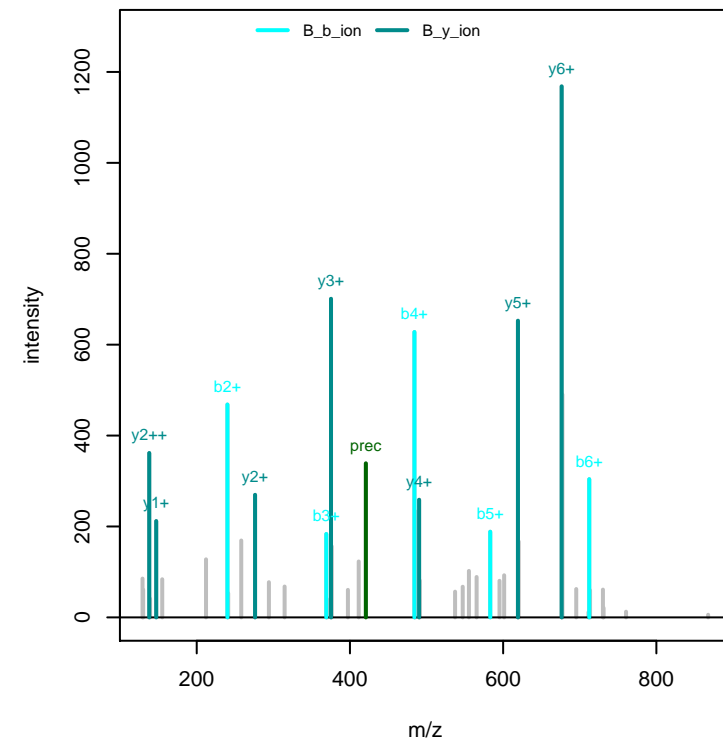

KGEDVEK+XL\_L

GKDQGVVNNVK  
GAFVSQVLPNSSAAKAGIK

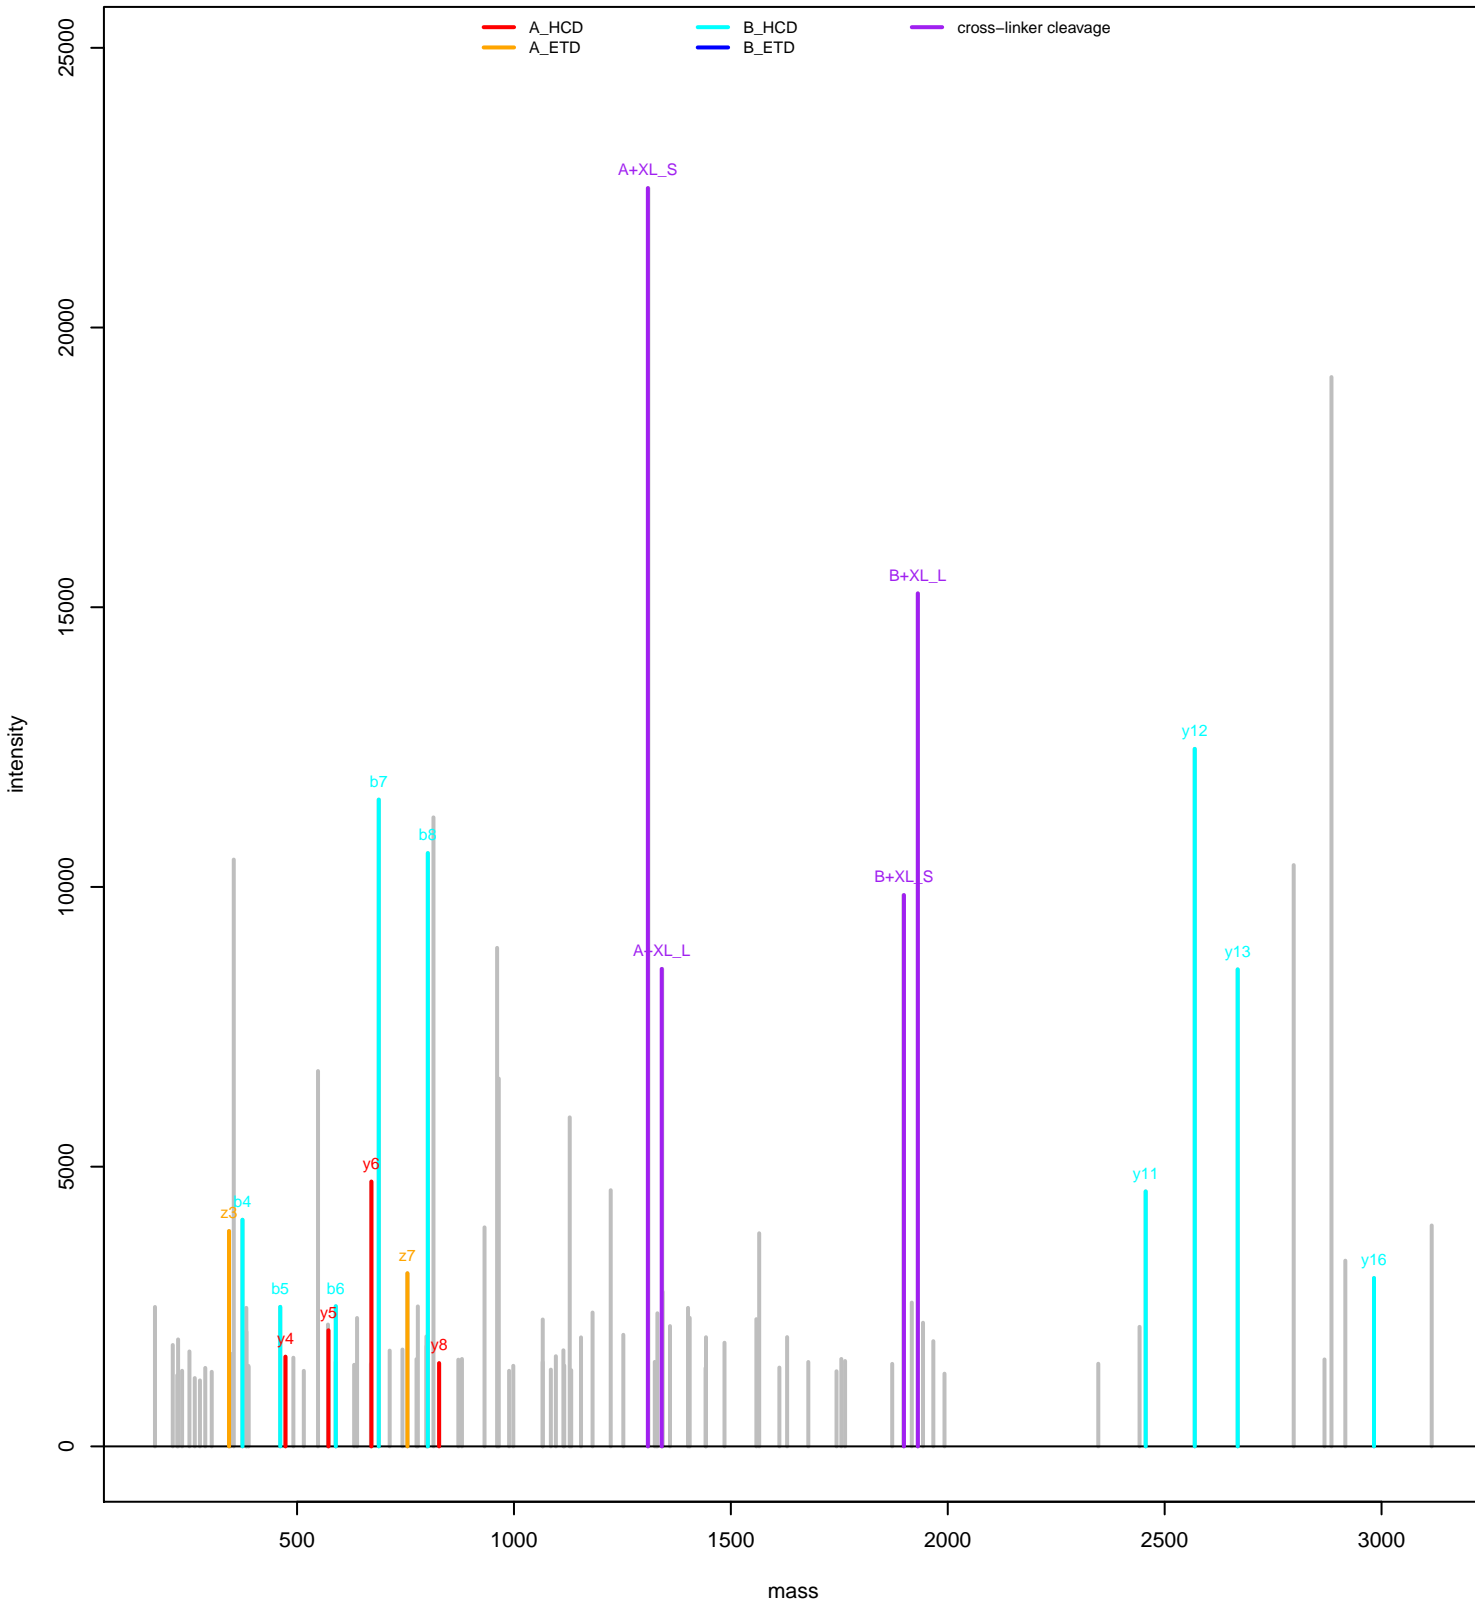

GKDQGVVNNVK+XL\_S

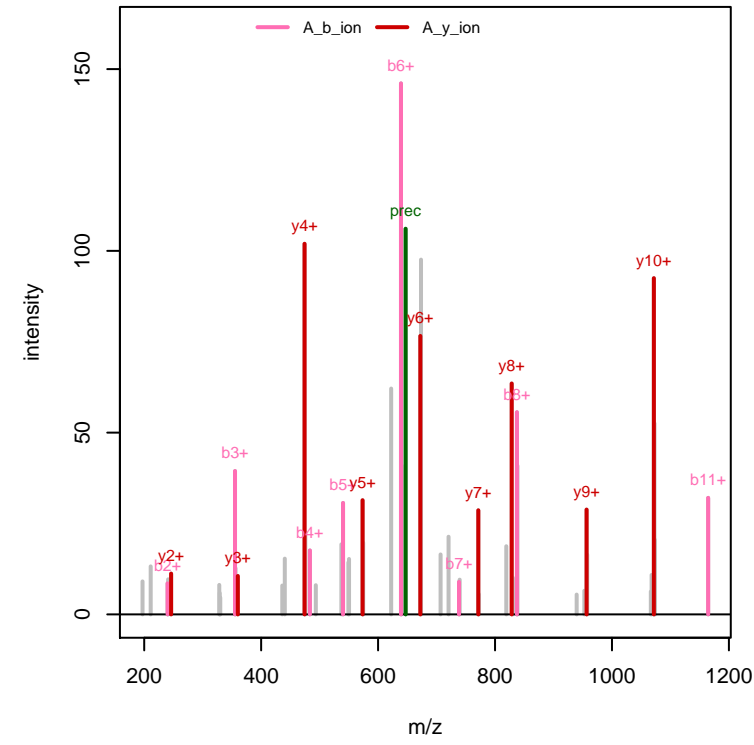

GKDQGVVNNVK+XL\_L

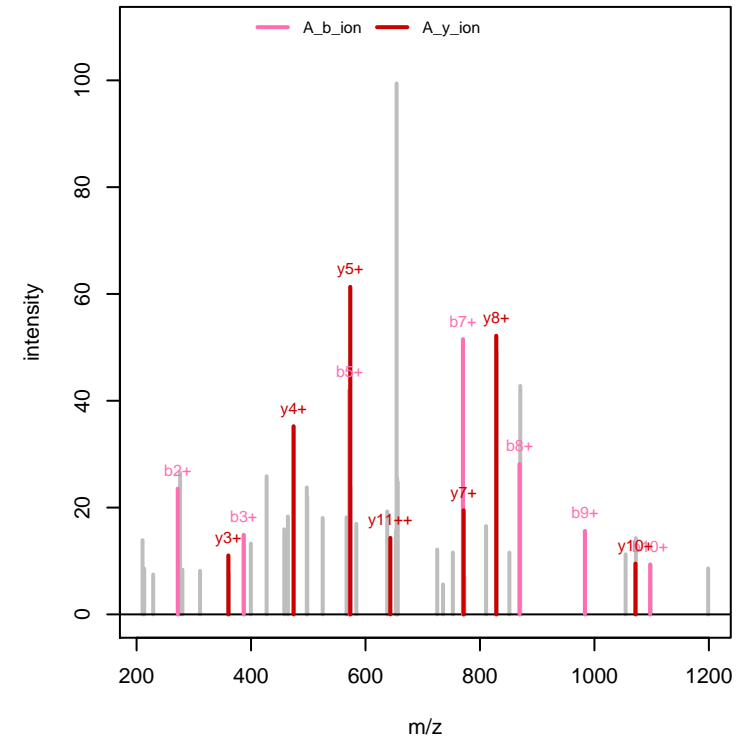

GAFVSQVLPNSSAAKAGIK+XL\_S

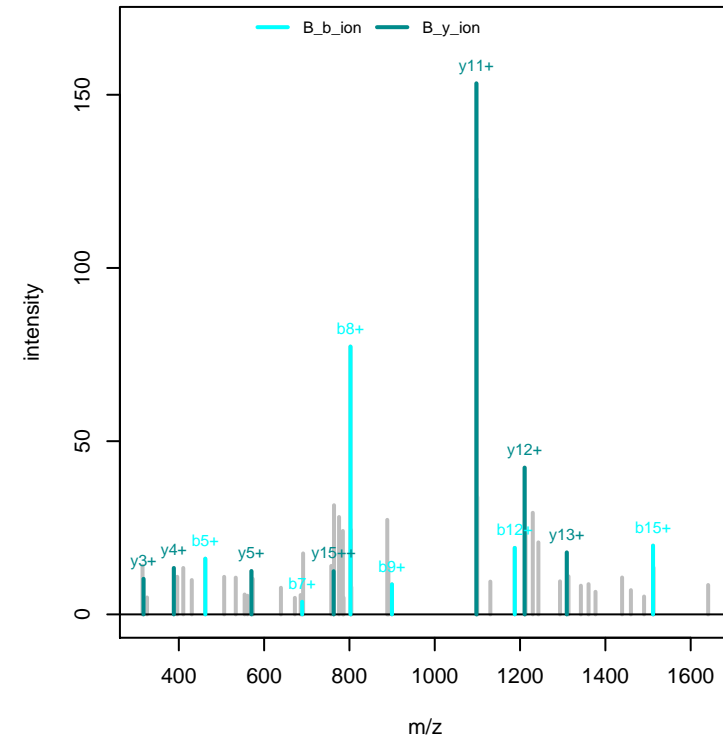

GAFVSQVLPNSSAAKAGIK+XL\_L

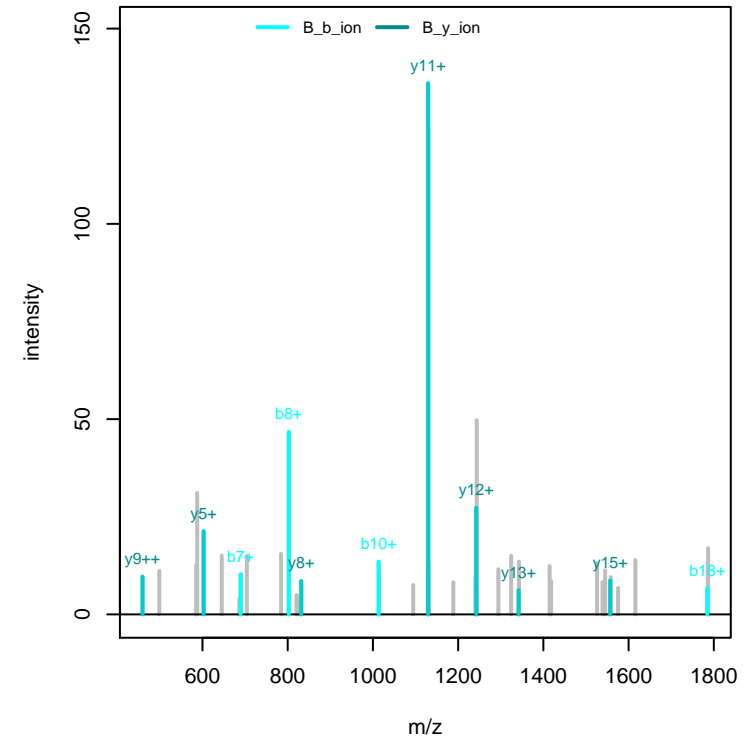

QSMoKAR  
EVKRVALADK

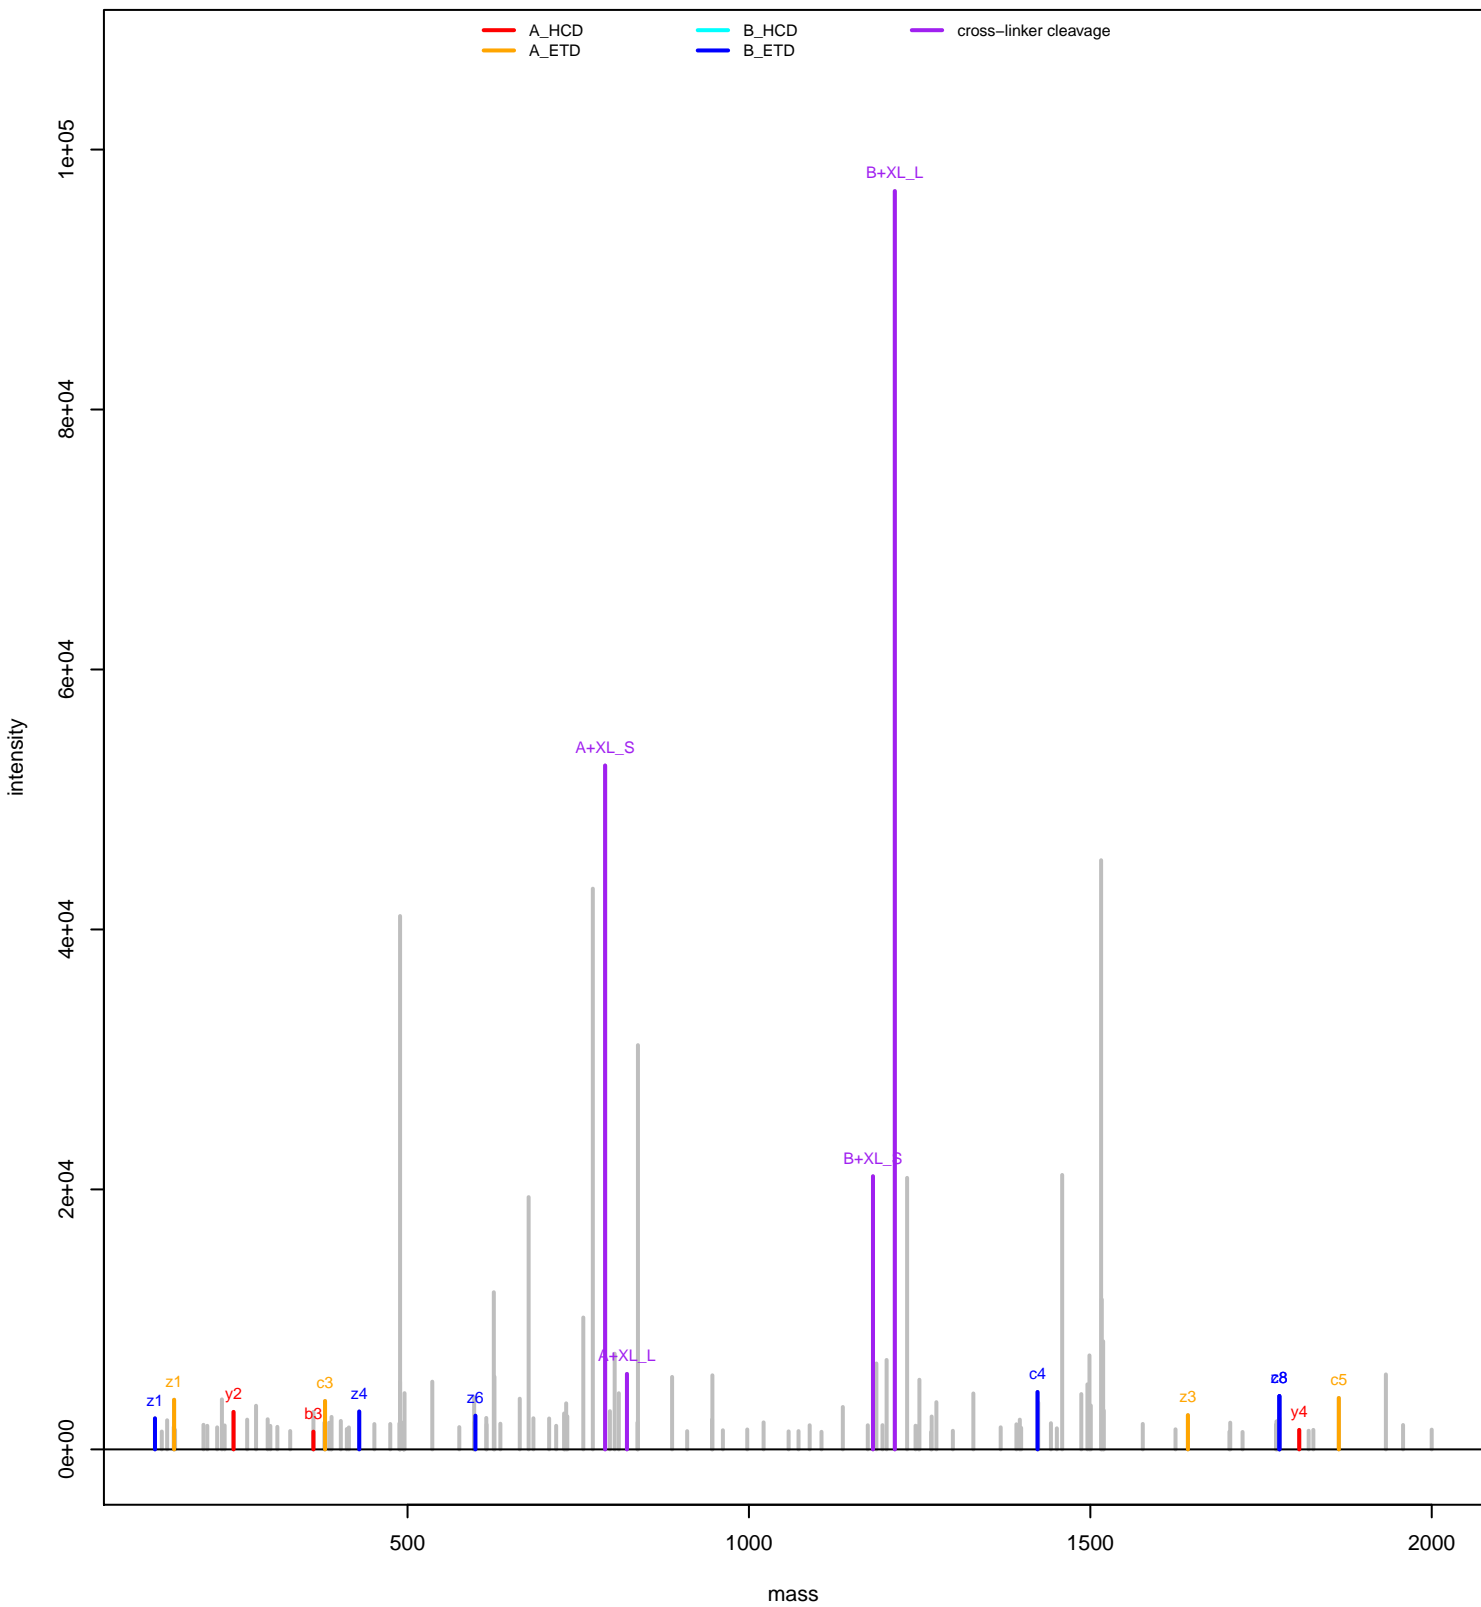

QSMoKAR+XL\_S

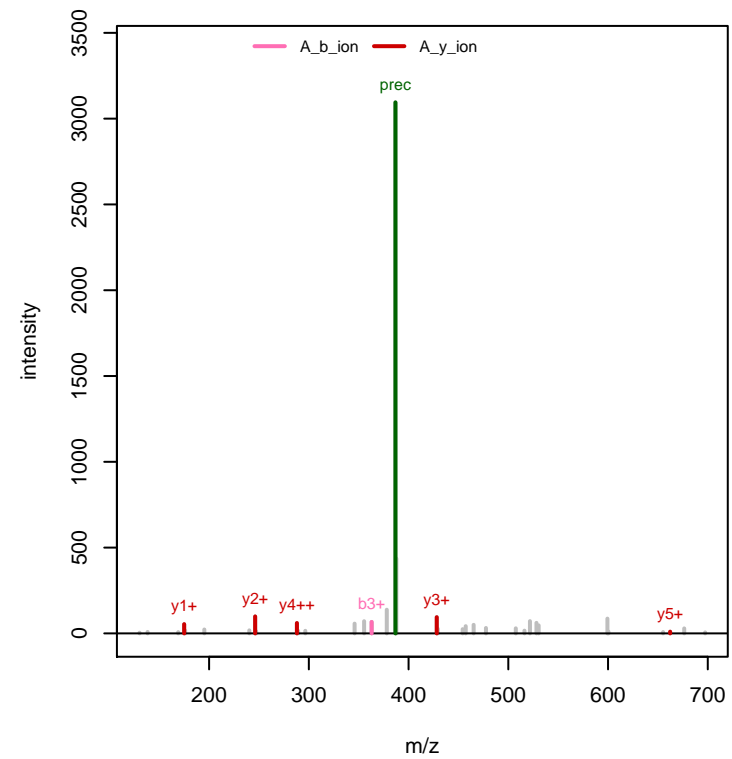

QSMoKAR+XL\_L

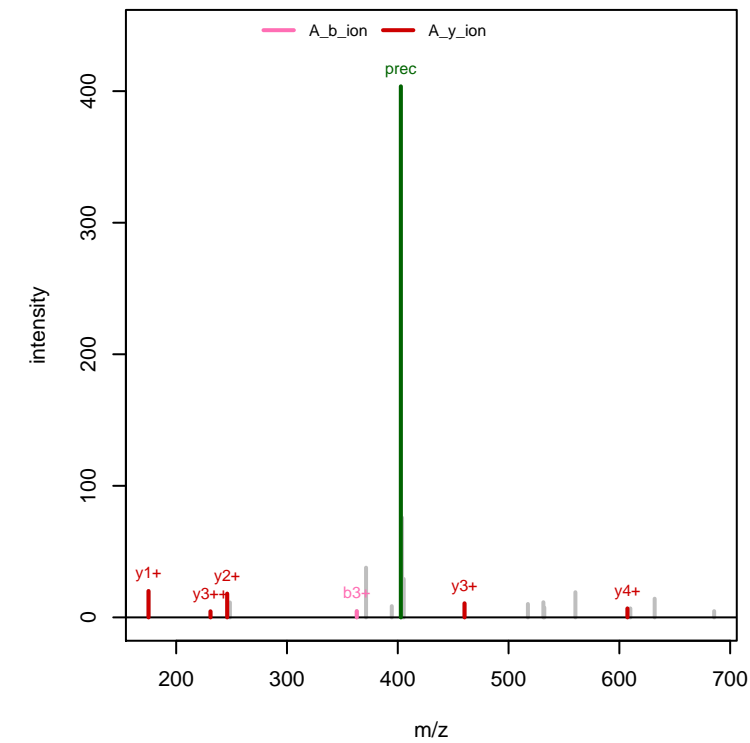

EVKRVALADK+XL\_S

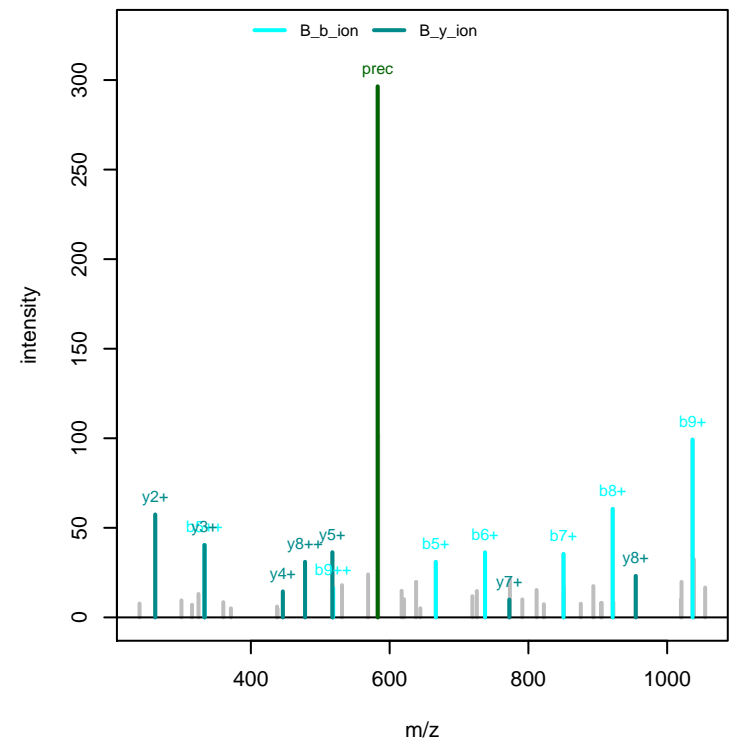

EVKRVALADK+XL\_L

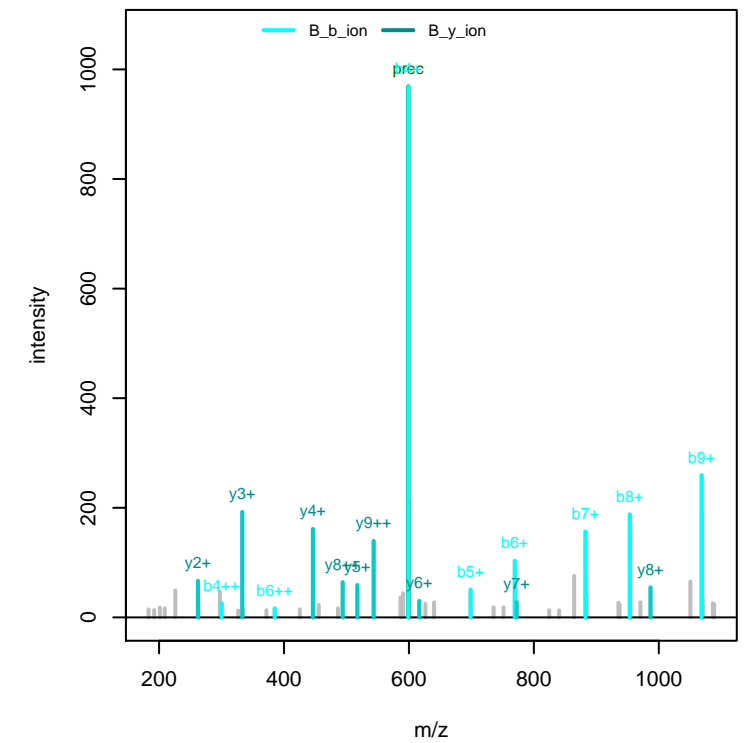

**SGSGKPNK  
TPPAVLLKK**

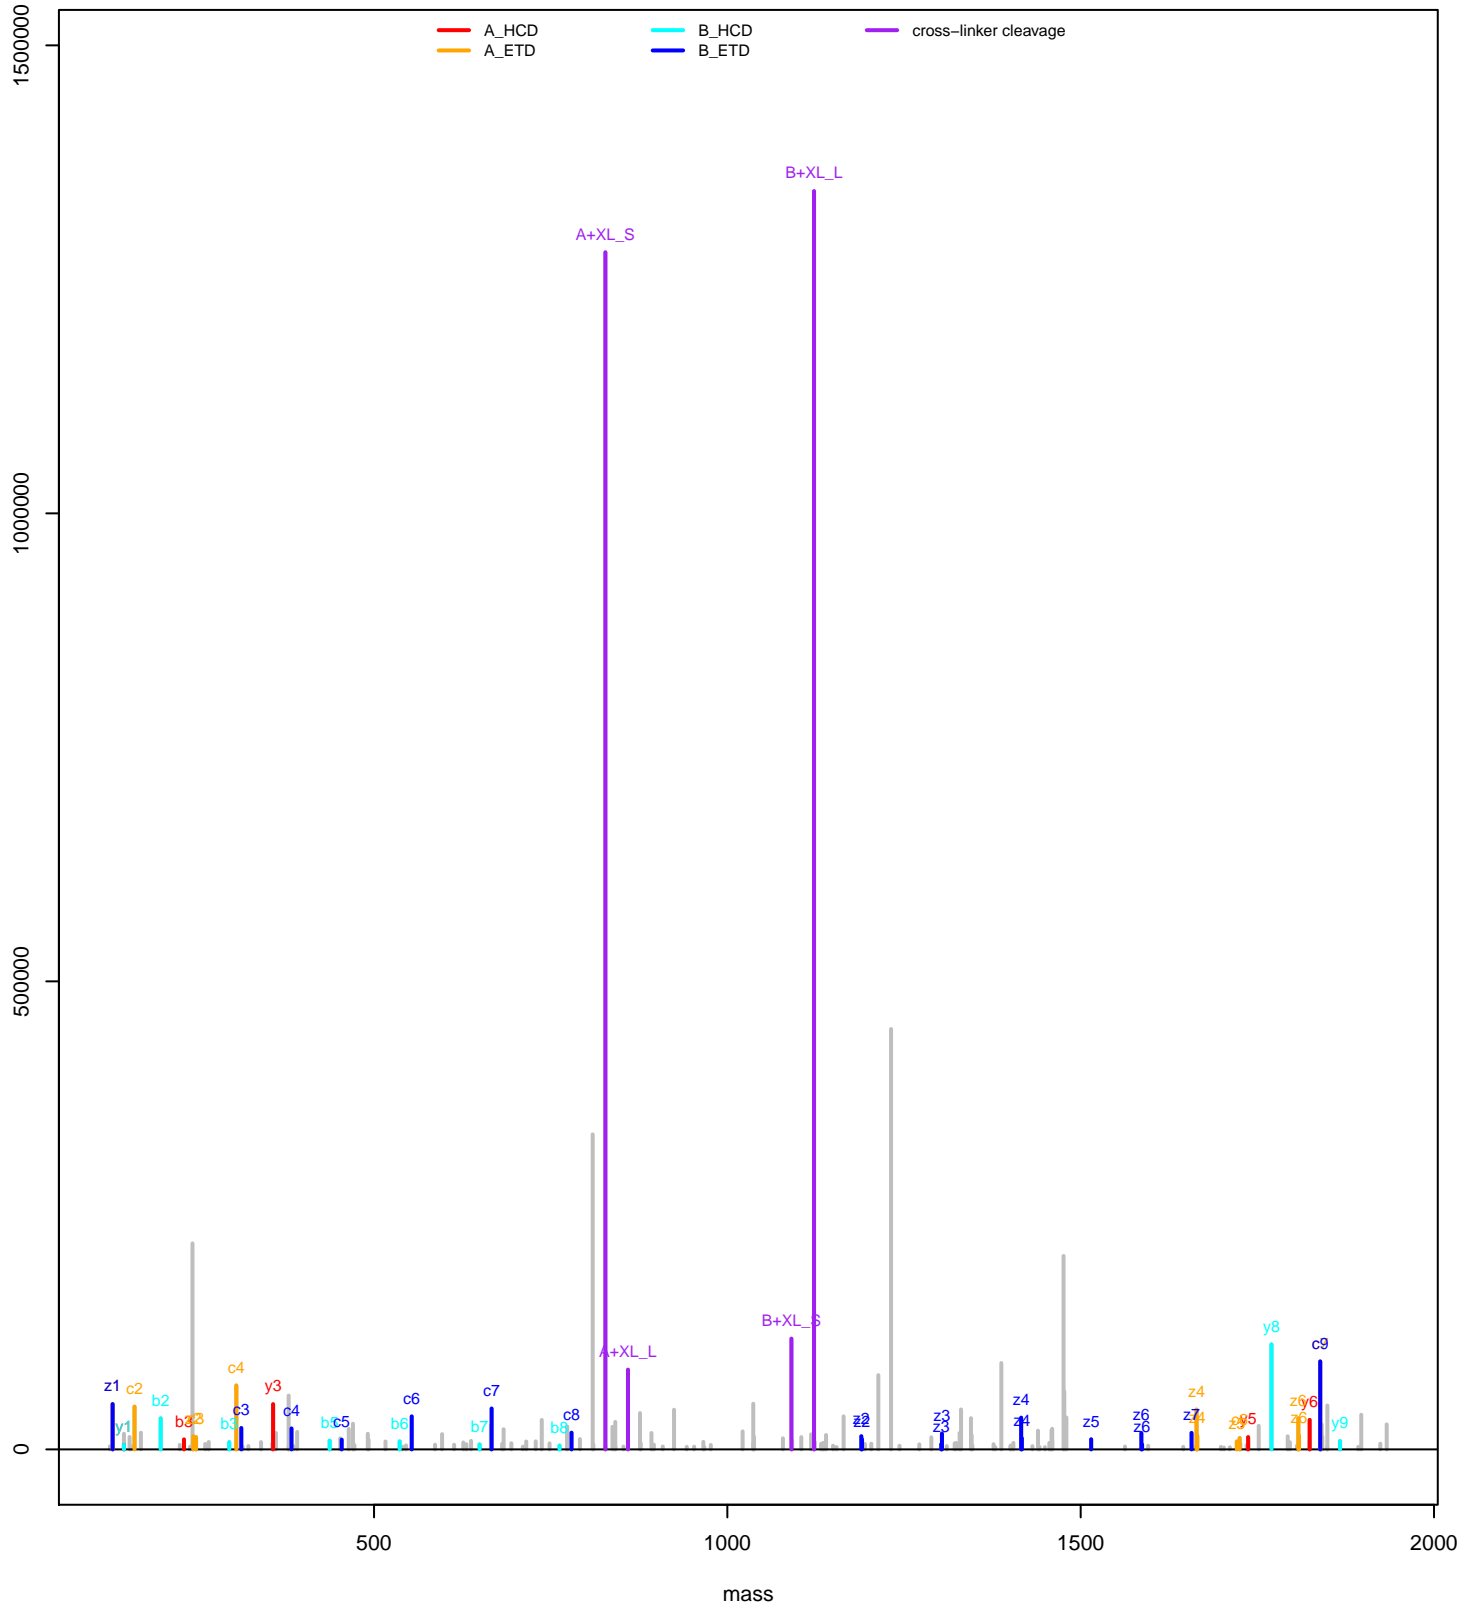

**SGSGKPNK+XL\_S**

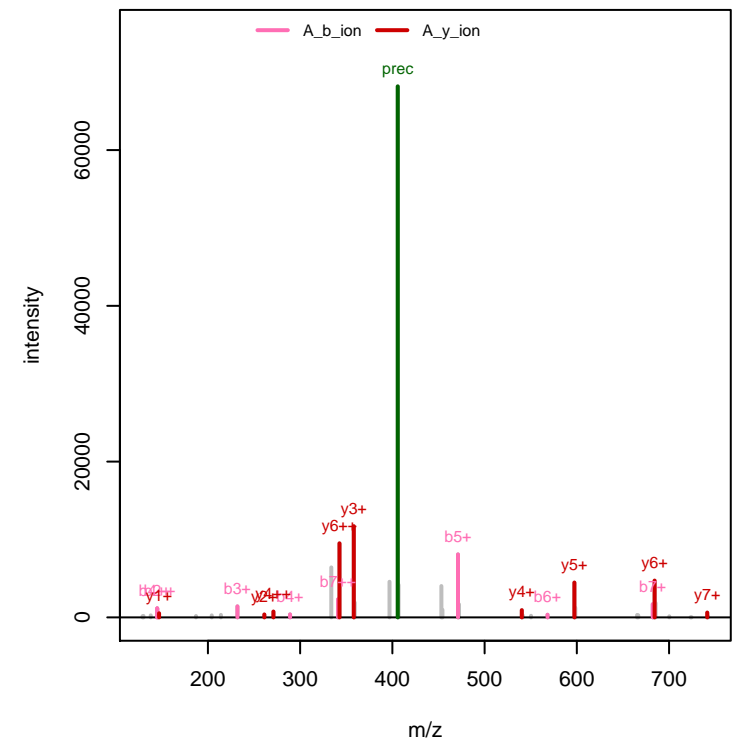

**SGSGKPNK+XL\_L**

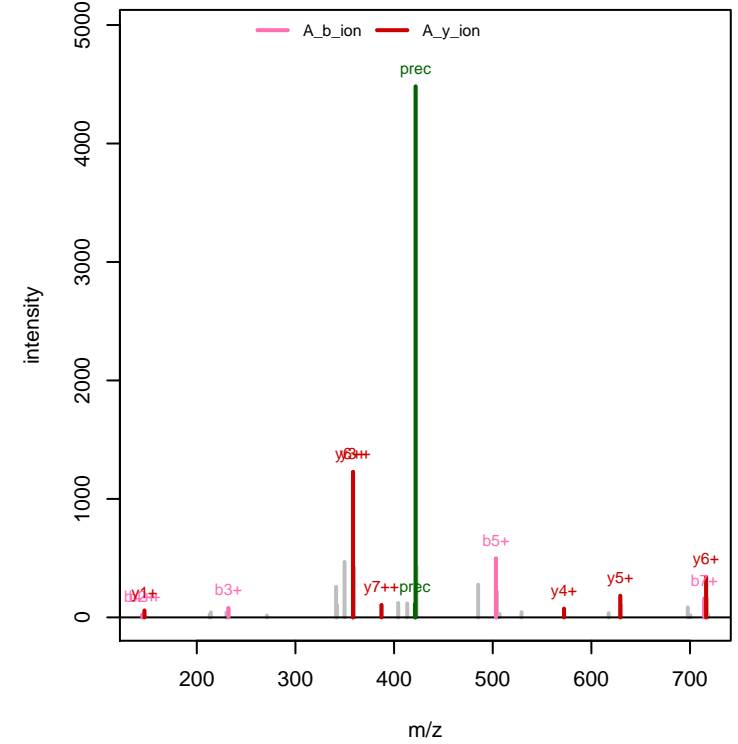

**TPPAVLLKK+XL\_S**

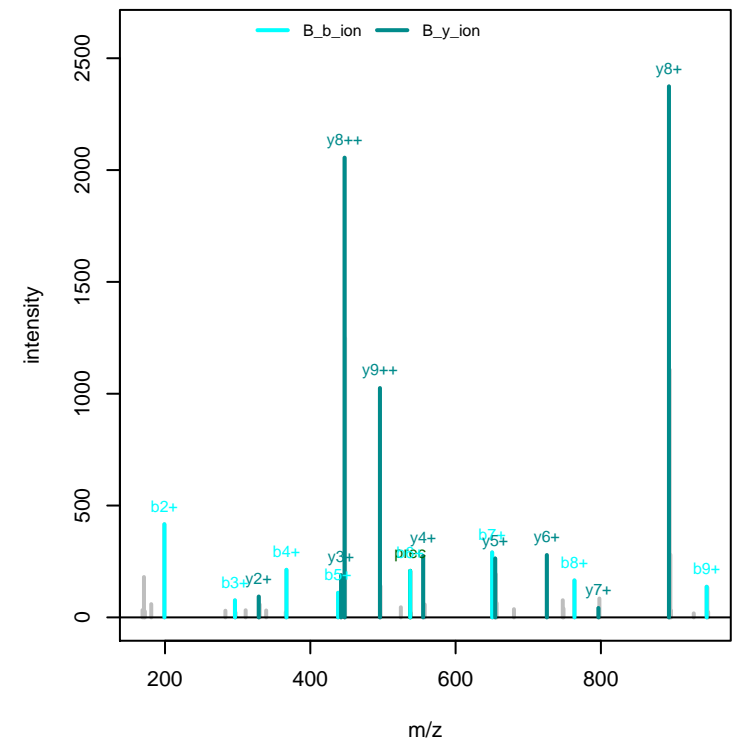

**TPPAVLLKK+XL\_L**

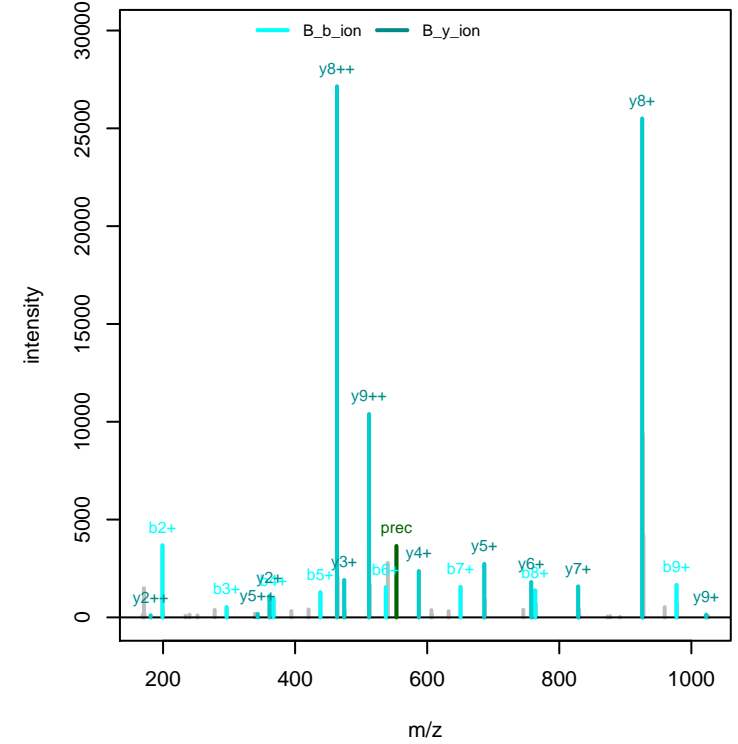

KAAQDAK  
AAVDKALSNNMTR

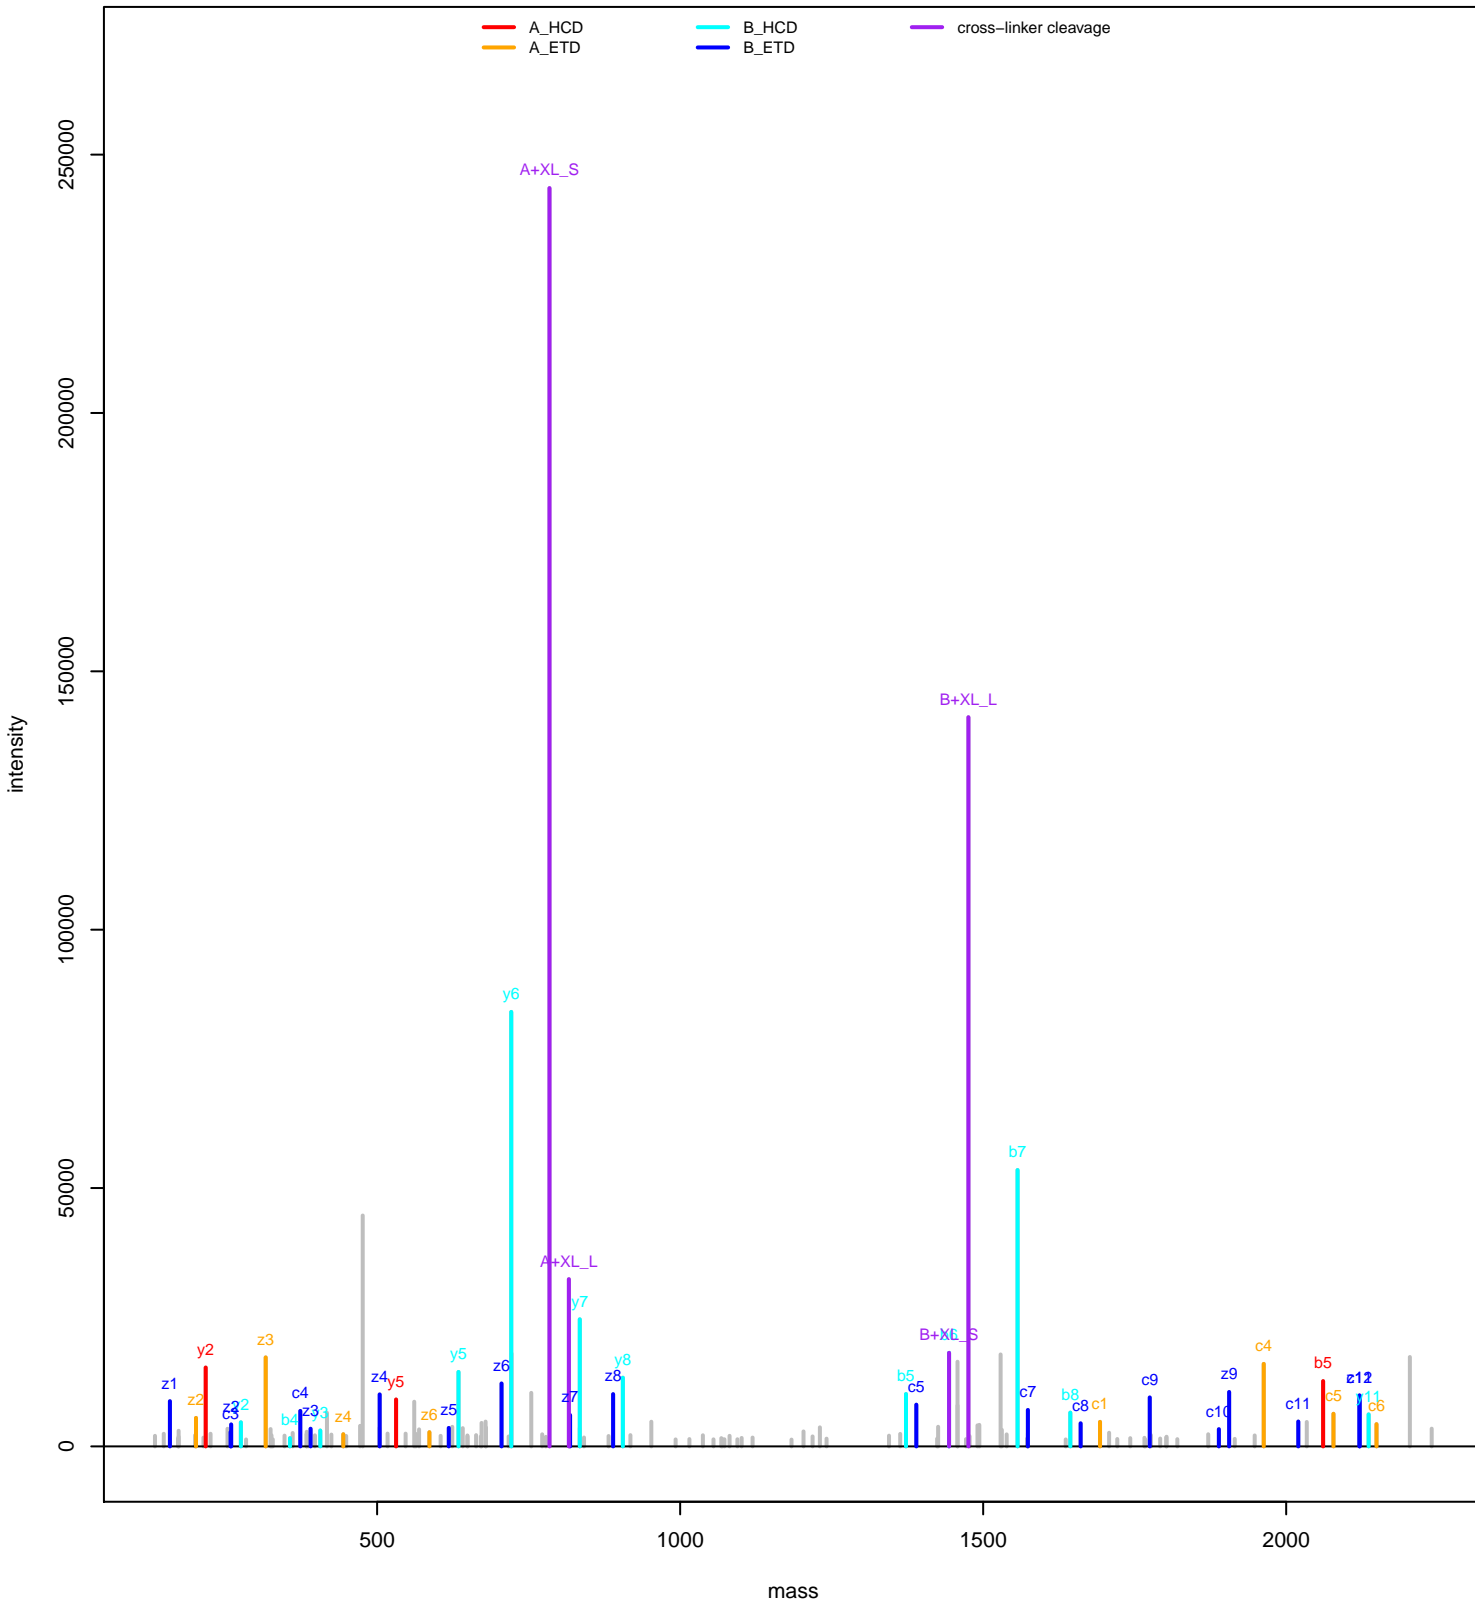

KAAQDAK+XL\_S

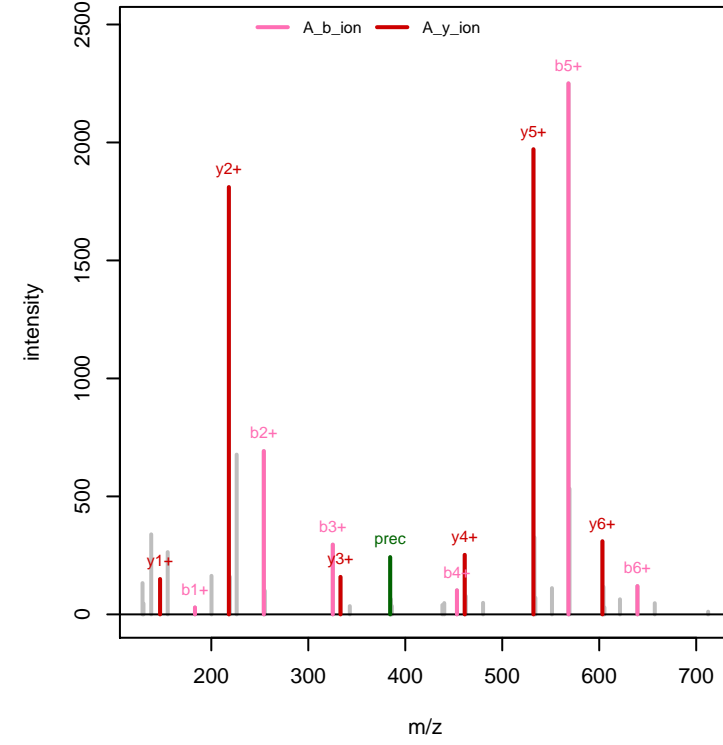

KAAQDAK+XL\_L

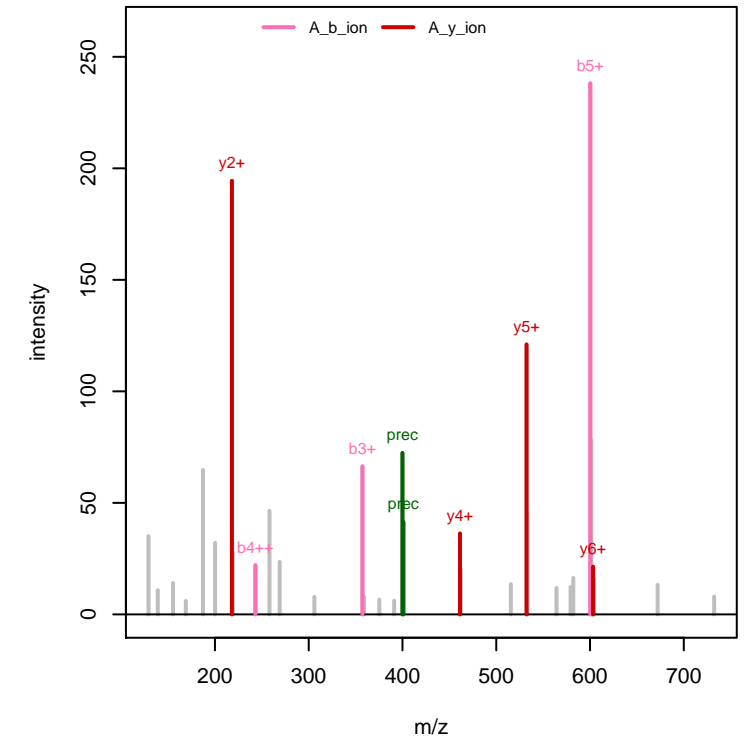

AAVDKALSNNMTR+XL\_S

AAVDKALSNNMTR+XL\_L



**LGAKGIK**  
**DLETQSQDGTDFDKLTK**

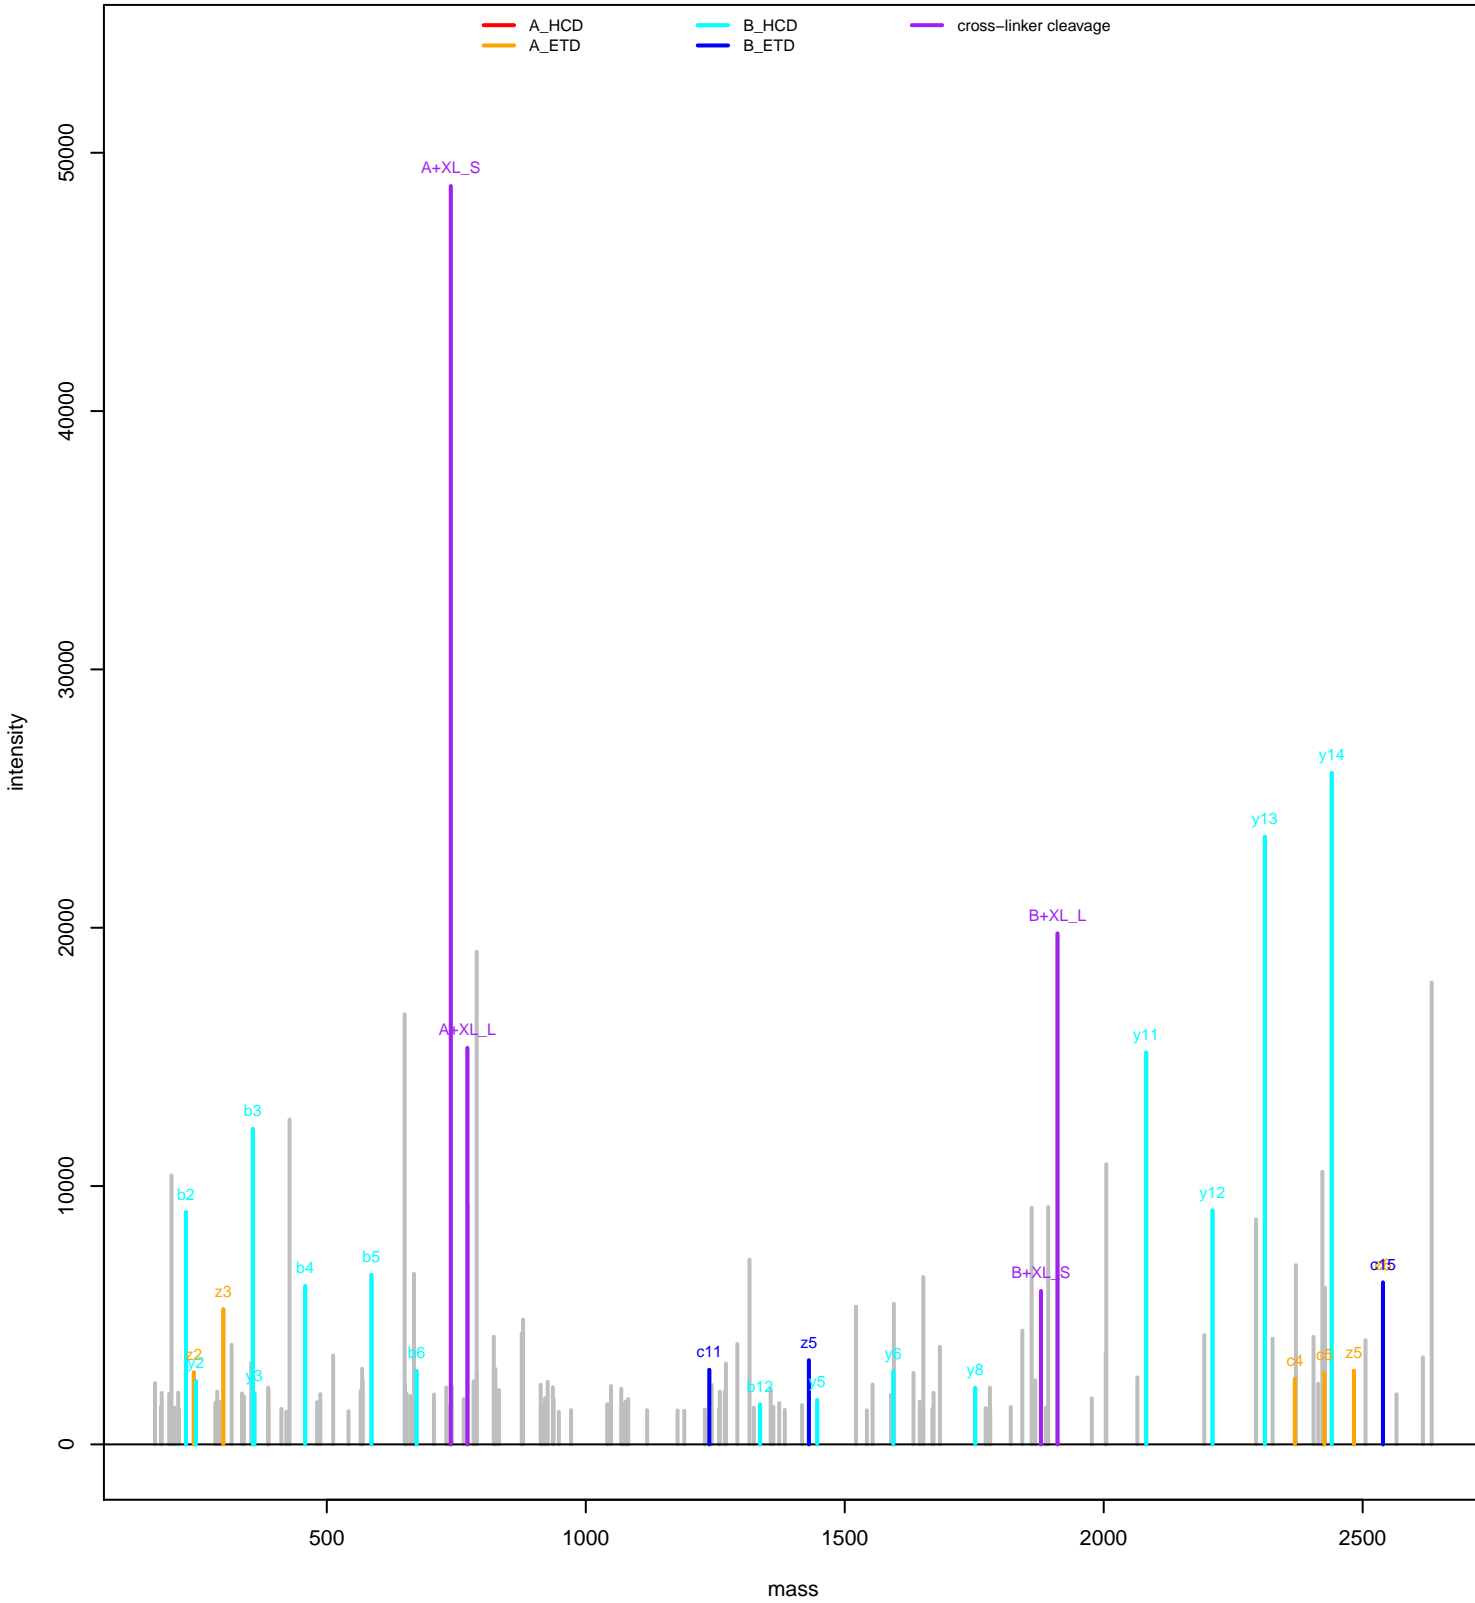

**LGAKGIK+XL\_S**

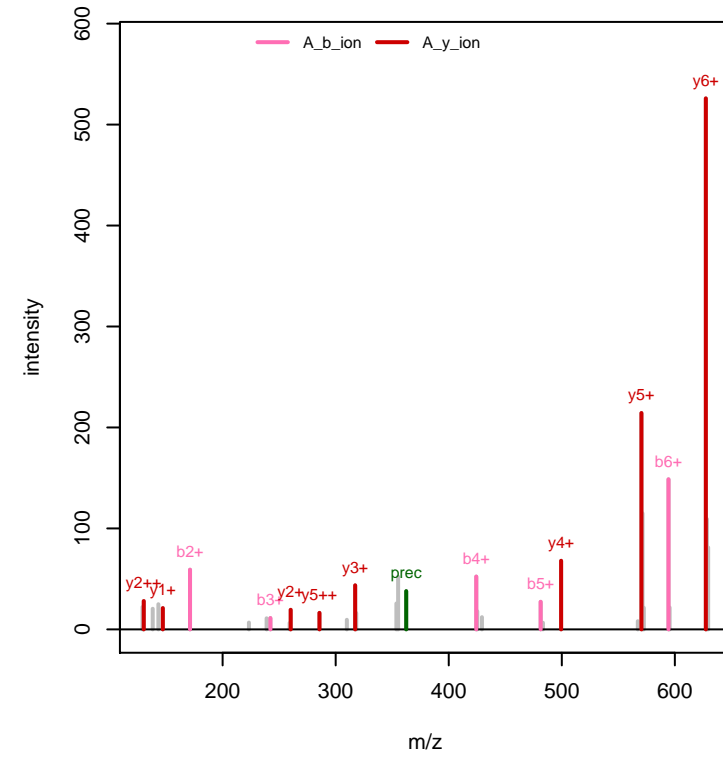

**LGAKGIK+XL\_L**

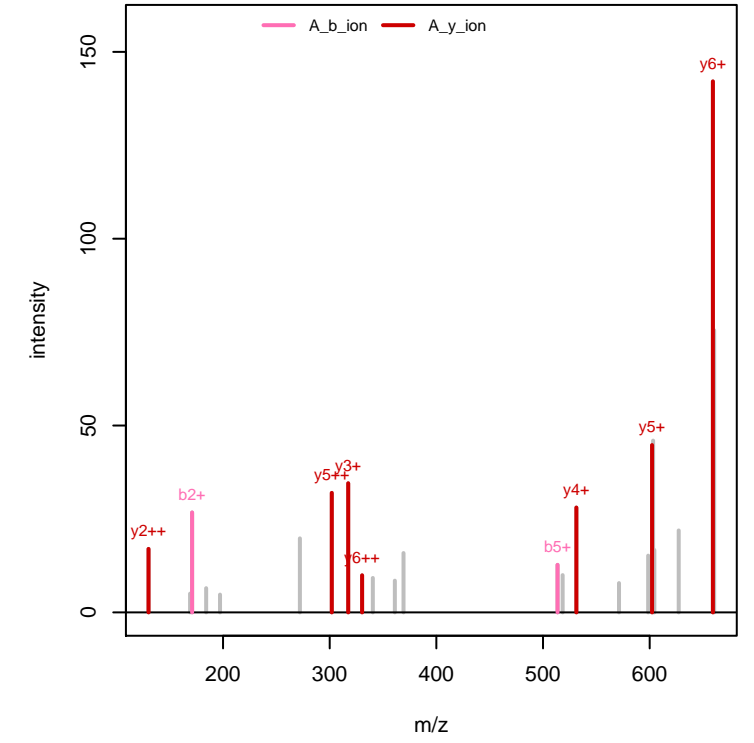

**DLETQSQDGTDFDKLTK+XL\_S**

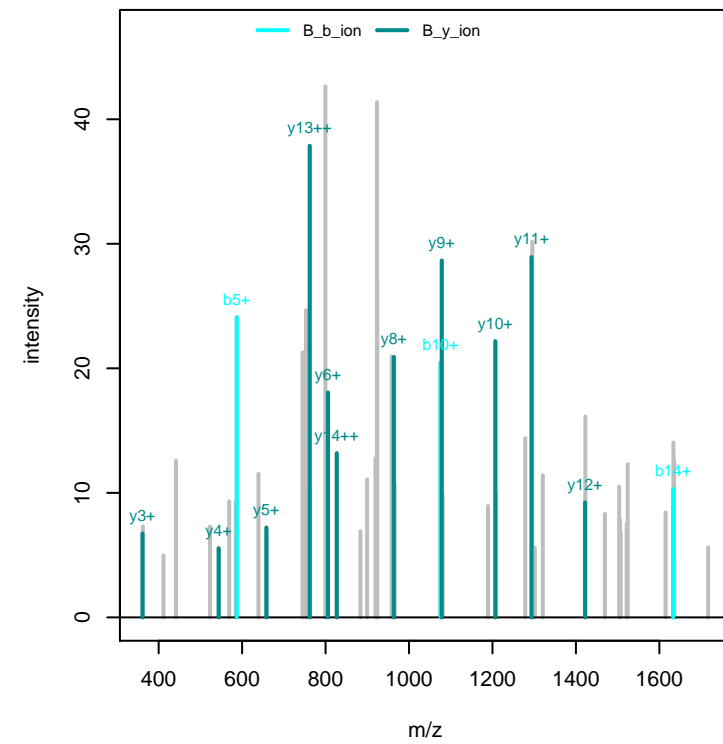

**DLETQSQDGTDFDKLTK+XL\_L**

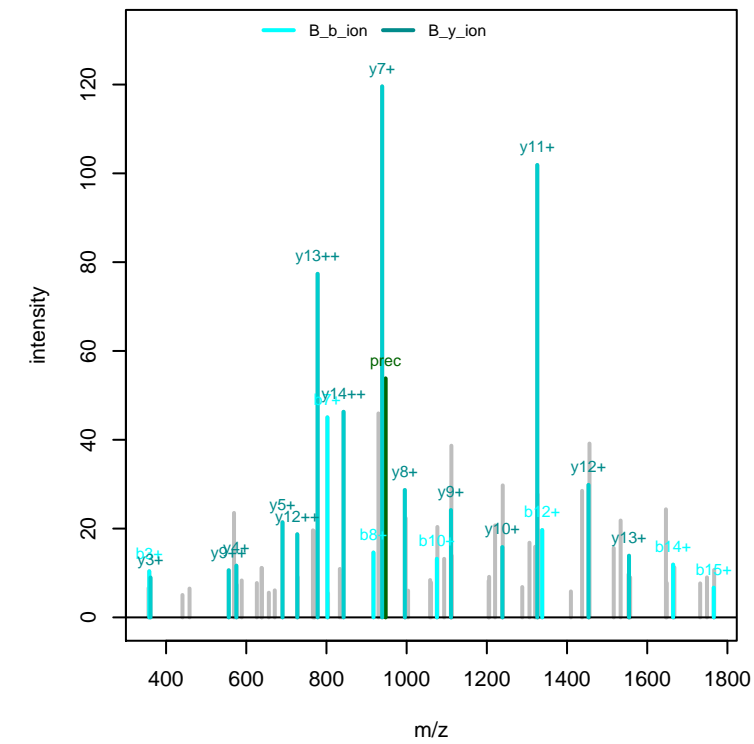

YAEGYPGKR  
ANITVKNKNSVPNDPK

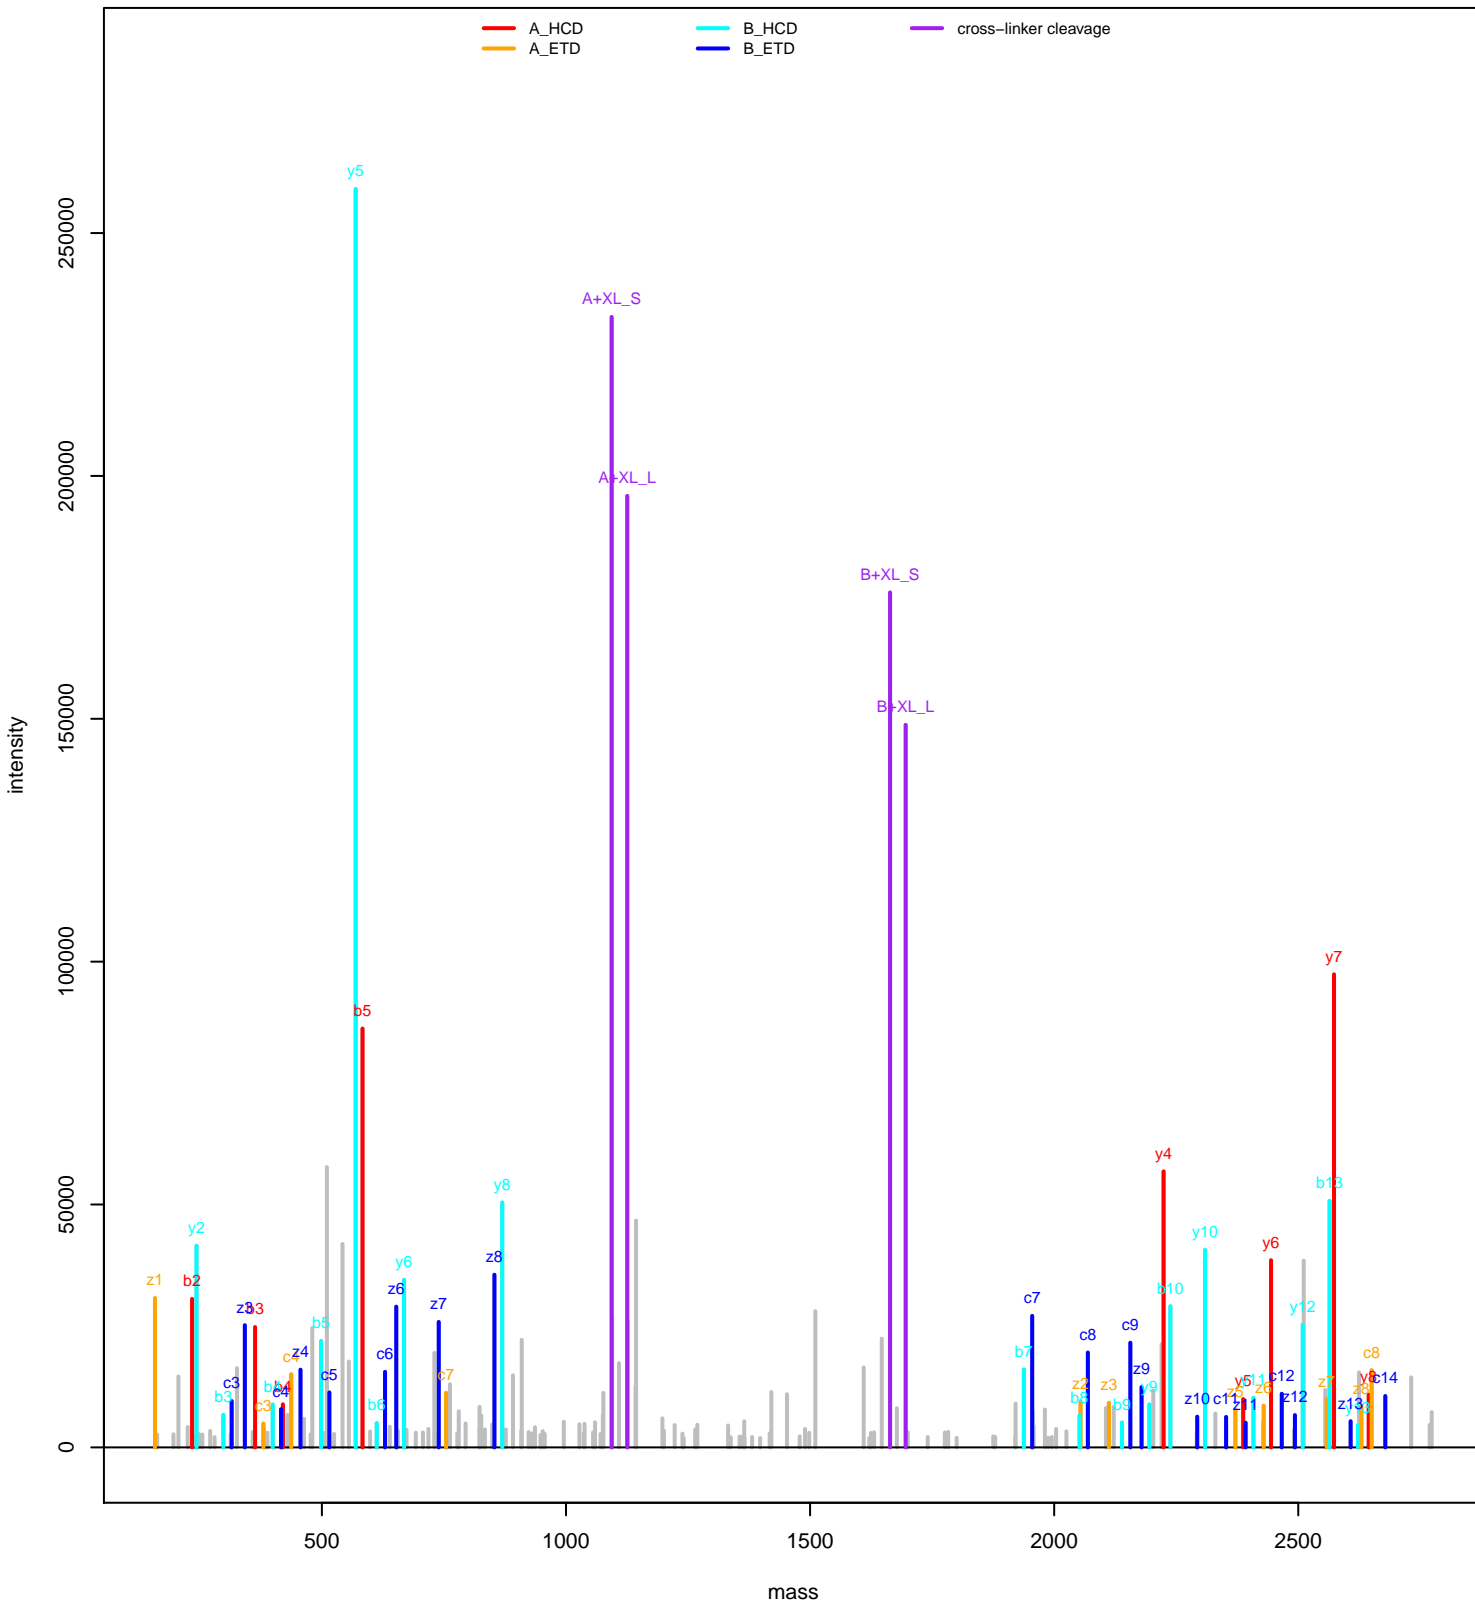

YAEGYPGKR+XL\_S

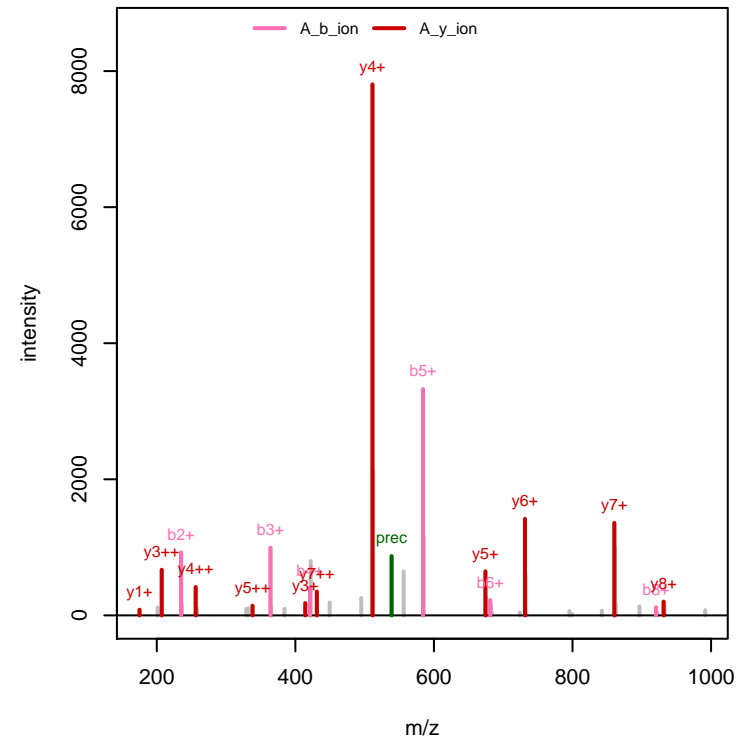

YAEGYPGKR+XL\_L

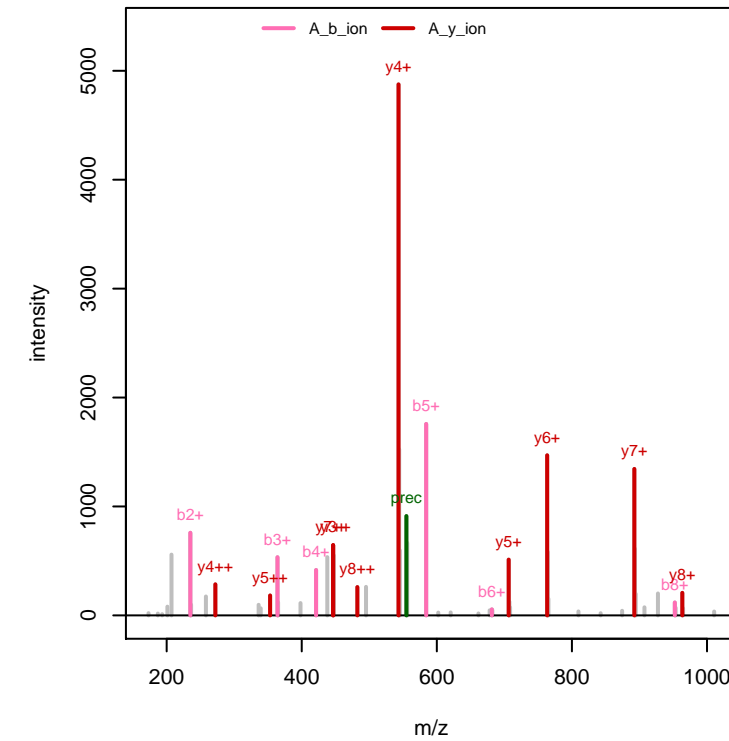

ANITVKNKNSVPNDPK+XL\_S

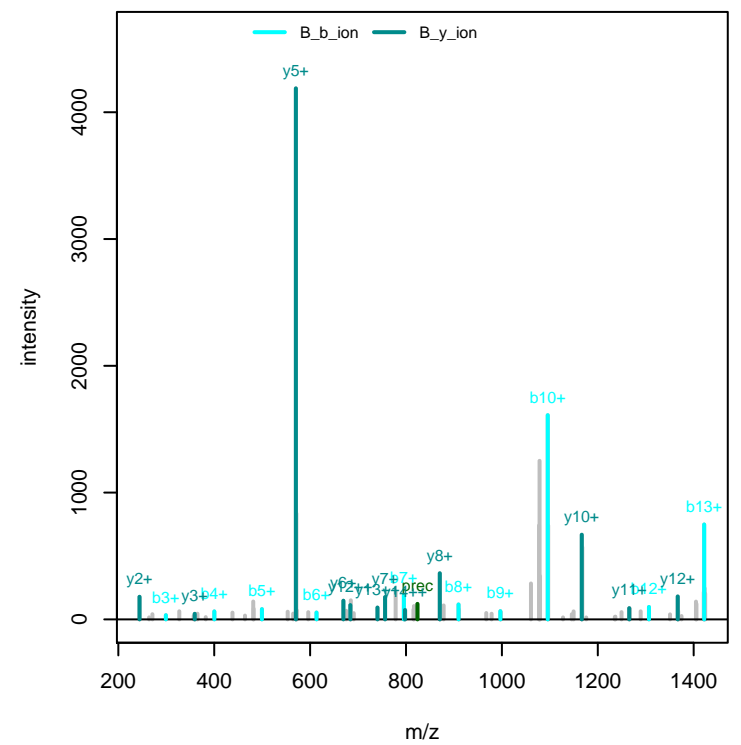

ANITVKNKNSVPNDPK+XL\_L

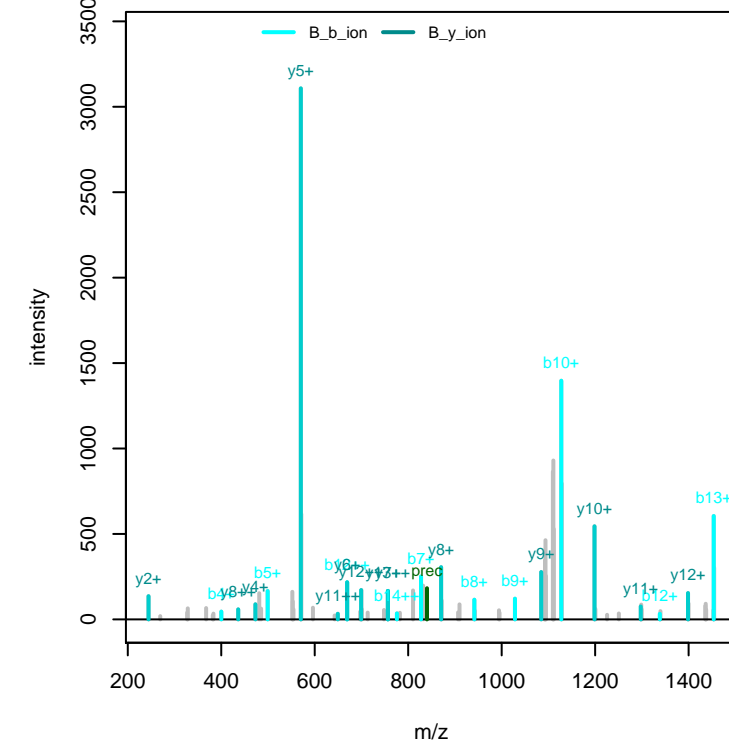

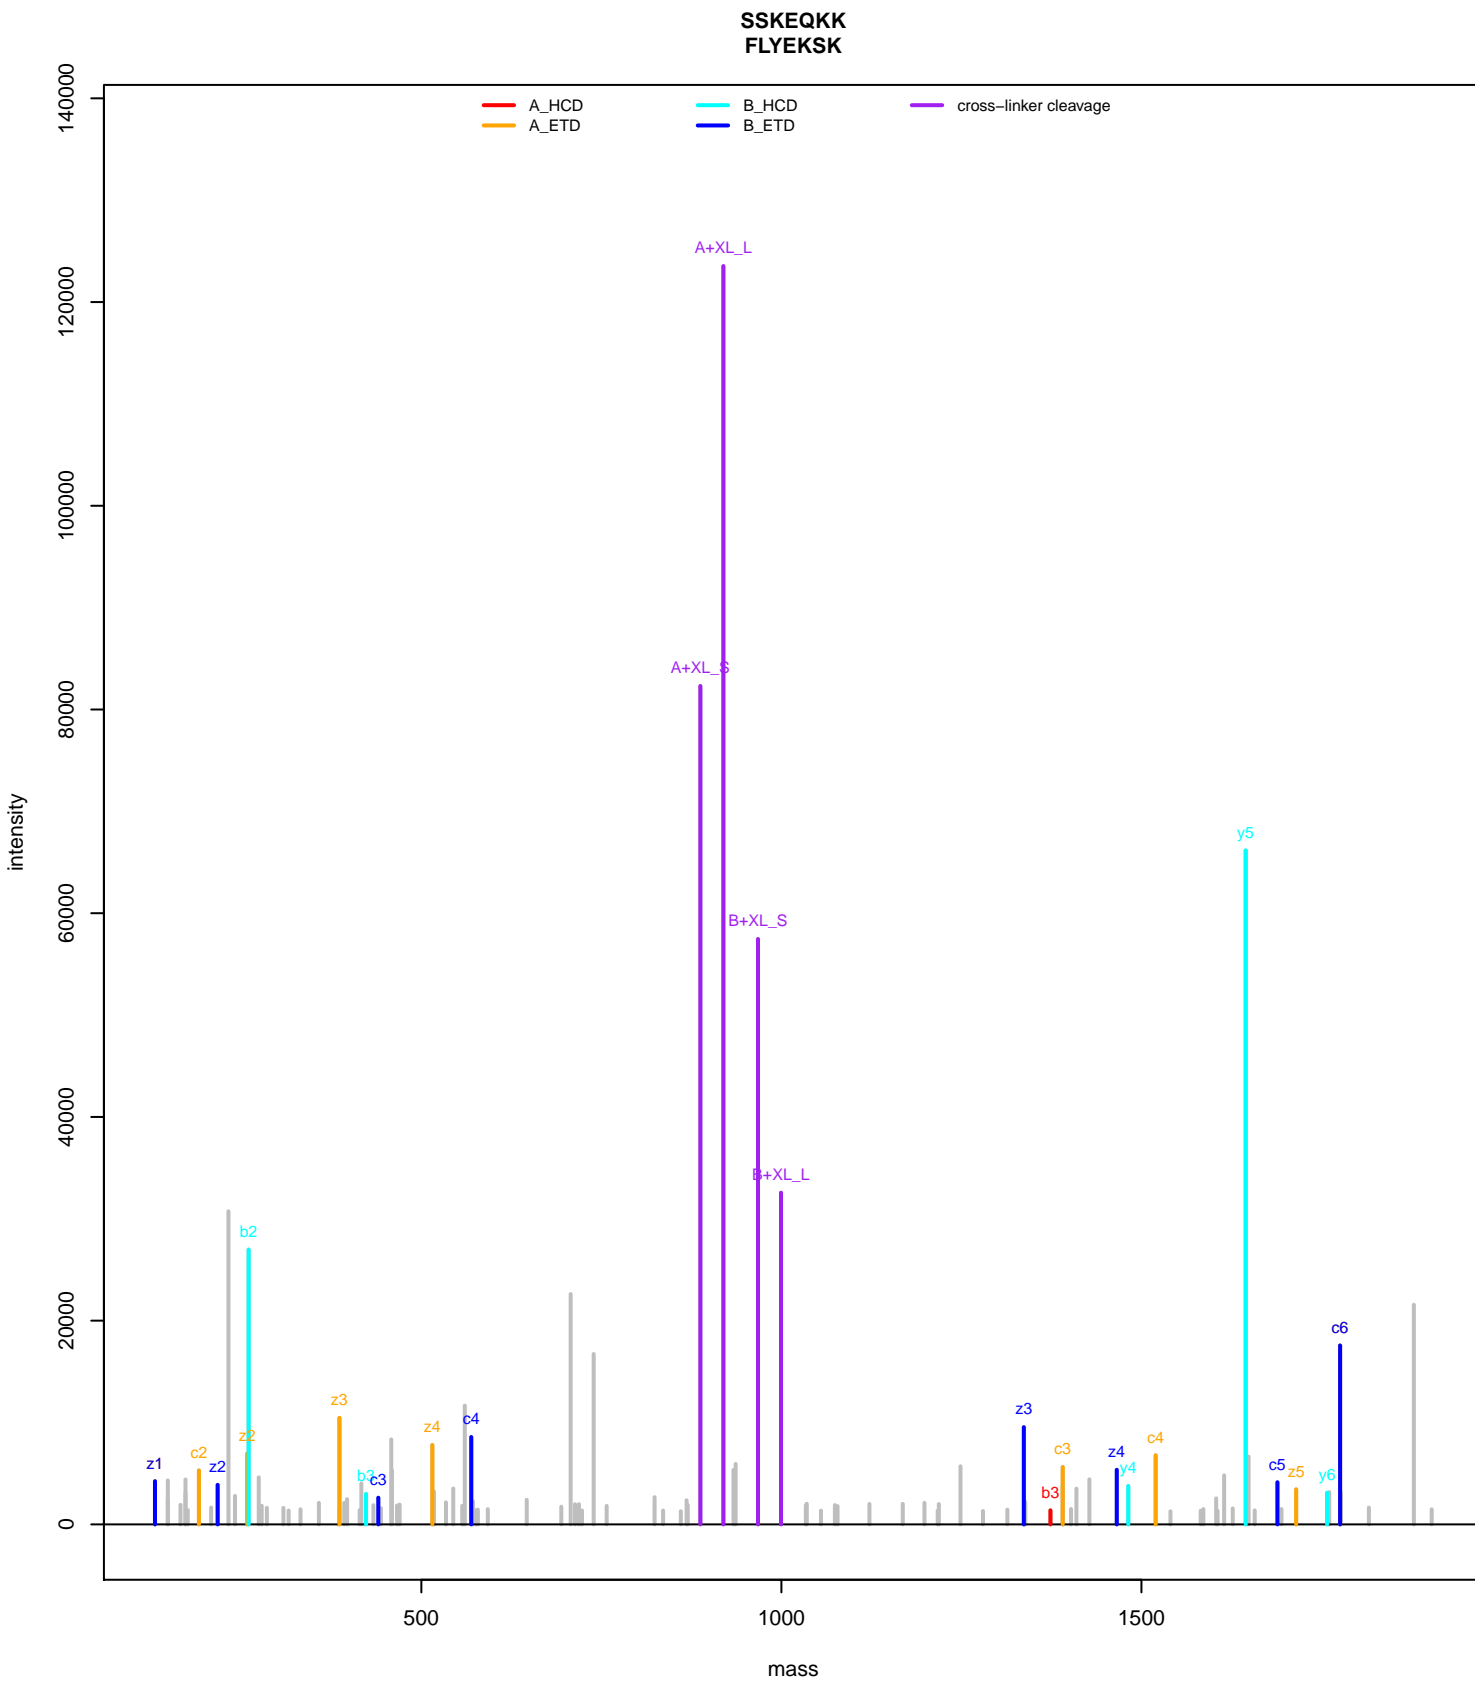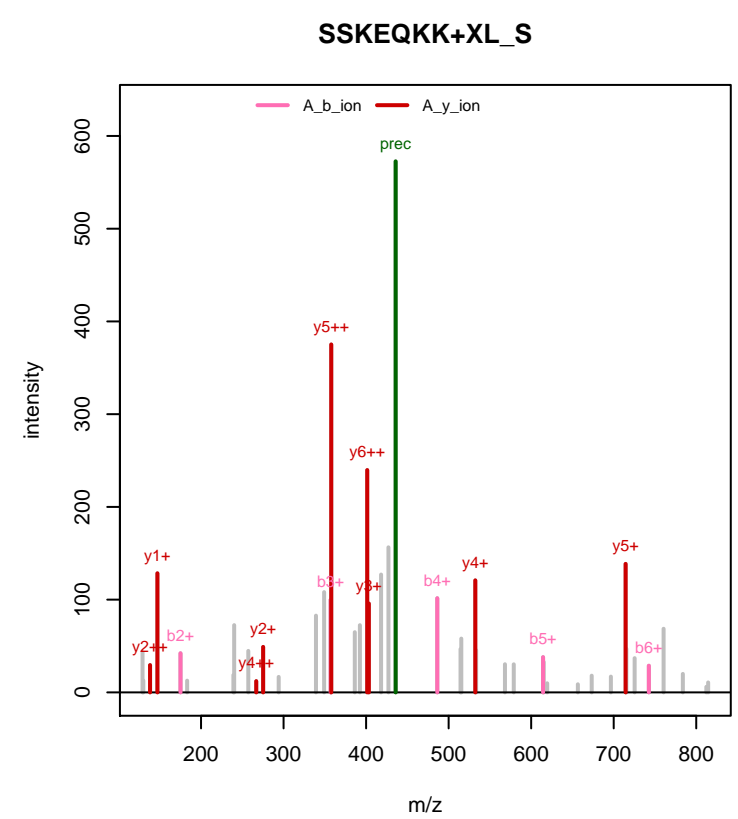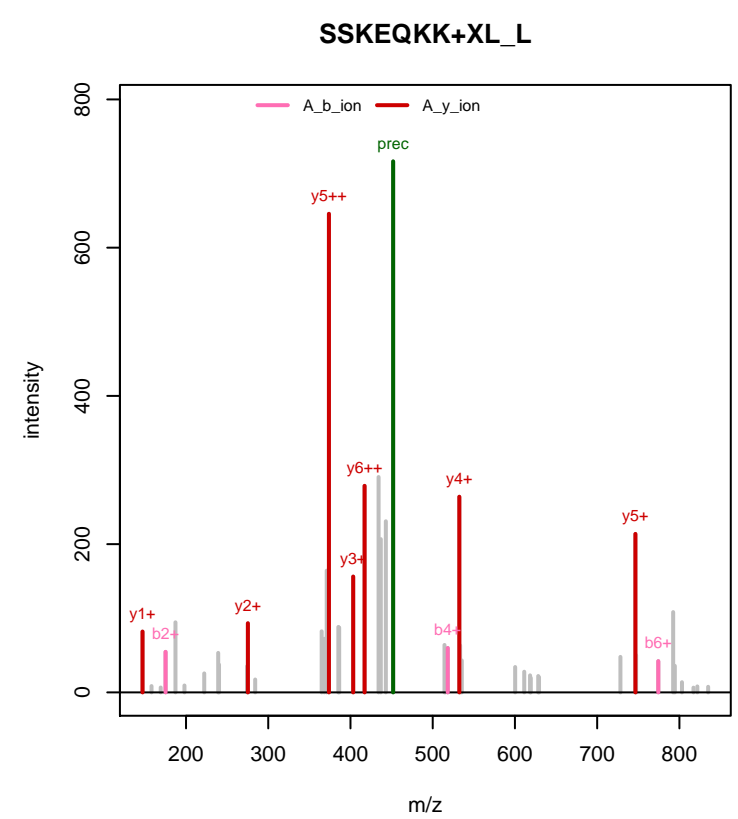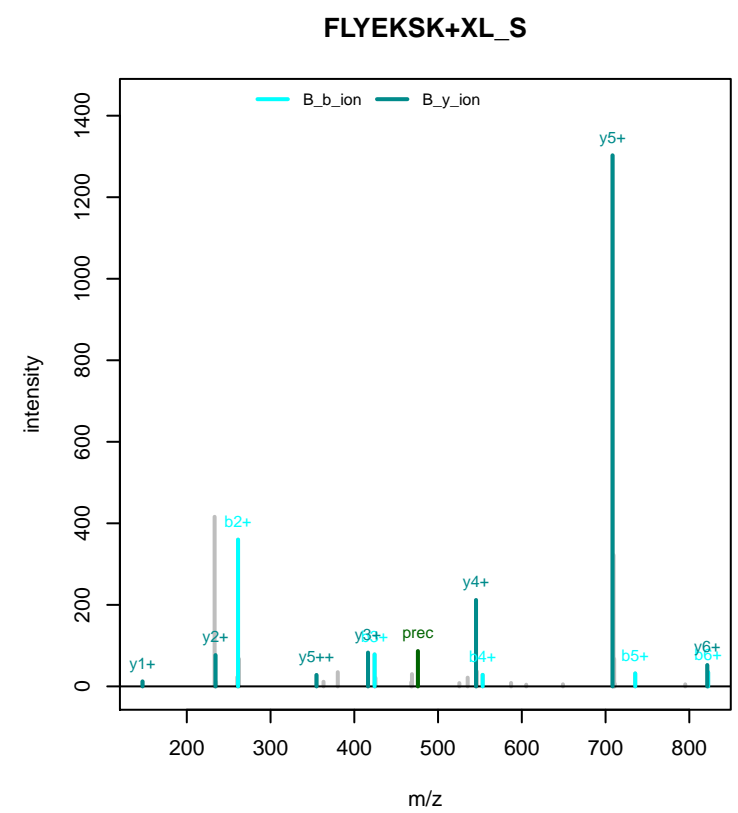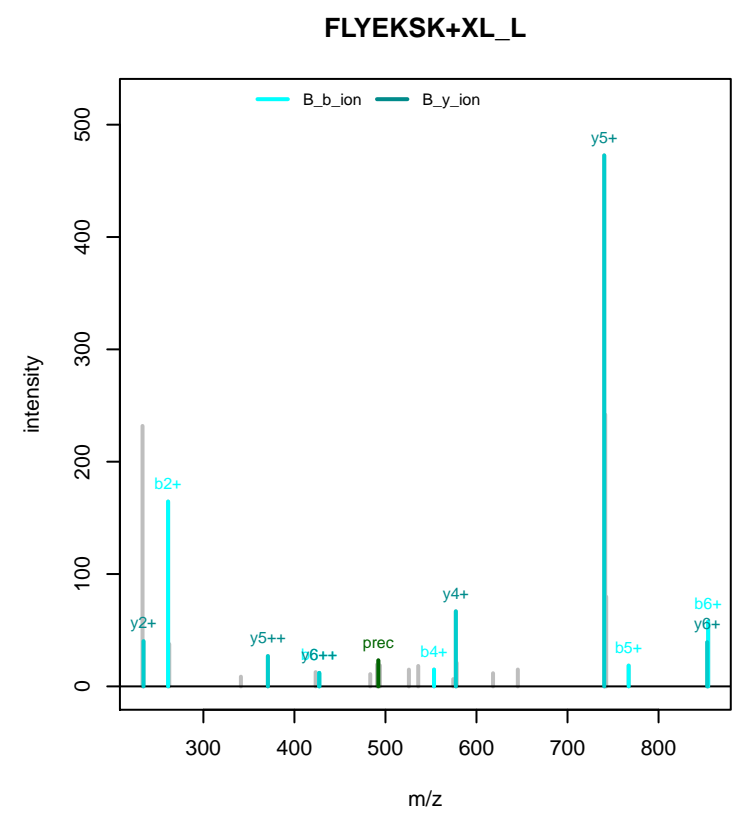

**KGAIVTGK**  
**GEILGGMAAVEQPEKPAAQPK**

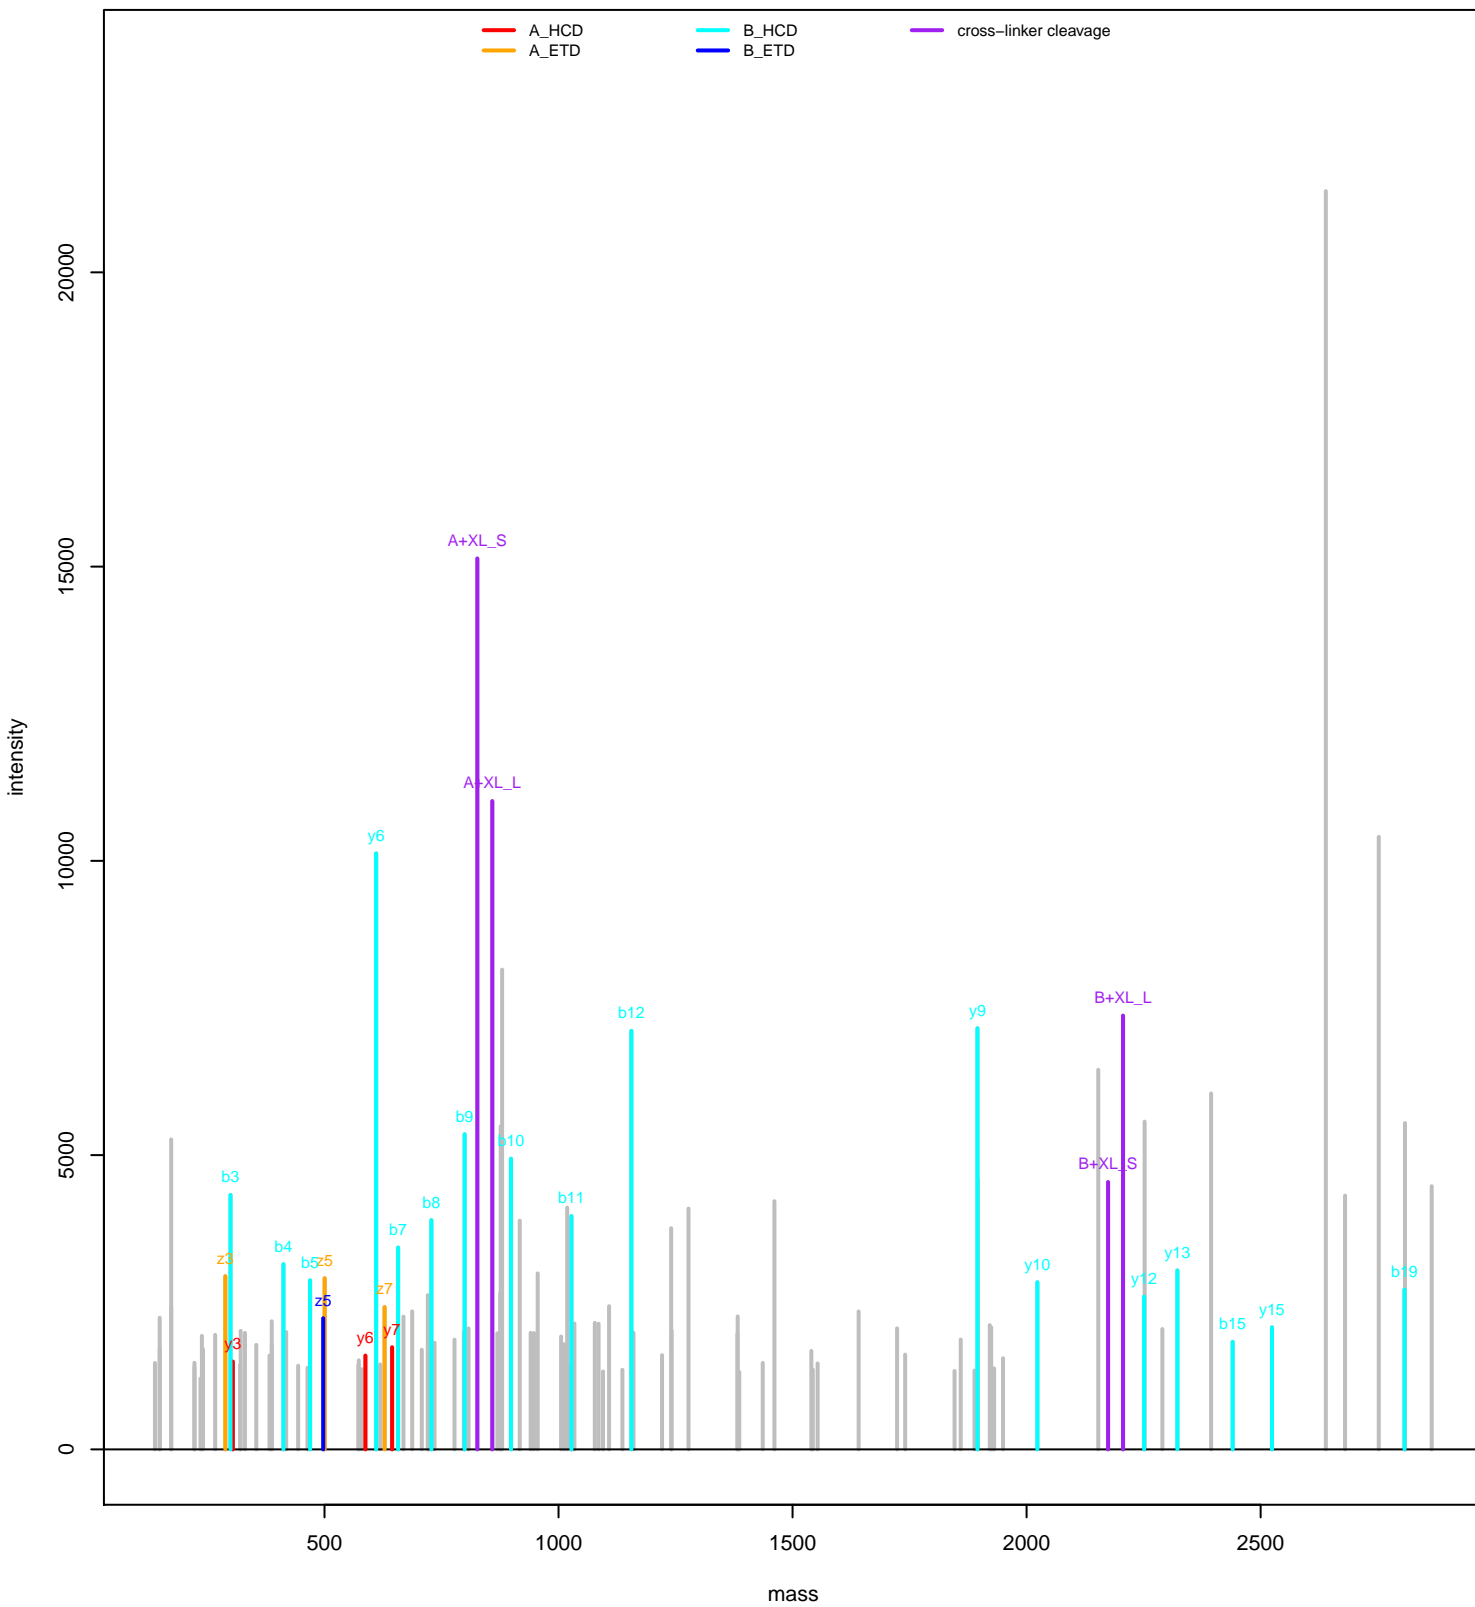

**KGAIVTGK+XL\_S**

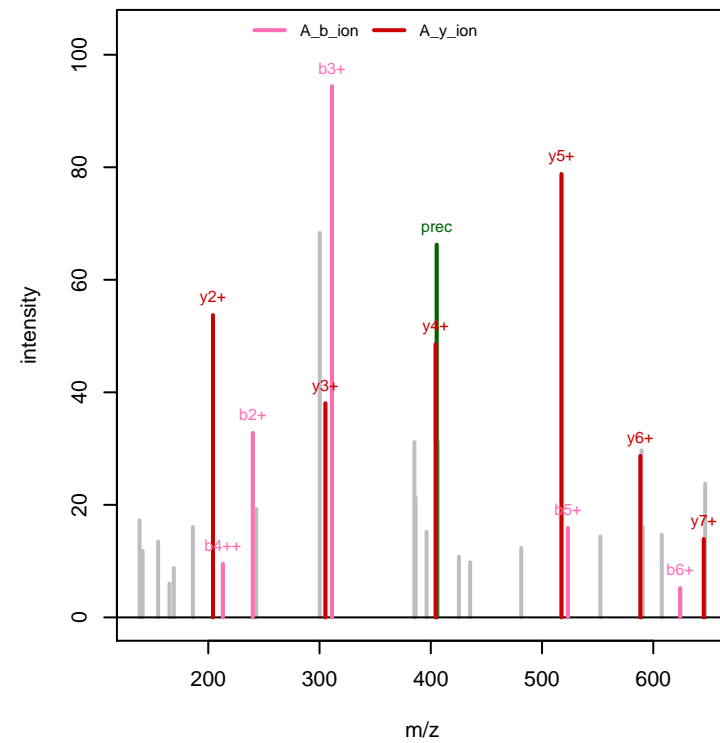

**KGAIVTGK+XL\_L**

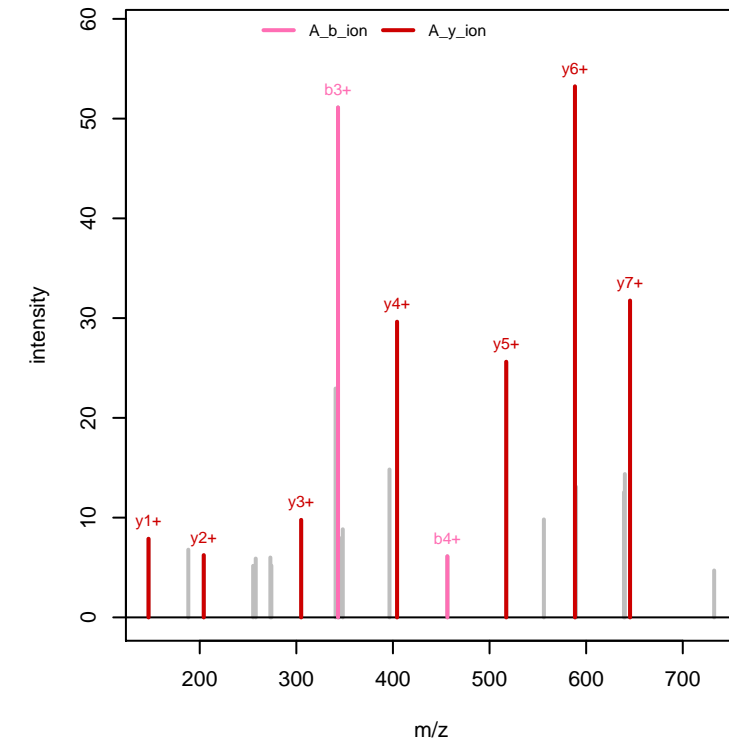

**GEILGGMAAVEQPEKPAAQPK+XL\_S**

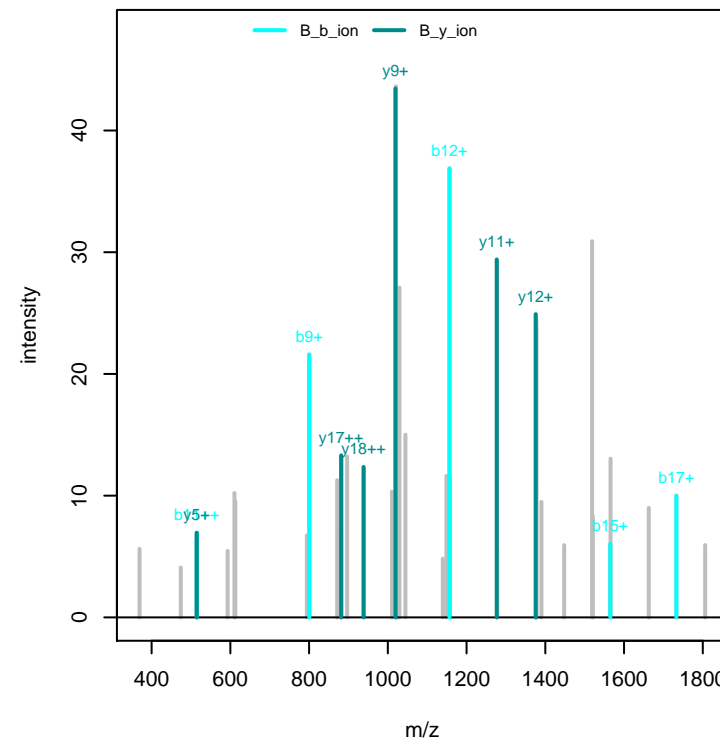

**GEILGGMAAVEQPEKPAAQPK+XL\_L**

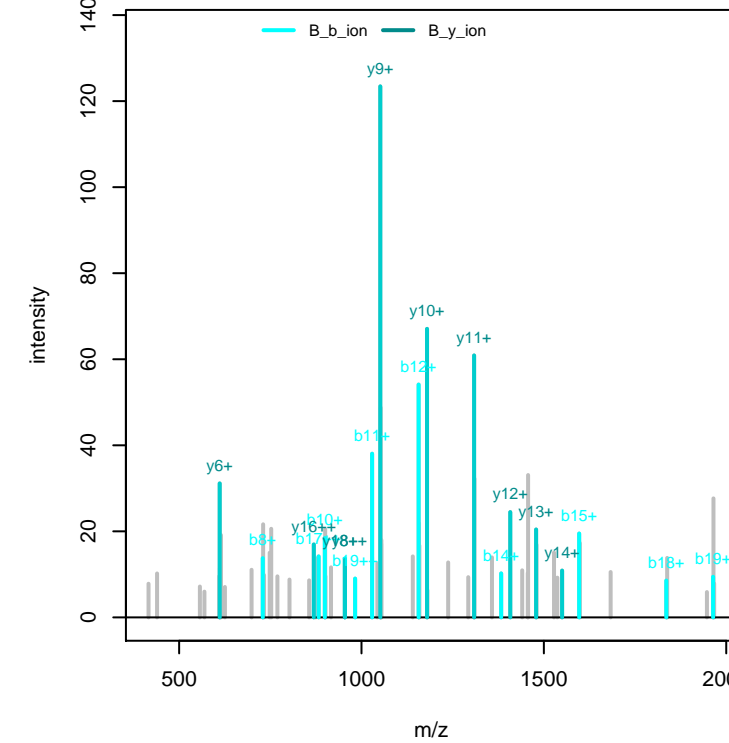

VAVIKAVR  
DDAEALKK

VAVIKAVR+XL\_S

VAVIKAVR+XL\_L

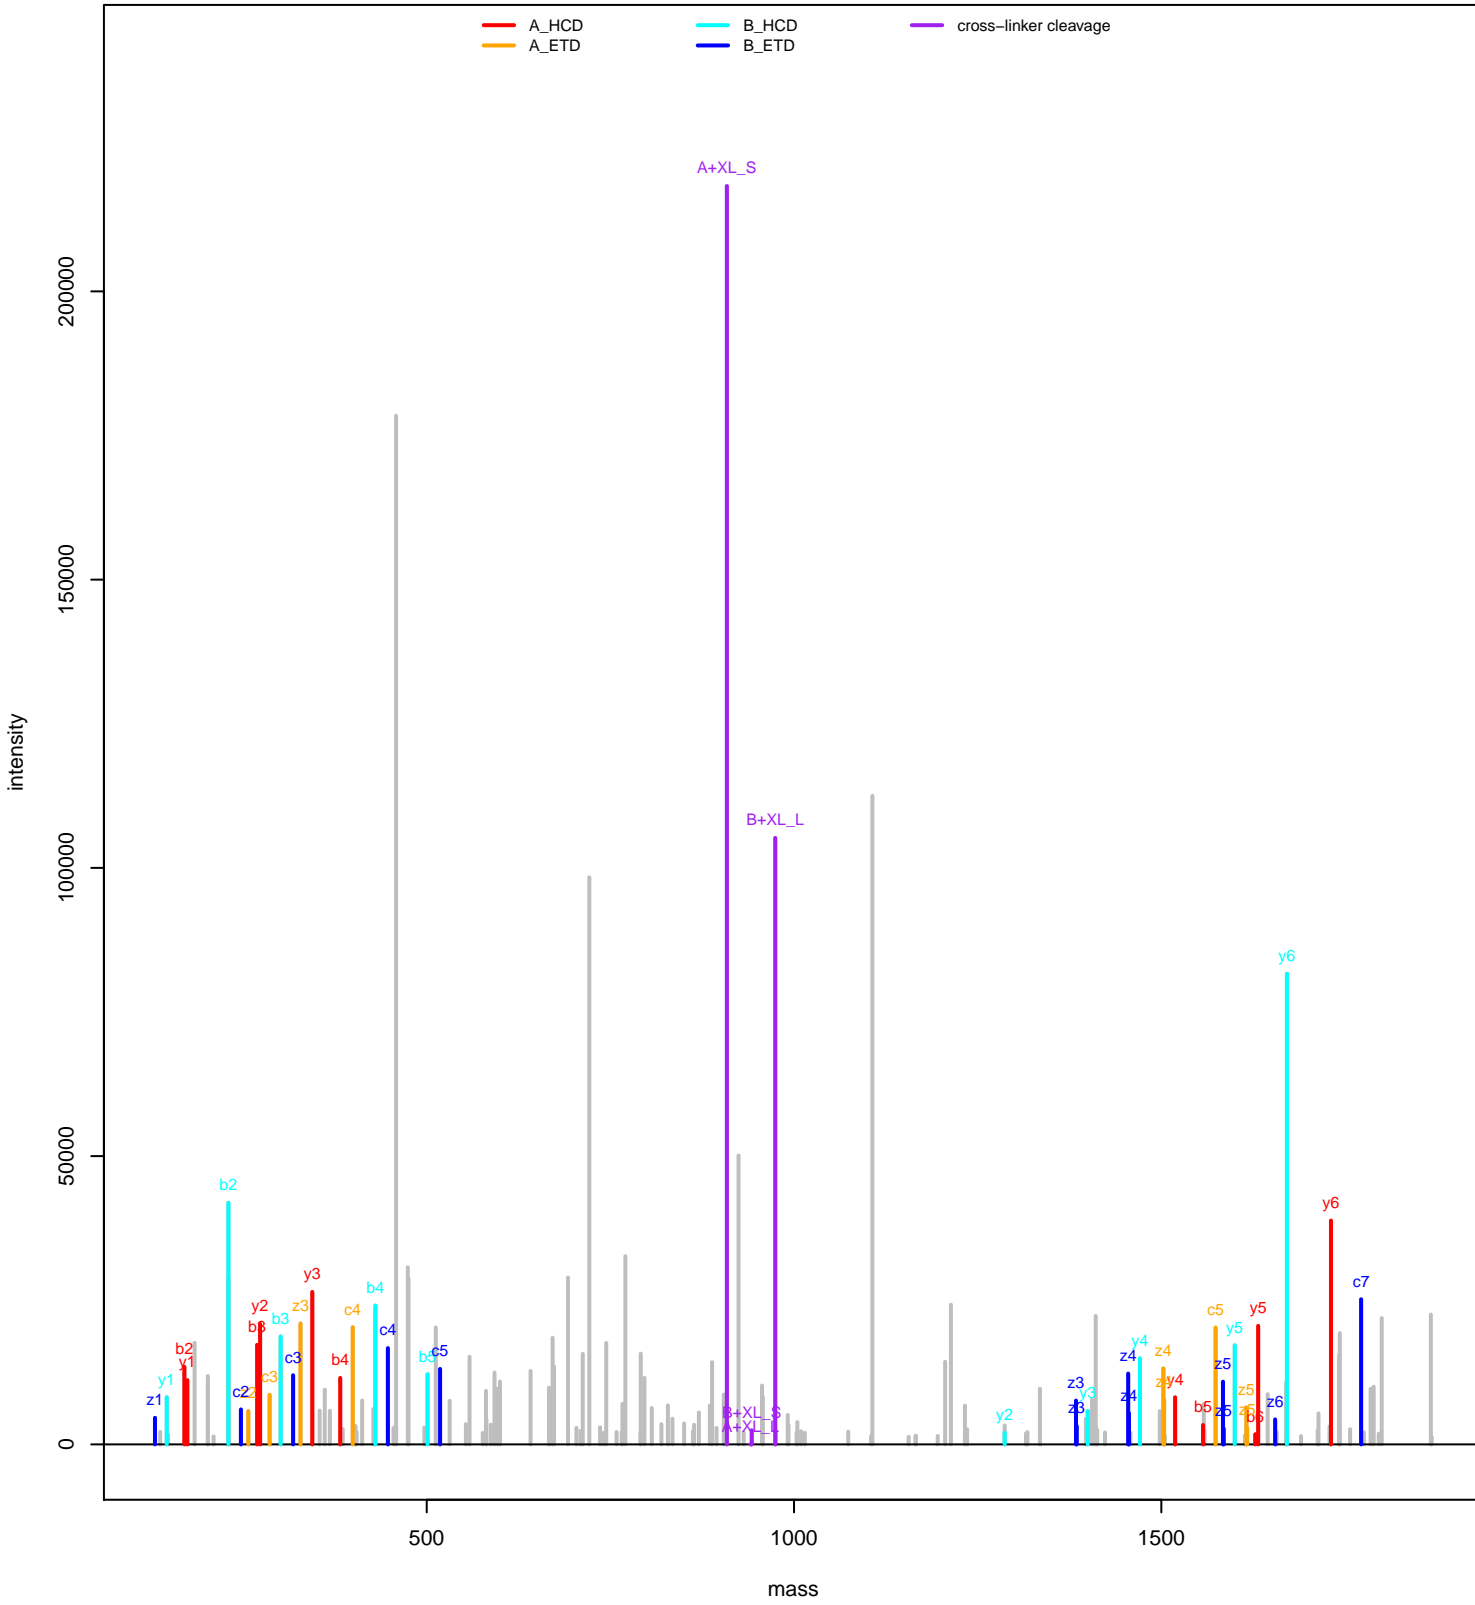

DDAEALKK+XL\_S

DDAEALKK+XL\_L

VAKGVEGVTSVSDK  
VDSSMNKVGFMDDSAITAK

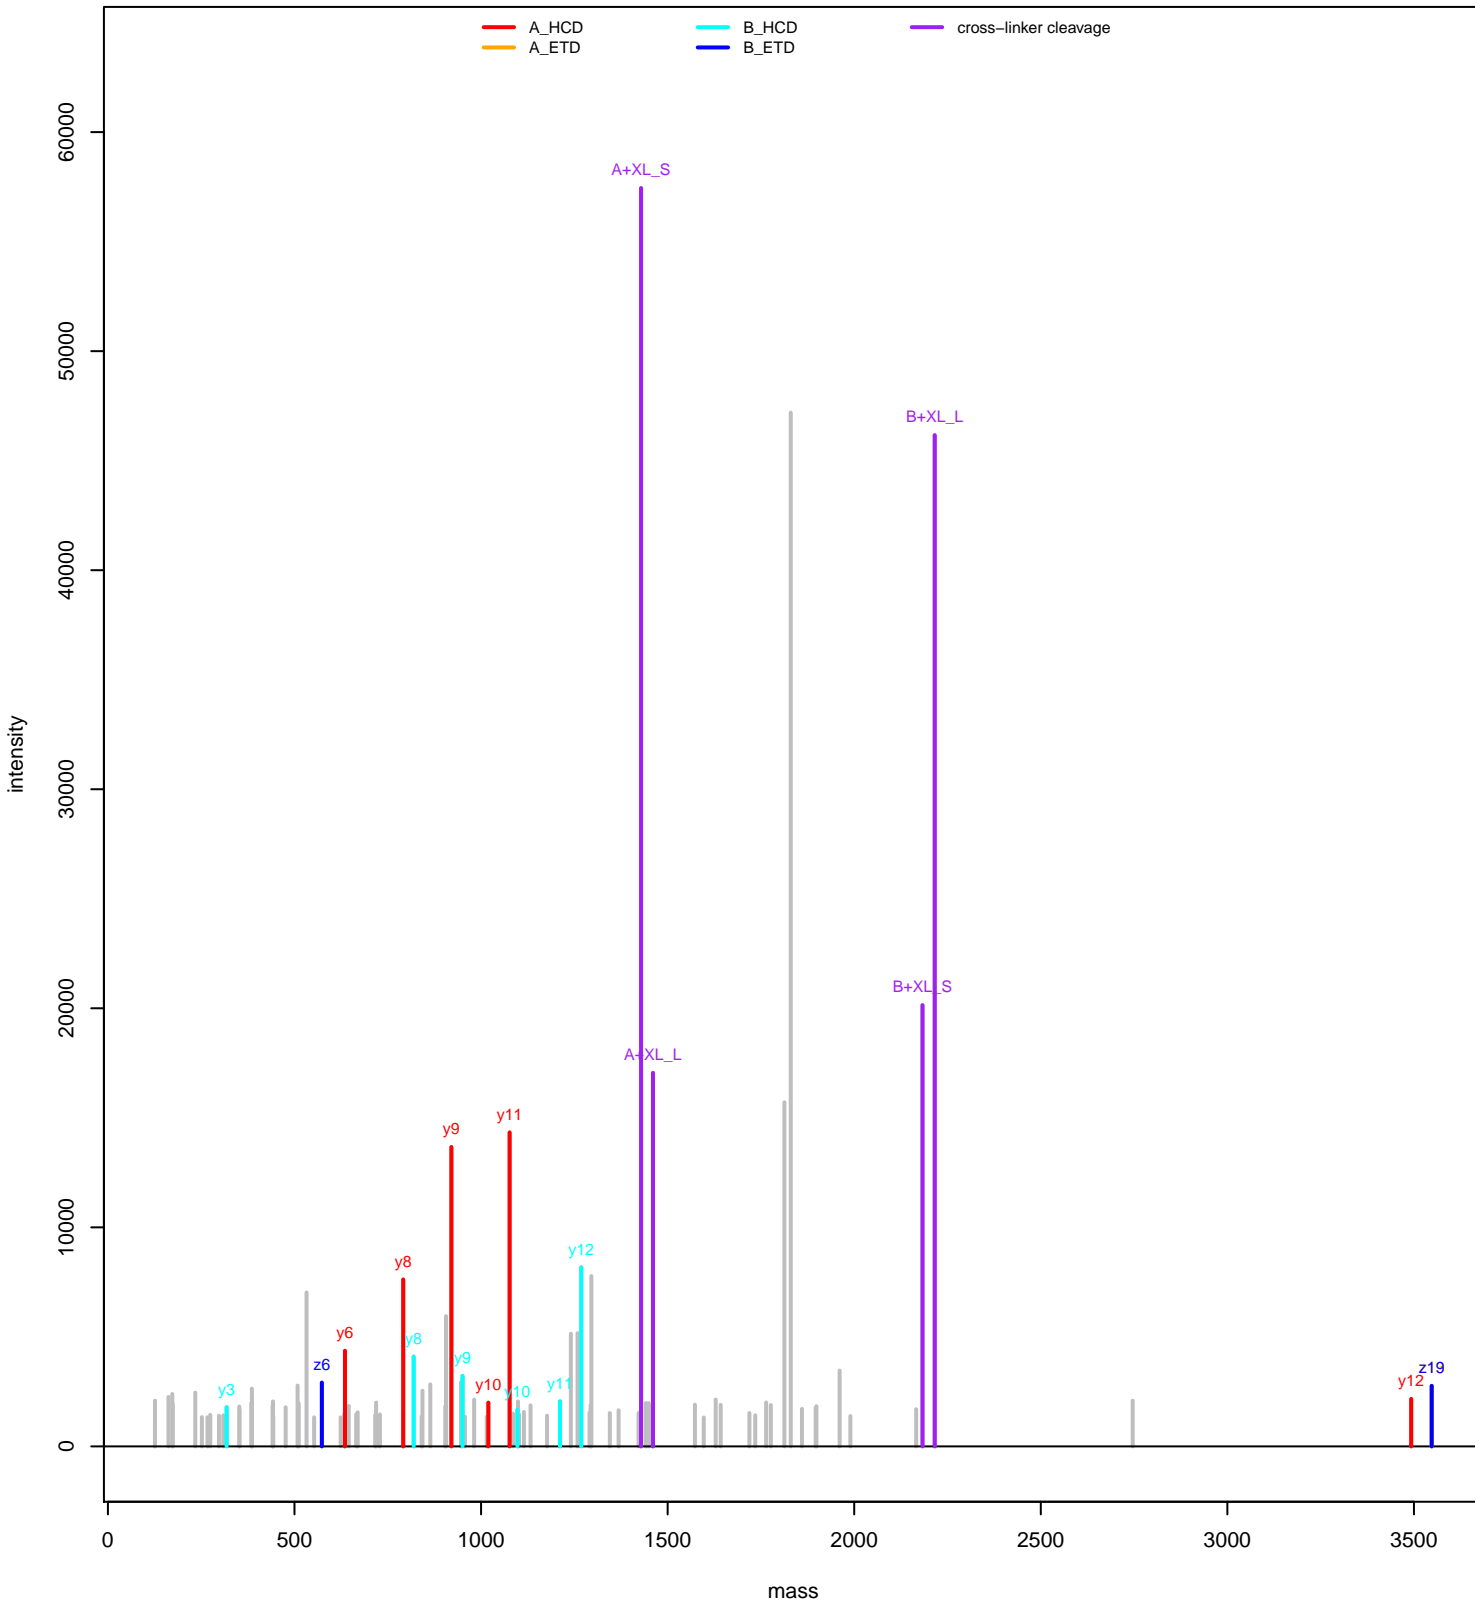

VAKGVEGVTSVSDK+XL\_S

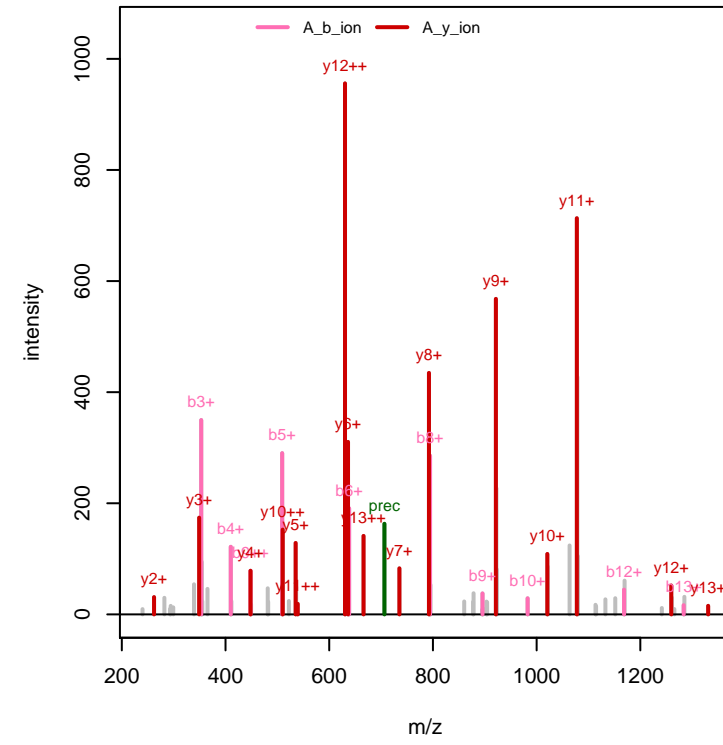

VAKGVEGVTSVSDK+XL\_L

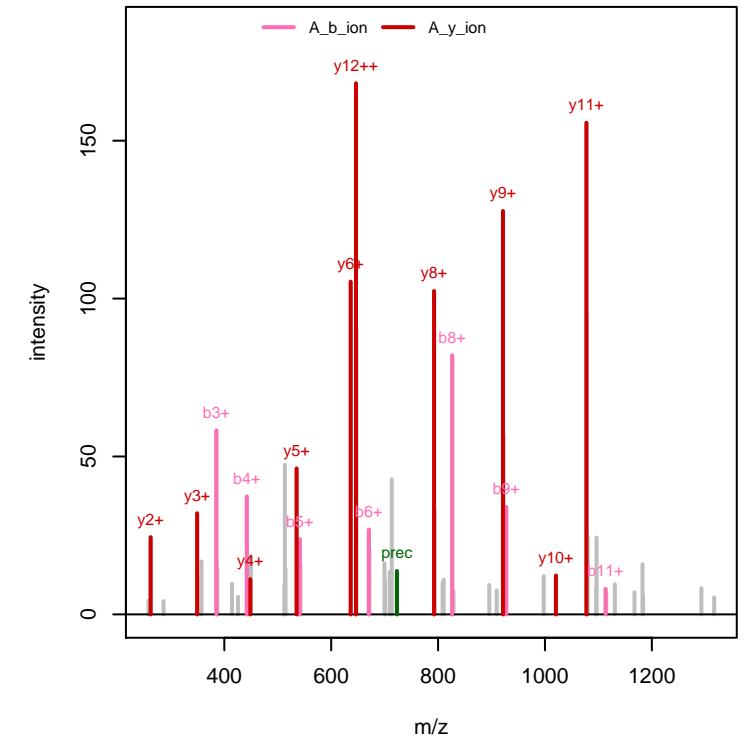

VDSSMNKVGFMDDSAITAK+XL\_S

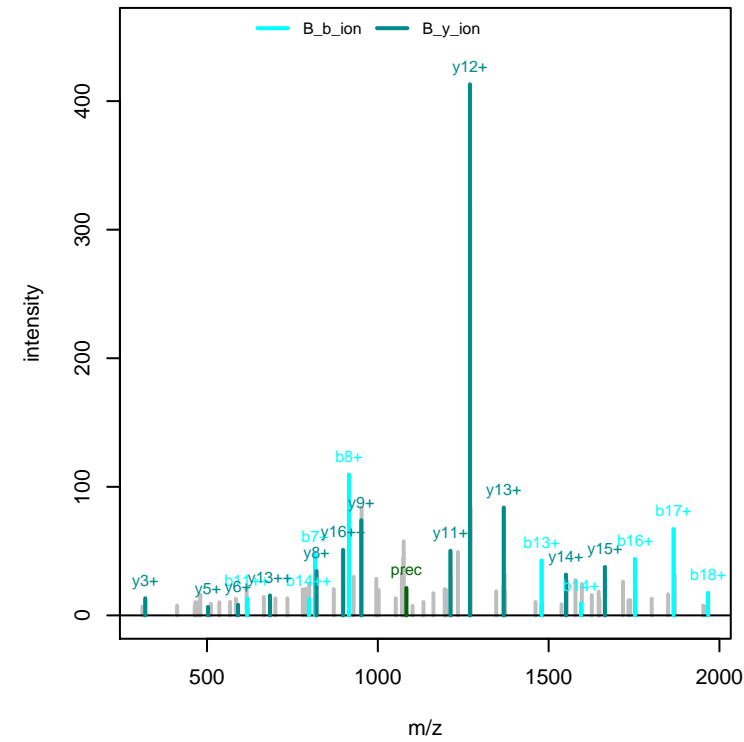

VDSSMNKVGFMDDSAITAK+XL\_L

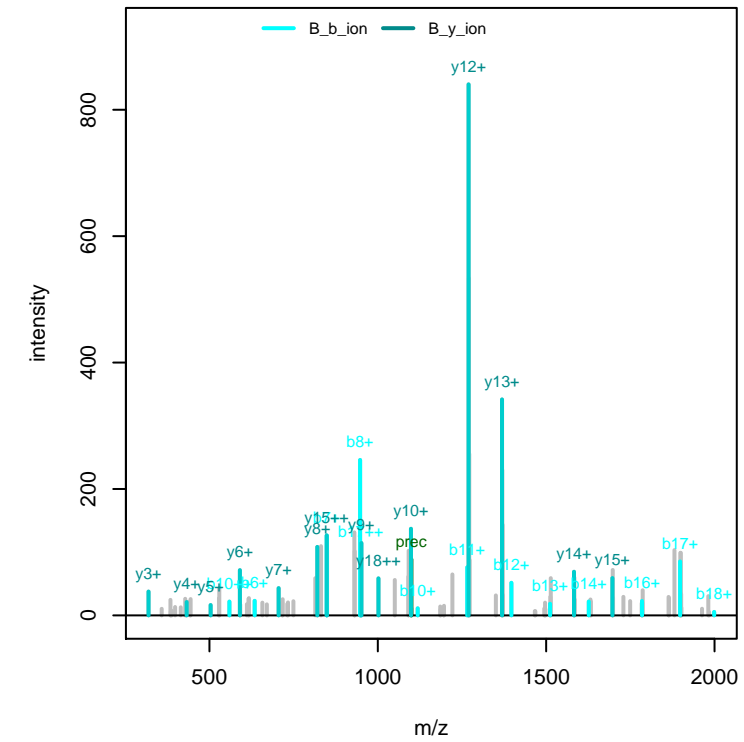

DAKEGSVK  
AKLLADDIVPSR

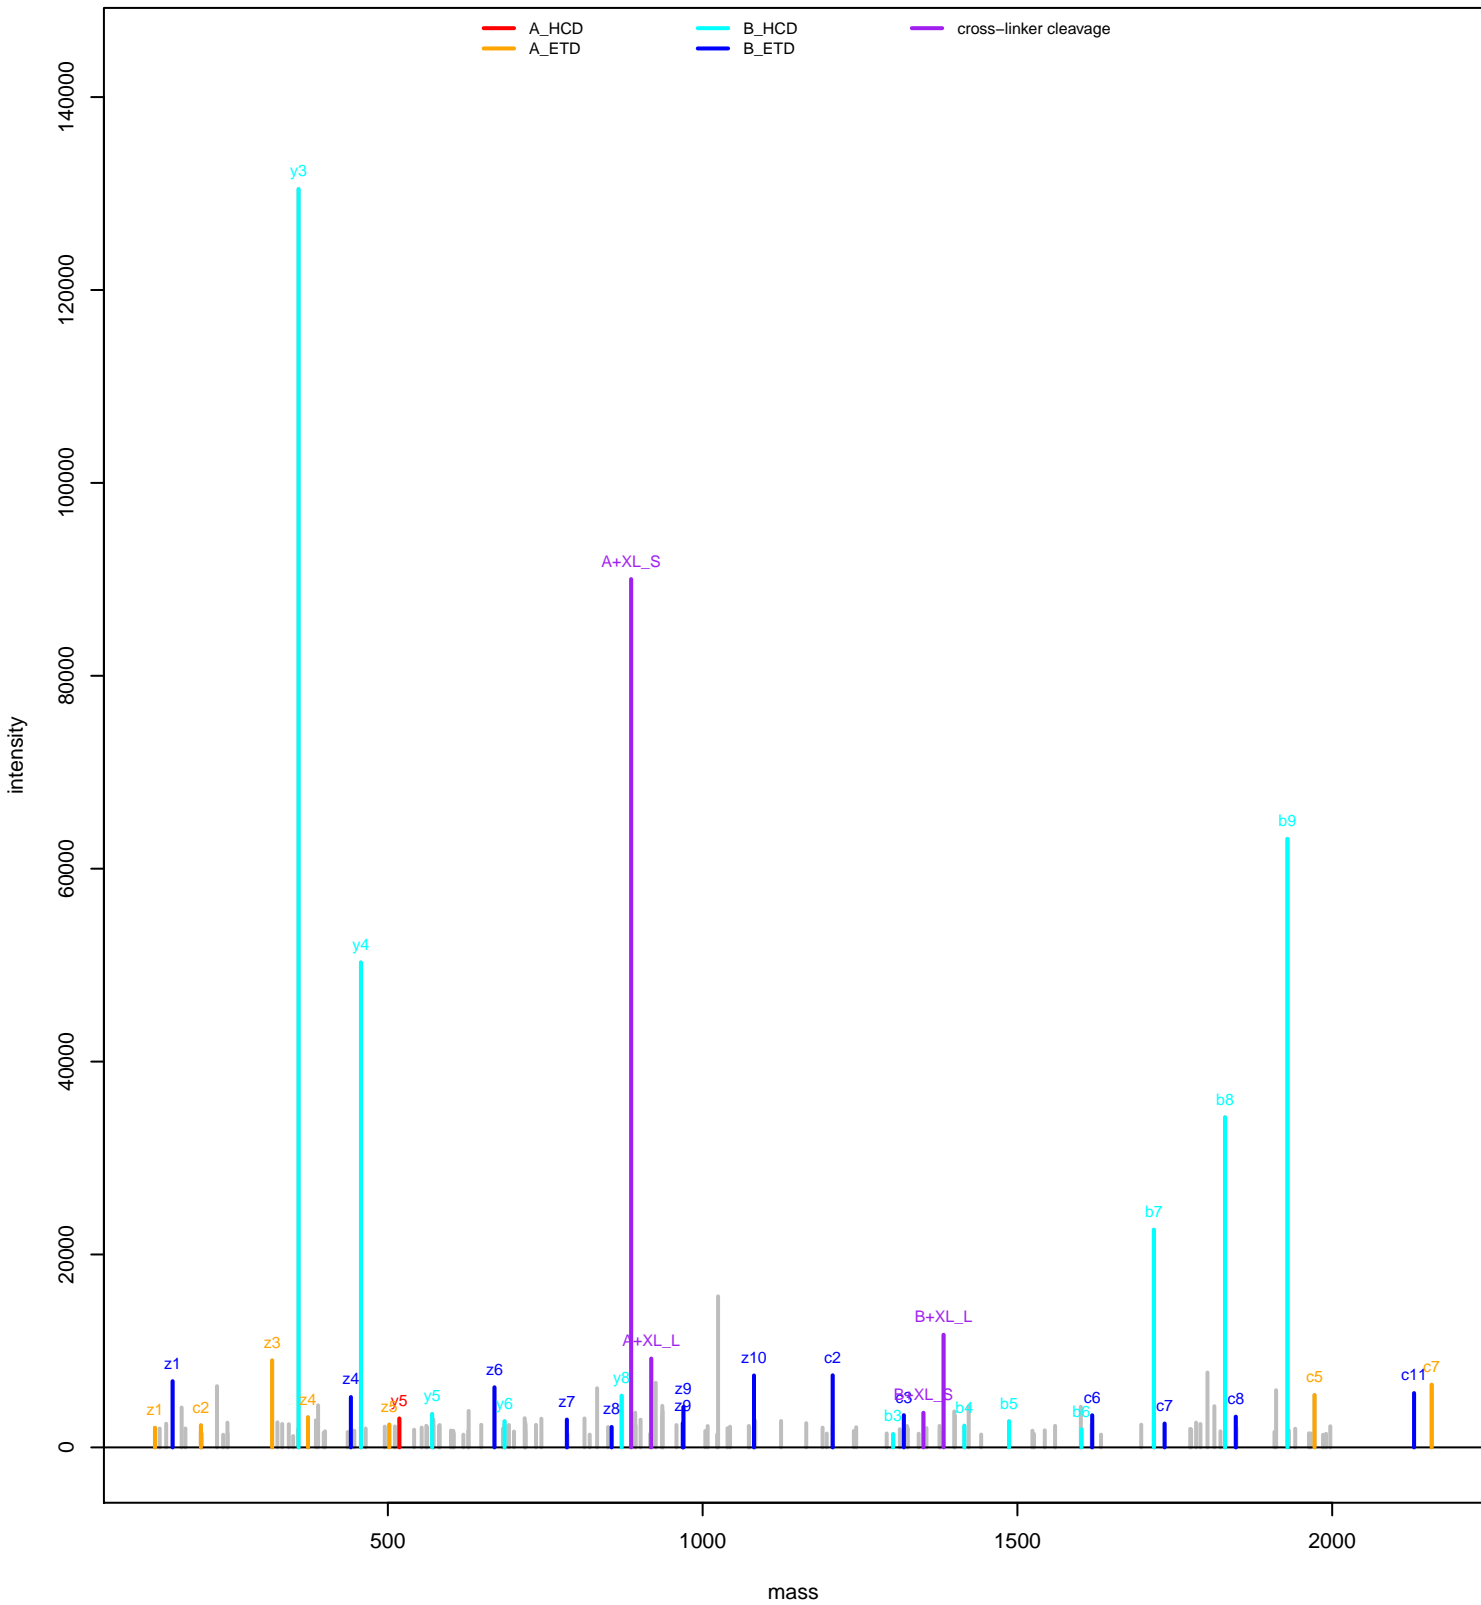

DAKEGSVK+XL\_S

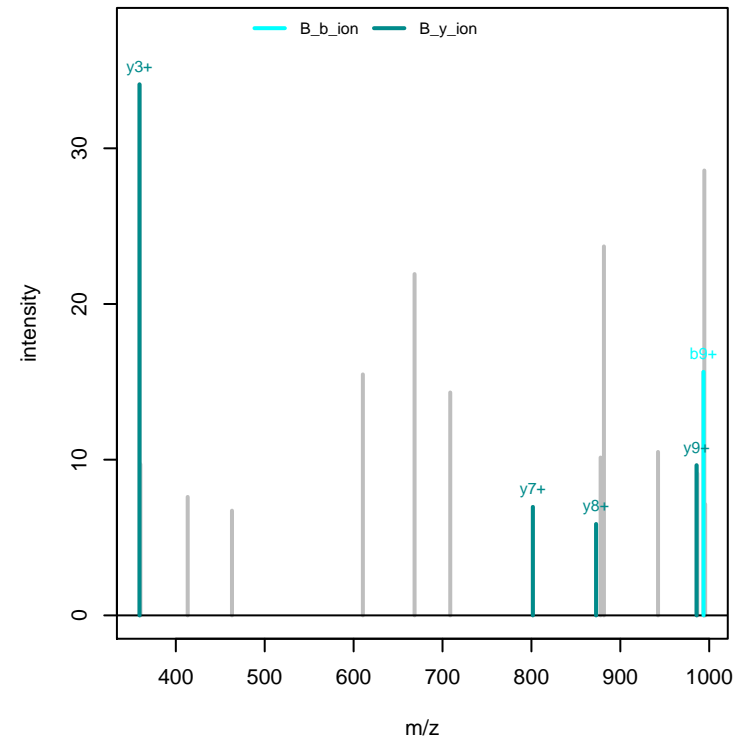

DAKEGSVK+XL\_L

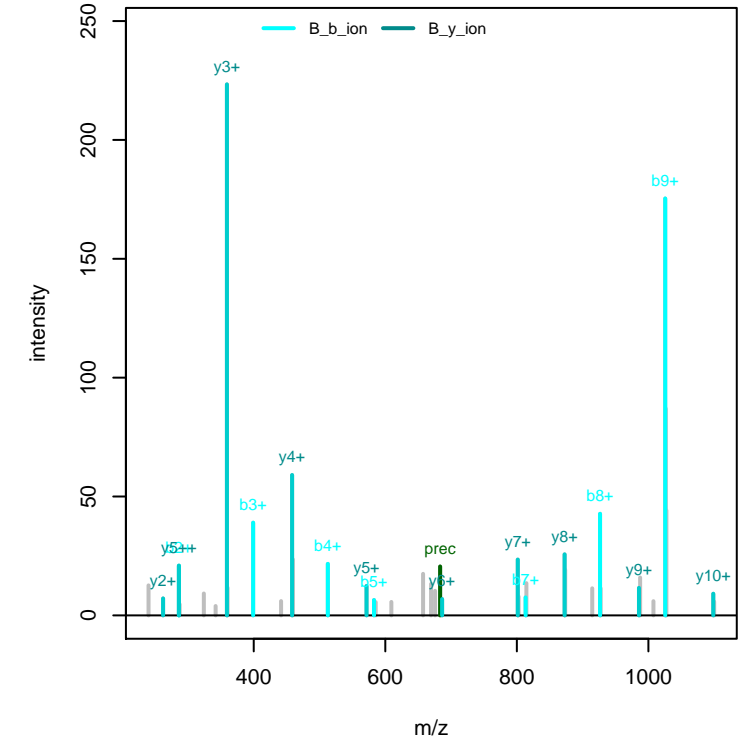

AKLLADDIVPSR+XL\_S



AKLLADDIVPSR+XL\_L



KIKELAVK  
ETSAKSEEK

KIKELAVK+XL\_S

KIKELAVK+XL\_L

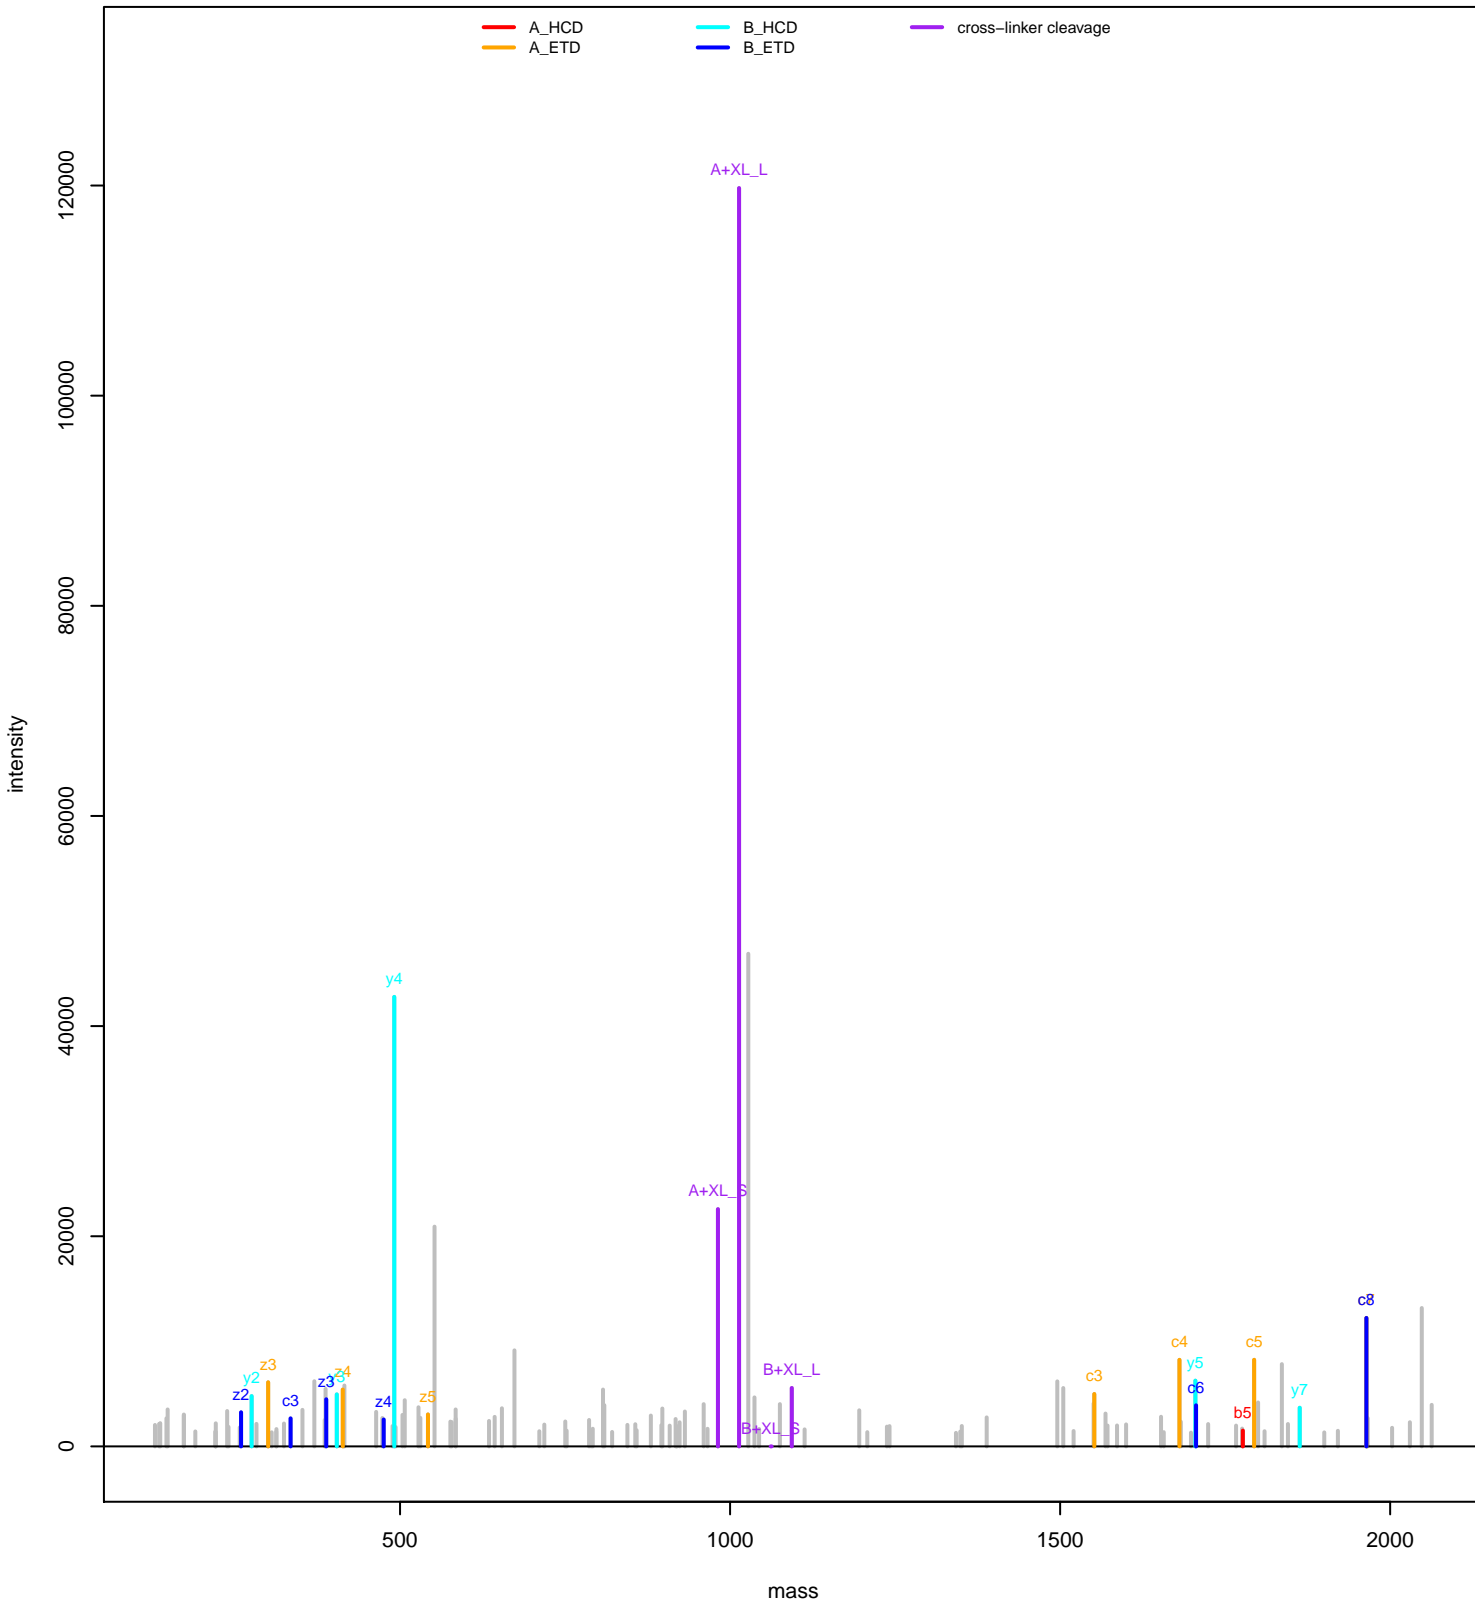

ETSAKSEEK+XL\_S

ETSAKSEEK+XL\_L



DAQTRITK  
YENGYDIK

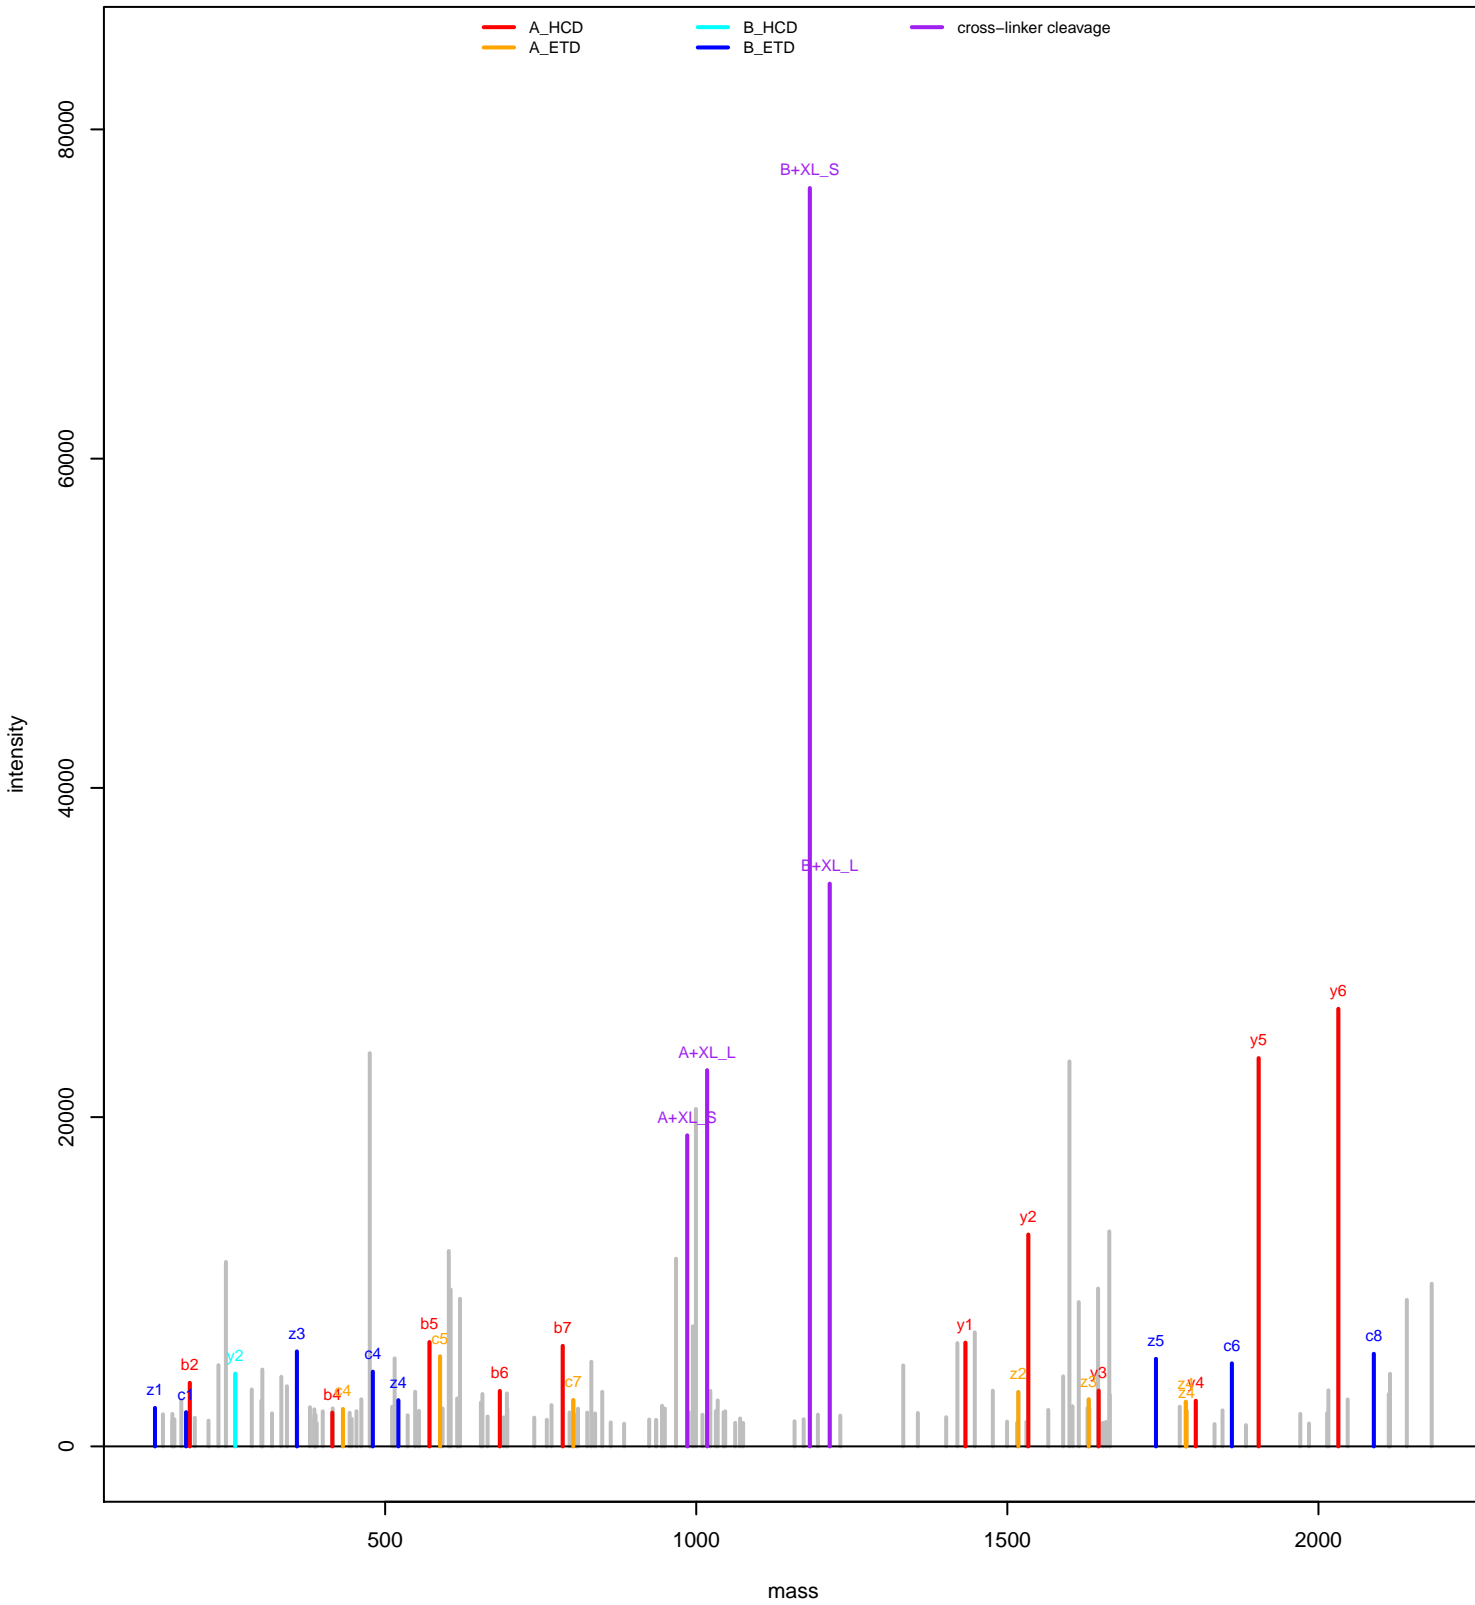

DAQTRITK+XL\_S

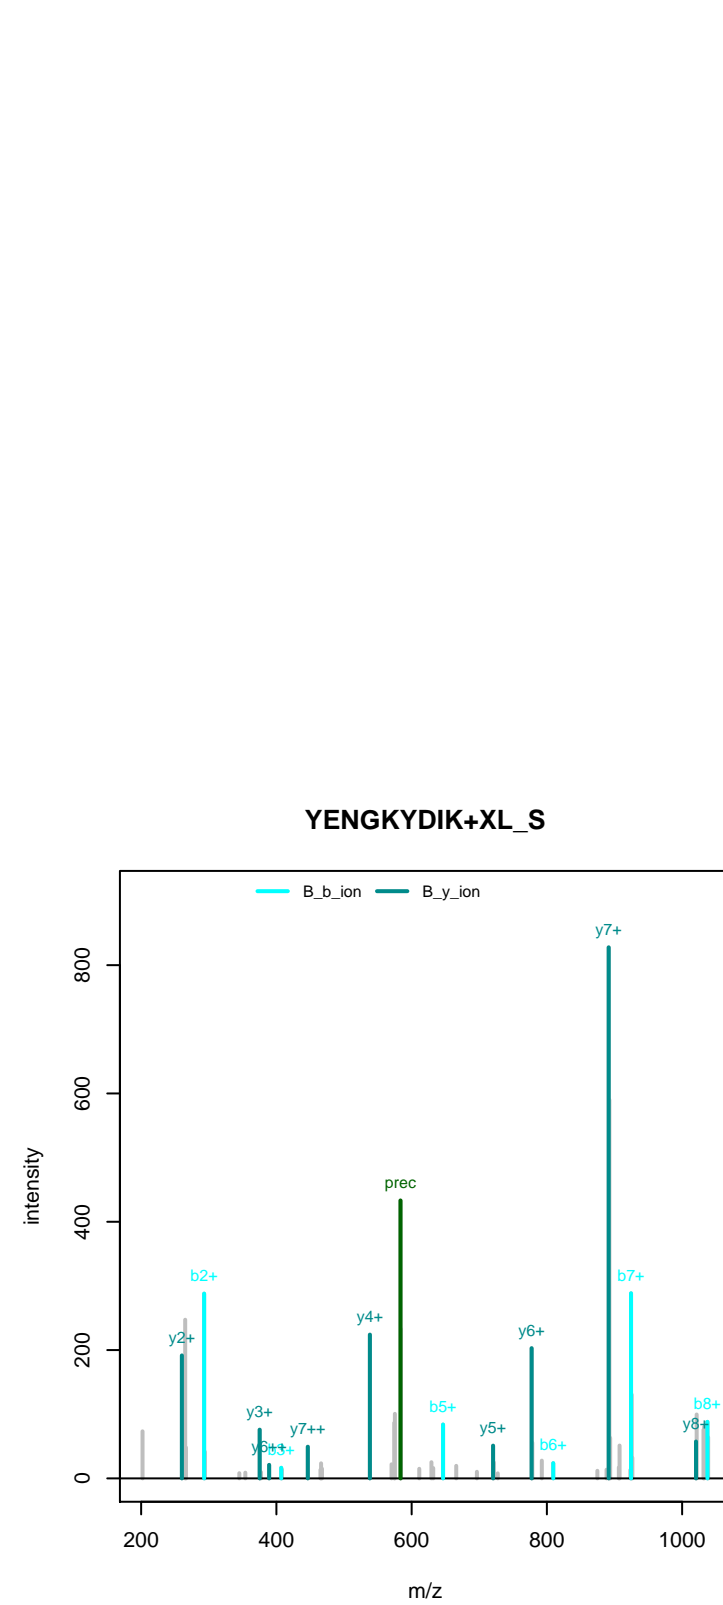

DAQTRITK+XL\_L

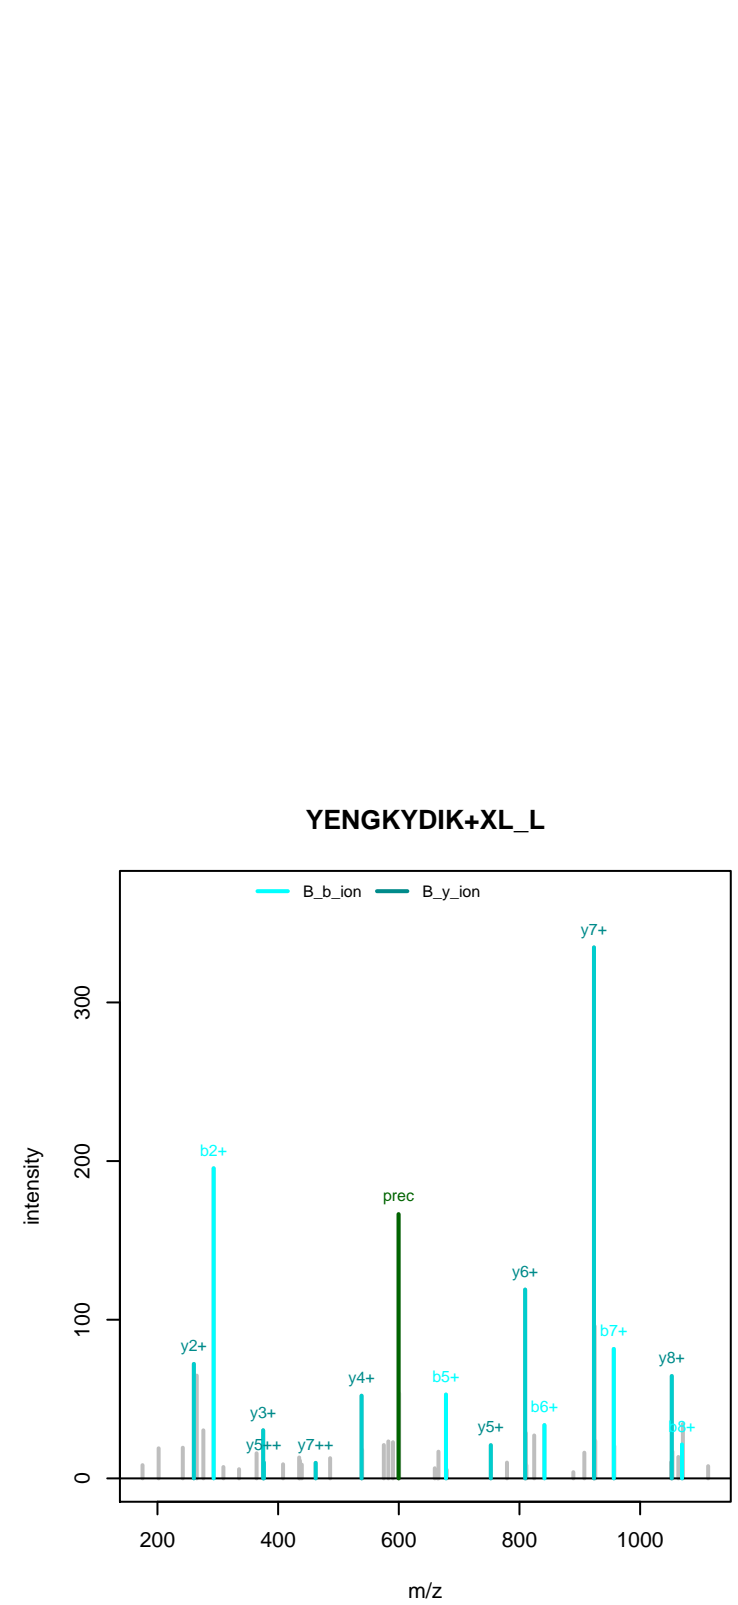

YENGYDIK+XL\_S

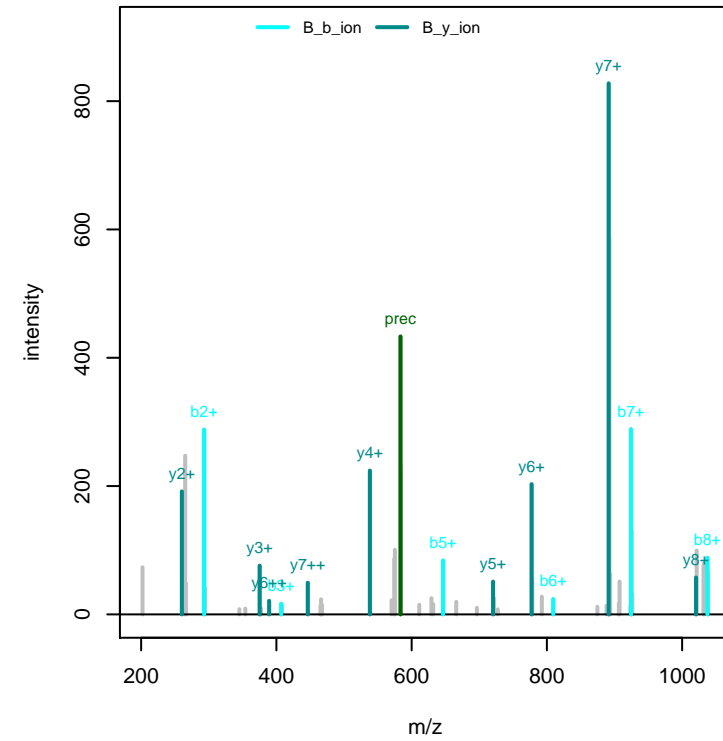

YENGYDIK+XL\_L

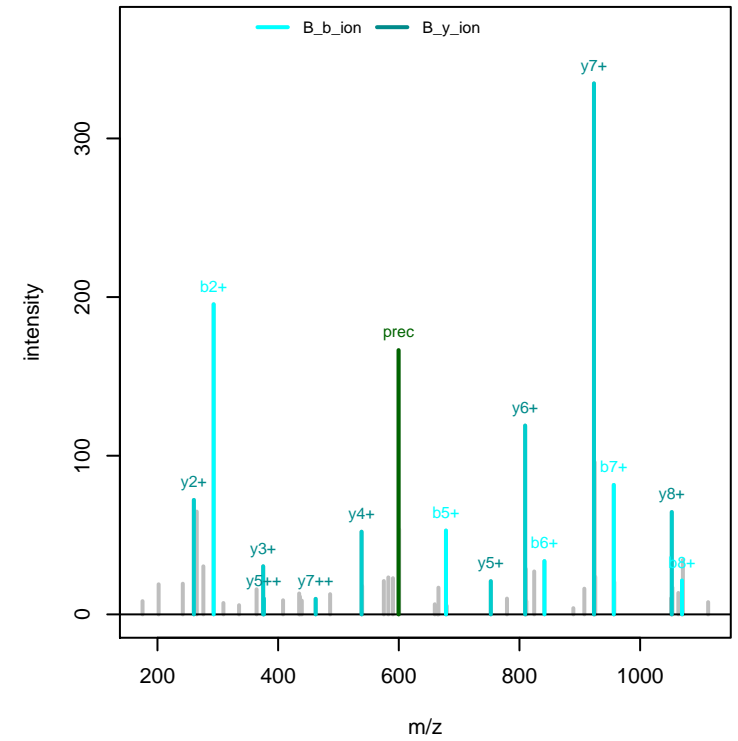

**QATKDAGR**  
**ITIKASSGLNEDEIQK**

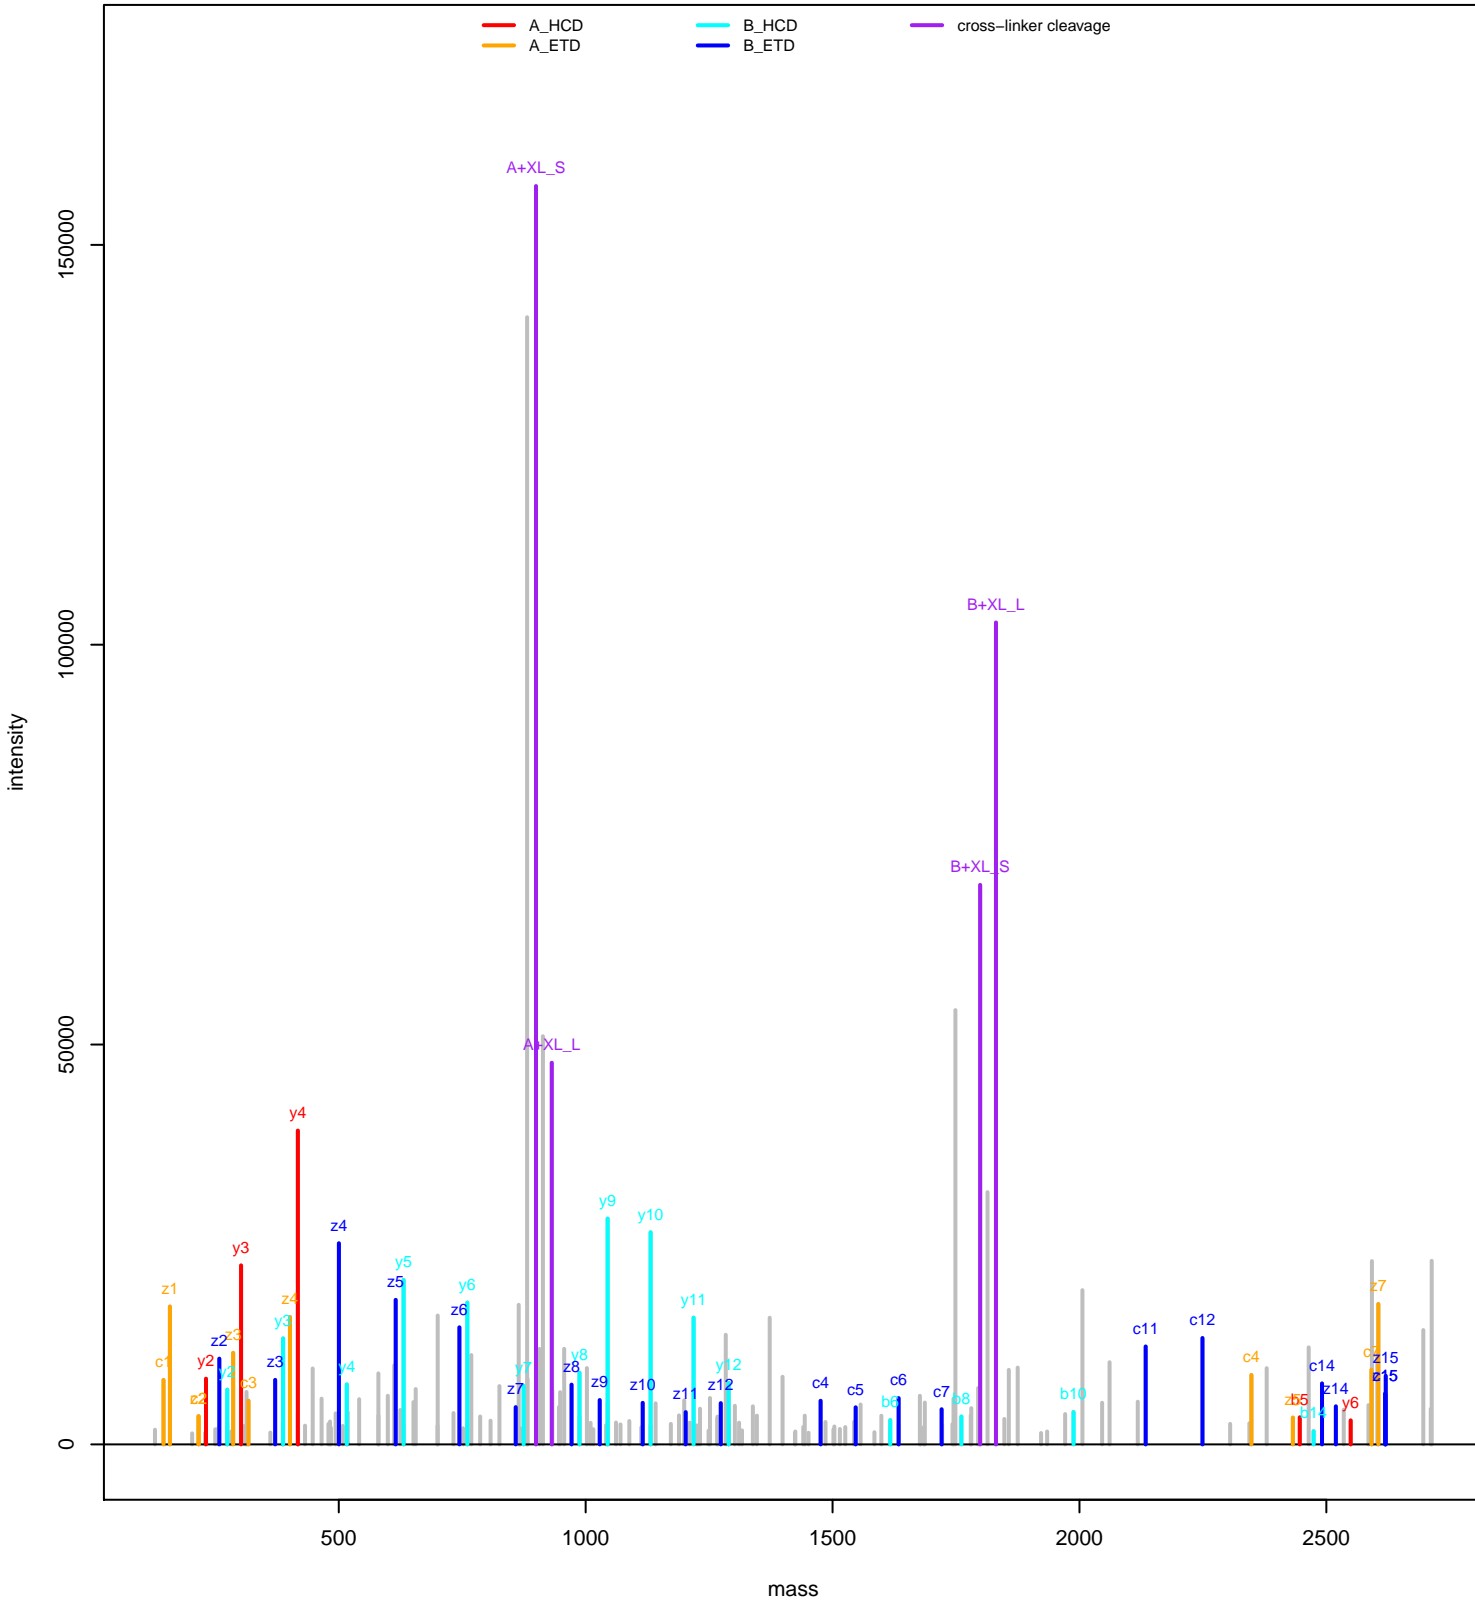

**QATKDAGR+XL\_S**

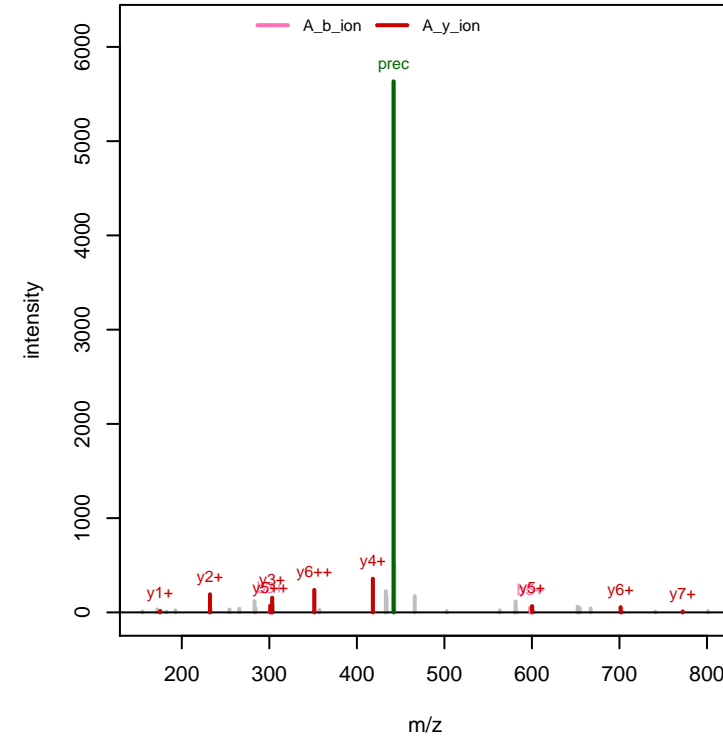

**QATKDAGR+XL\_L**

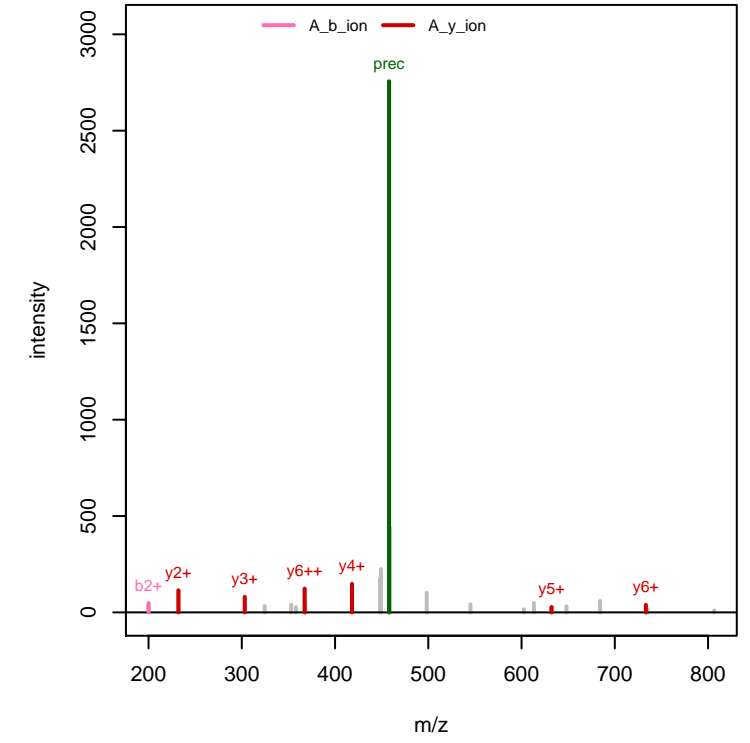

**ITIKASSGLNEDEIQK+XL\_S**

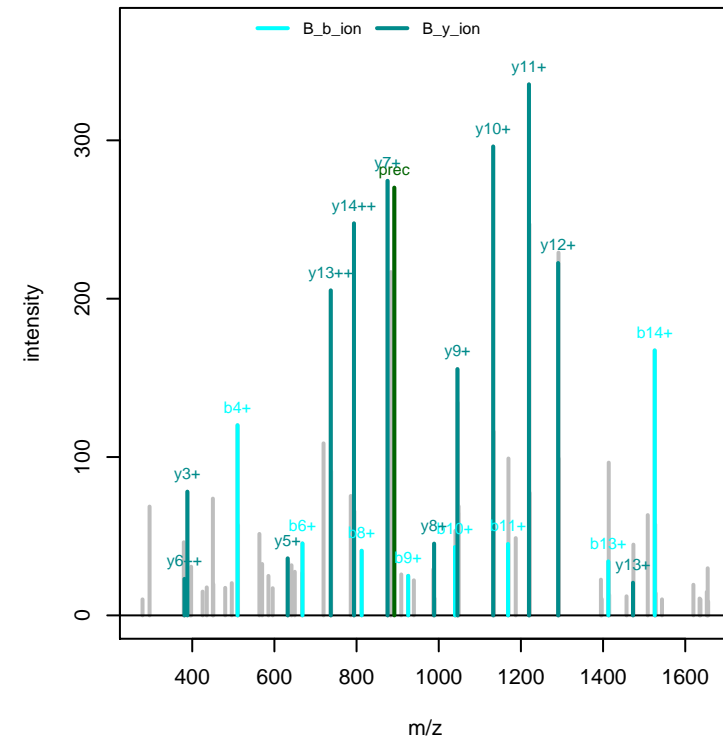

**ITIKASSGLNEDEIQK+XL\_L**

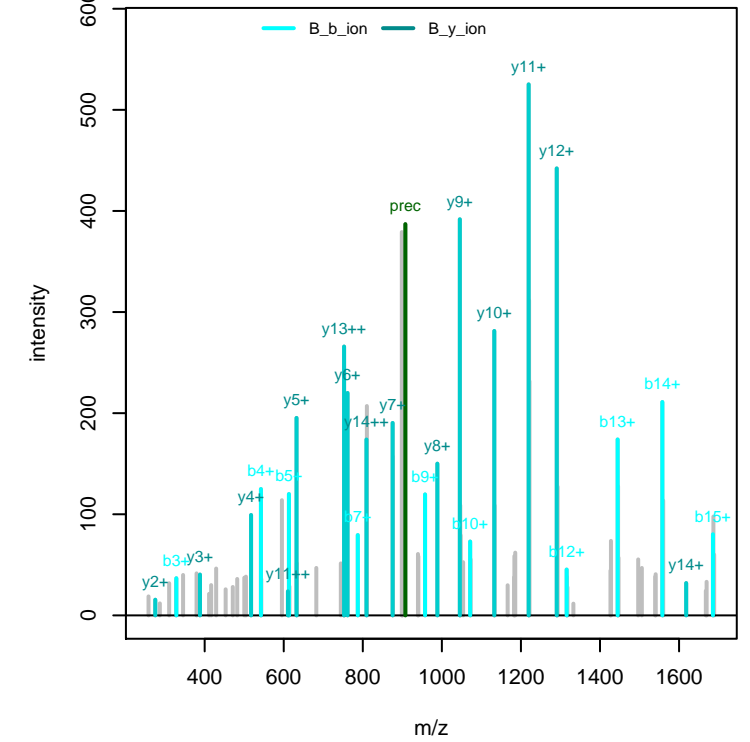

GEKVQAK  
LAATIAQLPDQIGAKGVETADK

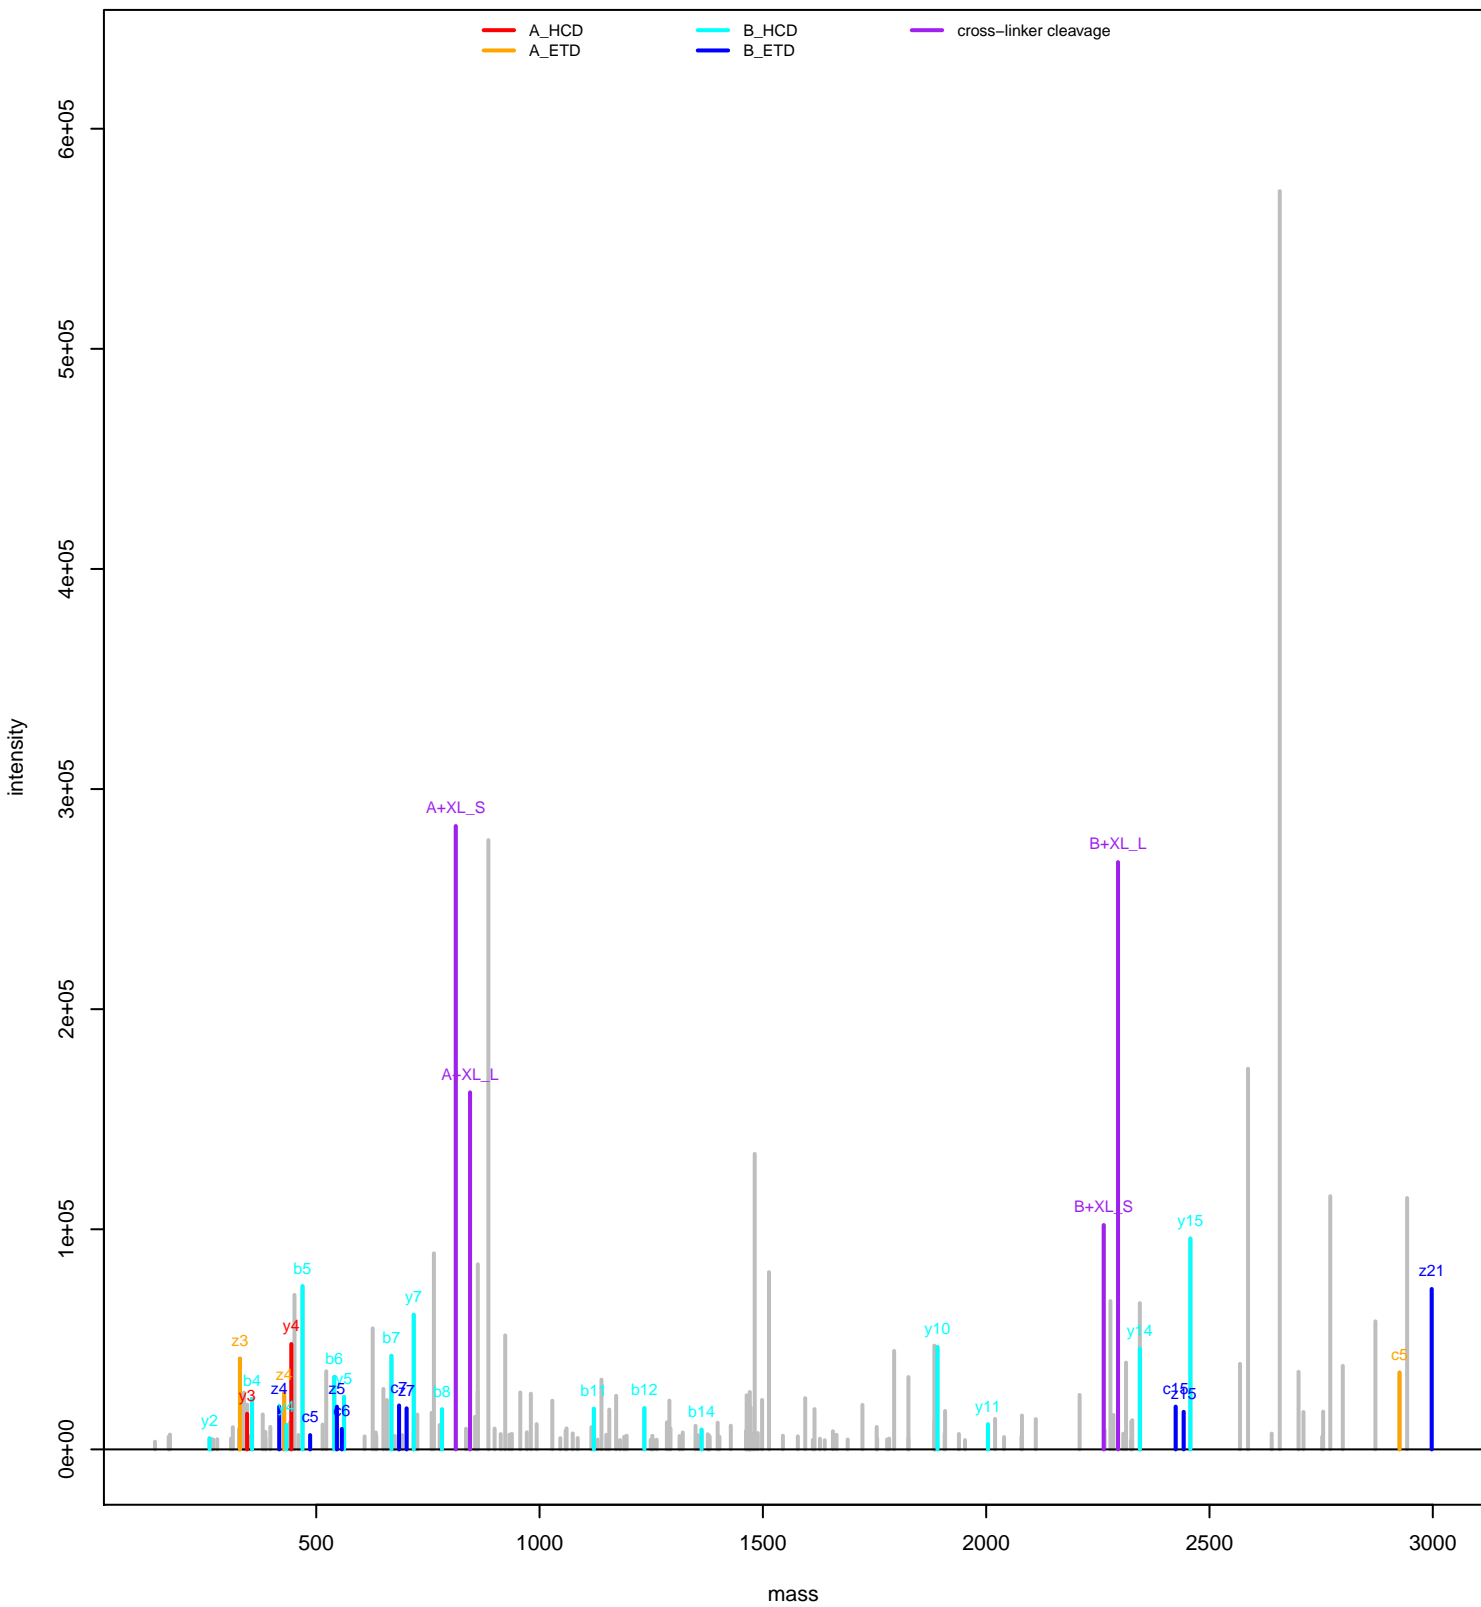

GEKVQAK+XL\_S

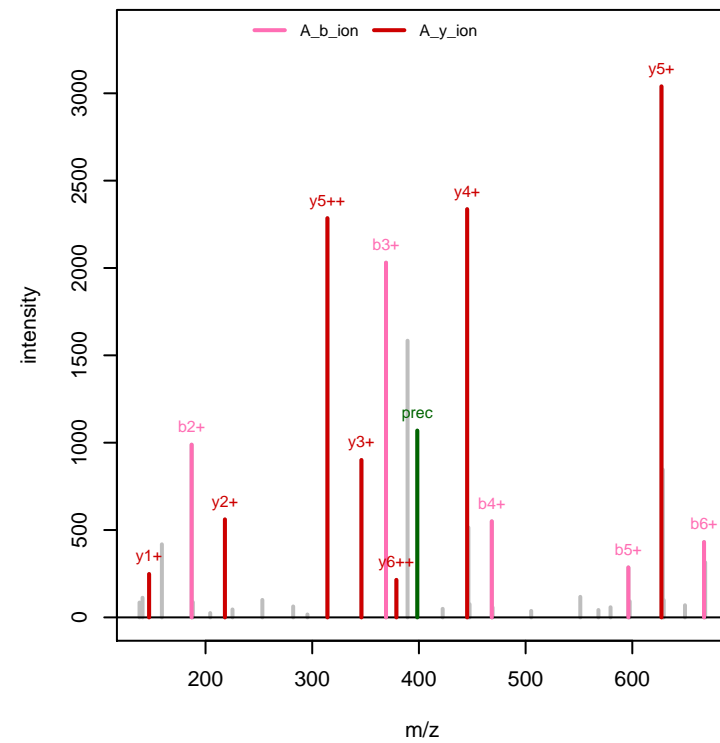

GEKVQAK+XL\_L

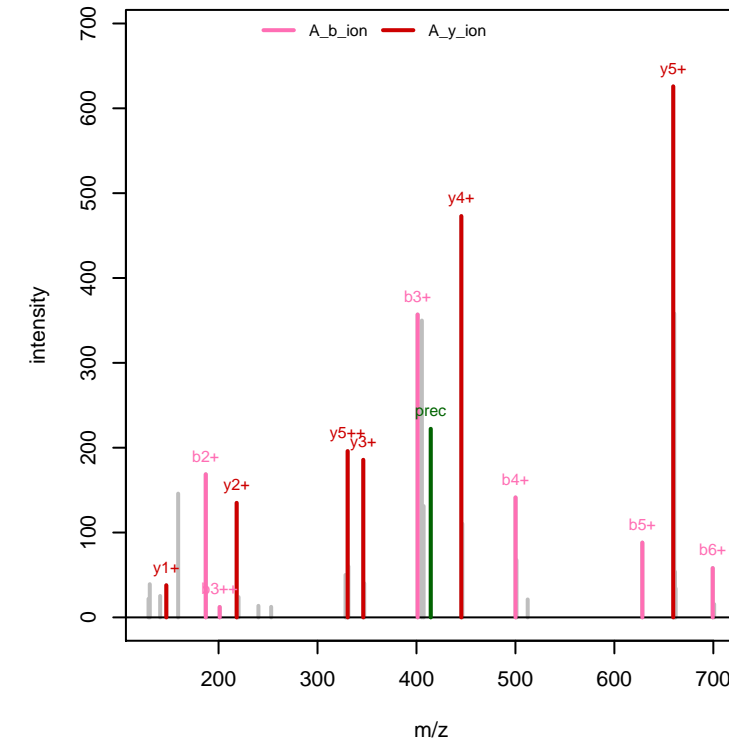

LAATIAQLPDQIGAKGVETADK+XL\_S

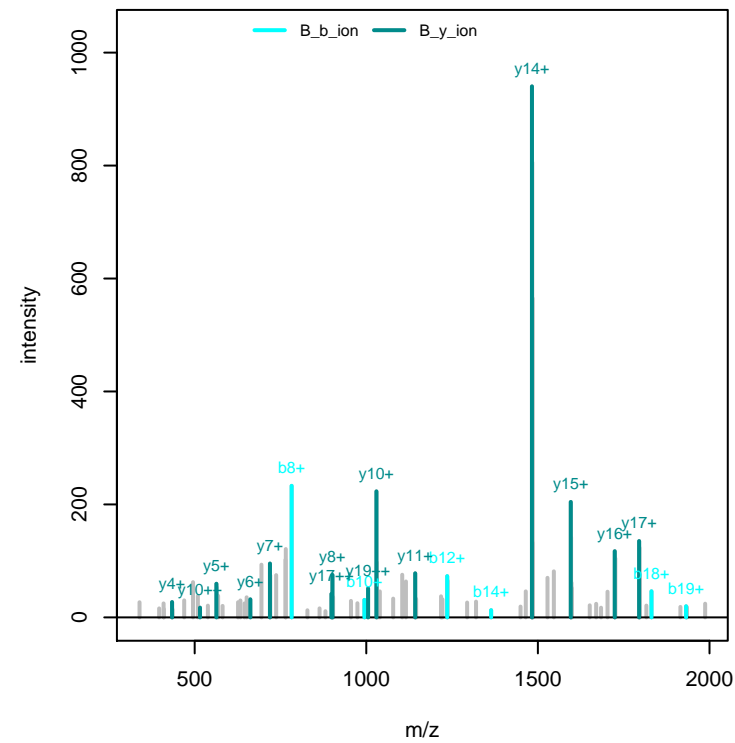

LAATIAQLPDQIGAKGVETADK+XL\_L

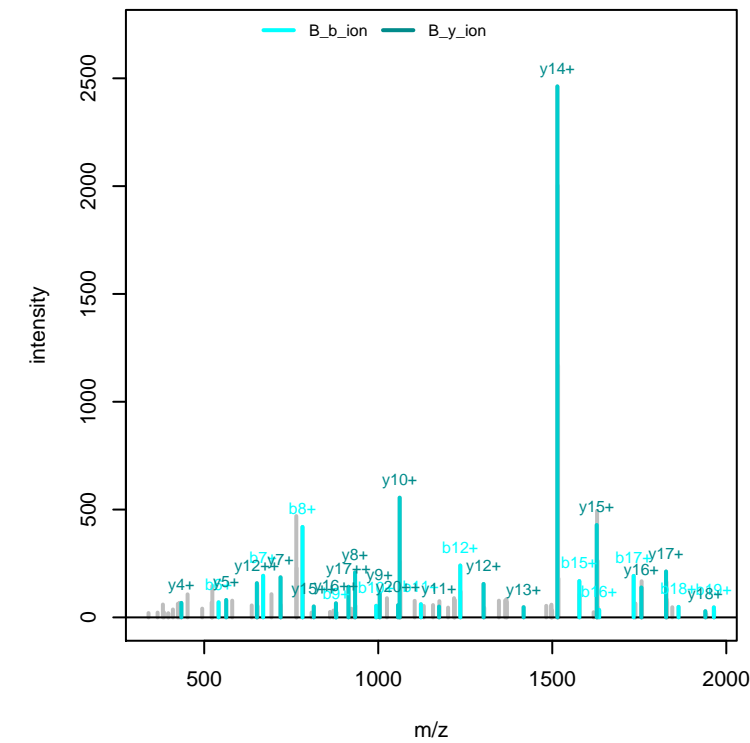

AAEIAKK  
SEKDSMGVIDVPADK

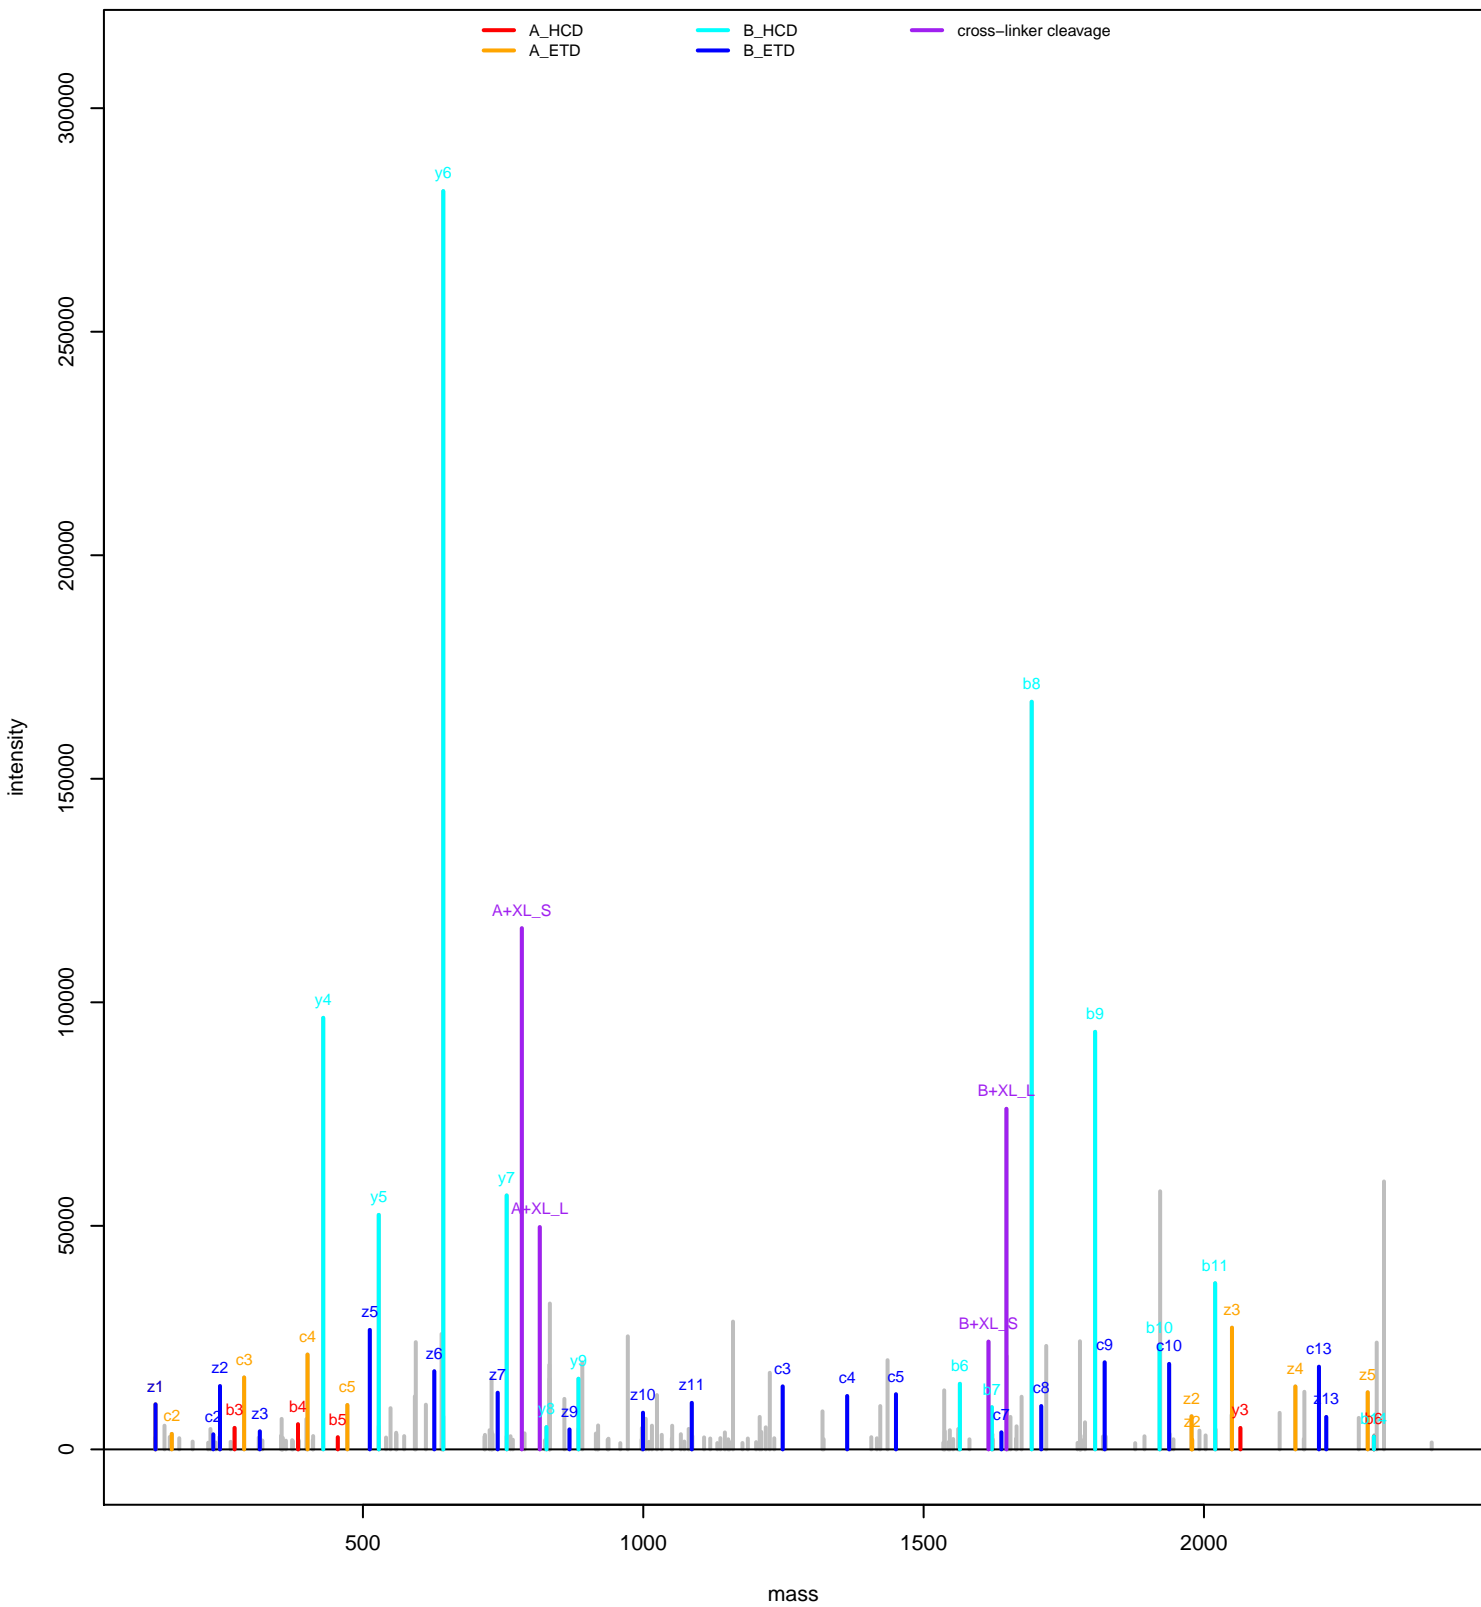

AAEIAKK+XL\_S

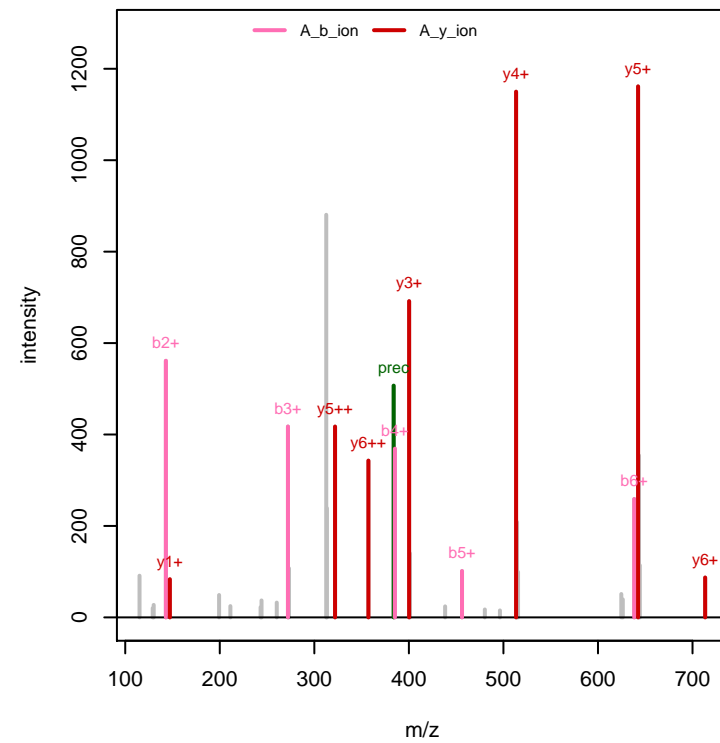

AAEIAKK+XL\_L

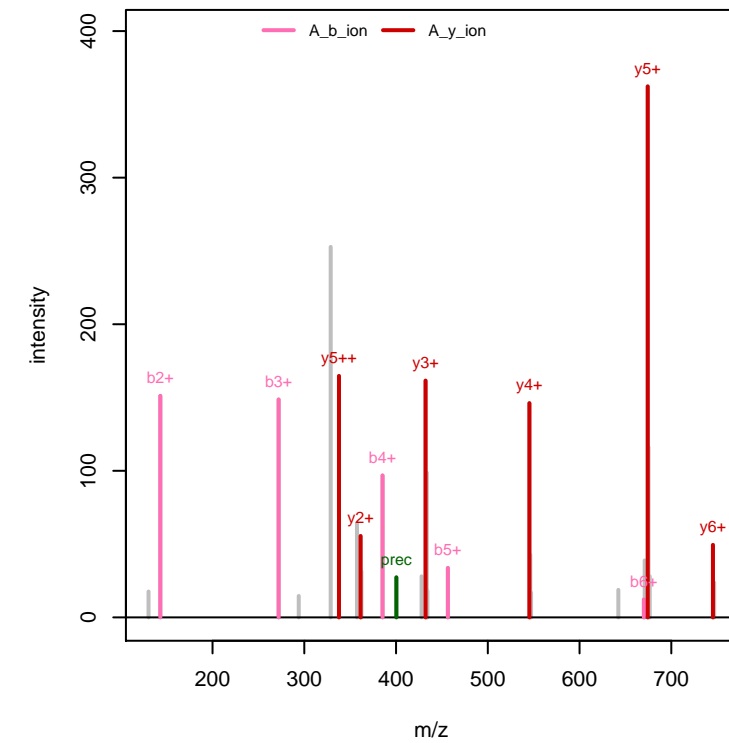

SEKDSMGVIDVPADK+XL\_S

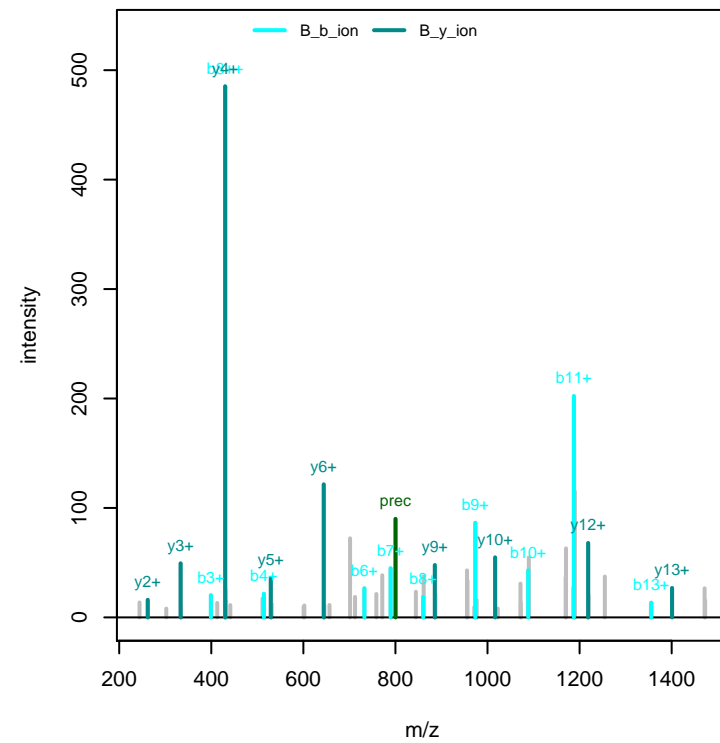

SEKDSMGVIDVPADK+XL\_L

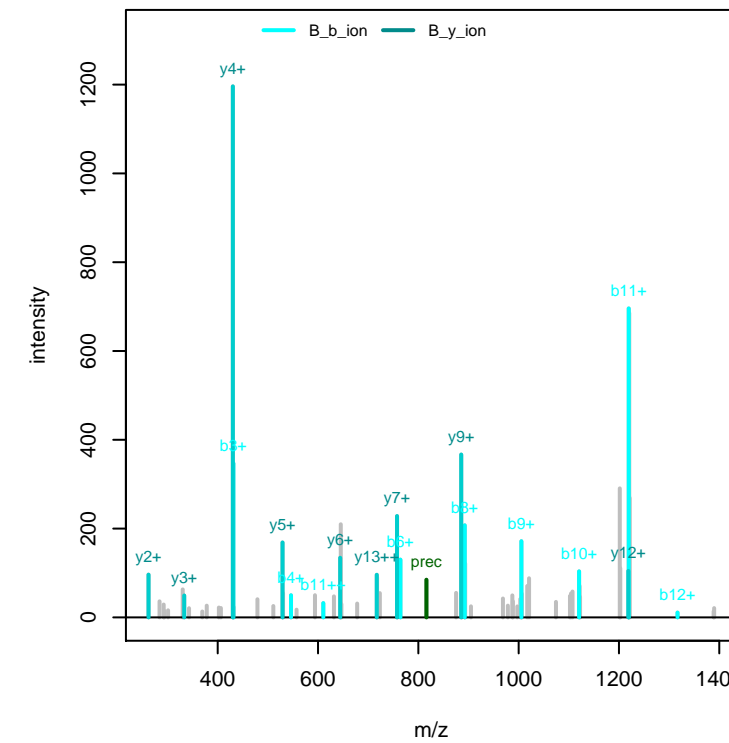

**IKERLN  
ERTGKAAR**

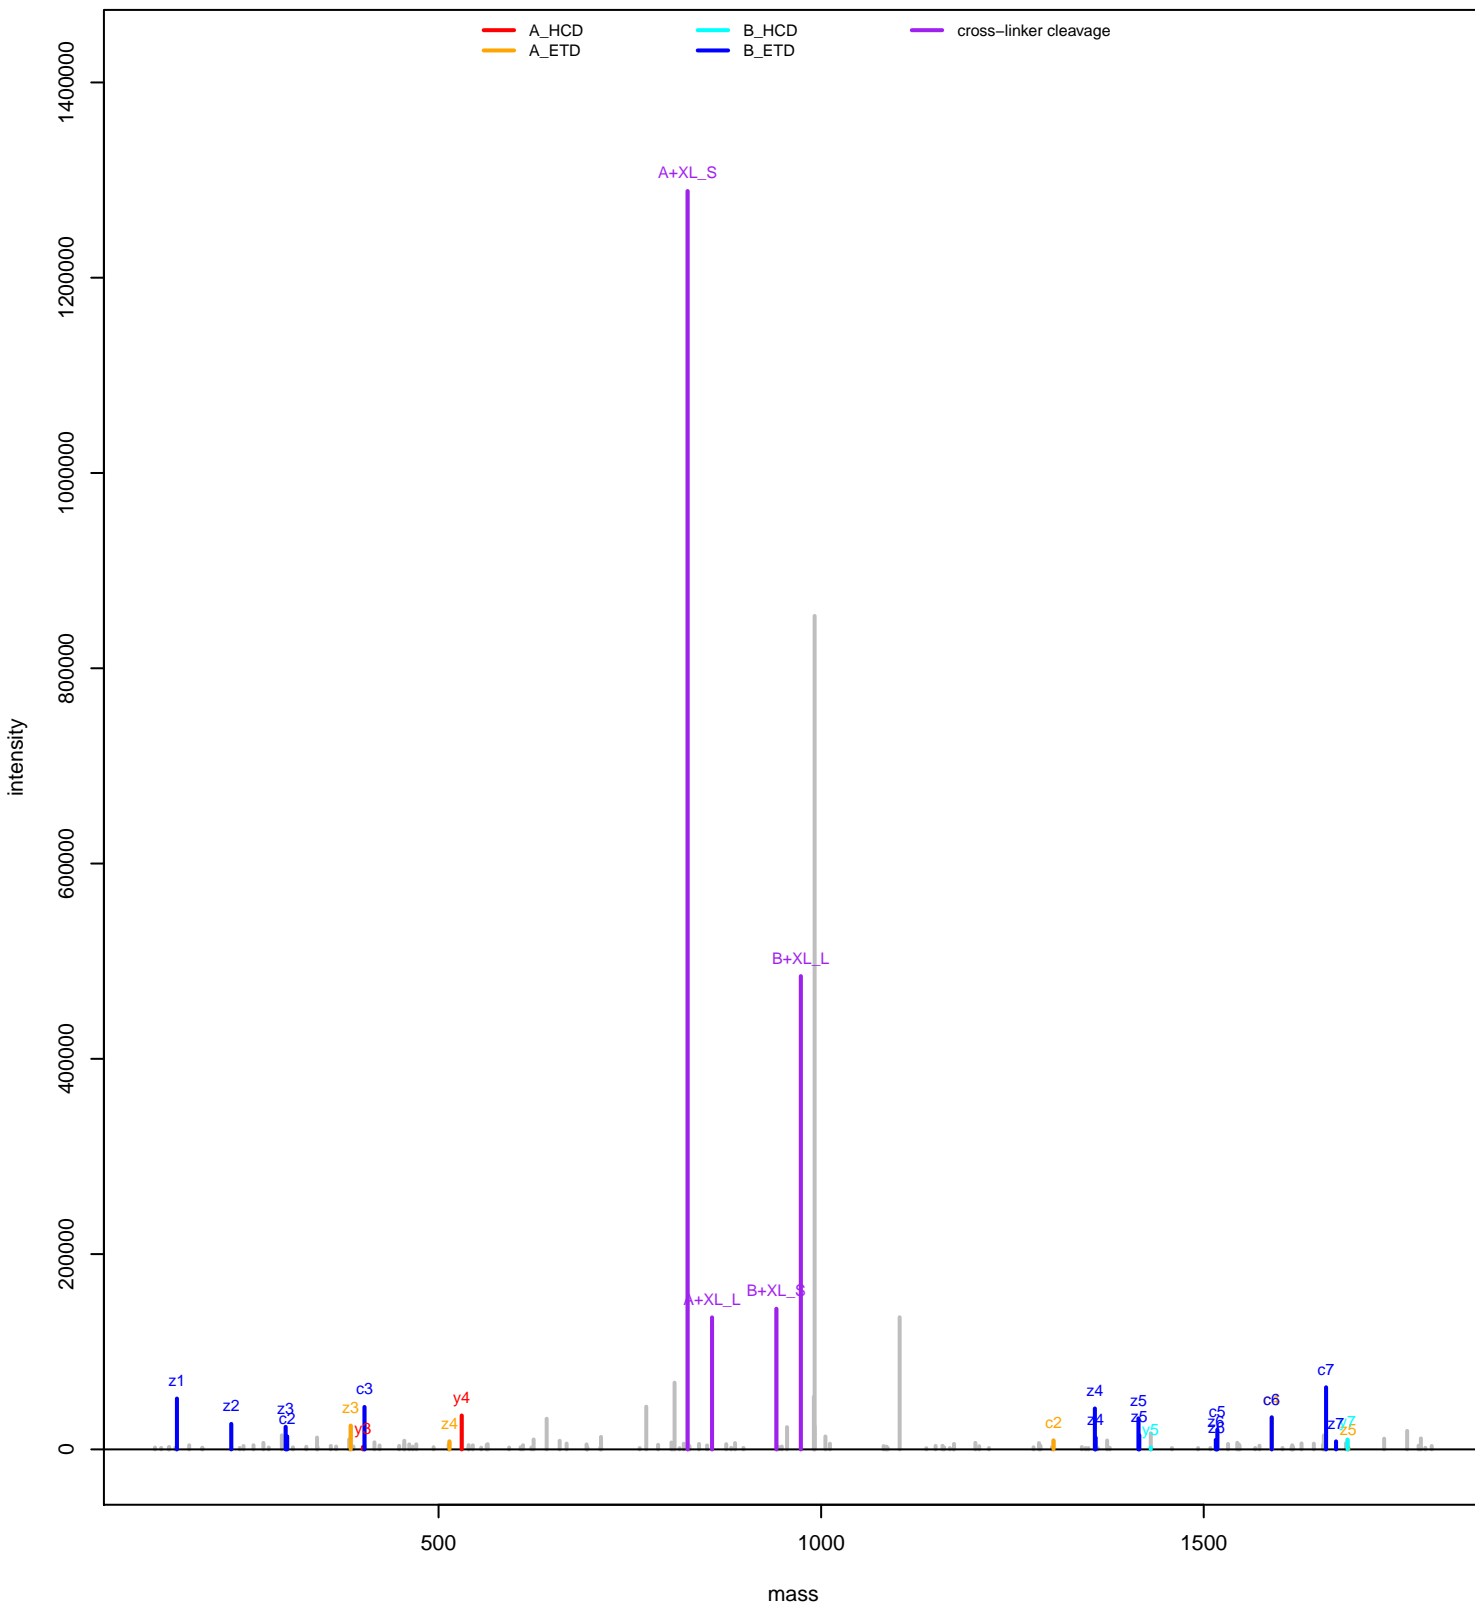

**IKERLN+XL\_S**

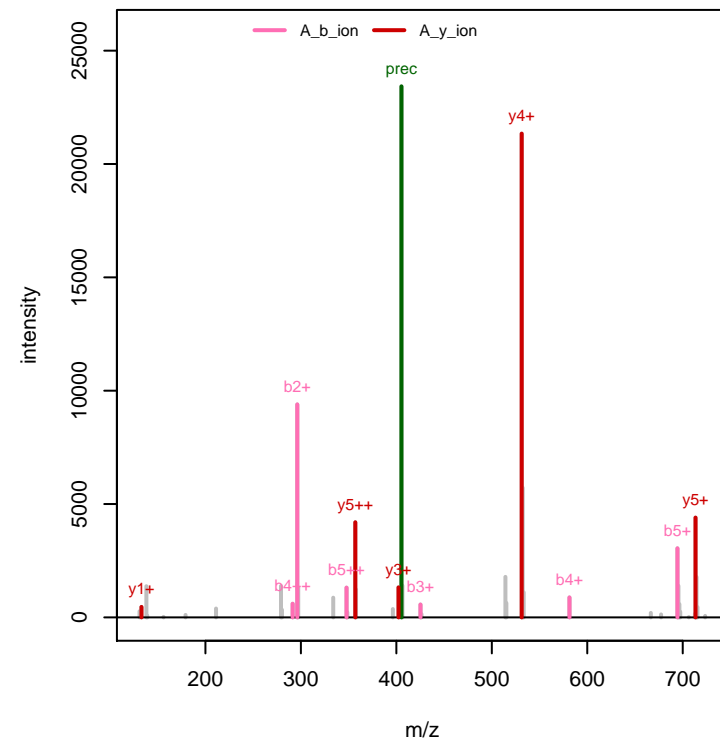

**IKERLN+XL\_L**

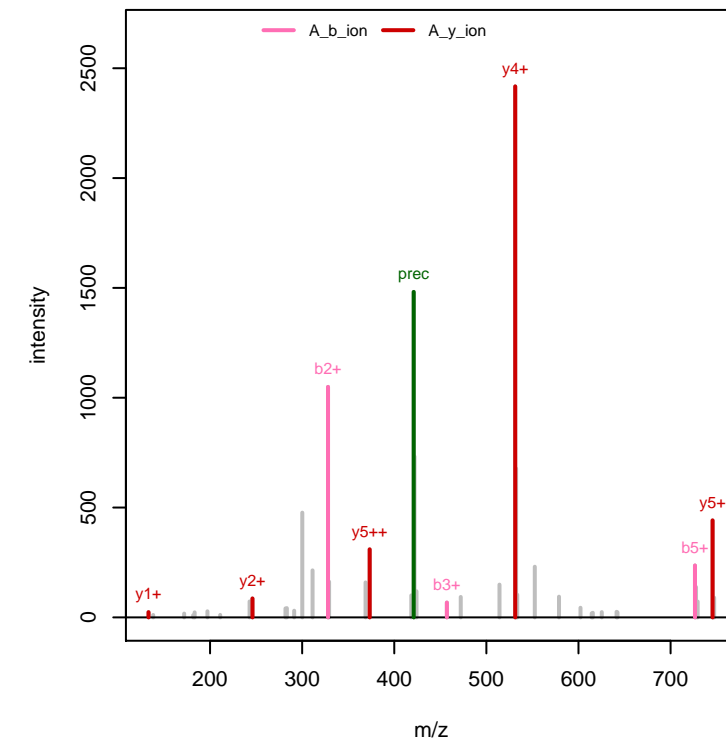

**ERTGKAAR+XL\_S**

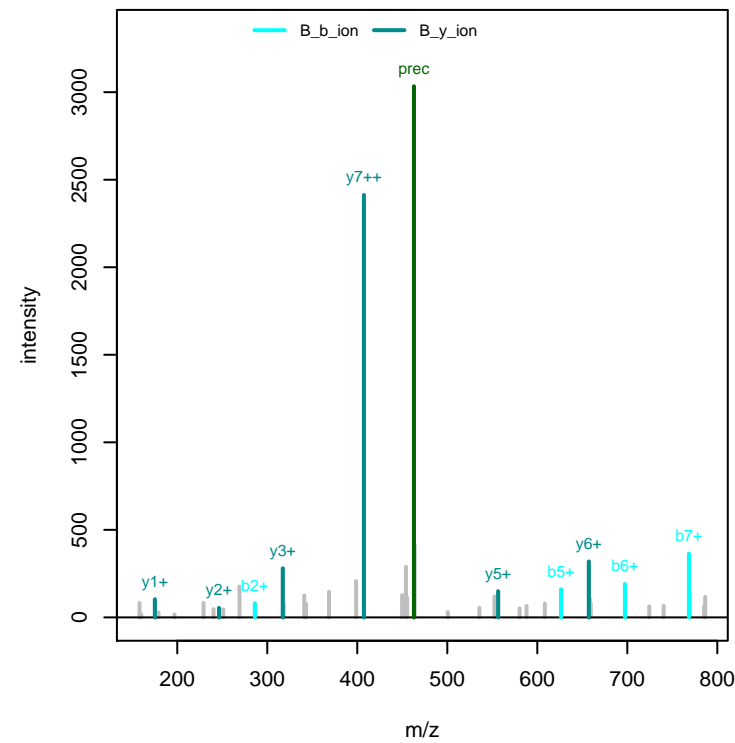

**ERTGKAAR+XL\_L**

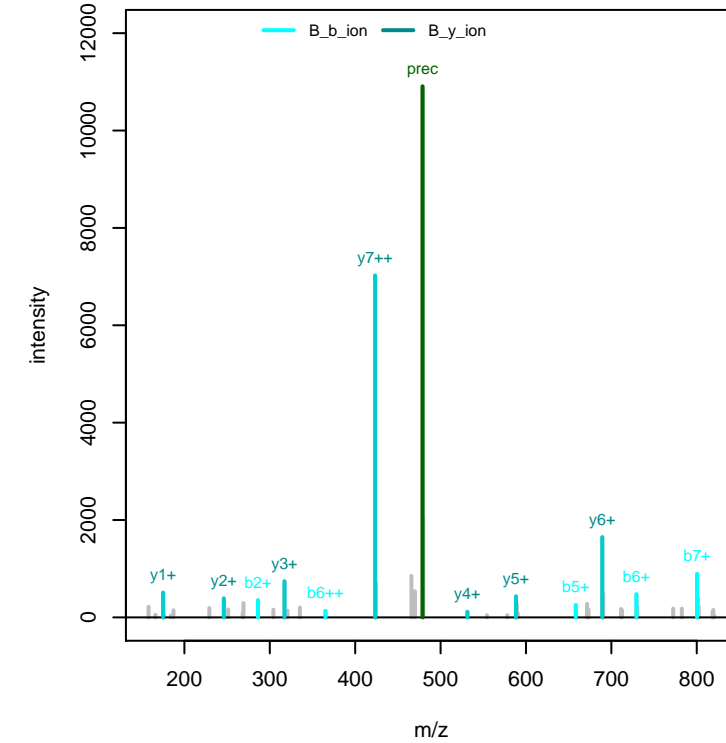

SHALNATKR  
VCQVTGKRPVTGNNR

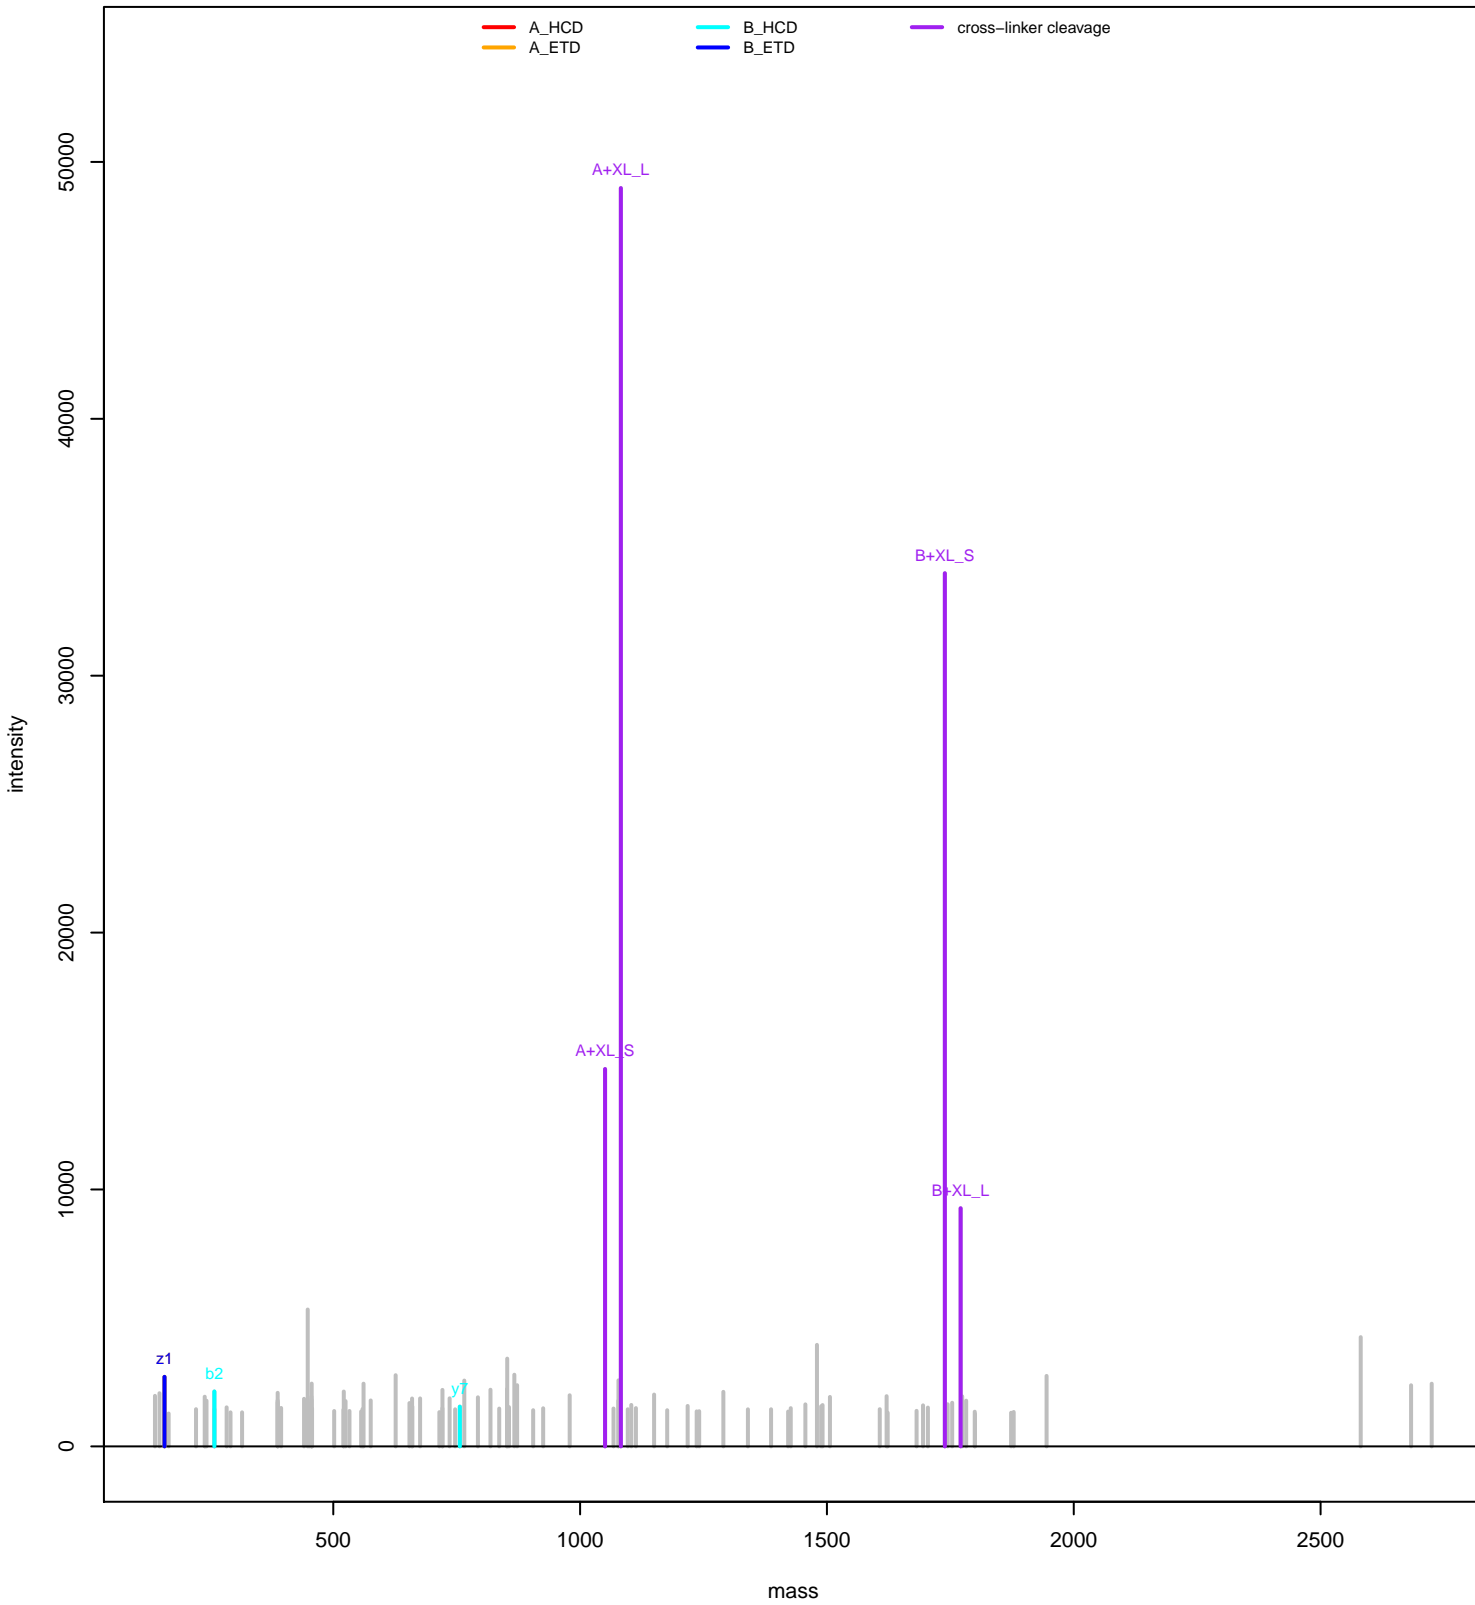

A\_HCD B\_HCD cross-linker cleavage  
A\_ETD B\_ETD

SHALNATKR+XL\_S

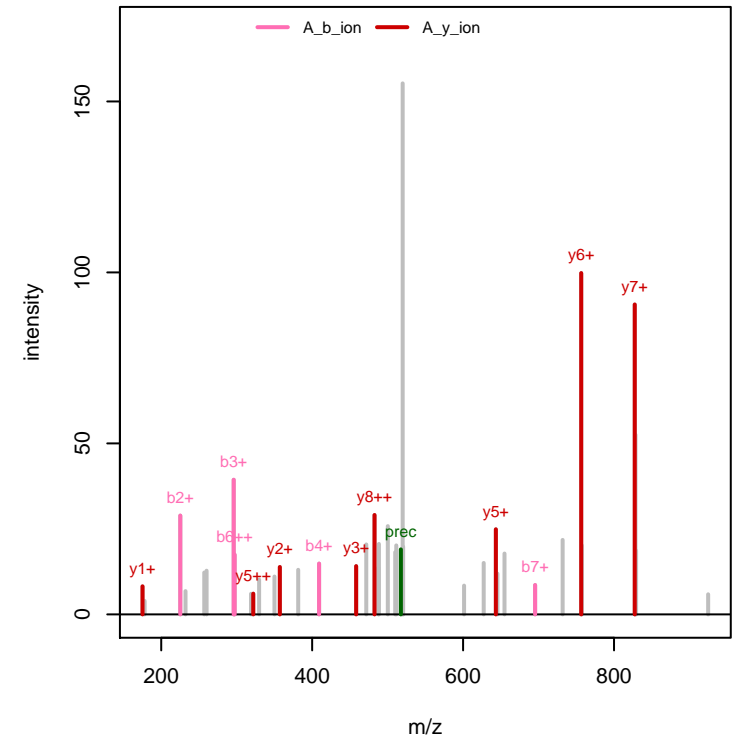

A\_b\_ion A\_y\_ion

SHALNATKR+XL\_L

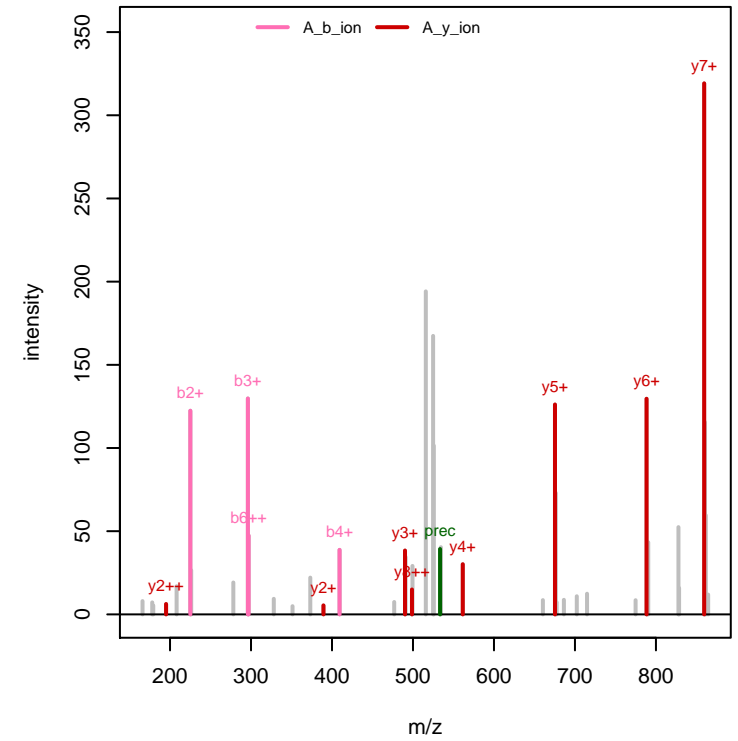

A\_b\_ion A\_y\_ion

VCQVTGKRPVTGNNR+XL\_S

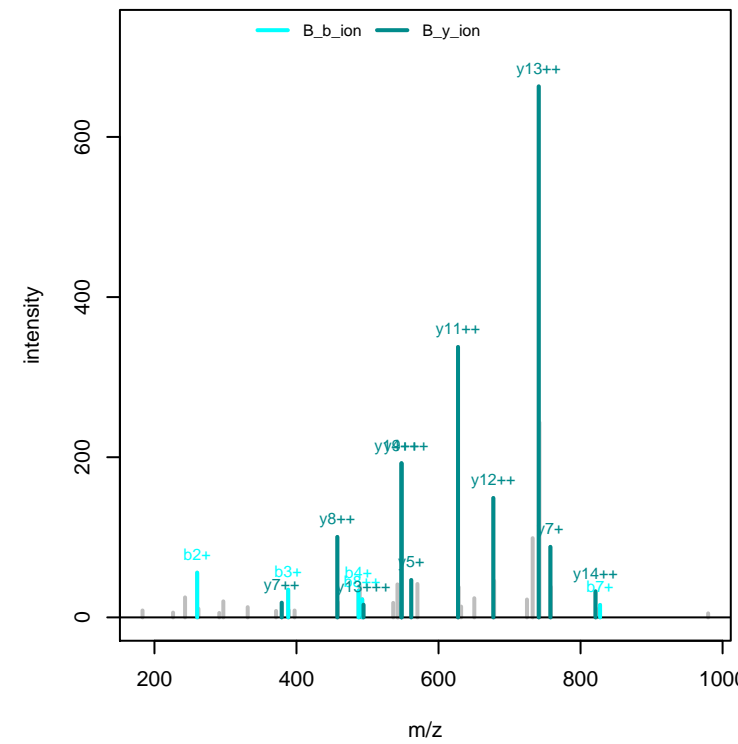

B\_b\_ion B\_y\_ion

VCQVTGKRPVTGNNR+XL\_L

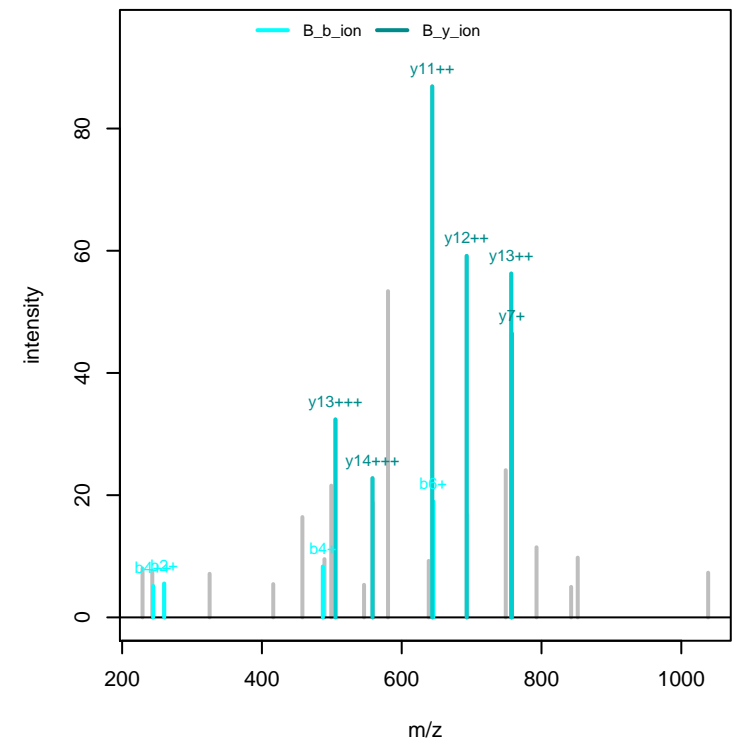

B\_b\_ion B\_y\_ion

**AATVAPEKIK**  
**KQATQGDELTIK**

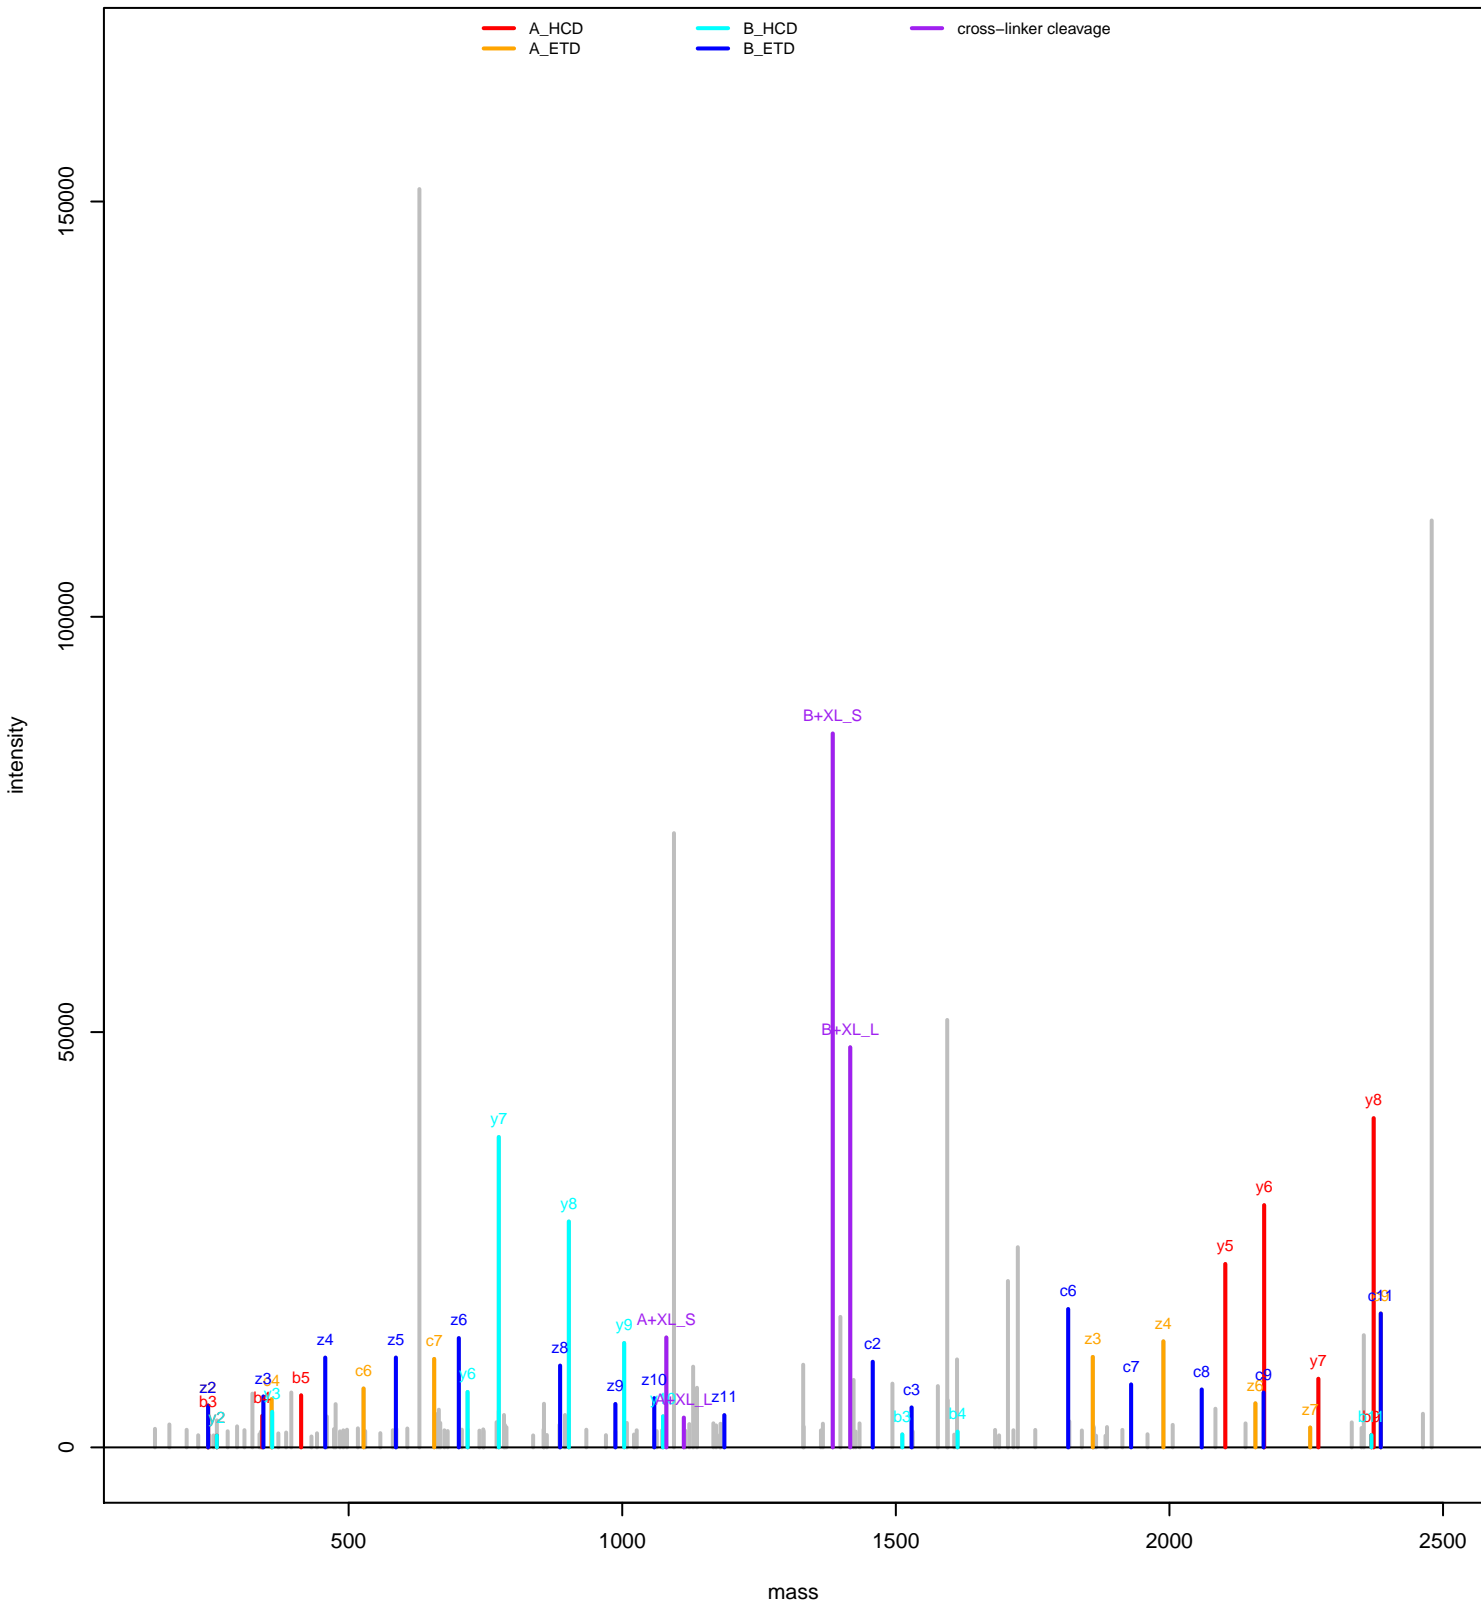

**AATVAPEKIK+XL\_S**

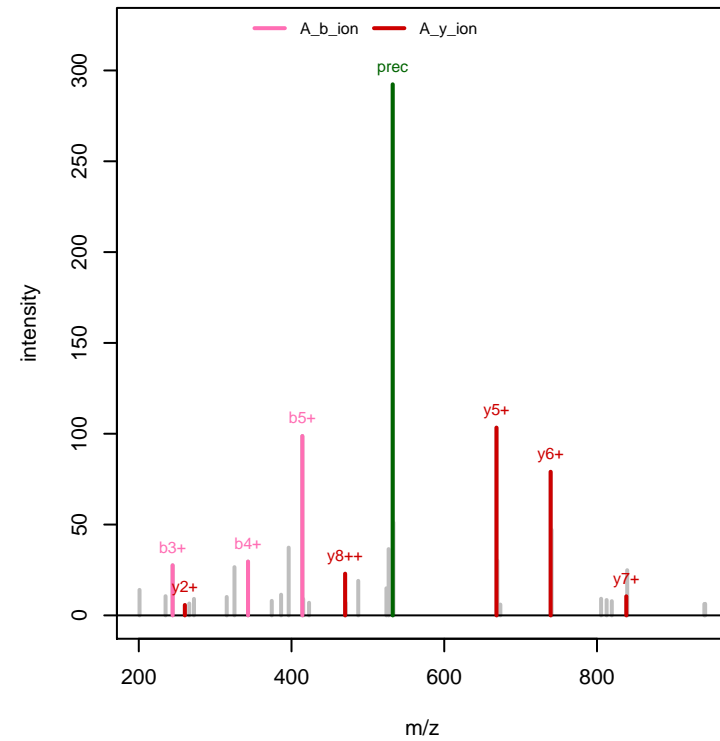

**AATVAPEKIK+XL\_L**

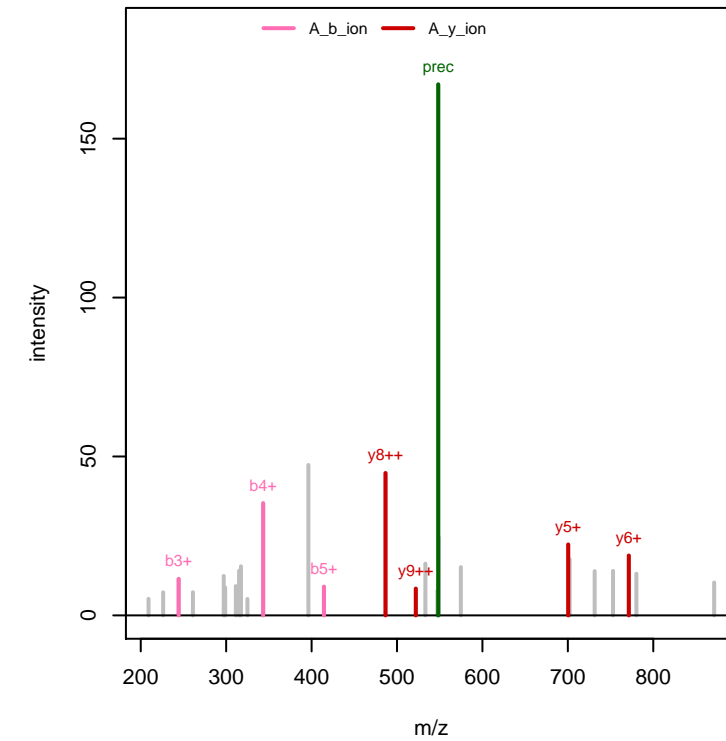

**KQATQGDELTIK+XL\_S**

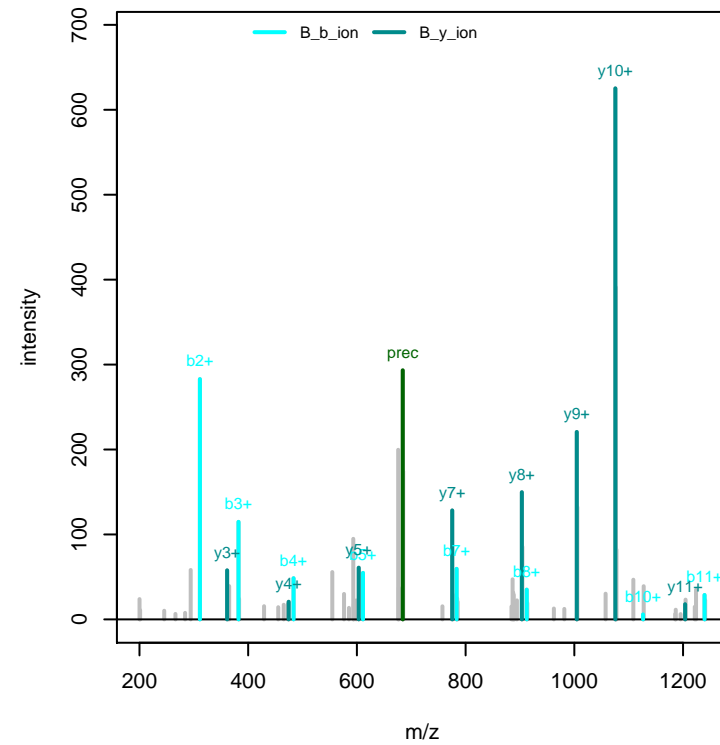

**KQATQGDELTIK+XL\_L**

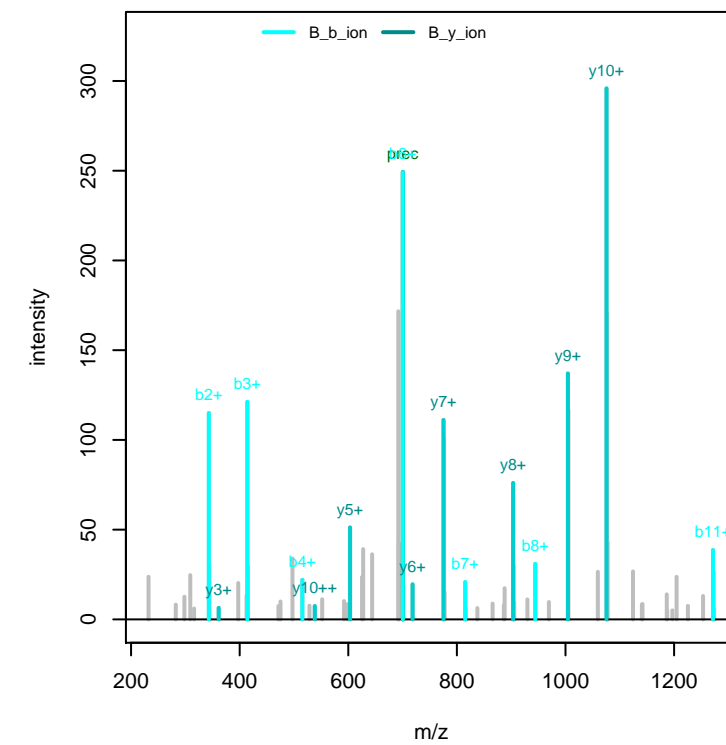

REAAEQAKREAAEK  
VSNQQDDMoTKNAQAEK

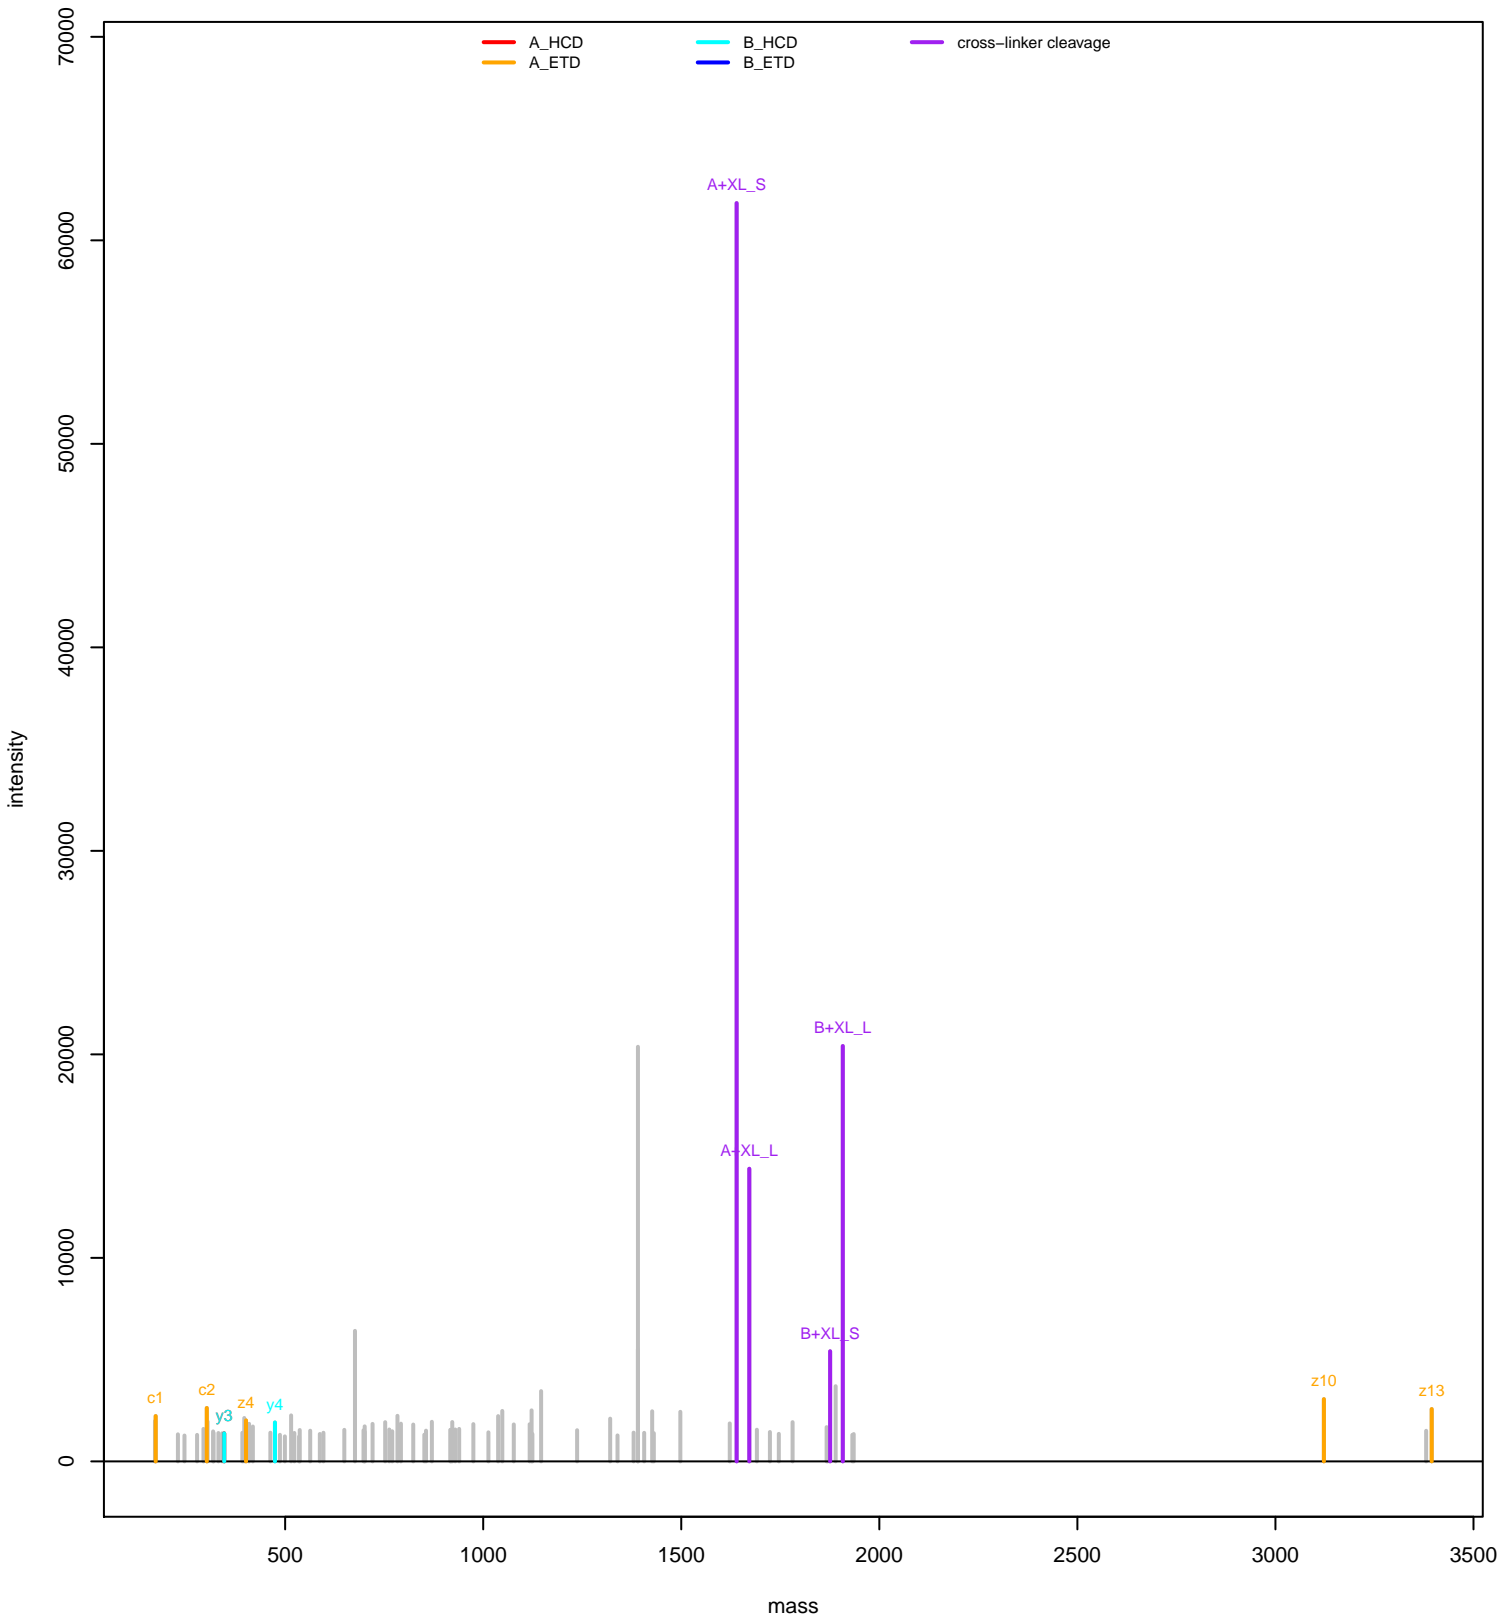

REAAEQAKREAAEK+XL\_S

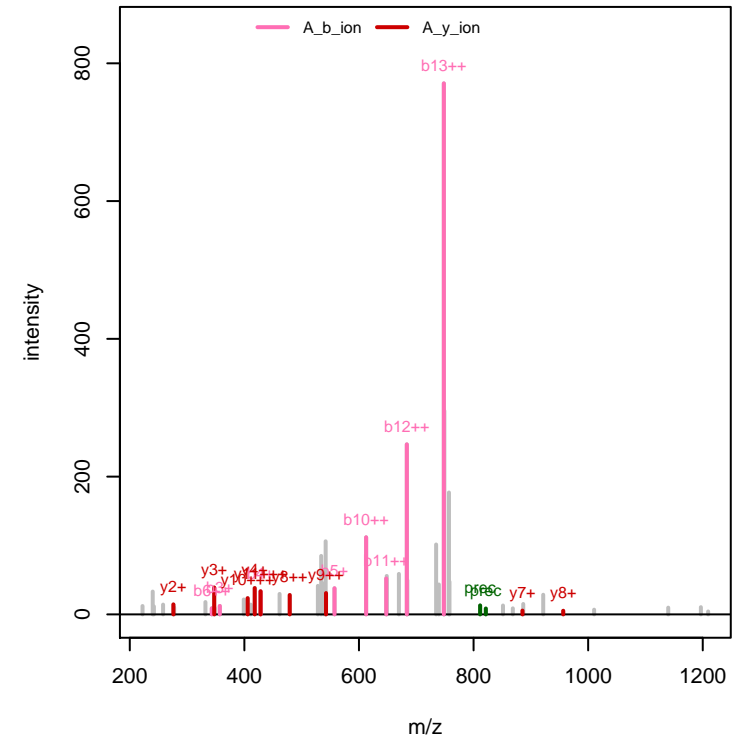

REAAEQAKREAAEK+XL\_L

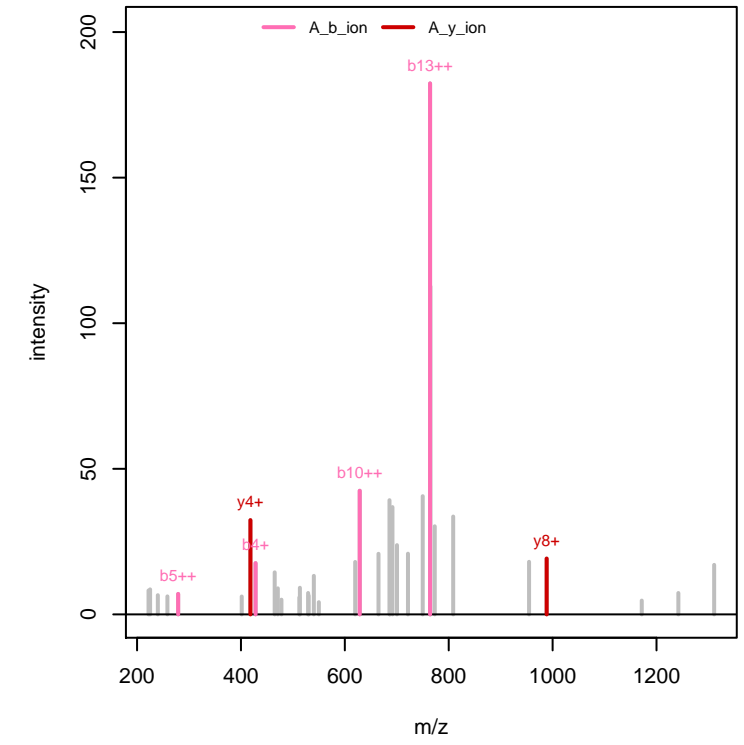

VSNQQDDMoTKNAQAEK+XL\_S

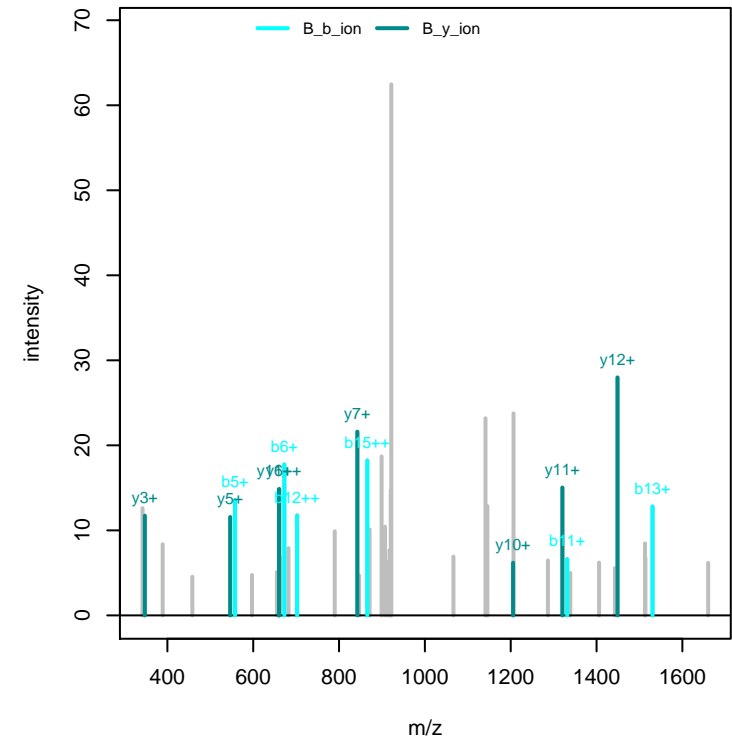

VSNQQDDMoTKNAQAEK+XL\_L

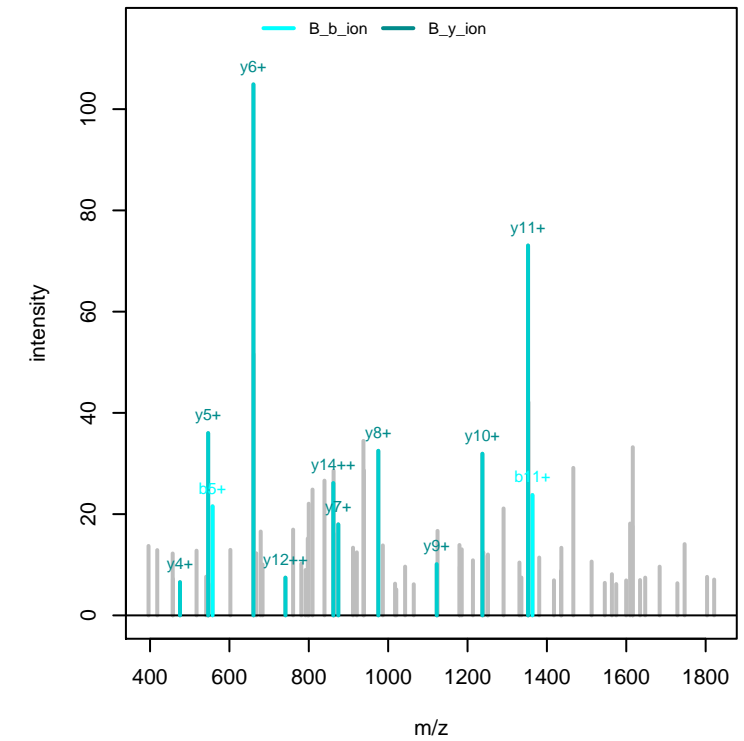



ELAKASVSR  
GEILGGMAAVEQPEKPAAPK

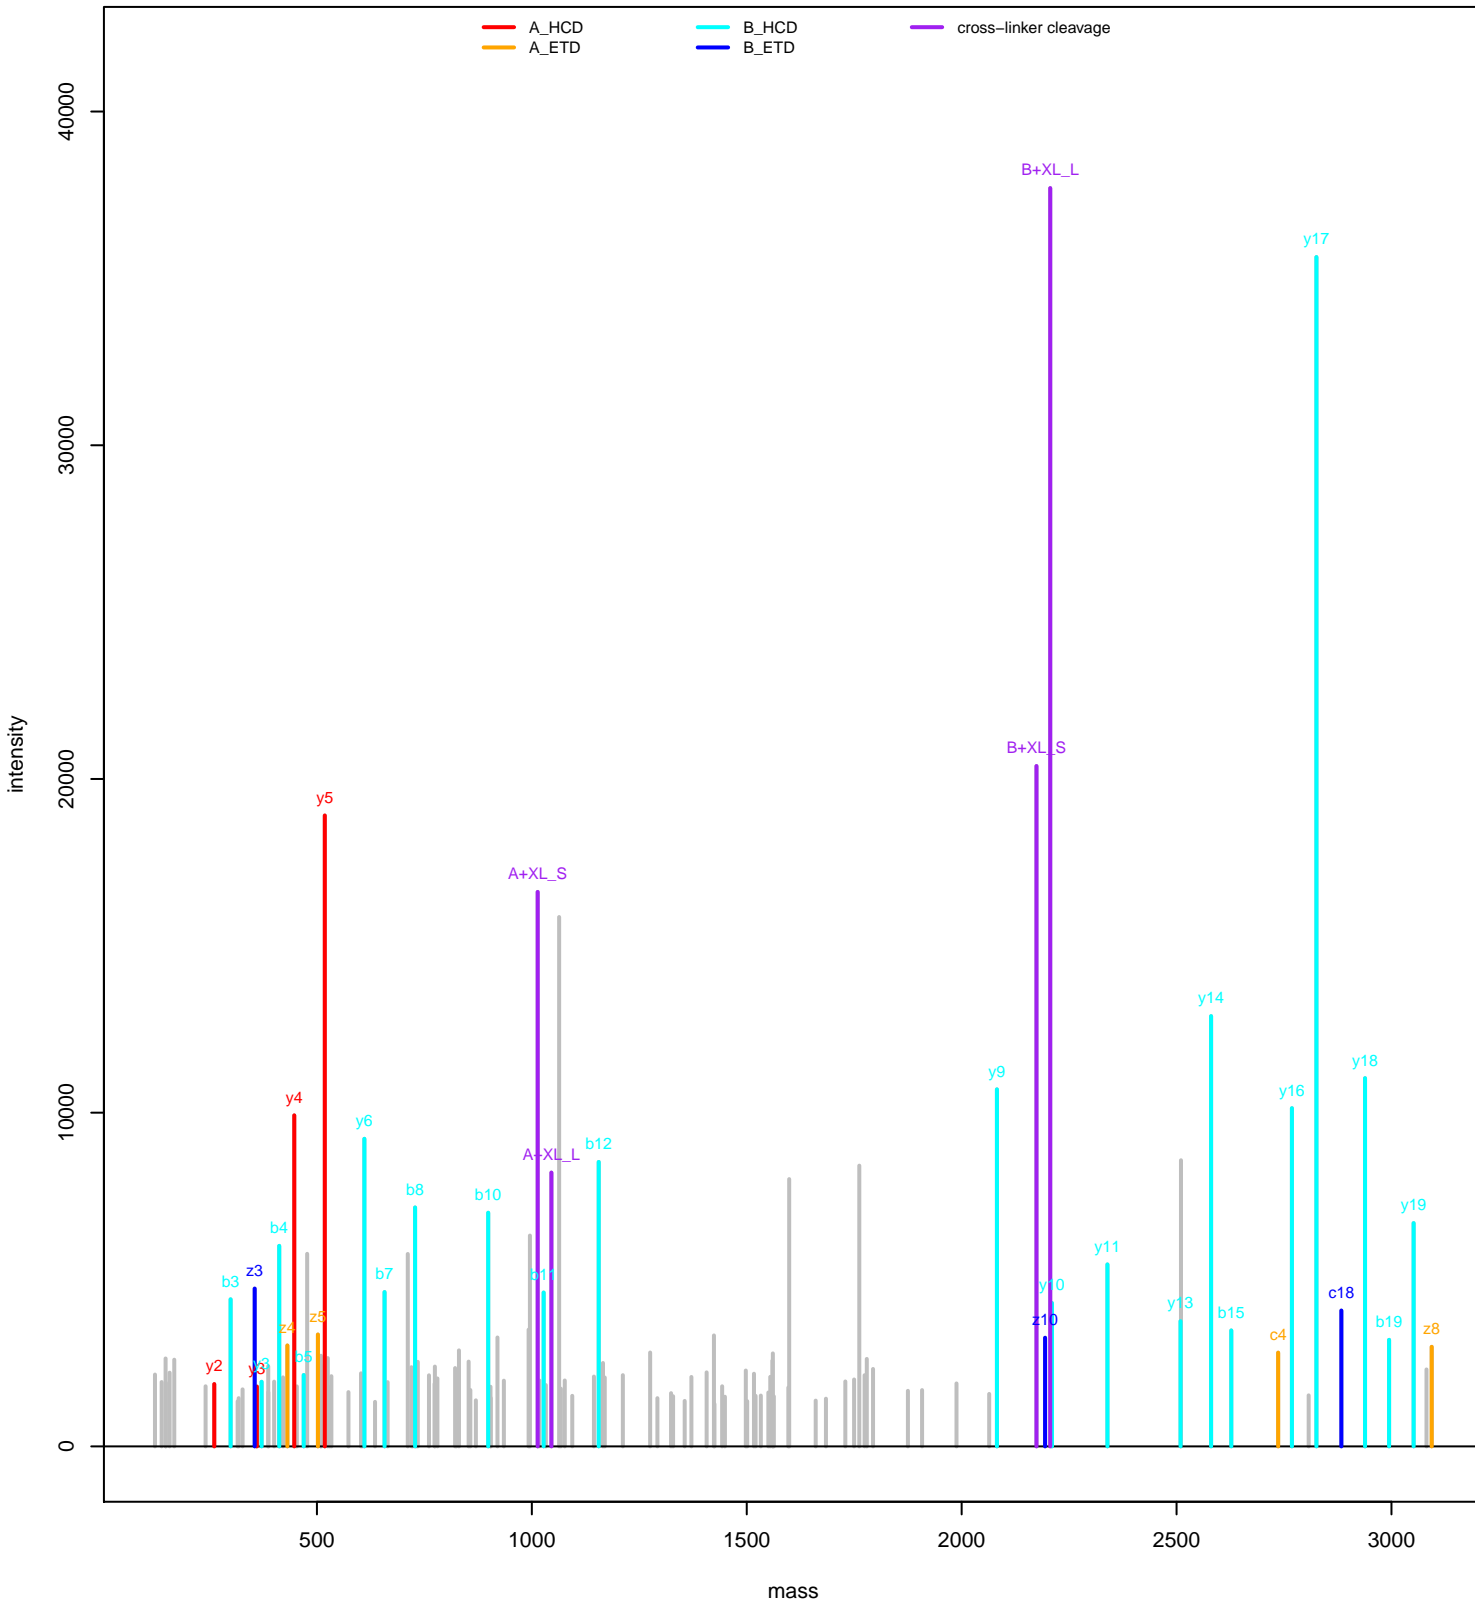

ELAKASVSR+XL\_S

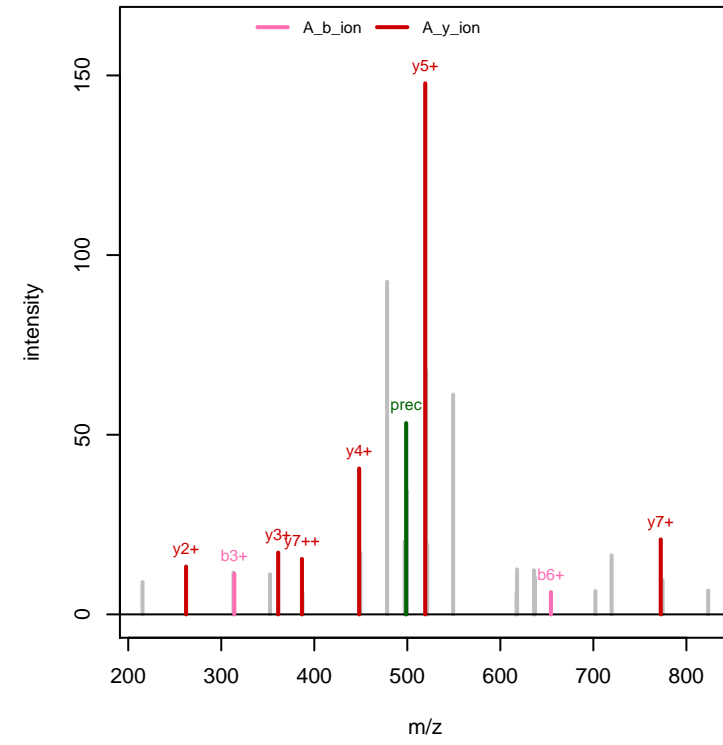

ELAKASVSR+XL\_L

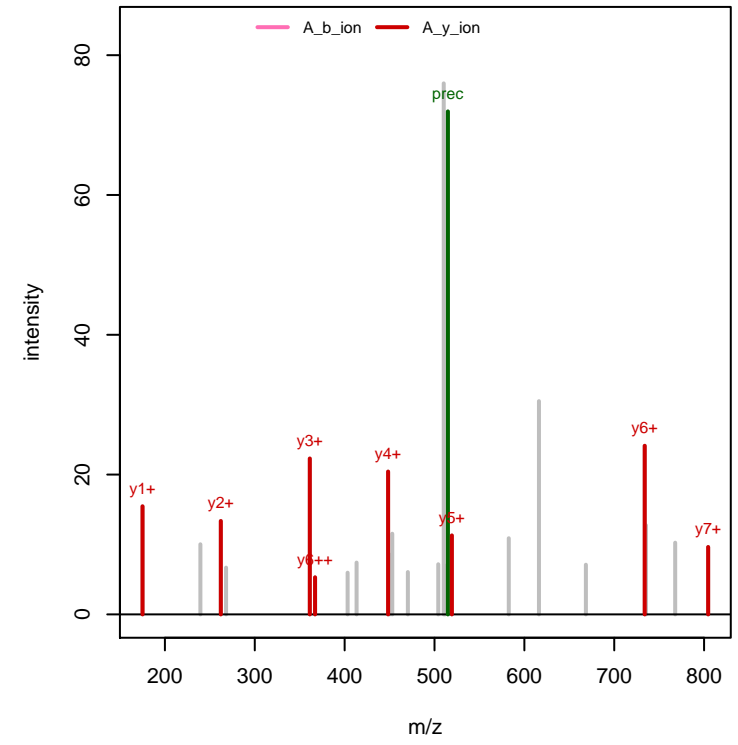

GEILGGMAAVEQPEKPAAPK+XL\_S

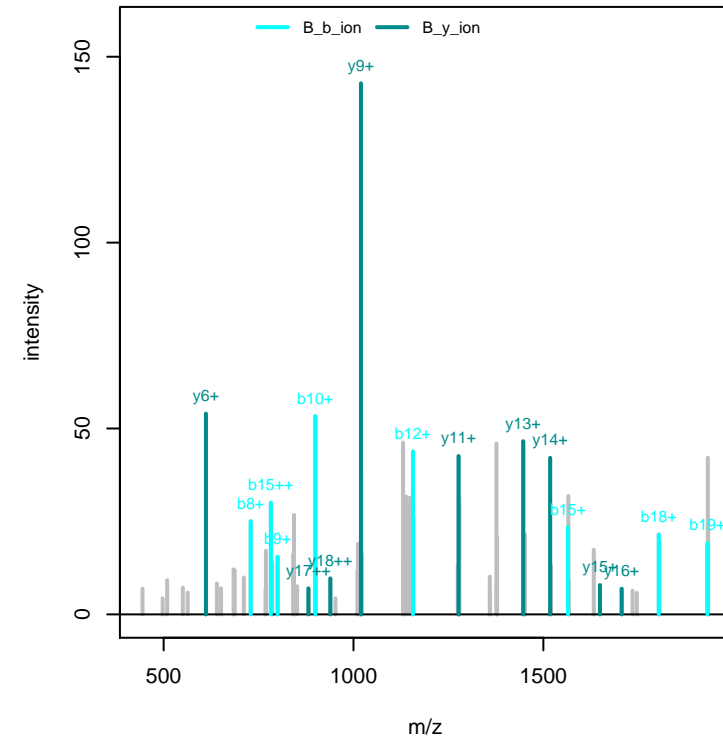

GEILGGMAAVEQPEKPAAPK+XL\_L

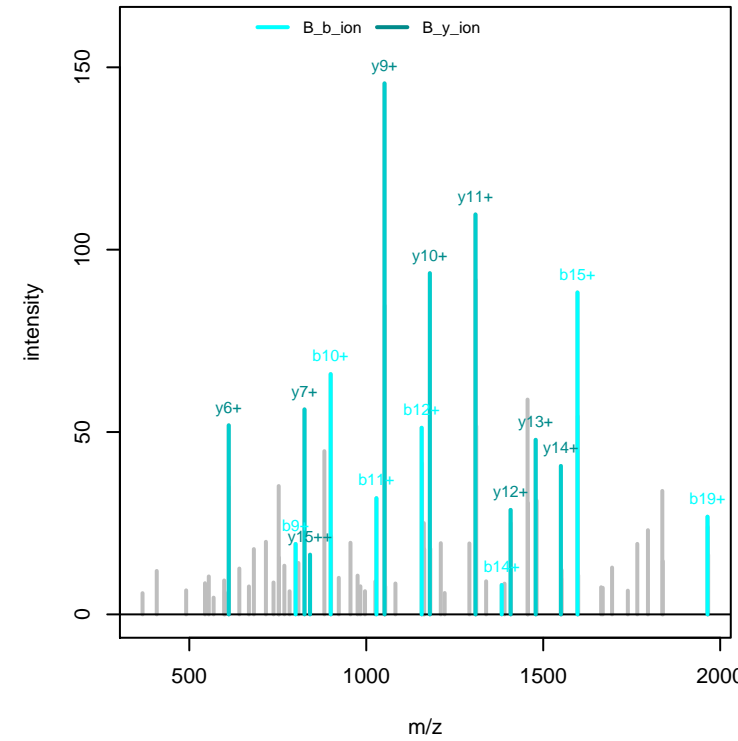

KIKELAVK  
SEEKASTPAQR

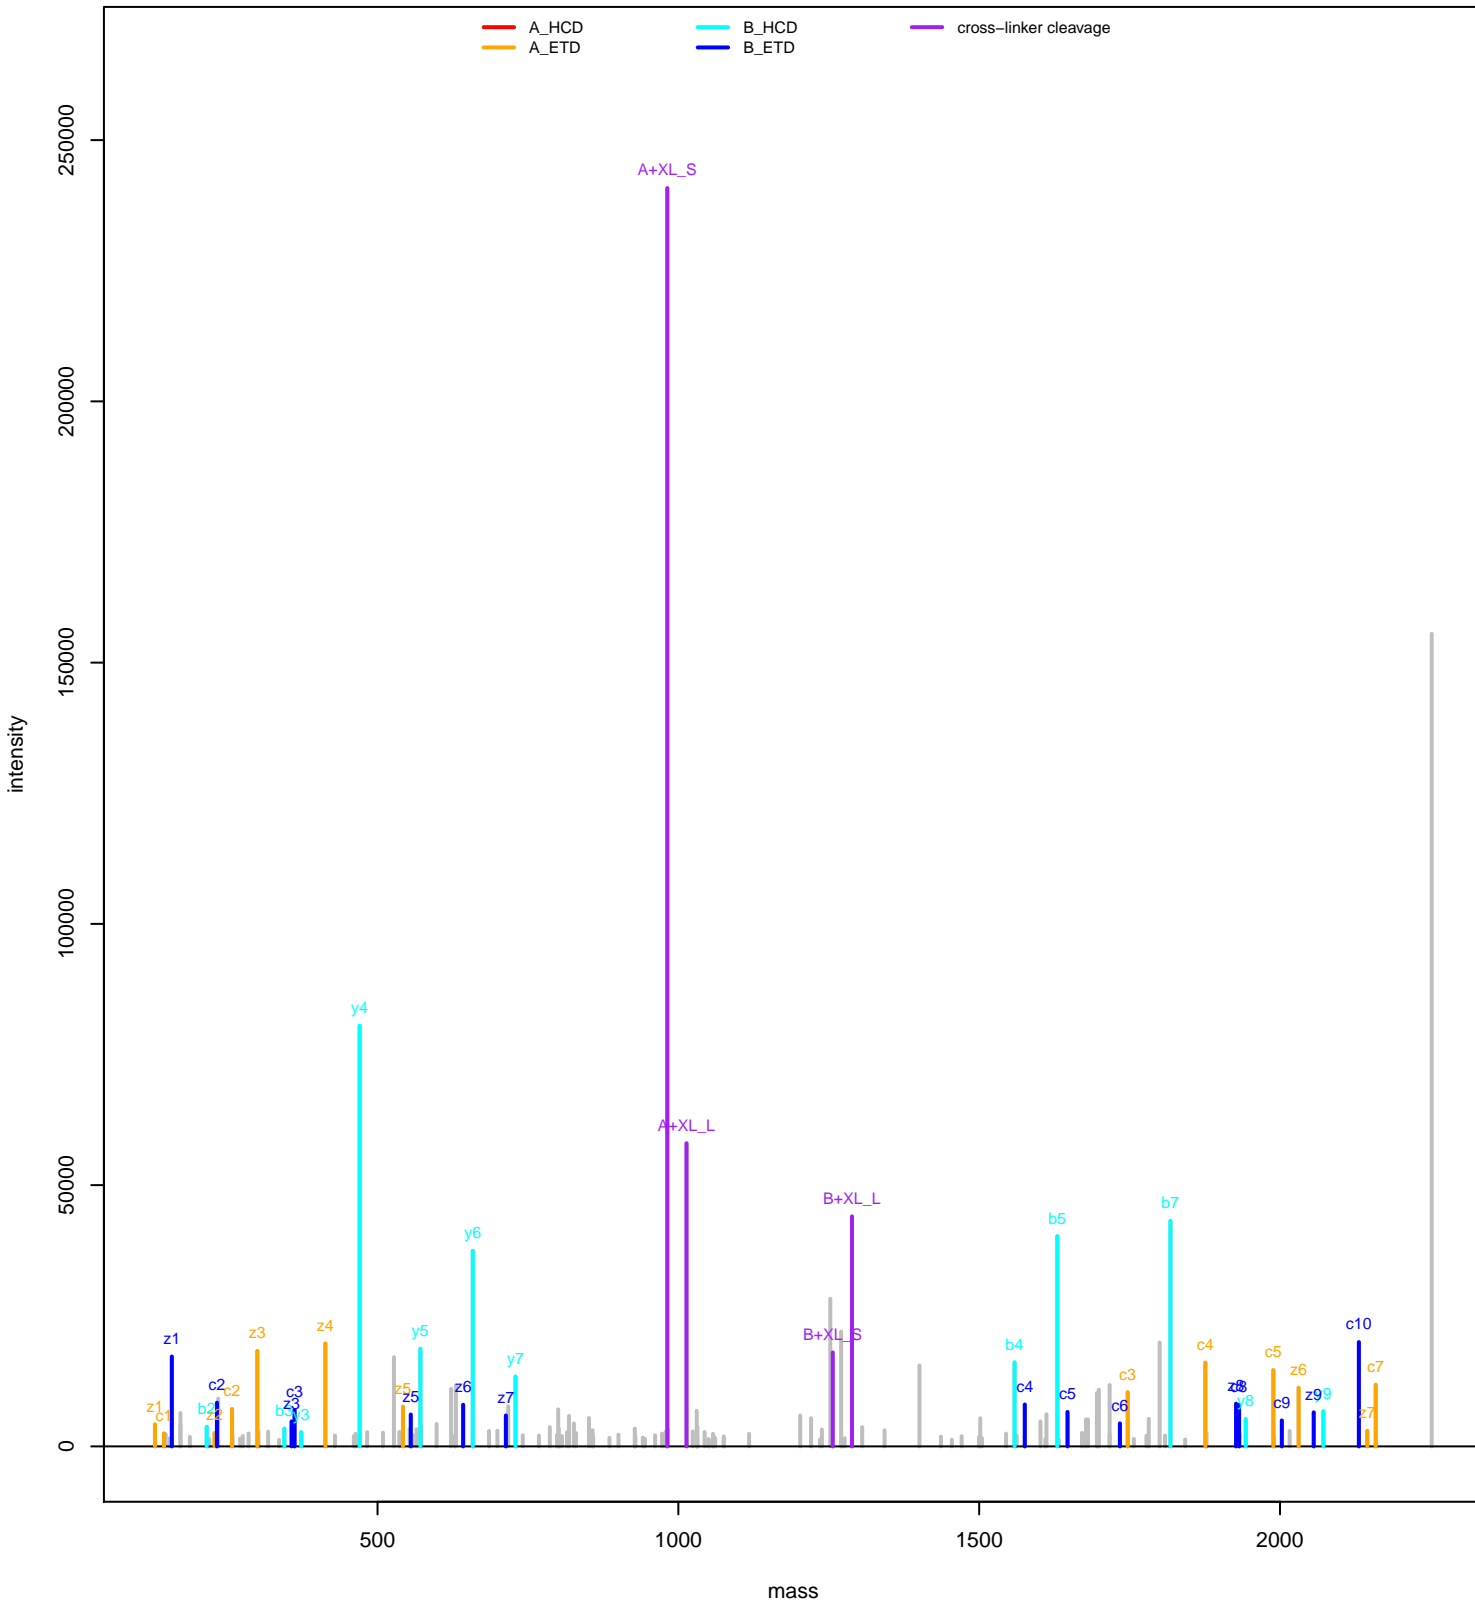

KIKELAVK+XL\_S

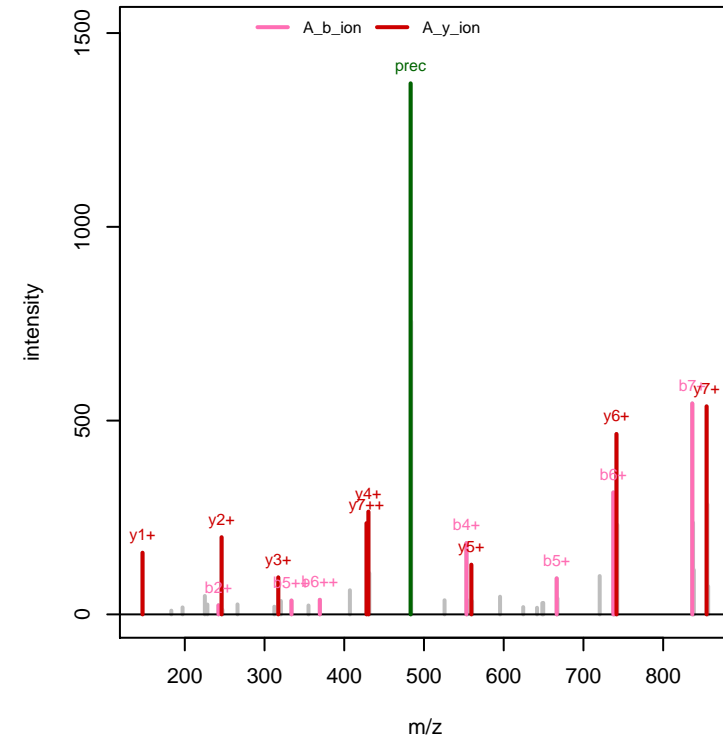

KIKELAVK+XL\_L

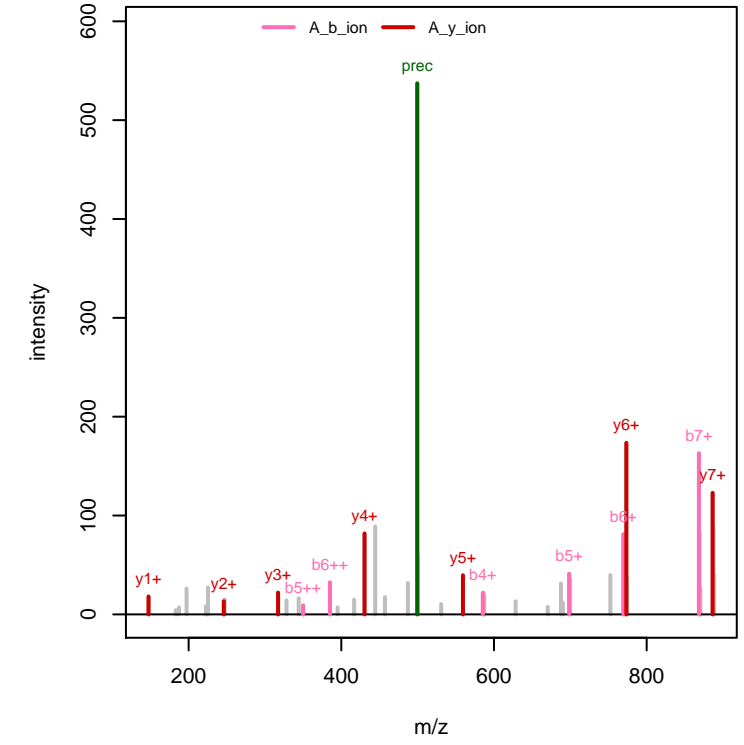

SEEKASTPAQR+XL\_S

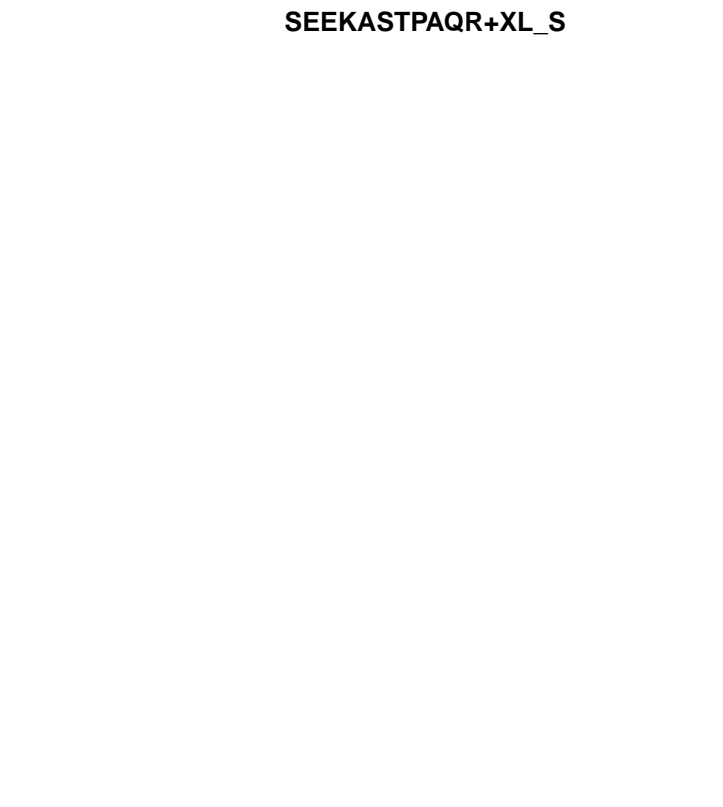

SEEKASTPAQR+XL\_L

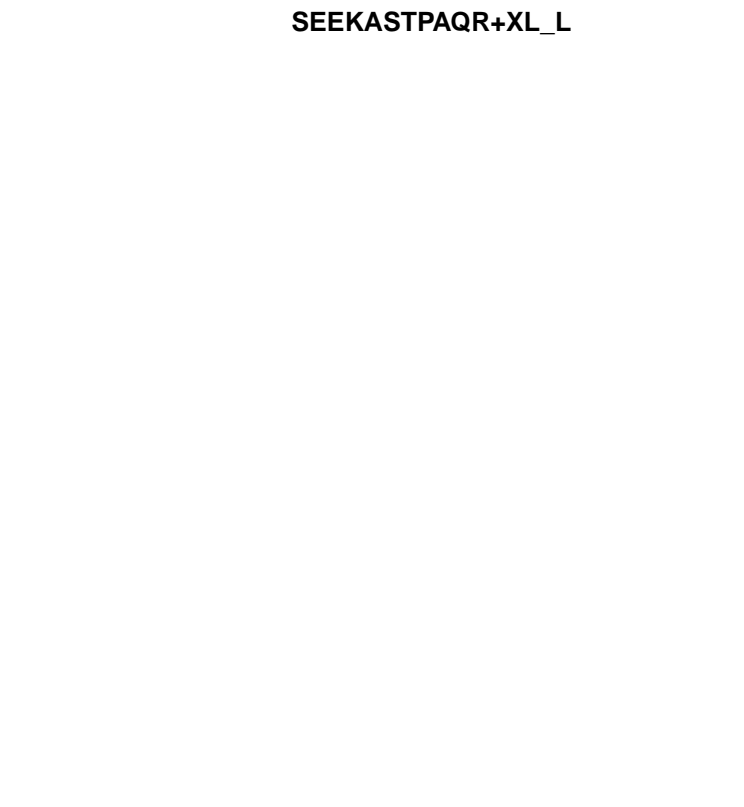

GGKEPNYSAK  
GGKEPNYSAK

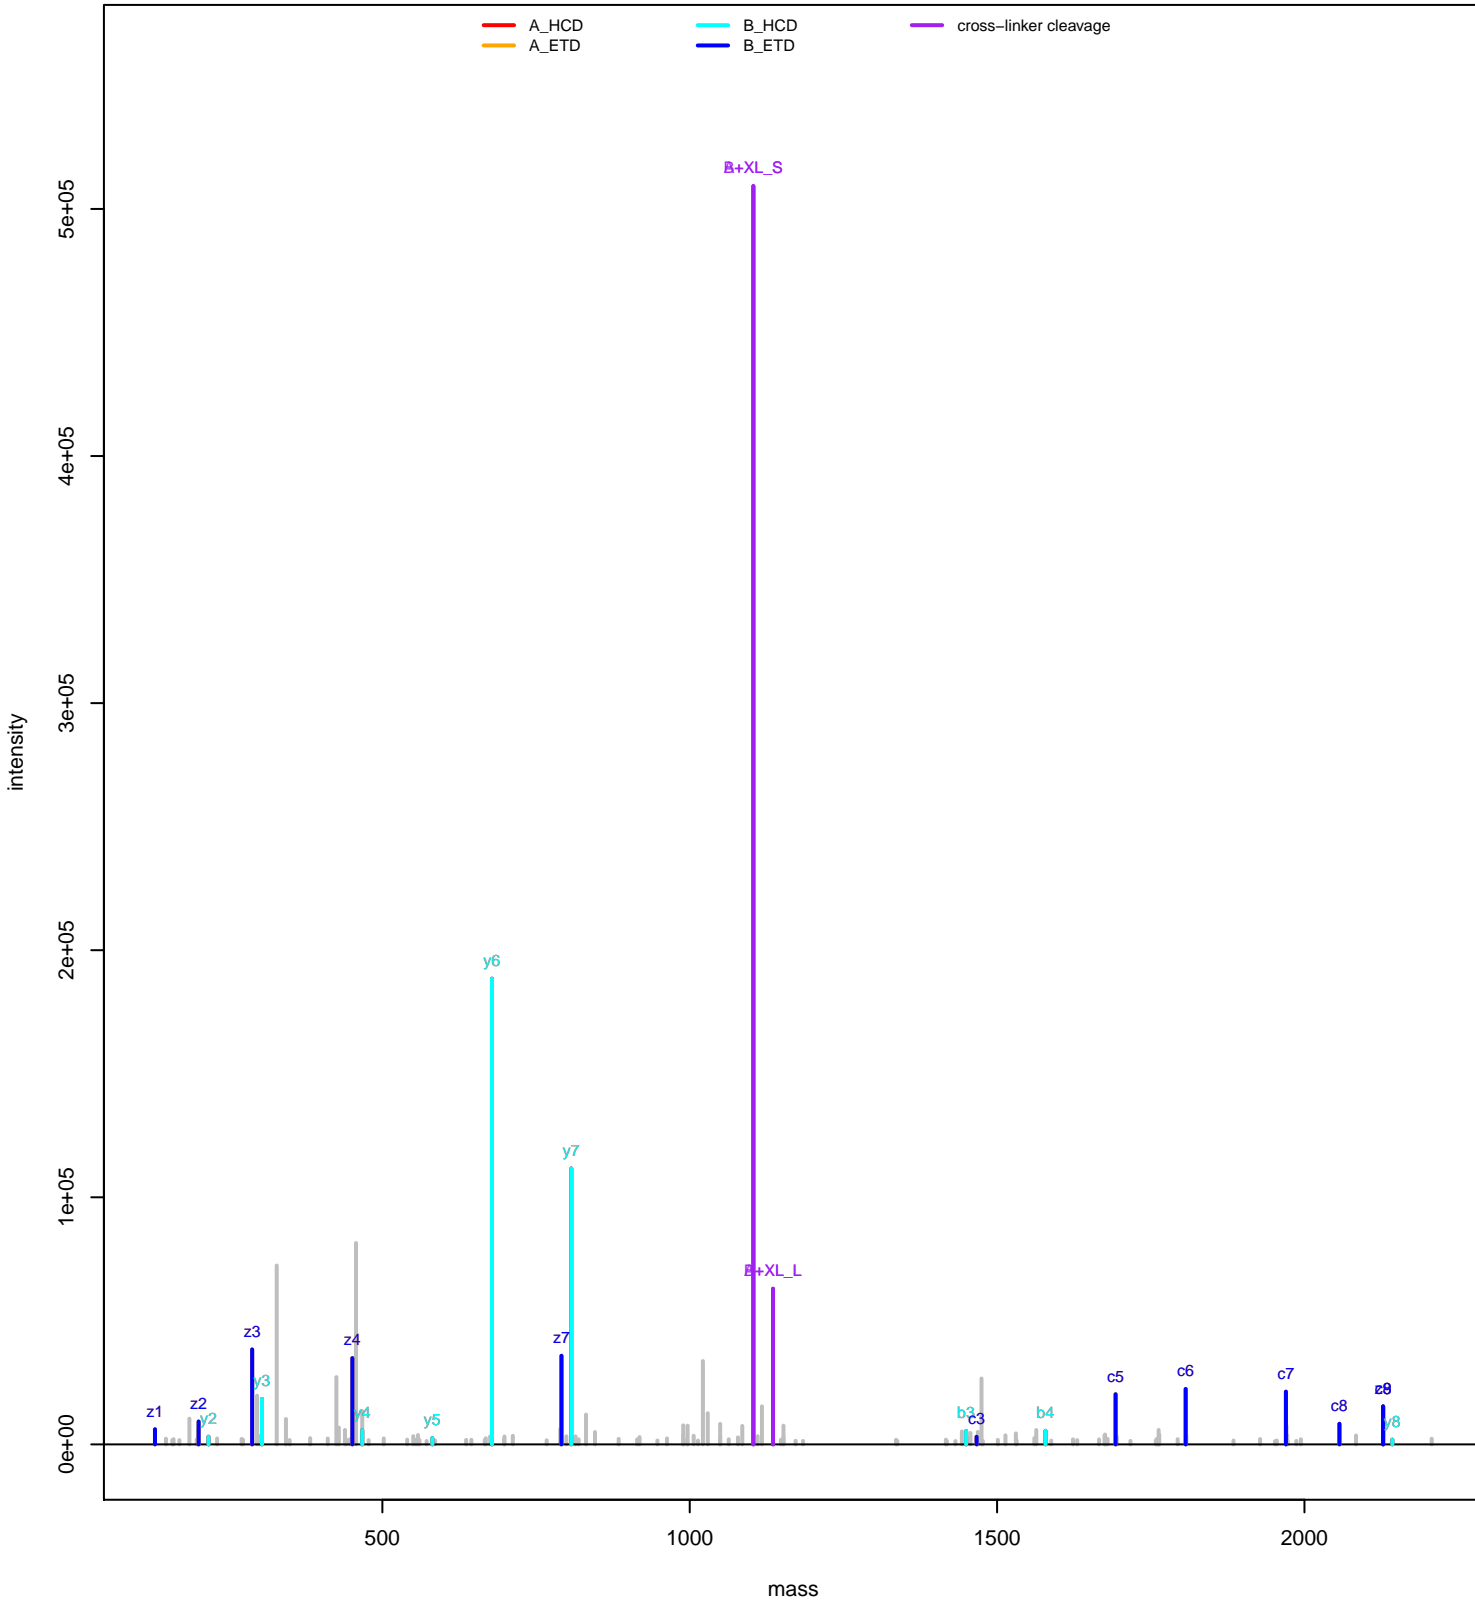

GGKEPNYSAK+XL\_S

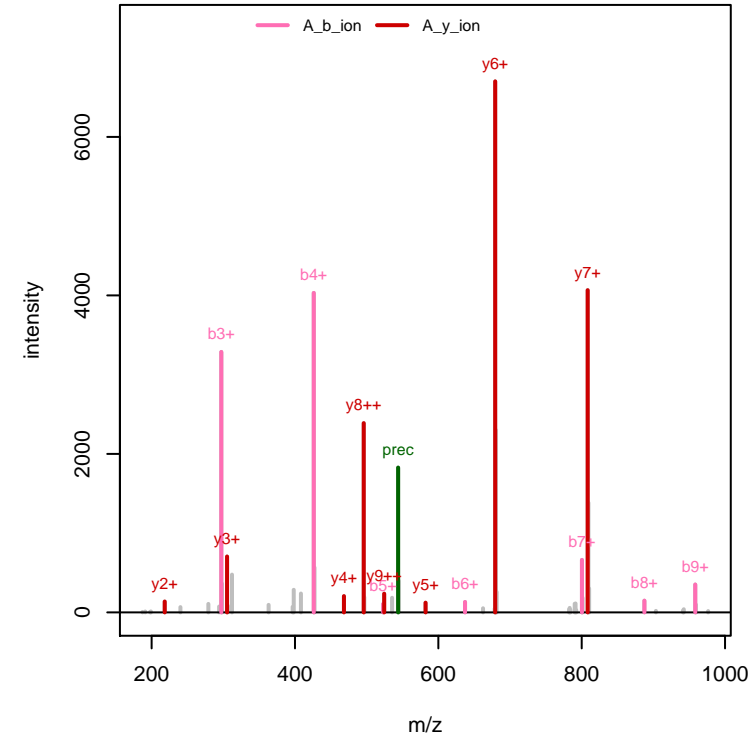

GGKEPNYSAK+XL\_L

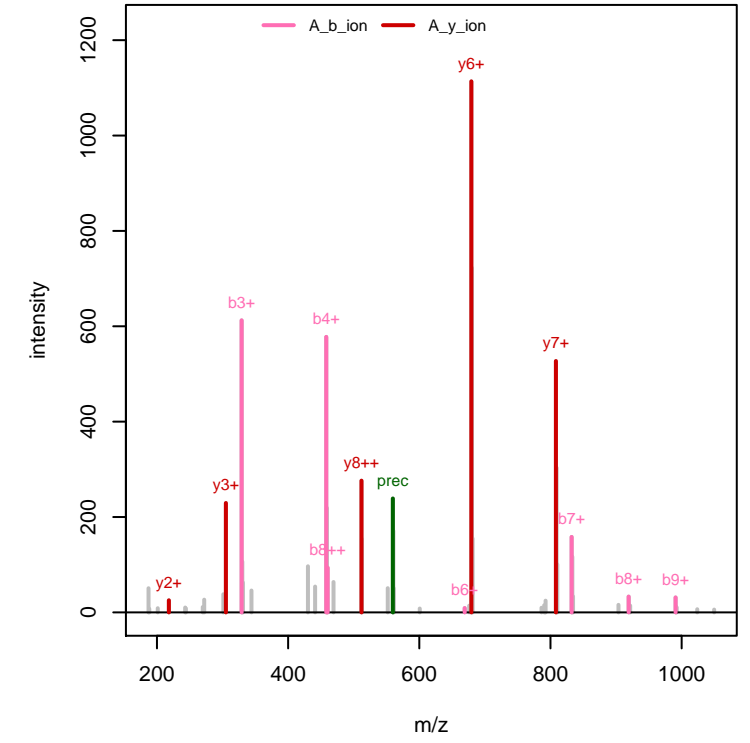

GGKEPNYSAK+XL\_S

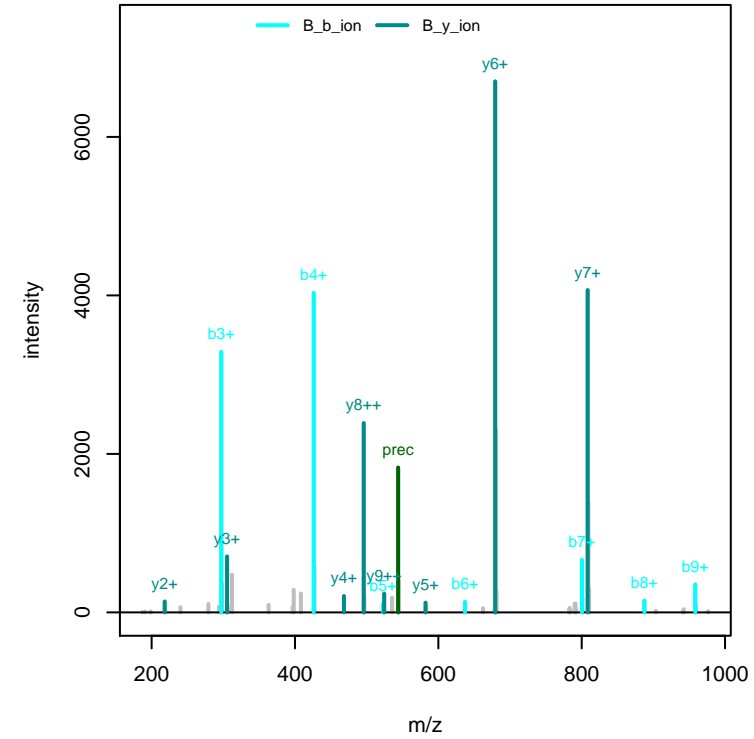

GGKEPNYSAK+XL\_L

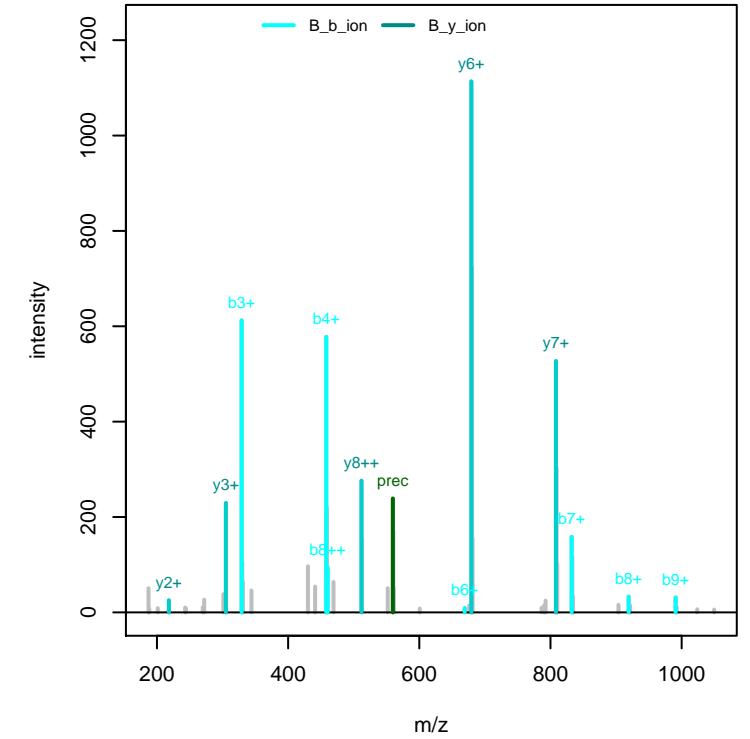

SQSGDFTRSKGK  
IADGQQKQENQIK

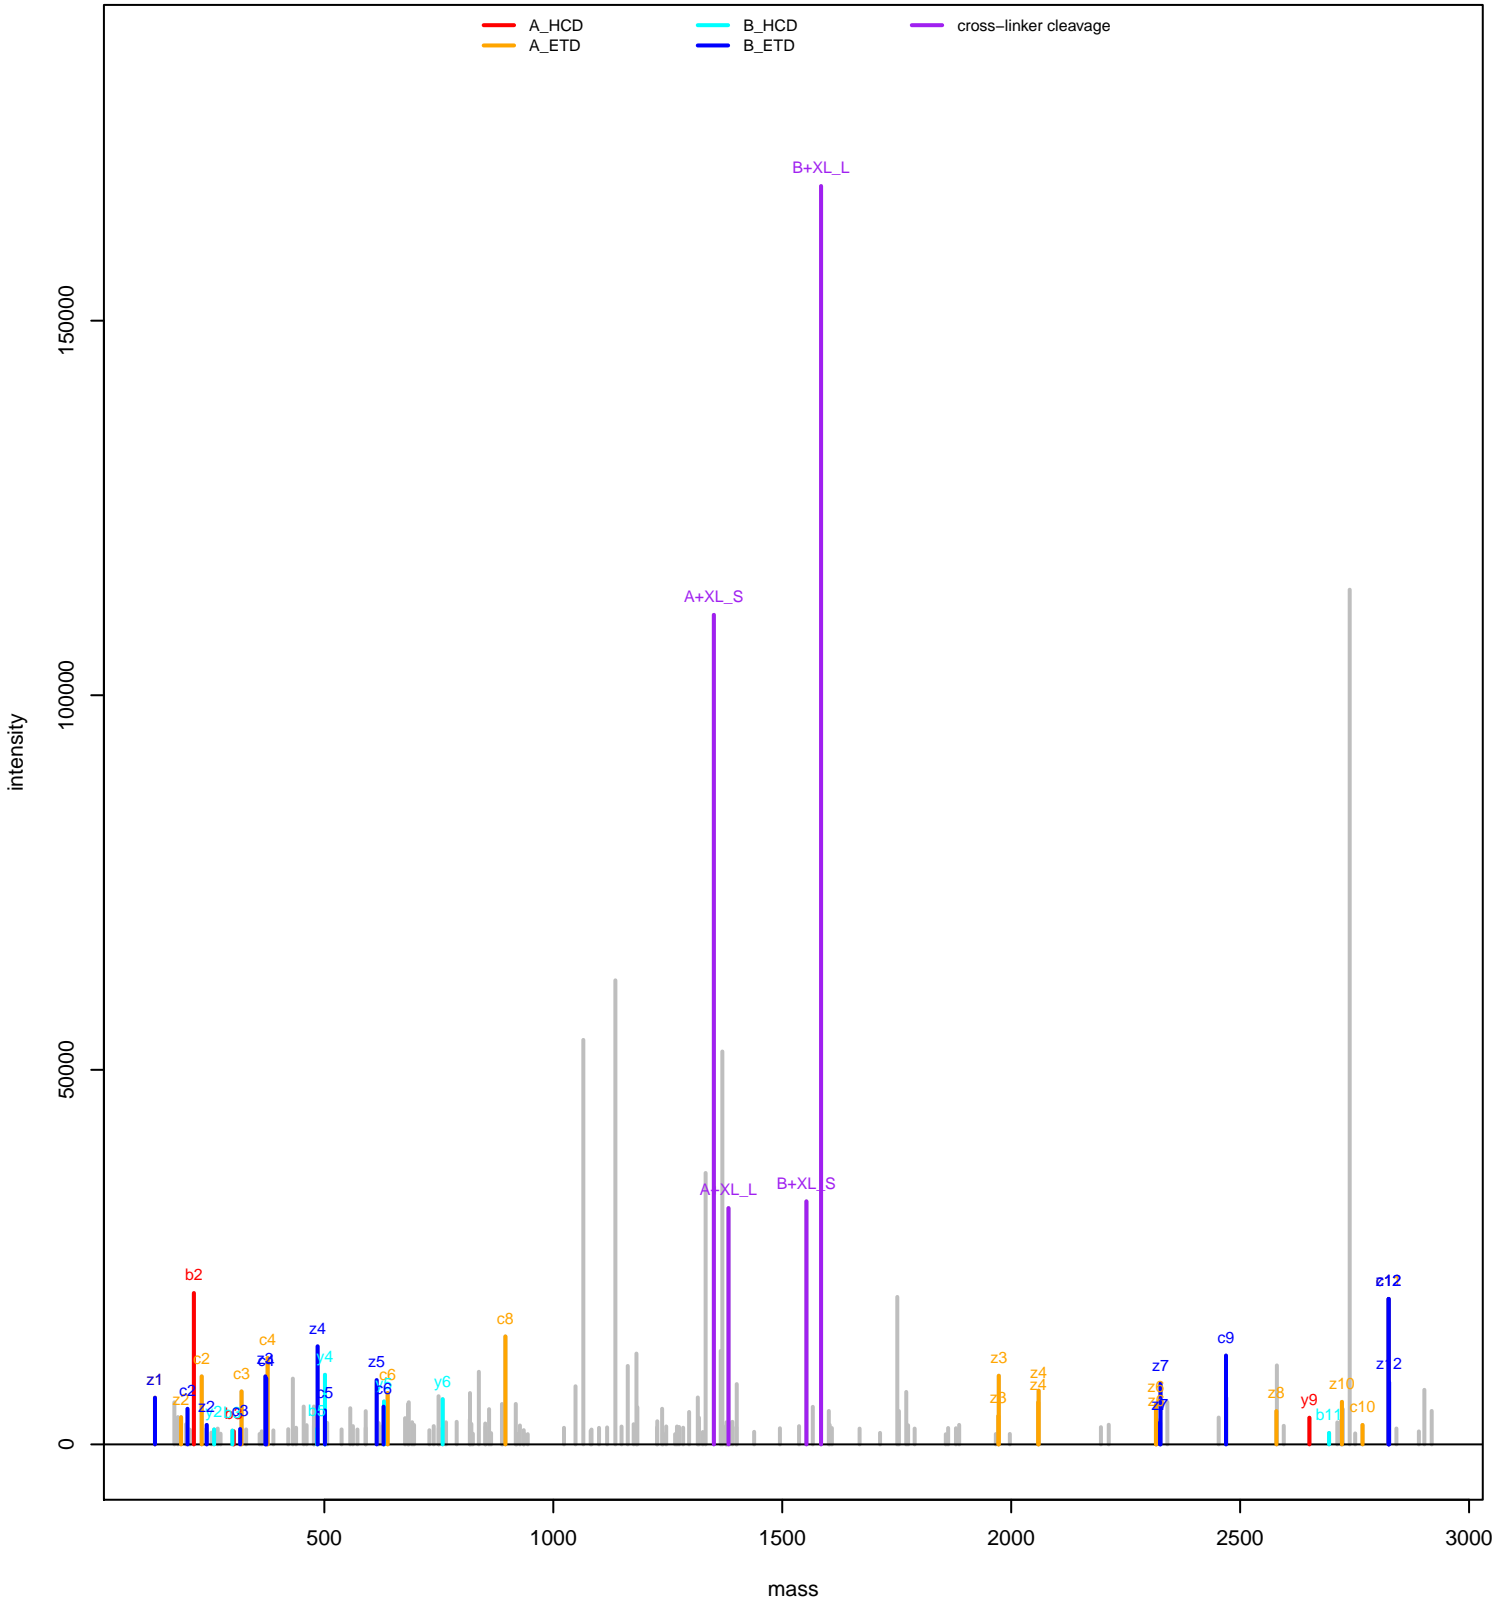

SQSGDFTRSKGK+XL\_S

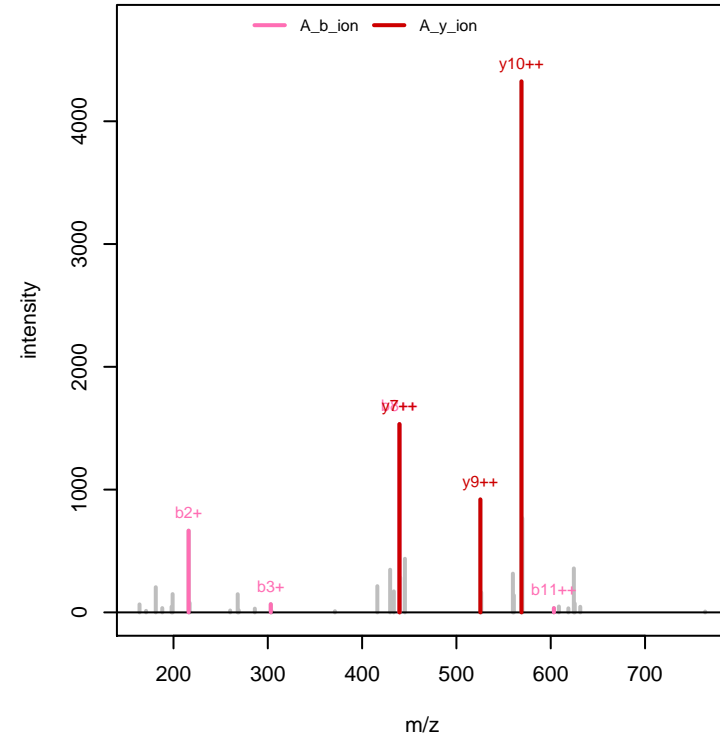

SQSGDFTRSKGK+XL\_L

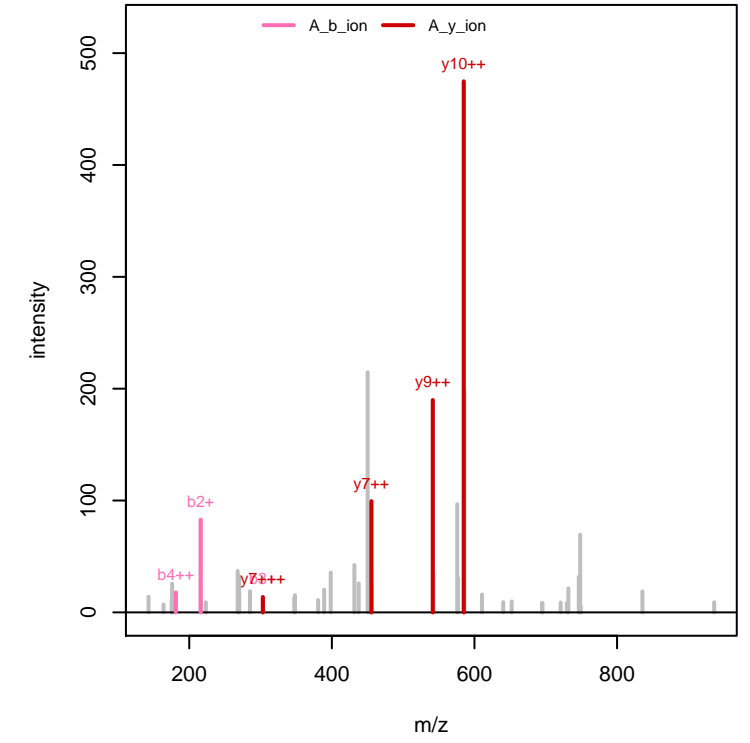

IADGQQKQENQIK+XL\_S

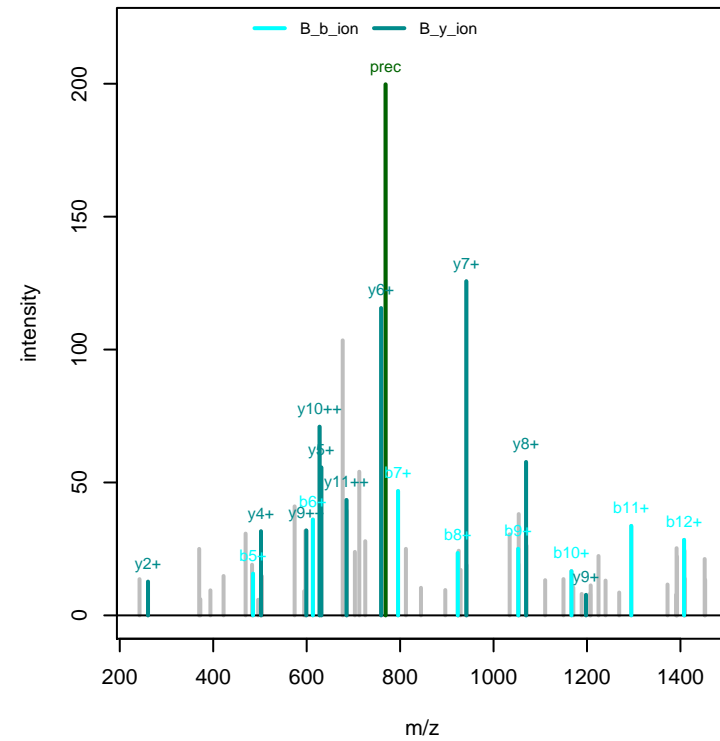

IADGQQKQENQIK+XL\_L

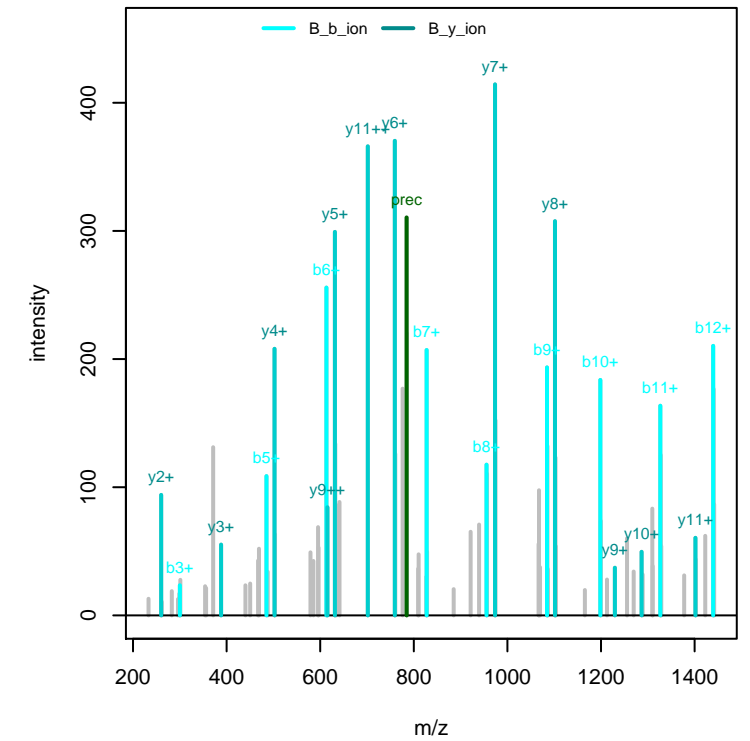

KPGMDR  
KPGMDR

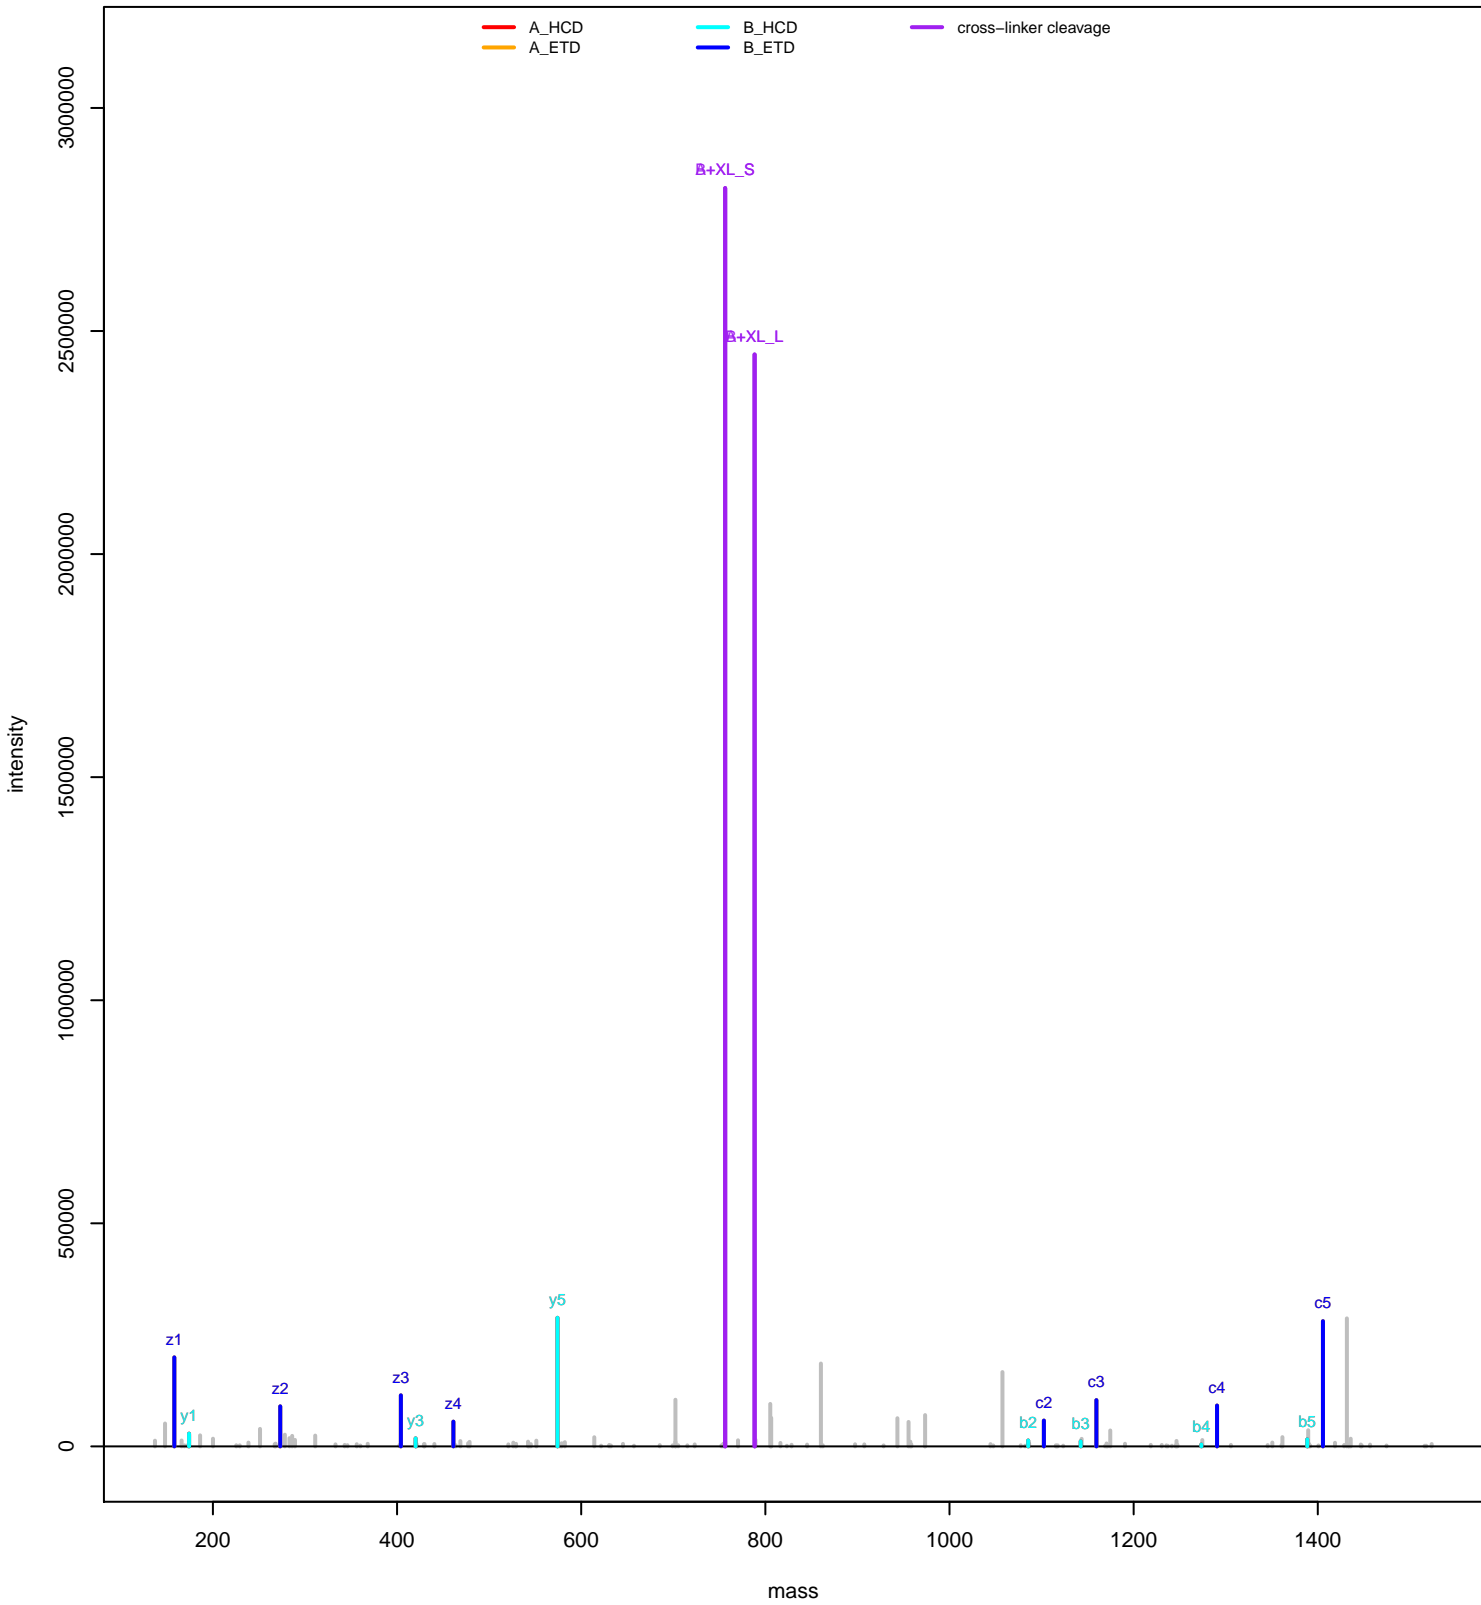

KPGMDR+XL\_S

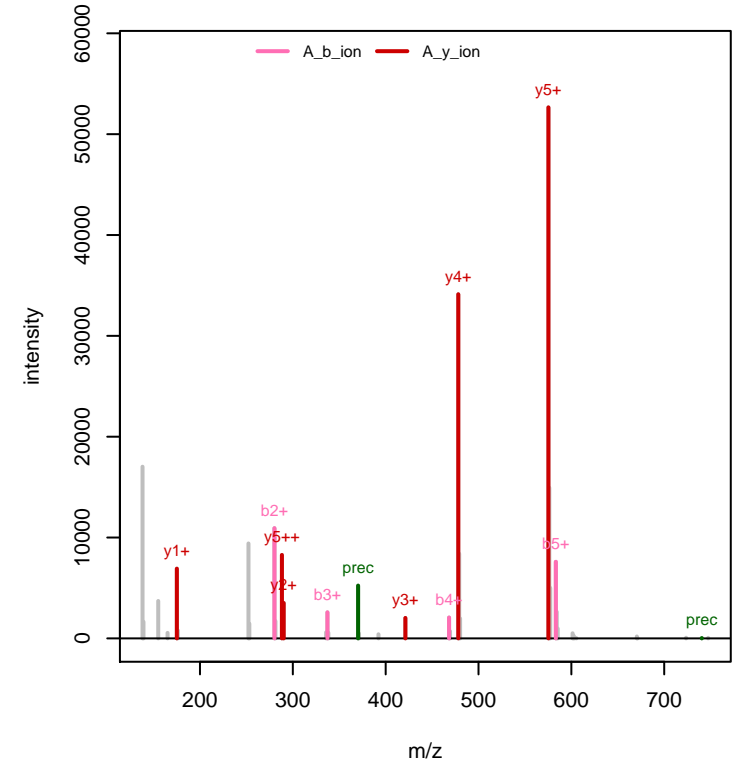

KPGMDR+XL\_L

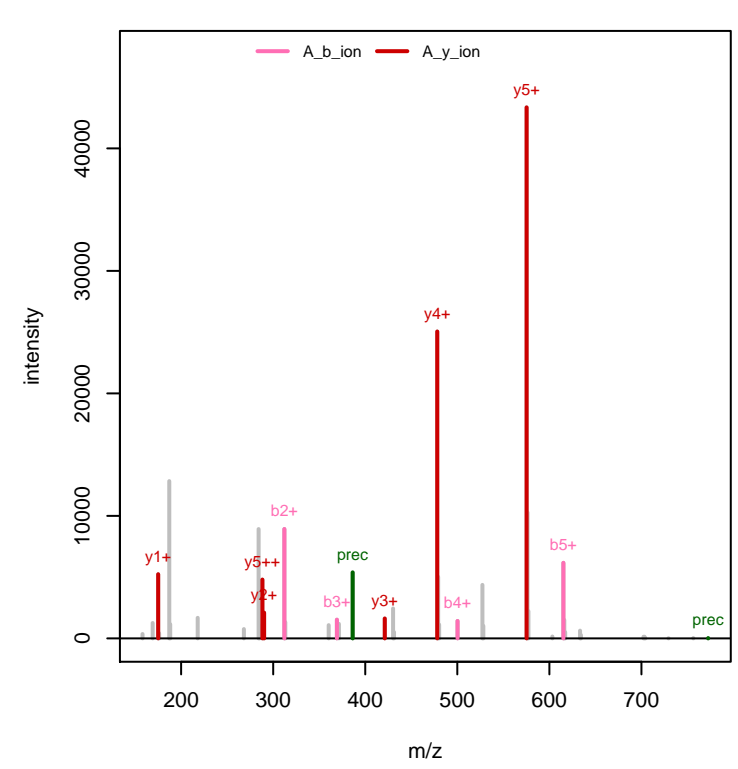

KPGMDR+XL\_S

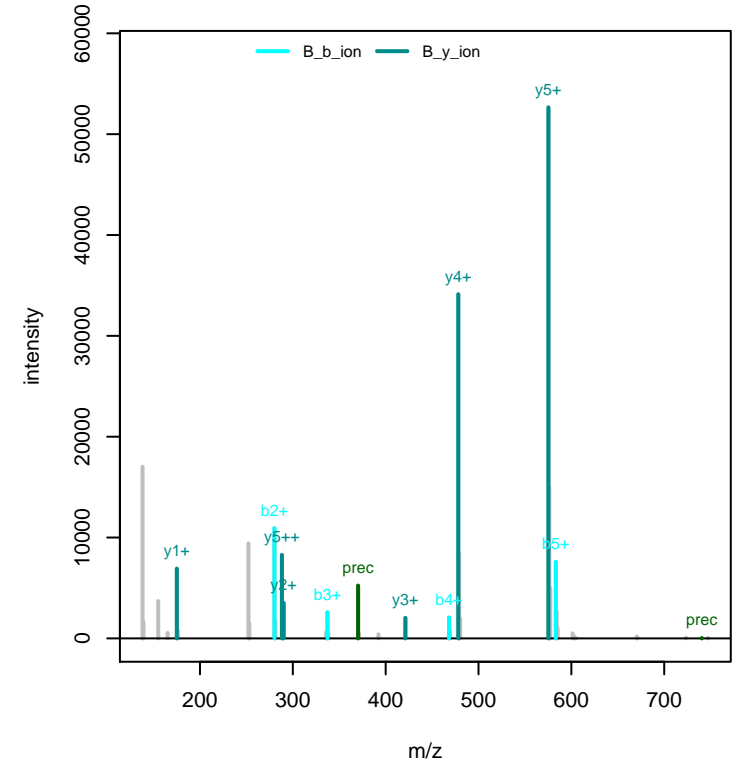

KPGMDR+XL\_L

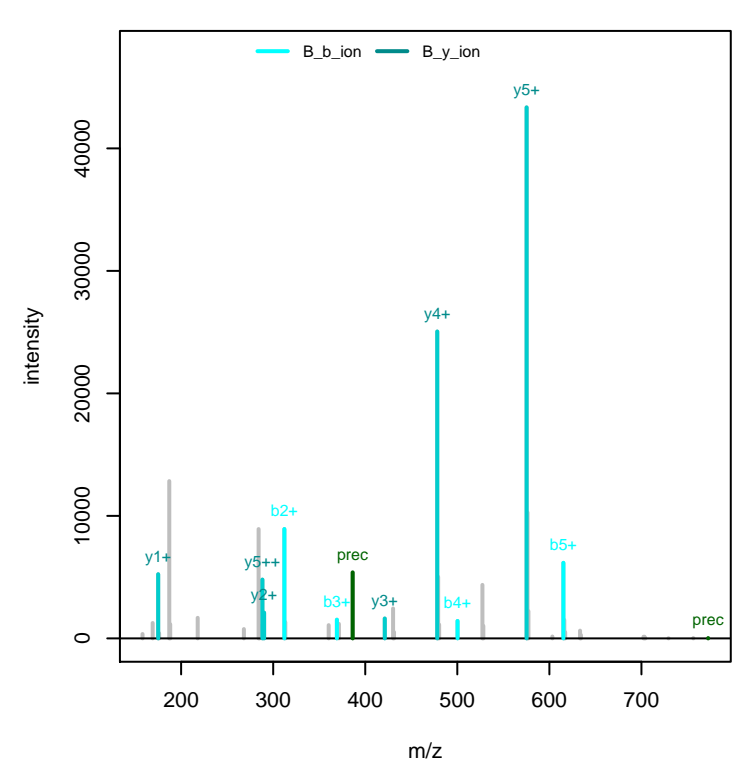

KSDQNVR  
AKPTQAKGVYIK

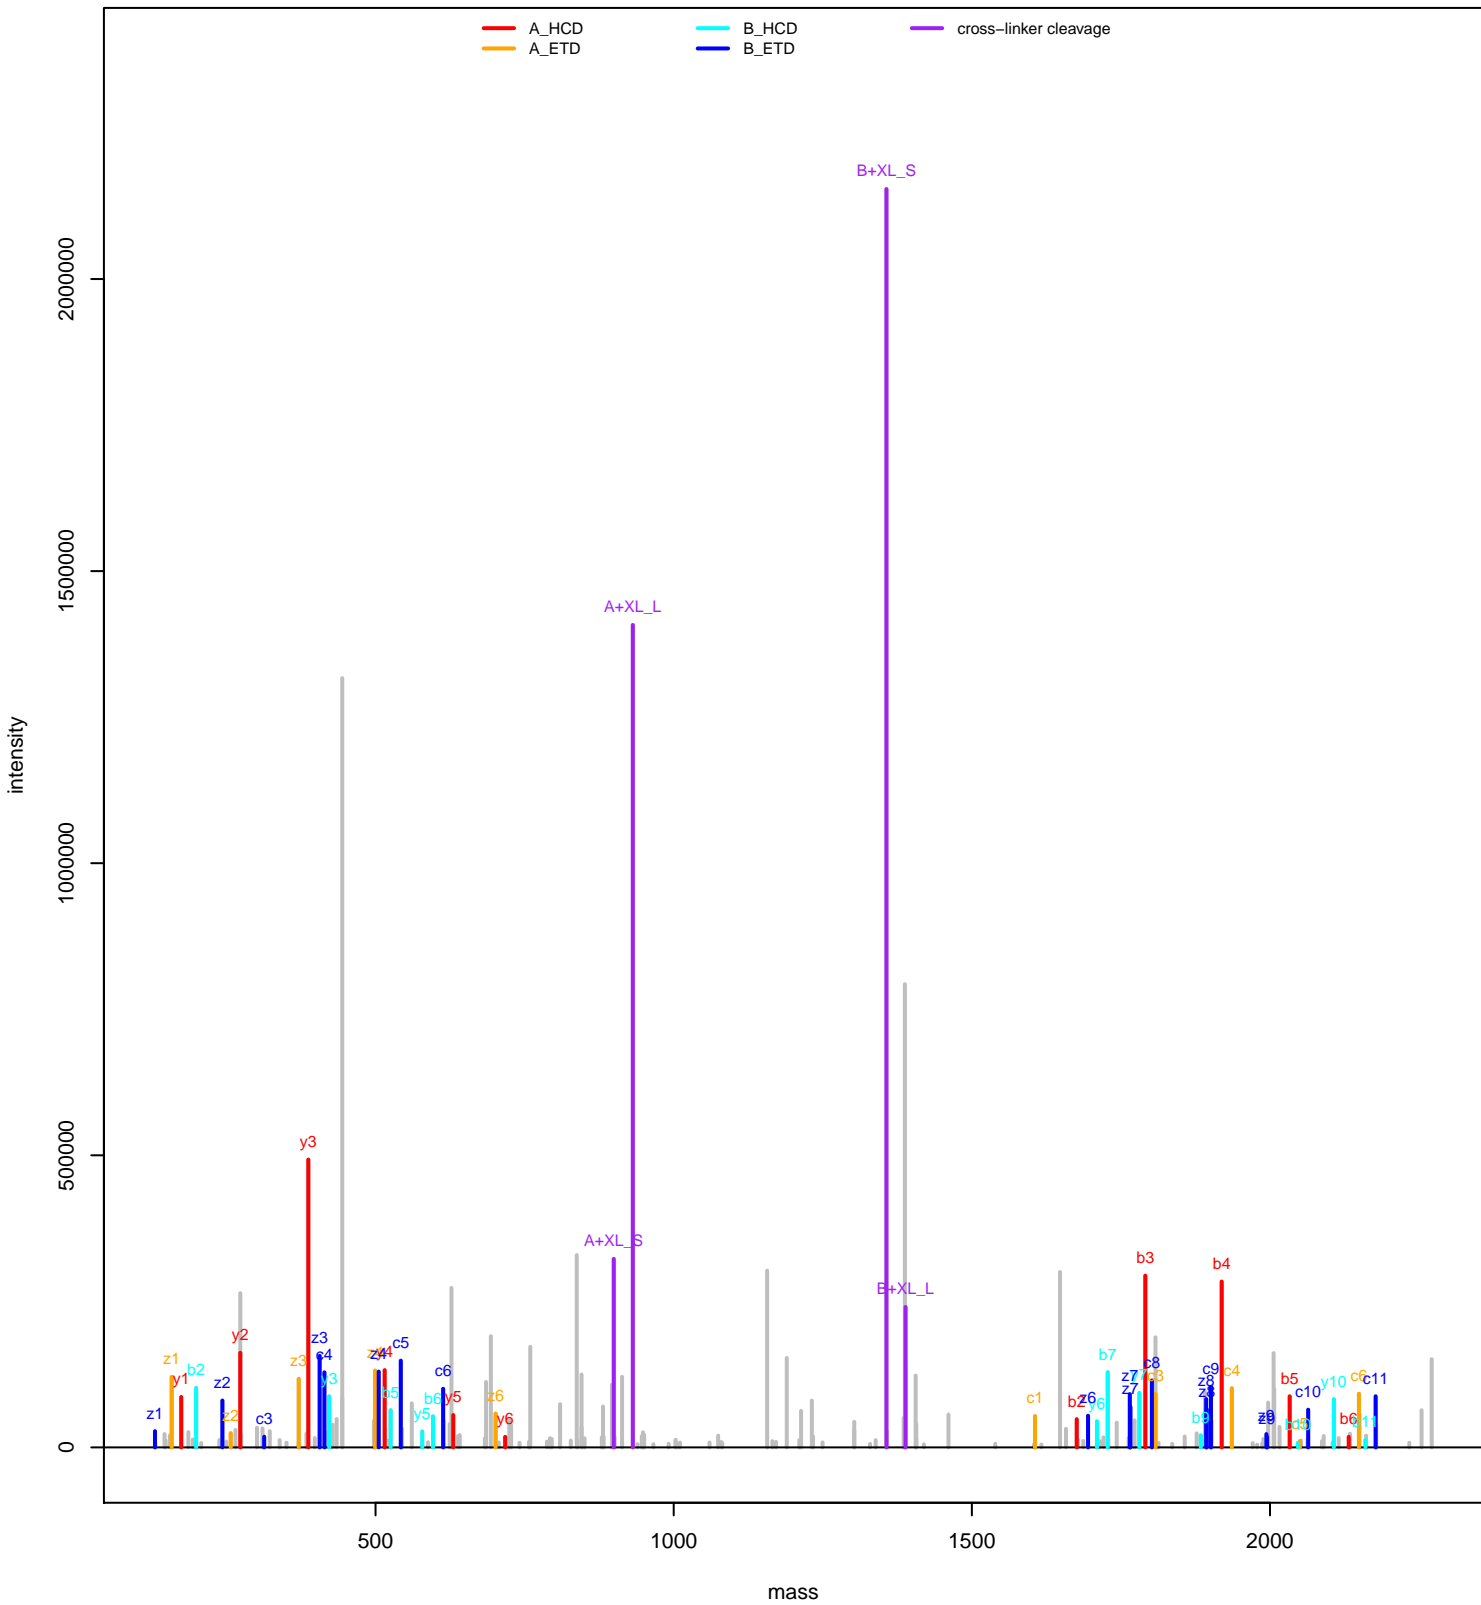

KSDQNVR+XL\_S

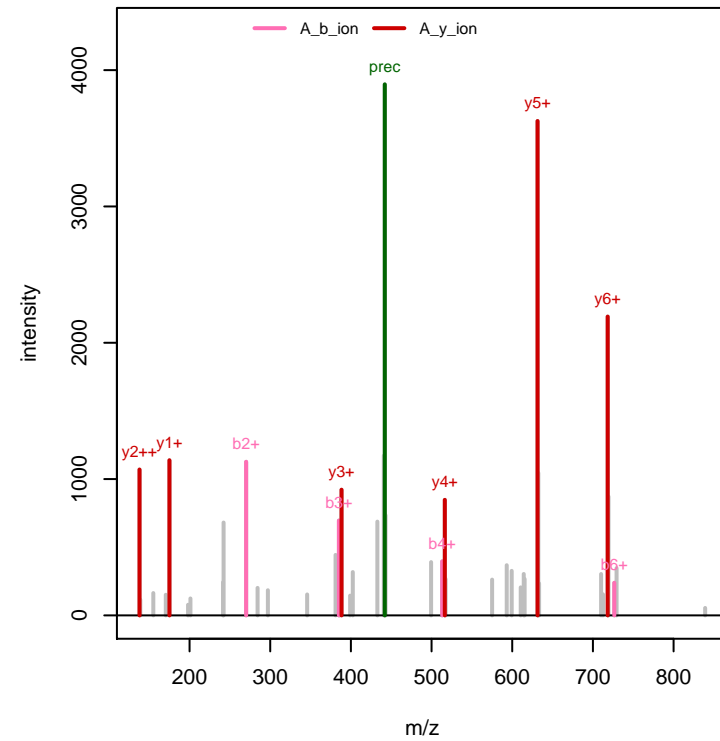

KSDQNVR+XL\_L

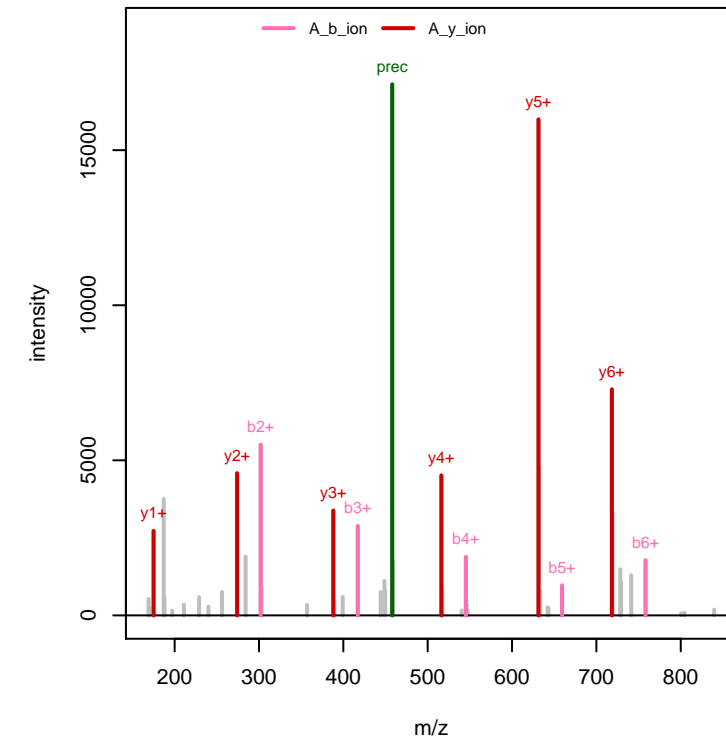

AKPTQAKGVYIK+XL\_S

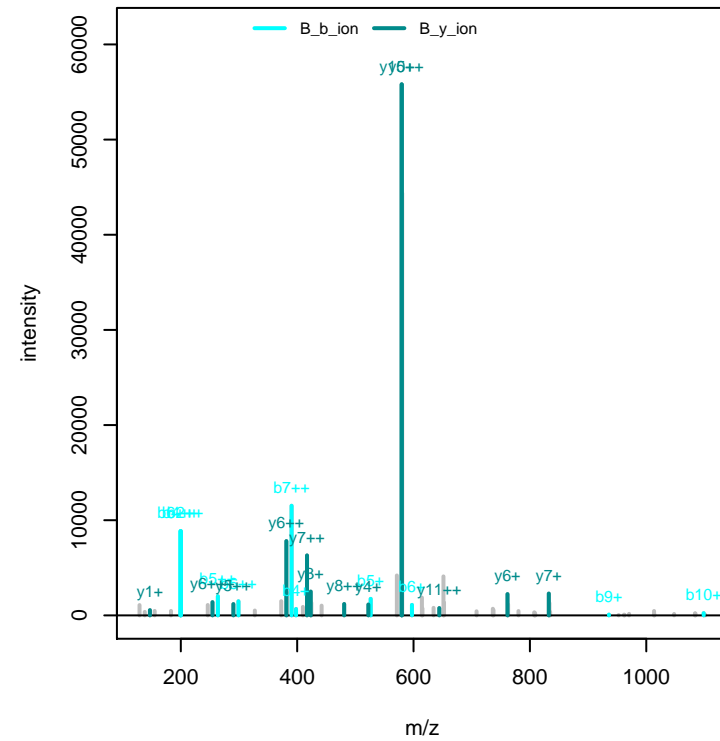

AKPTQAKGVYIK+XL\_L

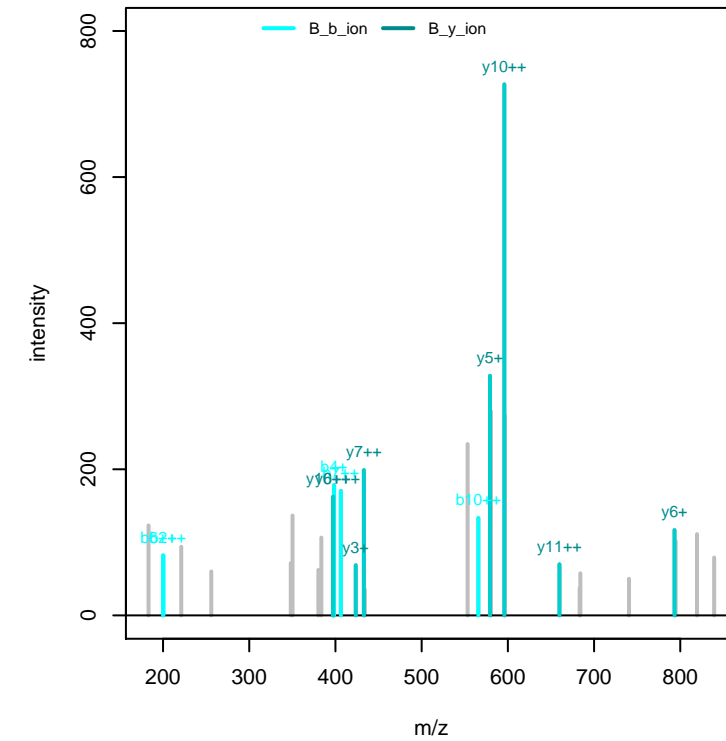

YGVKRPK  
GALDCSGVKDRK

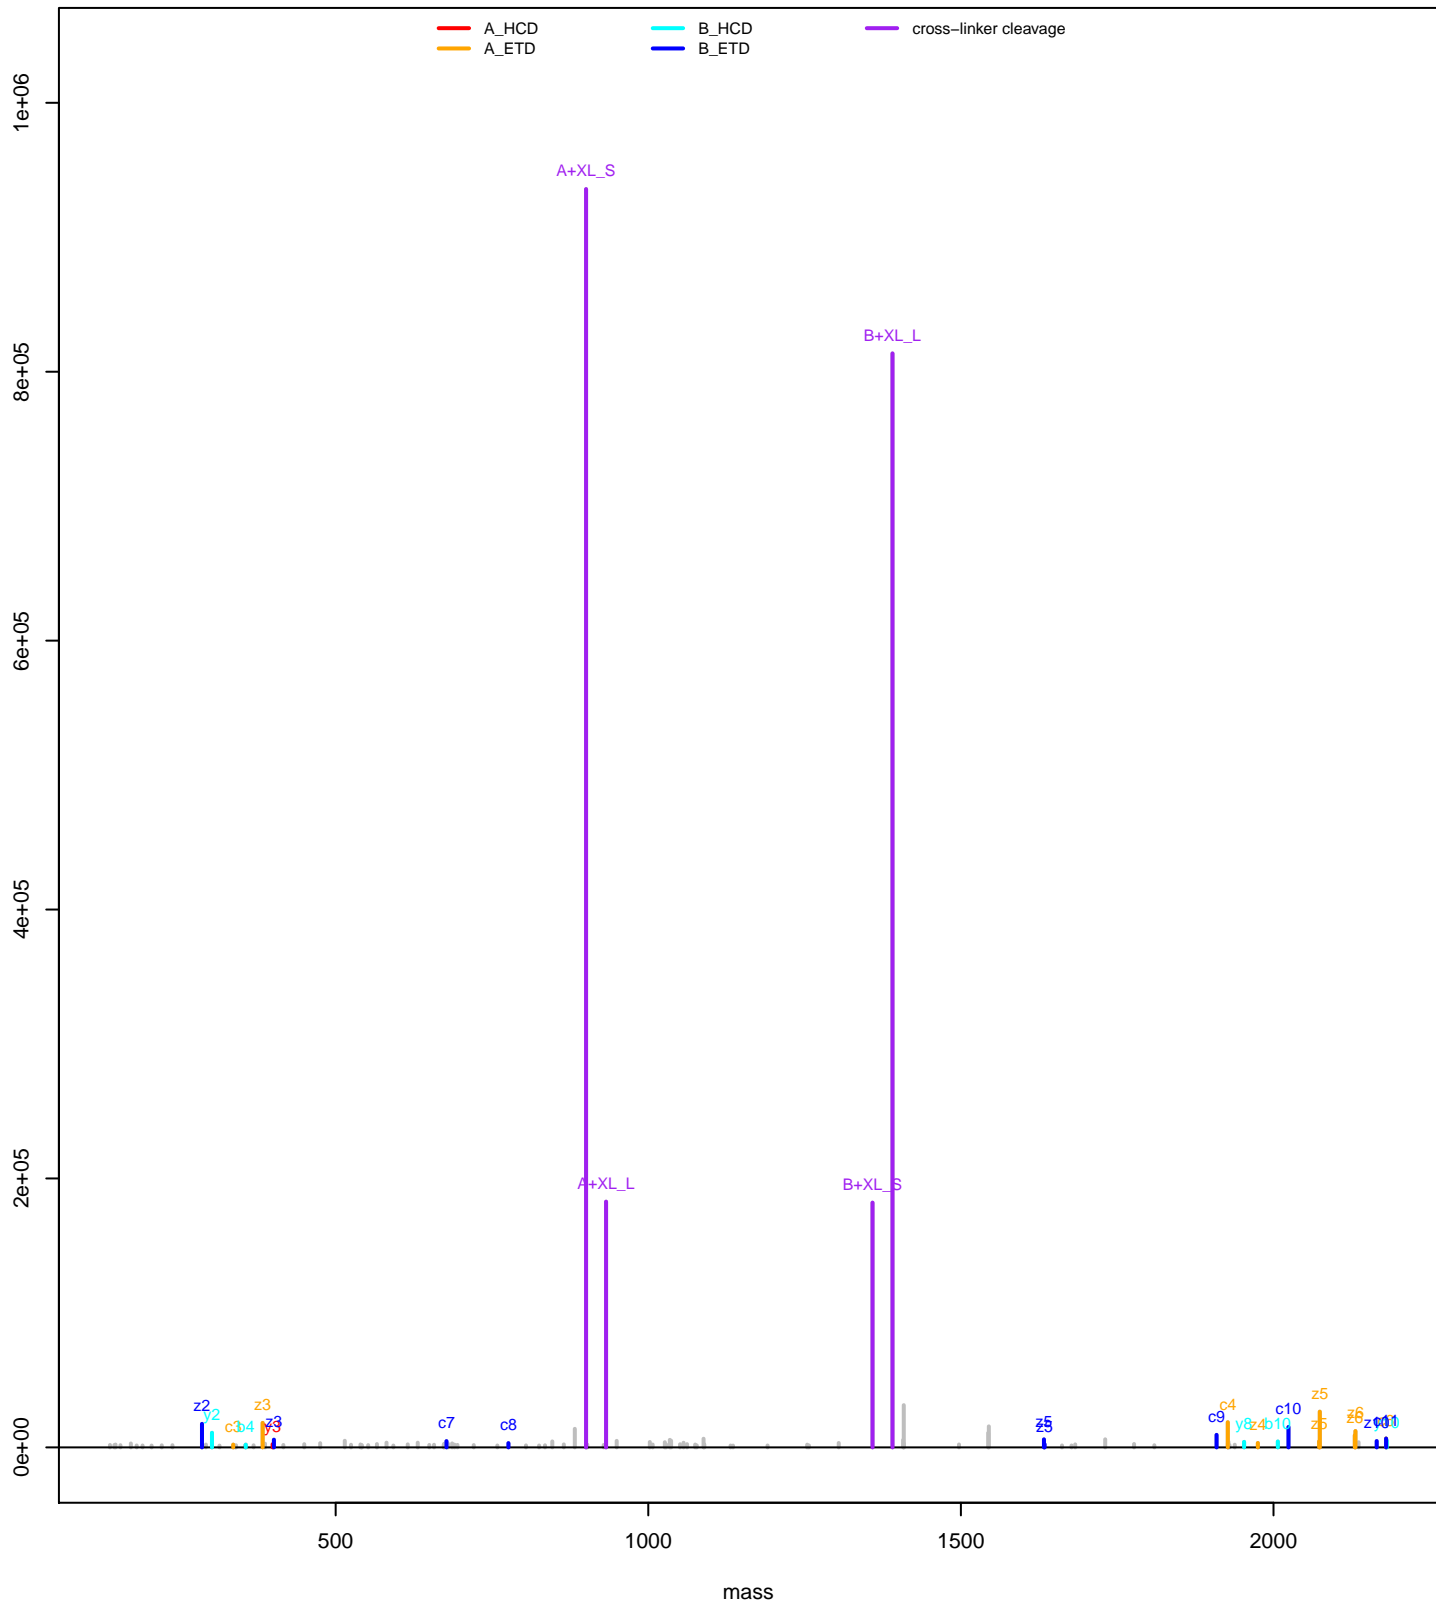

YGVKRPK+XL\_S

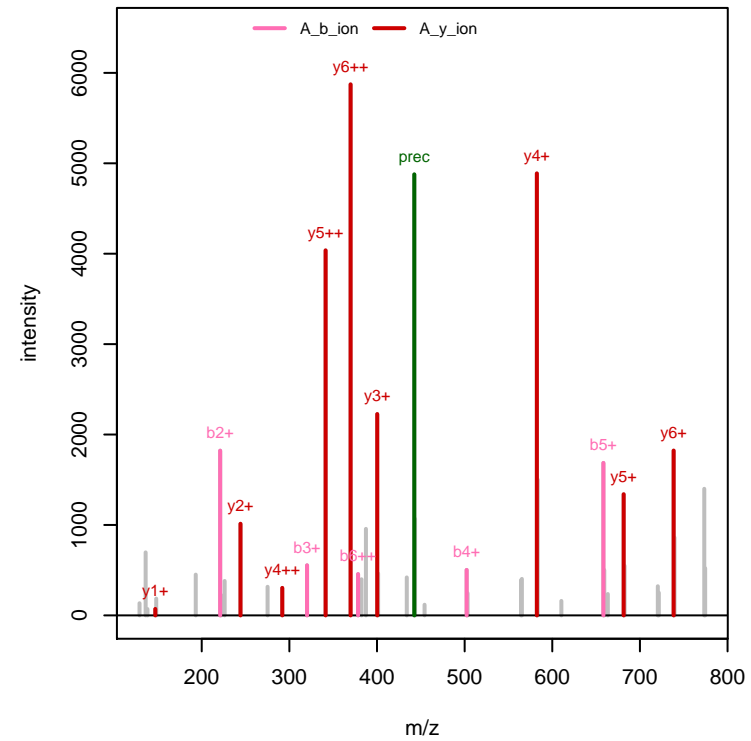

YGVKRPK+XL\_L

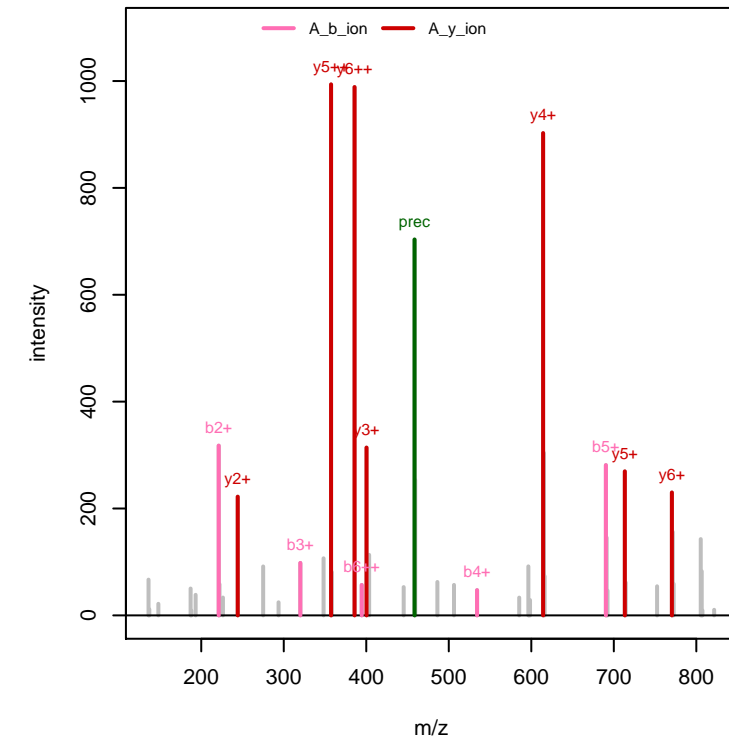

GALDCSGVKDRK+XL\_S

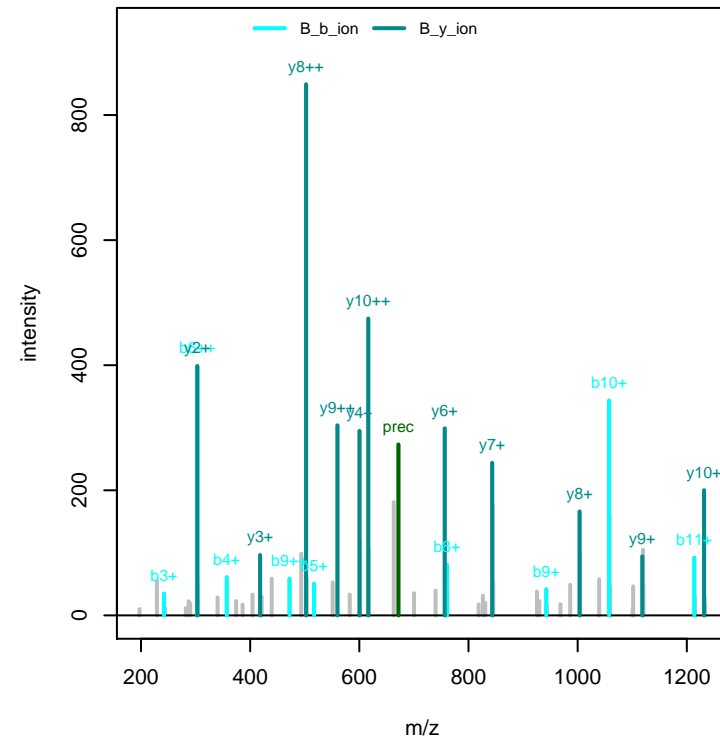

GALDCSGVKDRK+XL\_L

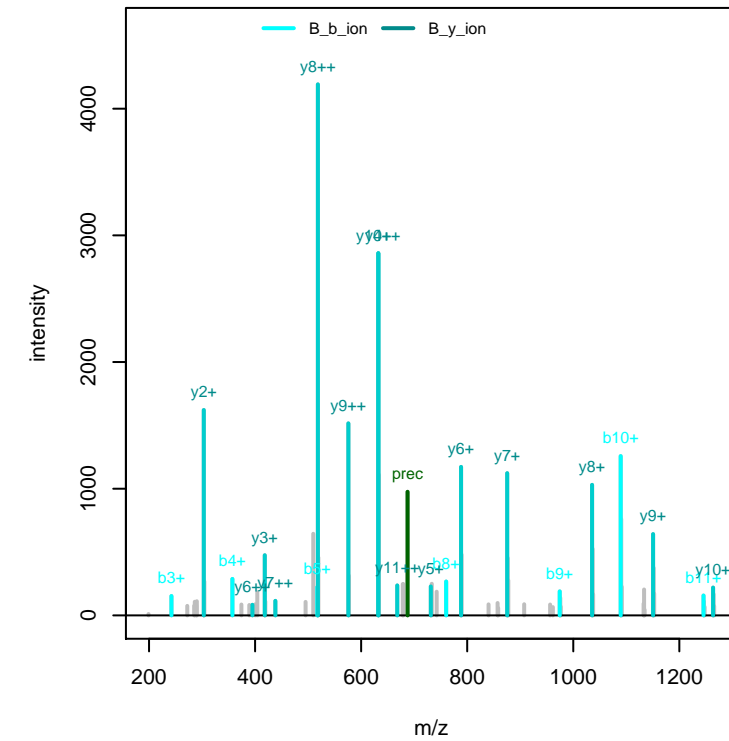

KAIEQDAK  
DNLAIEFSKK

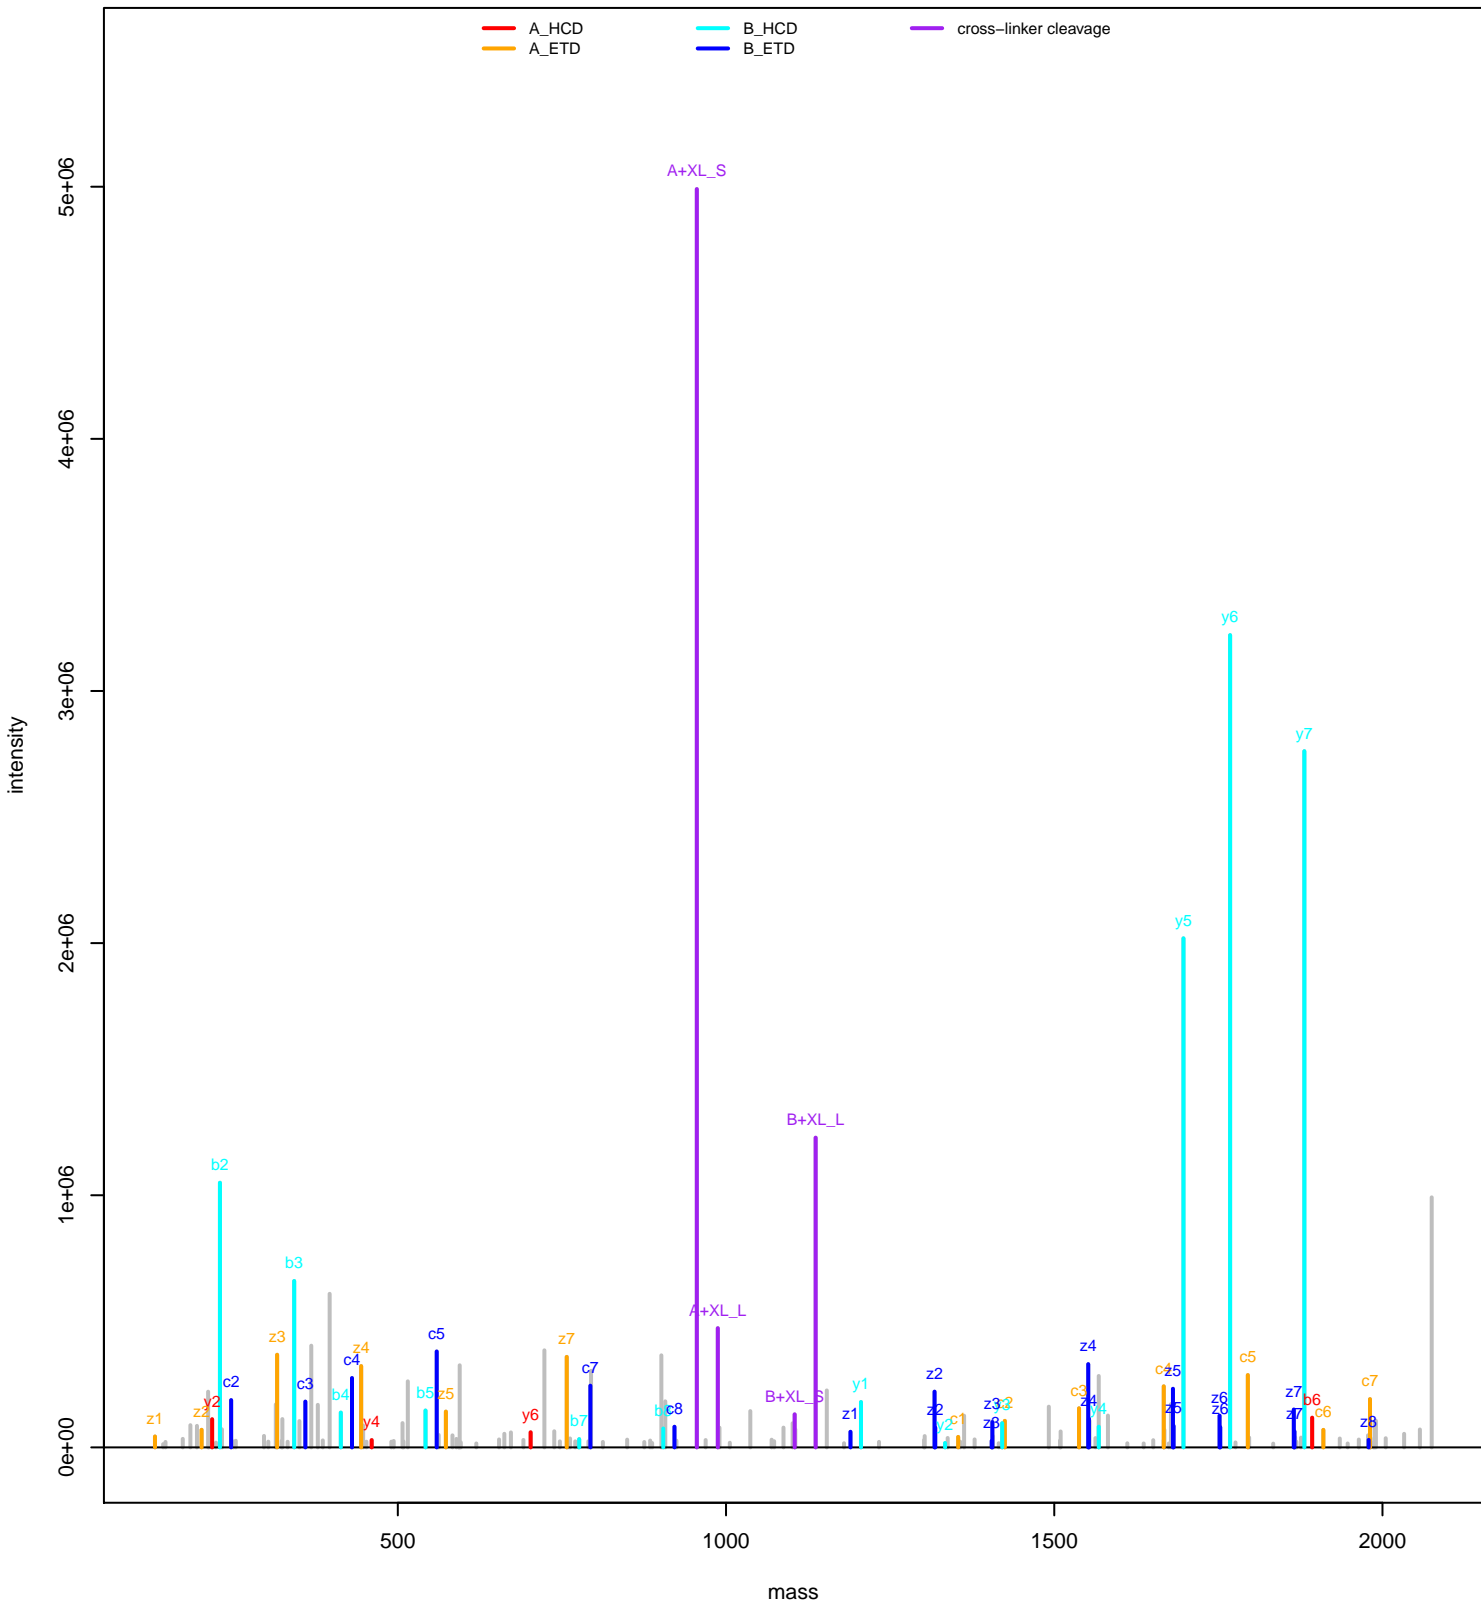

KAIEQDAK+XL\_S

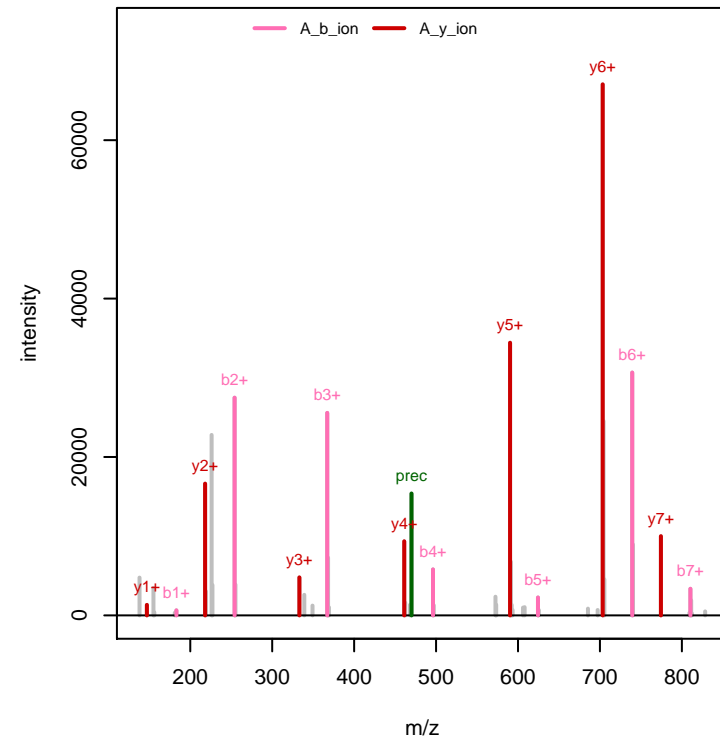

KAIEQDAK+XL\_L

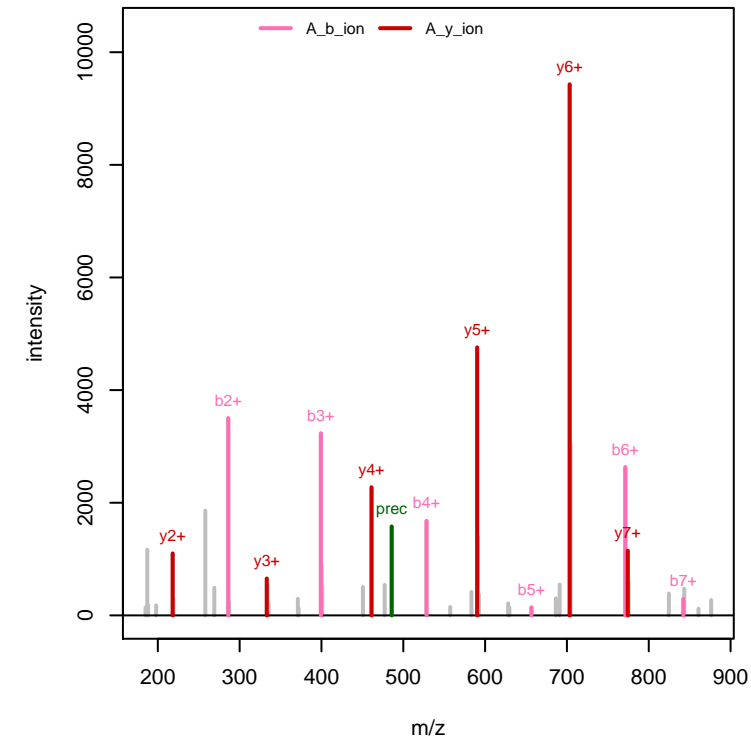

DNLAIEFSKK+XL\_S

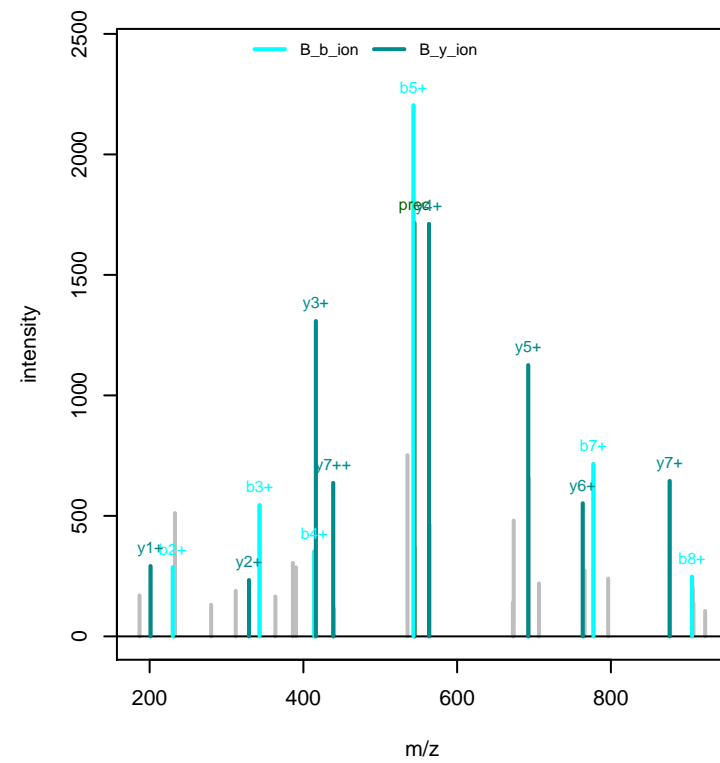

DNLAIEFSKK+XL\_L

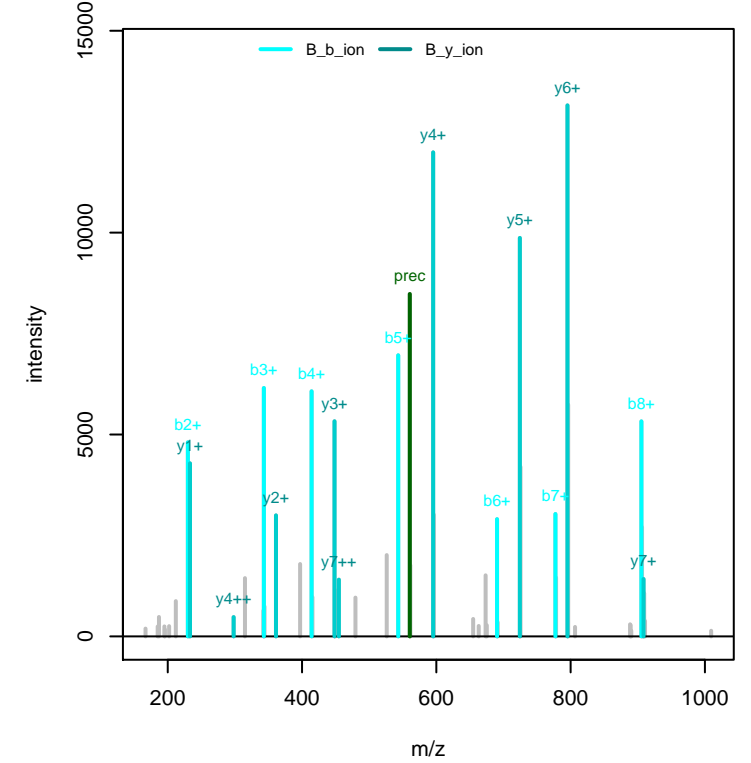



FAAPPSKNVSK  
FAAPPSKNVSK

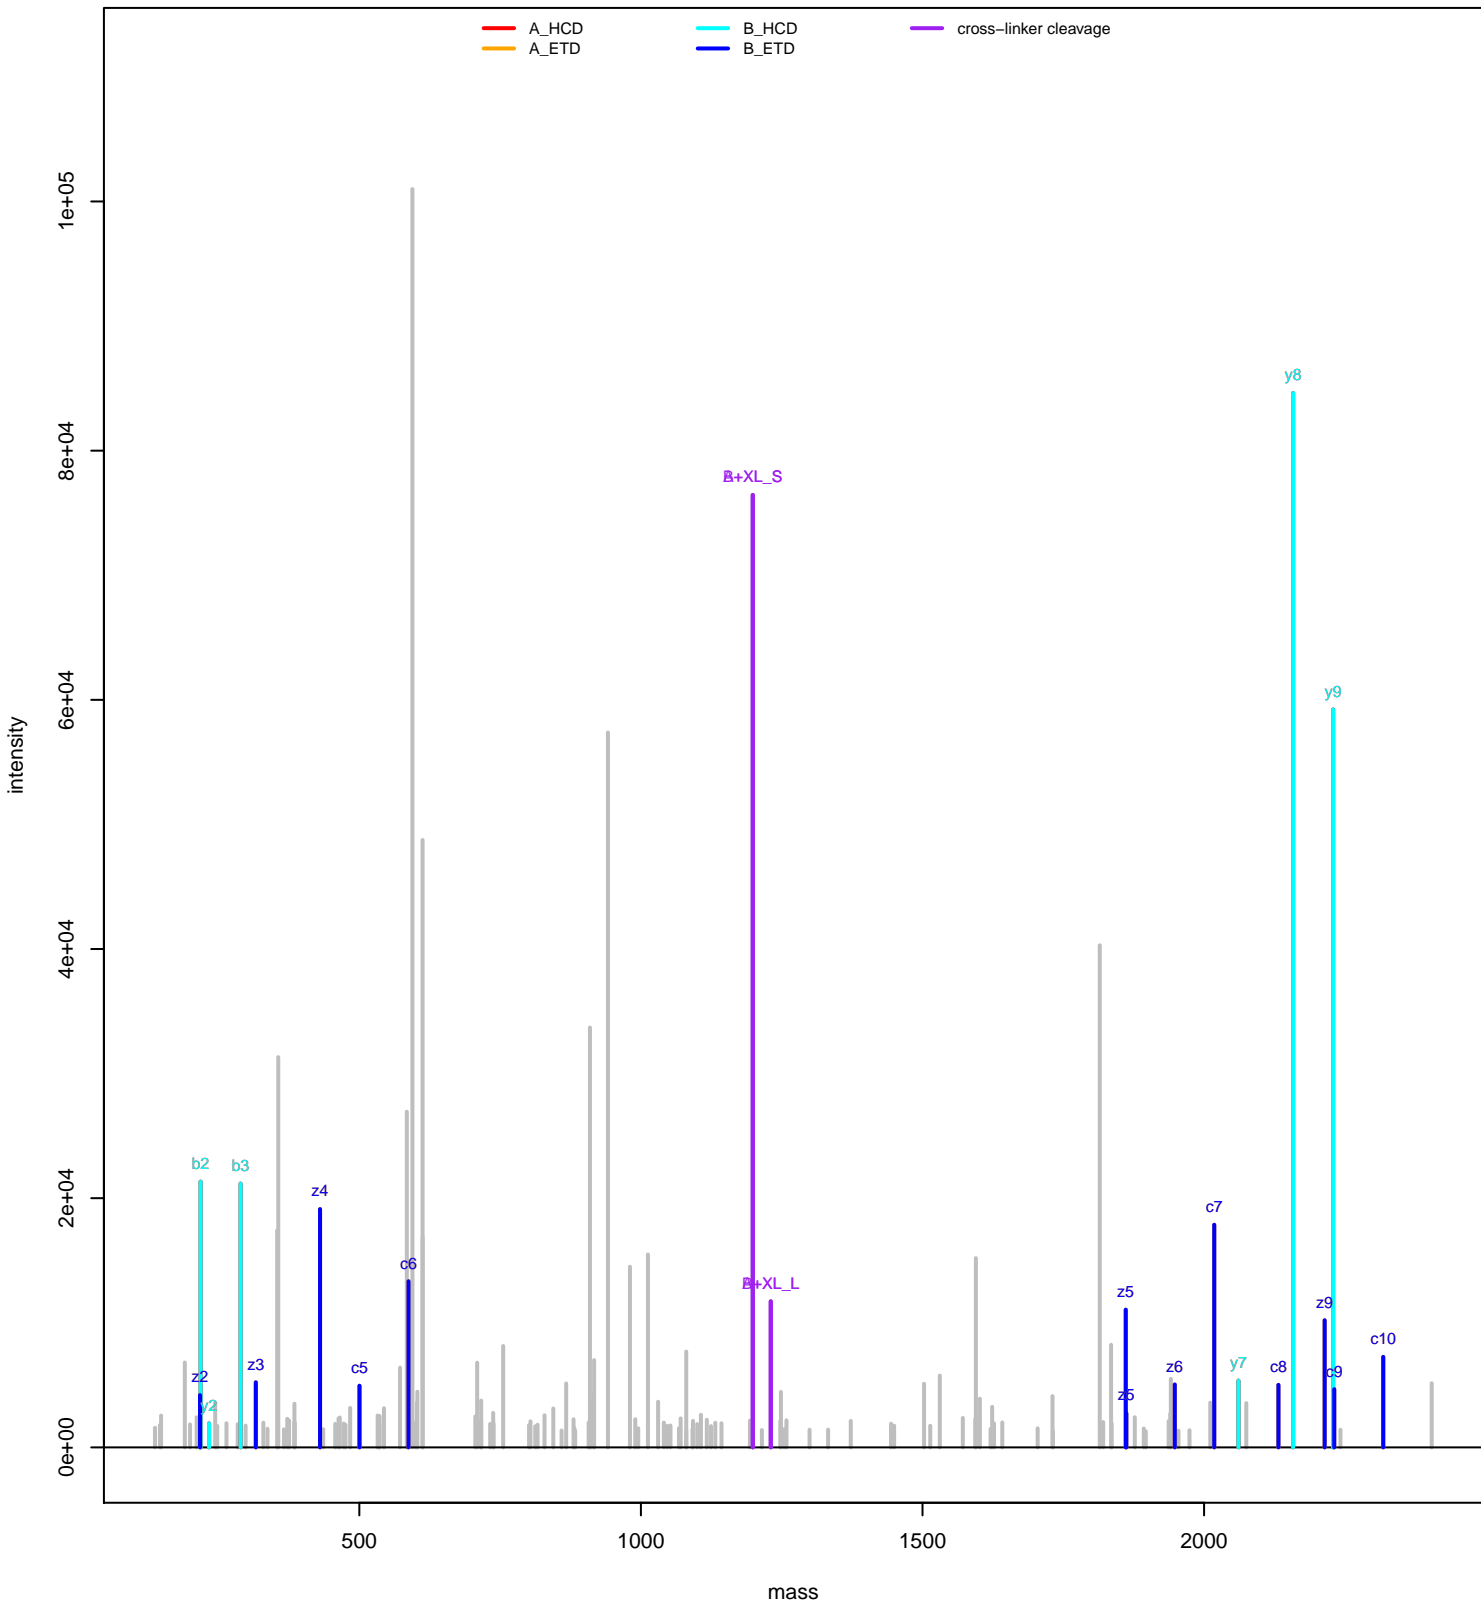

FAAPPSKNVSK+XL\_S

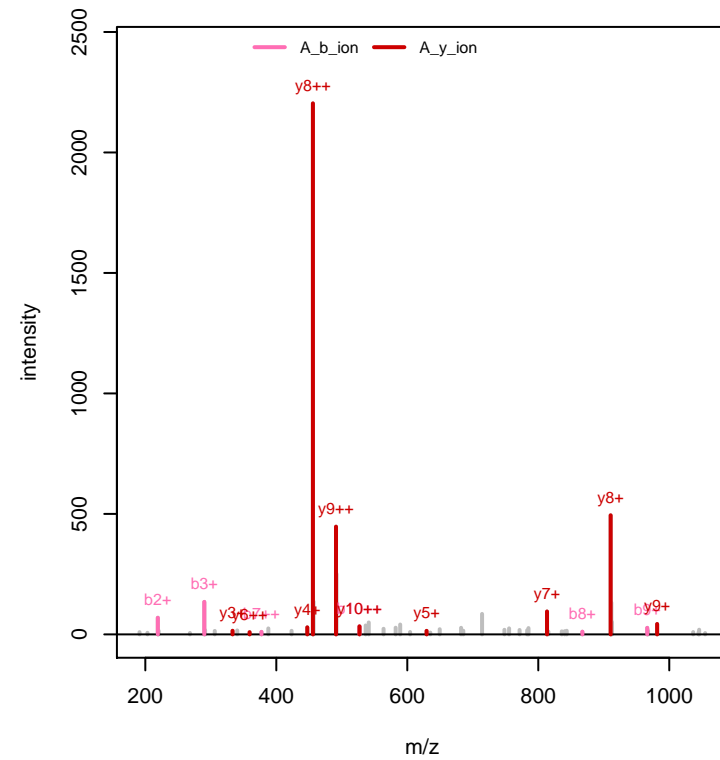

FAAPPSKNVSK+XL\_L

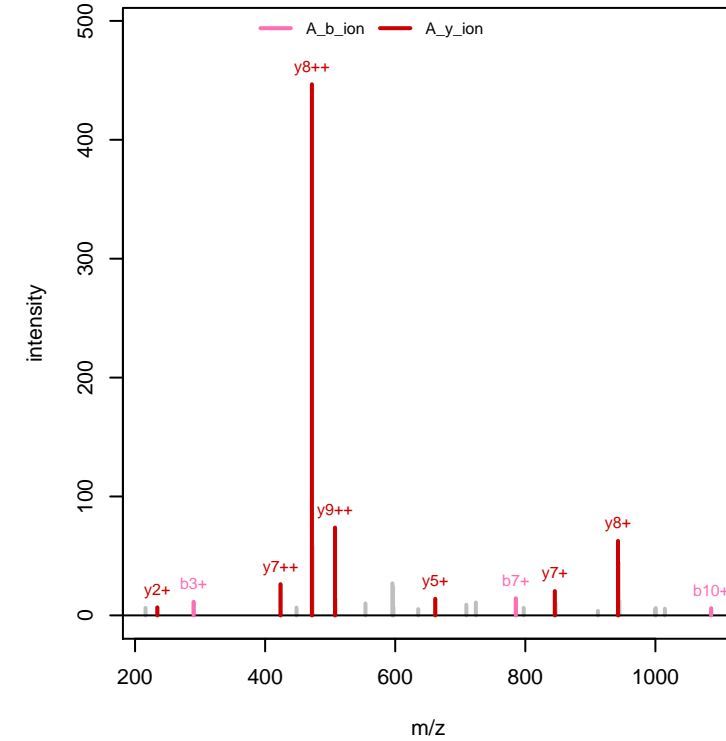

FAAPPSKNVSK+XL\_S

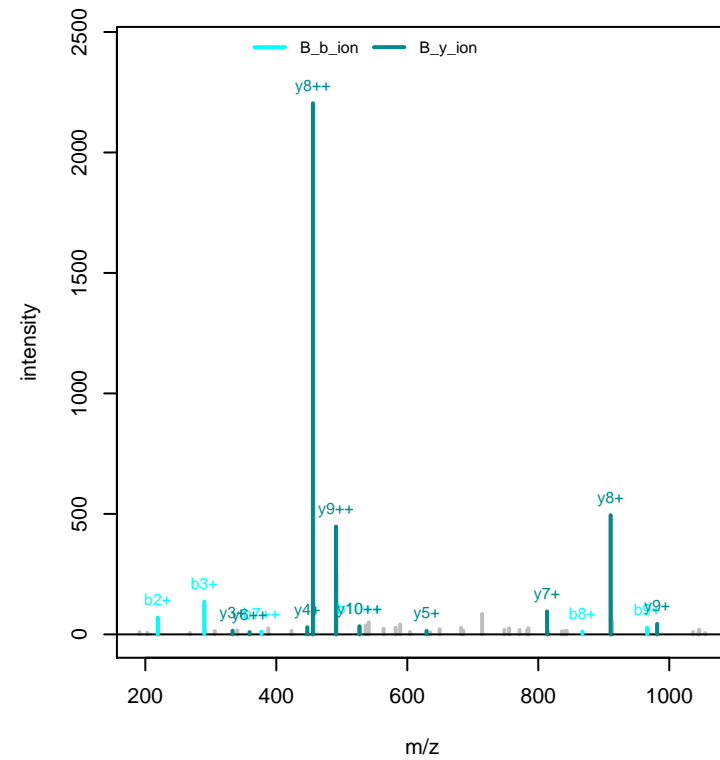

FAAPPSKNVSK+XL\_L

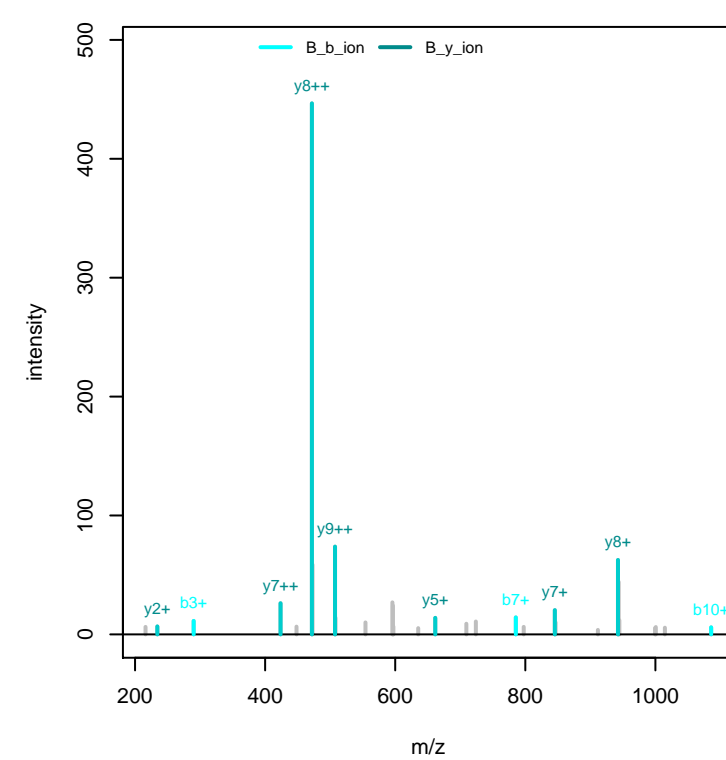

VVSDKMEK  
ECRPLSKTK

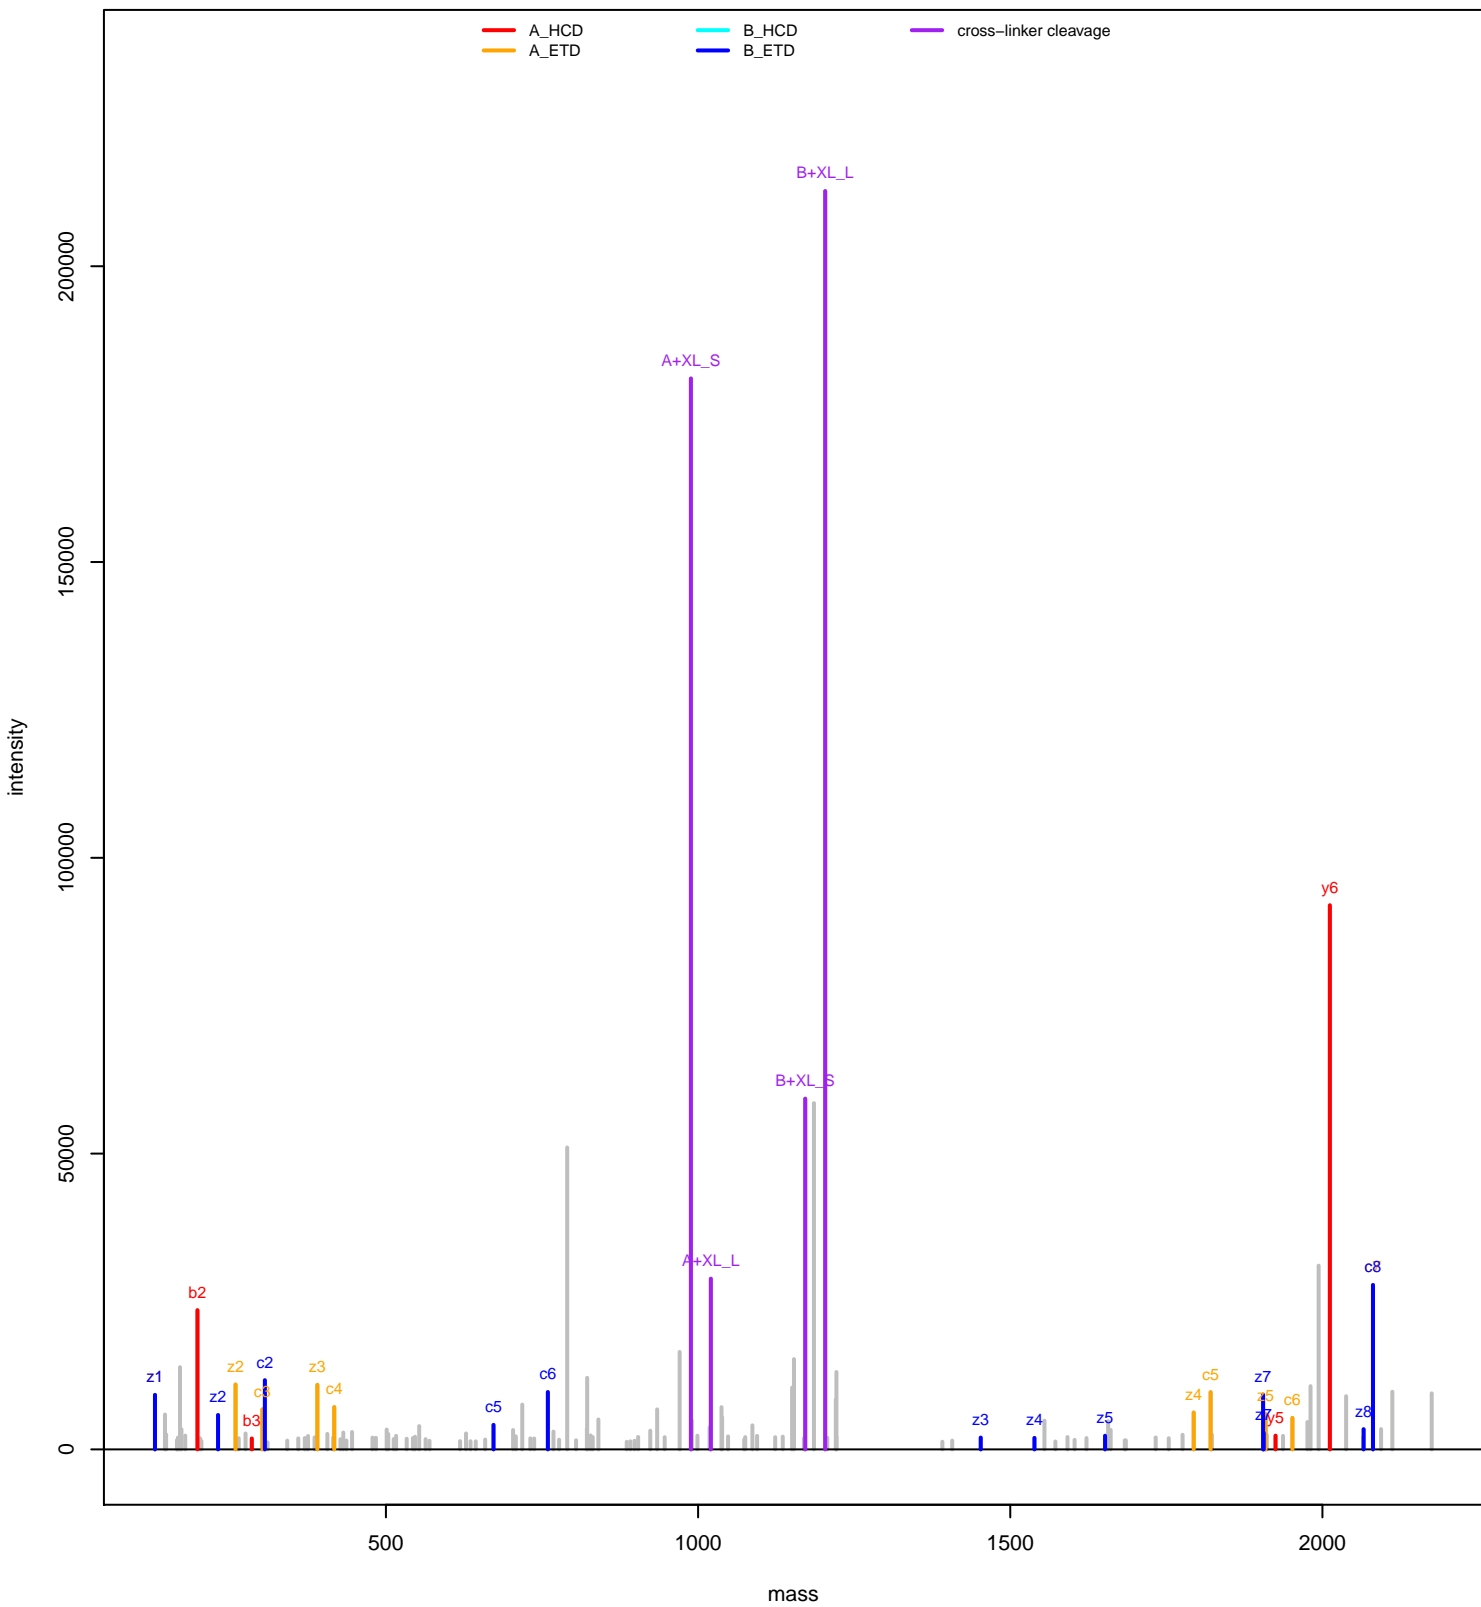

VVSDKMEK+XL\_S

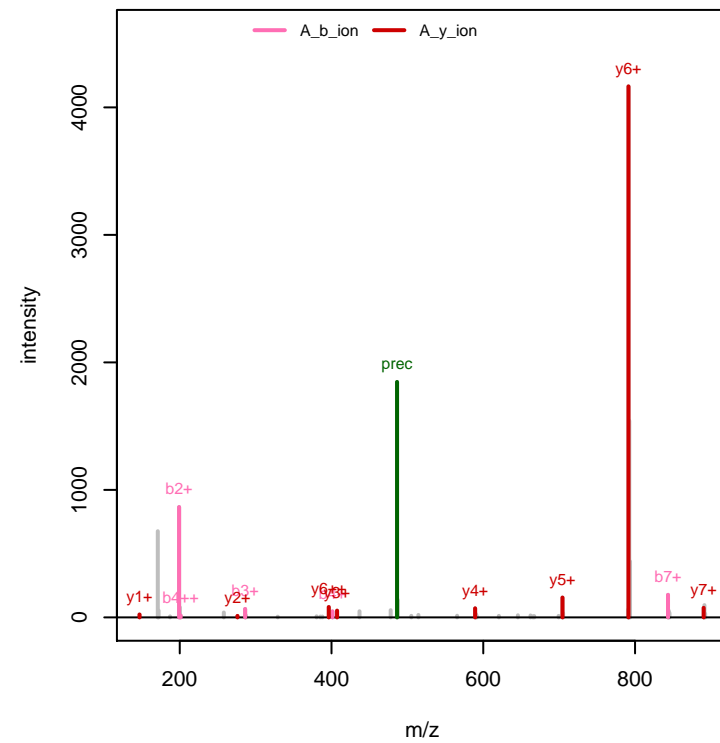

VVSDKMEK+XL\_L

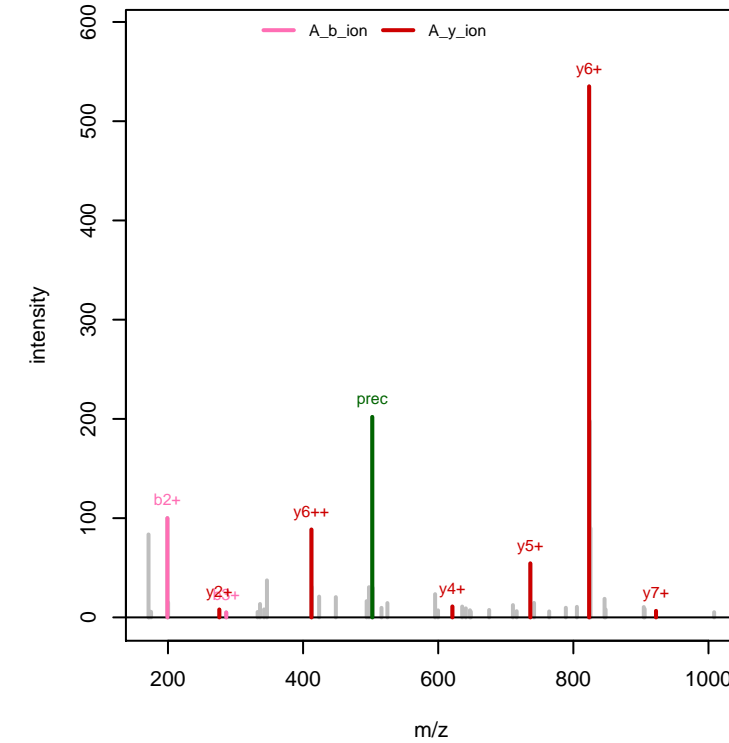

ECRPLSKTK+XL\_S

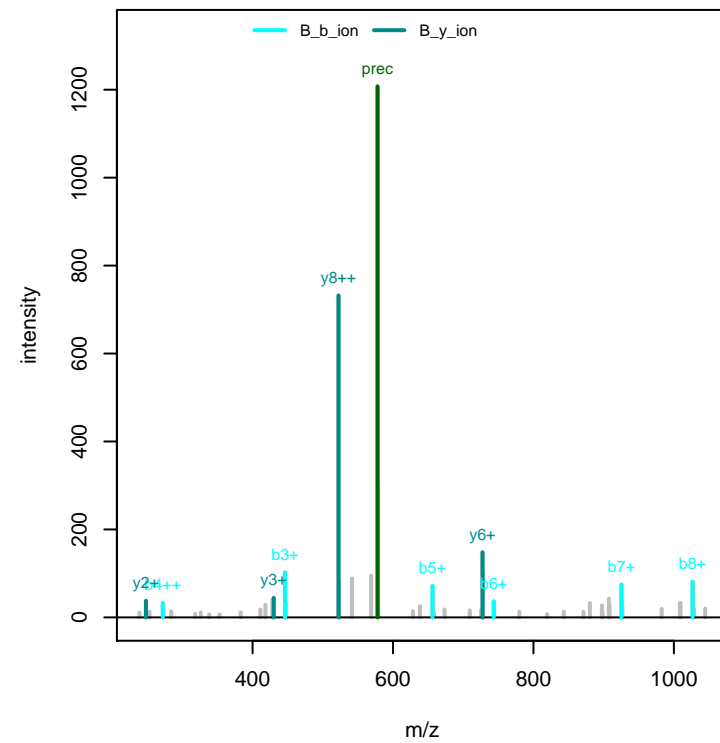

ECRPLSKTK+XL\_L

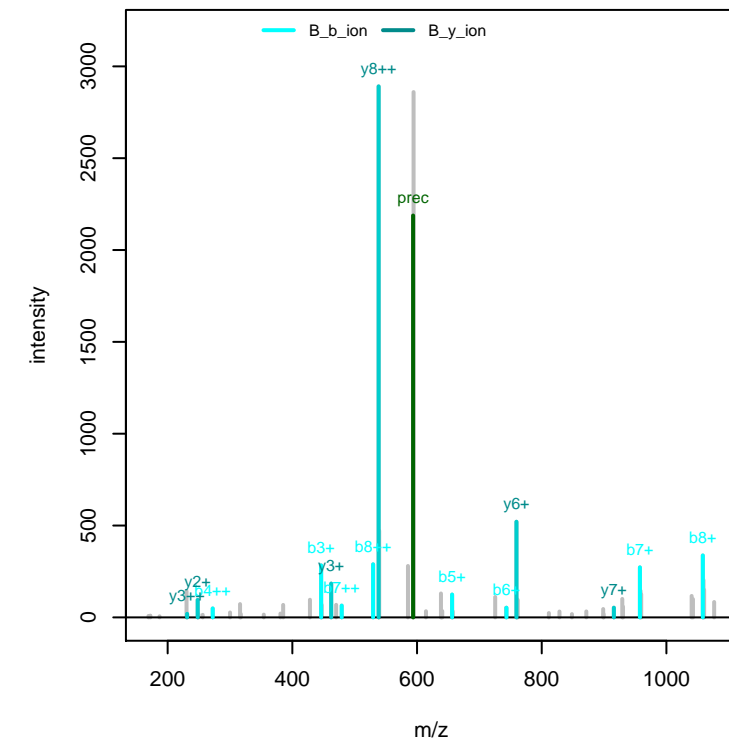

VKFGAGR  
HGKSLGSGK

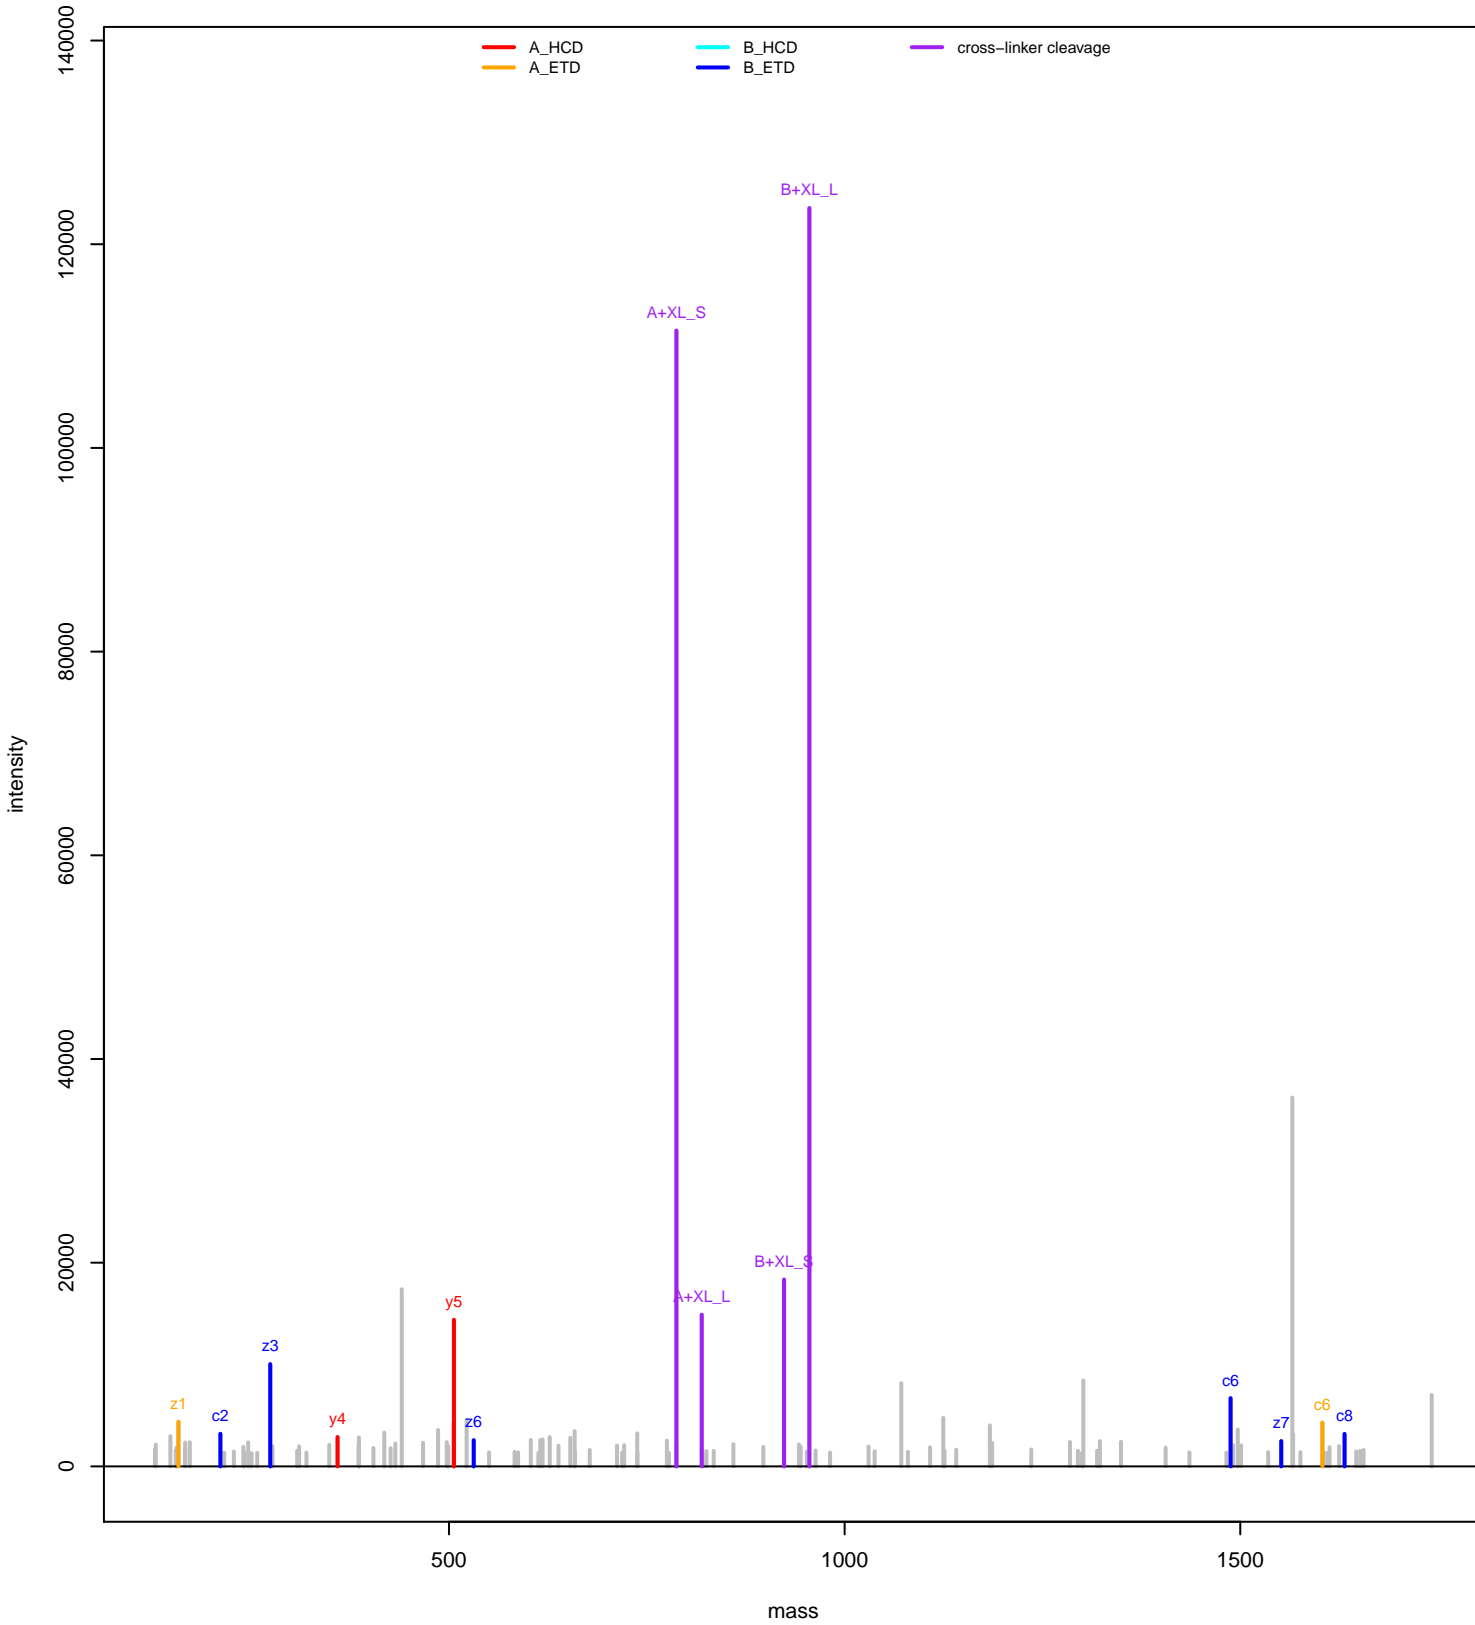

VKFGAGR+XL\_S

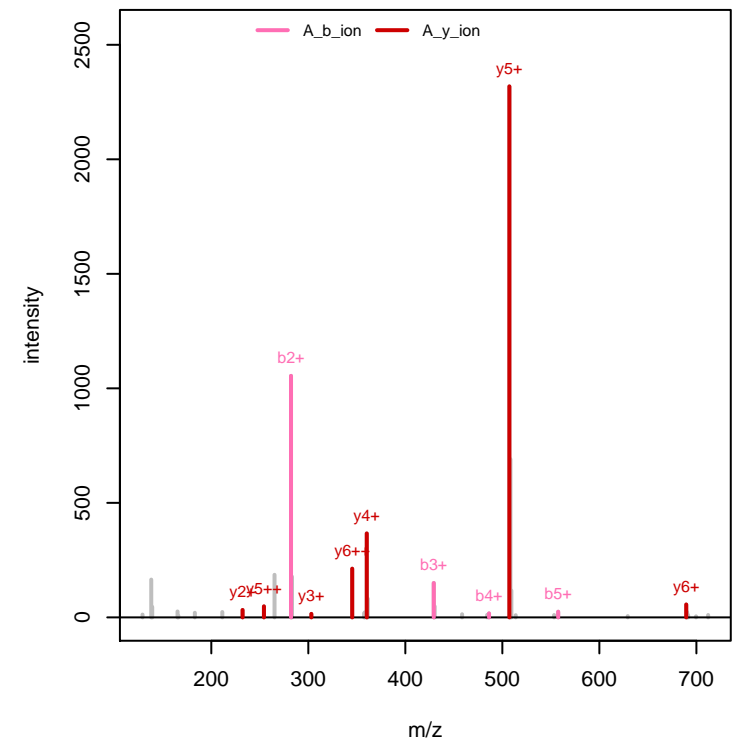

VKFGAGR+XL\_L

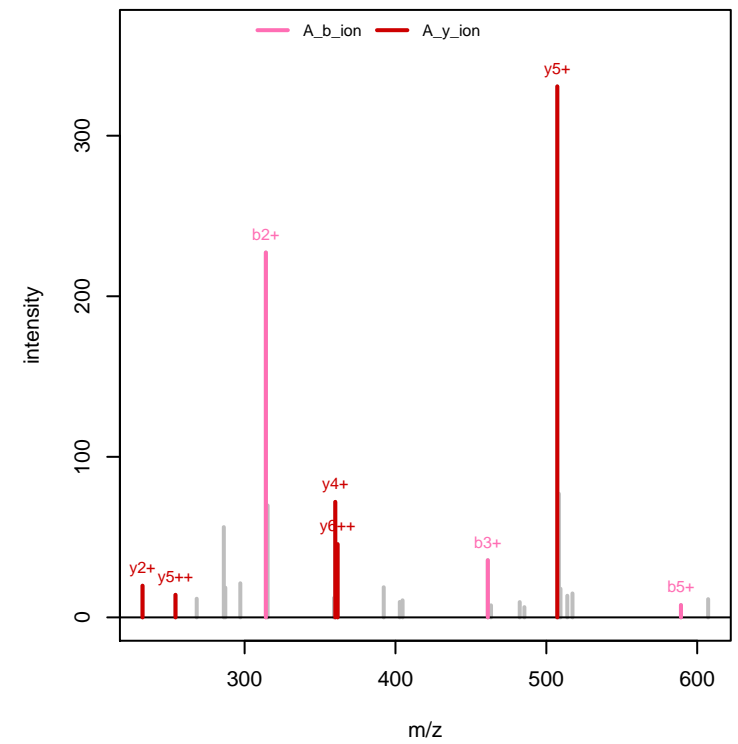

HGKSLGSGK+XL\_S

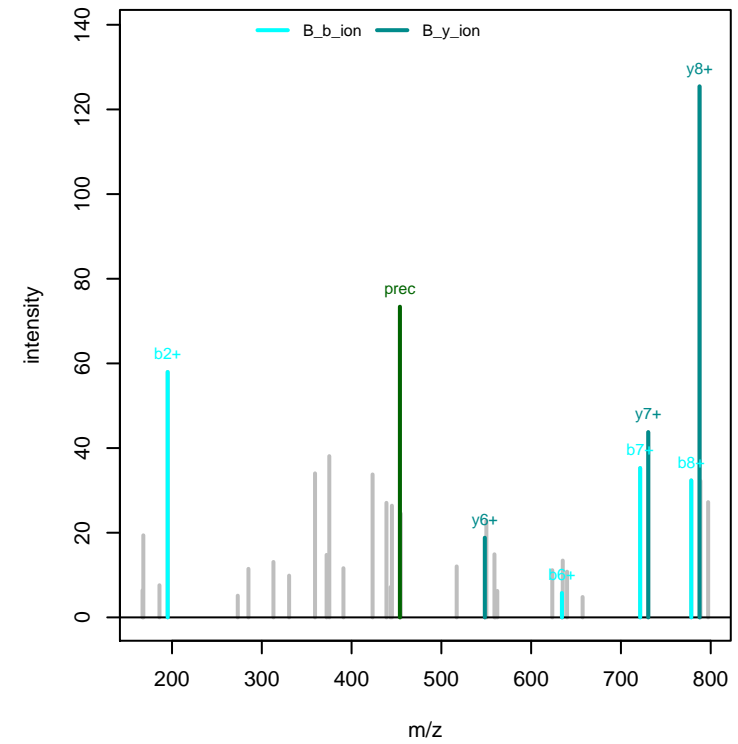

HGKSLGSGK+XL\_L

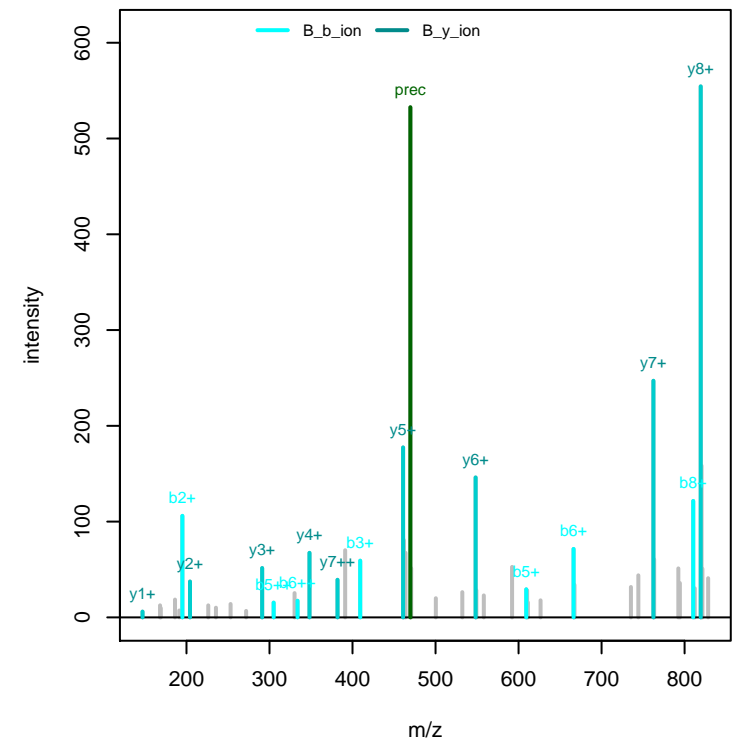

NSEKDVR  
EKVYVQDK

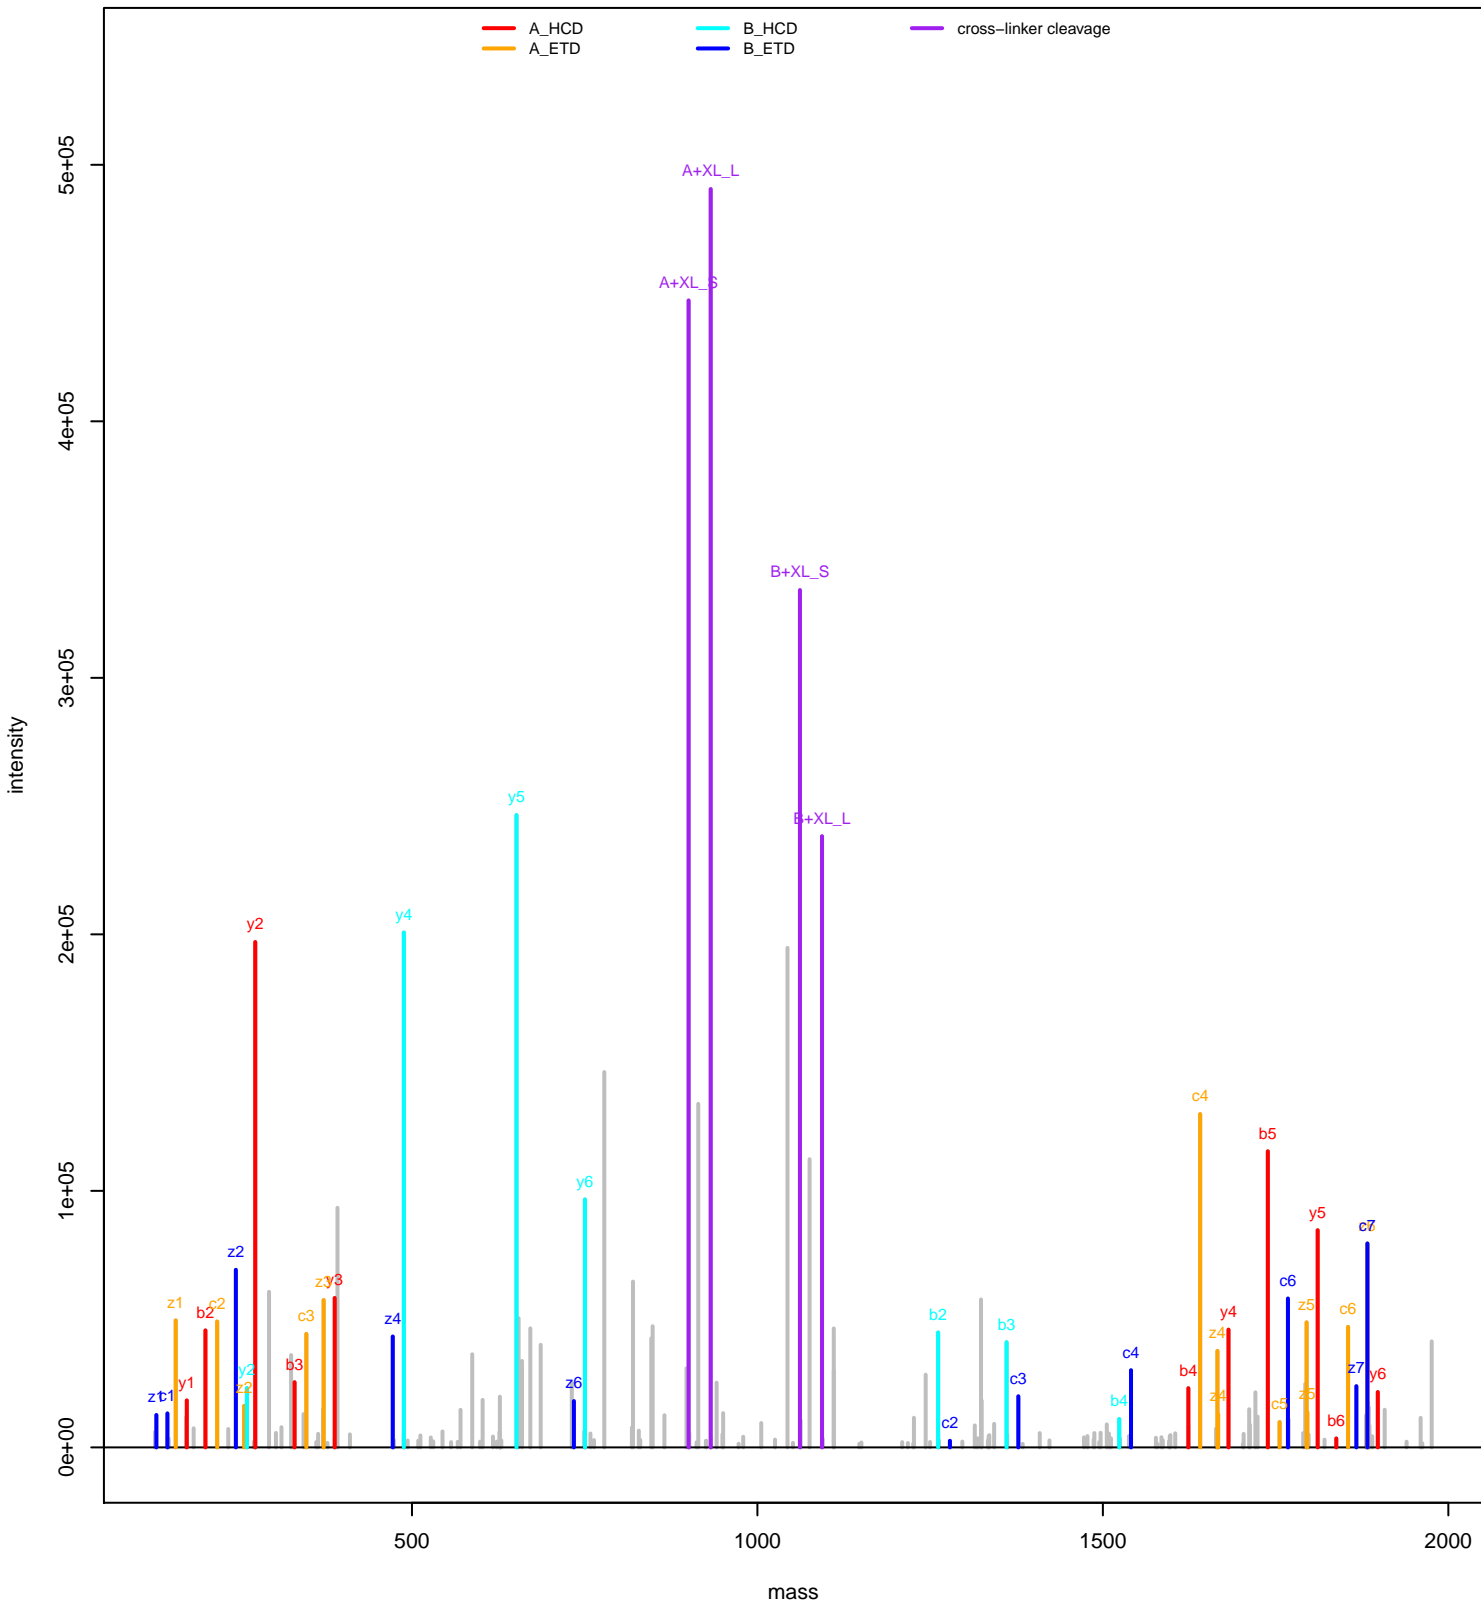

NSEKDVR+XL\_S

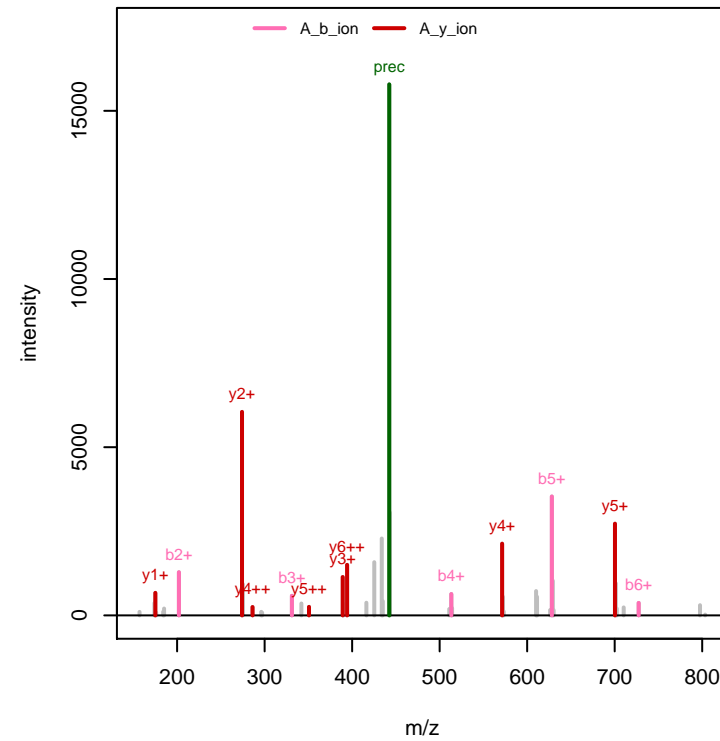

NSEKDVR+XL\_L

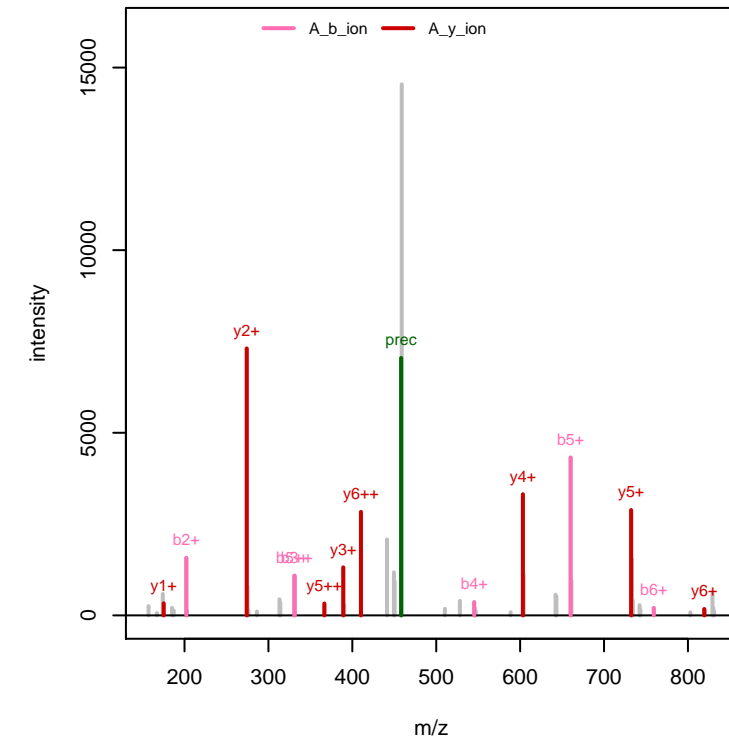

EKVYVQDK+XL\_S

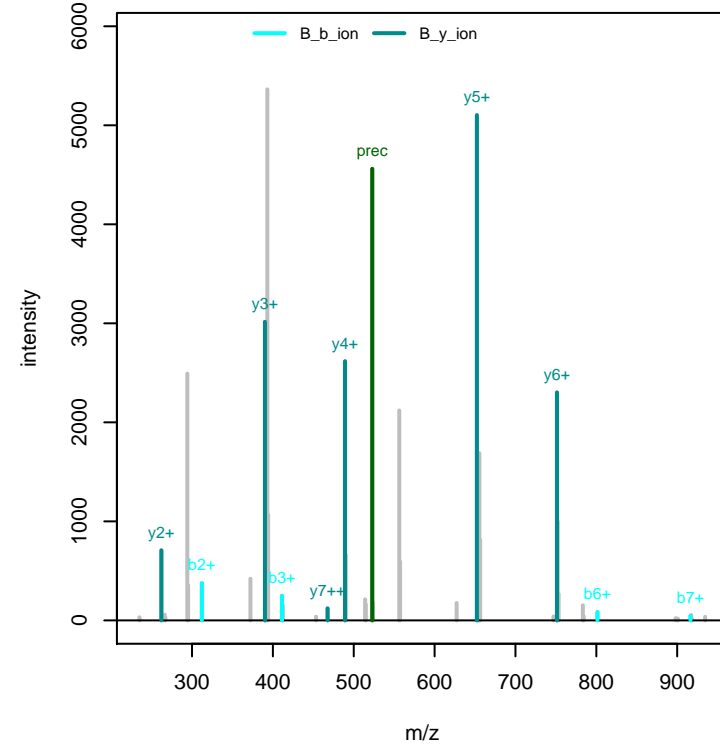

EKVYVQDK+XL\_L

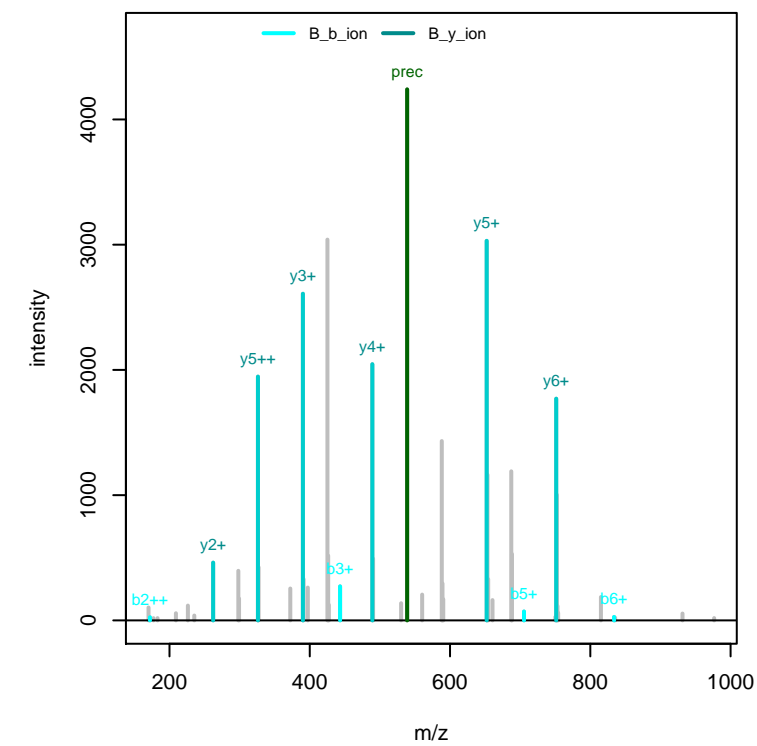

TAQTGKIGDGK  
QKGHTELYR

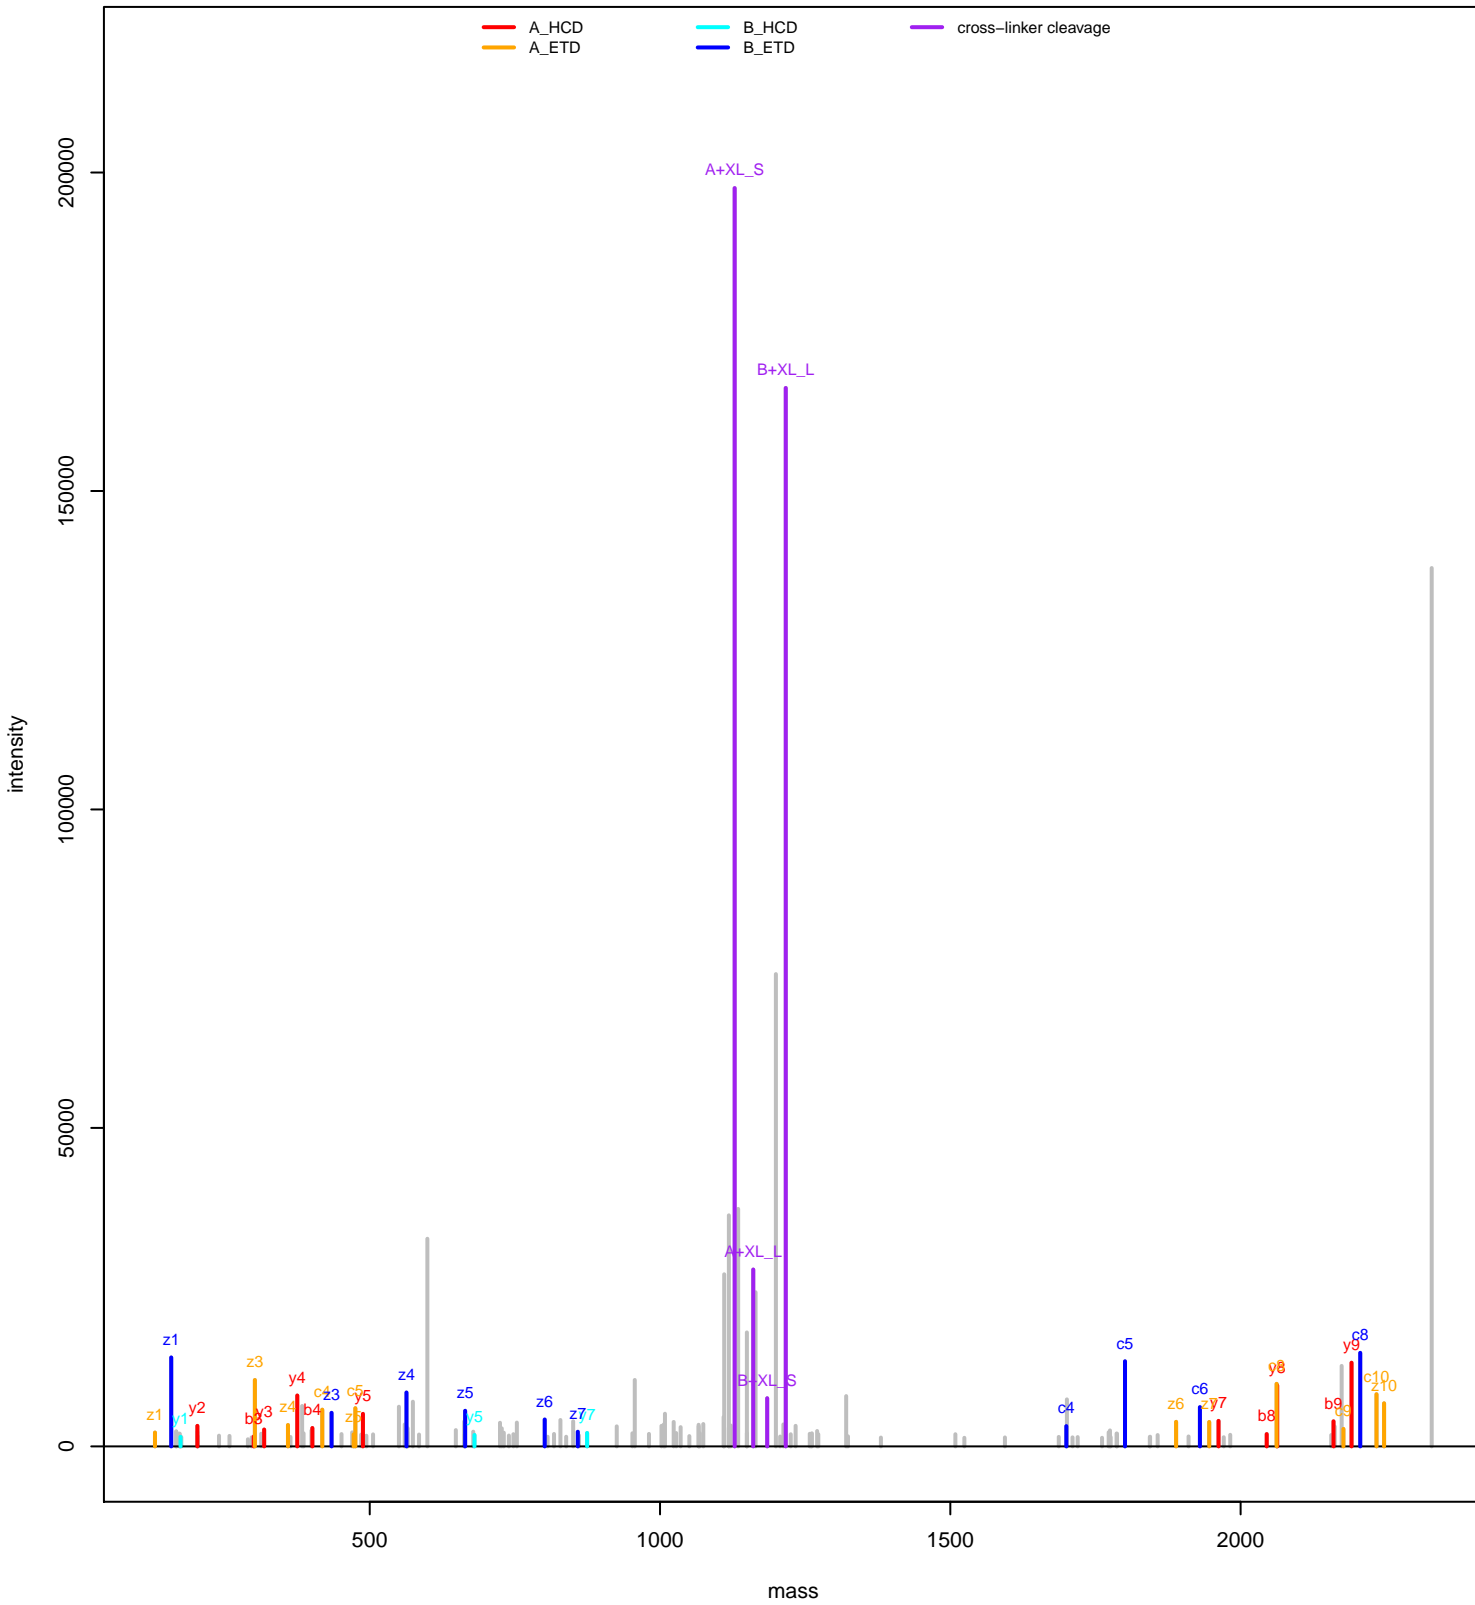

TAQTGKIGDGK+XL\_S

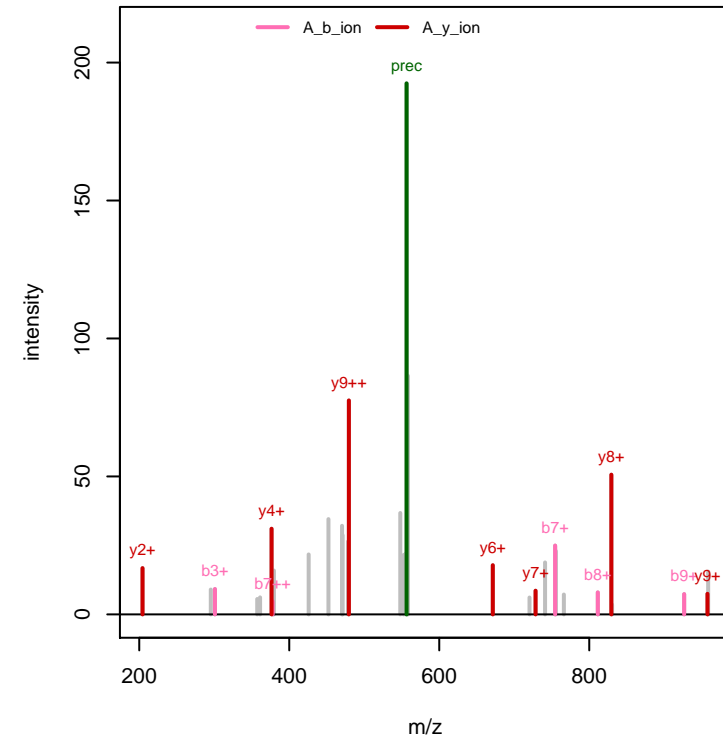

TAQTGKIGDGK+XL\_L

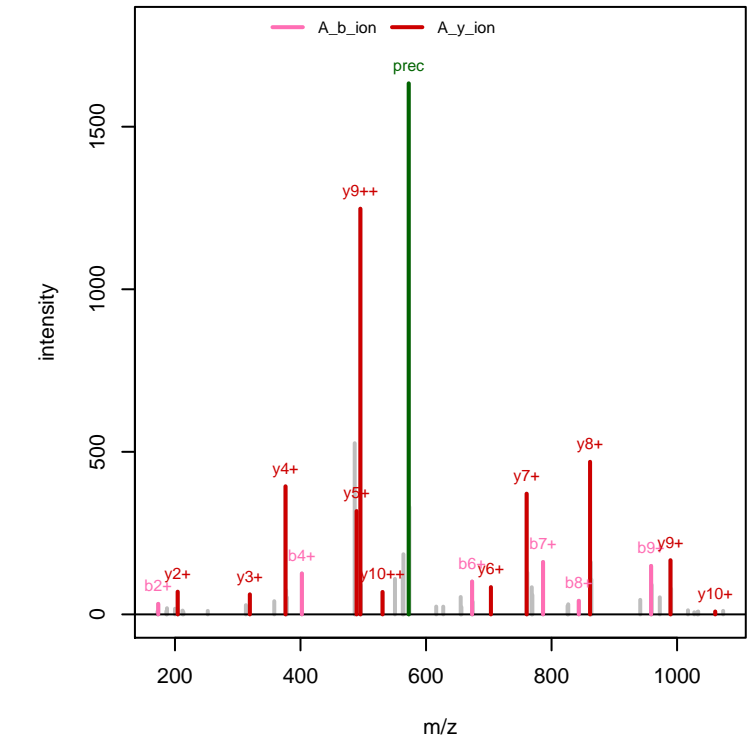

QKGHTELYR+XL\_S

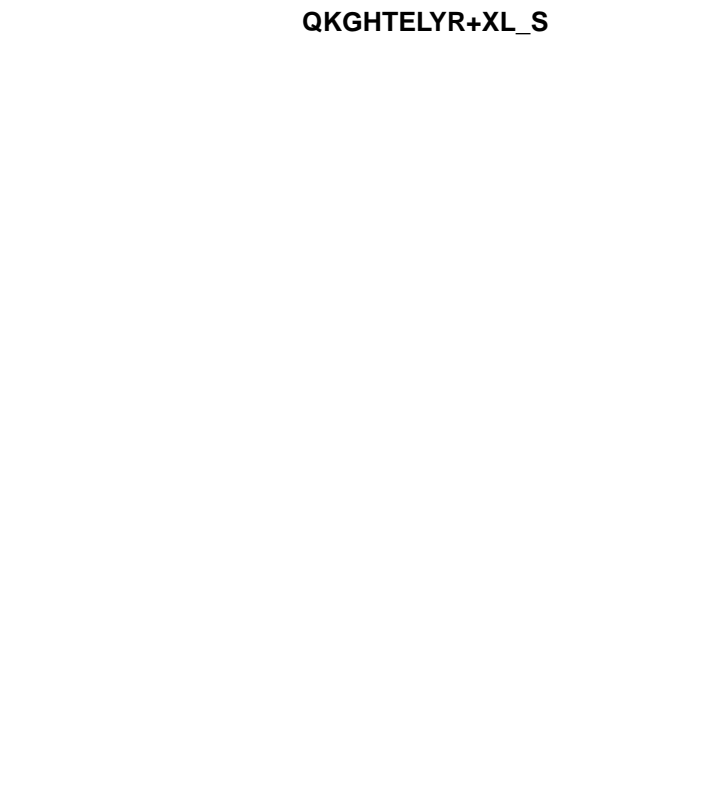

QKGHTELYR+XL\_L

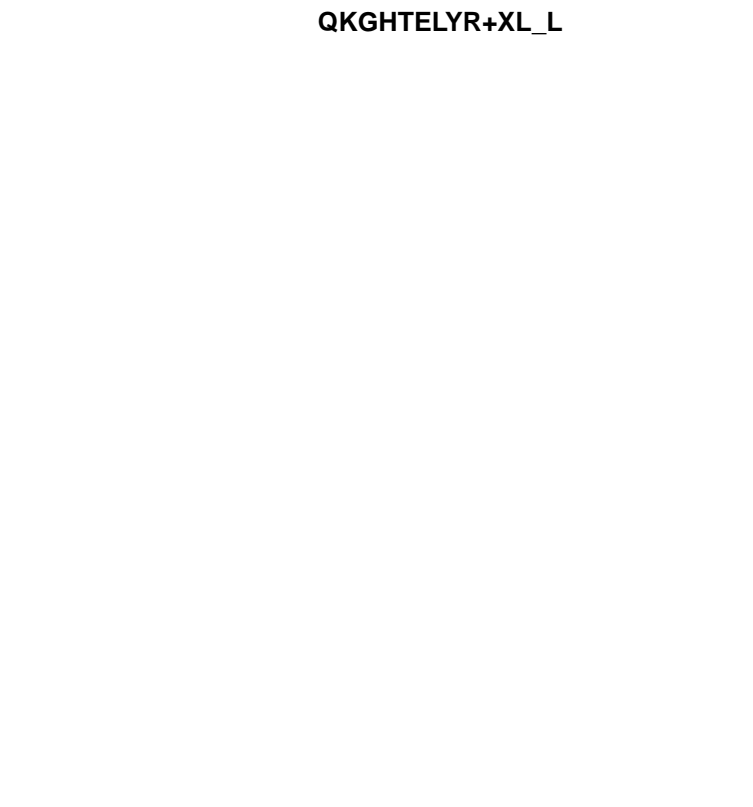

EFGVNLAKVK  
AEAPAAAPAAKAEGK

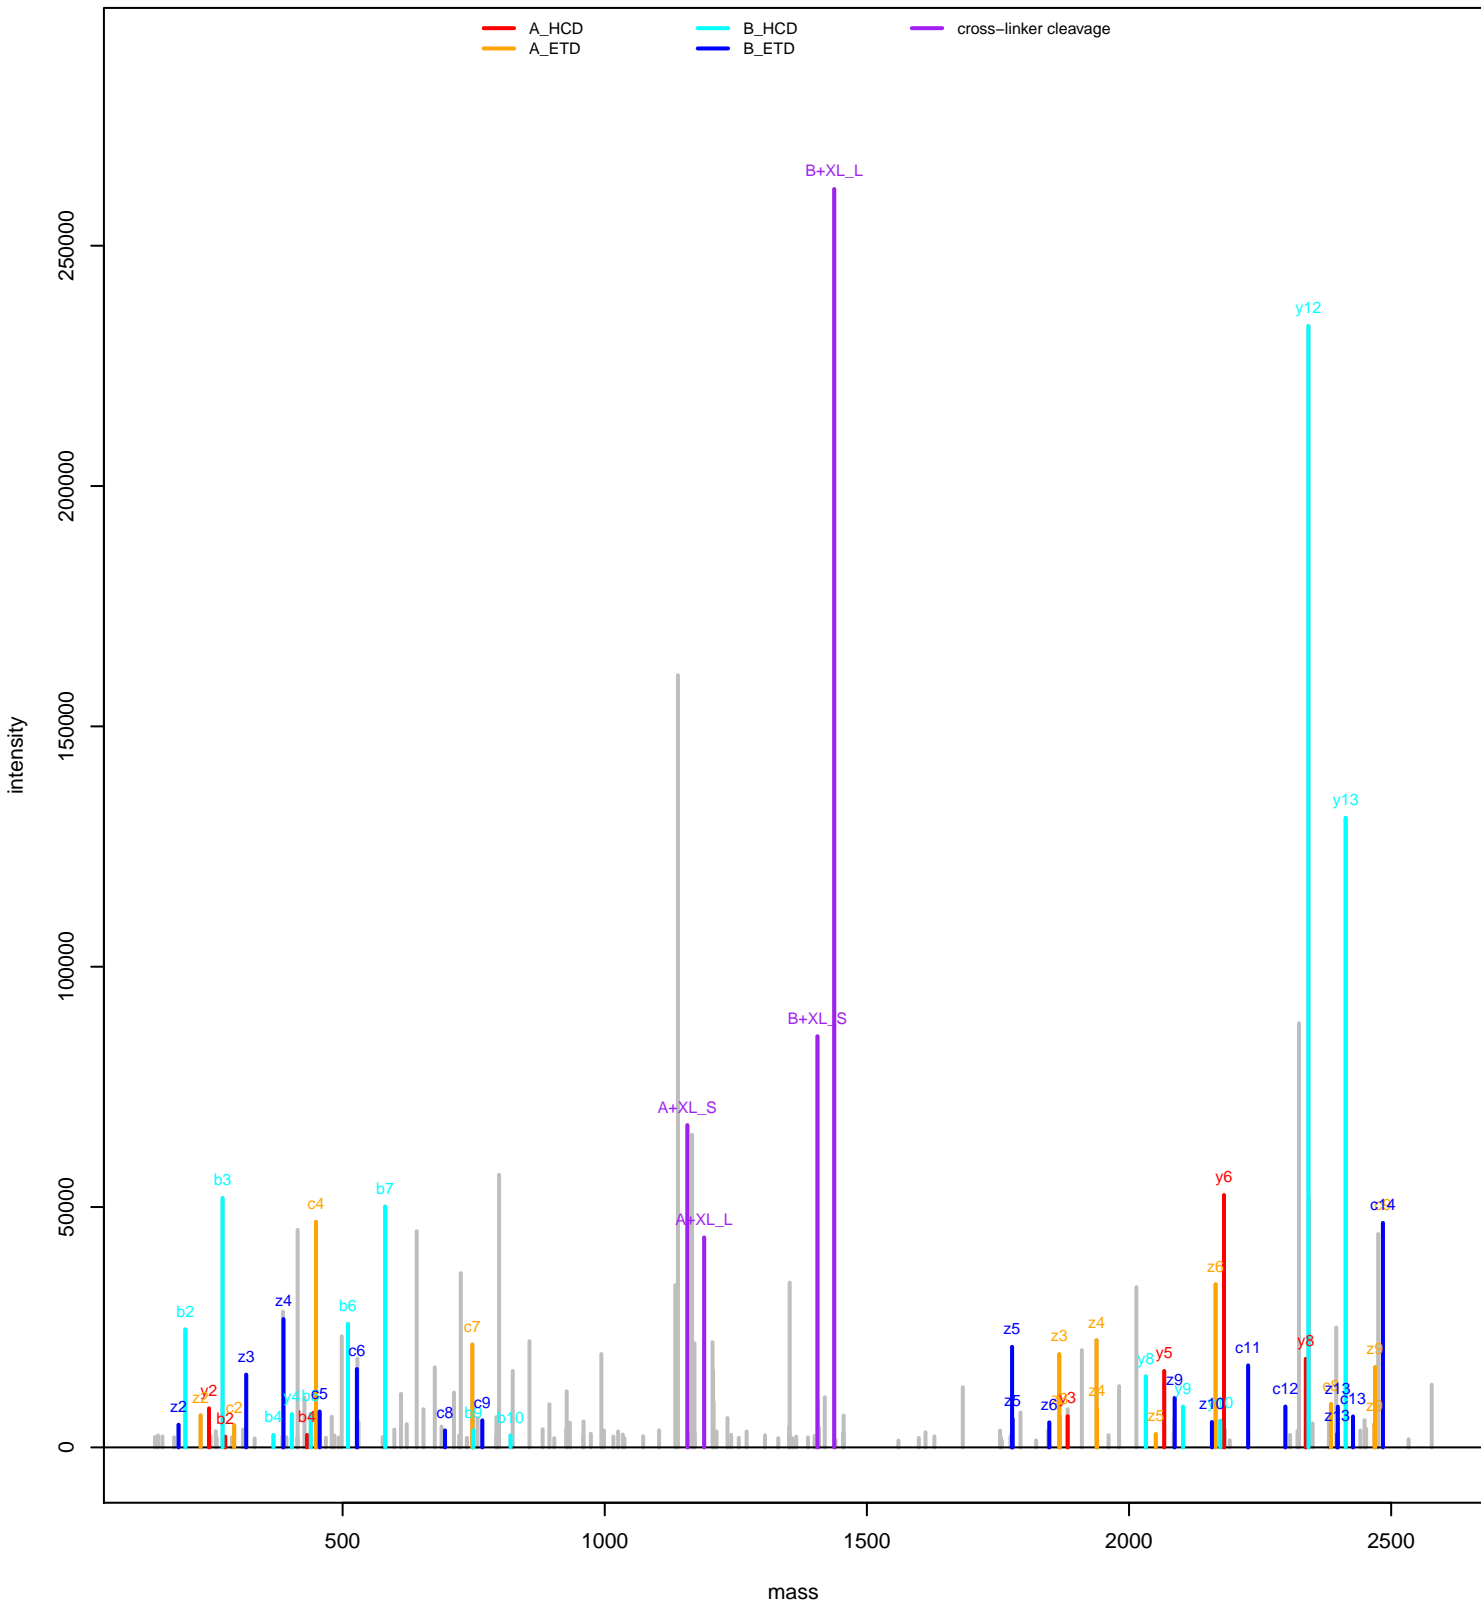

EFGVNLAKVK+XL\_S

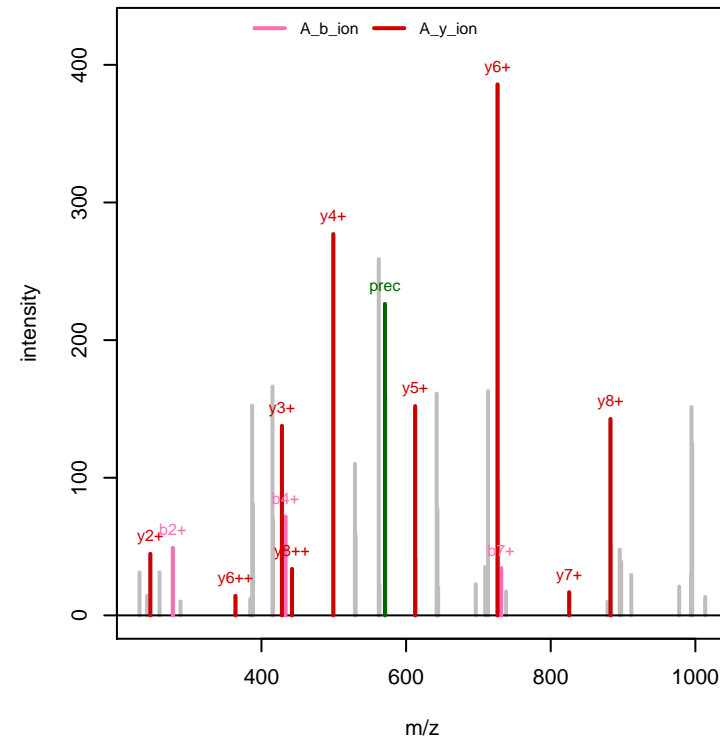

EFGVNLAKVK+XL\_L

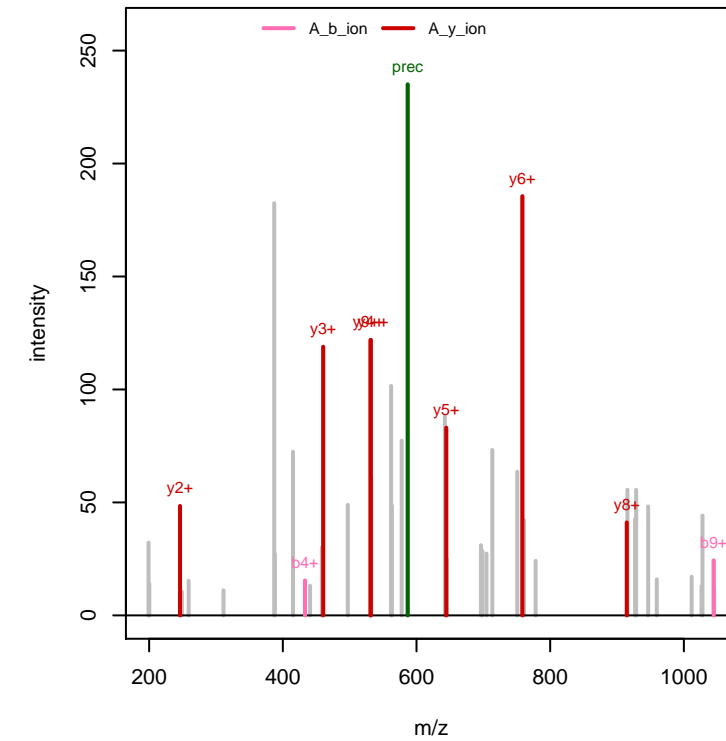

AEAPAAAPAAKAEGK+XL\_S

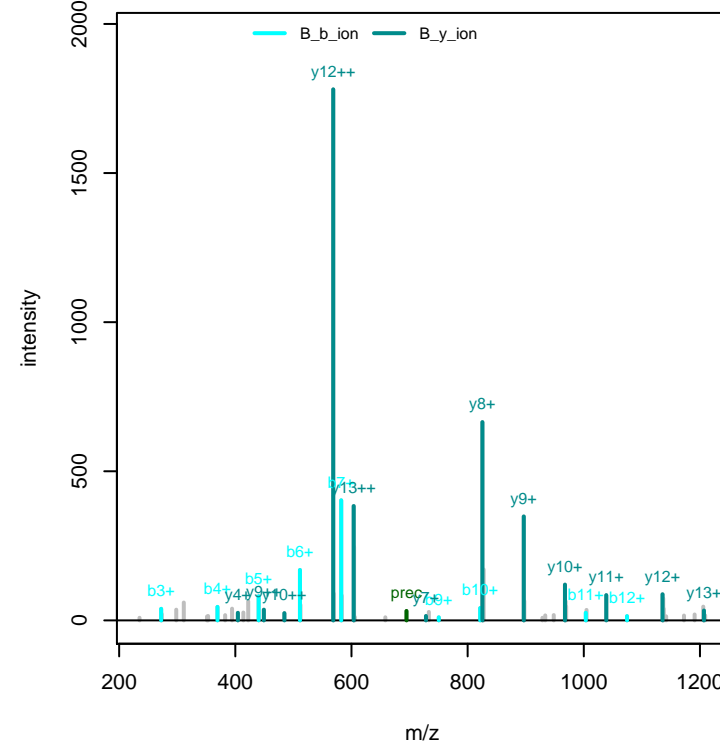

AEAPAAAPAAKAEGK+XL\_L

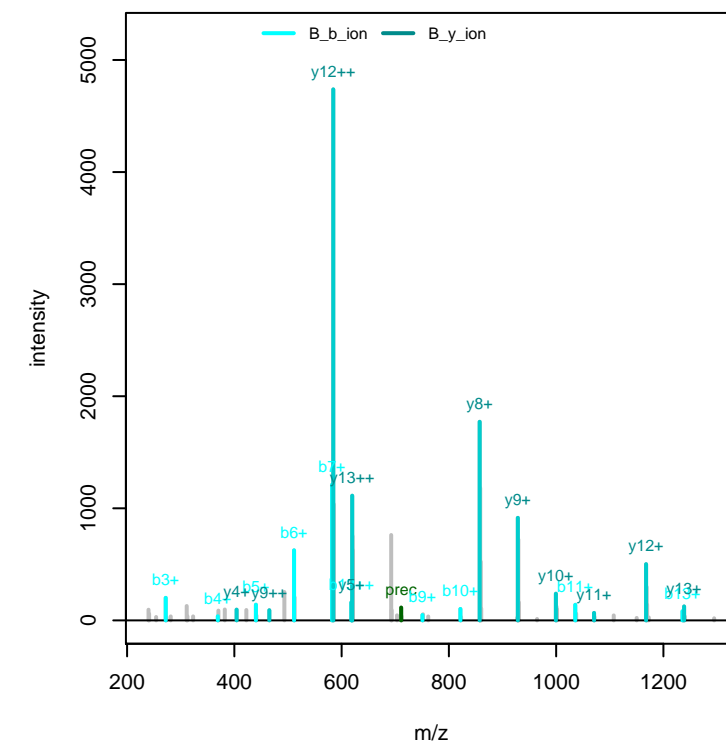

TGRNPKTGDK  
LKSRVENASPKDE

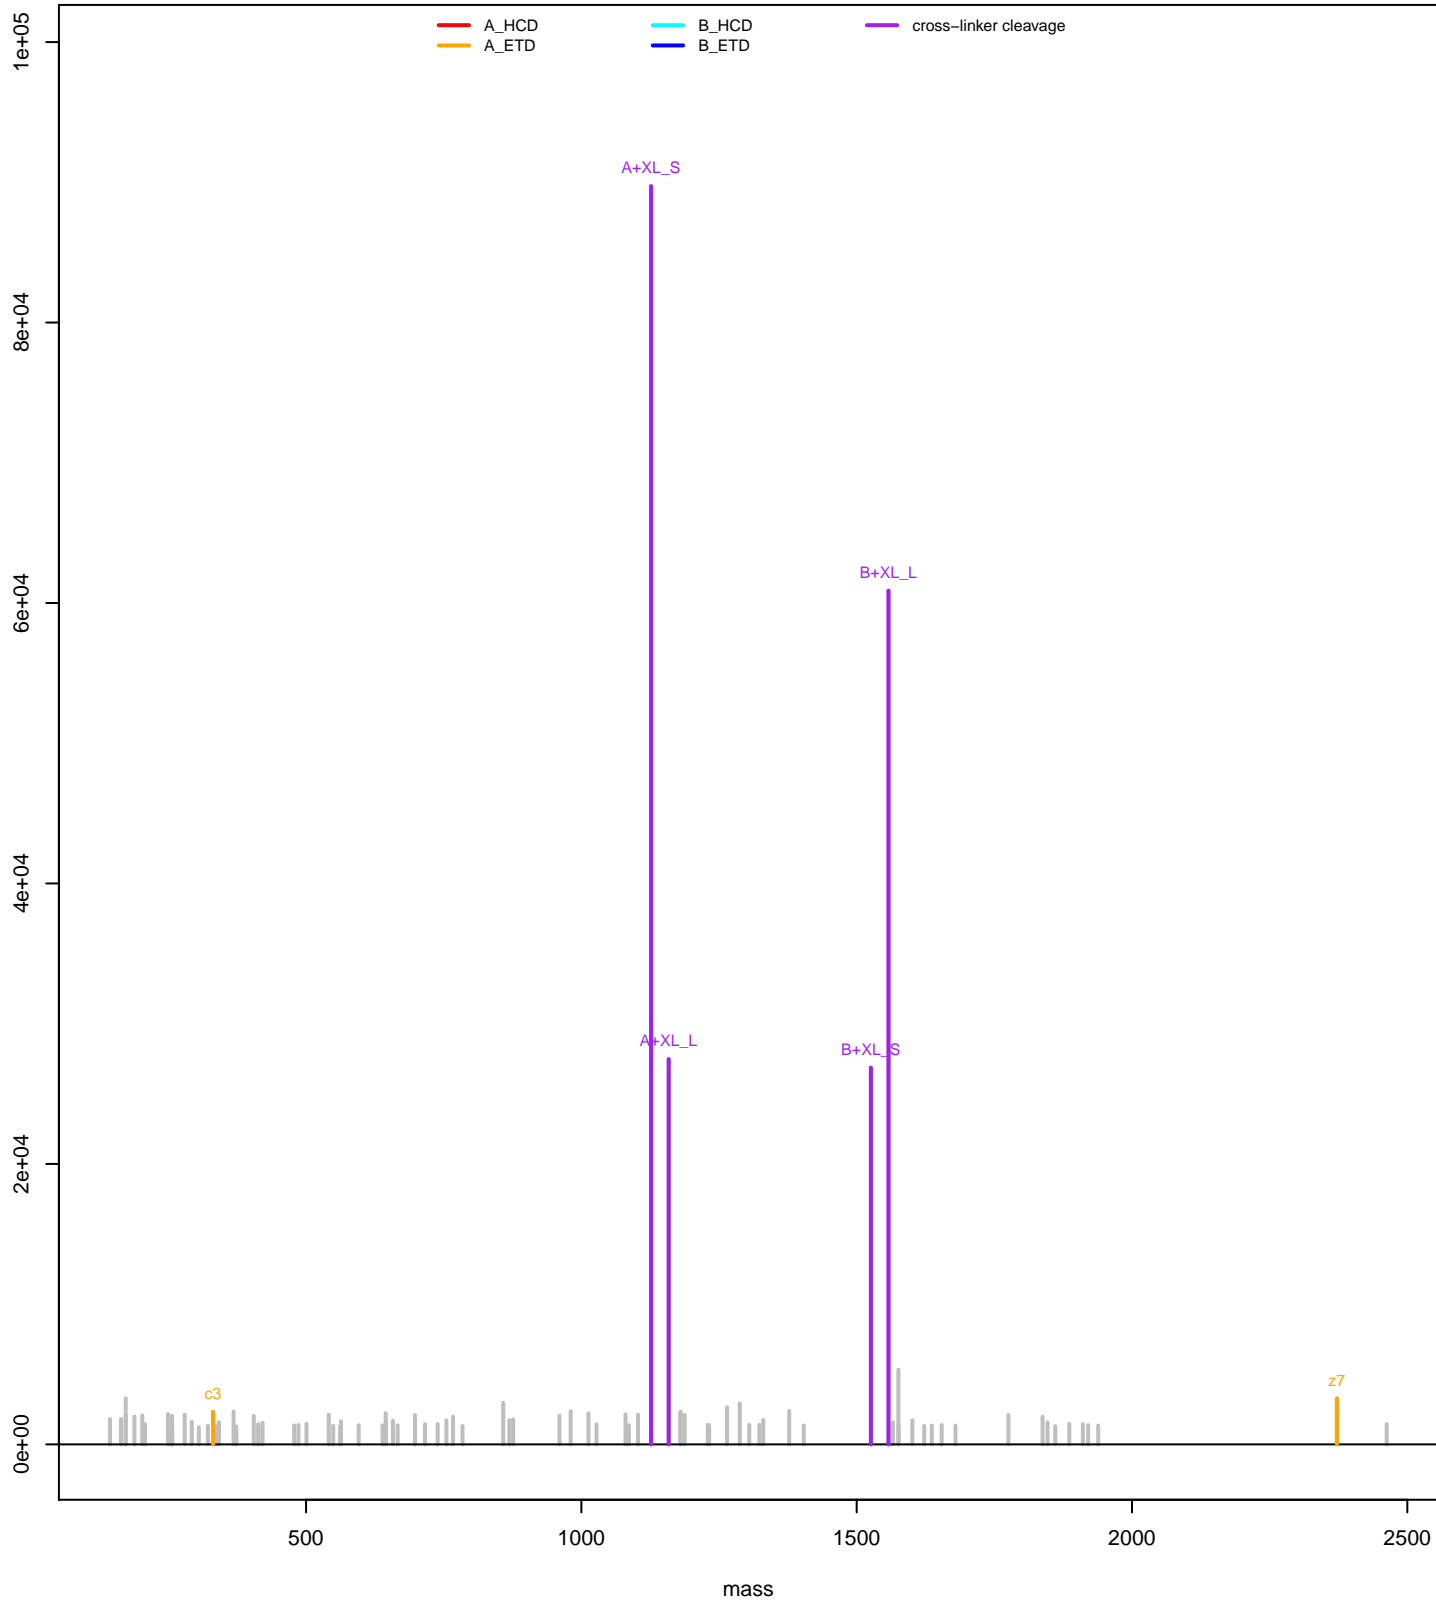

TGRNPKTGDK+XL\_S

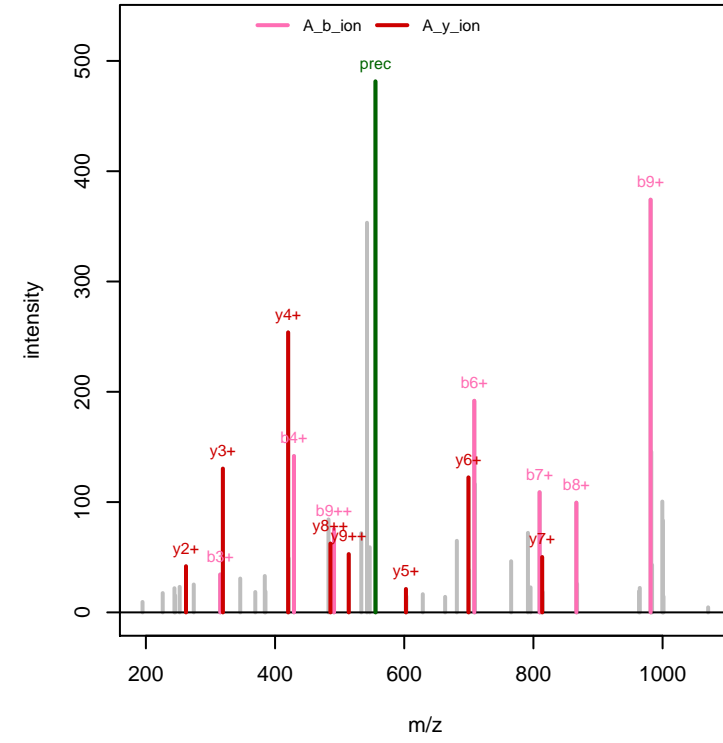

TGRNPKTGDK+XL\_L

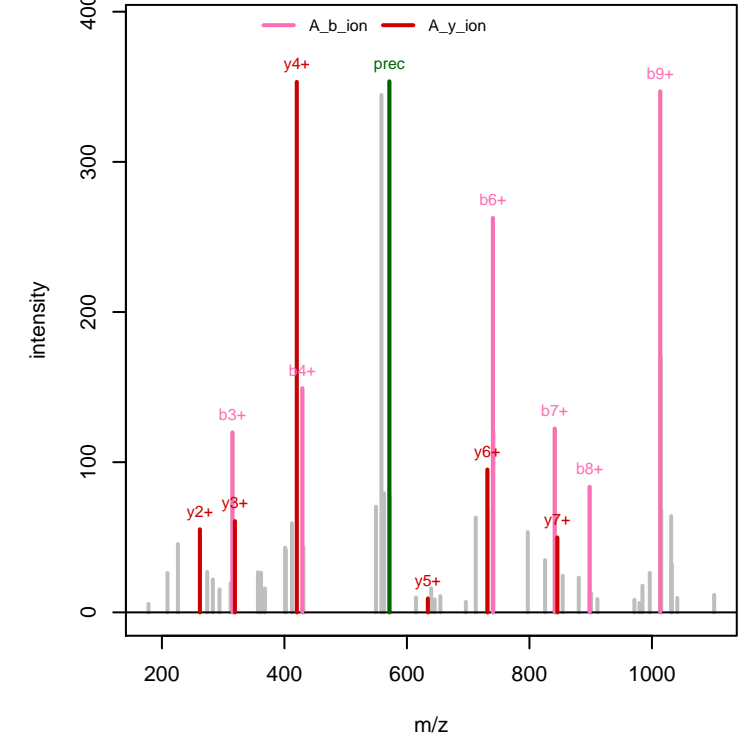

LKSRVENASPKDE+XL\_S

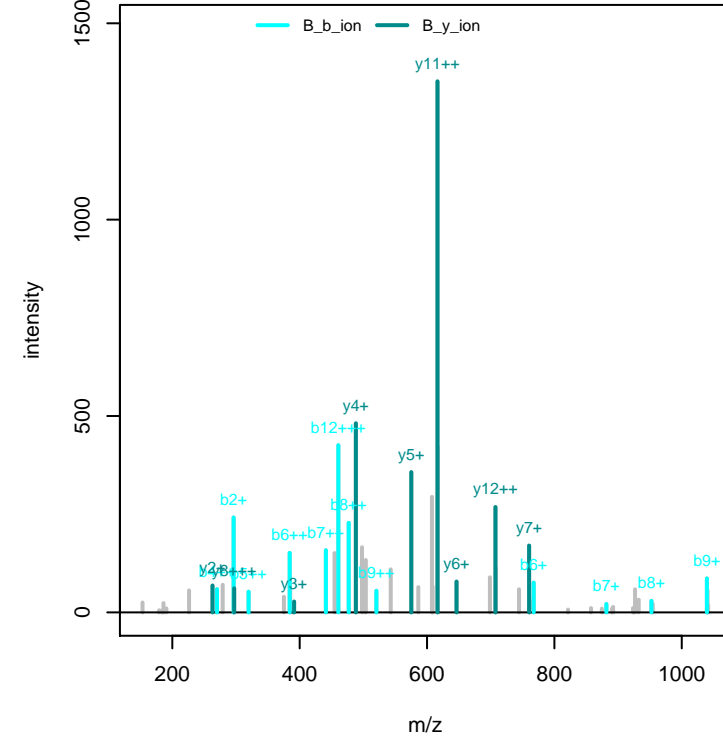

LKSRVENASPKDE+XL\_L

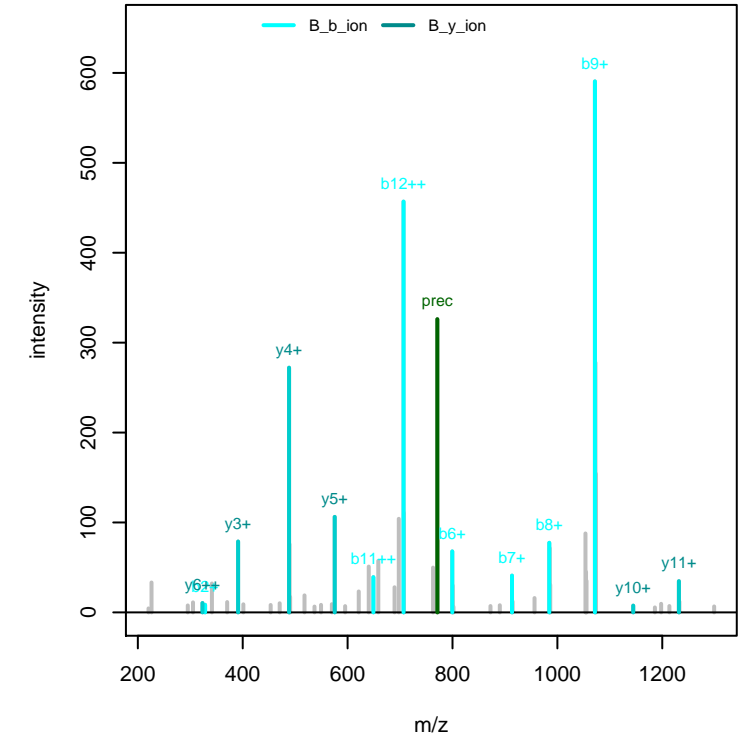

**GGHDPKK  
VKVVNGLGK**

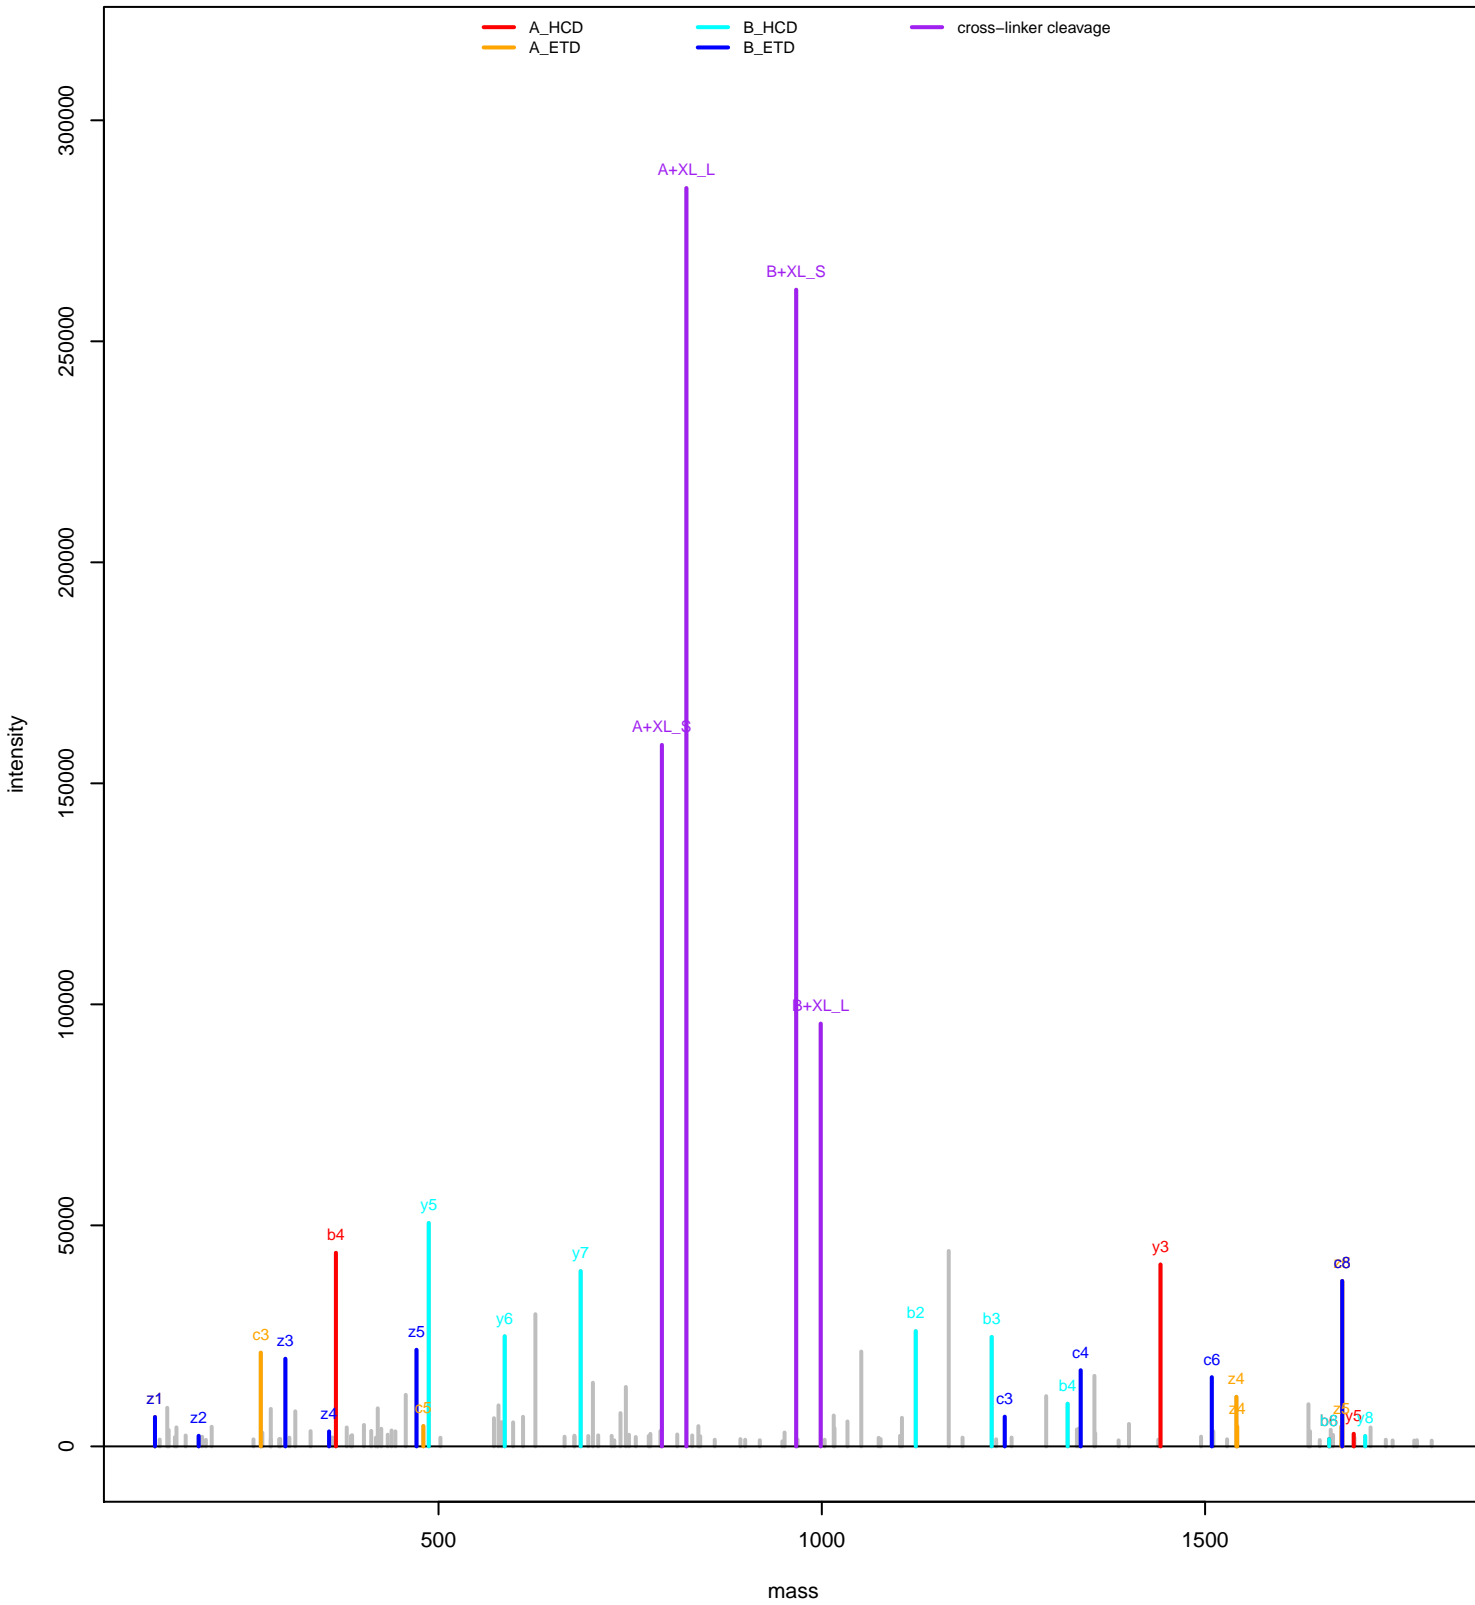

**GGHDPKK+XL\_S**

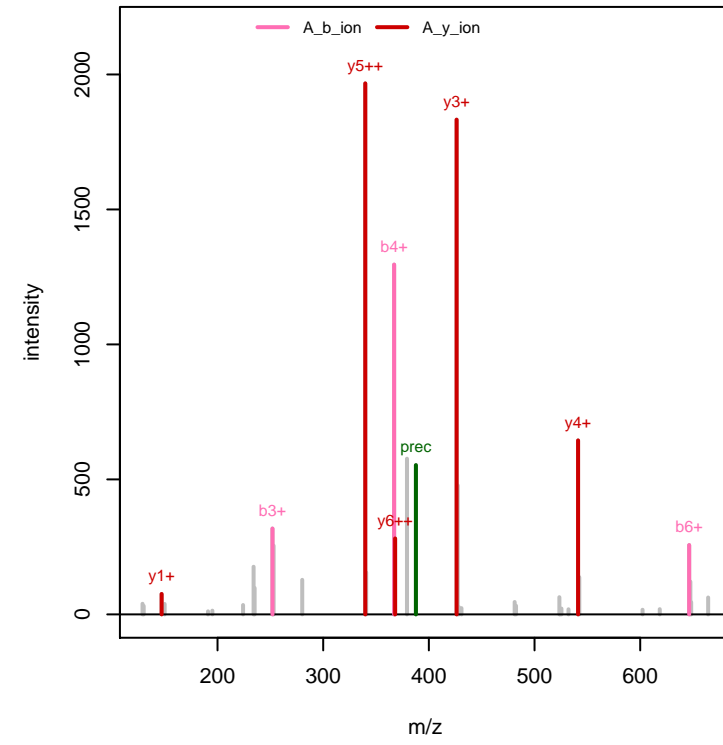

**GGHDPKK+XL\_L**

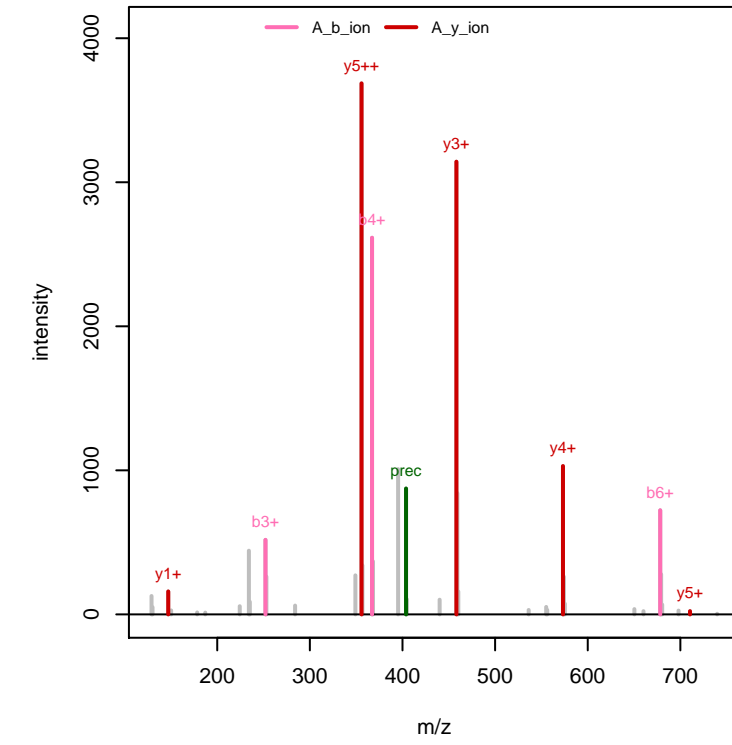

**VKVVNGLGK+XL\_S**

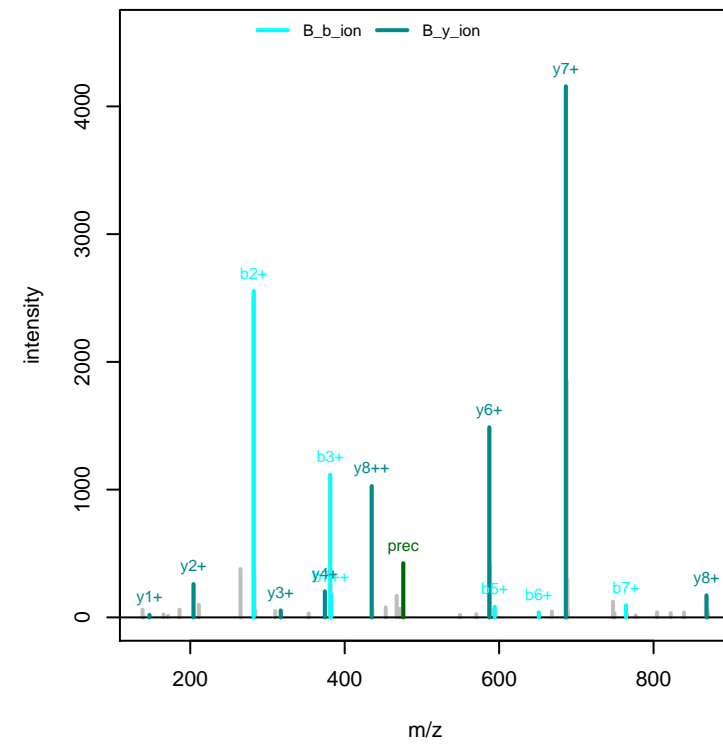

**VKVVNGLGK+XL\_L**

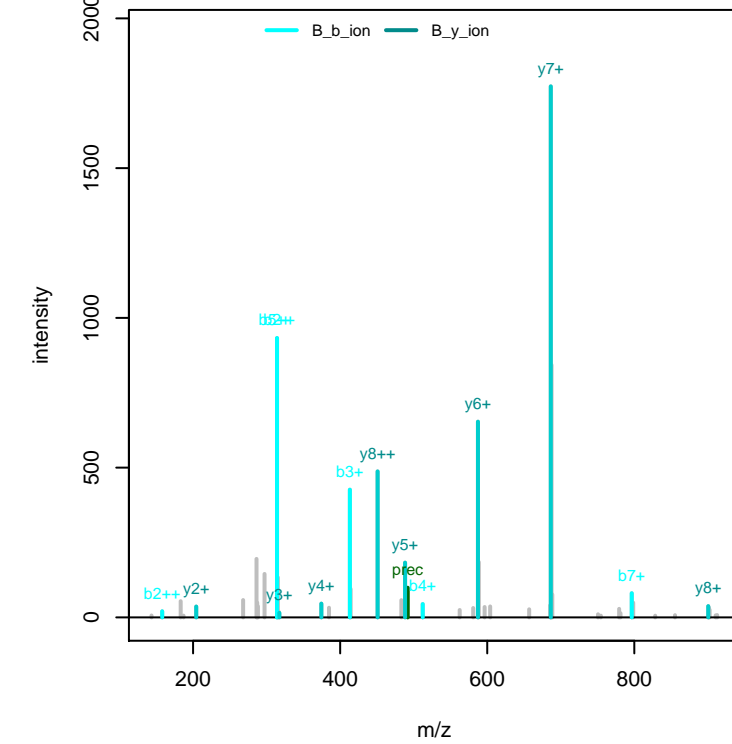



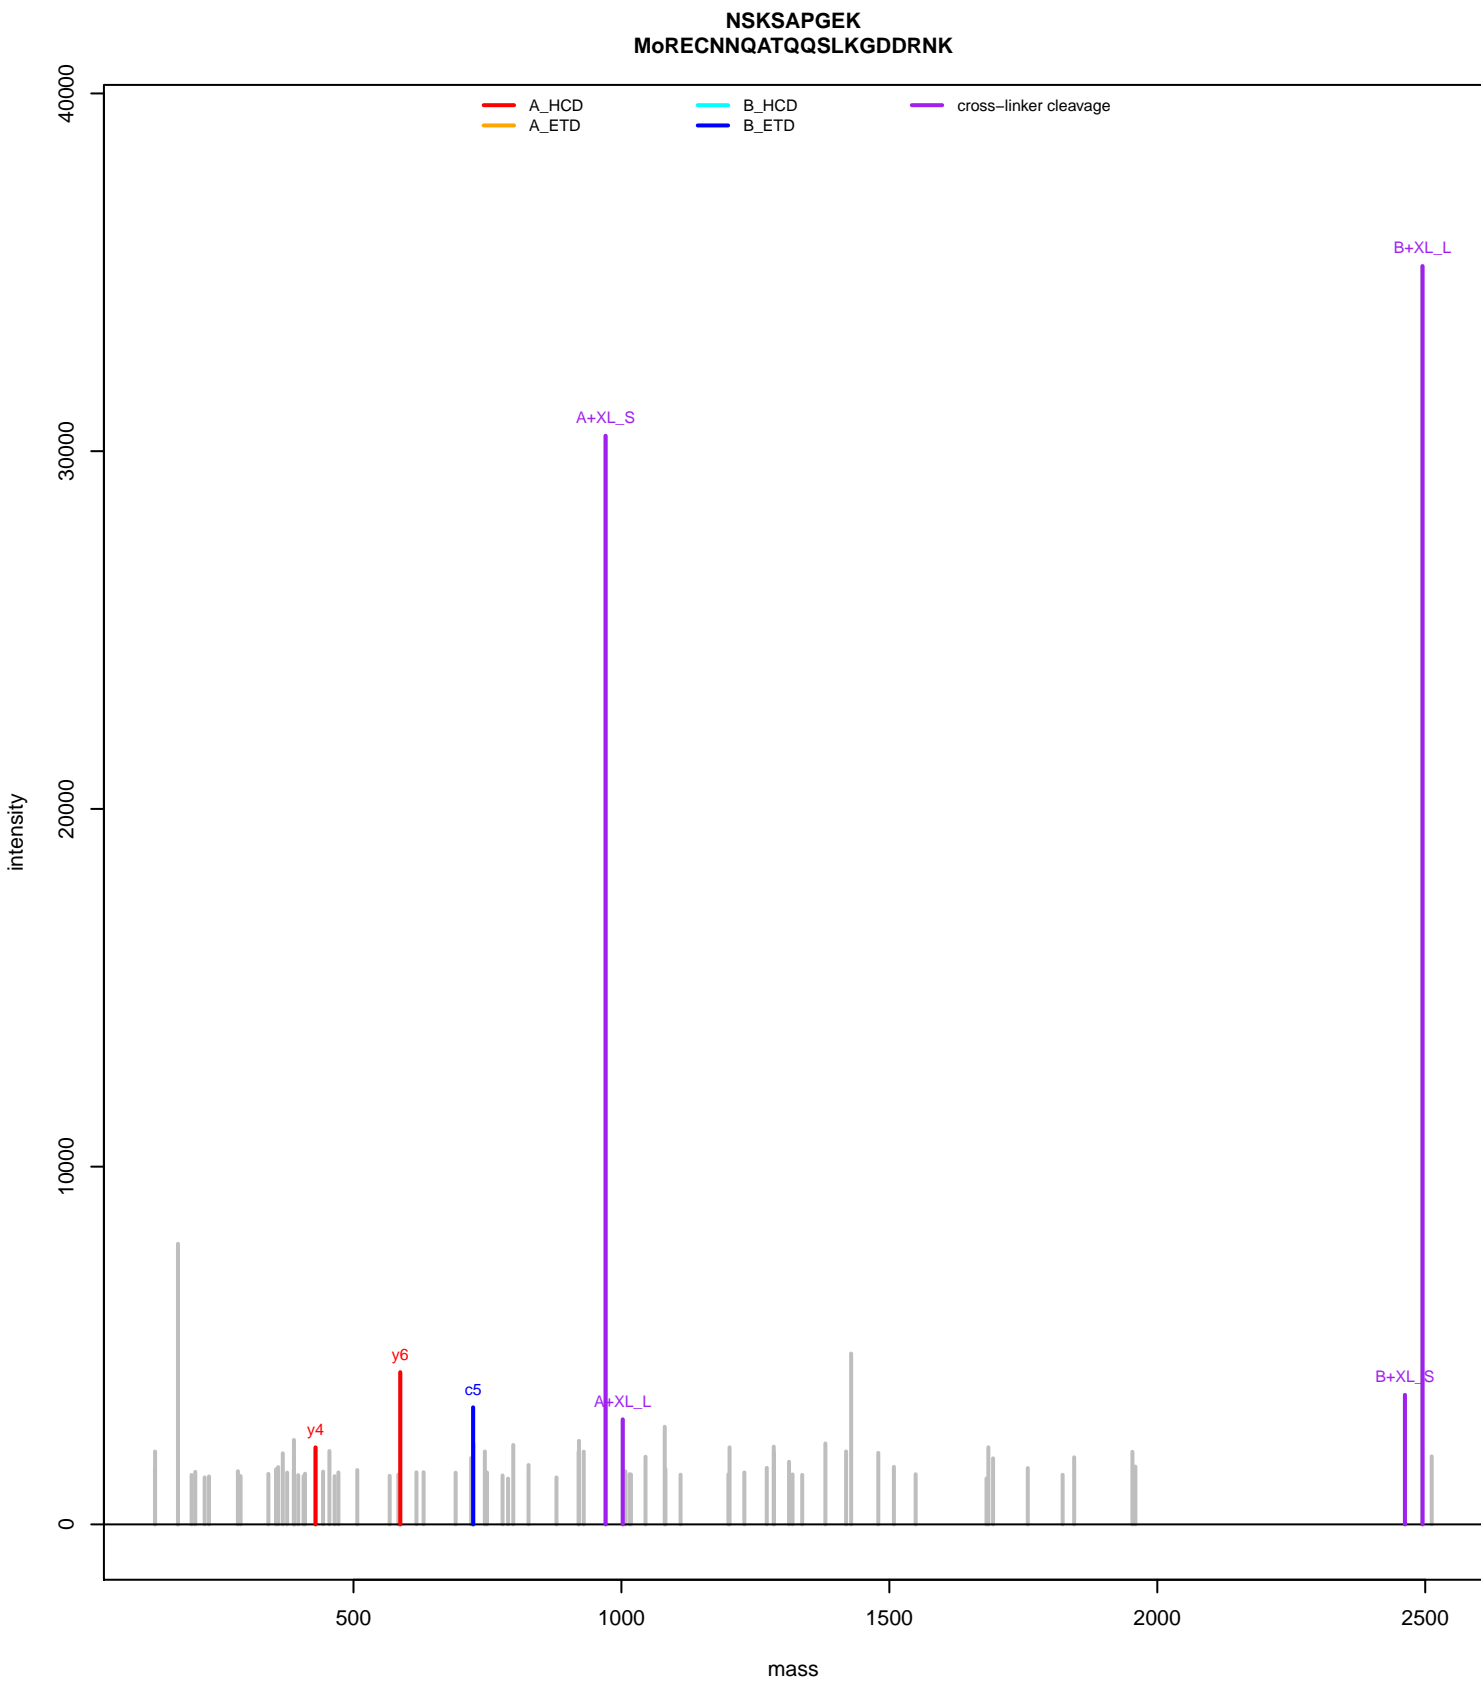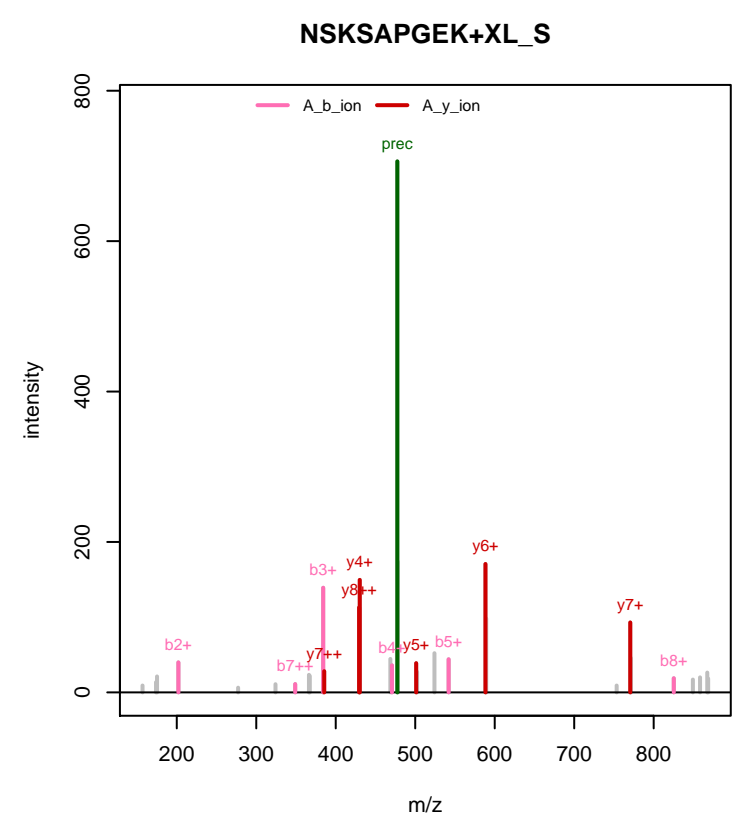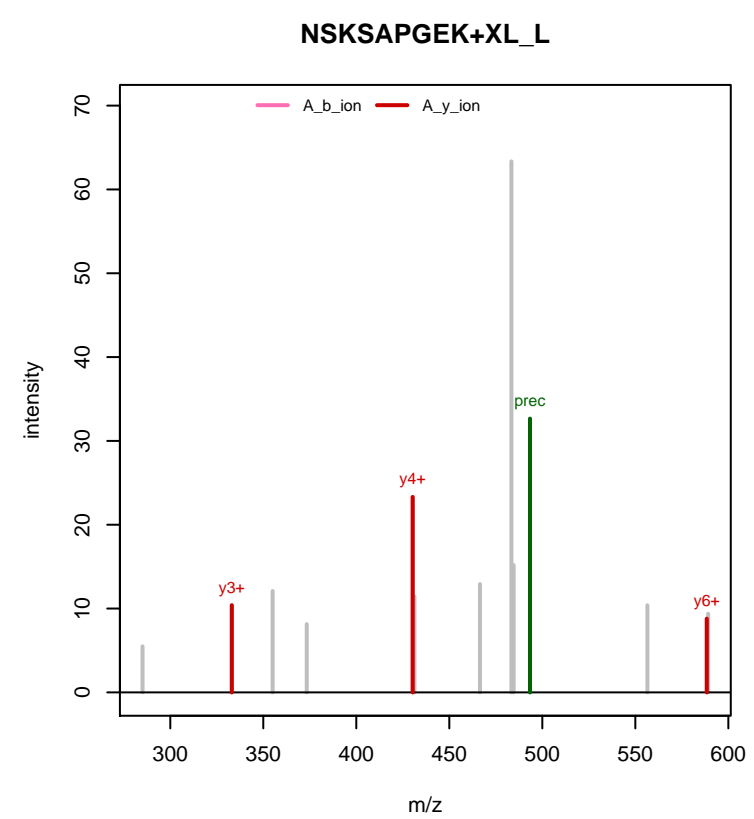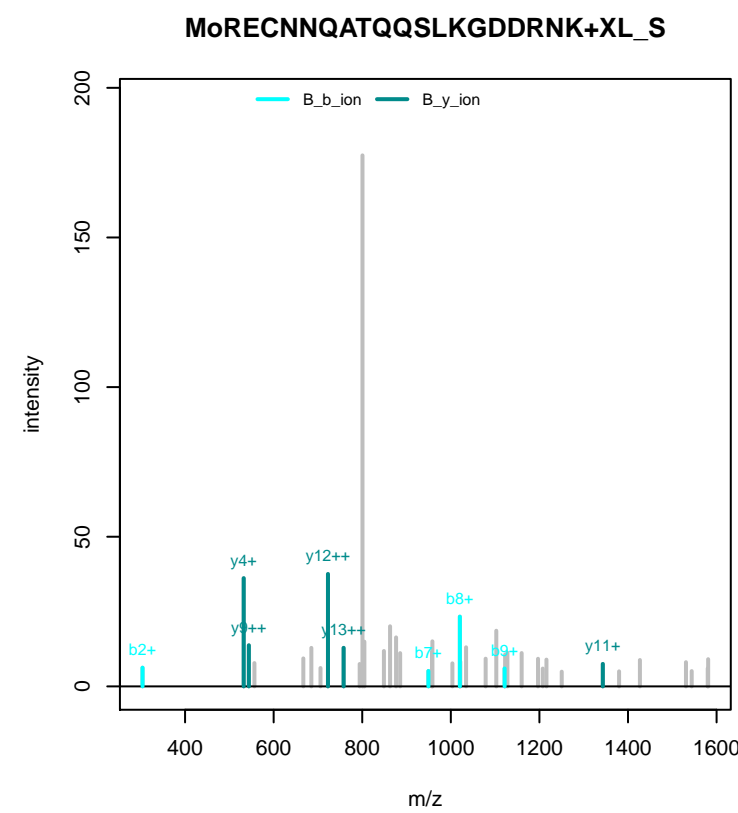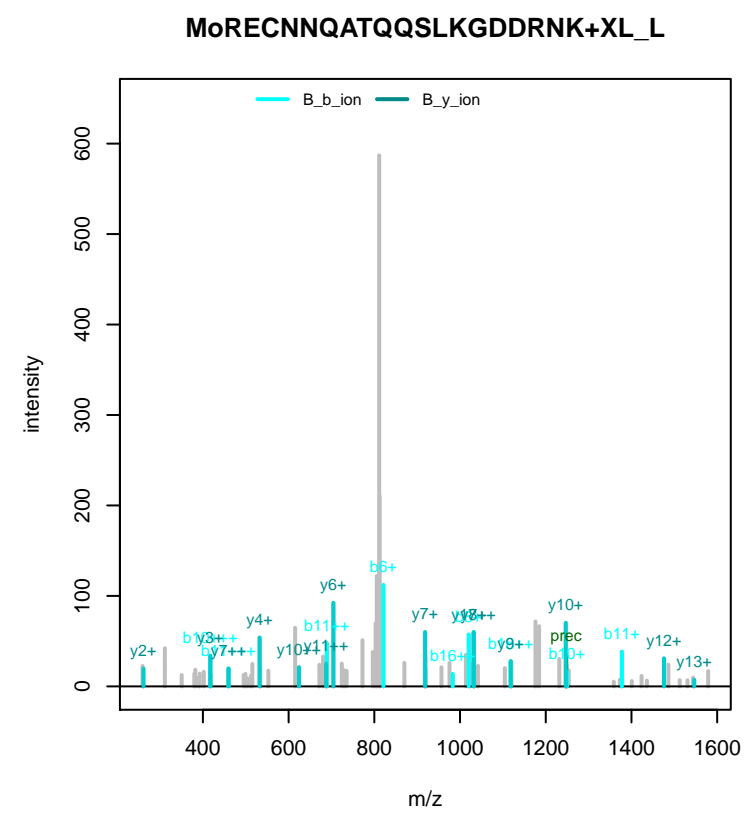

**KAMDEQGK**  
**AQRPAKYSYVDENGETK**

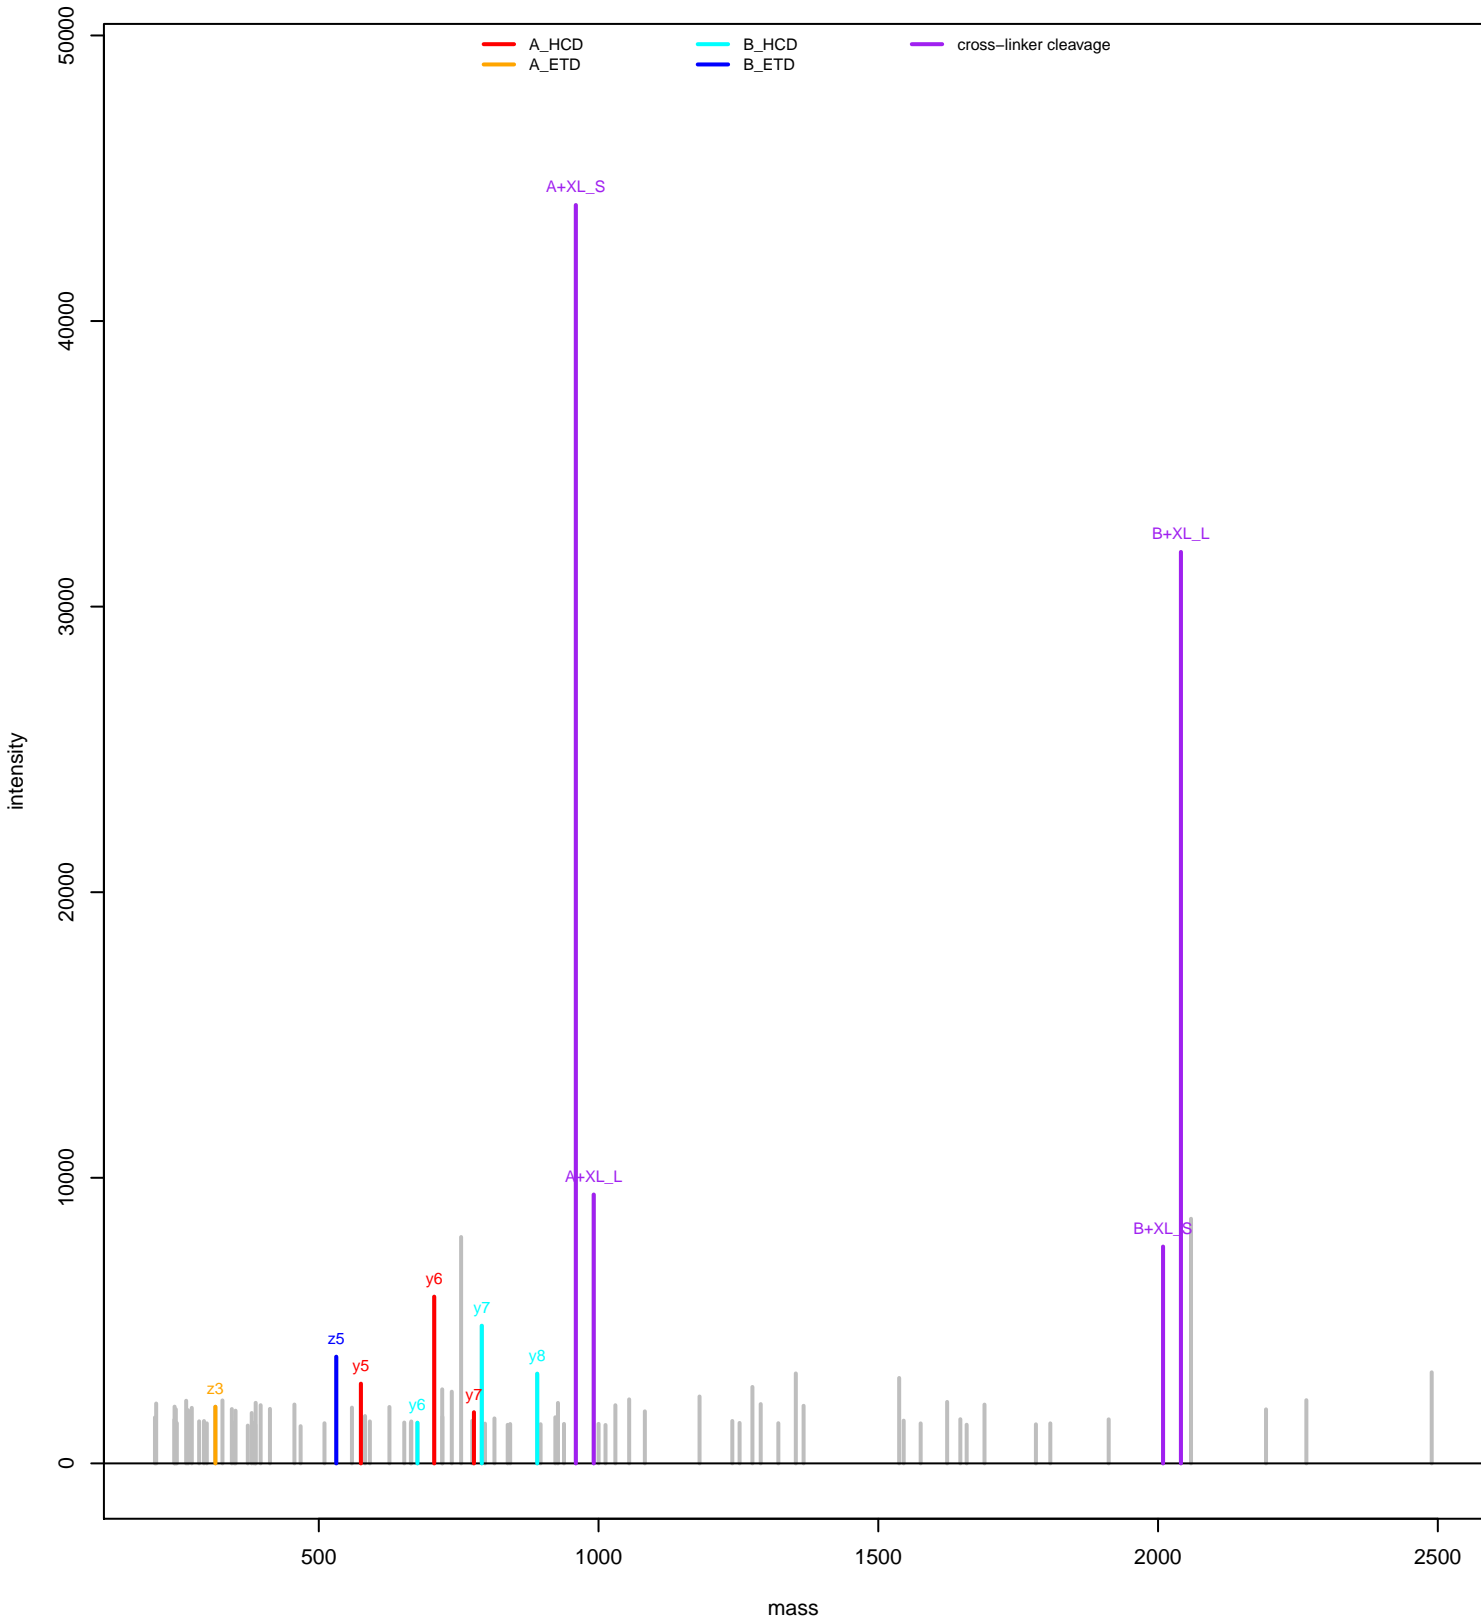

**KAMDEQGK+XL\_S**

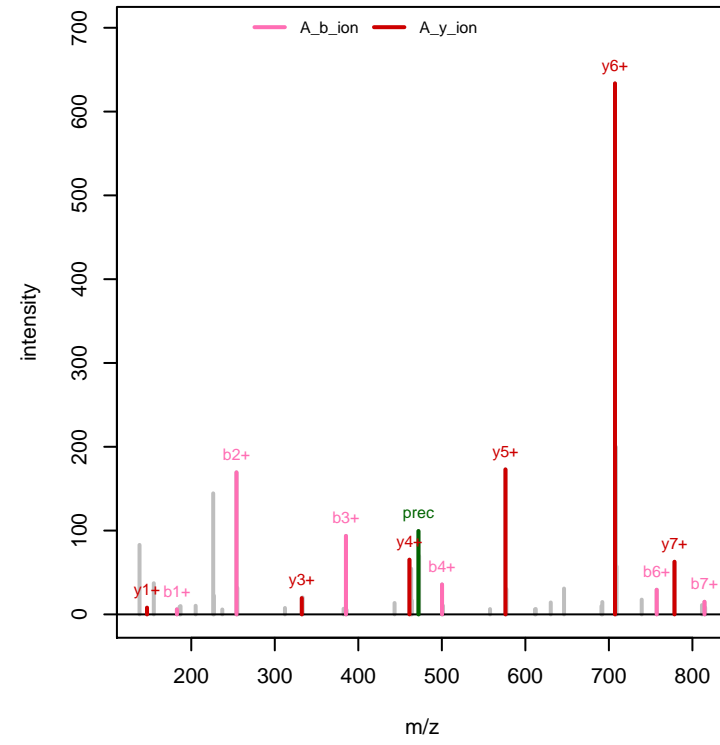

**KAMDEQGK+XL\_L**

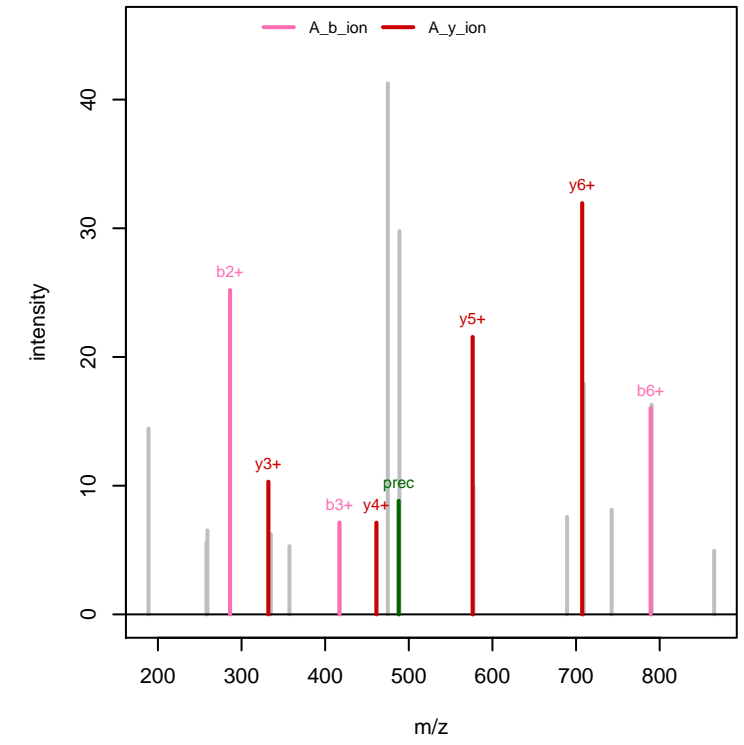

**AQRPAKYSYVDENGETK+XL\_S**

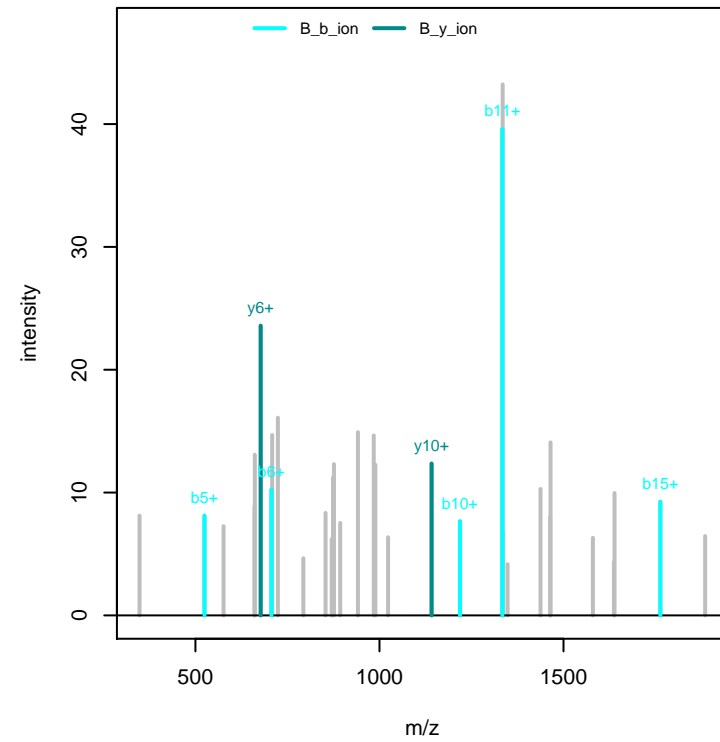

**AQRPAKYSYVDENGETK+XL\_L**

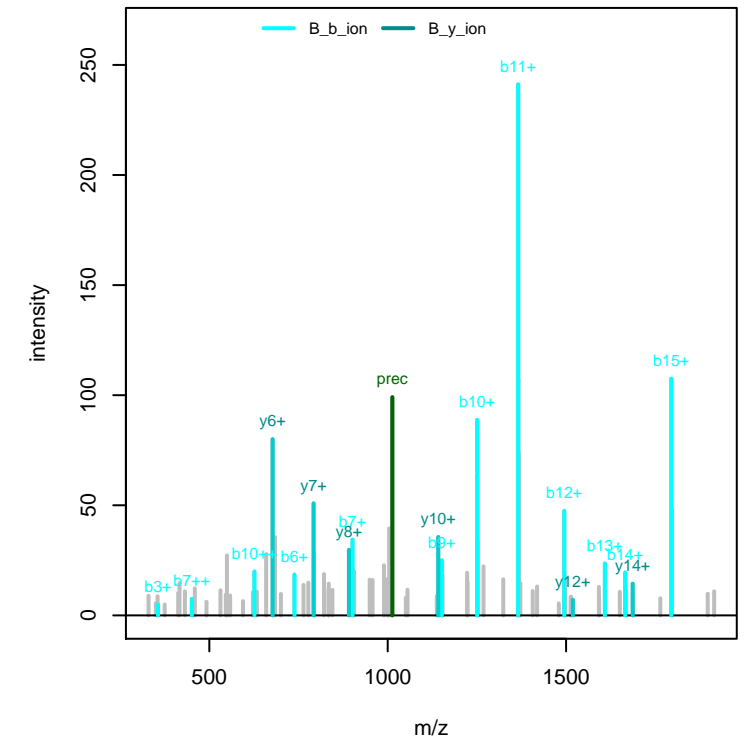

AAGANKVAVIK  
DLVESAPAALKEGVSK

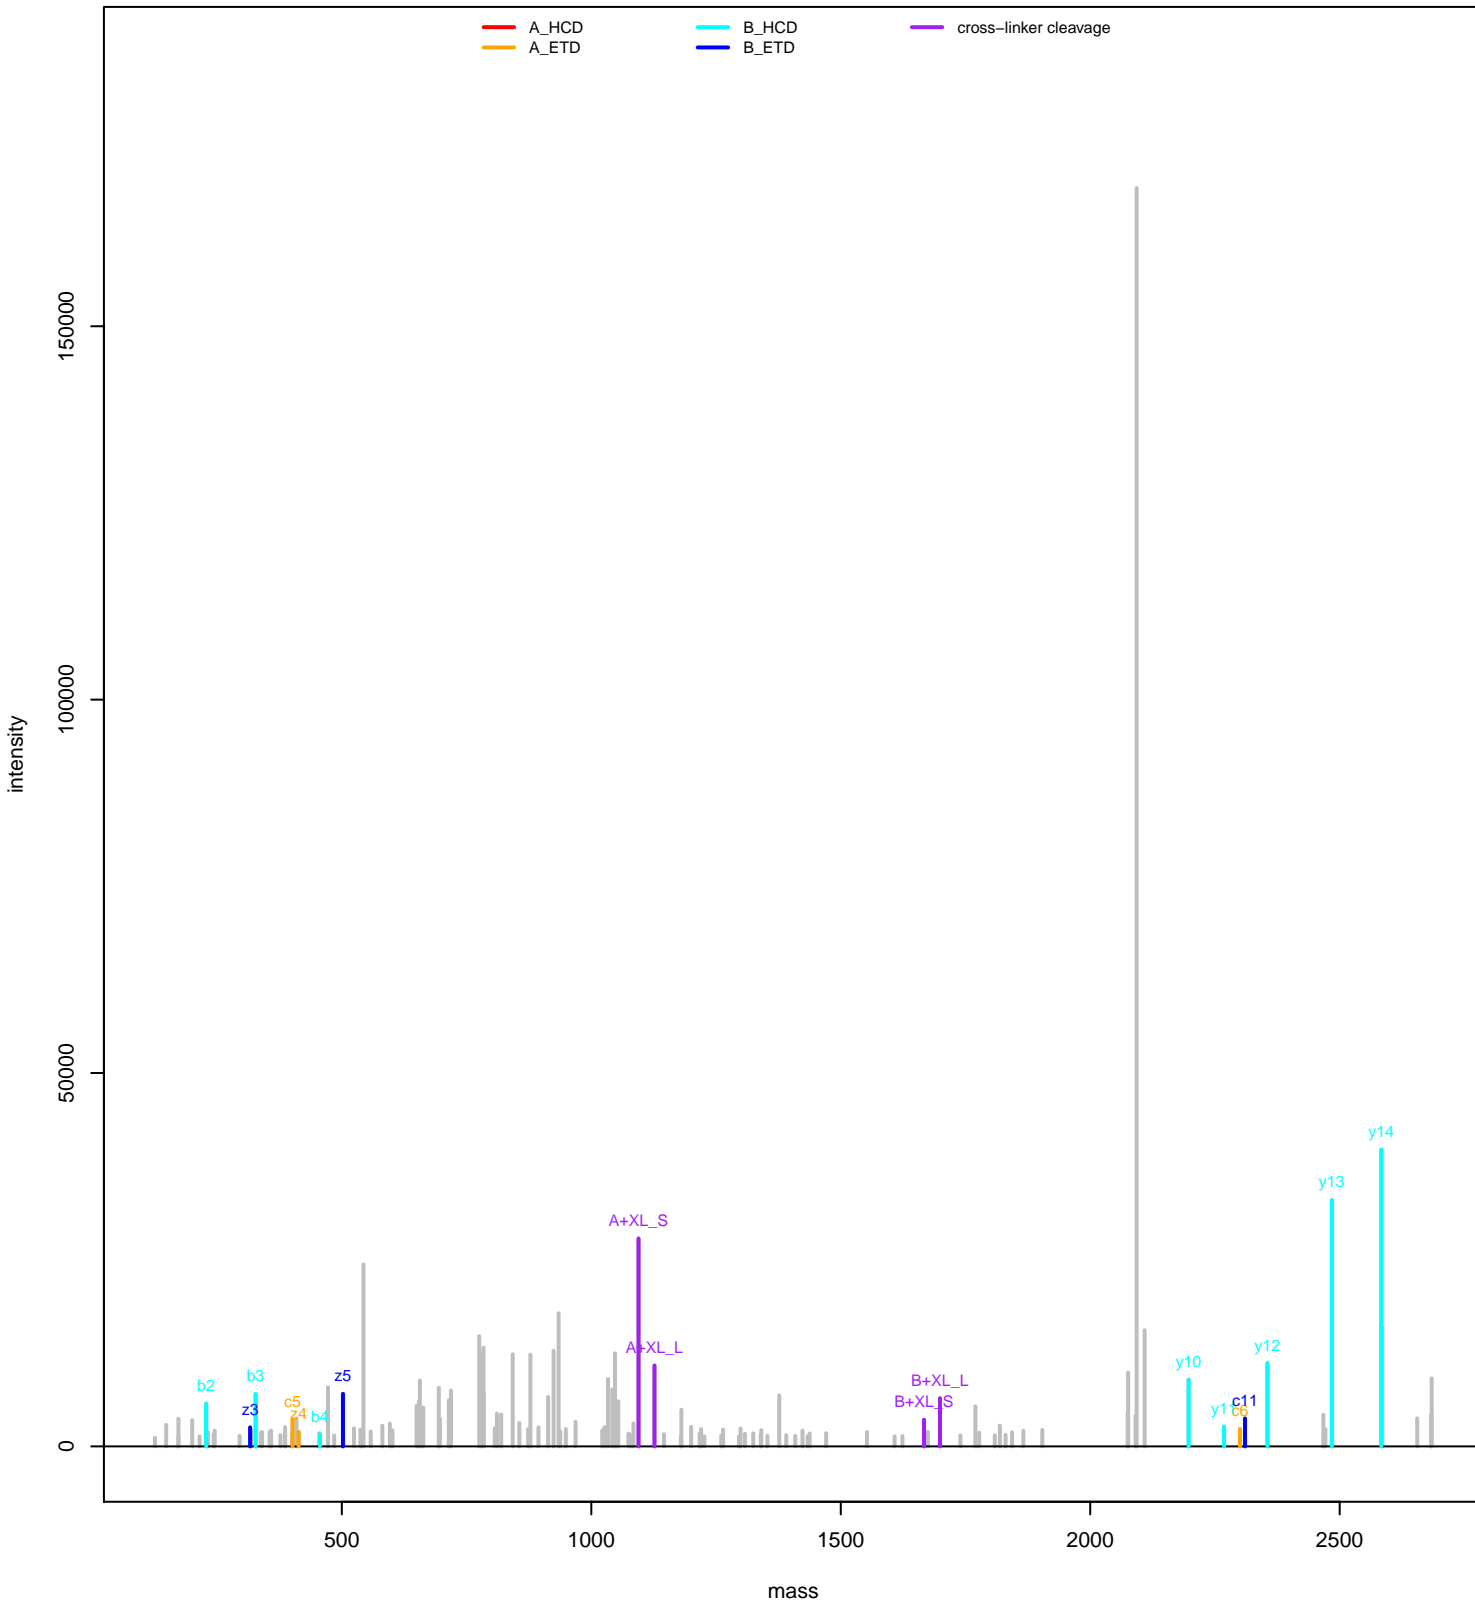

AAGANKVAVIK+XL\_S

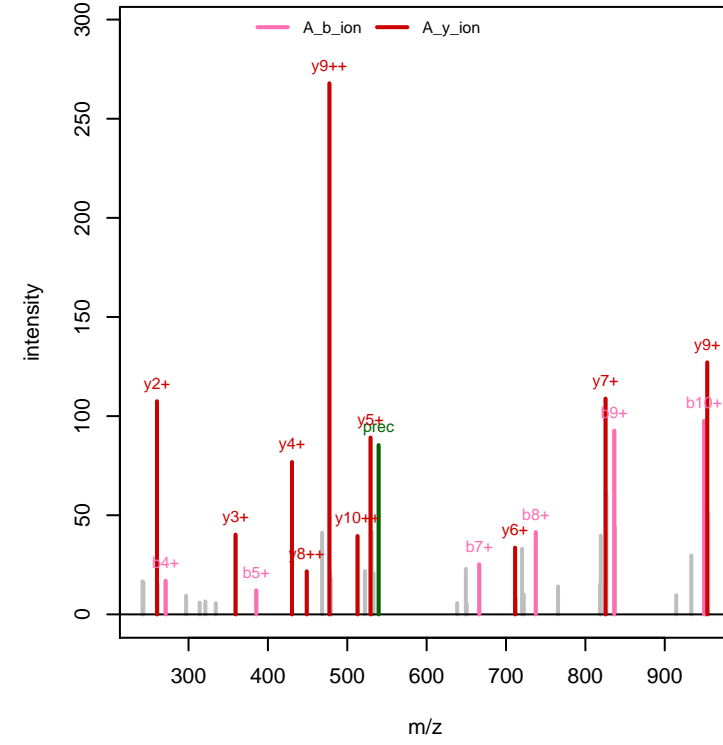

AAGANKVAVIK+XL\_L

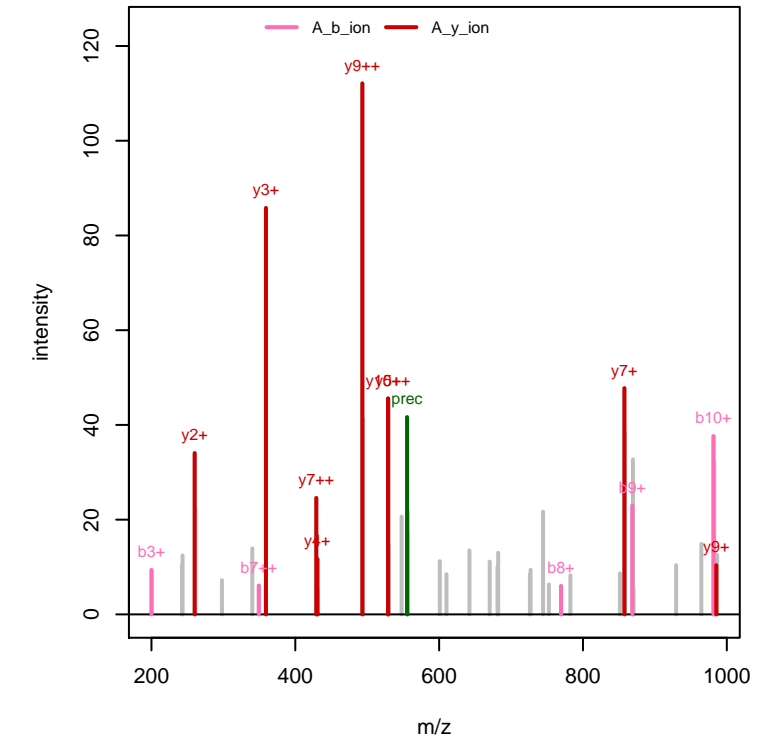

DLVESAPAALKEGVSK+XL\_S

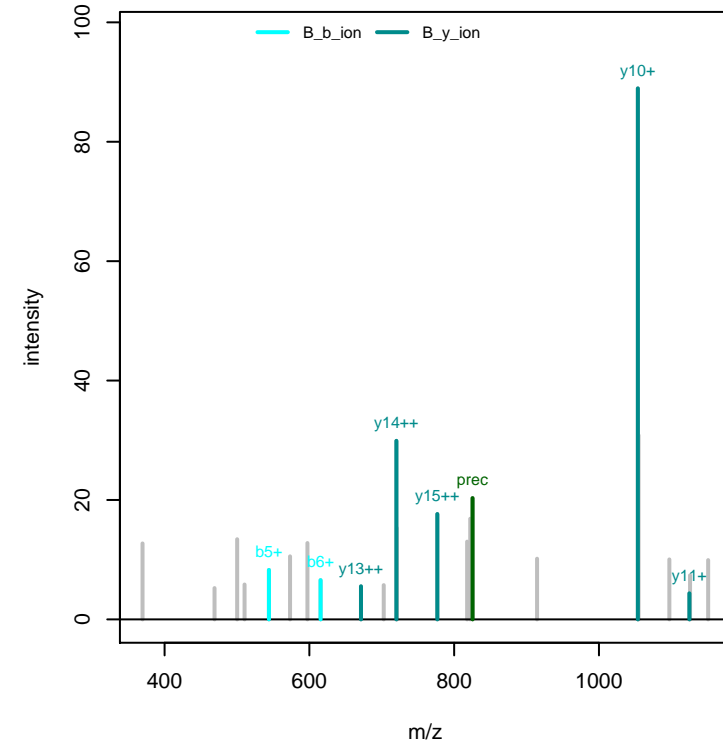

DLVESAPAALKEGVSK+XL\_L

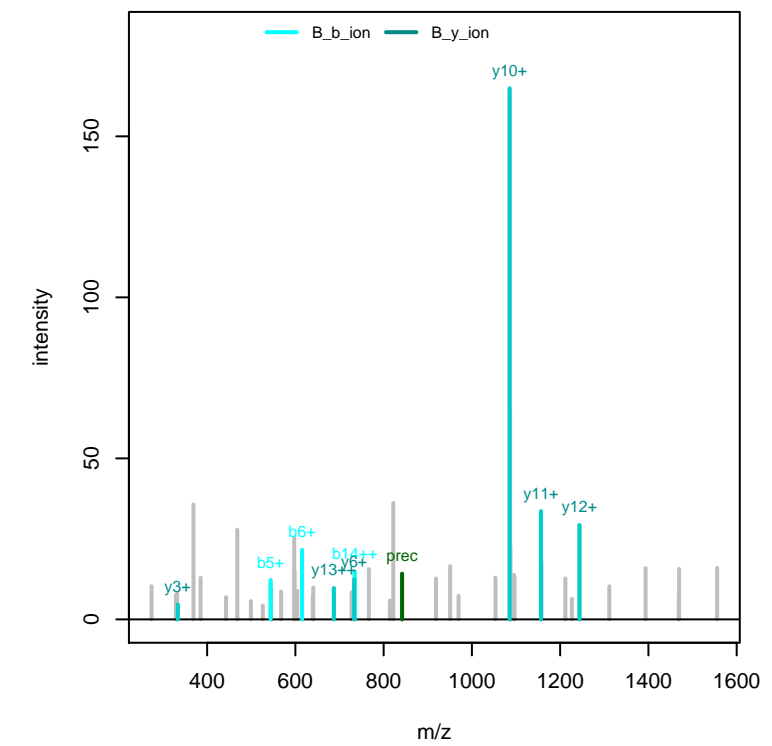

VKSSAQAK  
EQEKLGIK

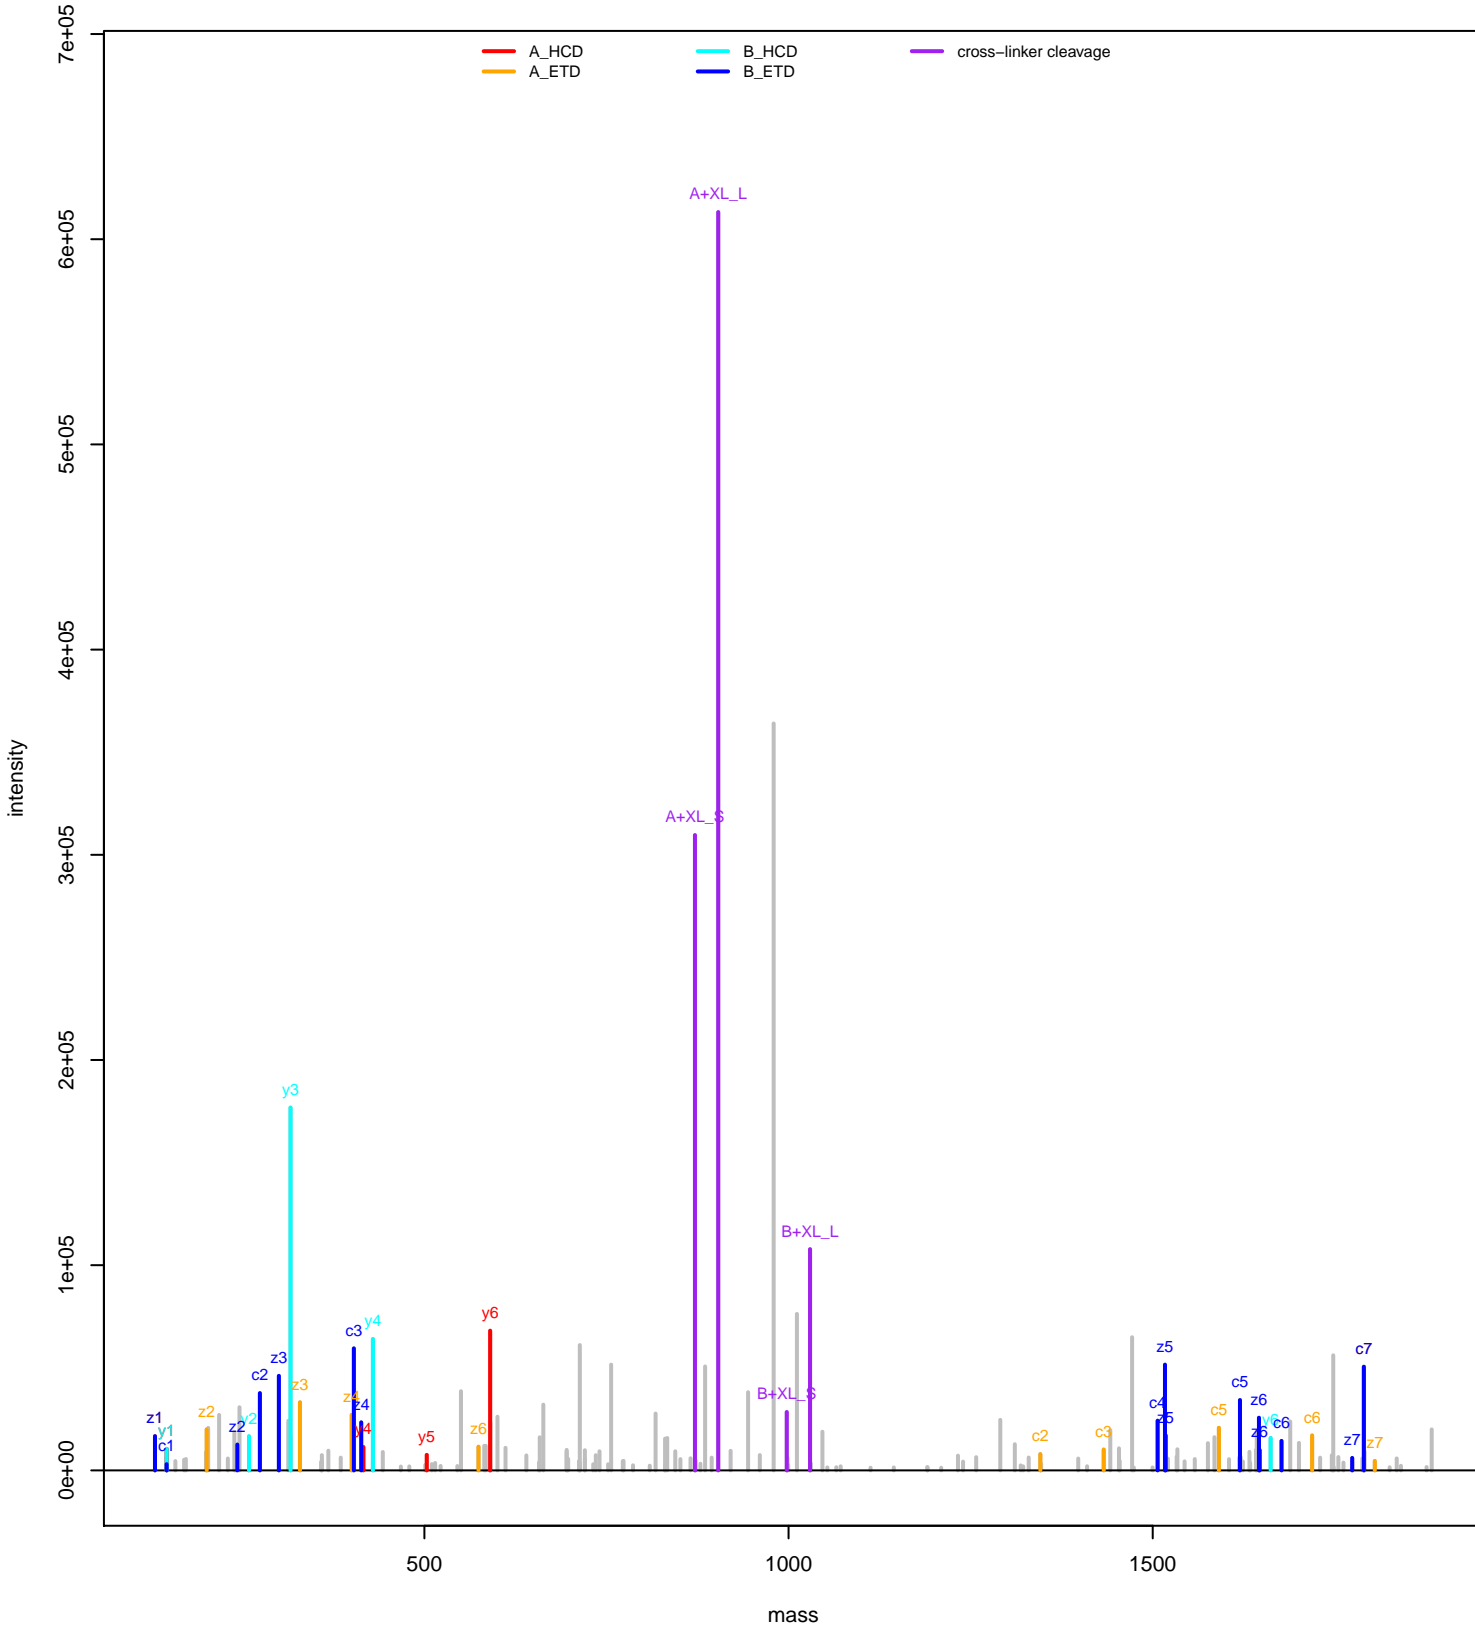

VKSSAQAK+XL\_S

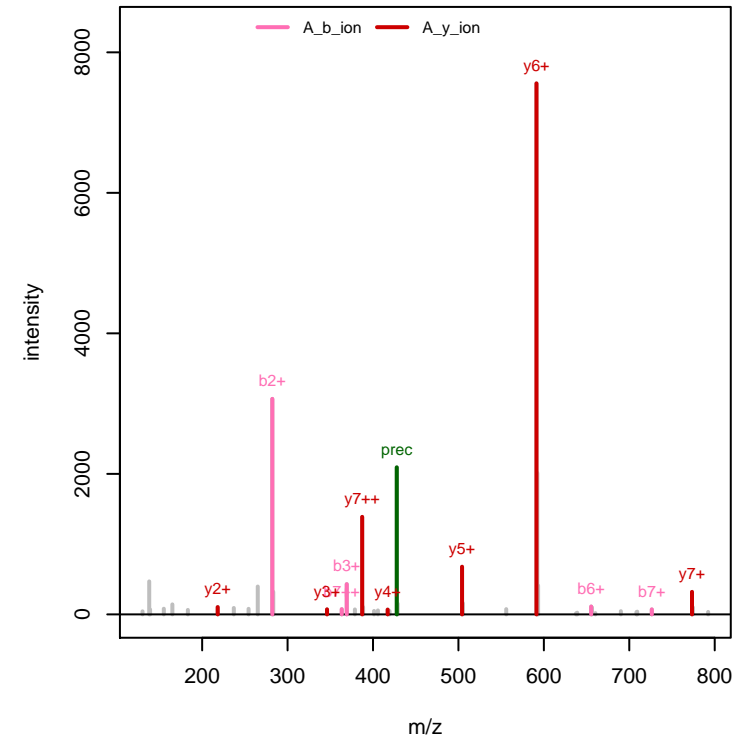

VKSSAQAK+XL\_L

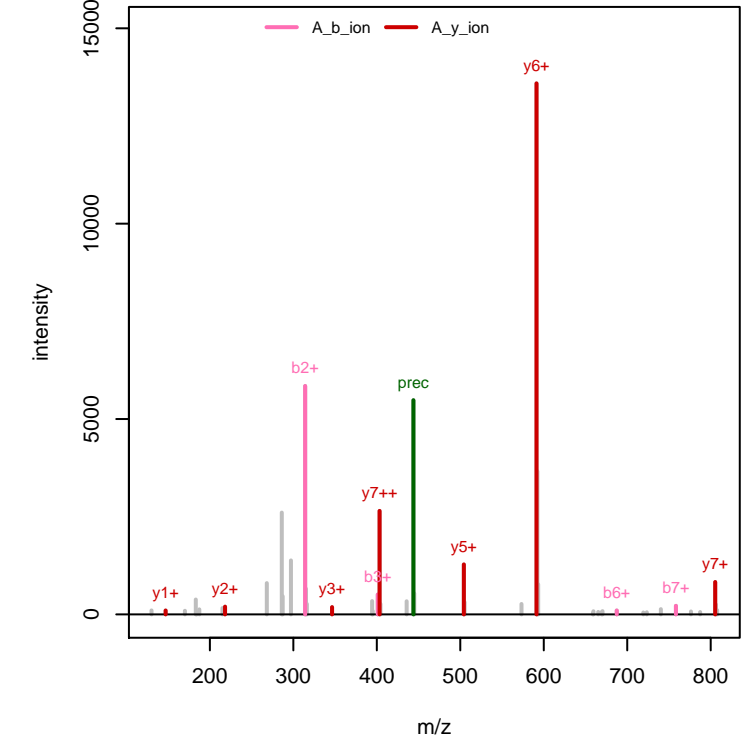

EQEKLGIK+XL\_S

EQEKLGIK+XL\_L

AKLLADDIVPSR  
EGSVKGYAGDTATTSEIK

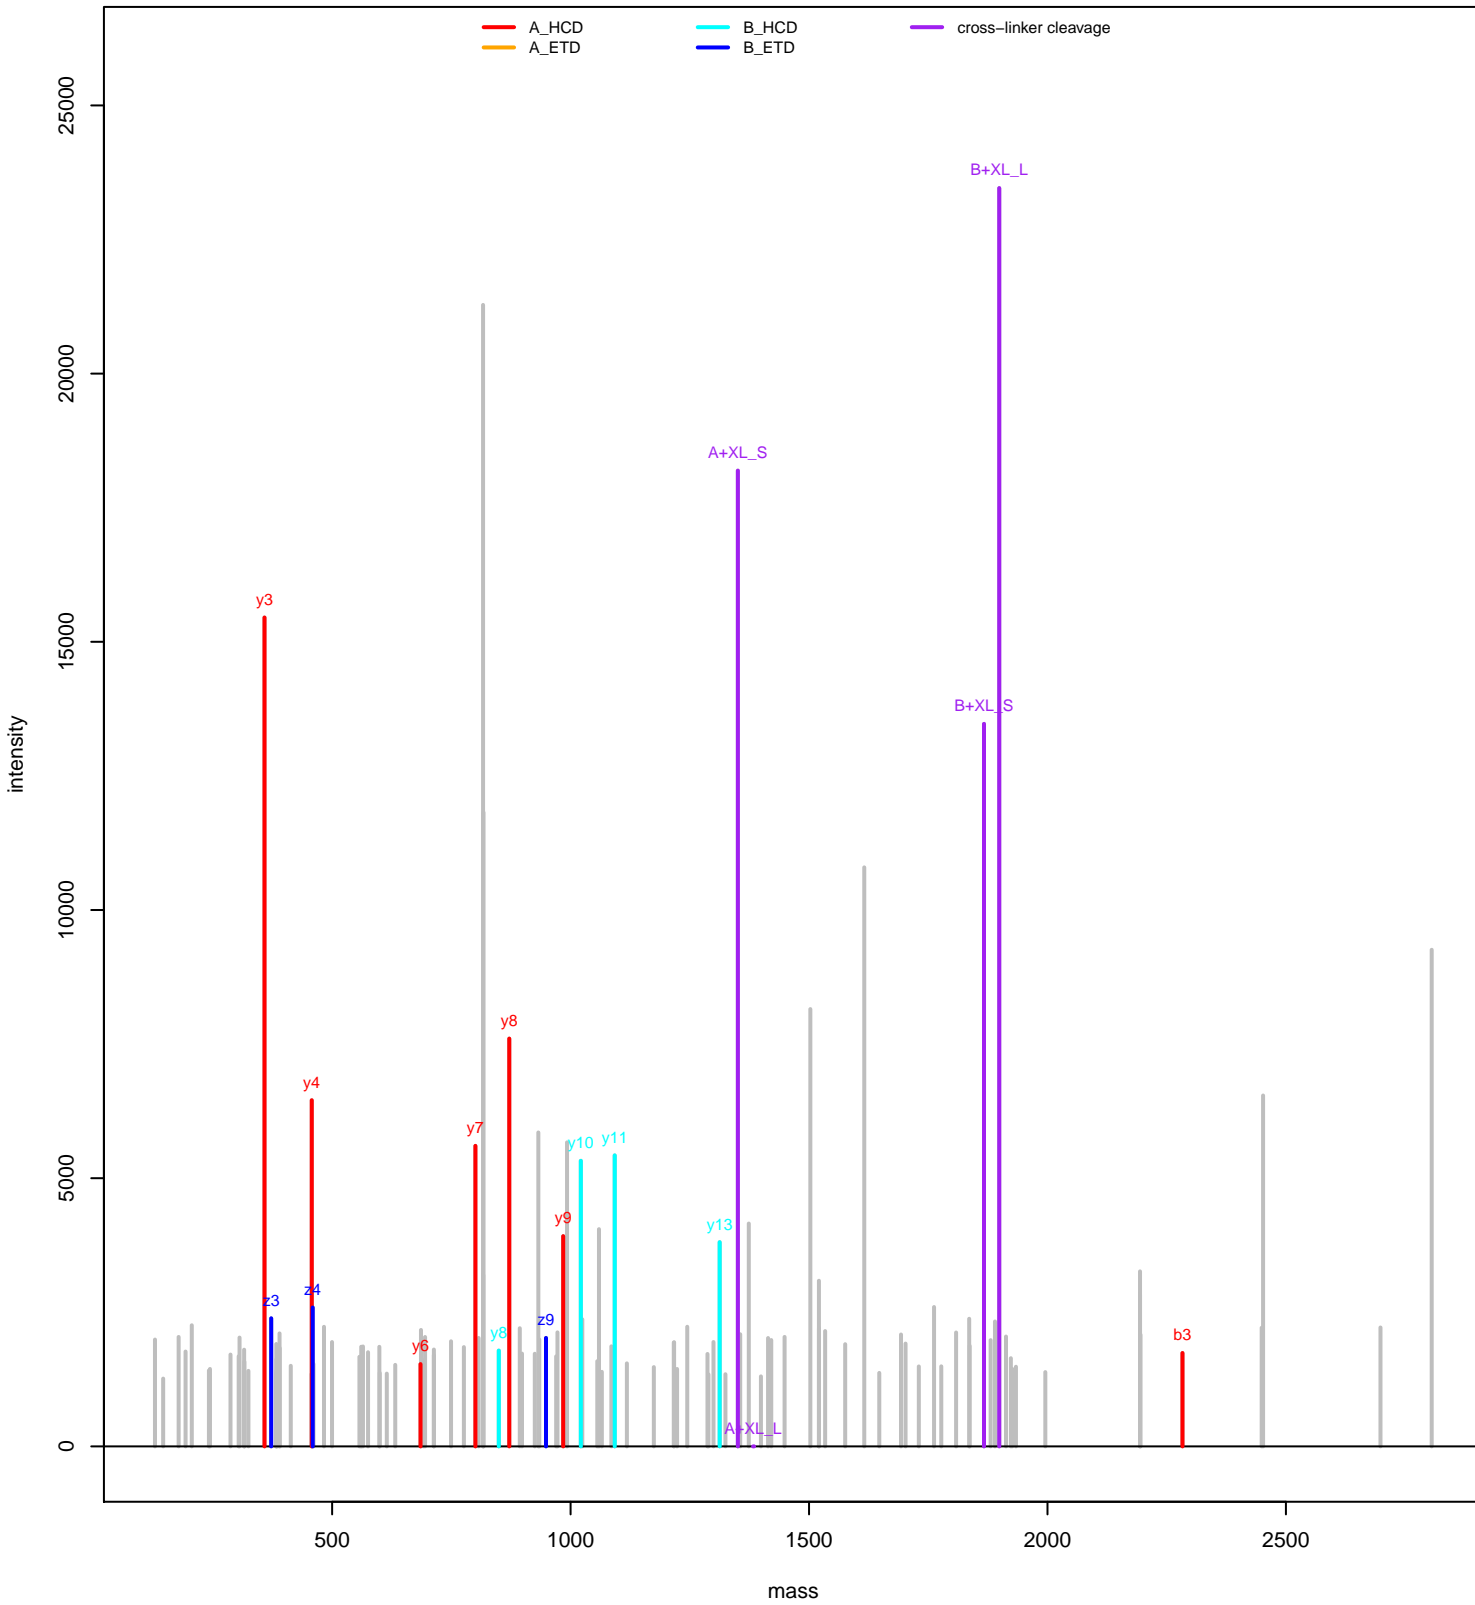

AKLLADDIVPSR+XL\_S

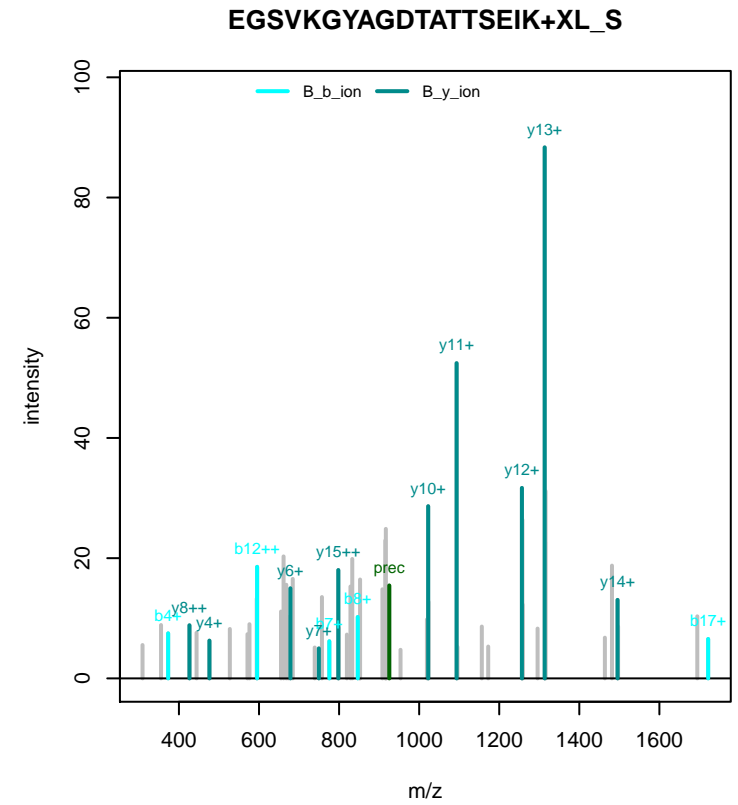

AKLLADDIVPSR+XL\_L

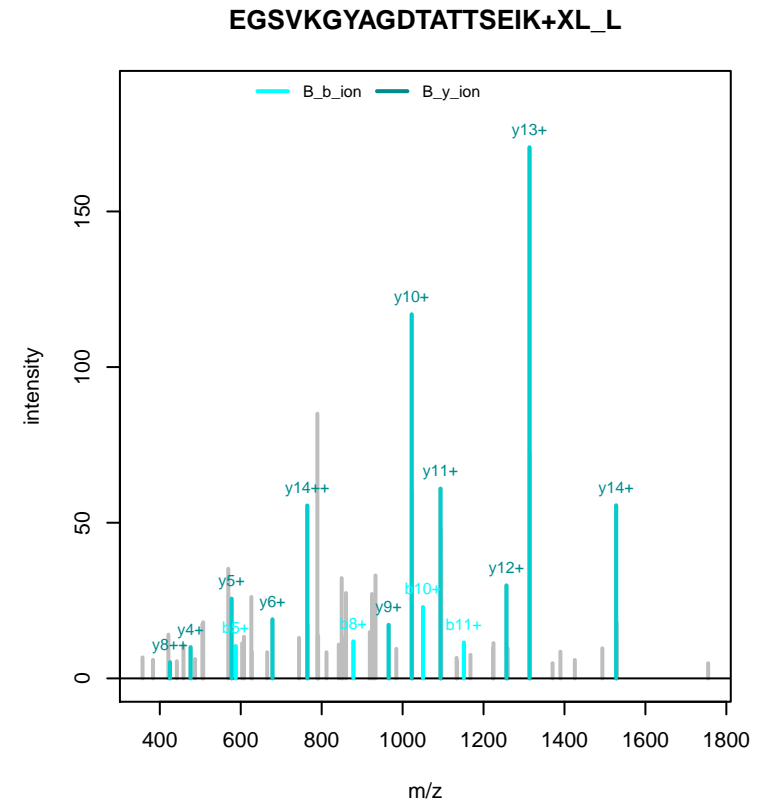

KAGEGEAVR  
NSDIAAKGVLPTCQDTGTAIIVGK

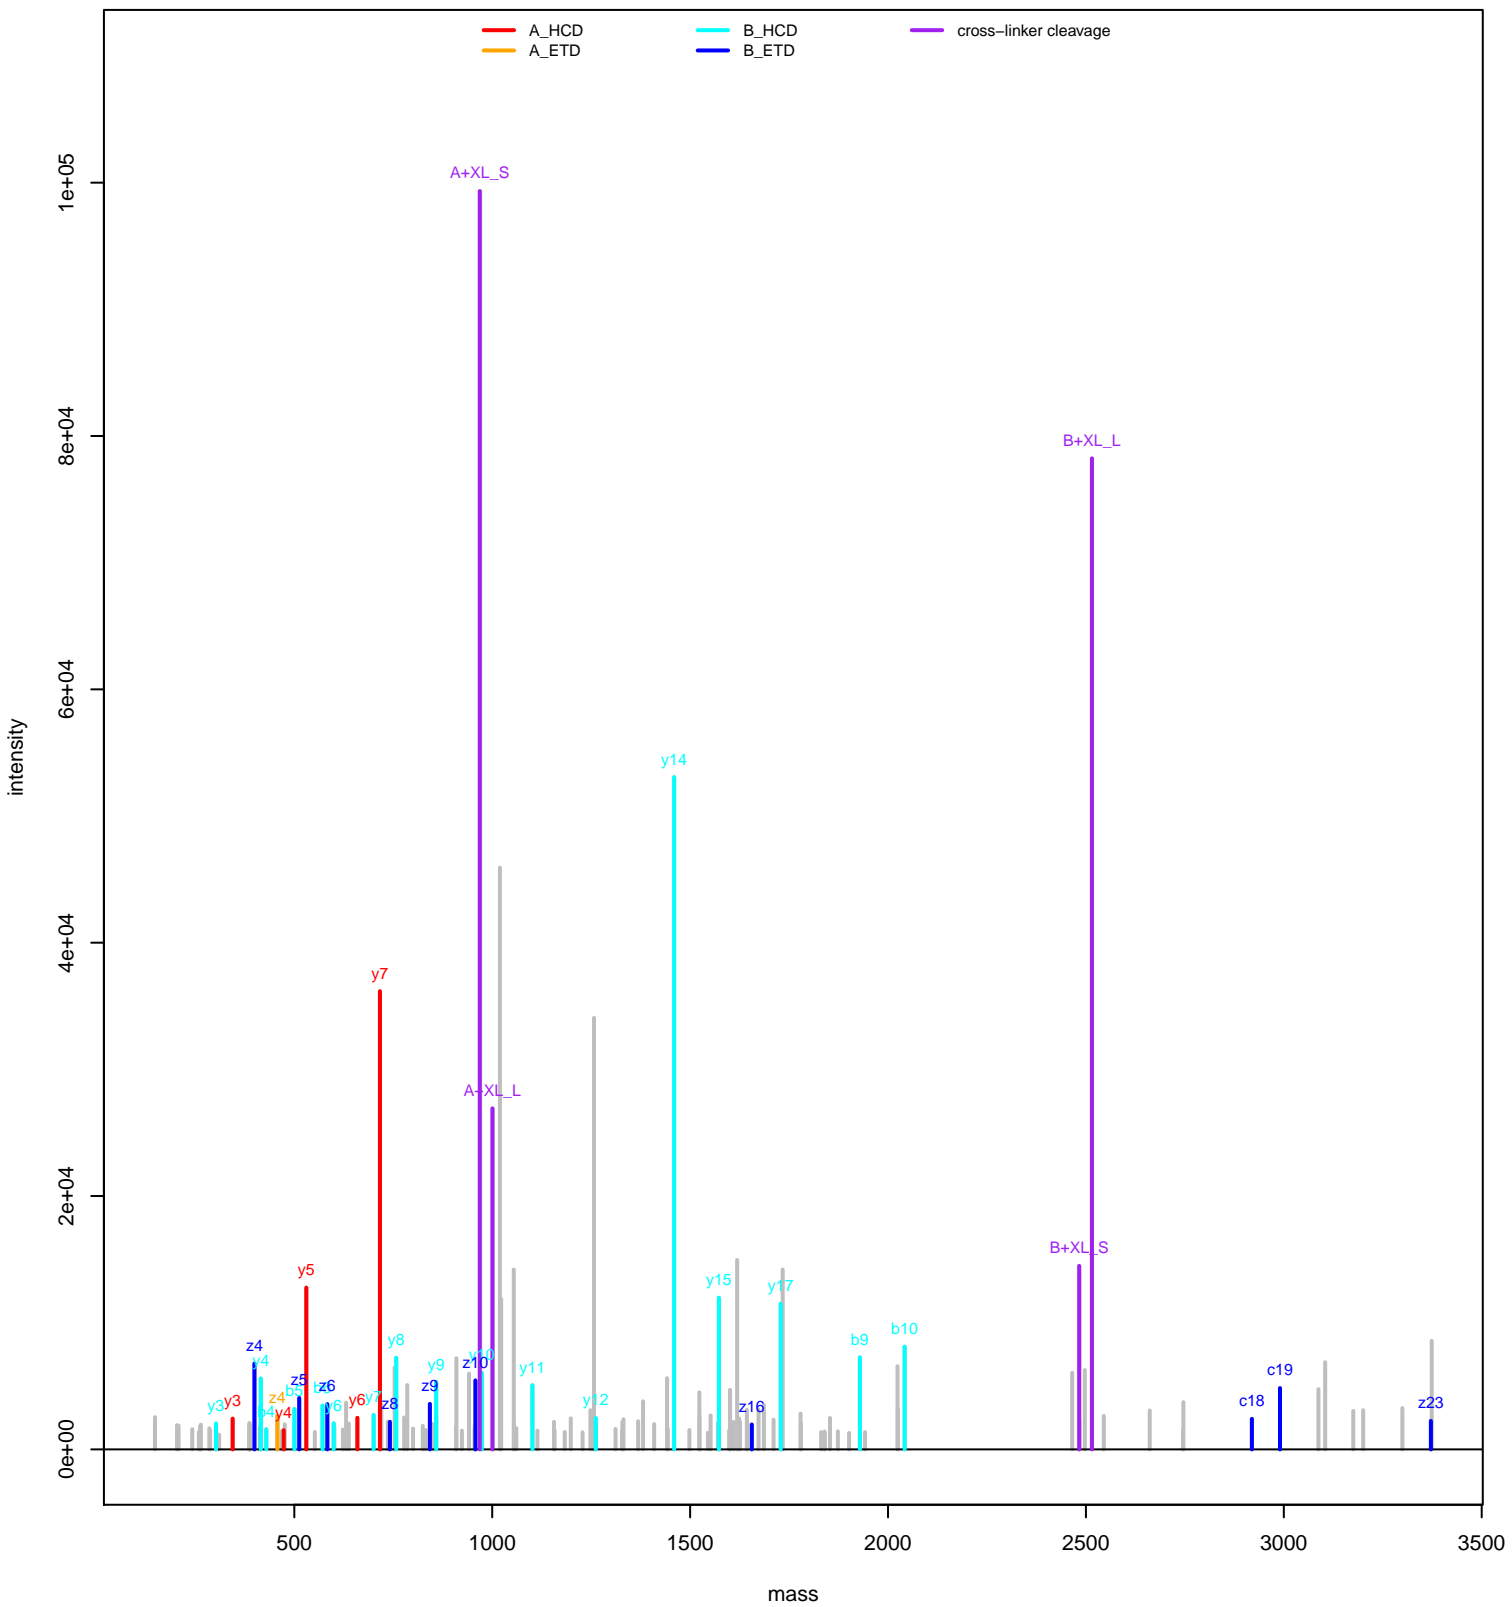

KAGEGEAVR+XL\_S

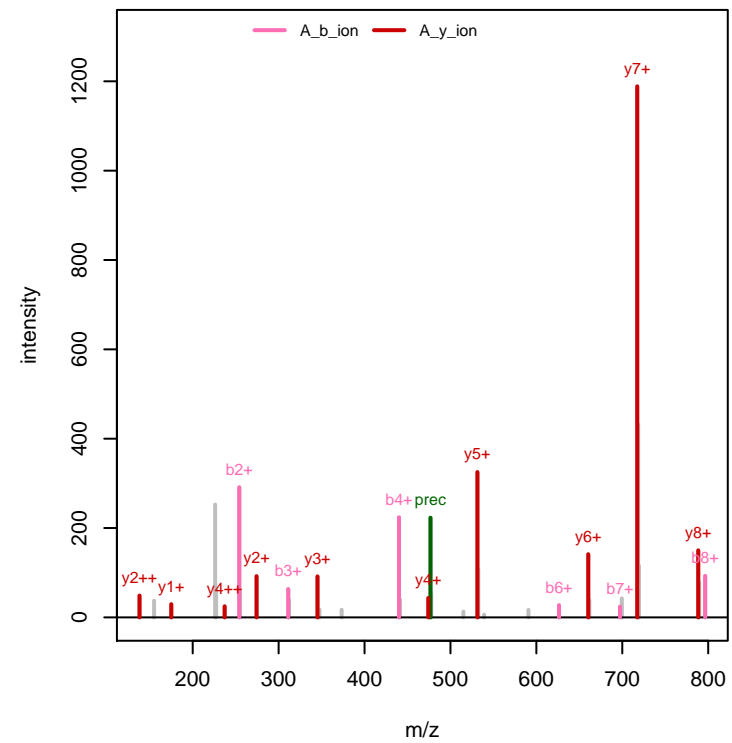

KAGEGEAVR+XL\_L

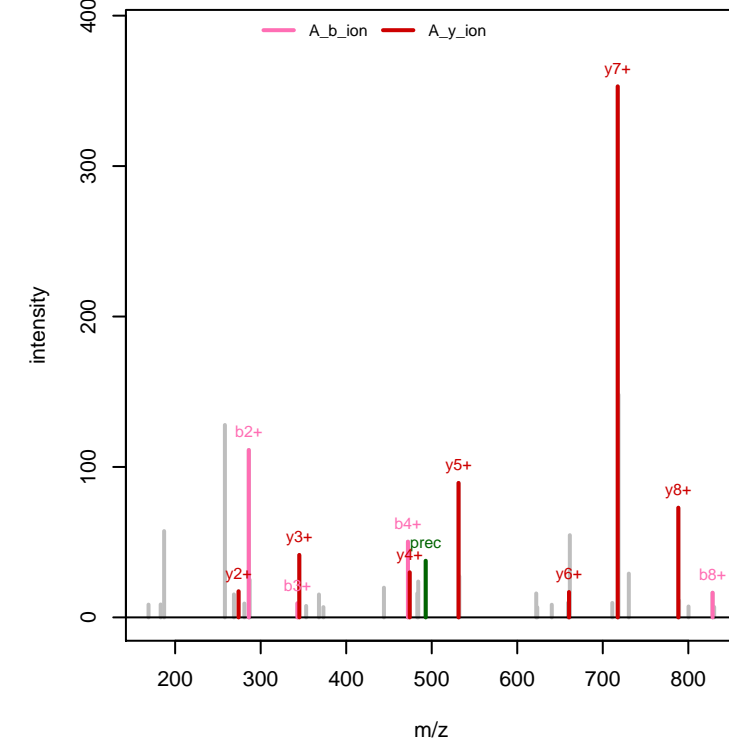

NSDIAAKGVLPTCQDTGTAIIVGK+XL\_S

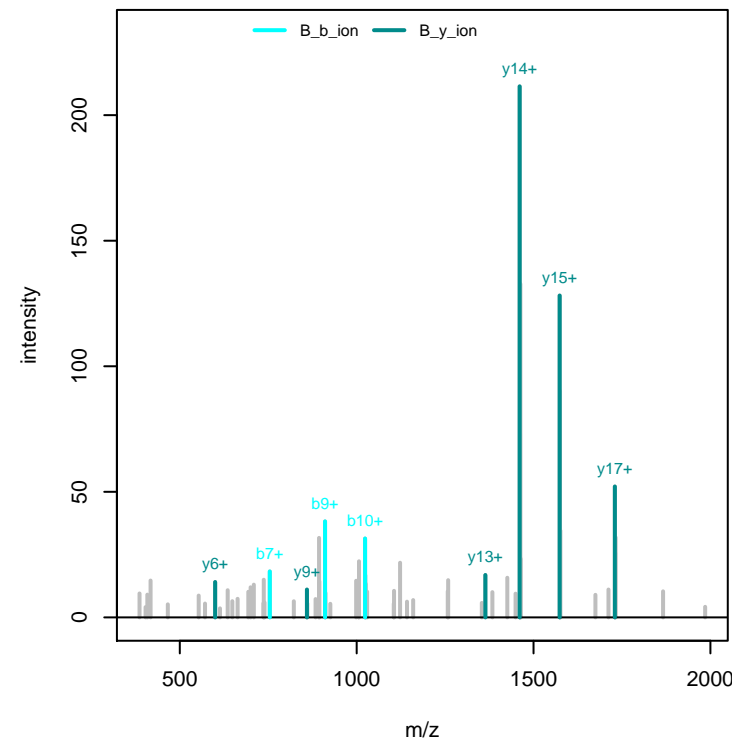

NSDIAAKGVLPTCQDTGTAIIVGK+XL\_L

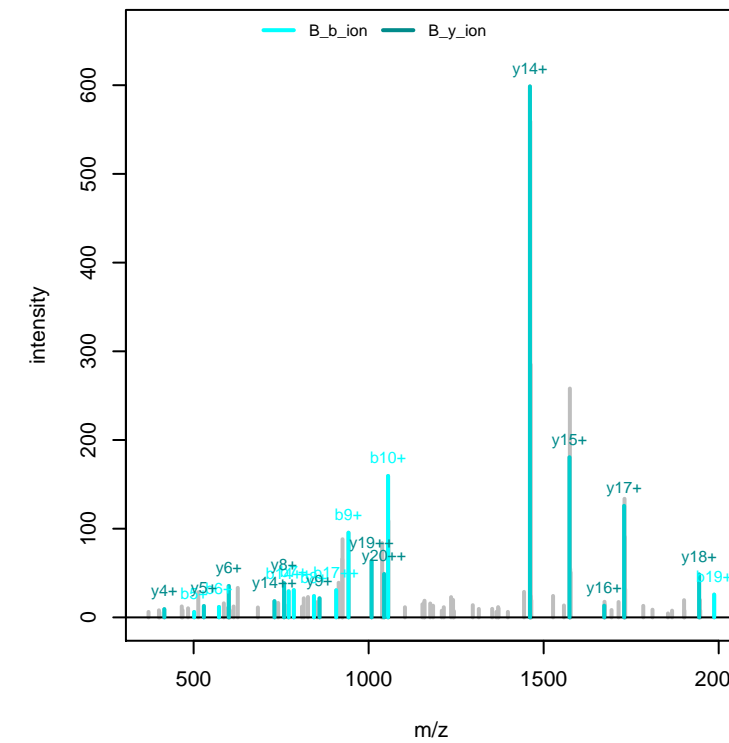

**KGAIVTGK**  
**GDRVEGKIK**

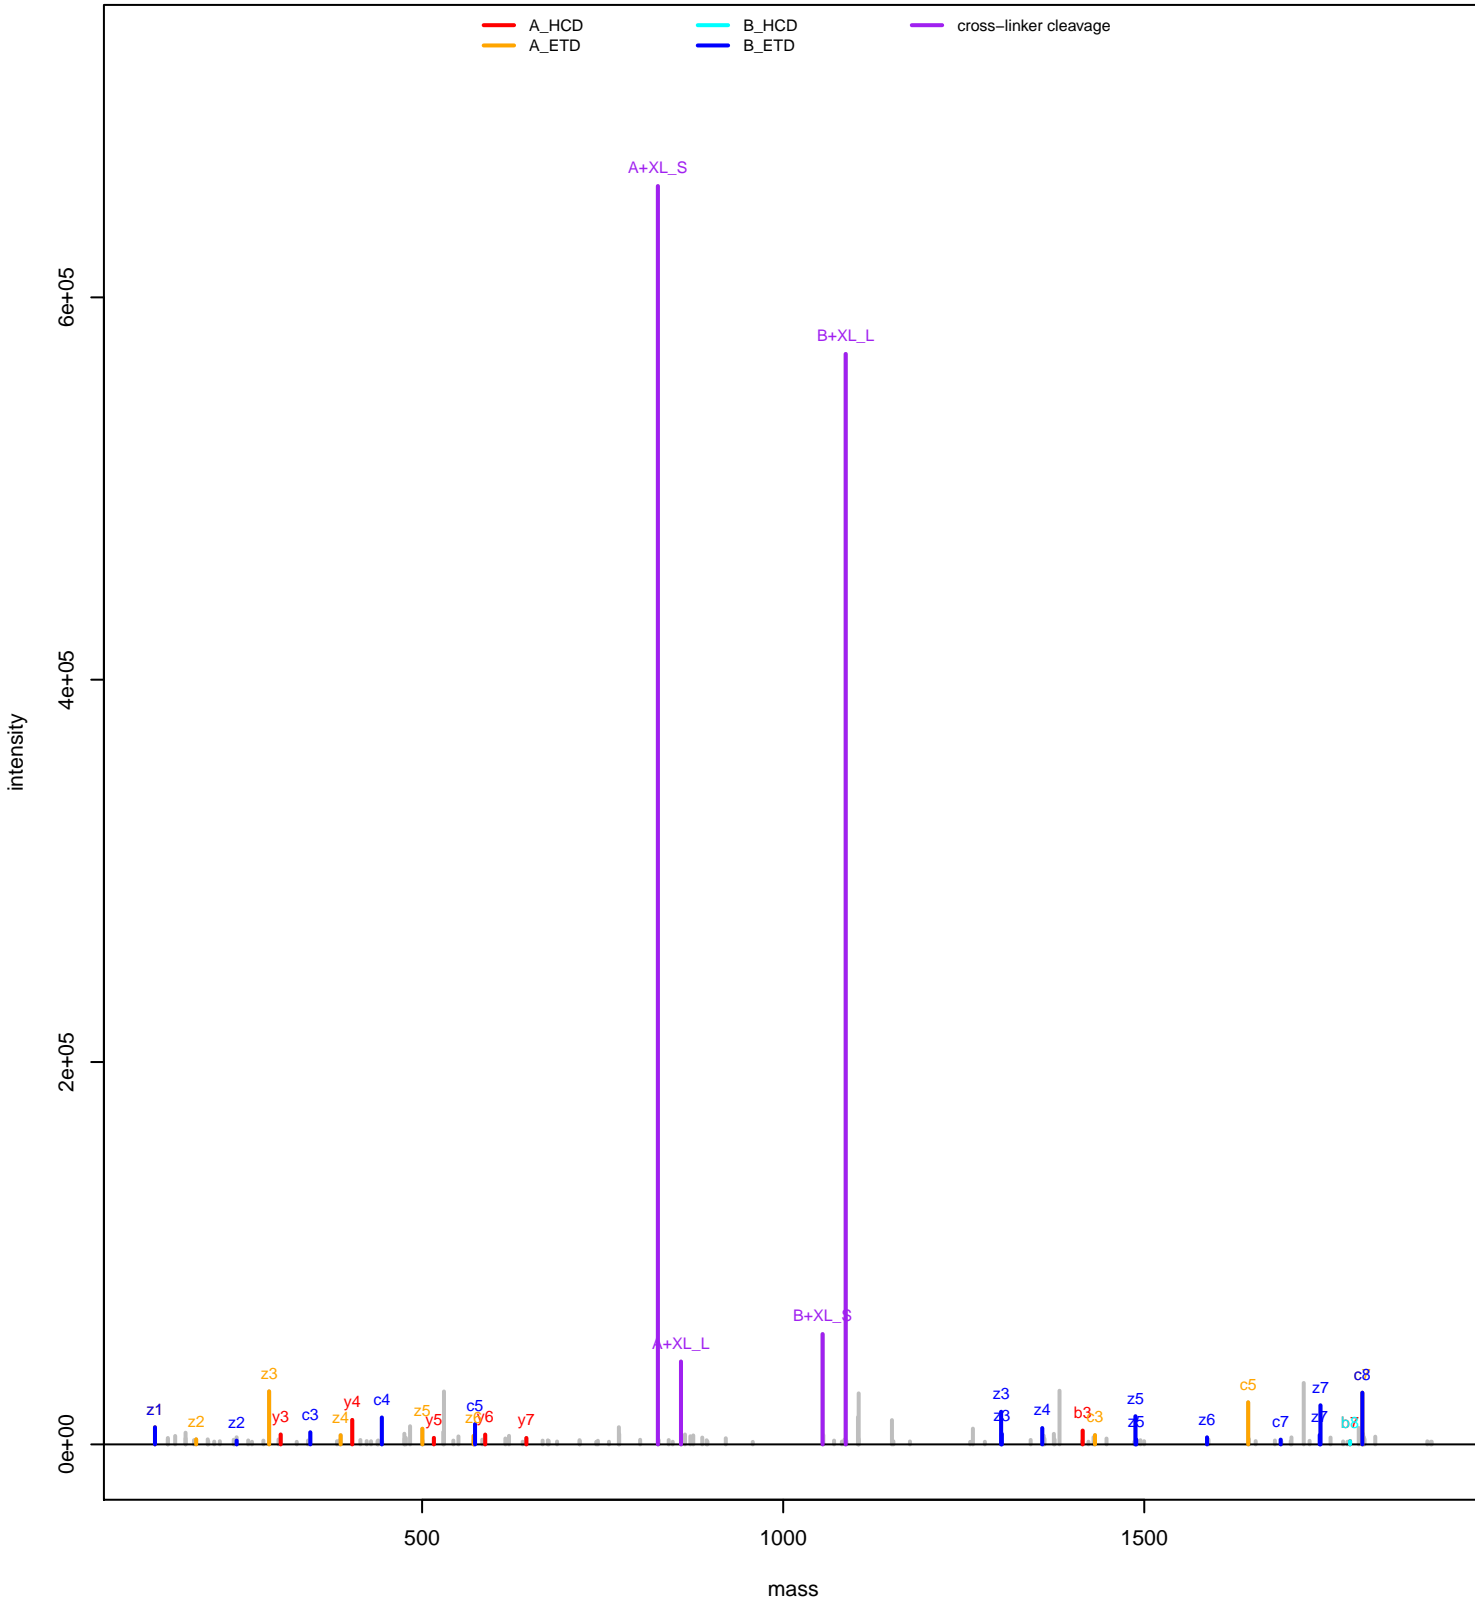

**KGAIVTGK+XL\_S**

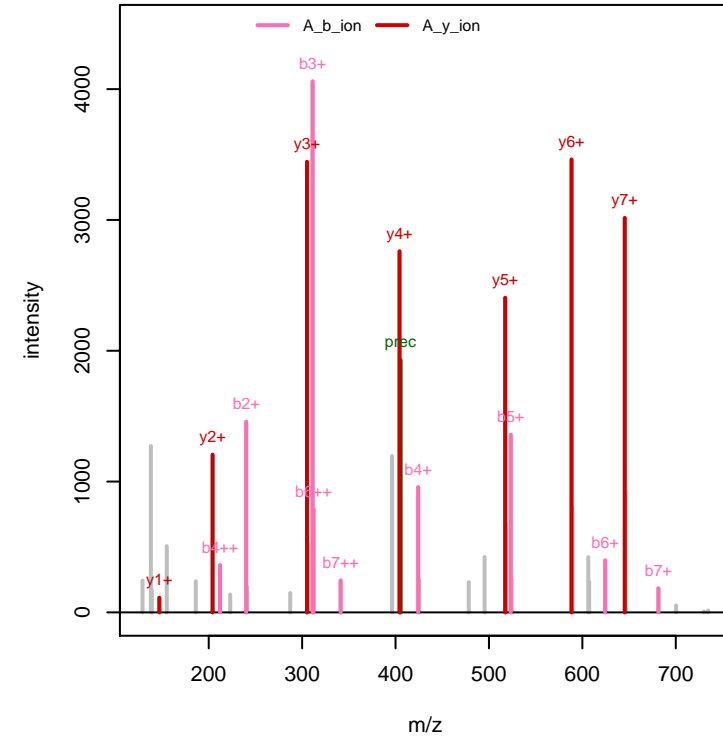

**KGAIVTGK+XL\_L**

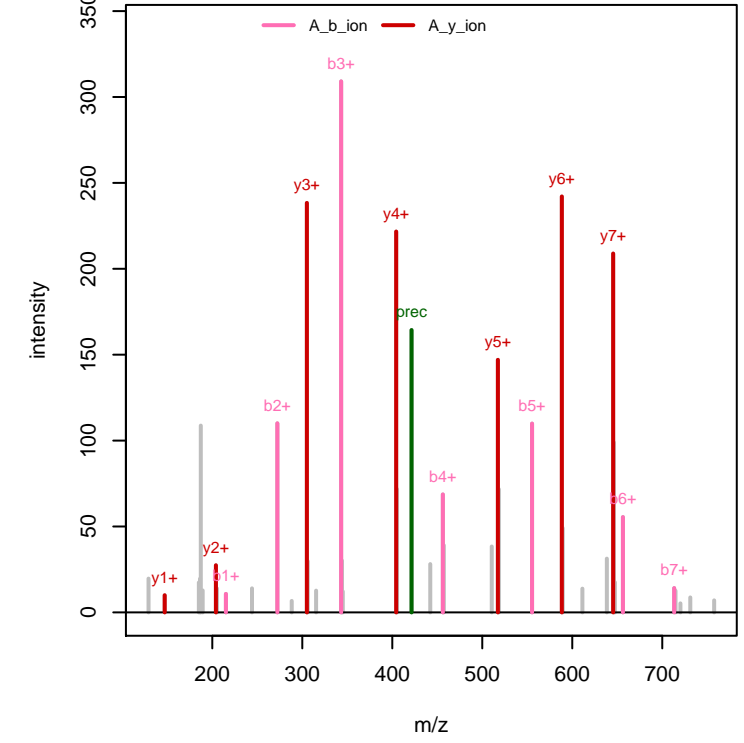

**GDRVEGKIK+XL\_S**

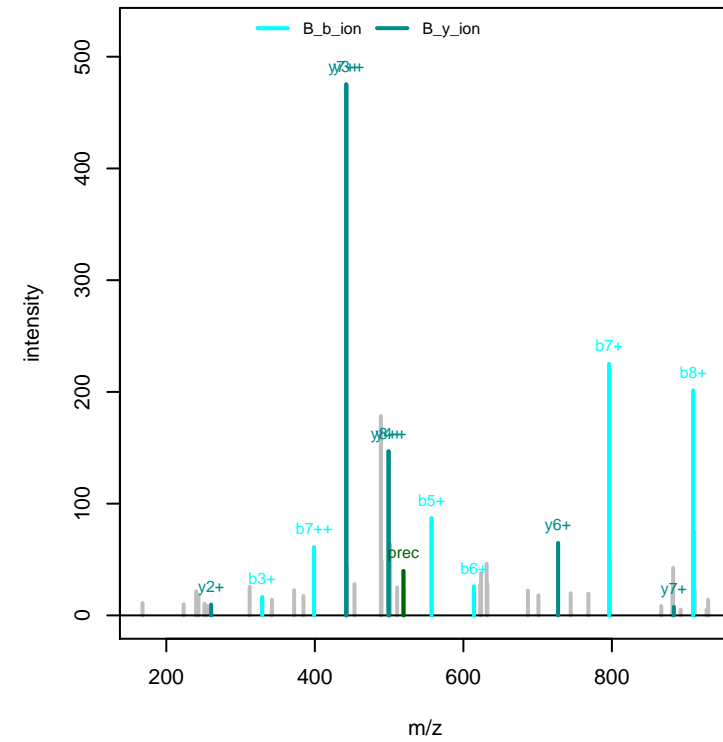

**GDRVEGKIK+XL\_L**

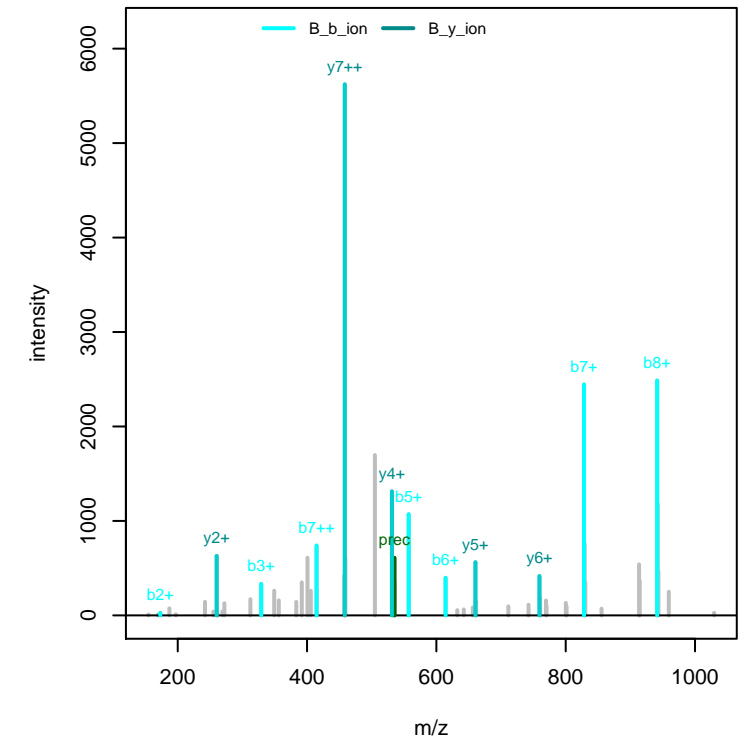





VVDALKSR  
VKAQDVQR

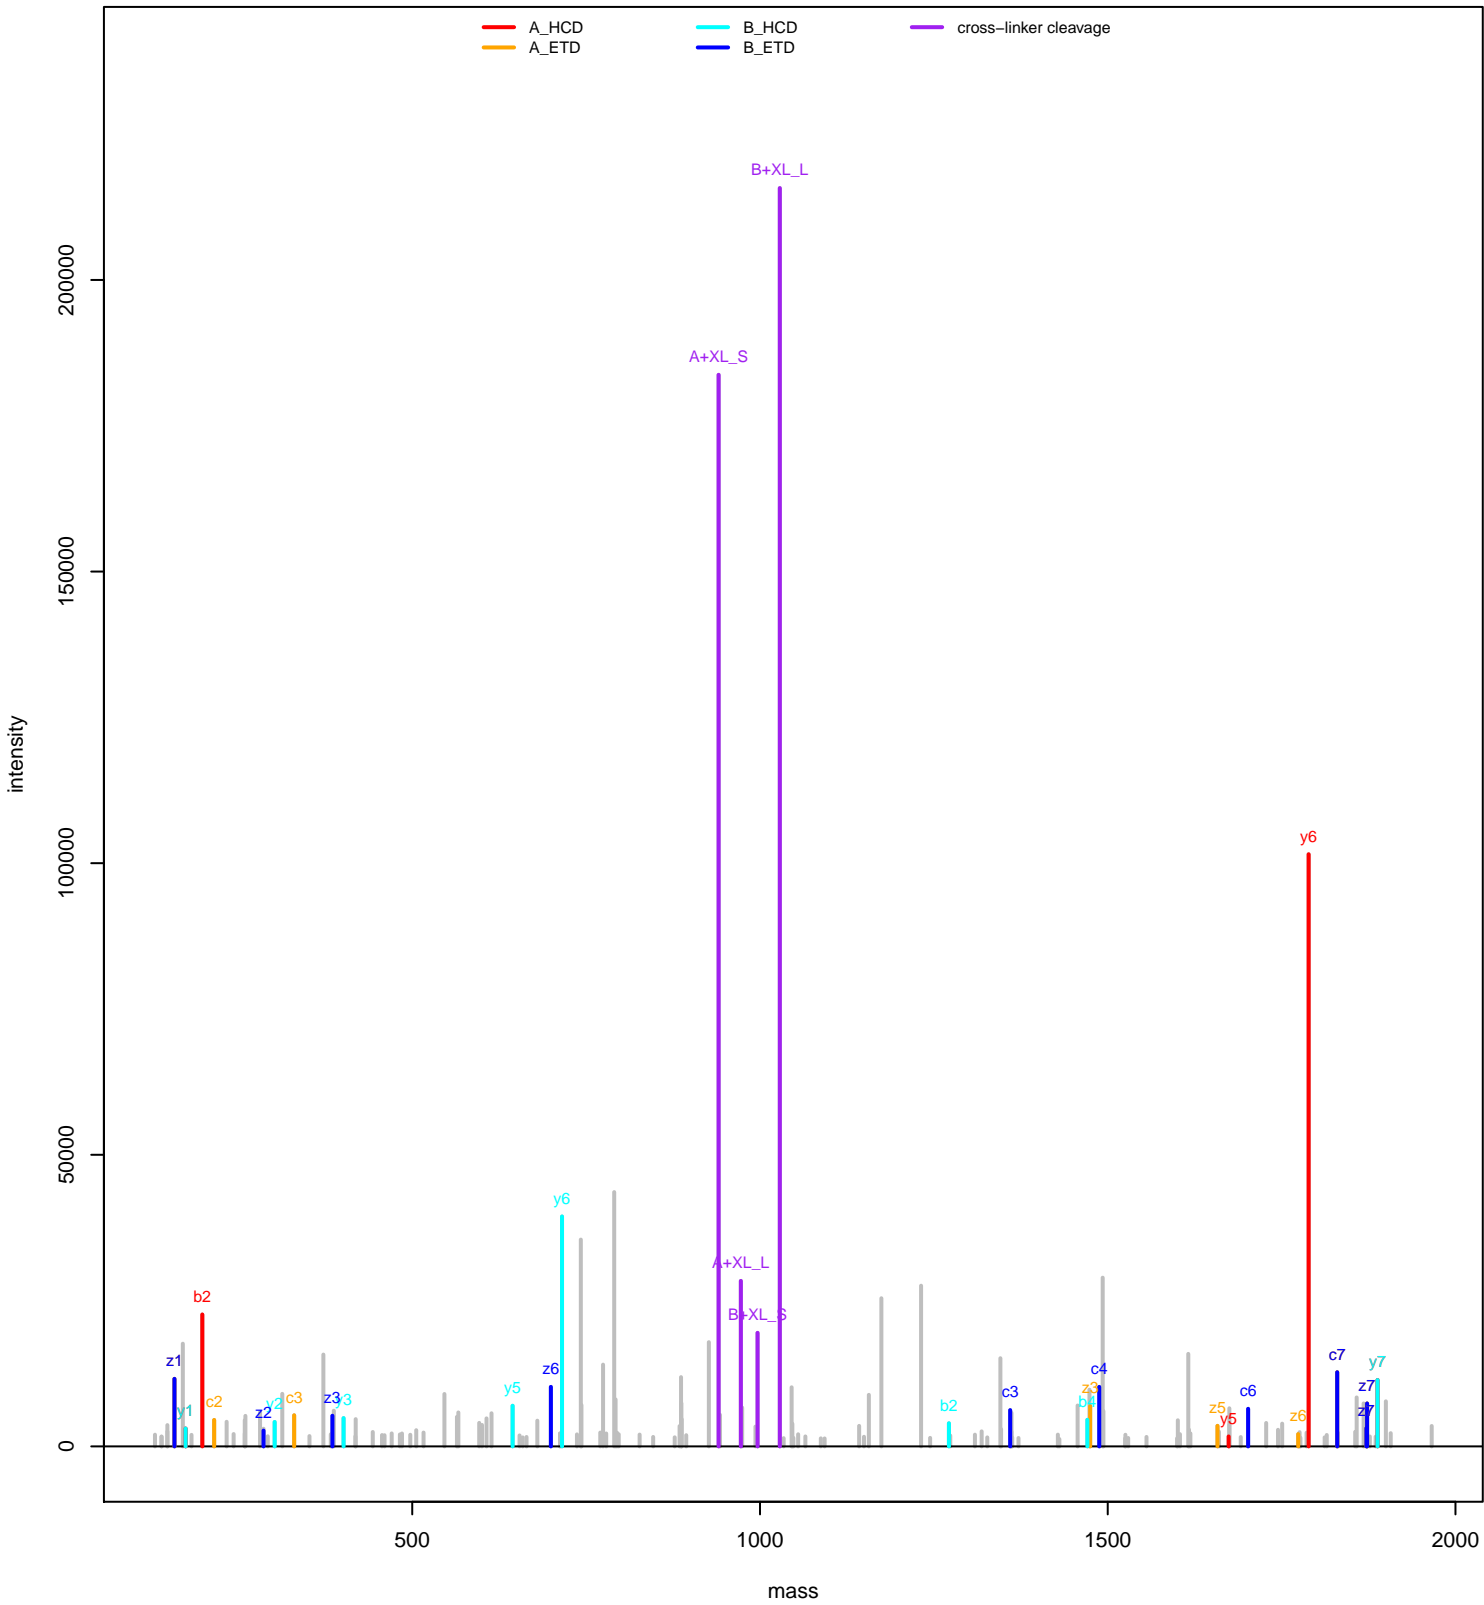

VVDALKSR+XL\_S

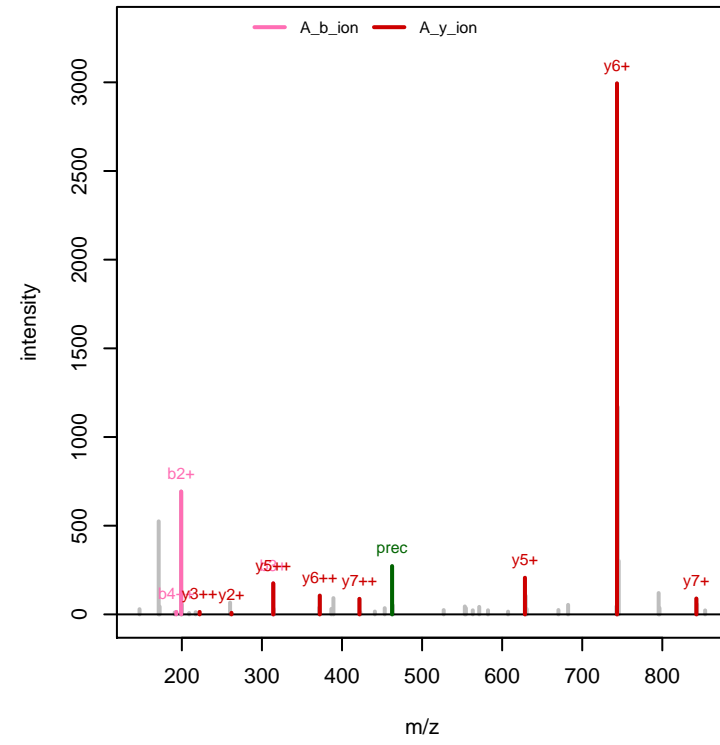

VVDALKSR+XL\_L

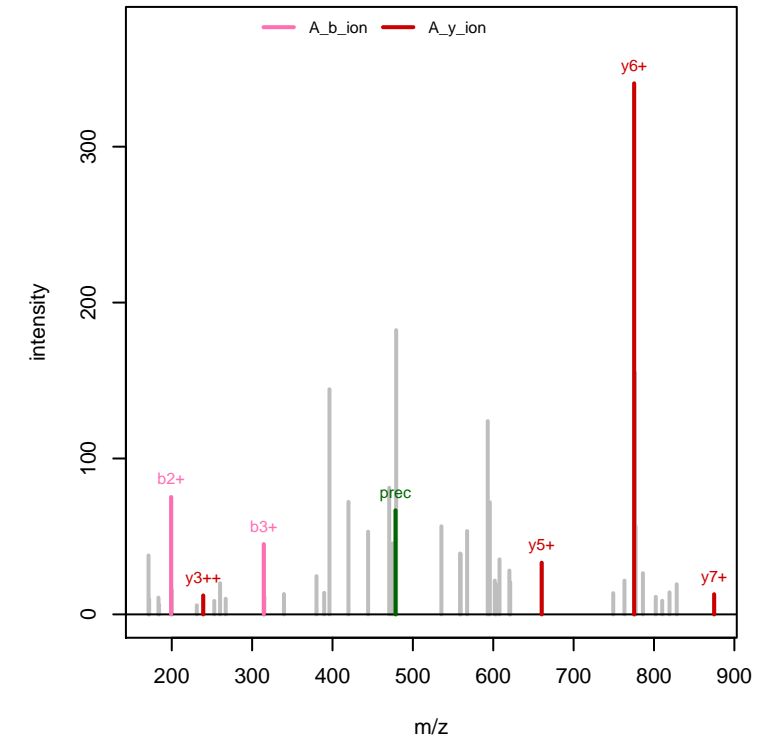

VKAQDVQR+XL\_S

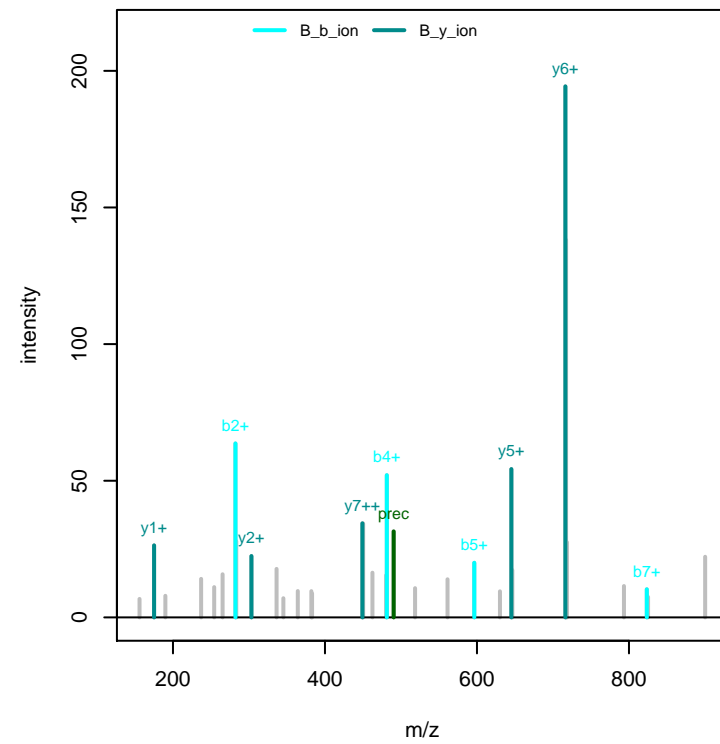

VKAQDVQR+XL\_L

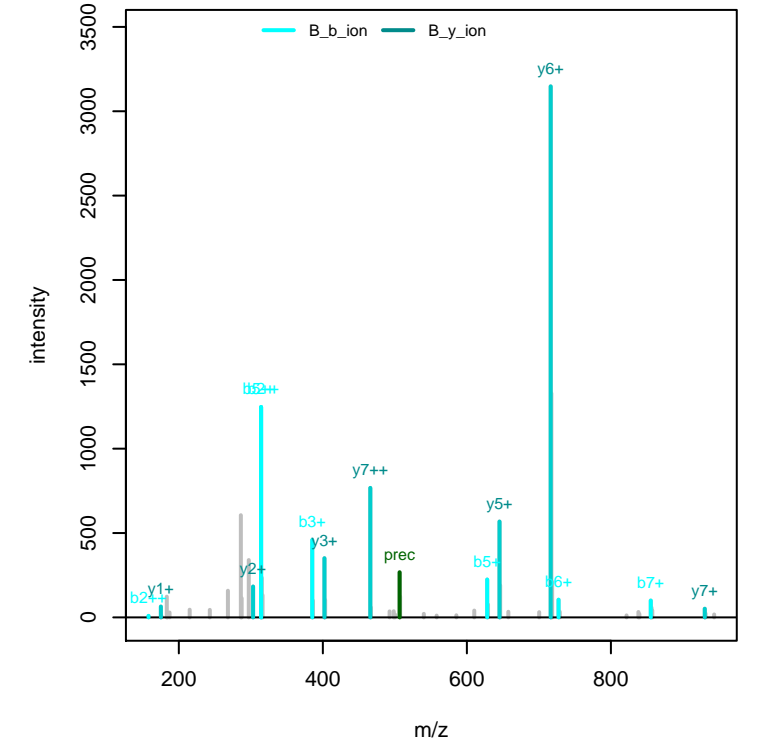

RKDLTK  
TQISKIR

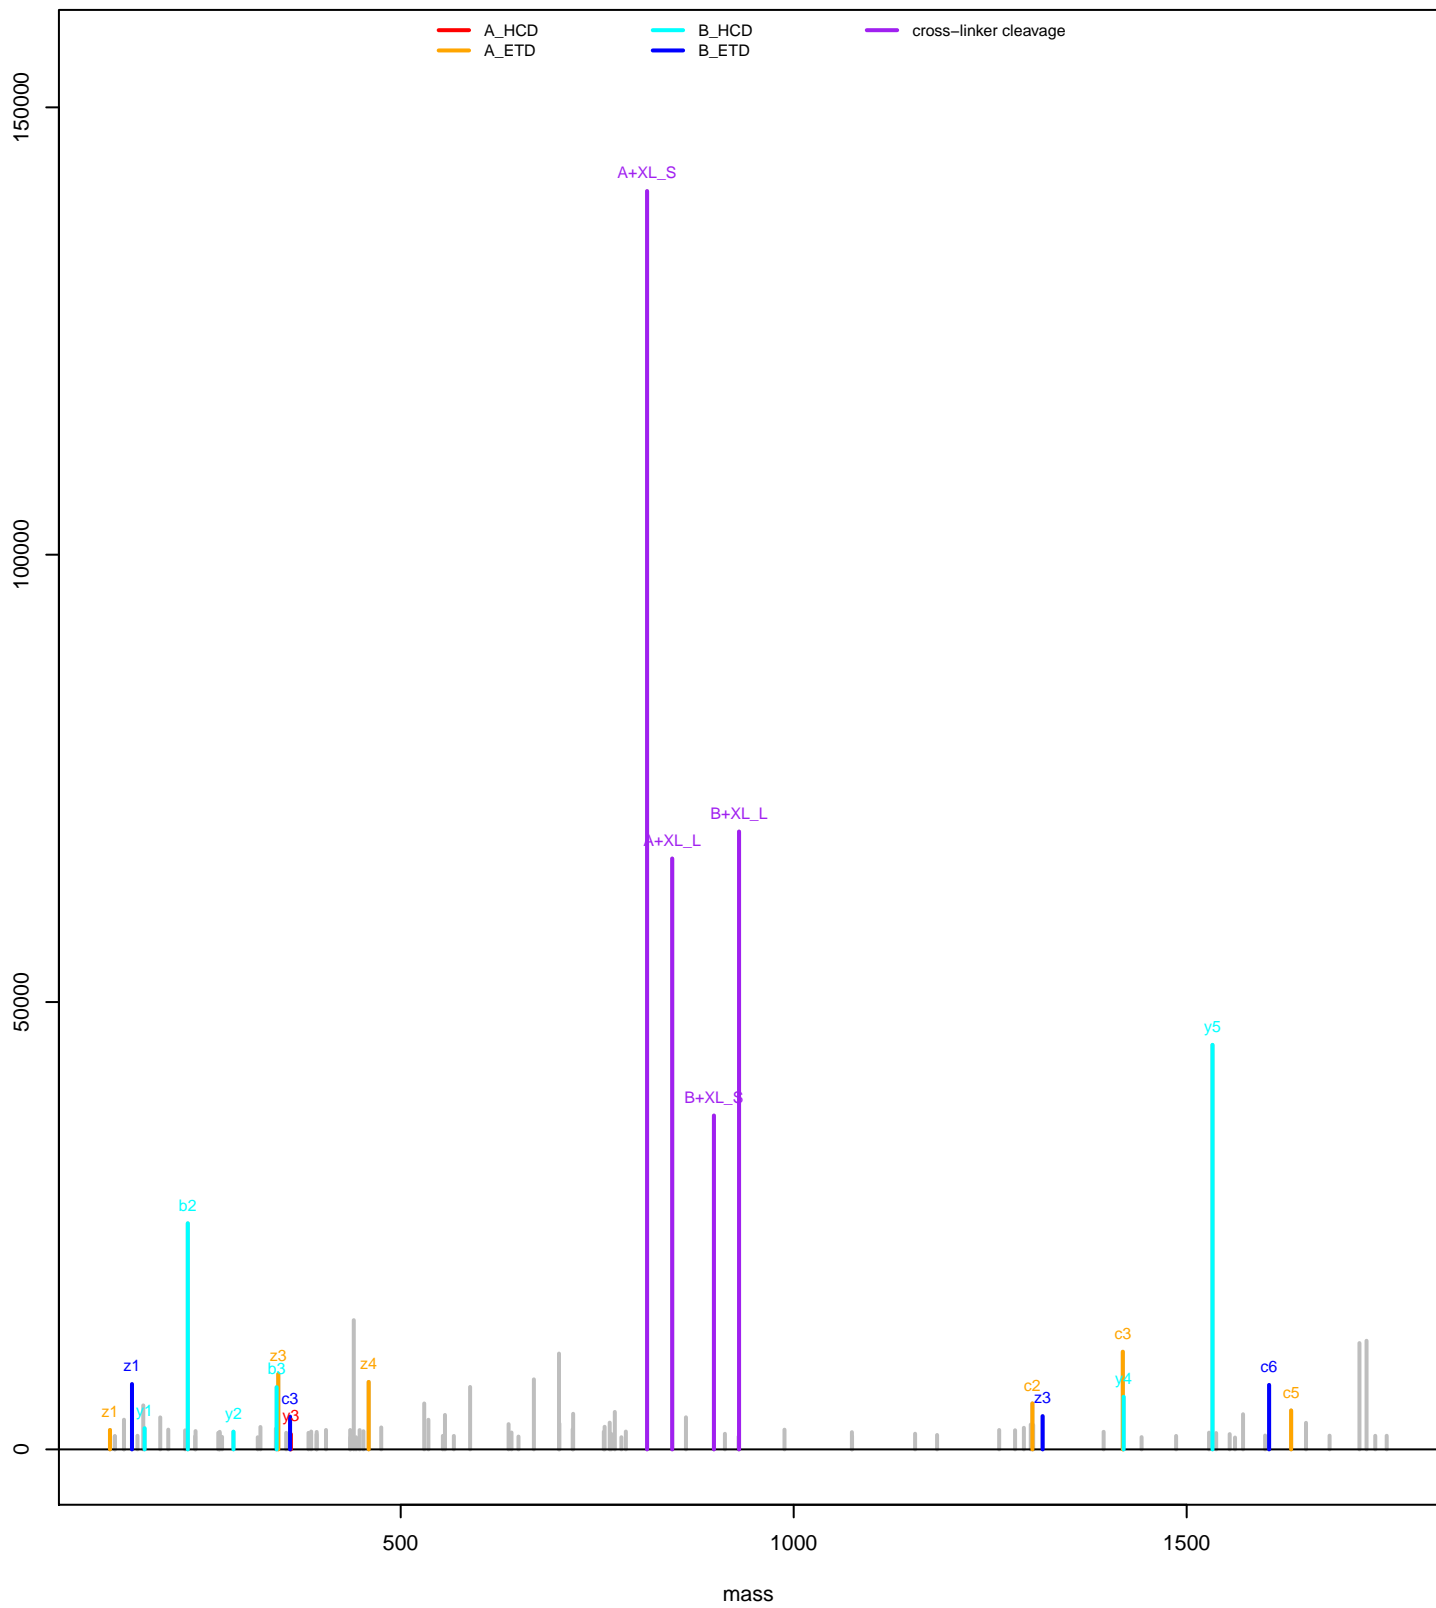

RKDLTK+XL\_S

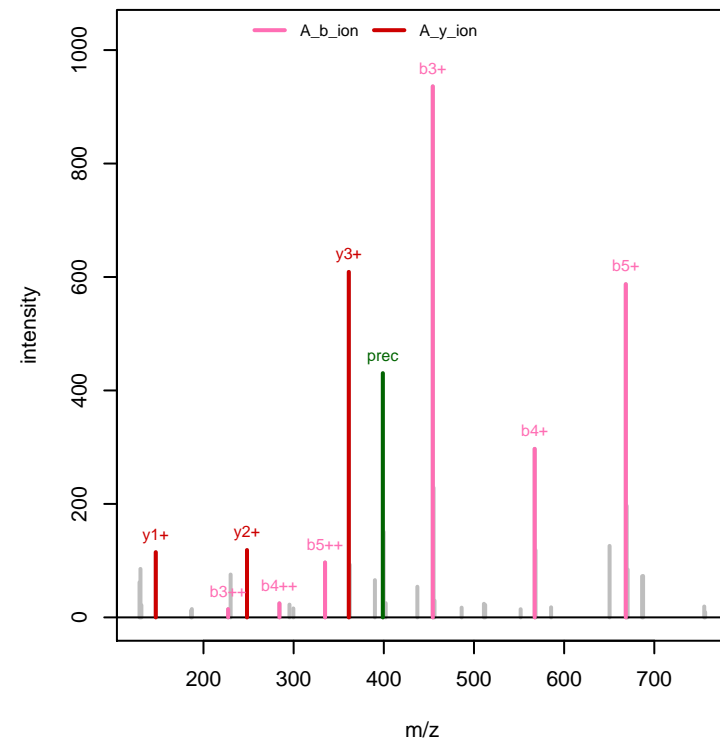

RKDLTK+XL\_L

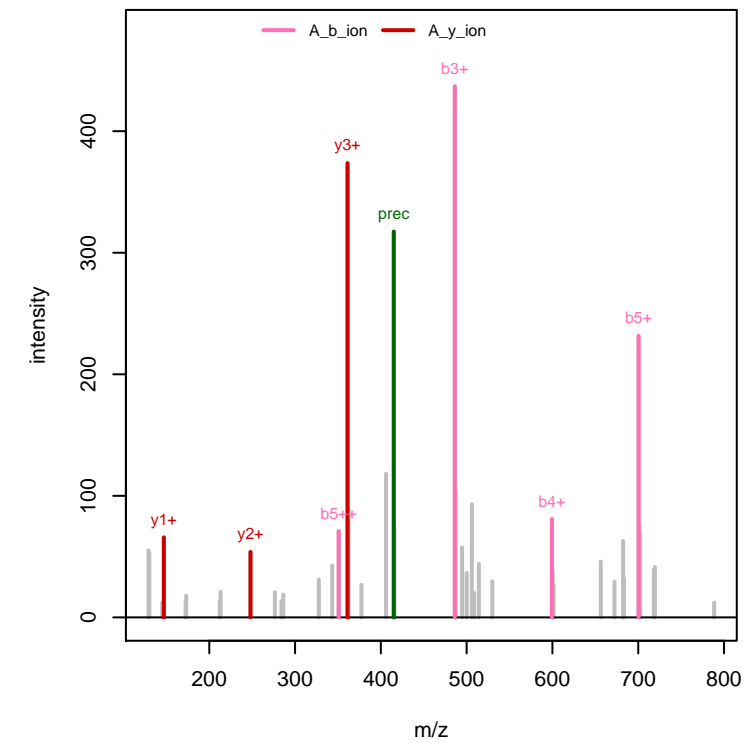

TQISKIR+XL\_S

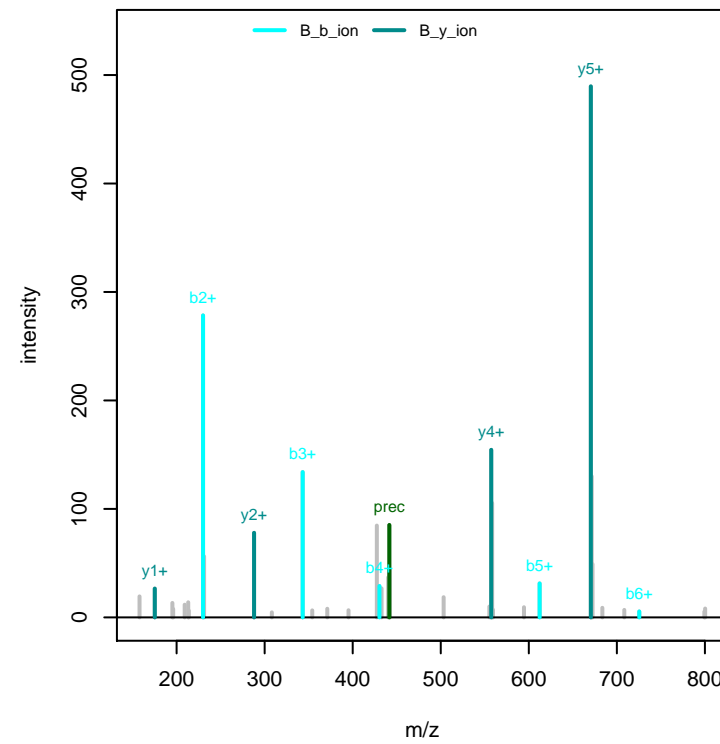

TQISKIR+XL\_L

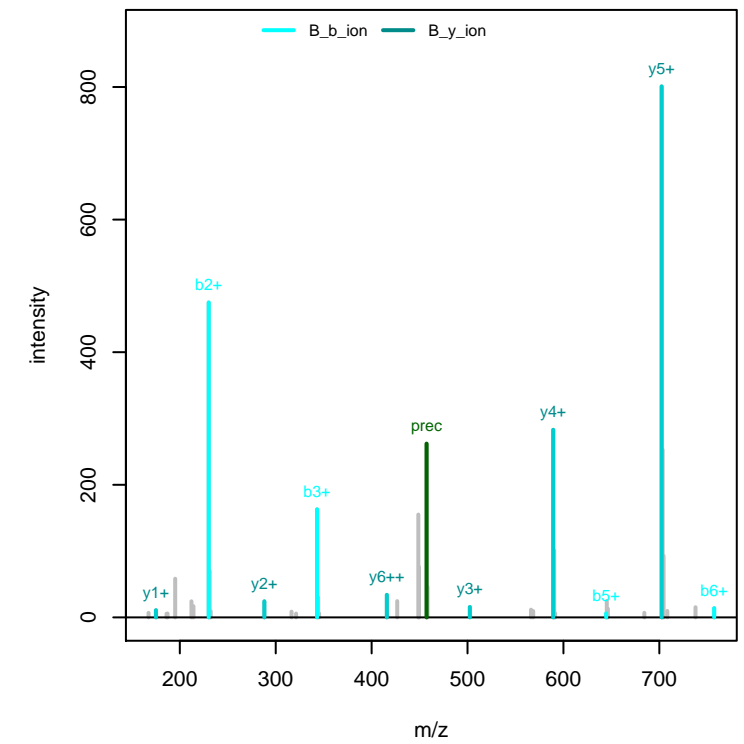

MQNSALK  
LREGNSAGKETSAK

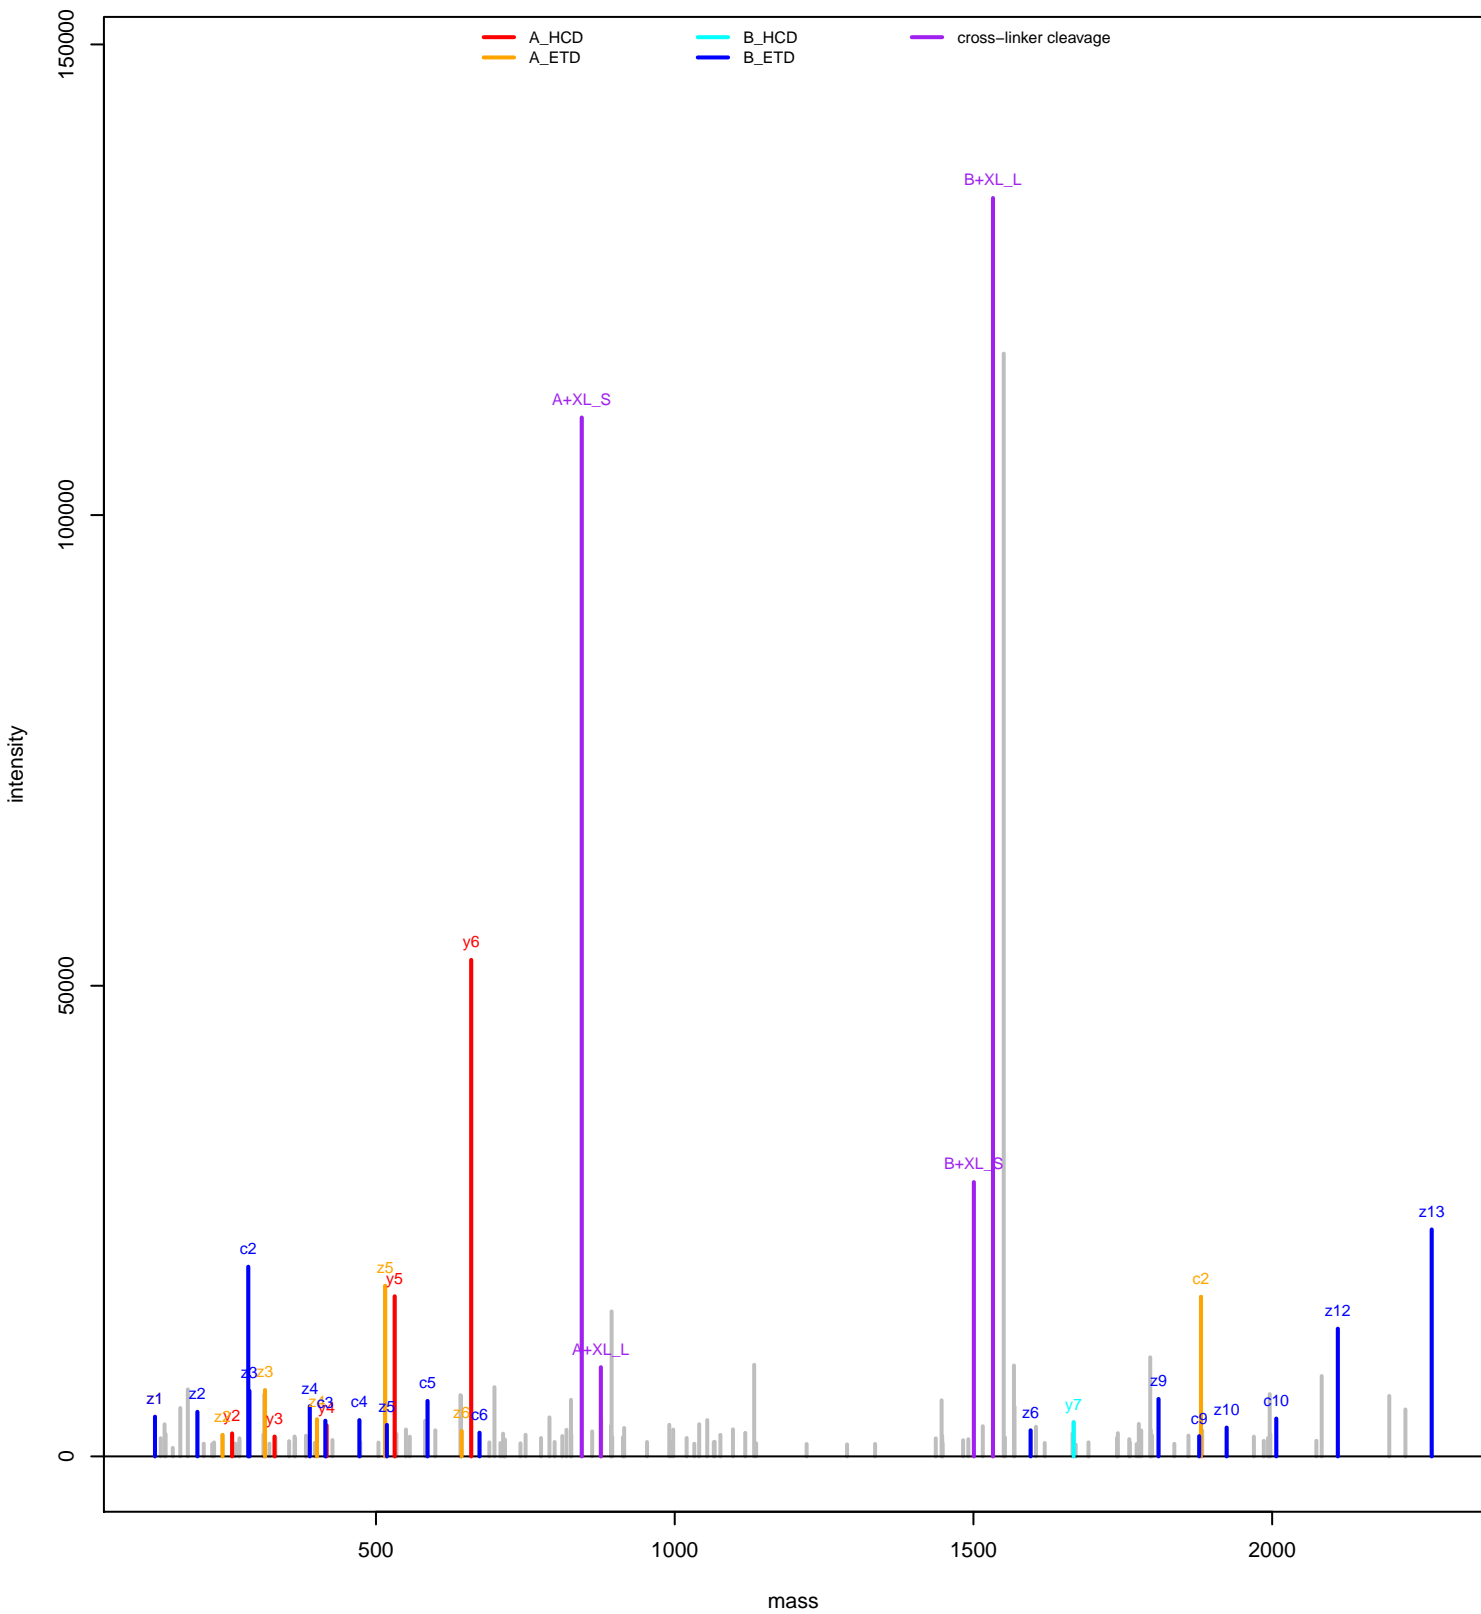

MQNSALK+XL\_S

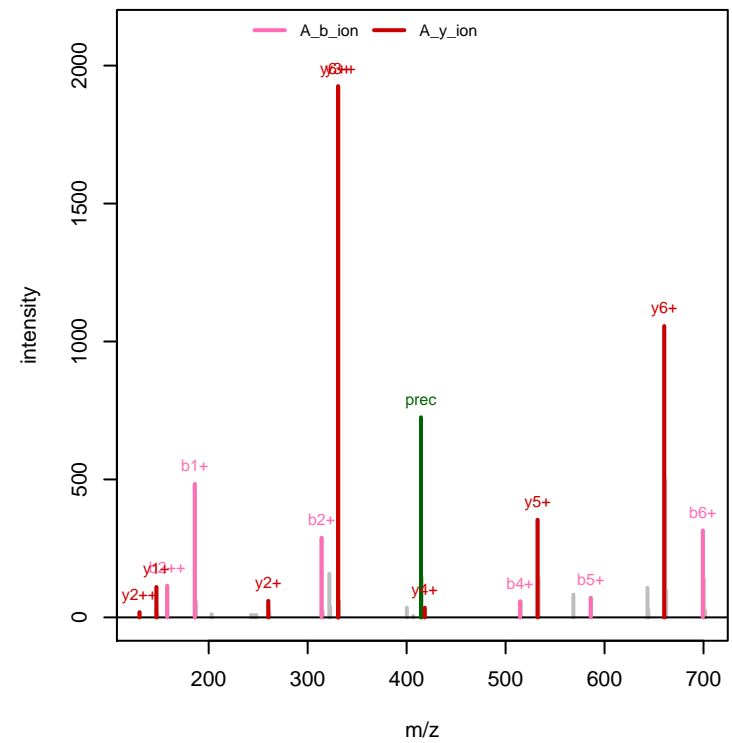

MQNSALK+XL\_L

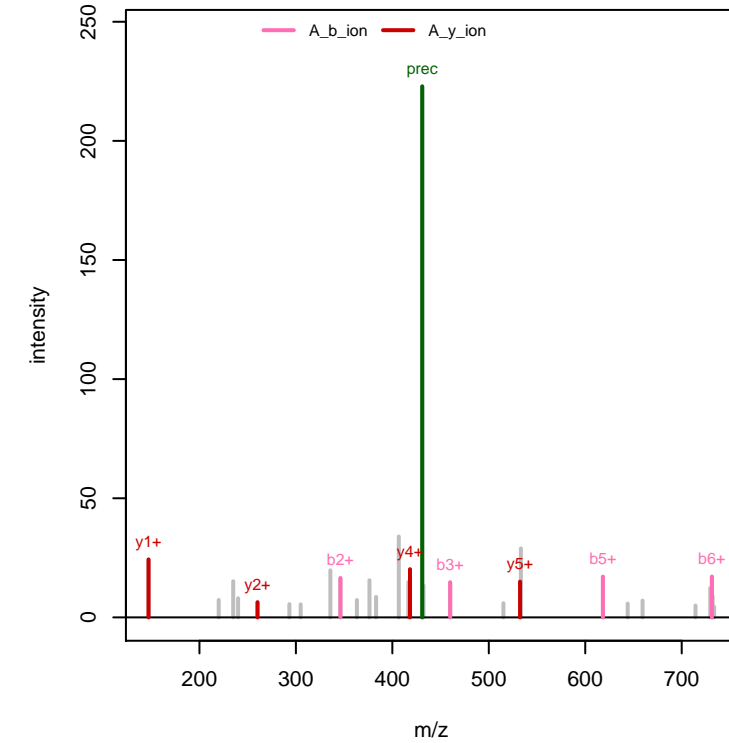

LREGNSAGKETSAK+XL\_S

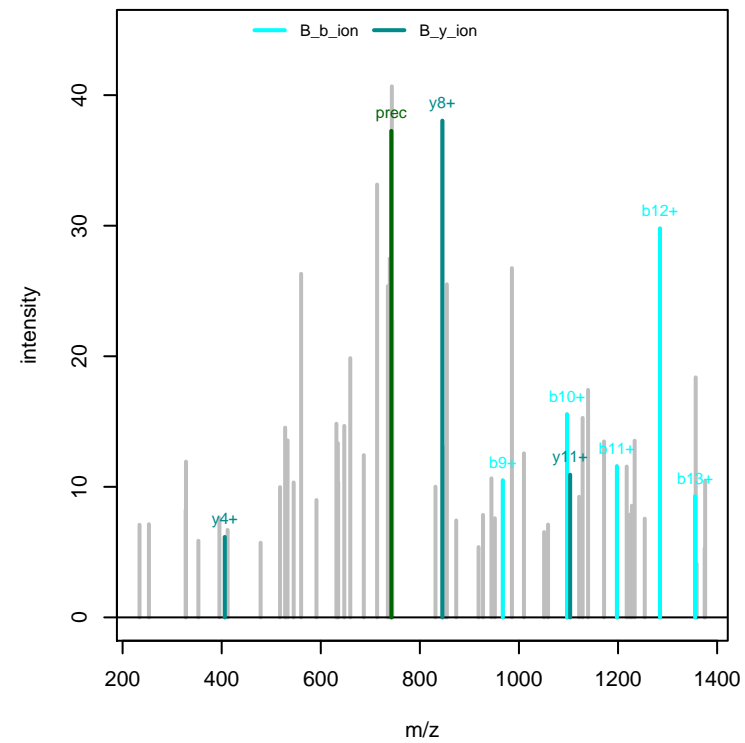

LREGNSAGKETSAK+XL\_L

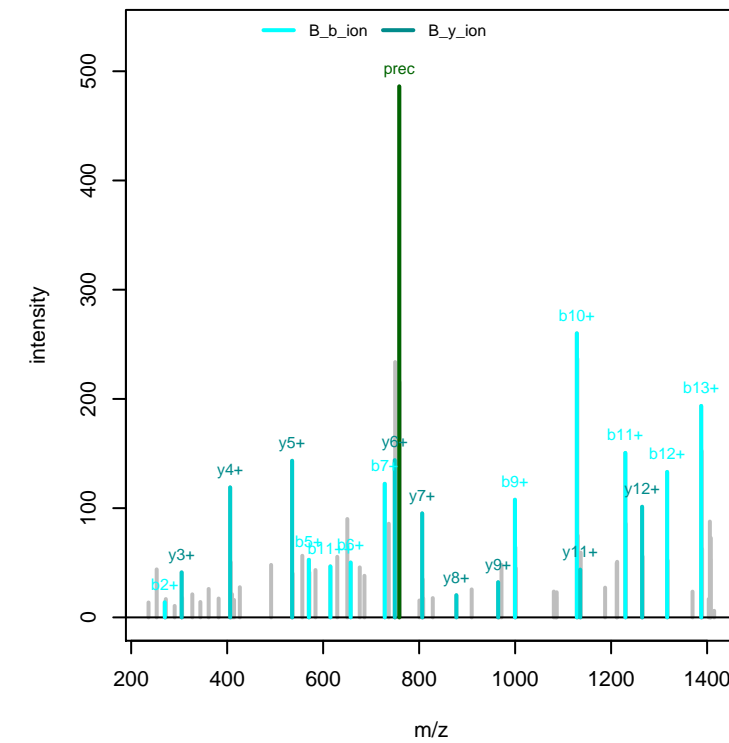

**KNGLVSSVR**  
**CQGKGGCQGGDK**

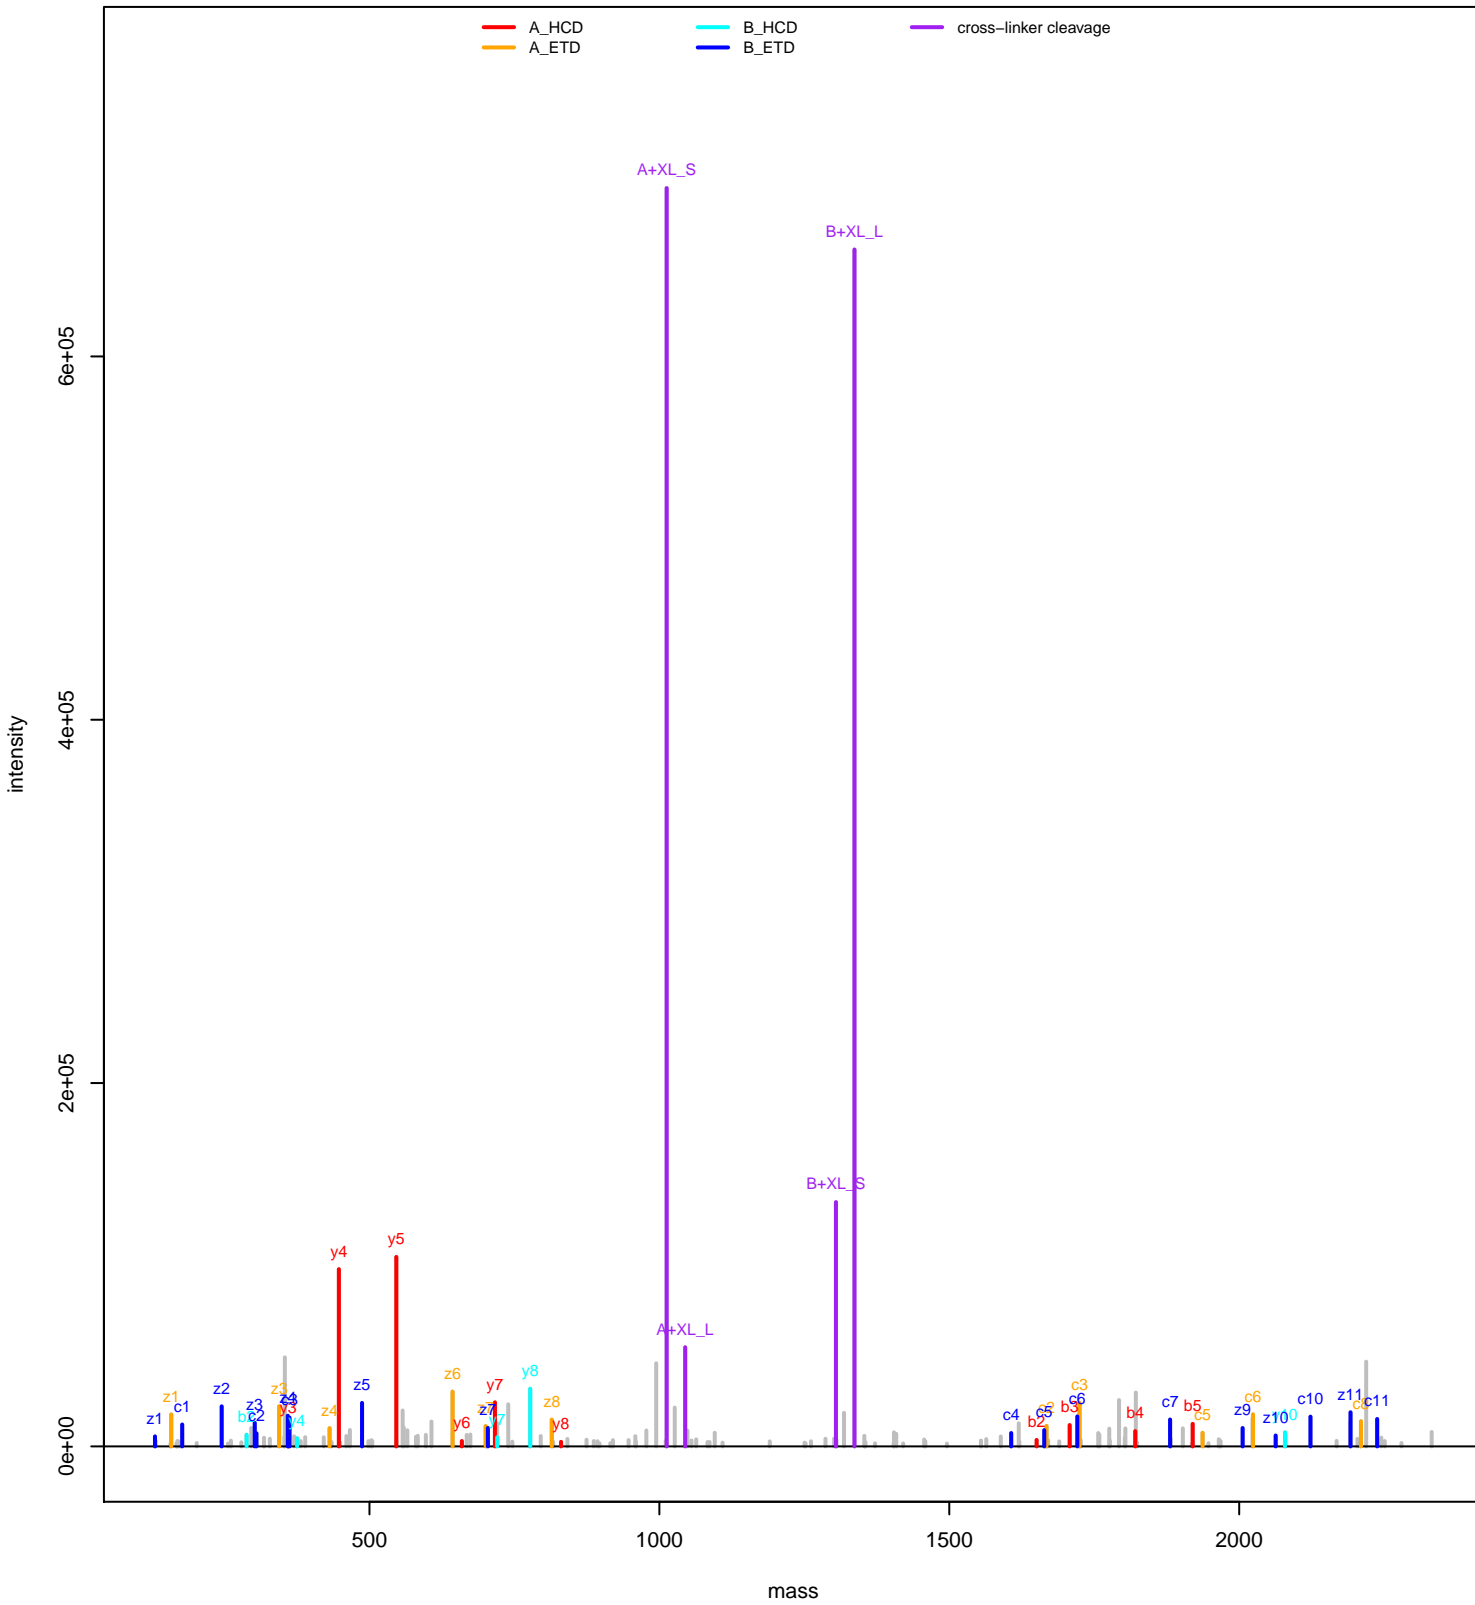

**KNGLVSSVR+XL\_S**

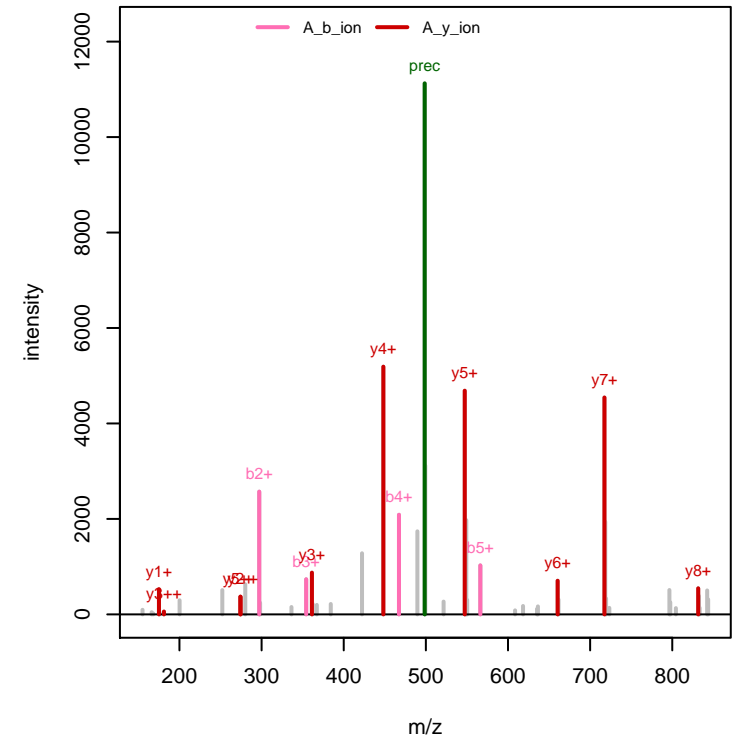

**KNGLVSSVR+XL\_L**

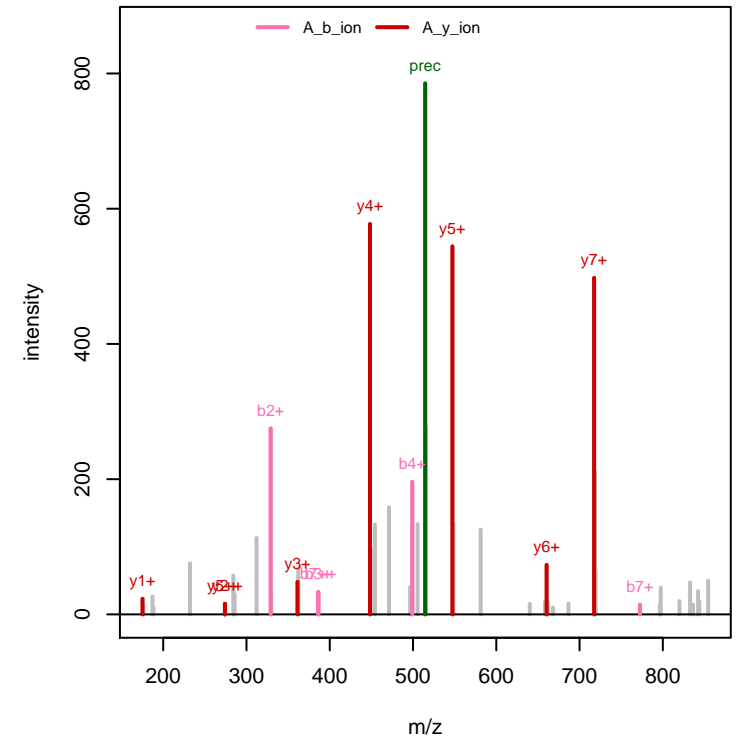

**CQGKGGCQGGDK+XL\_S**

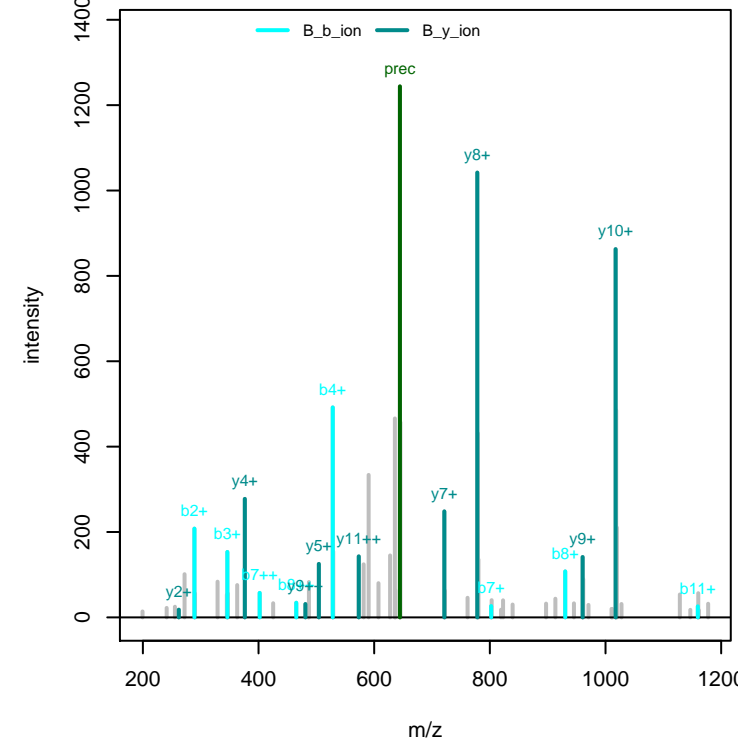

**CQGKGGCQGGDK+XL\_L**

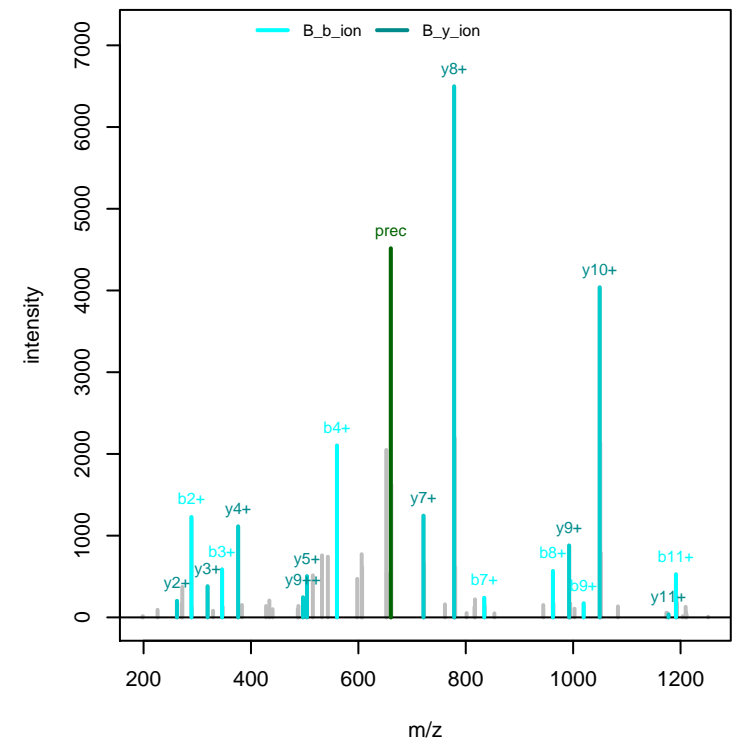

IVGDGIAIKPTGNK  
AKSTLTPVVISNM<sub>0</sub>DEIK

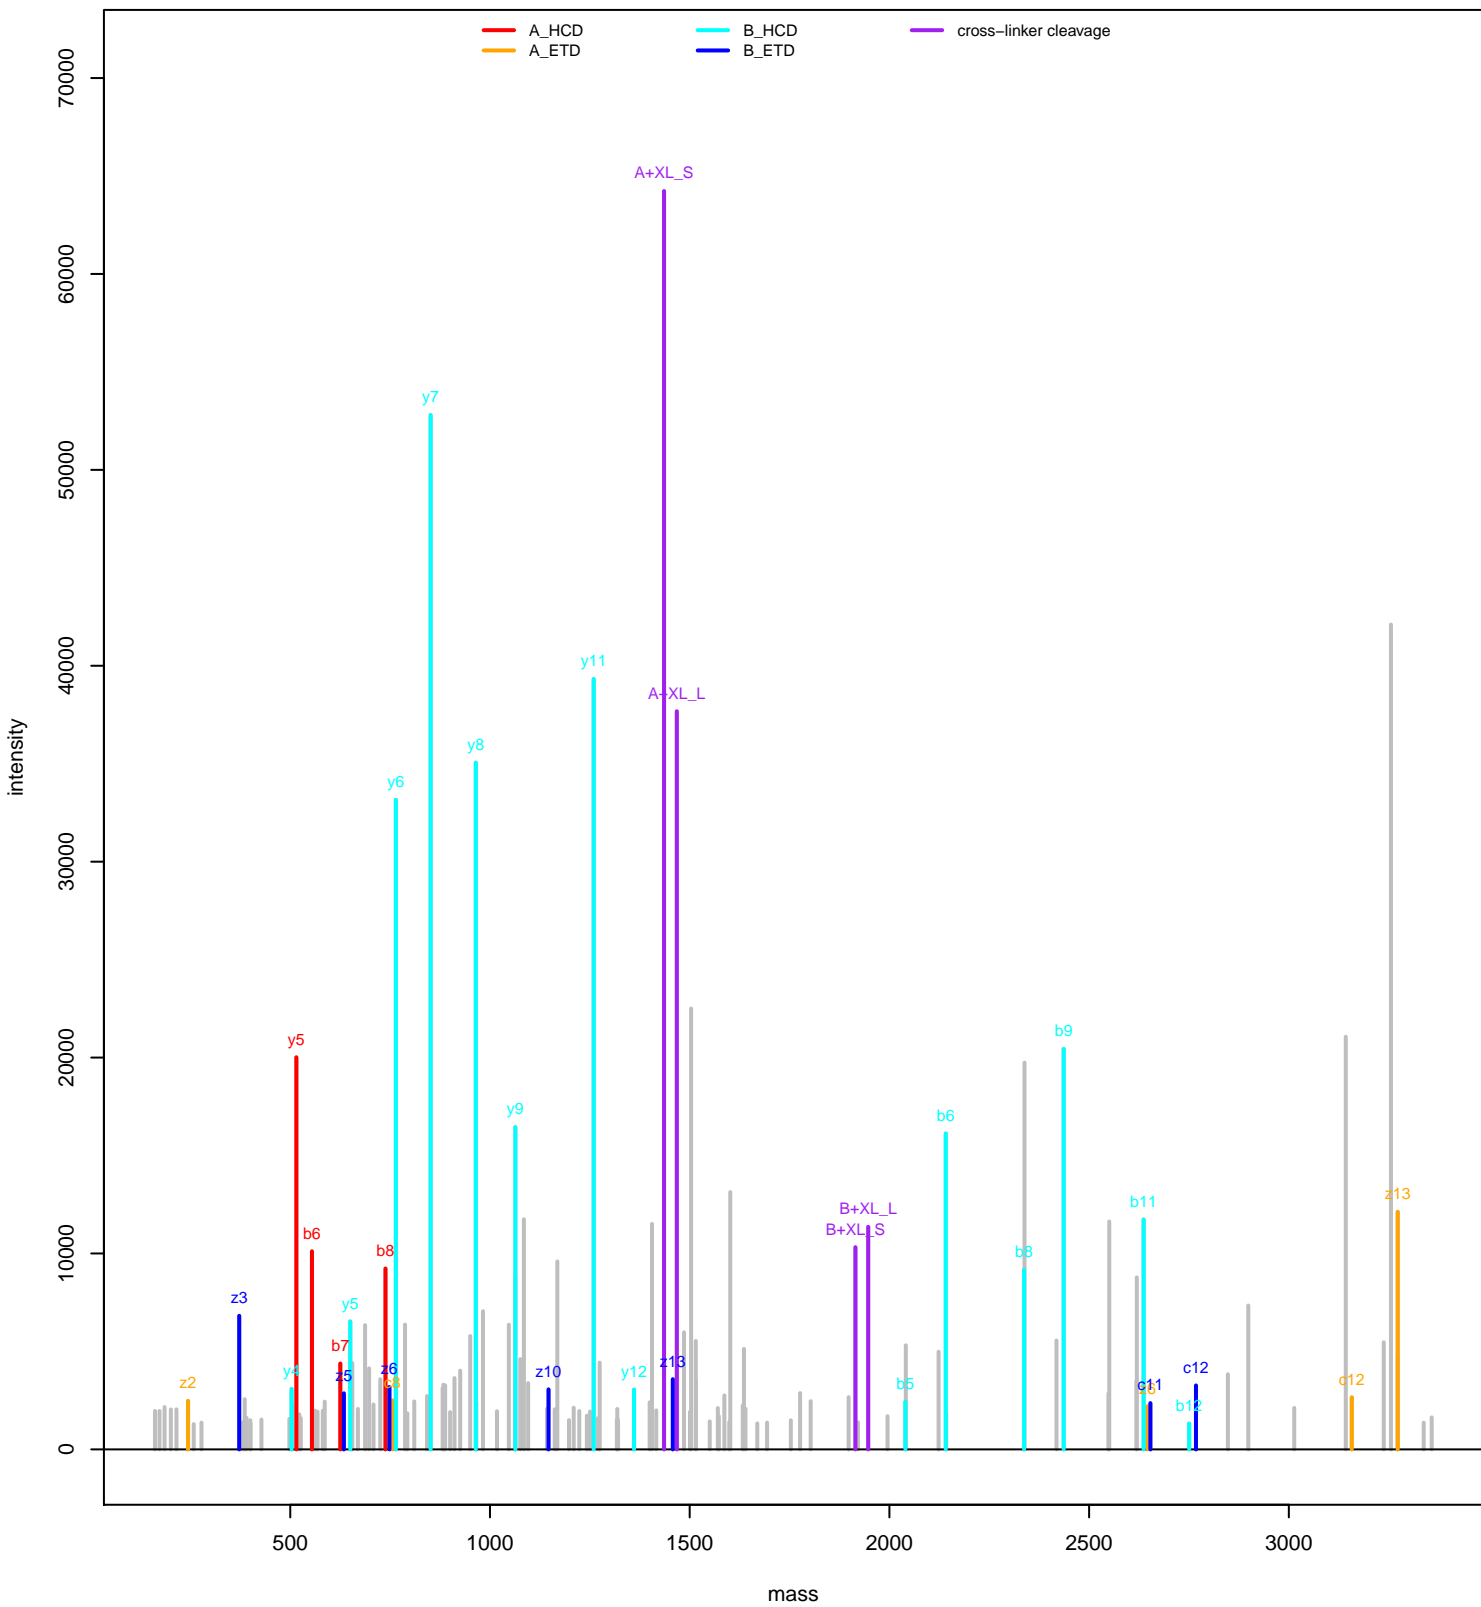

IVGDGIAIKPTGNK+XL\_S

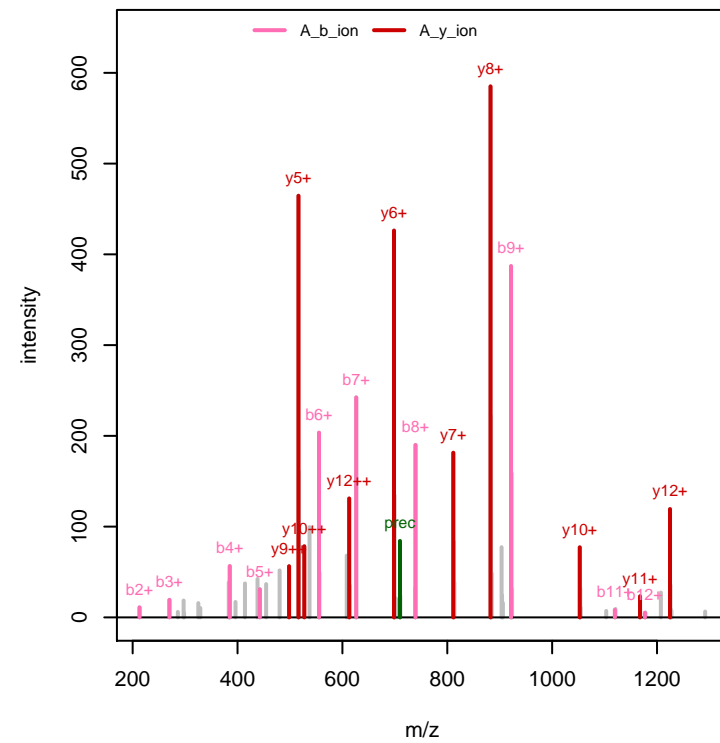

IVGDGIAIKPTGNK+XL\_L

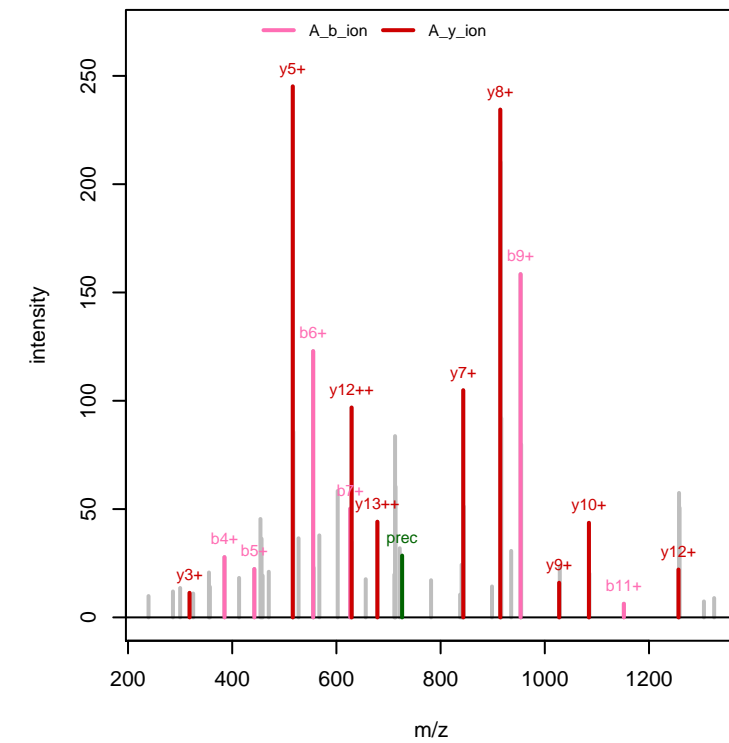

AKSTLTPVVISNM<sub>0</sub>DEIK+XL\_S

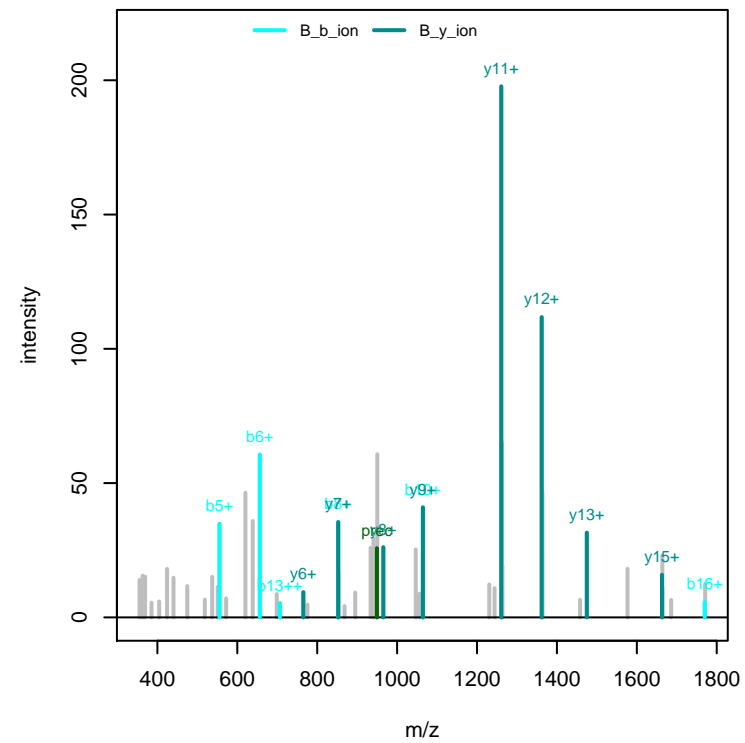

AKSTLTPVVISNM<sub>0</sub>DEIK+XL\_L

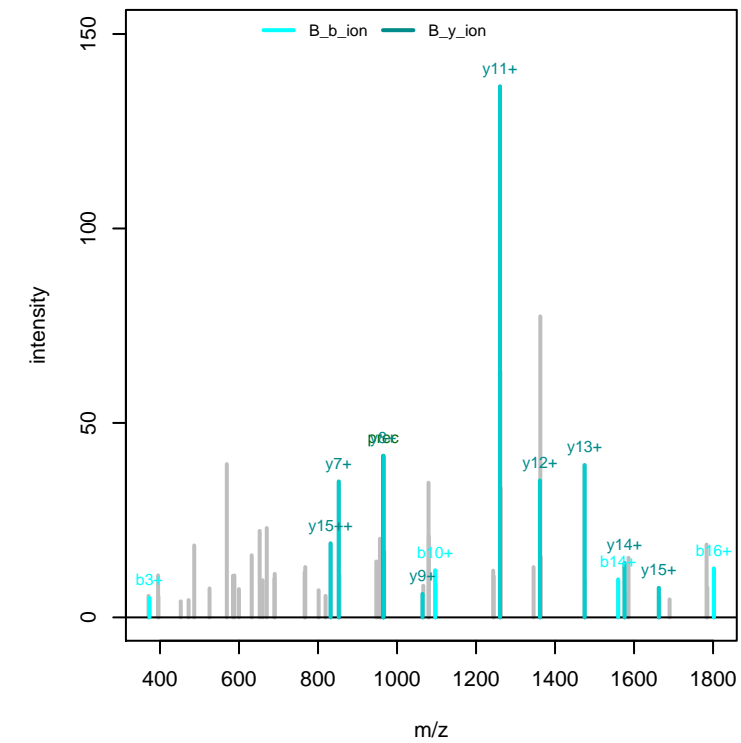

**GIKVEVSGR**  
**DLETQSQDGTDFDKLTK**

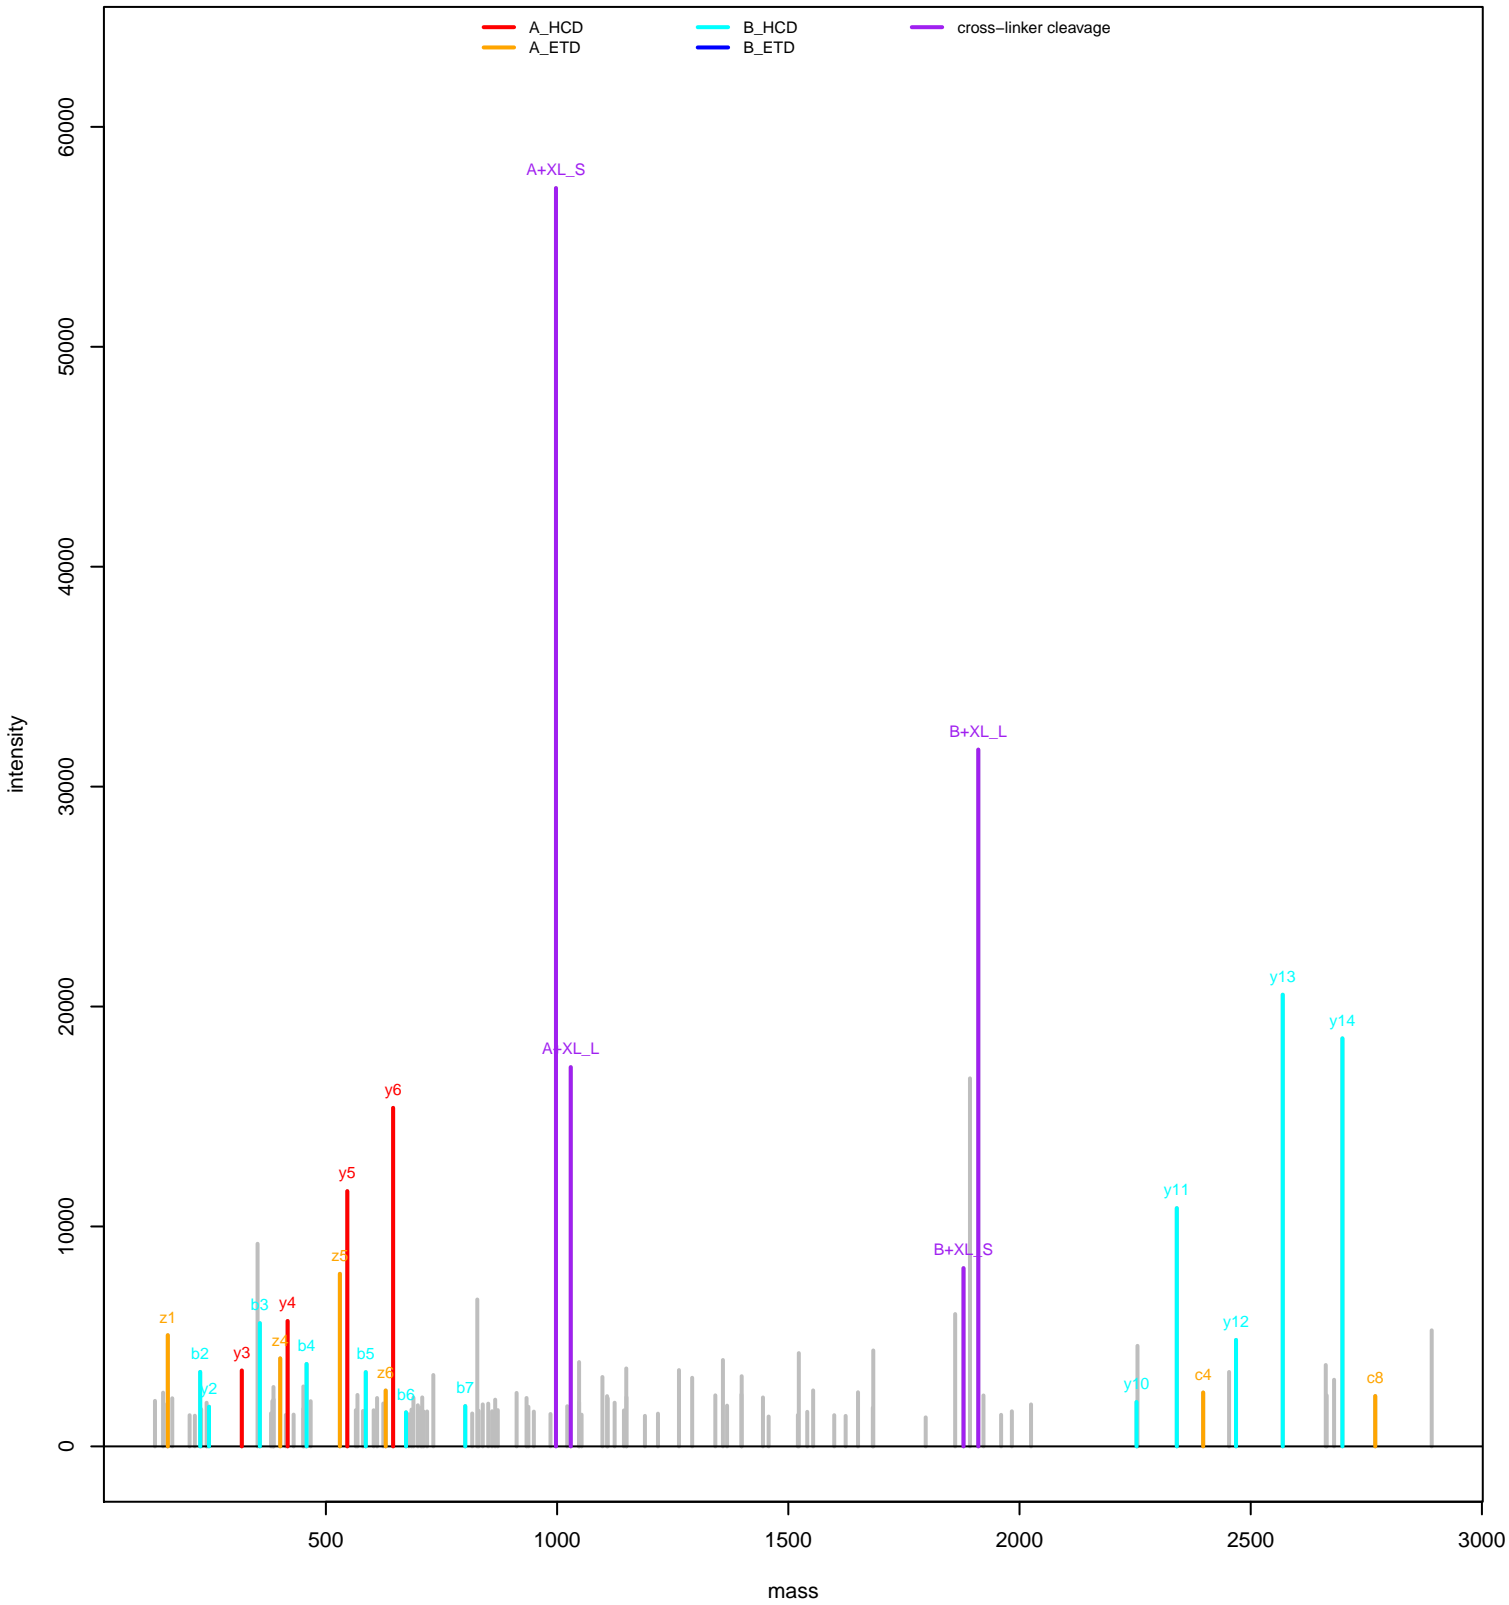

**GIKVEVSGR+XL\_S**

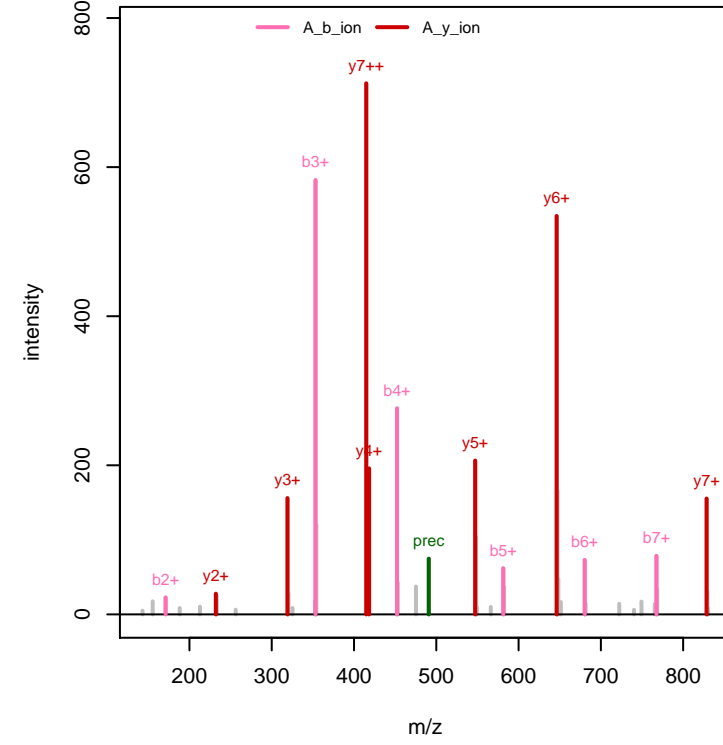

**GIKVEVSGR+XL\_L**

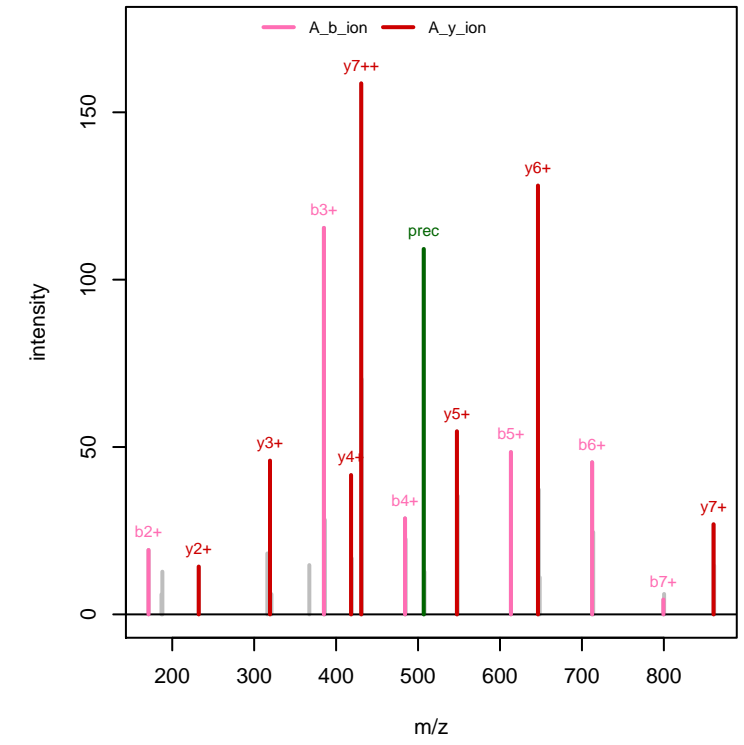

**DLETQSQDGTDFDKLTK+XL\_S**

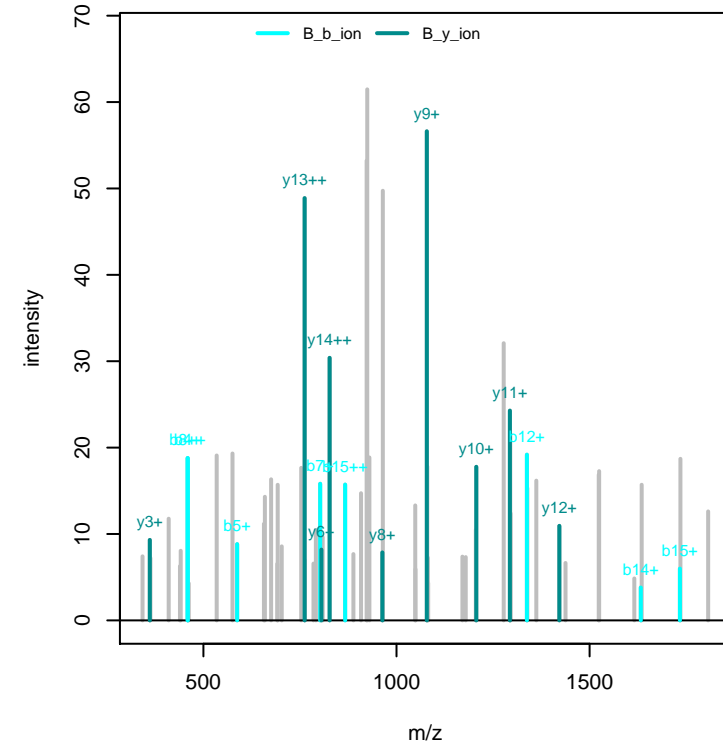

**DLETQSQDGTDFDKLTK+XL\_L**

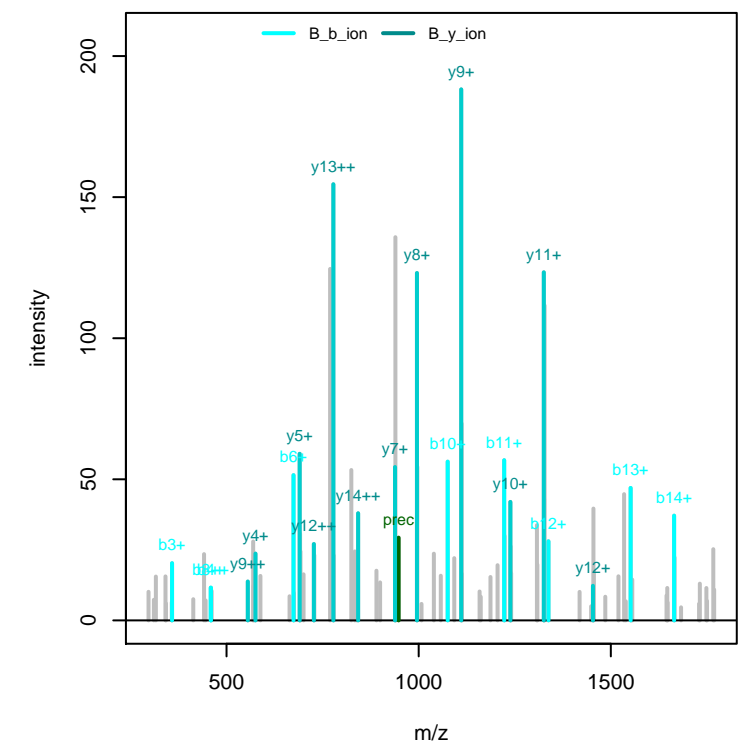

VTKGAR  
AHIEKQAGELQEK

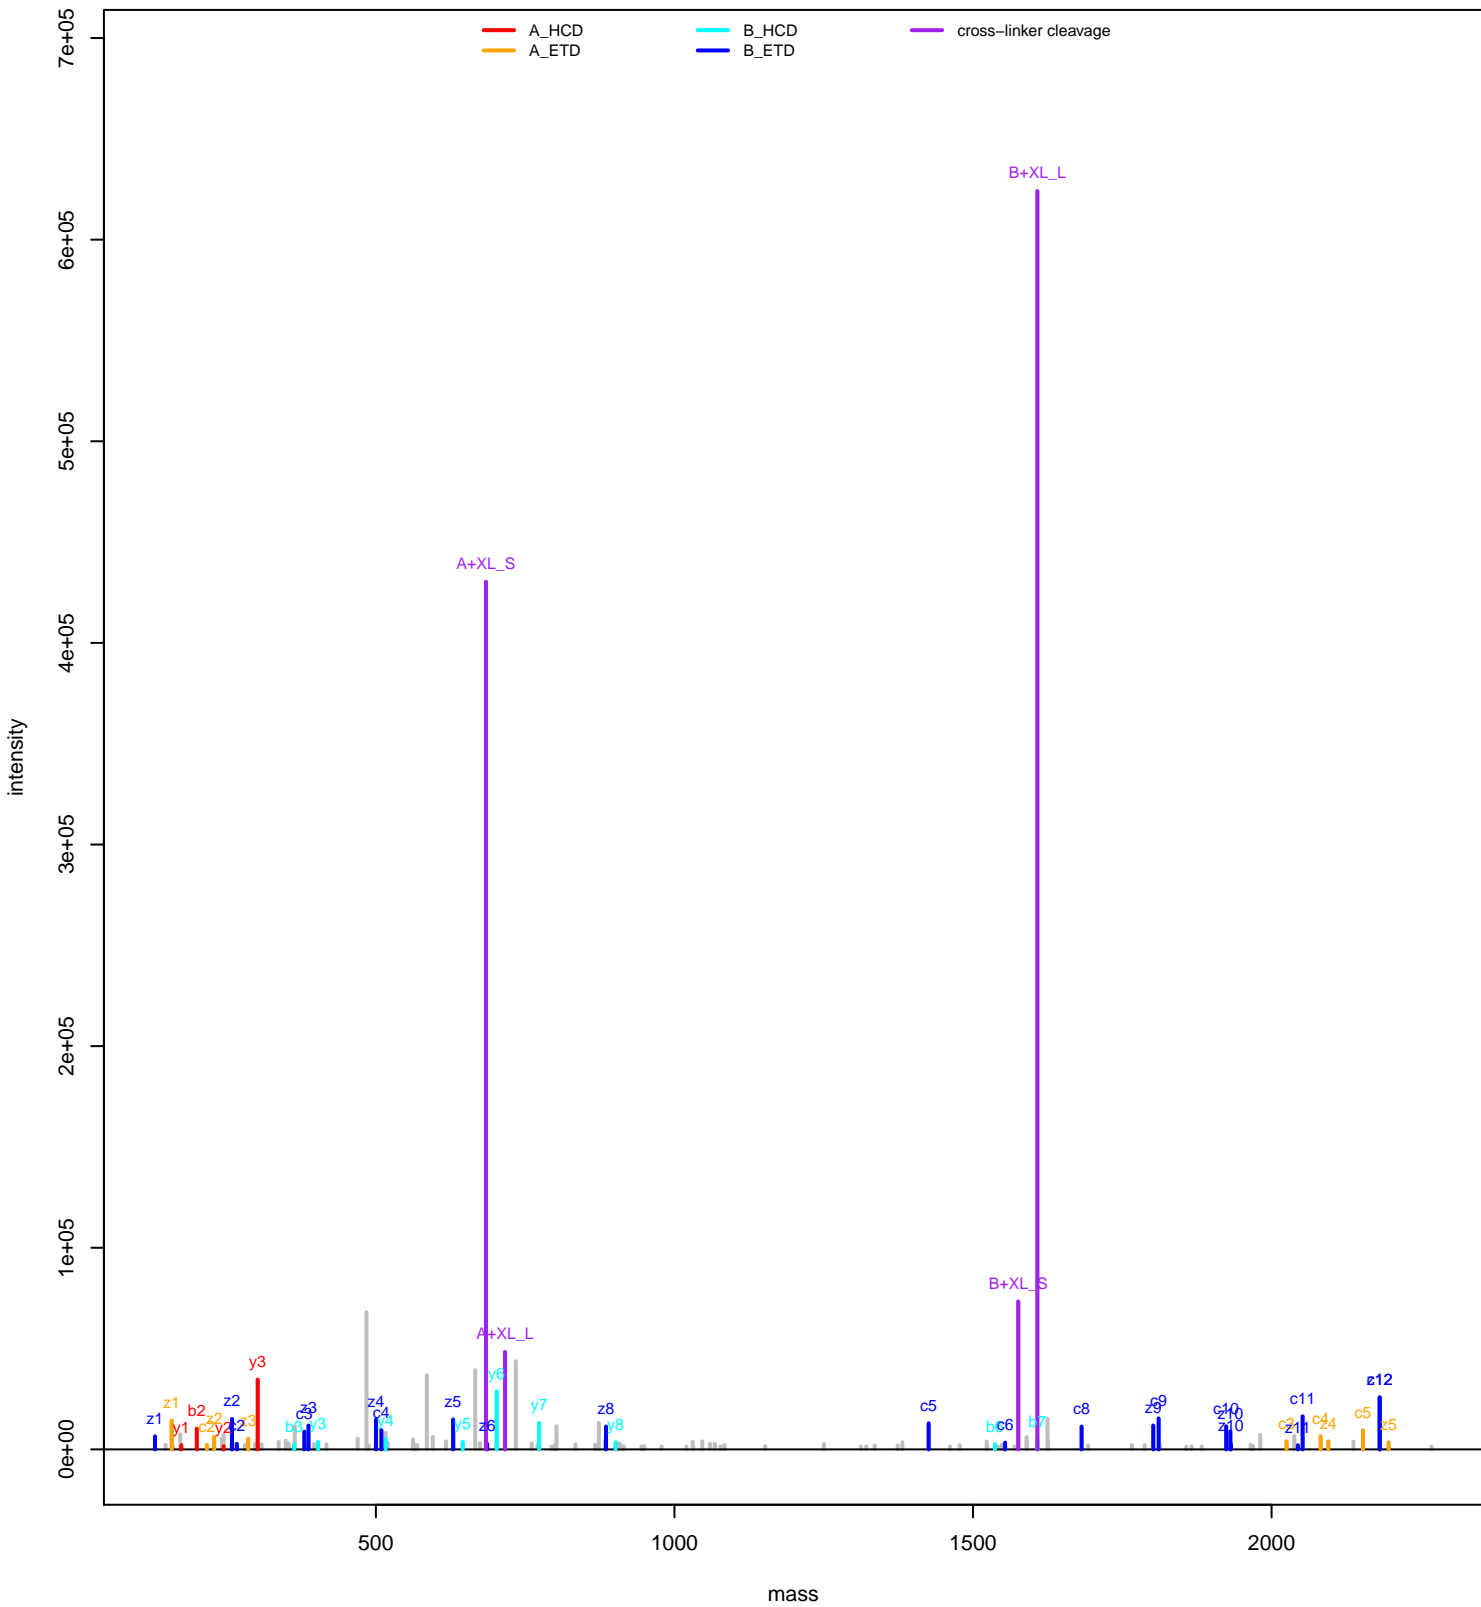

VTKGAR+XL\_S

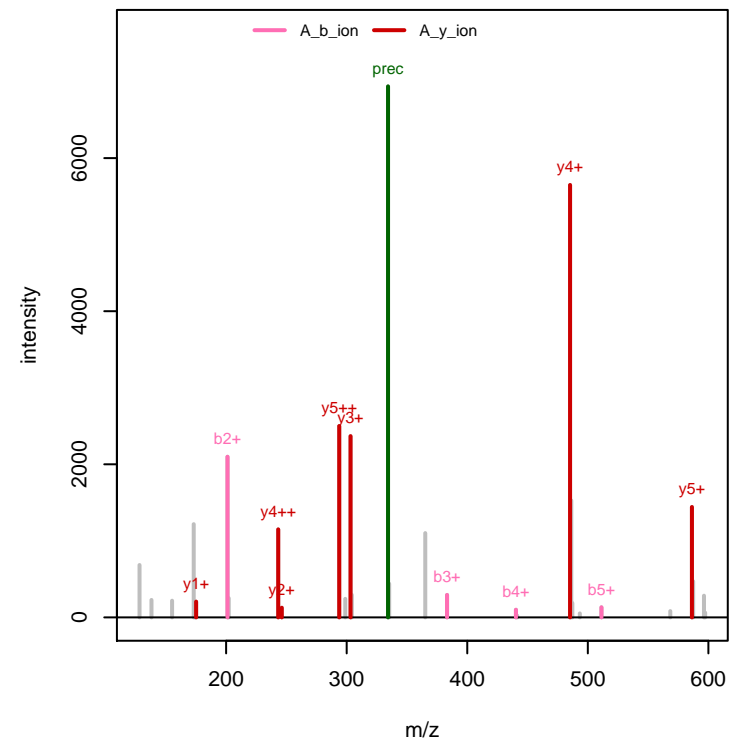

VTKGAR+XL\_L

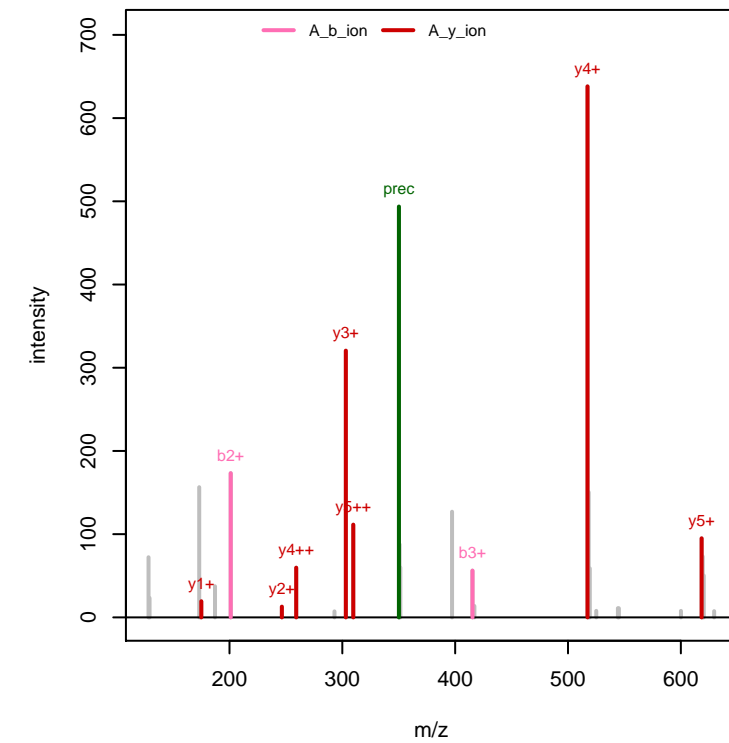

AHIEKQAGELQEK+XL\_S

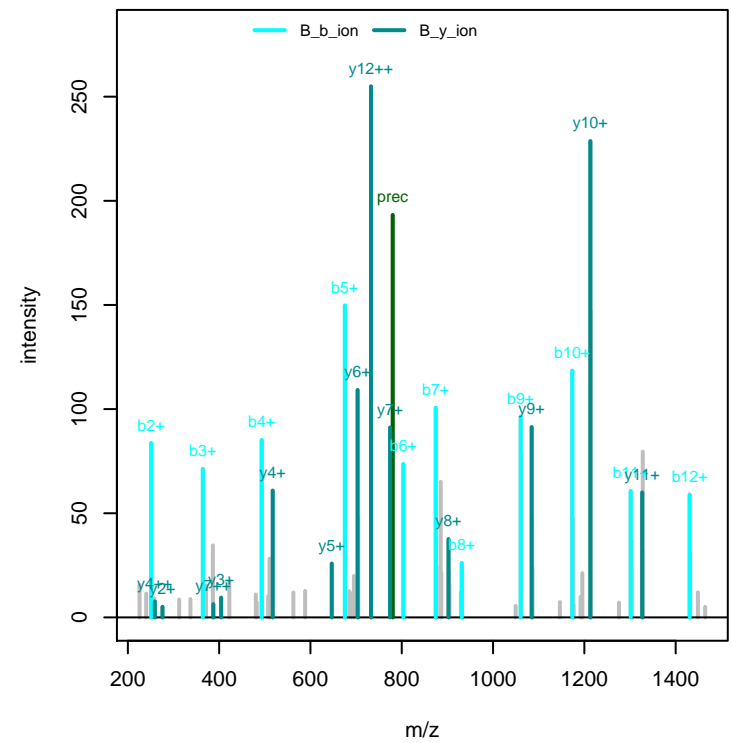

AHIEKQAGELQEK+XL\_L

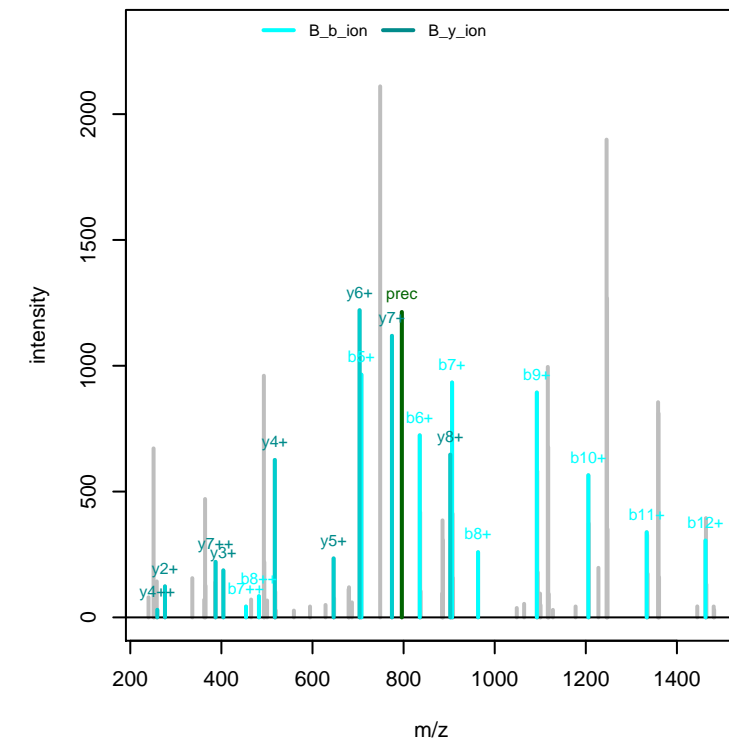

KAAVLVK  
SSAQKVR

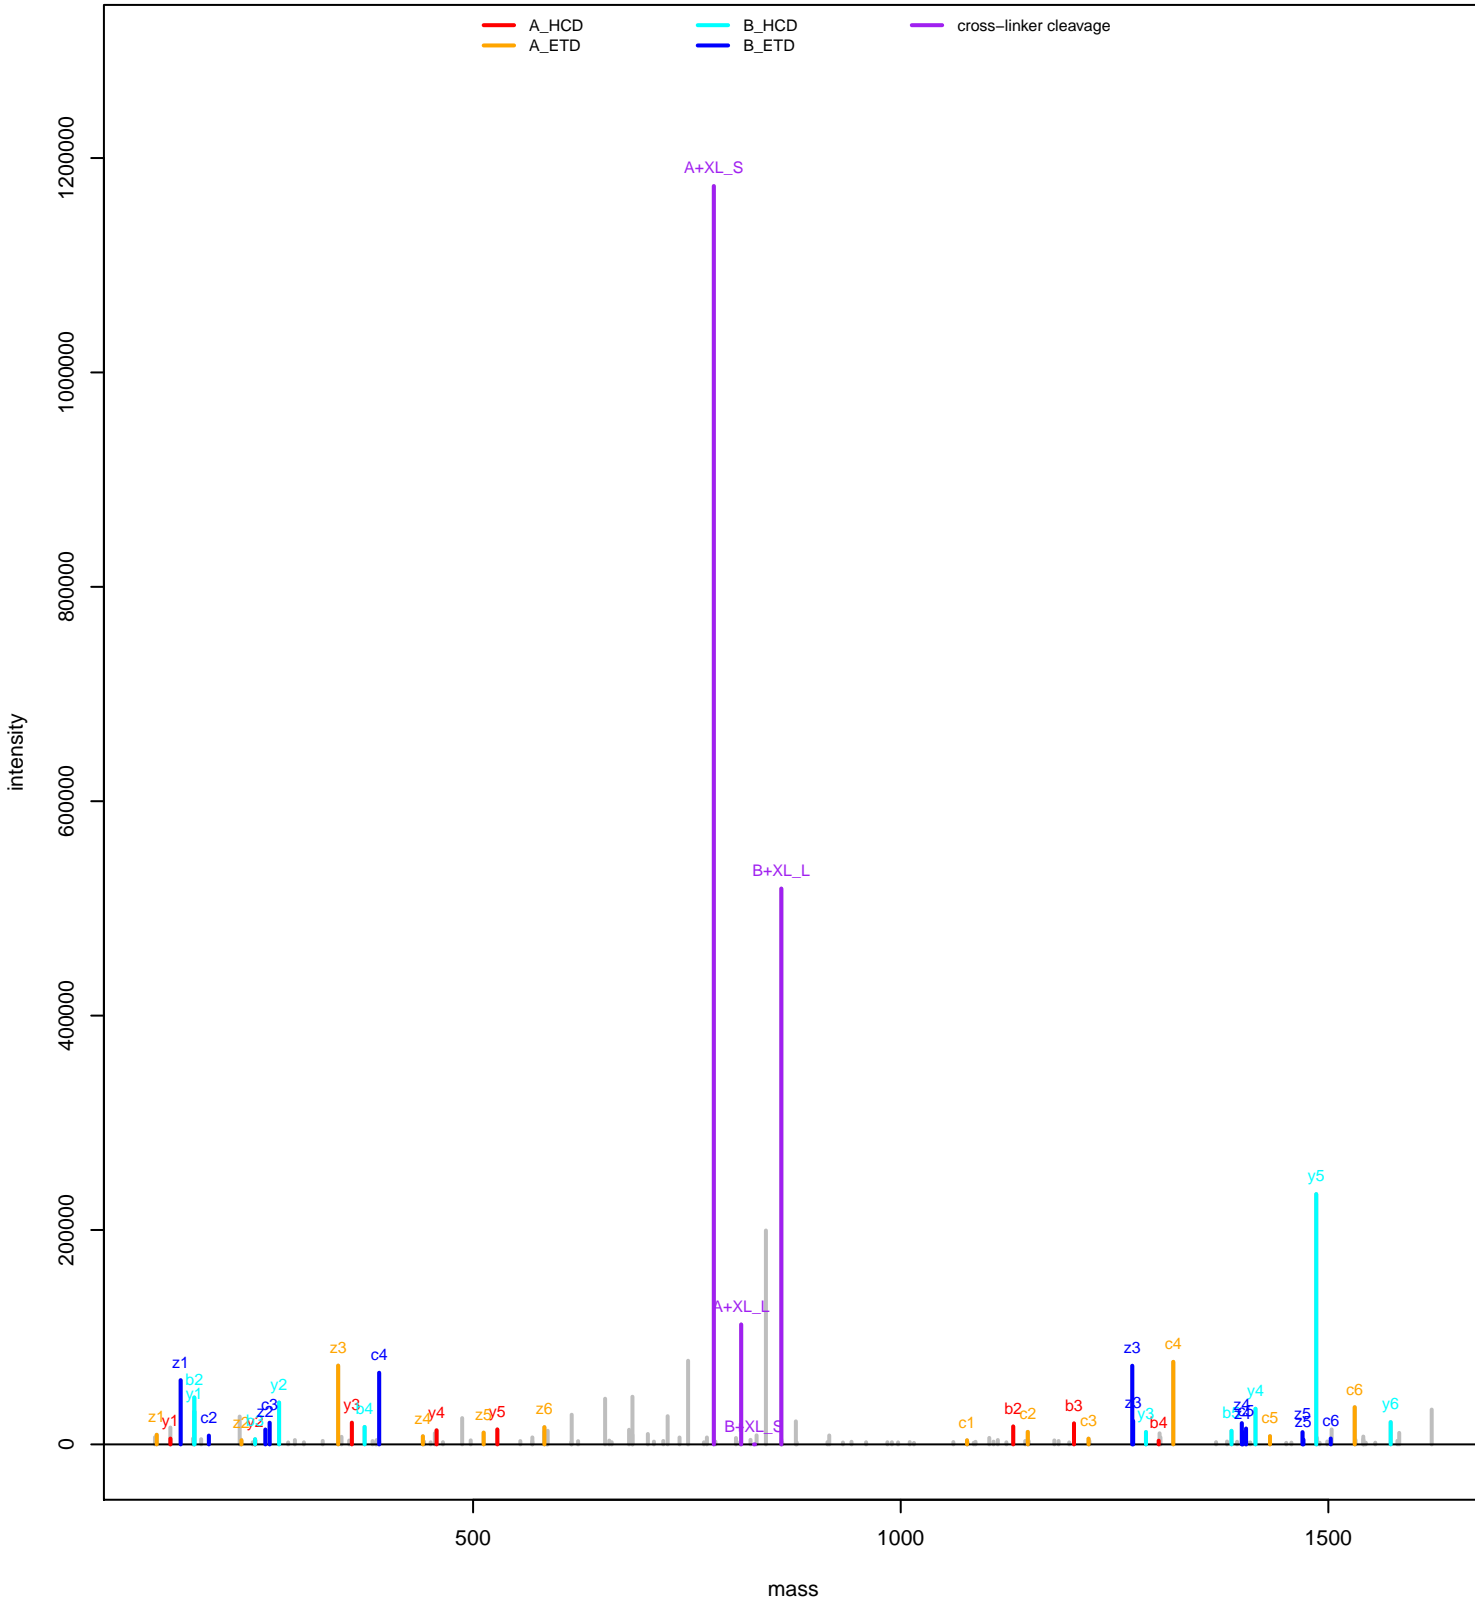

KAAVLVK+XL\_S

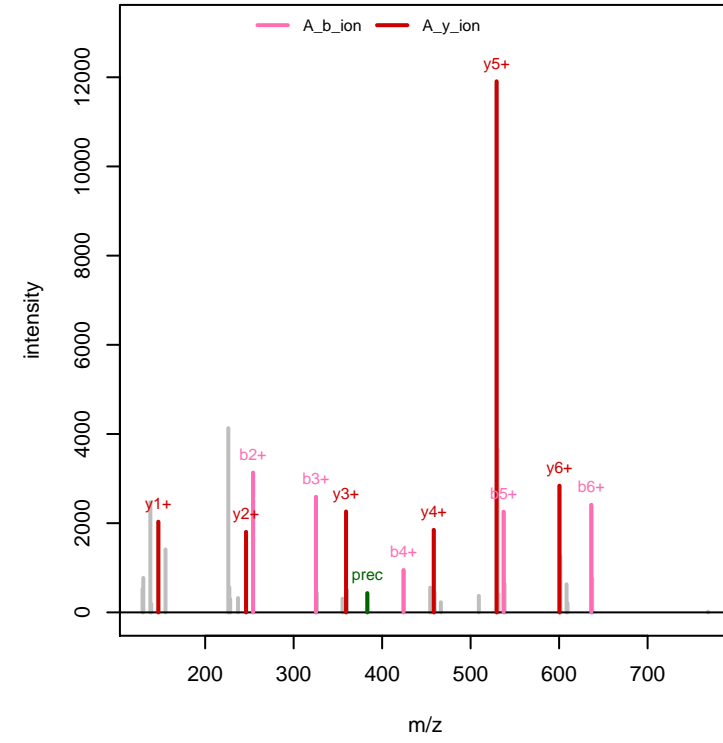

KAAVLVK+XL\_L

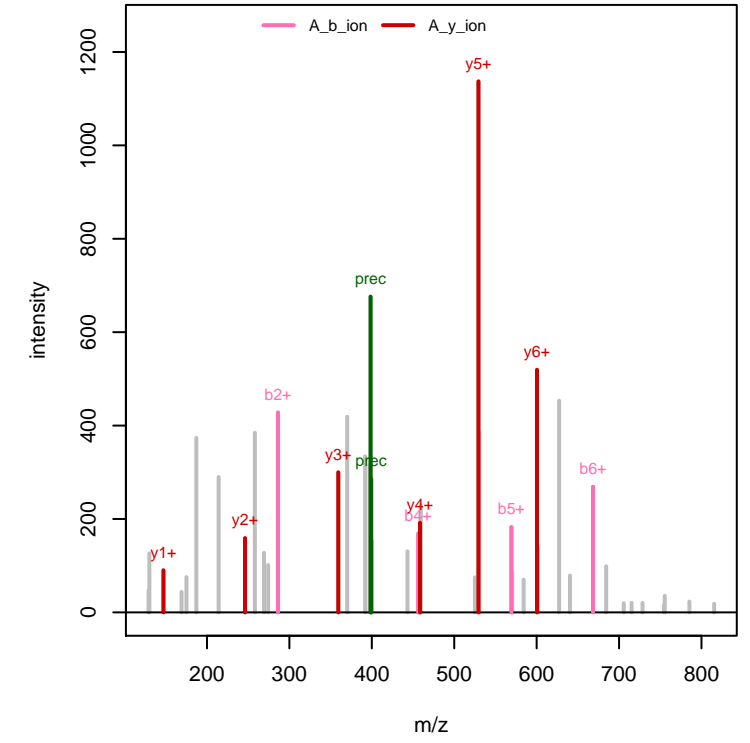

SSAQKVR+XL\_S

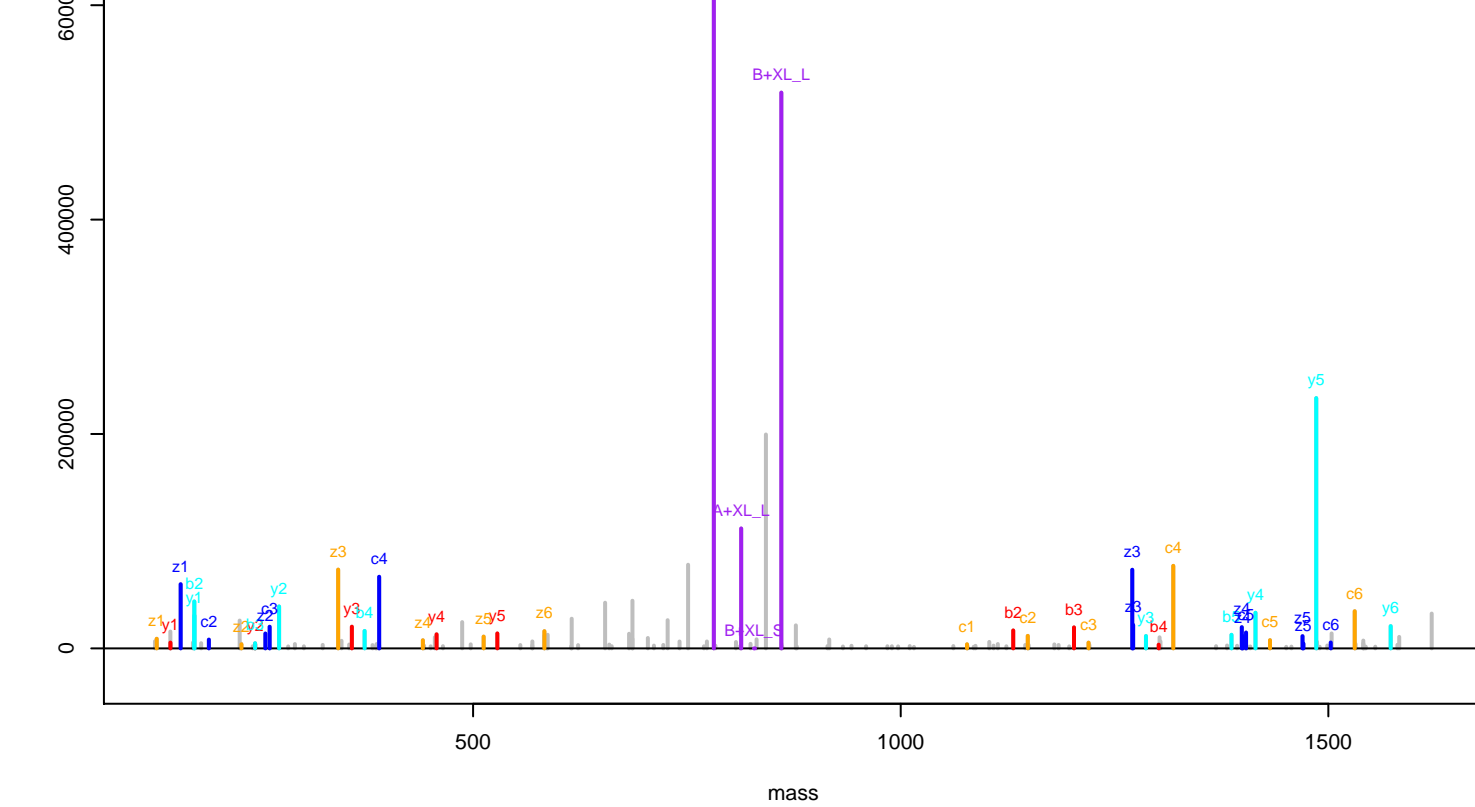

SSAQKVR+XL\_L

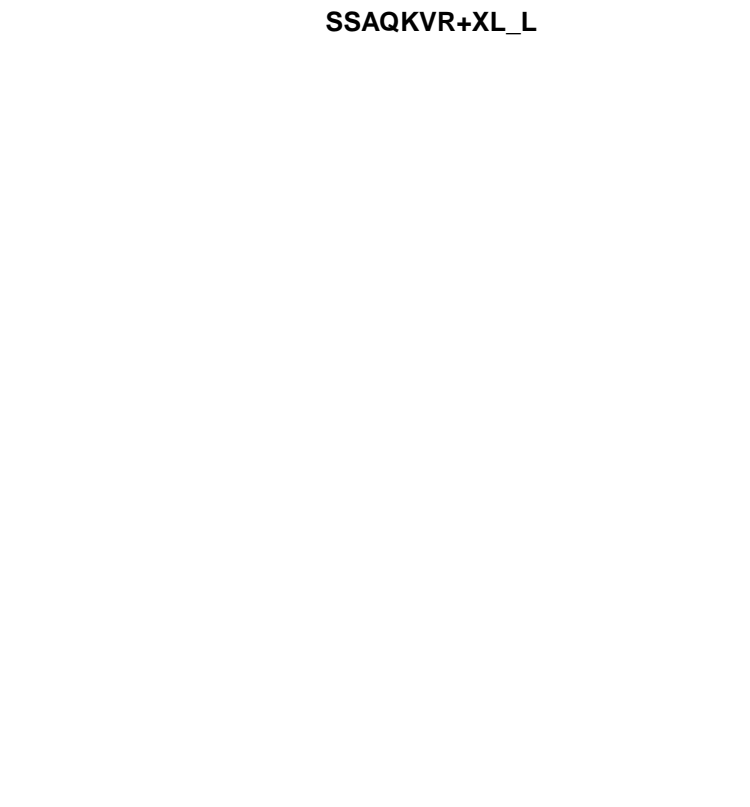



LDQLPADKK  
AEFEKAAASR

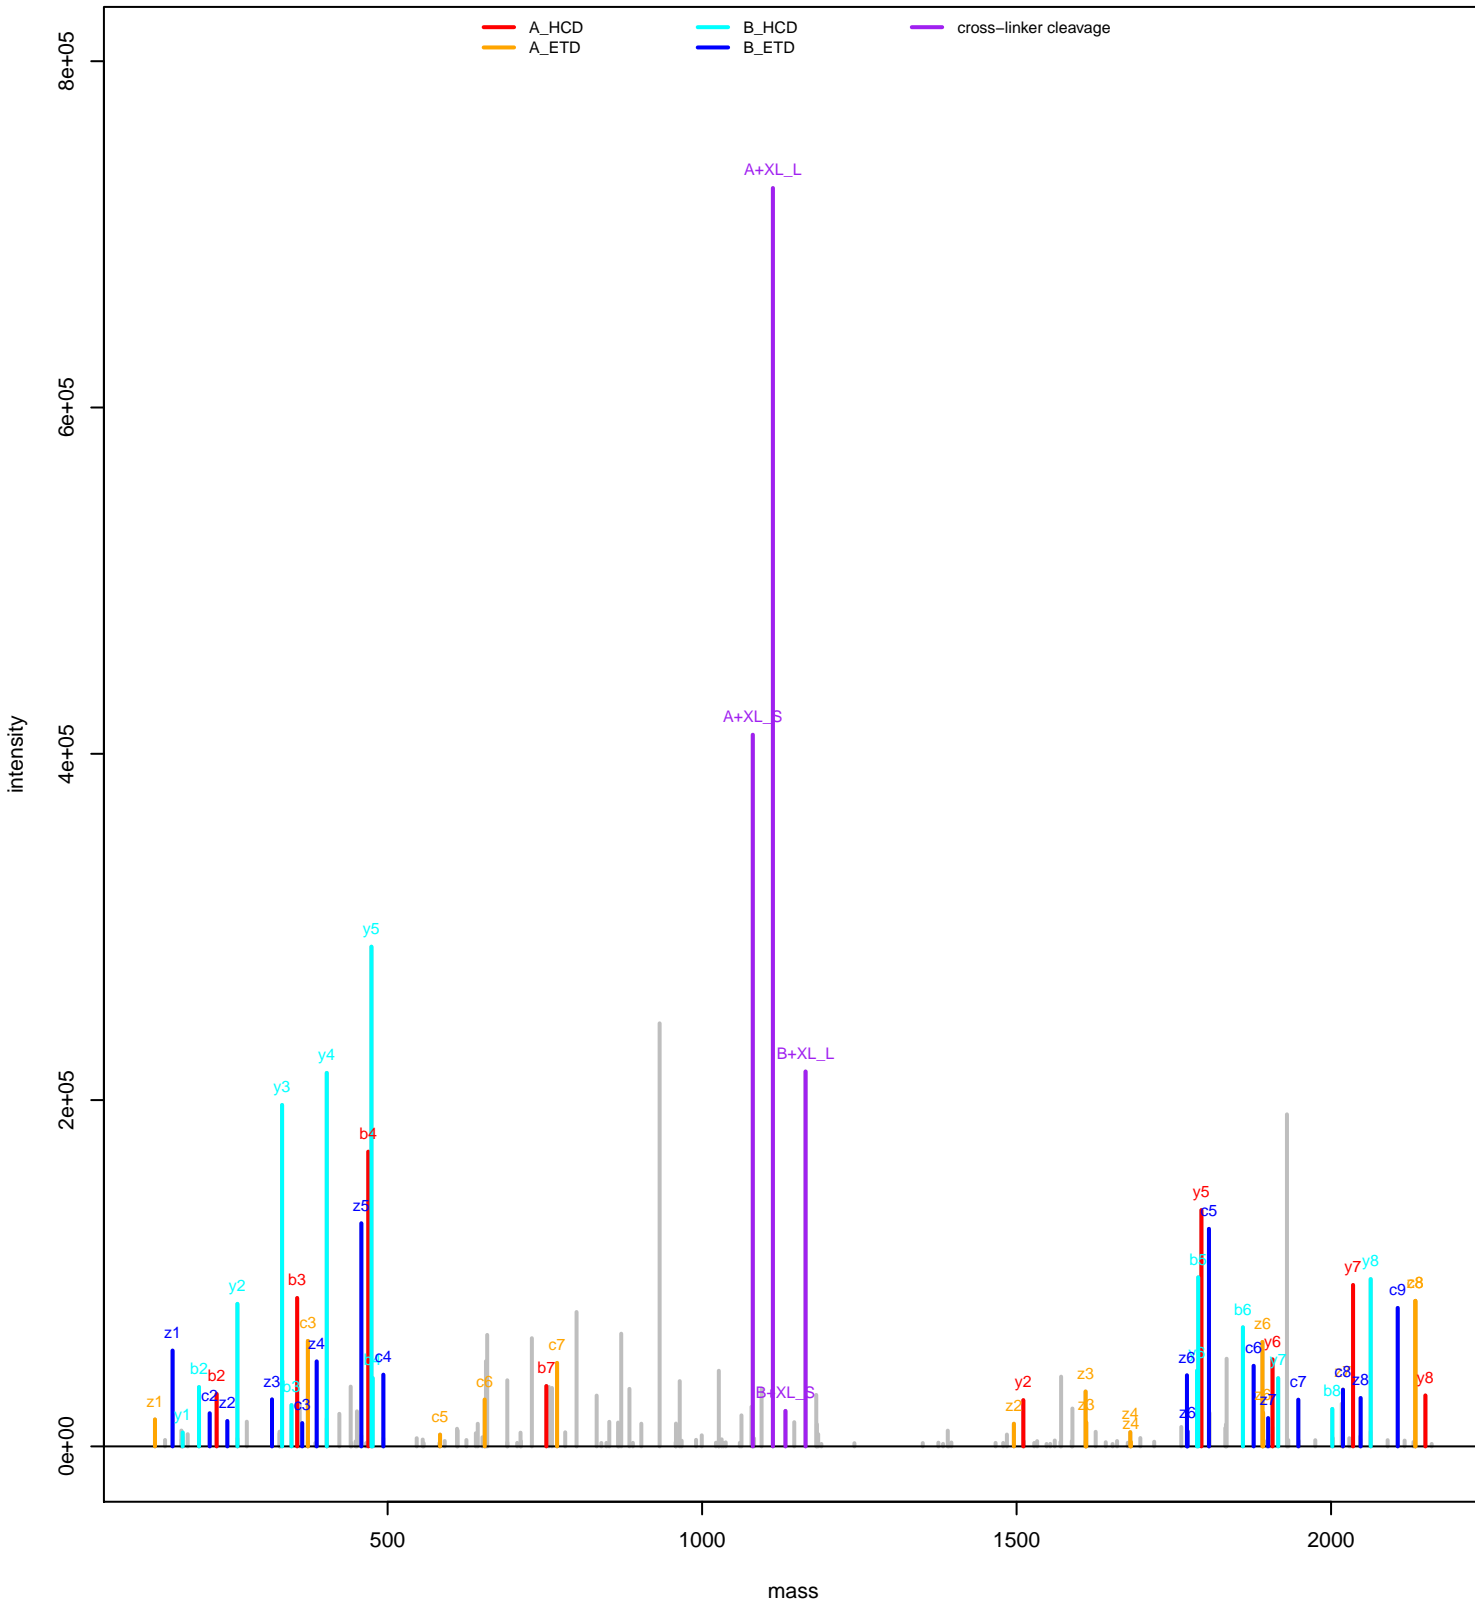

LDQLPADKK+XL\_S

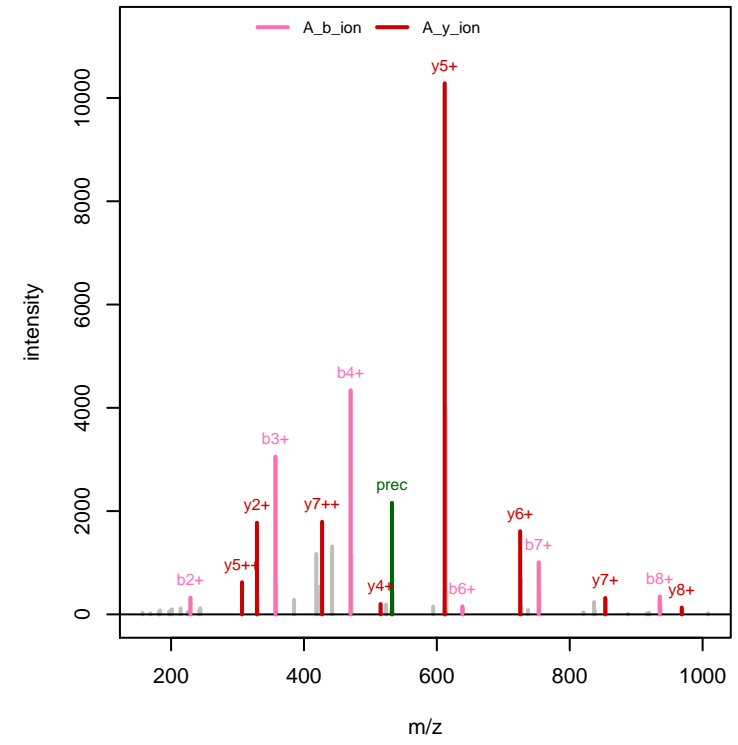

LDQLPADKK+XL\_L

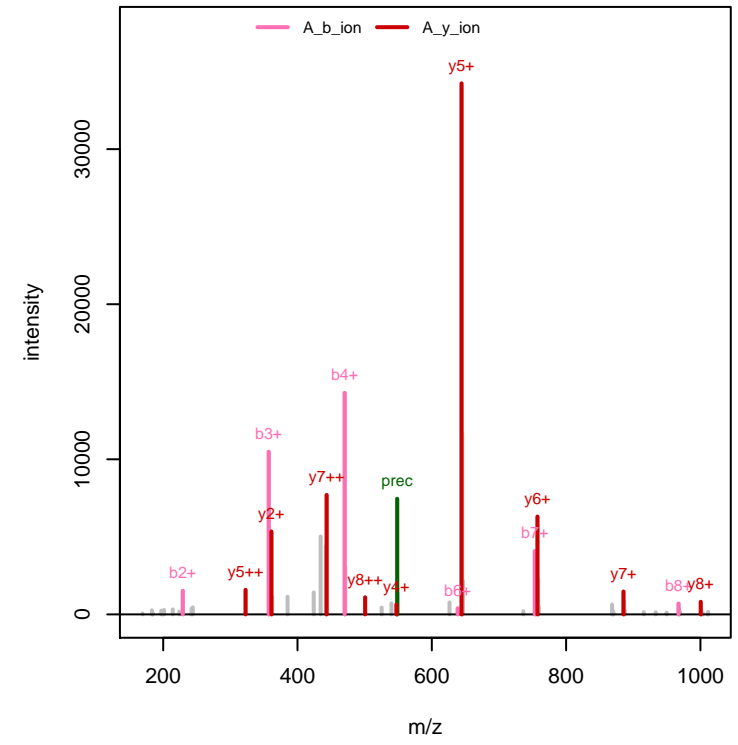

AEFEKAAASR+XL\_S

AEFEKAAASR+XL\_L

VAVIKAVR  
AAGIKSGSGKPNK

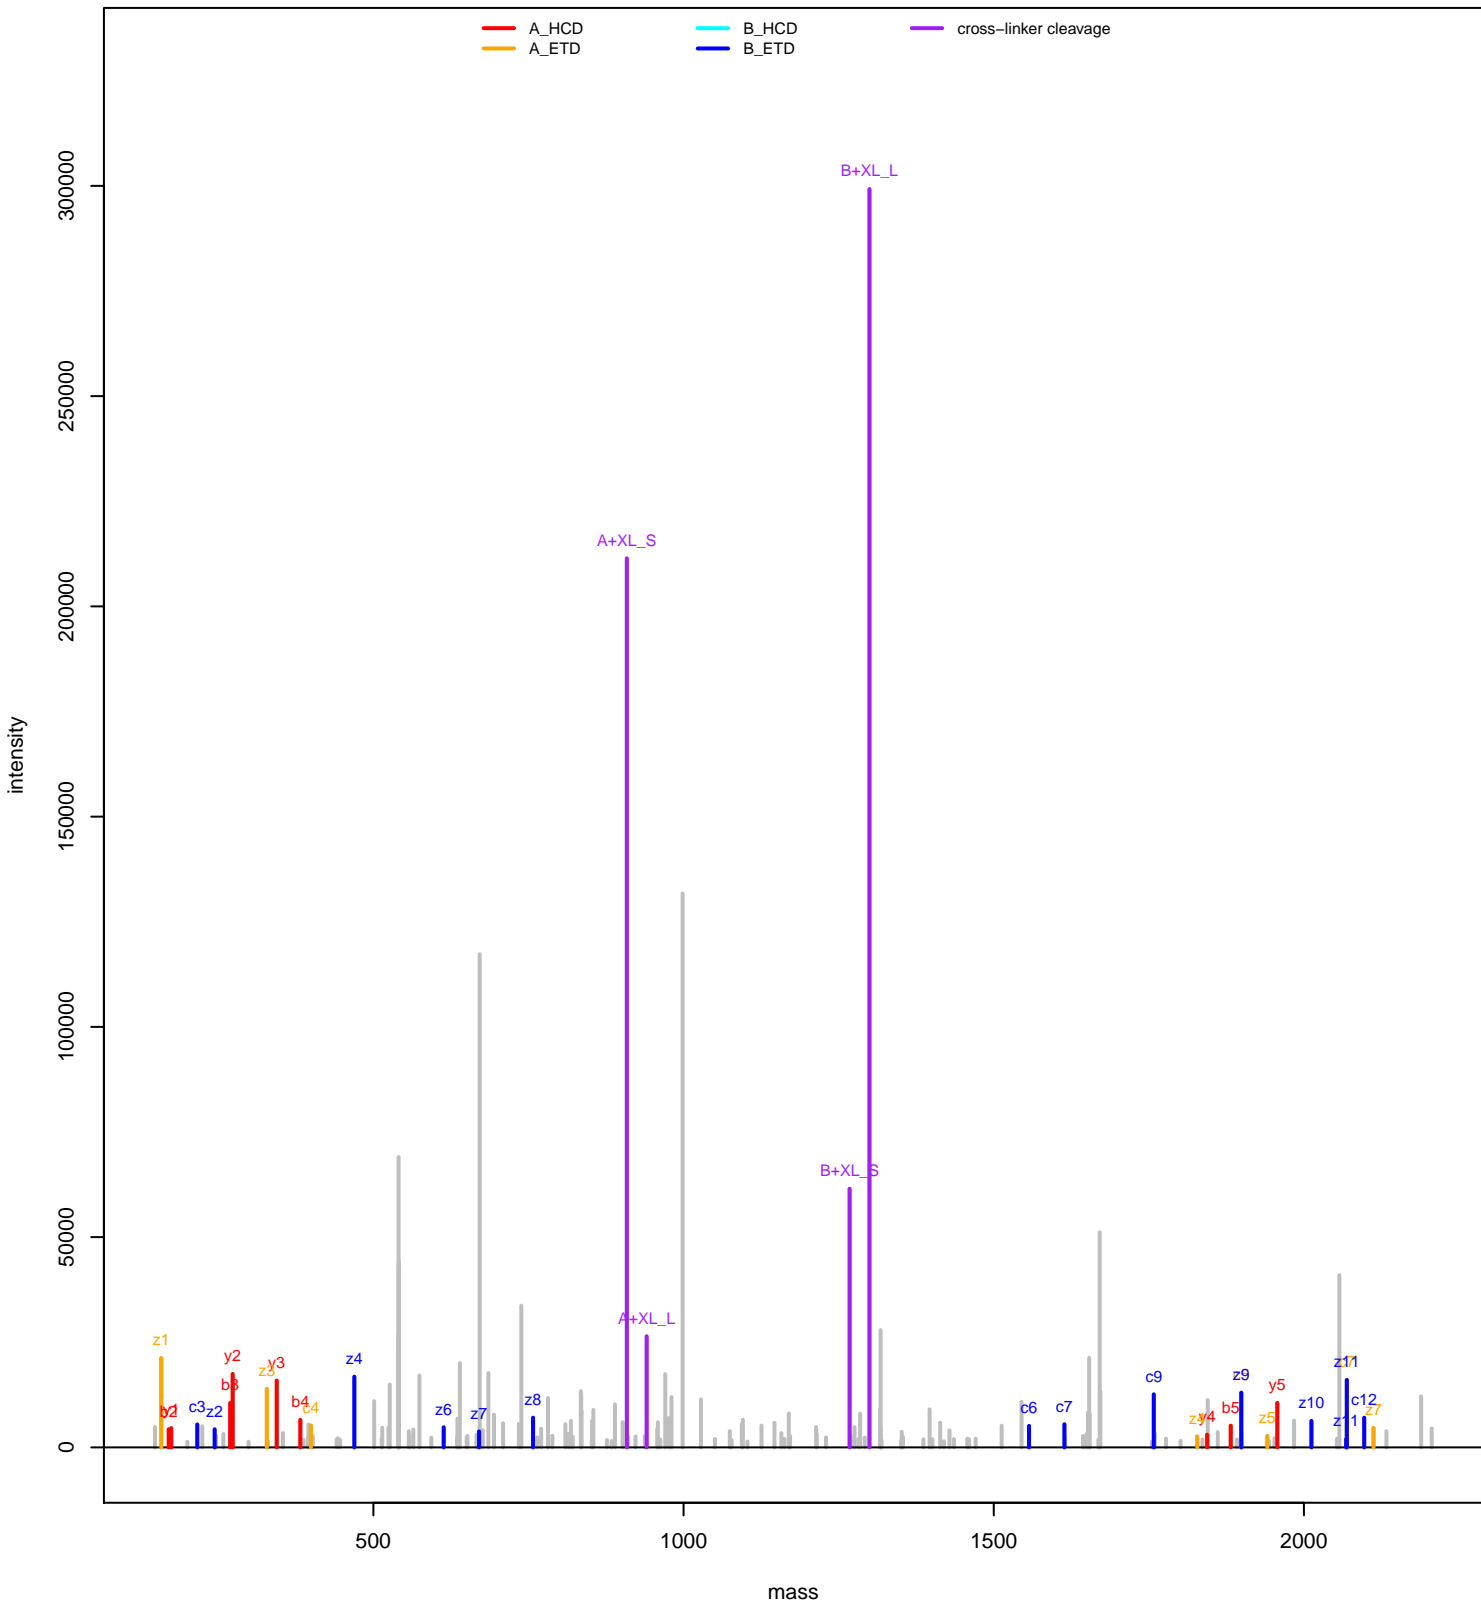

VAVIKAVR+XL\_S

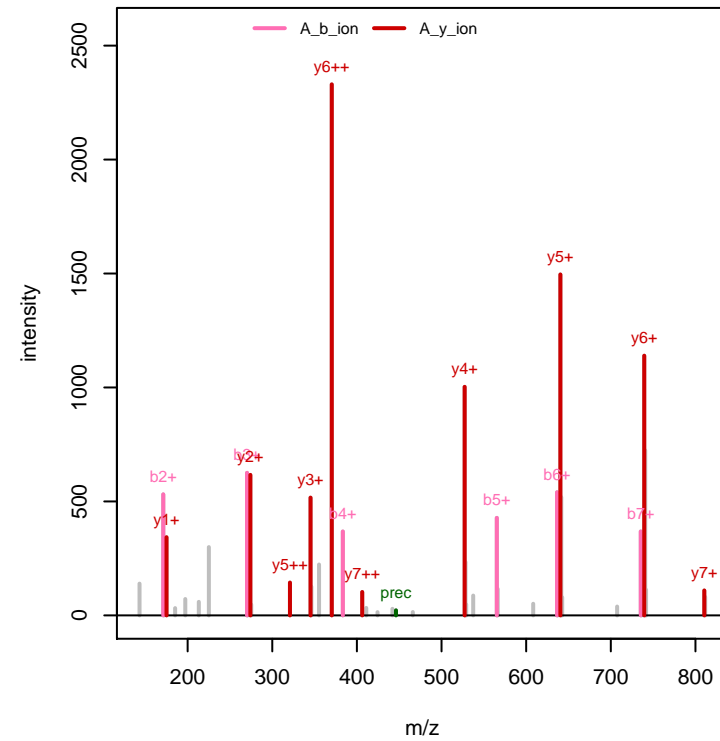

VAVIKAVR+XL\_L

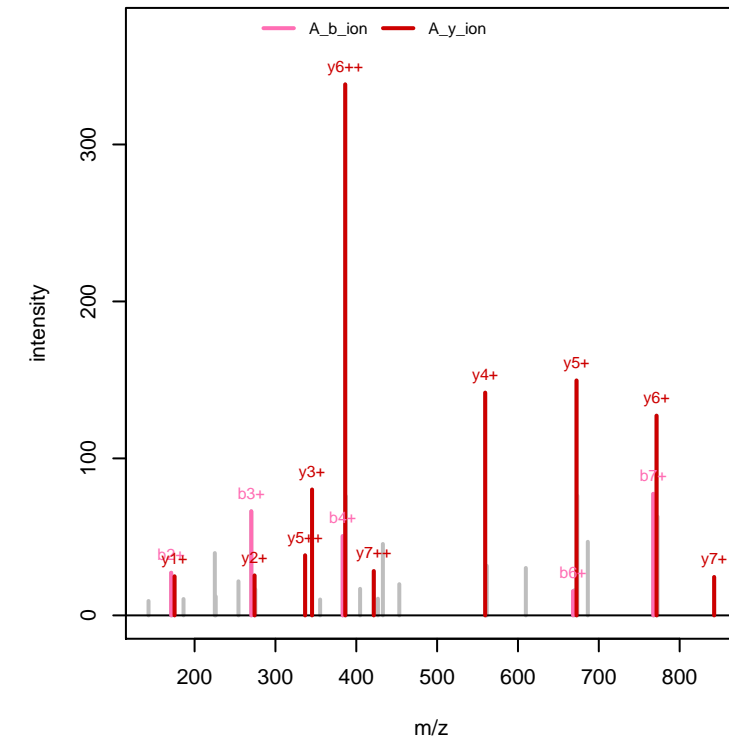

AAGIKSGSGKPNK+XL\_S

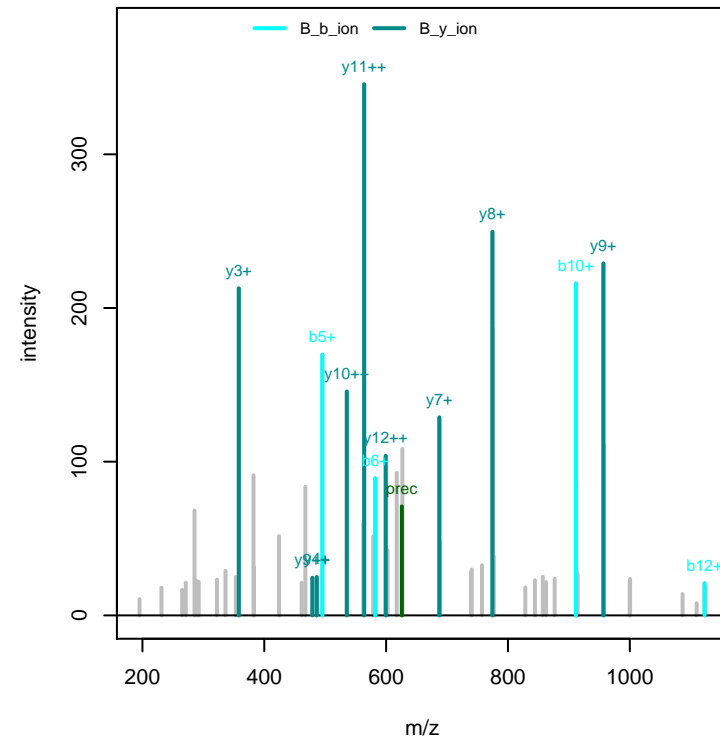

AAGIKSGSGKPNK+XL\_L

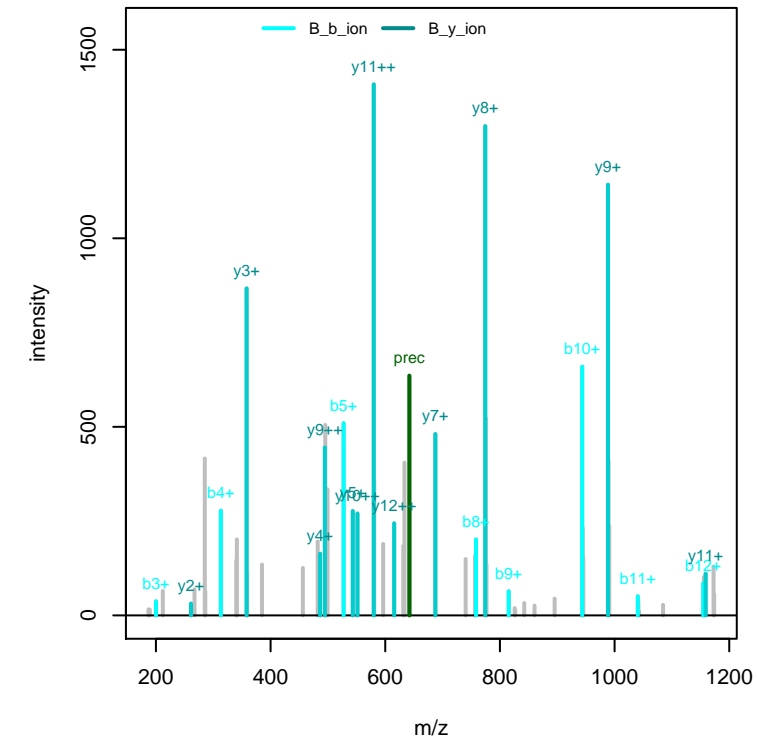

KLLDDGK  
TAIQNTGKMSTGLALDSEGK

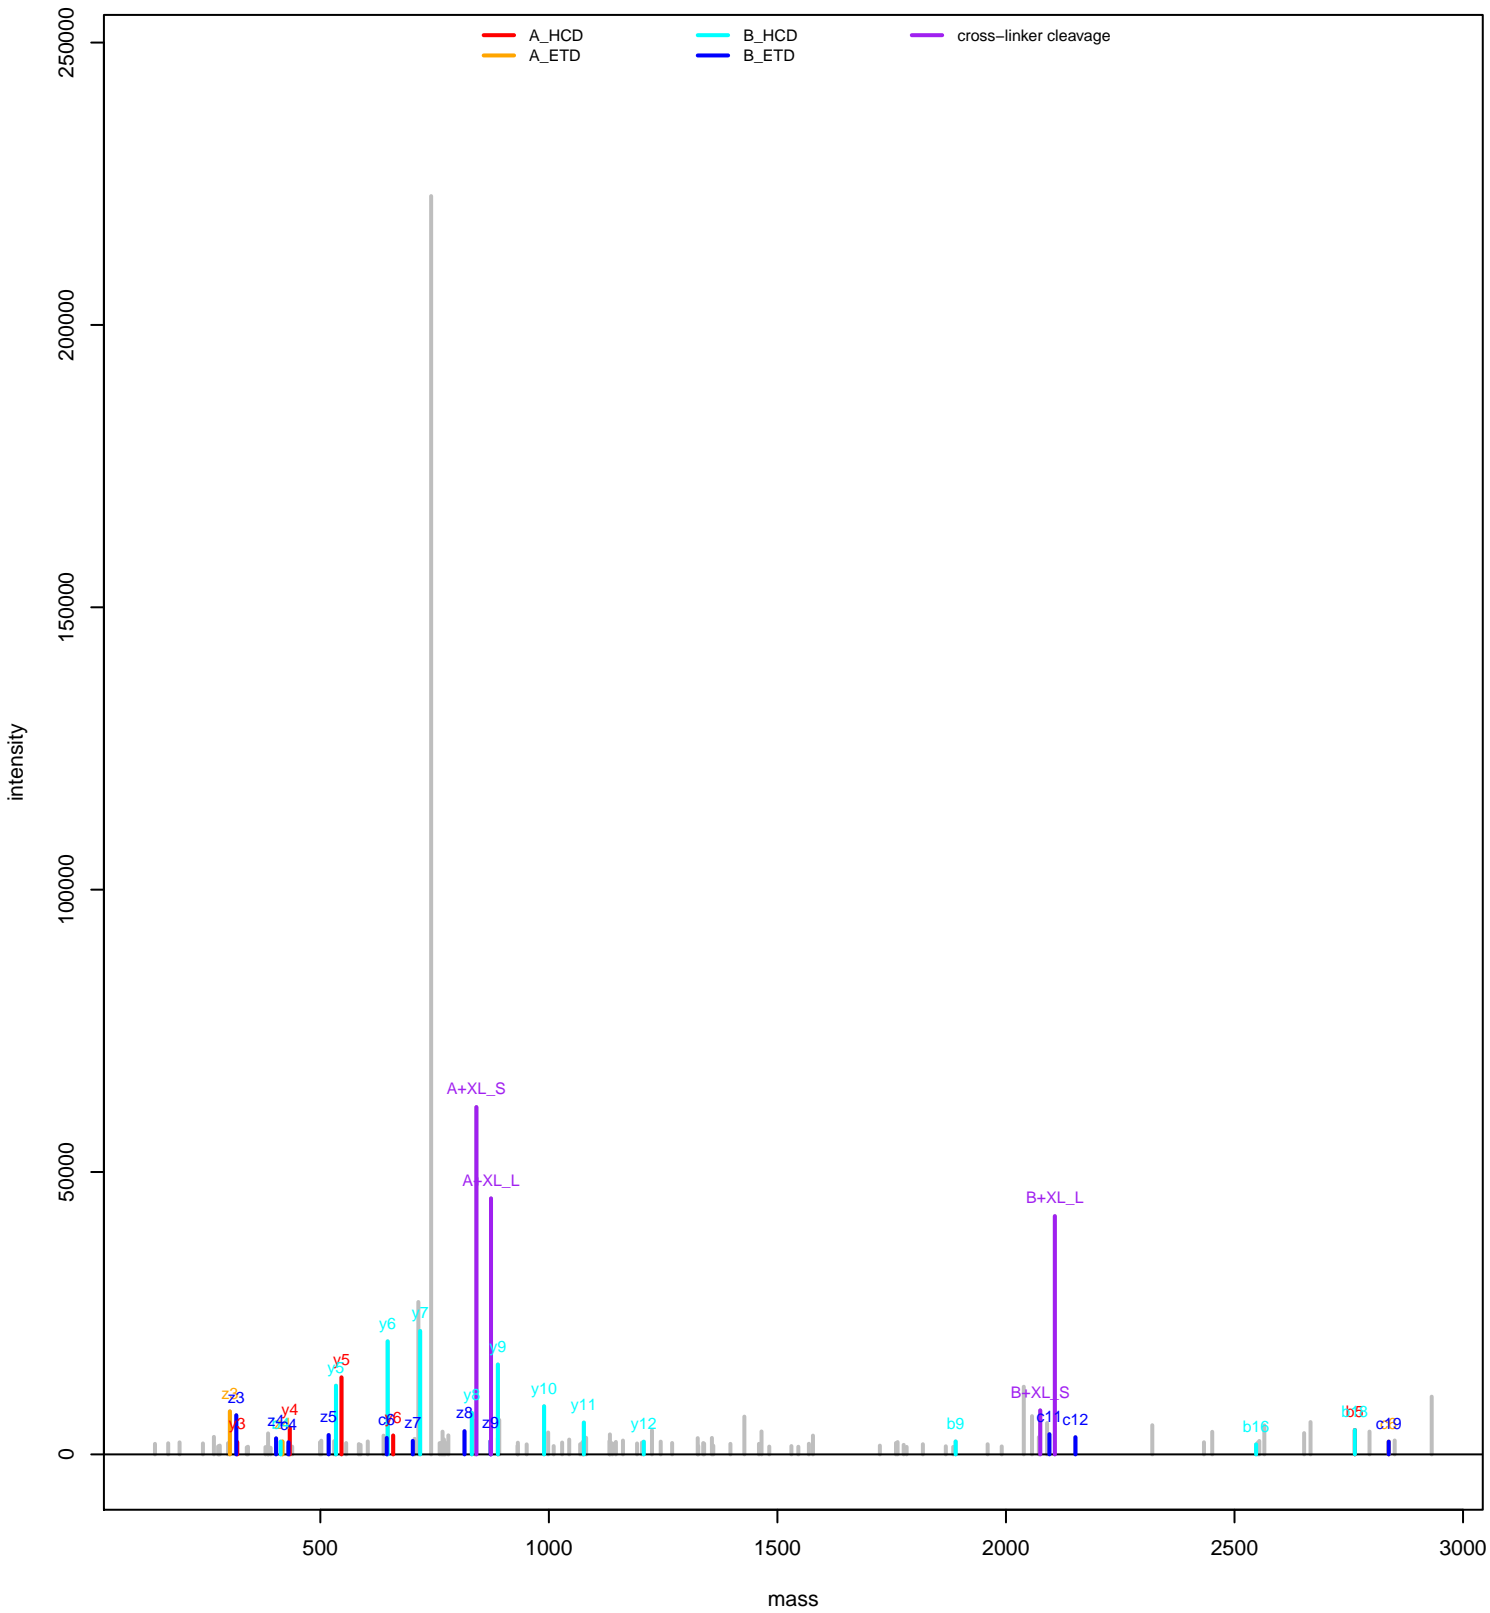

KLLDDGK+XL\_S

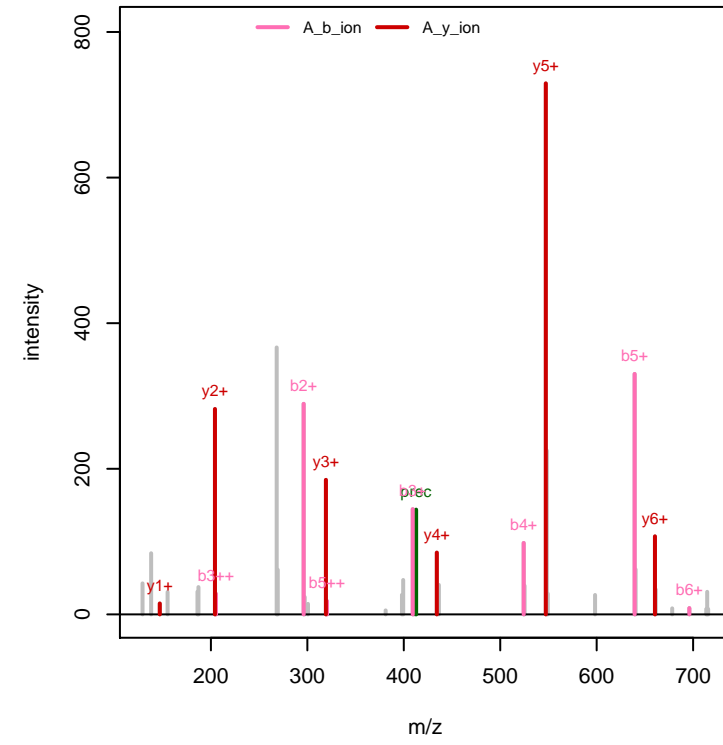

KLLDDGK+XL\_L

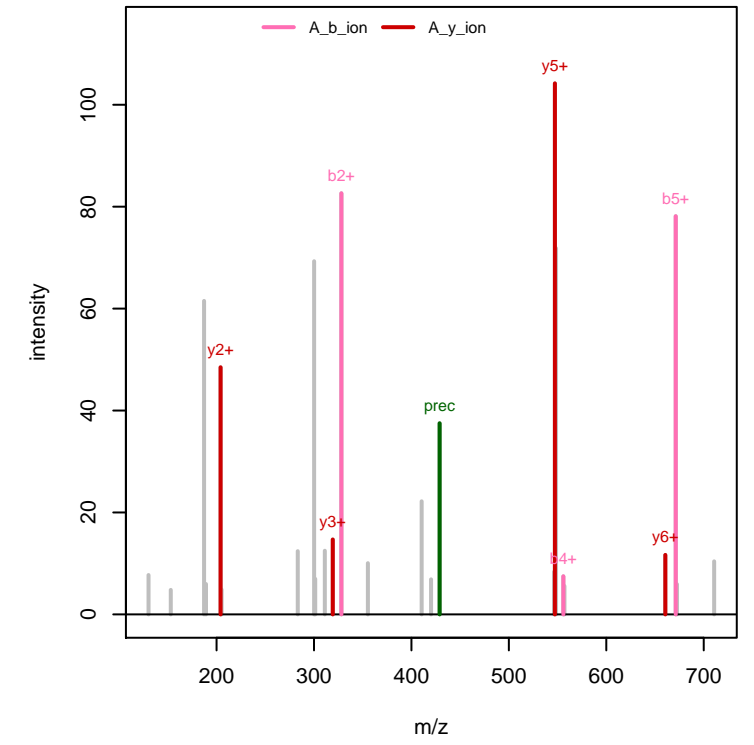

TAIQNTGKMSTGLALDSEGK+XL\_S

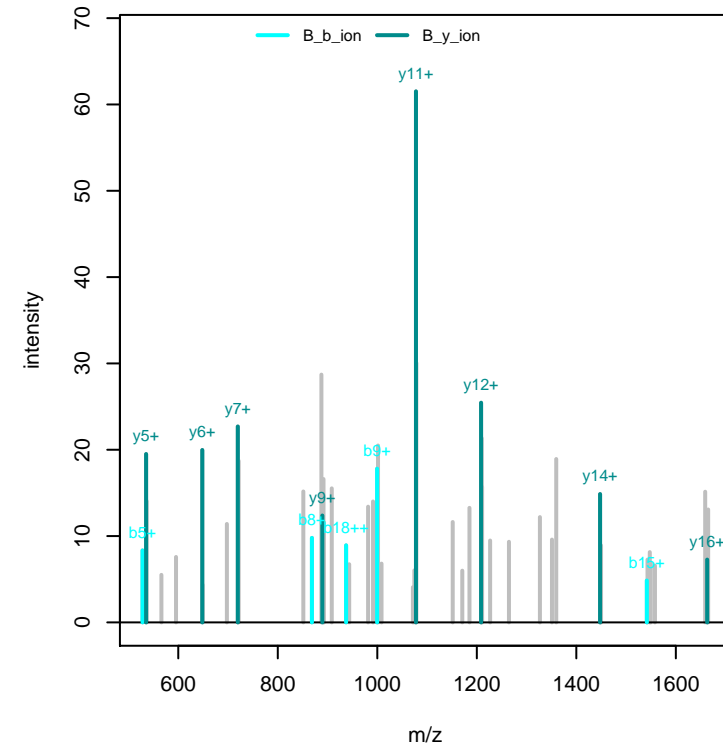

TAIQNTGKMSTGLALDSEGK+XL\_L

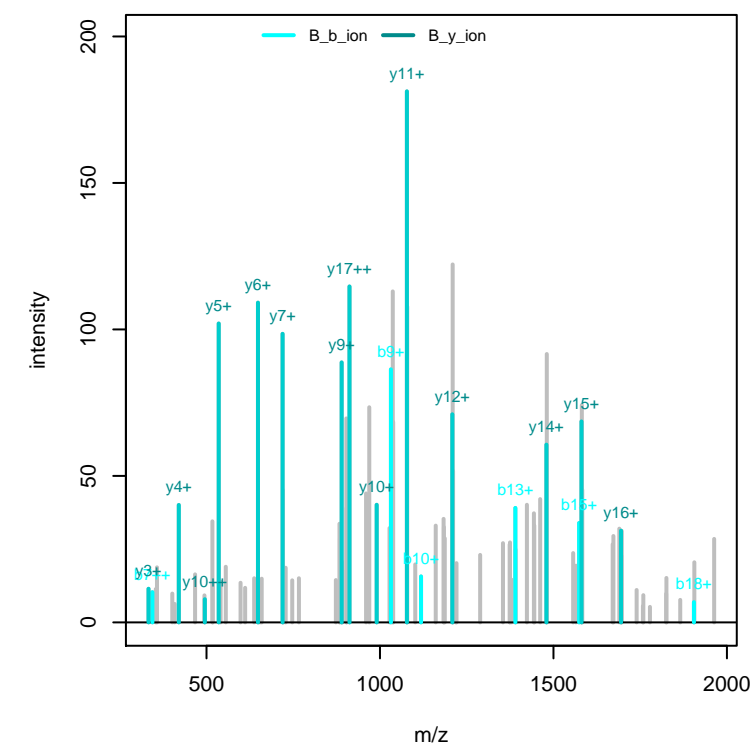

NSGKAPR  
LVHGEEGLQAAKR

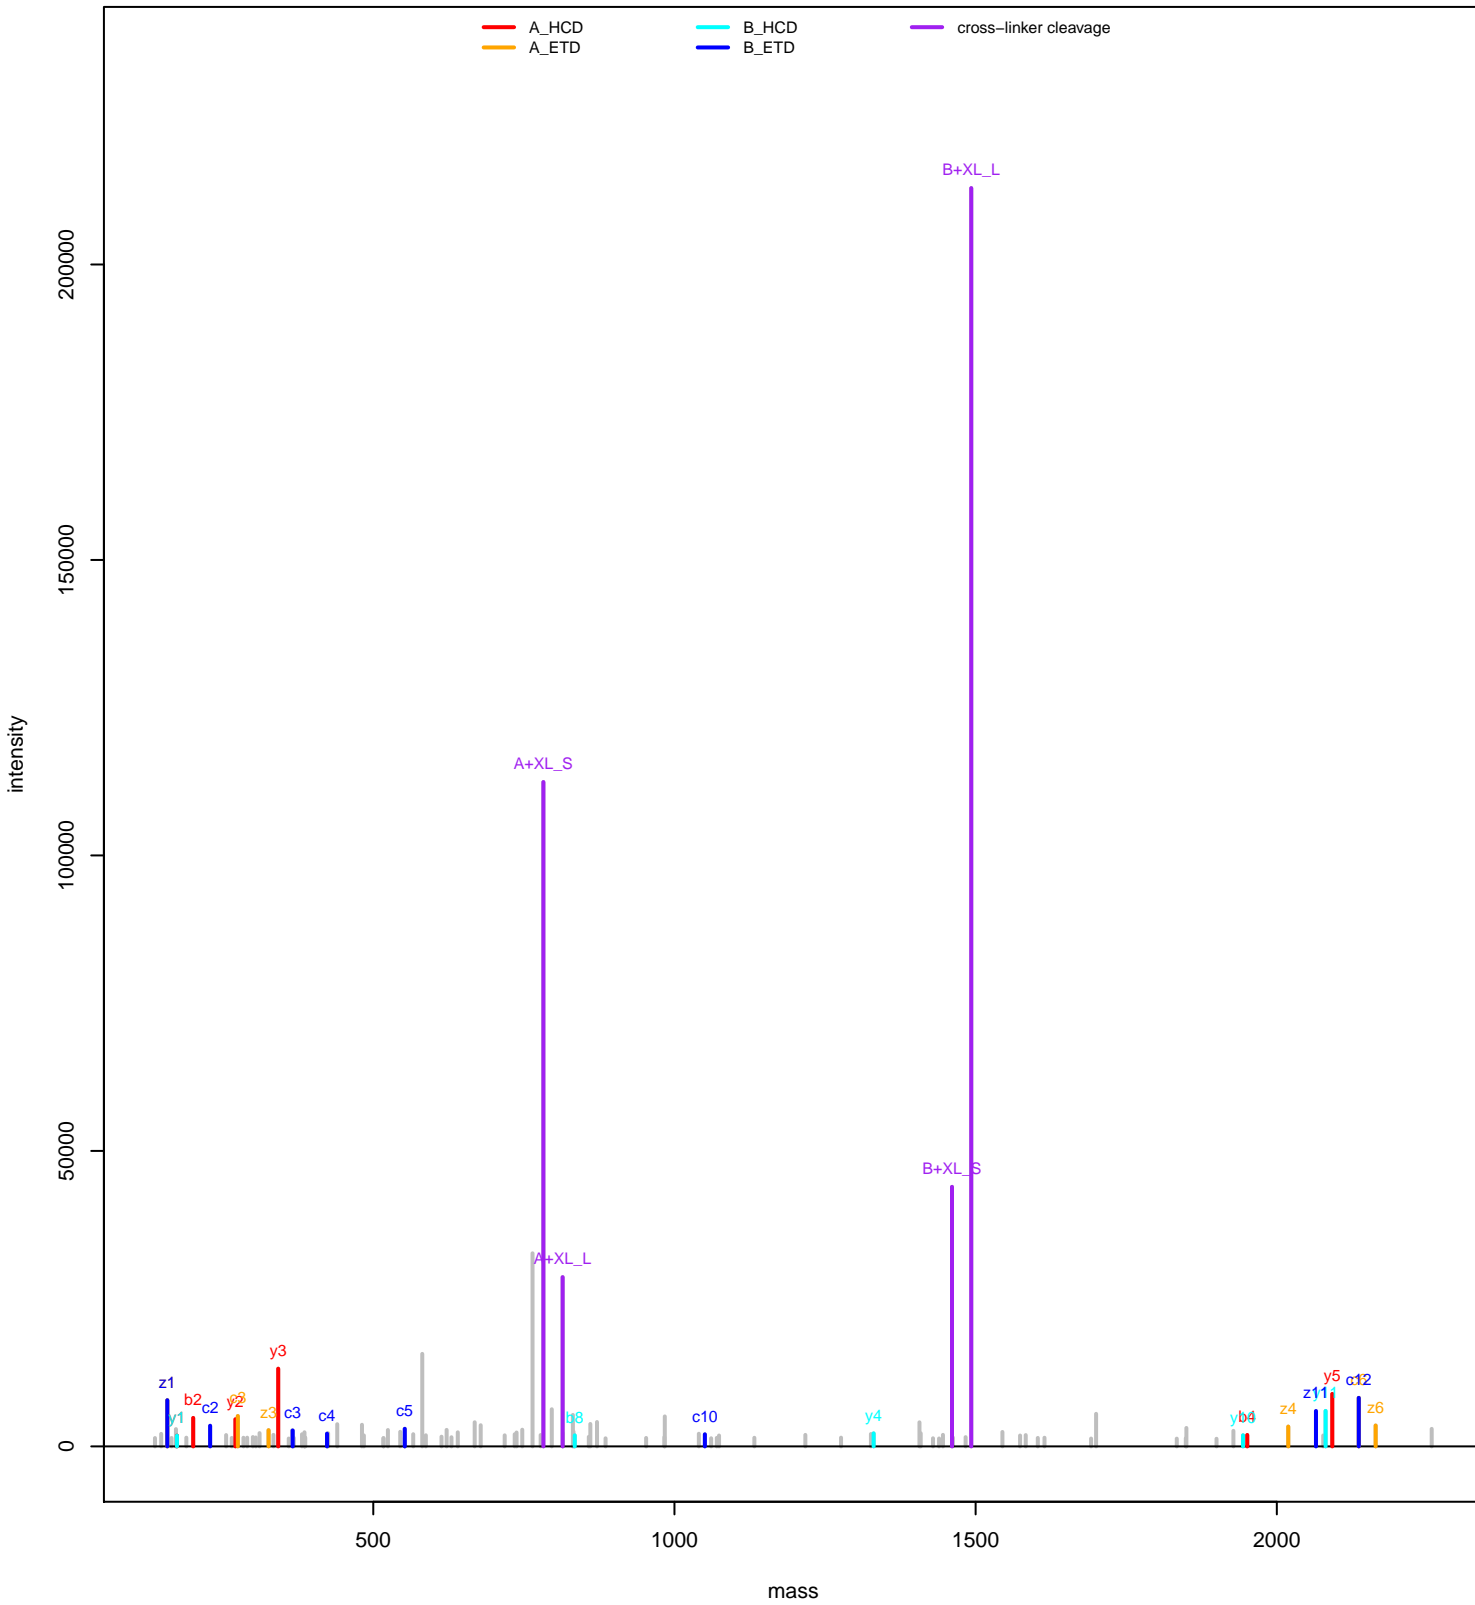

NSGKAPR+XL\_S

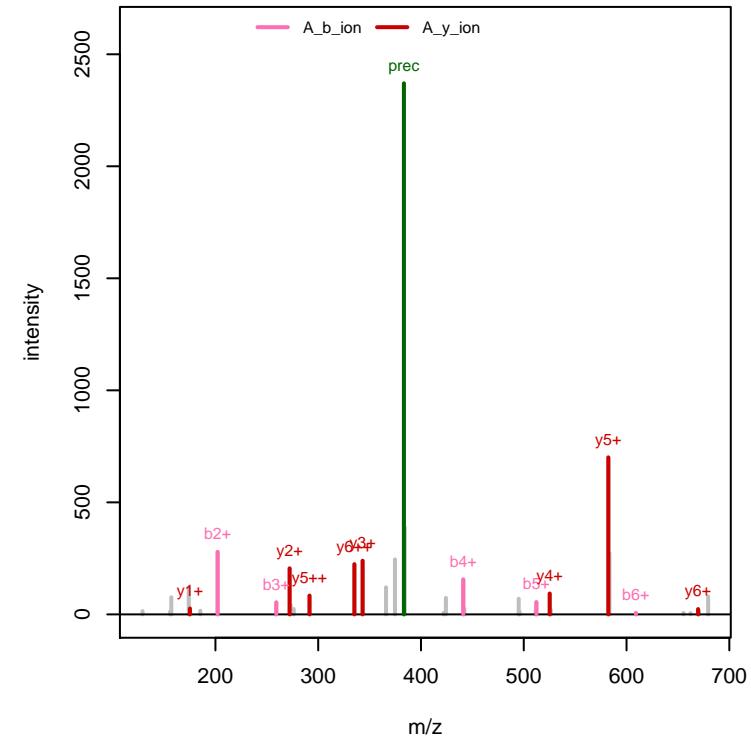

NSGKAPR+XL\_L

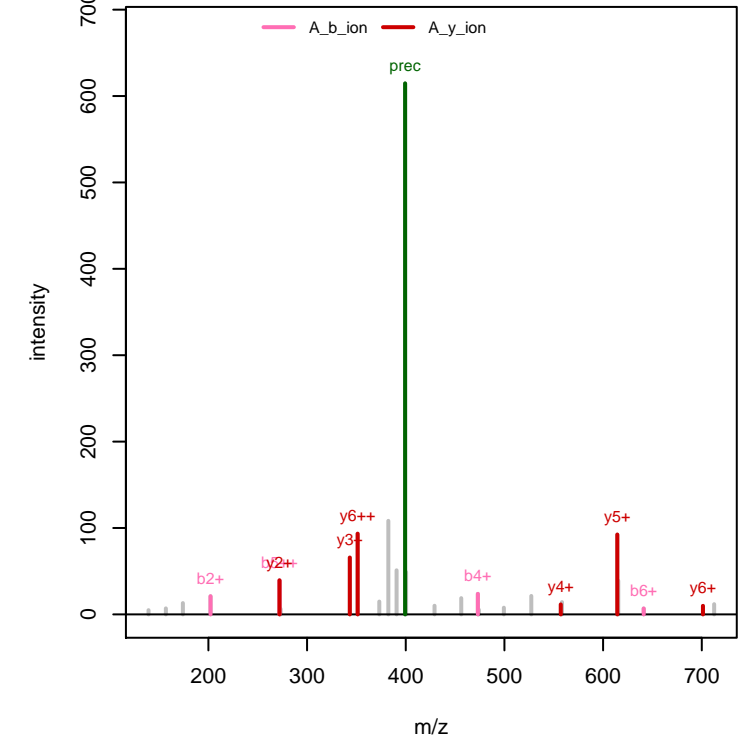

LVHGEEGLQAAKR+XL\_S

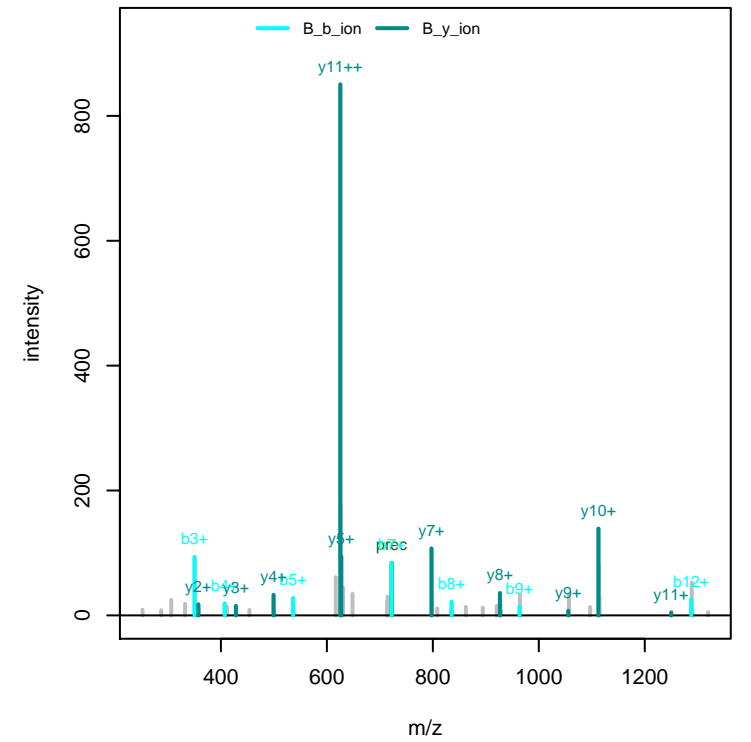

LVHGEEGLQAAKR+XL\_L

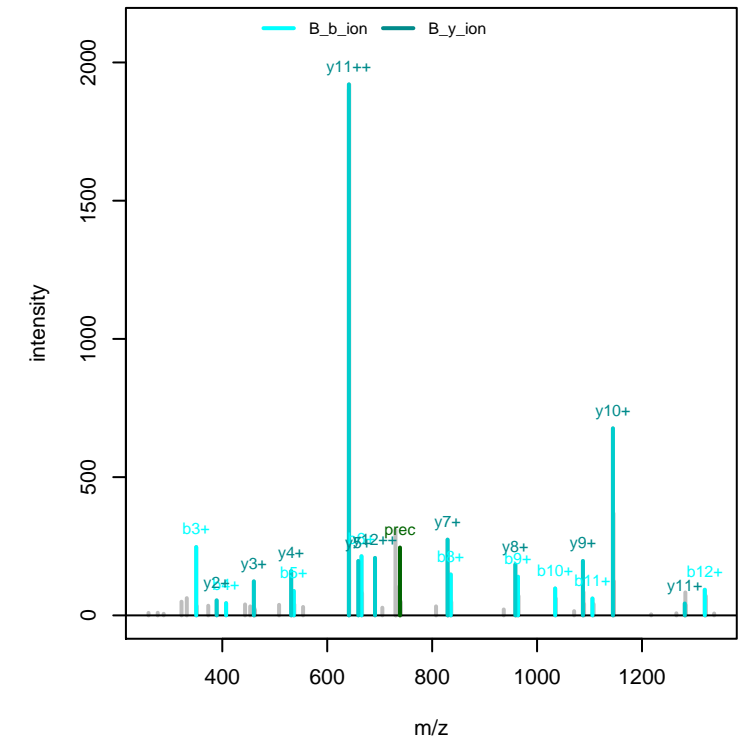

KTYMSDCLK  
SAPGEKSLTPQQQK

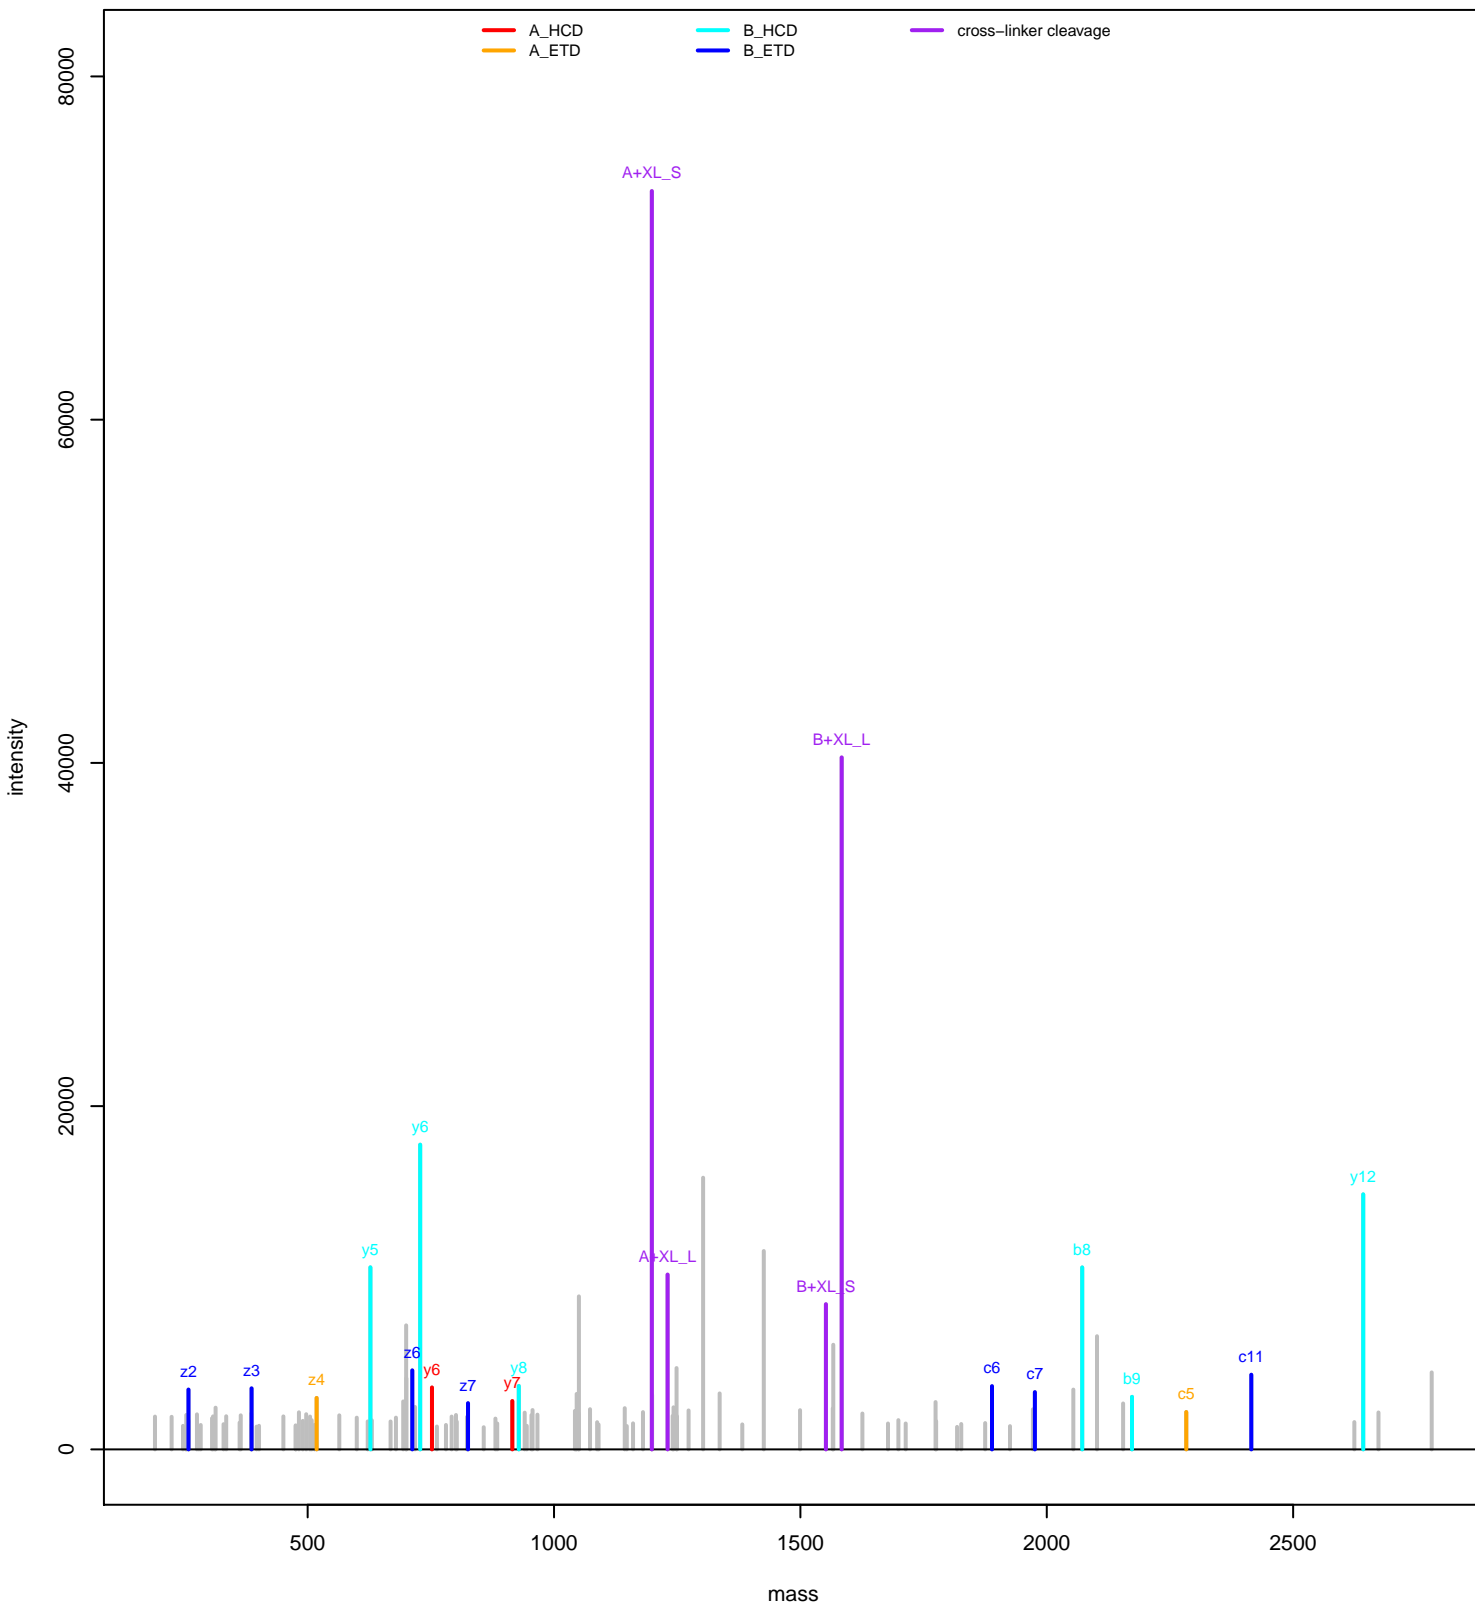

KTYMSDCLK+XL\_S

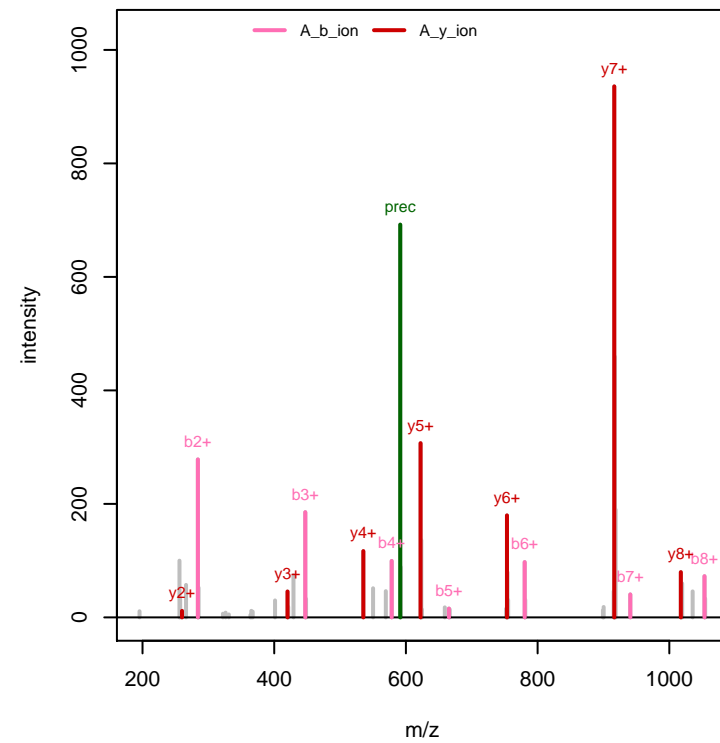

KTYMSDCLK+XL\_L

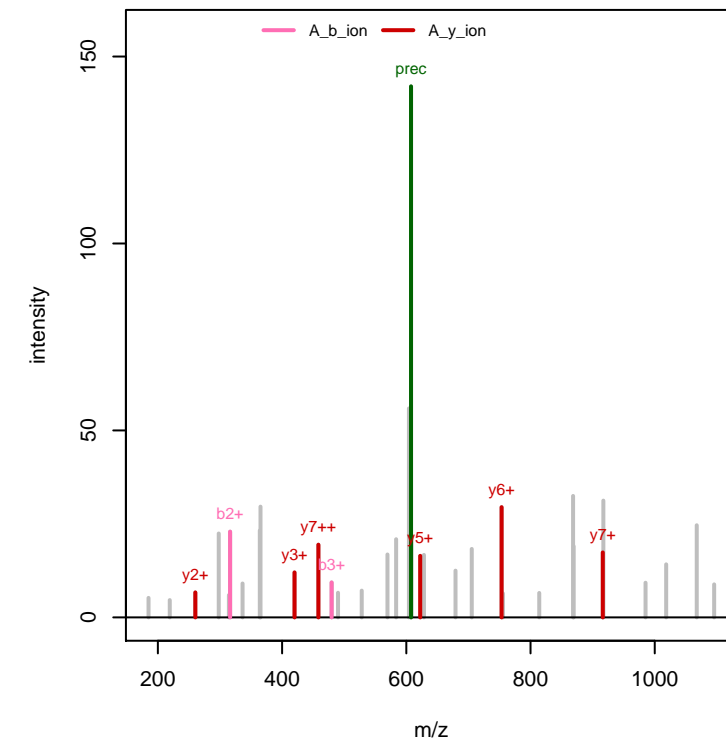

SAPGEKSLTPQQQK+XL\_S

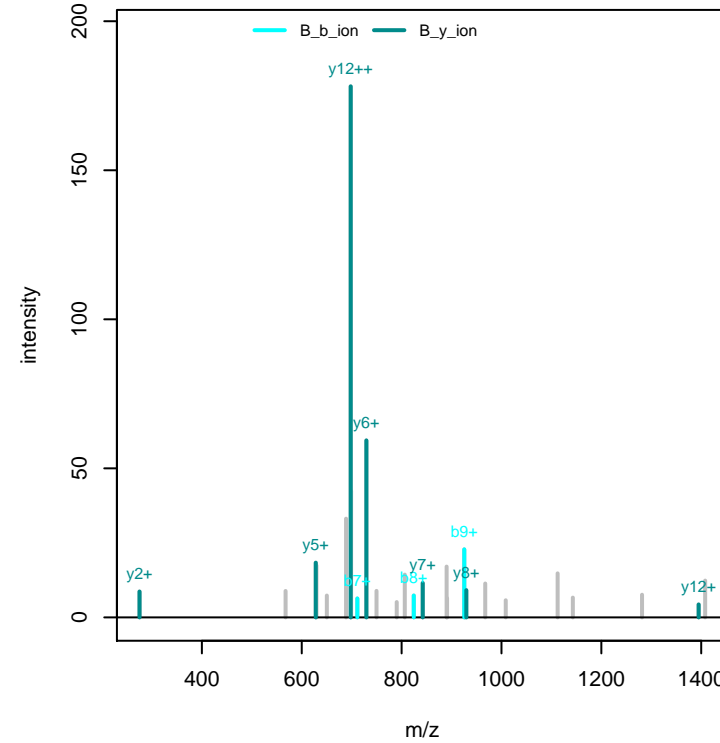

SAPGEKSLTPQQQK+XL\_L

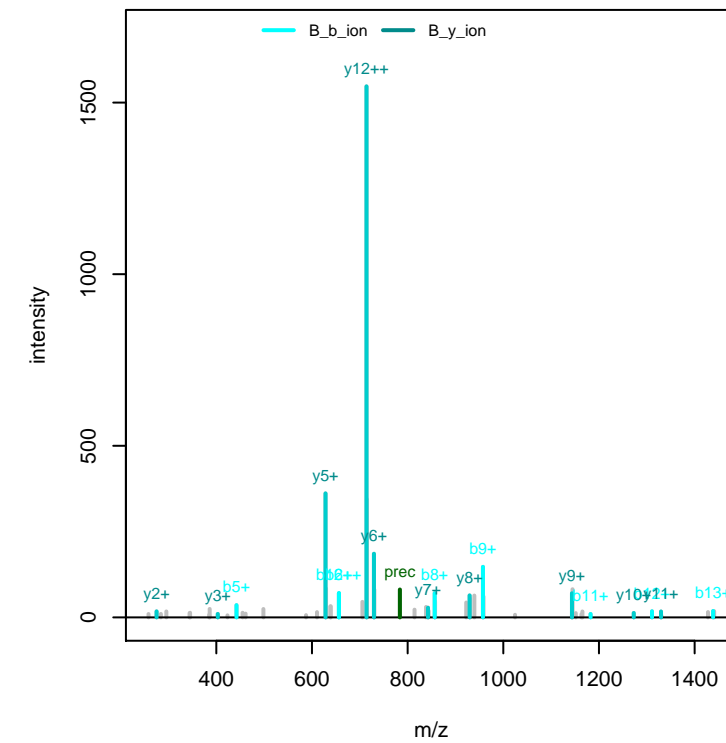

TVKGGR  
AHIEKQAGELQEK

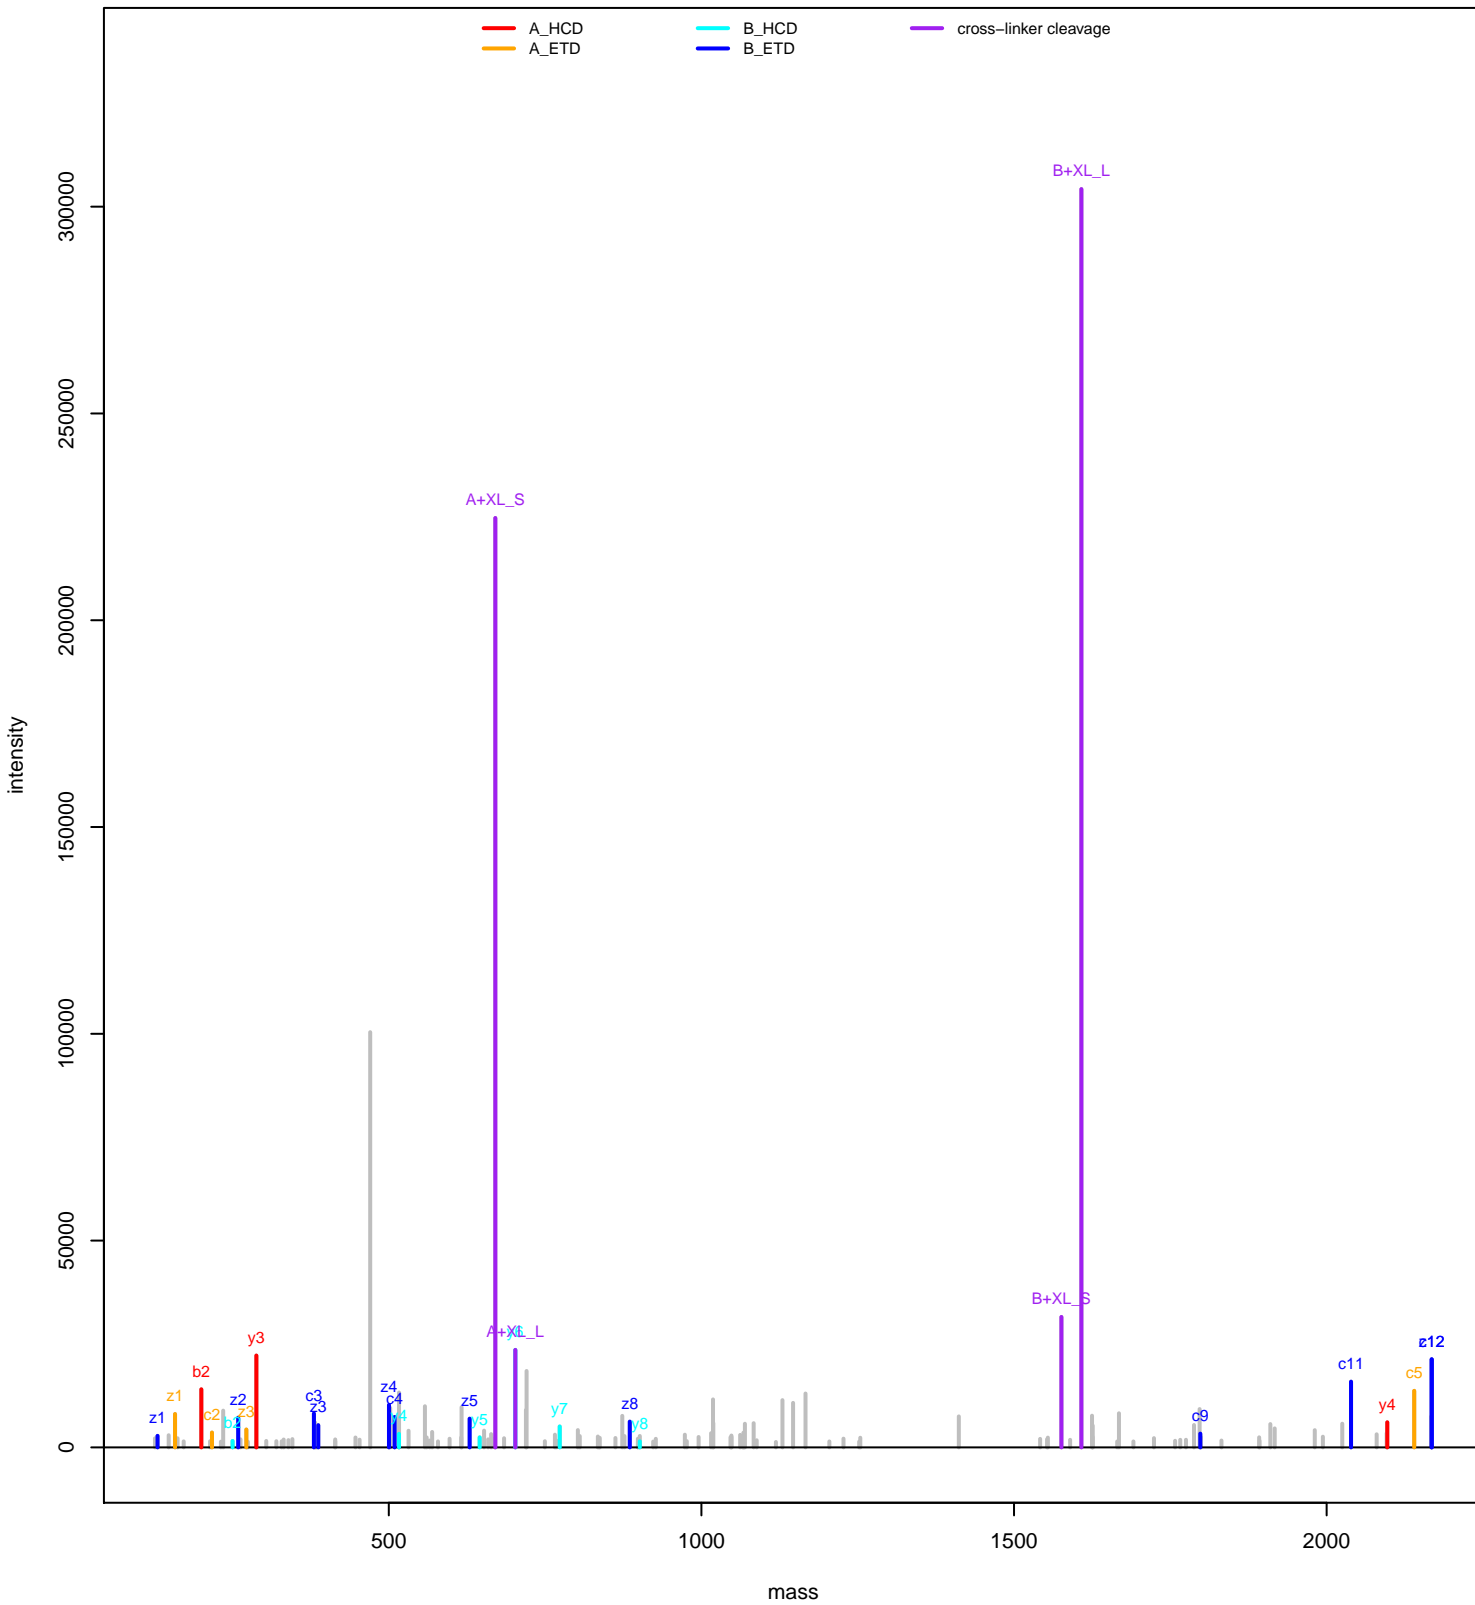

TVKGGR+XL\_S

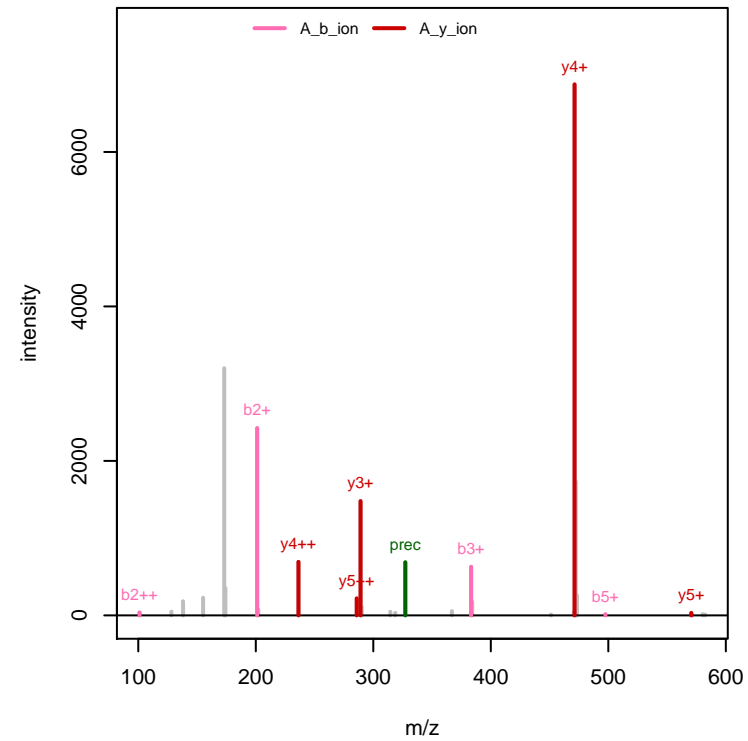

TVKGGR+XL\_L

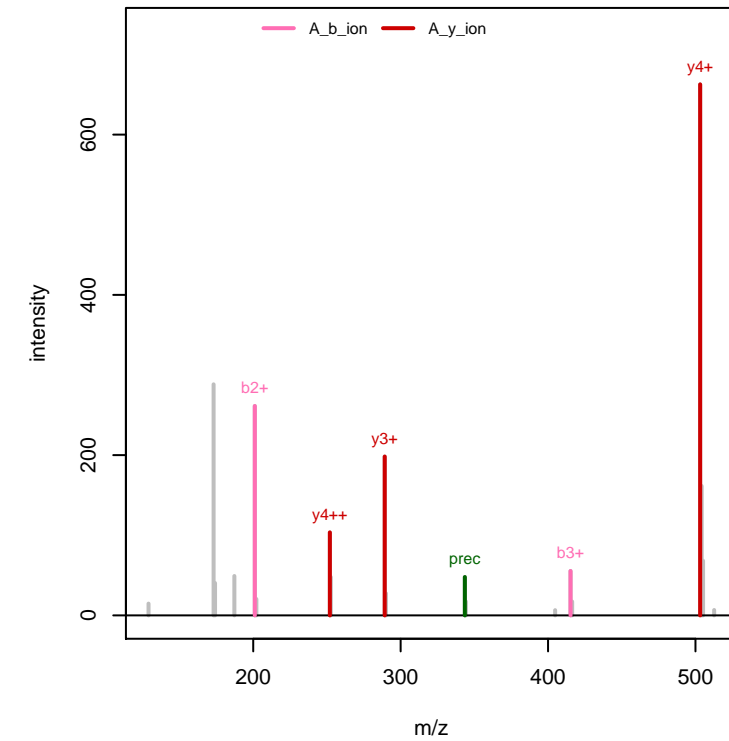

AHIEKQAGELQEK+XL\_S

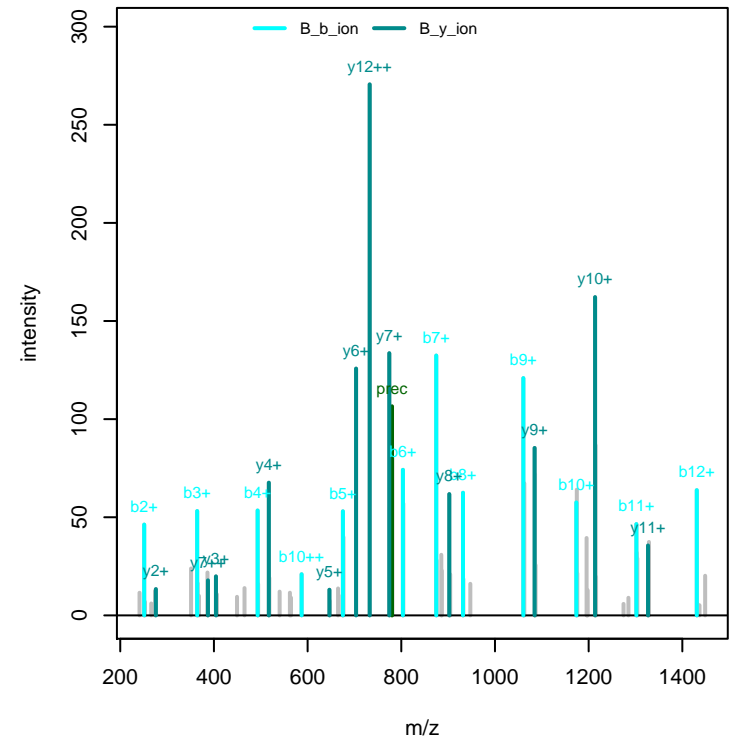

AHIEKQAGELQEK+XL\_L

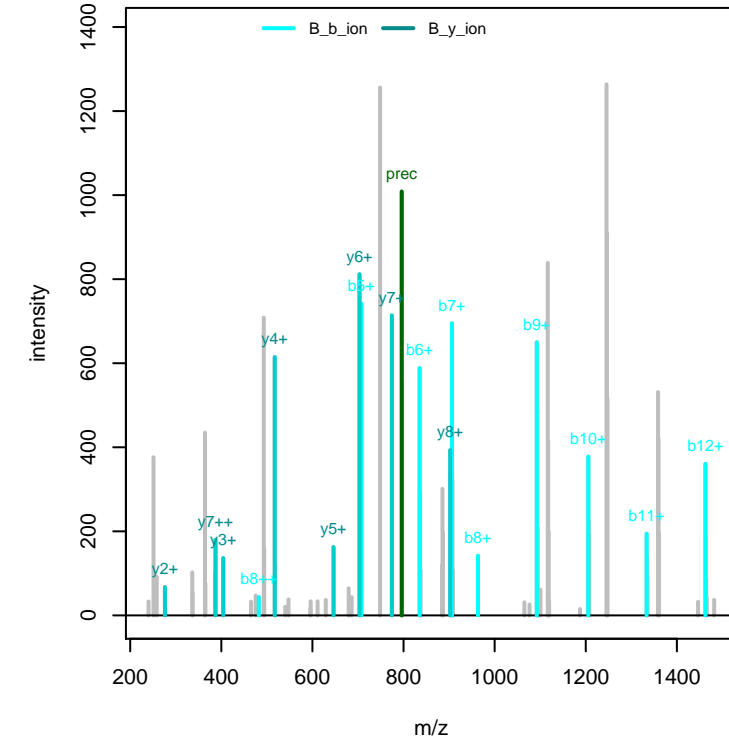

**LGIKLDK  
SSAQKMEK**

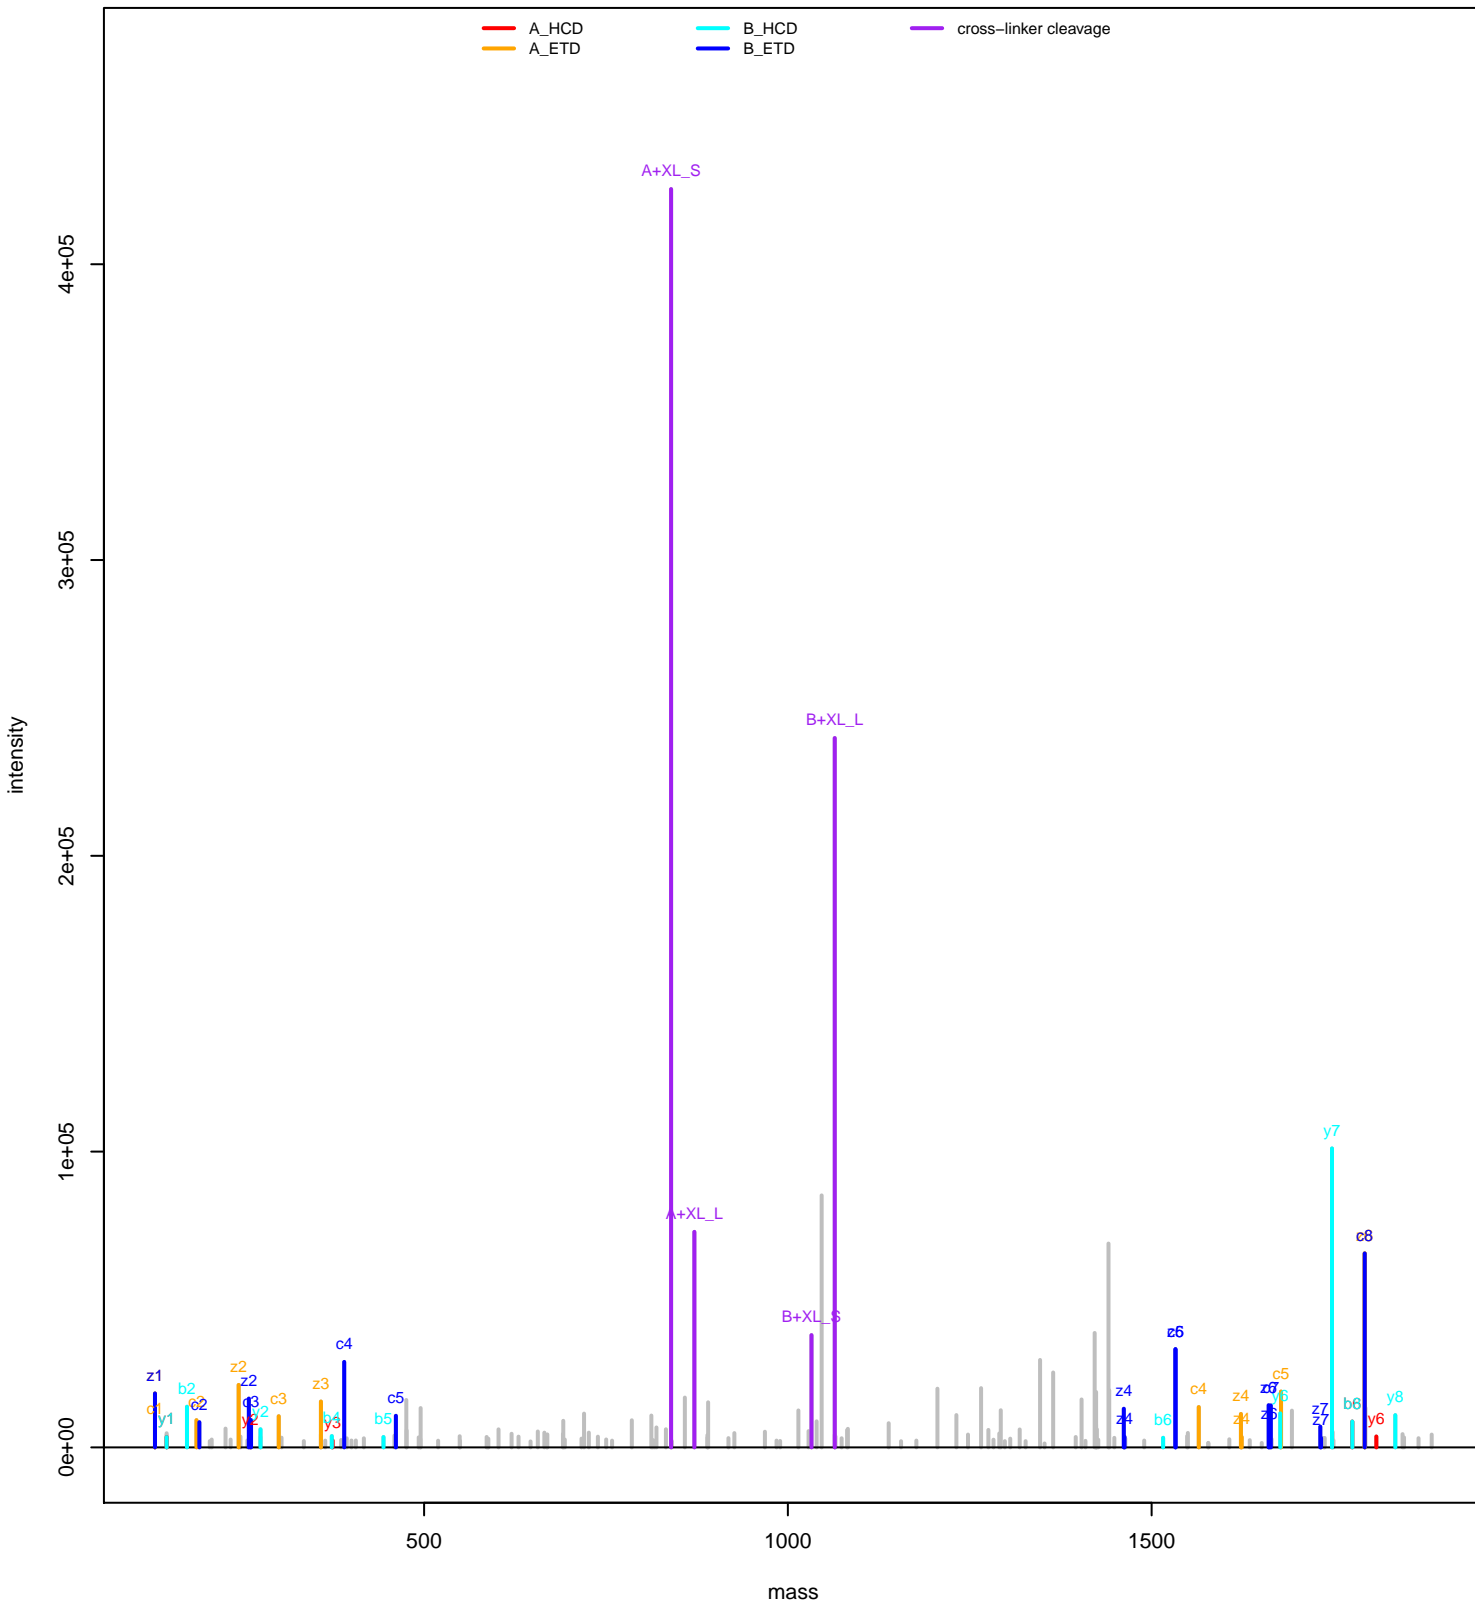

**LGIKLDK+XL\_S**

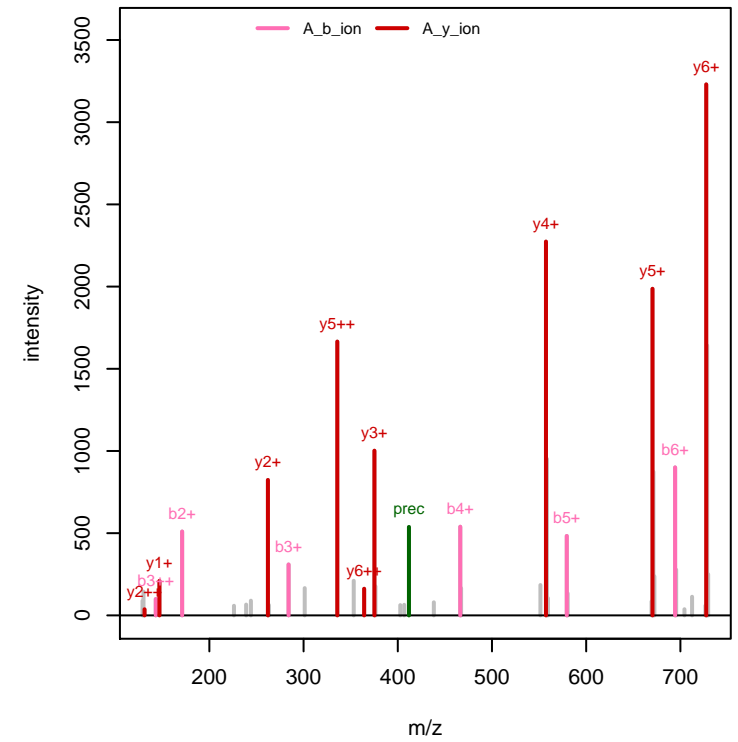

**LGIKLDK+XL\_L**

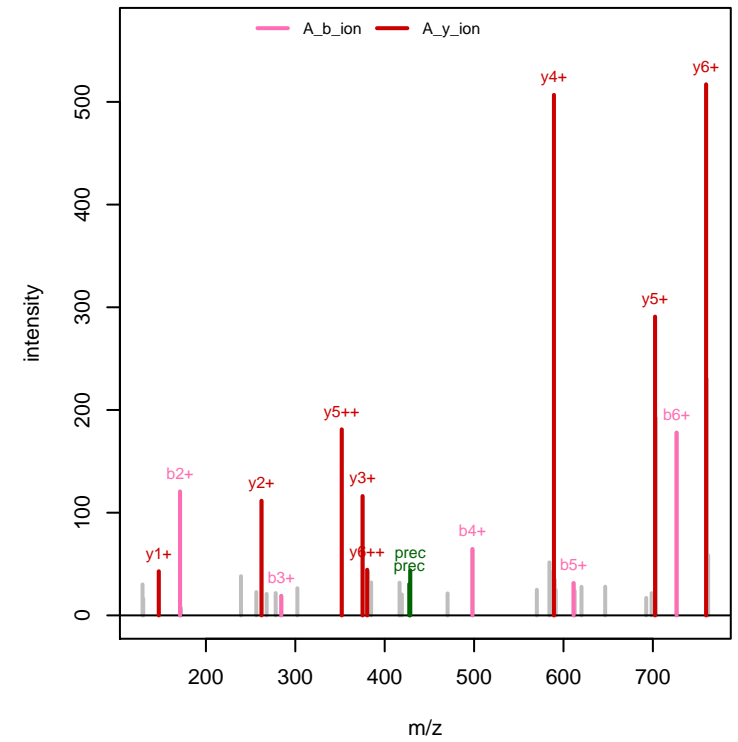

**SSAQKMEK+XL\_S**

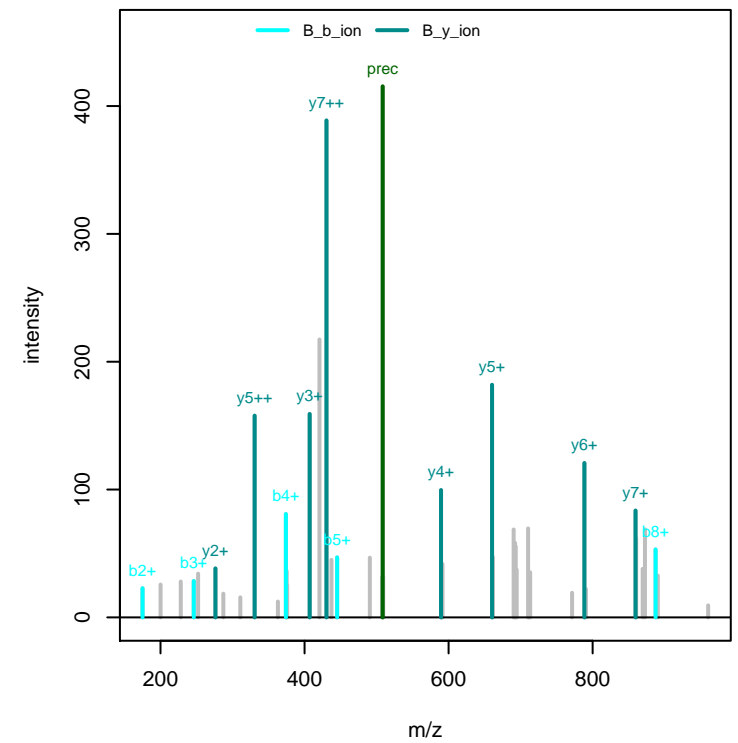

**SSAQKMEK+XL\_L**

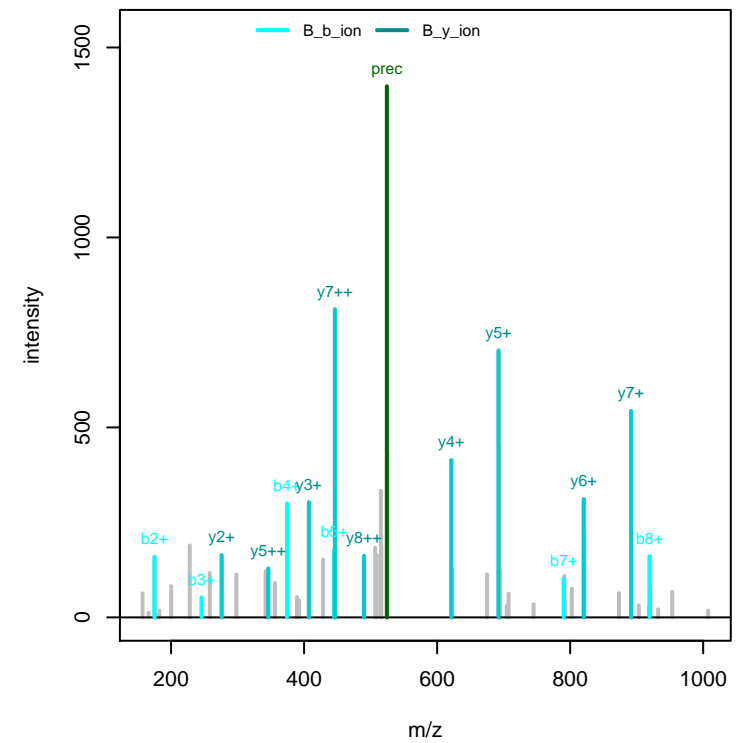

EFAKANAK  
EGVSKDDAEALK

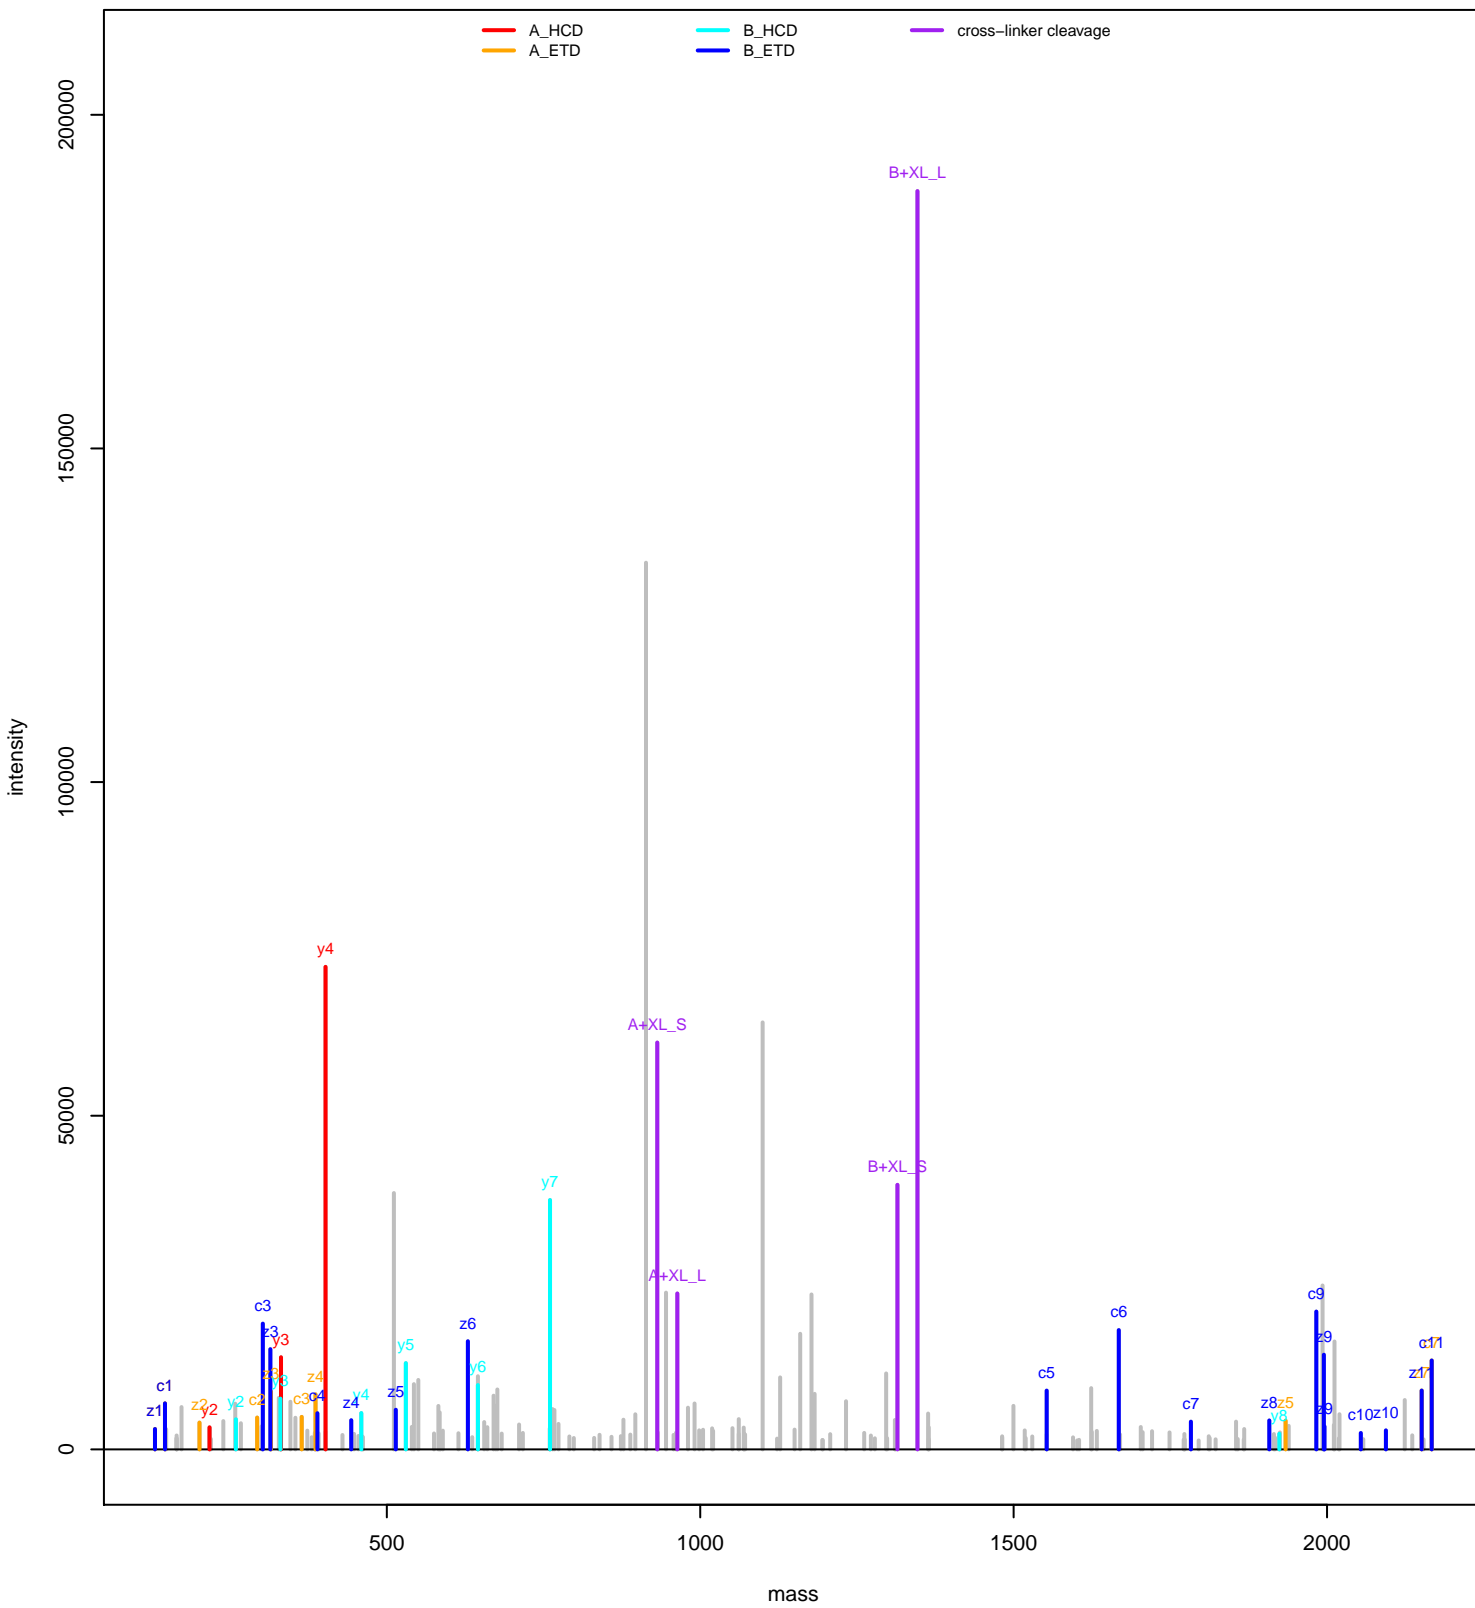

EFAKANAK+XL\_S

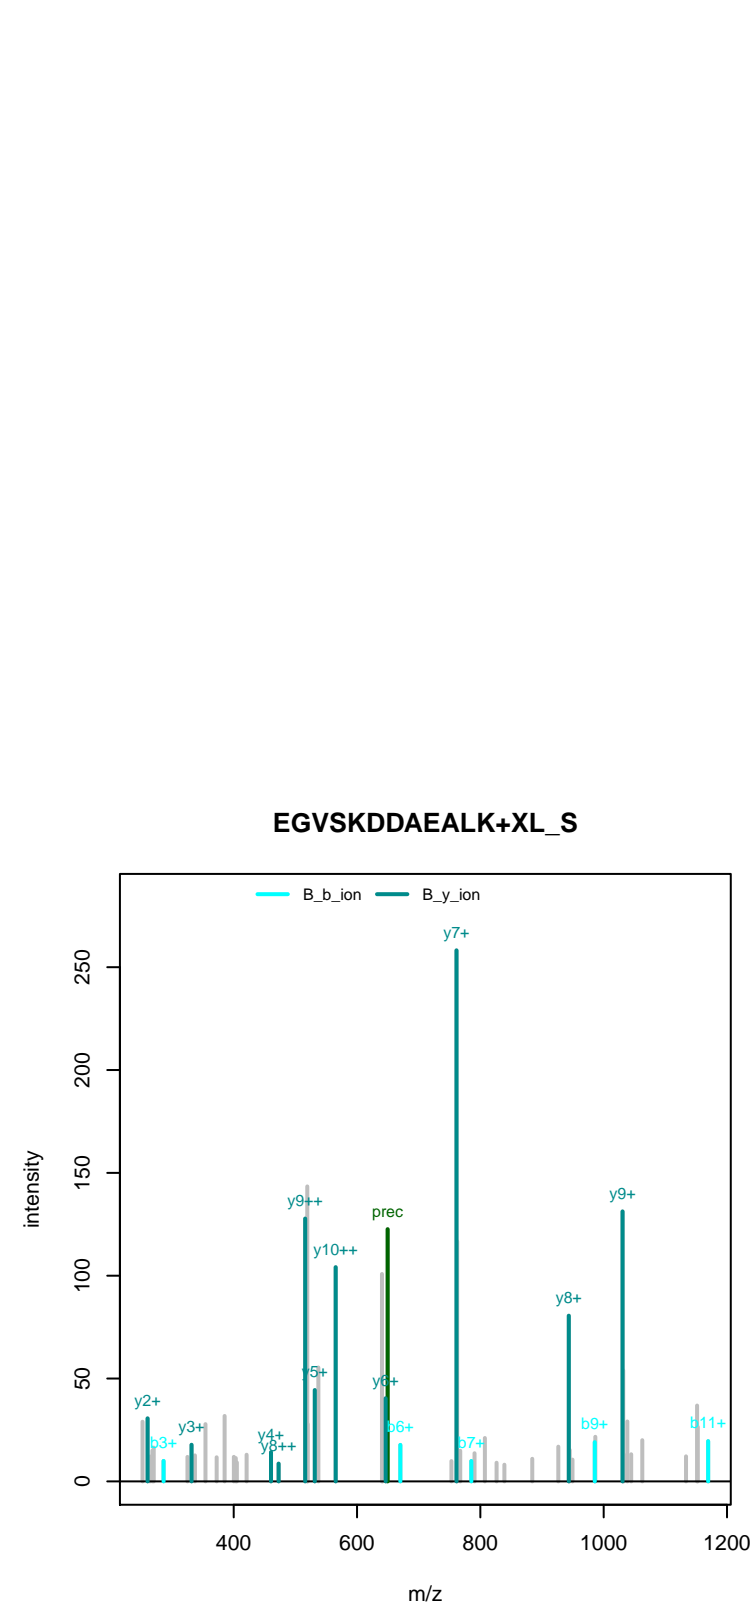

EFAKANAK+XL\_L

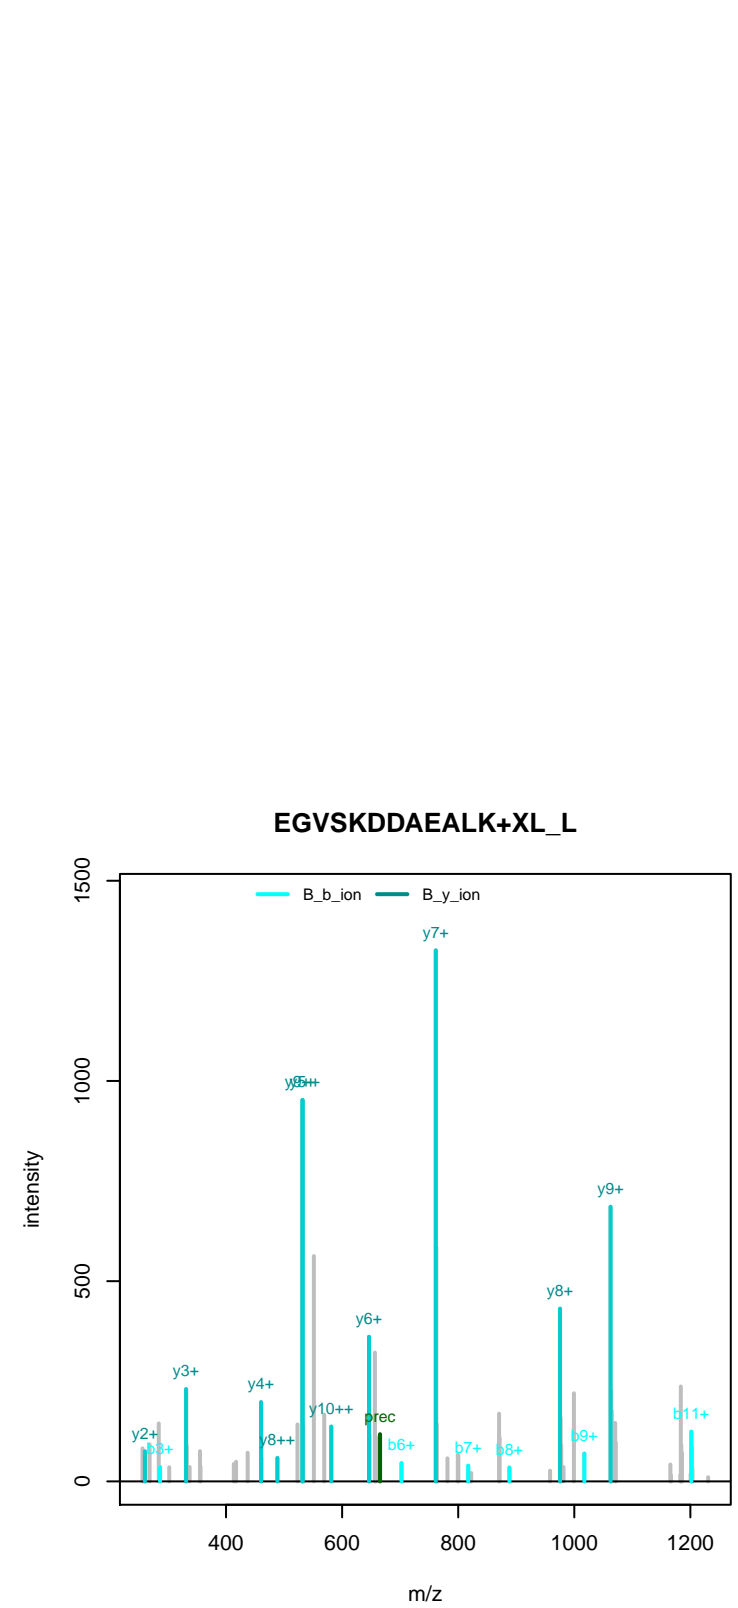

EGVSKDDAEALK+XL\_S

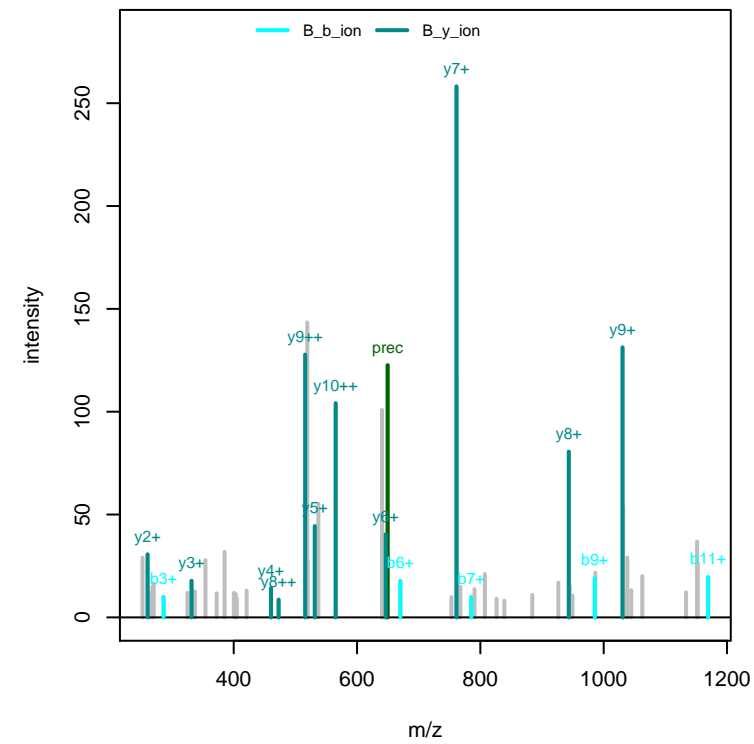

EGVSKDDAEALK+XL\_L

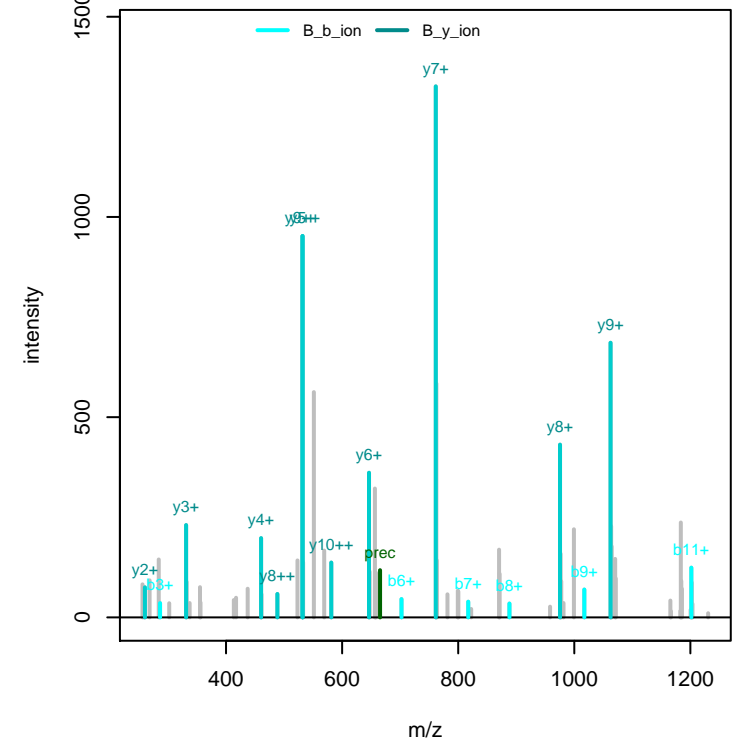



KGDVLK  
IKERLN

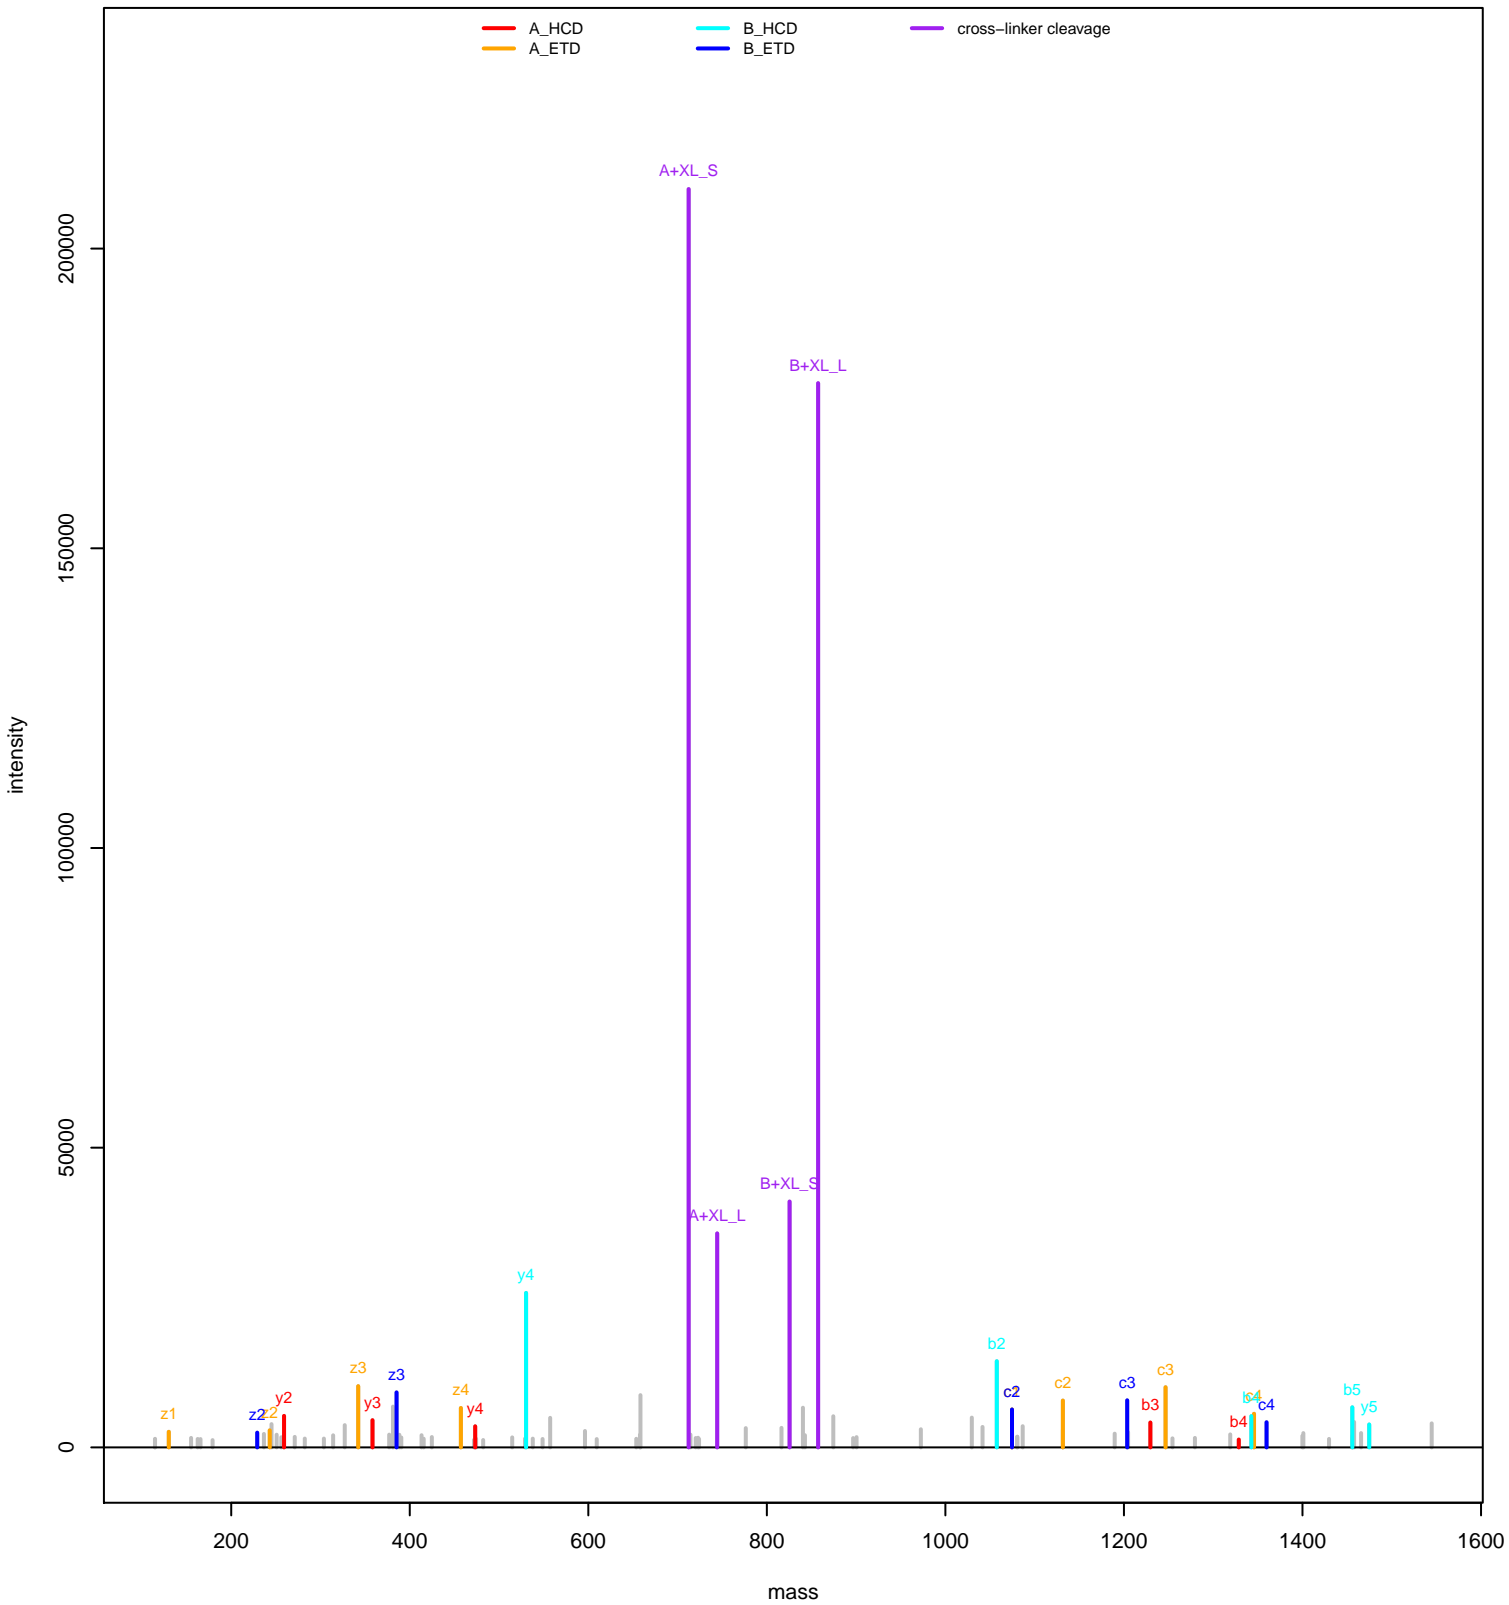

KGDVLK+XL\_S

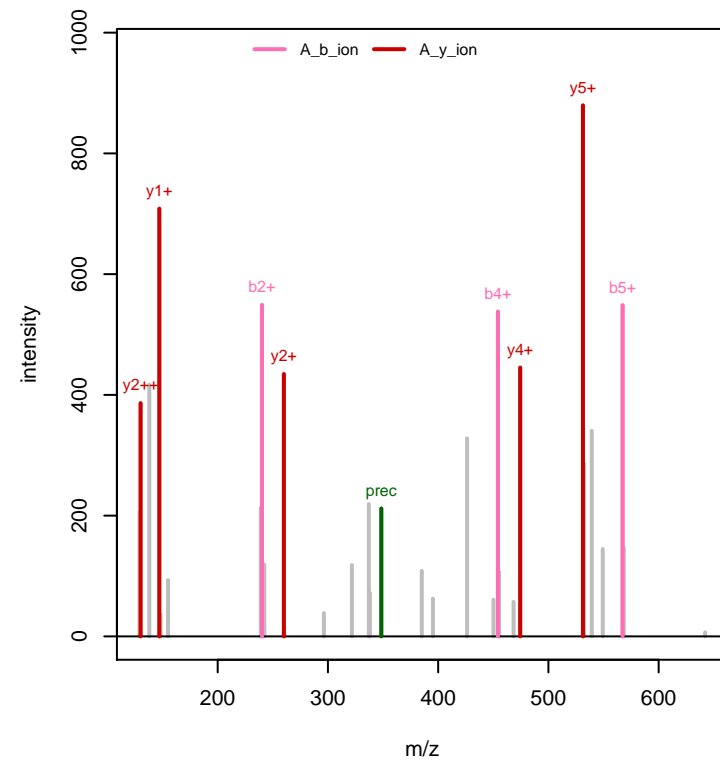

KGDVLK+XL\_L

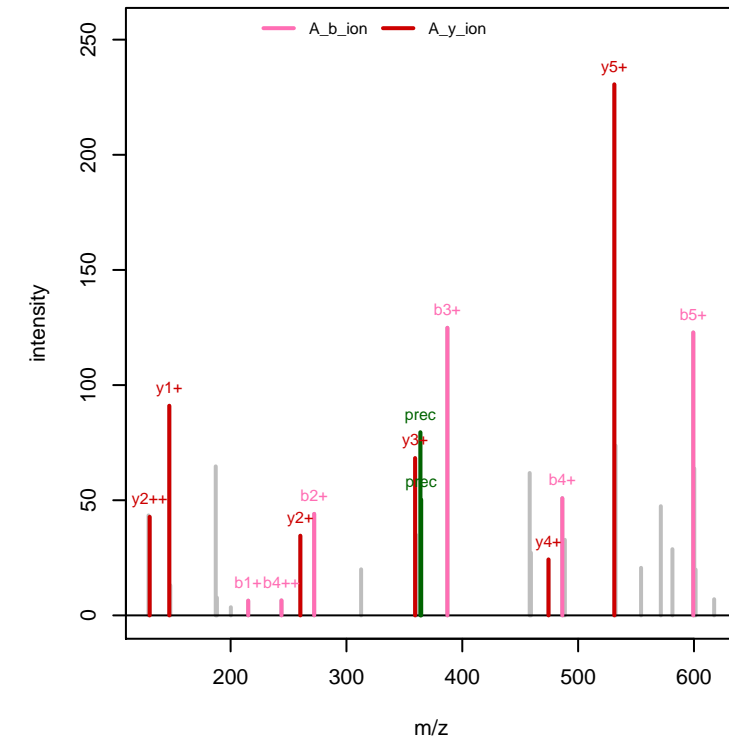

IKERLN+XL\_S

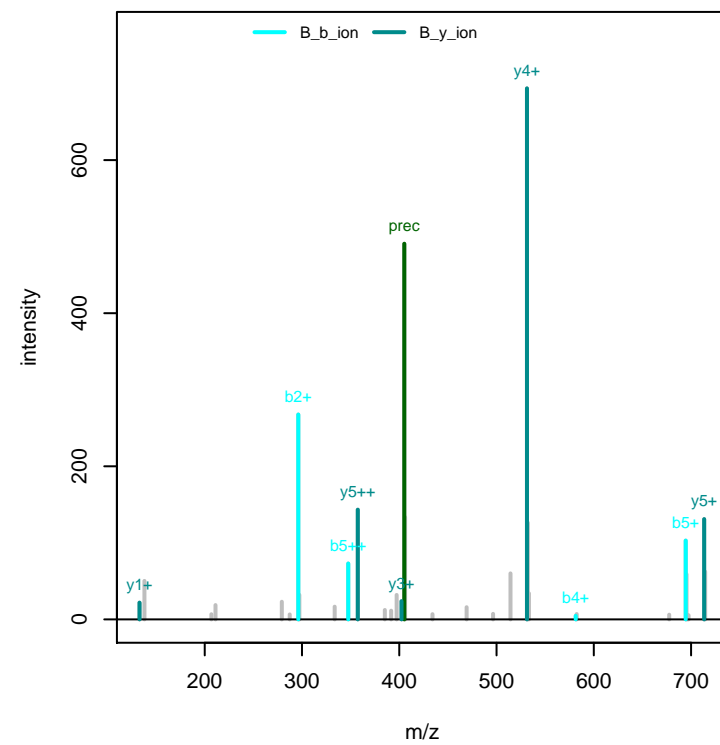

IKERLN+XL\_L

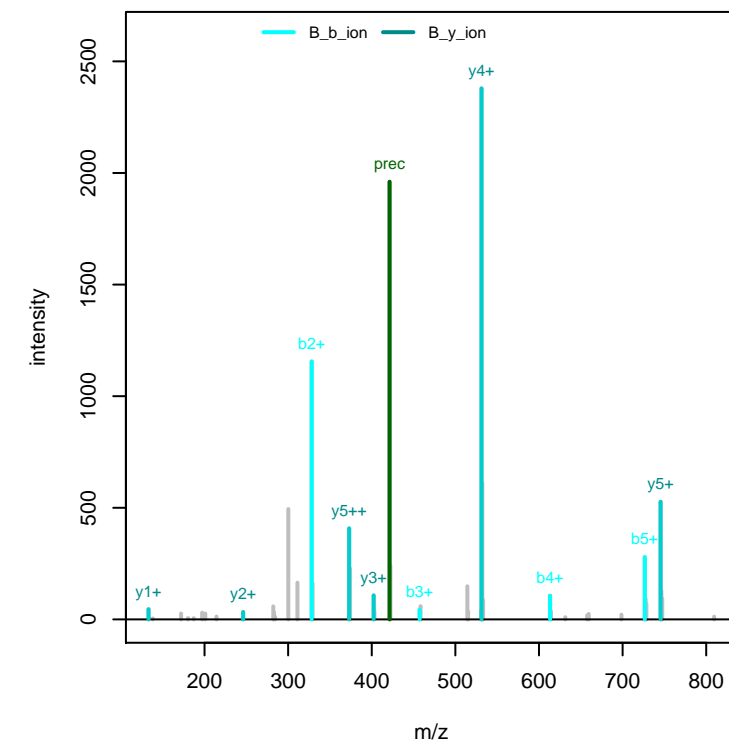

**KSDNPSITR**  
**KSDNPSITR**

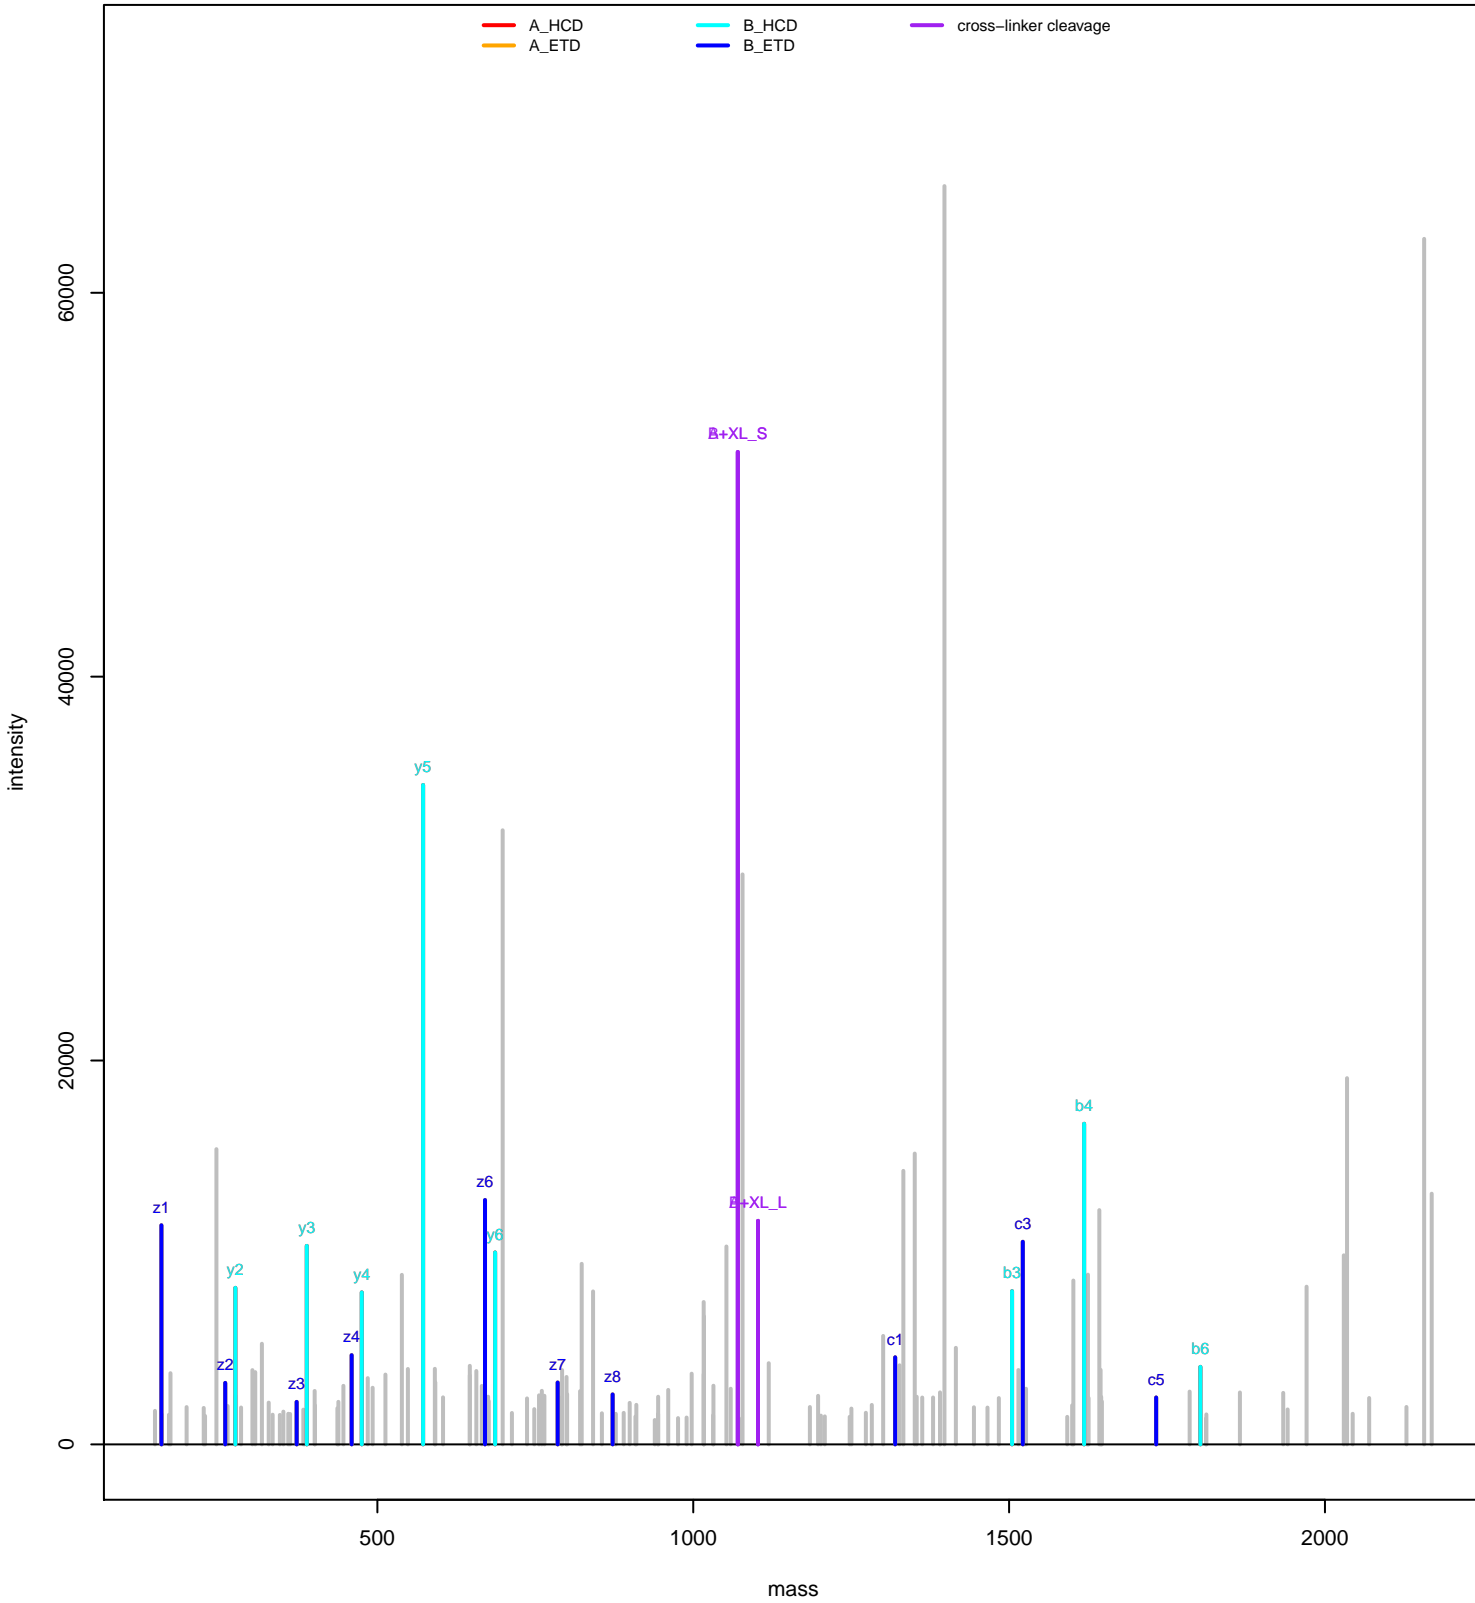

**KSDNPSITR+XL\_S**

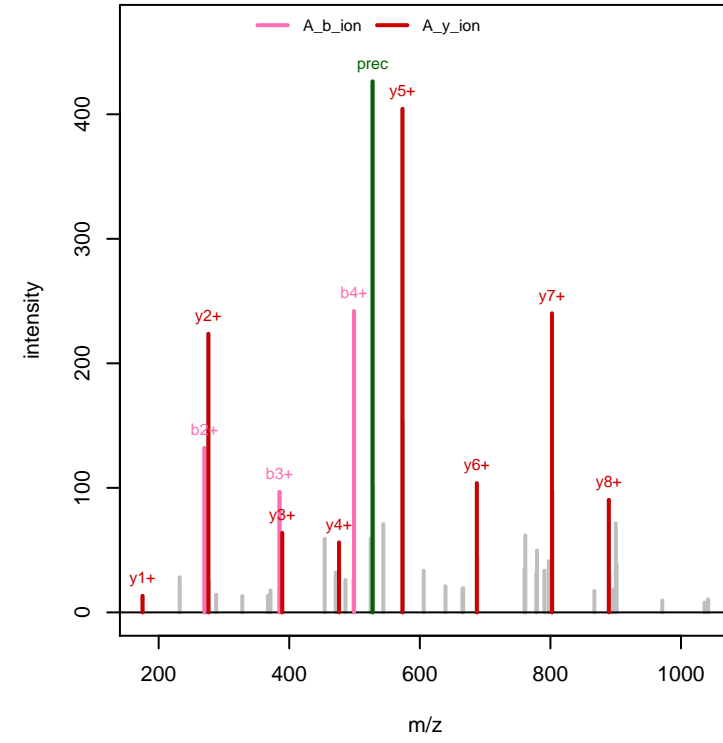

**KSDNPSITR+XL\_L**

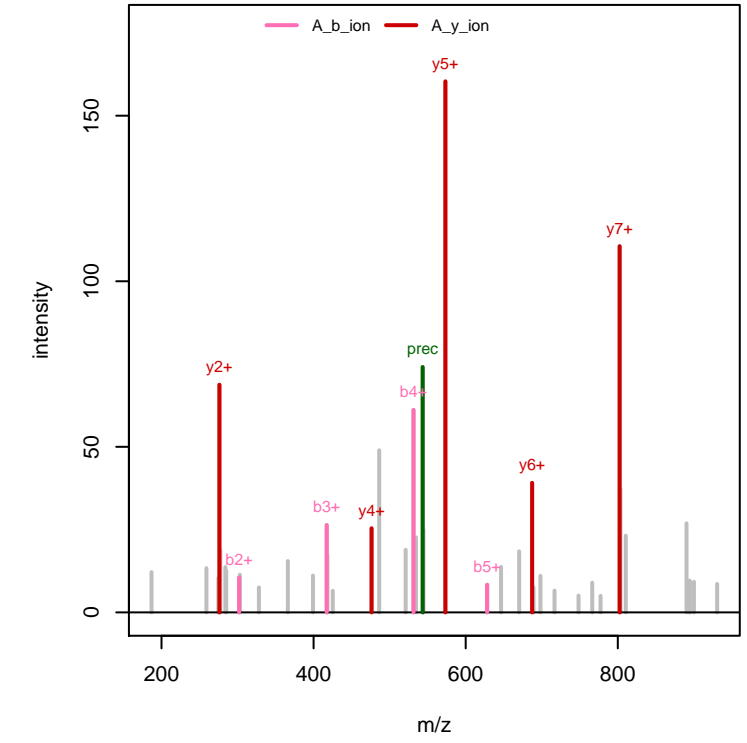

**KSDNPSITR+XL\_S**

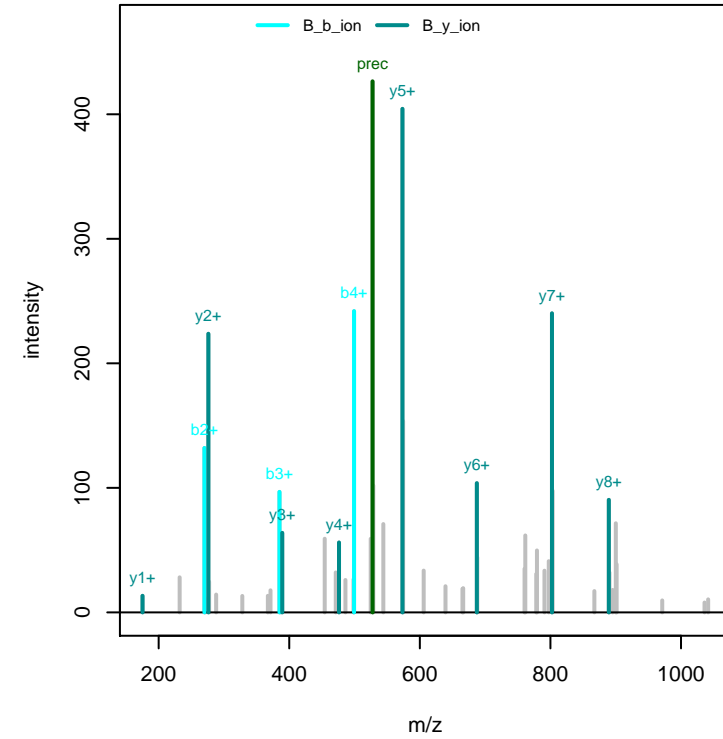

**KSDNPSITR+XL\_L**

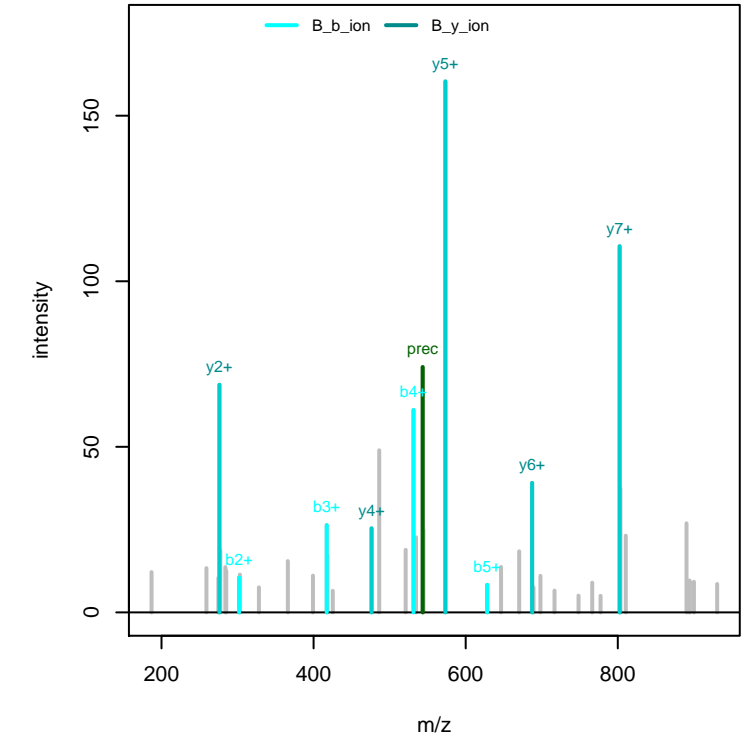

VMAGKSLAEQGVTK  
PKGIVQYGGQTPLK

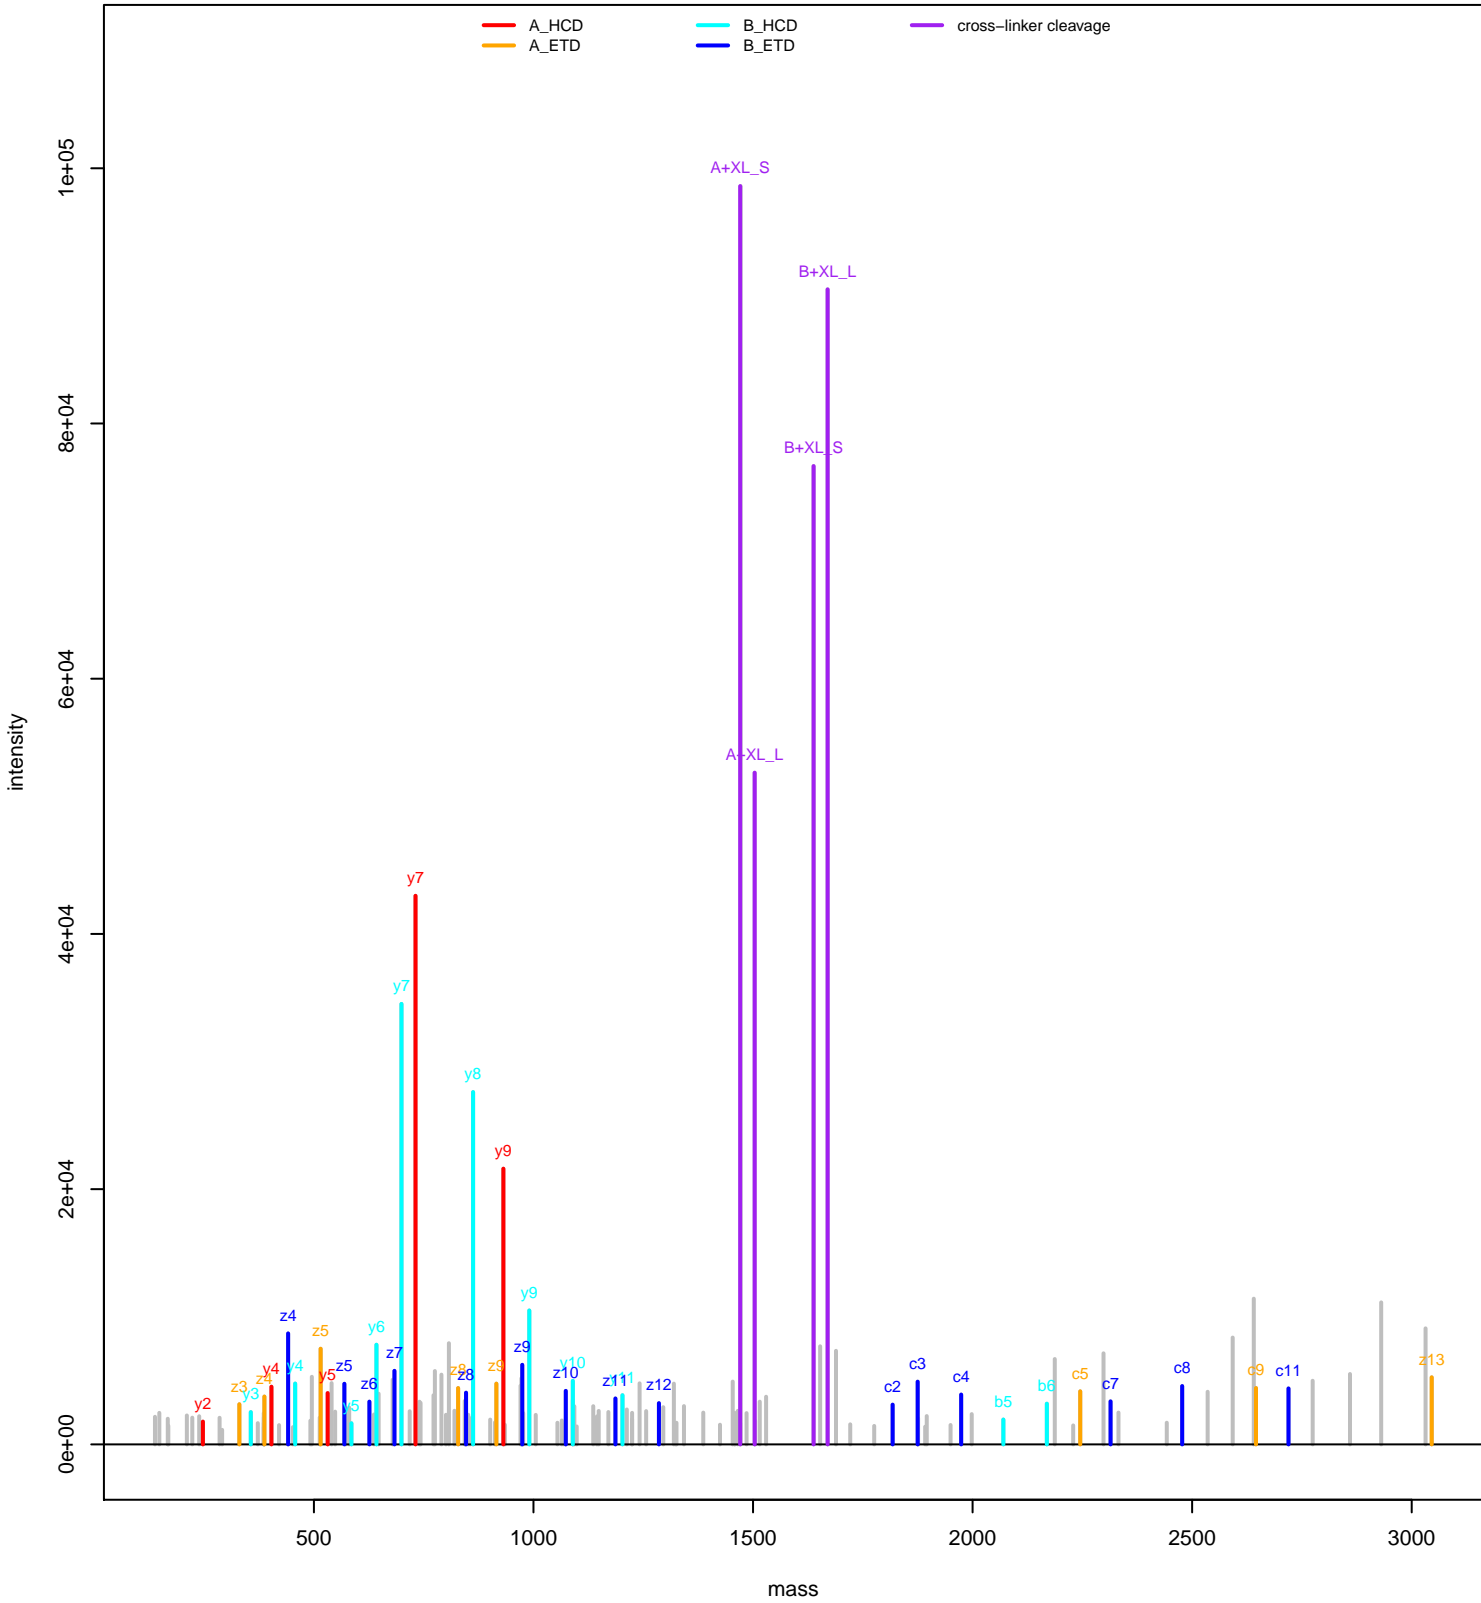

VMAGKSLAEQGVTK+XL\_S

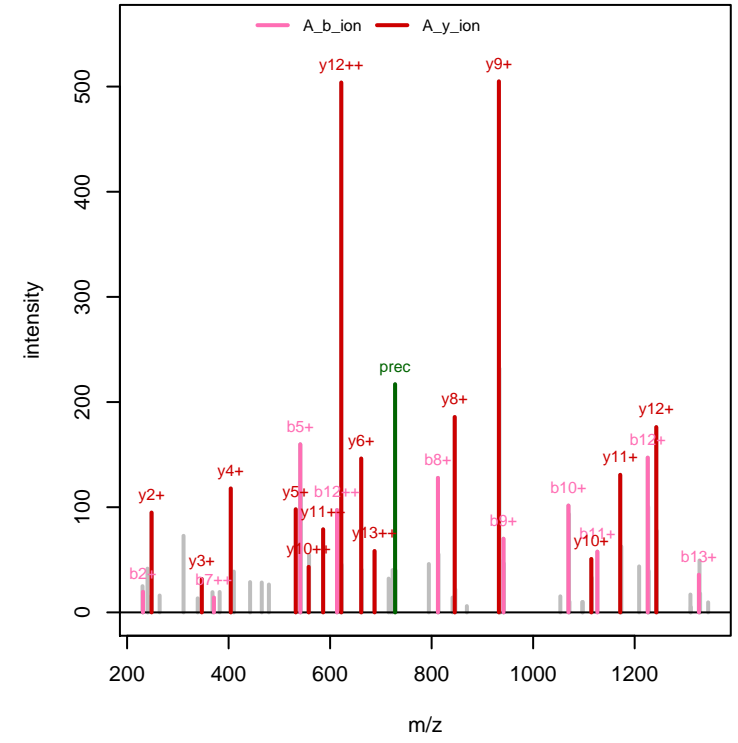

VMAGKSLAEQGVTK+XL\_L

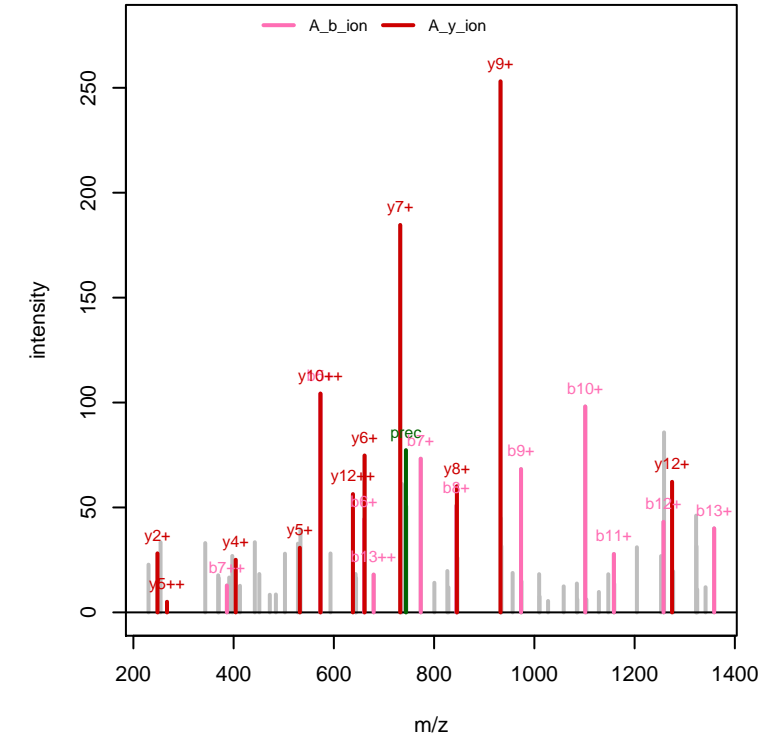

PKGIVQYGGQTPLK+XL\_S

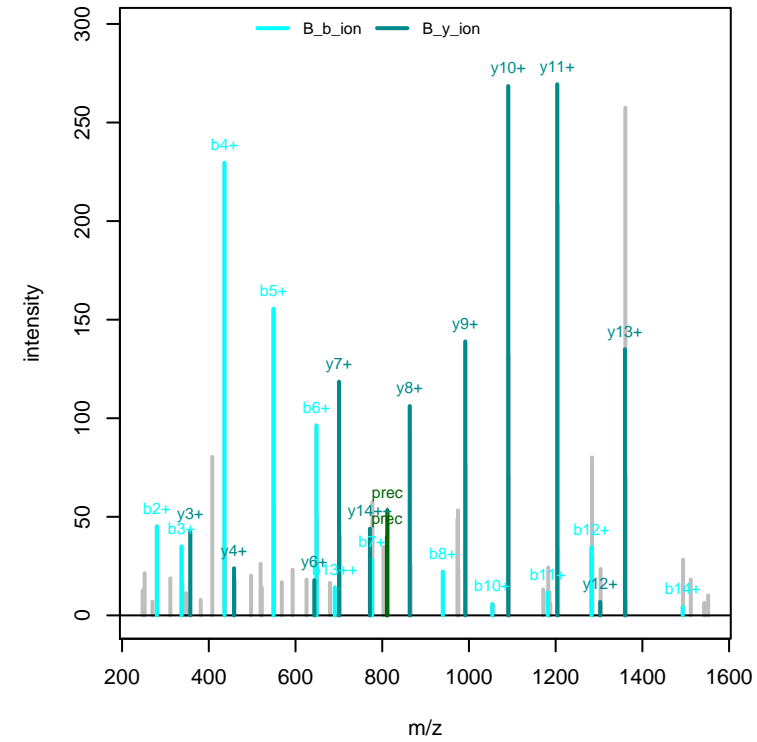

PKGIVQYGGQTPLK+XL\_L

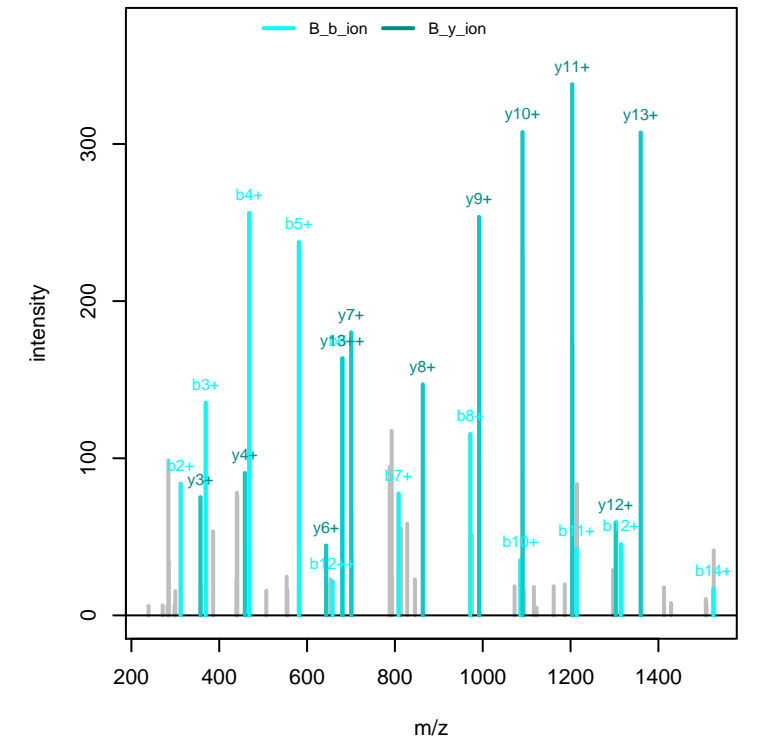

**TYMSDCLKNSK  
SAPGEKSLTPQQQK**

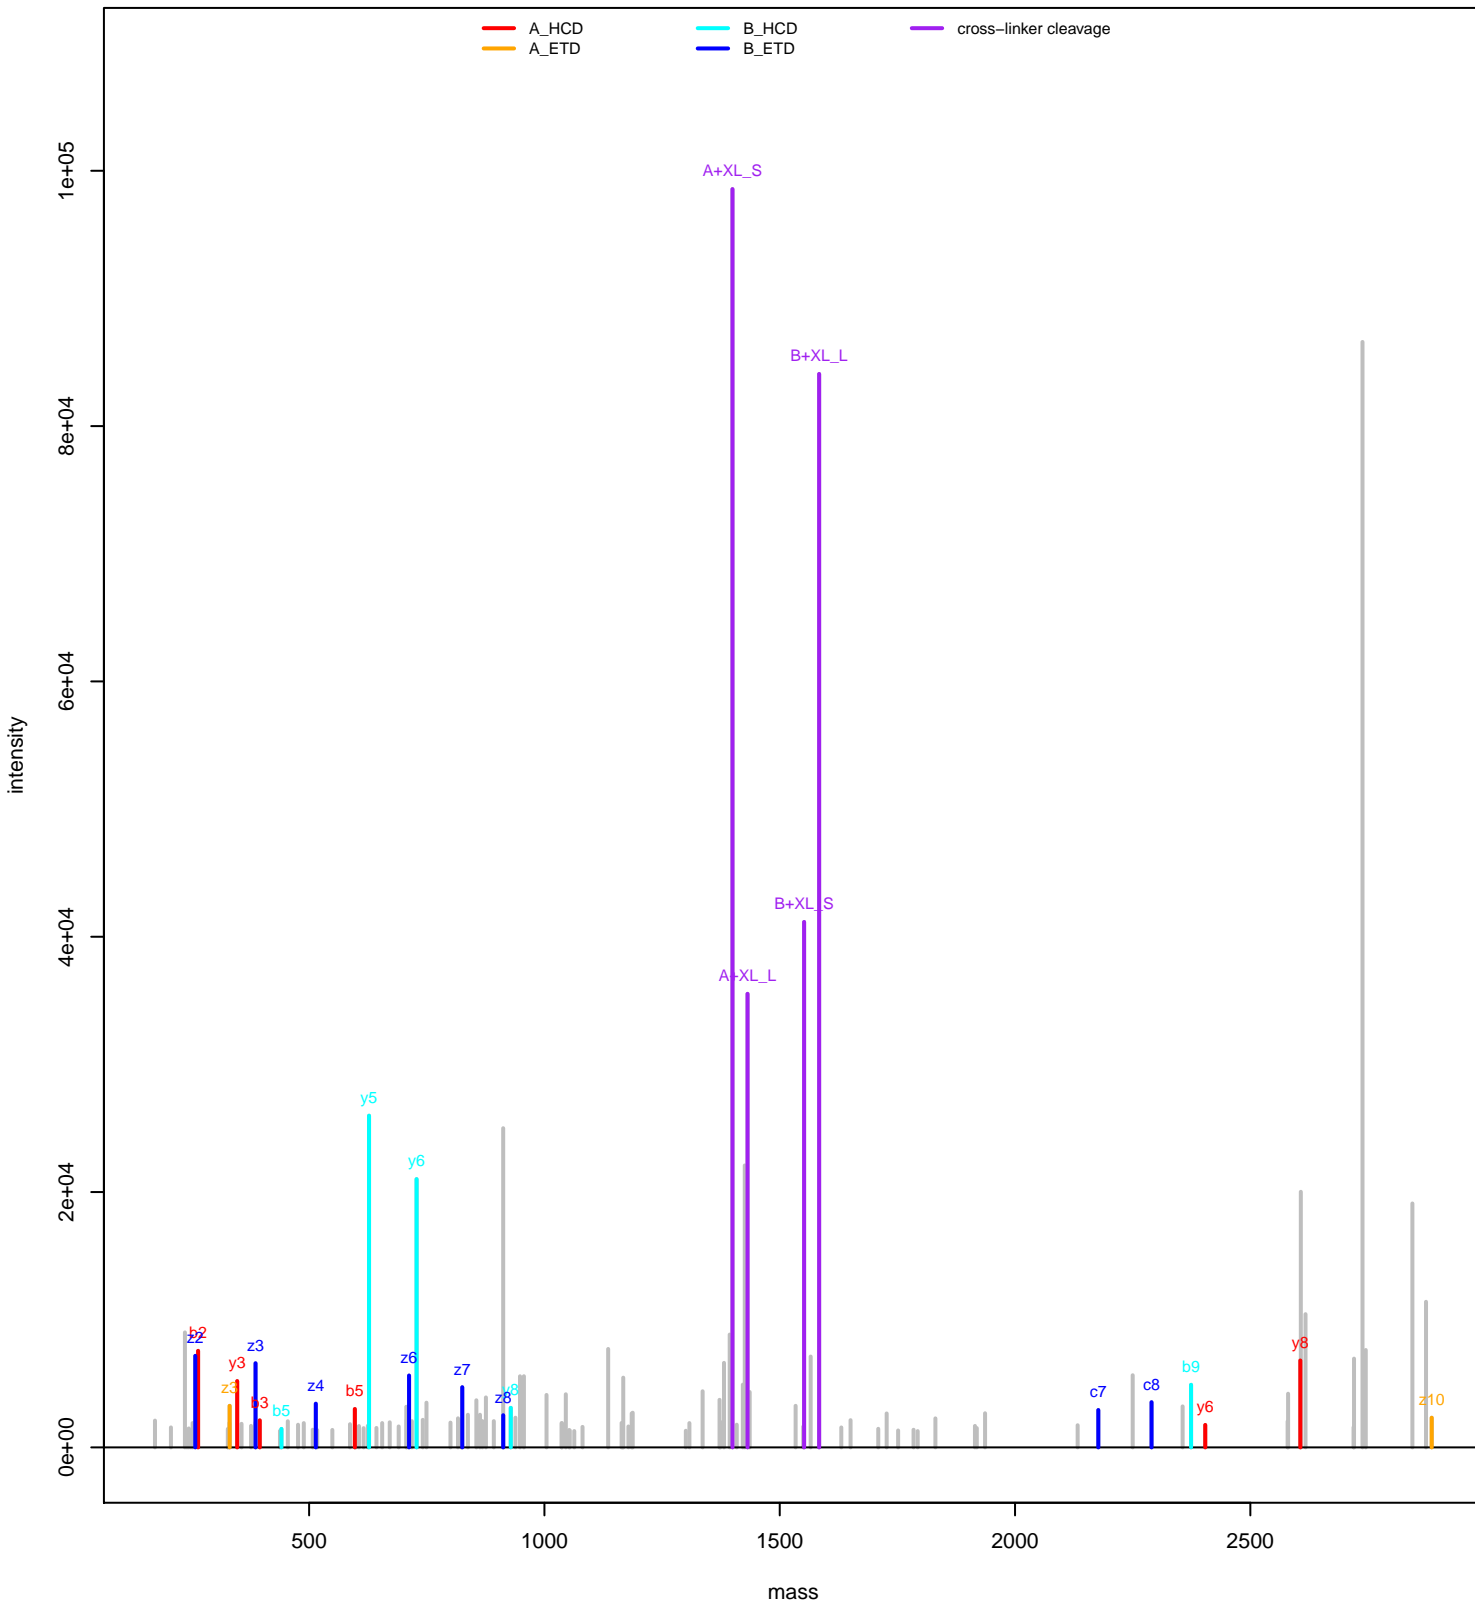

**TYMSDCLKNSK+XL\_S**

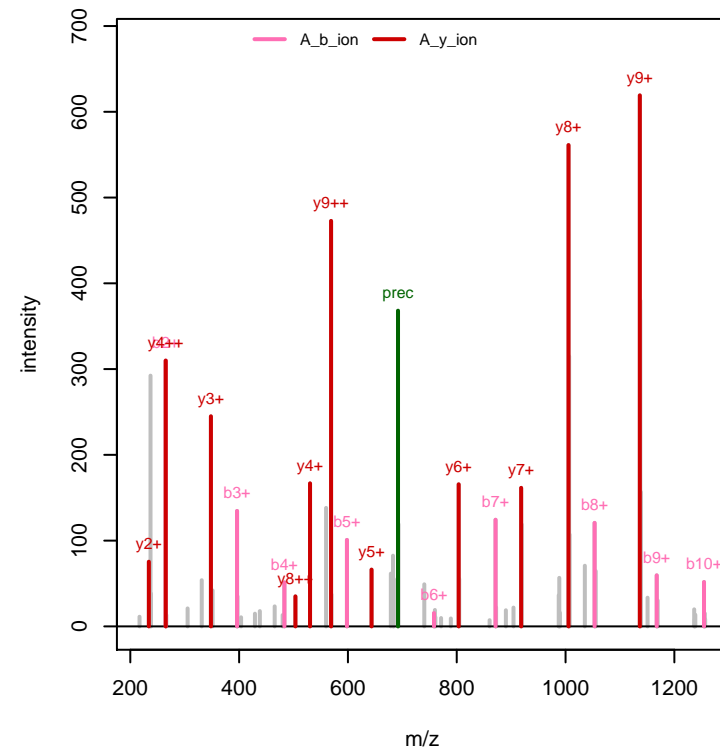

**TYMSDCLKNSK+XL\_L**

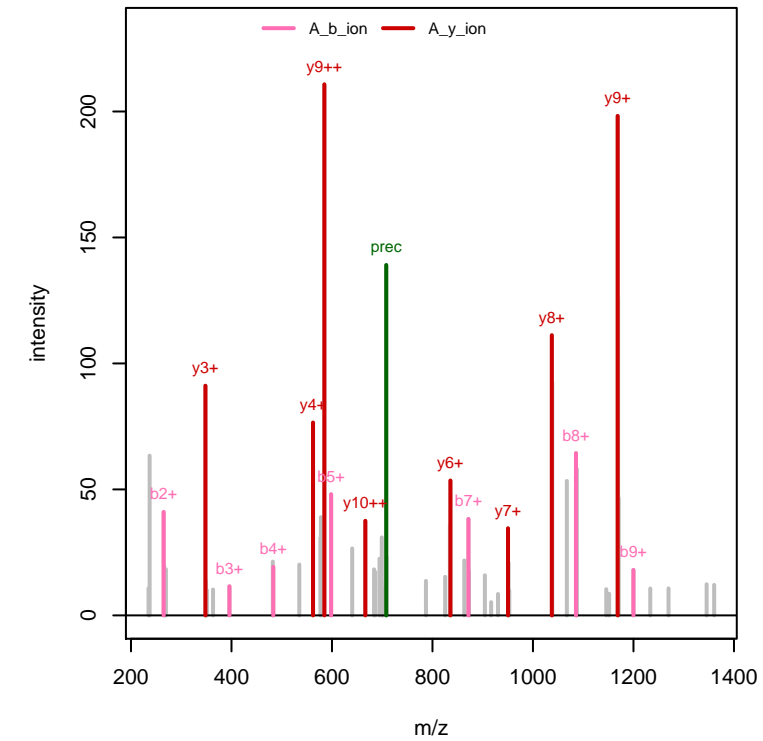

**SAPGEKSLTPQQQK+XL\_S**

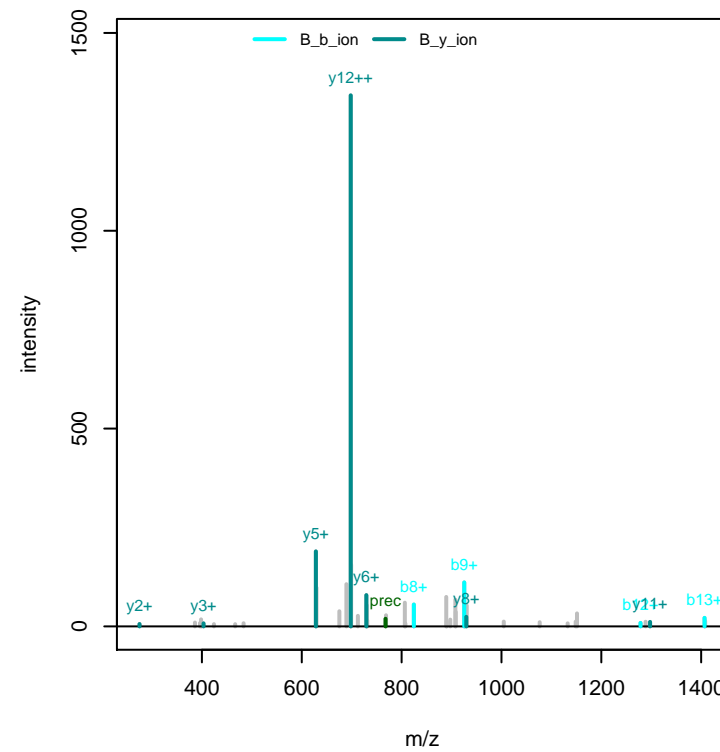

**SAPGEKSLTPQQQK+XL\_L**

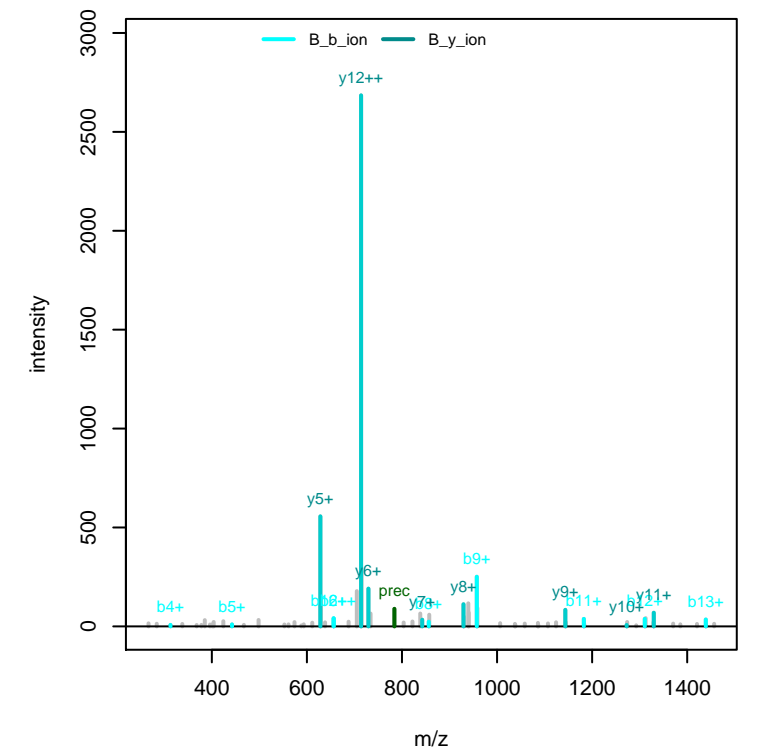

GTPPKVK  
AMoLAKHGIR

A\_HCD B\_HCD cross-linker cleavage  
A\_ETD B\_ETD

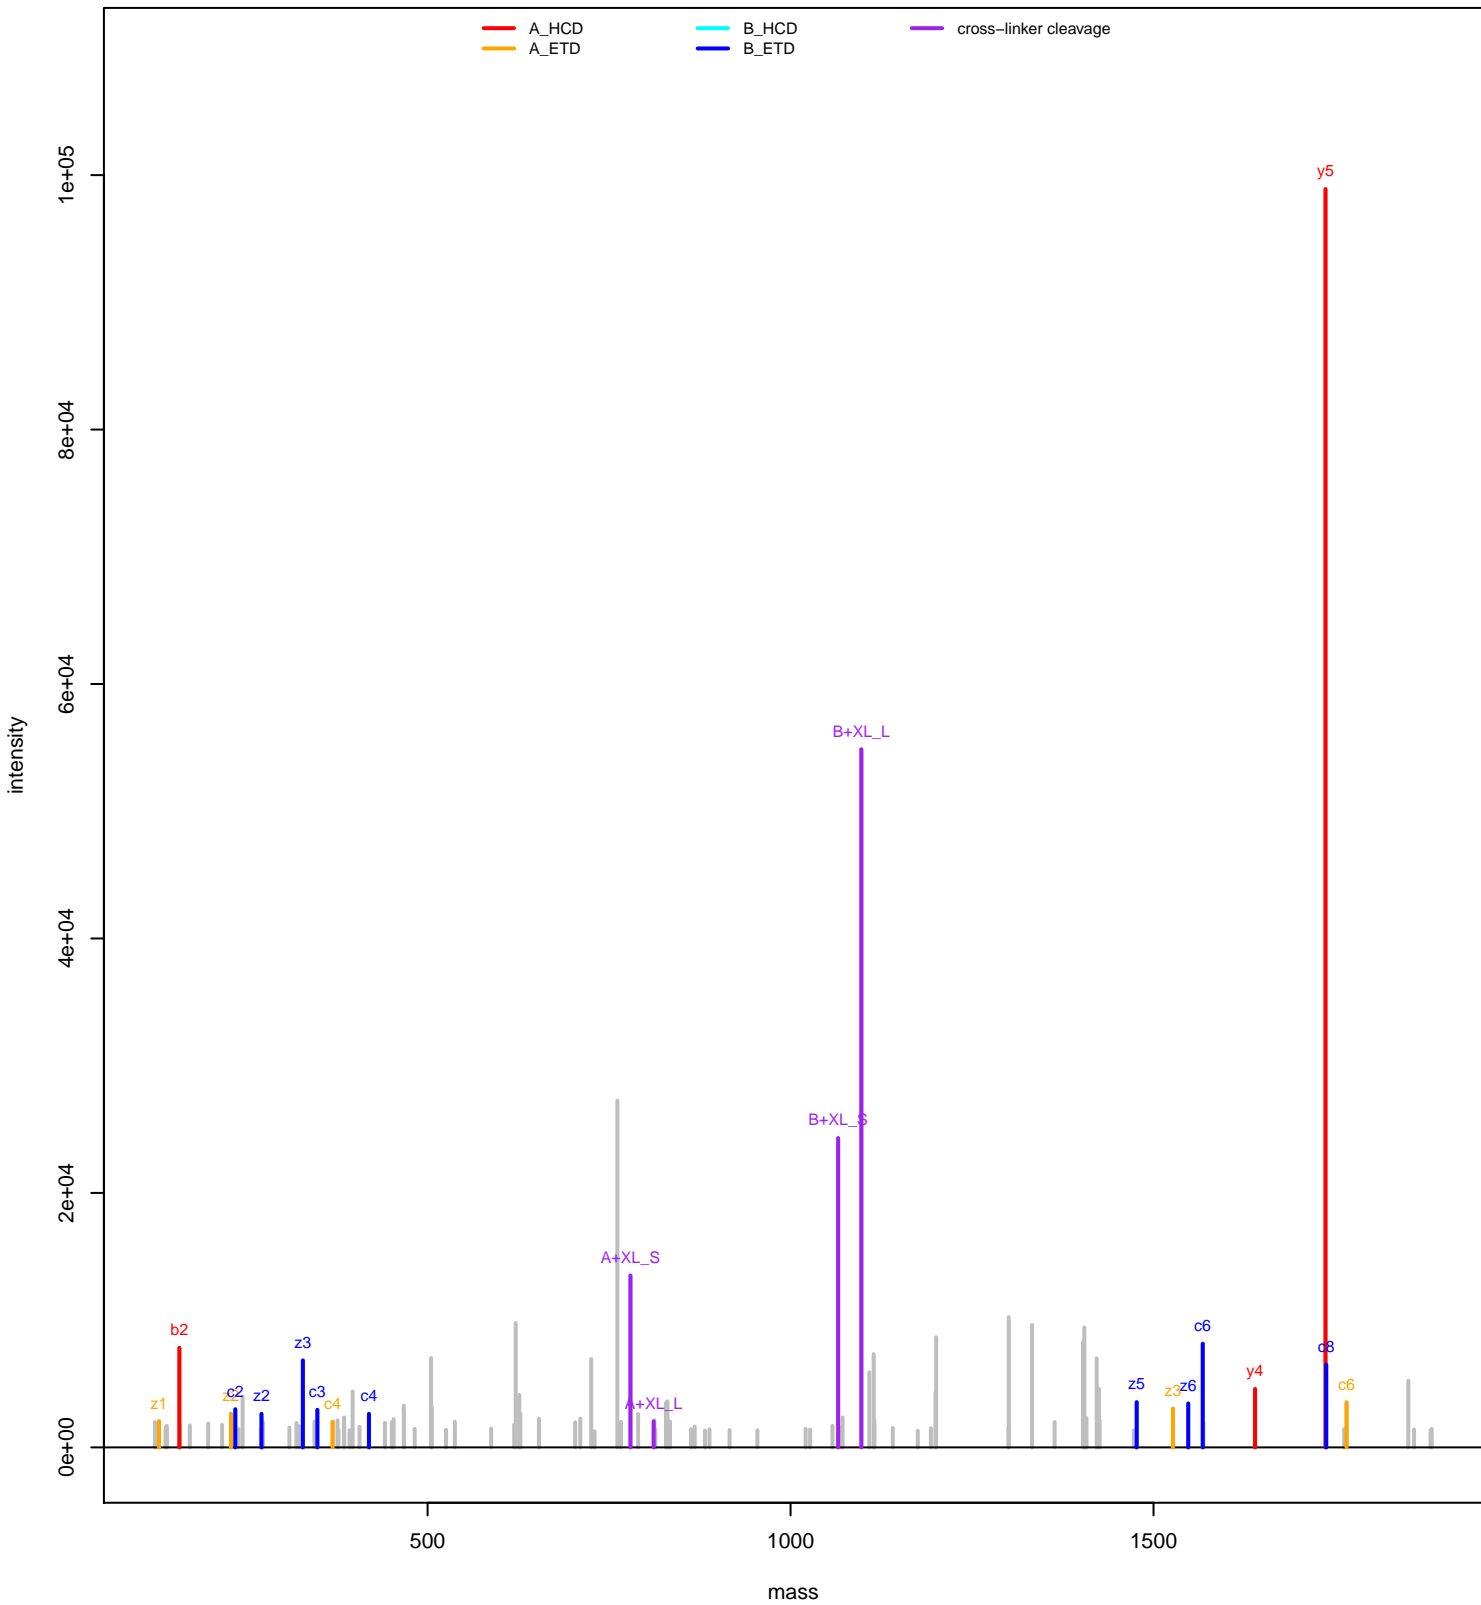

GTPPKVK+XL\_S

GTPPKVK+XL\_L

AMoLAKHGIR+XL\_S

AMoLAKHGIR+XL\_L

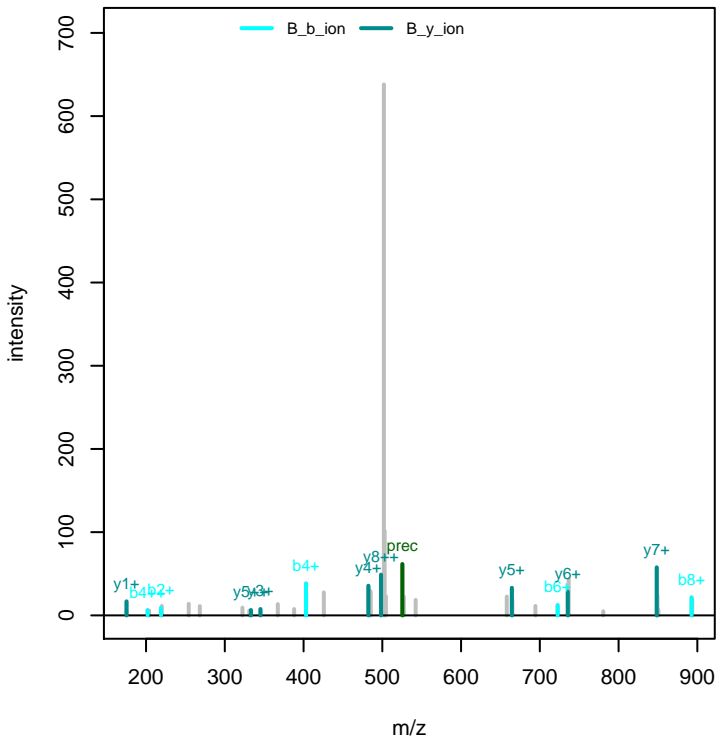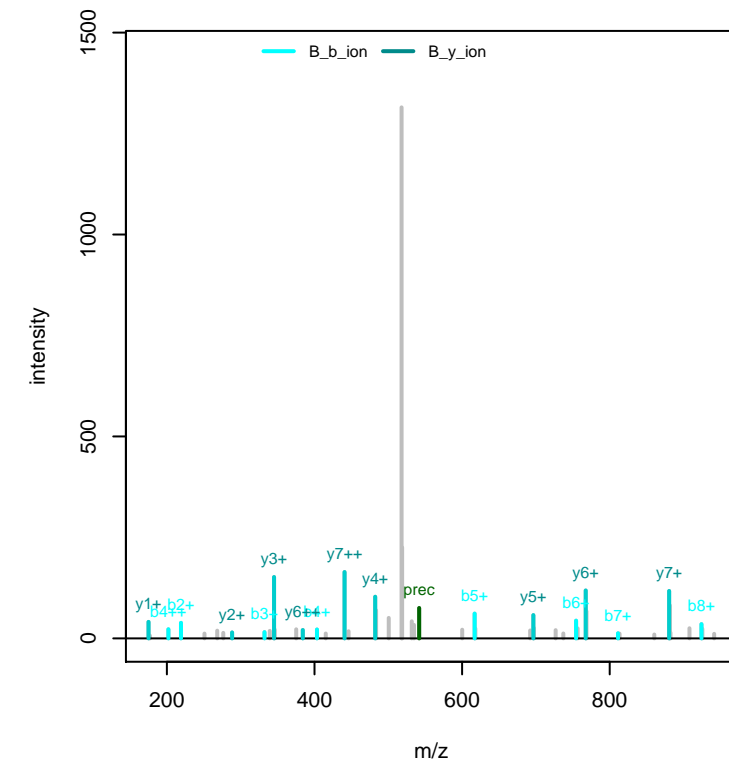

KAGNLIK  
NYETPDAVEASQKGSNDFVTNVDK

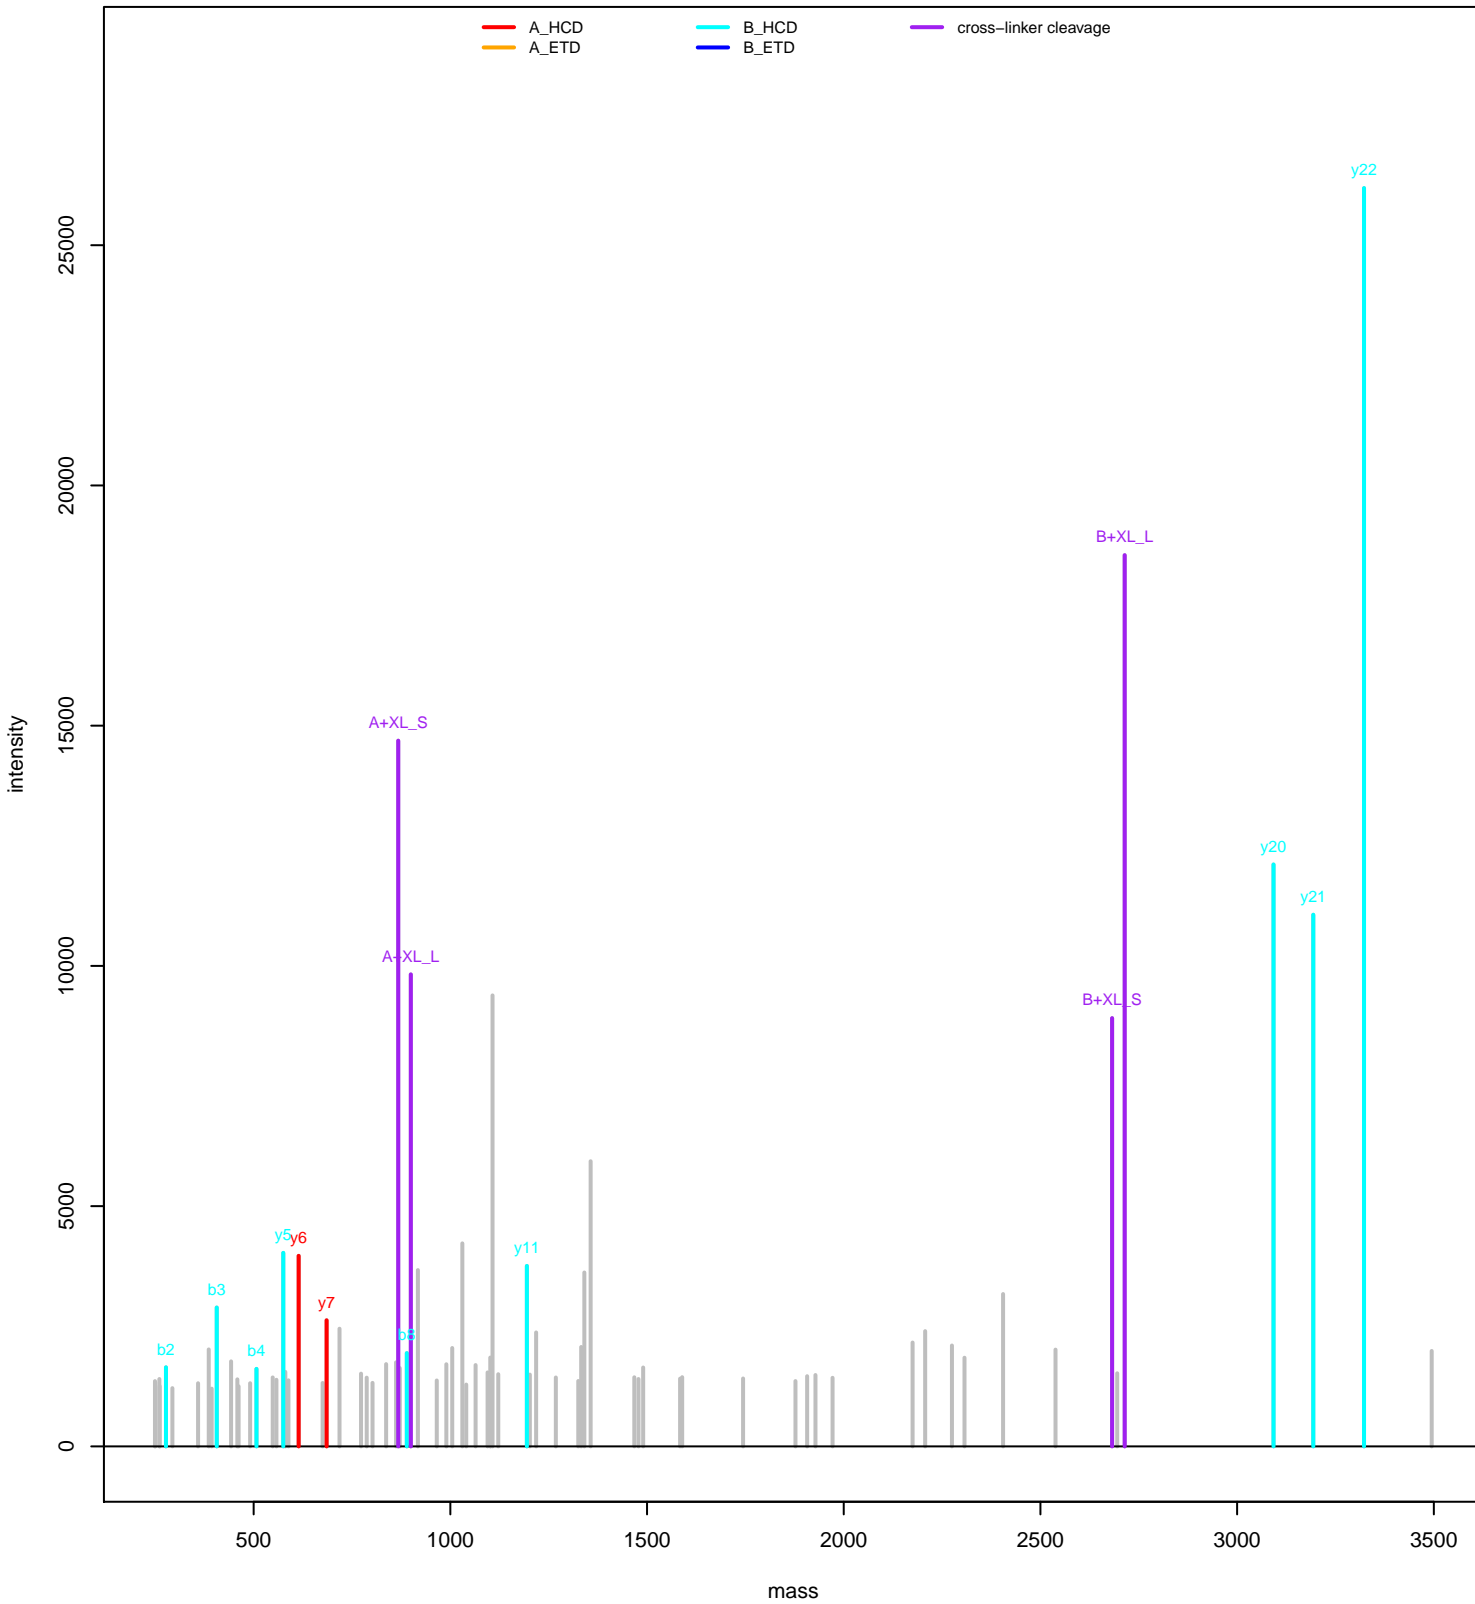

KAGNLIK+XL\_S

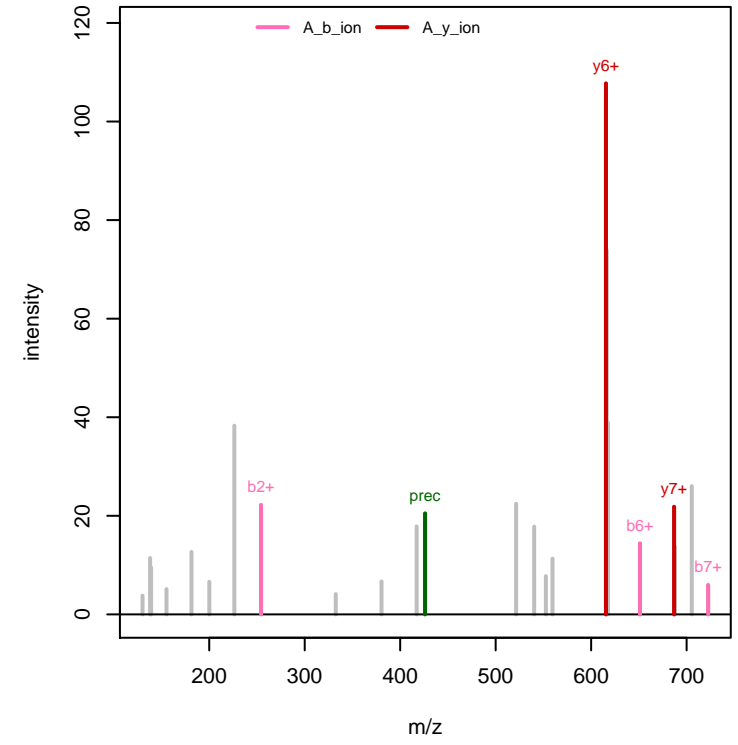

KAGNLIK+XL\_L

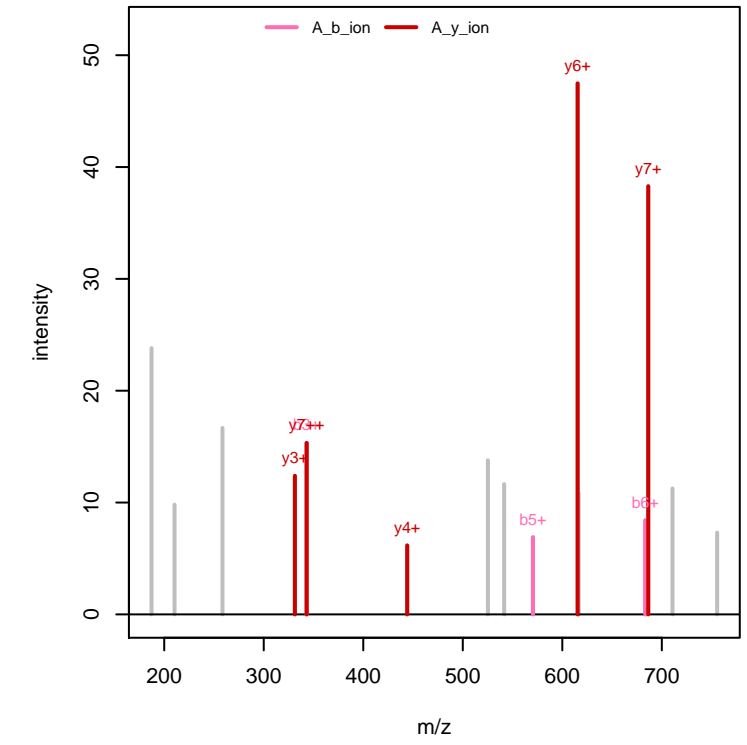

NYETPDAVEASQKGSNDFVTNVDK+XL\_S

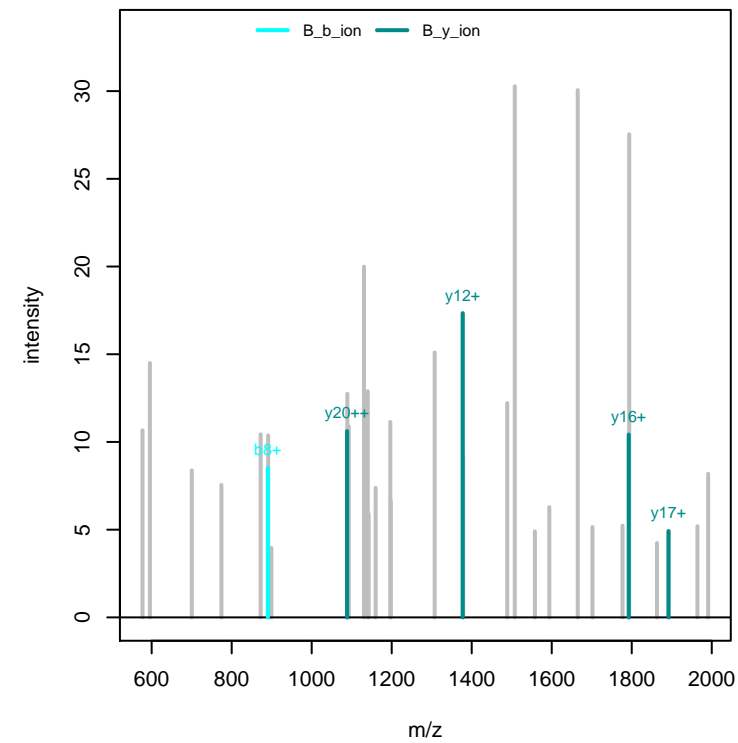

NYETPDAVEASQKGSNDFVTNVDK+XL\_L

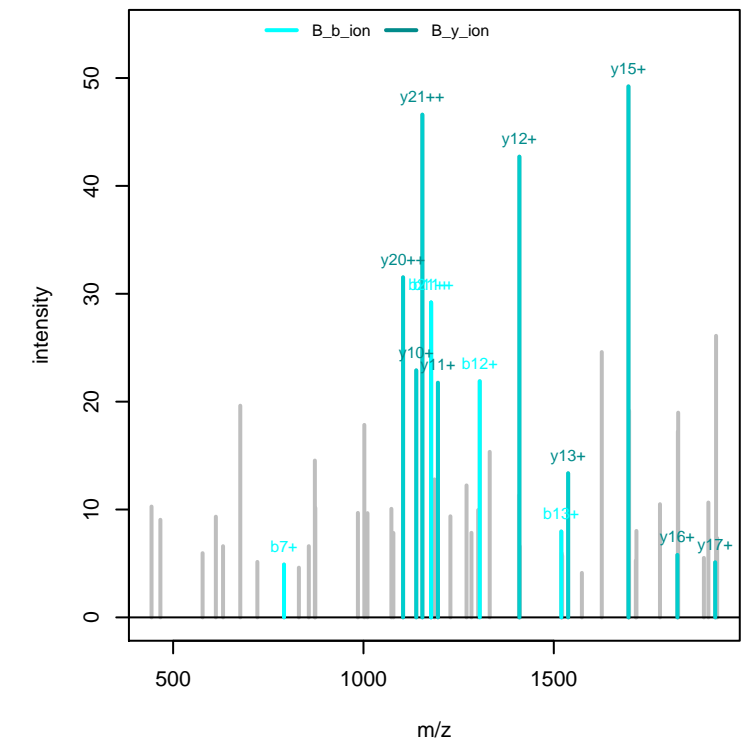

GKIFTK  
AAQDAKR

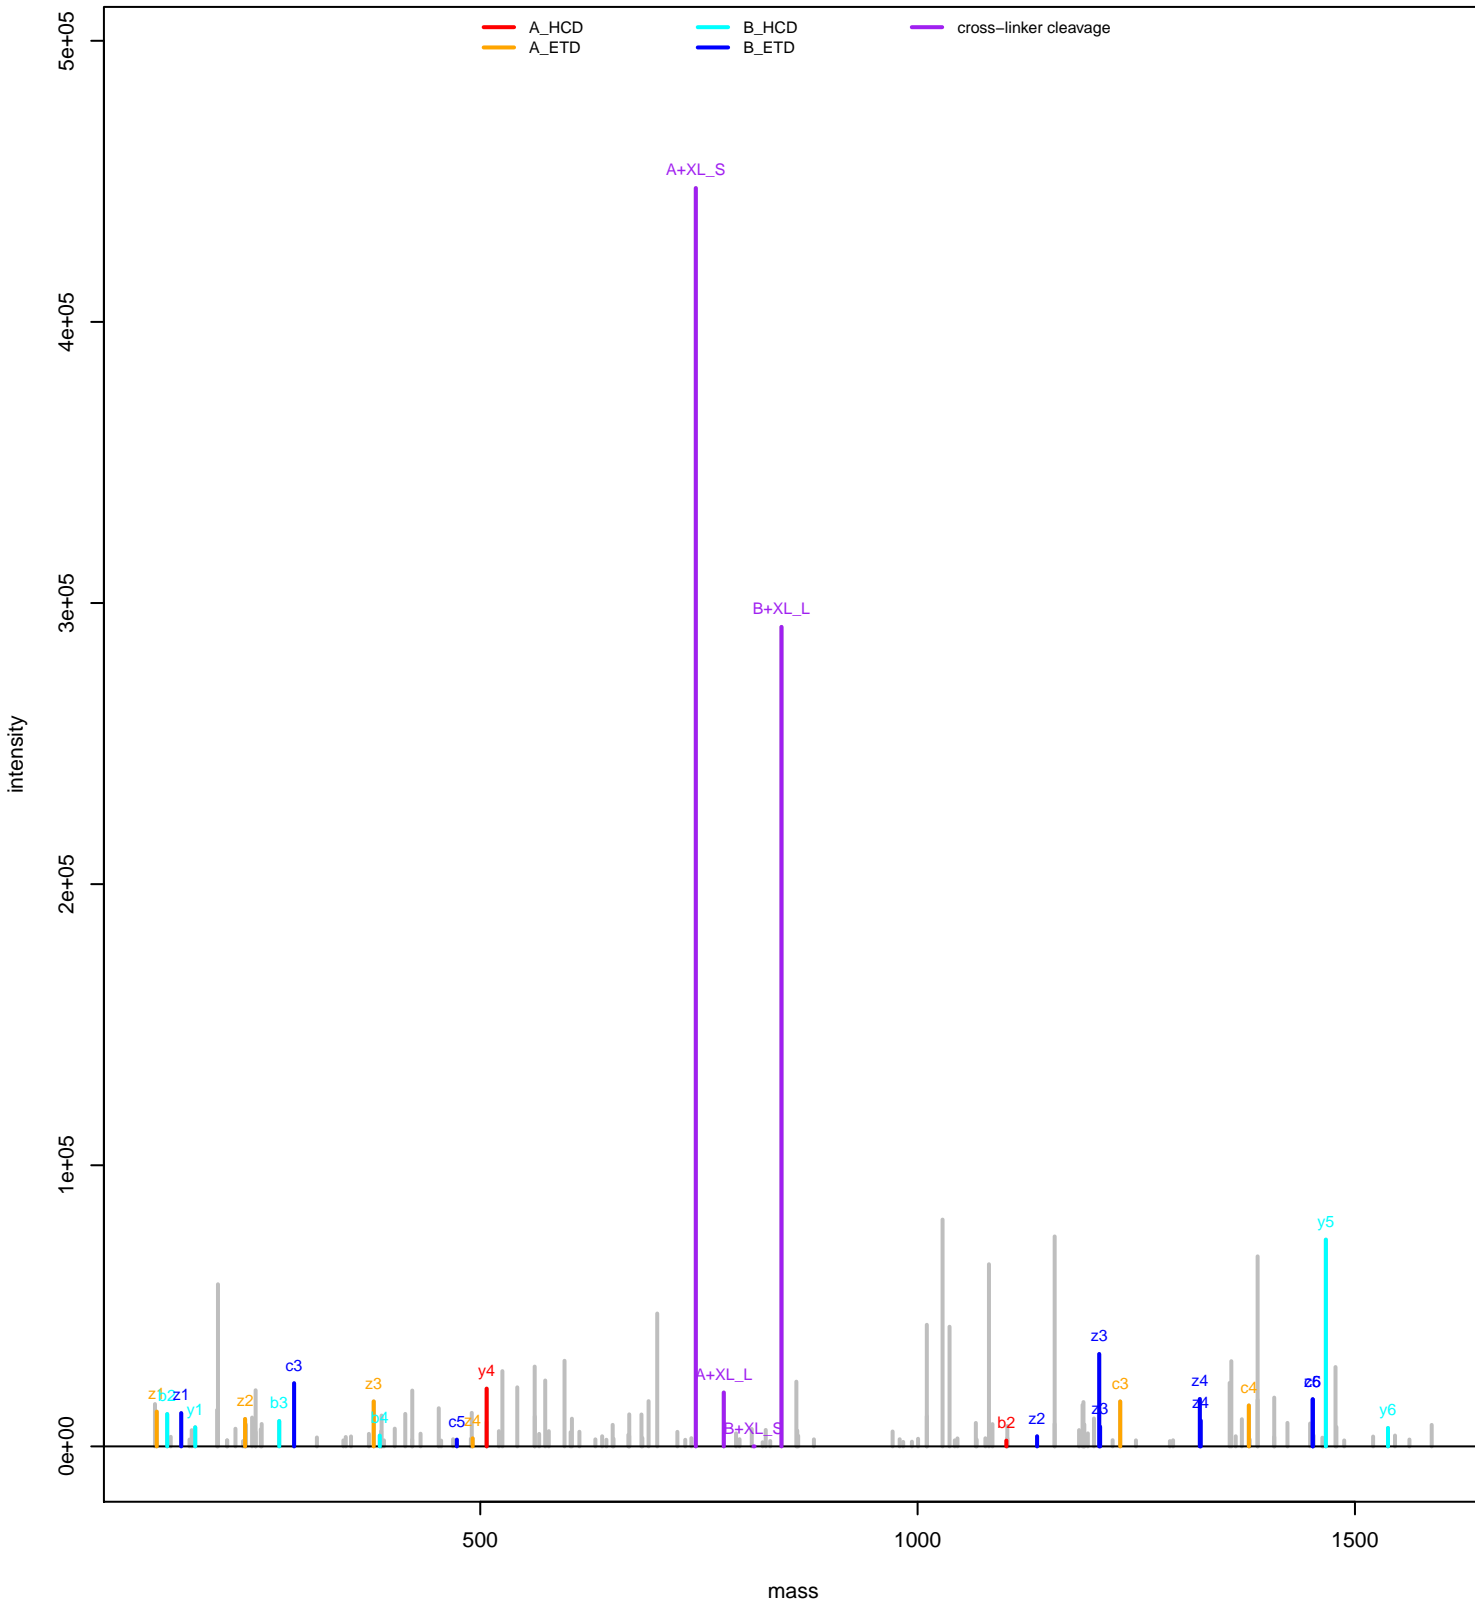

GKIFTK+XL\_S

AAQDAKR+XL\_S

GKIFTK+XL\_L

AAQDAKR+XL\_L

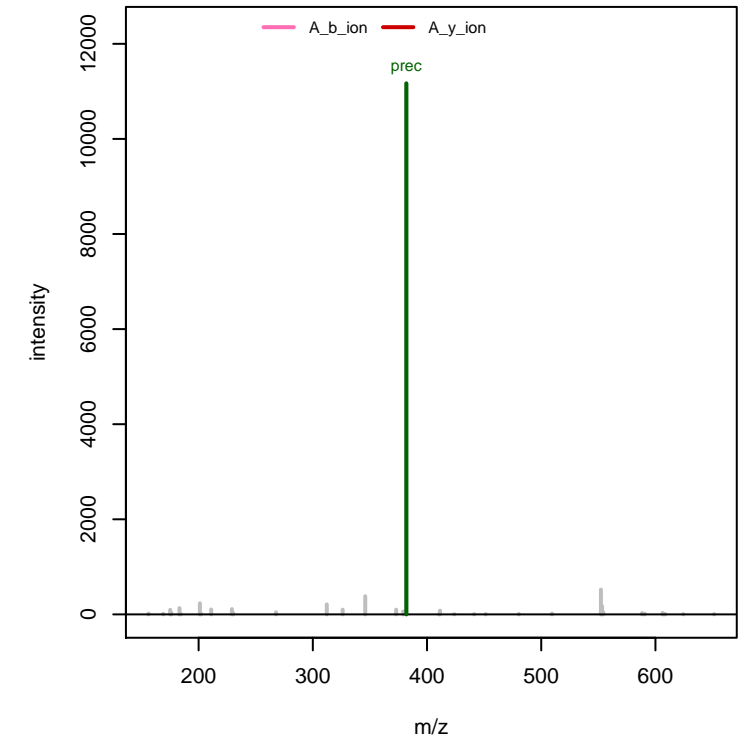

AAQDAKR  
AAVDKALSNNMTR

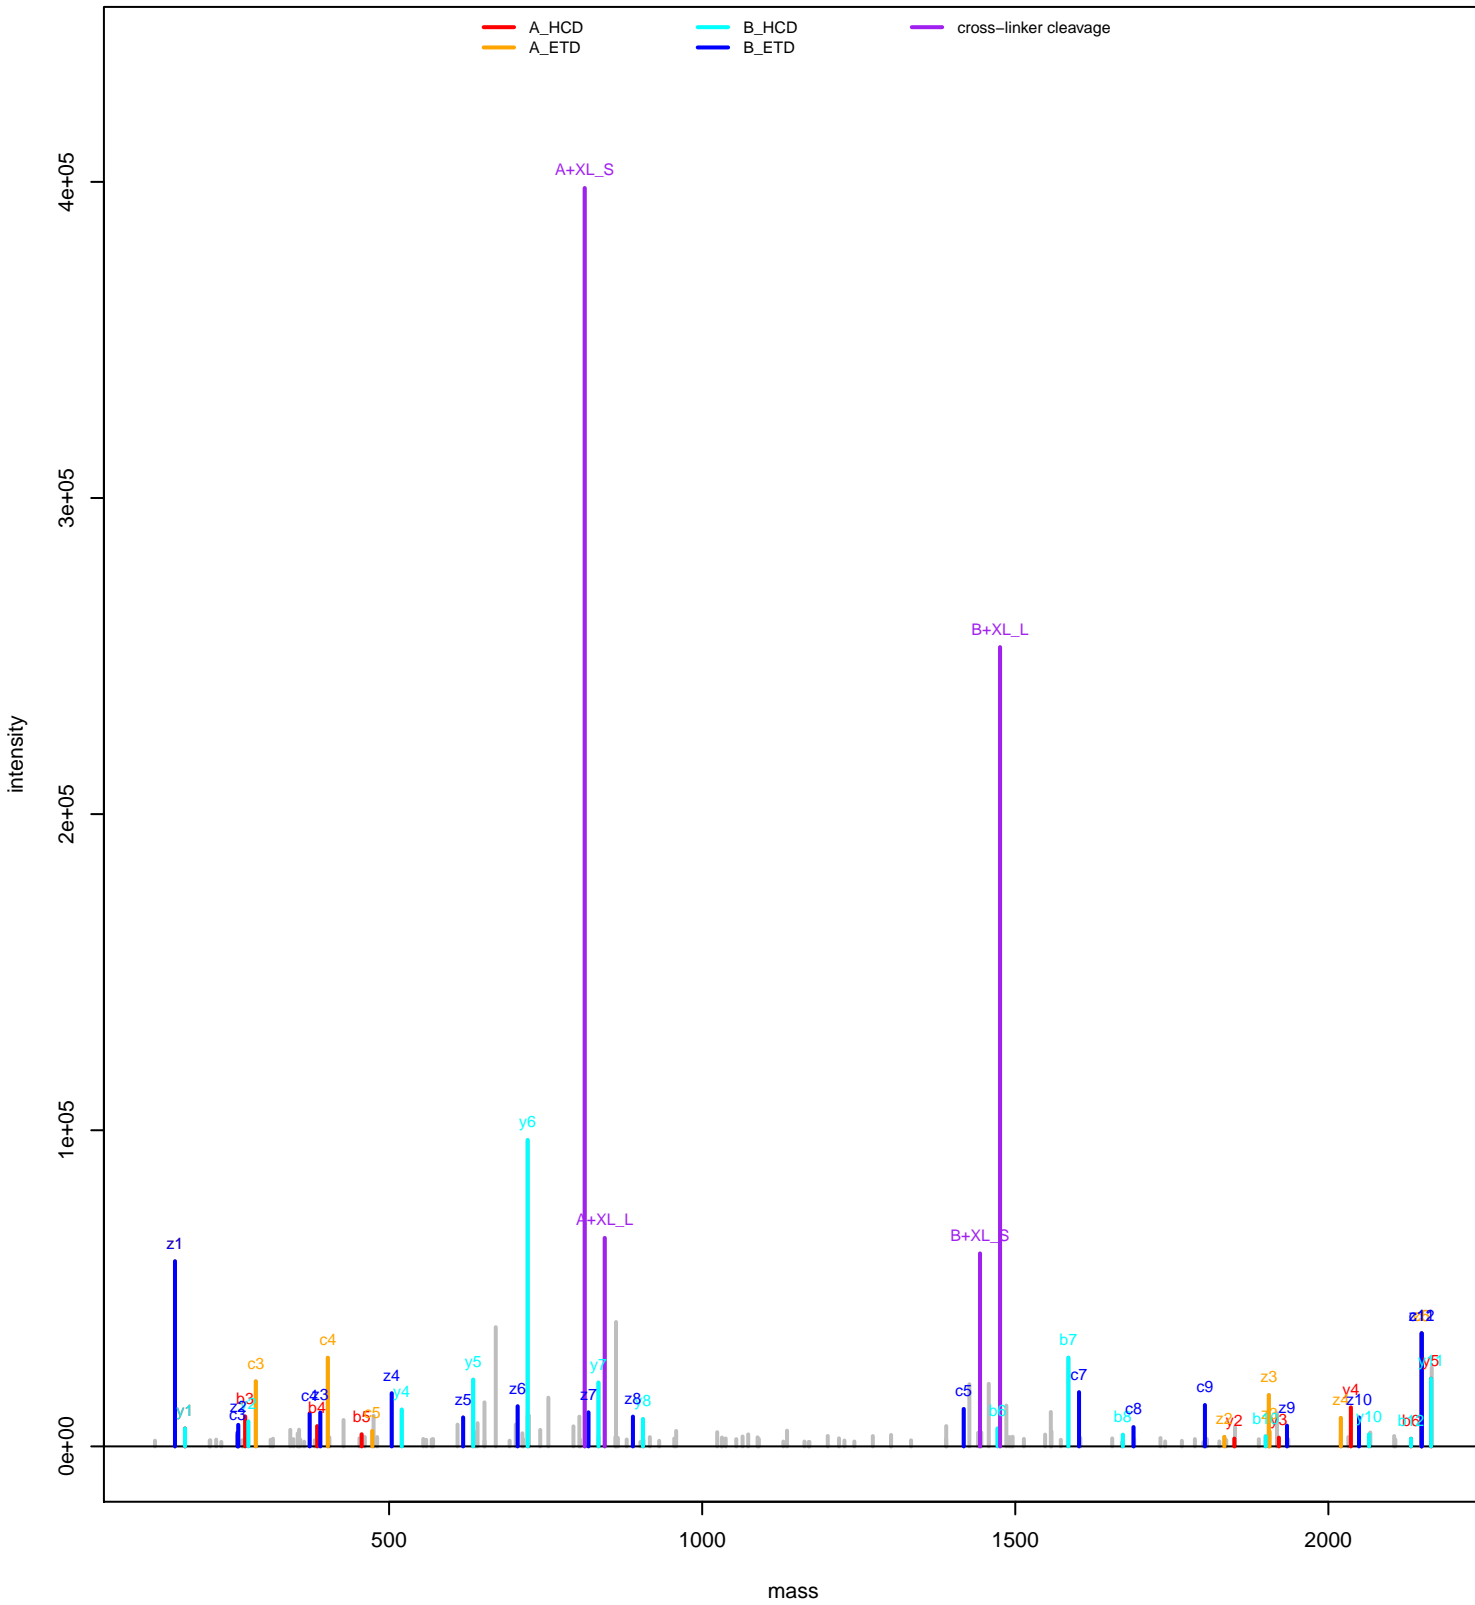

AAQDAKR+XL\_S

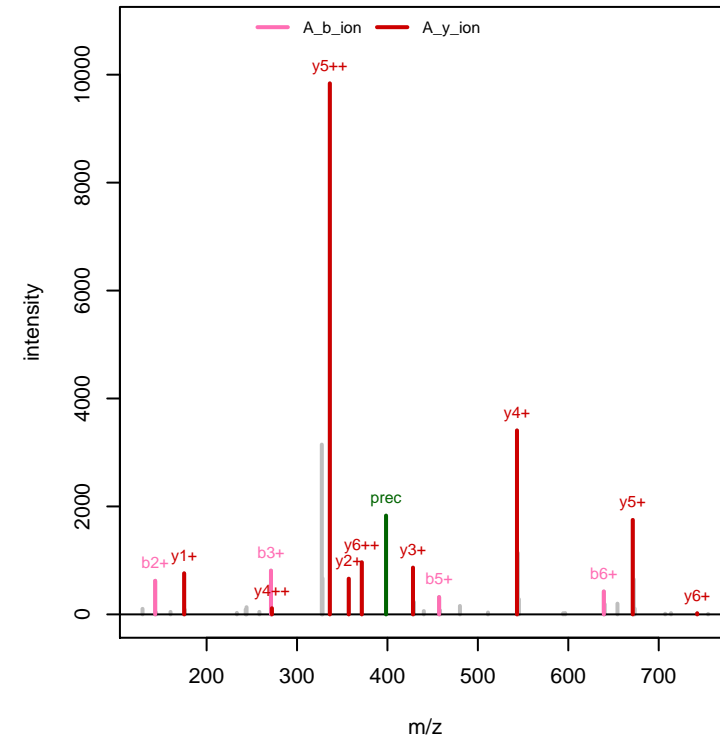

AAQDAKR+XL\_L

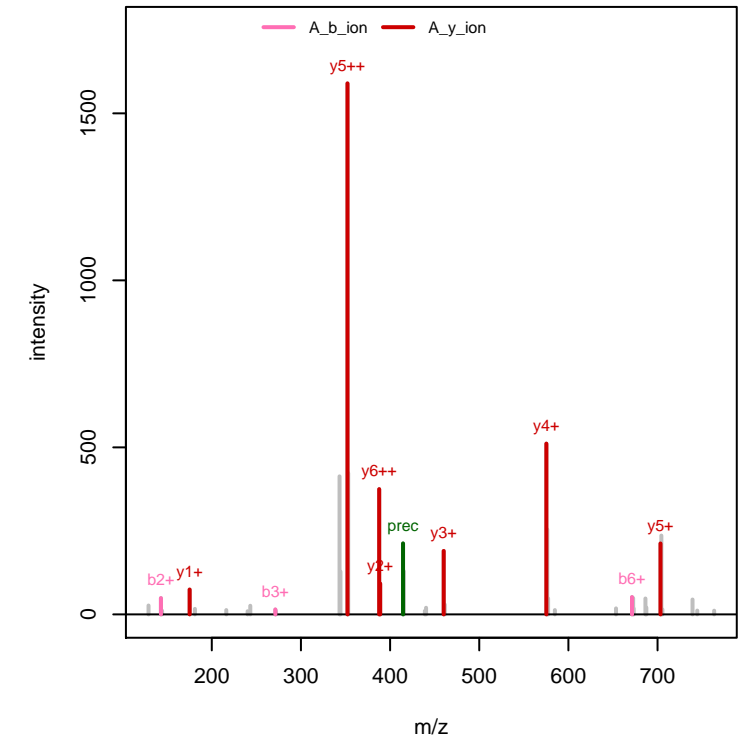

AAVDKALSNNMTR+XL\_S

AAVDKALSNNMTR+XL\_S

AAVDKALSNNMTR+XL\_L

AAVDKALSNNMTR+XL\_L



SHALNATKR  
SRVCQVTGK

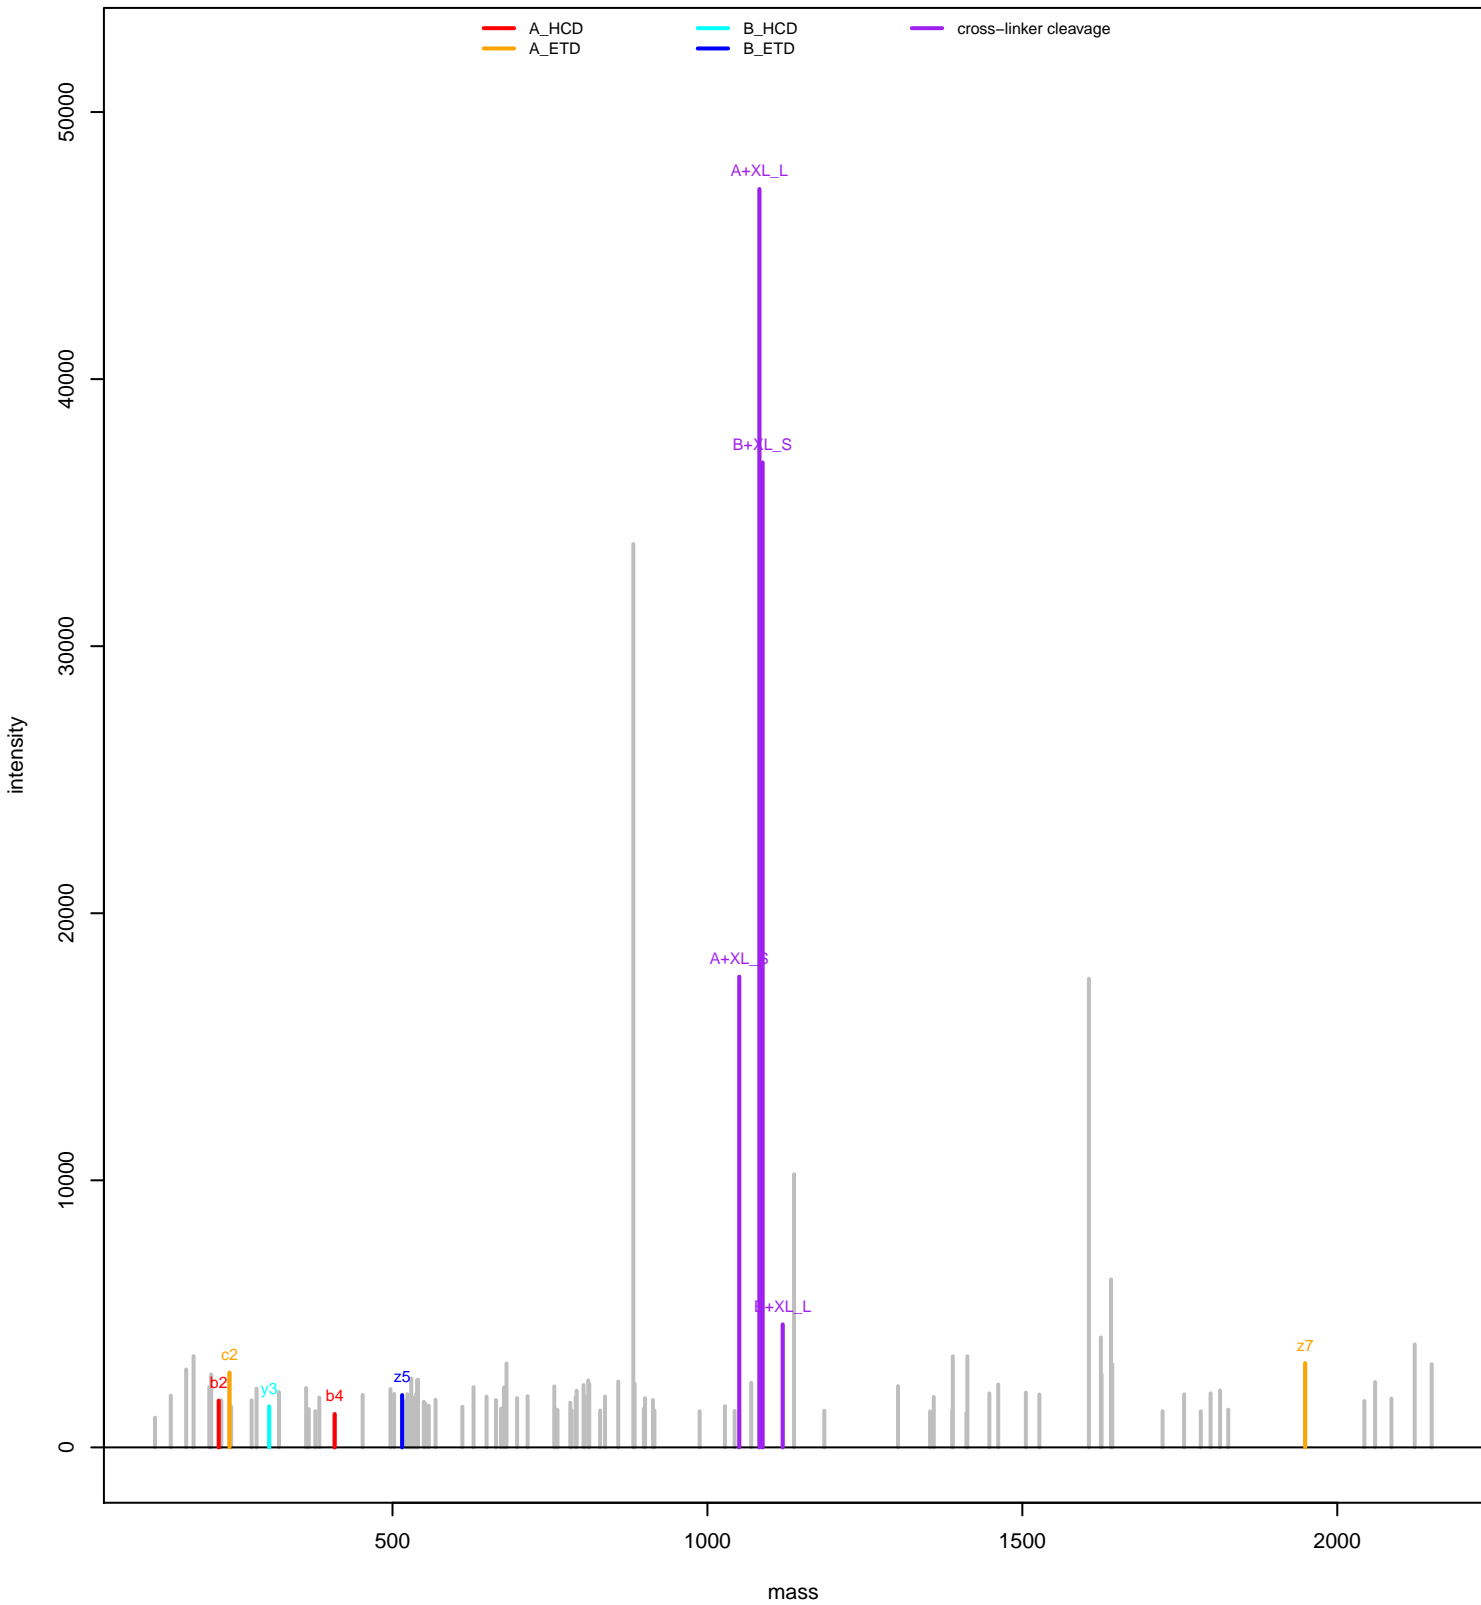

SHALNATKR+XL\_S

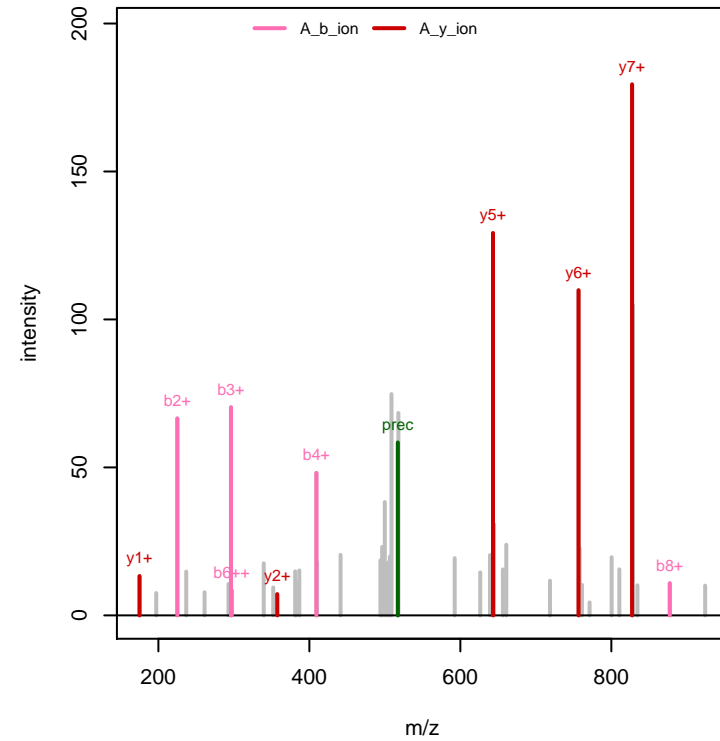

SHALNATKR+XL\_L

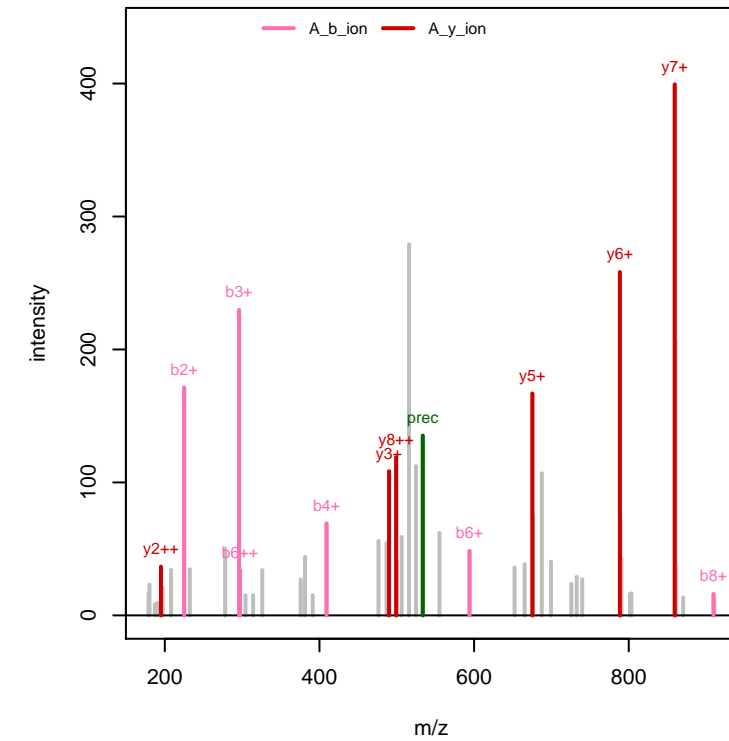

SRVCQVTGK+XL\_S

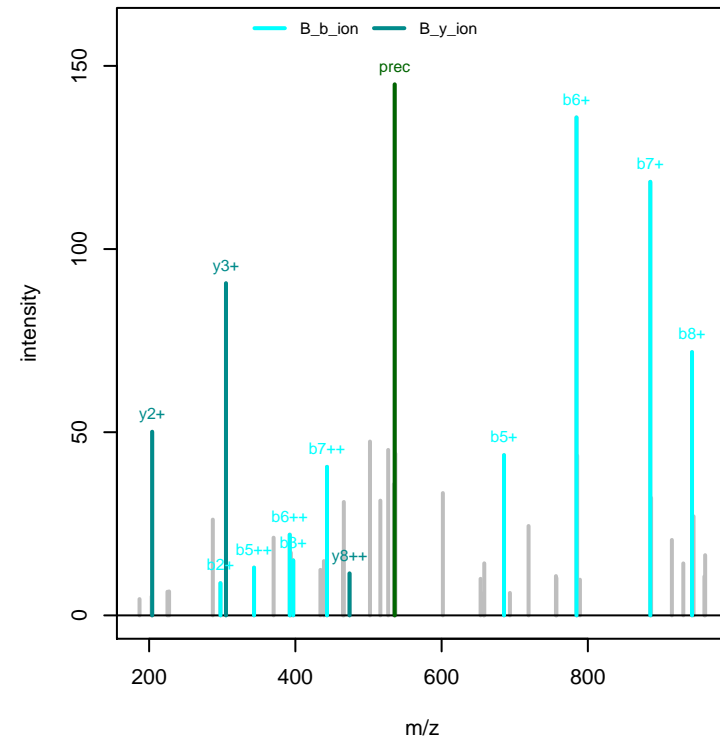

SRVCQVTGK+XL\_L

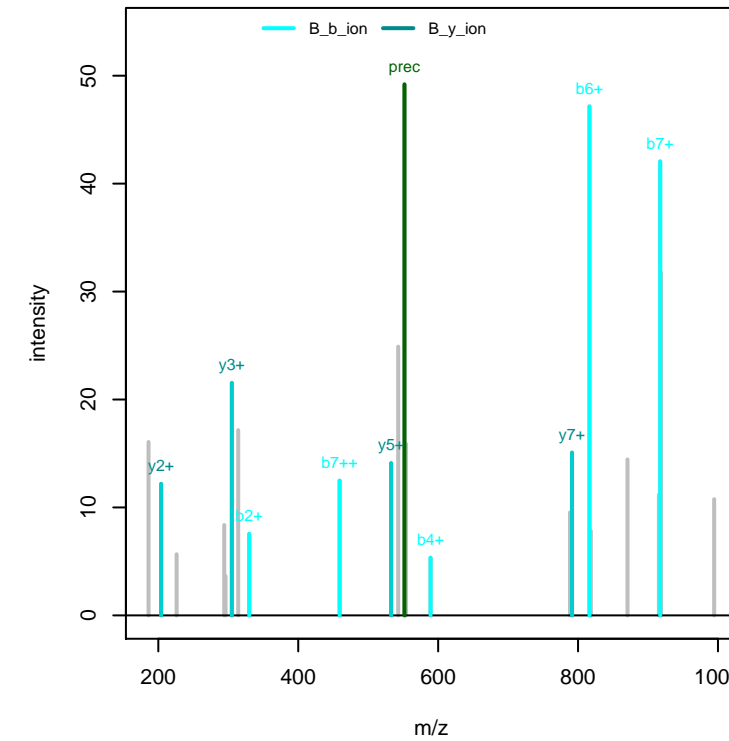

DEVVKK  
VDRFNKR

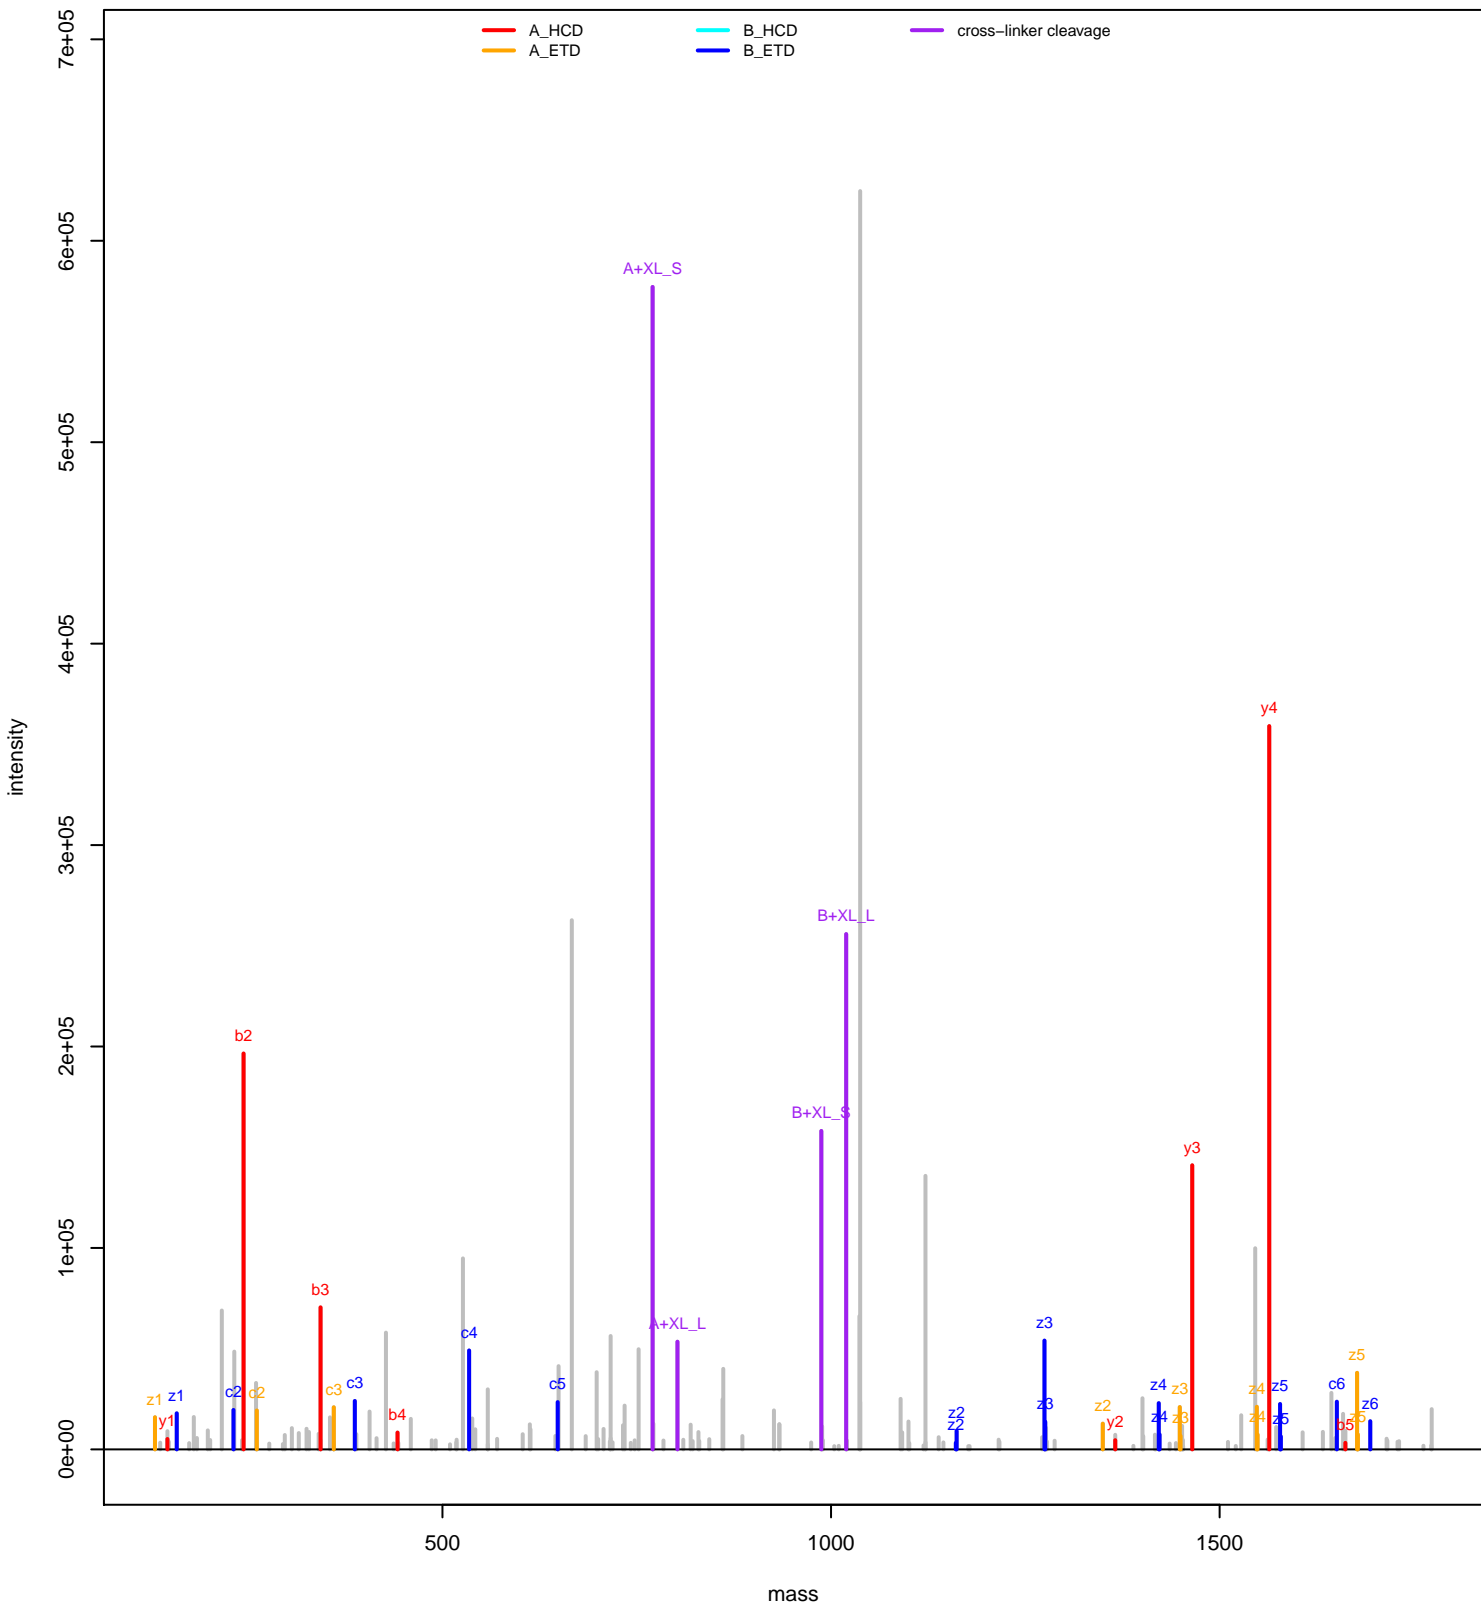

DEVVKK+XL\_S

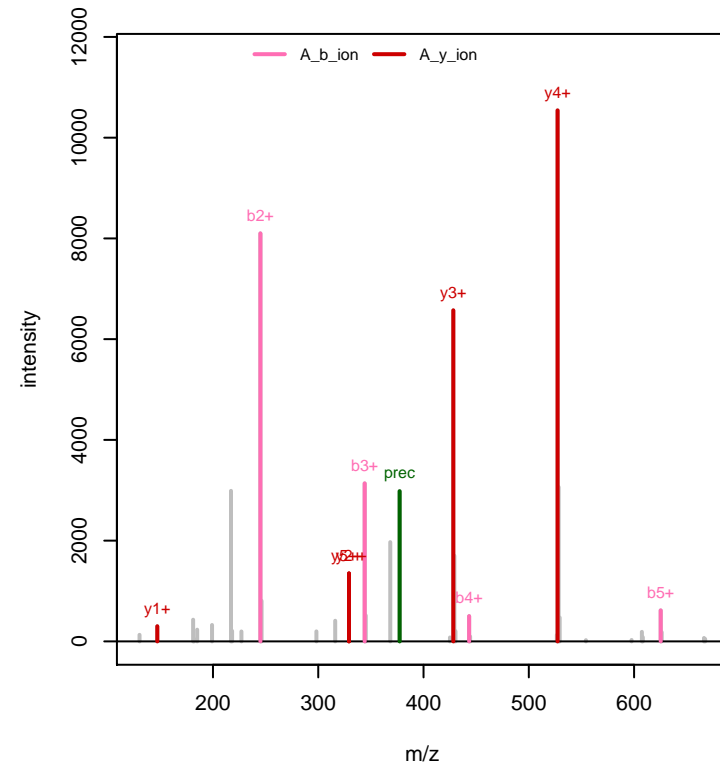

DEVVKK+XL\_L

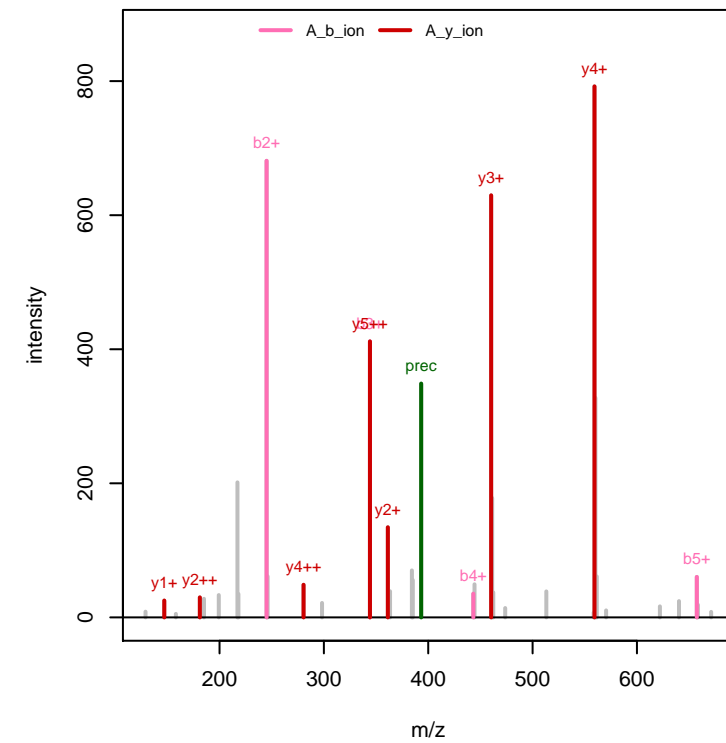

VDRFNKR+XL\_S

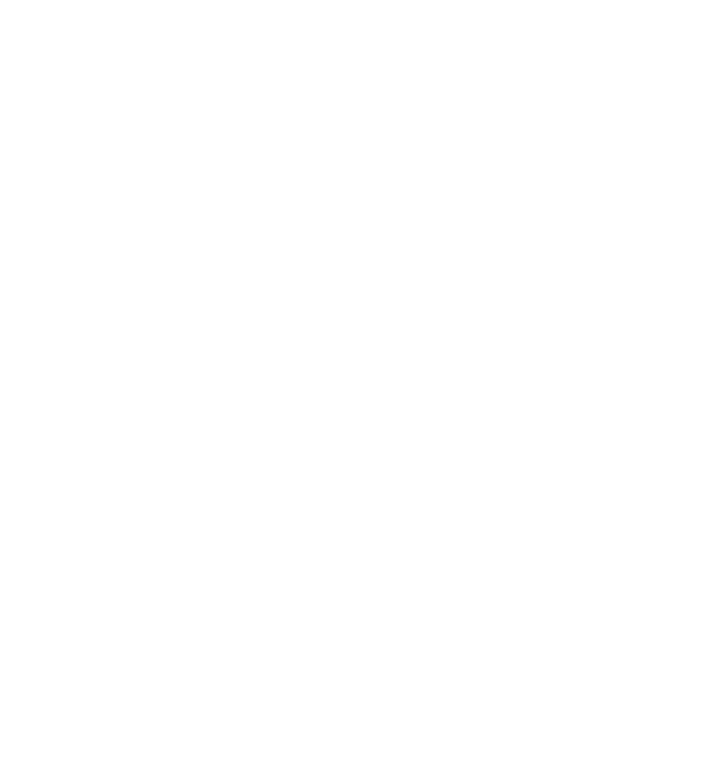

VDRFNKR+XL\_L

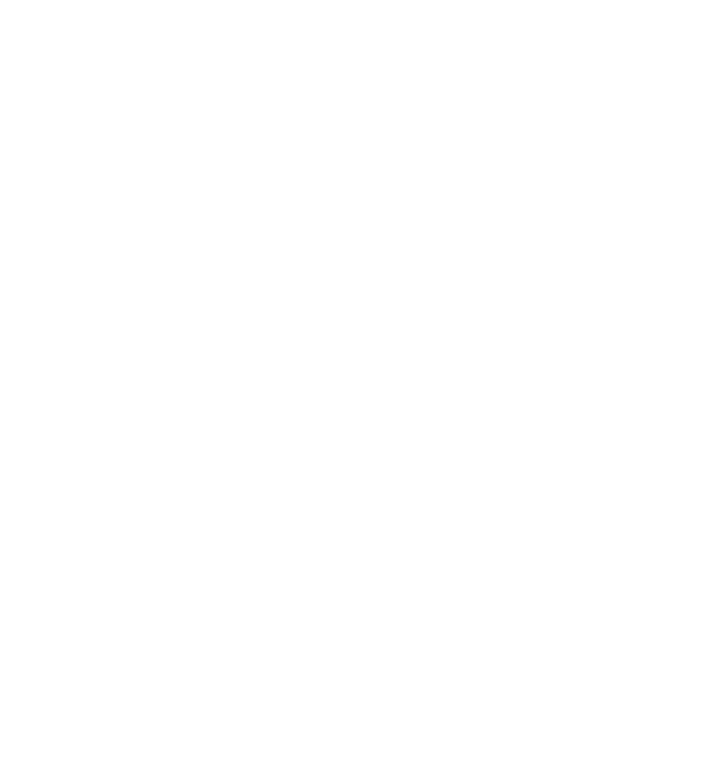

**ALEEAGAEVEVK**  
**EGVSKDDAEALKK**

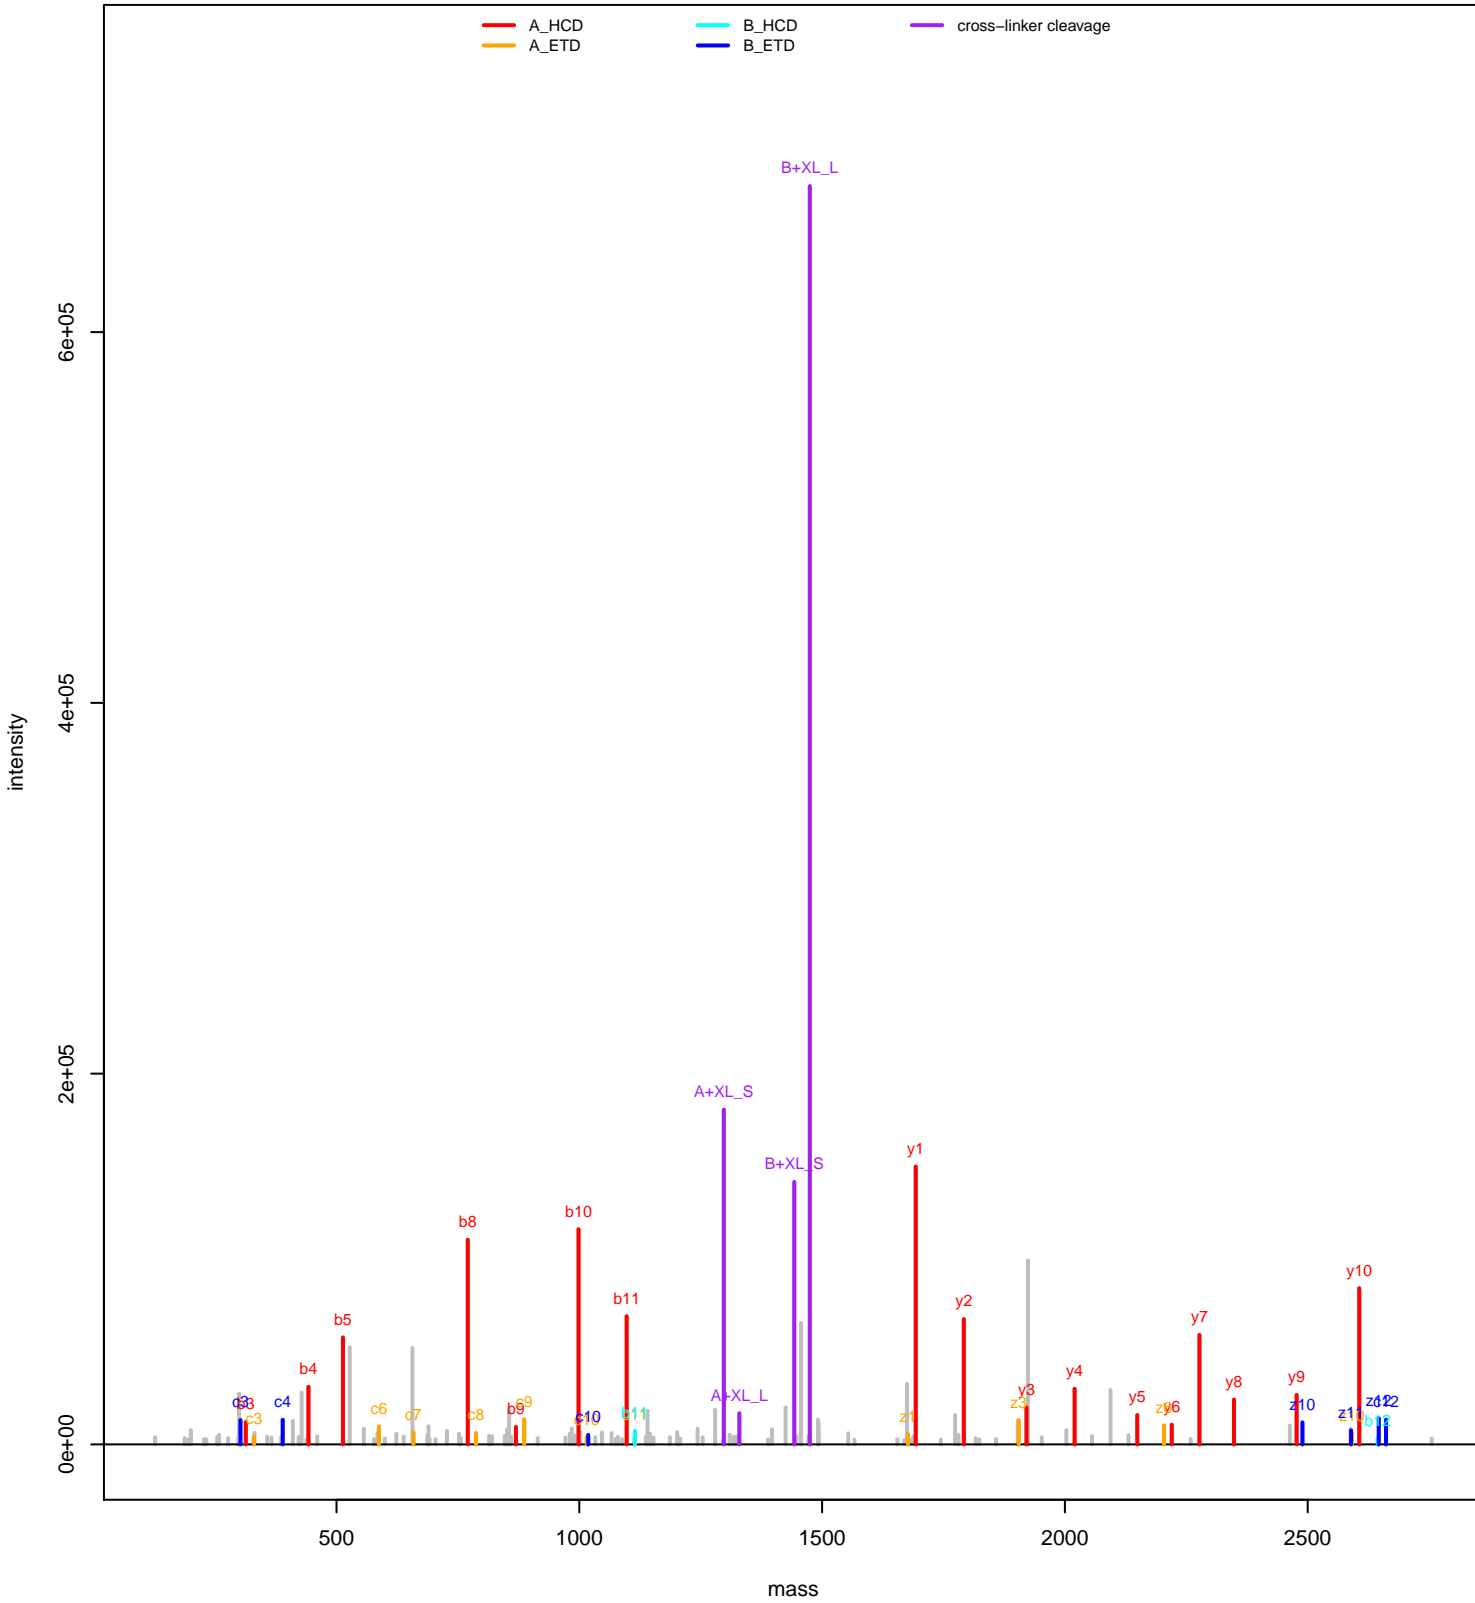

**ALEEAGAEVEVK+XL\_S**

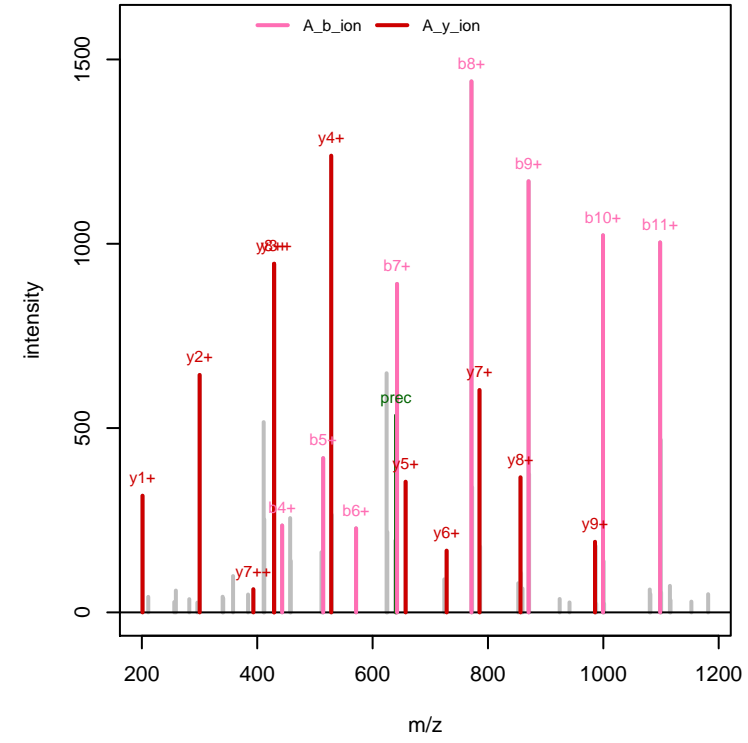

**ALEEAGAEVEVK+XL\_L**

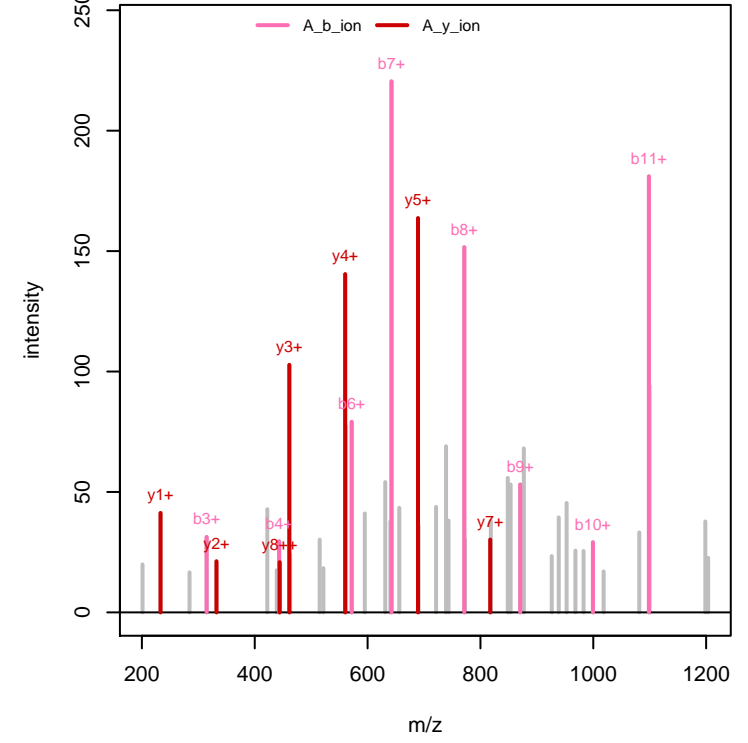

**EGVSKDDAEALKK+XL\_S**

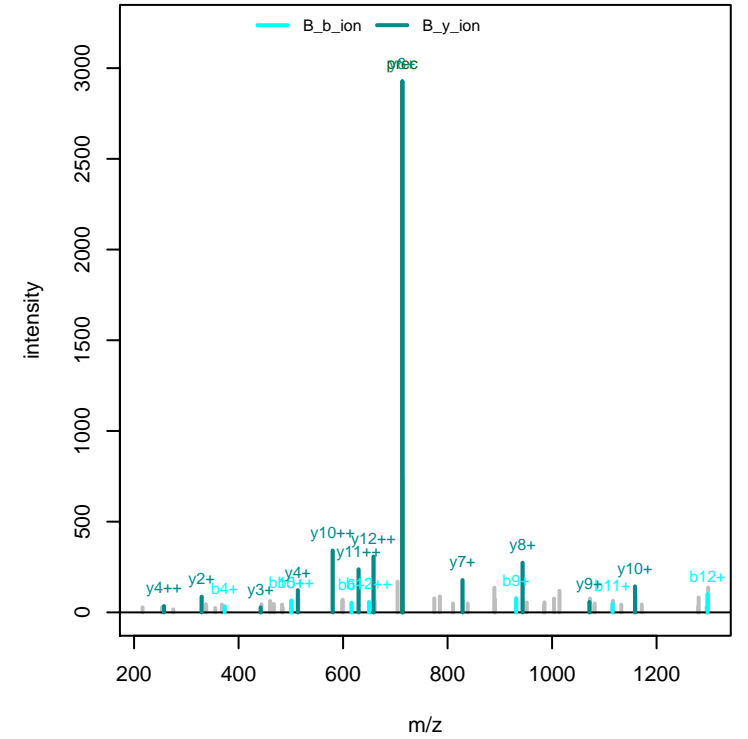

**EGVSKDDAEALKK+XL\_L**

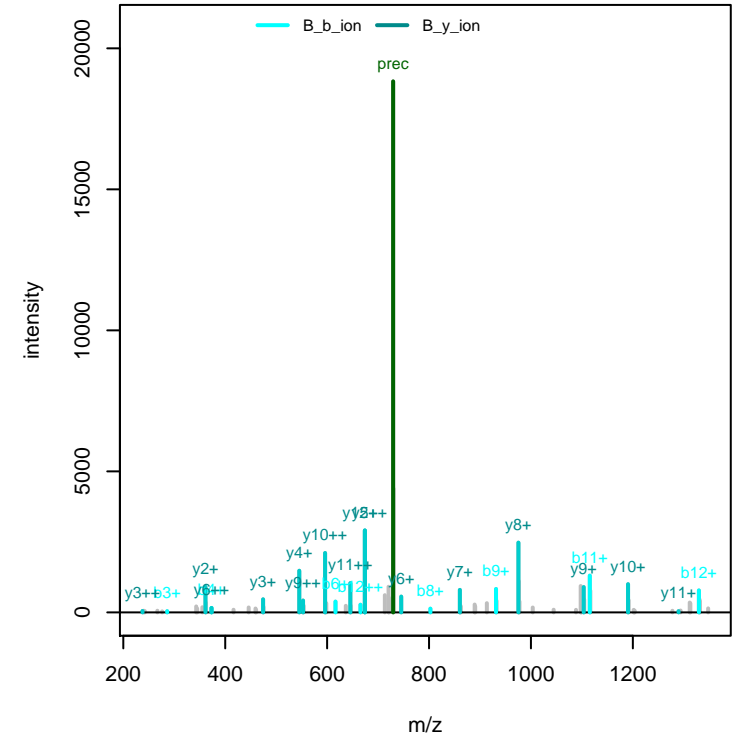

AKLLADDIVPSR  
VAKGVEGVTSVSDK

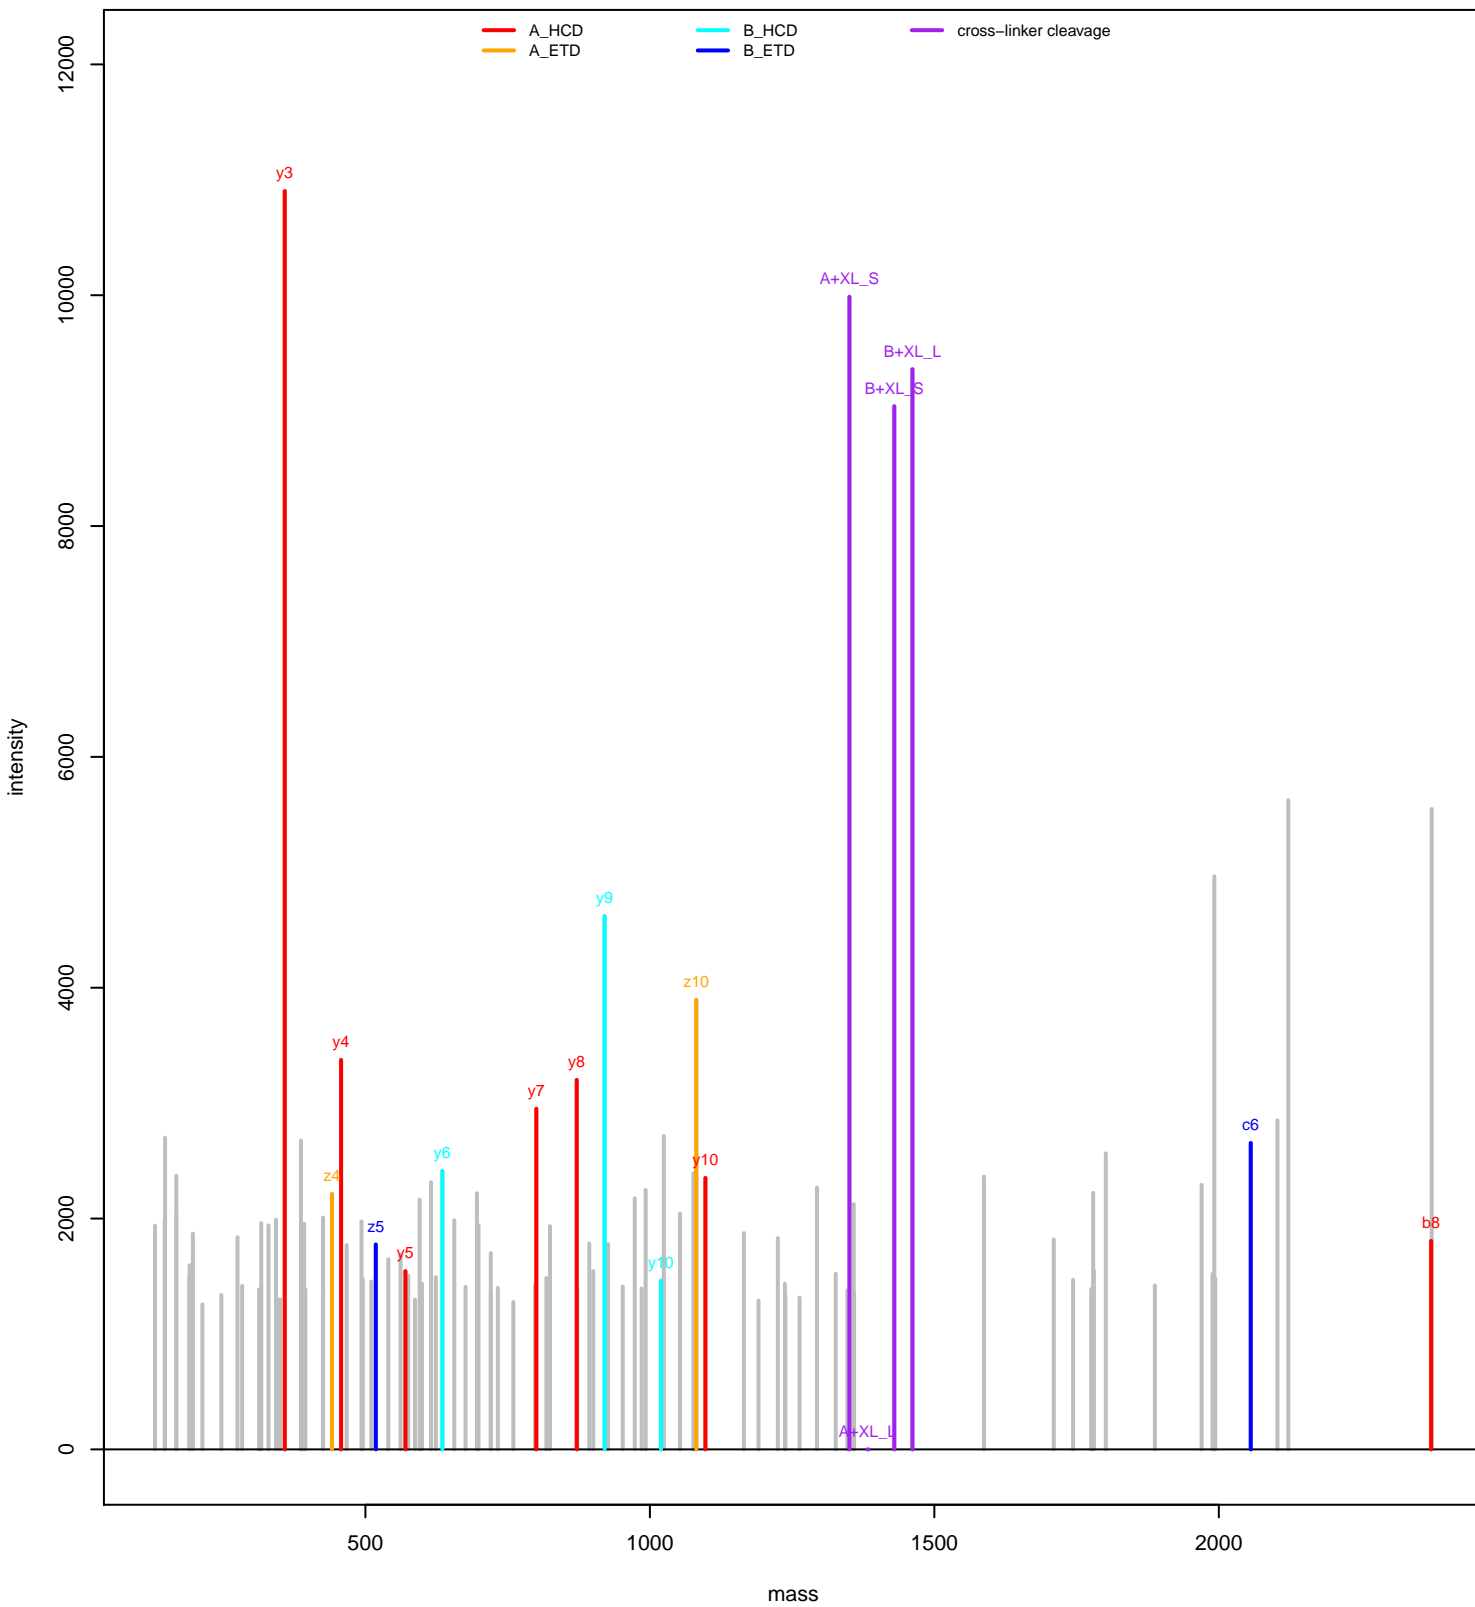

AKLLADDIVPSR+XL\_S

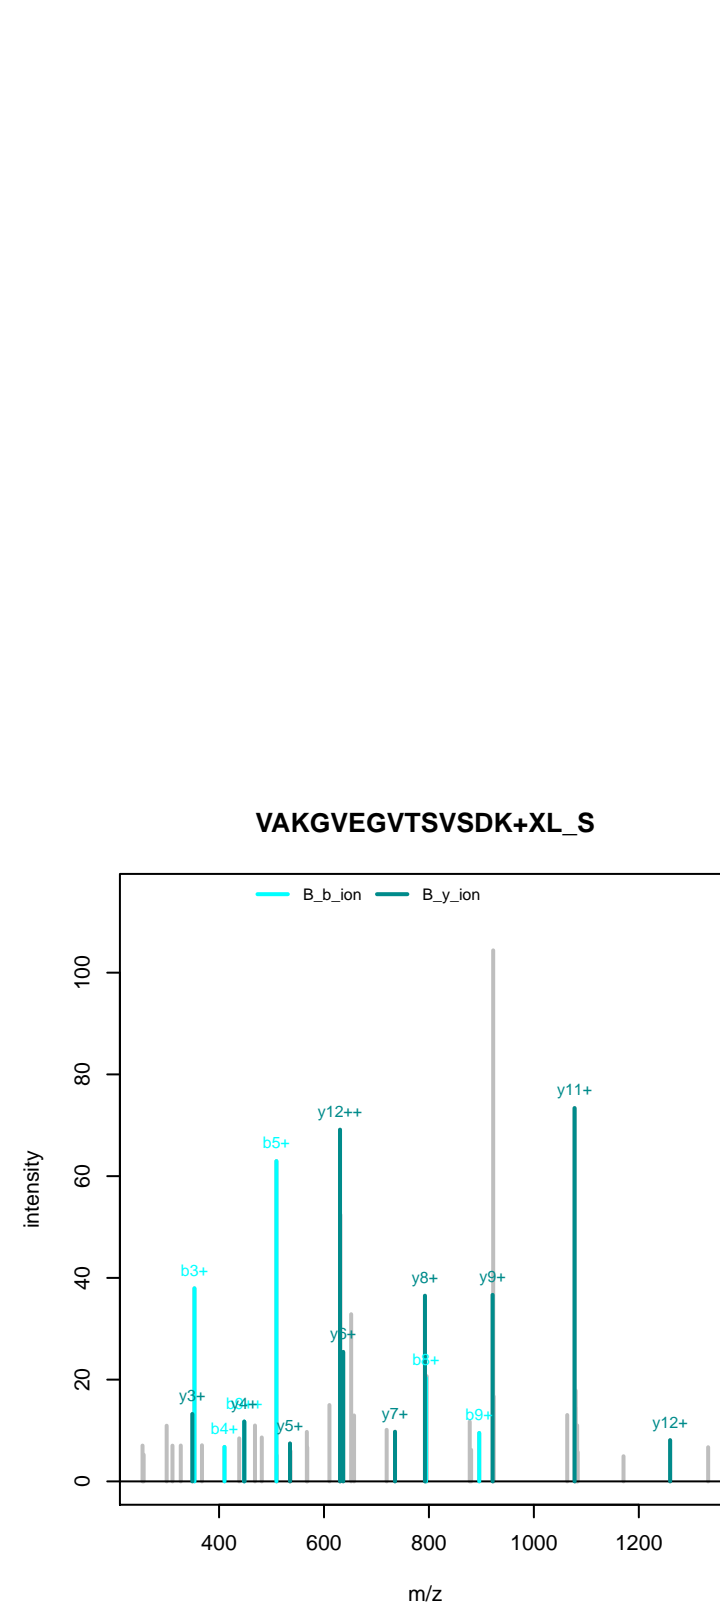

AKLLADDIVPSR+XL\_L

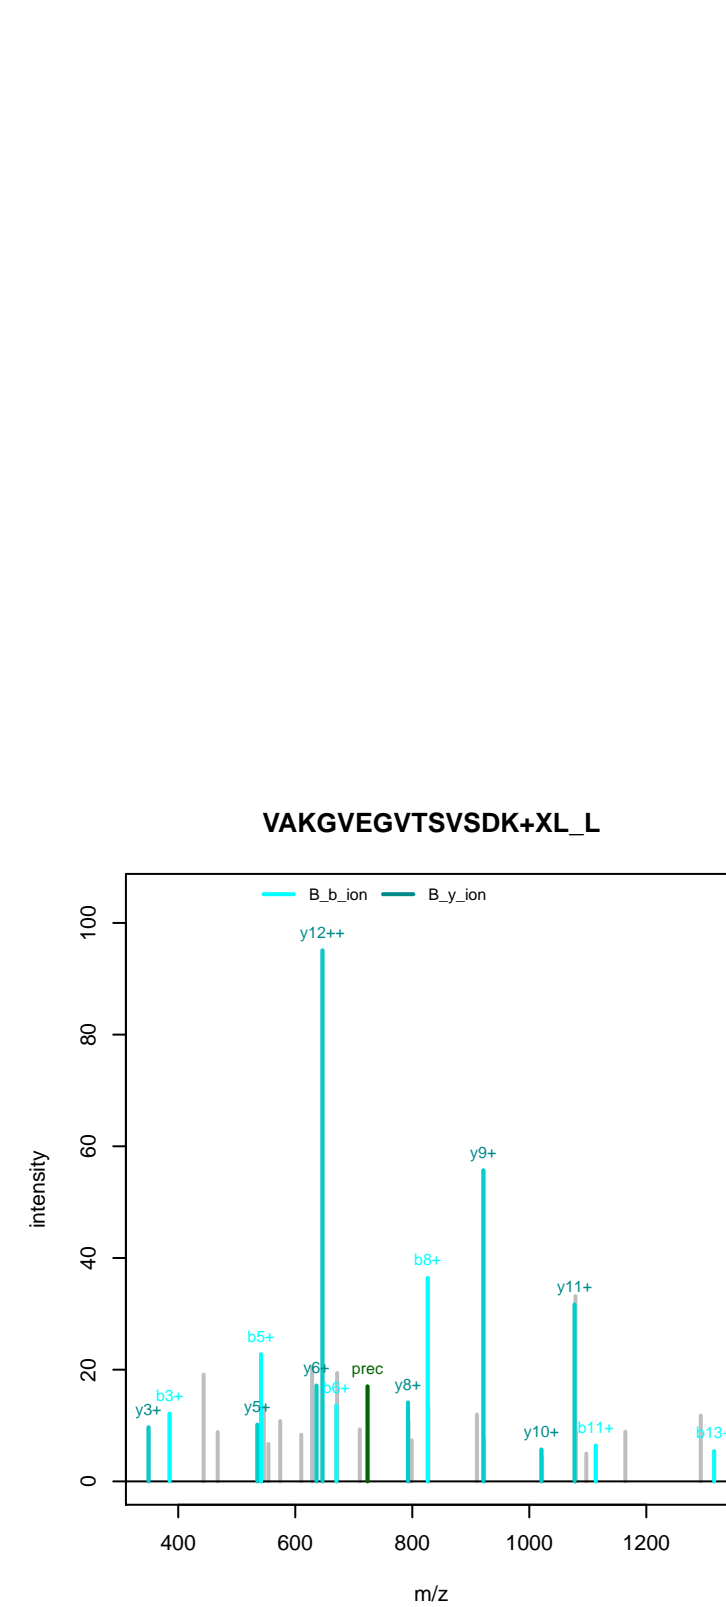

VAKGVEGVTSVSDK+XL\_S

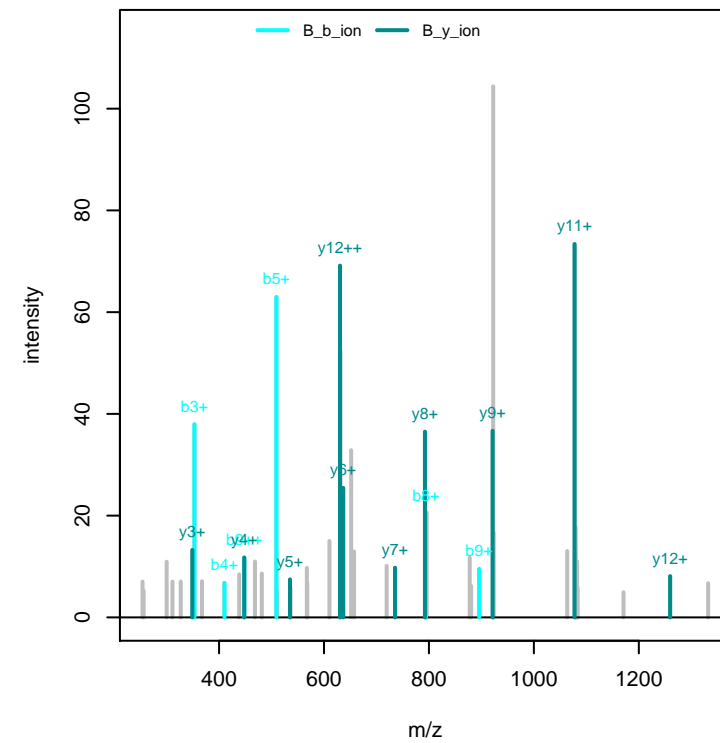

VAKGVEGVTSVSDK+XL\_L

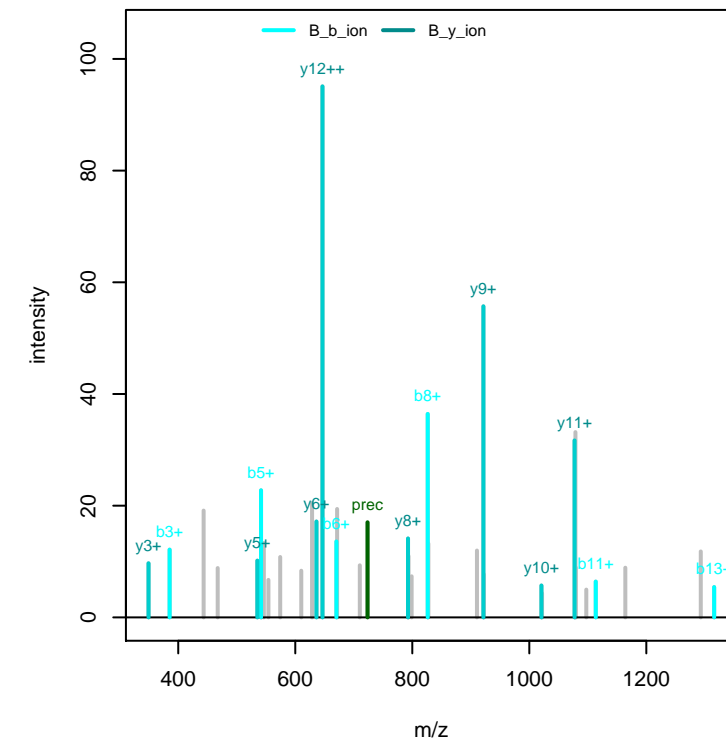

SKAPNSPVAGR  
TVKAAAICAER

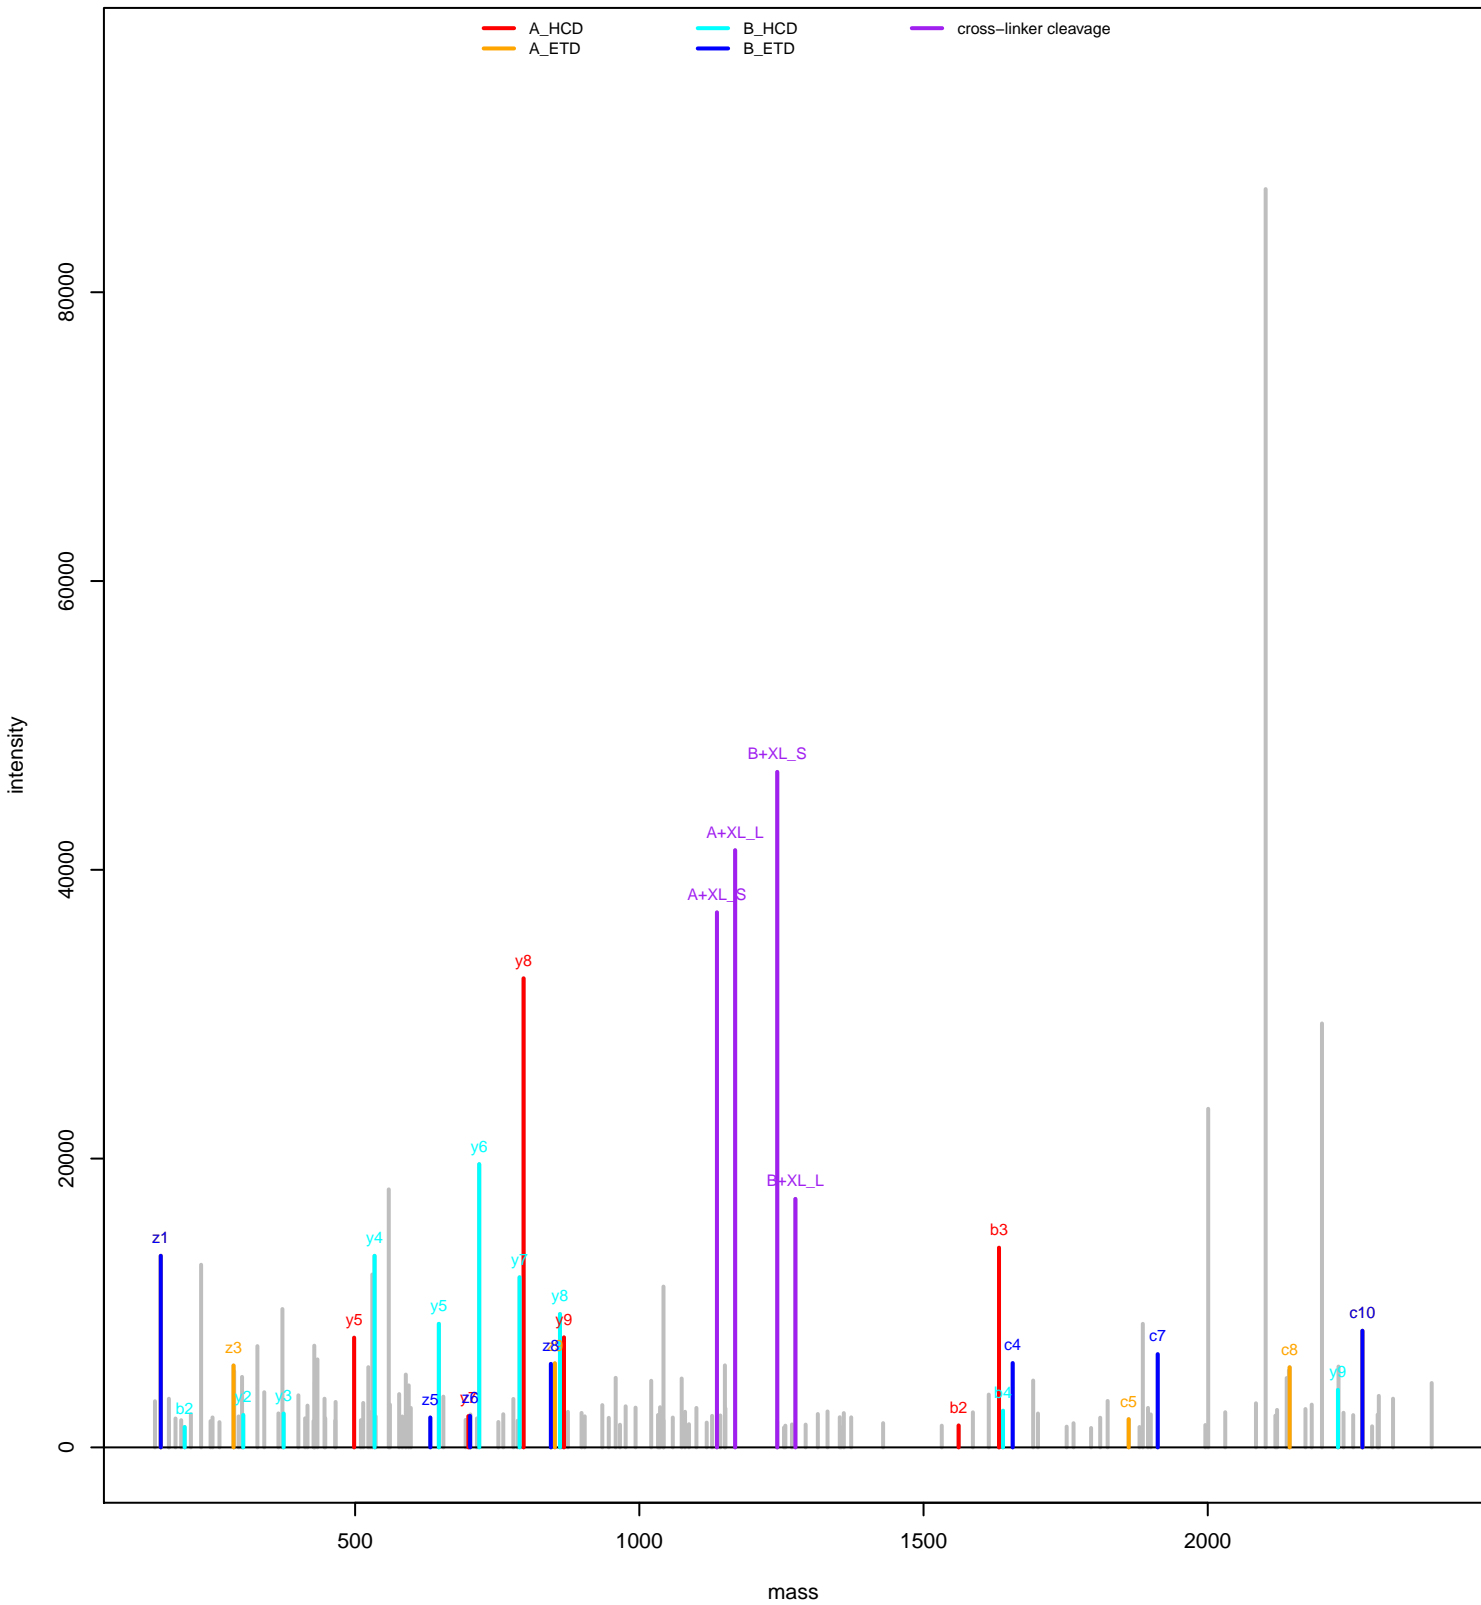

SKAPNSPVAGR+XL\_S

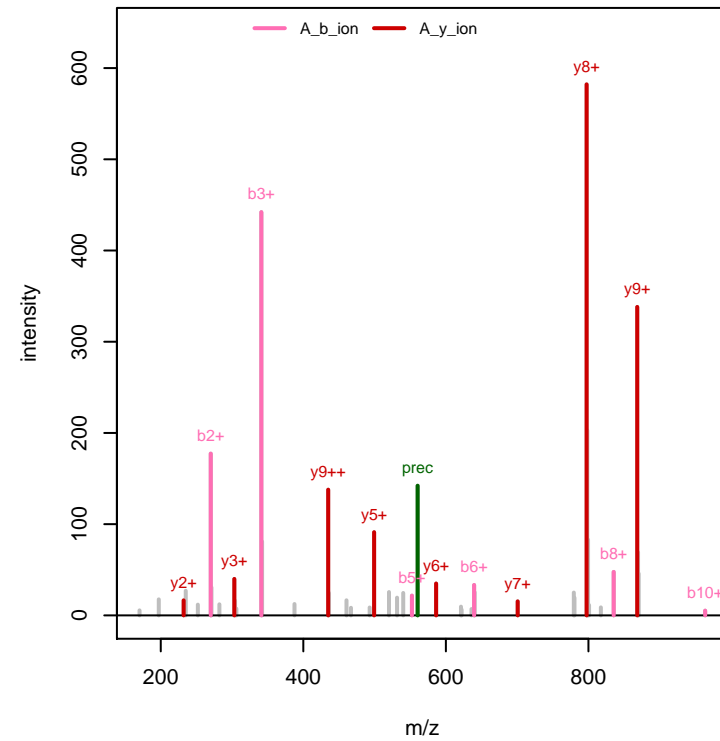

SKAPNSPVAGR+XL\_L

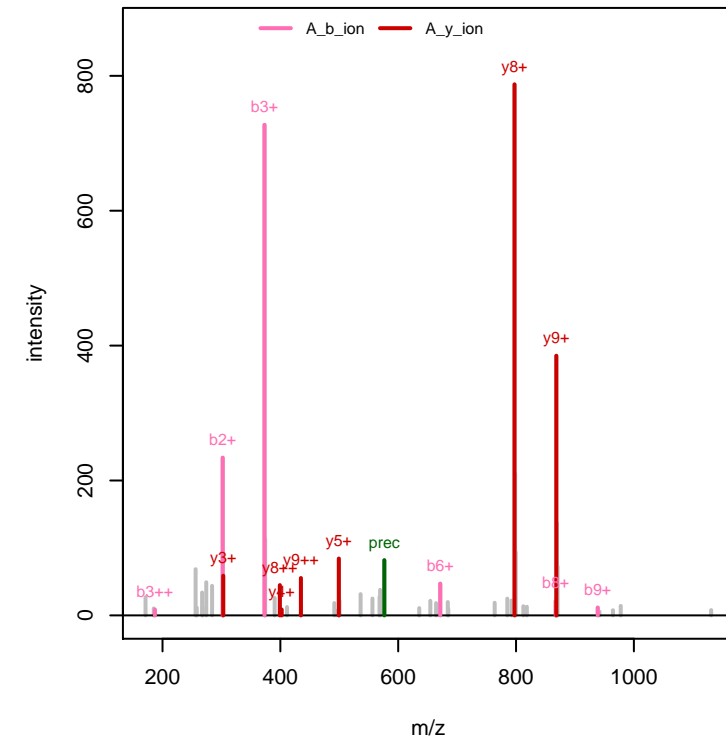

TVKAAAICAER+XL\_S

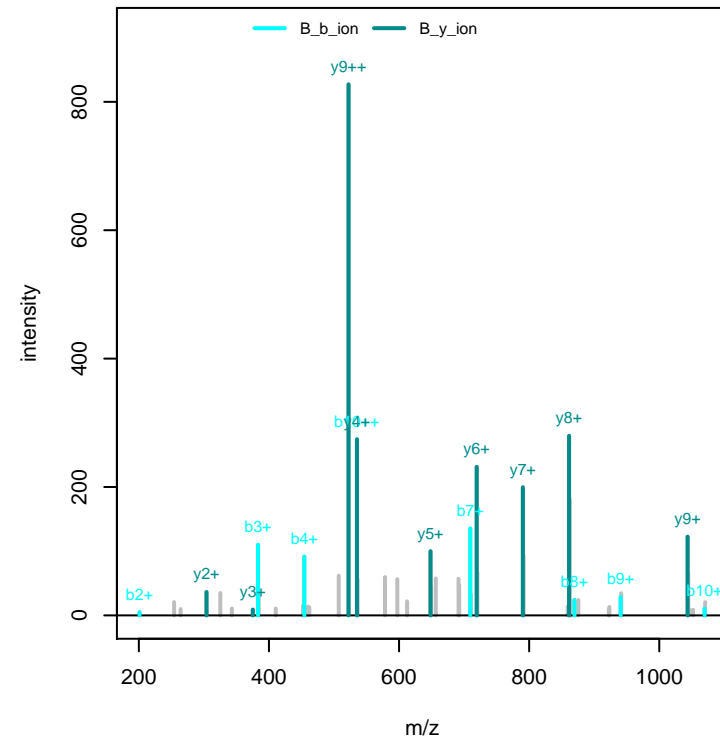

TVKAAAICAER+XL\_L

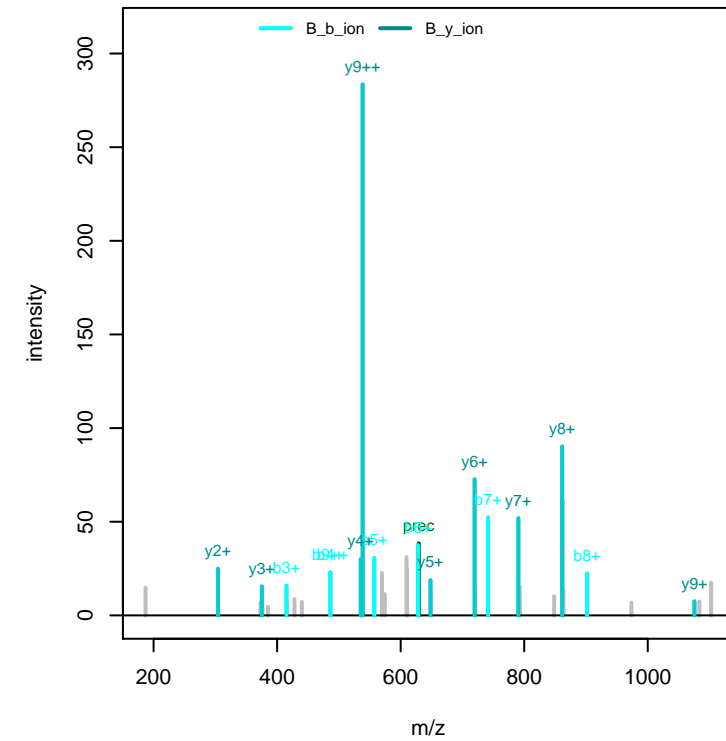

### ITQKEMTER VLTNSETNSIKK

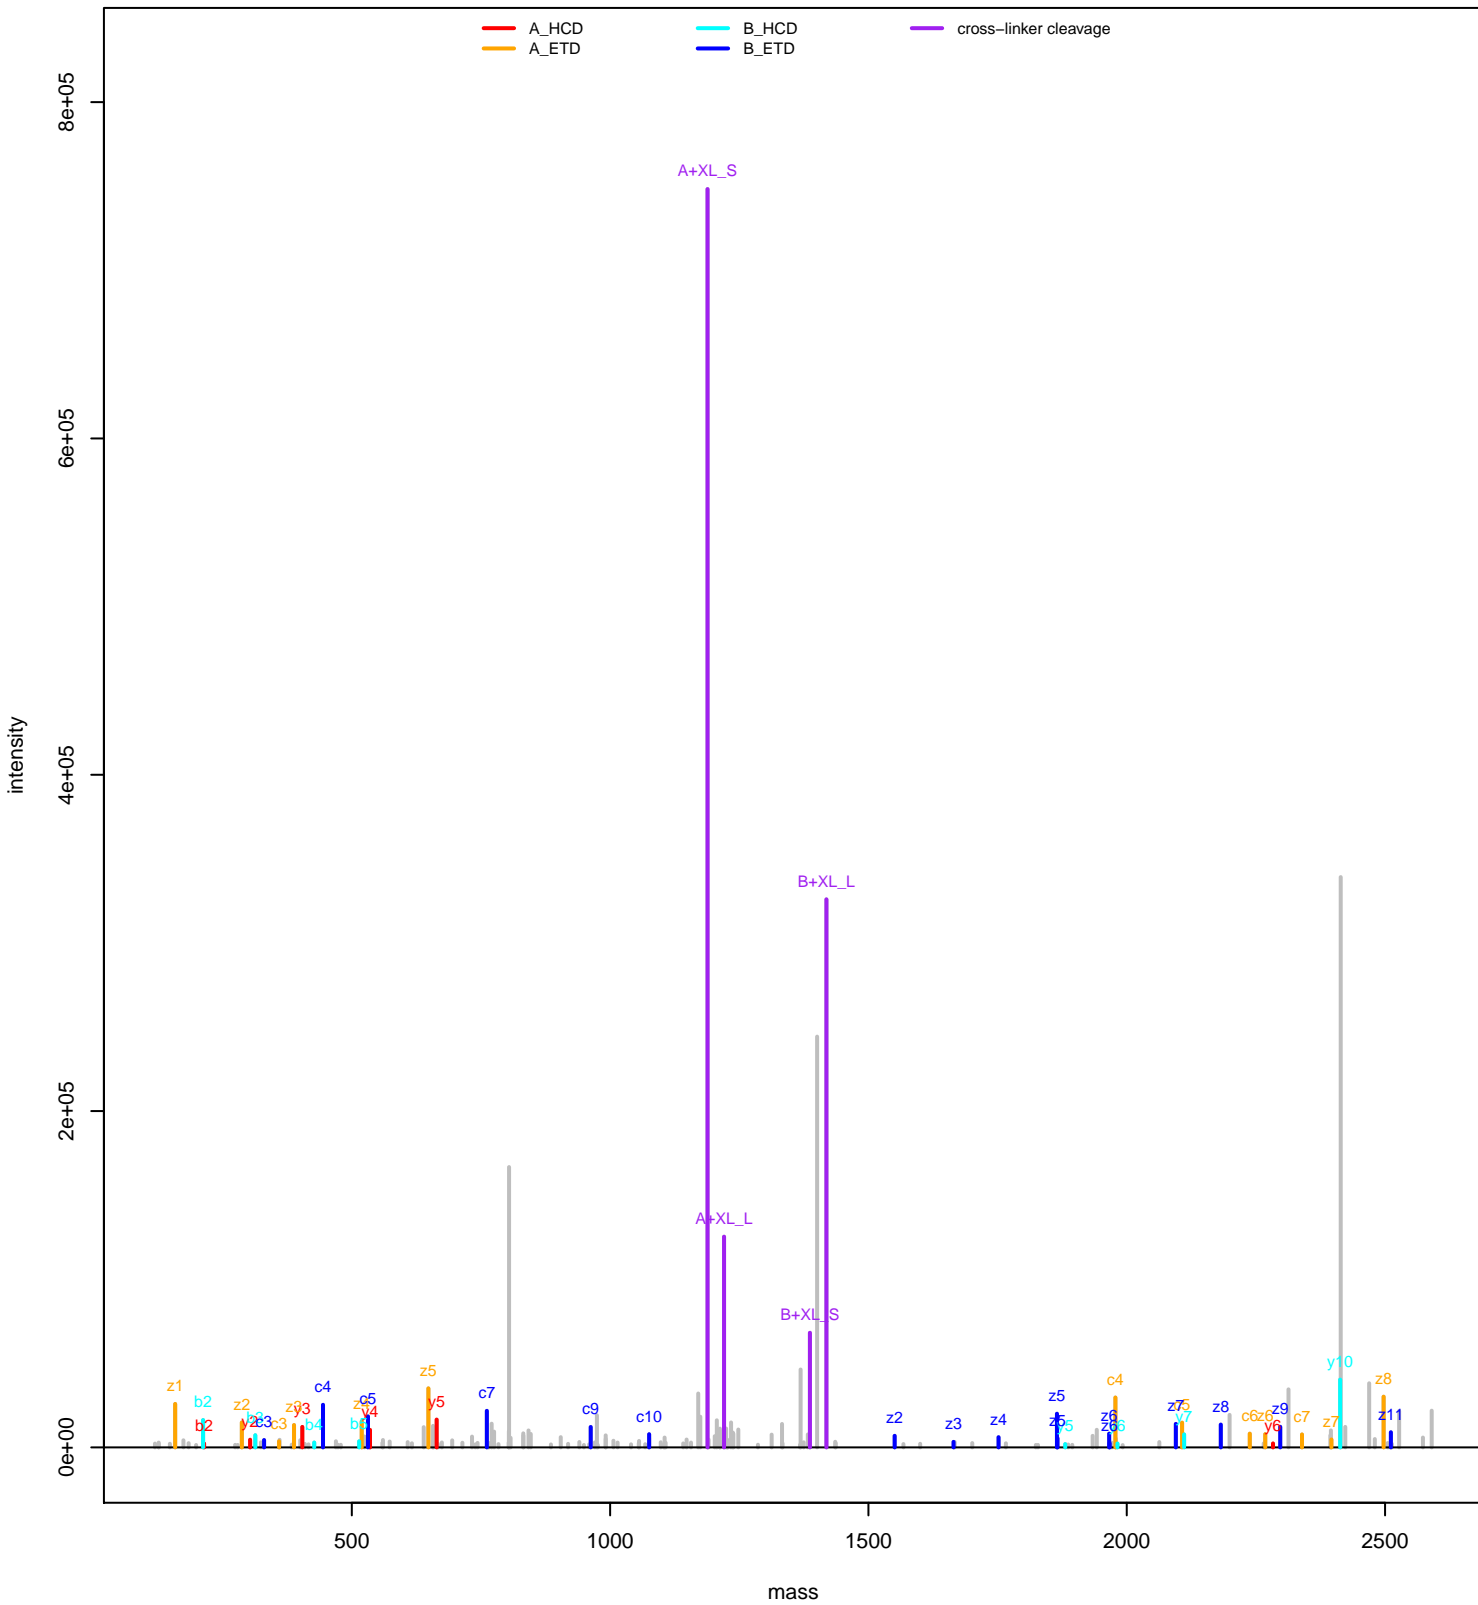

### ITQKEMTER+XL\_S

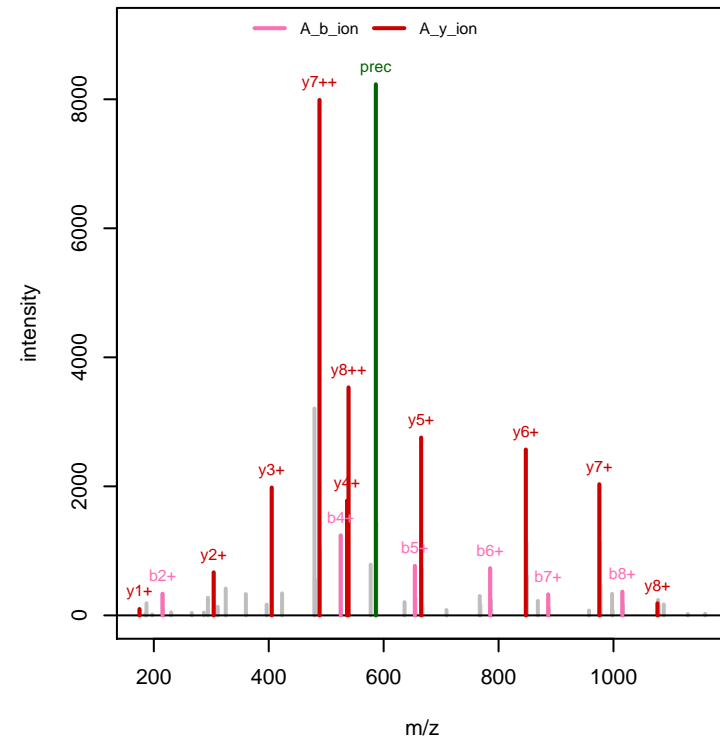

### ITQKEMTER+XL\_L

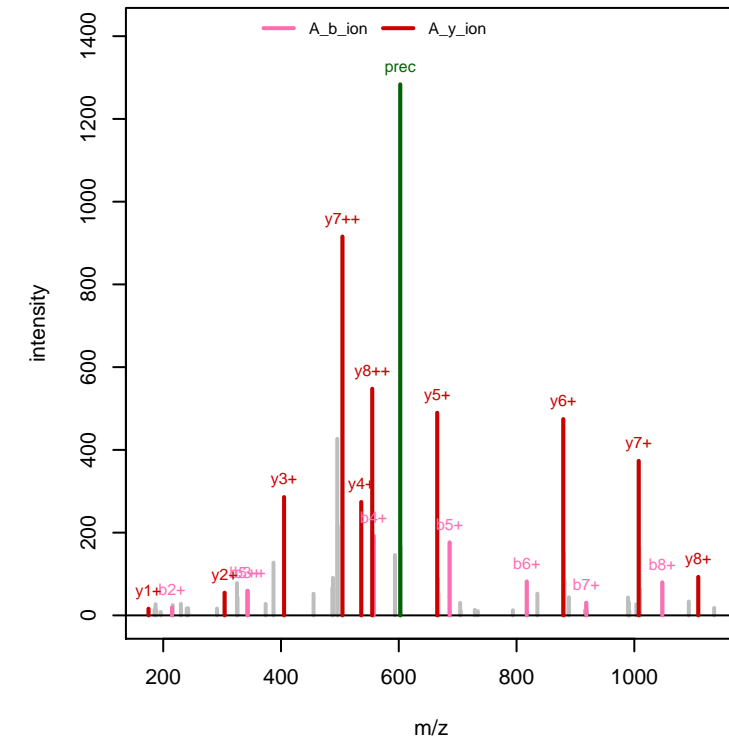

### VLTNSETNSIKK+XL\_S

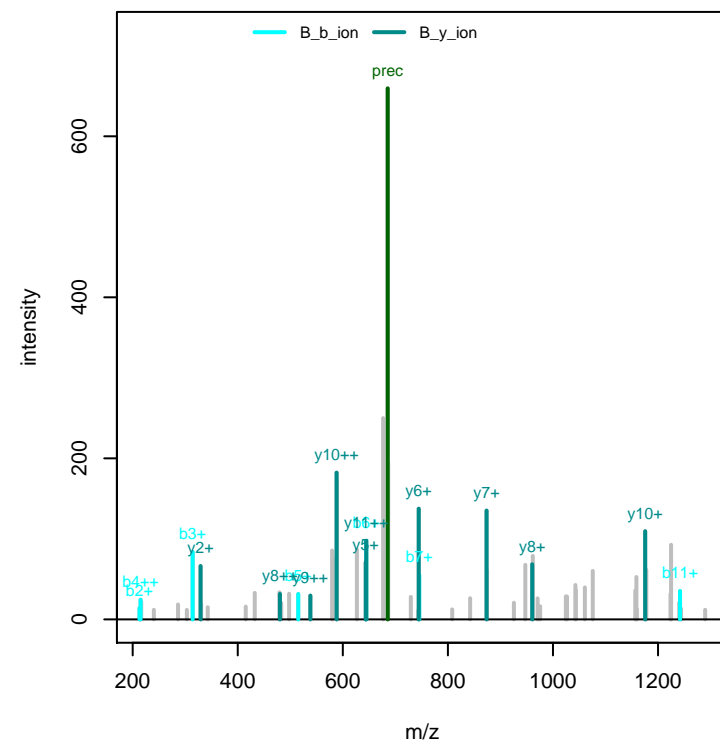

### VLTNSETNSIKK+XL\_L

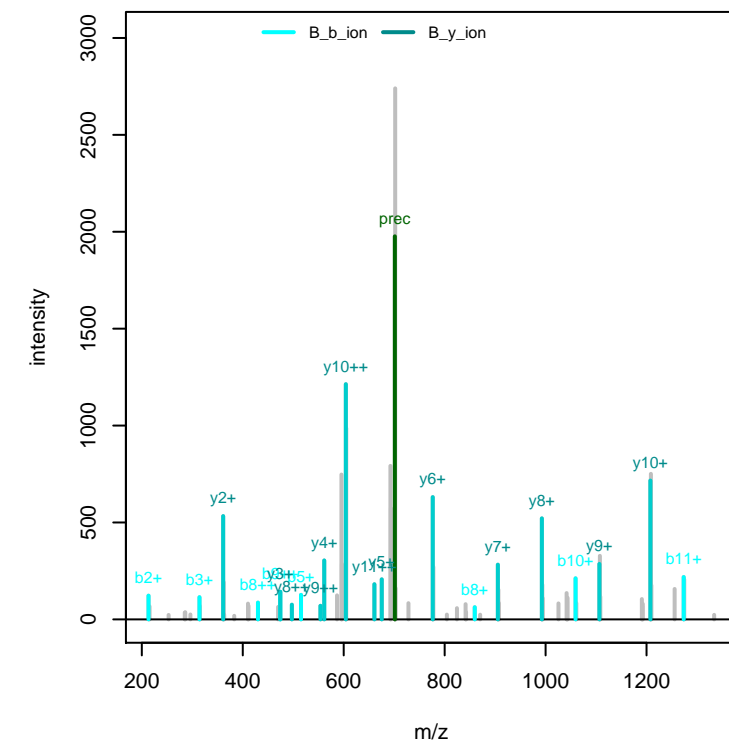

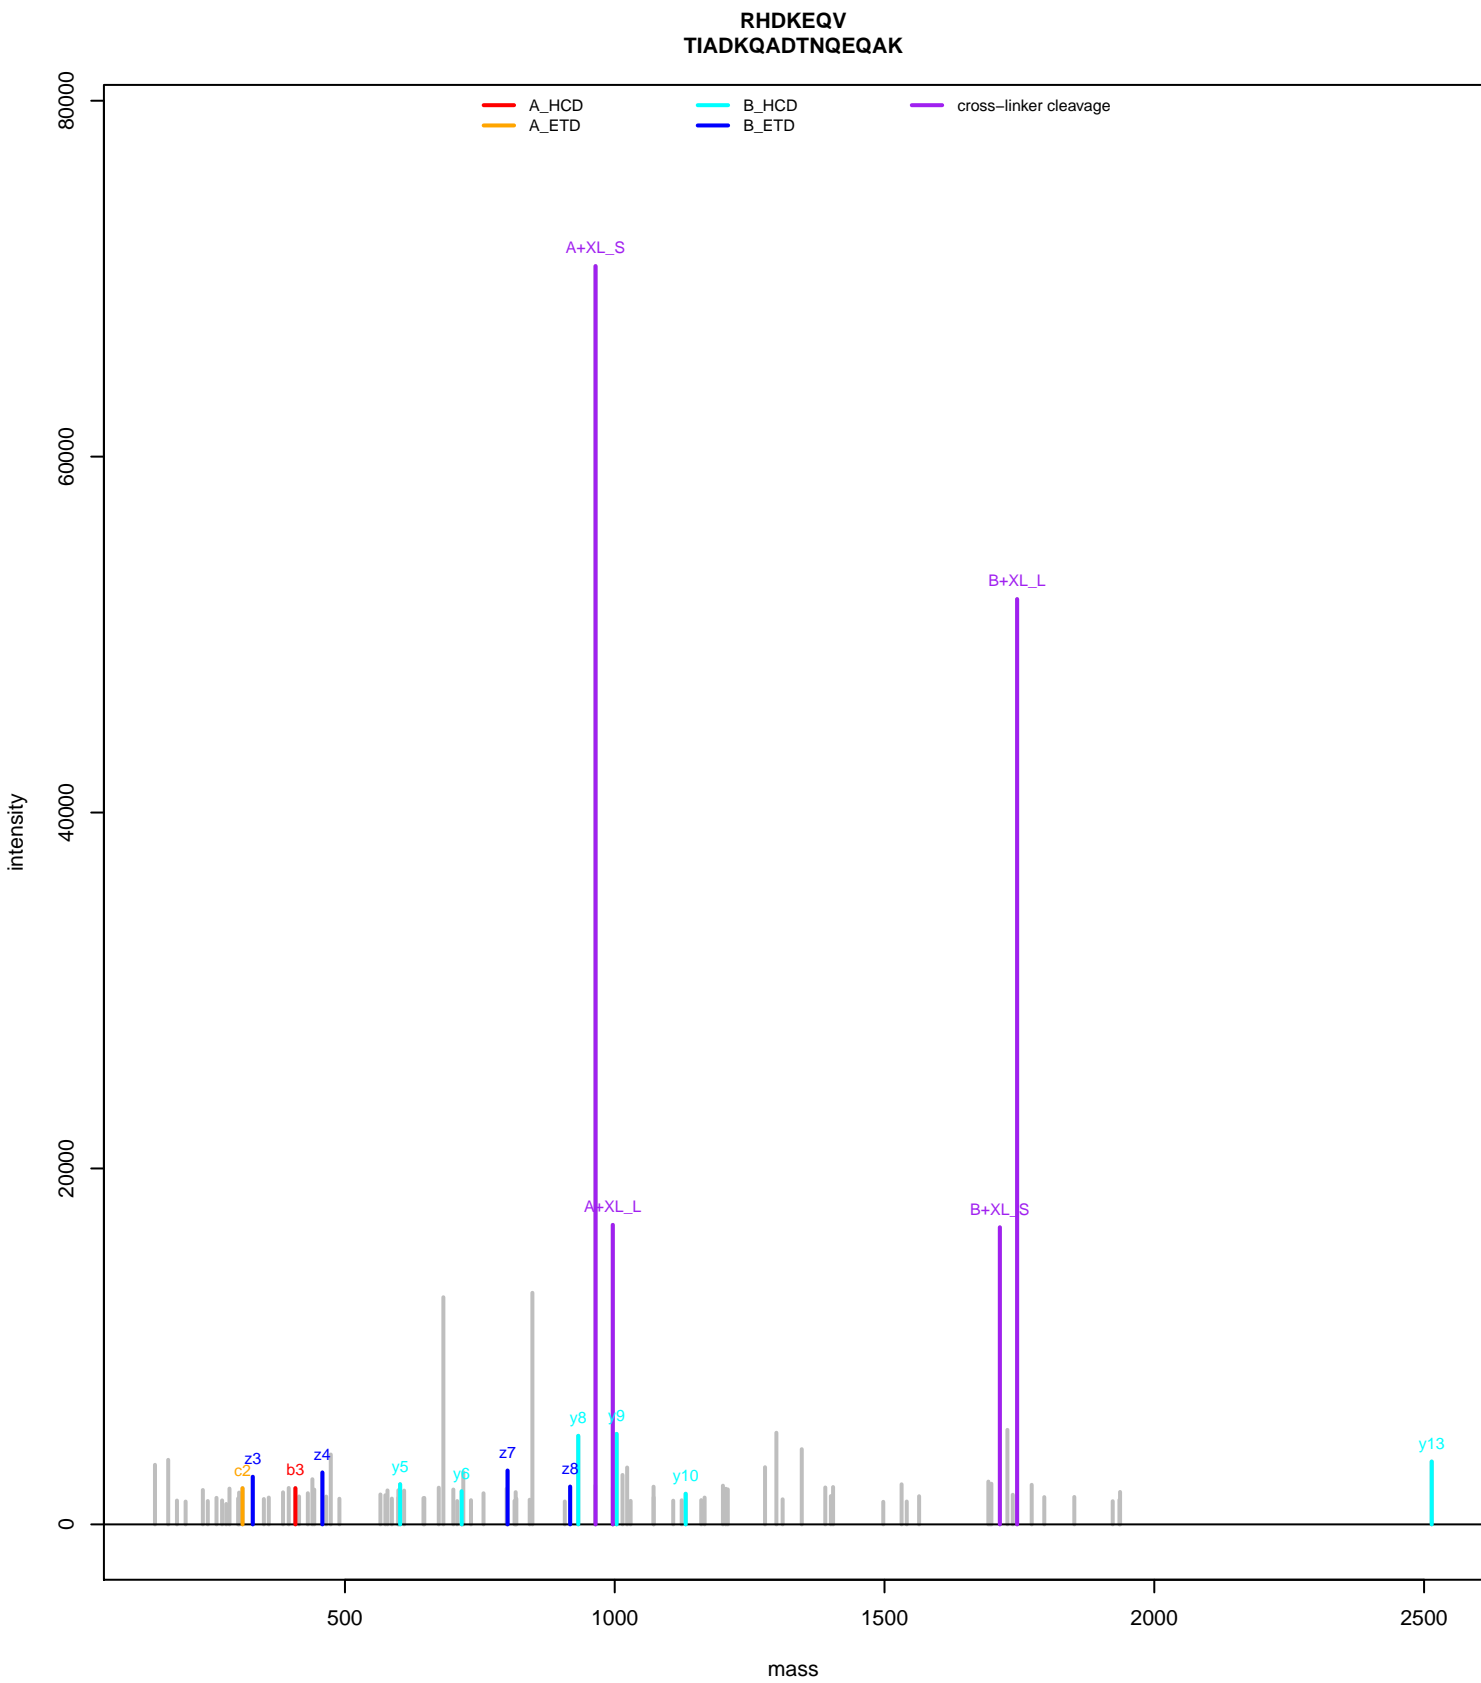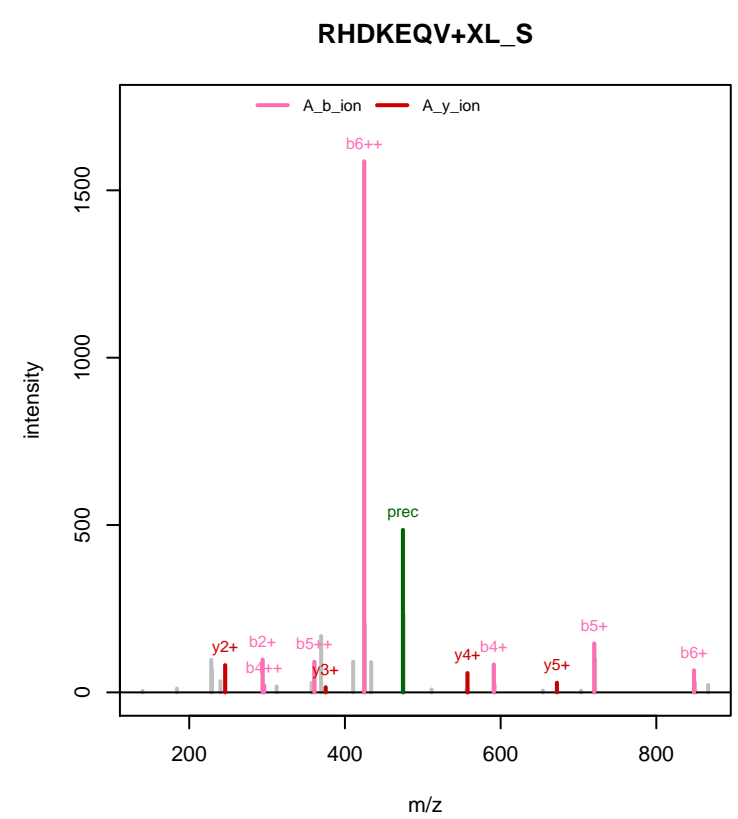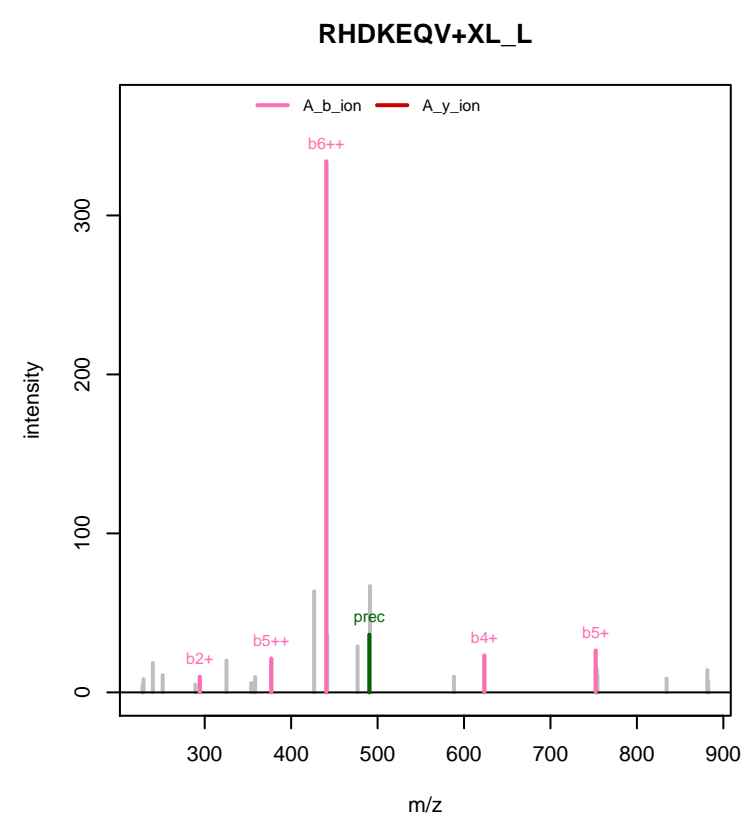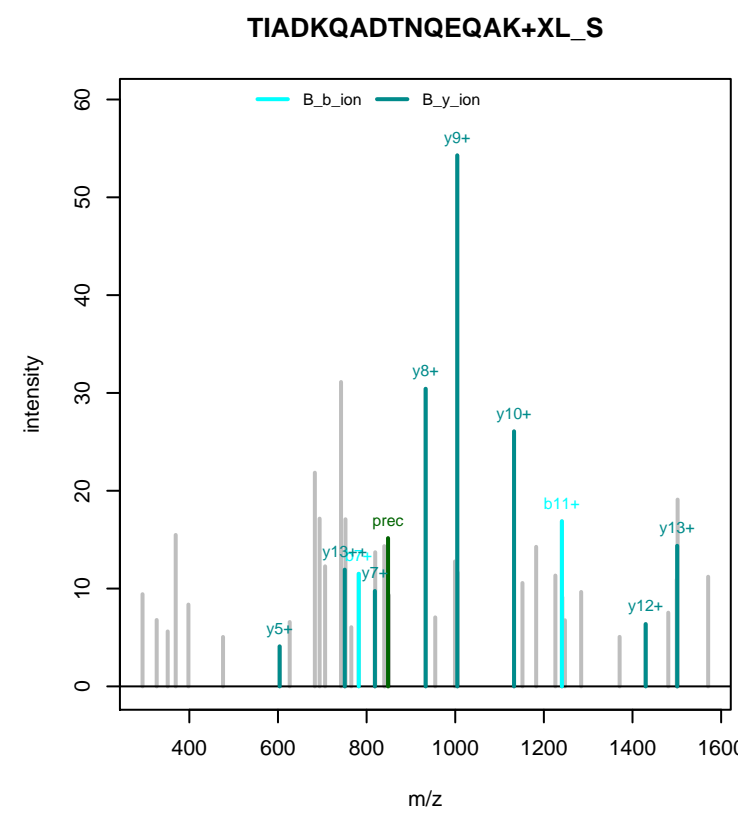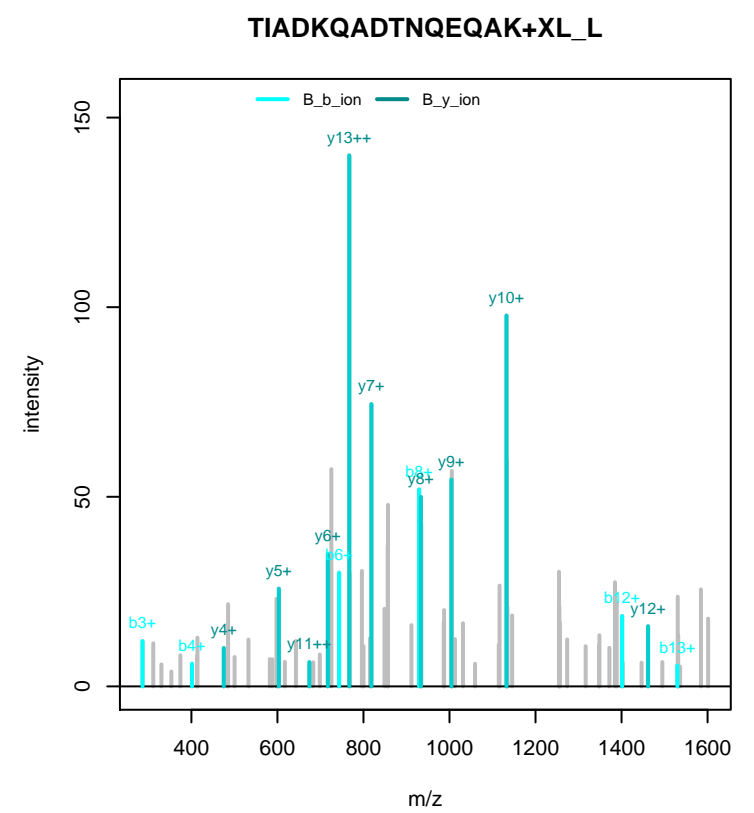

**AEQALKQSR**  
**SSGDPADQKYVELK**

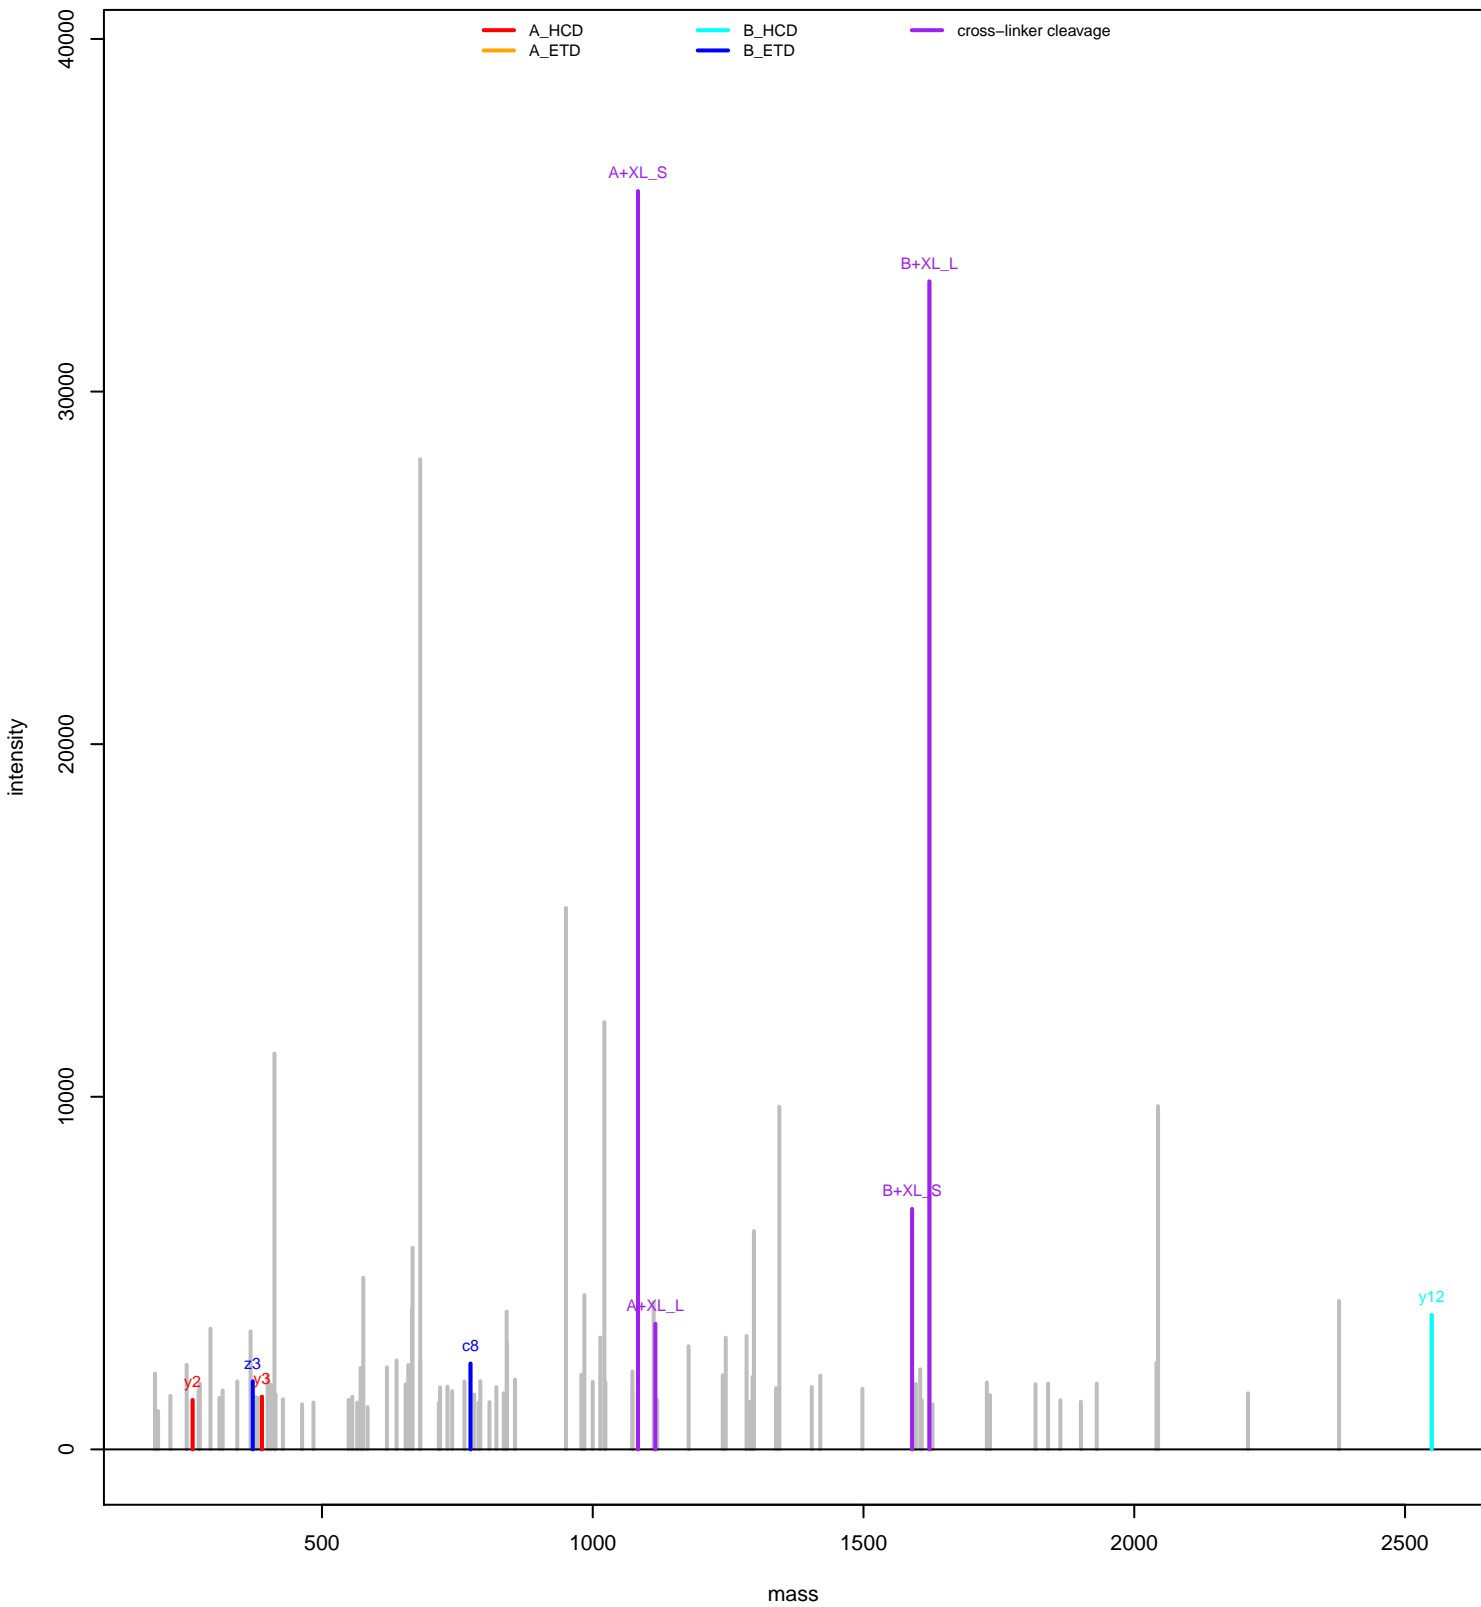

**AEQALKQSR+XL\_S**

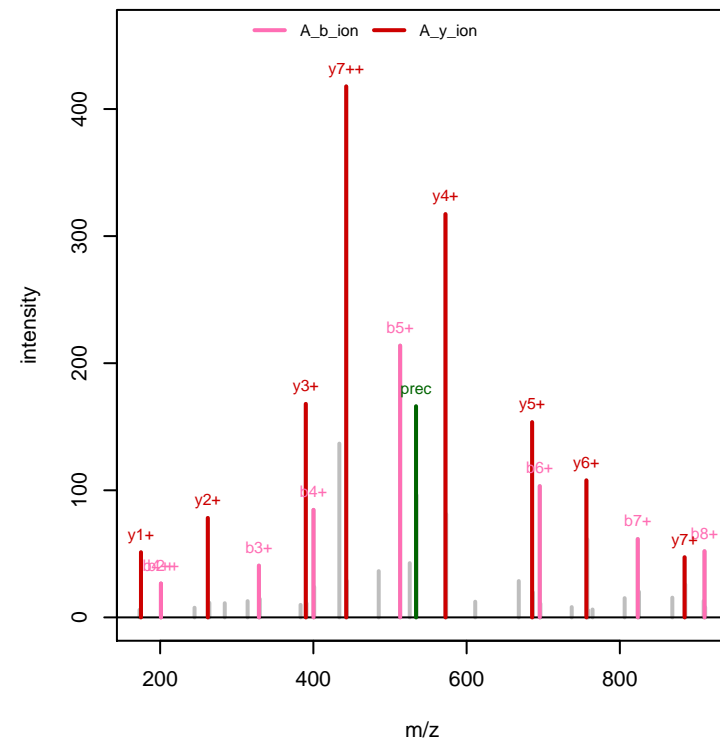

**AEQALKQSR+XL\_L**

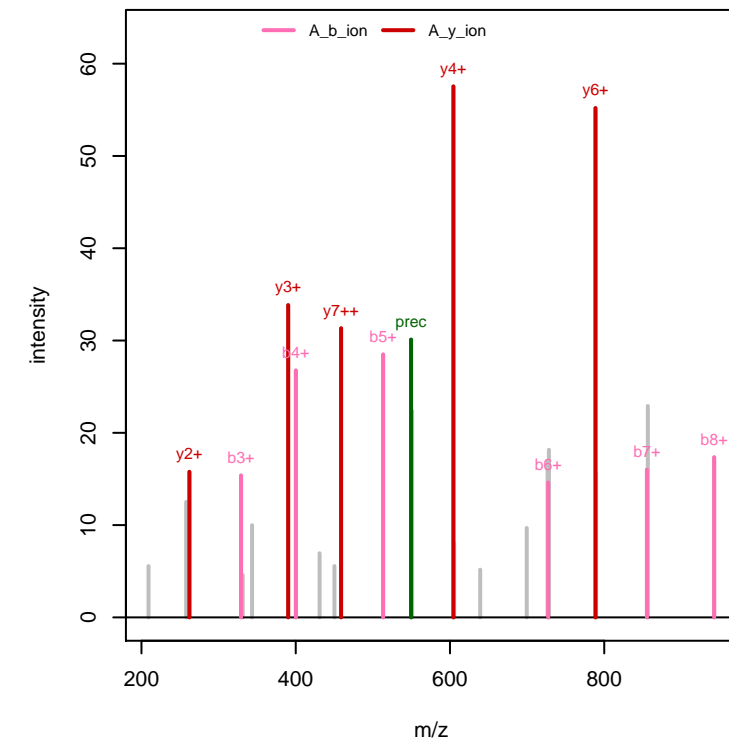

**SSGDPADQKYVELK+XL\_S**

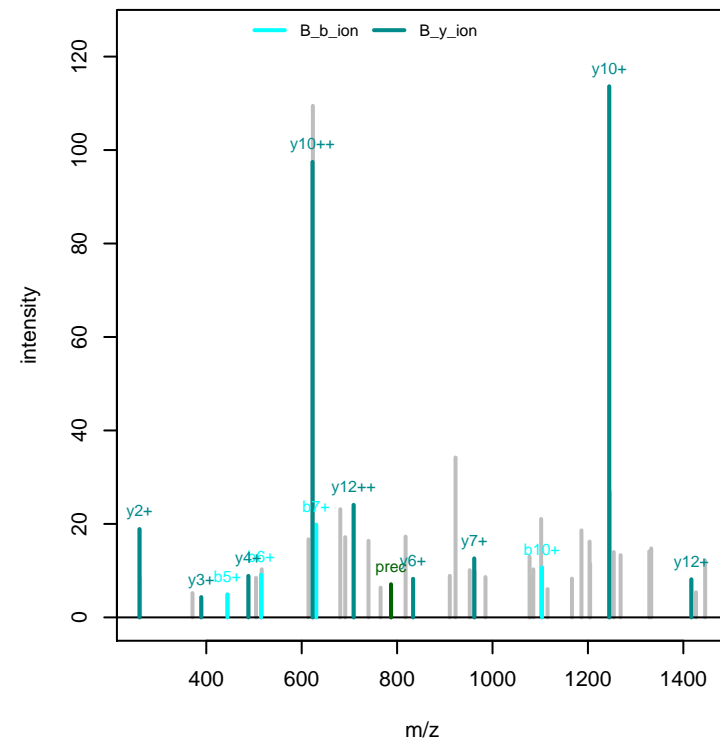

**SSGDPADQKYVELK+XL\_L**

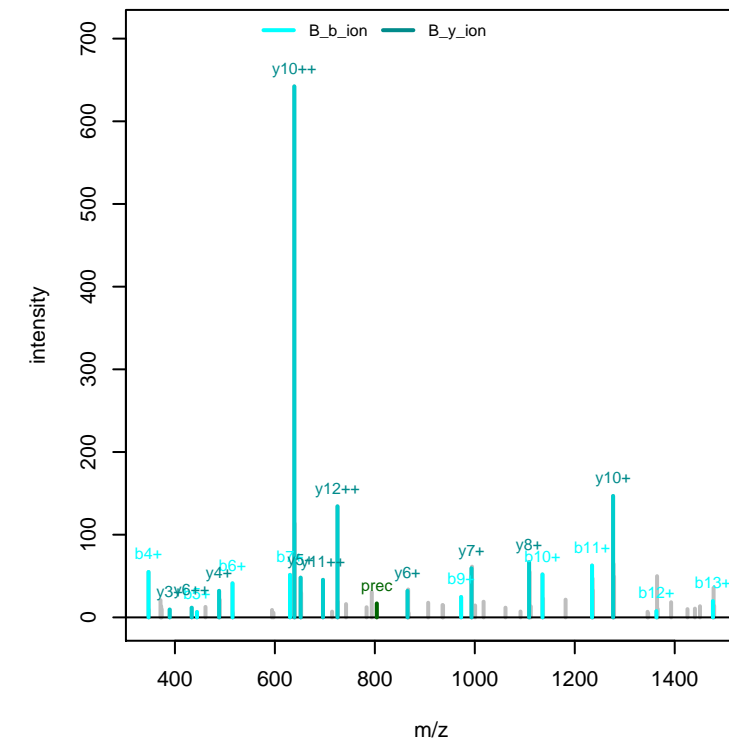



**ANAKFEVK**  
**DLVESAPAALKEGVSK**

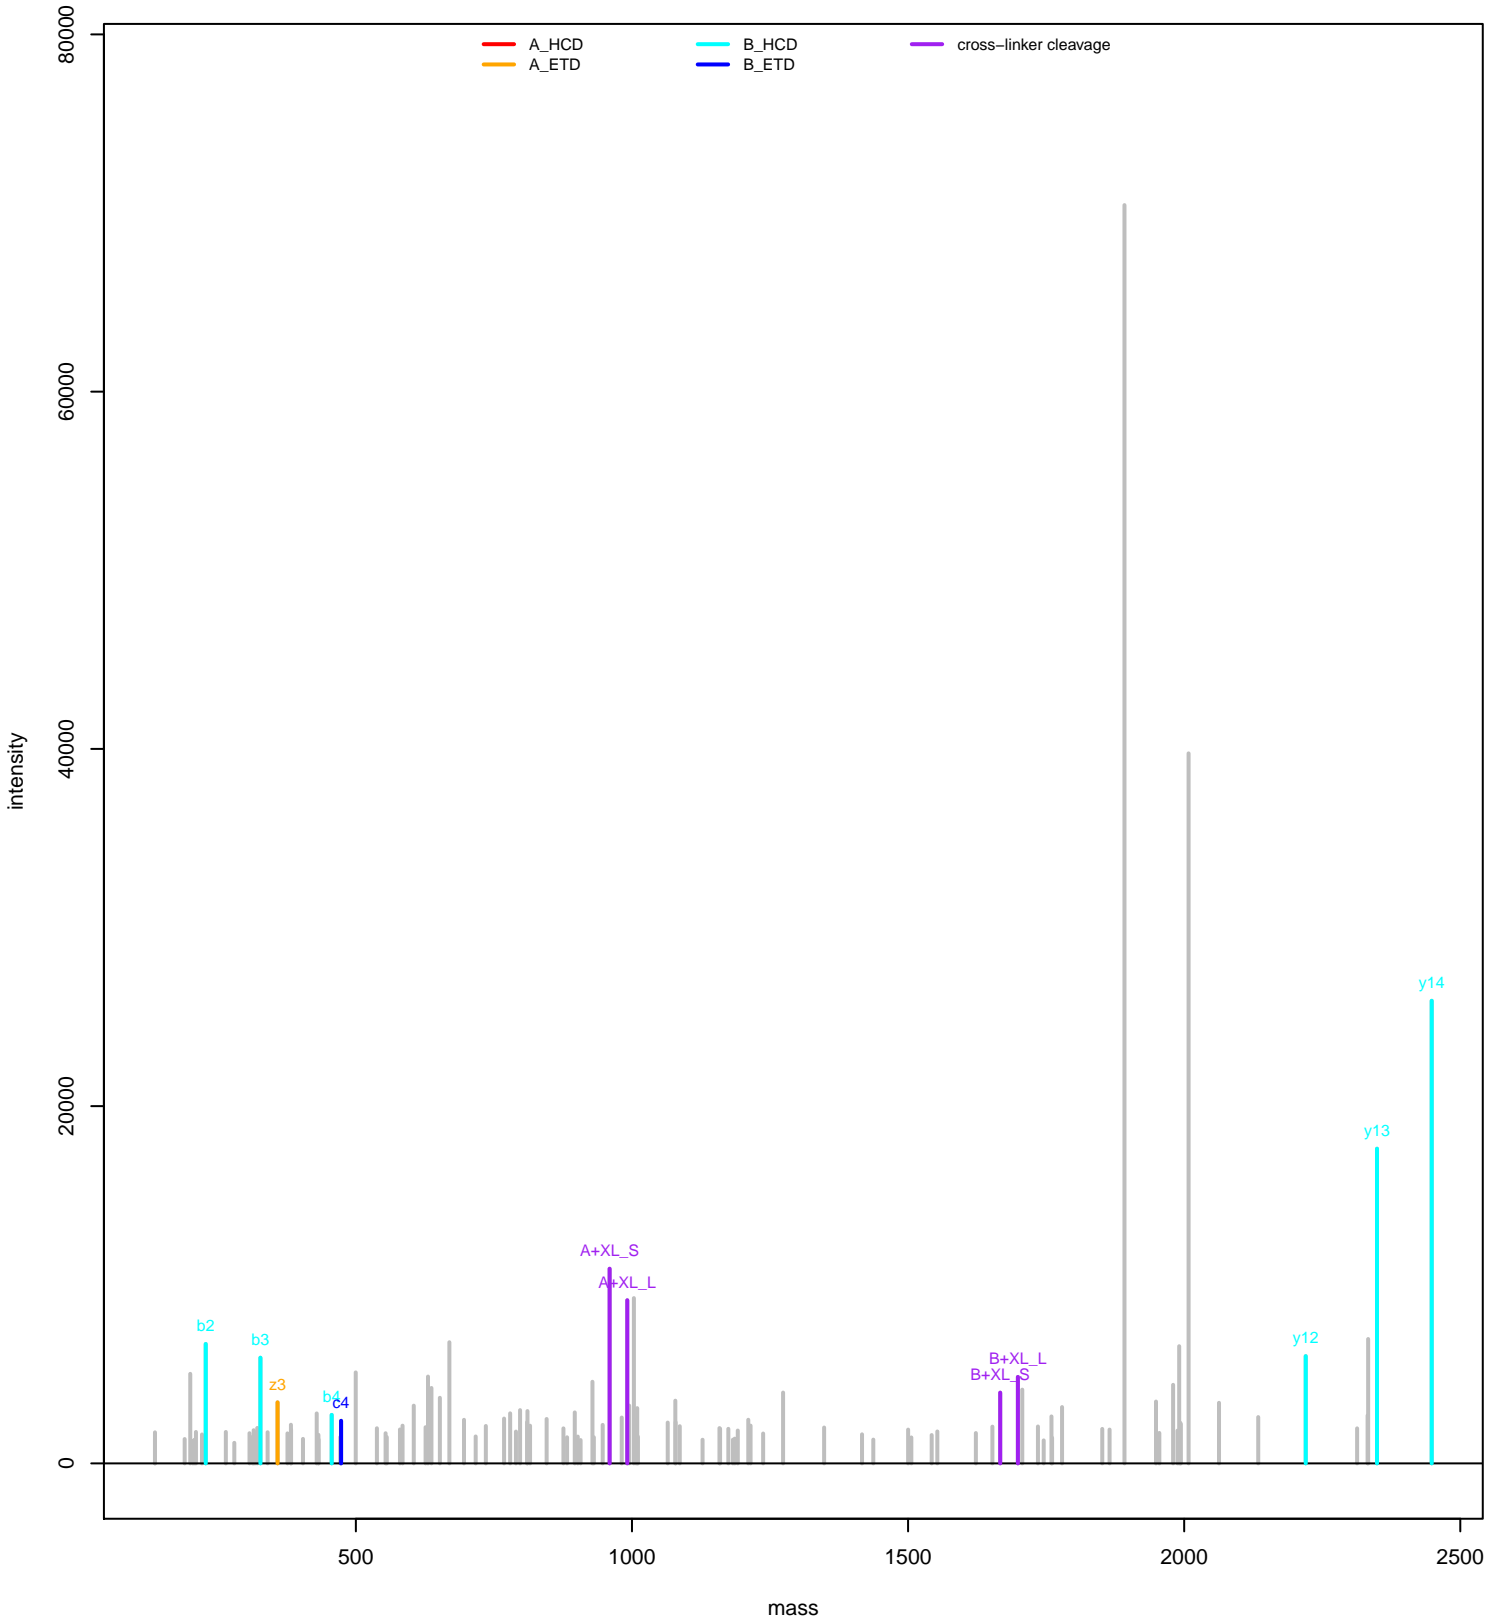

**ANAKFEVK+XL\_S**

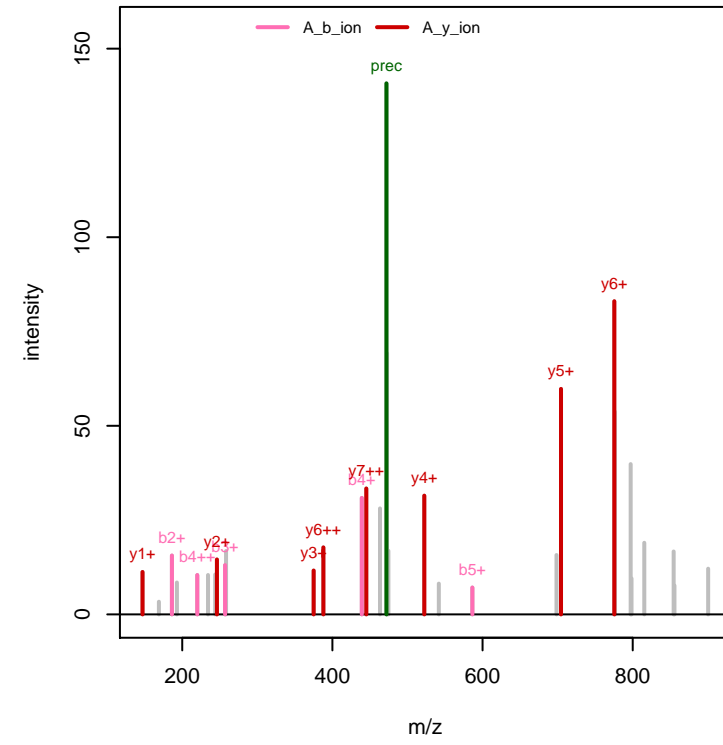

**ANAKFEVK+XL\_L**

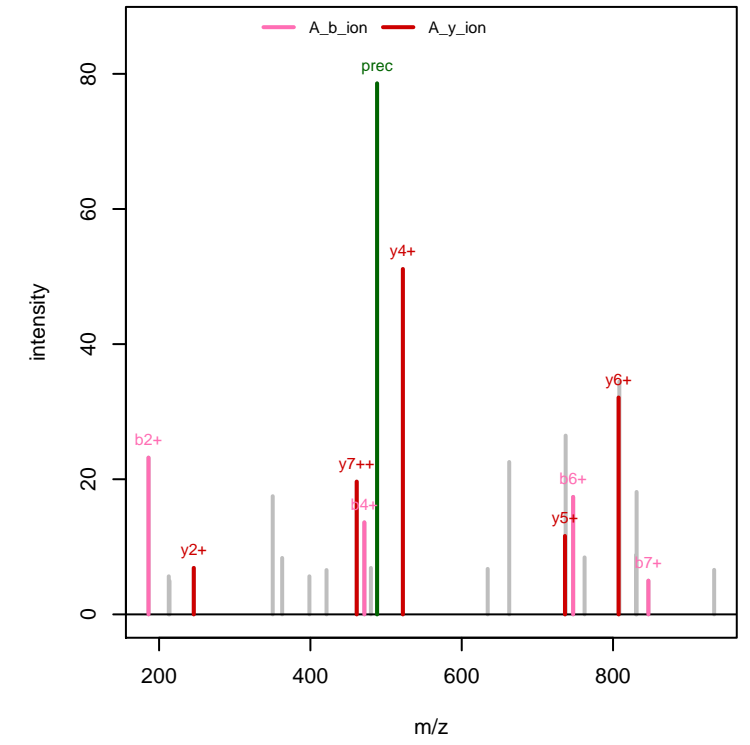

**DLVESAPAALKEGVSK+XL\_S**

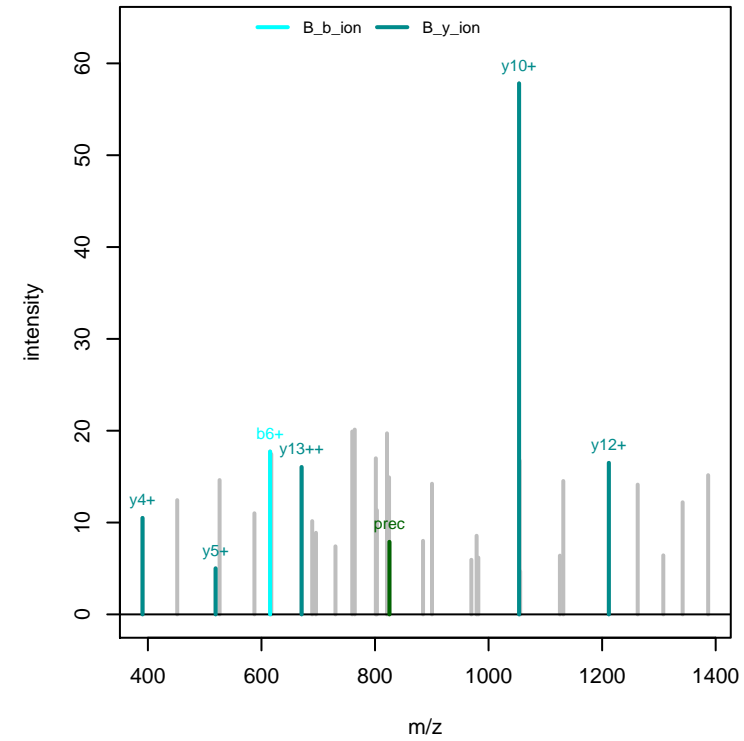

**DLVESAPAALKEGVSK+XL\_L**

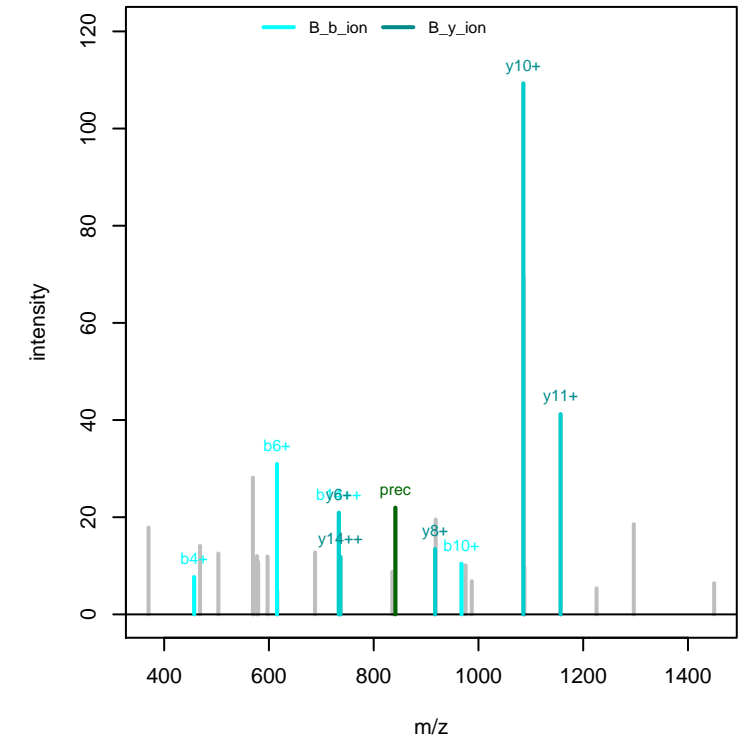

**SVKNDLK**  
**VAKGVEGVTSVSDK**

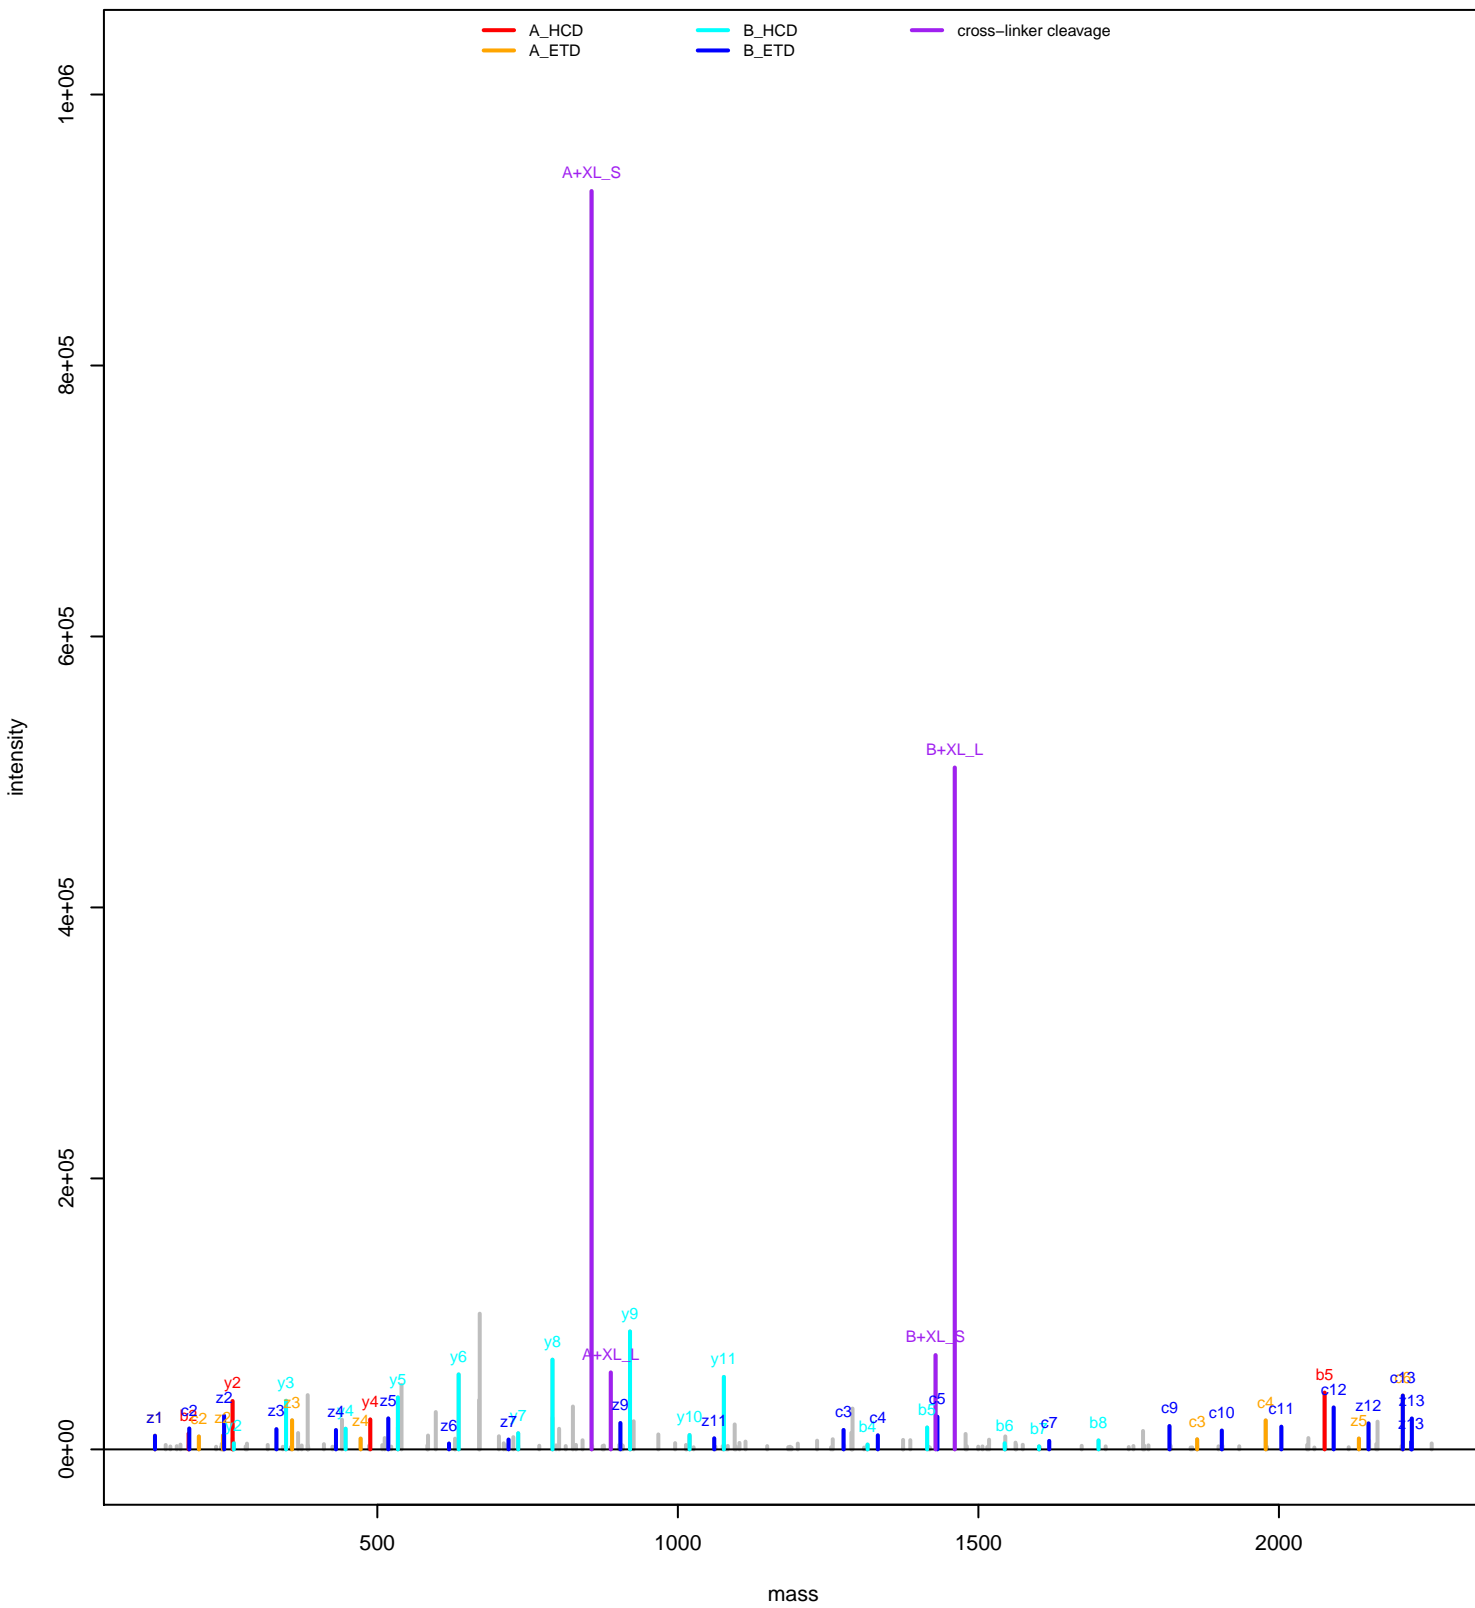

**SVKNDLK+XL\_S**

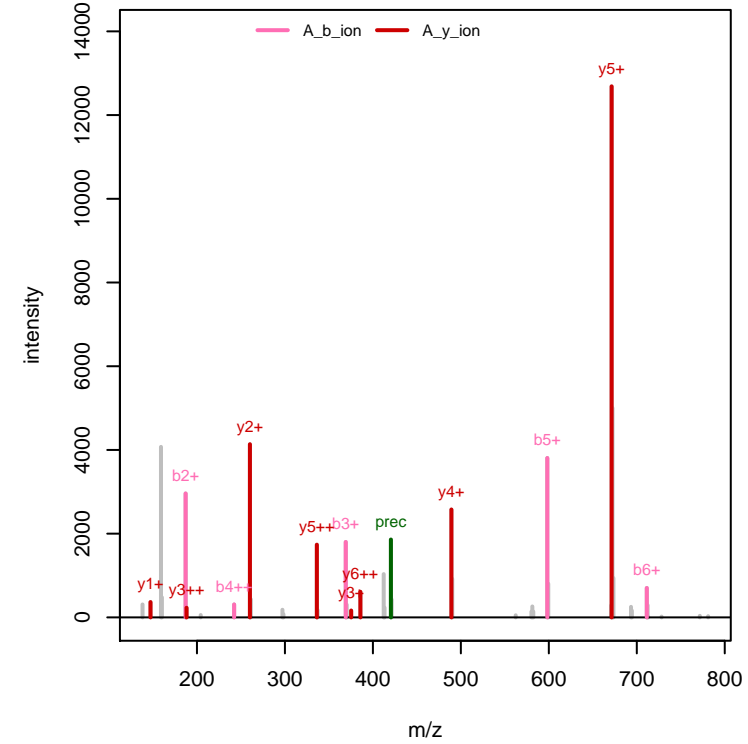

**SVKNDLK+XL\_L**

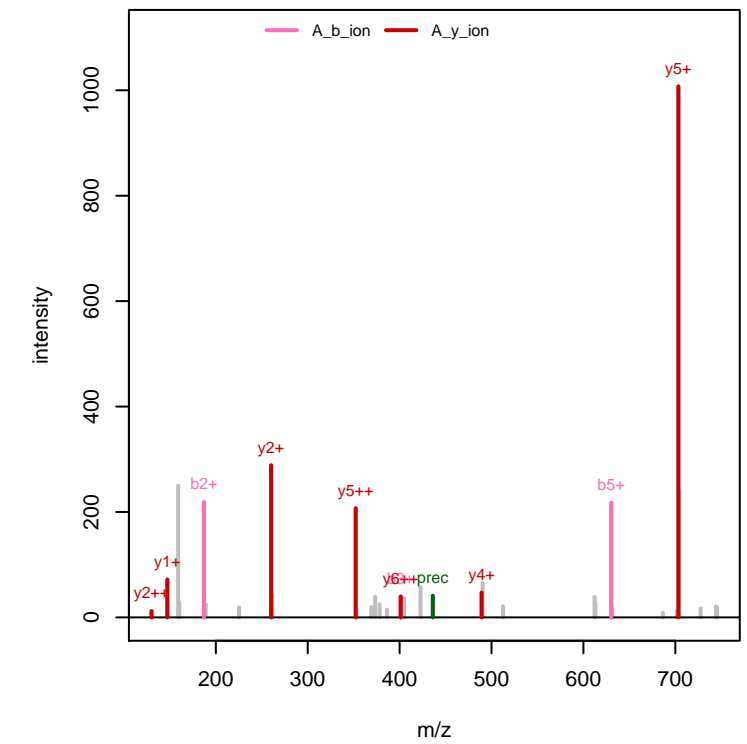

**VAKGVEGVTSVSDK+XL\_S**

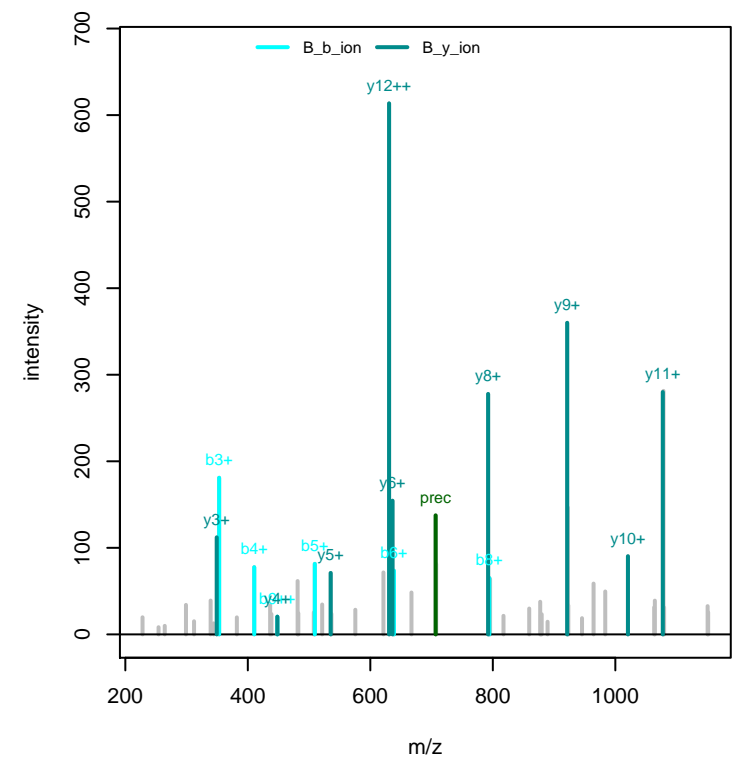

**VAKGVEGVTSVSDK+XL\_L**

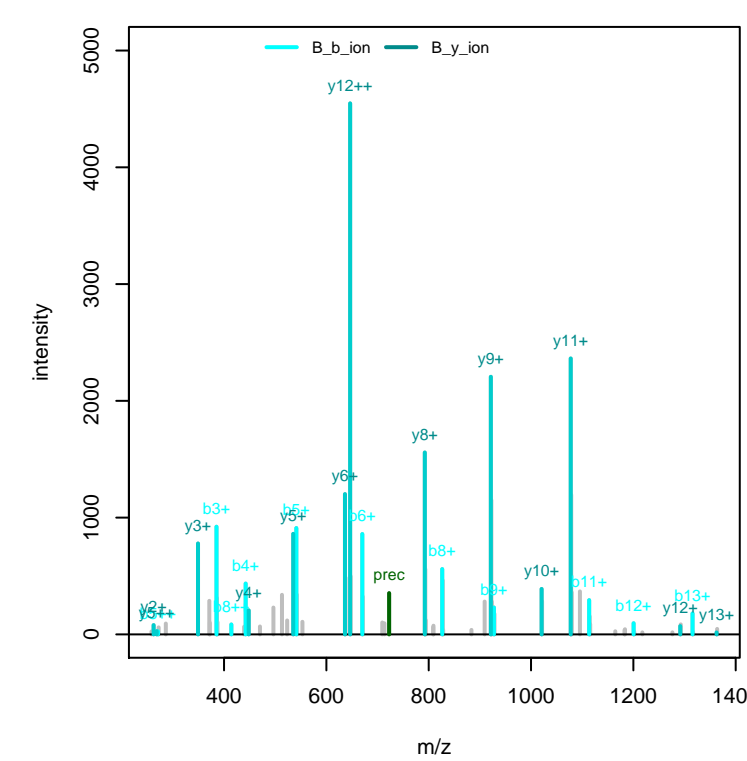

**AGKALK**  
**NPQTGKEITIAAAK**

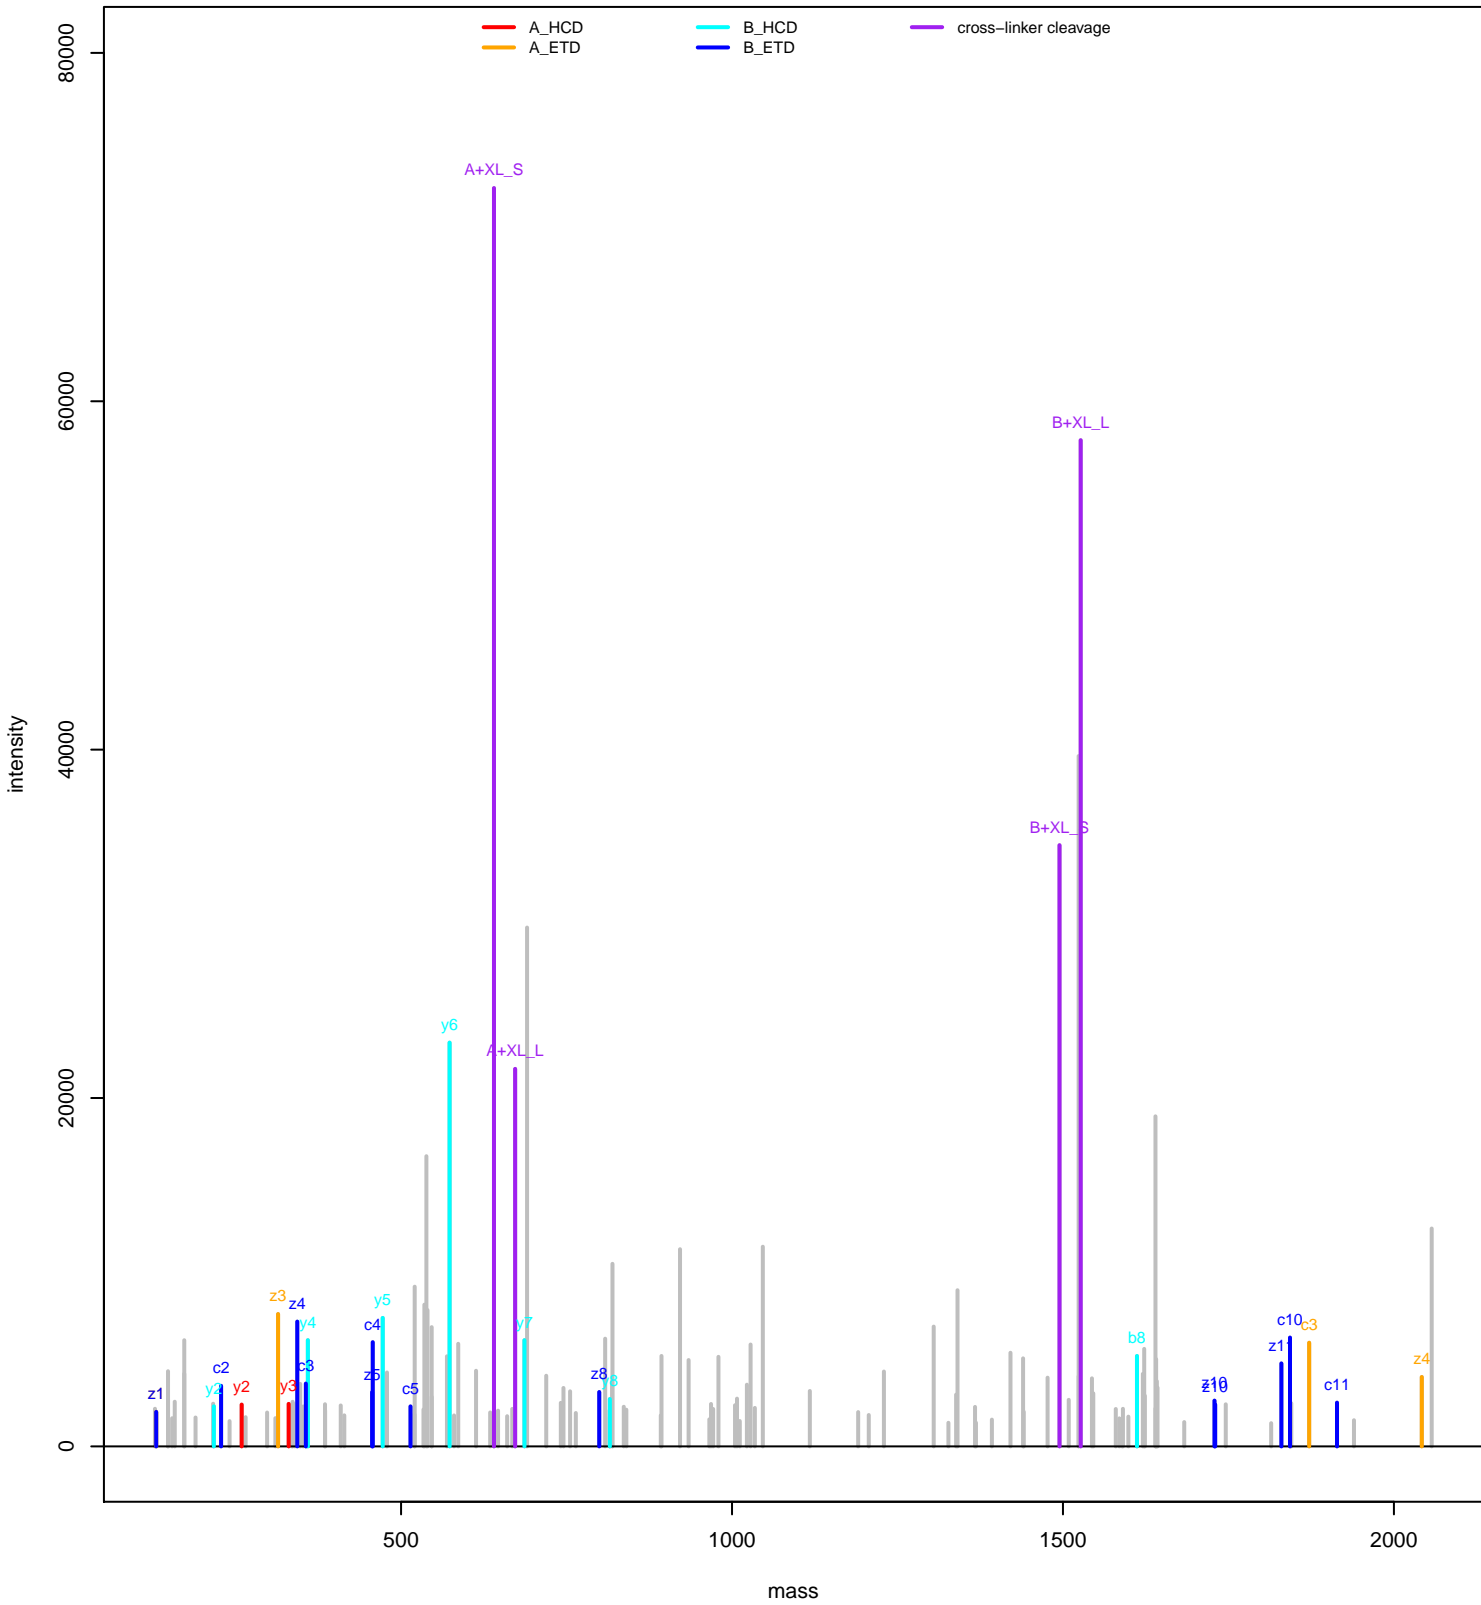

**AGKALK+XL\_S**

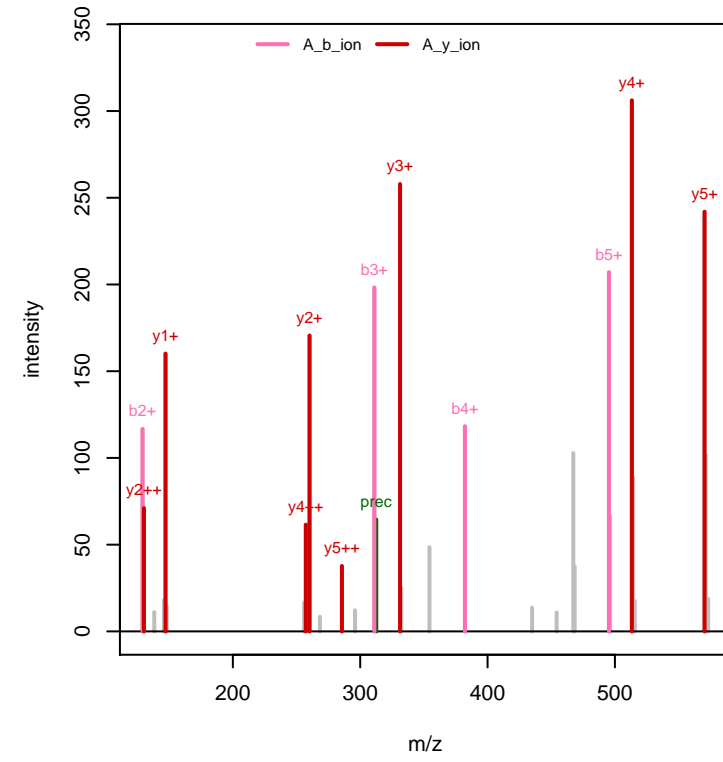

**AGKALK+XL\_L**

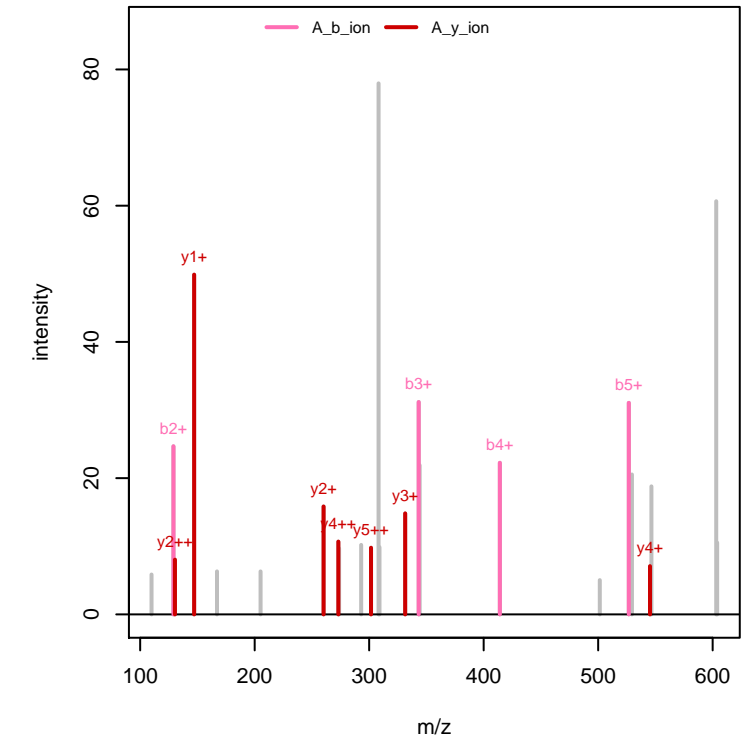

**NPQTGKEITIAAAK+XL\_S**

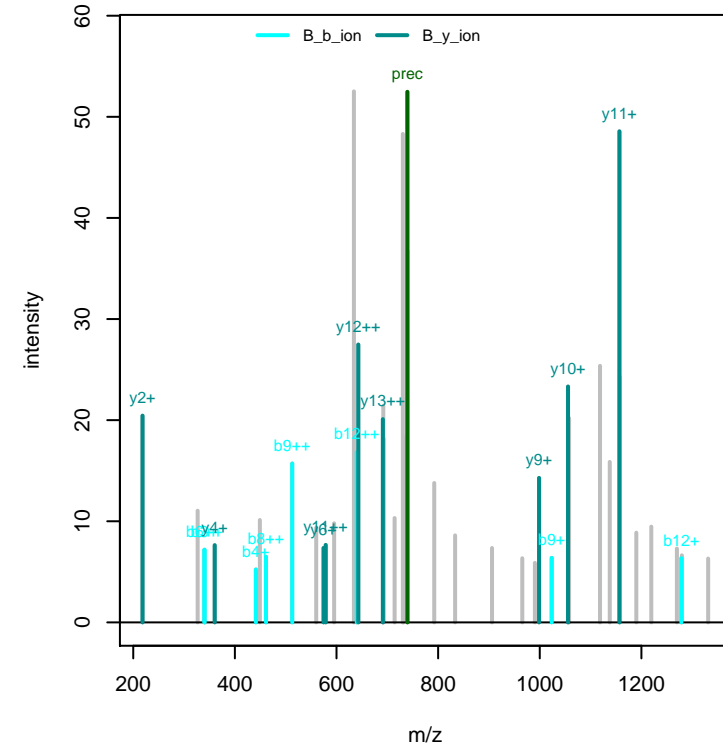

**NPQTGKEITIAAAK+XL\_L**

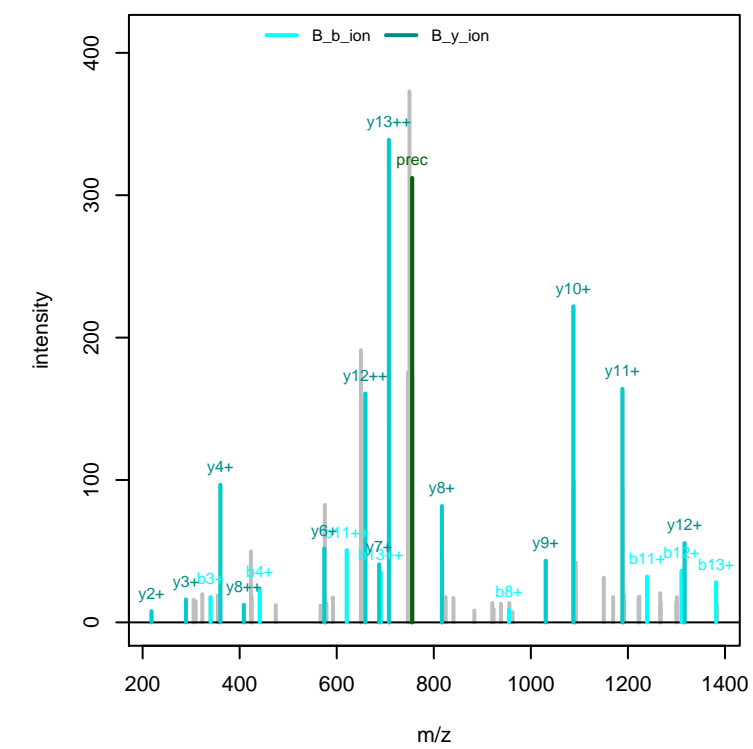

VMEGVKLENR  
DQKGAVASLTSVAK

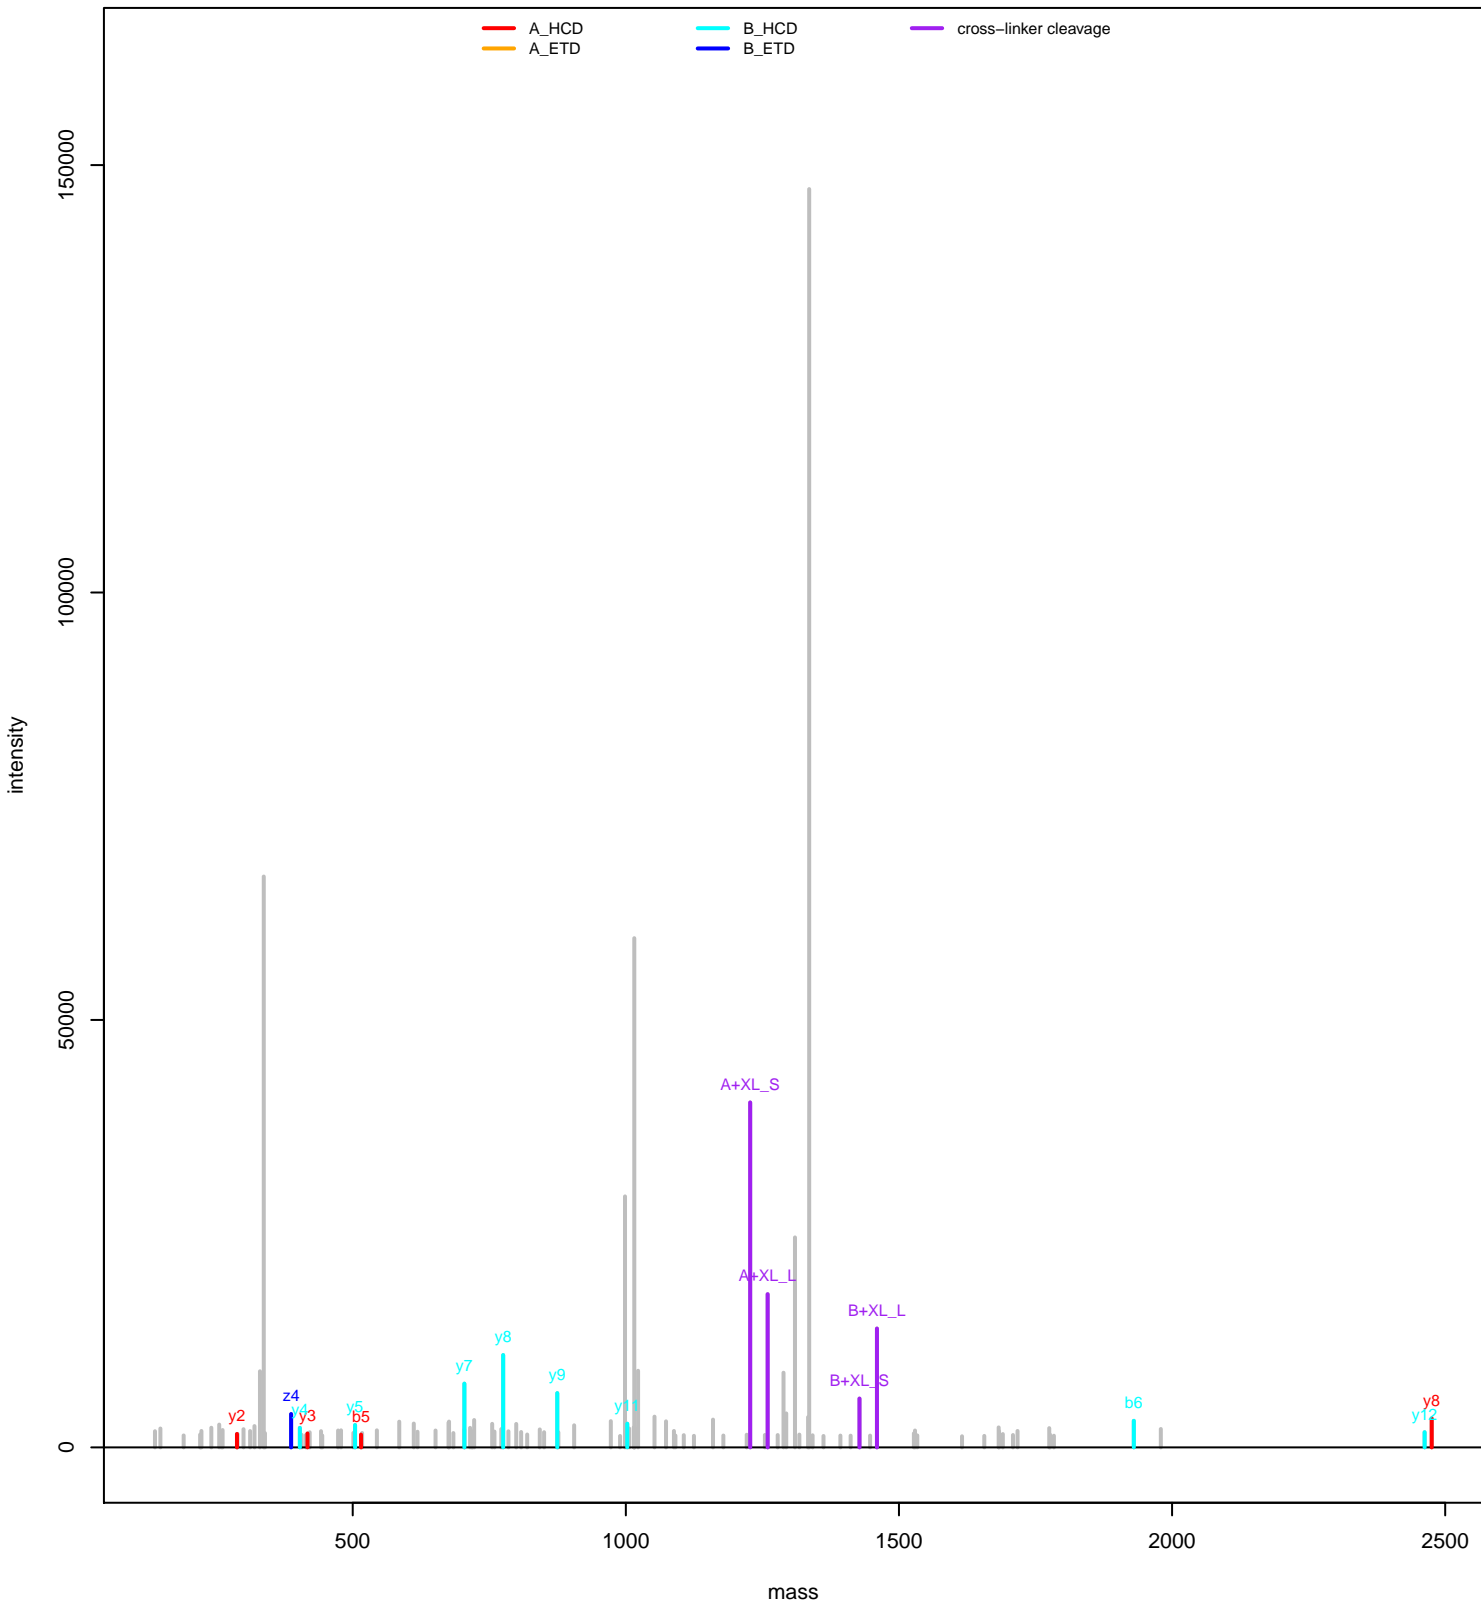

VMEGVKLENR+XL\_S

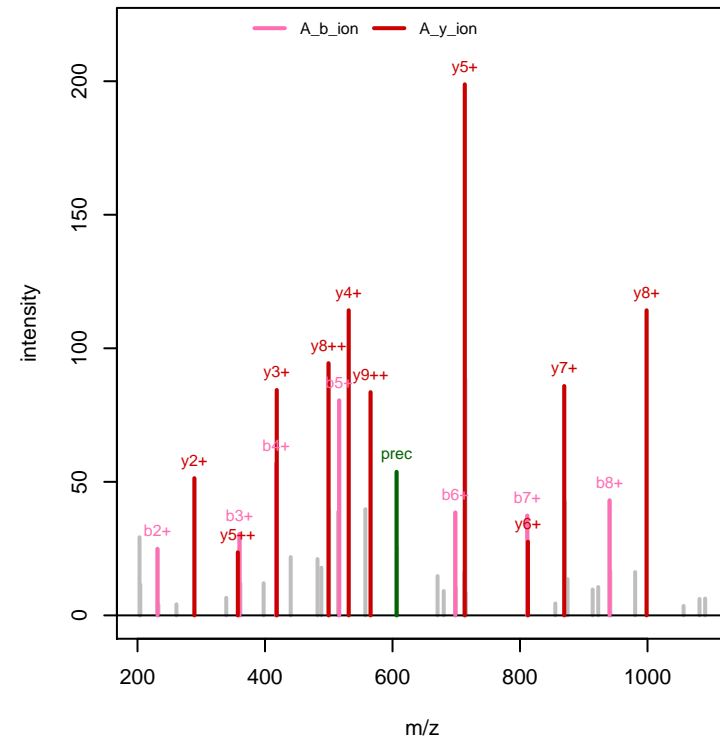

VMEGVKLENR+XL\_L

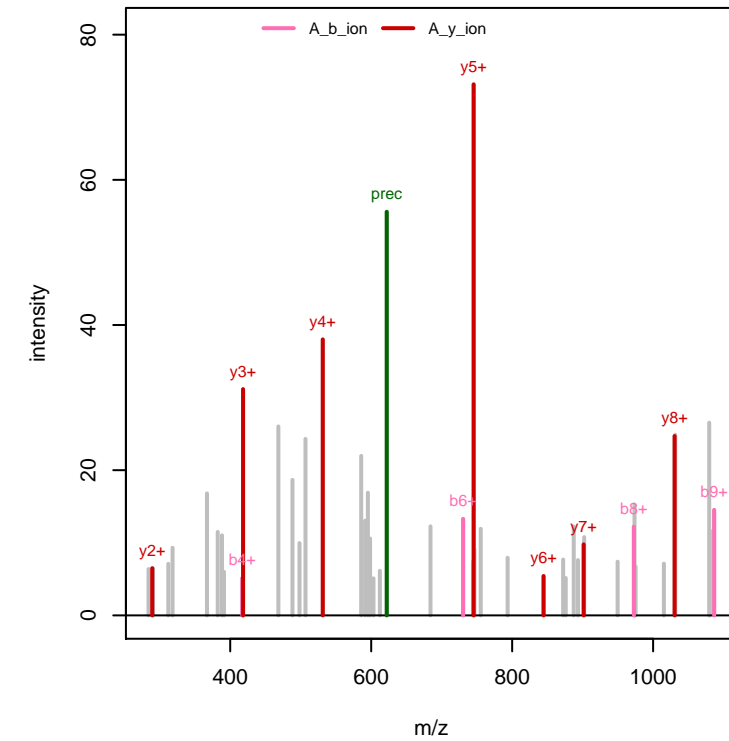

DQKGAVASLTSVAK+XL\_S

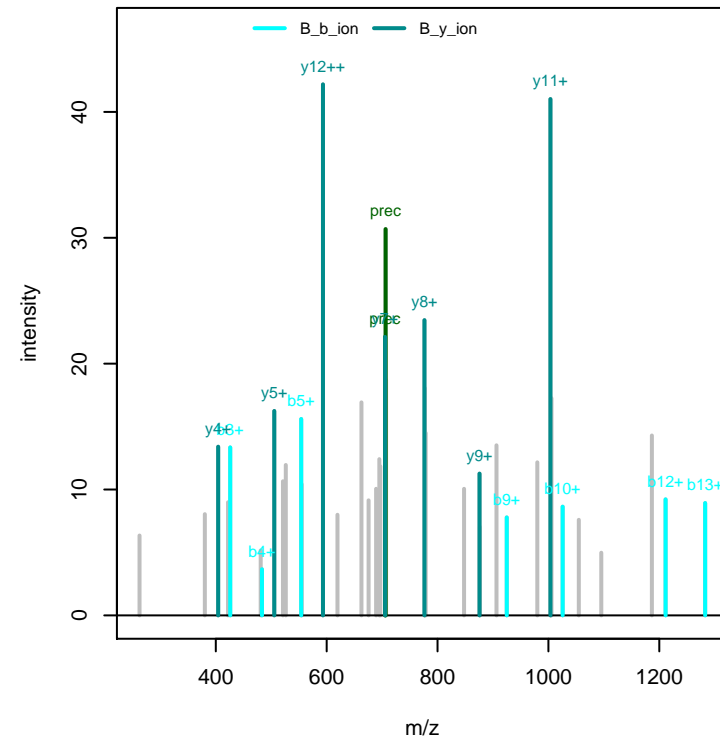

DQKGAVASLTSVAK+XL\_L

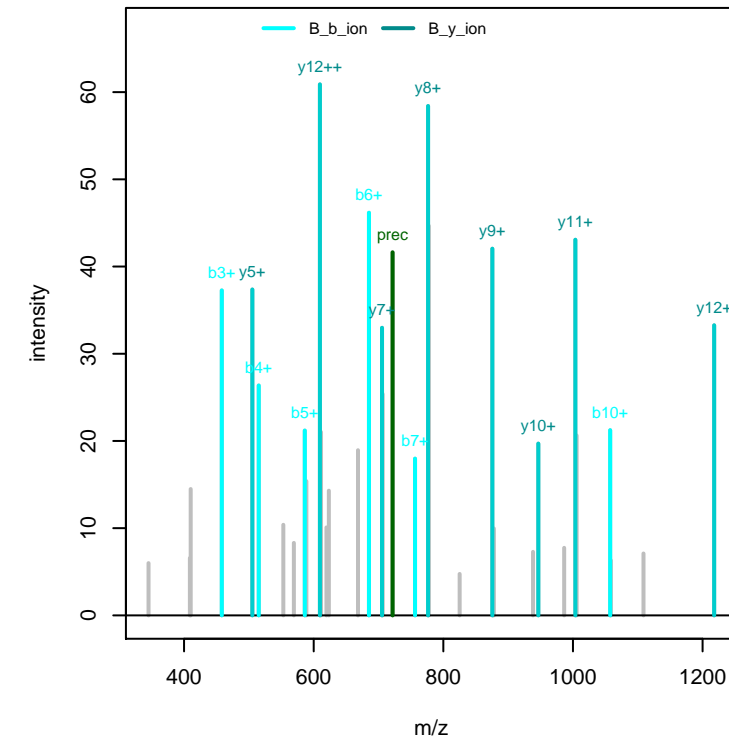

ELAKASVSR  
KGEDVEKLRK

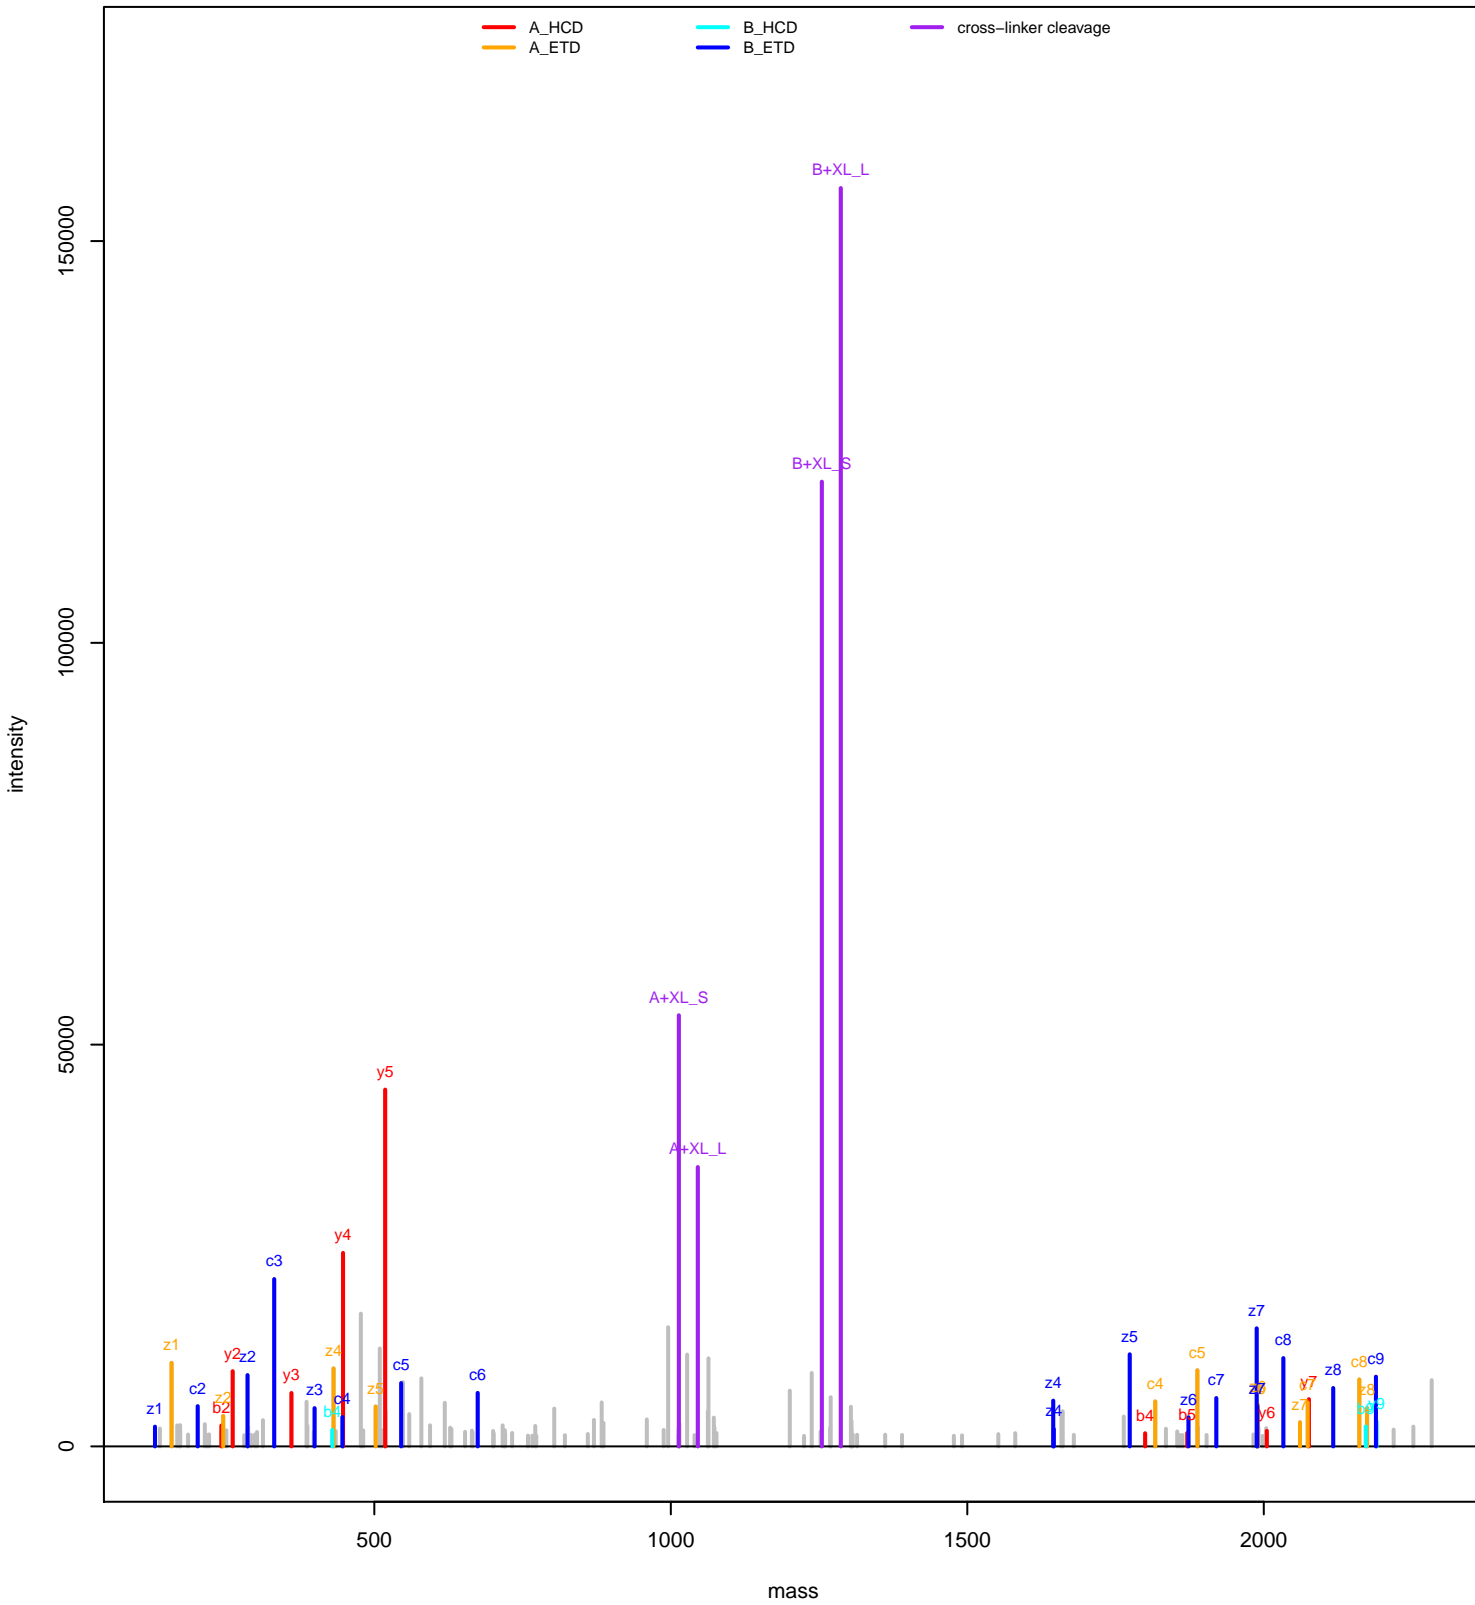

ELAKASVSR+XL\_S

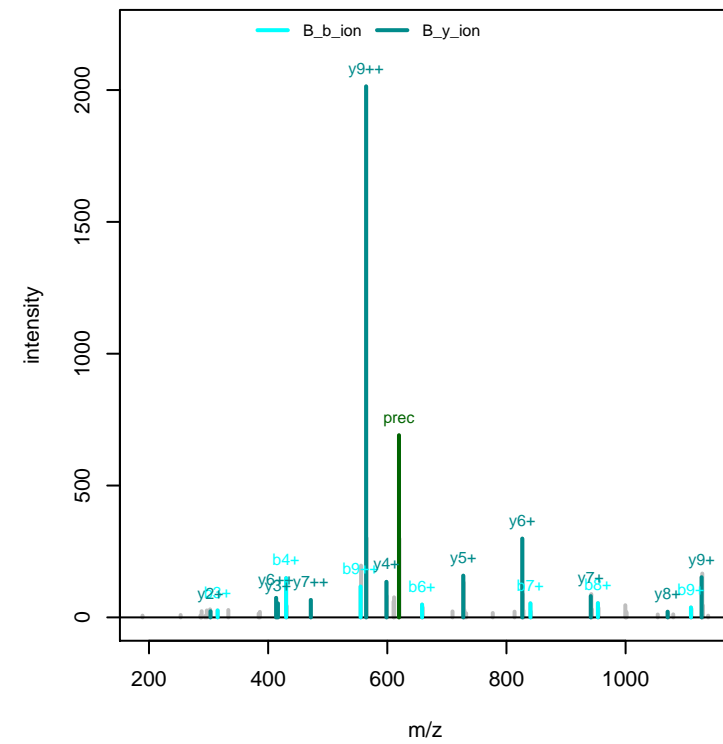

ELAKASVSR+XL\_L

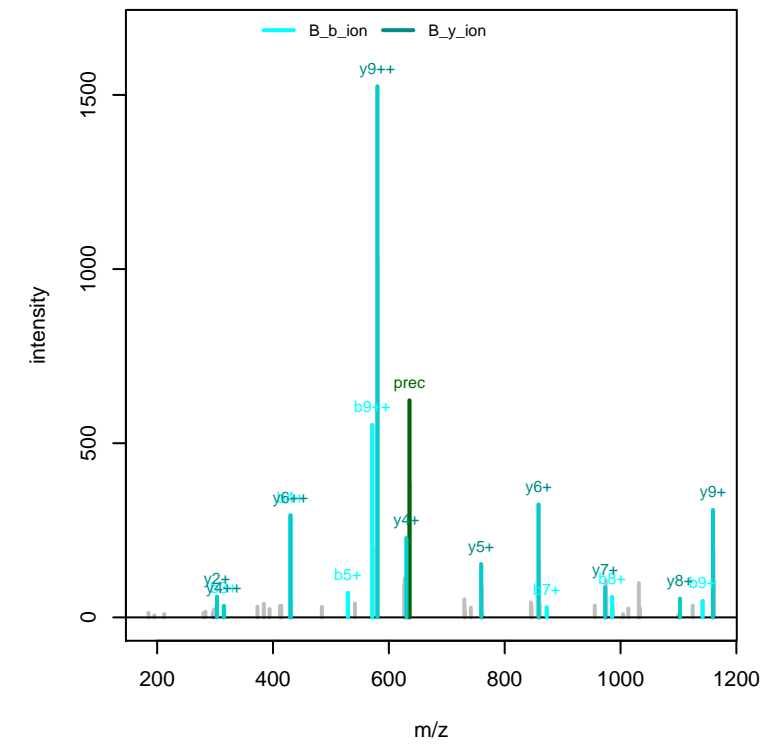

KGEDVEKLRK+XL\_S

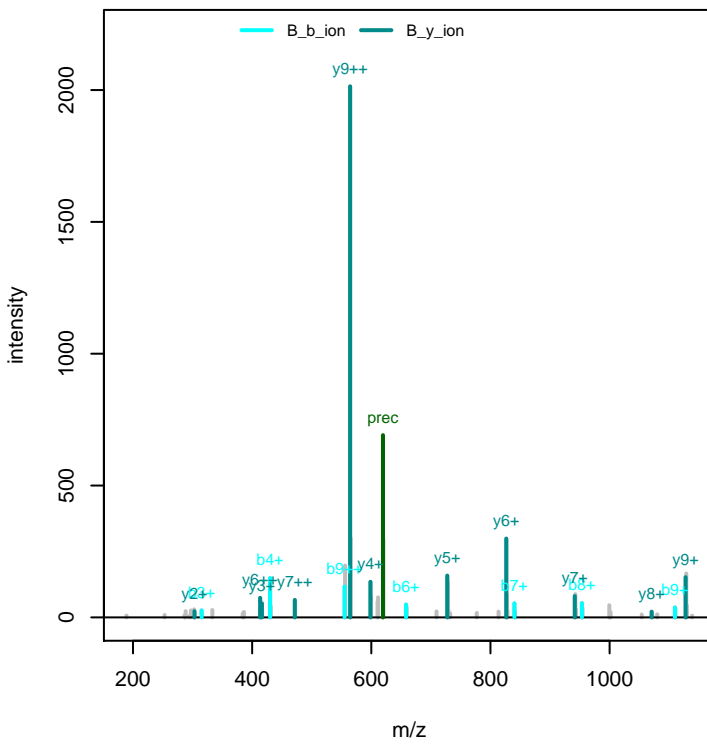

KGEDVEKLRK+XL\_L



STIEER  
TGRNPQTGKEIK

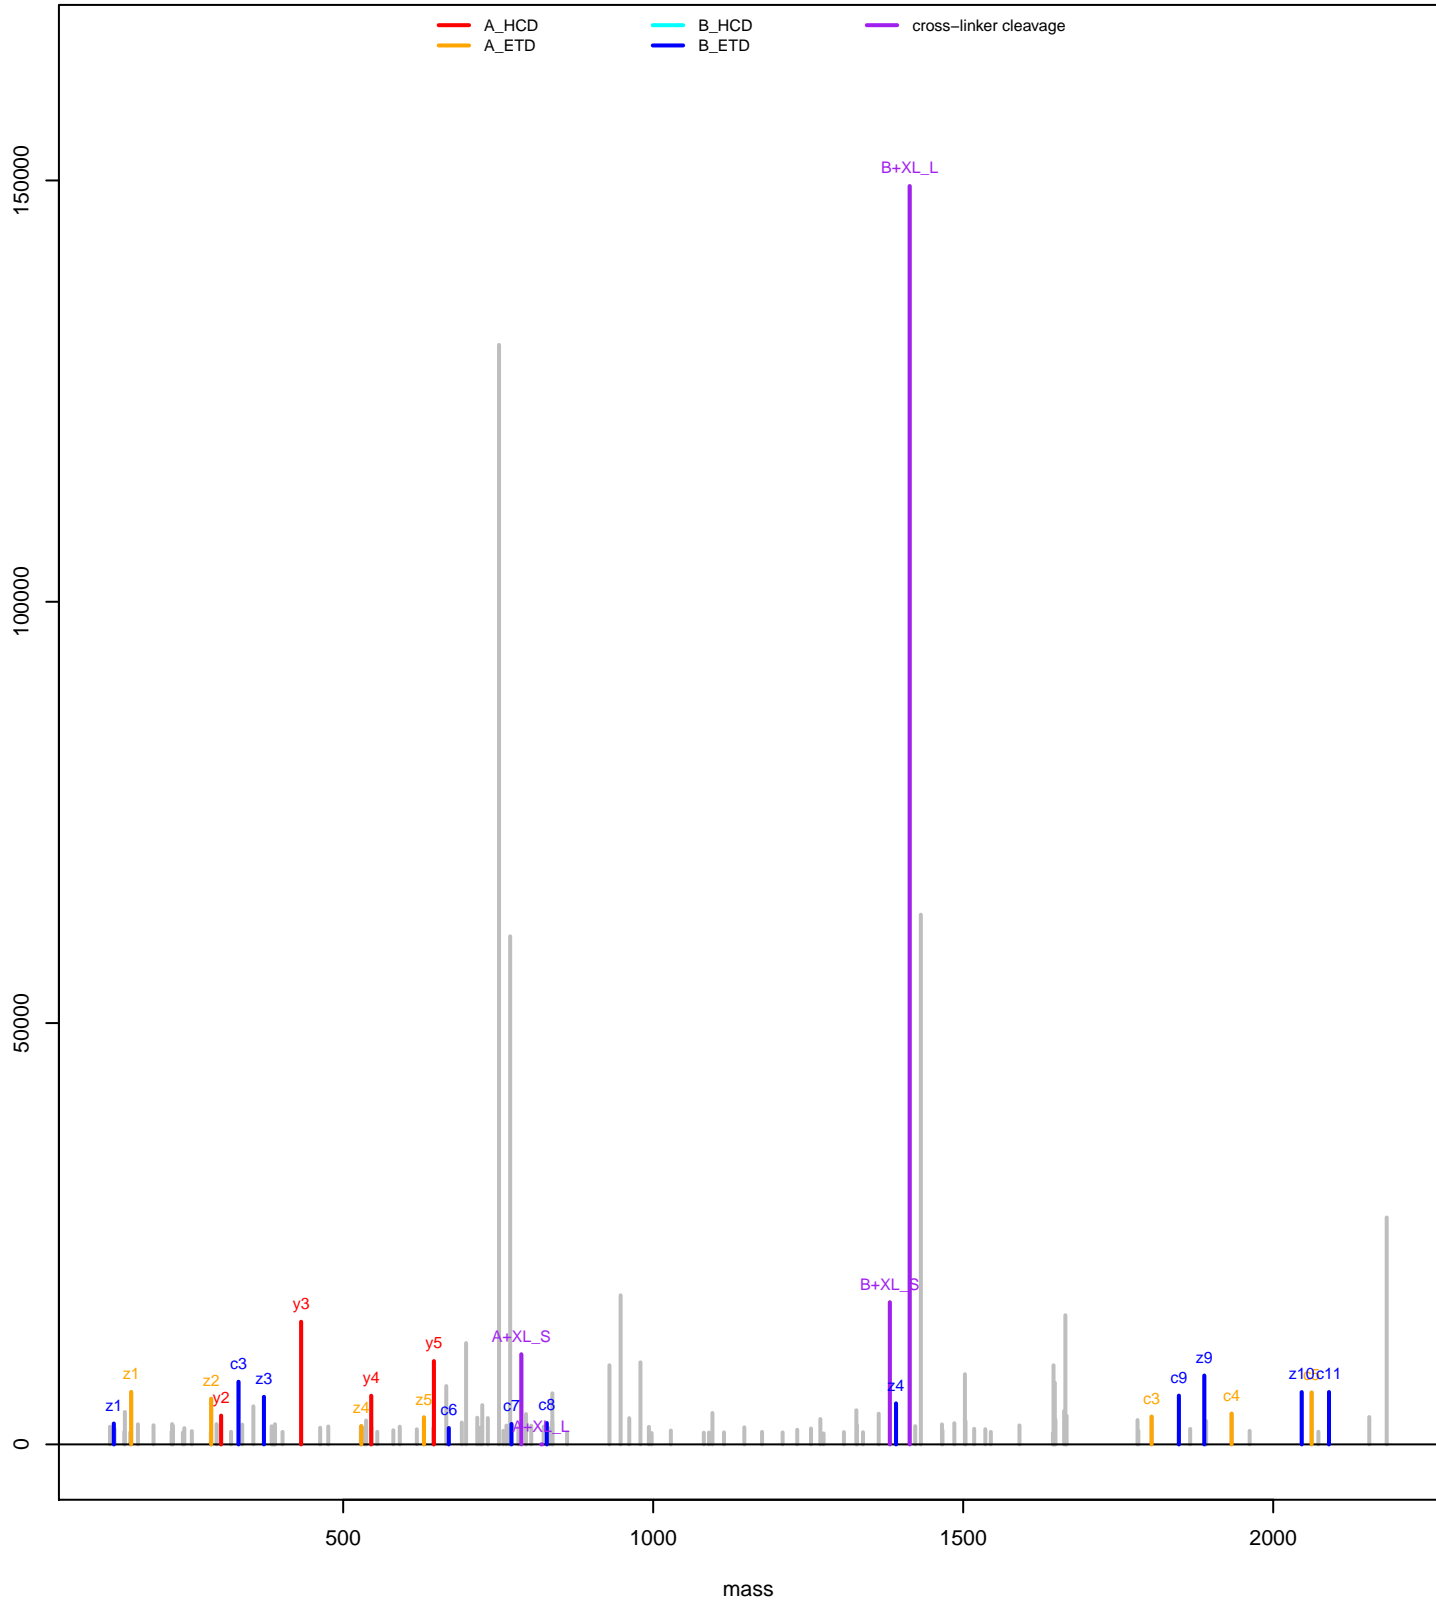

STIEER+XL\_S

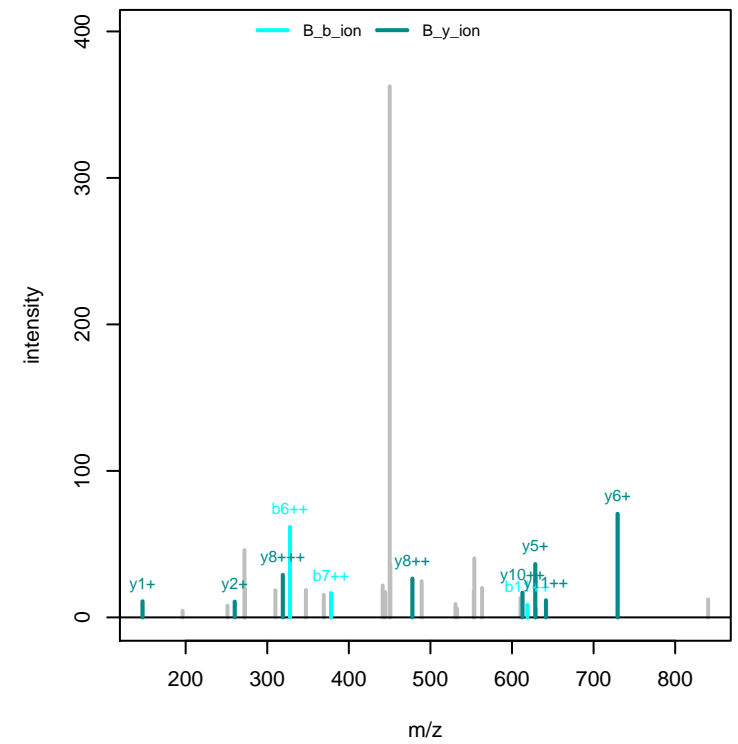

STIEER+XL\_L

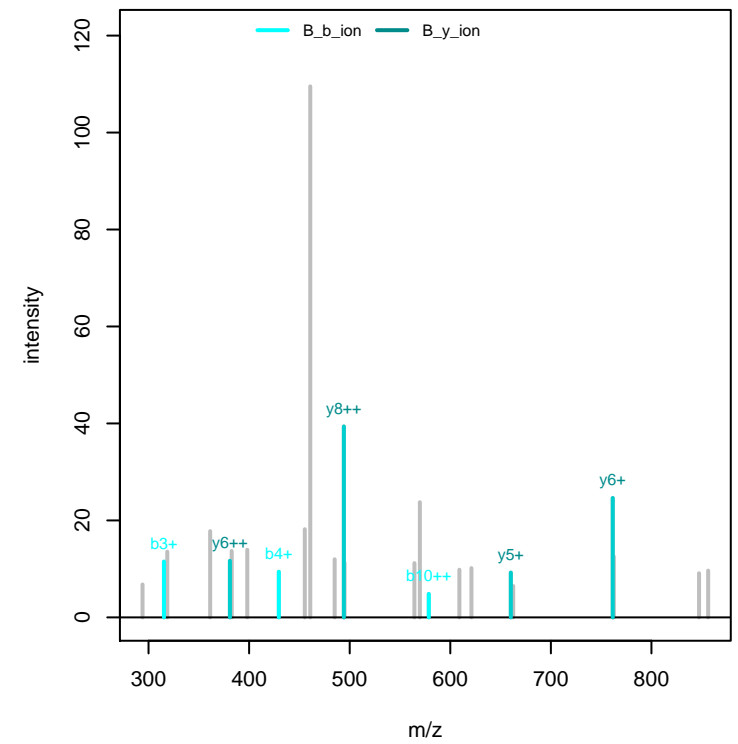

TGRNPQTGKEIK+XL\_S



TGRNPQTGKEIK+XL\_L



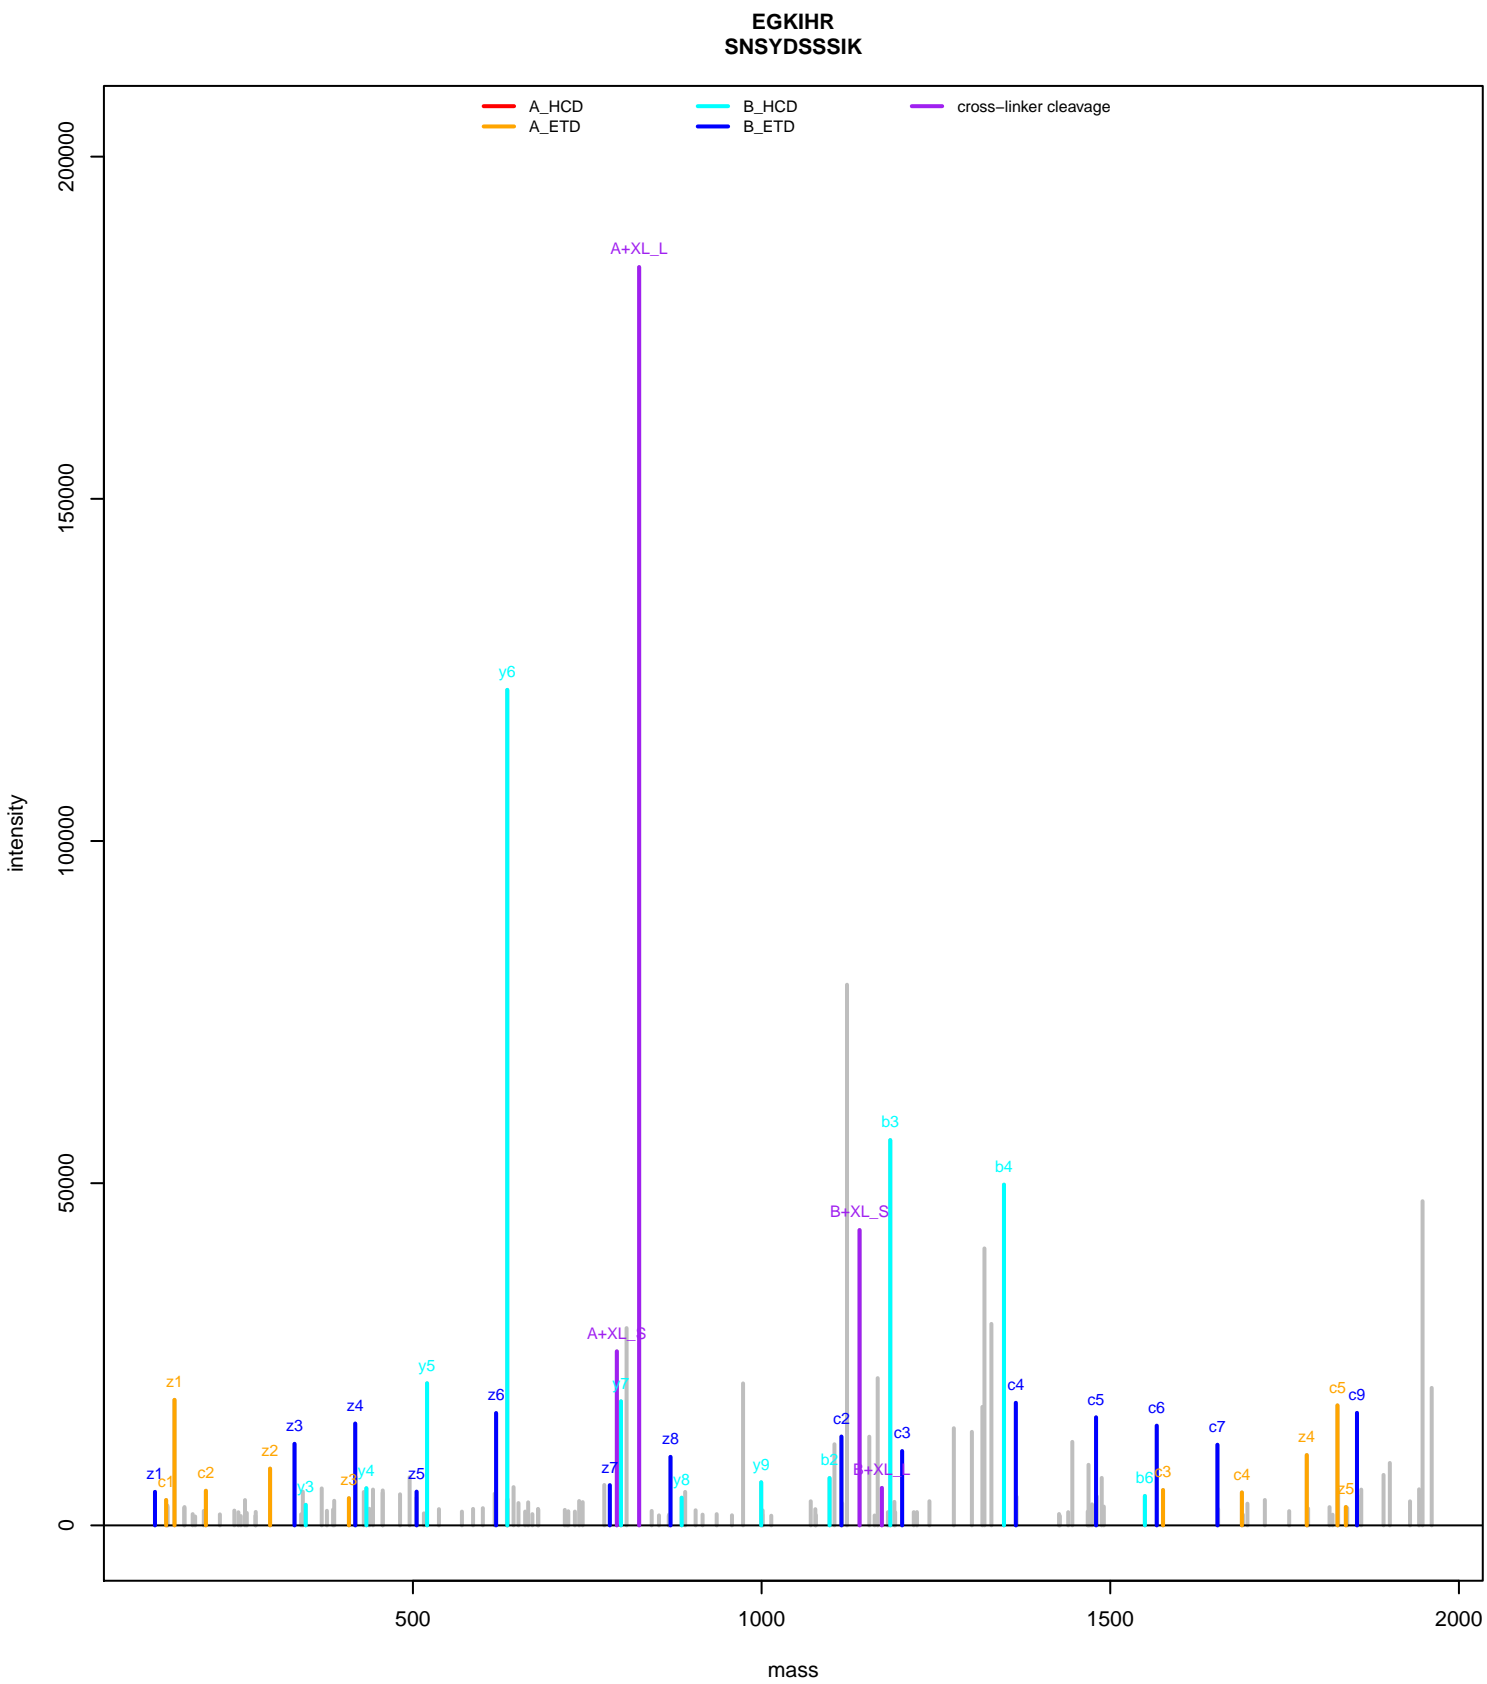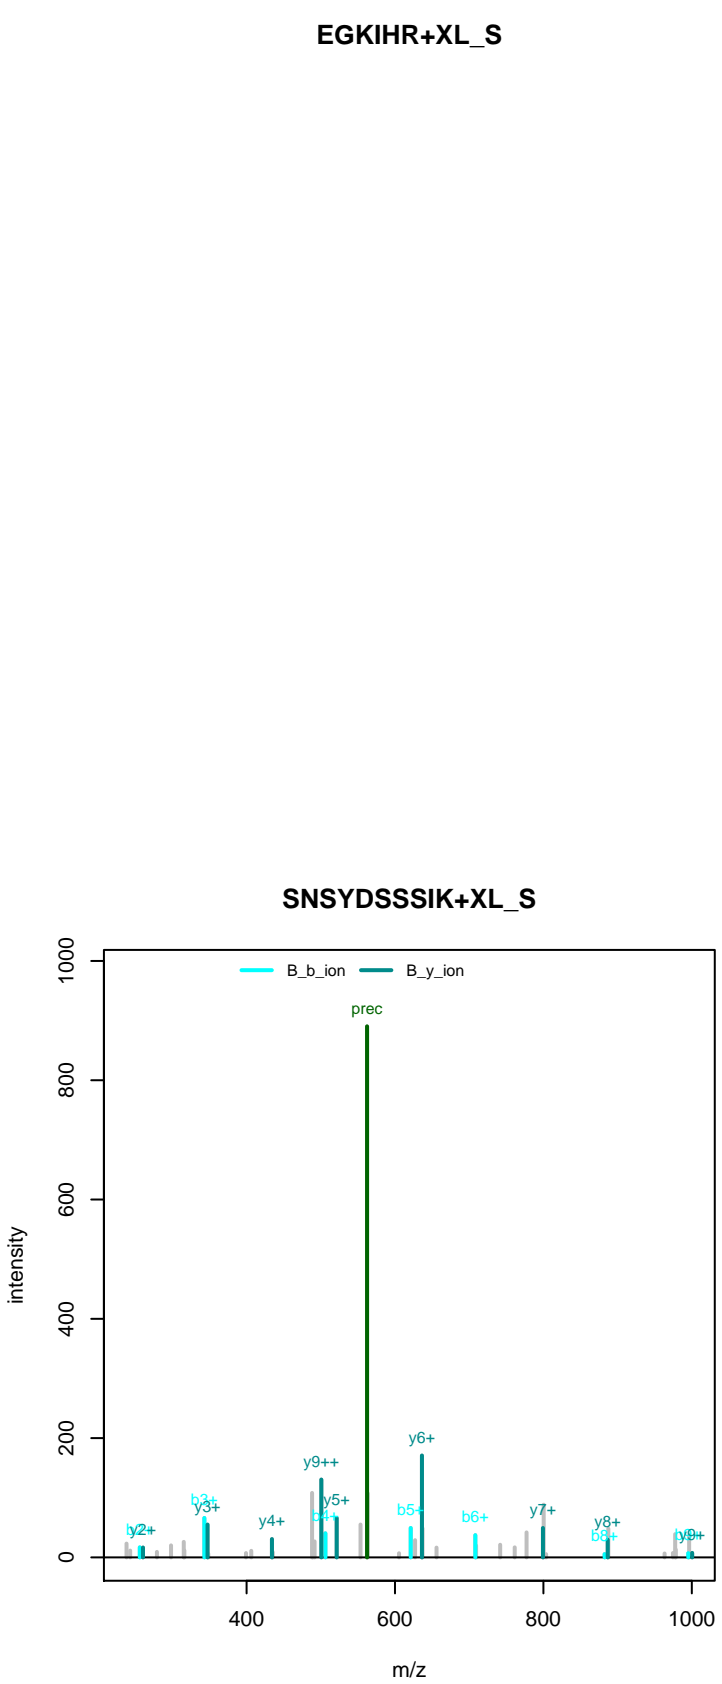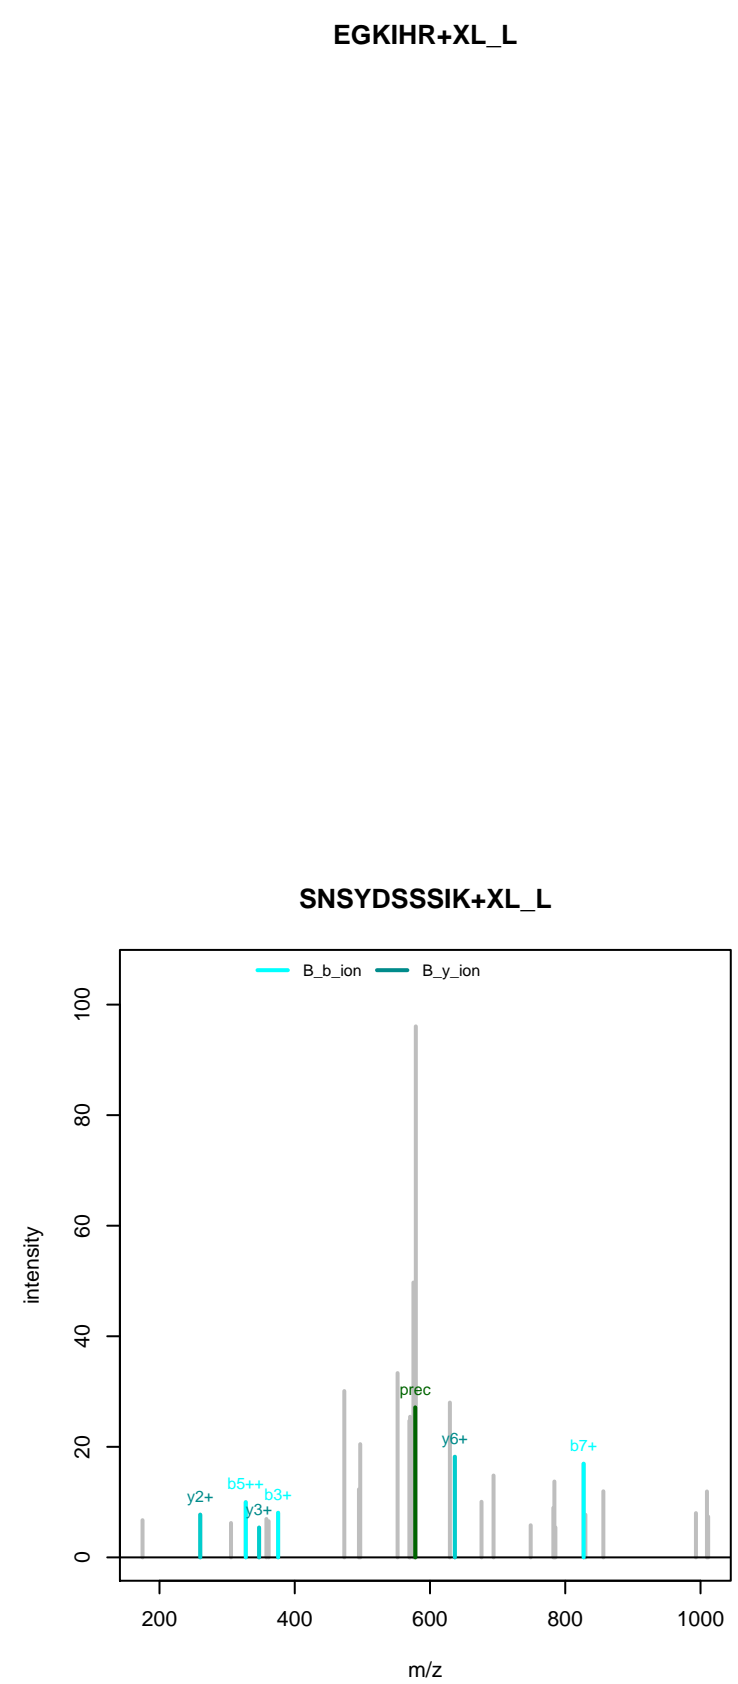

**KGAIVTGK**  
**DAIATV NKQEDANFSNNAMAEAFK**

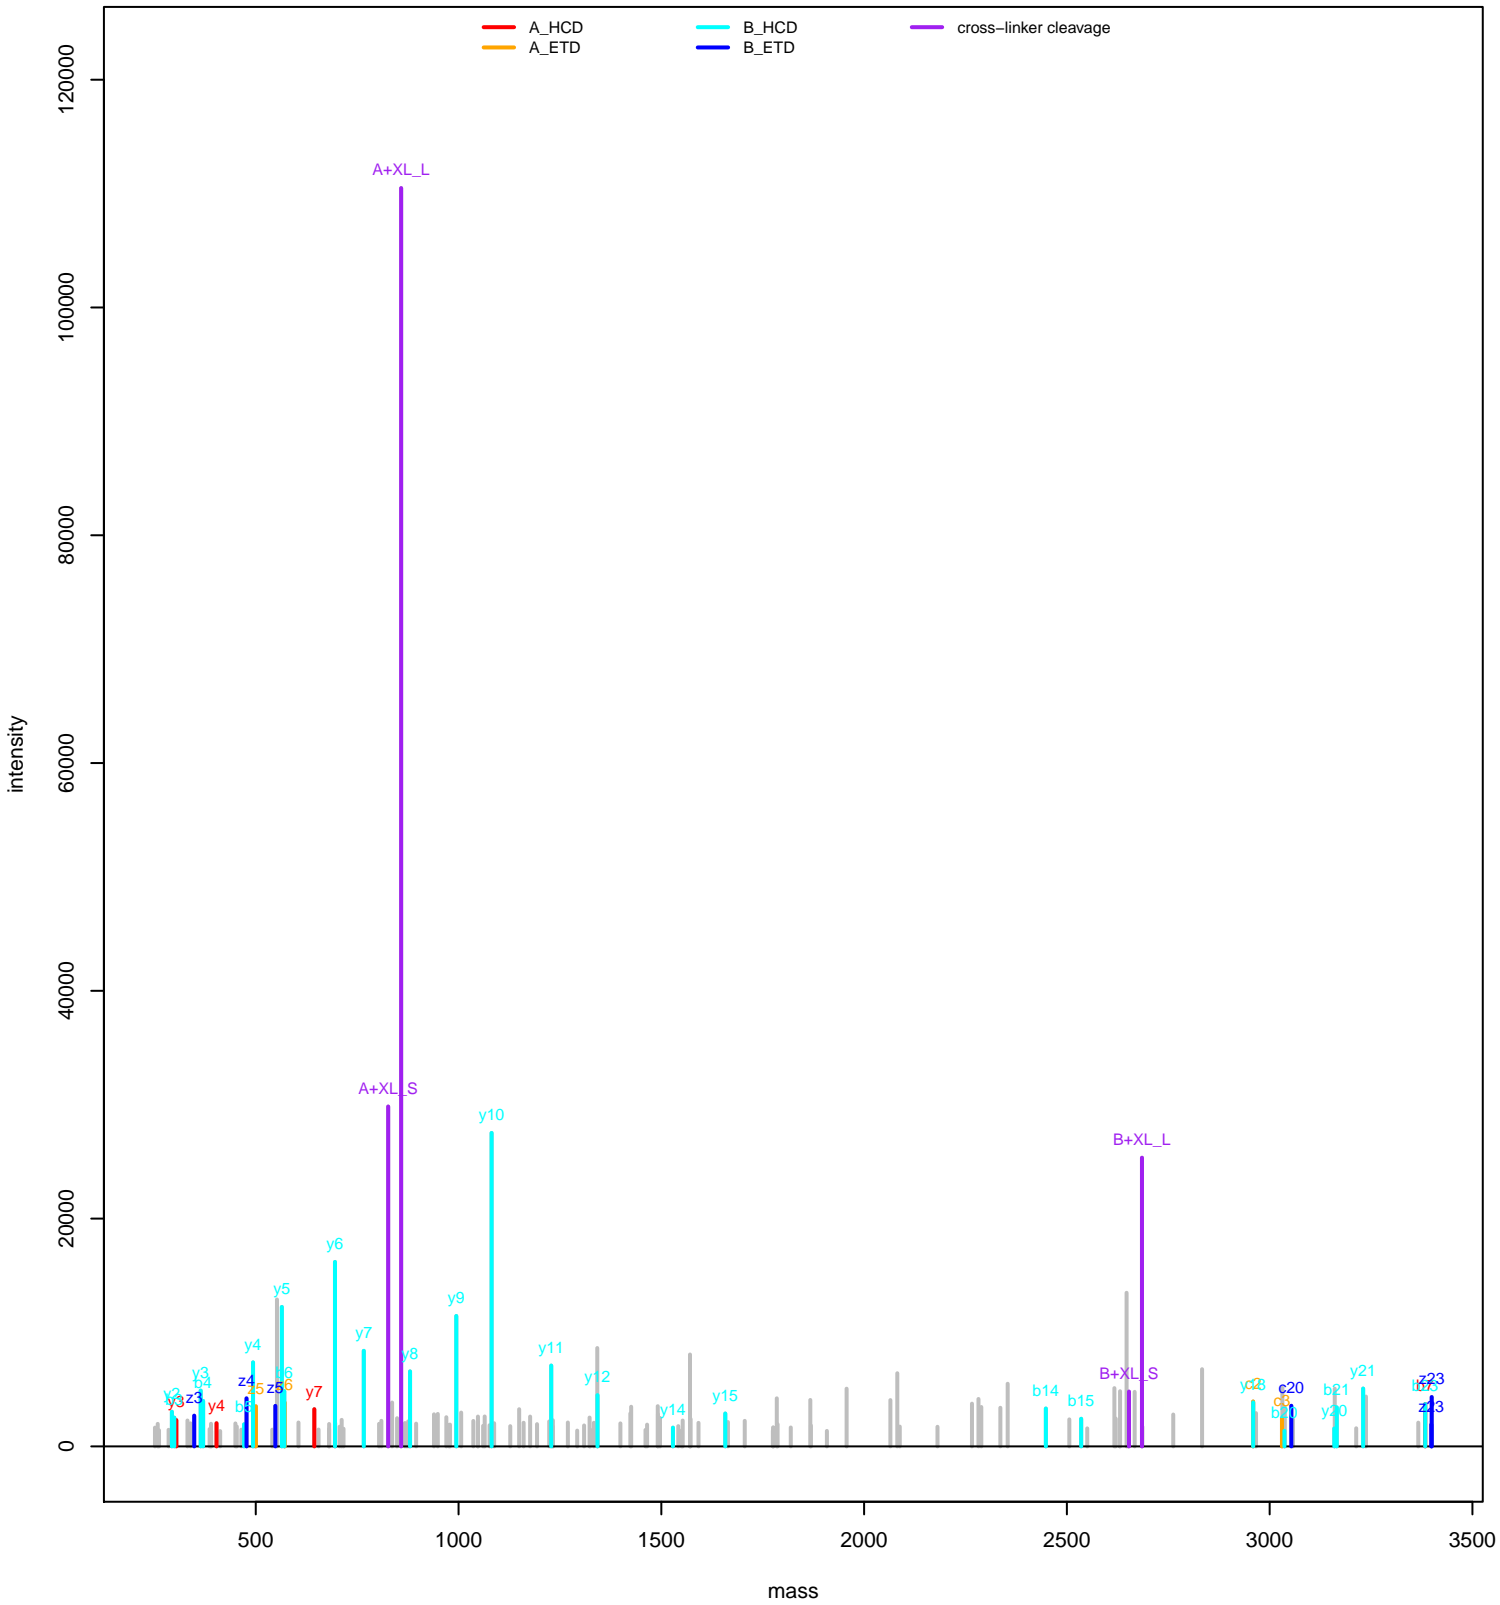

**KGAIVTGK+XL\_S**

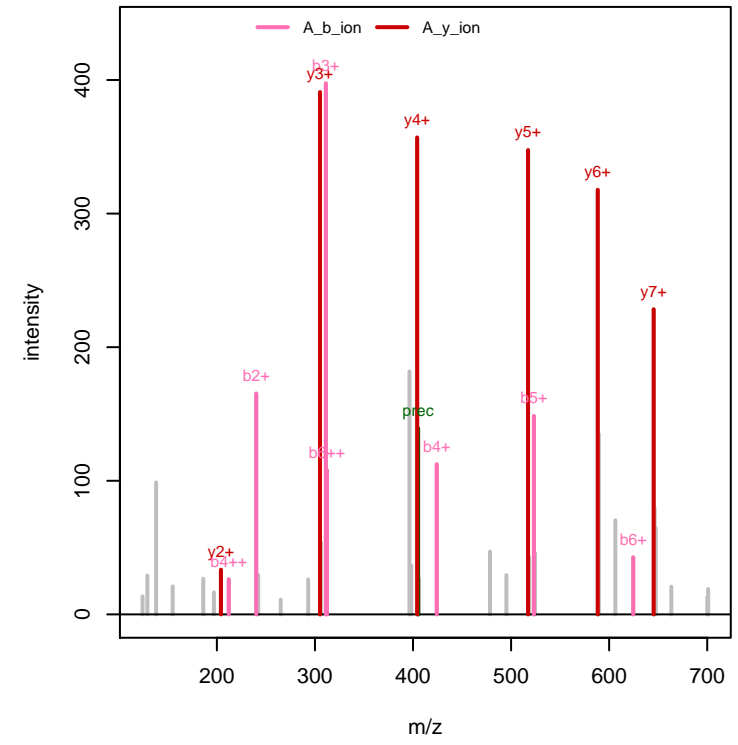

**KGAIVTGK+XL\_L**

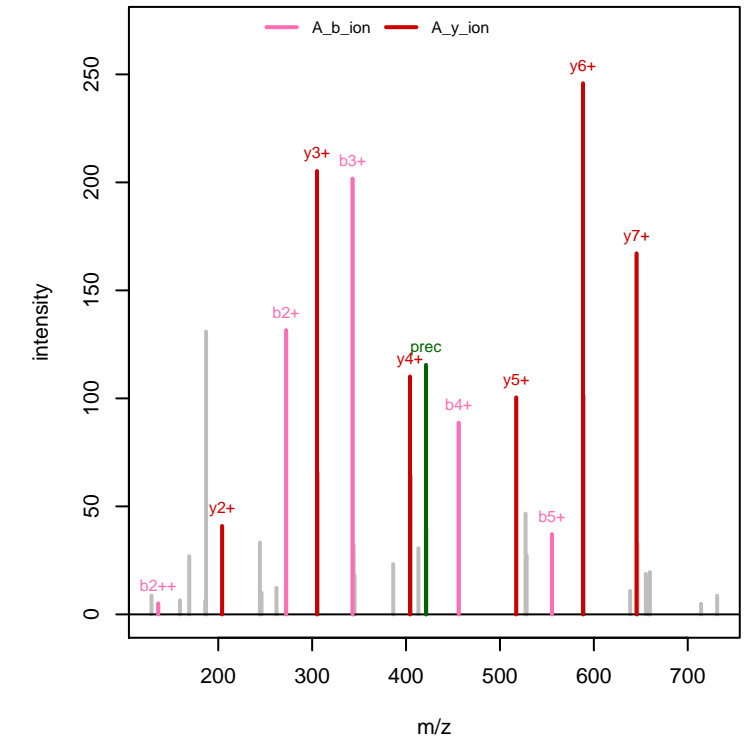

**DAIATV NKQEDANFSNNAMAEAFK+XL\_S**

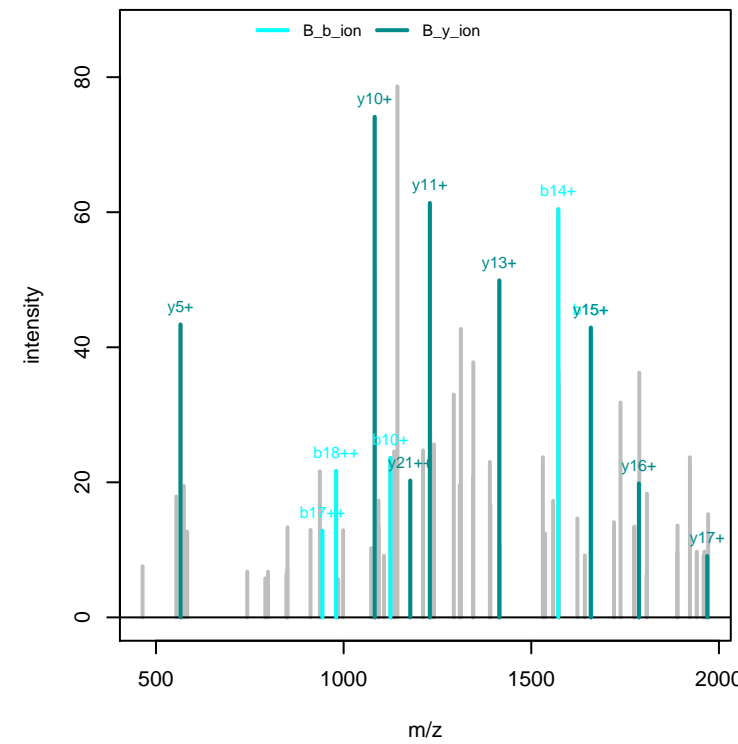

**DAIATV NKQEDANFSNNAMAEAFK+XL\_L**

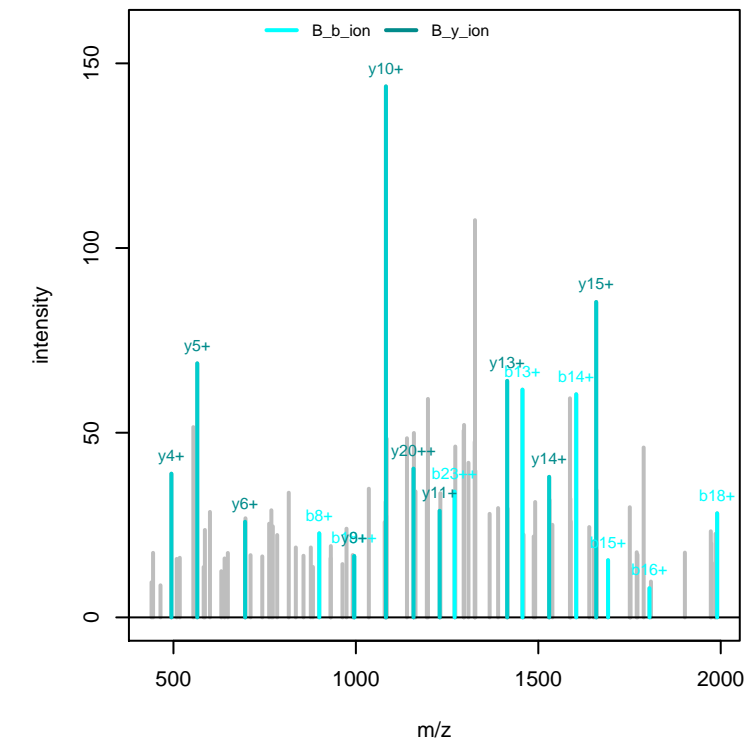



ALKDAVK  
TGRNPQTGKEIK

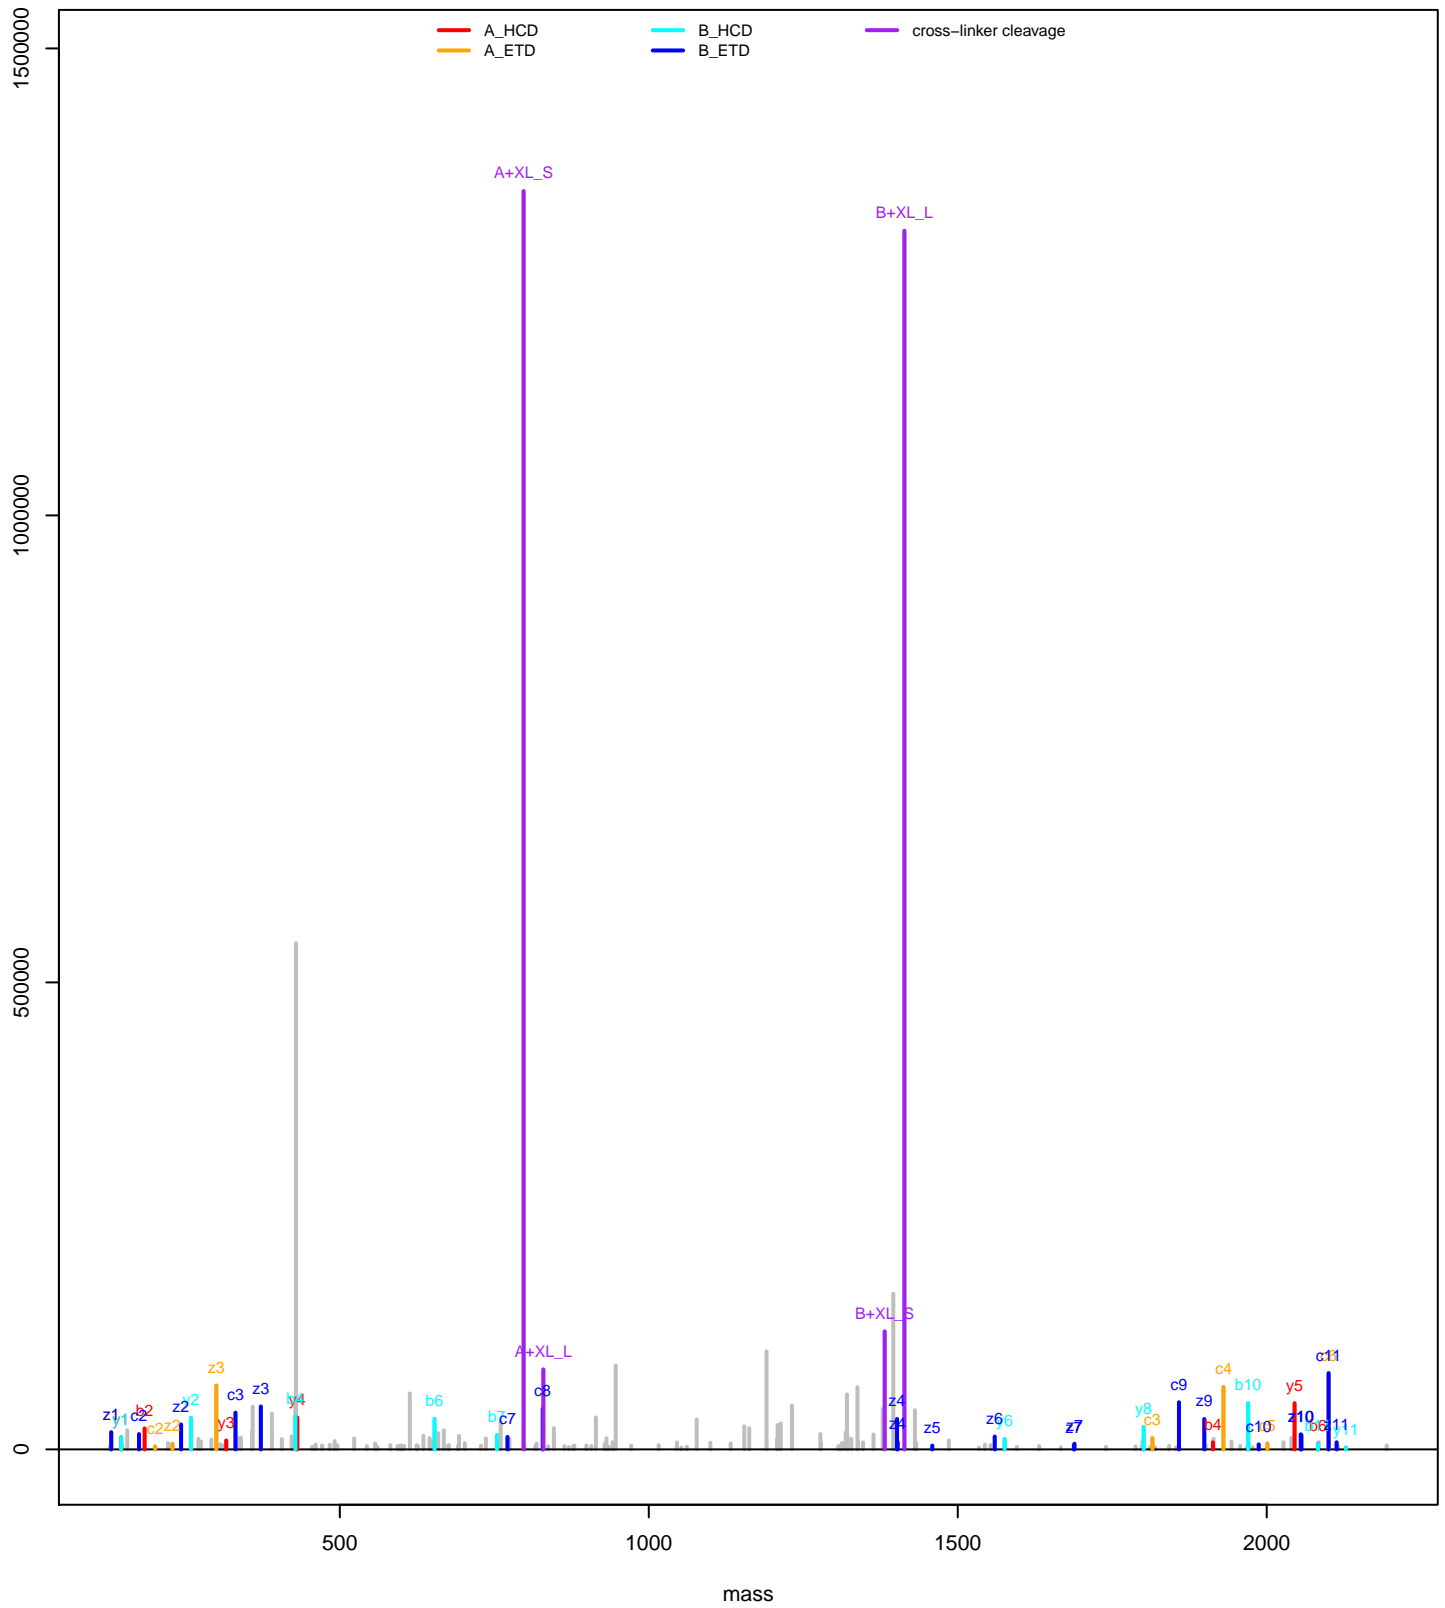

ALKDAVK+XL\_S

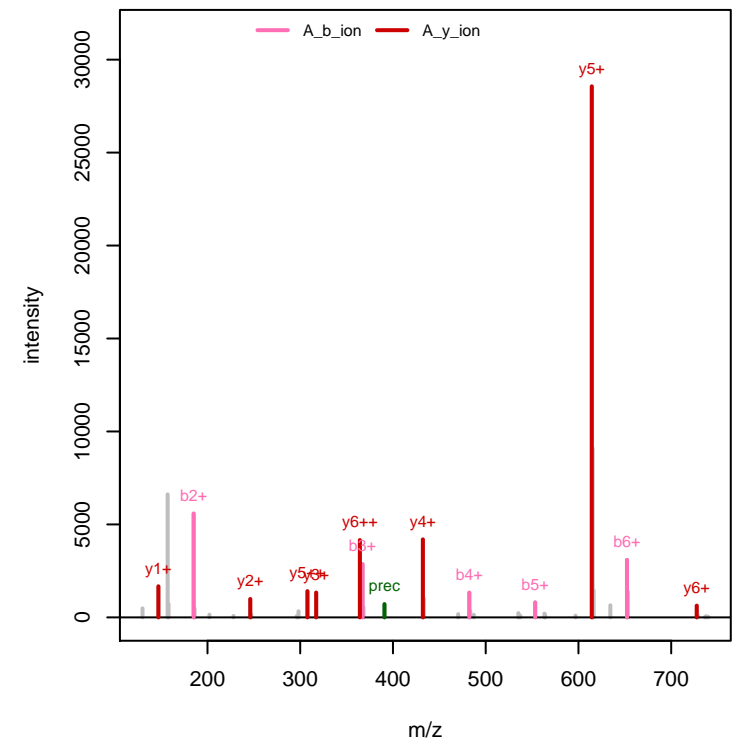

ALKDAVK+XL\_L

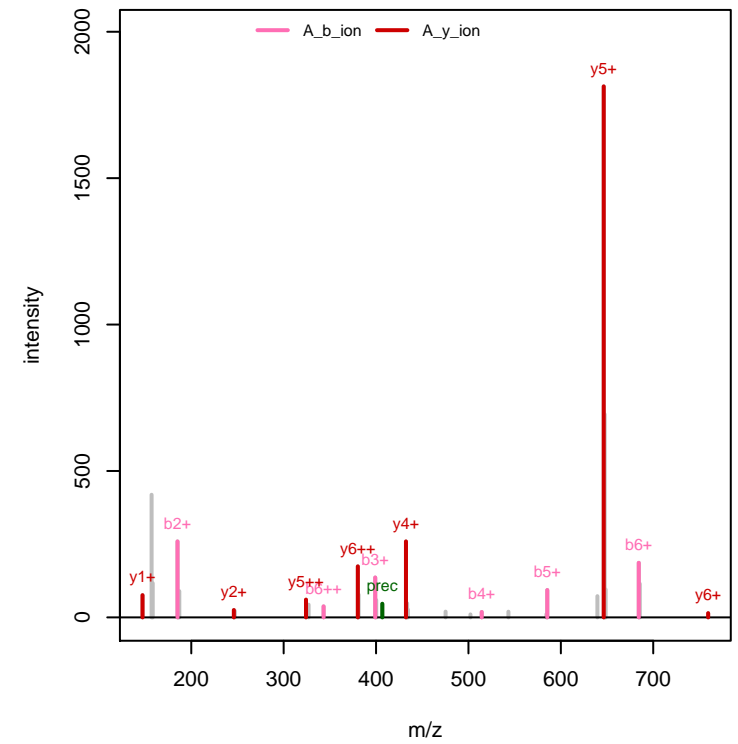

TGRNPQTGKEIK+XL\_S

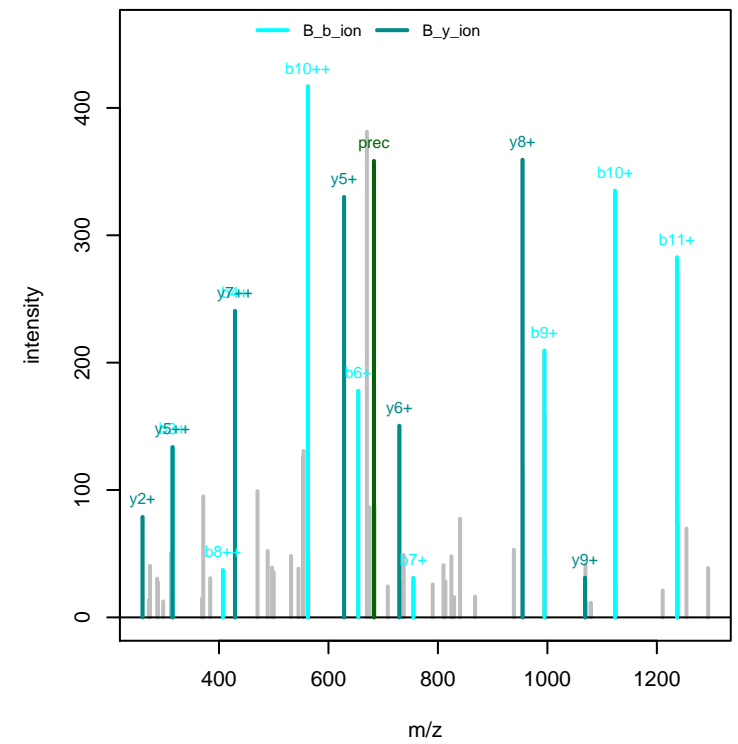

TGRNPQTGKEIK+XL\_L

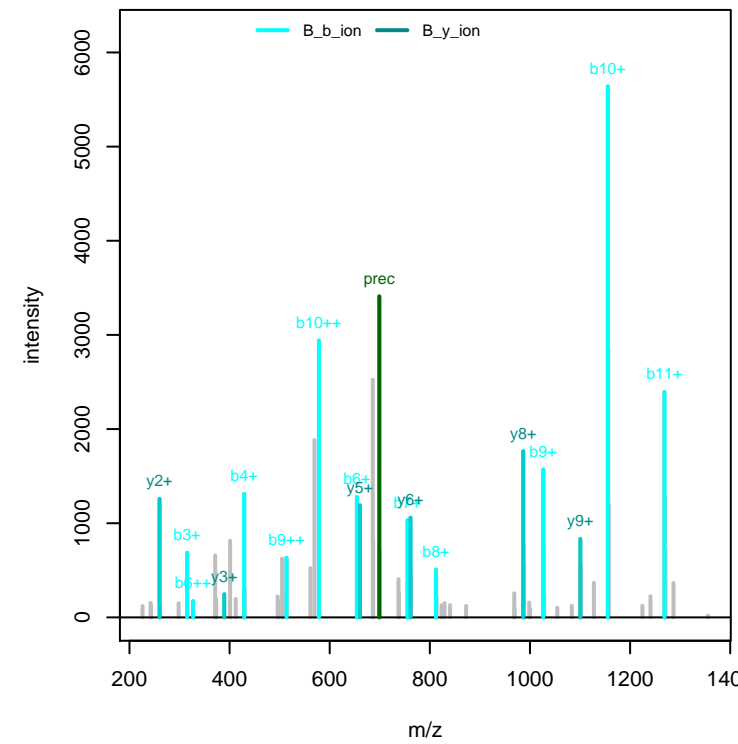

VALSKAEGEK  
VIEQARADKK

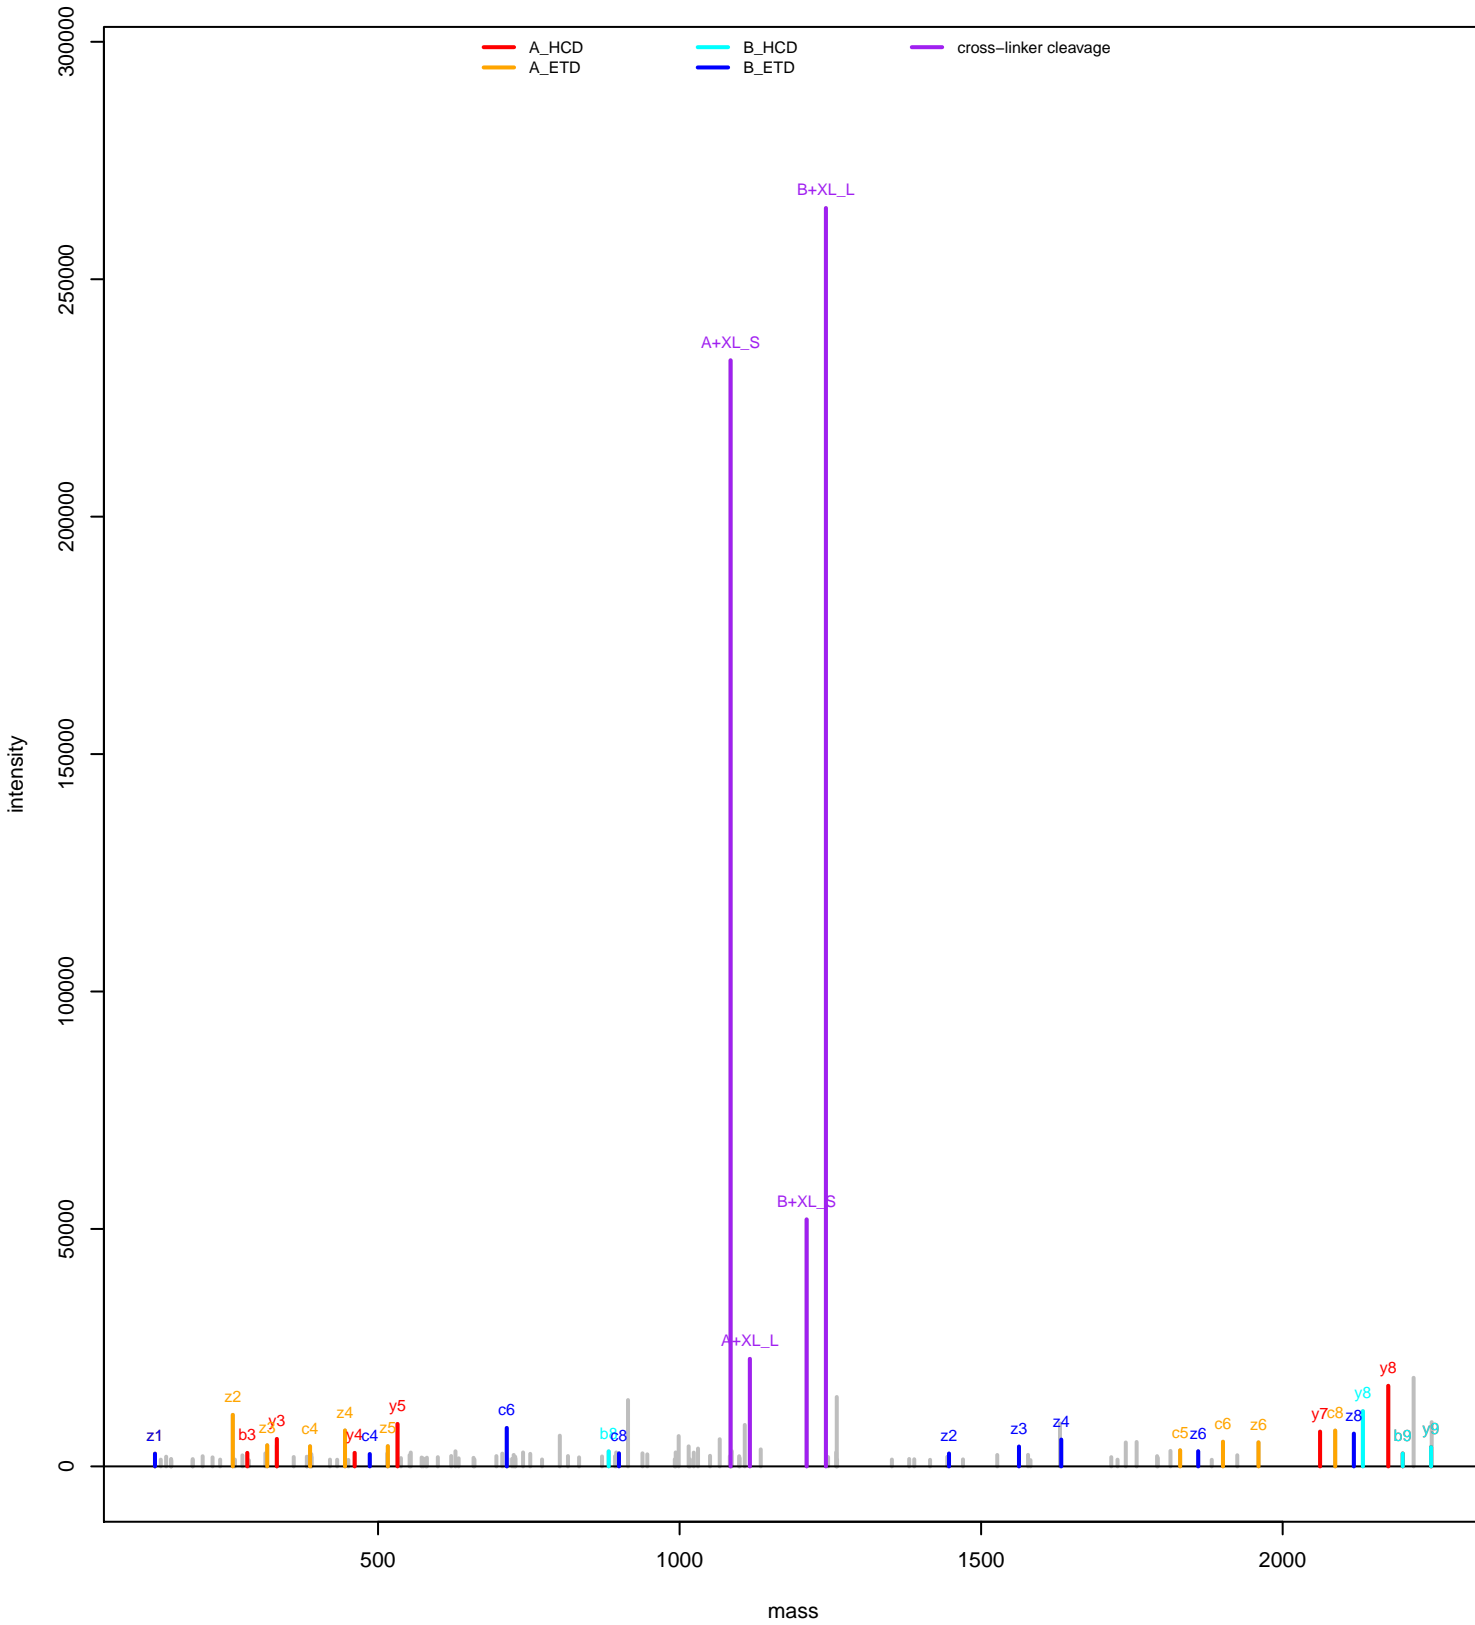

VALSKAEGEK+XL\_S

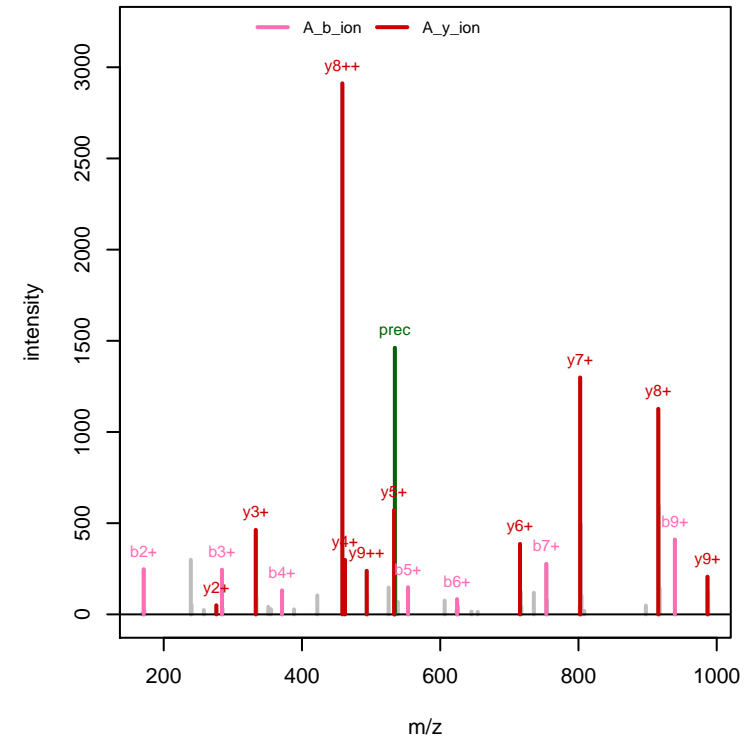

VALSKAEGEK+XL\_L

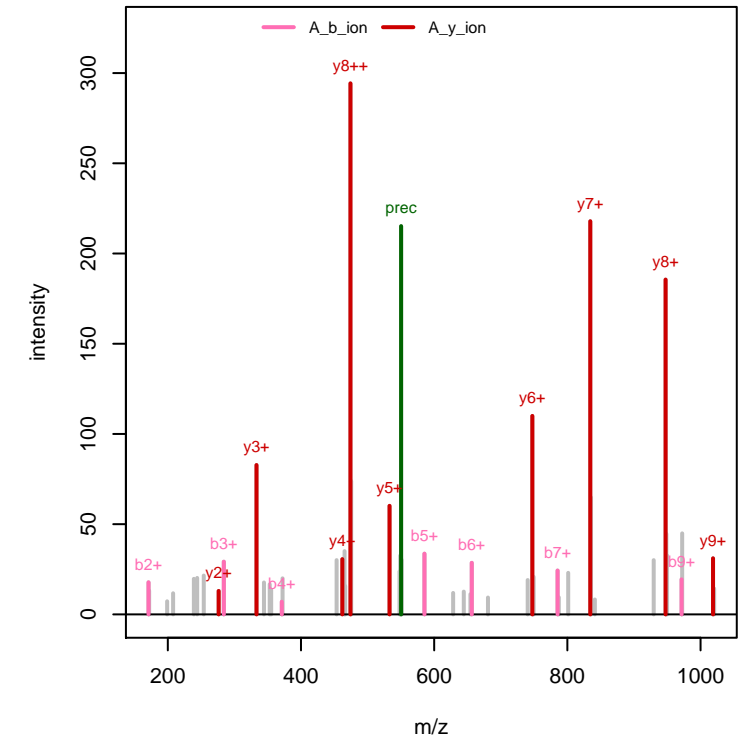

VIEQARADKK+XL\_S

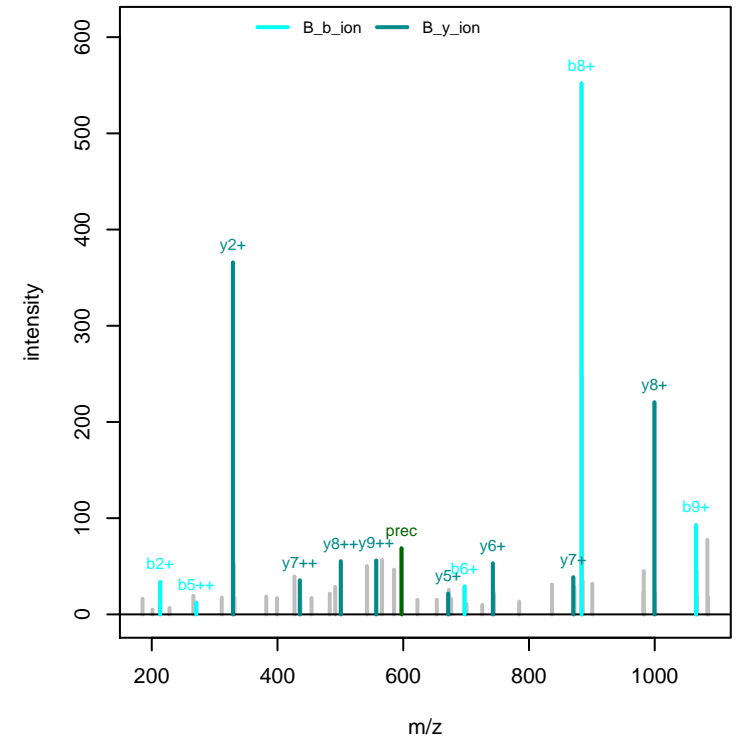

VIEQARADKK+XL\_L

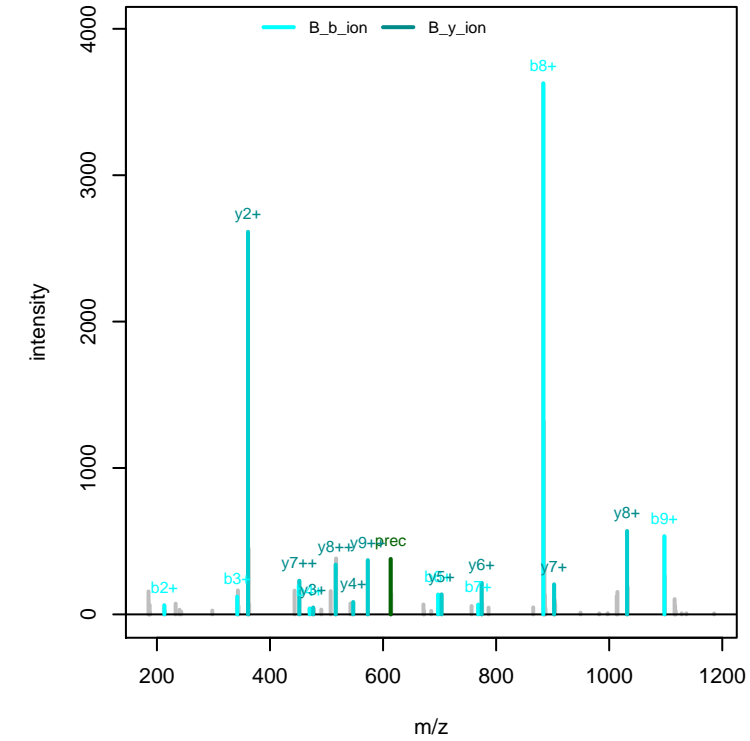

DKVSNQQDDMoTK  
REAAEQAKREAAEK

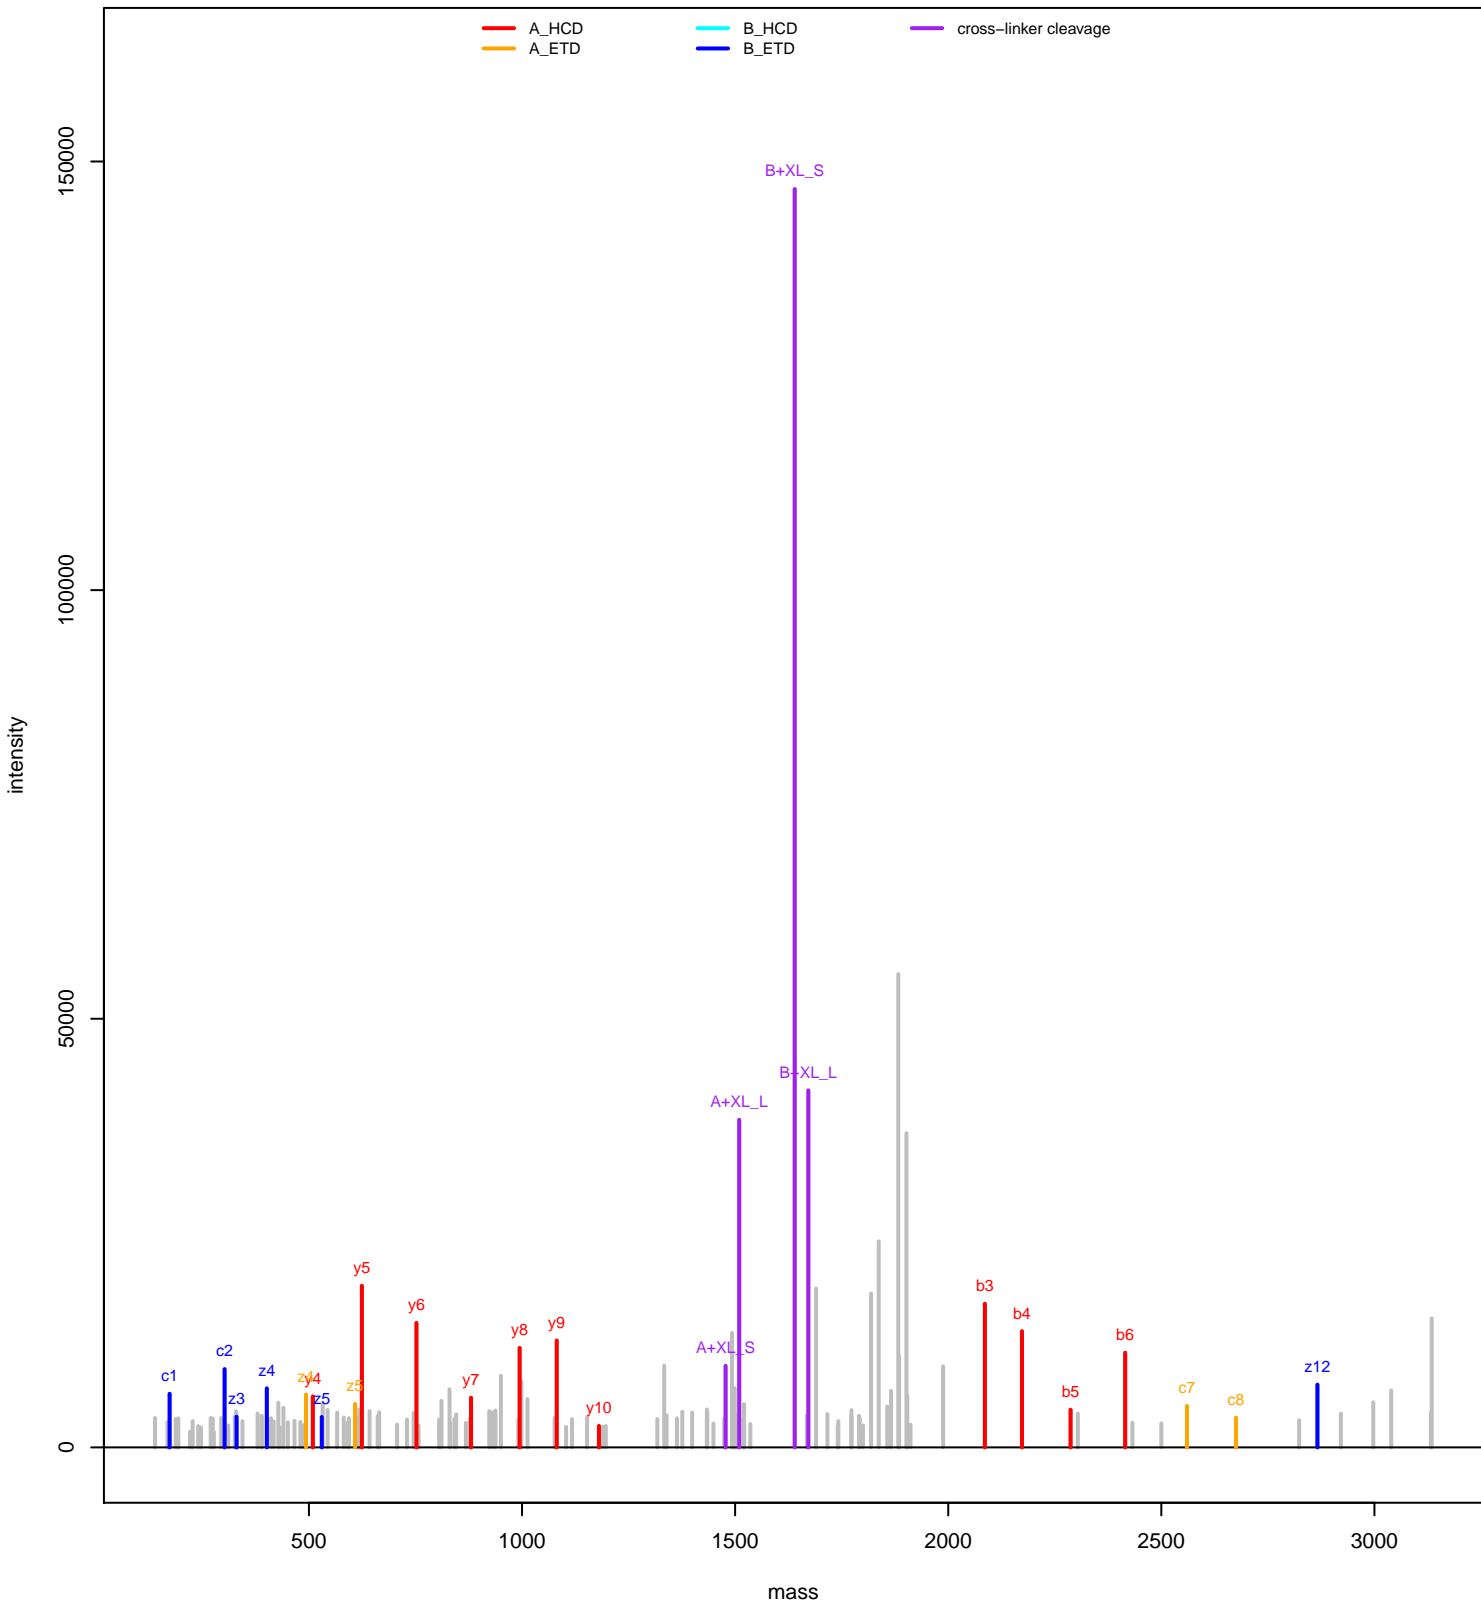

DKVSNQQDDMoTK+XL\_S

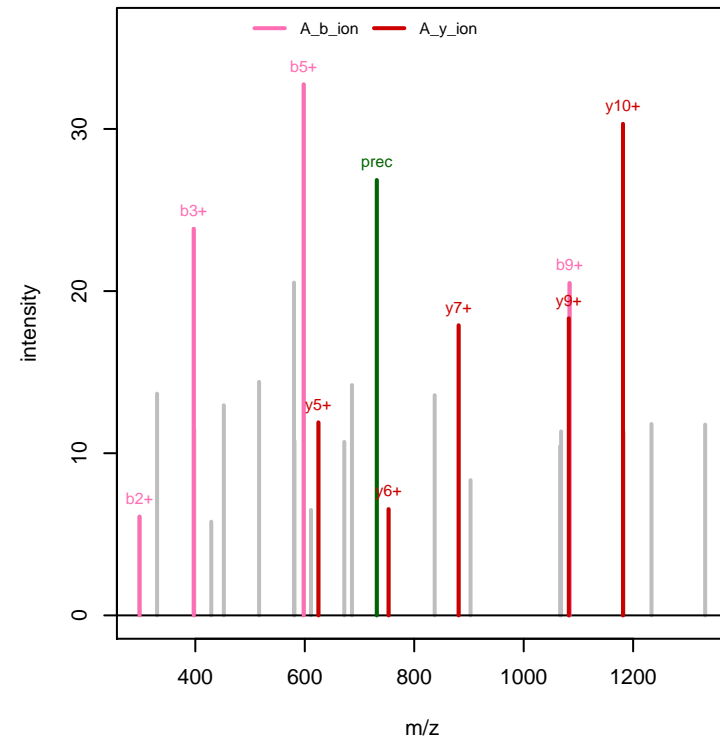

DKVSNQQDDMoTK+XL\_L

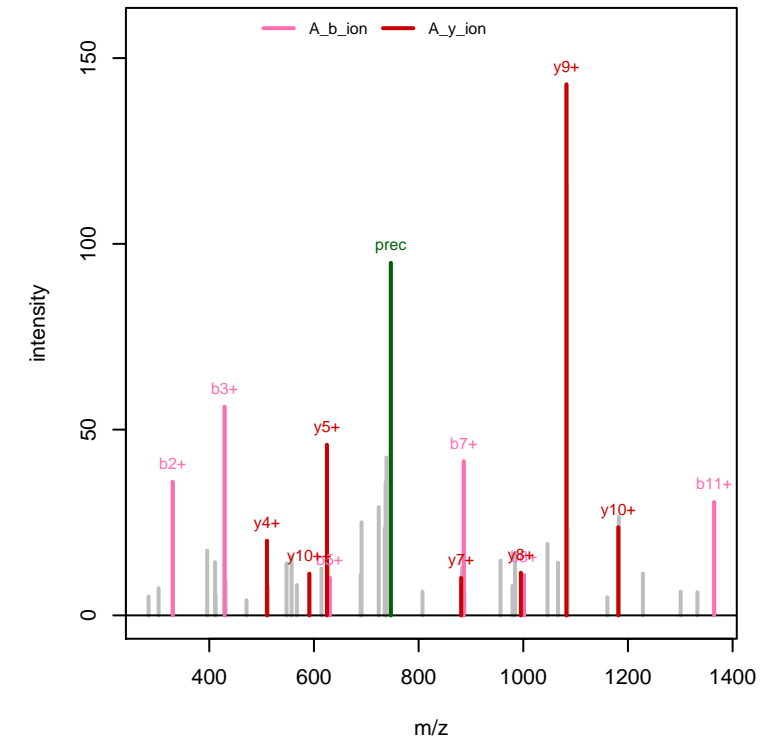

REAAEQAKREAAEK+XL\_S

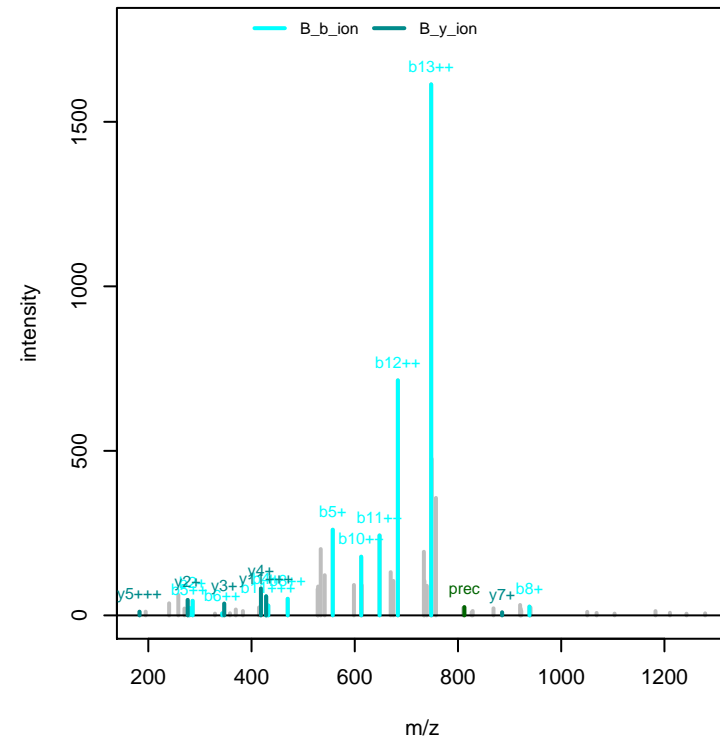

REAAEQAKREAAEK+XL\_L

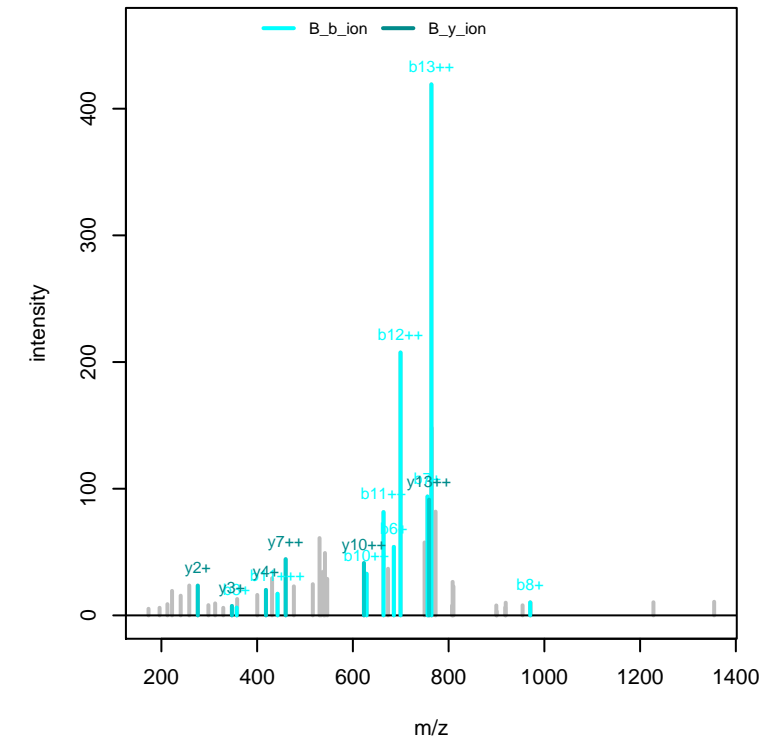

LSQSGHKR  
MEQNPQSQLK

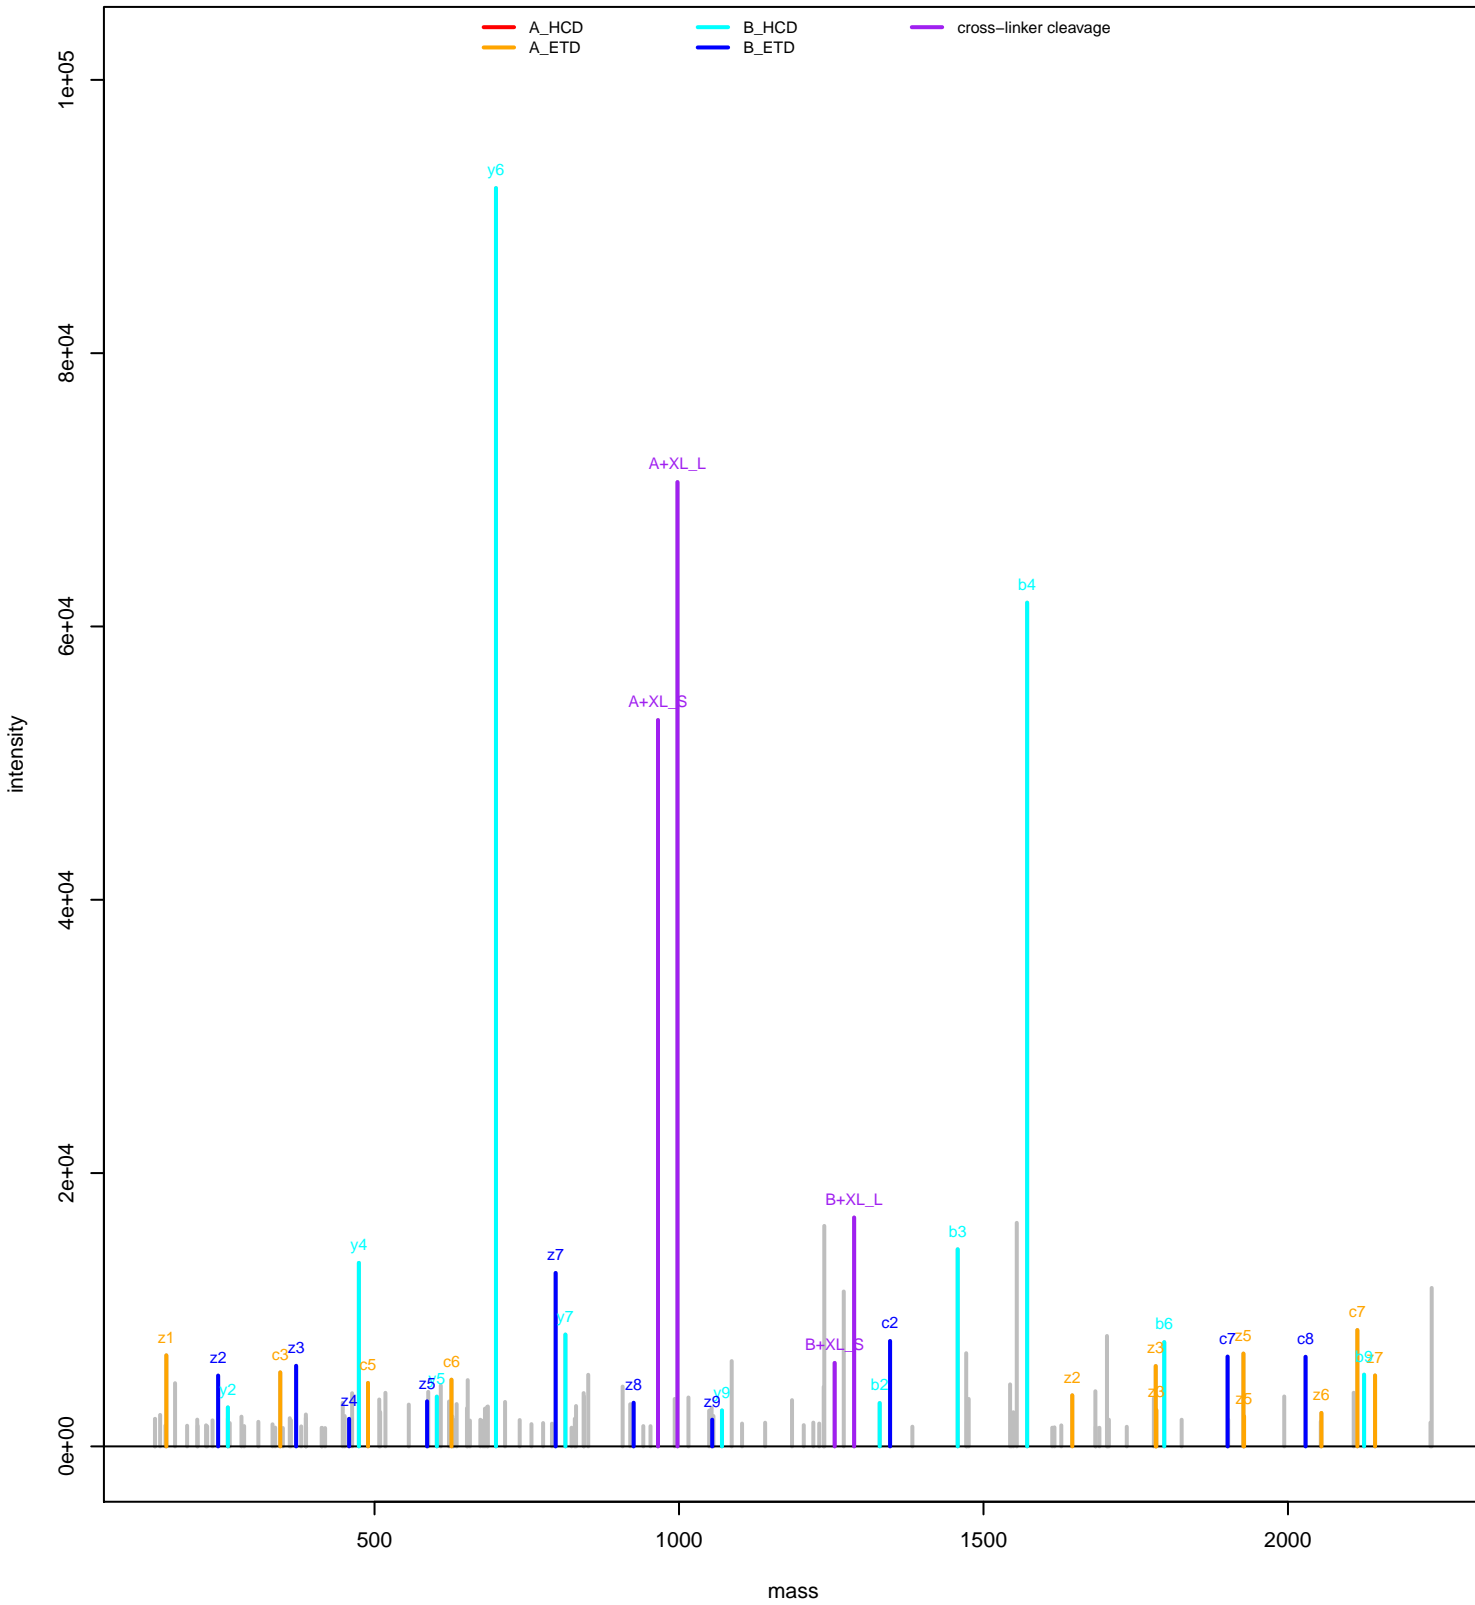

LSQSGHKR+XL\_S

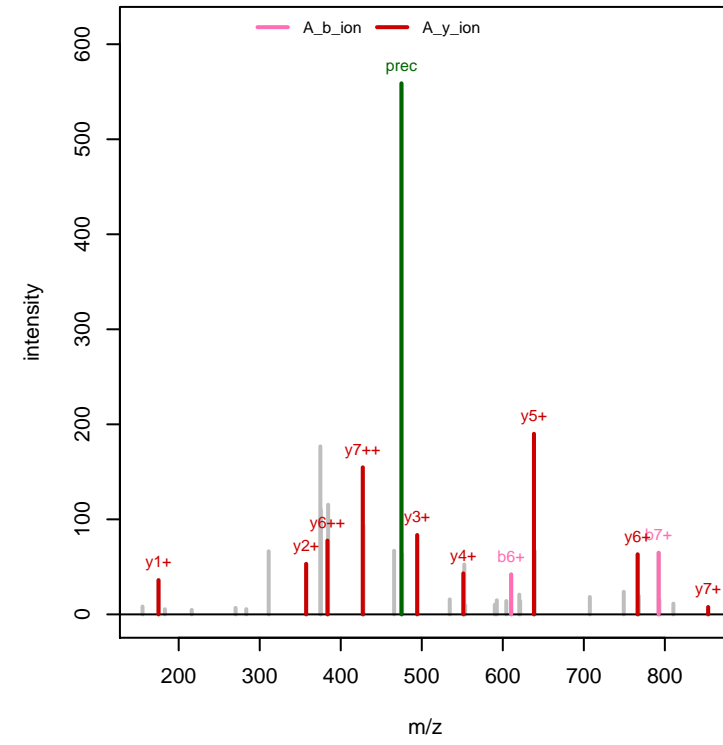

LSQSGHKR+XL\_L

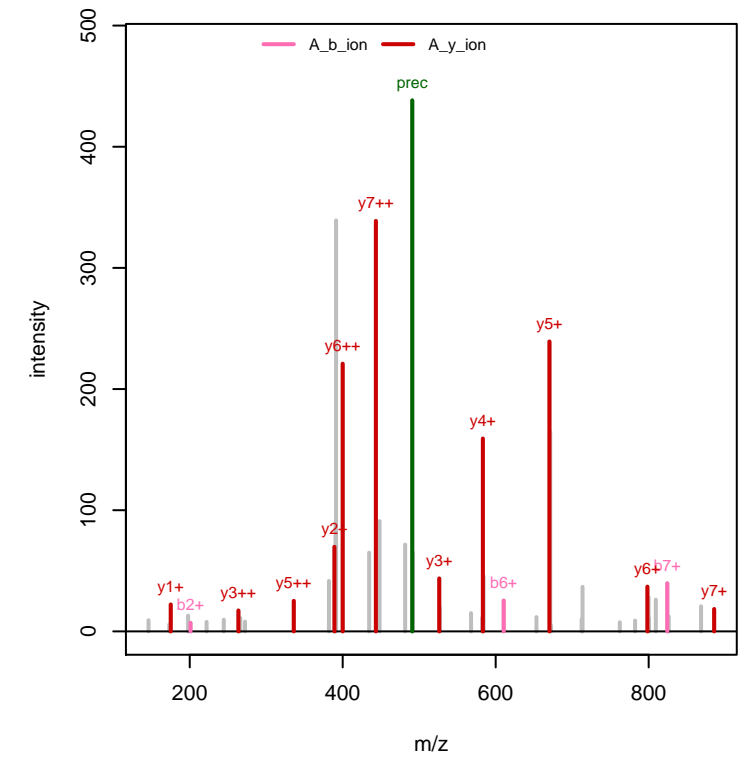

MEQNPQSQLK+XL\_S

MEQNPQSQLK+XL\_L

IMATAAKNITK  
IMATAAKNITK

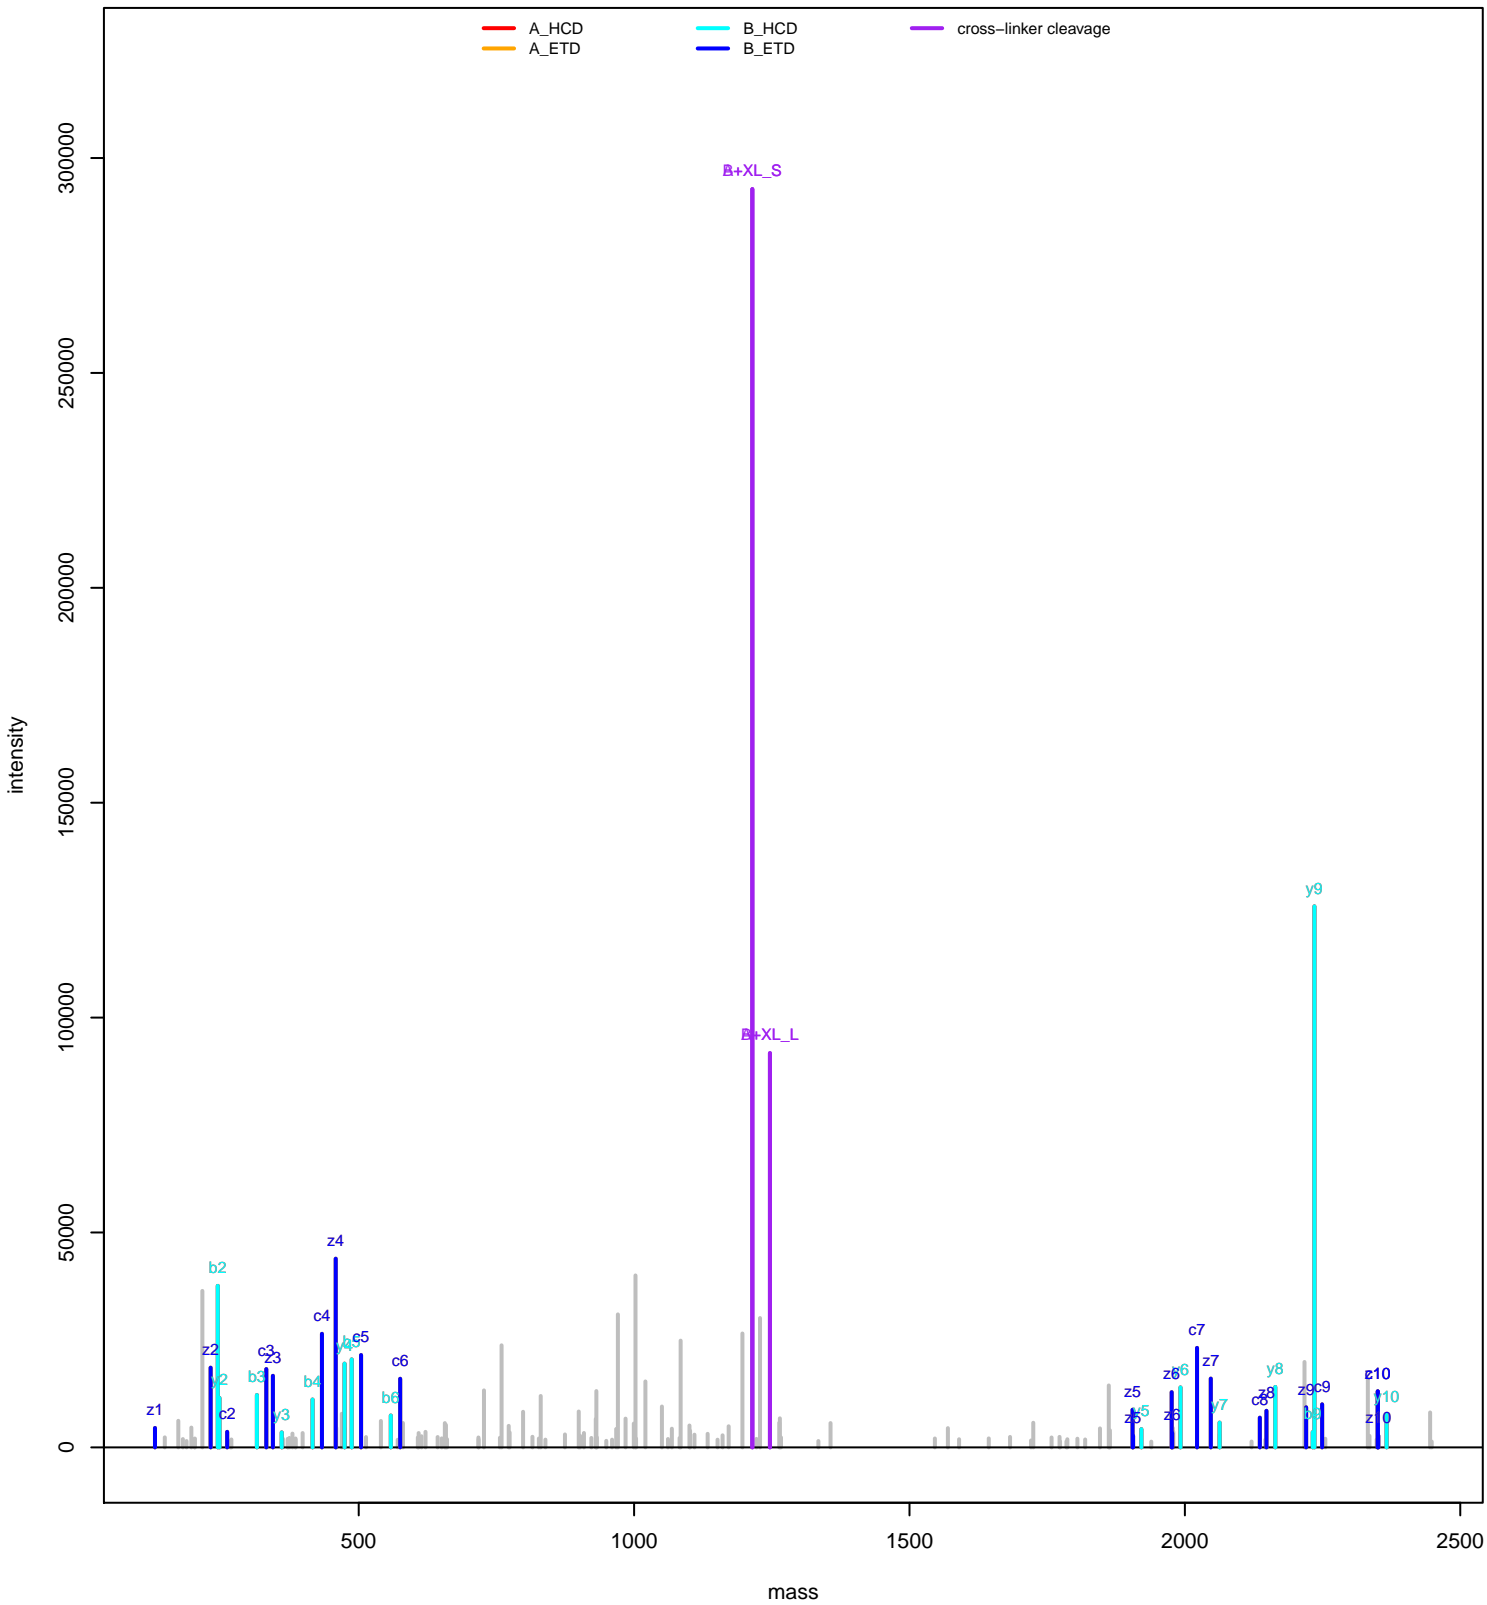

IMATAAKNITK+XL\_S

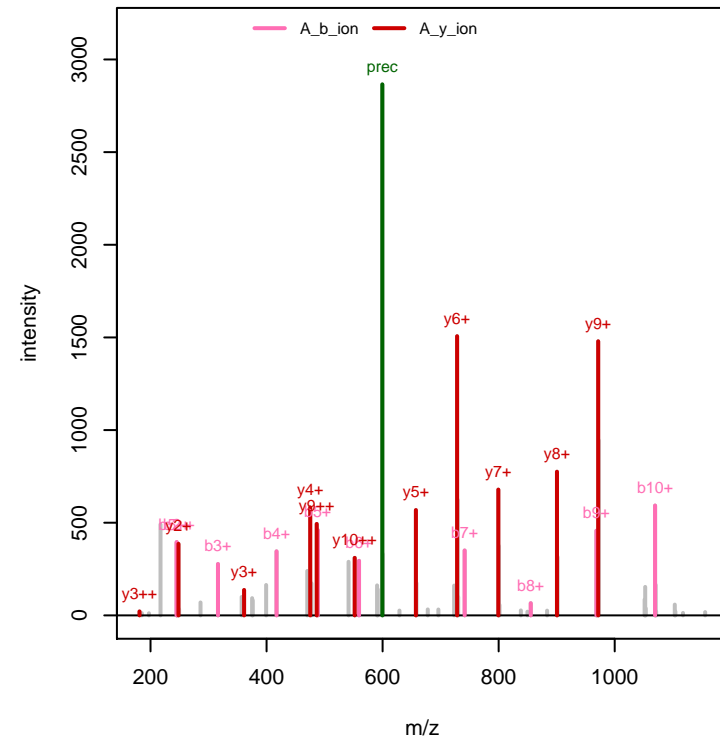

IMATAAKNITK+XL\_L

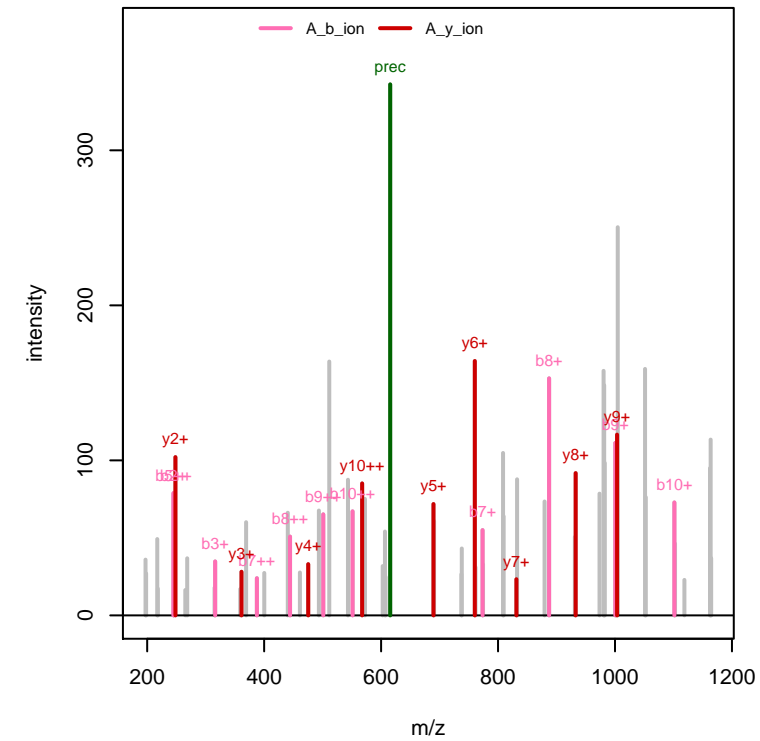

IMATAAKNITK+XL\_S

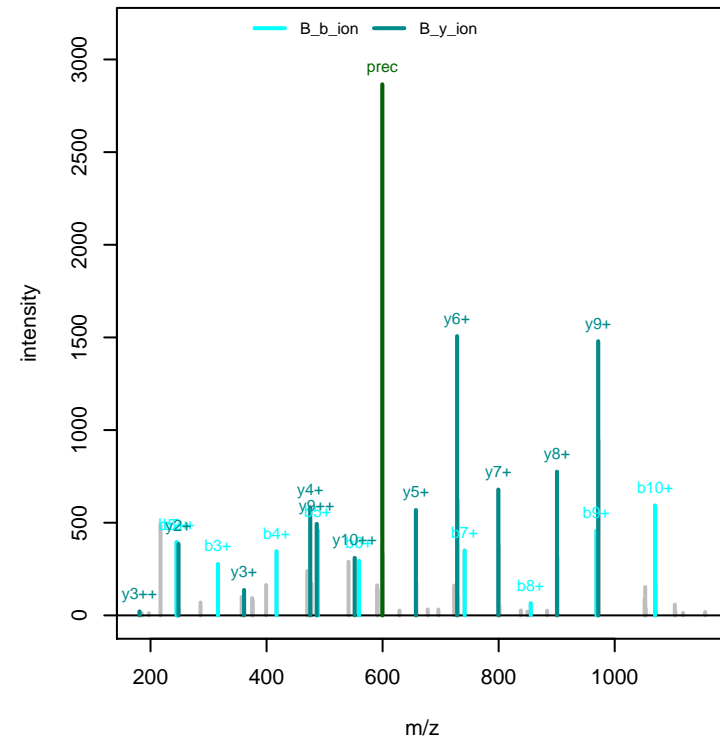

IMATAAKNITK+XL\_L

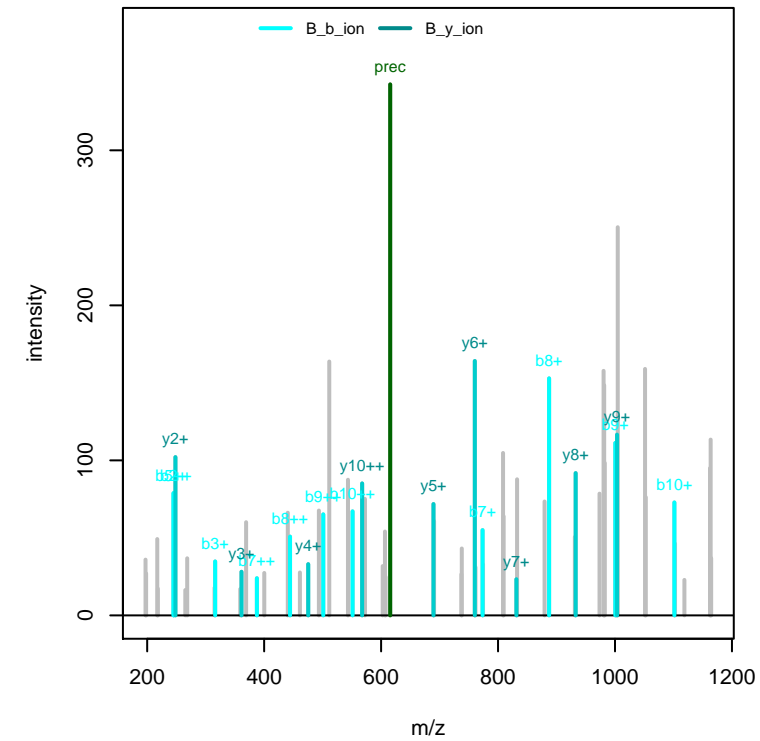

LKNSYPR  
LAETHNKGYR

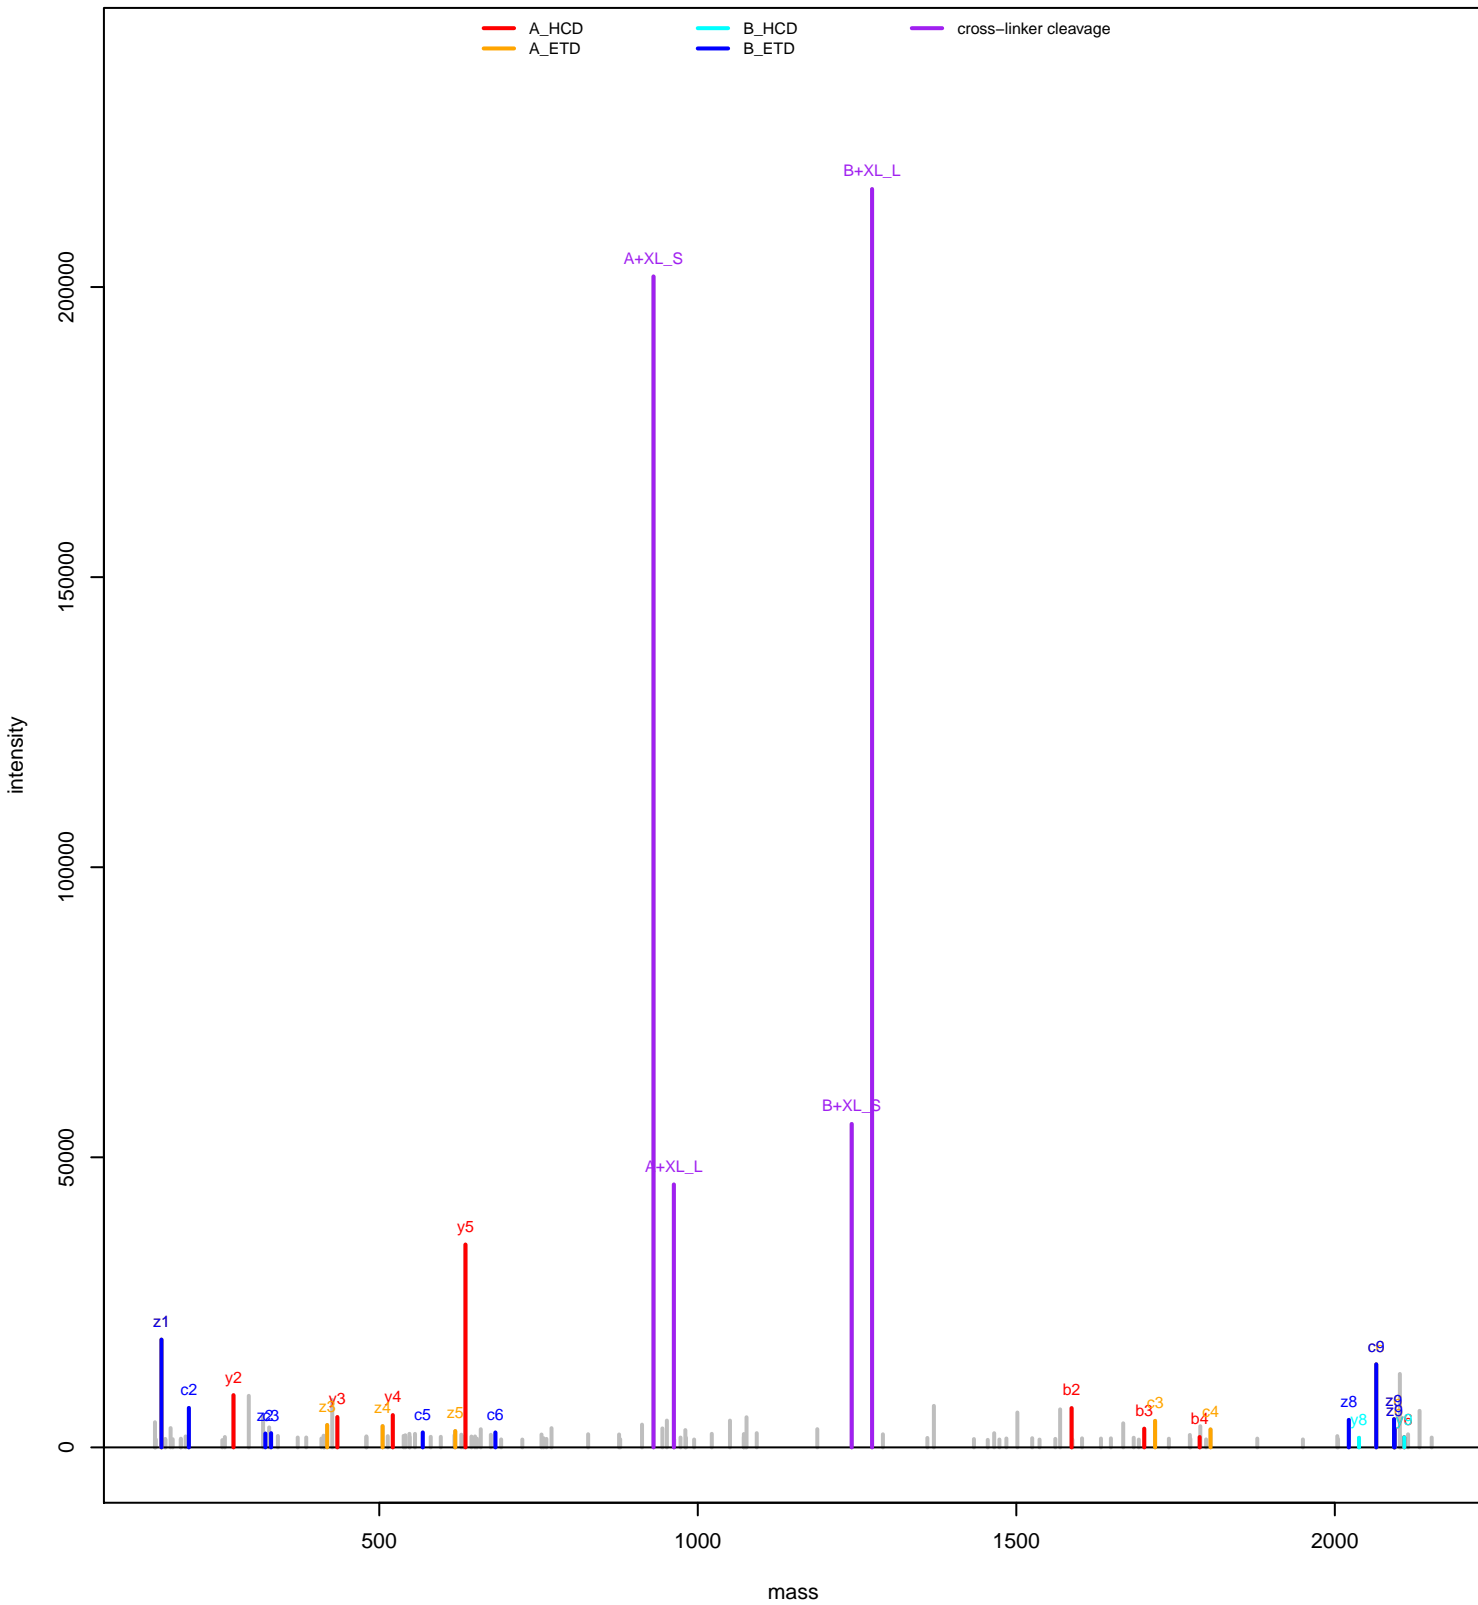

LKNSYPR+XL\_S

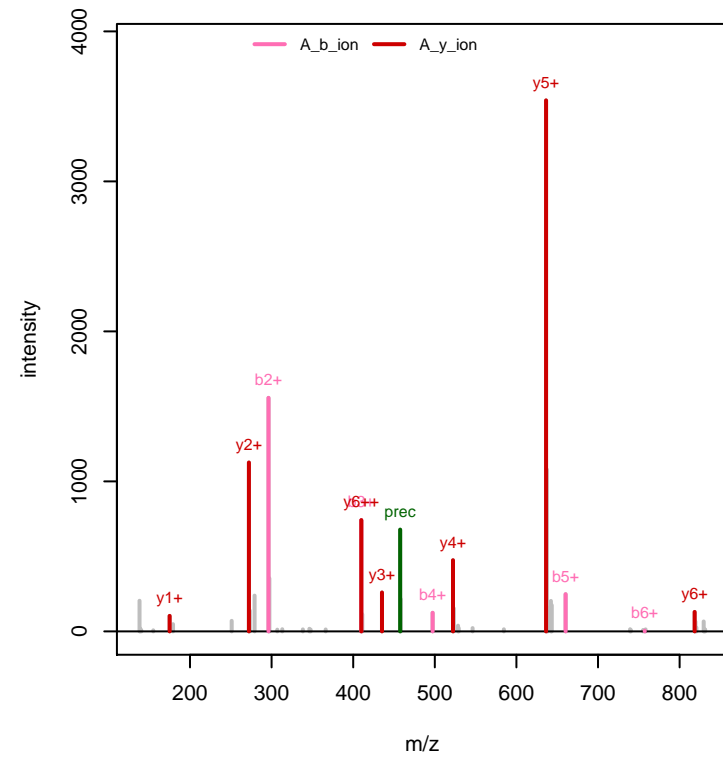

LKNSYPR+XL\_L

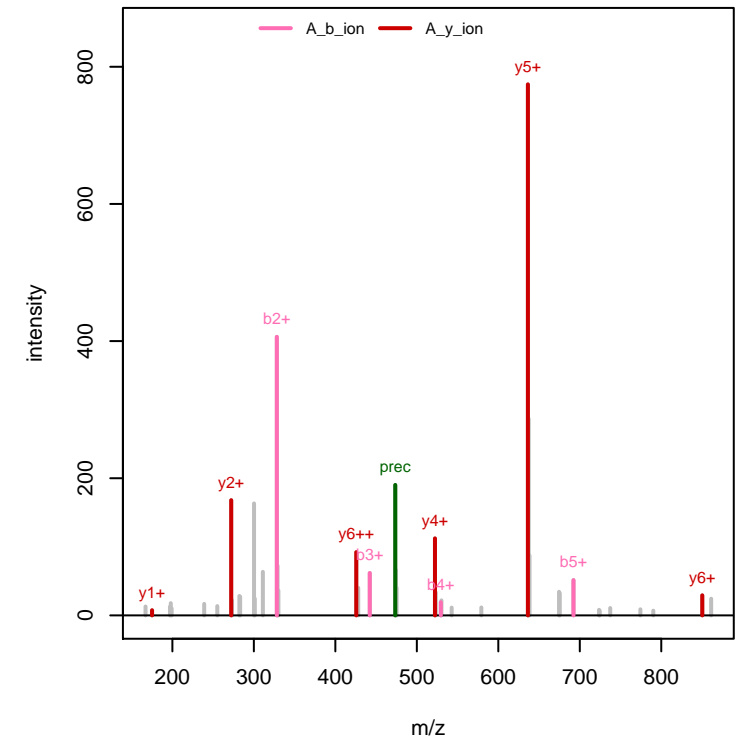

LAETHNKGYR+XL\_S

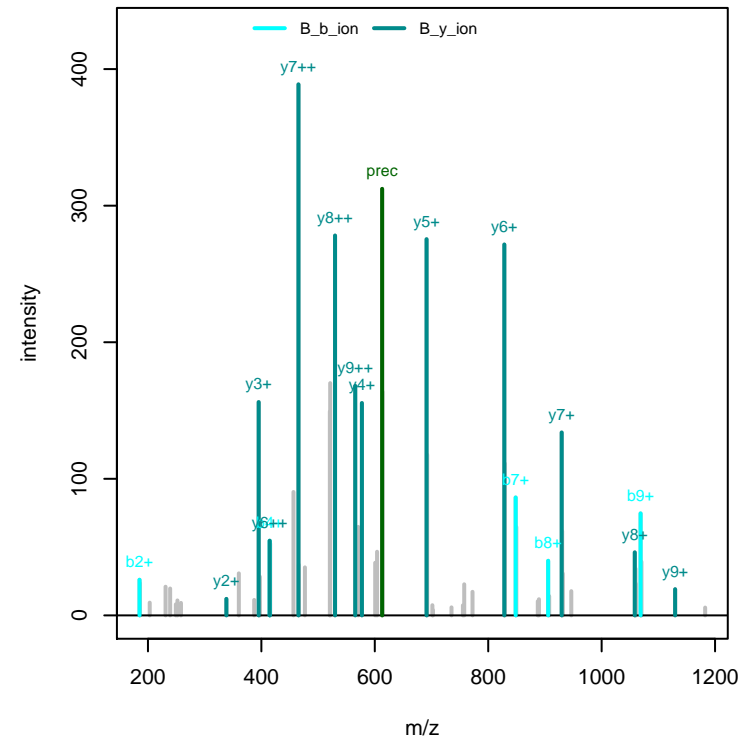

LAETHNKGYR+XL\_L

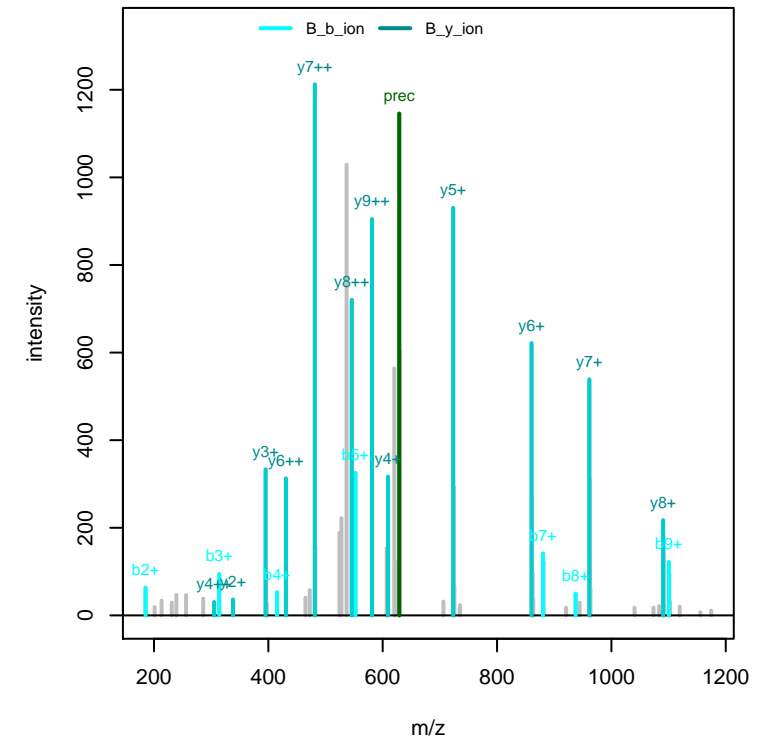

ASATDQLKK  
AKAEAQVIEQANK

ASATDQLKK+XL\_S

ASATDQLKK+XL\_L

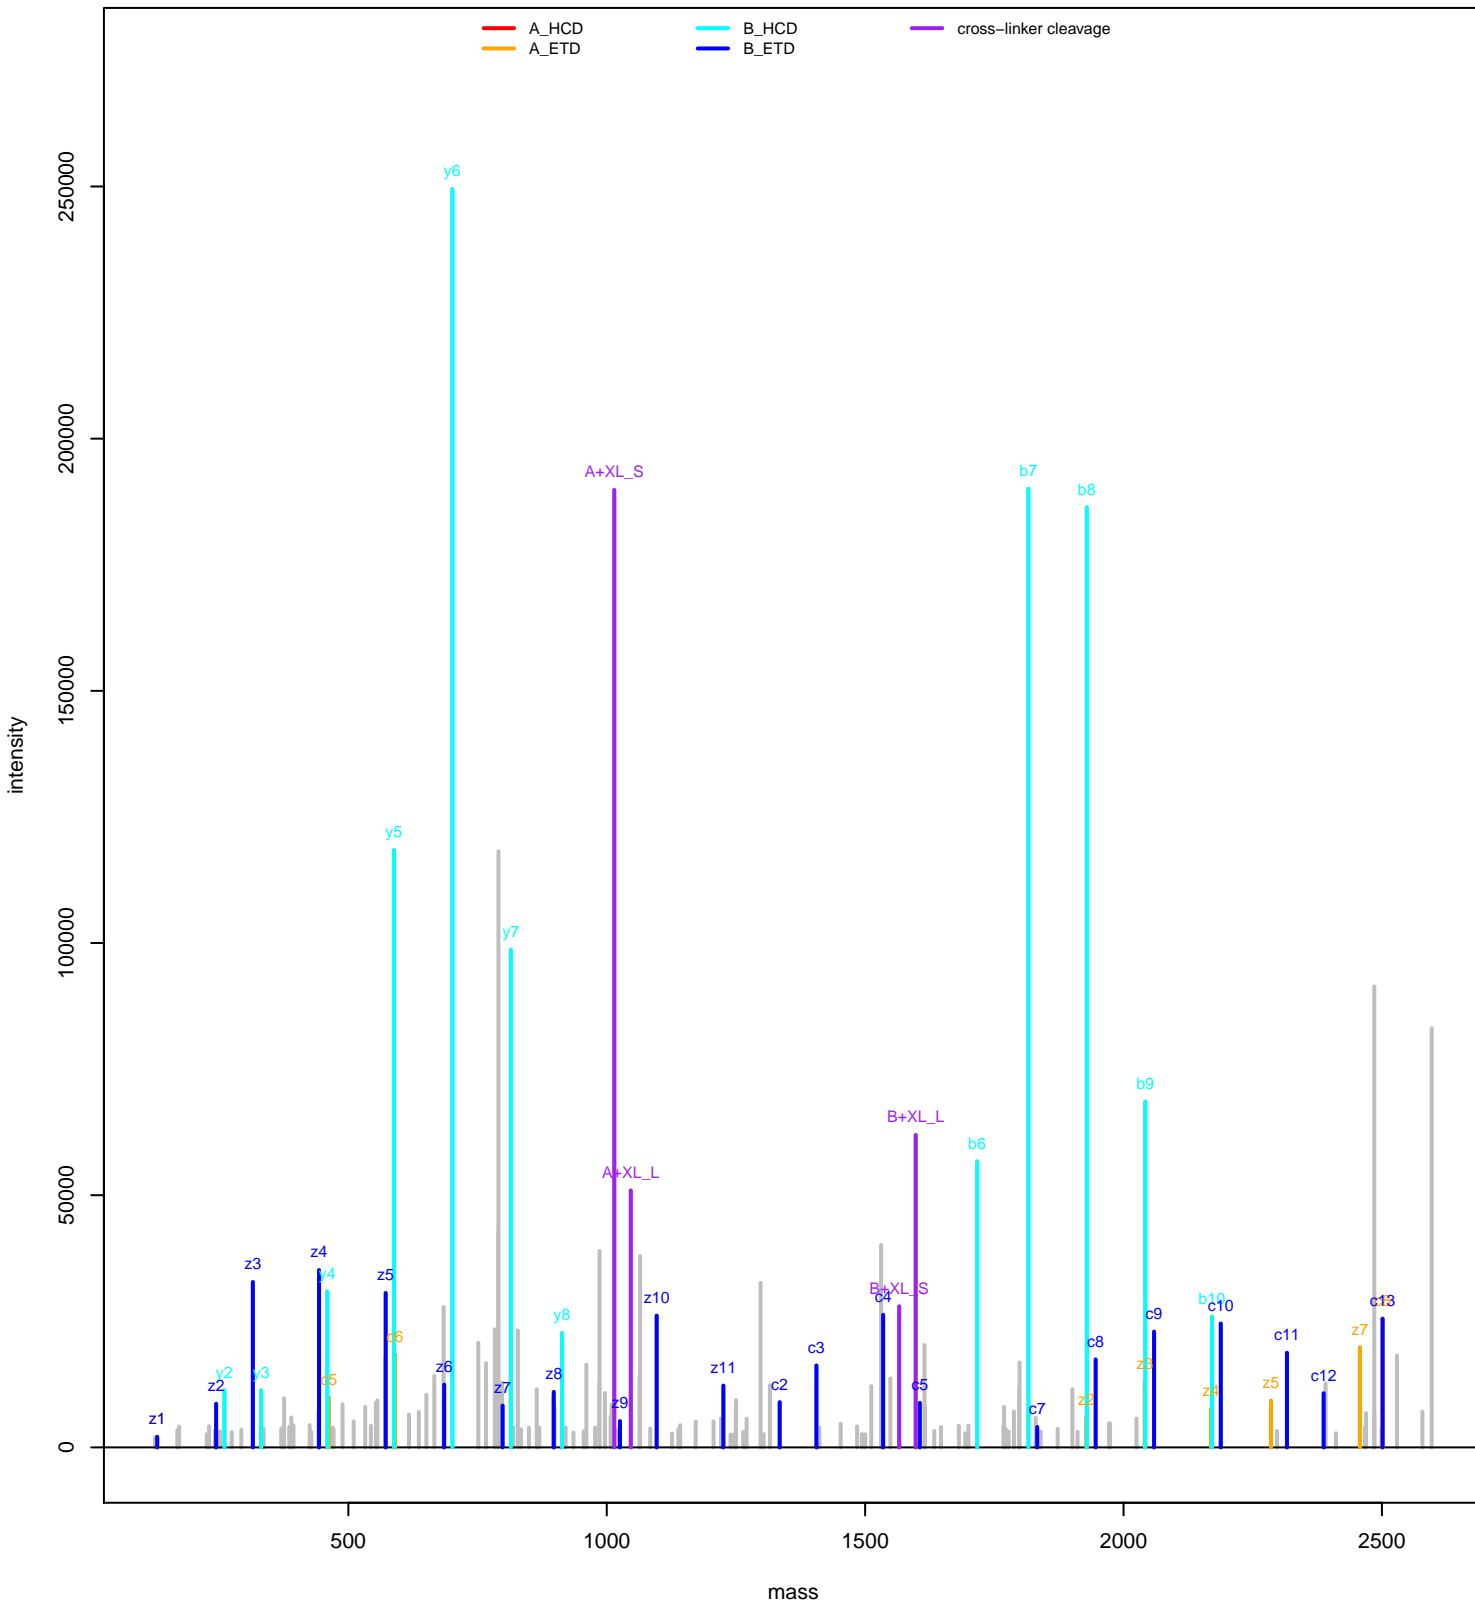

AKAEAQVIEQANK+XL\_S

AKAEAQVIEQANK+XL\_L

AGNKVAVAR  
AGNKVAVAR

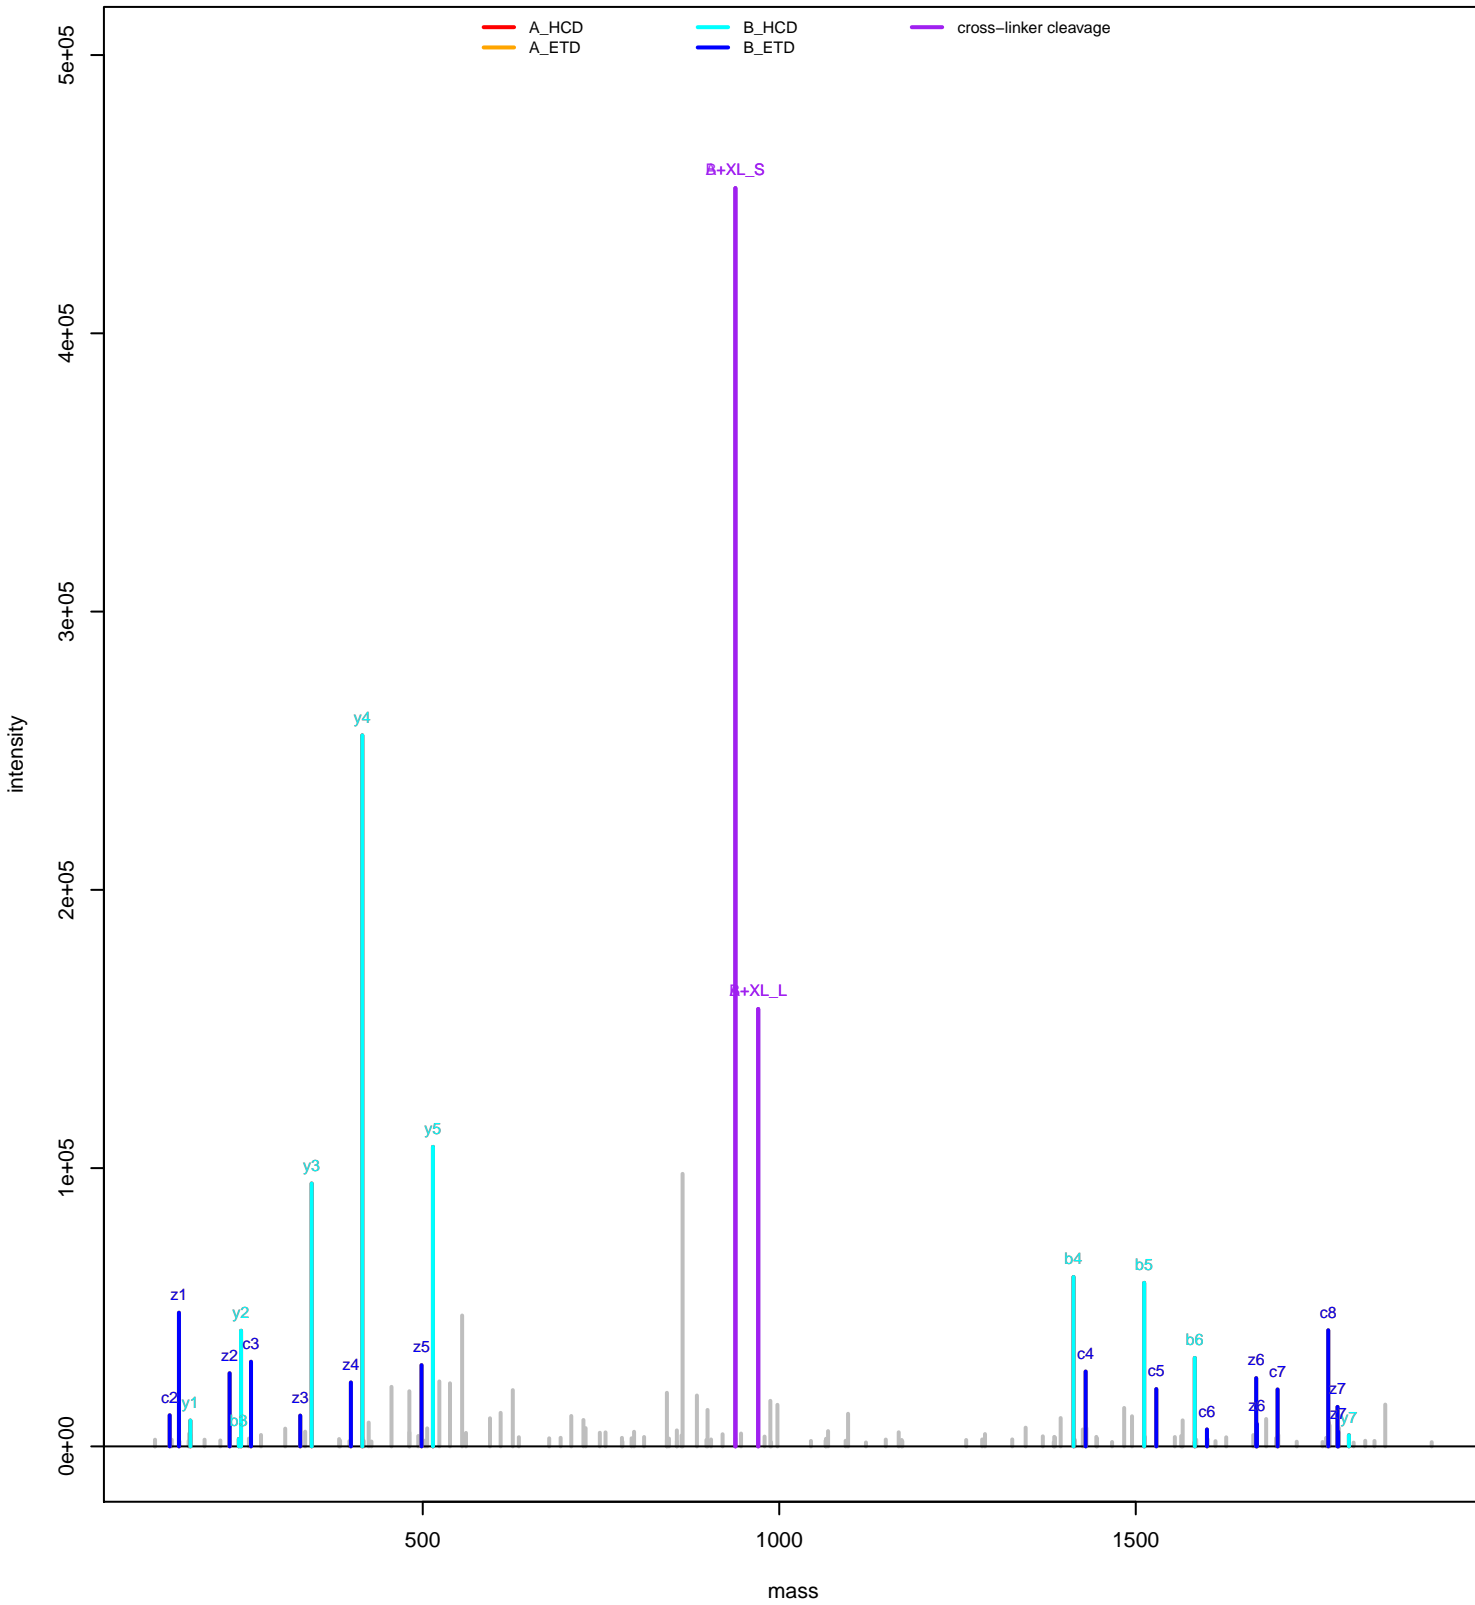

AGNKVAVAR+XL\_S

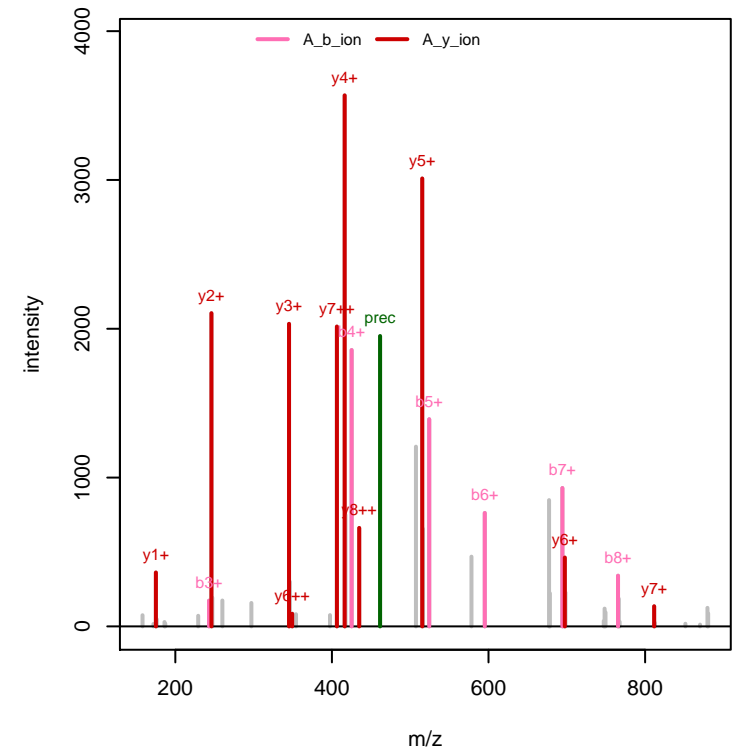

AGNKVAVAR+XL\_L

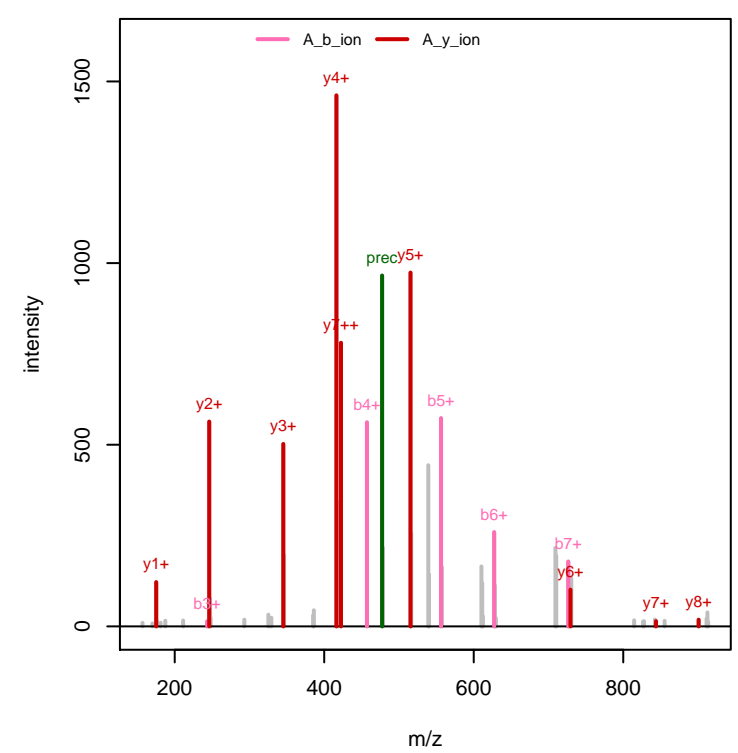

AGNKVAVAR+XL\_S

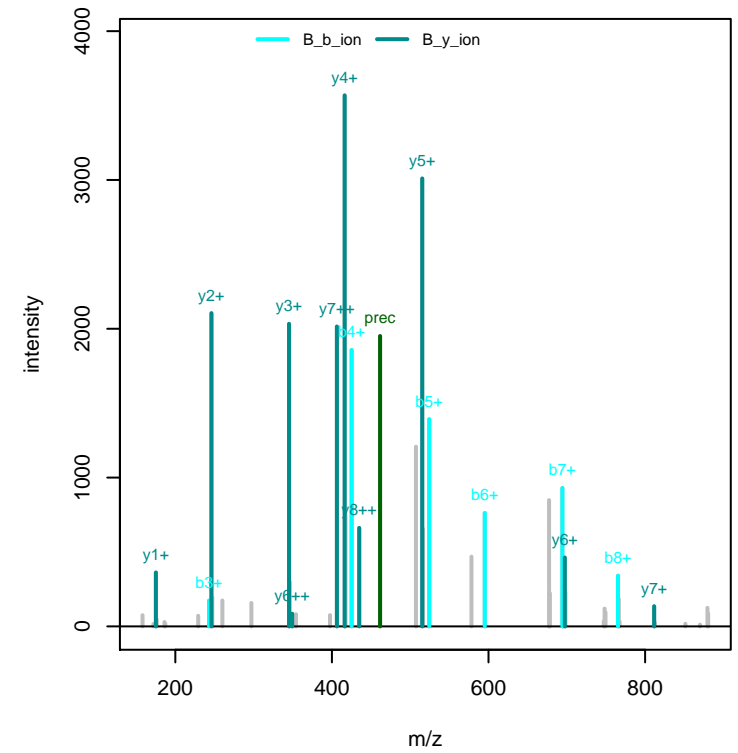

AGNKVAVAR+XL\_L

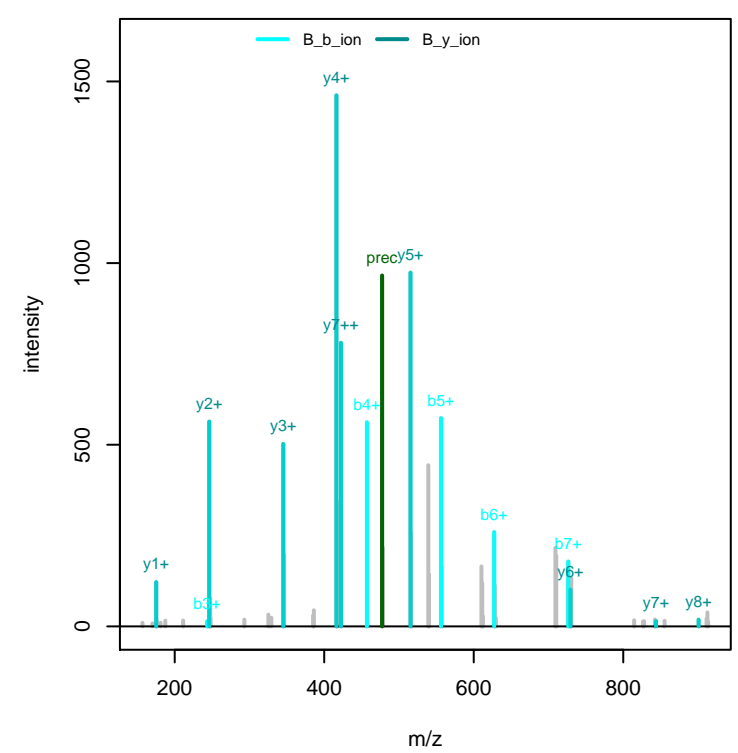



**GGHDPKK**  
**QEAAAPAPAAKAEAPAAAPAAK**

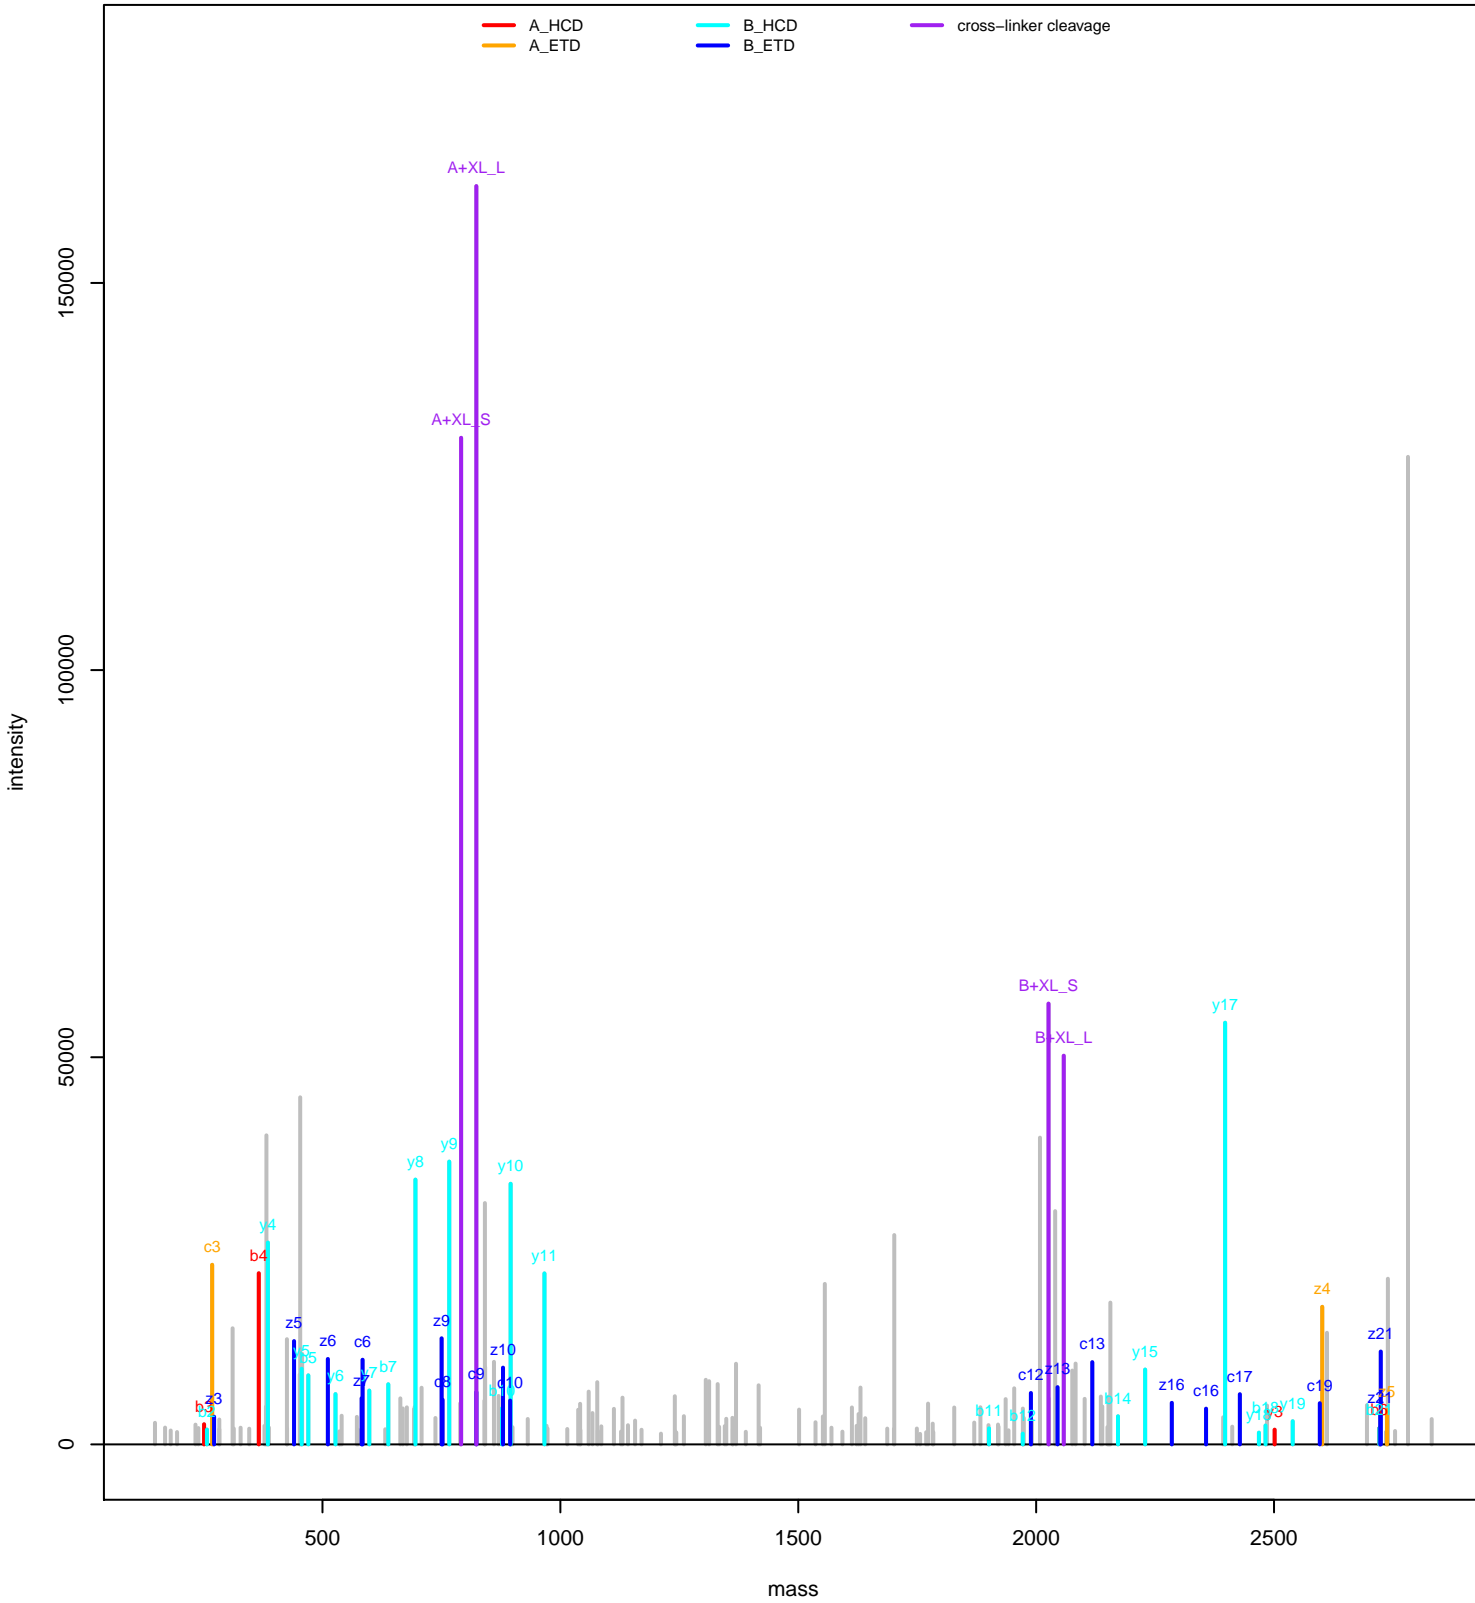

**GGHDPKK+XL\_S**

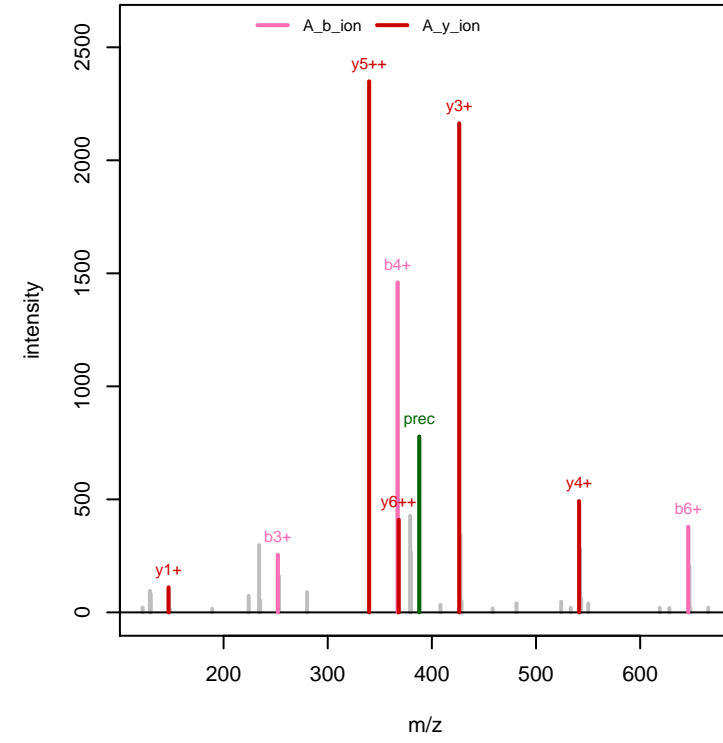

**GGHDPKK+XL\_L**

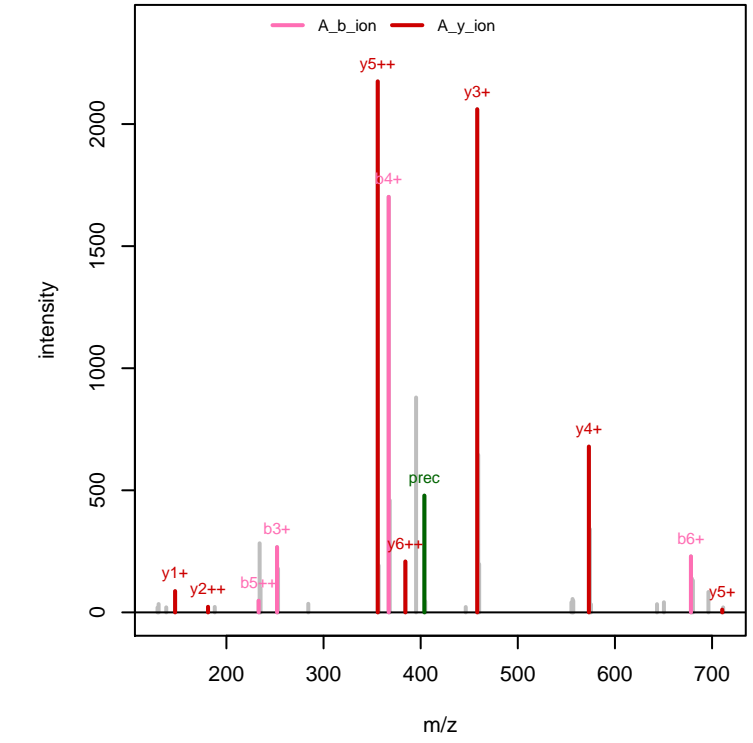

**QEAAAPAPAAKAEAPAAAPAAK+XL\_S**

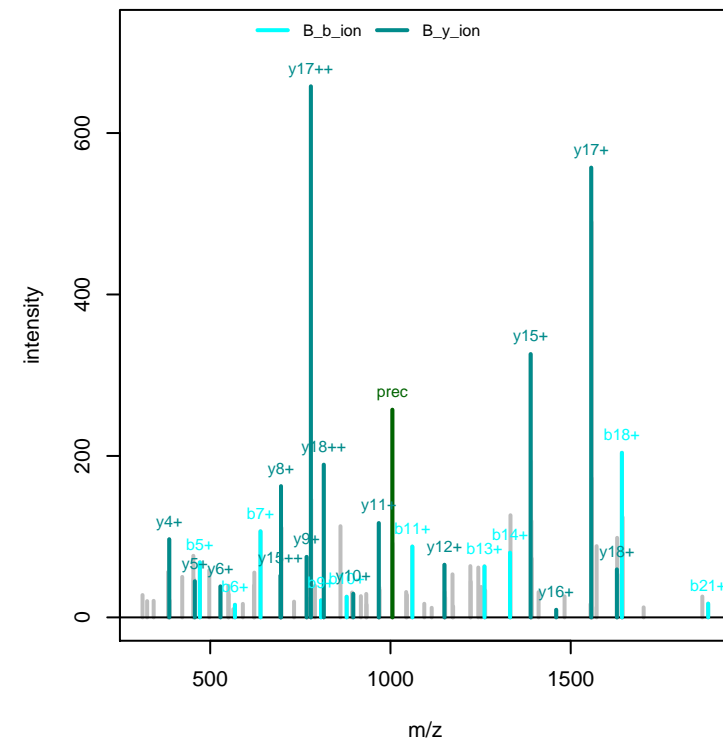

**QEAAAPAPAAKAEAPAAAPAAK+XL\_L**

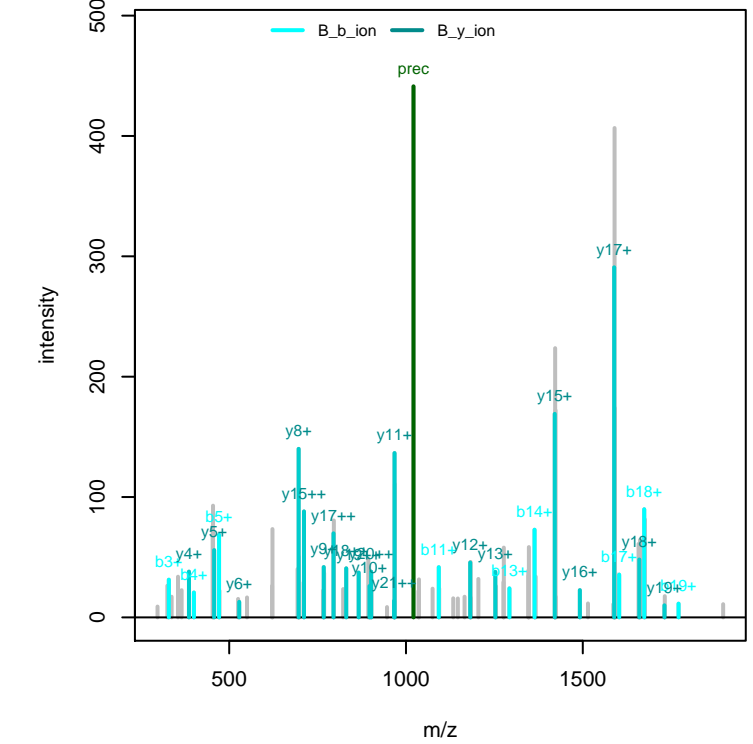

YISSLKDQR  
VAASKVLSGPQAQPAGDK

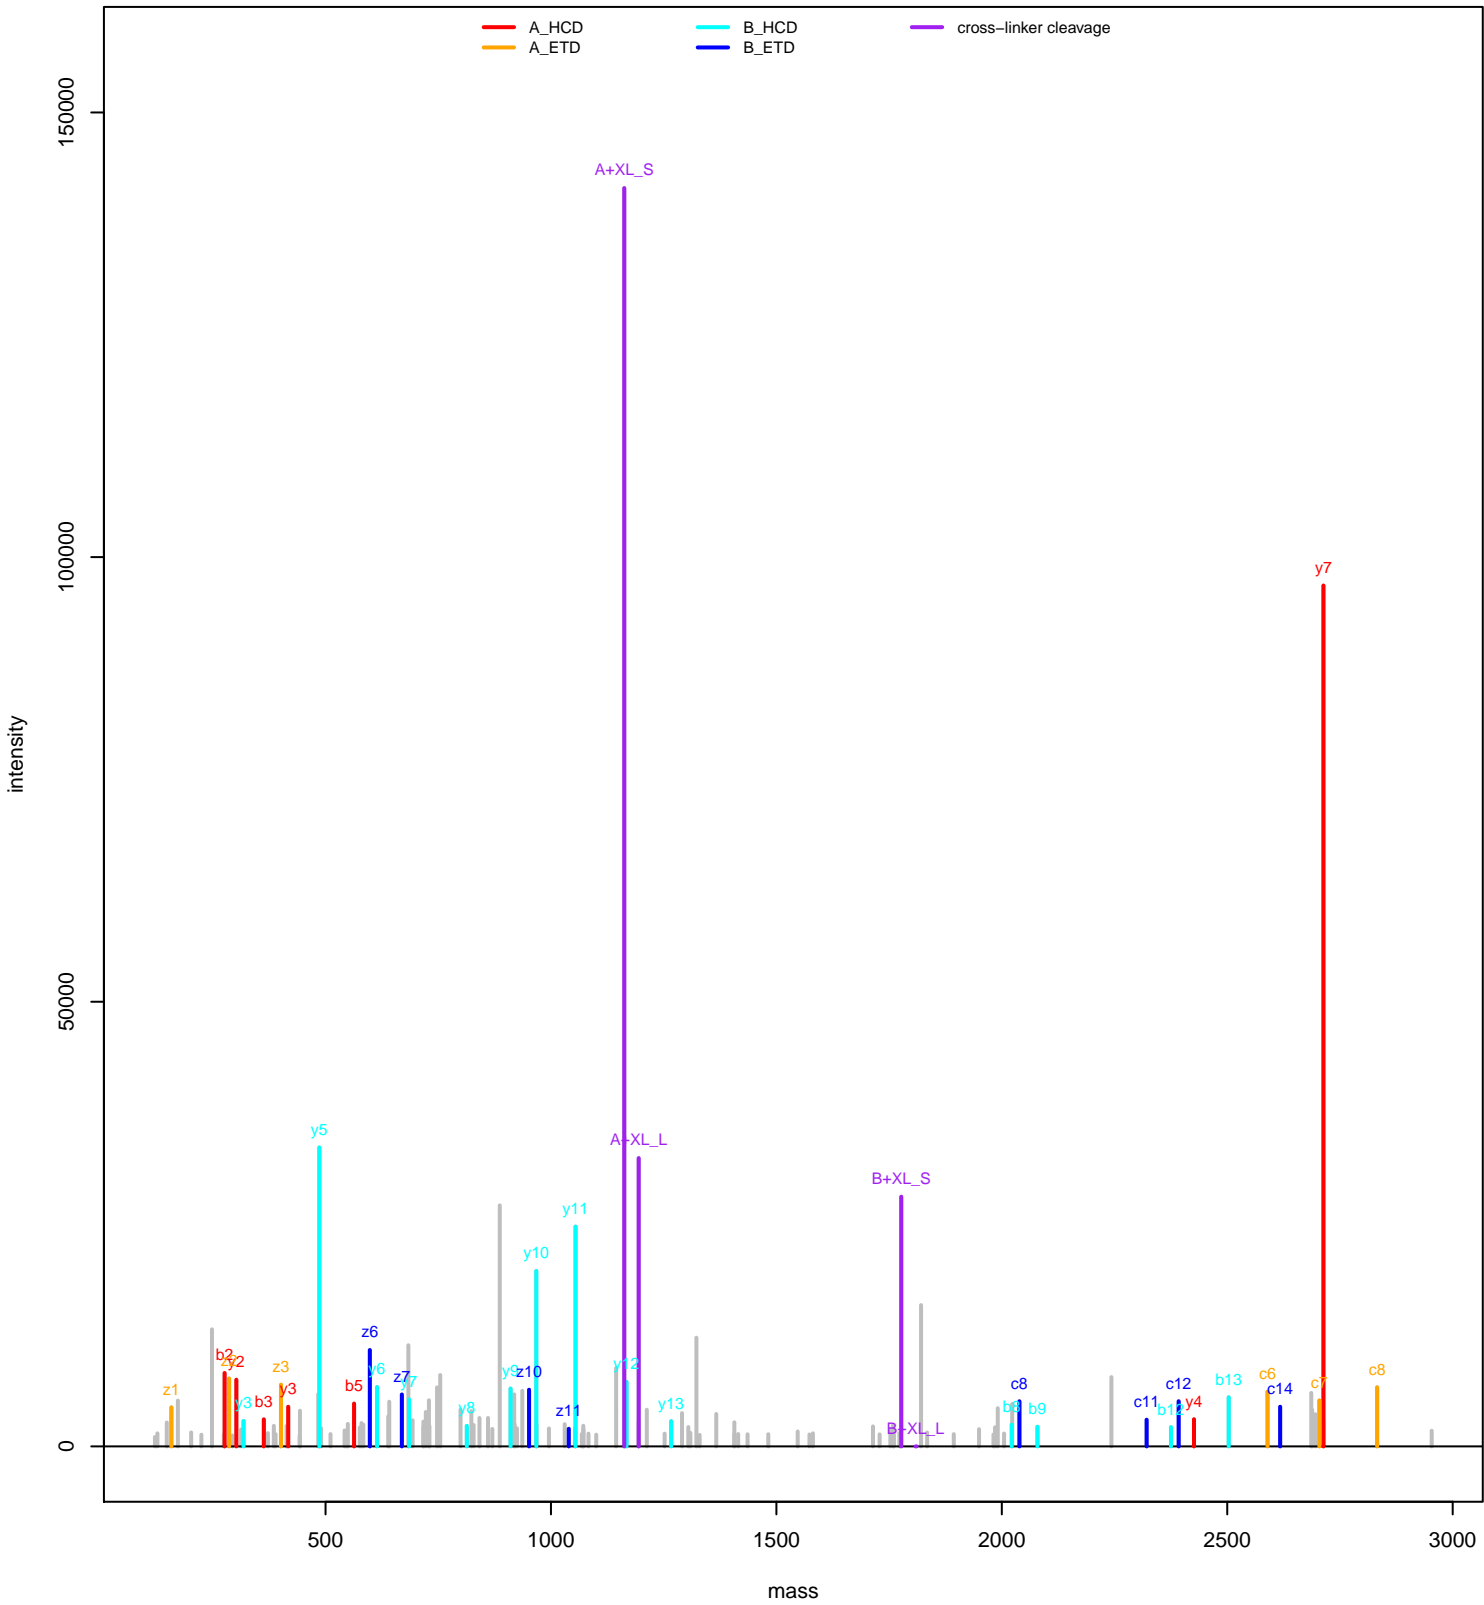

YISSLKDQR+XL\_S

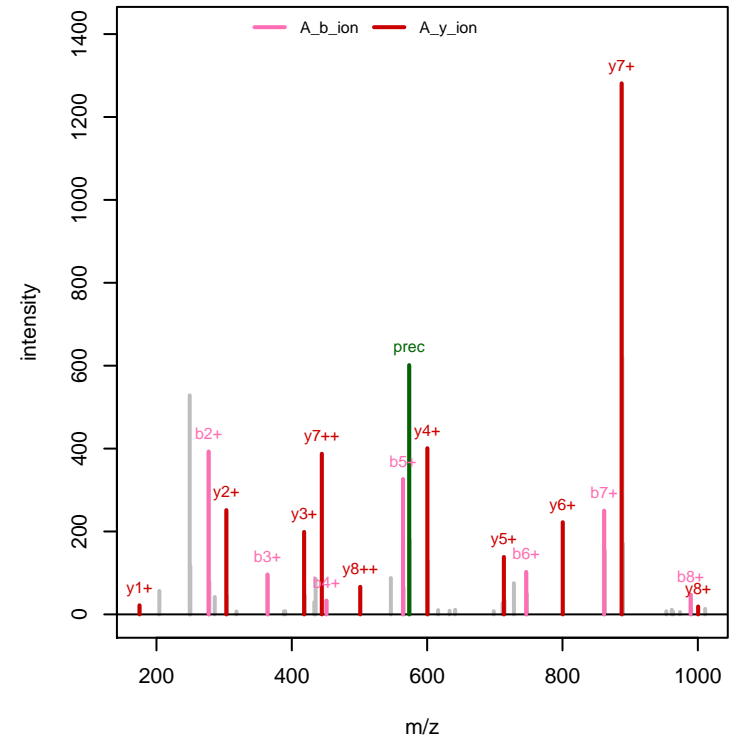

VAASKVLSGPQAQPAGDK+XL\_S

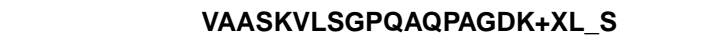

YISSLKDQR+XL\_L

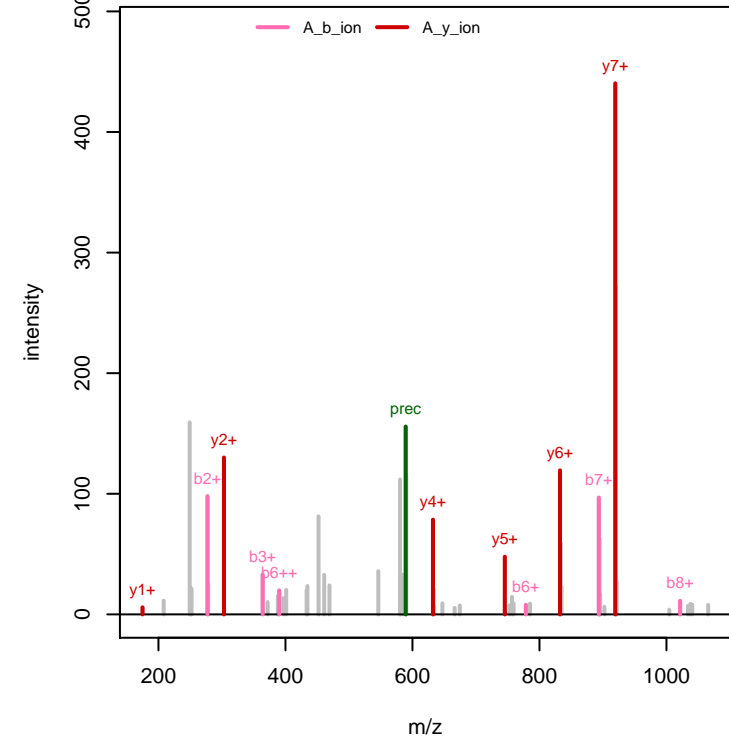

VAASKVLSGPQAQPAGDK+XL\_L

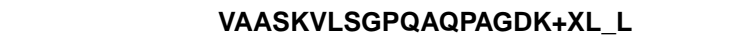

**KGMVNNK  
MDKDRFR**

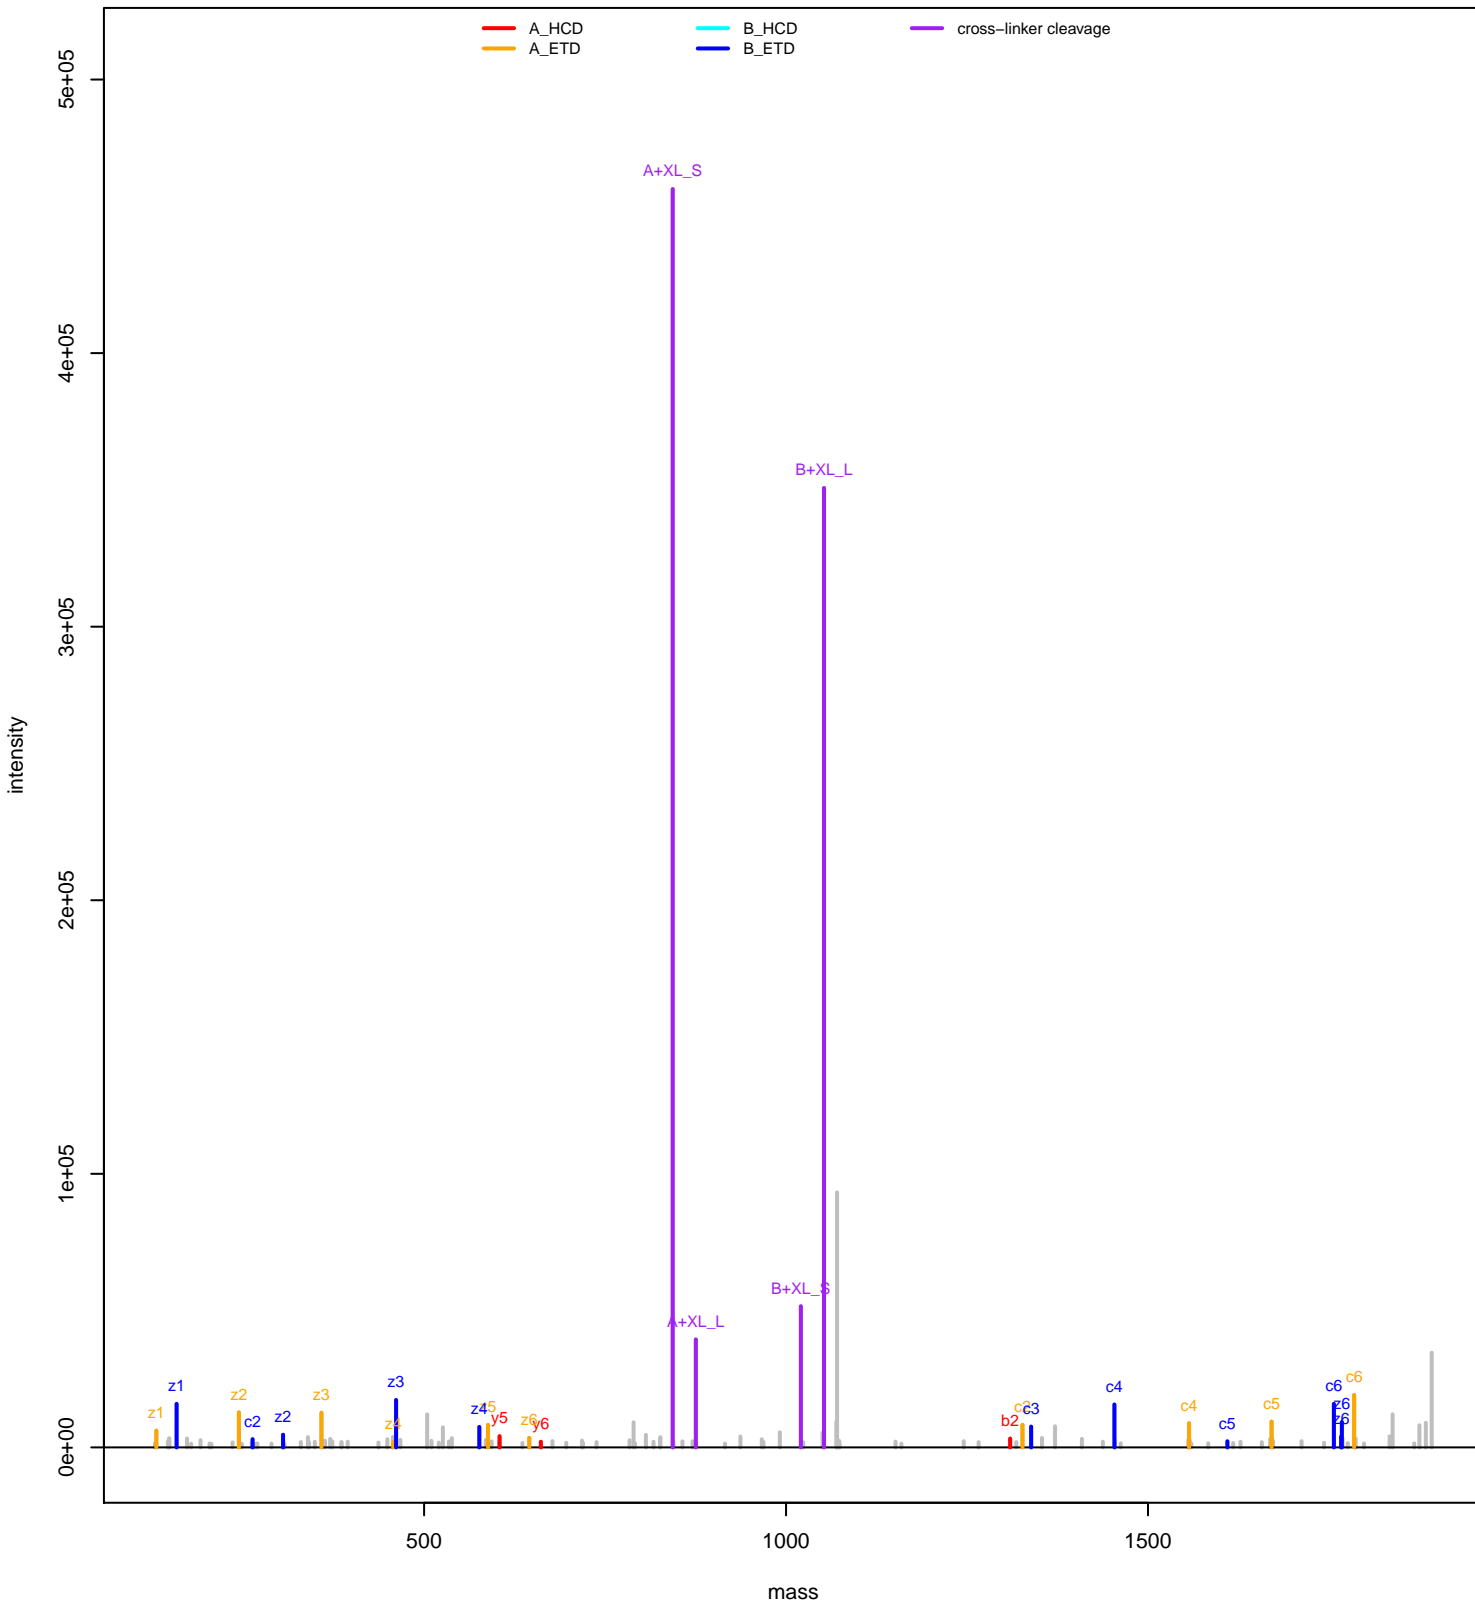

**KGMVNNK+XL\_S**

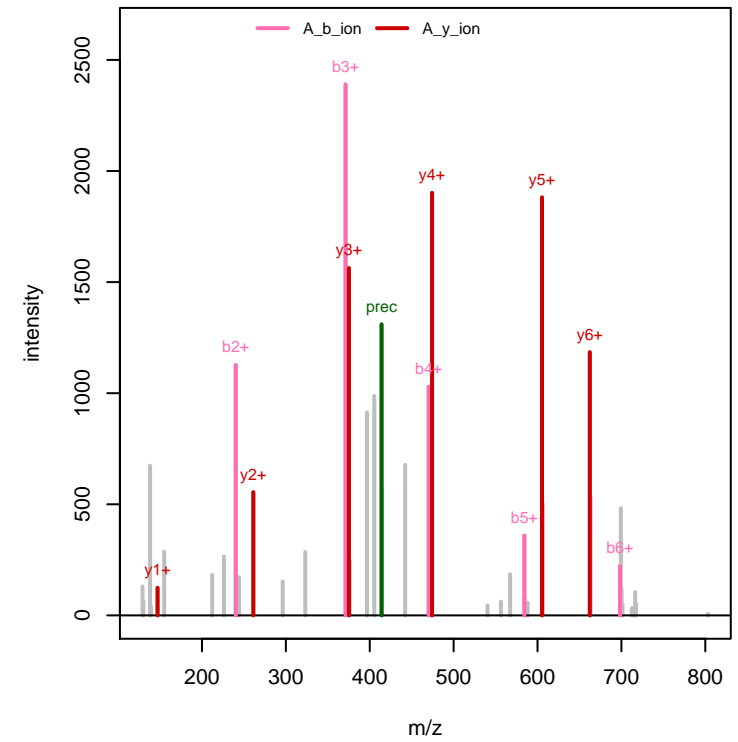

**KGMVNNK+XL\_L**

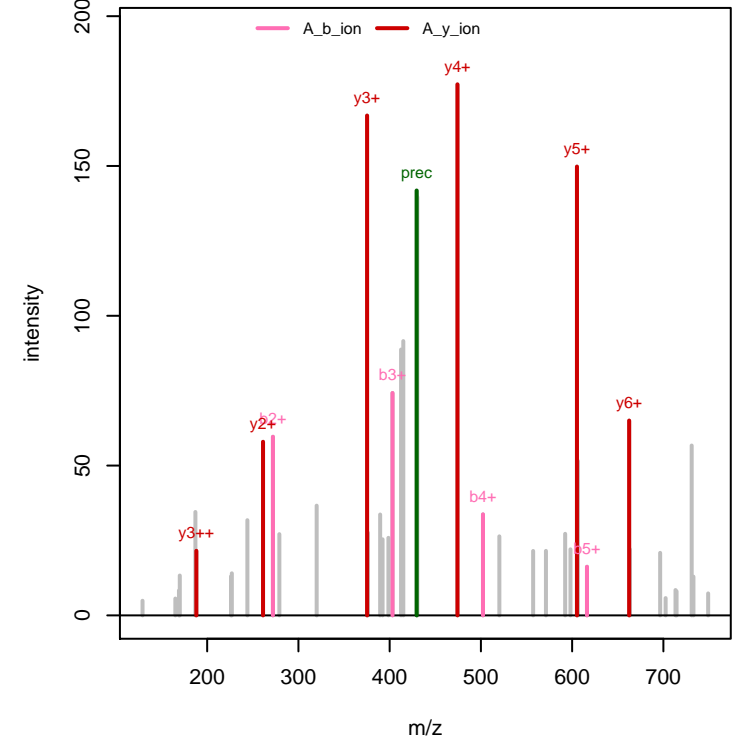

**MDKDRFR+XL\_S**

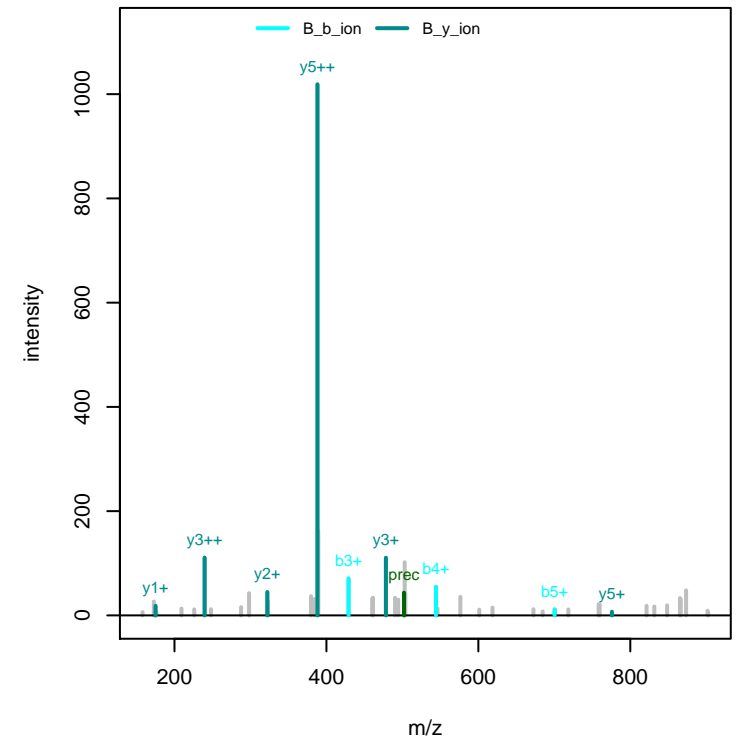

**MDKDRFR+XL\_L**

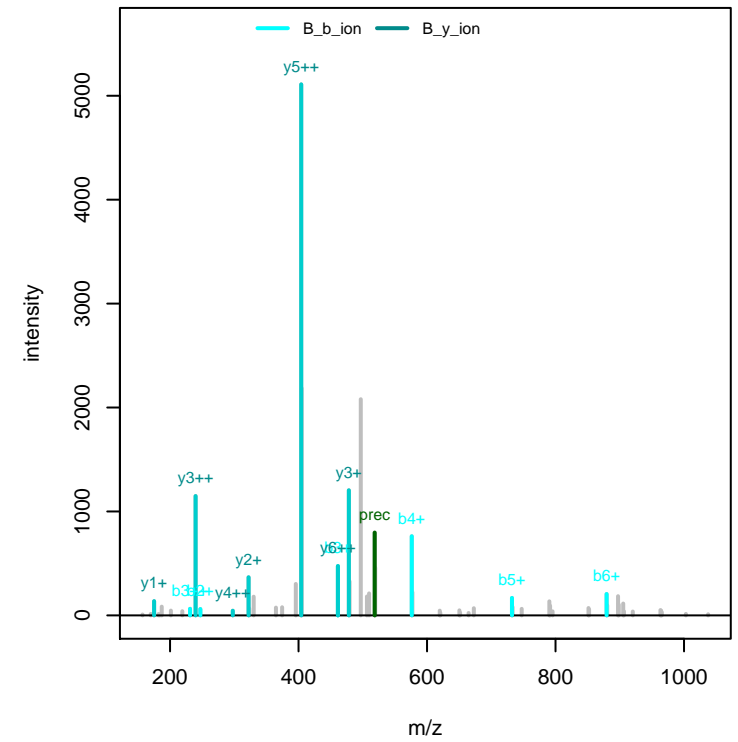

NAELSKER  
NAELSKERR

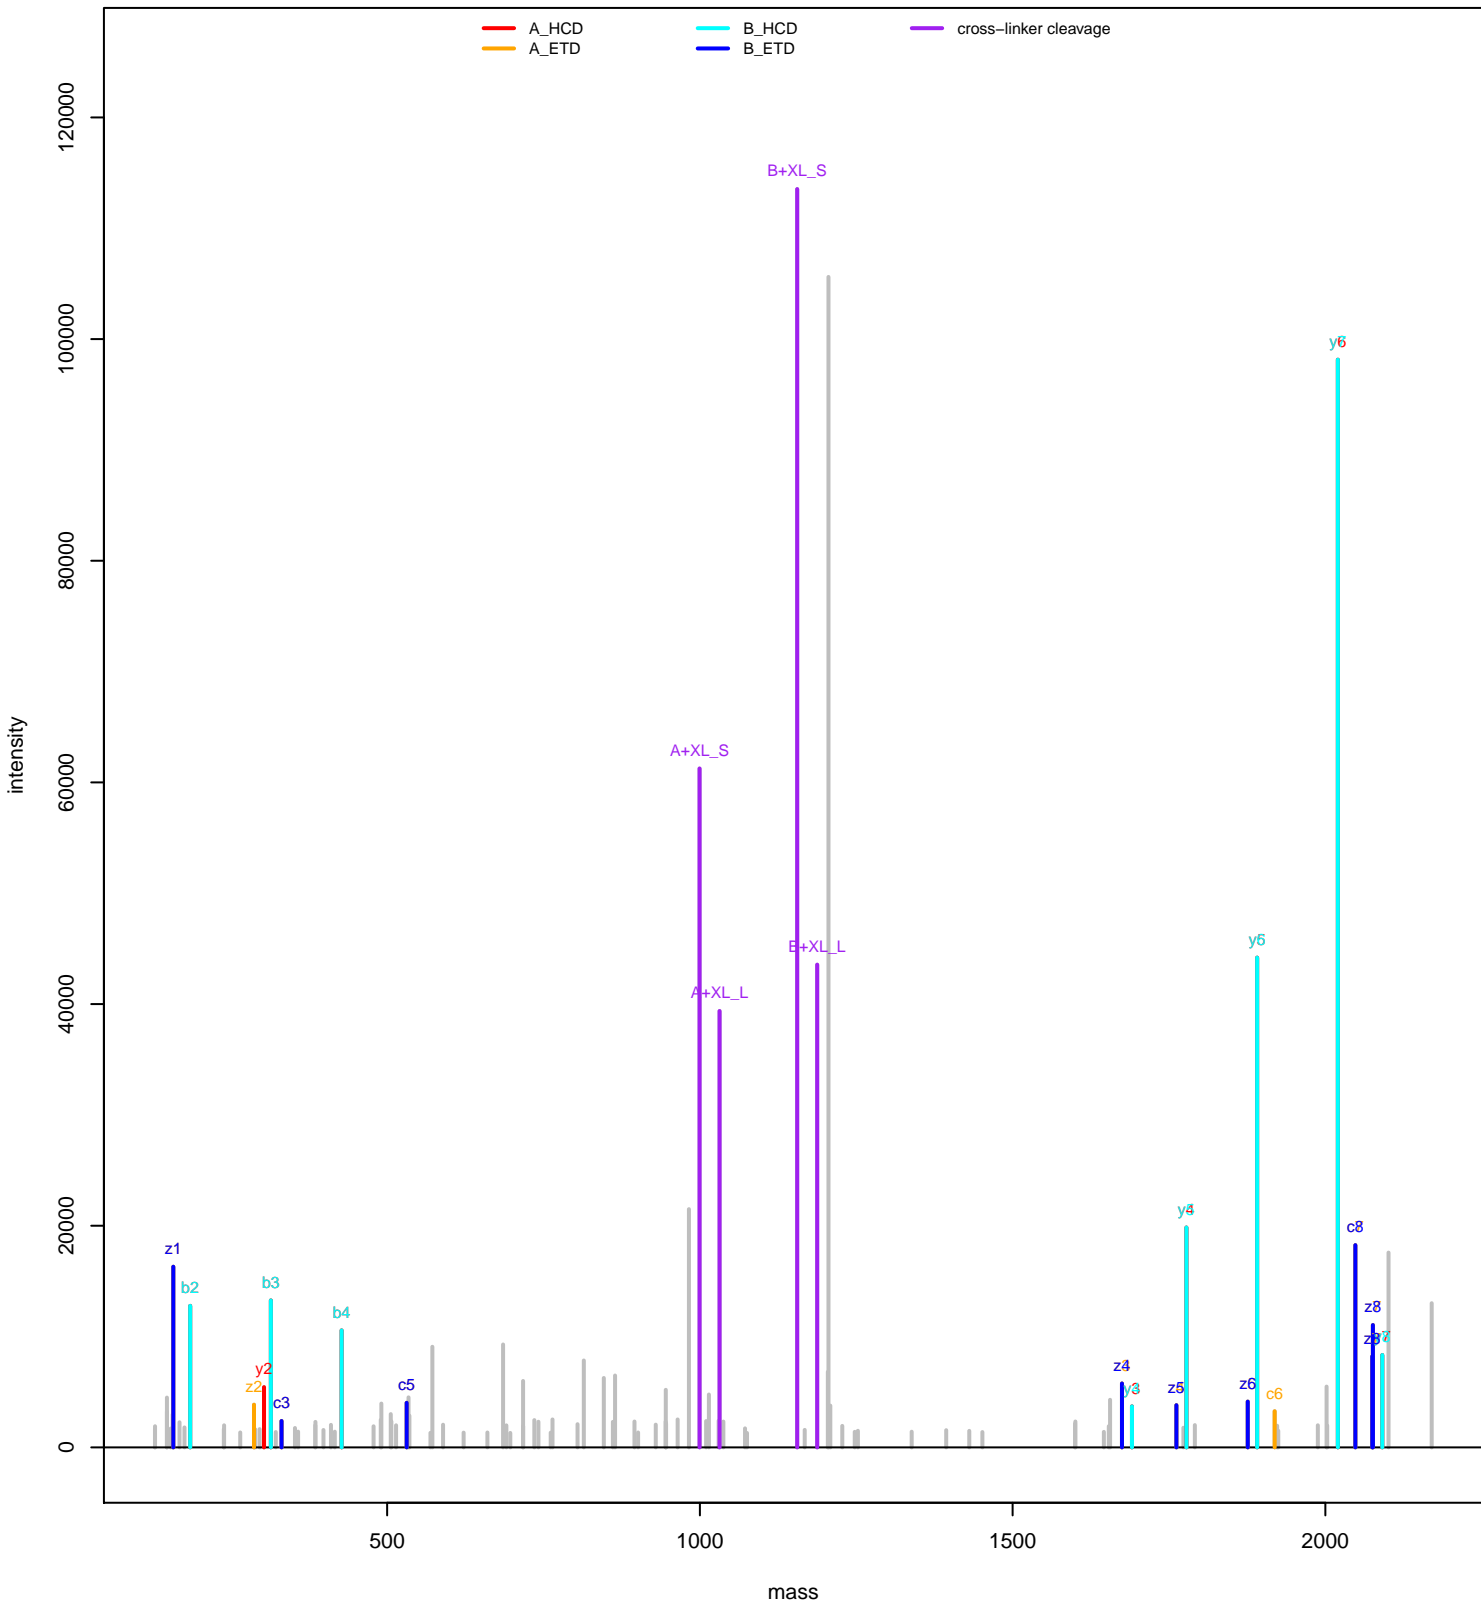

NAELSKER+XL\_S

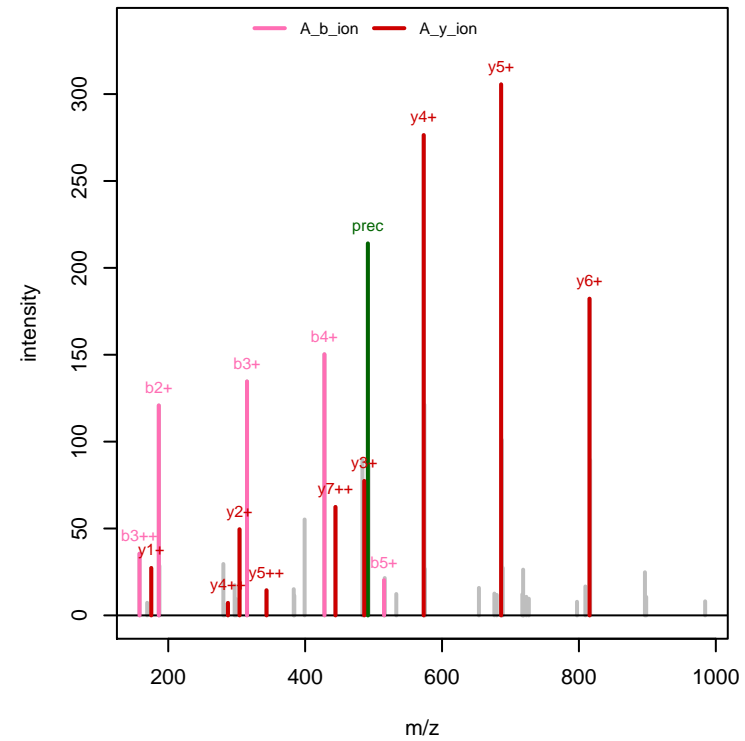

NAELSKER+XL\_L

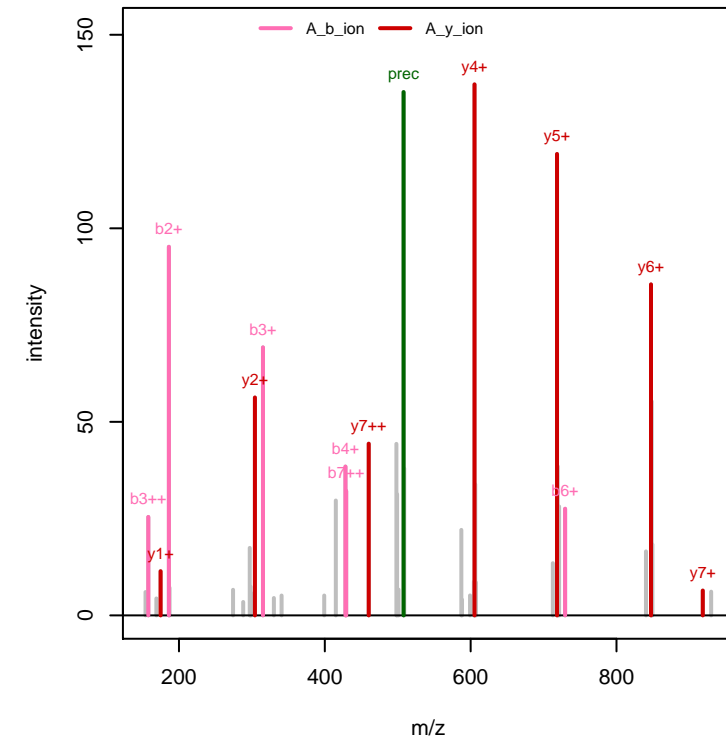

NAELSKERR+XL\_S

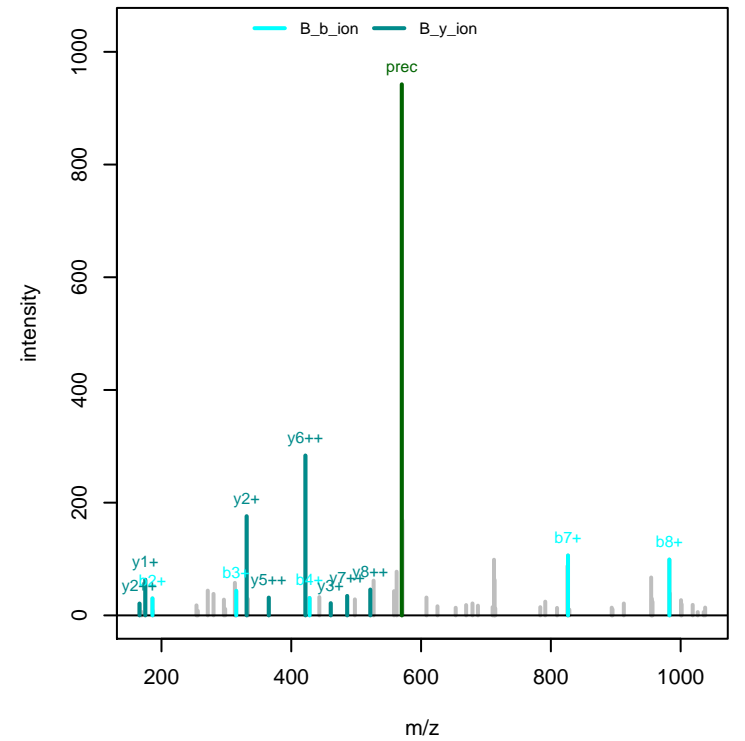

NAELSKERR+XL\_L

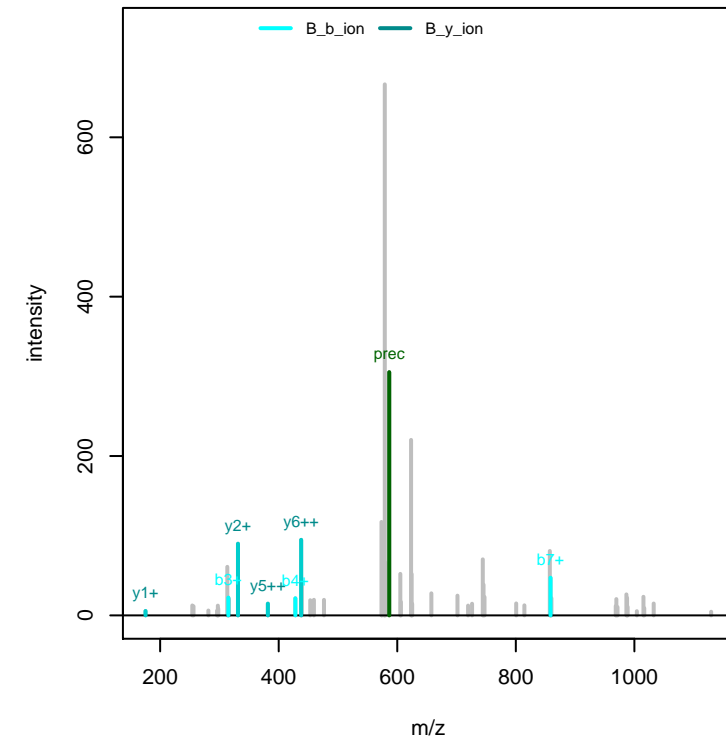

**KAIMoQHYQAR  
EAKRLEEEGNK**

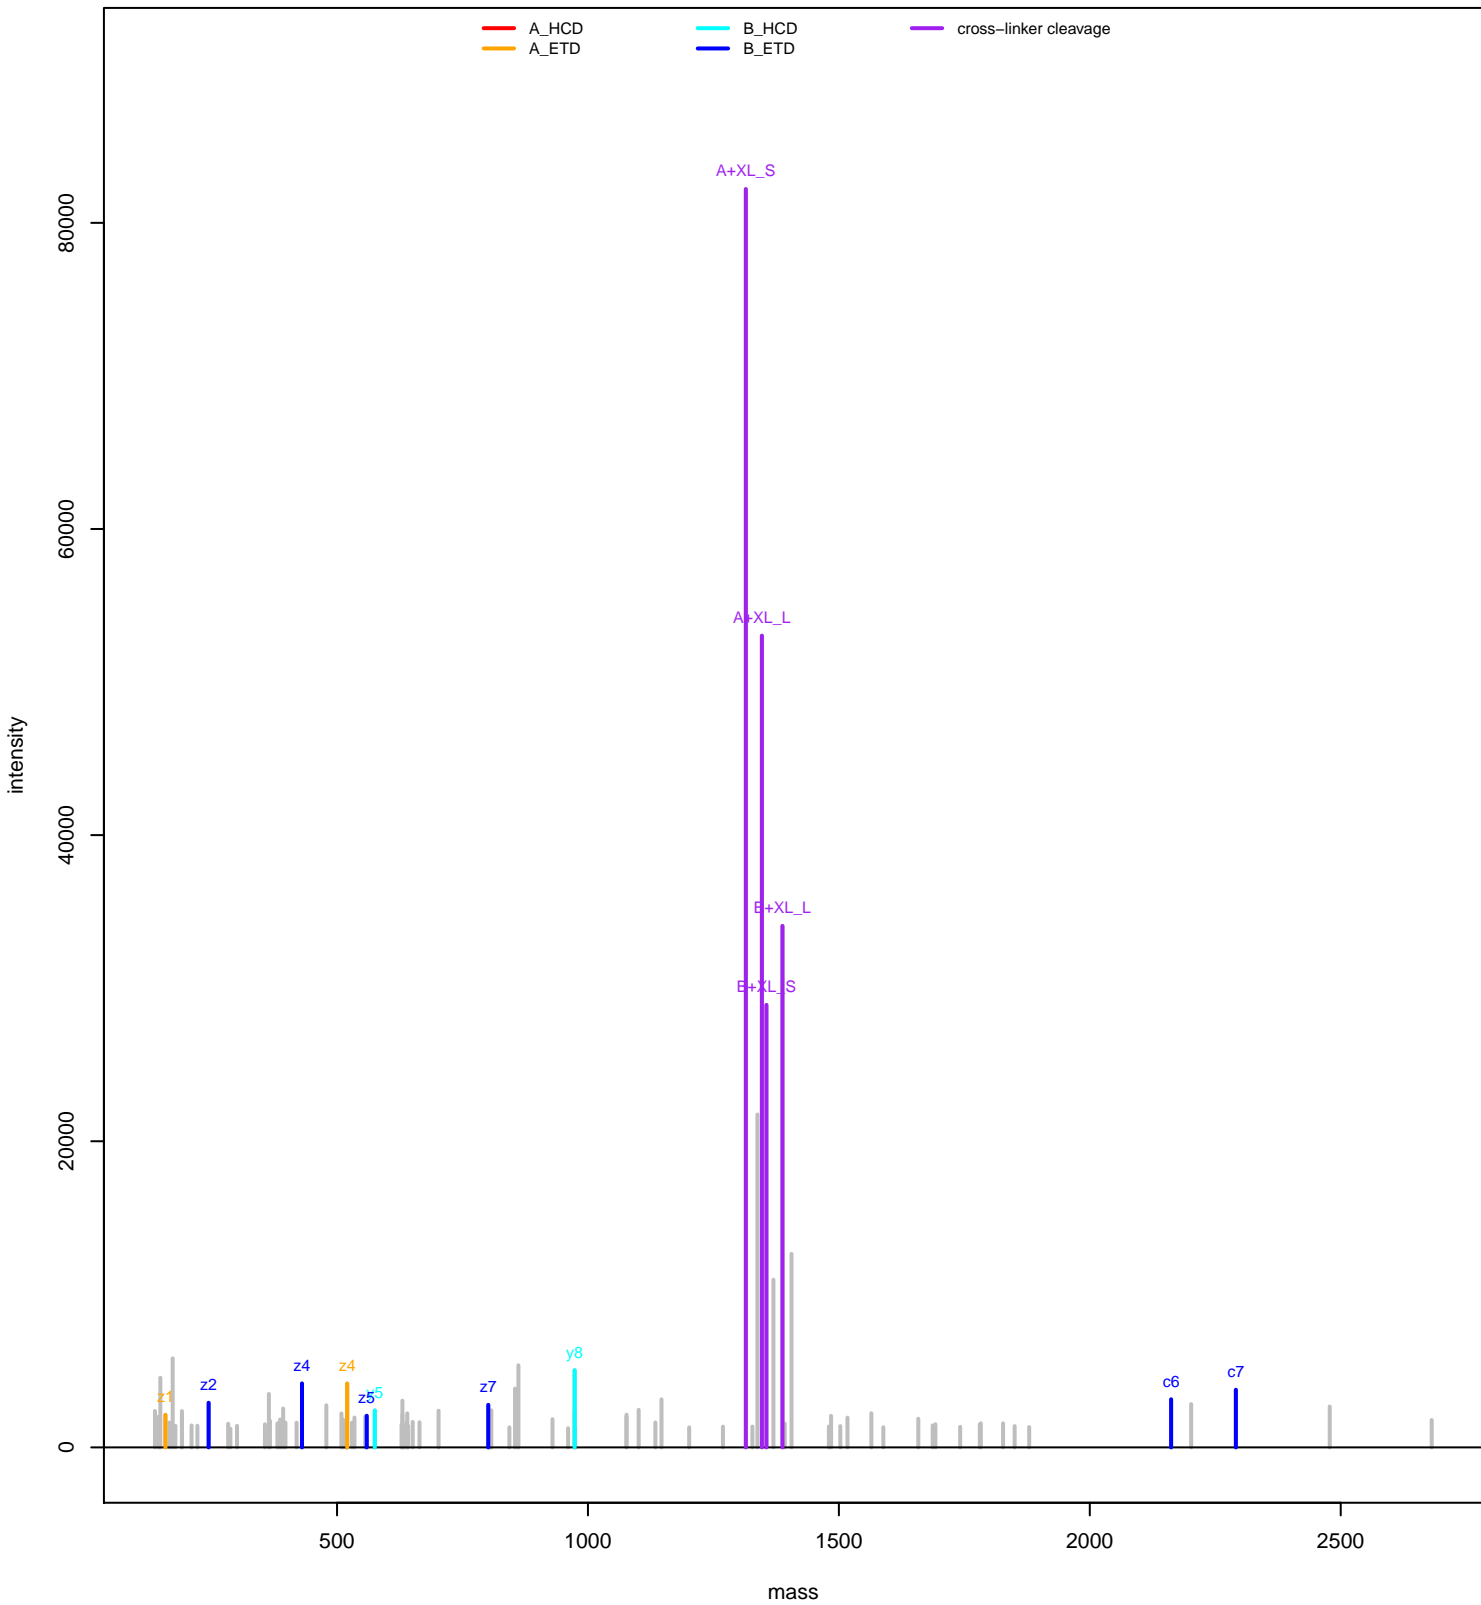

**KAIMoQHYQAR+XL\_S**

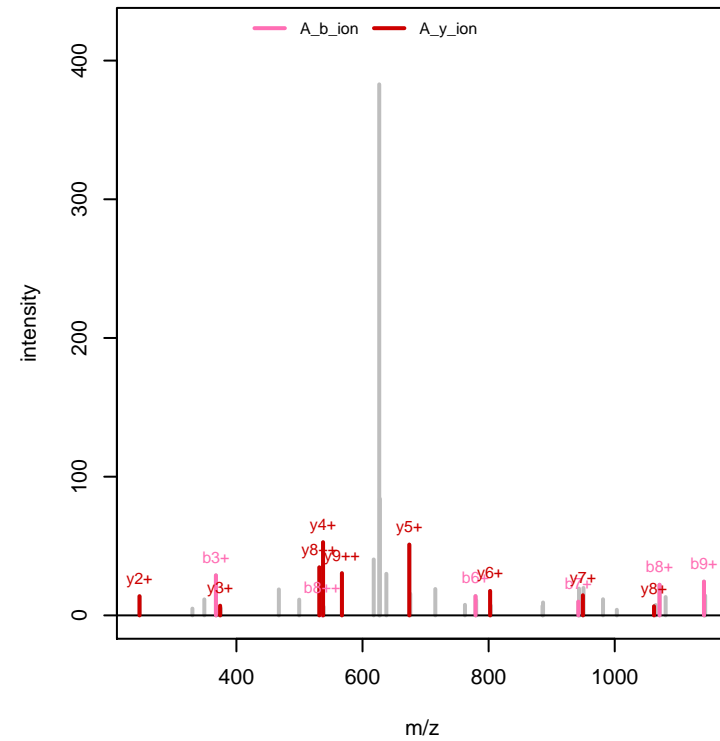

**KAIMoQHYQAR+XL\_L**

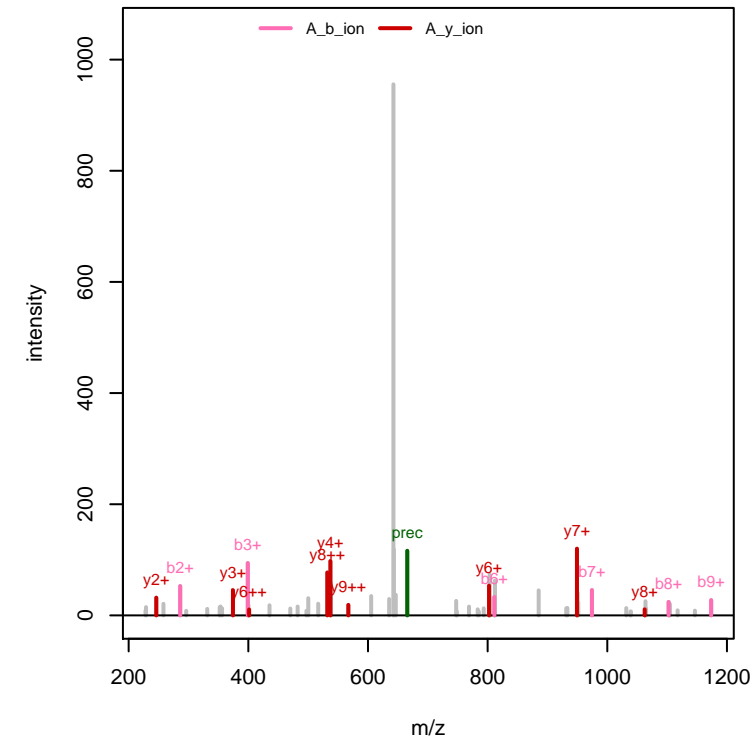

**EAKRLEEEGNK+XL\_S**

**EAKRLEEEGNK+XL\_L**

RGFKAEAK  
TYQQVAKNAK

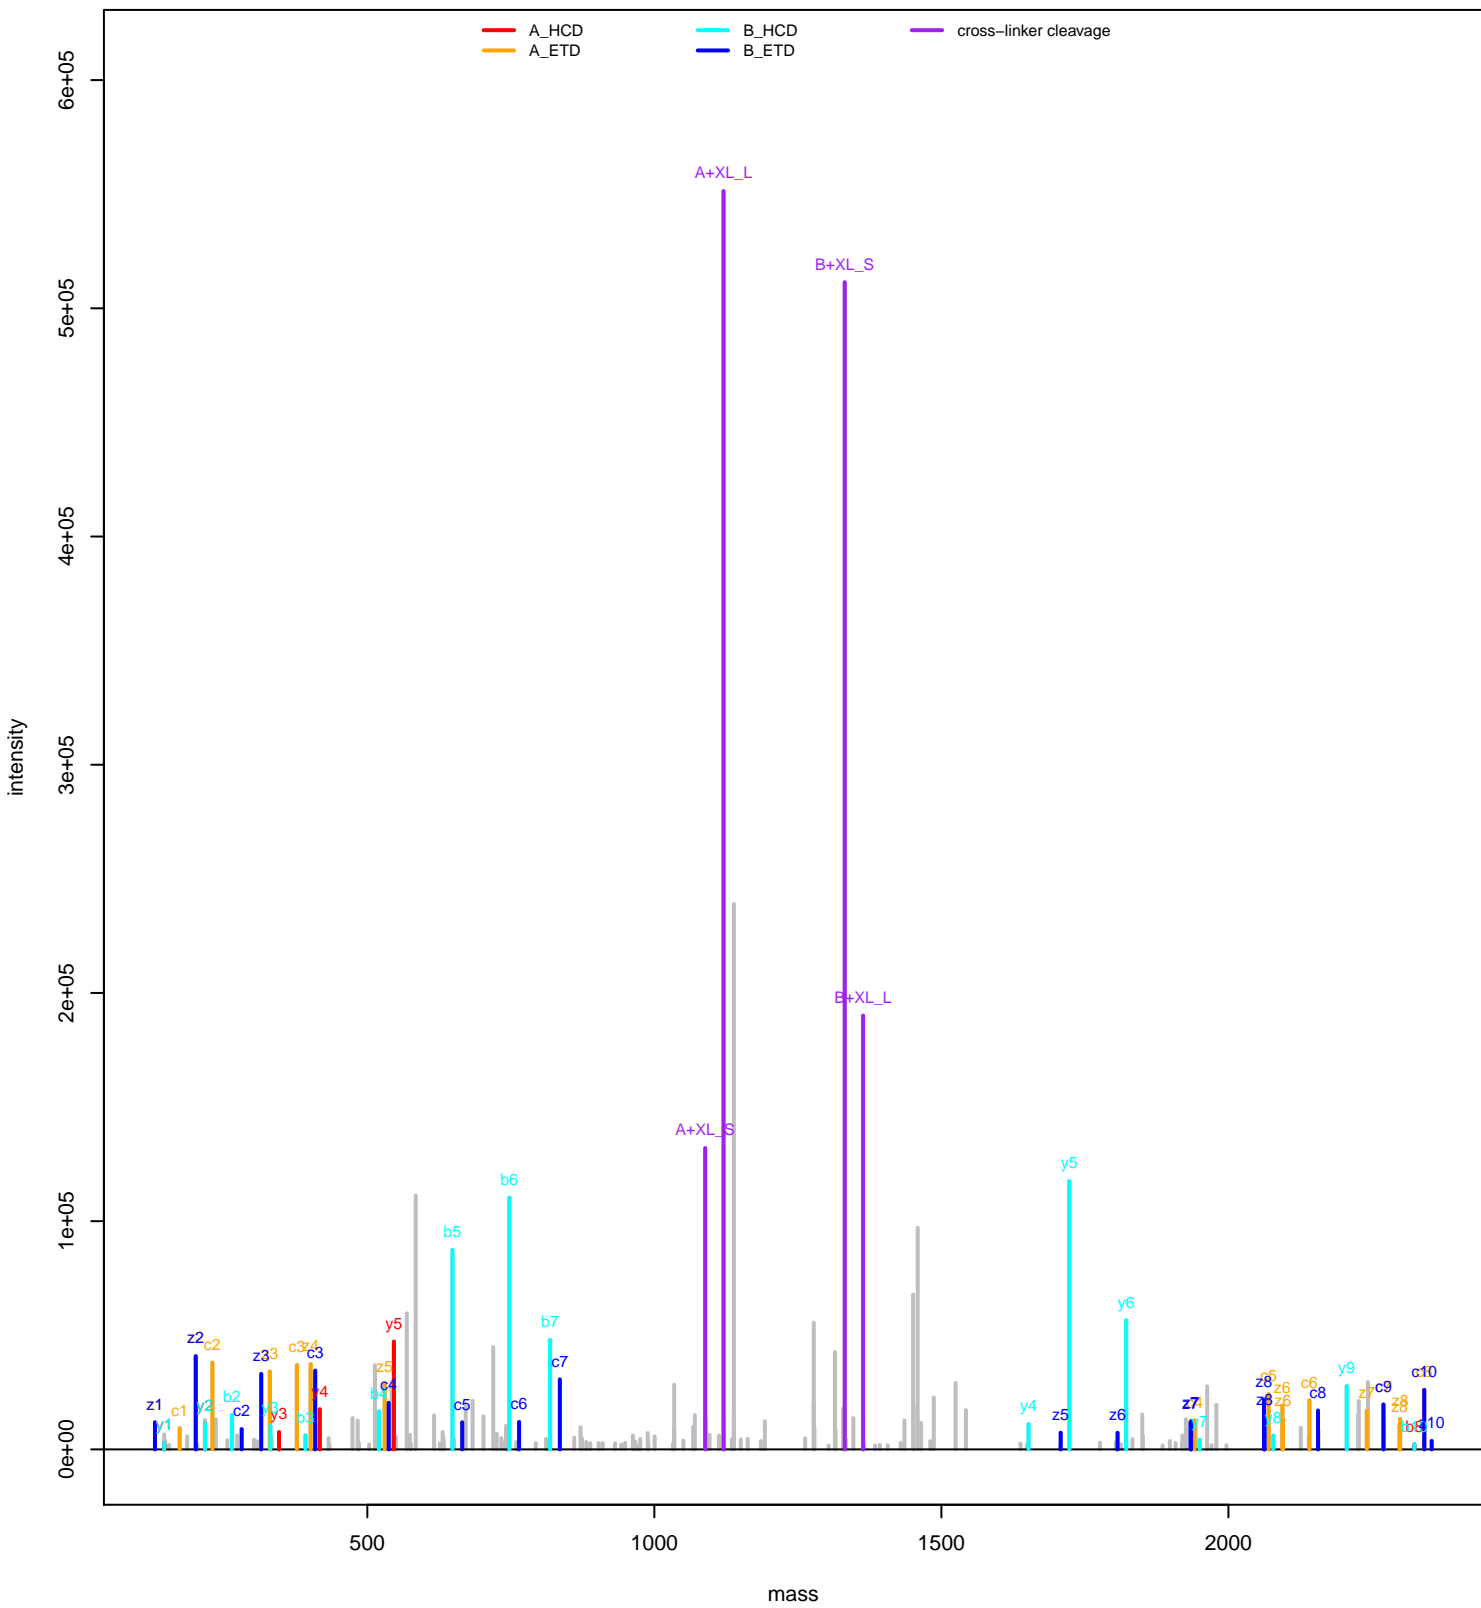

RGFKAEAK+XL\_S

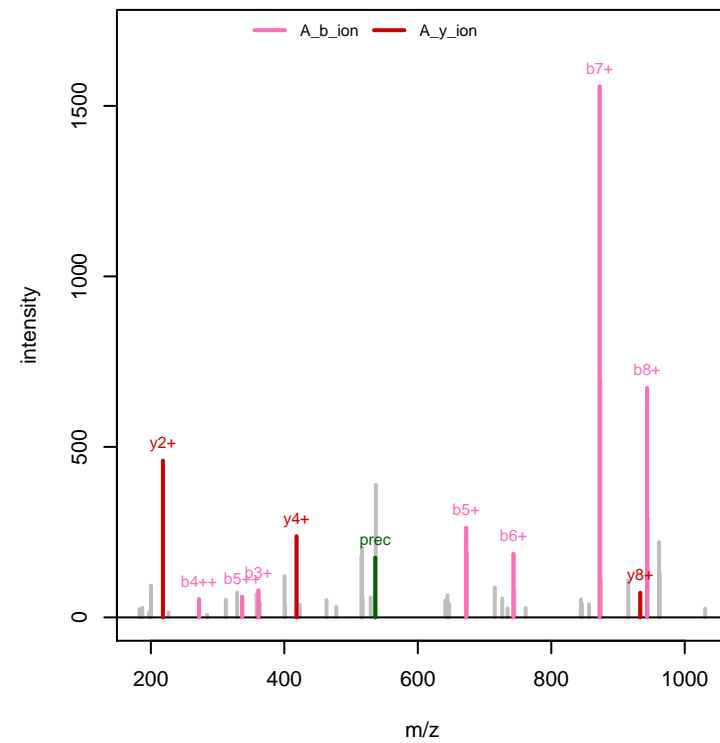

RGFKAEAK+XL\_L

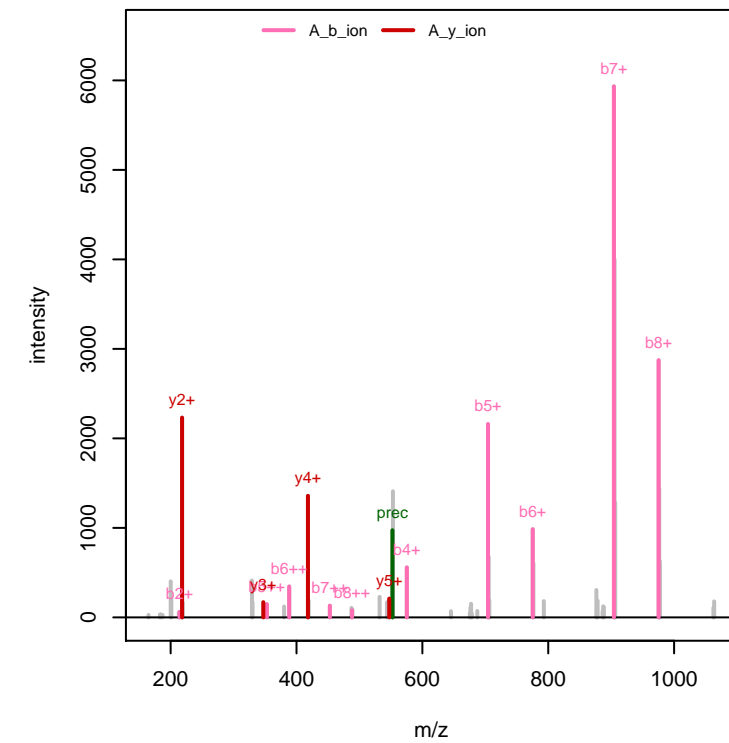

TYQQVAKNAK+XL\_S

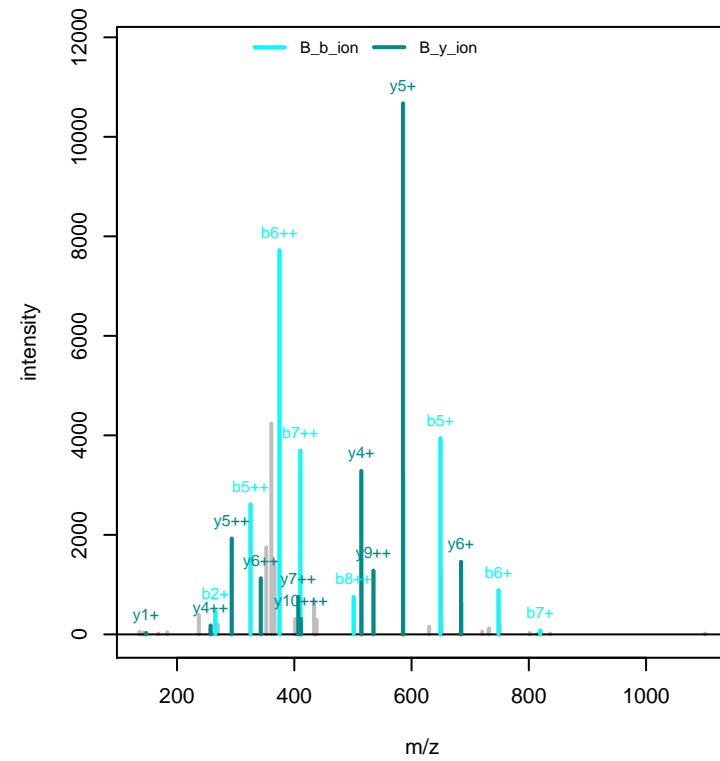

TYQQVAKNAK+XL\_L

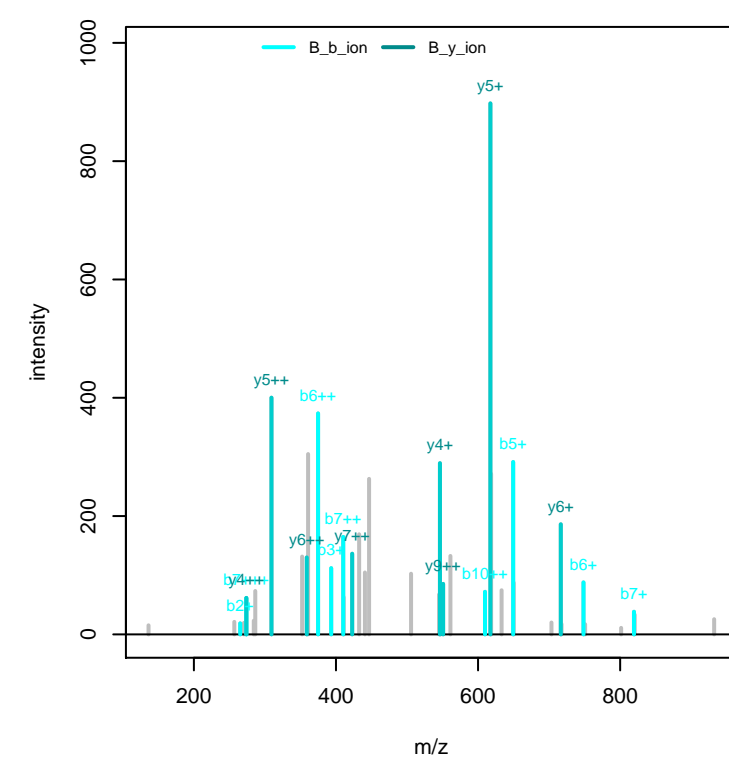

**LGAKGIK**  
**GEILGGMAAVEQPEKPAAPK**

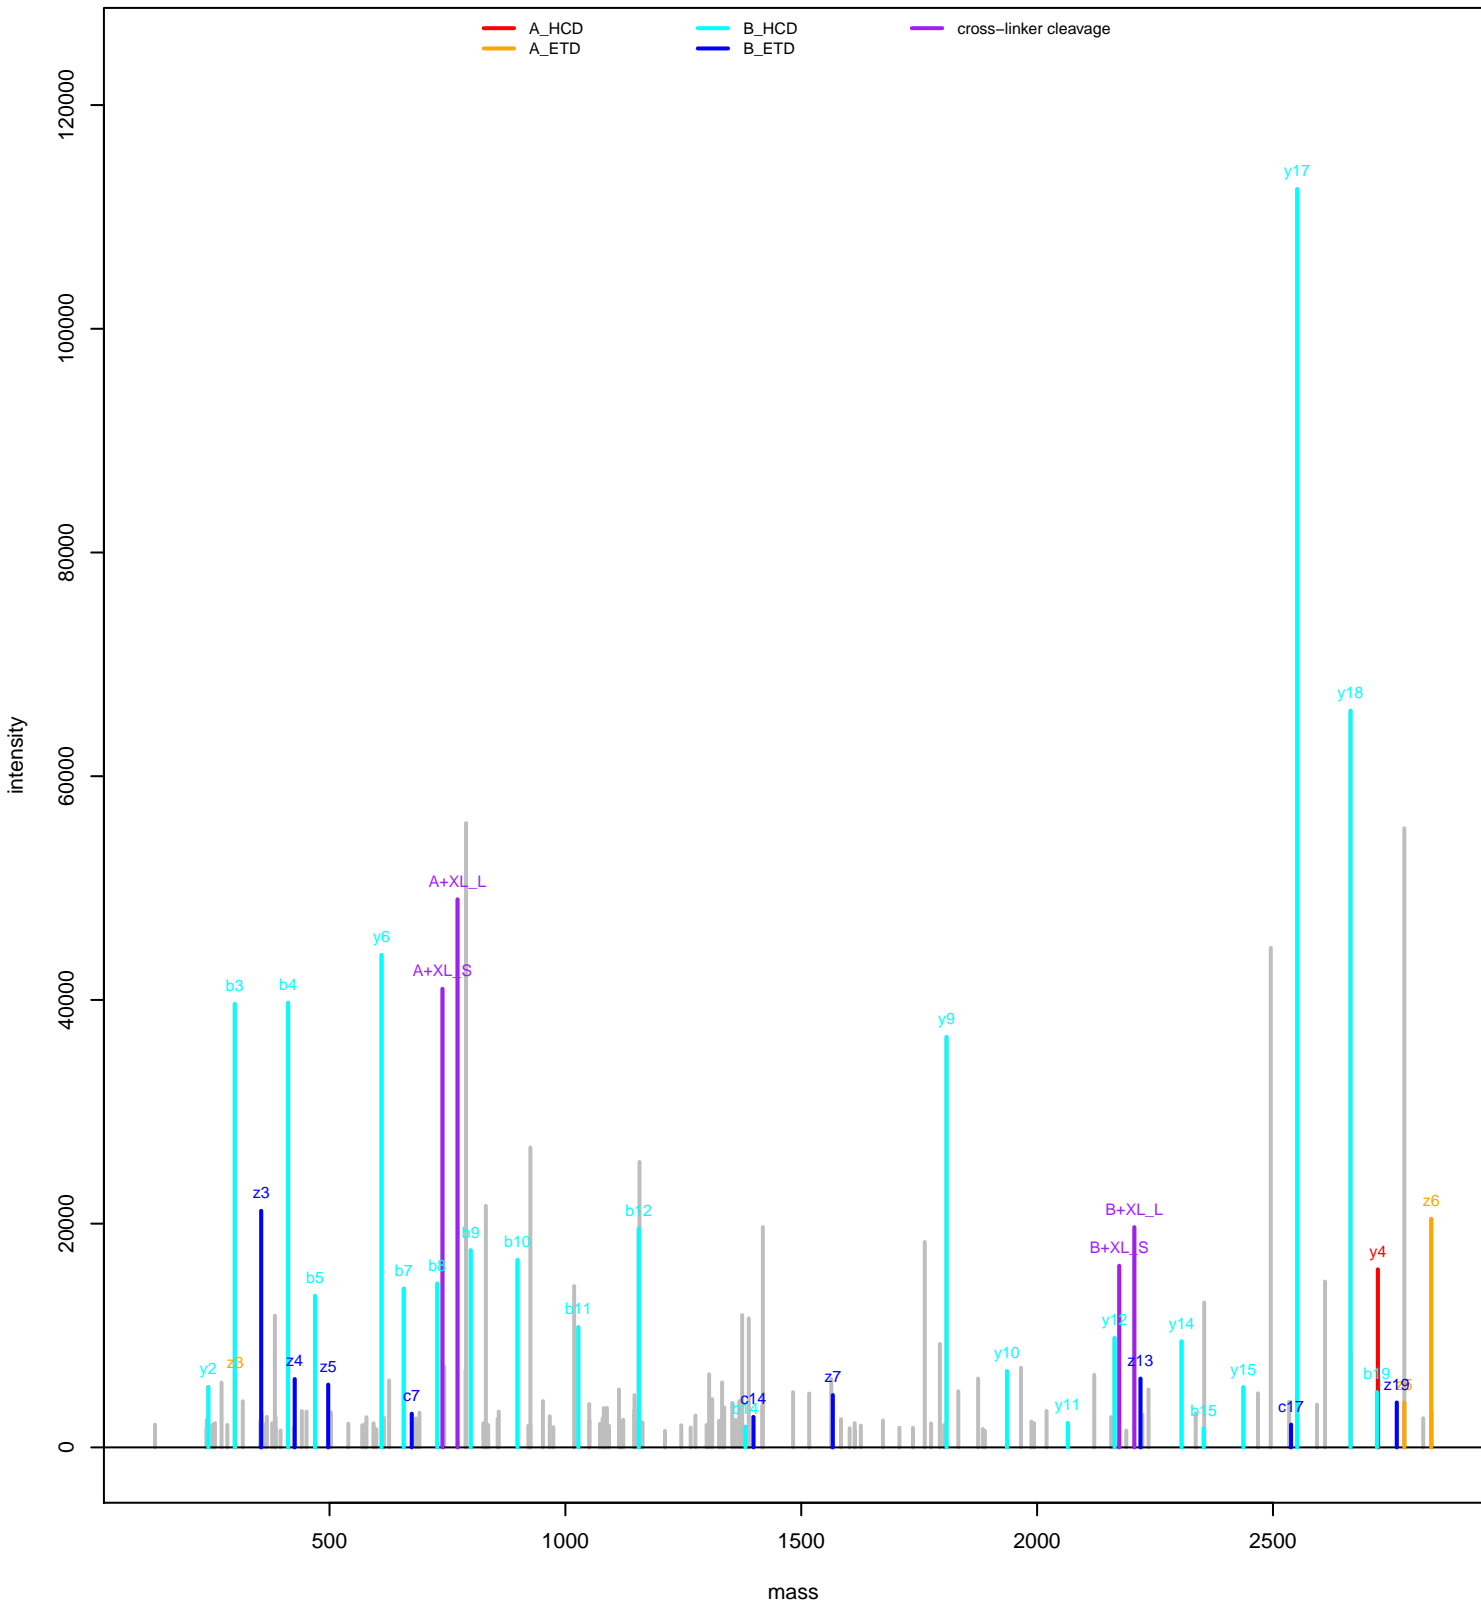

**LGAKGIK+XL\_S**

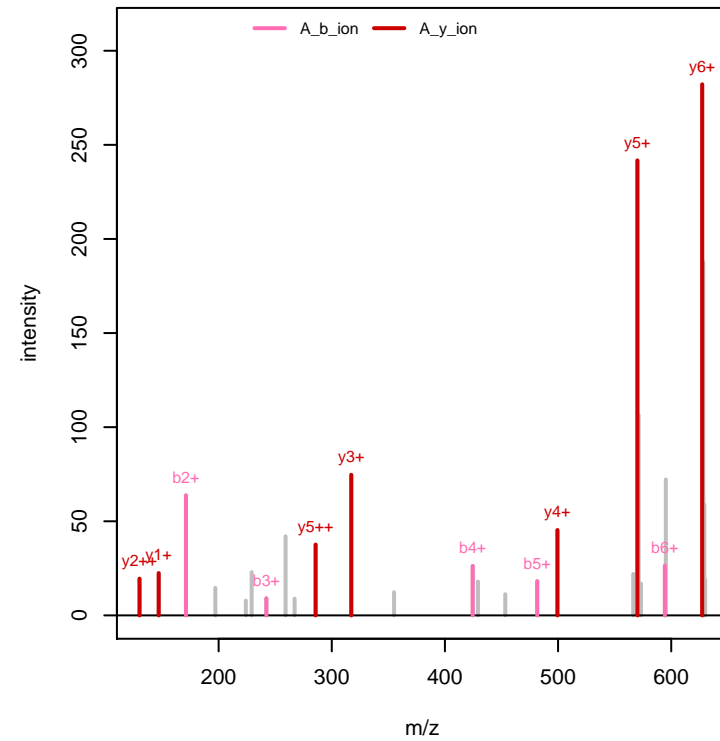

**LGAKGIK+XL\_L**

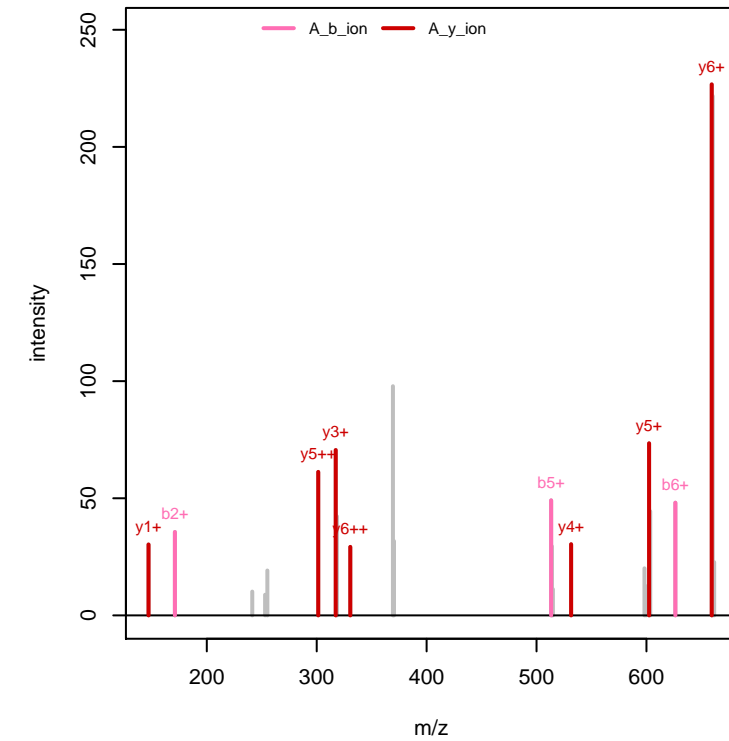

**GEILGGMAAVEQPEKPAAPK+XL\_S**

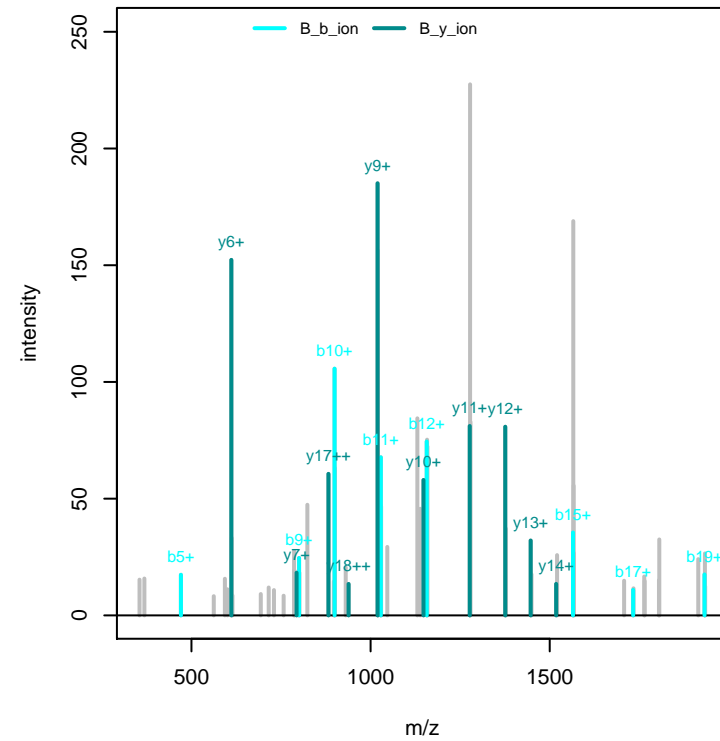

**GEILGGMAAVEQPEKPAAPK+XL\_L**

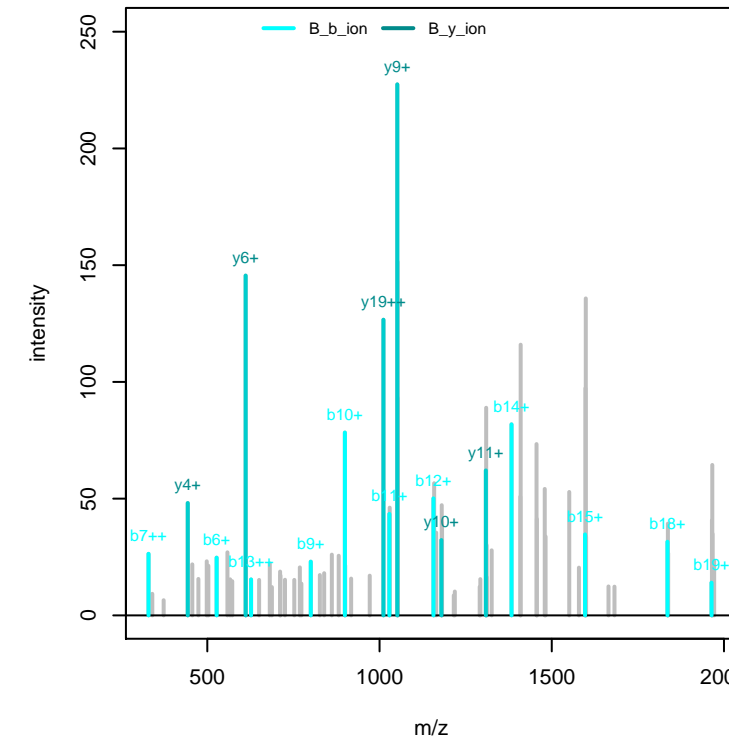

### AETVQR SSSKLSYK

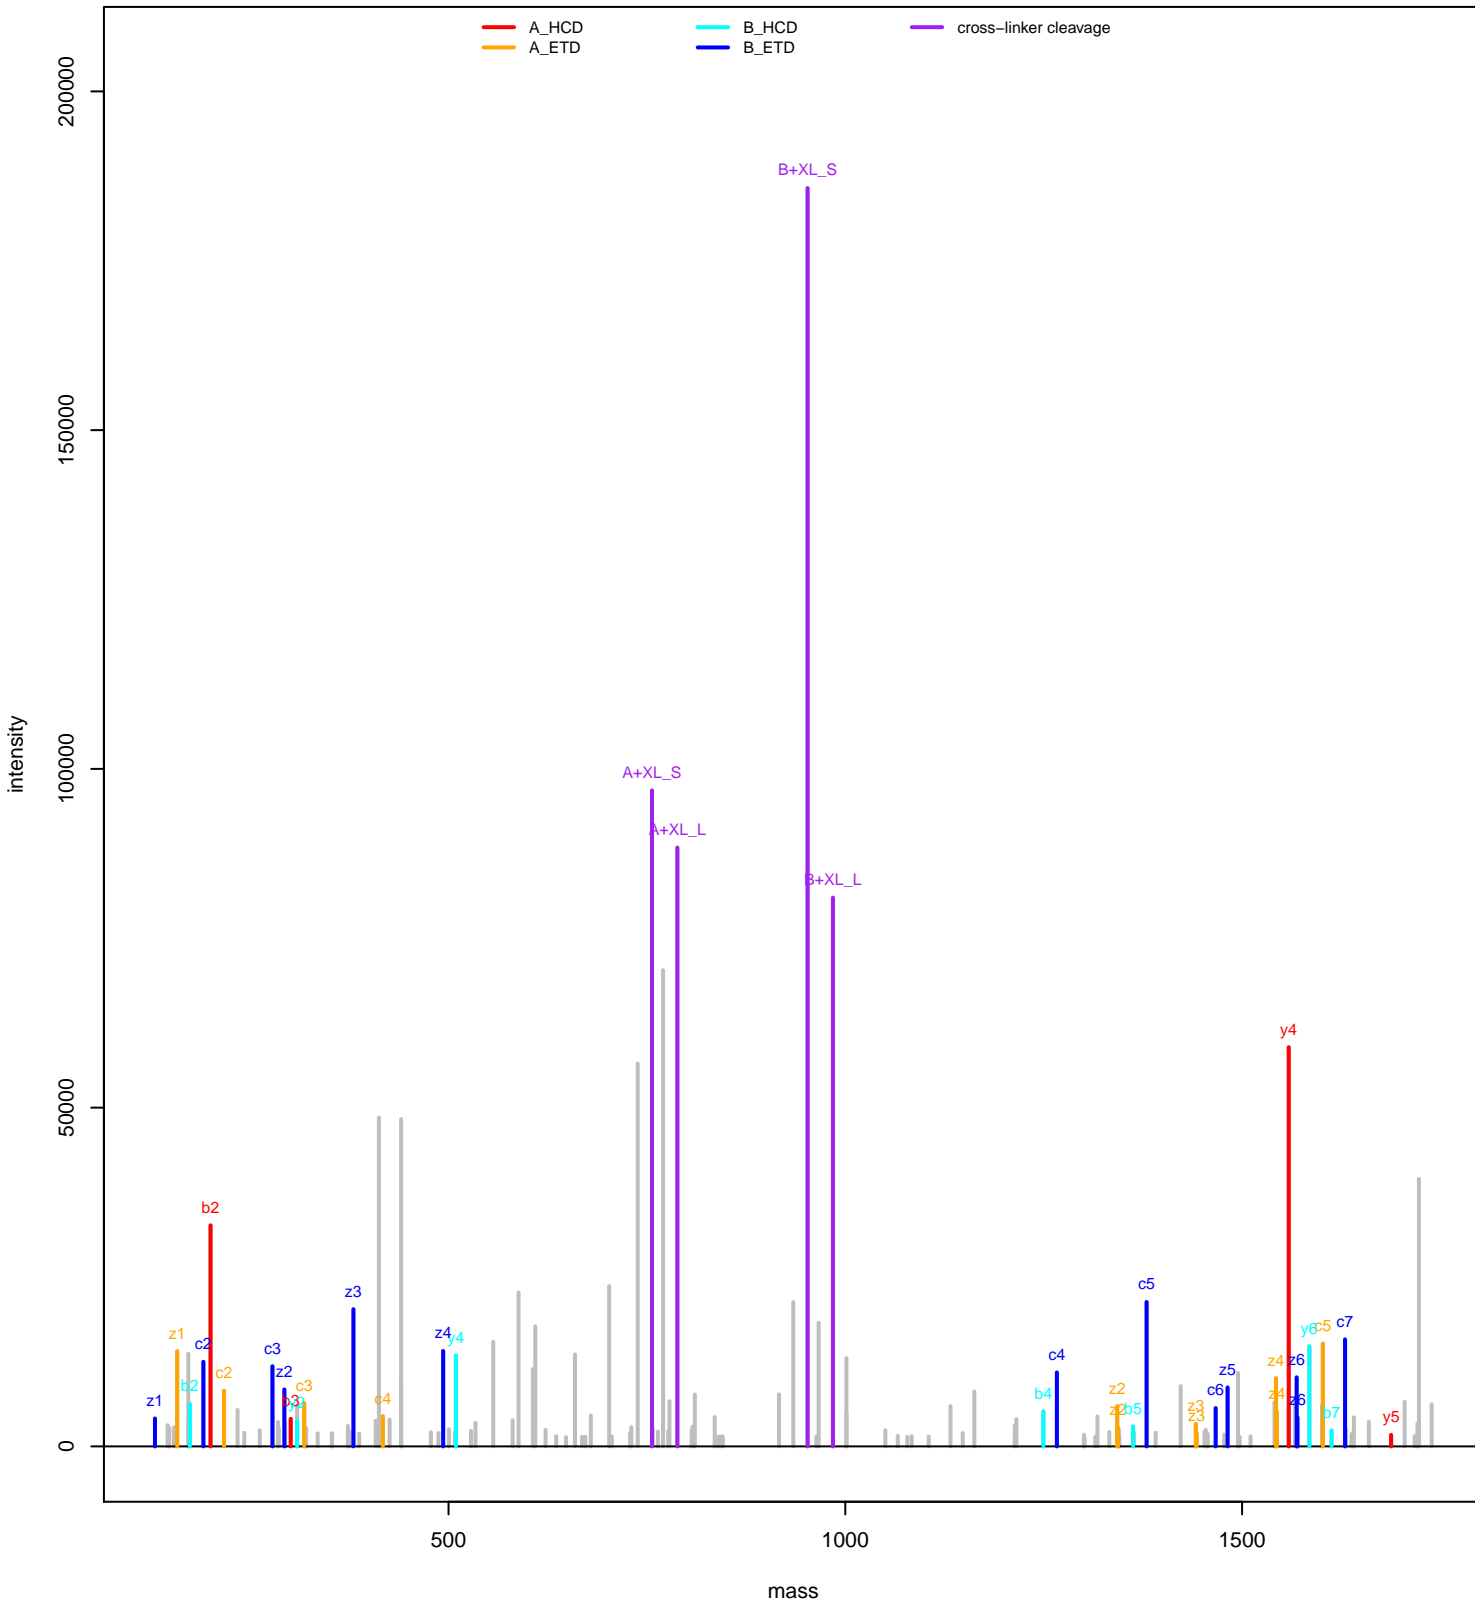

### AETVQR+XL\_S

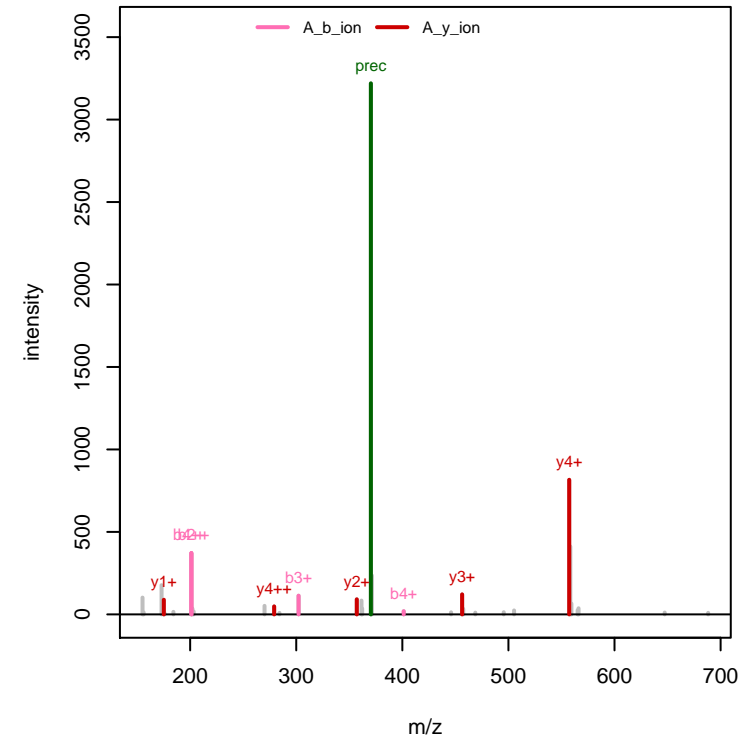

### AETVQR+XL\_L

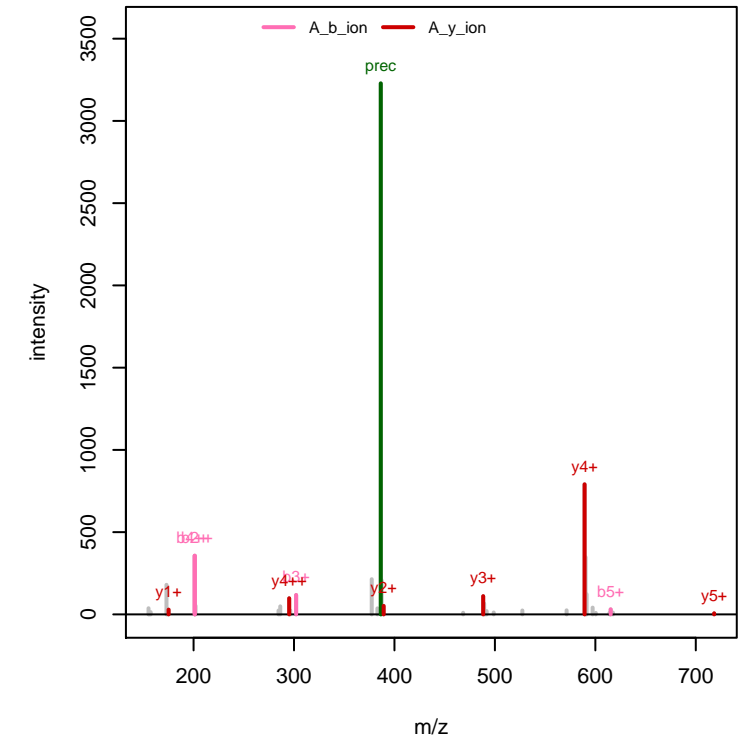

### SSSKLSYK+XL\_S

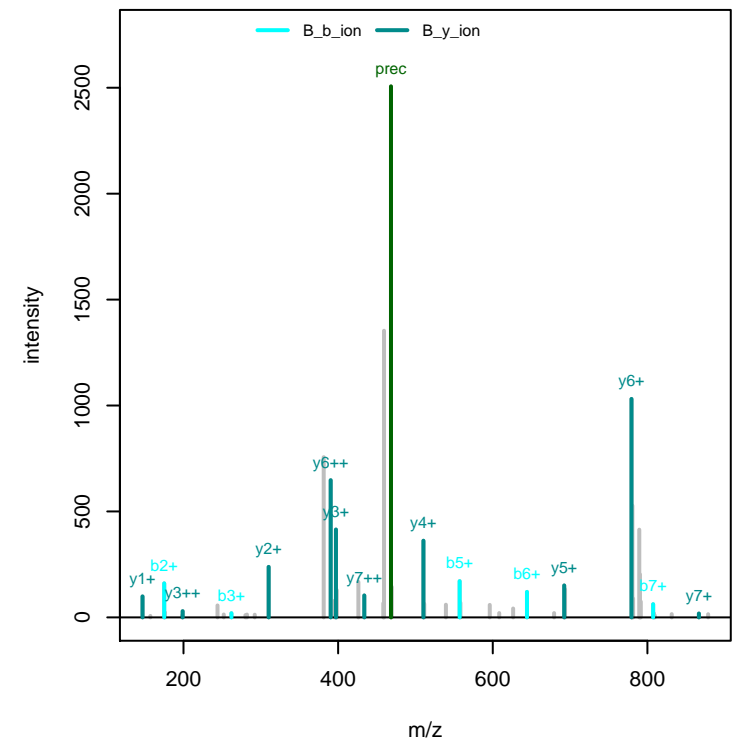

### SSSKLSYK+XL\_L

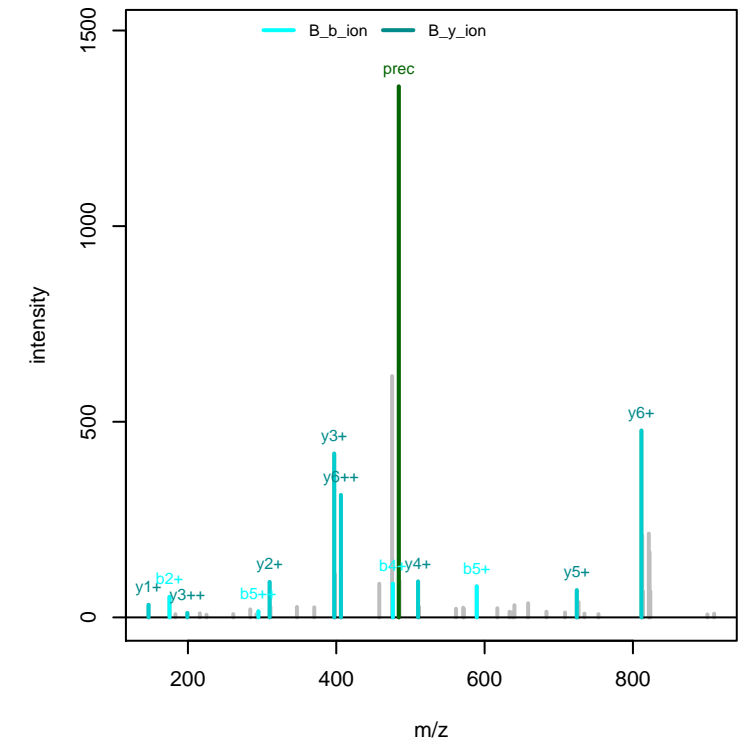



TRKQATIAVR  
EAKDLVESAPAALK

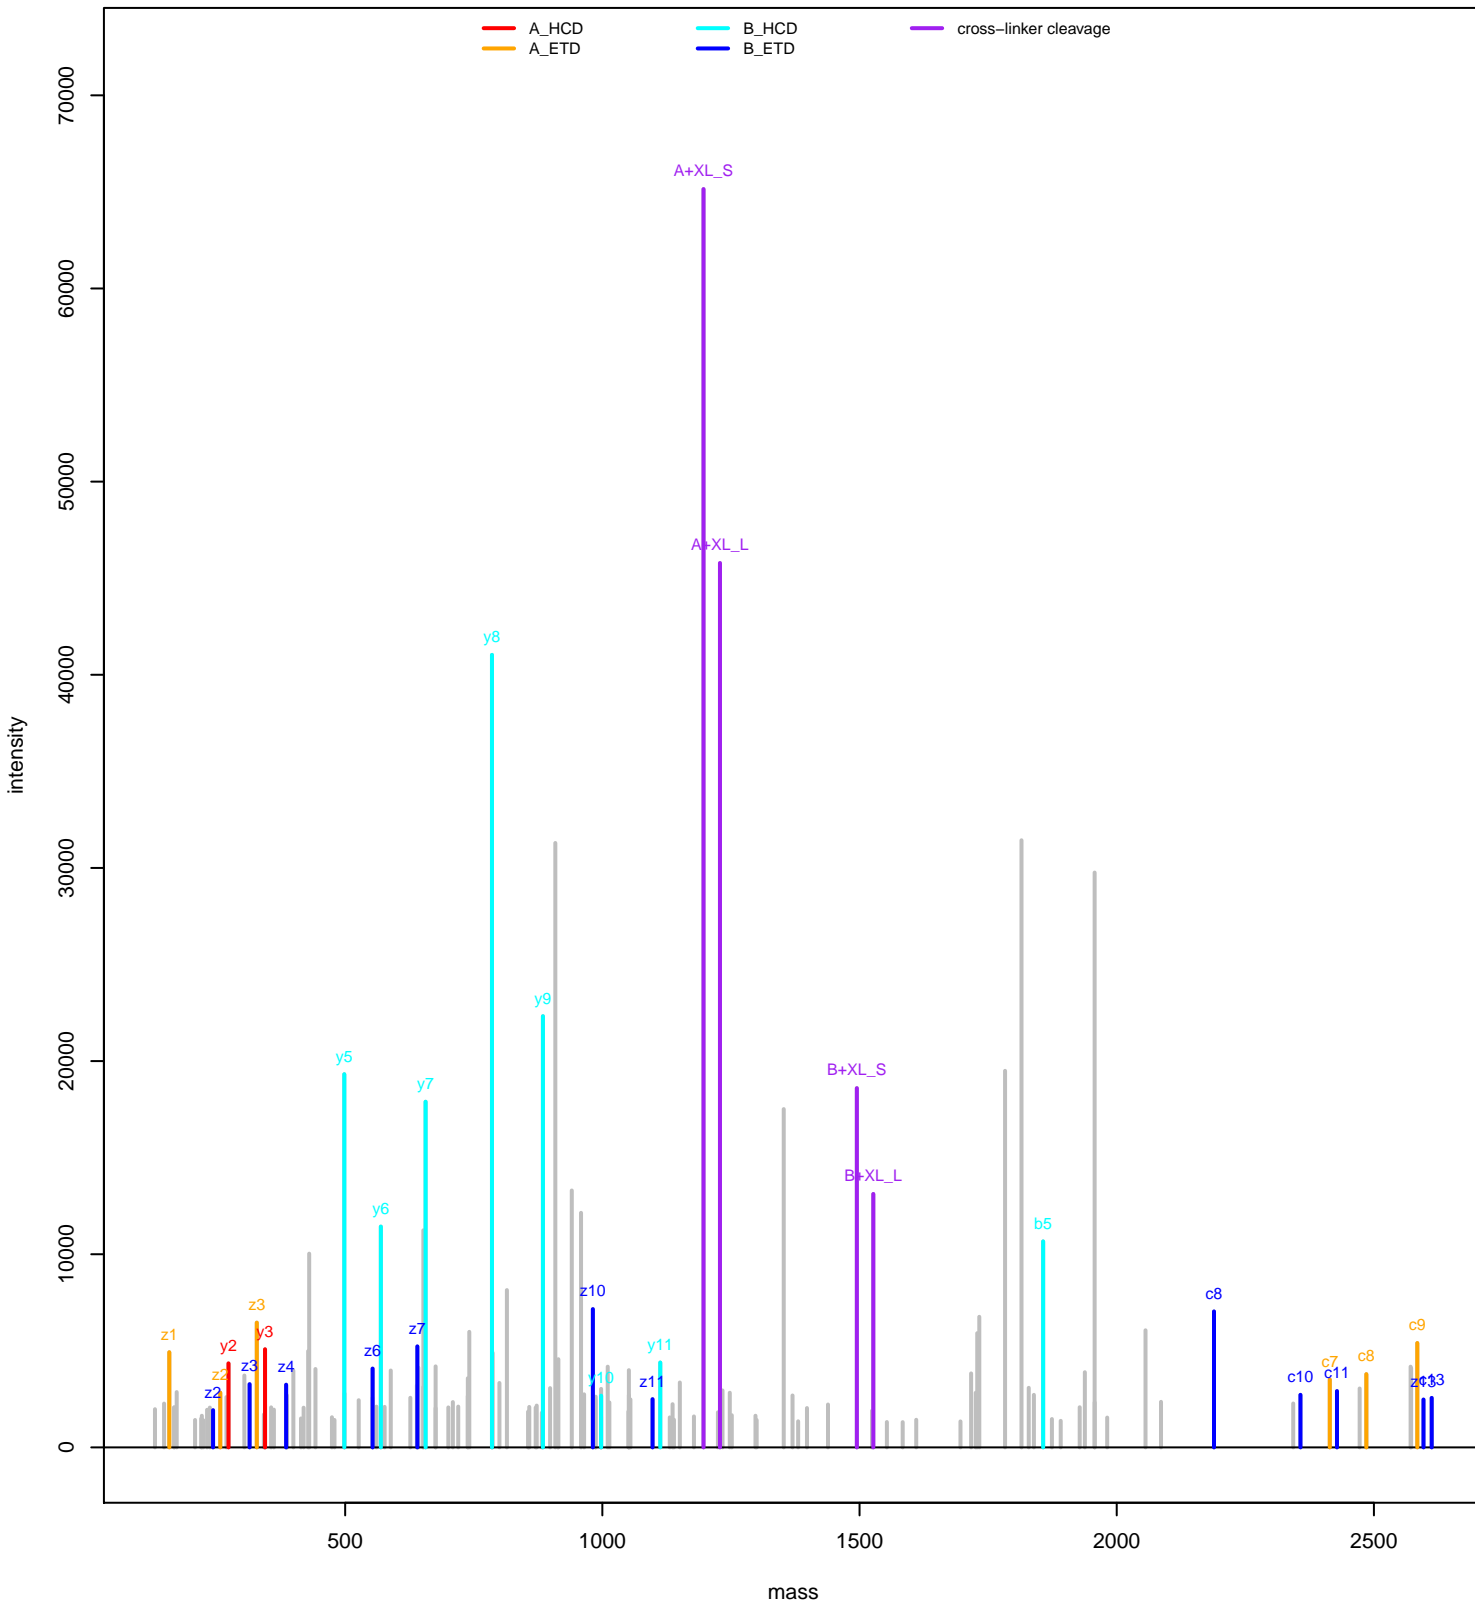

TRKQATIAVR+XL\_S

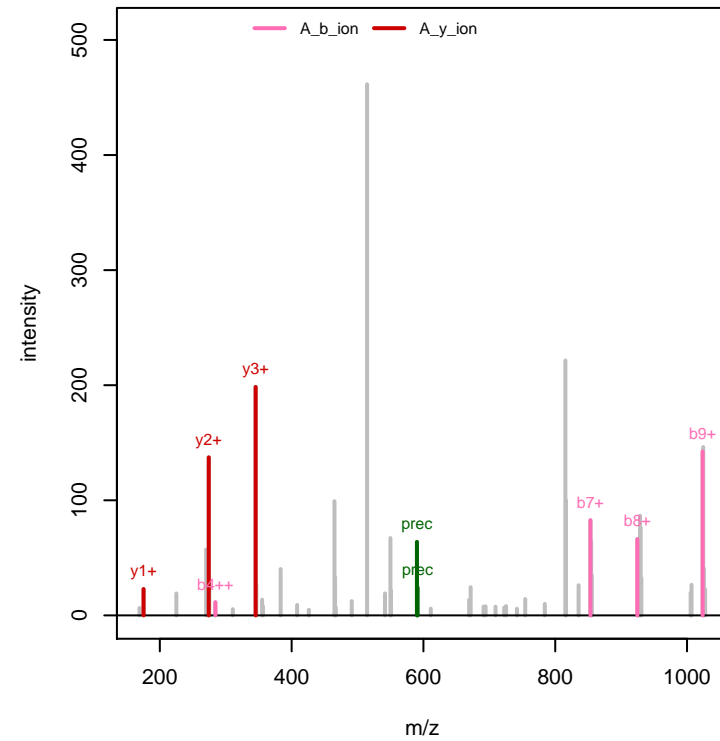

TRKQATIAVR+XL\_L

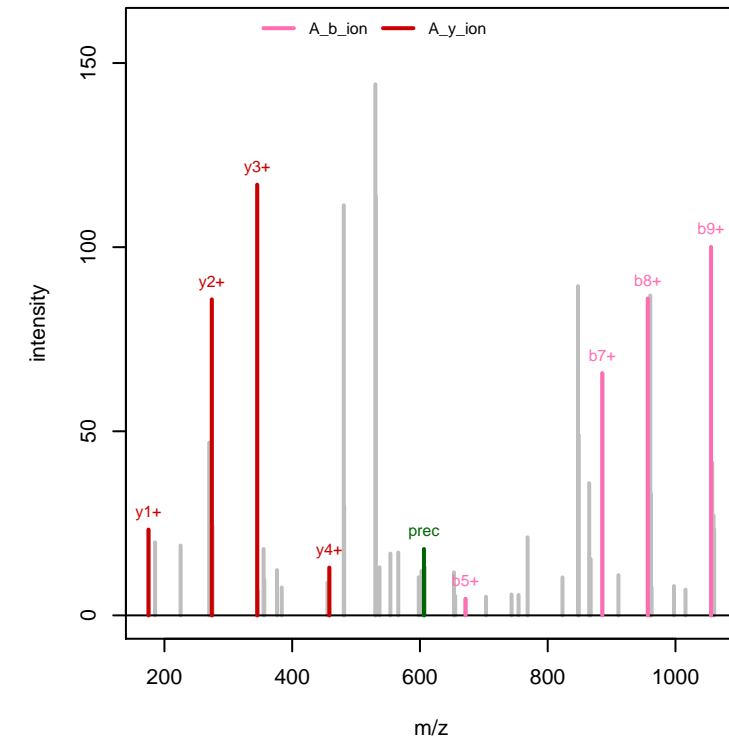

EAKDLVESAPAALK+XL\_S

EAKDLVESAPAALK+XL\_L

EKHQQR  
NIYGTKGQLR

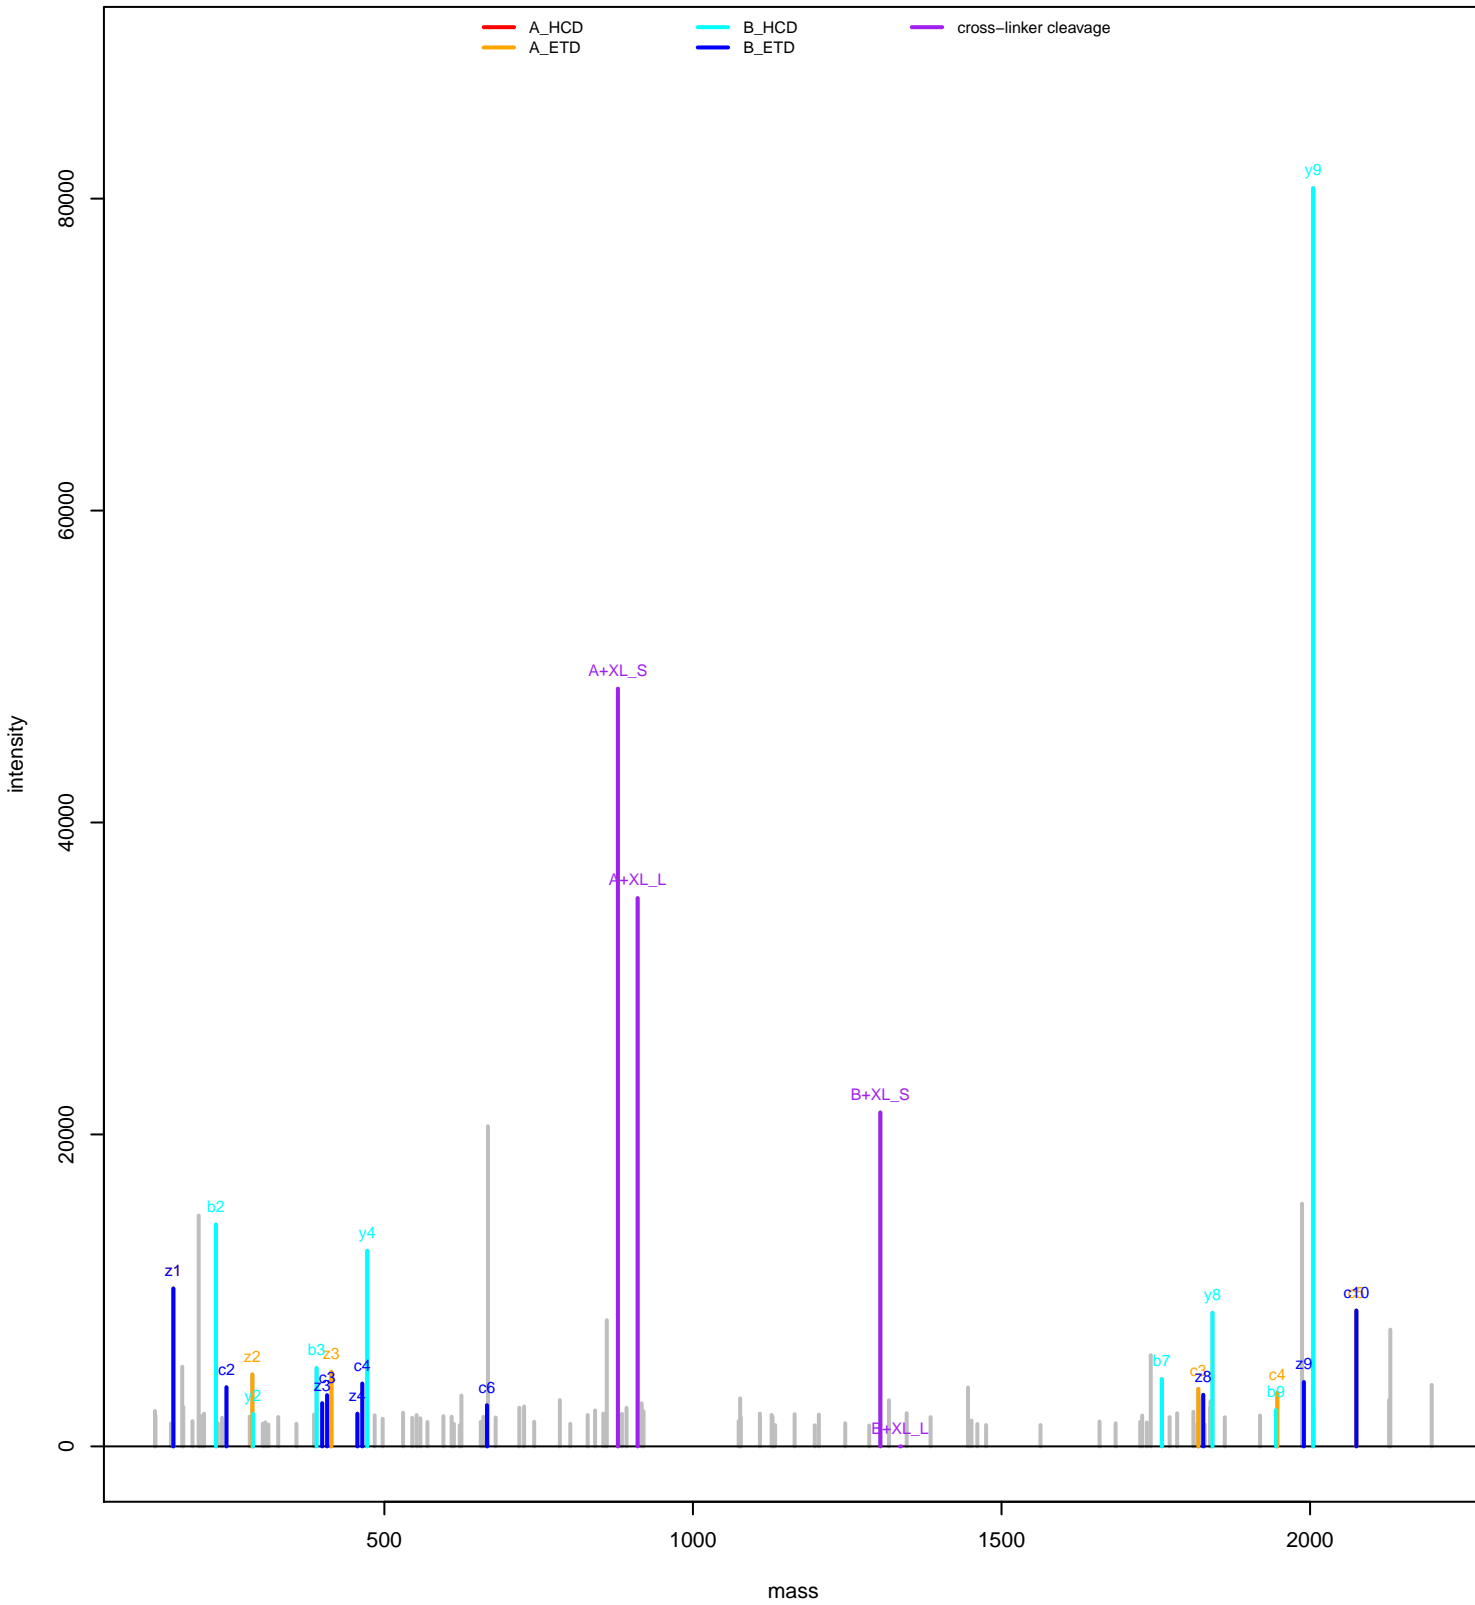

EKHQQR+XL\_S

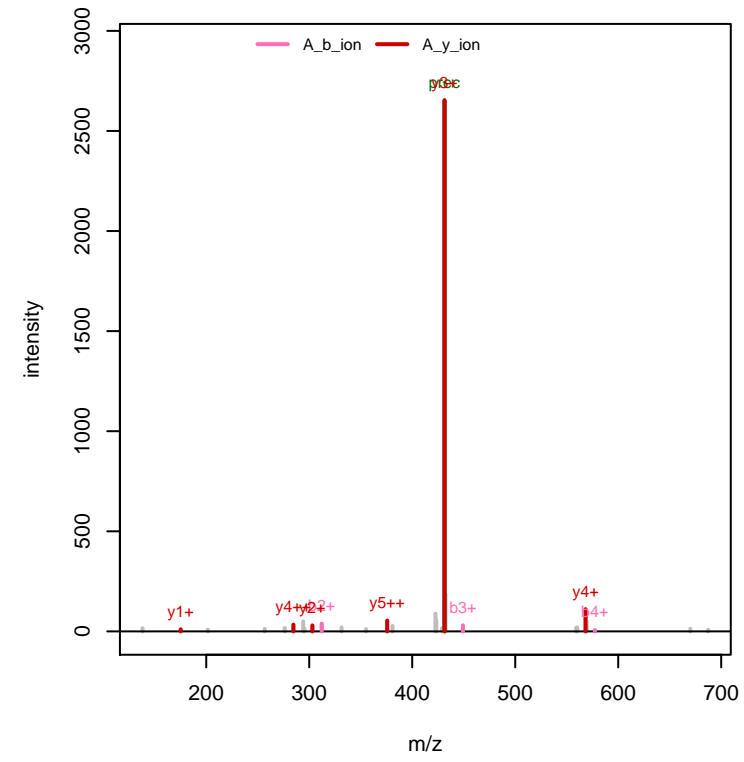

EKHQQR+XL\_L

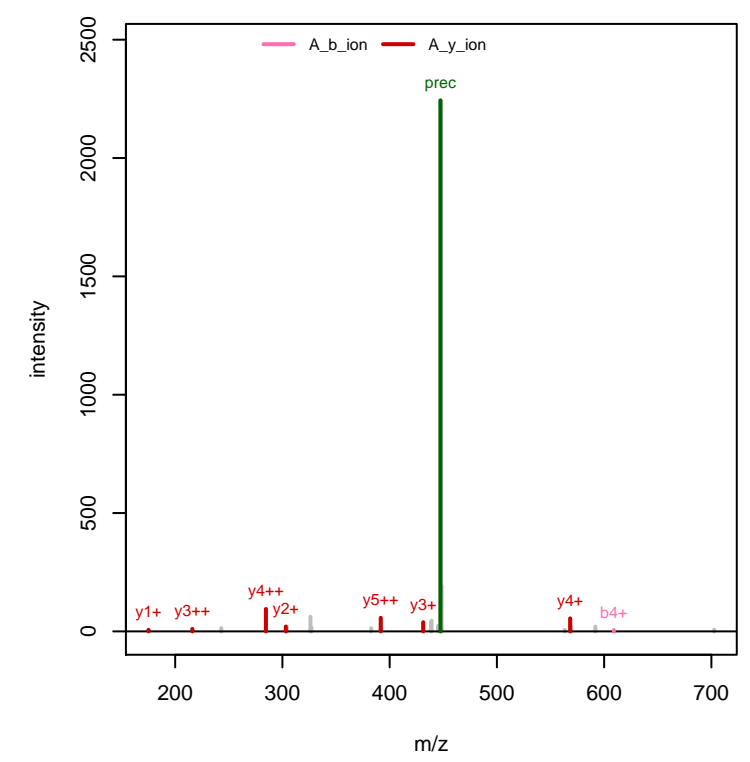

NIYGTKGQLR+XL\_S

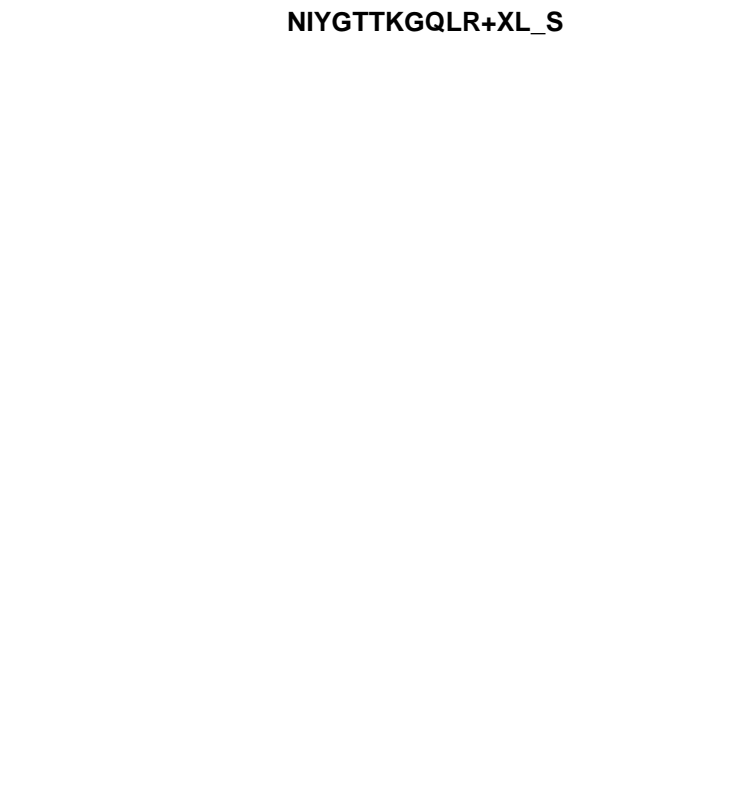

NIYGTKGQLR+XL\_L

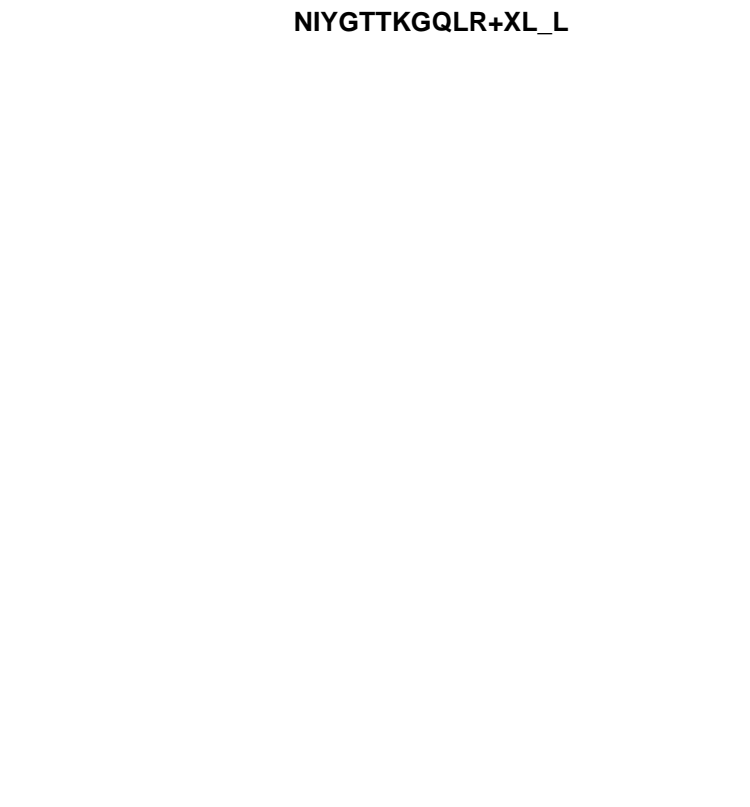

KQYGEAFEK  
LREGNSAGKETSAK

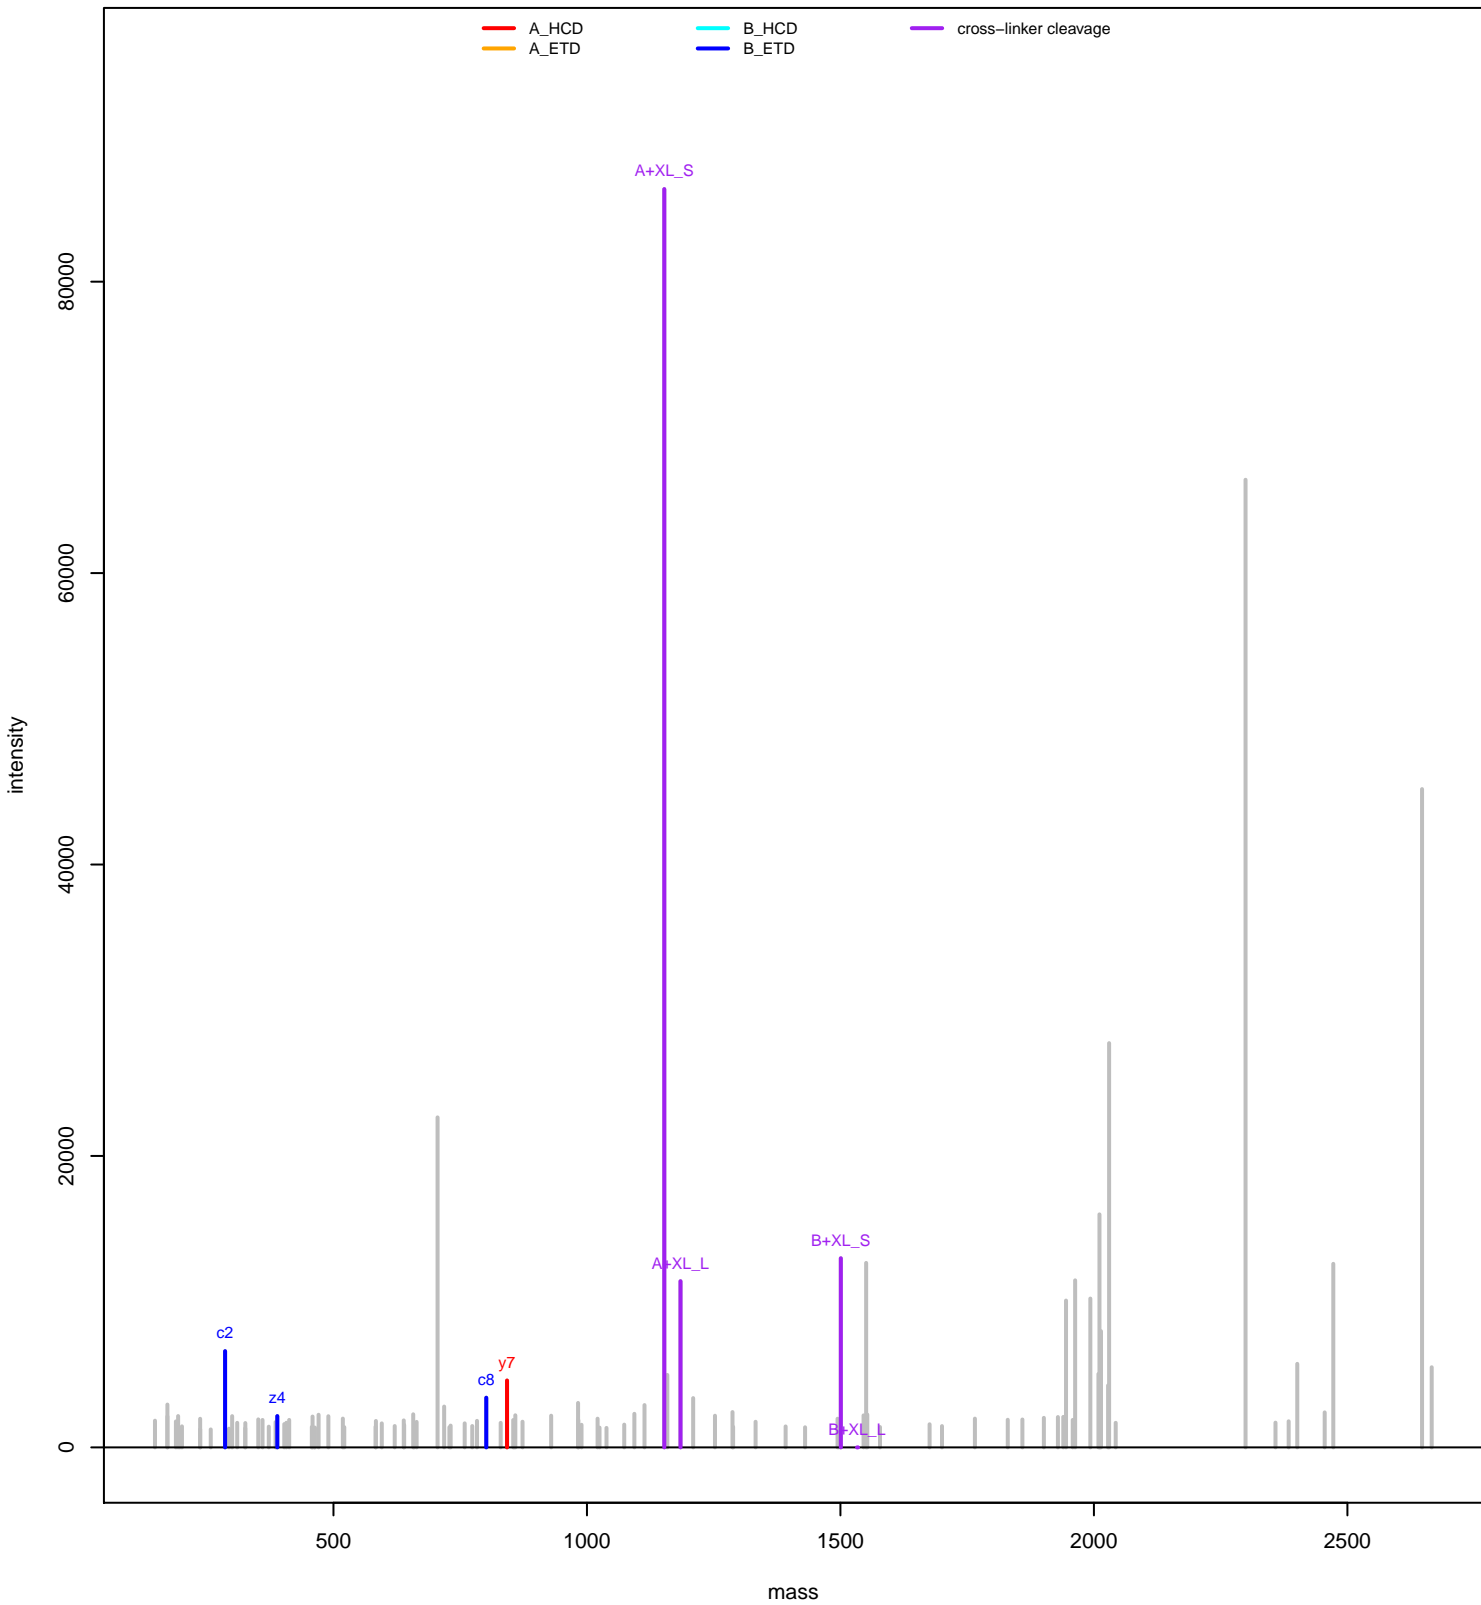

KQYGEAFEK+XL\_S

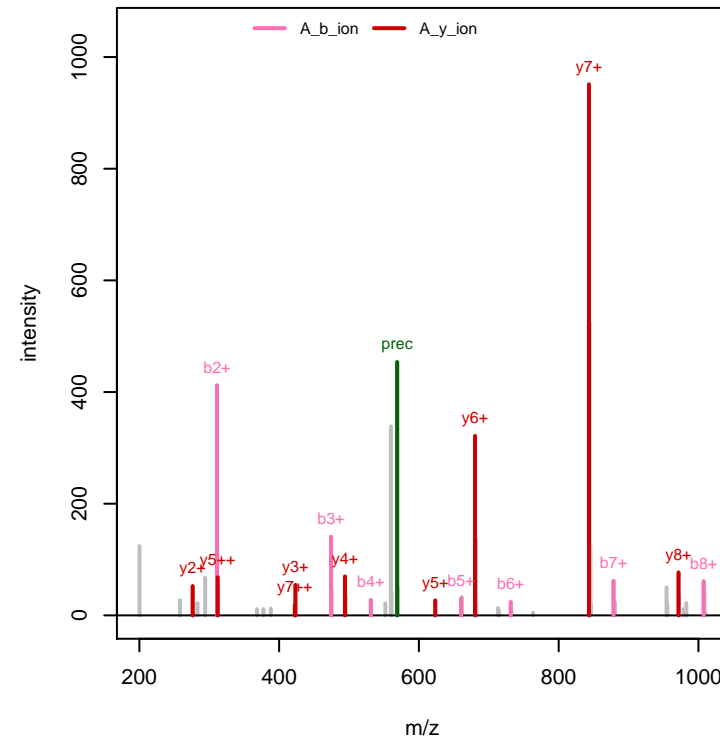

KQYGEAFEK+XL\_L

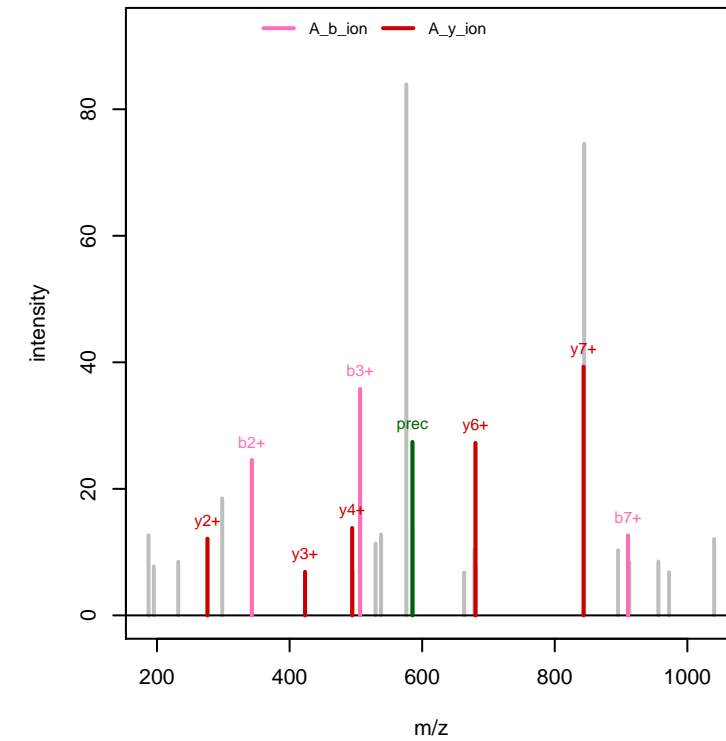

LREGNSAGKETSAK+XL\_S

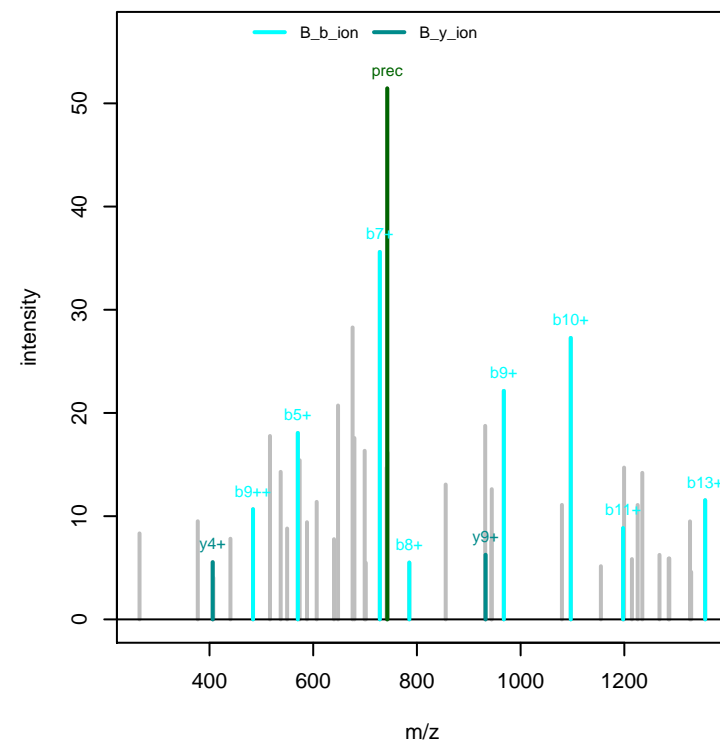

LREGNSAGKETSAK+XL\_L

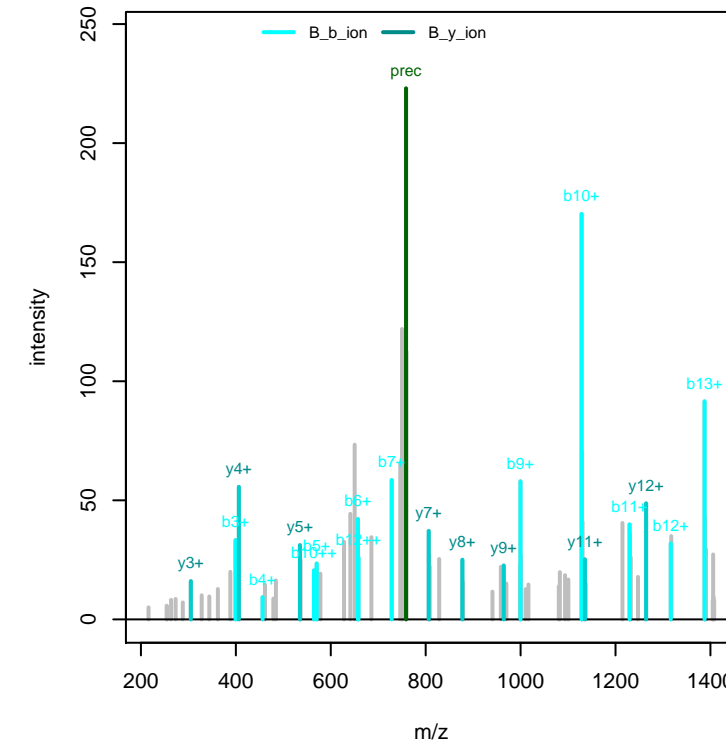

LKTAIQNTGK  
MSTGLALDSEGKR

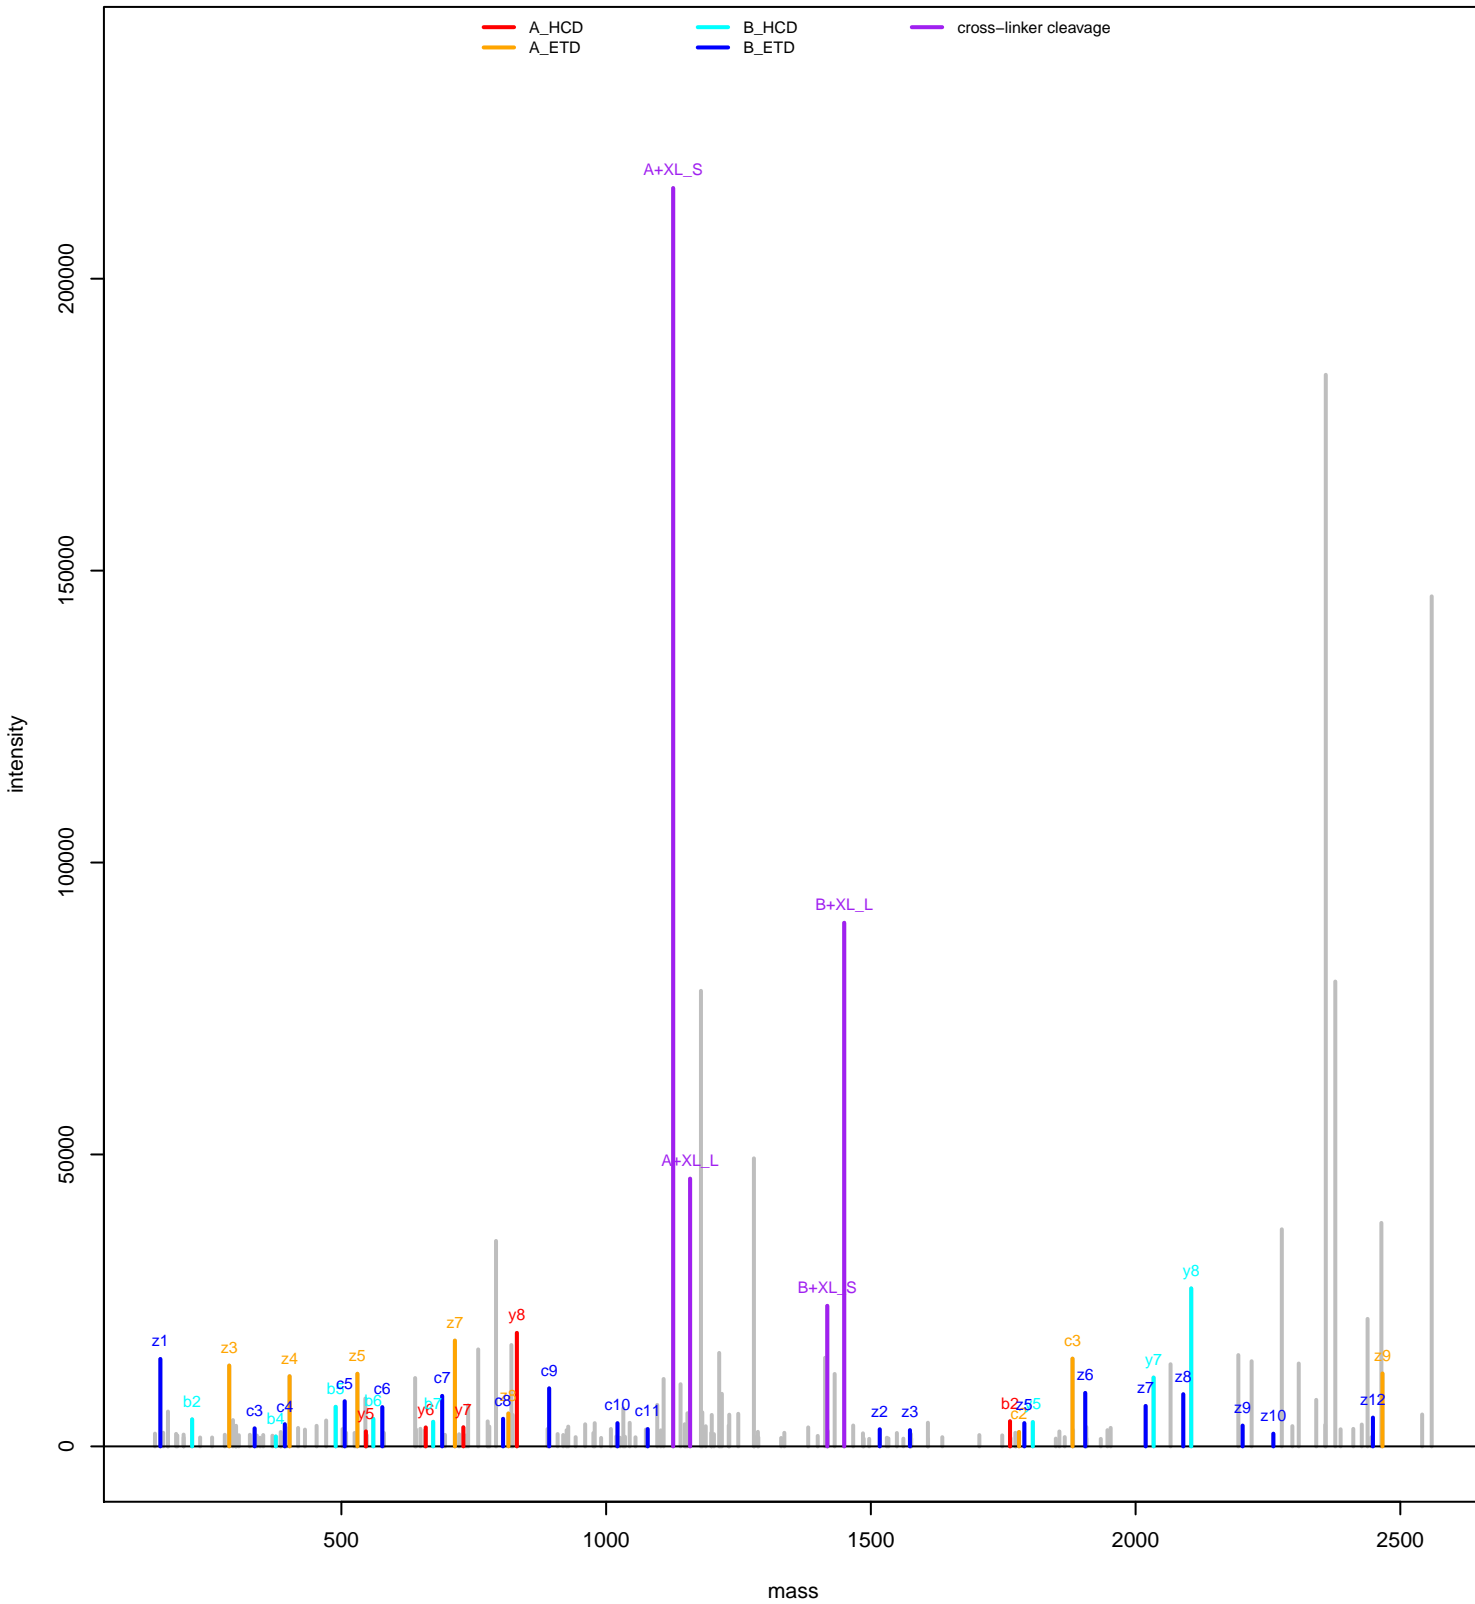

LKTAIQNTGK+XL\_S

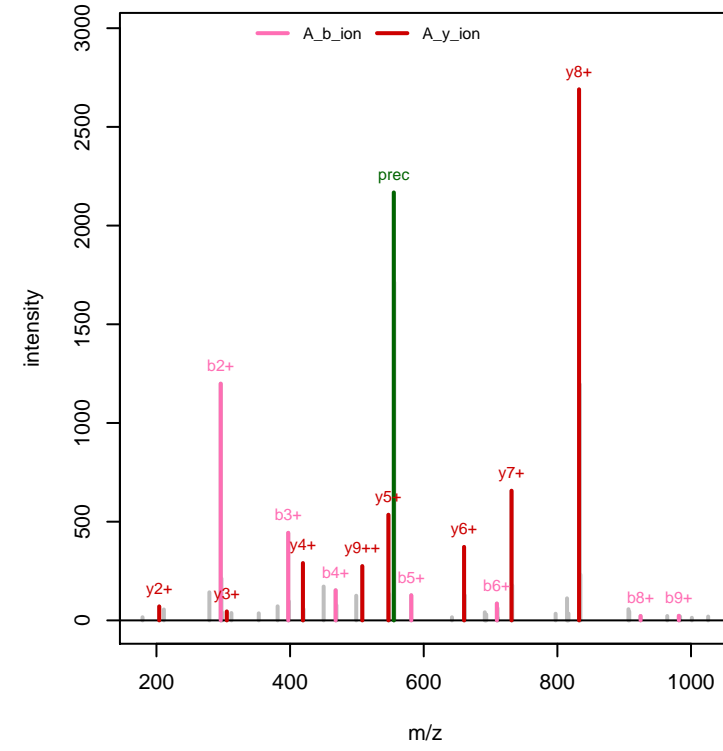

LKTAIQNTGK+XL\_L

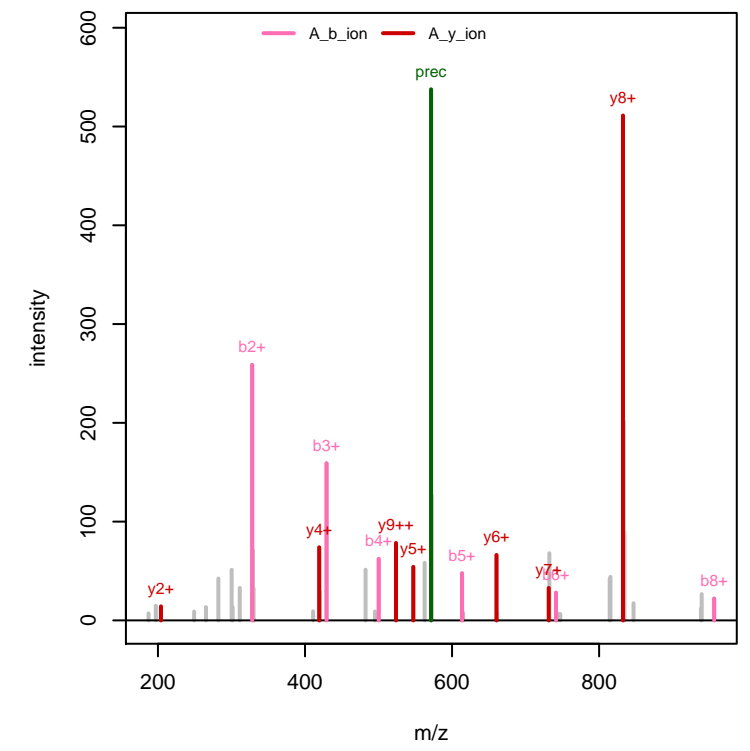

MSTGLALDSEGKR+XL\_S

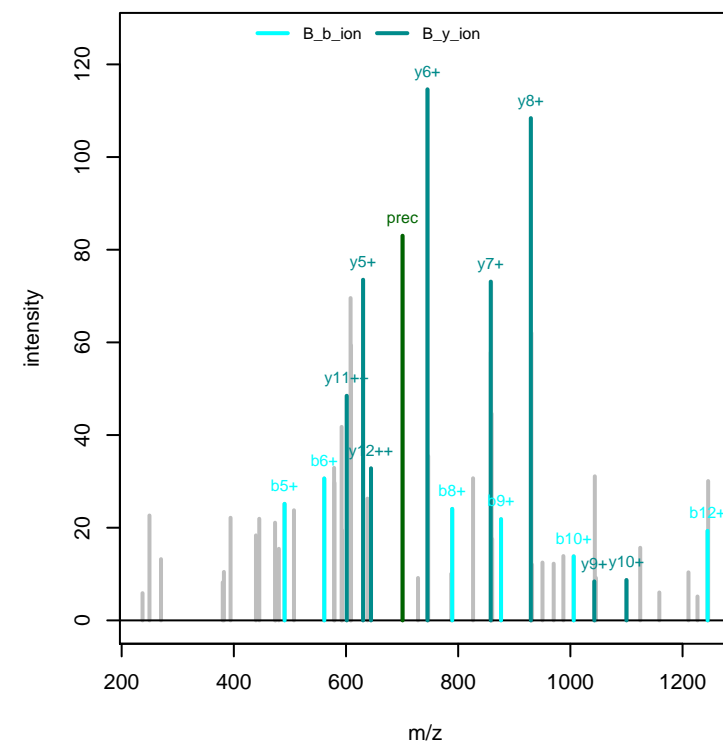

MSTGLALDSEGKR+XL\_L

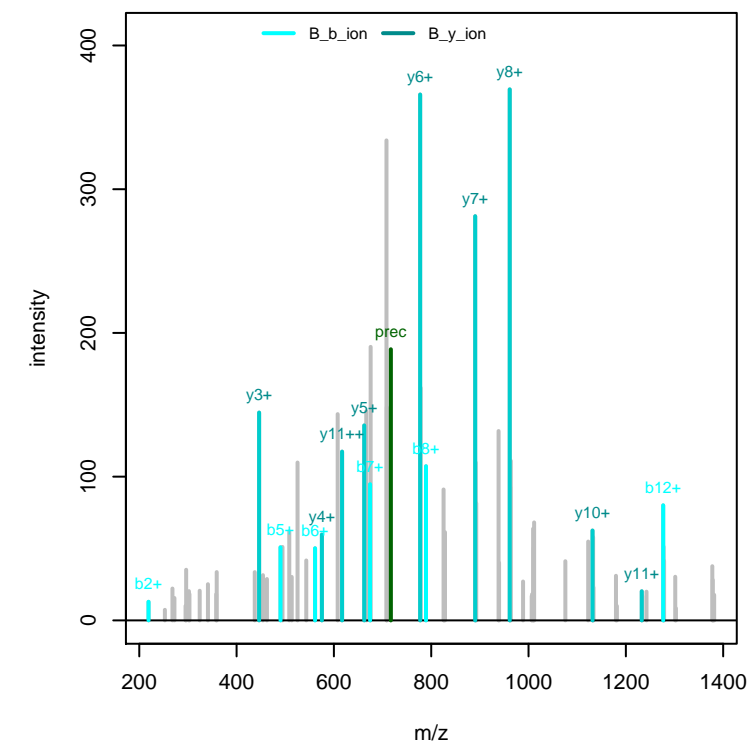

AEAANKKEKANG  
NDDQKSAYALGASLGR

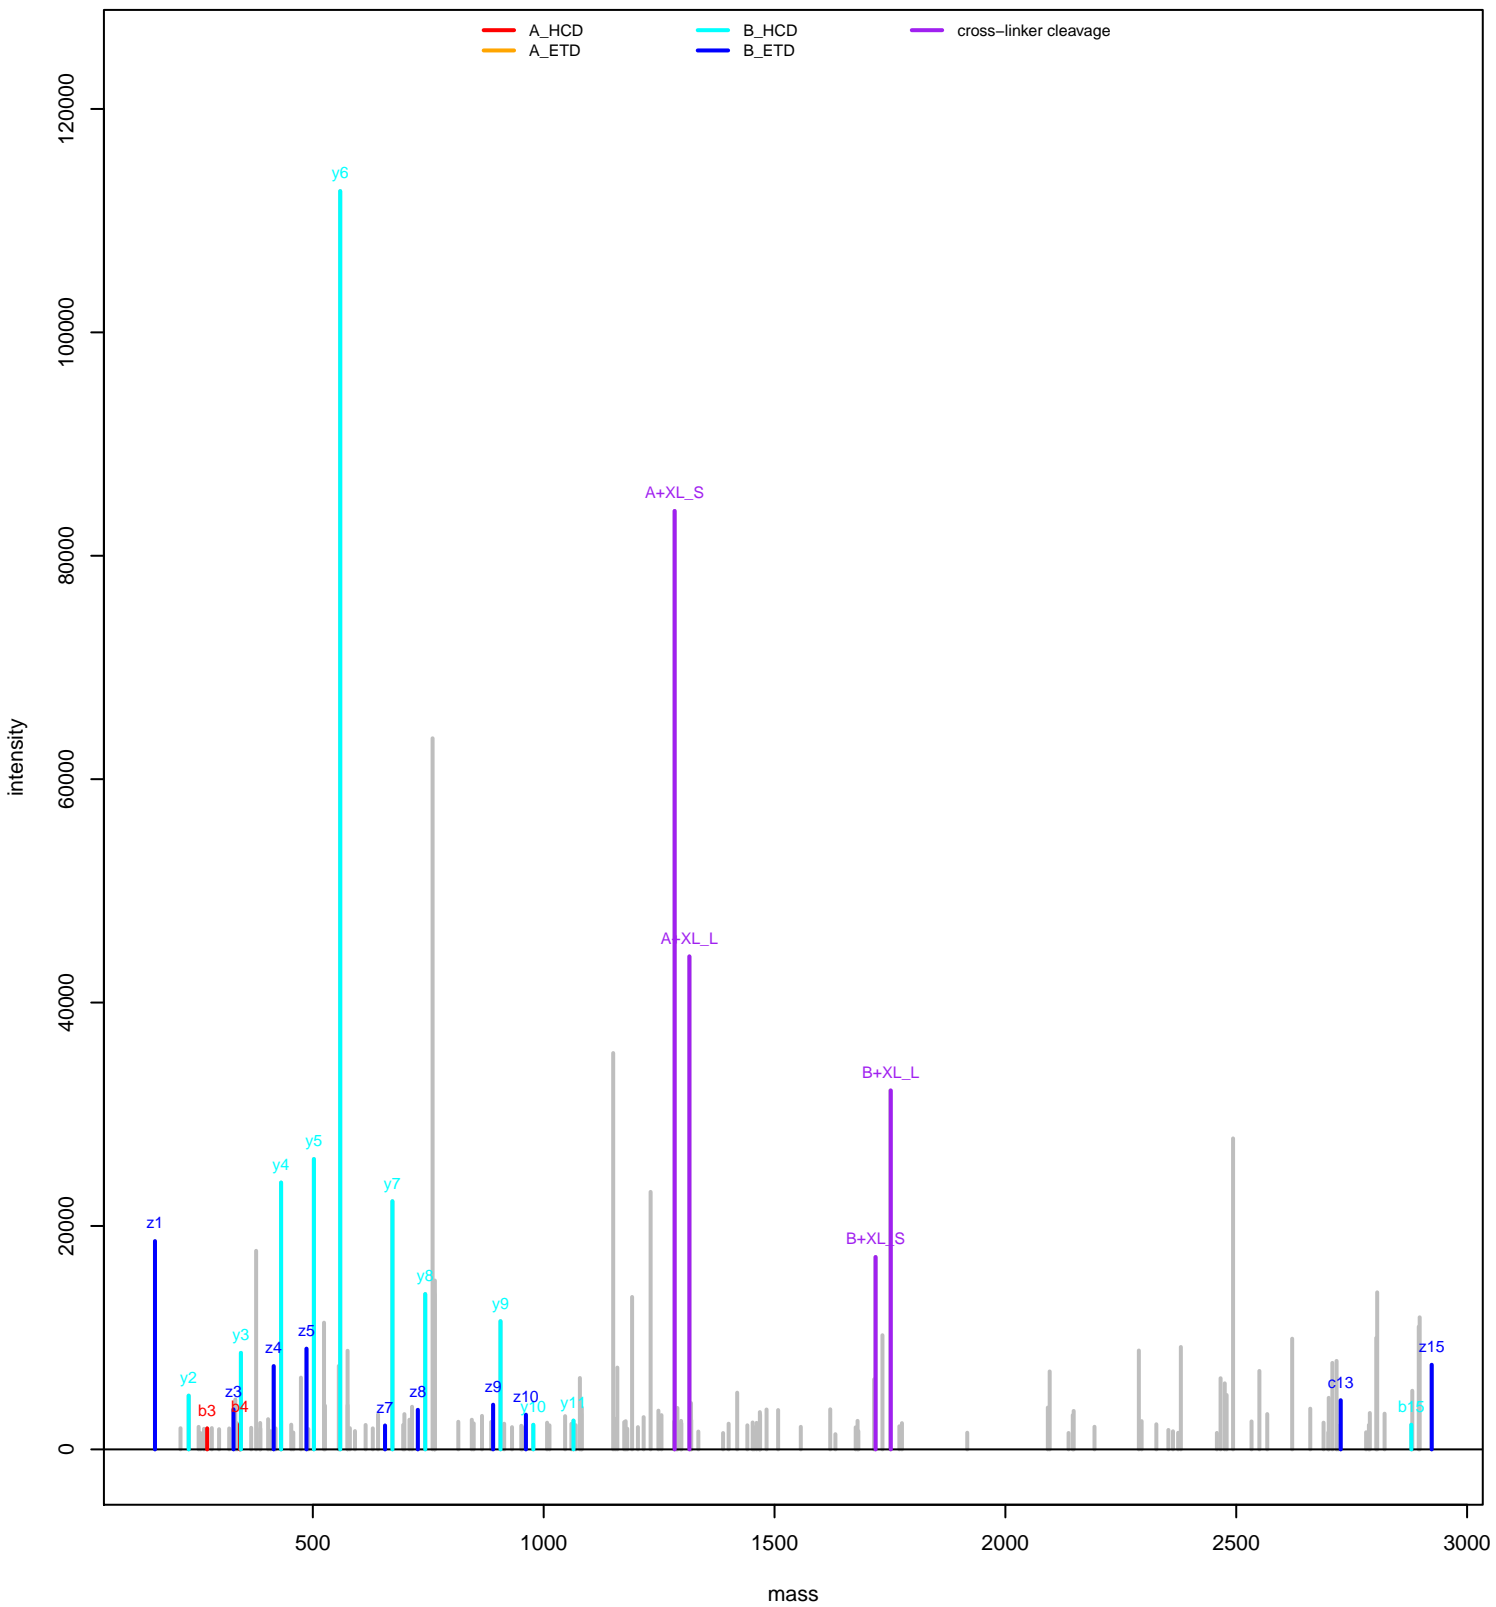

AEAANKKEKANG+XL\_S

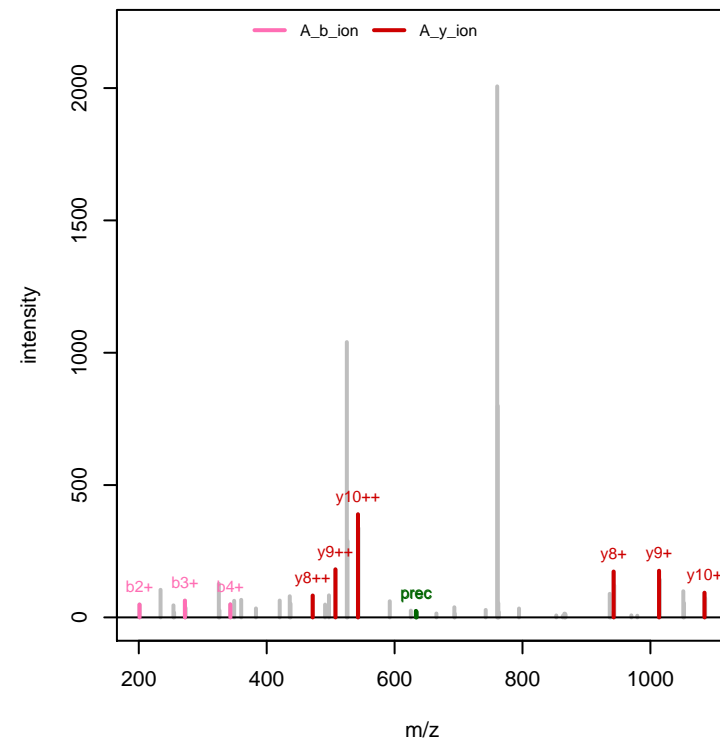

AEAANKKEKANG+XL\_L

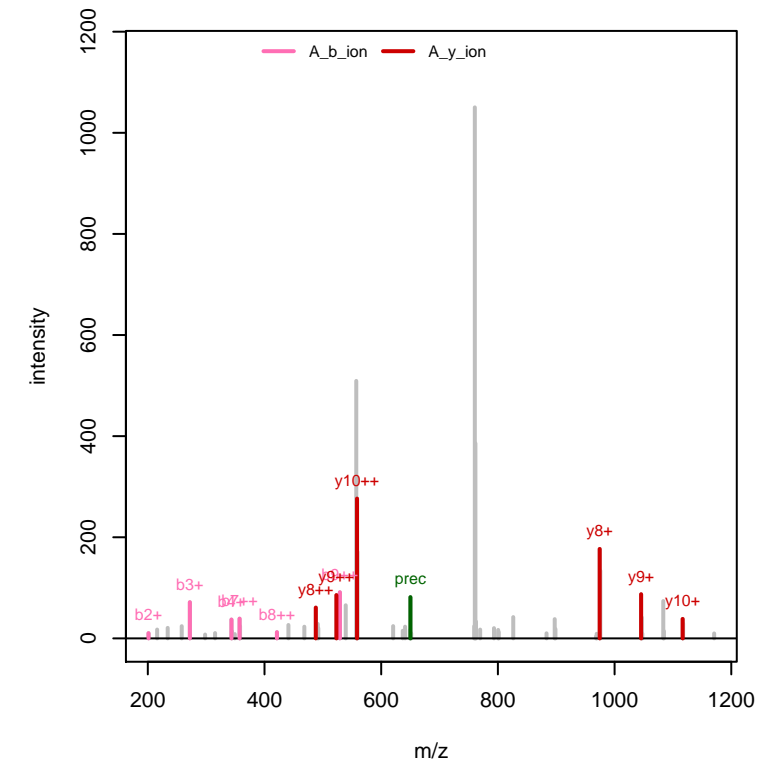

NDDQKSAYALGASLGR+XL\_S

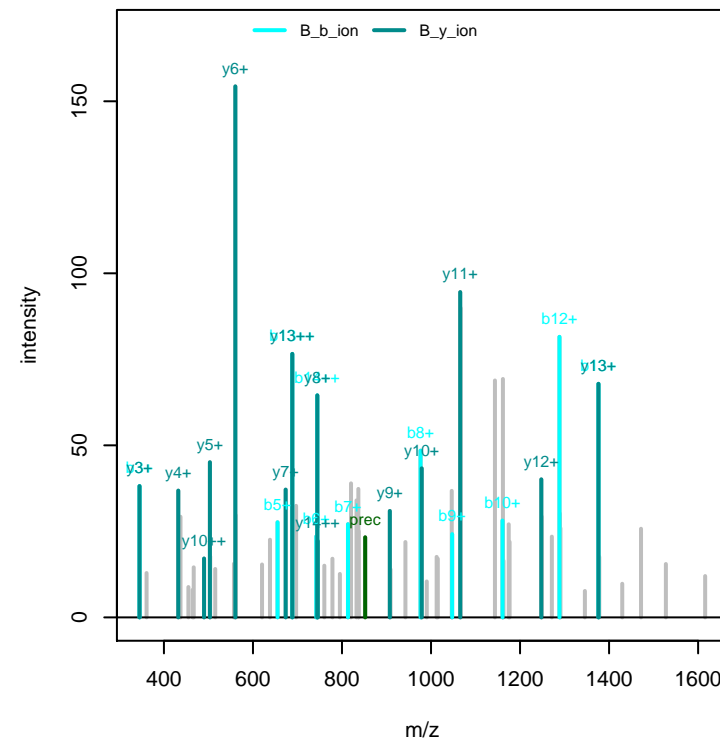

NDDQKSAYALGASLGR+XL\_L

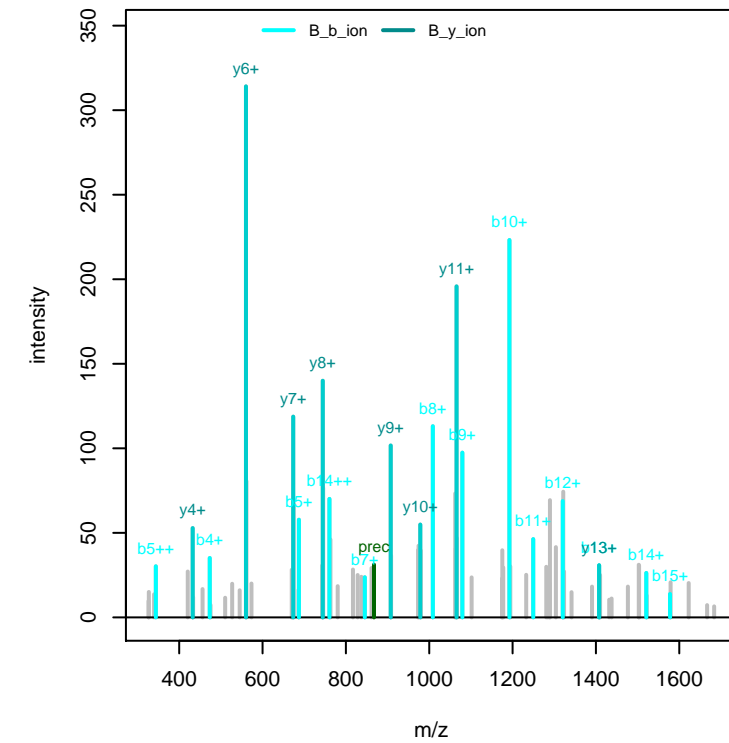

**DKDALTR  
FIEEEKK**

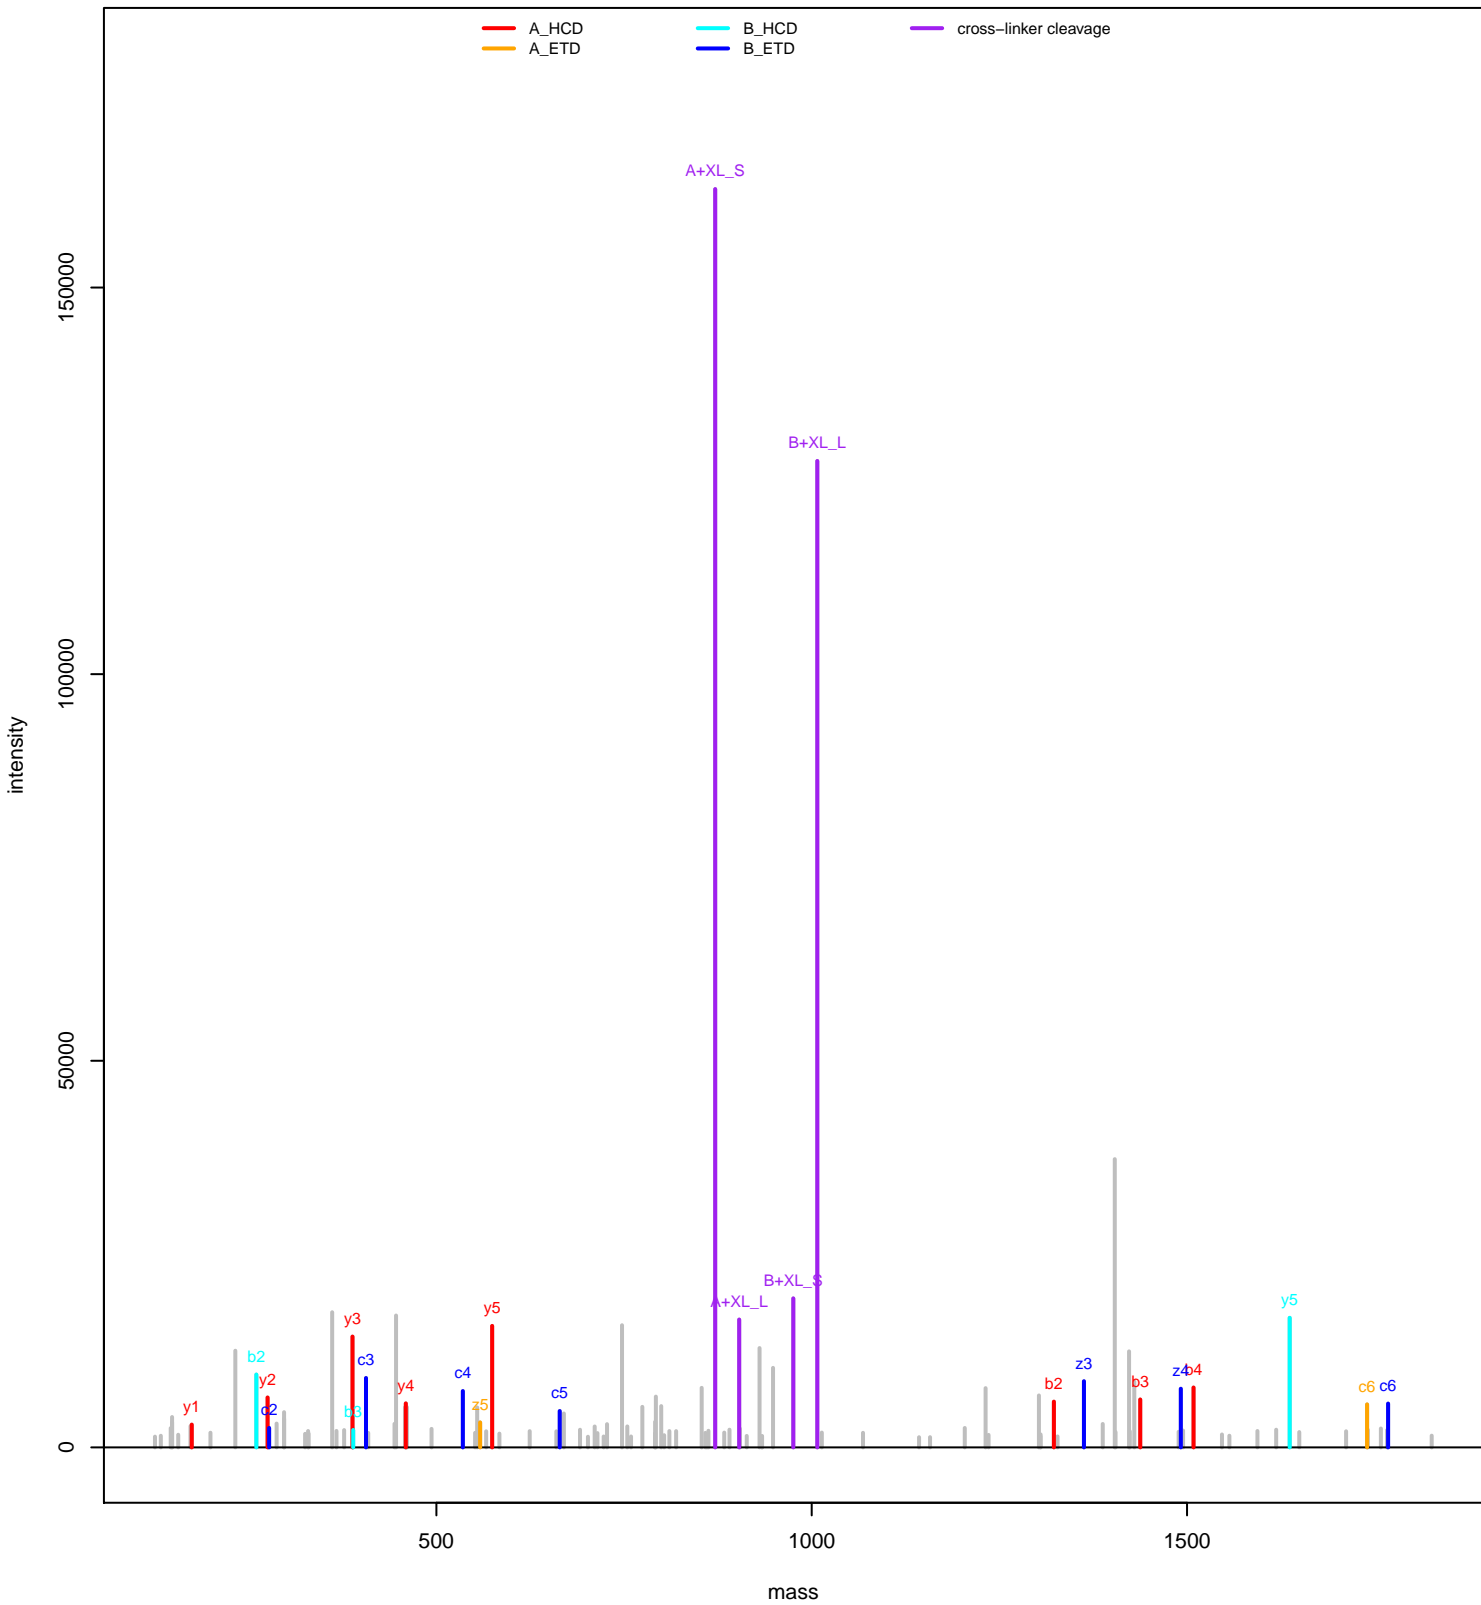

**DKDALTR+XL\_S**

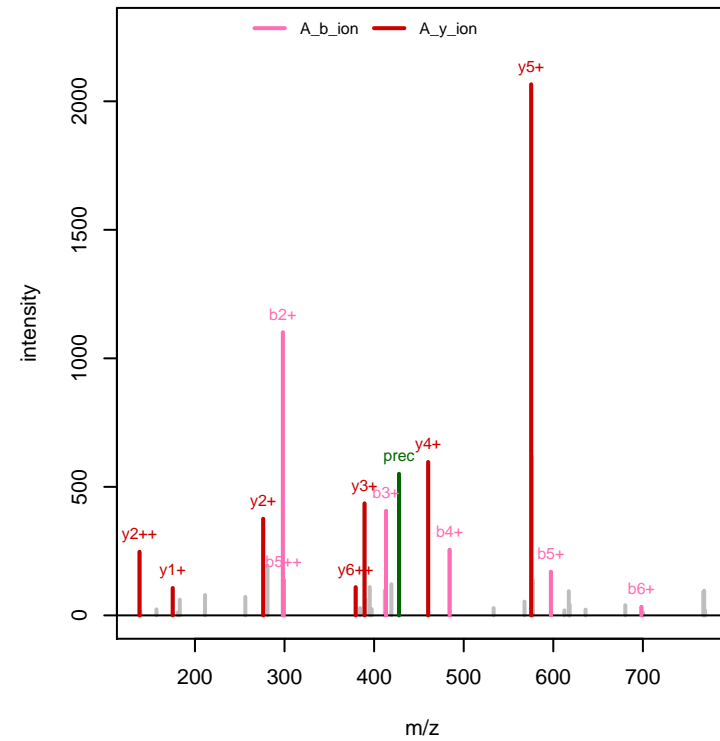

**DKDALTR+XL\_L**

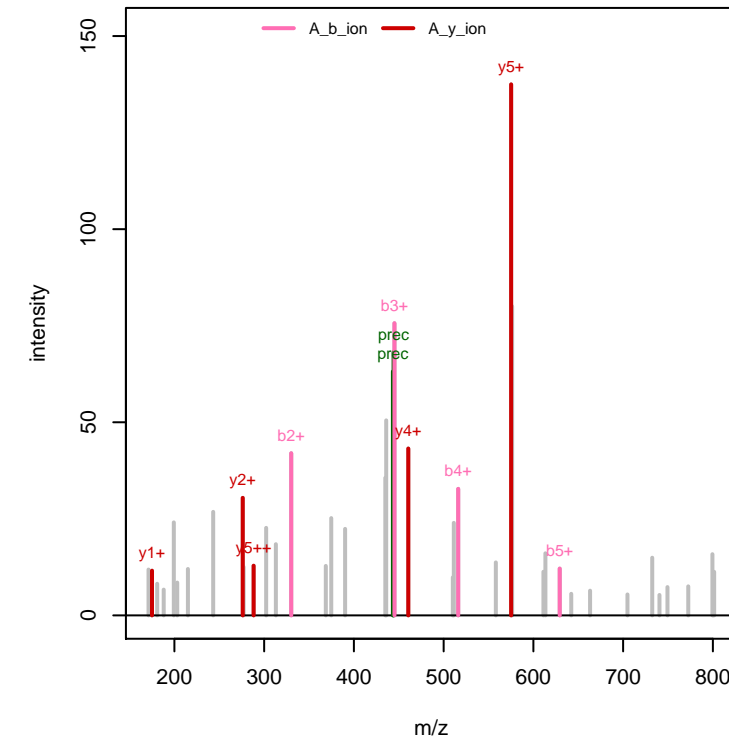

**FIEEEKK+XL\_S**

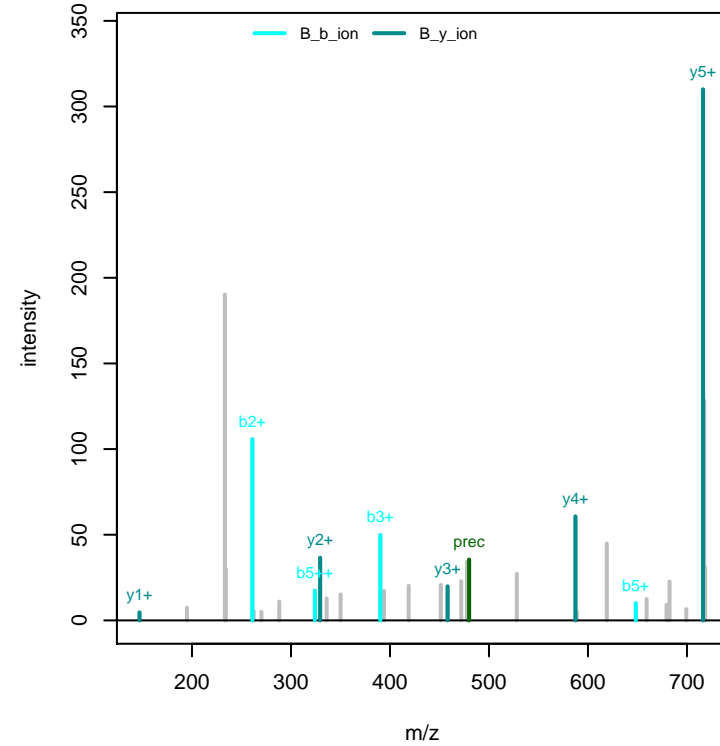

**FIEEEKK+XL\_L**

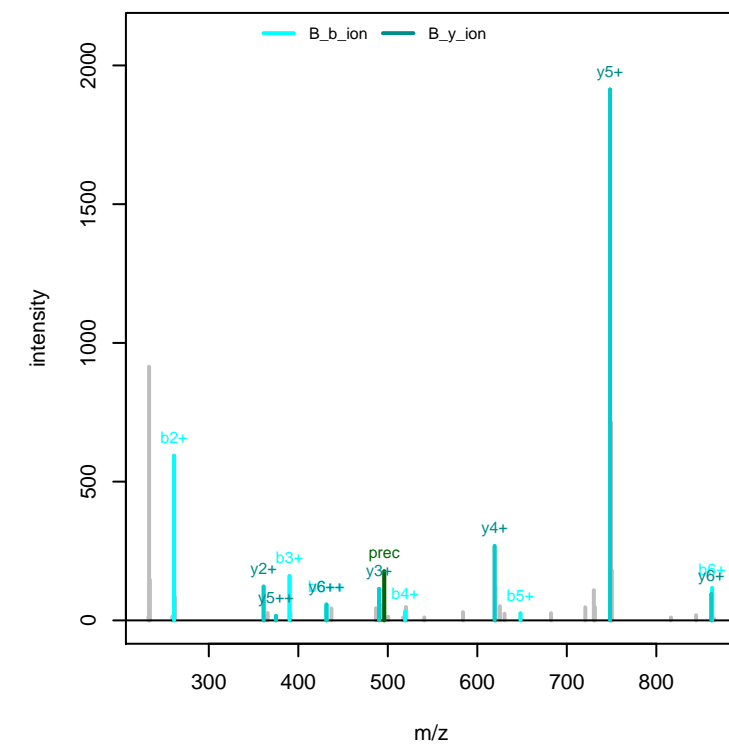

DGDKLPHR  
TGYDGAAPPKGETHR

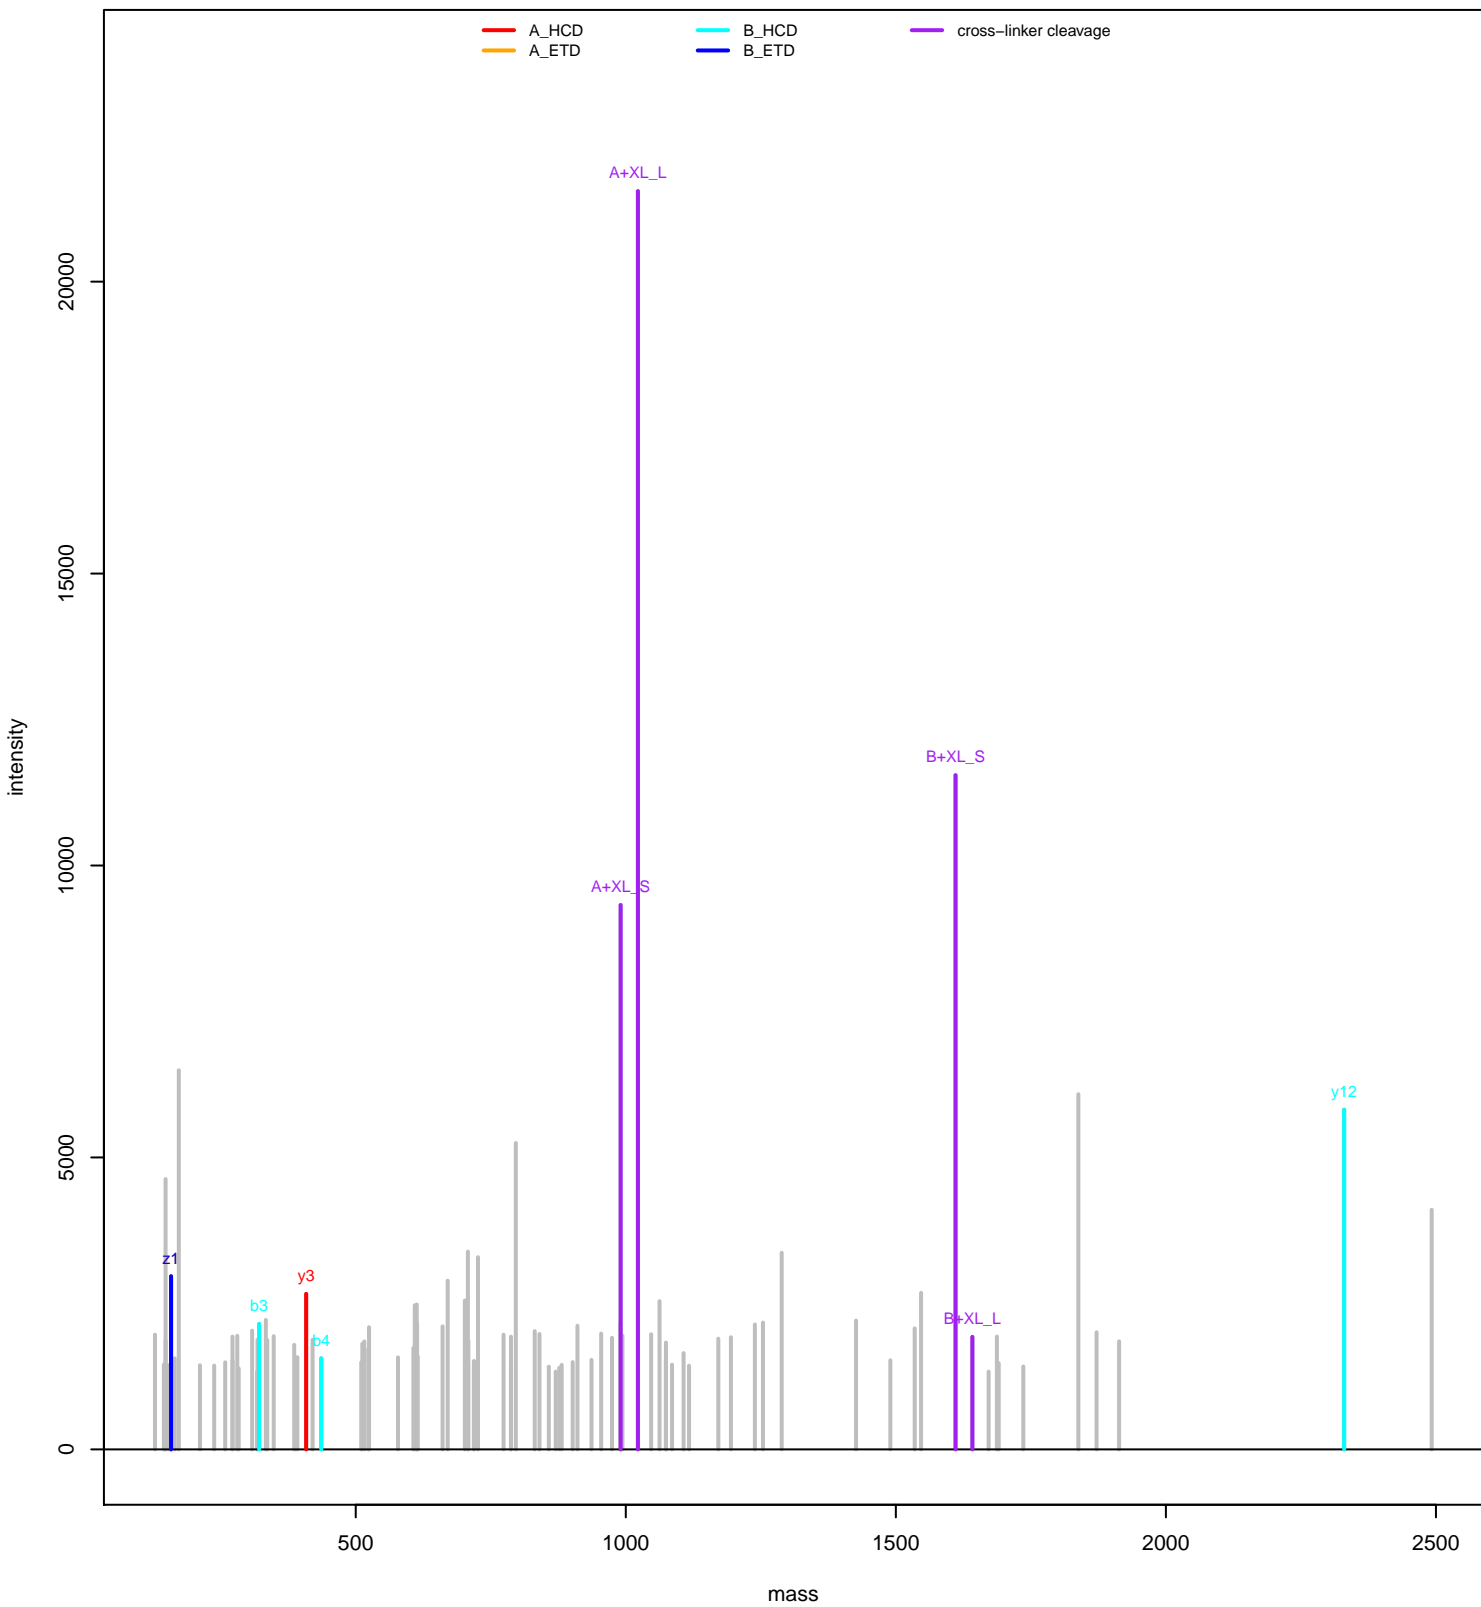

DGDKLPHR+XL\_S

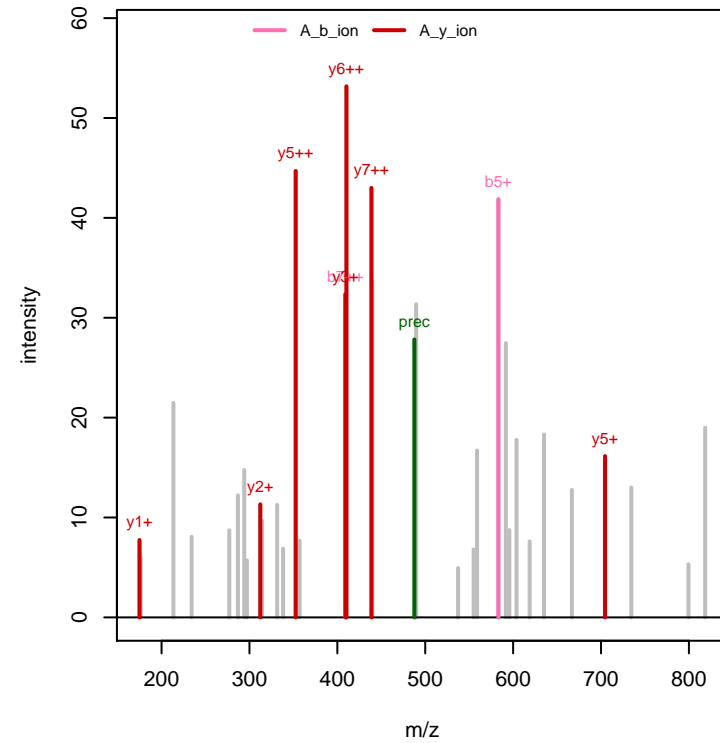

DGDKLPHR+XL\_L

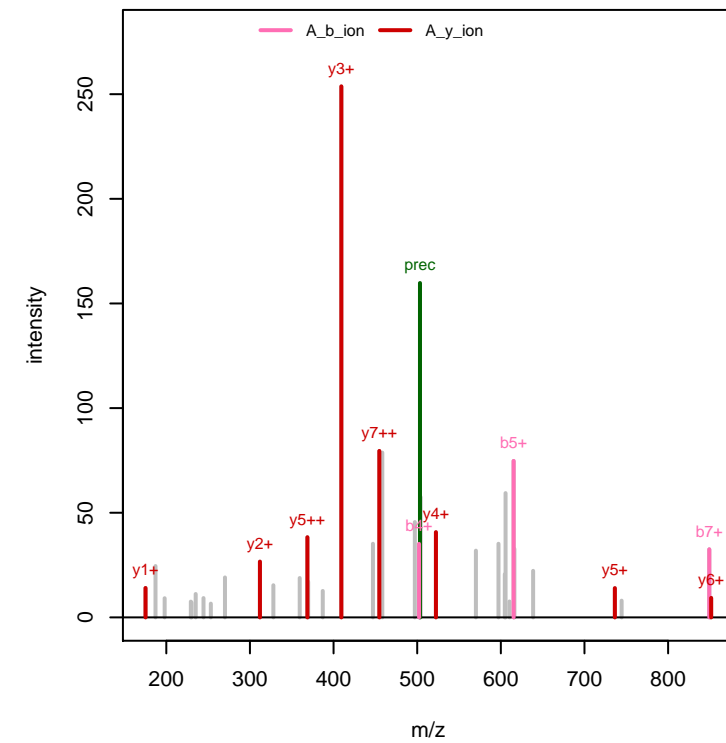

TGYDGAAPPKGETHR+XL\_S

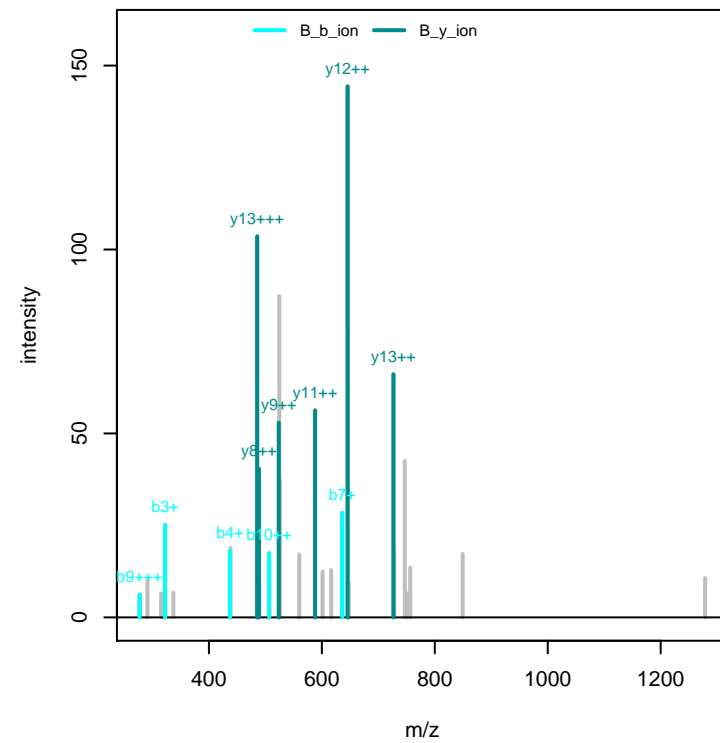

TGYDGAAPPKGETHR+XL\_L

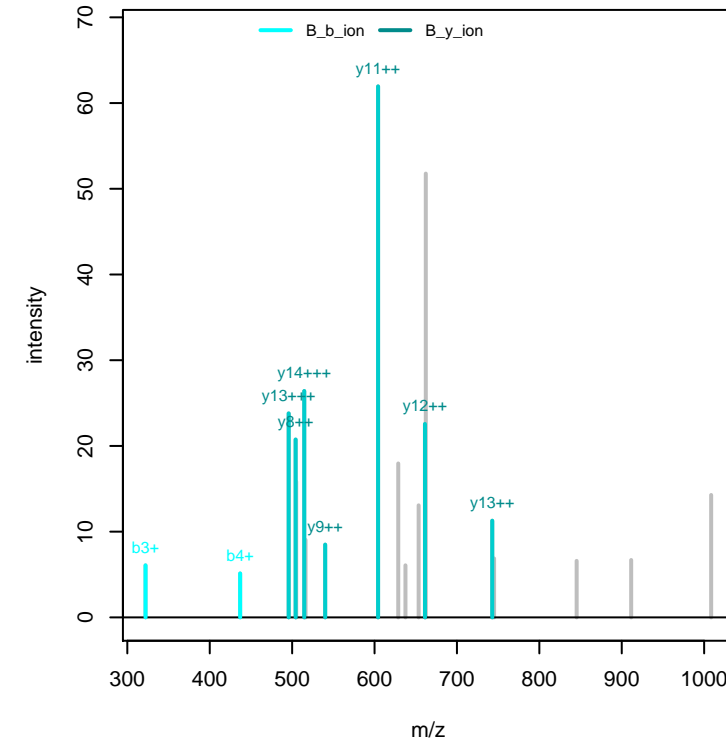

**KAQDAK**  
**ADMDAETAPKLMR**

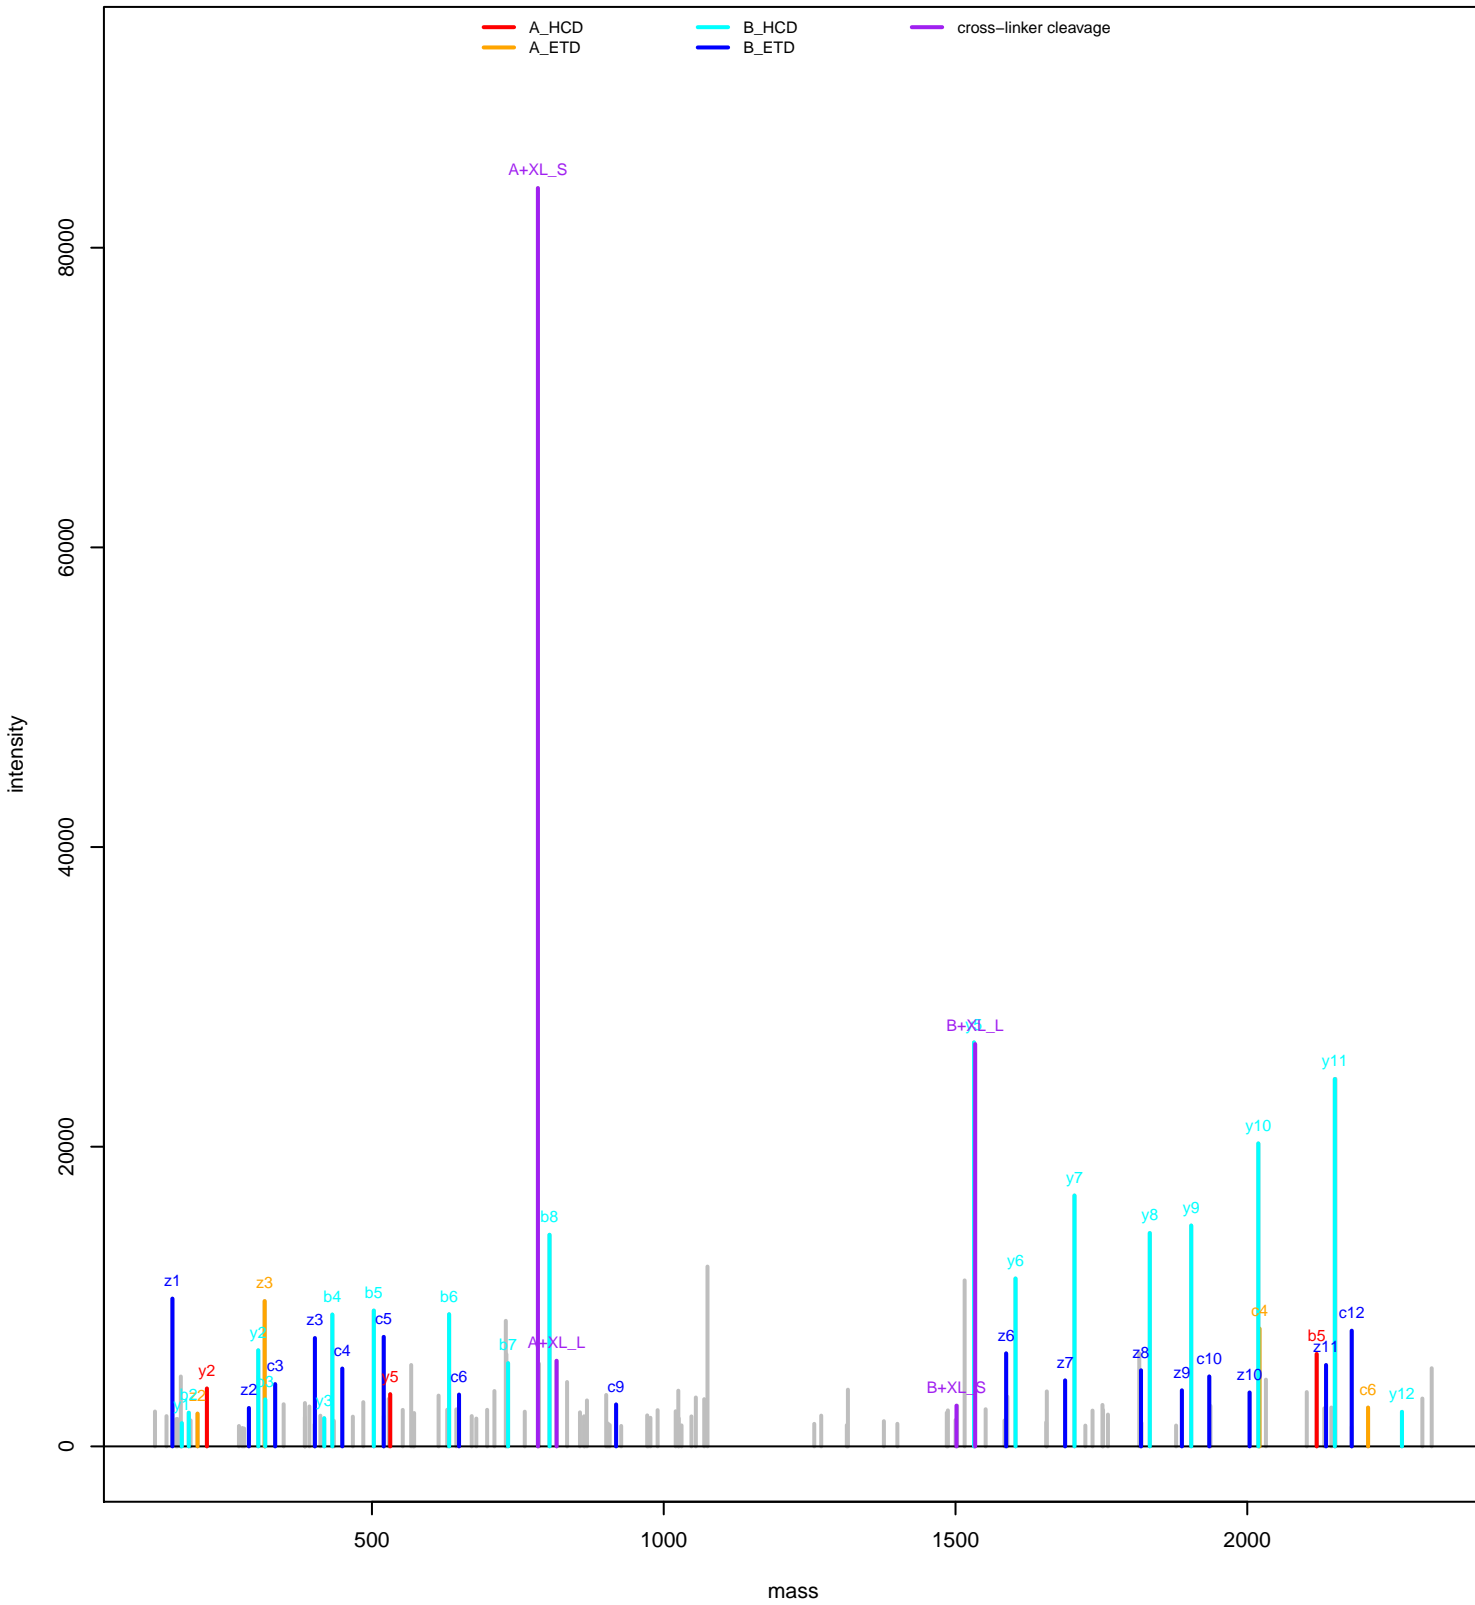

**KAAQDAK+XL\_S**

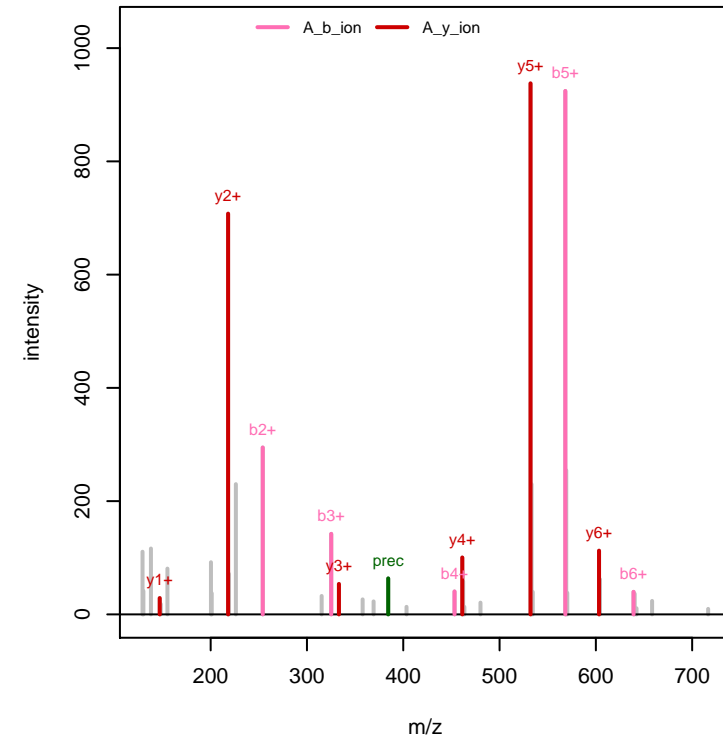

**KAAQDAK+XL\_L**

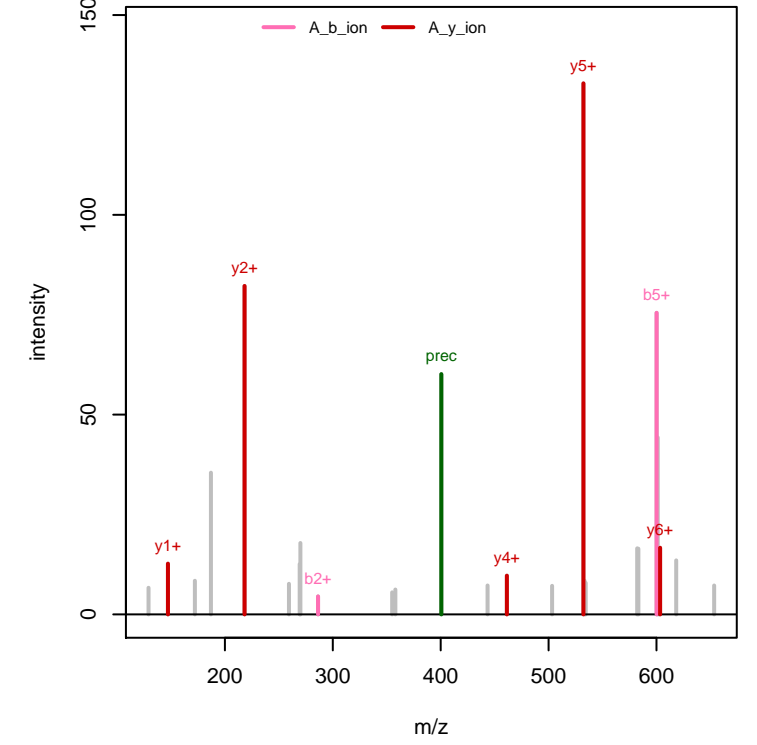

**ADMDAETAPKLMR+XL\_S**

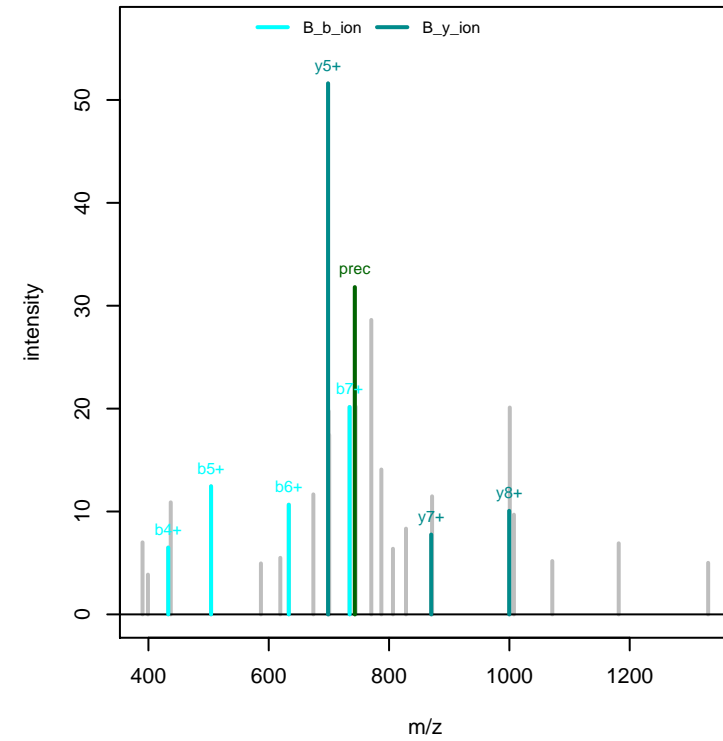

**ADMDAETAPKLMR+XL\_L**

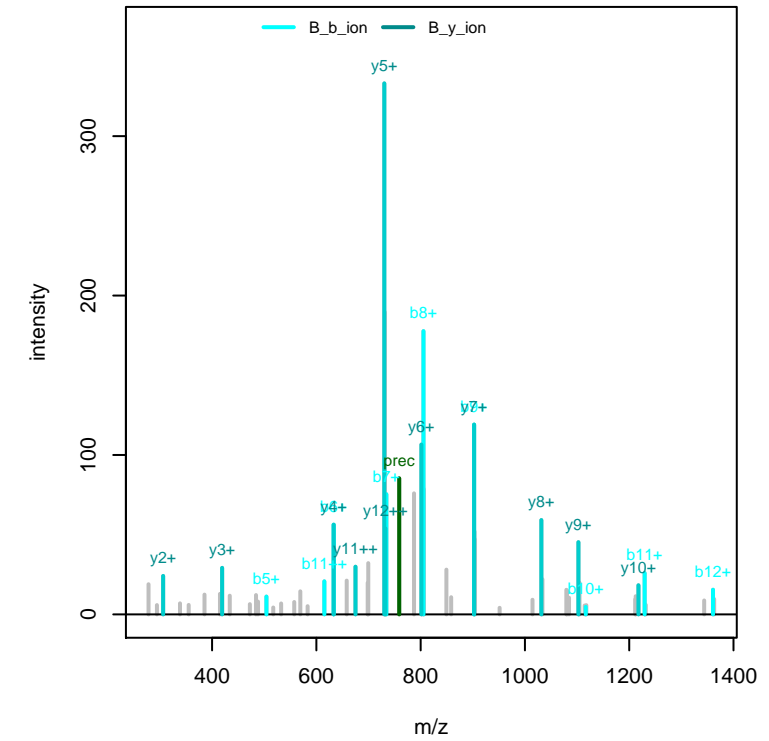



**AIFGEKASDVK**  
**VTPKGETQLTPEEK**

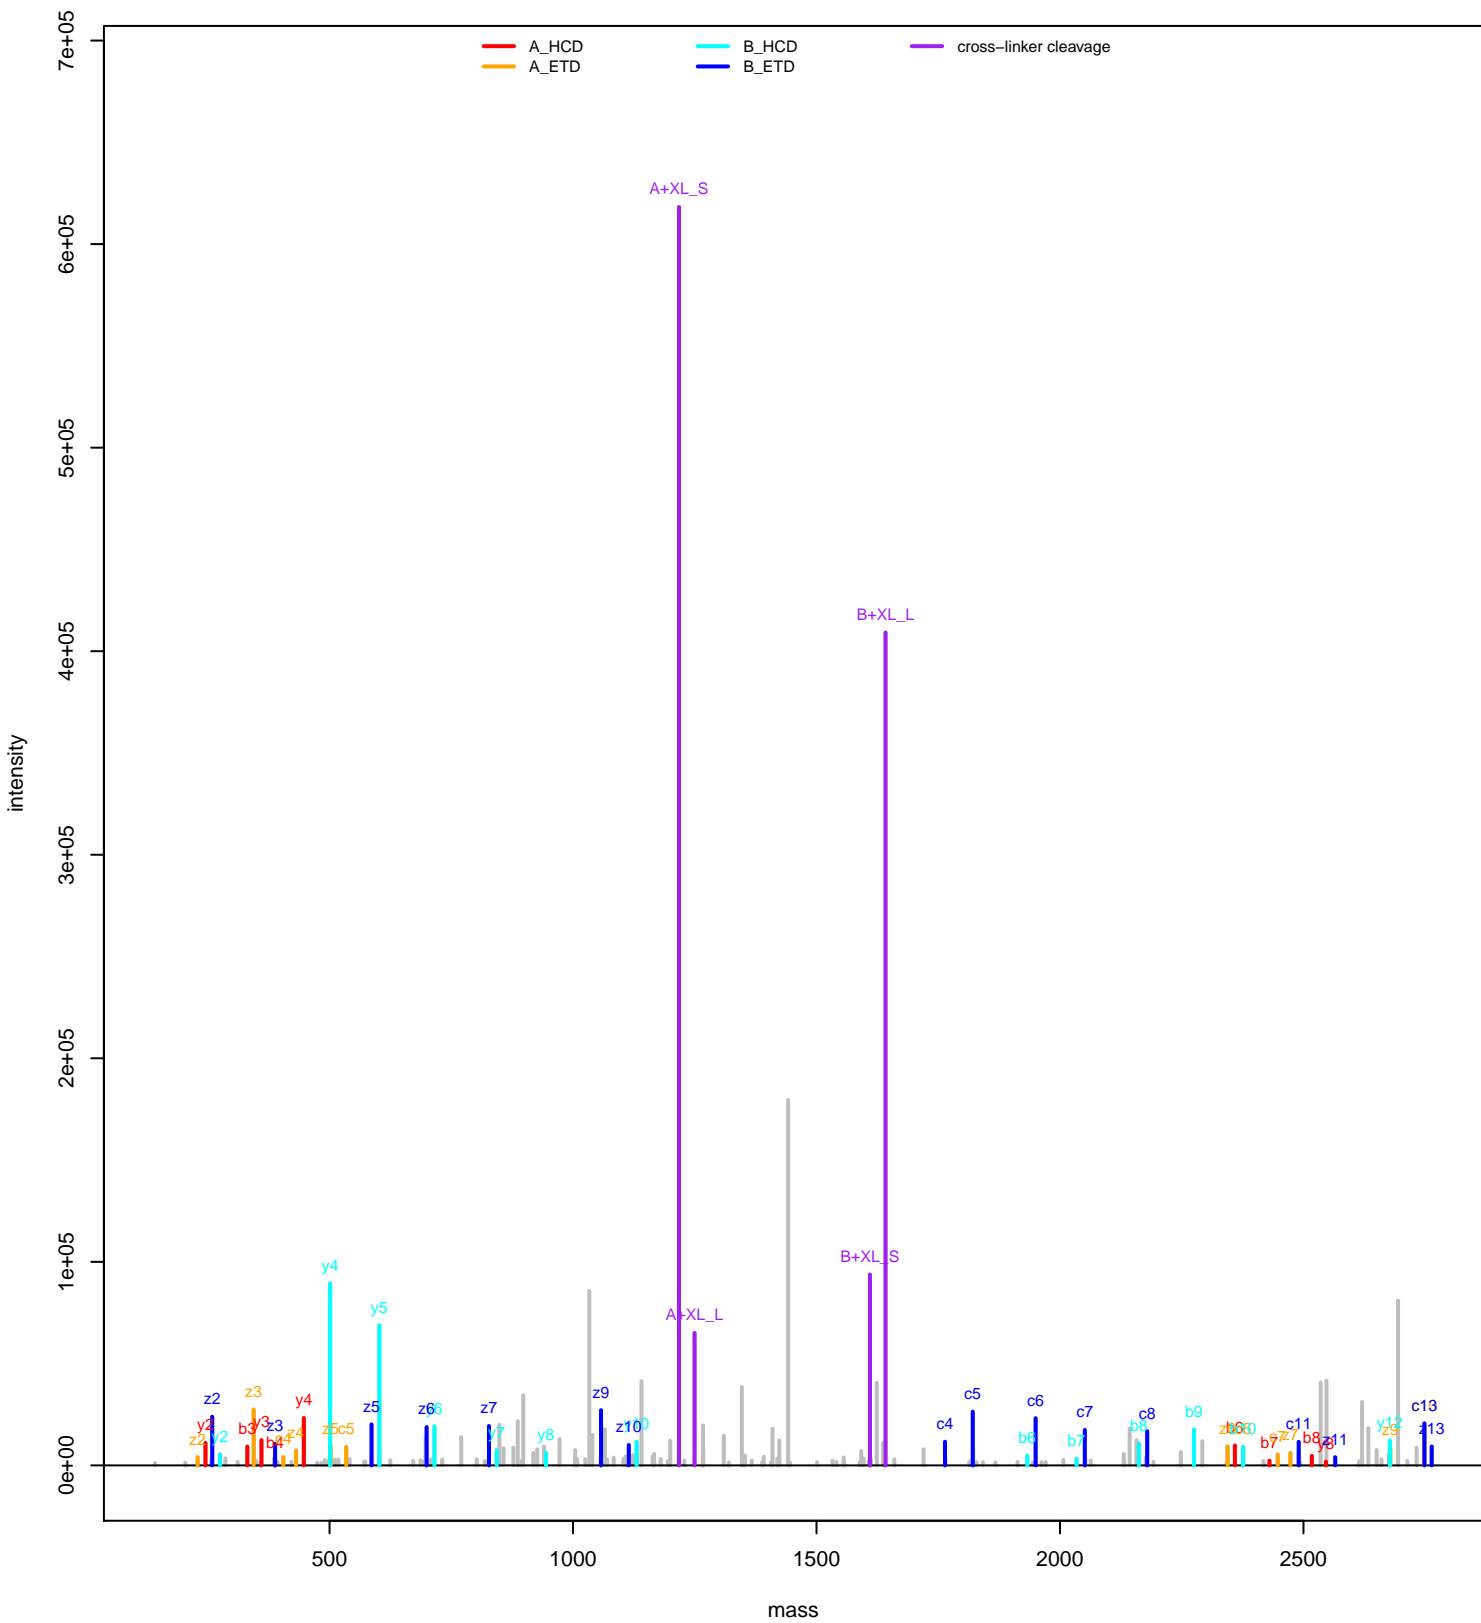

**AIFGEKASDVK+XL\_S**

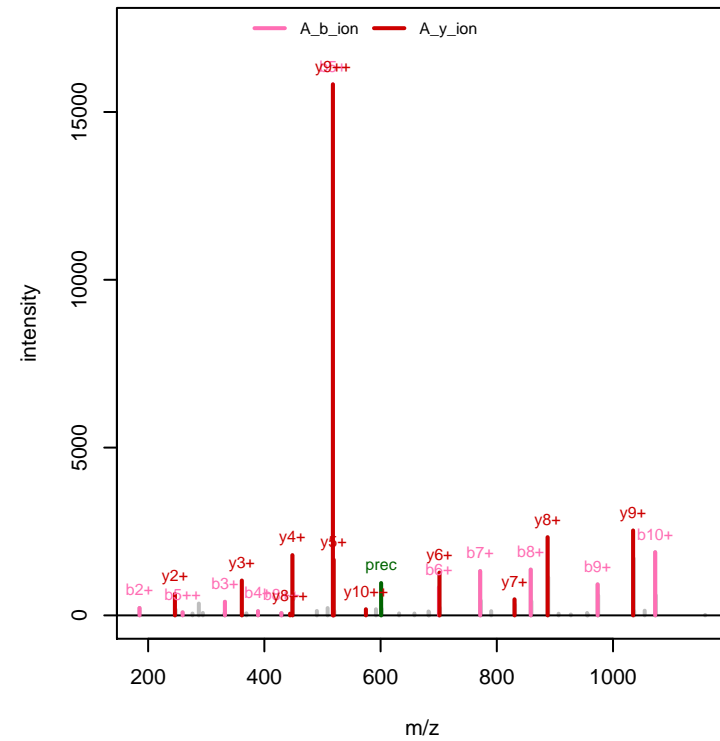

**AIFGEKASDVK+XL\_L**

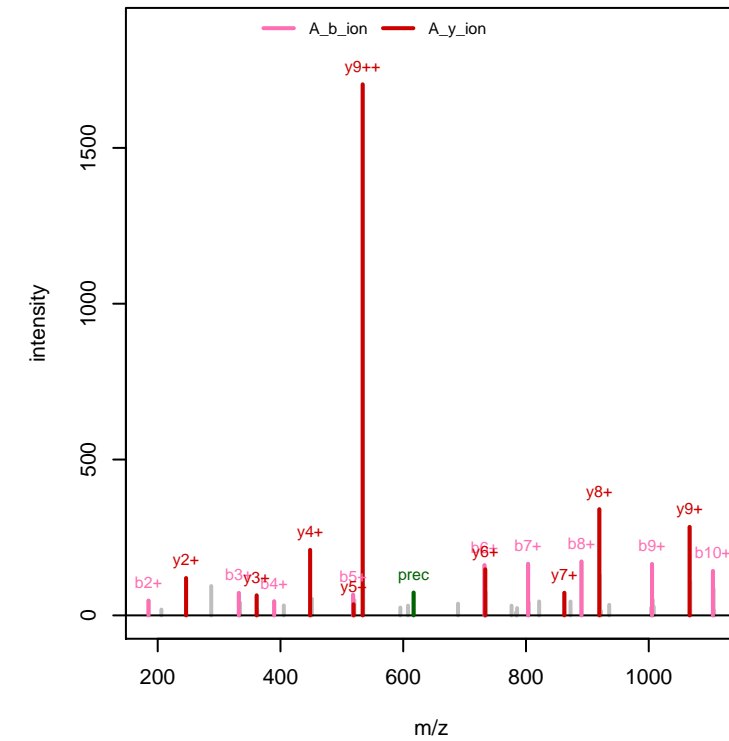

**VTPKGETQLTPEEK+XL\_S**

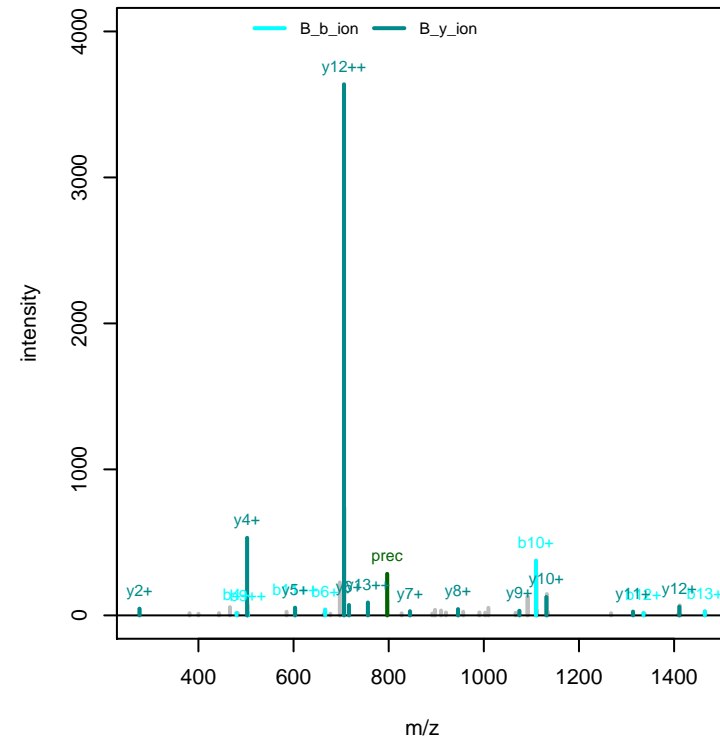

**VTPKGETQLTPEEK+XL\_L**

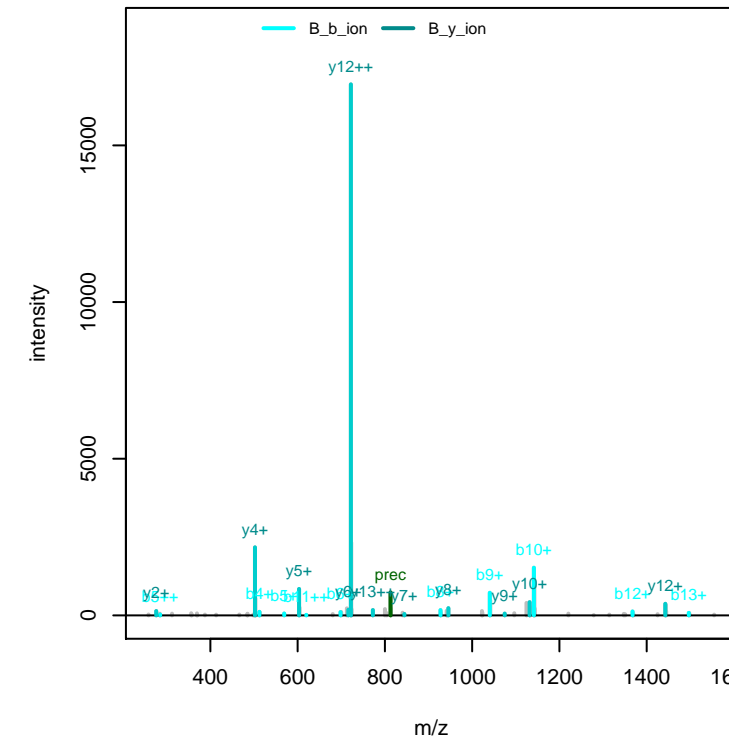

**TDVTIK**  
**SADDSVSAQEKQTLIDHLNQK**

A\_HCD    B\_HCD    cross-linker cleavage  
A\_ETD    B\_ETD

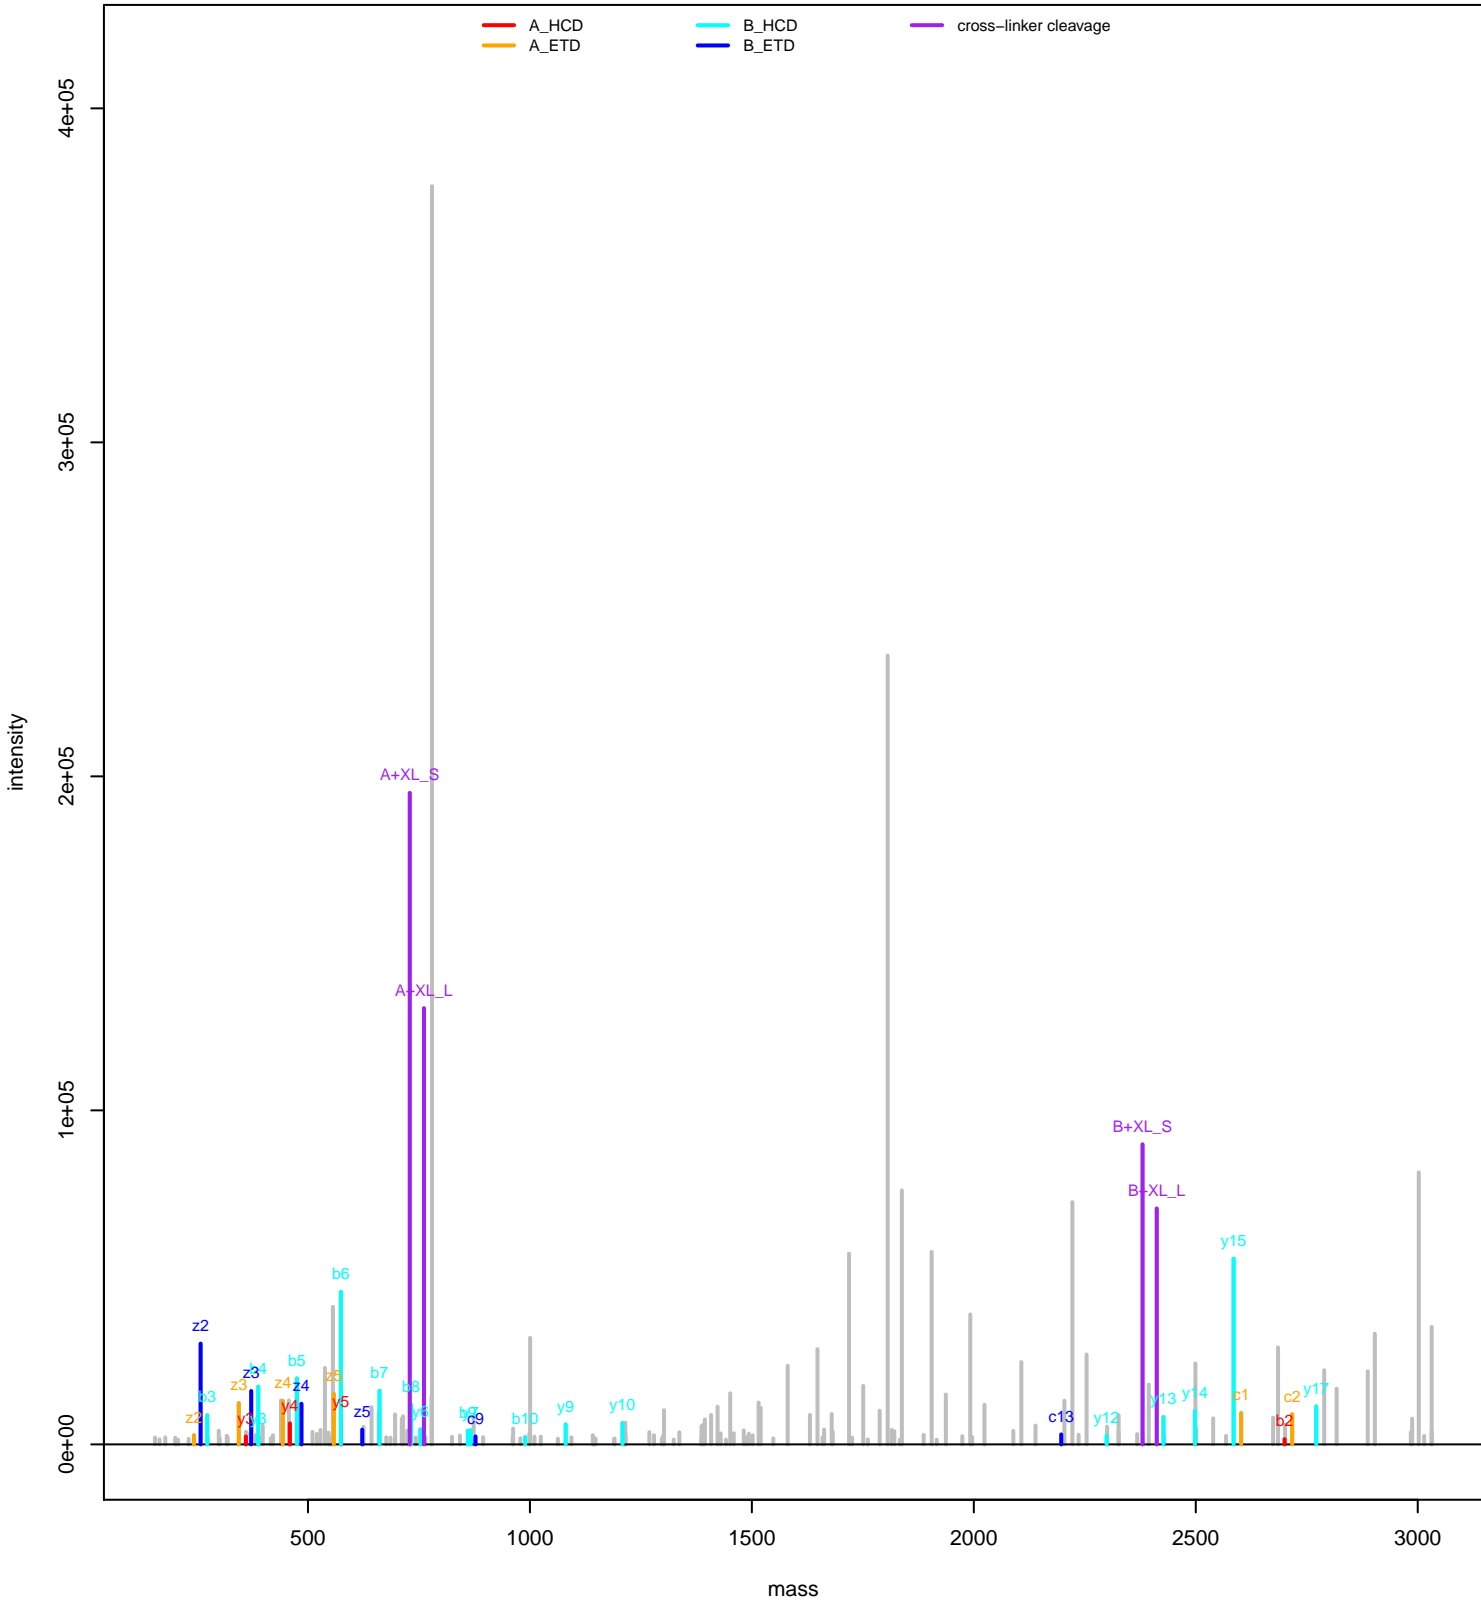

**TDVTIK+XL\_S**

**SADDSVSAQEKQTLIDHLNQK+XL\_S**

**TDVTIK+XL\_L**

**SADDSVSAQEKQTLIDHLNQK+XL\_L**

**IKELAVK  
DVDTLGMADIEKK**

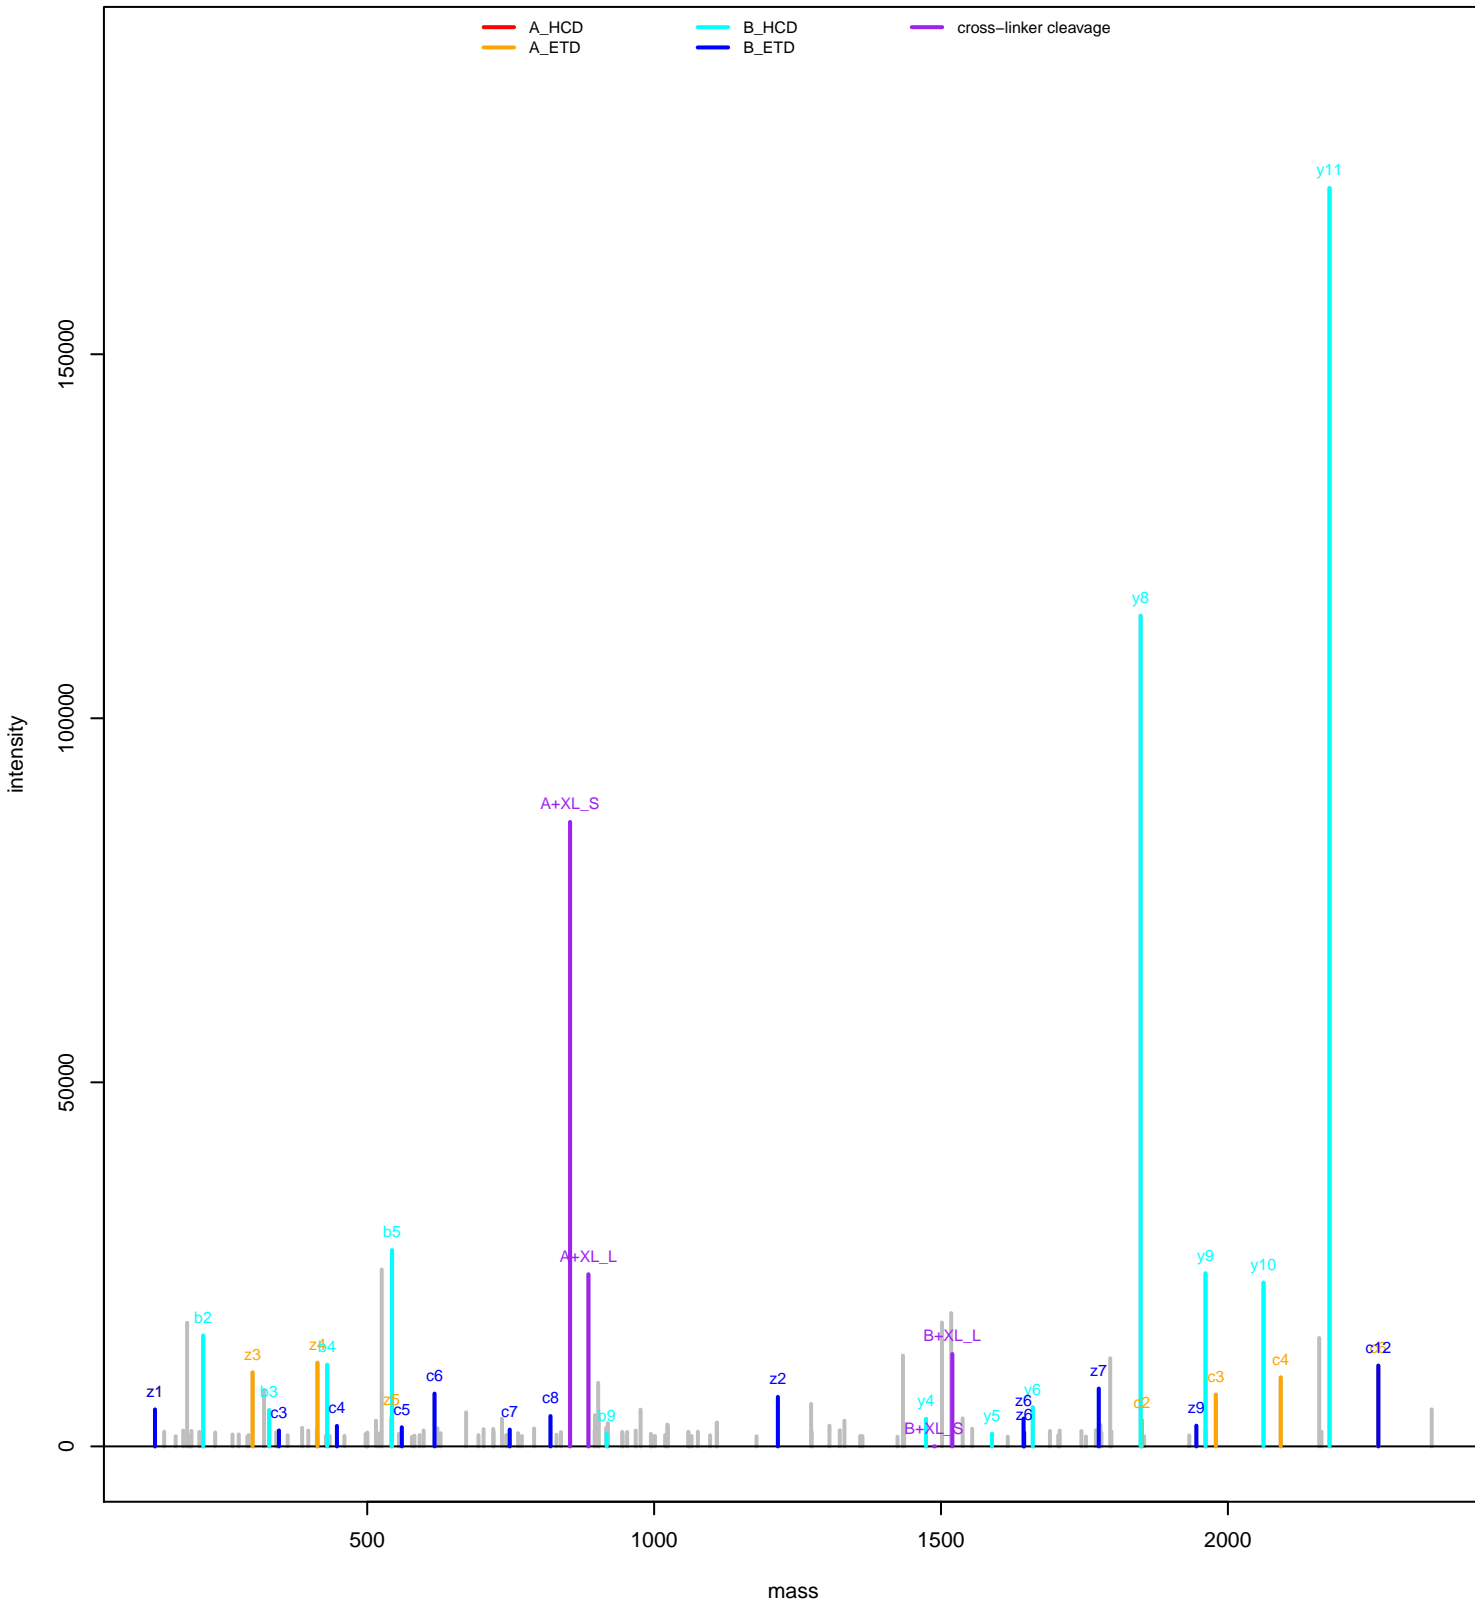

**IKELAVK+XL\_S**

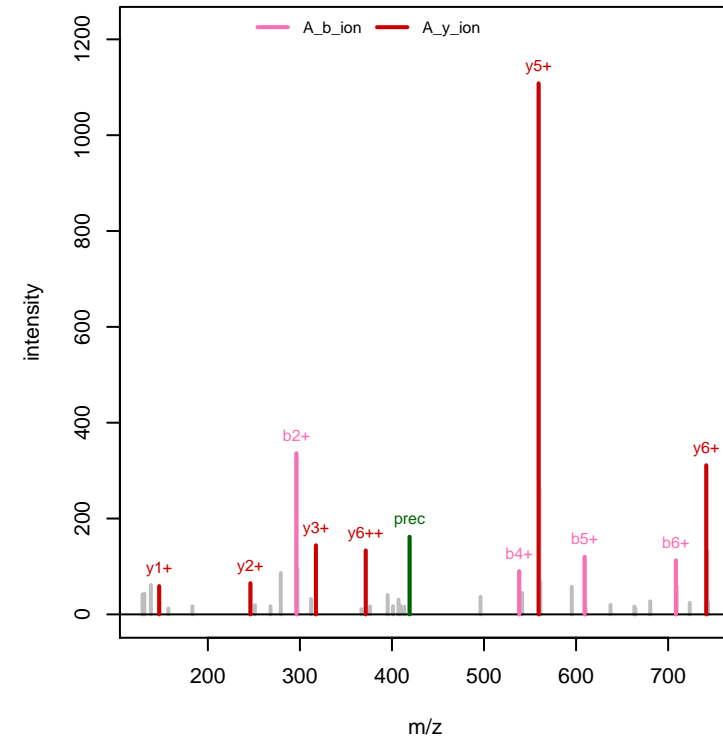

**IKELAVK+XL\_L**

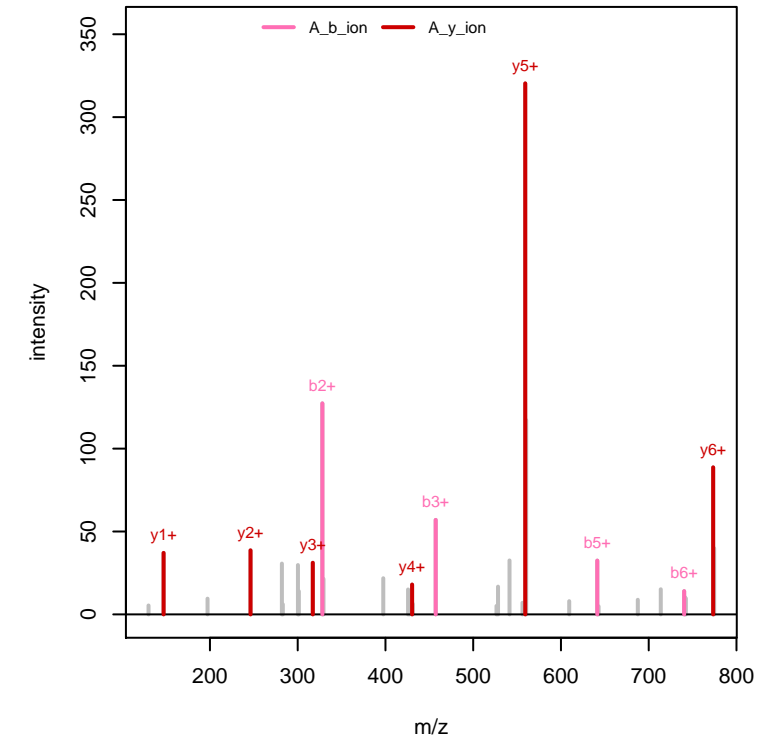

**DVDTLGMADIEKK+XL\_S**

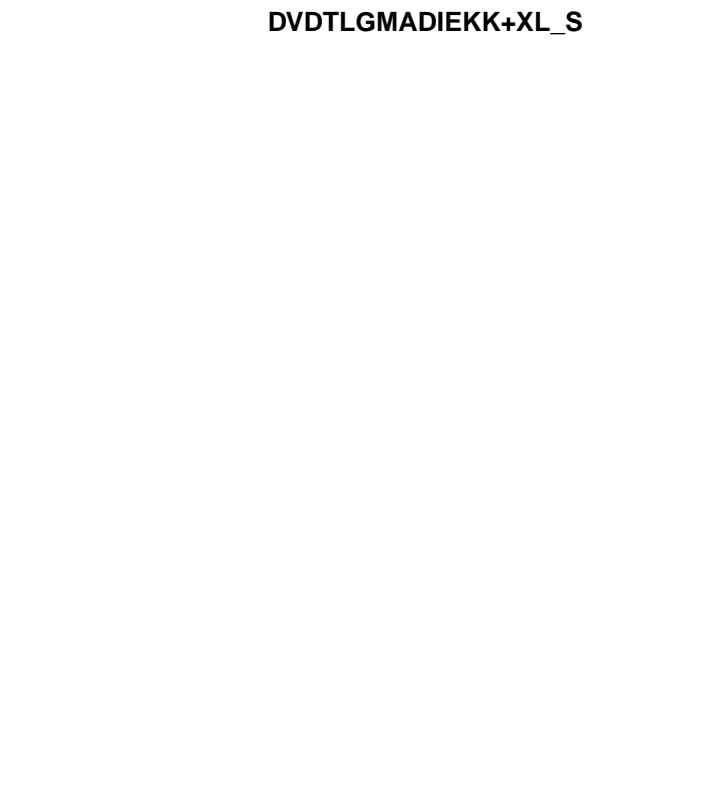

**DVDTLGMADIEKK+XL\_L**

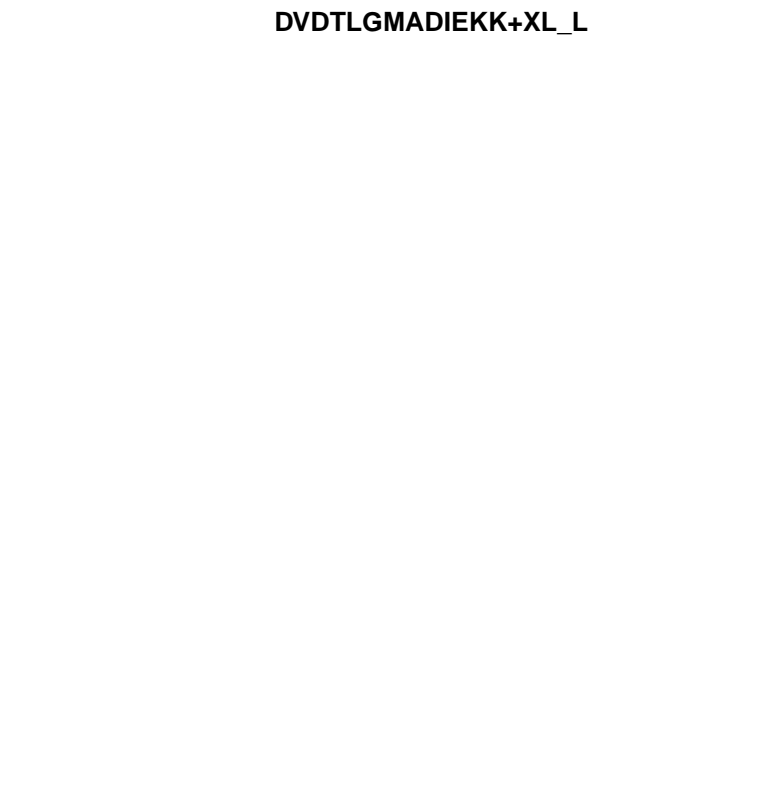

**GFAGTVKR  
KVDVTGTSKGK**

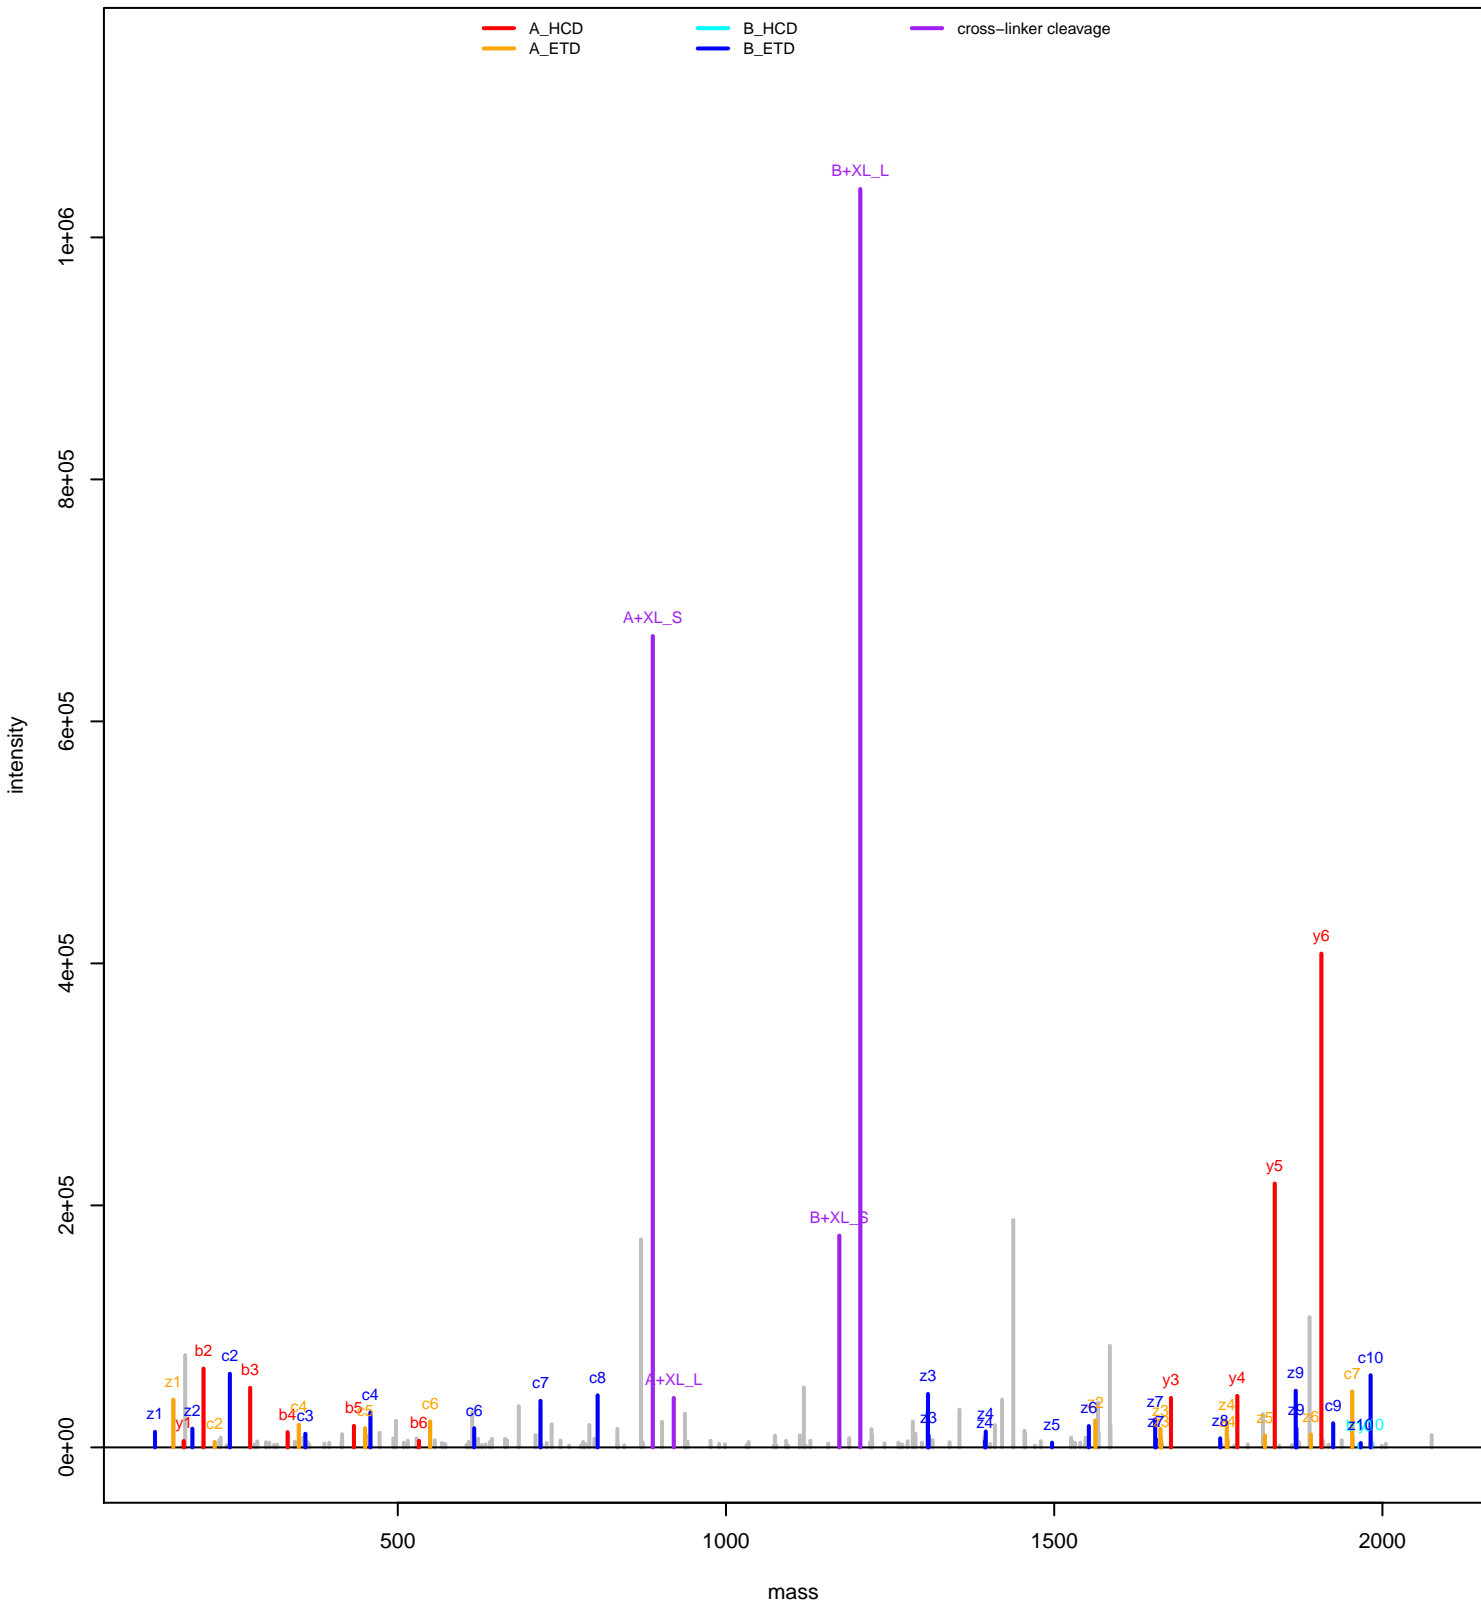

**GFAGTVKR+XL\_S**

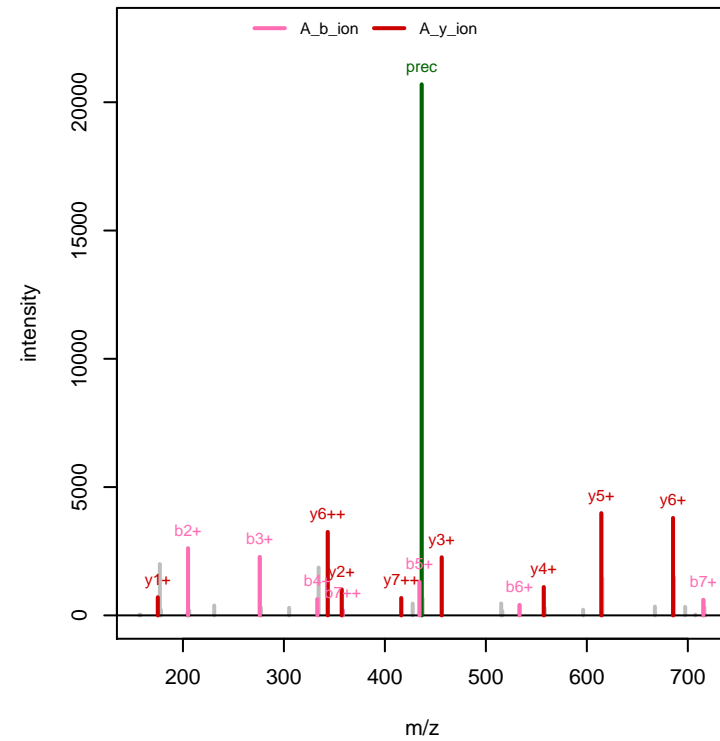

**GFAGTVKR+XL\_L**

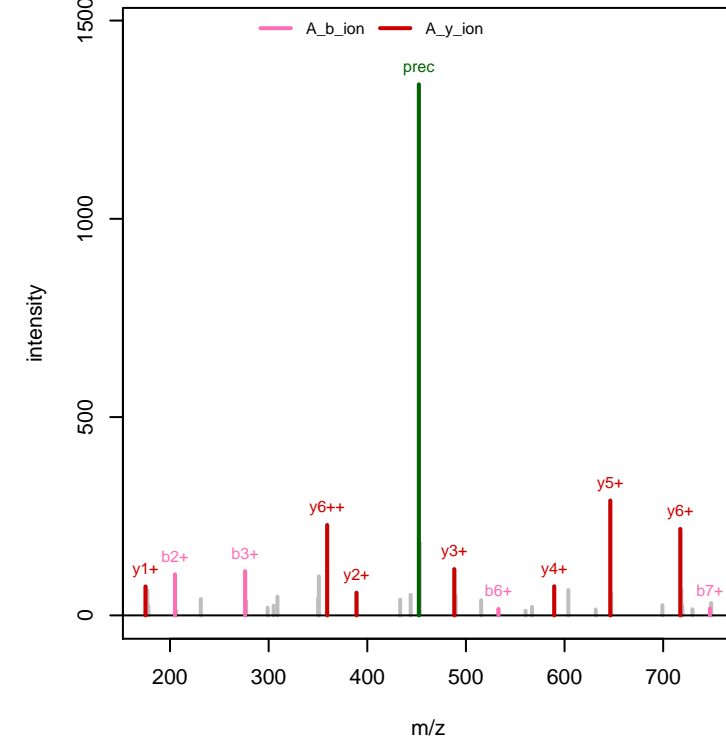

**KVDVTGTSKGK+XL\_S**

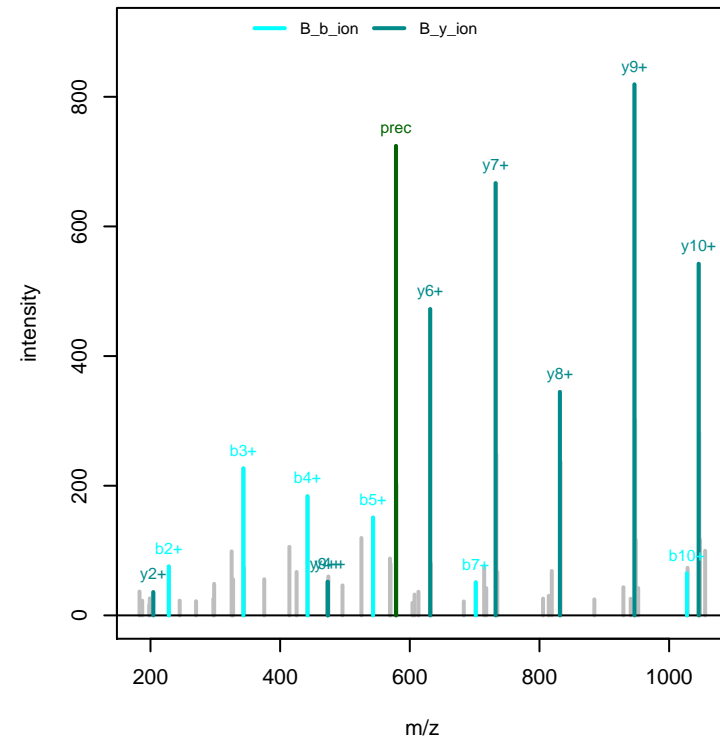

**KVDVTGTSKGK+XL\_L**

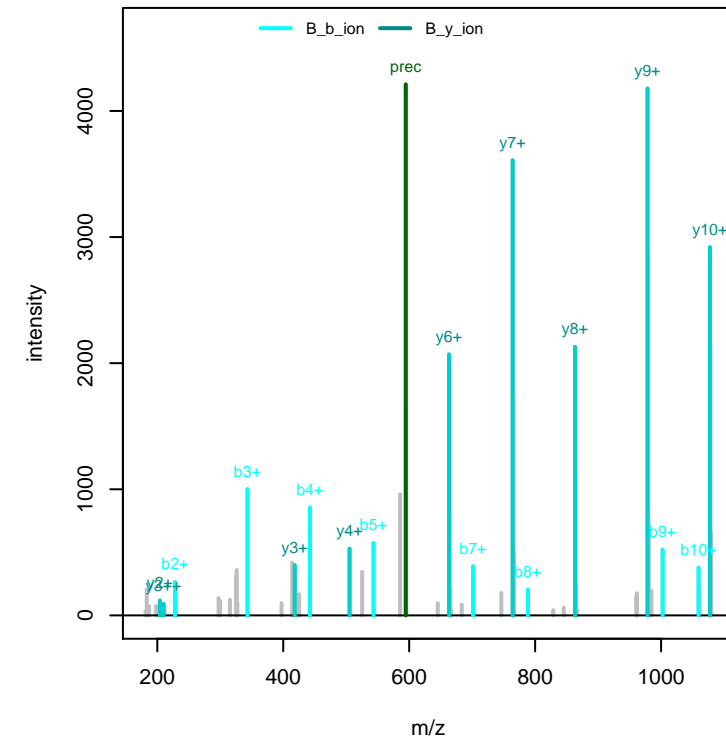

VDFDADKLK  
VGTVTPNVAEAVKNAK

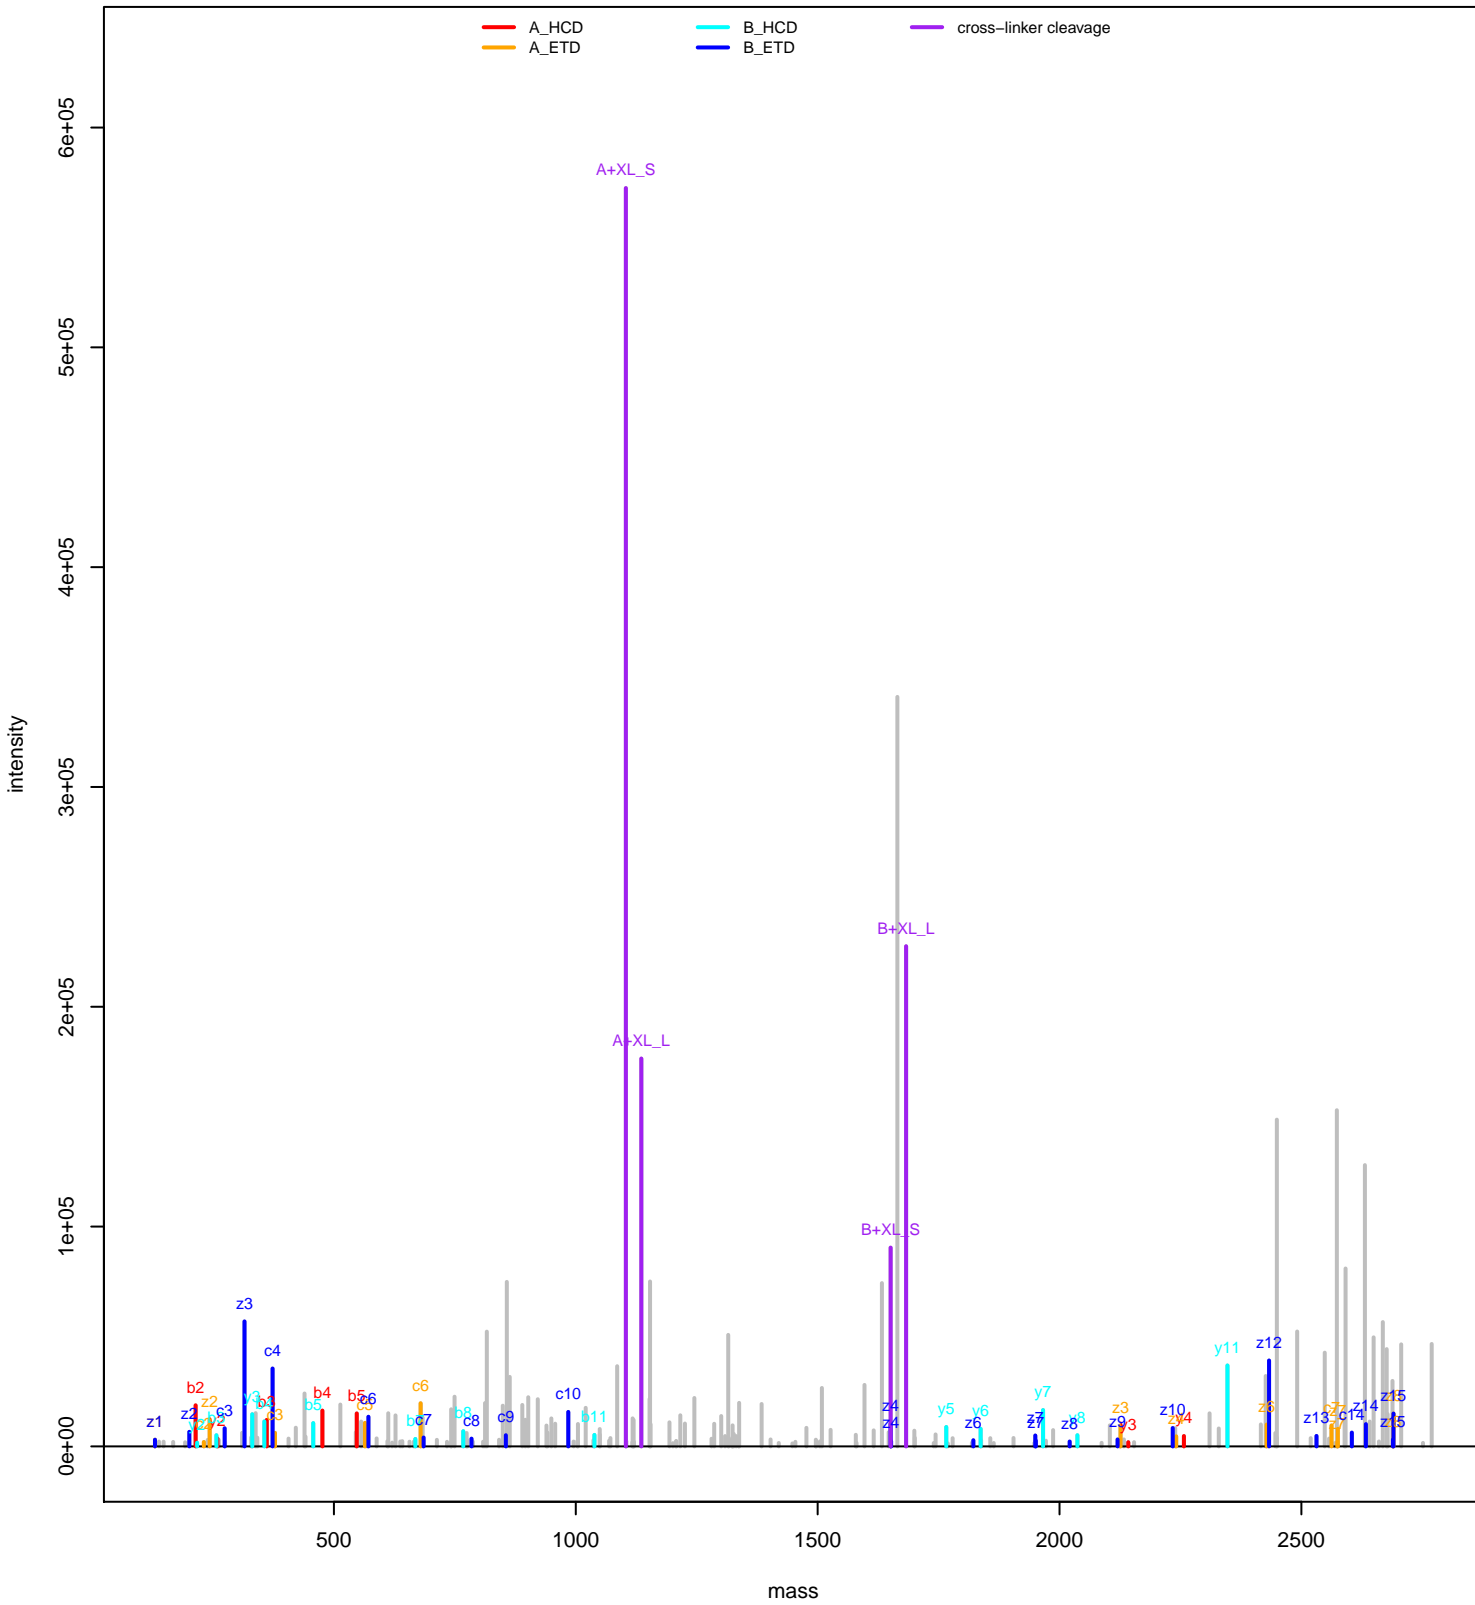

VDFDADKLK+XL\_S

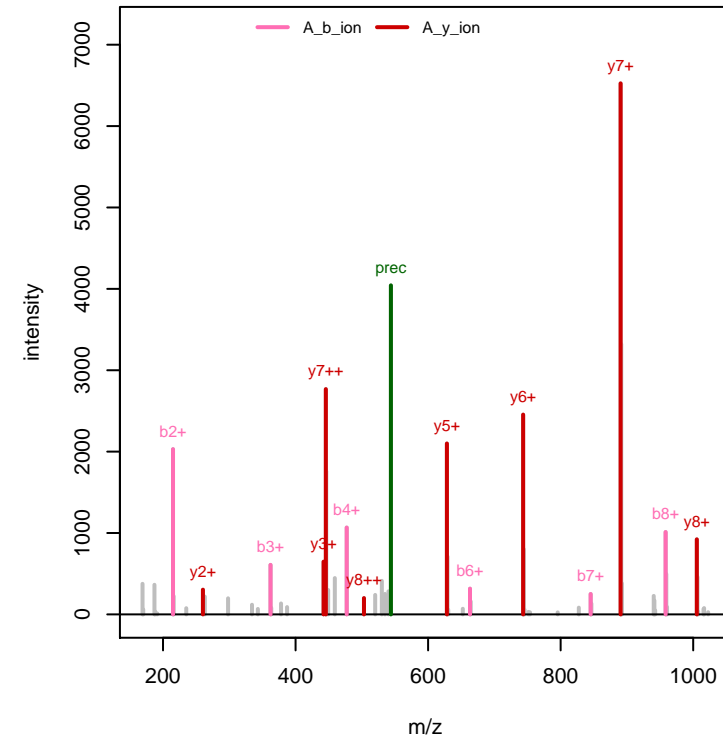

VDFDADKLK+XL\_L

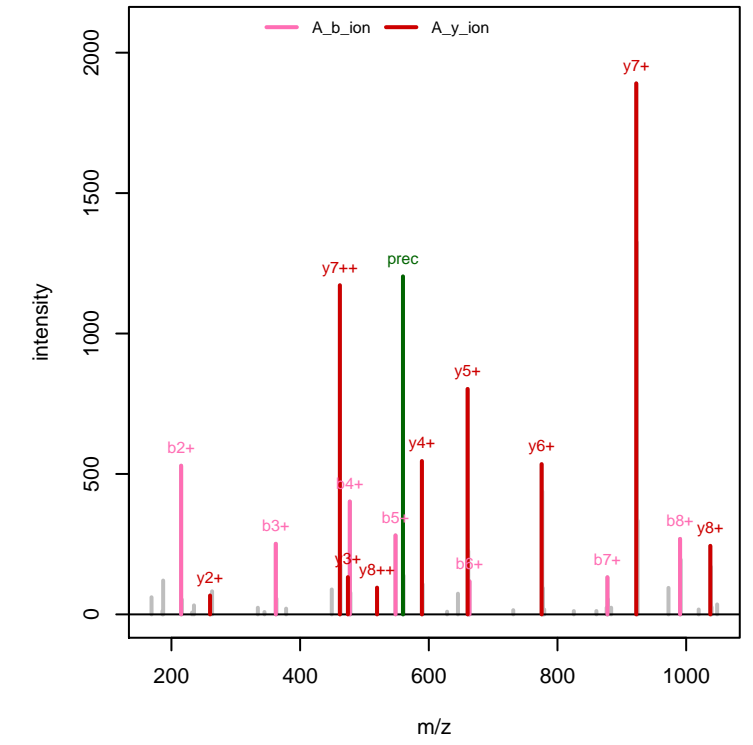

VGTVTPNVAEAVKNAK+XL\_S

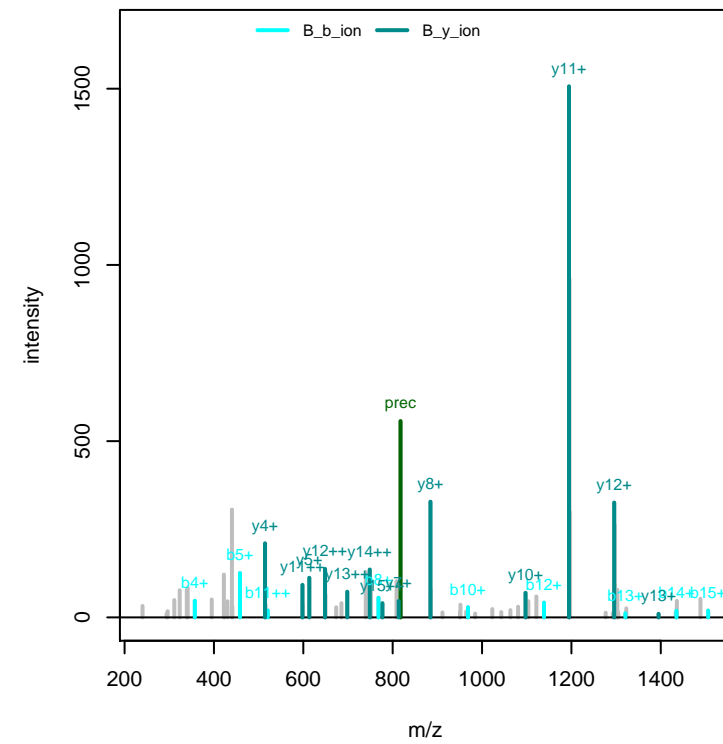

VGTVTPNVAEAVKNAK+XL\_L

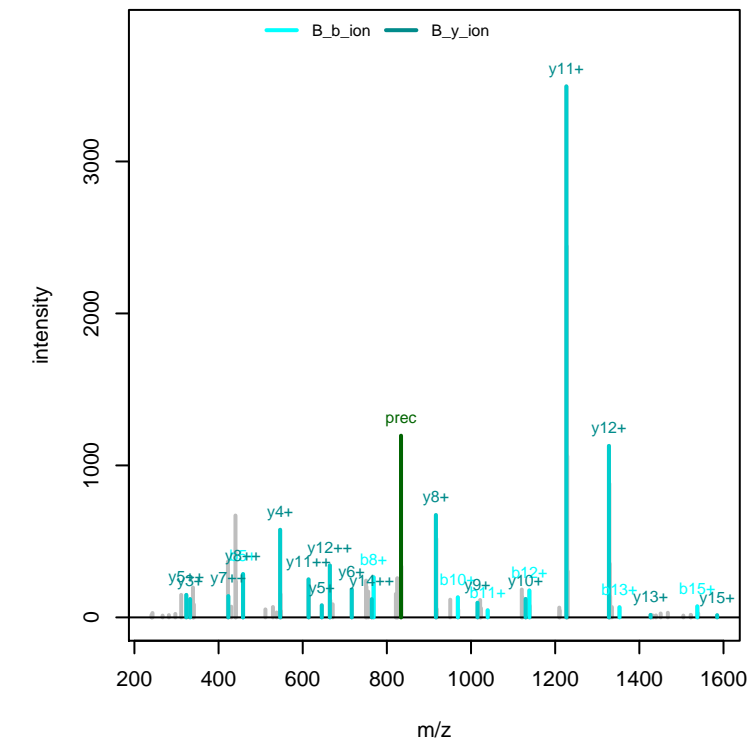

AAGANKVAVIK  
KALEEAGAEVEVK

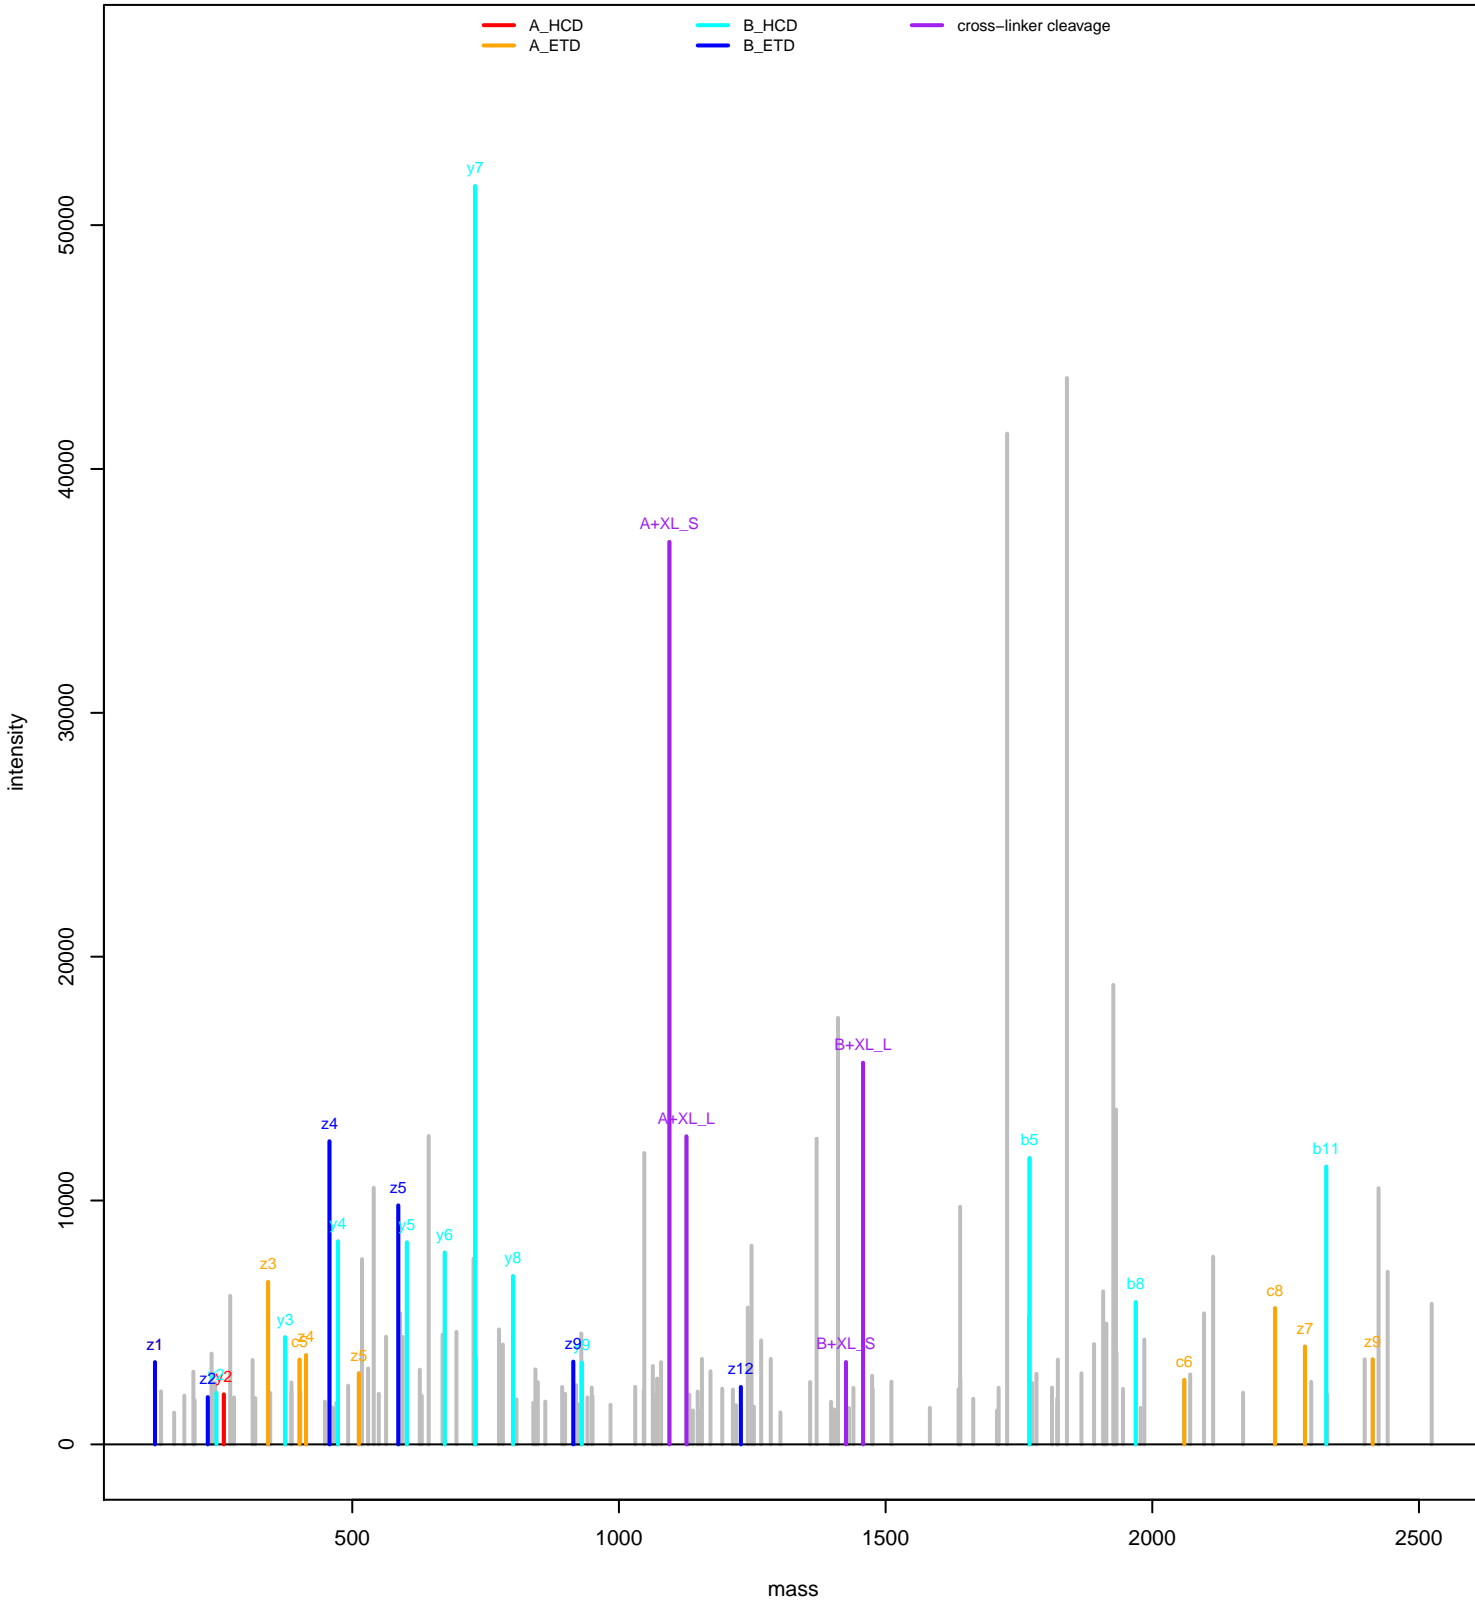

AAGANKVAVIK+XL\_S

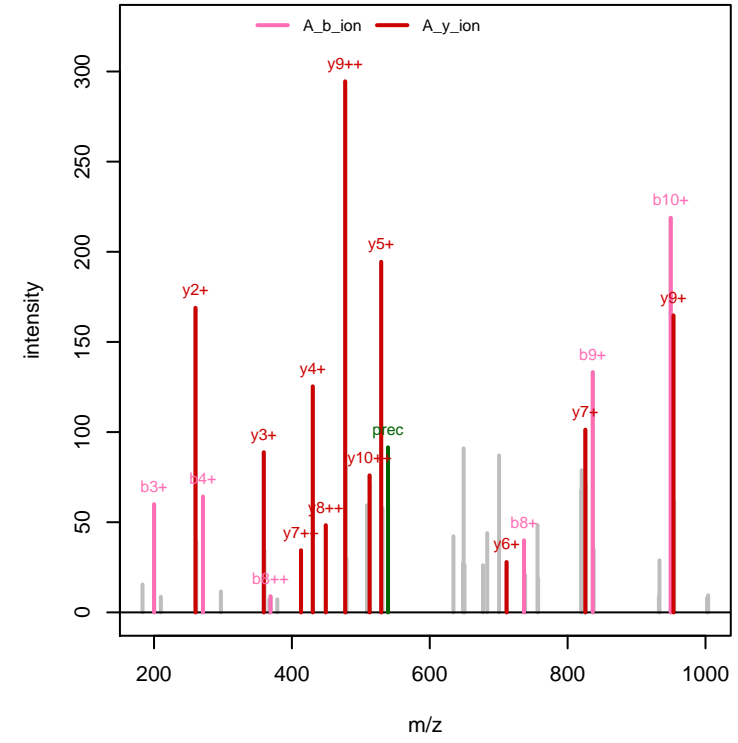

AAGANKVAVIK+XL\_L

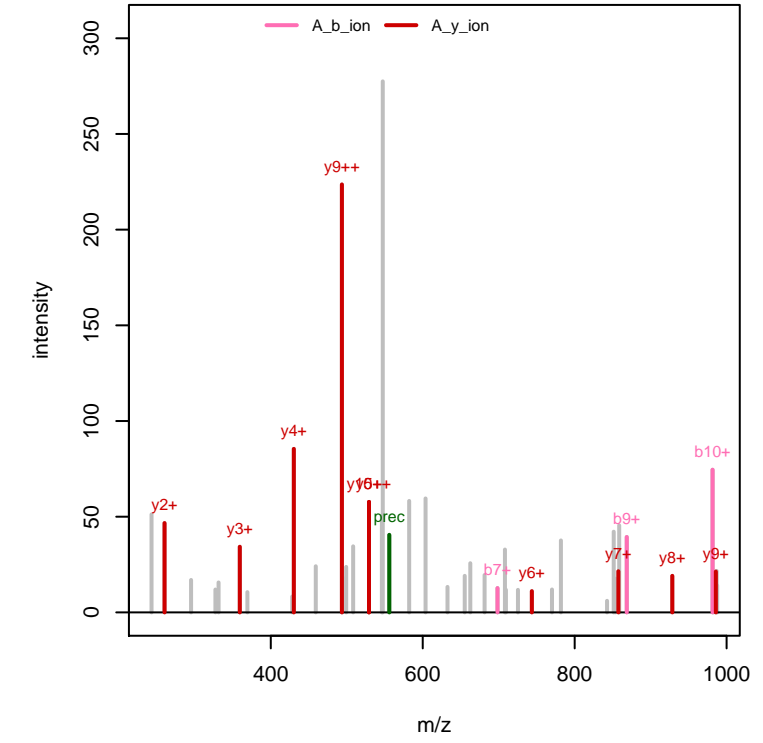

KALEEAGAEVEVK+XL\_S

KALEEAGAEVEVK+XL\_S

KALEEAGAEVEVK+XL\_L

KALEEAGAEVEVK+XL\_L

TSTGLALKK  
PYTAPVAATAPVAASGPKR

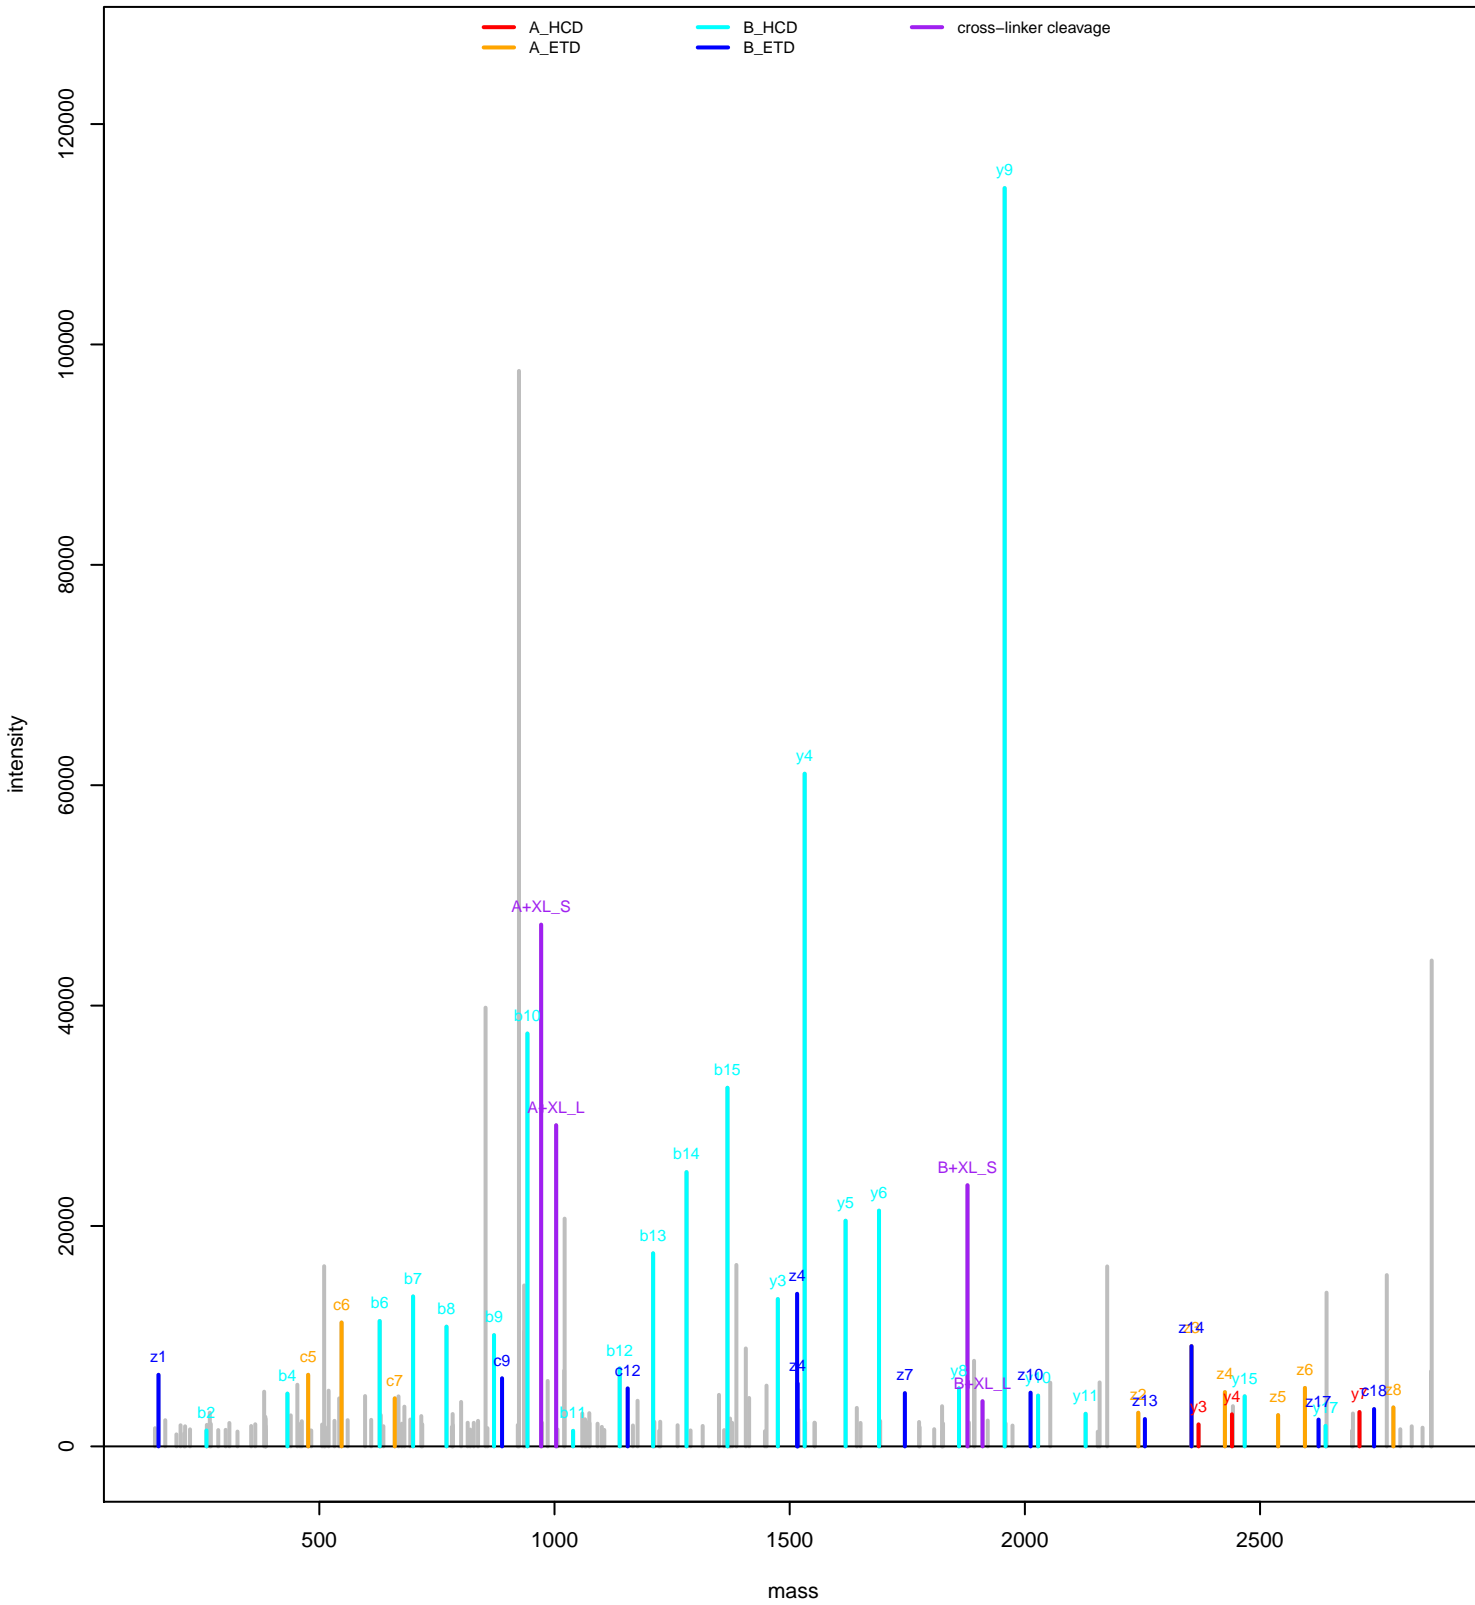

TSTGLALKK+XL\_S

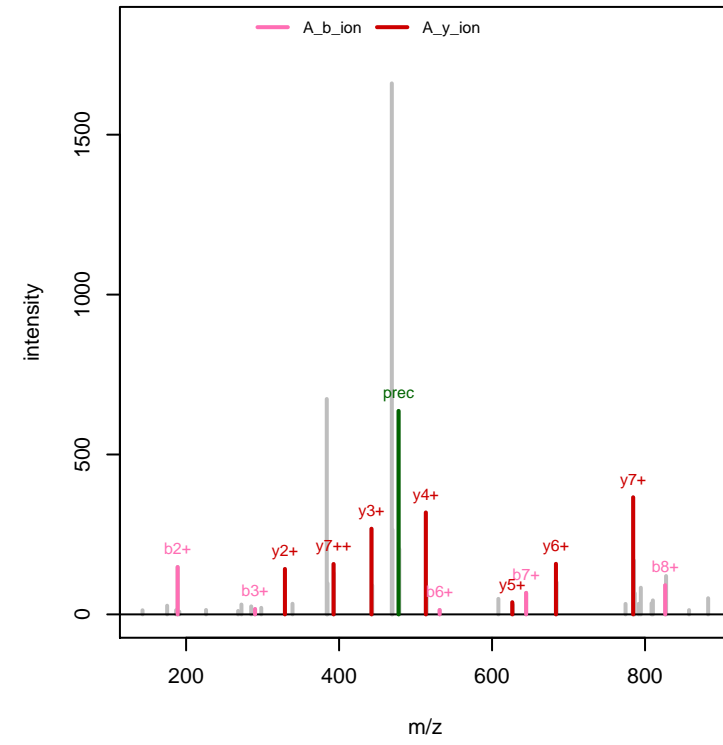

TSTGLALKK+XL\_L

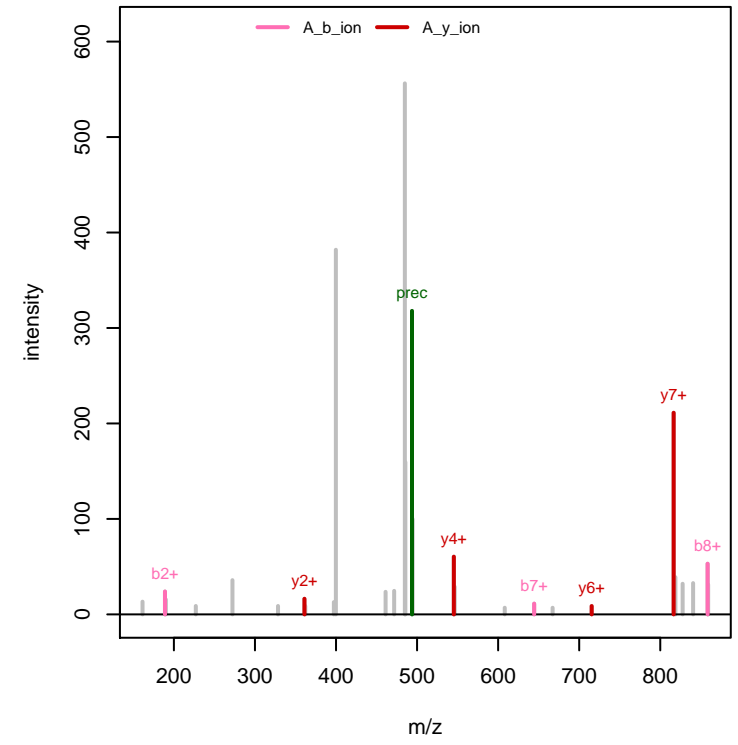

PYTAPVAATAPVAASGPKR+XL\_S

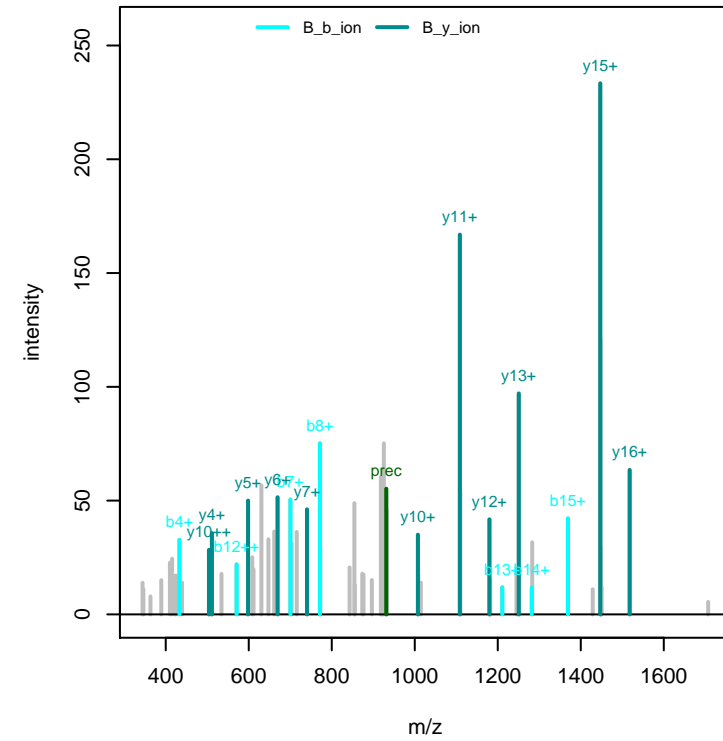

PYTAPVAATAPVAASGPKR+XL\_L

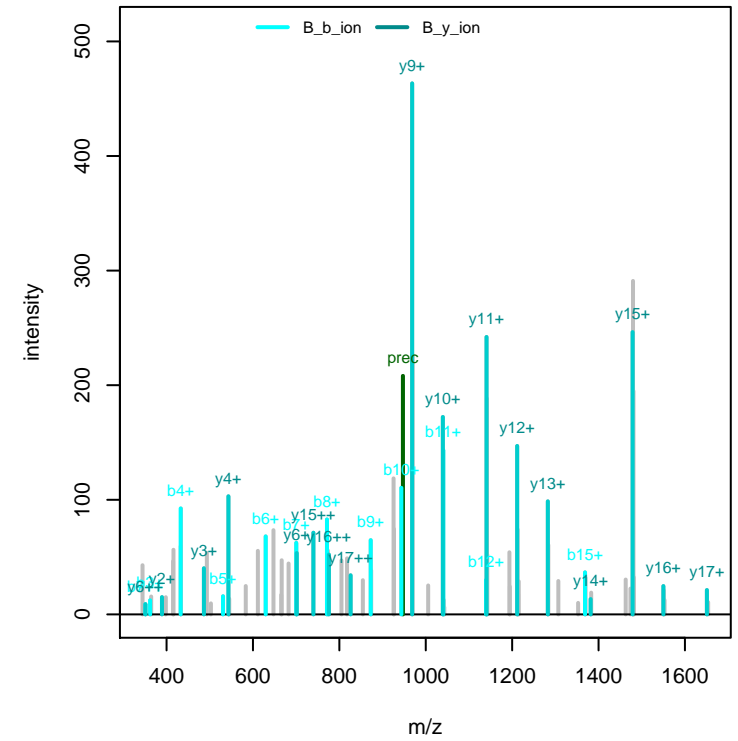

TTLSCK  
DKRPFMASTPDEK

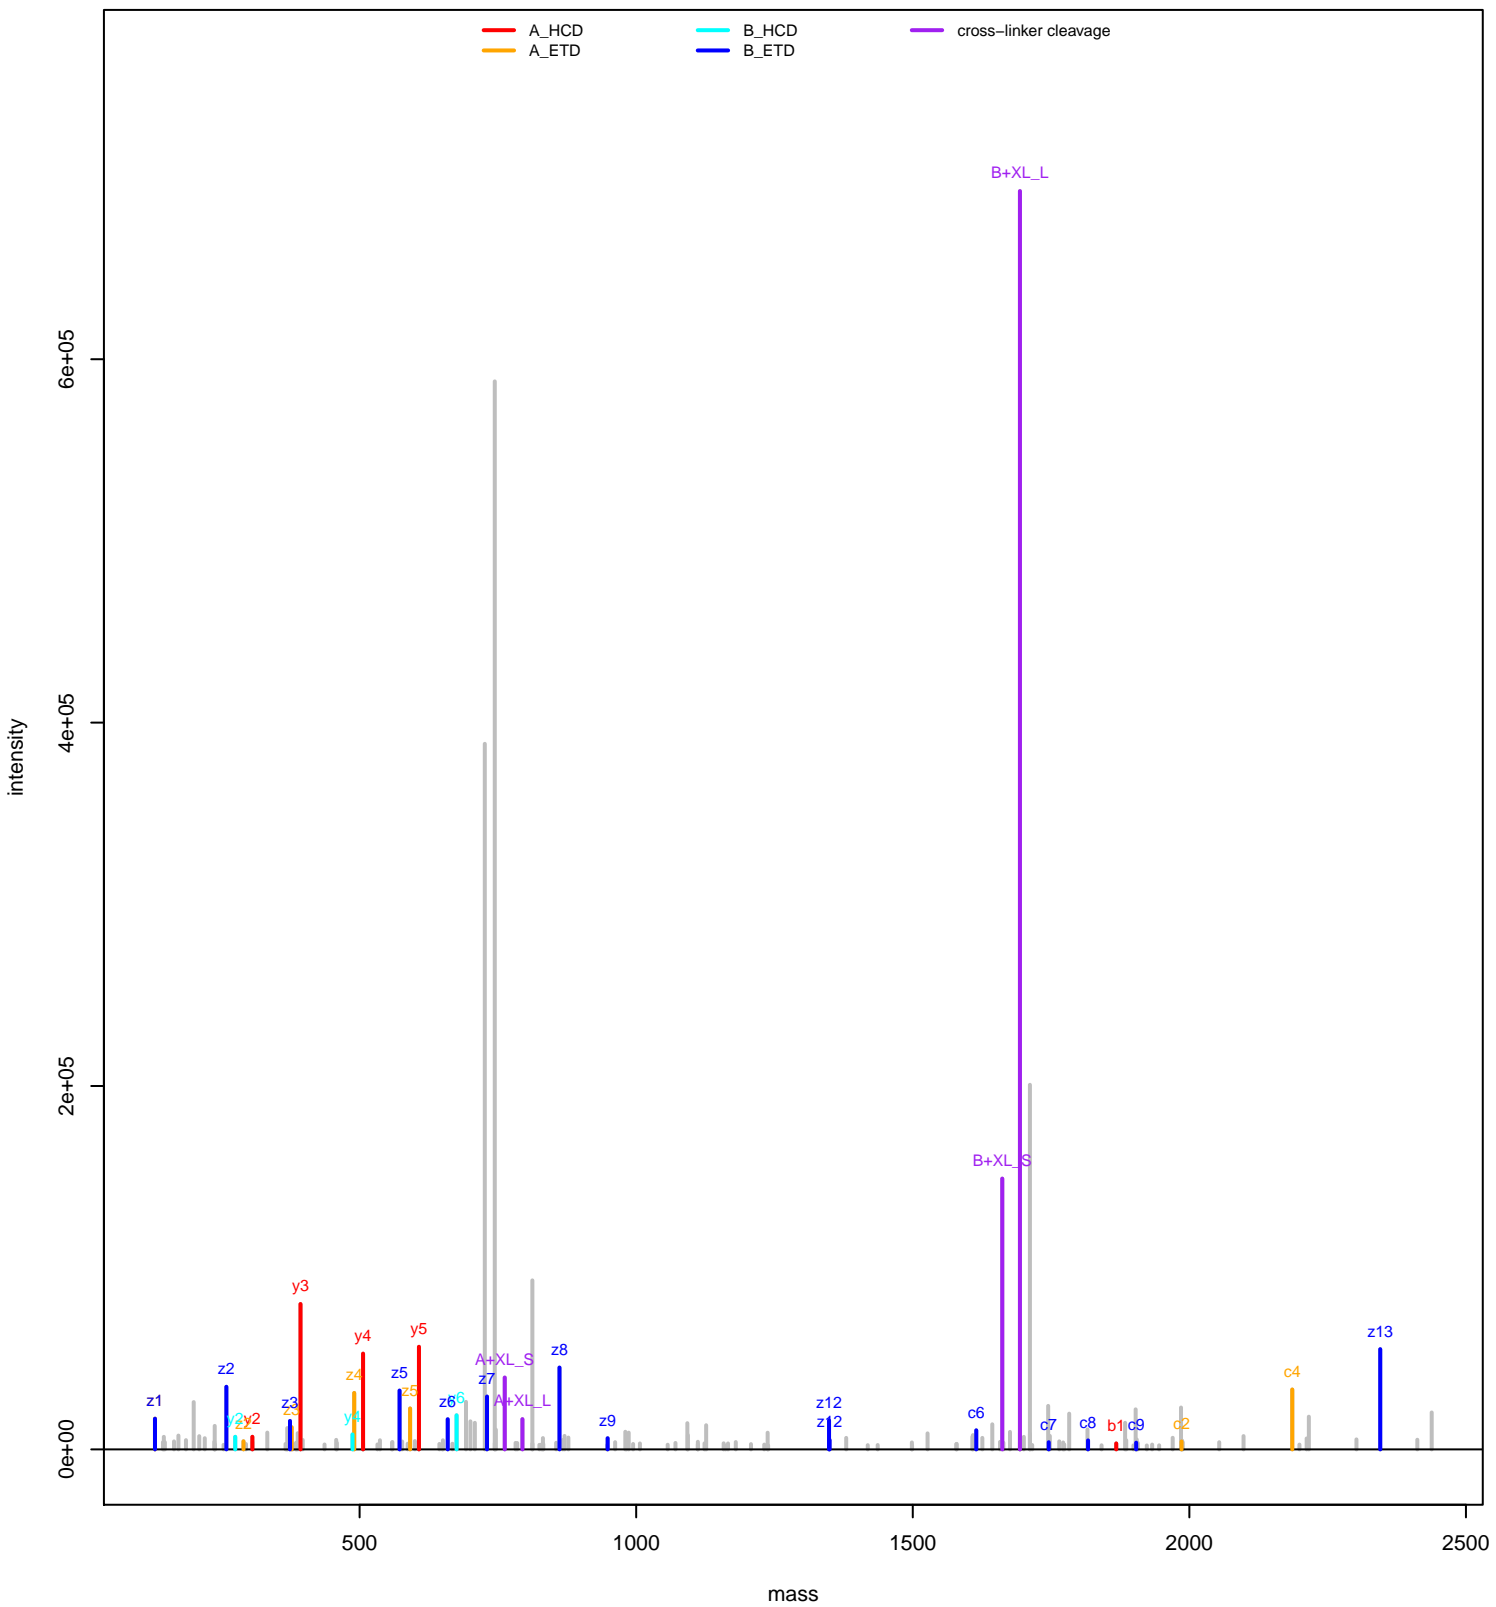

TTLSCK+XL\_S

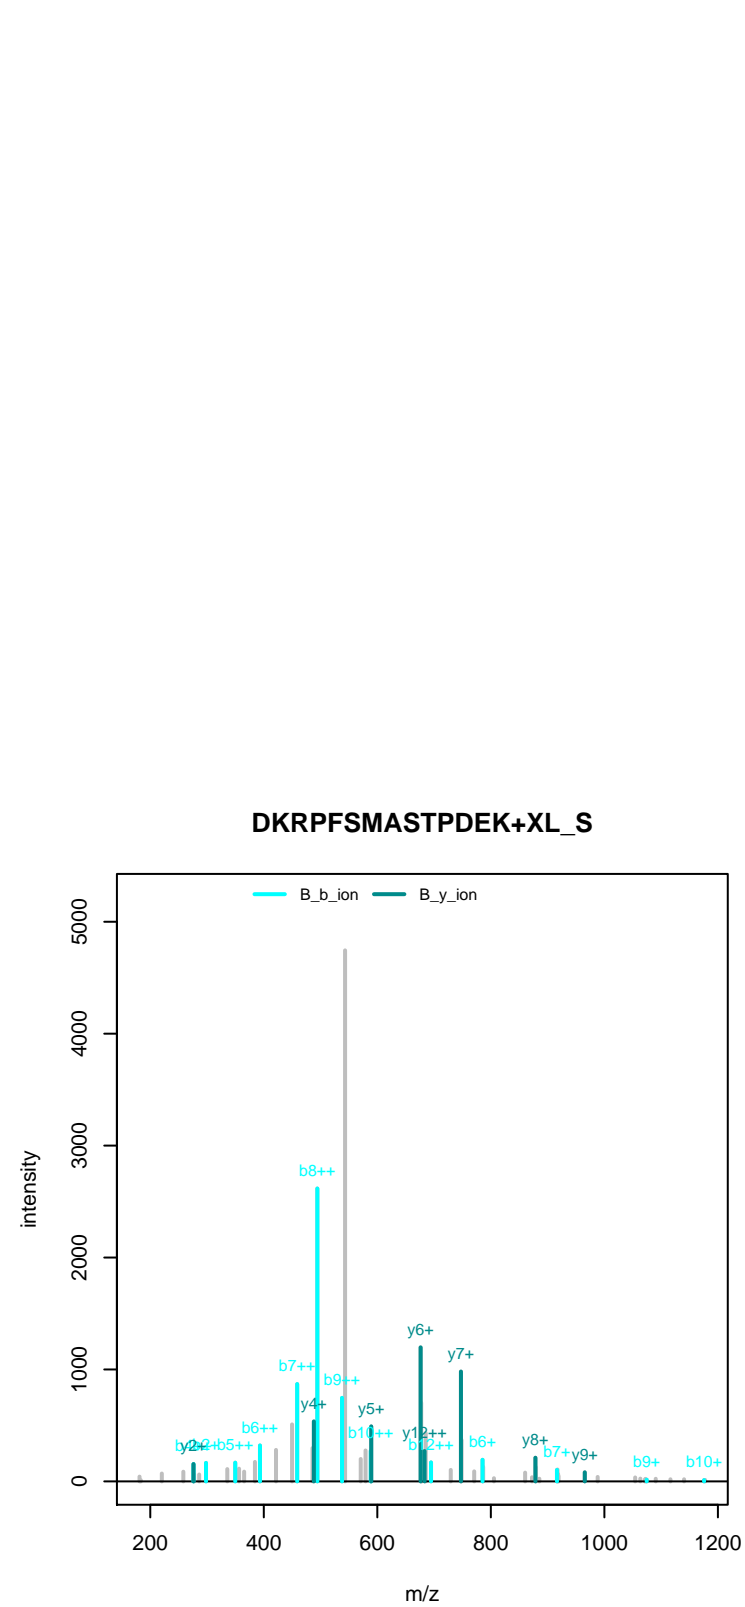

TTLSCK+XL\_L

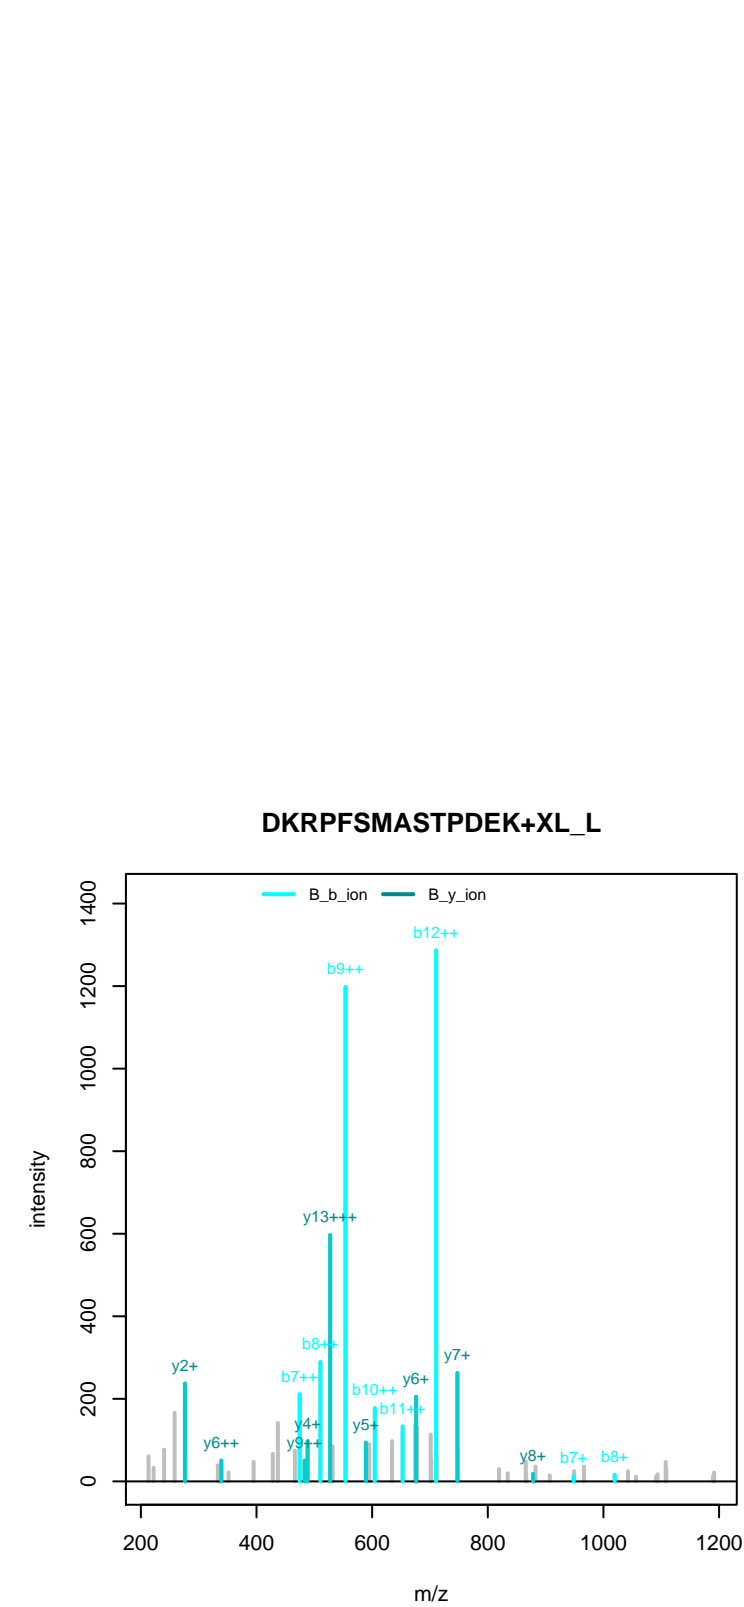

DKRPFMASTPDEK+XL\_S

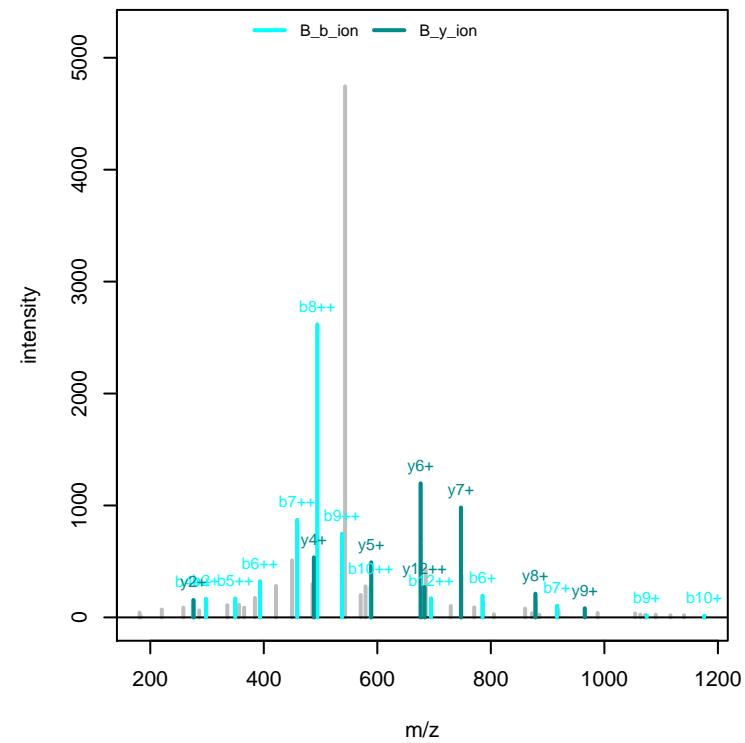

DKRPFMASTPDEK+XL\_L

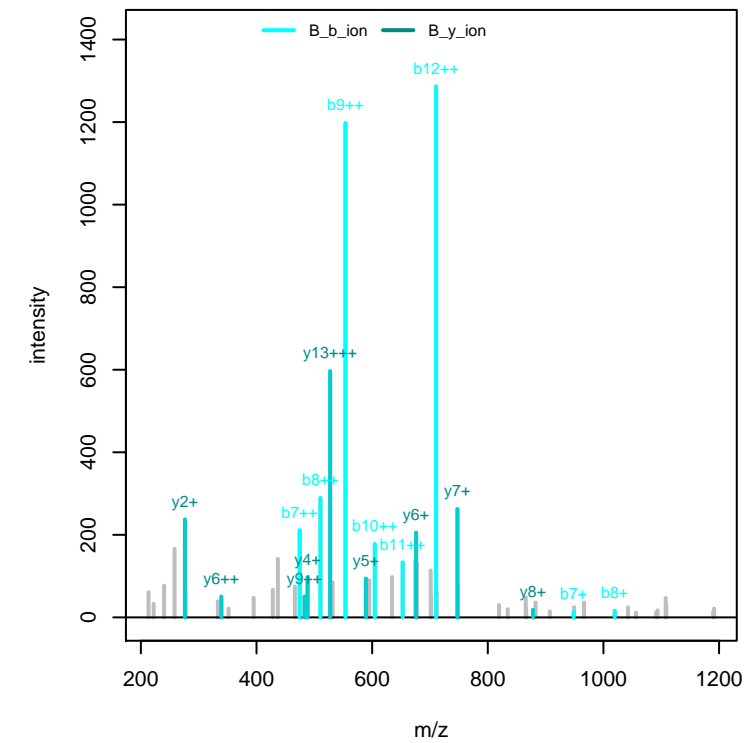



KCGCGGAVK  
DGVIEIQGDKR

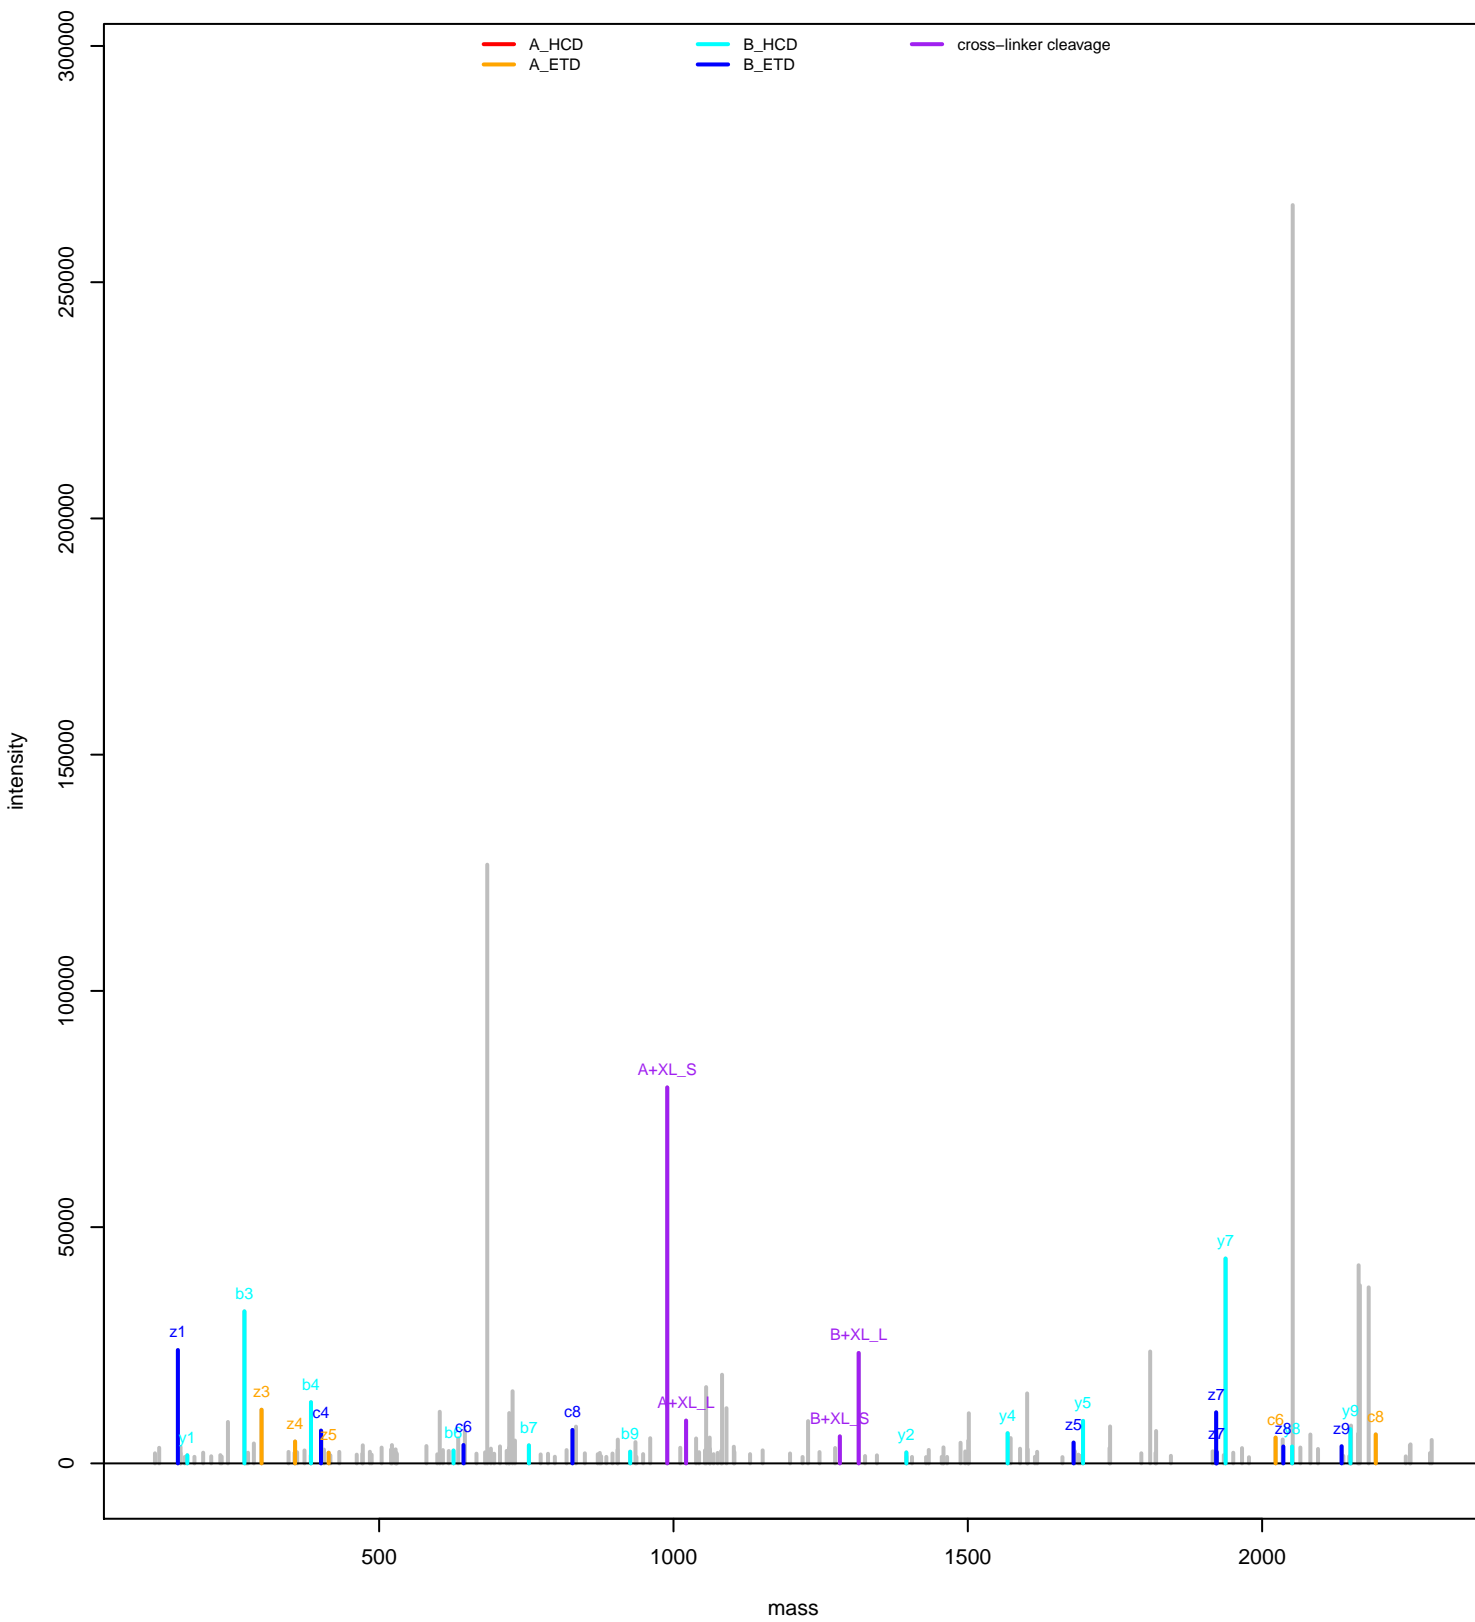

KCGCGGAVK+XL\_S

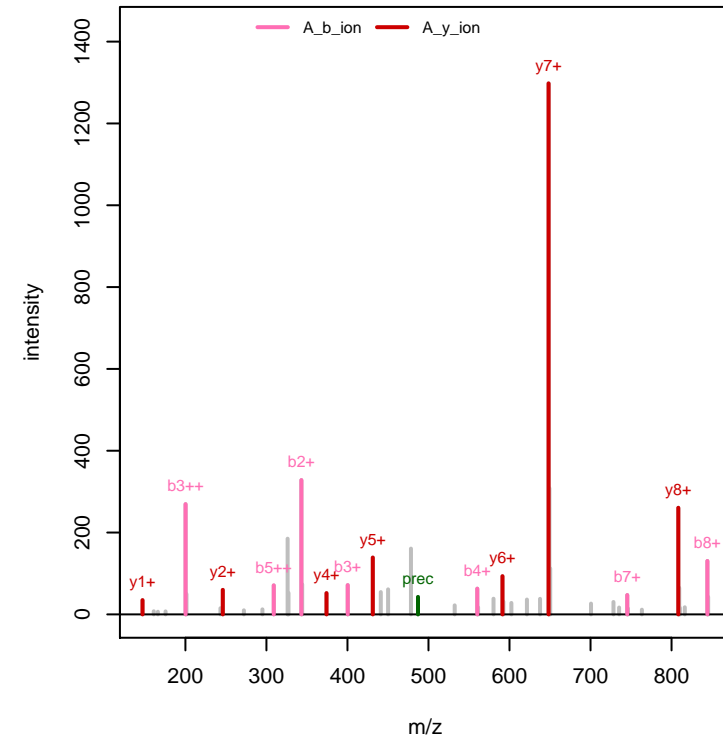

KCGCGGAVK+XL\_L

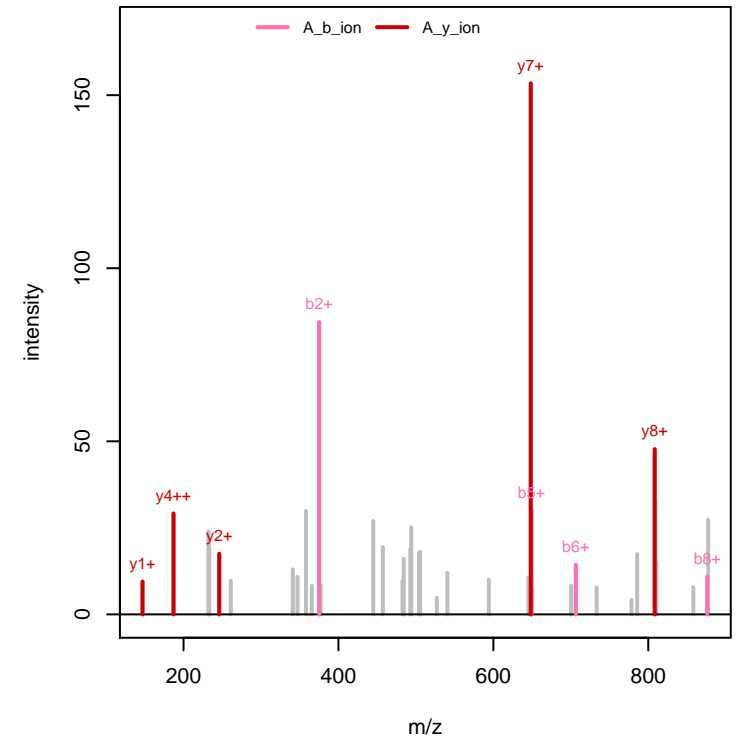

DGVIEIQGDKR+XL\_S

DGVIEIQGDKR+XL\_L

KVIYVPGK  
LAKAPTDGEQDR

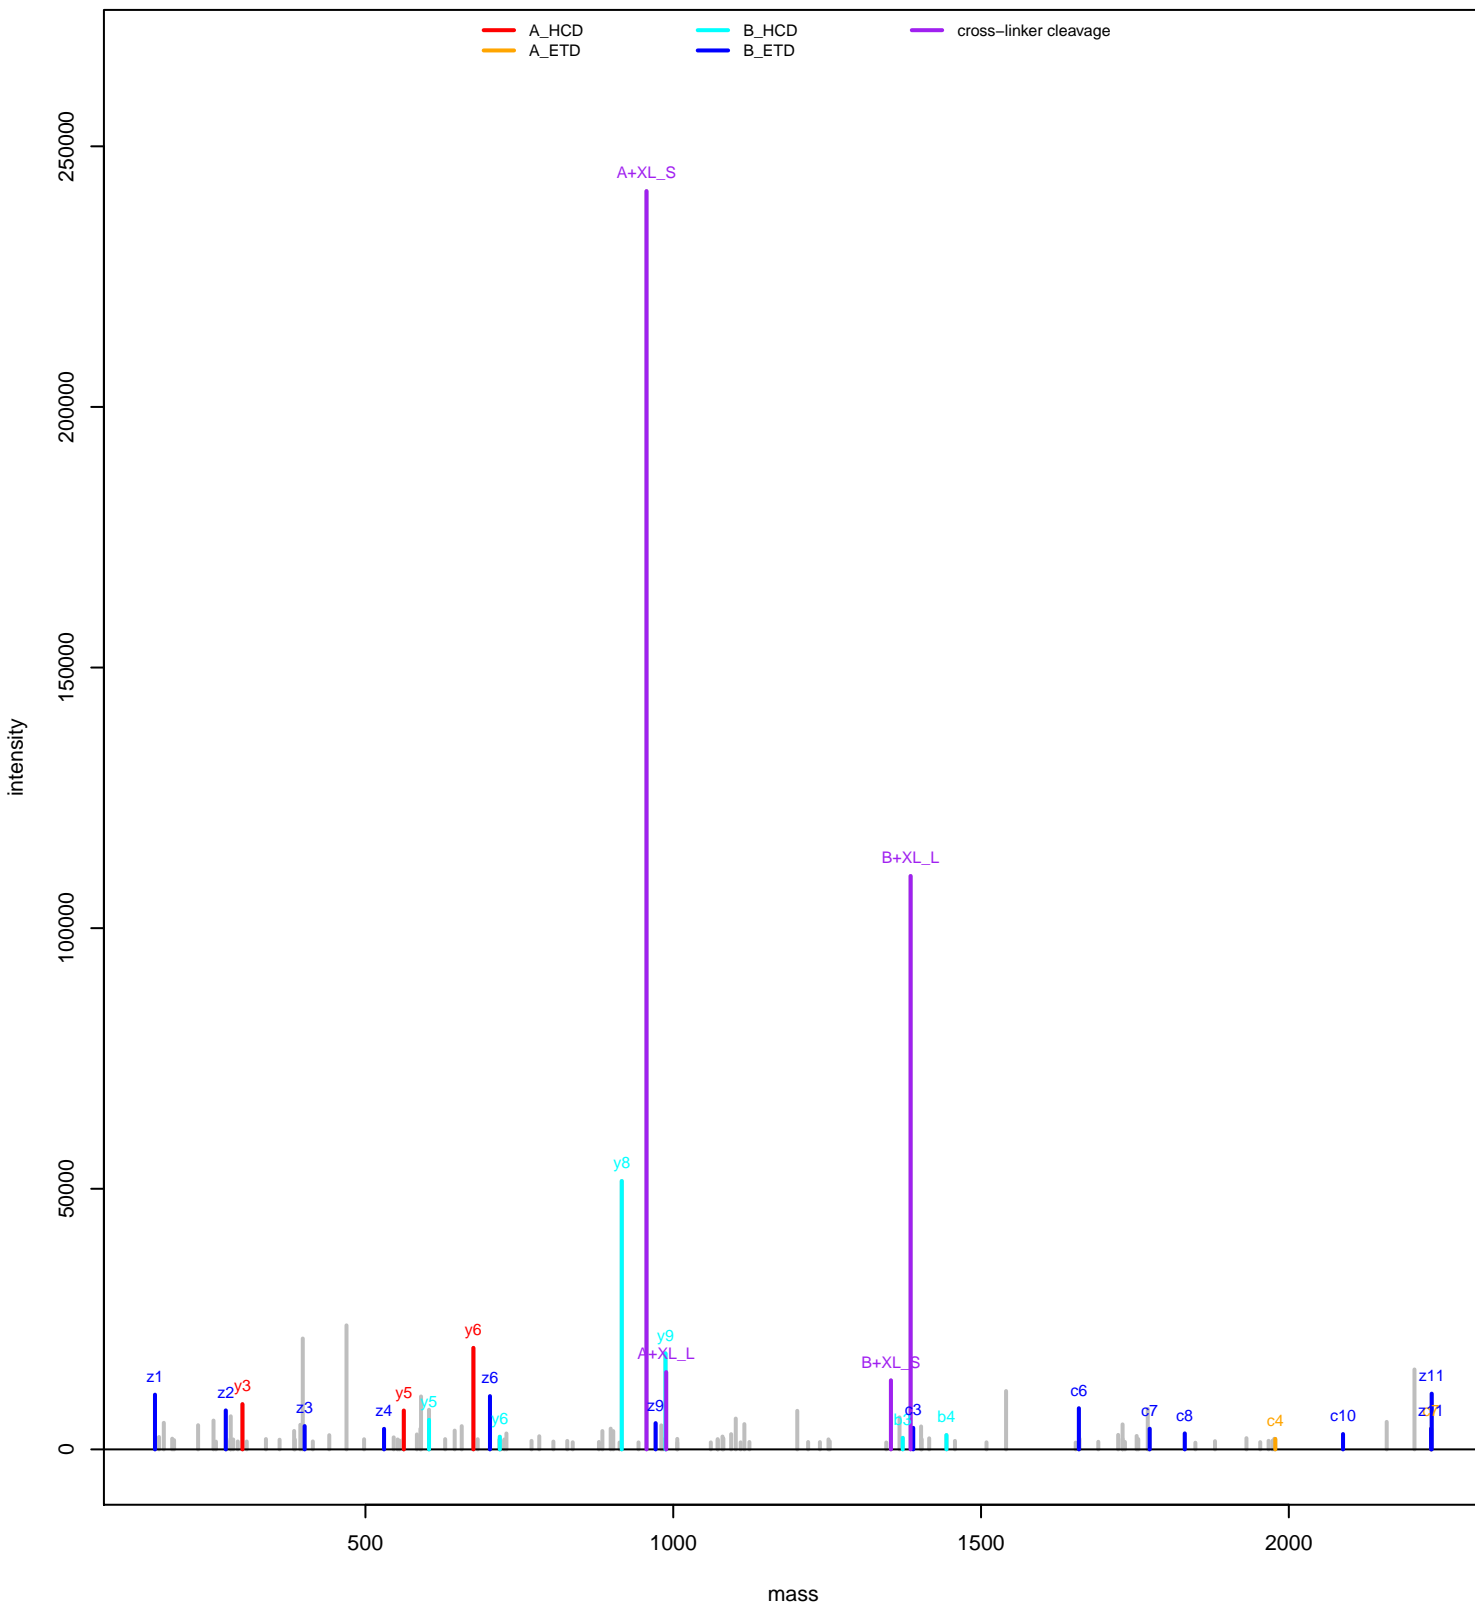

KVIYVPGK+XL\_S

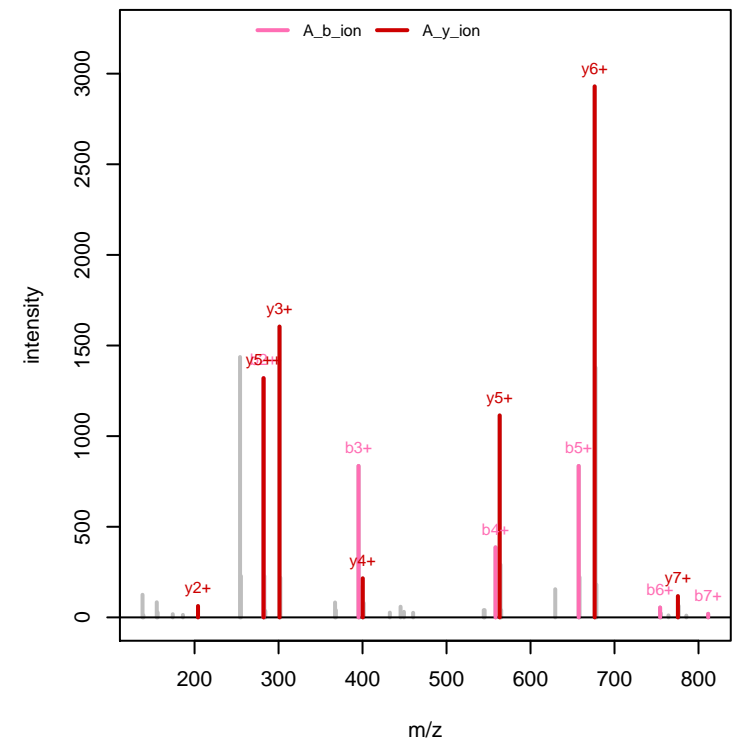

KVIYVPGK+XL\_L

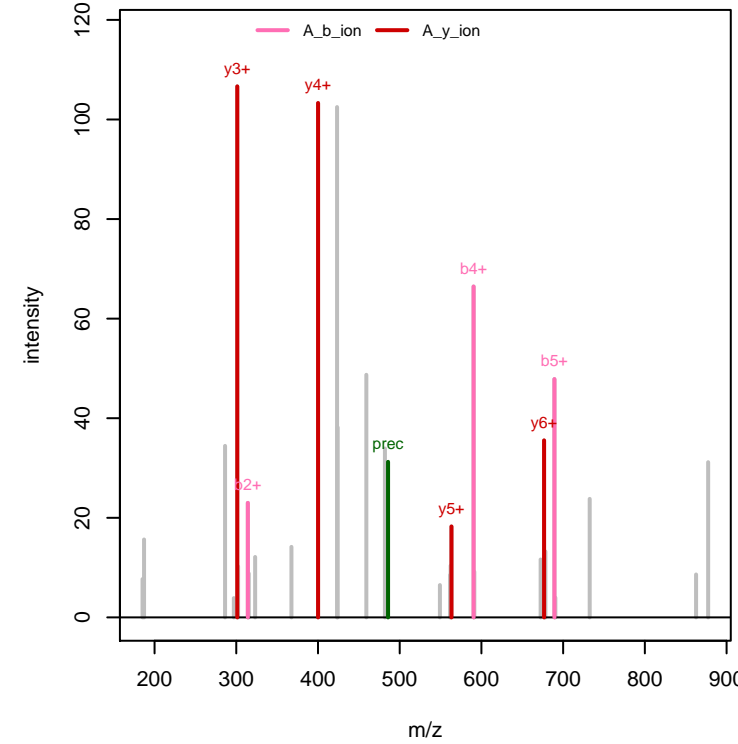

LAKAPTDGEQDR+XL\_S

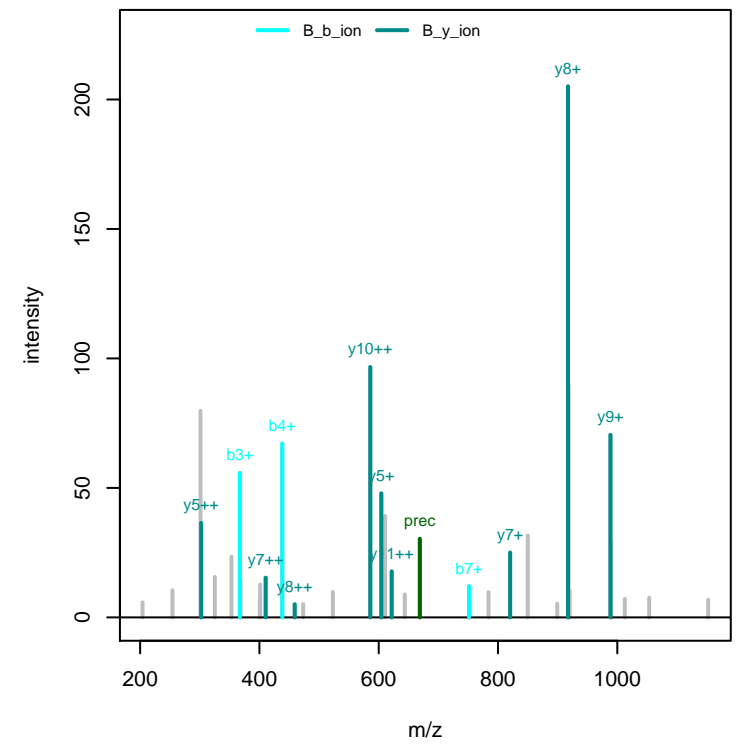

LAKAPTDGEQDR+XL\_L

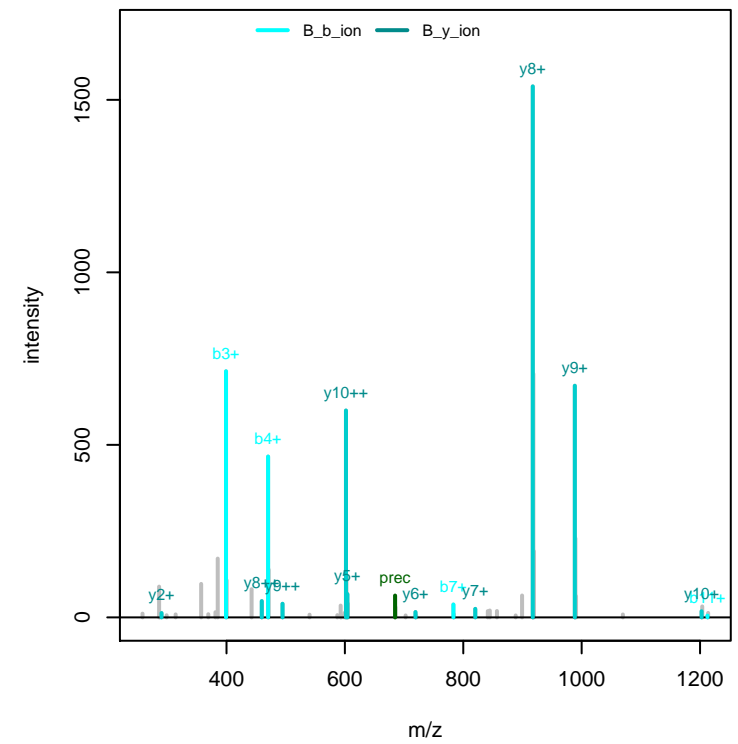

LGIKLDK  
MEKDAADNEAK

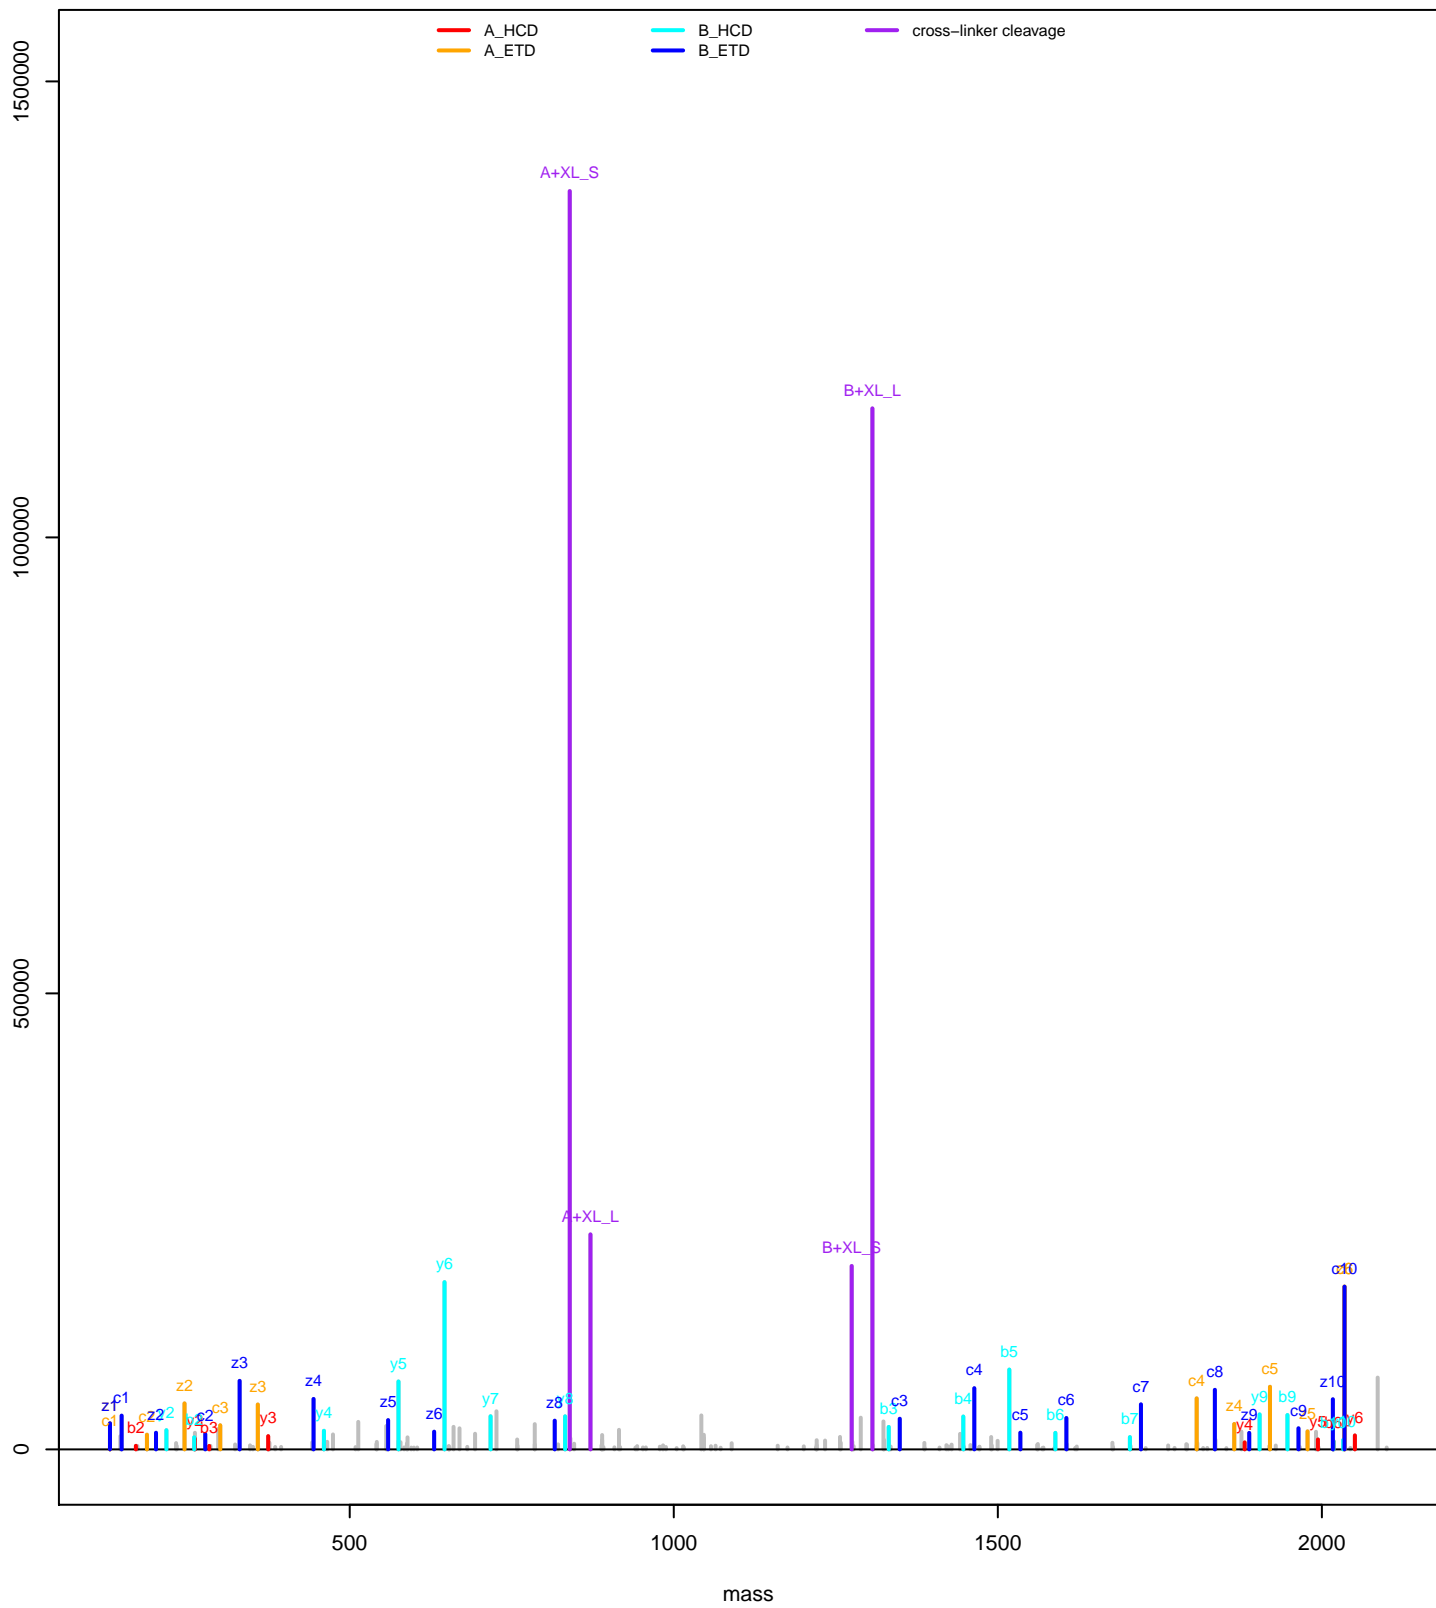

LGIKLDK+XL\_S

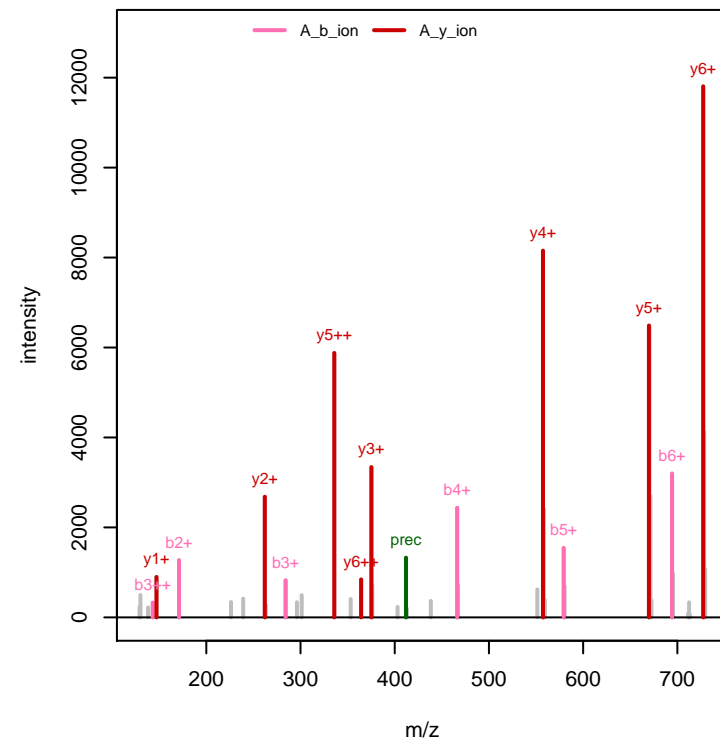

LGIKLDK+XL\_L

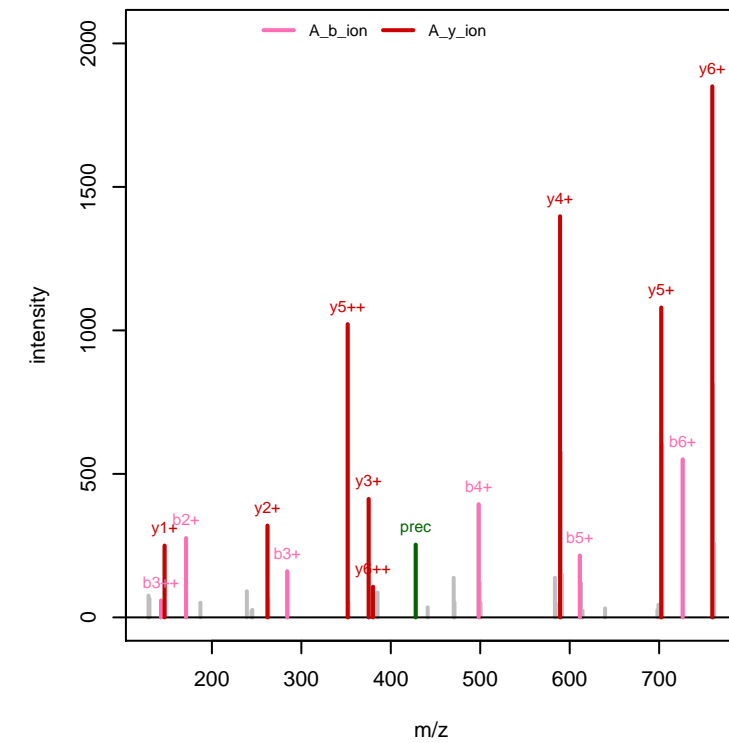

MEKDAADNEAK+XL\_S

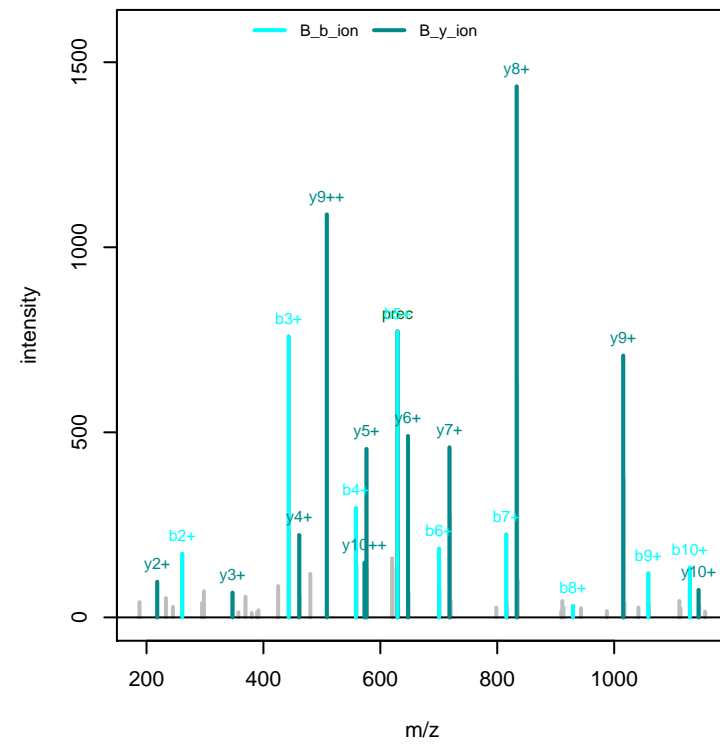

MEKDAADNEAK+XL\_L

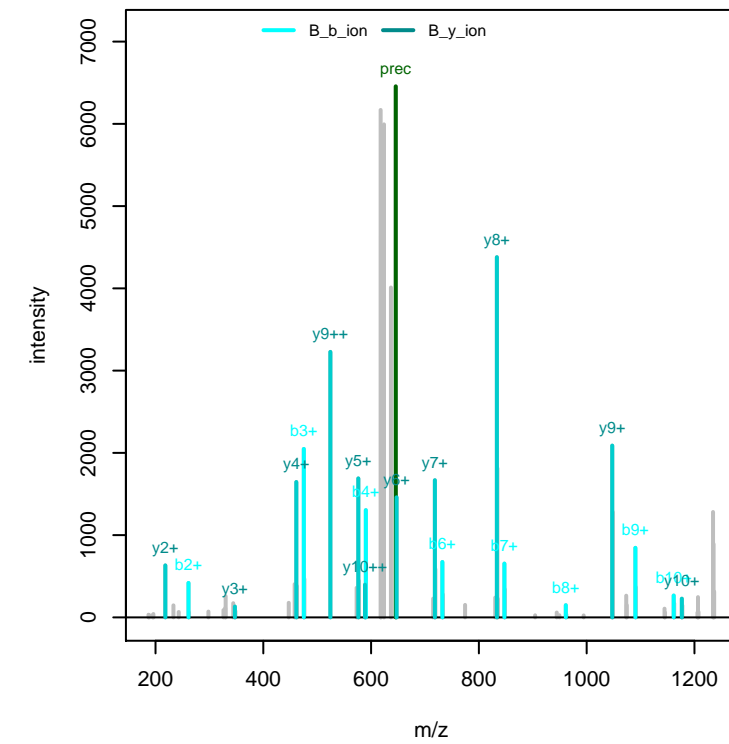

LLADNAKK  
FSANASKSR

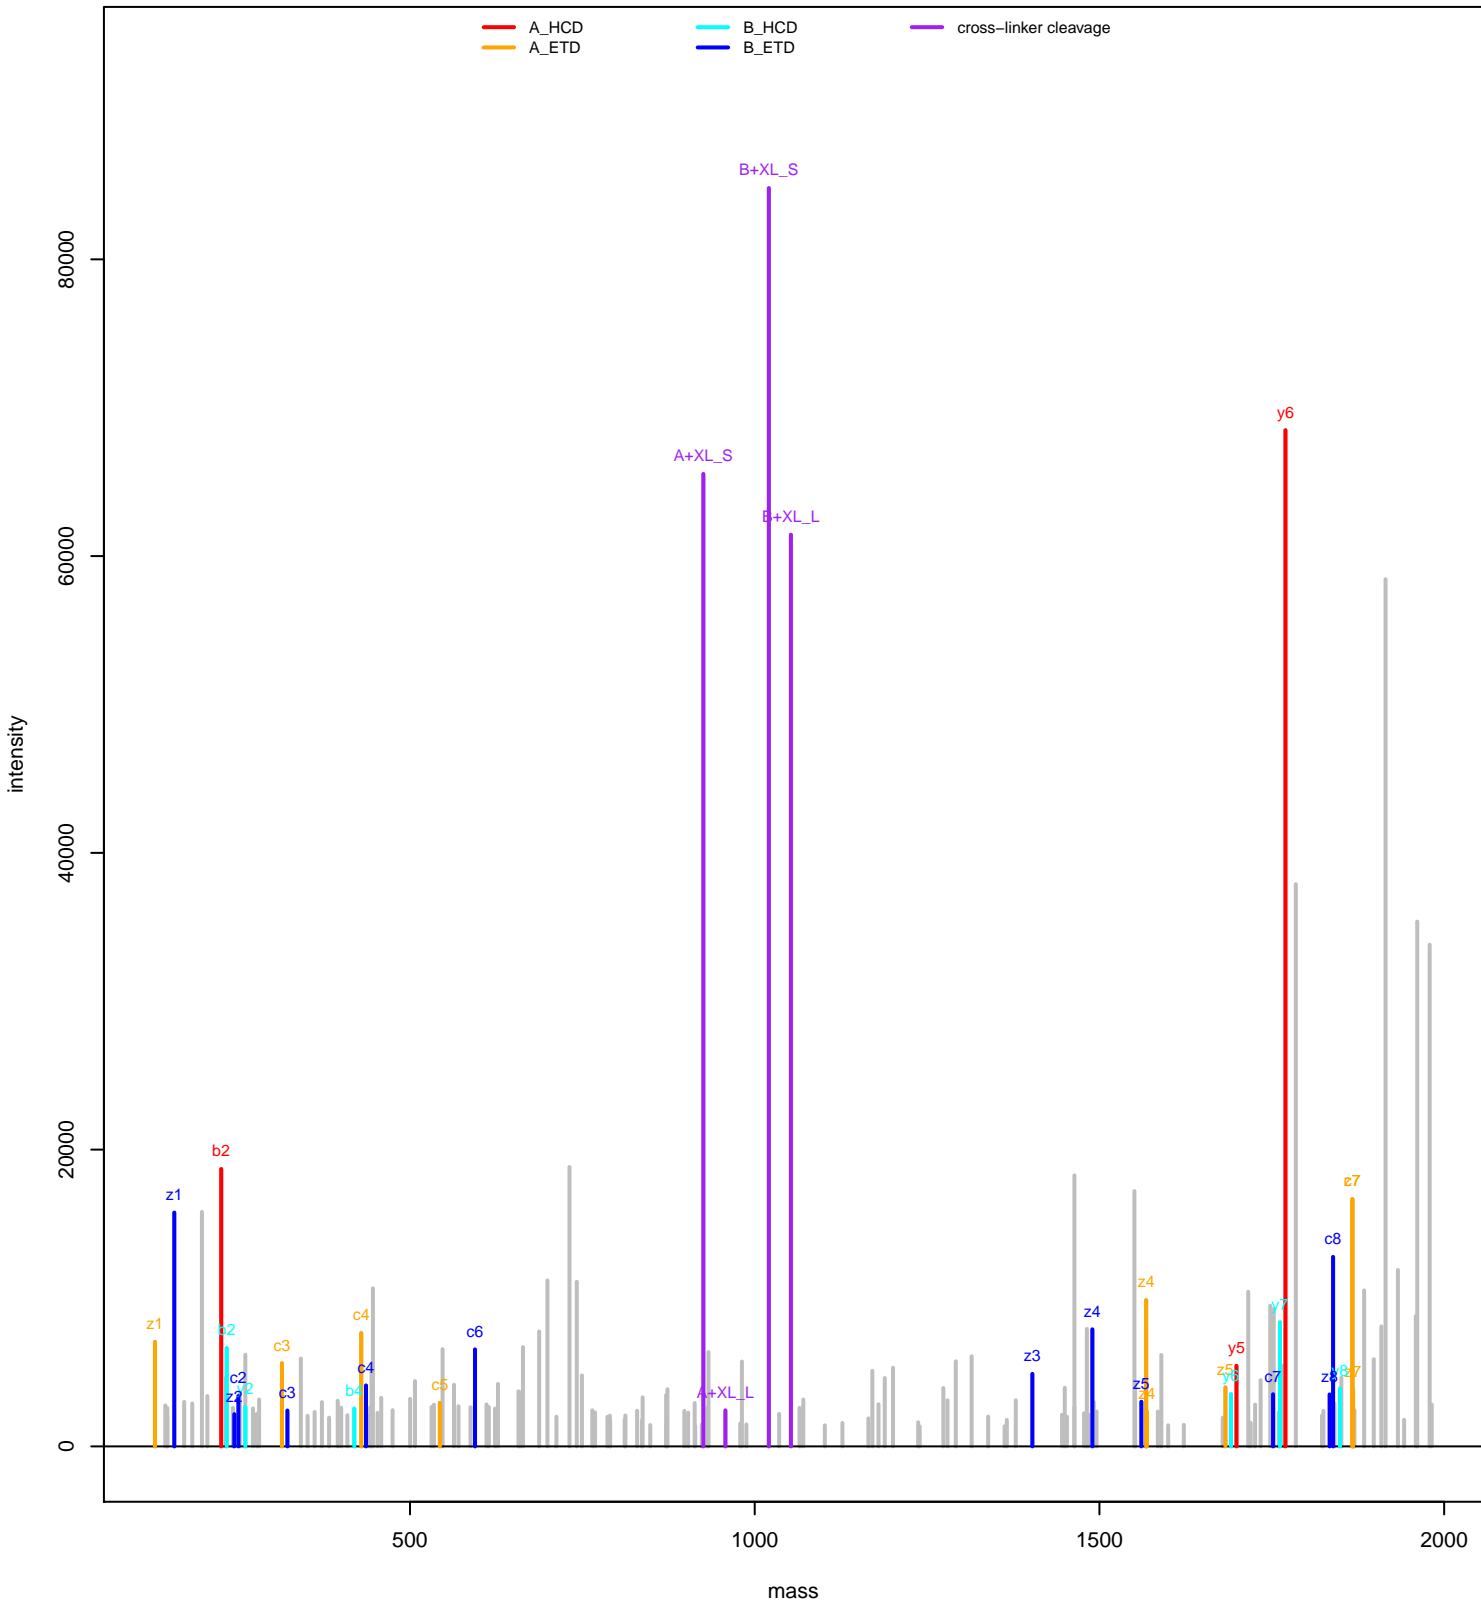

LLADNAKK+XL\_S

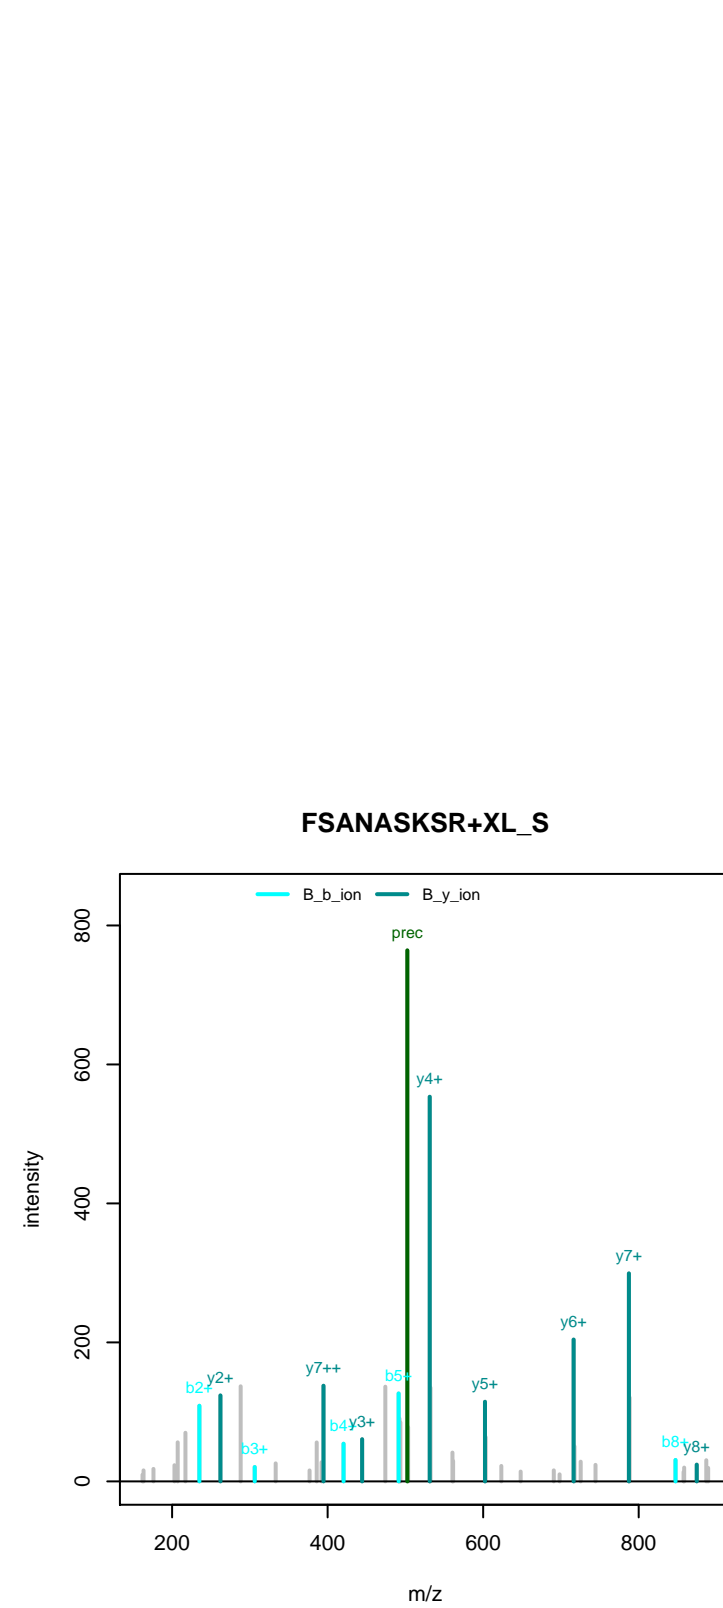

LLADNAKK+XL\_L

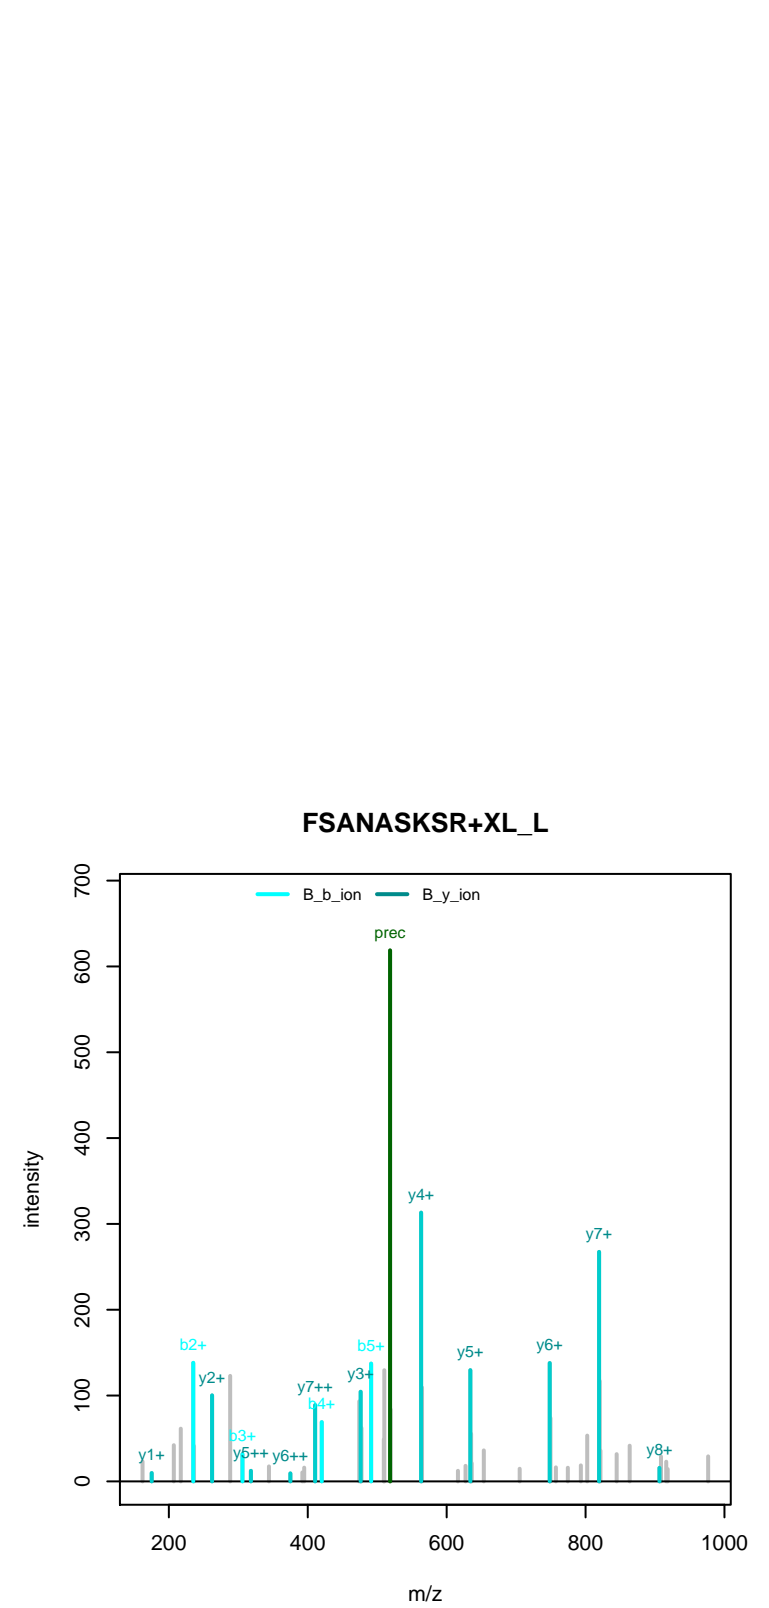

FSANASKSR+XL\_S

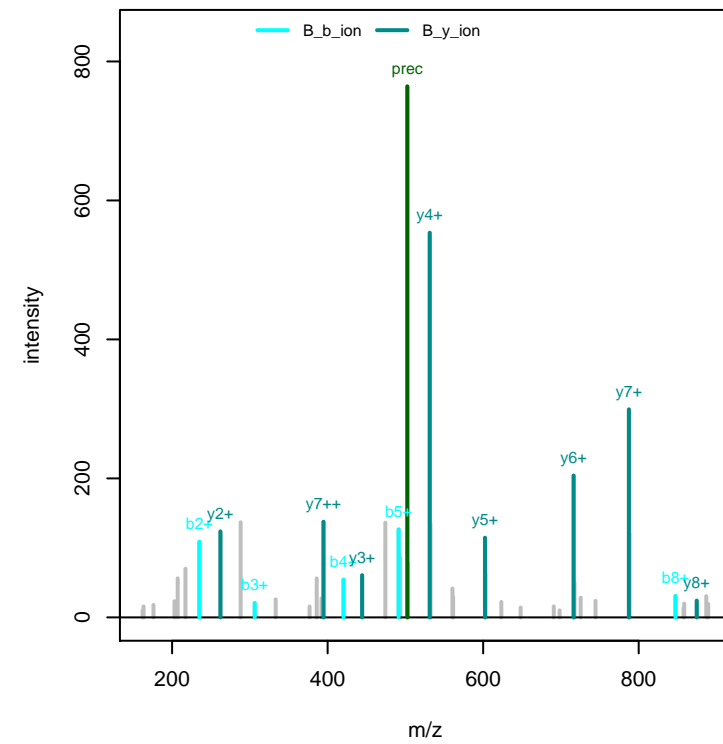

FSANASKSR+XL\_L

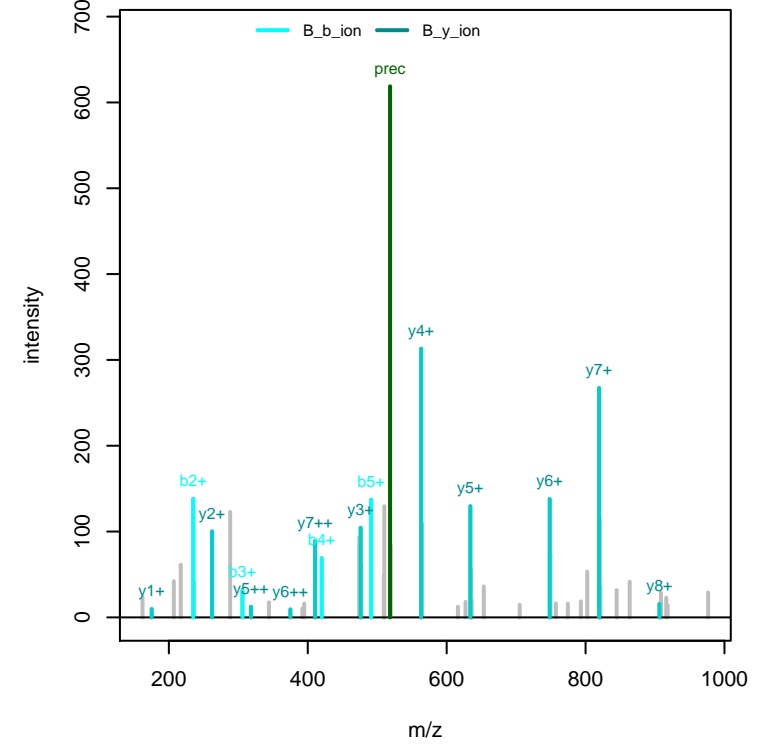

**KQGVDK**  
**SSALNTLTNQKSLAR**

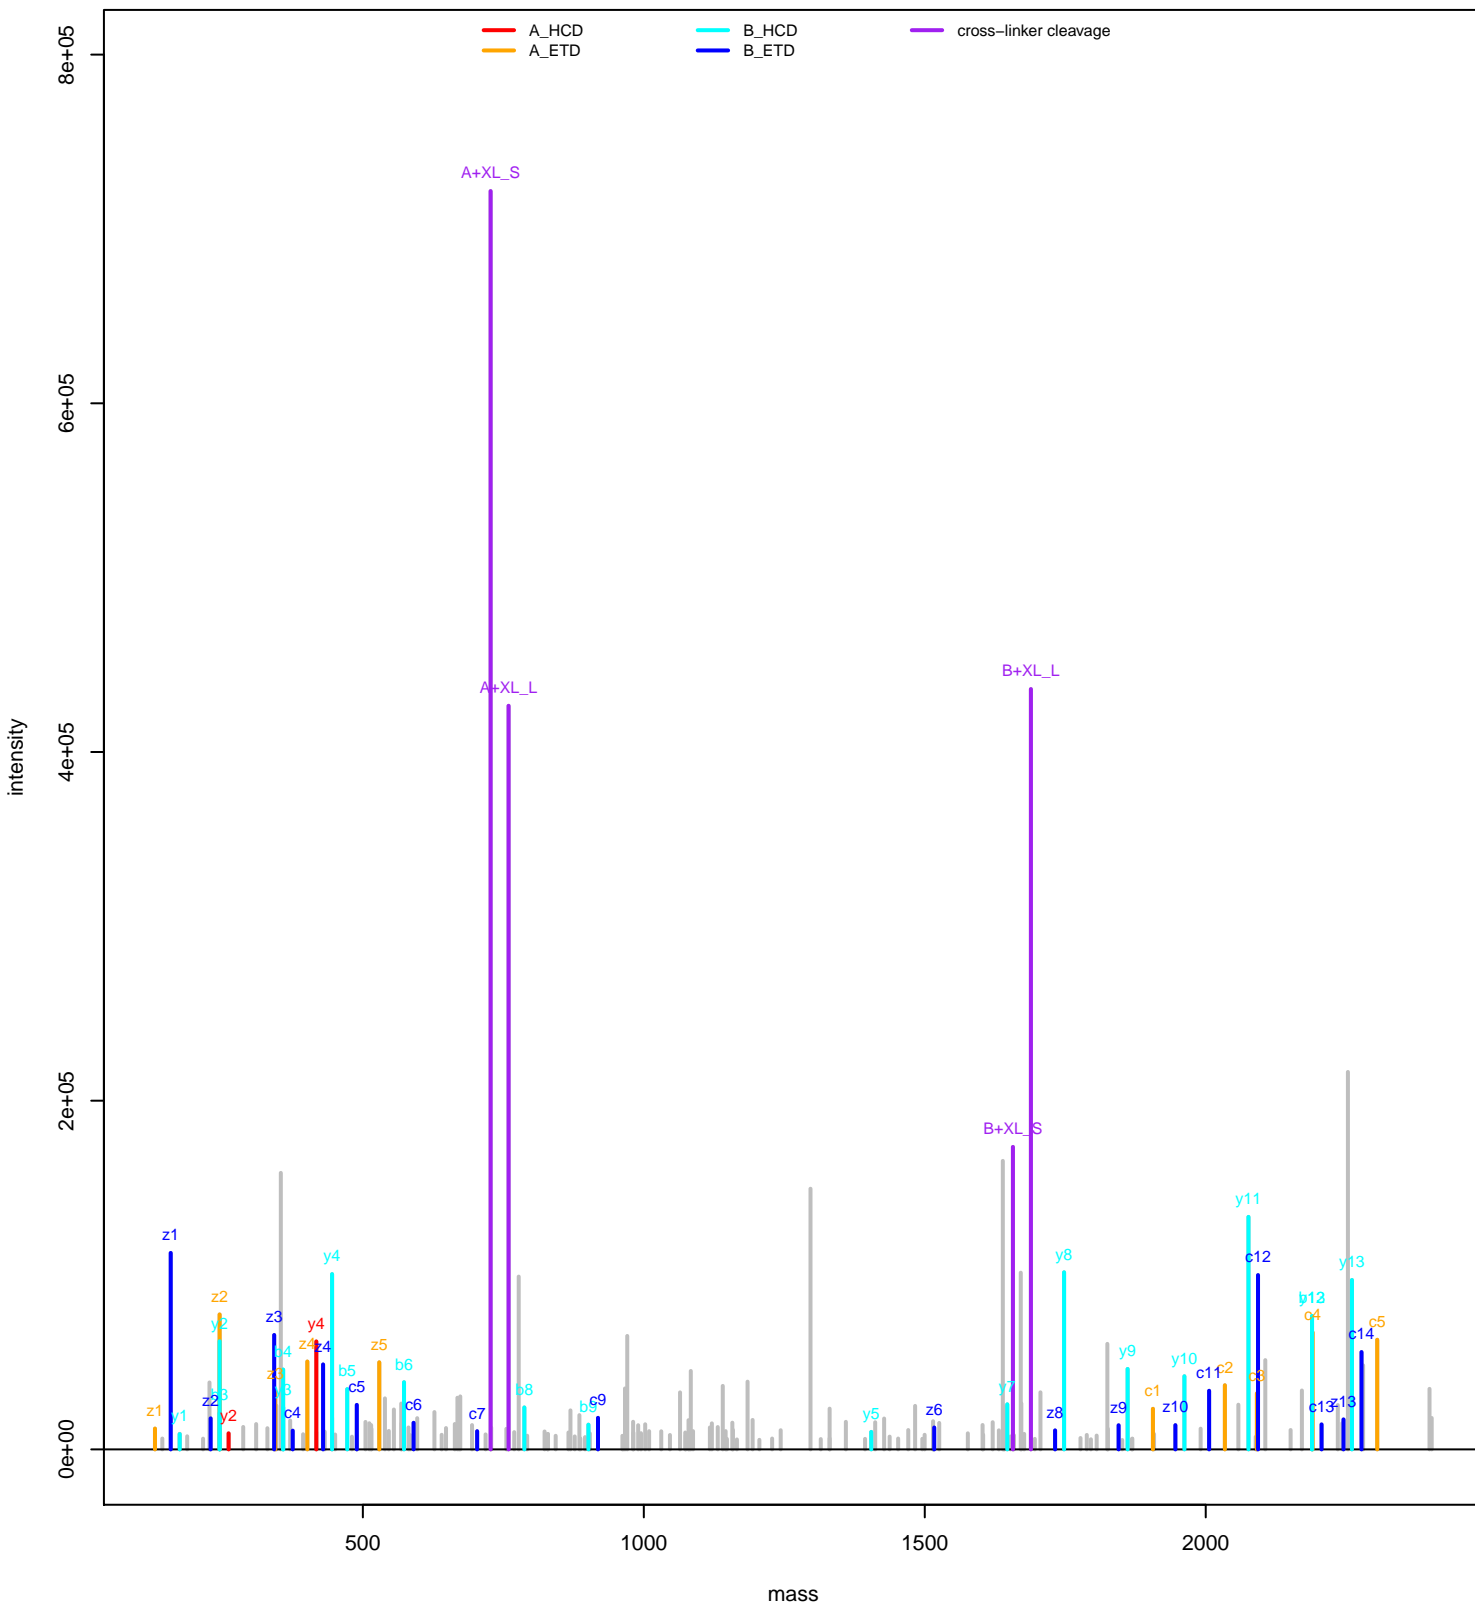

**KQGVDK+XL\_S**

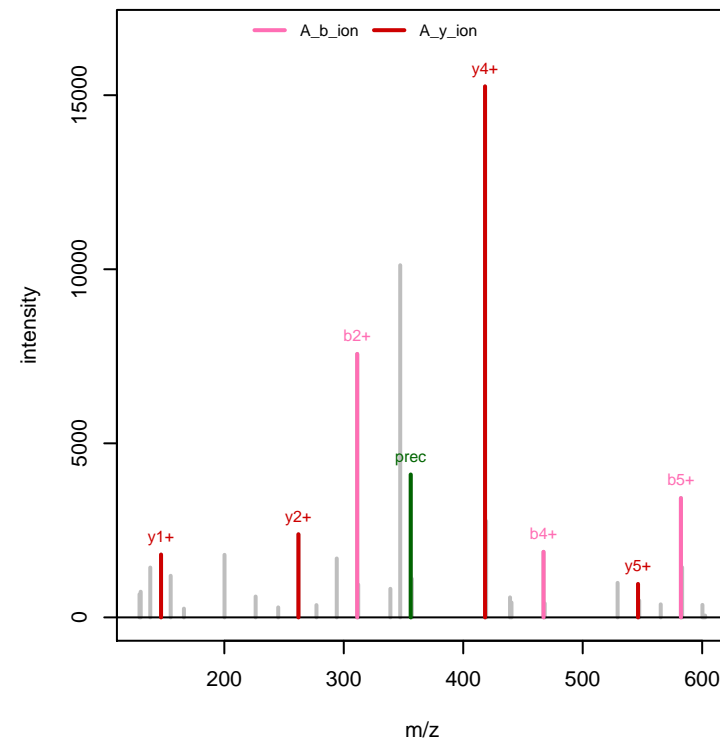

**KQGVDK+XL\_L**

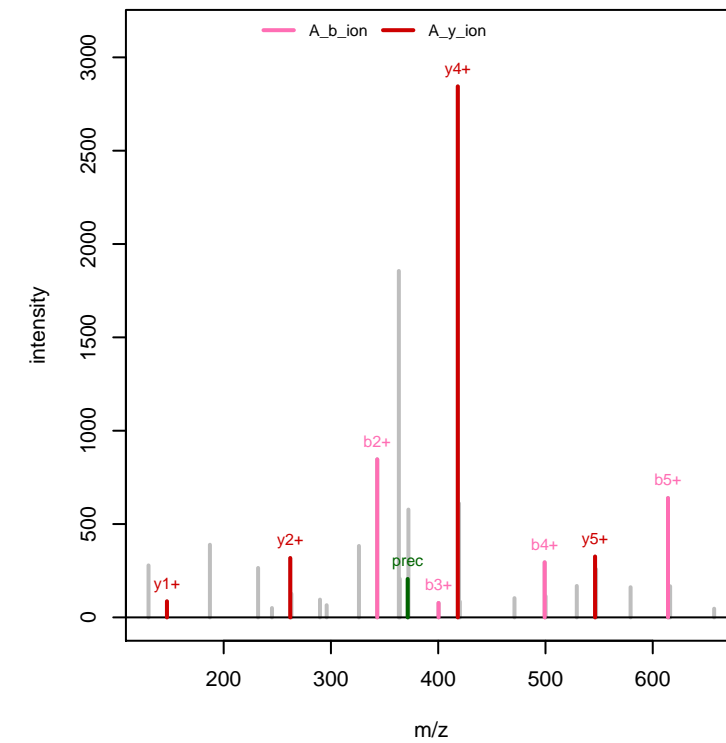

**SSALNTLTNQKSLAR+XL\_S**

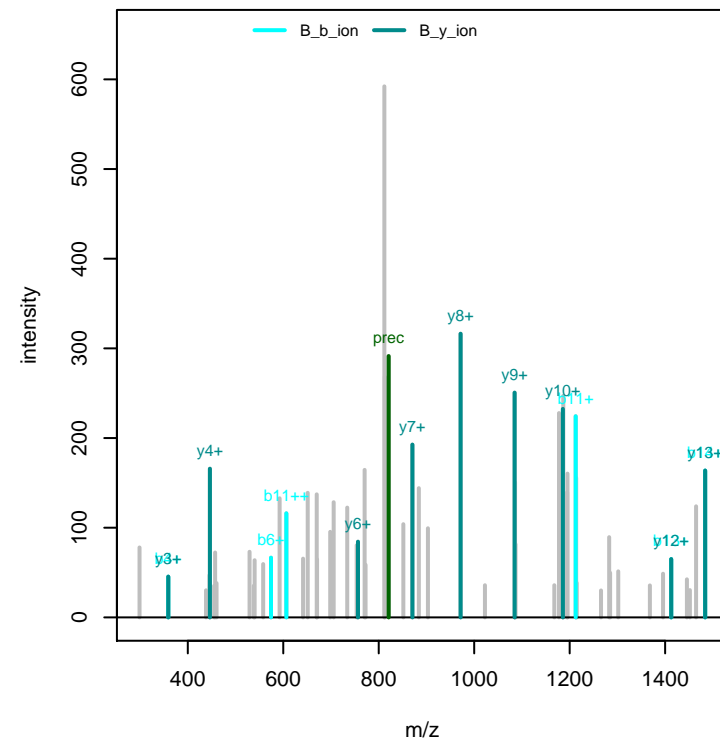

**SSALNTLTNQKSLAR+XL\_L**

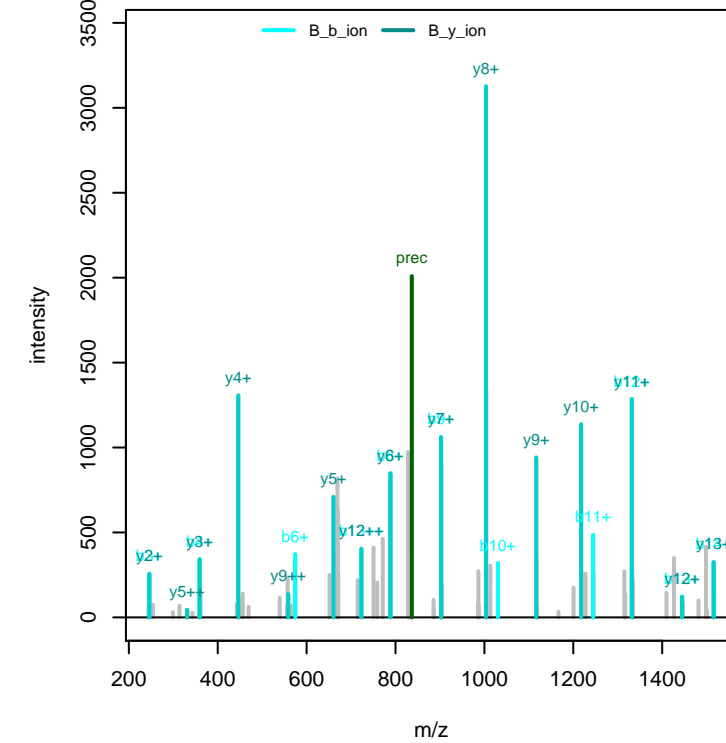

QYGEAFEKR  
APAKESAPAAAAPAAQPALAAR

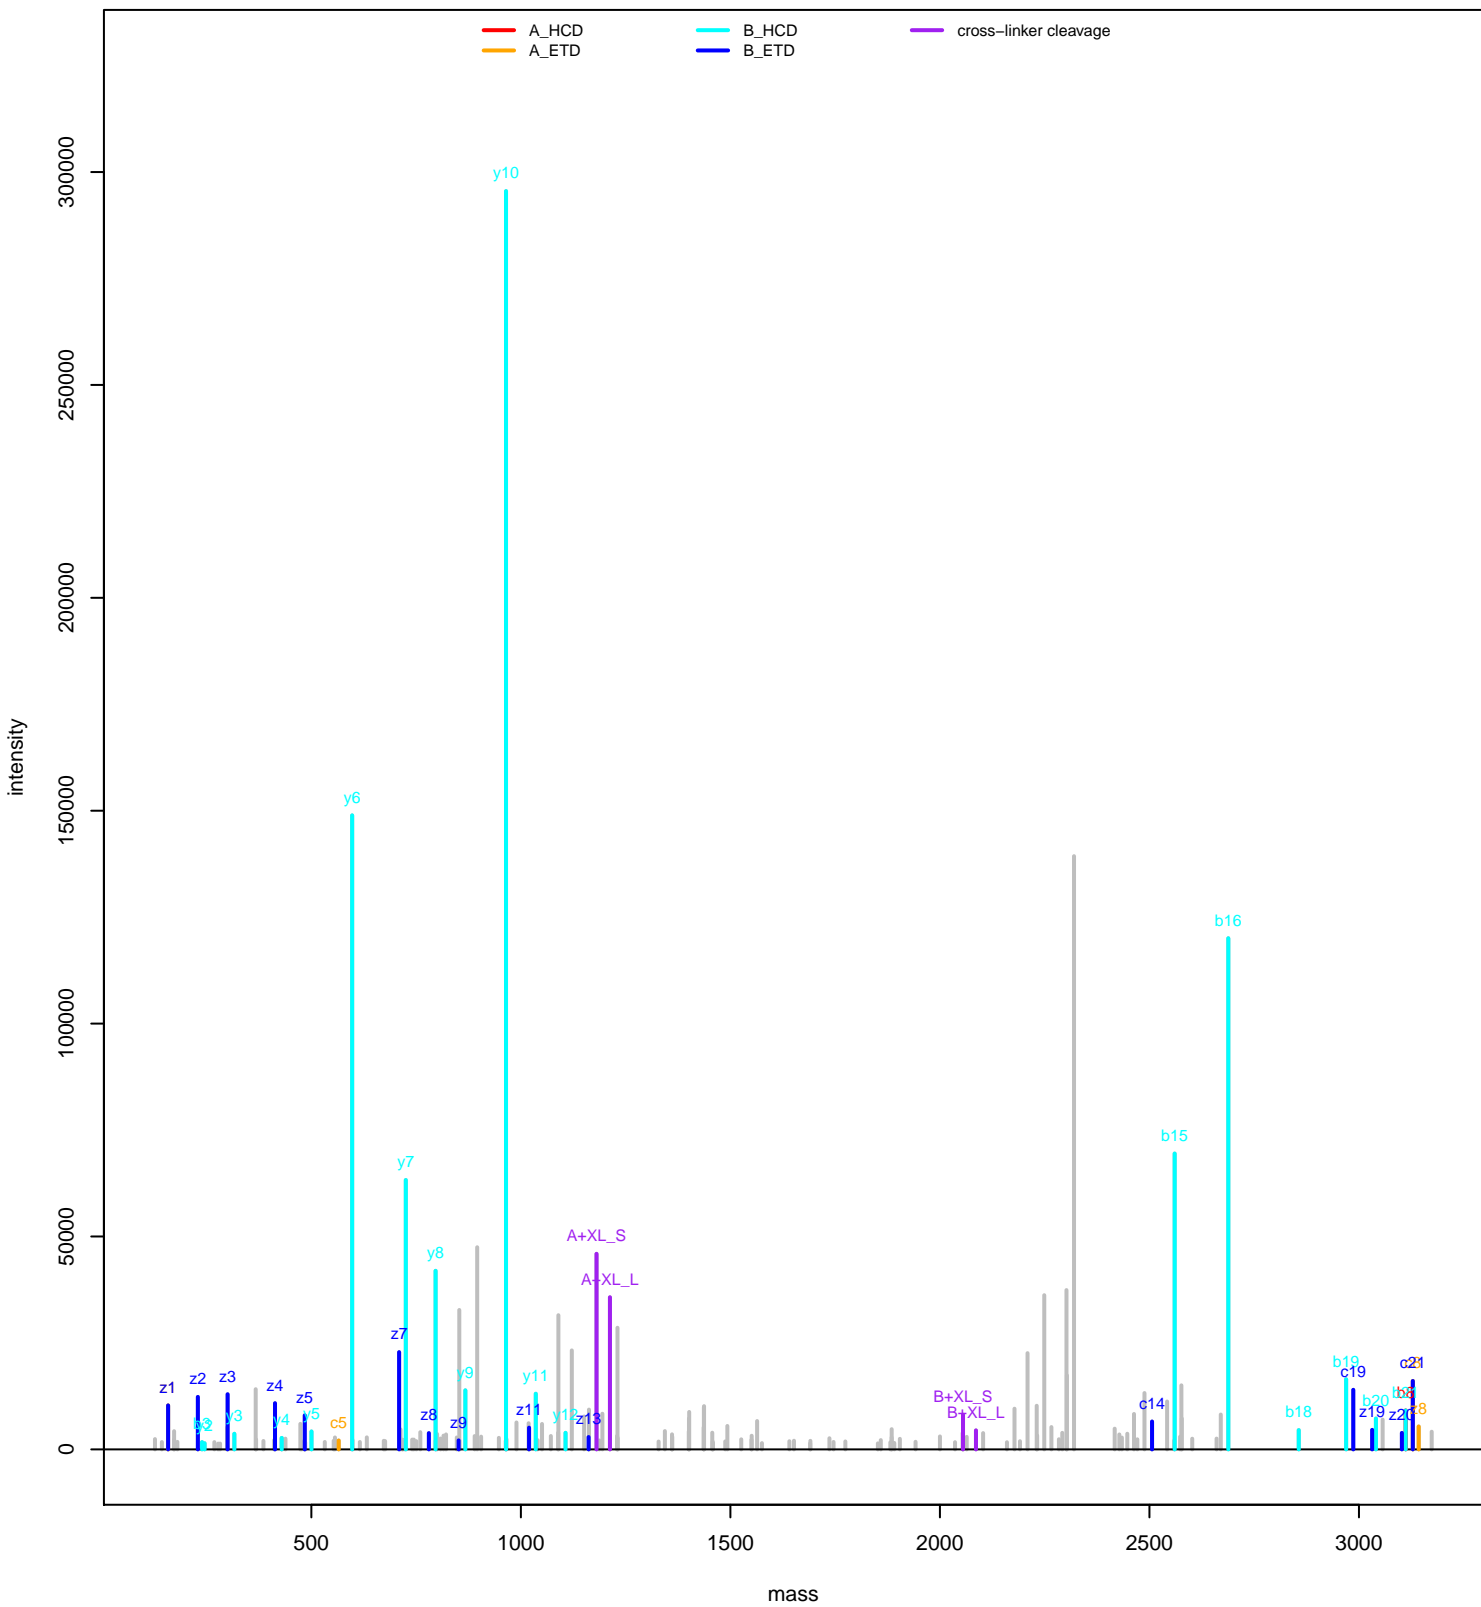

QYGEAFEKR+XL\_S

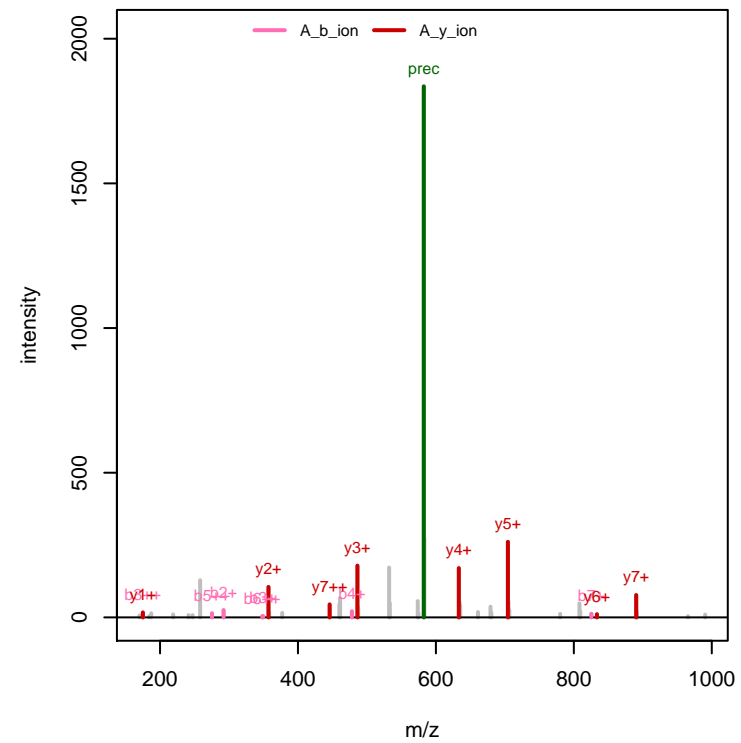

QYGEAFEKR+XL\_L

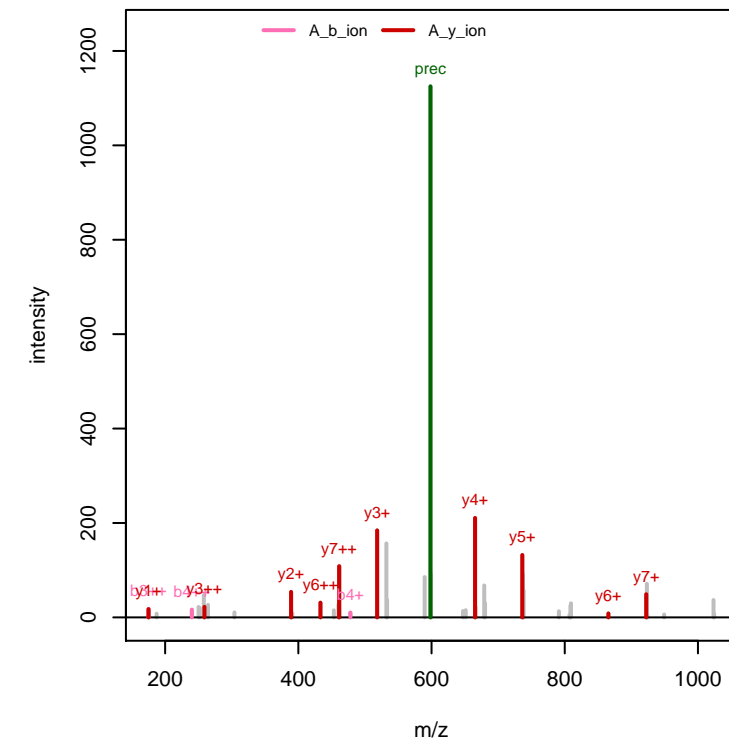

APAKESAPAAAAPAAQPALAAR+XL\_S

APAKESAPAAAAPAAQPALAAR+XL\_L

**VLGKAGAAR**  
**AHIEKQAGELQEK**

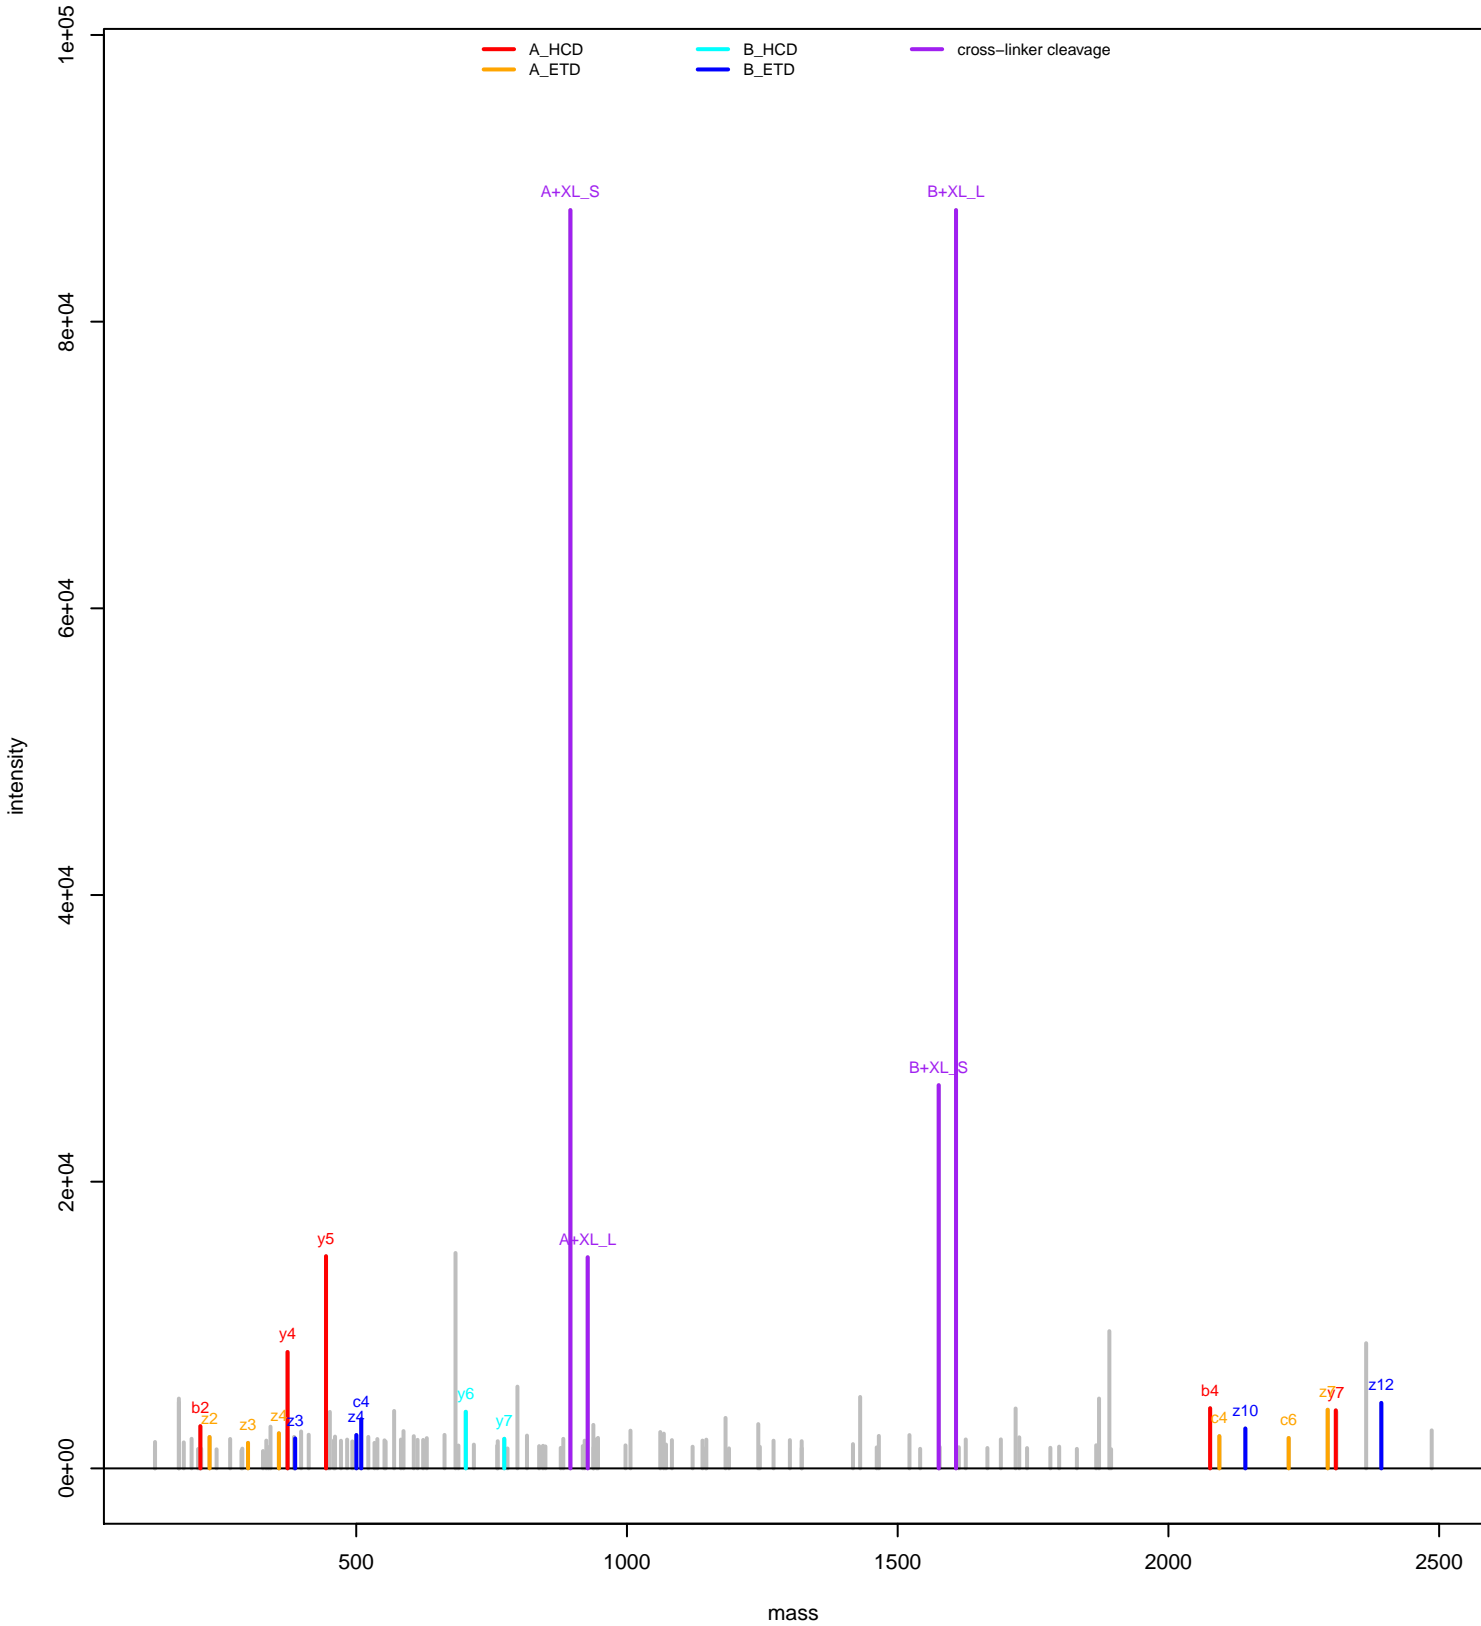

**VLGKAGAAR+XL\_S**

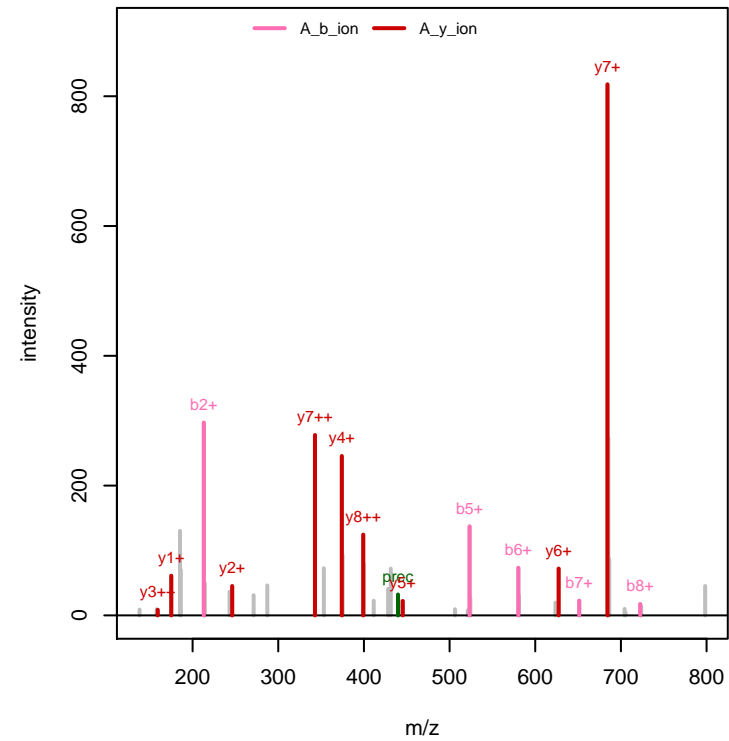

**VLGKAGAAR+XL\_L**

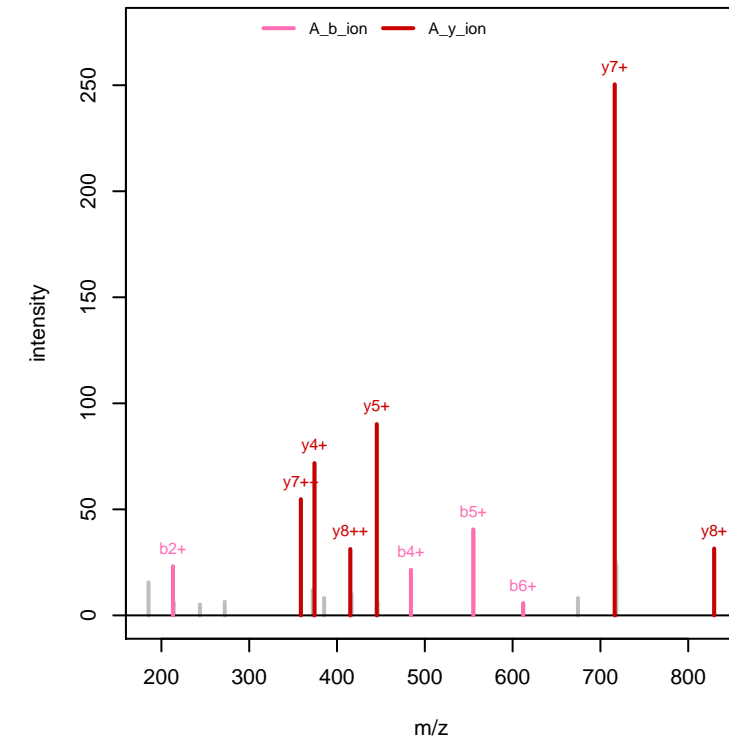

**AHIEKQAGELQEK+XL\_S**

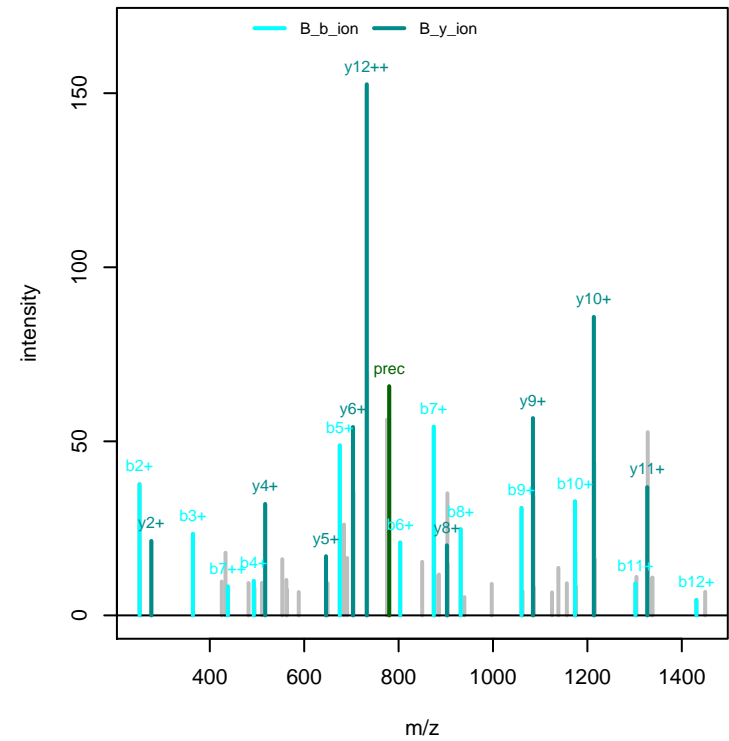

**AHIEKQAGELQEK+XL\_L**

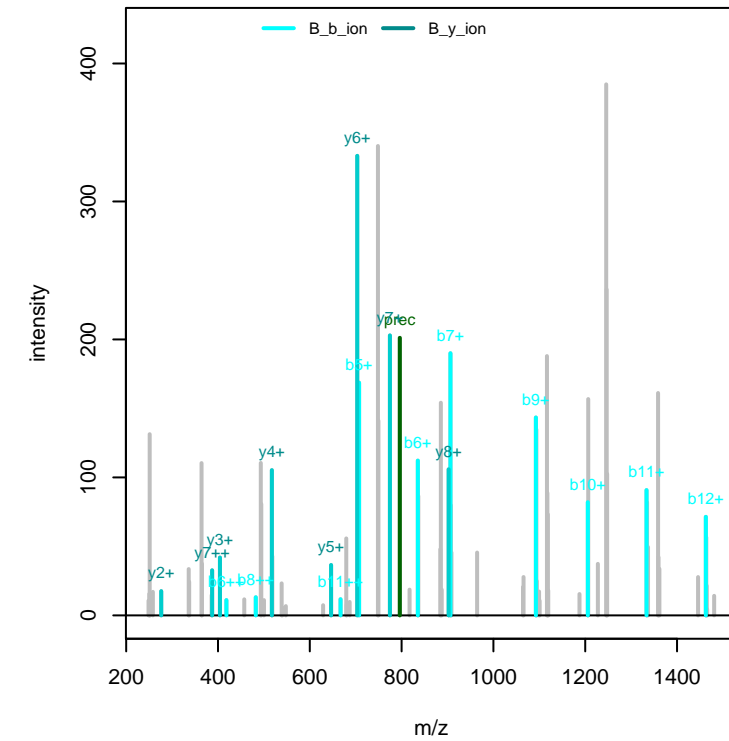

VVALAKR  
ADTRPER

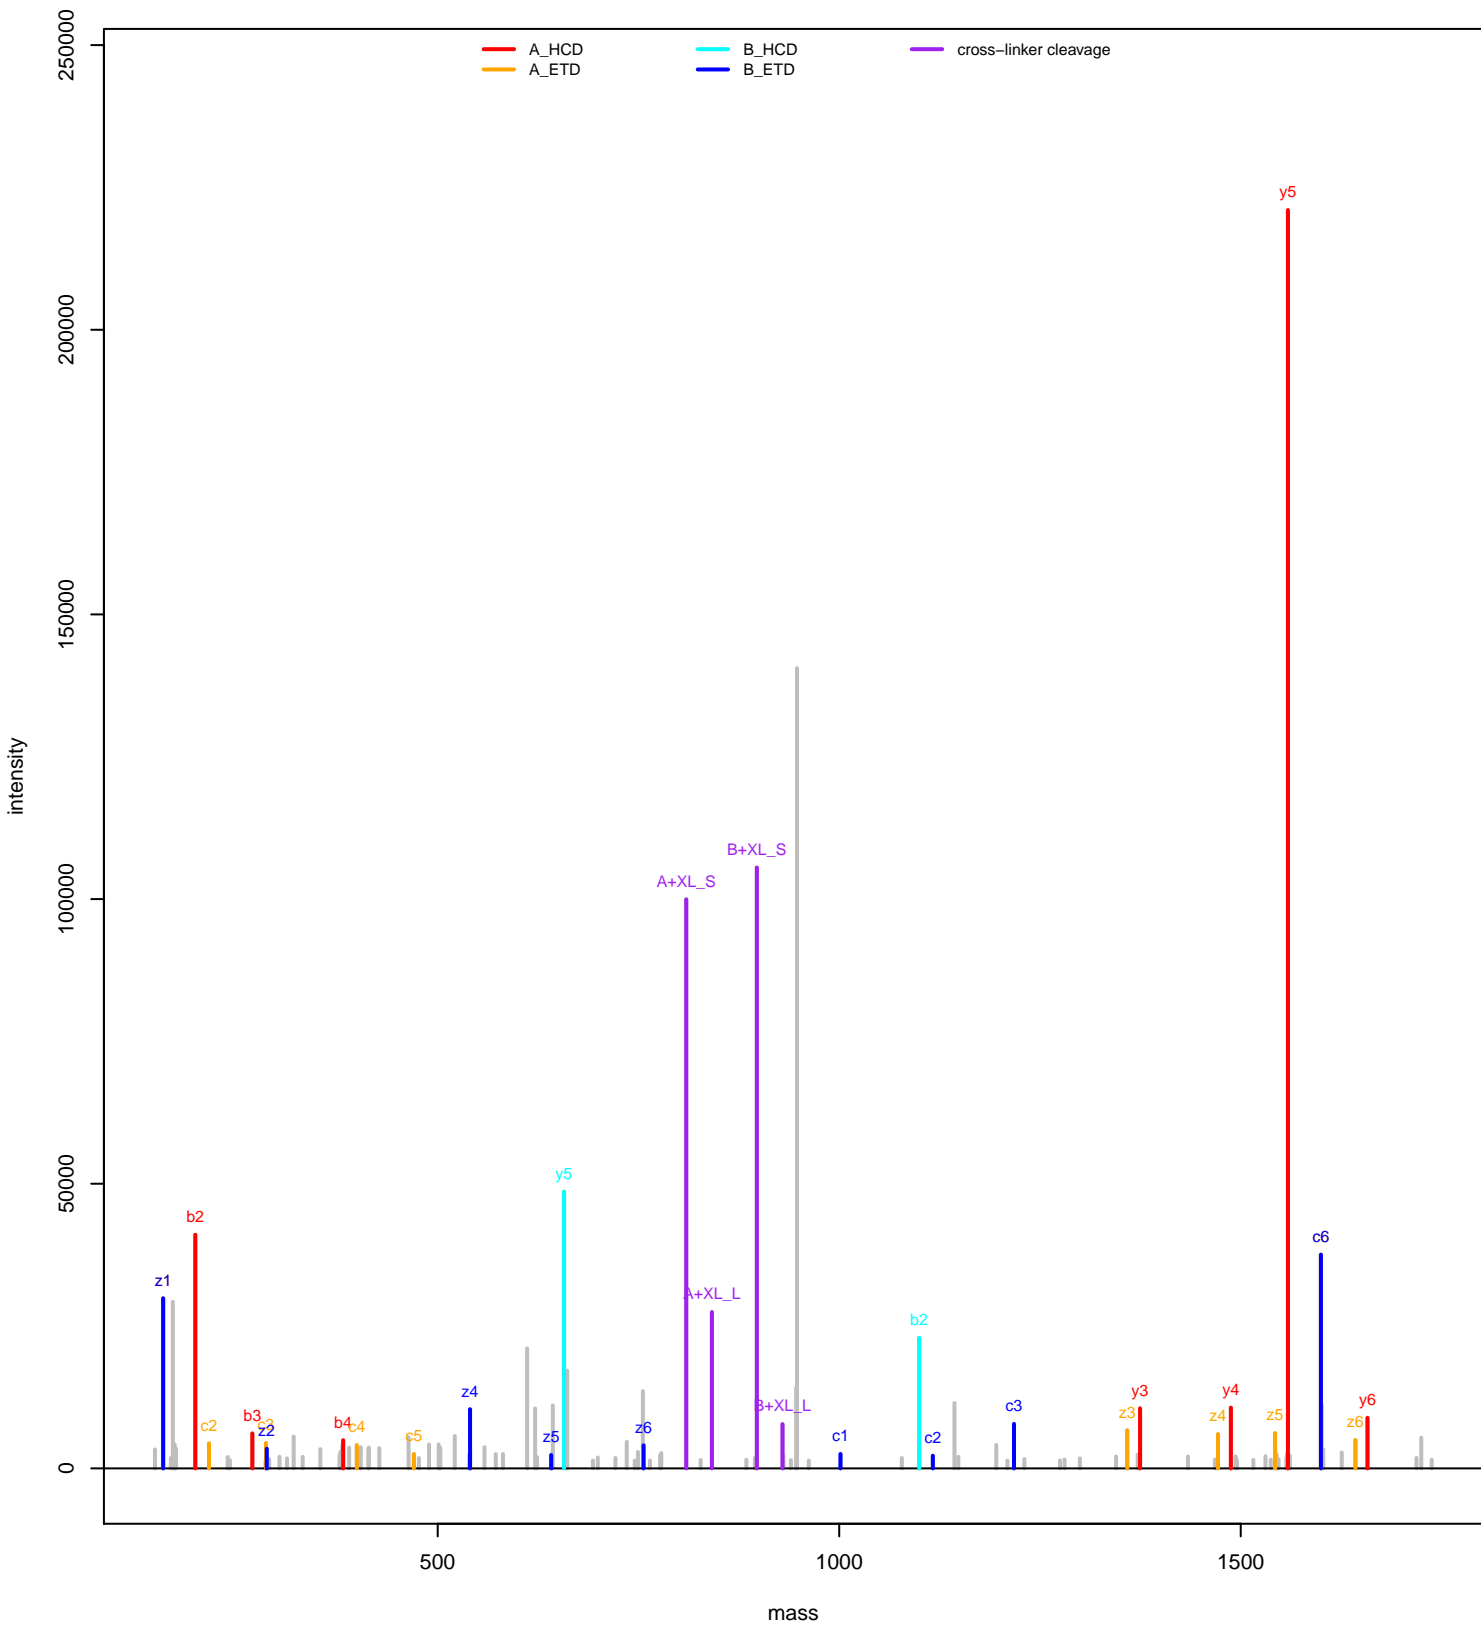

VVALAKR+XL\_S

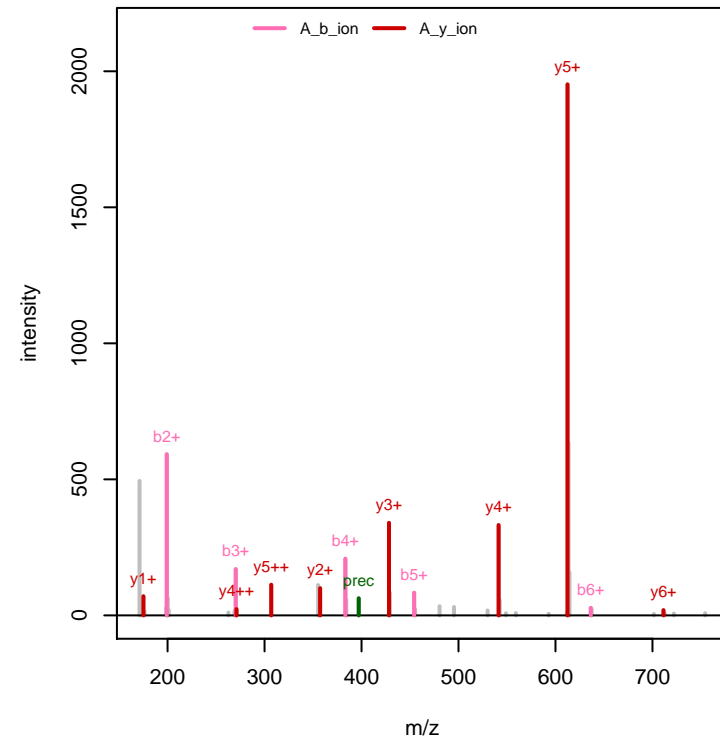

ADTRPER+XL\_S

VVALAKR+XL\_L

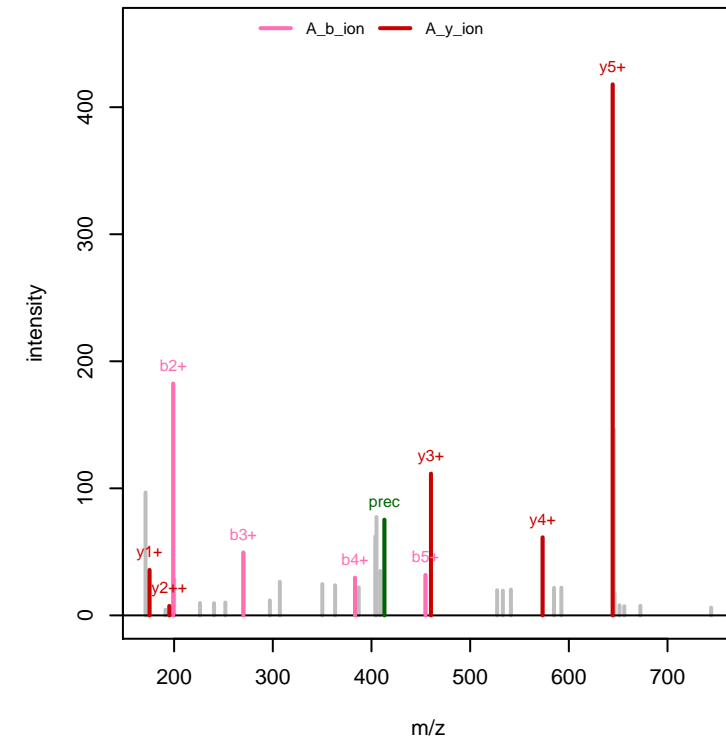

ADTRPER+XL\_L



TGTPAAQIGLKK  
KGDVIIGANQQAVK

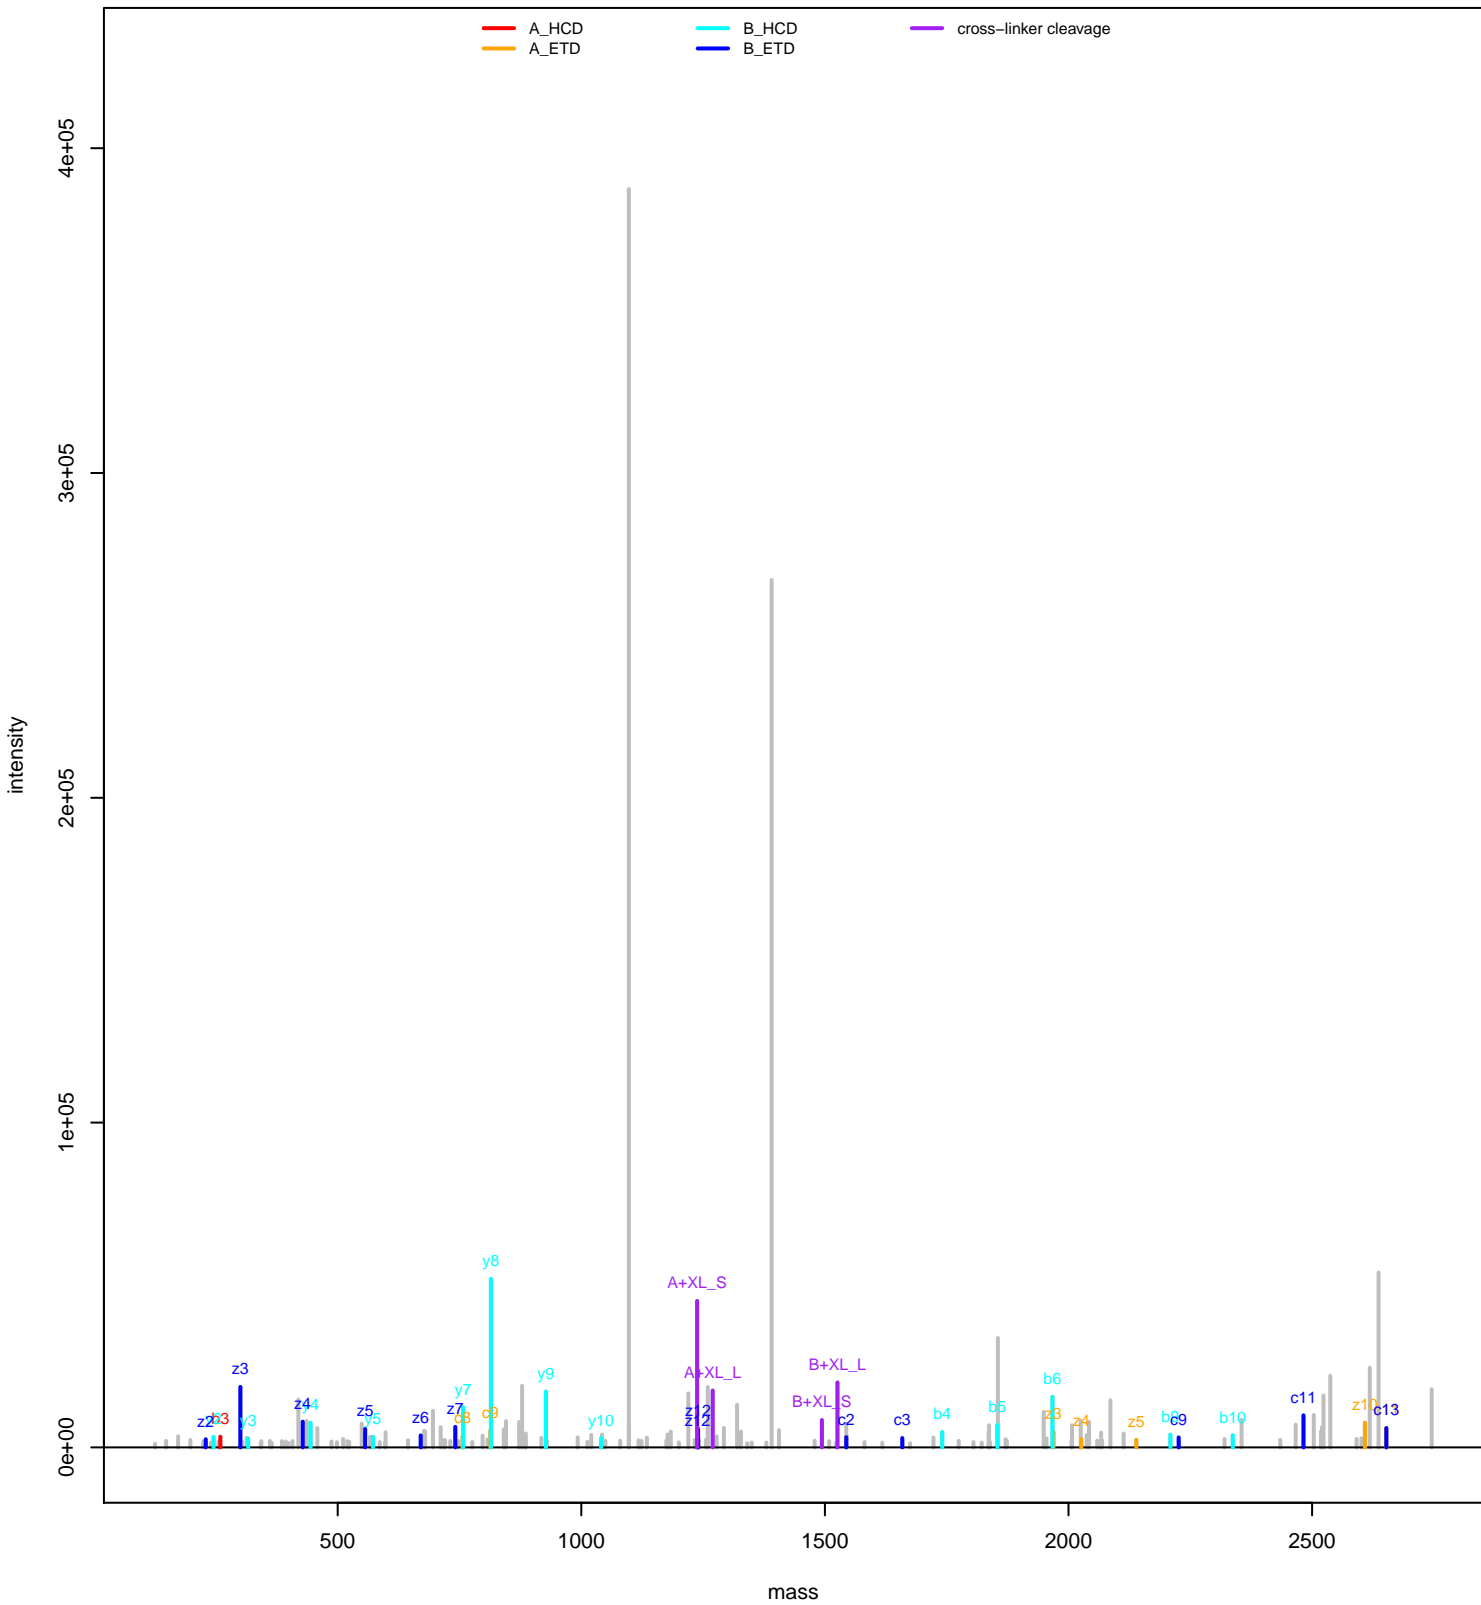

TGTPAAQIGLKK+XL\_S

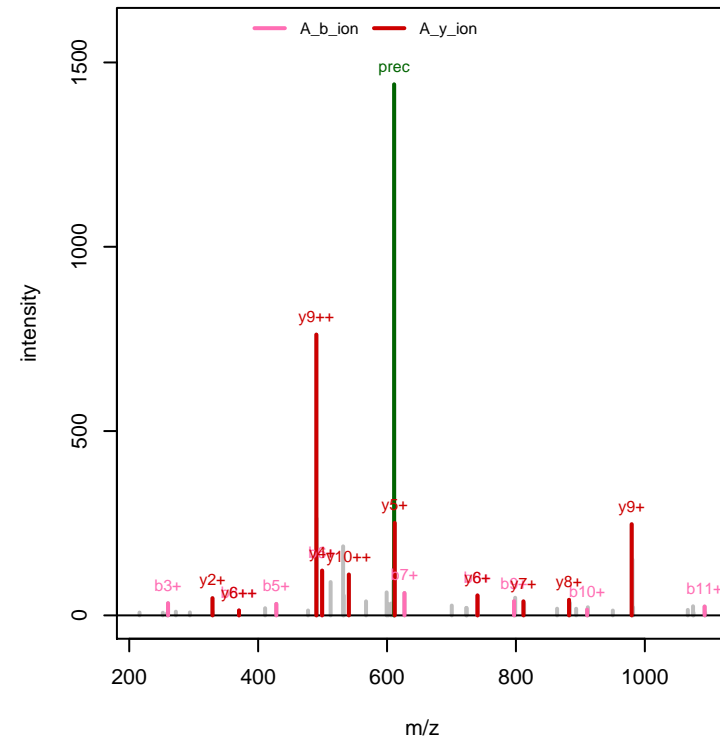

TGTPAAQIGLKK+XL\_L

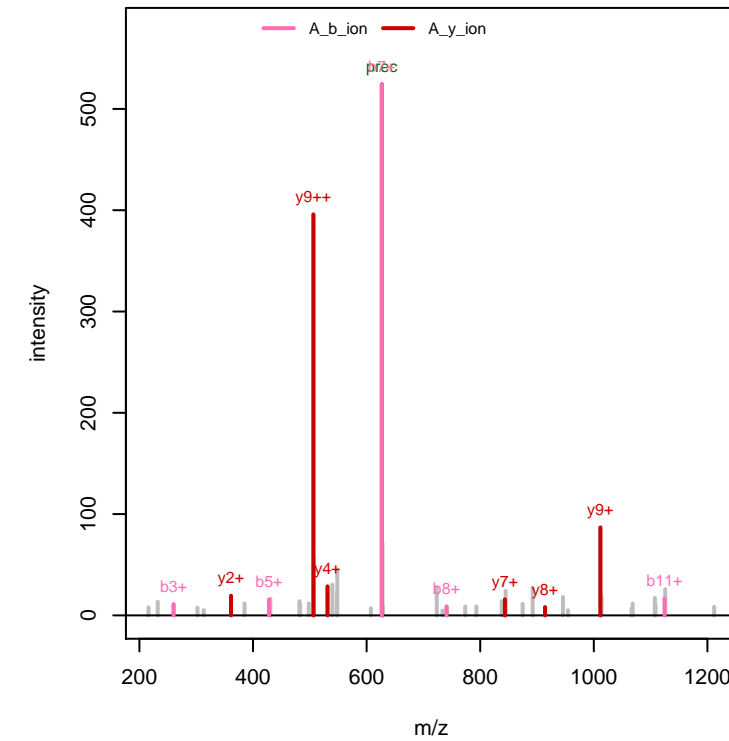

KGDVIIGANQQAVK+XL\_S

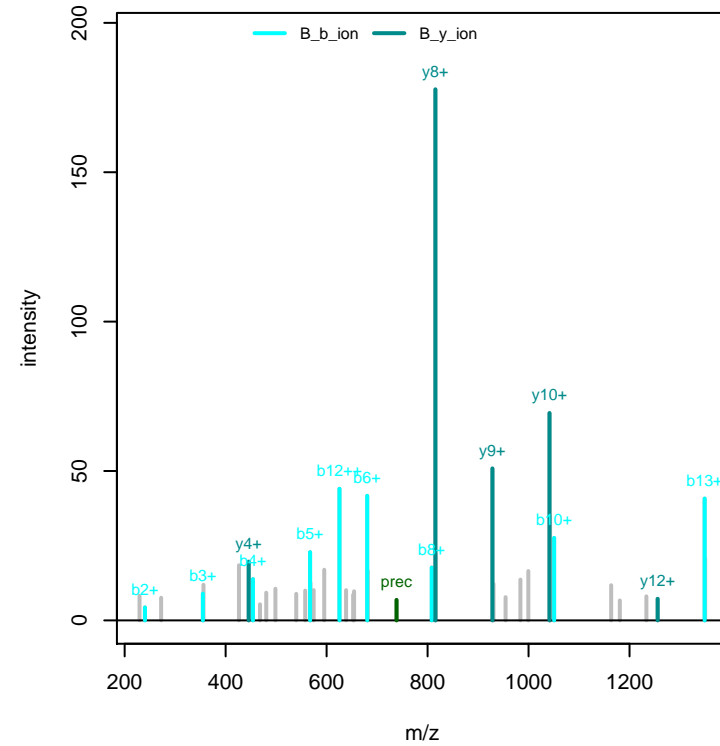

KGDVIIGANQQAVK+XL\_L

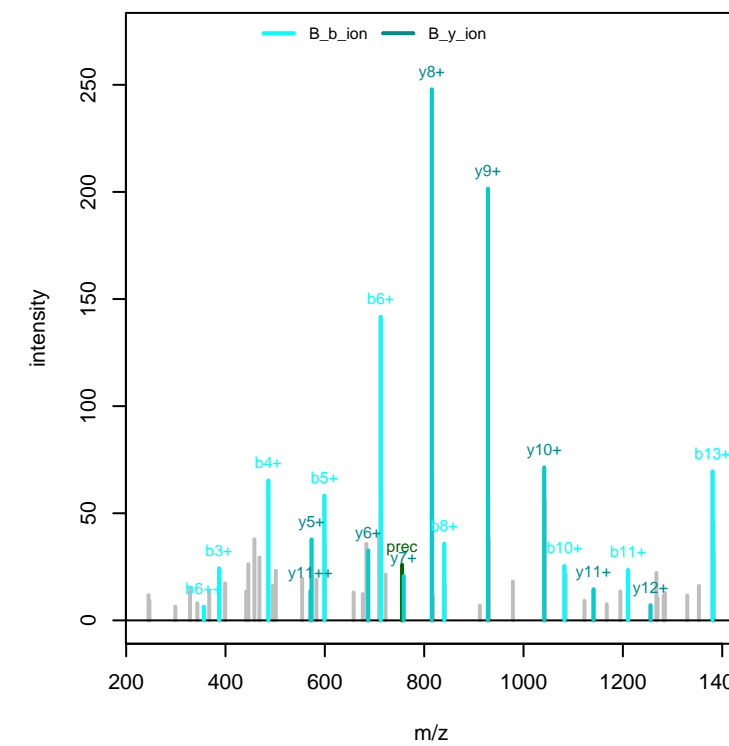

SEKSDLGGTMR  
SEKSDLGGTMoR

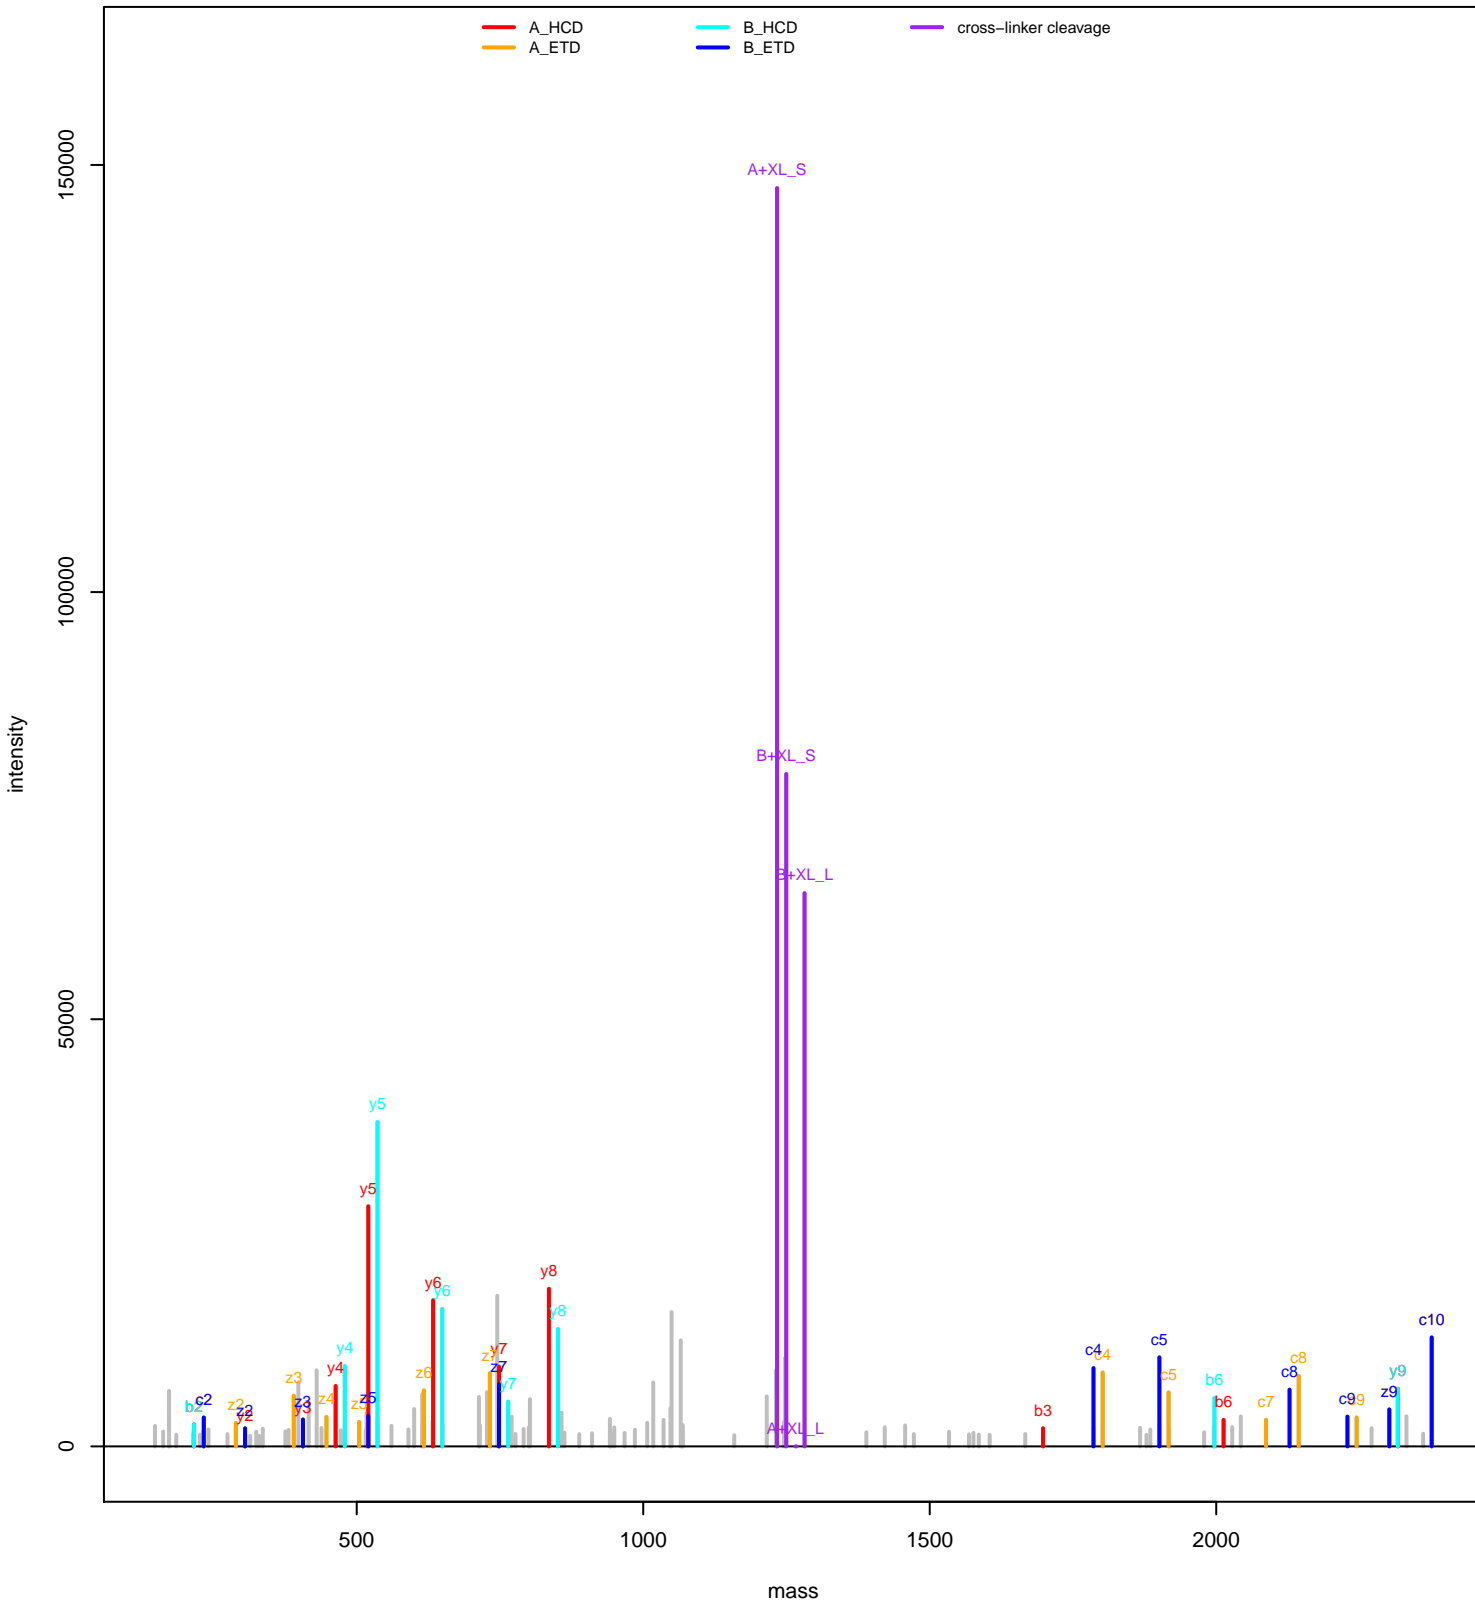

SEKSDLGGTMR+XL\_S

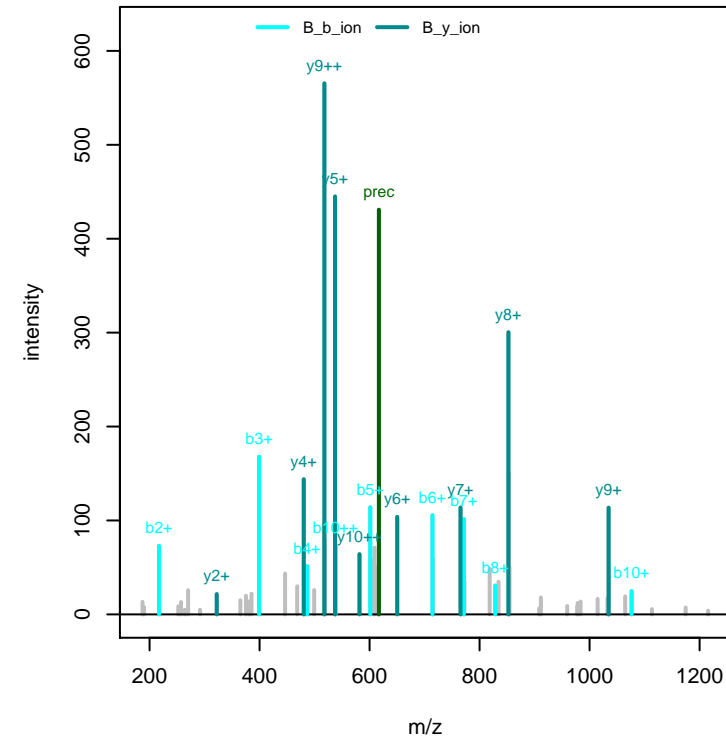

SEKSDLGGTMR+XL\_L

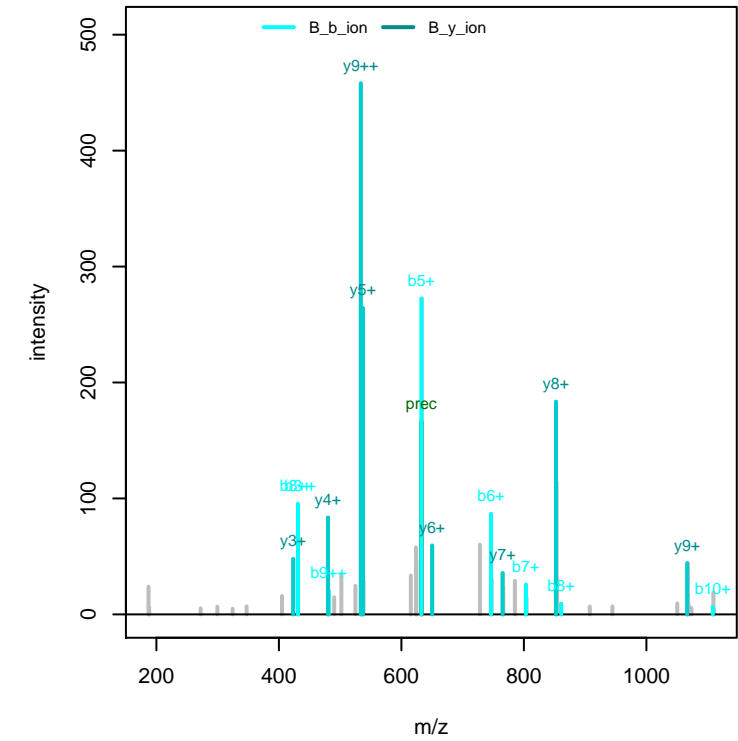

**DKNSGK**  
**IIAADNGDAWVEVKGQK**

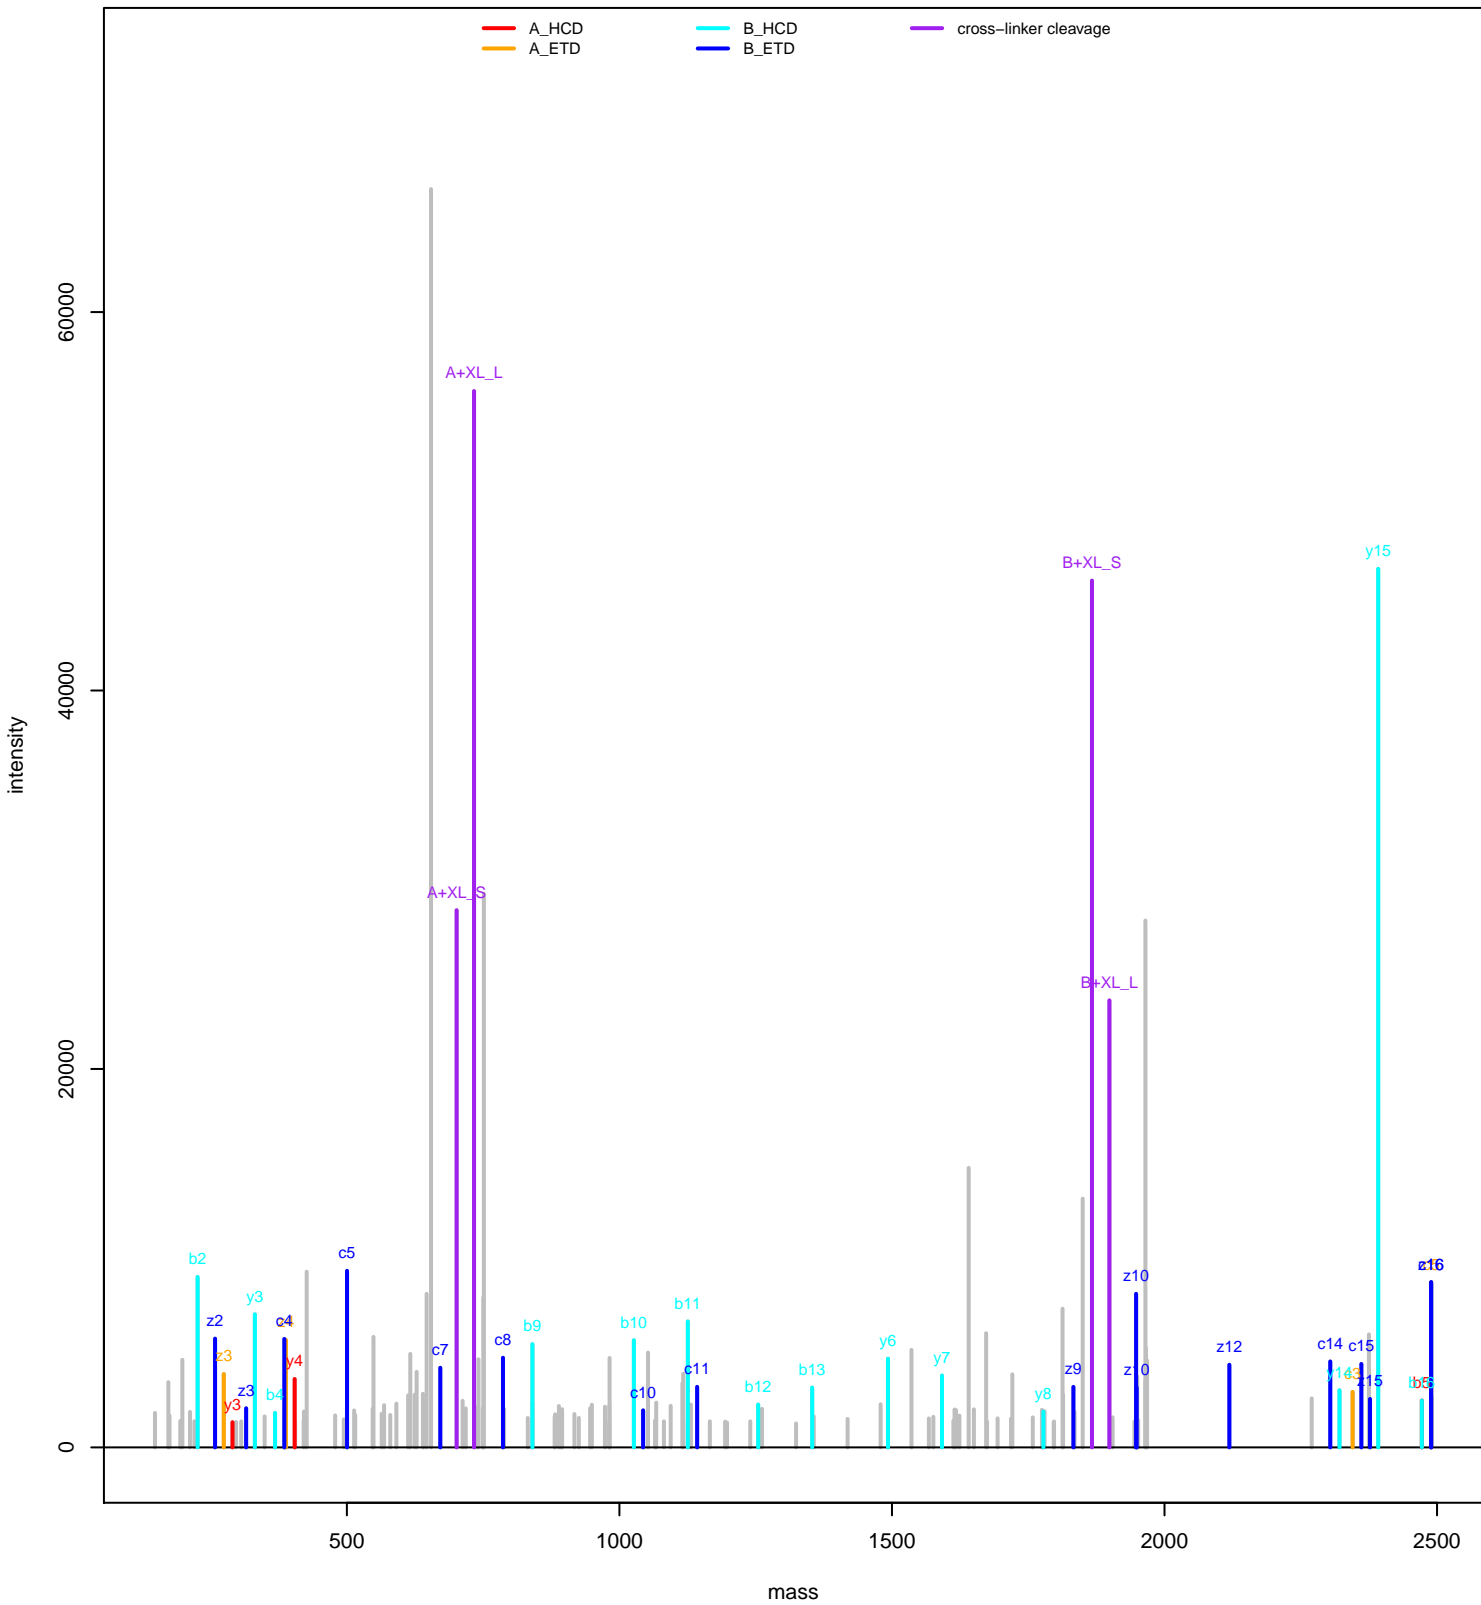

**DKNSGK+XL\_S**

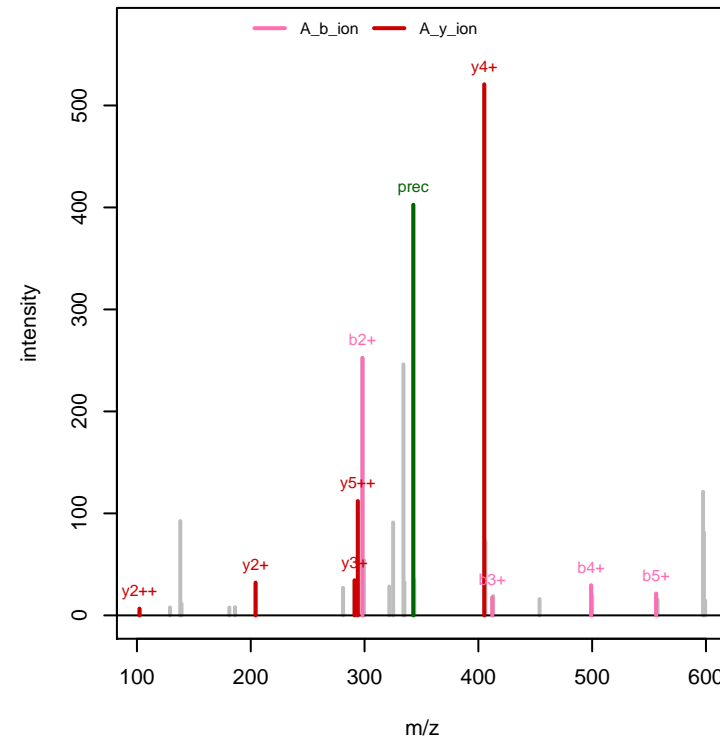

**DKNSGK+XL\_L**

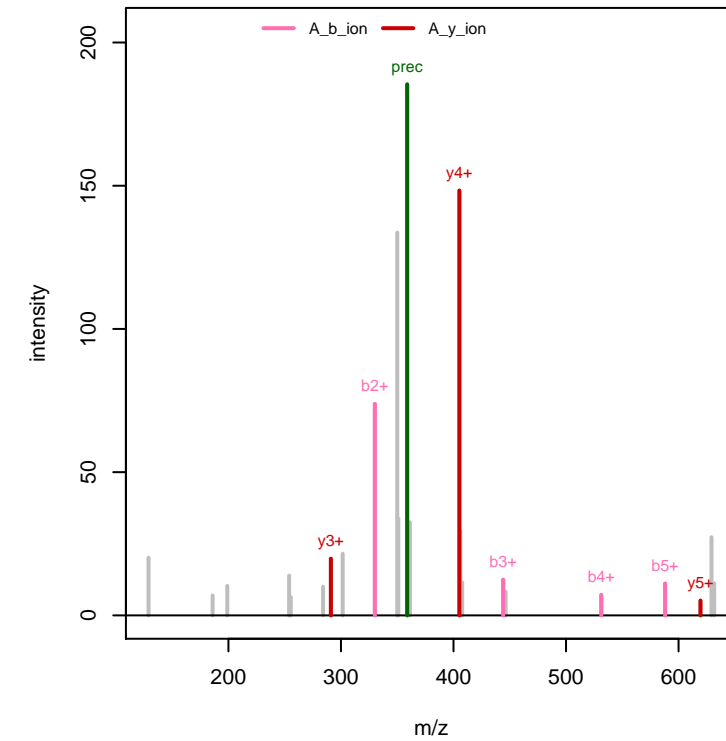

**IIAADNGDAWVEVKGQK+XL\_S**

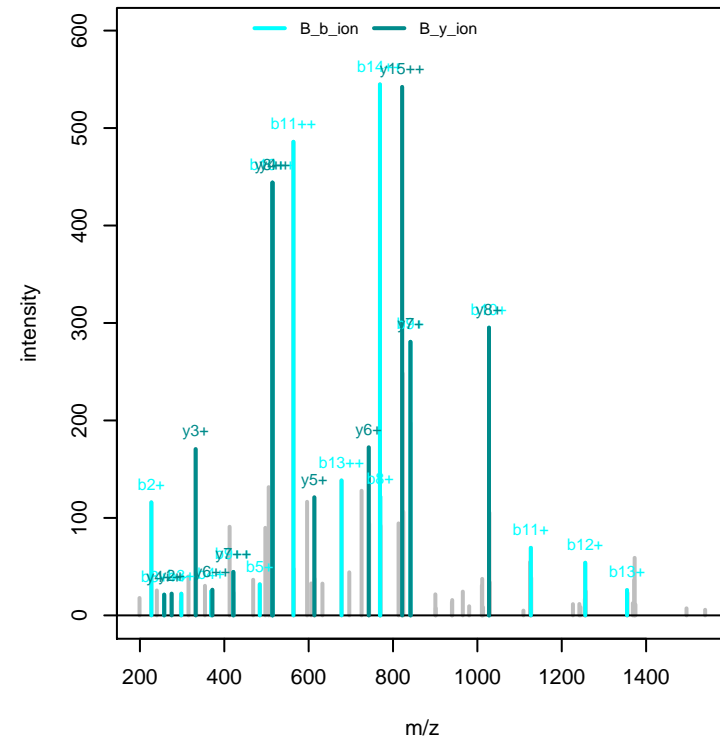

**IIAADNGDAWVEVKGQK+XL\_L**

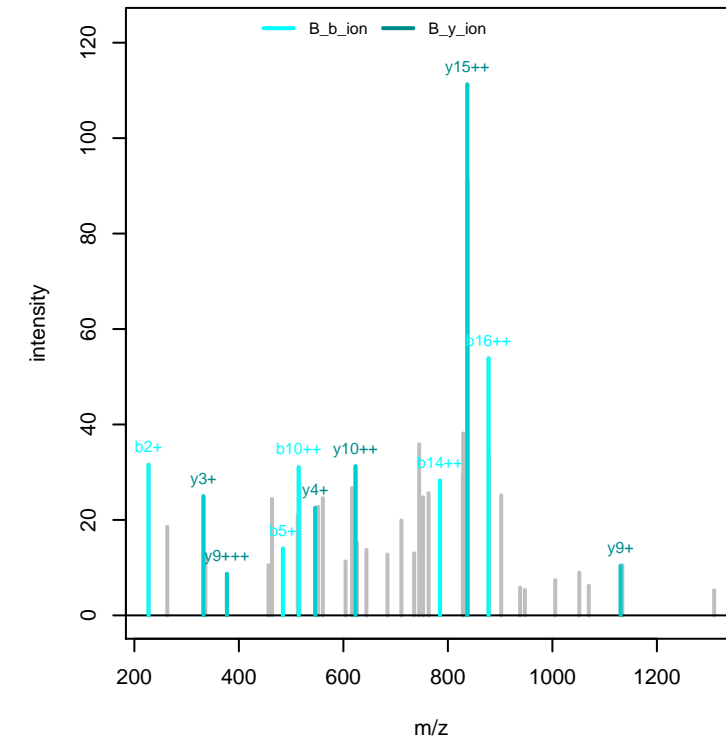

**KLQSMK  
METDLQAKMK**

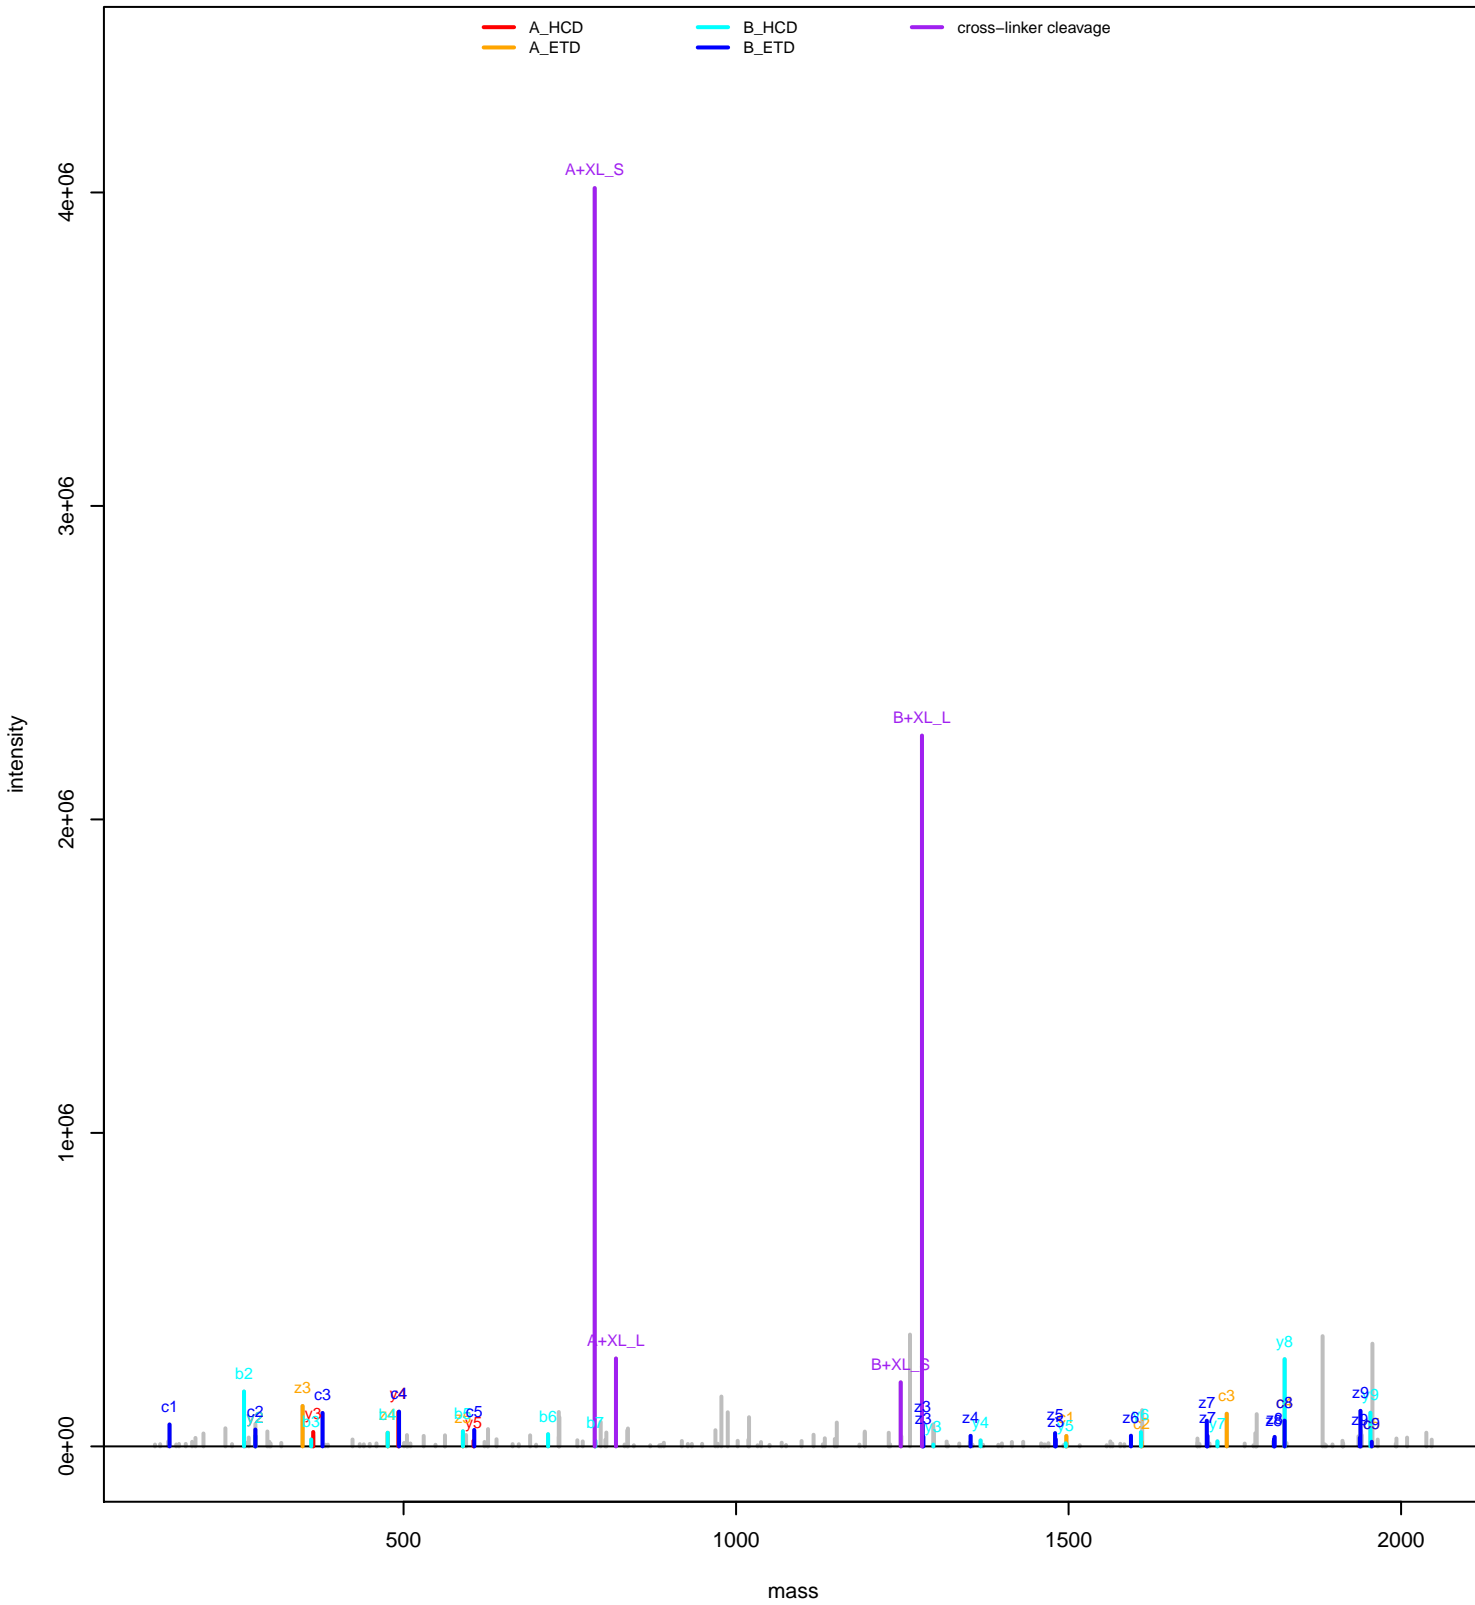

**KLQSMK+XL\_S**

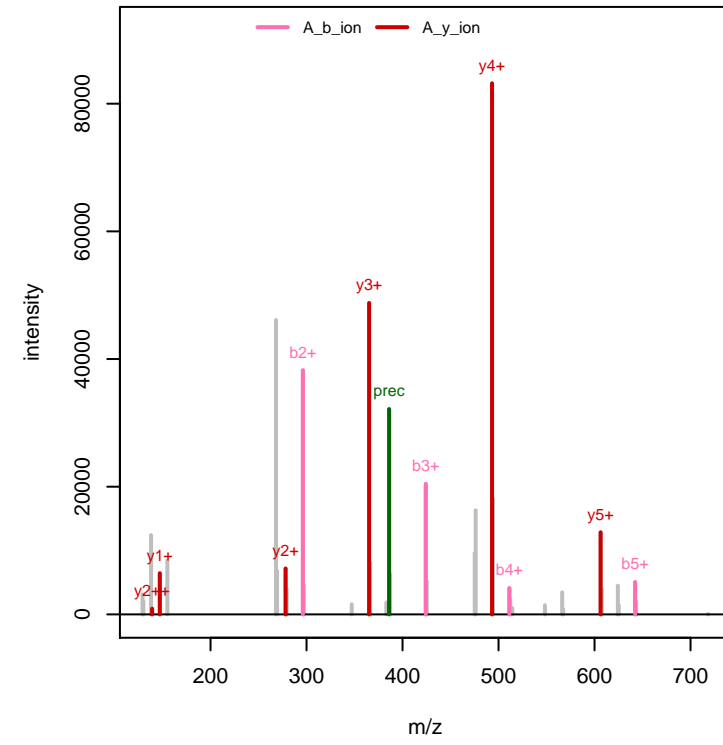

**KLQSMK+XL\_L**

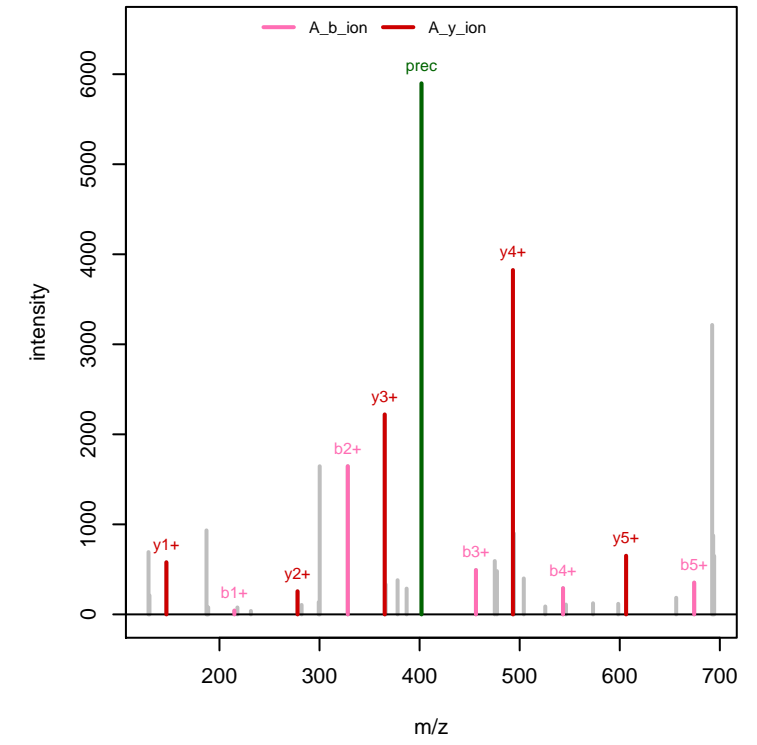

**METDLQAKMK+XL\_S**

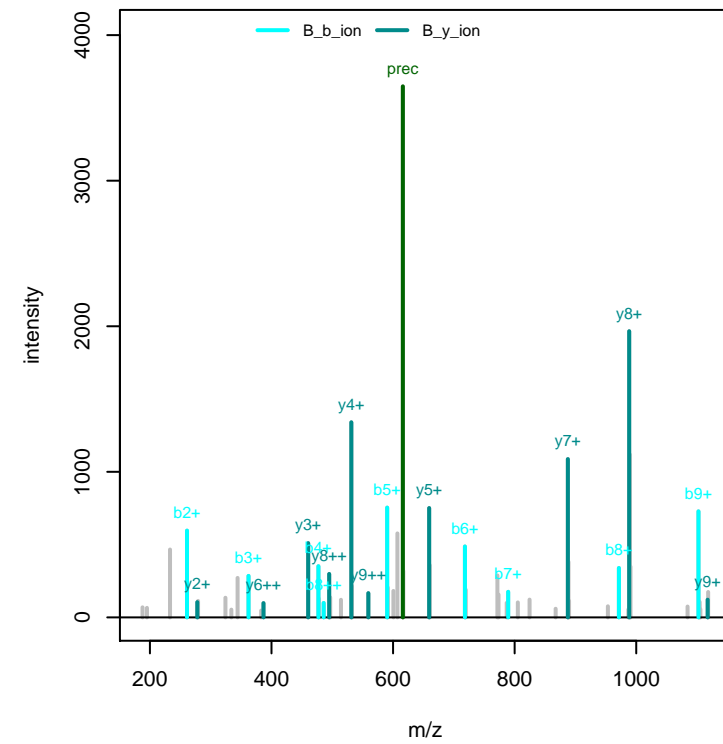

**METDLQAKMK+XL\_L**

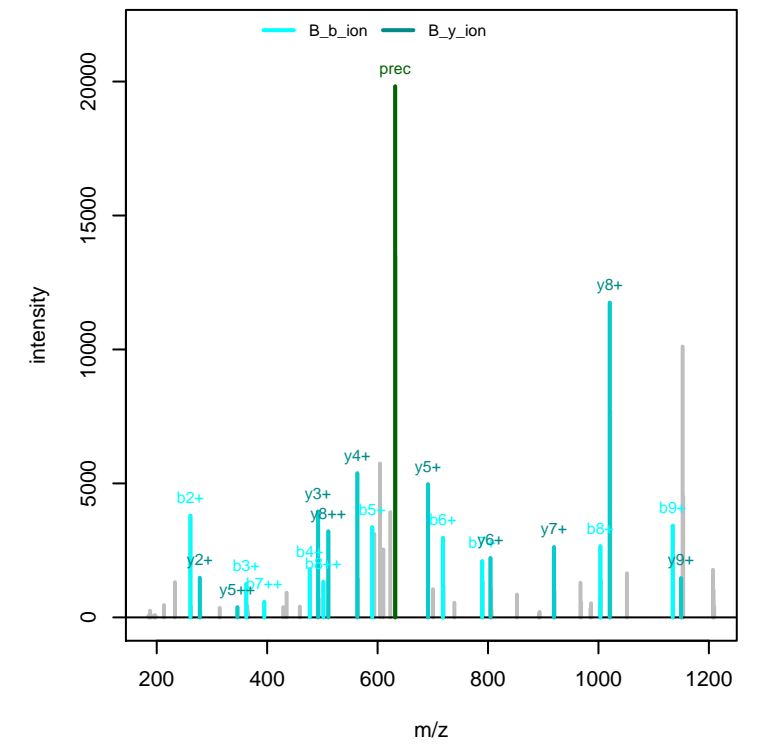

AMEKAR  
AHIEKQAGELQEK

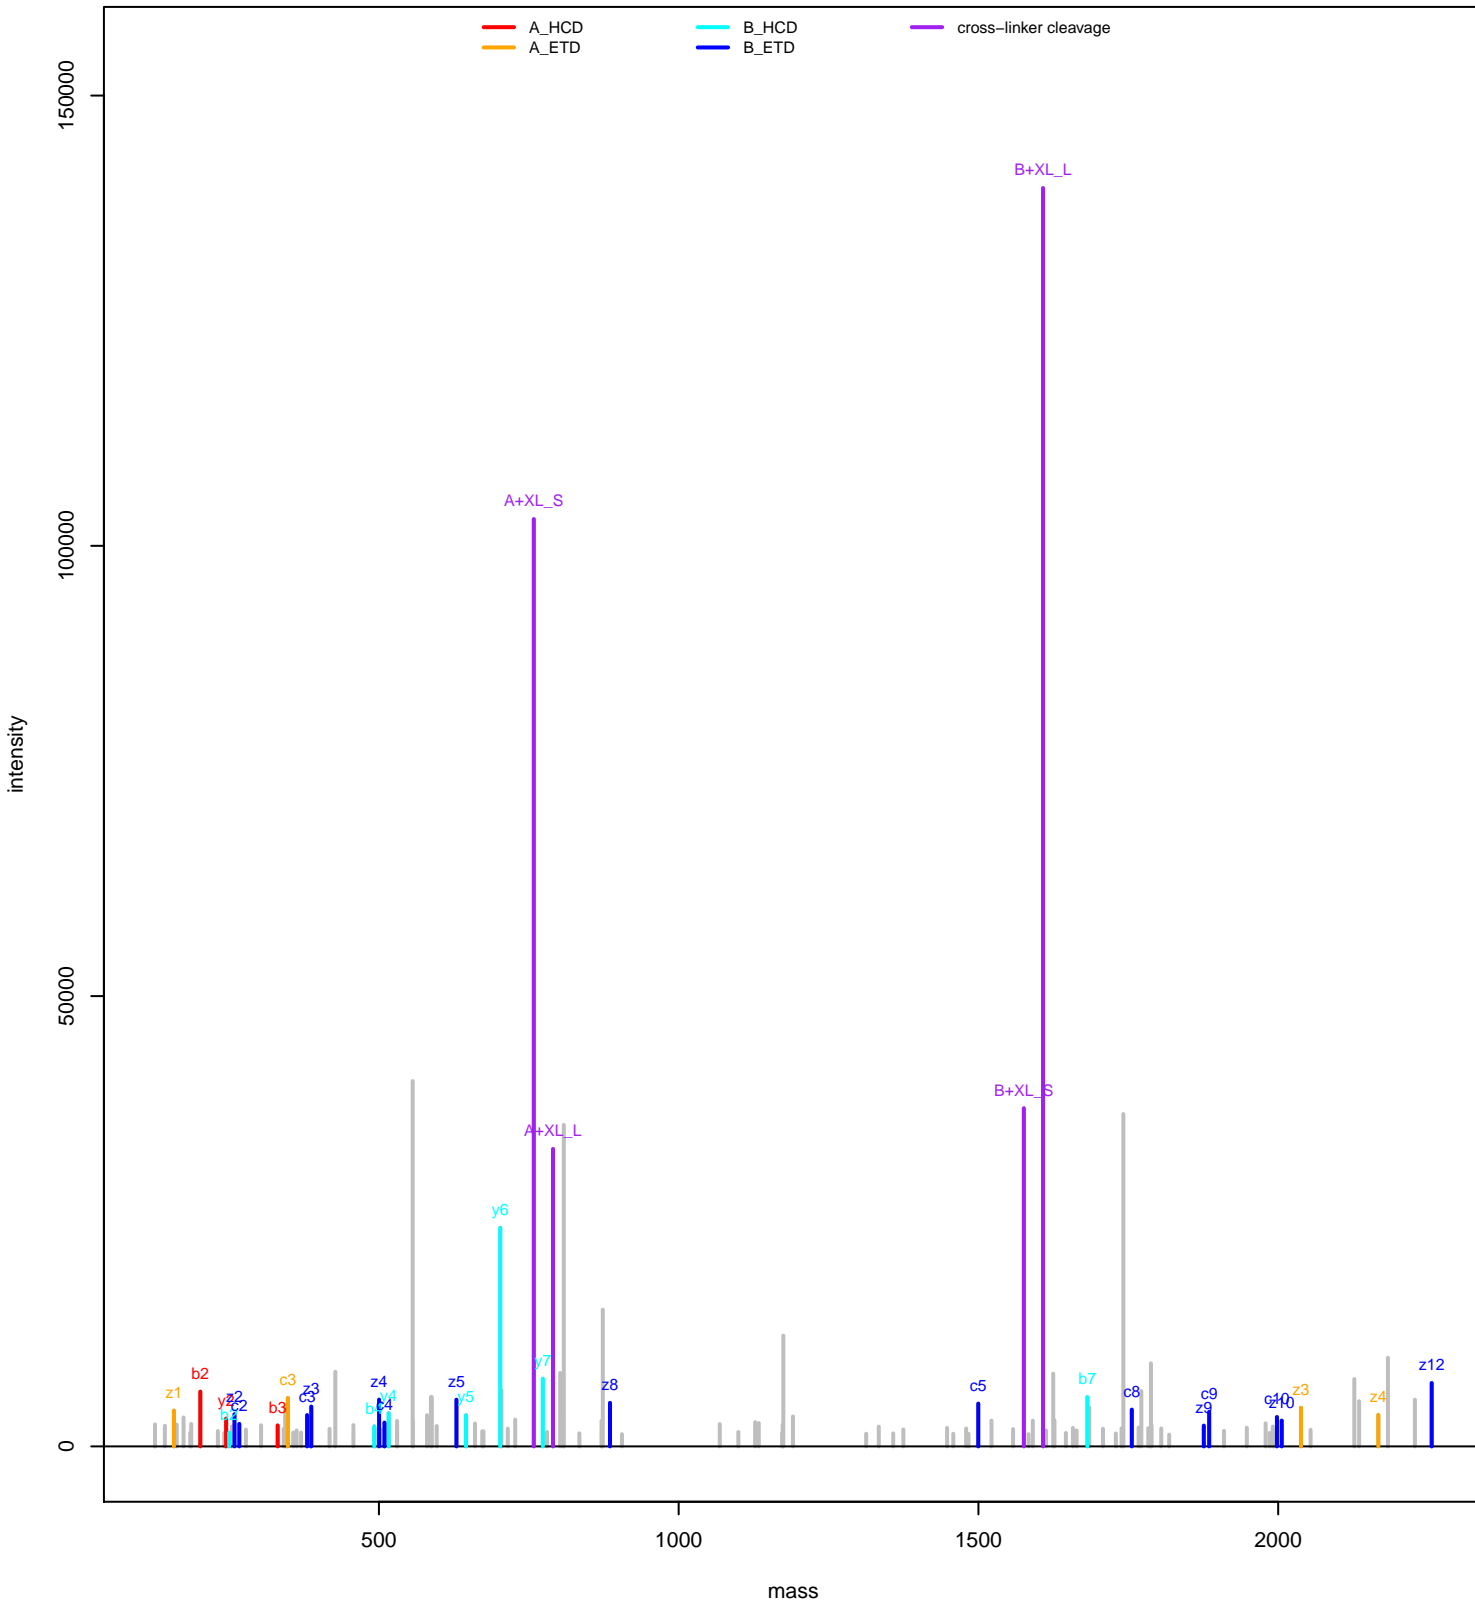

AMEKAR+XL\_S

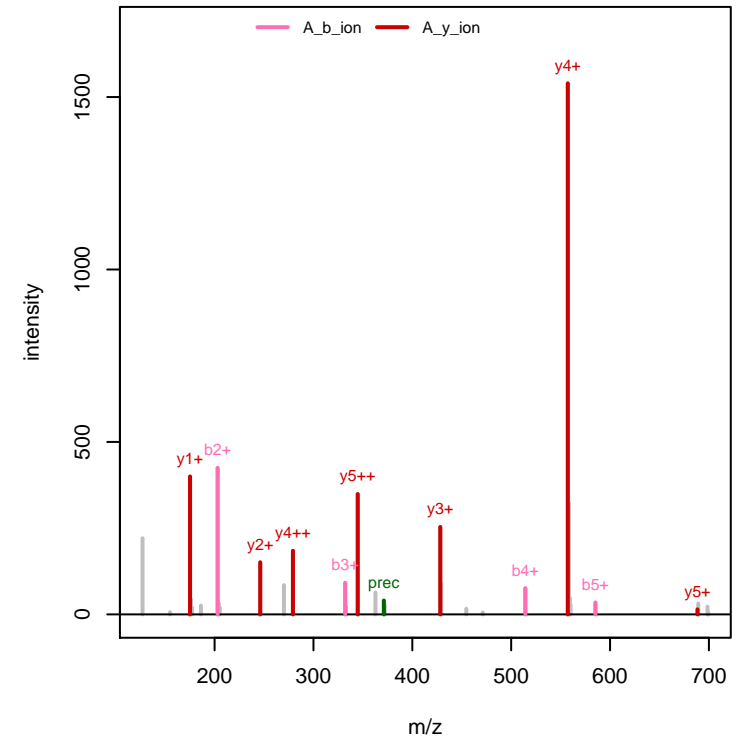

AMEKAR+XL\_L

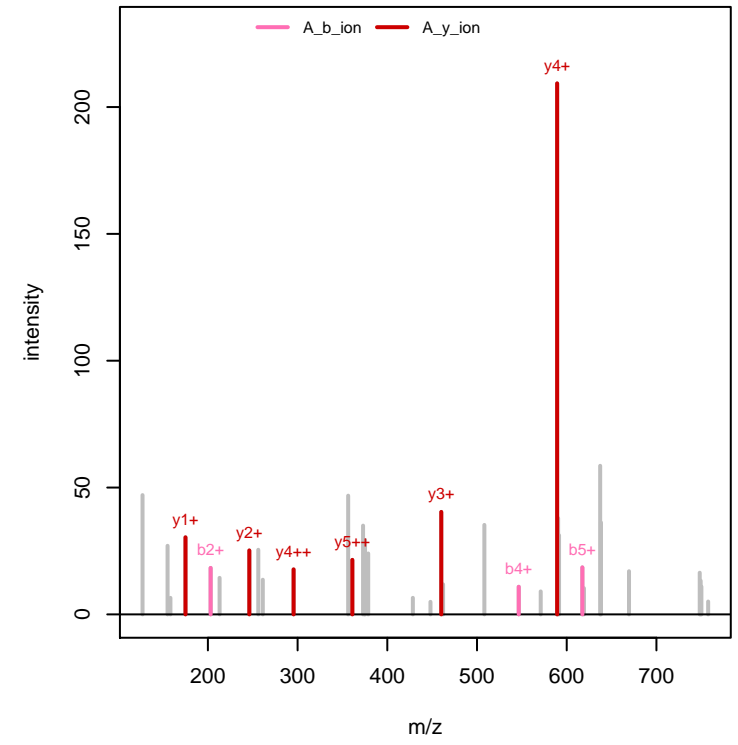

AHIEKQAGELQEK+XL\_S

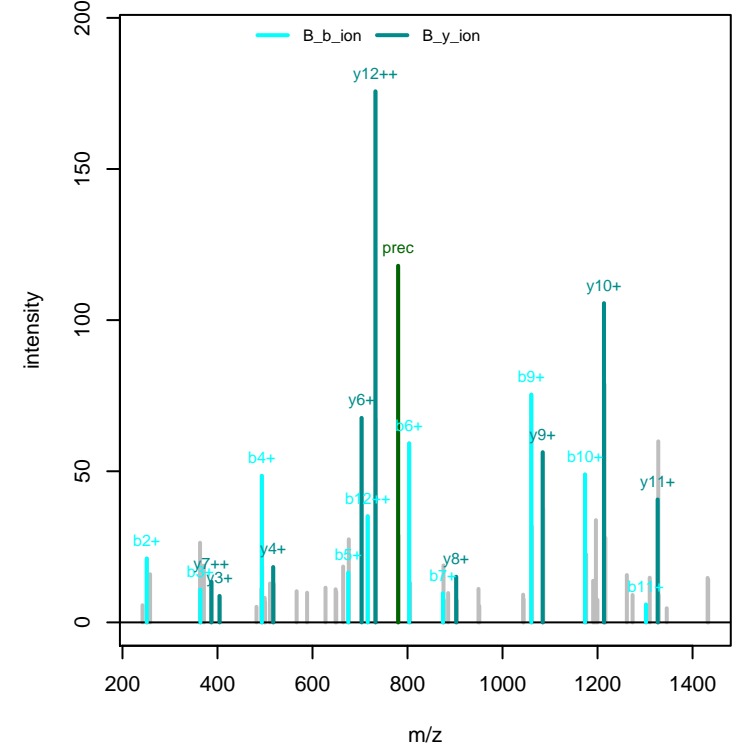

AHIEKQAGELQEK+XL\_L

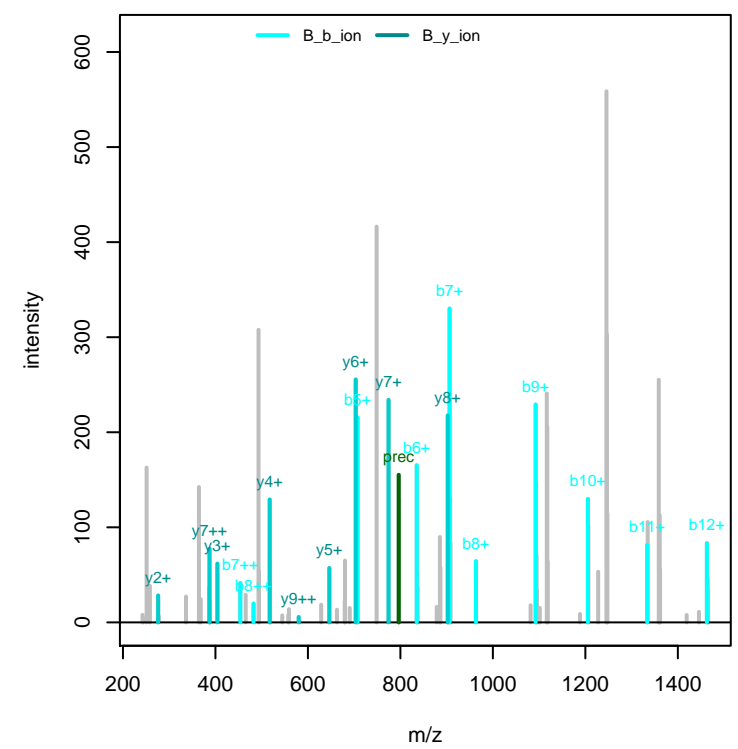

**KMDDPSGR  
AVGVHQSAYK**

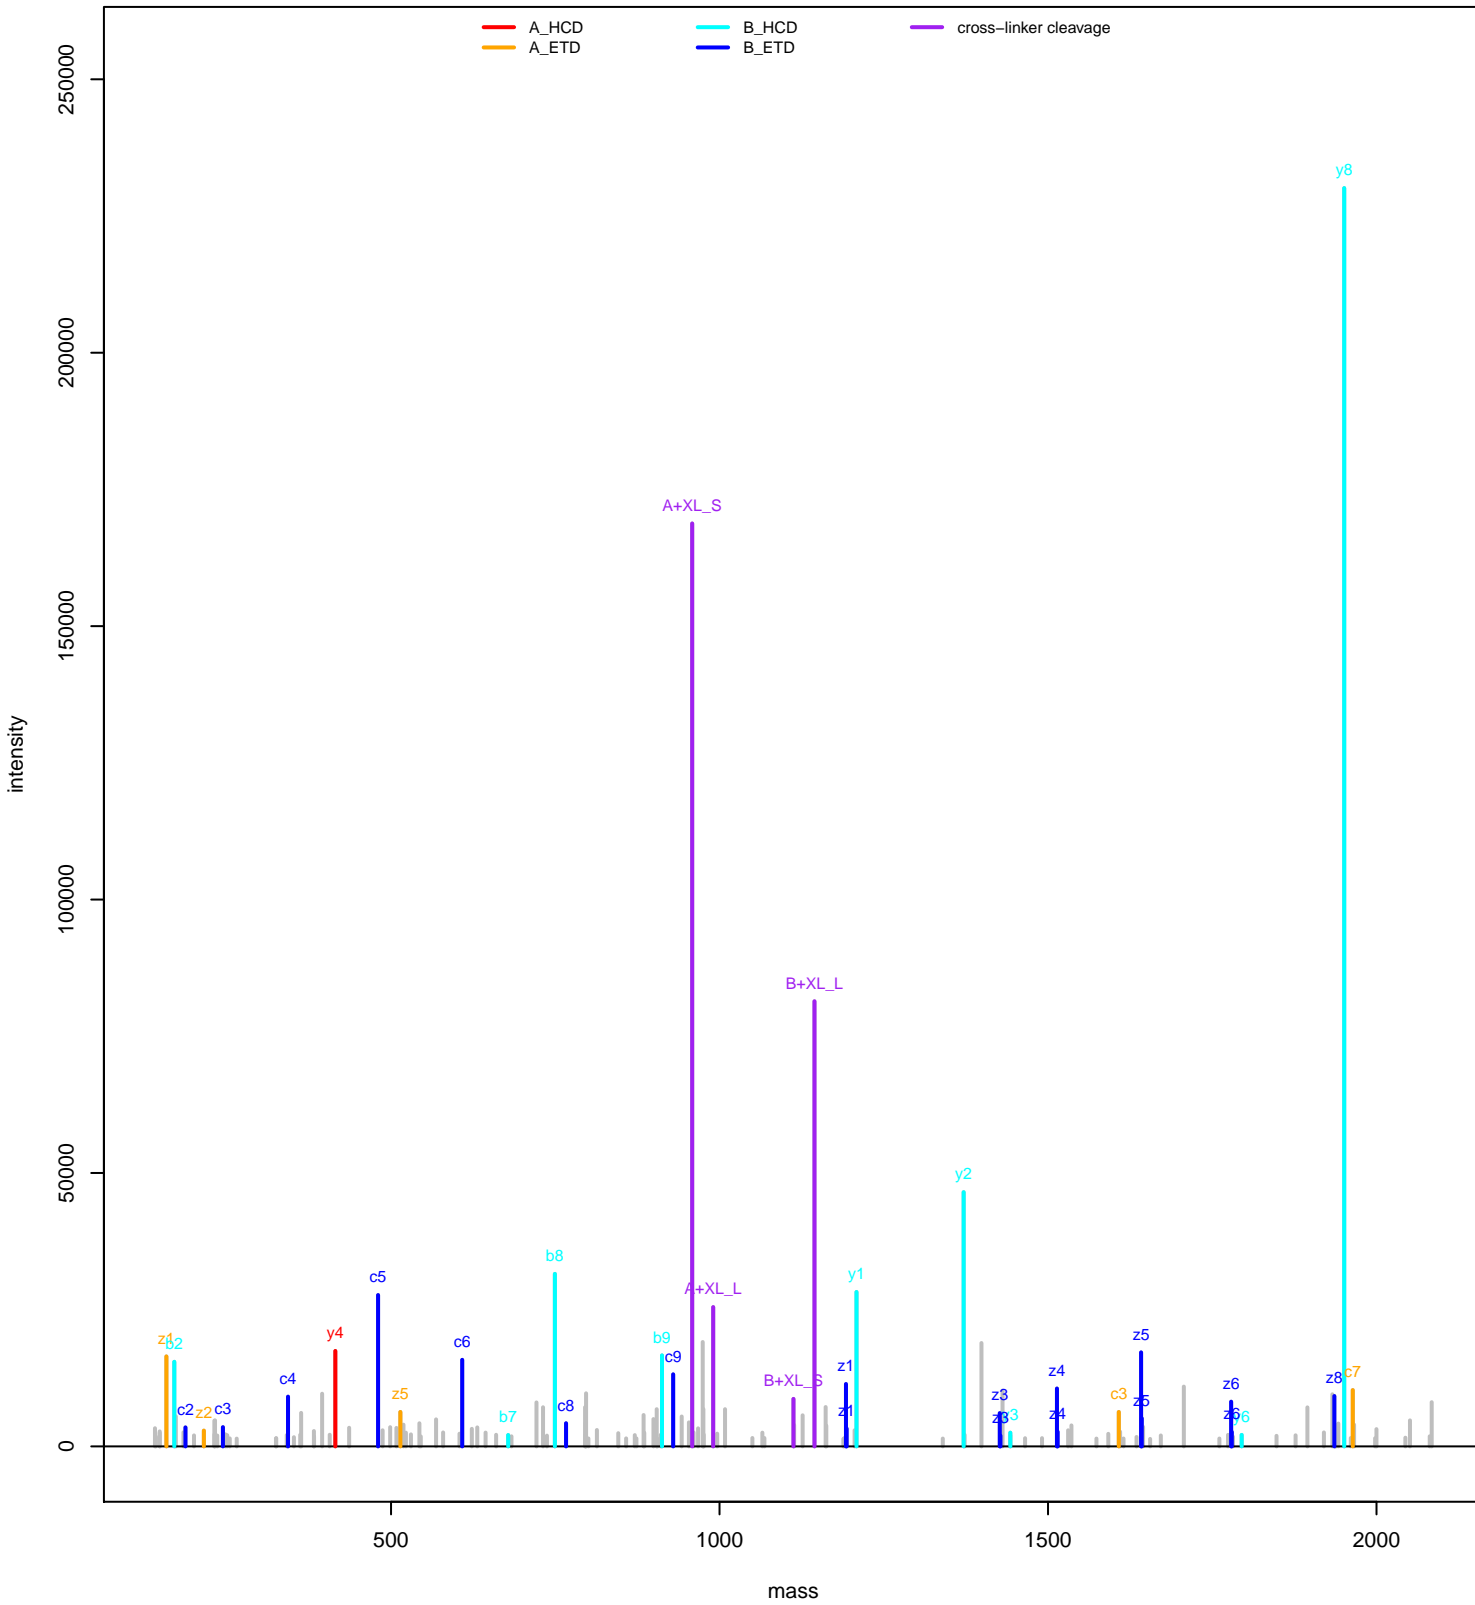

**KMDDPSGR+XL\_S**

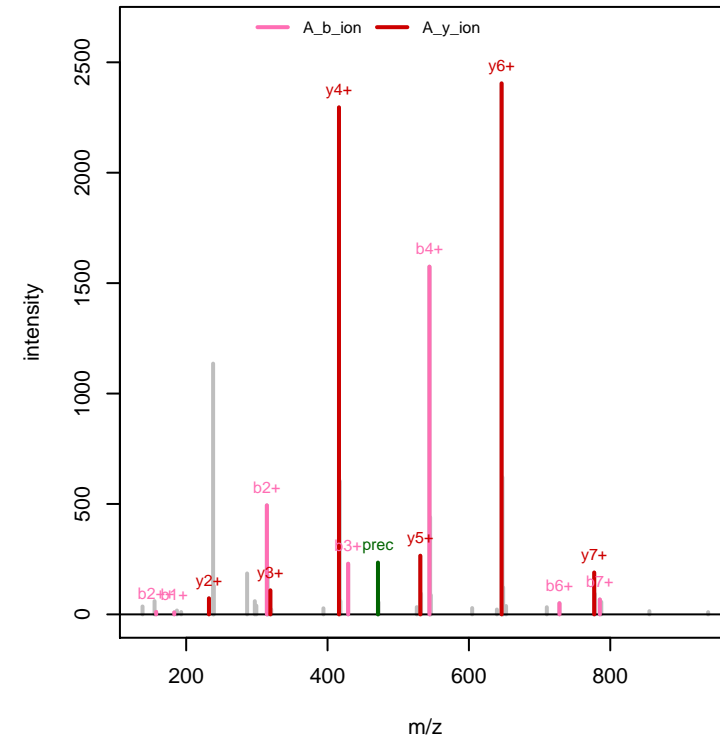

**KMDDPSGR+XL\_L**

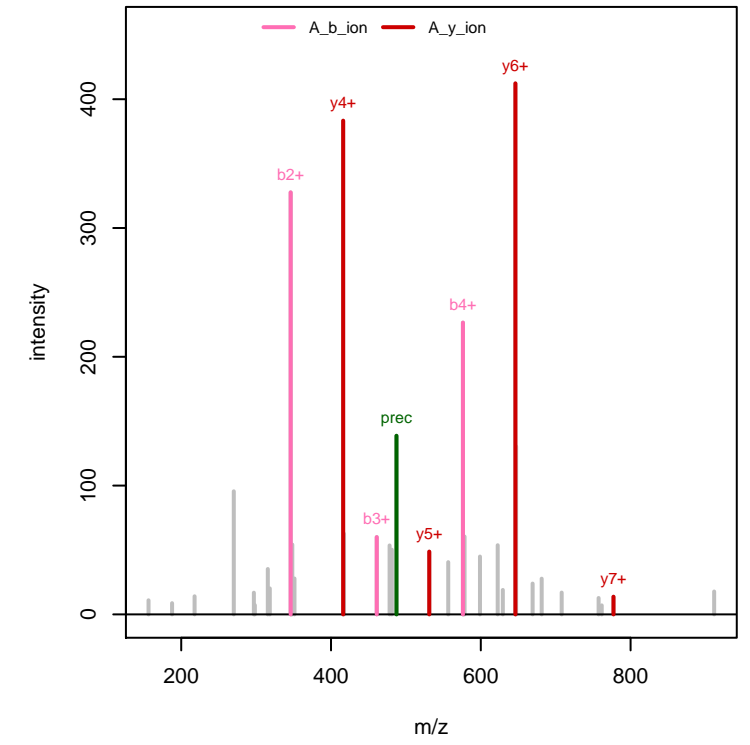

**AVGVHQSAYK+XL\_S**

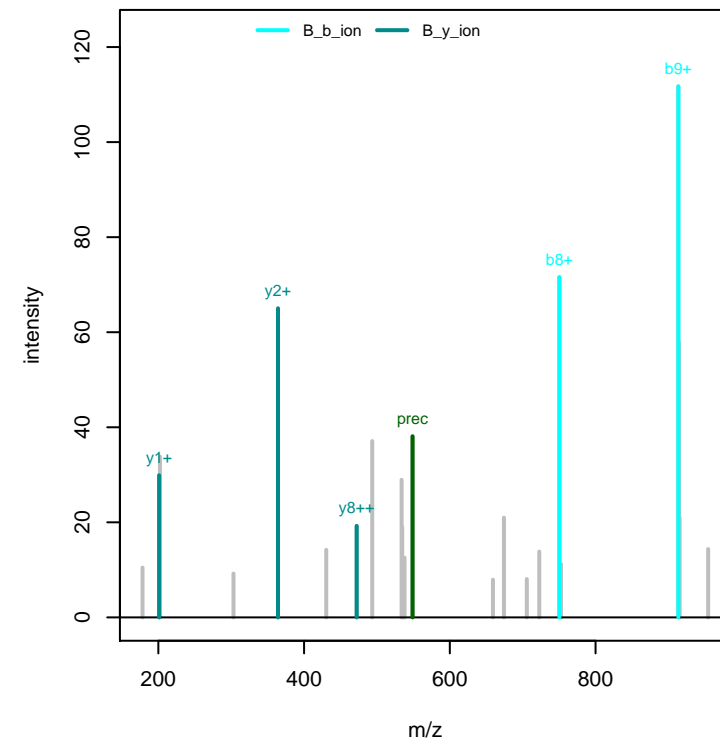

**AVGVHQSAYK+XL\_L**

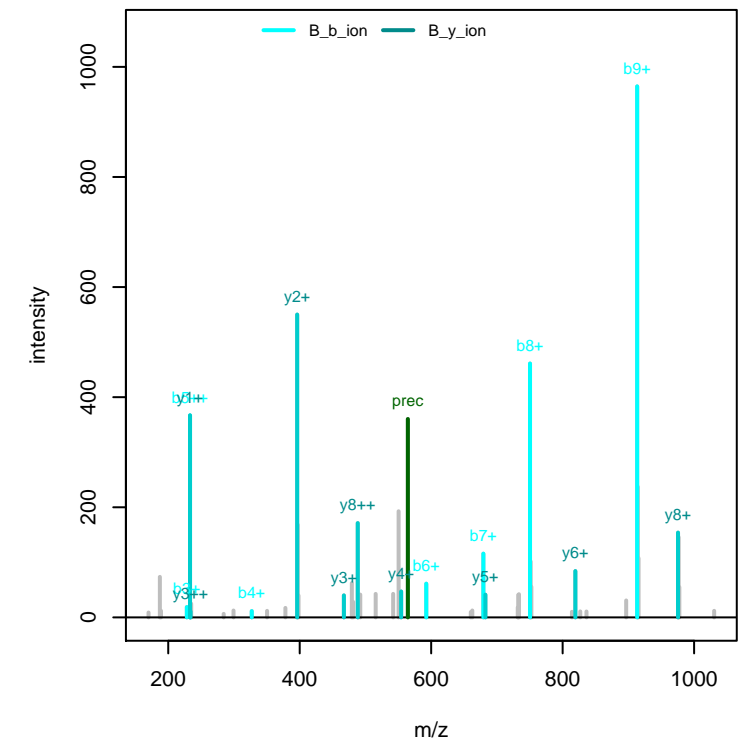

DANDKVK  
MISDIRK

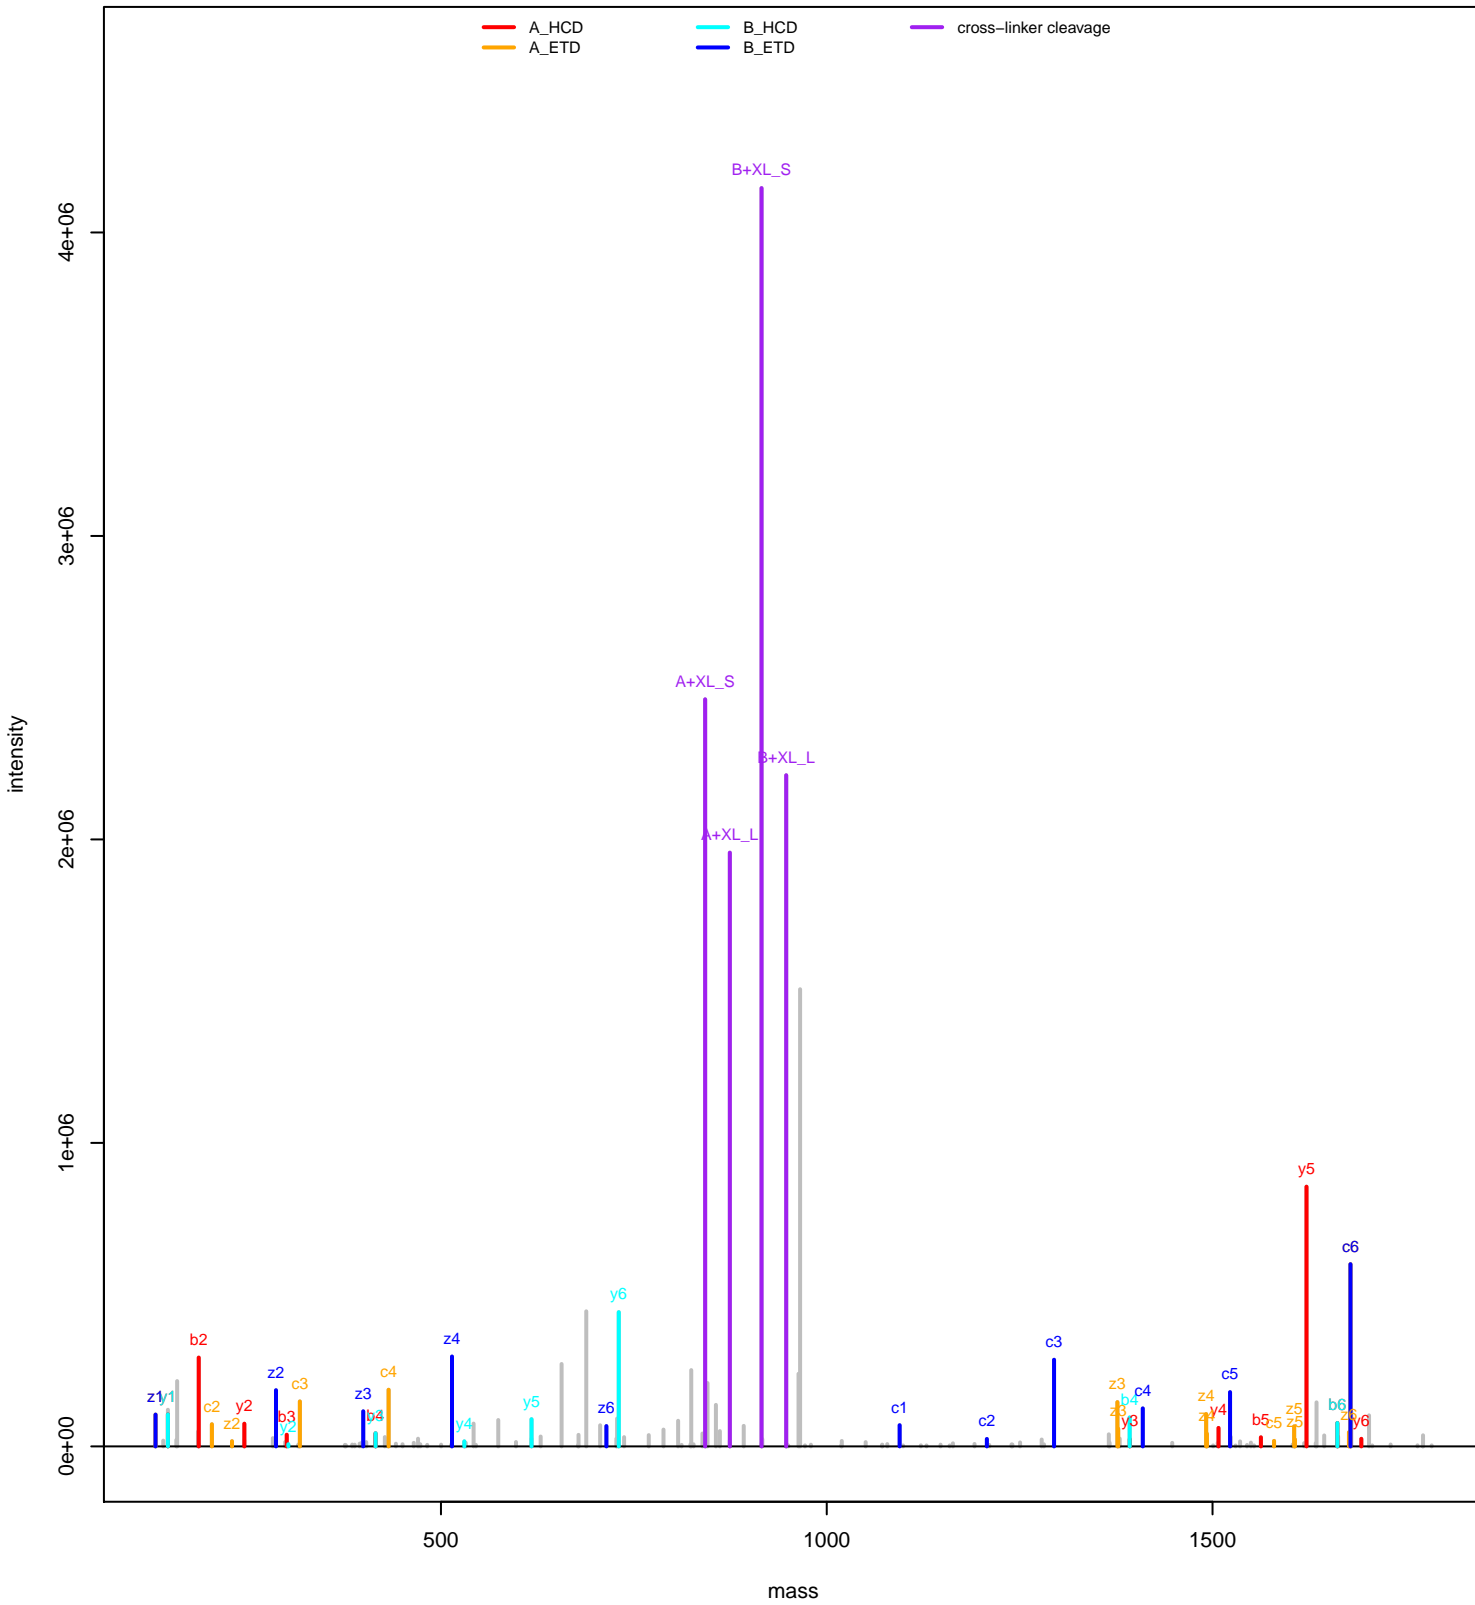

DANDKVK+XL\_S

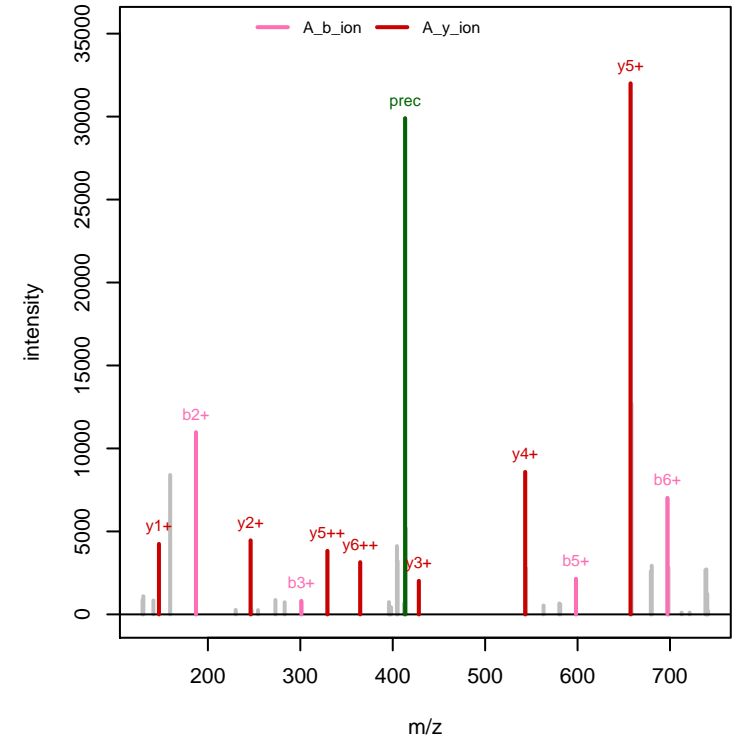

DANDKVK+XL\_L

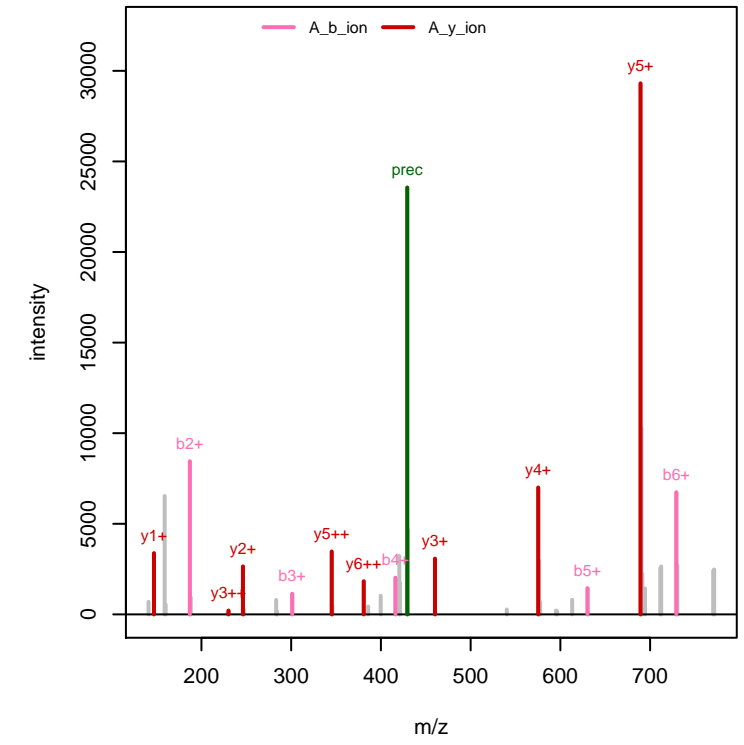

MISDIRK+XL\_S

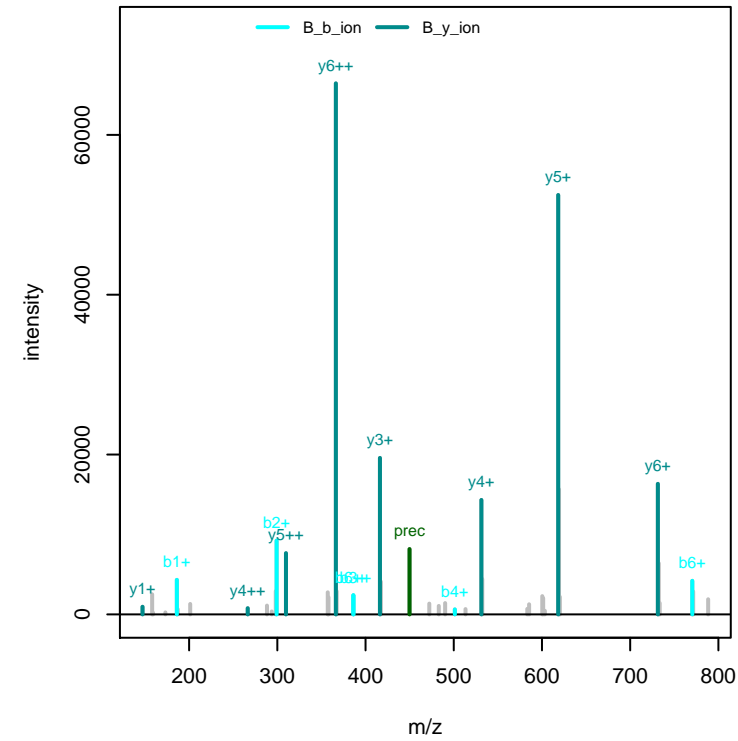

MISDIRK+XL\_L

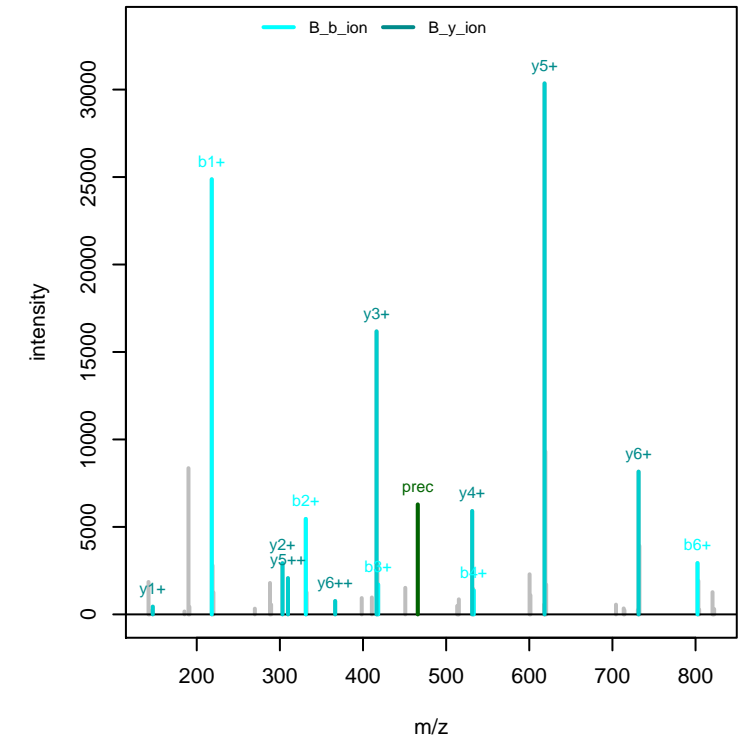

**GQNAPKDPR  
IGSKTPIPLGVTEK**

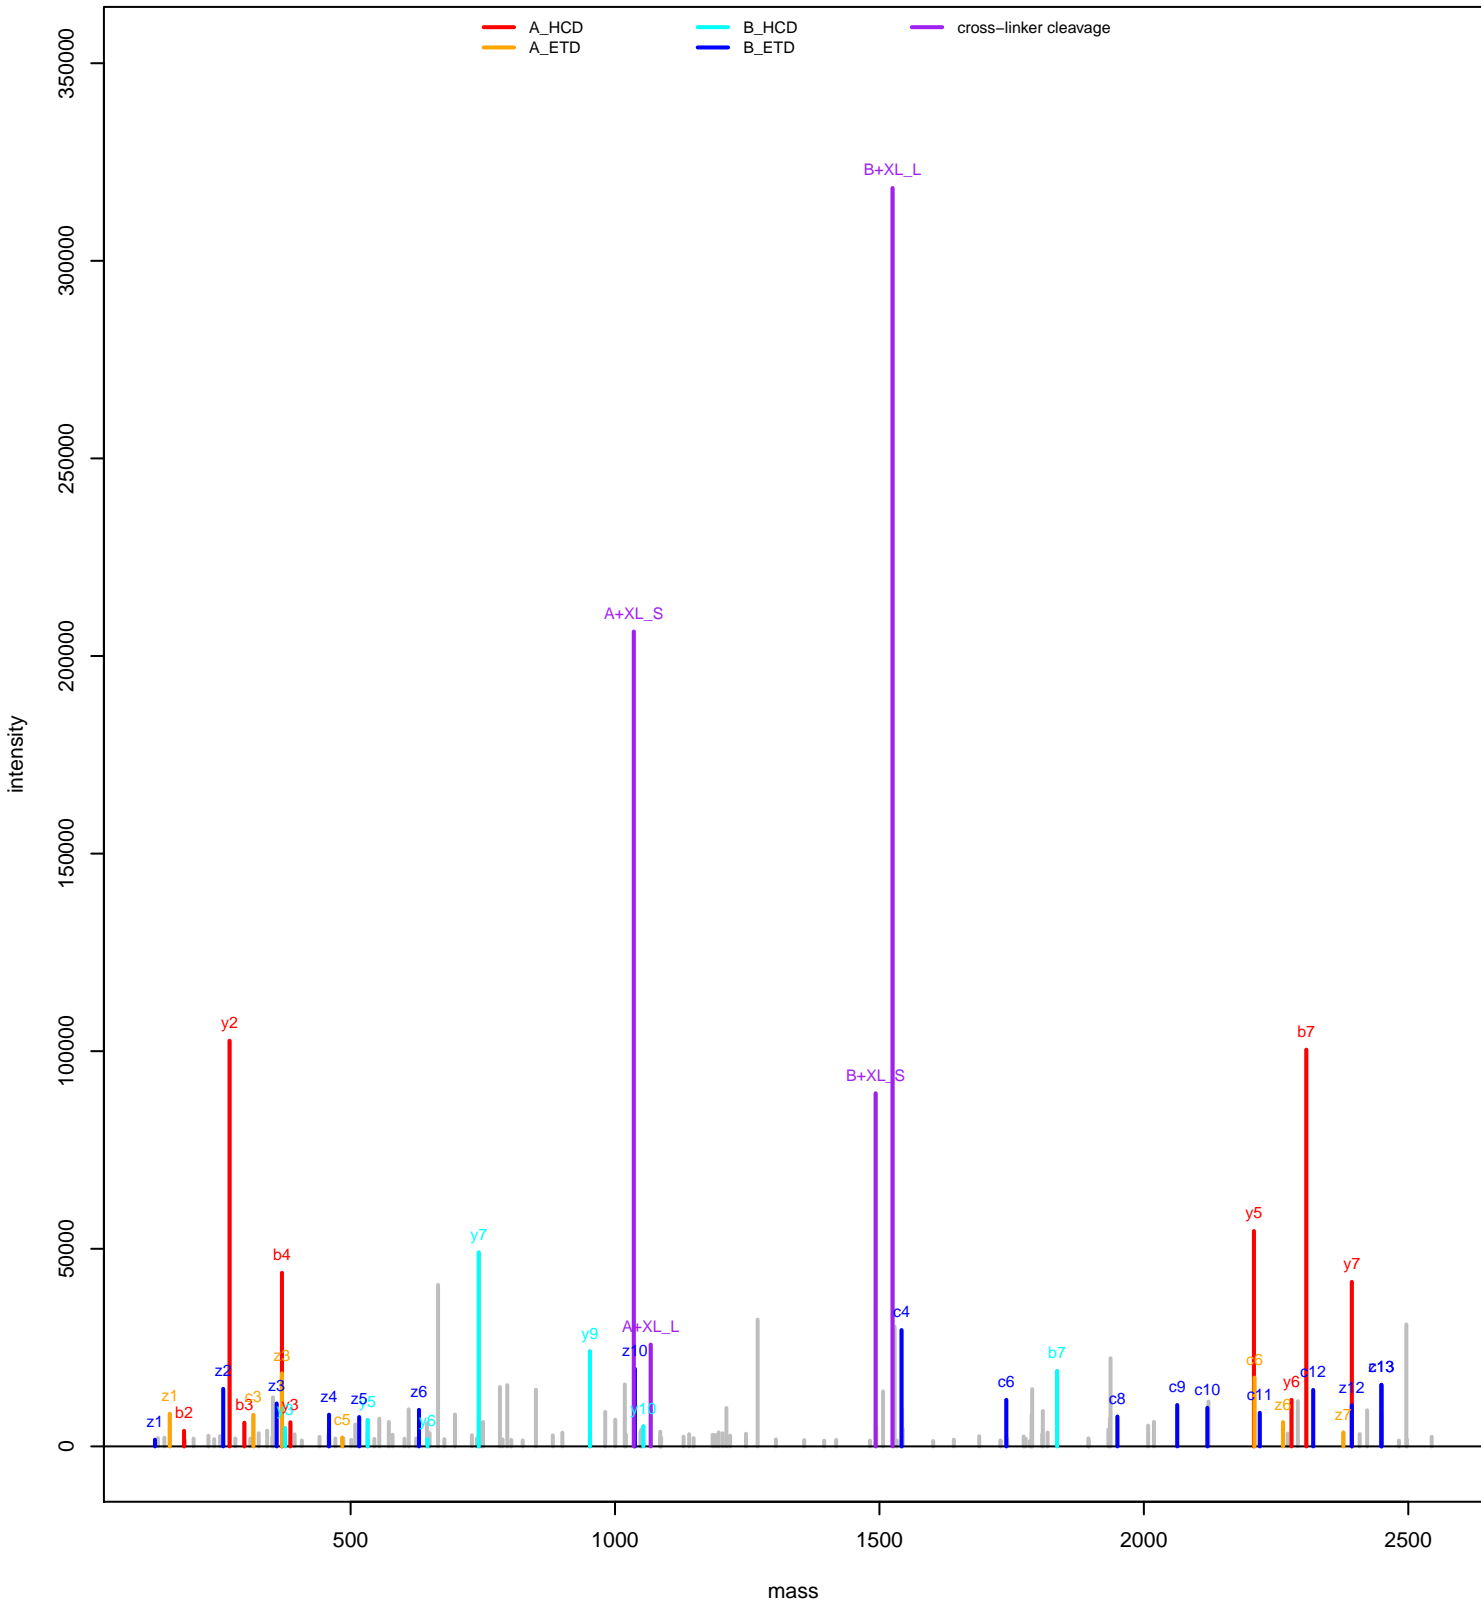

**GQNAPKDPR+XL\_S**

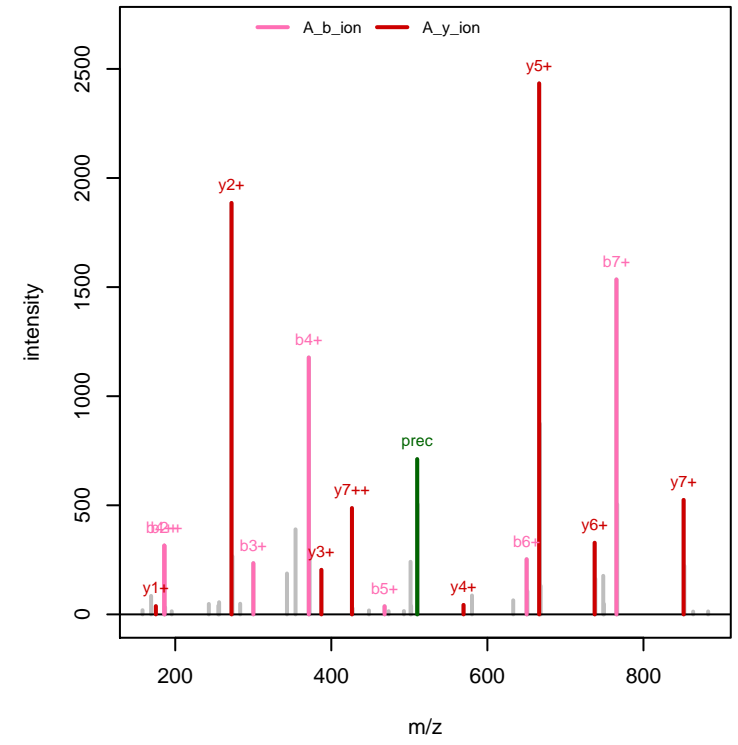

**GQNAPKDPR+XL\_L**

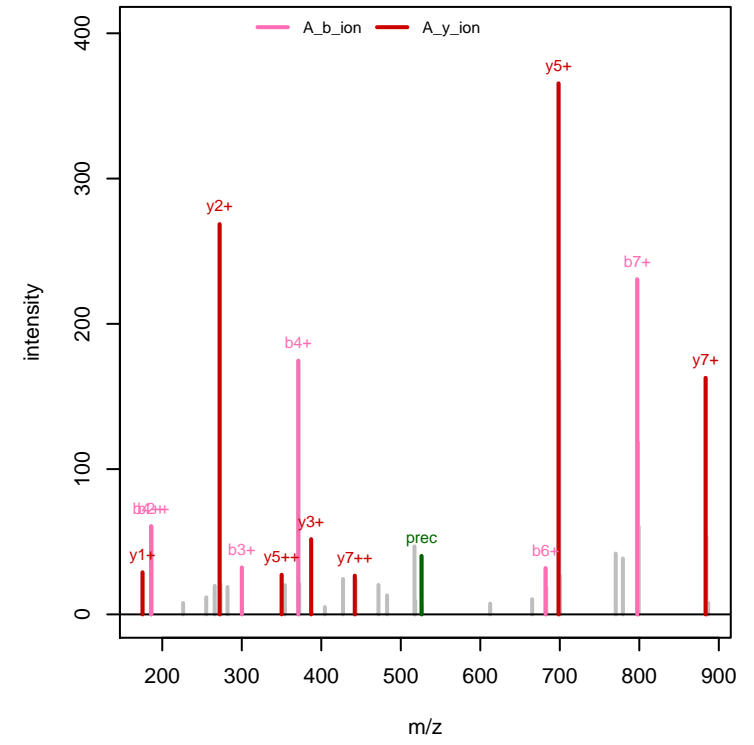

**IGSKTPIPLGVTEK+XL\_S**

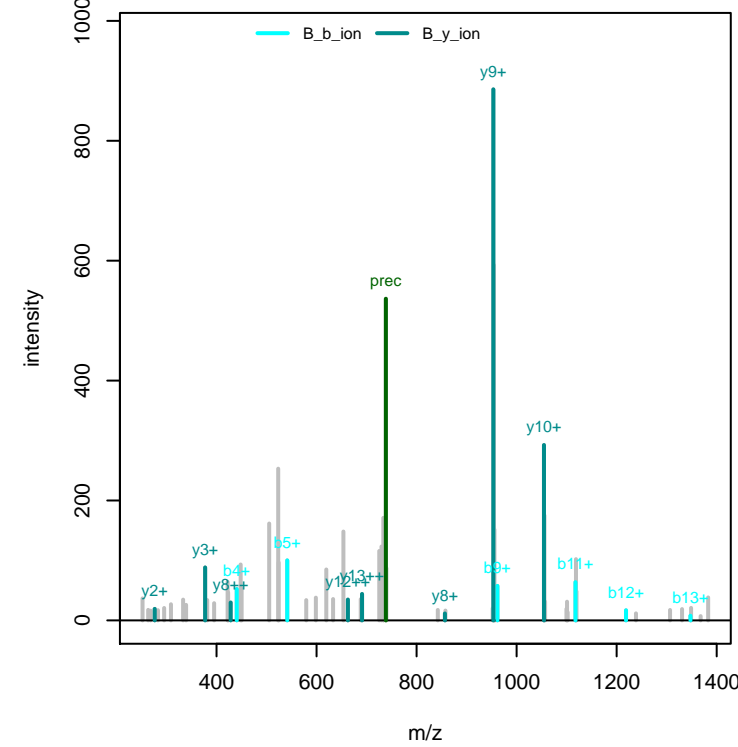

**IGSKTPIPLGVTEK+XL\_L**

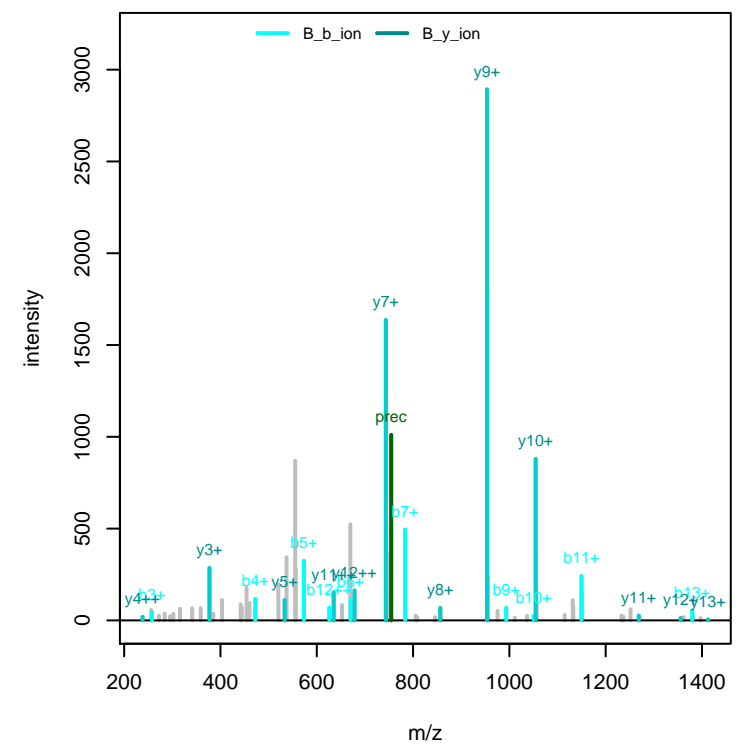



**SIDVKDK  
KGFAEAIK**

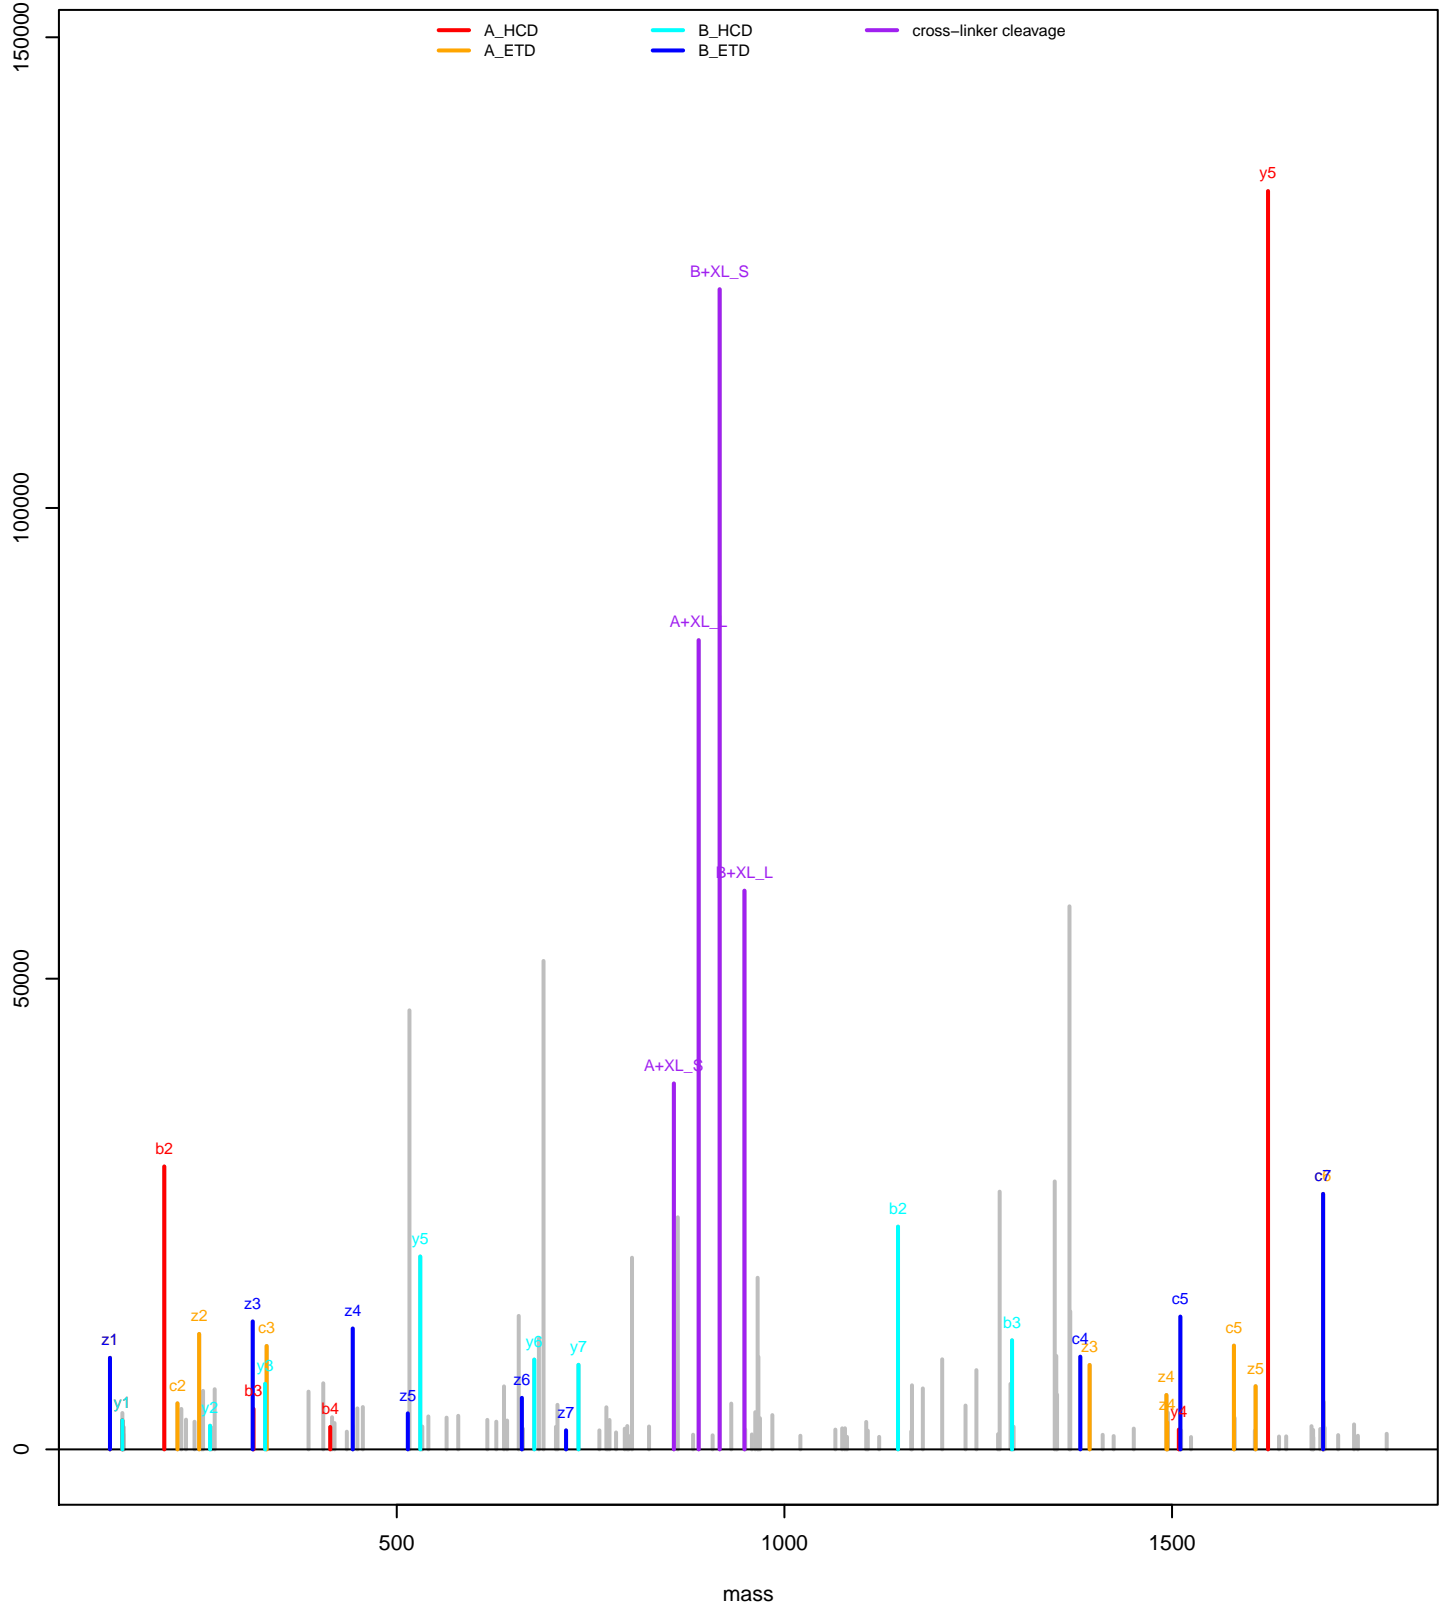

**SIDVKDK+XL\_S**

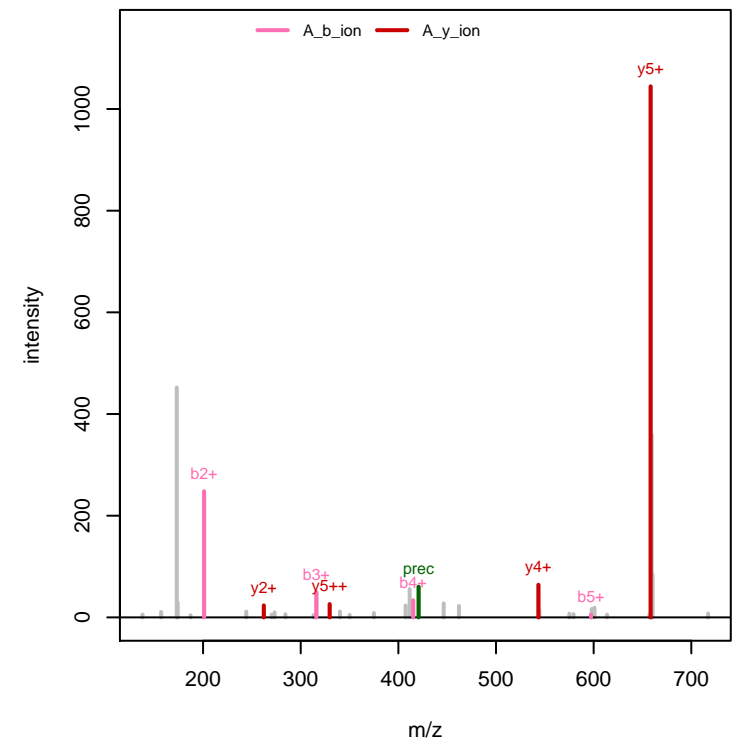

**SIDVKDK+XL\_L**

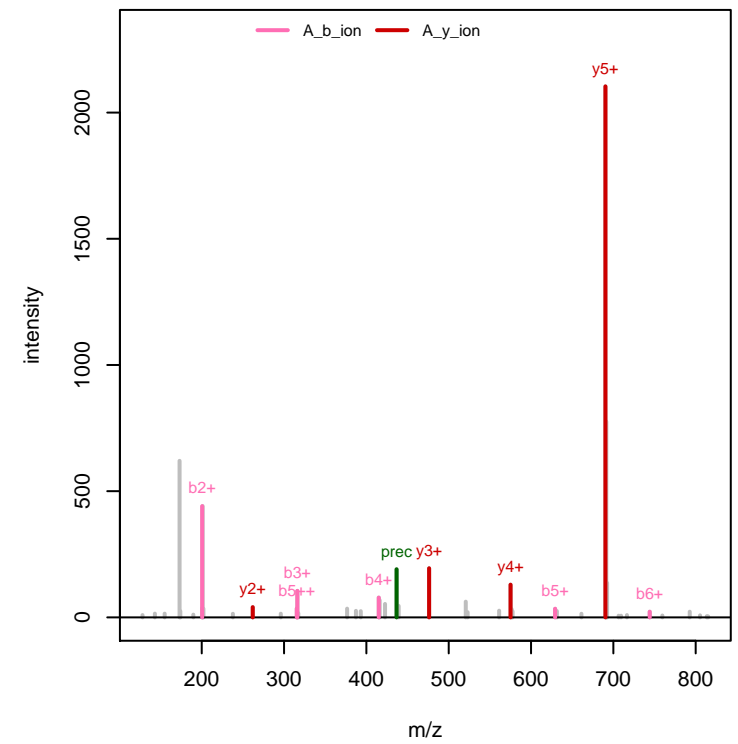

**KGFAEAIK+XL\_S**

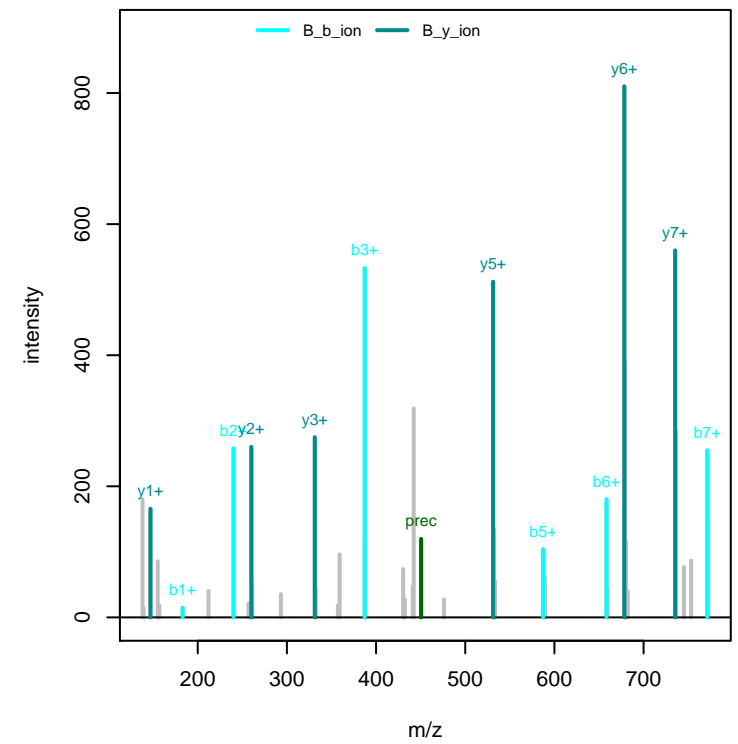

**KGFAEAIK+XL\_L**

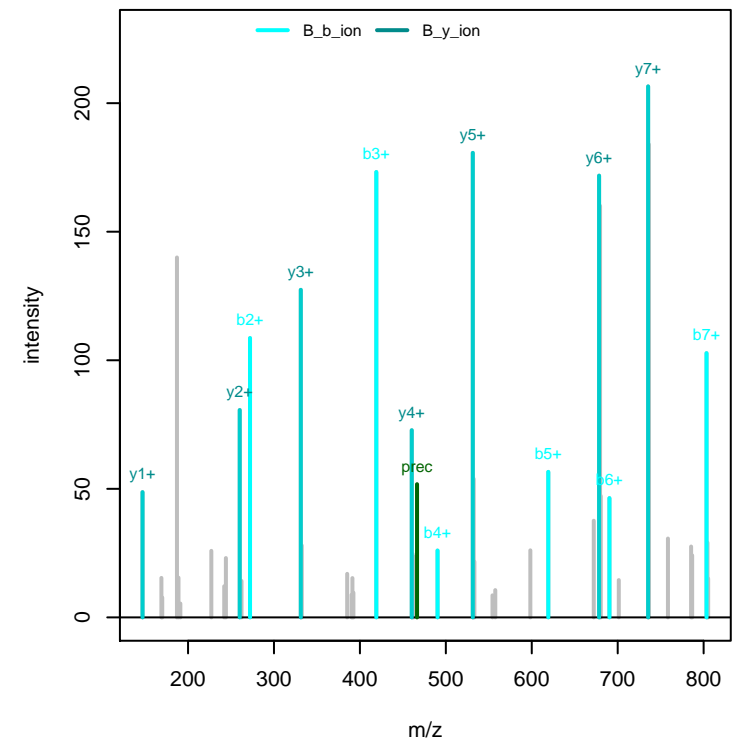

**KVHGGPDR**  
**IQAYPEGKPSAIK**

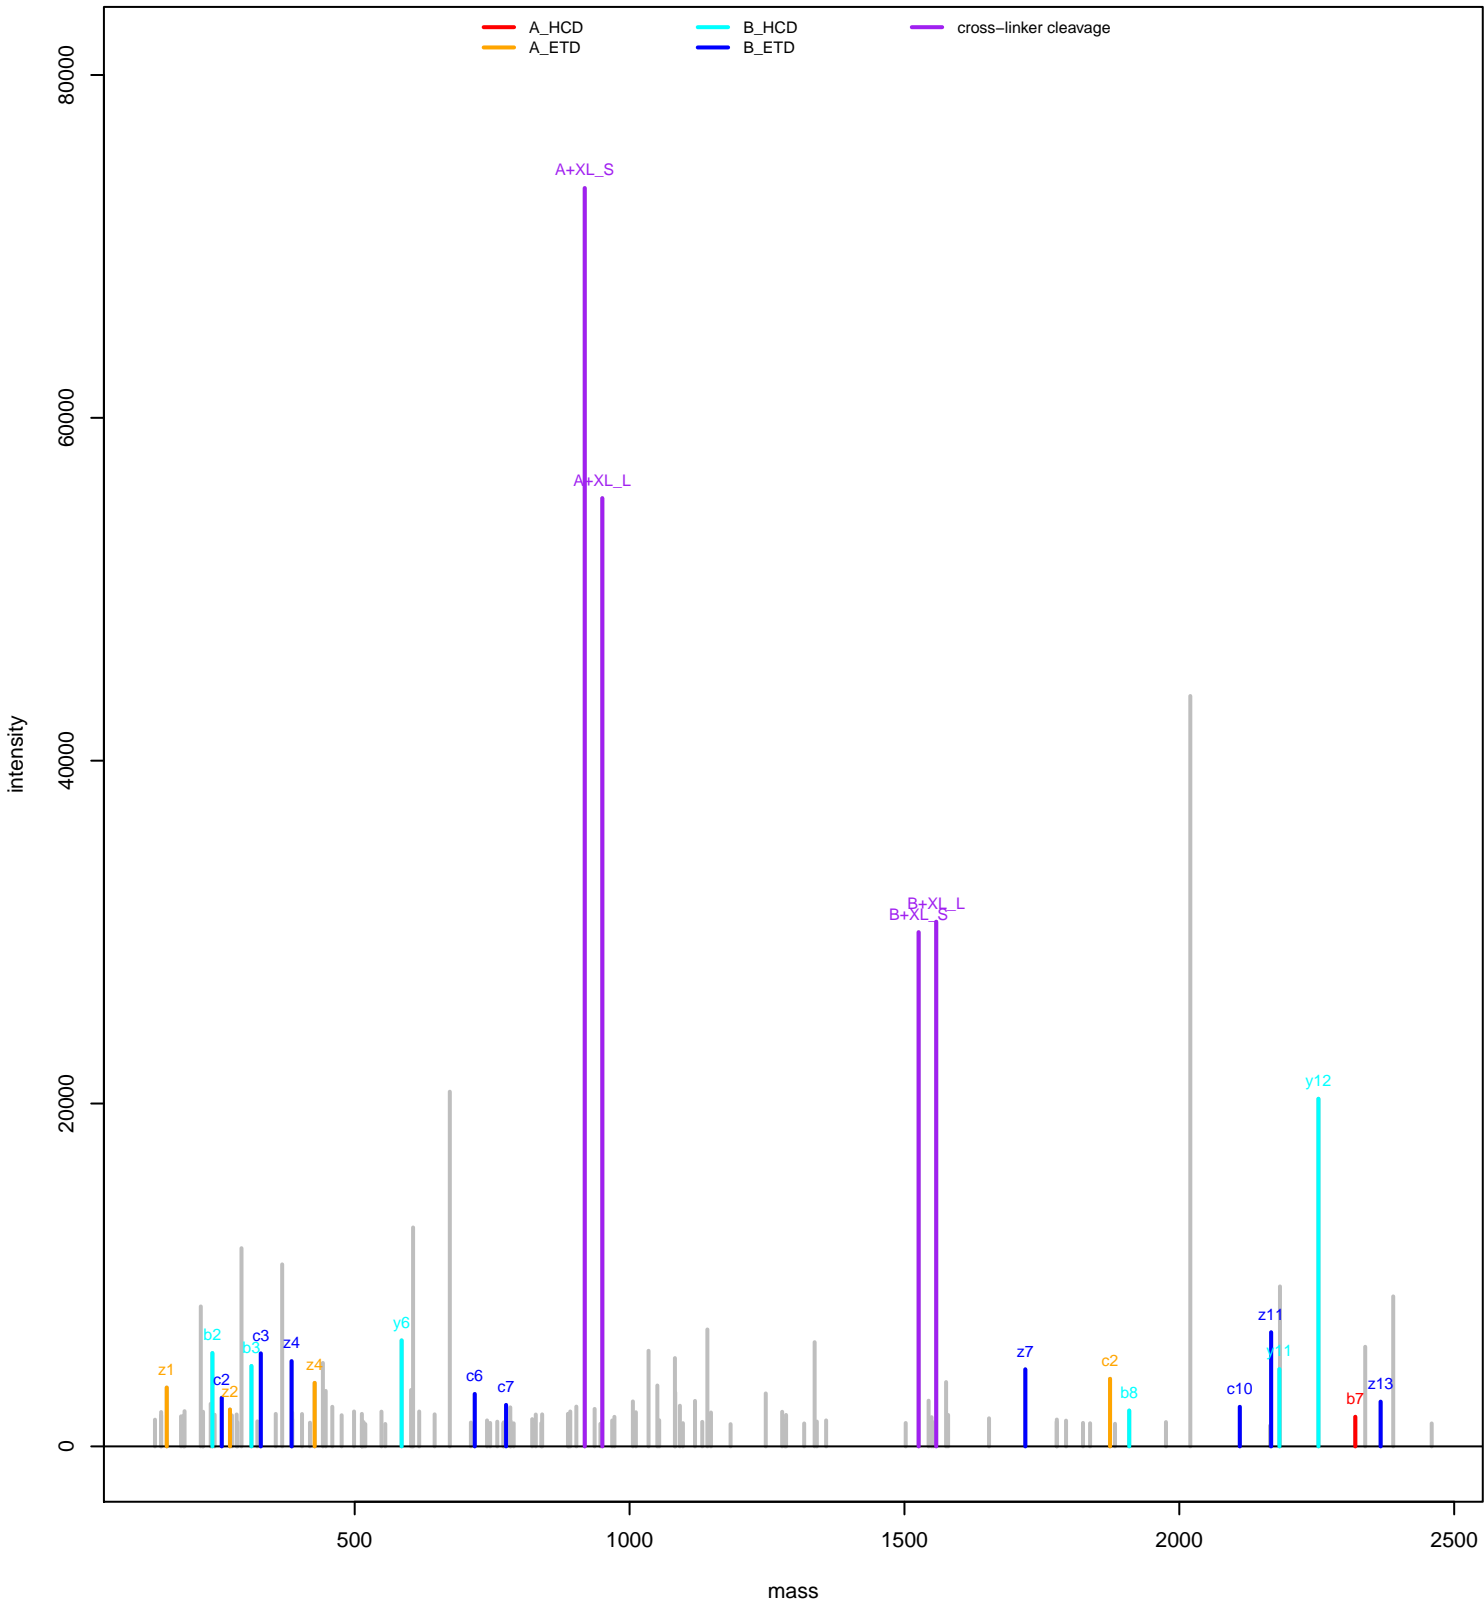

**KVHGGPDR+XL\_S**

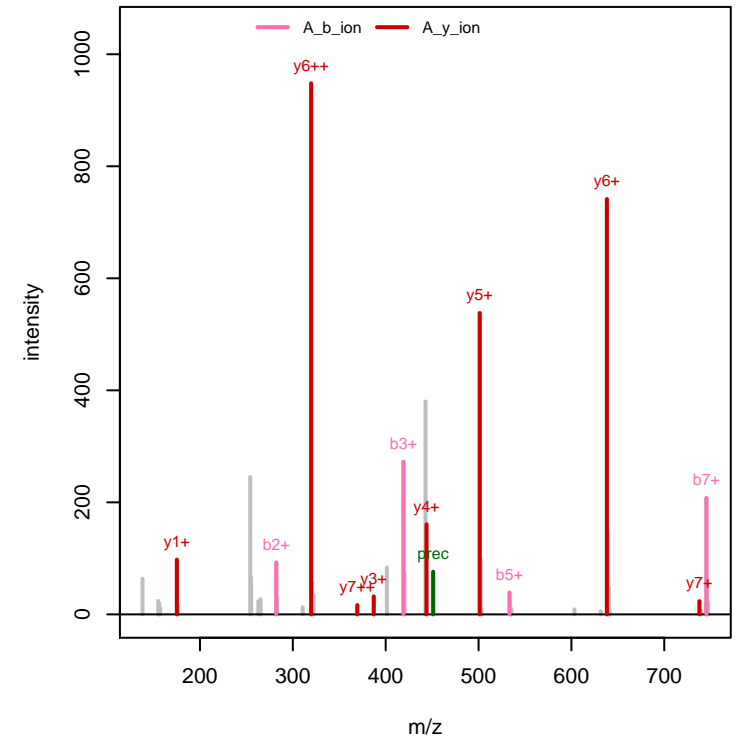

**KVHGGPDR+XL\_L**

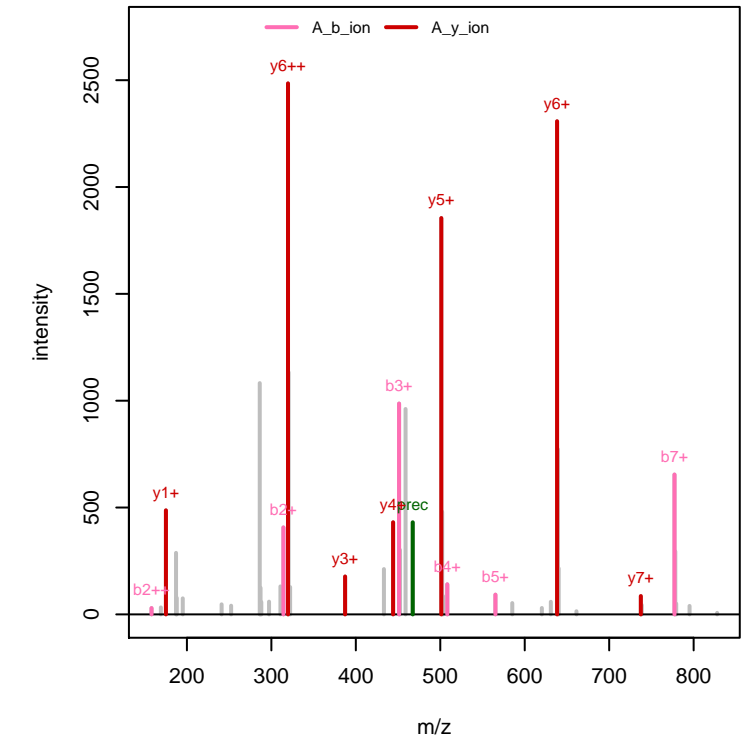

**IQAYPEGKPSAIK+XL\_S**

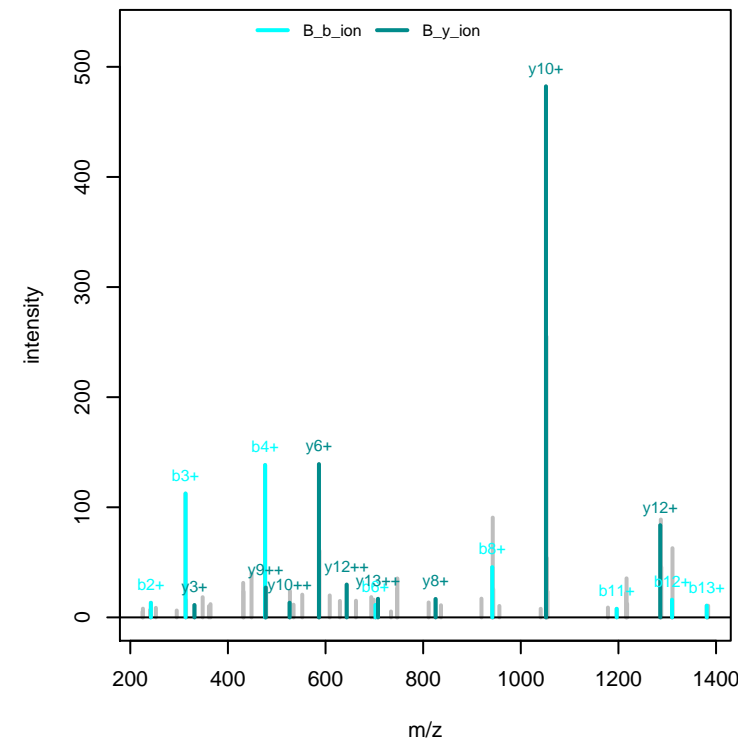

**IQAYPEGKPSAIK+XL\_L**

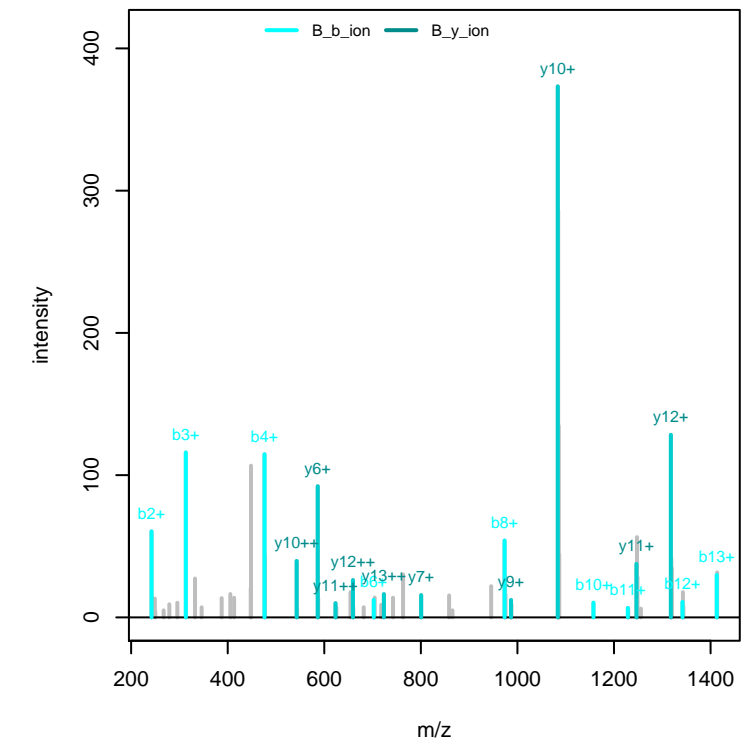

**AEIKAAVQK**  
**ASTAMEKSNTIVLK**

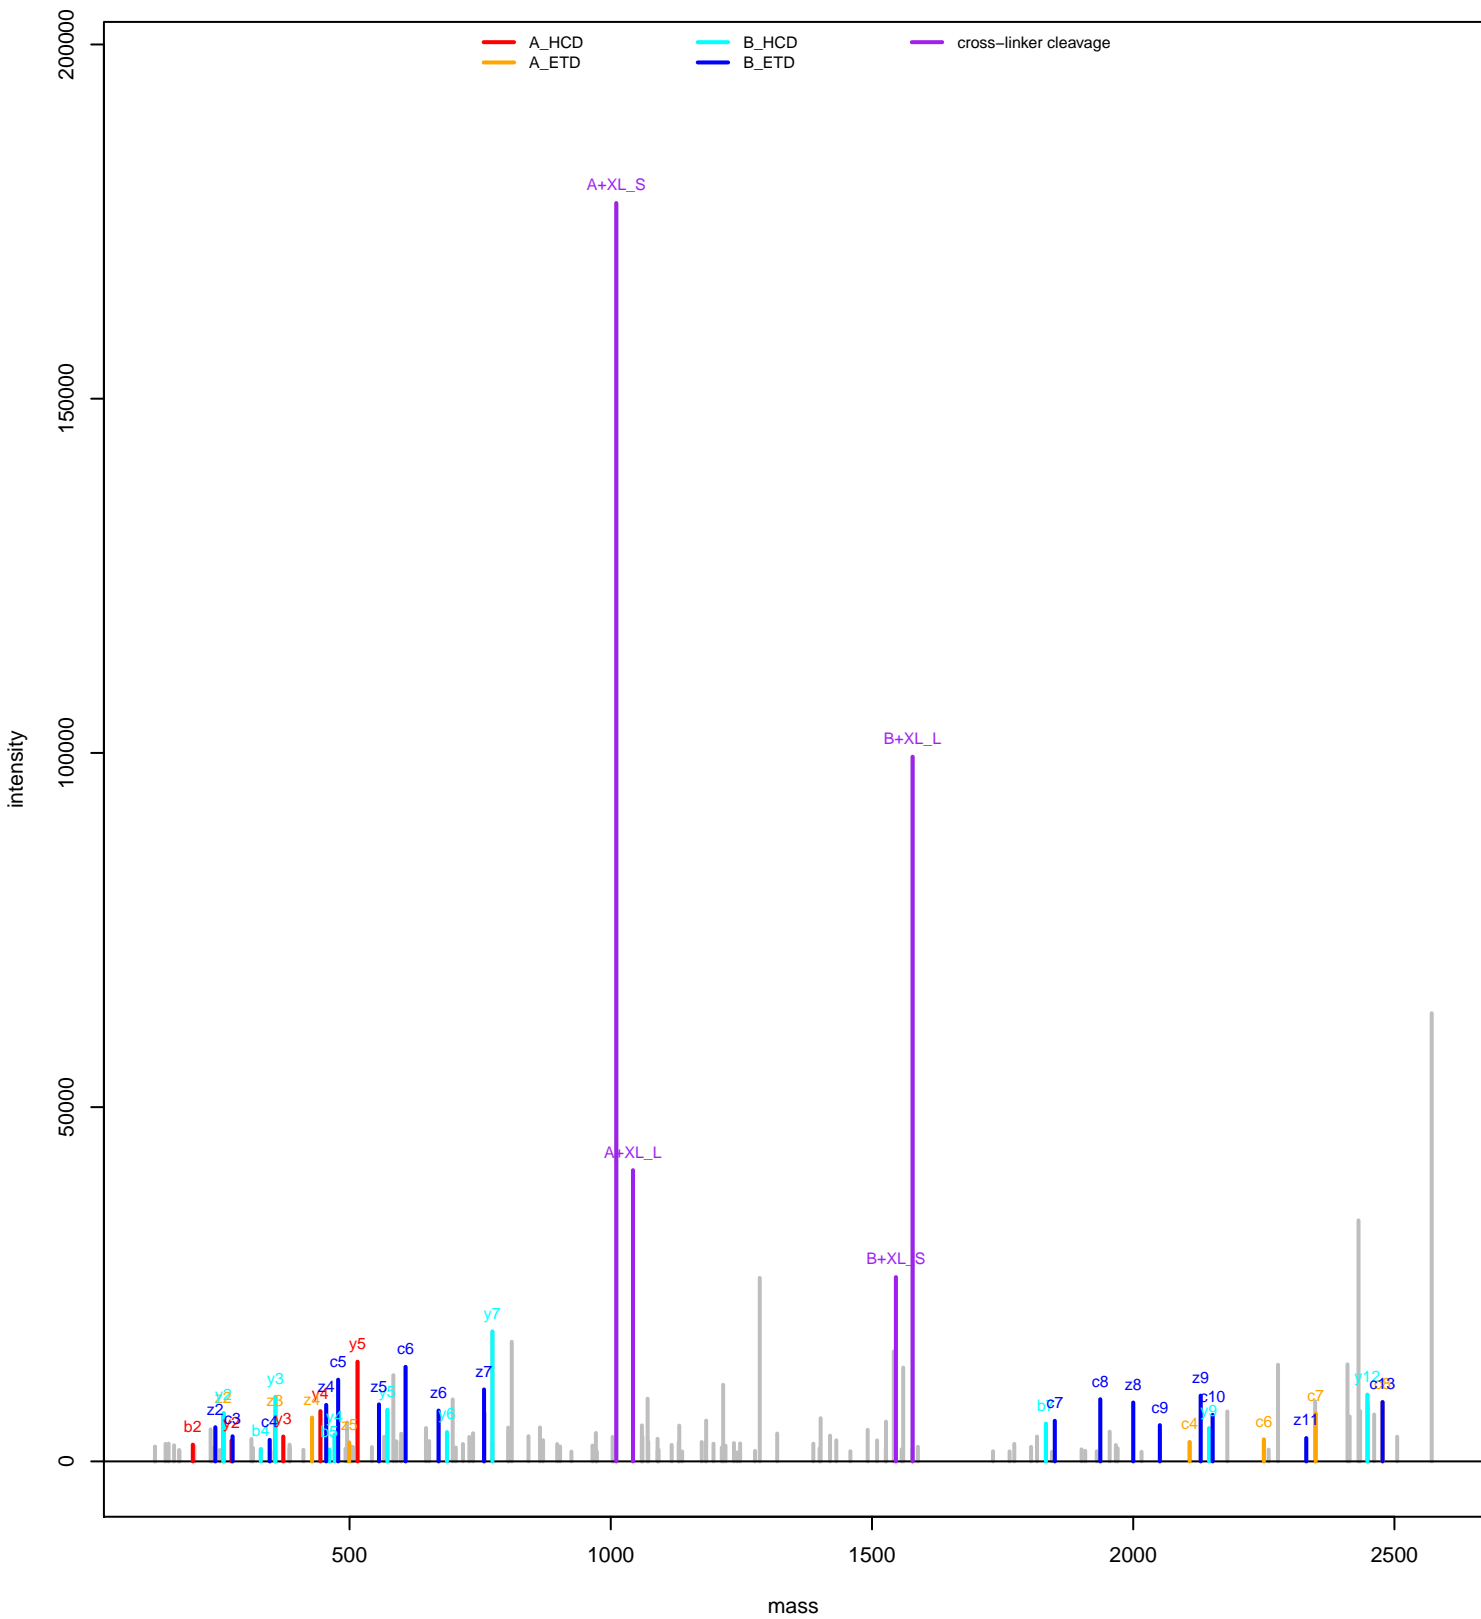

**AEIKAAVQK+XL\_S**

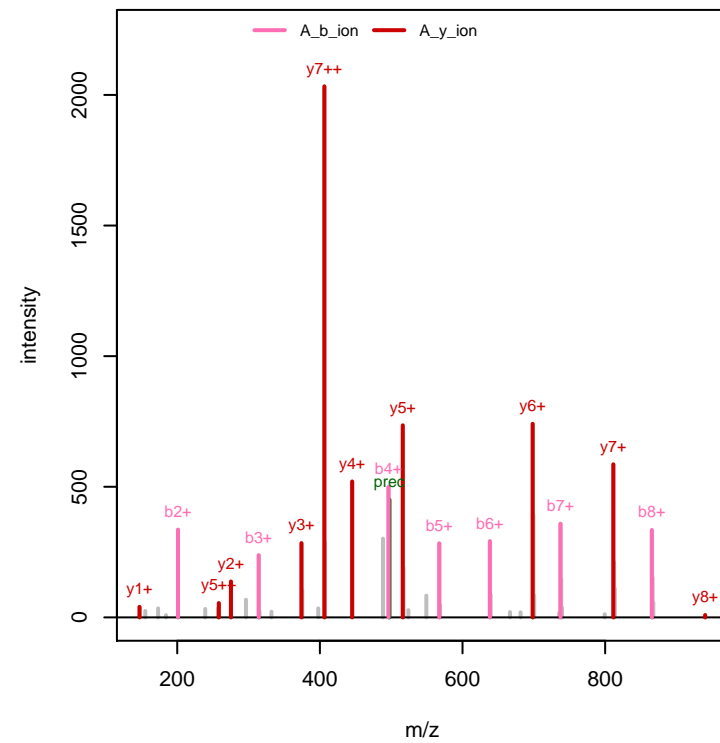

**AEIKAAVQK+XL\_L**

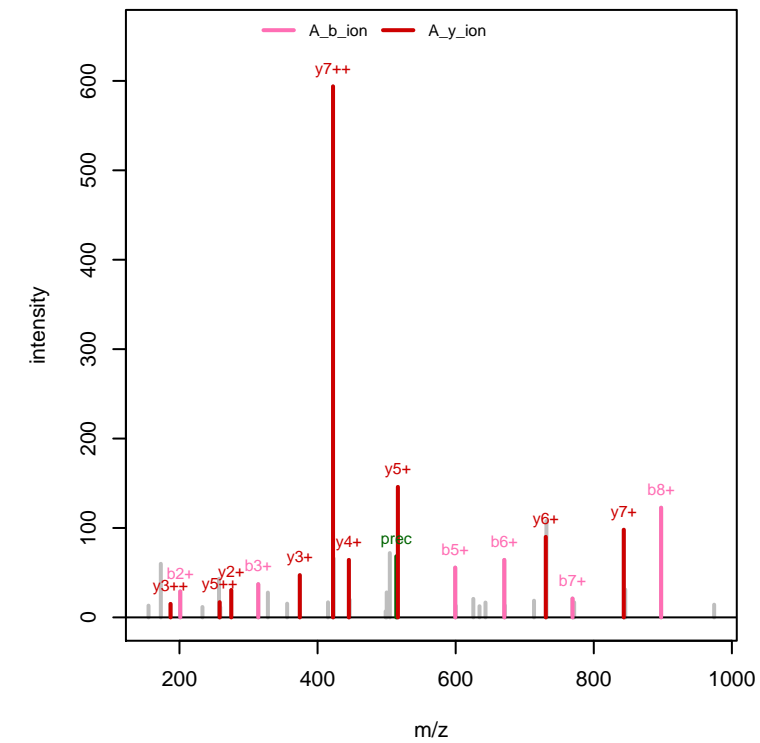

**ASTAMEKSNTIVLK+XL\_S**

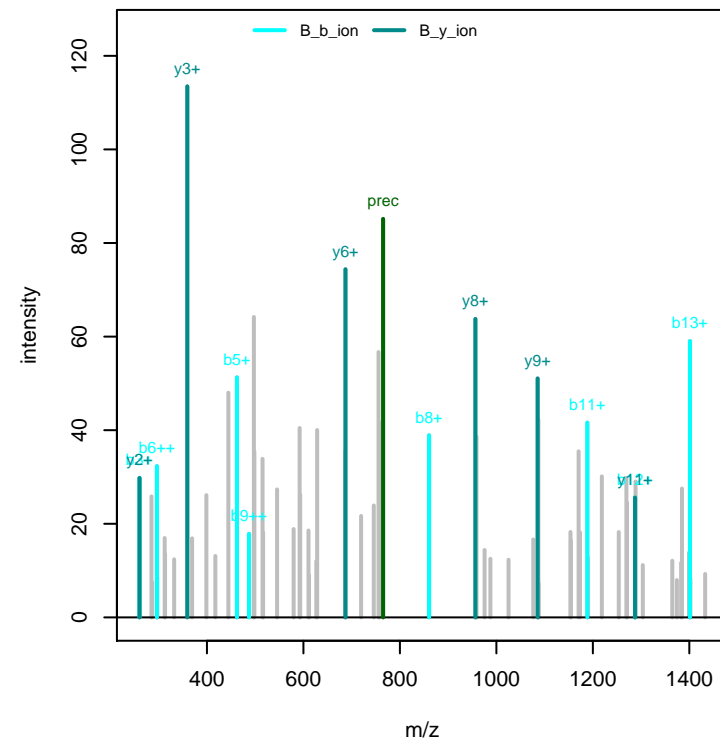

**ASTAMEKSNTIVLK+XL\_L**

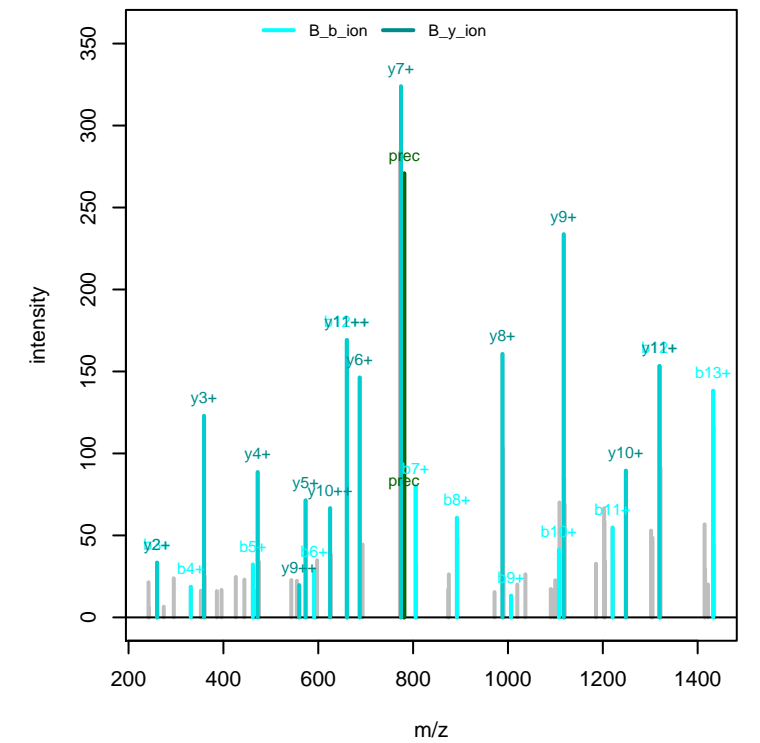

AAALAGGEAAKK  
FFETQSSKGG

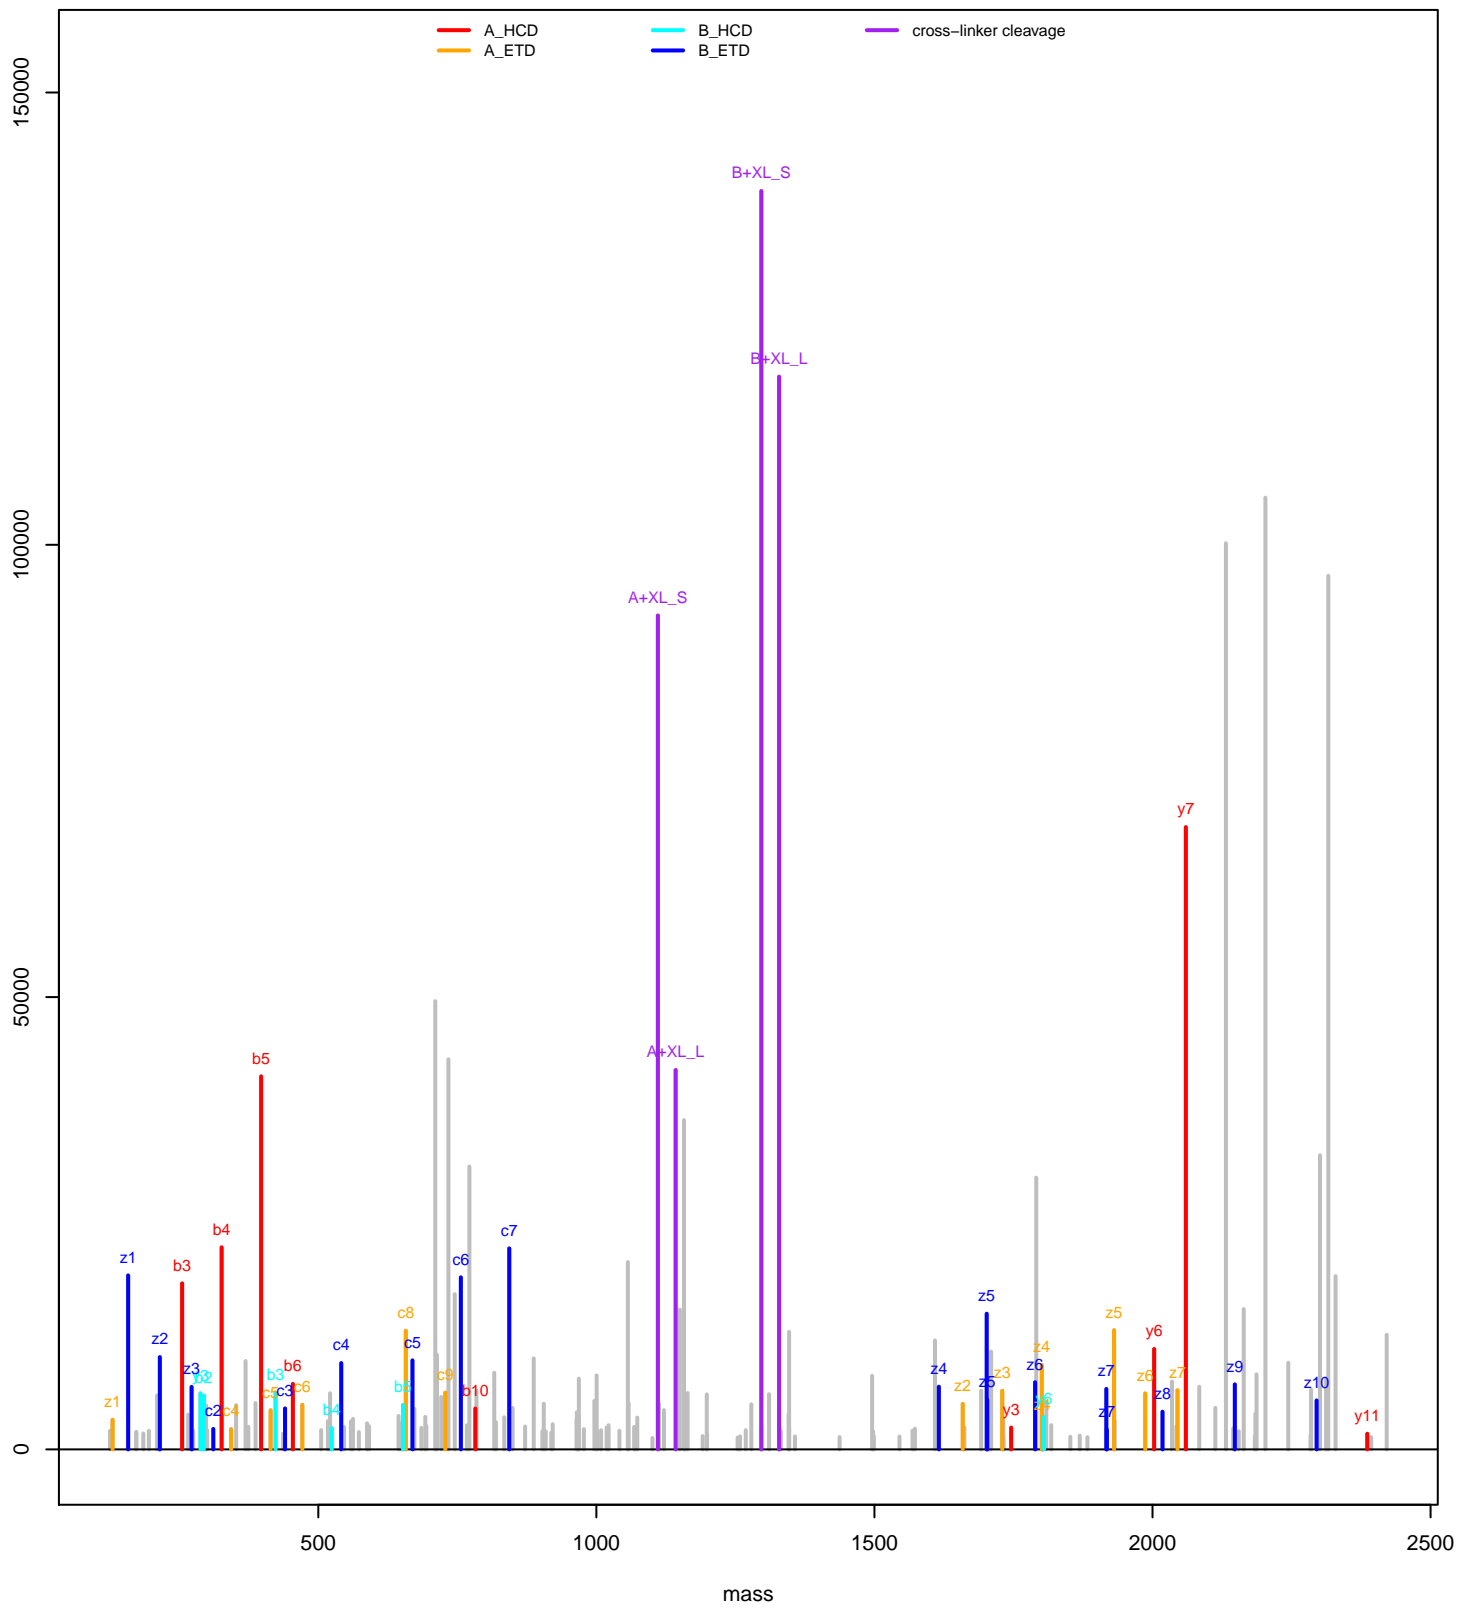

AAALAGGEAAKK+XL\_S

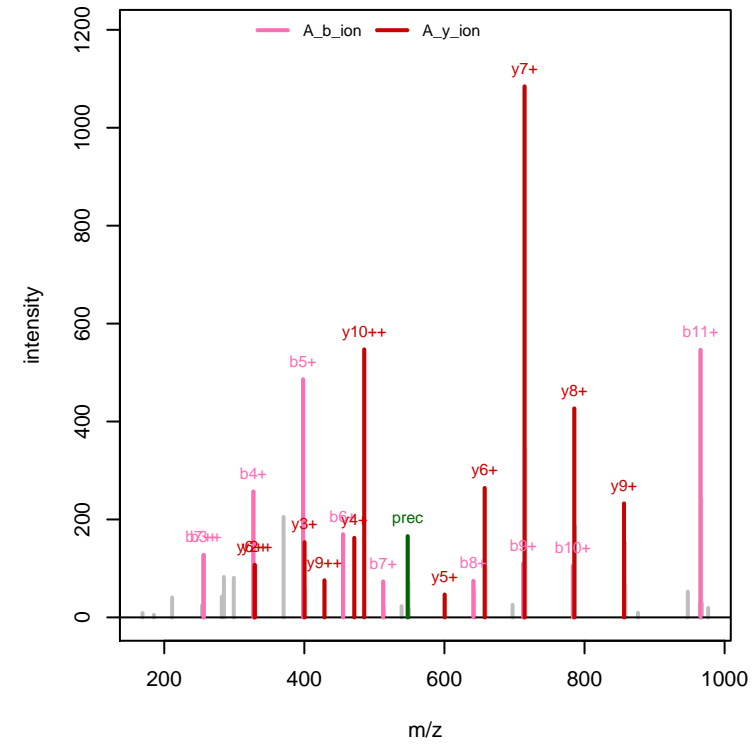

AAALAGGEAAKK+XL\_L

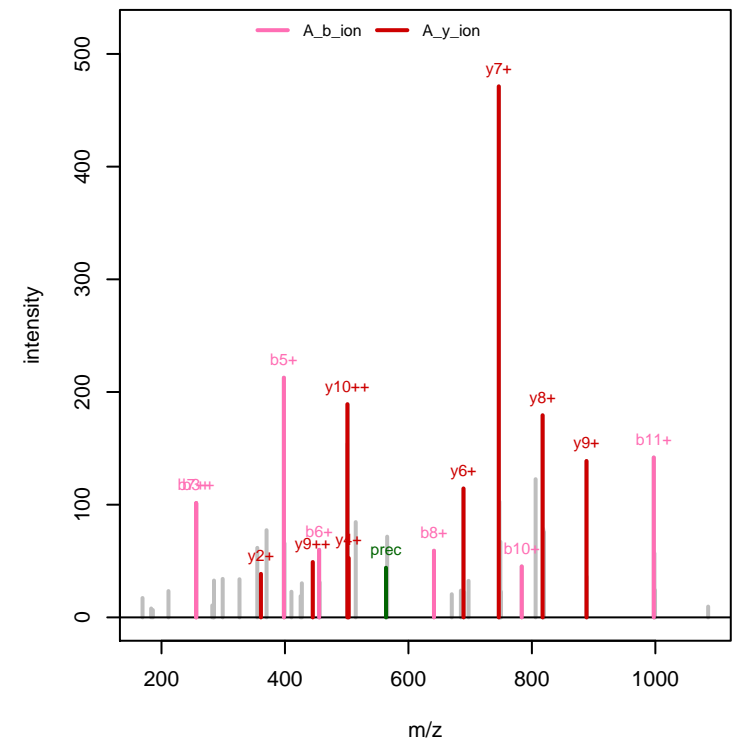

FFETQSSKGG+XL\_S

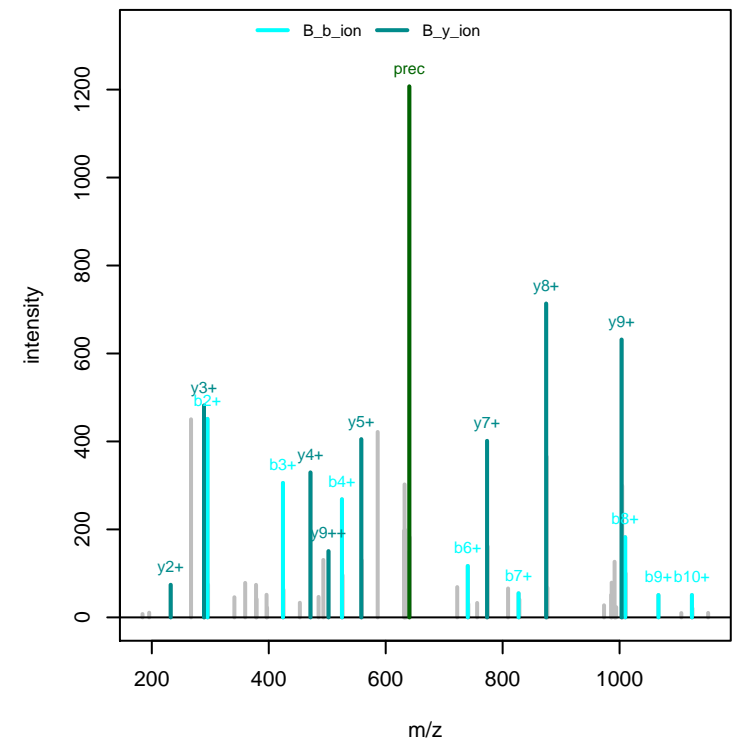

FFETQSSKGG+XL\_L

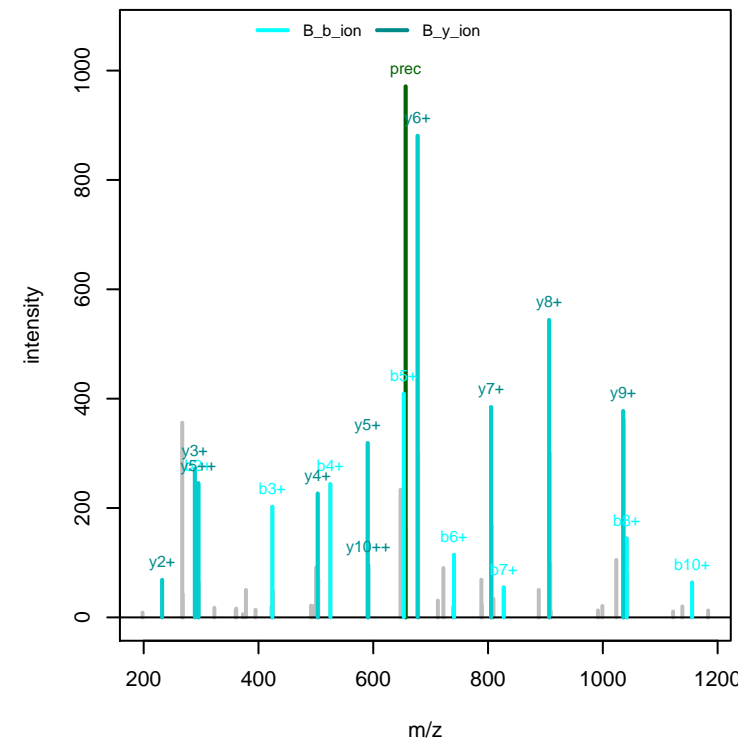

VVNQIKTR  
GMLKGQSEVTGVK

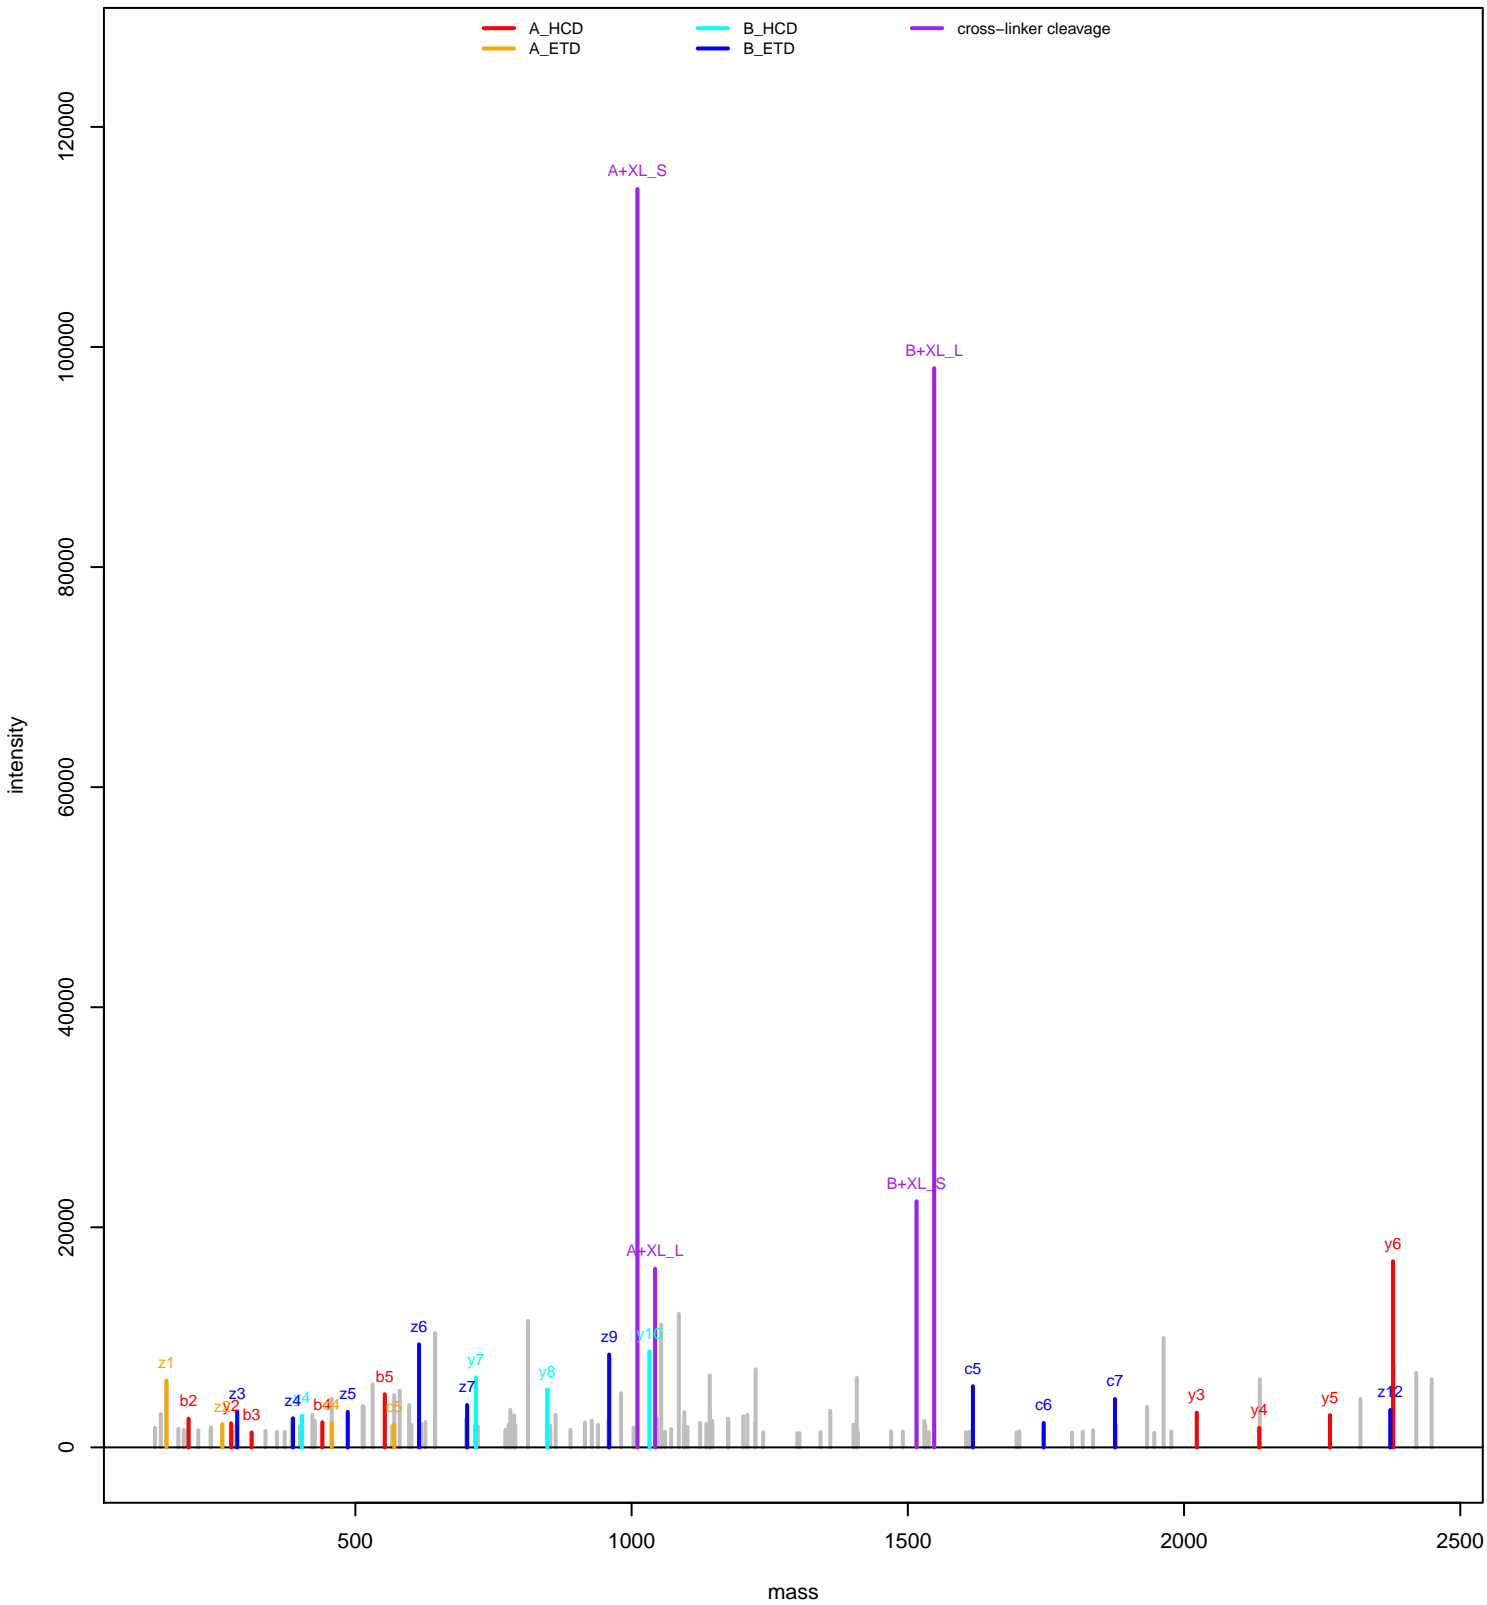

VVNQIKTR+XL\_S

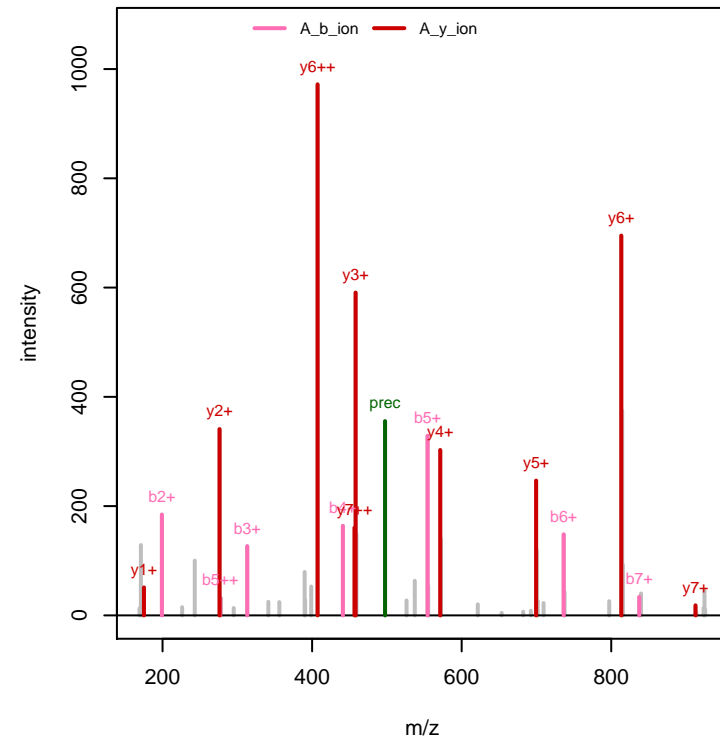

VVNQIKTR+XL\_L

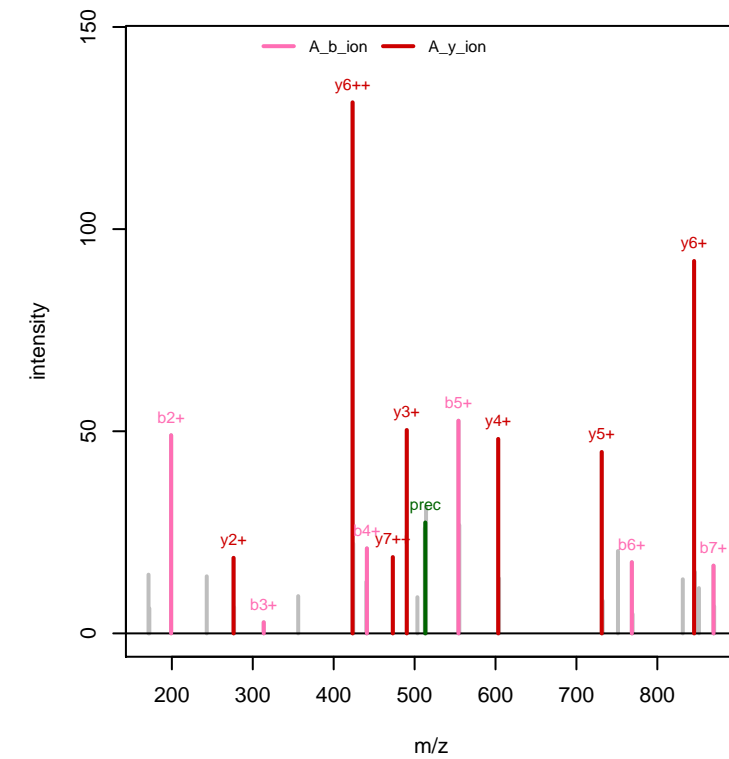

GMLKGQSEVTGVK+XL\_S

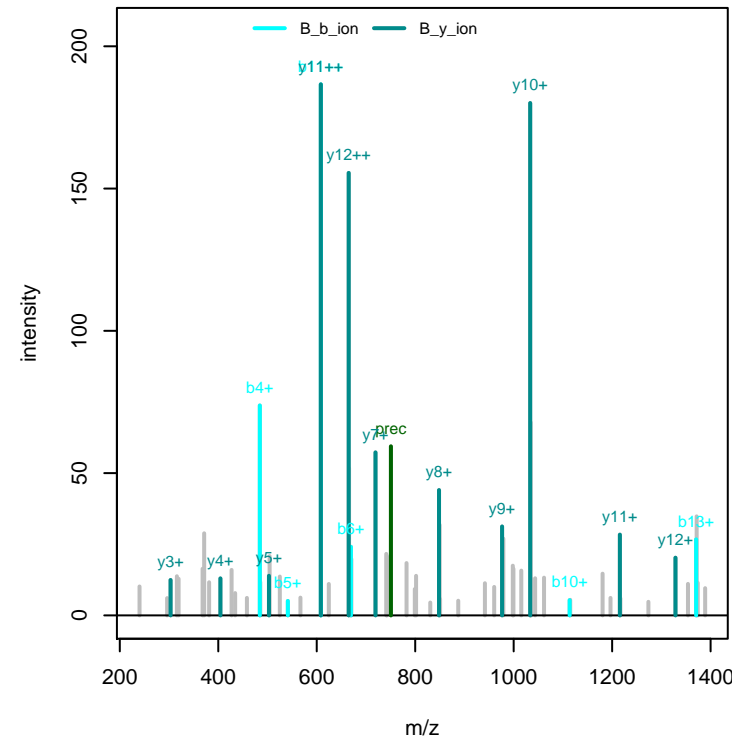

GMLKGQSEVTGVK+XL\_L

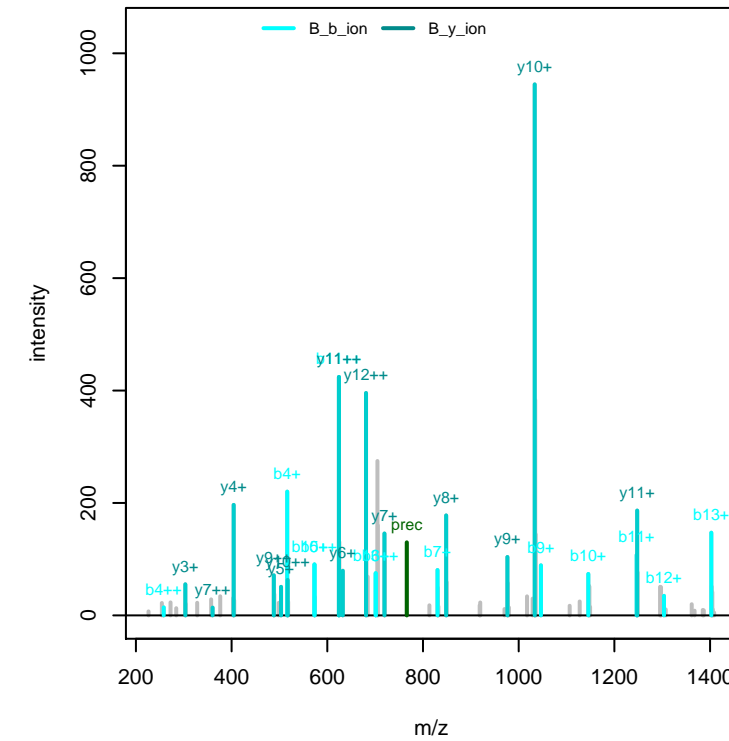

**GEKIGQGK**  
**IGAVKEGENVVGSETR**

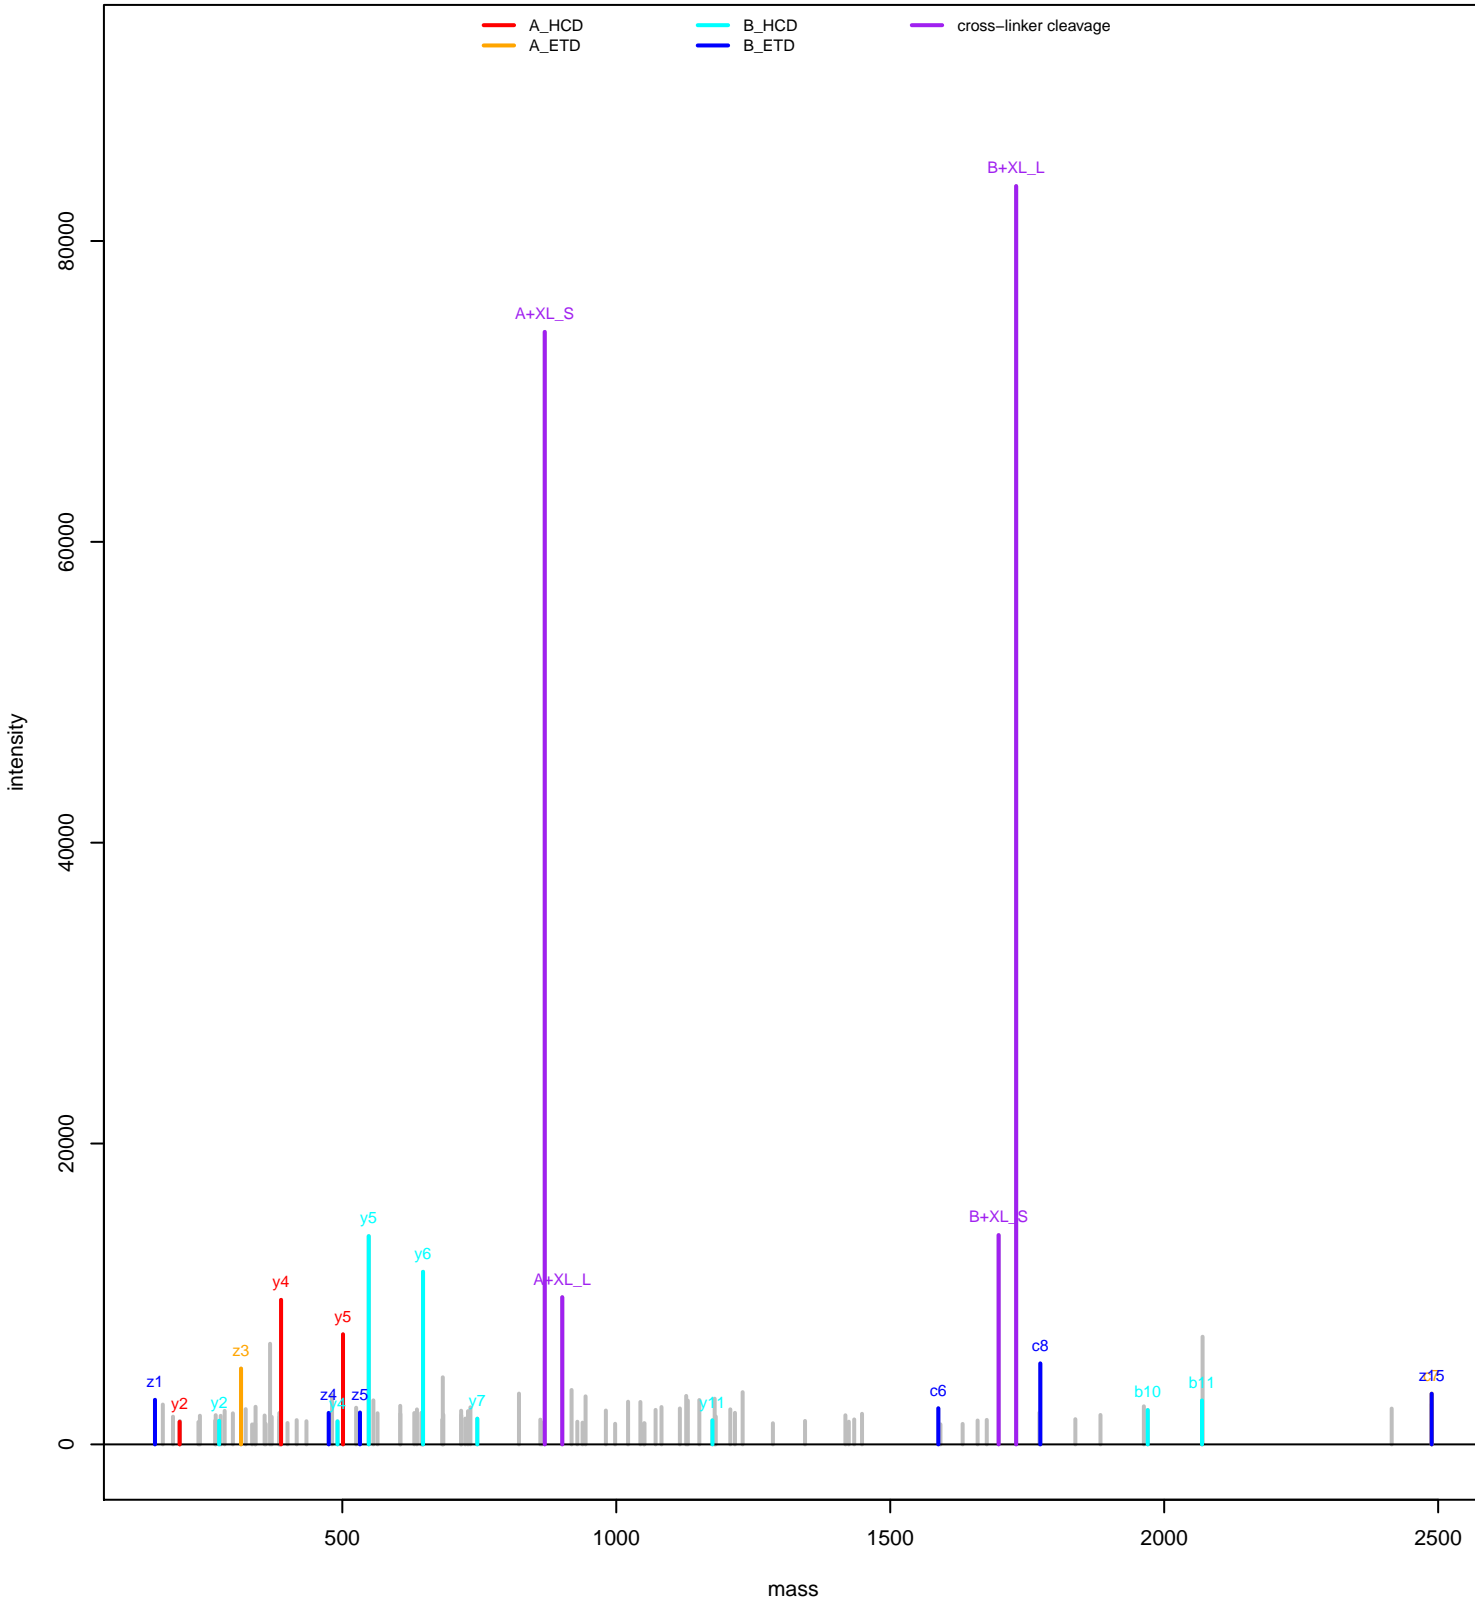

**GEKIGQGK+XL\_S**

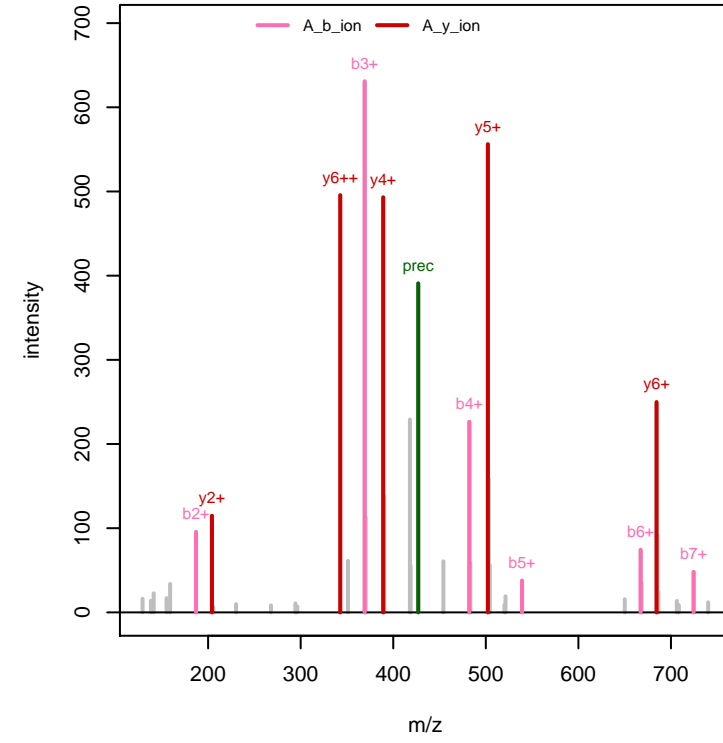

**GEKIGQGK+XL\_L**

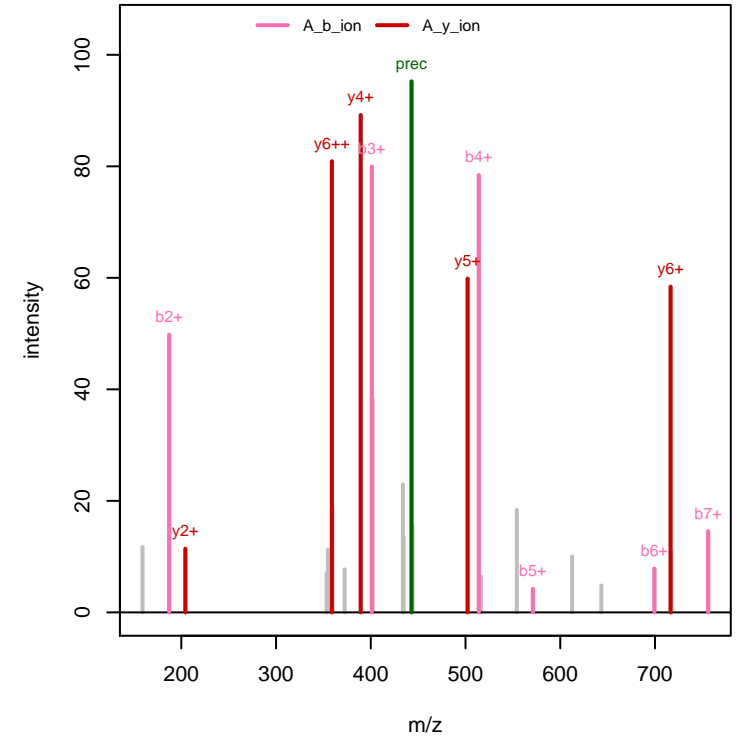

**IGAVKEGENVVGSETR+XL\_S**

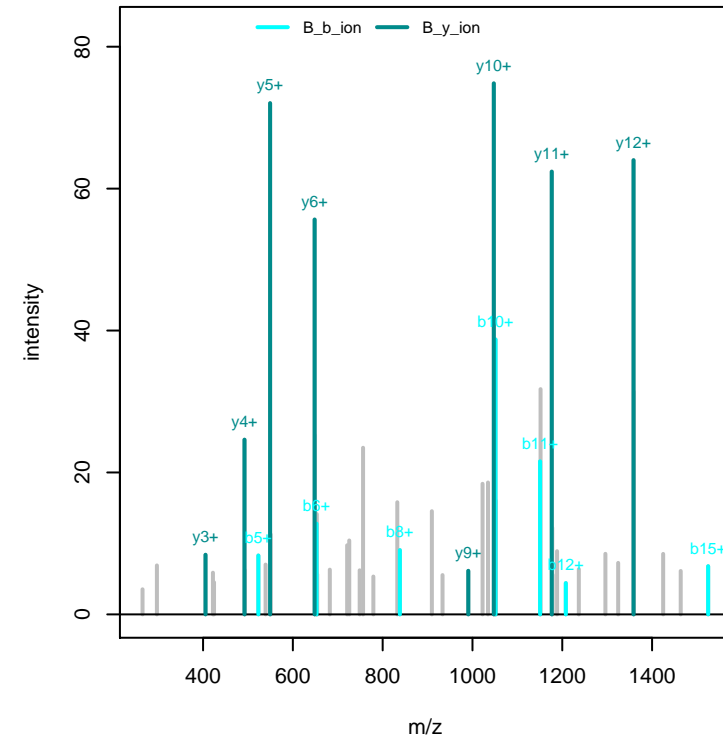

**IGAVKEGENVVGSETR+XL\_L**

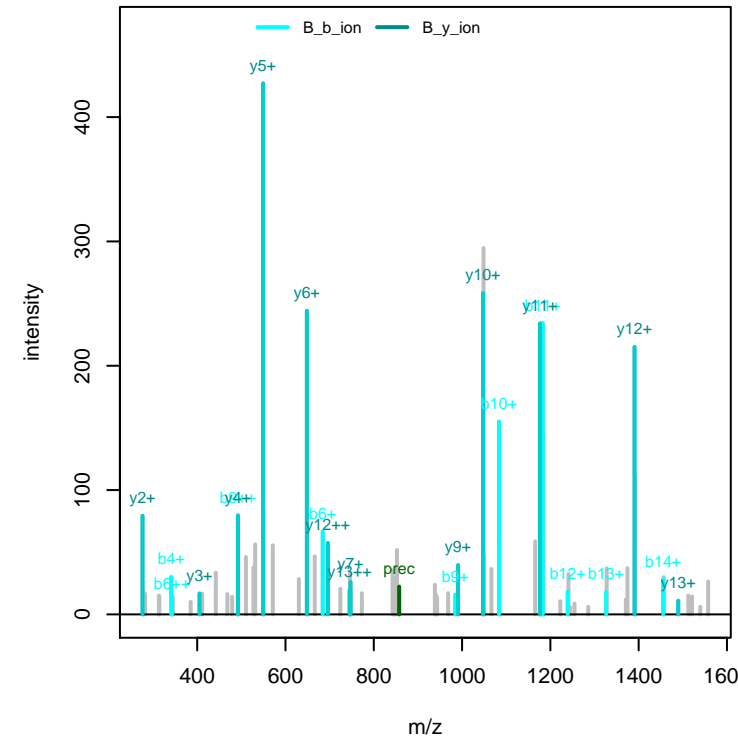

**TLYVSVKQK**  
**STKQQEATQPDDVIR**

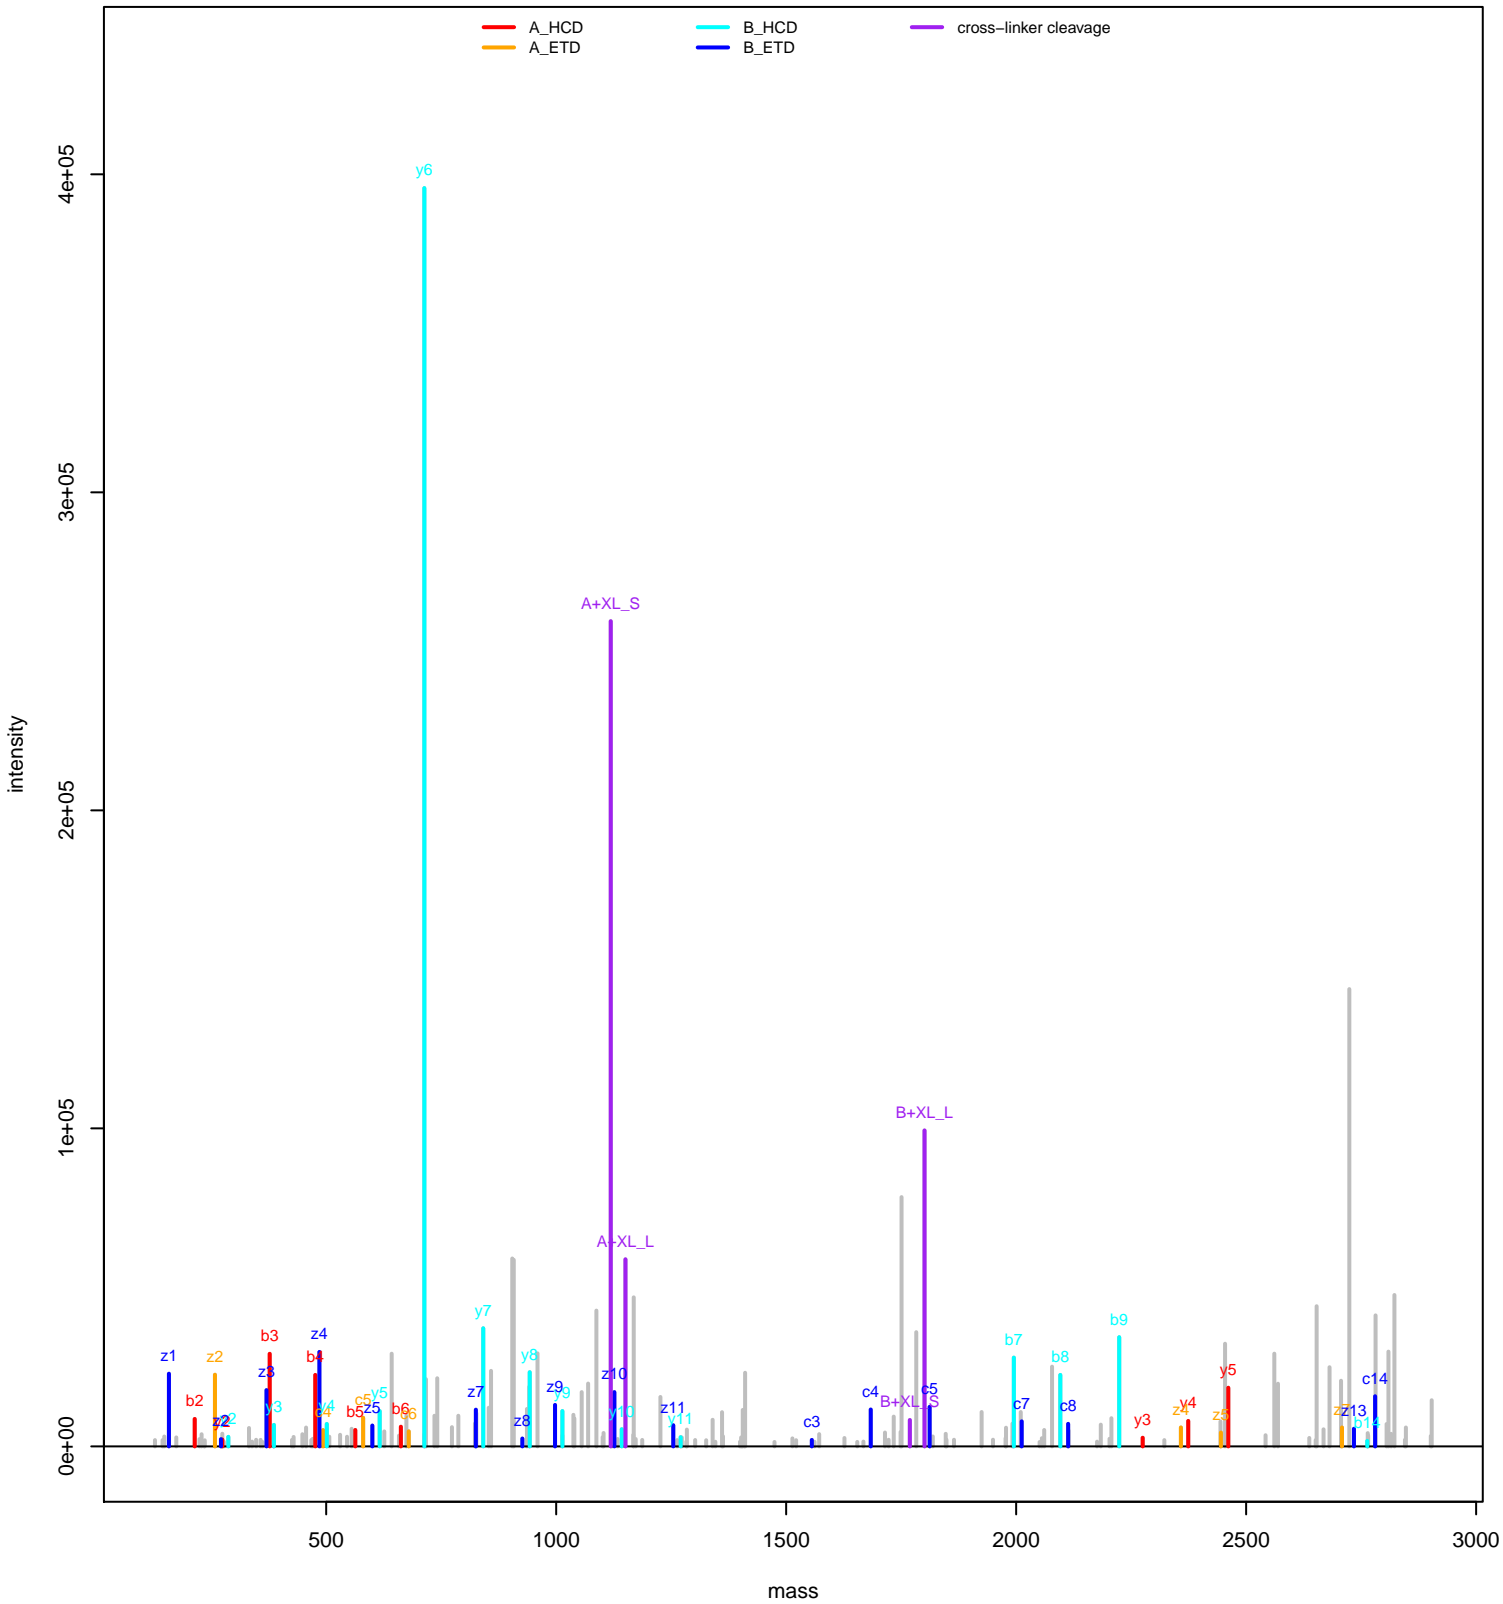

**TLYVSVKQK+XL\_S**

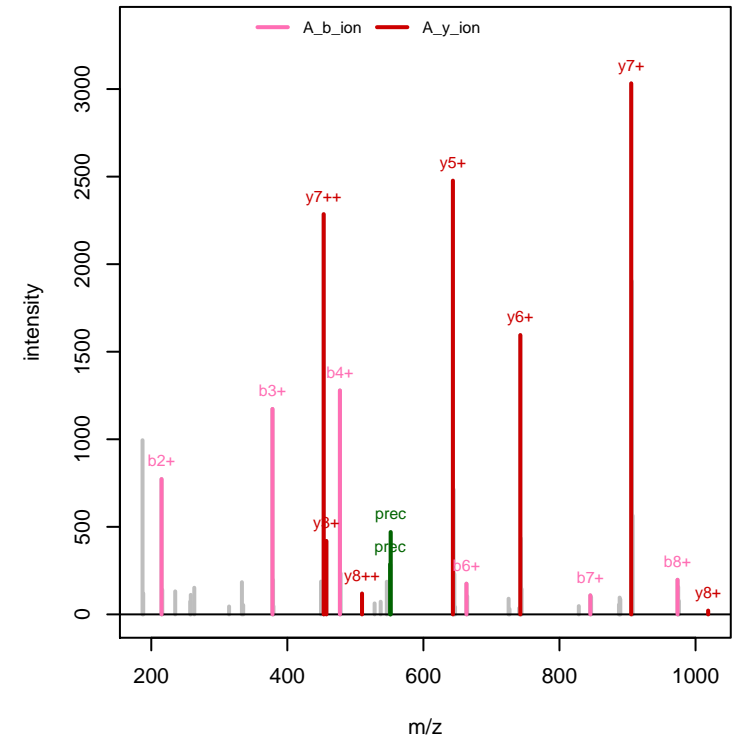

**TLYVSVKQK+XL\_L**

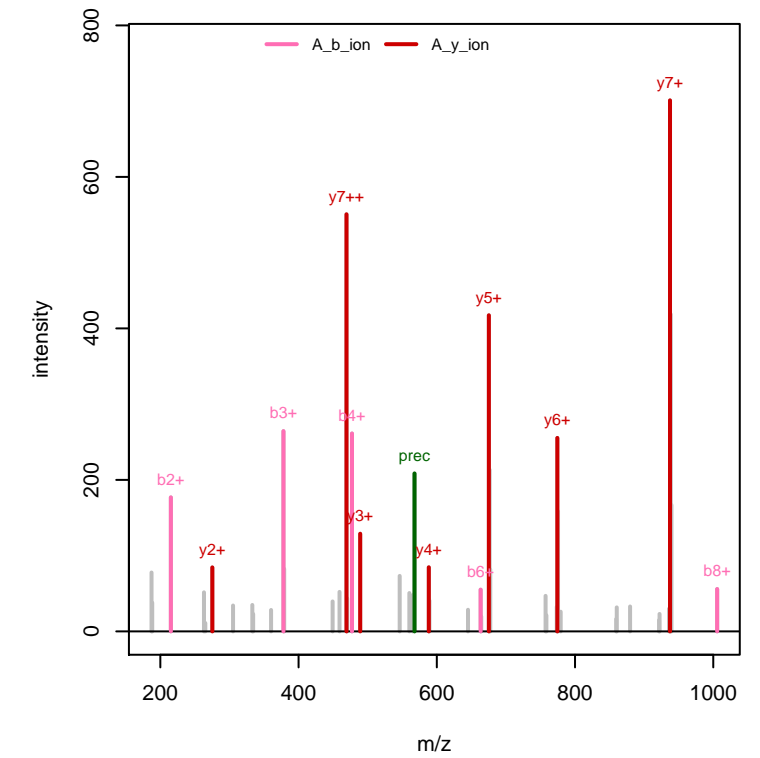

**STKQQEATQPDDVIR+XL\_S**

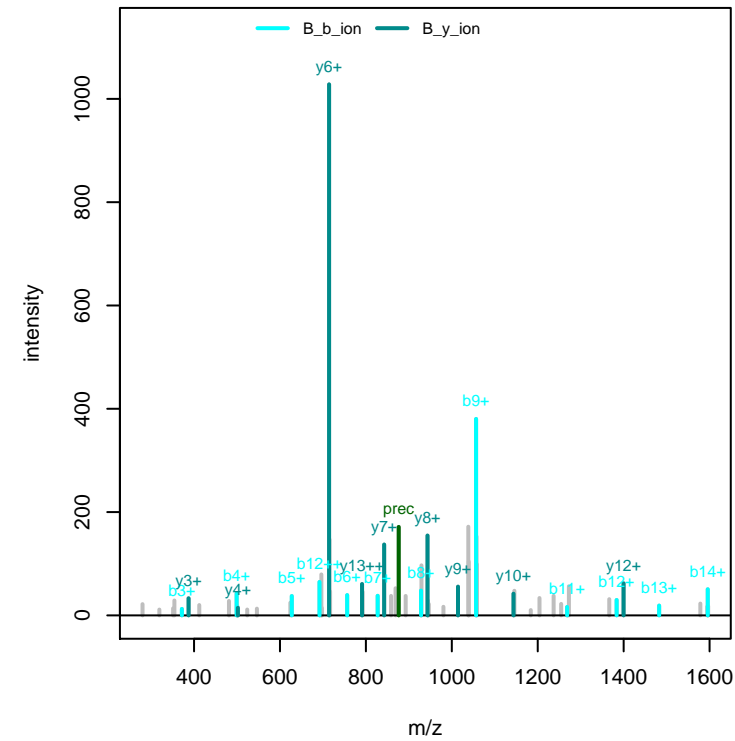

**STKQQEATQPDDVIR+XL\_L**

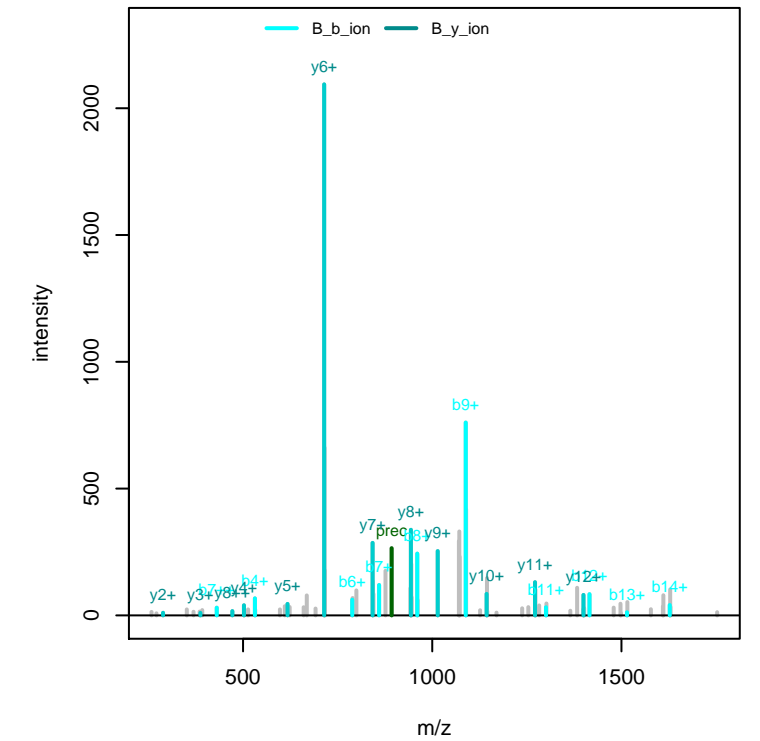

VKETDR  
VDGTINLPGSKSVSNR

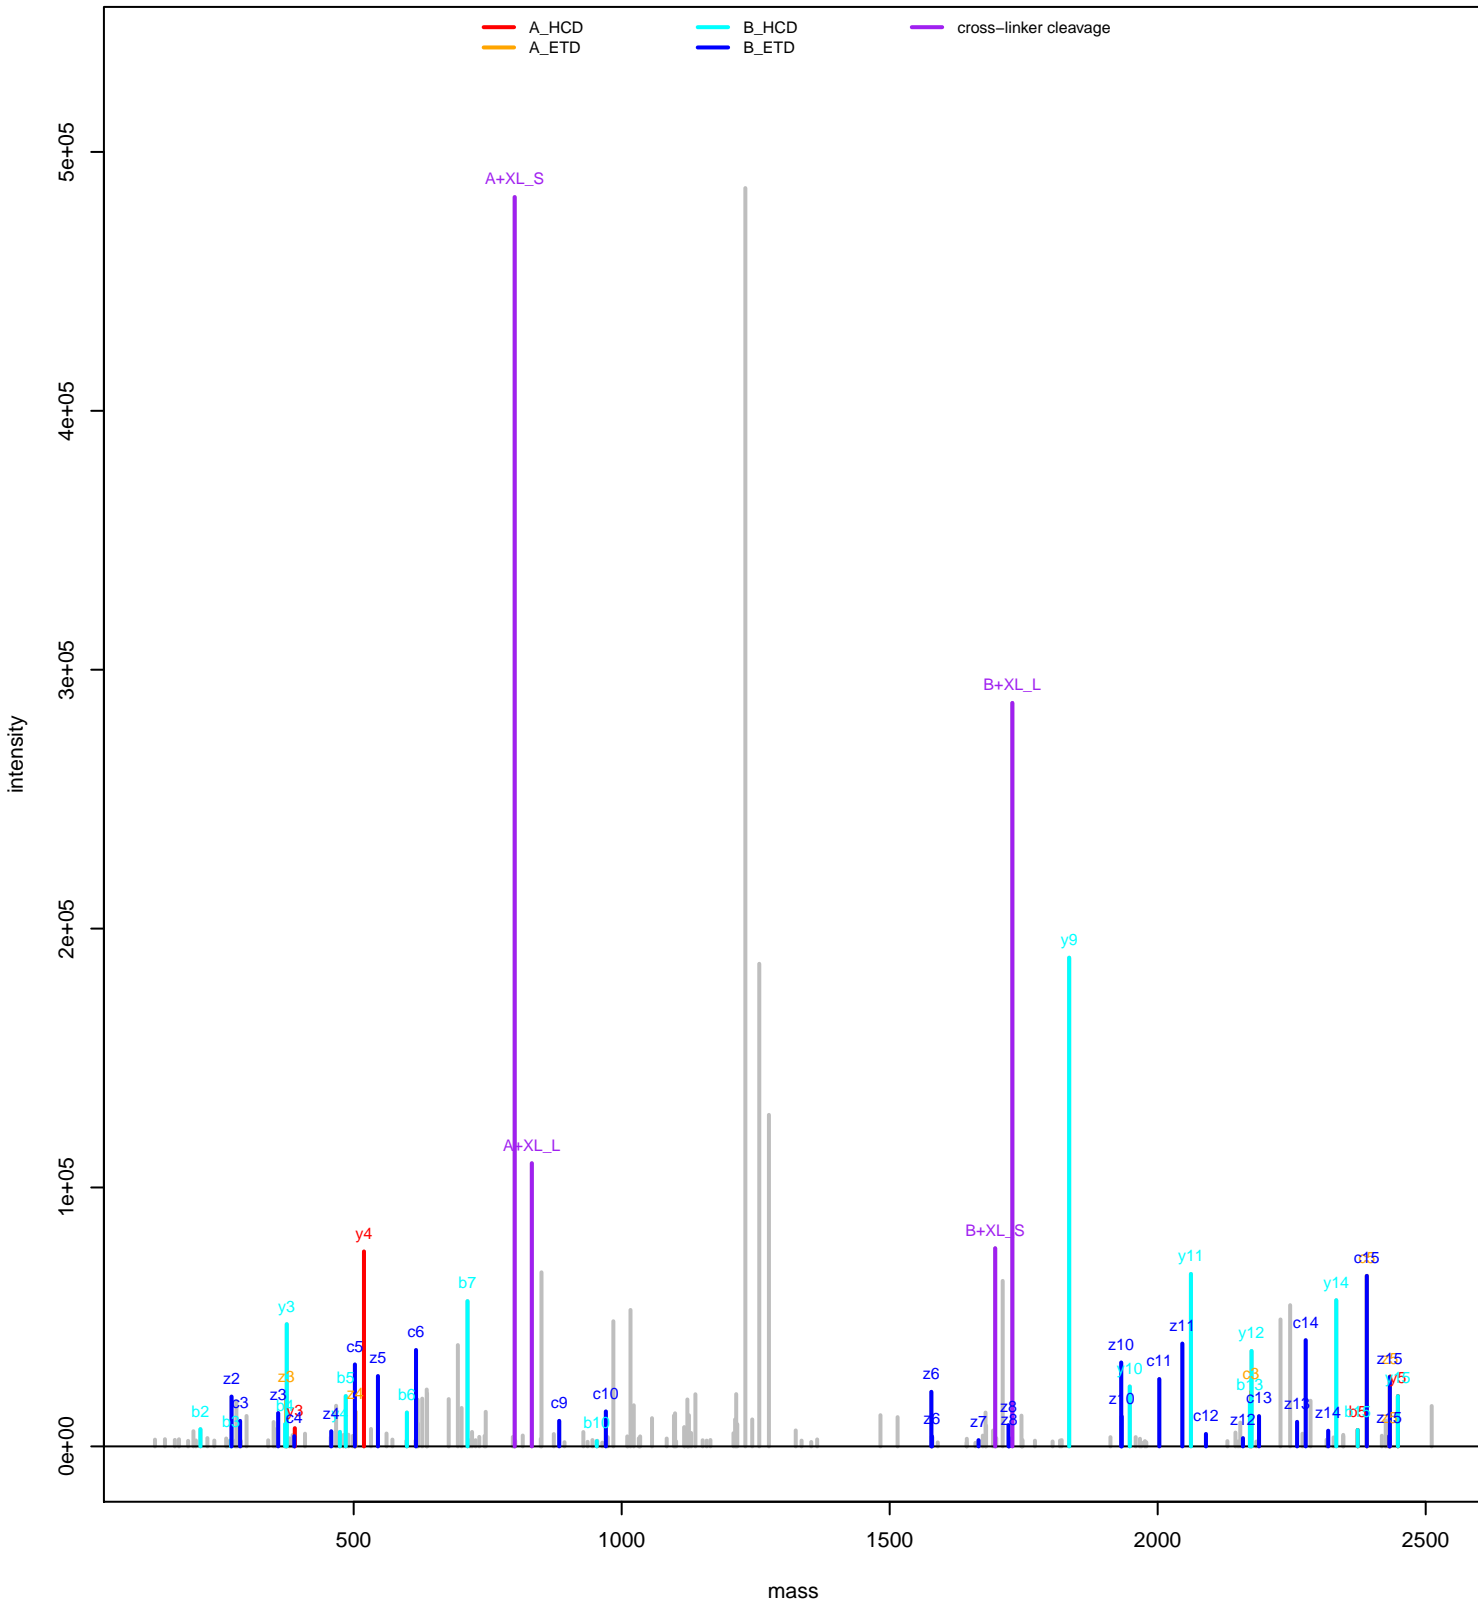

VKETDR+XL\_S

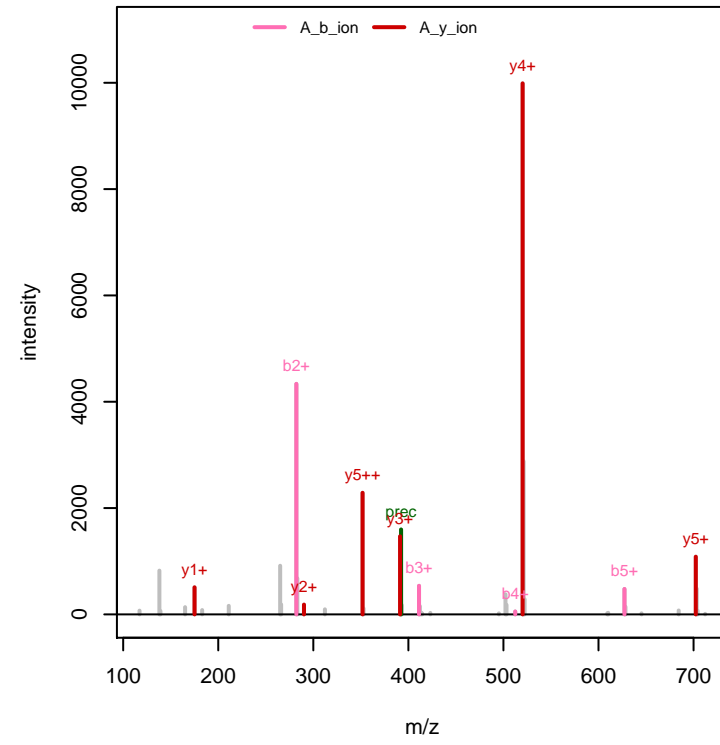

VKETDR+XL\_L

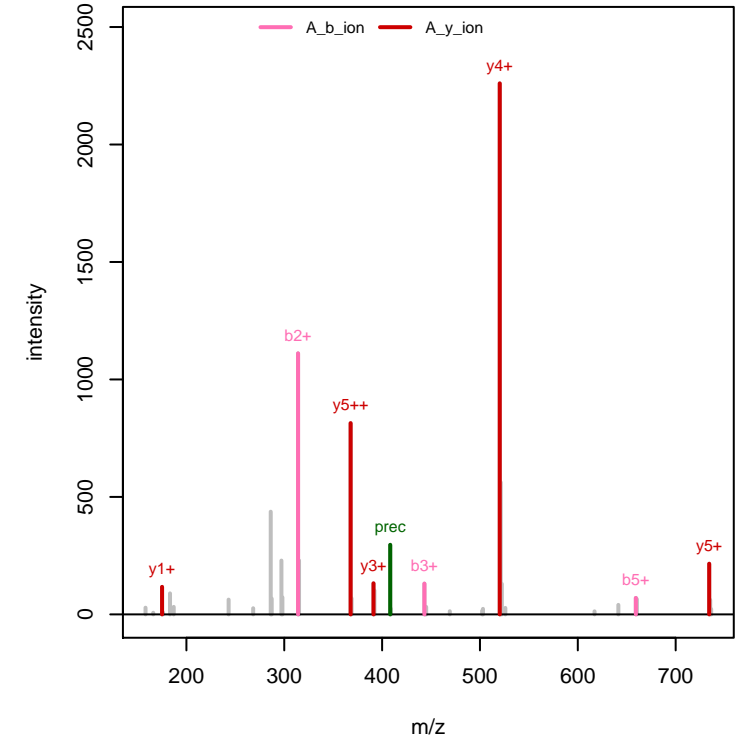

VDGTINLPGSKSVSNR+XL\_S

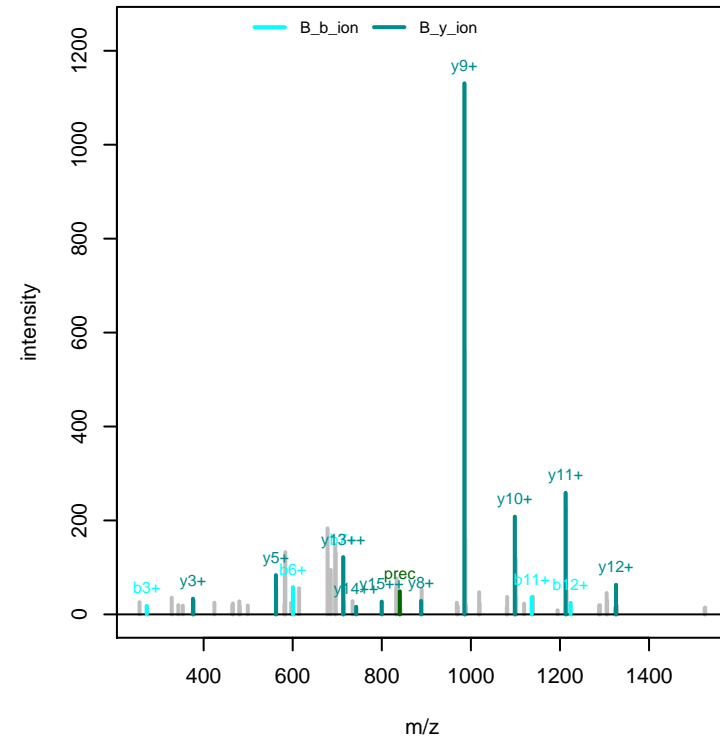

VDGTINLPGSKSVSNR+XL\_L

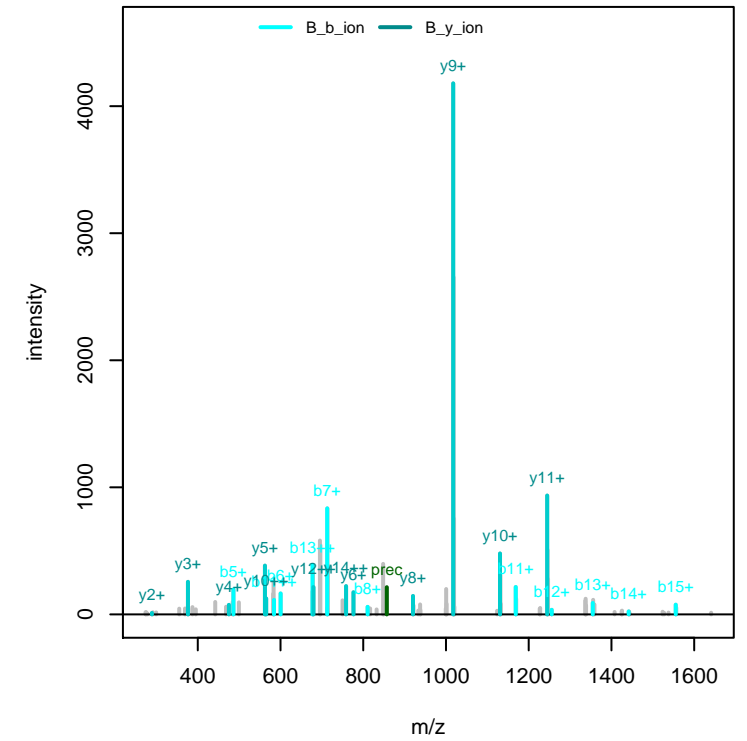



**AIDTKCK  
NYYKEAAR**

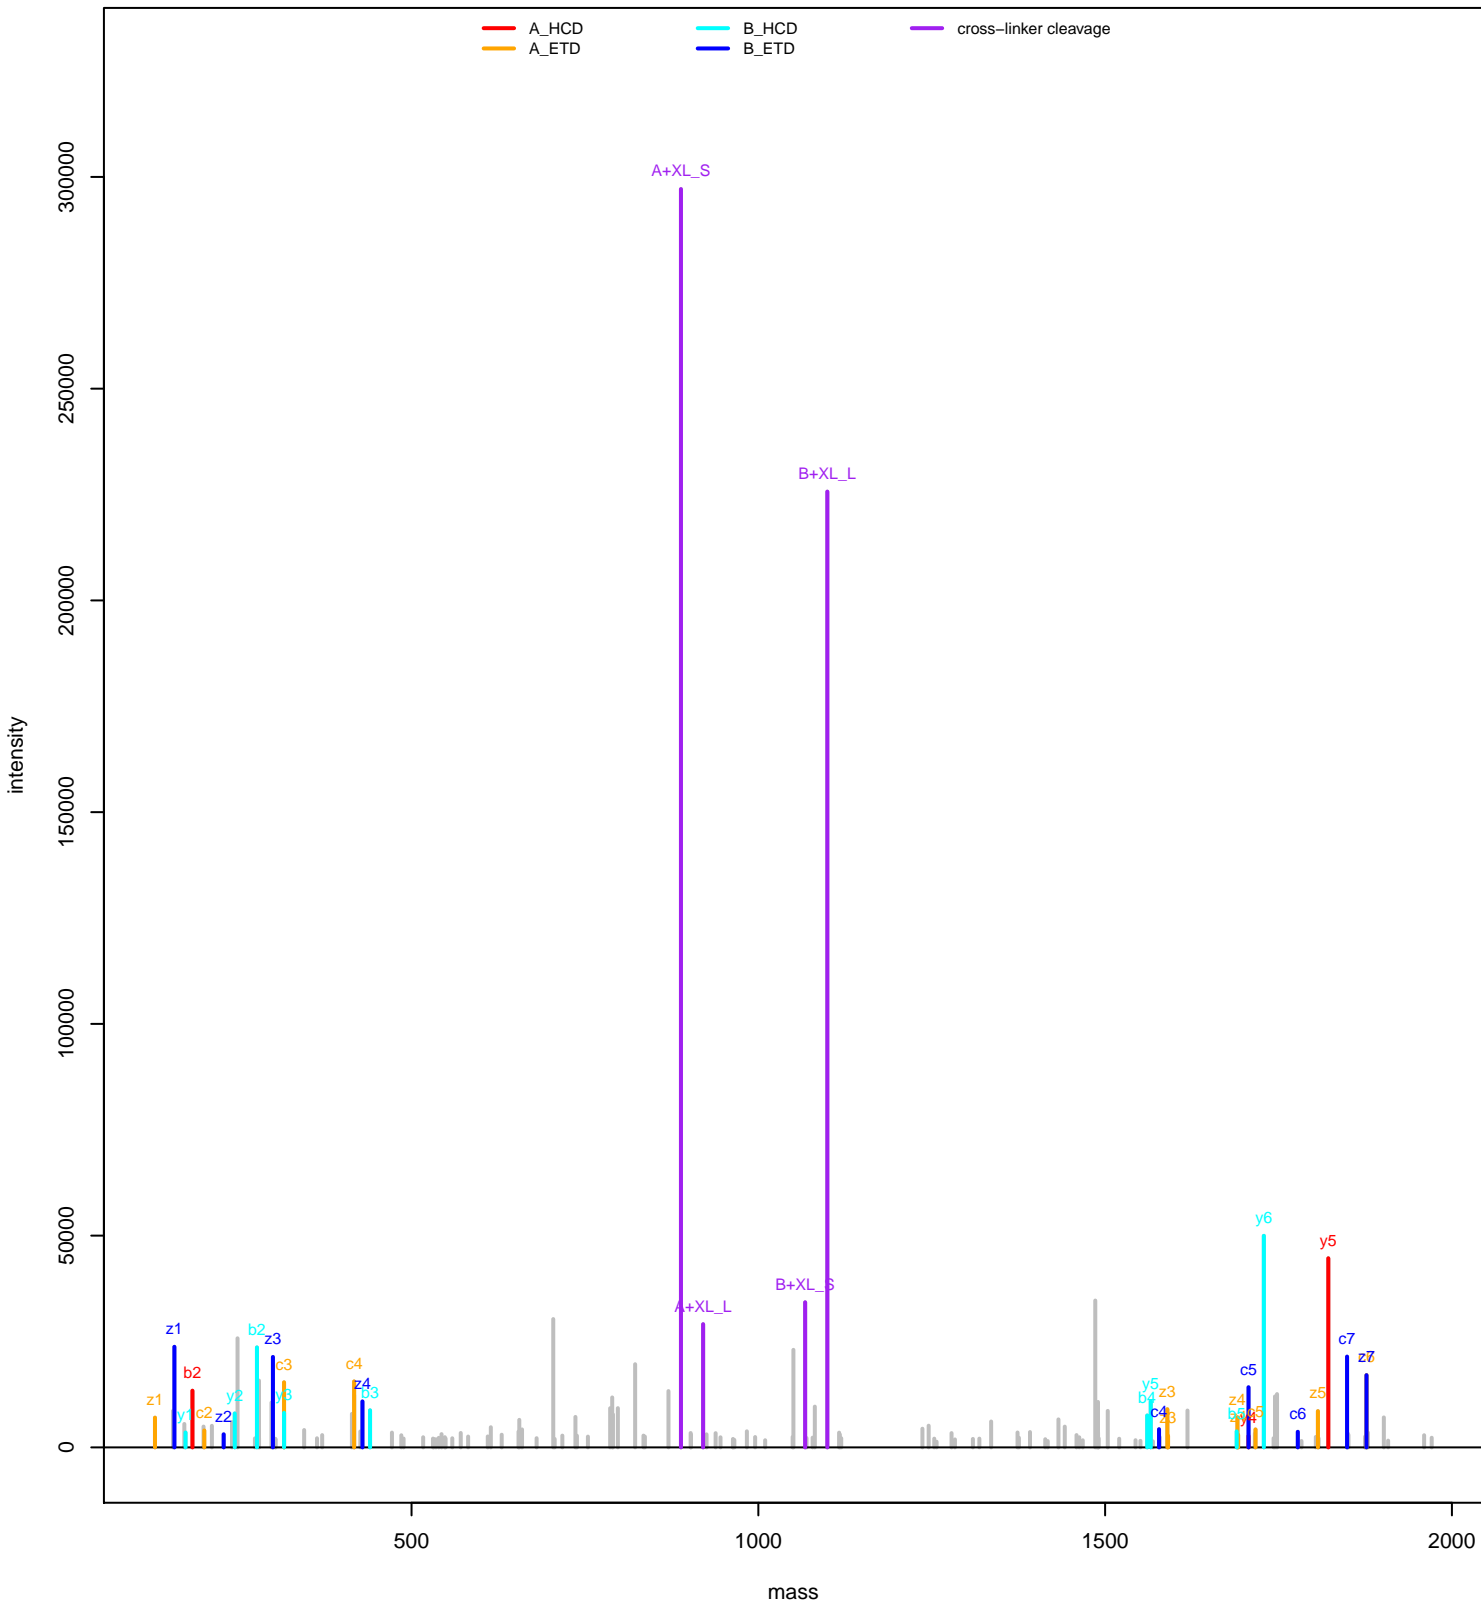

**AIDTKCK+XL\_S**

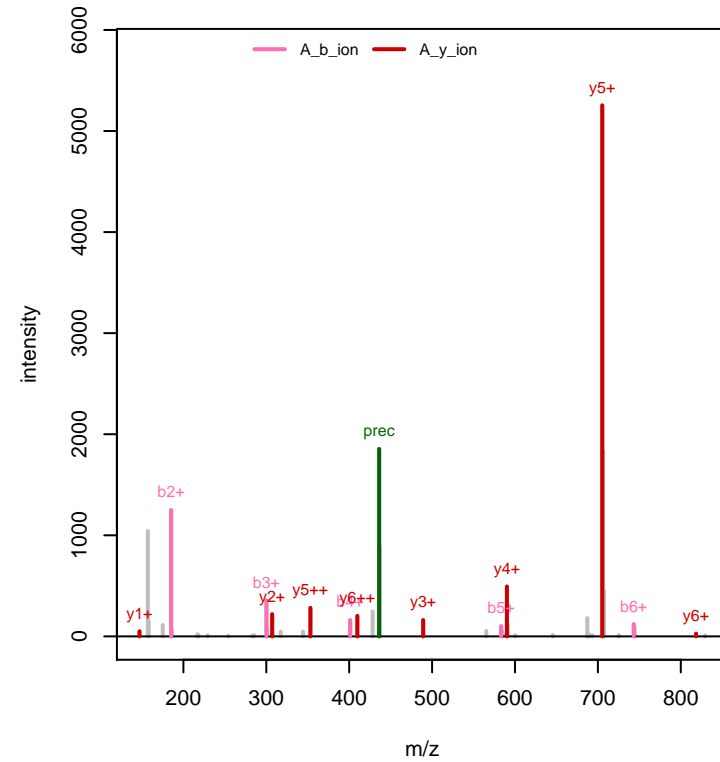

**AIDTKCK+XL\_L**

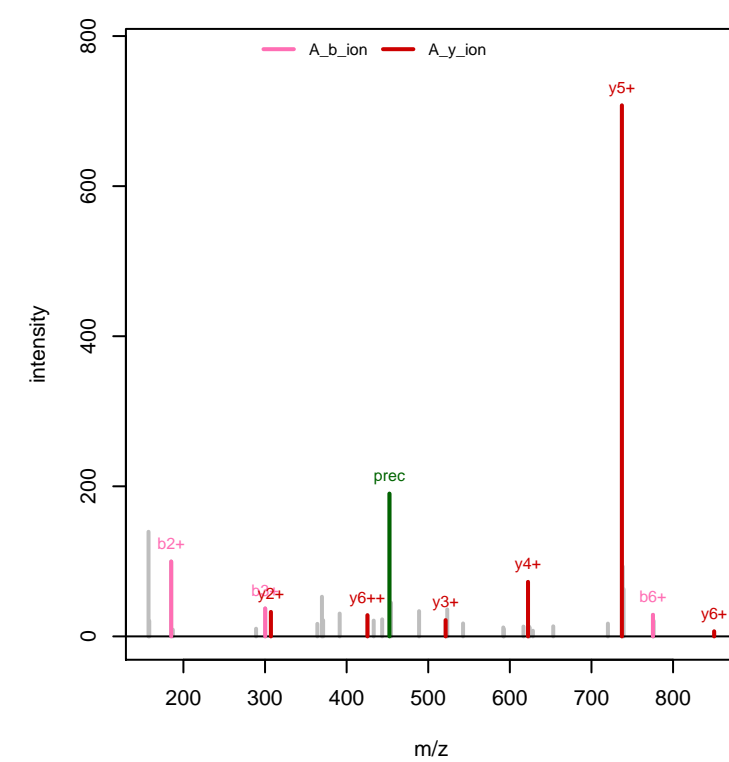

**NYYKEAAR+XL\_S**

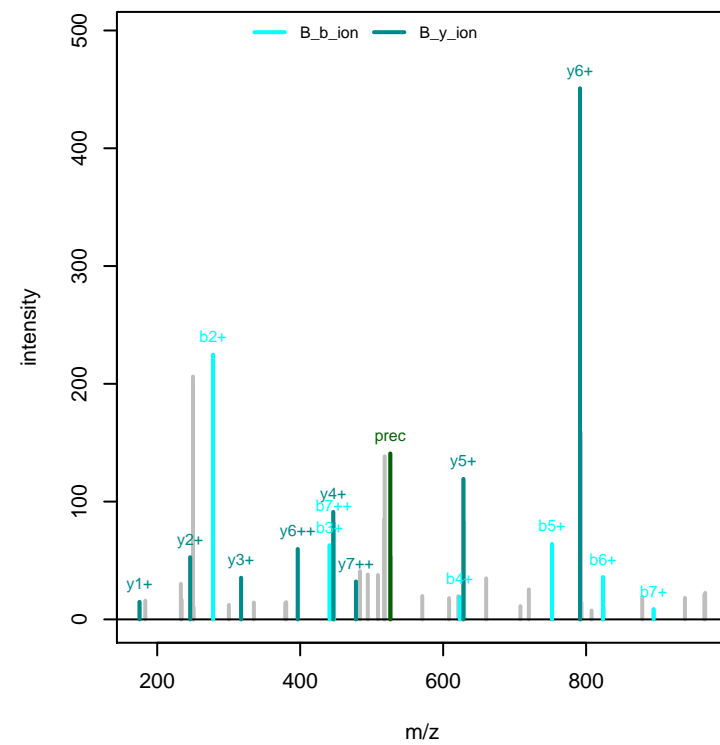

**NYYKEAAR+XL\_L**

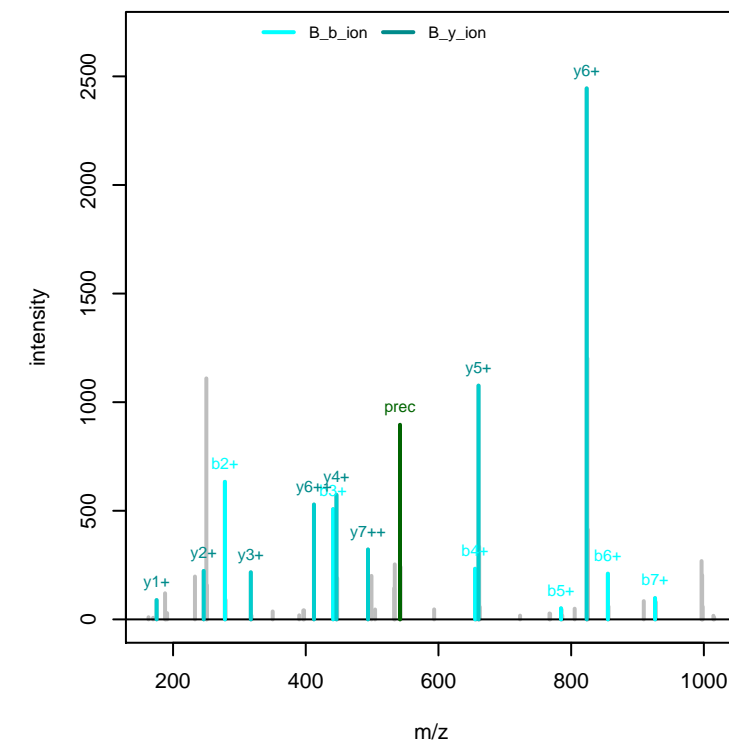

TGDKVELEGK  
DKNQRPGRNPK

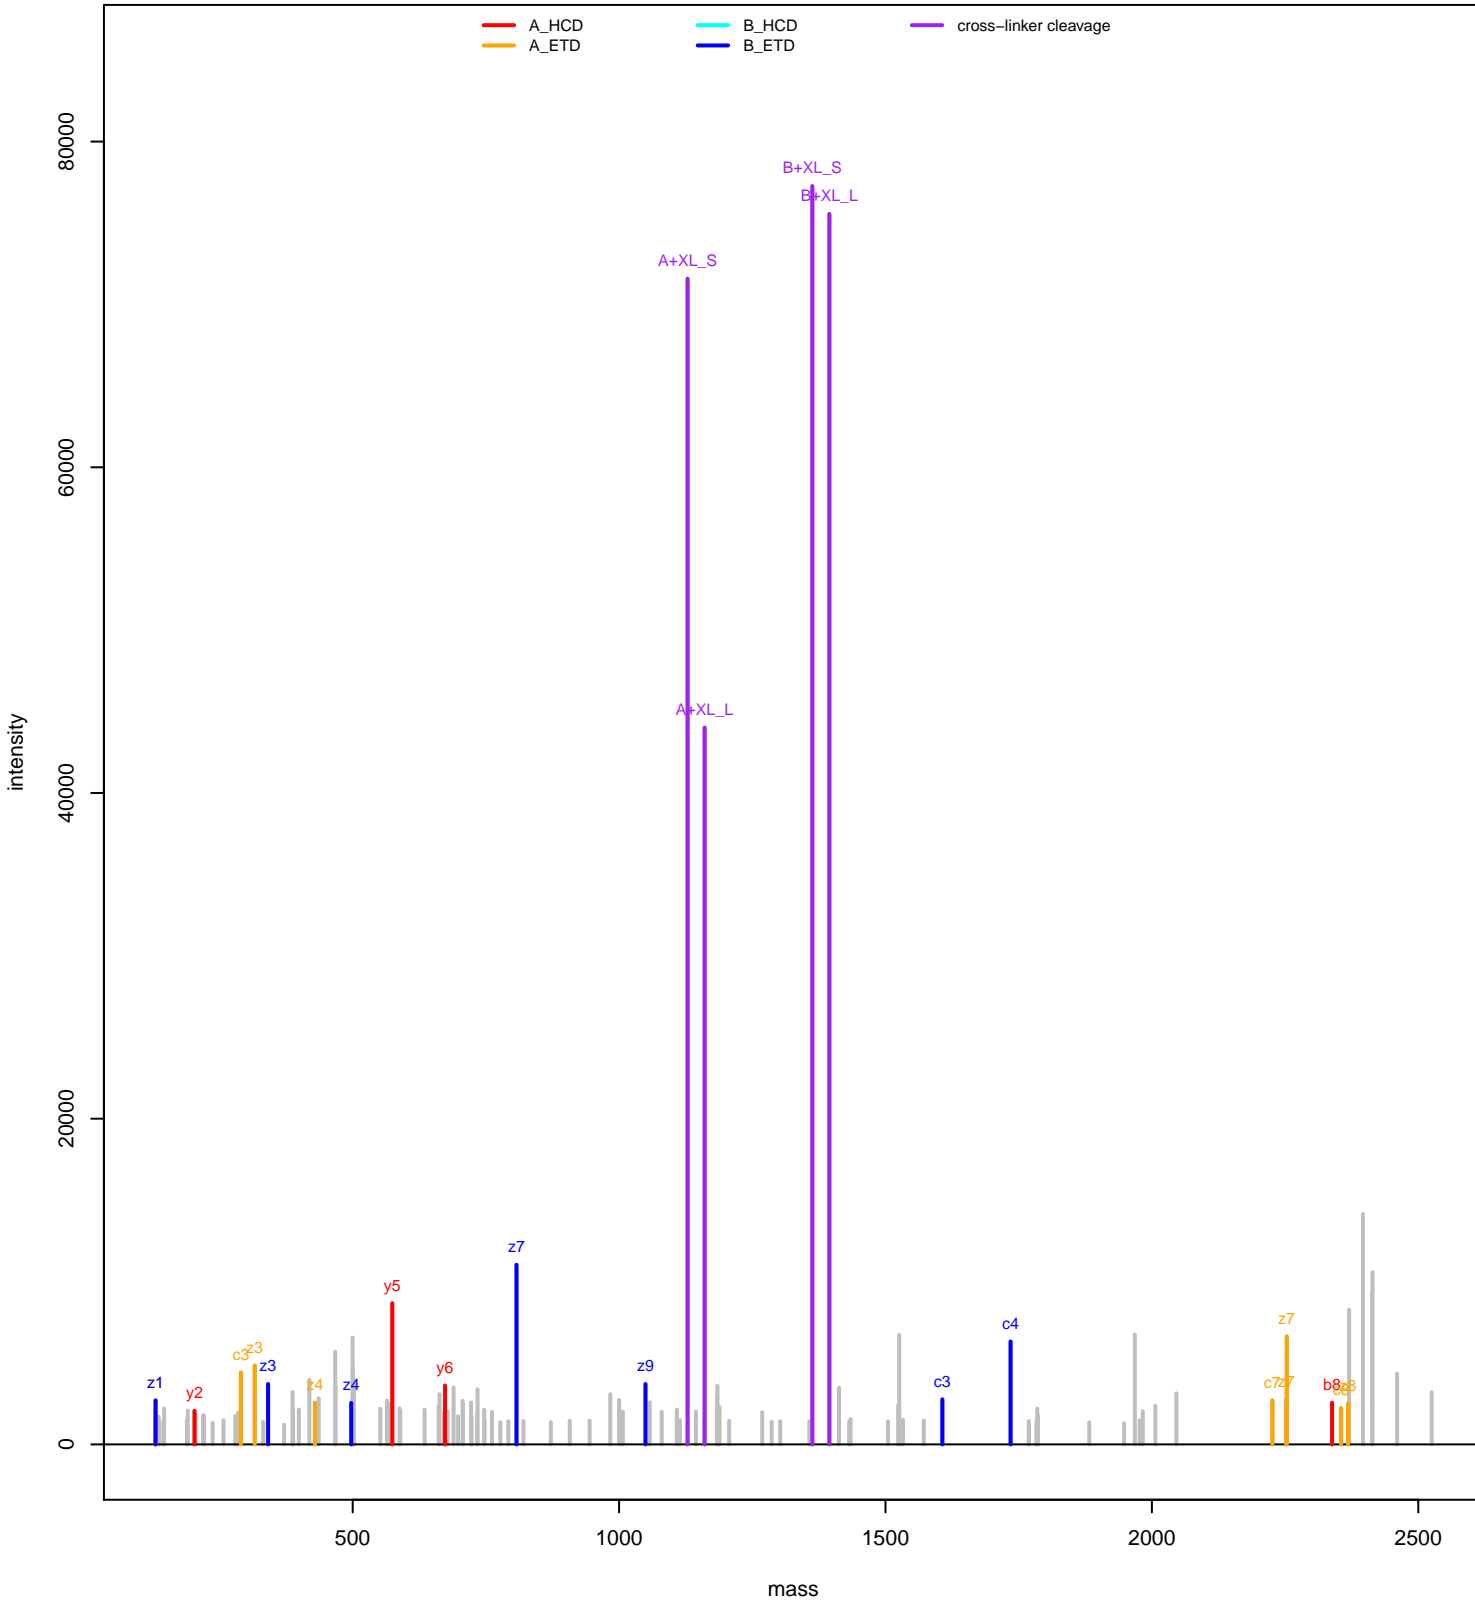

TGDKVELEGK+XL\_S

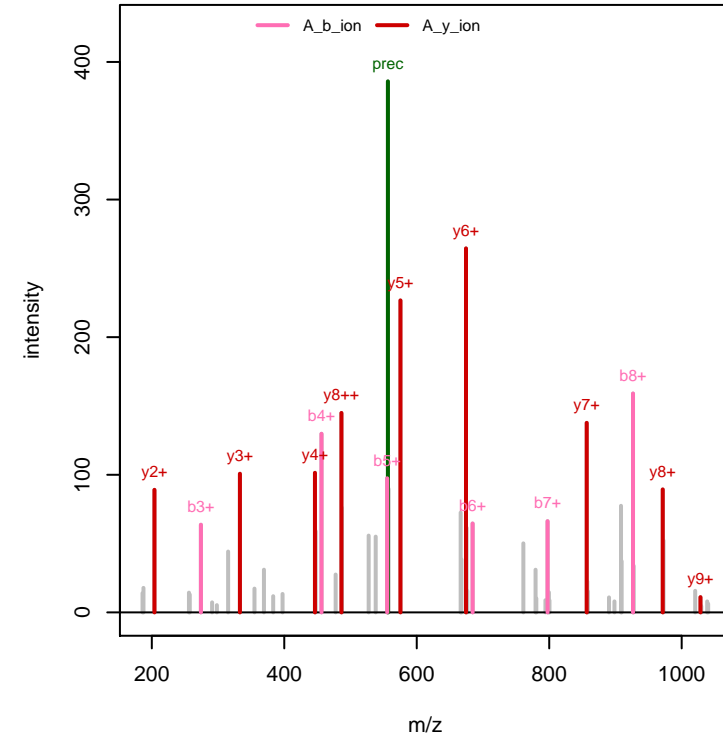

TGDKVELEGK+XL\_L

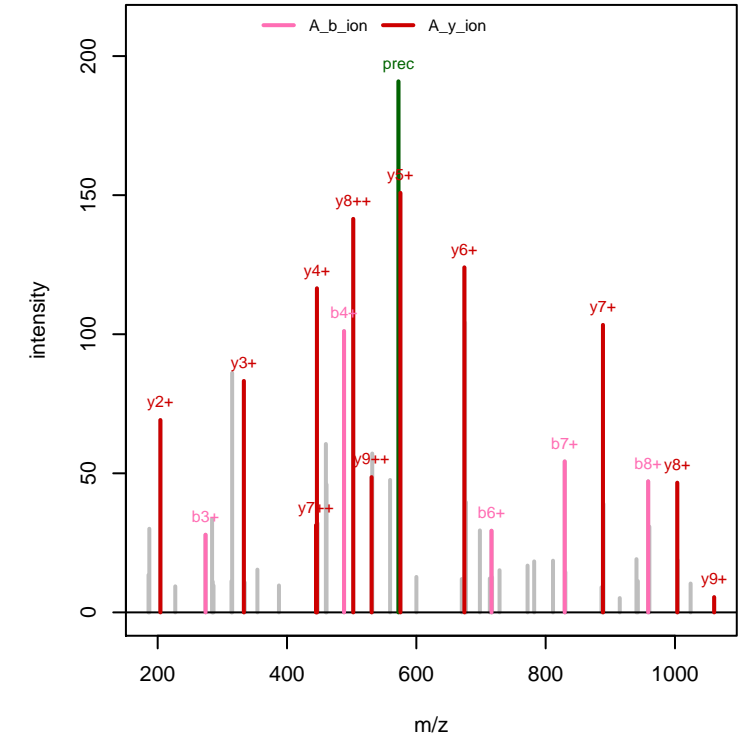

DKNQRPGRNPK+XL\_S

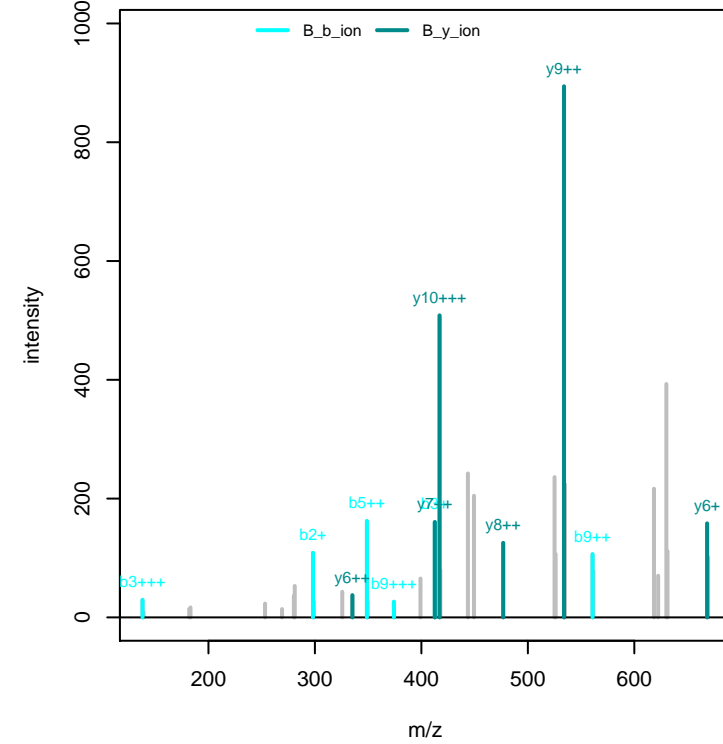

DKNQRPGRNPK+XL\_L

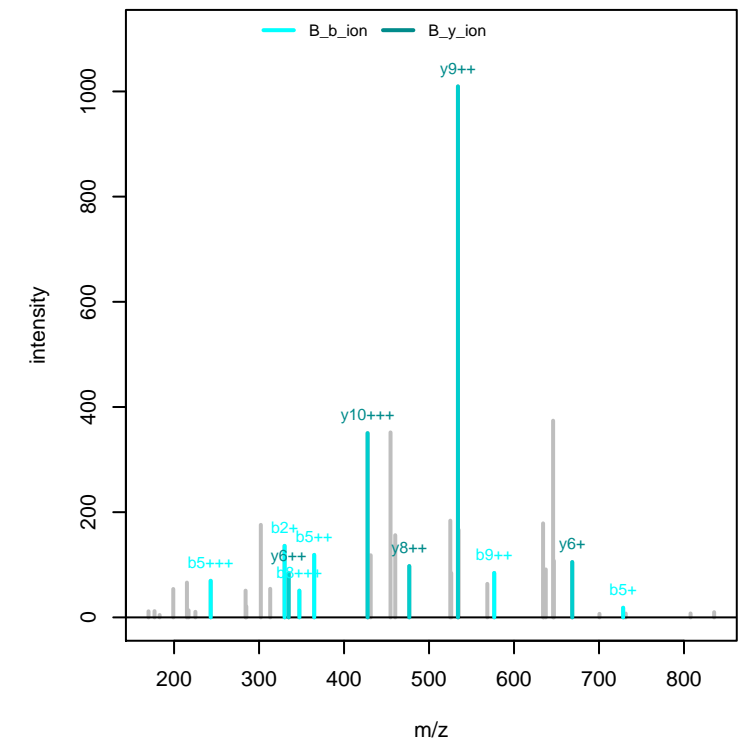

**AELLKK  
ELKPHDR**

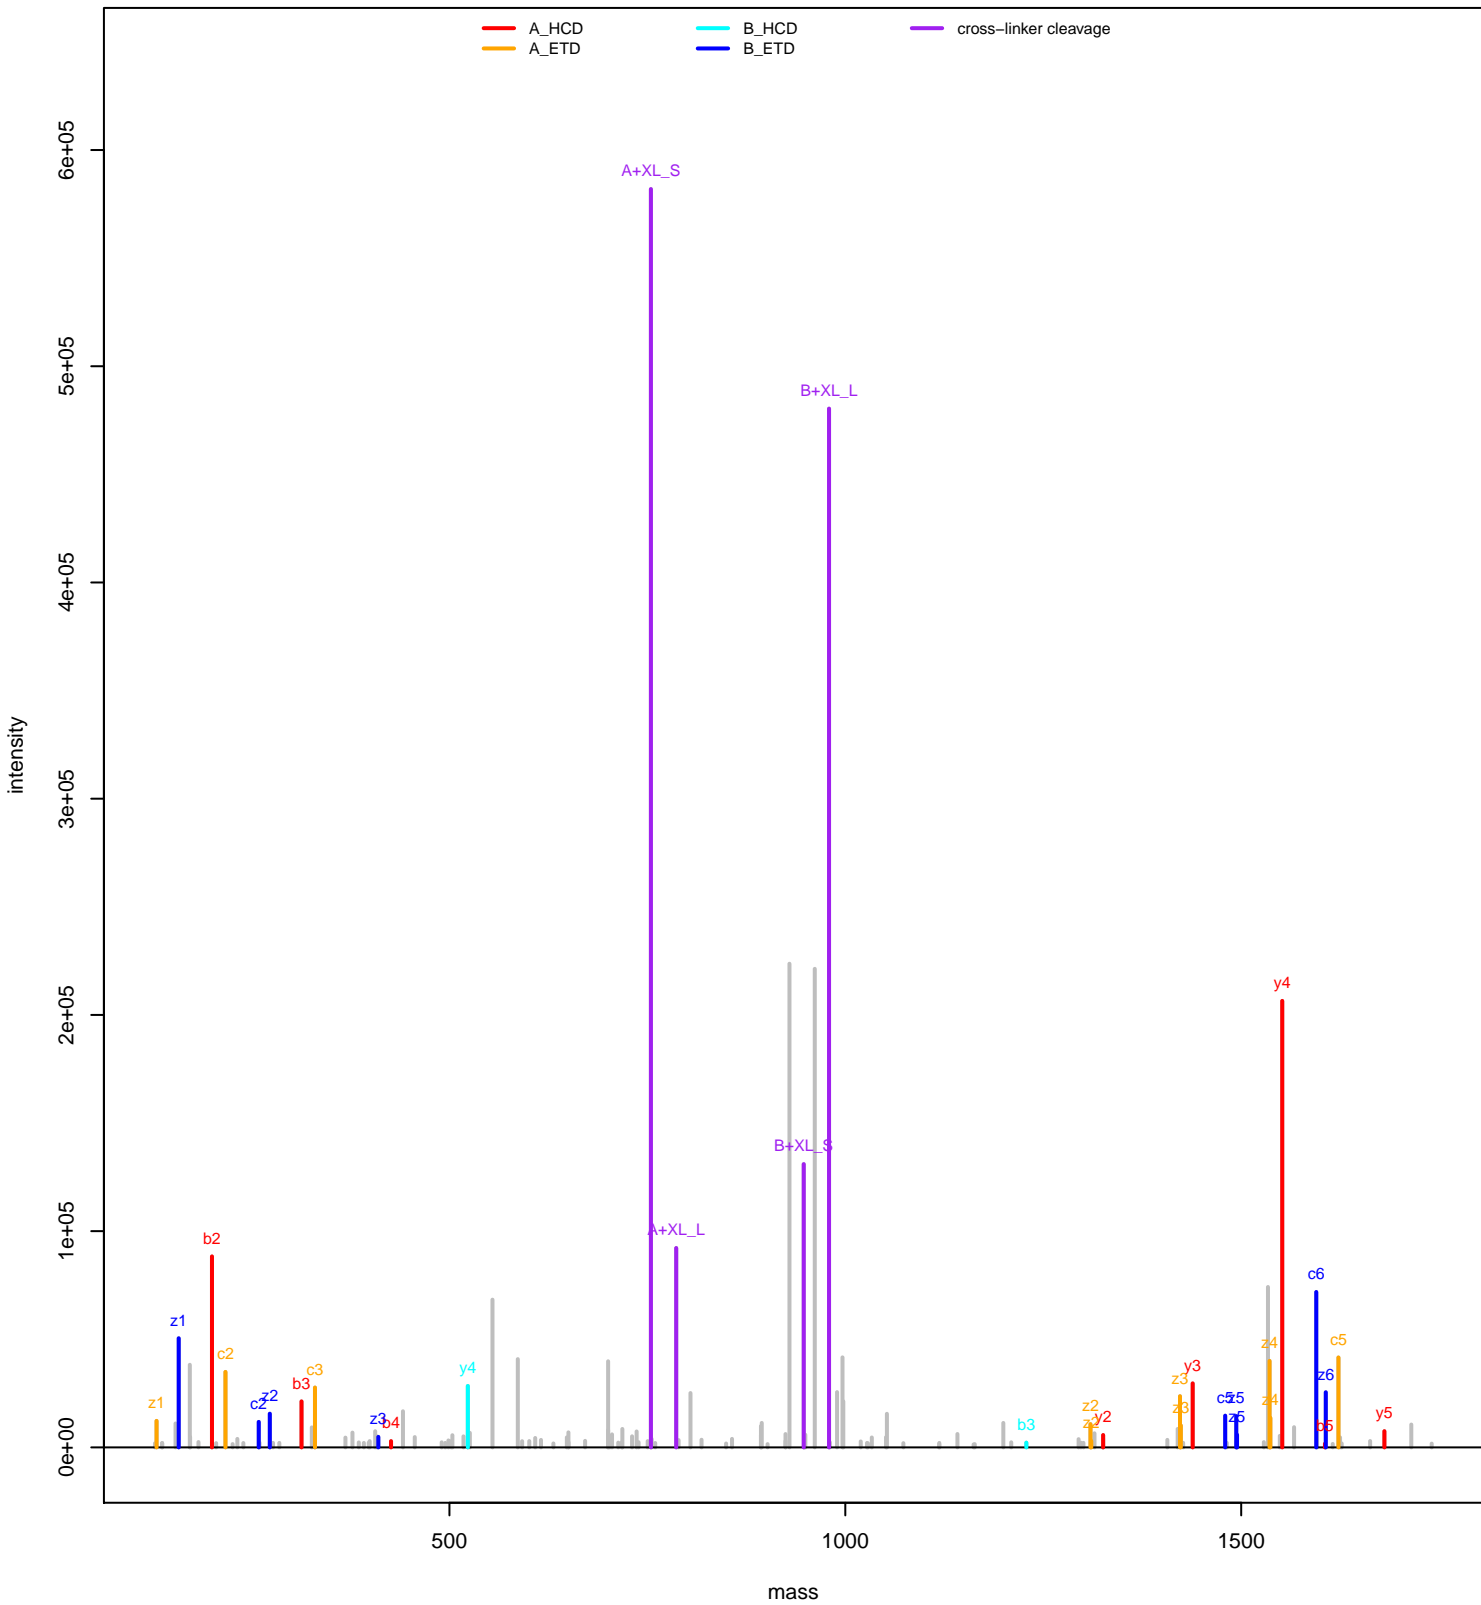

**AELLKK+XL\_S**

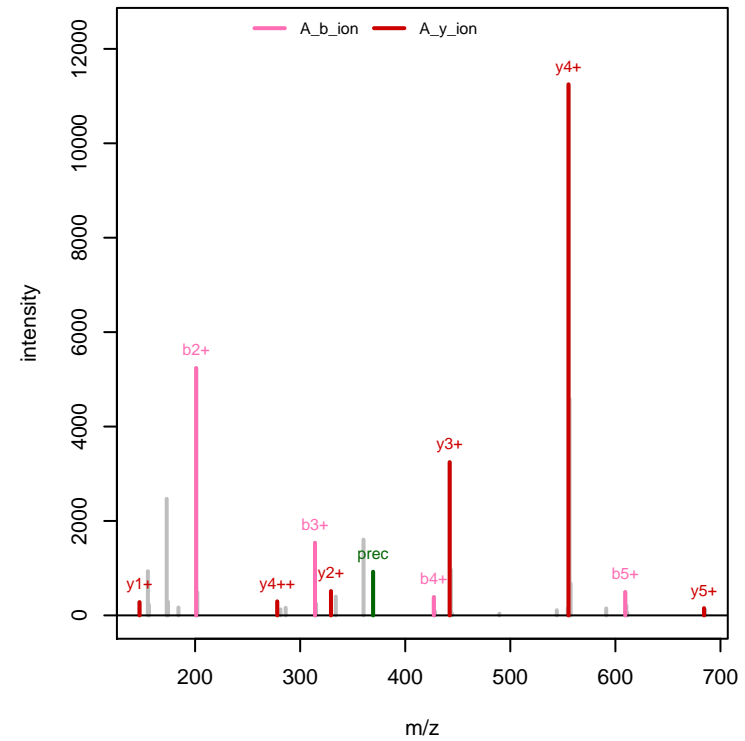

**AELLKK+XL\_L**

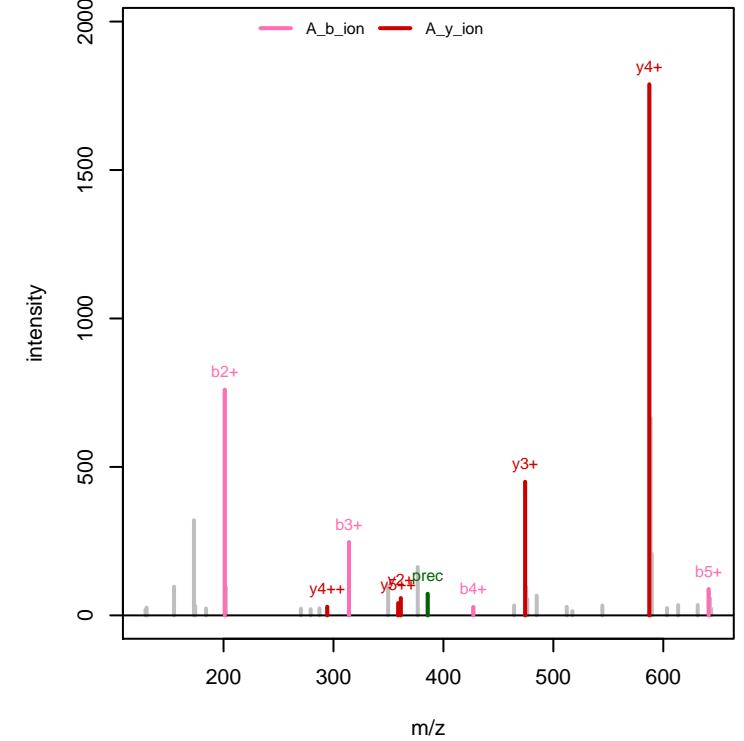

**ELKPHDR+XL\_S**

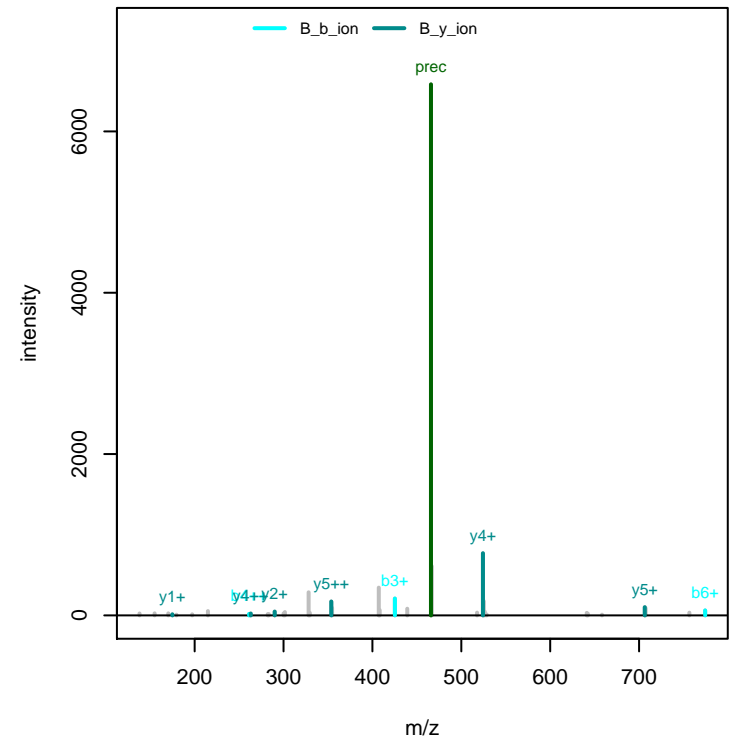

**ELKPHDR+XL\_L**

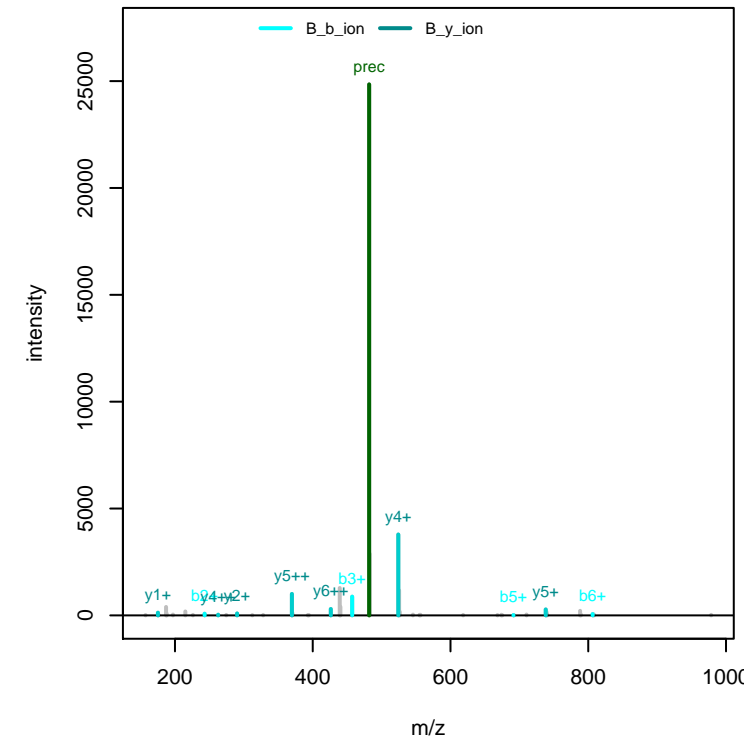

DLEK GK  
LSKEYDHIK

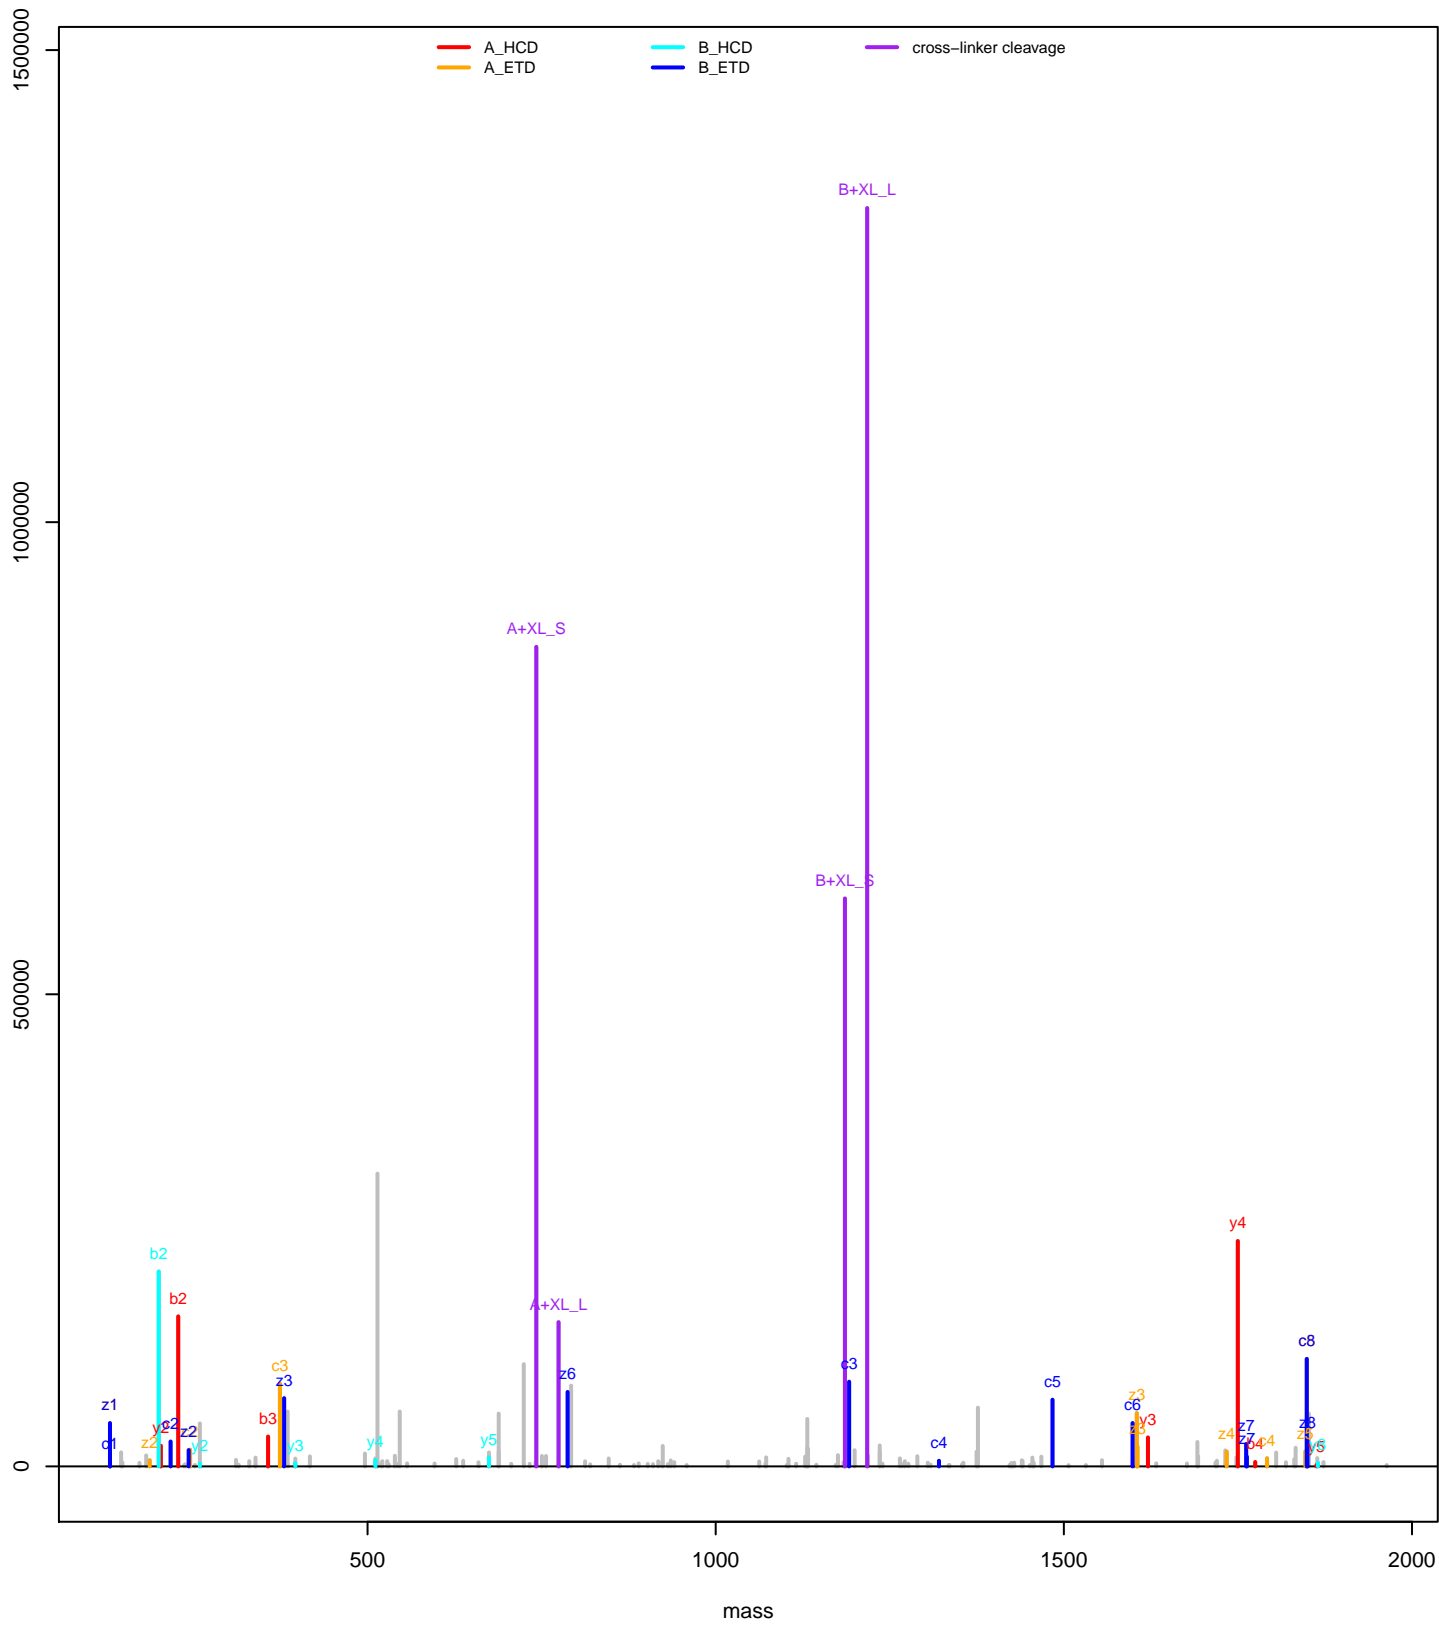

DLEK GK+XL\_S

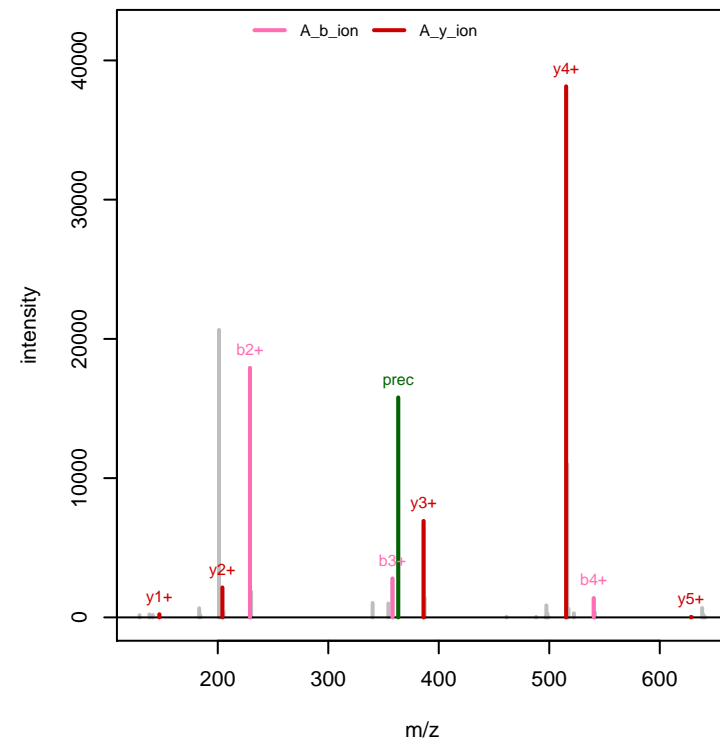

DLEK GK+XL\_L

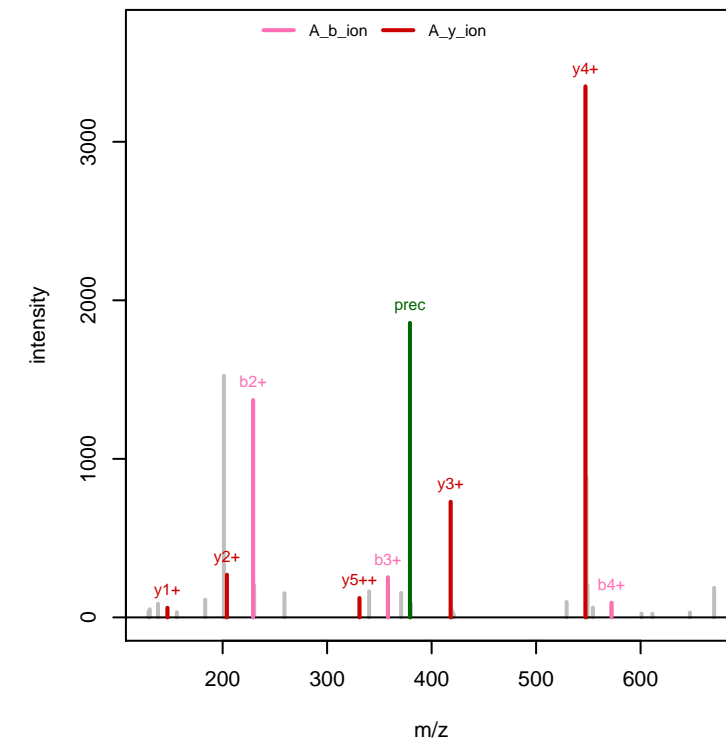

LSKEYDHIK+XL\_S

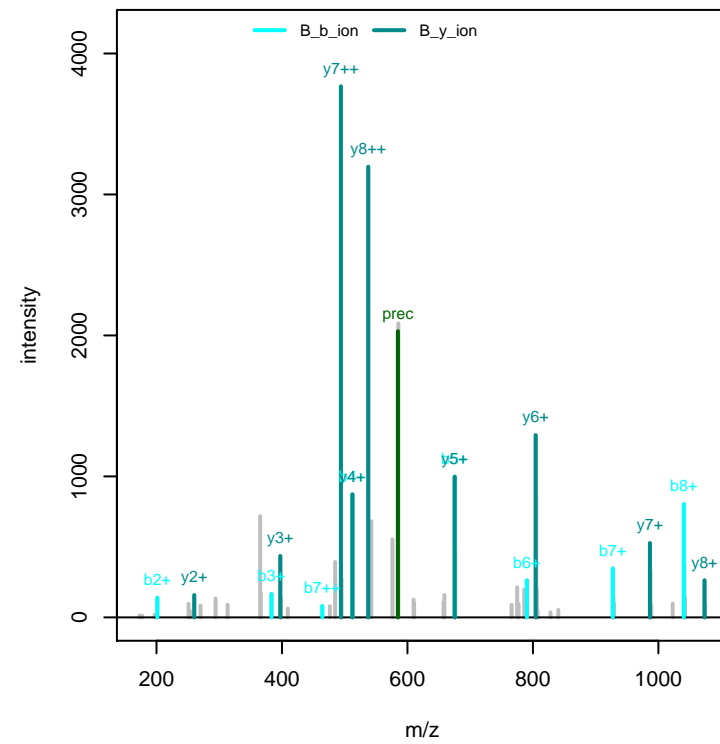

LSKEYDHIK+XL\_L

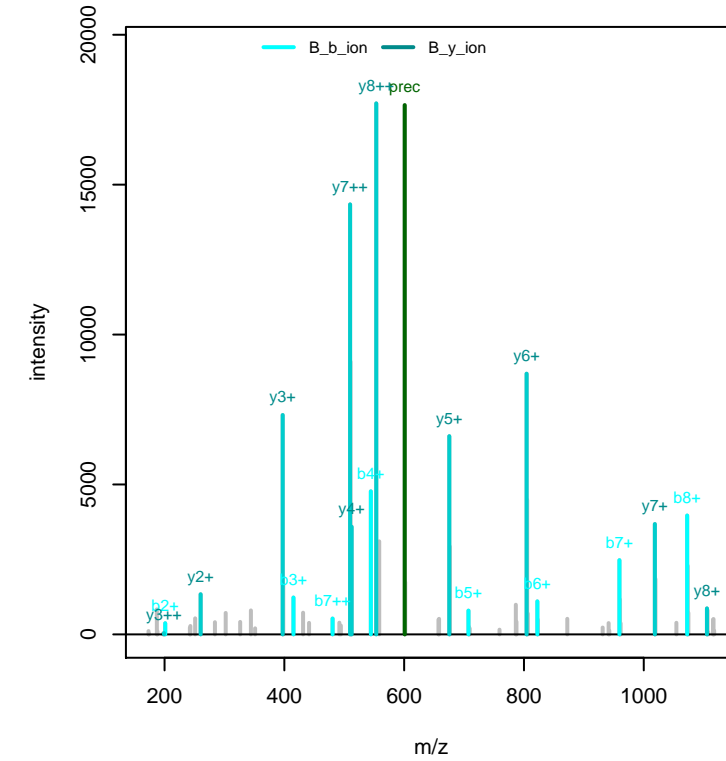

TGEVKGR  
LVLDDRKR

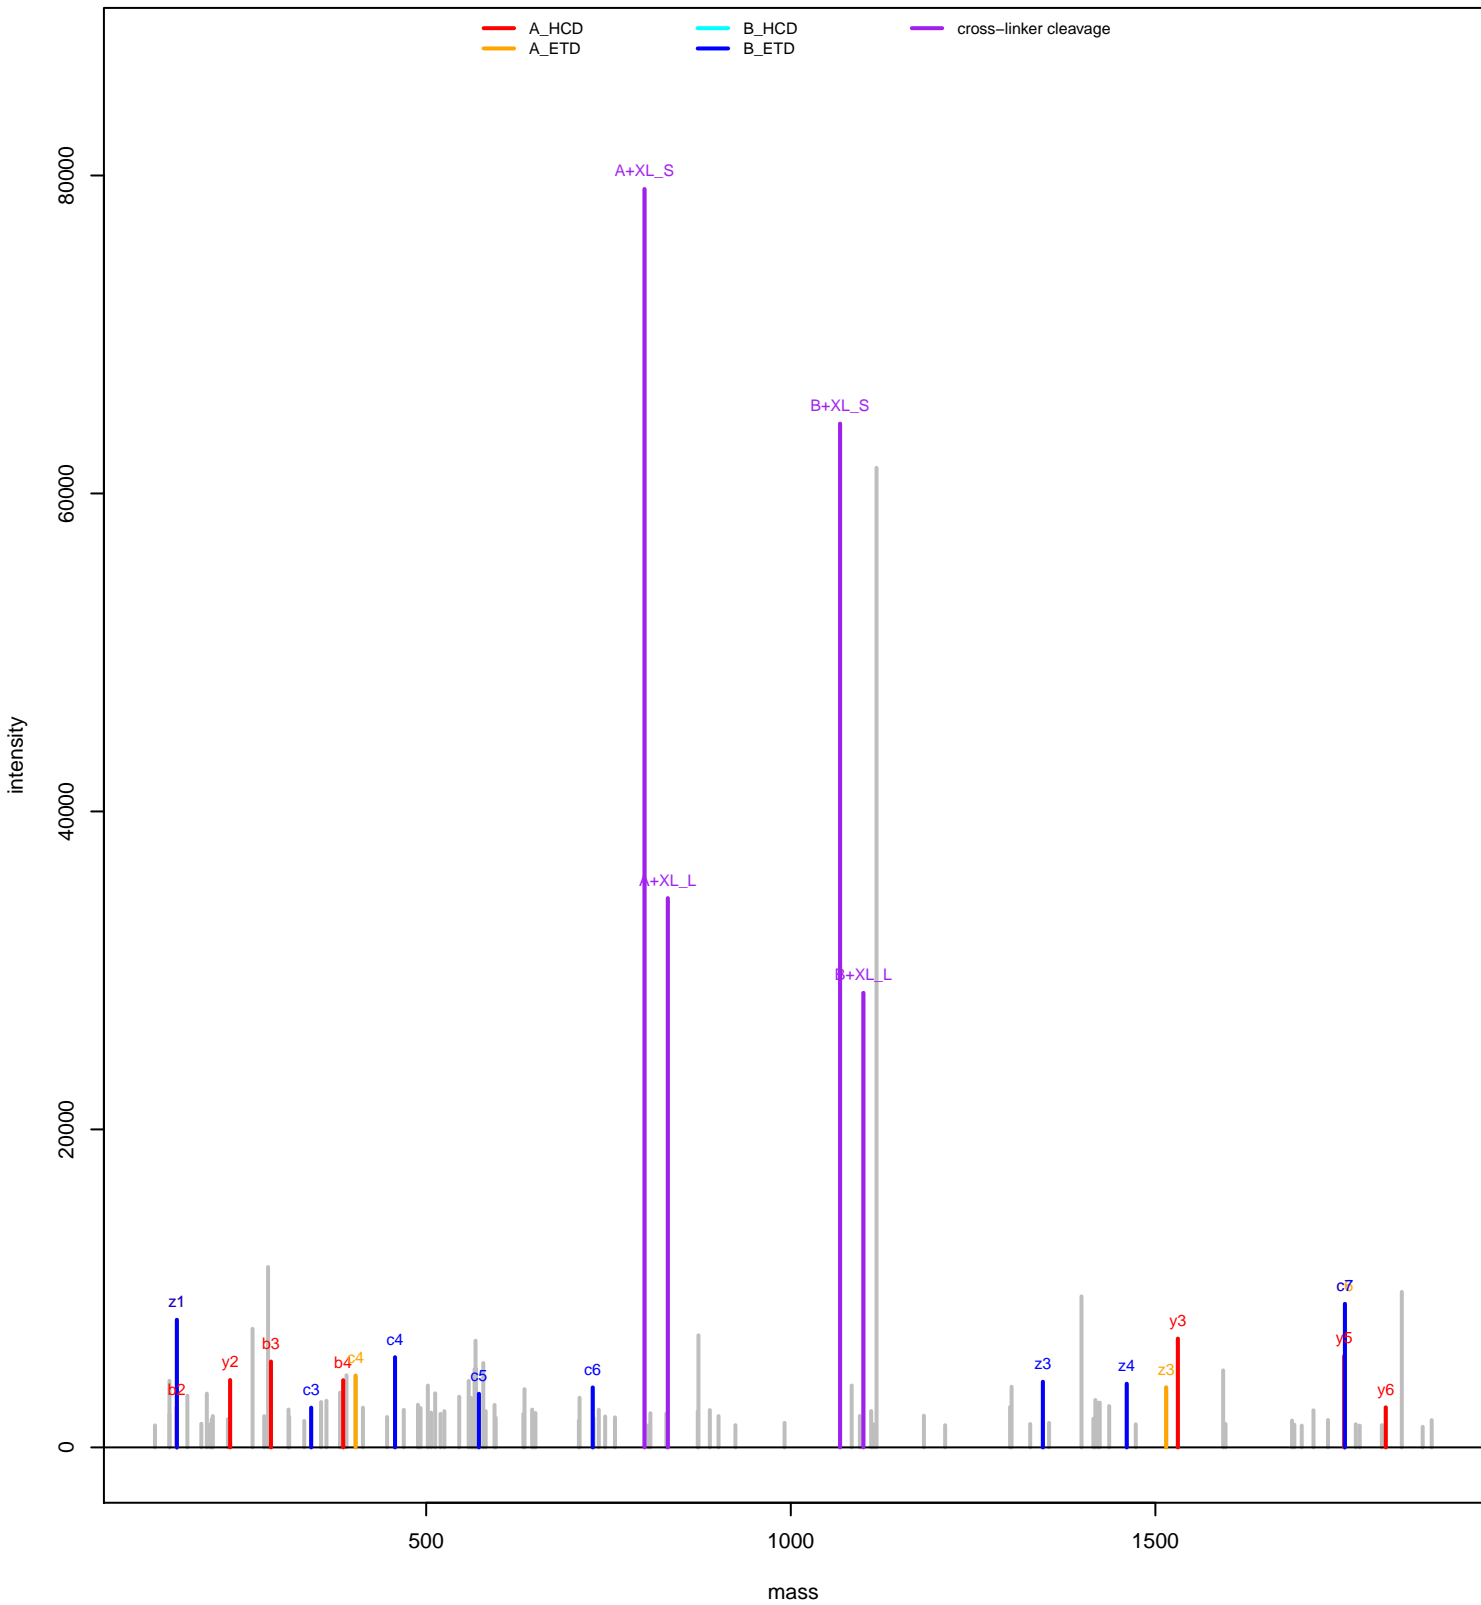

TGEVKGR+XL\_S

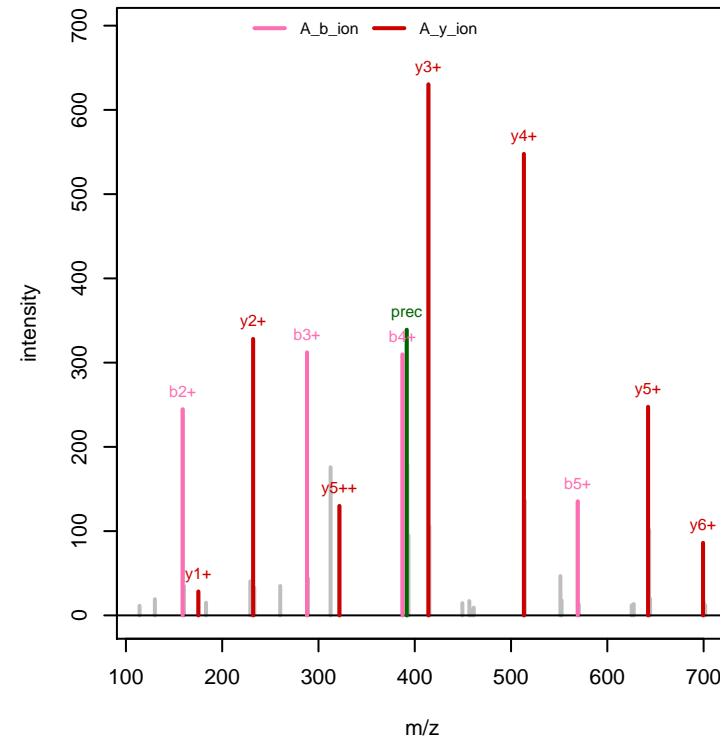

TGEVKGR+XL\_L

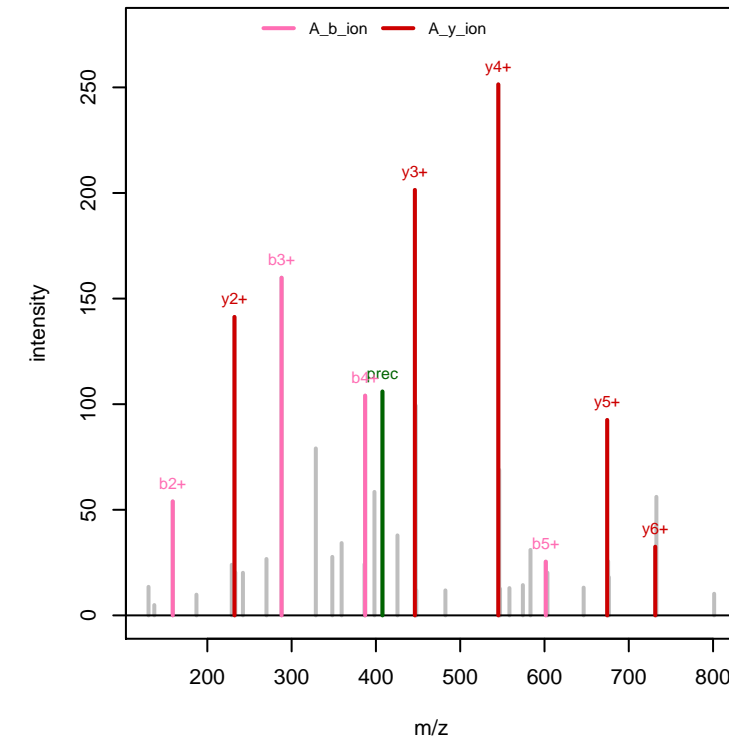

LVLDDRKR+XL\_S

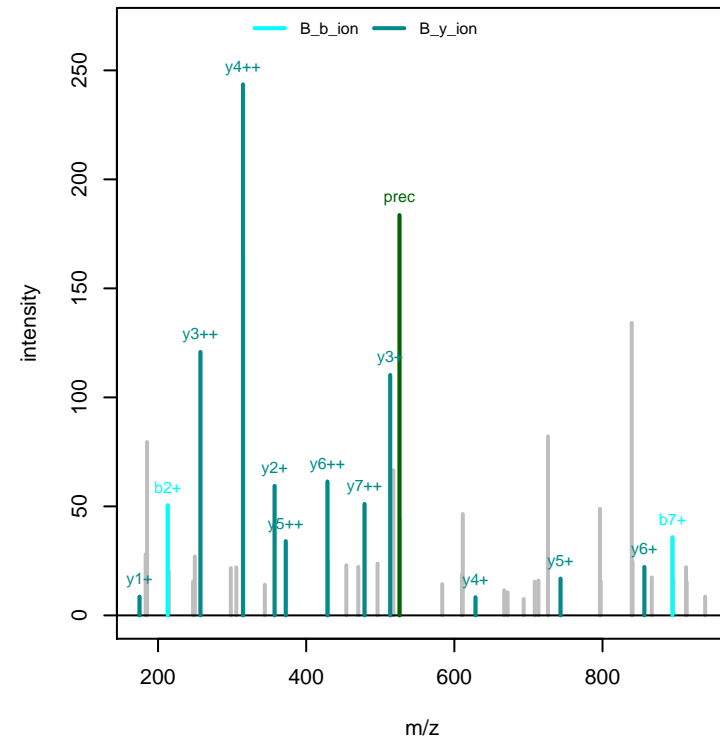

LVLDDRKR+XL\_L

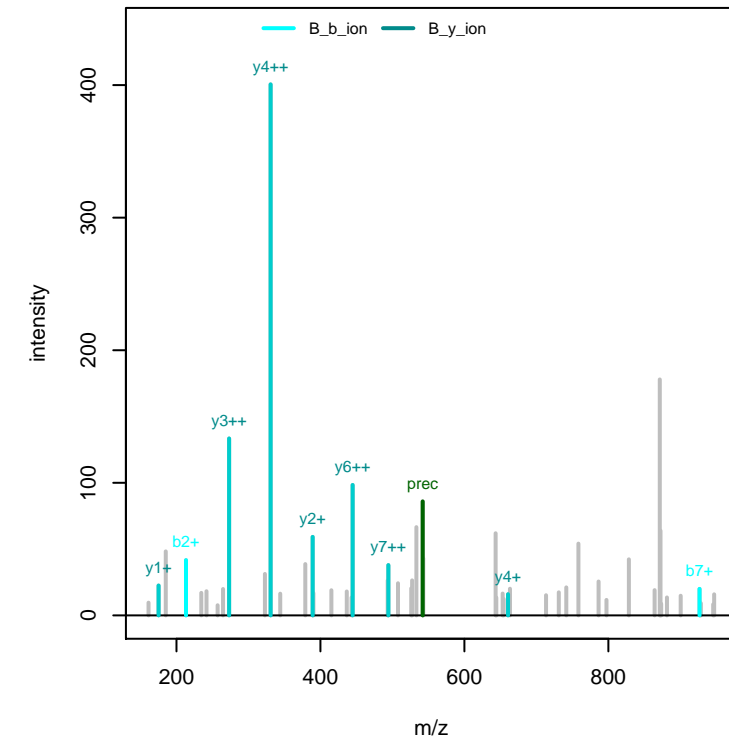

AIQVTTGAKK  
VTKPEAGHFAK

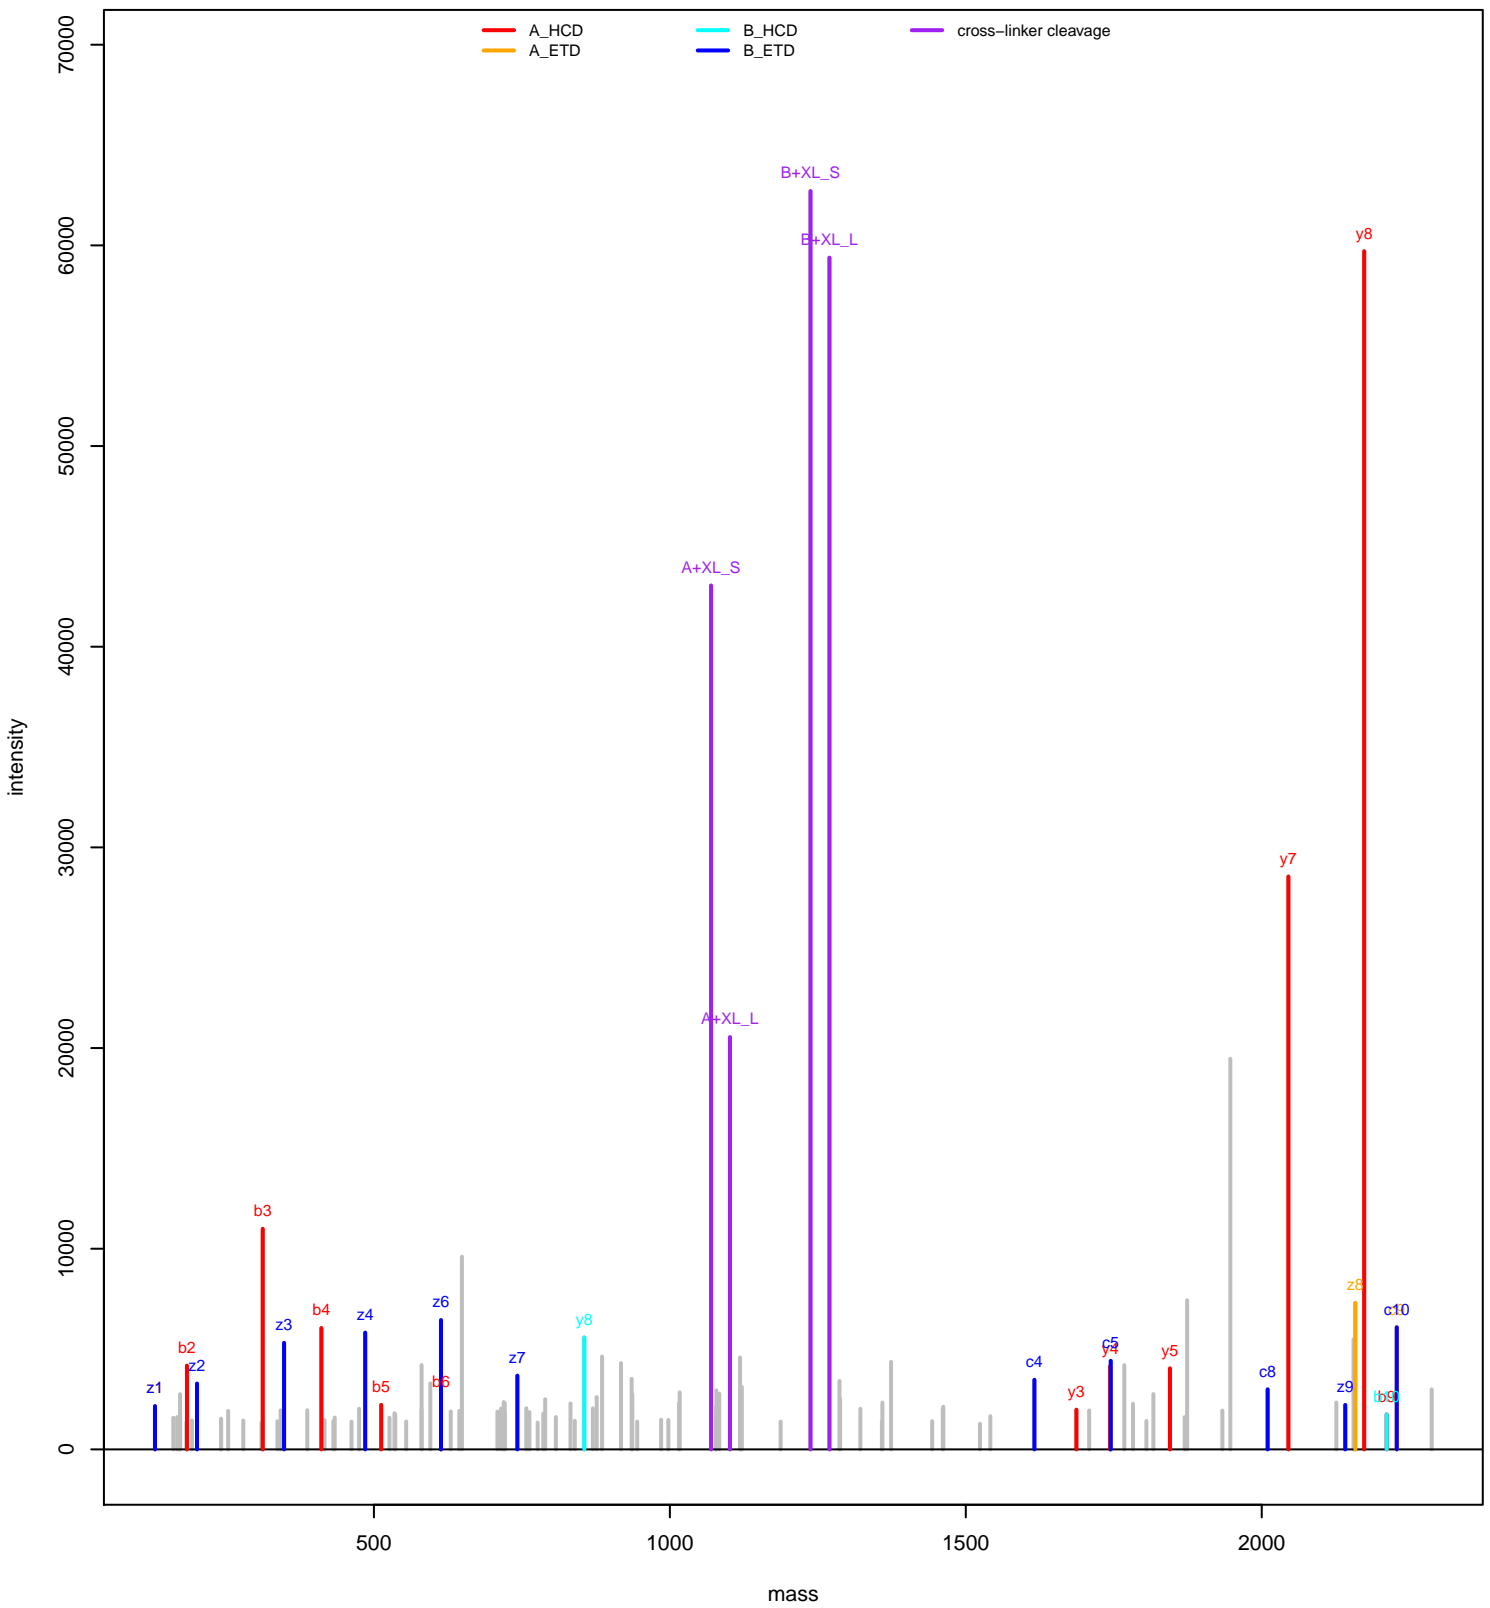

AIQVTTGAKK+XL\_S

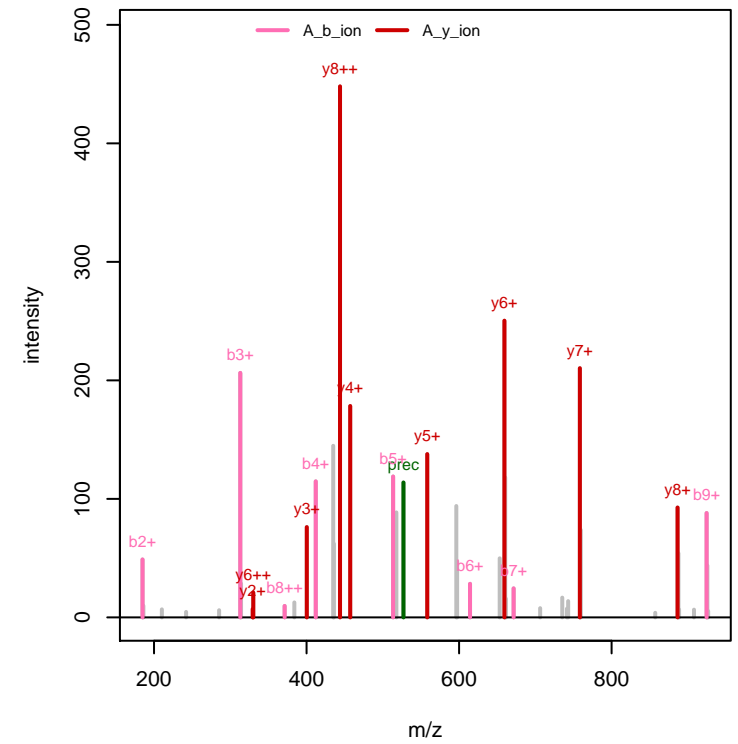

AIQVTTGAKK+XL\_L

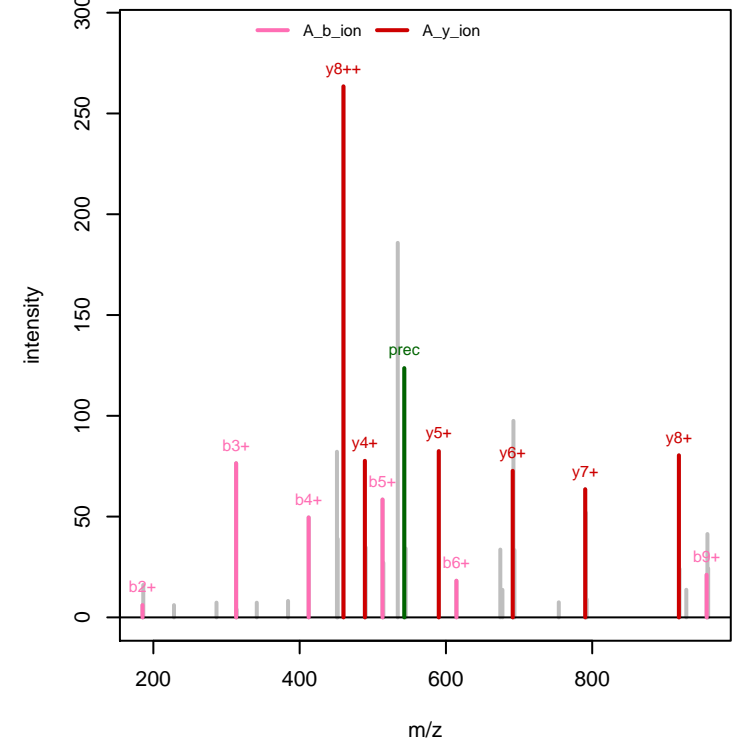

VTKPEAGHFAK+XL\_S

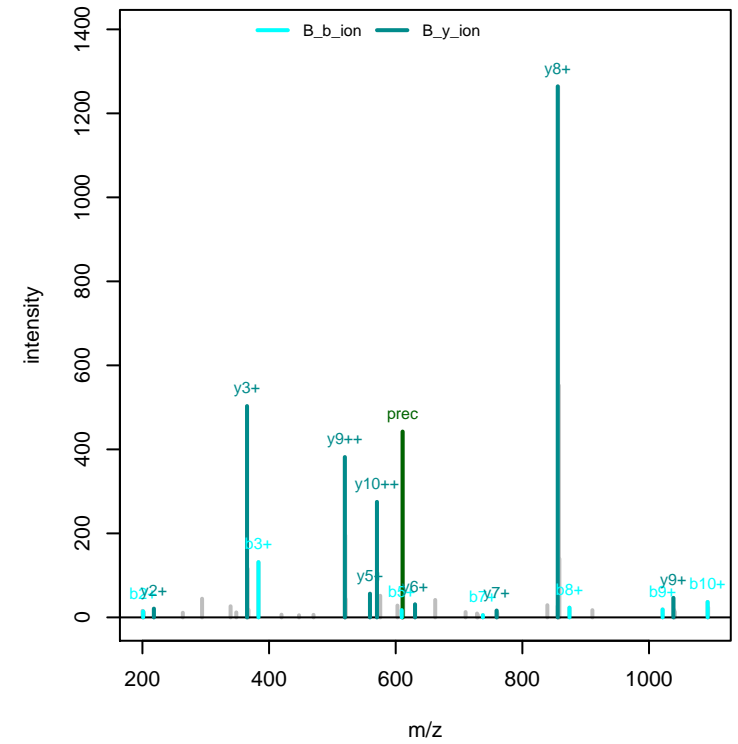

VTKPEAGHFAK+XL\_L

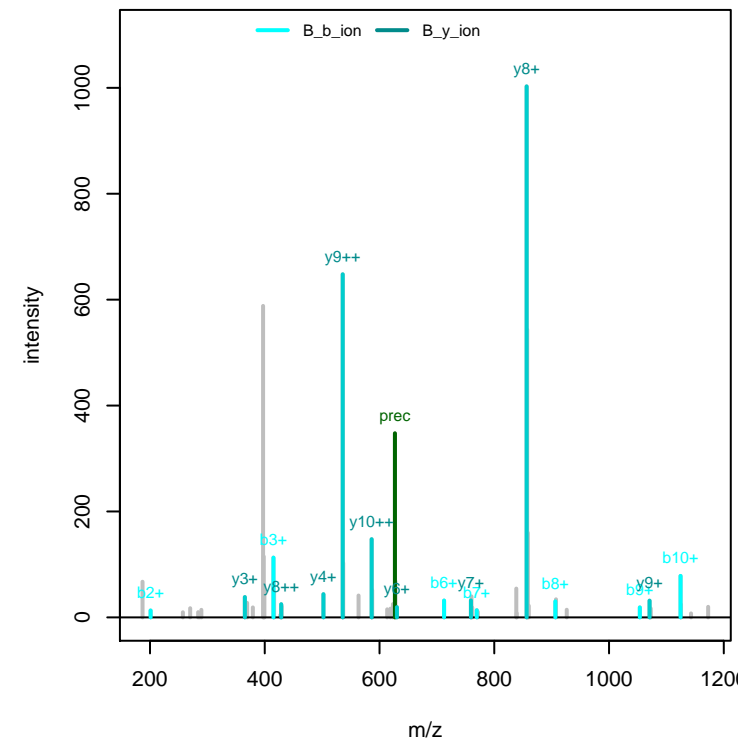

SKYGVK  
GALDCSGVKDRK

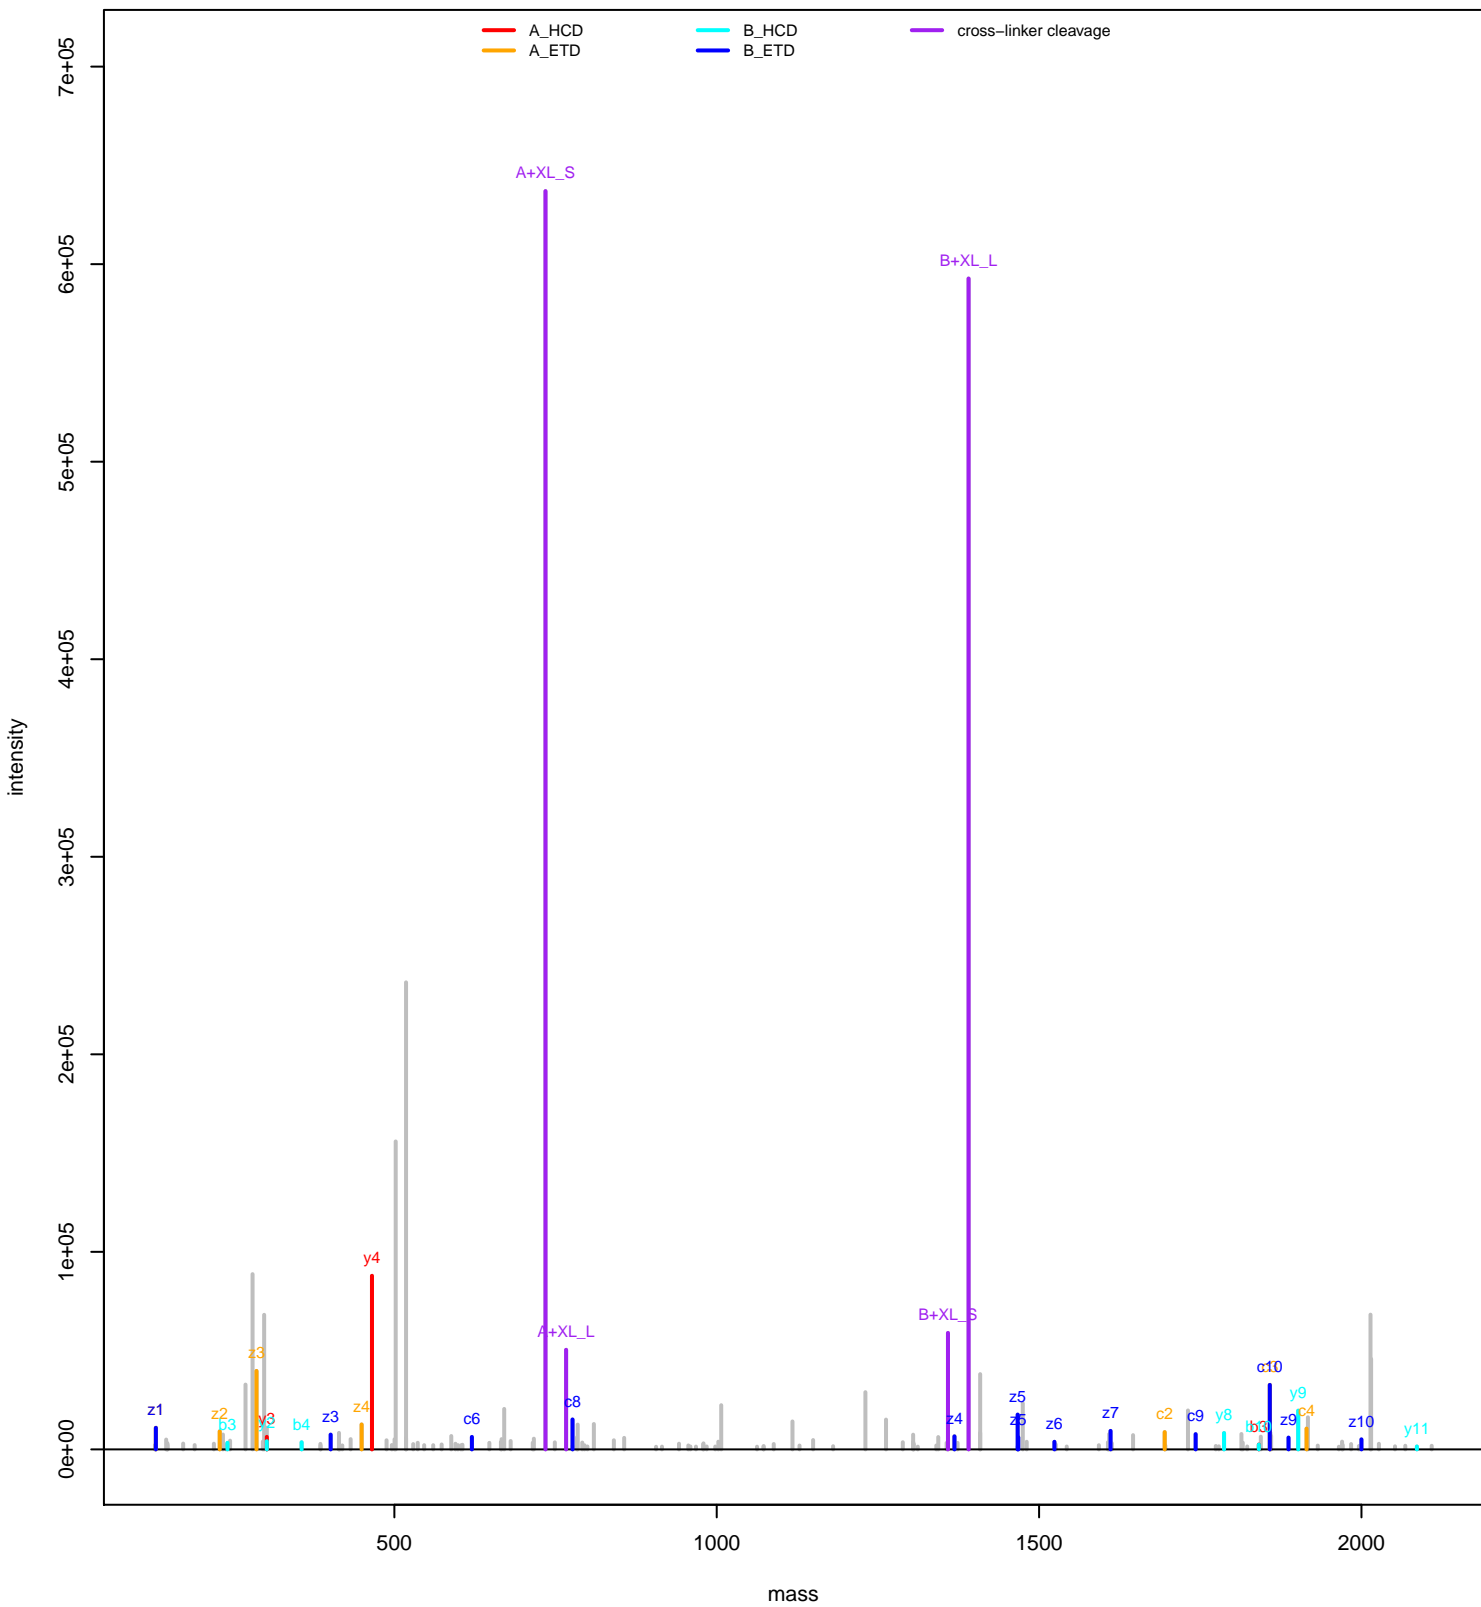

SKYGVK+XL\_S

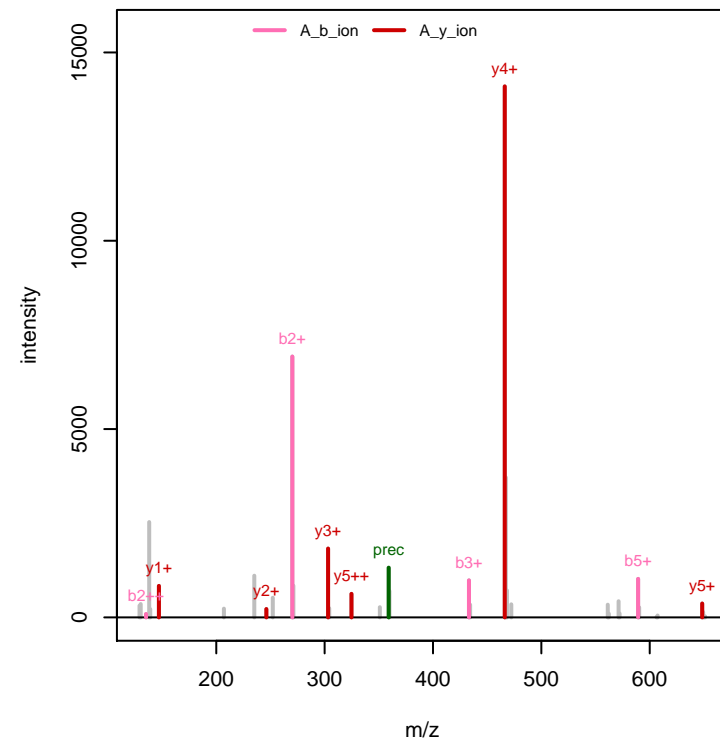

SKYGVK+XL\_L

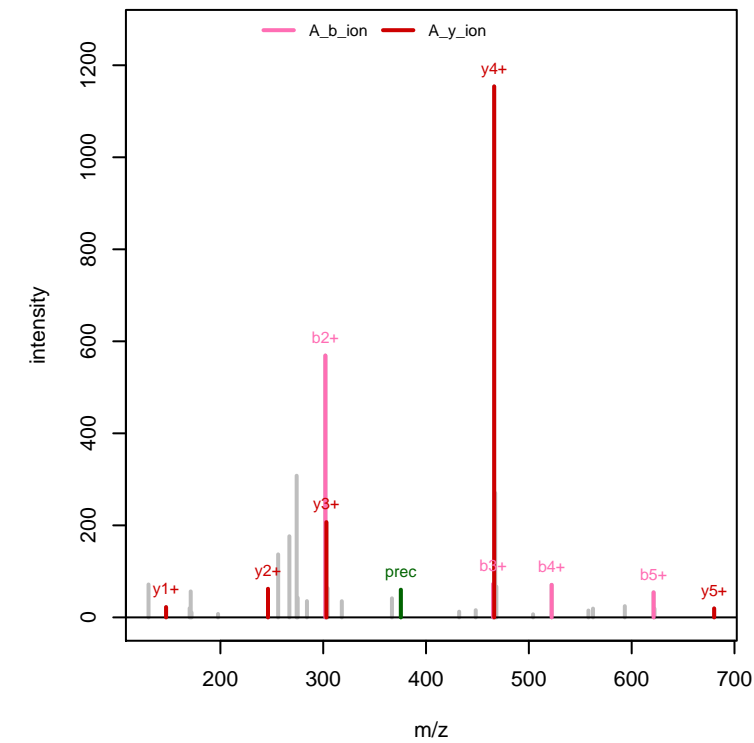

GALDCSGVKDRK+XL\_S

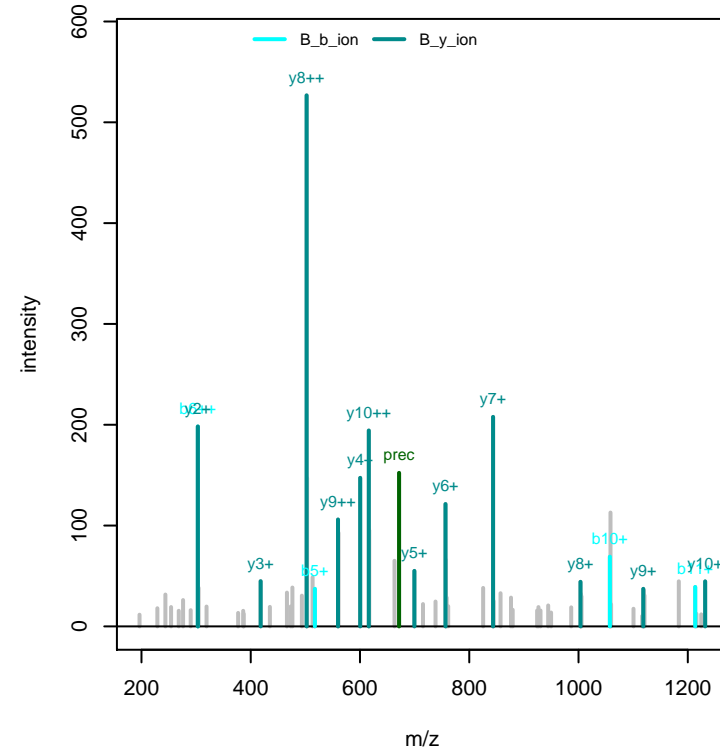

GALDCSGVKDRK+XL\_L

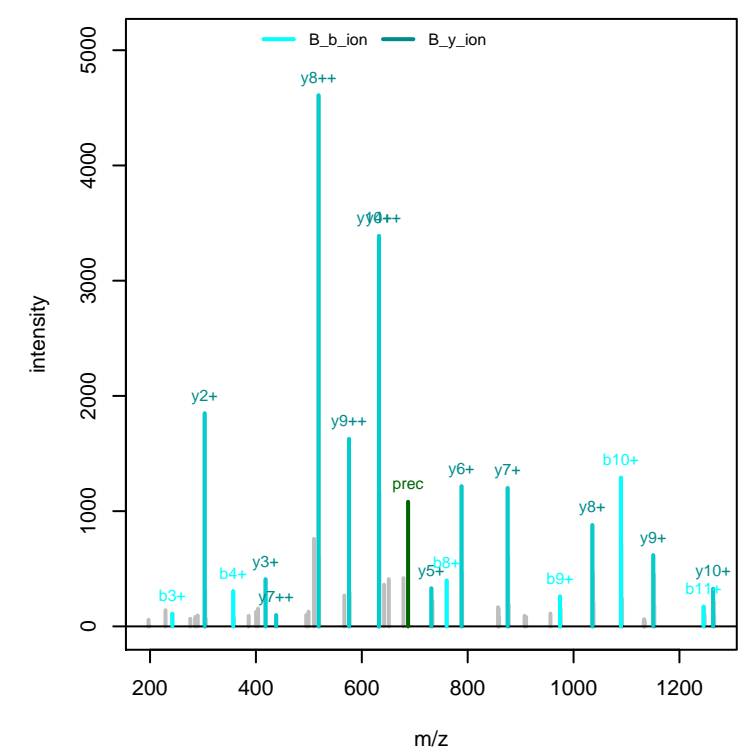

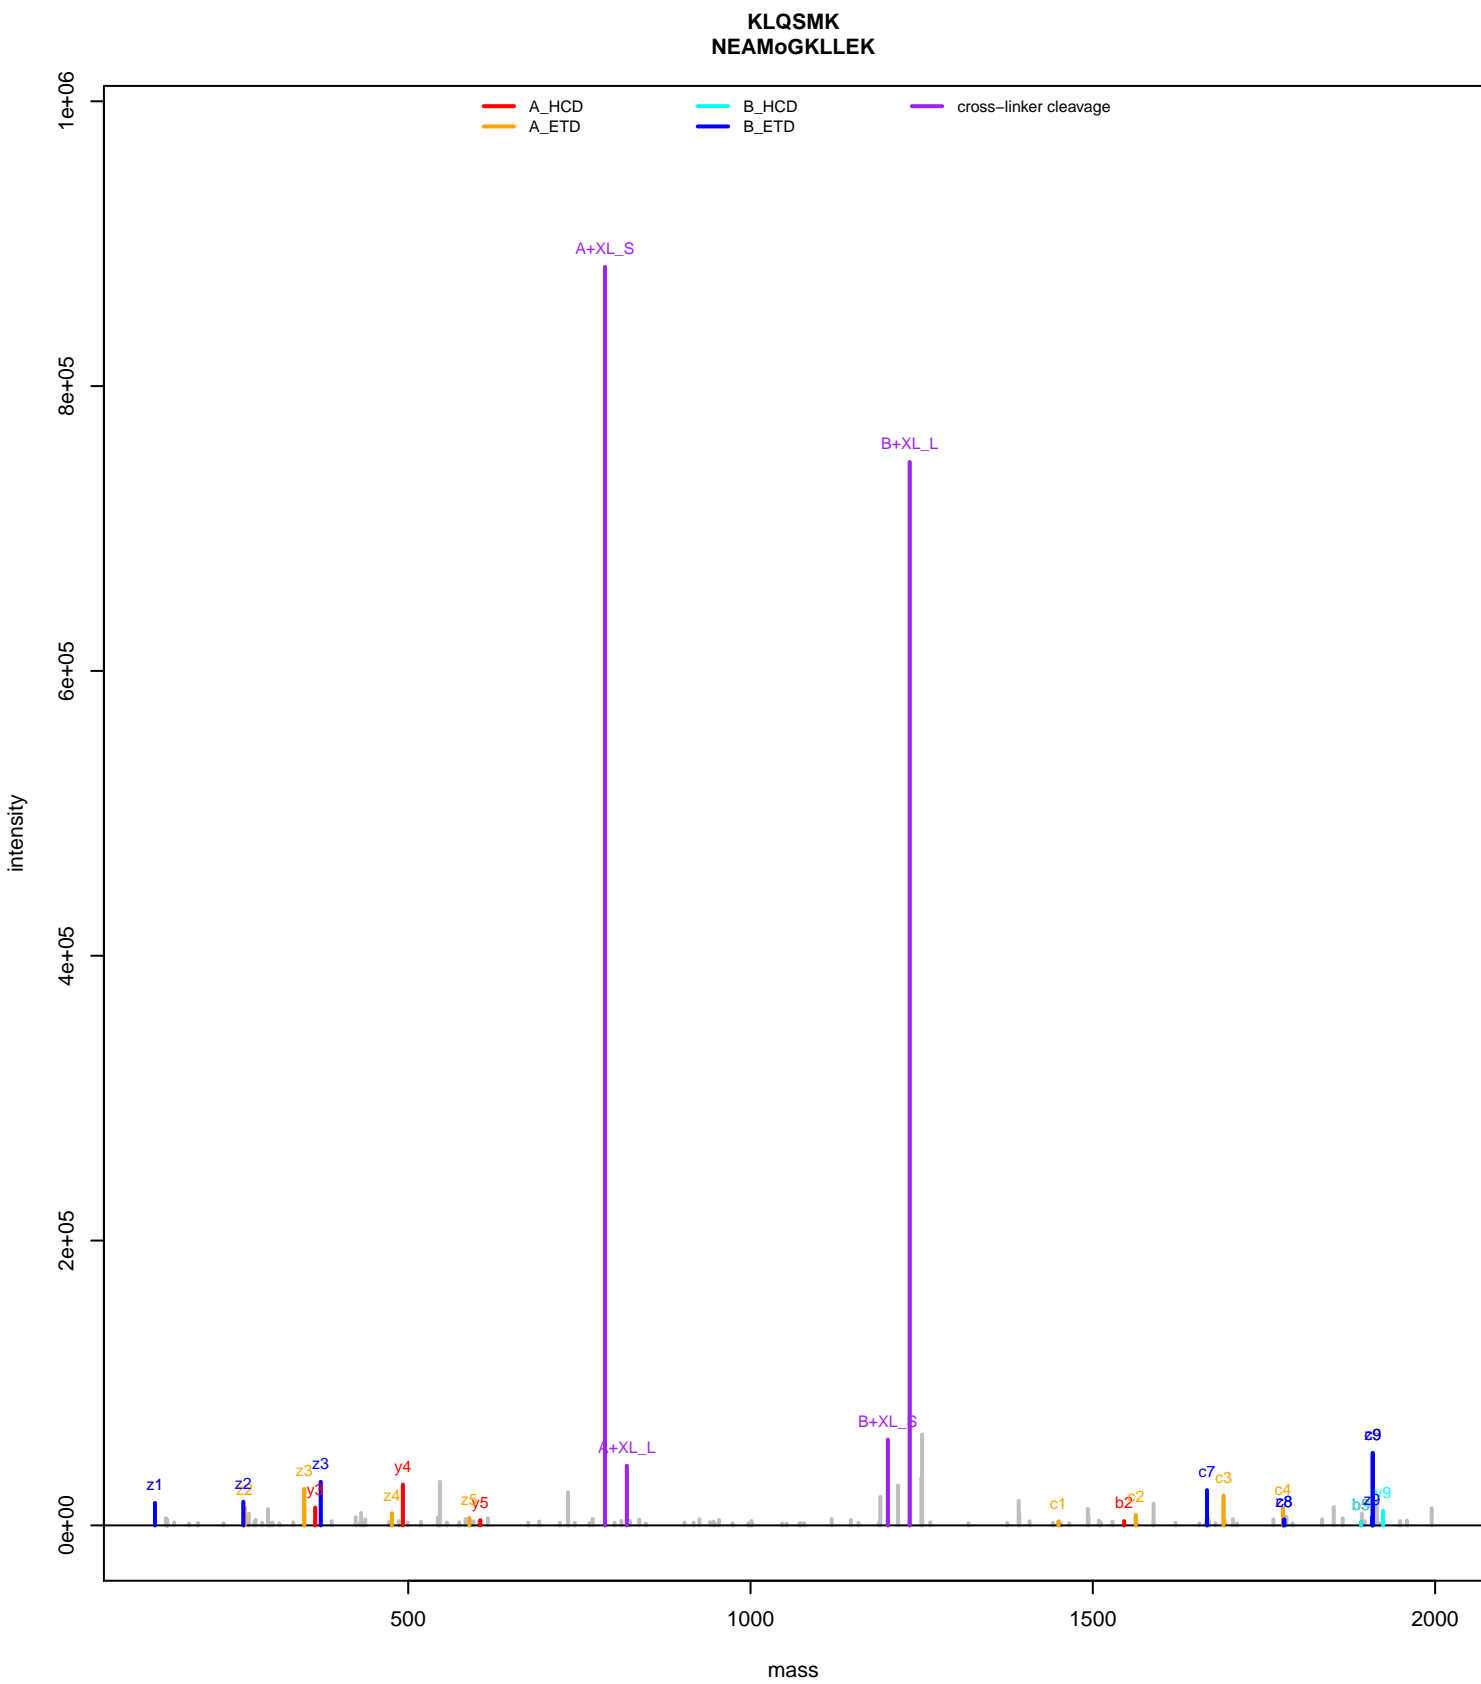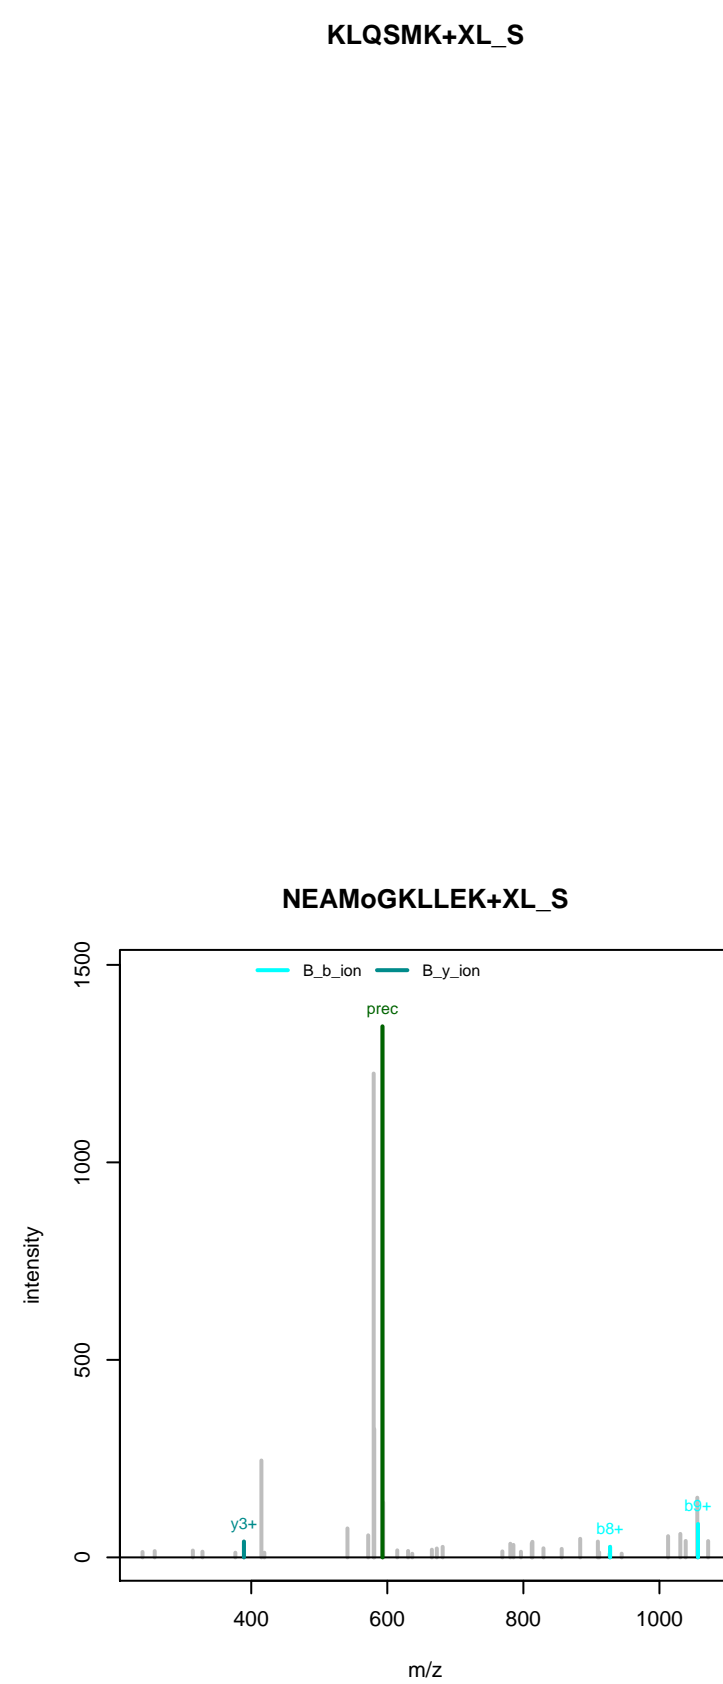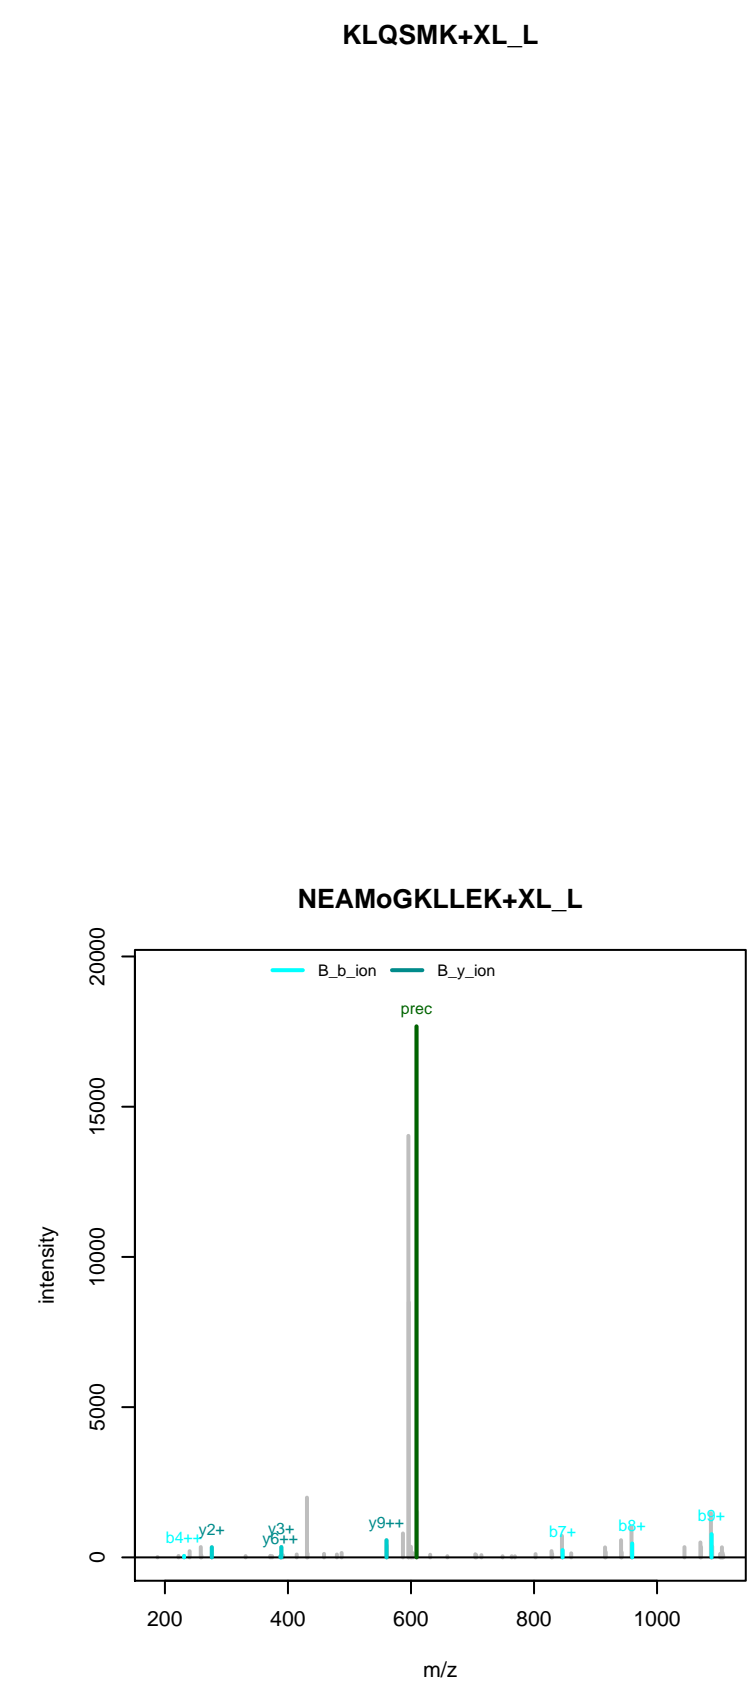



KPELDAK  
GQKVHPNGIR

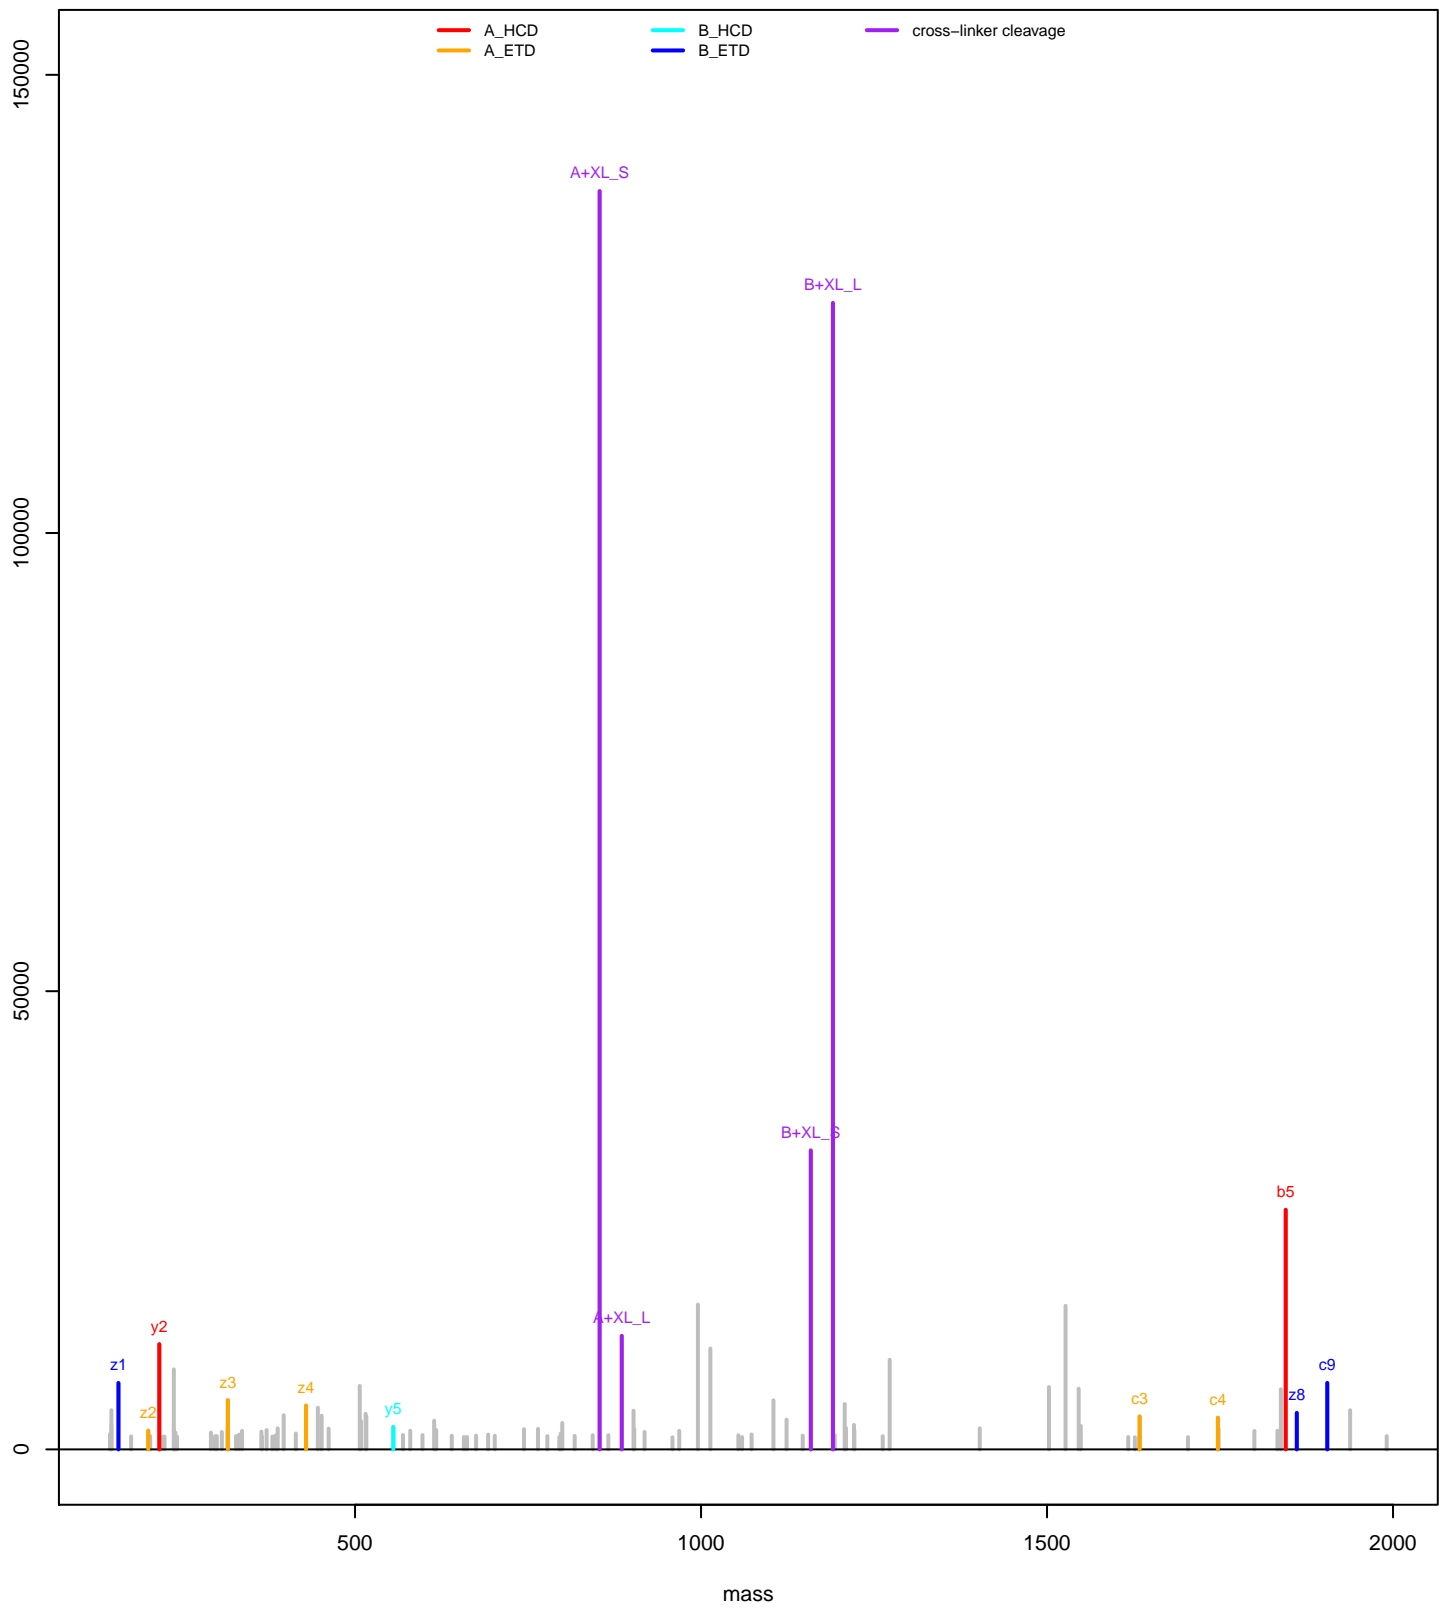

KPELDAK+XL\_S

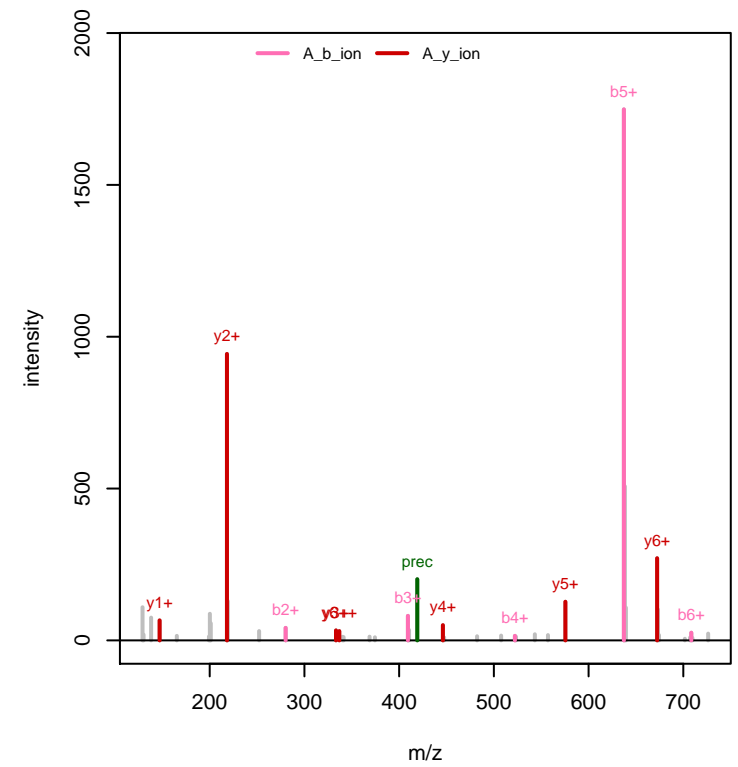

KPELDAK+XL\_L

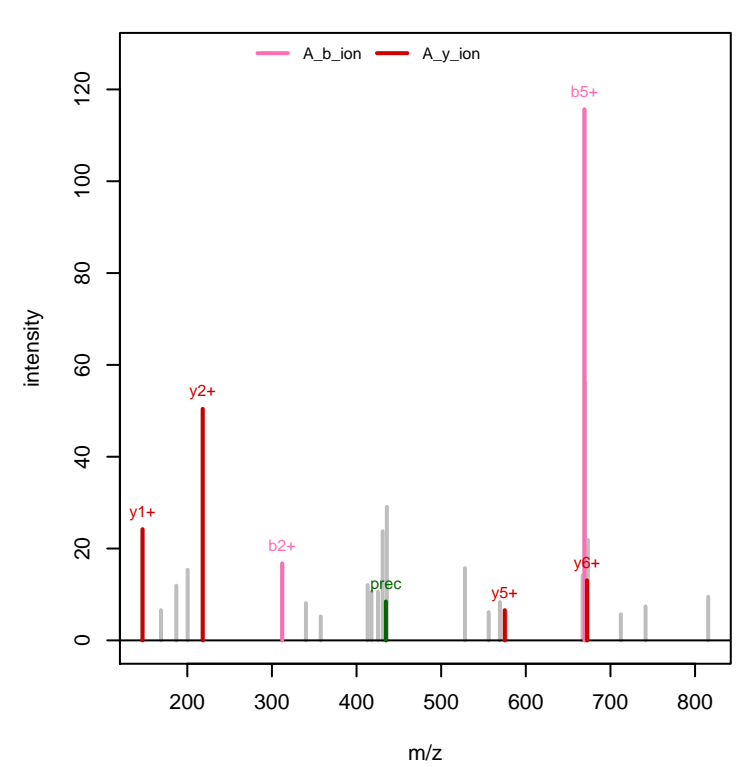

GQKVHPNGIR+XL\_S

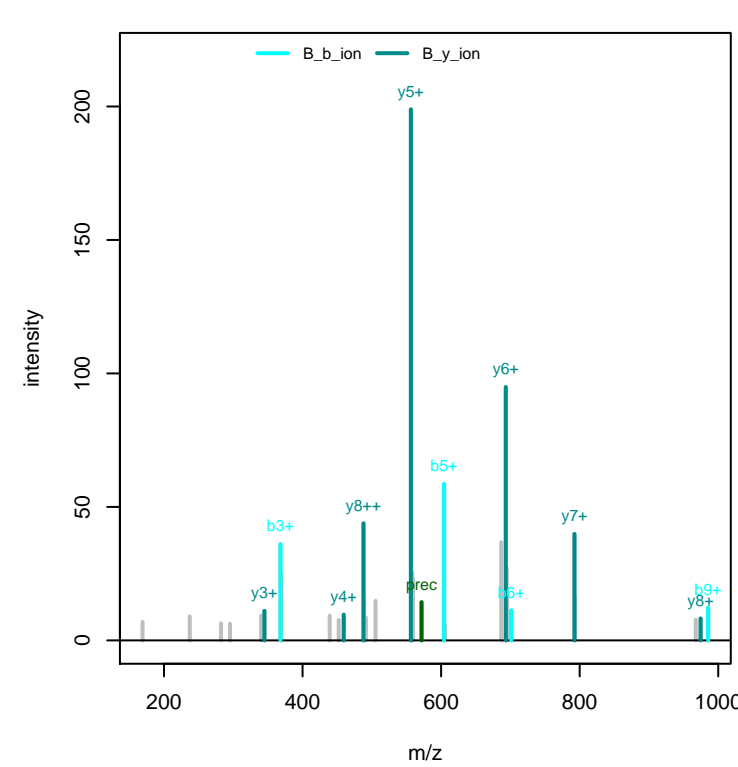

GQKVHPNGIR+XL\_L

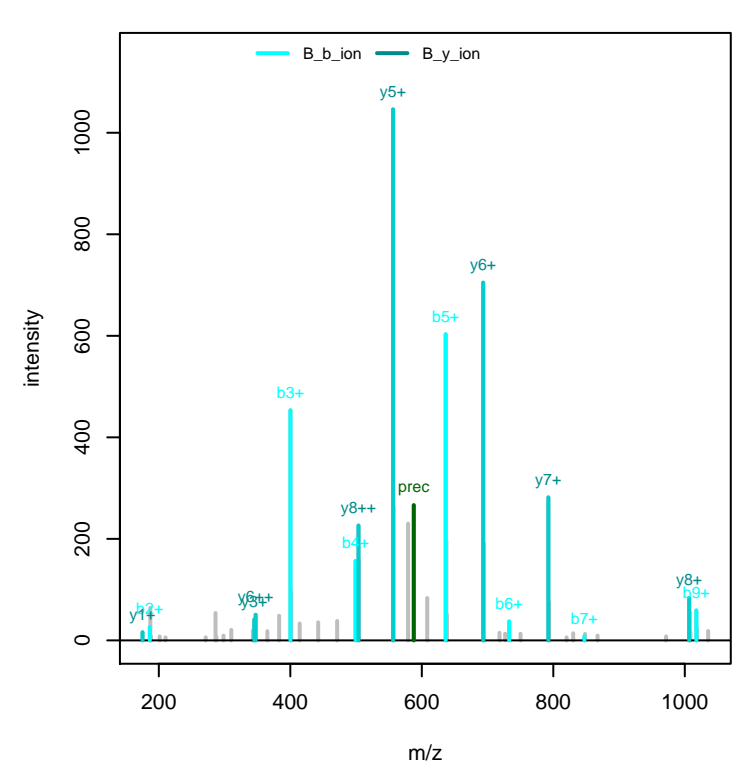

**MoRGKGVK  
LKVPGETQTGK**

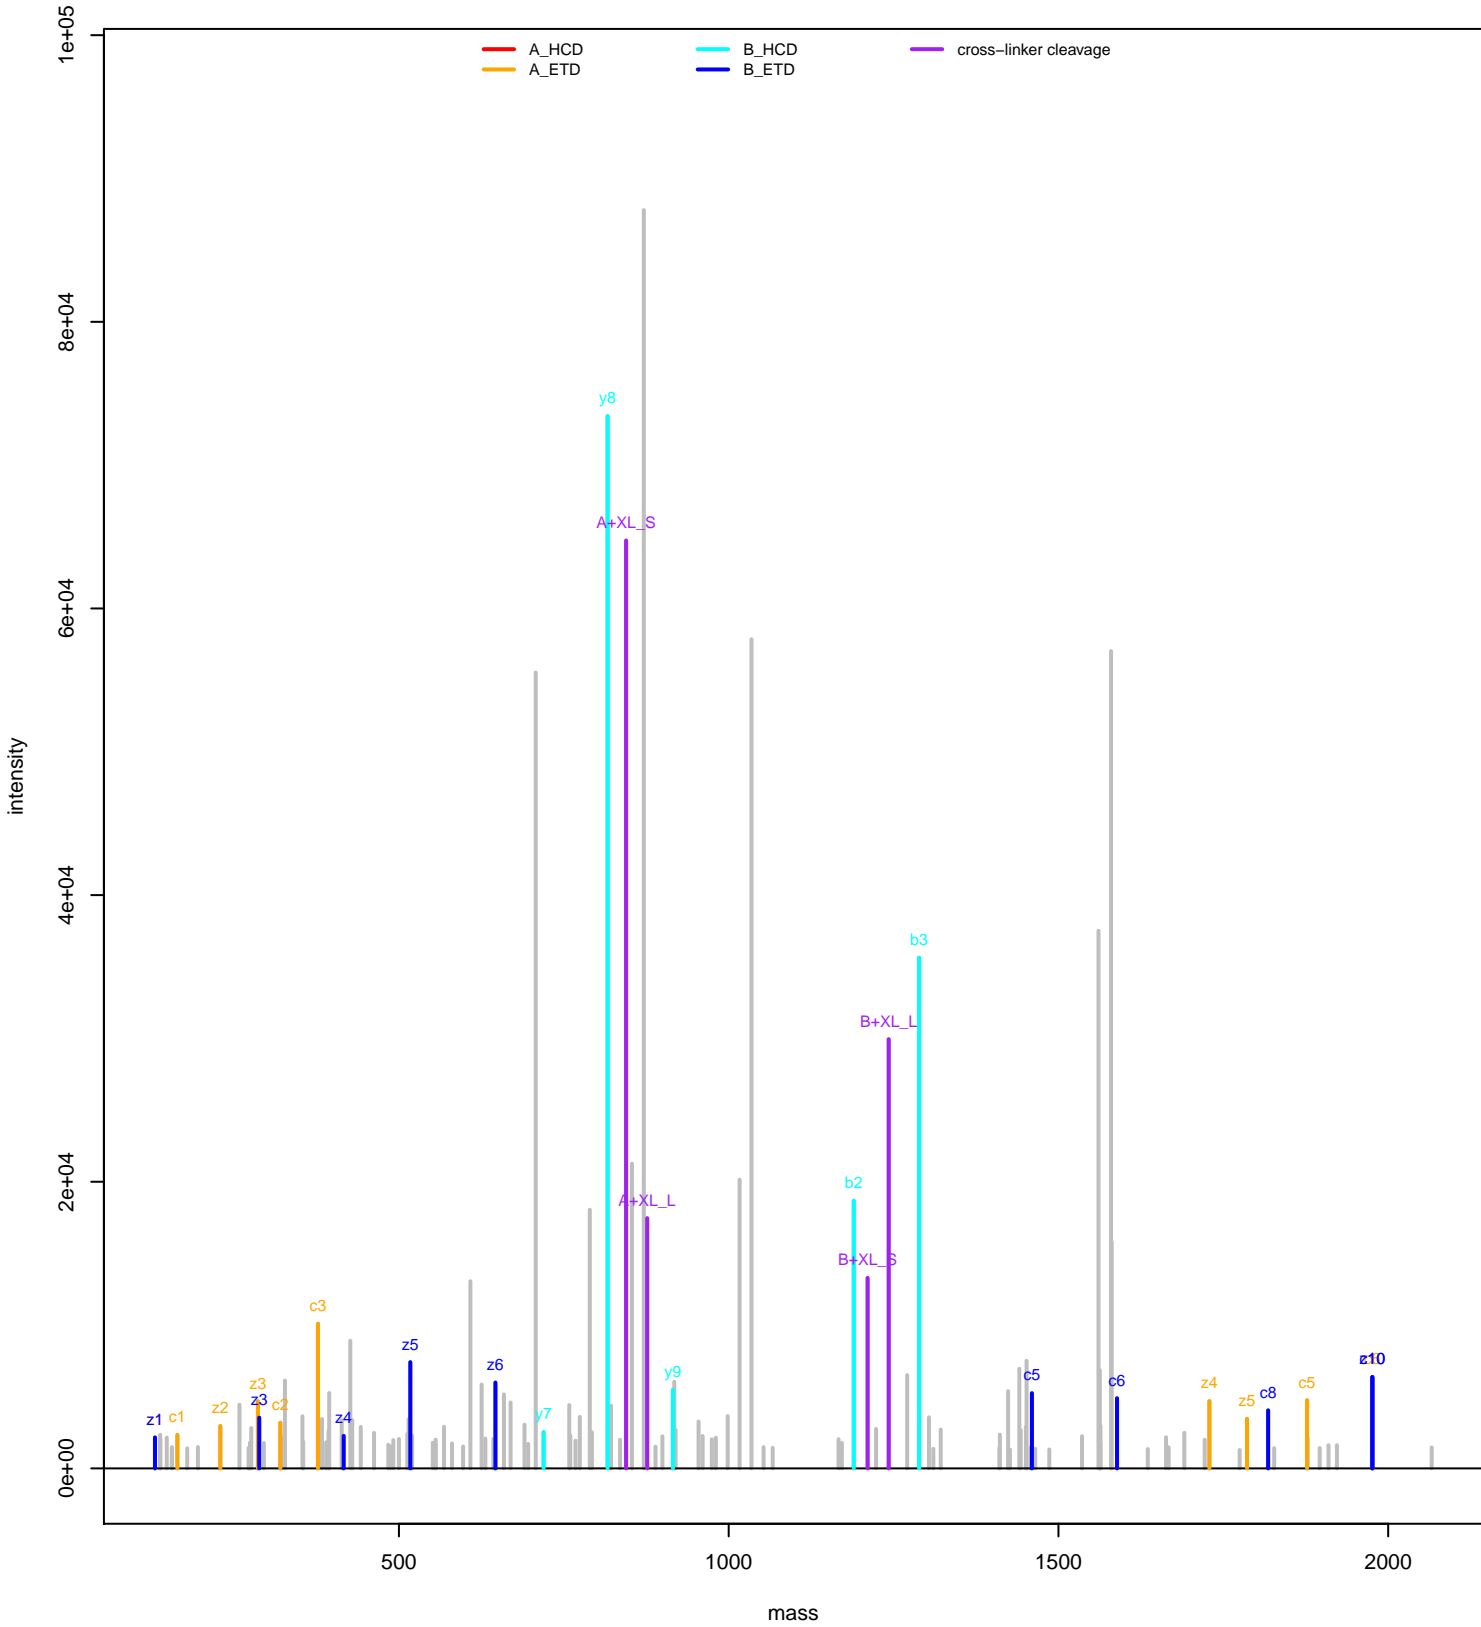

**MoRGKGVK+XL\_S**

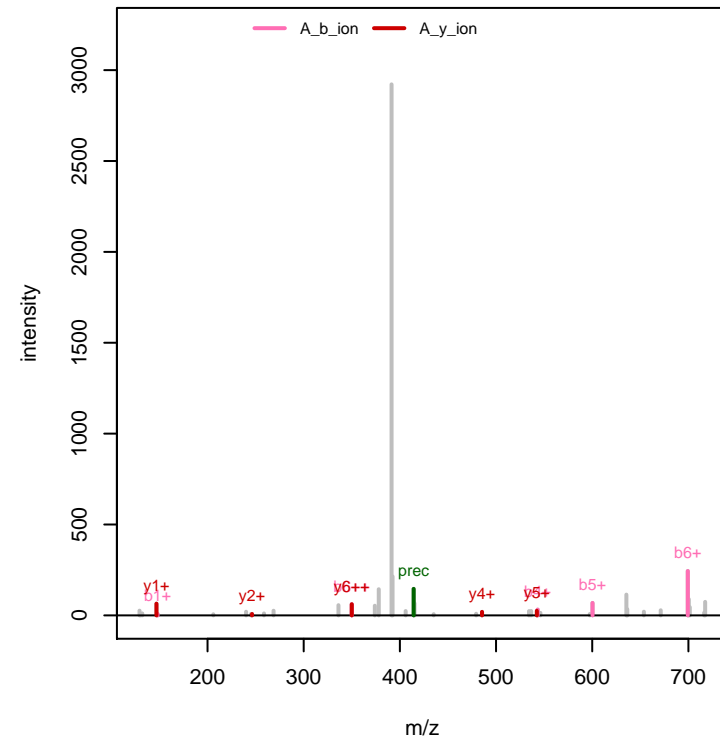

**MoRGKGVK+XL\_L**

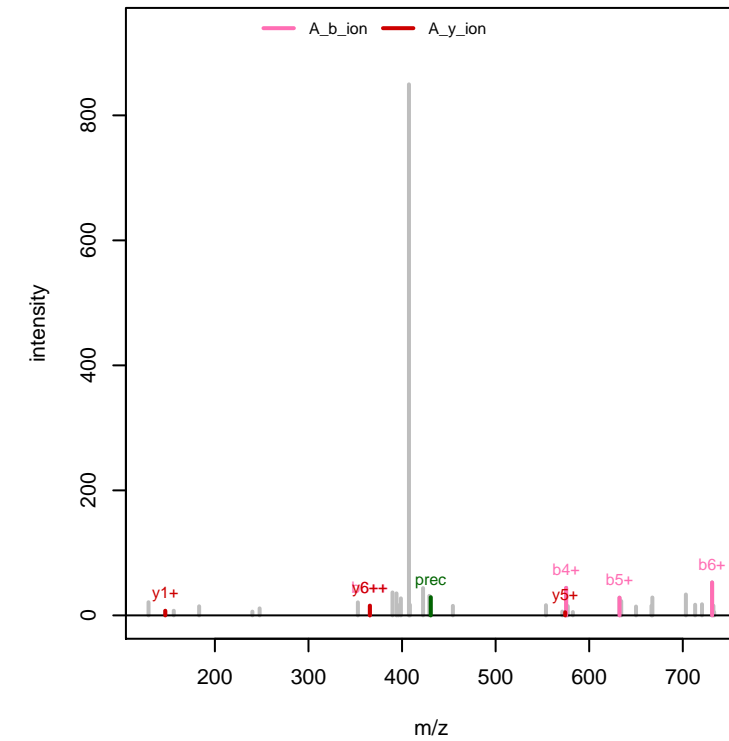

**LKVPGETQTGK+XL\_S**

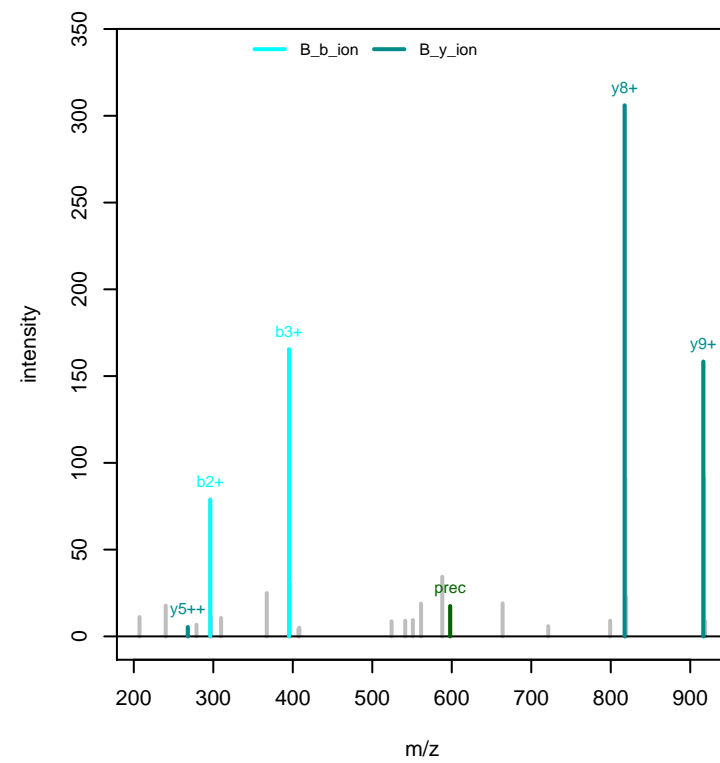

**LKVPGETQTGK+XL\_L**

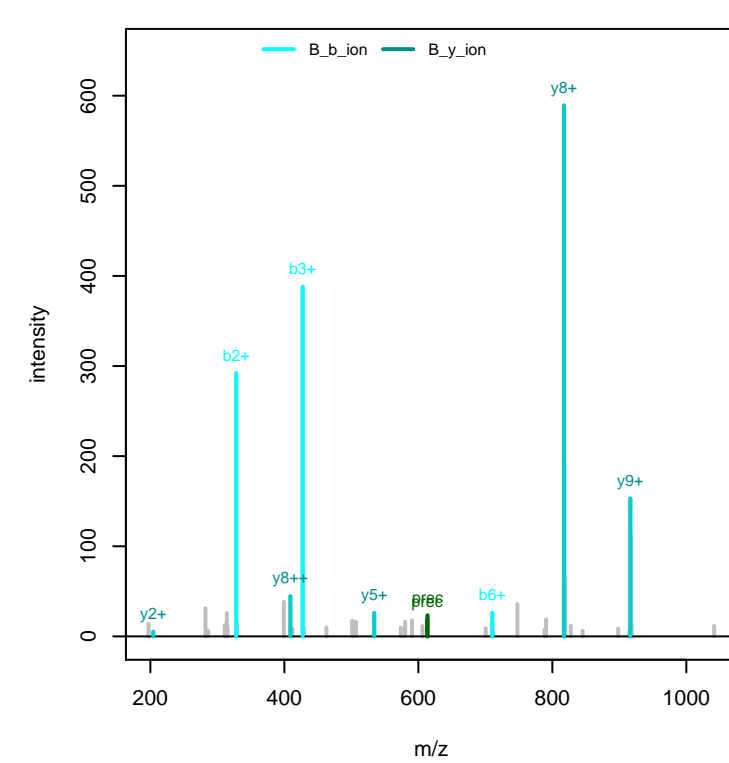

INGQVITIKGK  
EAKDLVESAPAALK

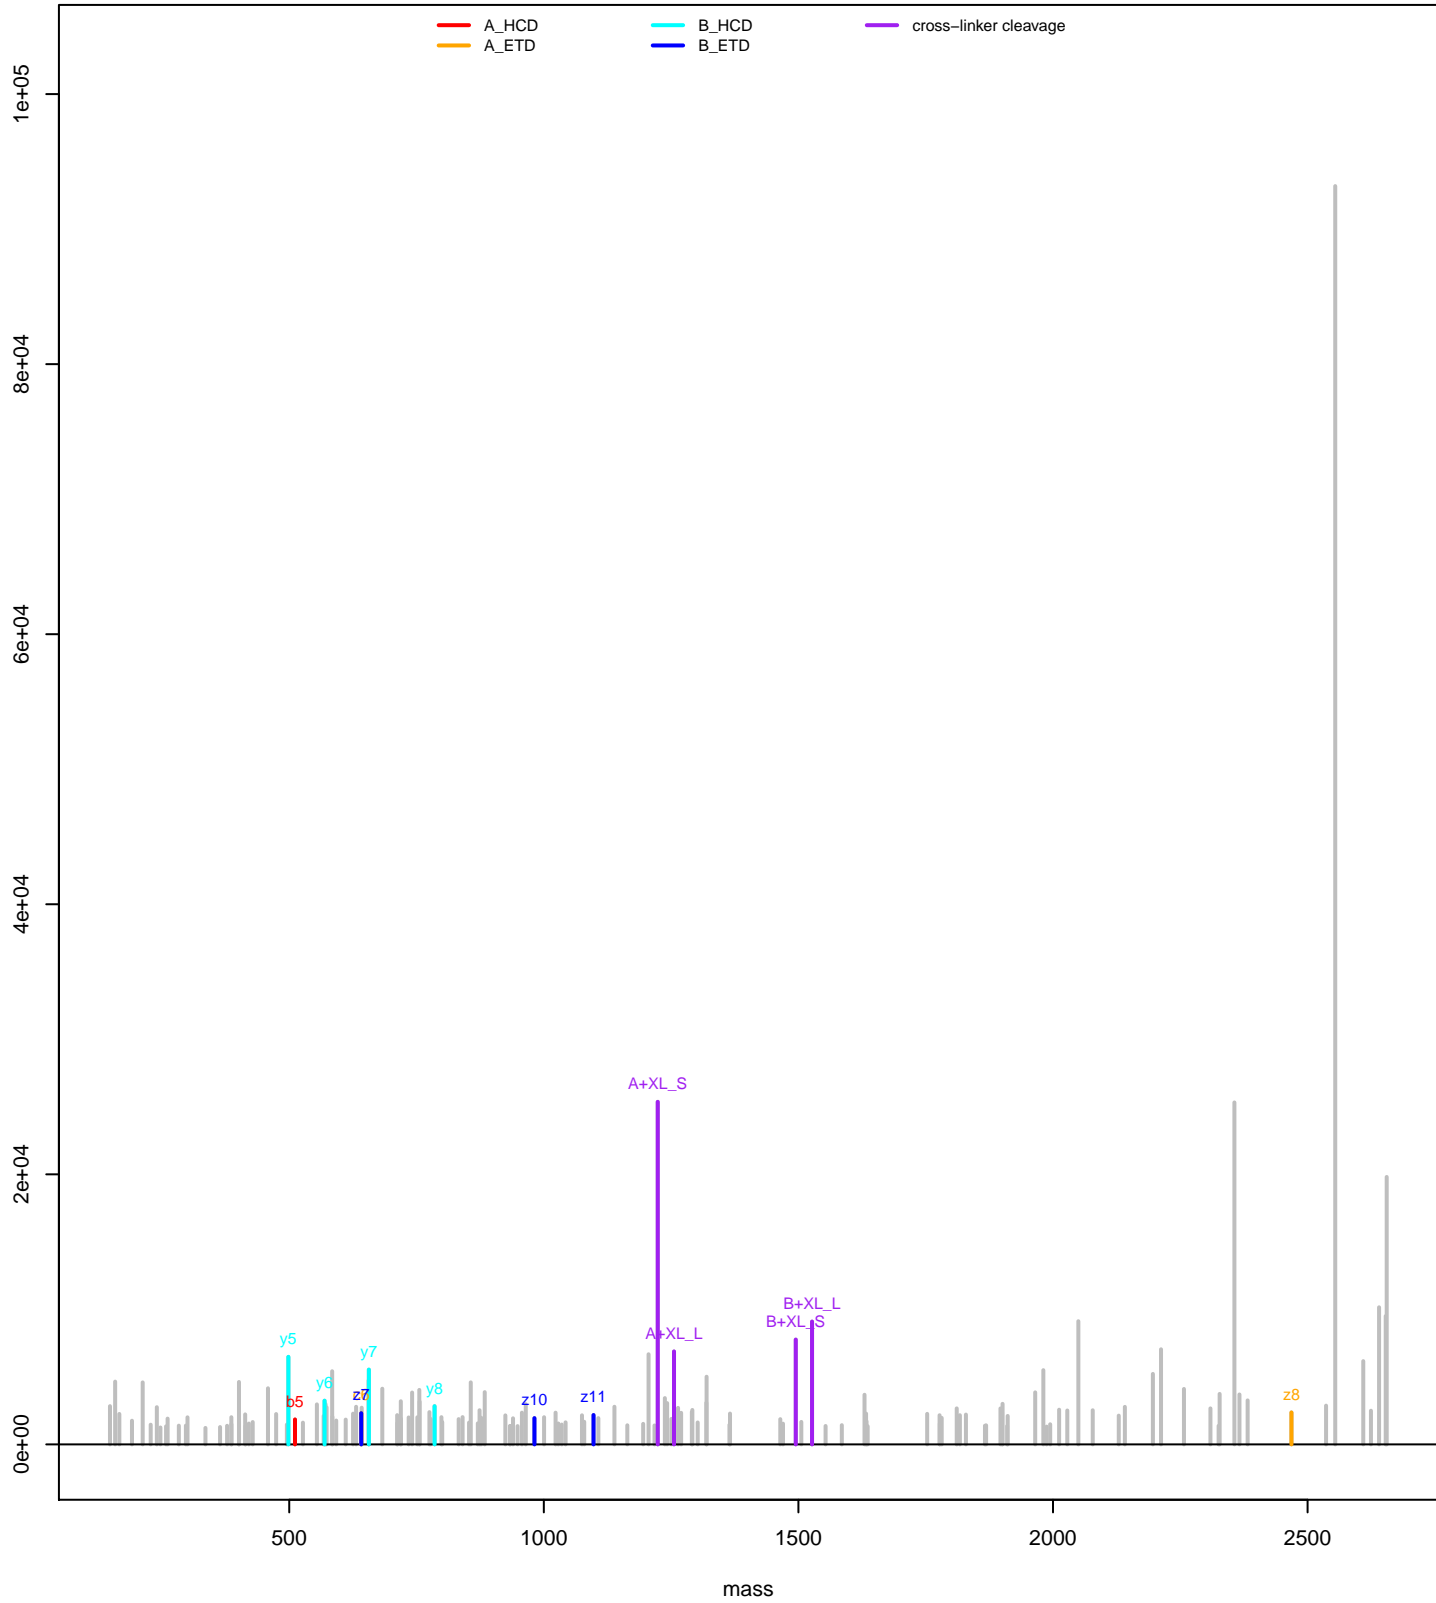

INGQVITIKGK+XL\_S

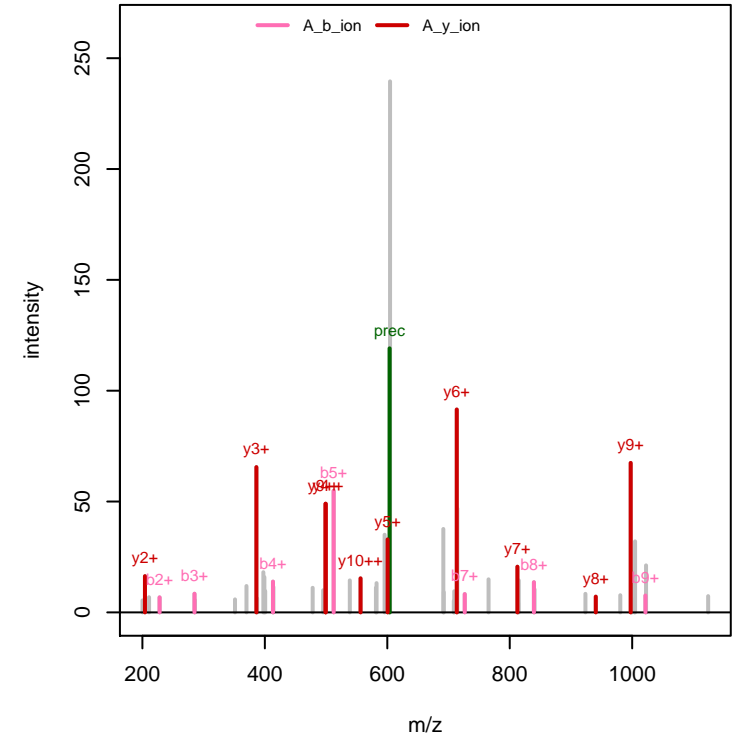

INGQVITIKGK+XL\_L

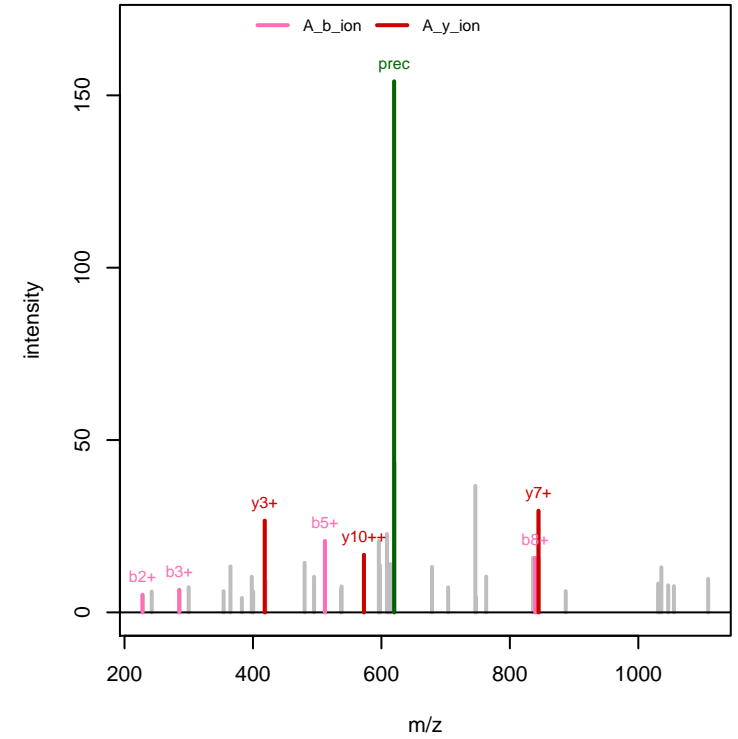

EAKDLVESAPAALK+XL\_S

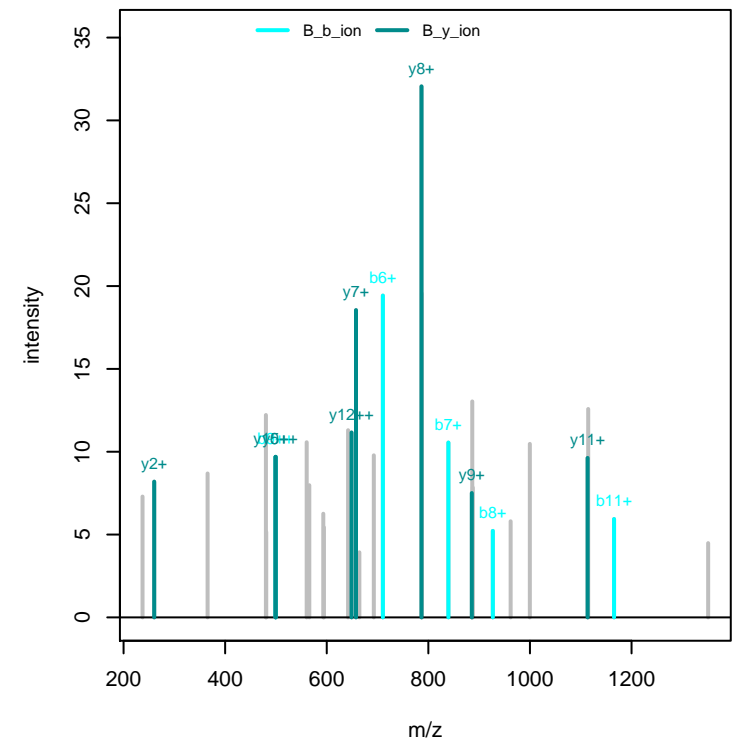

EAKDLVESAPAALK+XL\_L

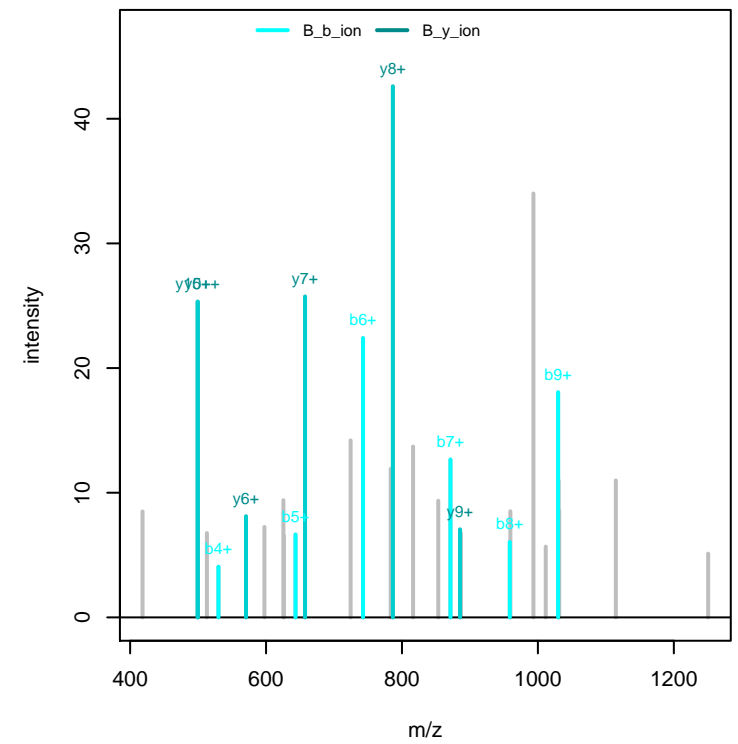

ELAVEVGKAK  
KAINVSDQVPAK

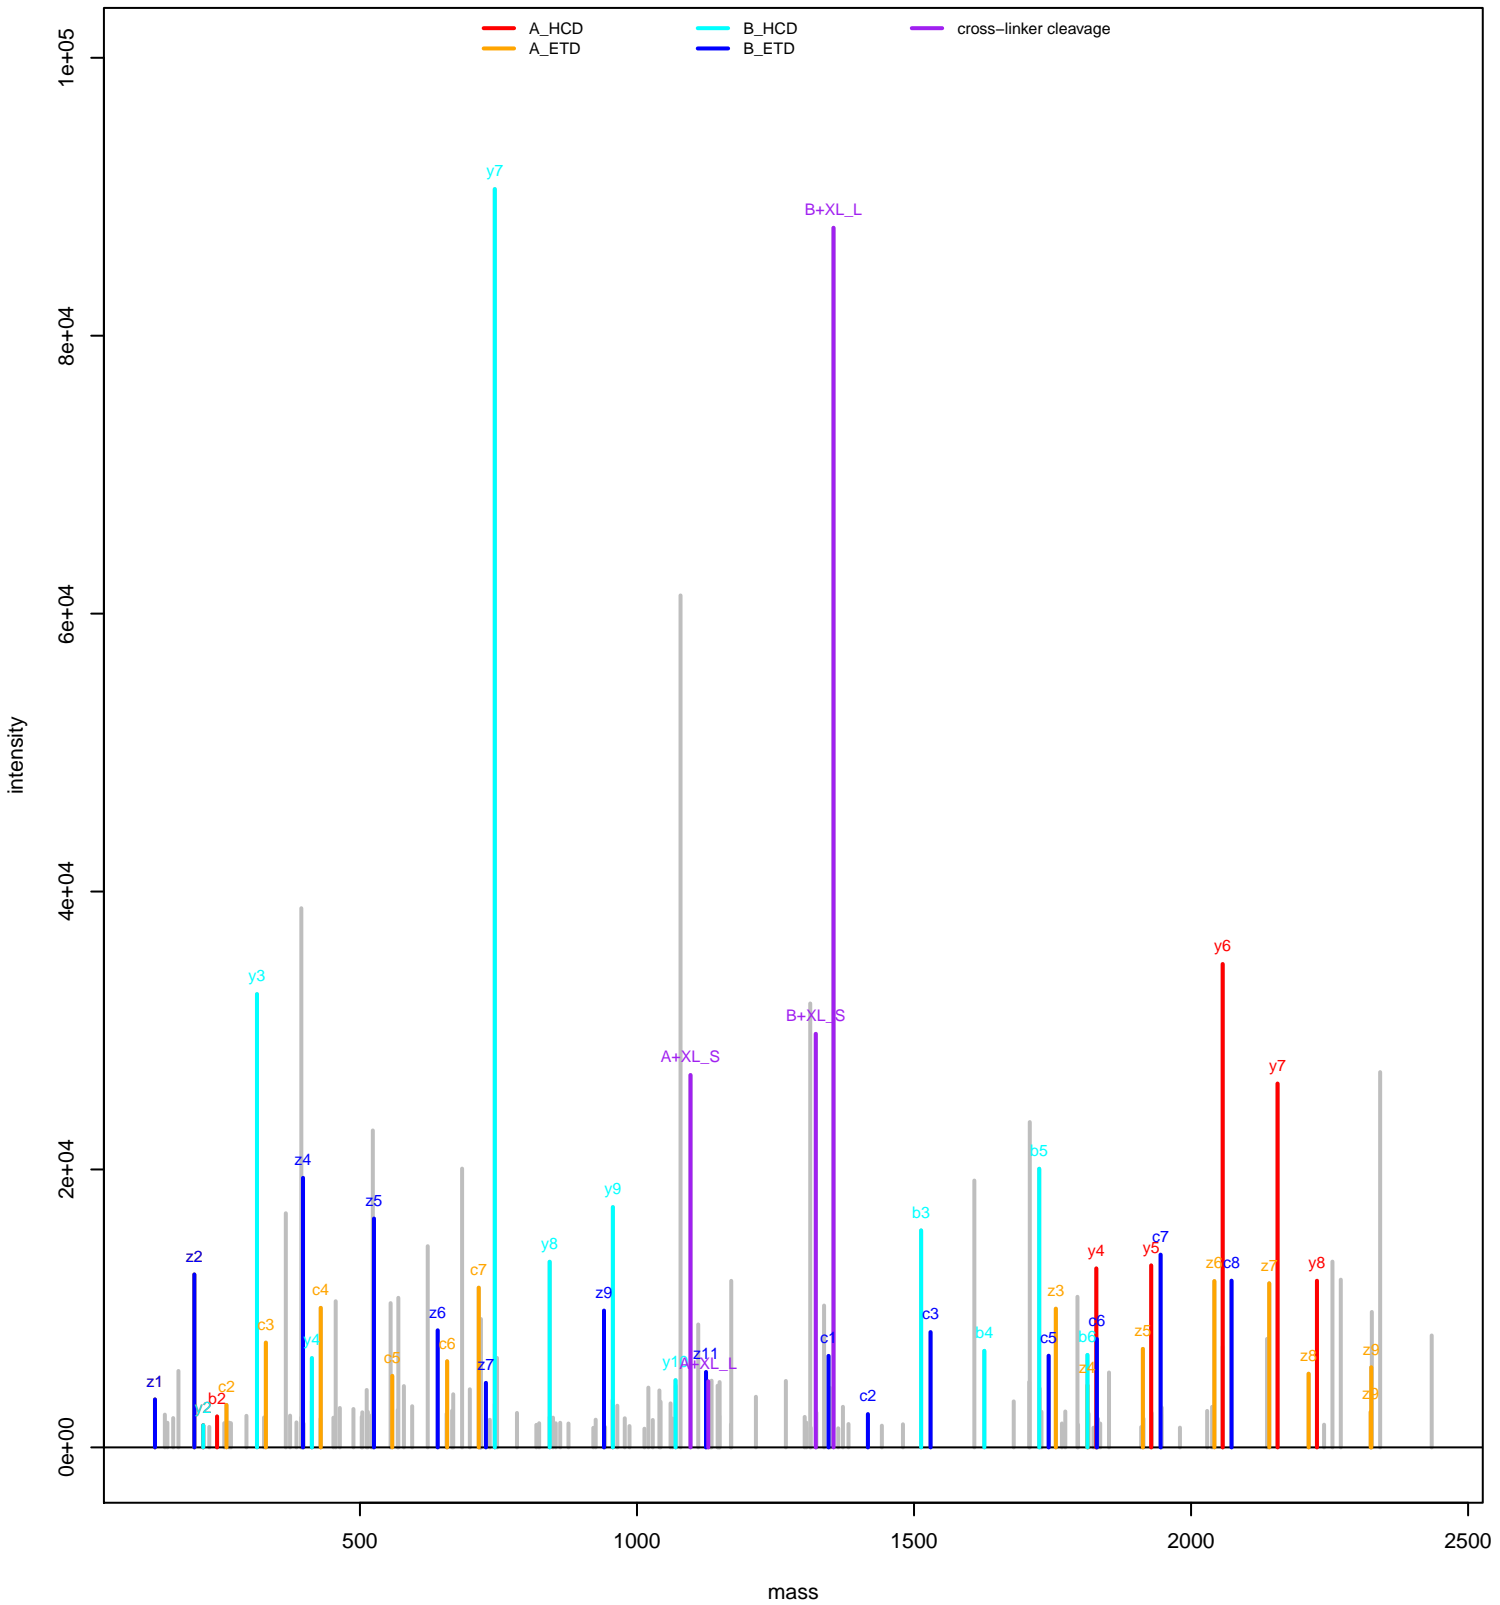

ELAVEVGKAK+XL\_S

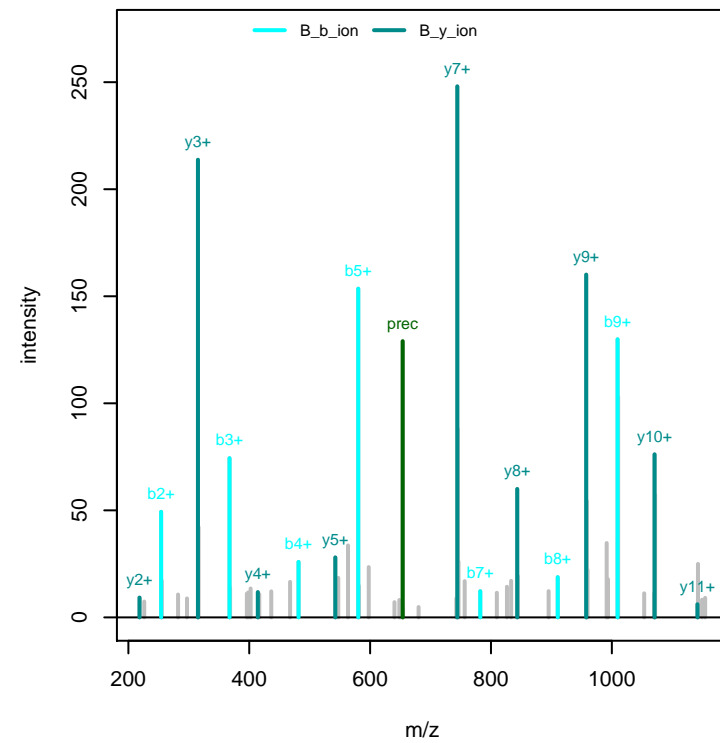

ELAVEVGKAK+XL\_L

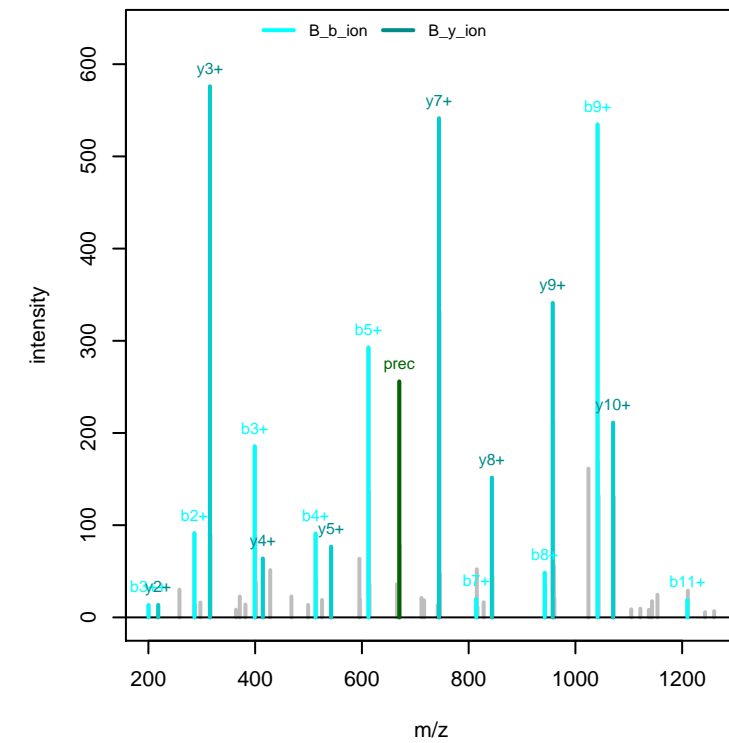

SSKEQK  
FLYEKSK

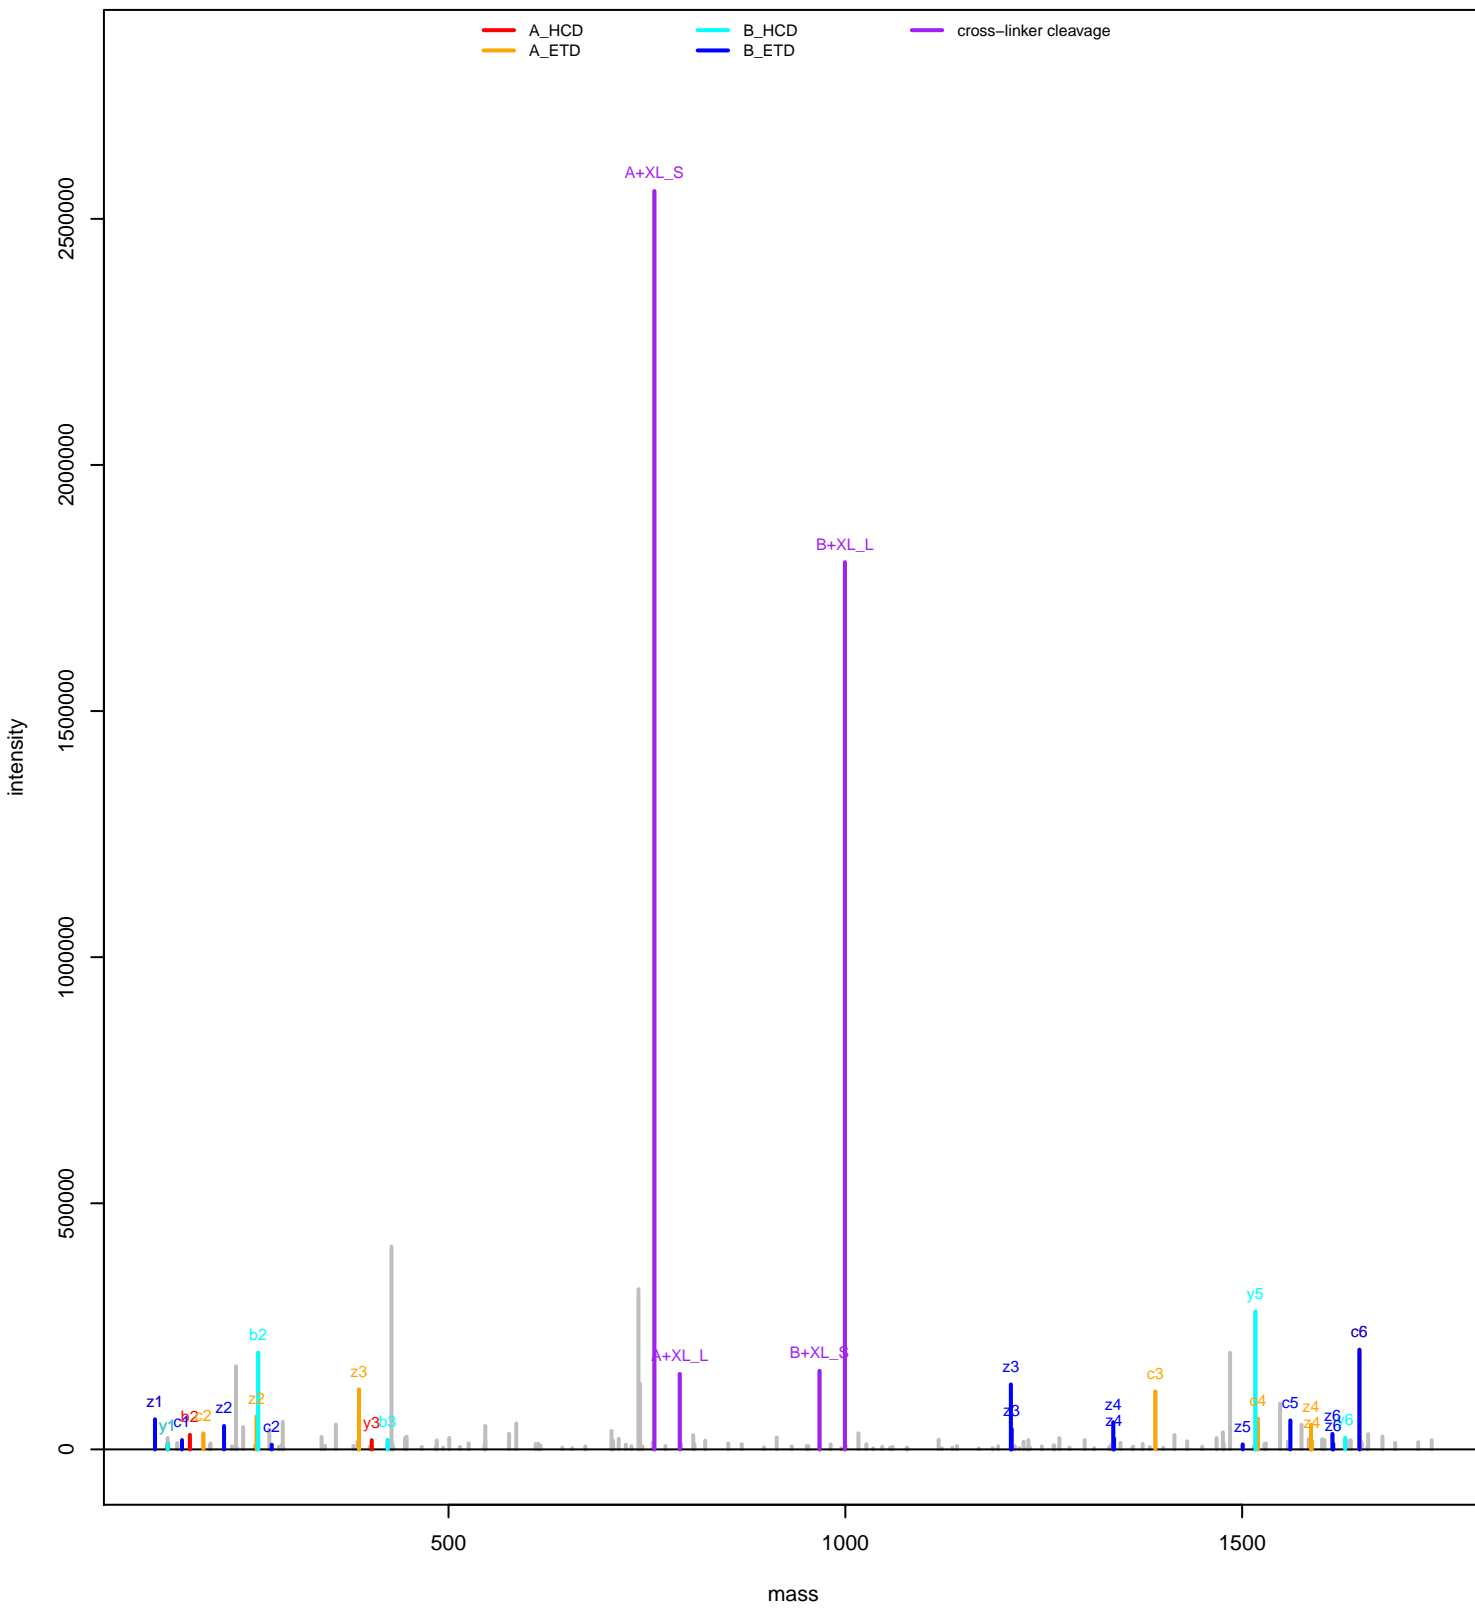

SSKEQK+XL\_S

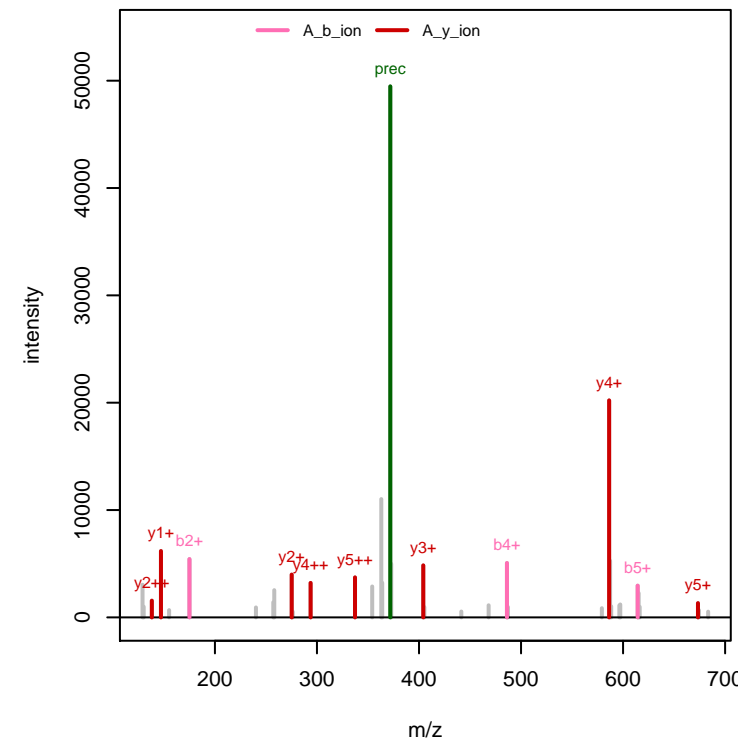

SSKEQK+XL\_L

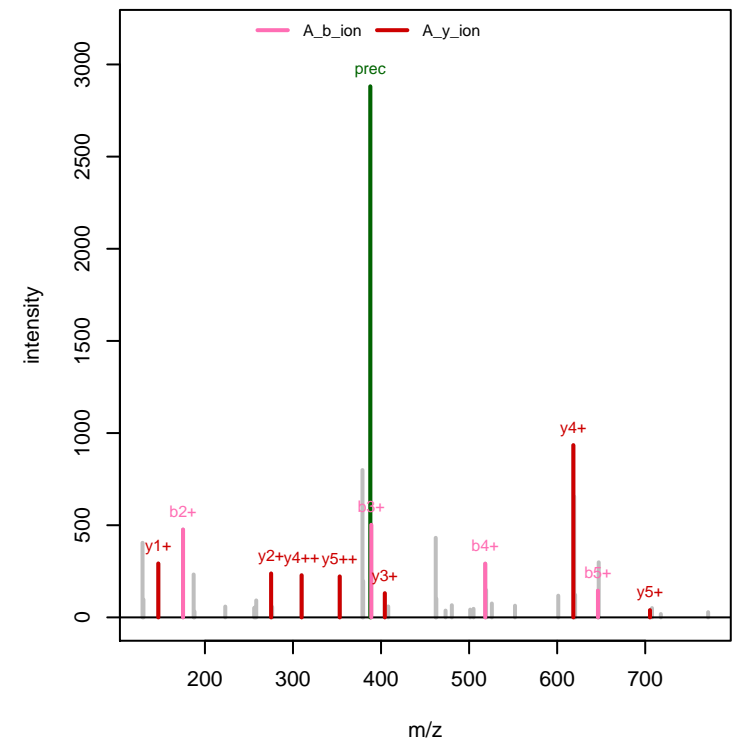

FLYEKSK+XL\_S

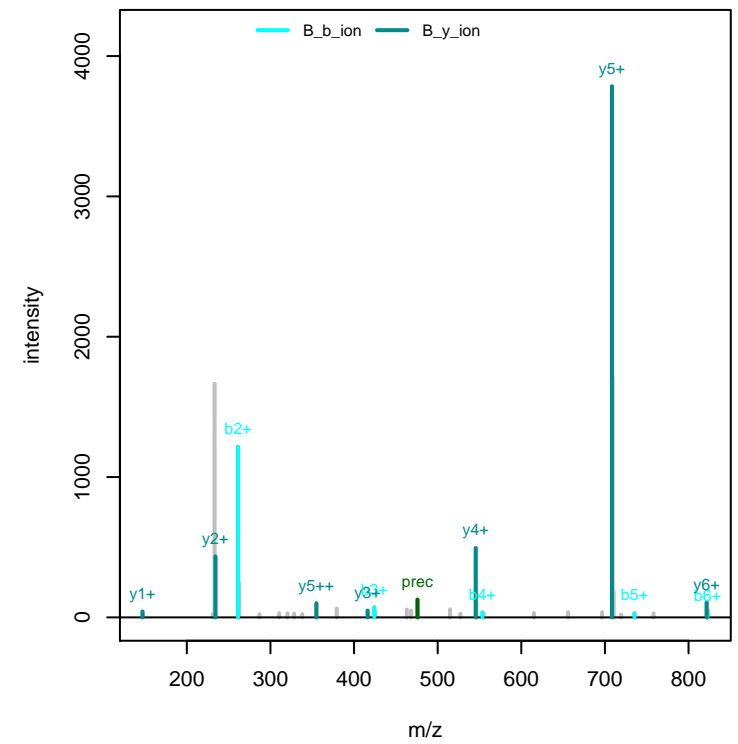

FLYEKSK+XL\_L

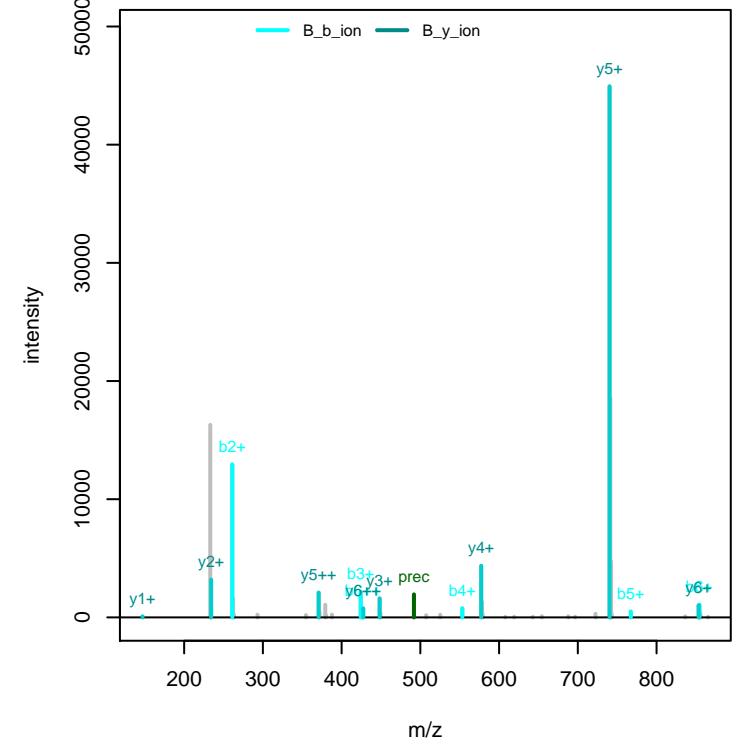

LTSKGR  
KNGLVSSVR

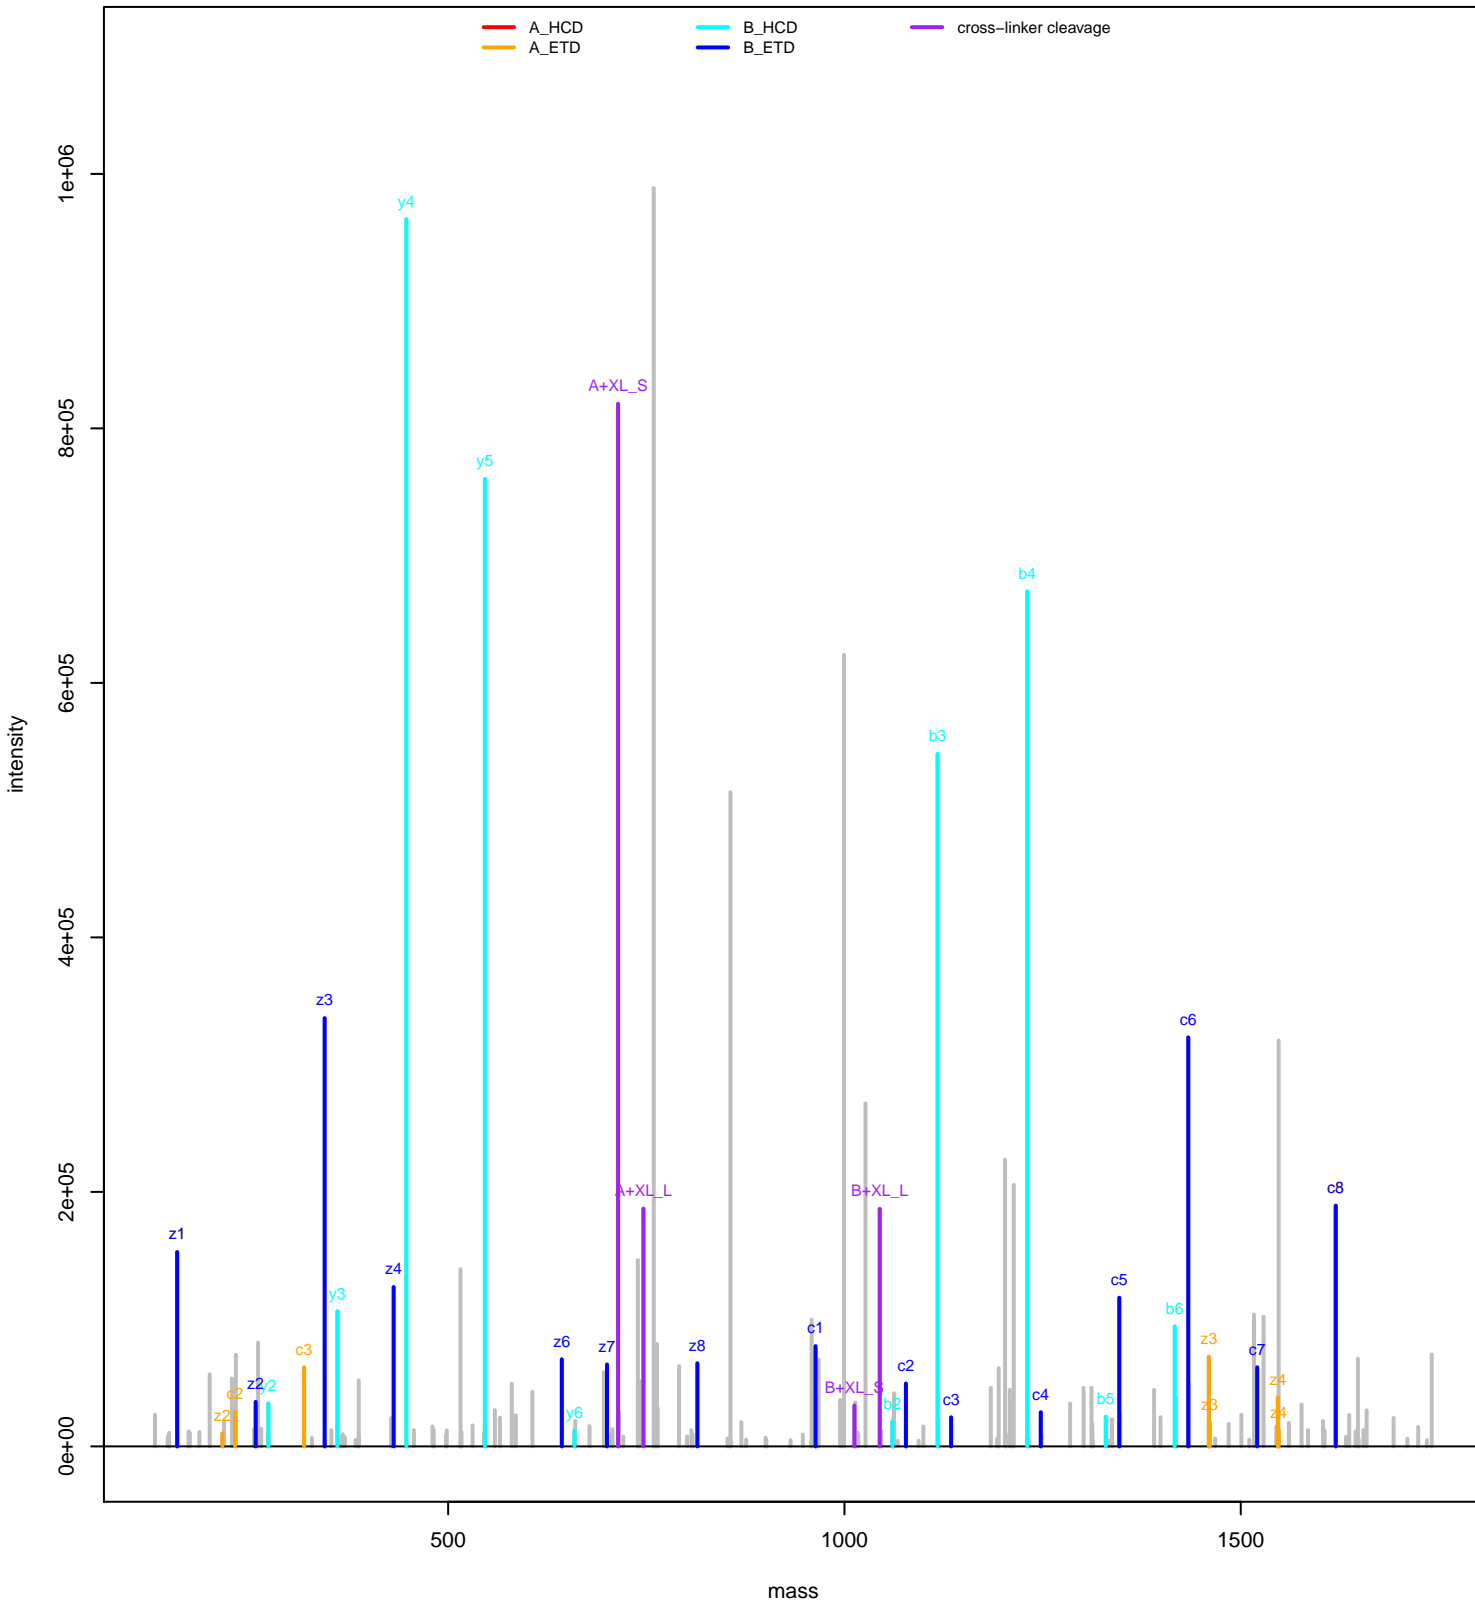

LTSKGR+XL\_S

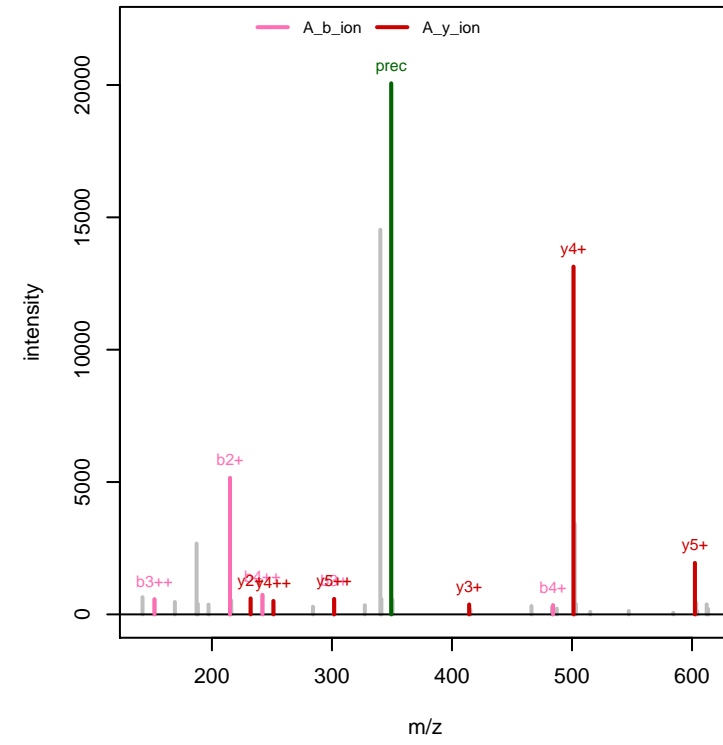

LTSKGR+XL\_L

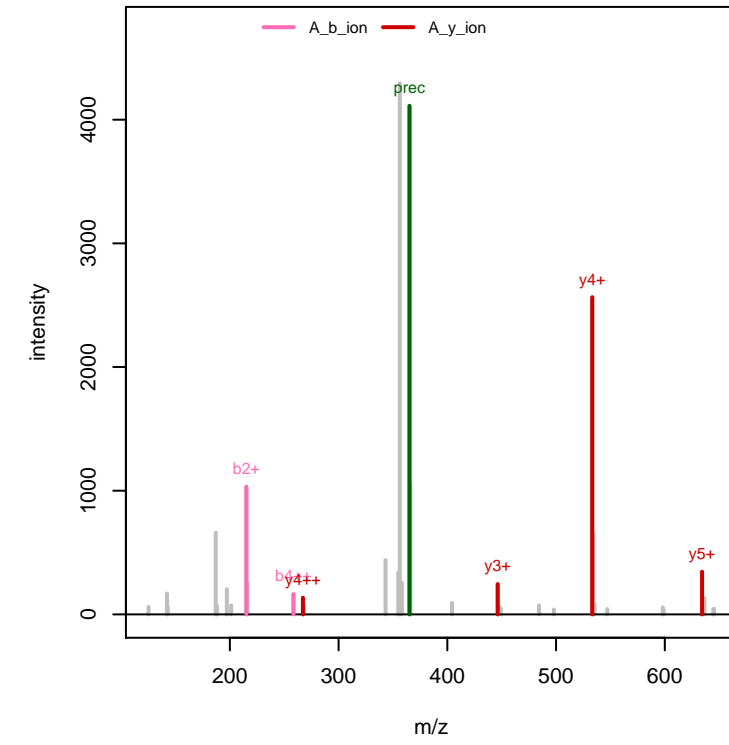

KNGLVSSVR+XL\_S

KNGLVSSVR+XL\_L

VAGVSKSTVSR  
AIEELQYQPNKLAR

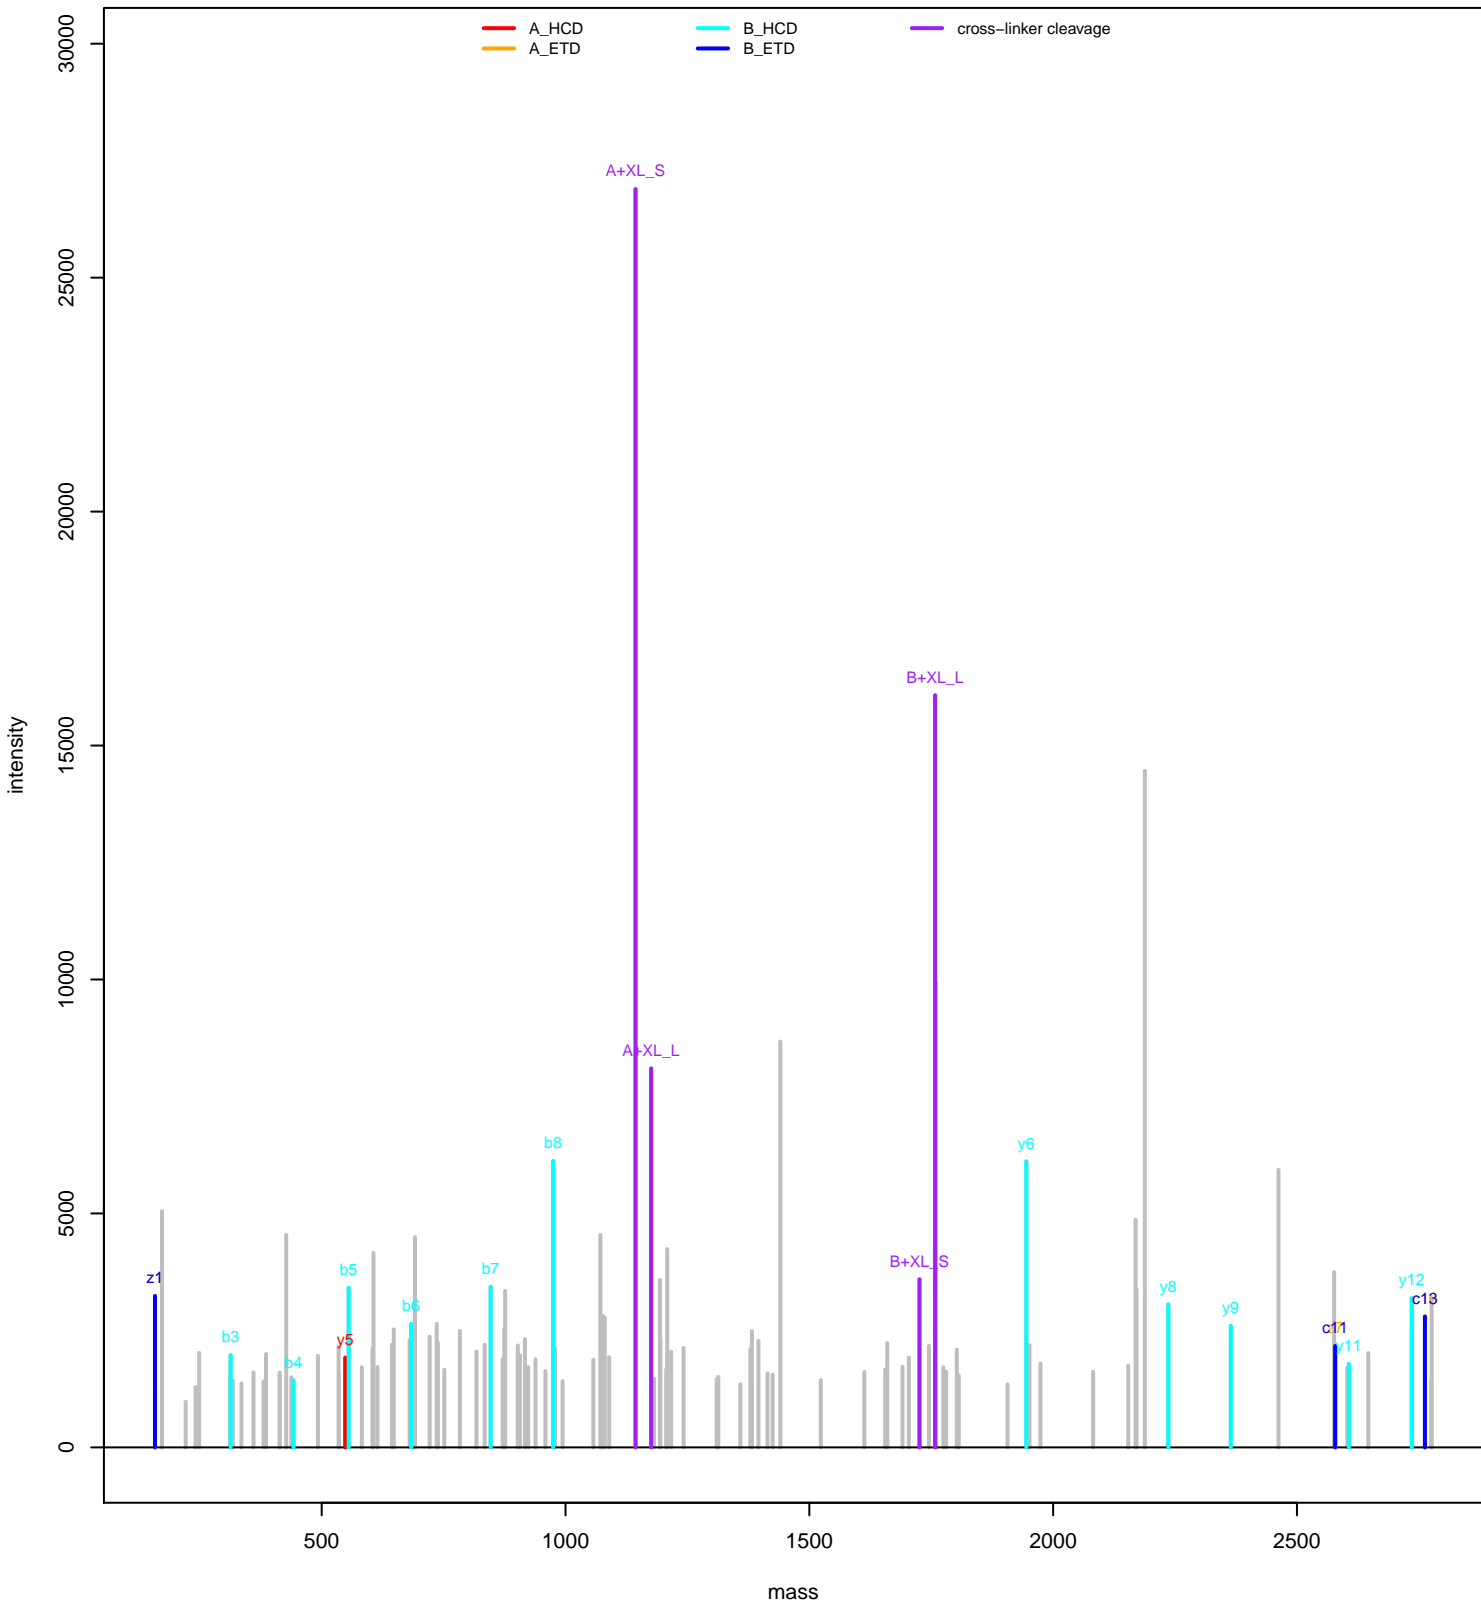

VAGVSKSTVSR+XL\_S

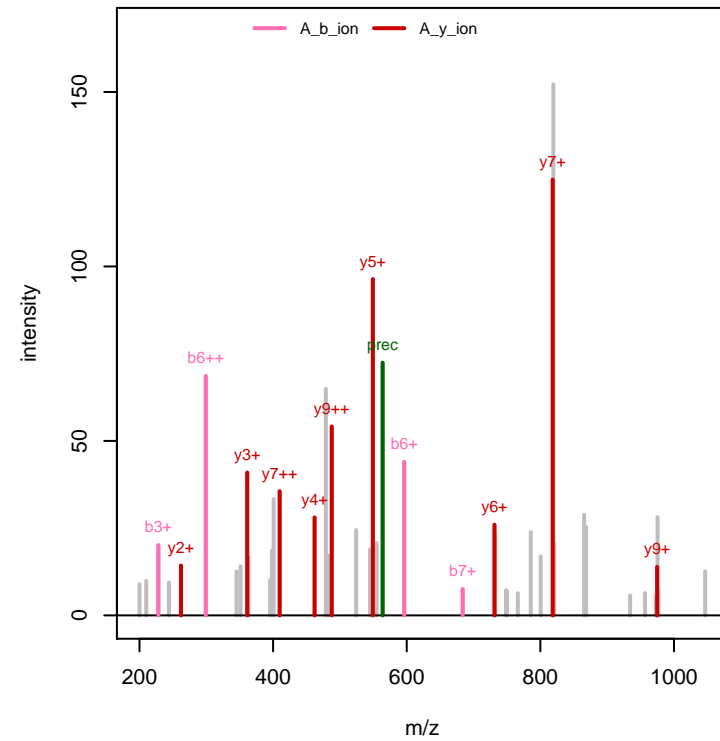

VAGVSKSTVSR+XL\_L

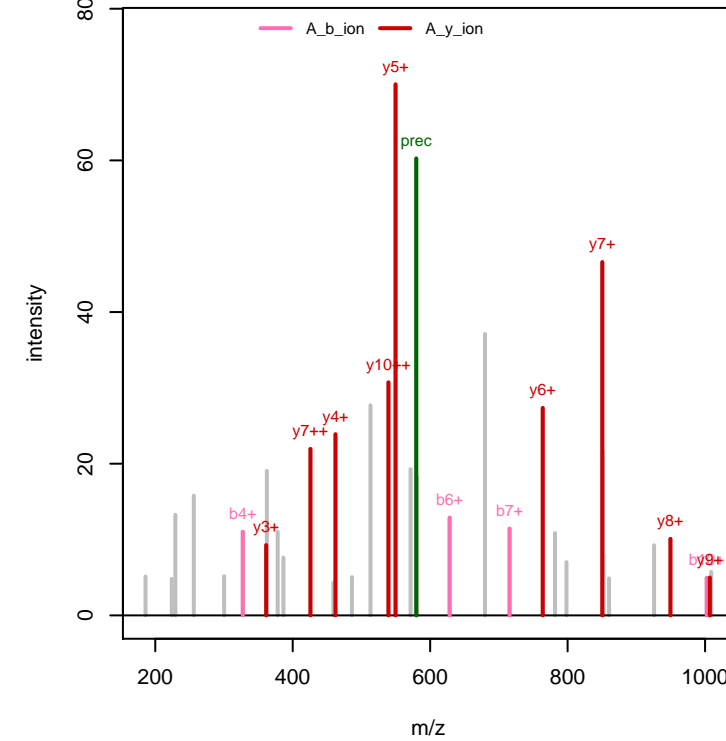

AIEELQYQPNKLAR+XL\_S

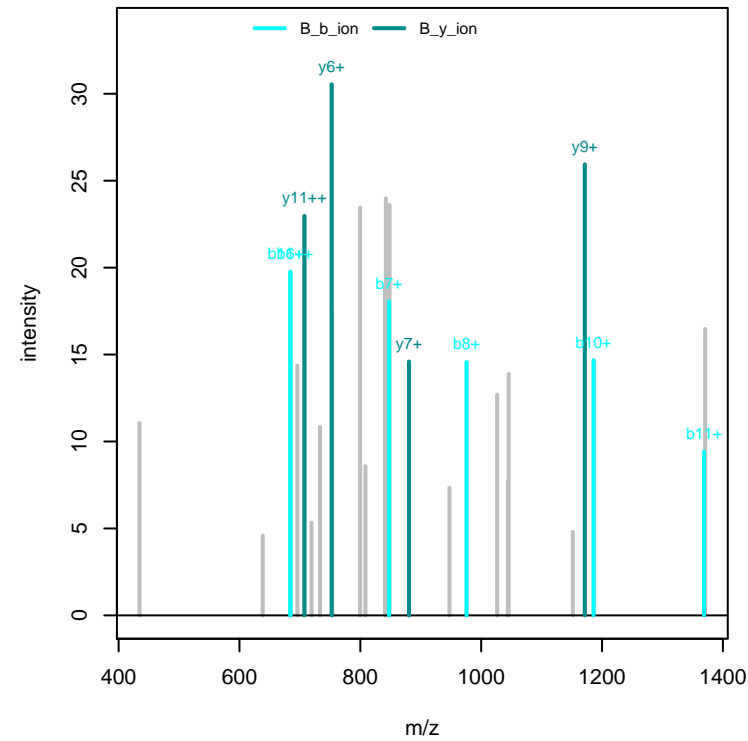

AIEELQYQPNKLAR+XL\_L

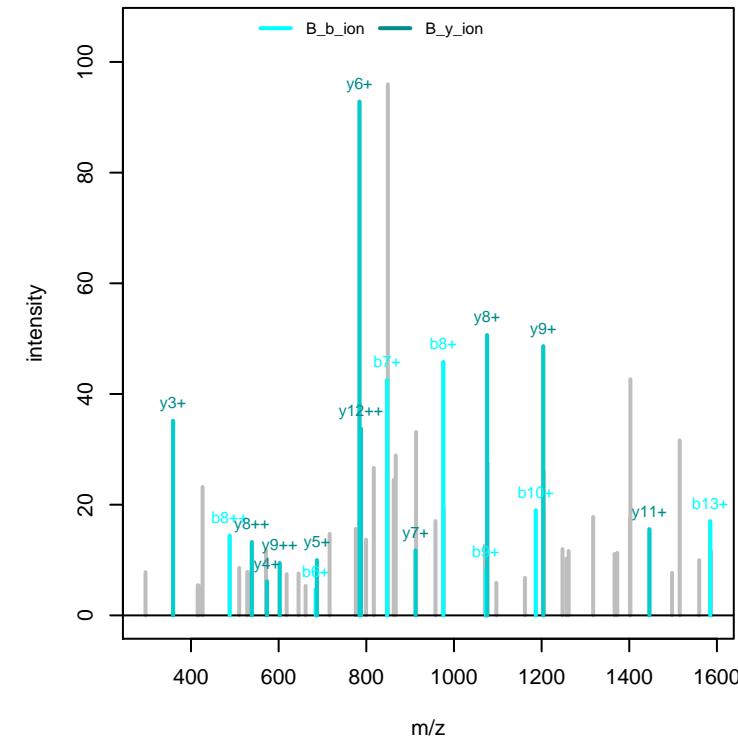

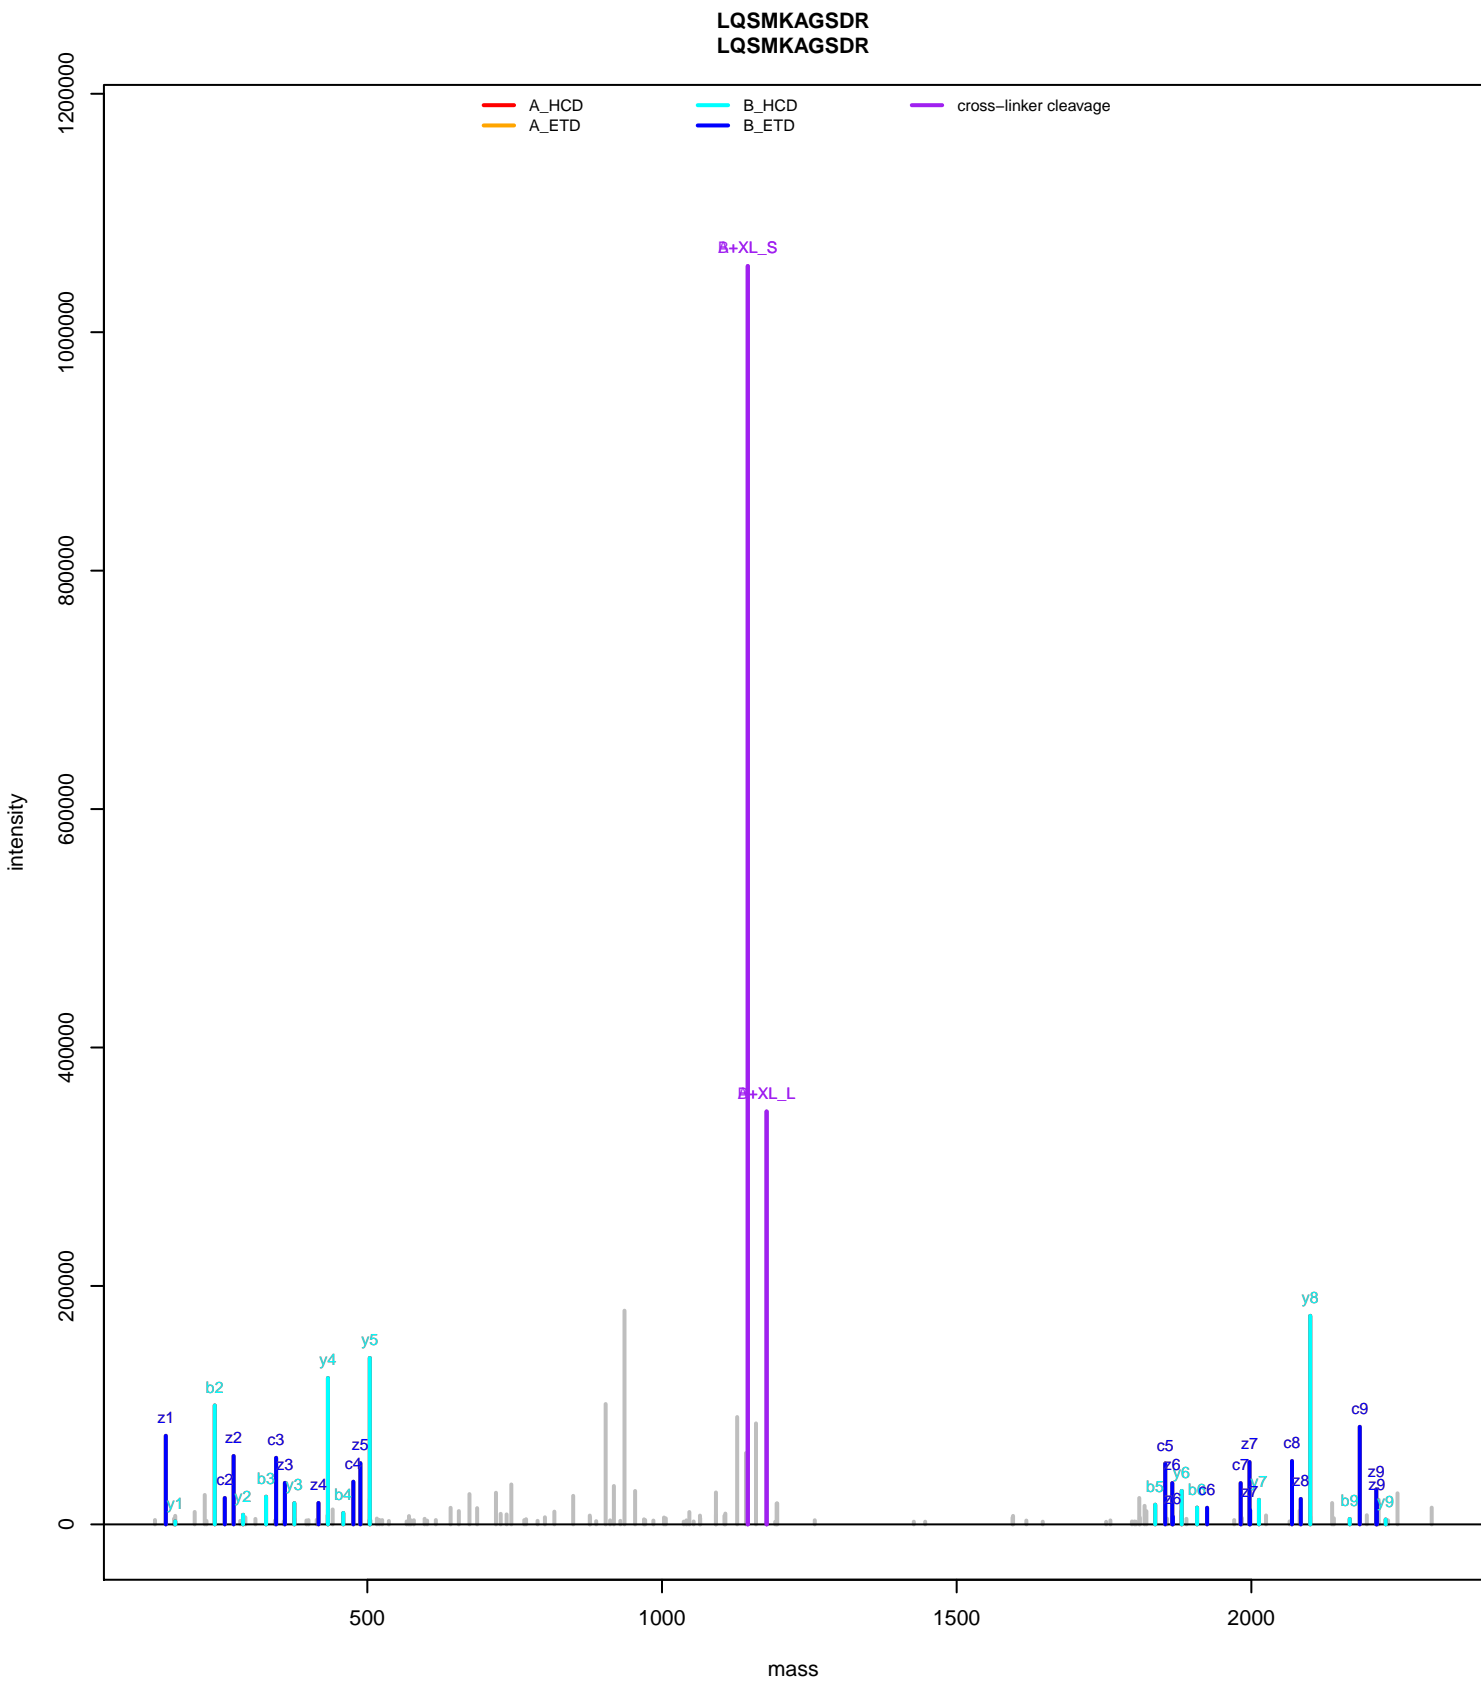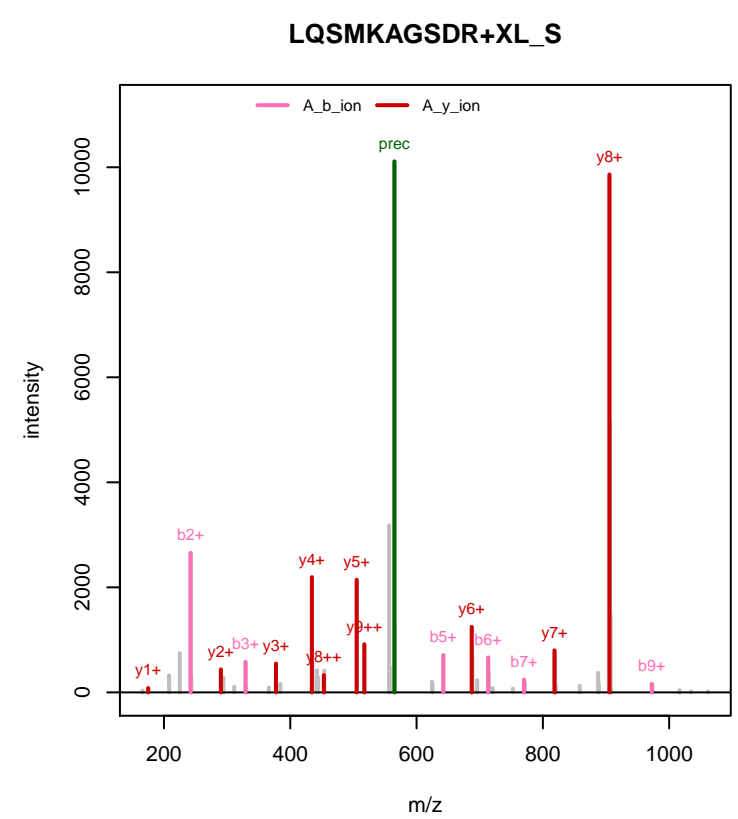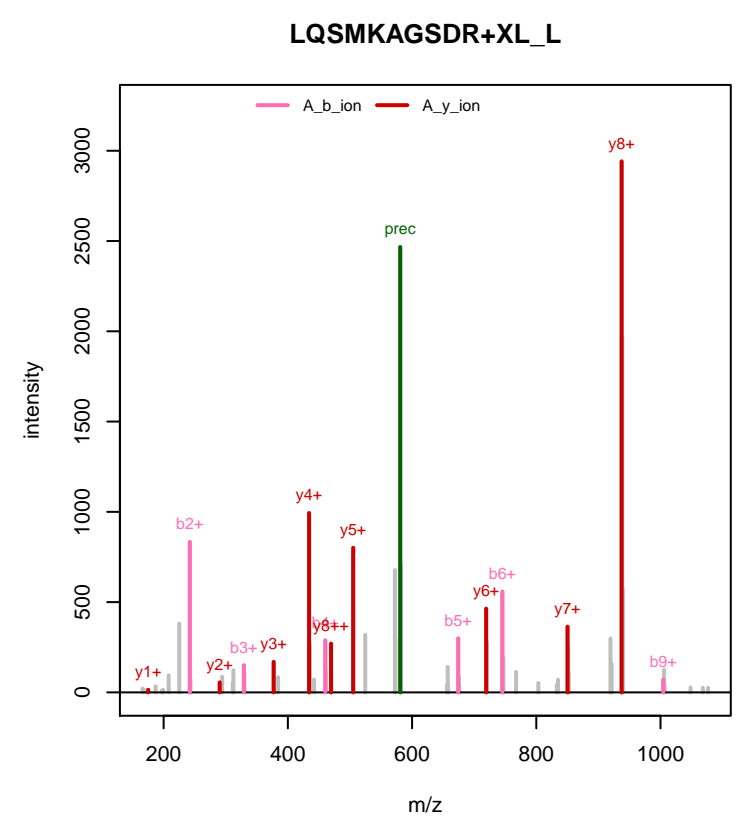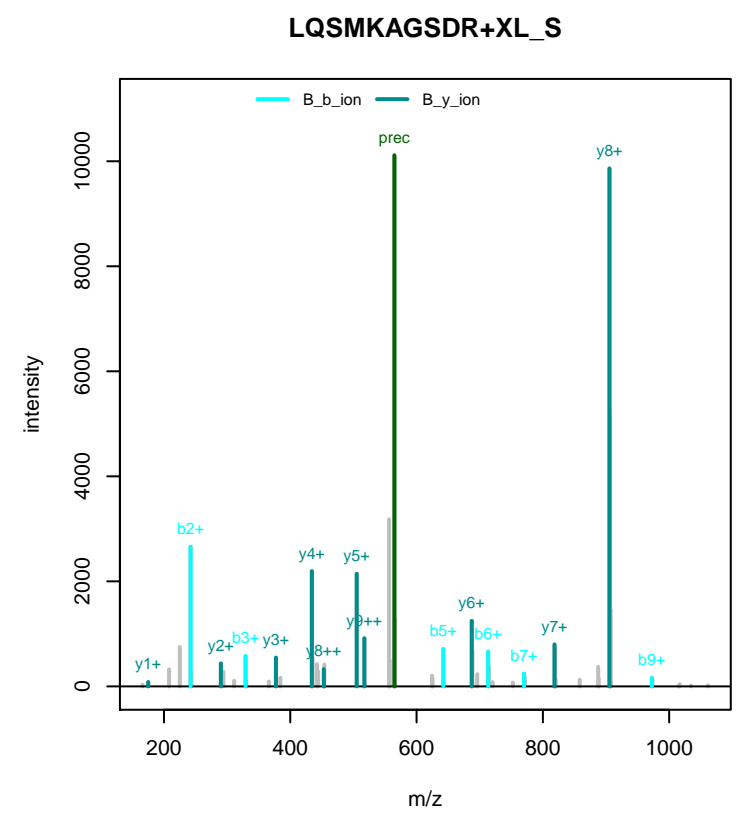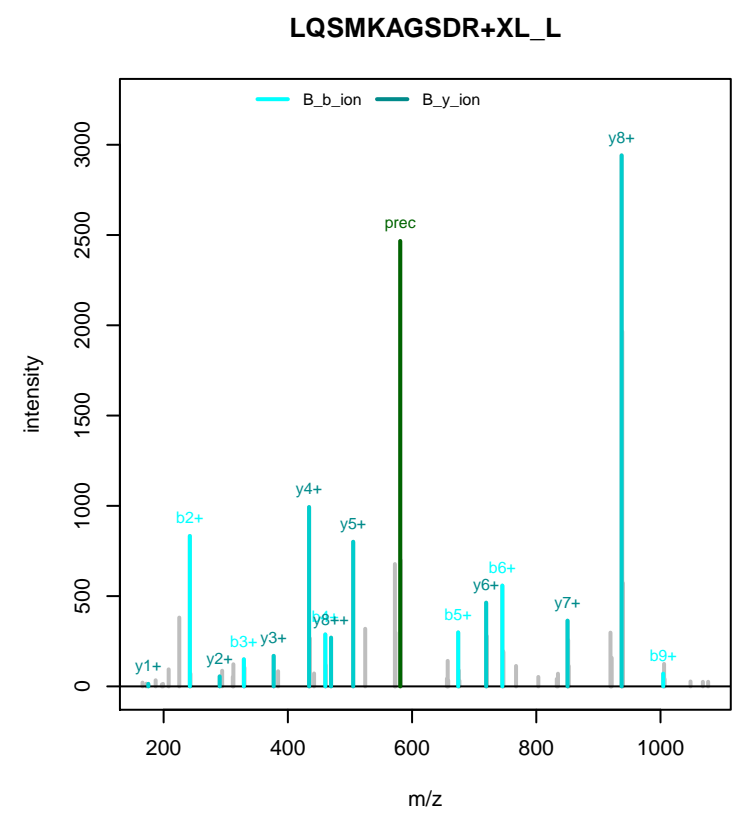



AVNIKTK  
RGIKPR

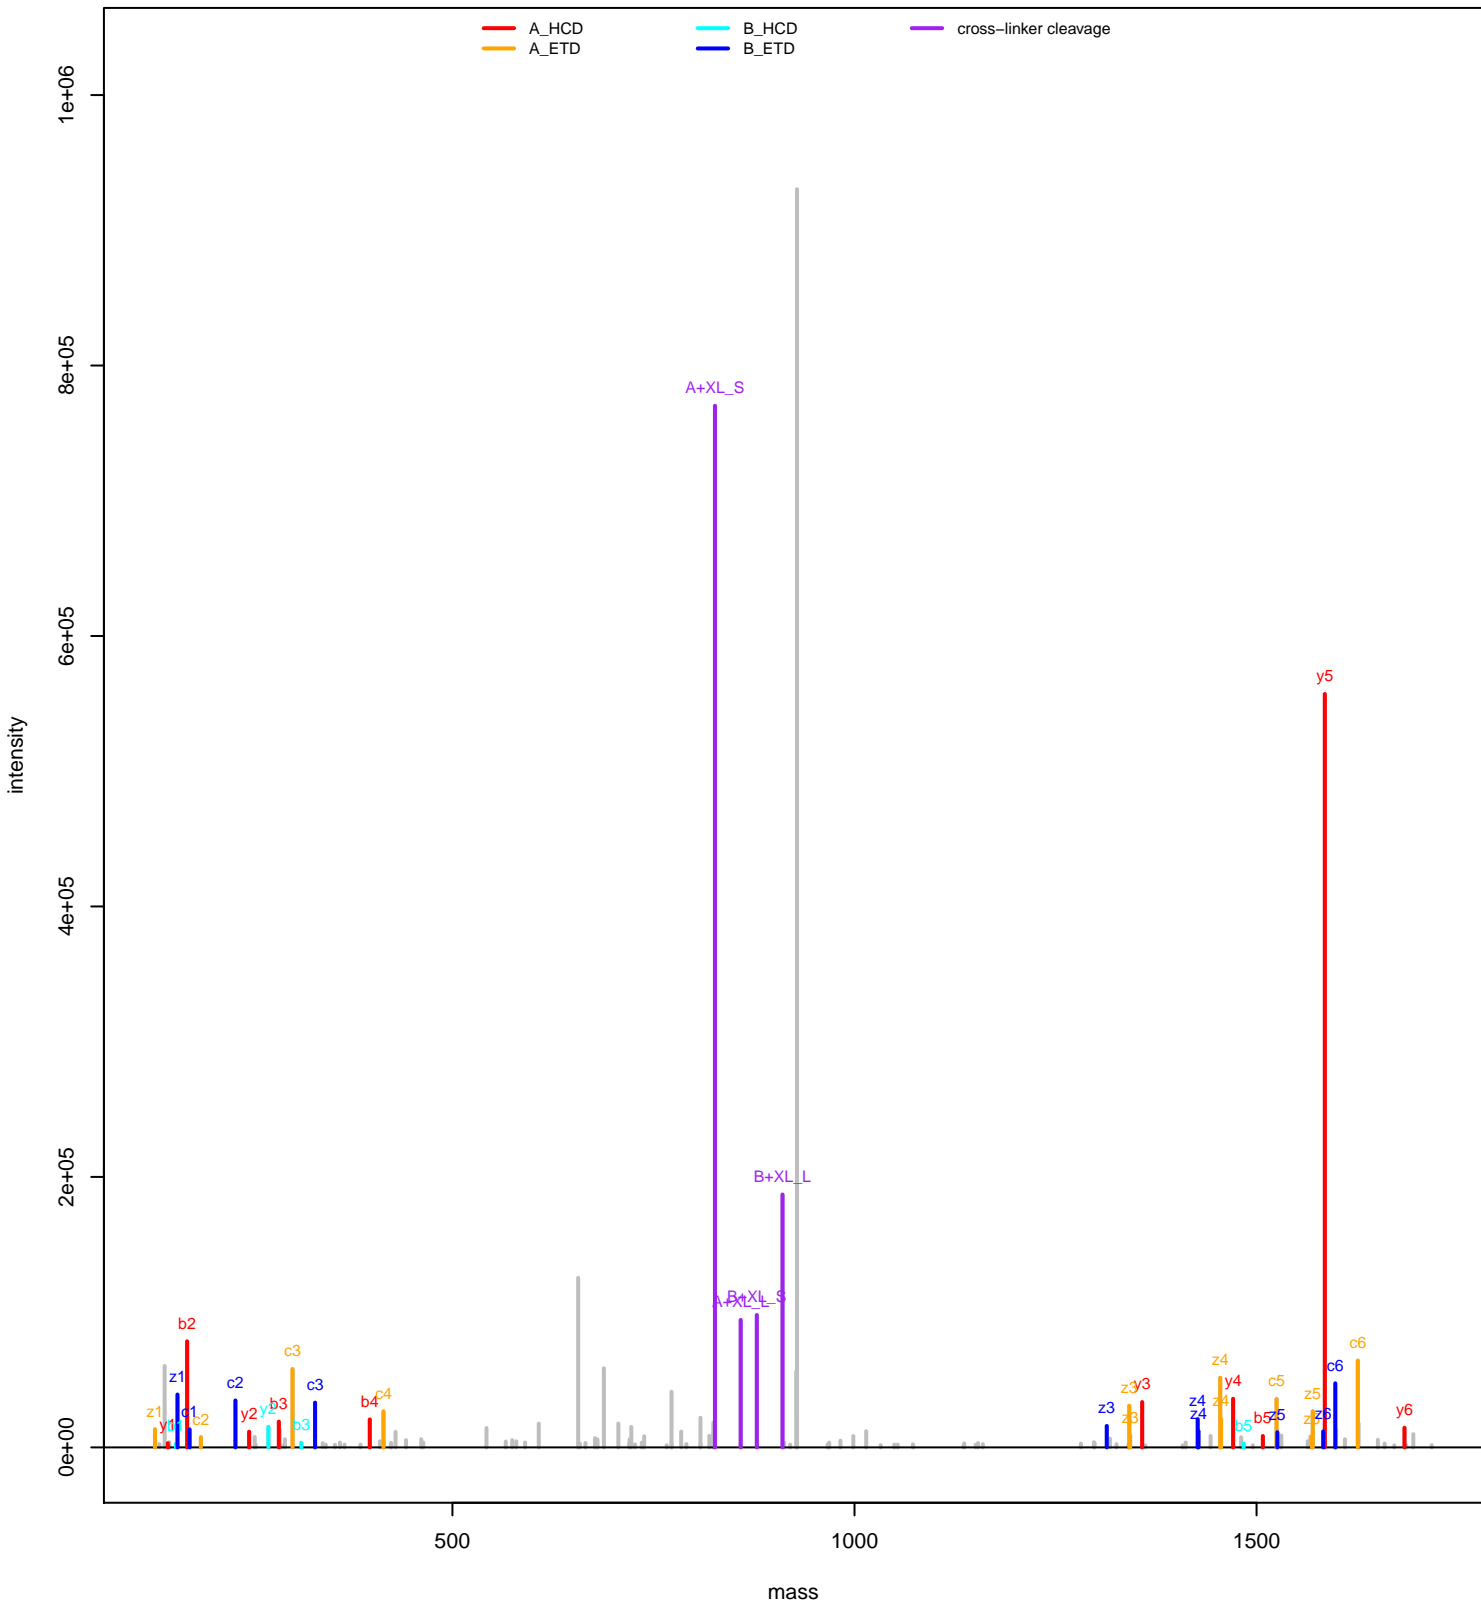

AVNIKTK+XL\_S

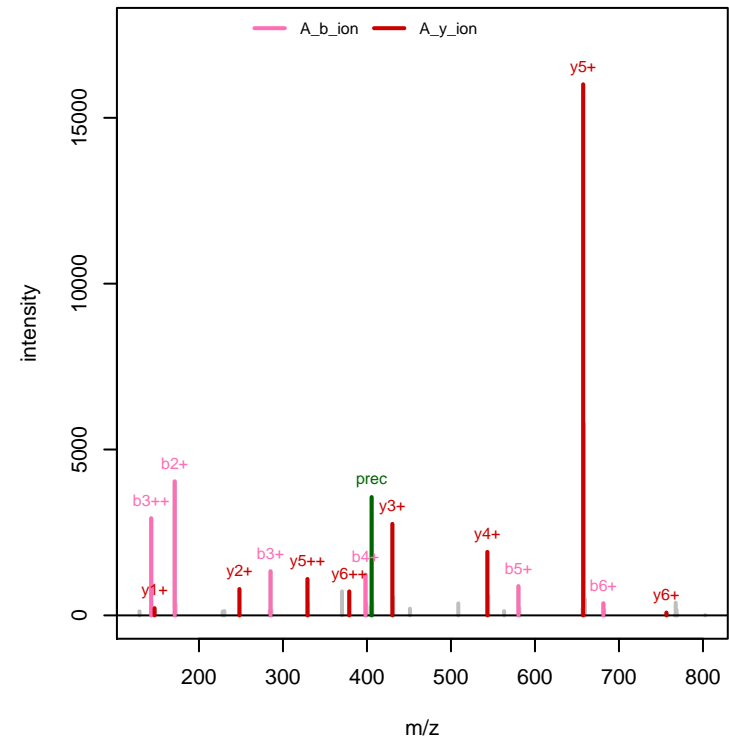

AVNIKTK+XL\_L

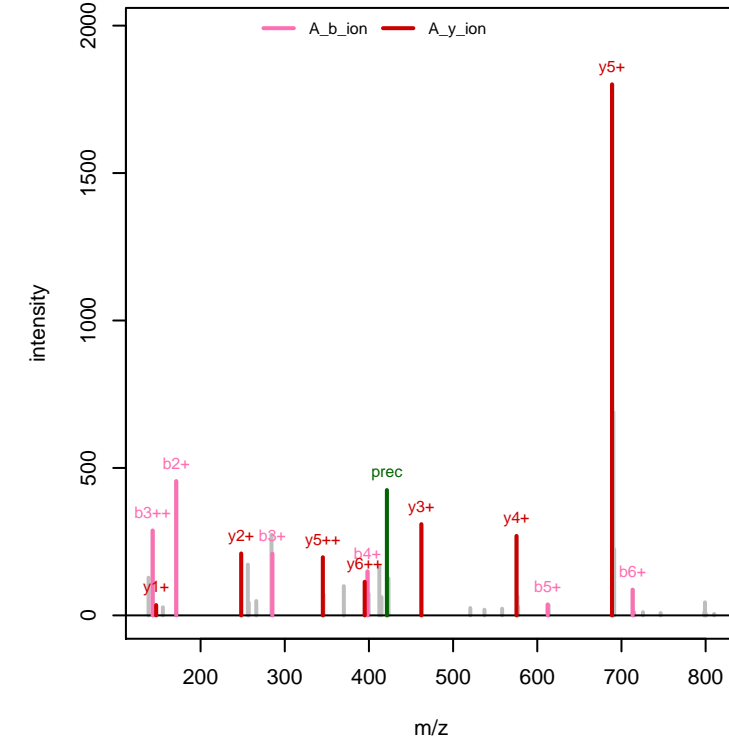

RGIKPR+XL\_S

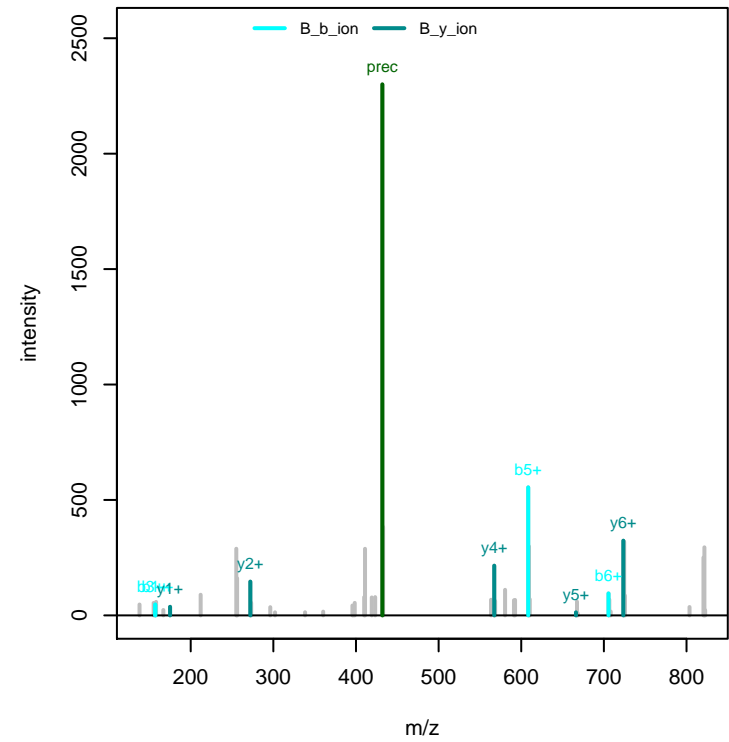

RGIKPR+XL\_L

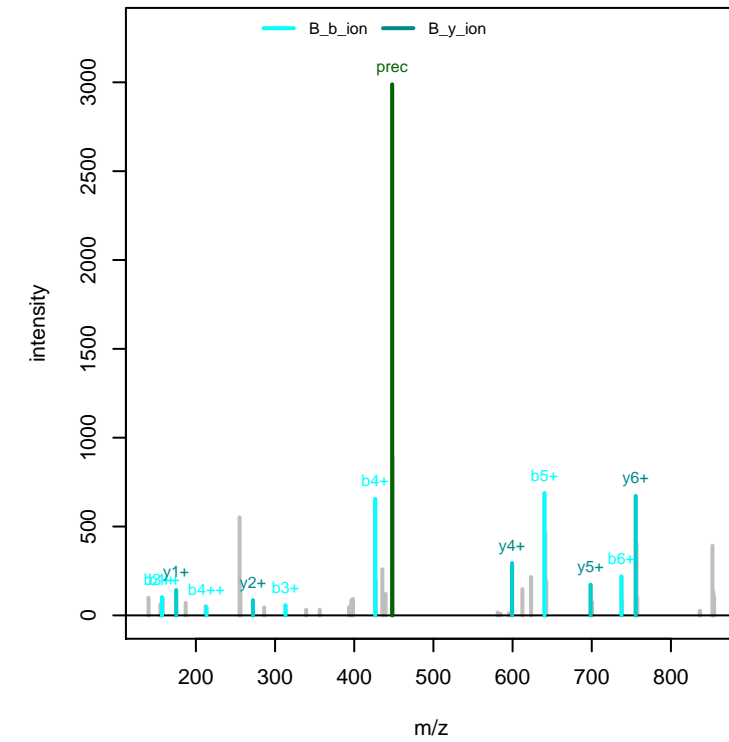

PAAQPKK  
IVIERPAKSIR

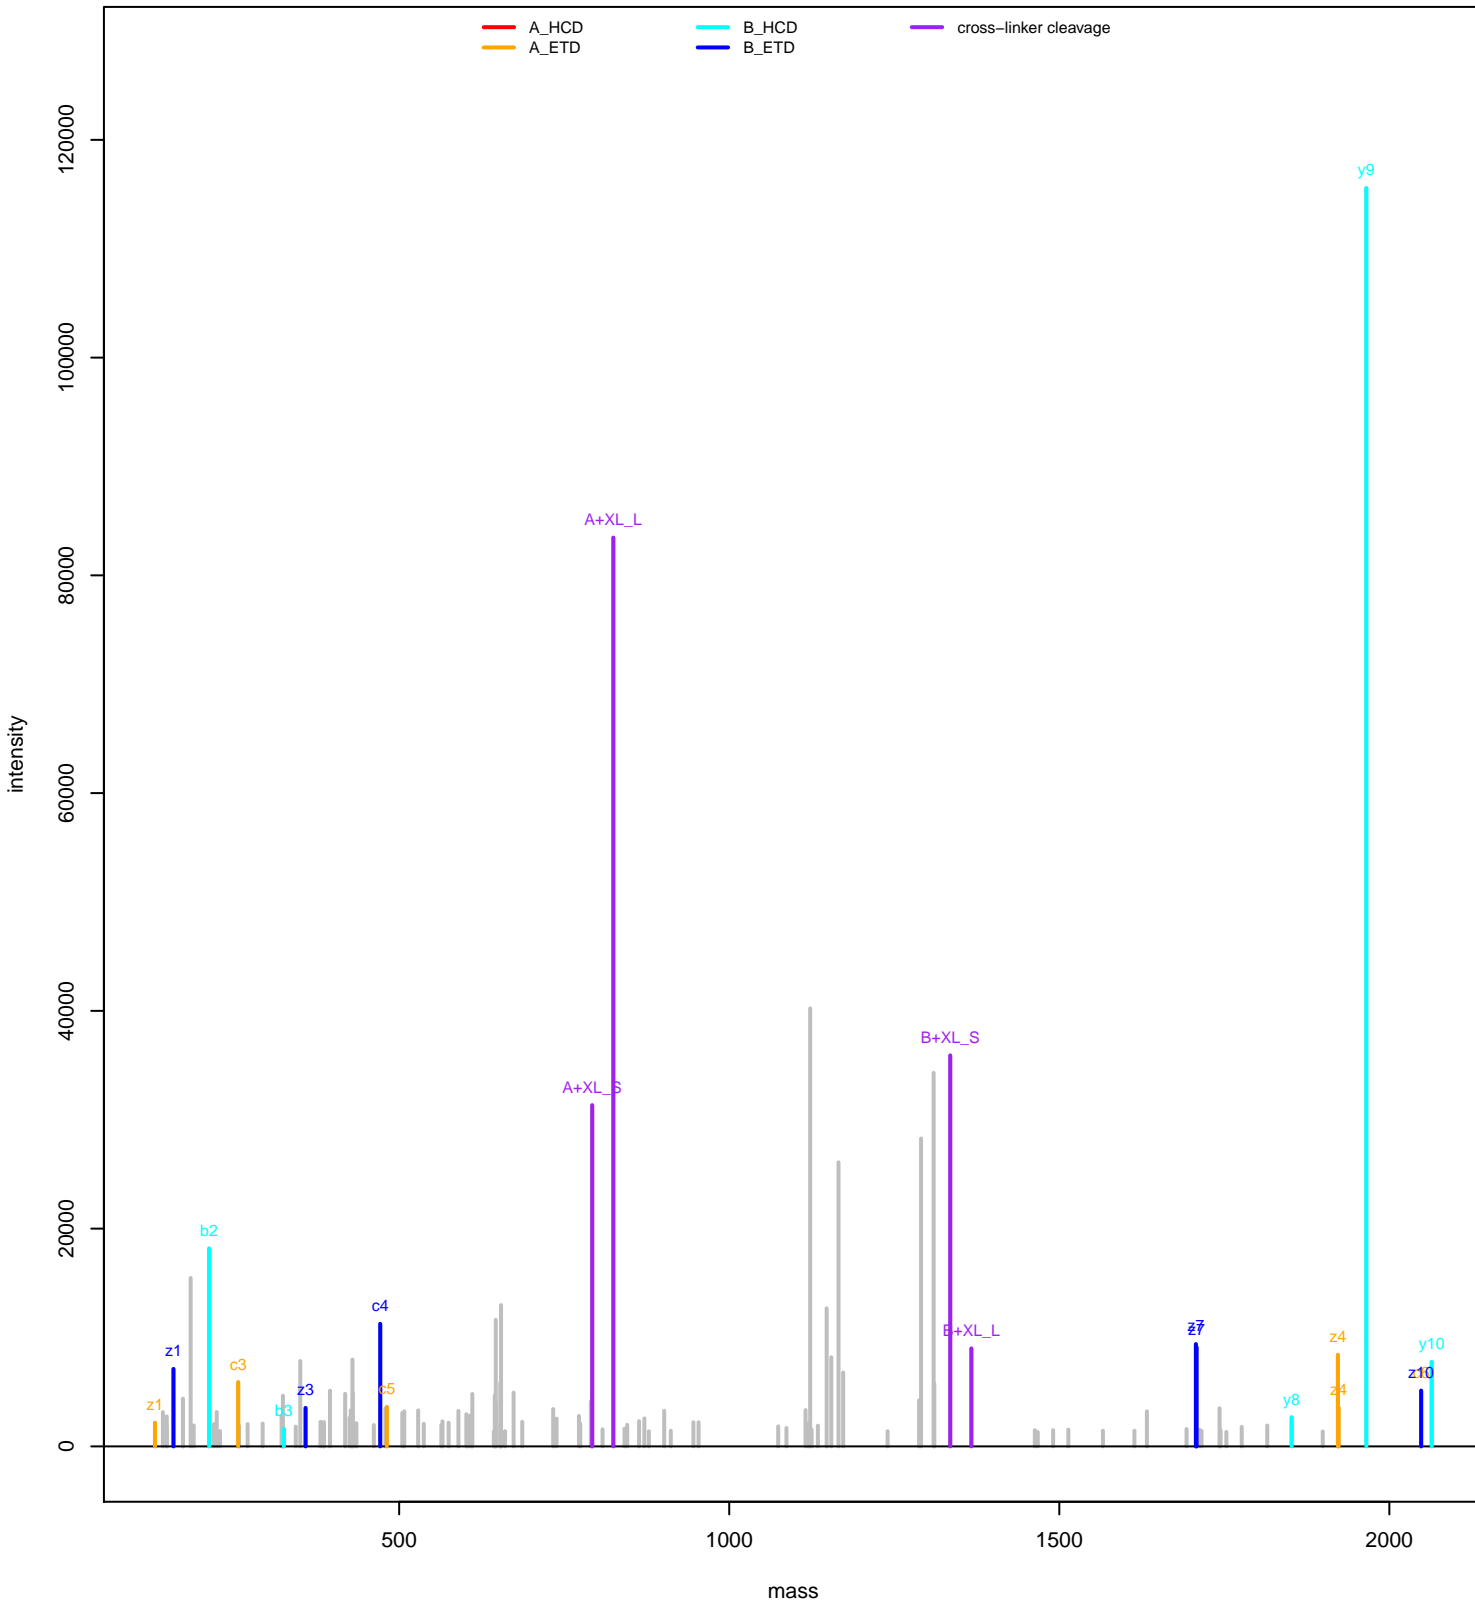

PAAQPKK+XL\_S

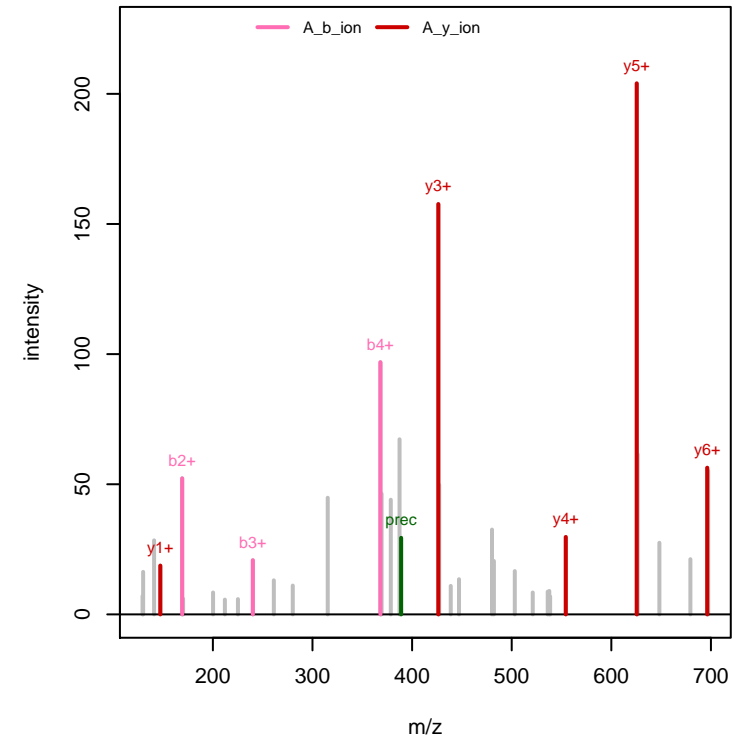

PAAQPKK+XL\_L

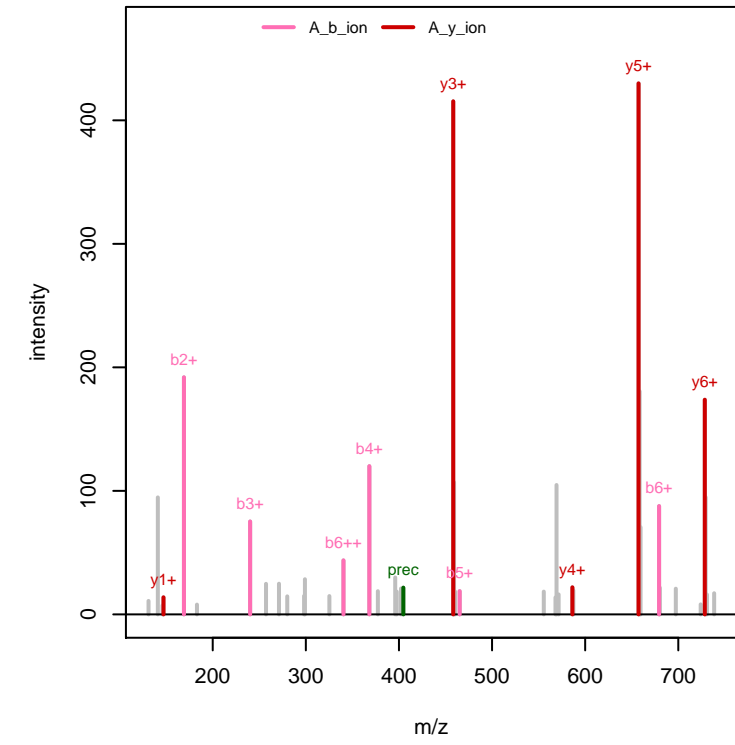

IVIERPAKSIR+XL\_S

IVIERPAKSIR+XL\_L

KAGVYDK  
NLVQQVAKTCPK

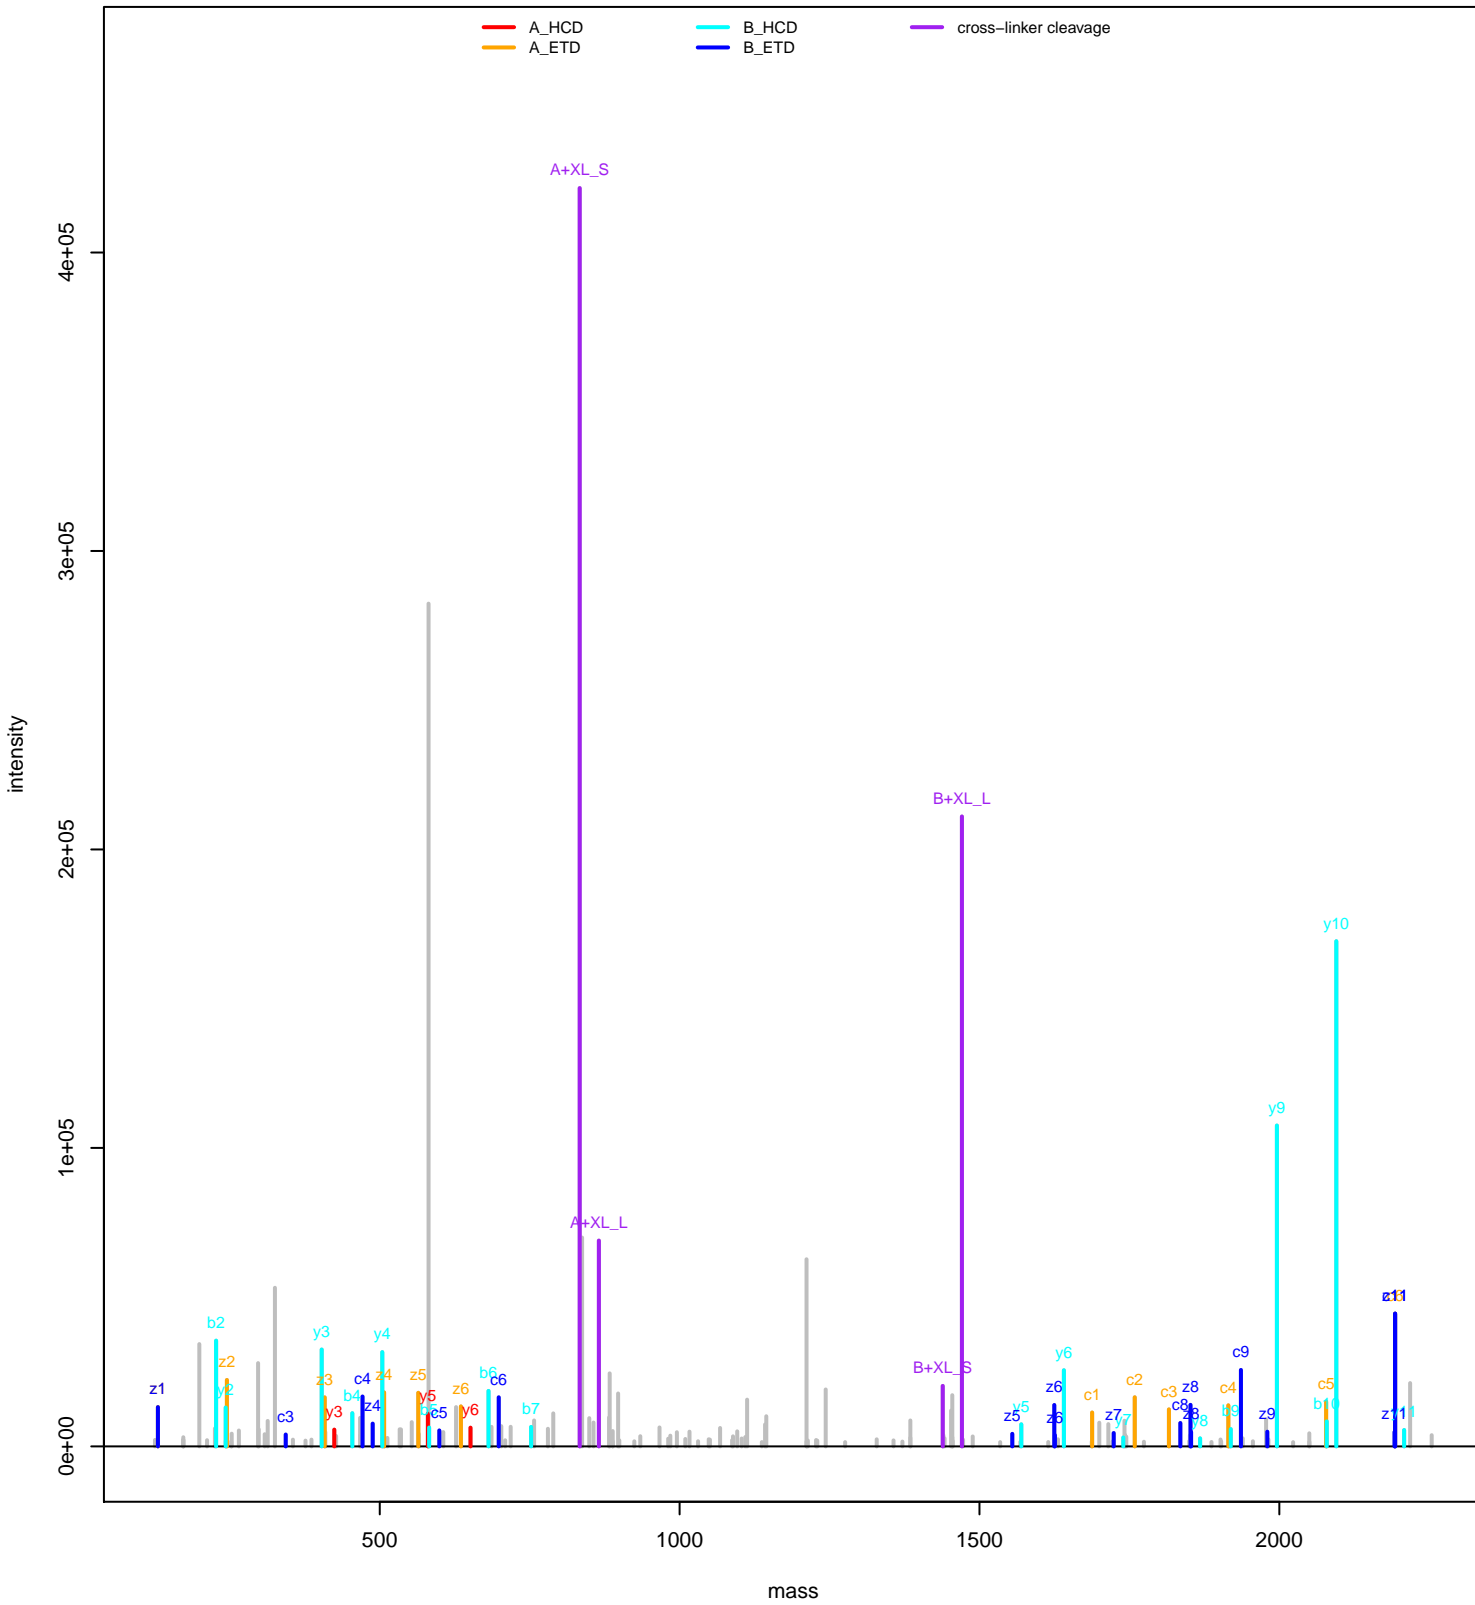

KAGVYDK+XL\_S

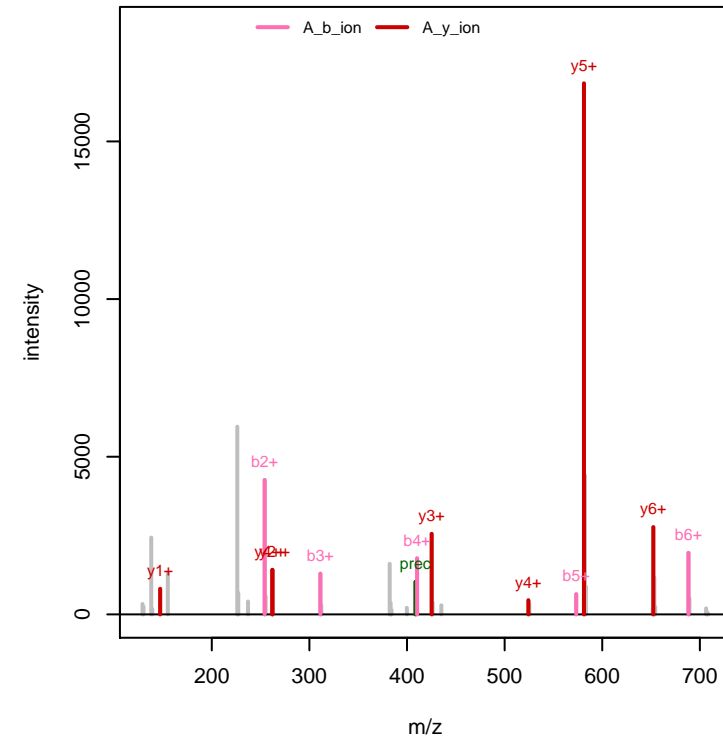

KAGVYDK+XL\_L

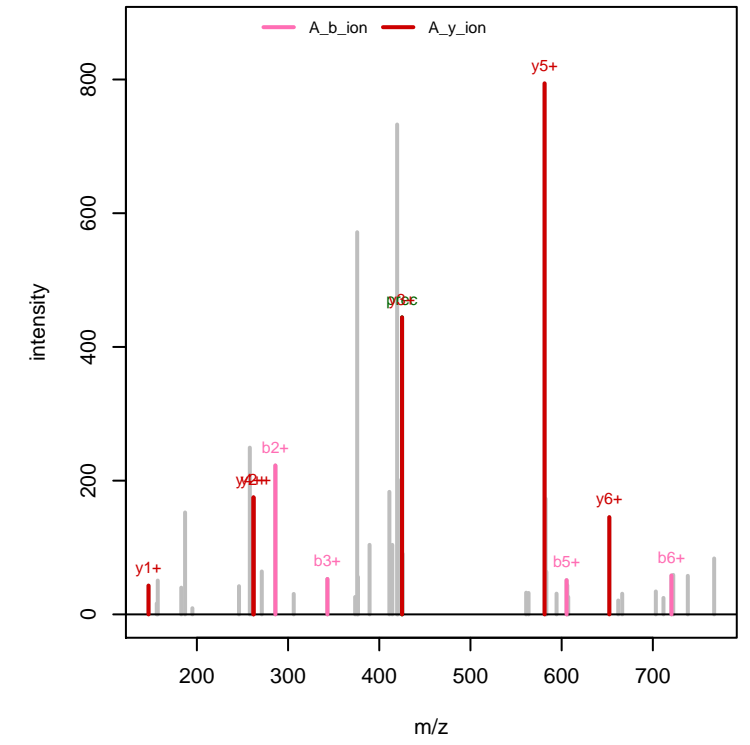

NLVQQVAKTCPK+XL\_S

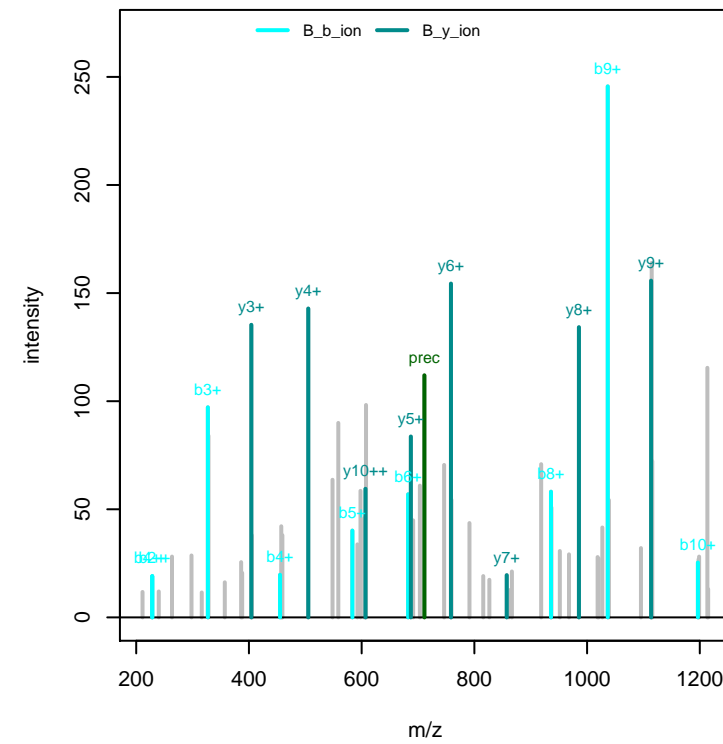

NLVQQVAKTCPK+XL\_L

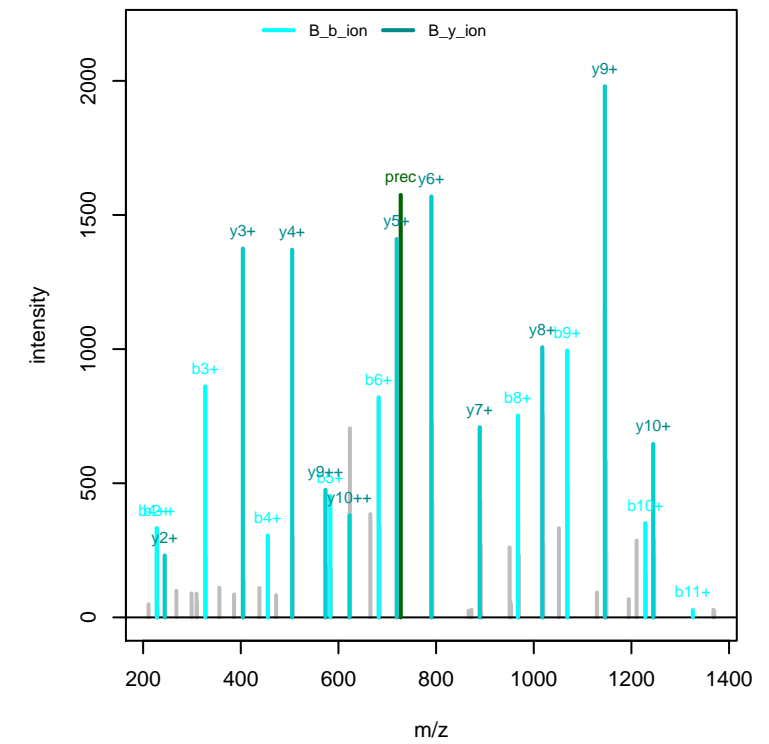

AVGVHQSAYK  
DNVTDKNELR

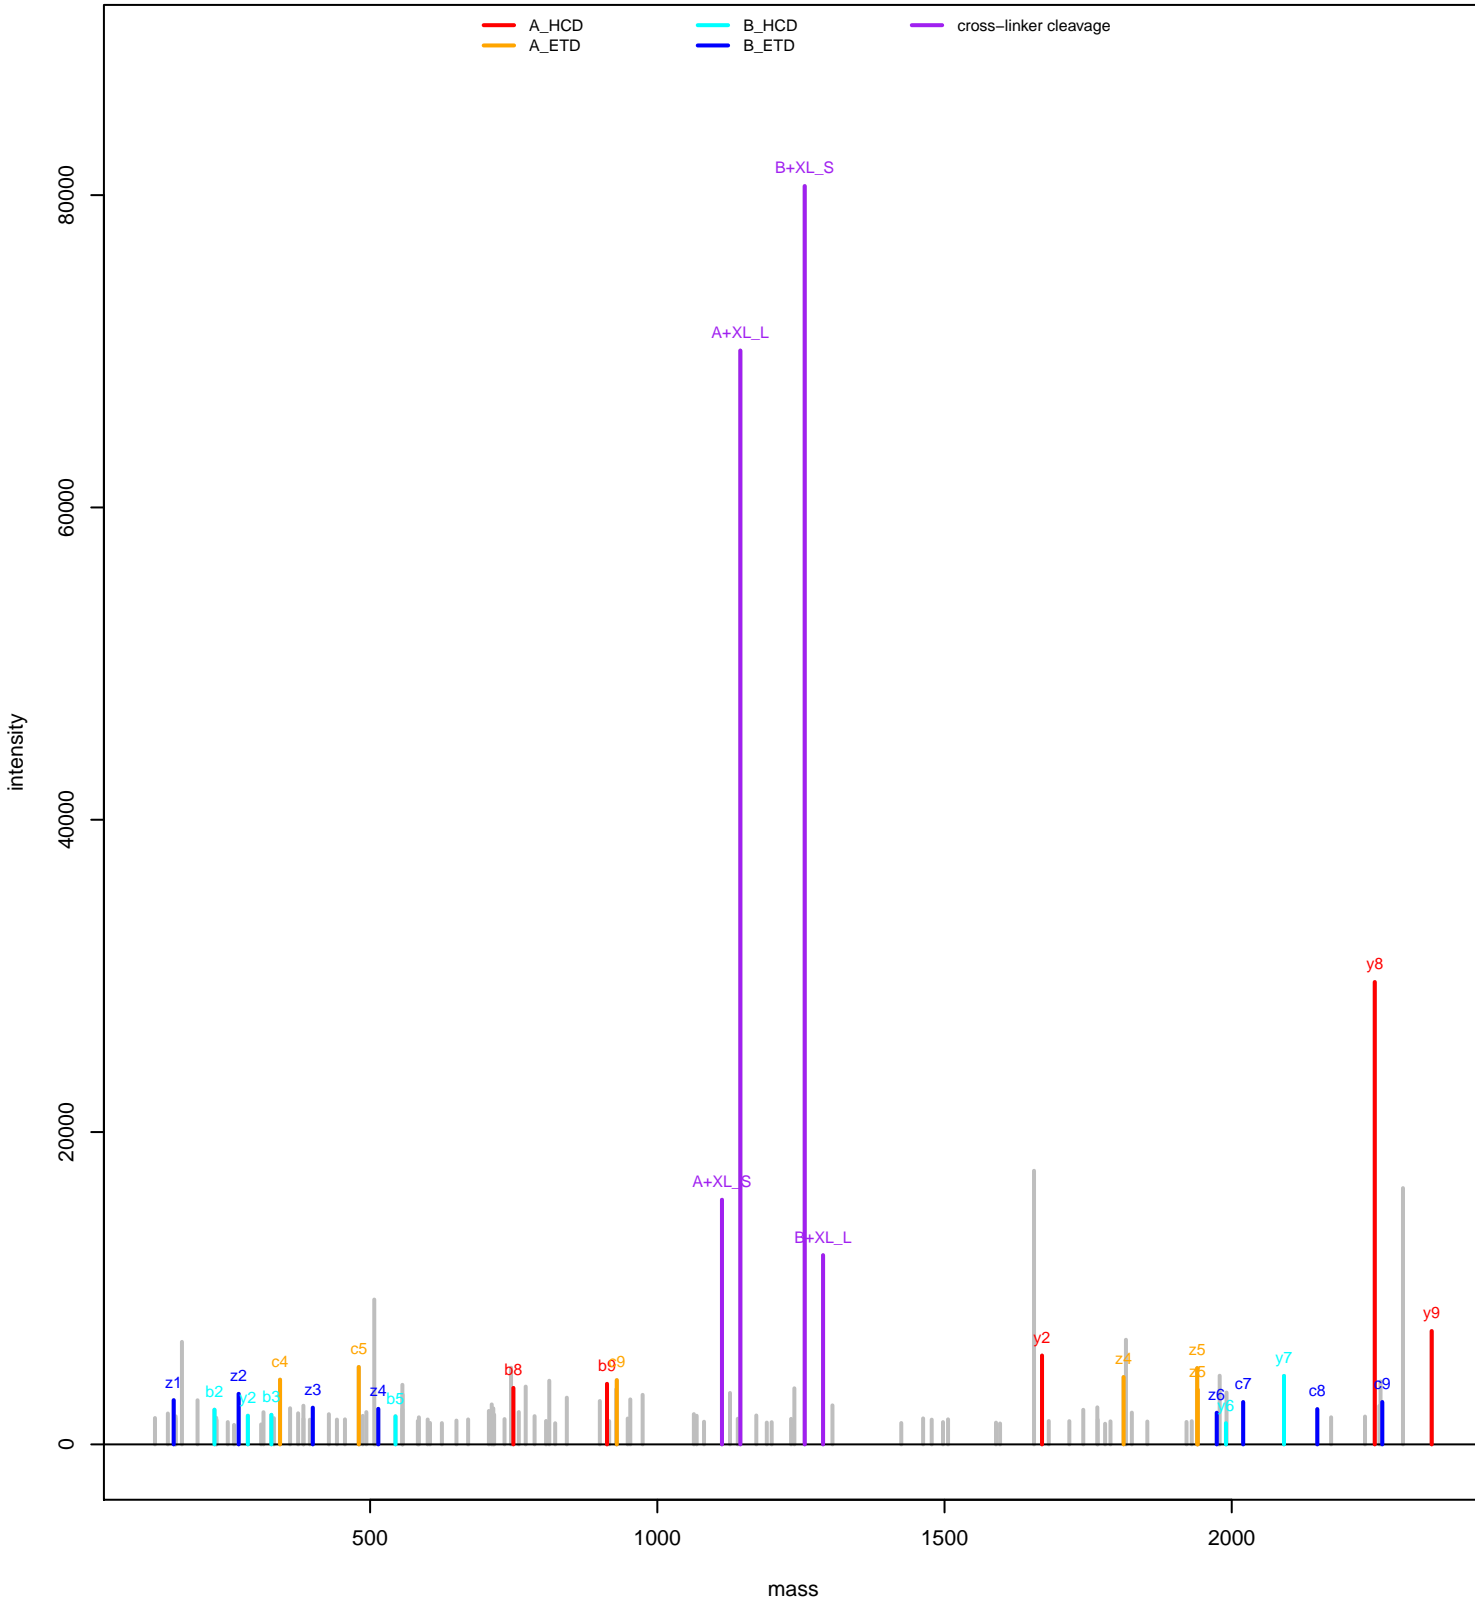

AVGVHQSAYK+XL\_S

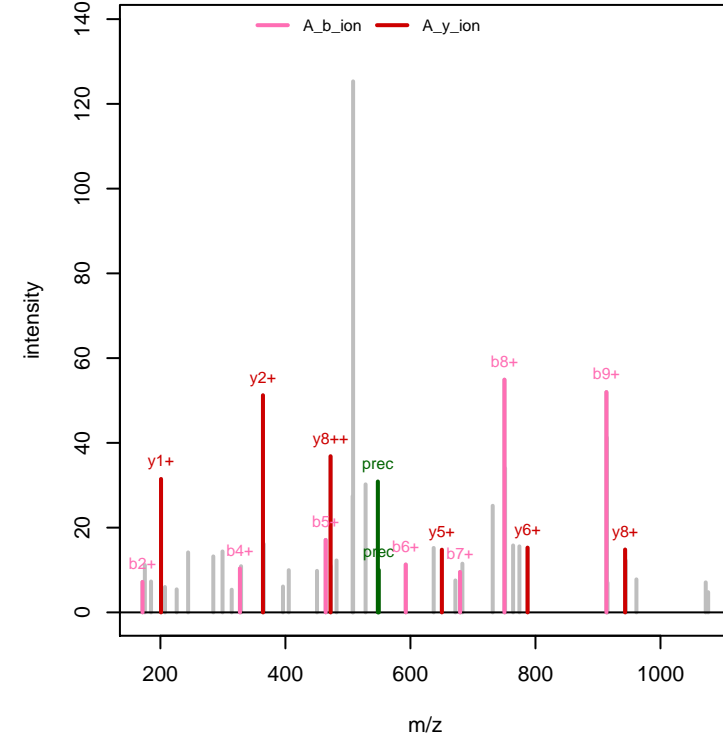

AVGVHQSAYK+XL\_L

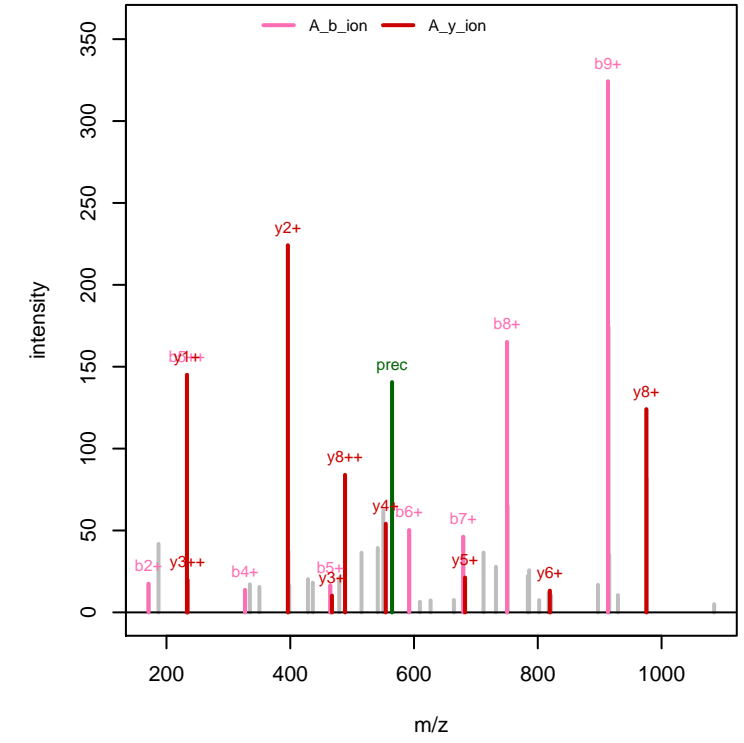

DNVTDKNELR+XL\_S

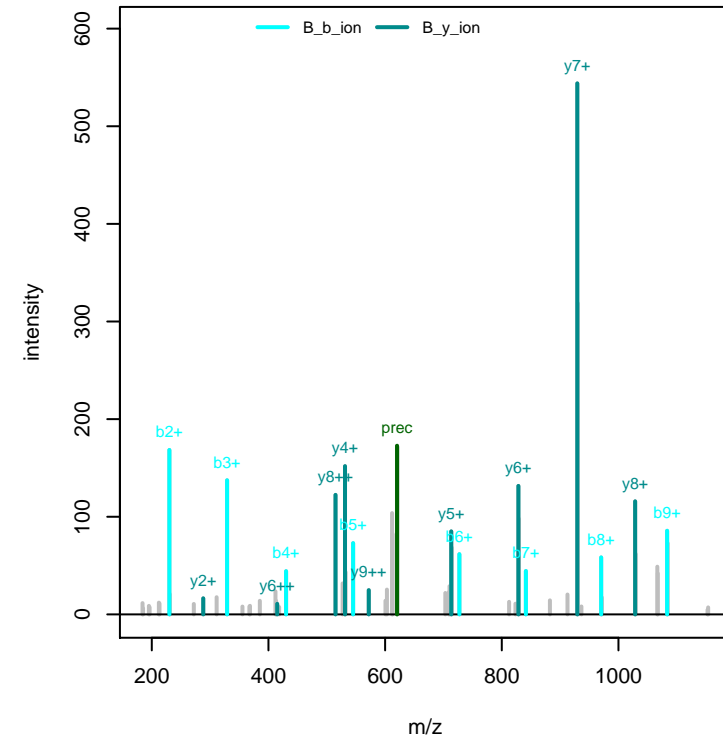

DNVTDKNELR+XL\_L

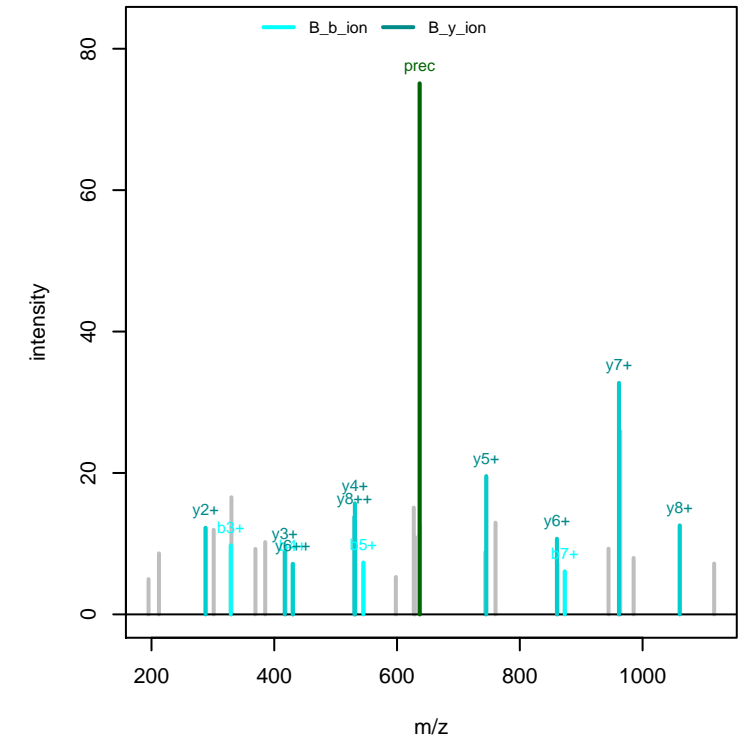

AAIADYKSK  
GKSLDEAQAIIK

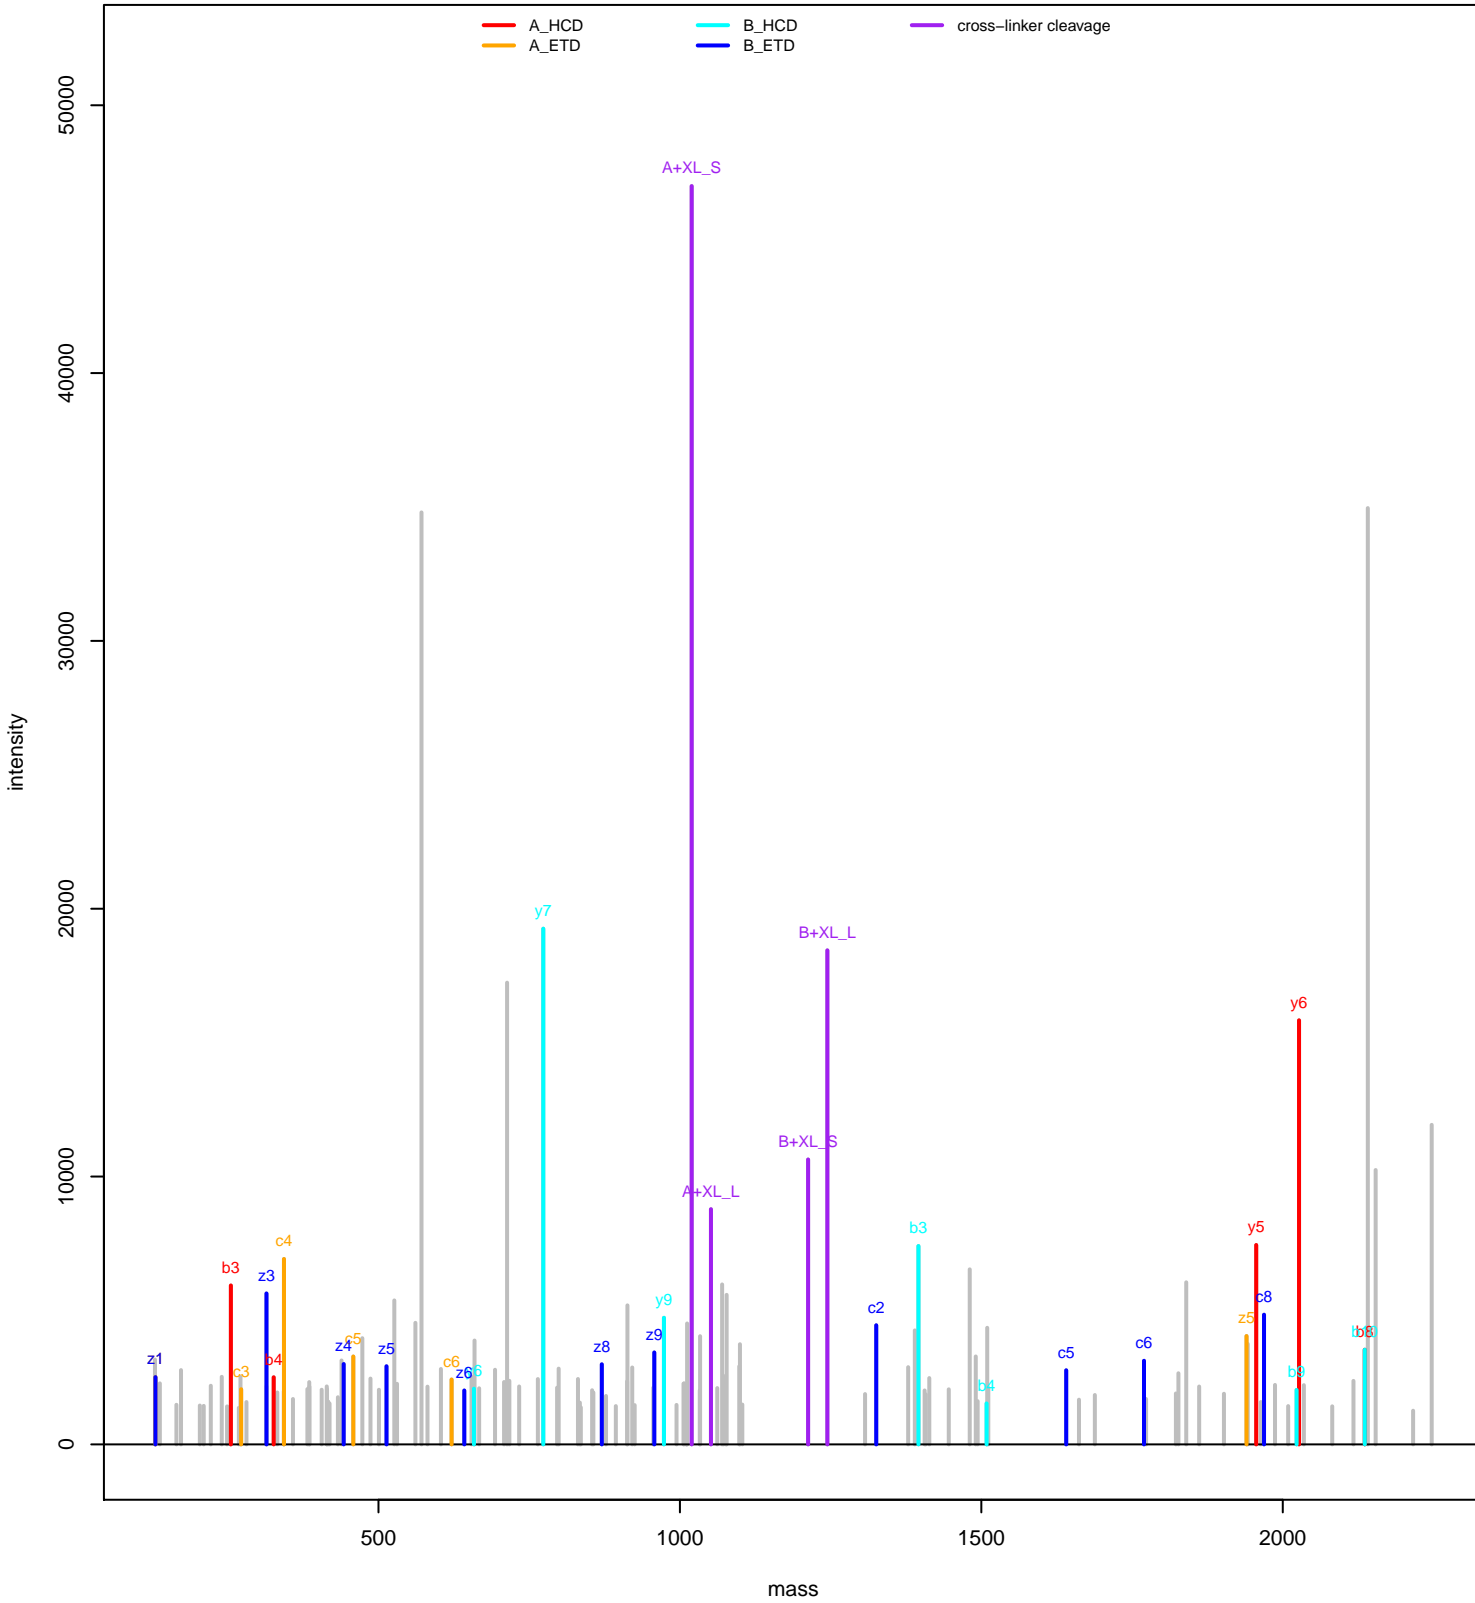

AAIADYKSK+XL\_S

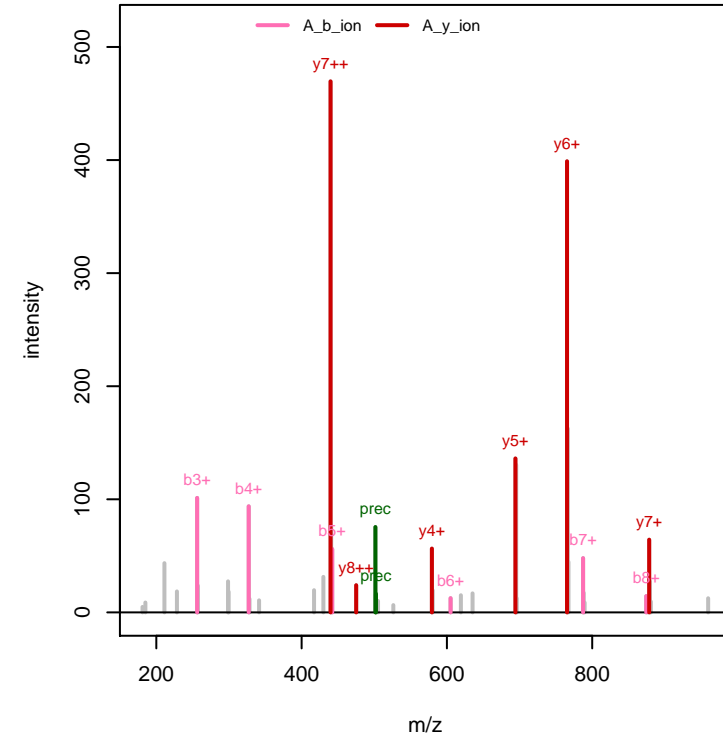

AAIADYKSK+XL\_L

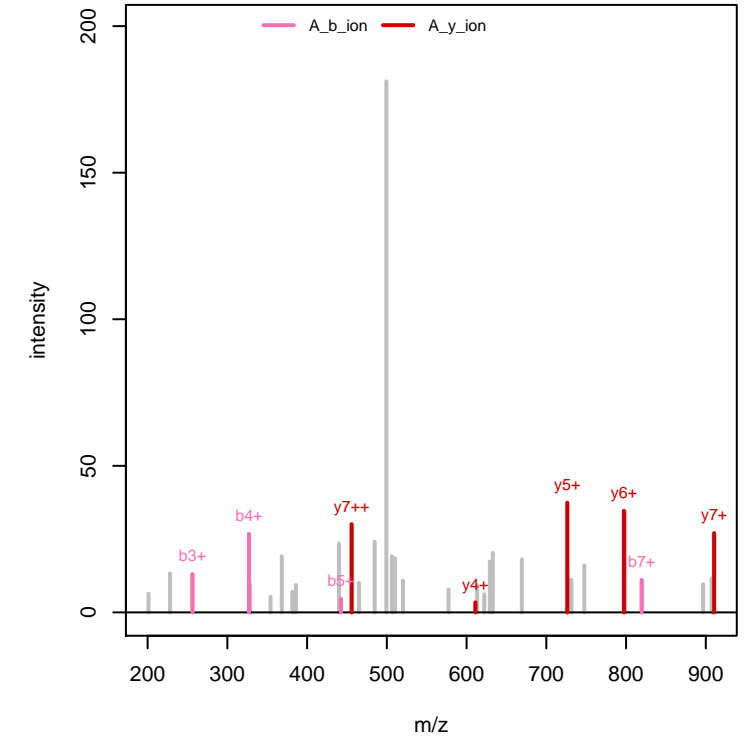

GKSLDEAQAIIK+XL\_S

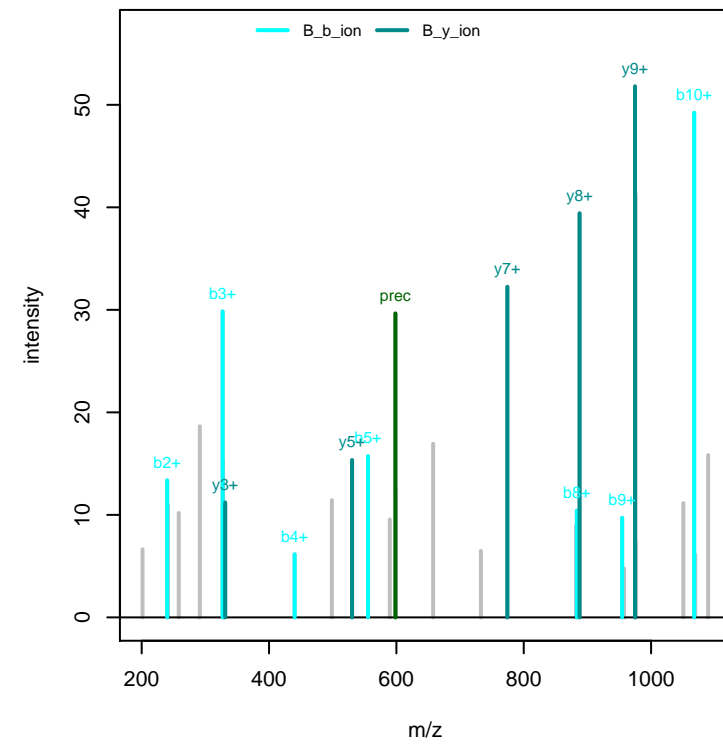

GKSLDEAQAIIK+XL\_L

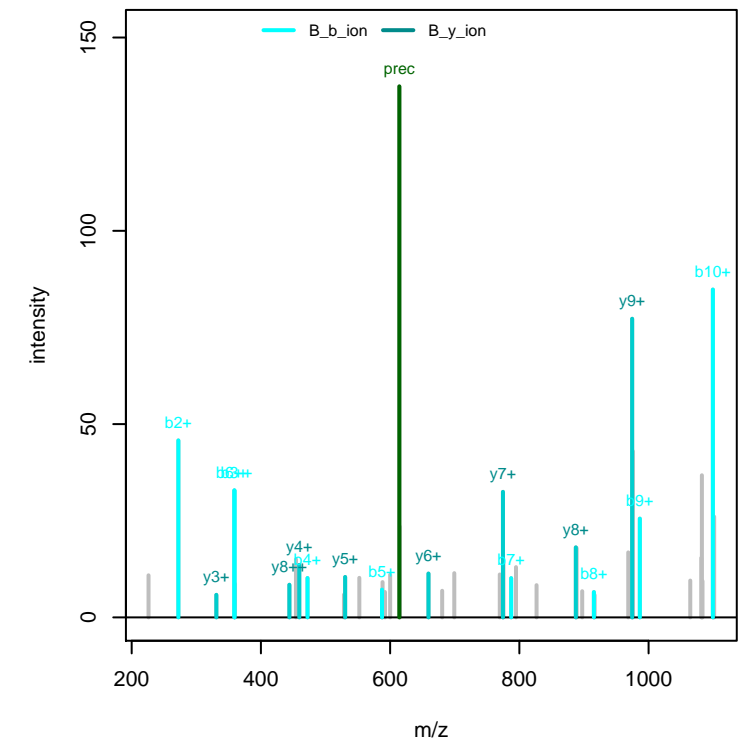

### TIKPVK DFKQNR

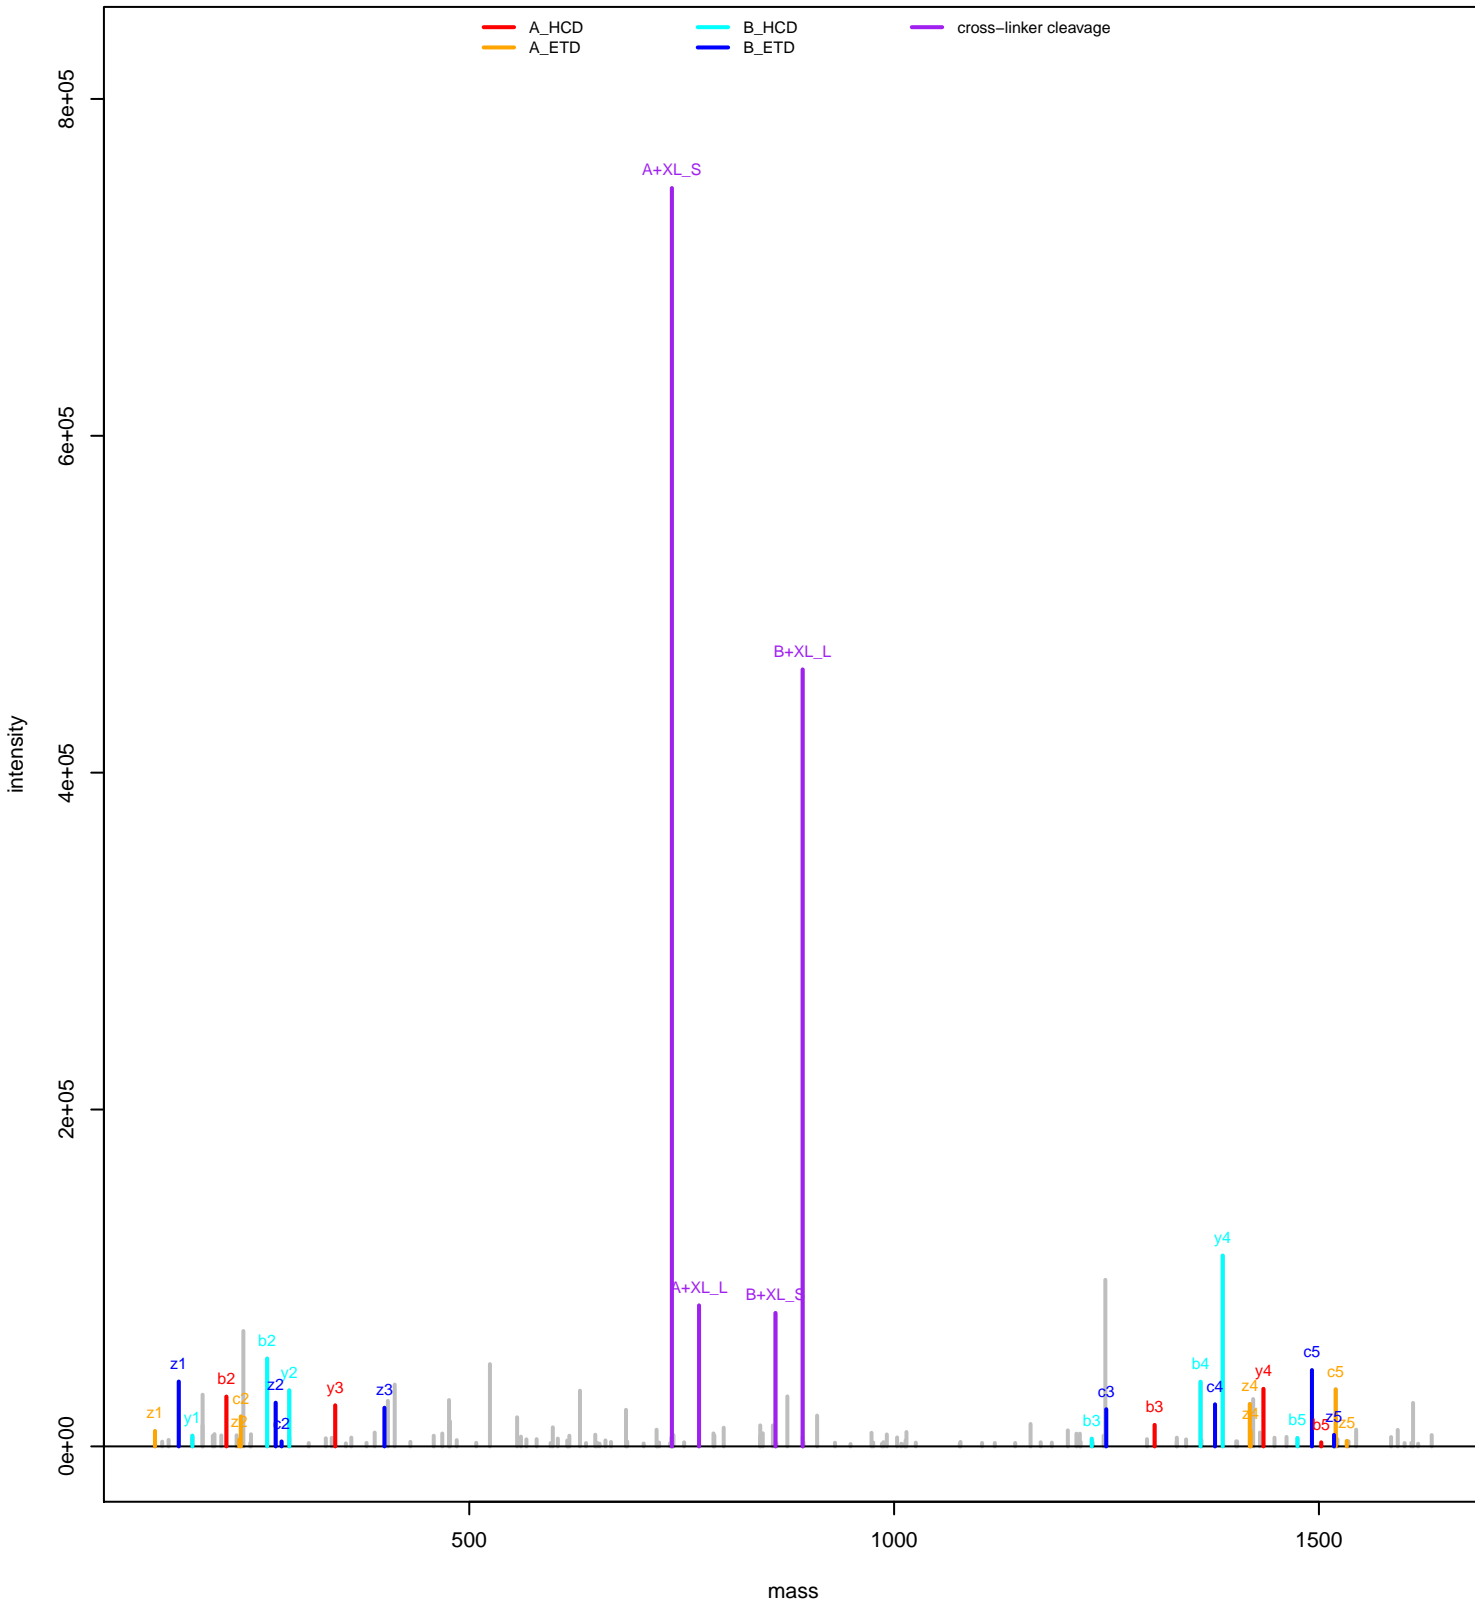

### TIKPVK+XL\_S

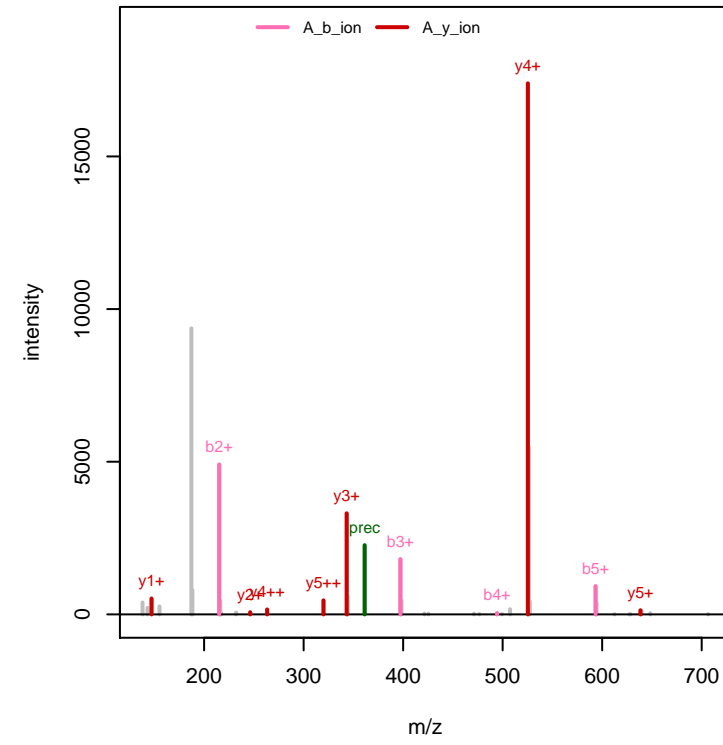

### TIKPVK+XL\_L

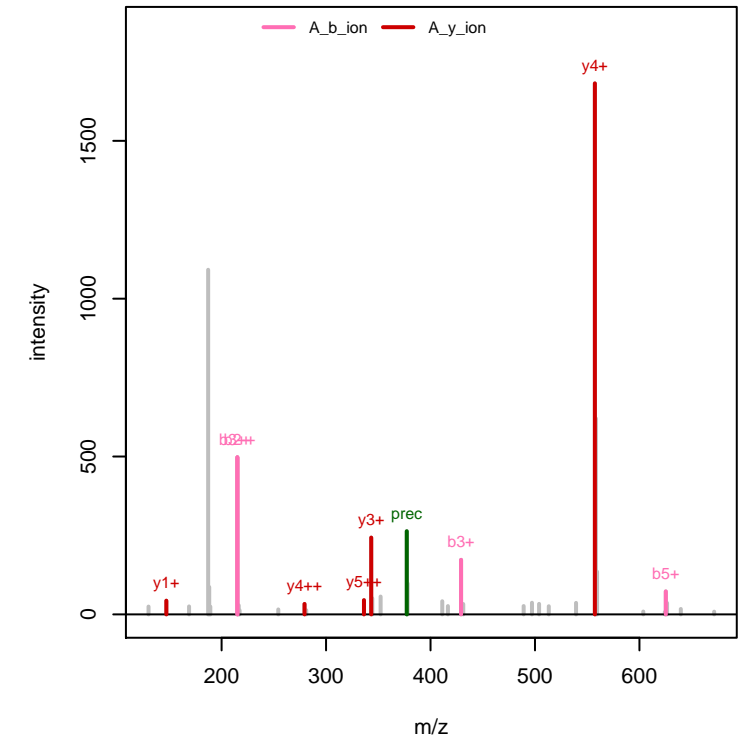

### DFKQNR+XL\_S

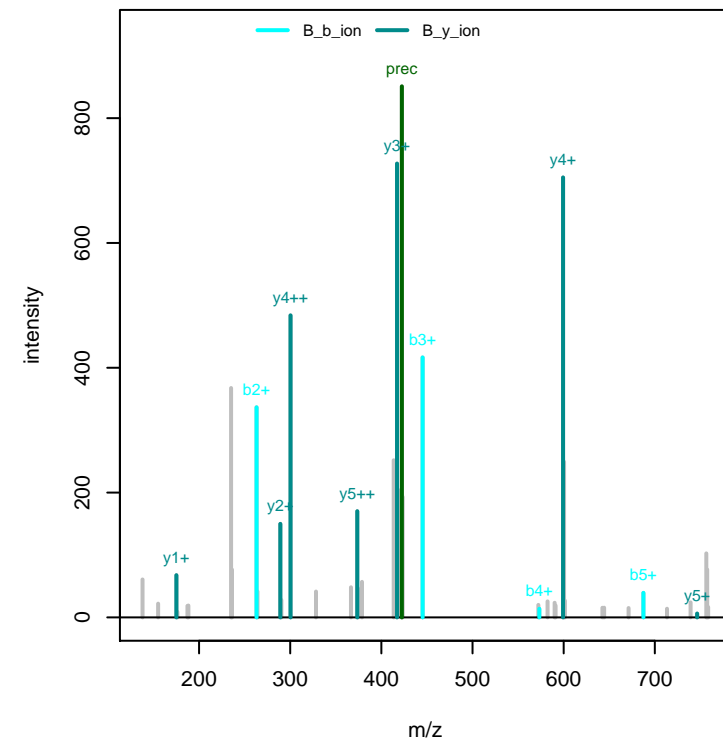

### DFKQNR+XL\_L

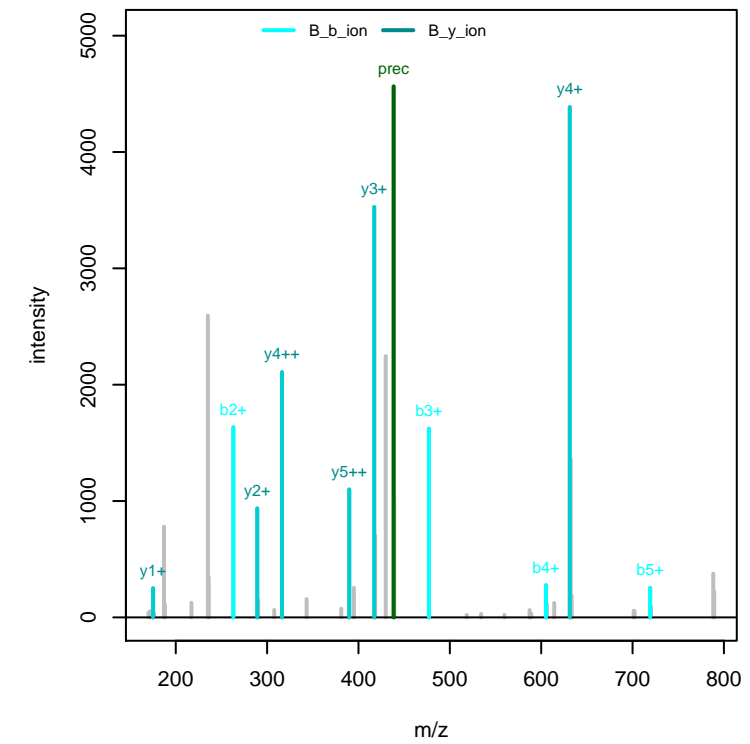

TFKPER  
VTPKGETQLTPEEK

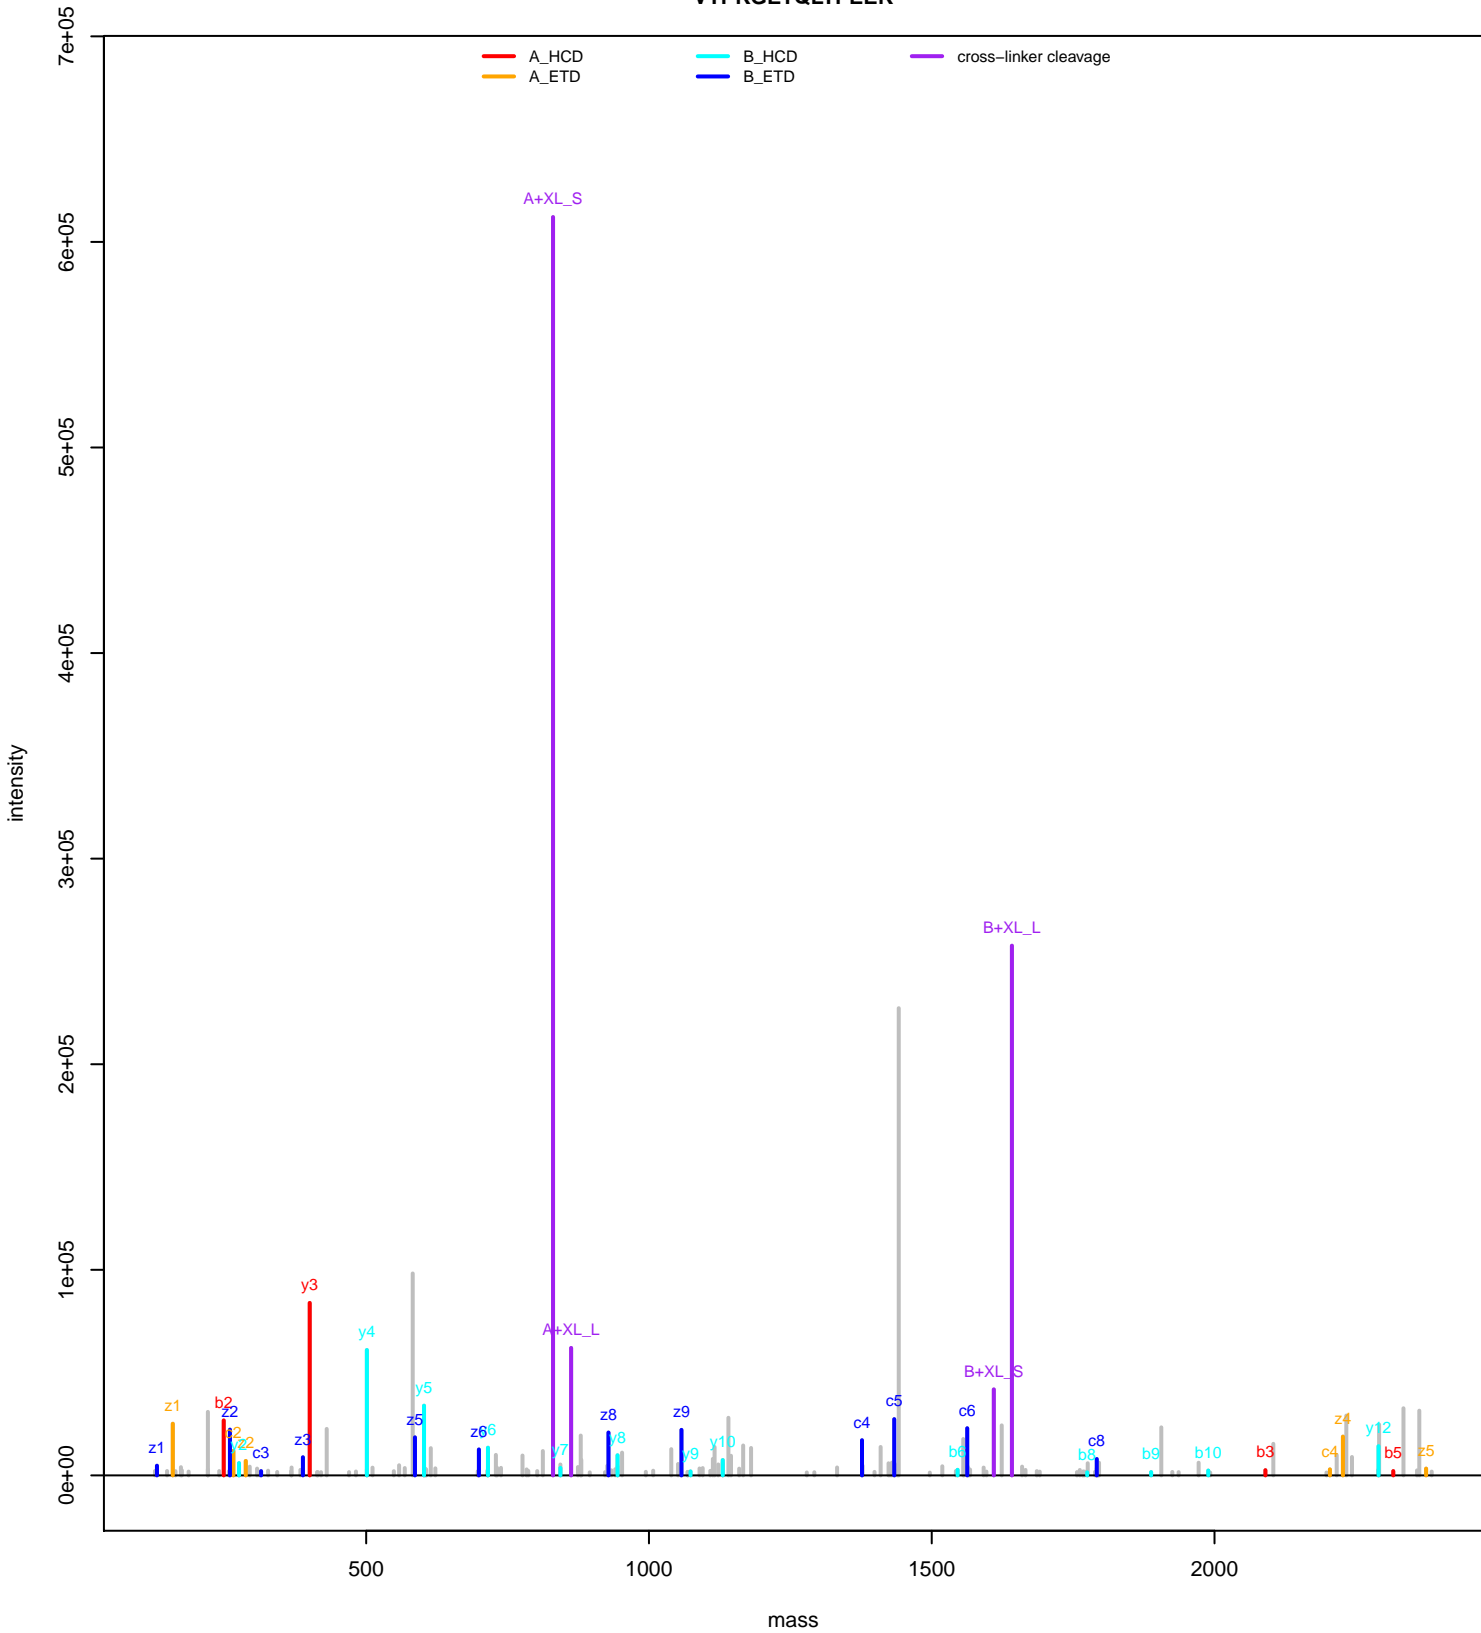

TFKPER+XL\_S

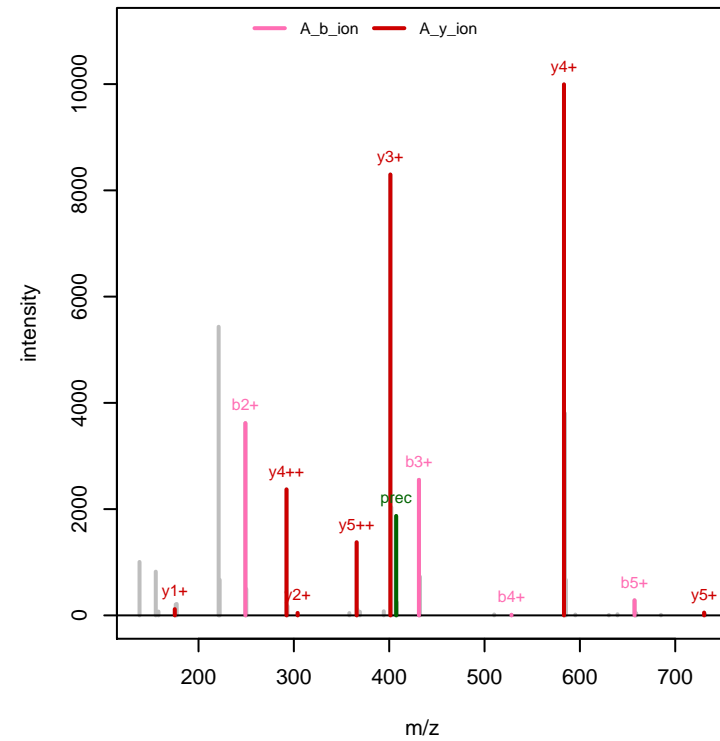

TFKPER+XL\_L

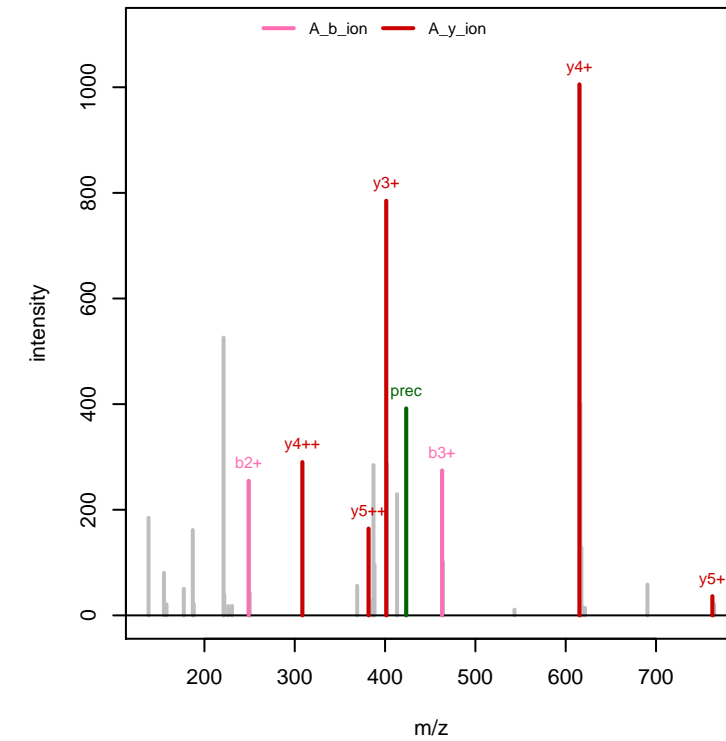

VTPKGETQLTPEEK+XL\_S

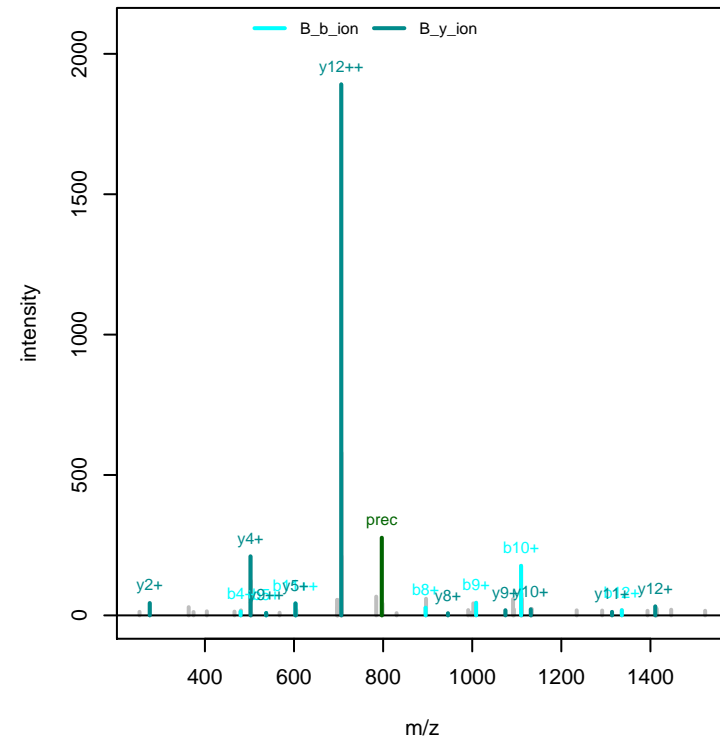

VTPKGETQLTPEEK+XL\_L

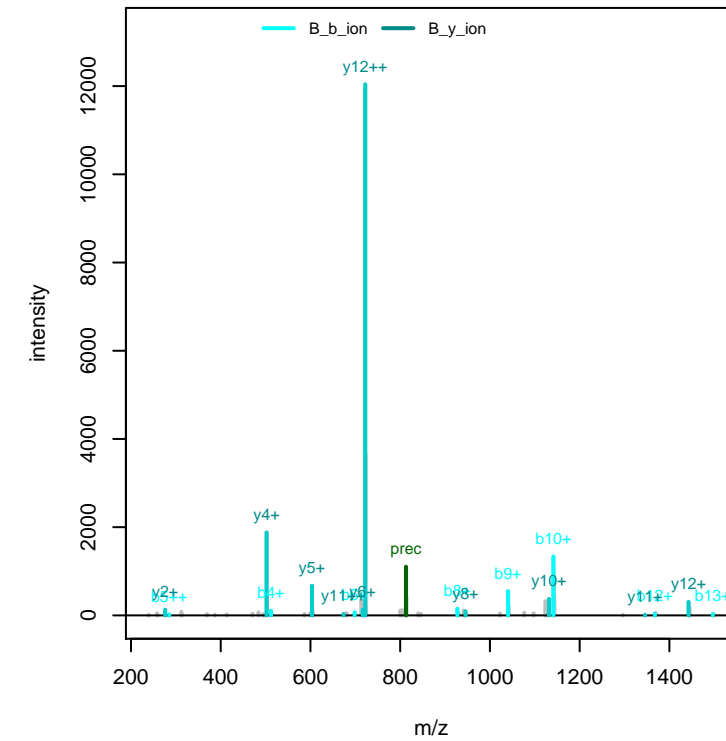

DEVVKK  
AKLHDYYK

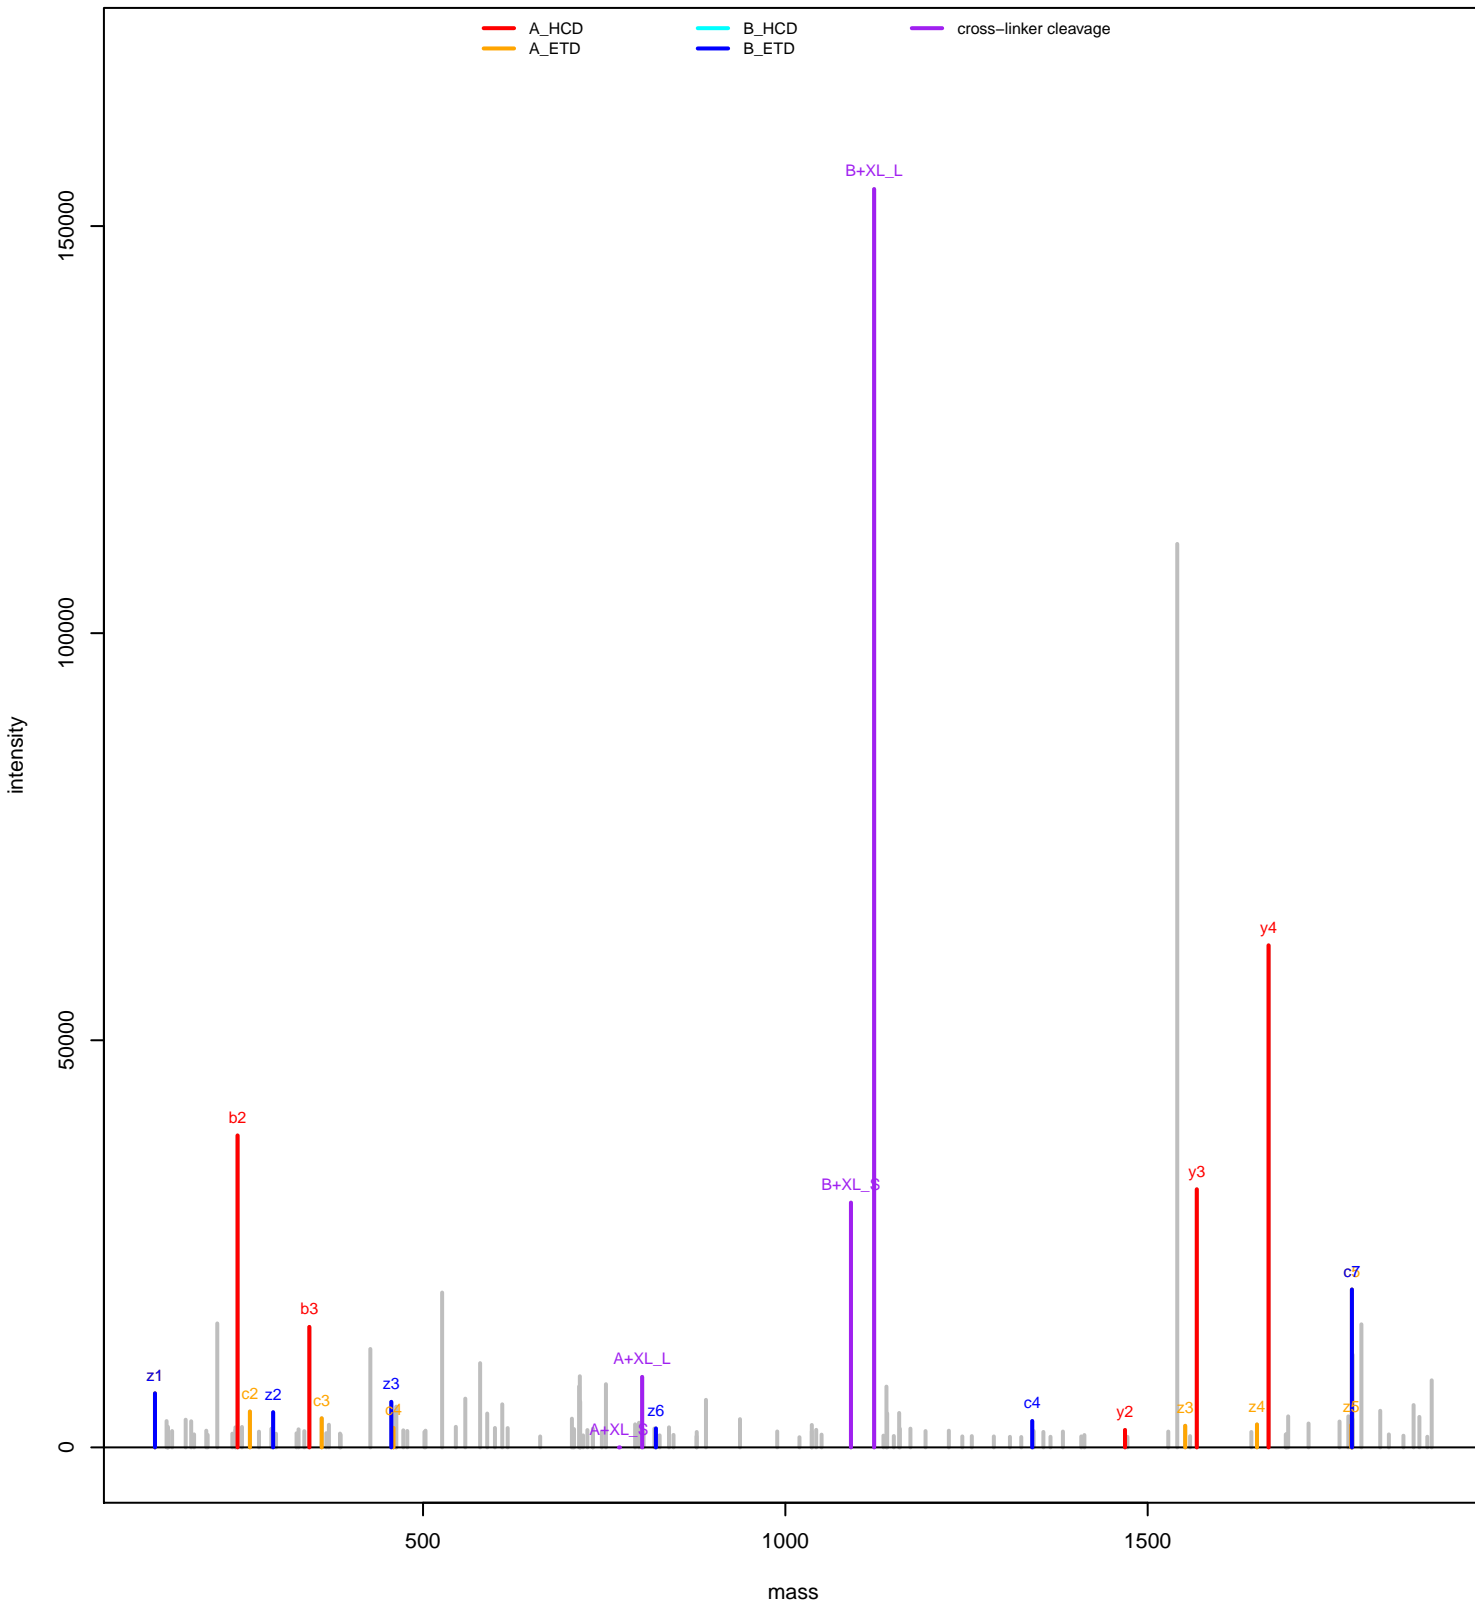

DEVVKK+XL\_S

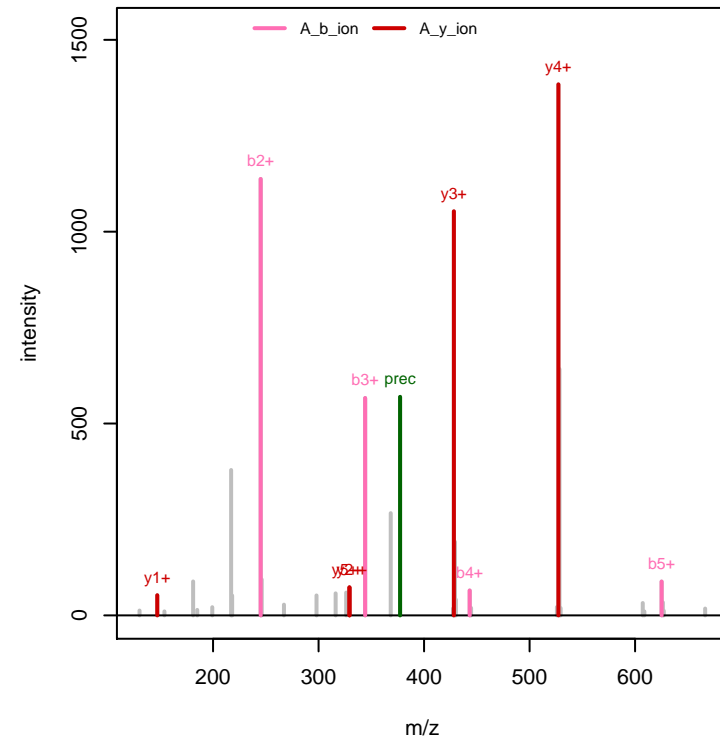

DEVVKK+XL\_L

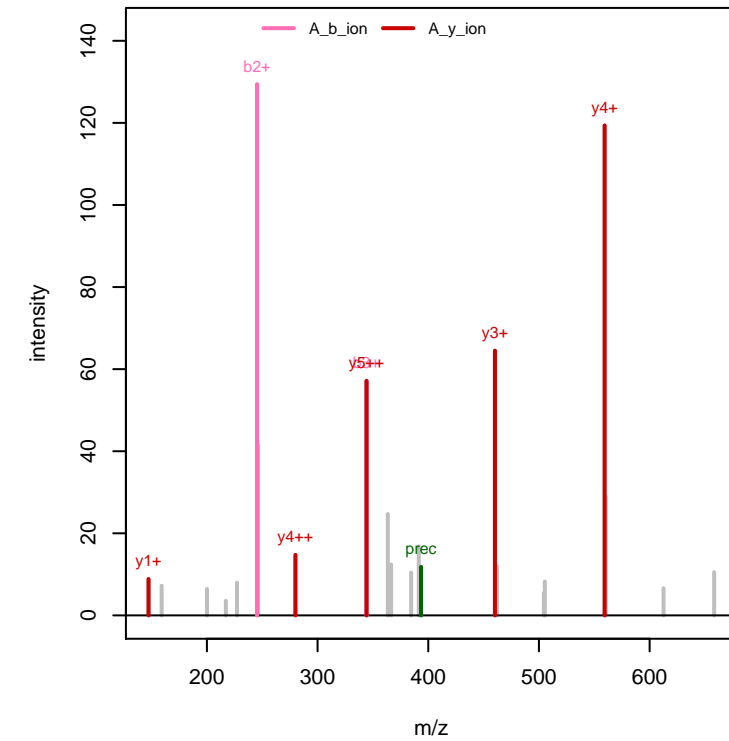

AKLHDYYK+XL\_S

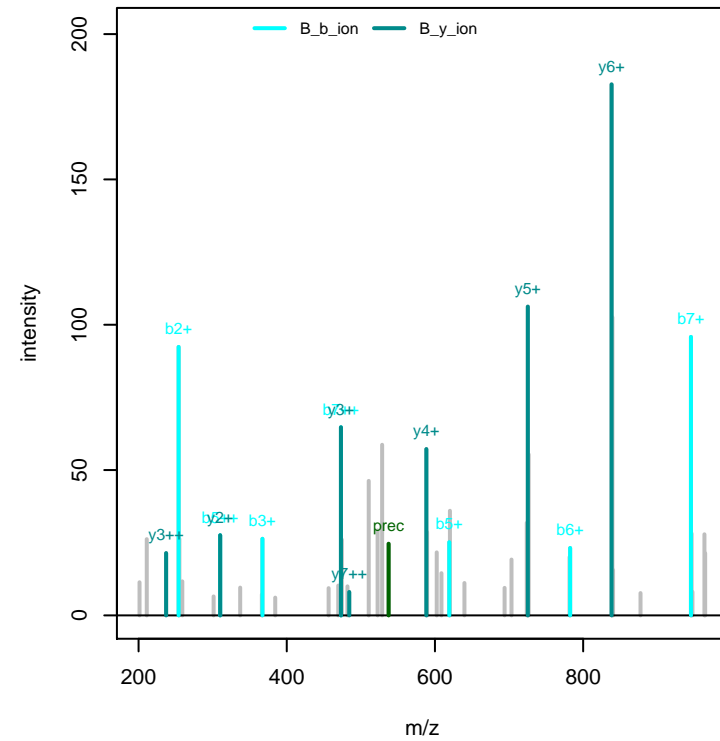

AKLHDYYK+XL\_L

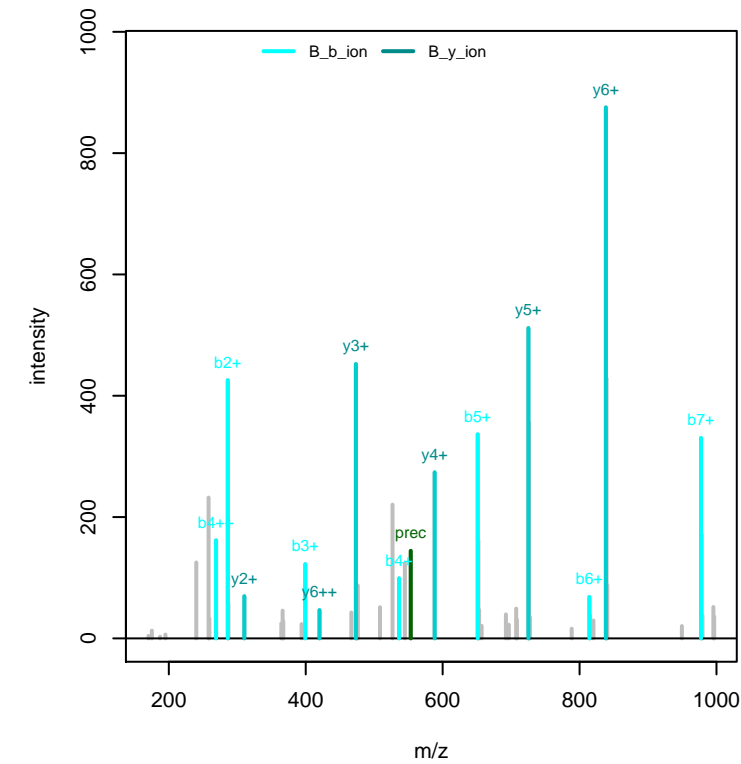



LEKDVMAQR  
AGSDRTKLEK

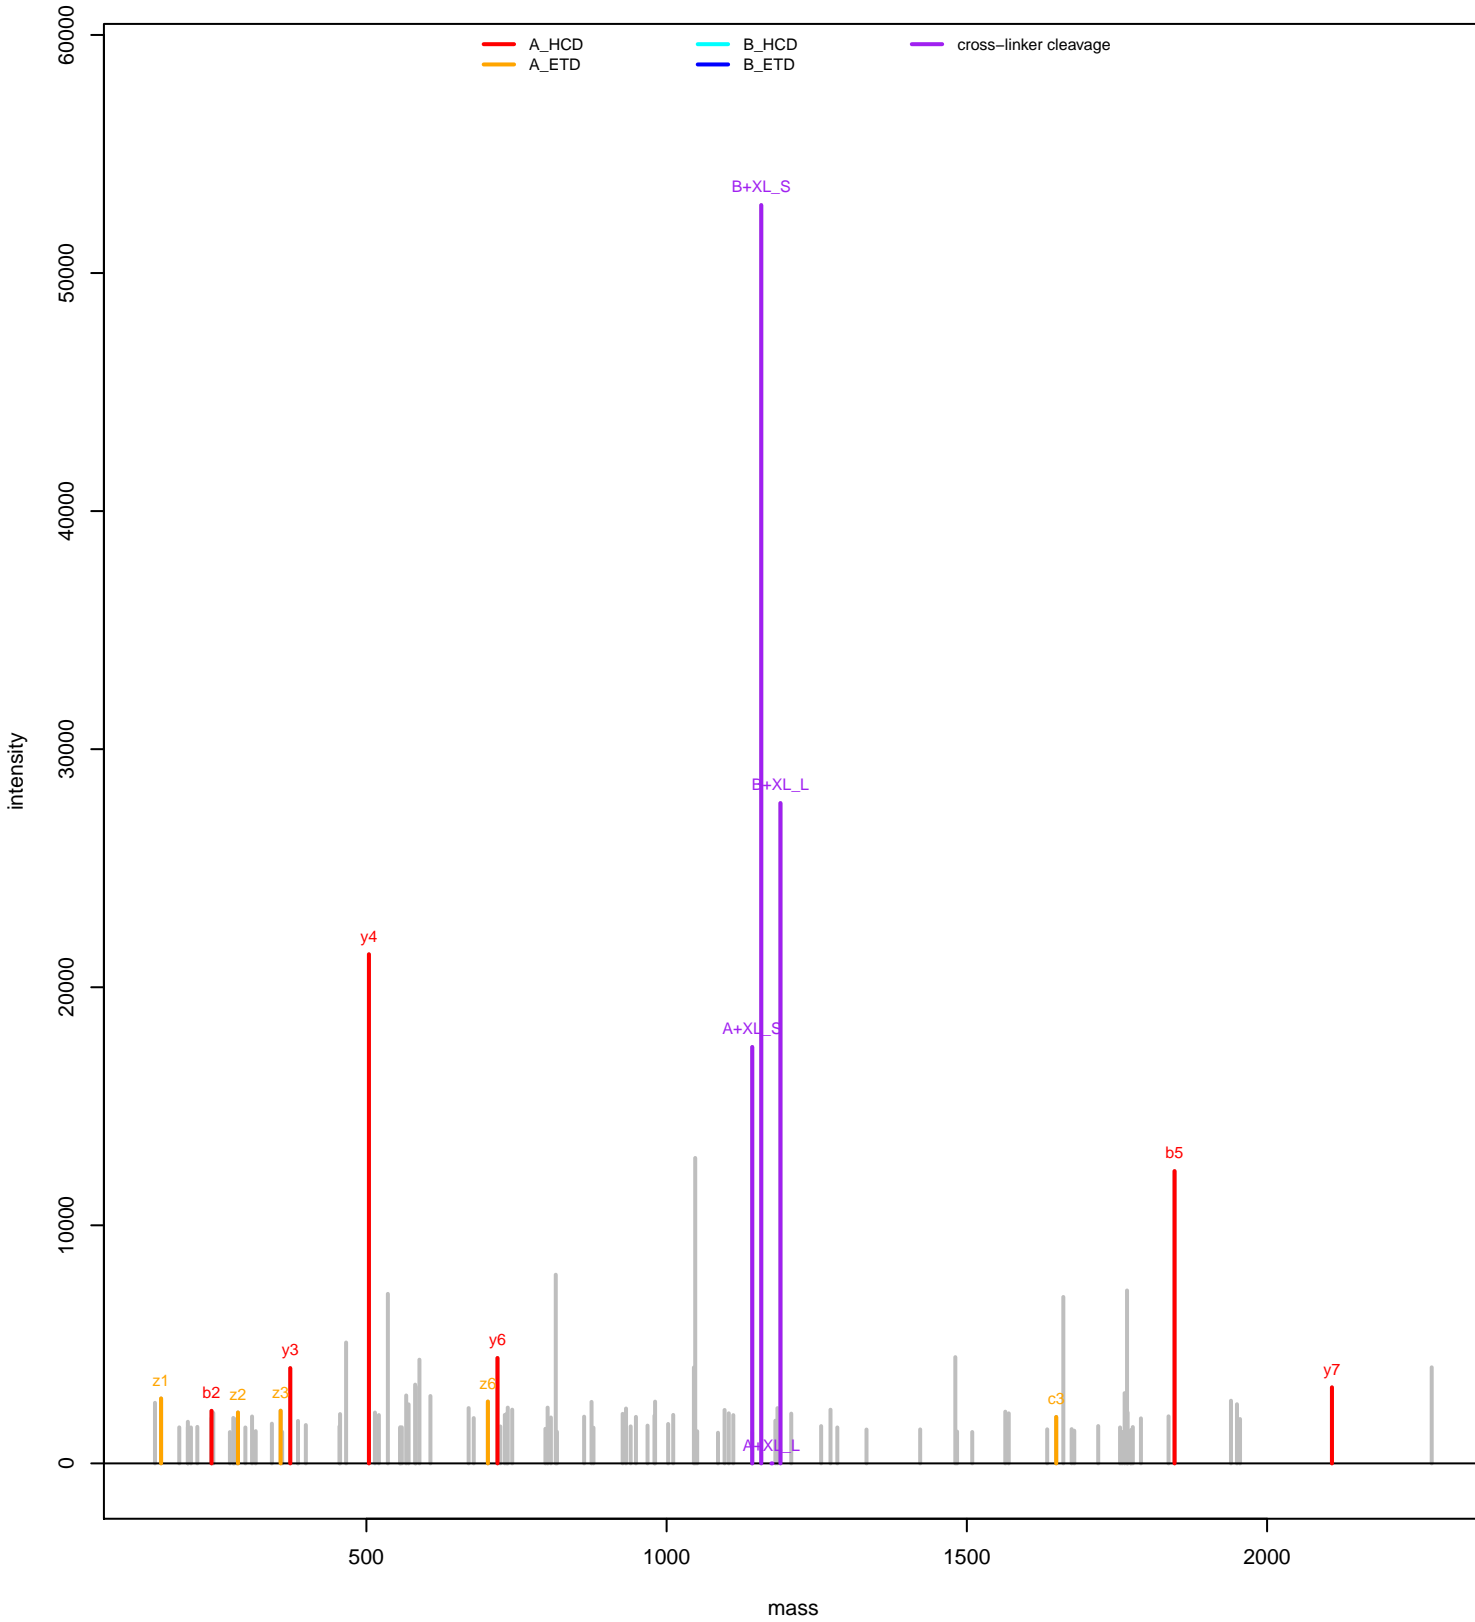

LEKDVMAQR+XL\_S

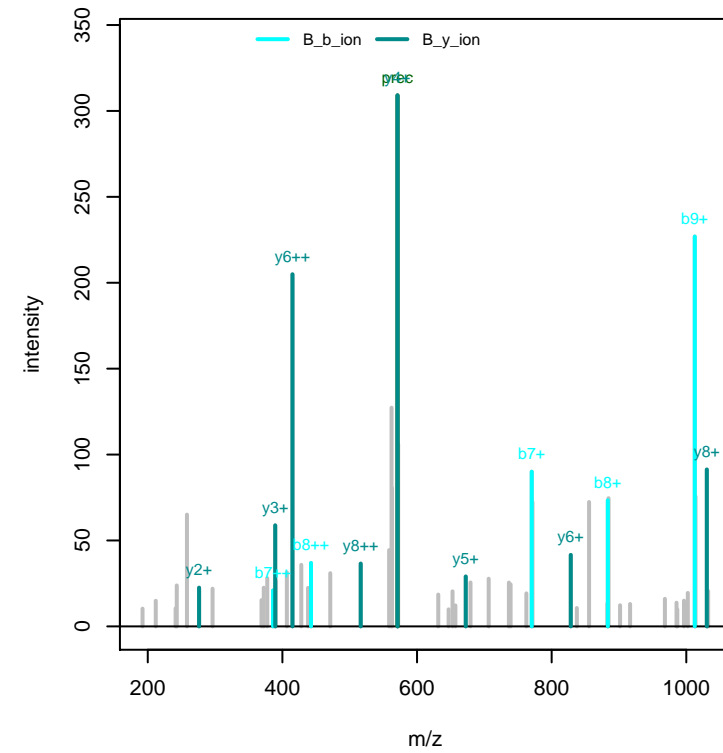

LEKDVMAQR+XL\_L

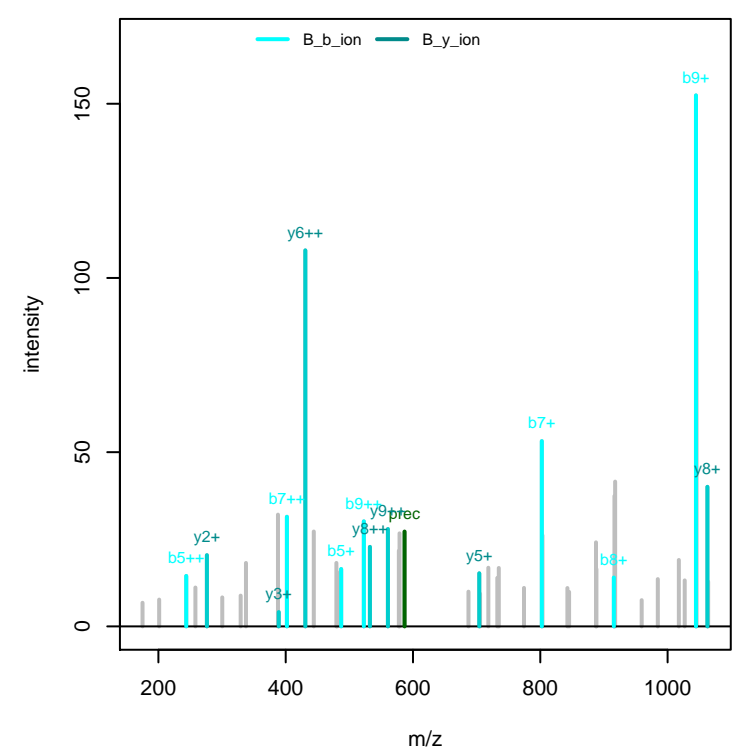

IPEGKTTCSLCSR  
IVEENTYGIVKEK

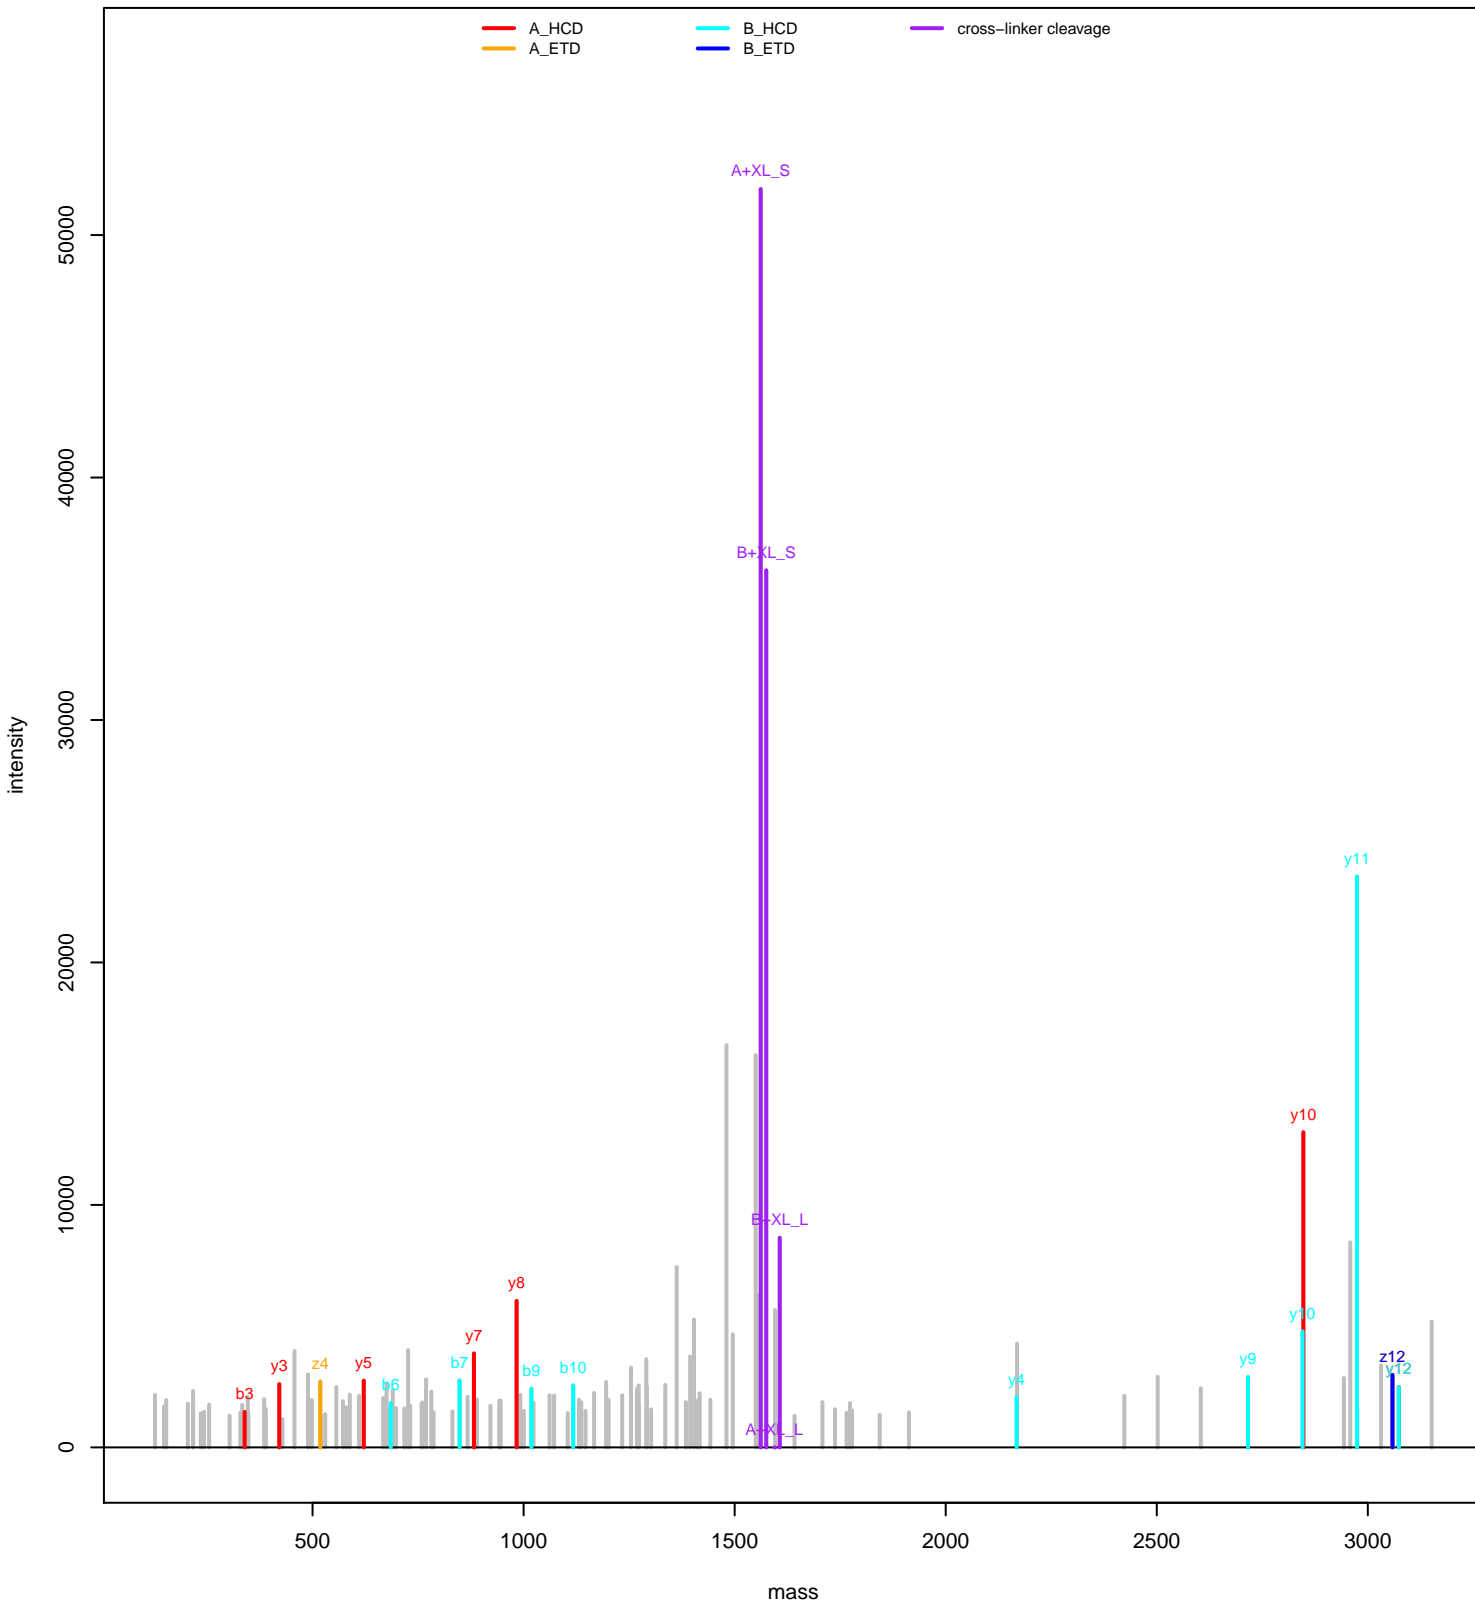

IPEGKTTCSLCSR+XL\_S

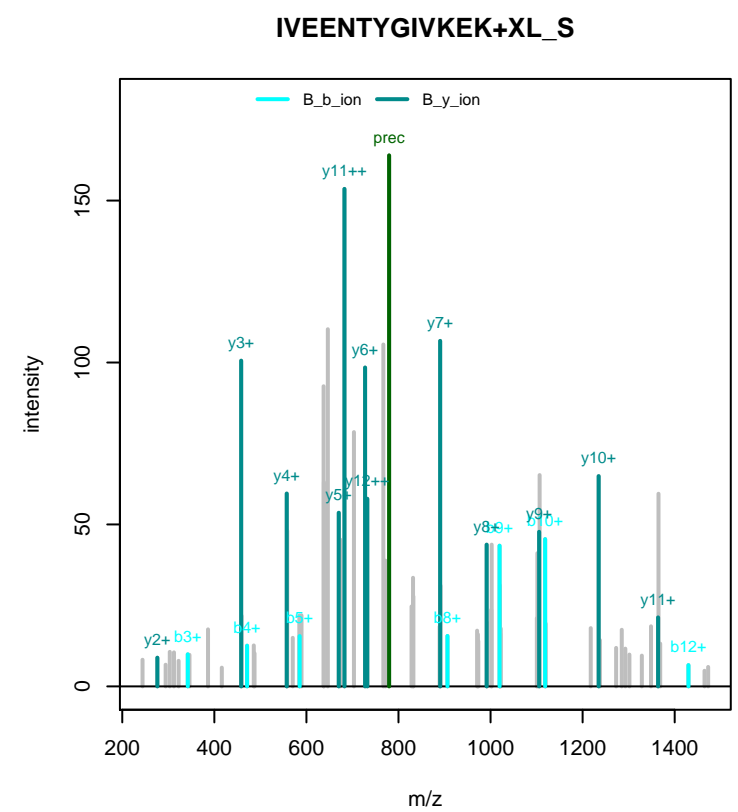

IPEGKTTCSLCSR+XL\_L

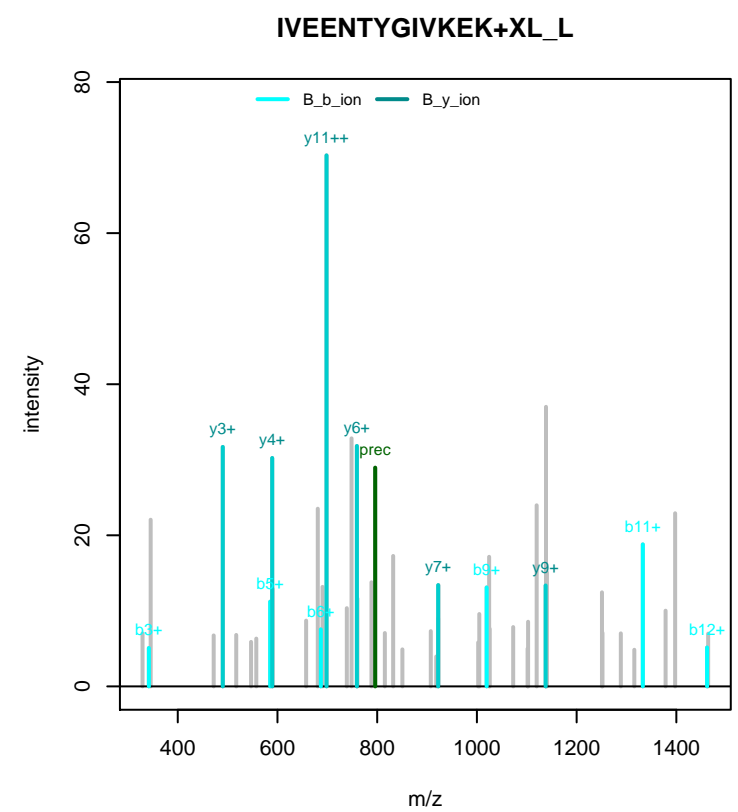

**IGTKVK  
LKSEFVKKN**

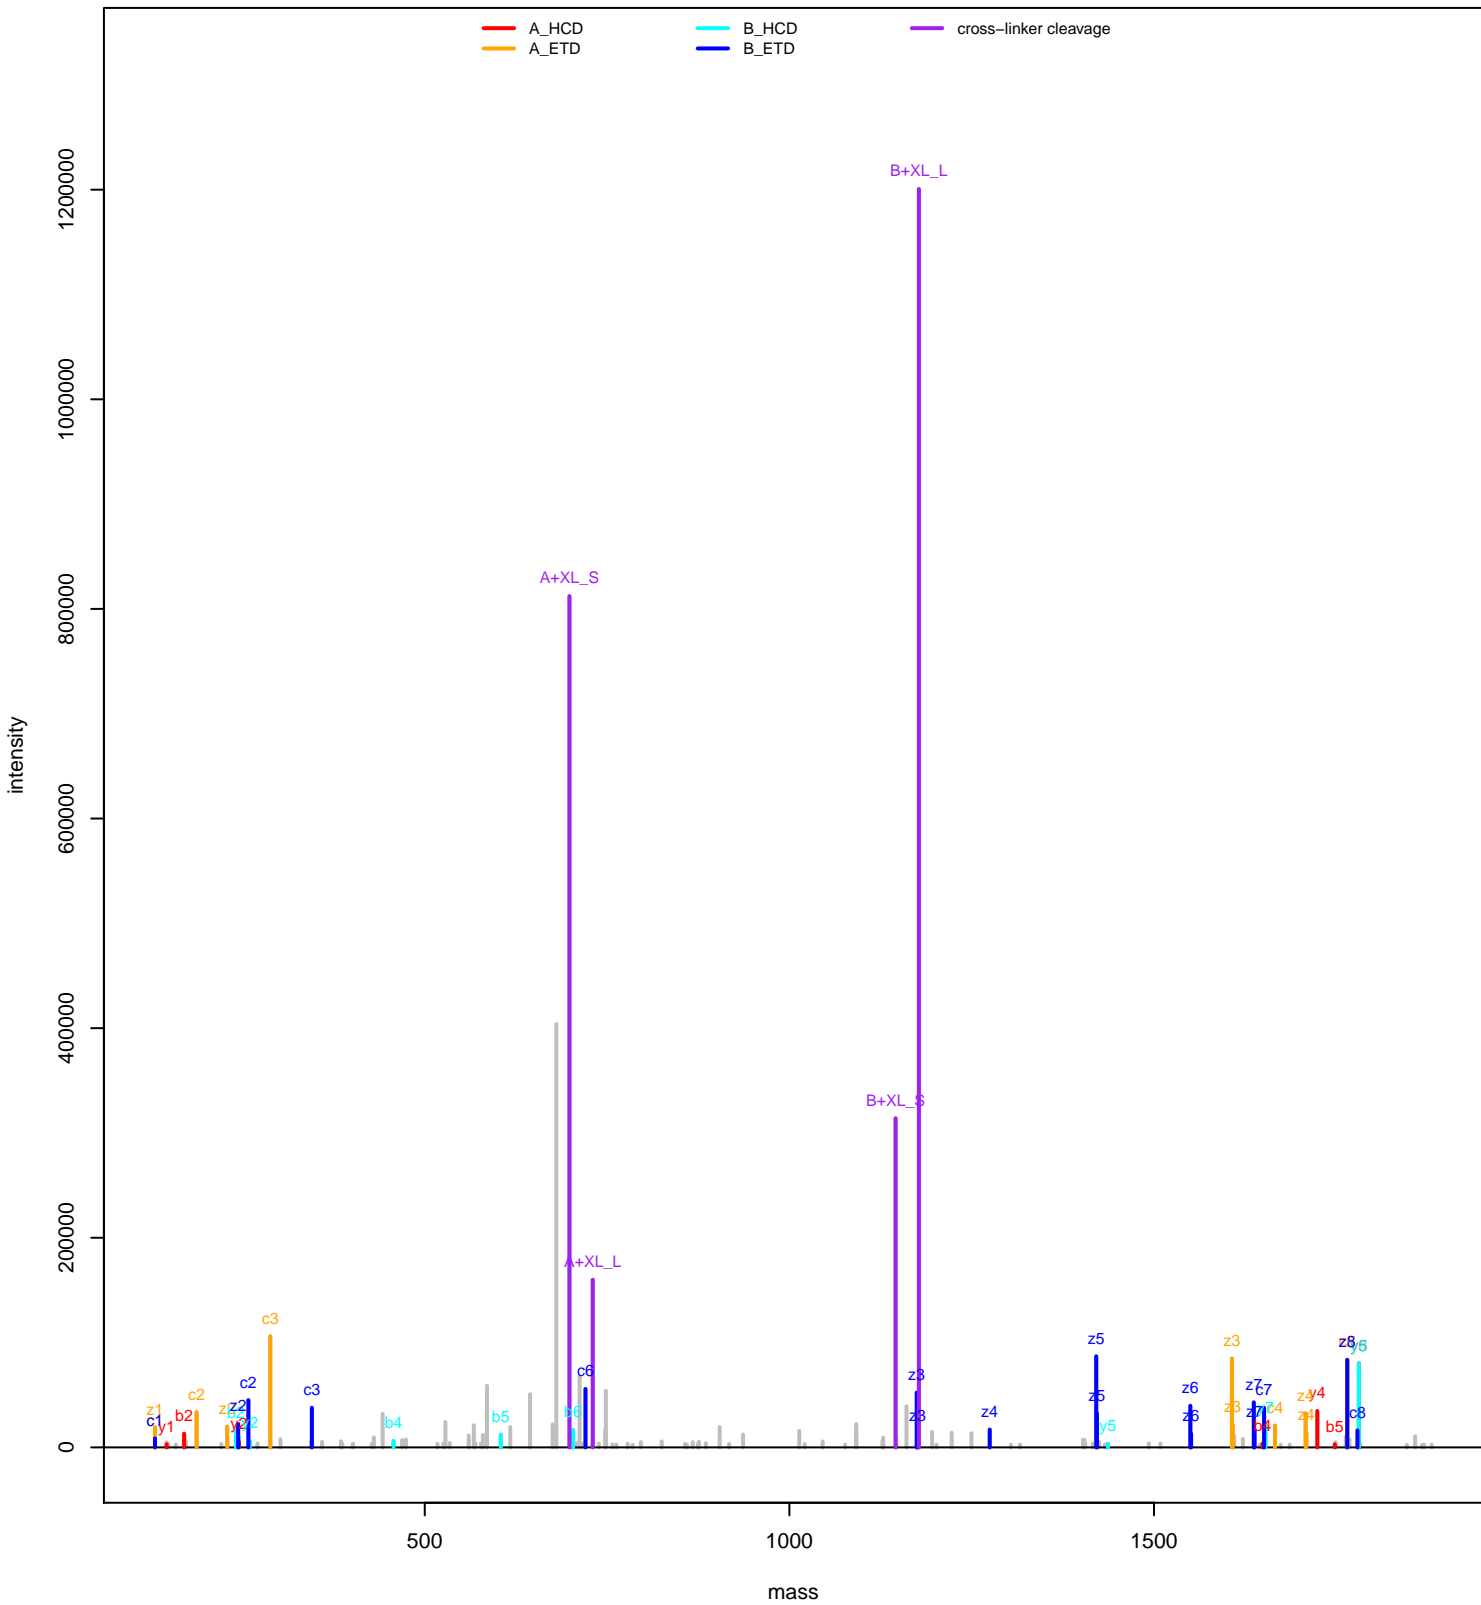

**IGTKVK+XL\_S**

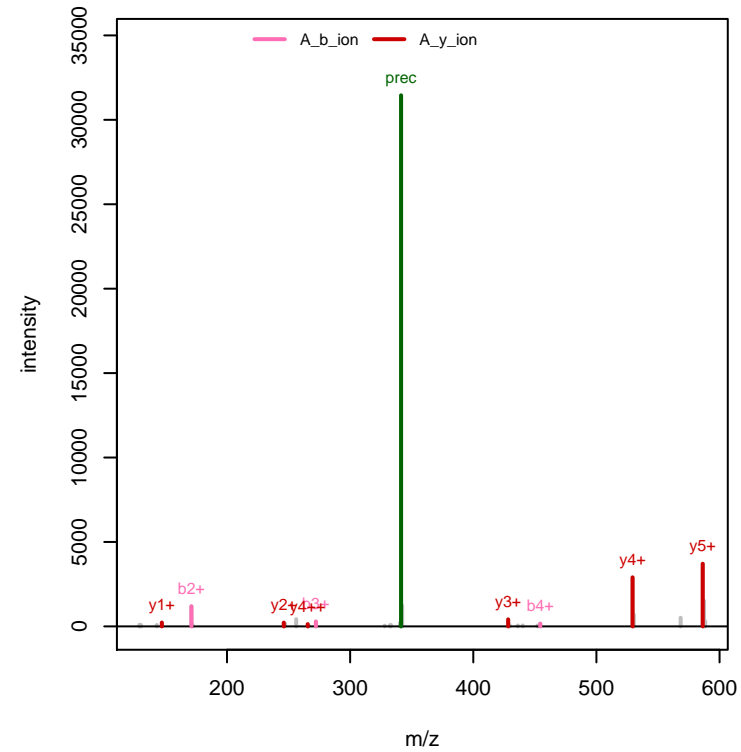

**IGTKVK+XL\_L**

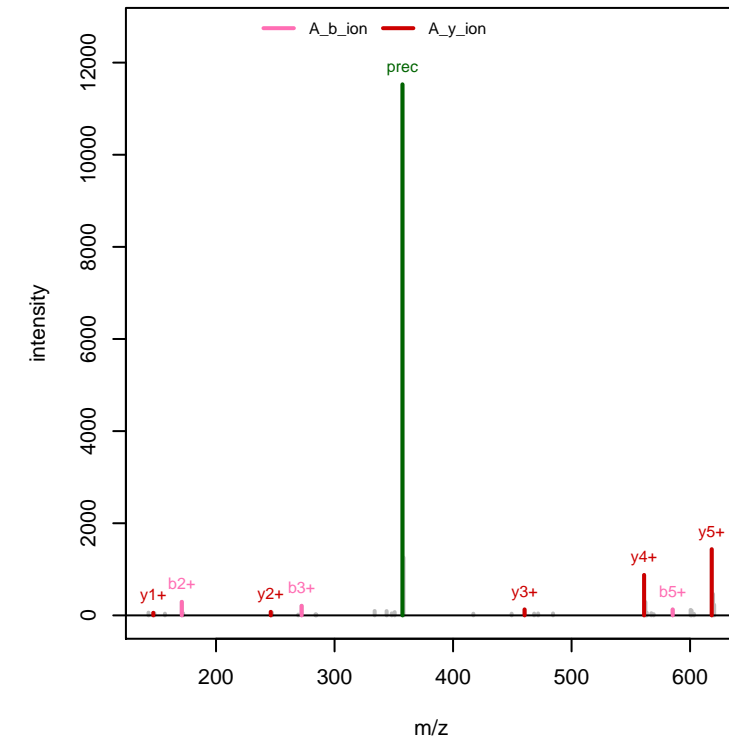

**LKSEFVKKN+XL\_S**

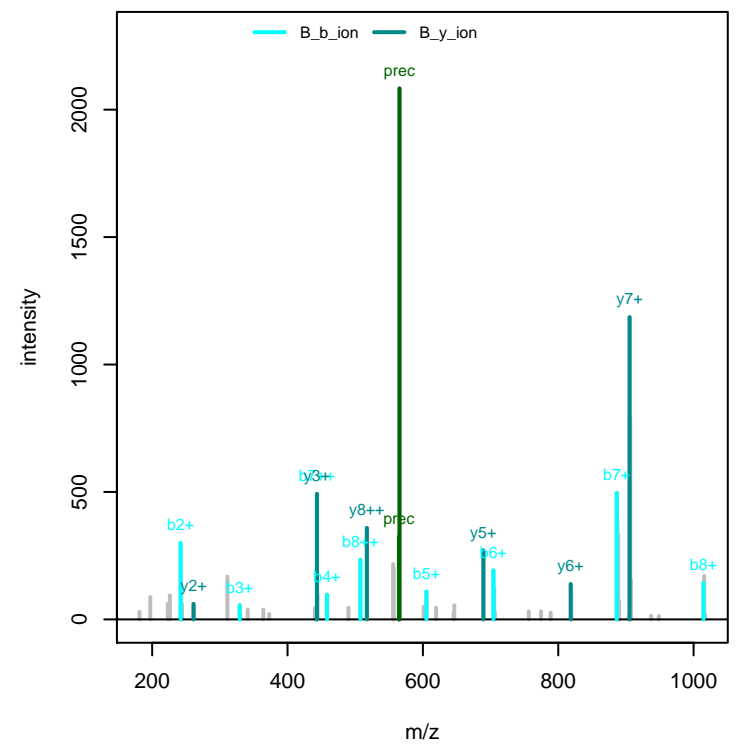

**LKSEFVKKN+XL\_L**

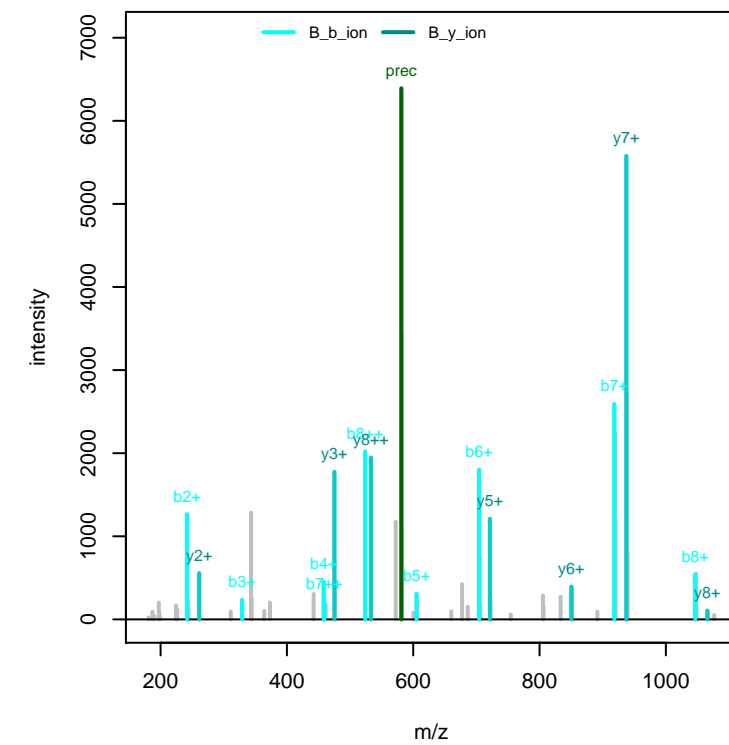

**TKACDLVLK**  
**DGQQLNLDNIGTTPLAEKVK**

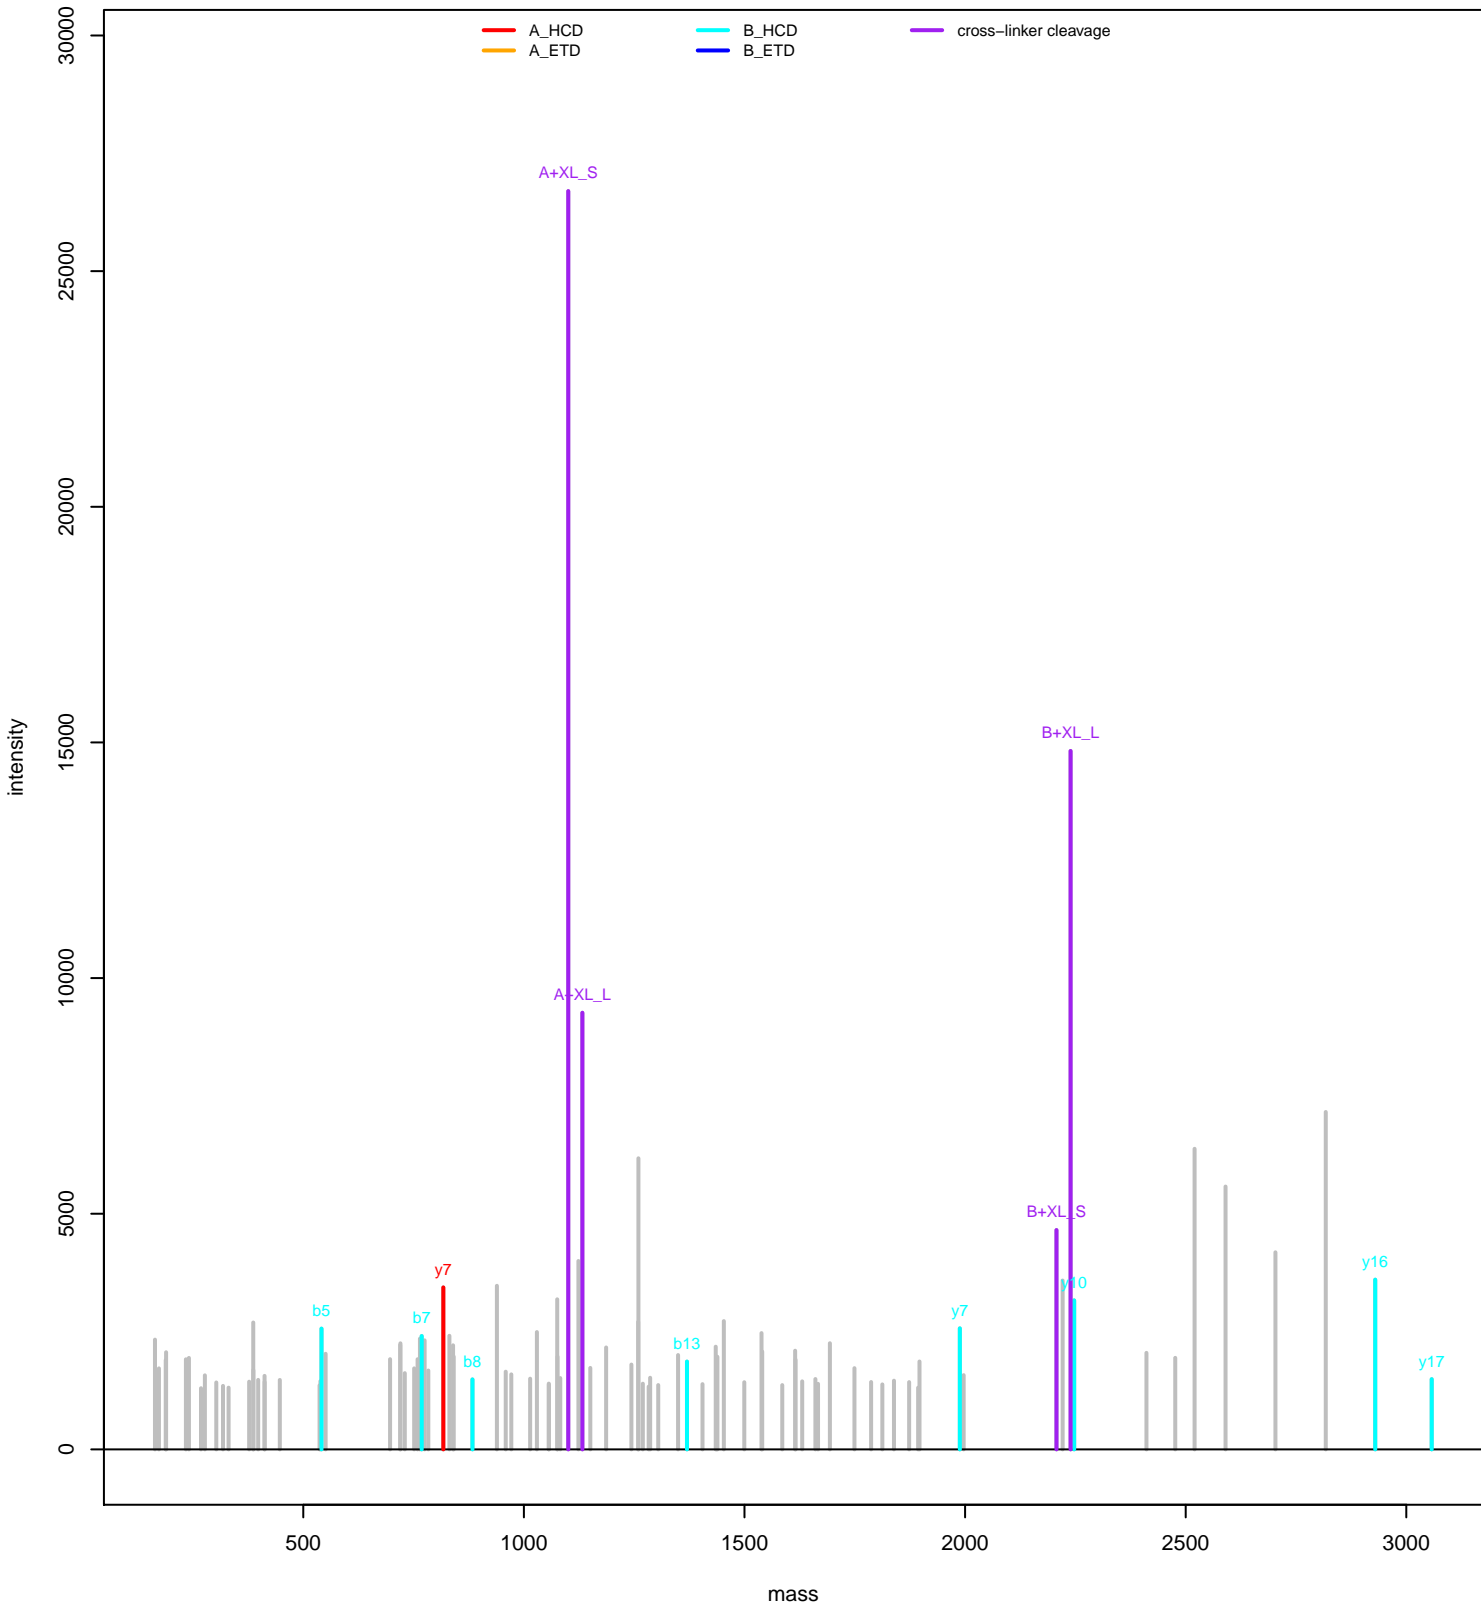

**TKACDLVLK+XL\_S**

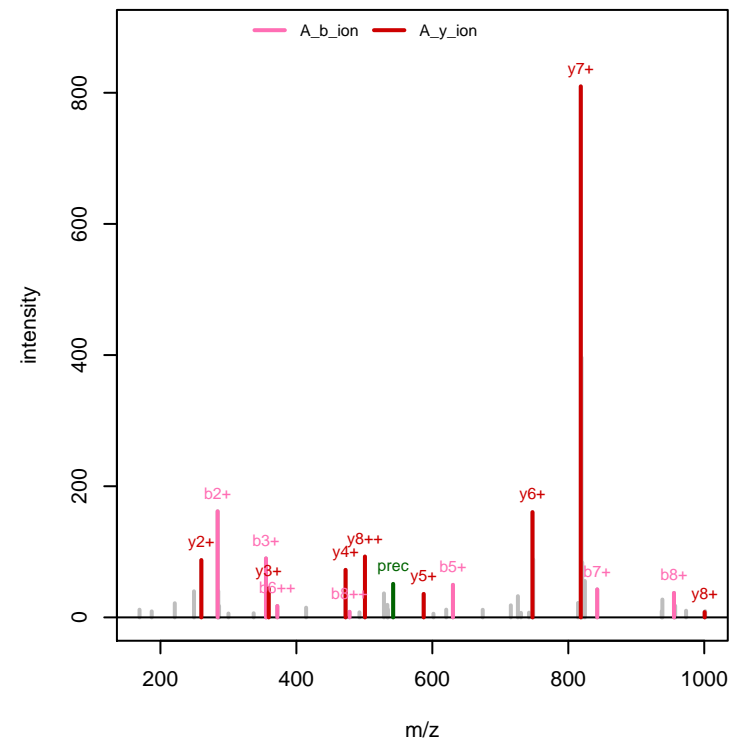

**TKACDLVLK+XL\_L**

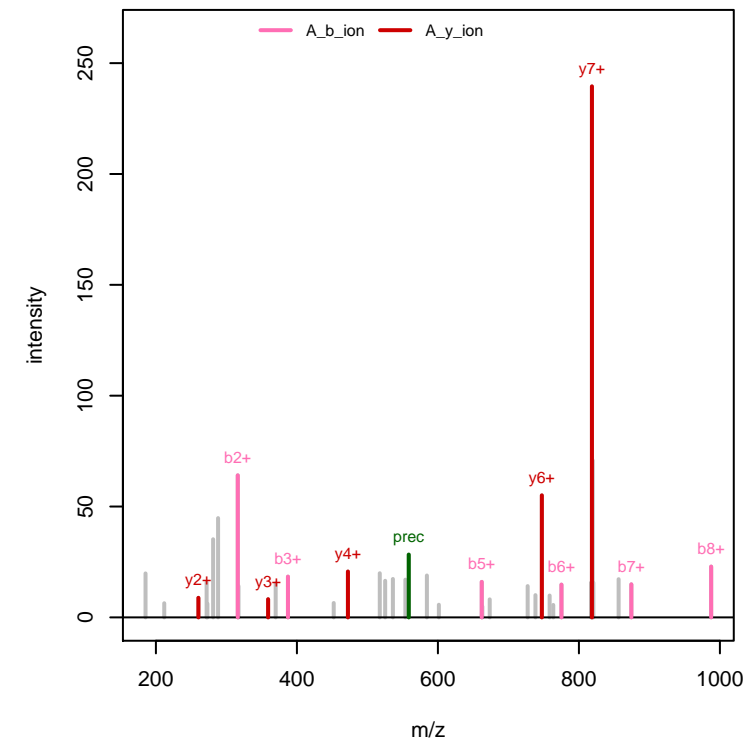

**DGQQLNLDNIGTTPLAEKVK+XL\_S**

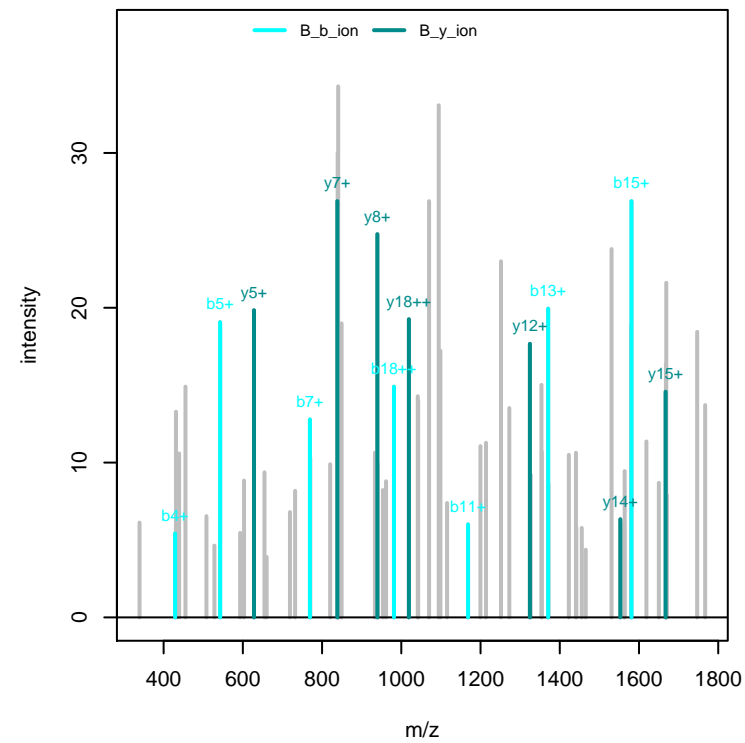

**DGQQLNLDNIGTTPLAEKVK+XL\_L**

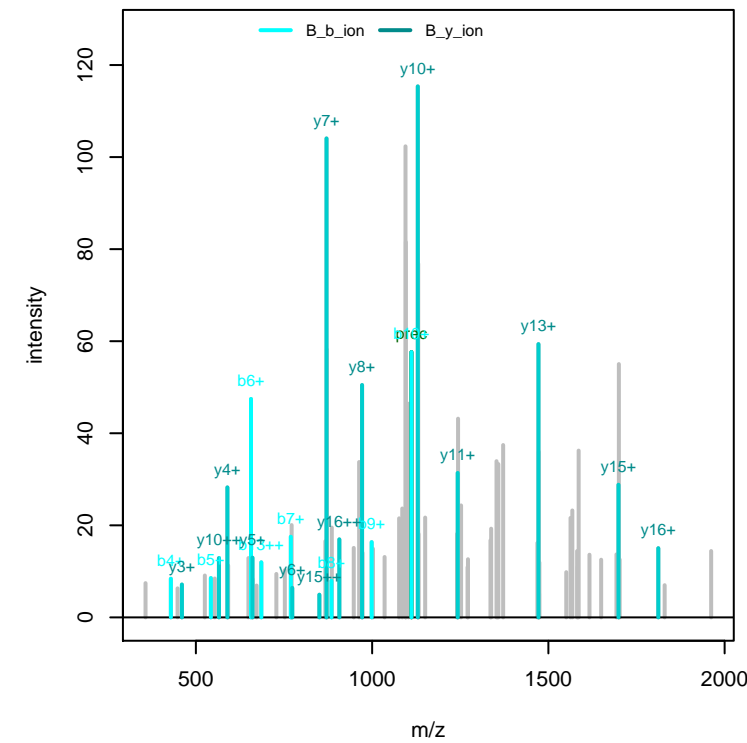

GVETADKVLK  
EADKLGYNLVVLD SQNNPAK

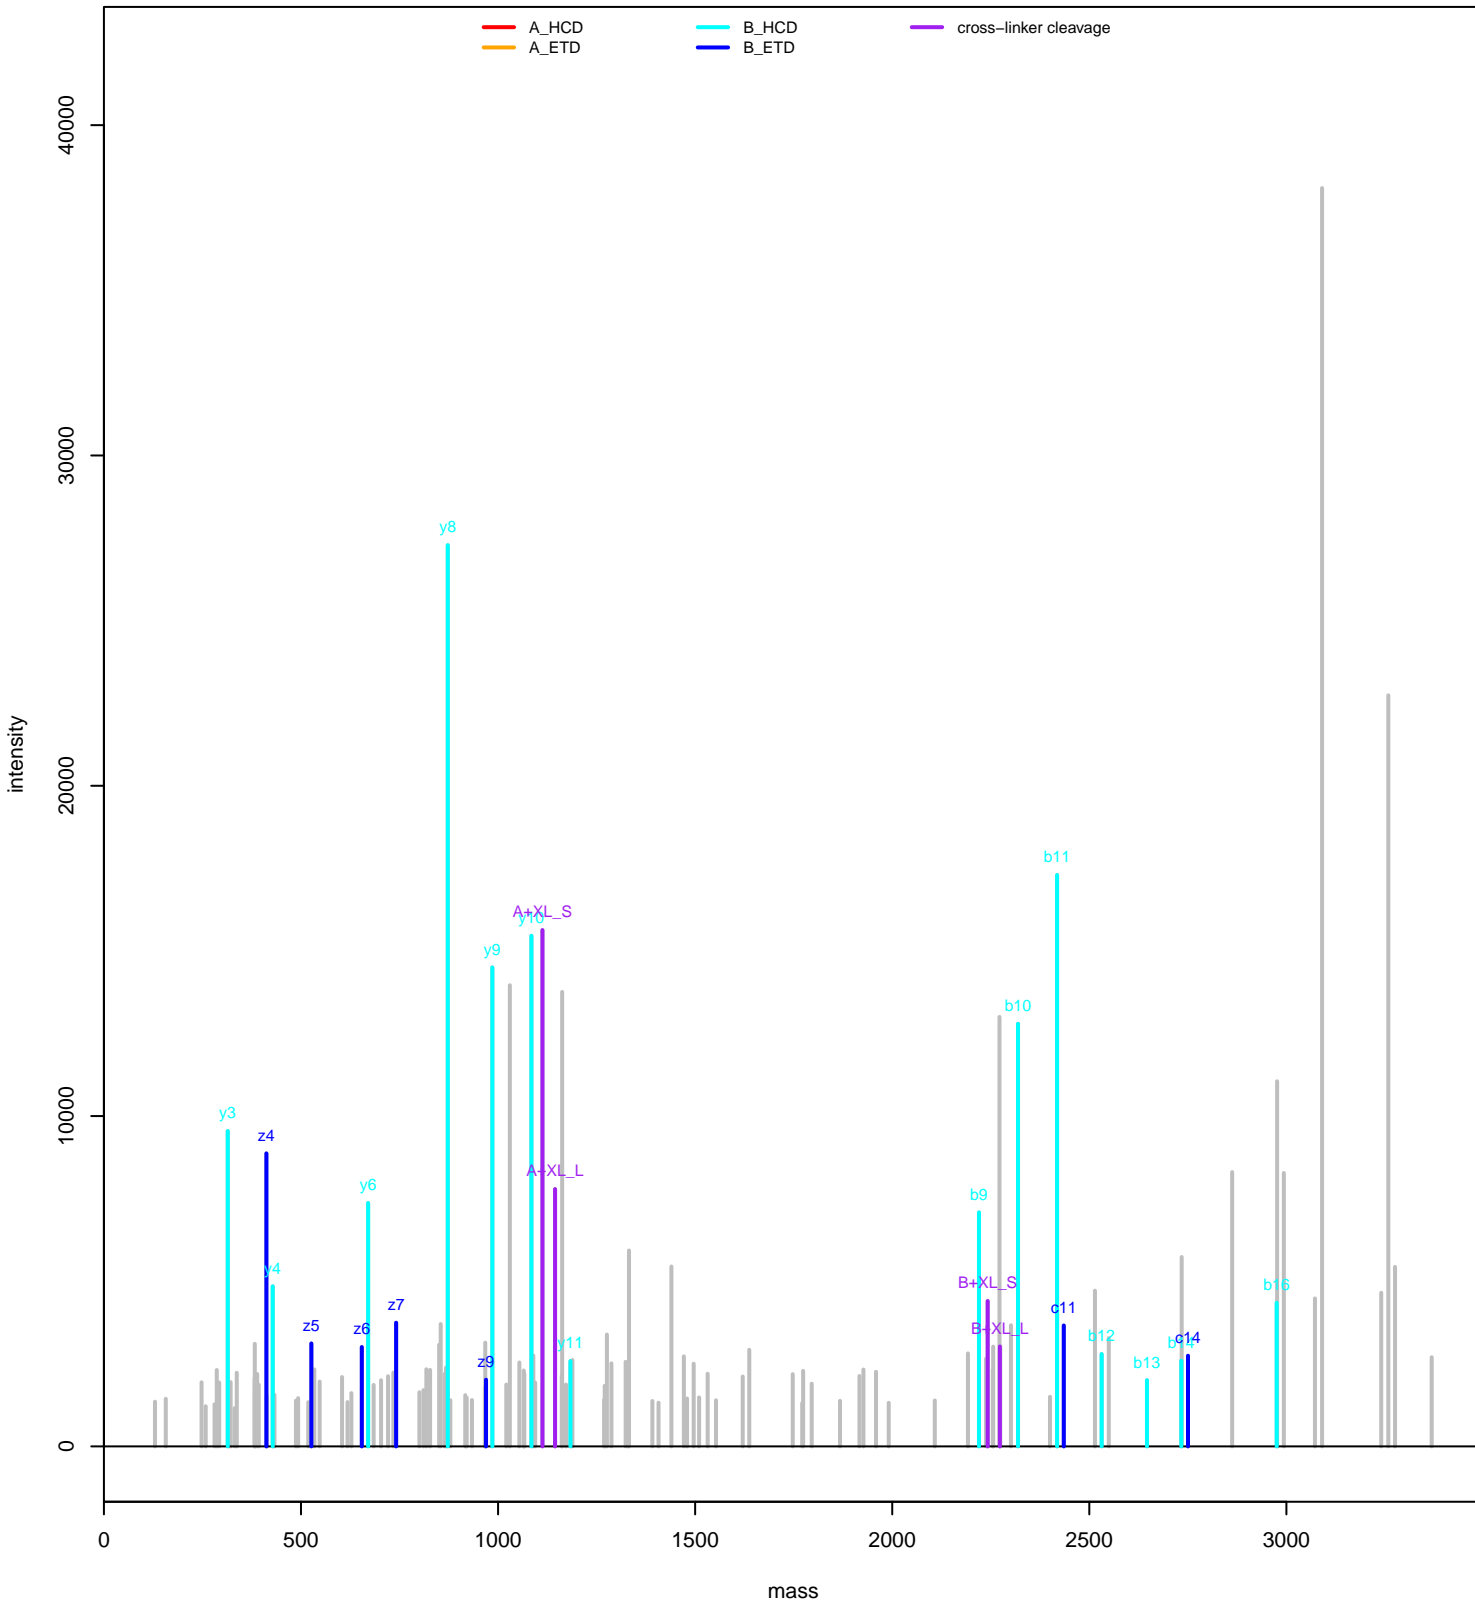

GVETADKVLK+XL\_S

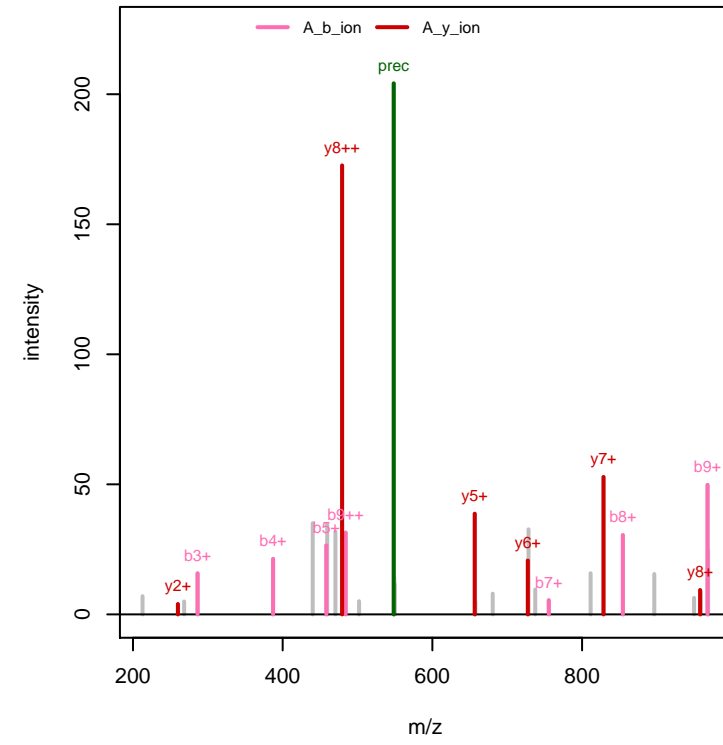

GVETADKVLK+XL\_L

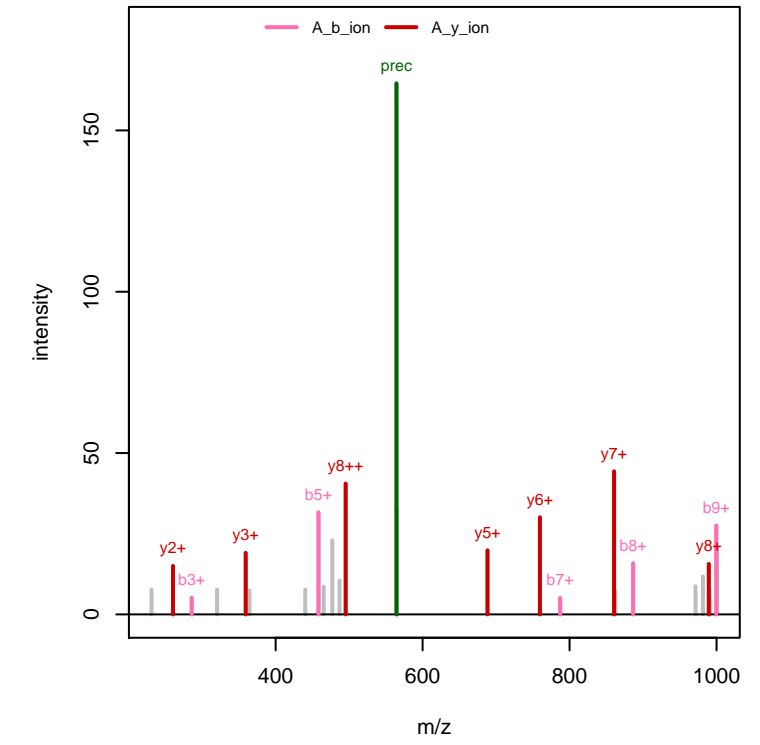

EADKLGYNLVVLD SQNNPAK+XL\_S

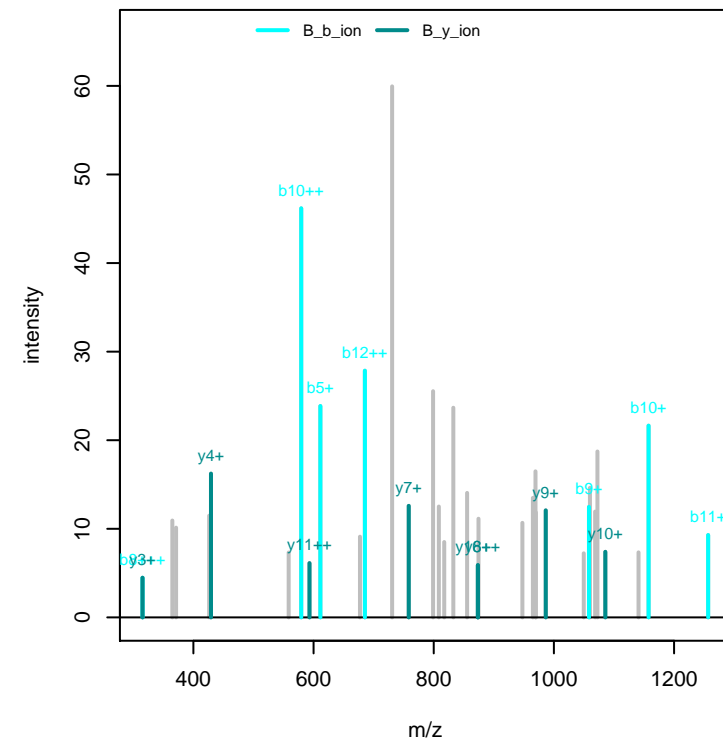

EADKLGYNLVVLD SQNNPAK+XL\_L

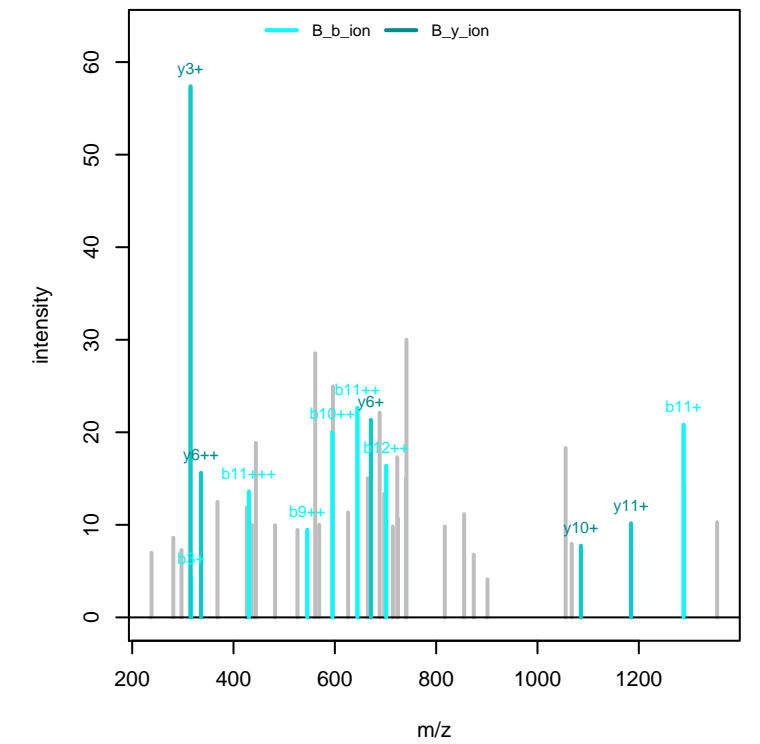

EFAKANAK  
KALEEAGAEVEVK

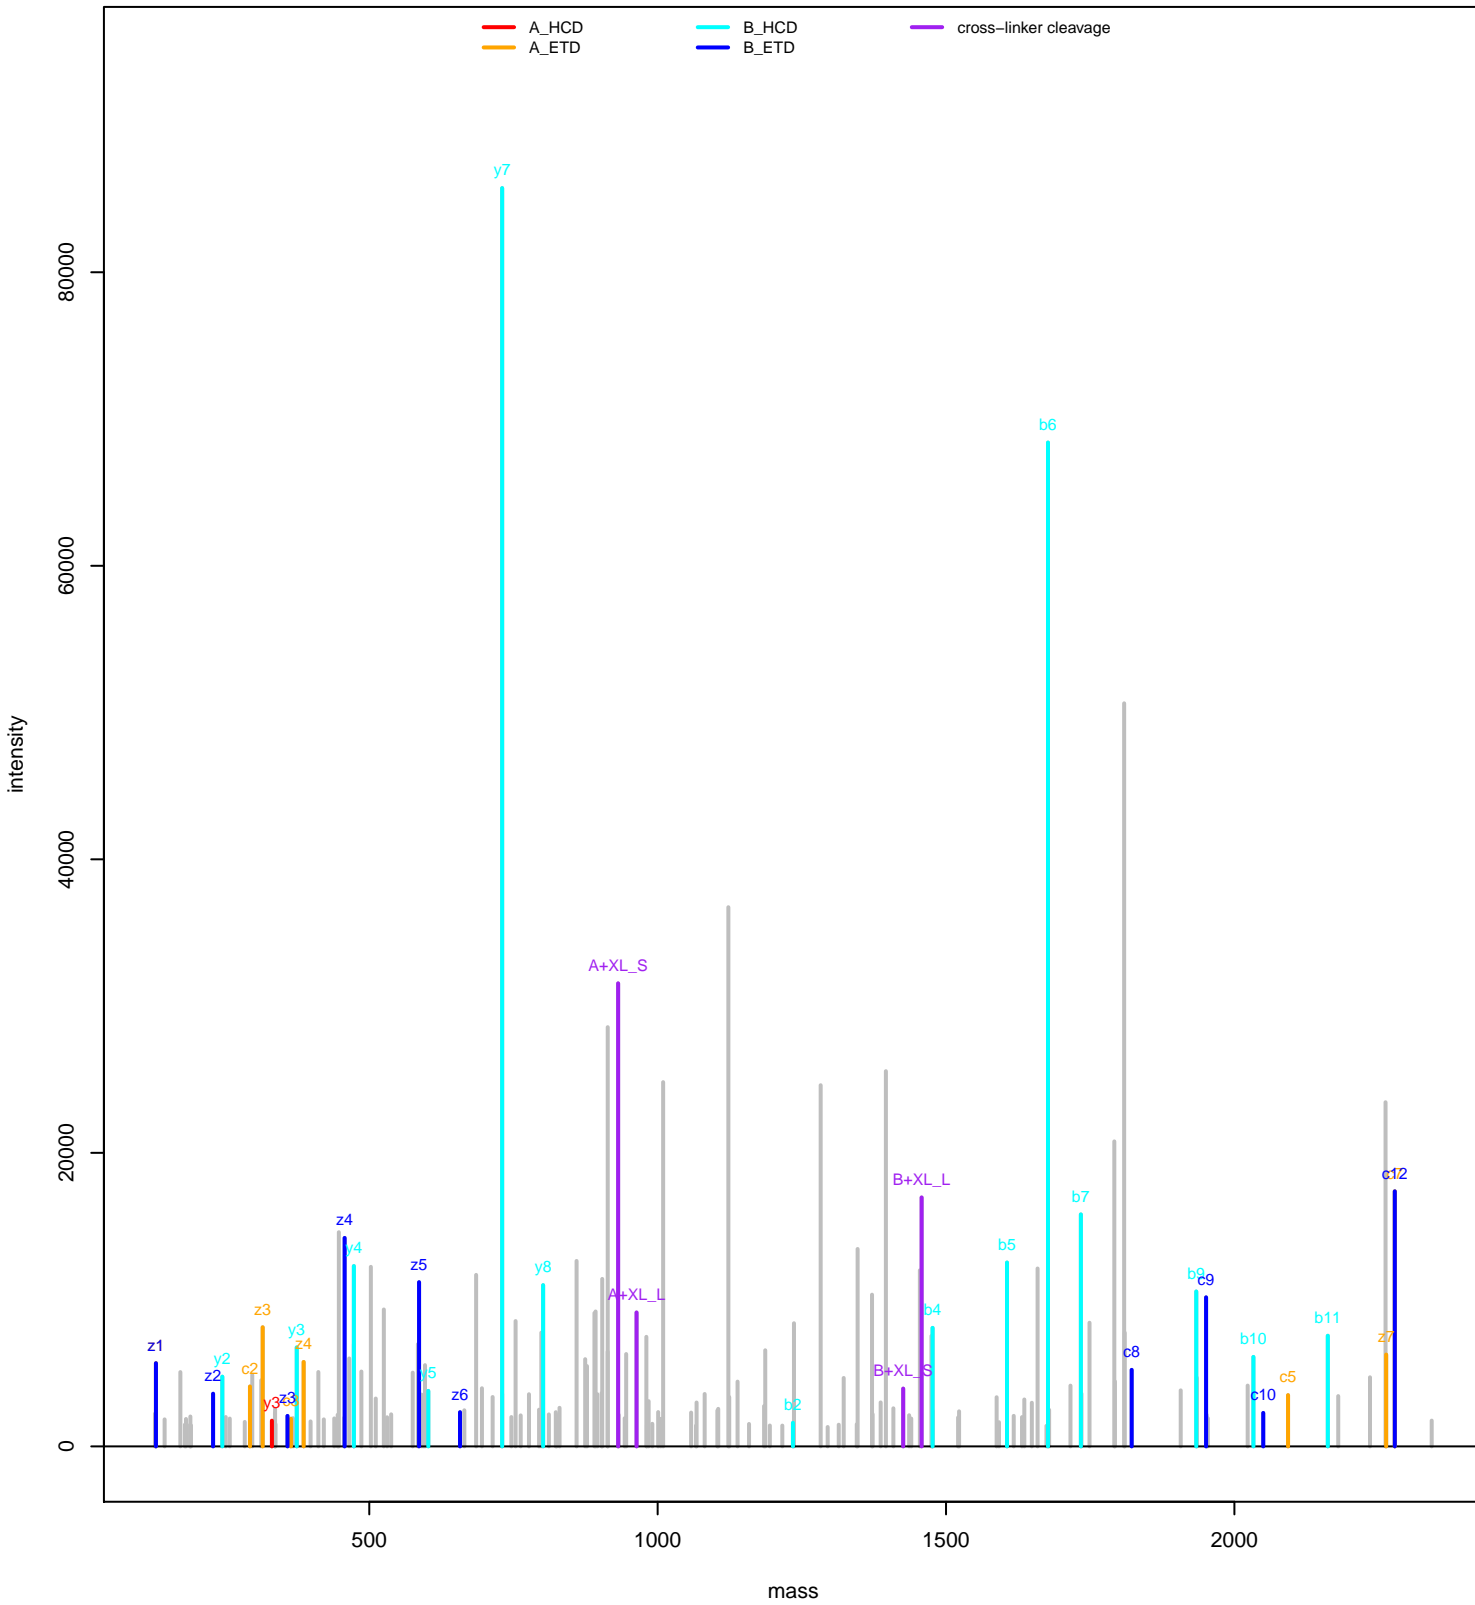

EFAKANAK+XL\_S

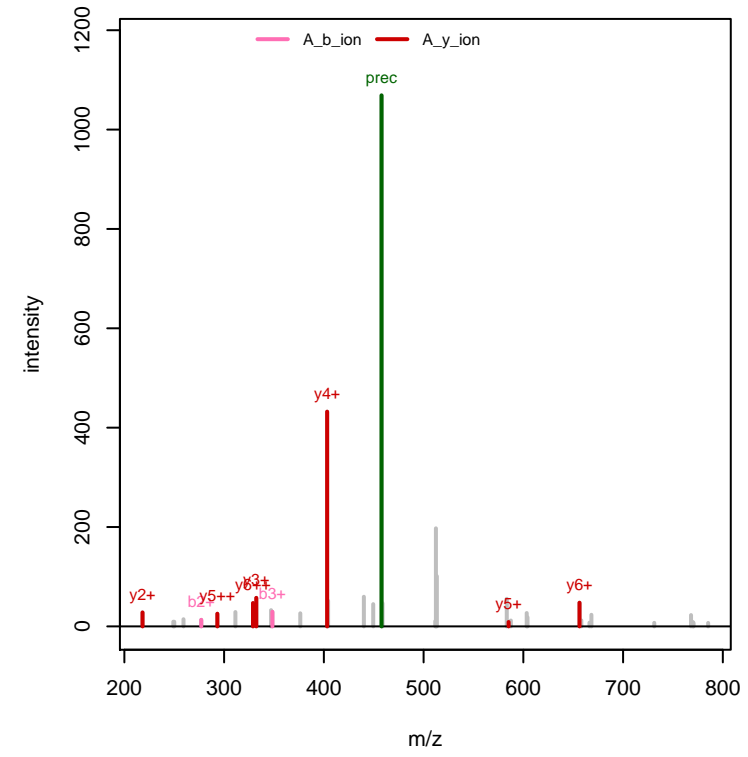

EFAKANAK+XL\_L

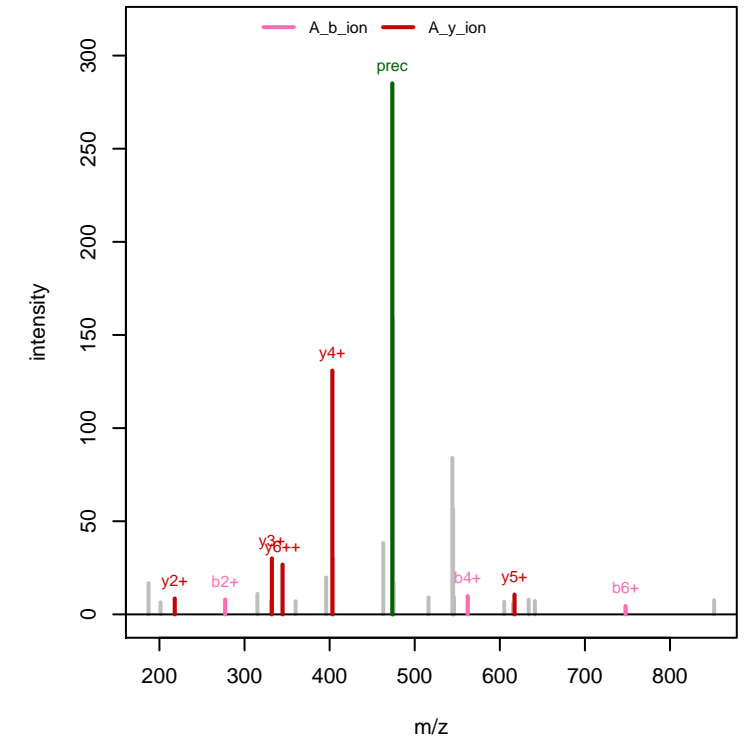

KALEEAGAEVEVK+XL\_S

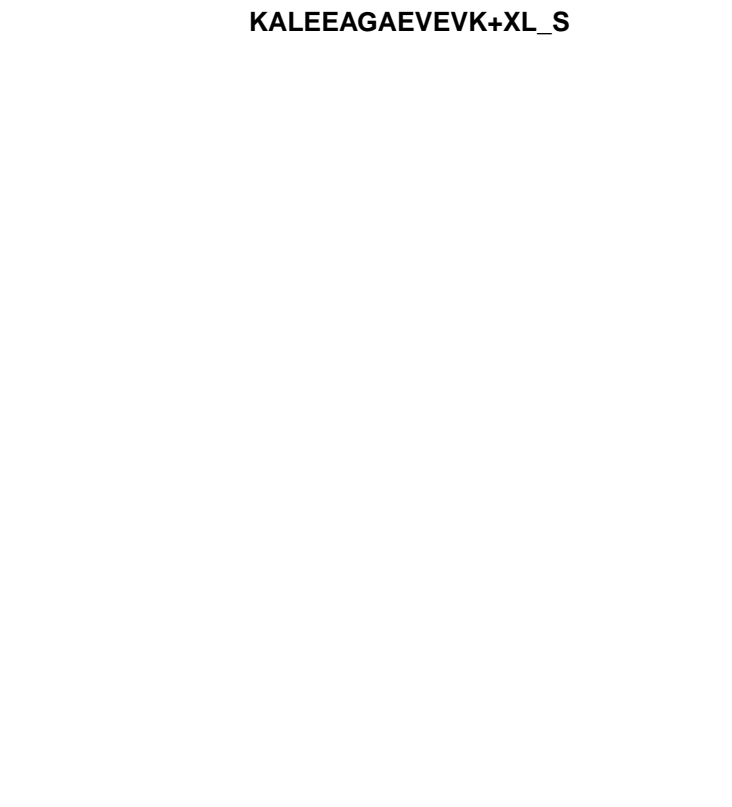

KALEEAGAEVEVK+XL\_L

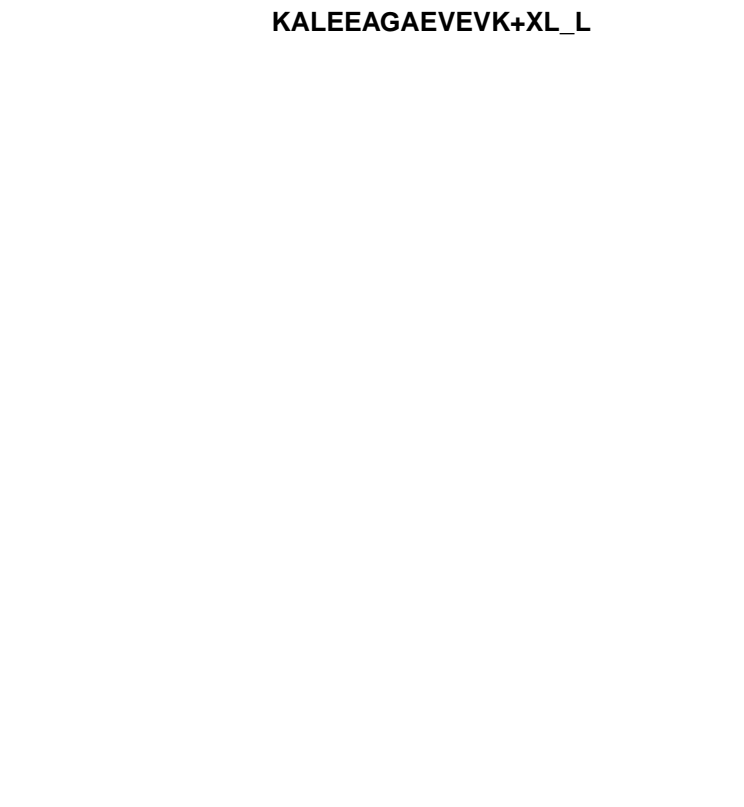

LAKLEK  
QLNKLQHK

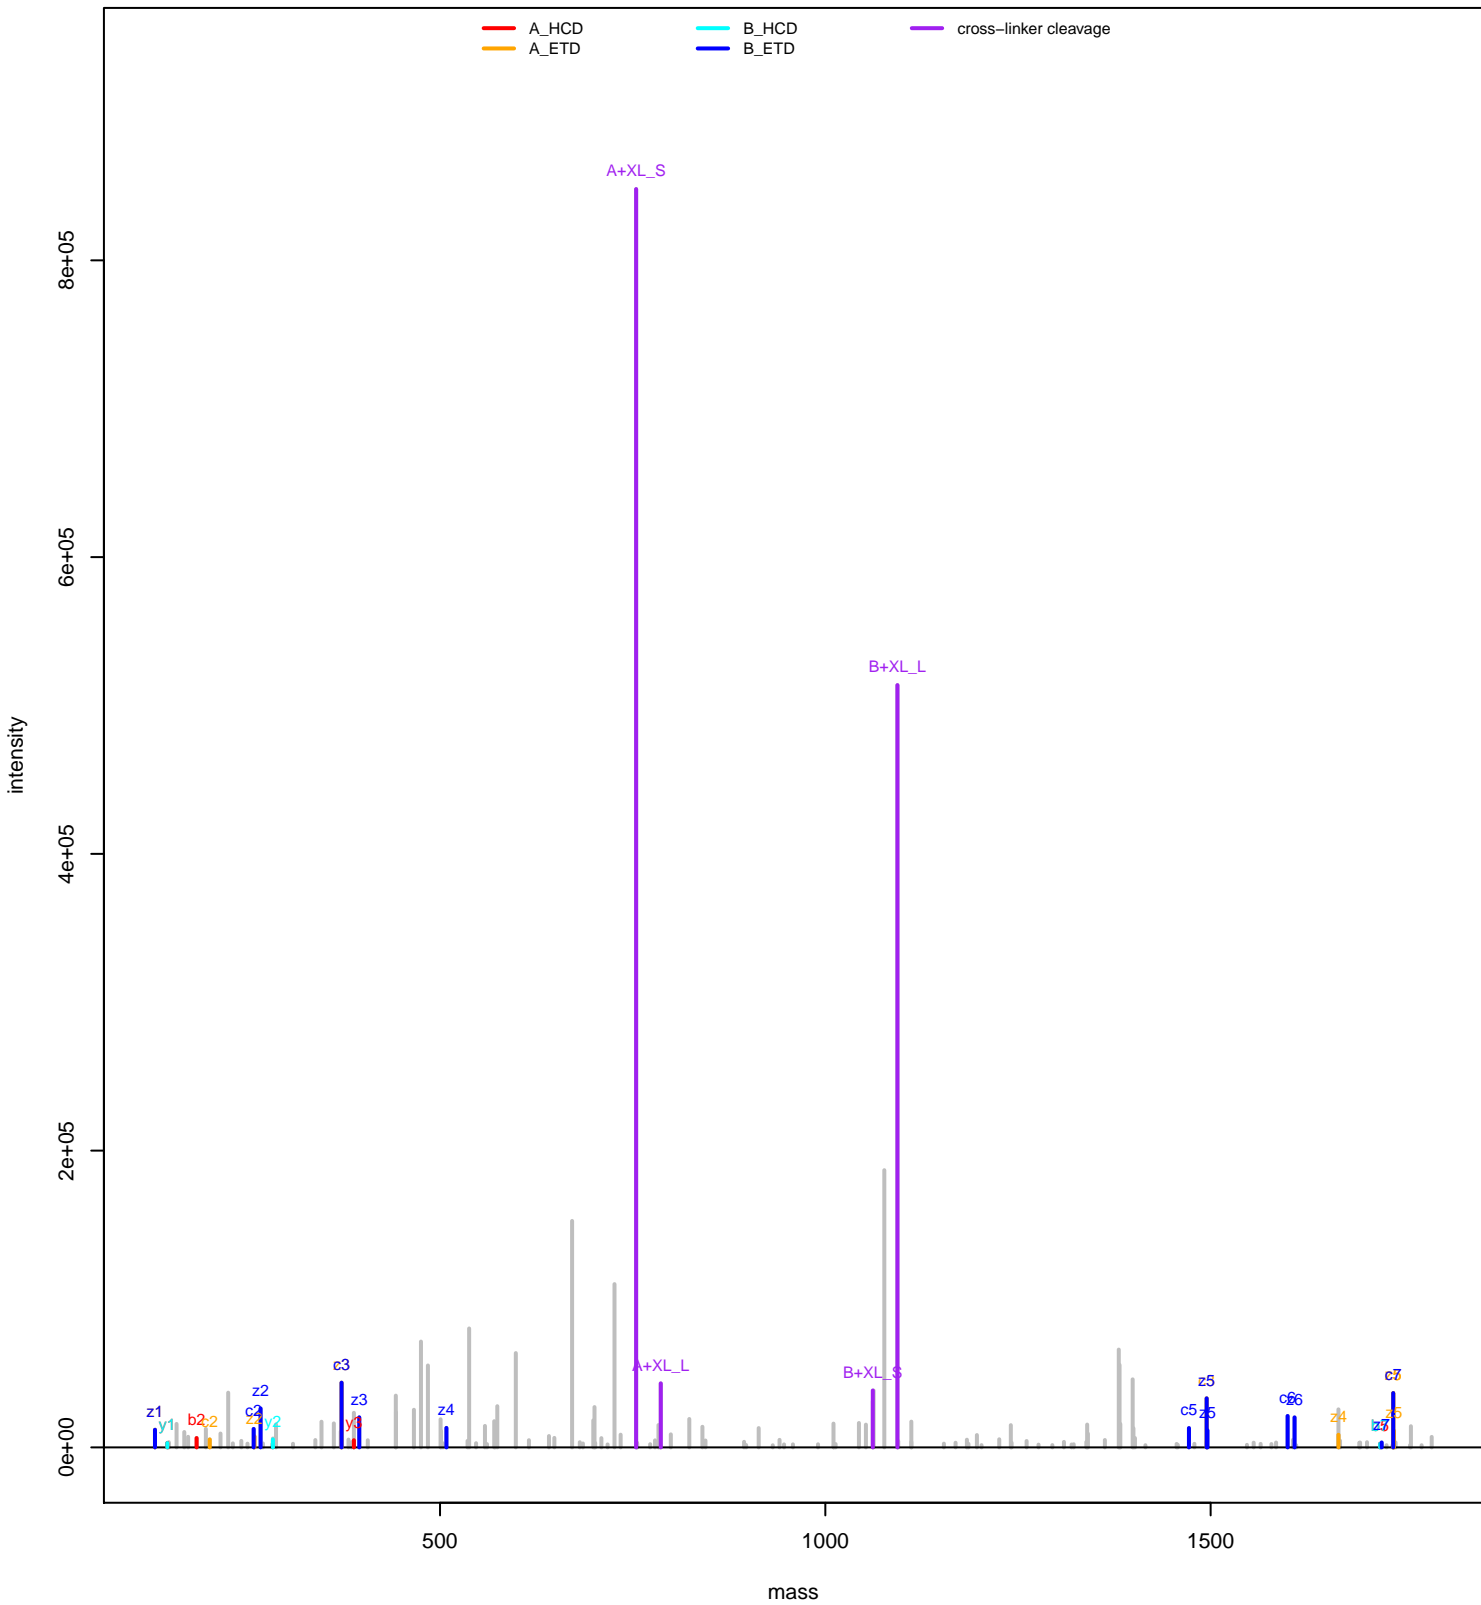

LAKLEK+XL\_S

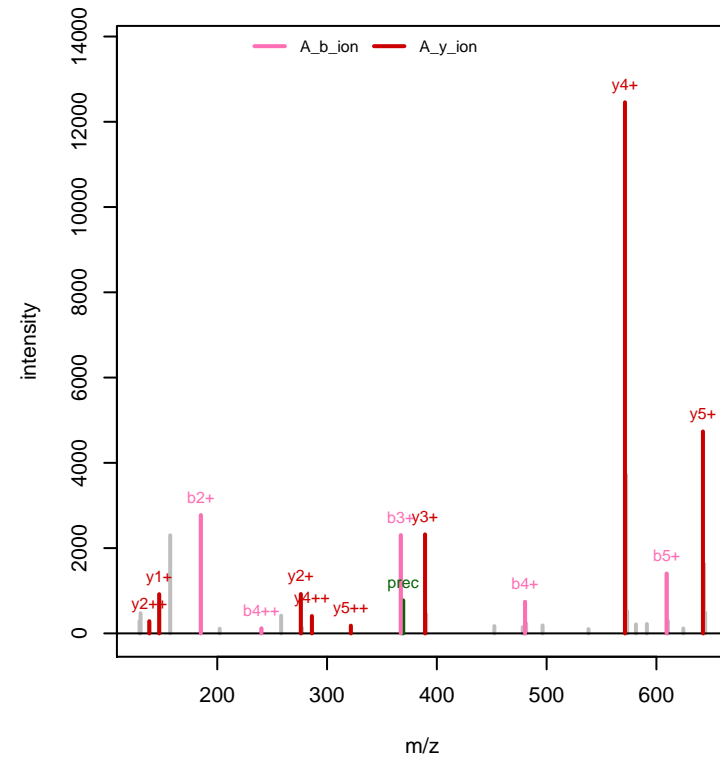

LAKLEK+XL\_L

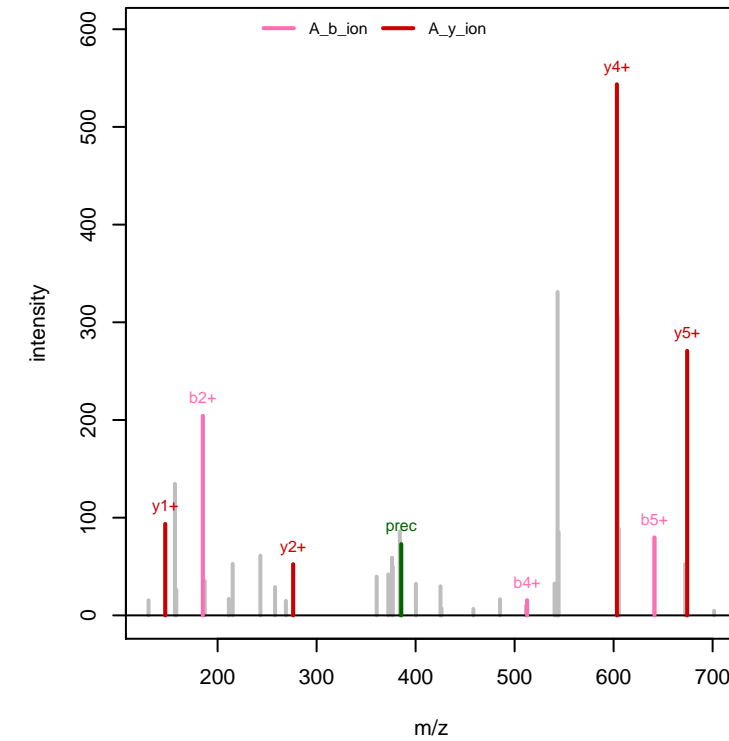

QLNKLQHK+XL\_S

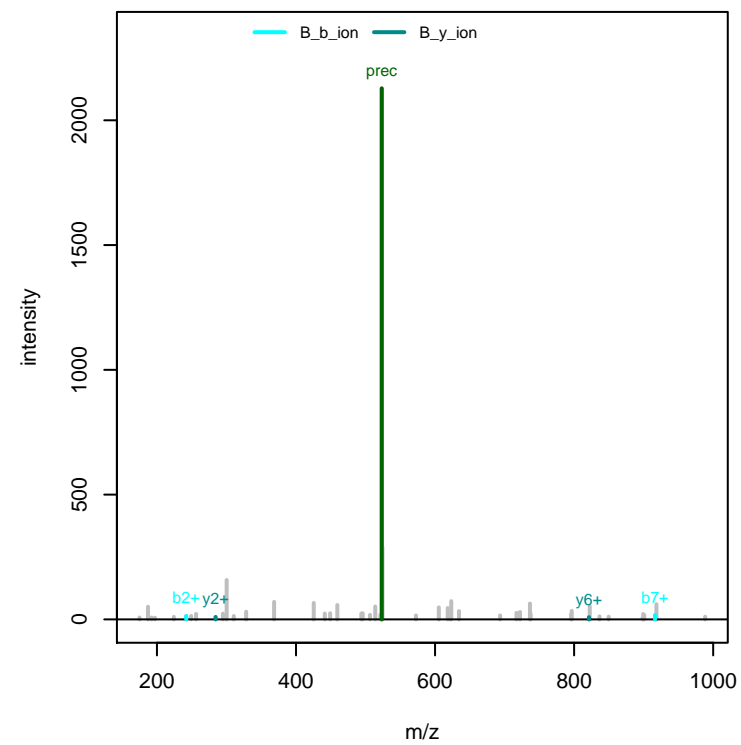

QLNKLQHK+XL\_L

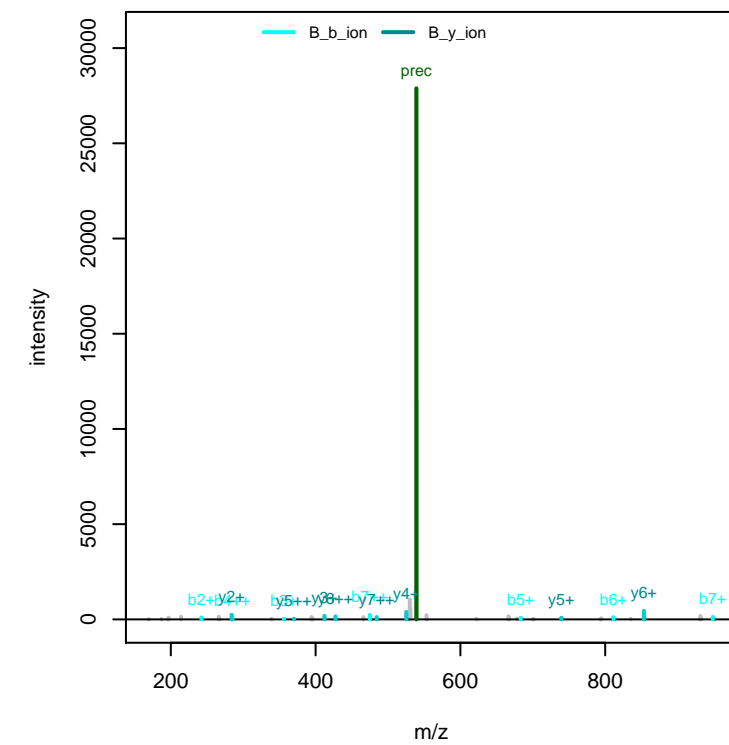

**KPNSALRK  
VFIKPGNGK**

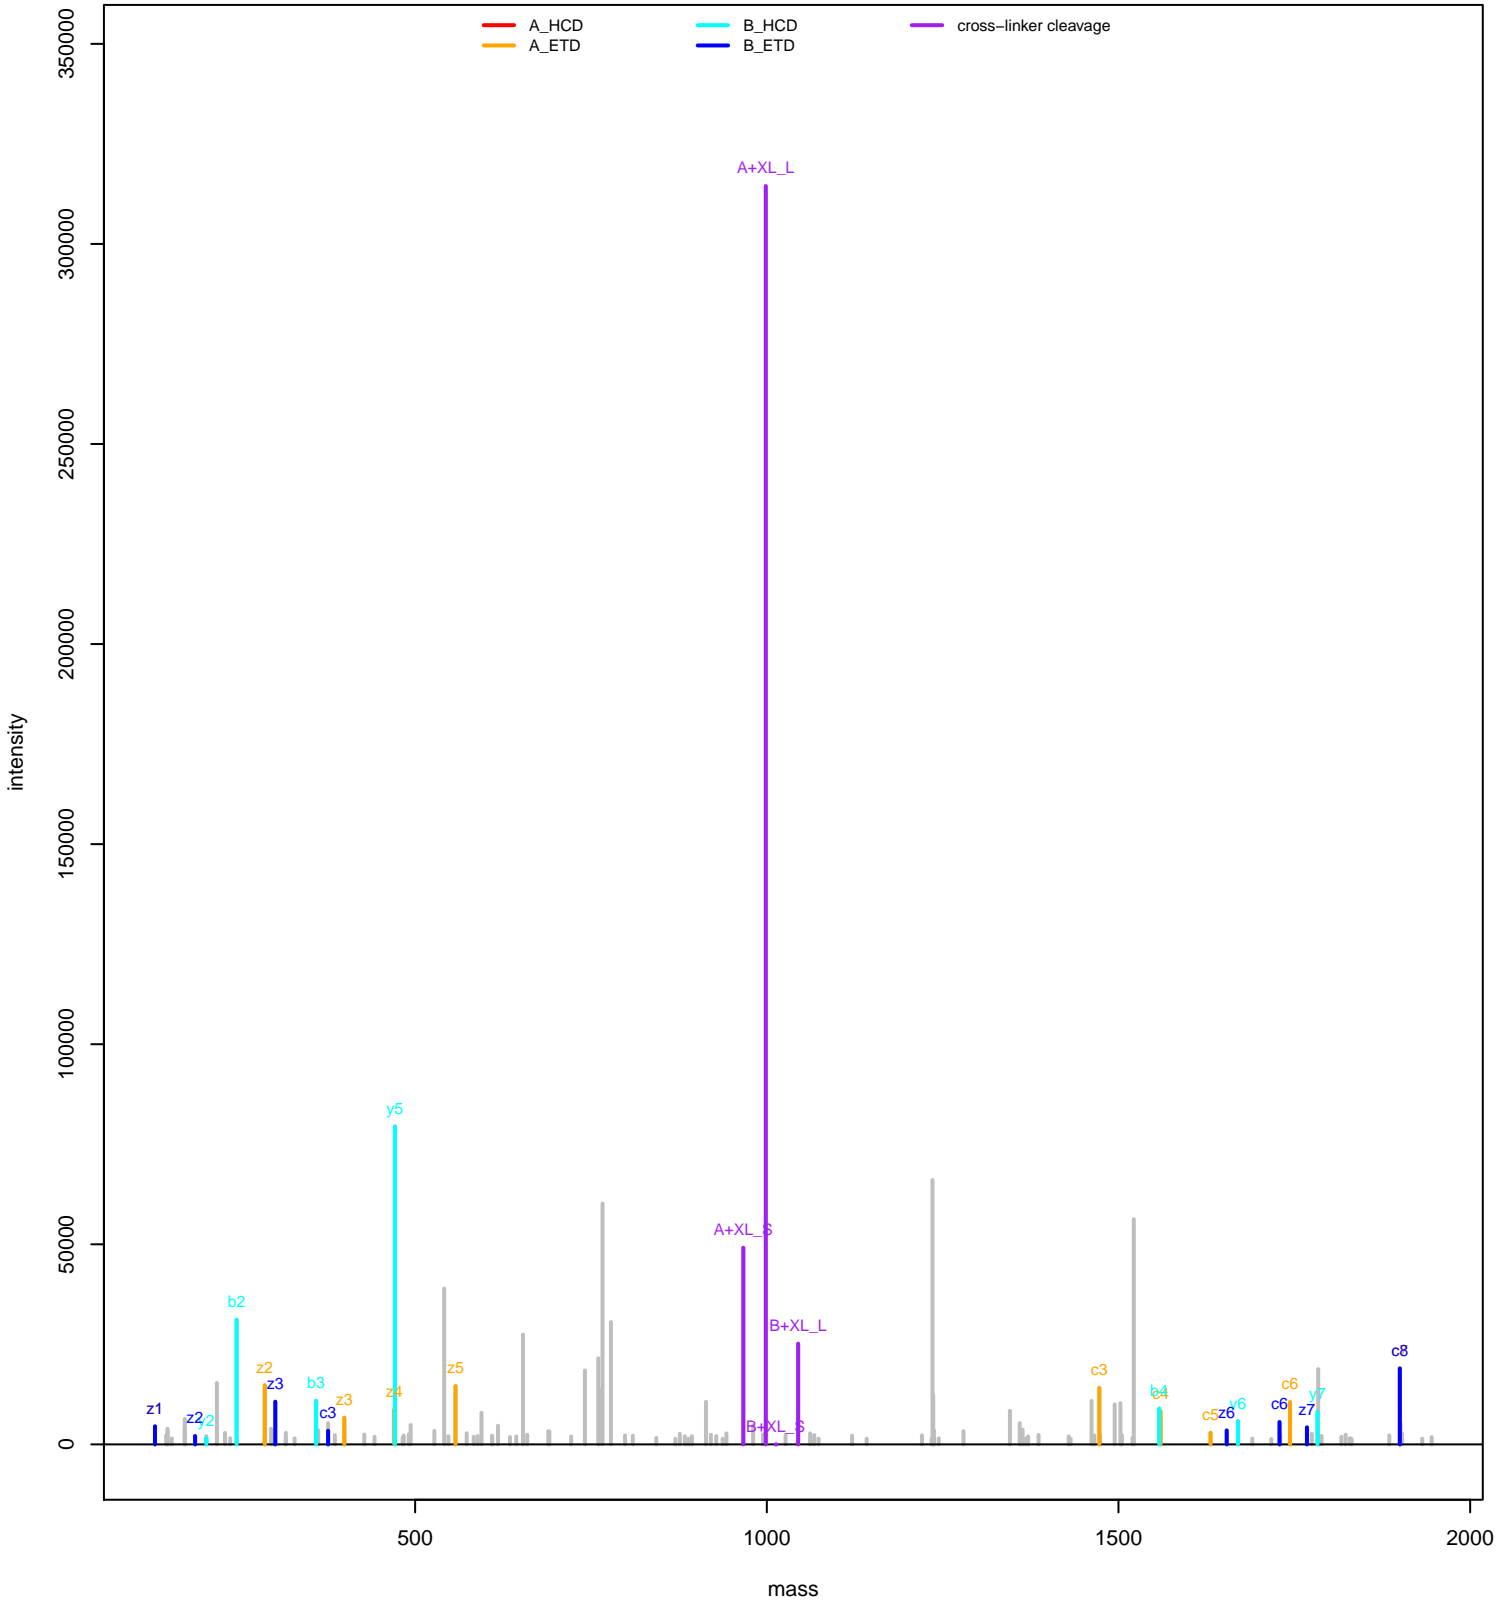

**KPNSALRK+XL\_S**

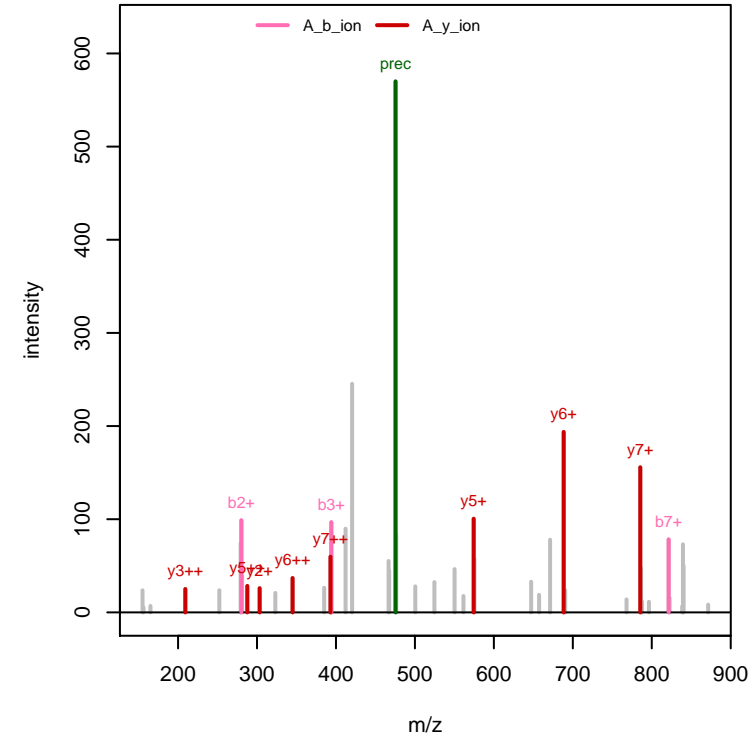

**KPNSALRK+XL\_L**

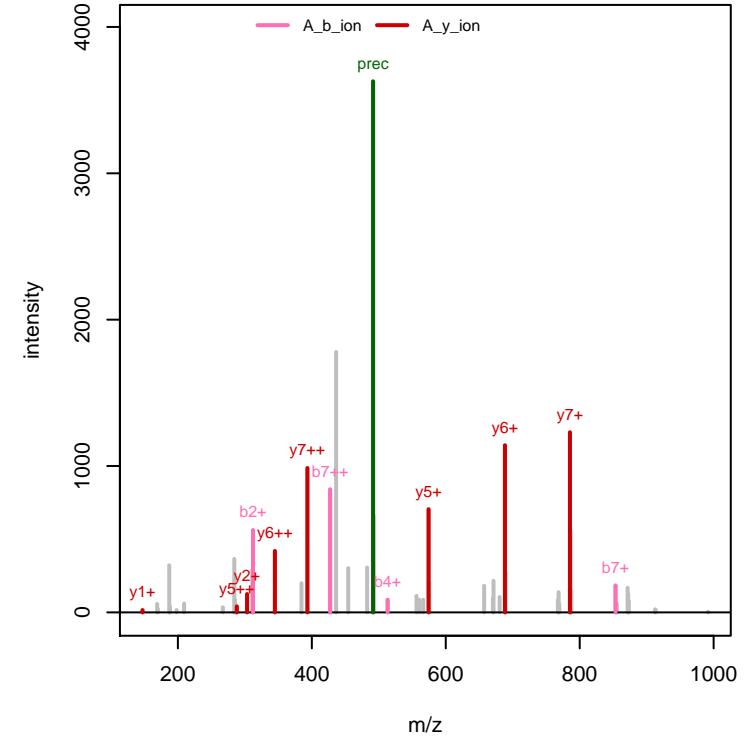

**VFIKPGNGK+XL\_S**

**VFIKPGNGK+XL\_L**



AANDKGR  
KFFADMohR

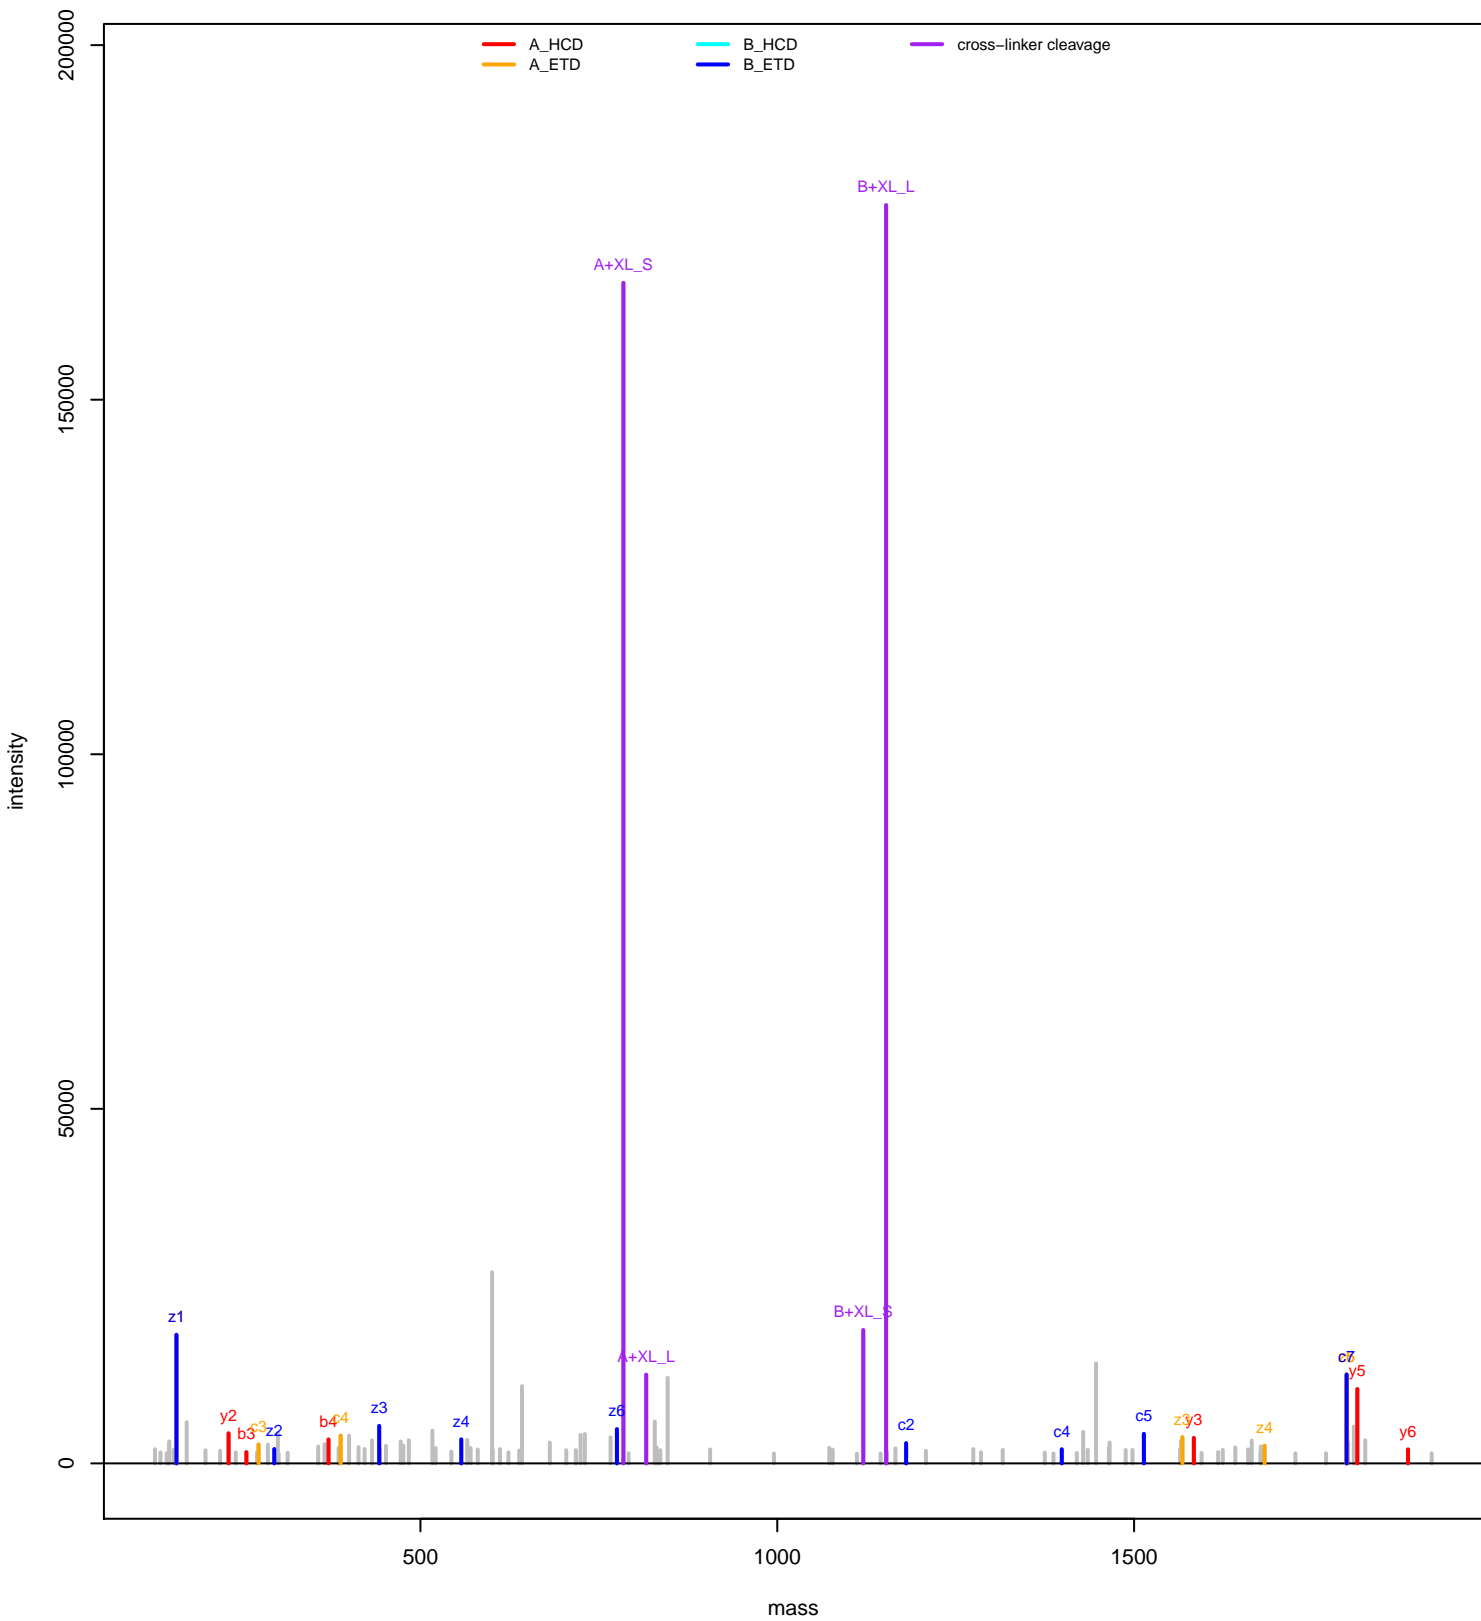

AANDKGR+XL\_S

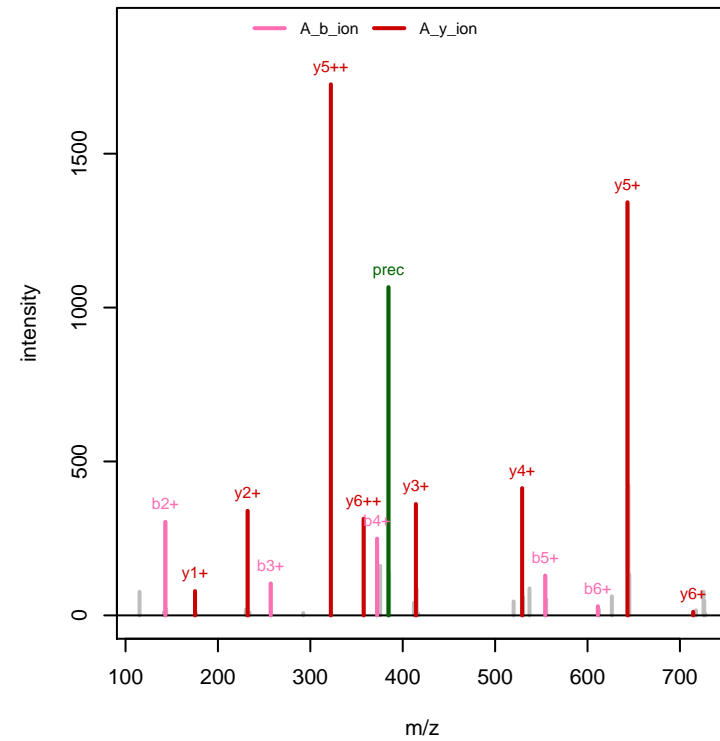

AANDKGR+XL\_L

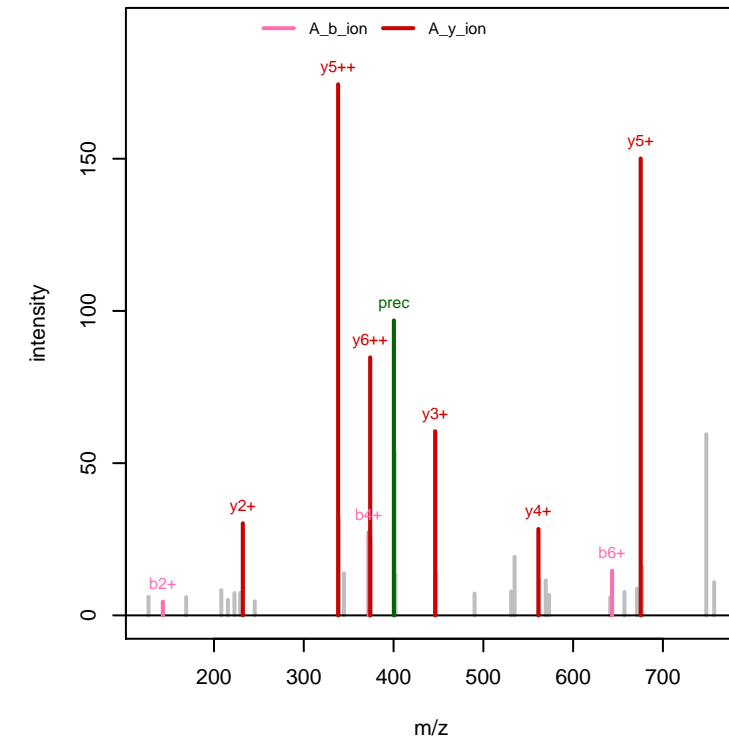

KFFADMohR+XL\_S

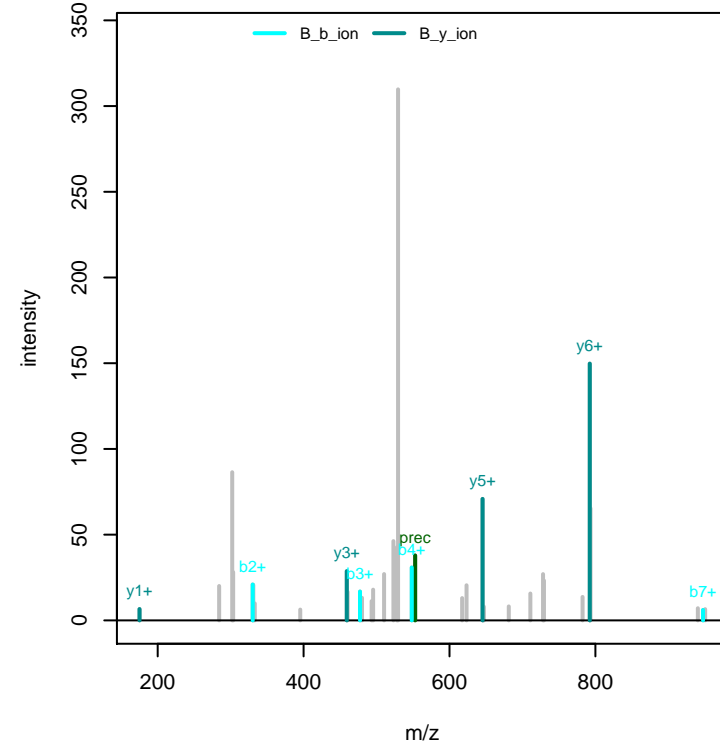

KFFADMohR+XL\_L

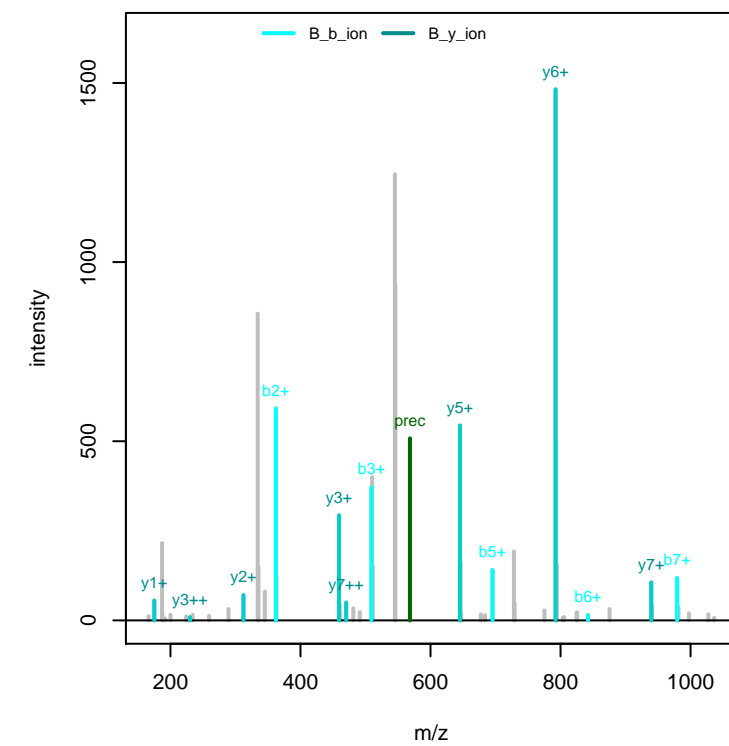

DWEKTTQK  
TPDQVKEIAR

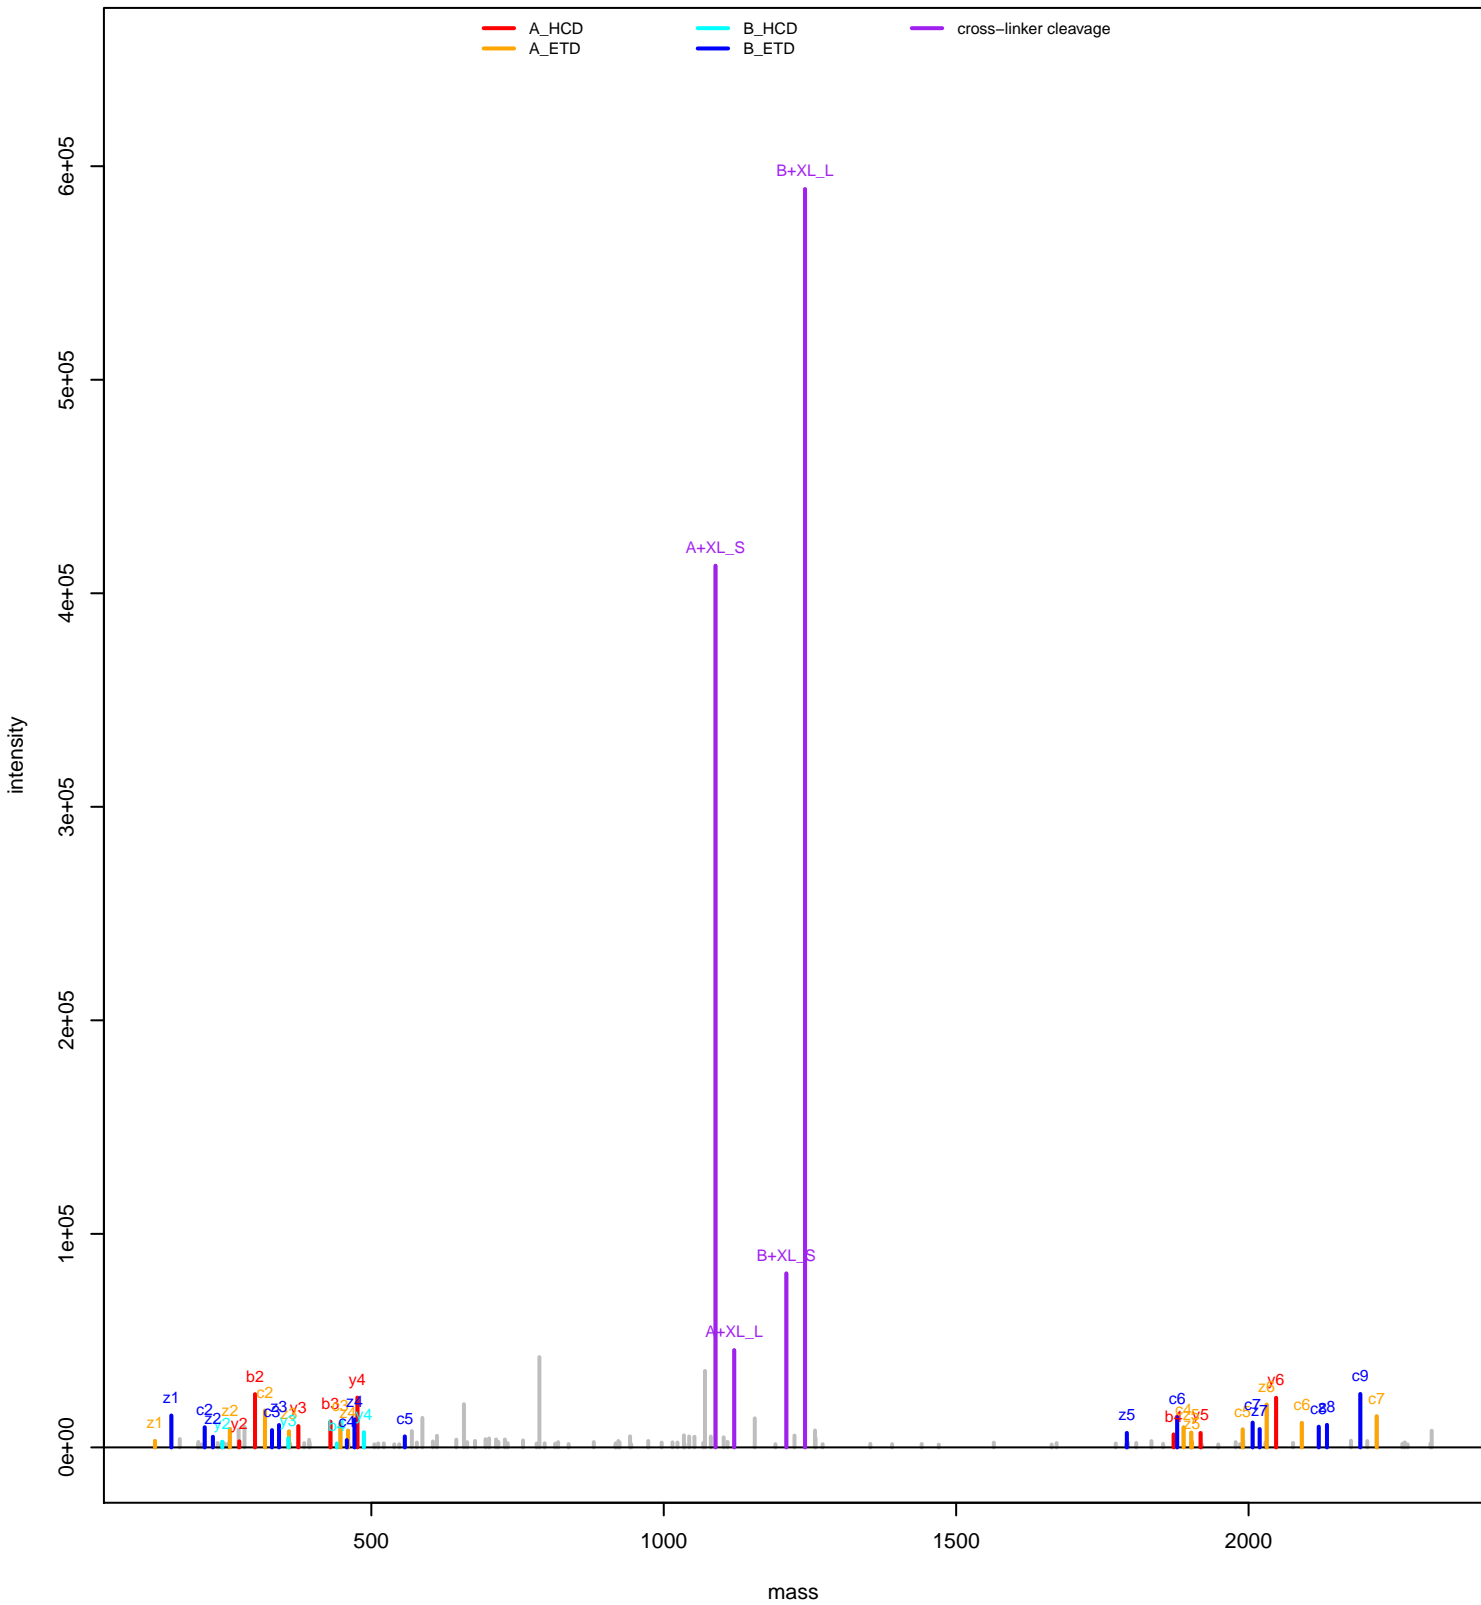

DWEKTTQK+XL\_S

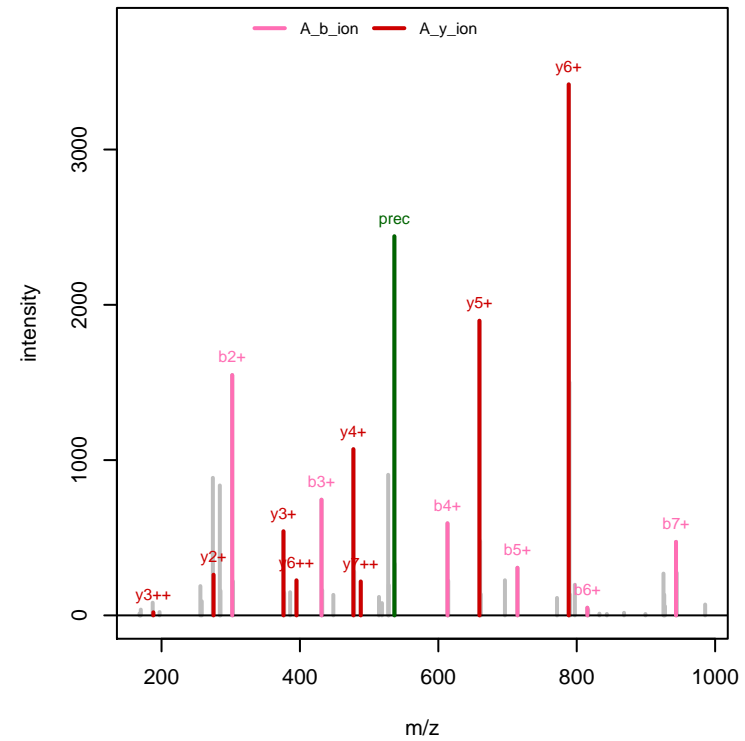

DWEKTTQK+XL\_L

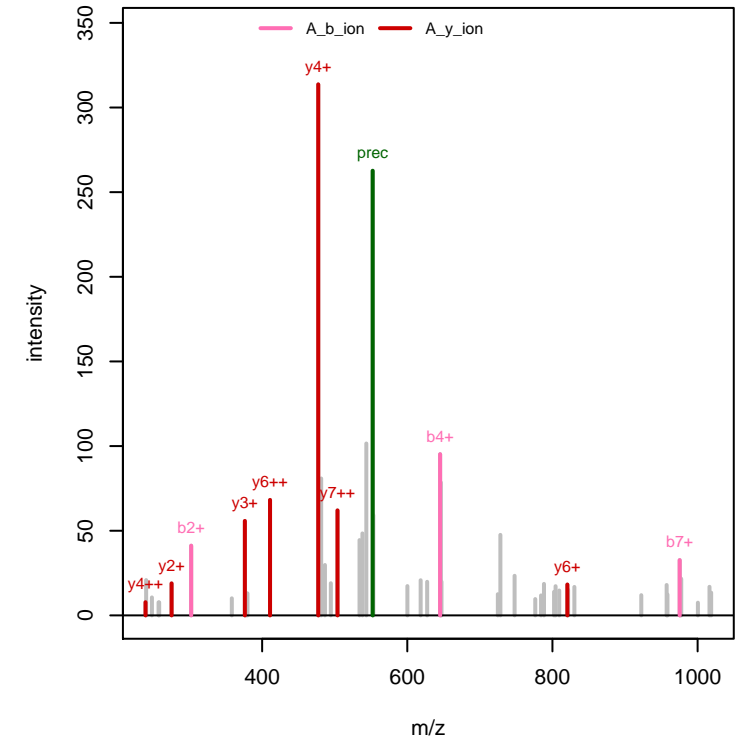

TPDQVKEIAR+XL\_S

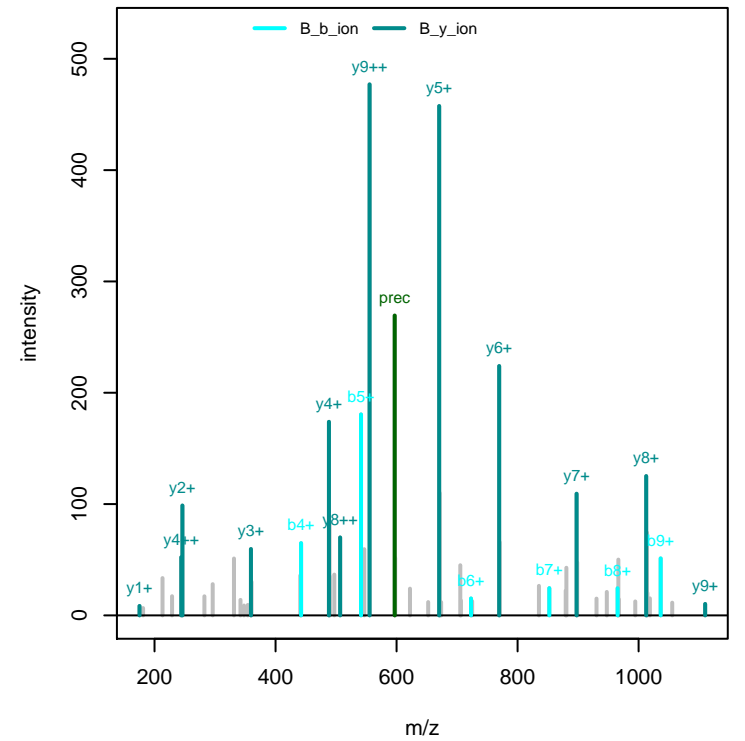

TPDQVKEIAR+XL\_L

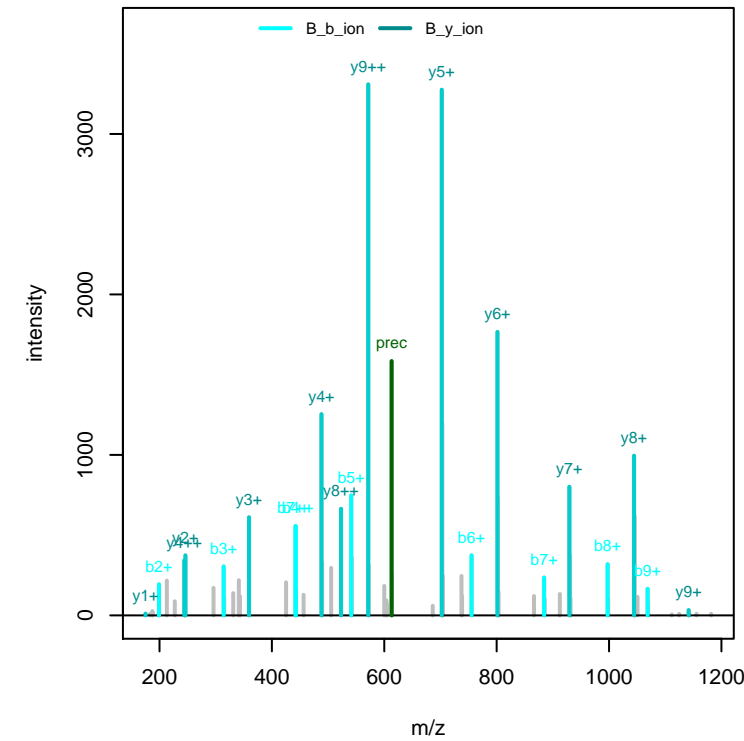

QPVGKDYK  
LVVAKNSDIQPTVESLK

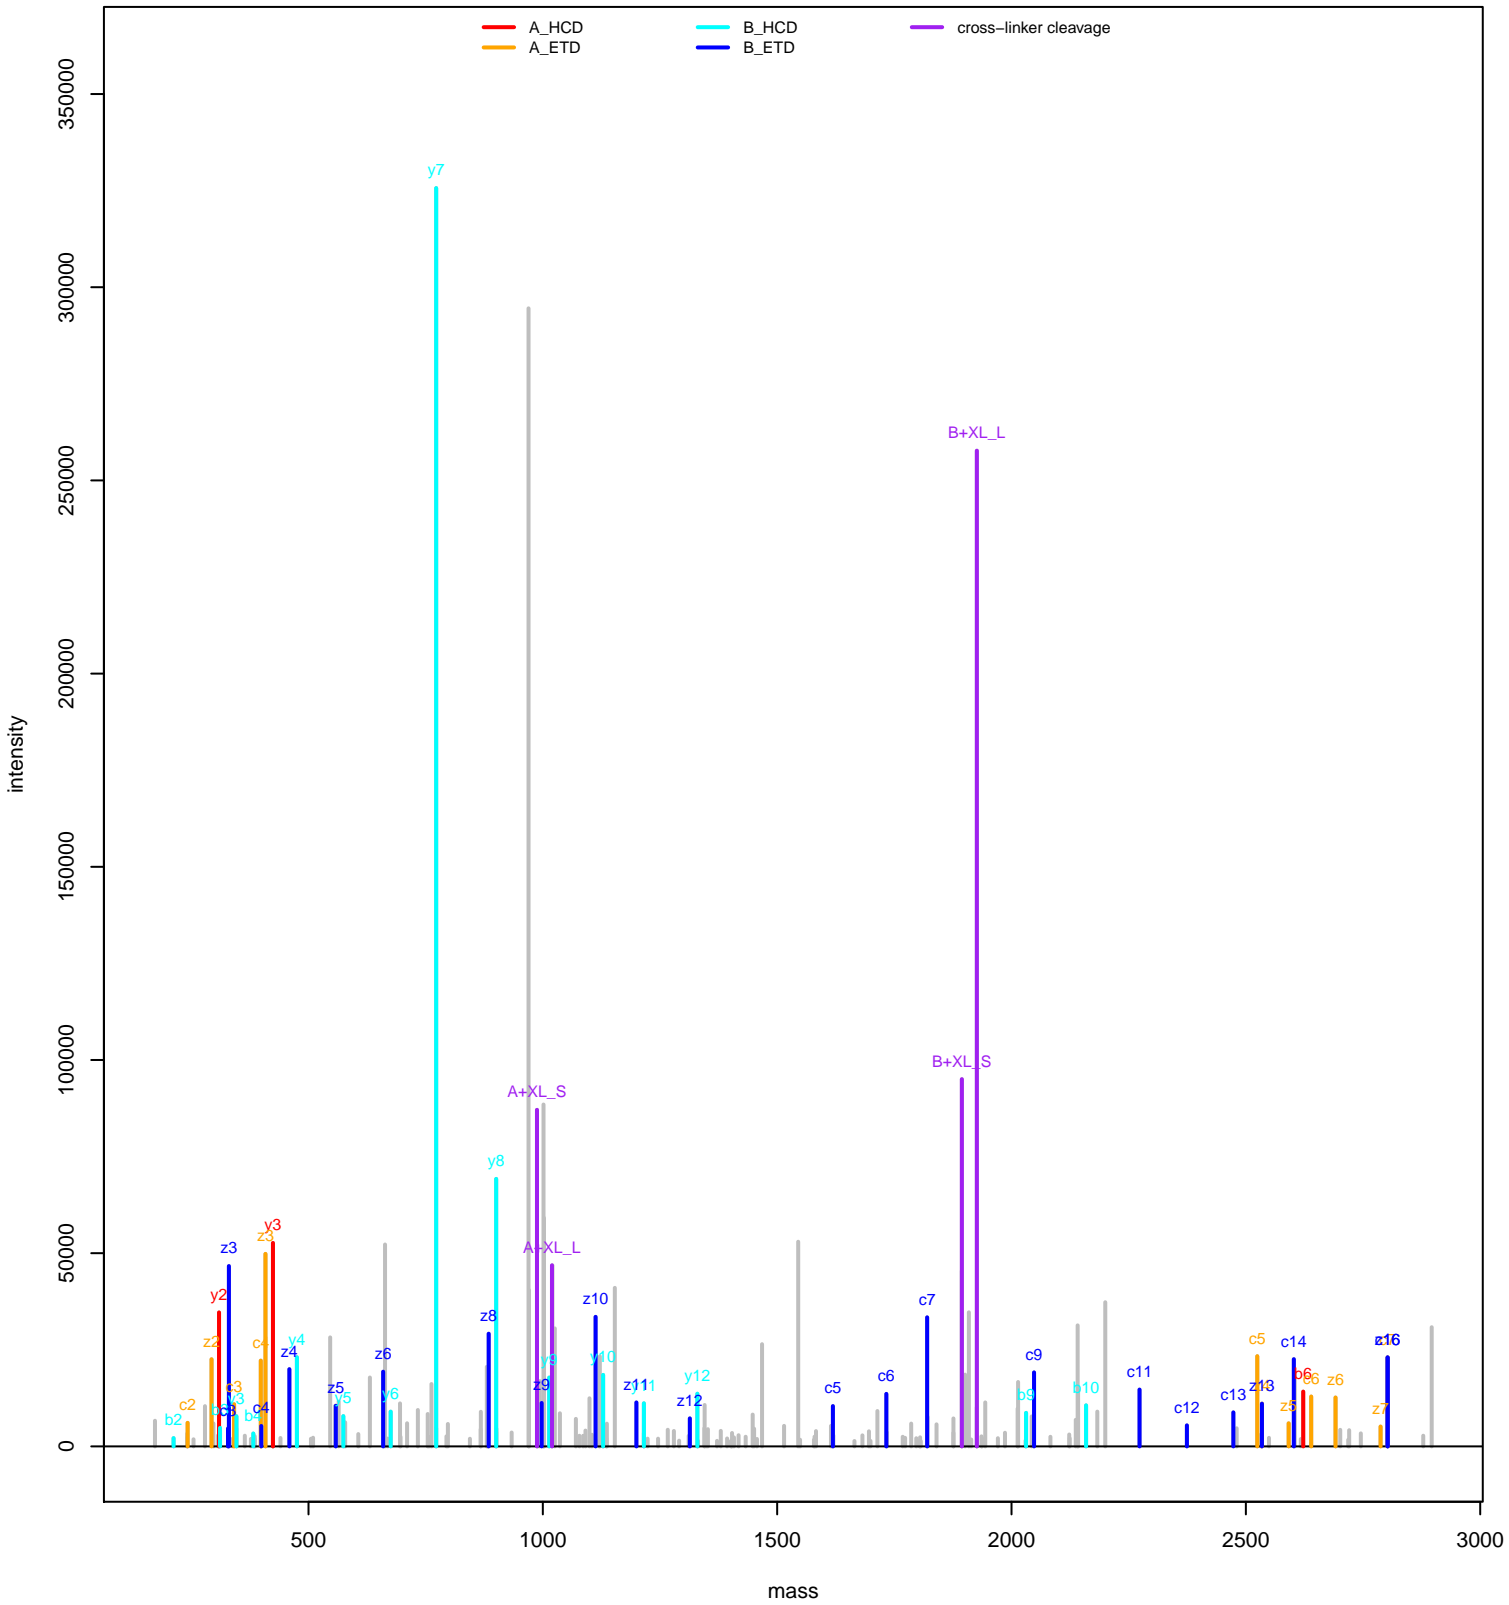

QPVGKDYK+XL\_S

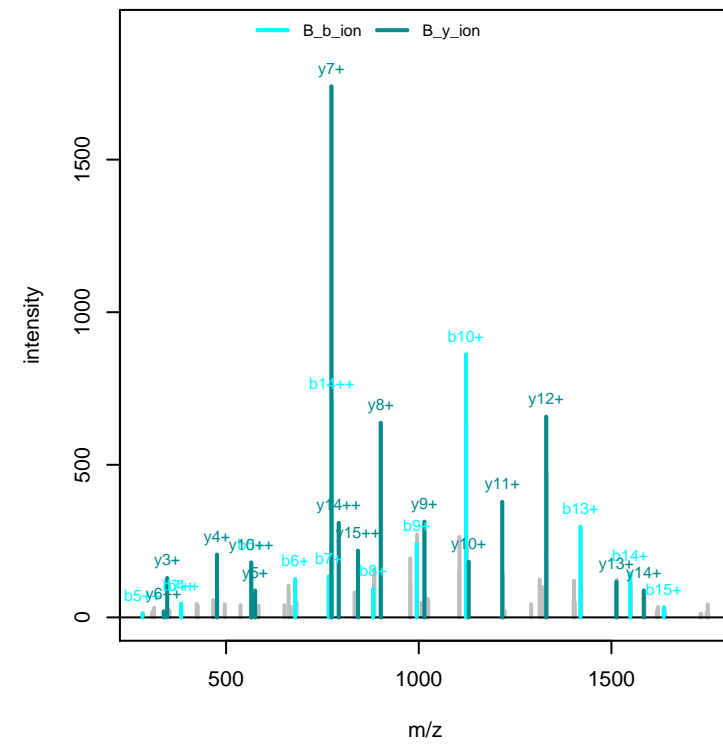

QPVGKDYK+XL\_L

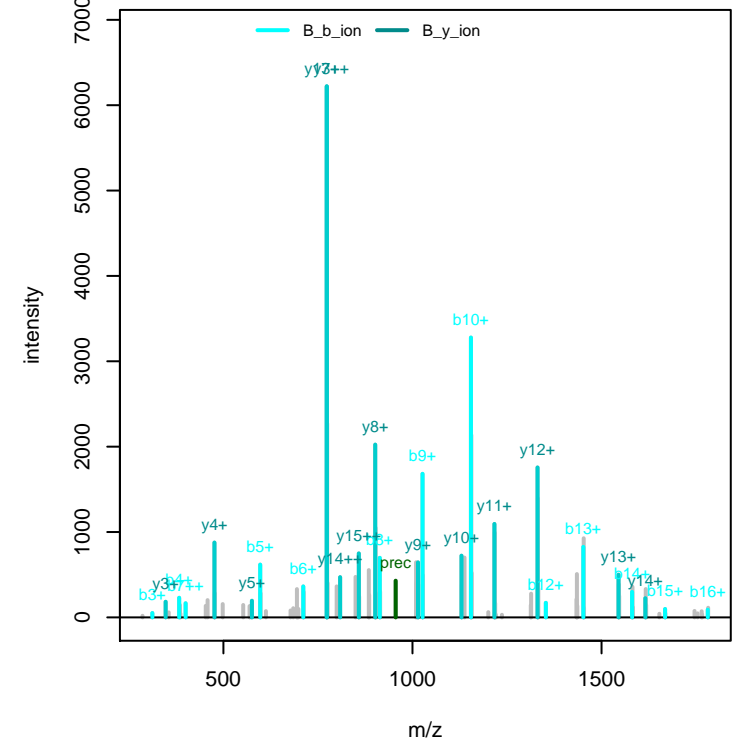

LVVAKNSDIQPTVESLK+XL\_S

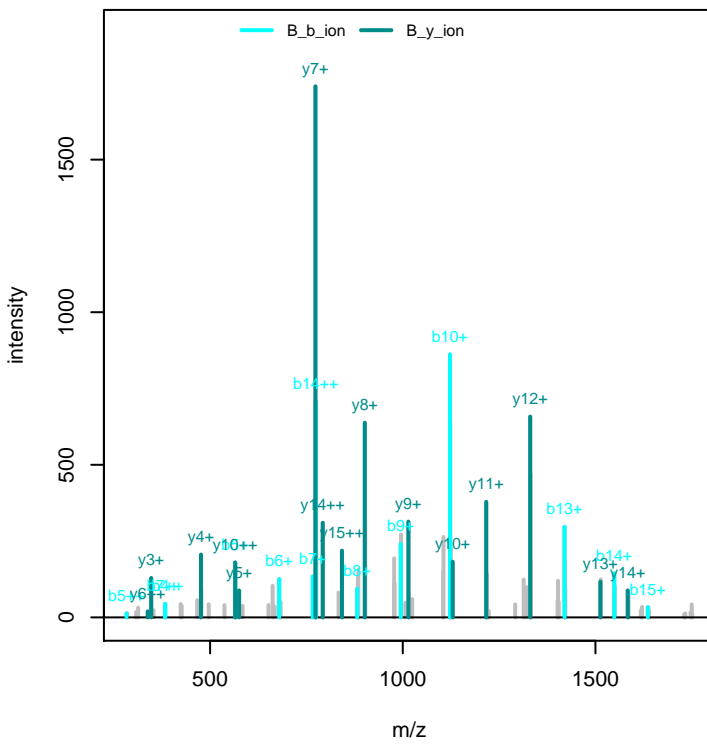

LVVAKNSDIQPTVESLK+XL\_L



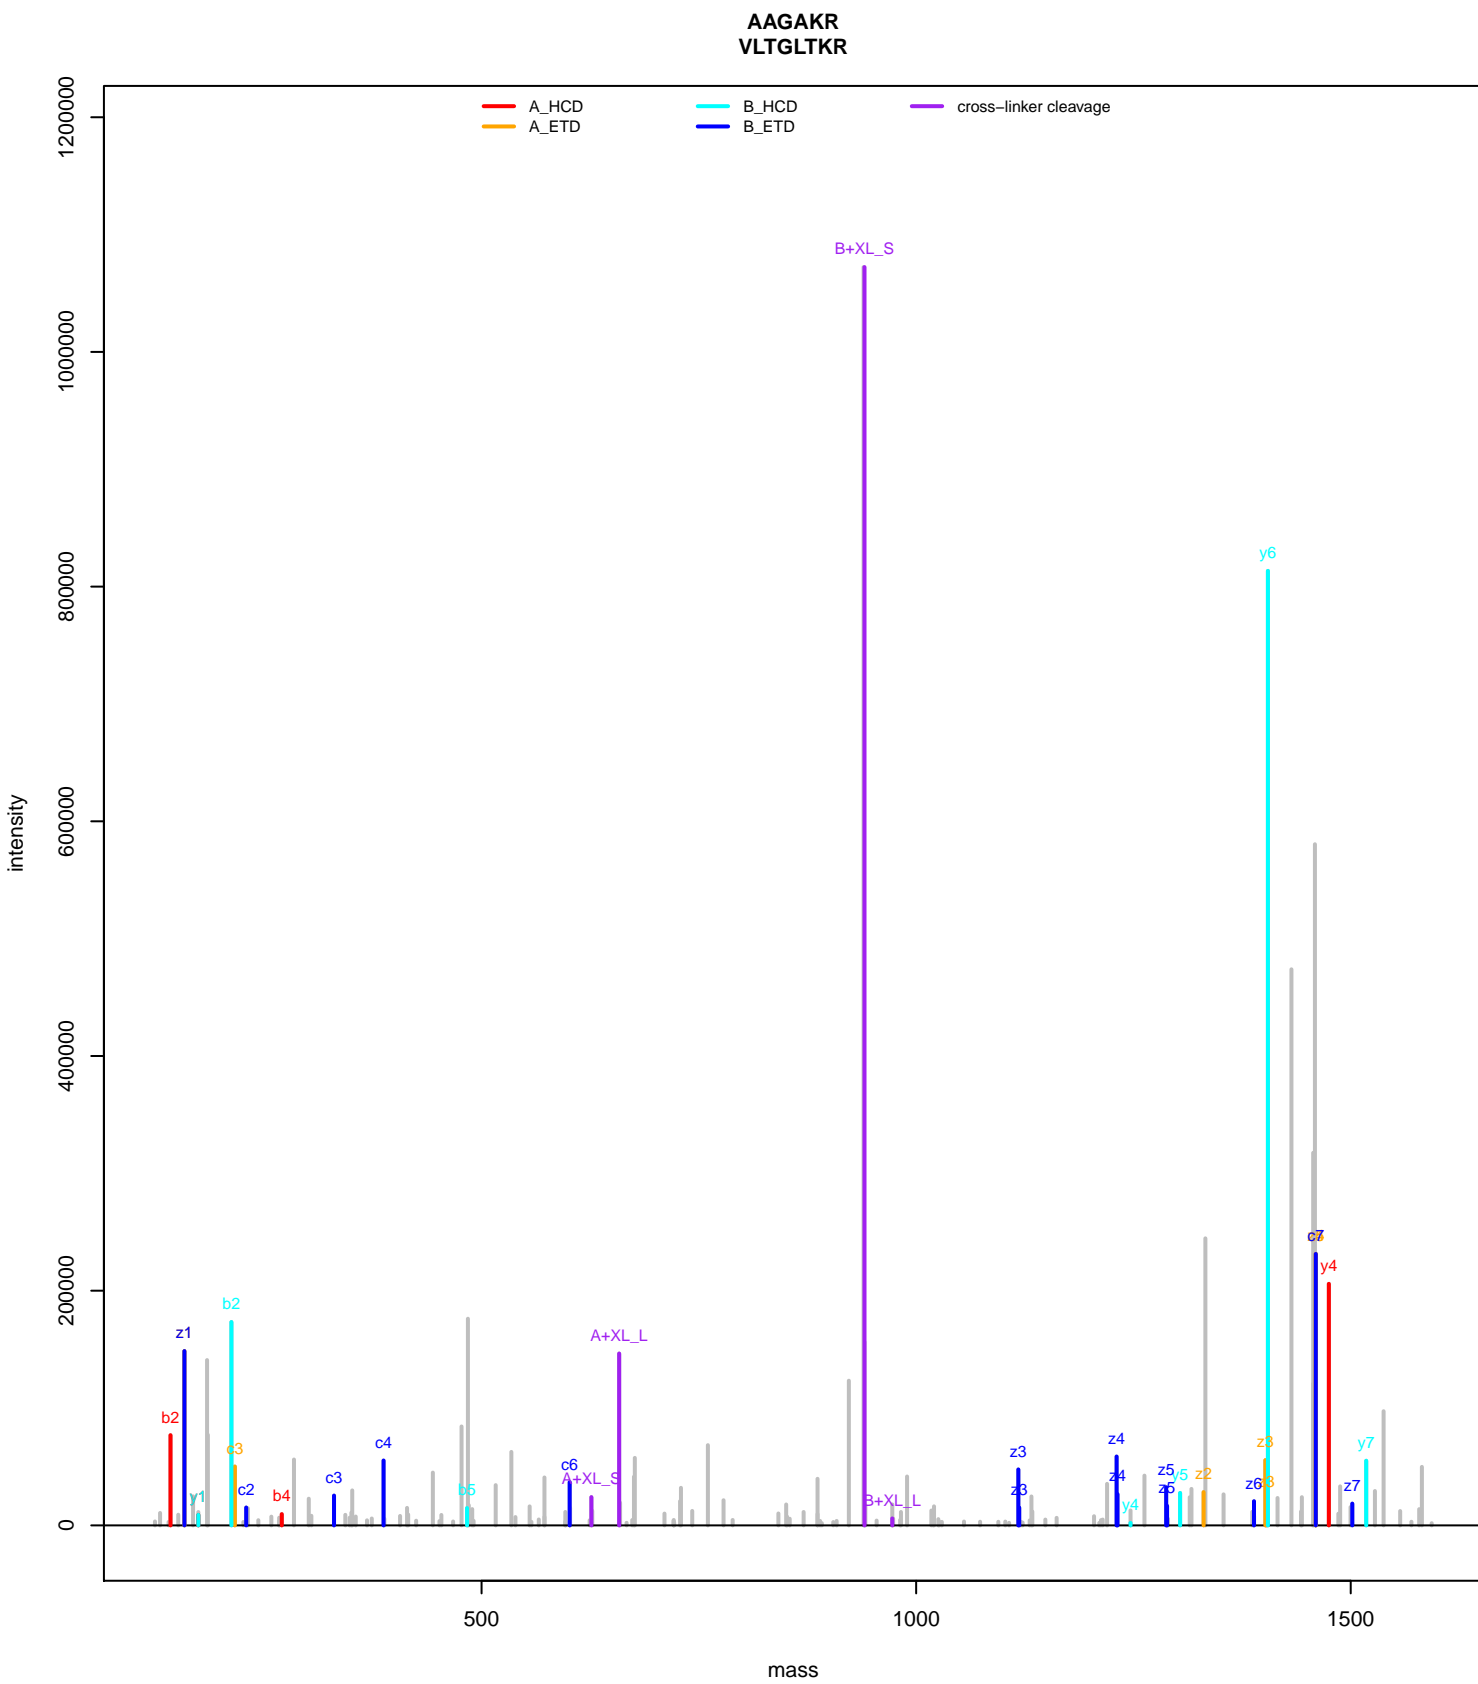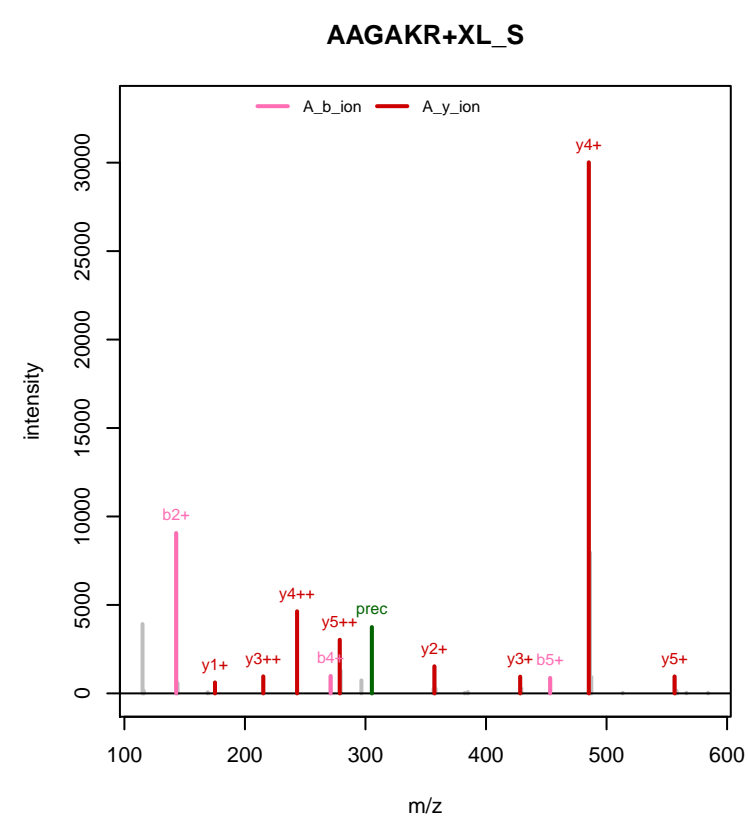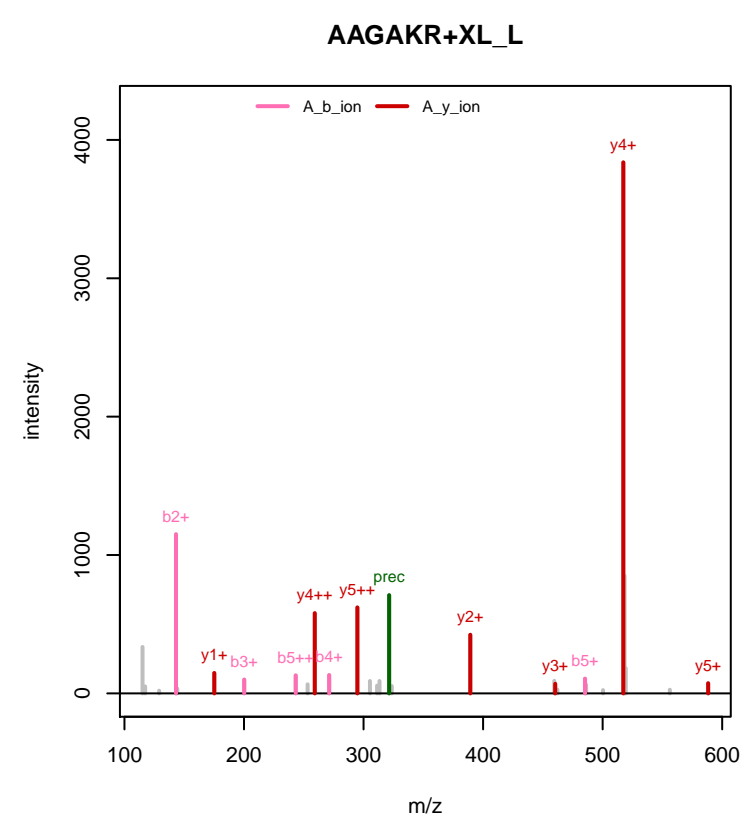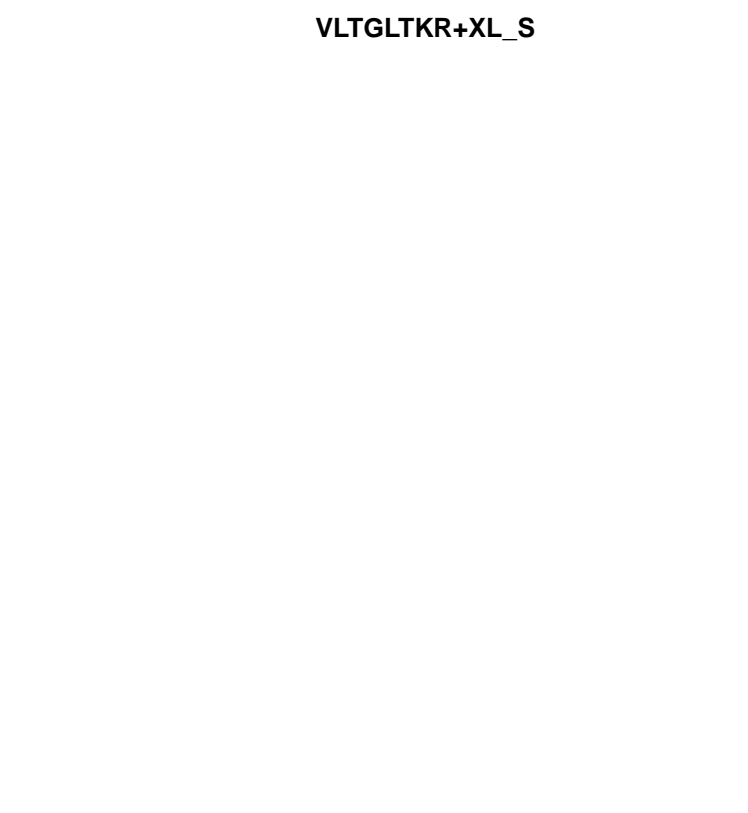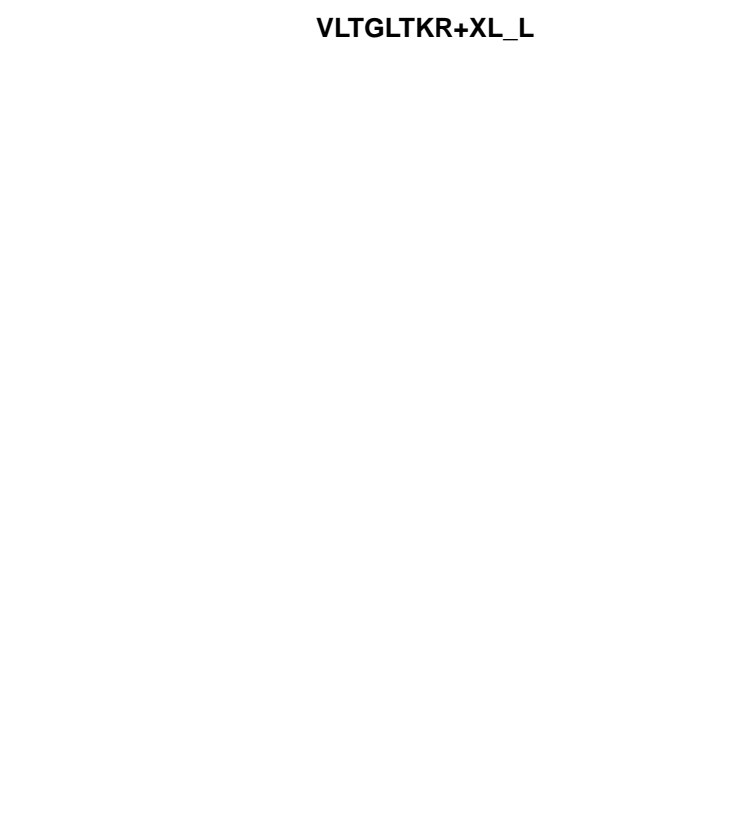

DAAAAGKAVAER  
AIAEQLKYTGNK

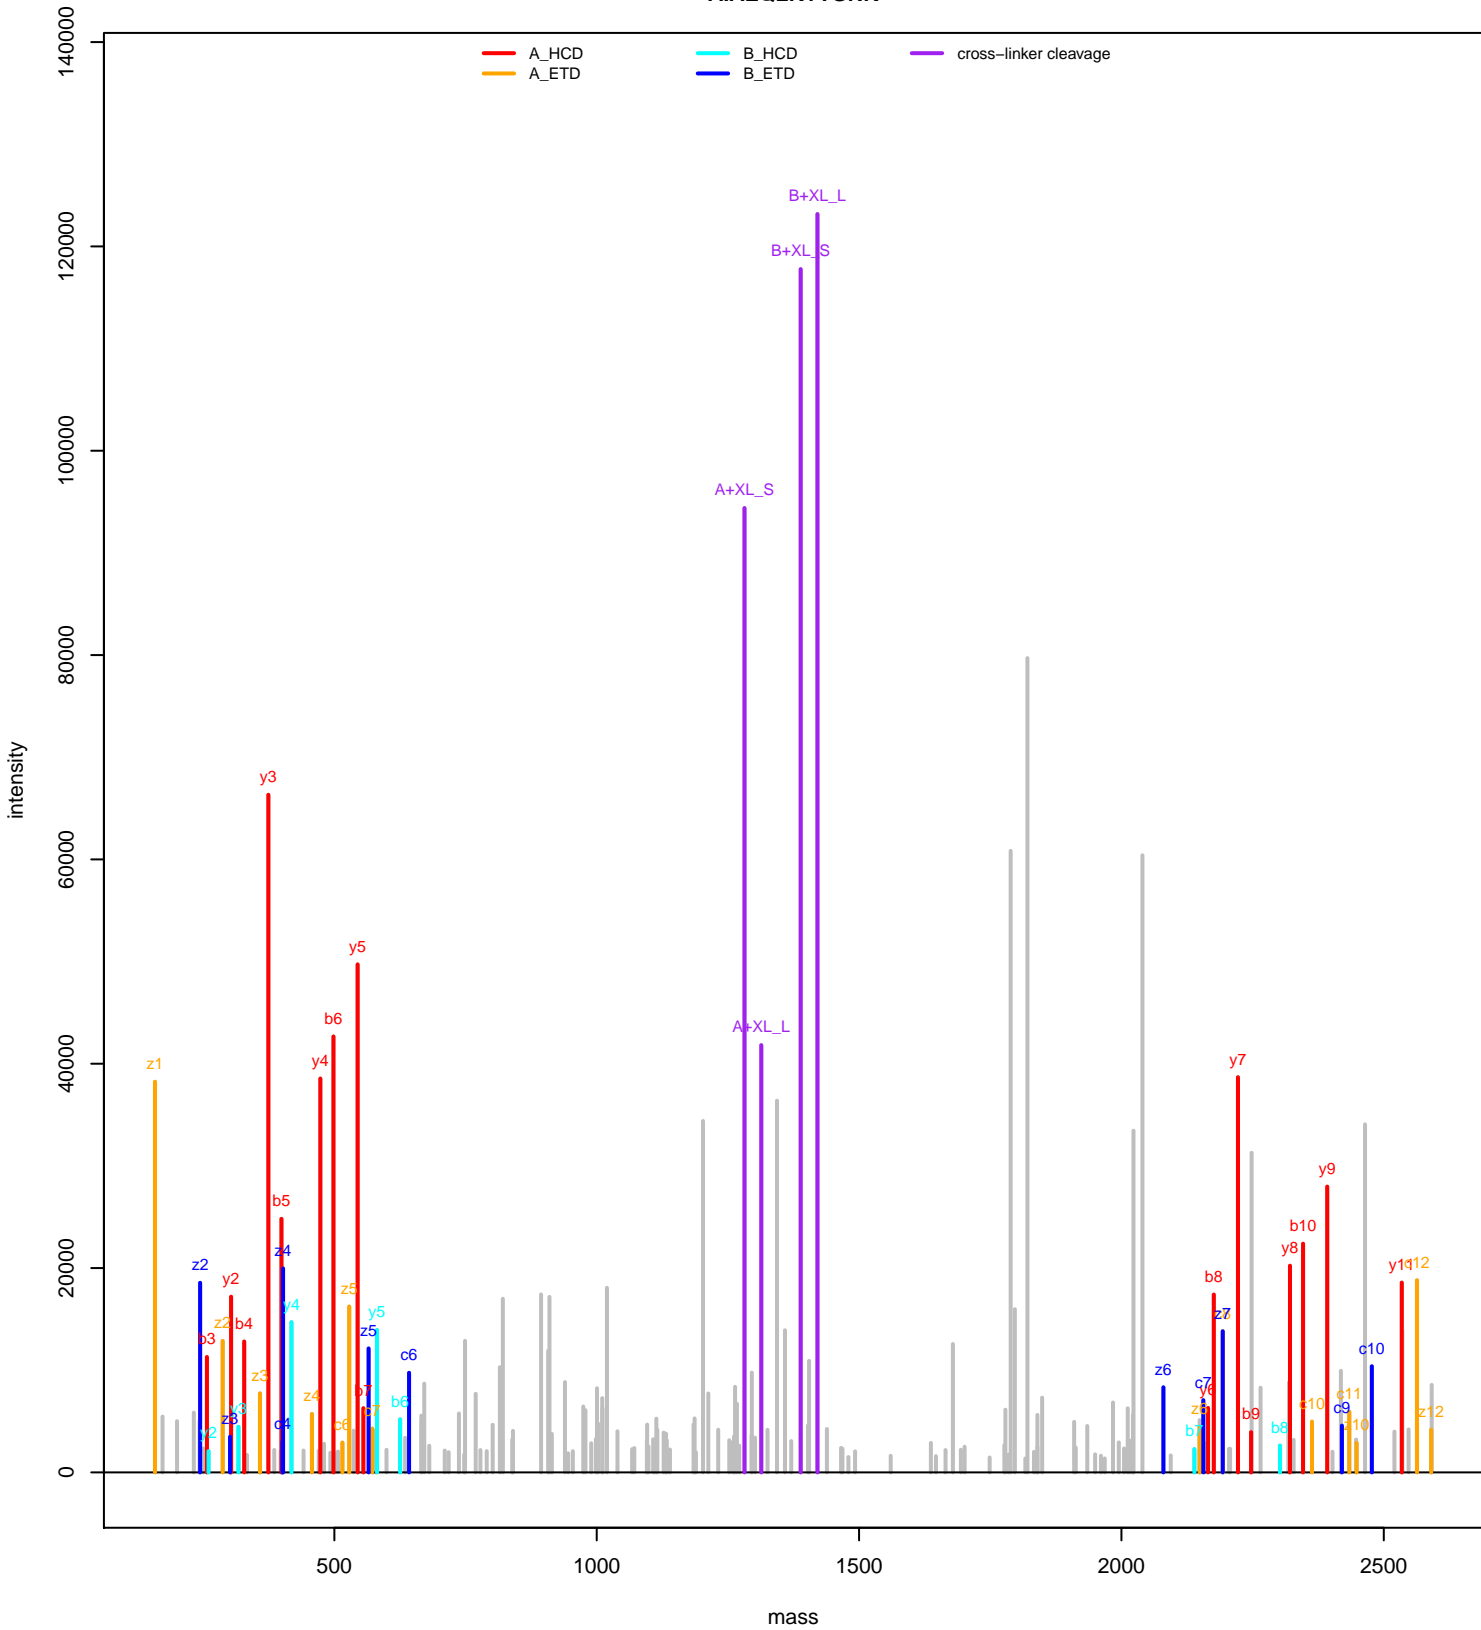

DAAAAGKAVAER+XL\_S

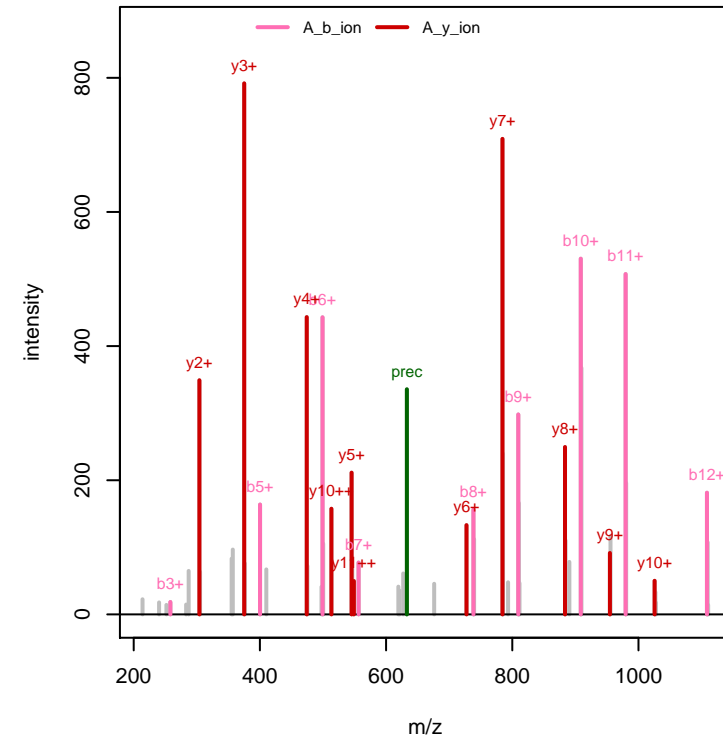

DAAAAGKAVAER+XL\_L

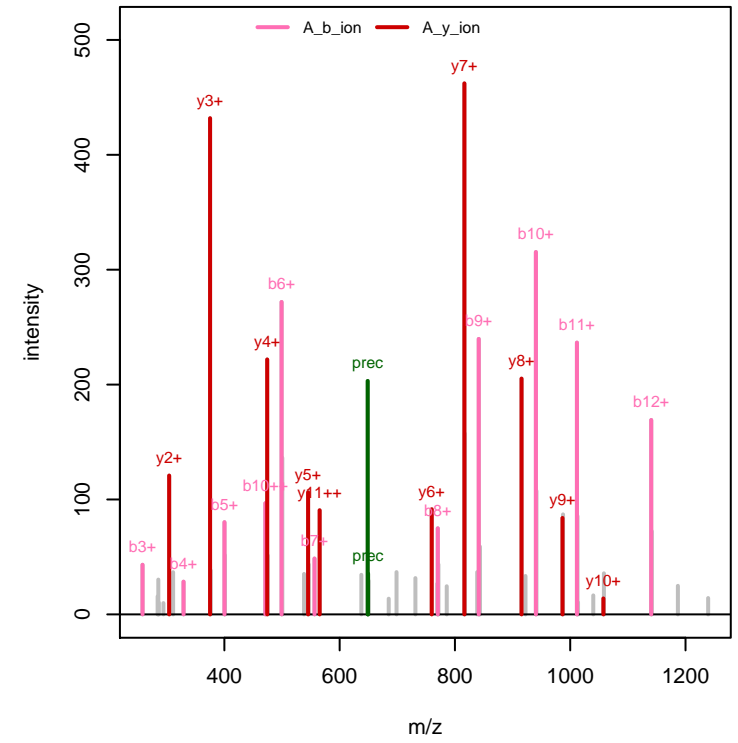

AIAEQLKYTGNK+XL\_S

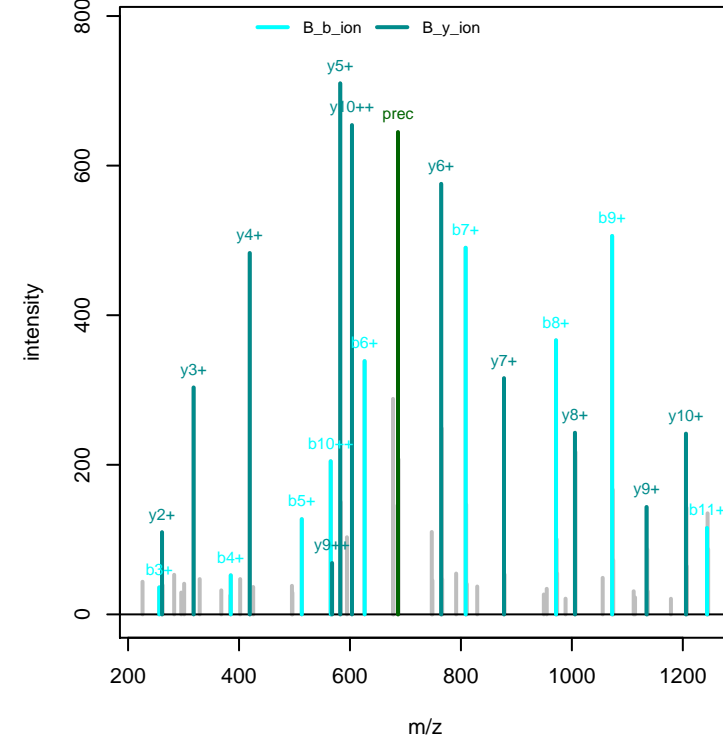

AIAEQLKYTGNK+XL\_L

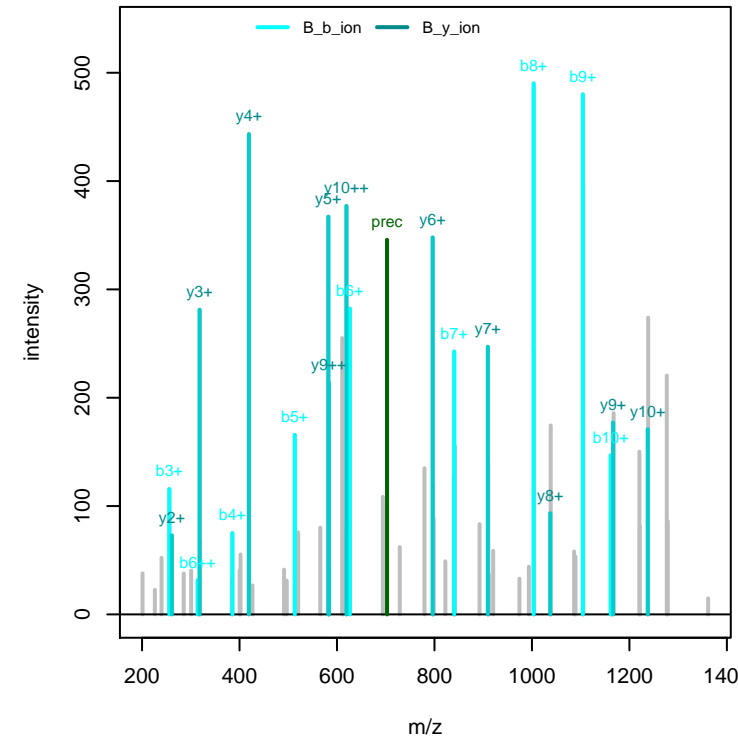

KTYMSDCLK  
MTSCNQQATAQALKGDAR

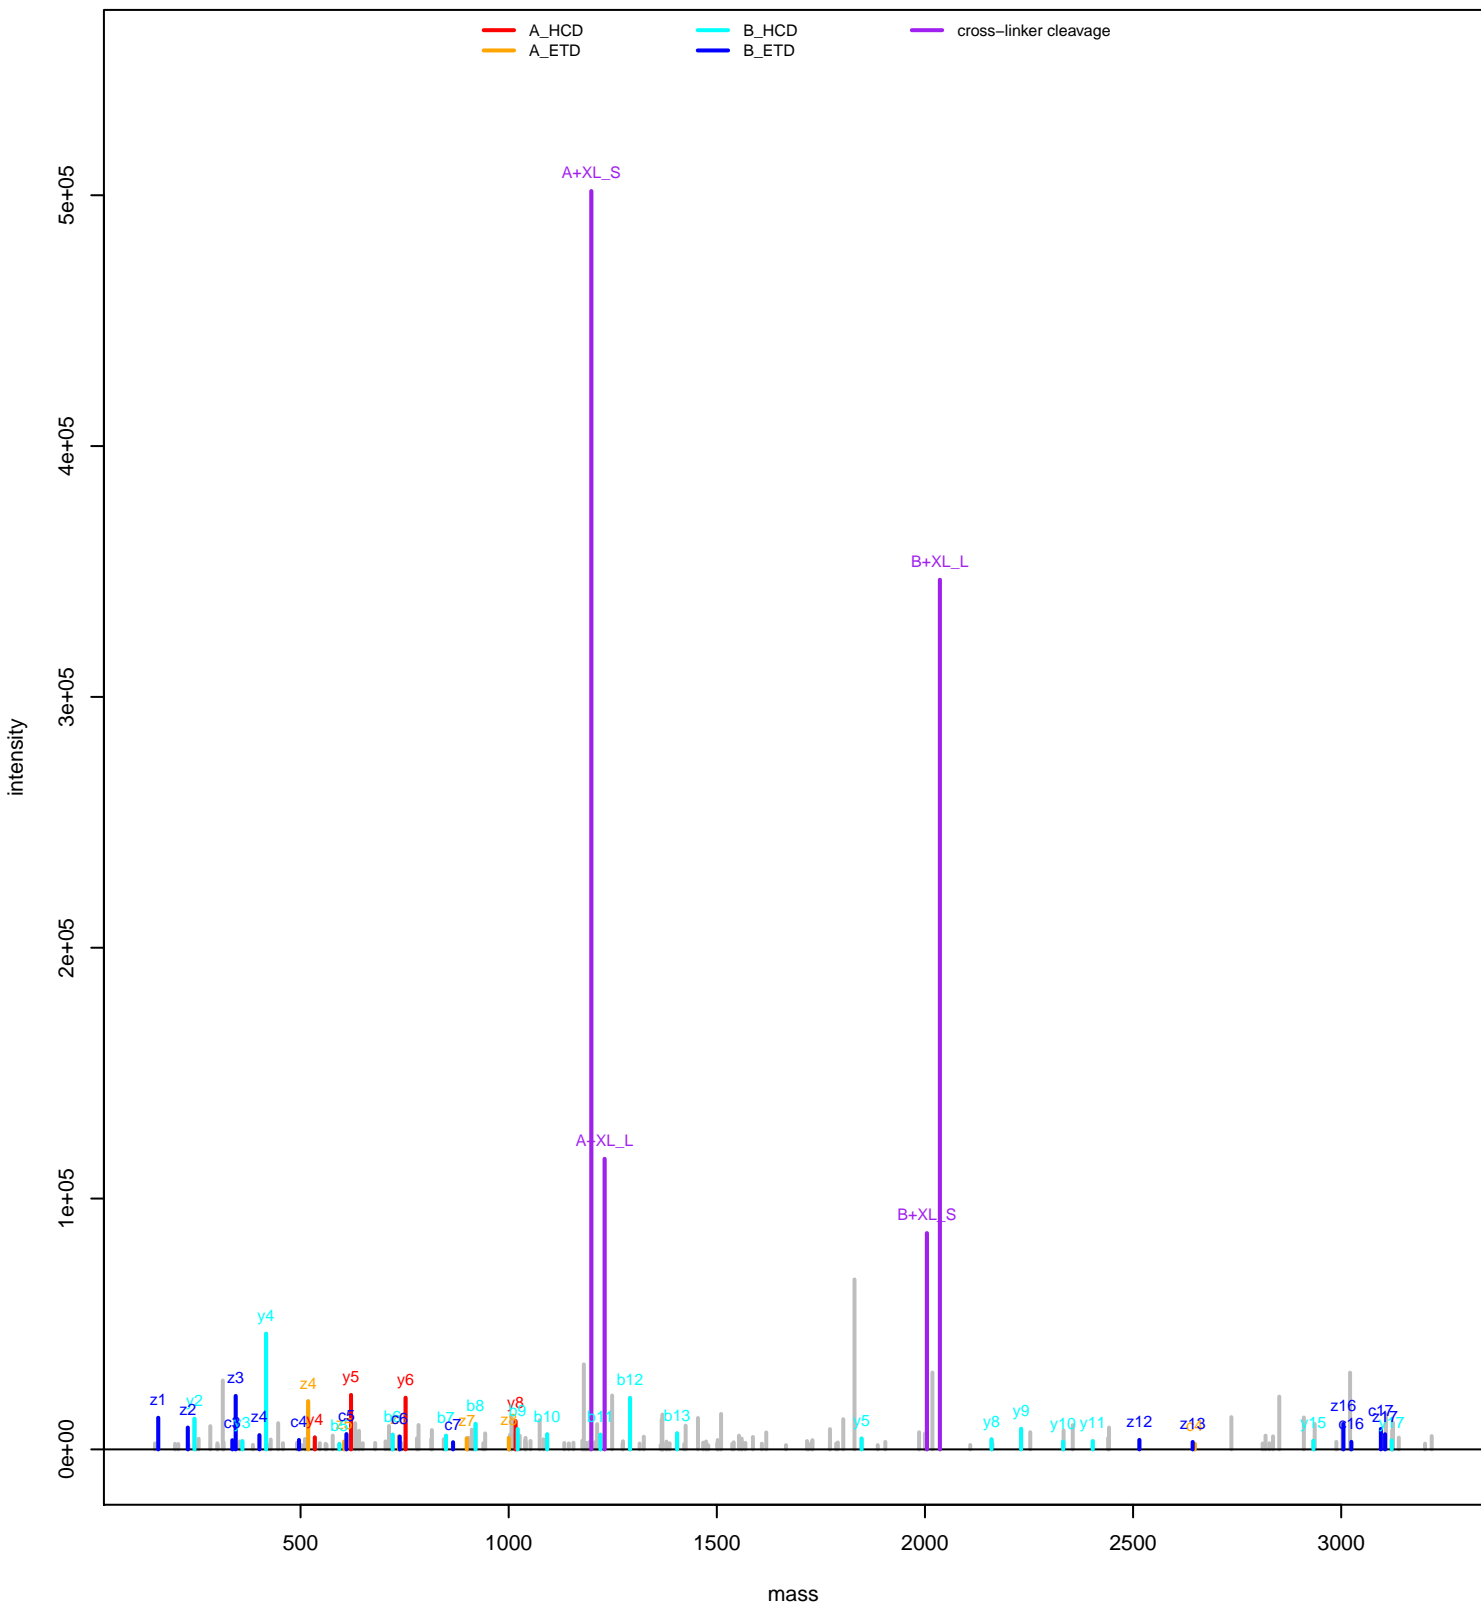

KTYMSDCLK+XL\_S

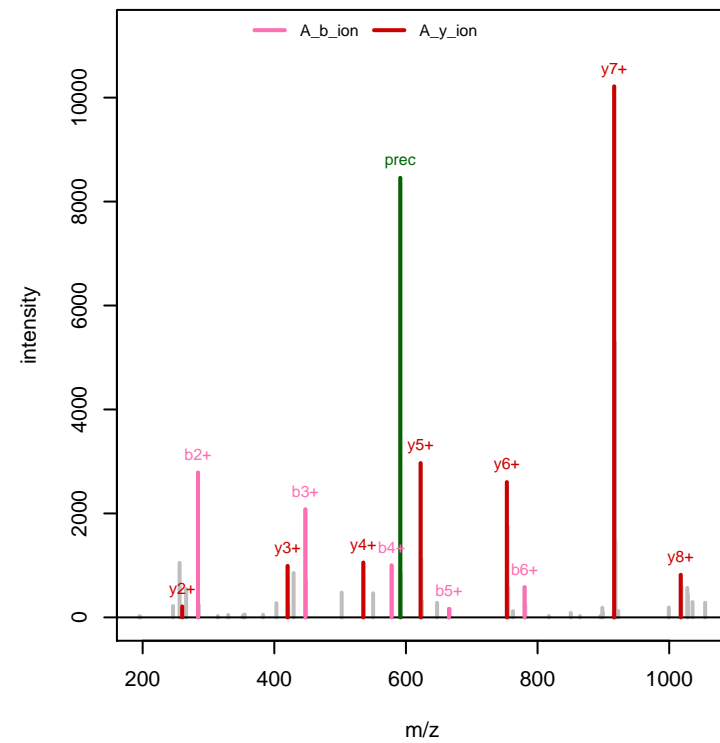

KTYMSDCLK+XL\_L

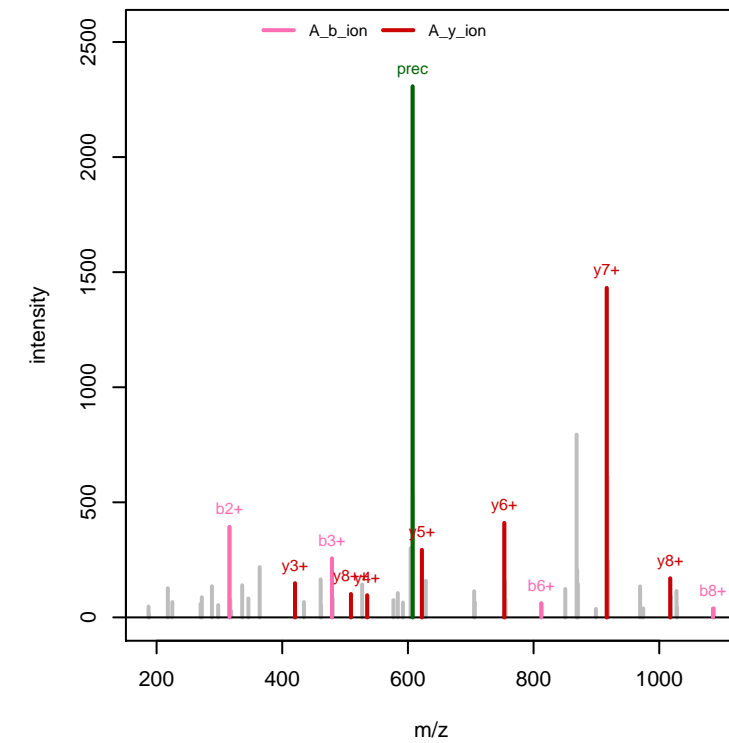

MTSCNQQATAQALKGDAR+XL\_S

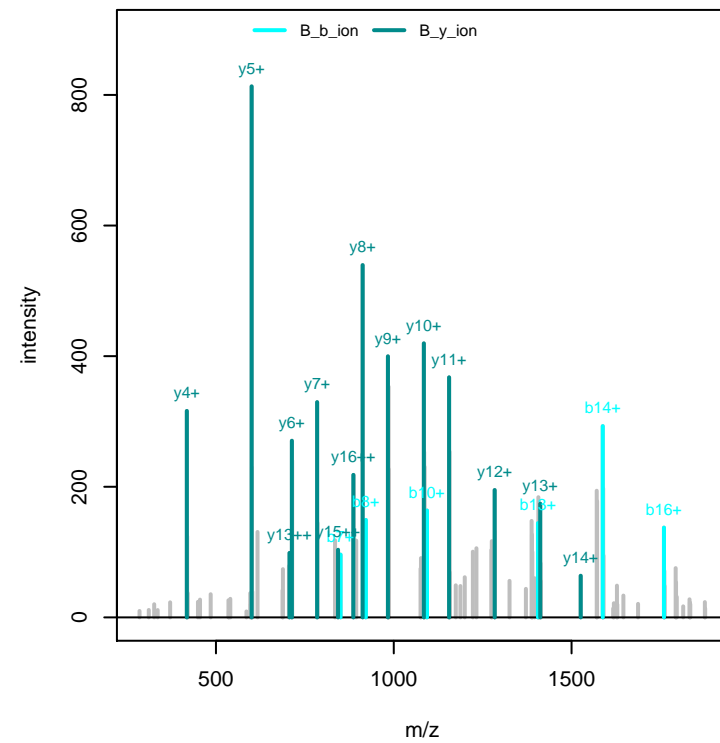

MTSCNQQATAQALKGDAR+XL\_L

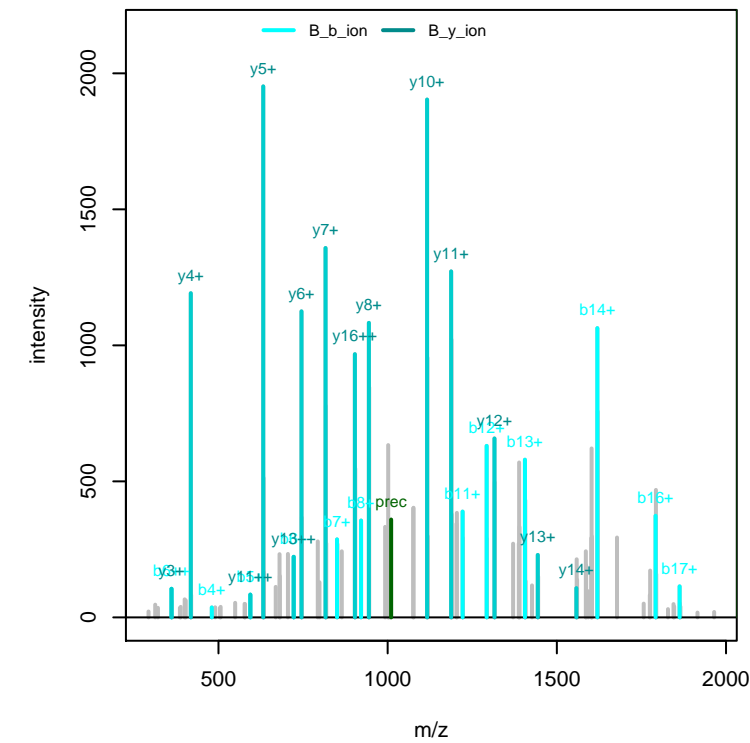

**KGAIVTGK  
FTGVDRKNR**

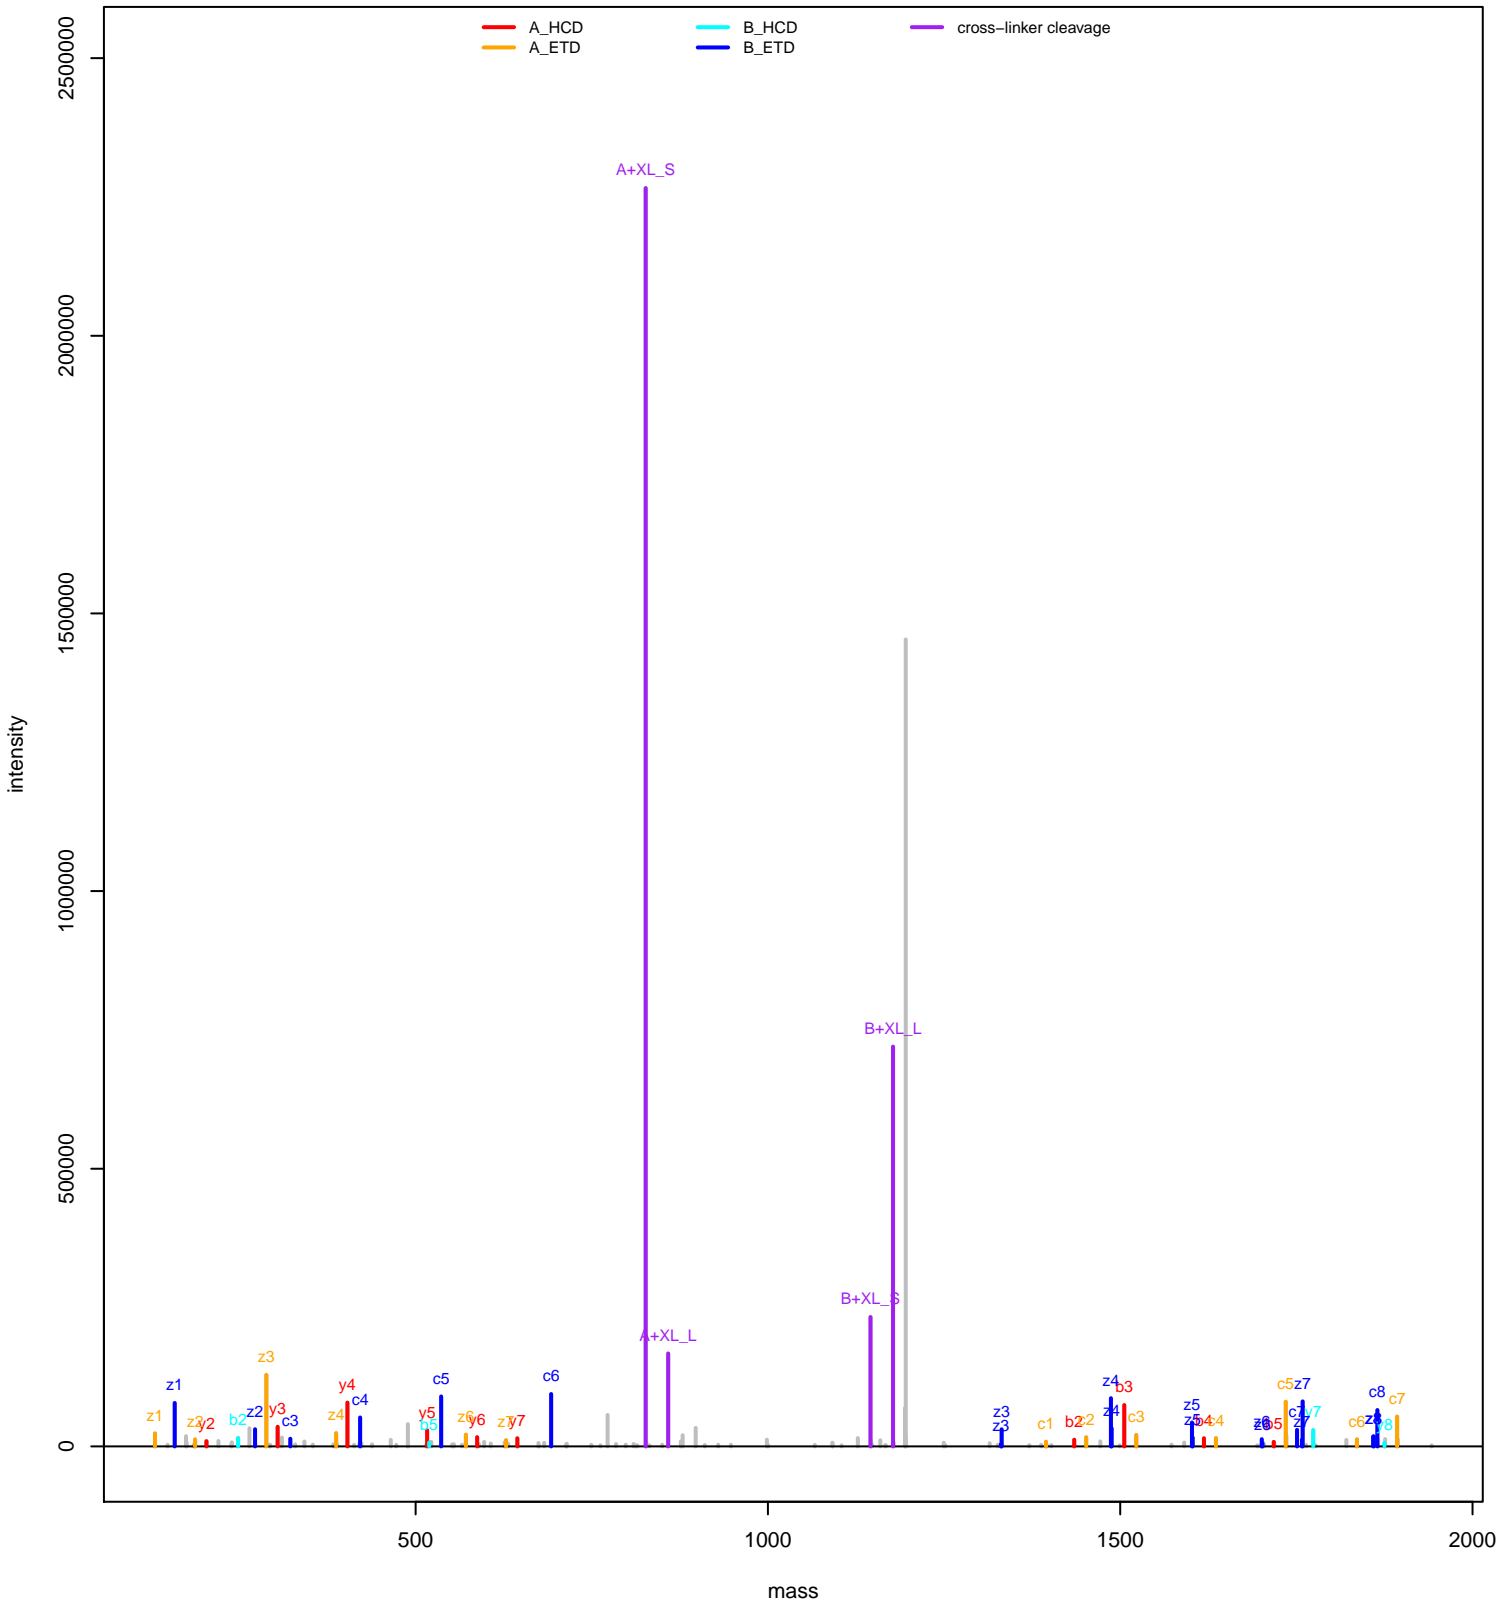

**KGAIVTGK+XL\_S**

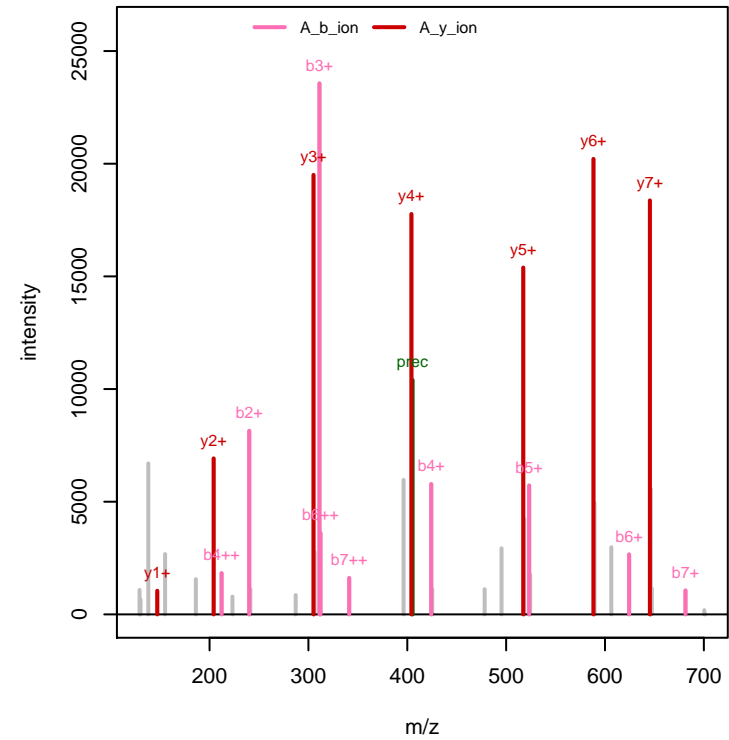

**KGAIVTGK+XL\_L**

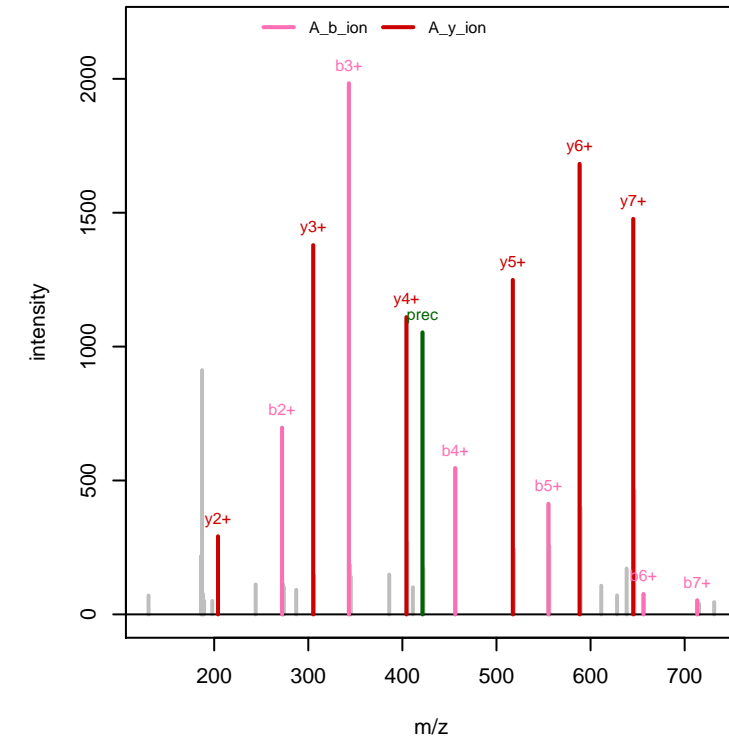

**FTGVDRKNR+XL\_S**

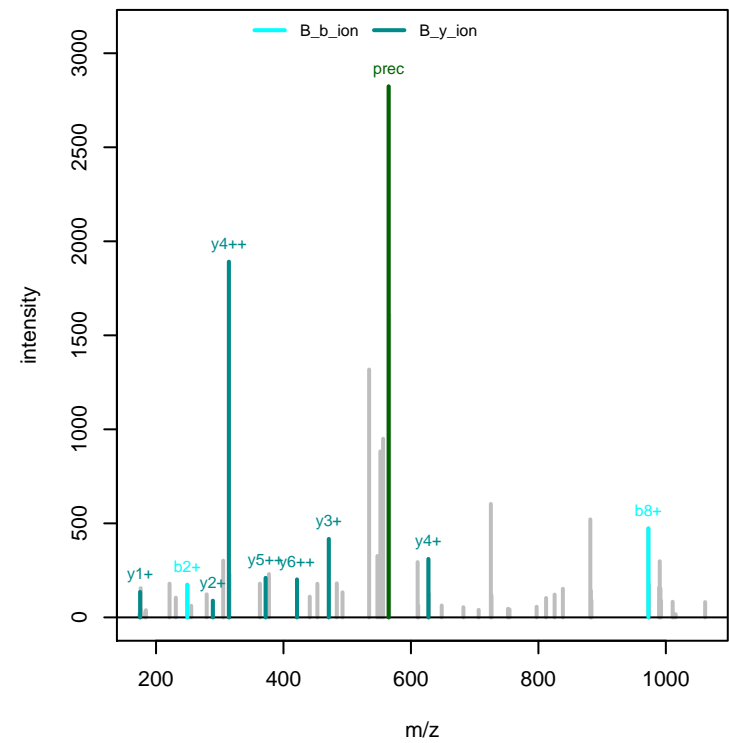

**FTGVDRKNR+XL\_L**

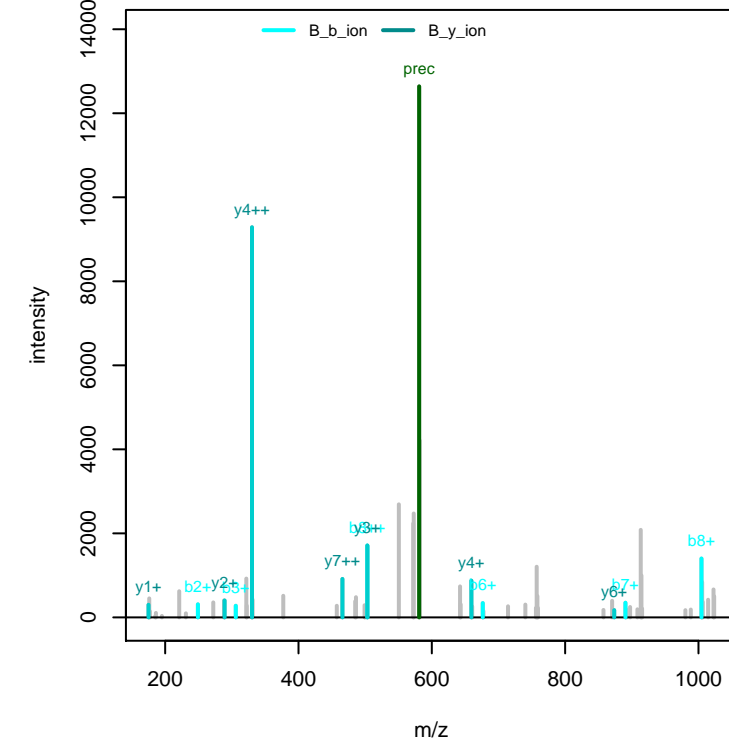

NKEGALK  
EGMoIQKIDK

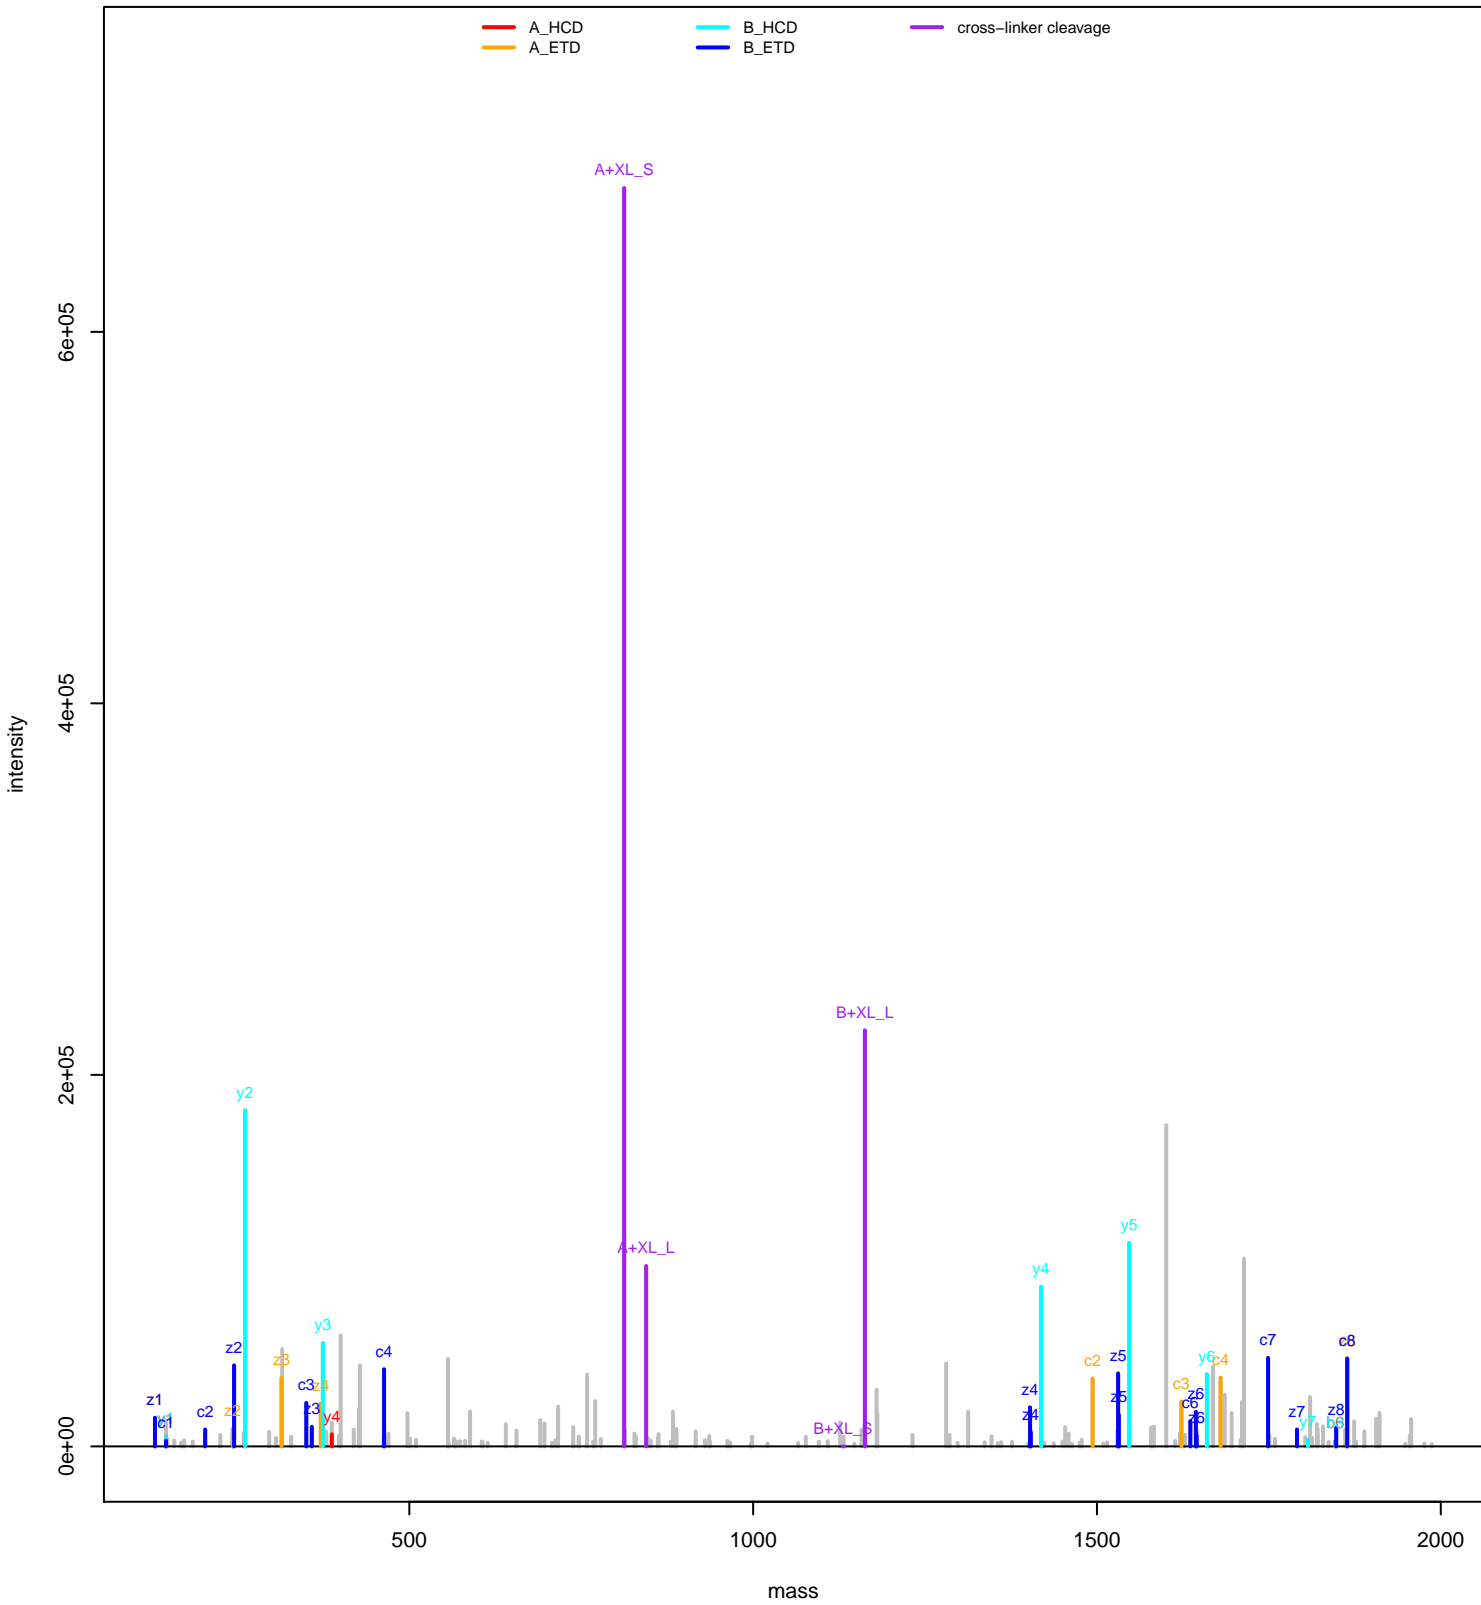

NKEGALK+XL\_S

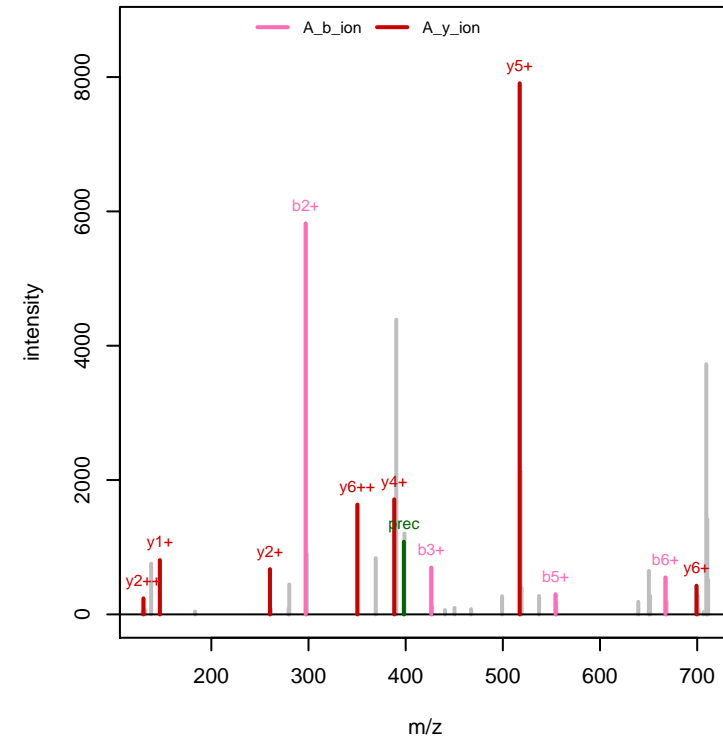

NKEGALK+XL\_L

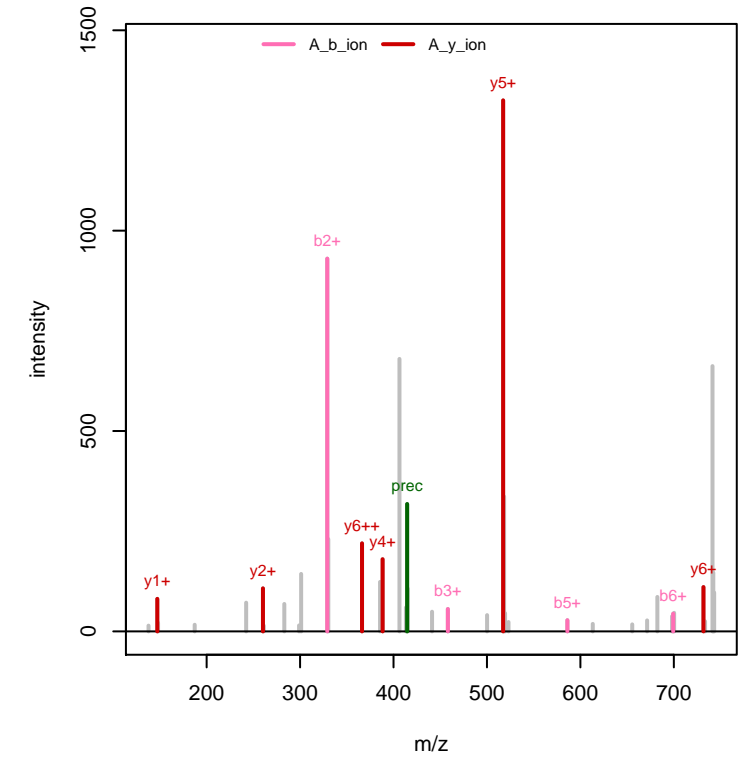

EGMoIQKIDK+XL\_S

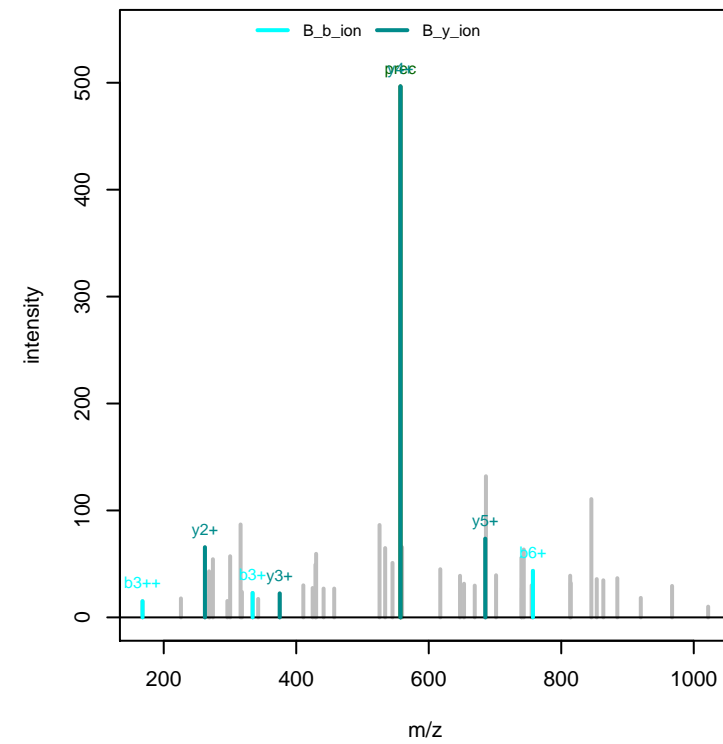

EGMoIQKIDK+XL\_L

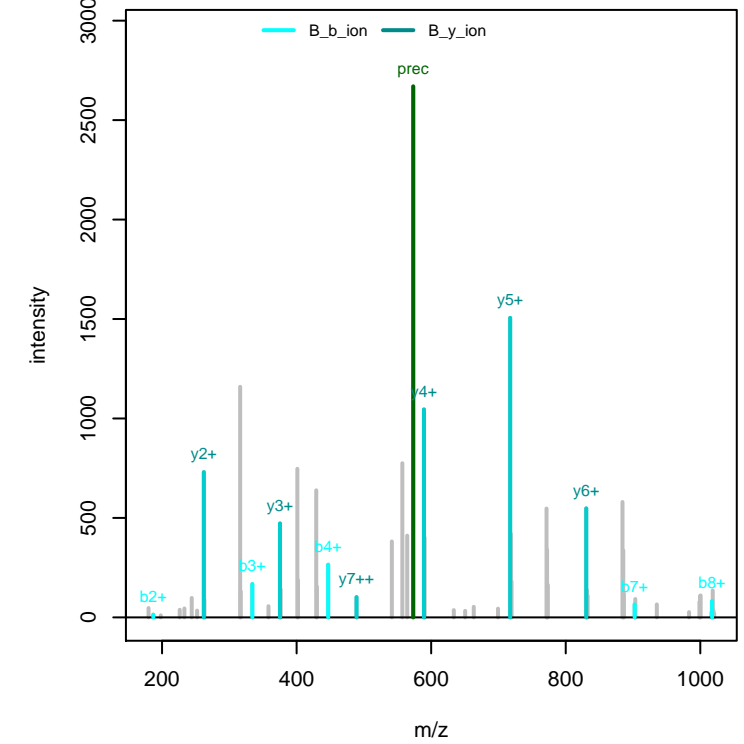



KGEDVEK  
AKDEADEKDAIATVNK

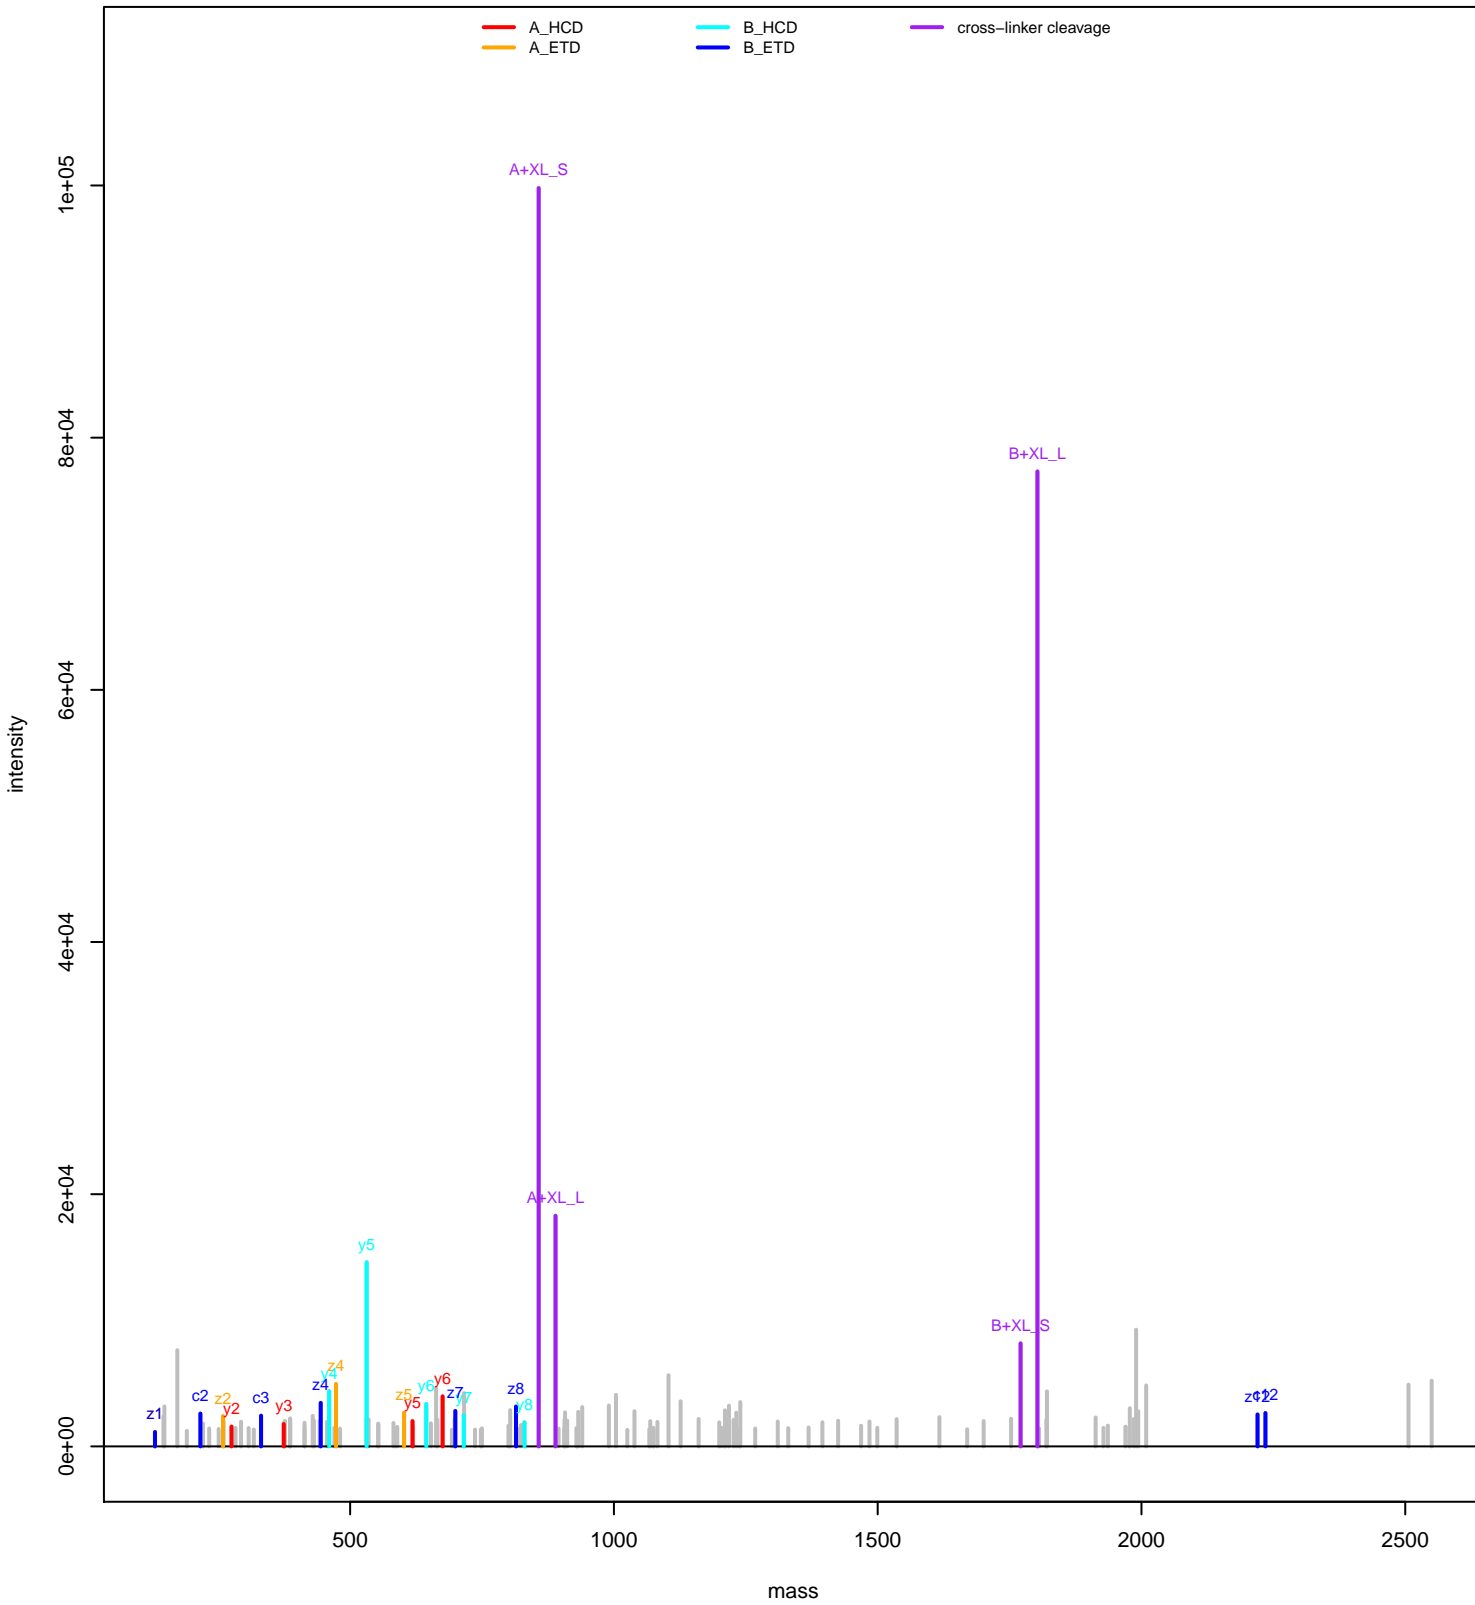

KGEDVEK+XL\_S

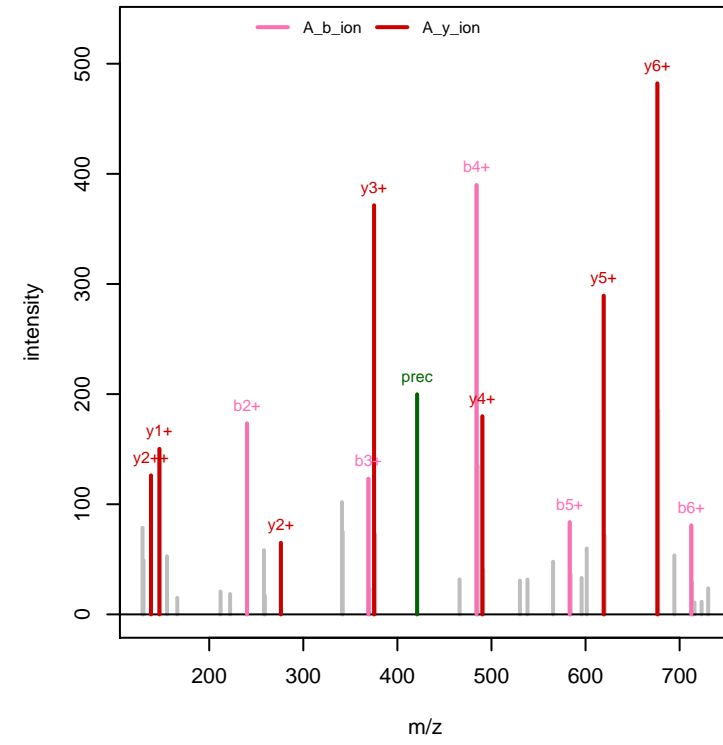

KGEDVEK+XL\_L

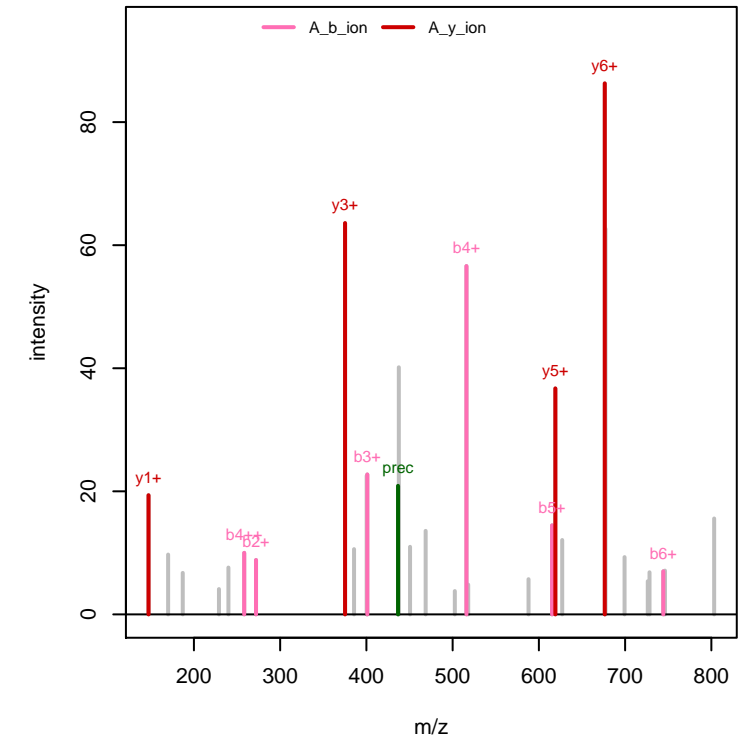

AKDEADEKDAIATVNK+XL\_S

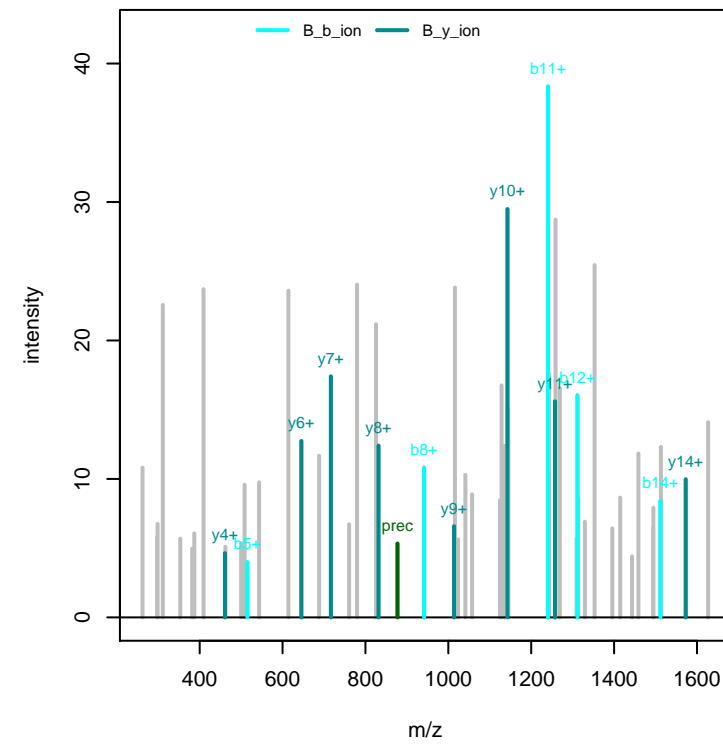

AKDEADEKDAIATVNK+XL\_L

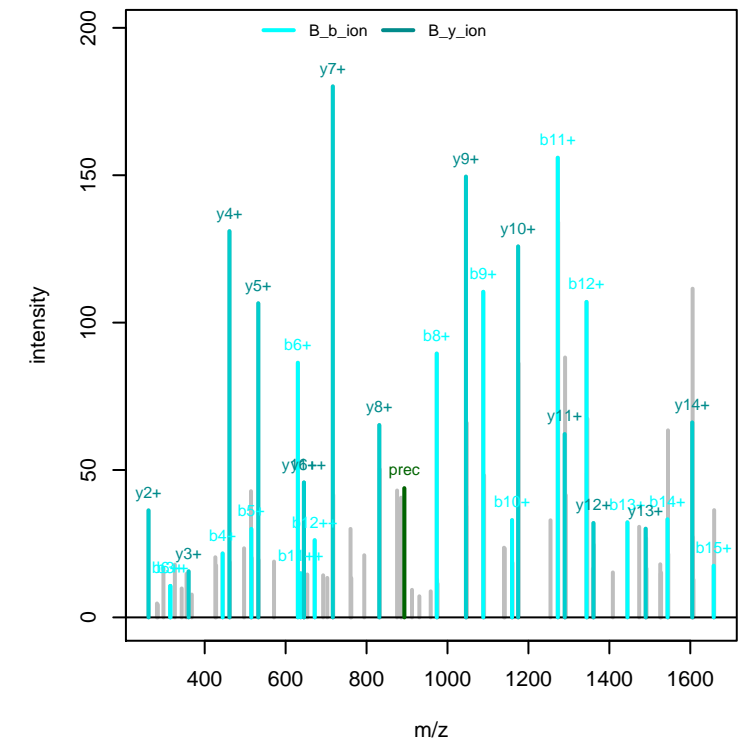

VPNGKNLDAGK  
VVNGLGKFTGANTLEVEGENGK

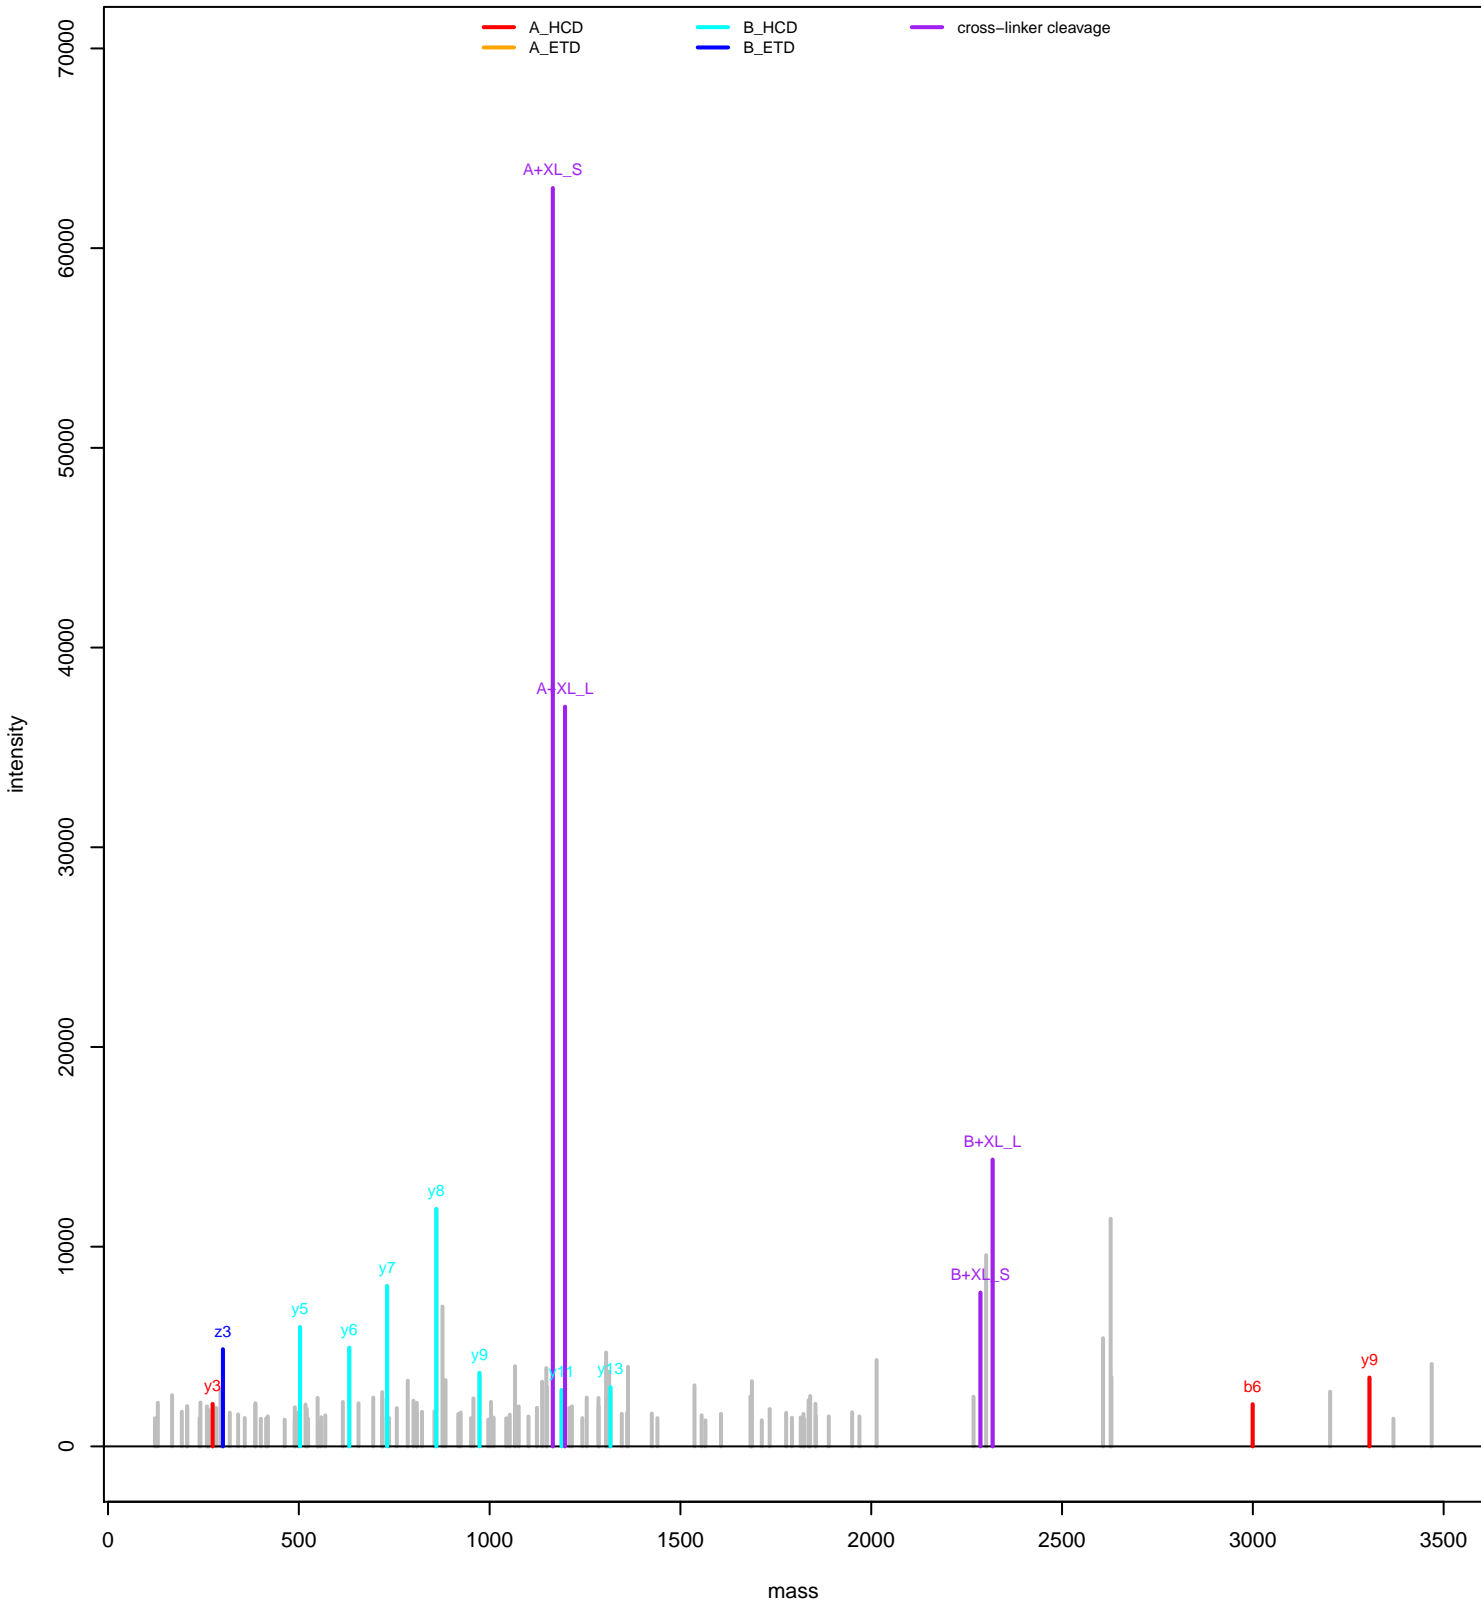

VPNGKNLDAGK+XL\_S

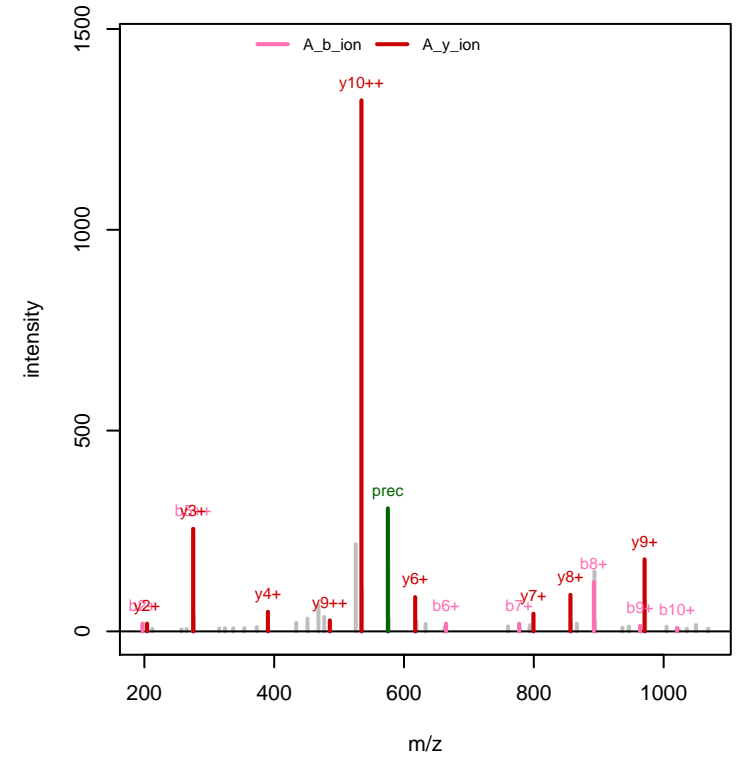

VPNGKNLDAGK+XL\_L

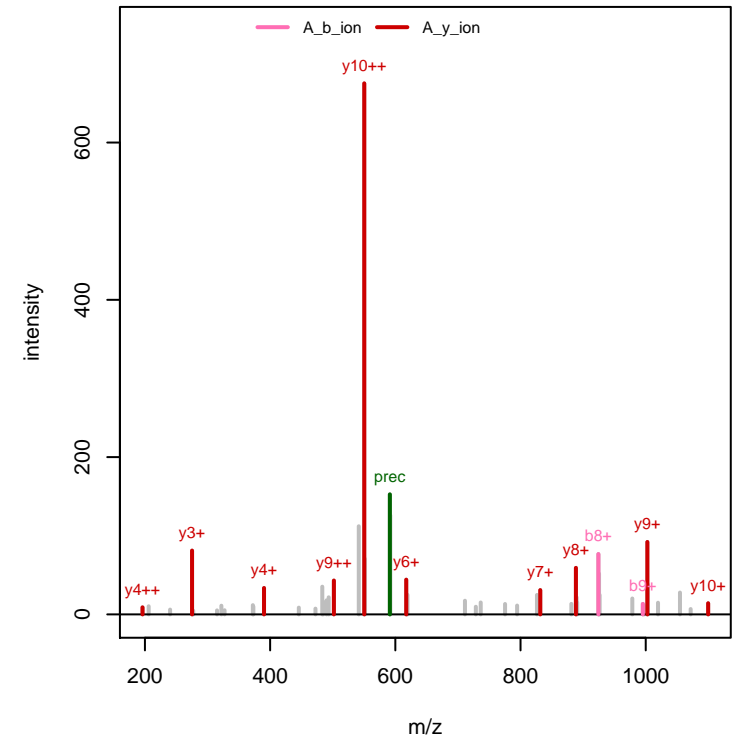

VVNGLGKFTGANTLEVEGENGK+XL\_S

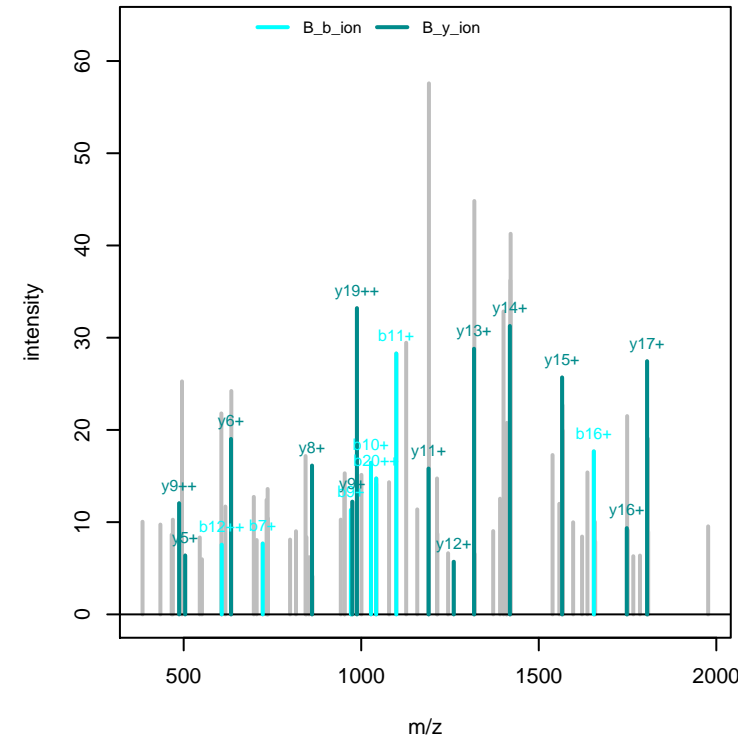

VVNGLGKFTGANTLEVEGENGK+XL\_L

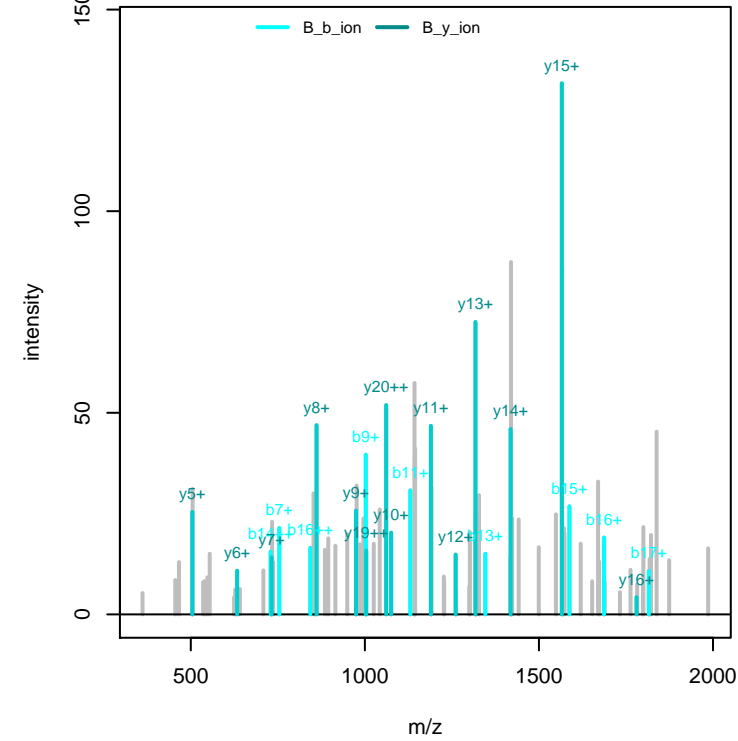

IAMQKSGR  
IAMQKSGR

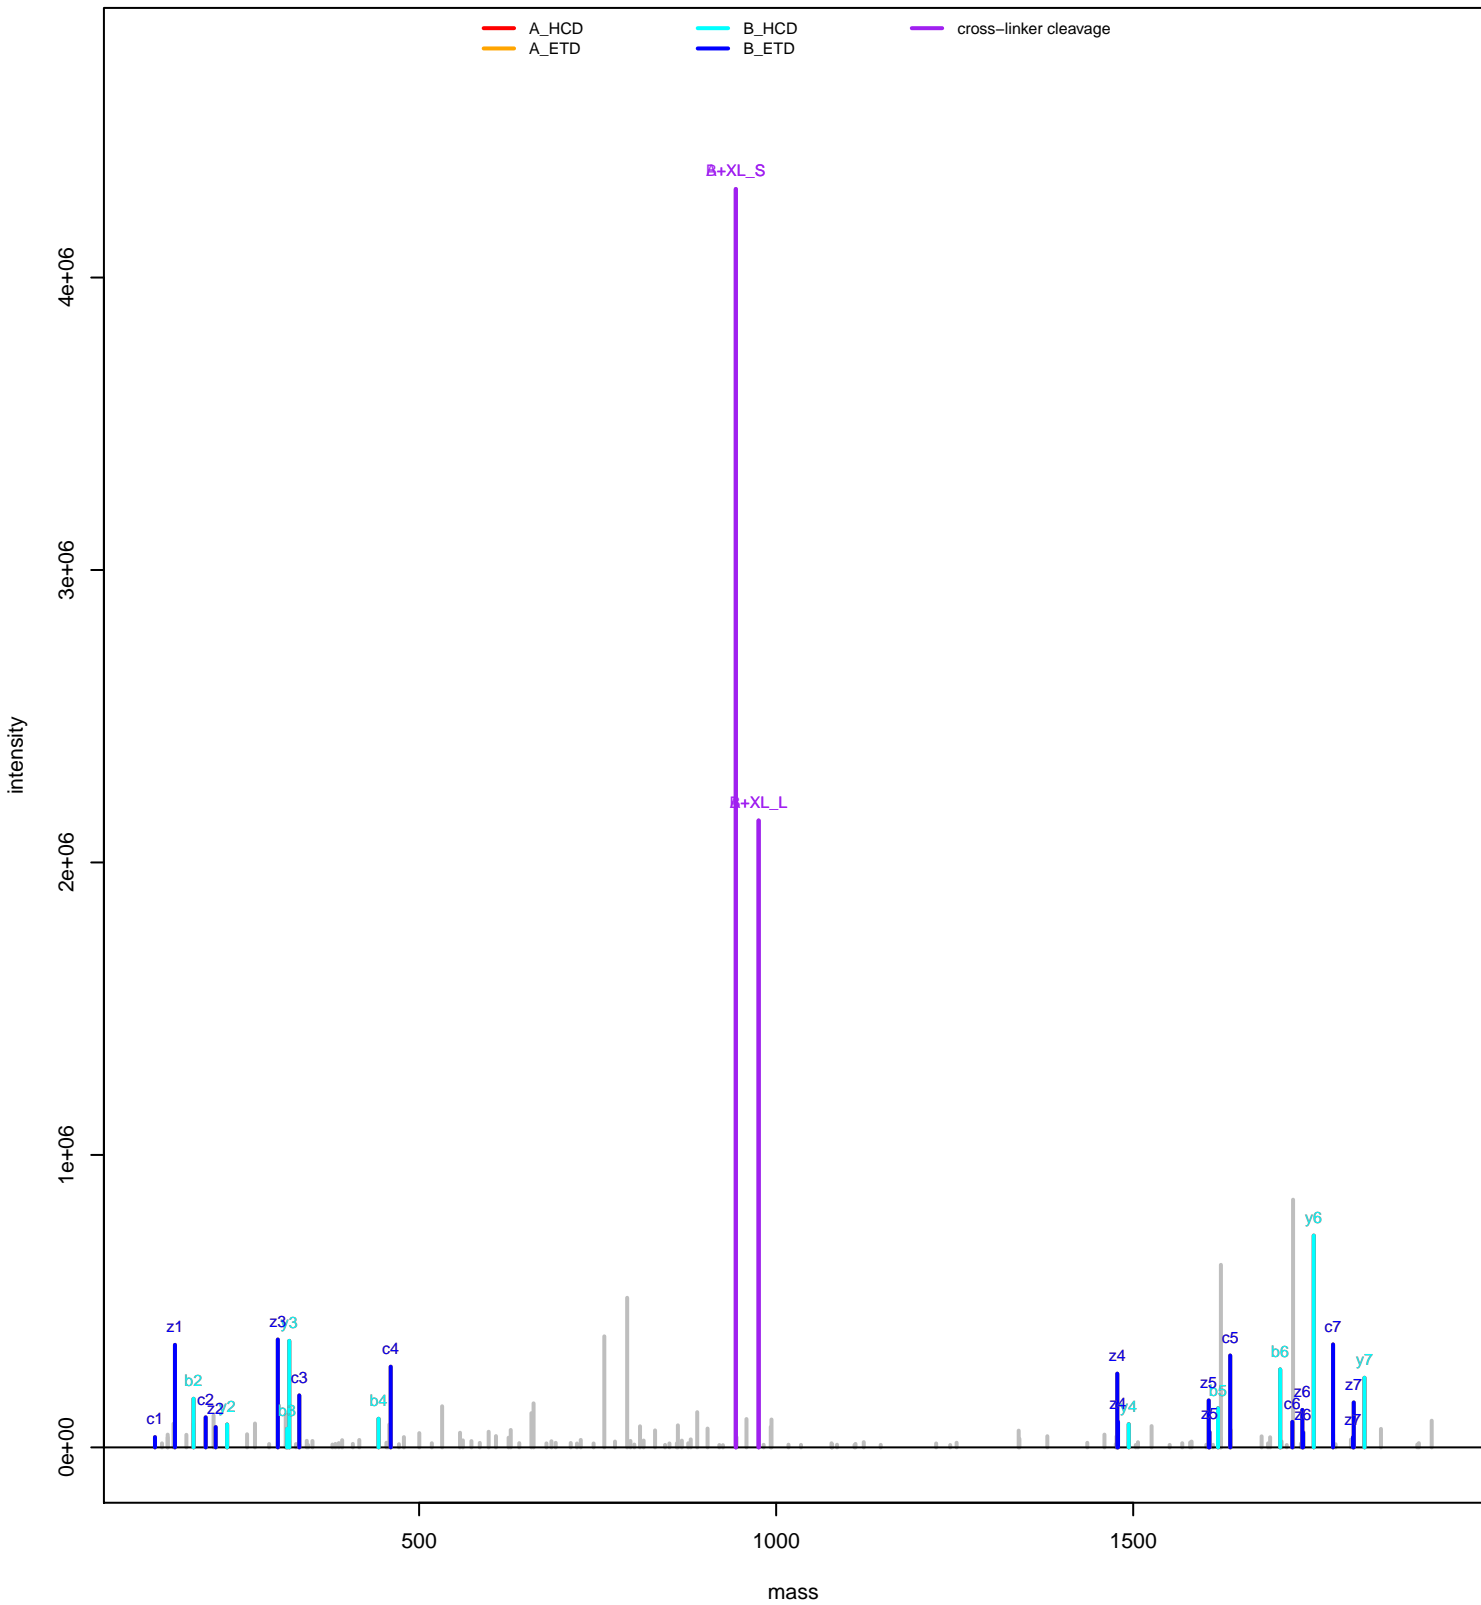

IAMQKSGR+XL\_S

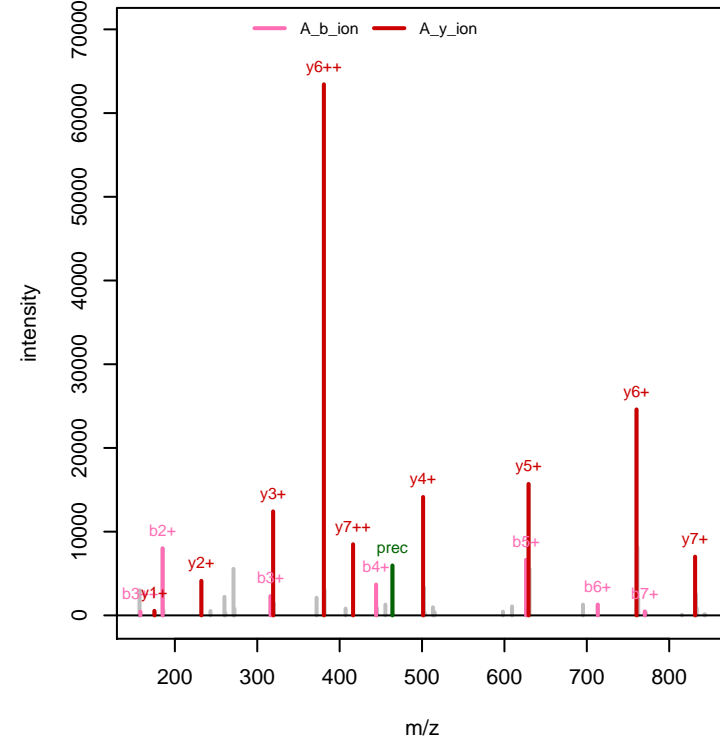

IAMQKSGR+XL\_L

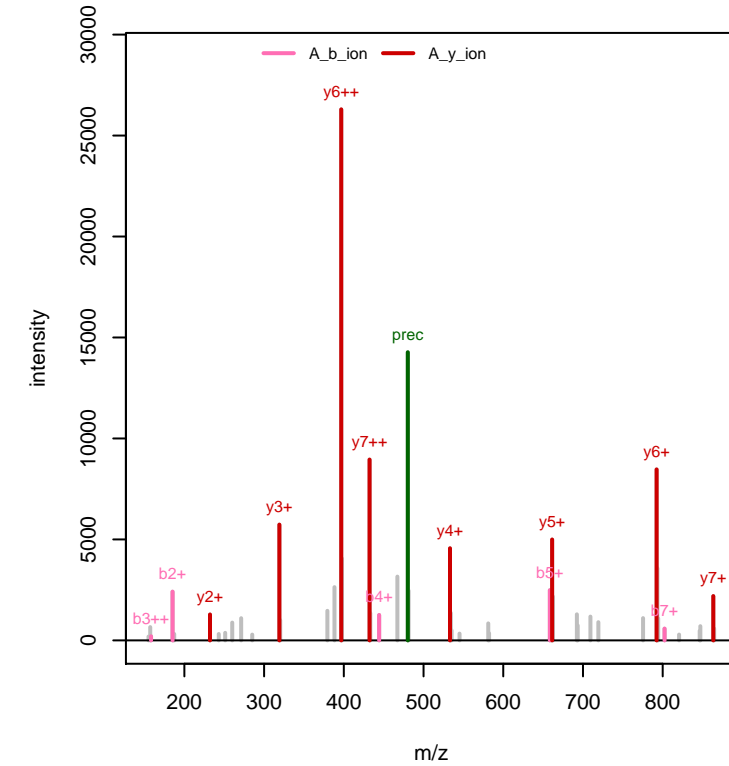

IAMQKSGR+XL\_S

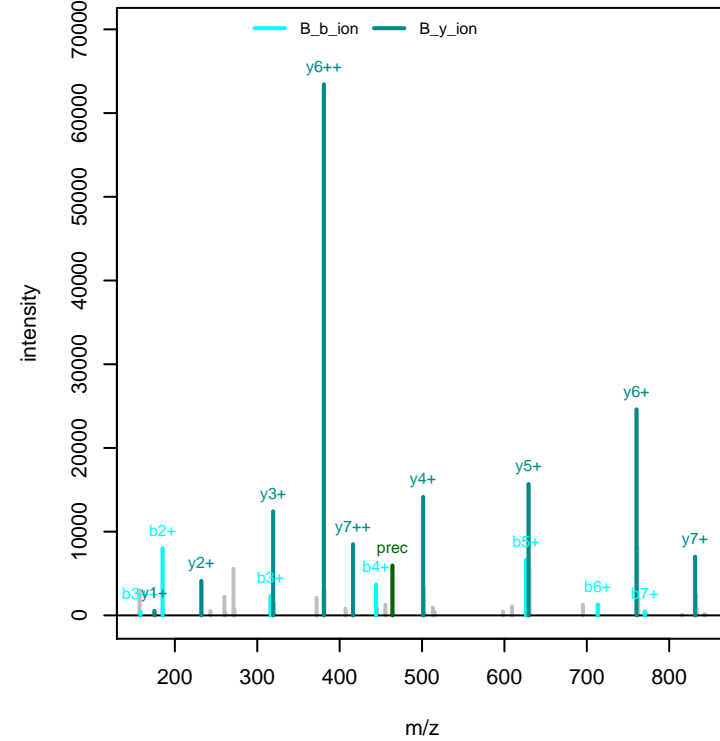

IAMQKSGR+XL\_L

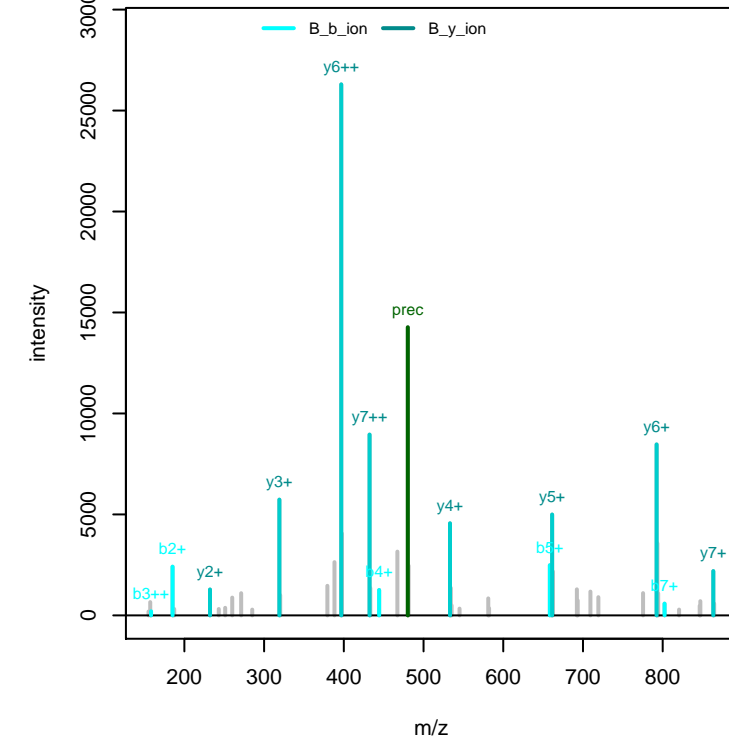

TPNLGKK  
TPNLGKK

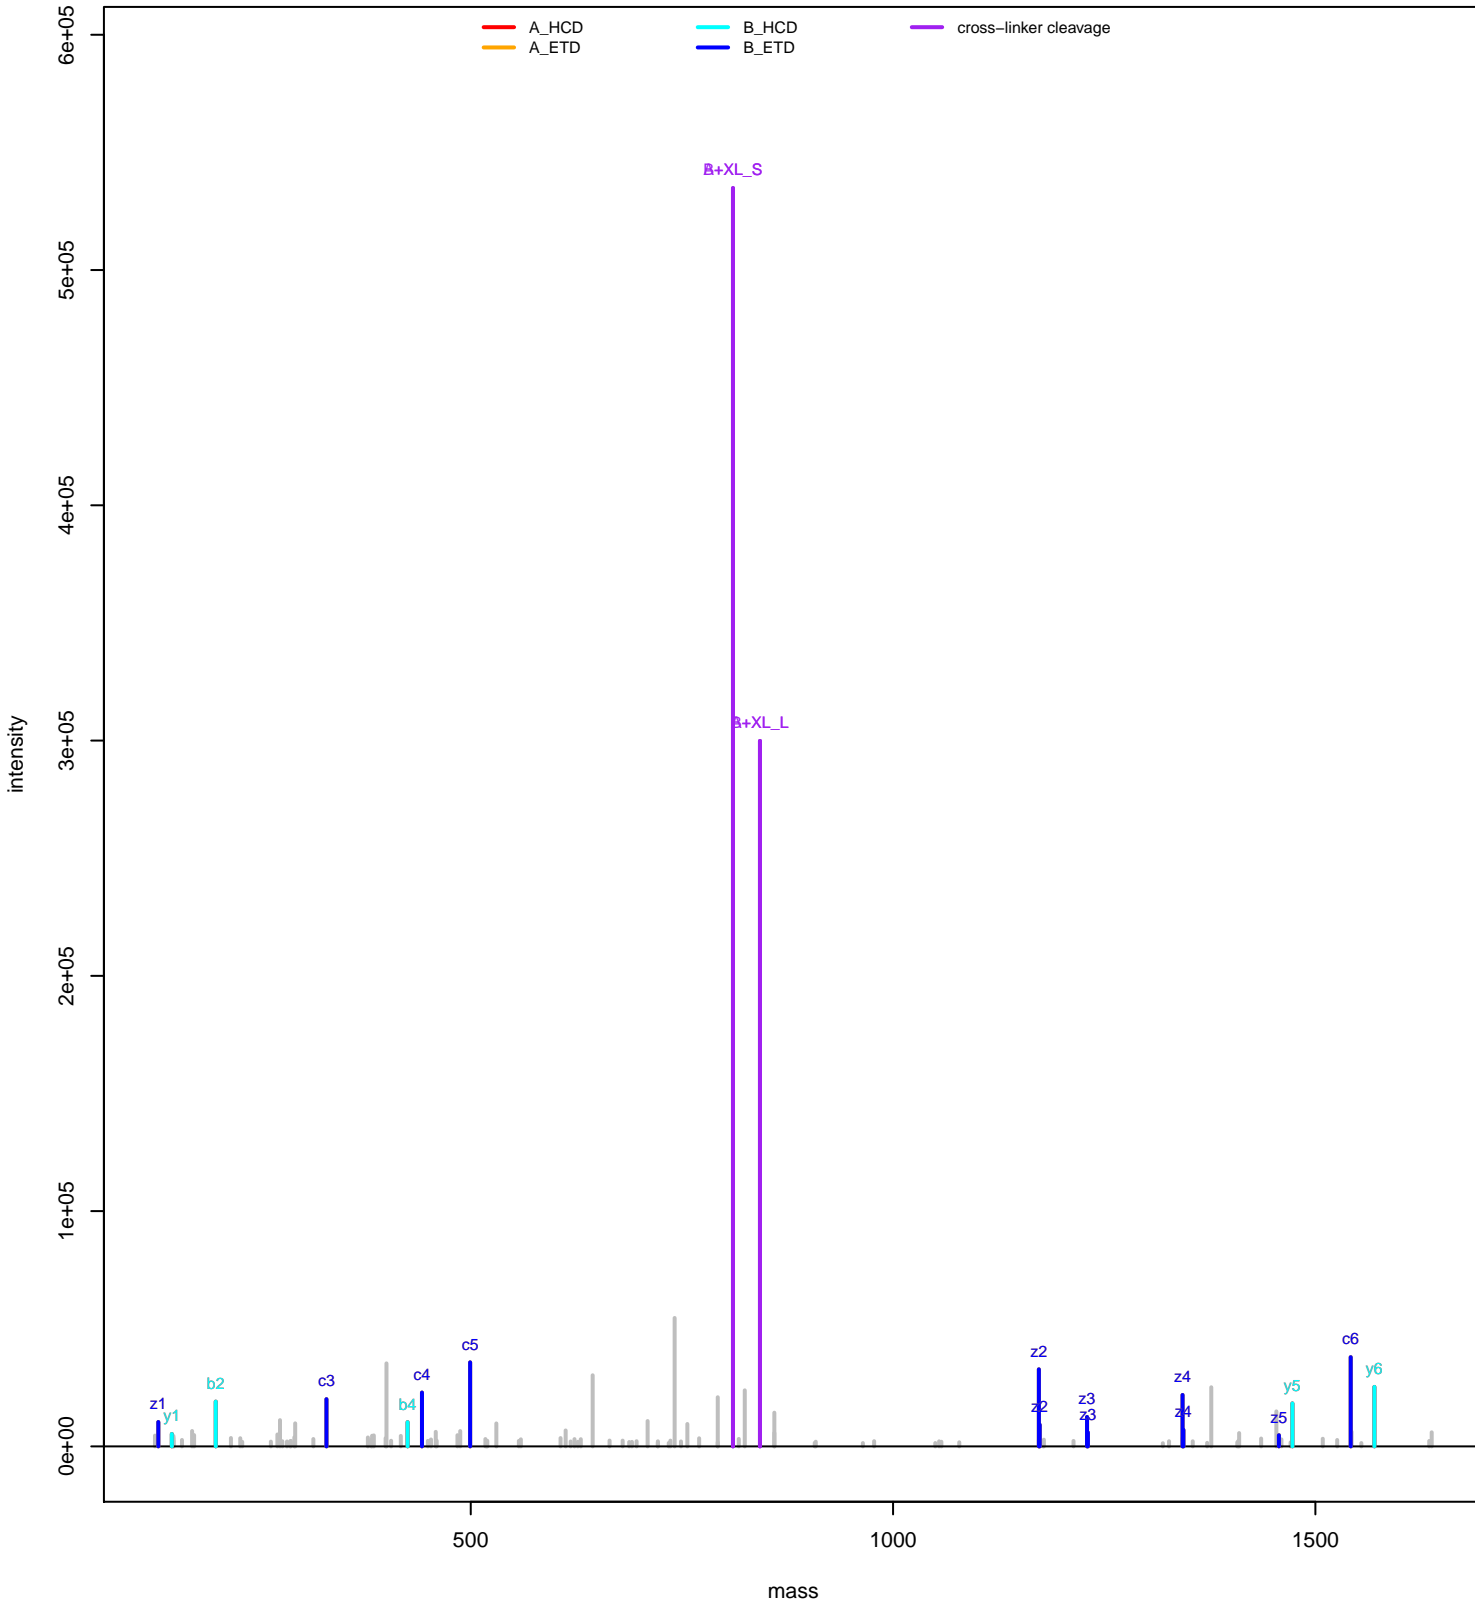

TPNLGKK+XL\_S

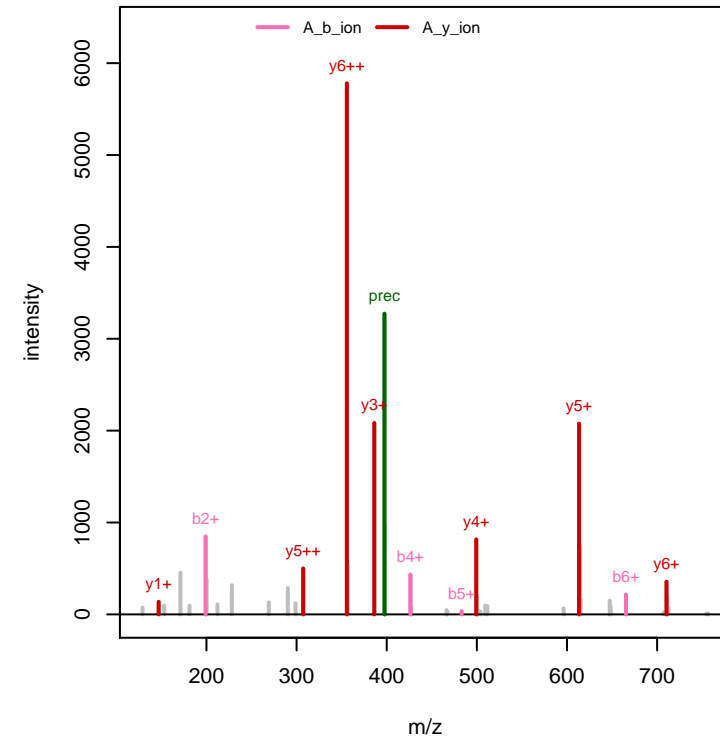

TPNLGKK+XL\_L

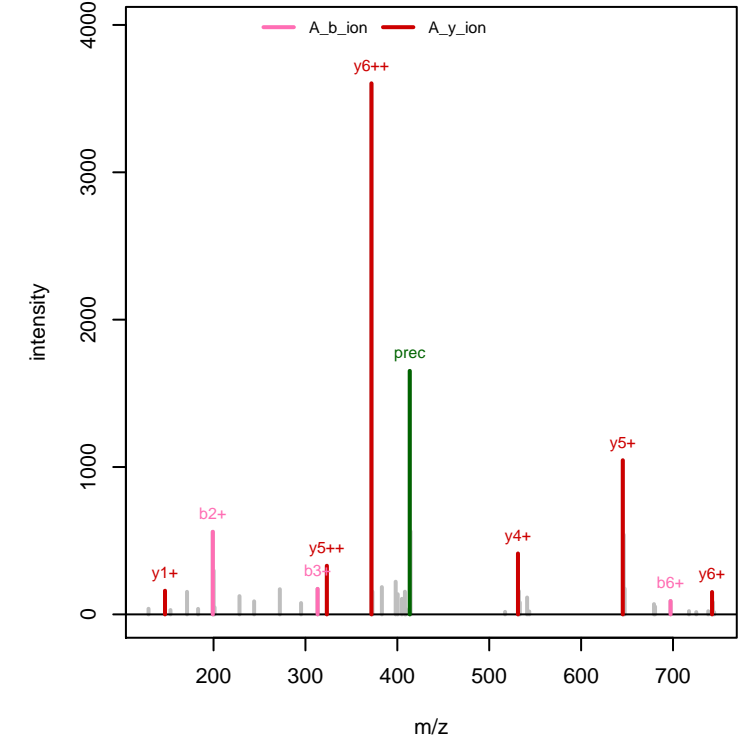

TPNLGKK+XL\_S

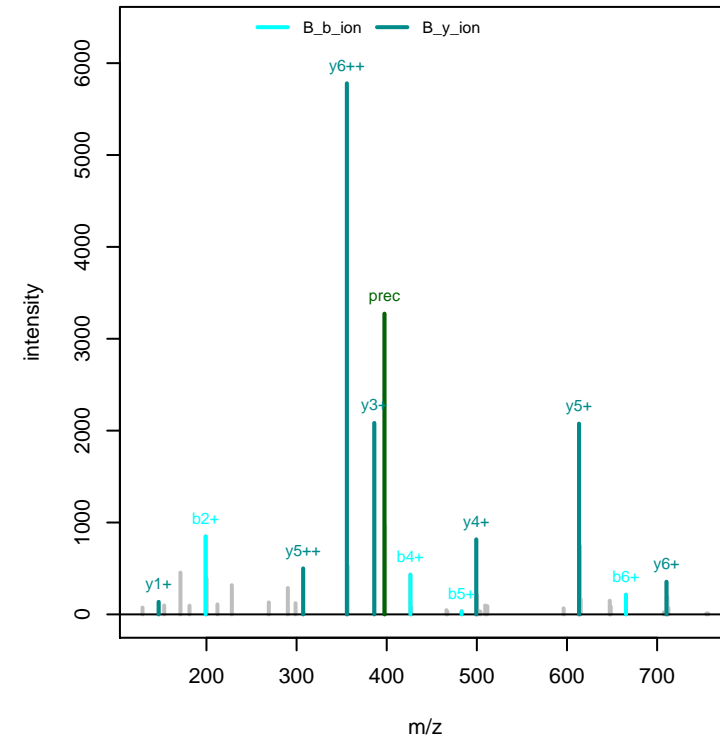

TPNLGKK+XL\_L

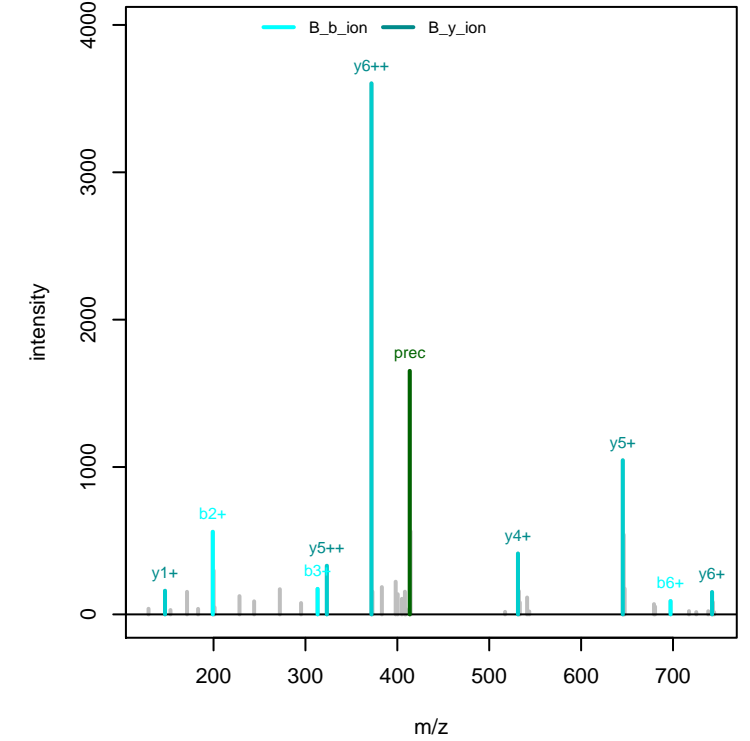

QPAGKDFAFAGSSVK  
LIAAKGSPIQPTLDSLK

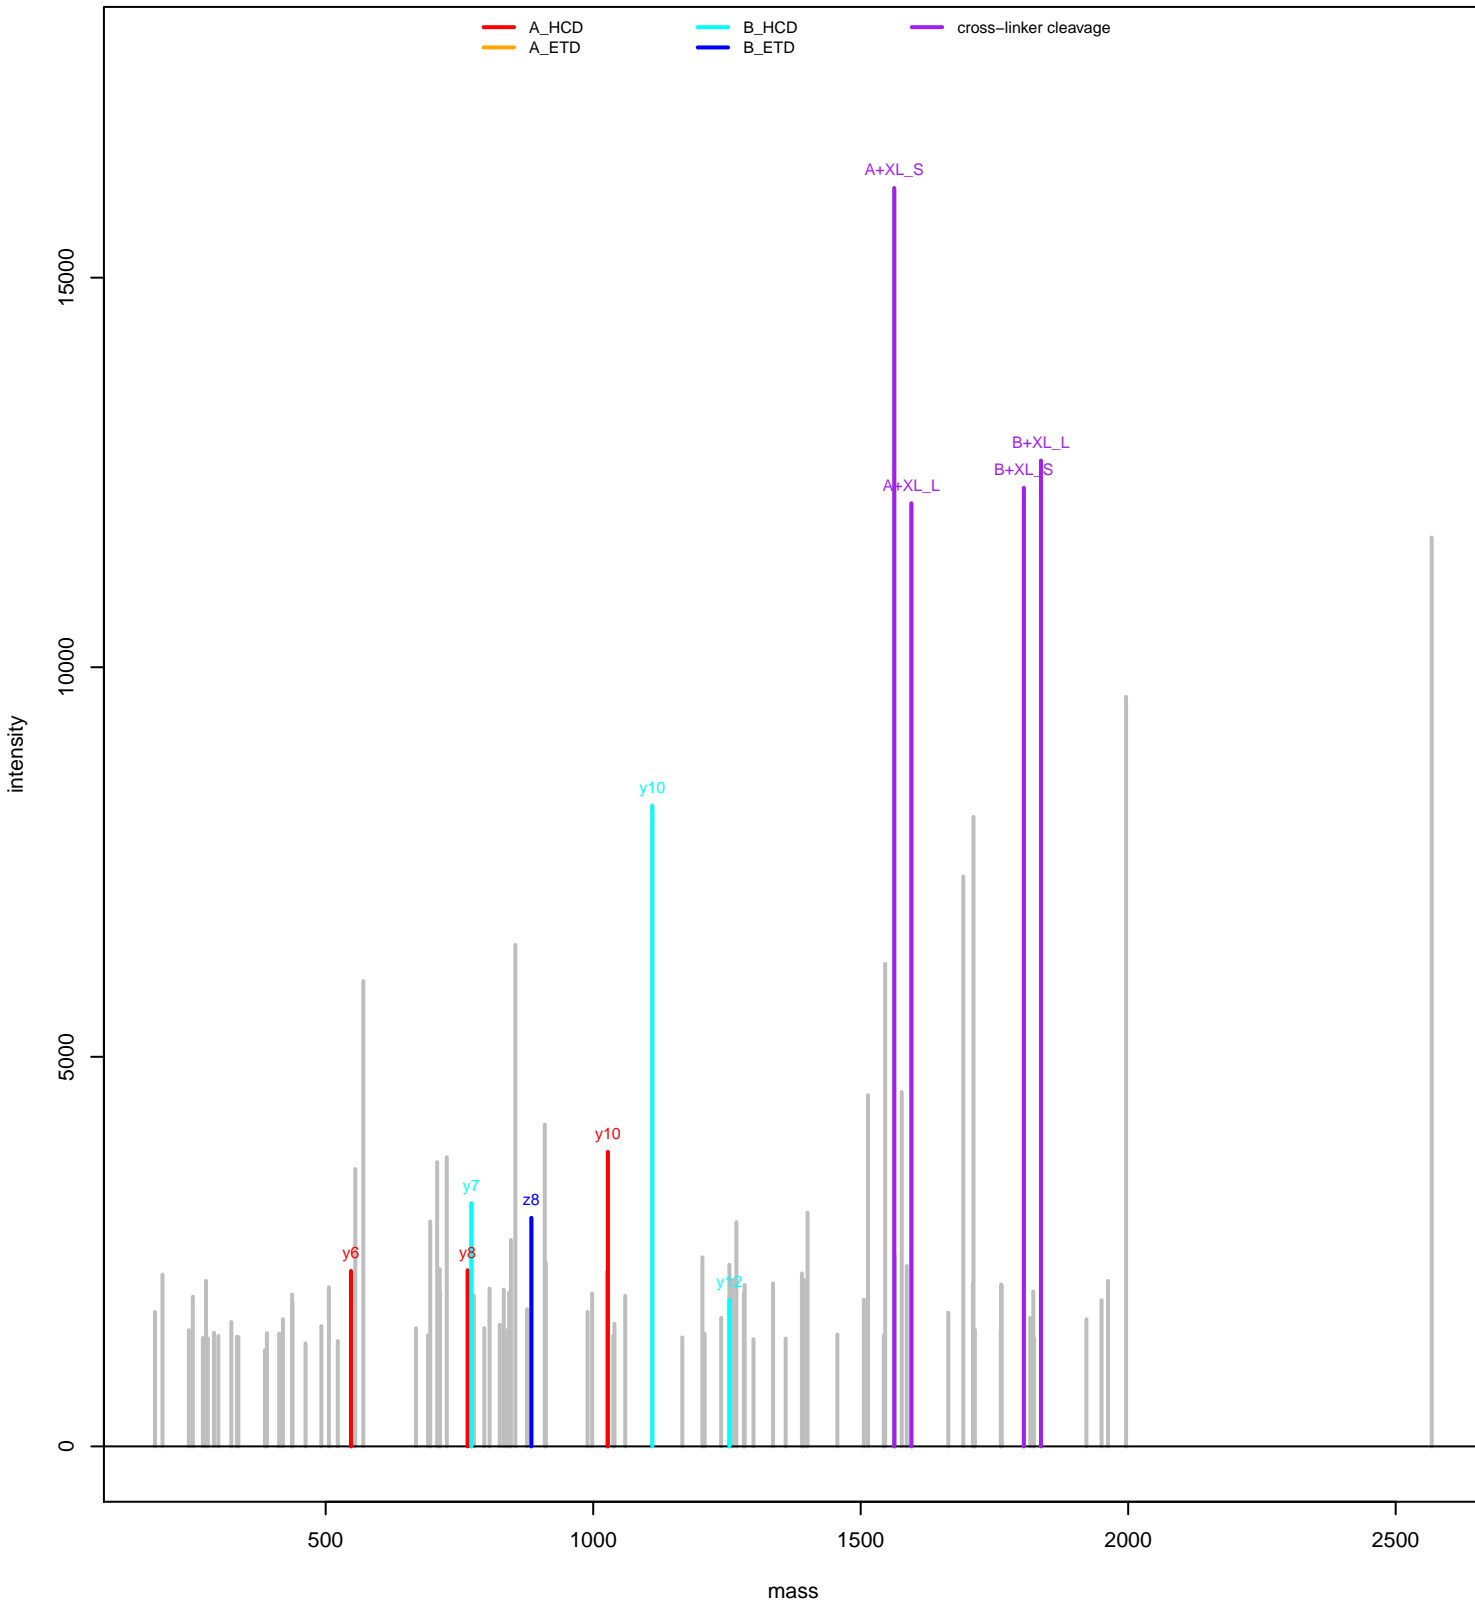

QPAGKDFAFAGSSVK+XL\_S

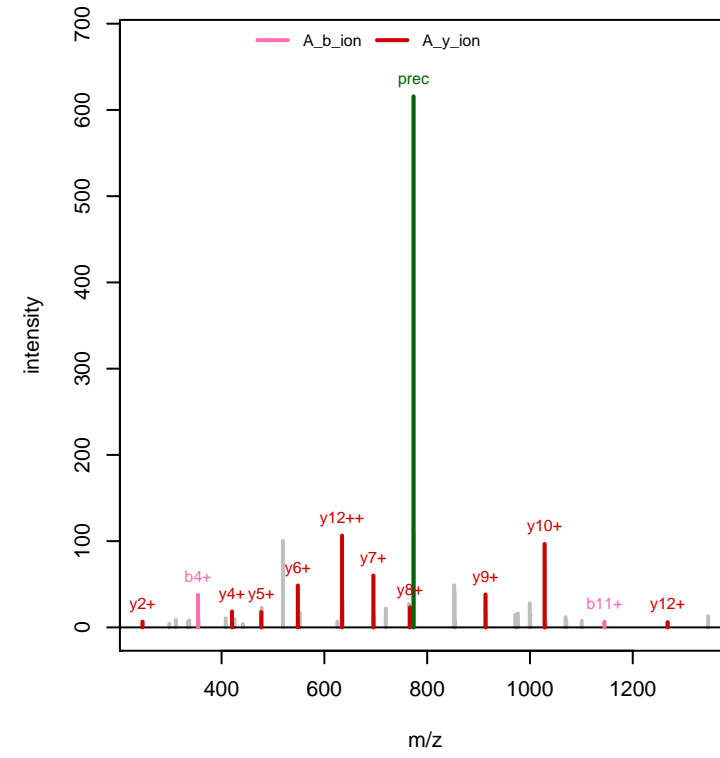

QPAGKDFAFAGSSVK+XL\_L

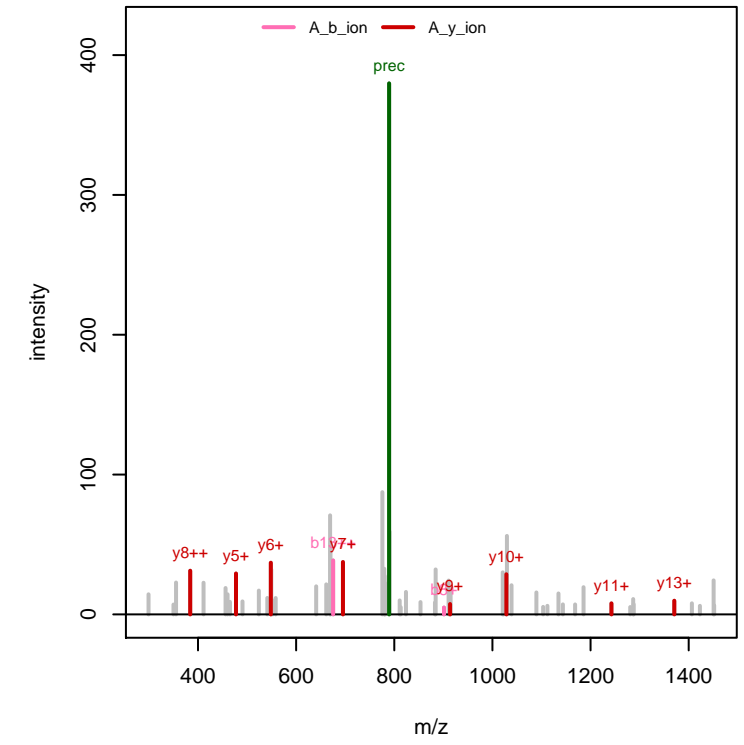

LIAAKGSPIQPTLDSLK+XL\_S

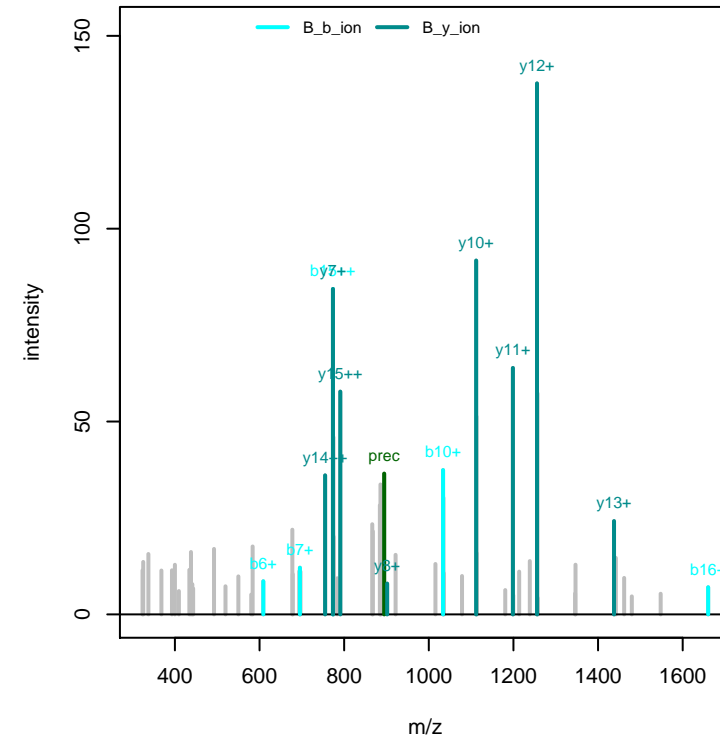

LIAAKGSPIQPTLDSLK+XL\_L

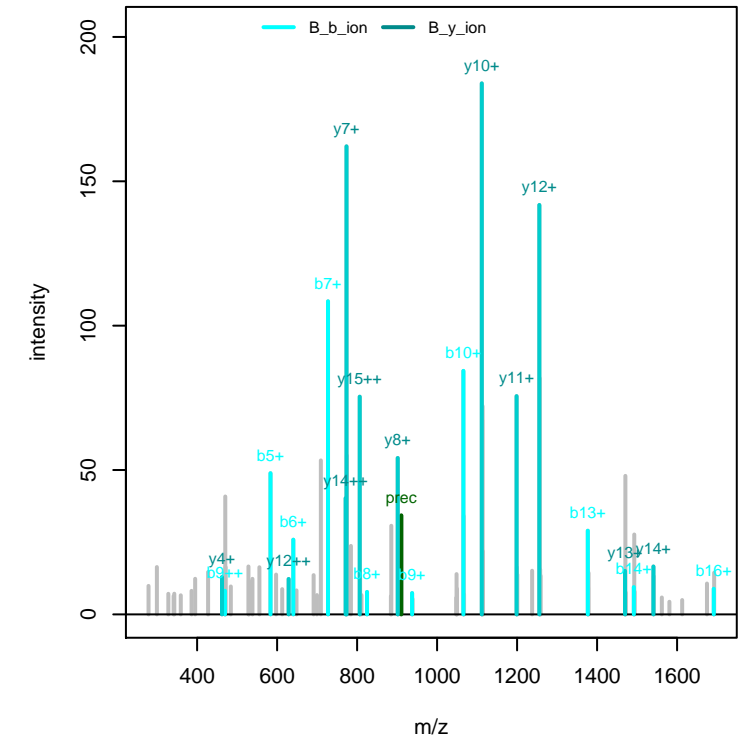

AAEIAKK  
AHKEGLTLK

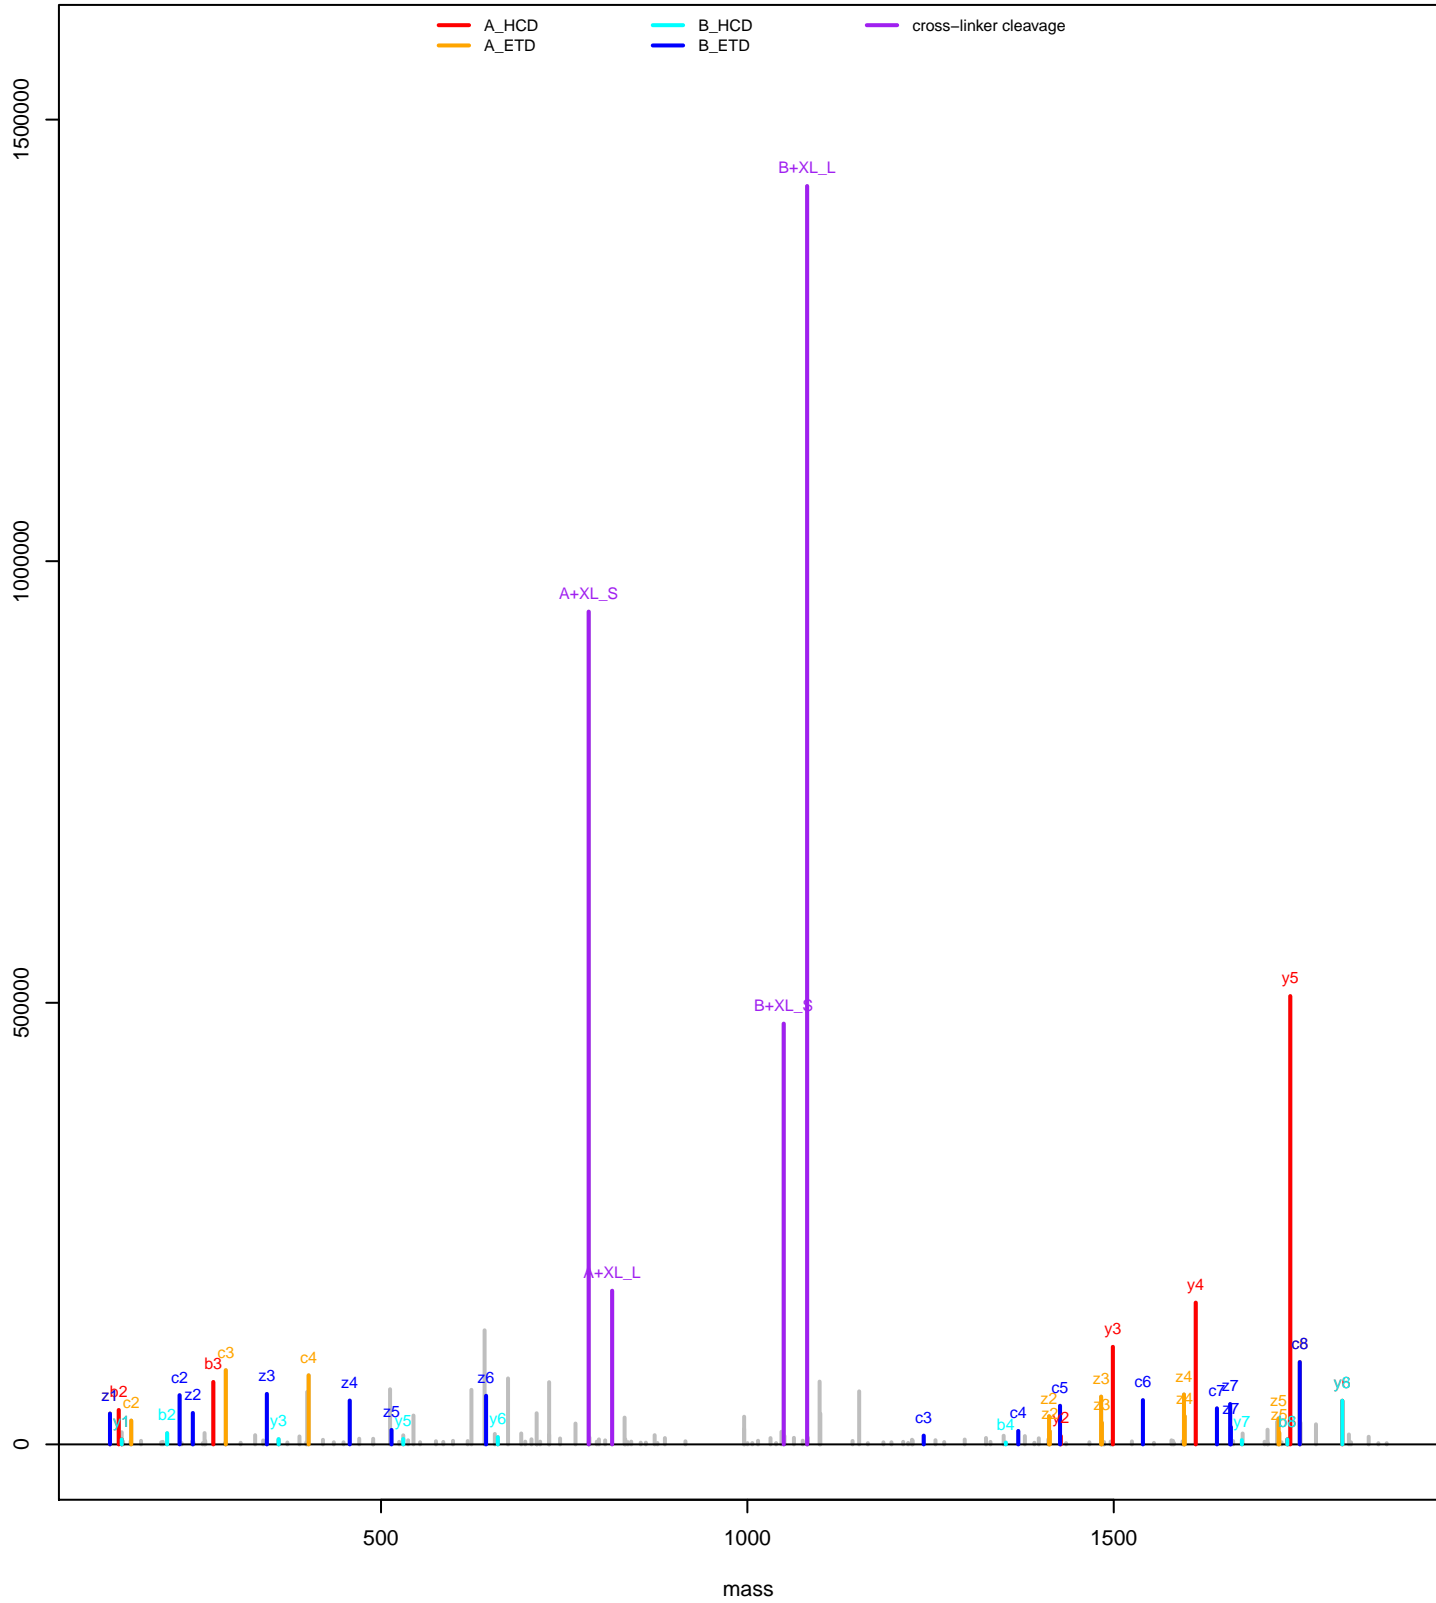

AAEIAKK+XL\_S

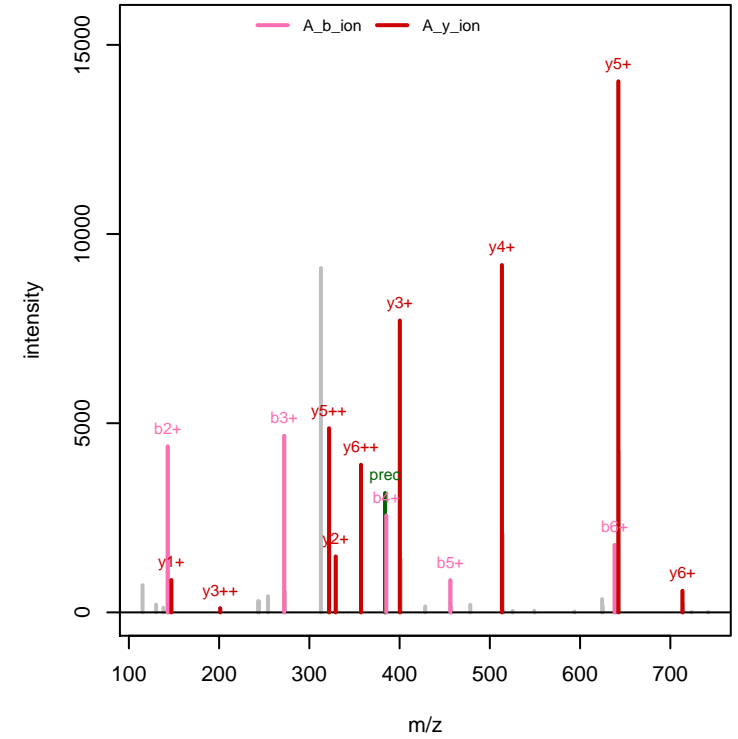

AAEIAKK+XL\_L

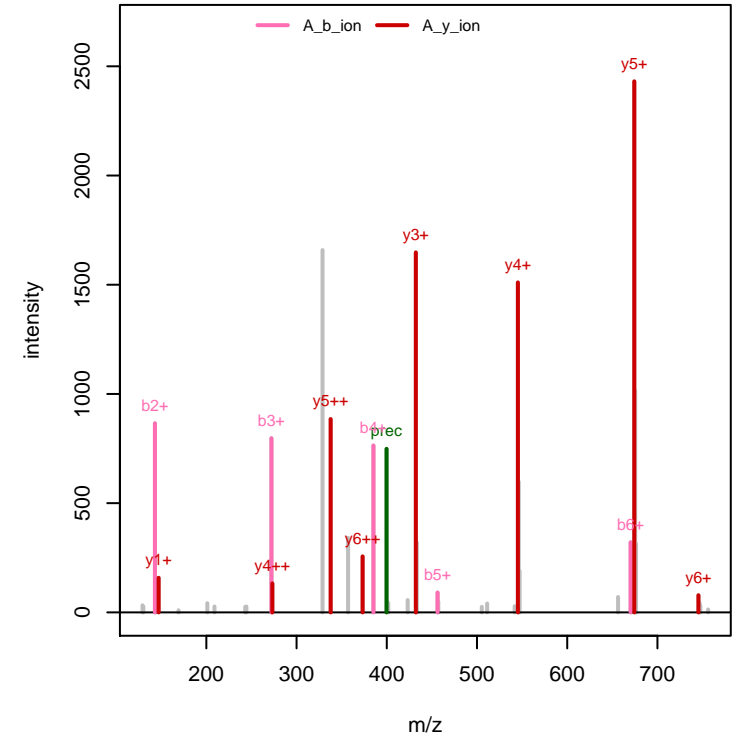

AHKEGLTLK+XL\_S

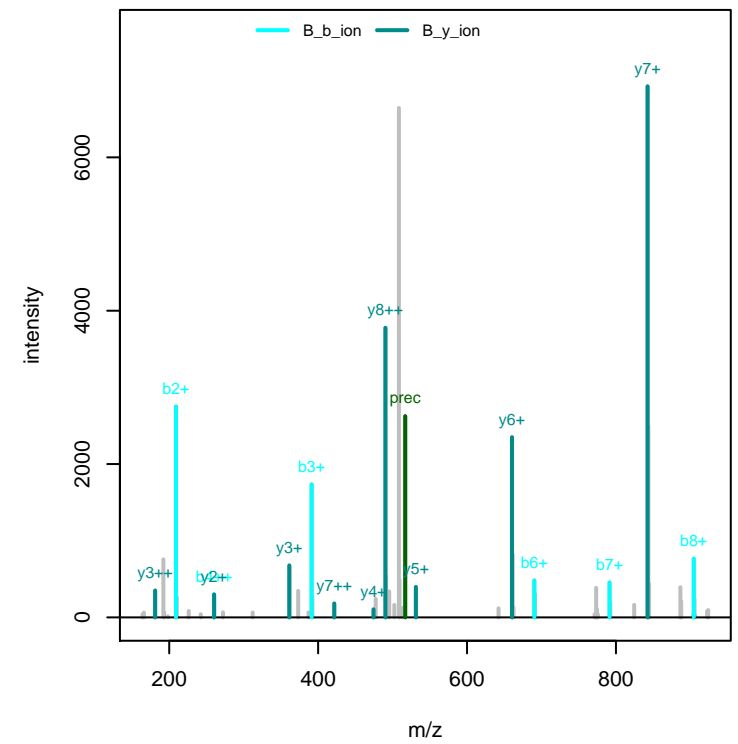

AHKEGLTLK+XL\_L

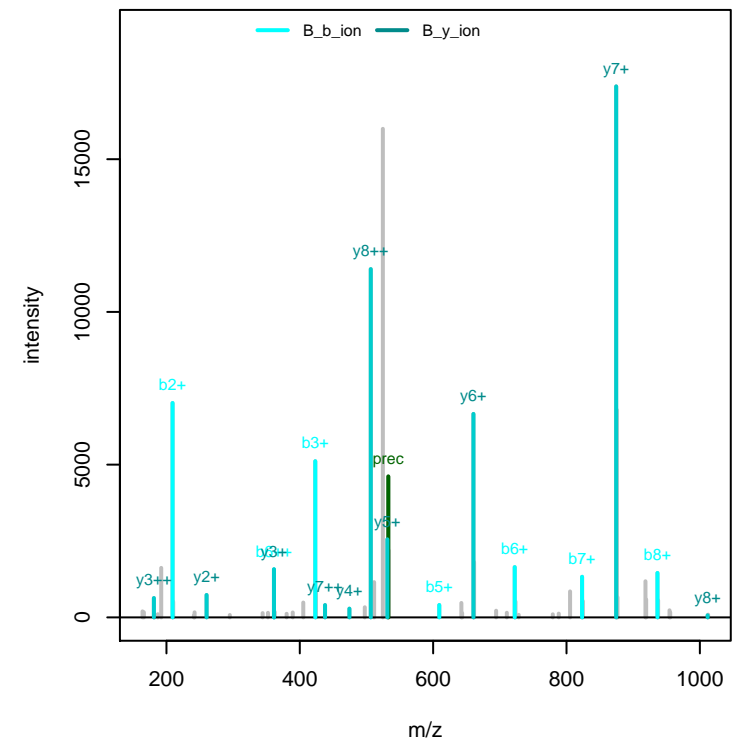

**QATKDAGR  
IAGLEVKR**

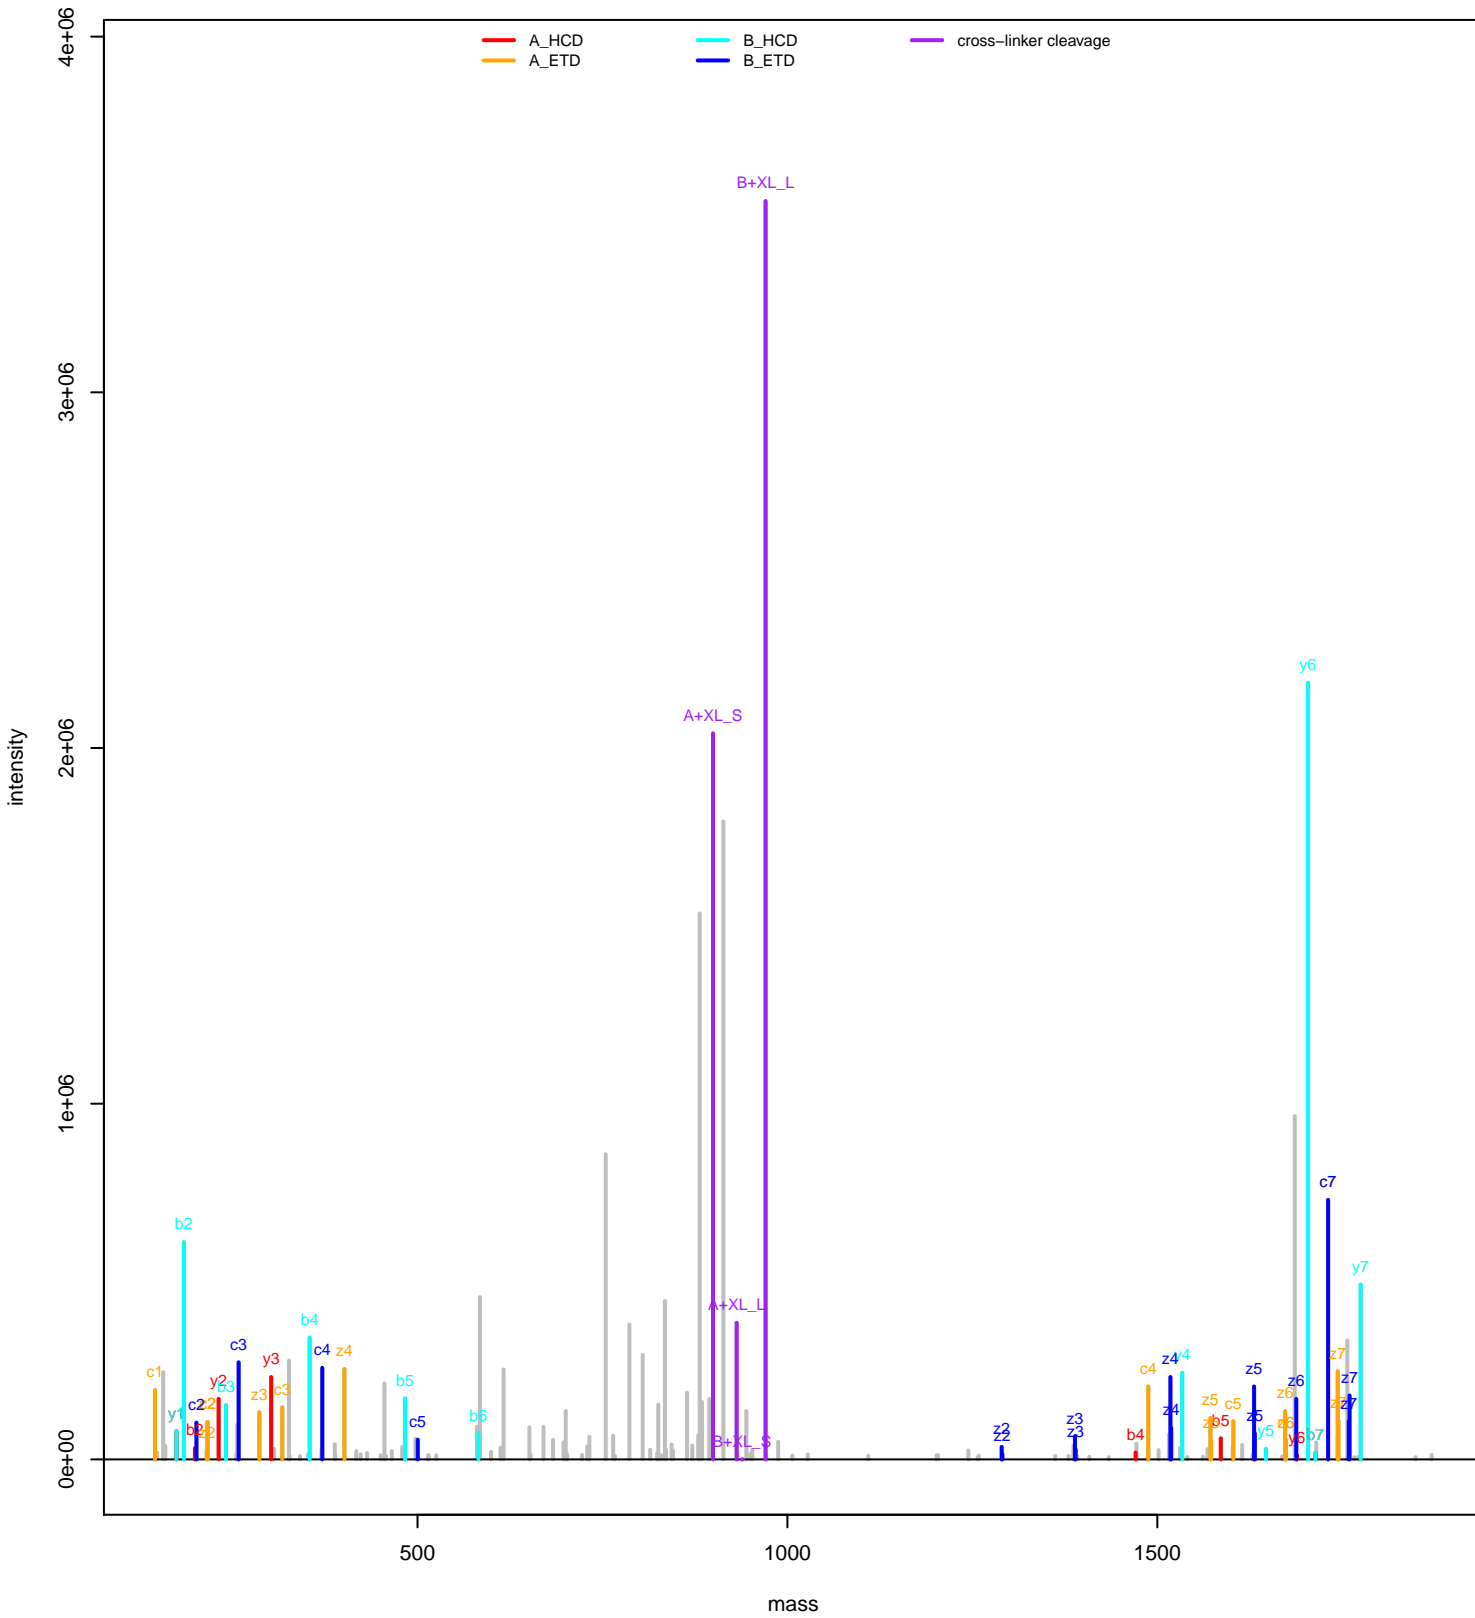

**QATKDAGR+XL\_S**

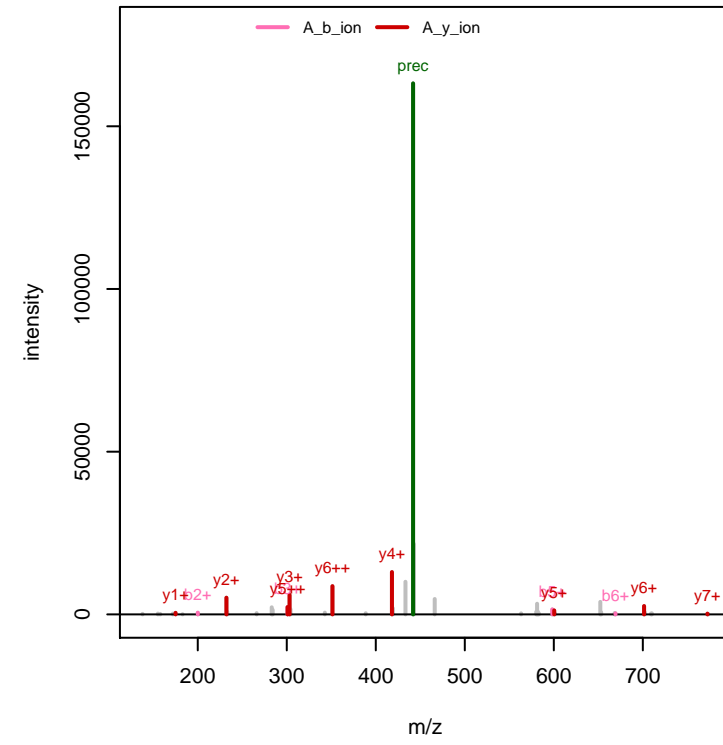

**QATKDAGR+XL\_L**

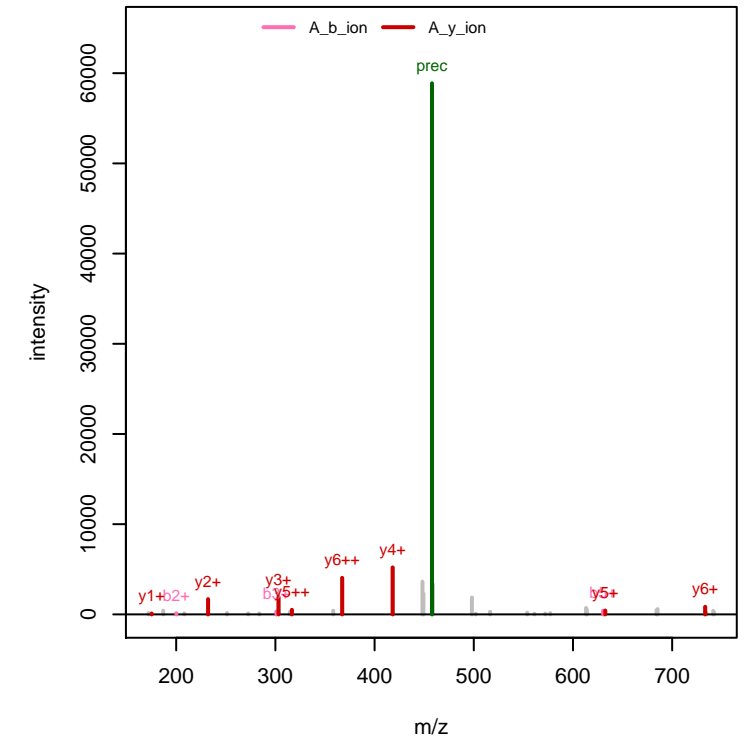

**IAGLEVKR+XL\_S**

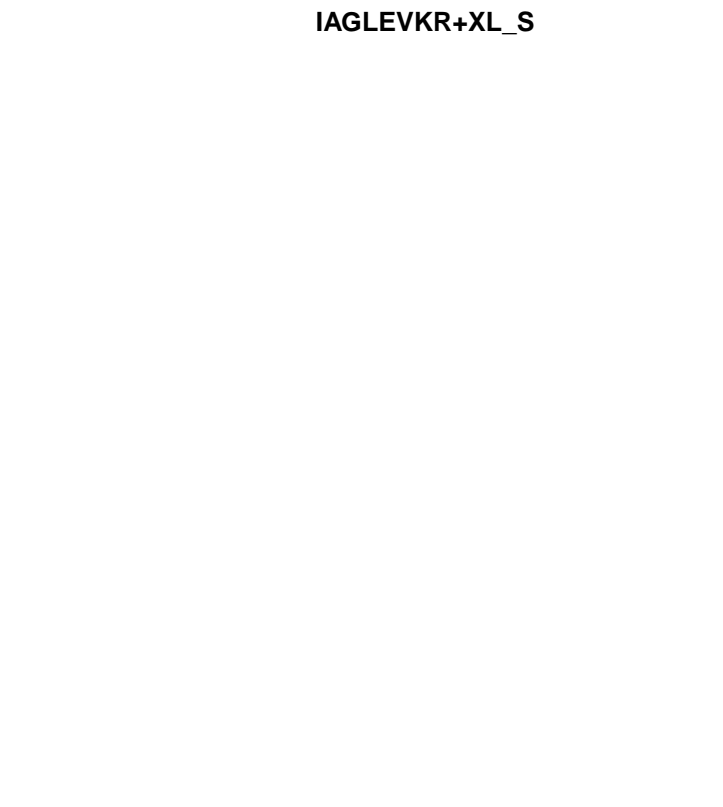

**IAGLEVKR+XL\_L**

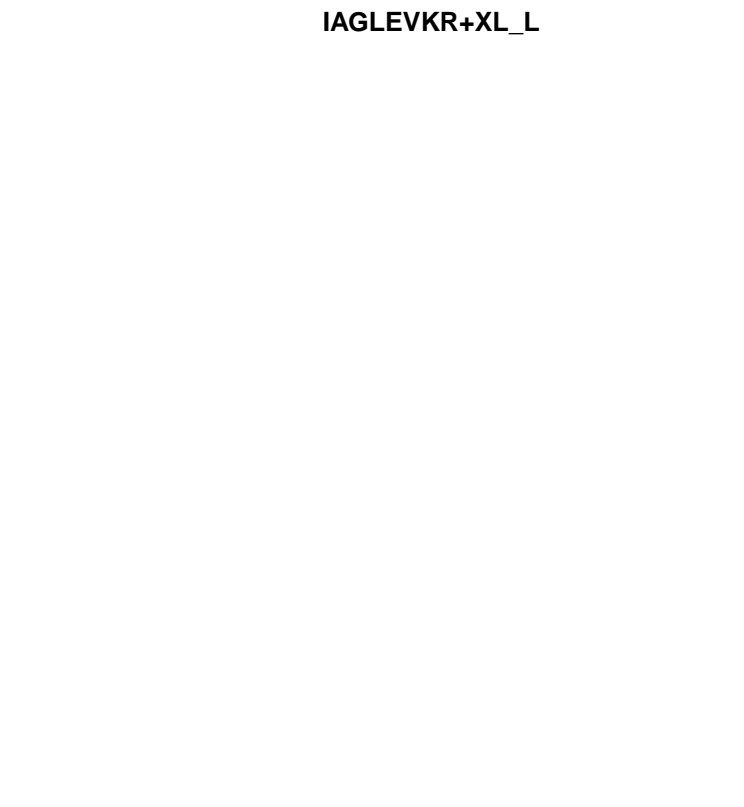

**KSDQNVR  
NDKNGIHTTIGK**

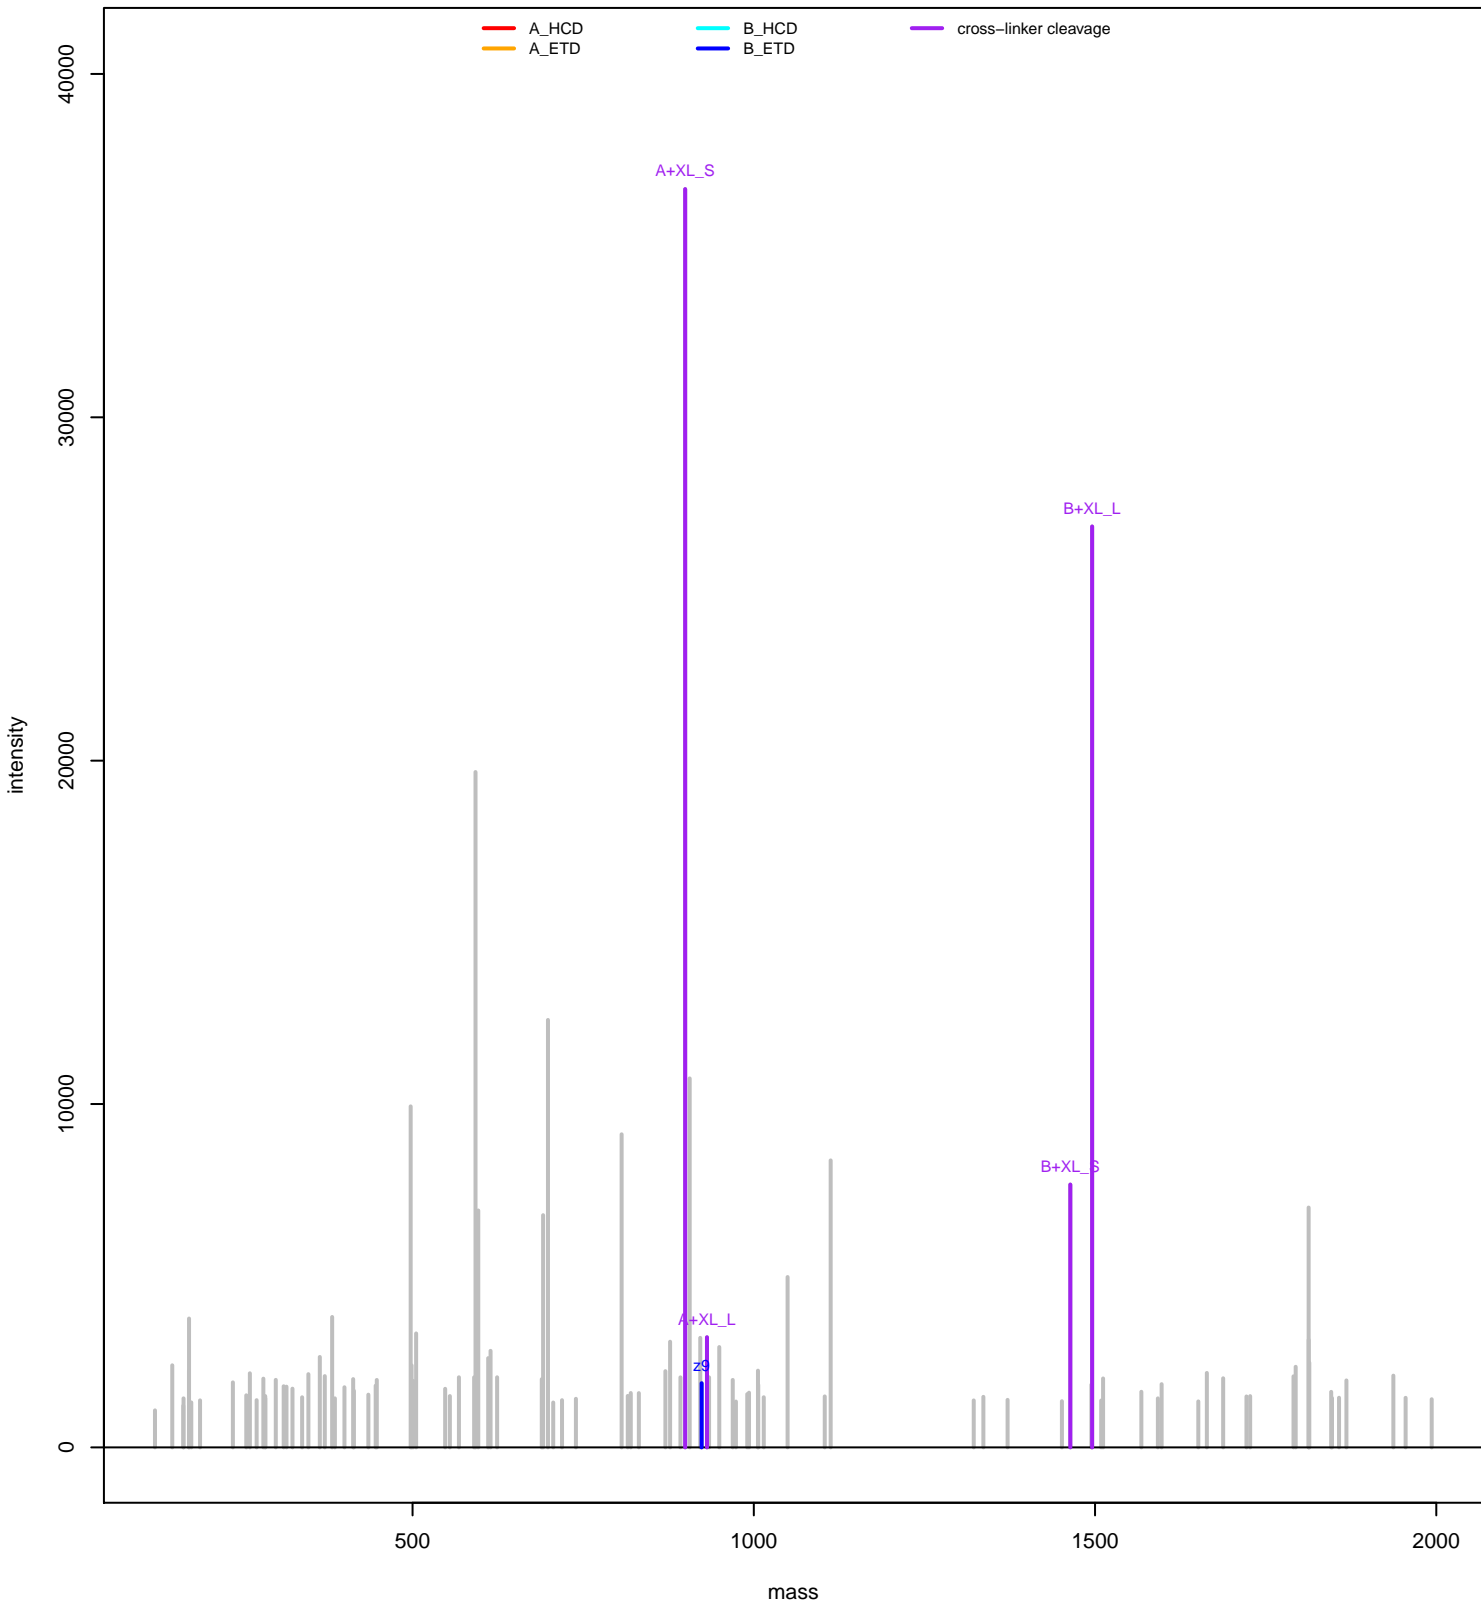

**KSDQNVR+XL\_S**

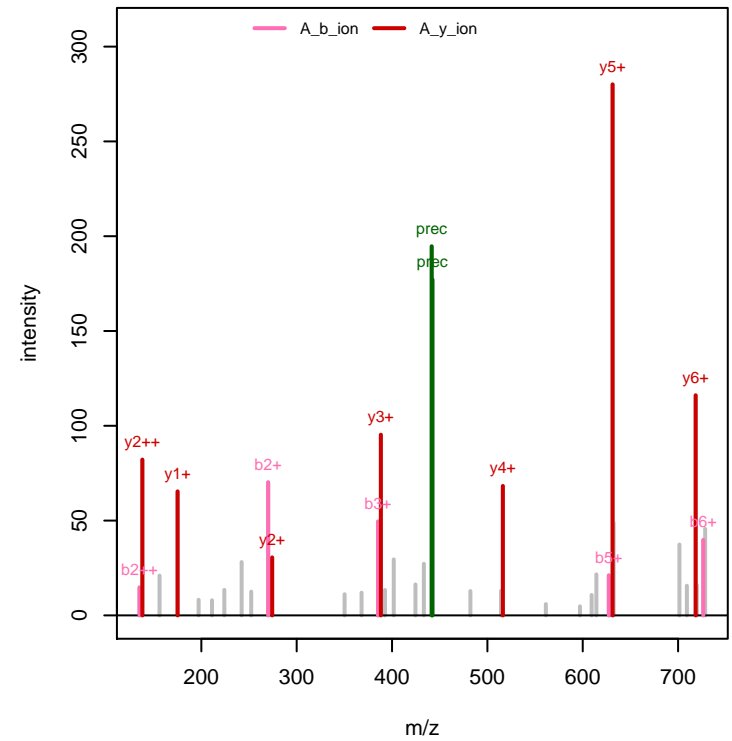

**KSDQNVR+XL\_L**

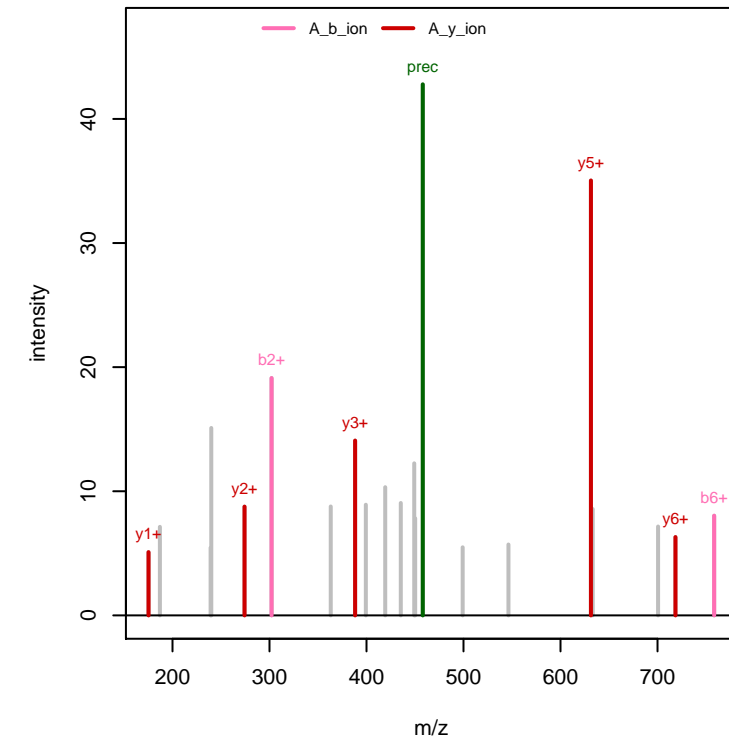

**NDKNGIHTTIGK+XL\_S**

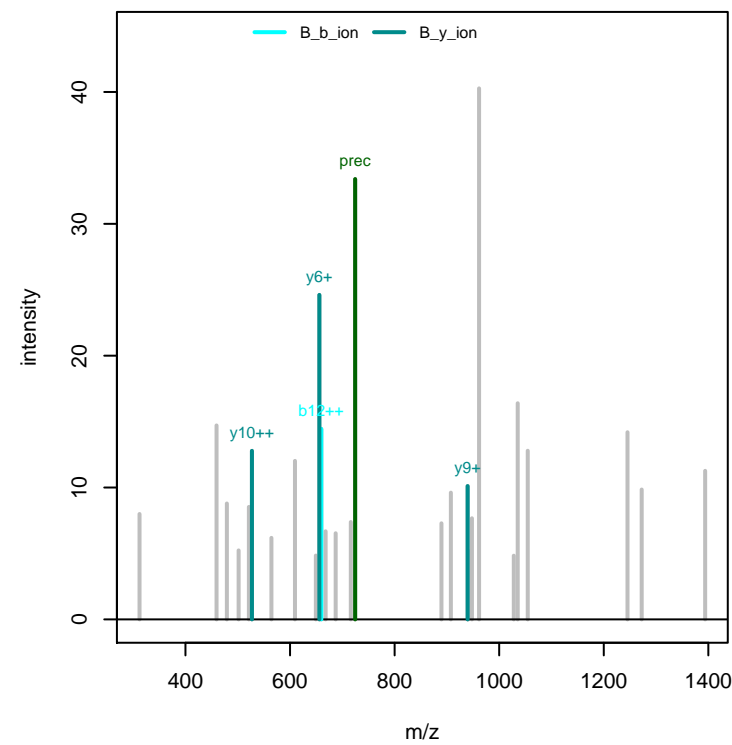

**NDKNGIHTTIGK+XL\_L**

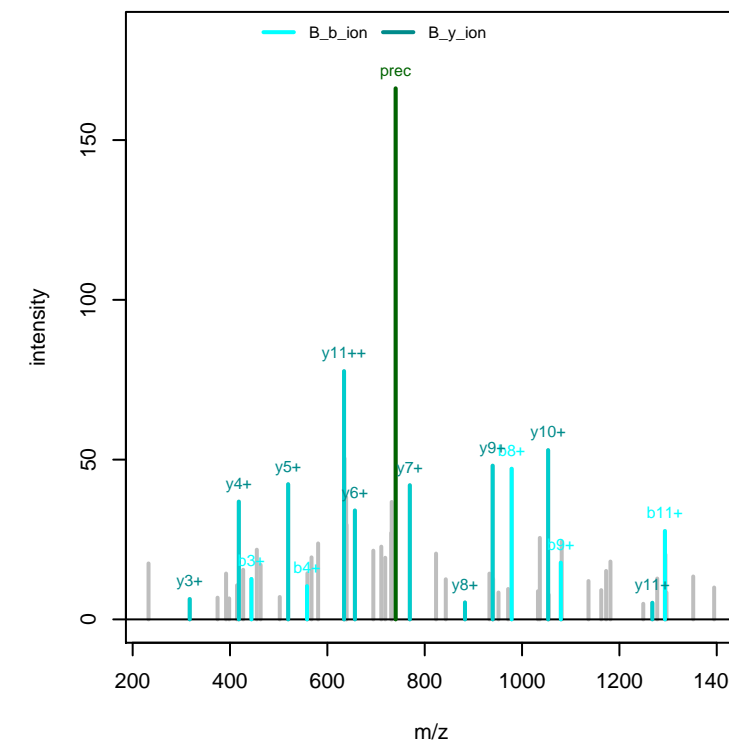



ALKDAVN  
TGRNPQTGKEIK

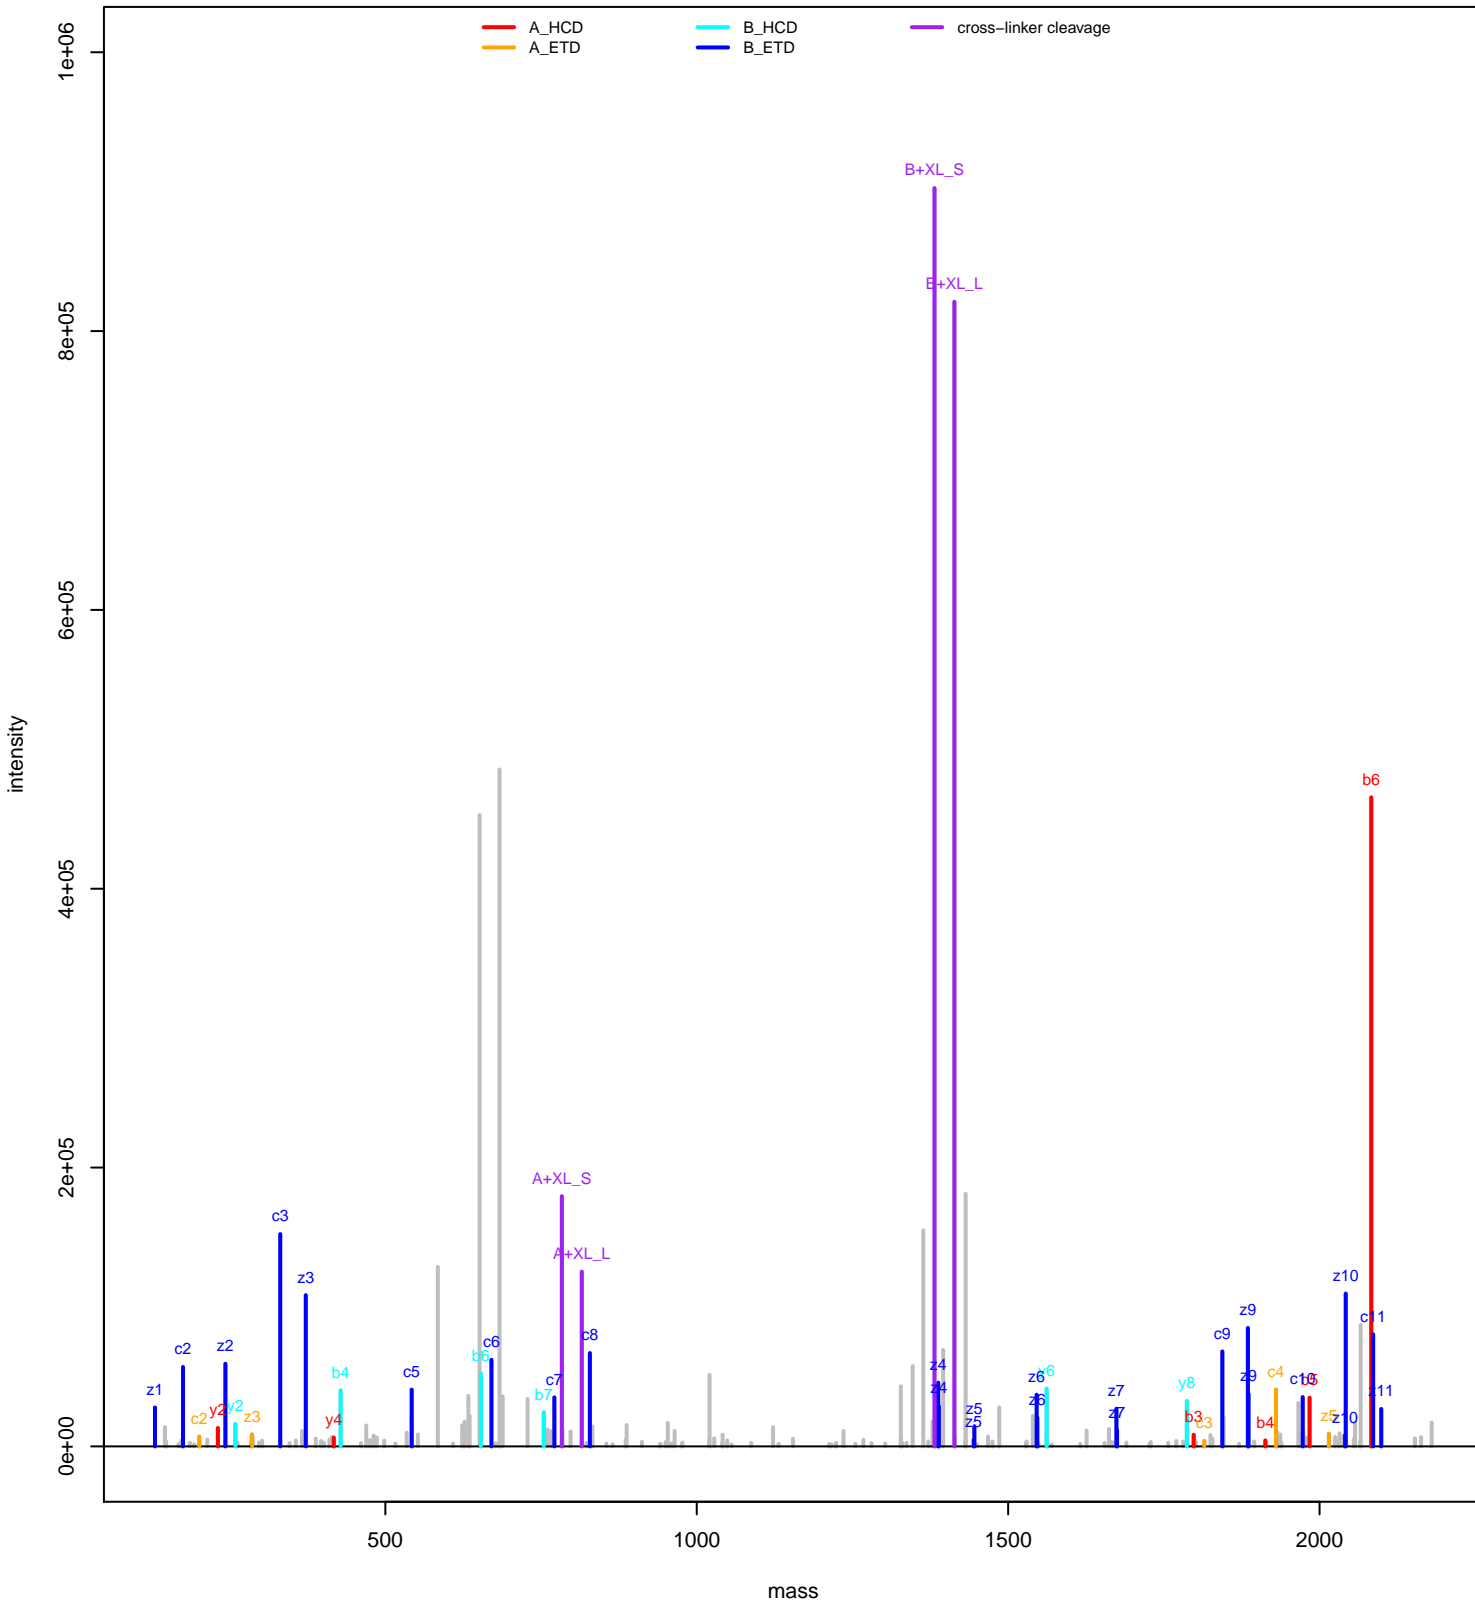

ALKDAVN+XL\_S

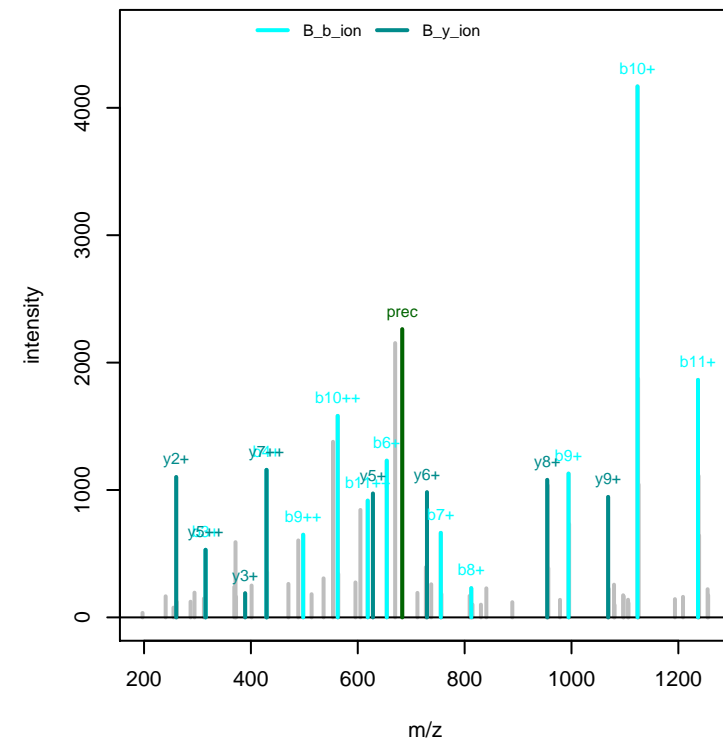

ALKDAVN+XL\_L

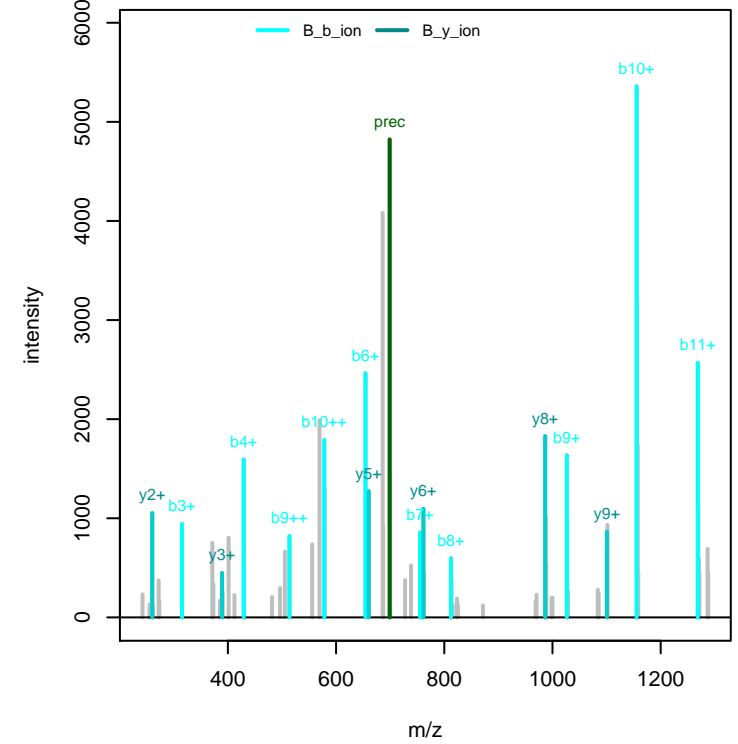

LDNMATKYR  
SDVQAAKDDAAR

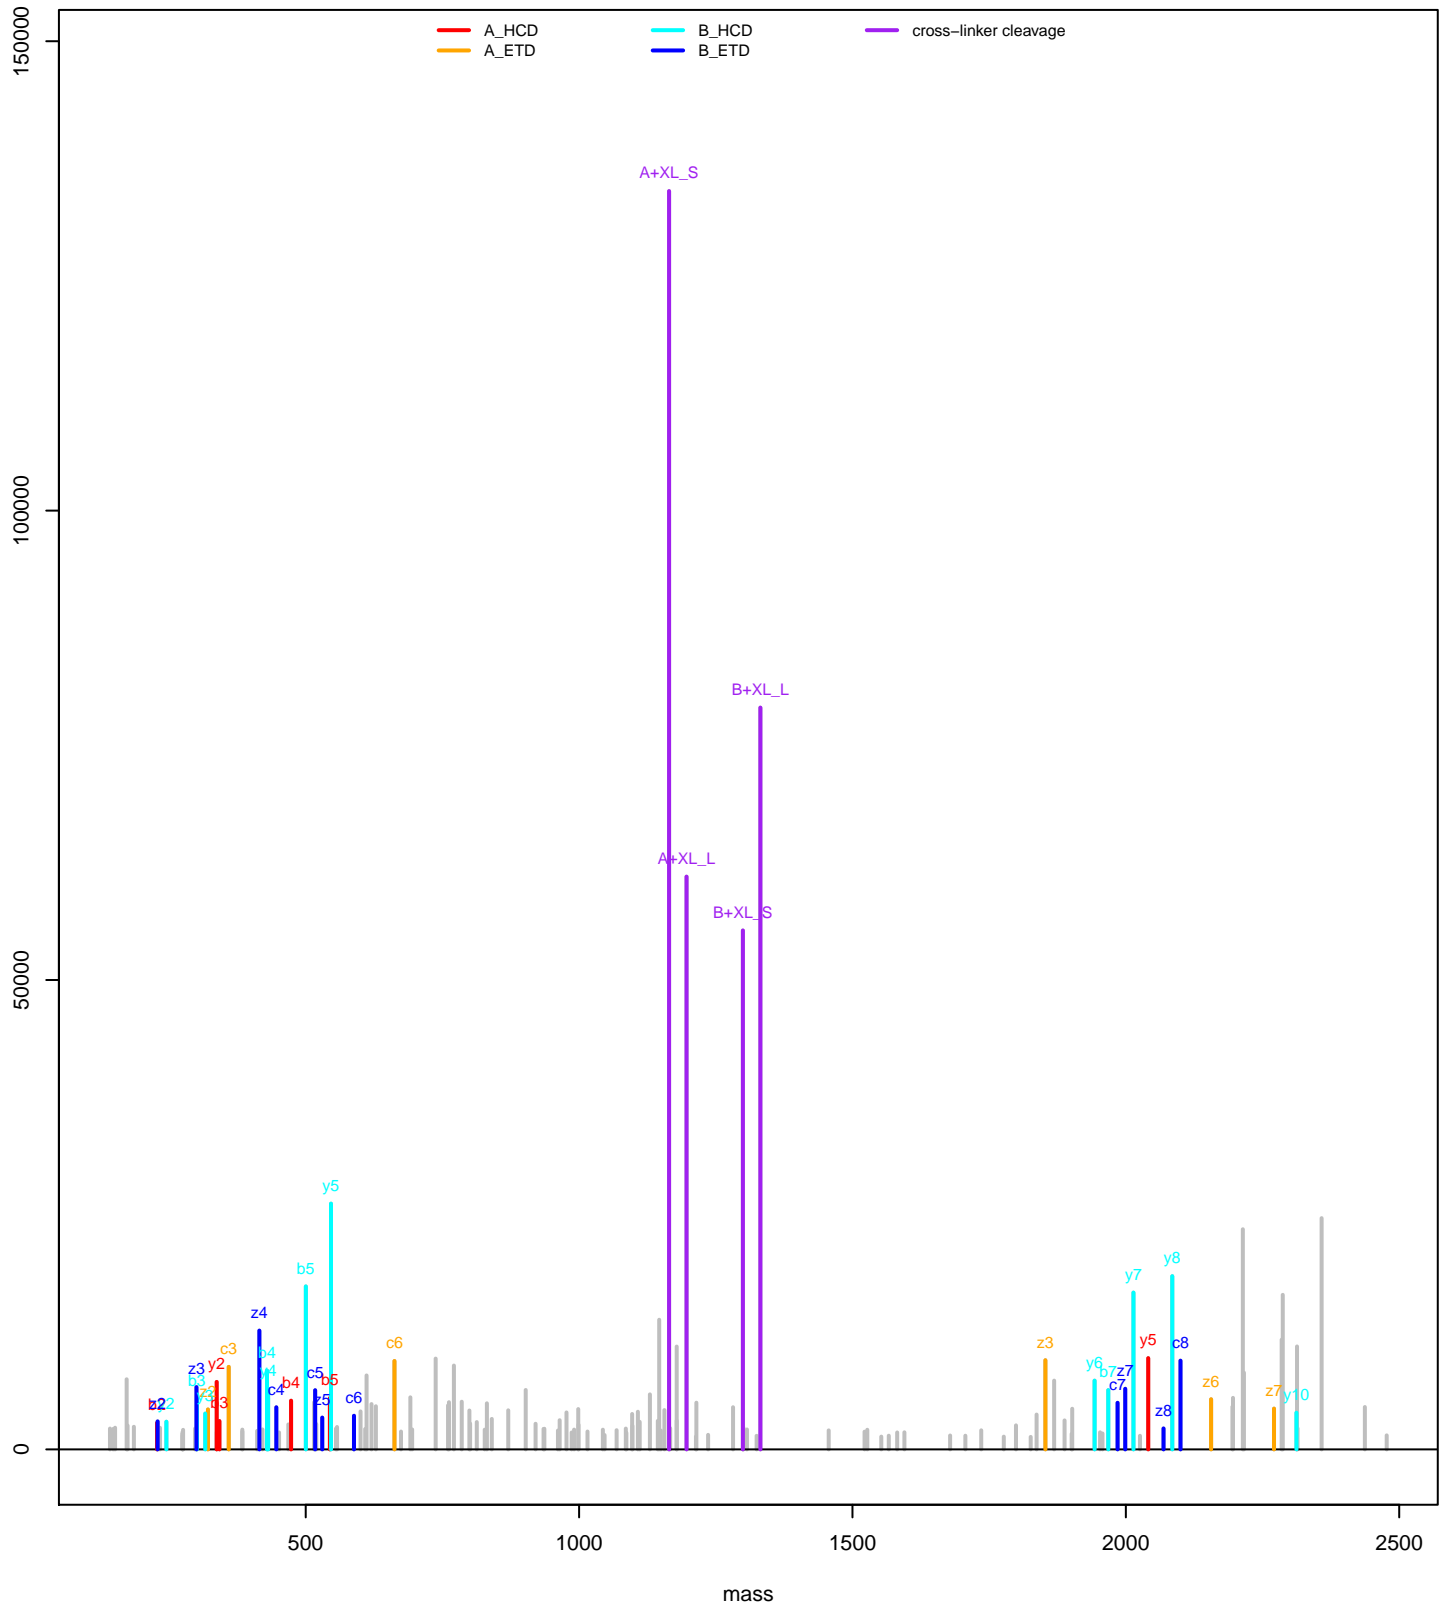

LDNMATKYR+XL\_S

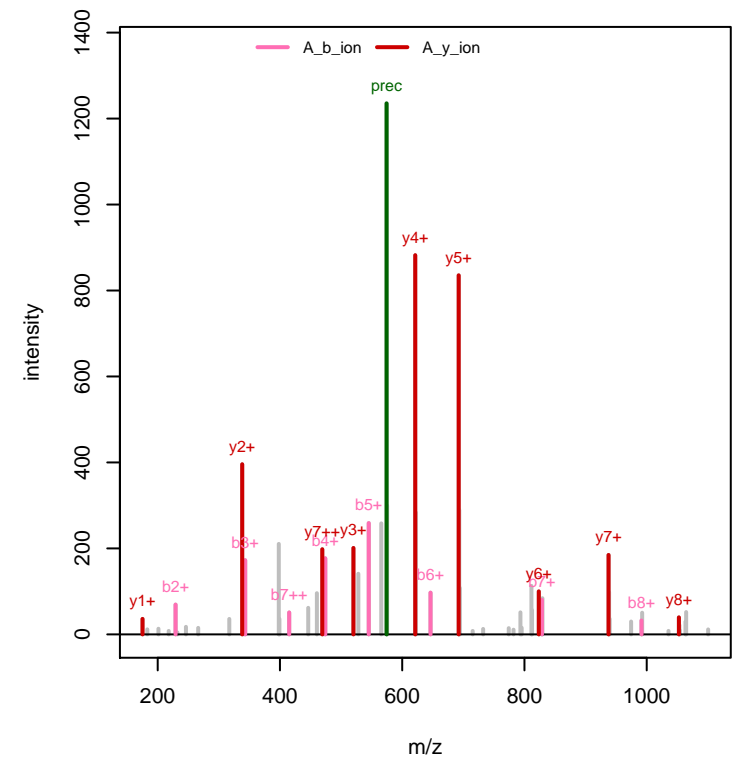

LDNMATKYR+XL\_L

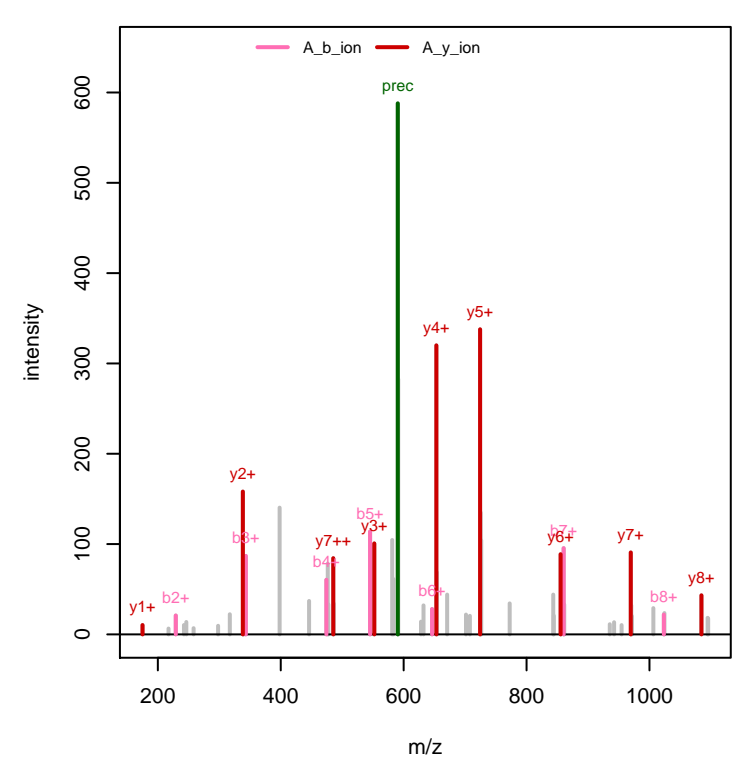

SDVQAAKDDAAR+XL\_S

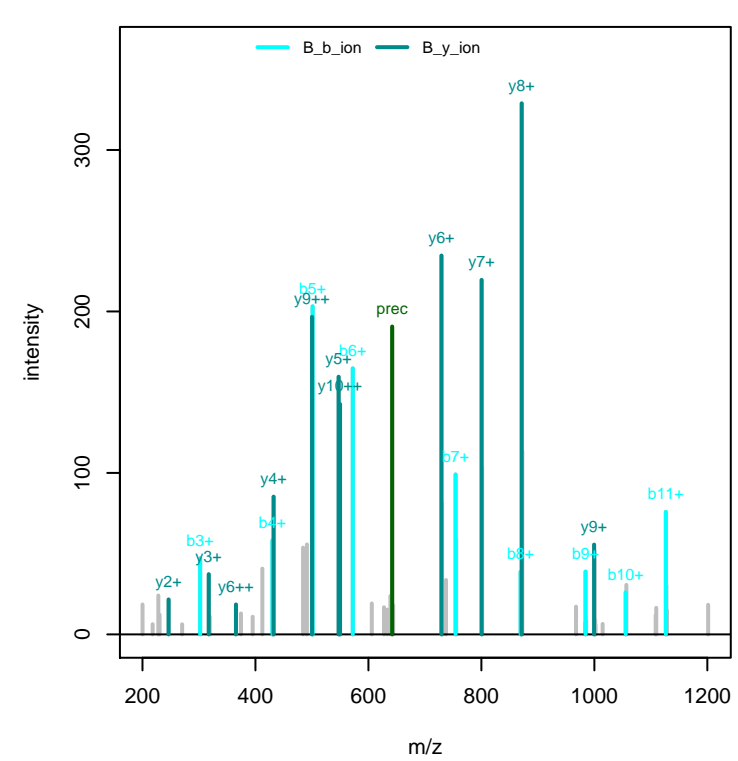

SDVQAAKDDAAR+XL\_L

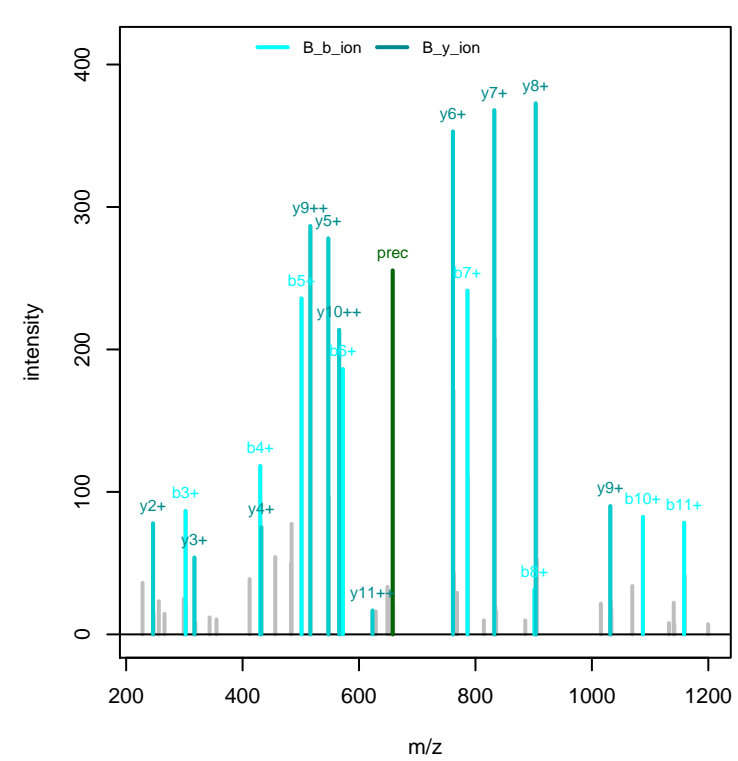

**IKELAVK  
HLAKAPAK**

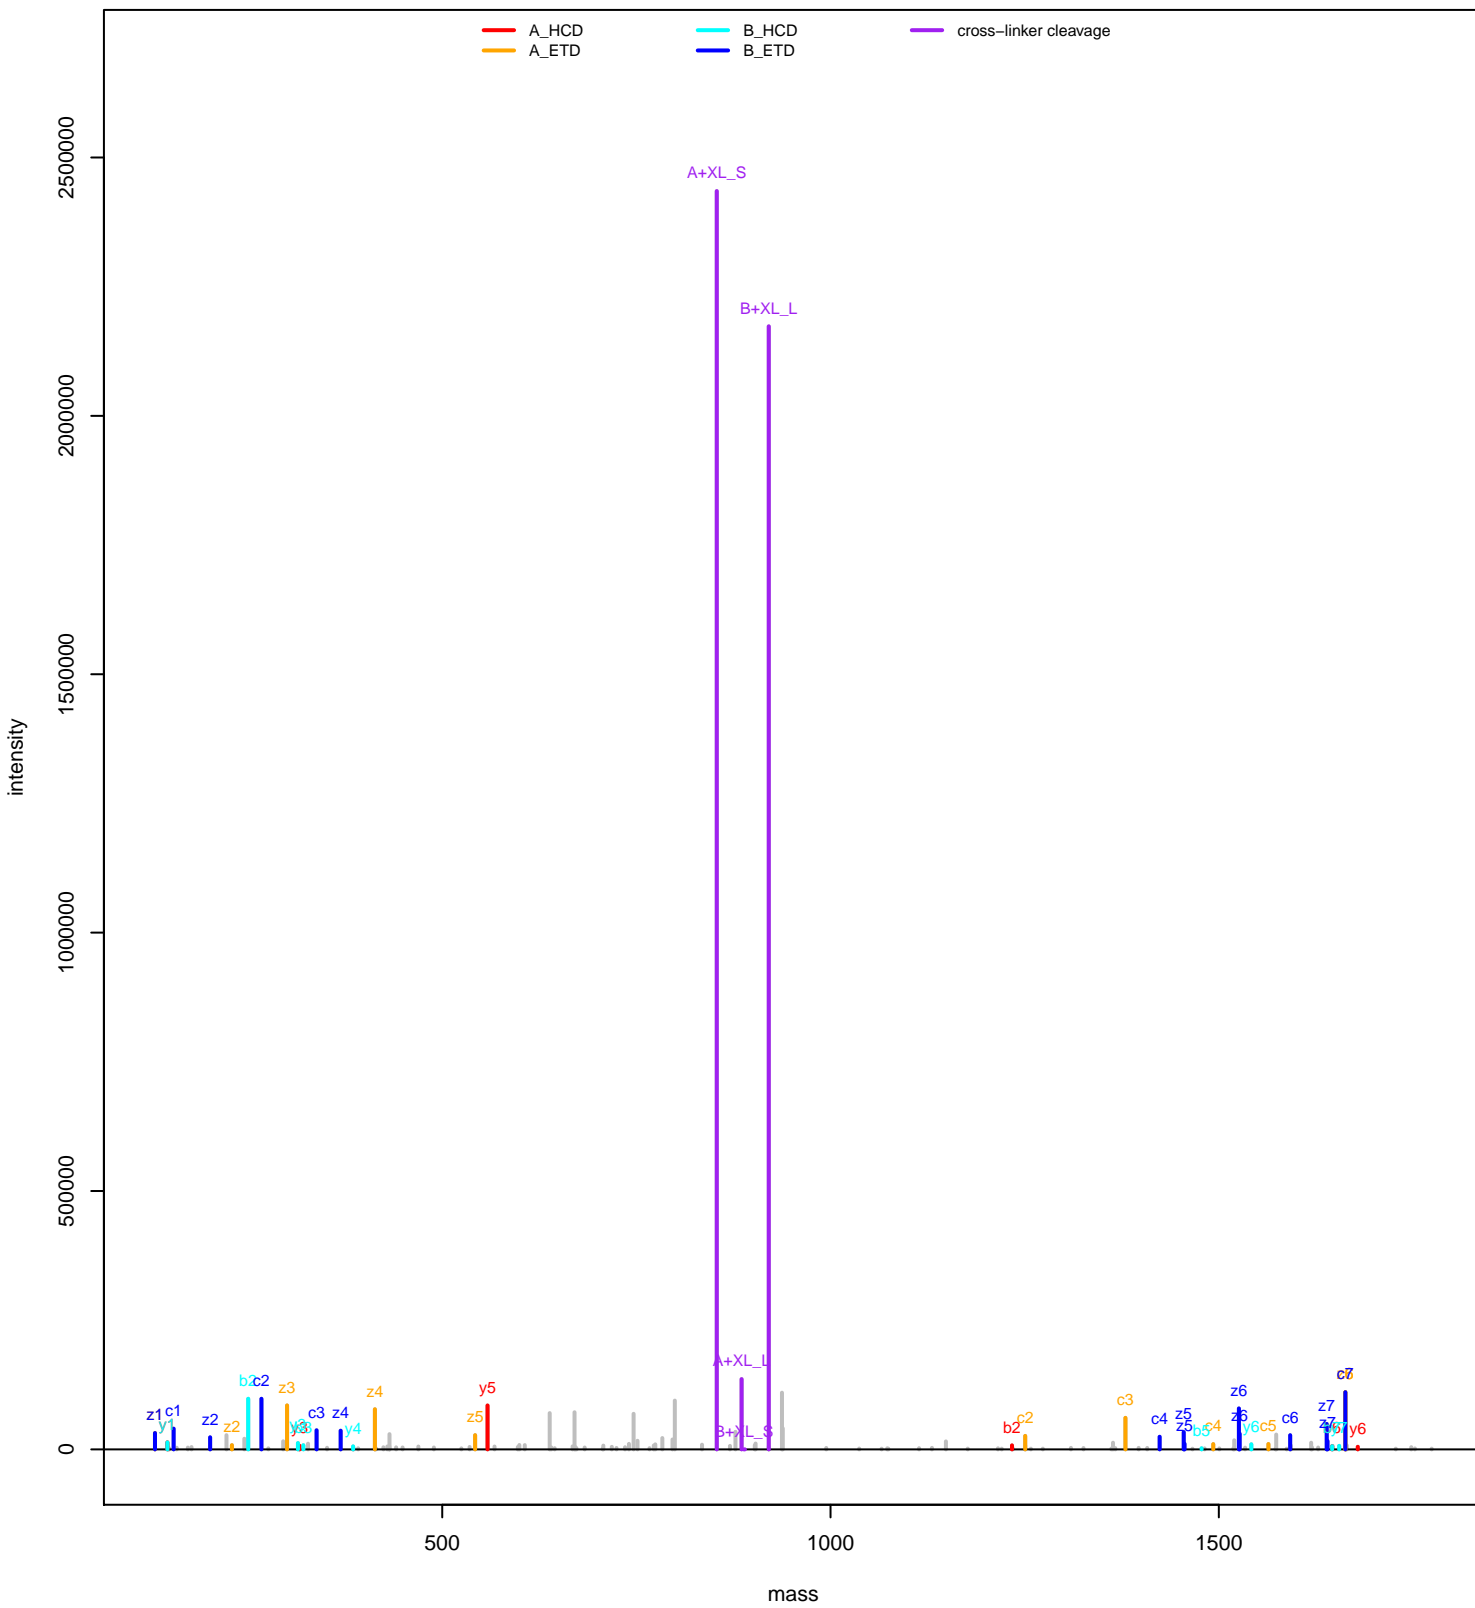

**IKELAVK+XL\_S**

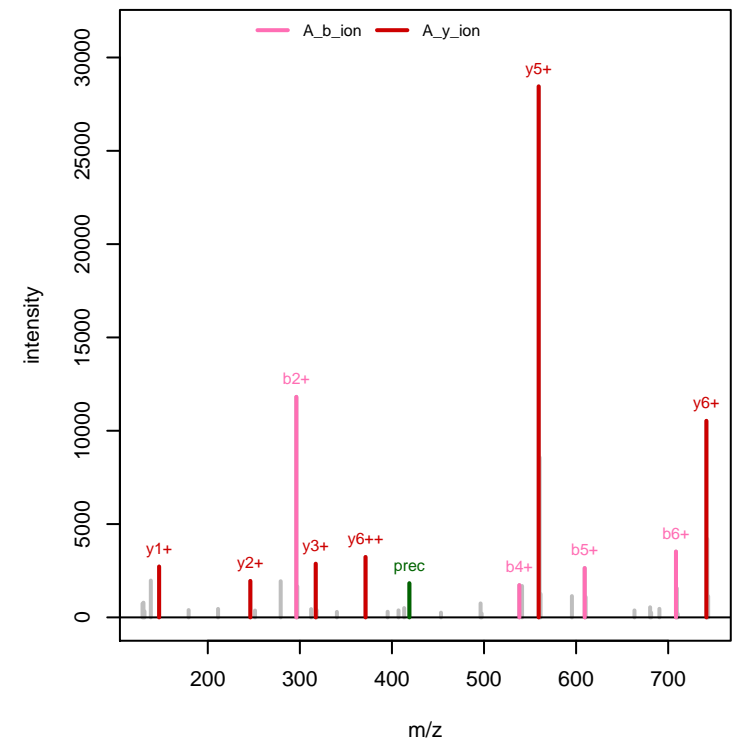

**IKELAVK+XL\_L**

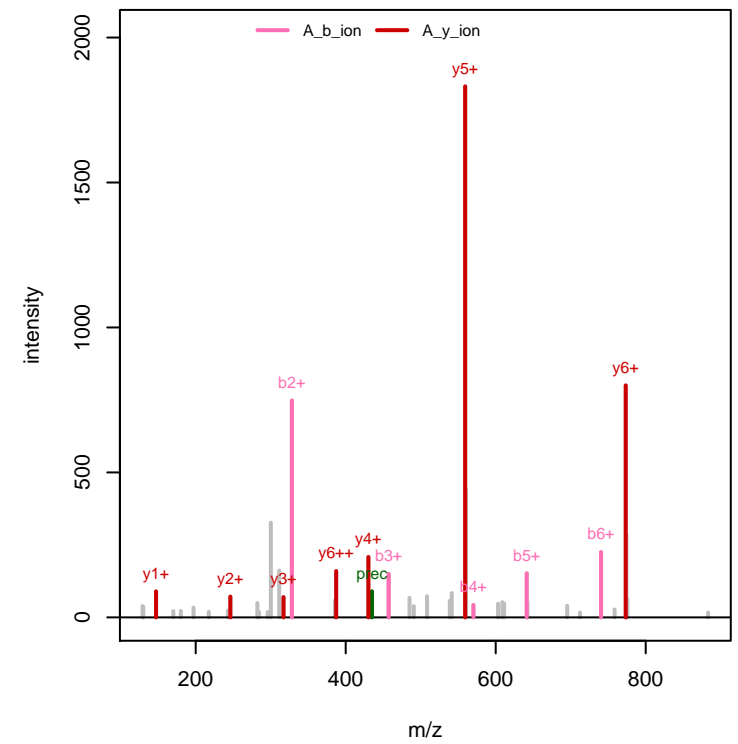

**HLAKAPAK+XL\_S**

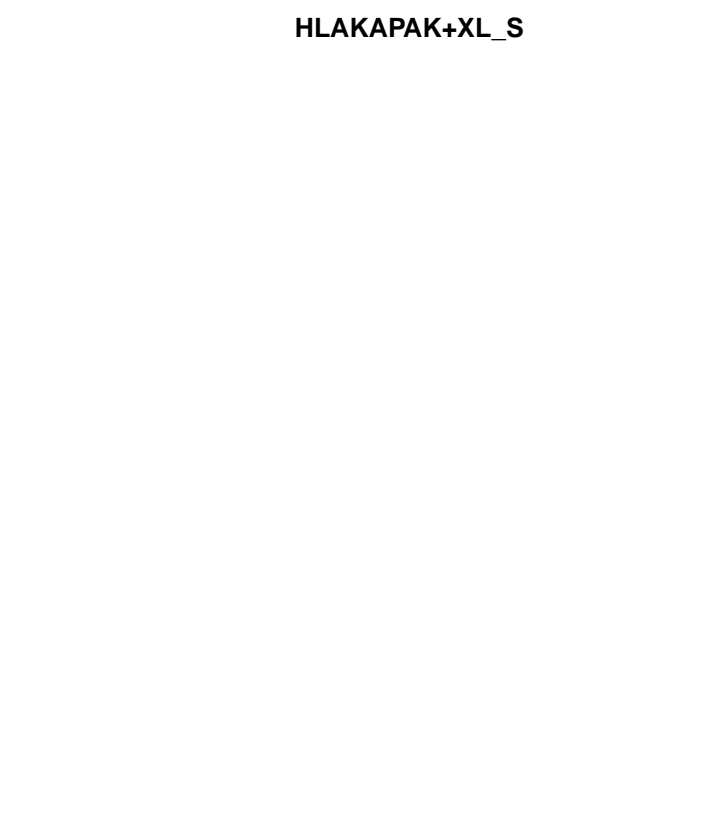

**HLAKAPAK+XL\_L**

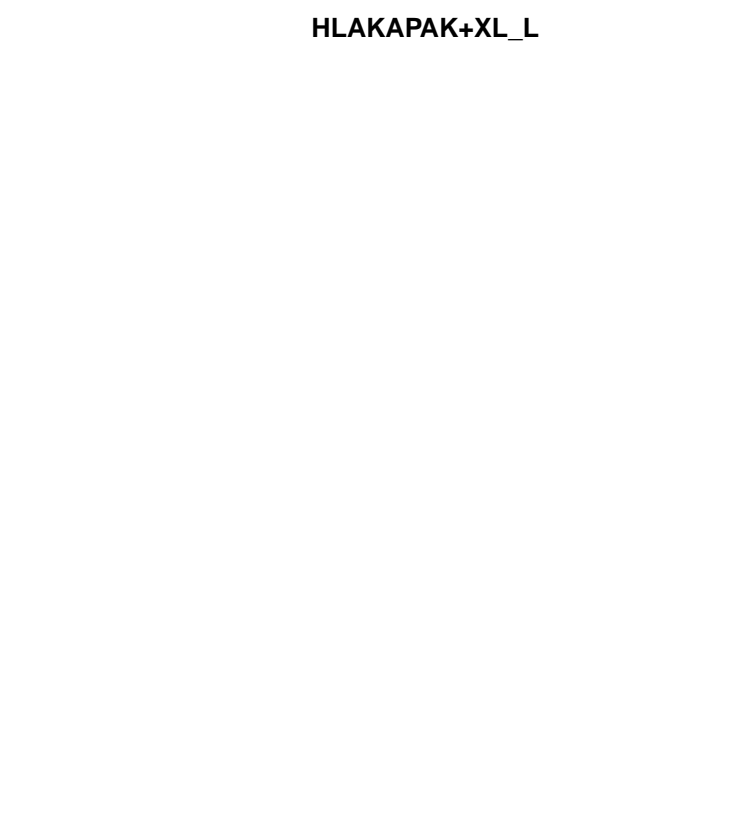

KAVLNR  
KAVLNR

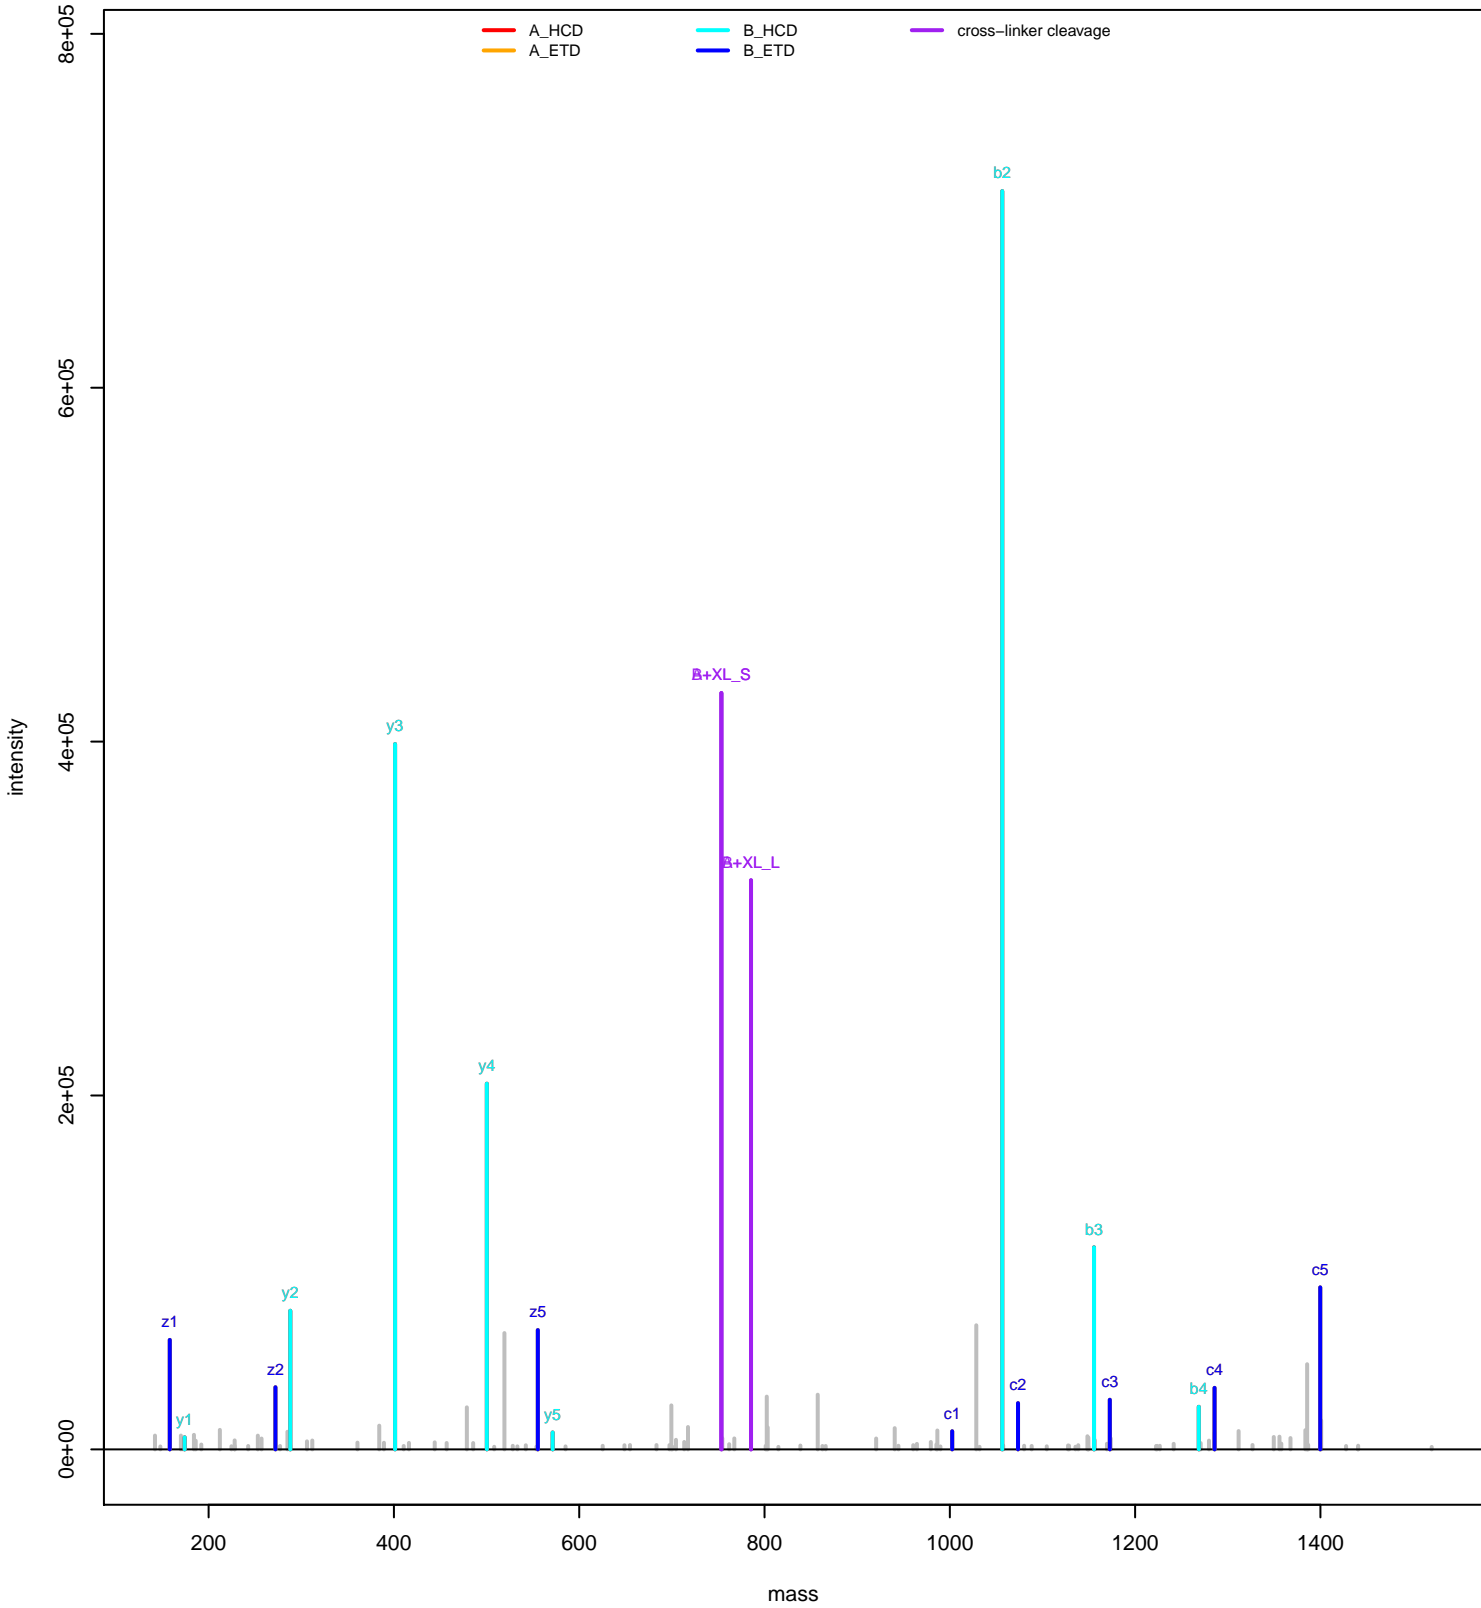

KAVLNR+XL\_S

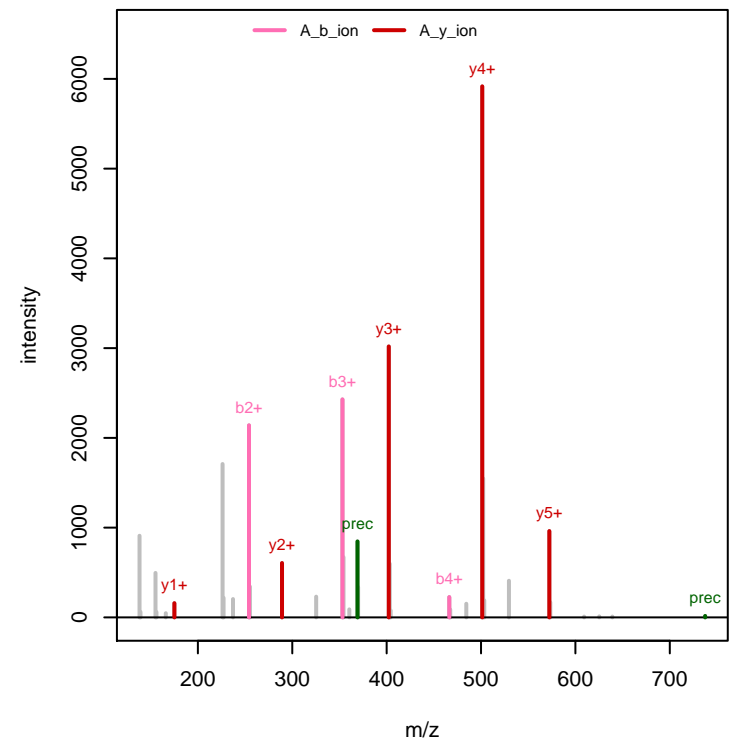

KAVLNR+XL\_L

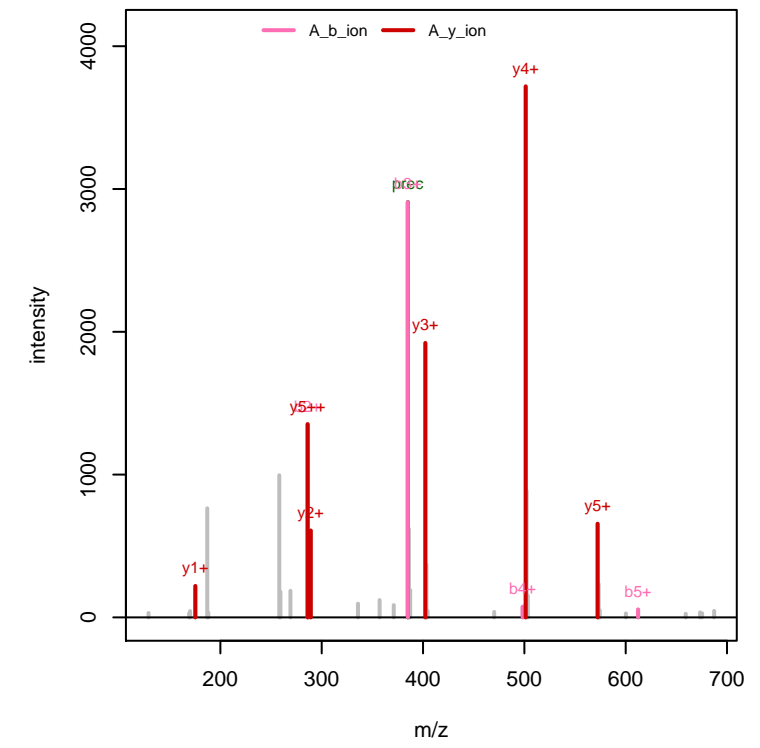

KAVLNR+XL\_S

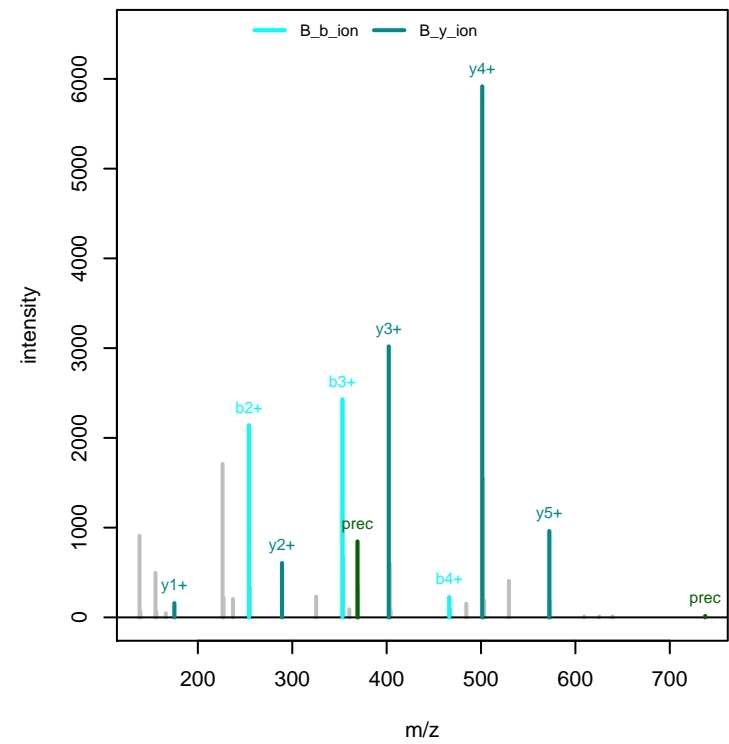

KAVLNR+XL\_L

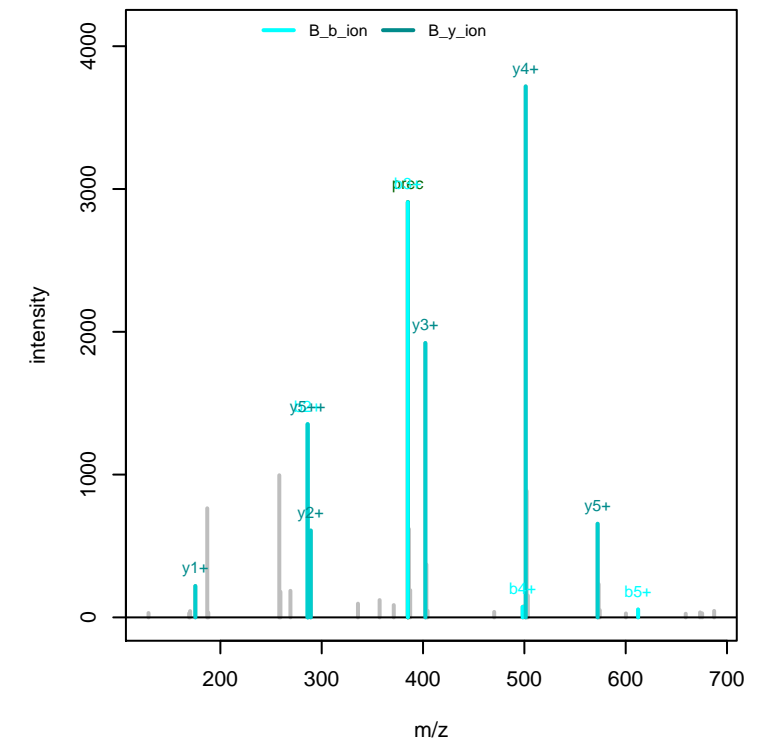

KAQLNMoVR  
QGVDKLRQK

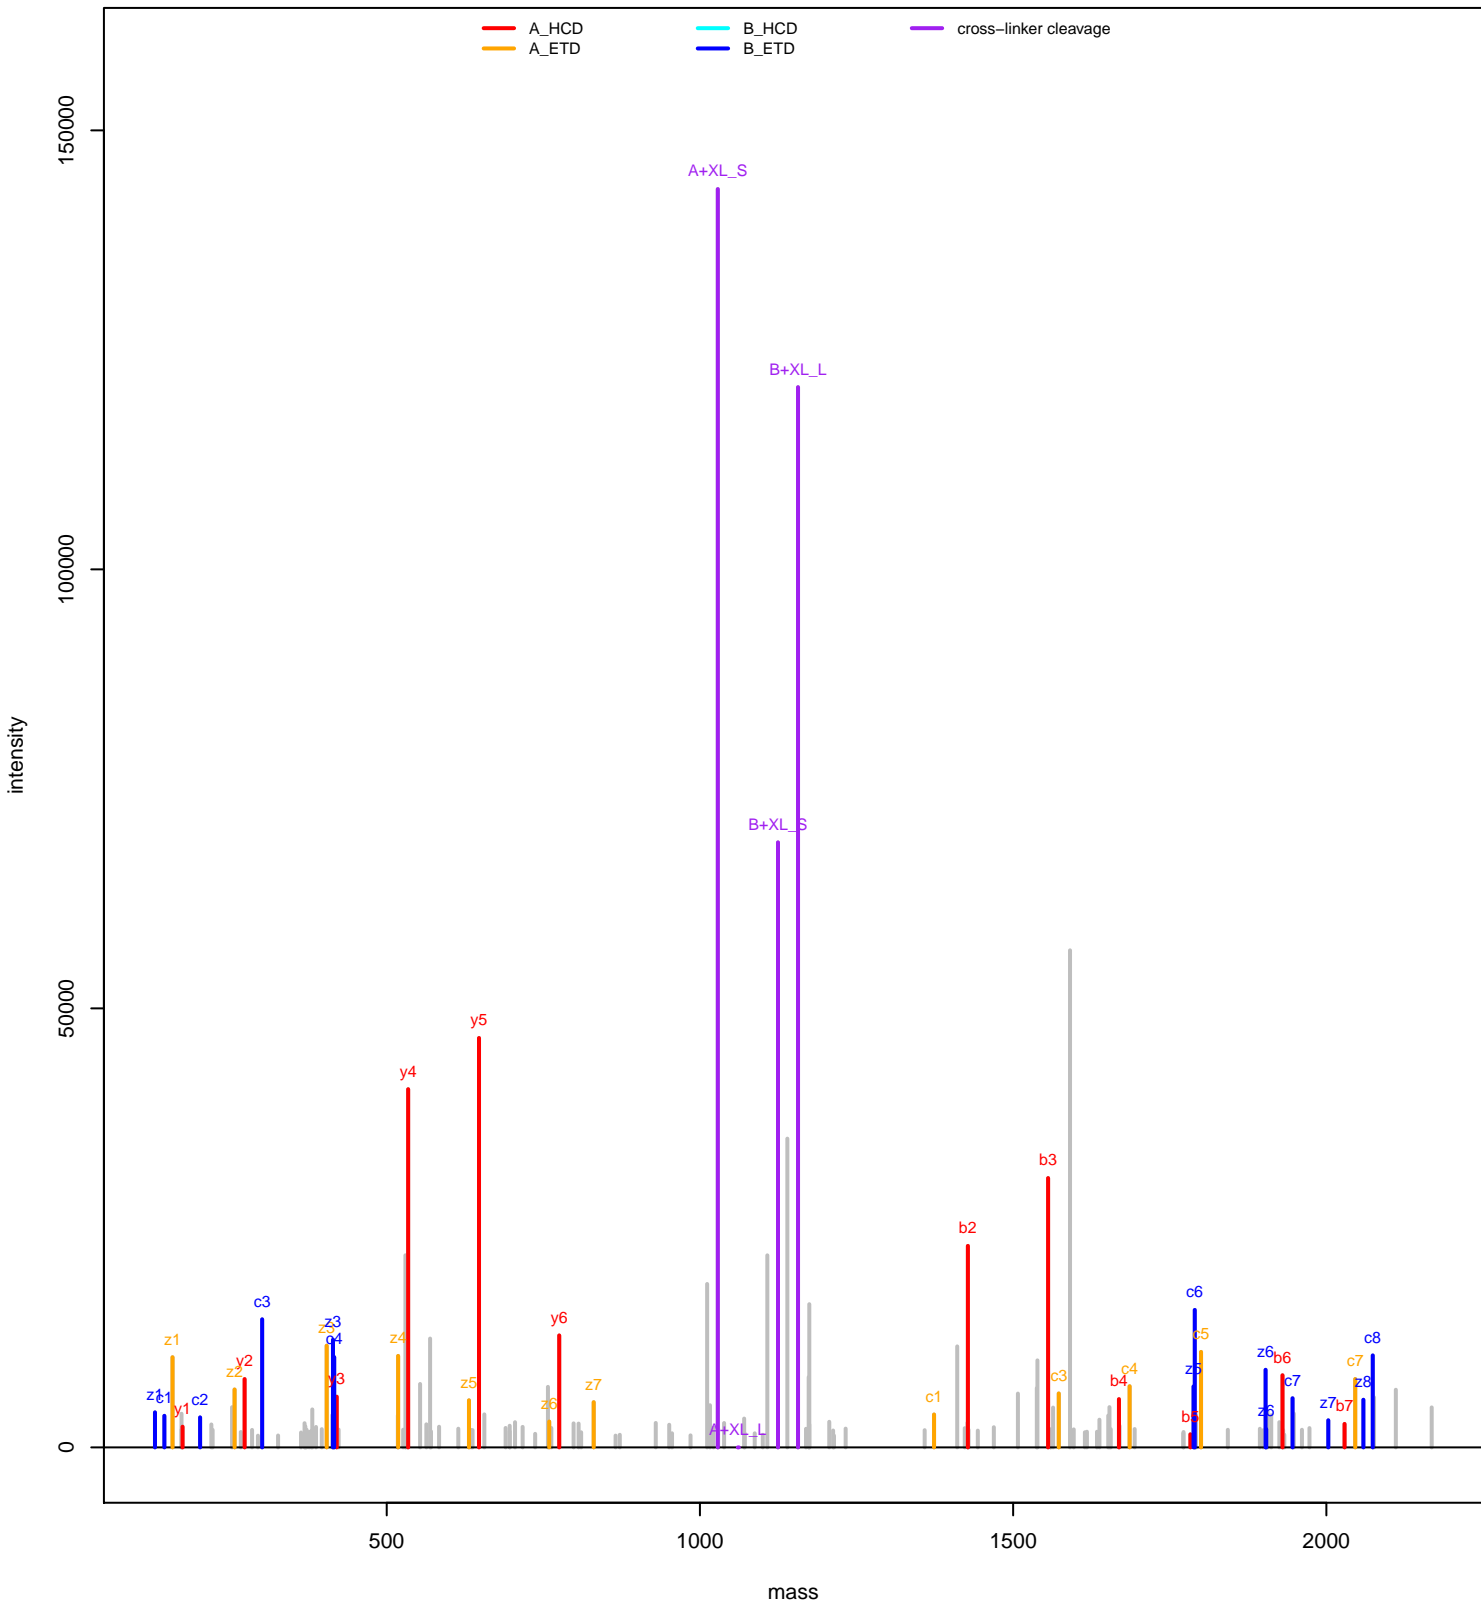

KAQLNMoVR+XL\_S

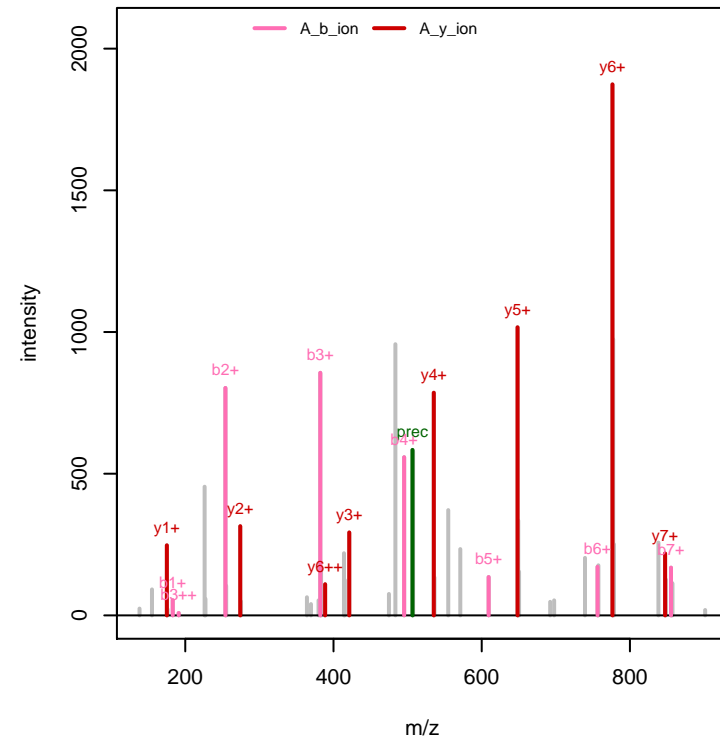

KAQLNMoVR+XL\_L

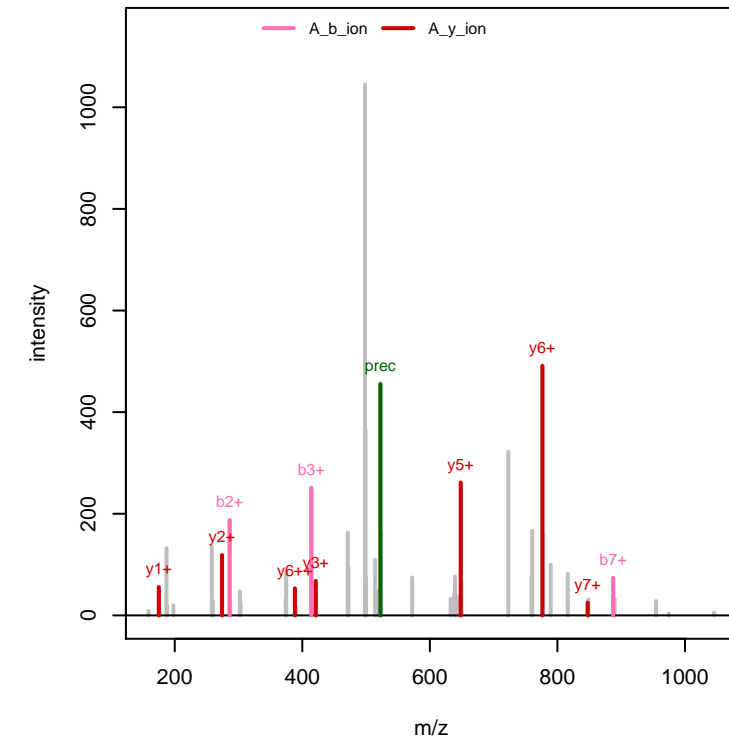

QGVDKLRQK+XL\_S

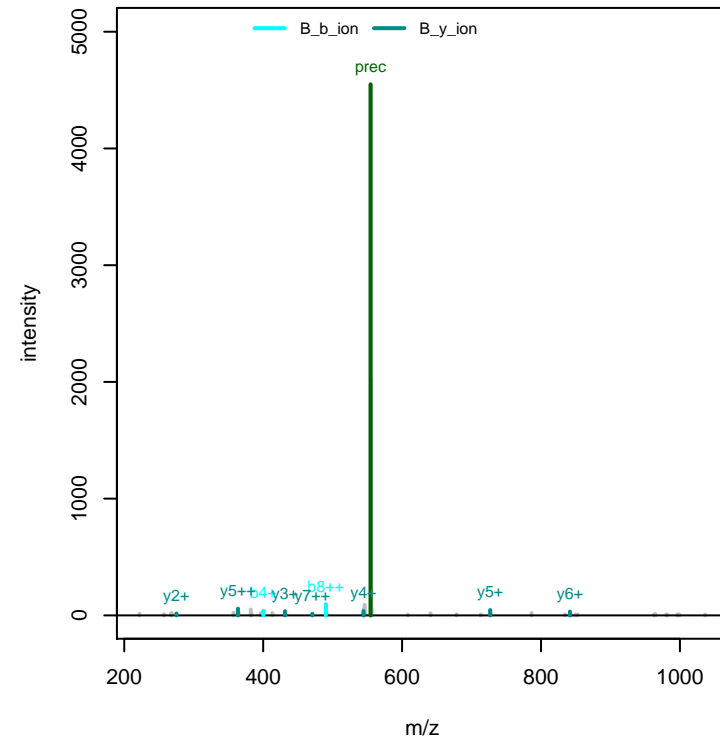

QGVDKLRQK+XL\_L

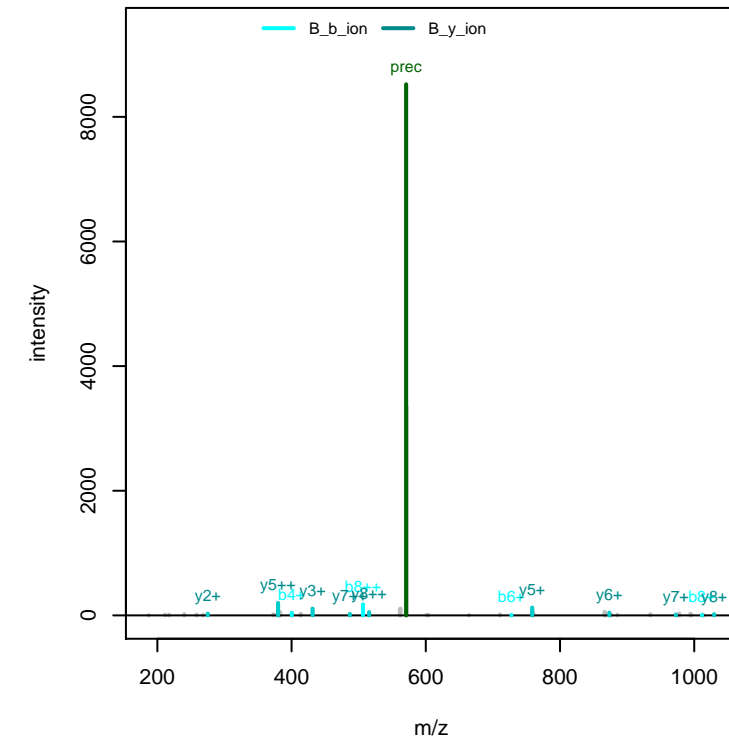

TGAGMMDCKK  
KAGNVAADGVK

TGAGMMDCKK+XL\_S

TGAGMMDCKK+XL\_L

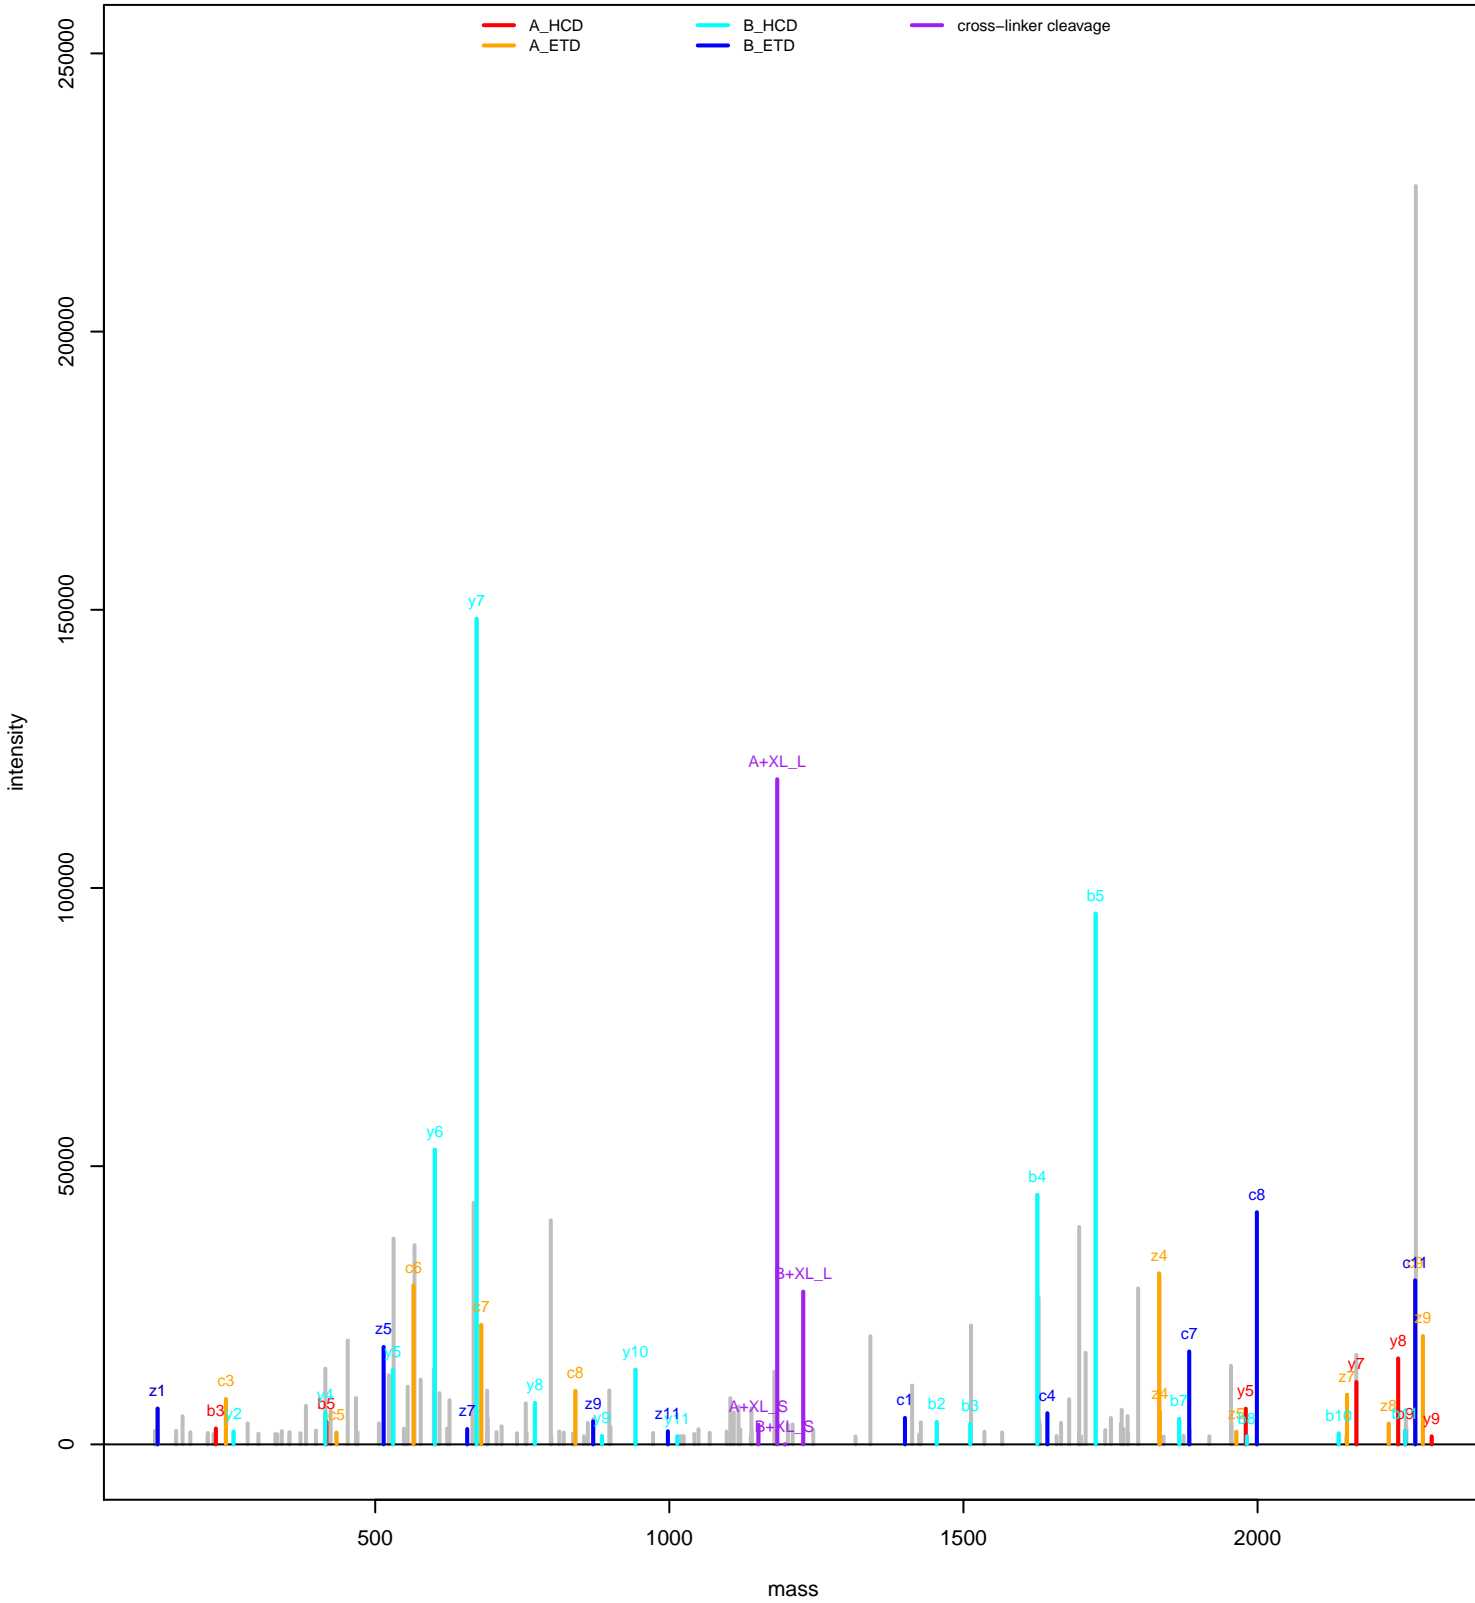

KAGNVAADGVK+XL\_S

KAGNVAADGVK+XL\_L

DEADEKDAIATVNK  
QLAEDPFNNWVALNKK

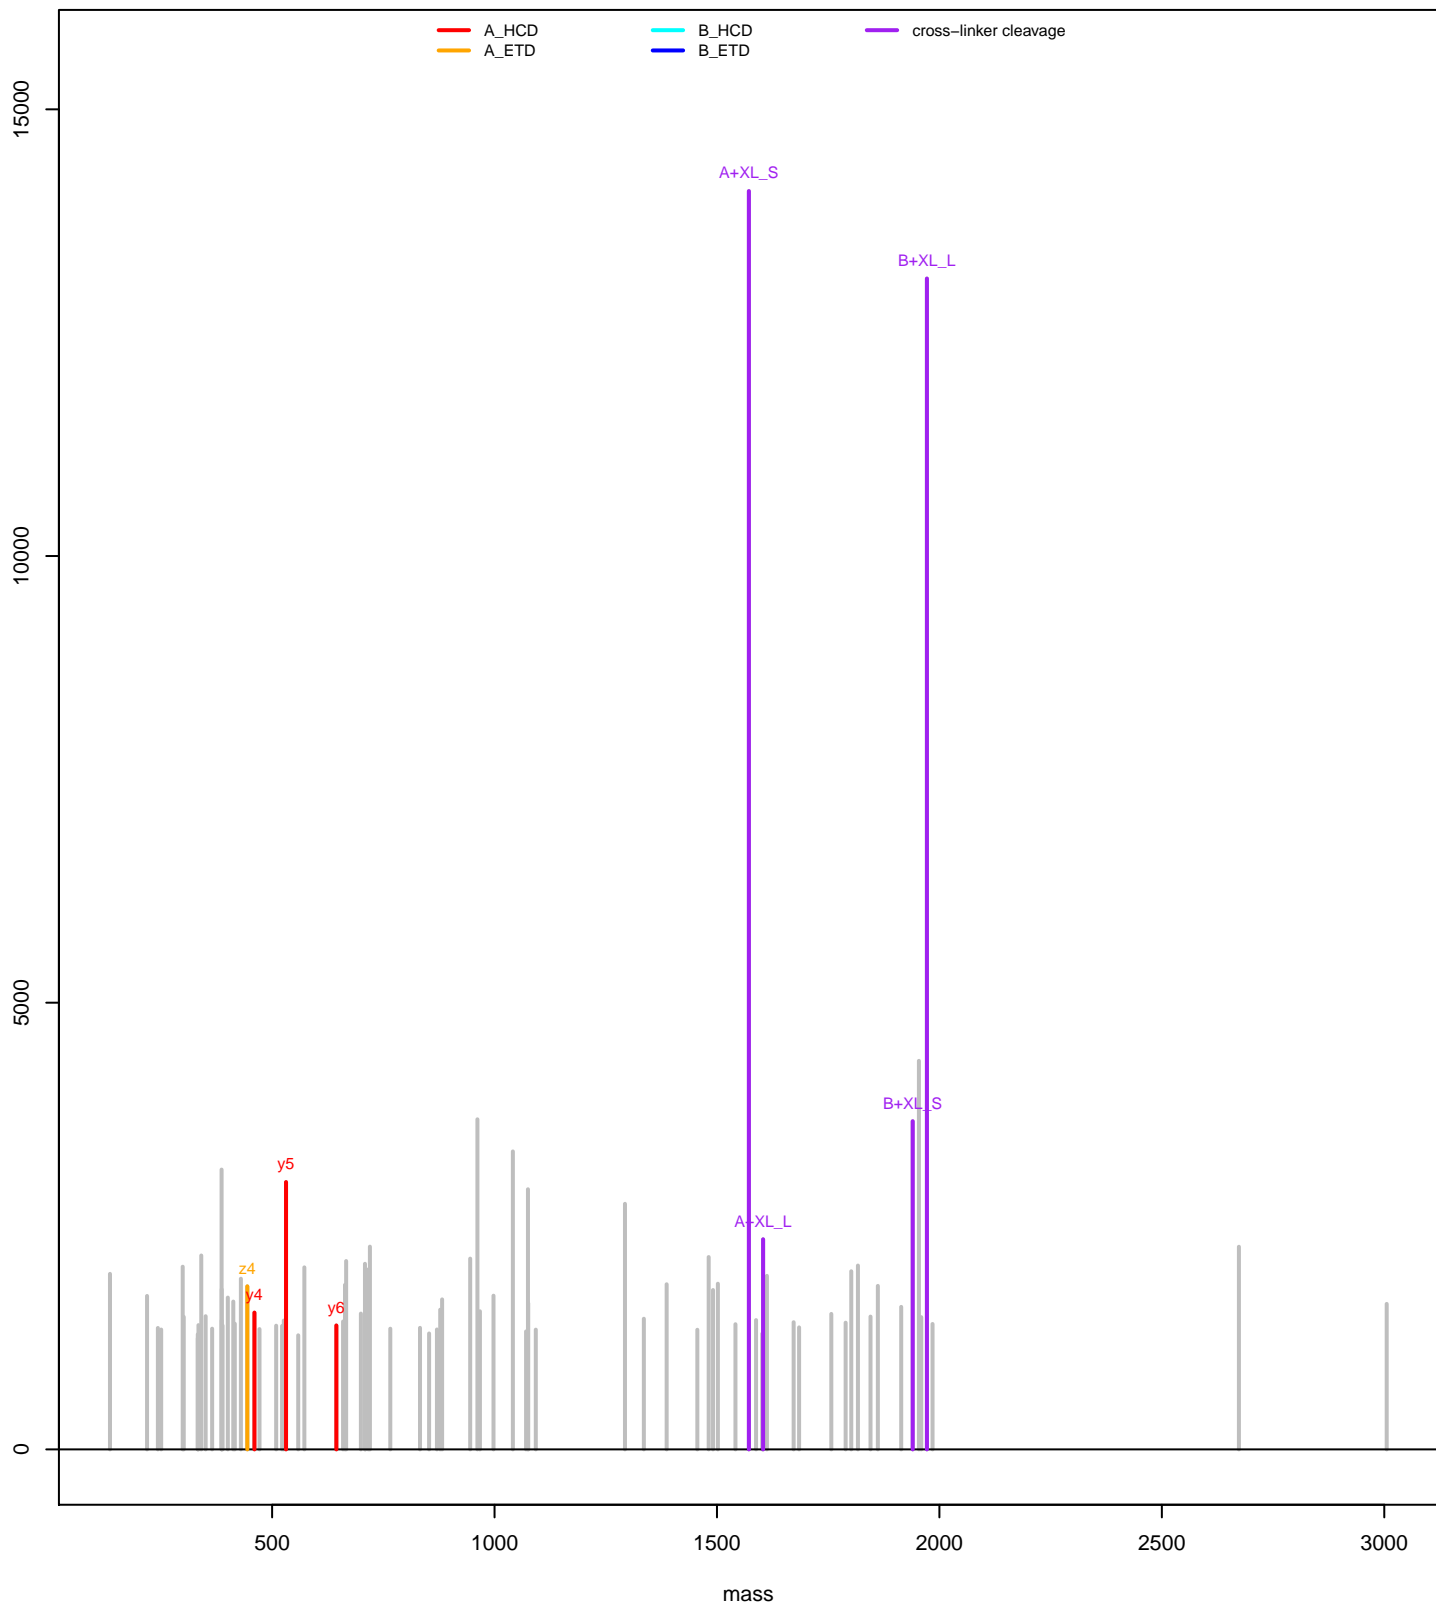

DEADEKDAIATVNK+XL\_S

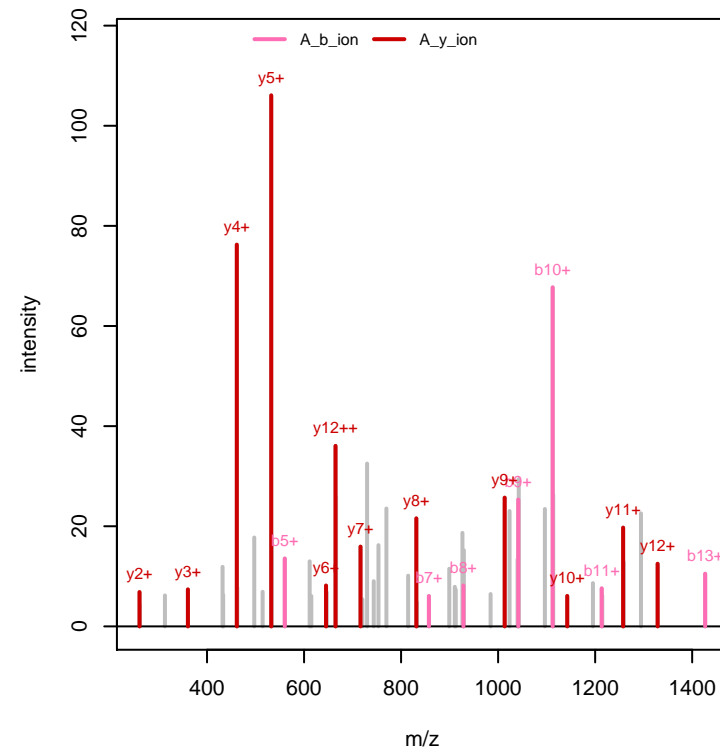

DEADEKDAIATVNK+XL\_L

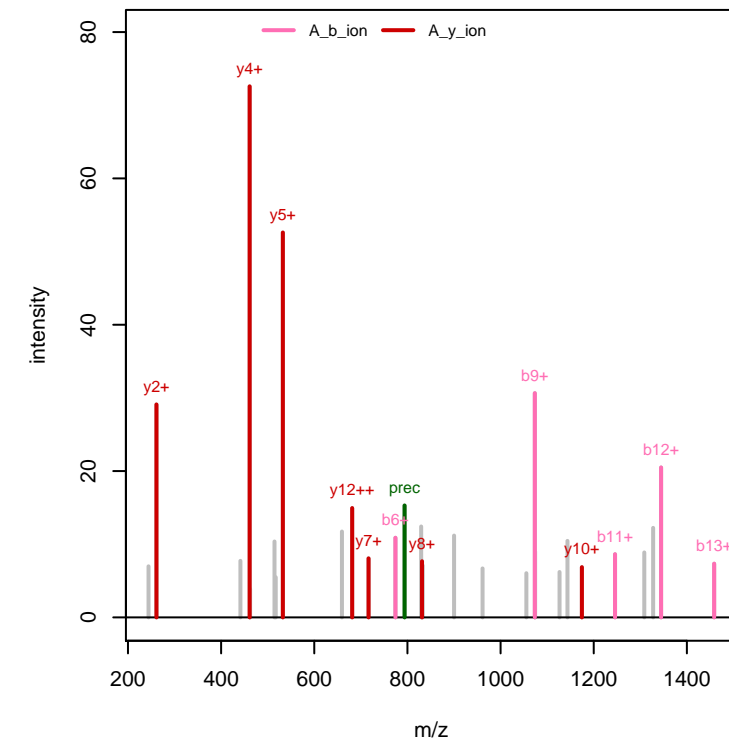

QLAEDPFNNWVALNKK+XL\_S

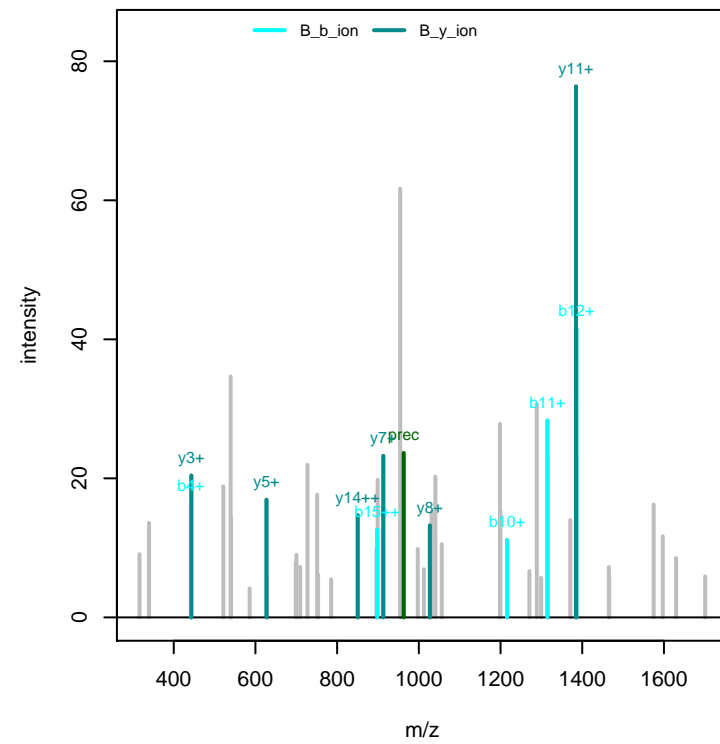

QLAEDPFNNWVALNKK+XL\_L

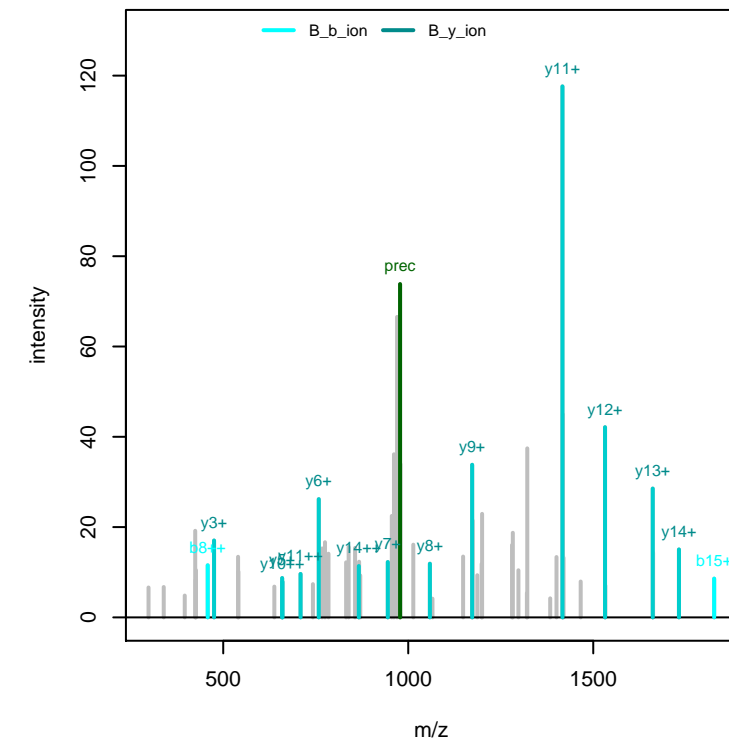

**FKESSVR**  
**RTAVAEYPTKSR**

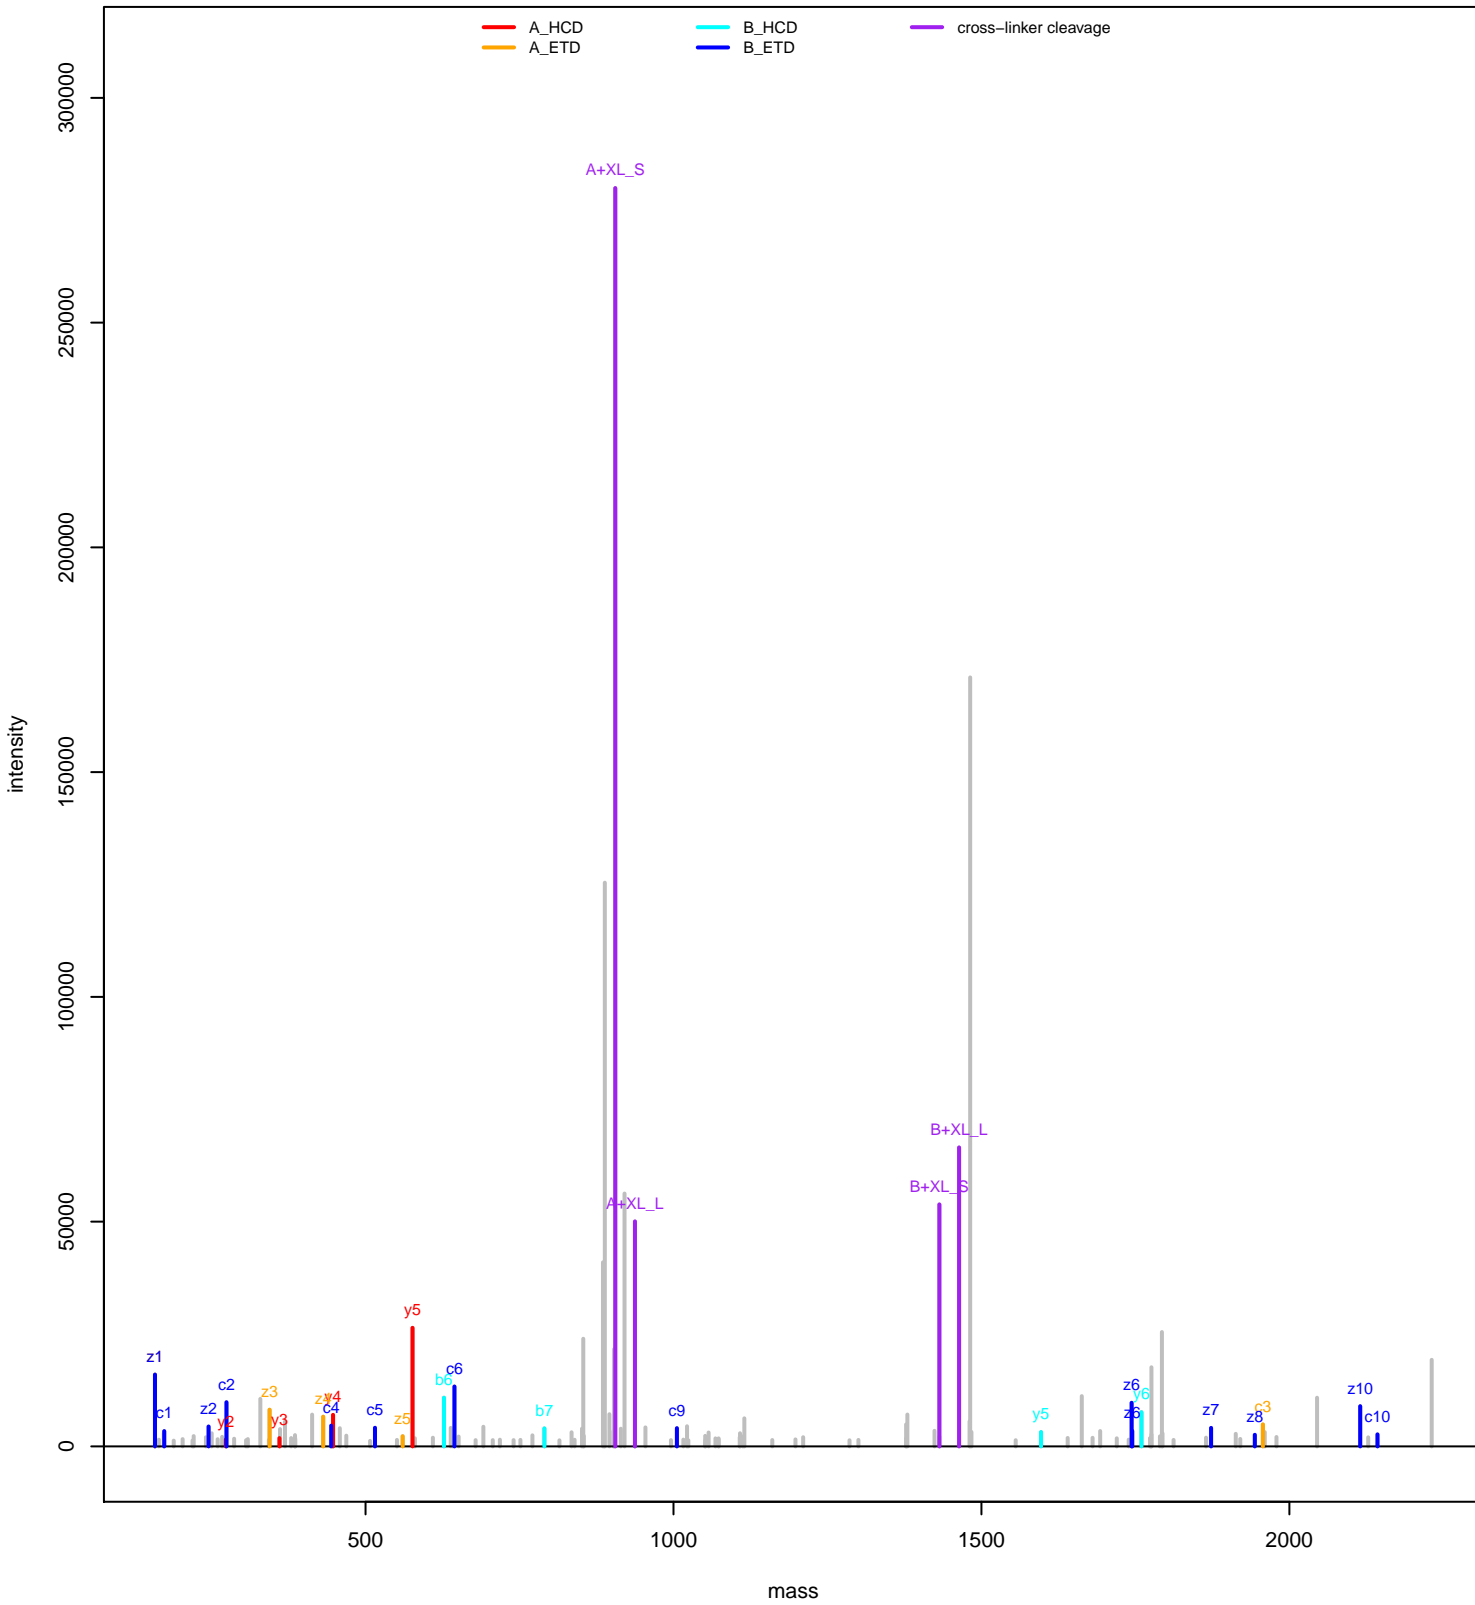

**FKESSVR+XL\_S**

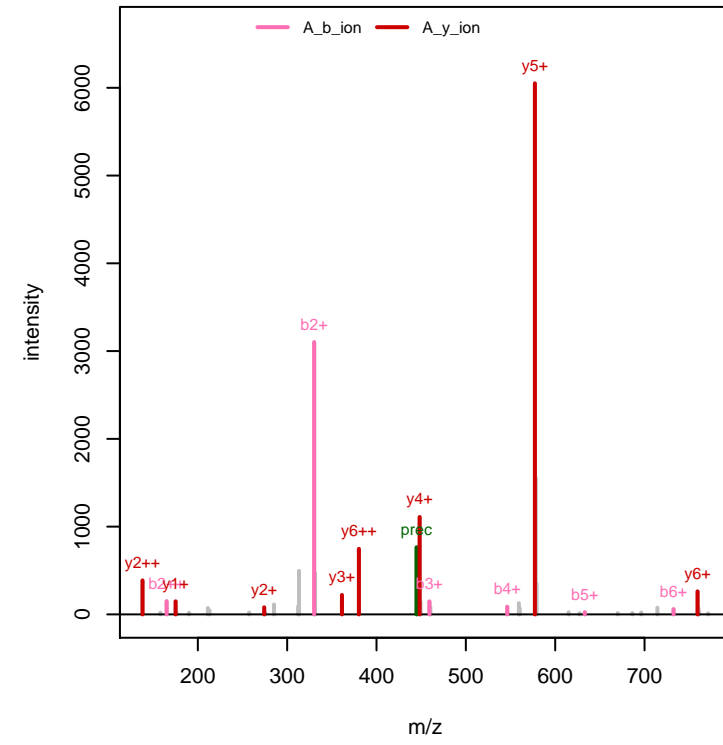

**FKESSVR+XL\_L**

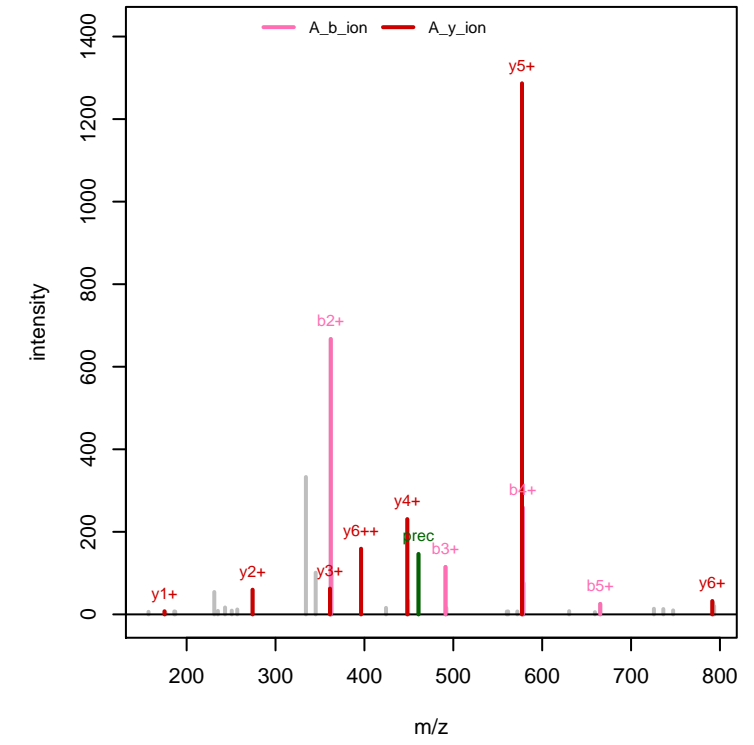

**RTAVAEYPTKSR+XL\_S**

**RTAVAEYPTKSR+XL\_L**



ETSAKSEEK  
QYGEAFEKR

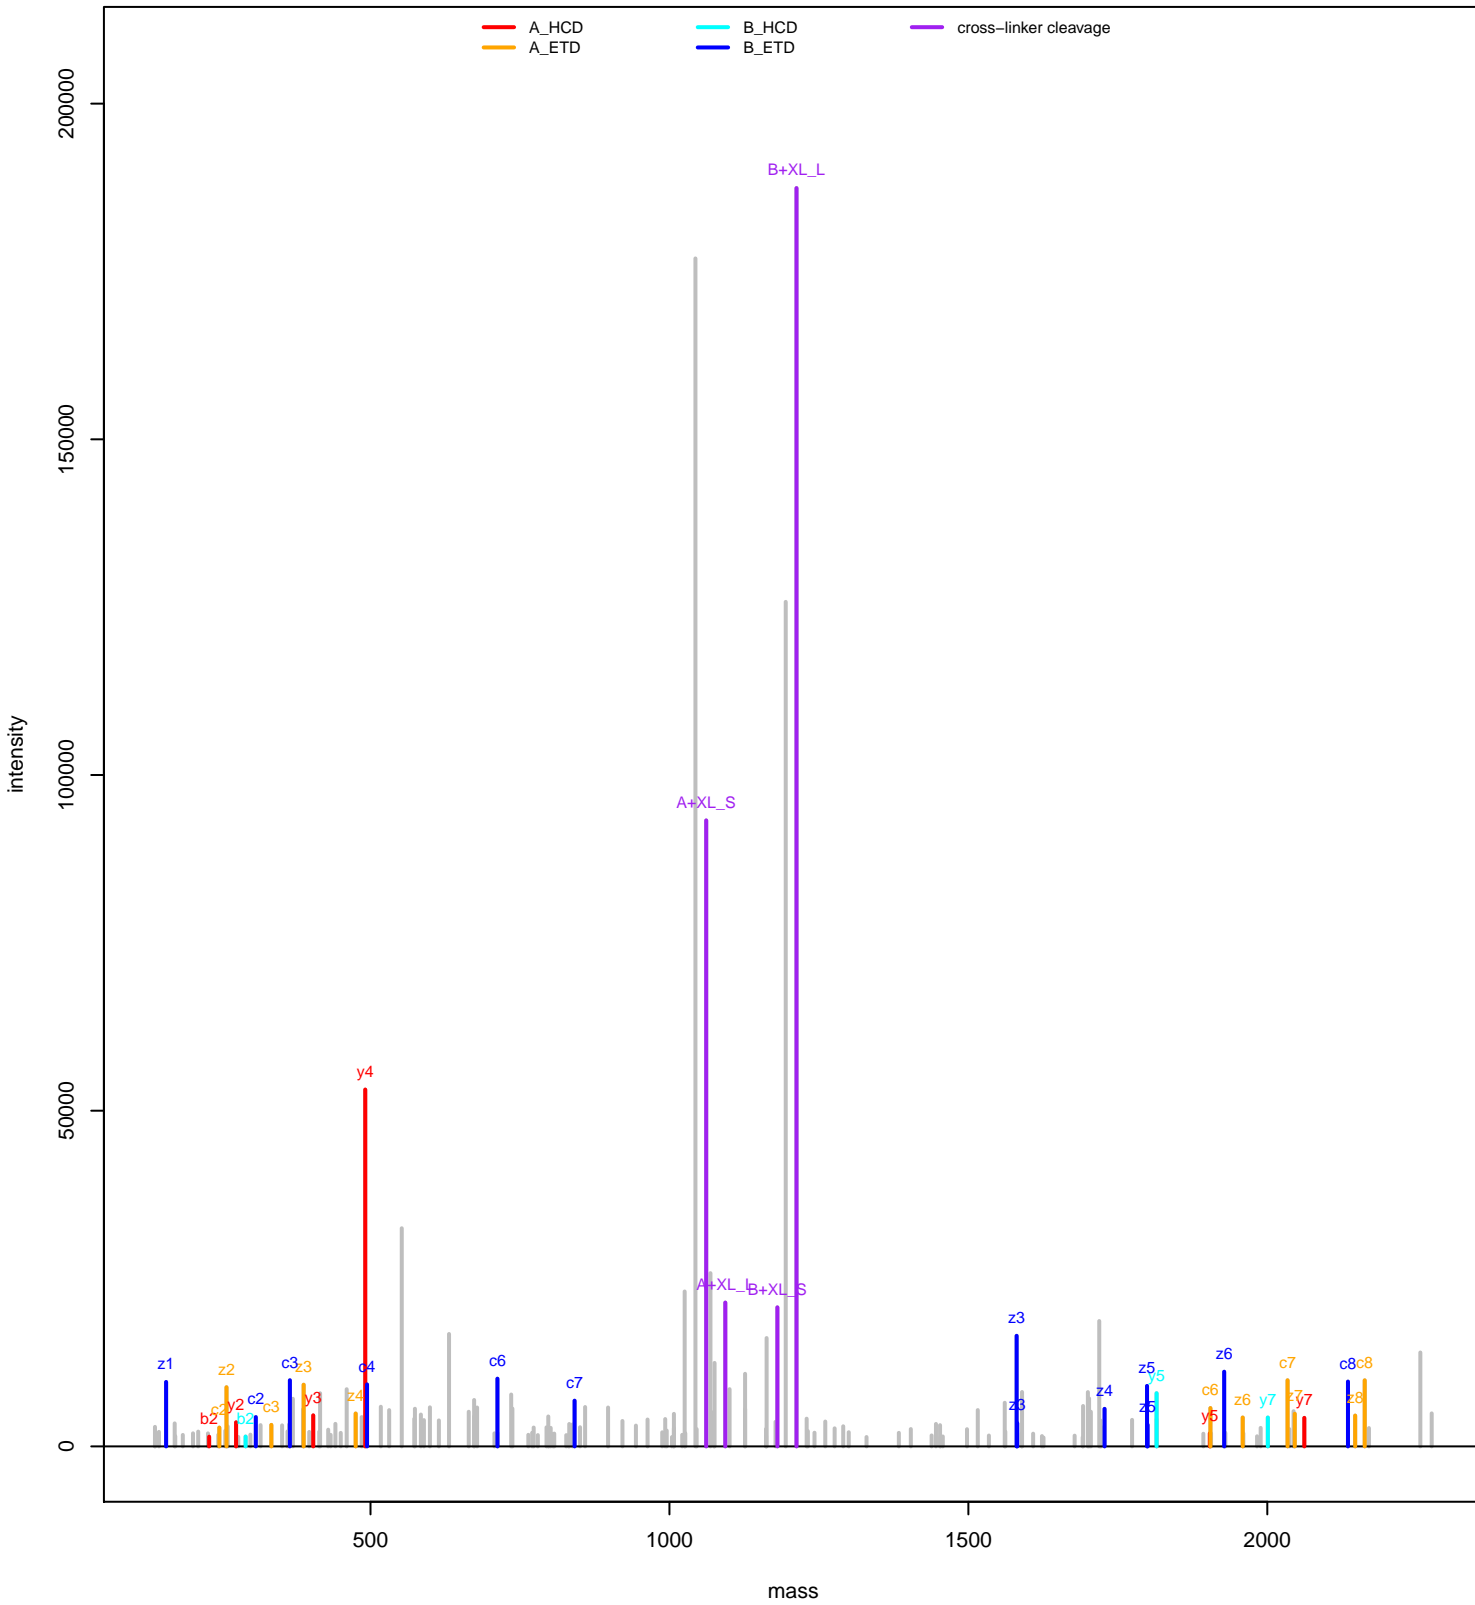

ETSAKSEEK+XL\_S

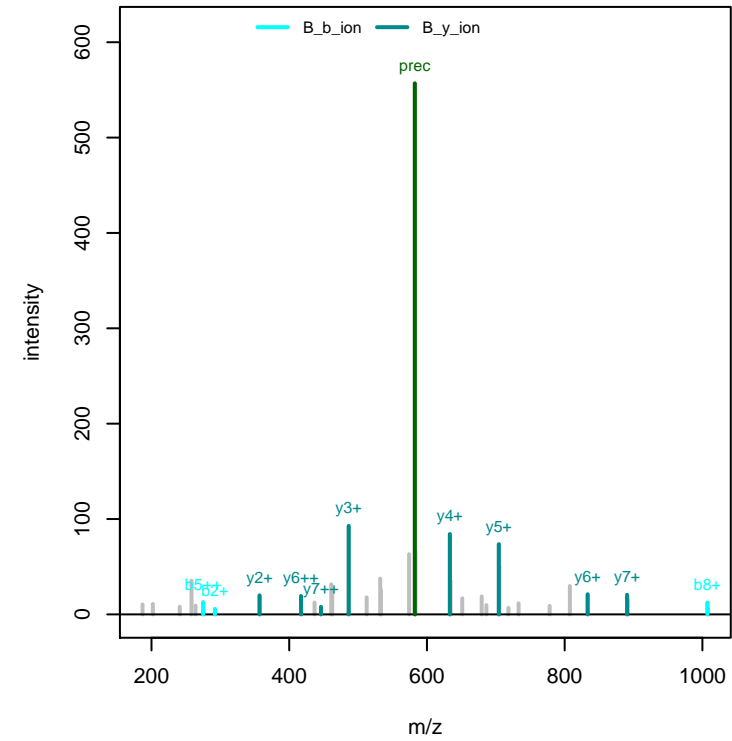

ETSAKSEEK+XL\_L

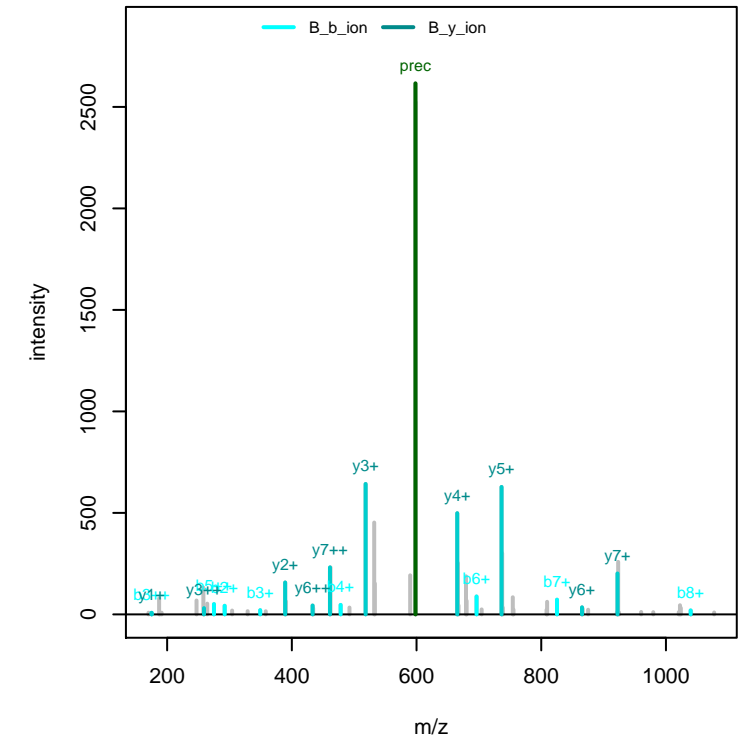

QYGEAFEKR+XL\_S



QYGEAFEKR+XL\_L



TPAVIKK  
AQRPAKYSYVDENGETK

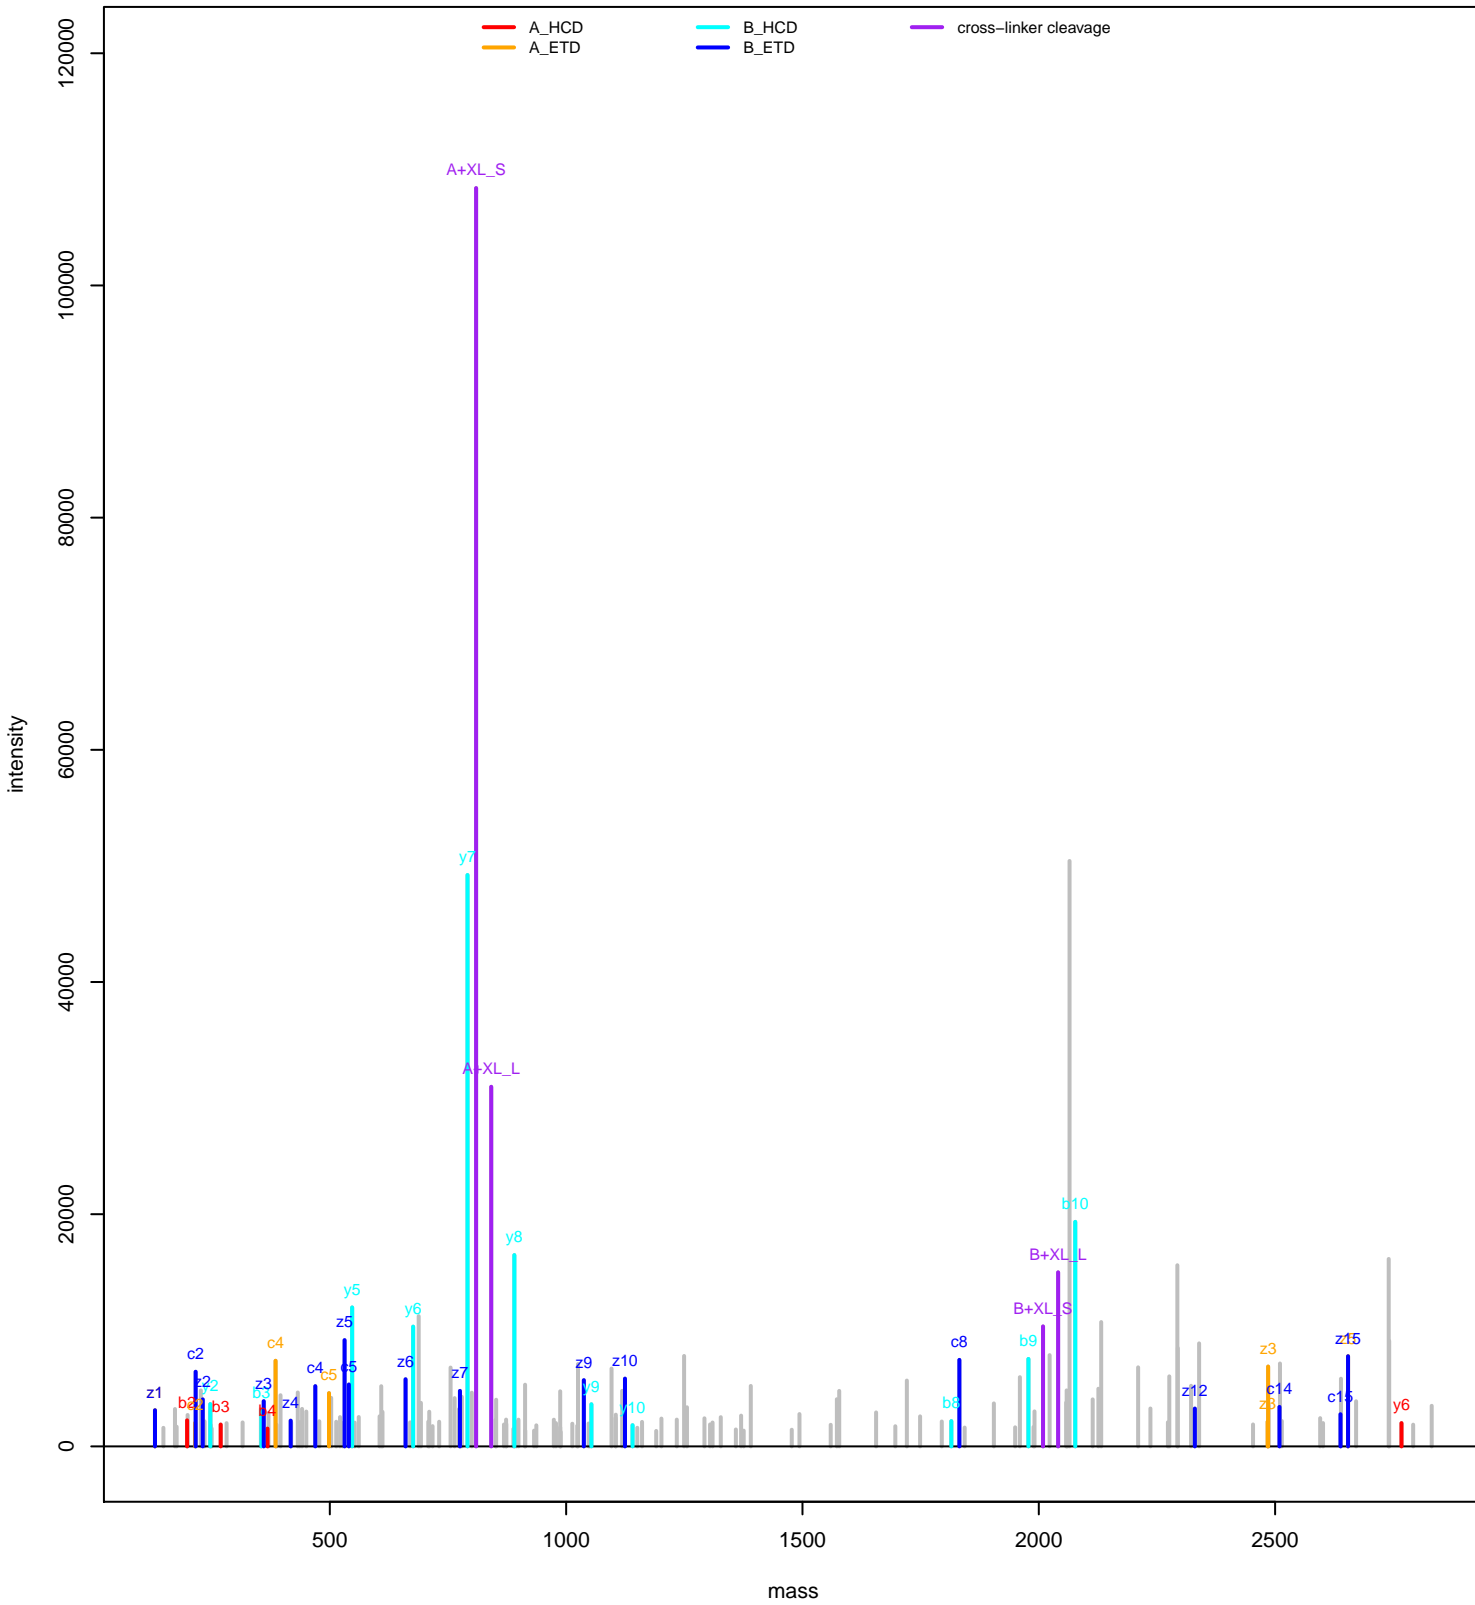

TPAVIKK+XL\_S

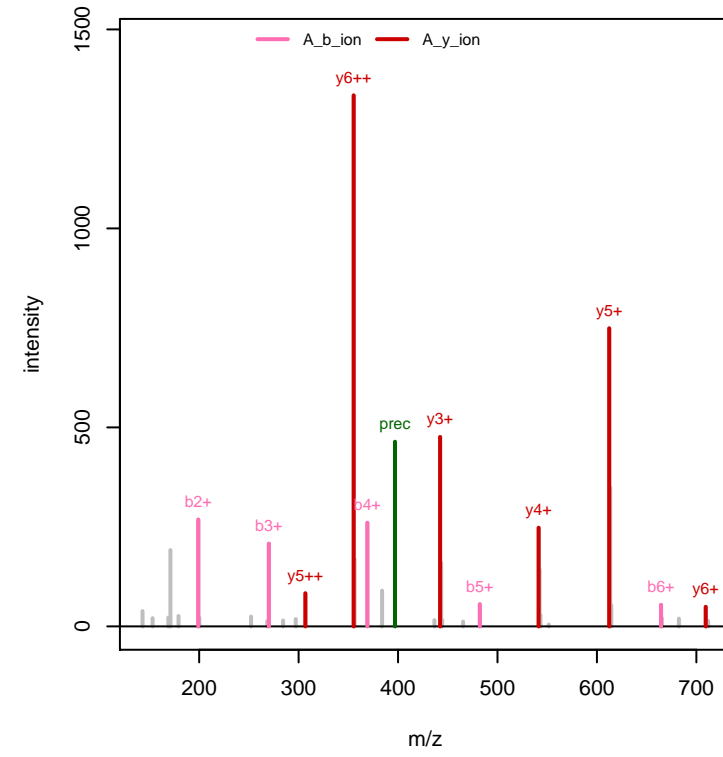

TPAVIKK+XL\_L

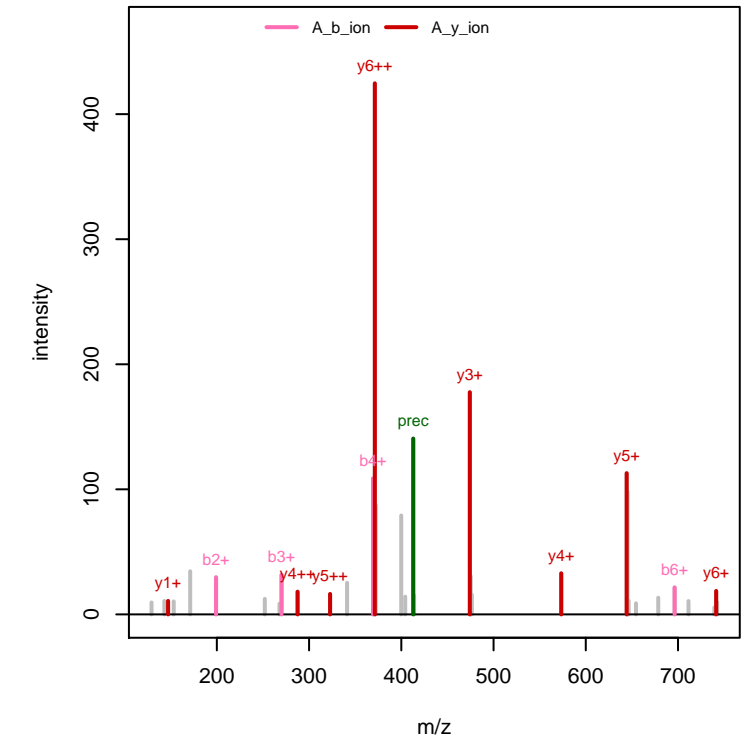

AQRPAKYSYVDENGETK+XL\_S

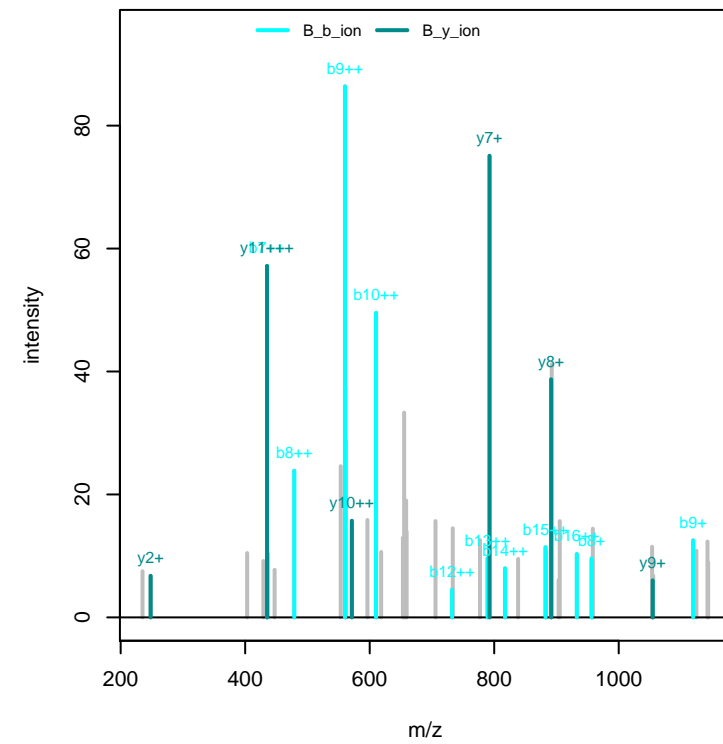

AQRPAKYSYVDENGETK+XL\_L

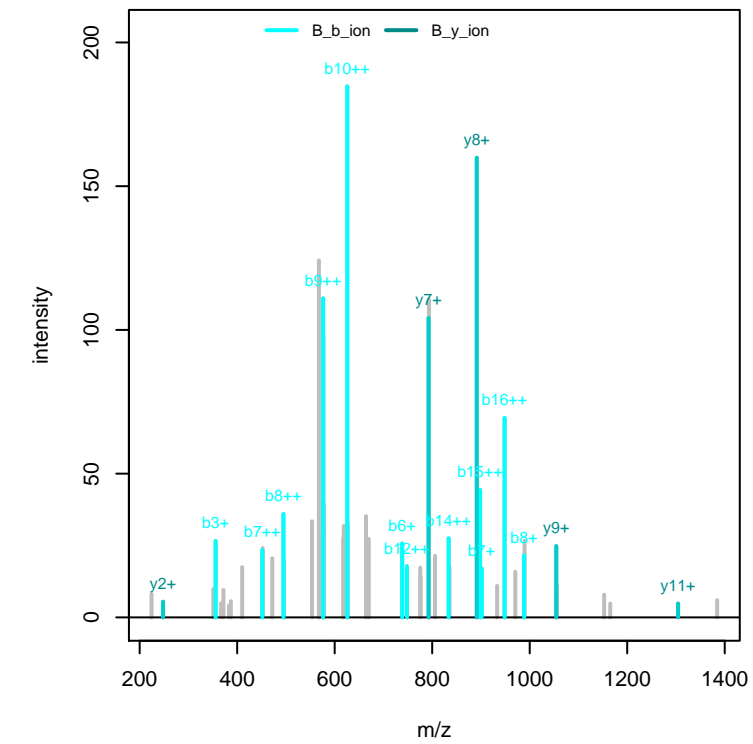

QKGDADKIAK  
KLAEAQEELK

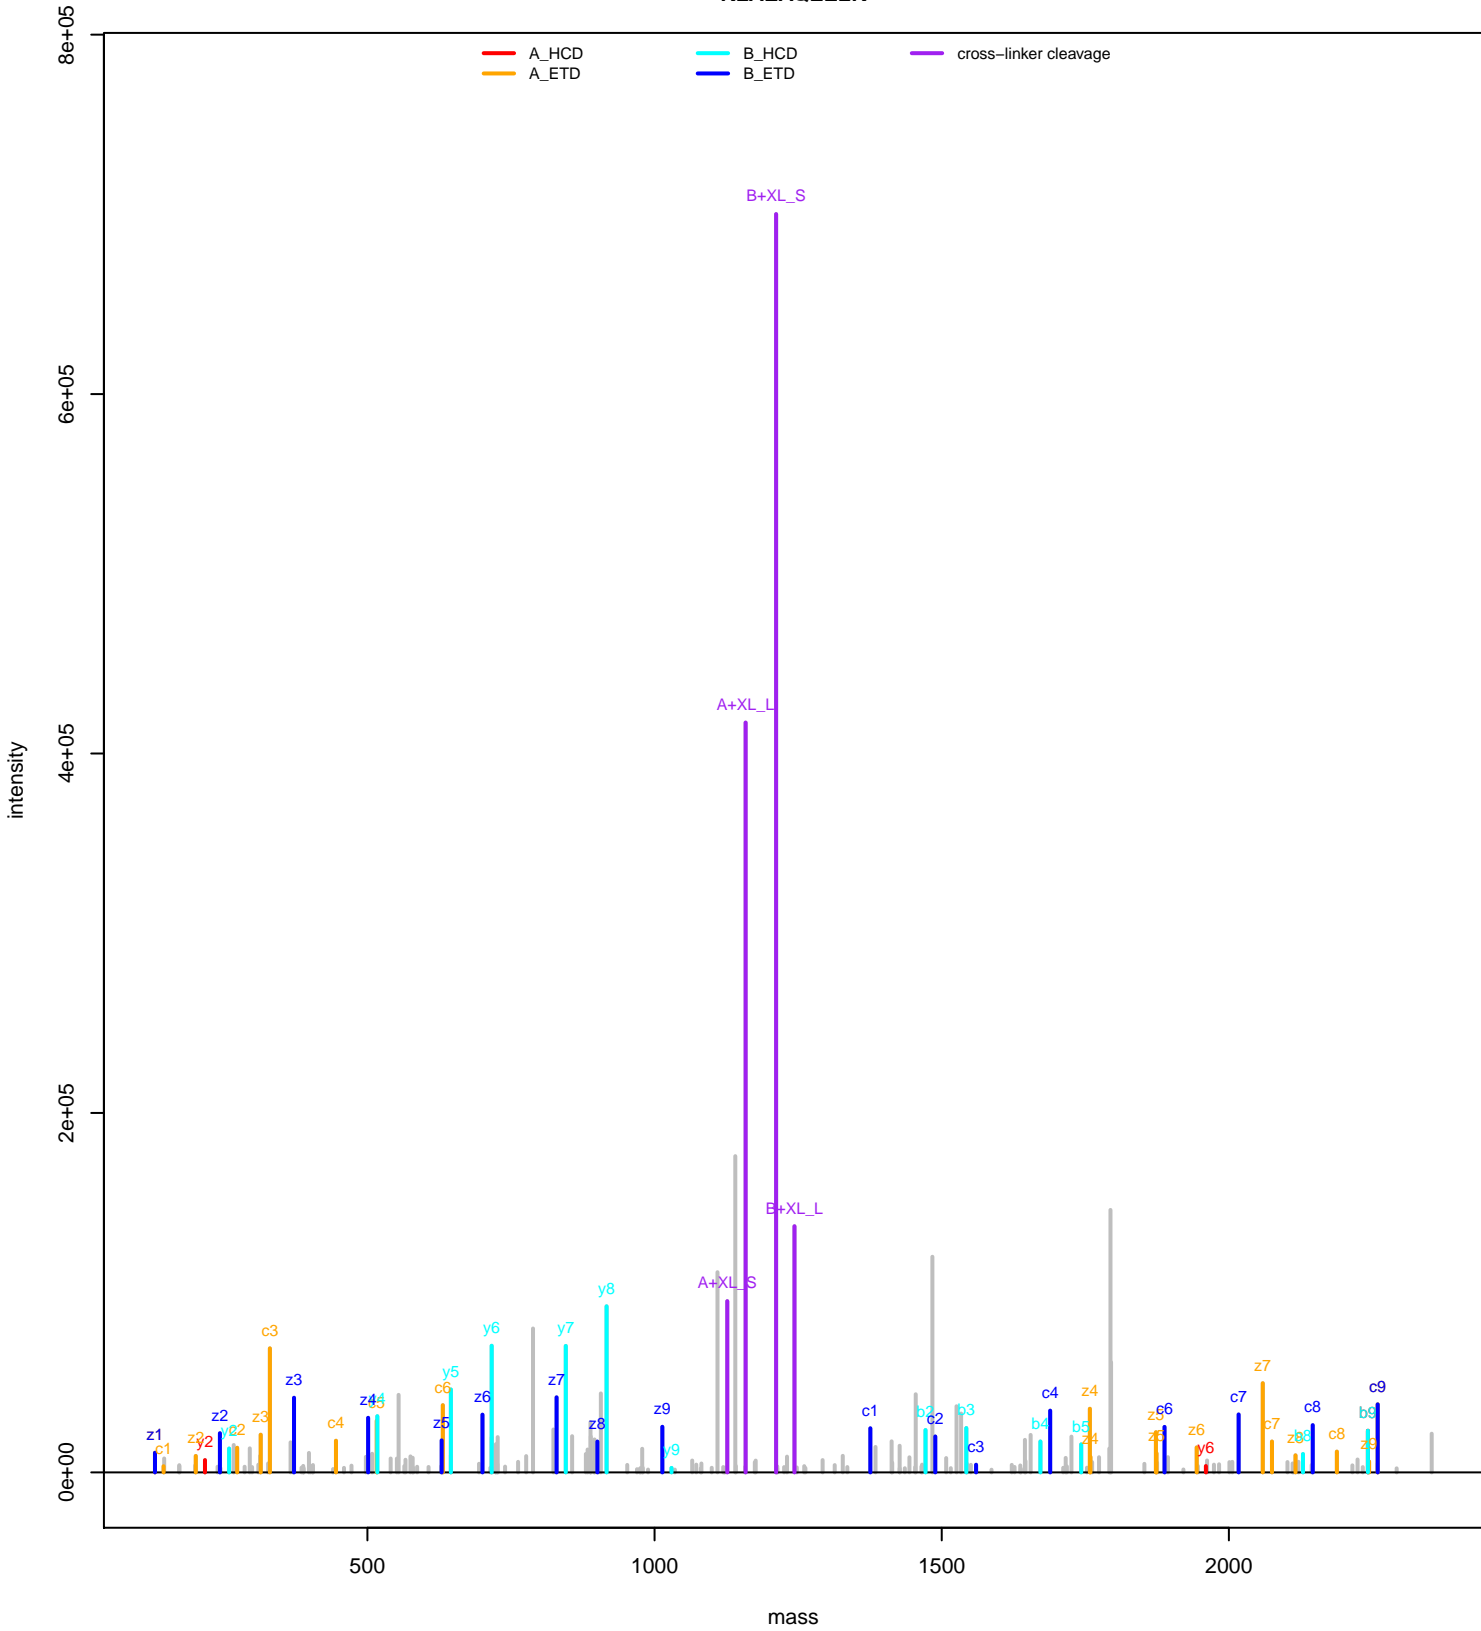

QKGDADKIAK+XL\_S

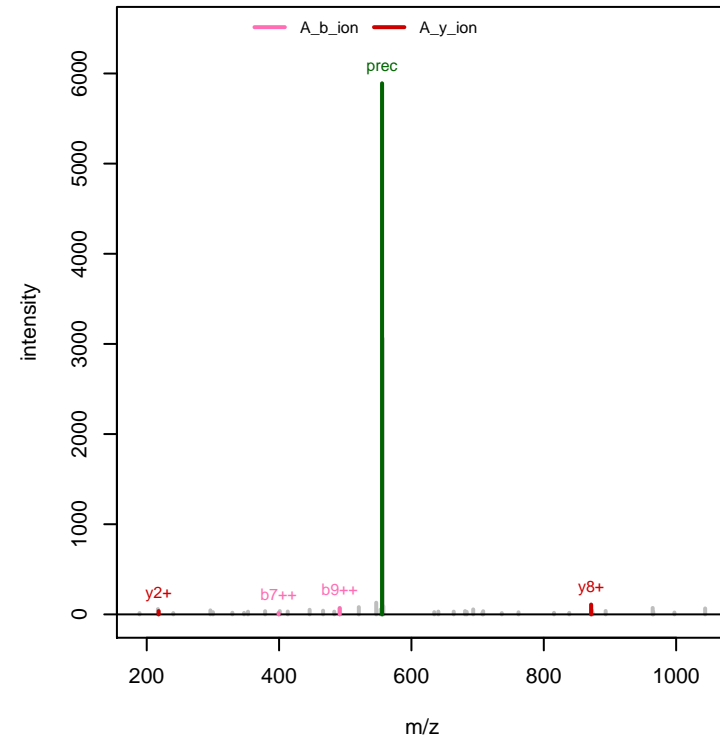

QKGDADKIAK+XL\_L

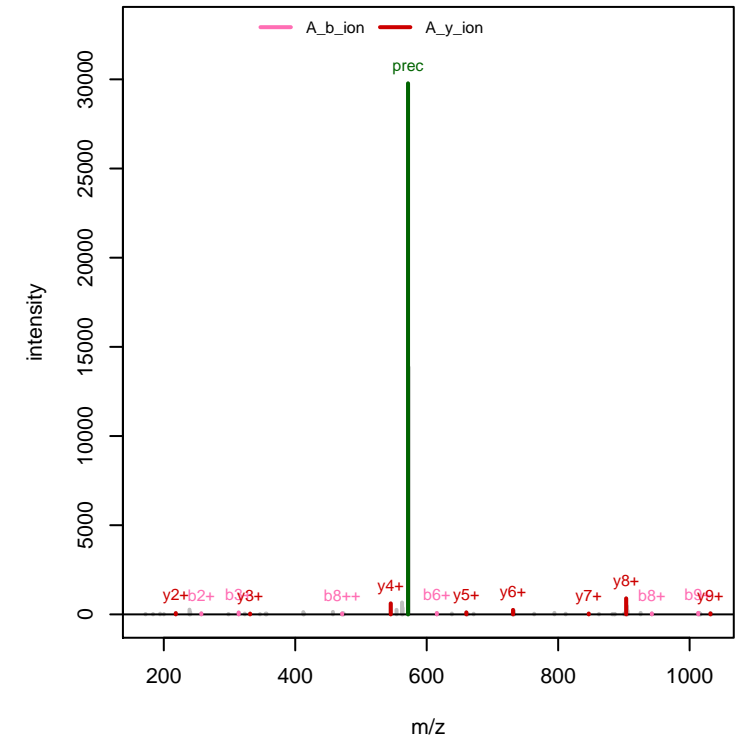

KLAEAQEELK+XL\_S

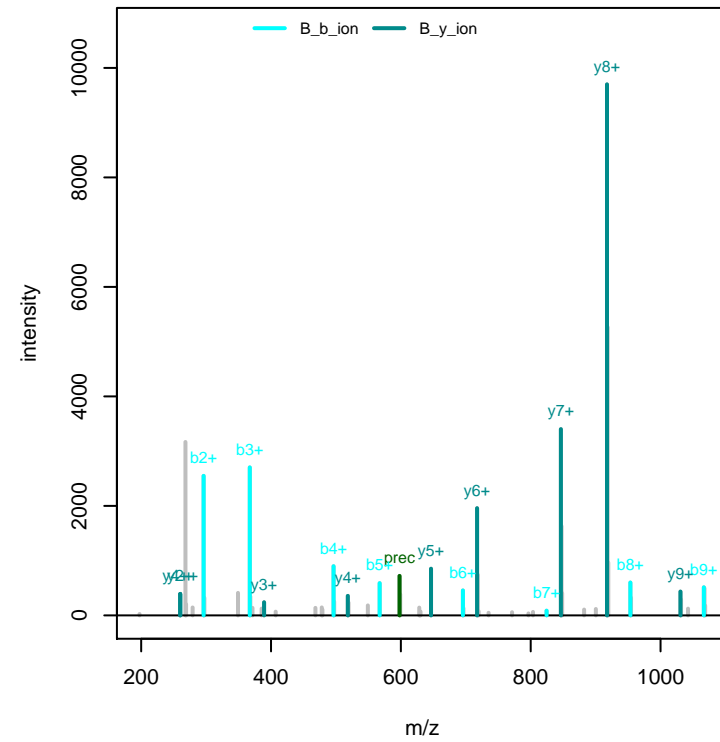

KLAEAQEELK+XL\_L

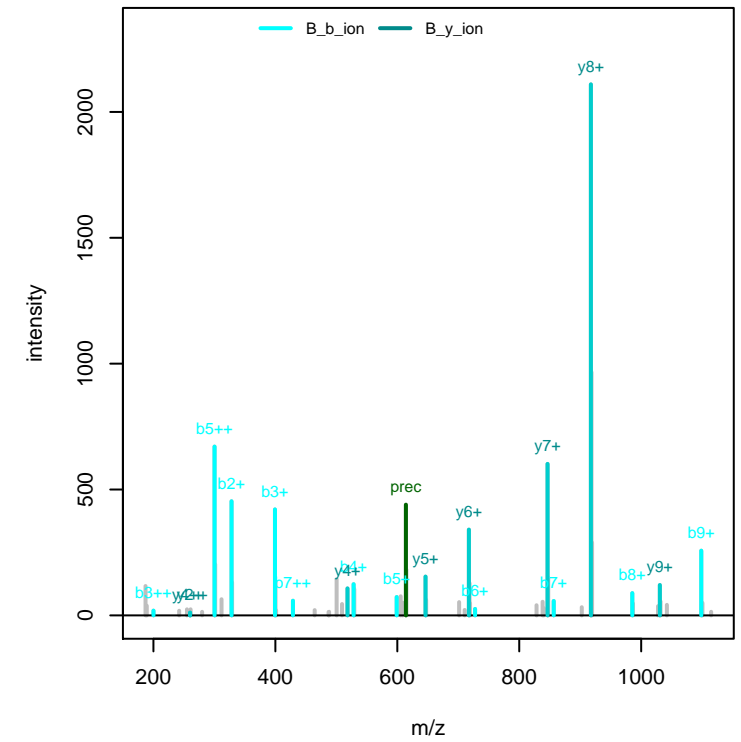

TGDKVELEGK  
LKSRVENASPKDE

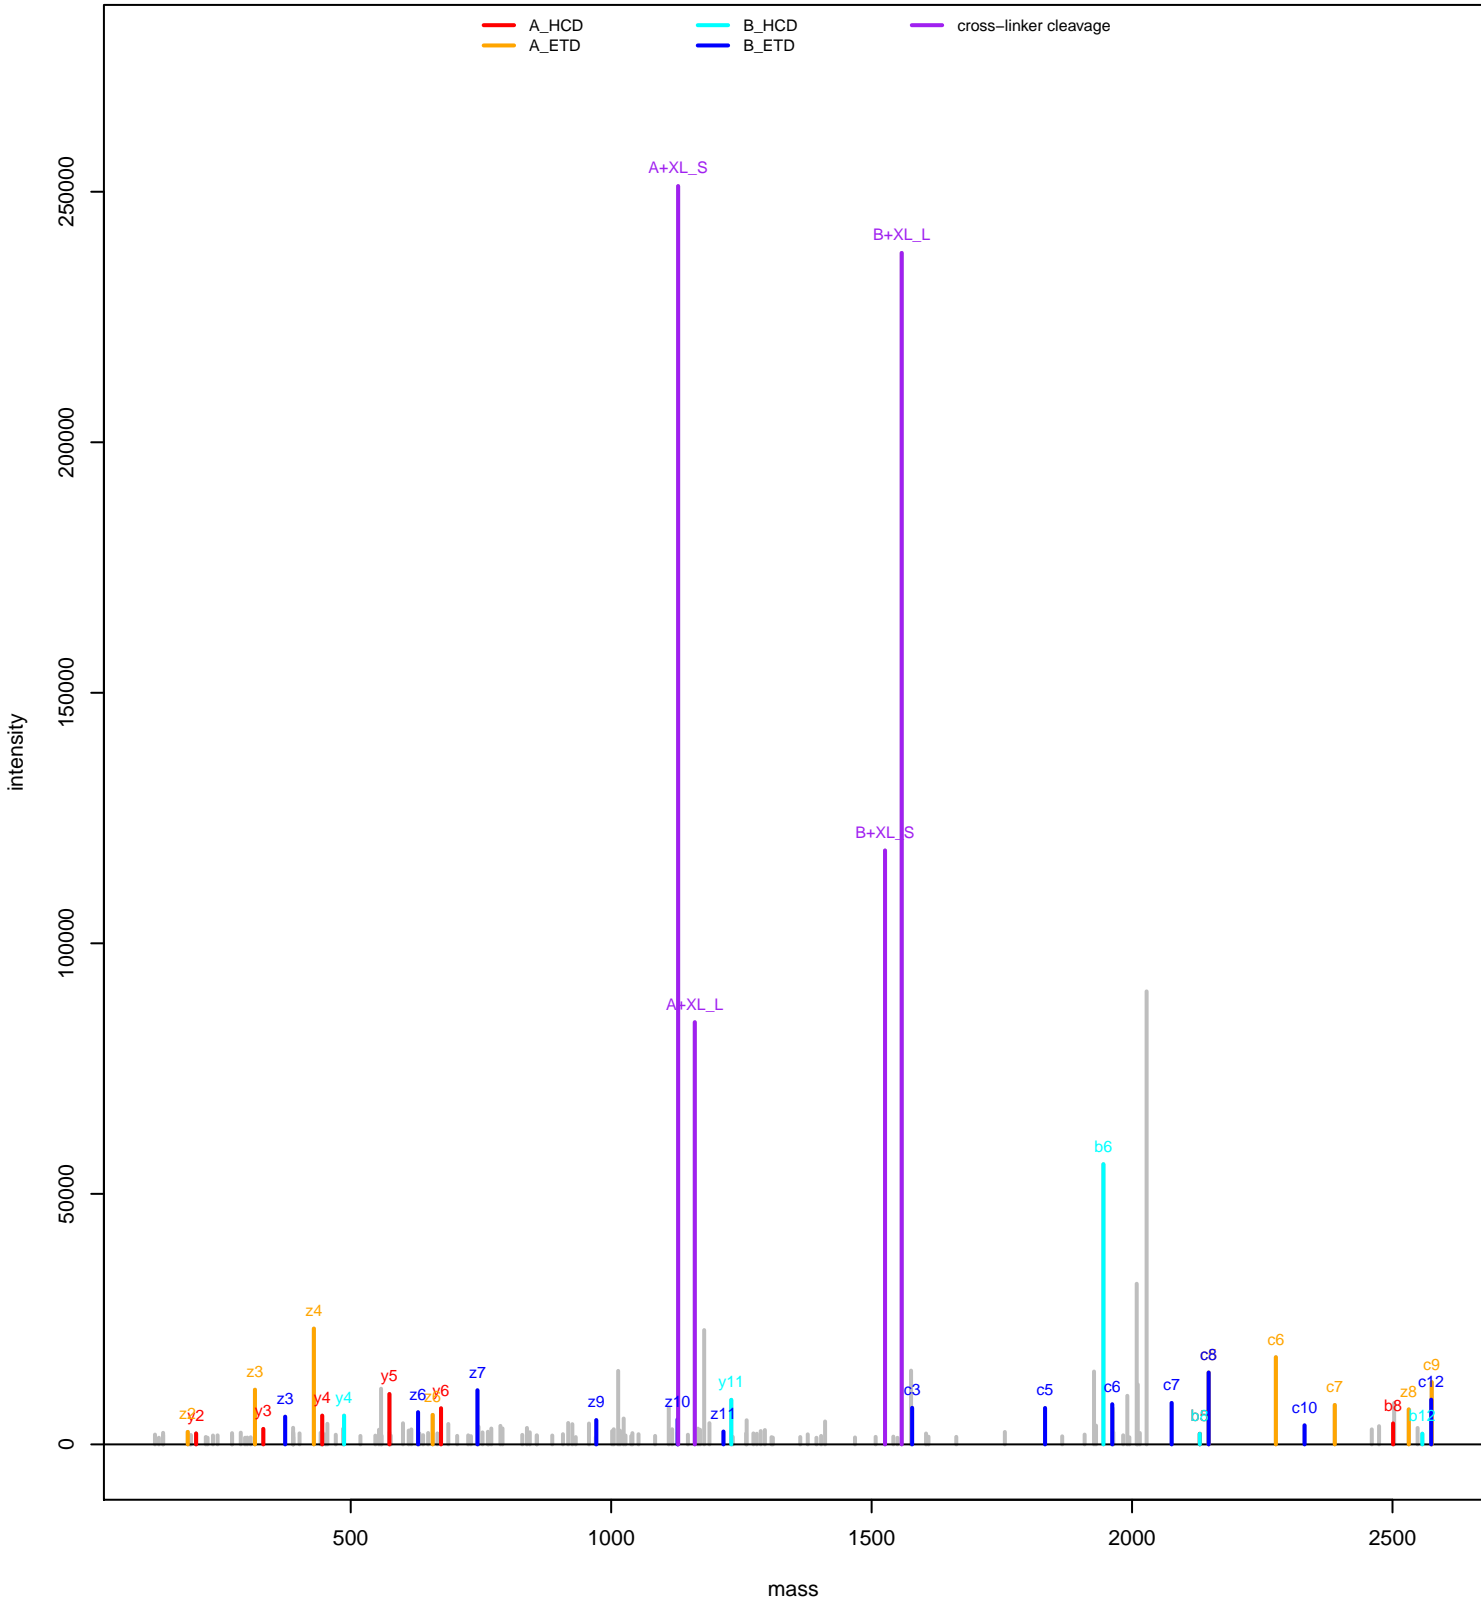

TGDKVELEGK+XL\_S

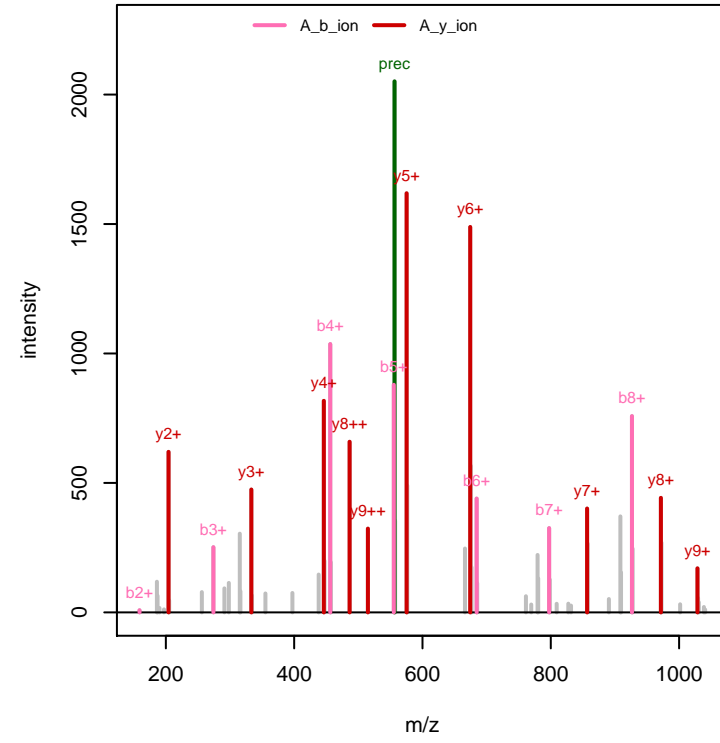

TGDKVELEGK+XL\_L

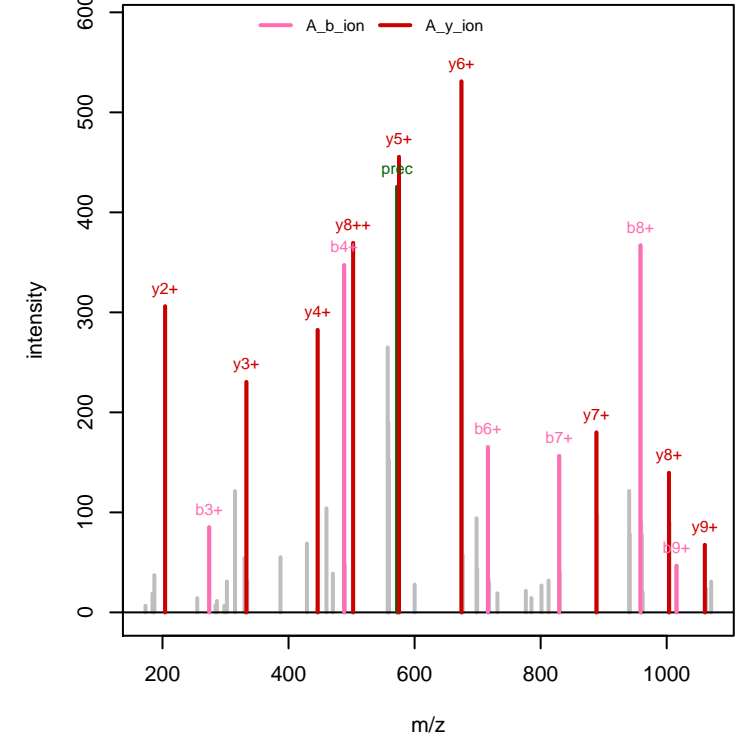

LKSRVENASPKDE+XL\_S

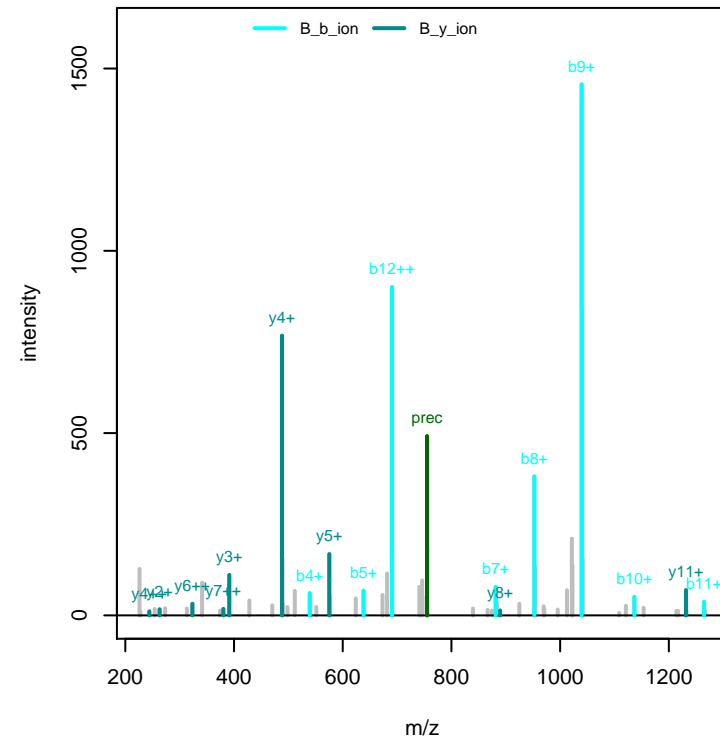

LKSRVENASPKDE+XL\_L

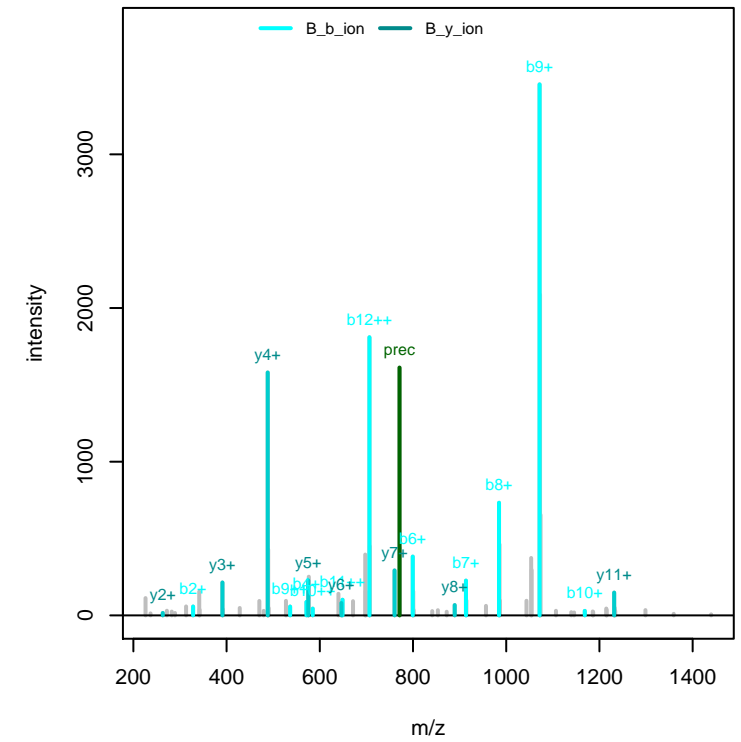

KSAMMK  
SIKTISSQK

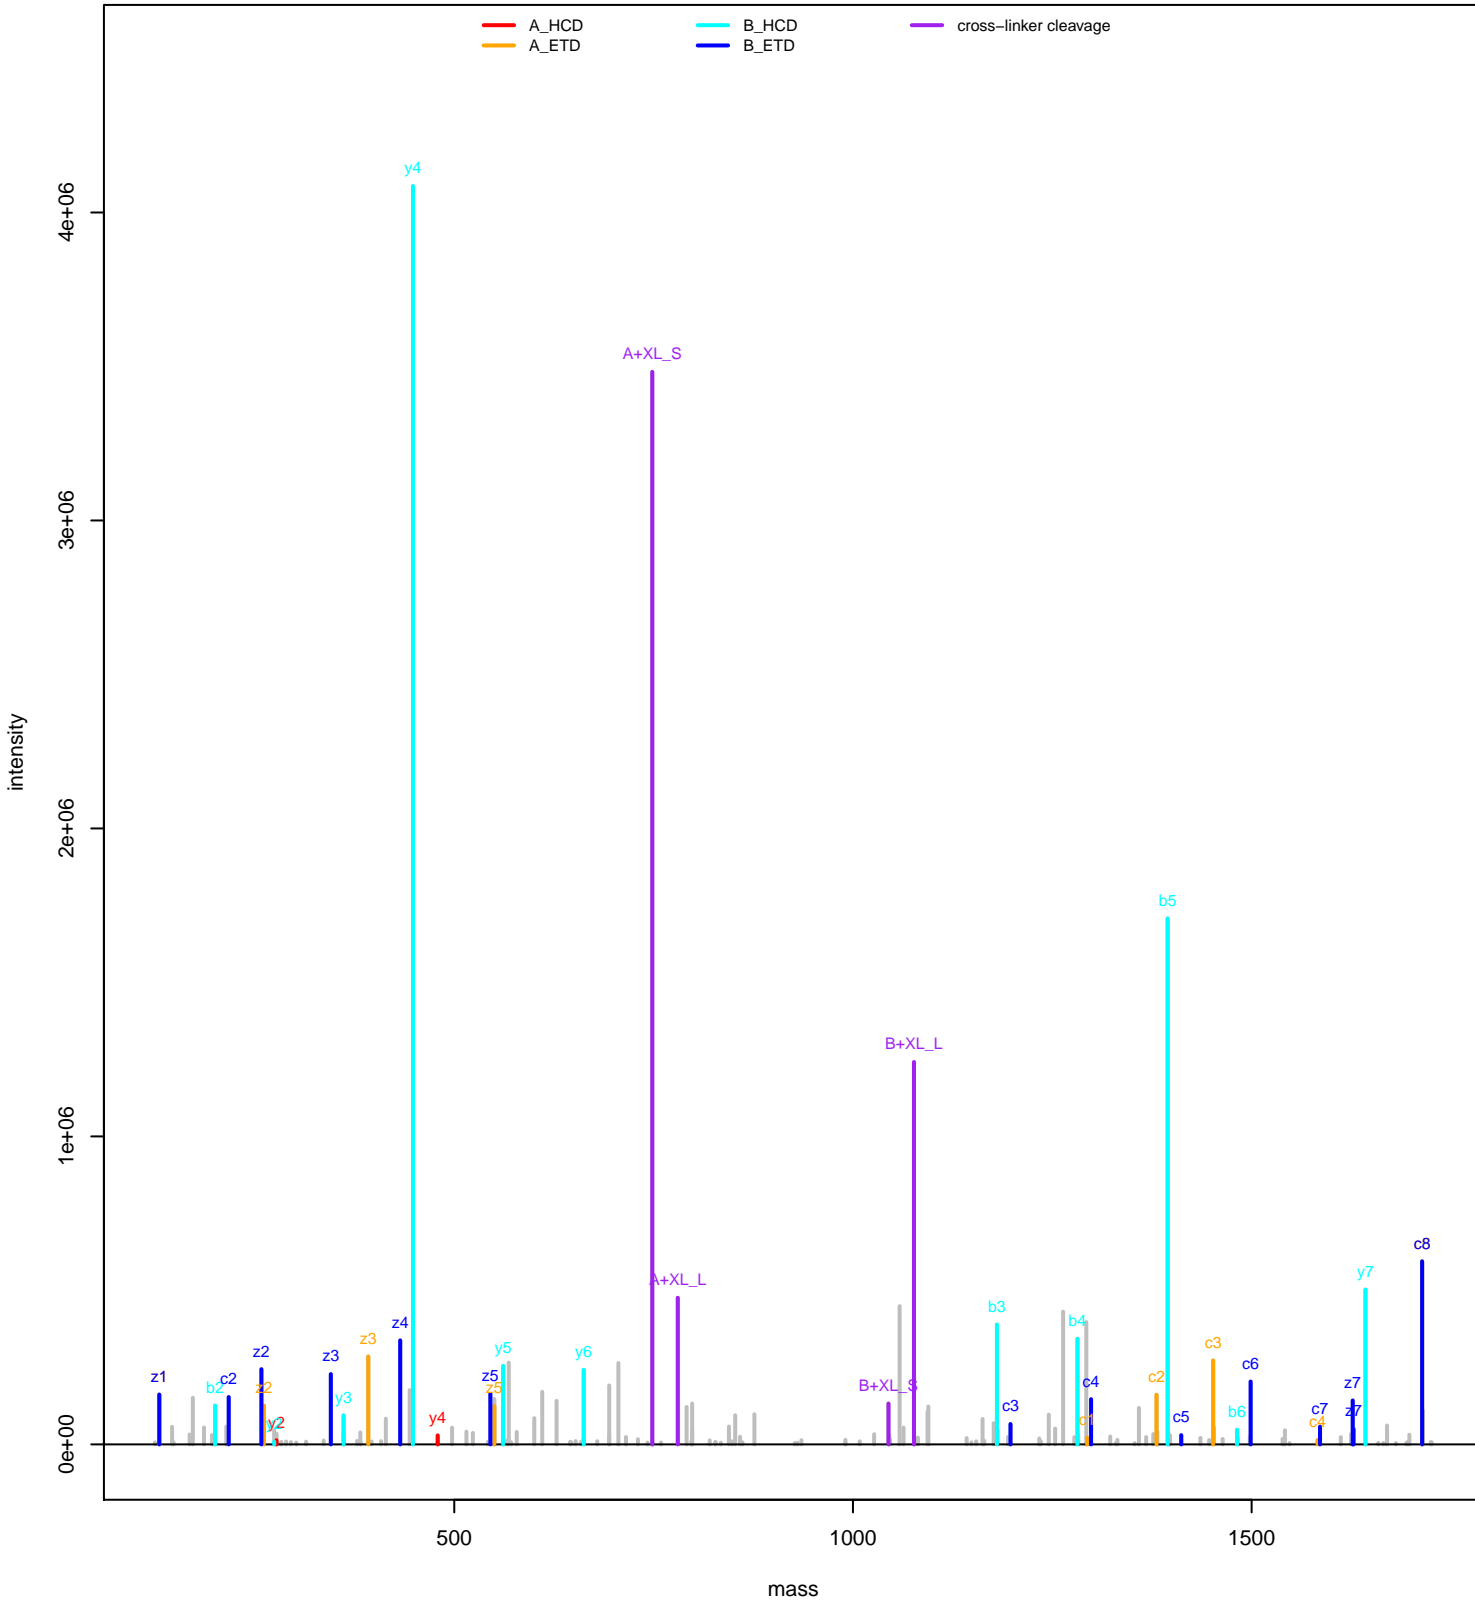

KSAMMK+XL\_S

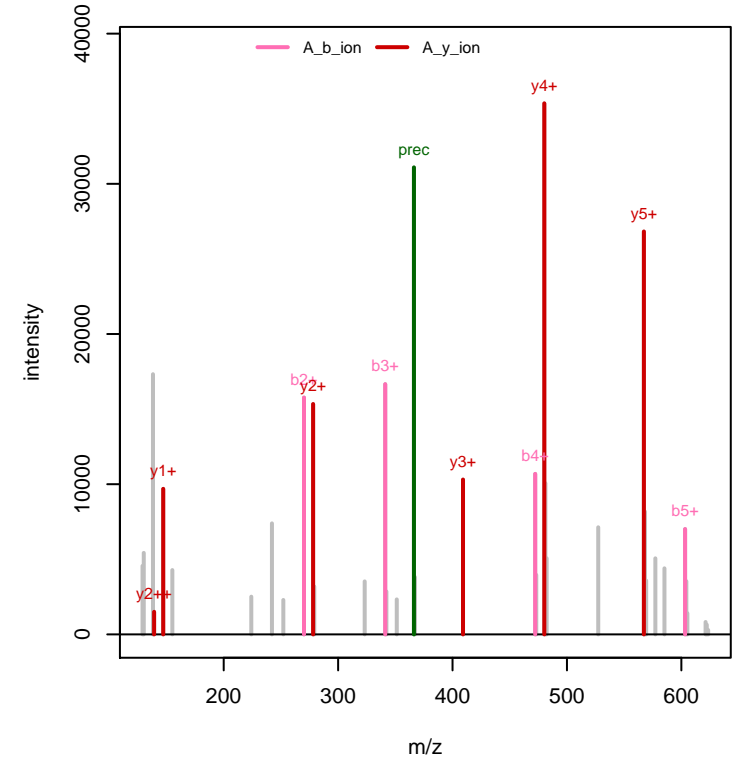

KSAMMK+XL\_L

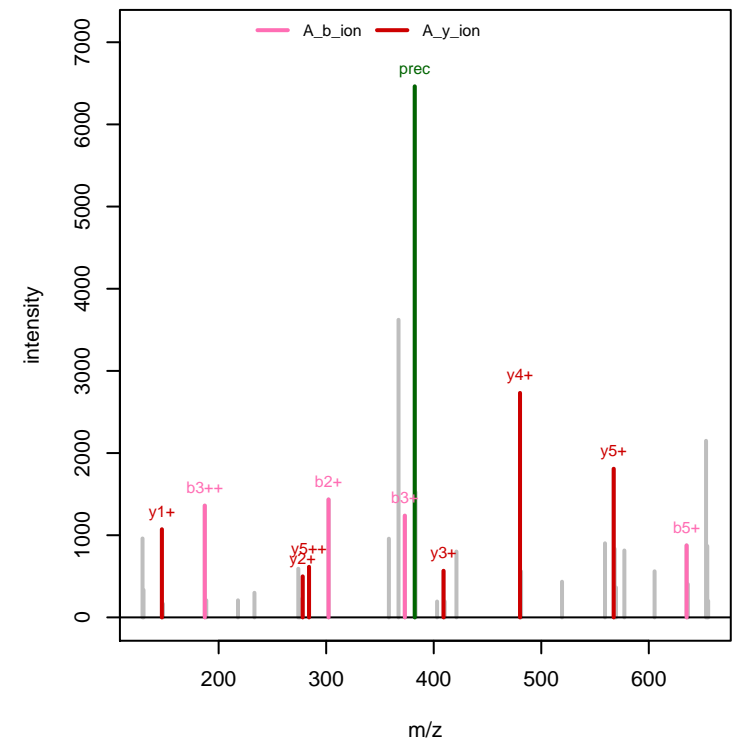

SIKTISSQK+XL\_S

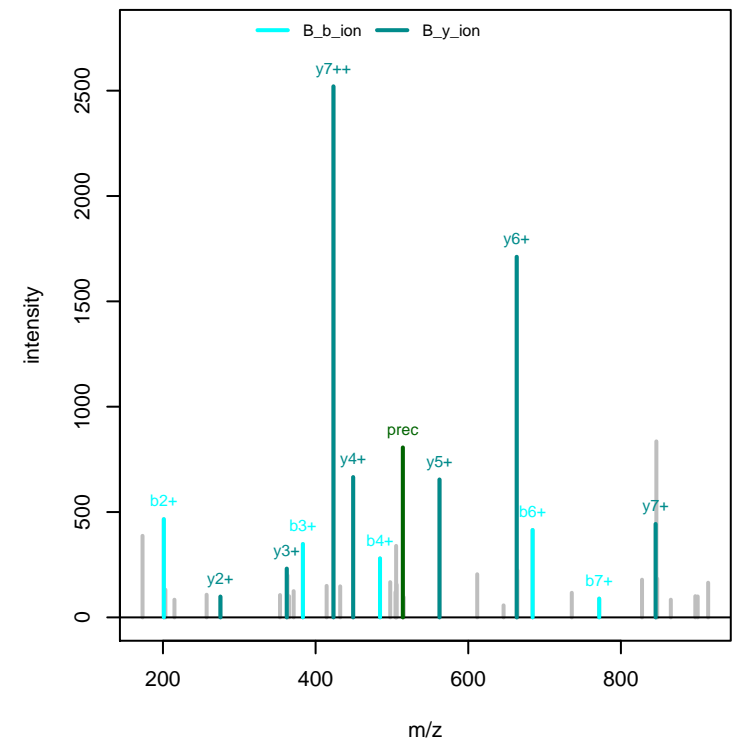

SIKTISSQK+XL\_L

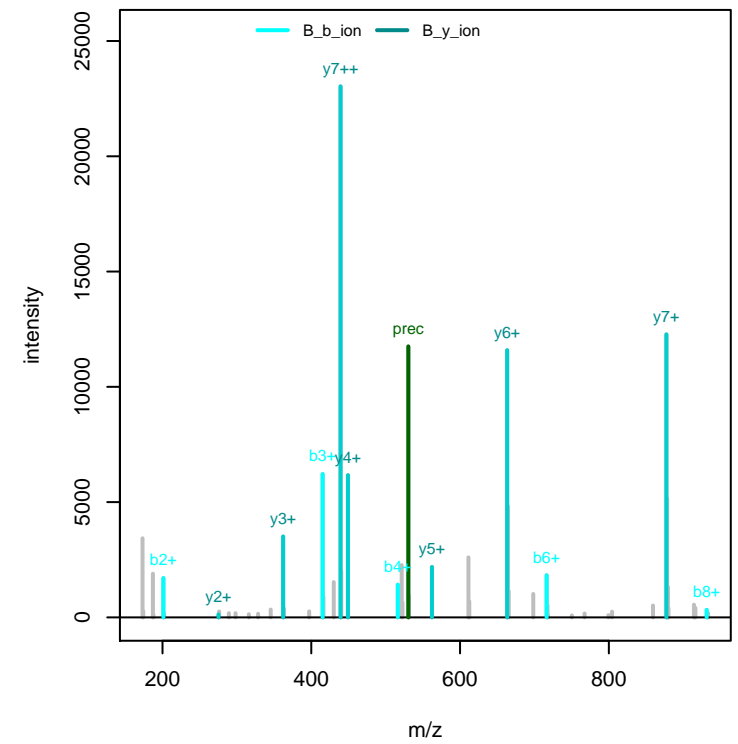

QAQVPKHVIDK  
AKGGGDETFVQGR

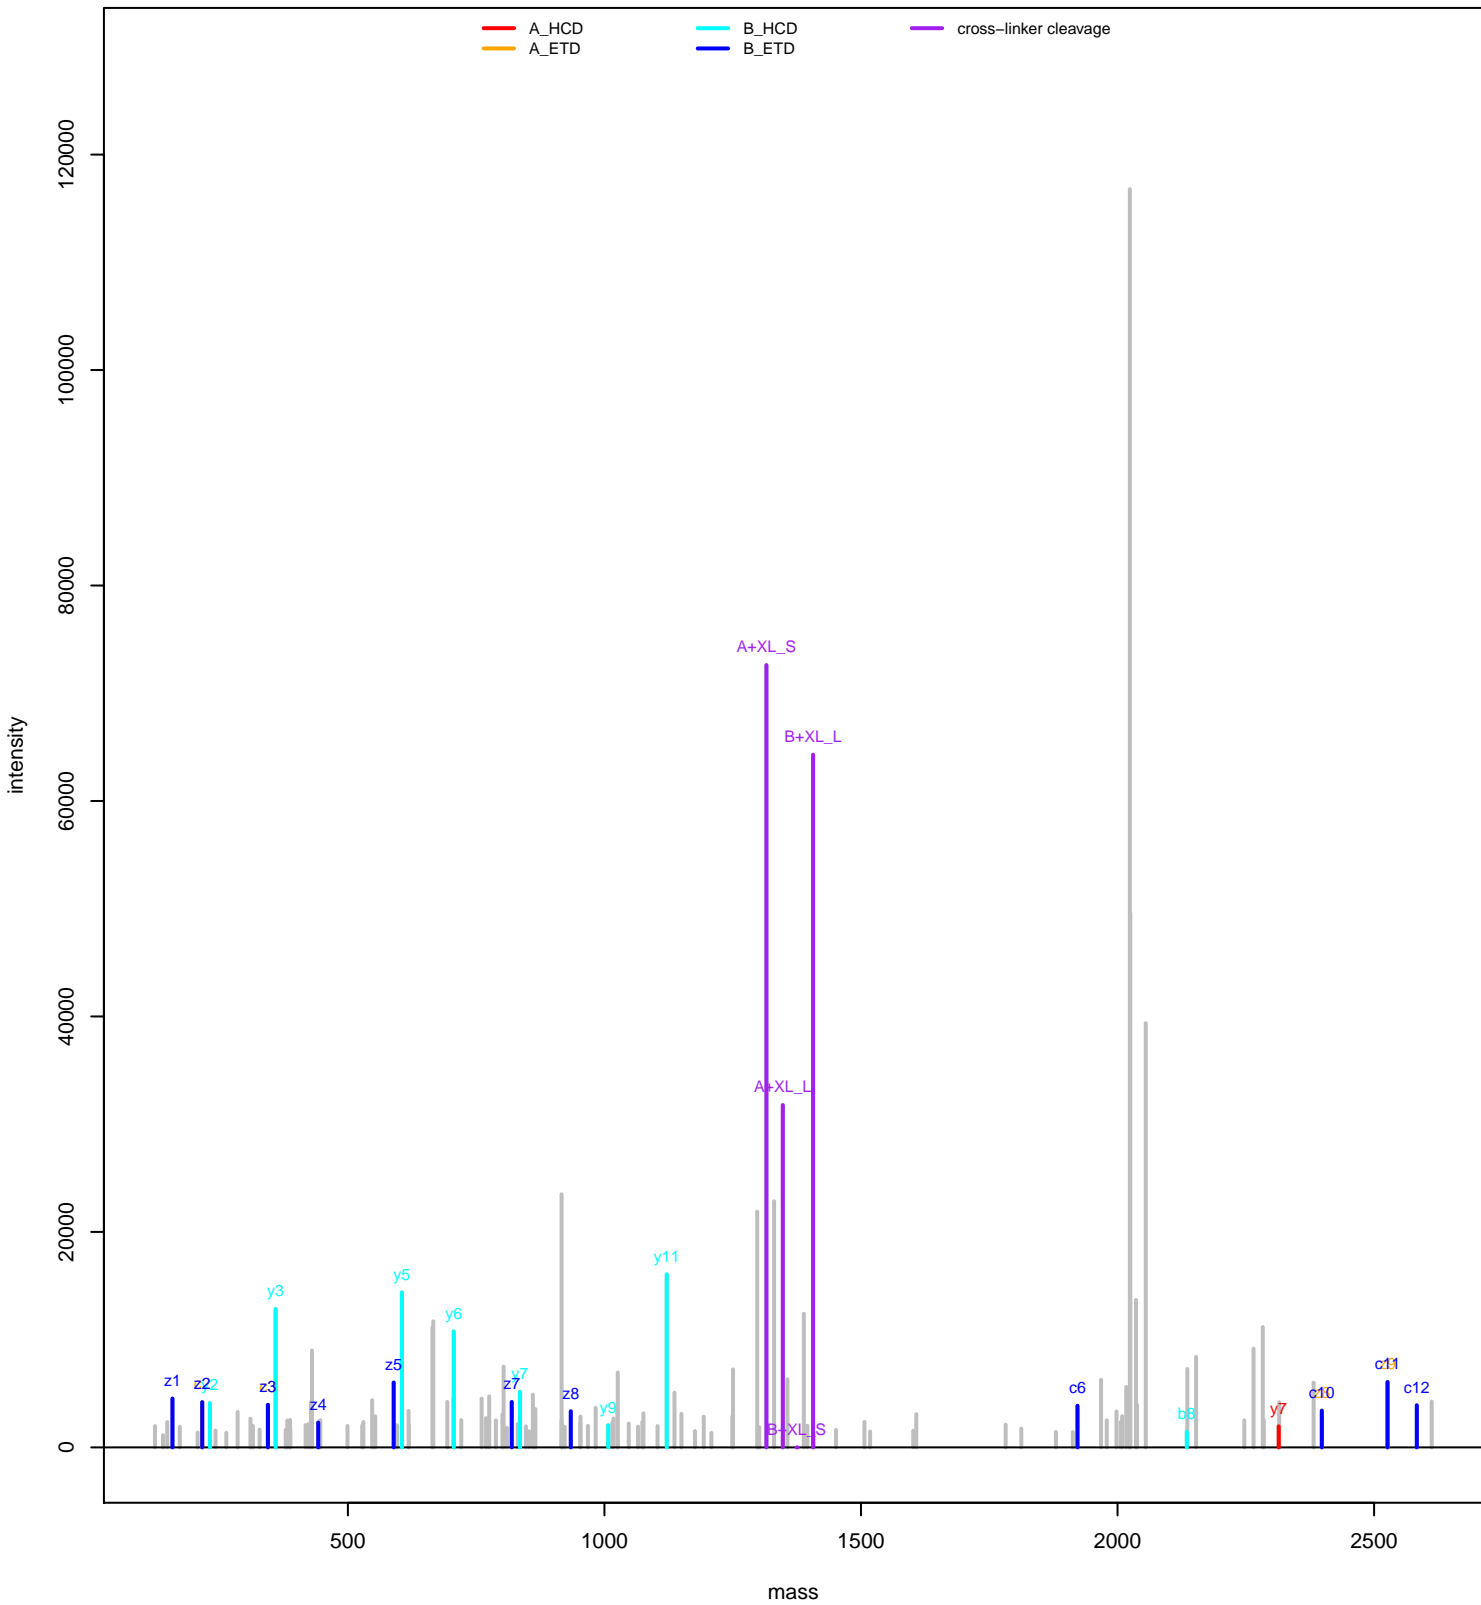

QAQVPKHVIDK+XL\_S

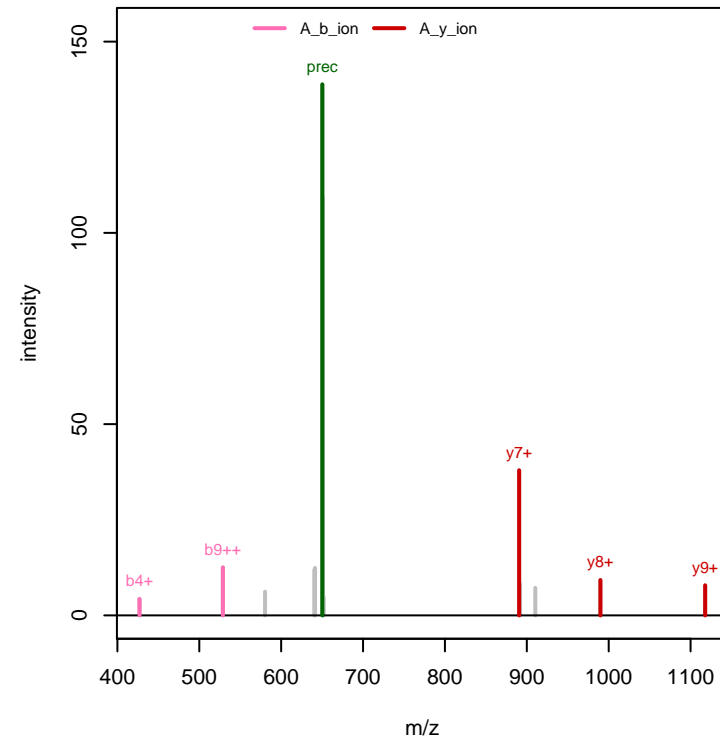

QAQVPKHVIDK+XL\_L

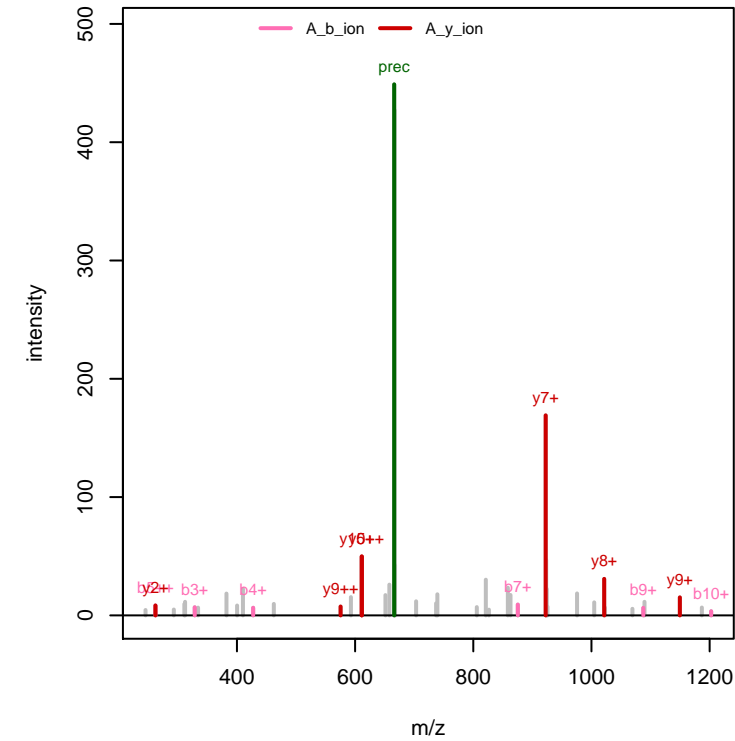

AKGGGDETFVQGR+XL\_S

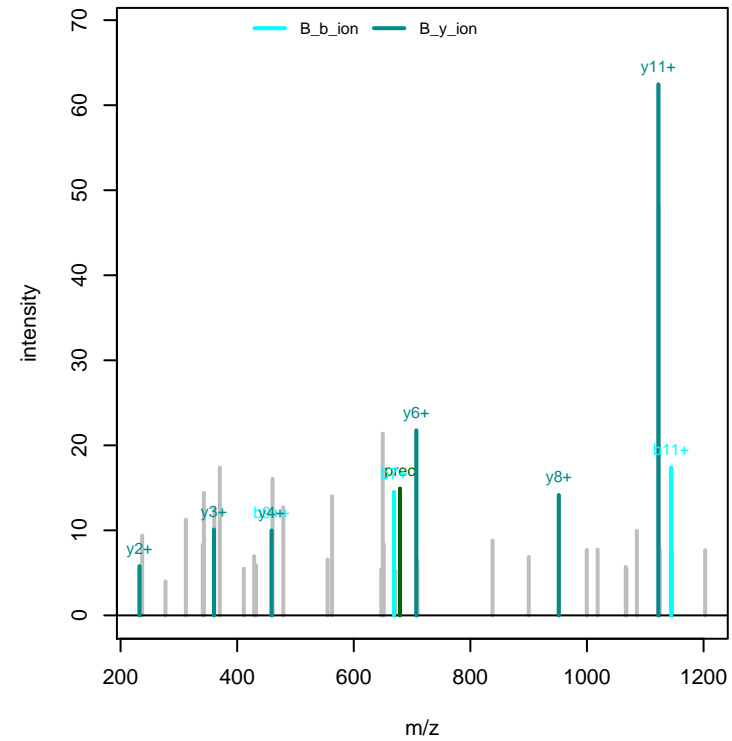

AKGGGDETFVQGR+XL\_L

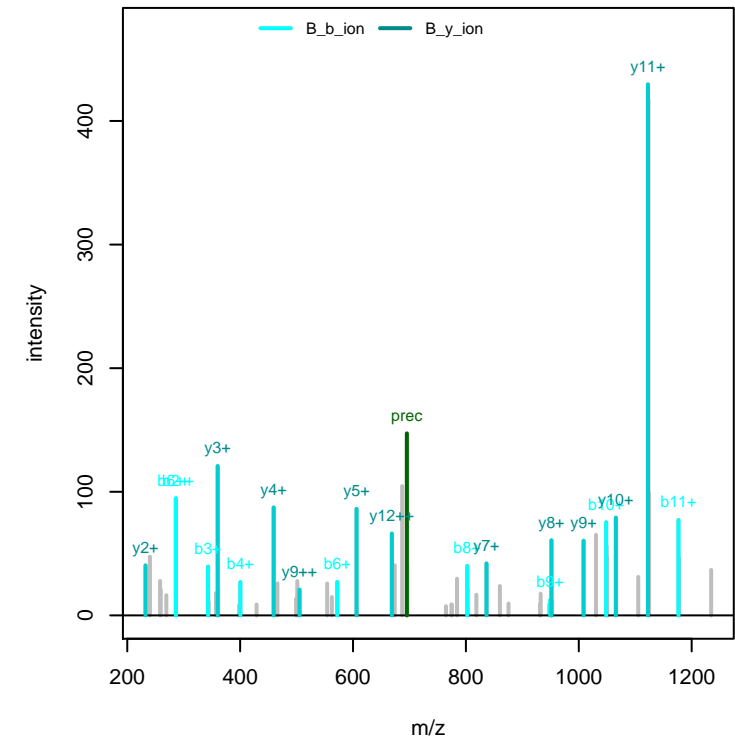

LNTALEKVK  
KDGTYETIYNK

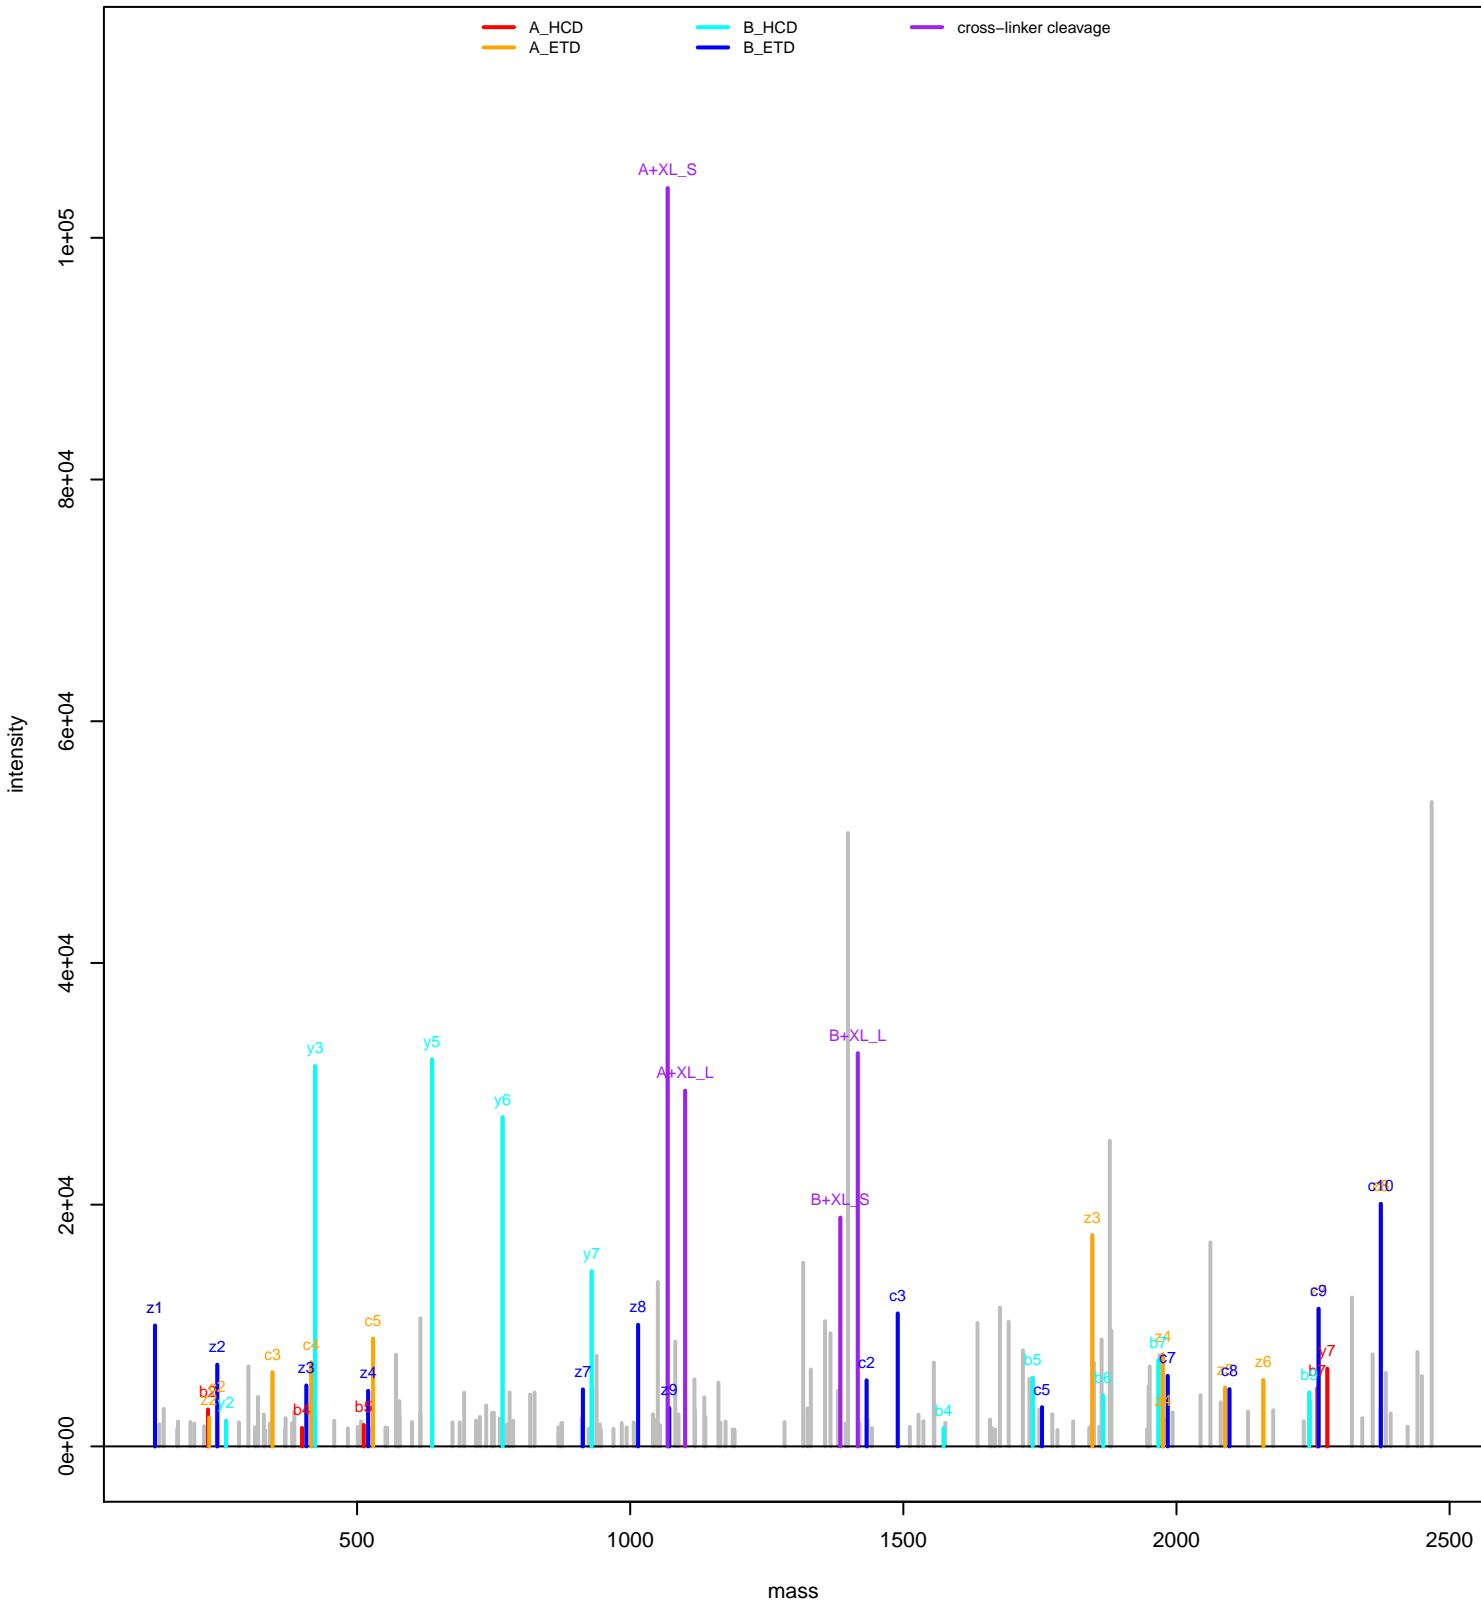

LNTALEKVK+XL\_S

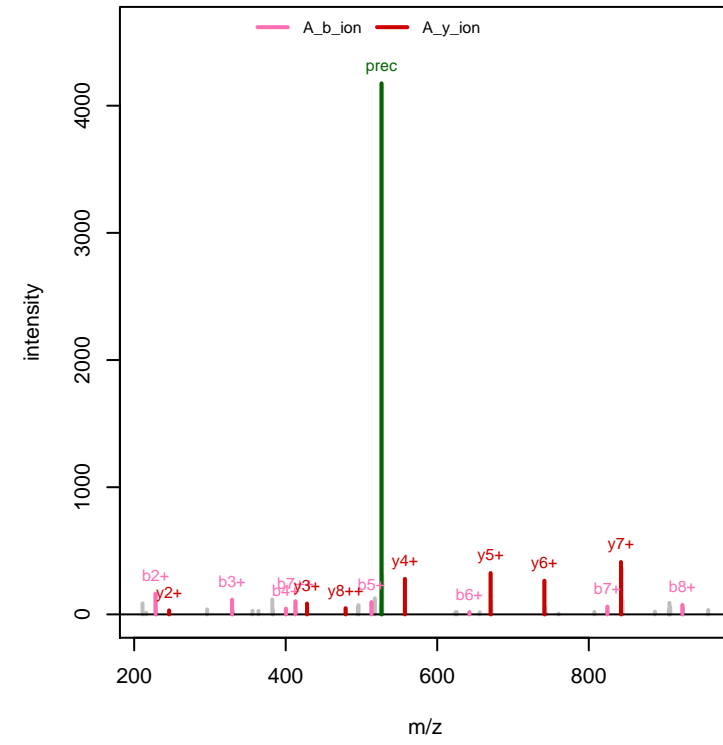

LNTALEKVK+XL\_L

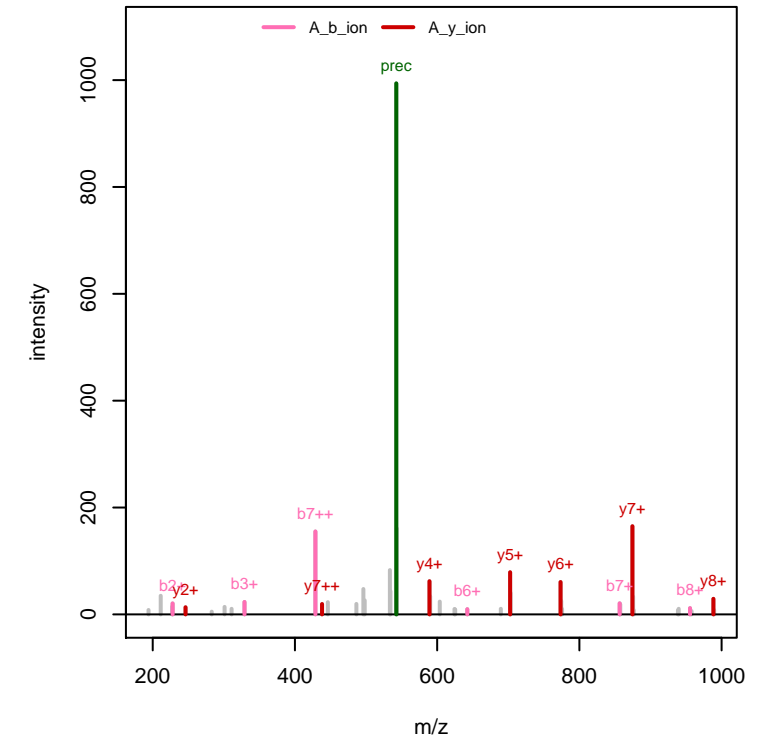

KDGTYETIYNK+XL\_S

KDGTYETIYNK+XL\_L

TPAVIKK  
KLQQYR

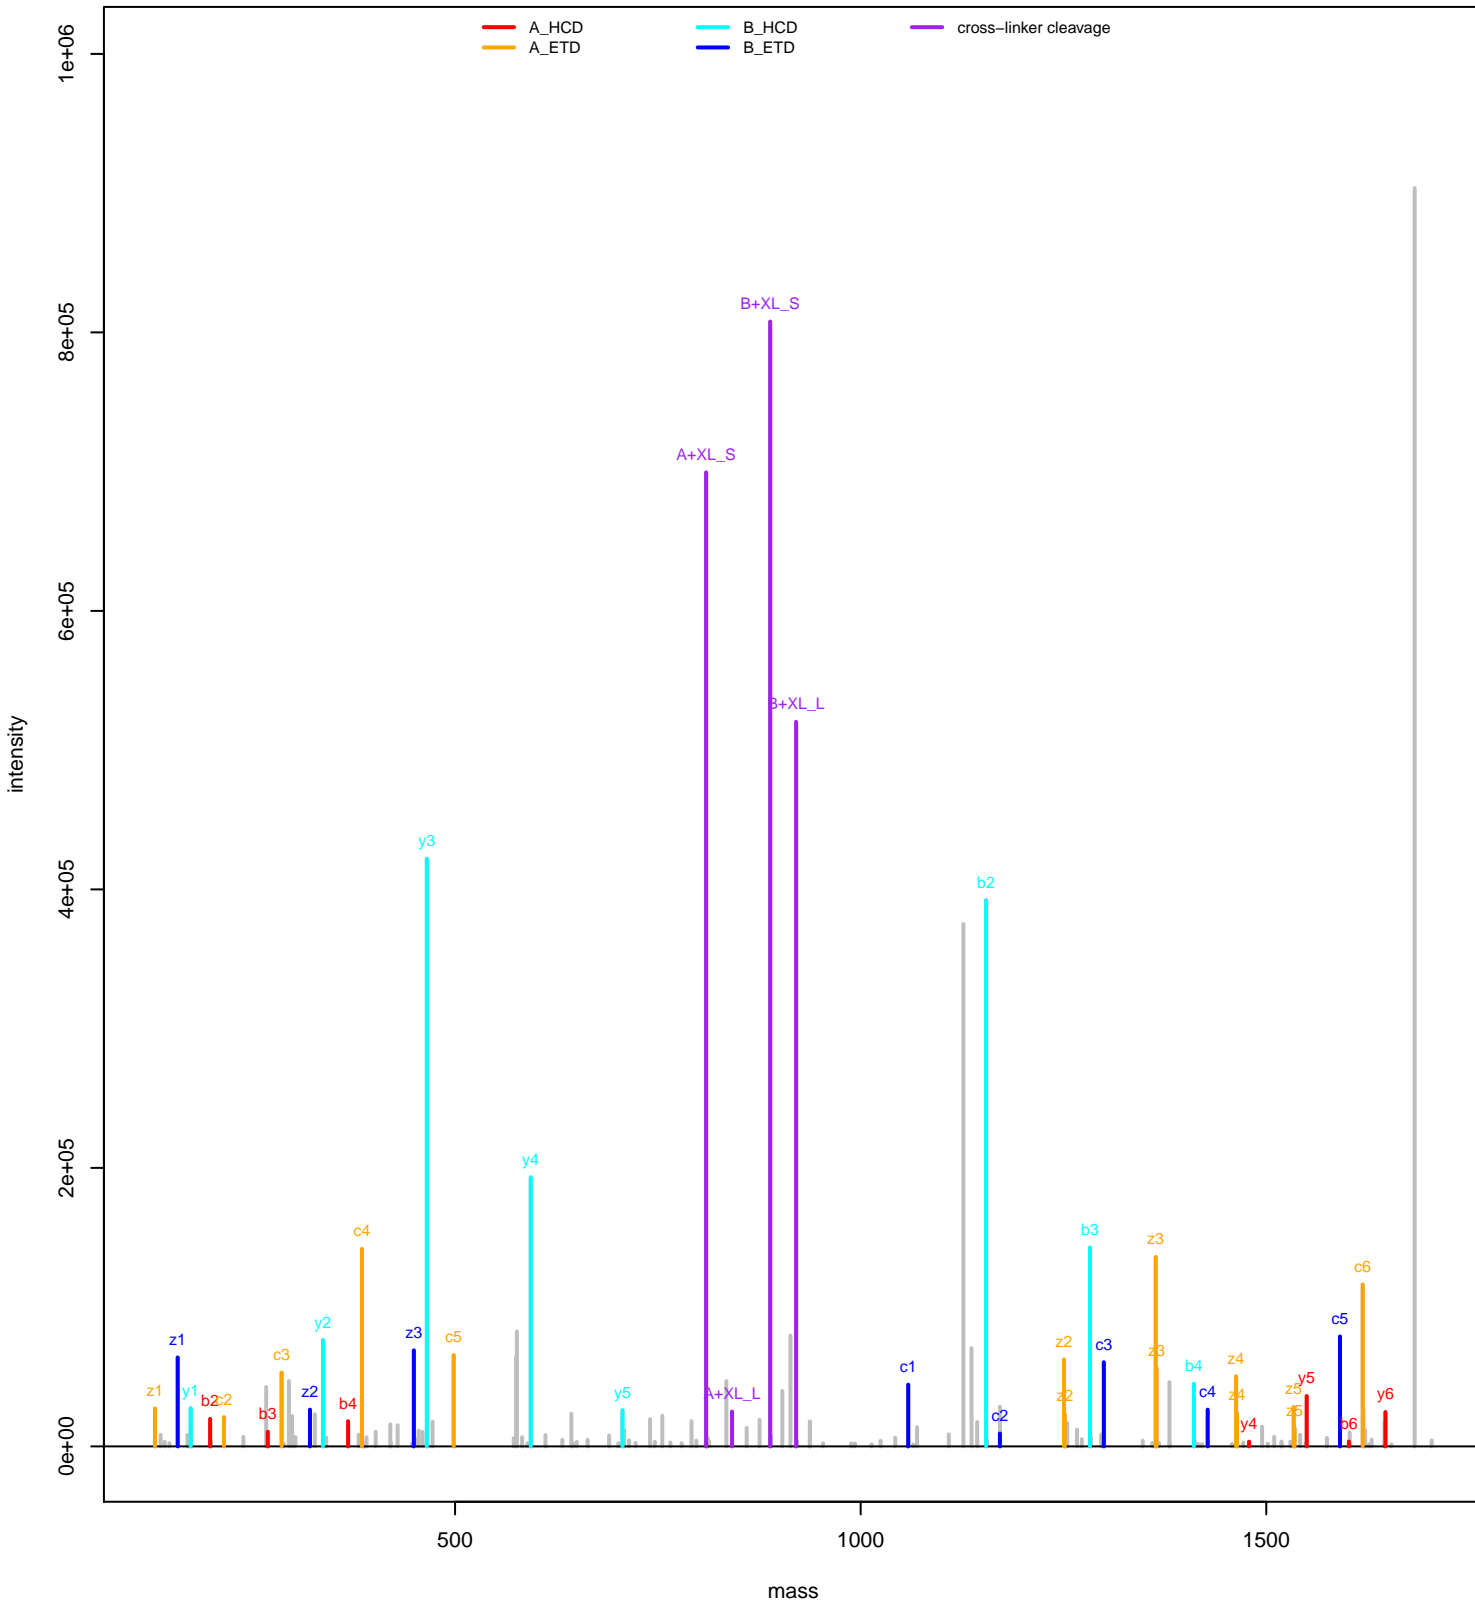

TPAVIKK+XL\_S

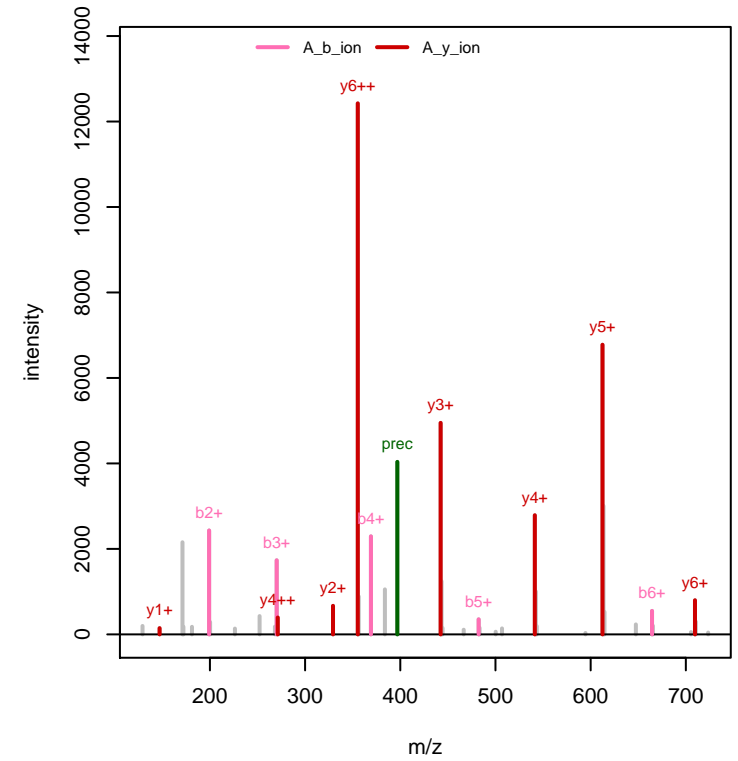

TPAVIKK+XL\_L

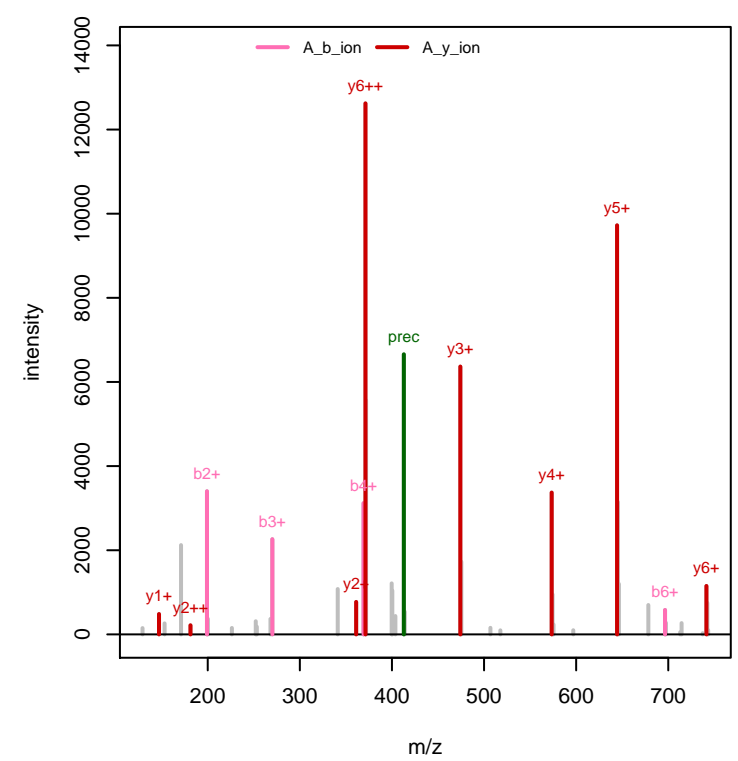

KLQQYR+XL\_S

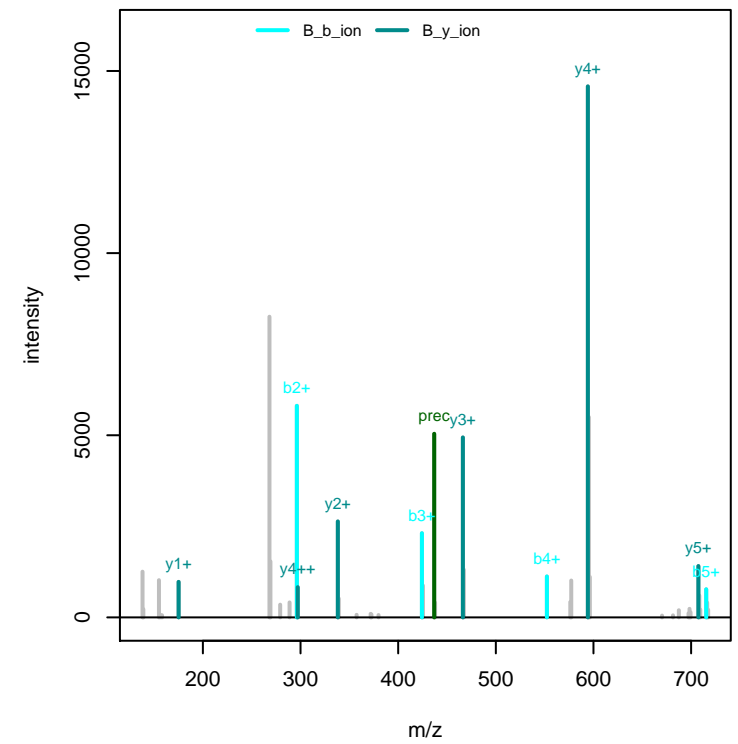

KLQQYR+XL\_L

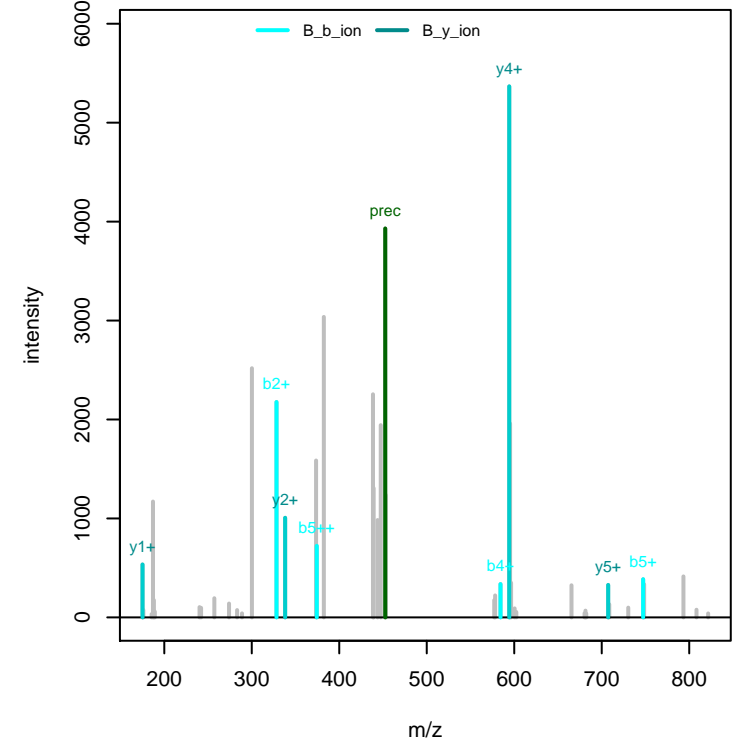



KREDVHR  
LANELSDAAENKGTAVK

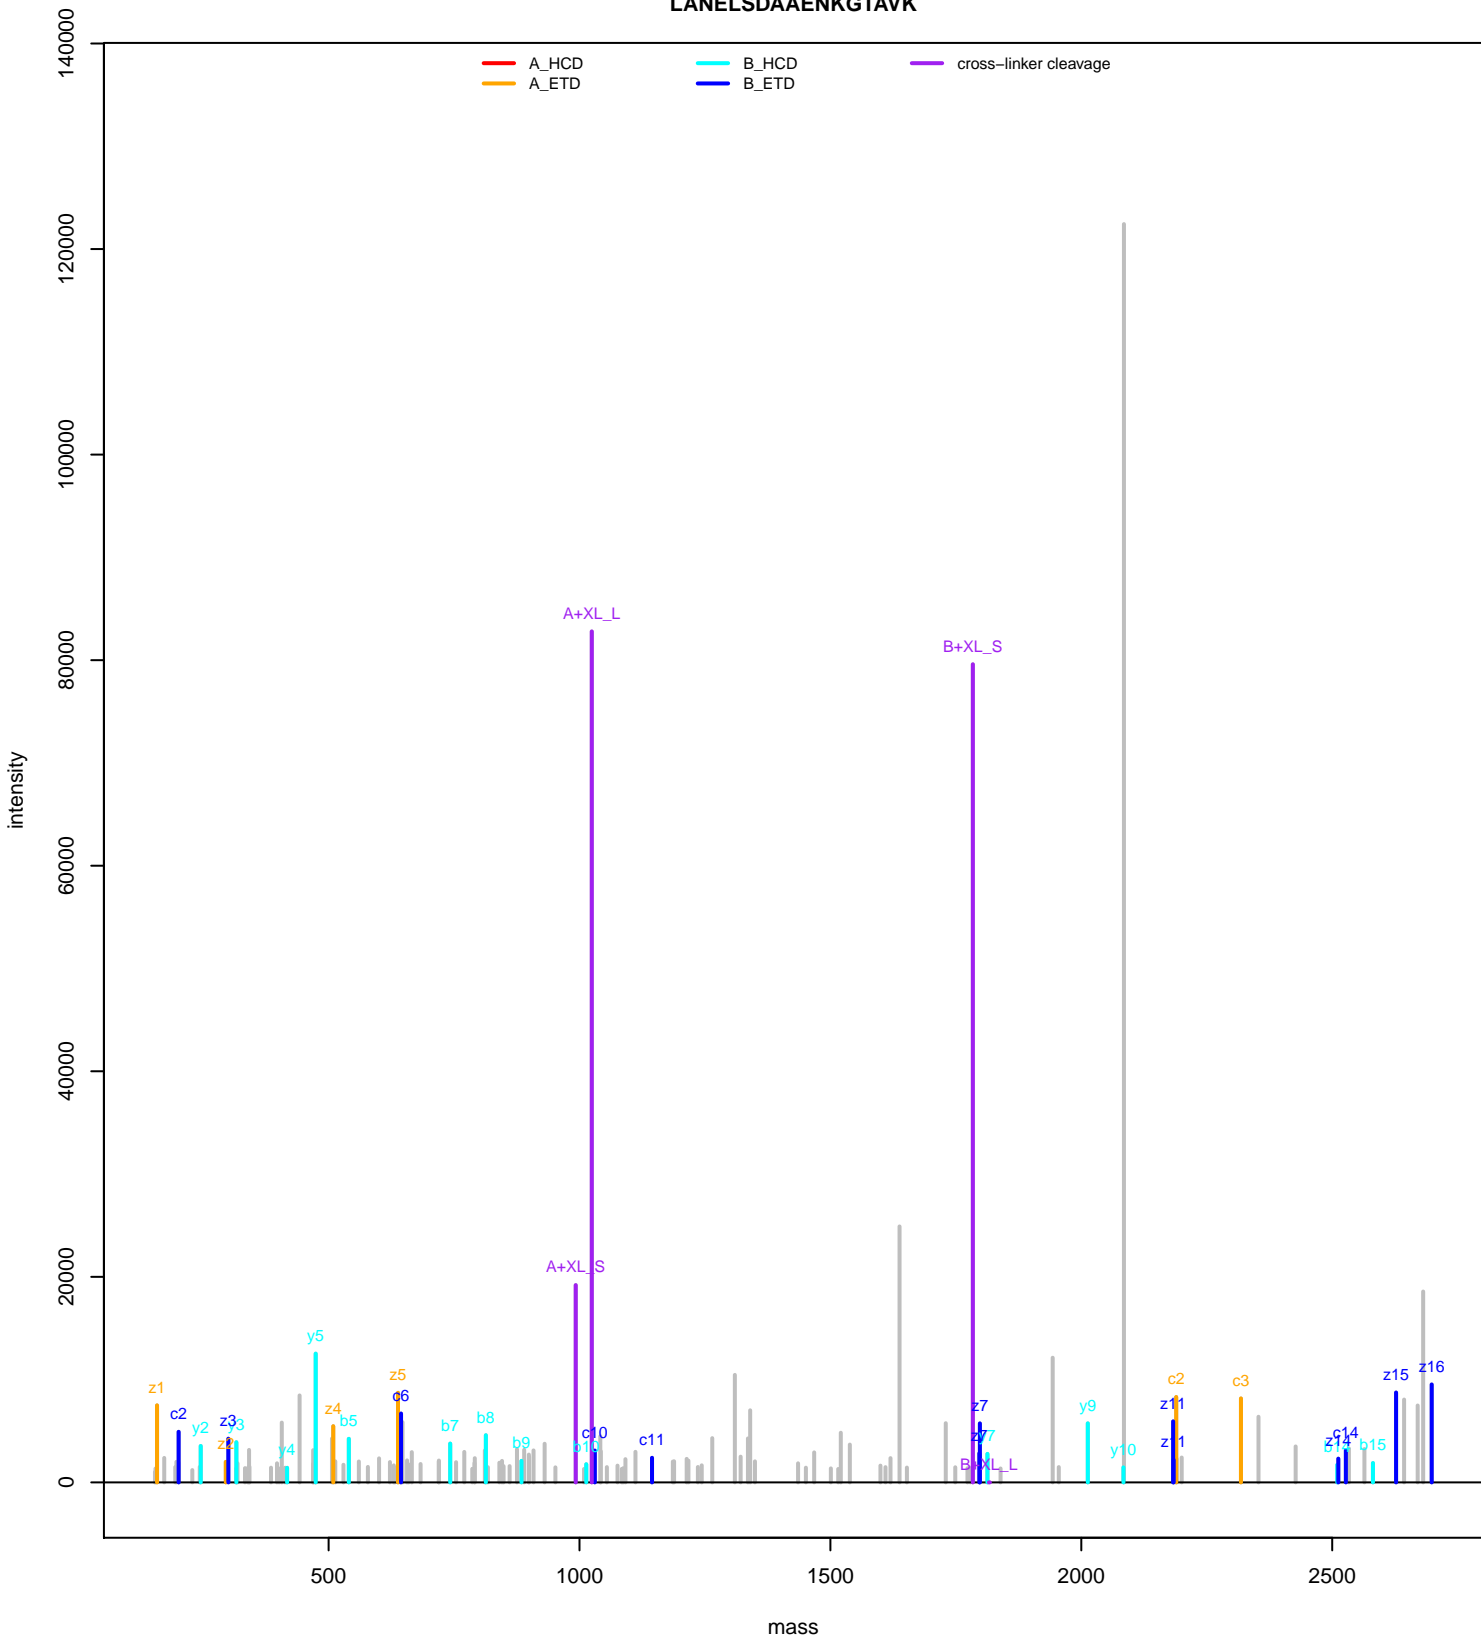

KREDVHR+XL\_S

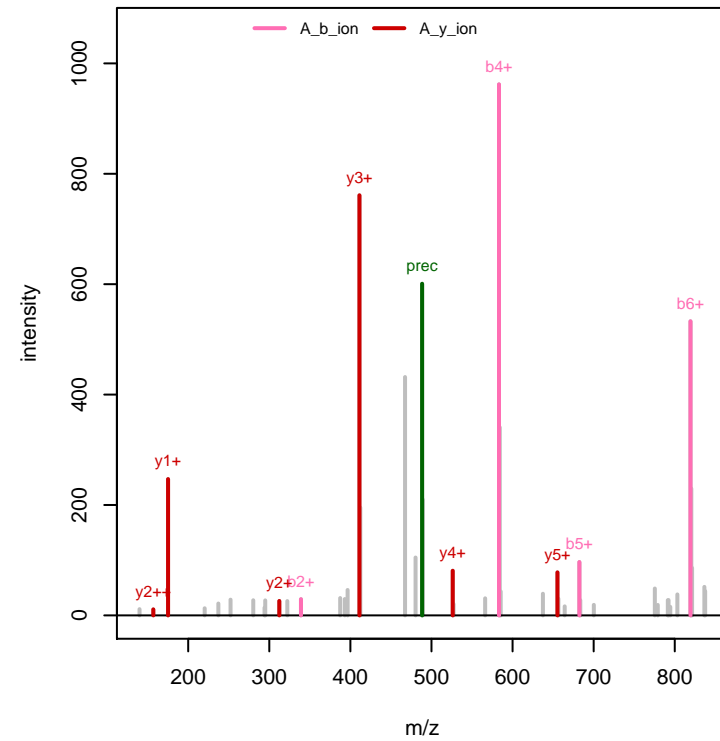

KREDVHR+XL\_L

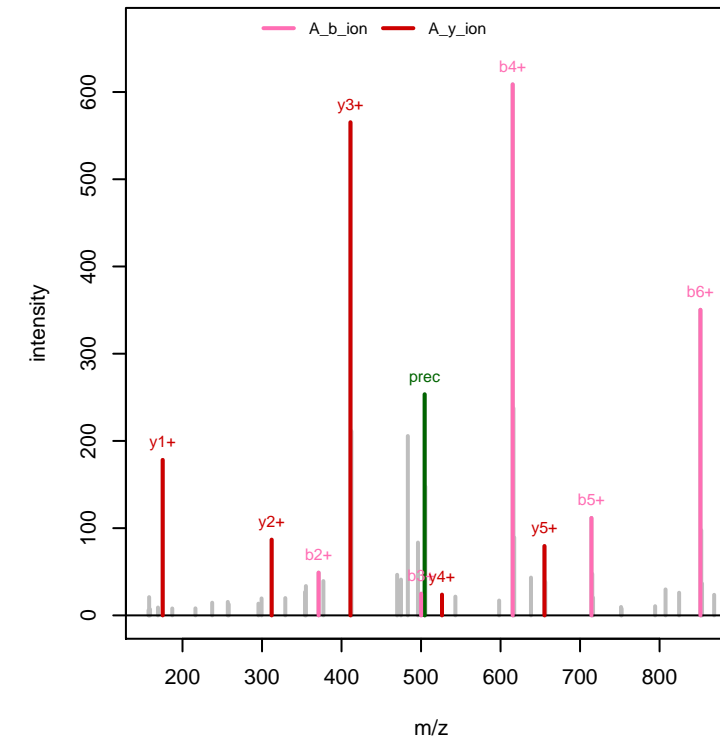

LANELSDAAENKGTAVK+XL\_S

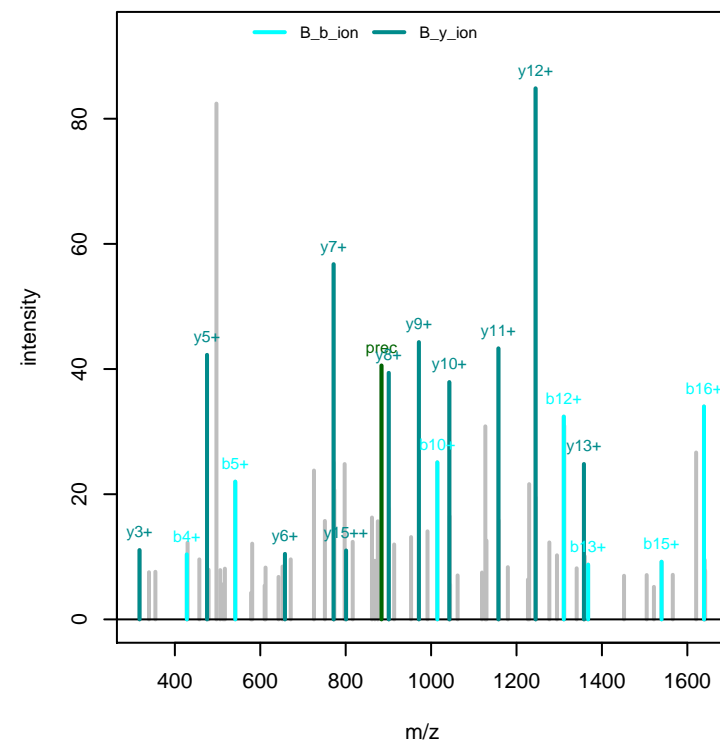

LANELSDAAENKGTAVK+XL\_L

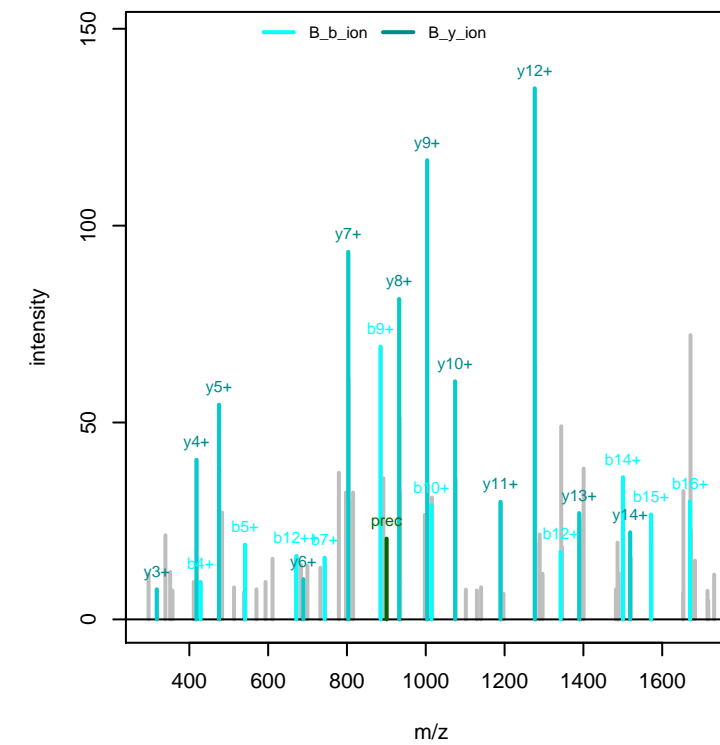

TGKAAR  
IAAGADISKAAAGR

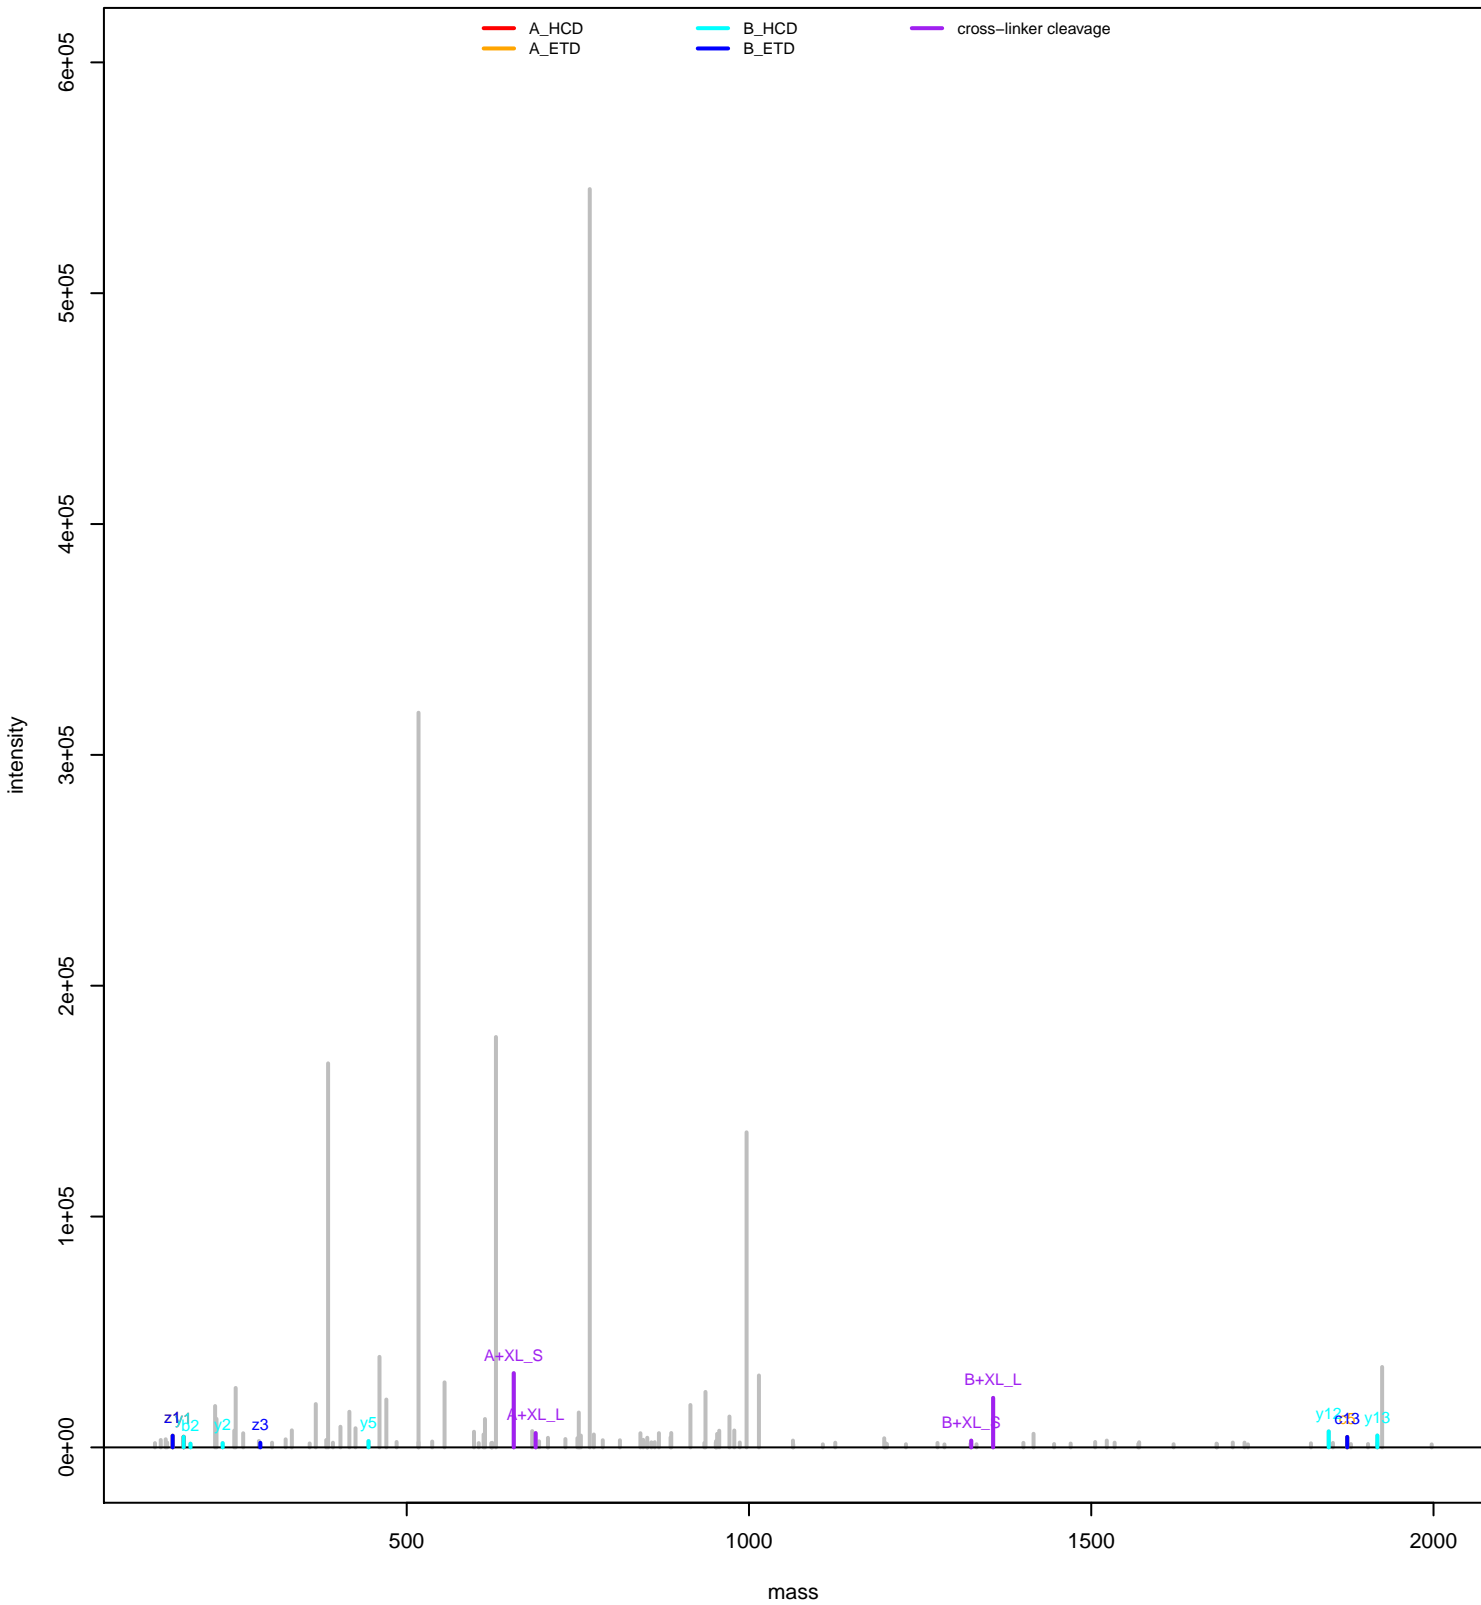

TGKAAR+XL\_S

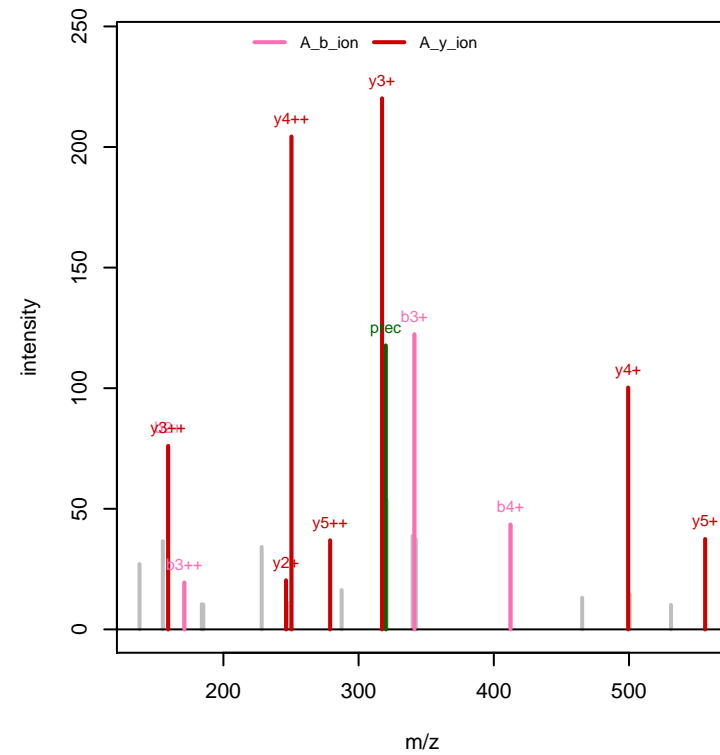

TGKAAR+XL\_L

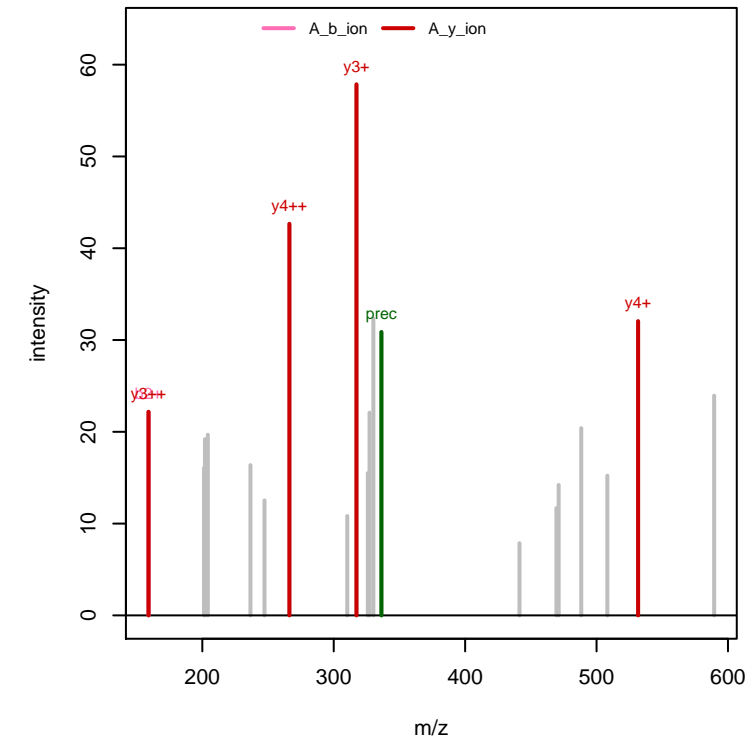

IAAGADISKAAAGR+XL\_S

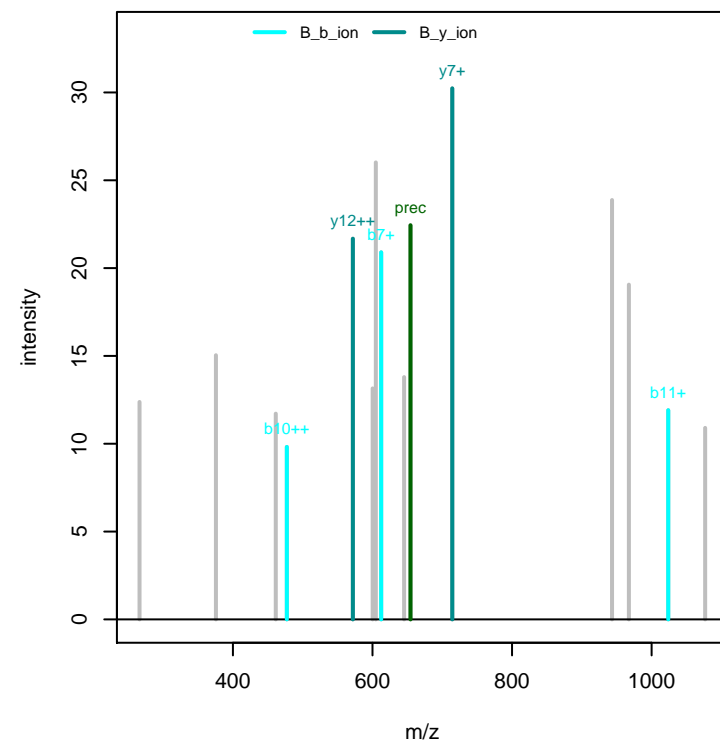

IAAGADISKAAAGR+XL\_L

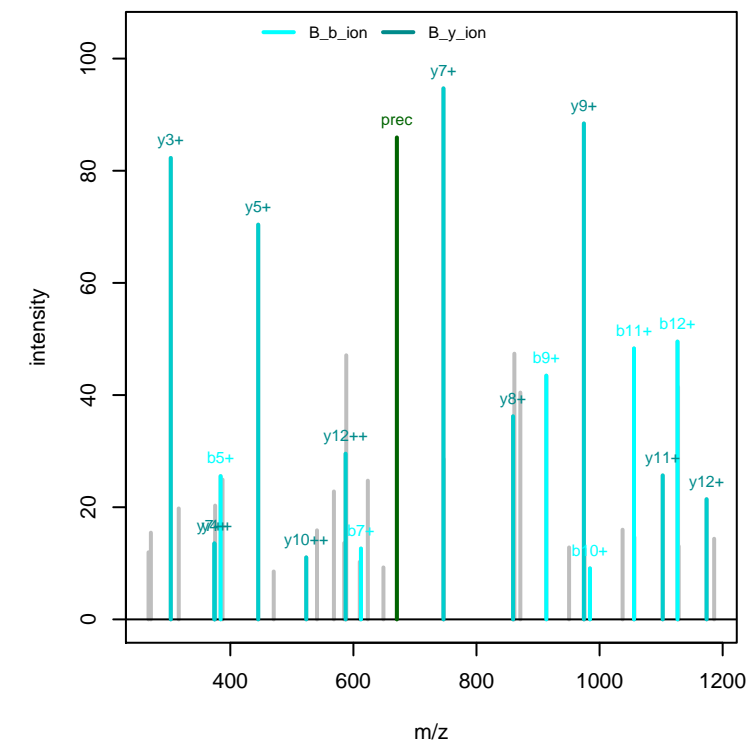

**KATENGFK**  
**CPGTEVREEYKR**

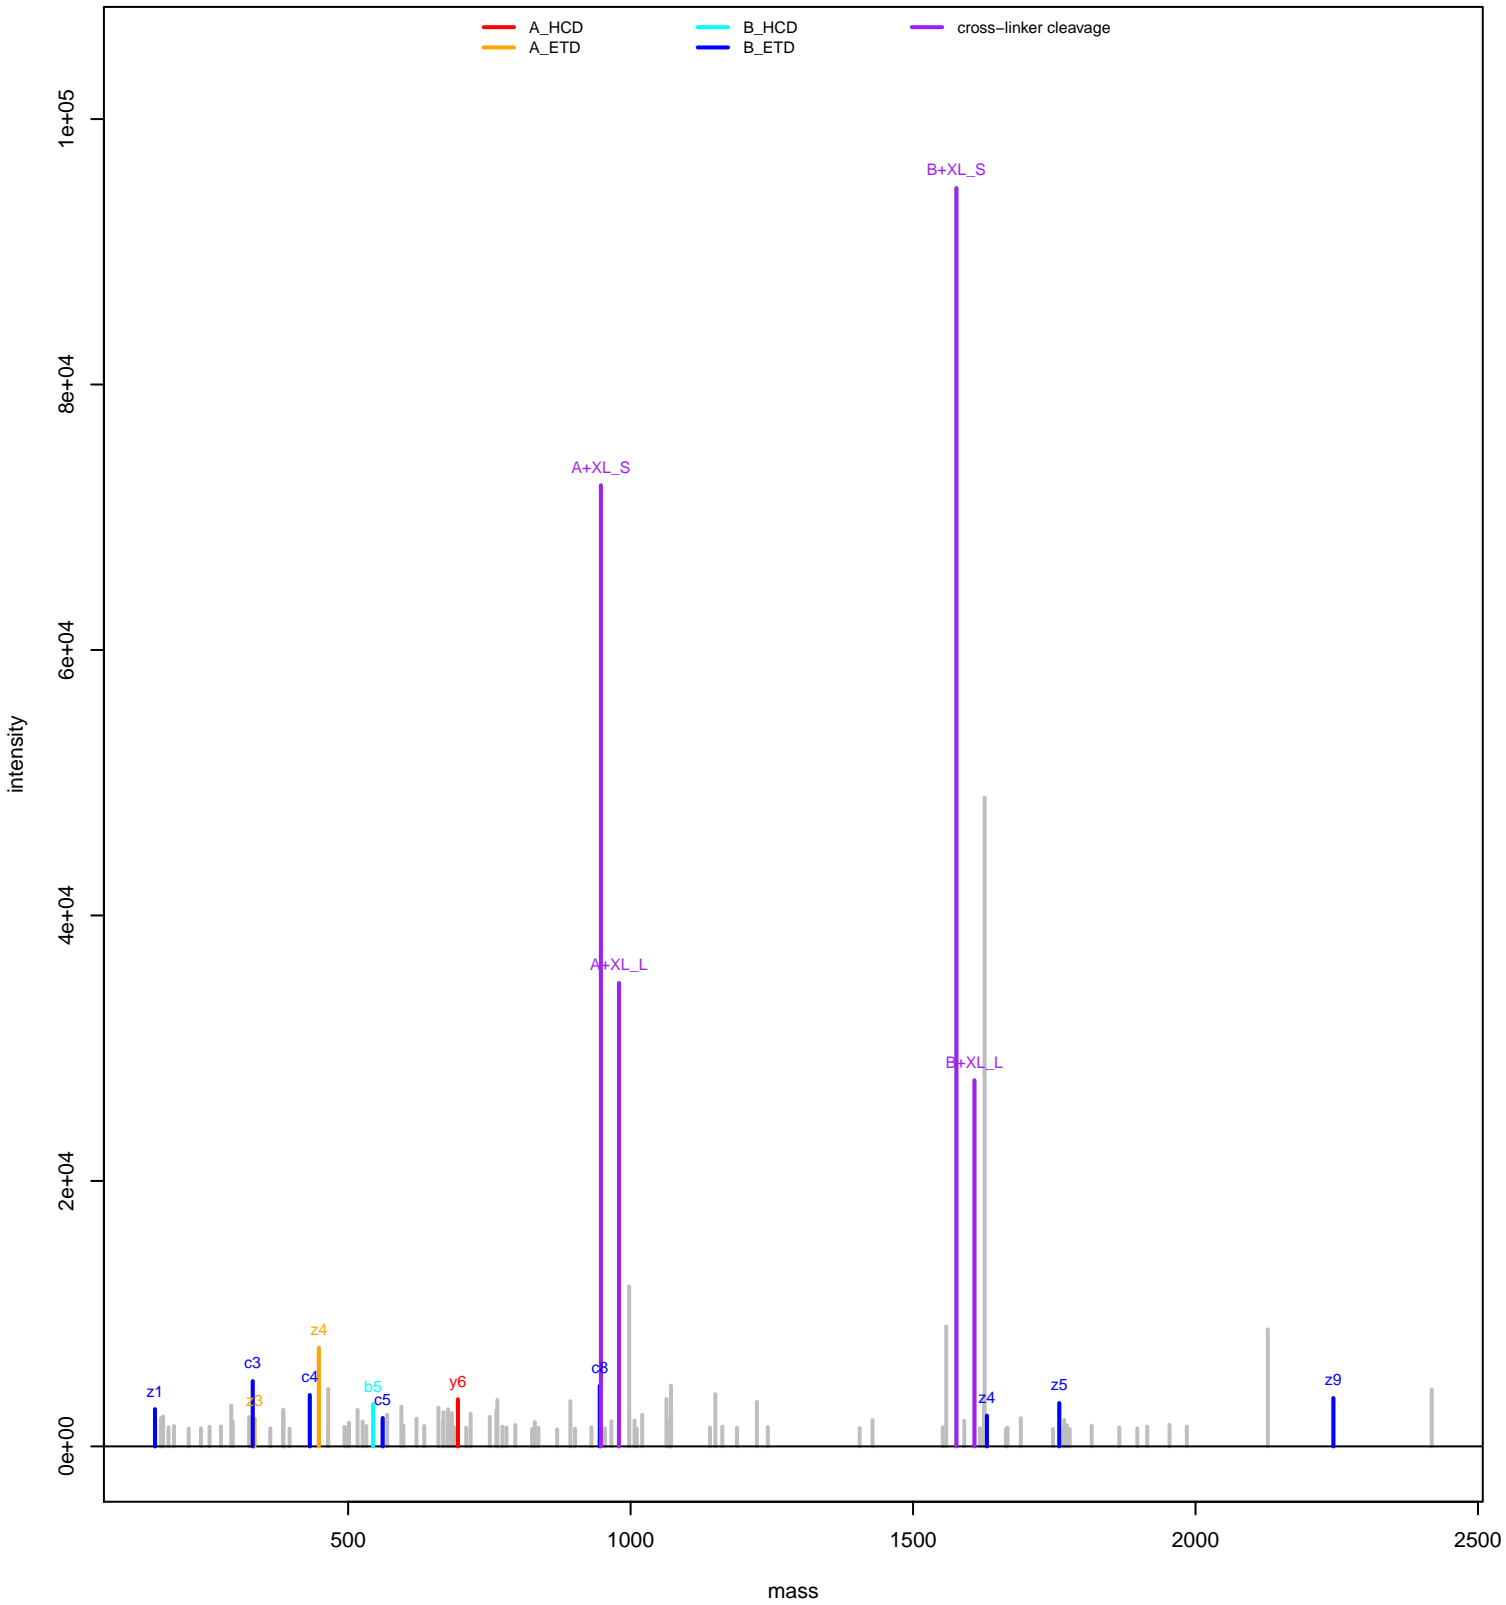

**KATENGFK+XL\_S**

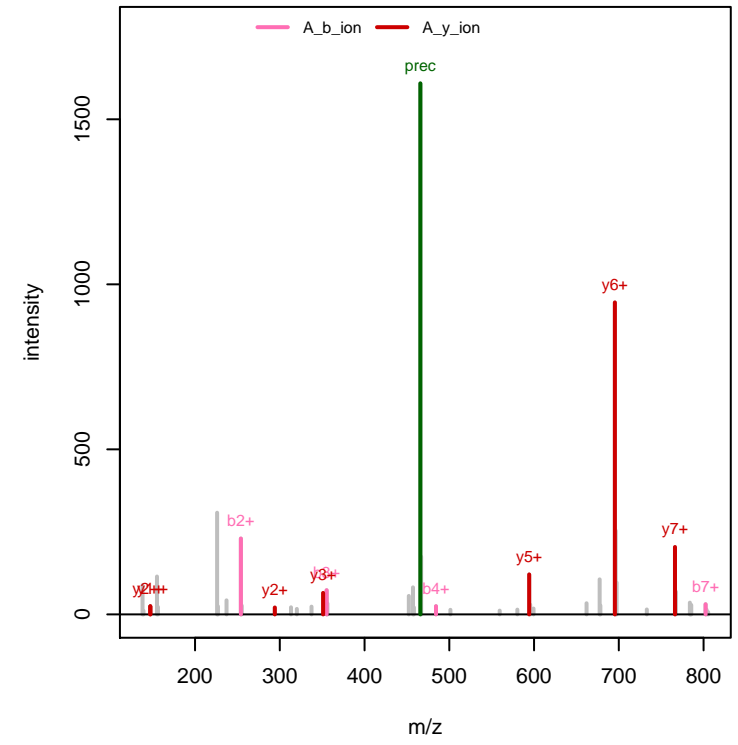

**KATENGFK+XL\_L**

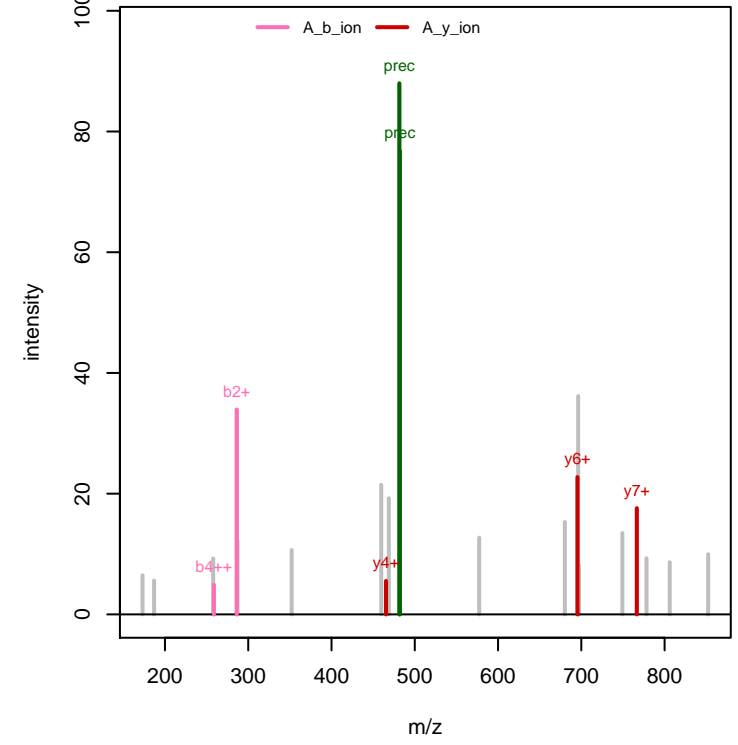

**CPGTEVREEYKR+XL\_S**

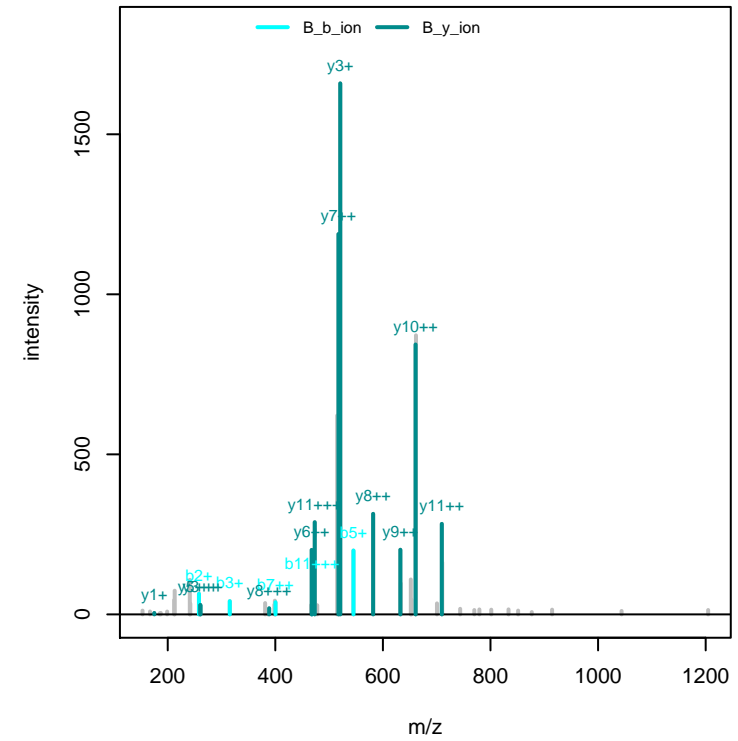

**CPGTEVREEYKR+XL\_L**

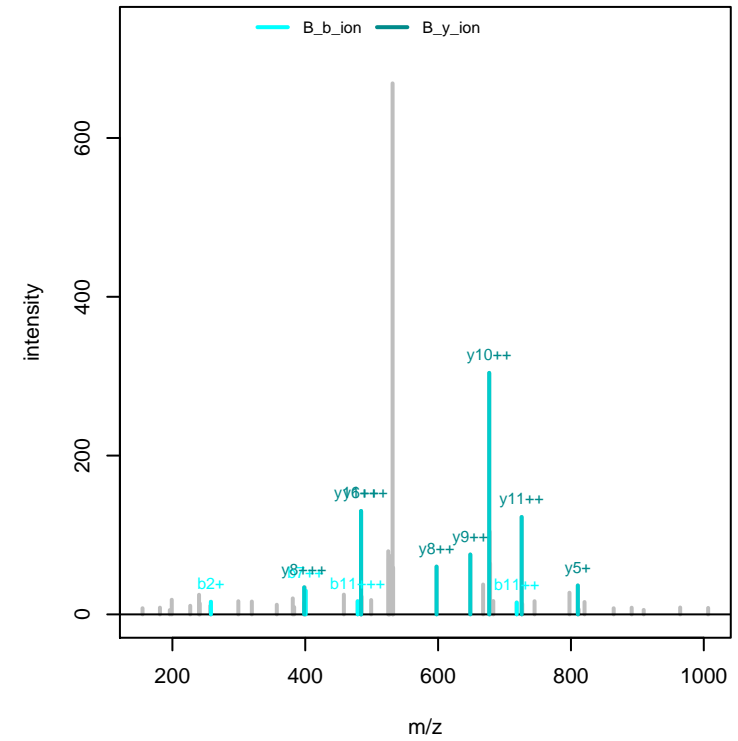

**GKTHSSGK**  
**IPQESGGTKDITGGLPR**

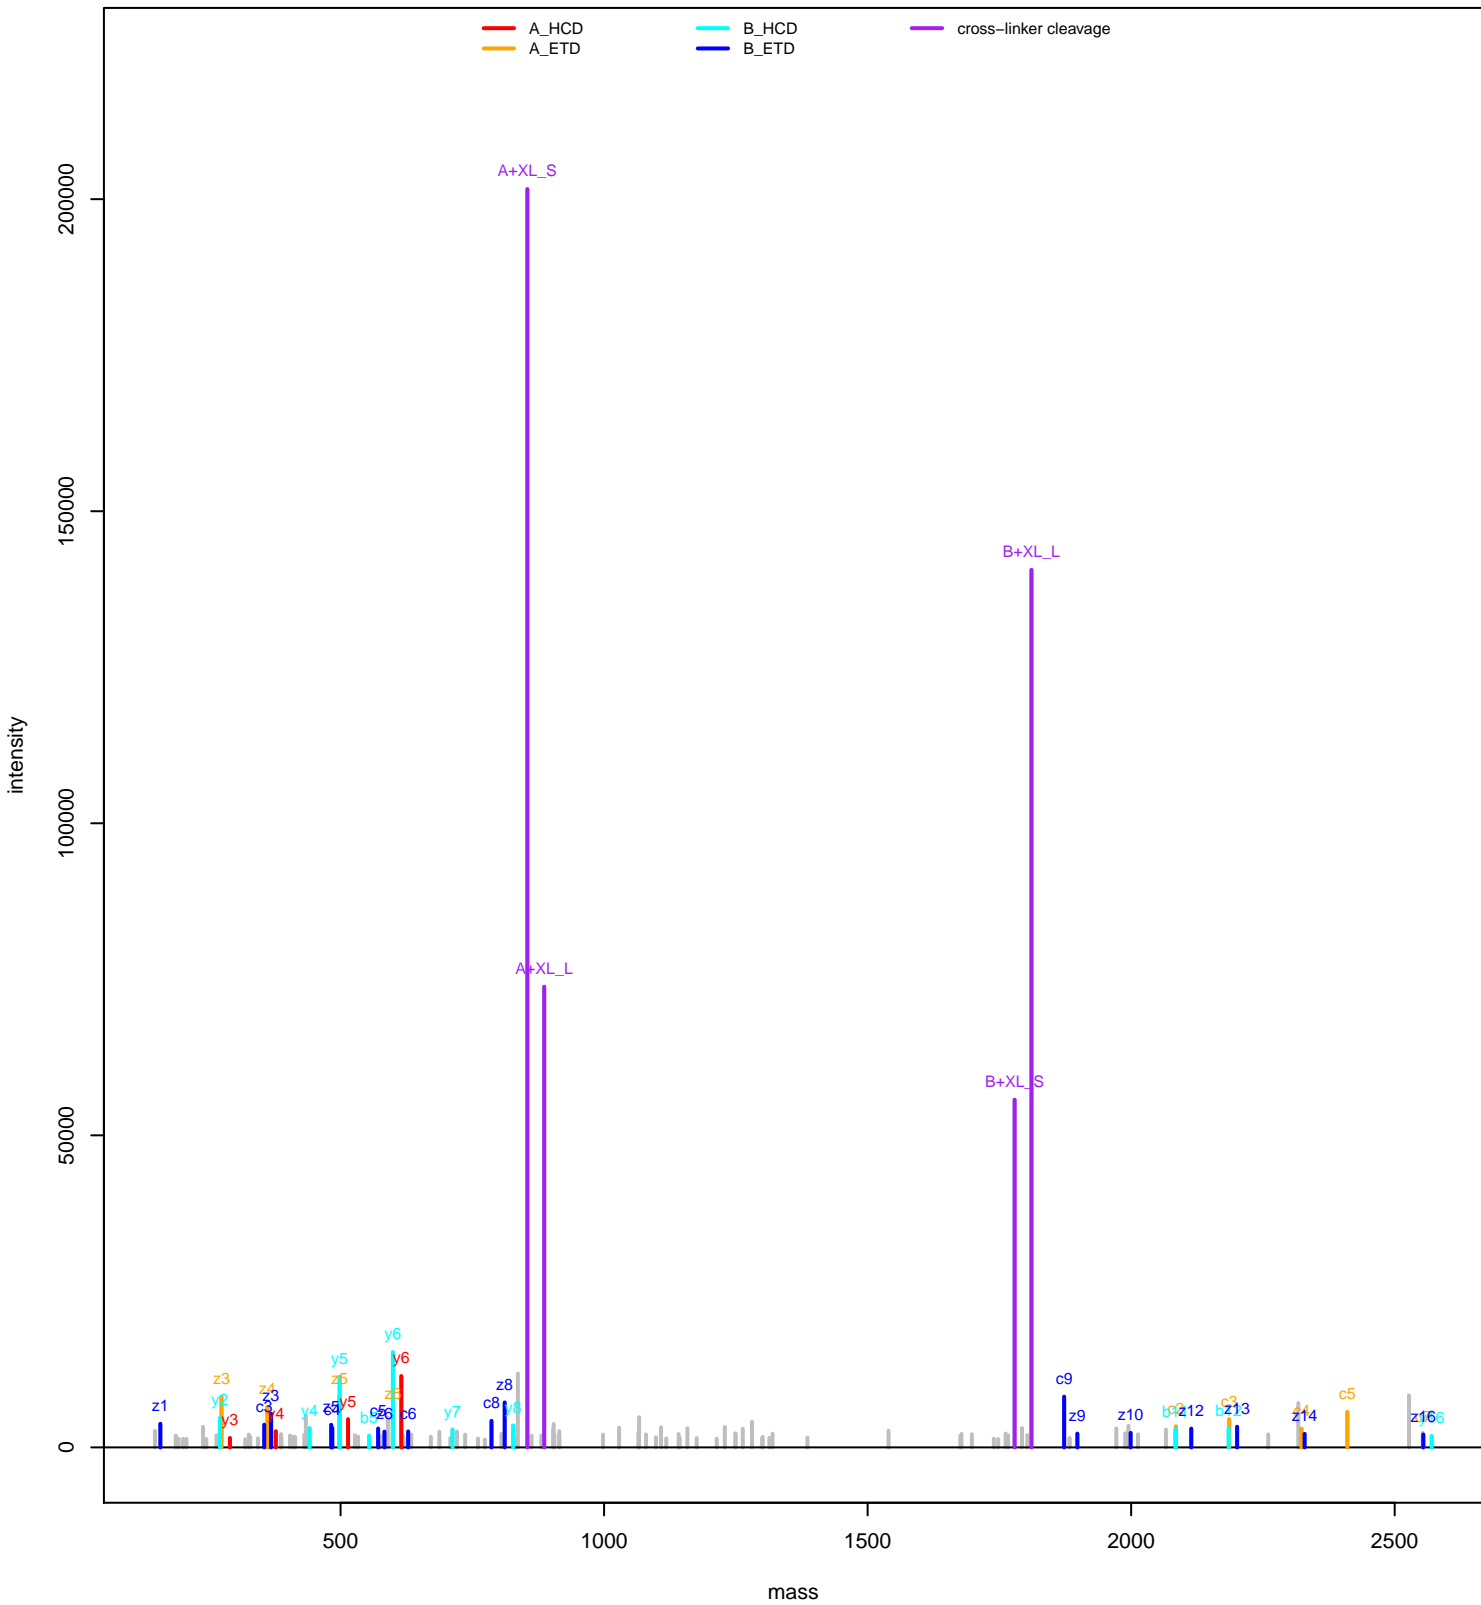

**GKTHSSGK+XL\_S**

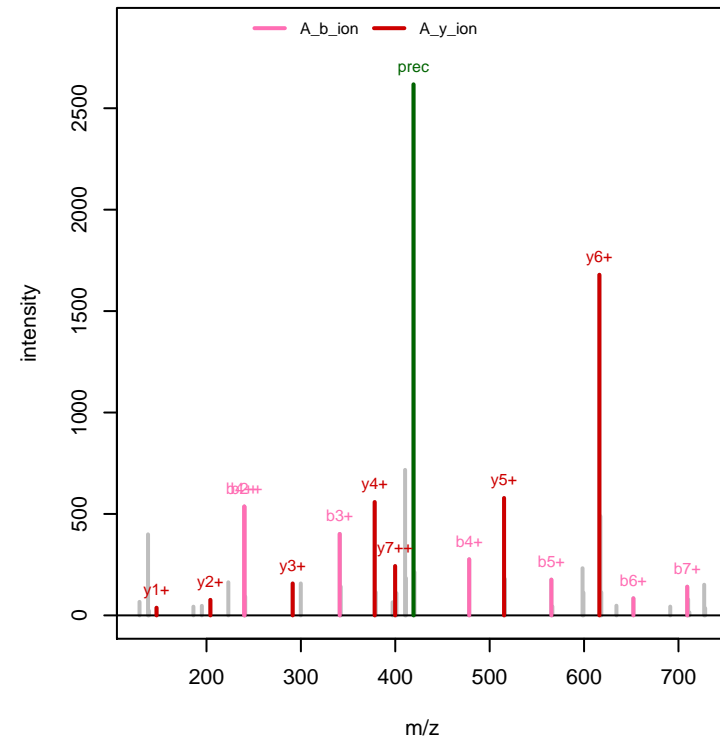

**GKTHSSGK+XL\_L**

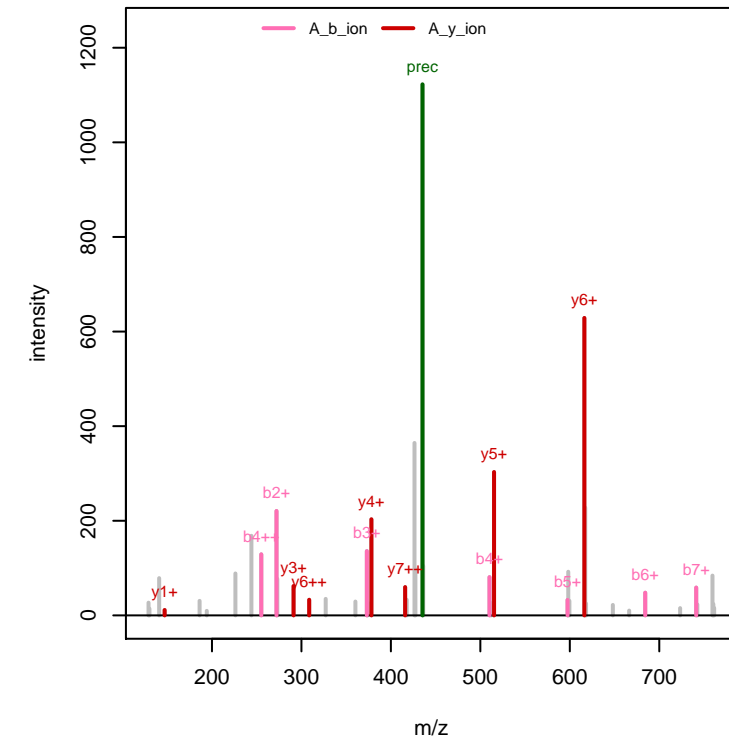

**IPQESGGTKDITGGLPR+XL\_S**

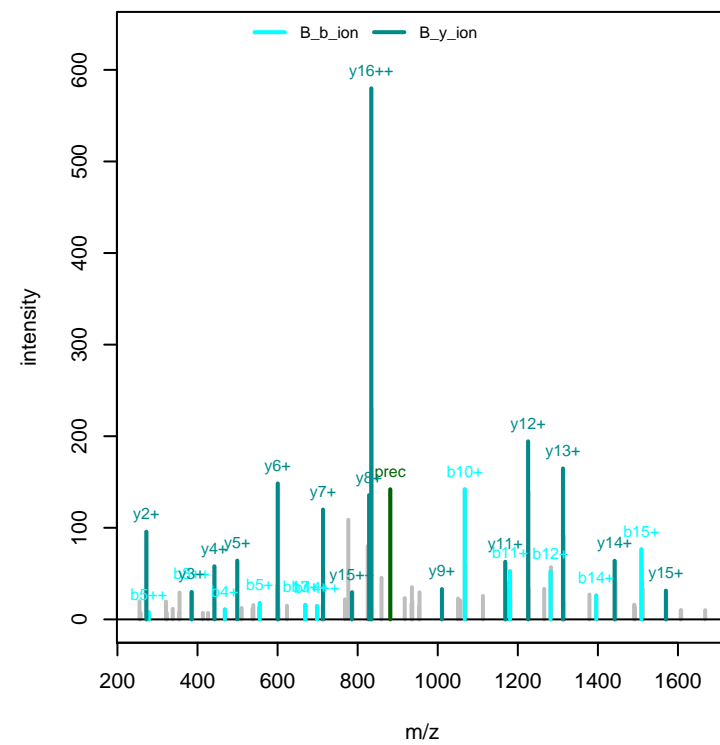

**IPQESGGTKDITGGLPR+XL\_L**

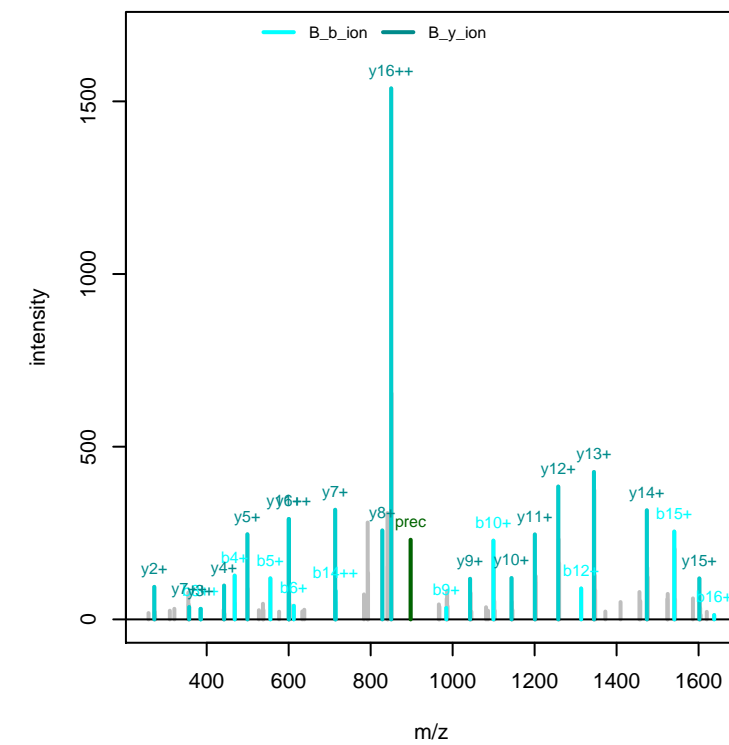

### SKAEQALK SKEELSKIR

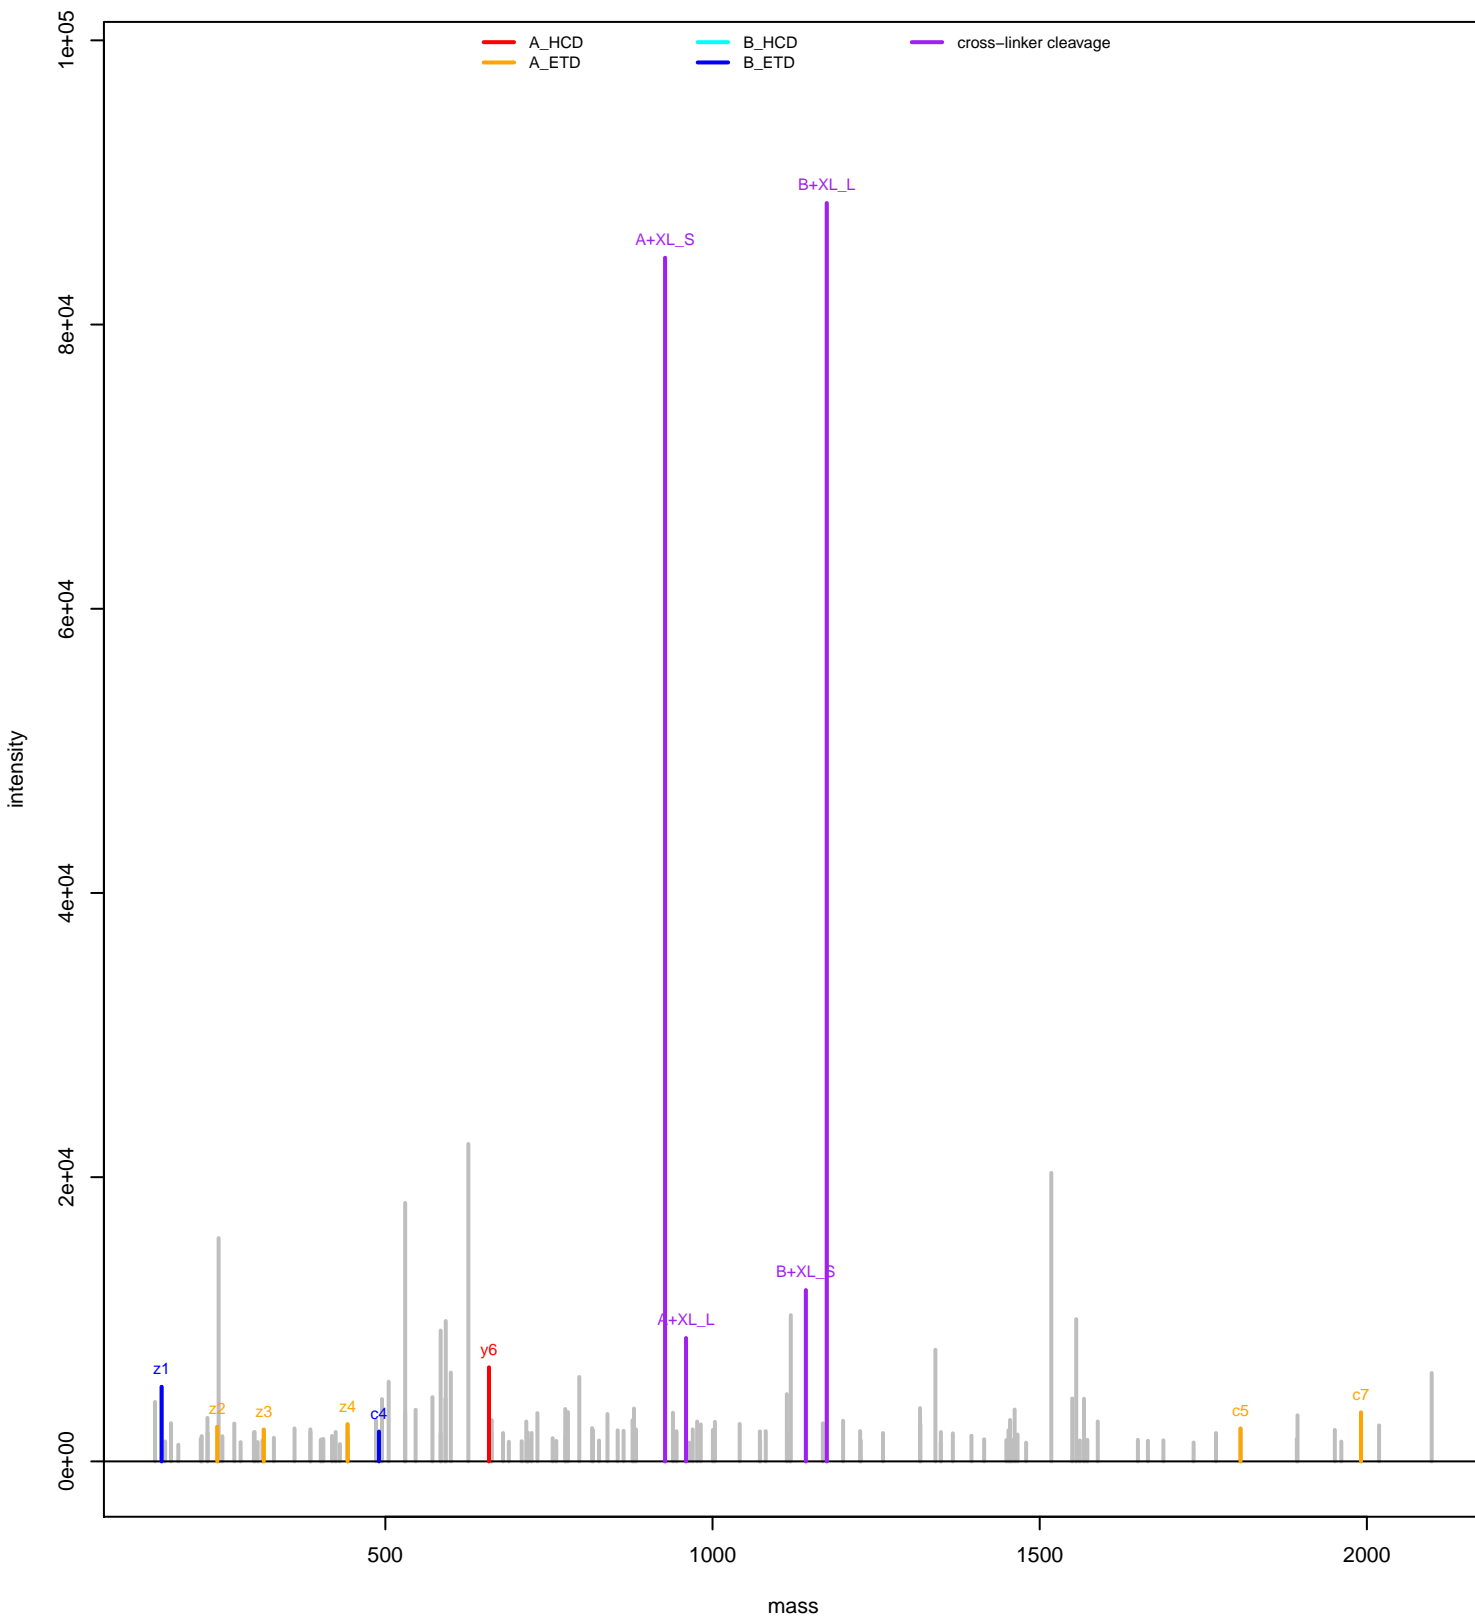

### SKAEQALK+XL\_S

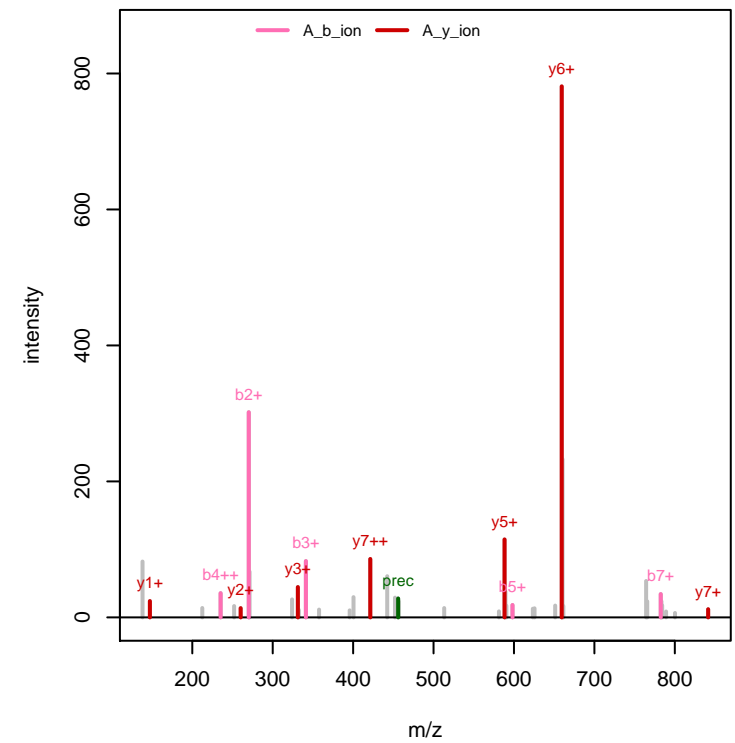

### SKAEQALK+XL\_L

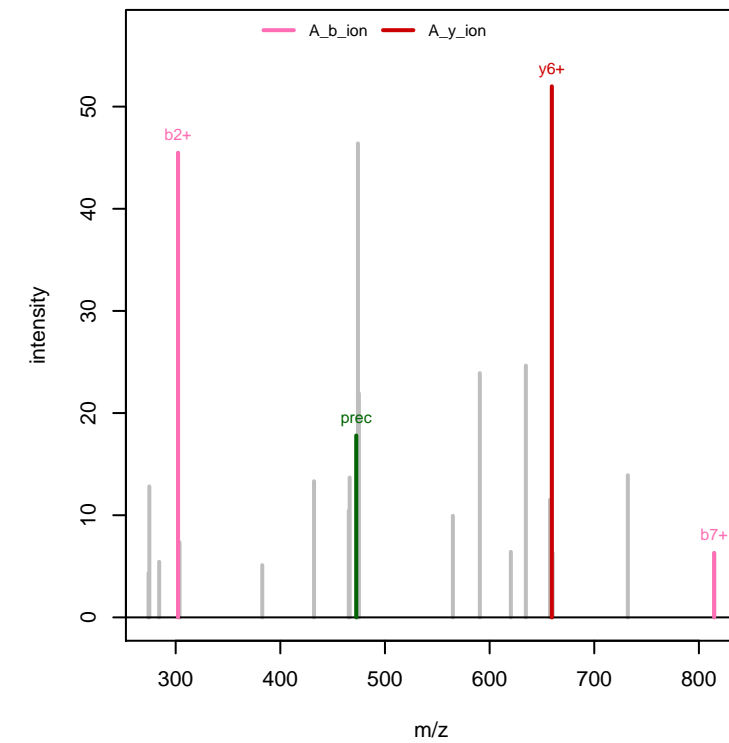

### SKEELSKIR+XL\_S

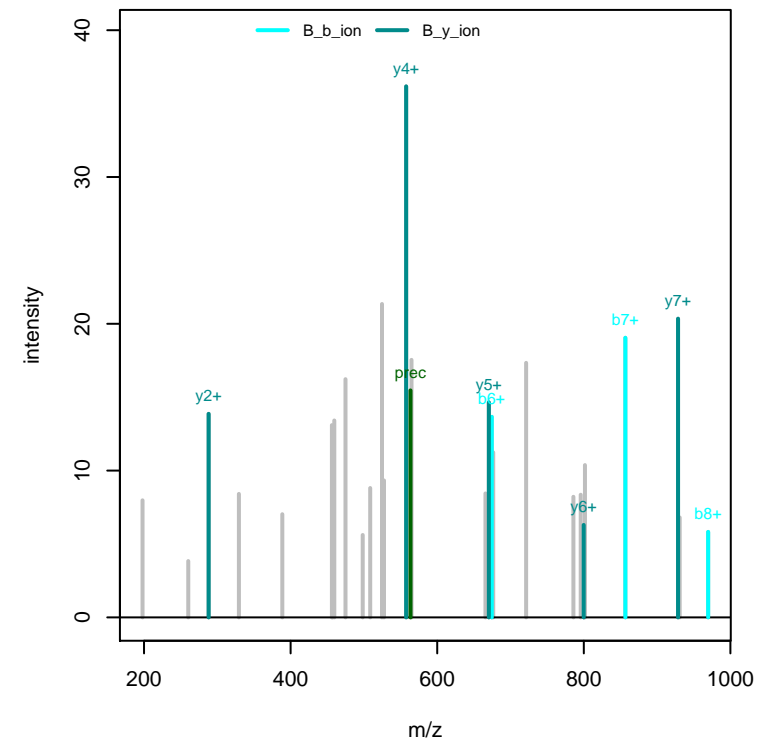

### SKEELSKIR+XL\_L

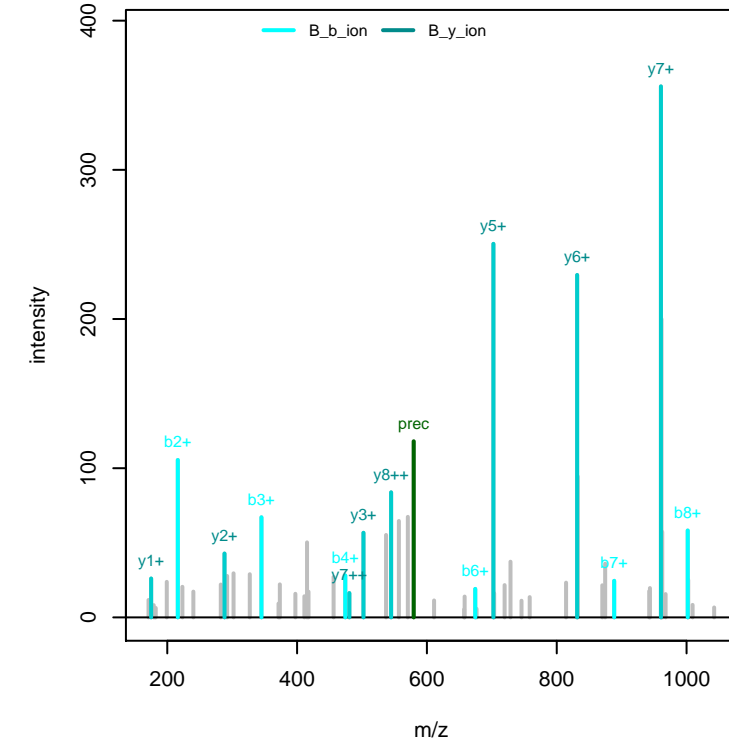

**LEKEMEK**  
**AQTQPLRKEIAR**

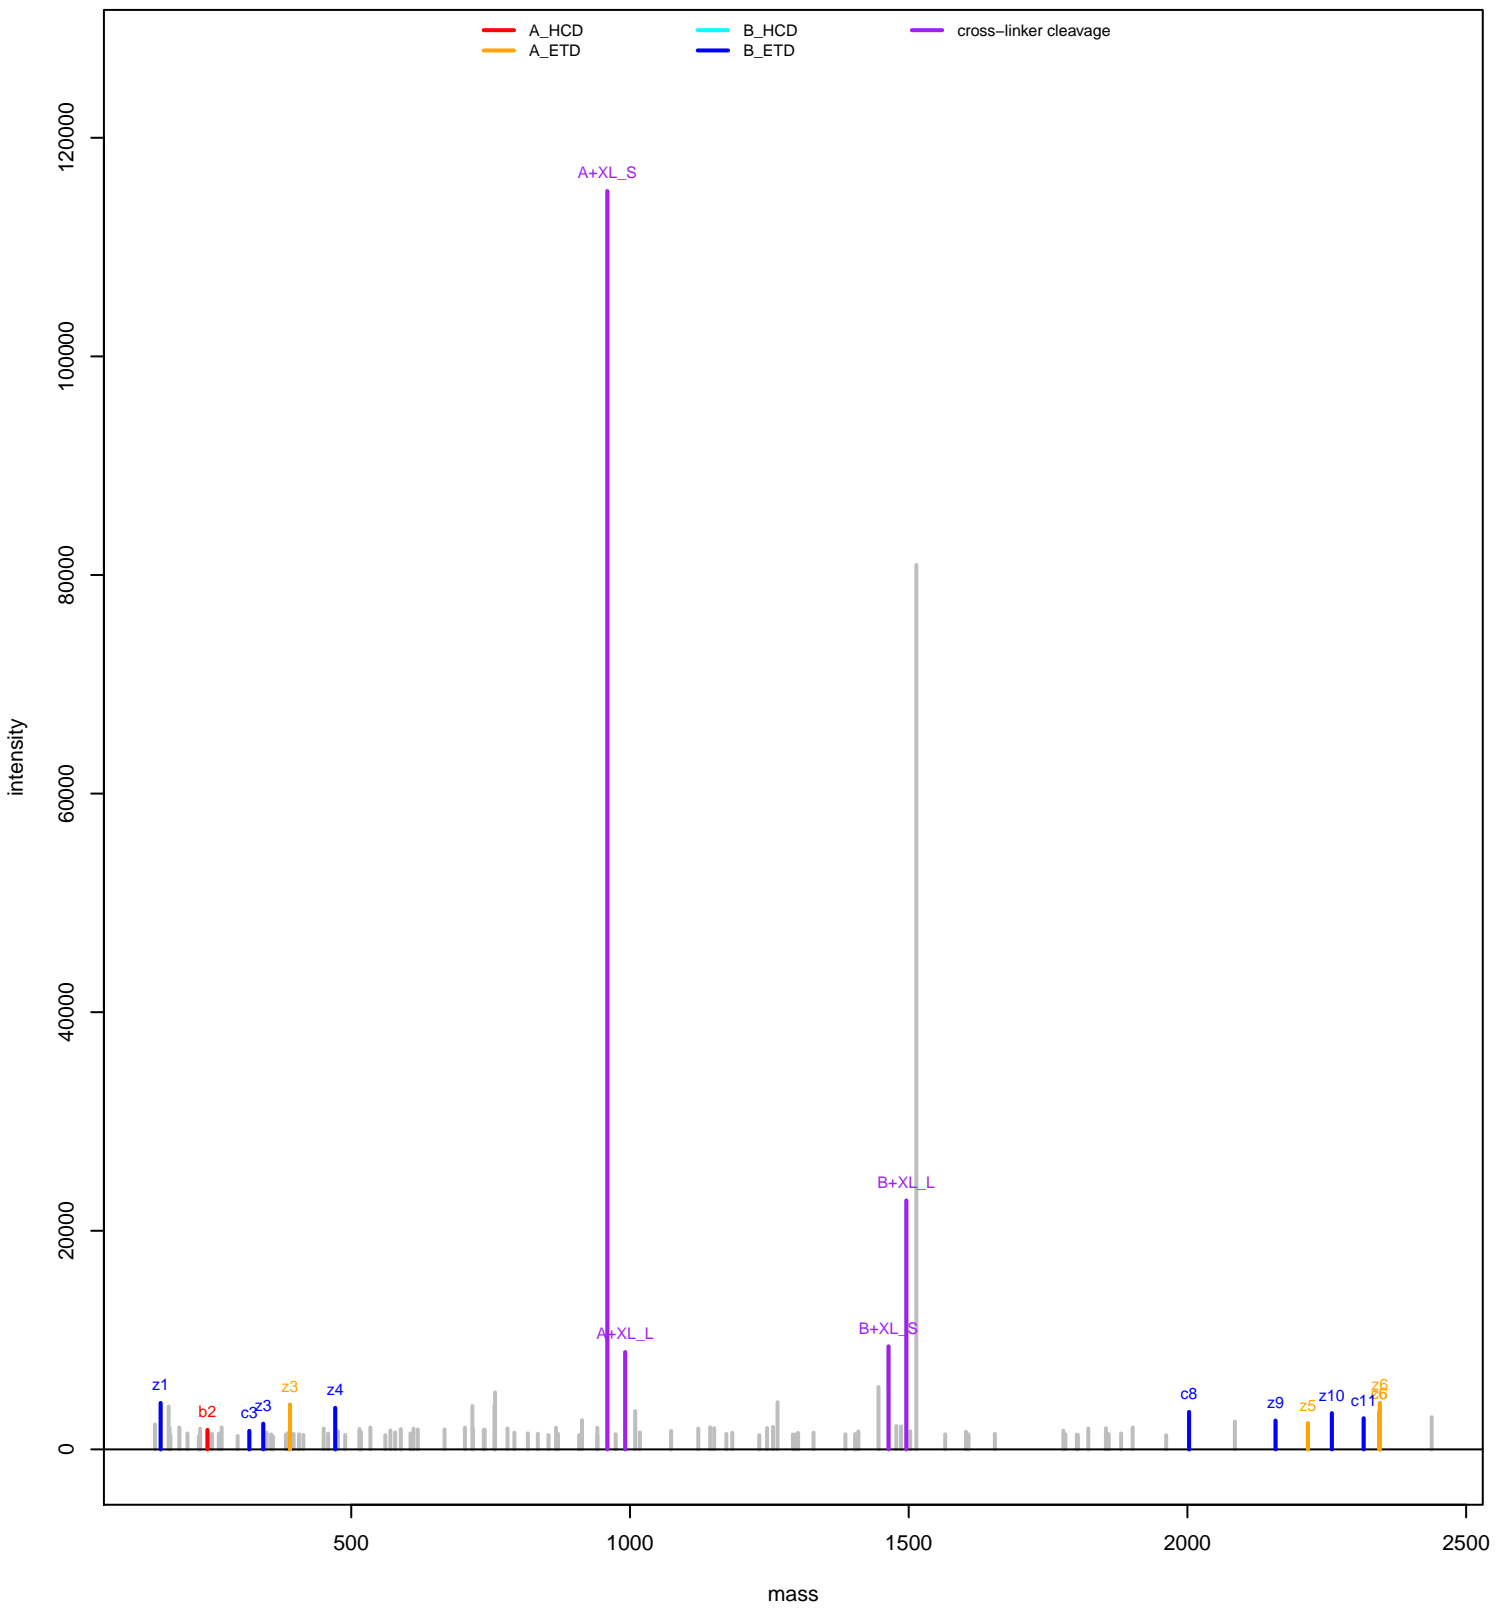

**LEKEMEK+XL\_S**

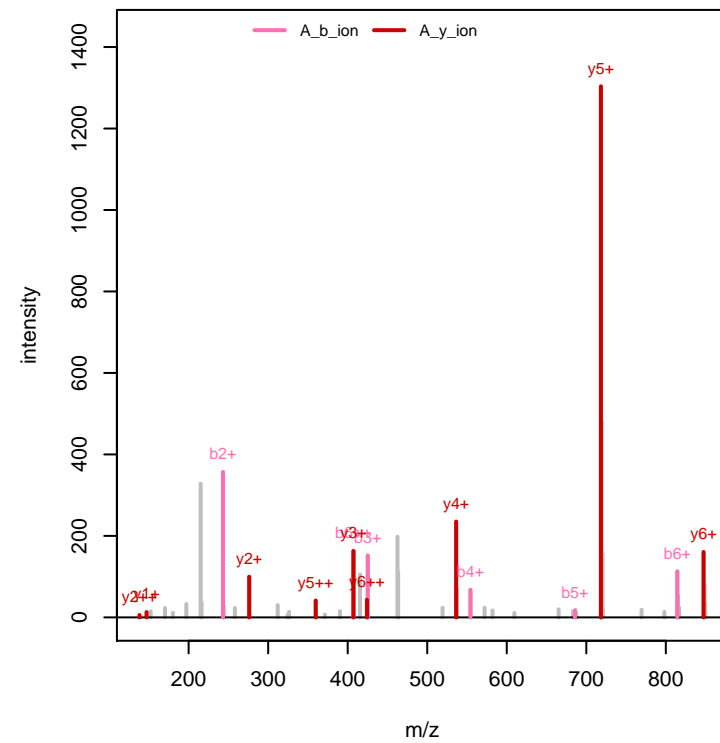

**LEKEMEK+XL\_L**

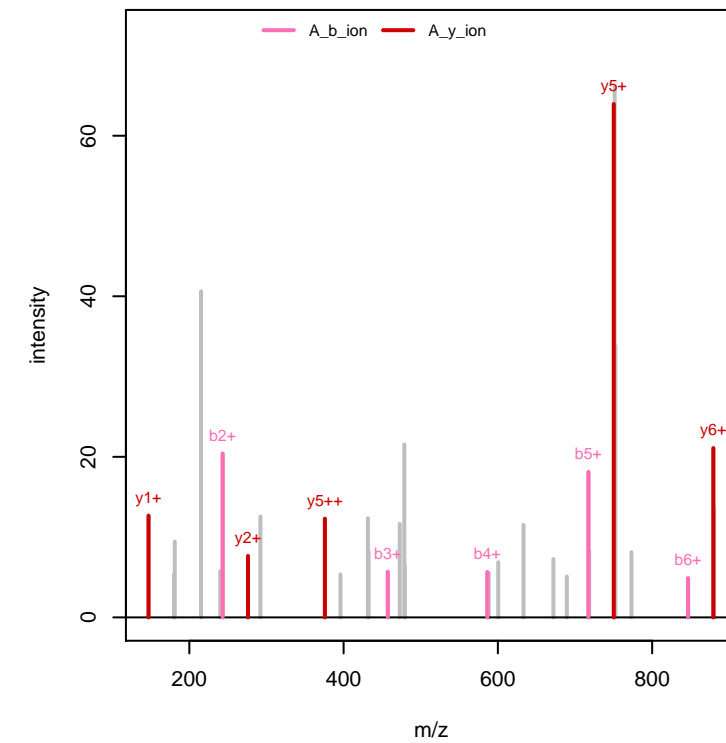

**AQTQPLRKEIAR+XL\_S**

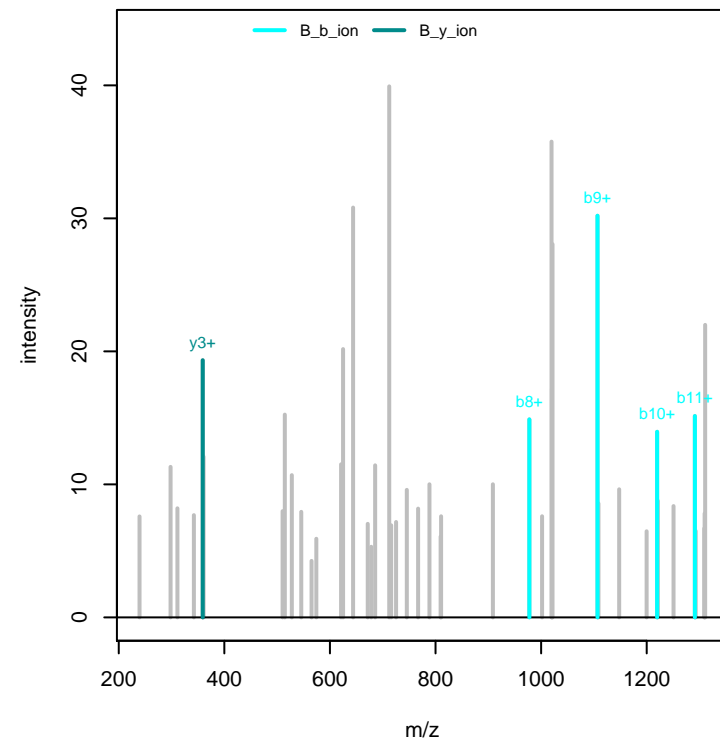

**AQTQPLRKEIAR+XL\_L**

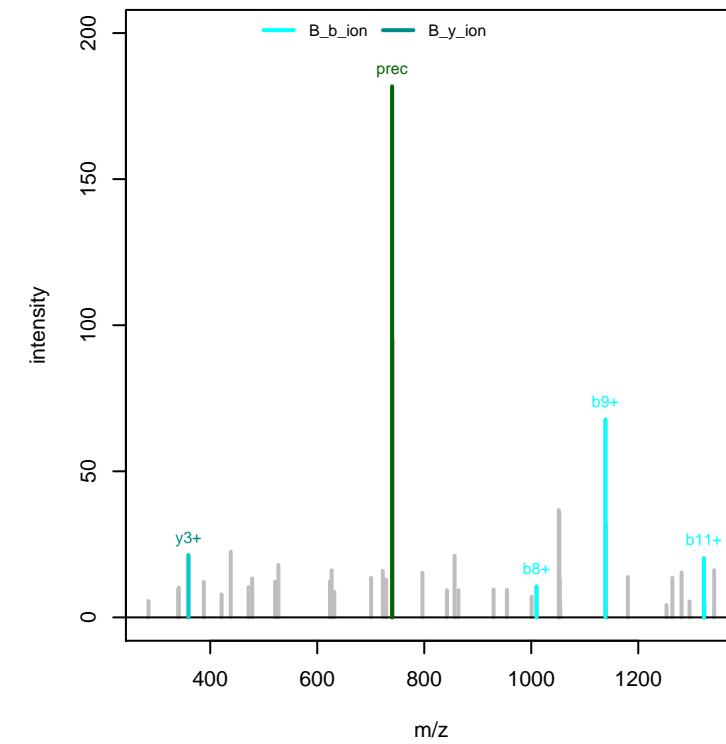

**FIEEEKK  
IIVVTSGKGGVGK**

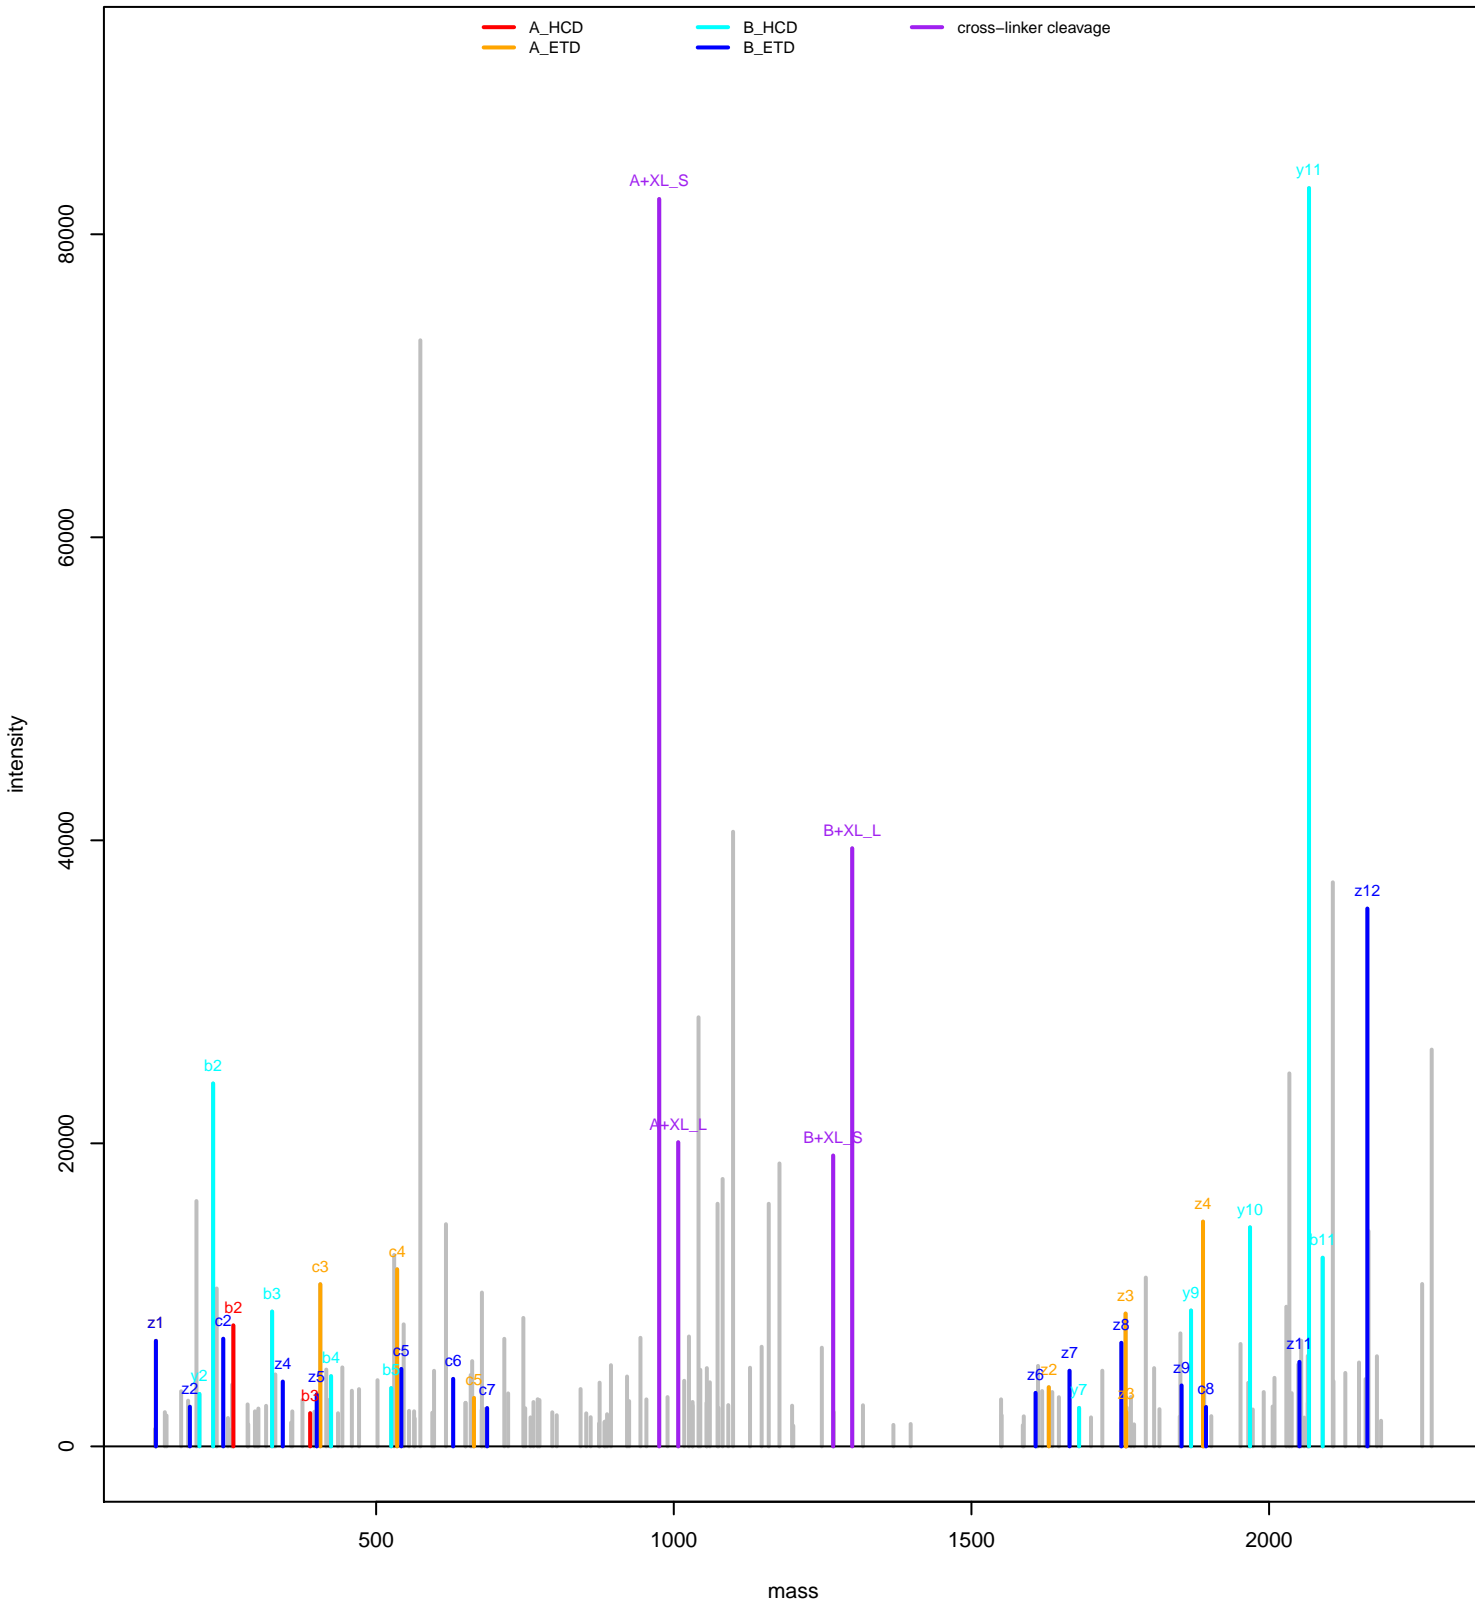

**FIEEEKK+XL\_S**

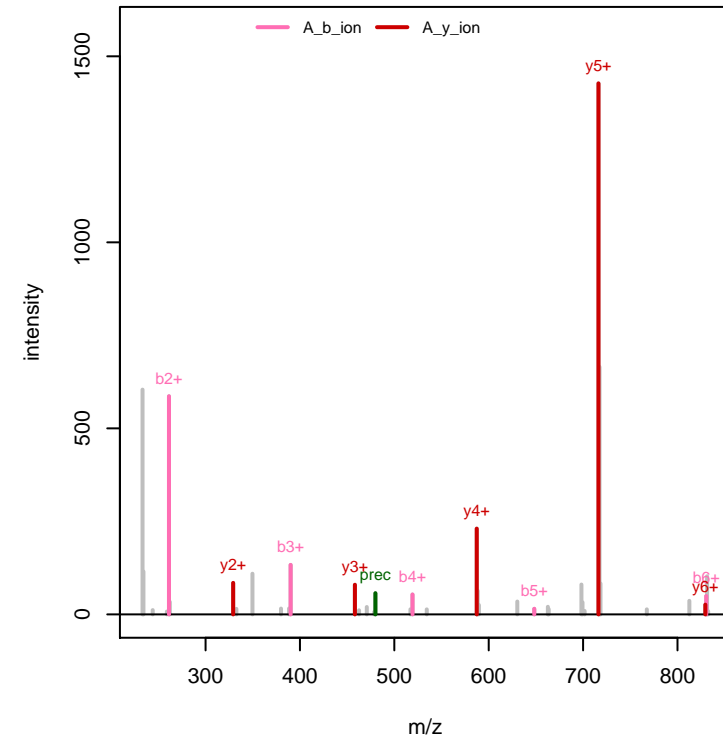

**FIEEEKK+XL\_L**

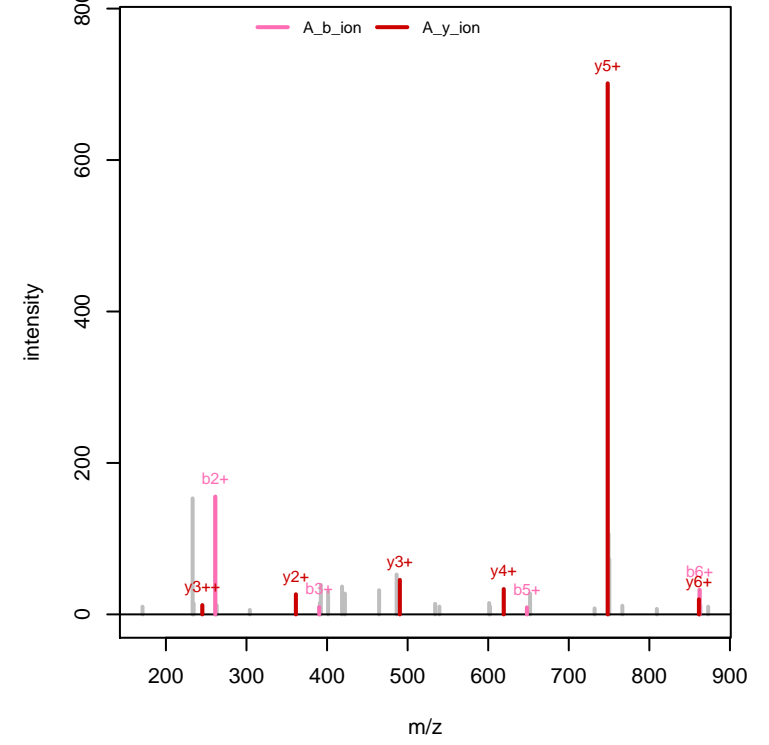

**IIVVTSGKGGVGK+XL\_S**

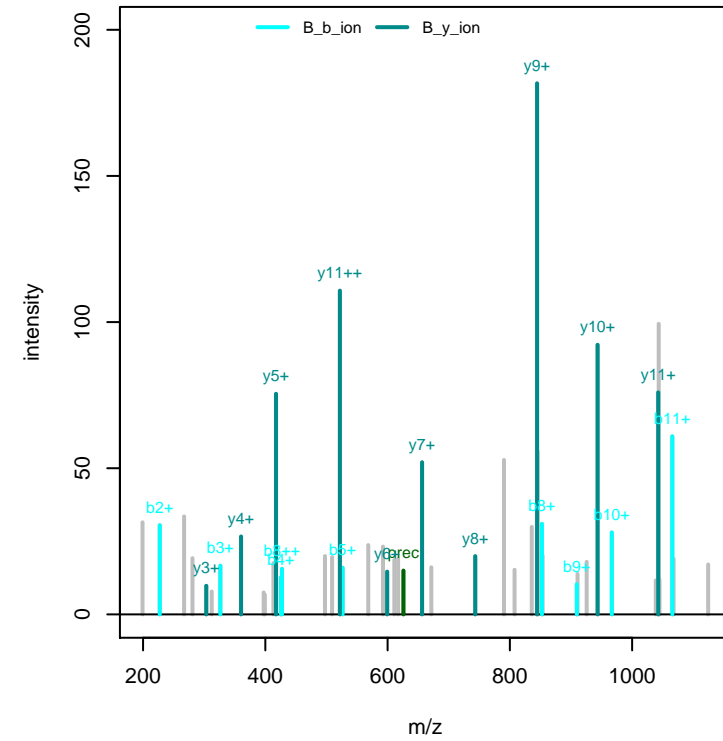

**IIVVTSGKGGVGK+XL\_L**

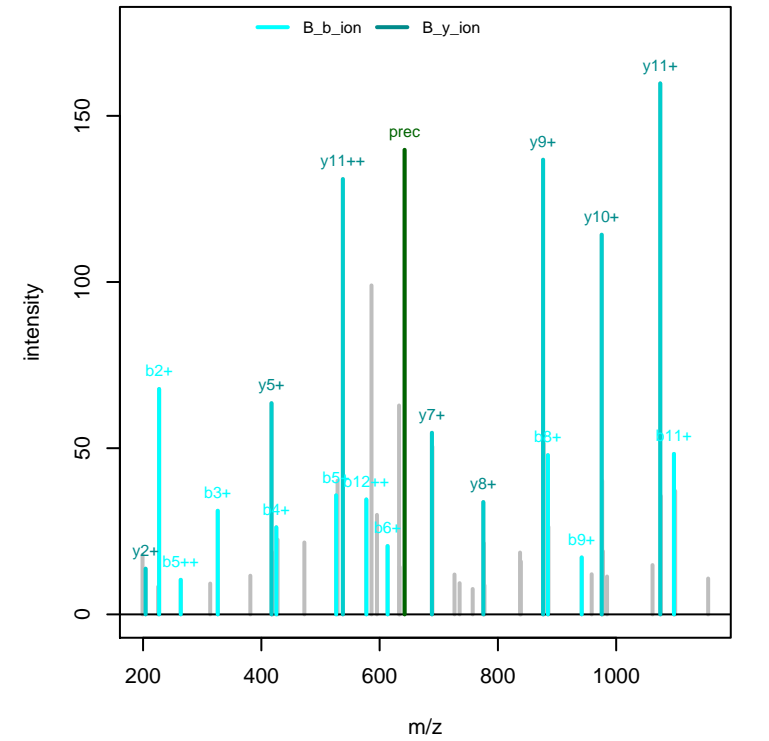

**KSDNPSITR  
LLQKCDYDVQK**

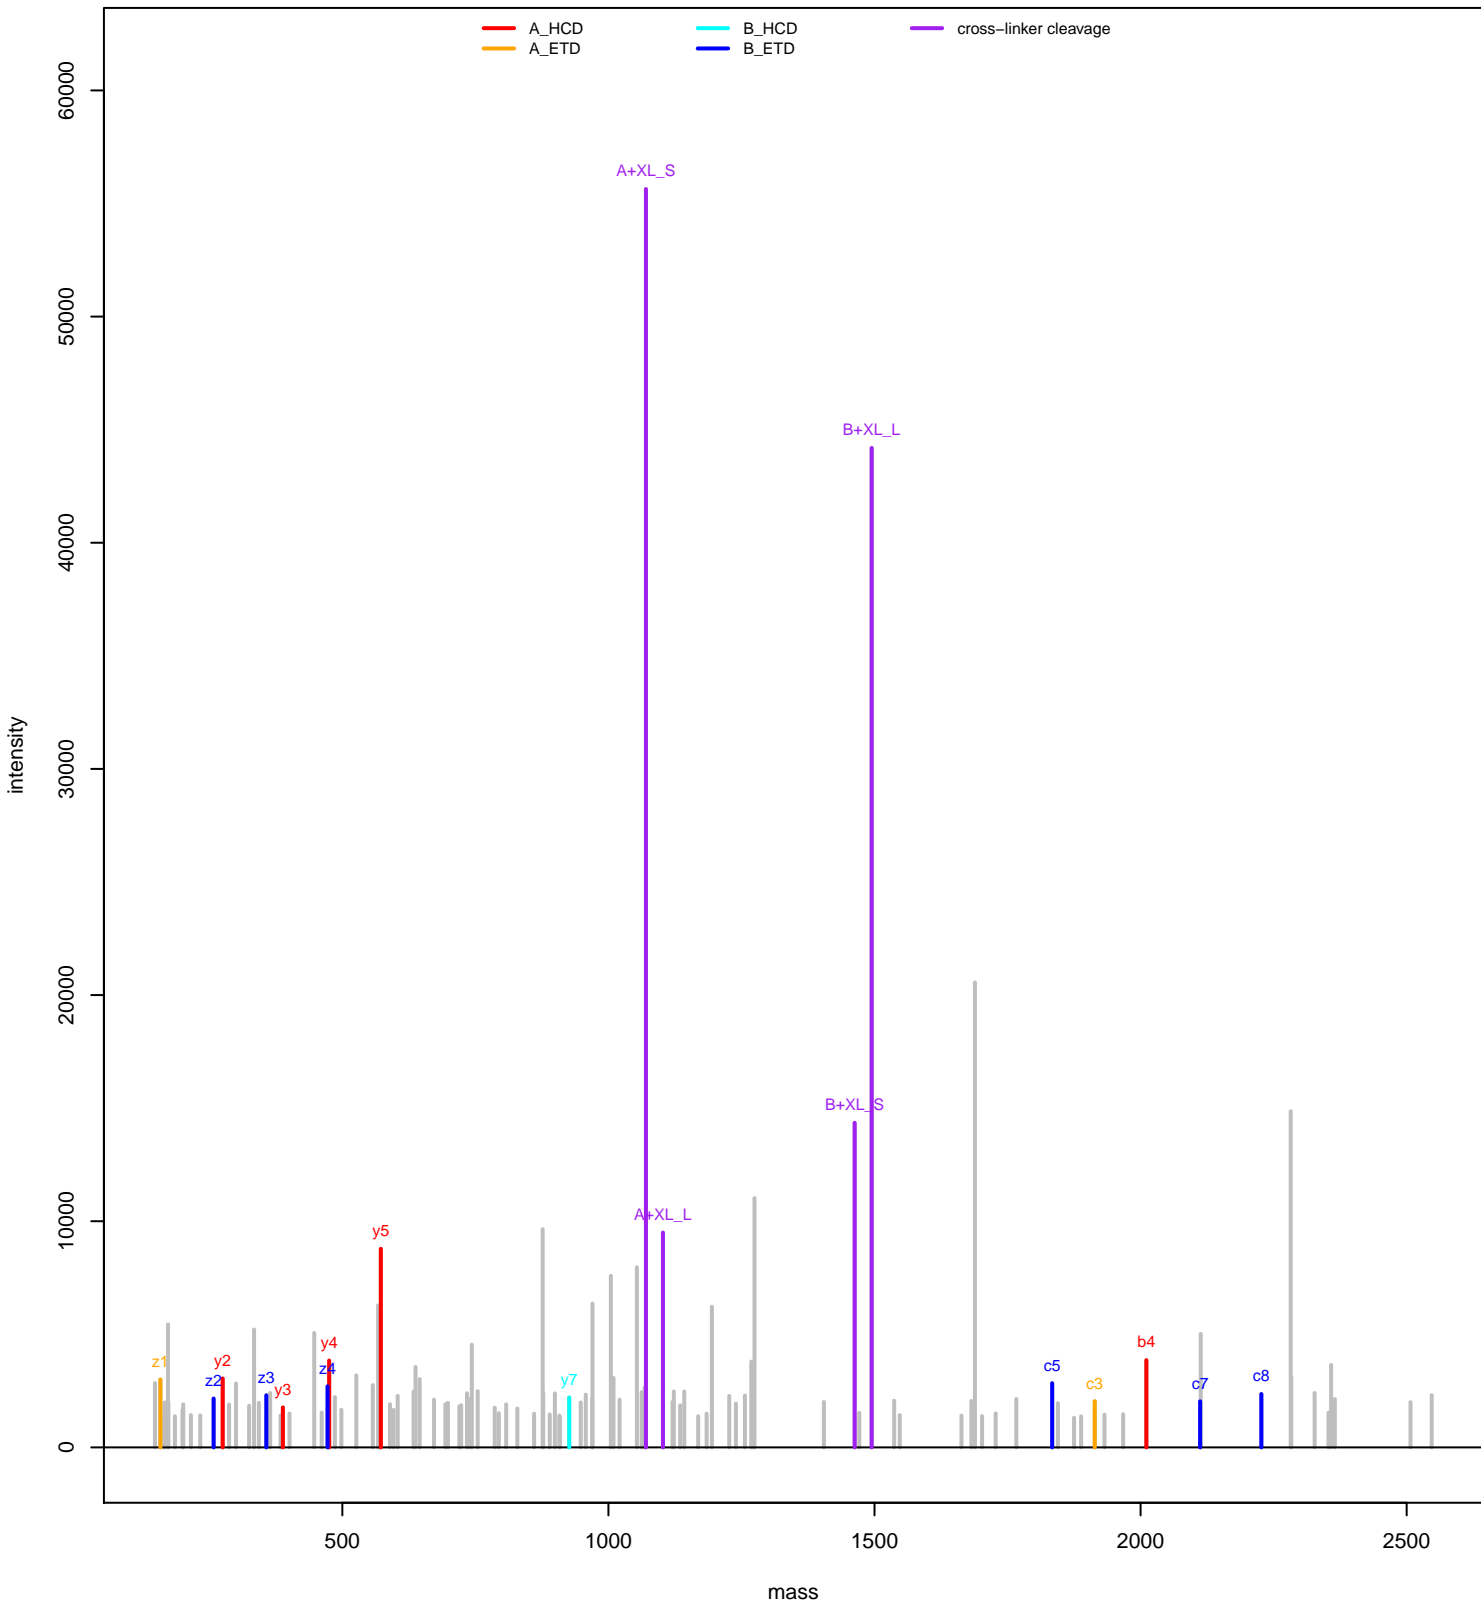

**KSDNPSITR+XL\_S**

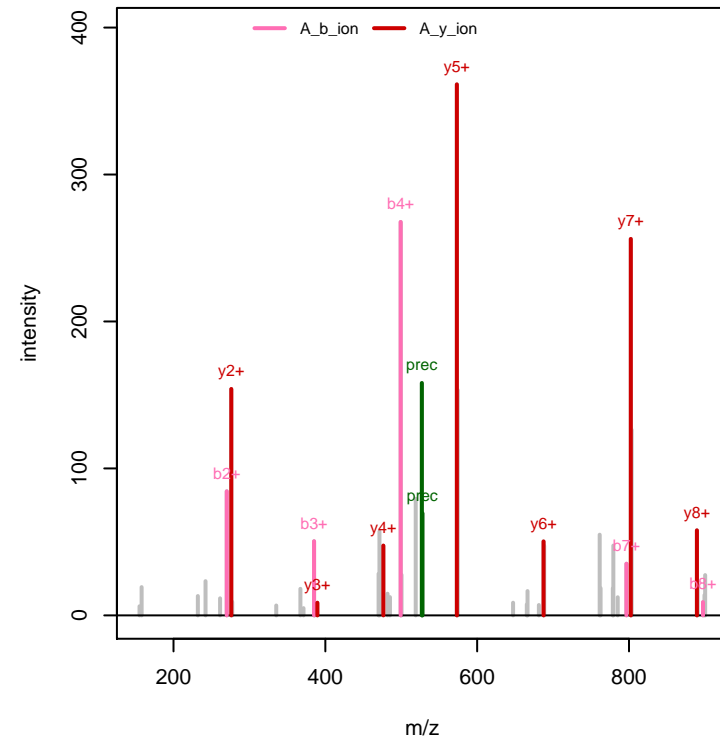

**KSDNPSITR+XL\_L**

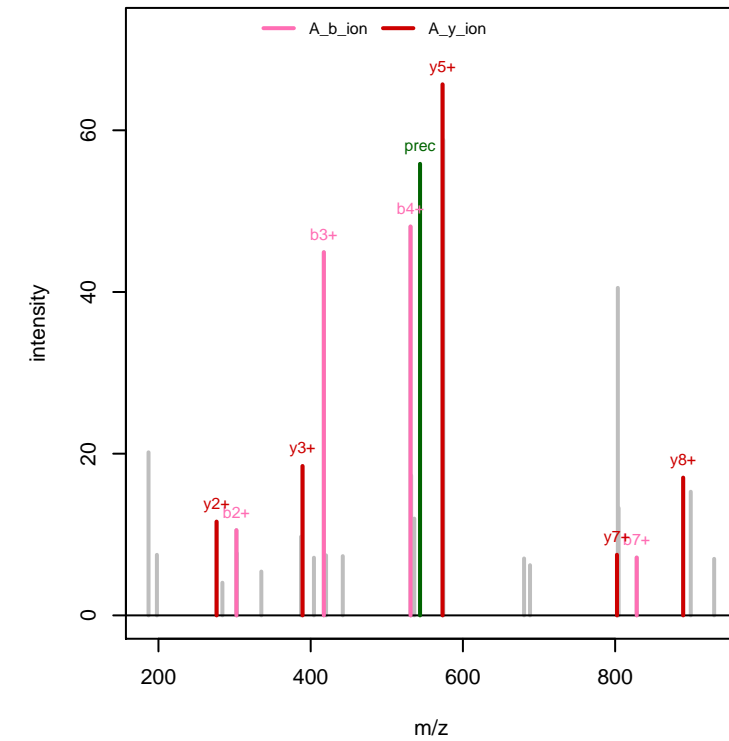

**LLQKCDYDVQK+XL\_S**

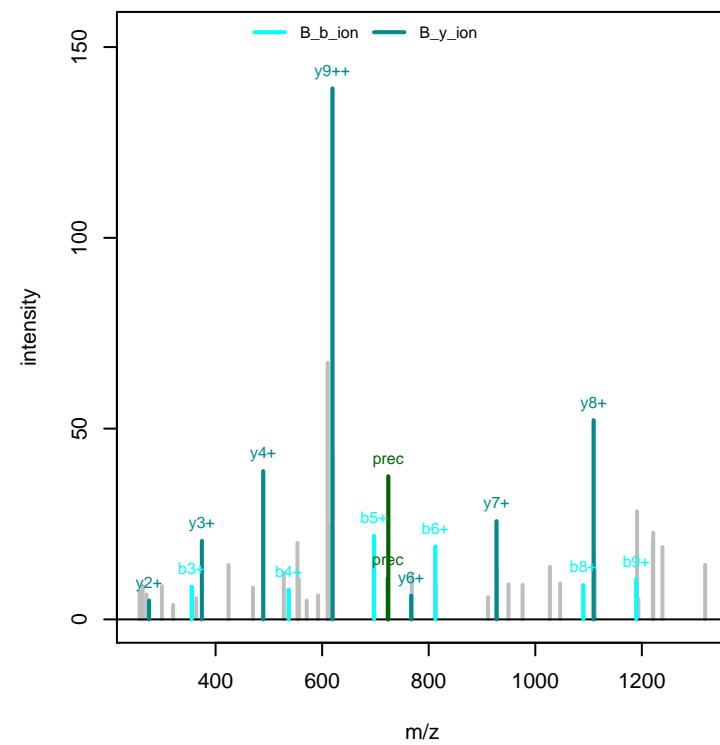

**LLQKCDYDVQK+XL\_L**

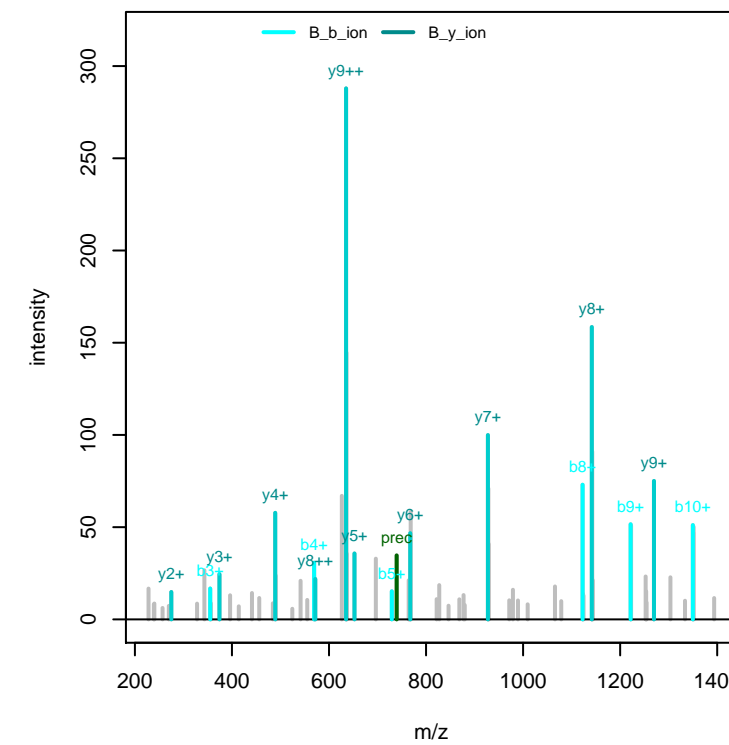



PKPTDKR  
VLYPINSKDK

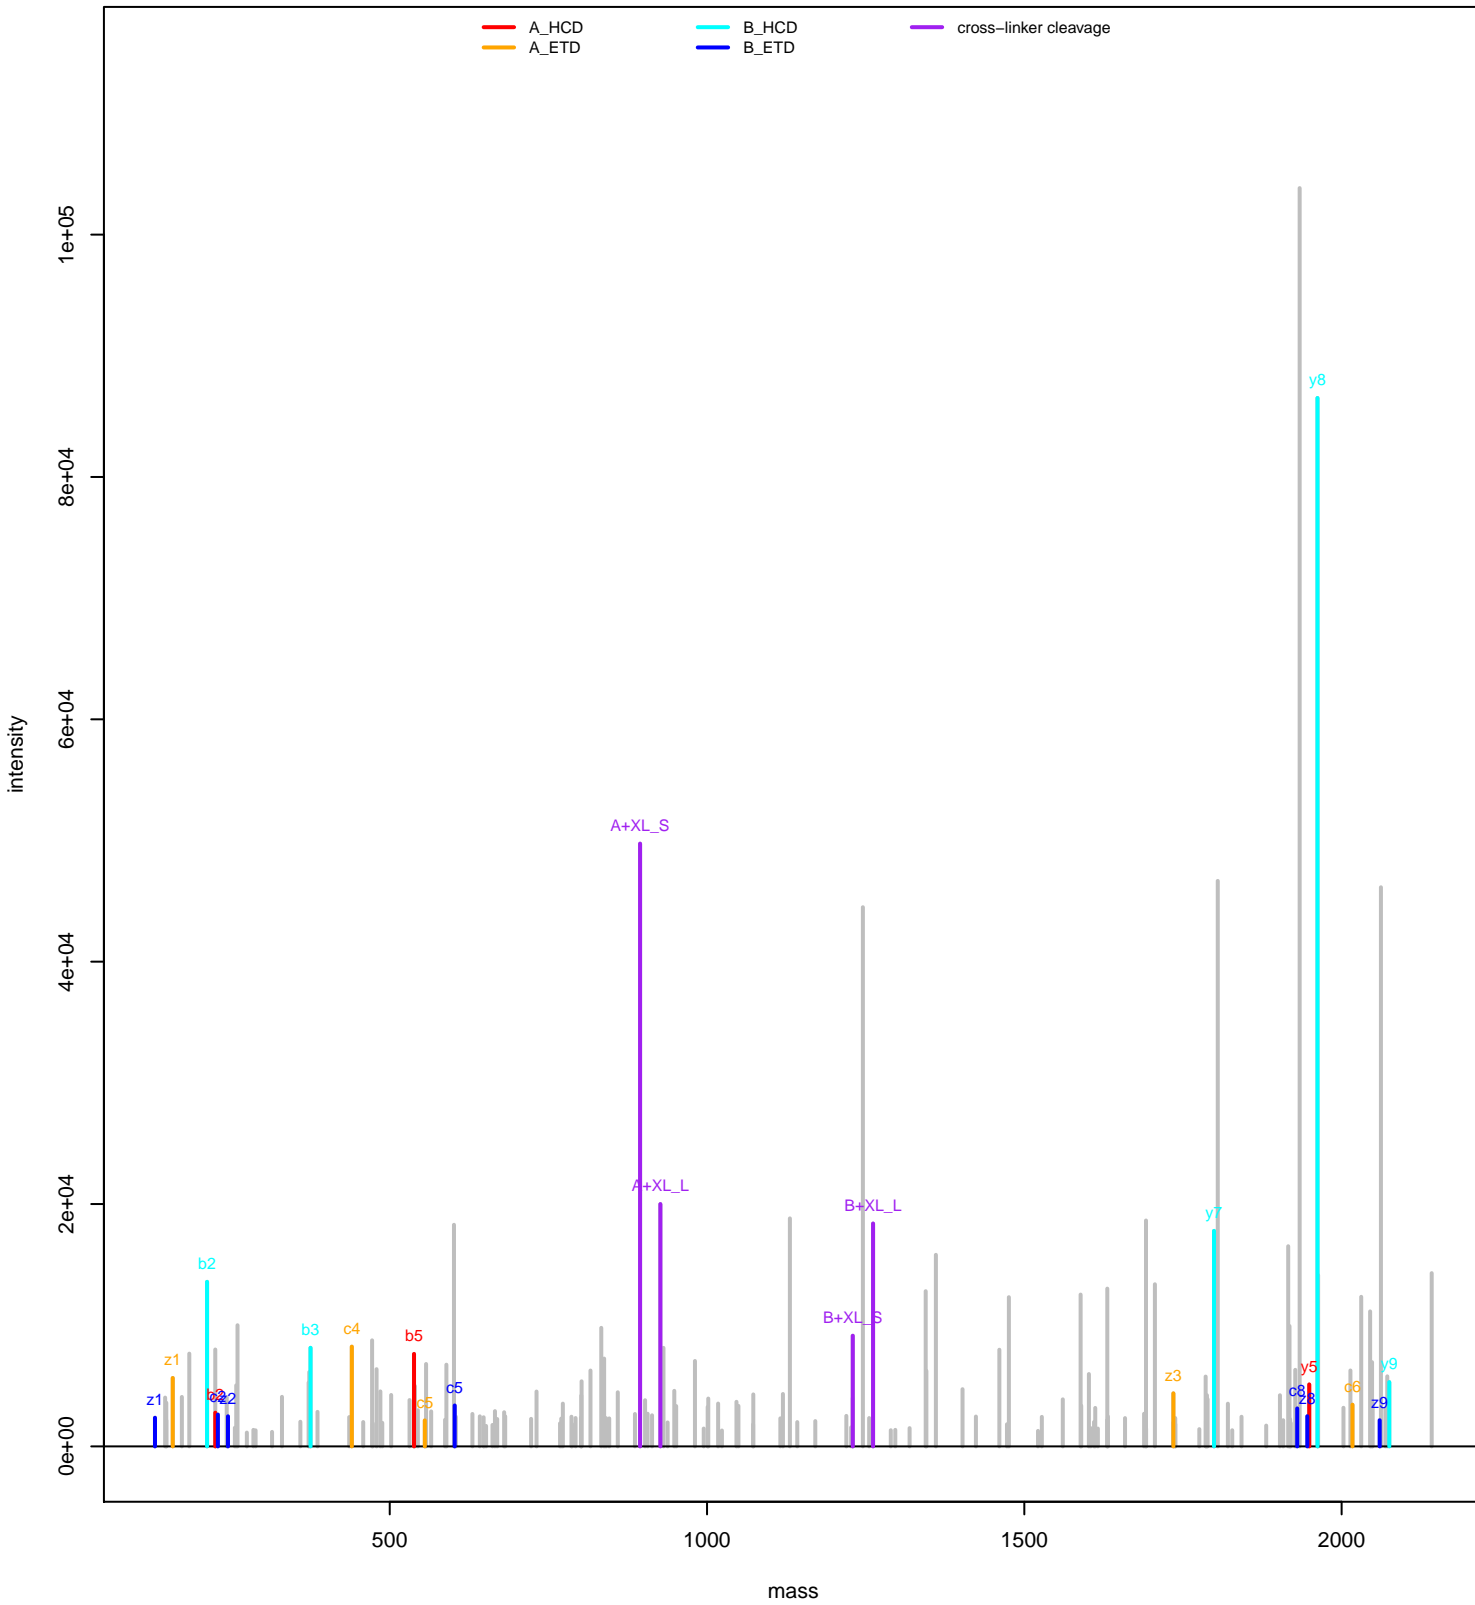

PKPTDKR+XL\_S

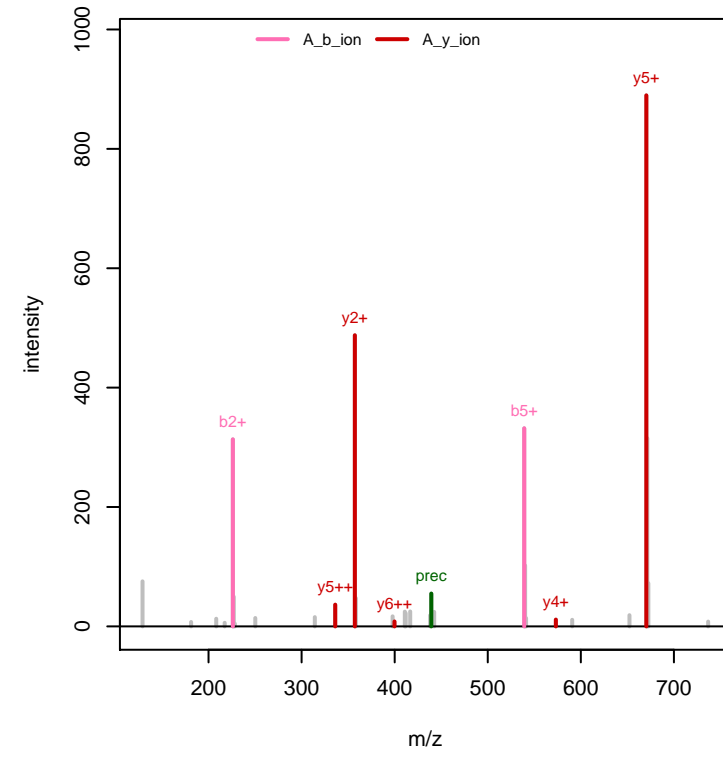

PKPTDKR+XL\_L

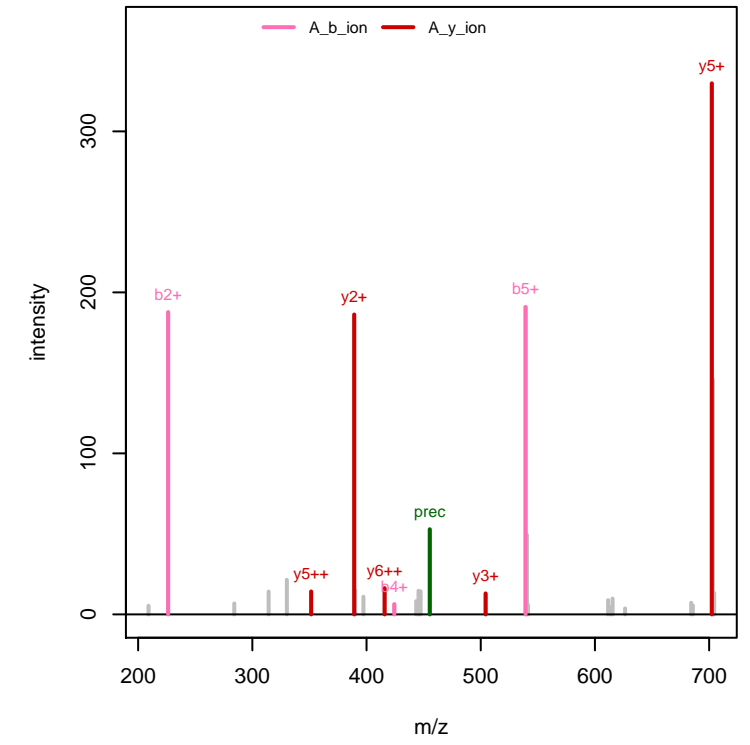

VLYPINSKDK+XL\_S

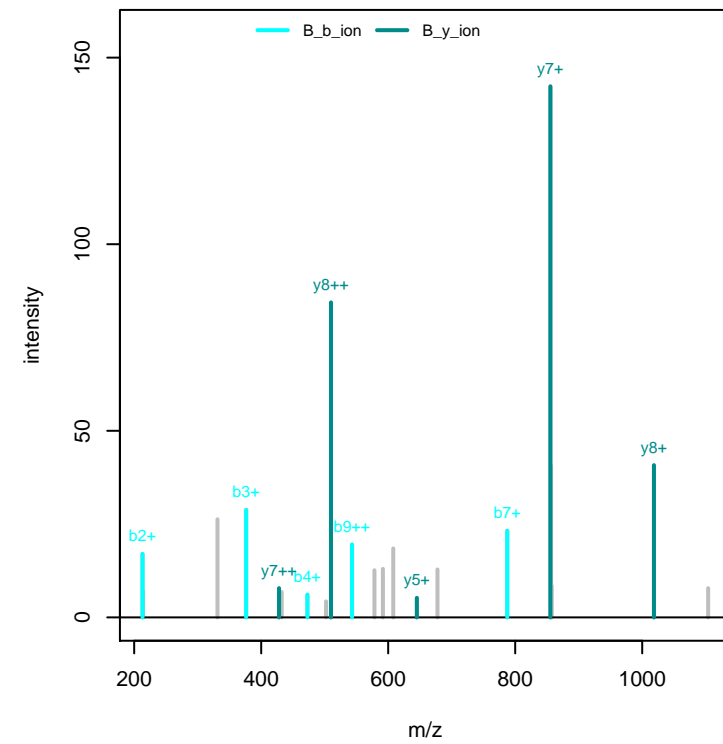

VLYPINSKDK+XL\_L

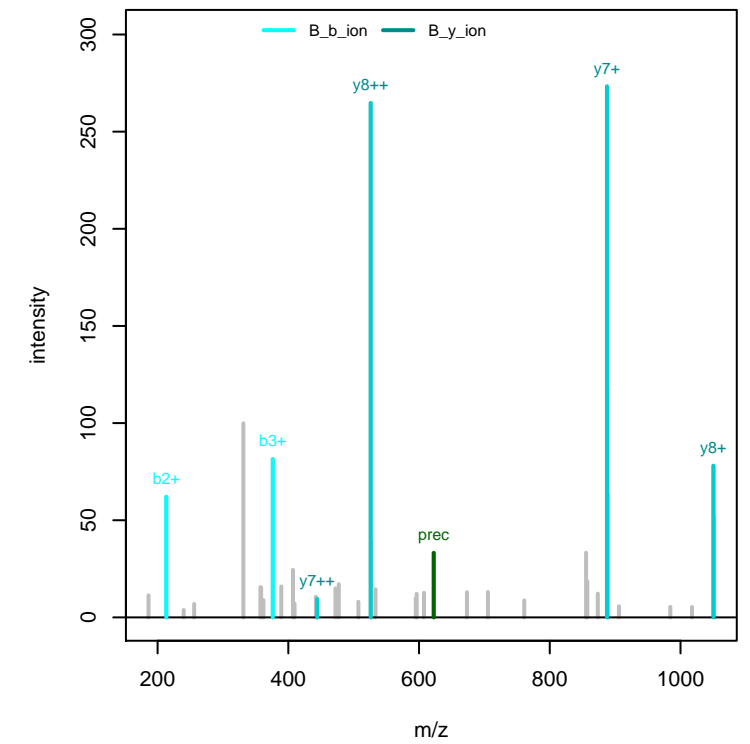

AKVNNVDPK  
VKSVTFCAR

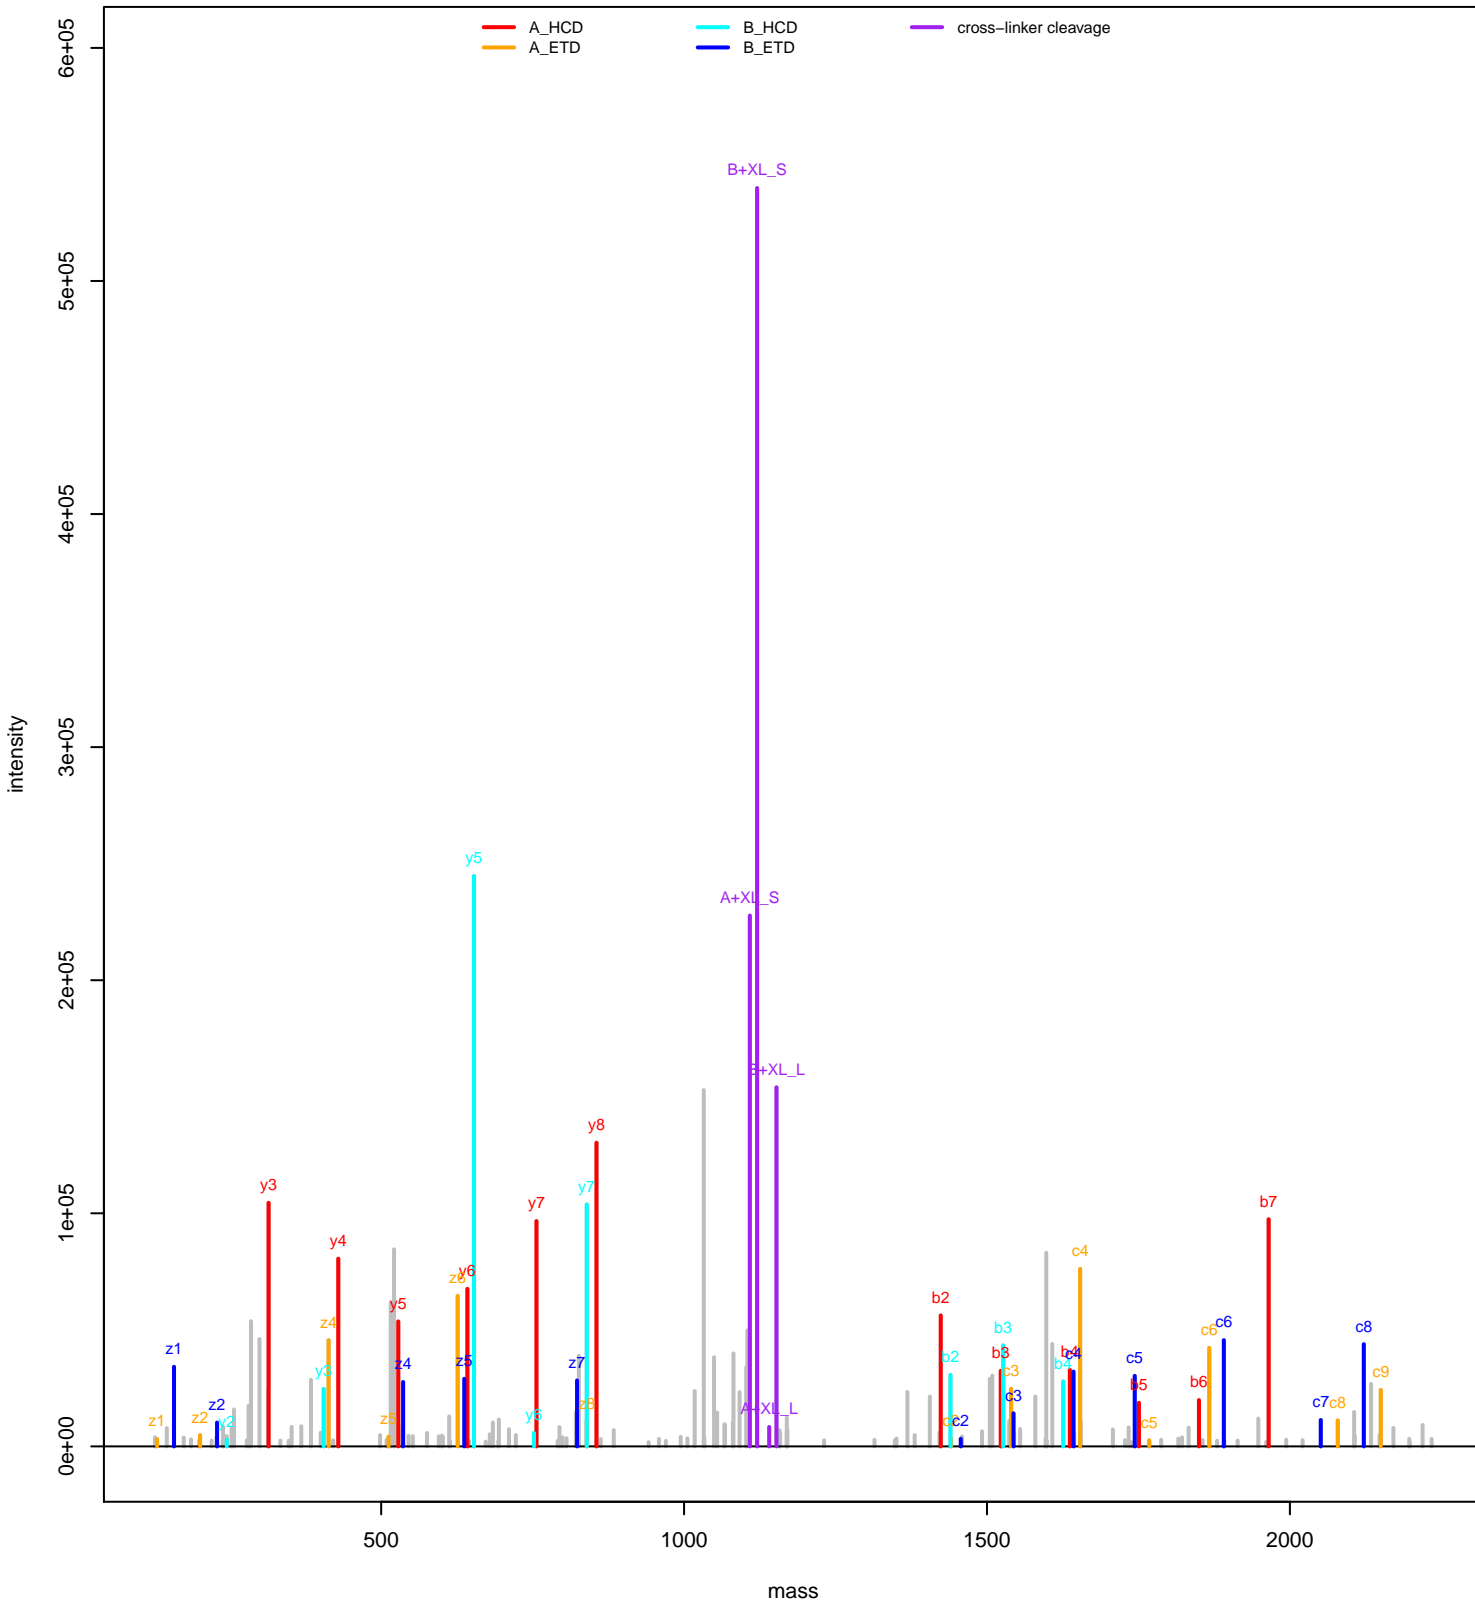

AKVNNVDPK+XL\_S

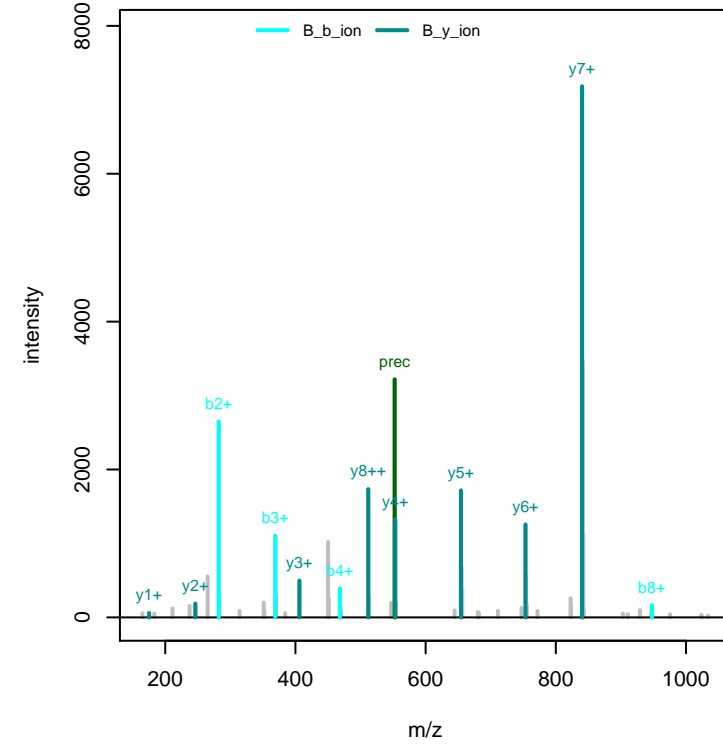

AKVNNVDPK+XL\_L

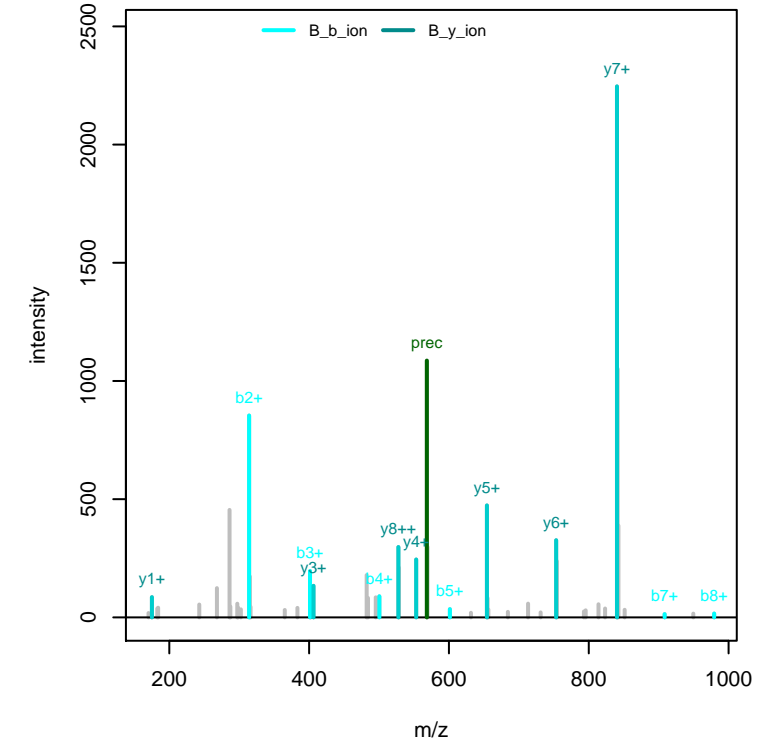

VKSVTFCAR+XL\_S



VKSVTFCAR+XL\_L



### NSKSGGR IVDFKR

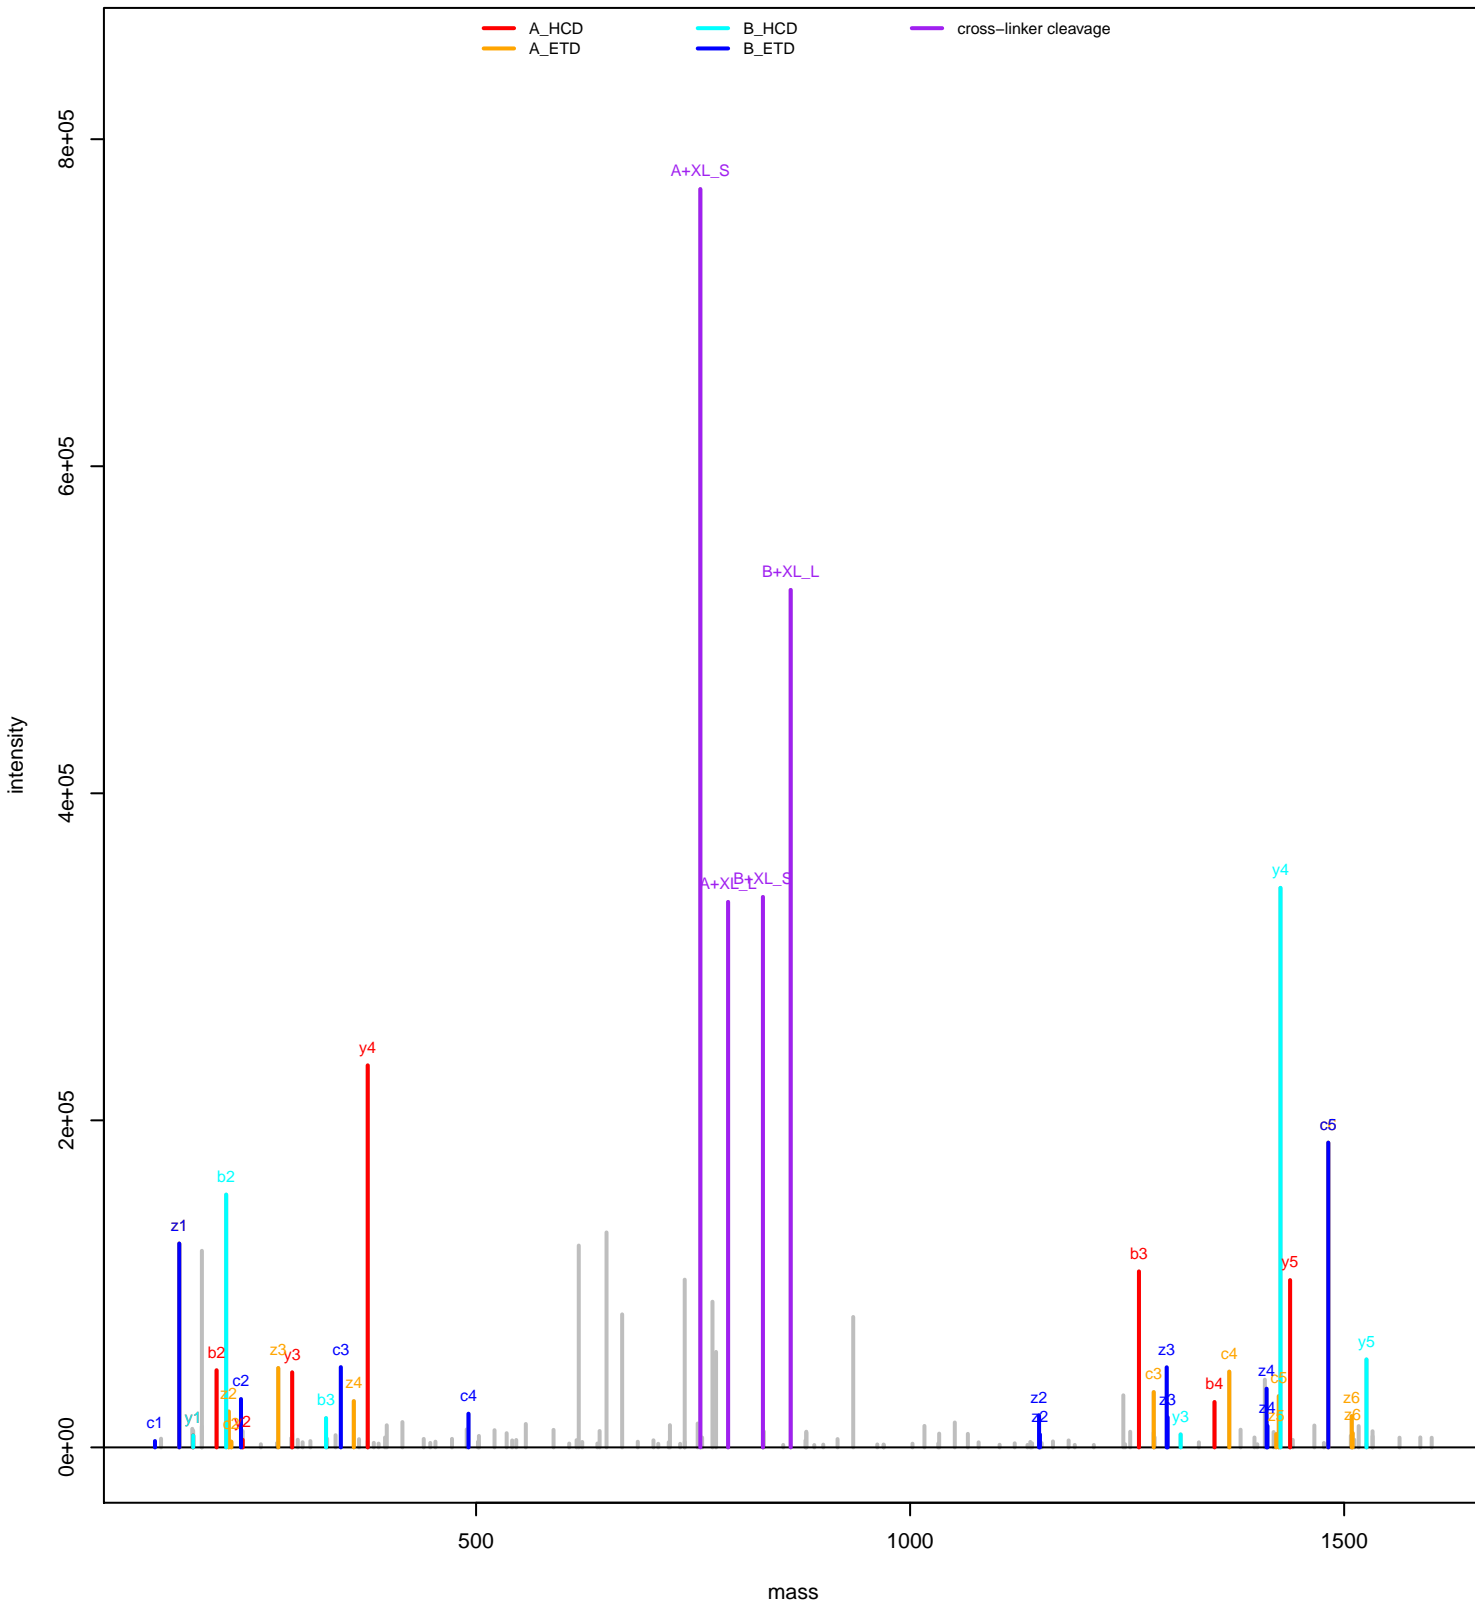

### NSKSGGR+XL\_S

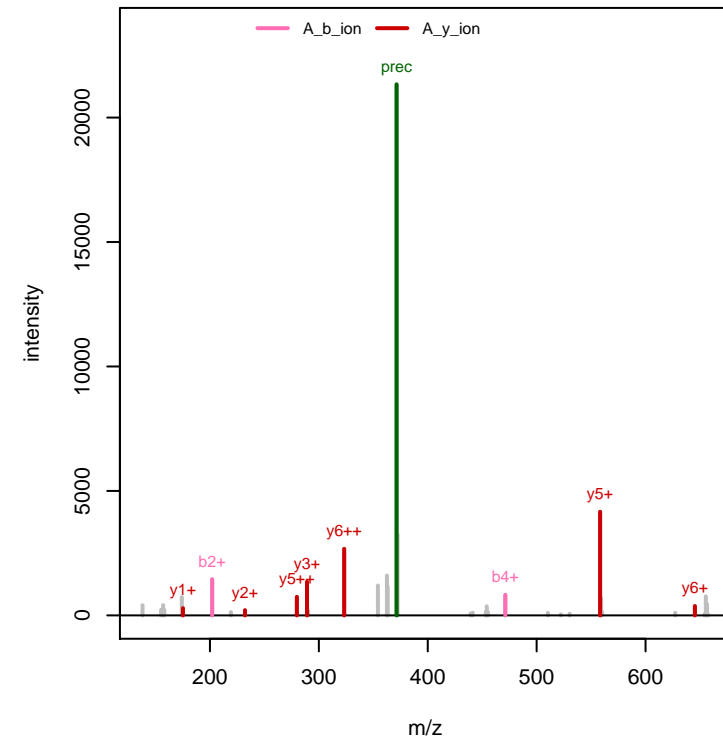

### NSKSGGR+XL\_L

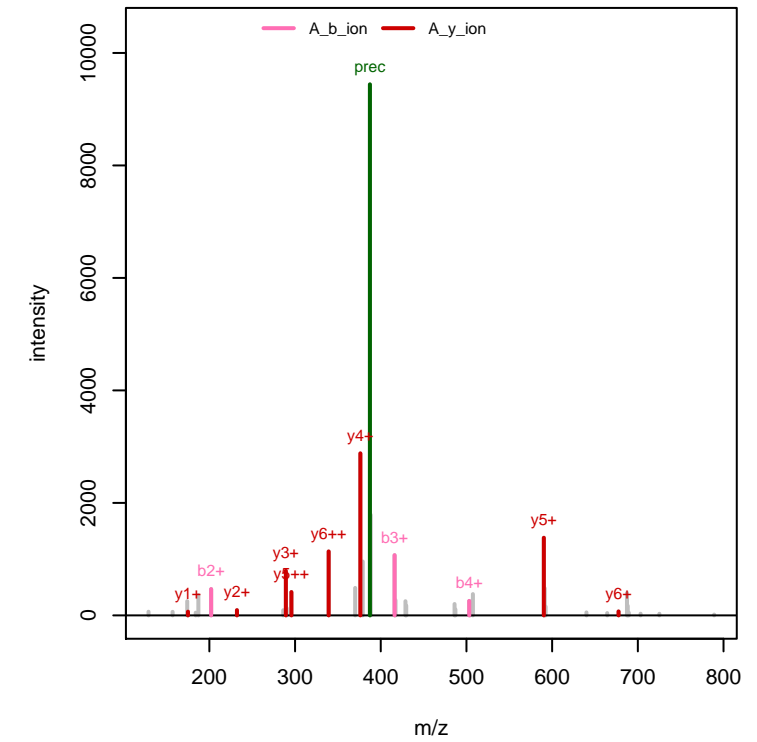

### IVDFKR+XL\_S

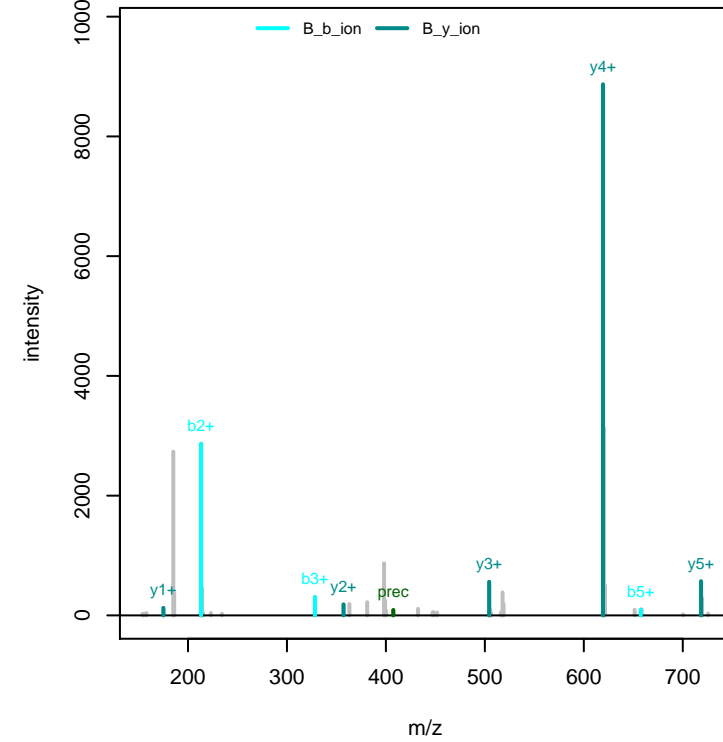

### IVDFKR+XL\_L

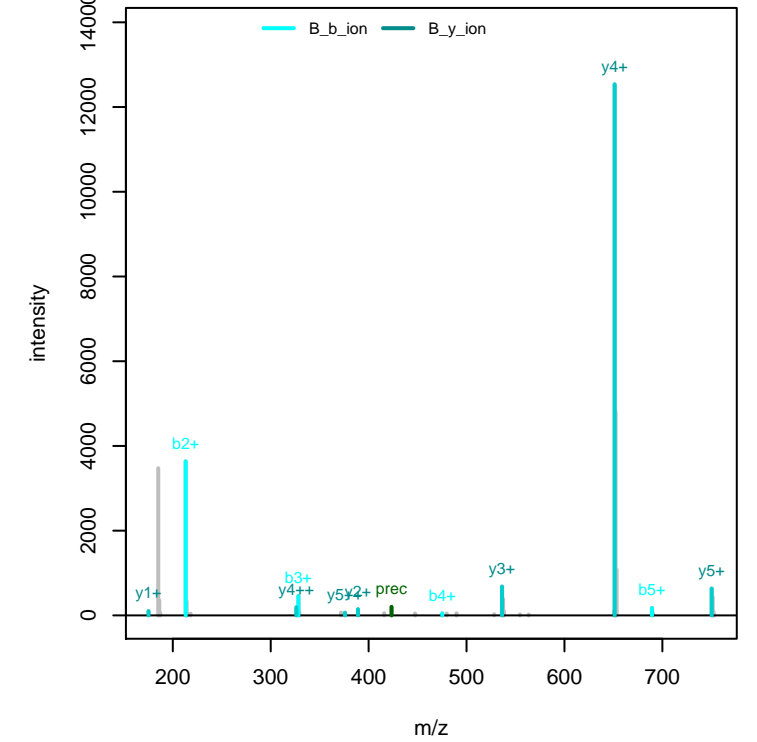

TNELKADEER  
EKINPAGAPTYVPGEYK

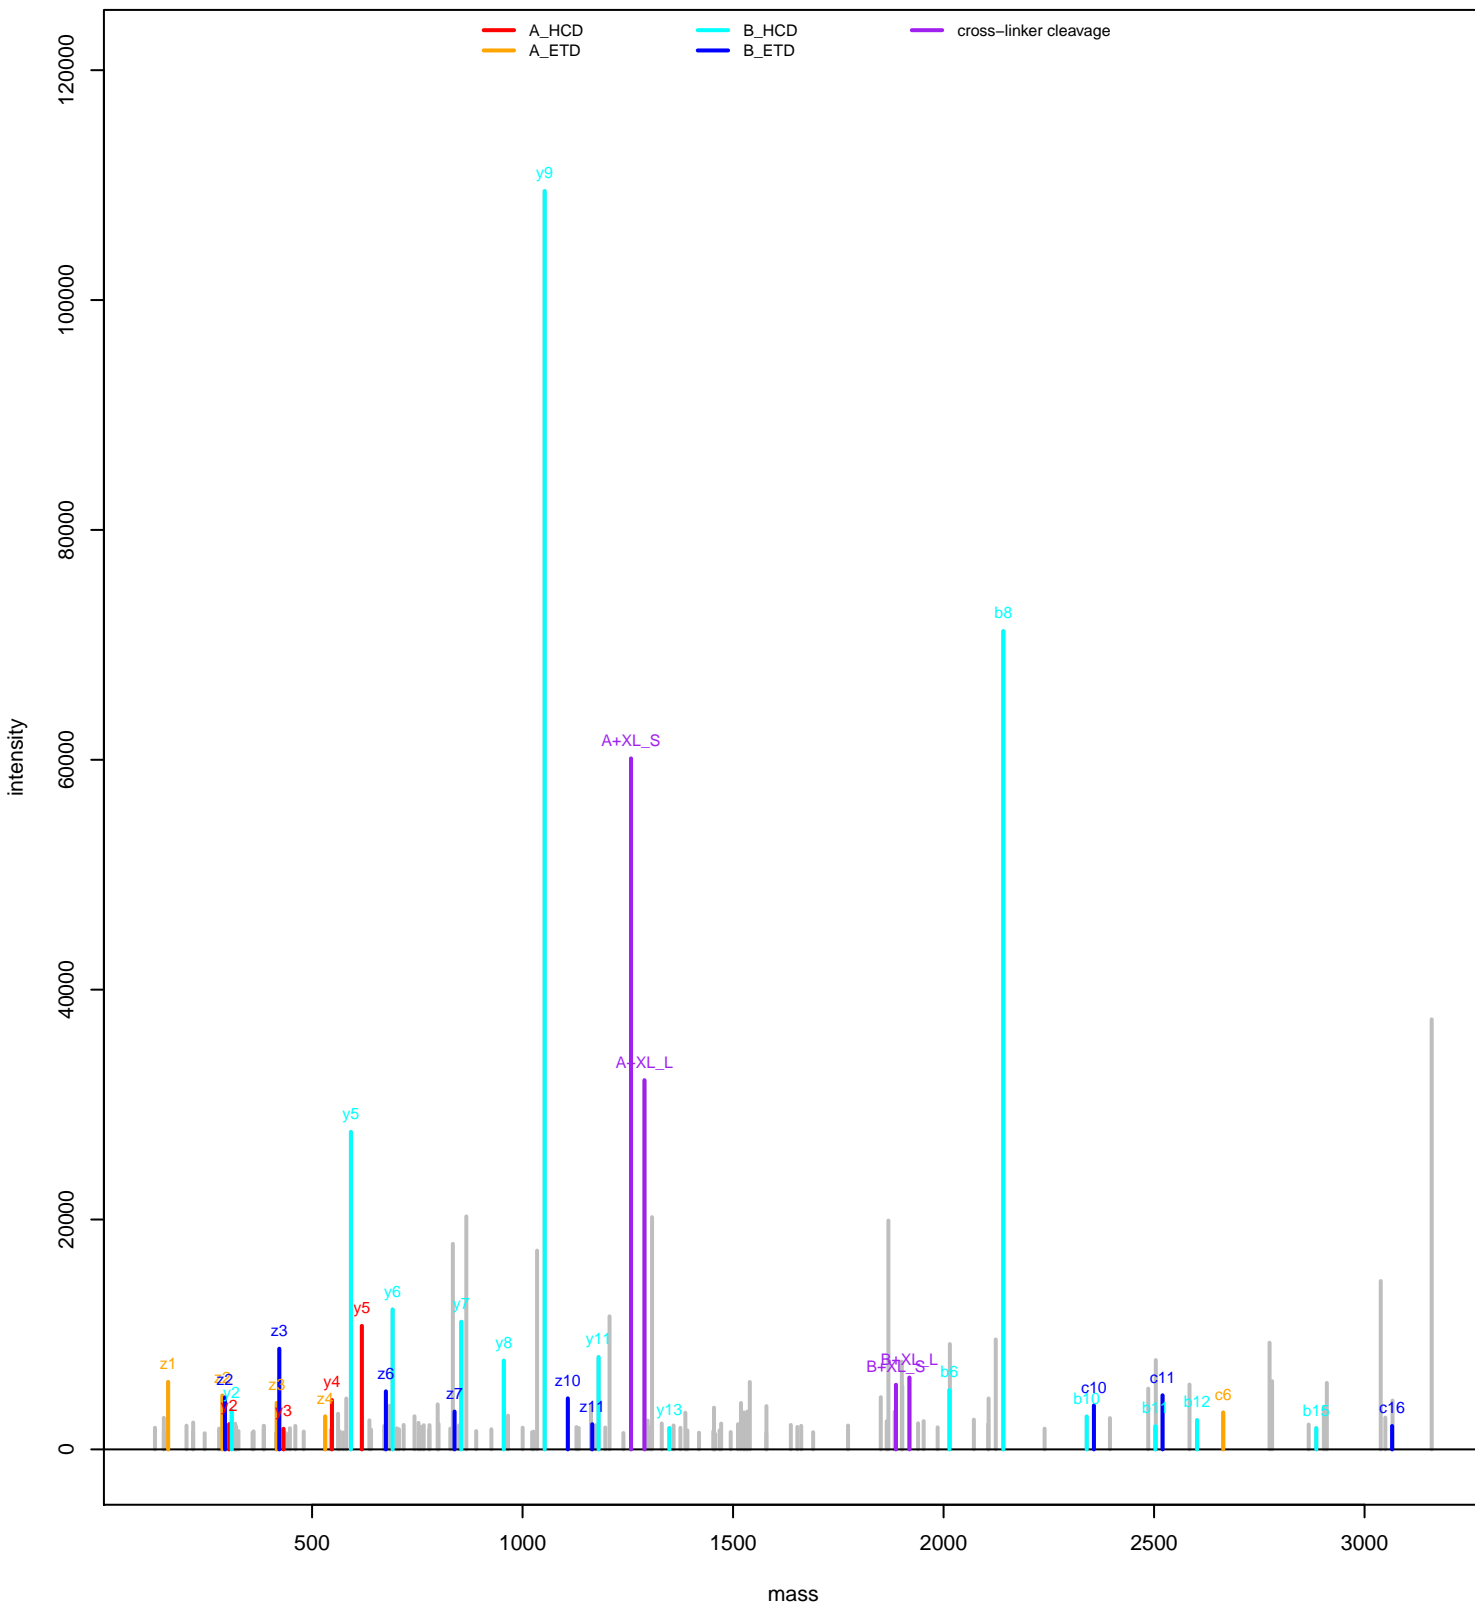

TNELKADEER+XL\_S

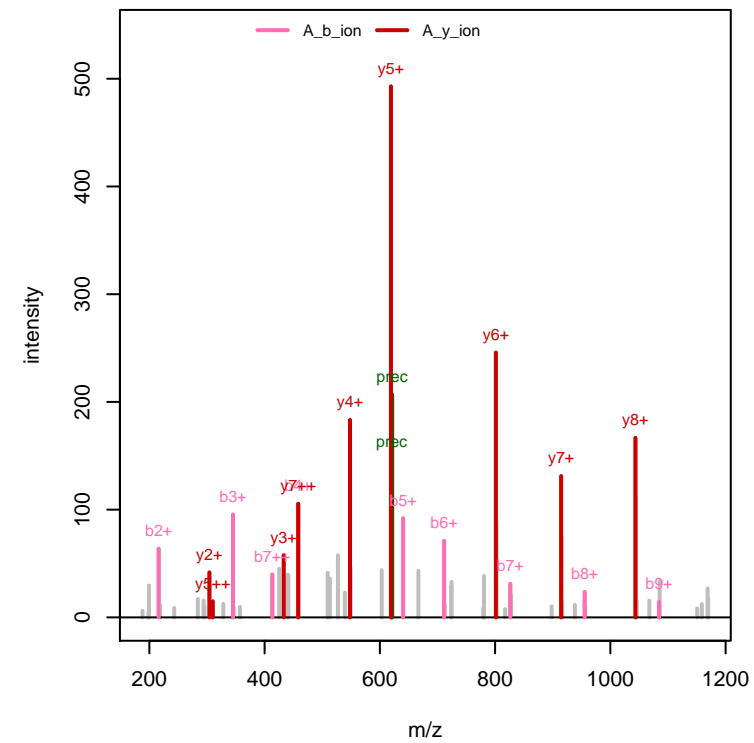

TNELKADEER+XL\_L

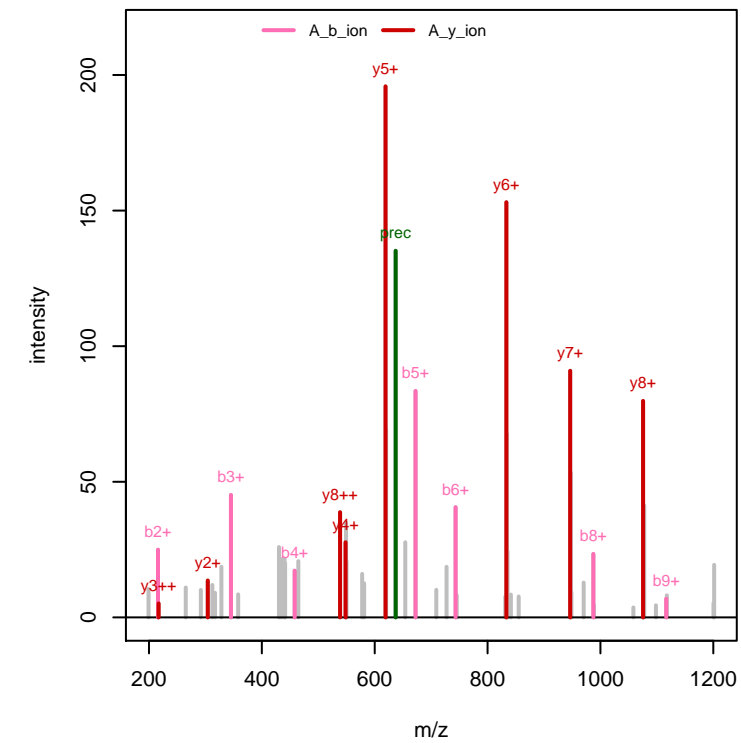

EKINPAGAPTYVPGEYK+XL\_S

EKINPAGAPTYVPGEYK+XL\_L

**KAGEGAK**  
ALQTAGKSDVMVVGFDGTPDGEK

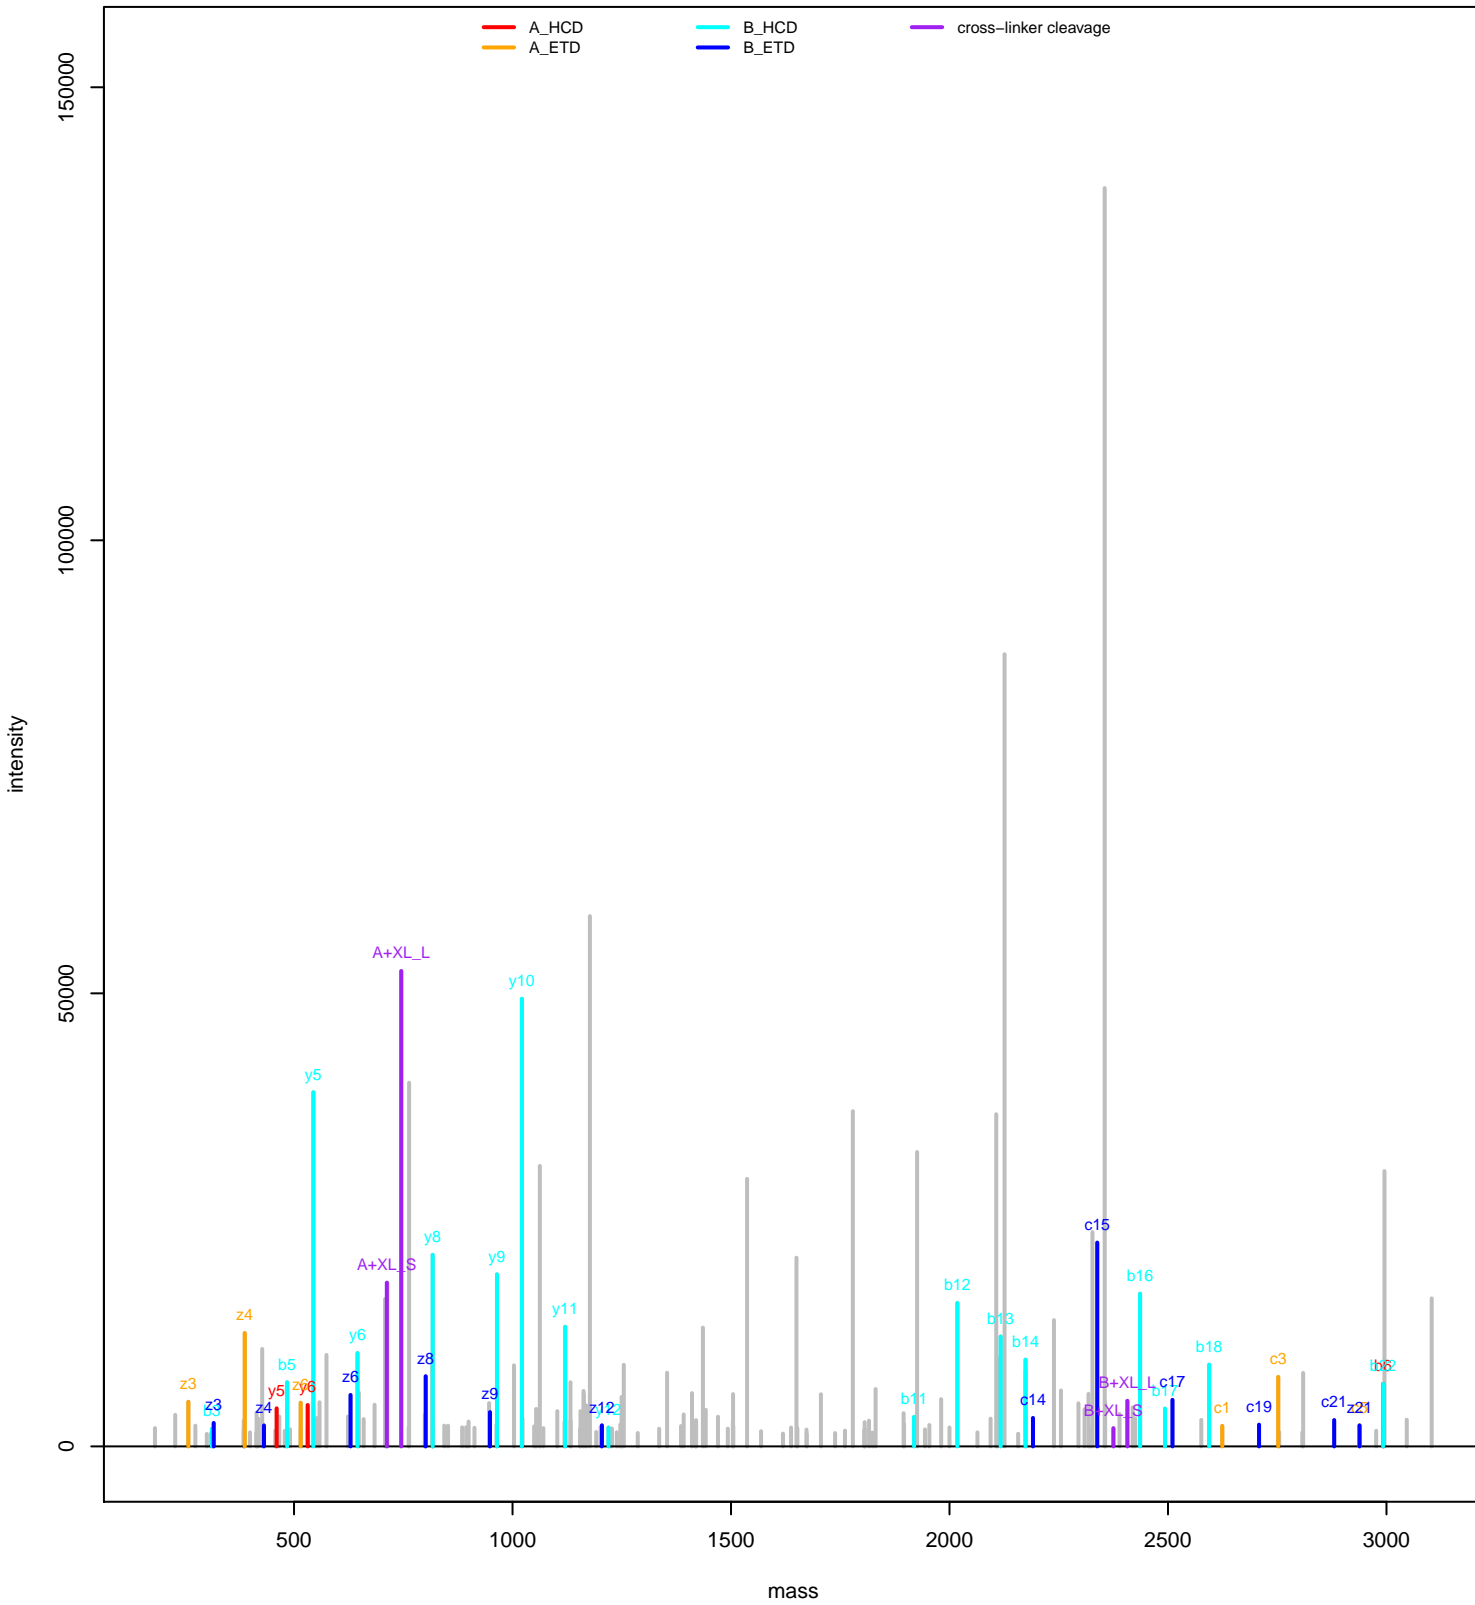

**KAGEGAK+XL\_S**

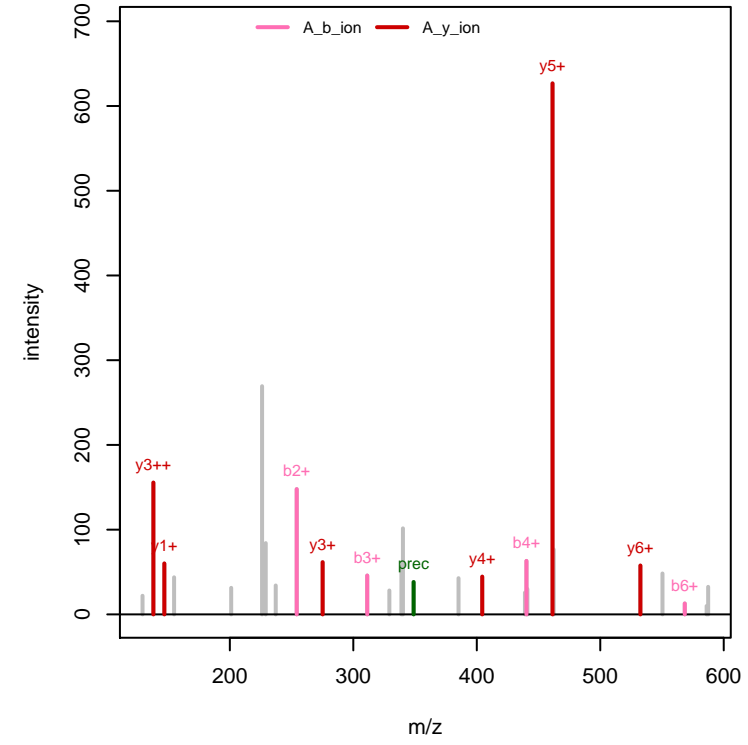

**KAGEGAK+XL\_L**

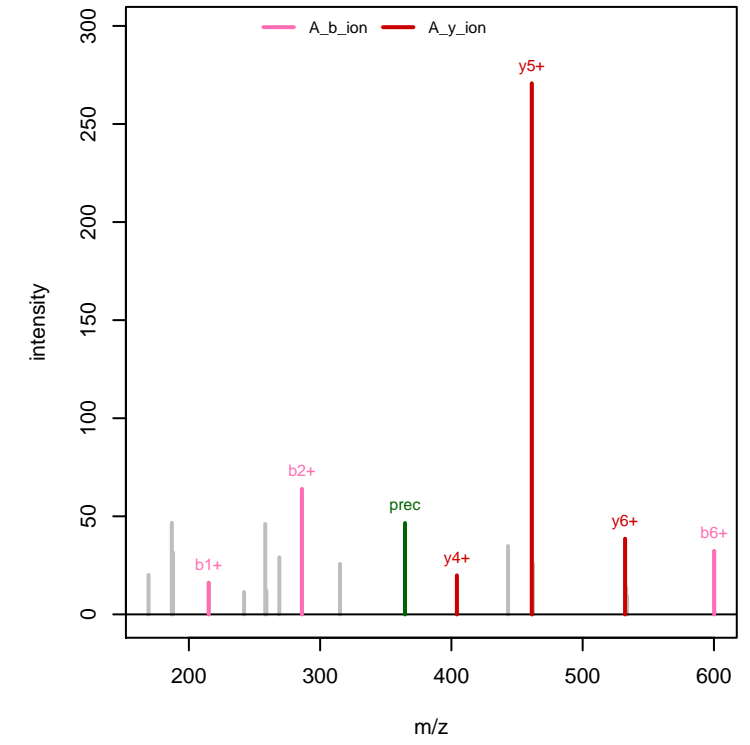

**ALQTAGKSDVMVVGFDGTPDGEK+XL\_S**

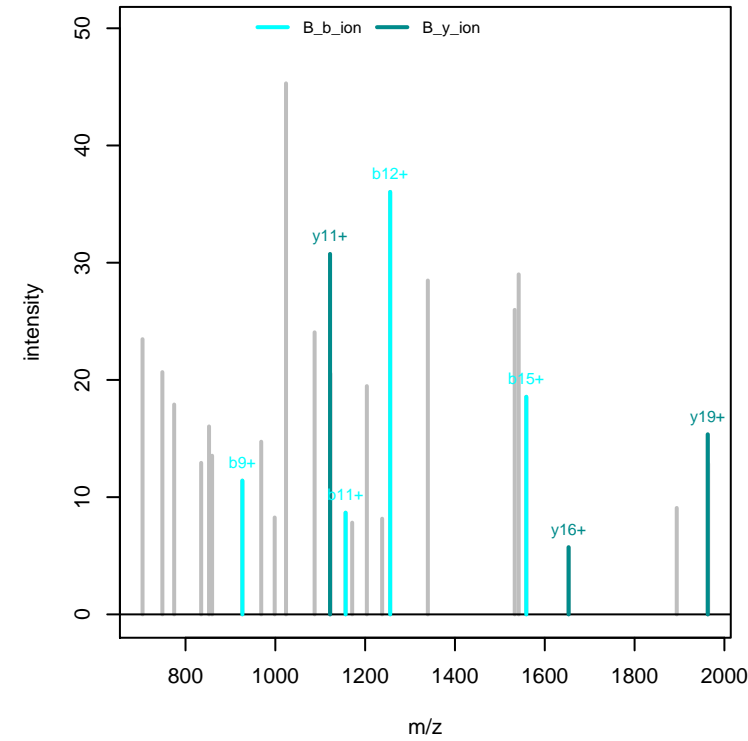

**ALQTAGKSDVMVVGFDGTPDGEK+XL\_L**

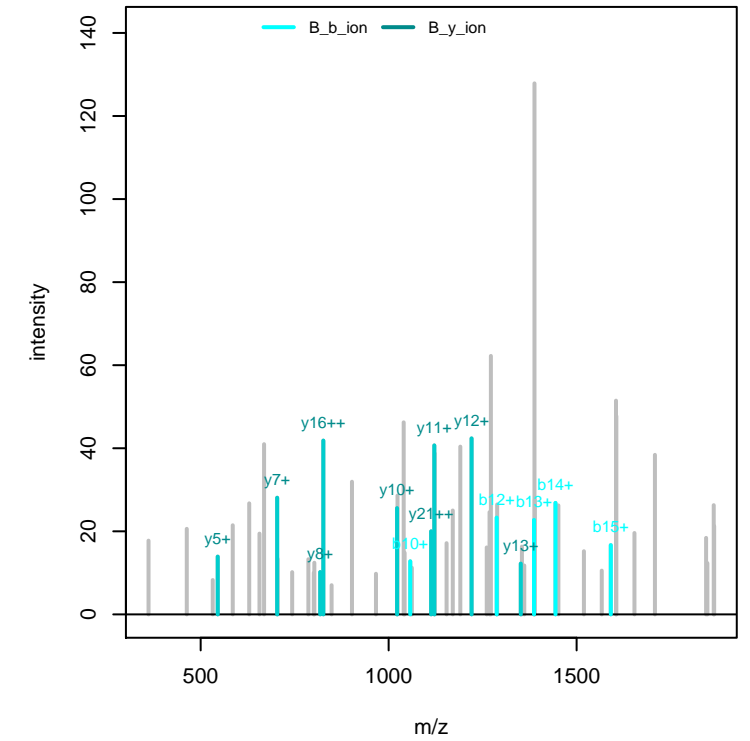

TGRNPQTGKEIK  
TGRNPQTGKEITIAAAK

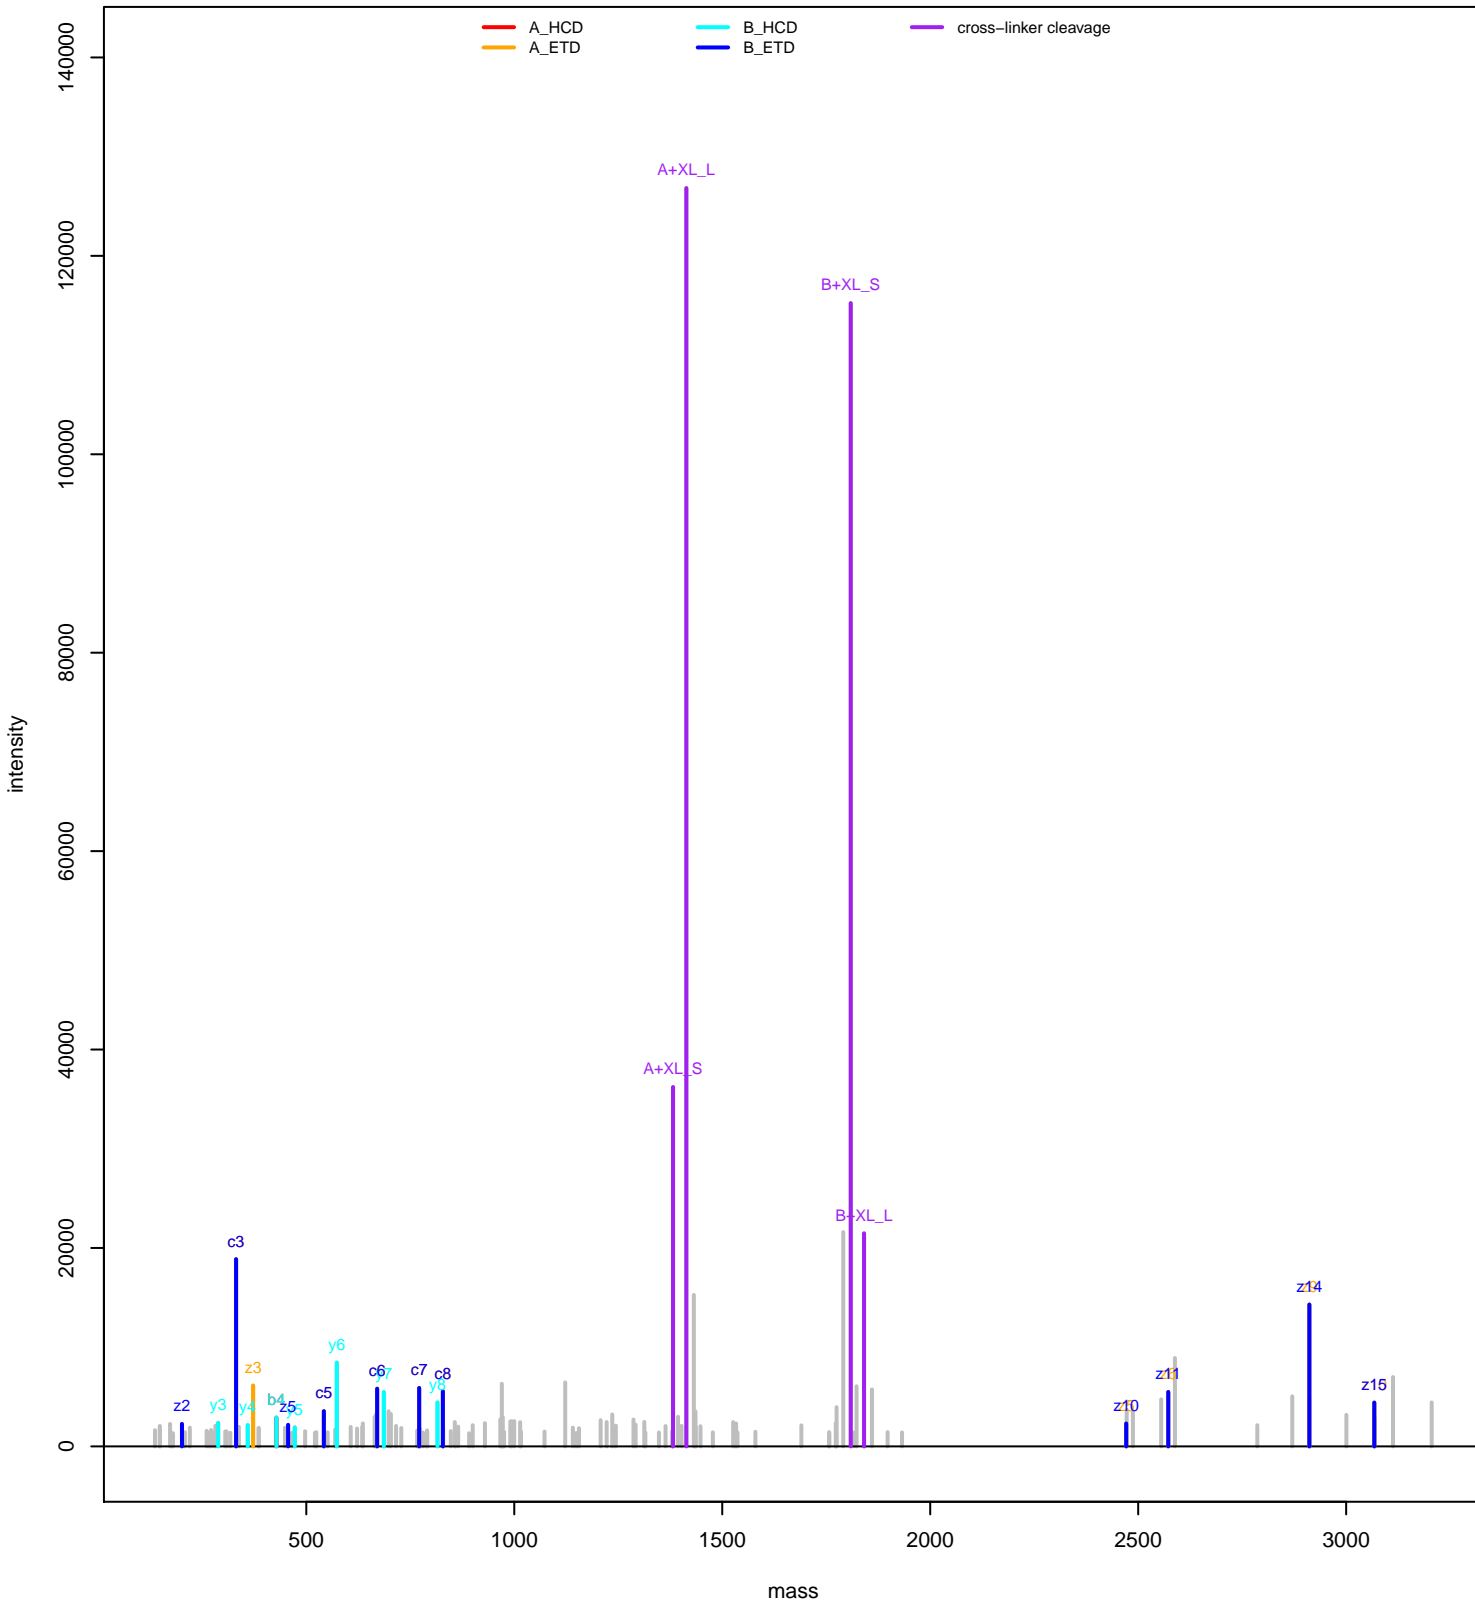

TGRNPQTGKEIK+XL\_S

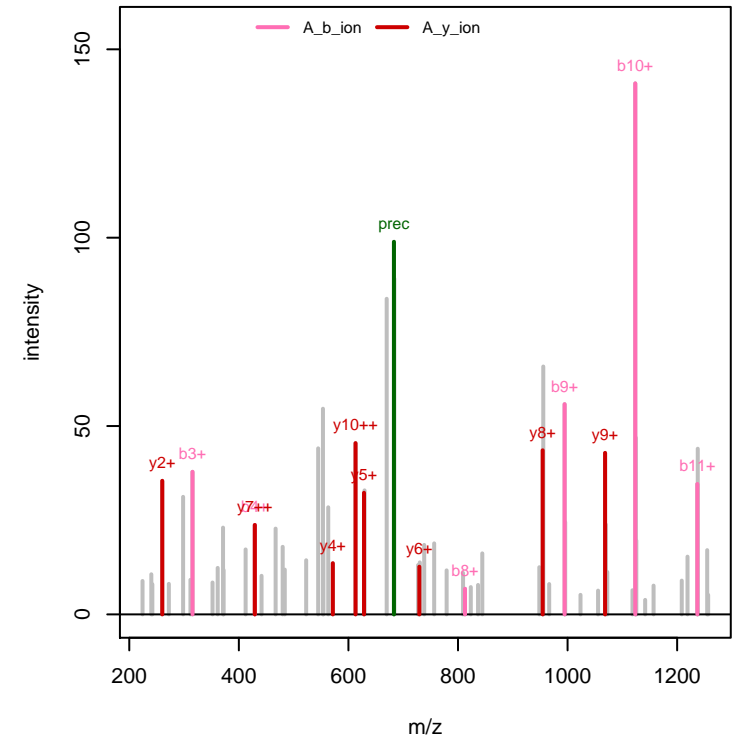

TGRNPQTGKEIK+XL\_L

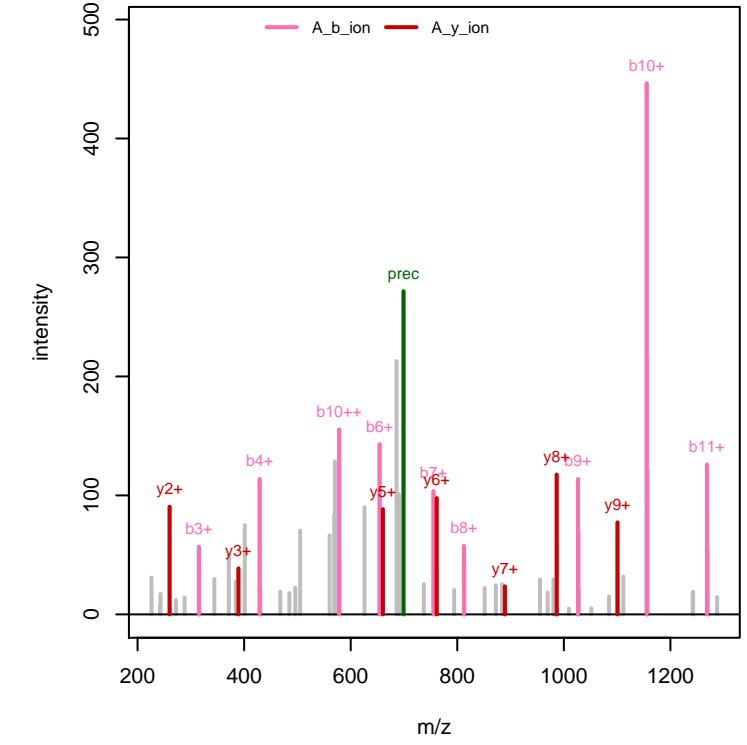

TGRNPQTGKEITIAAAK+XL\_S

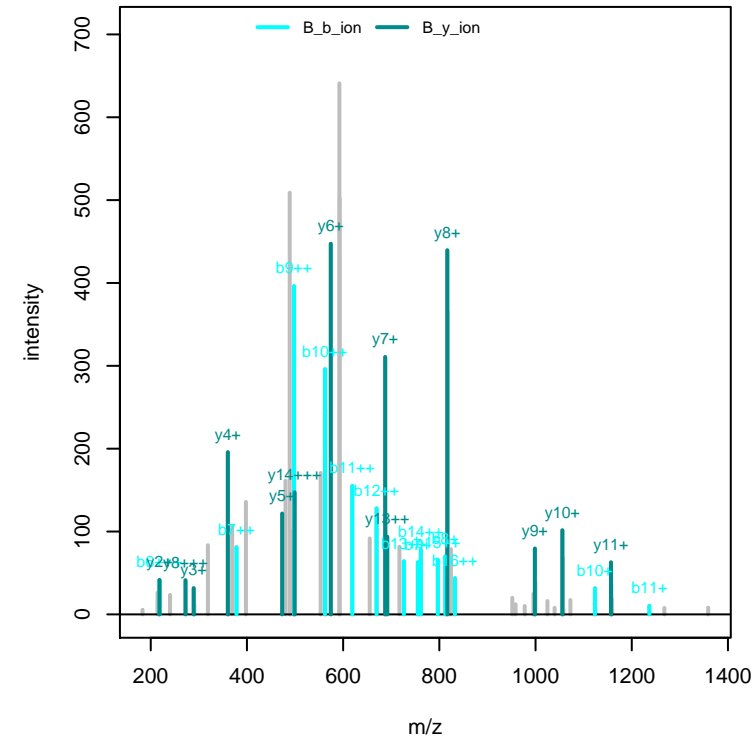

TGRNPQTGKEITIAAAK+XL\_L

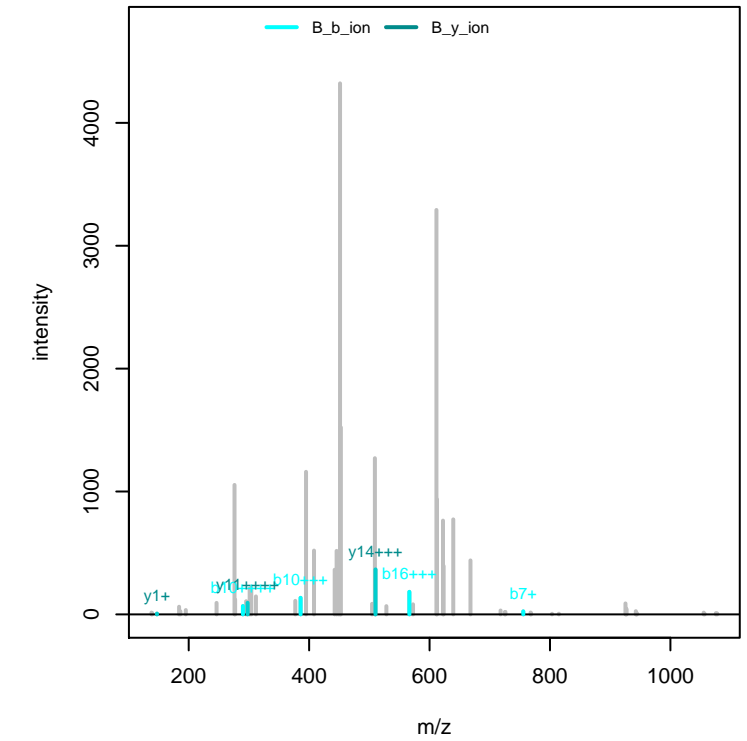

LAKDDAEAR  
AKLQAVLDNGK

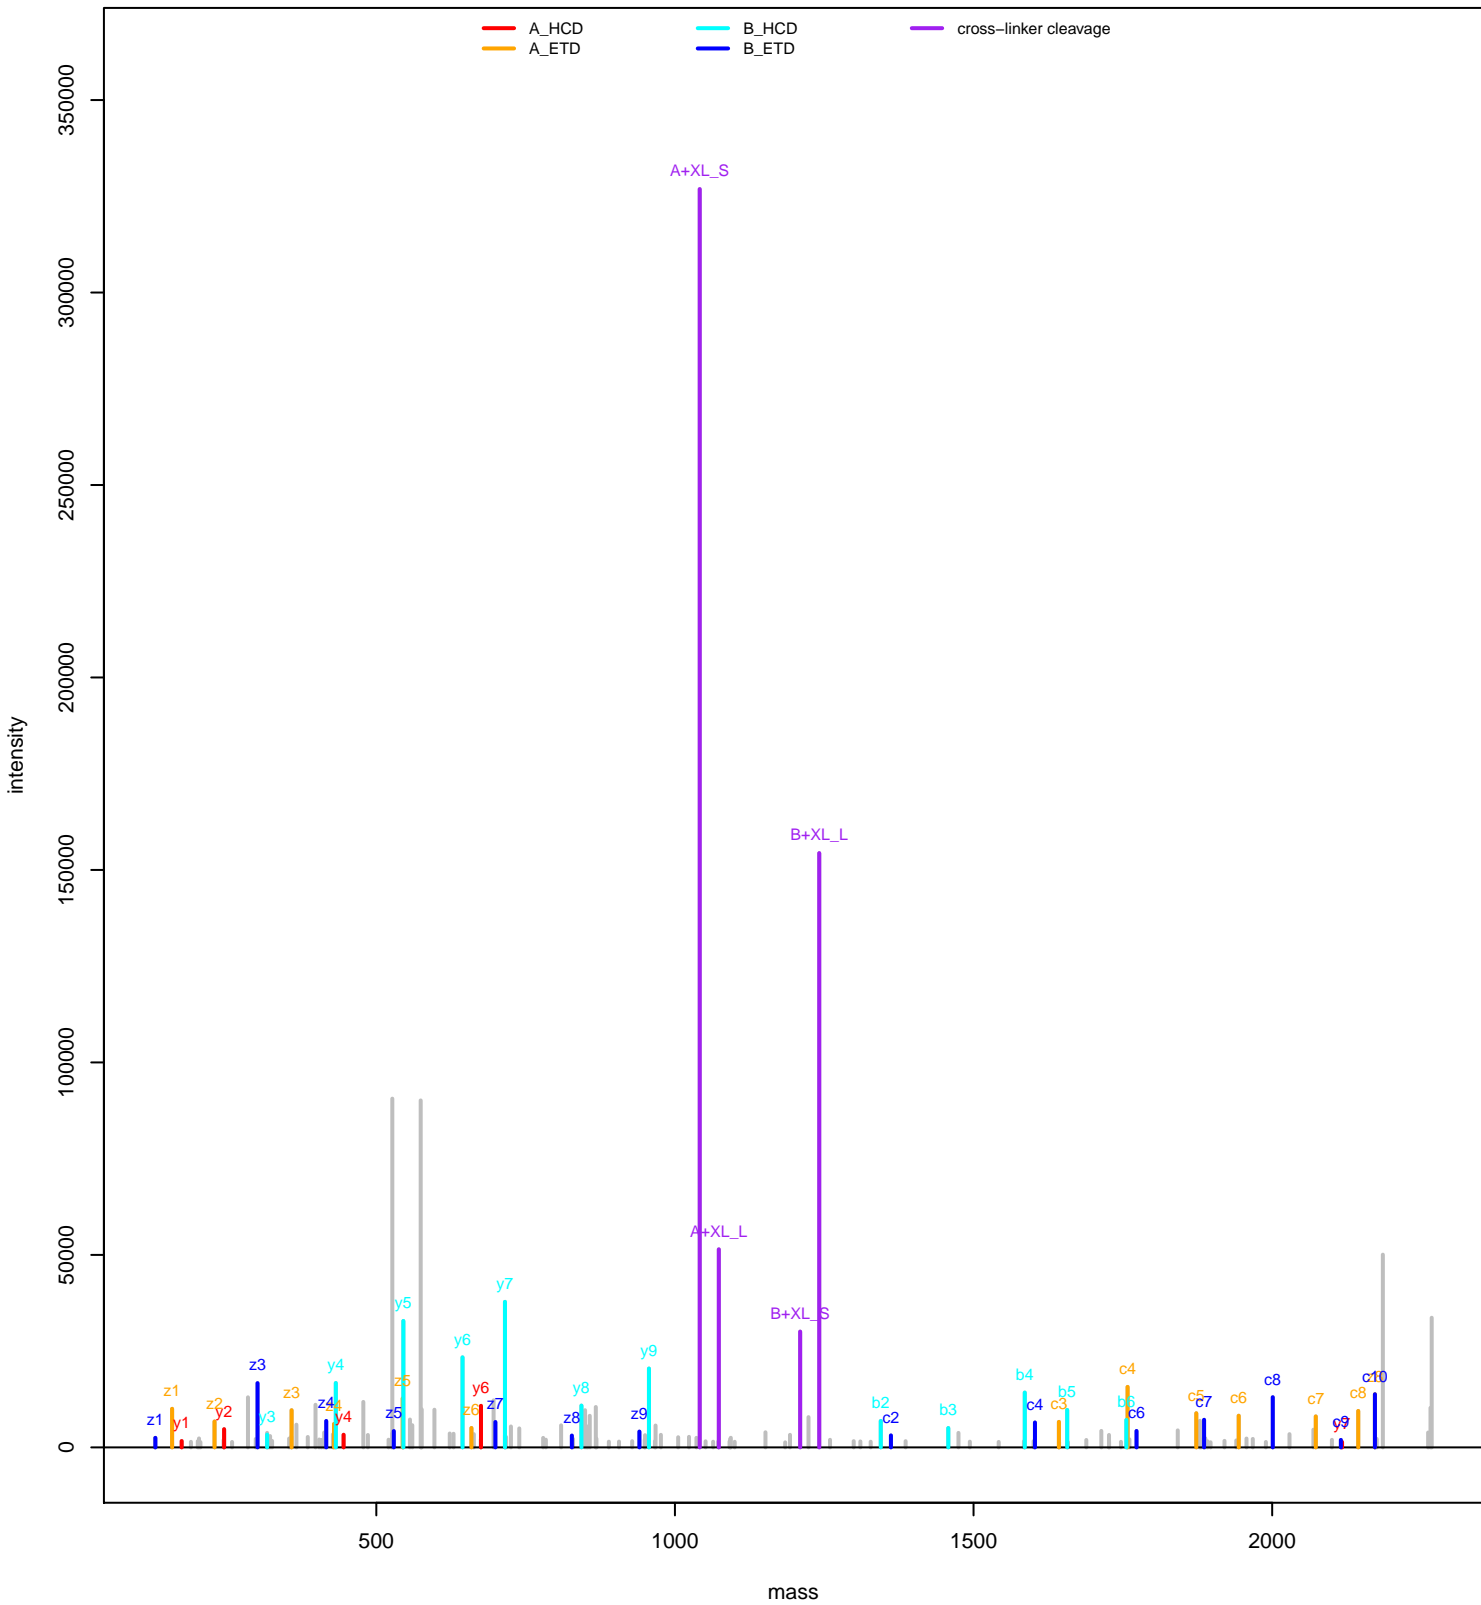

LAKDDAEAR+XL\_S

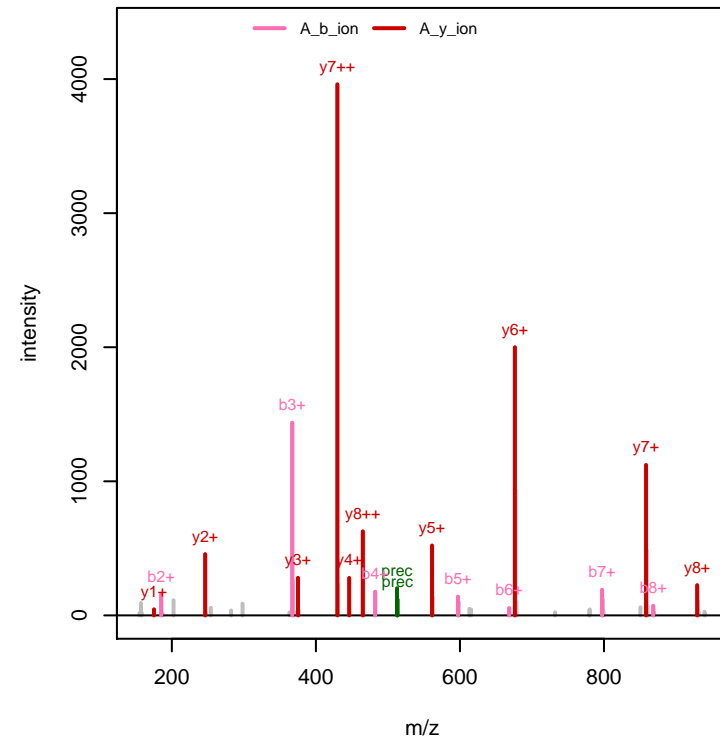

LAKDDAEAR+XL\_L

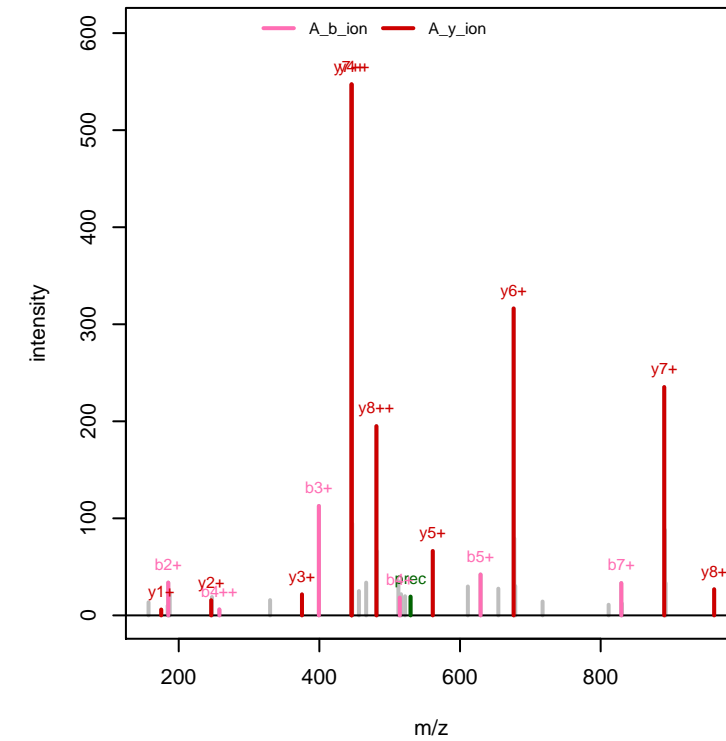

AKLQAVLDNGK+XL\_S

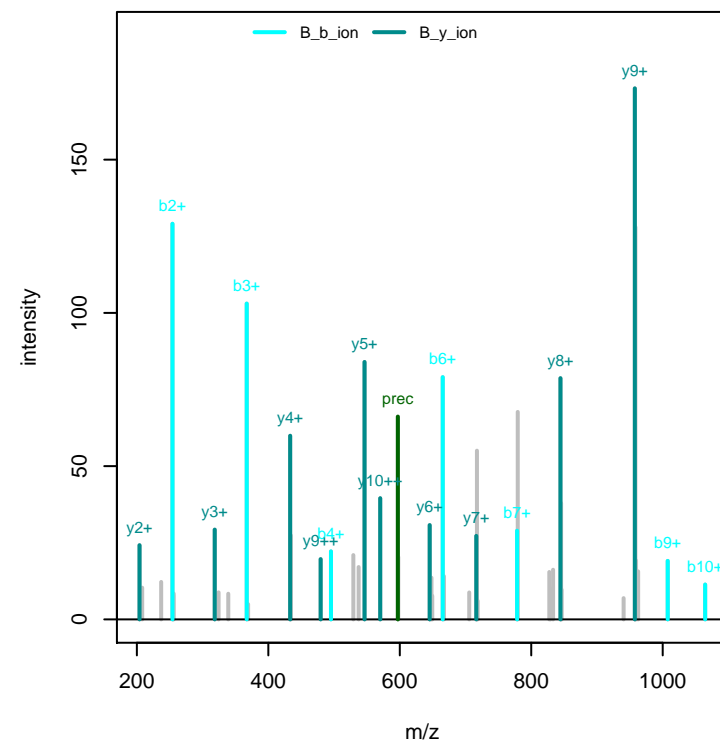

AKLQAVLDNGK+XL\_L

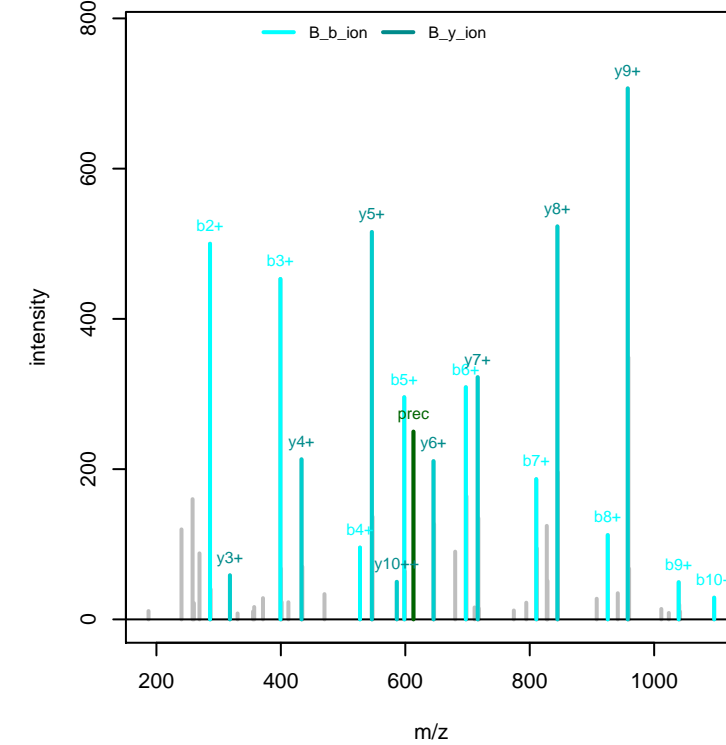

IAELNKNTGK  
EKMTGLESYDVK

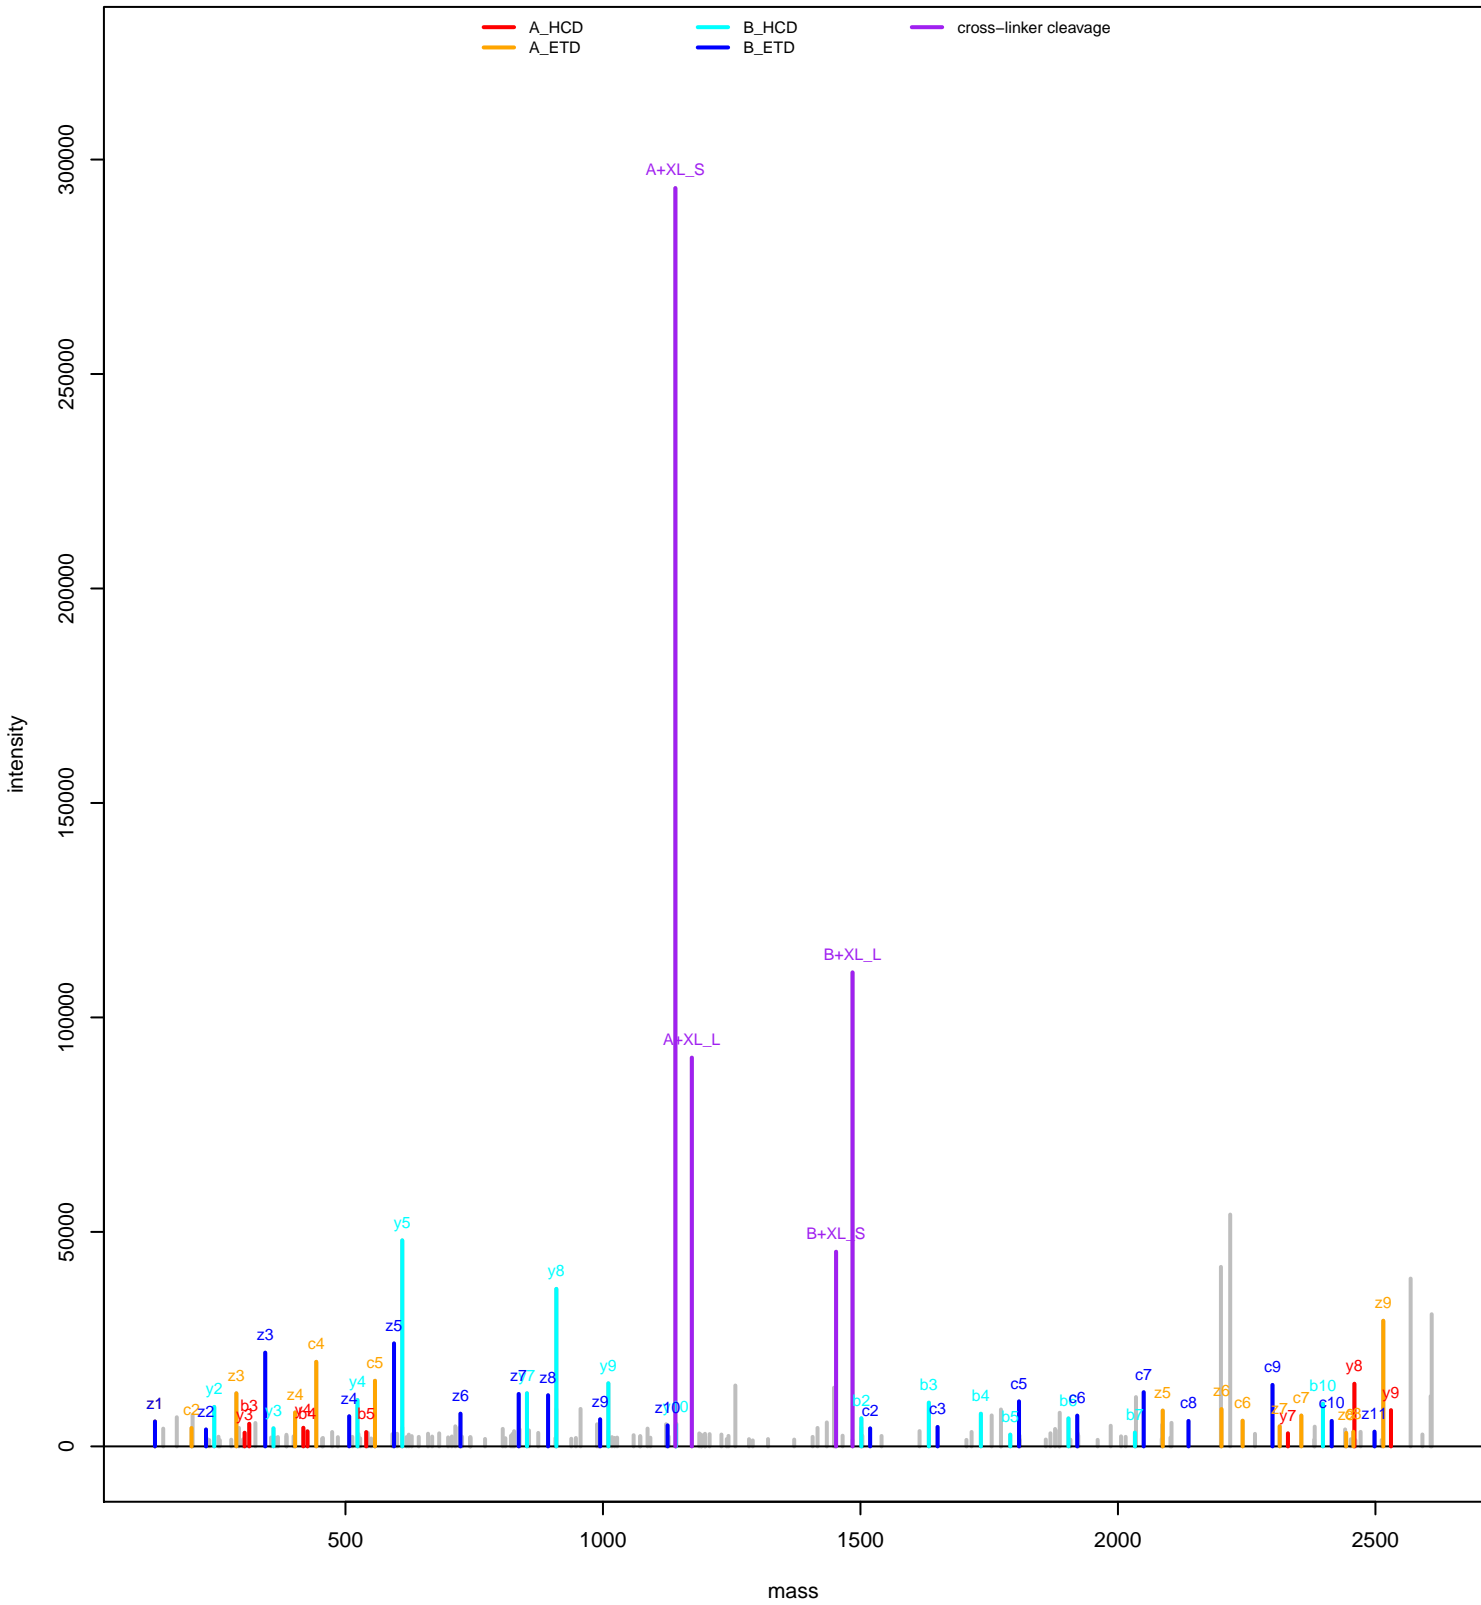

IAELNKNTGK+XL\_S

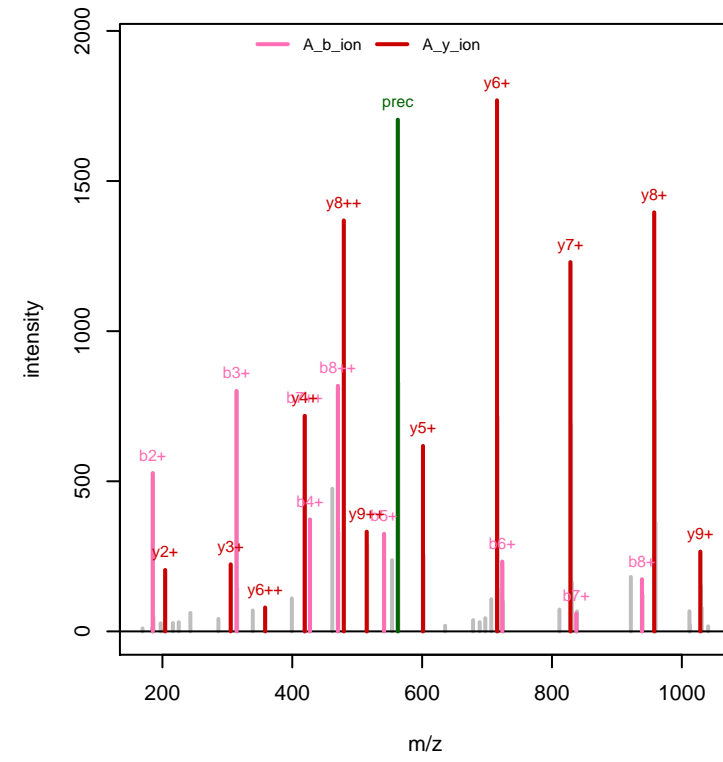

IAELNKNTGK+XL\_L

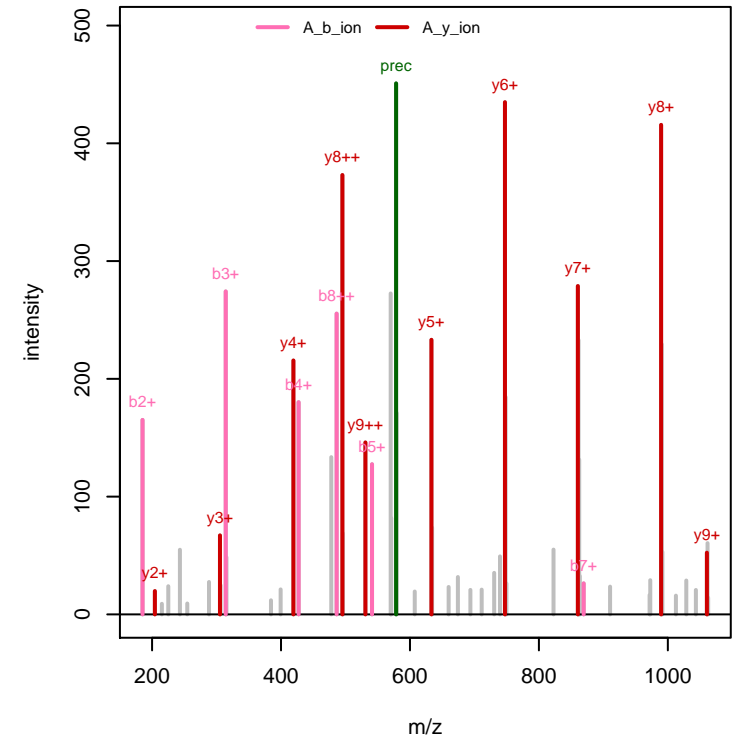

EKMTGLESYDVK+XL\_S

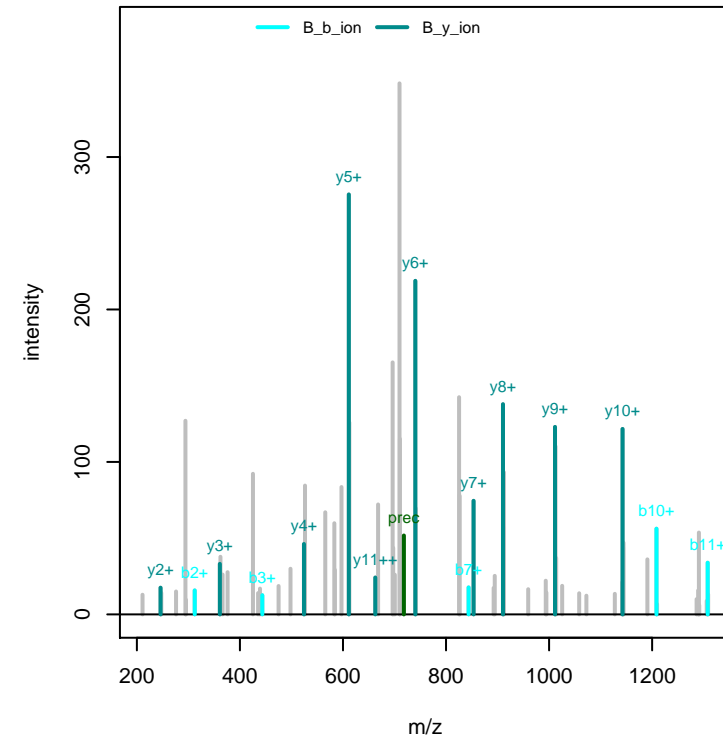

EKMTGLESYDVK+XL\_L

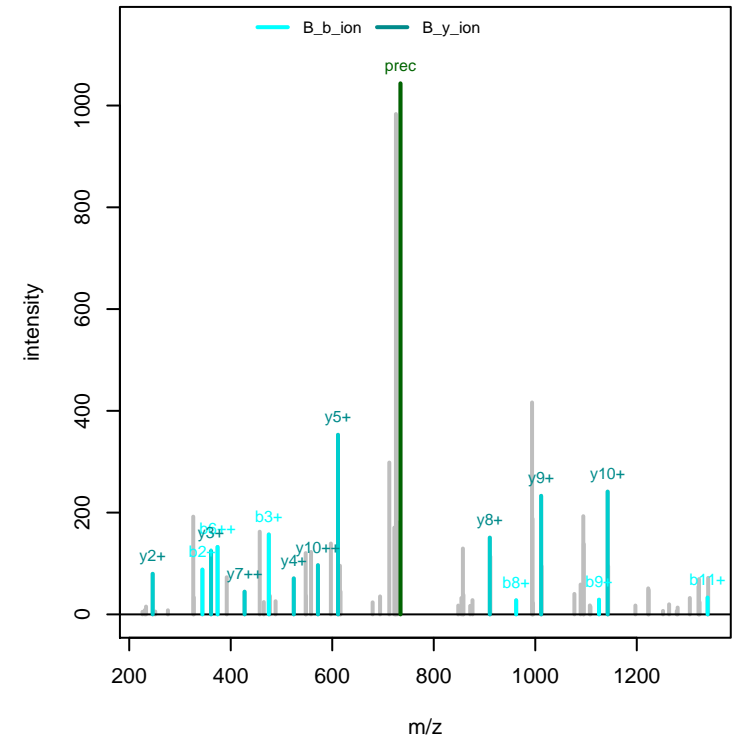



MVGKDPR  
KGDVIIGANQQAVK

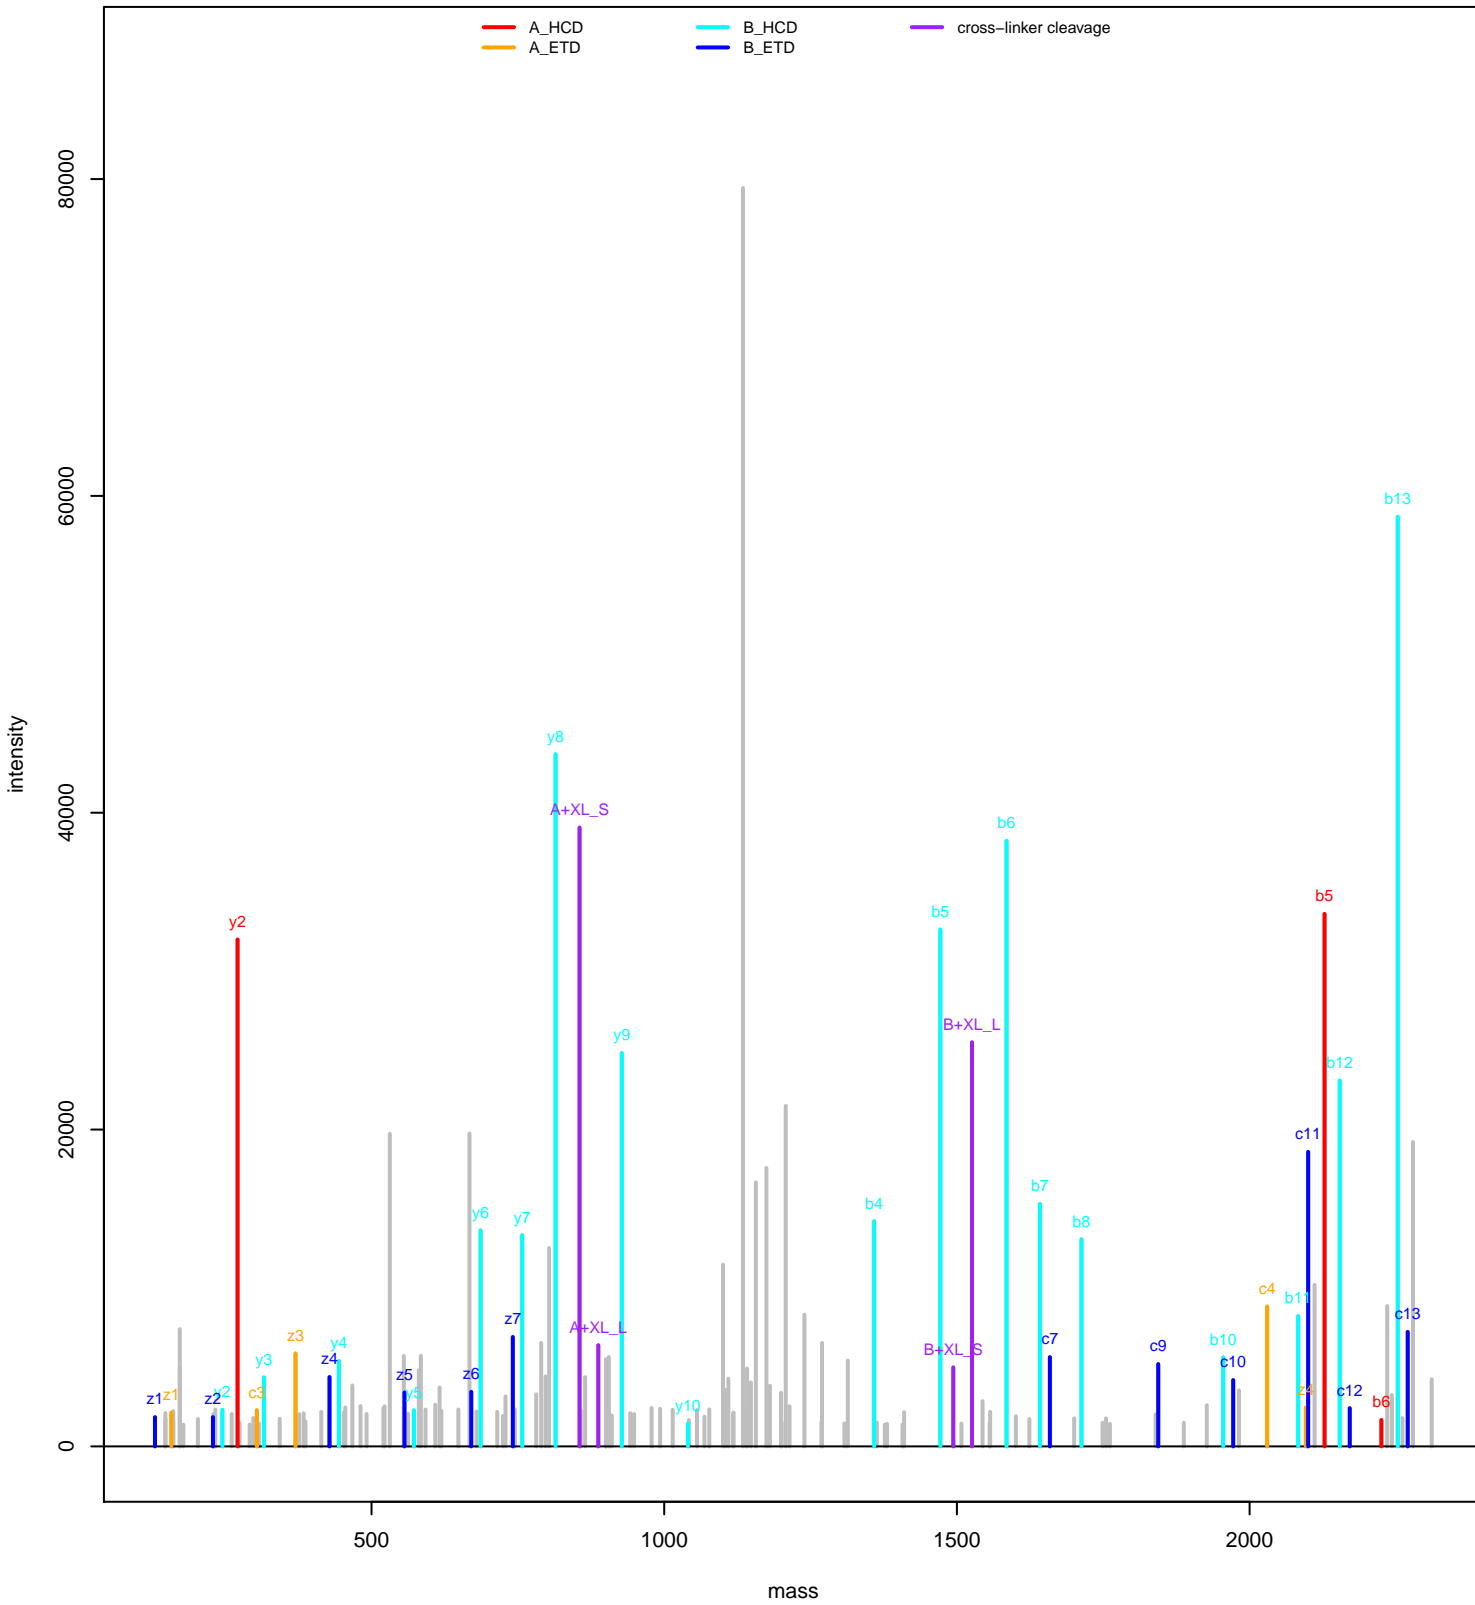

MVGKDPR+XL\_S

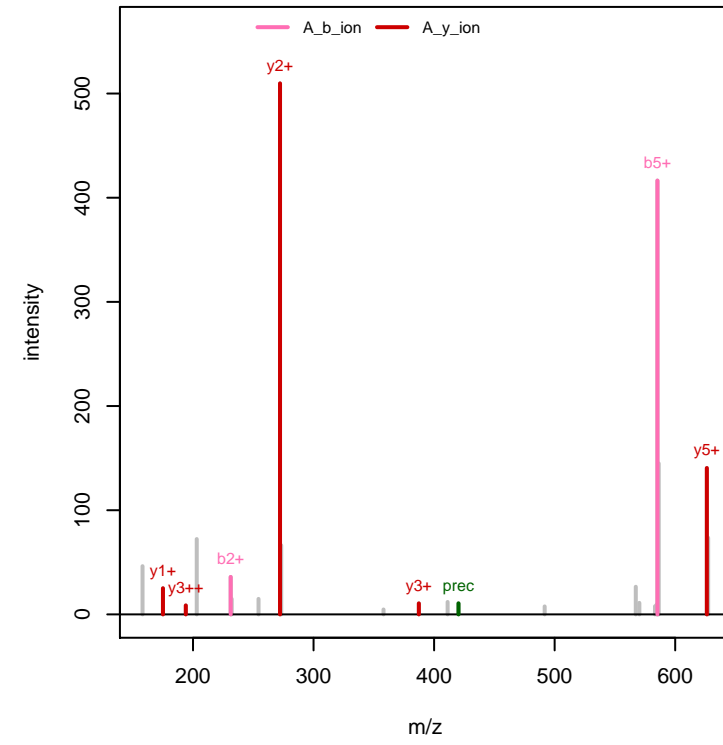

MVGKDPR+XL\_L

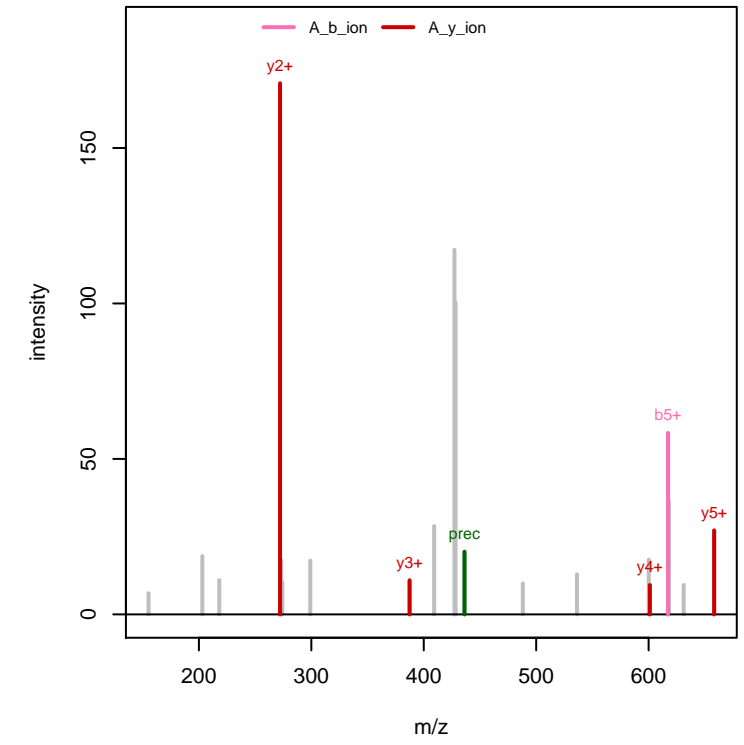

KGDVIIGANQQAVK+XL\_S

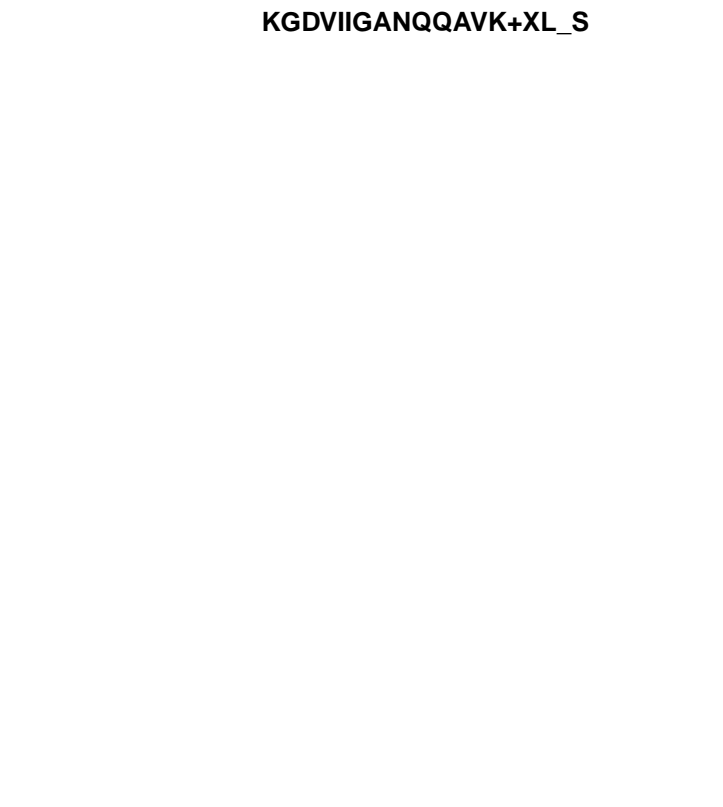

KGDVIIGANQQAVK+XL\_L

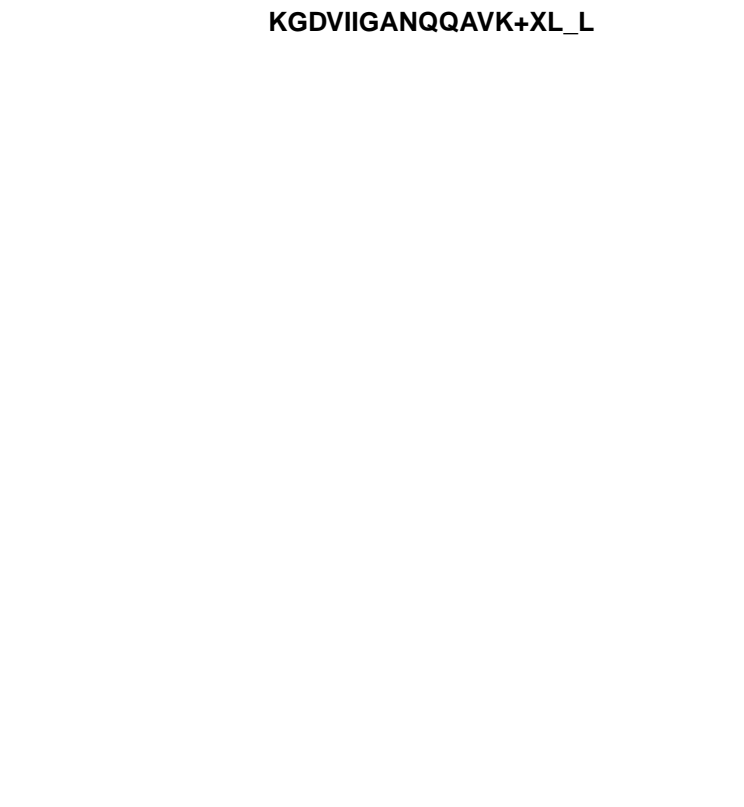

VKGSSSMoLK  
DANGNLLADGDSVTIIKDLK

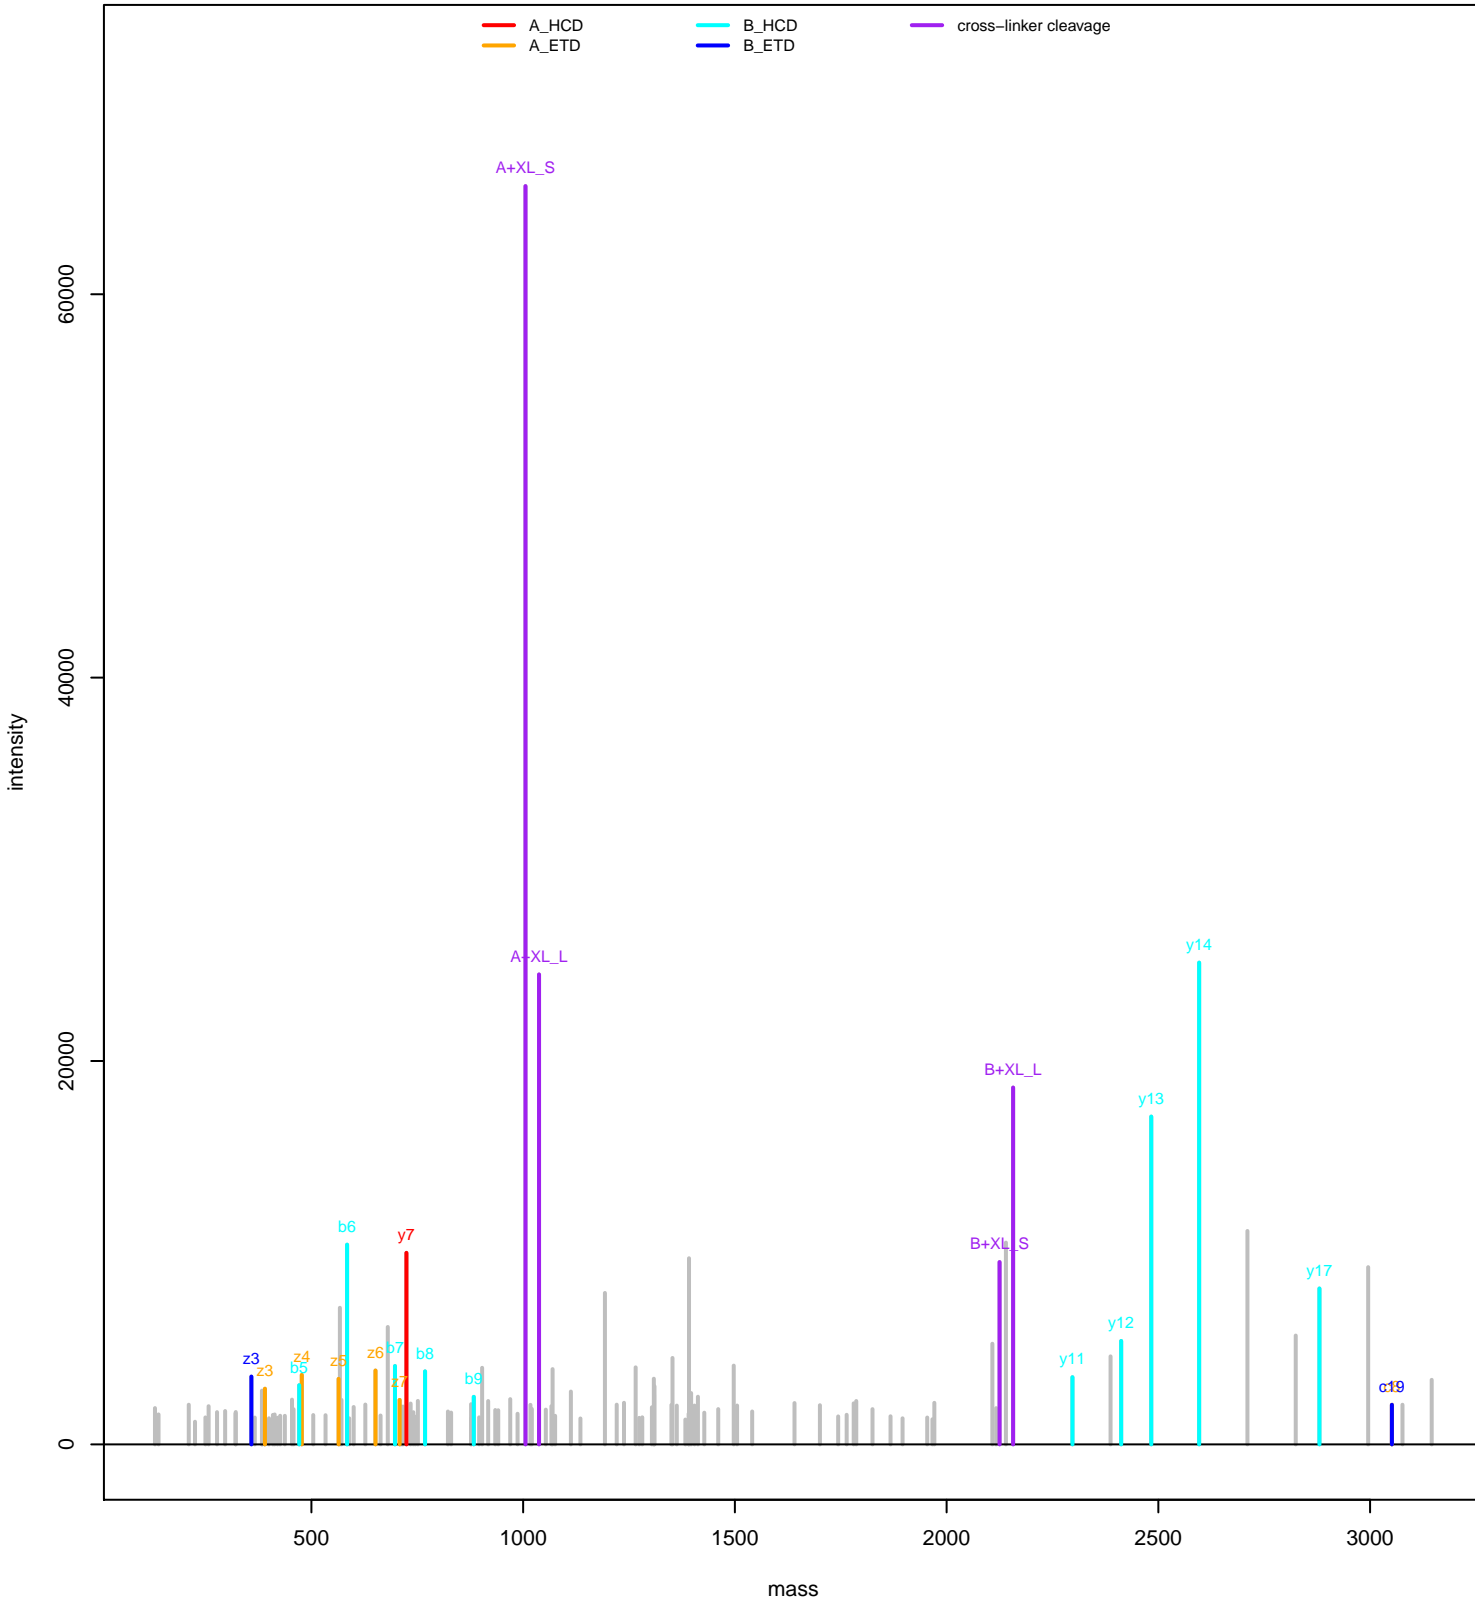

VKGSSSMoLK+XL\_S

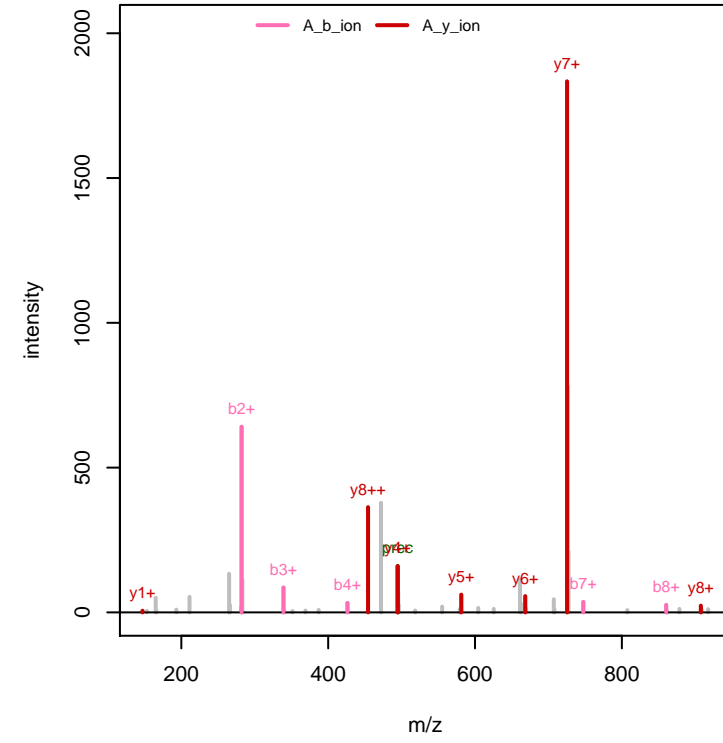

VKGSSSMoLK+XL\_L

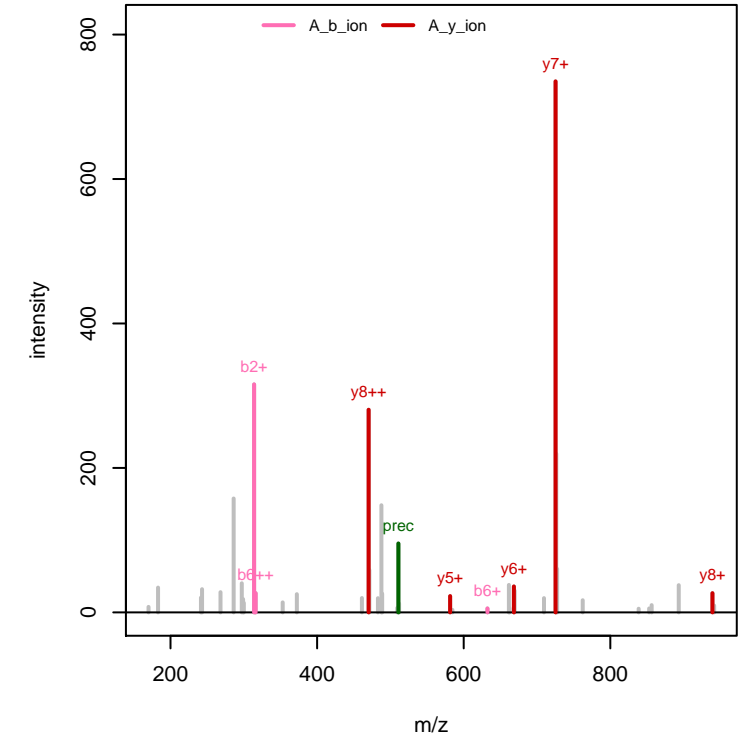

DANGNLLADGDSVTIIKDLK+XL\_S

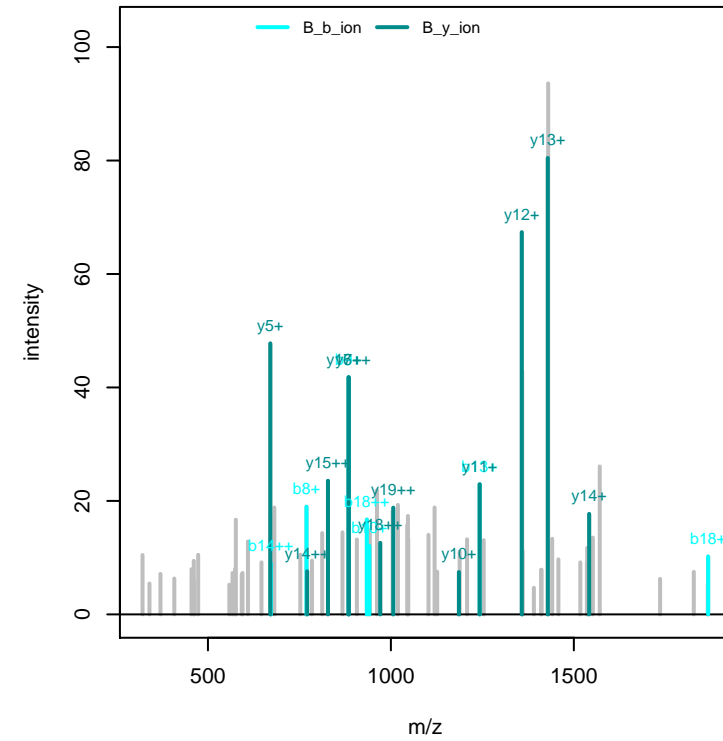

DANGNLLADGDSVTIIKDLK+XL\_L

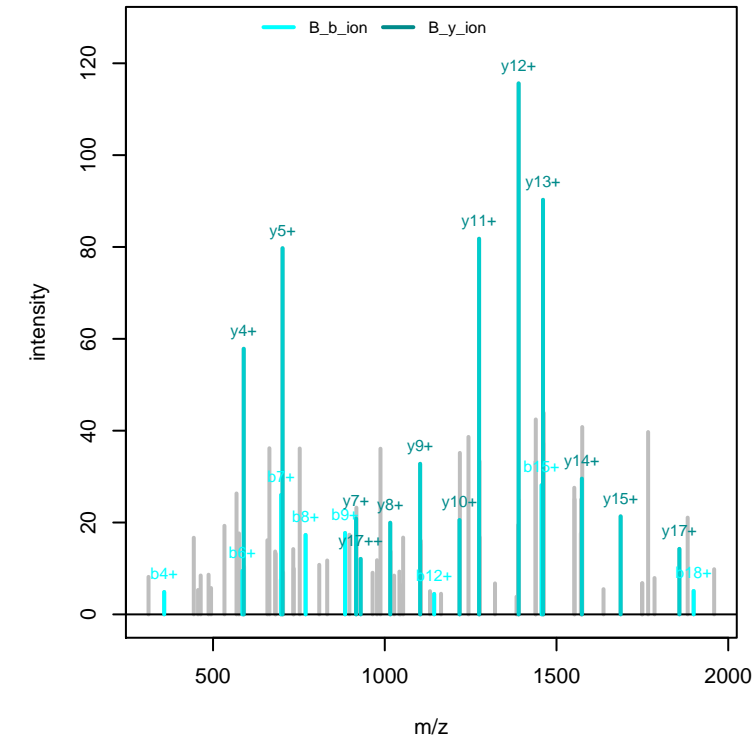

KPNSALR  
VAKSNVPALEACPQK

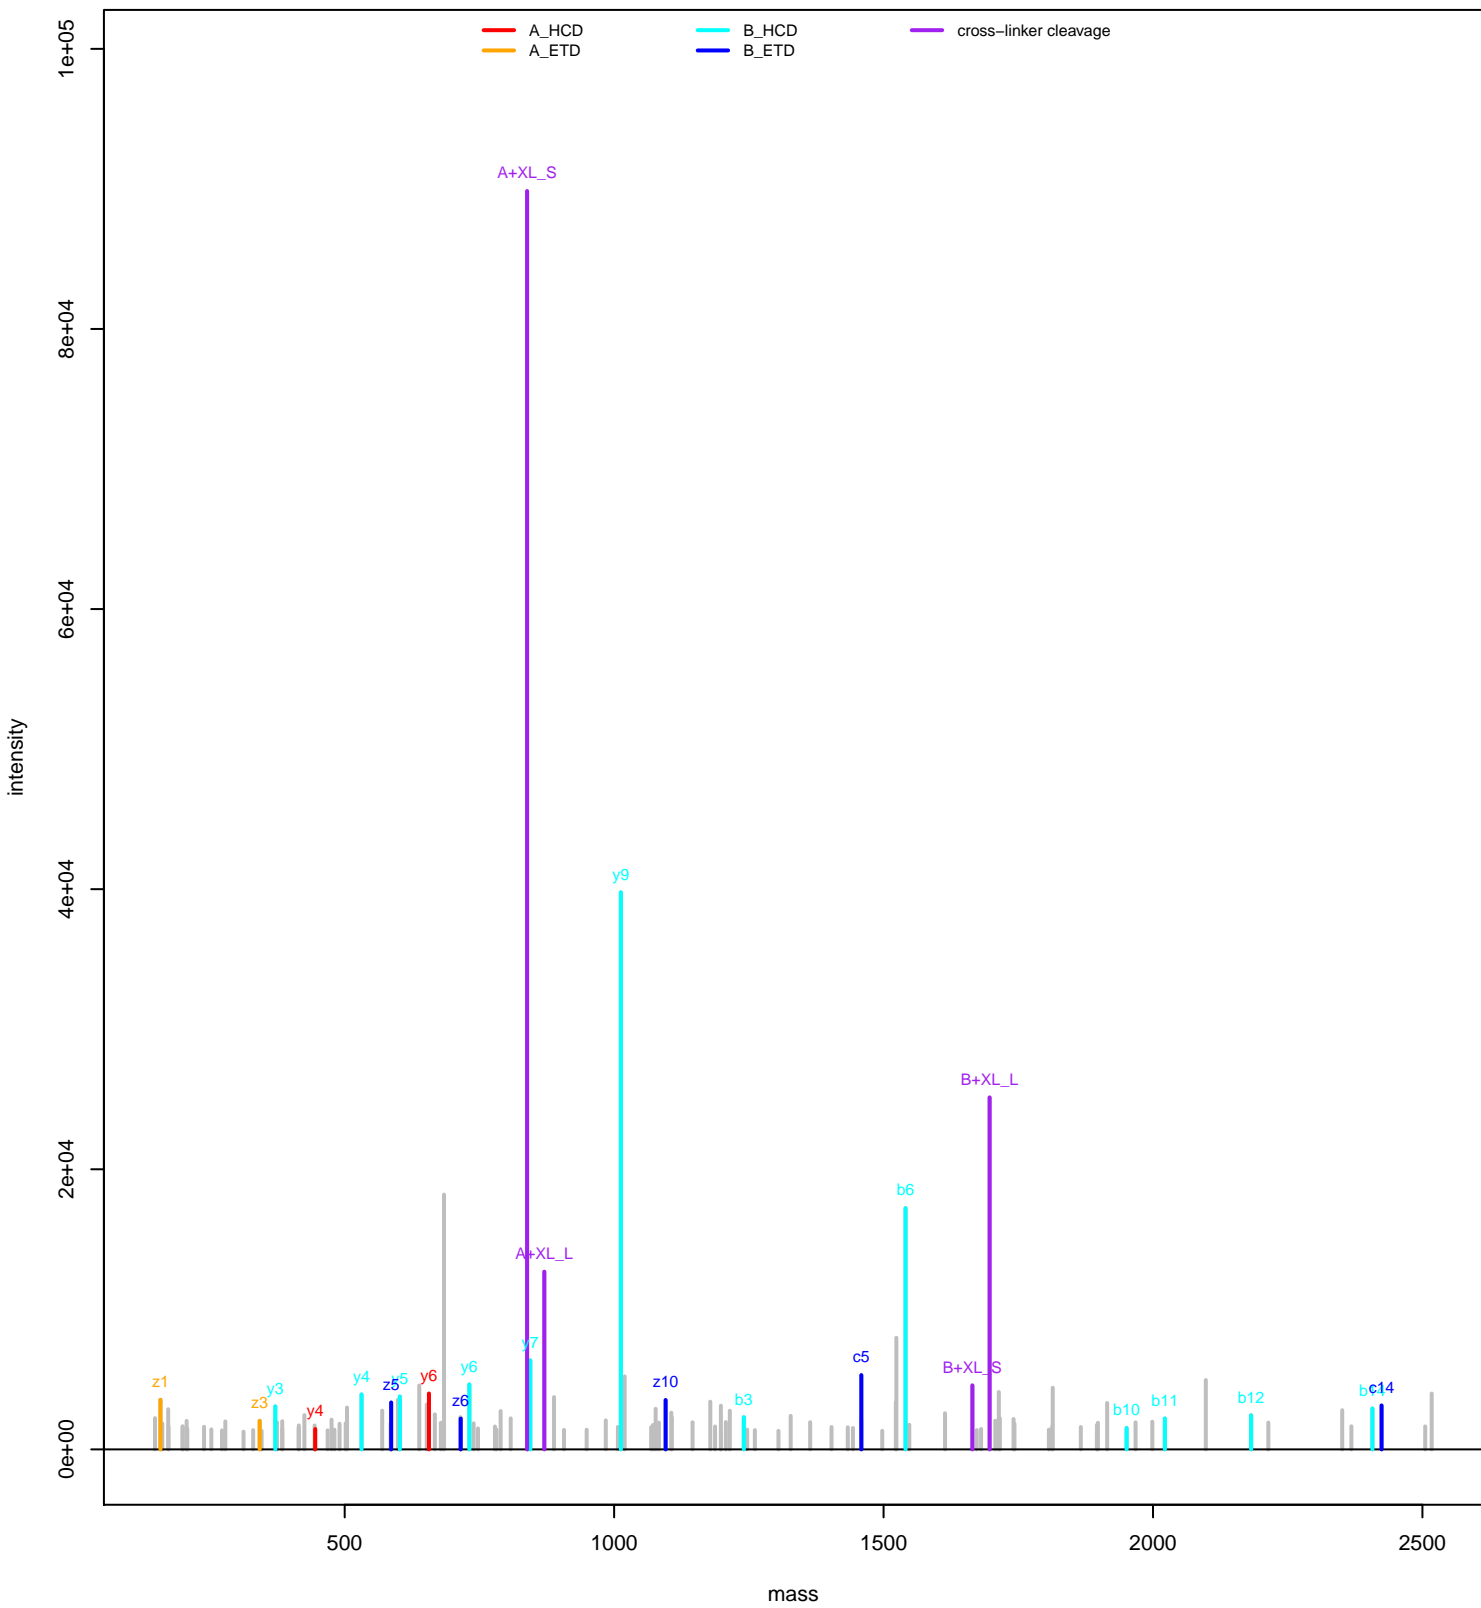

KPNSALR+XL\_S

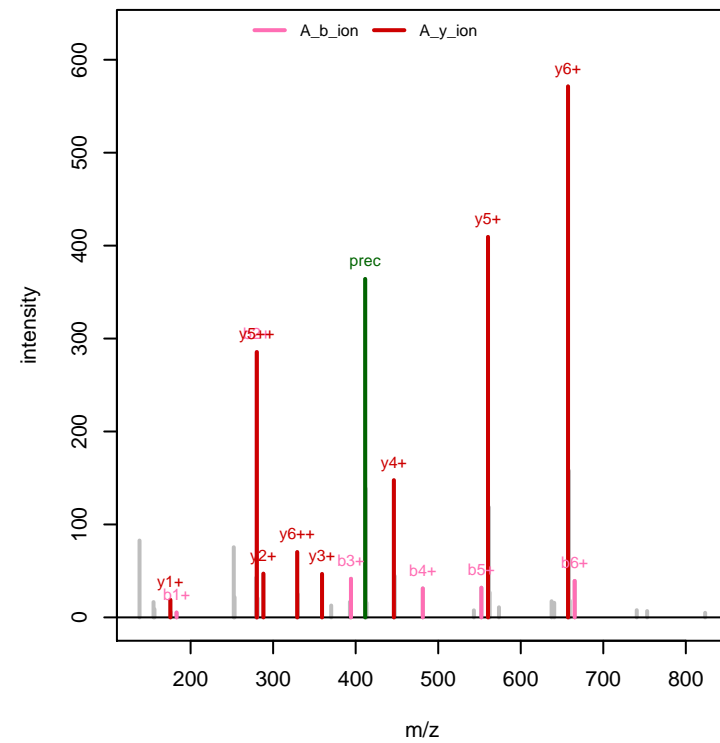

KPNSALR+XL\_L

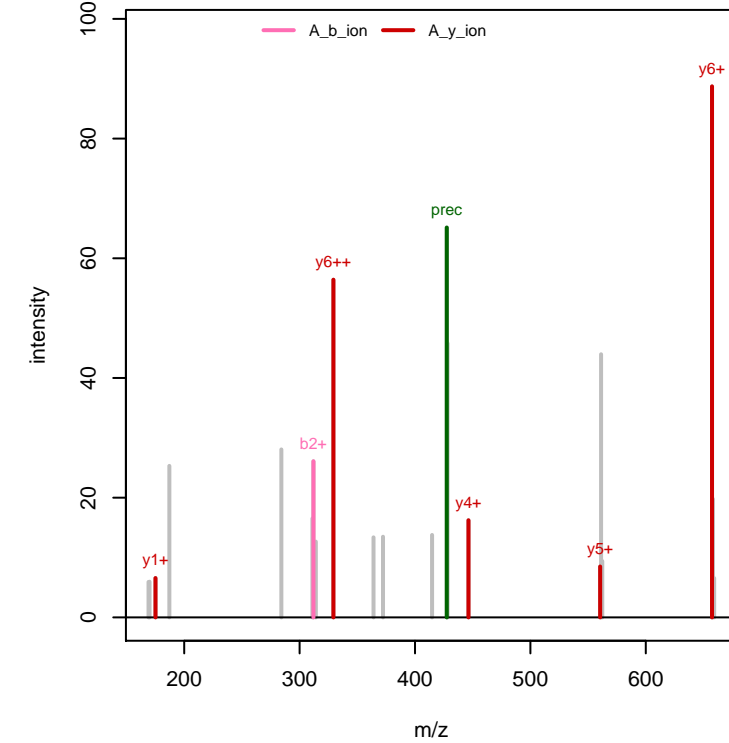

VAKSNVPALEACPQK+XL\_S

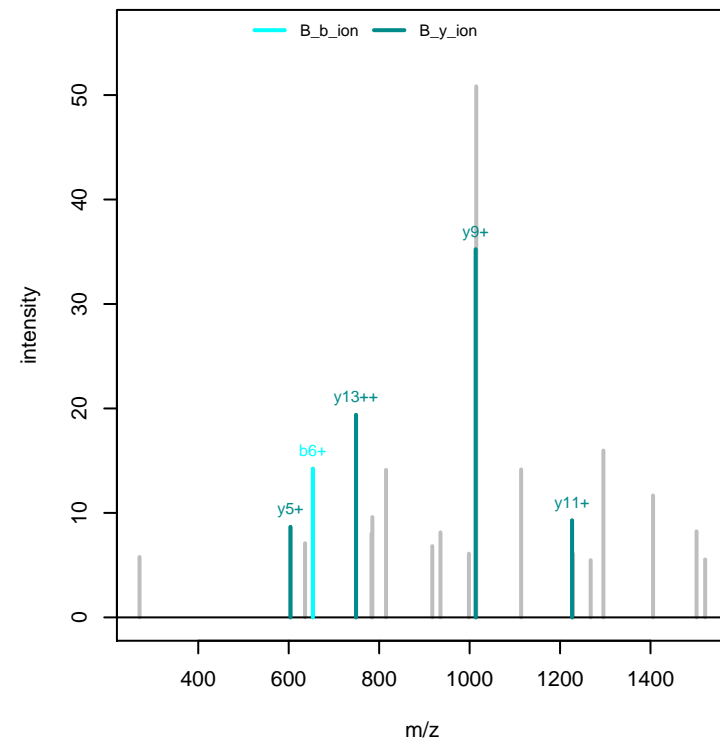

VAKSNVPALEACPQK+XL\_L

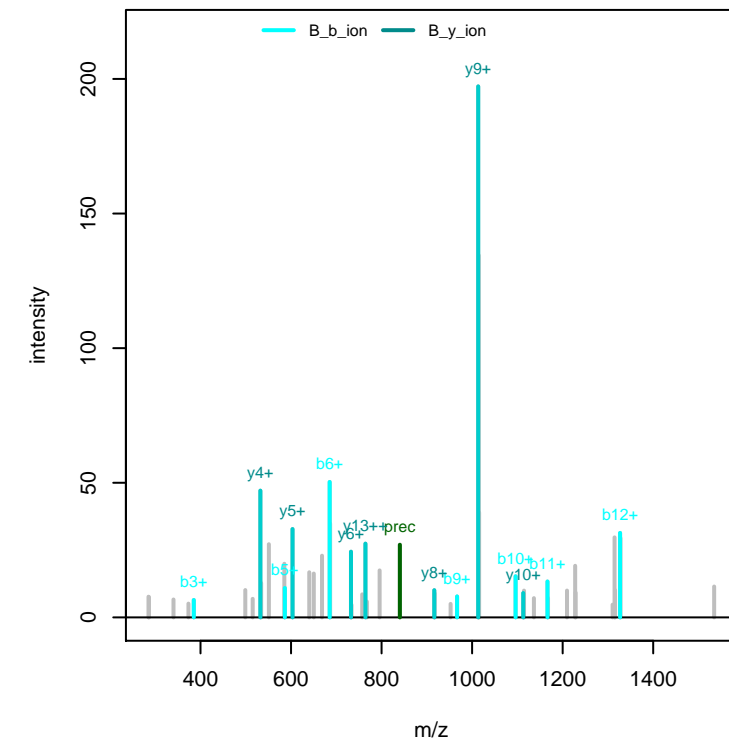

STAKLVK  
KATVELLNR

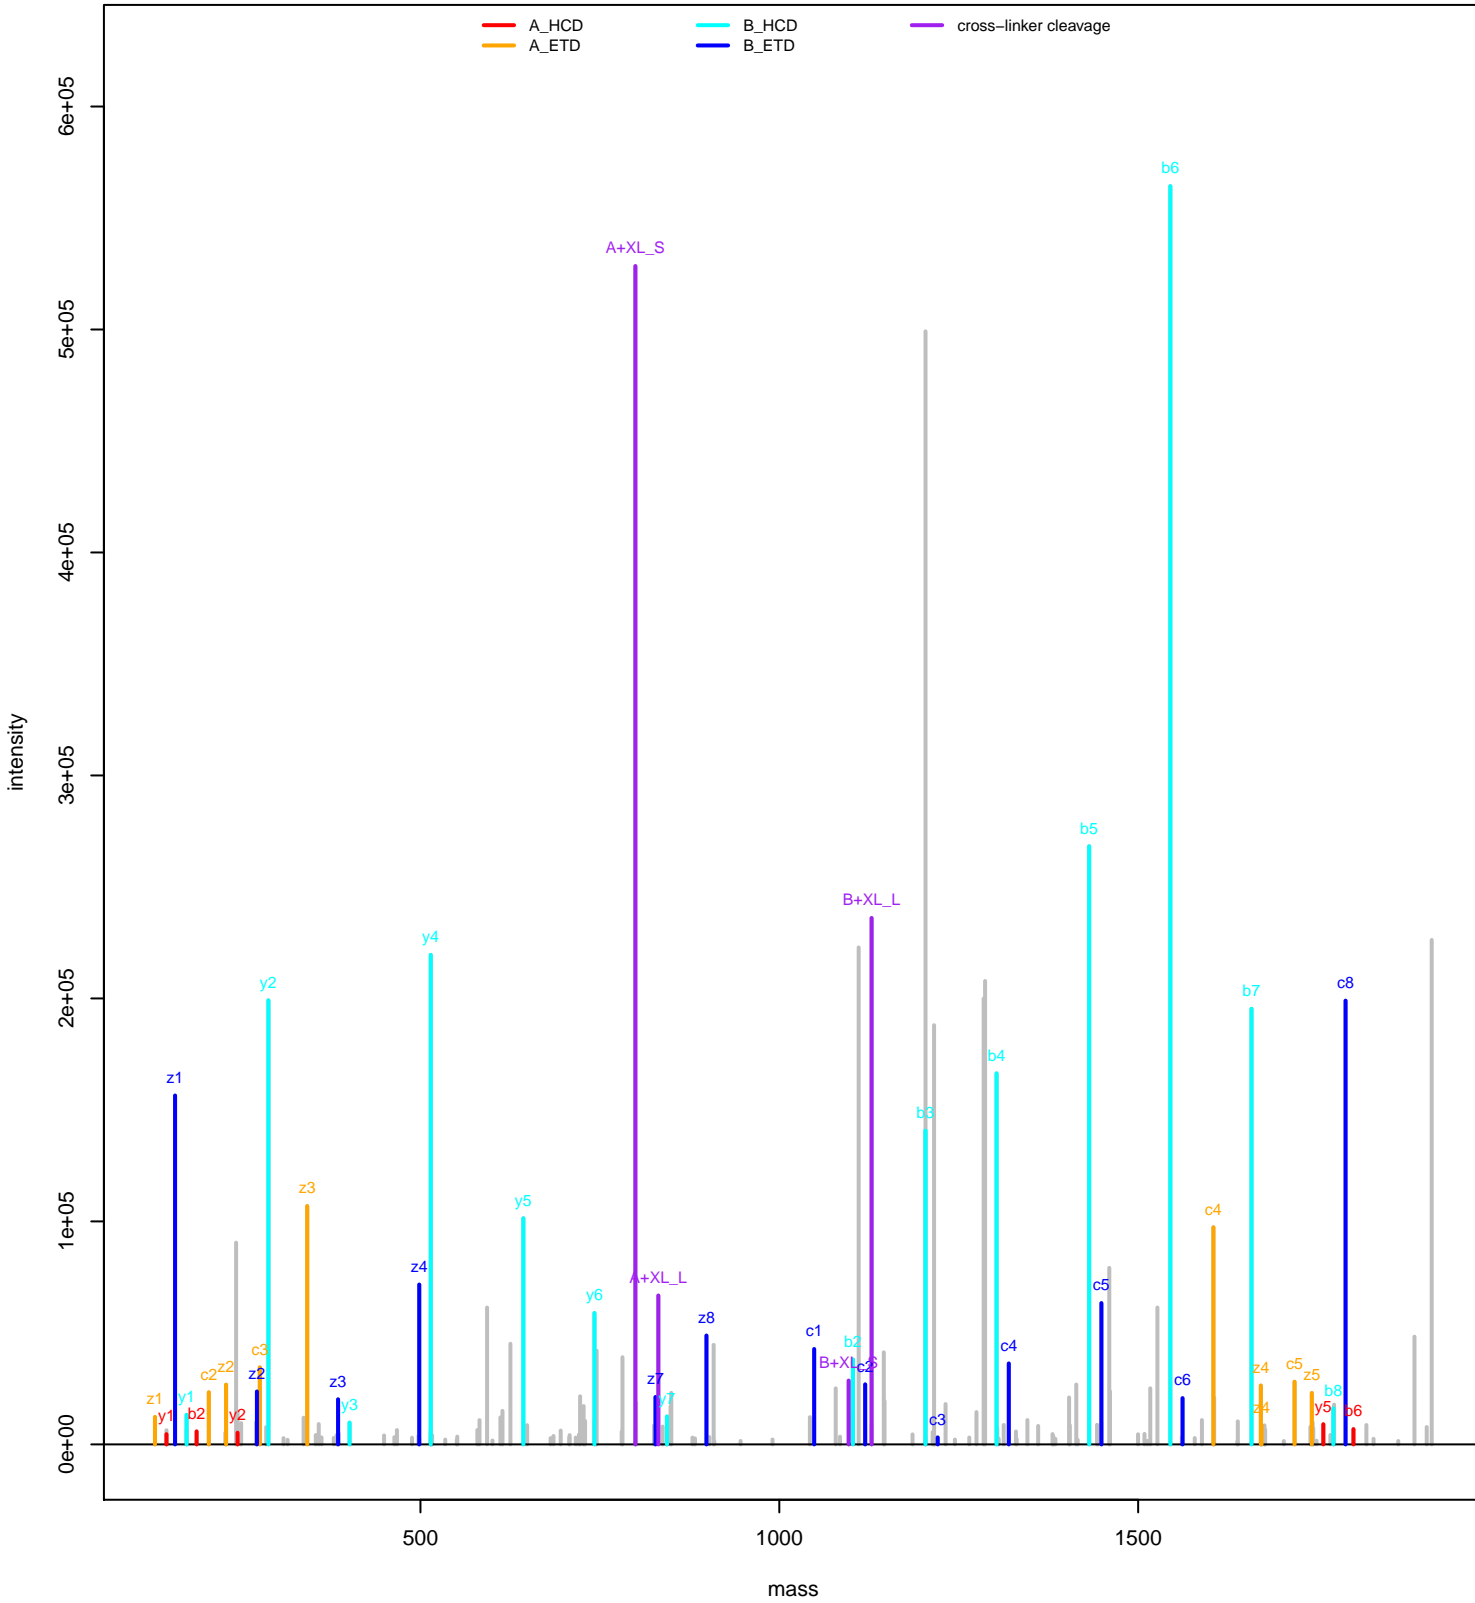

STAKLVK+XL\_S

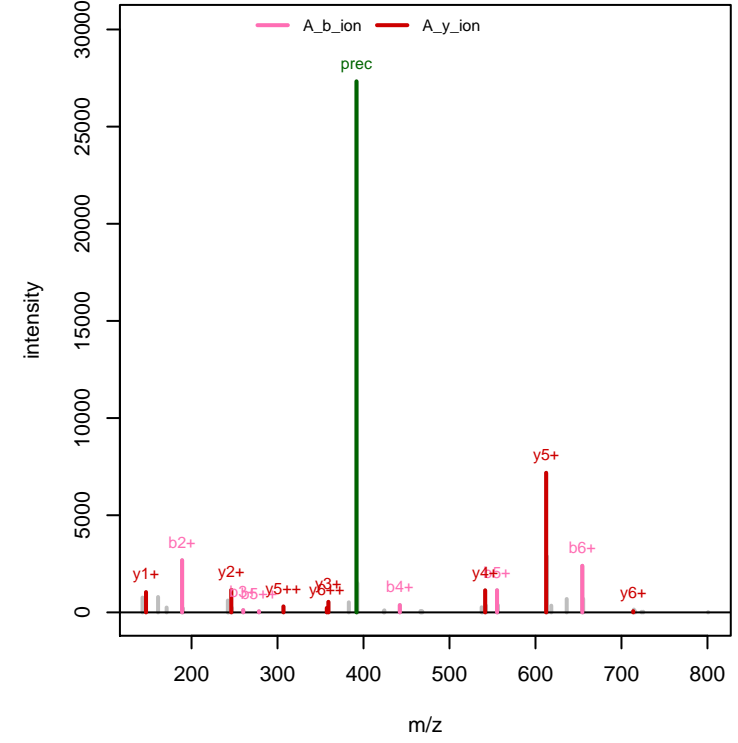

STAKLVK+XL\_L

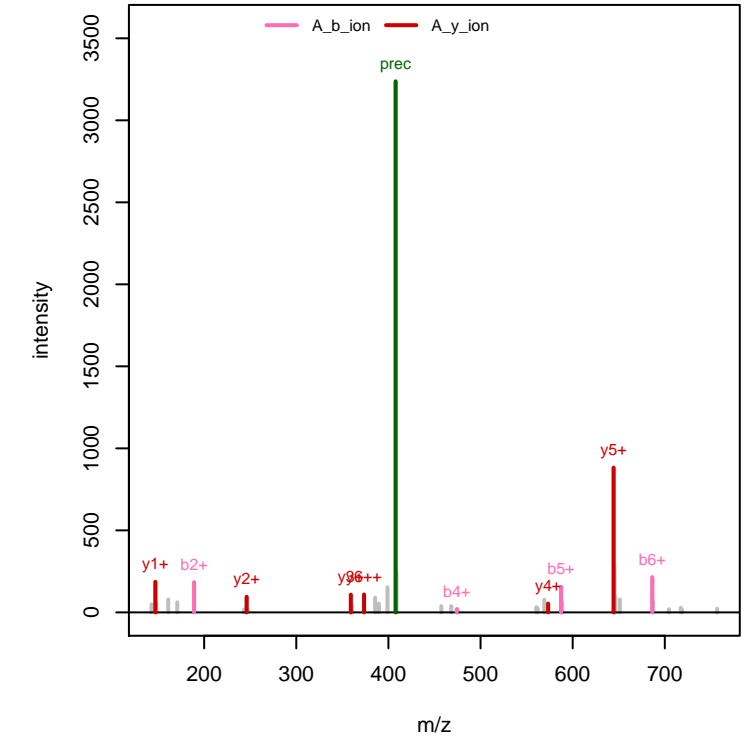

KATVELLNR+XL\_S

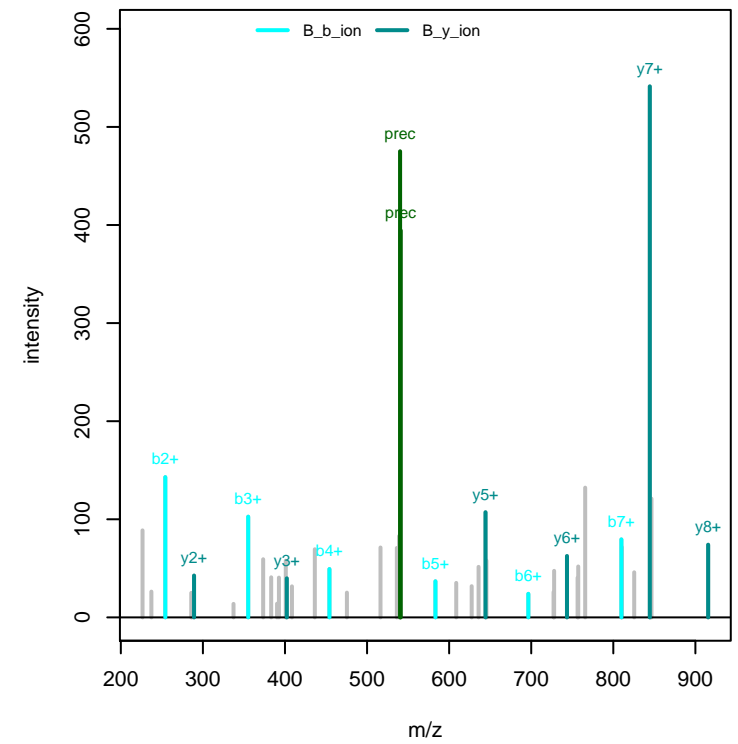

KATVELLNR+XL\_L

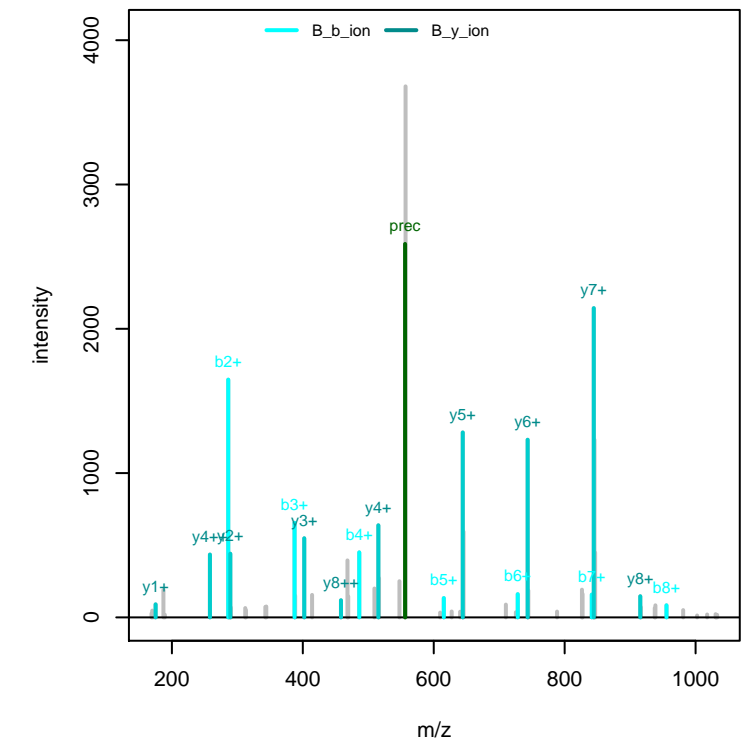

VKIGVAK  
AHKPGSATIALNKR

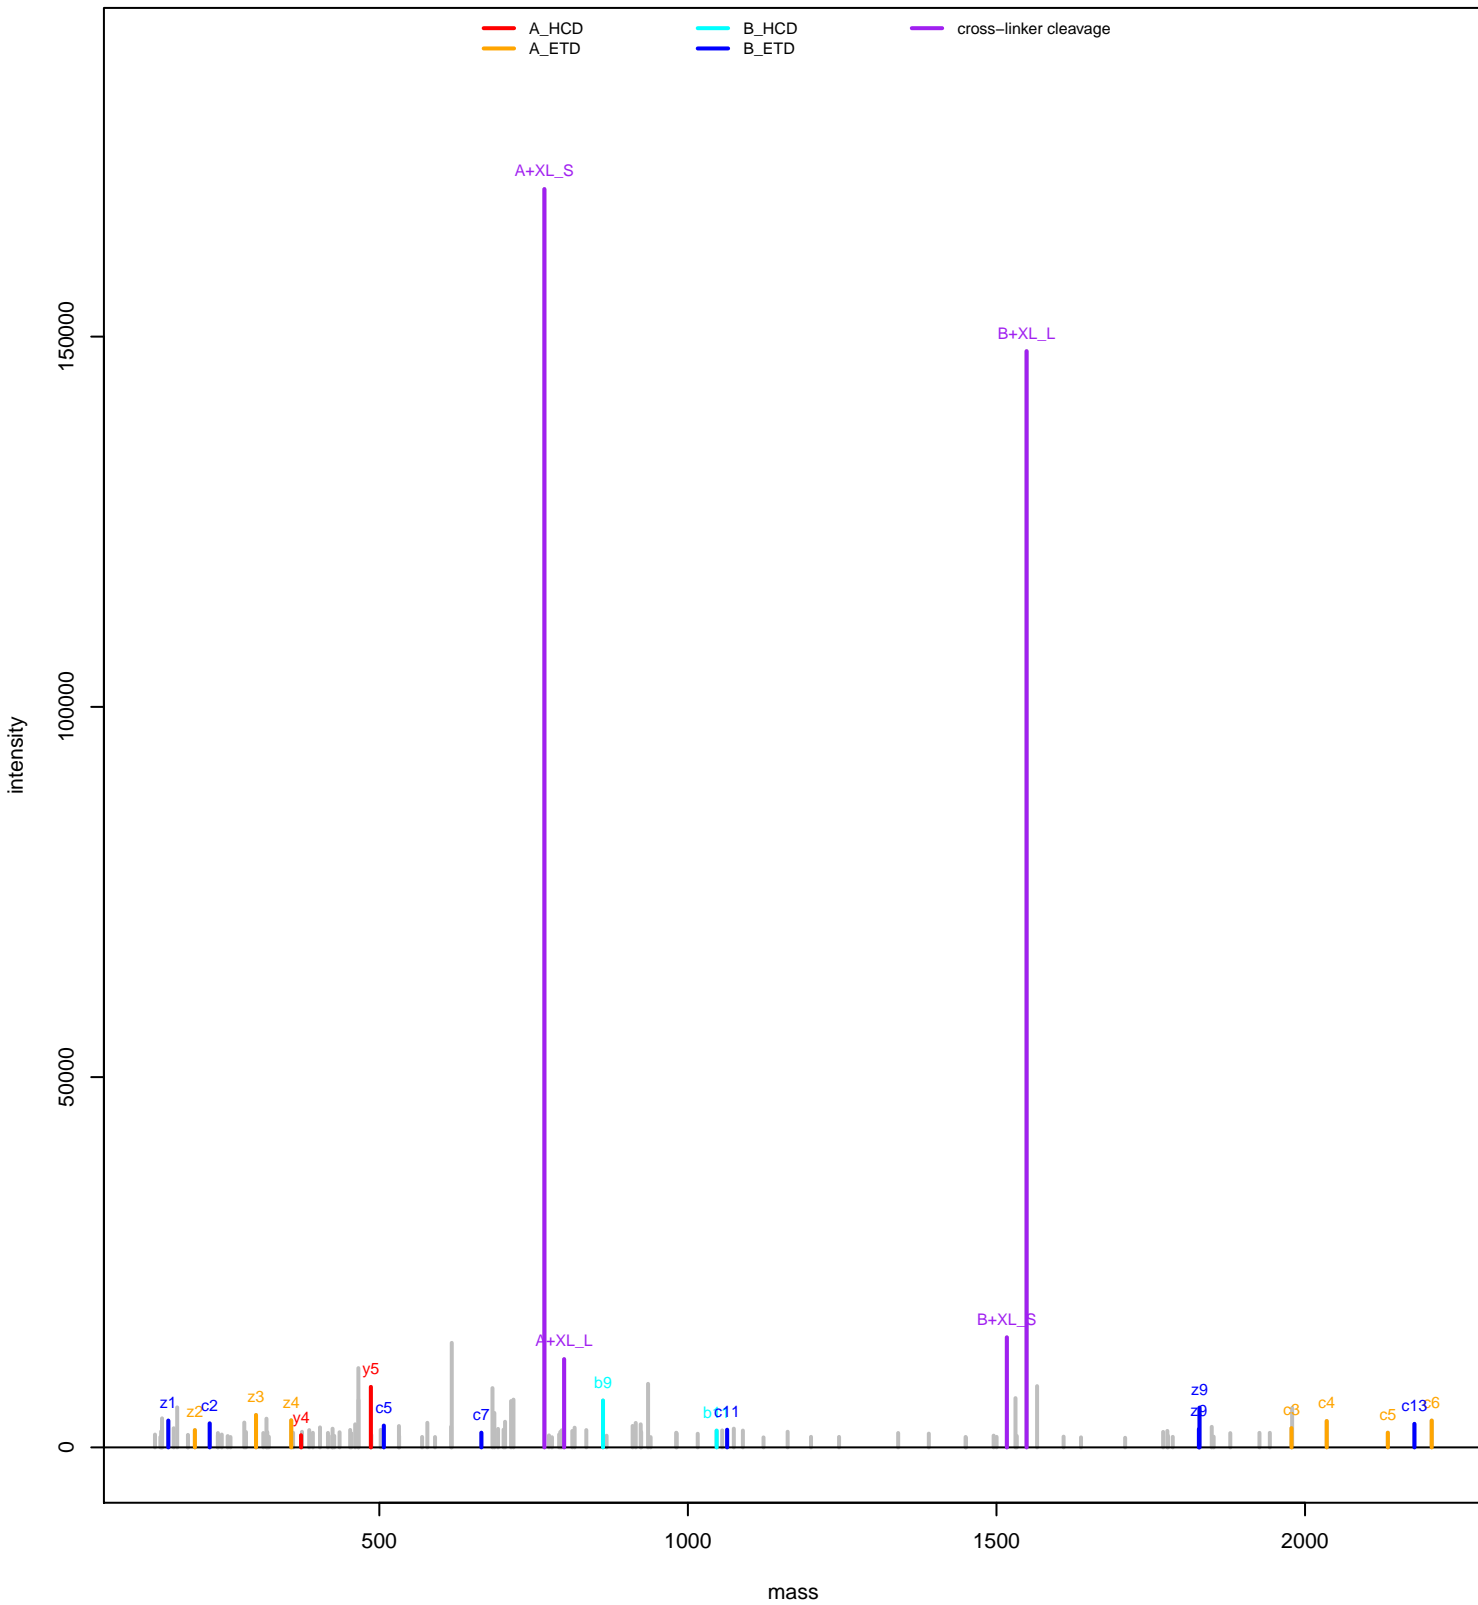

VKIGVAK+XL\_S

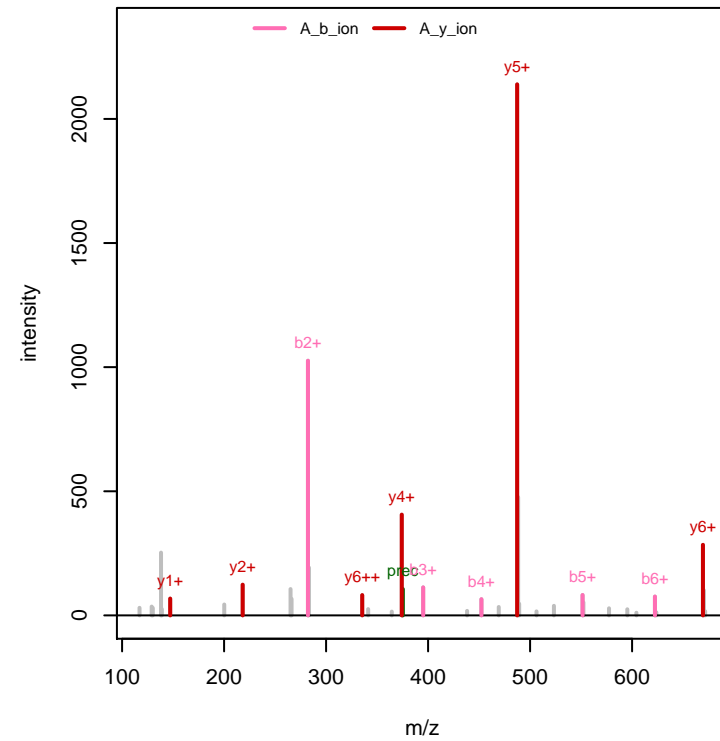

VKIGVAK+XL\_L

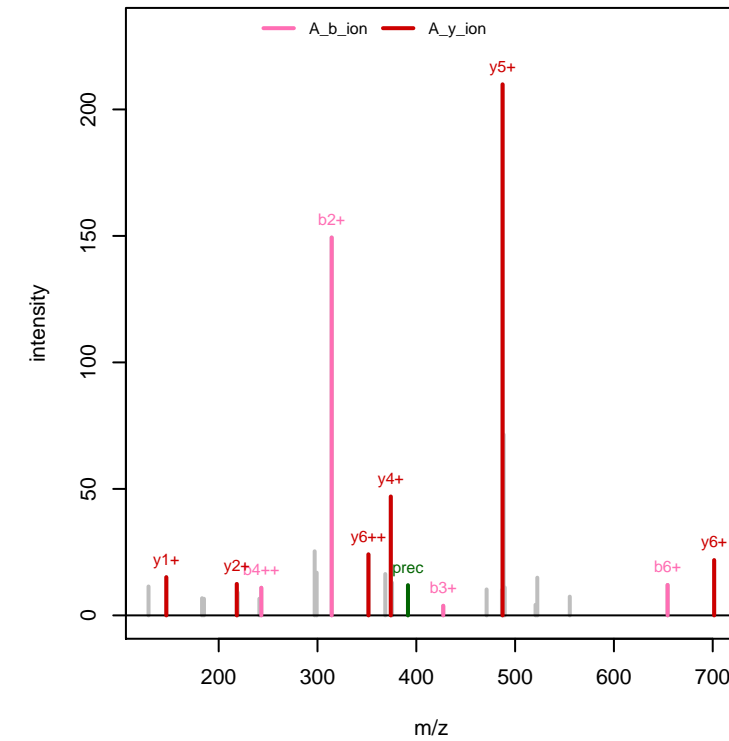

AHKPGSATIALNKR+XL\_S

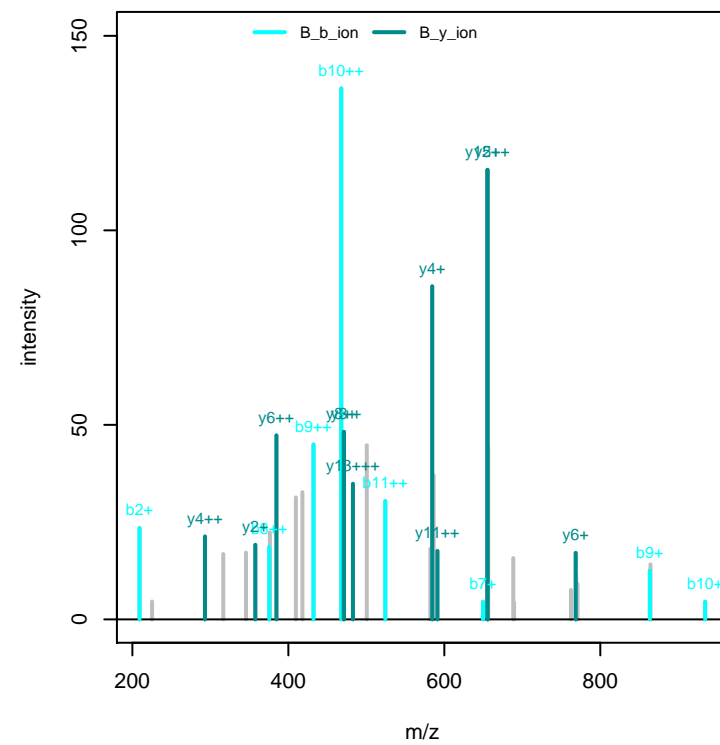

AHKPGSATIALNKR+XL\_L

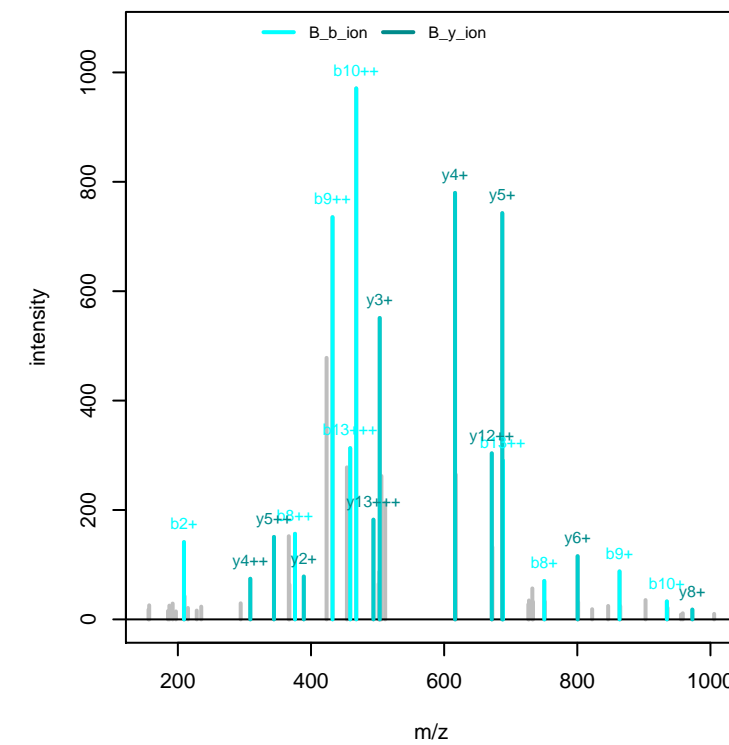

GKNGELTR  
EAKDLVESAPAALK

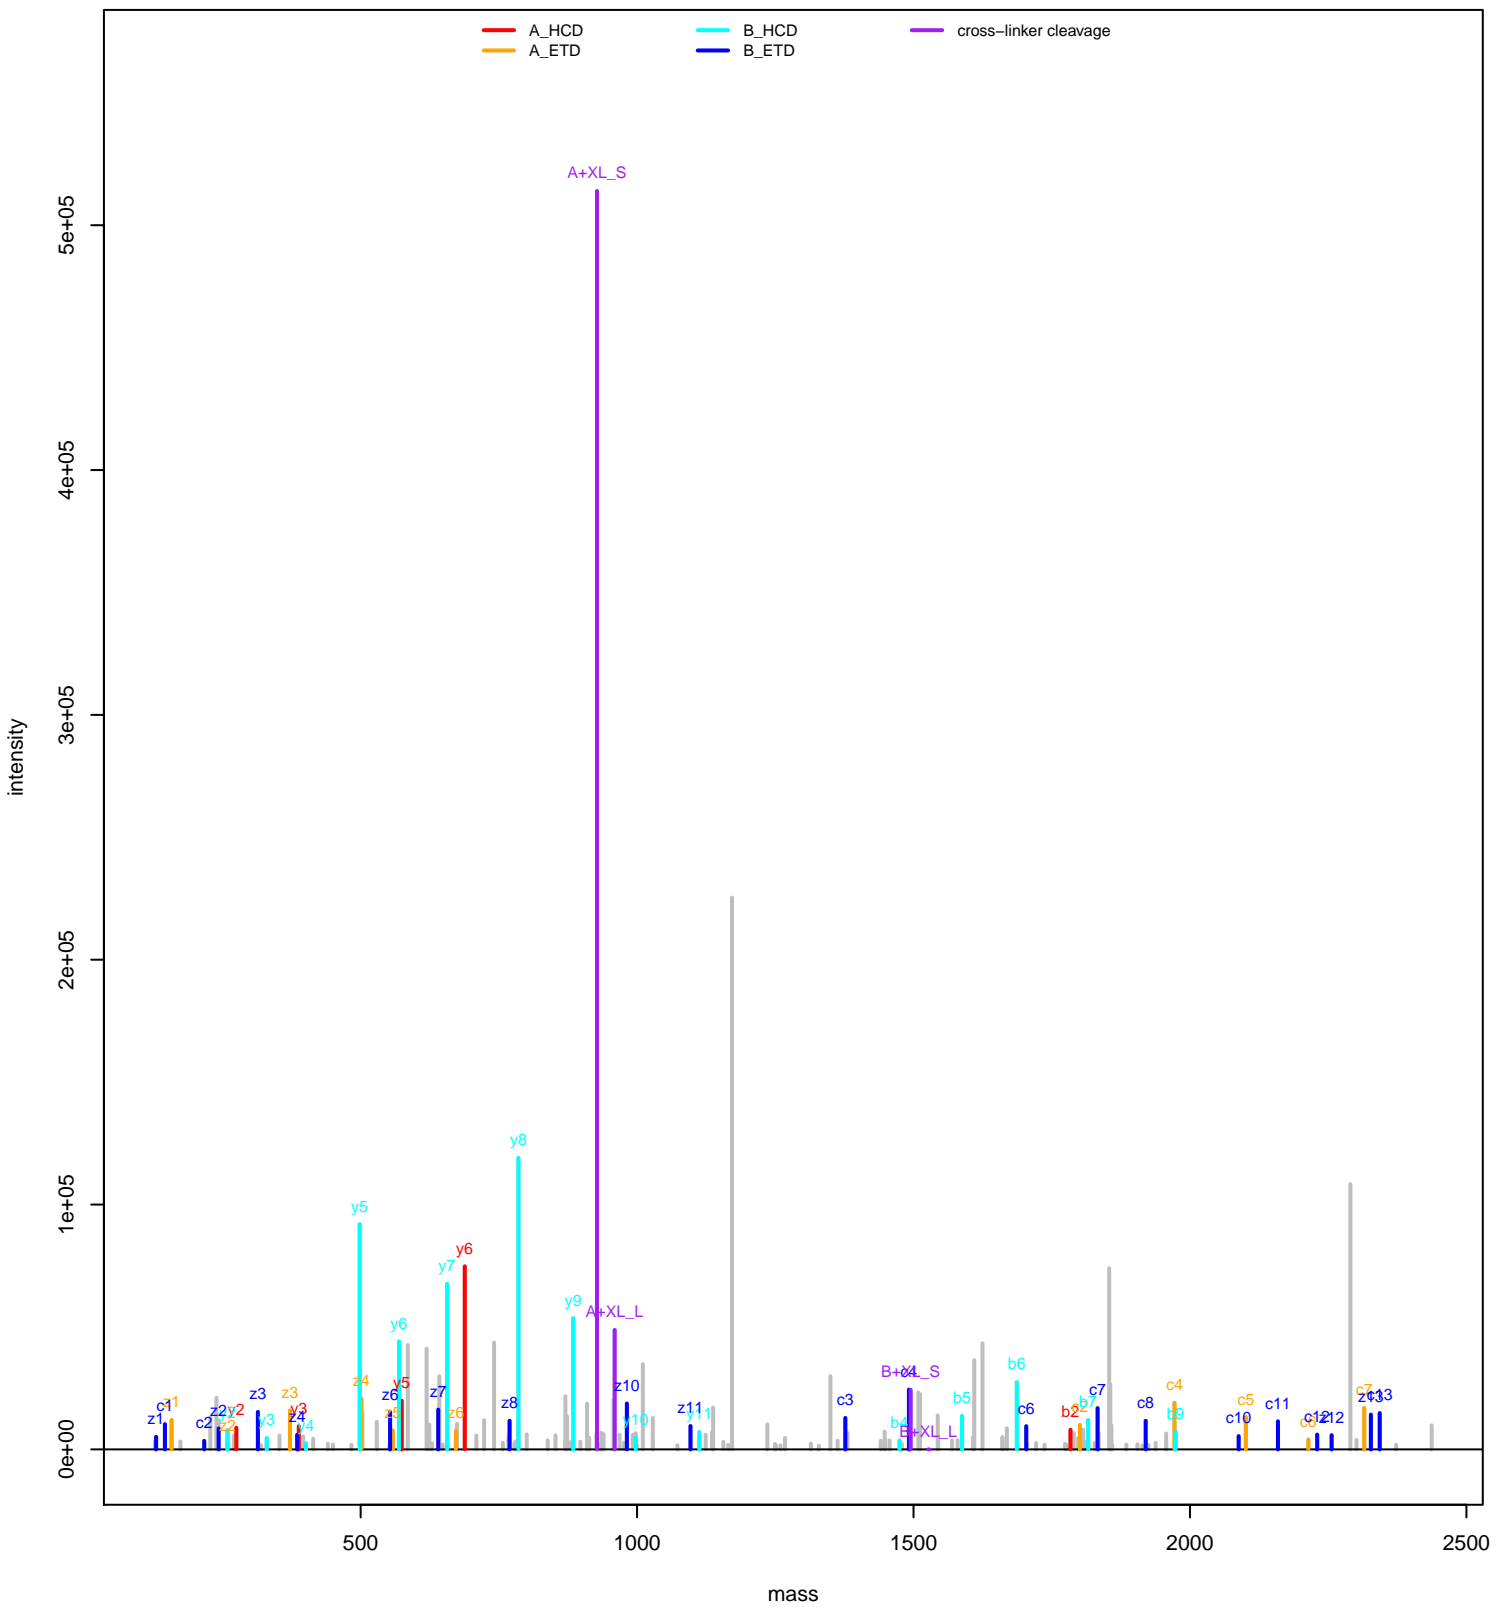

GKNGELTR+XL\_S

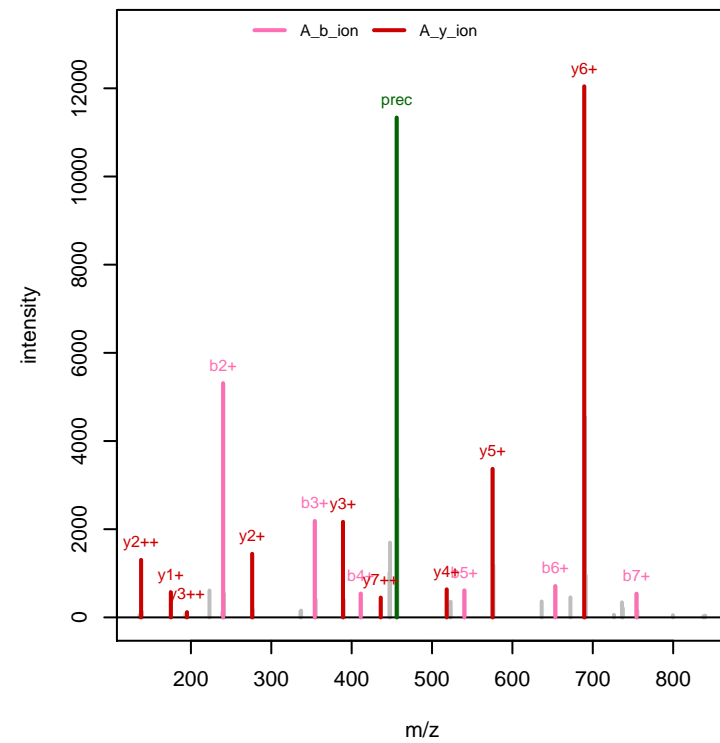

GKNGELTR+XL\_L

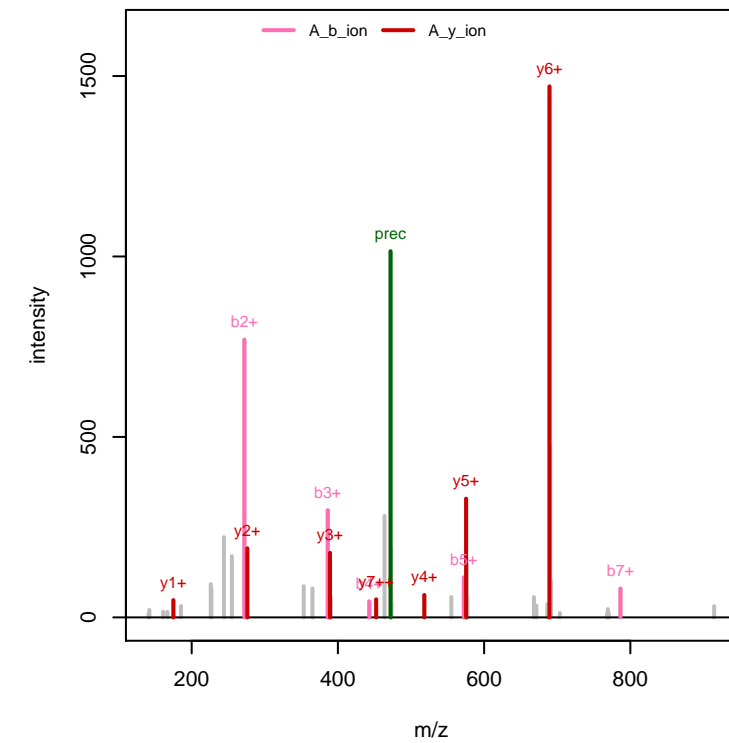

EAKDLVESAPAALK+XL\_S

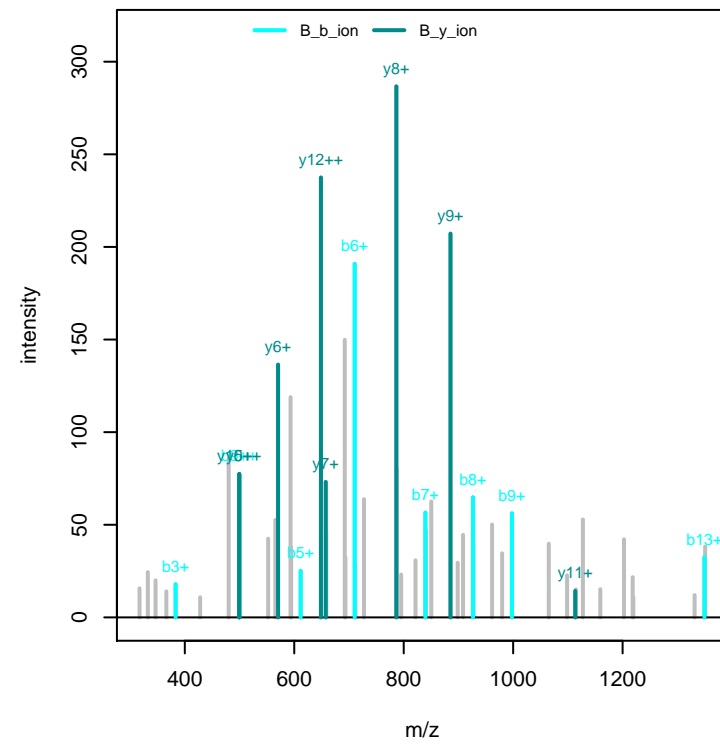

EAKDLVESAPAALK+XL\_L

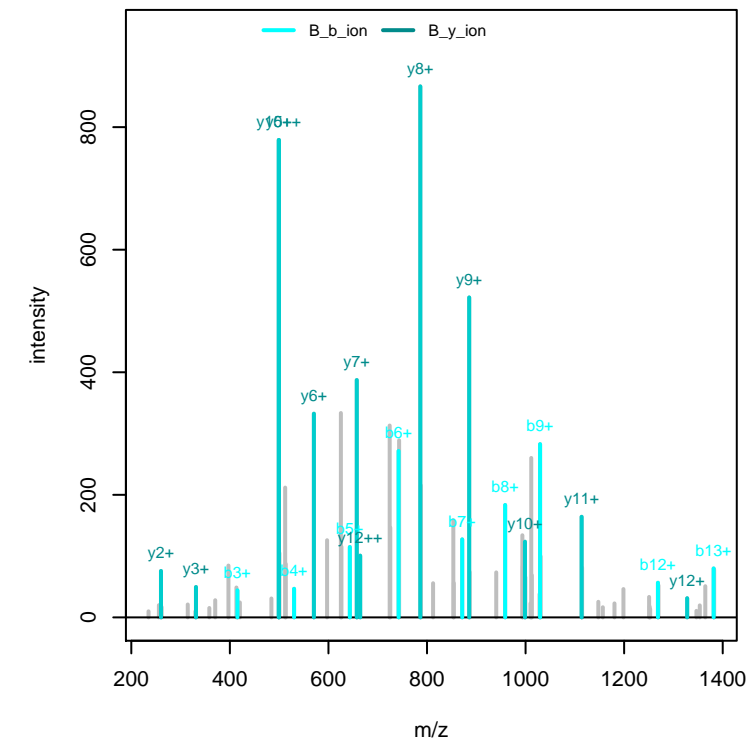

RLAKDASR  
QYGEAFEKR

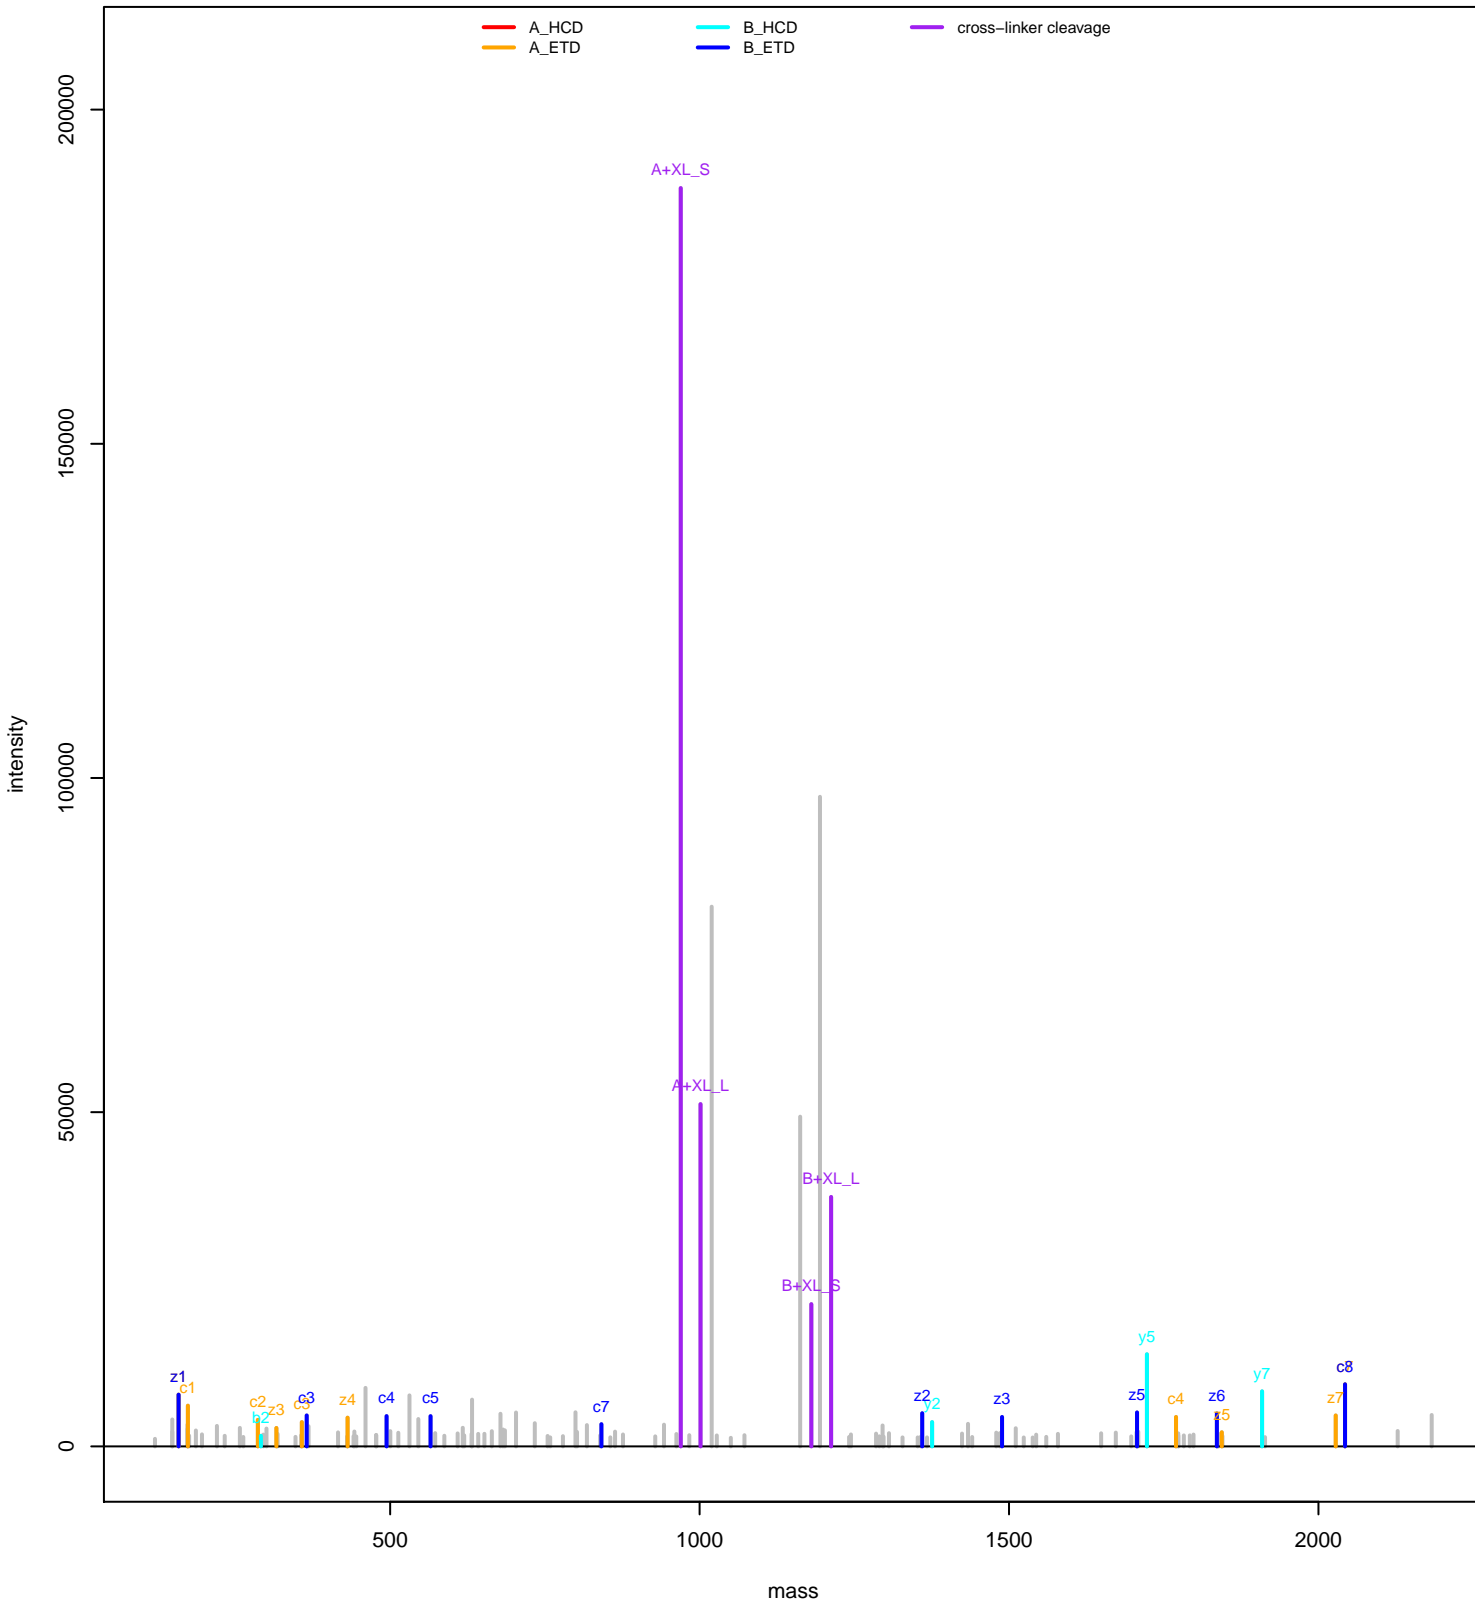

RLAKDASR+XL\_S

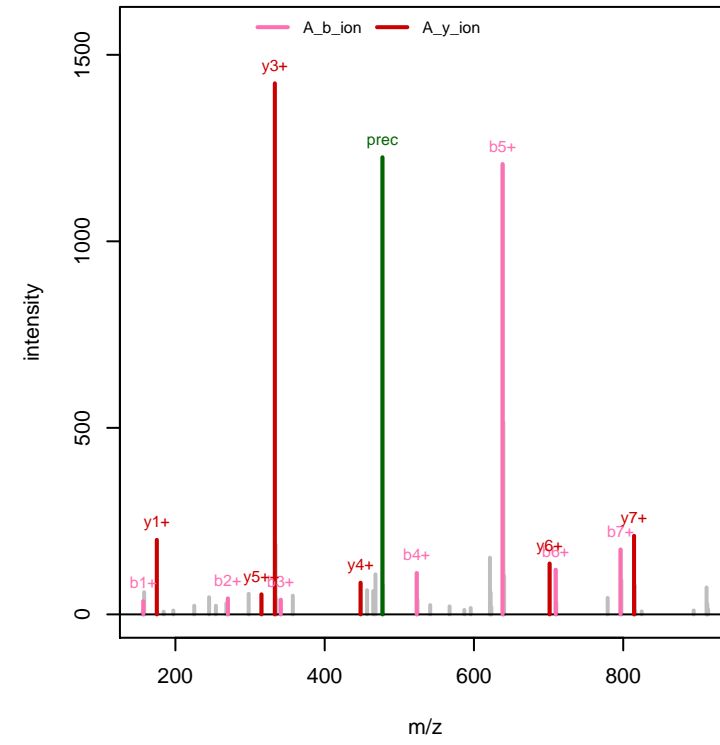

RLAKDASR+XL\_L

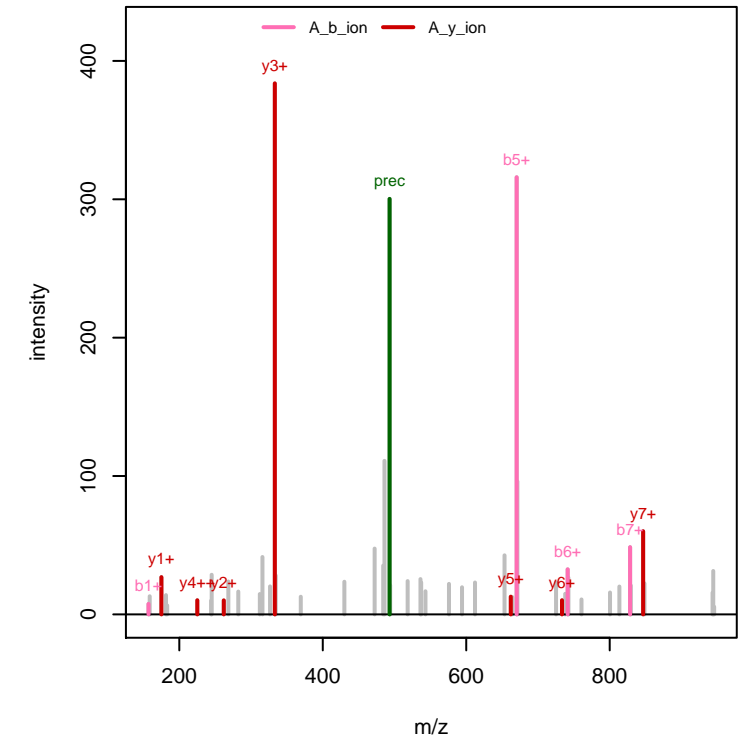

QYGEAFEKR+XL\_S

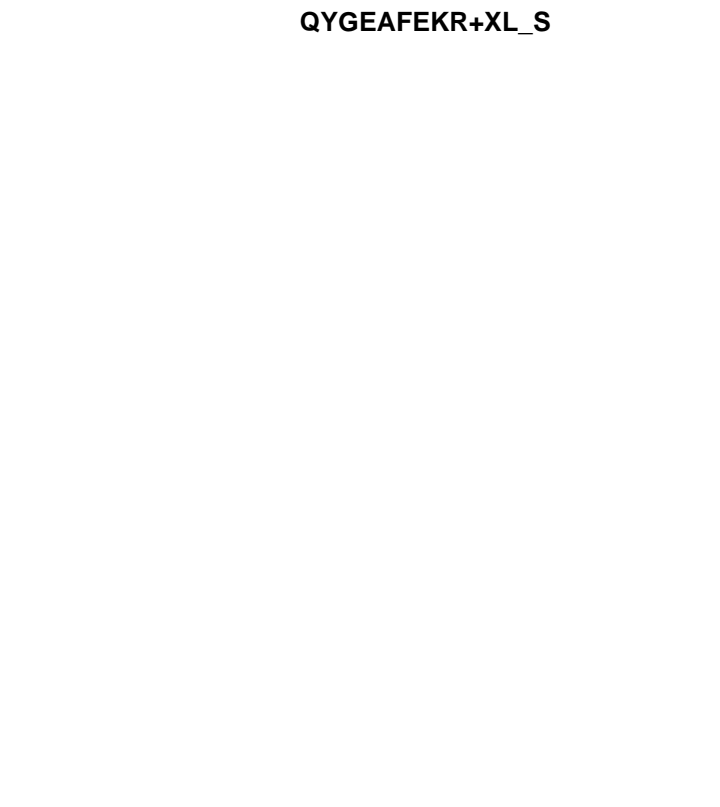

QYGEAFEKR+XL\_L

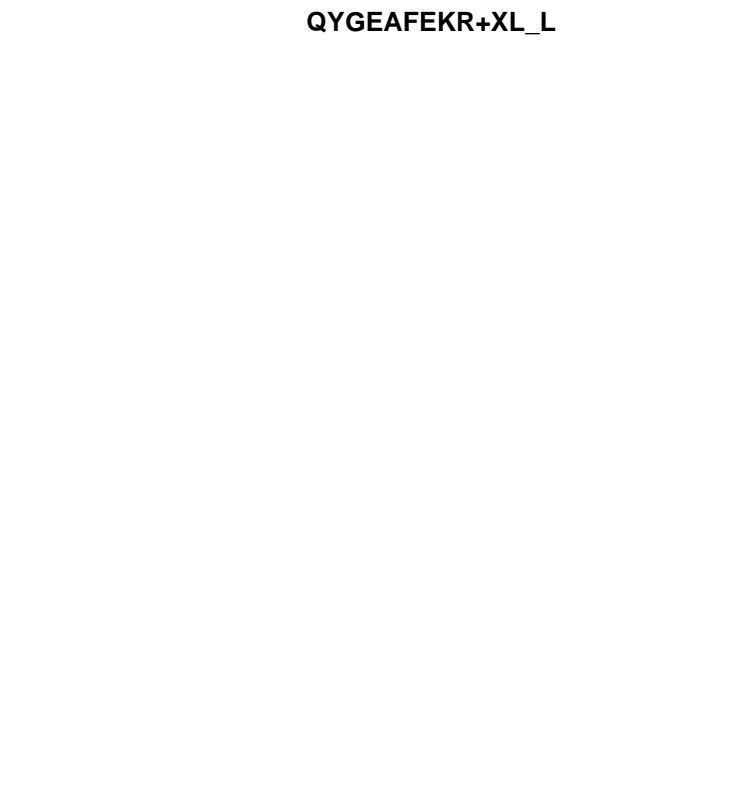

AIQVTTGAKK  
VTQVKDLANDGYR

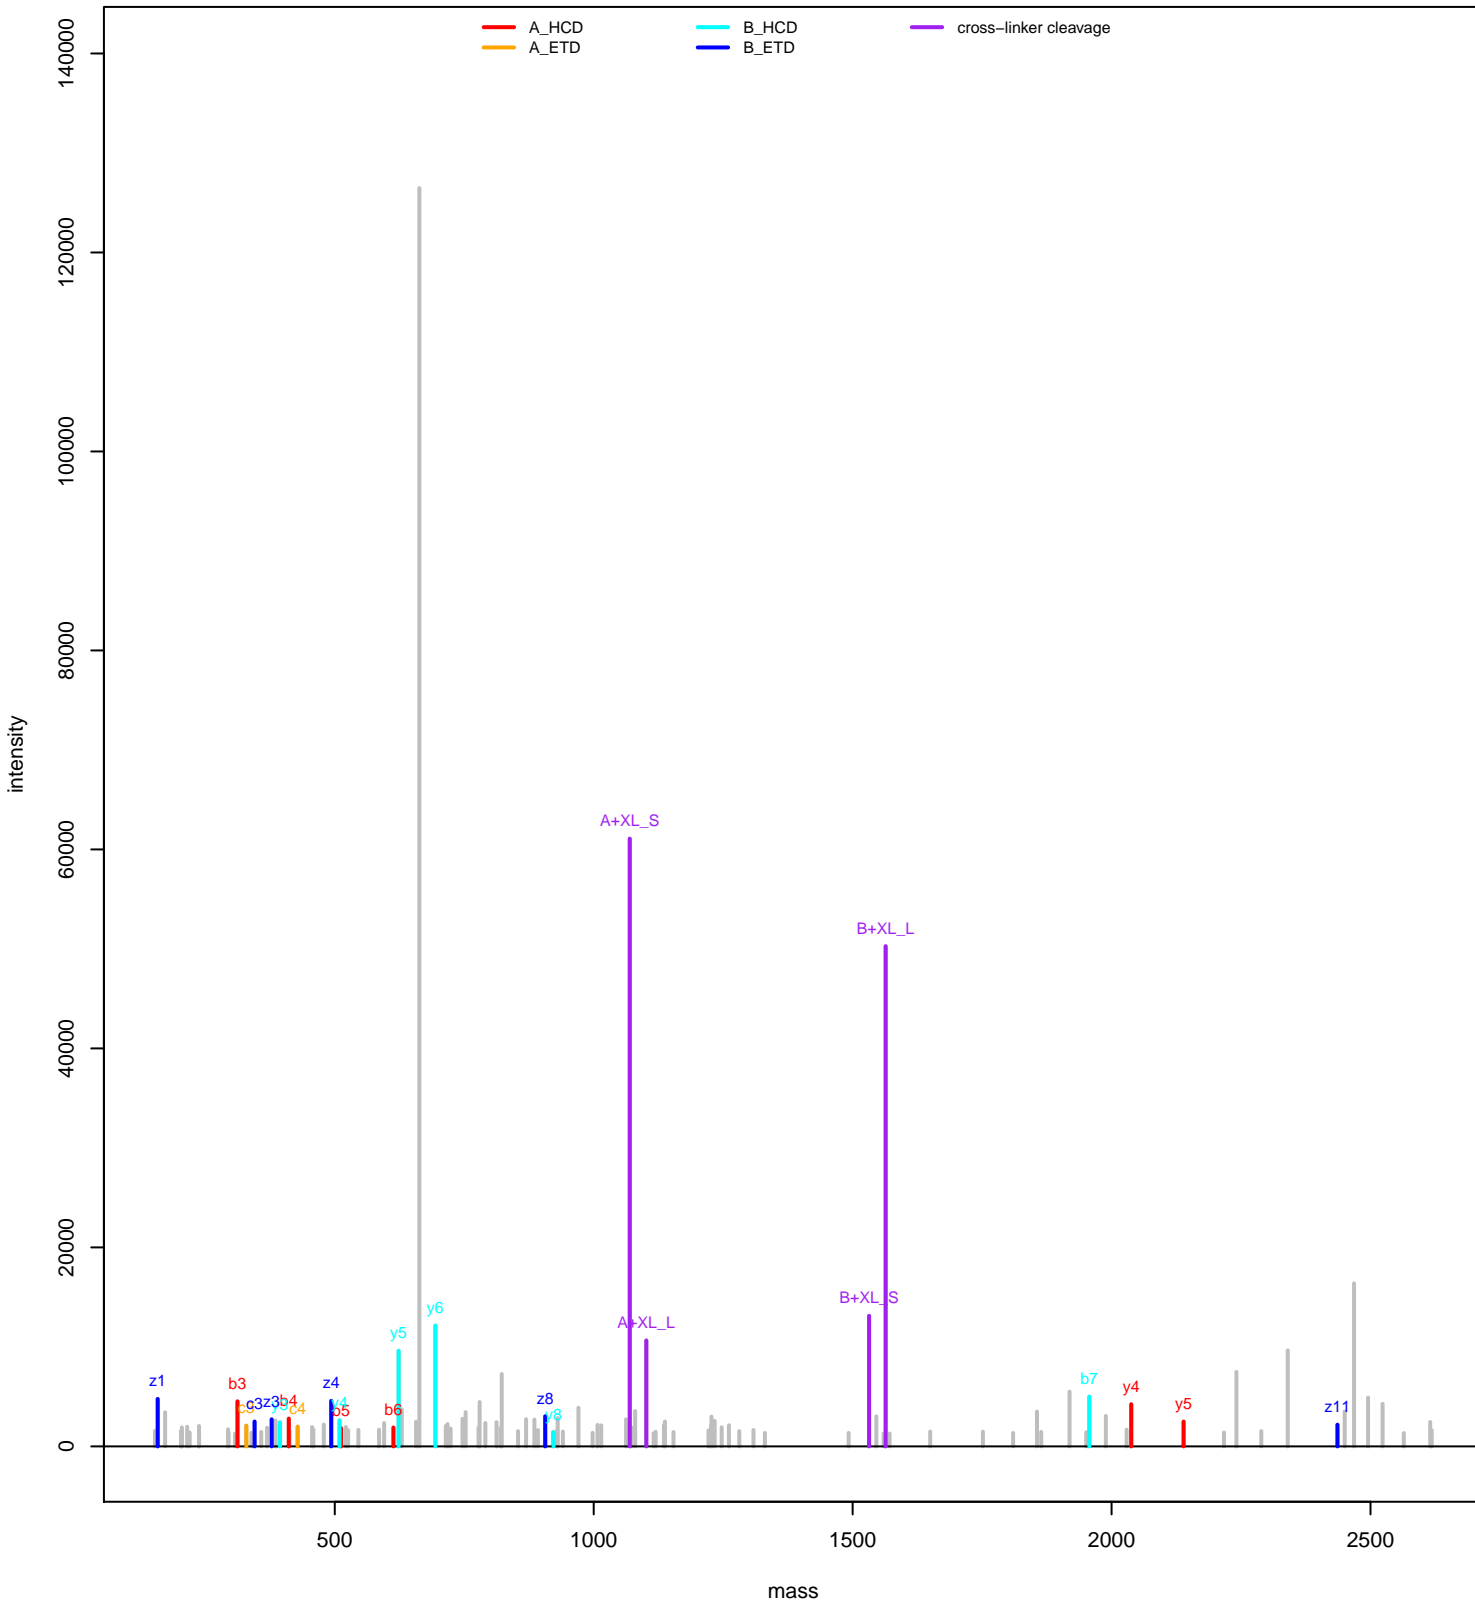

AIQVTTGAKK+XL\_S

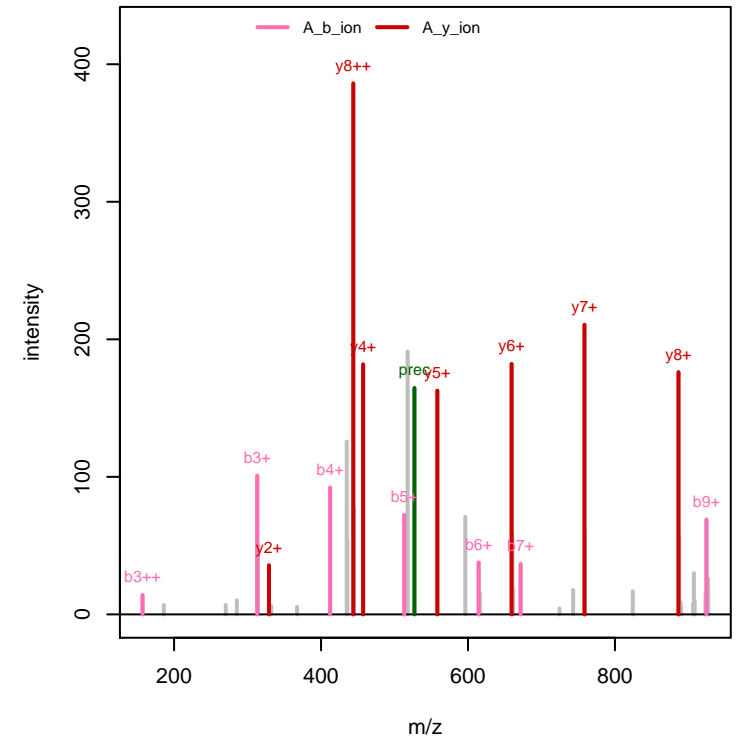

AIQVTTGAKK+XL\_L

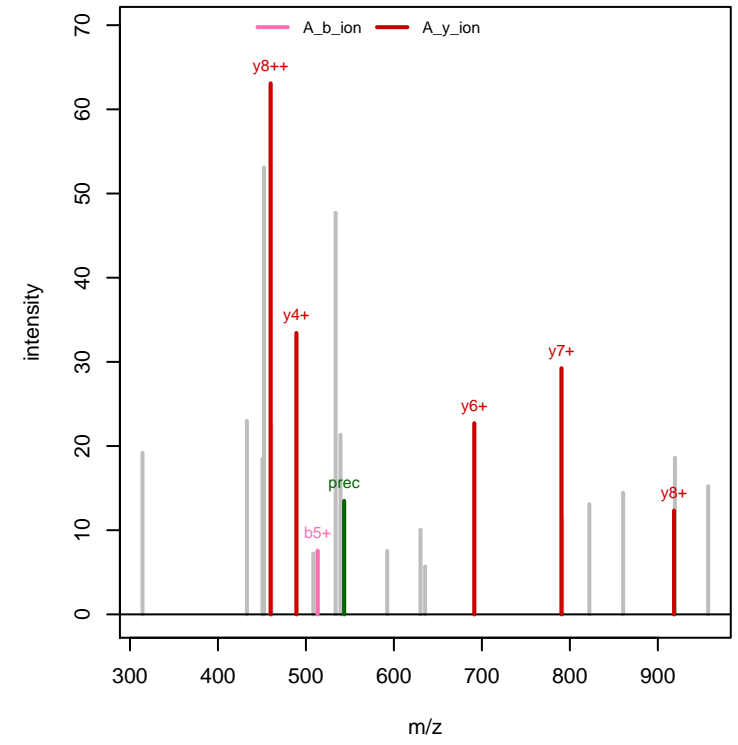

VTQVKDLANDGYR+XL\_S

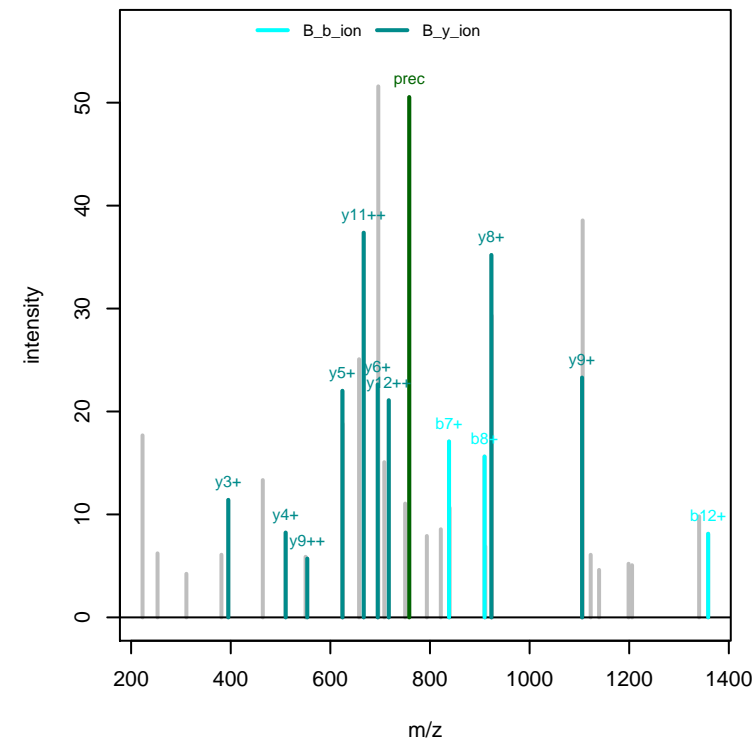

VTQVKDLANDGYR+XL\_L

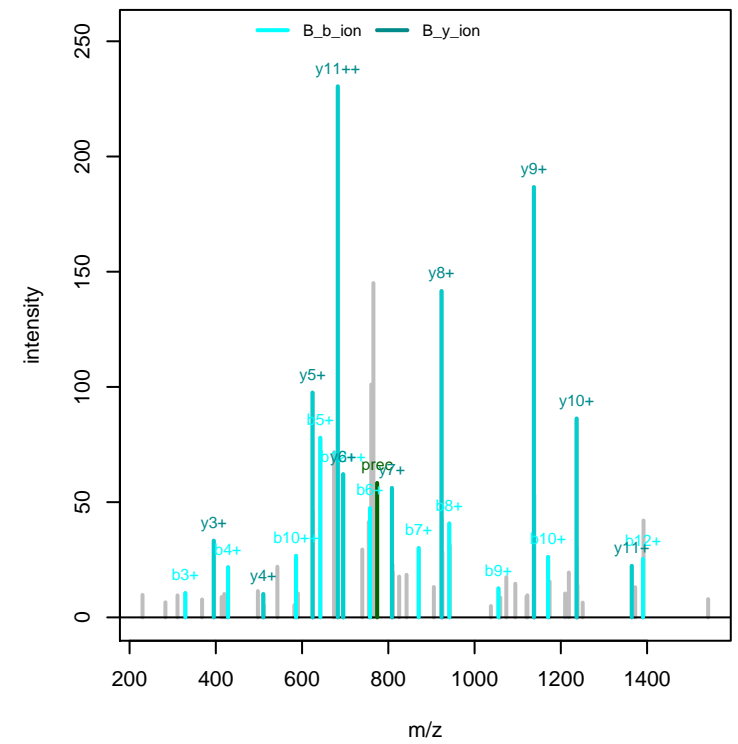



RKEVETK  
SAGGIVLTGSAAAKSTR

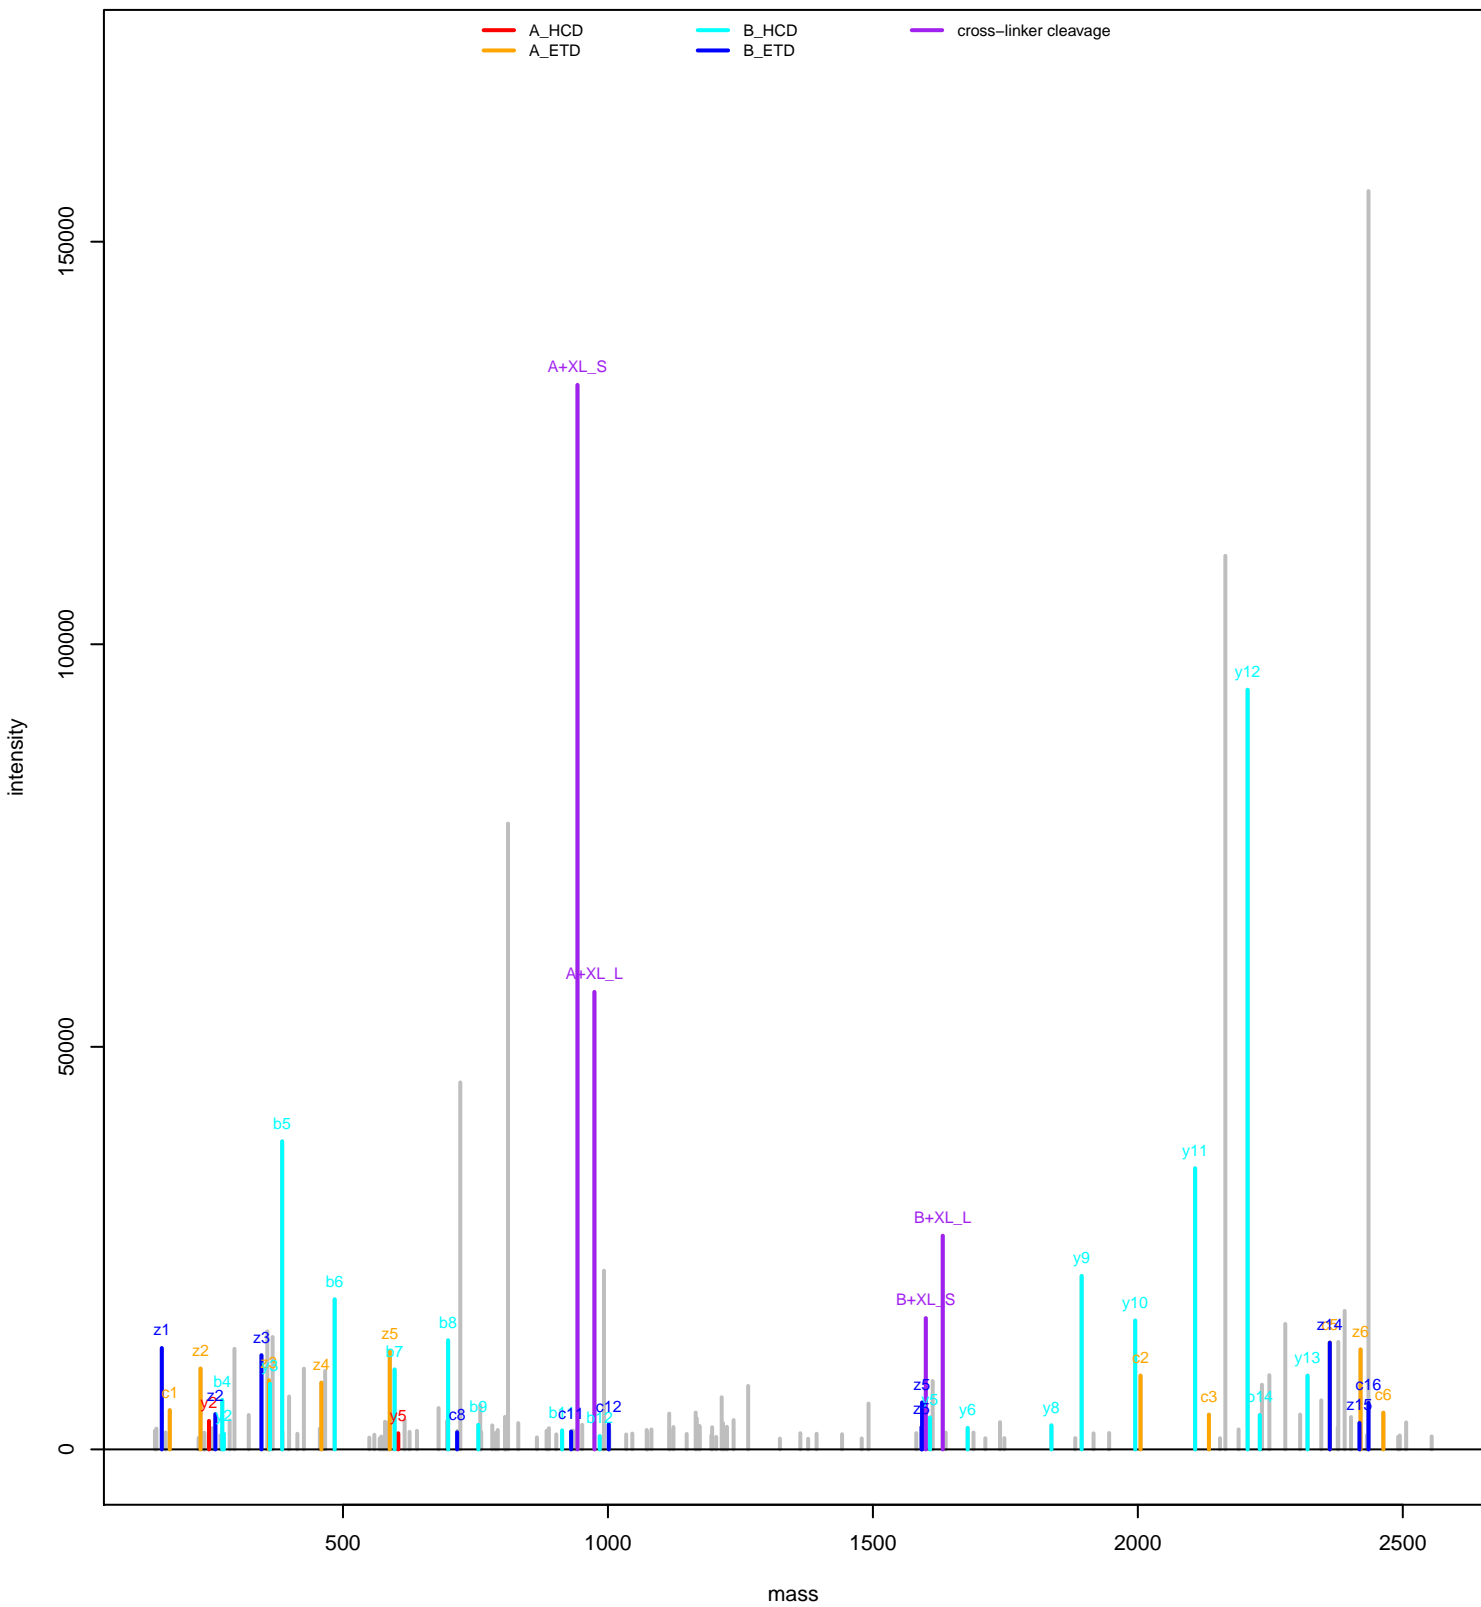

RKEVETK+XL\_S

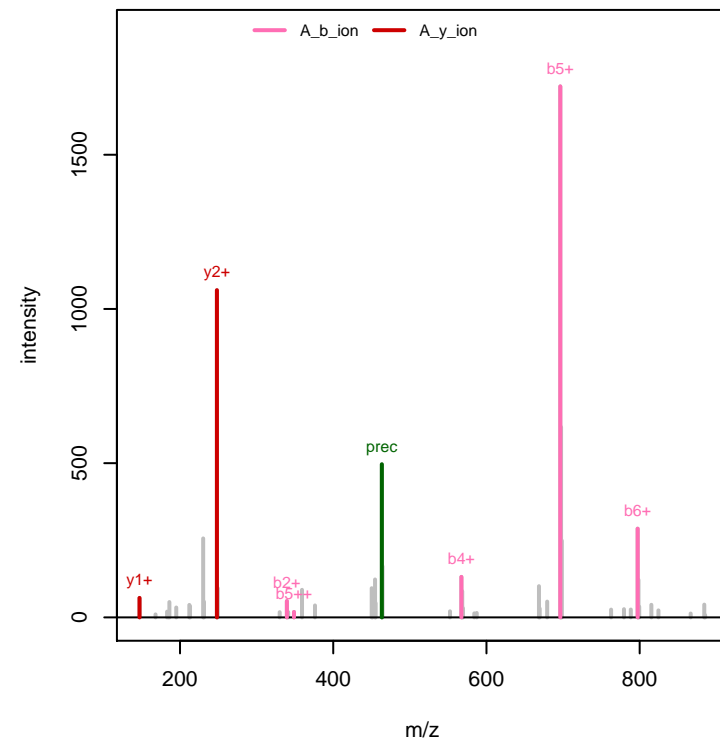

RKEVETK+XL\_L

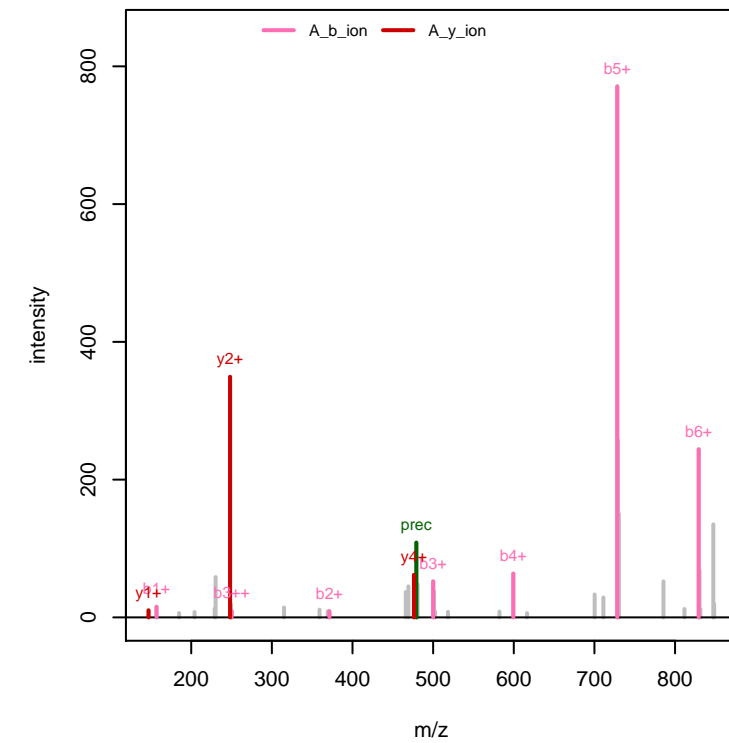

SAGGIVLTGSAAAKSTR+XL\_S

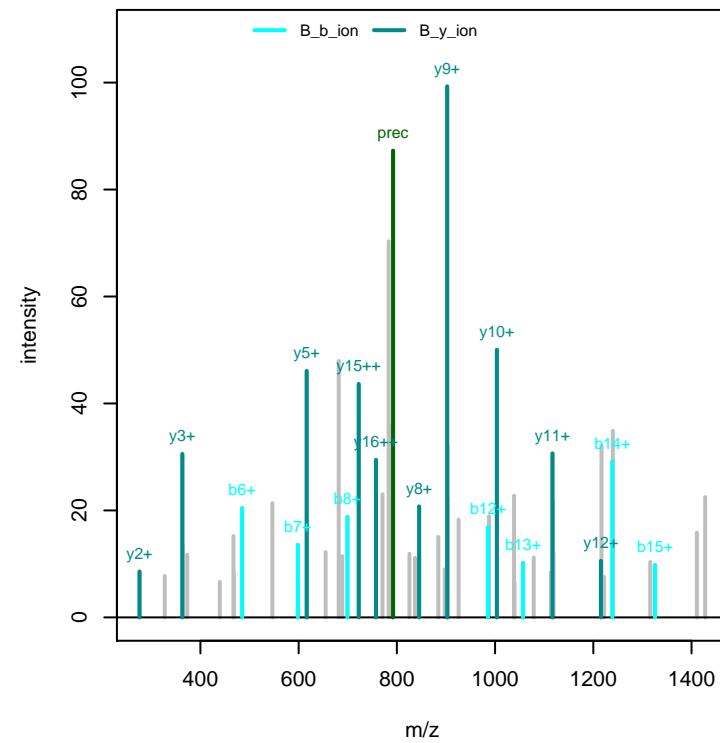

SAGGIVLTGSAAAKSTR+XL\_L

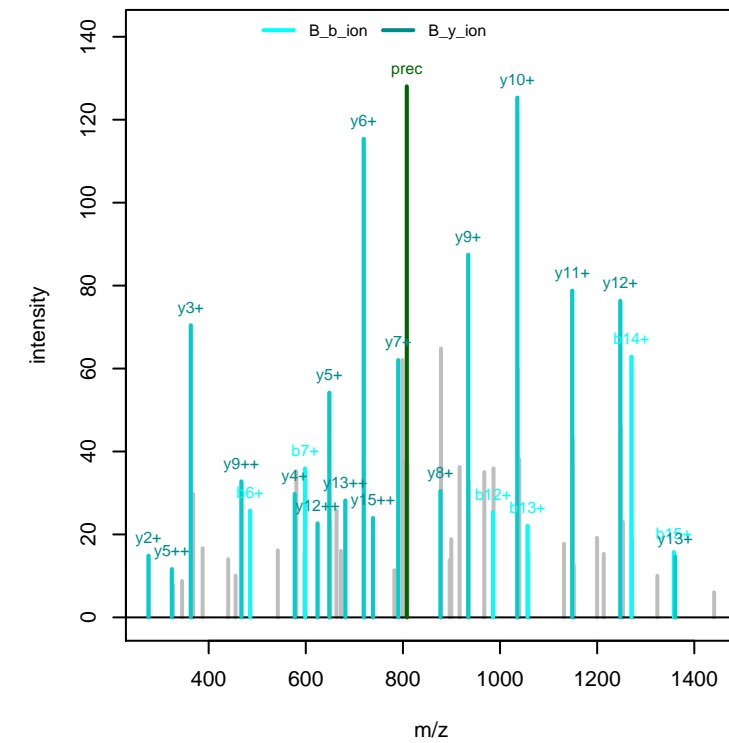

AEQALKQSR  
SKEELSKIR

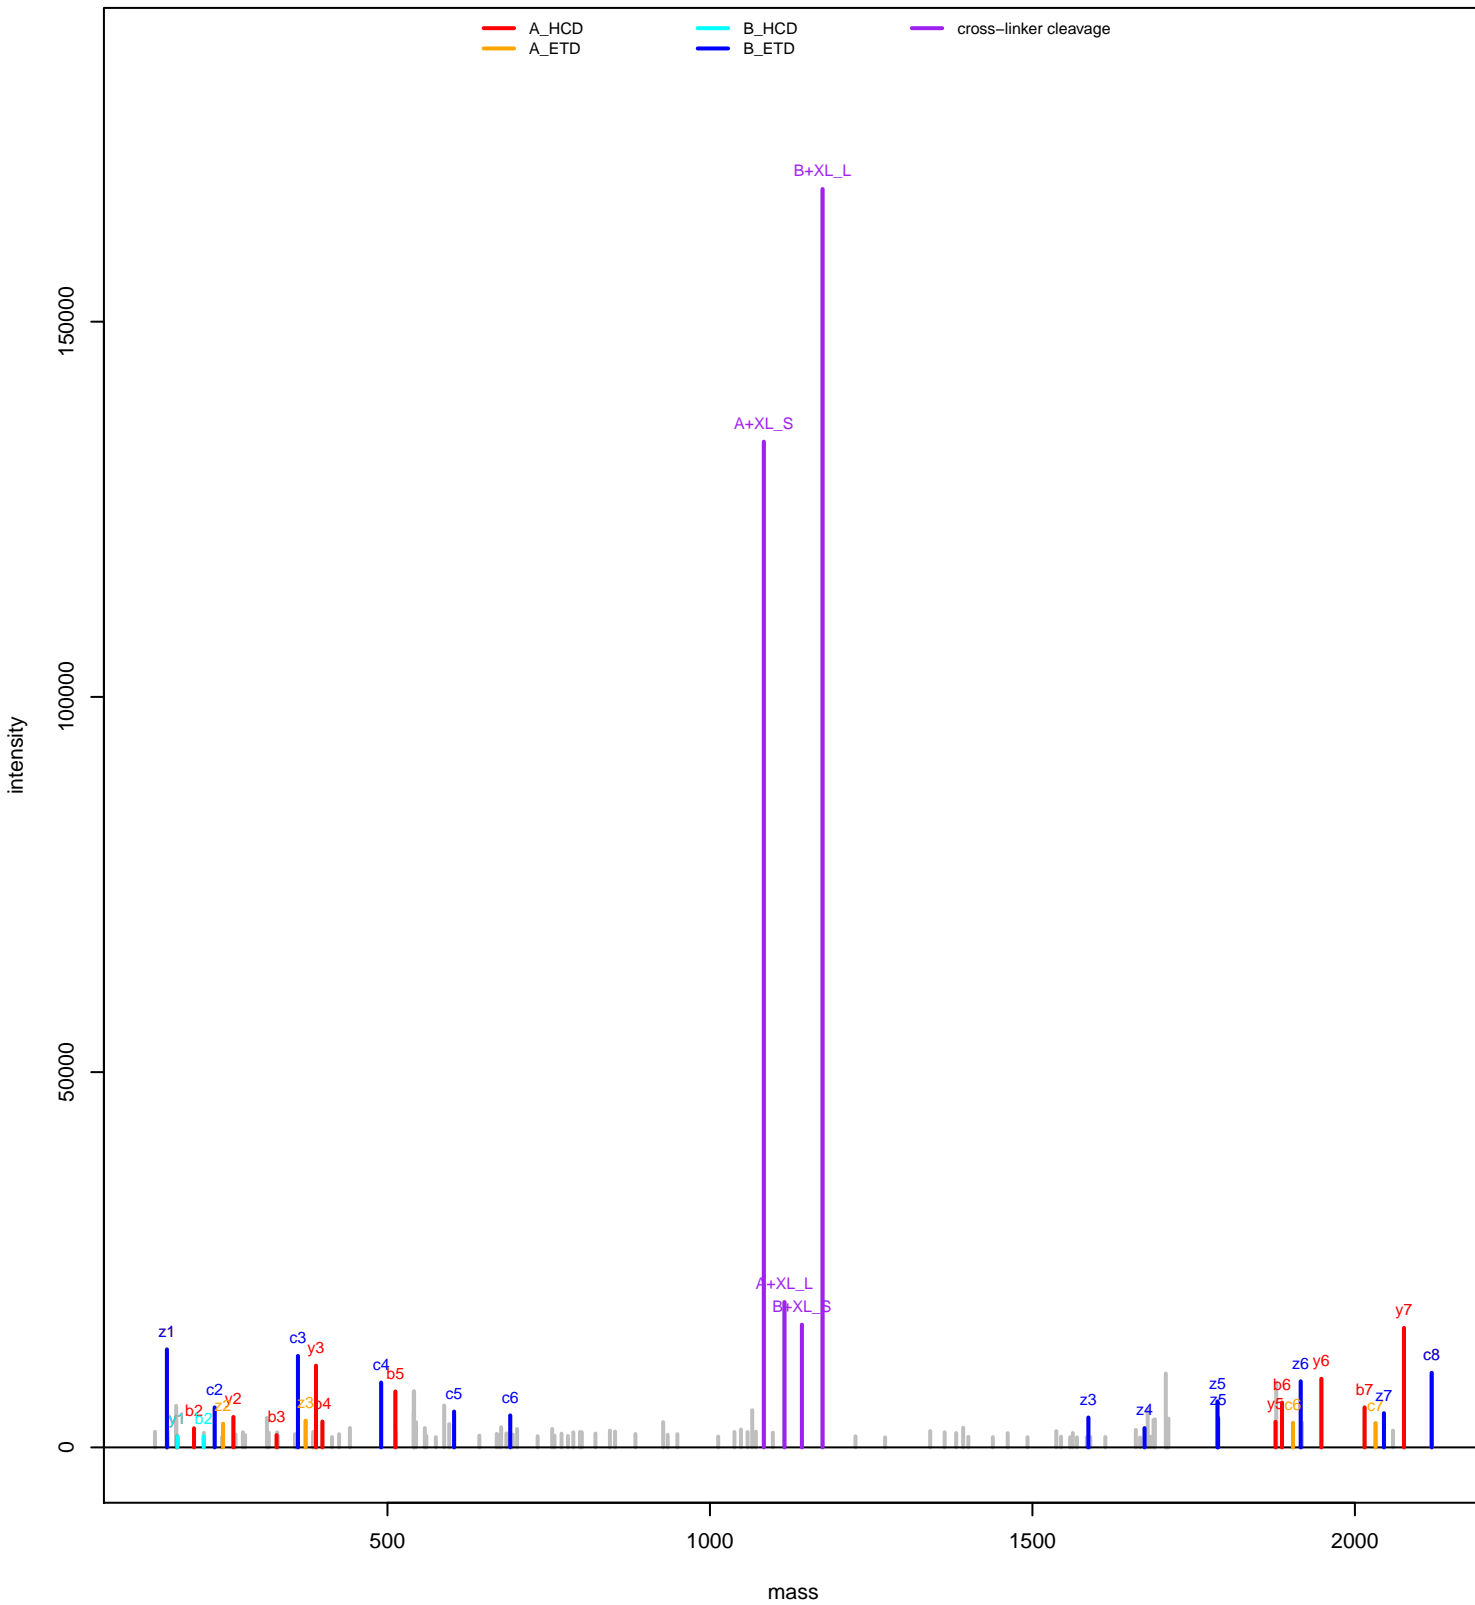

AEQALKQSR+XL\_S

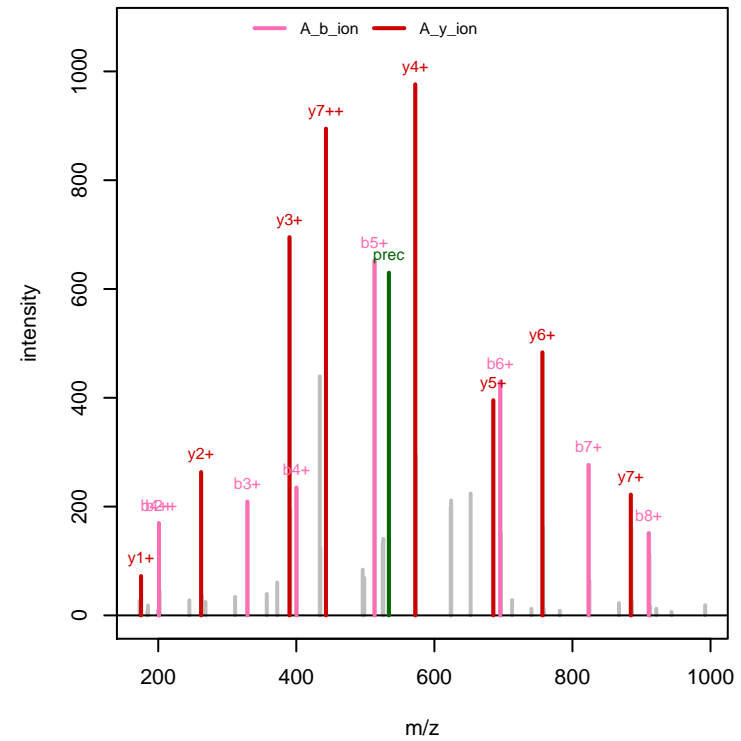

AEQALKQSR+XL\_L

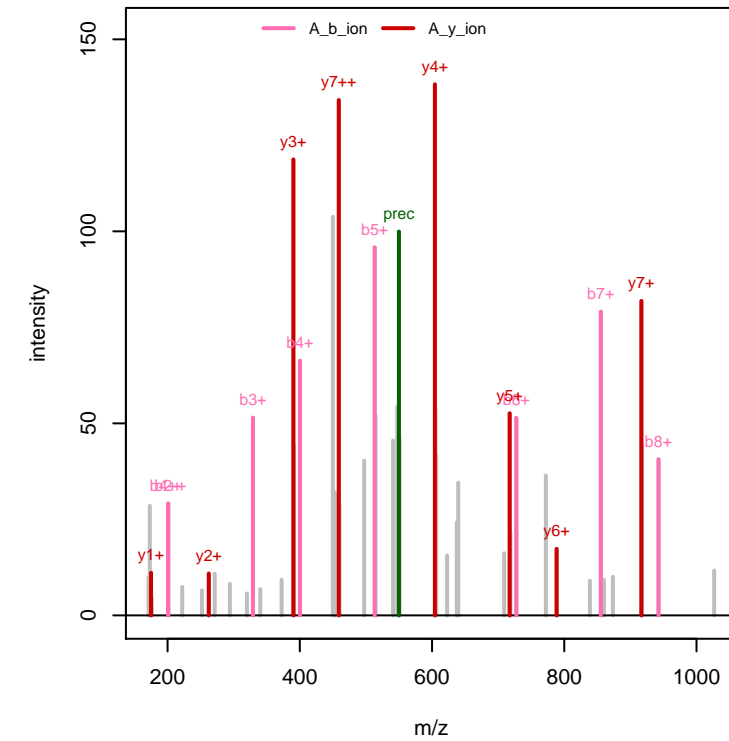

SKEELSKIR+XL\_S

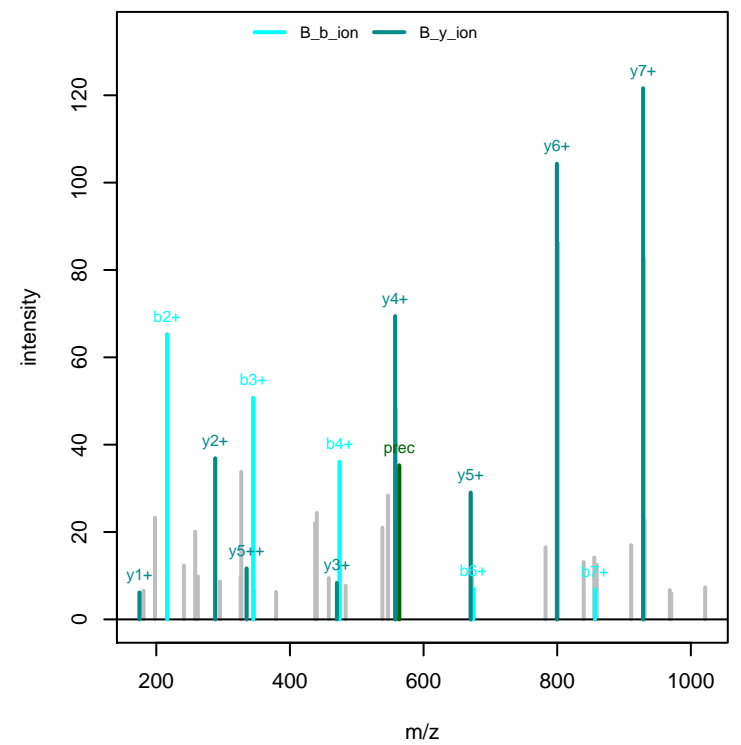

SKEELSKIR+XL\_L

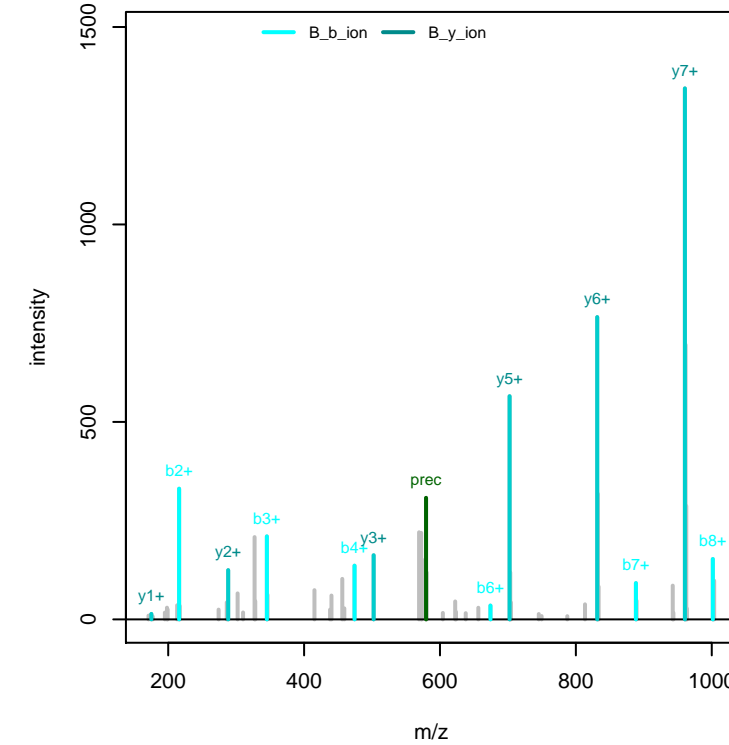

**HLAKAPAK**  
**APAKESAPAAAAPAAQPALAAR**

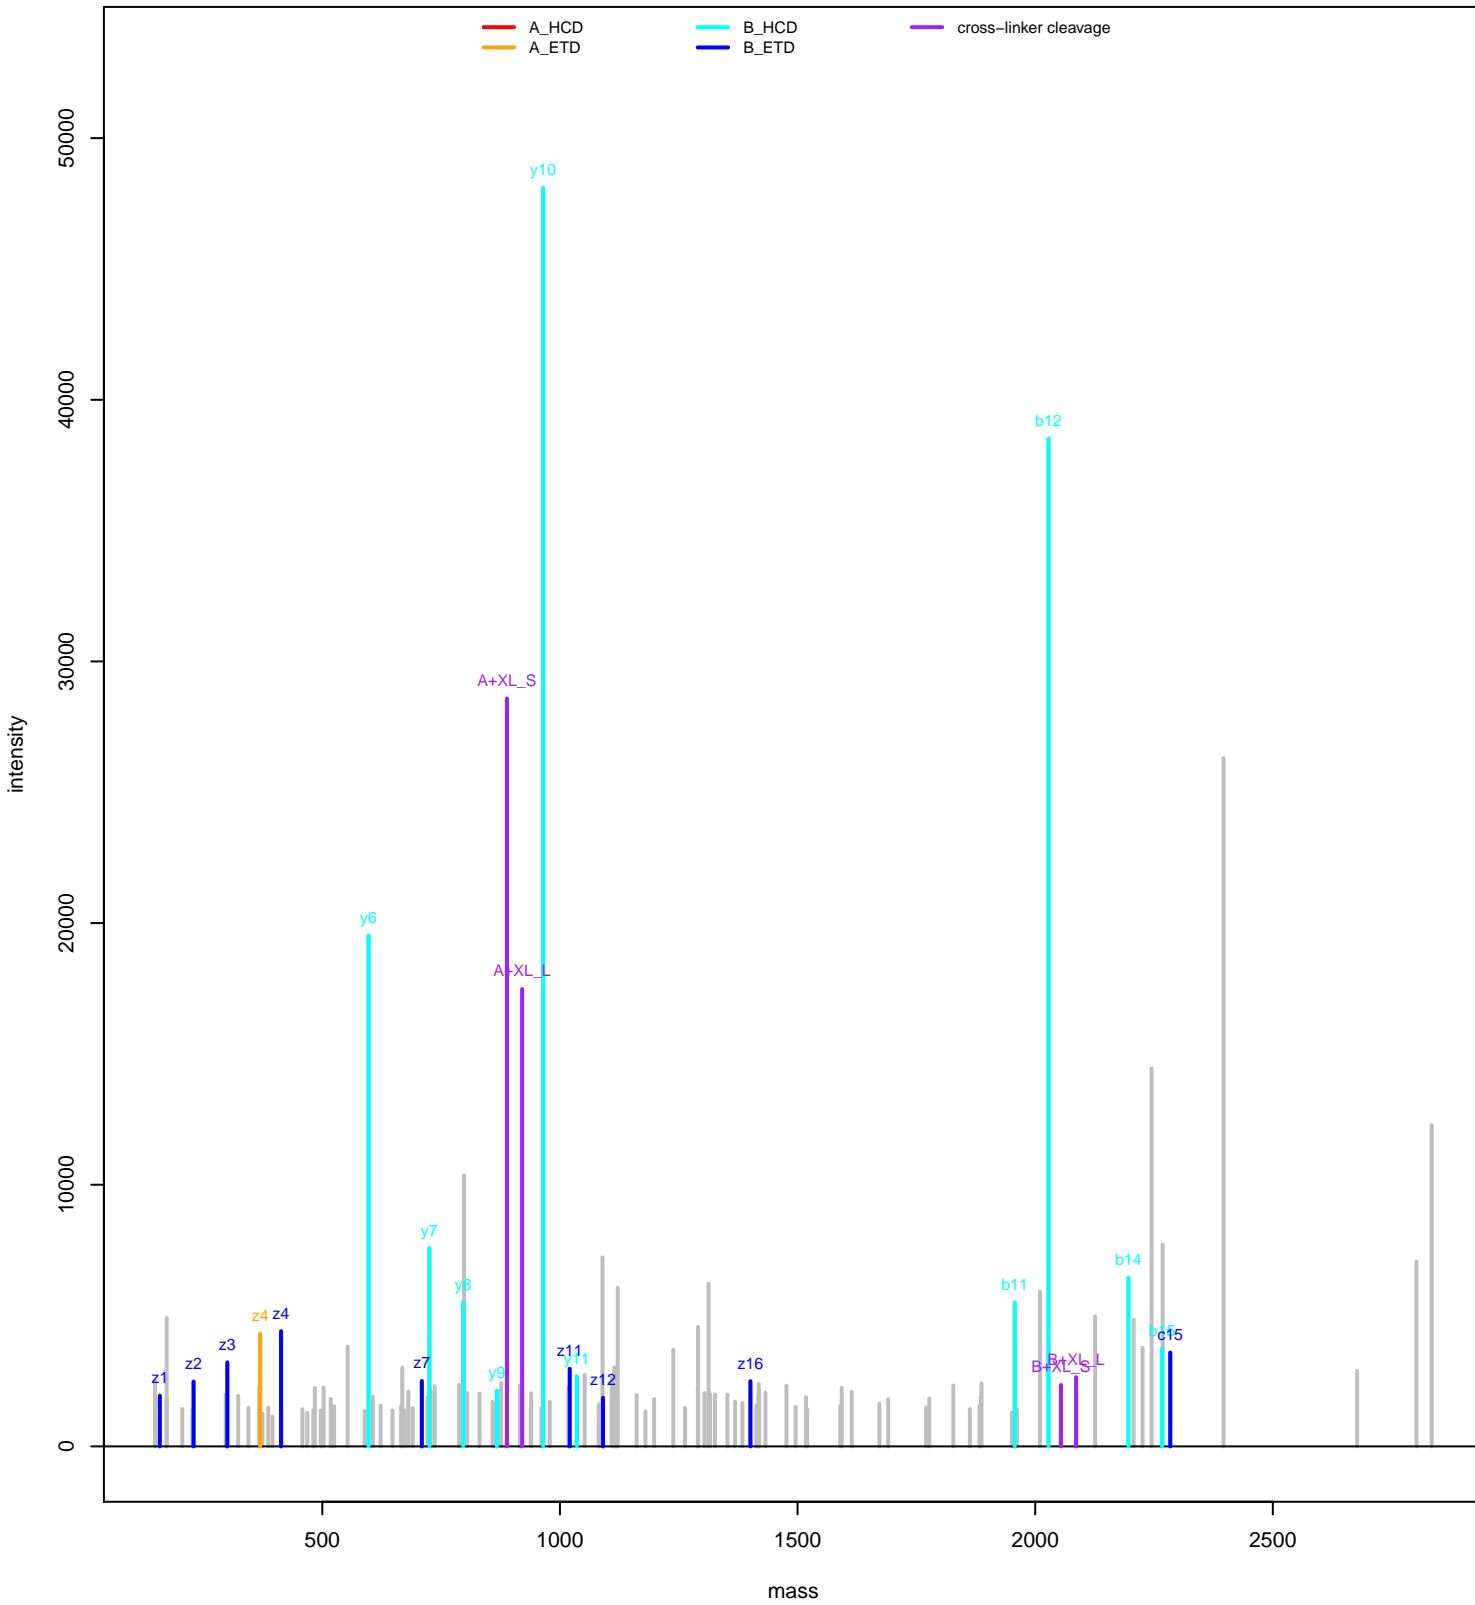

**HLAKAPAK+XL\_S**

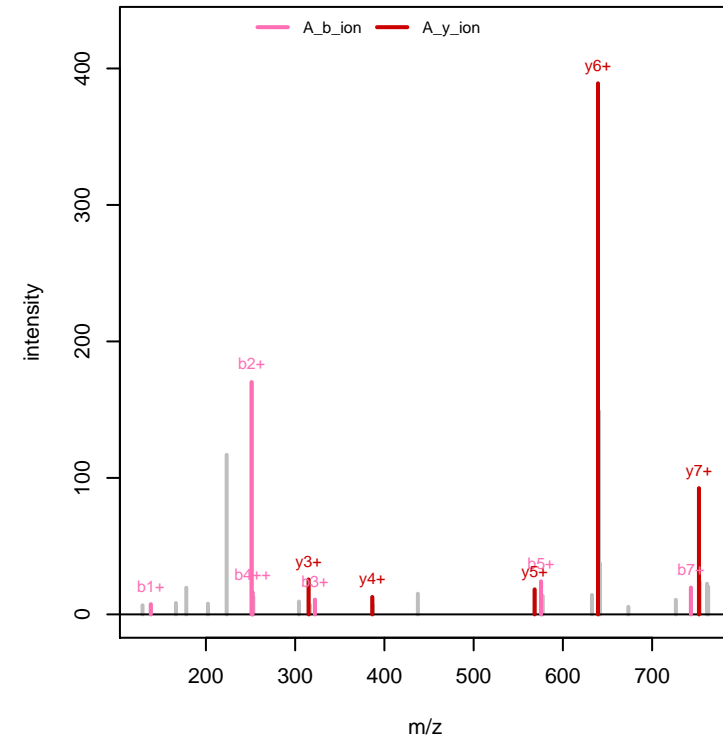

**HLAKAPAK+XL\_L**

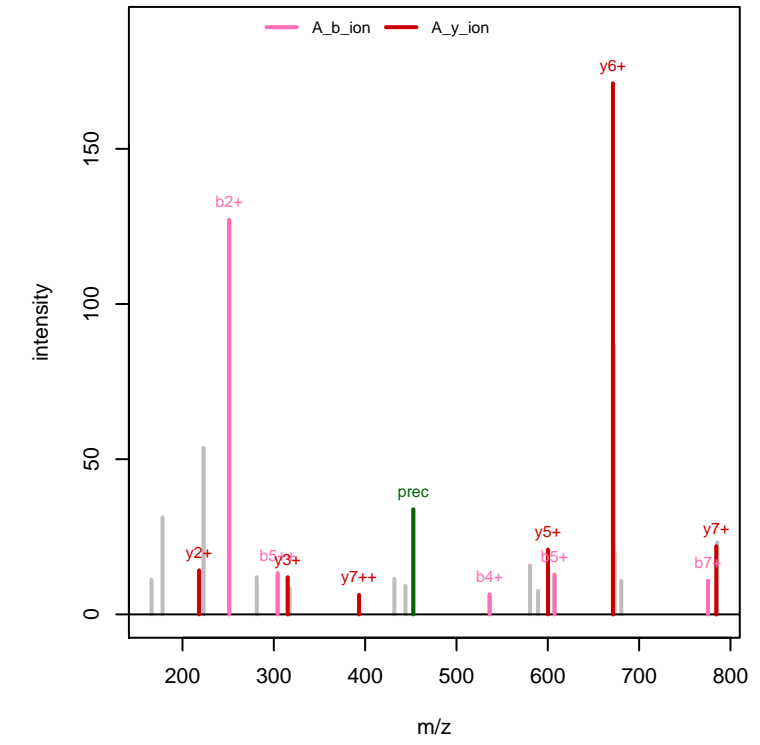

**APAKESAPAAAAPAAQPALAAR+XL\_S**

**APAKESAPAAAAPAAQPALAAR+XL\_L**

AAGANKVAVIK  
EAKDLVESAPAALK

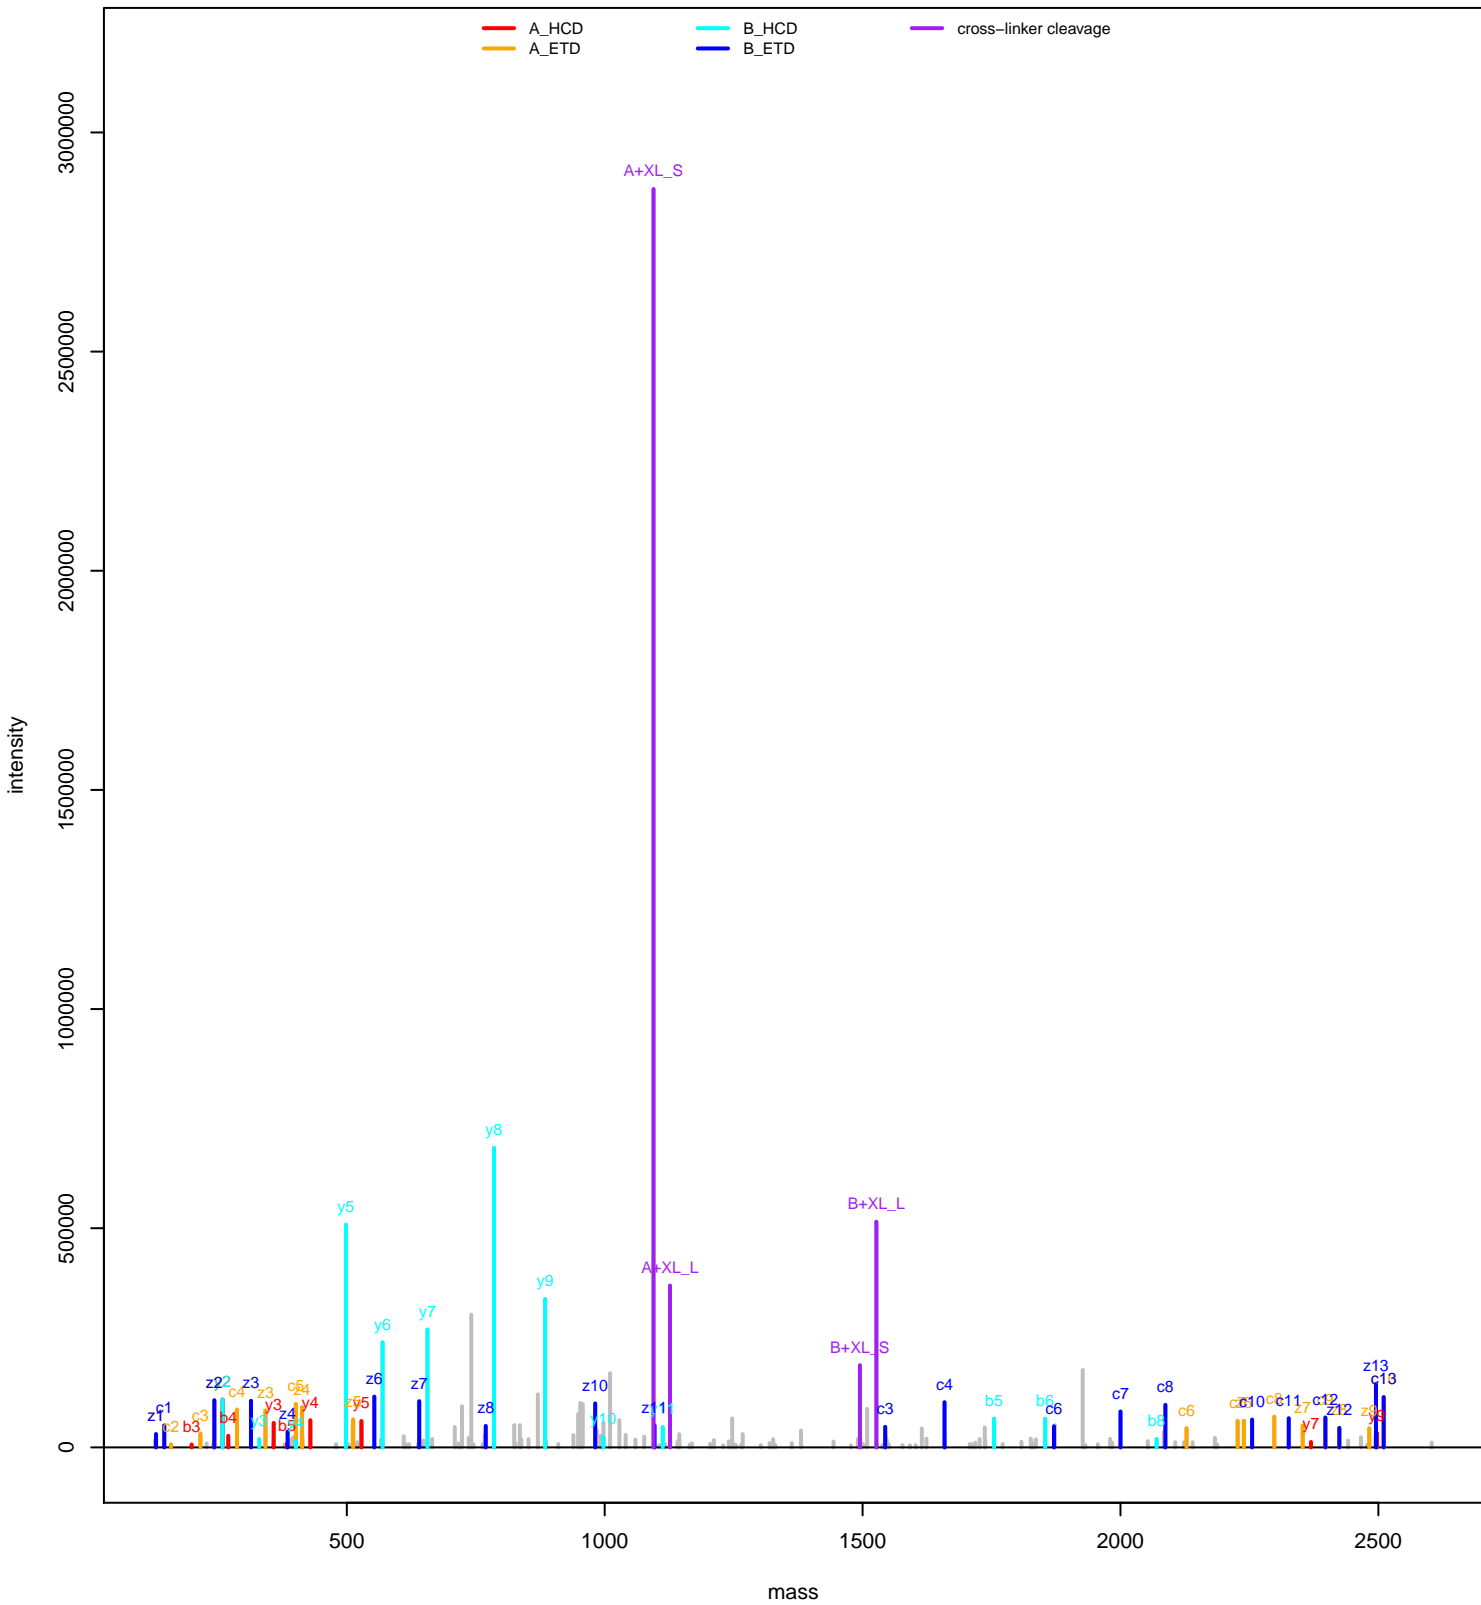

AAGANKVAVIK+XL\_S

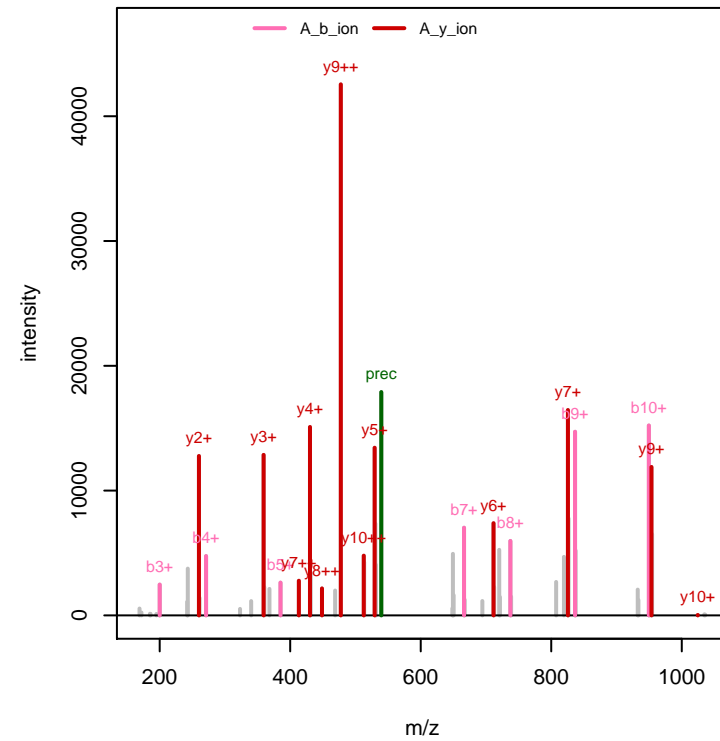

AAGANKVAVIK+XL\_L

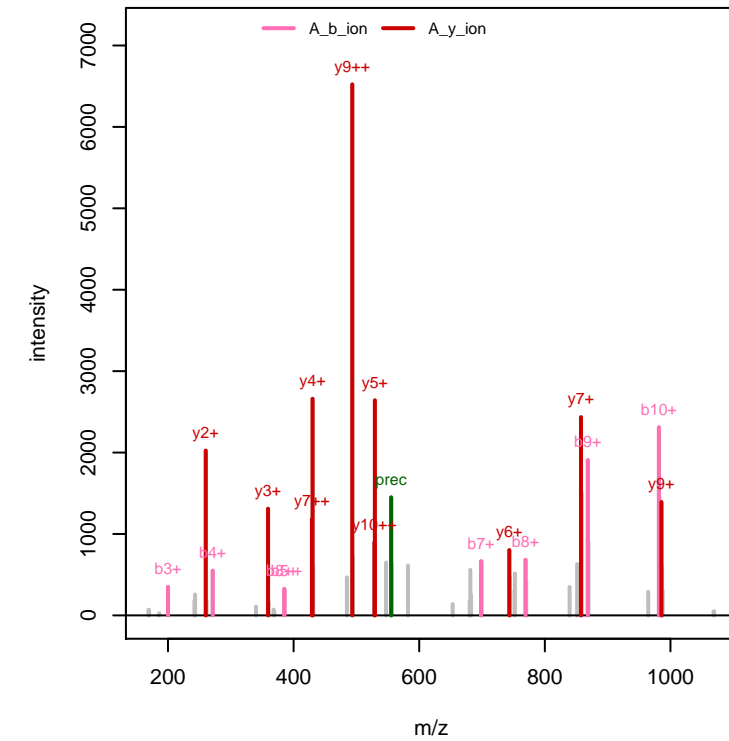

EAKDLVESAPAALK+XL\_S

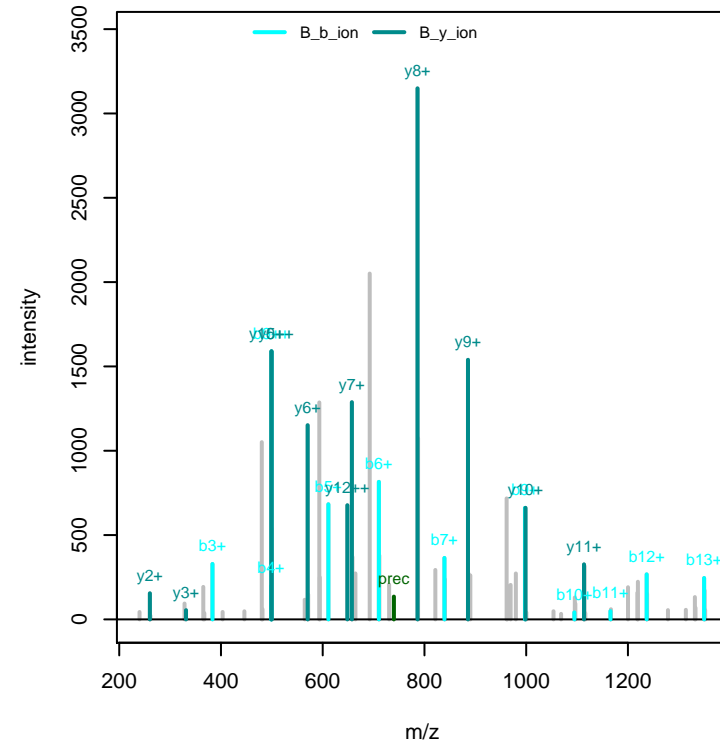

EAKDLVESAPAALK+XL\_L

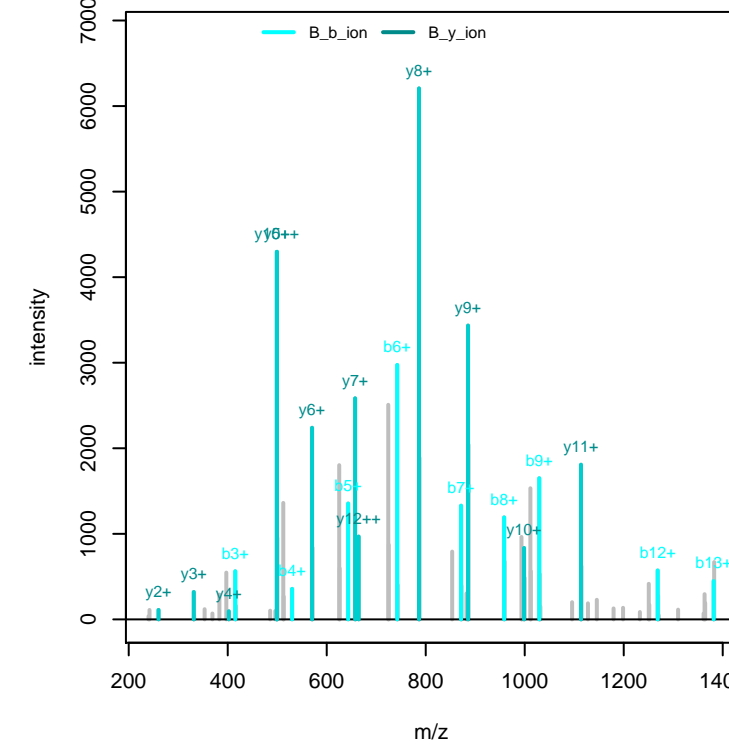

AVIGDKGGVR  
TVEAASALEQQDLKR

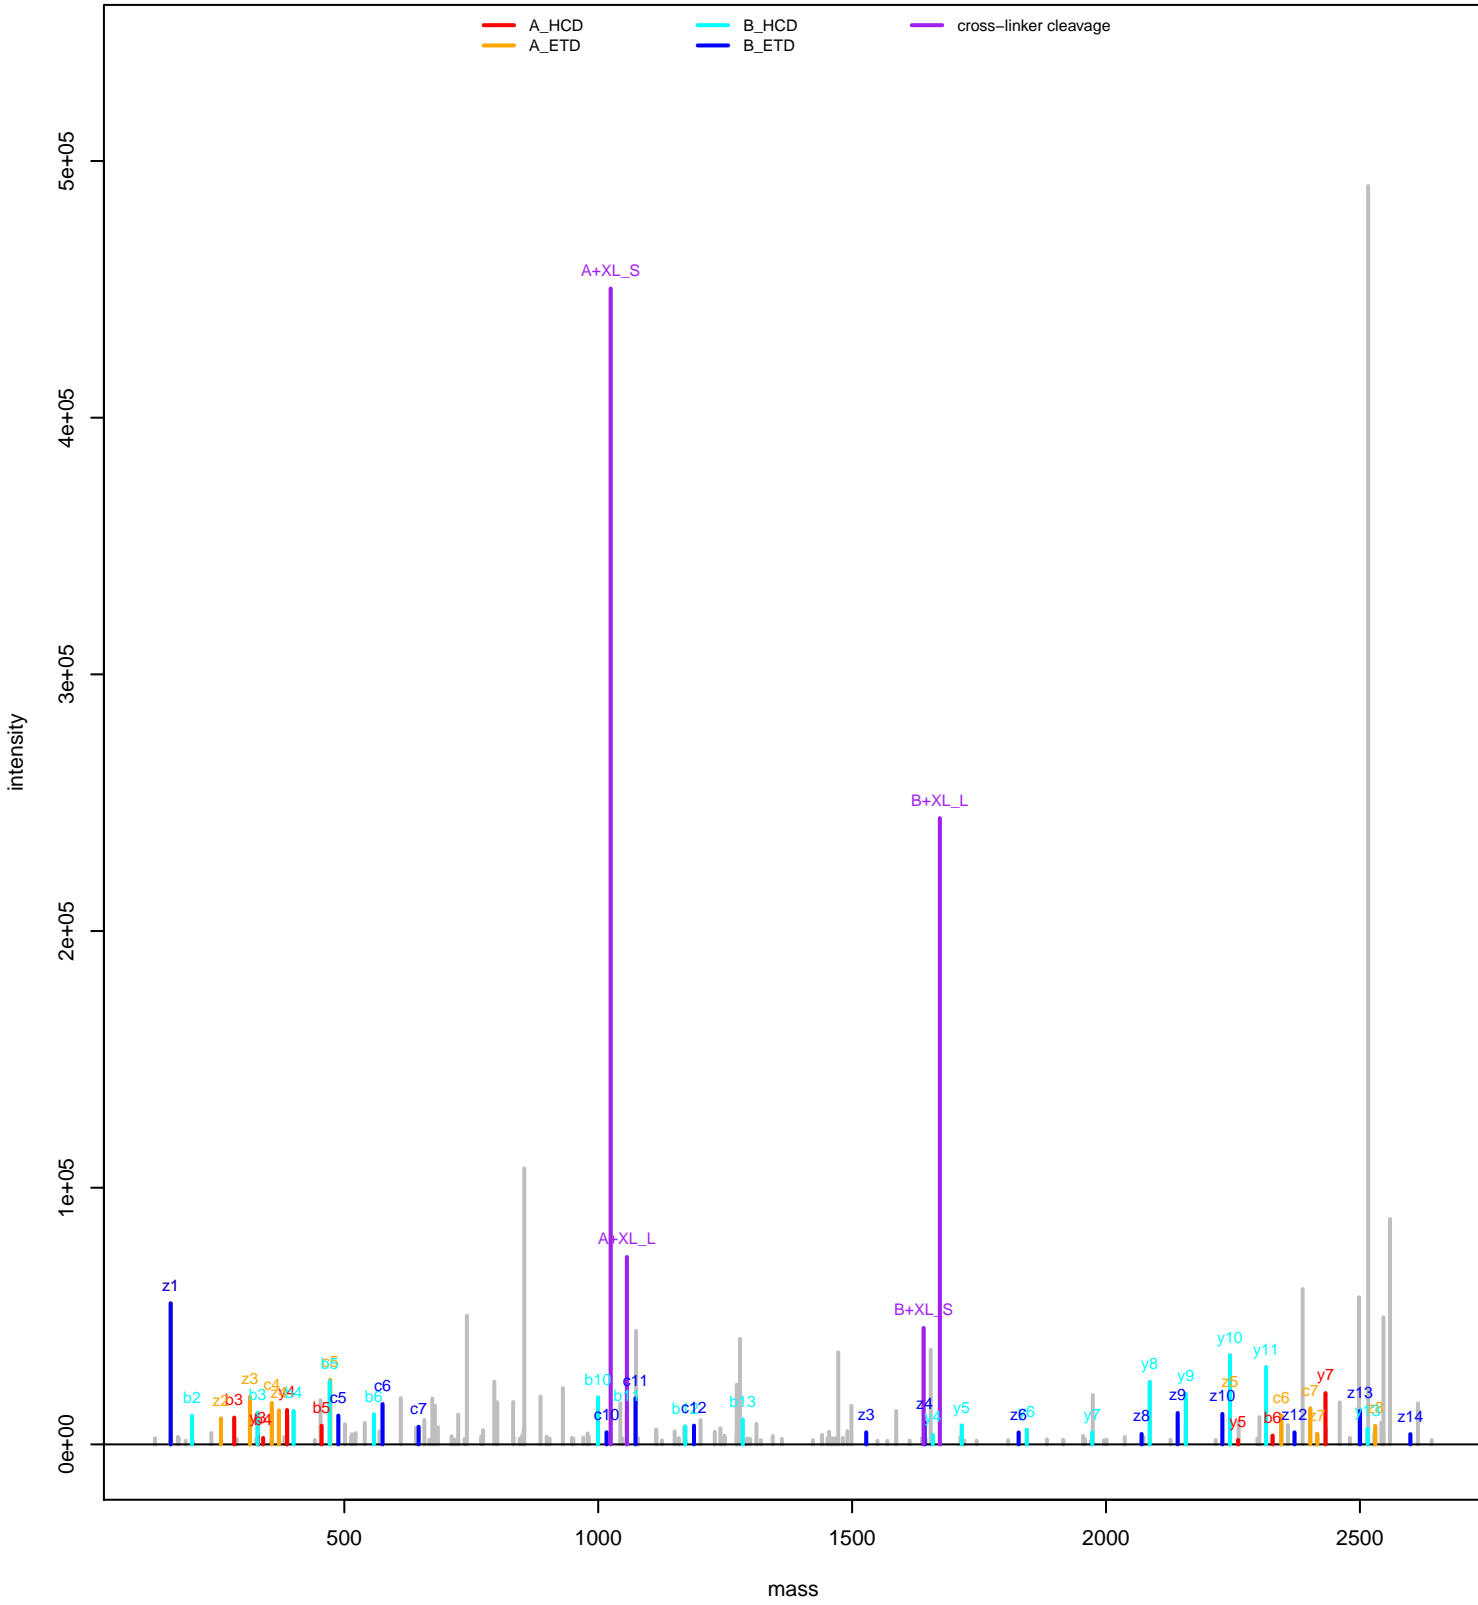

VFIKPGNGK  
ANPEQLEEQR ETR

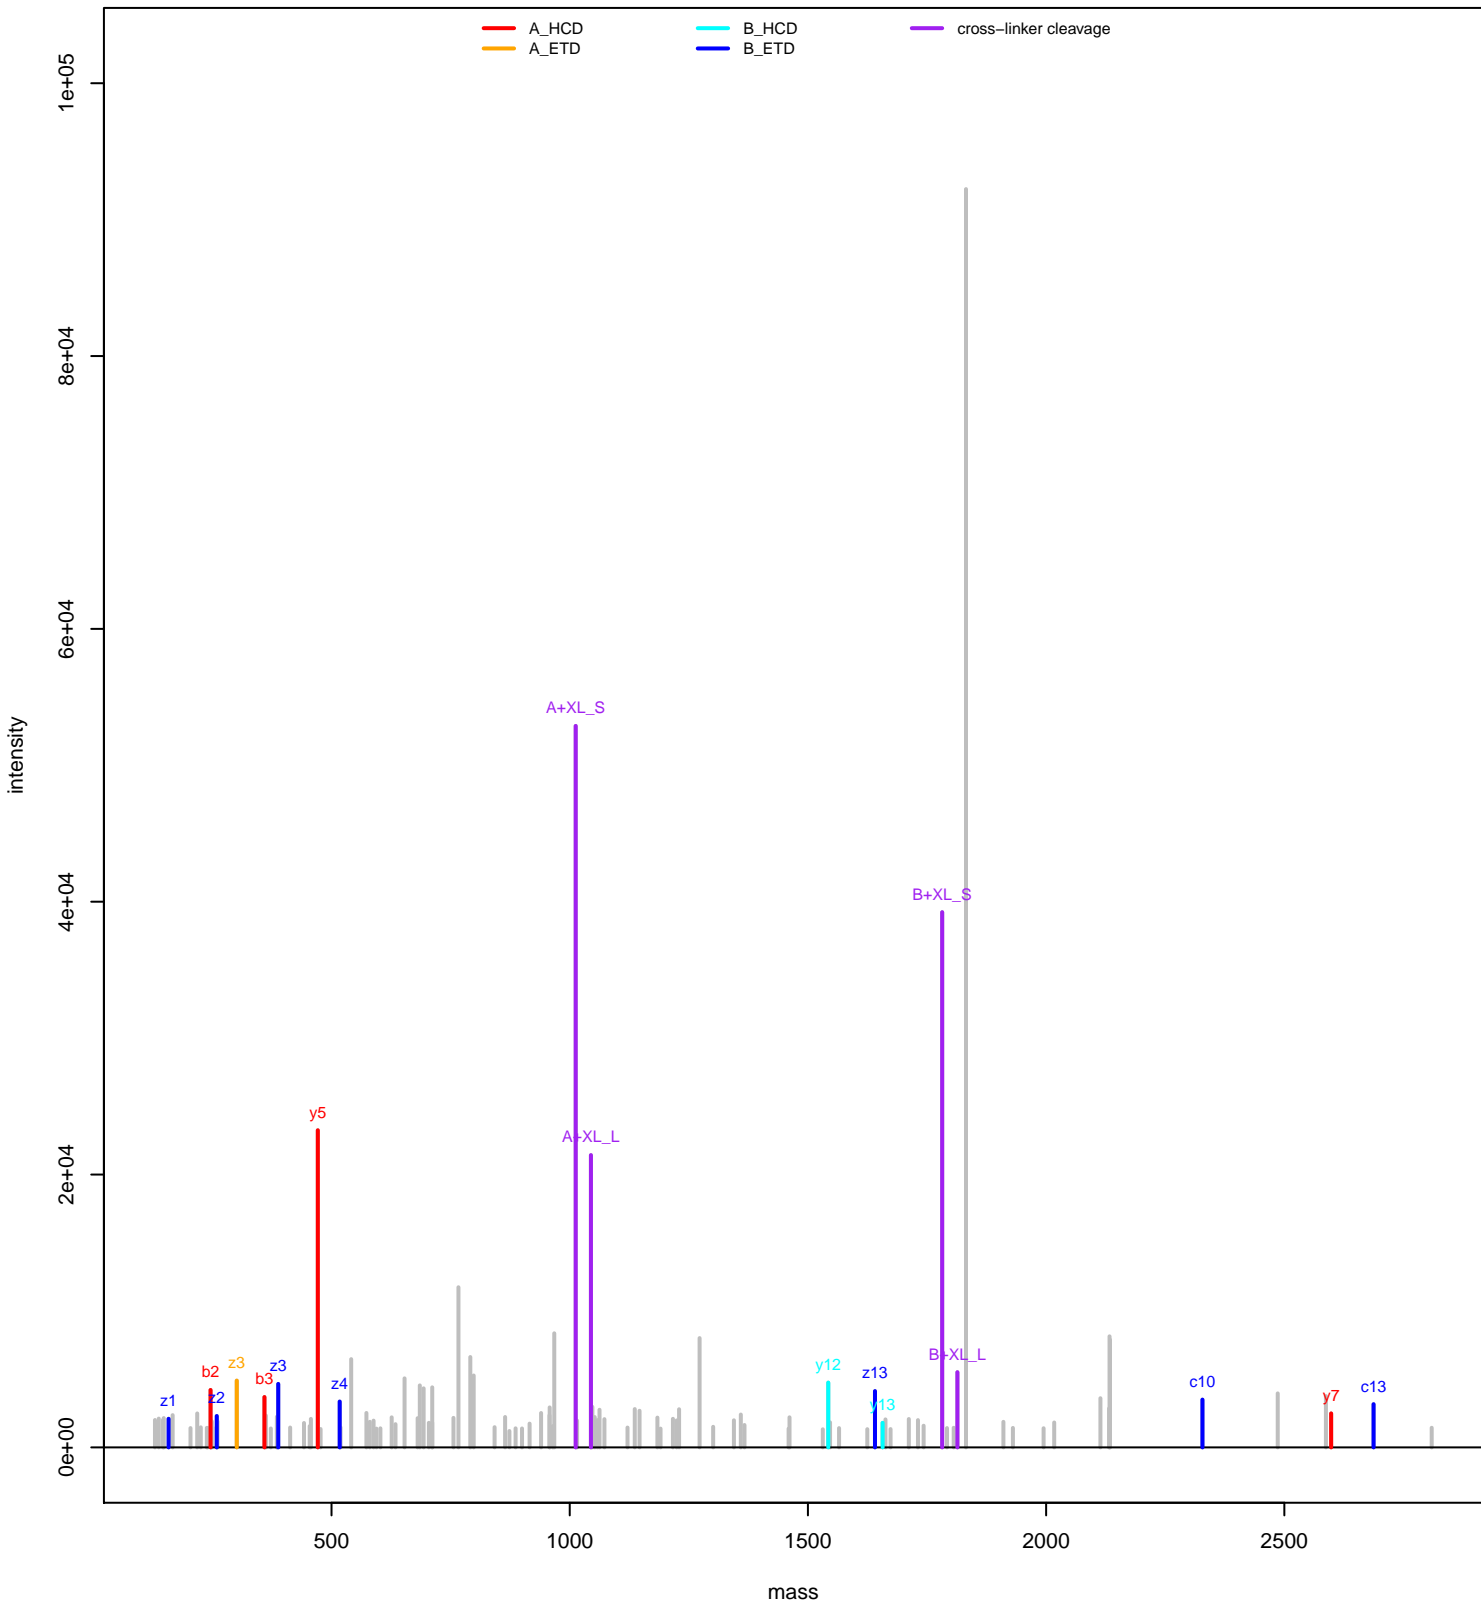

VFIKPGNGK+XL\_S

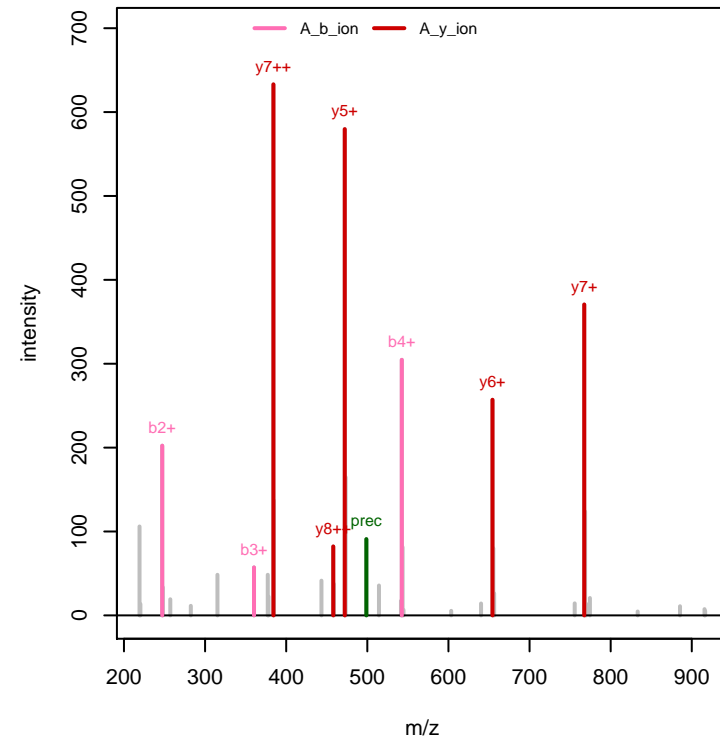

VFIKPGNGK+XL\_L

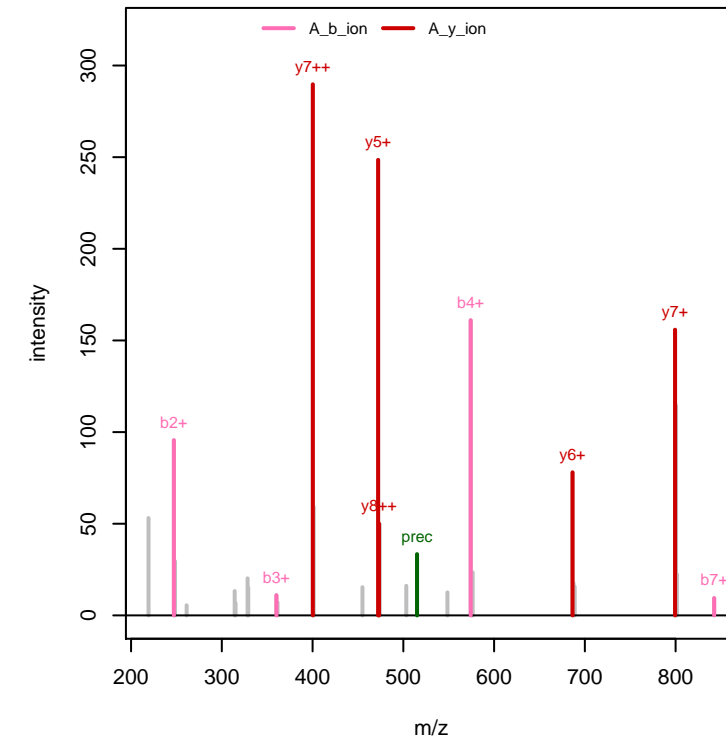

ANPEQLEEQR ETR+XL\_S

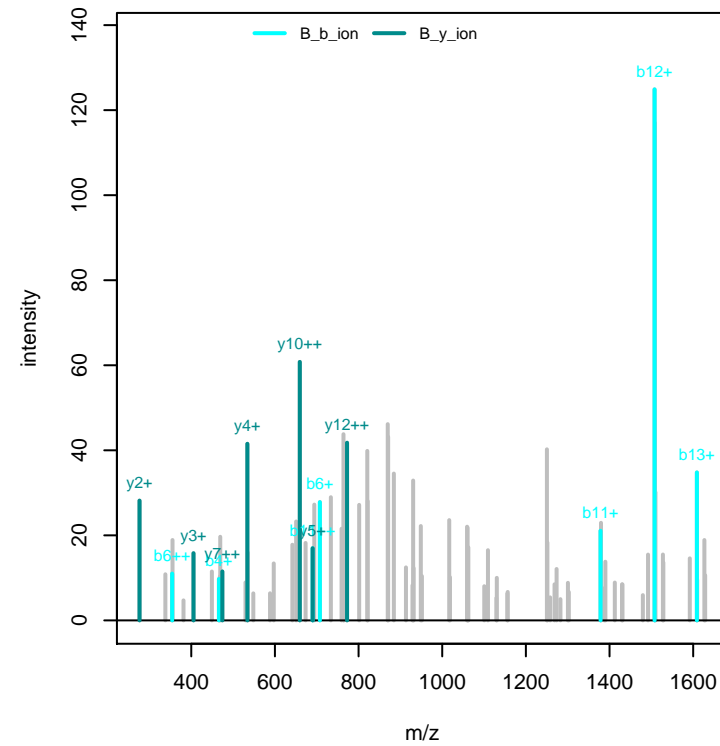

ANPEQLEEQR ETR+XL\_L

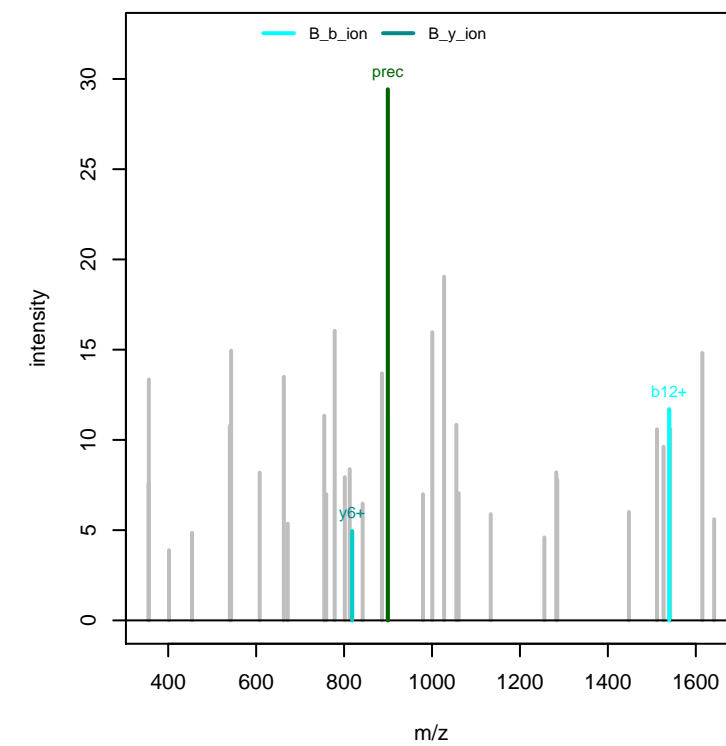

GTTTMGVK  
GTTTMGVKLD DATRER

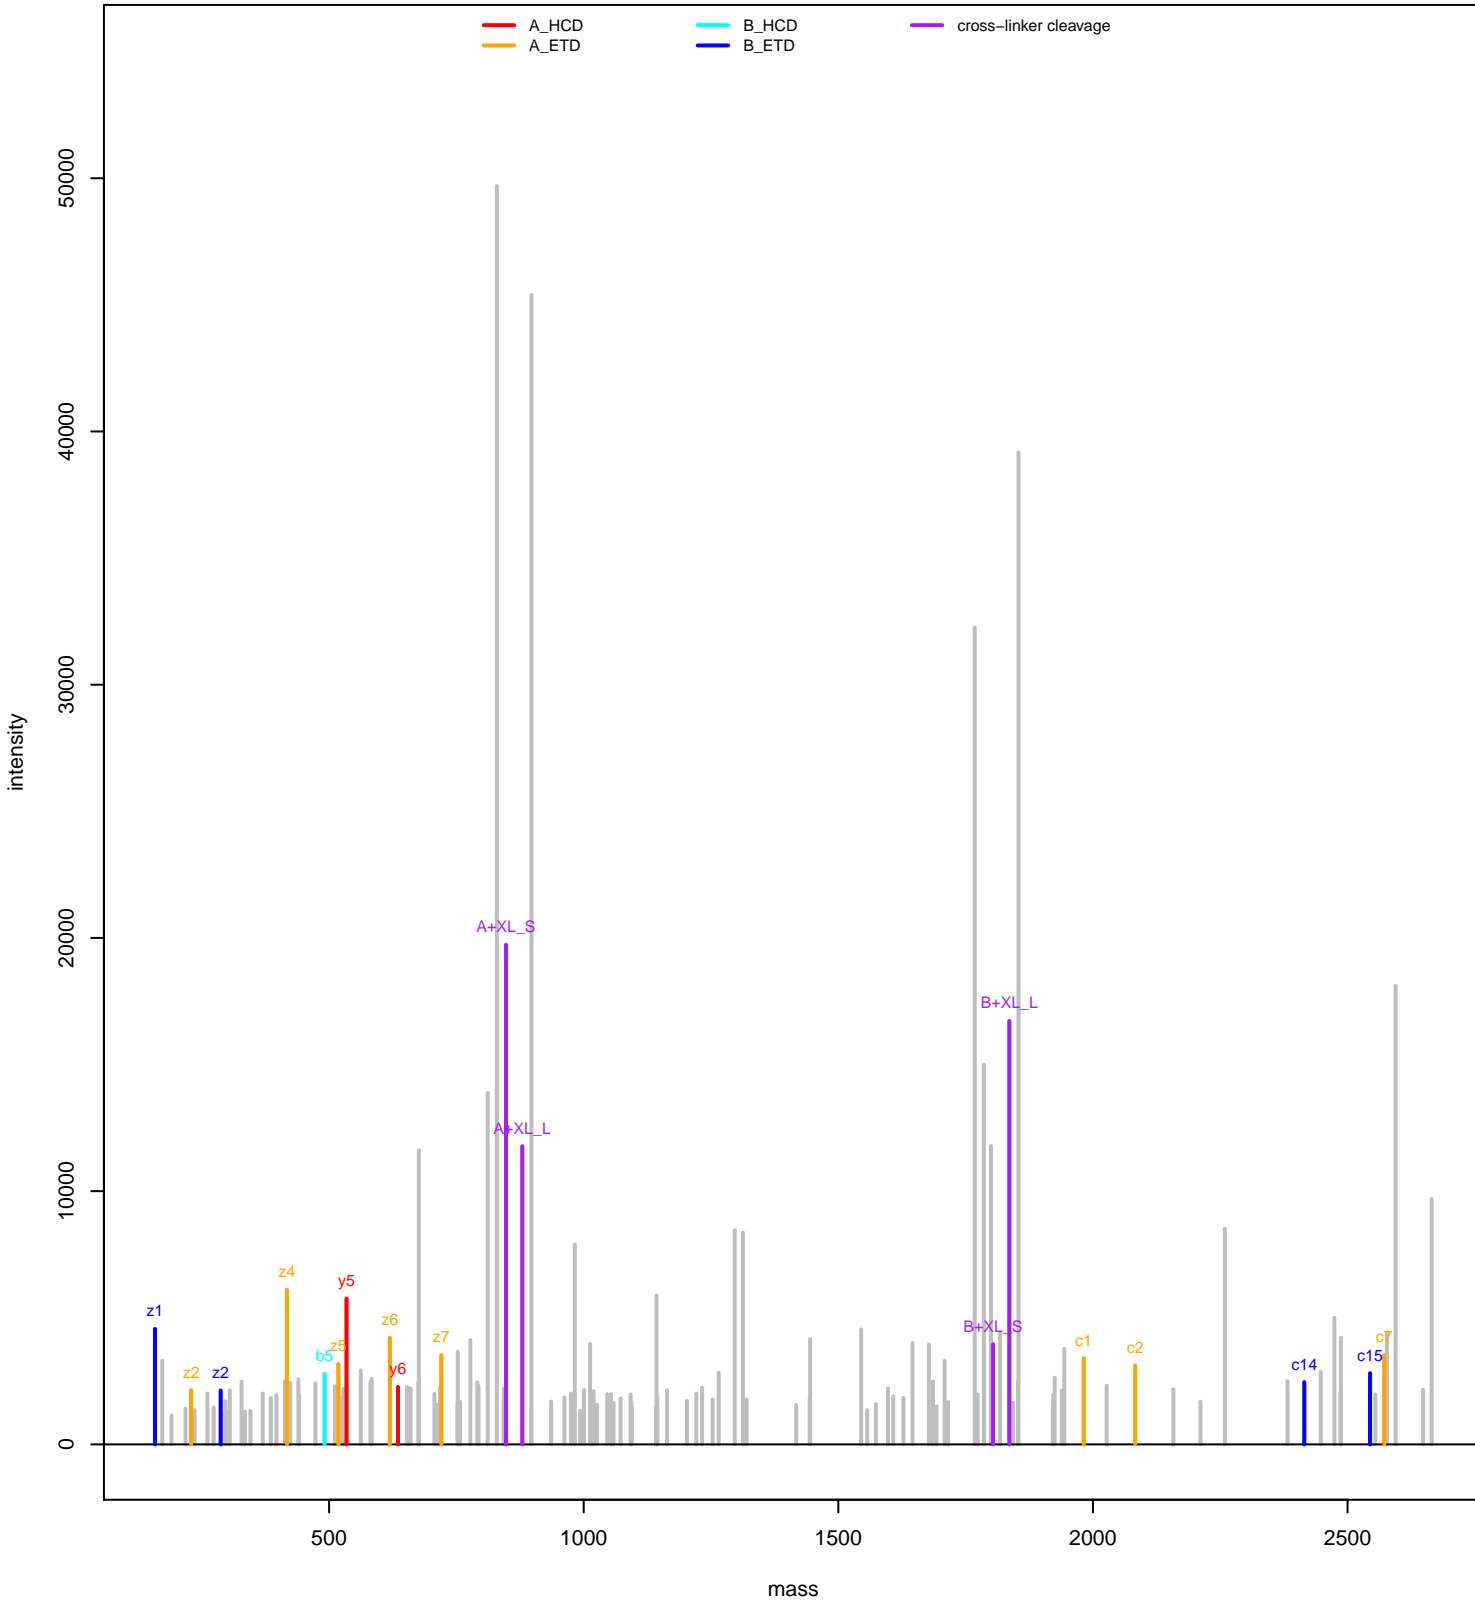

GTTTMGVK+XL\_S

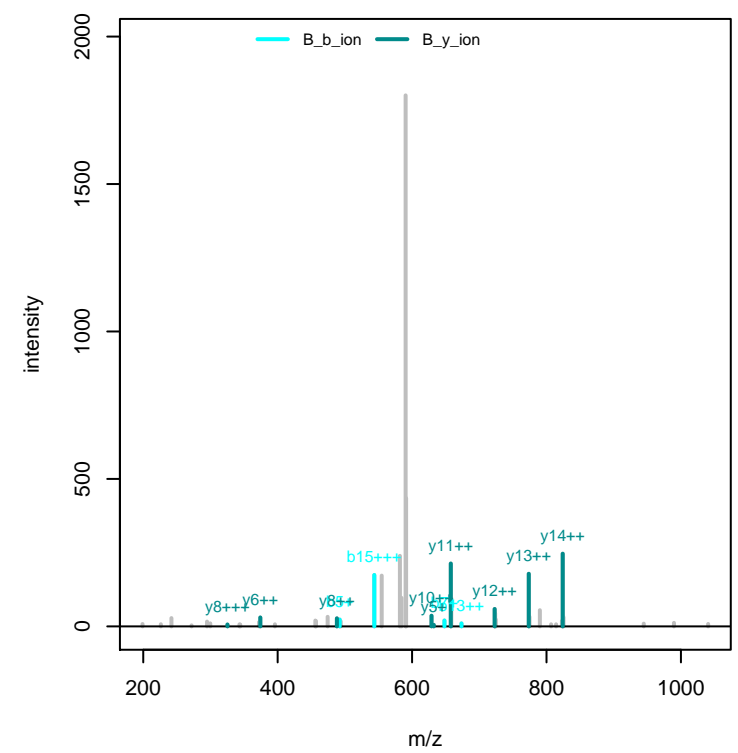

GTTTMGVK+XL\_L

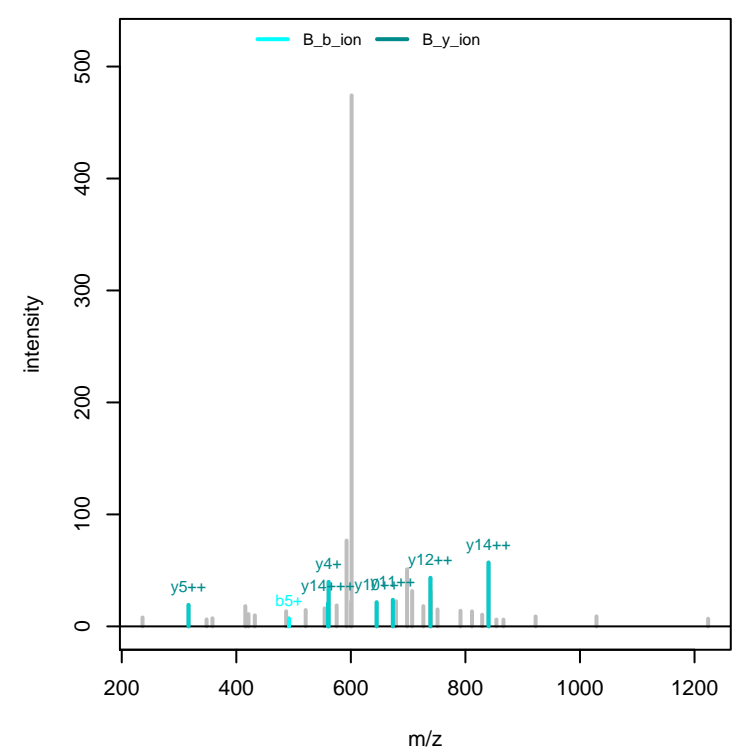

DLEKGG  
LVAVPHSKLSK

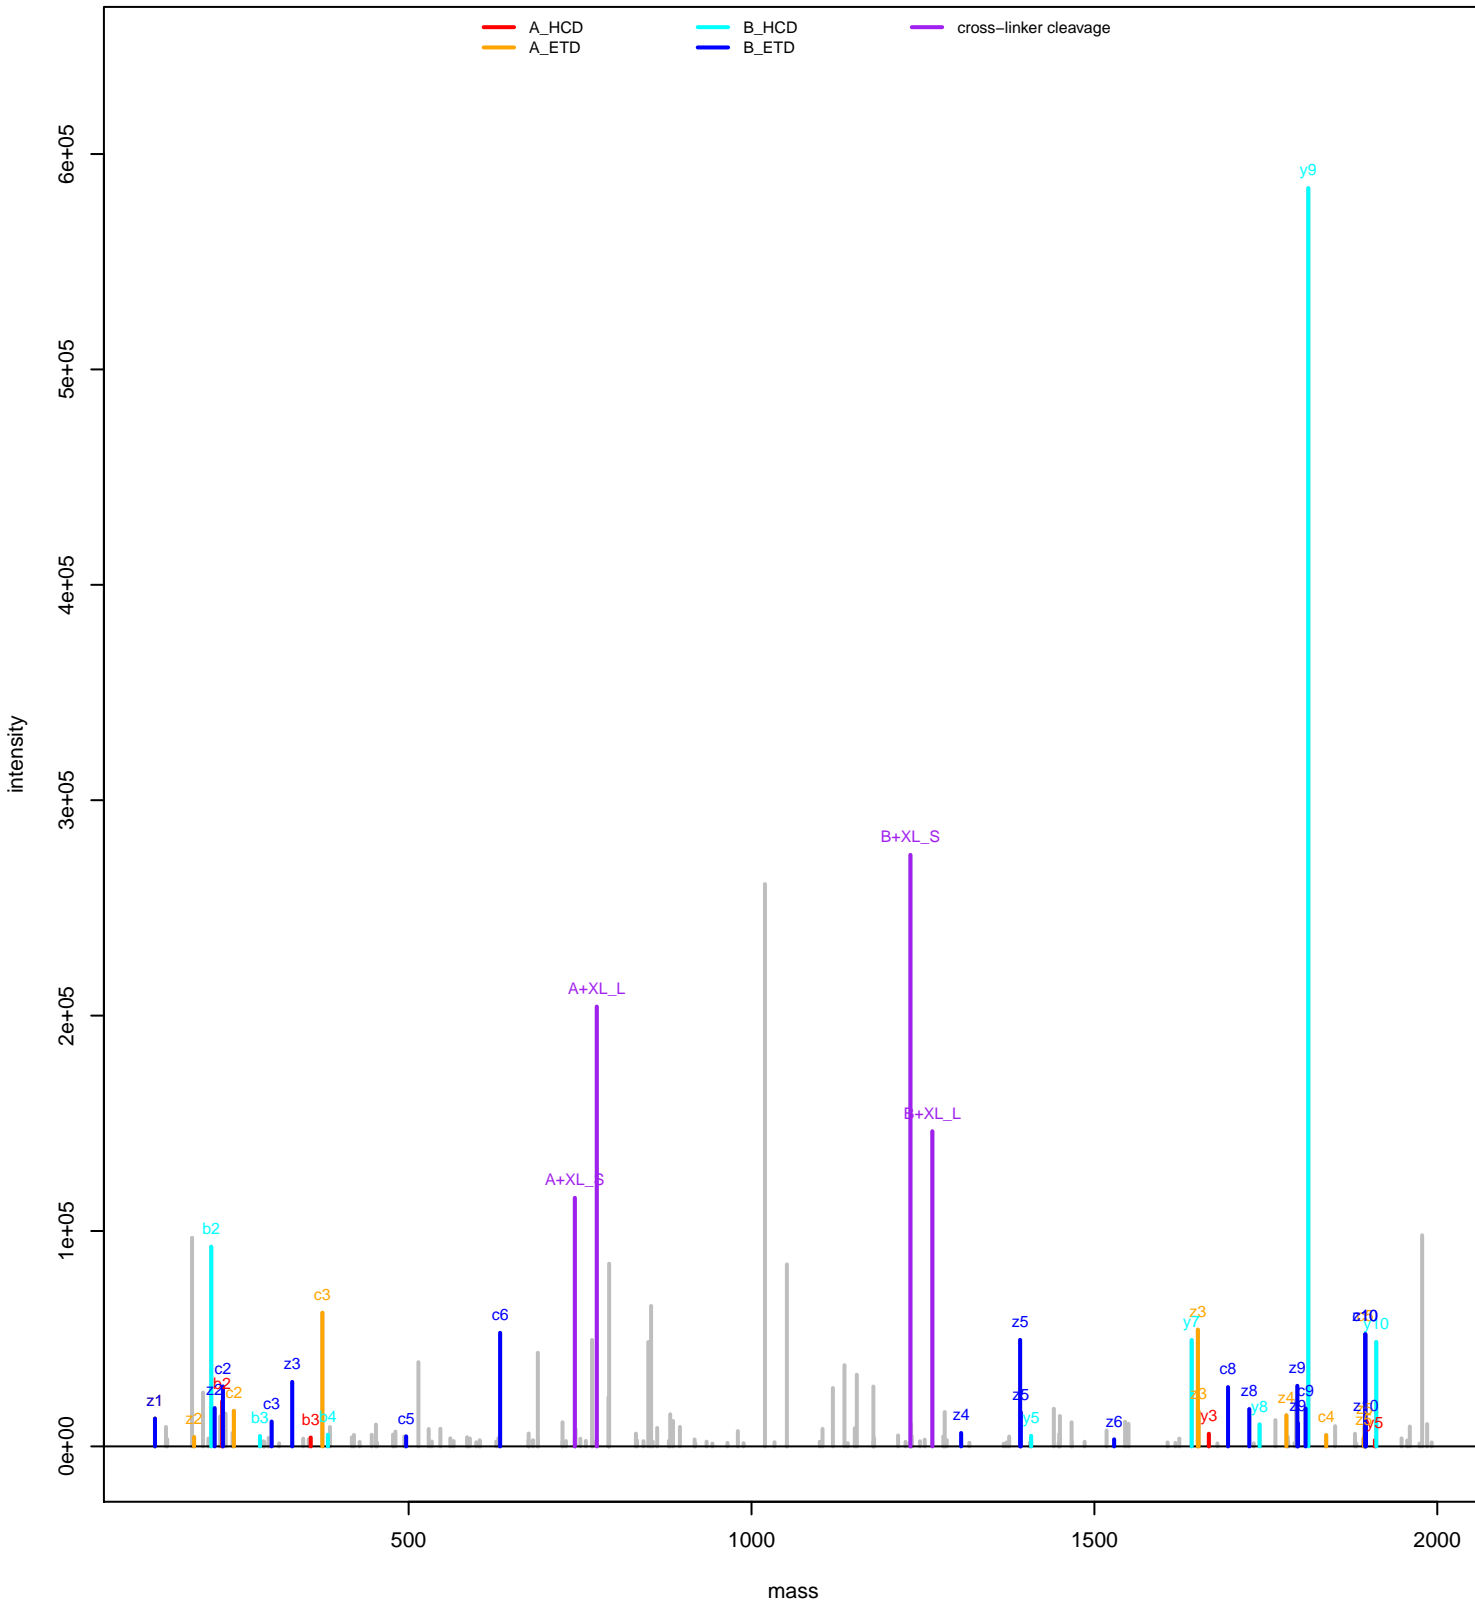

DLEKGG+XL\_S

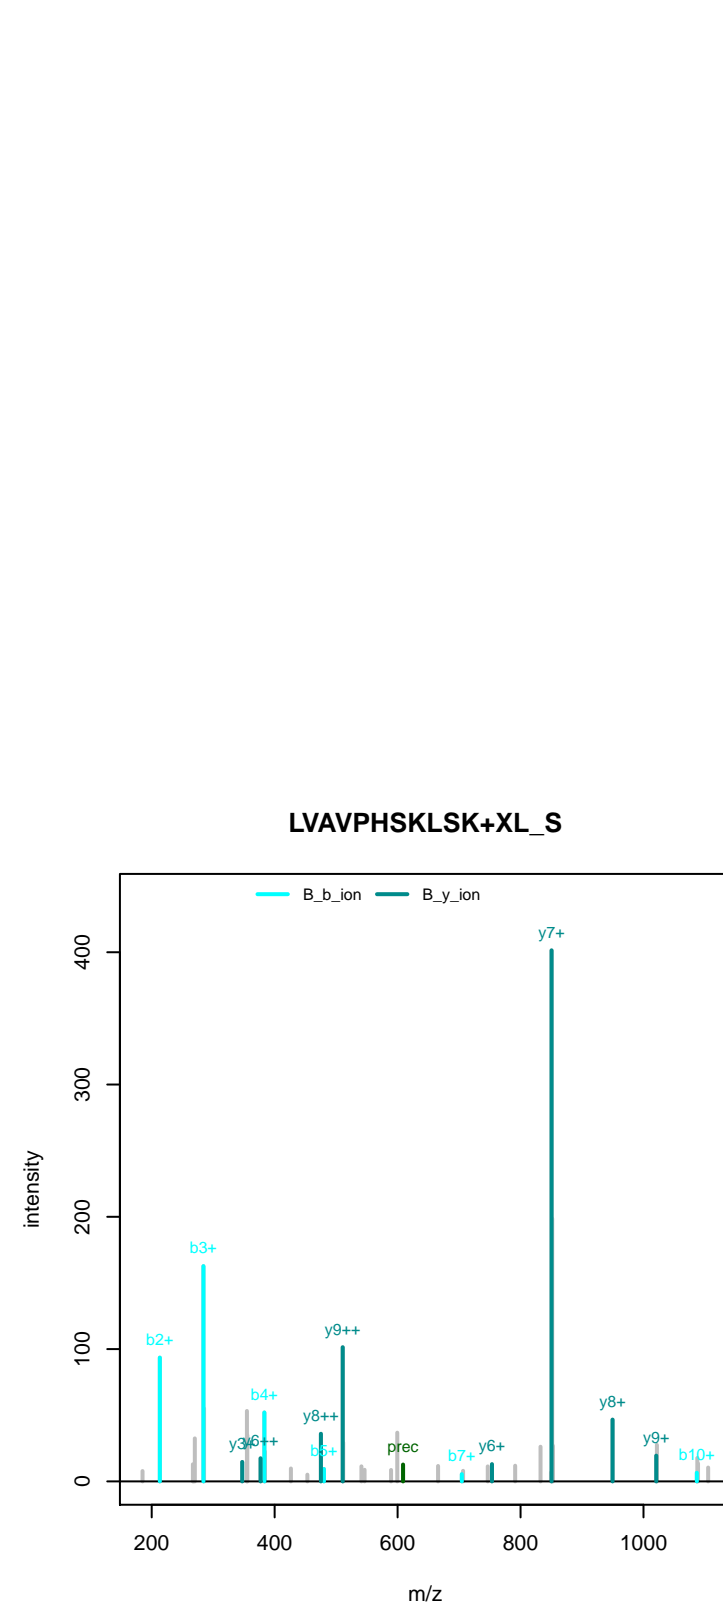

DLEKGG+XL\_L

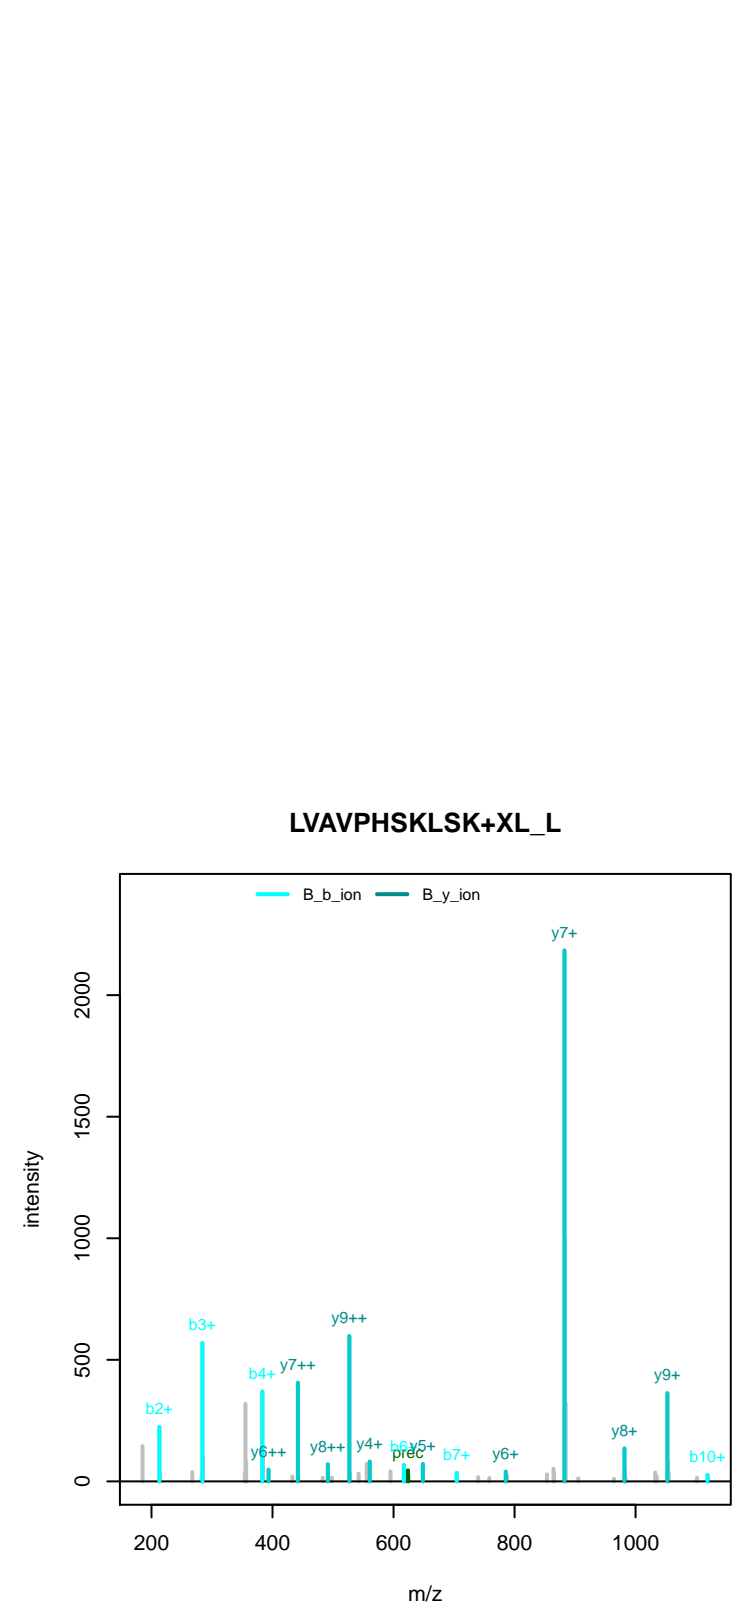

LVAVPHSKLSK+XL\_S

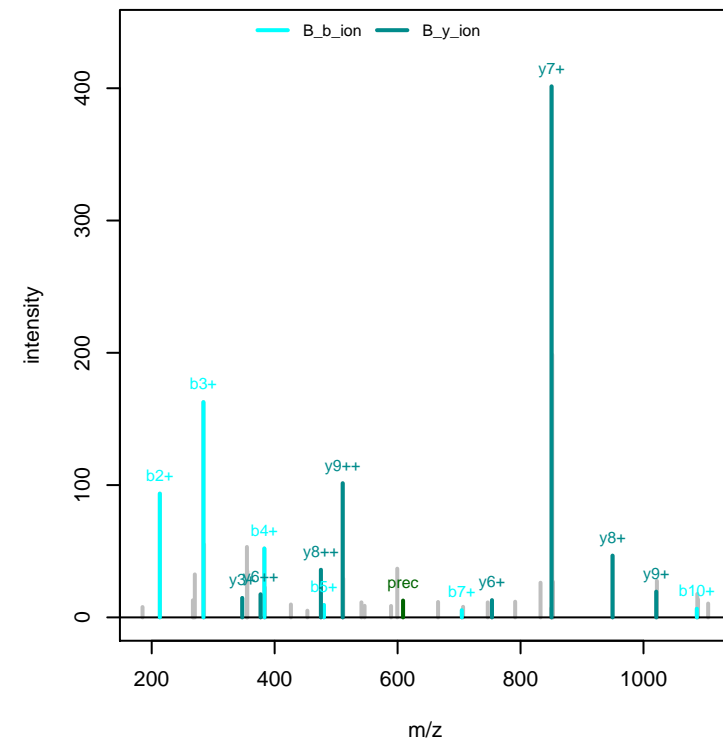

LVAVPHSKLSK+XL\_L

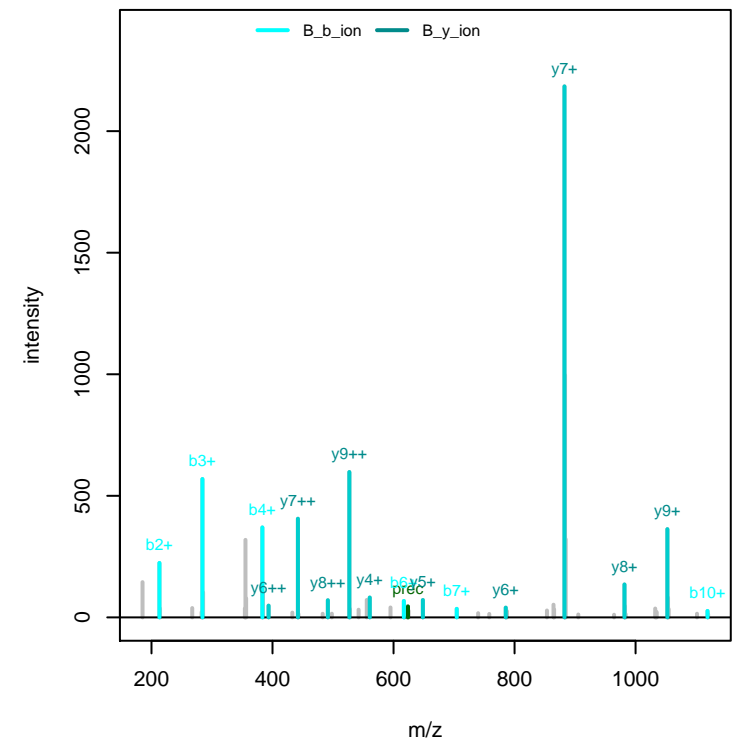



LEKLEAK  
AVDALTZR

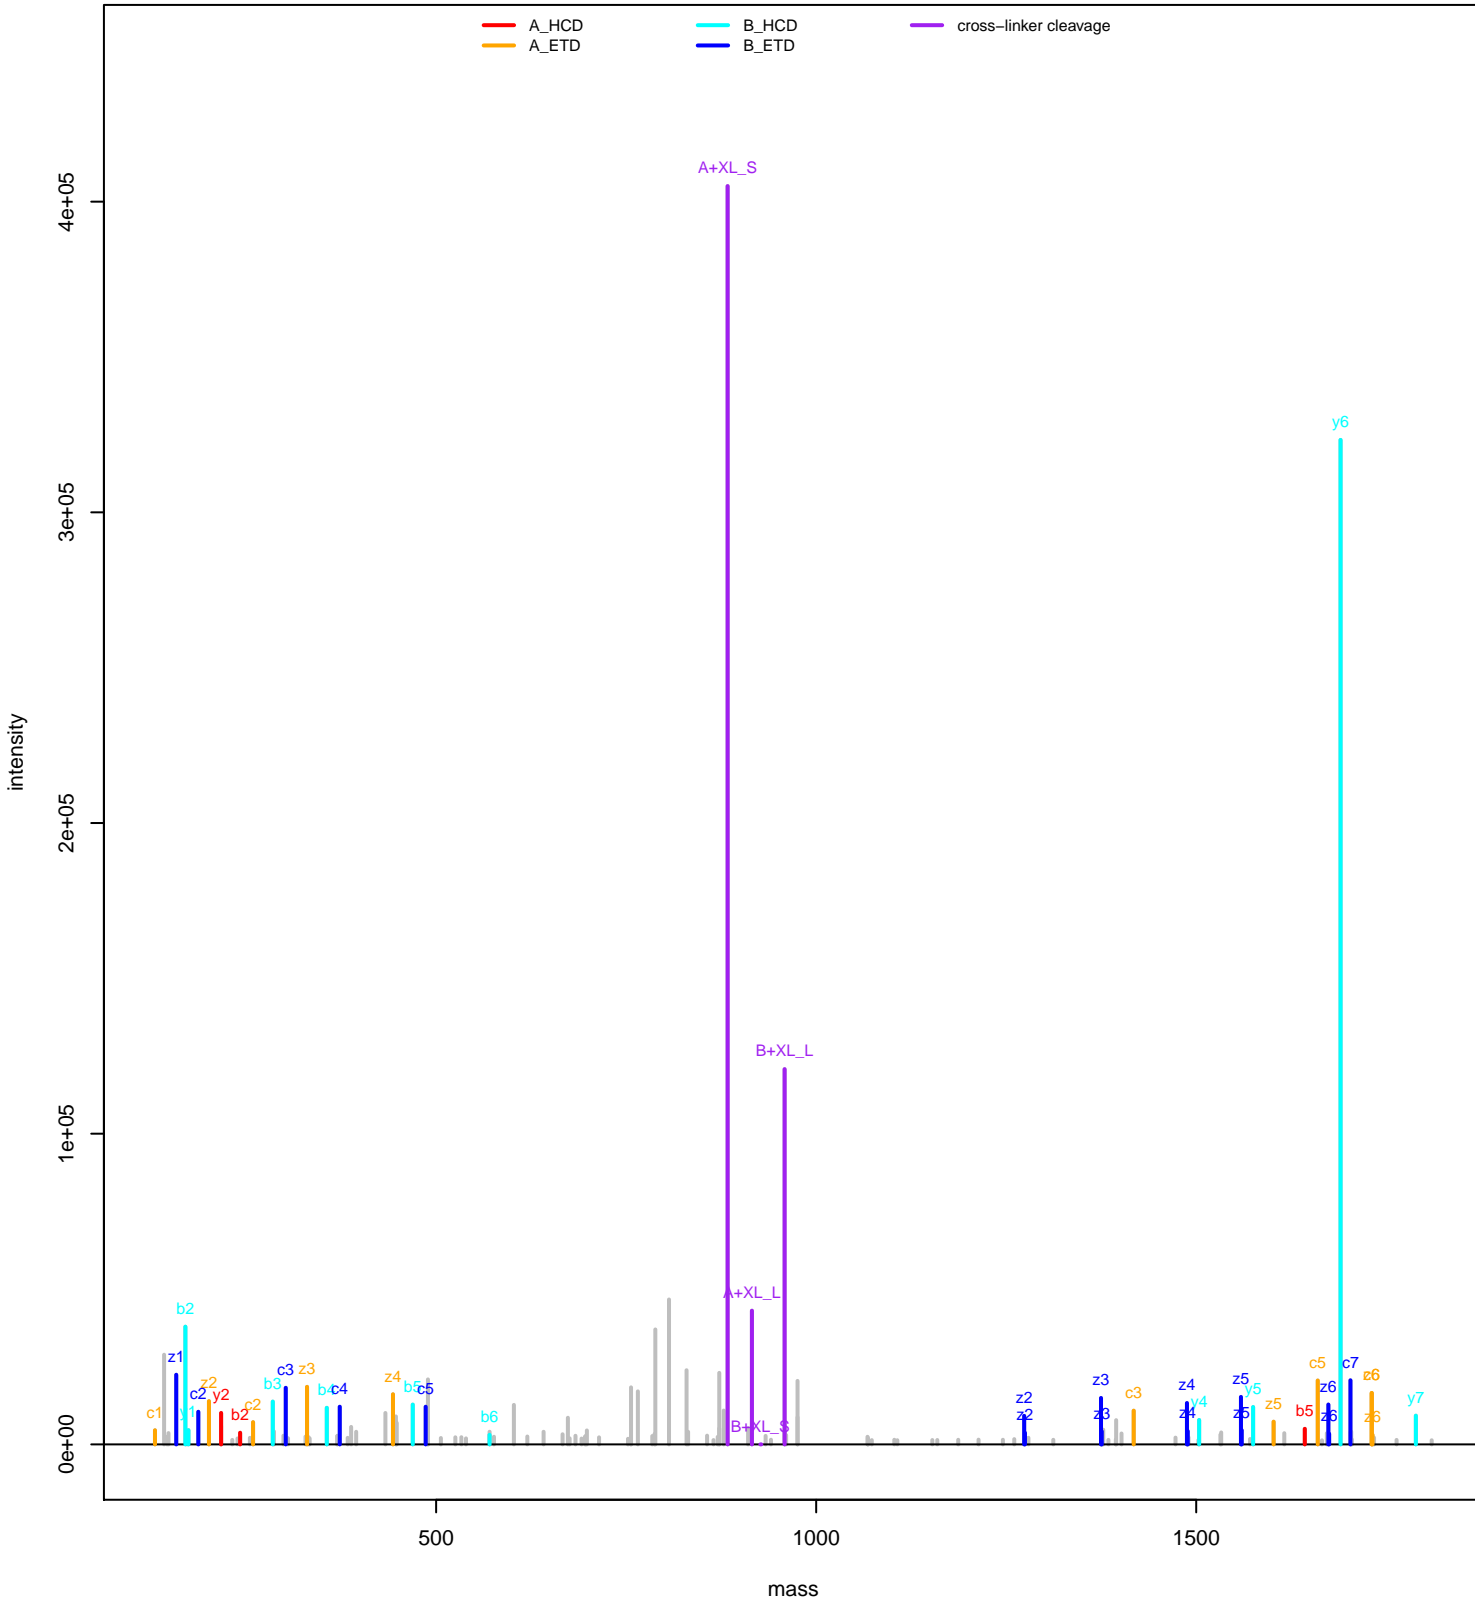

LEKLEAK+XL\_S

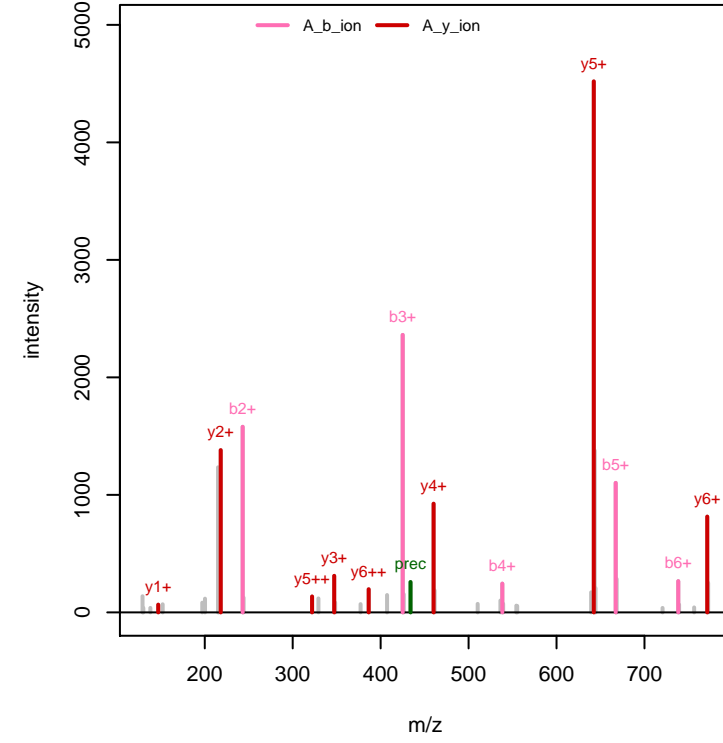

LEKLEAK+XL\_L

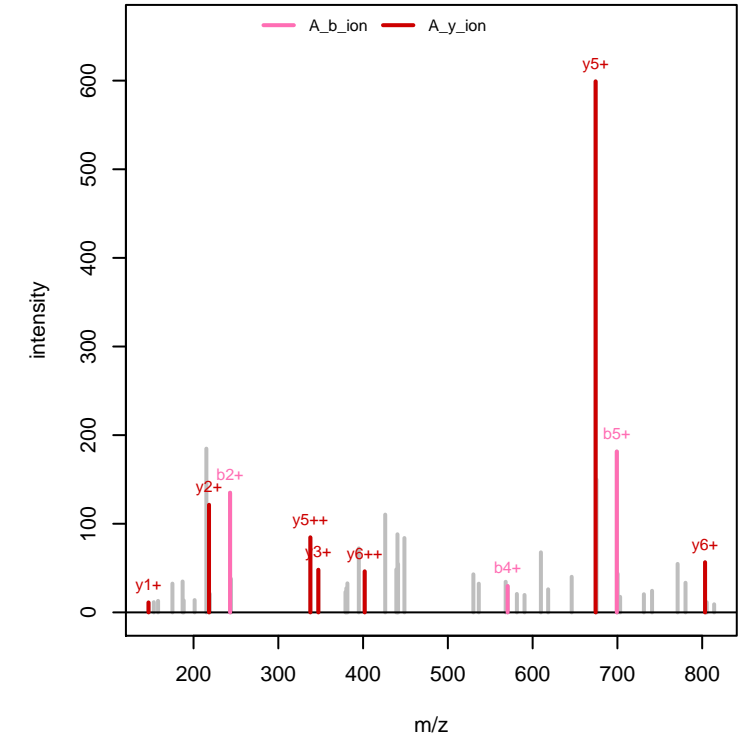

AVDALTZR+XL\_S

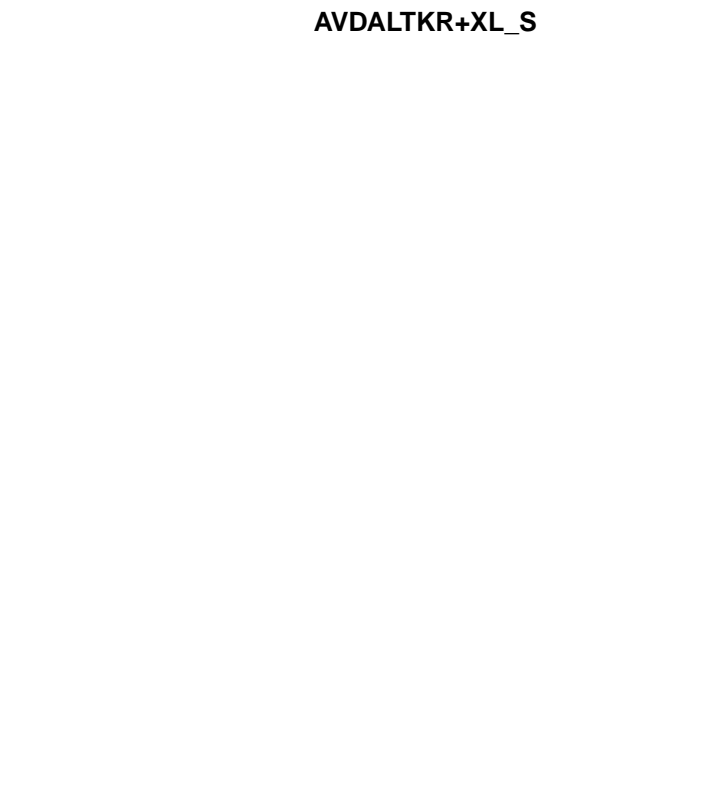

AVDALTZR+XL\_L

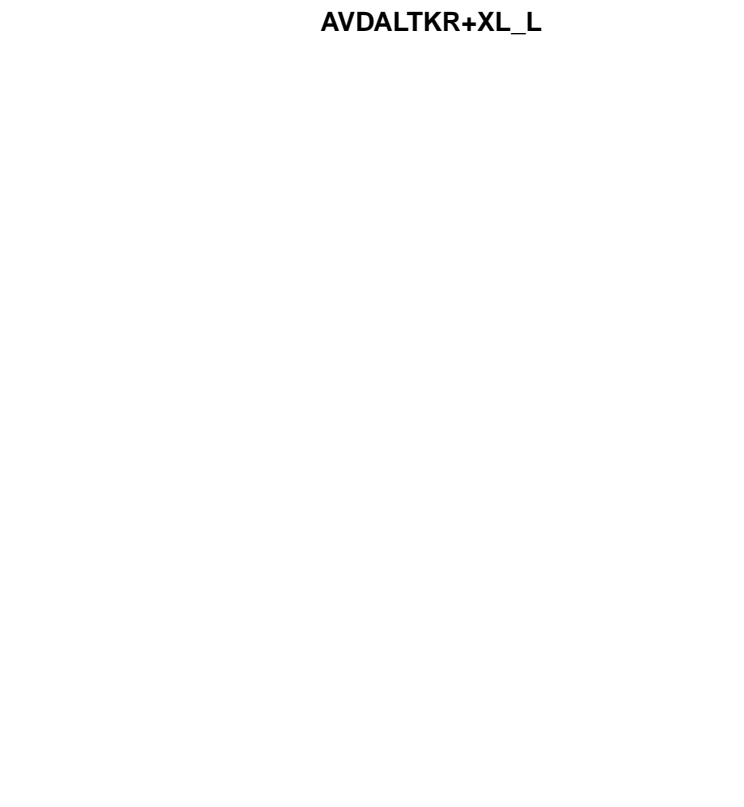

NDLKTK  
VKAALVDHDIK

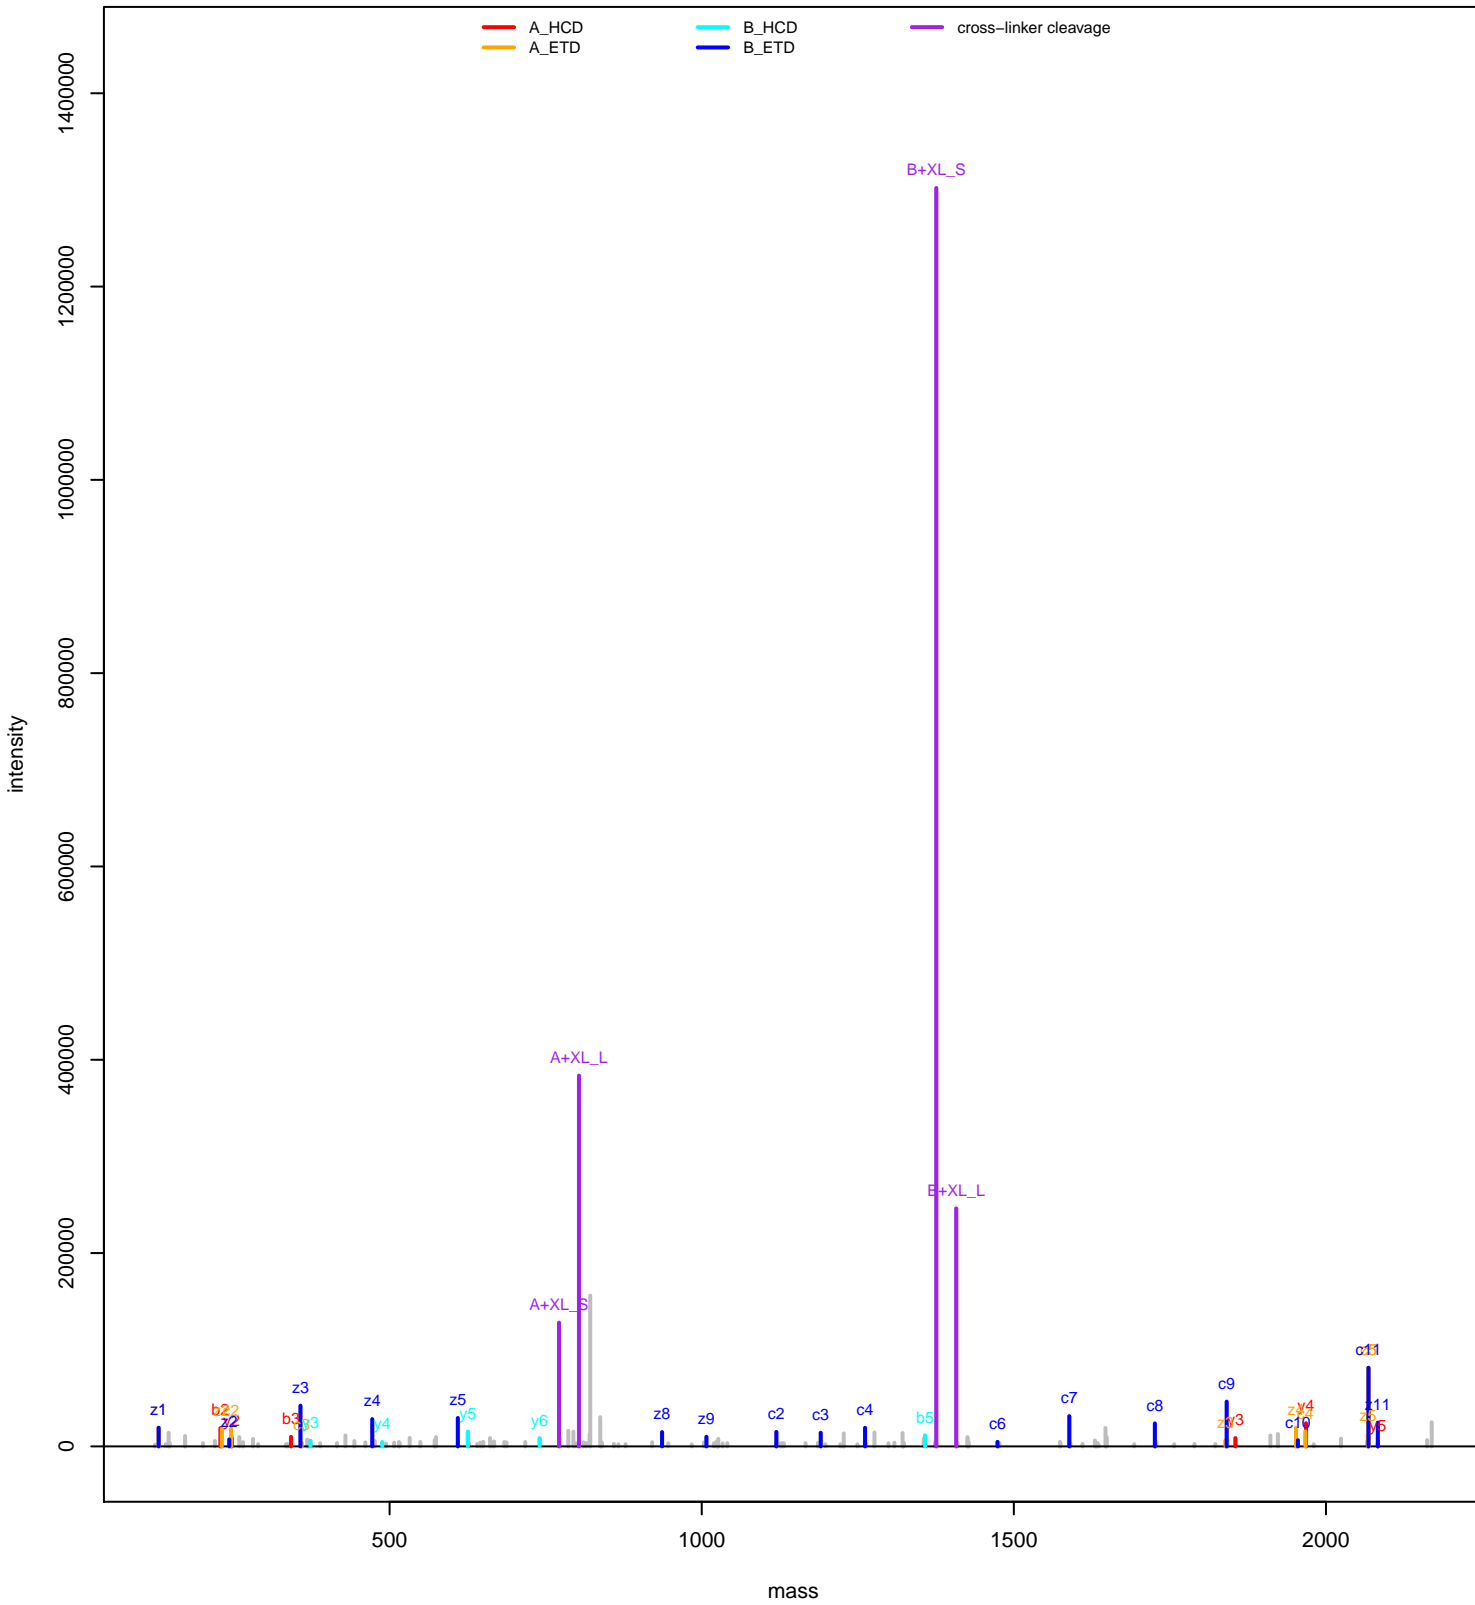

NDLKTK+XL\_S

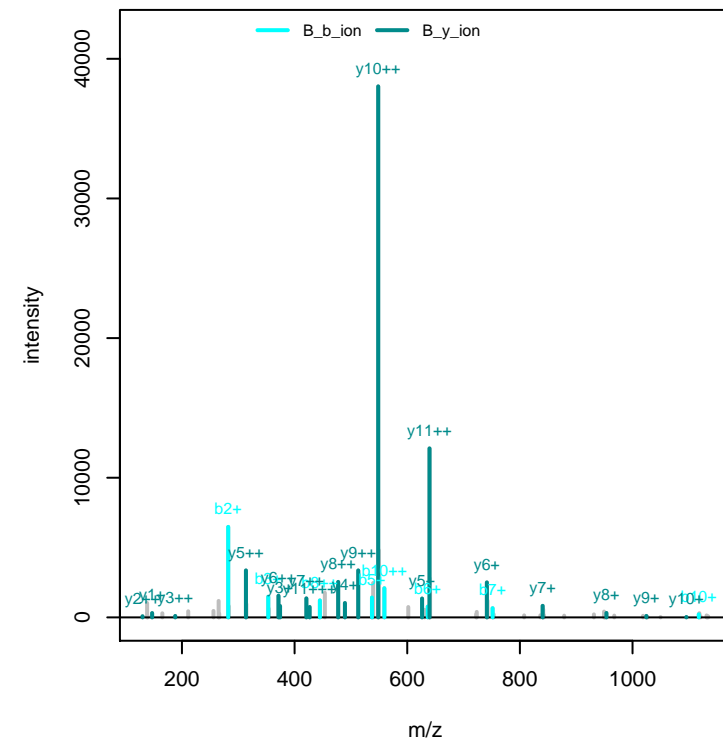

NDLKTK+XL\_L

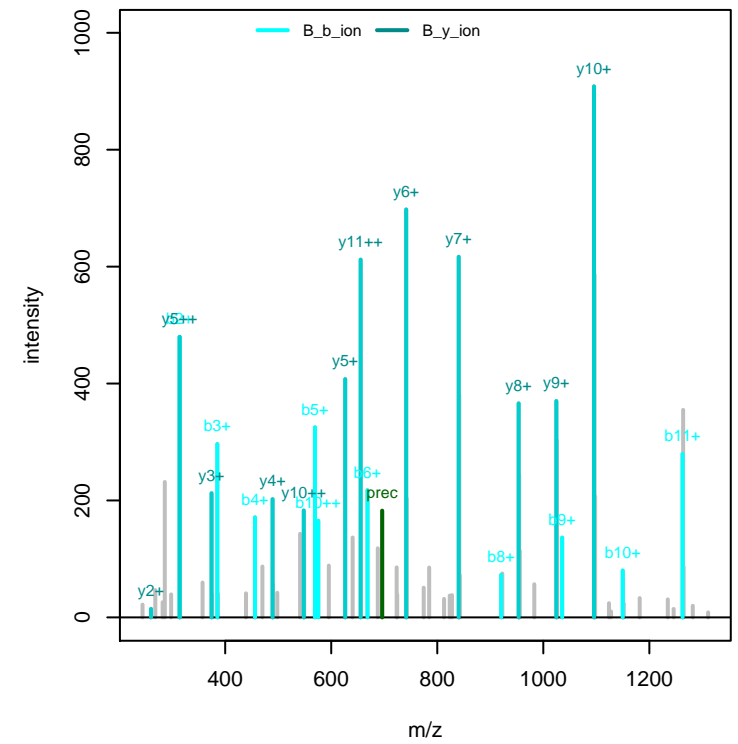

VKAALVDHDIK+XL\_S

VKAALVDHDIK+XL\_L

**AANDKGRK**  
**KDLHDDAEWMoAK**

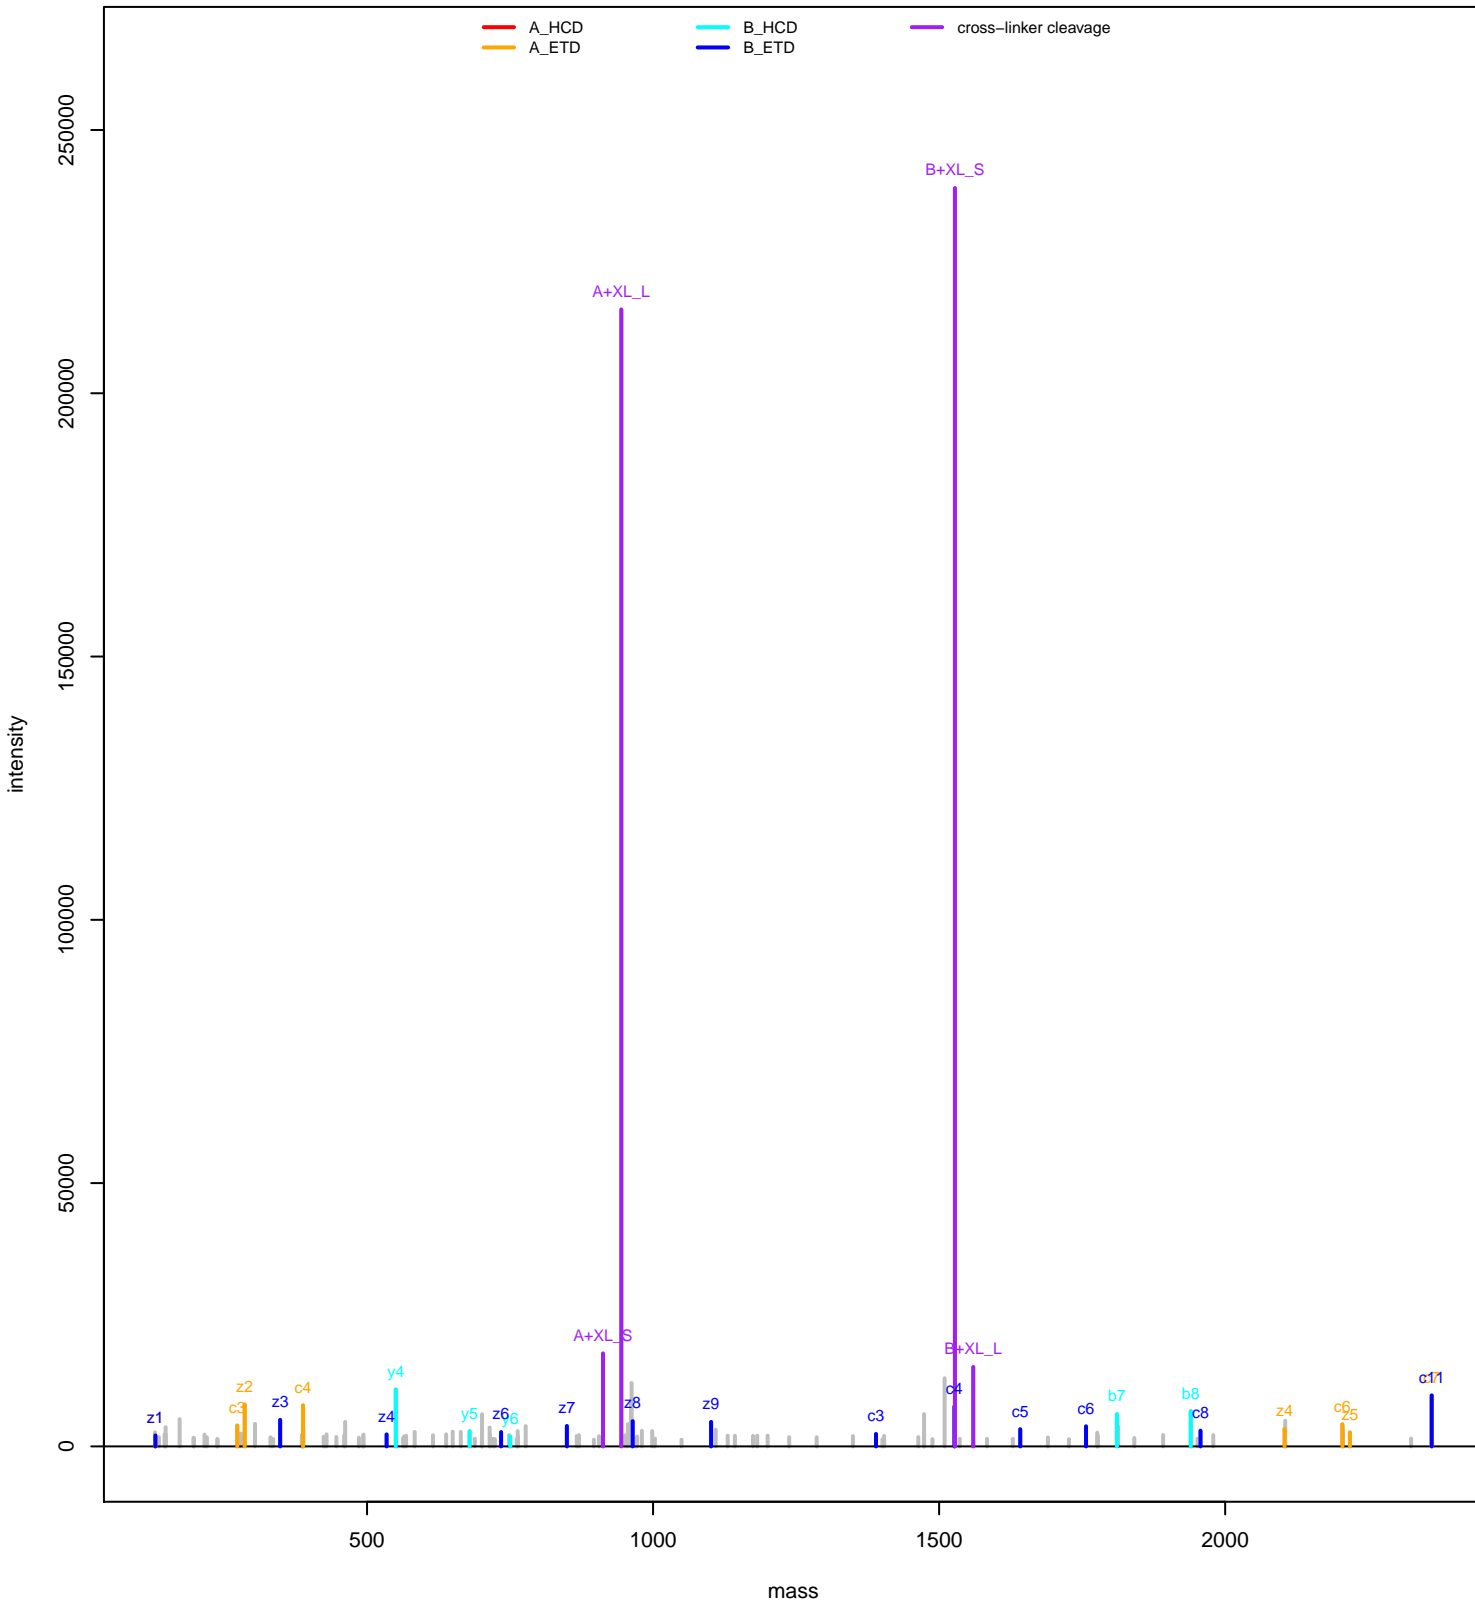

**AANDKGRK+XL\_S**

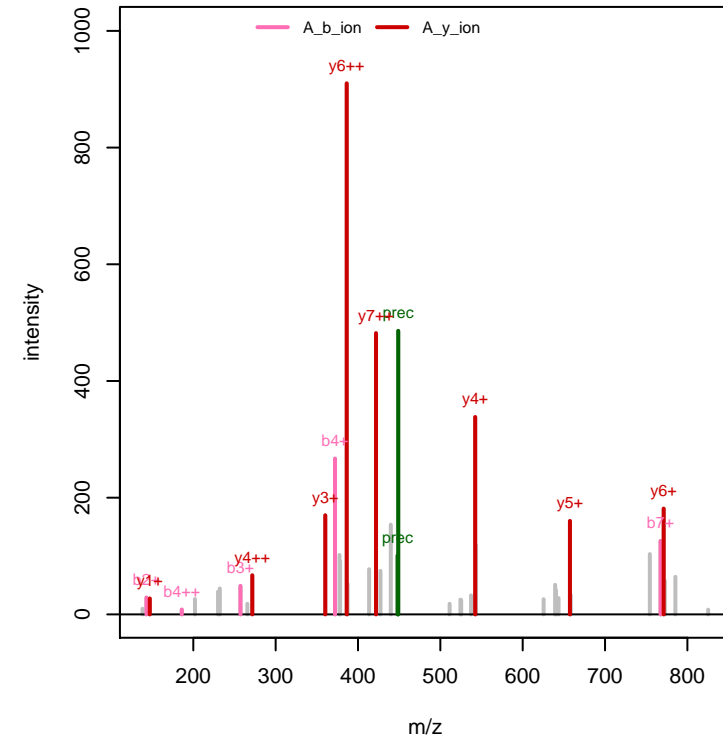

**AANDKGRK+XL\_L**

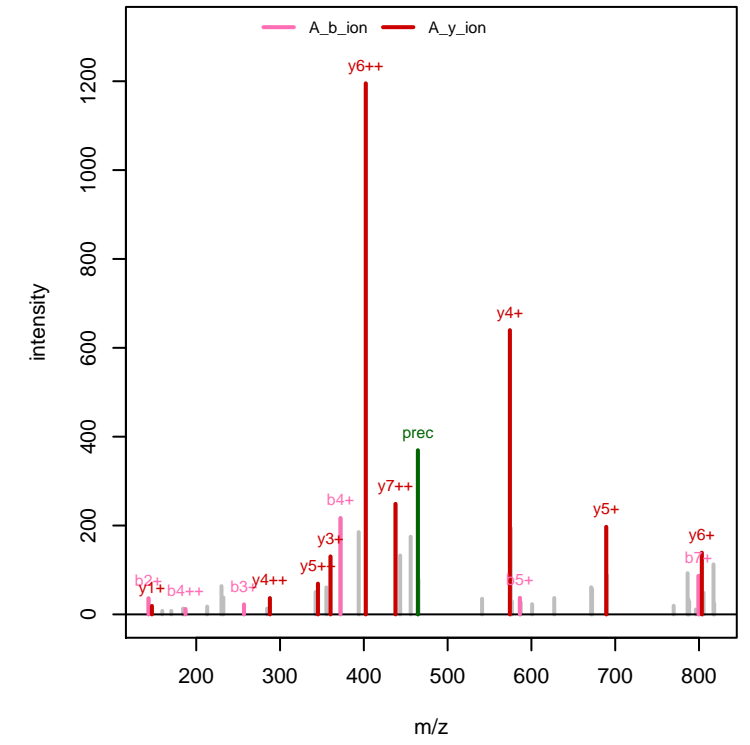

**KDLHDDAEWMoAK+XL\_S**

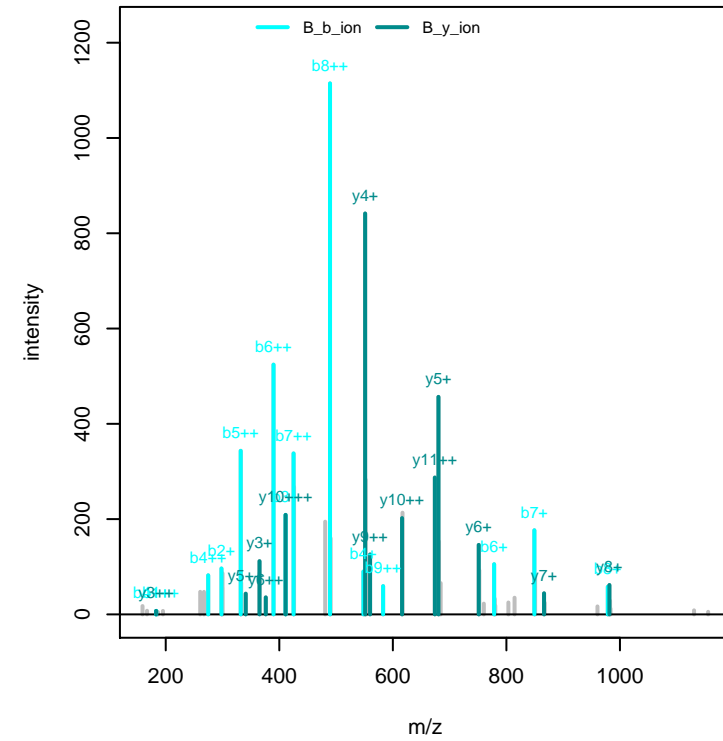

**KDLHDDAEWMoAK+XL\_L**

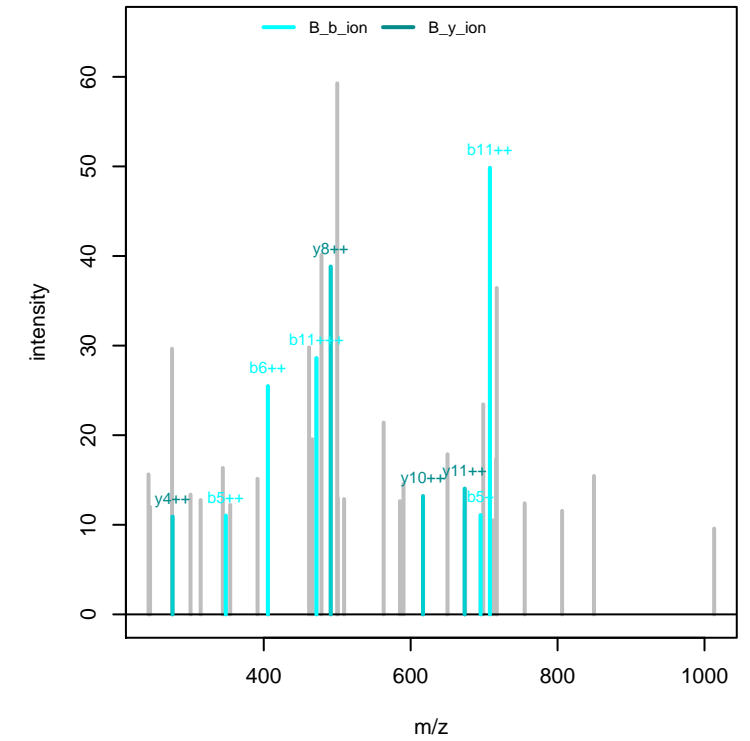

ANAKFEVK  
EGVSKDDAEALK

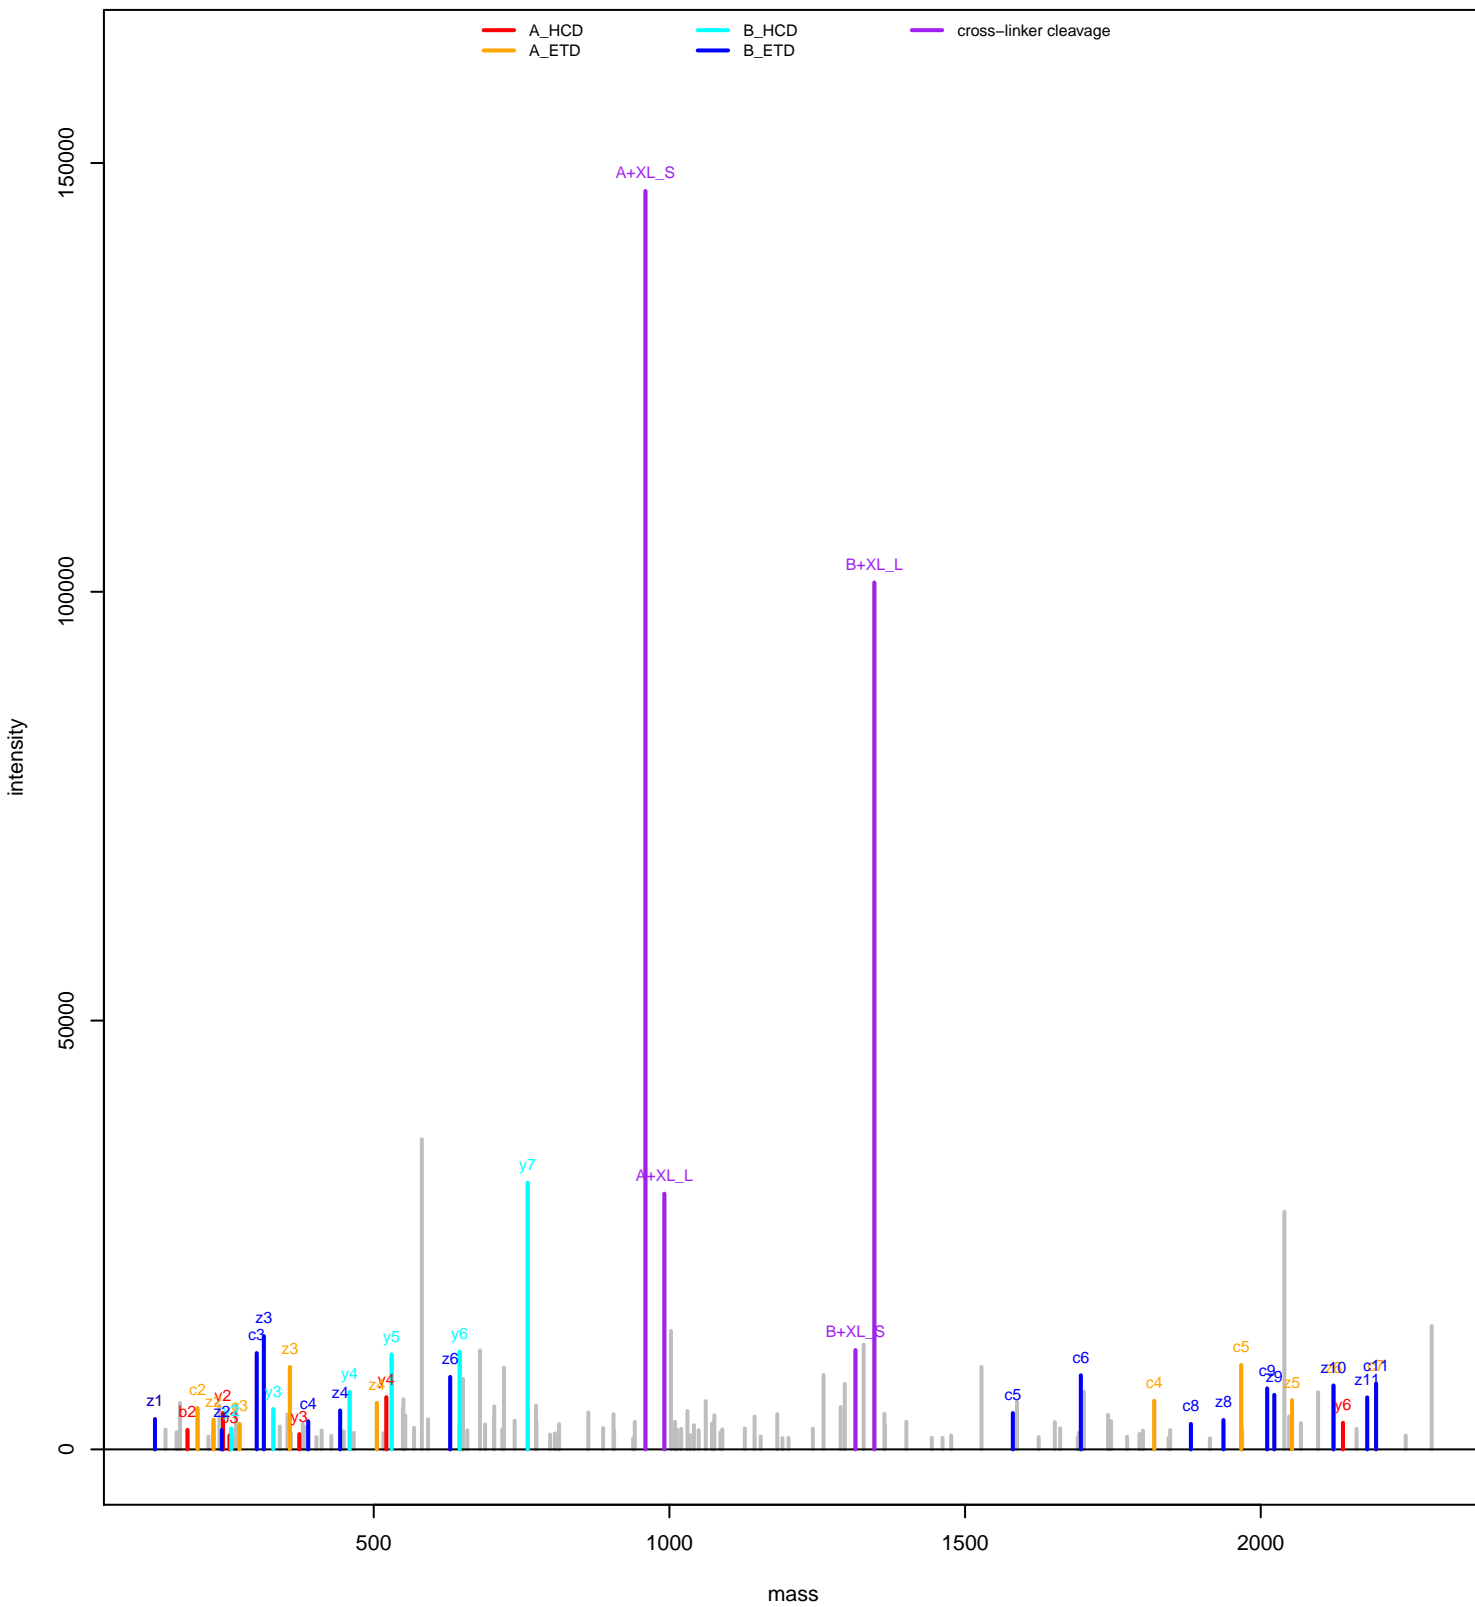

ANAKFEVK+XL\_S

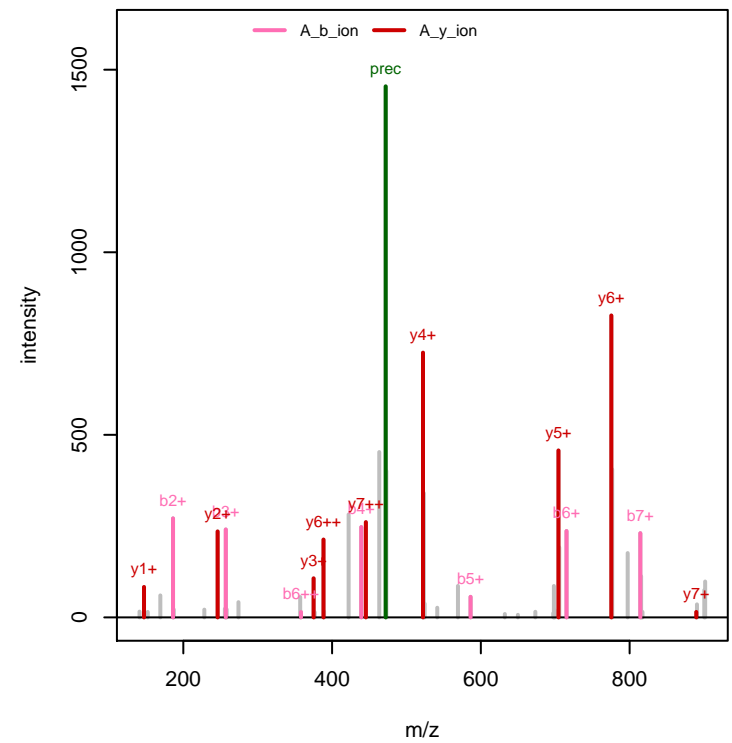

ANAKFEVK+XL\_L

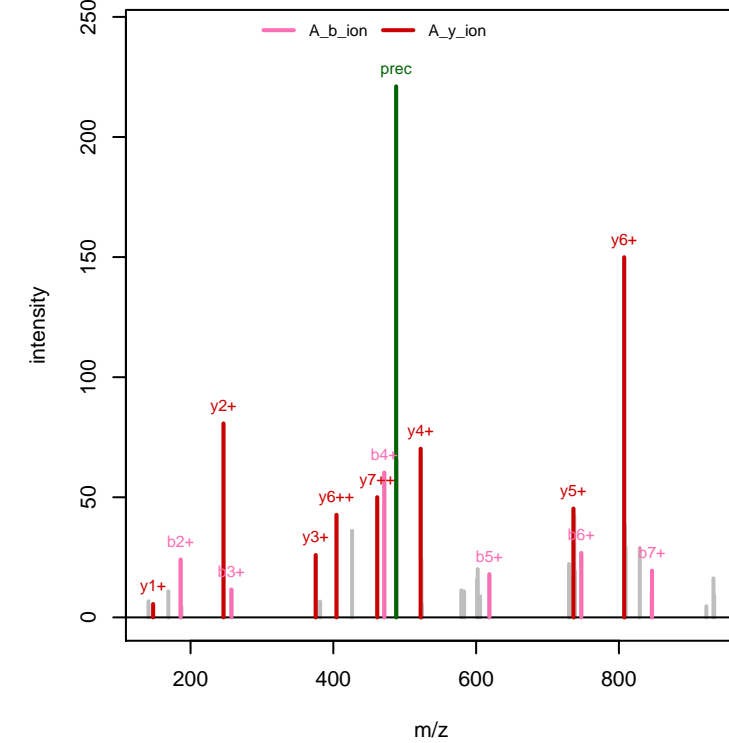

EGVSKDDAEALK+XL\_S

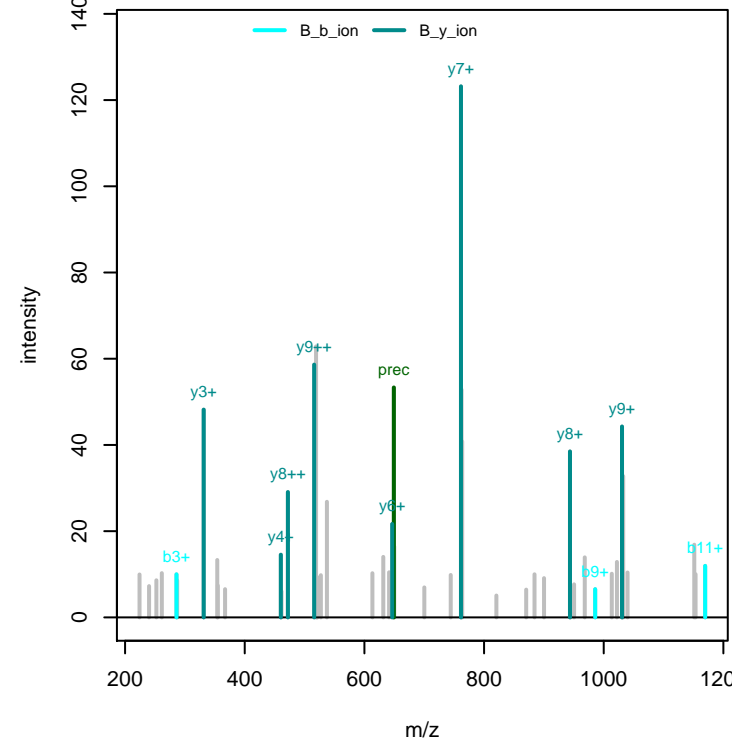

EGVSKDDAEALK+XL\_L

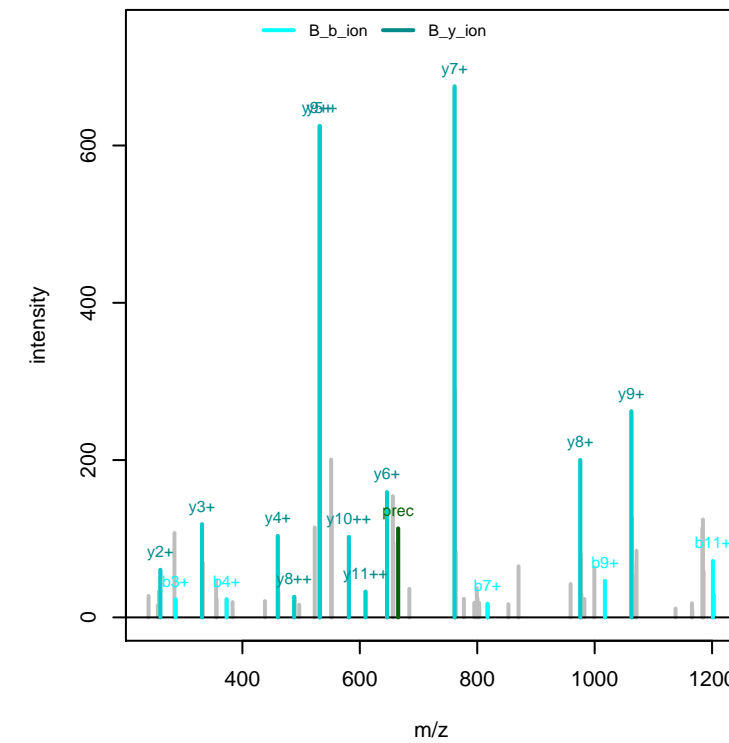

VKGTGR  
IQKISGANLSR

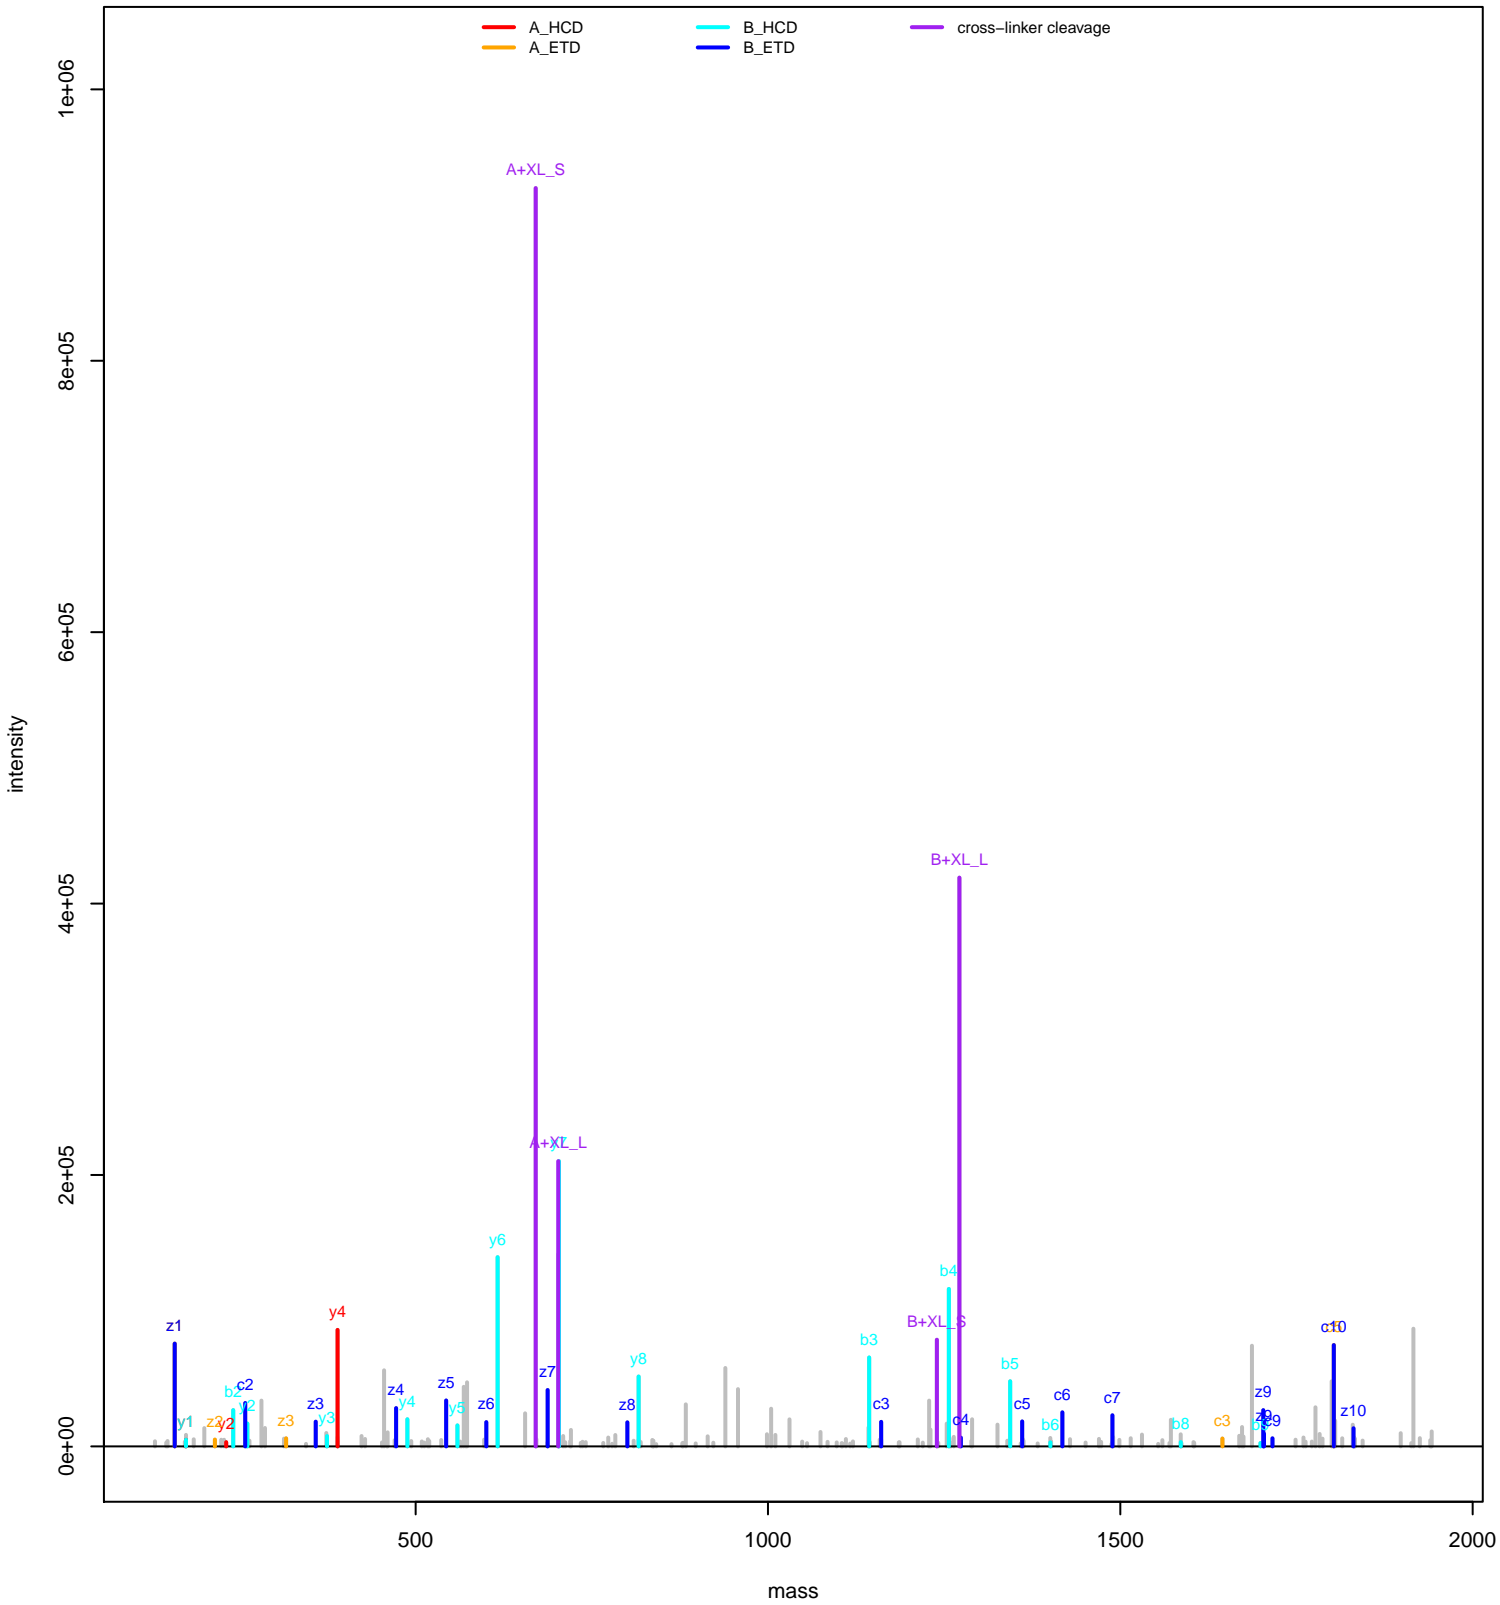

VKGTGR+XL\_S

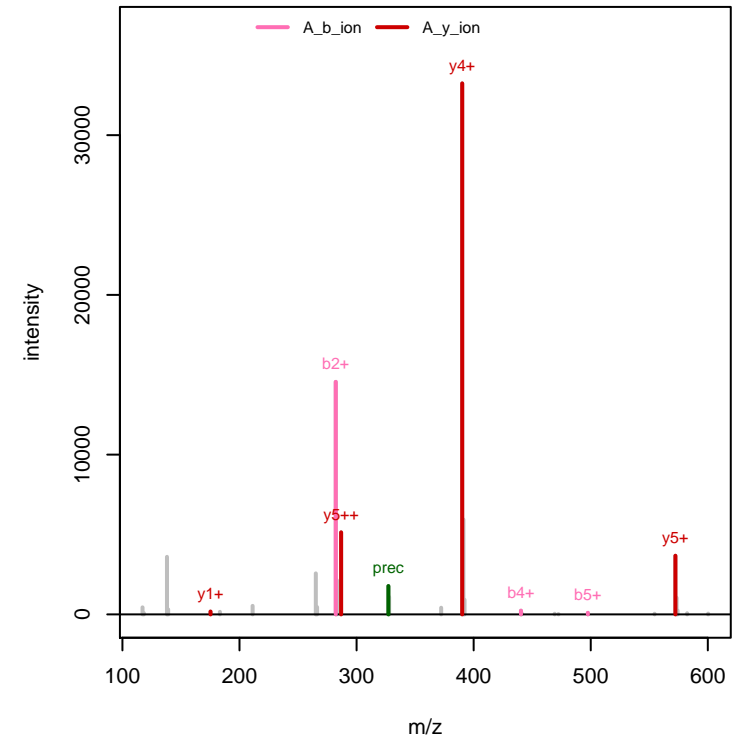

VKGTGR+XL\_L

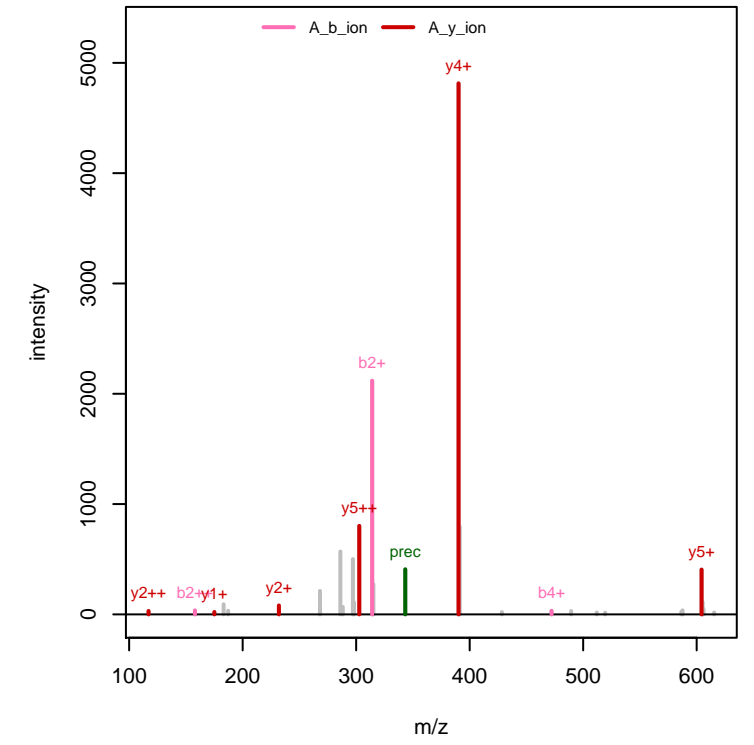

IQKISGANLSR+XL\_S

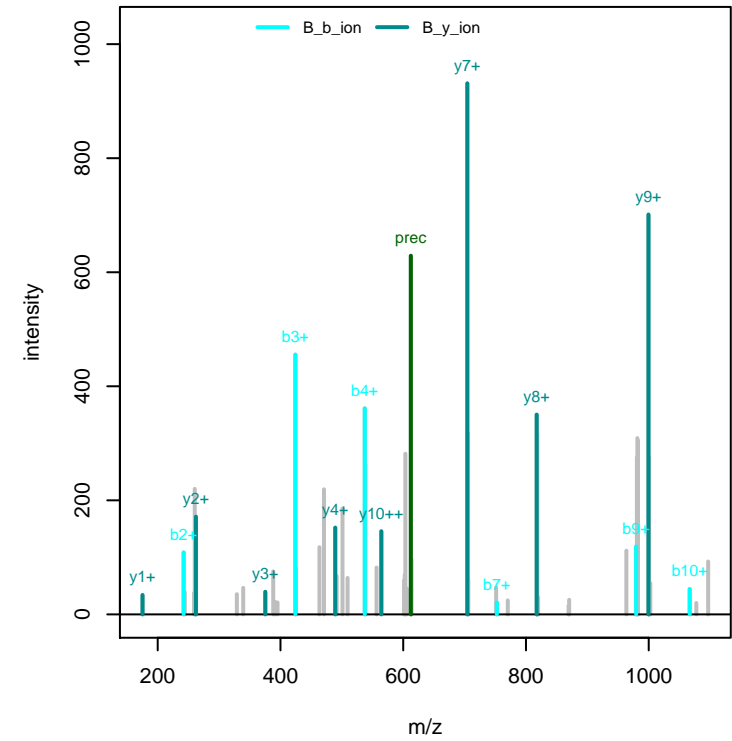

IQKISGANLSR+XL\_L

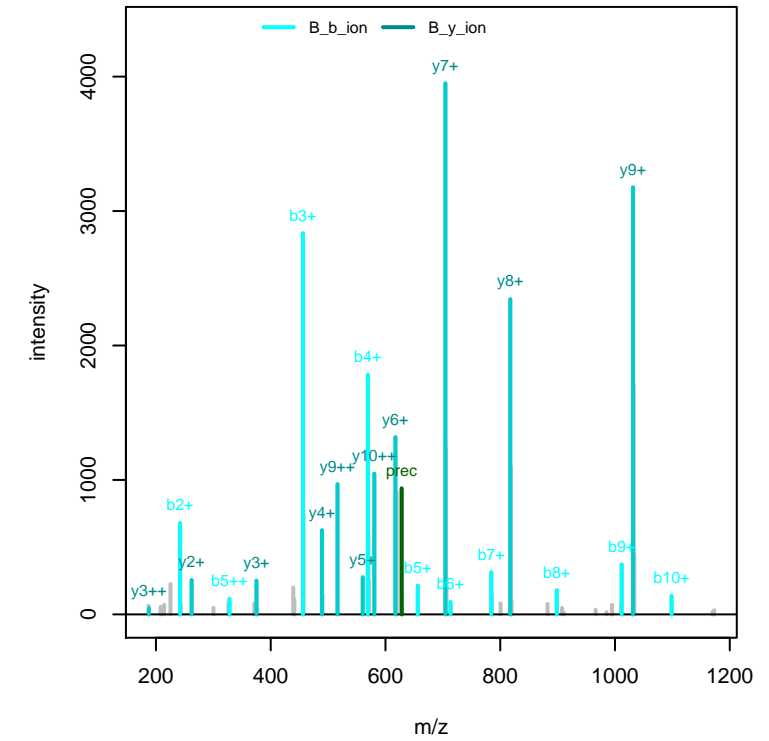

**KLGEEGATLR  
EKTQQLADVK**

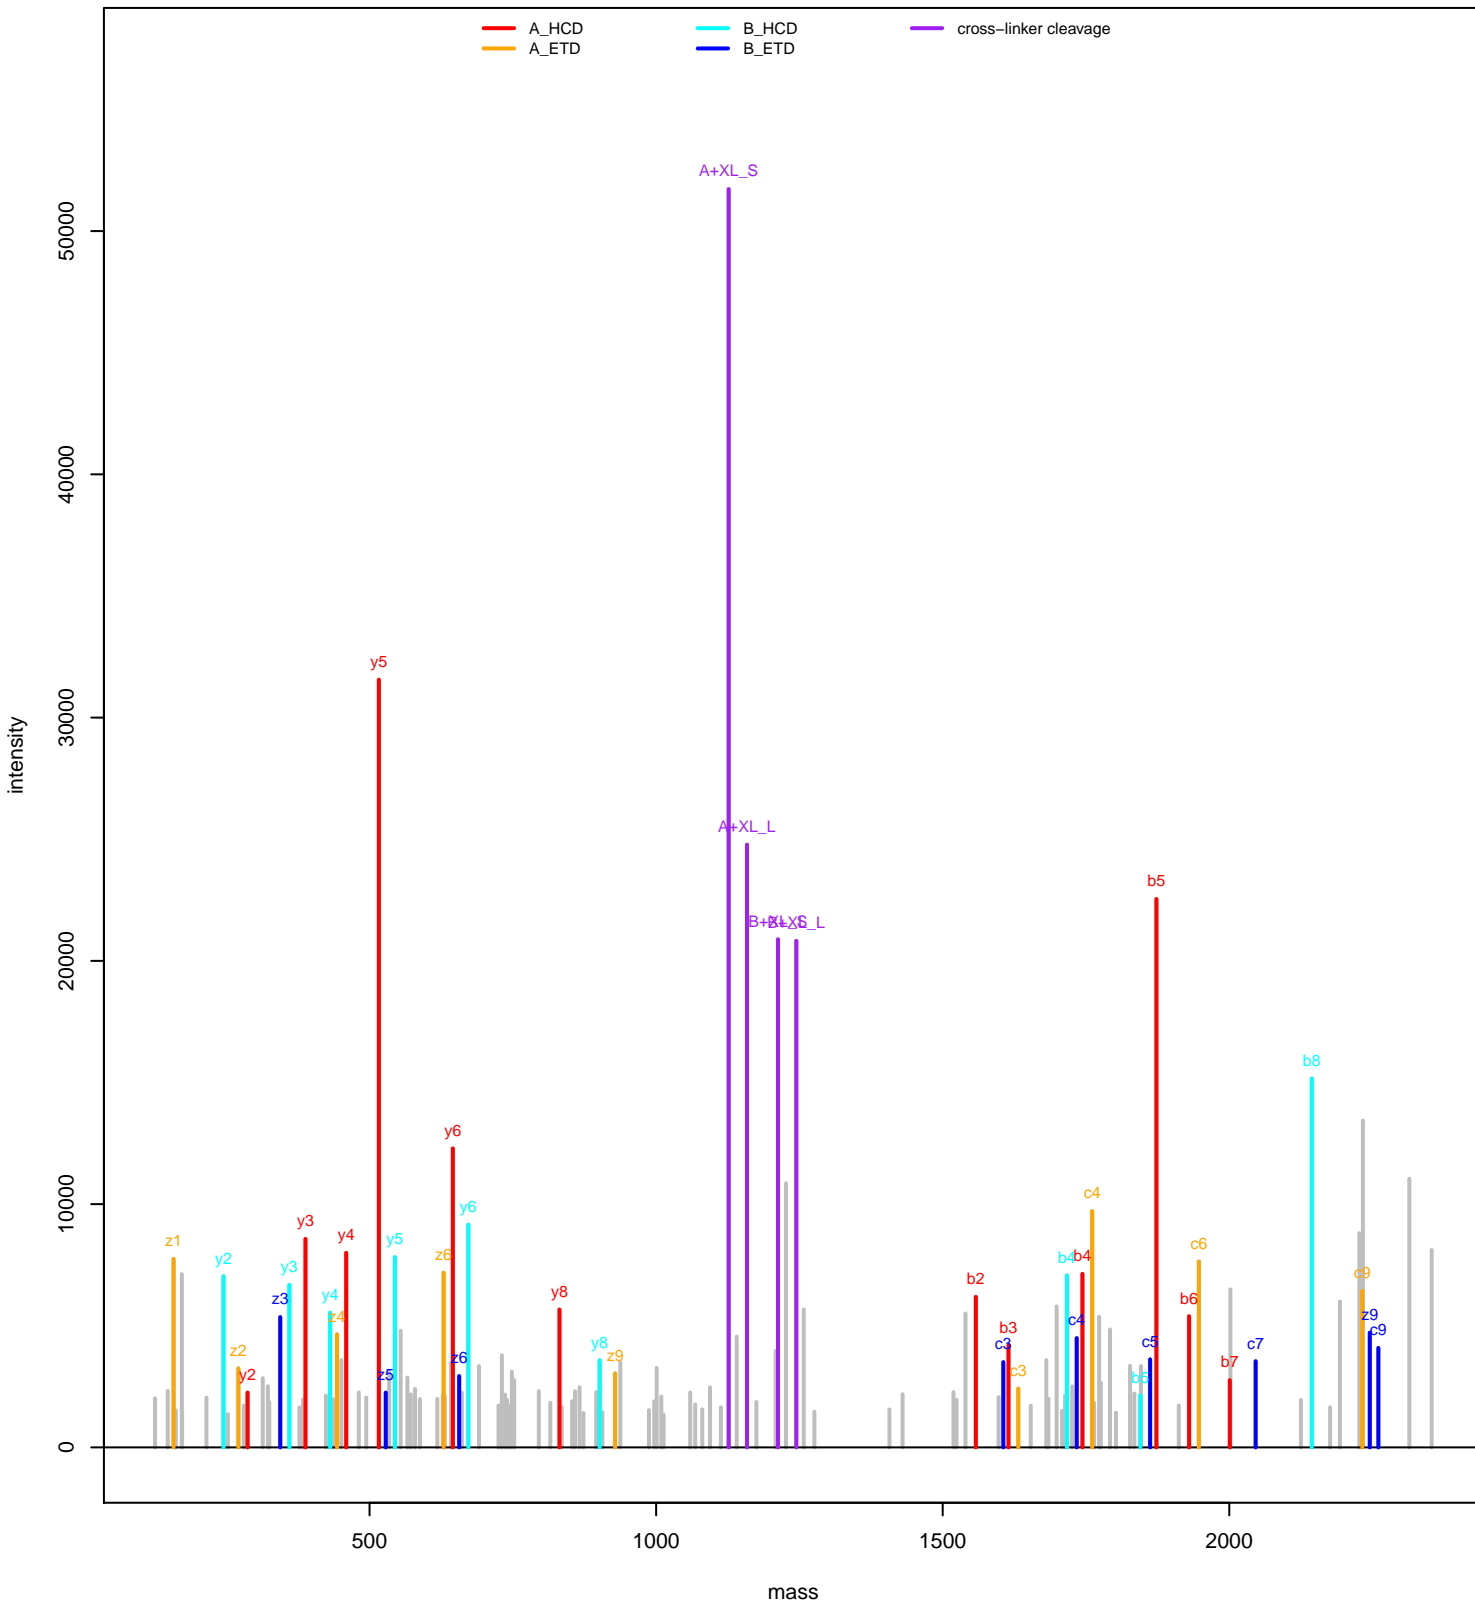

**KLGEEGATLR+XL\_S**

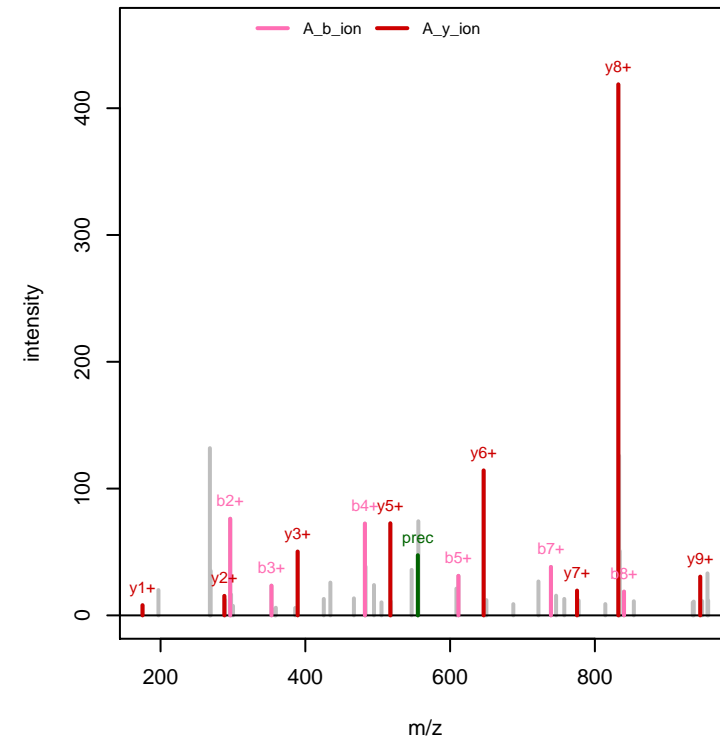

**KLGEEGATLR+XL\_L**

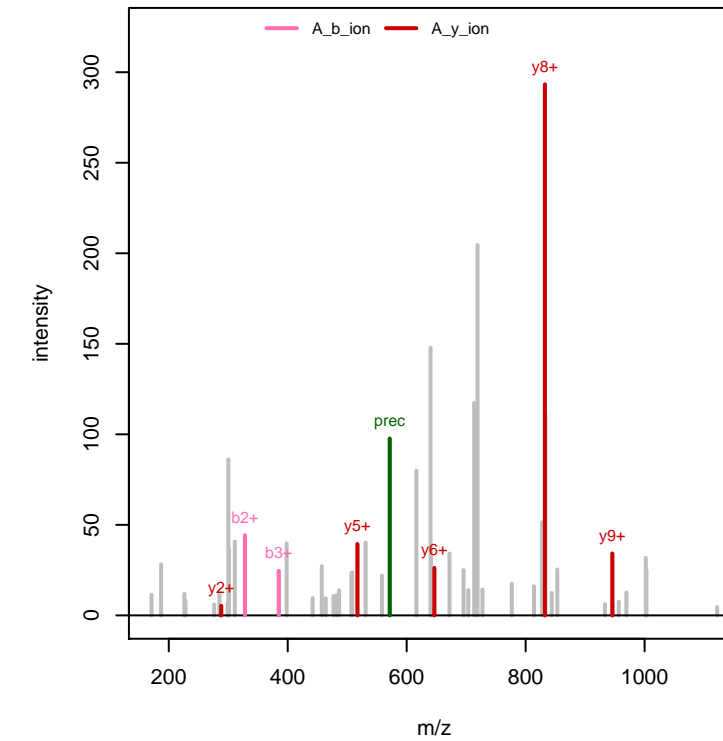

**EKTQQLADVK+XL\_S**

**EKTQQLADVK+XL\_L**

**GFAGTVKR  
KVDVTGTSK**

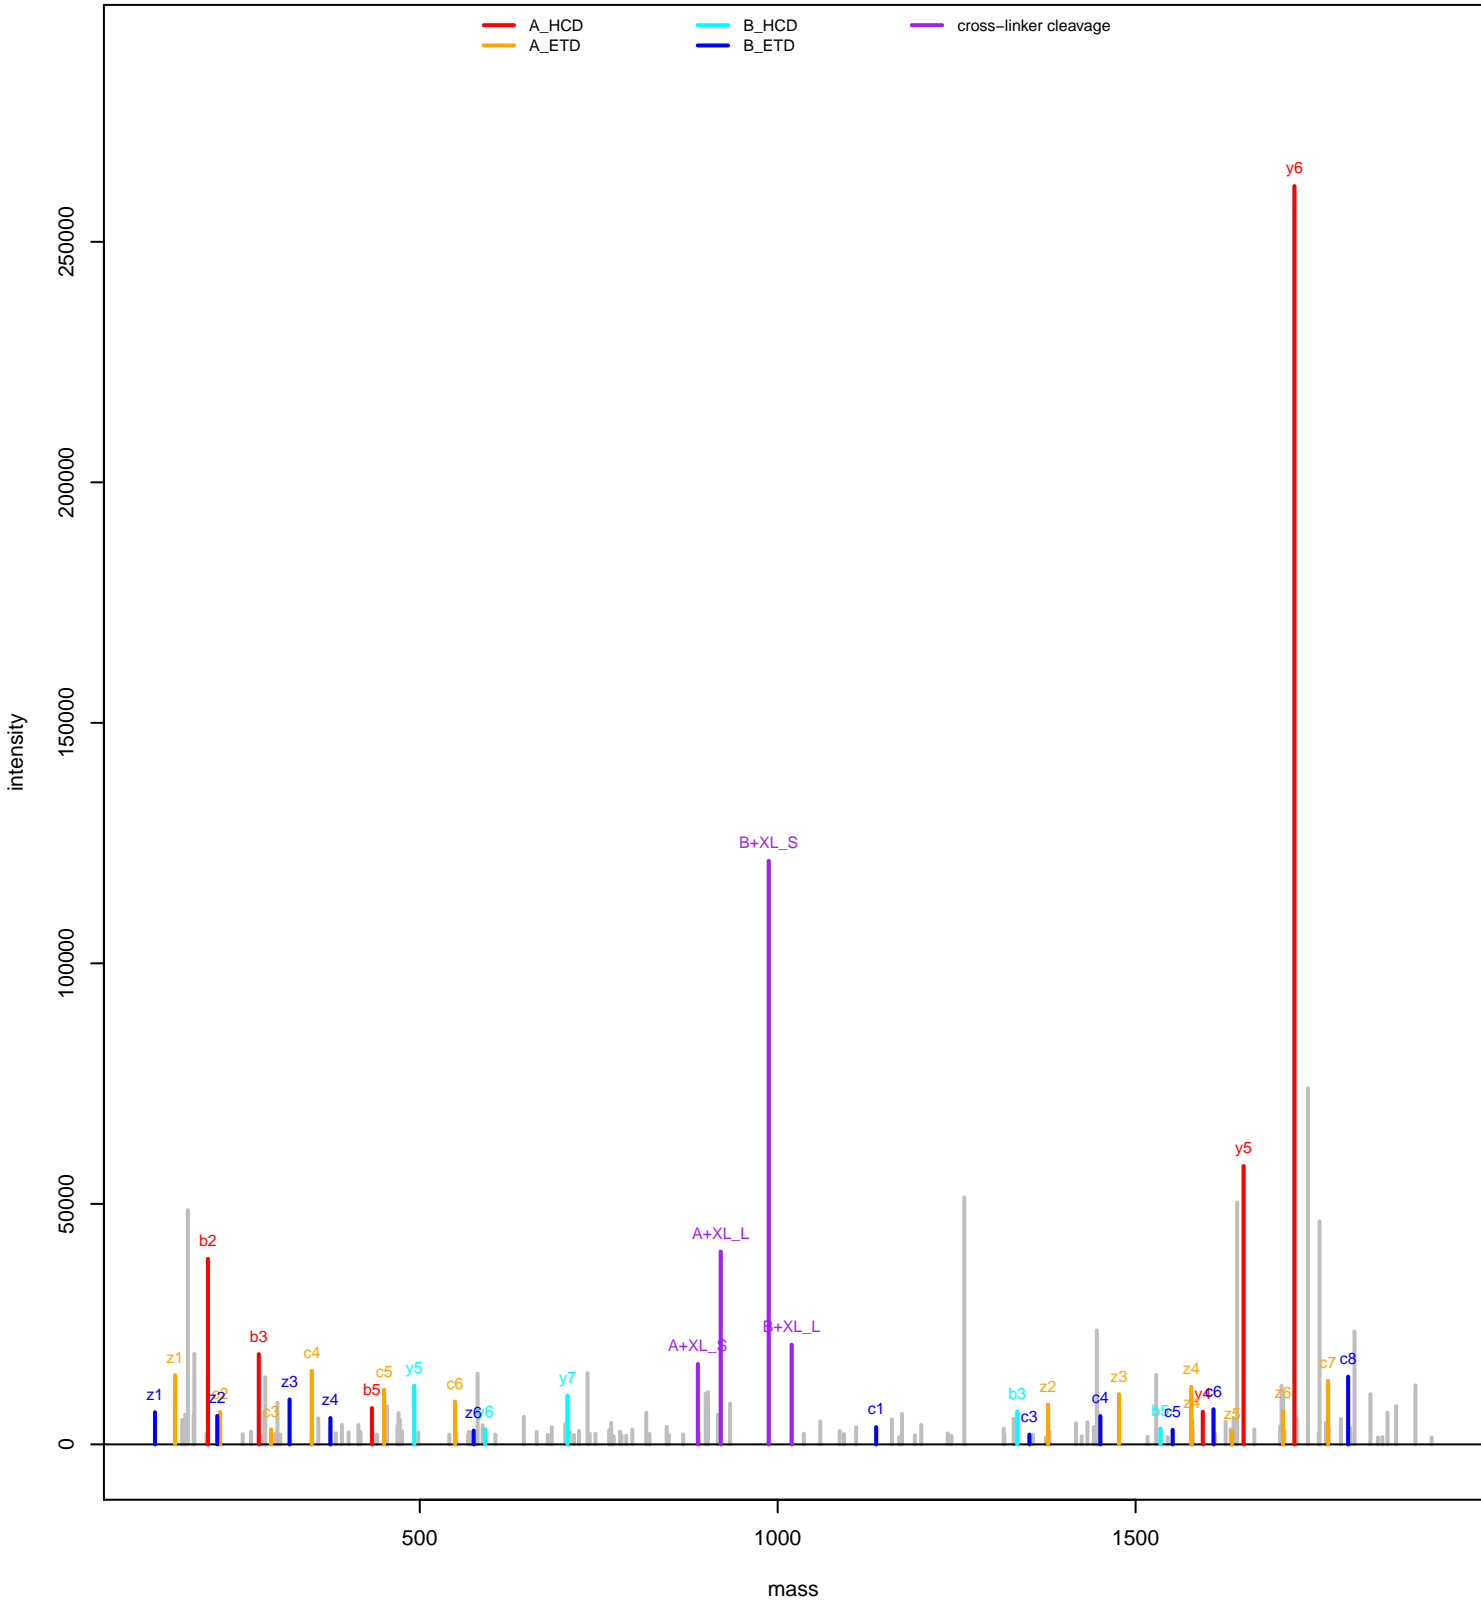

**GFAGTVKR+XL\_S**

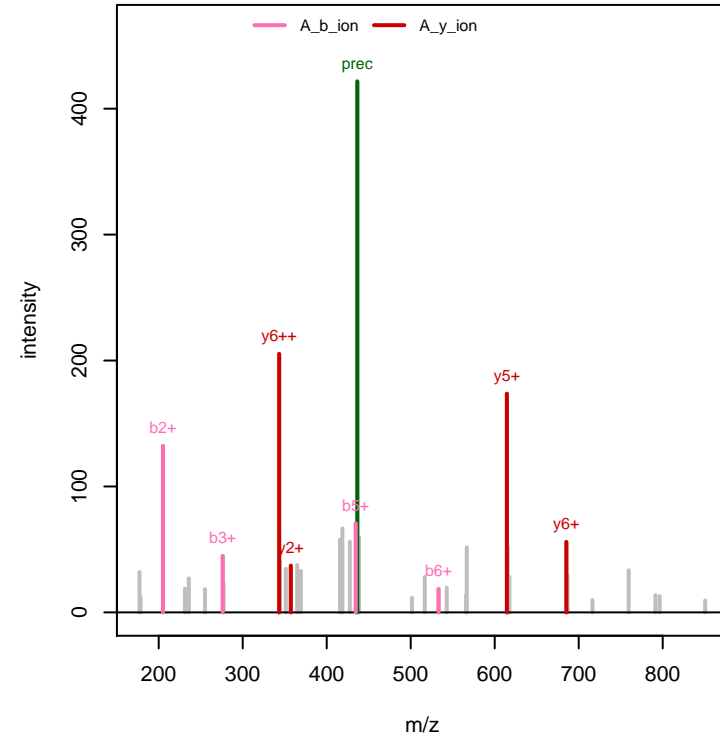

**GFAGTVKR+XL\_L**

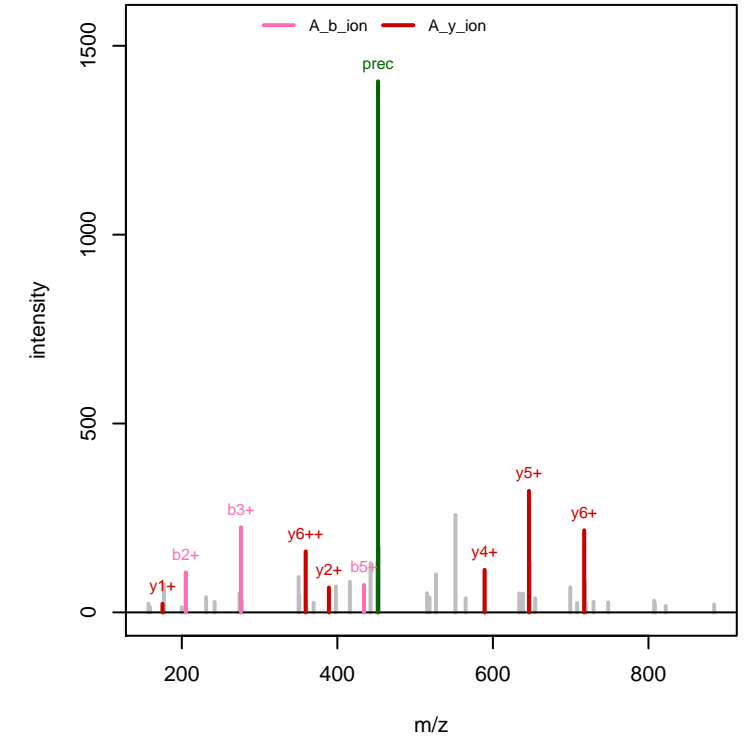

**KVDVTGTSK+XL\_S**

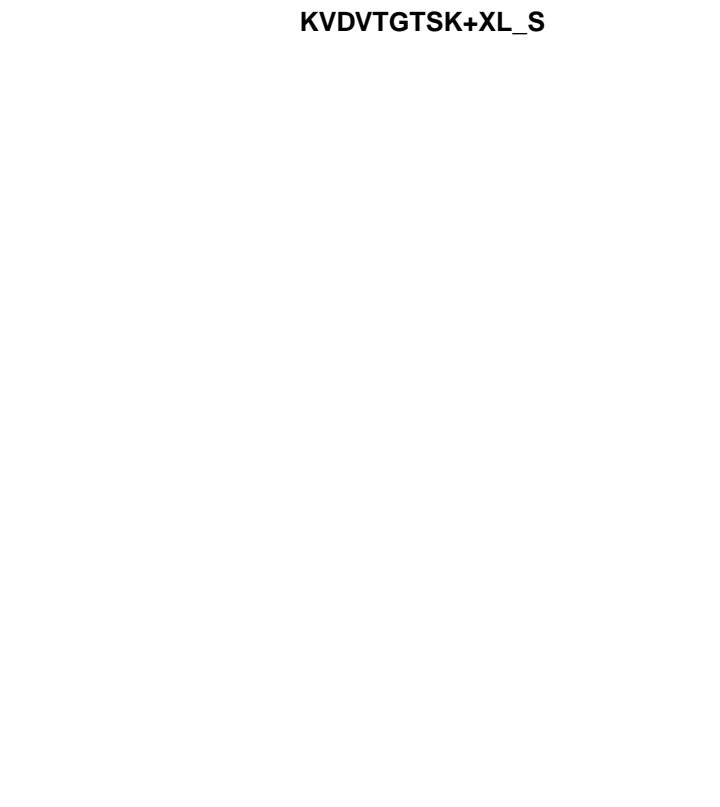

**KVDVTGTSK+XL\_L**

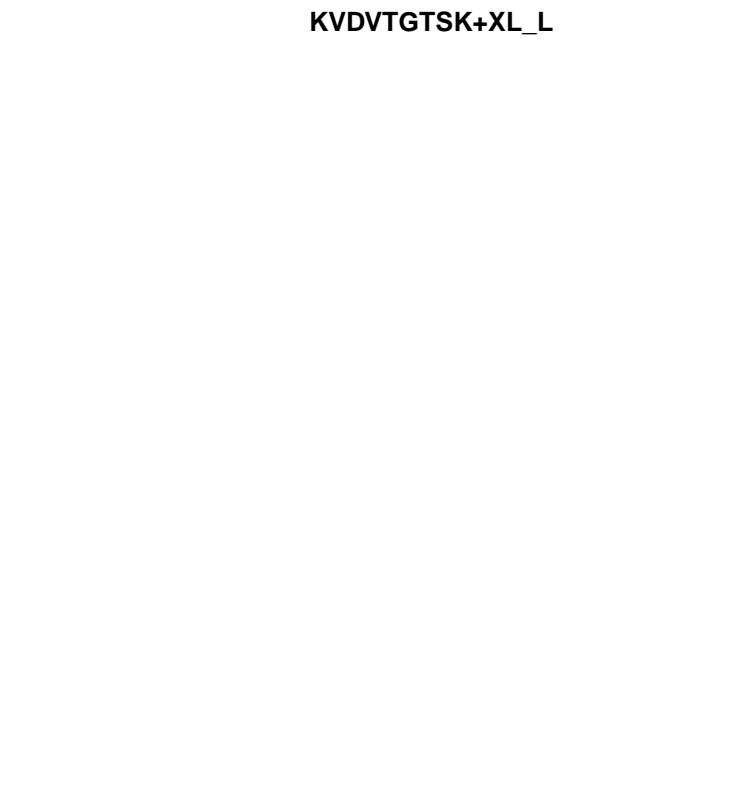

**AQETK GK  
IYAAF KK**

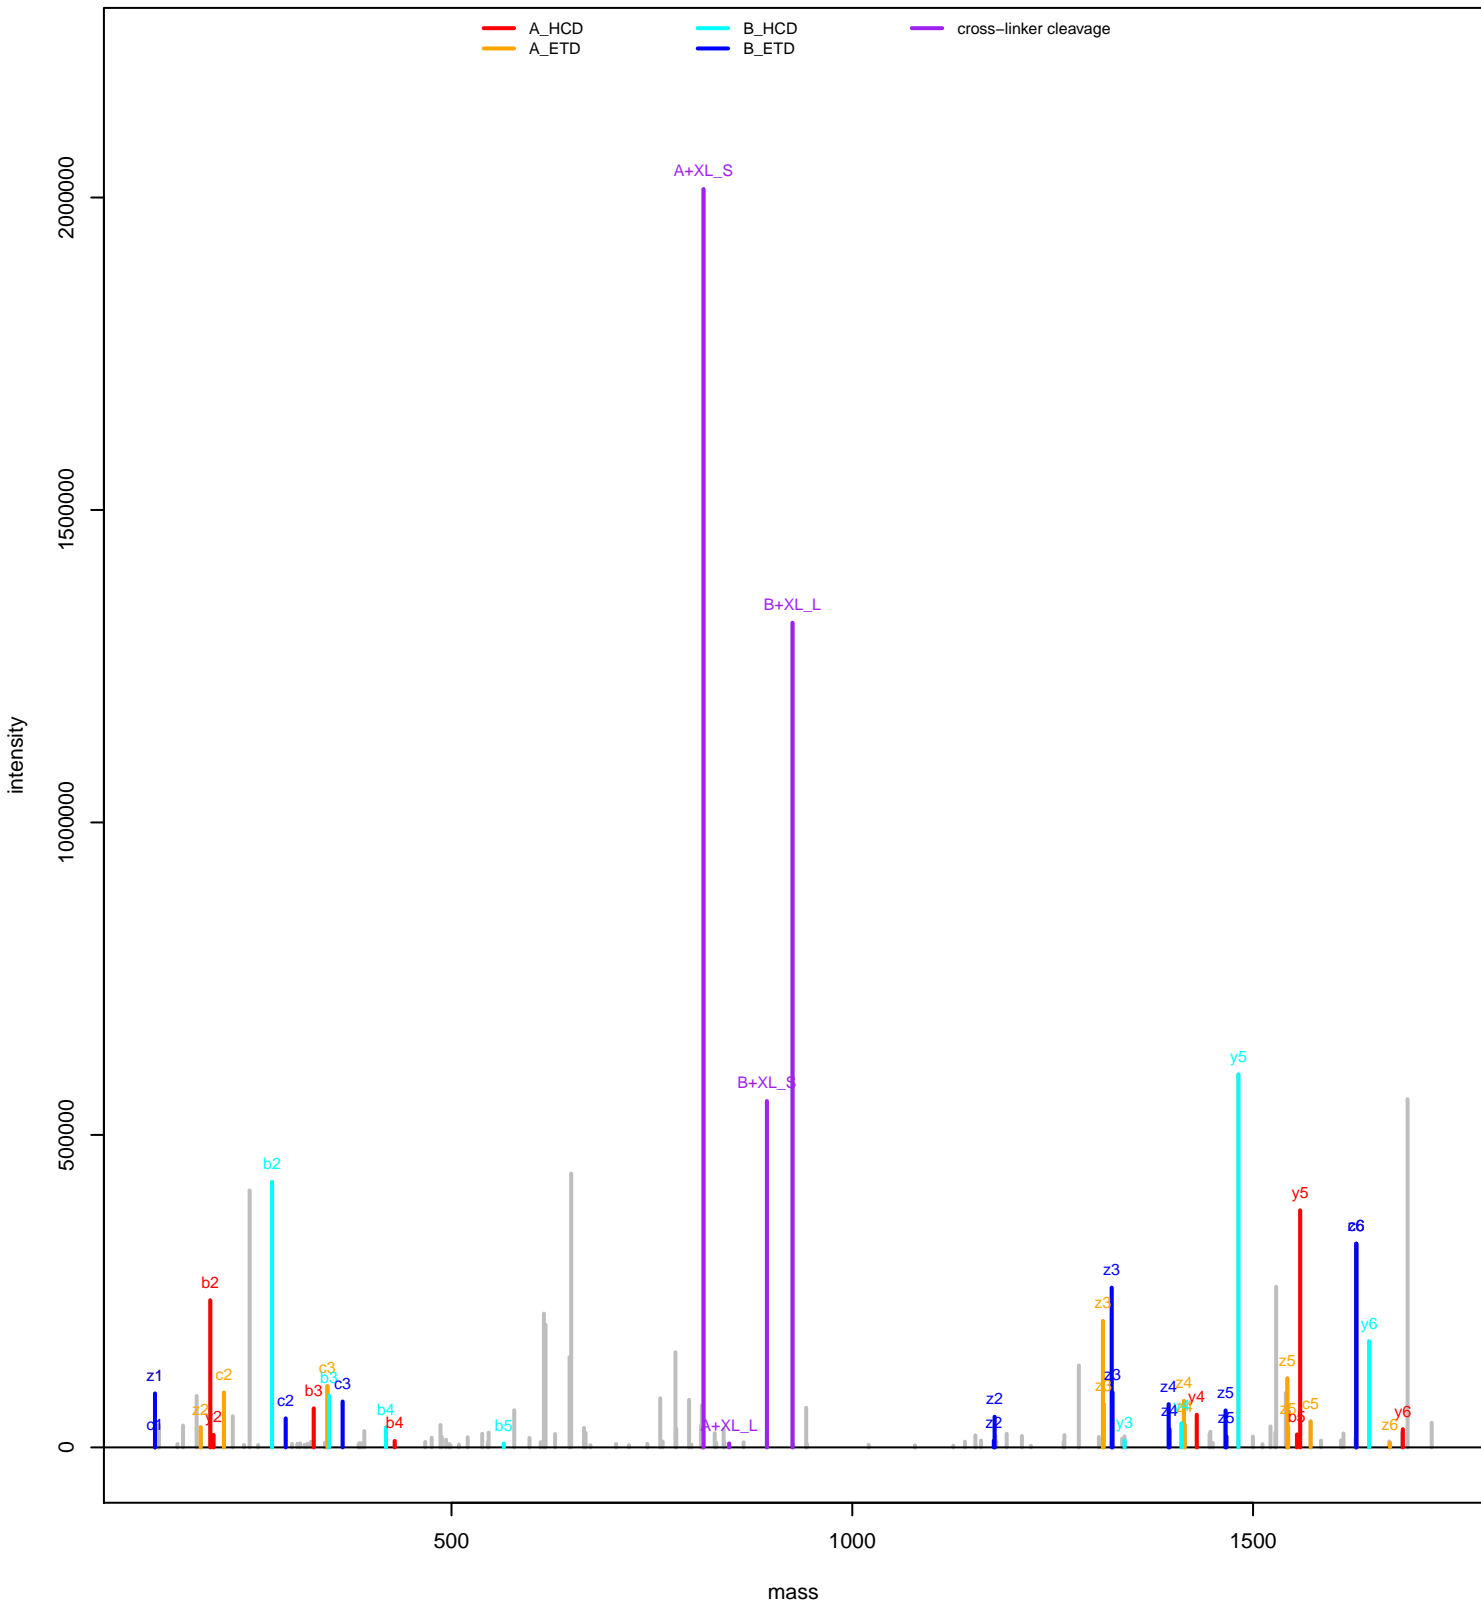

**AQETK GK+XL\_S**

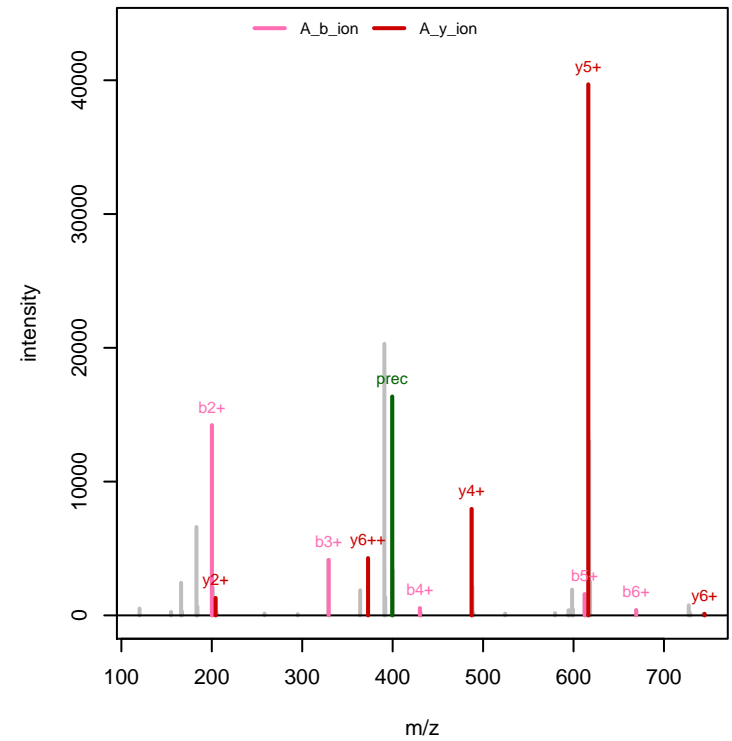

**AQETK GK+XL\_L**

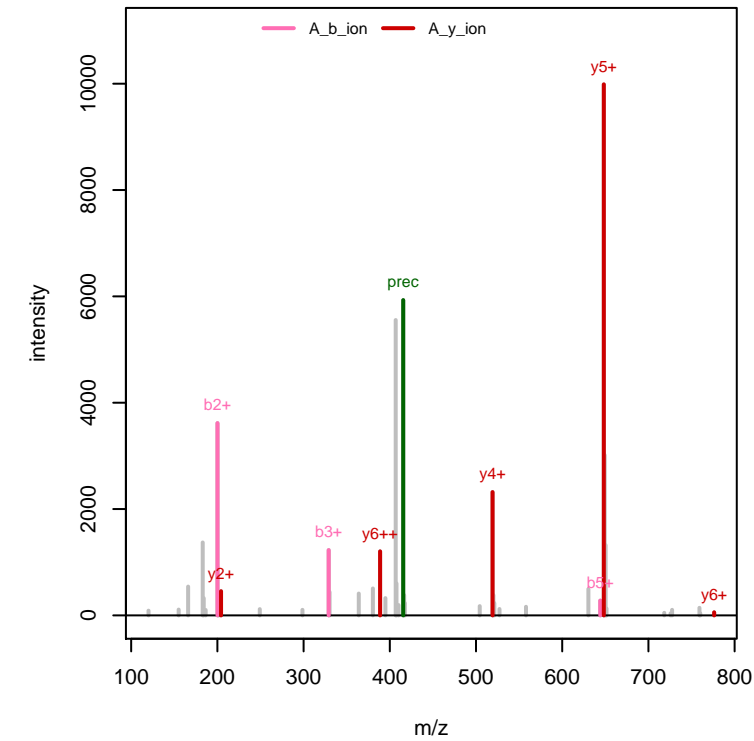

**IYAAF KK+XL\_S**

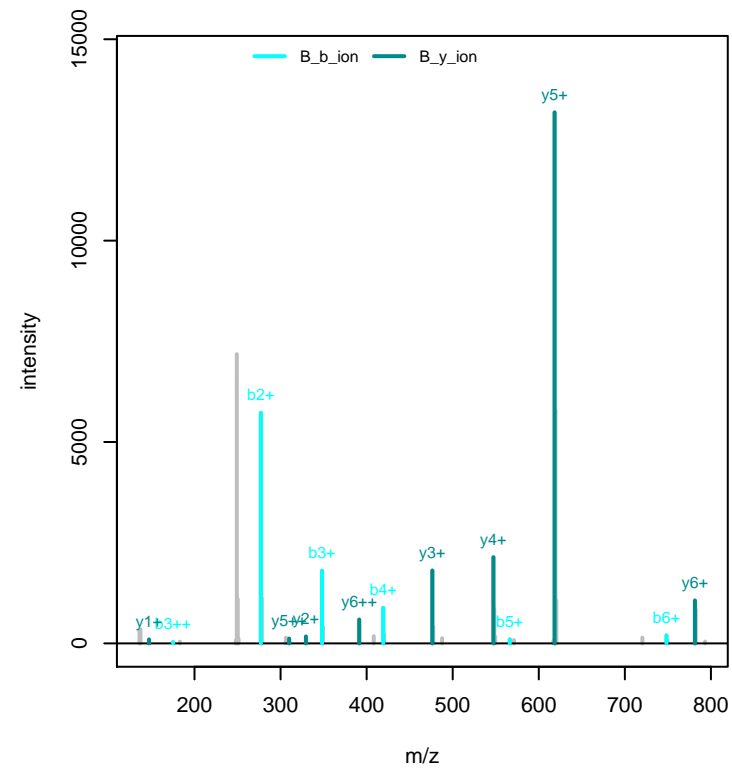

**IYAAF KK+XL\_L**

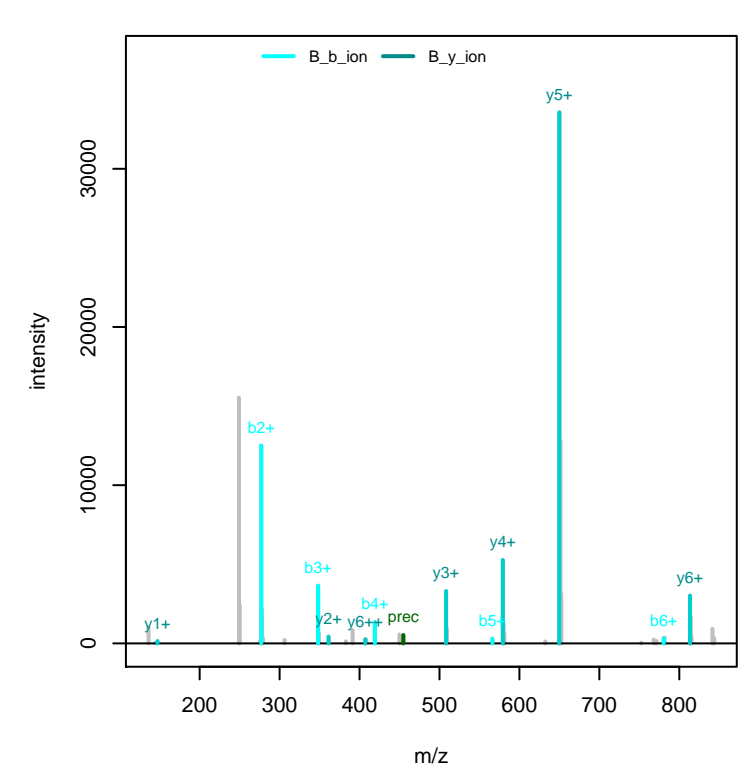



ISIKDTR  
TTLSTDPKRR

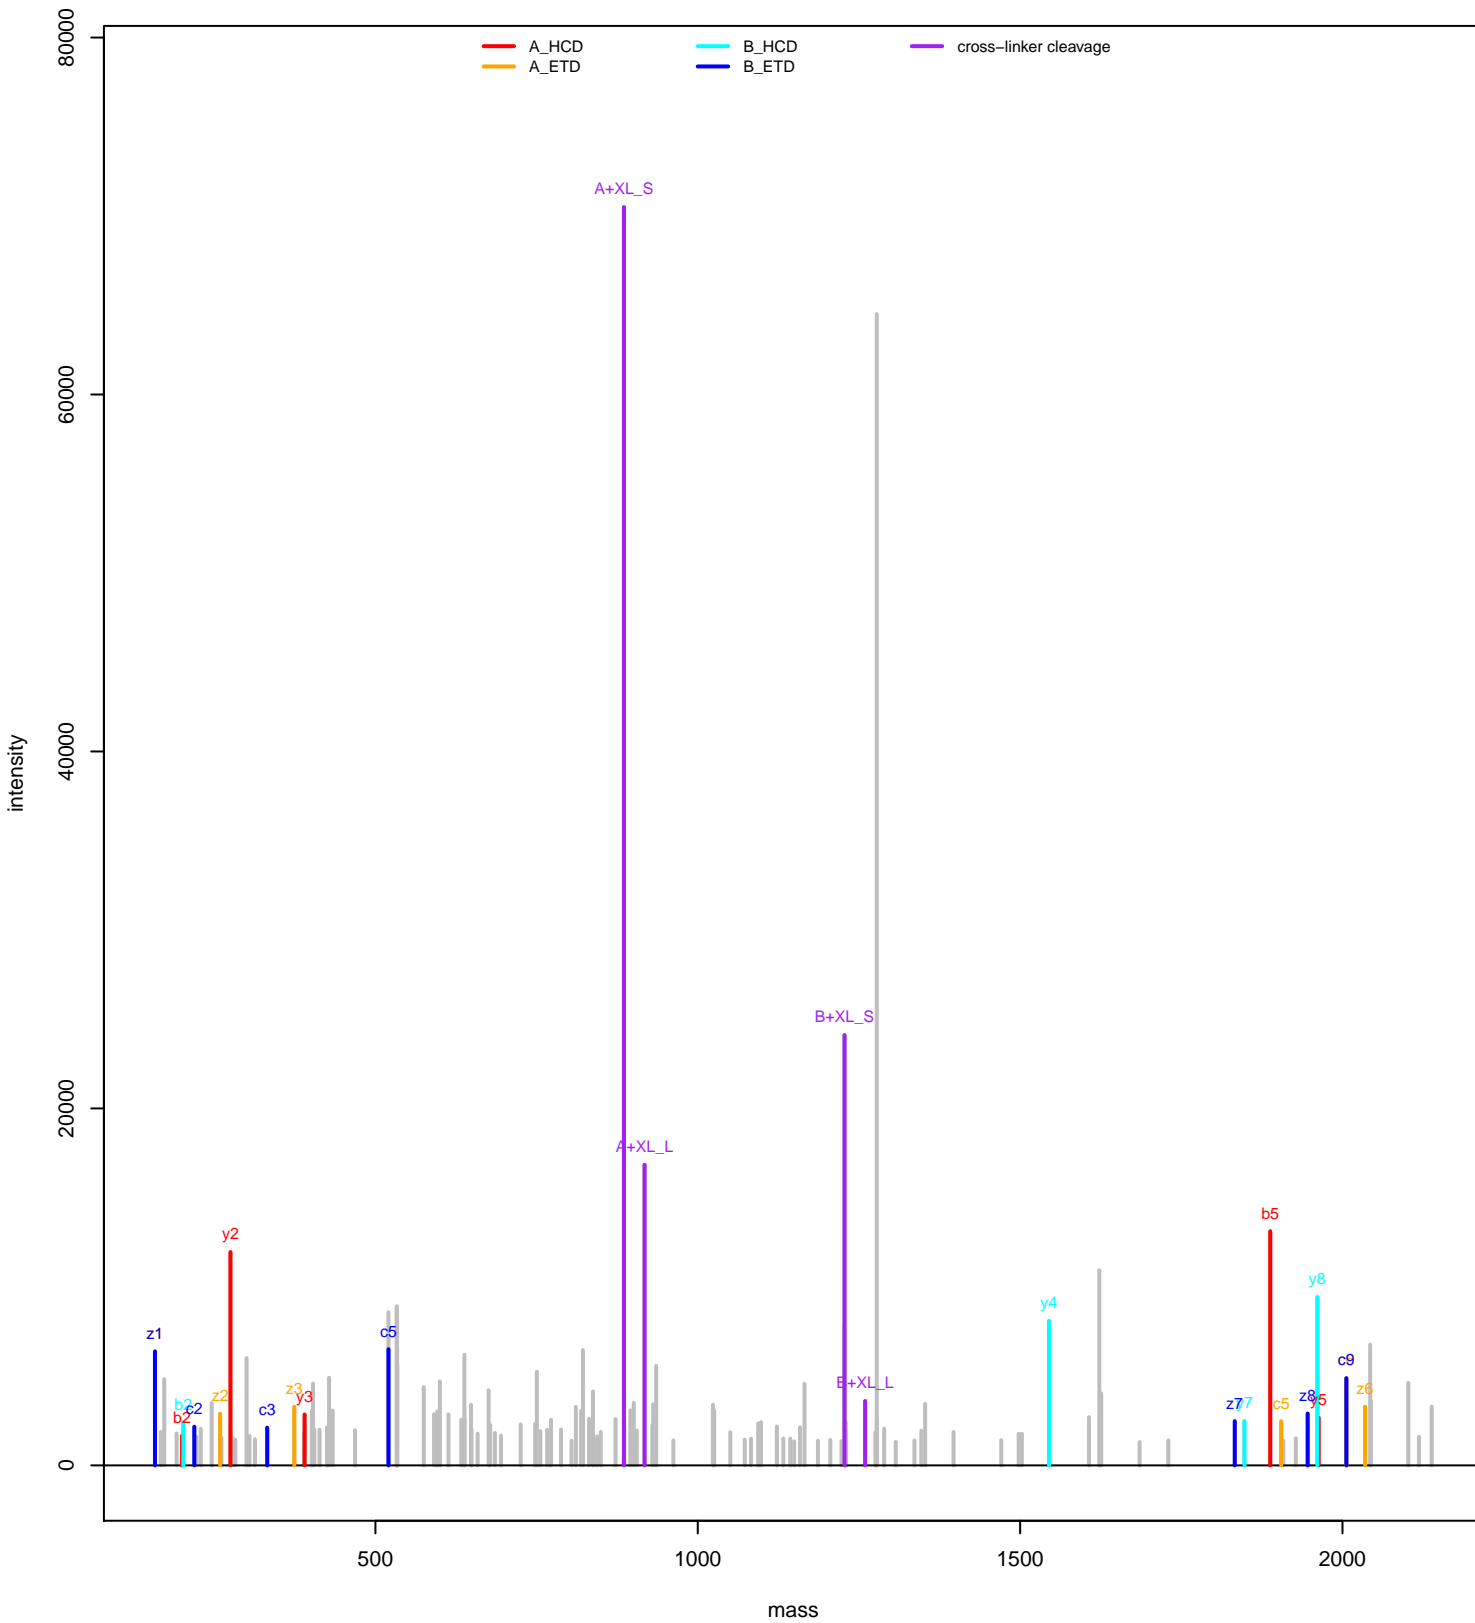

ISIKDTR+XL\_S

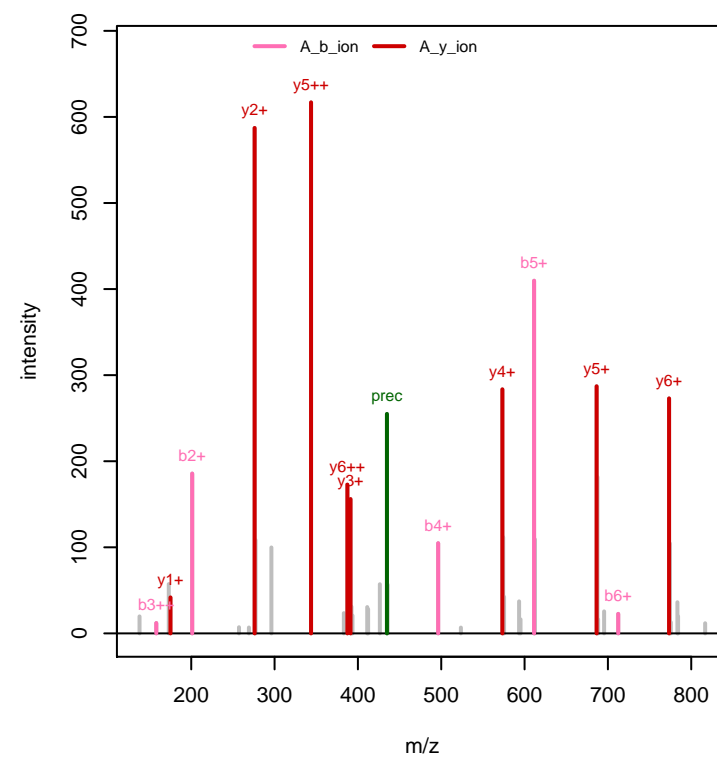

ISIKDTR+XL\_L

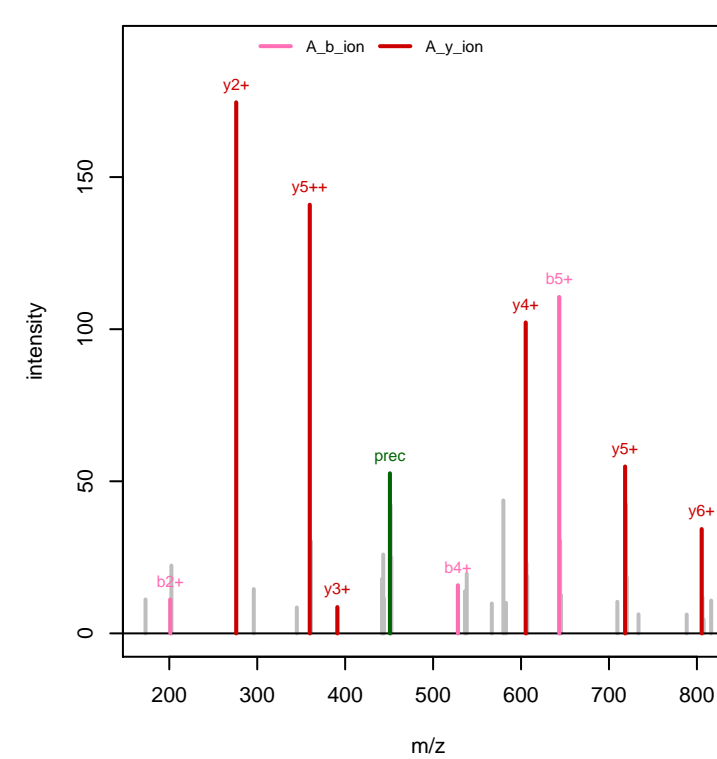

TTLSTDPKRR+XL\_S

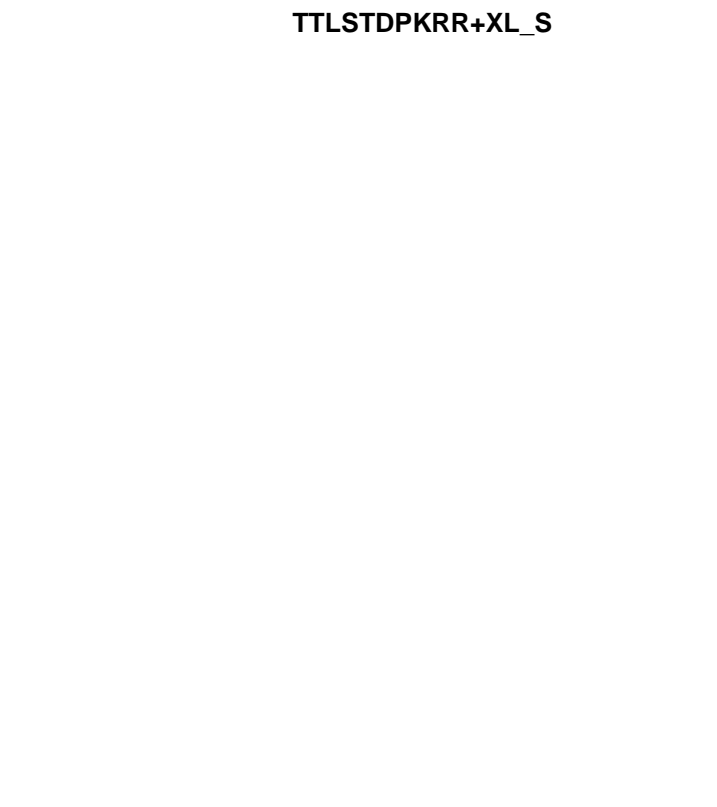

TTLSTDPKRR+XL\_L

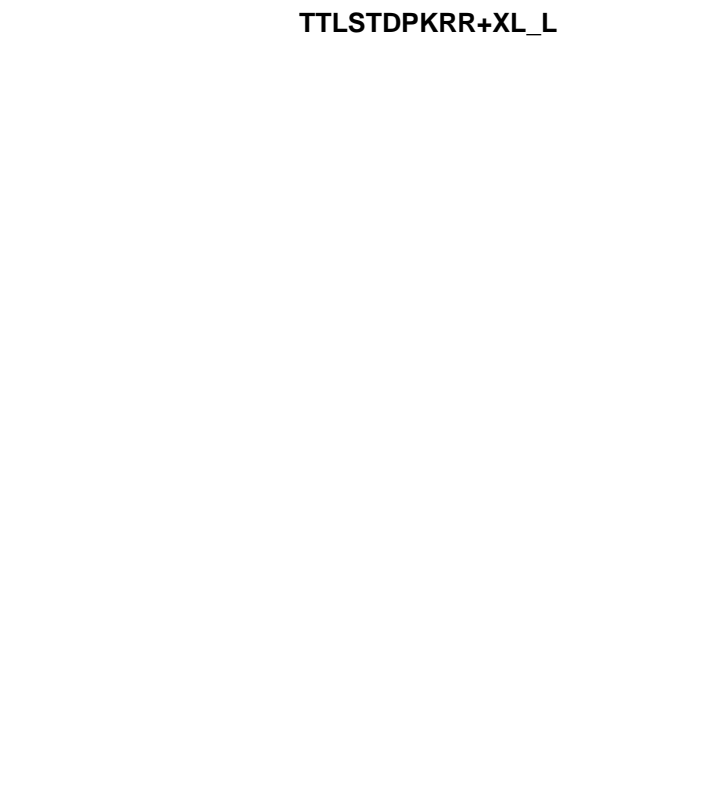

GIGSGLGKTGGR  
LNTLSPAEGSKK

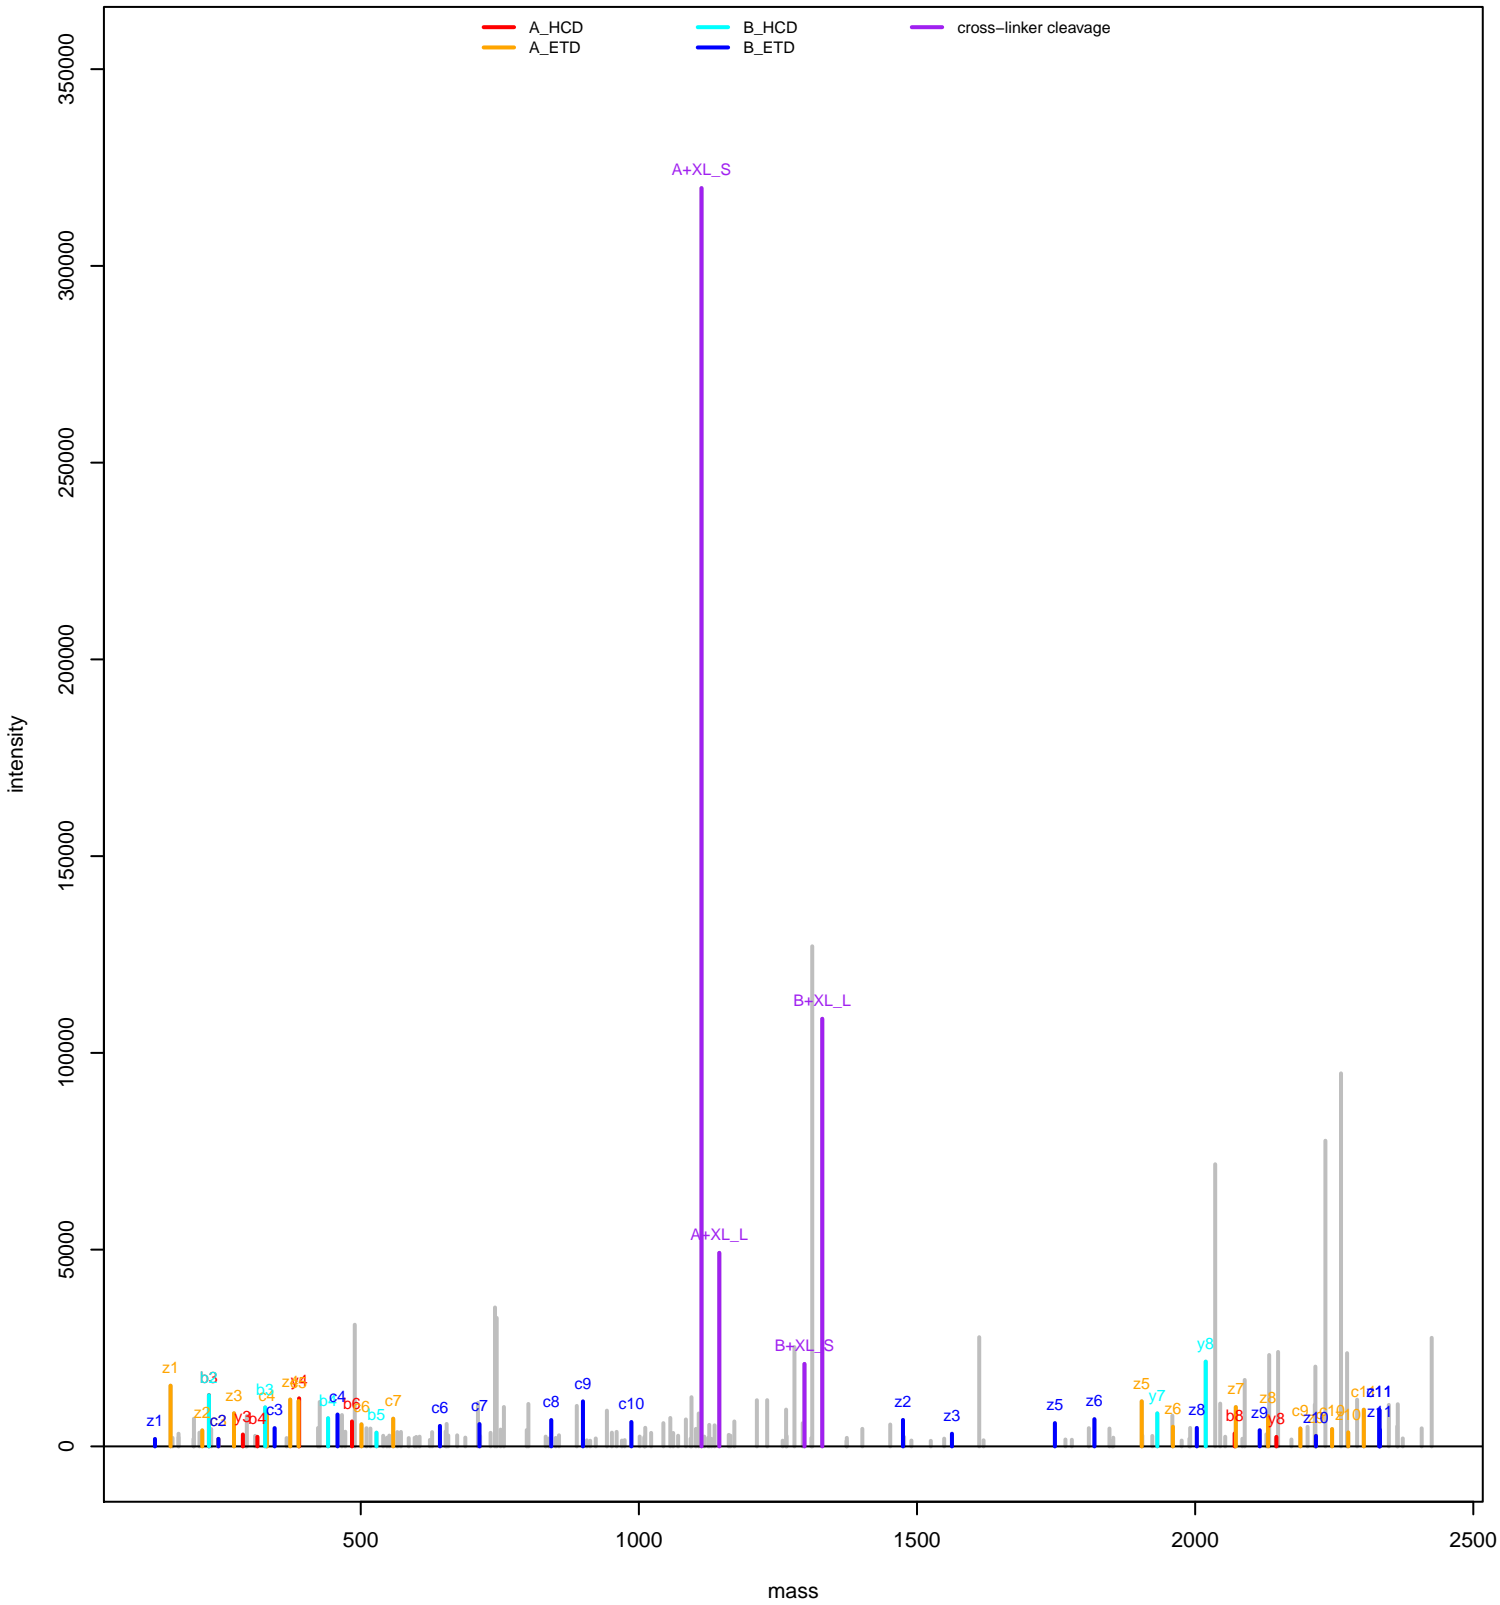

GIGSGLGKTGGR+XL\_S

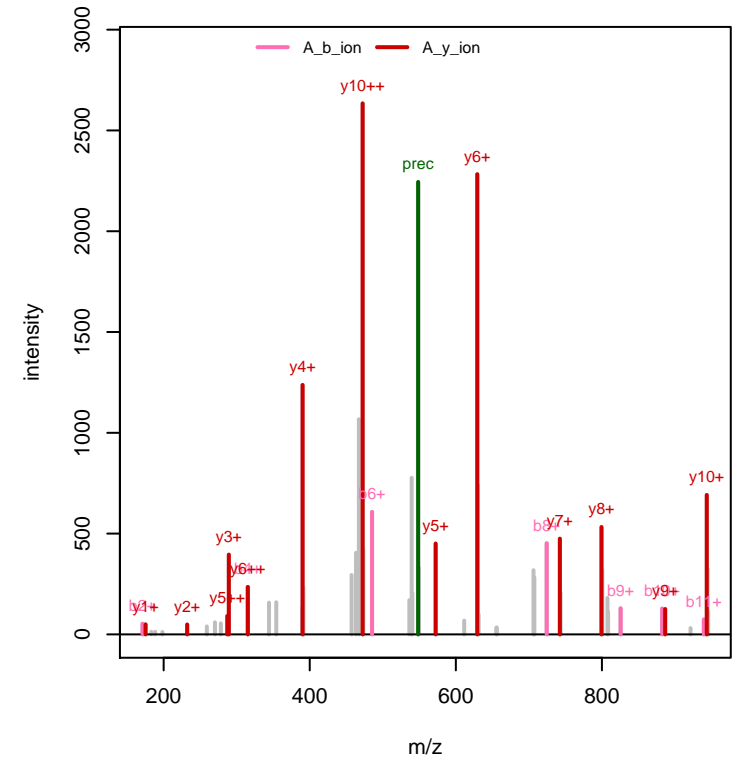

GIGSGLGKTGGR+XL\_L

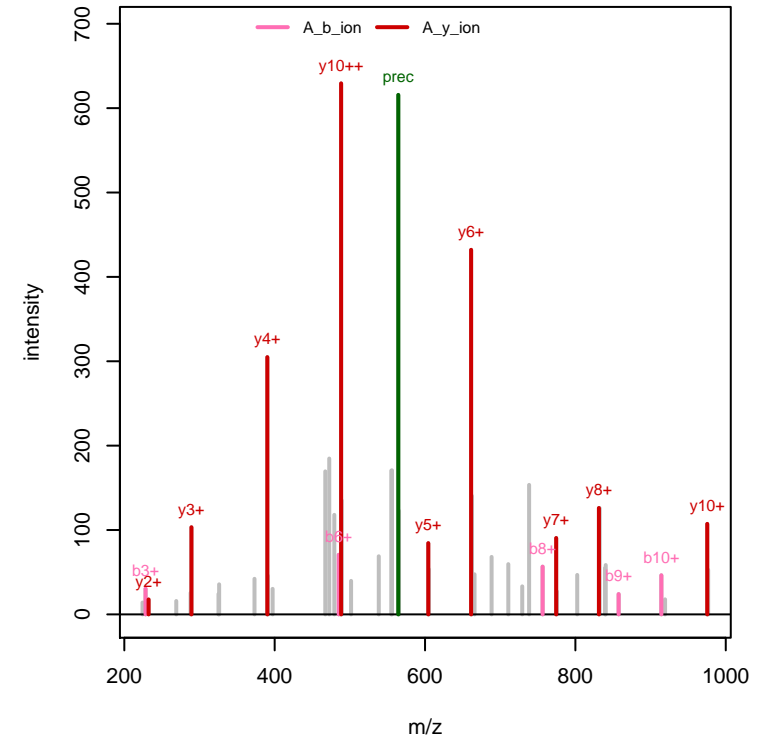

LNTLSPAEGSKK+XL\_S

LNTLSPAEGSKK+XL\_L

**AGAKGSK  
FREVKLAR**

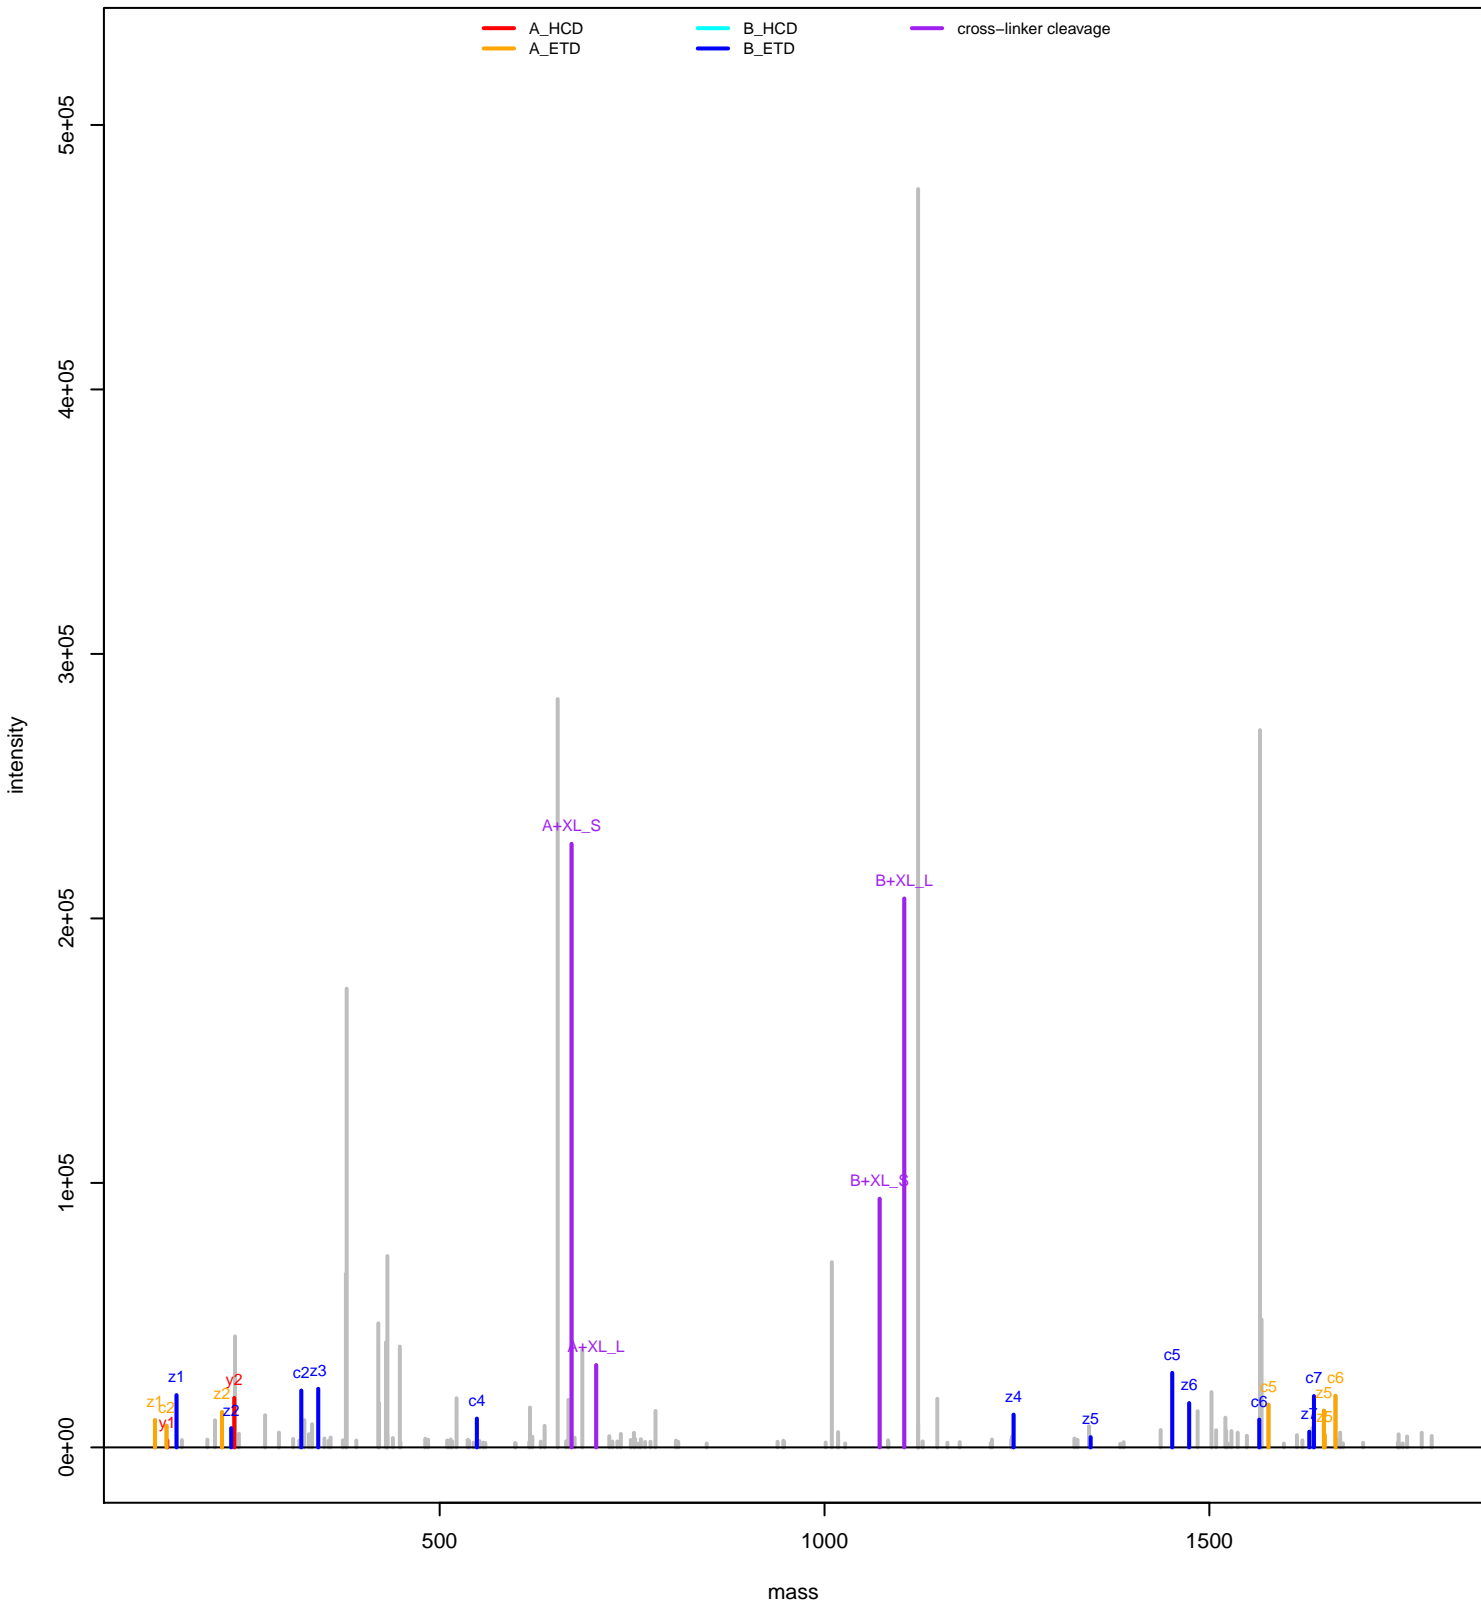

**AGAKGSK+XL\_S**

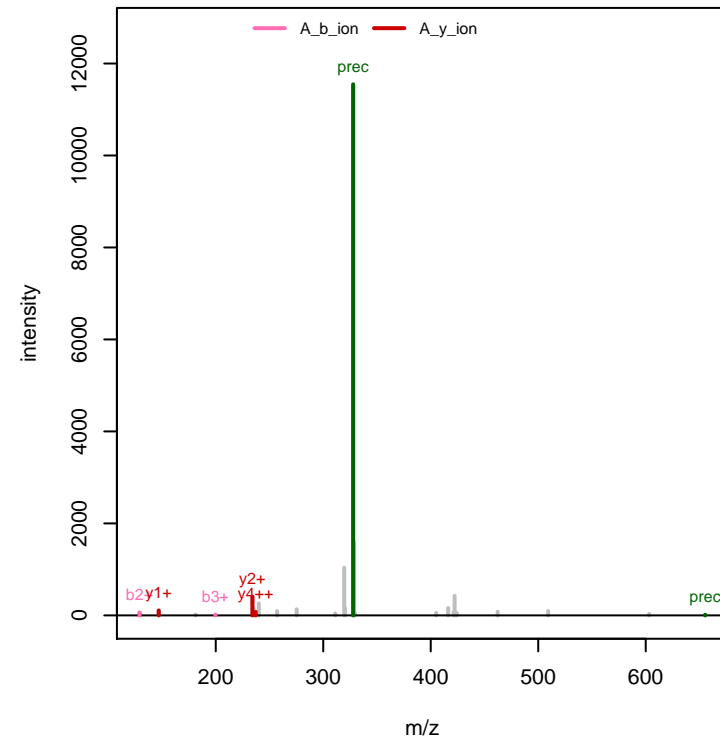

**FREVKLAR+XL\_S**

**AGAKGSK+XL\_L**

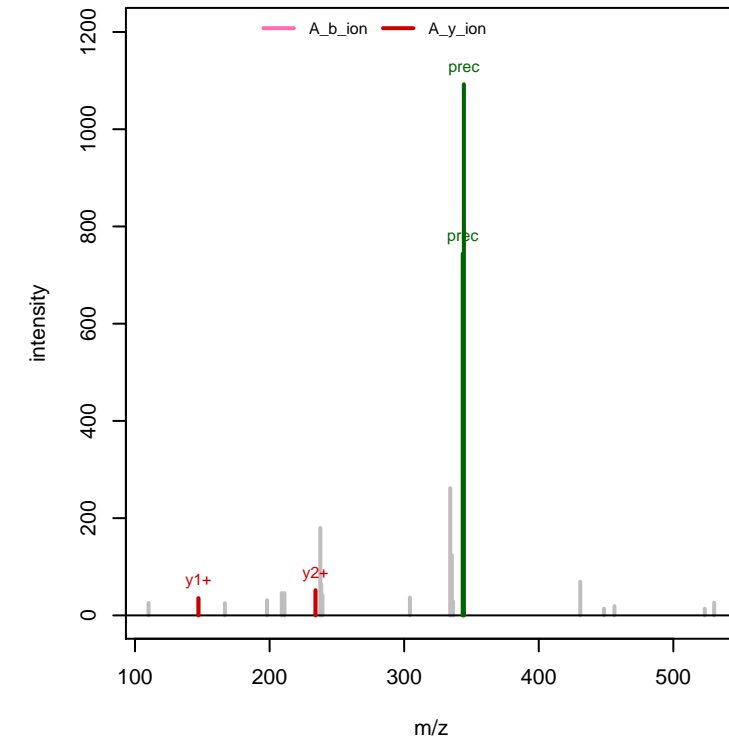

**FREVKLAR+XL\_L**

TPDQVKEIAR  
TTQKYINELQANPAK

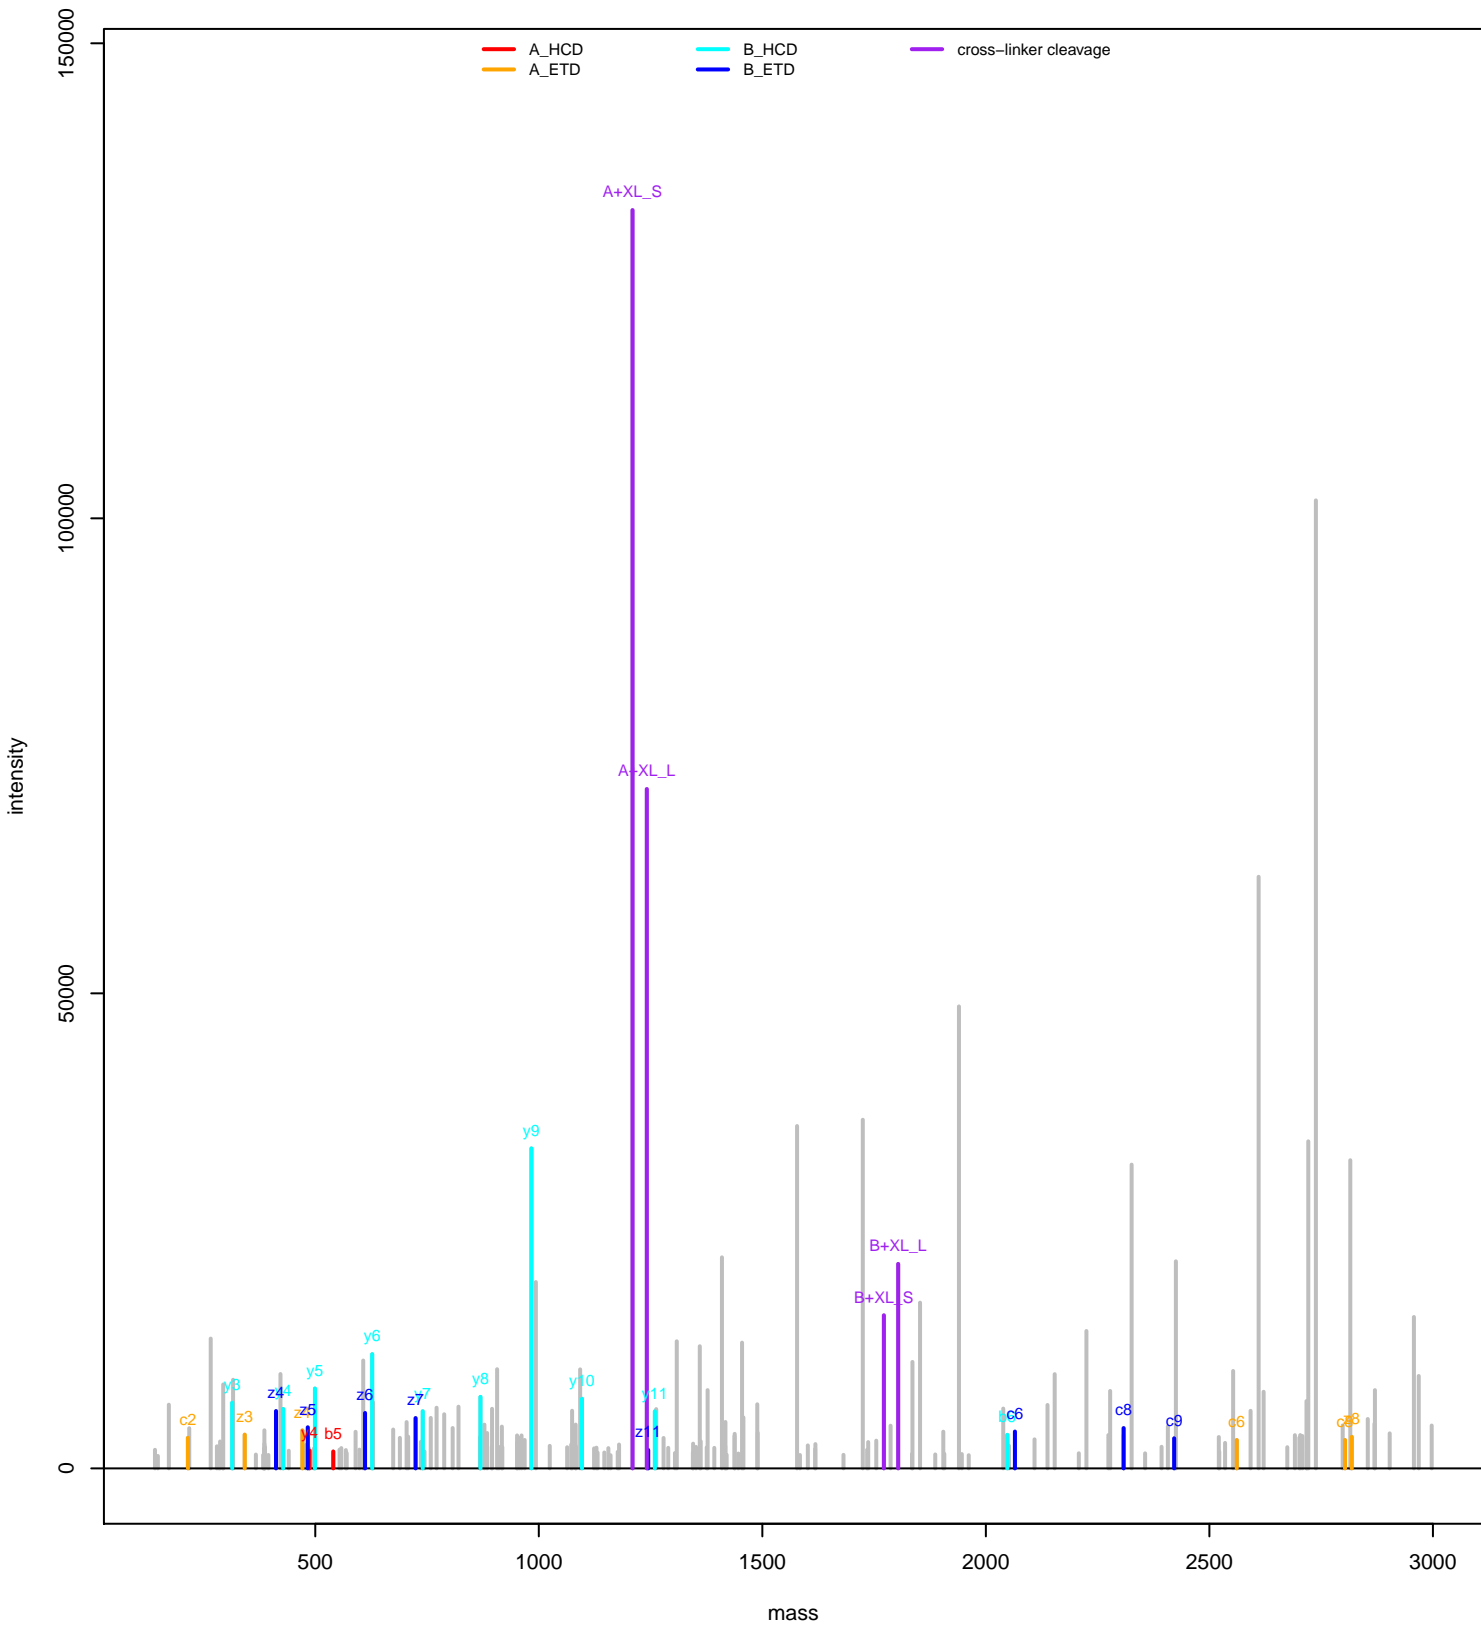

TPDQVKEIAR+XL\_S

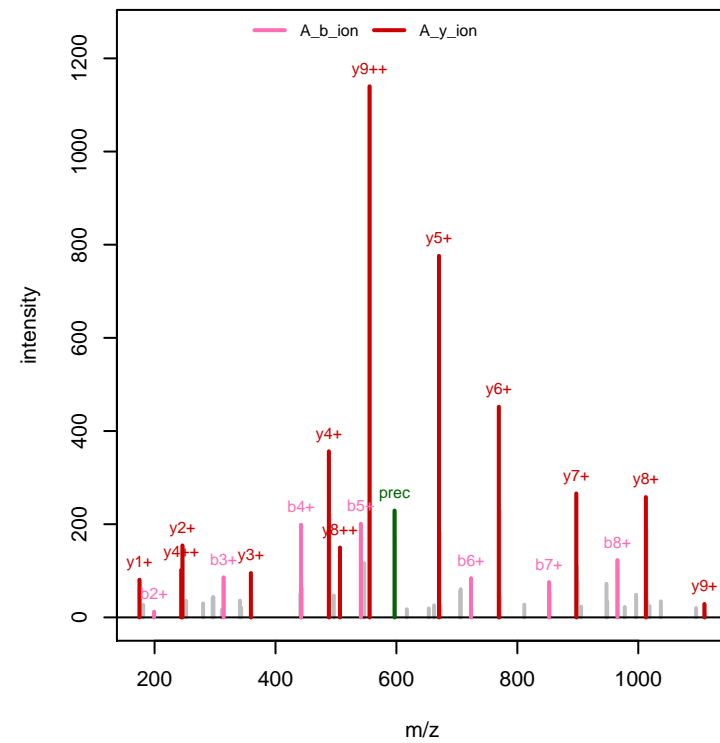

TPDQVKEIAR+XL\_L

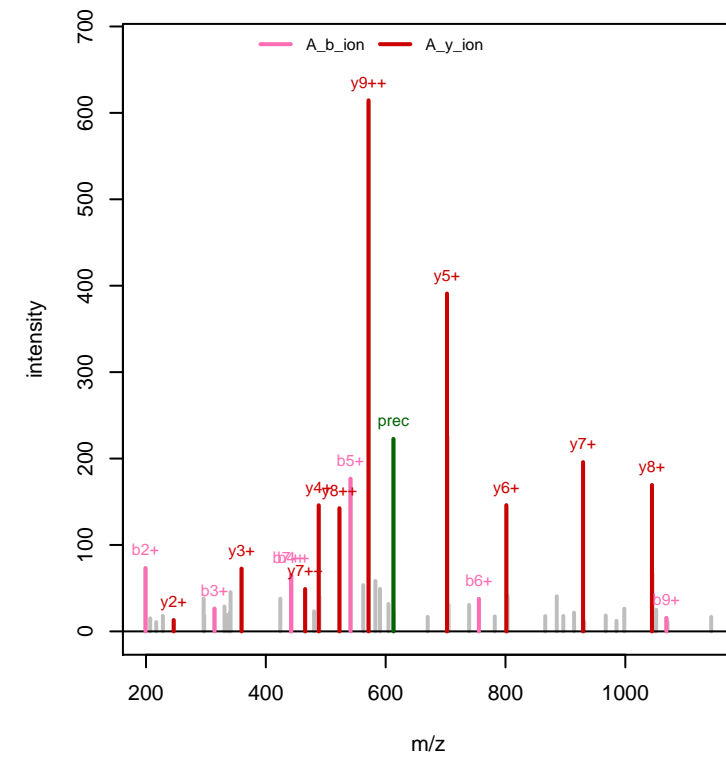

TTQKYINELQANPAK+XL\_S

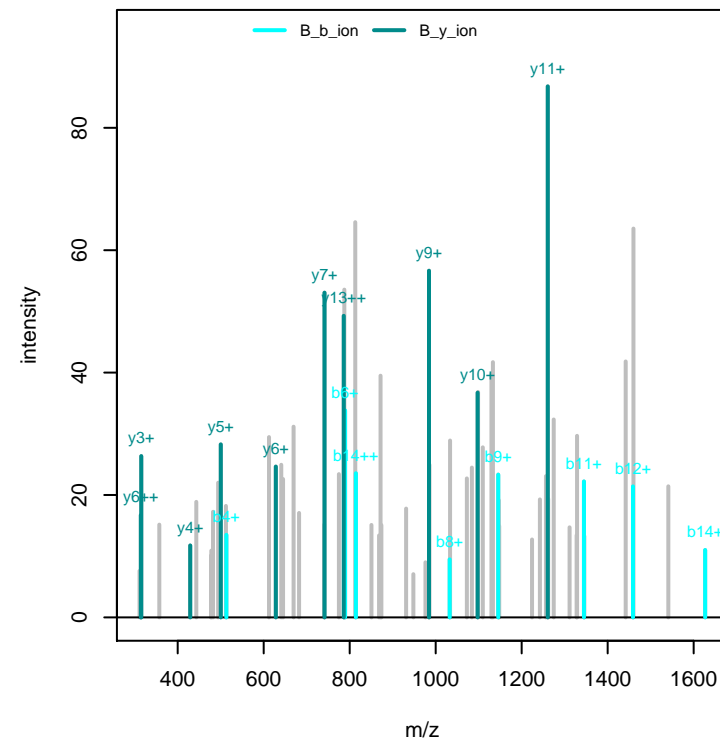

TTQKYINELQANPAK+XL\_L

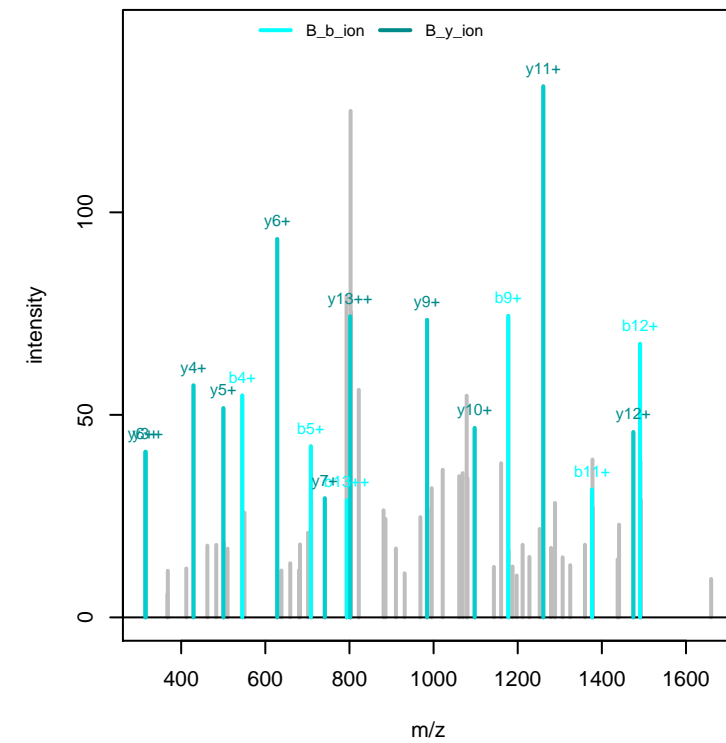

STIEER  
TGRNPQTGKEITIAAAK

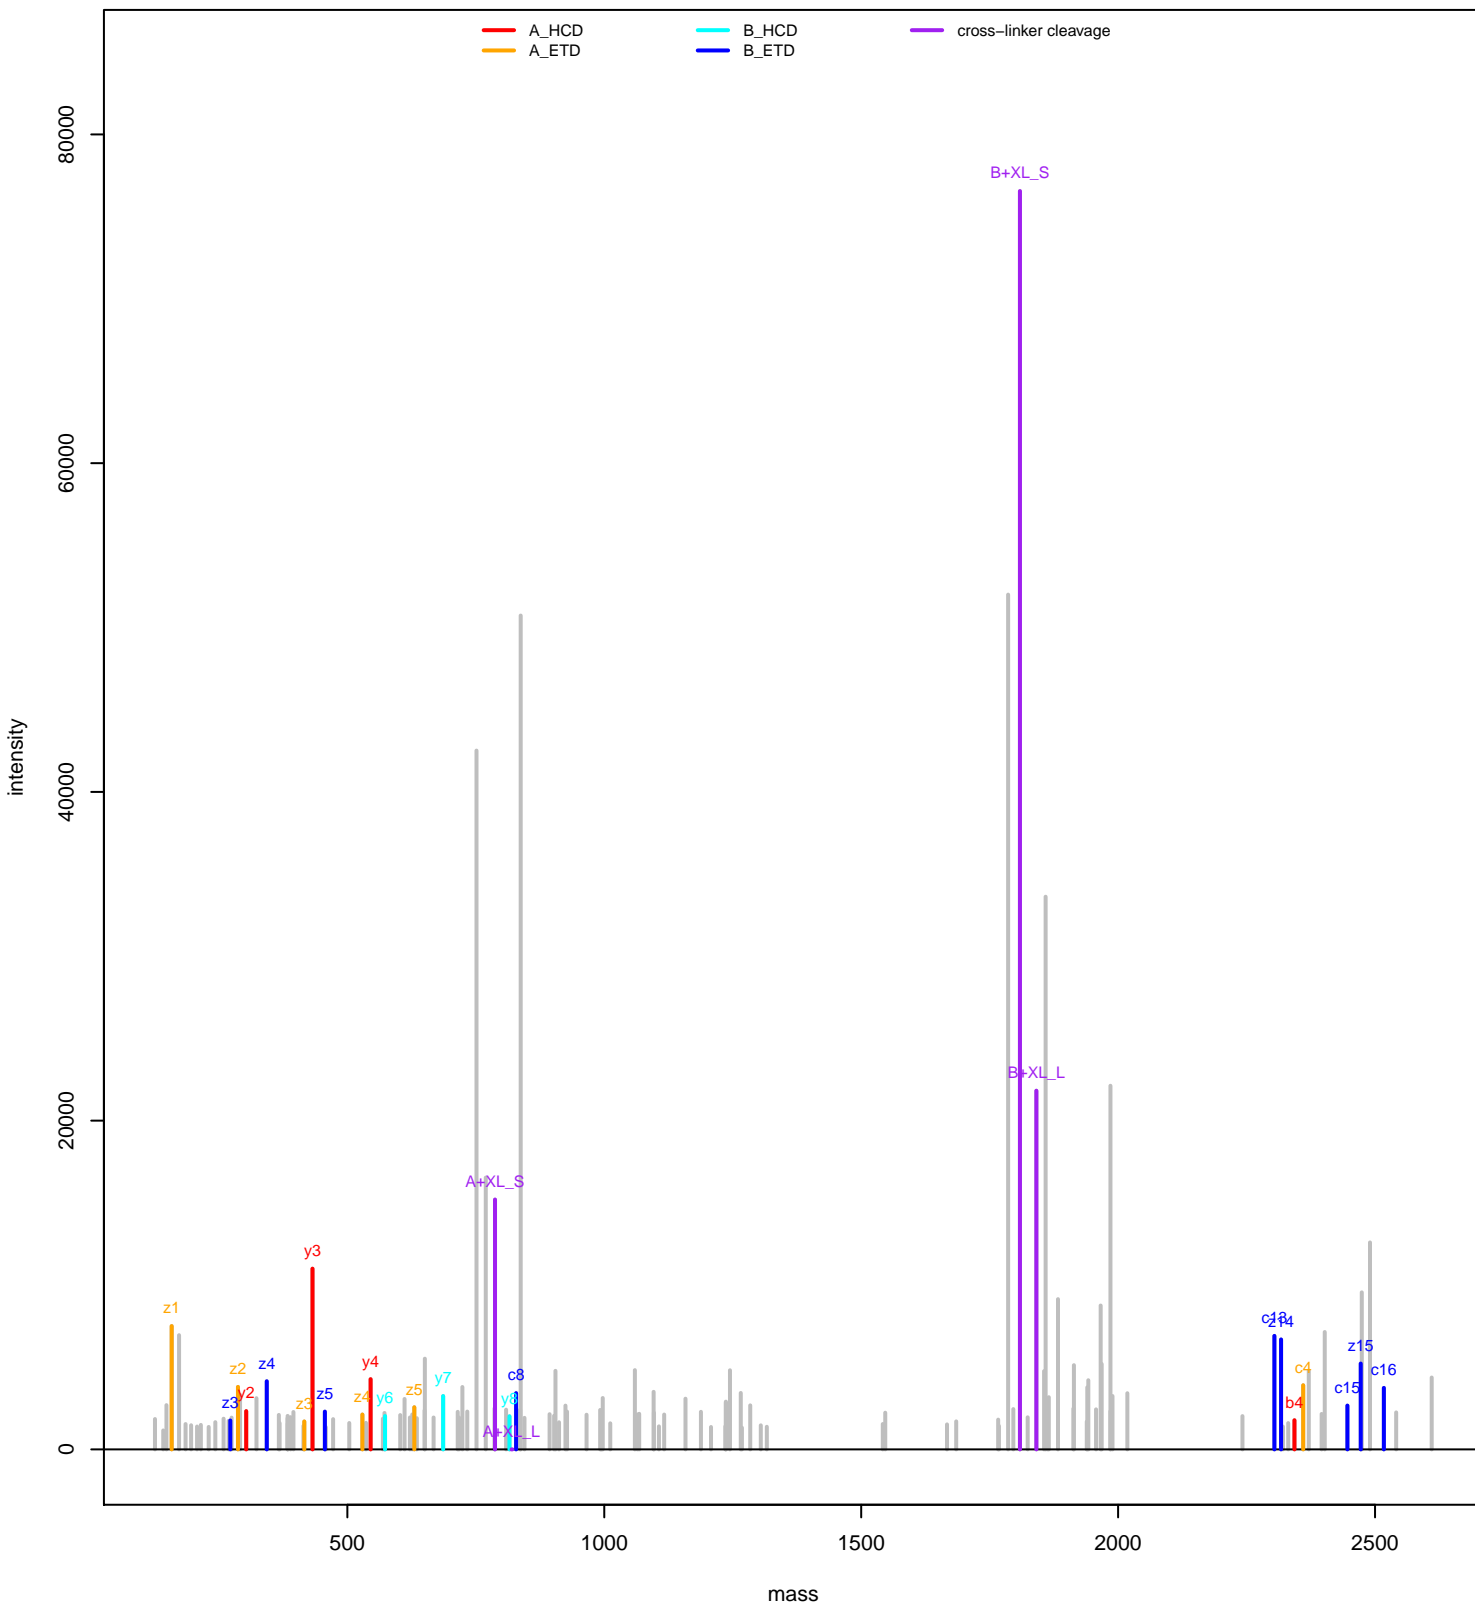

STIEER+XL\_S

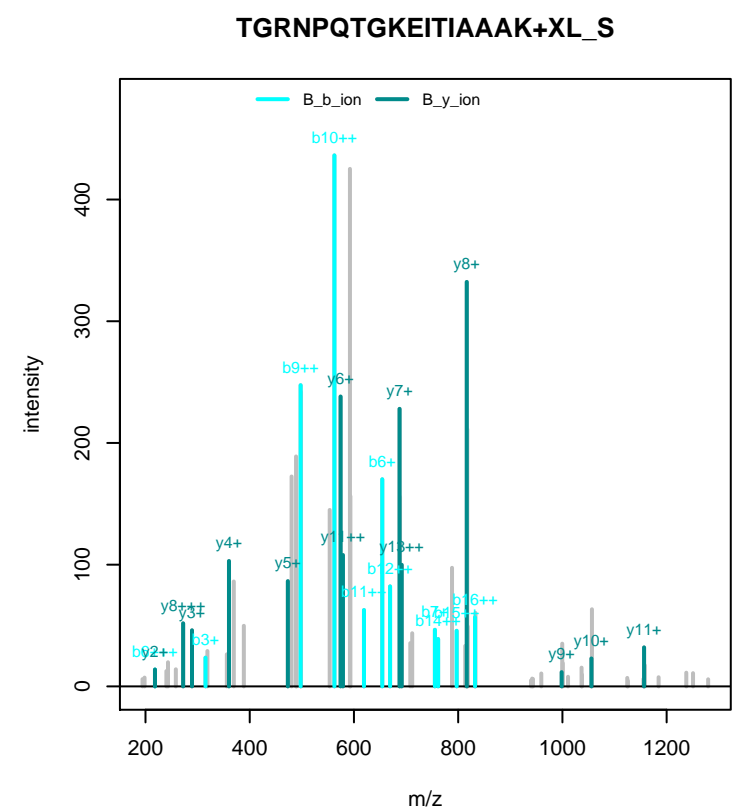

STIEER+XL\_L

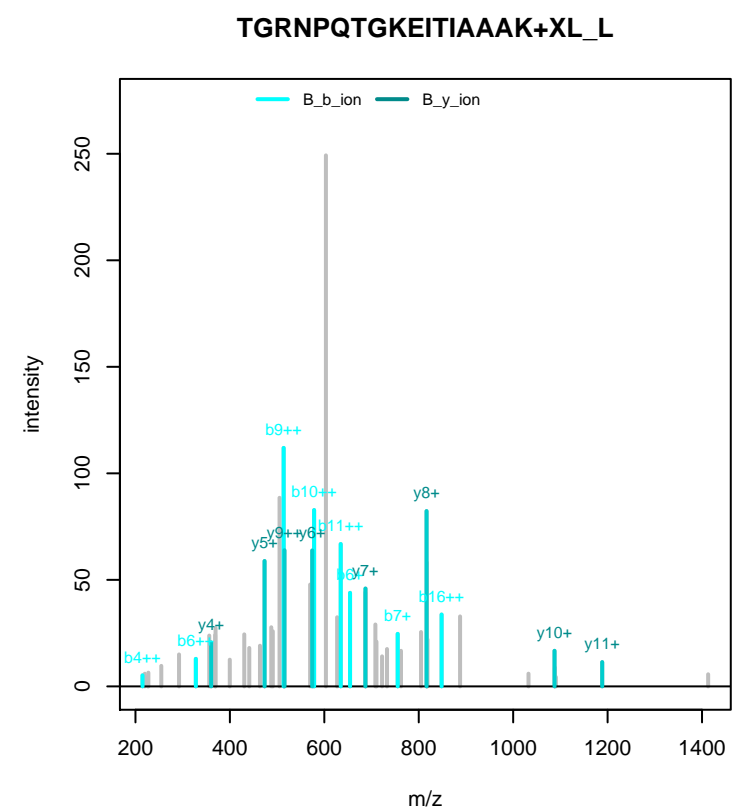

RVNPDSDKED  
LANELSDAAENKGTAVK

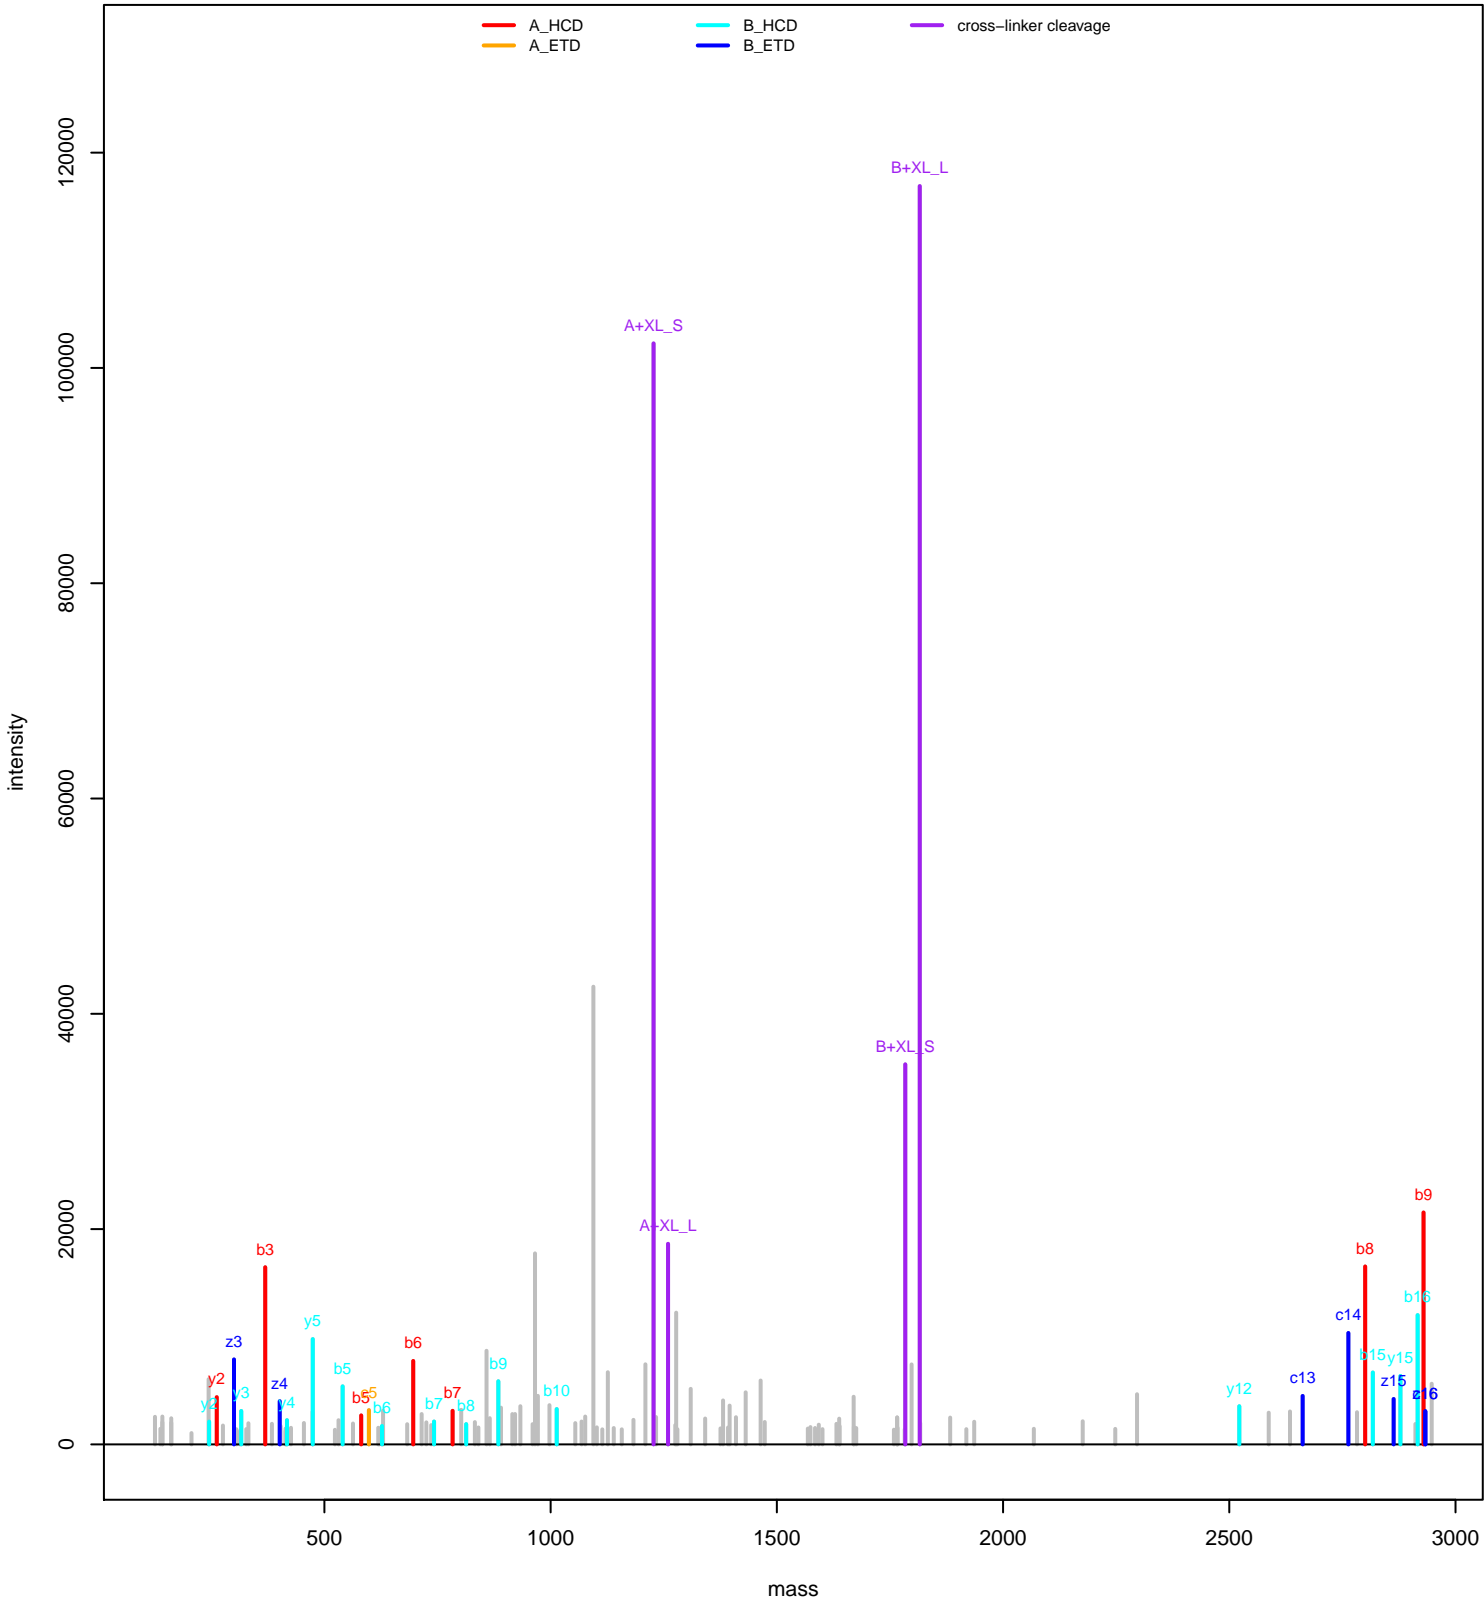

RVNPDSDKED+XL\_S

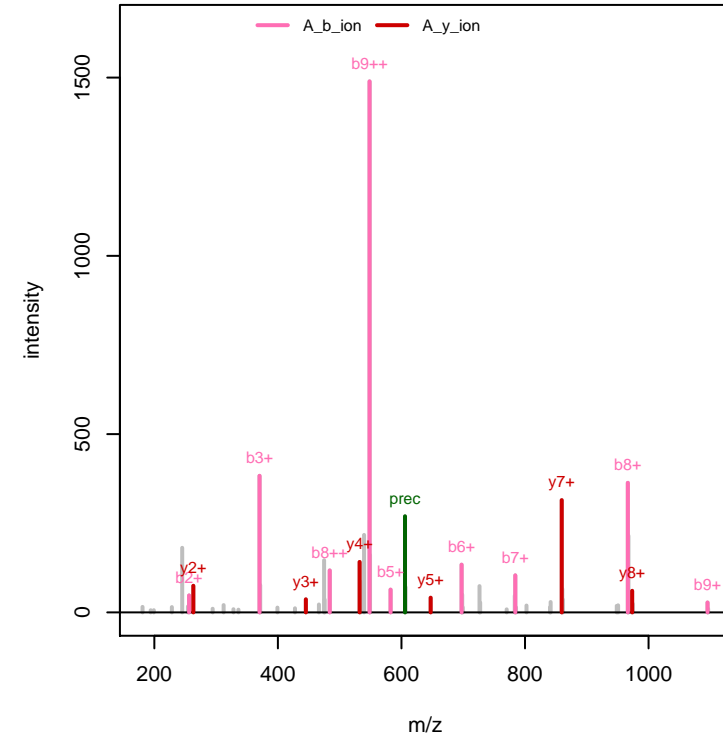

RVNPDSDKED+XL\_L

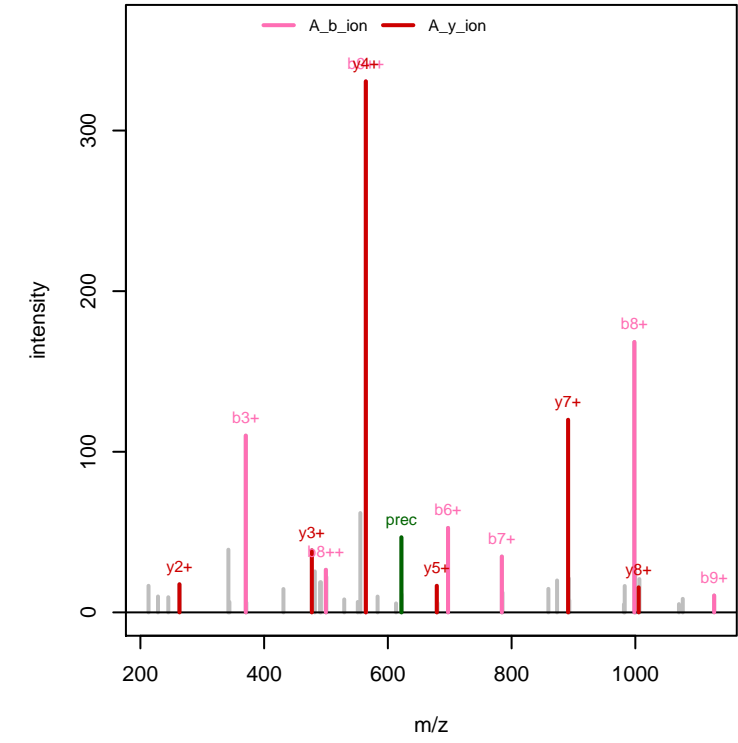

LANELSDAAENKGTAVK+XL\_S

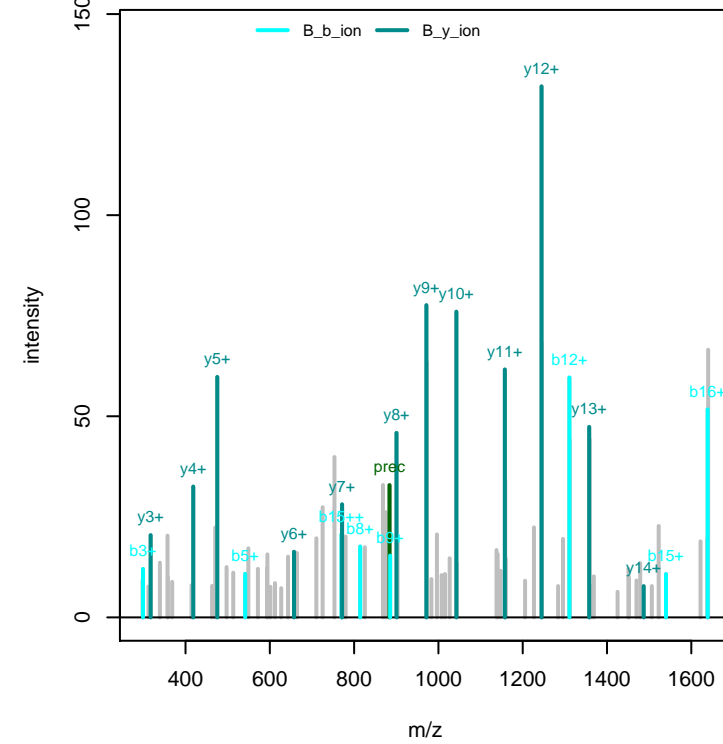

LANELSDAAENKGTAVK+XL\_L

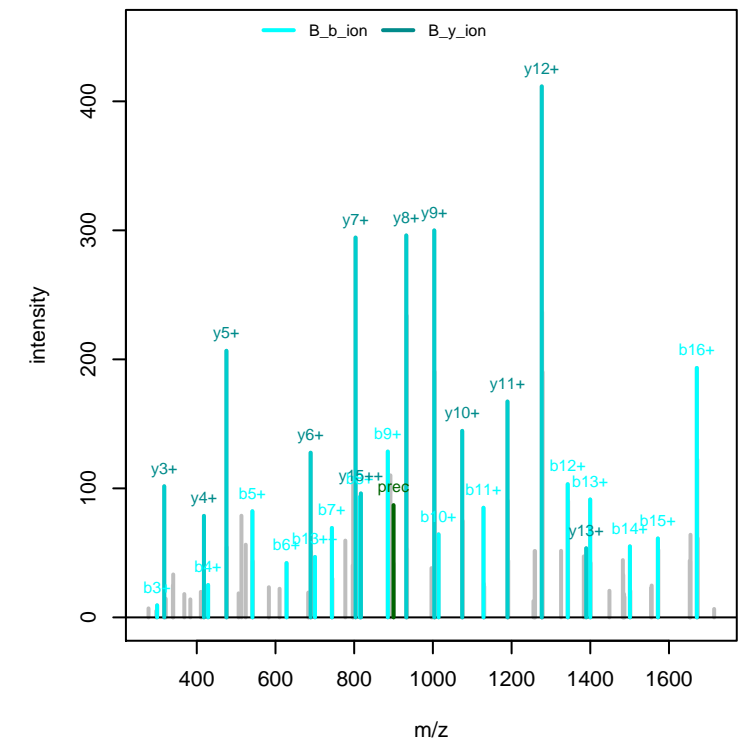

SGSGKPNKDK  
TPPAVLLKK

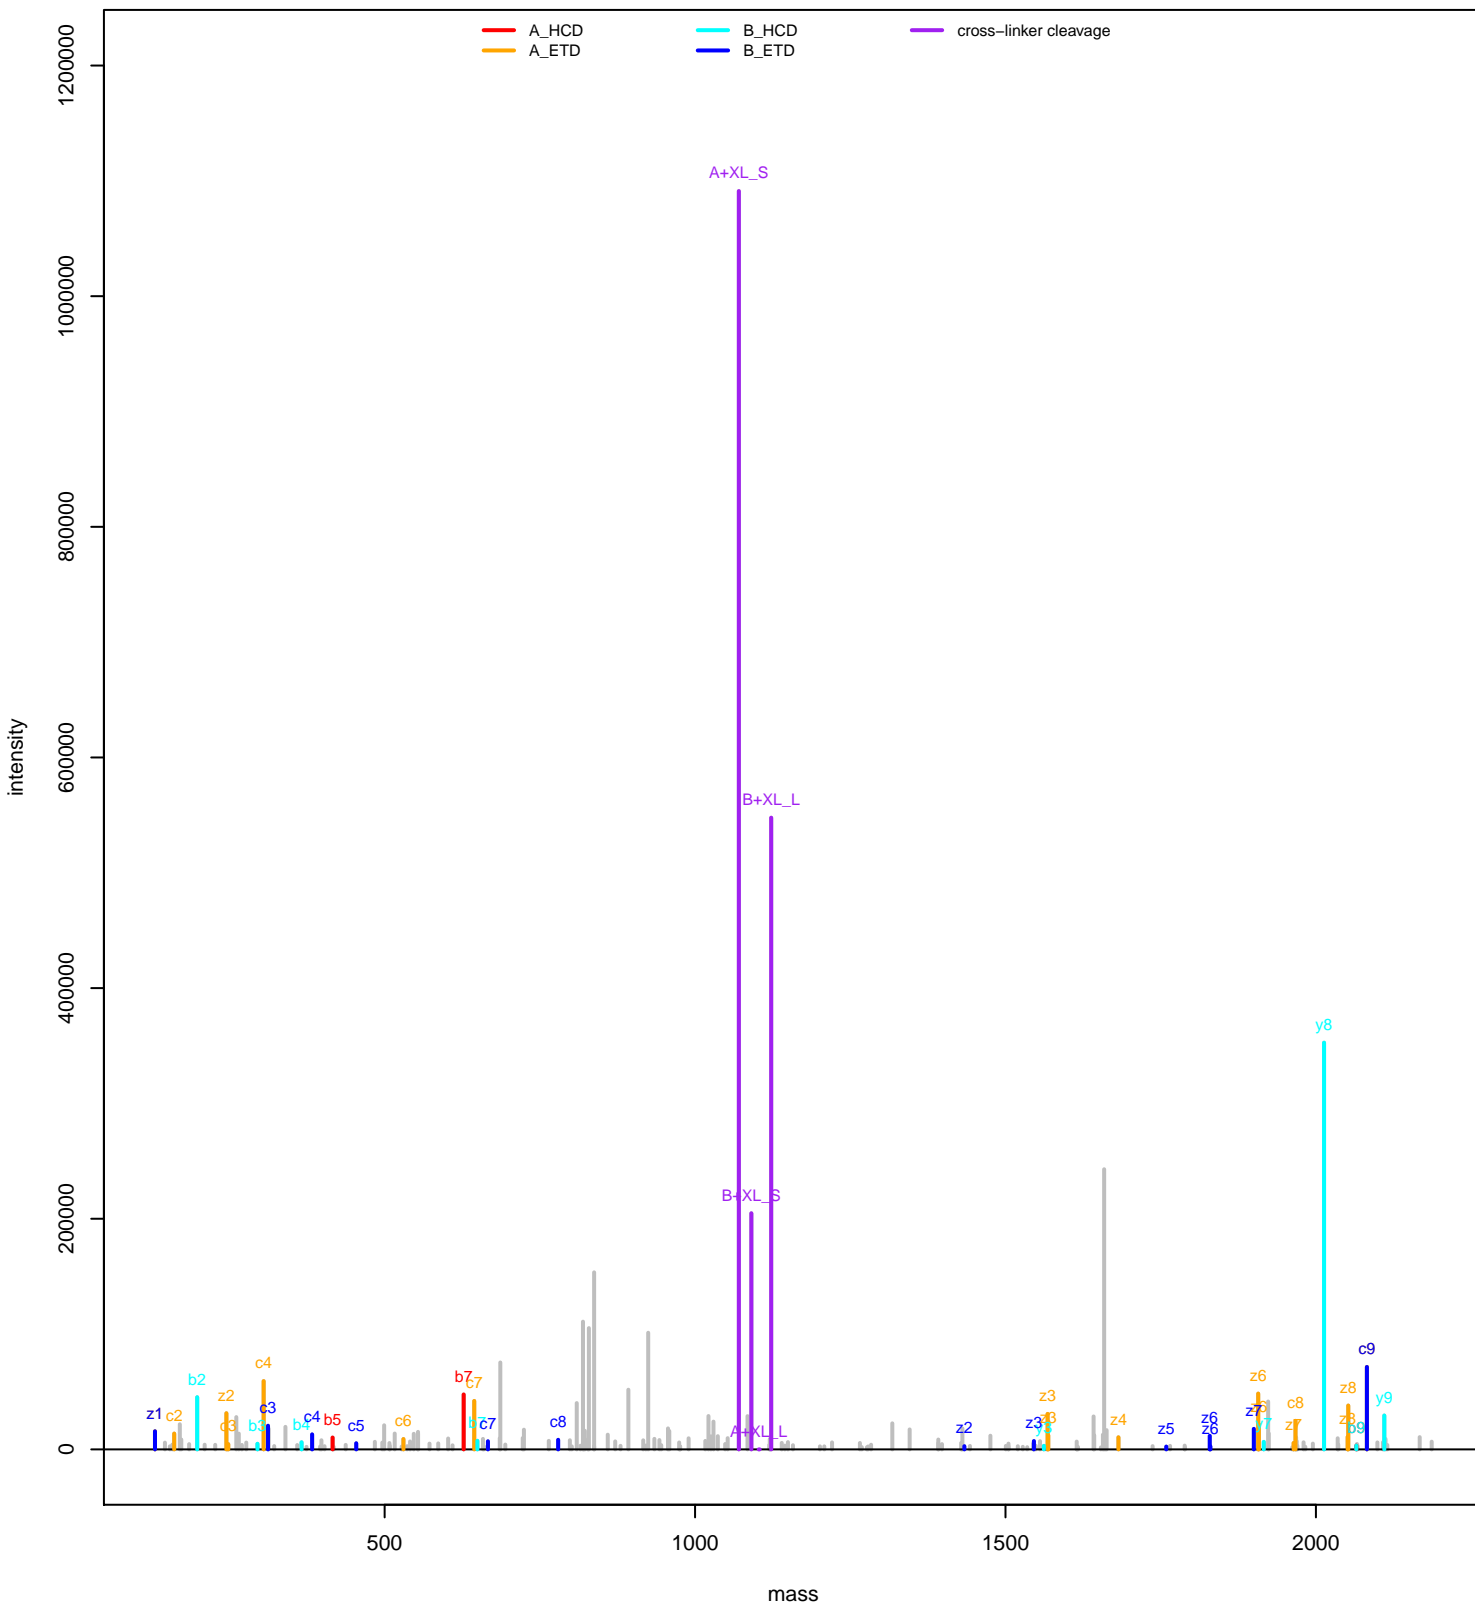

SGSGKPNKDK+XL\_S

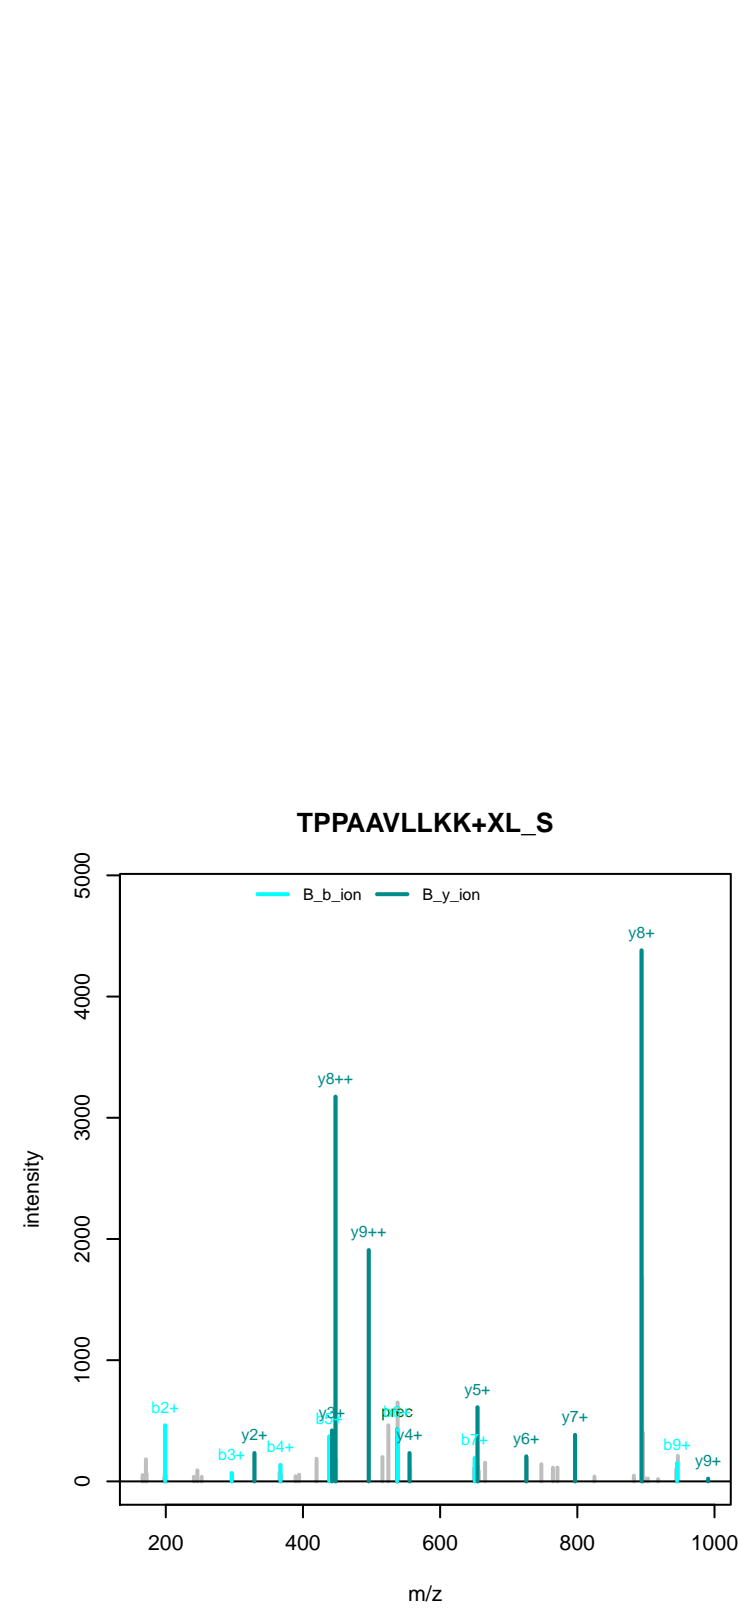

SGSGKPNKDK+XL\_L

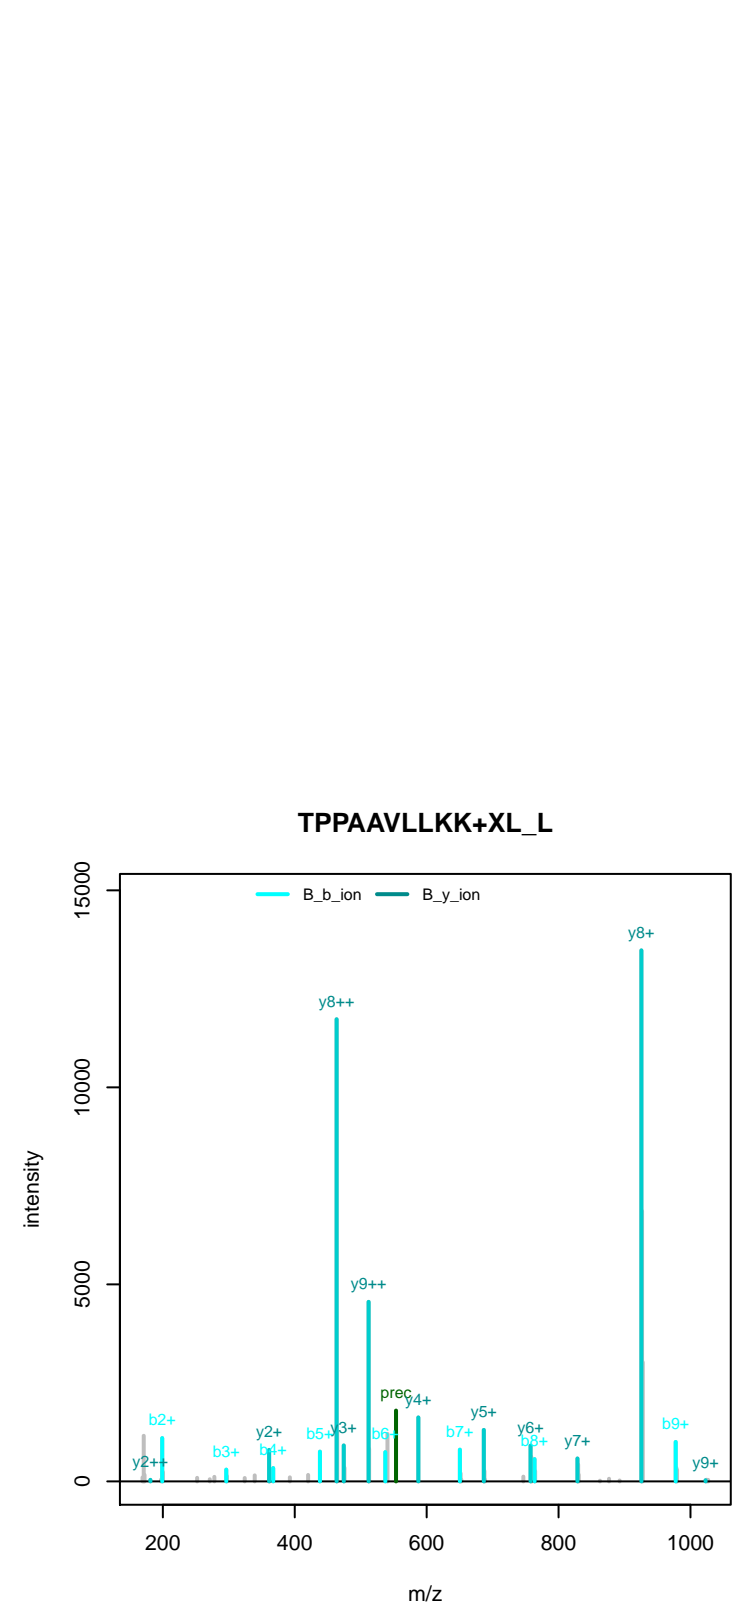

TPPAVLLKK+XL\_S

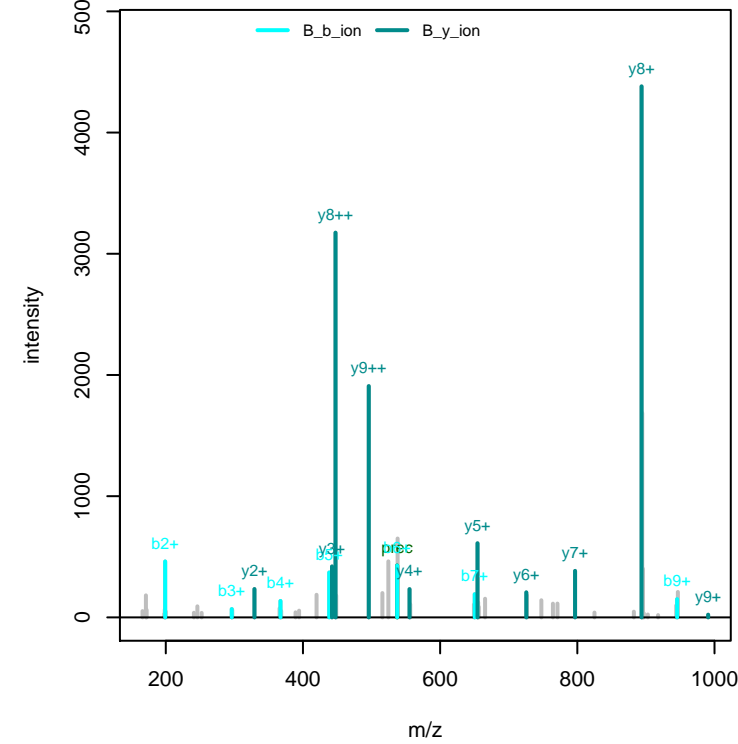

TPPAVLLKK+XL\_L

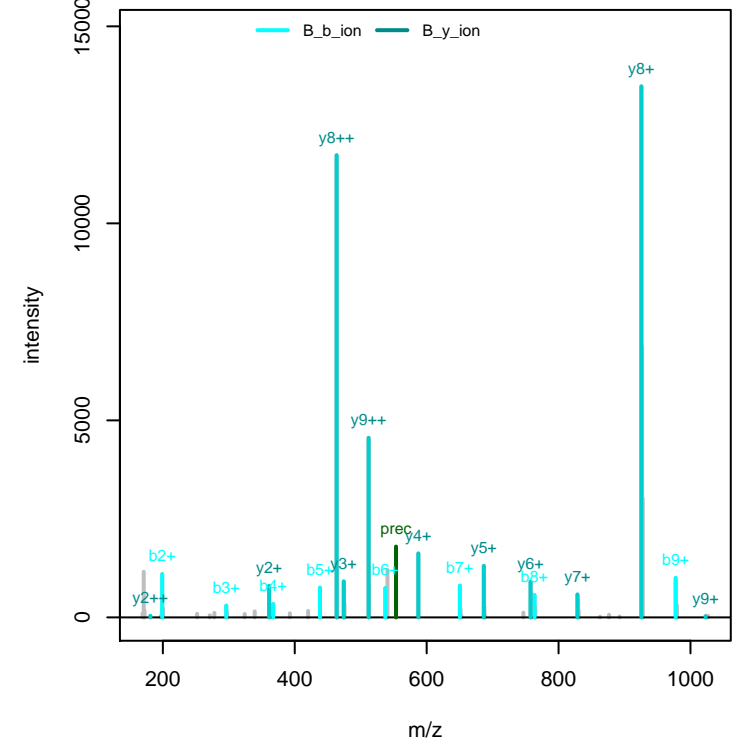

**HLAKAPAK  
KQYGEAFEK**

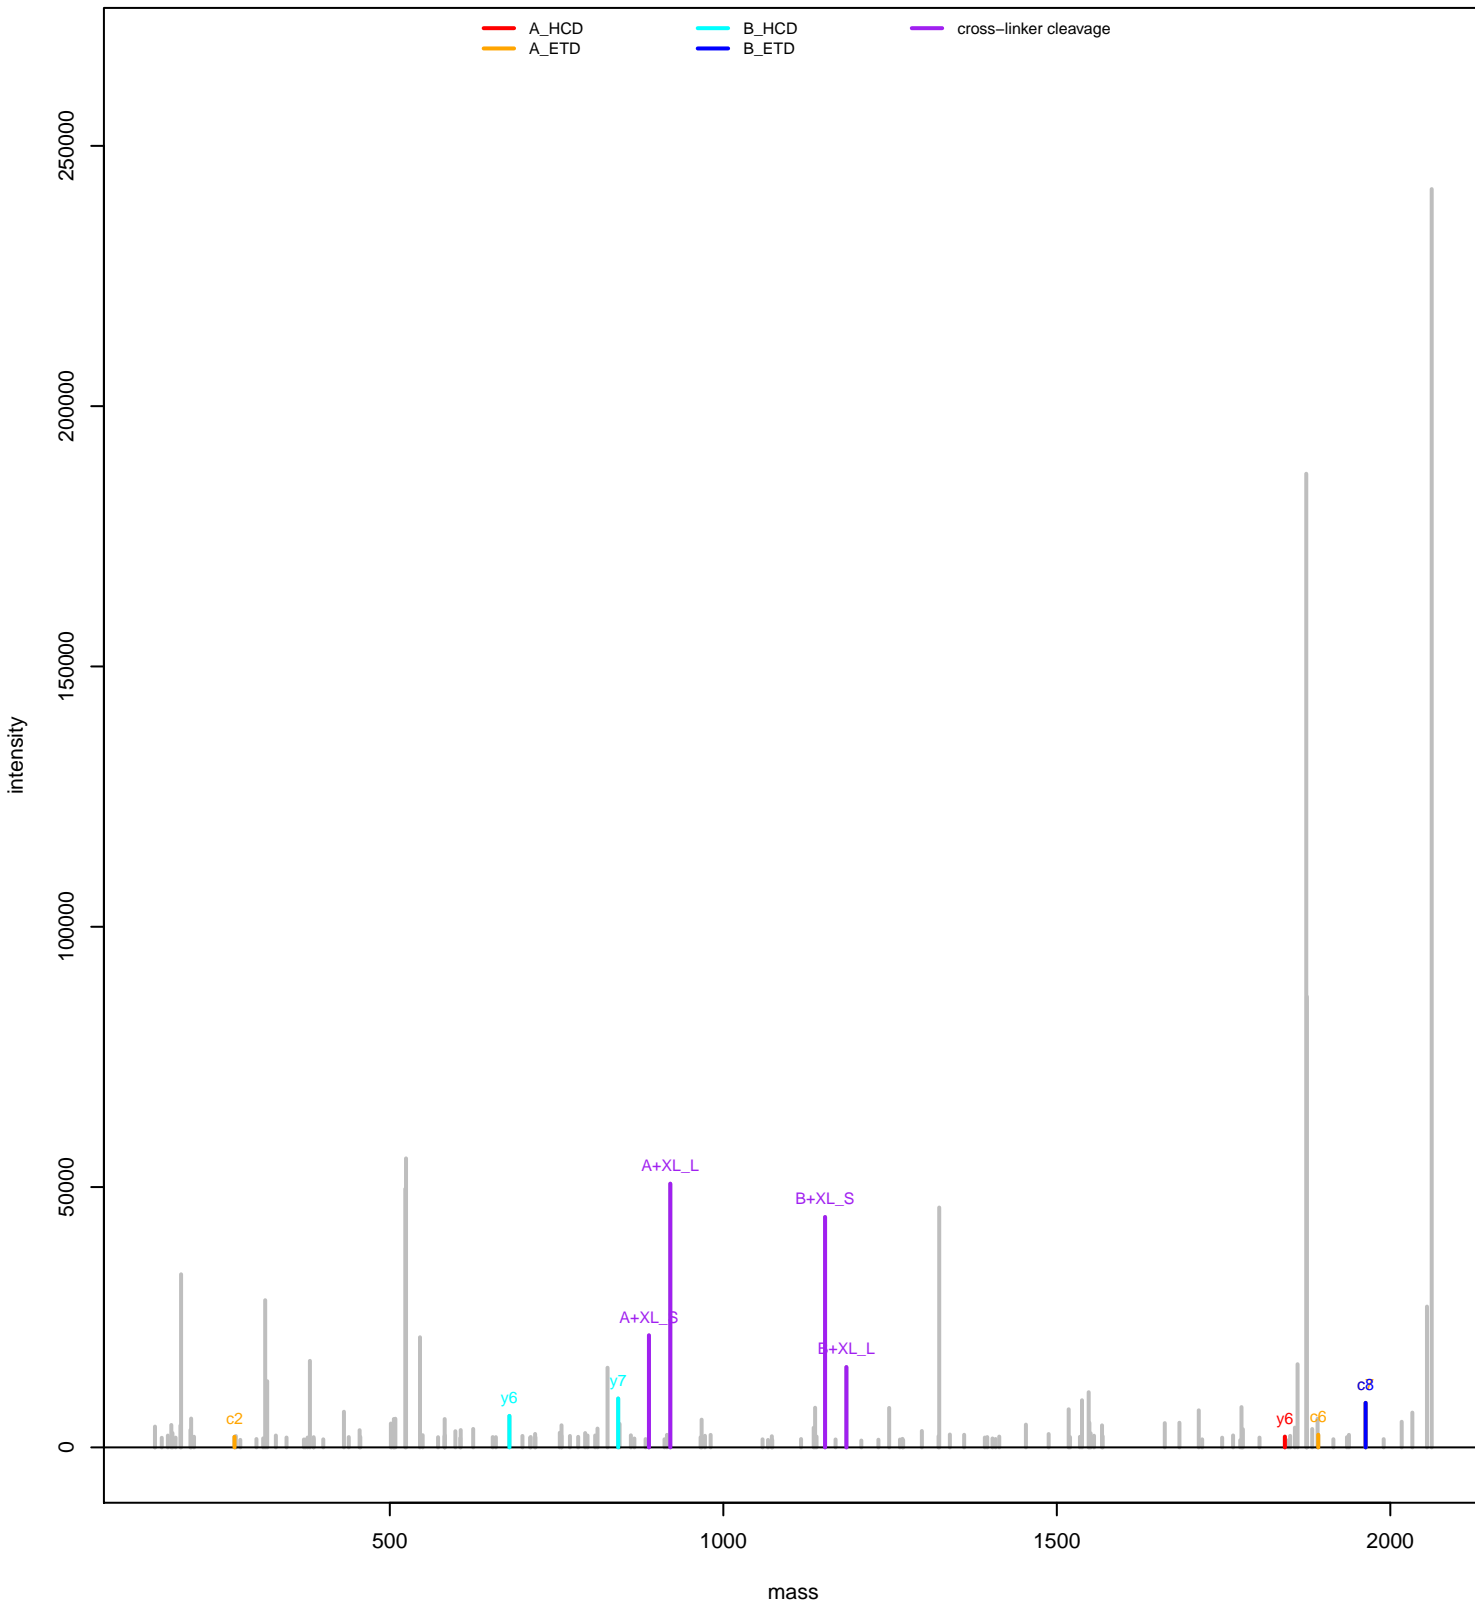

**HLAKAPAK+XL\_S**

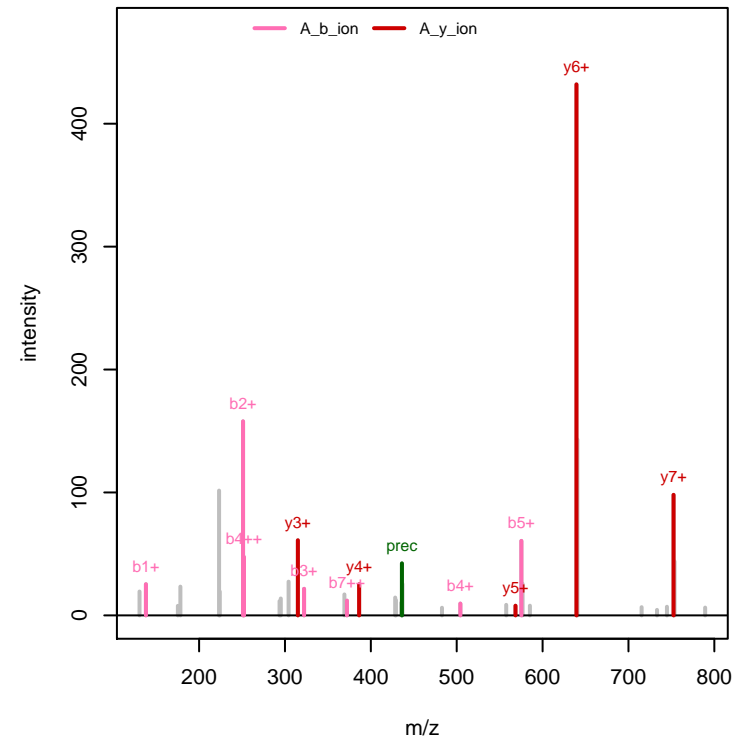

**HLAKAPAK+XL\_L**

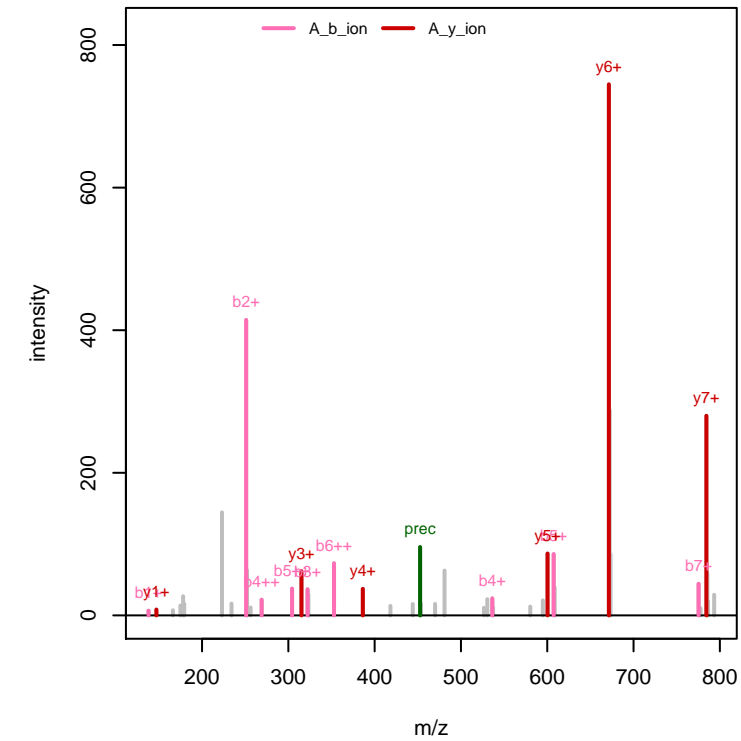

**KQYGEAFEK+XL\_S**

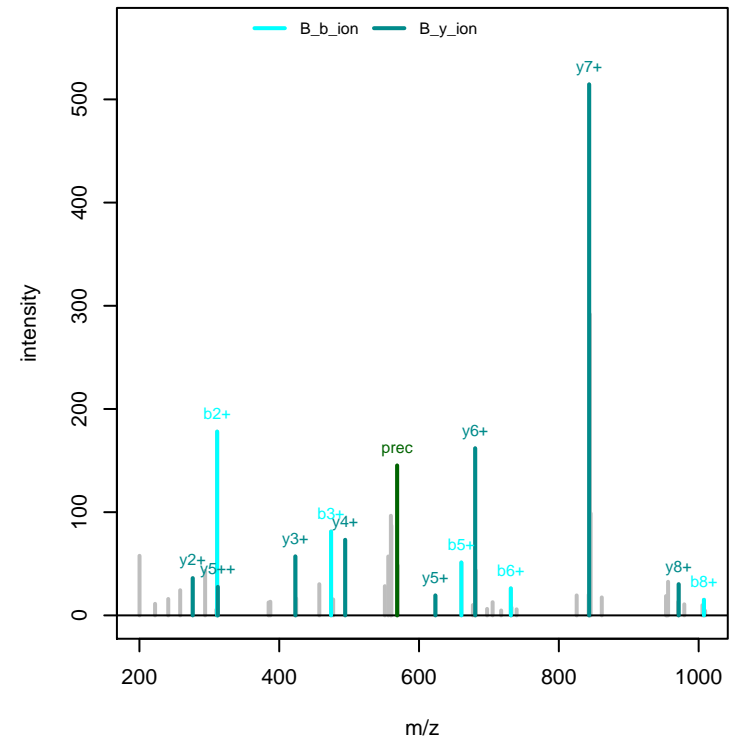

**KQYGEAFEK+XL\_L**

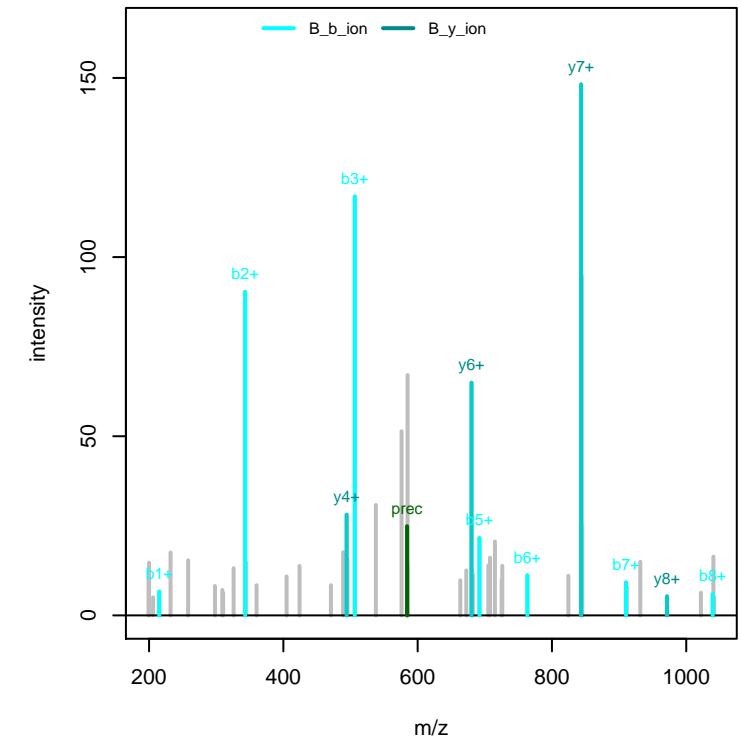



KLQQYR  
AQRPAKYSYVDENGETK

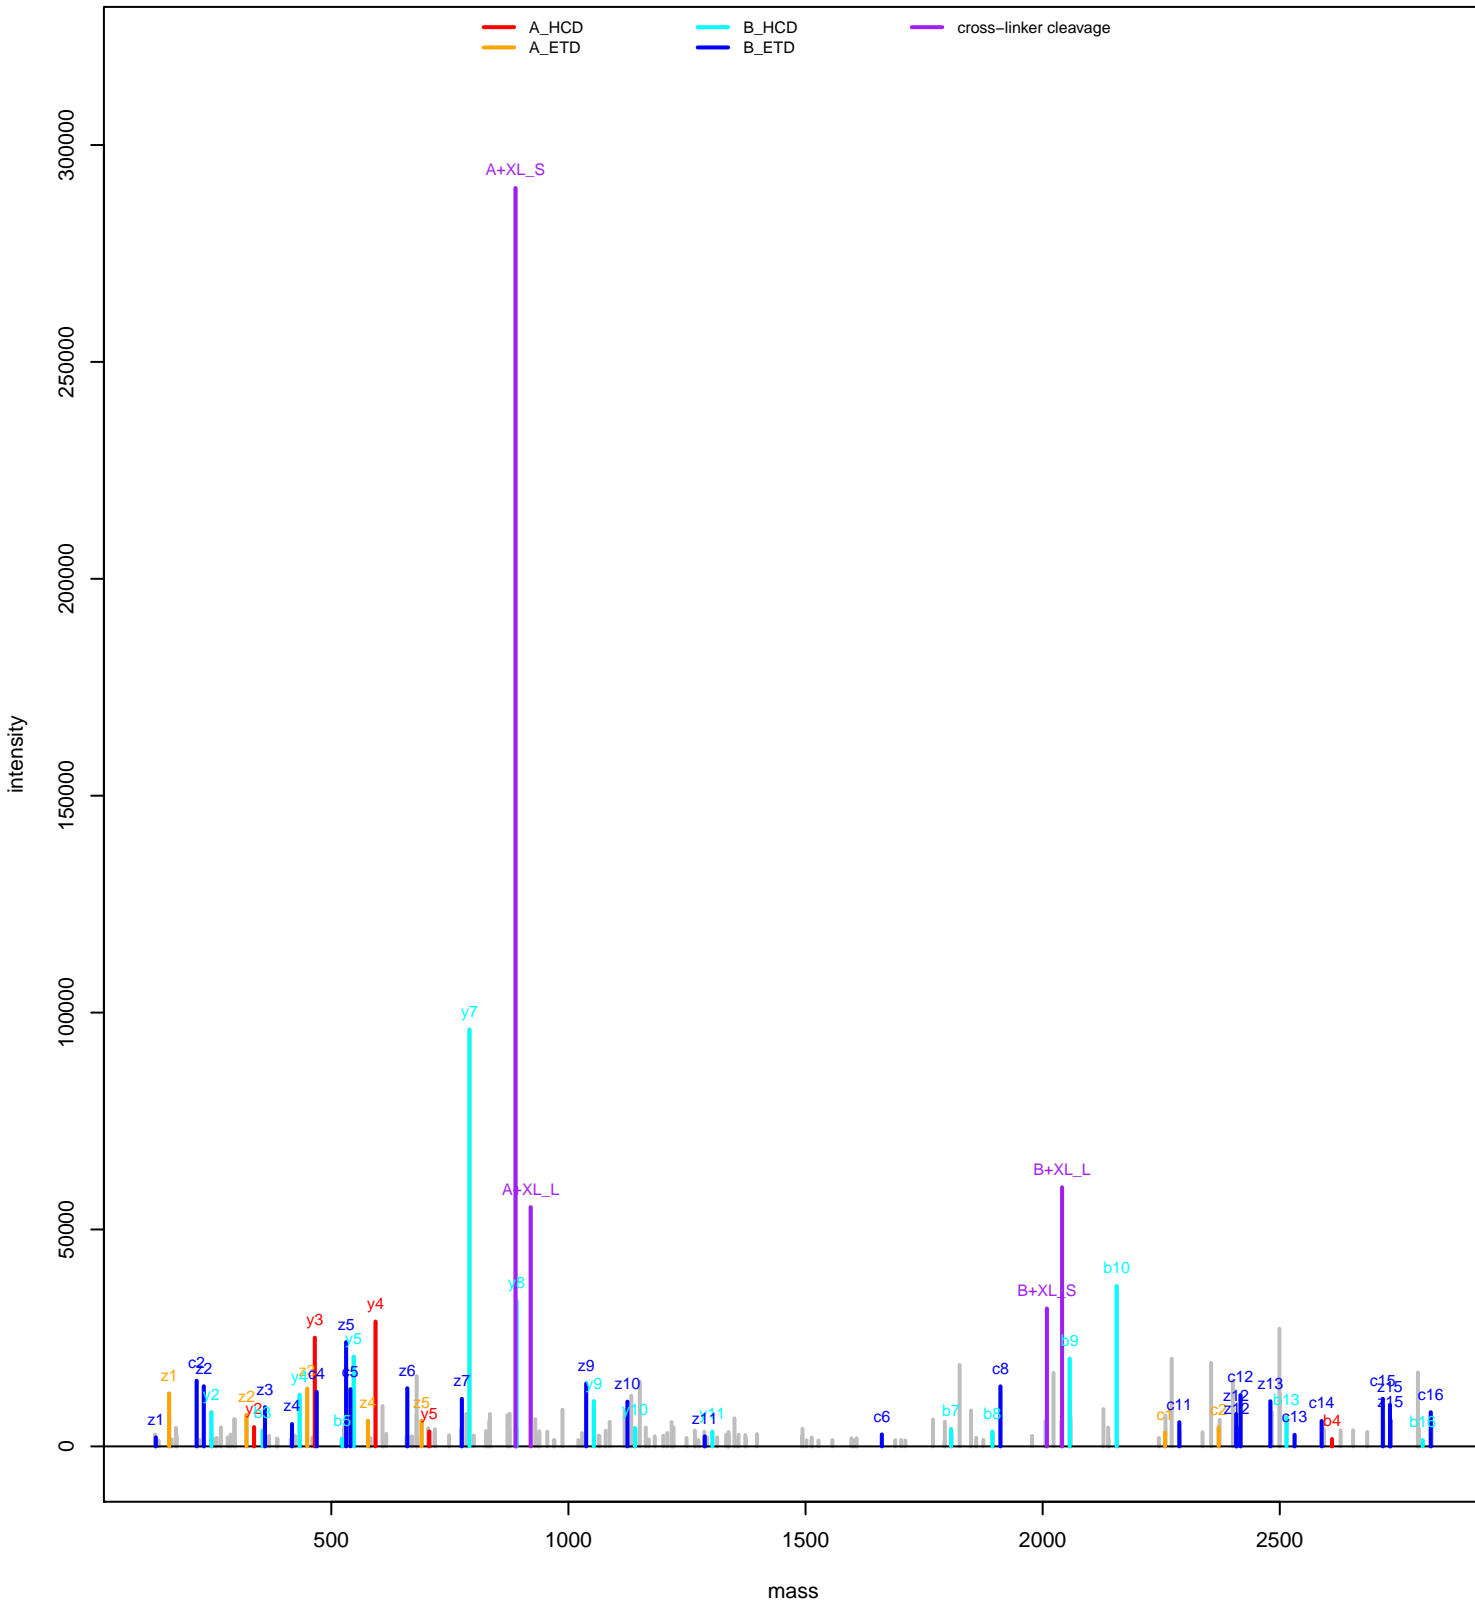

KLQQYR+XL\_S

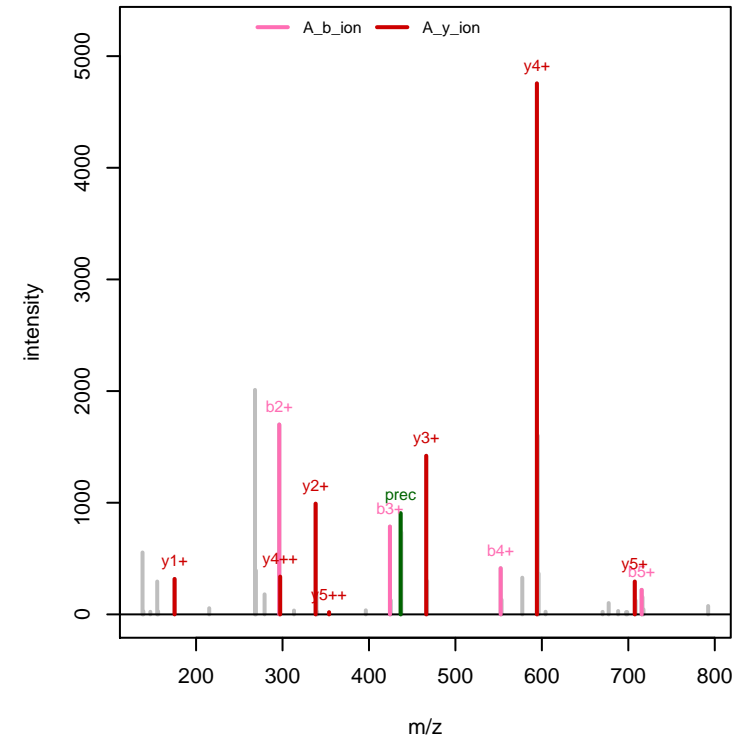

KLQQYR+XL\_L

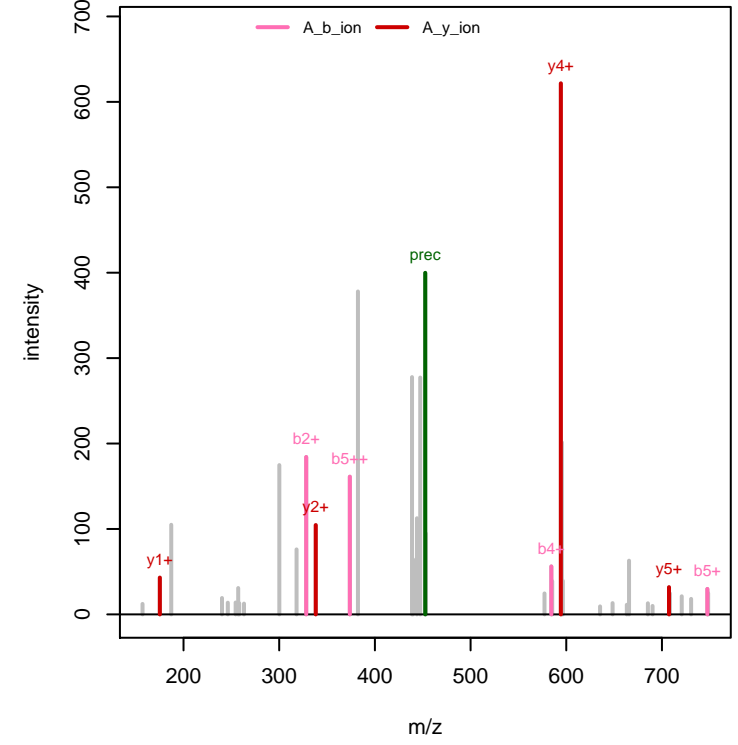

AQRPAKYSYVDENGETK+XL\_S

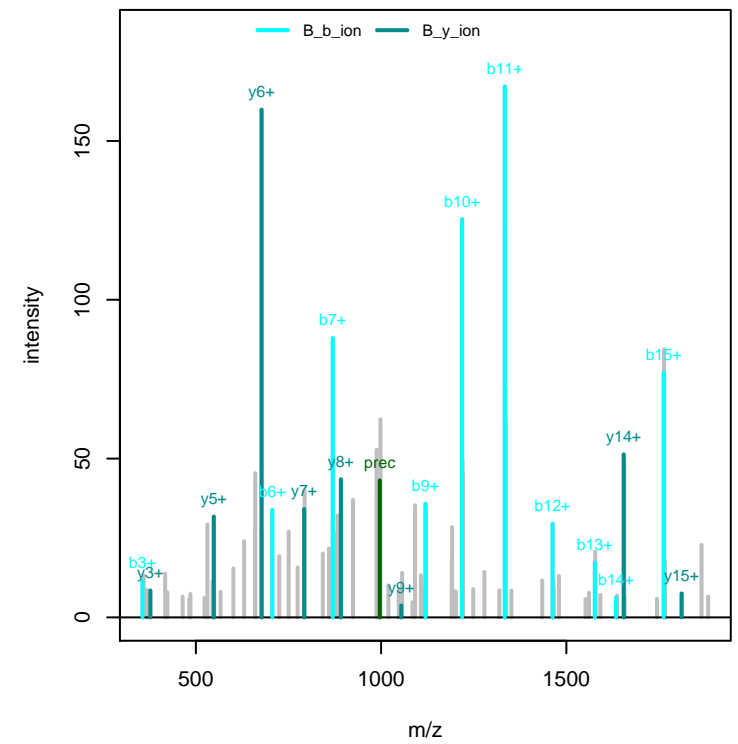

AQRPAKYSYVDENGETK+XL\_L

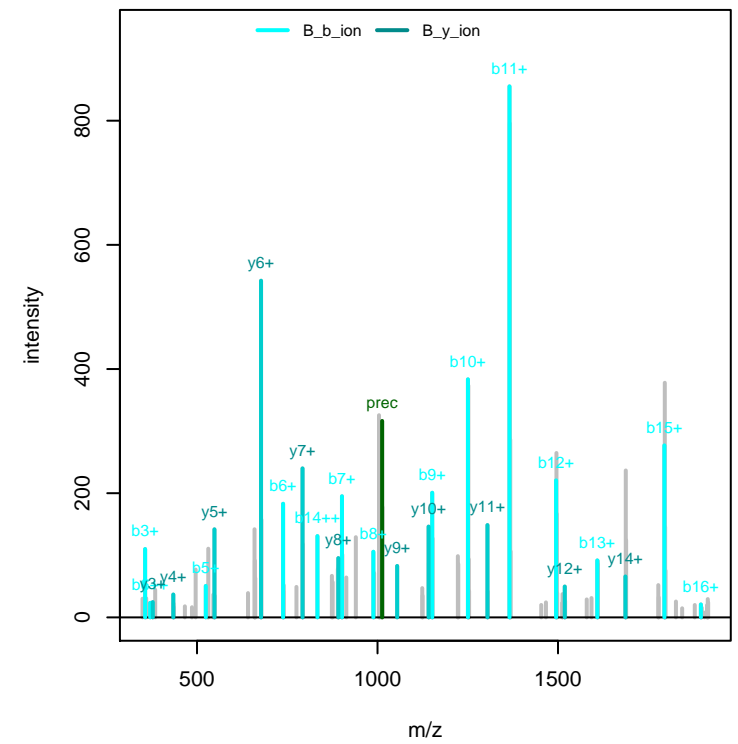

VKLAGG  
AAPVRPKGDGVVR

VKLAGG+XL\_S

VKLAGG+XL\_L

A\_HCD B\_HCD cross-linker cleavage  
A\_ETD B\_ETD

intensity

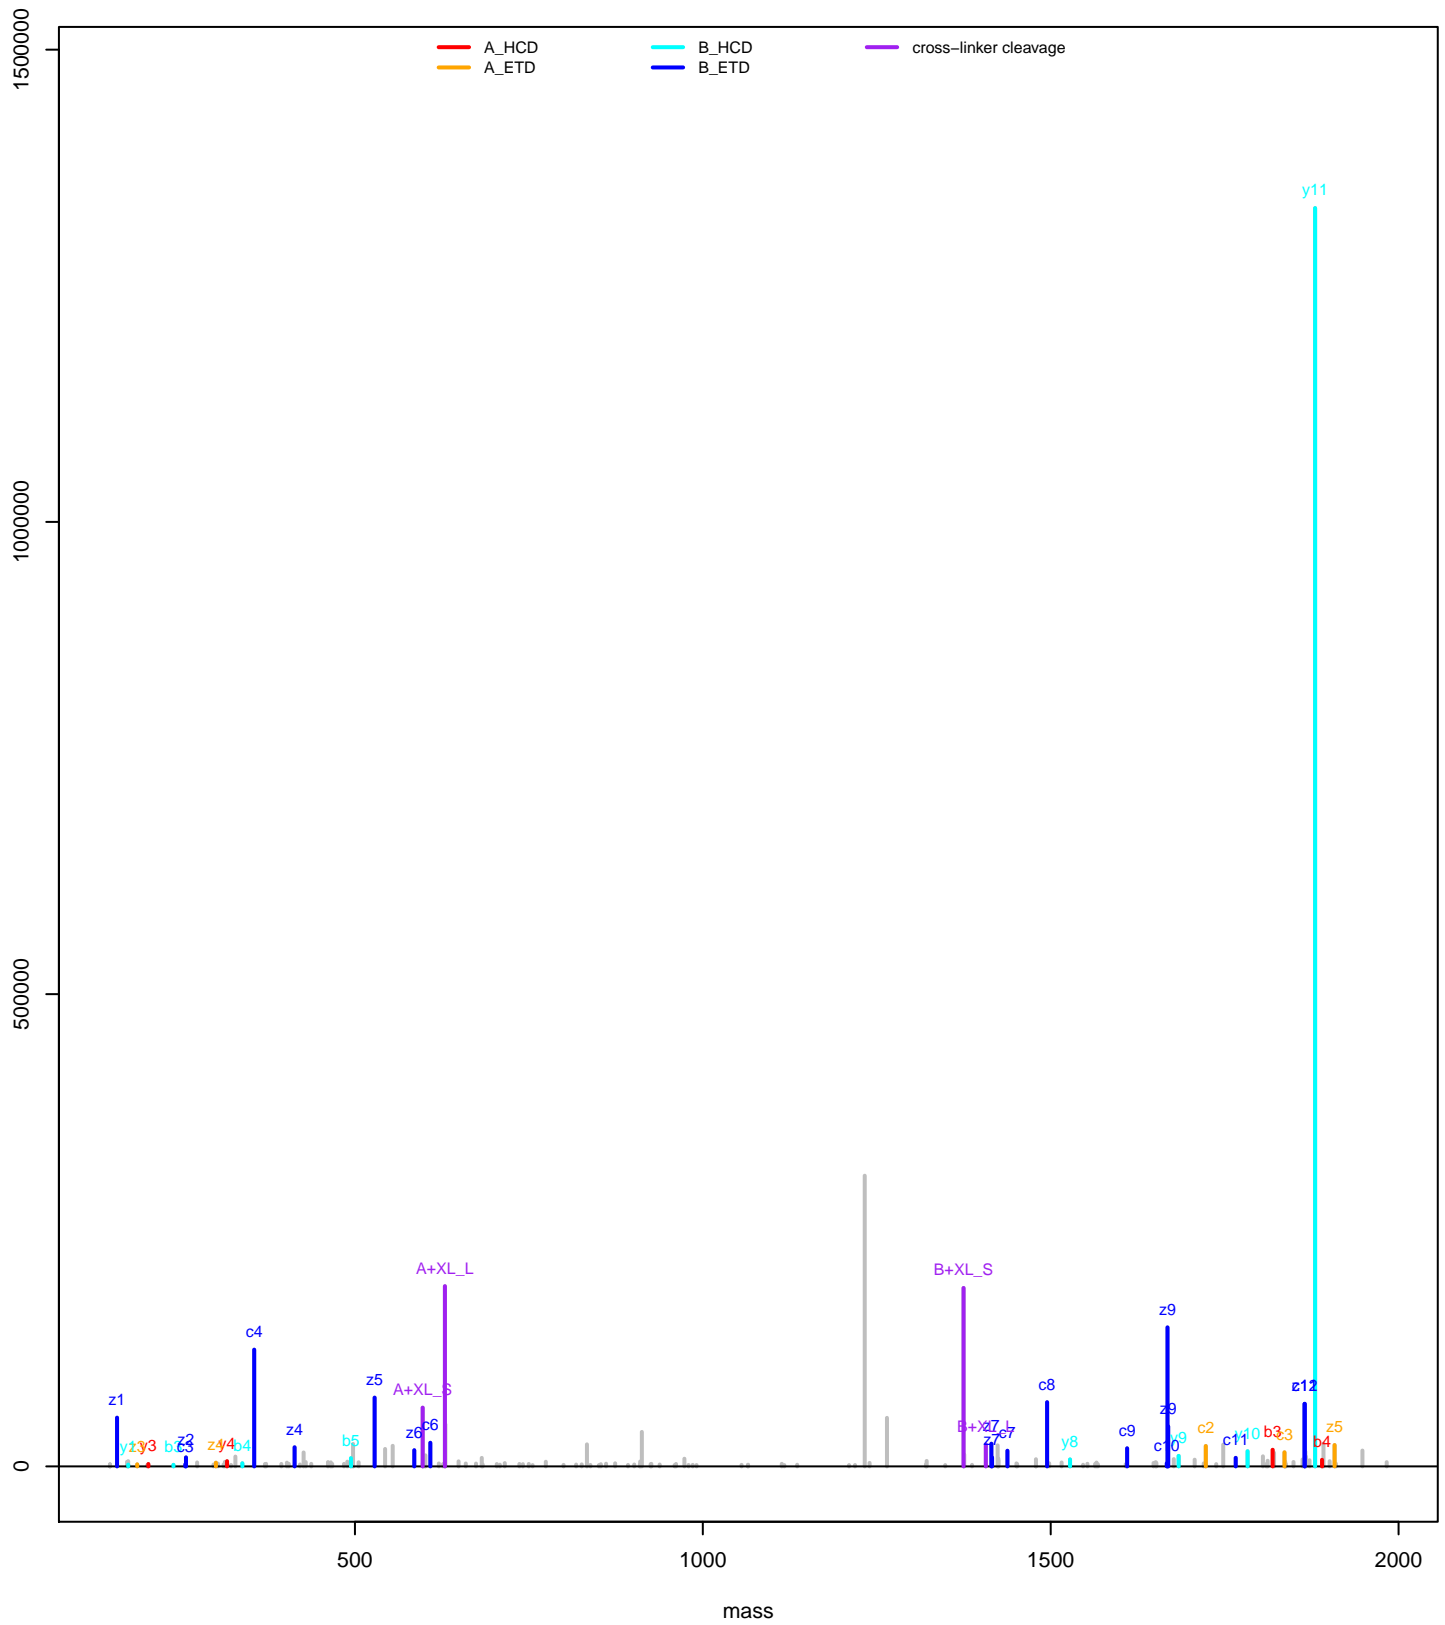

AAPVRPKGDGVVR+XL\_S

AAPVRPKGDGVVR+XL\_L

TRNAKVGK  
VKPNQQVTIIDSEGK

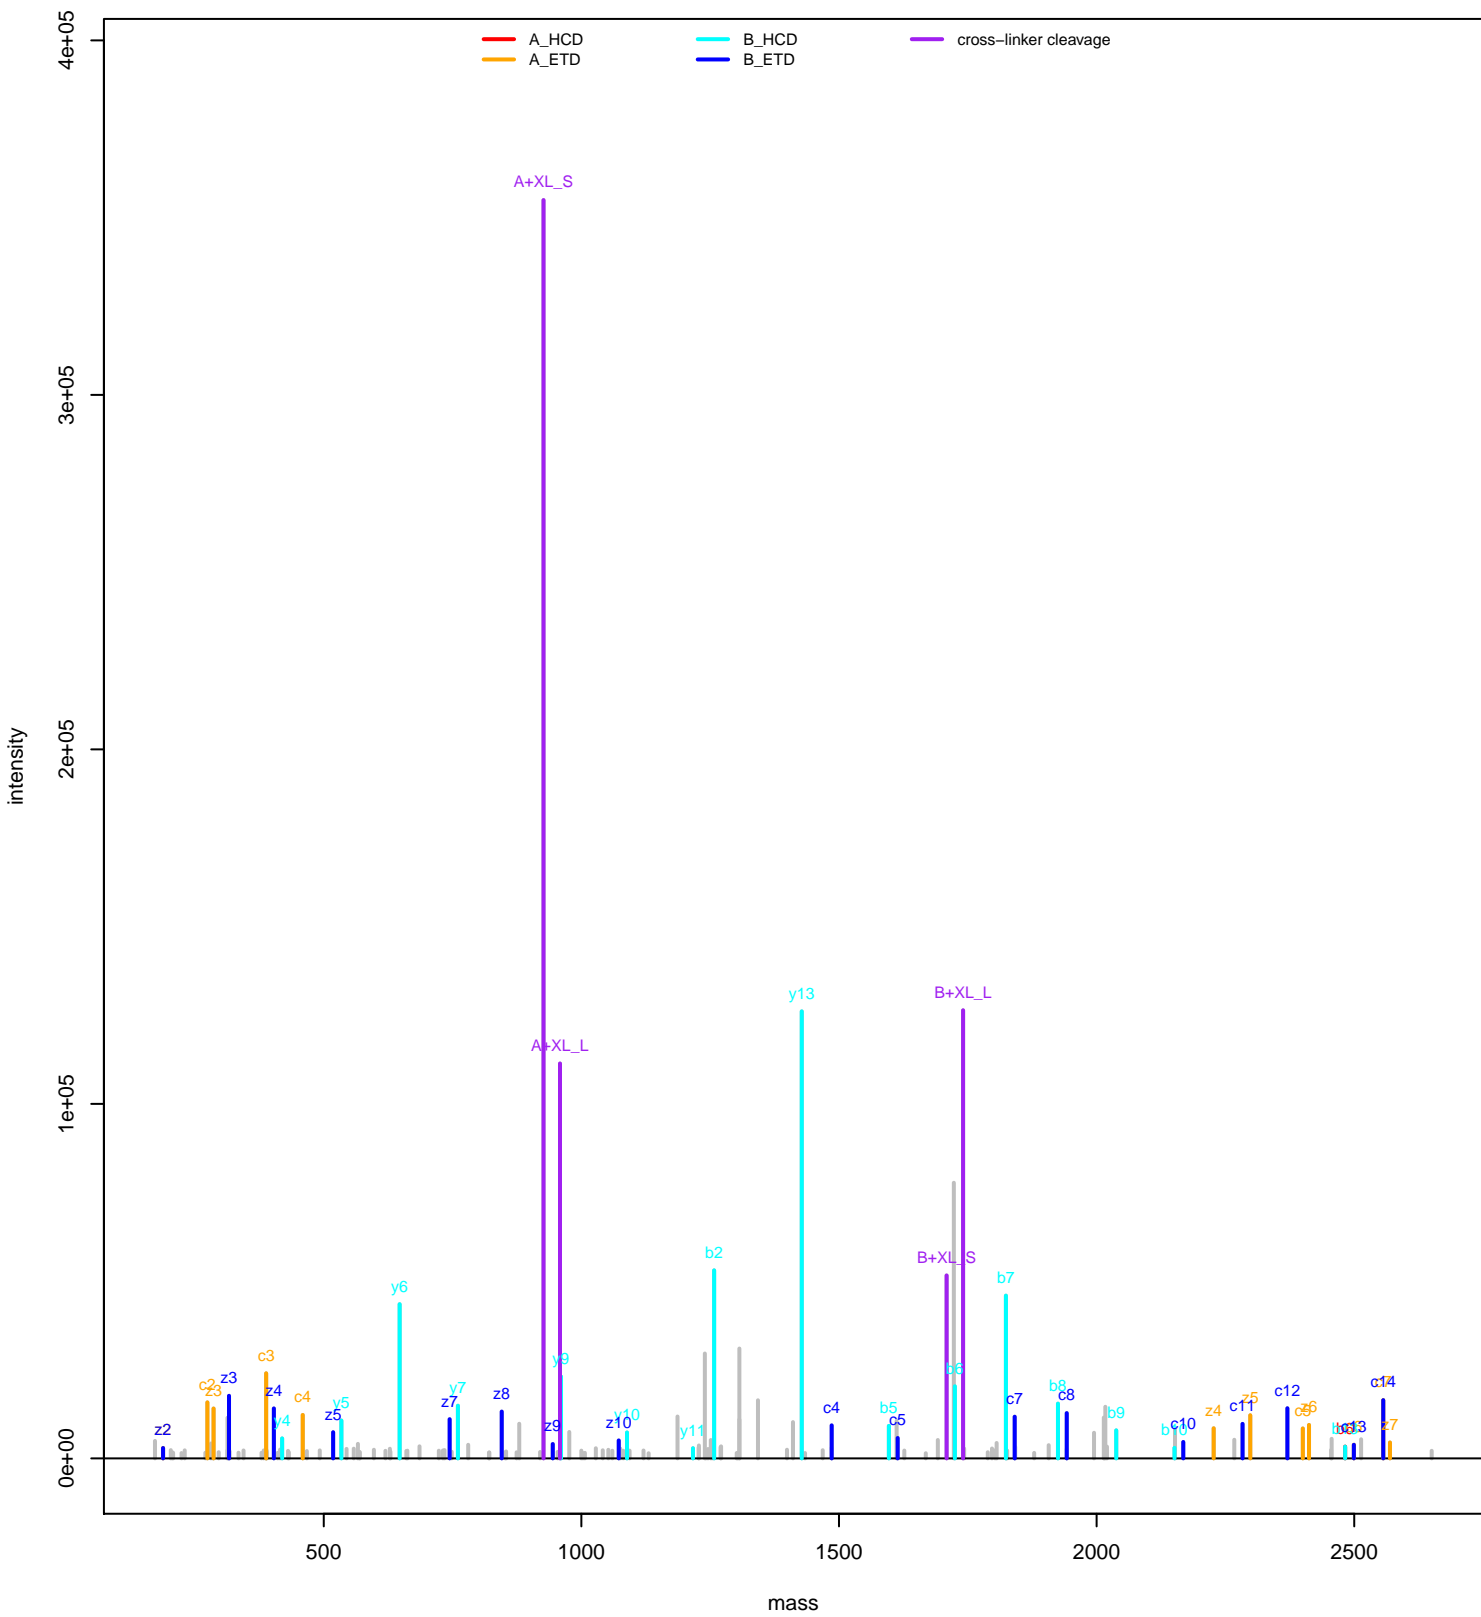

TRNAKVGK+XL\_S

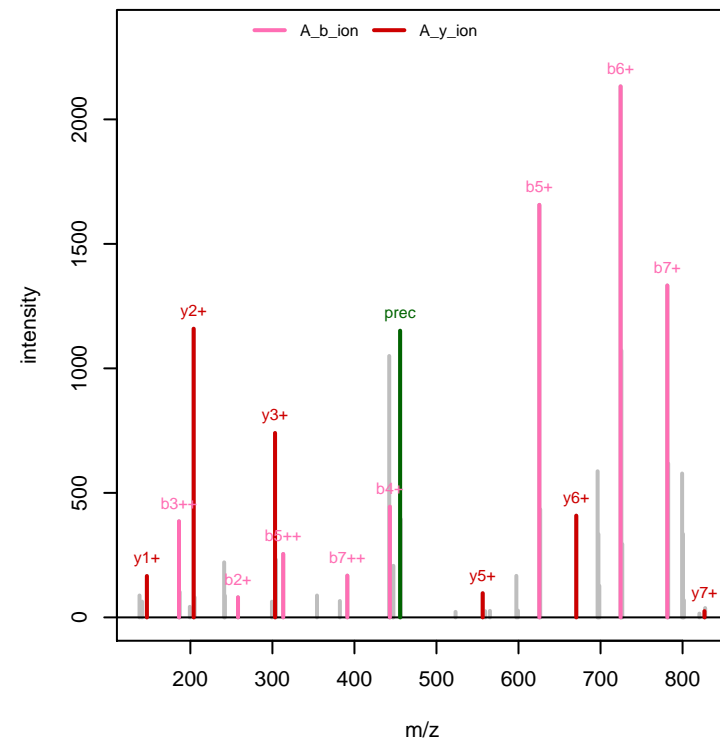

TRNAKVGK+XL\_L

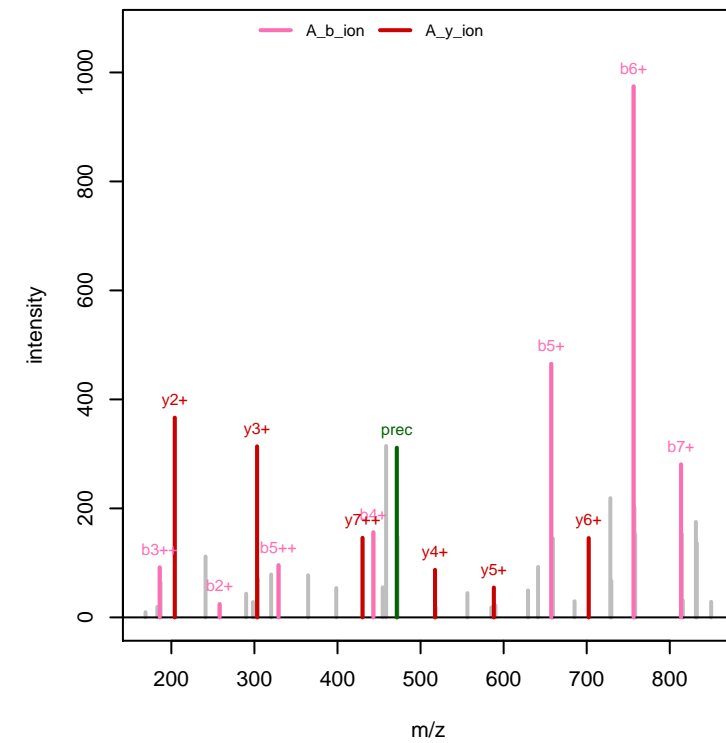

VKPNQQVTIIDSEGK+XL\_S

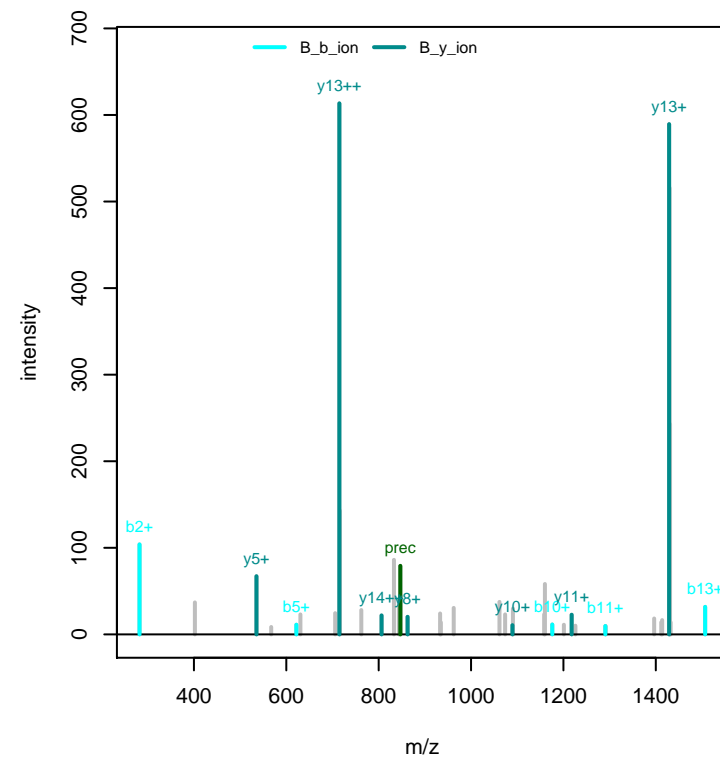

VKPNQQVTIIDSEGK+XL\_L

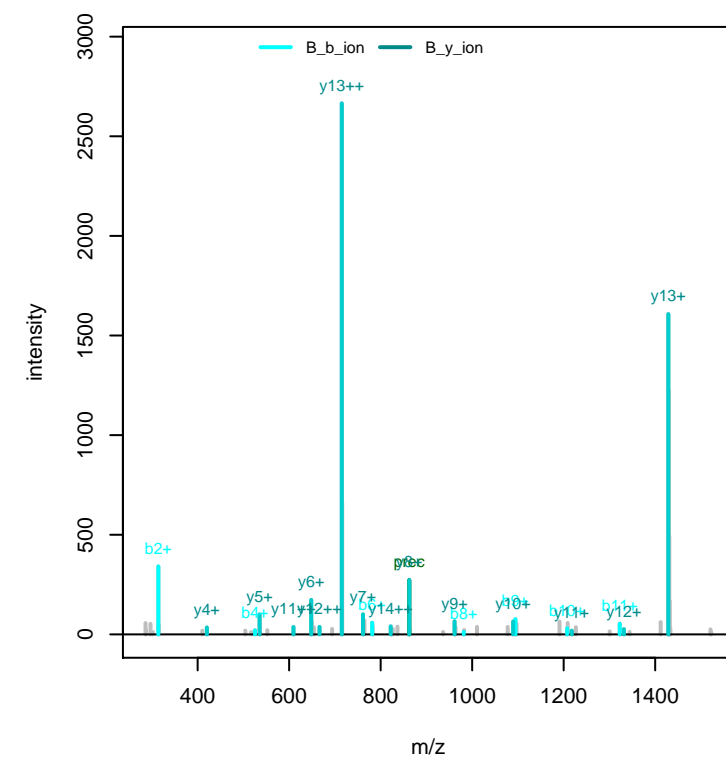

GTKTEVVK  
QVLNMPTKR

GTKTEVVK+XL\_S

GTKTEVVK+XL\_L

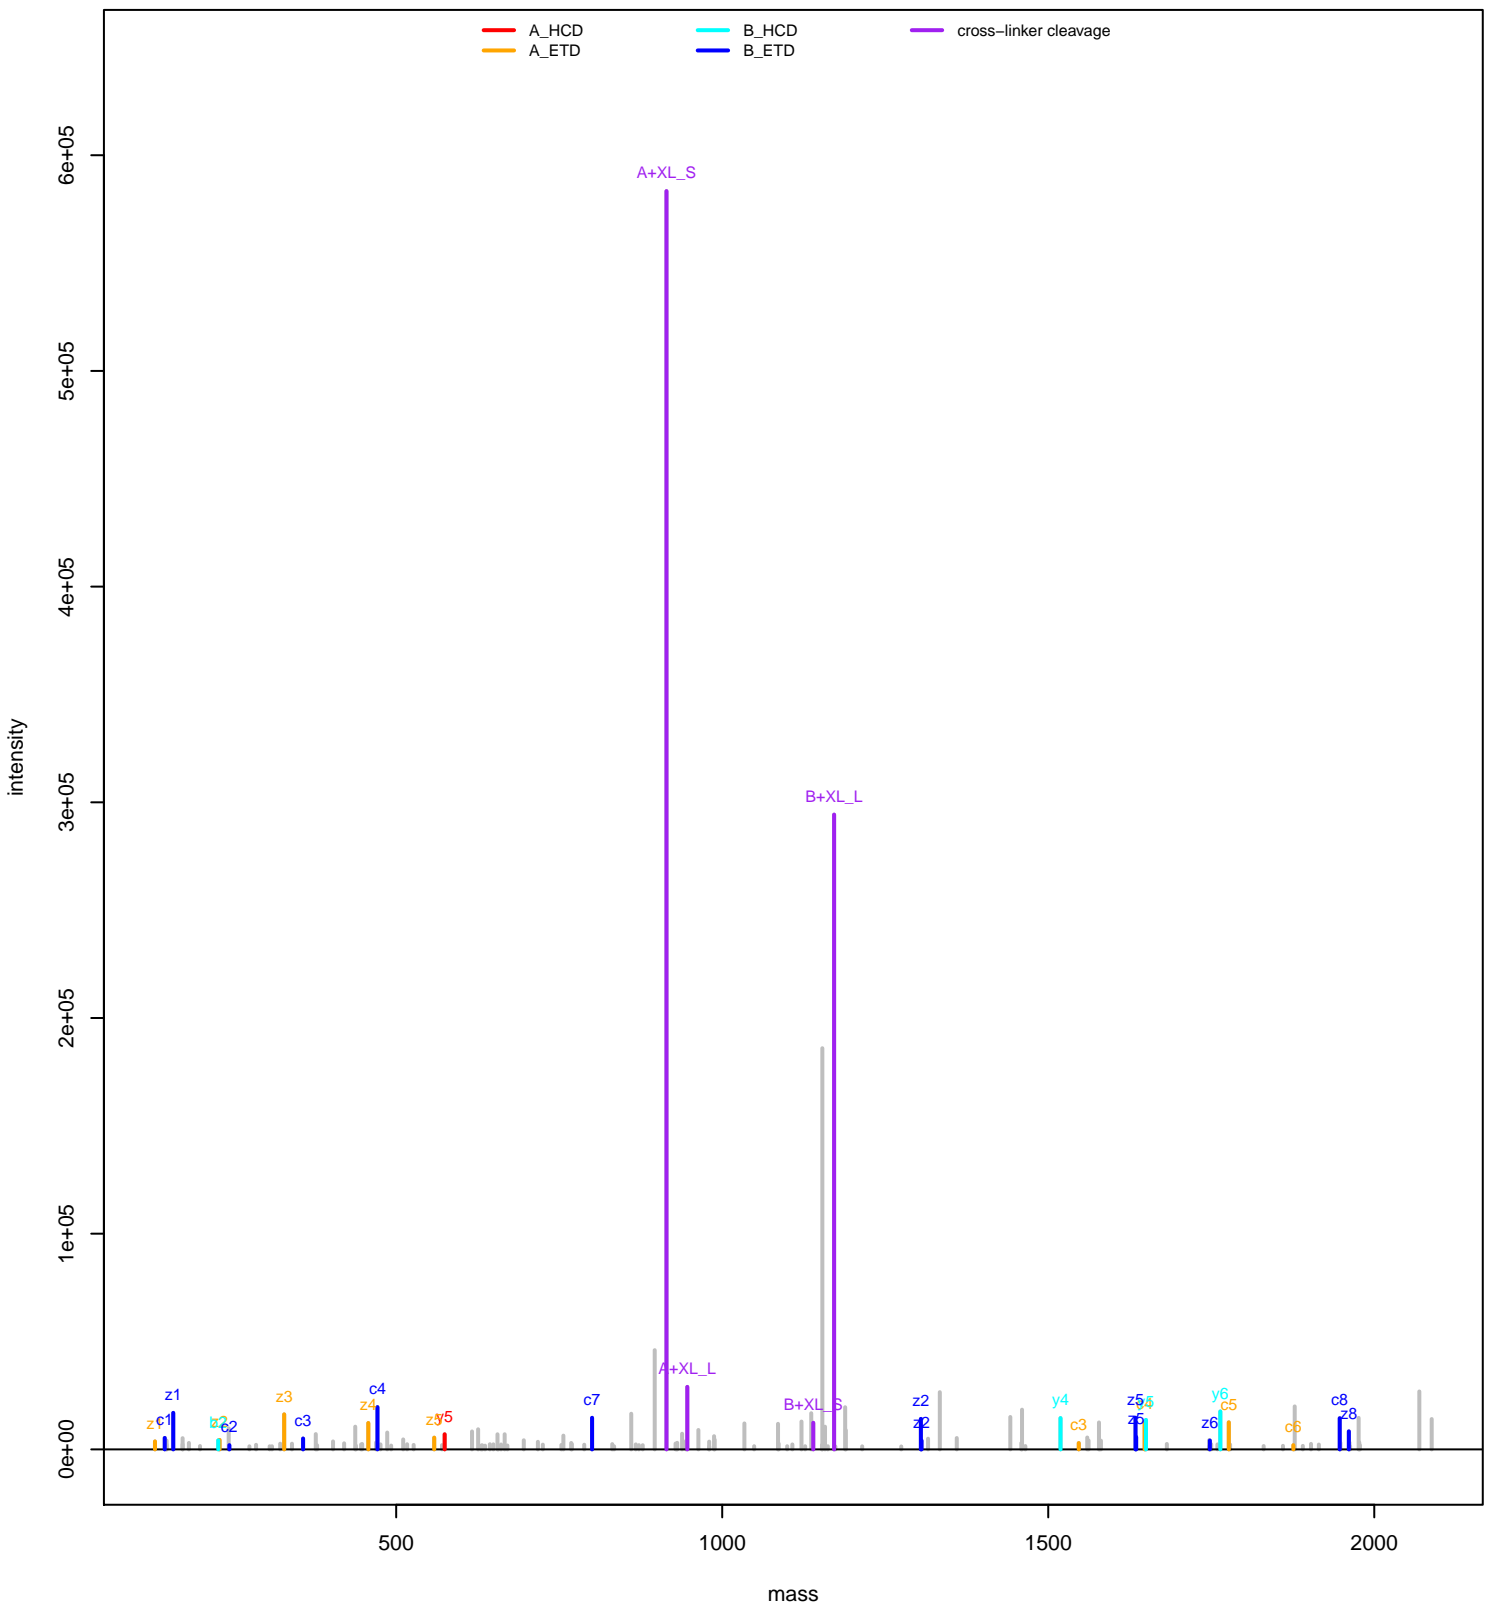

QVLNMPTKR+XL\_S

QVLNMPTKR+XL\_L

SVKNDLK  
AESIAKAVDGVK

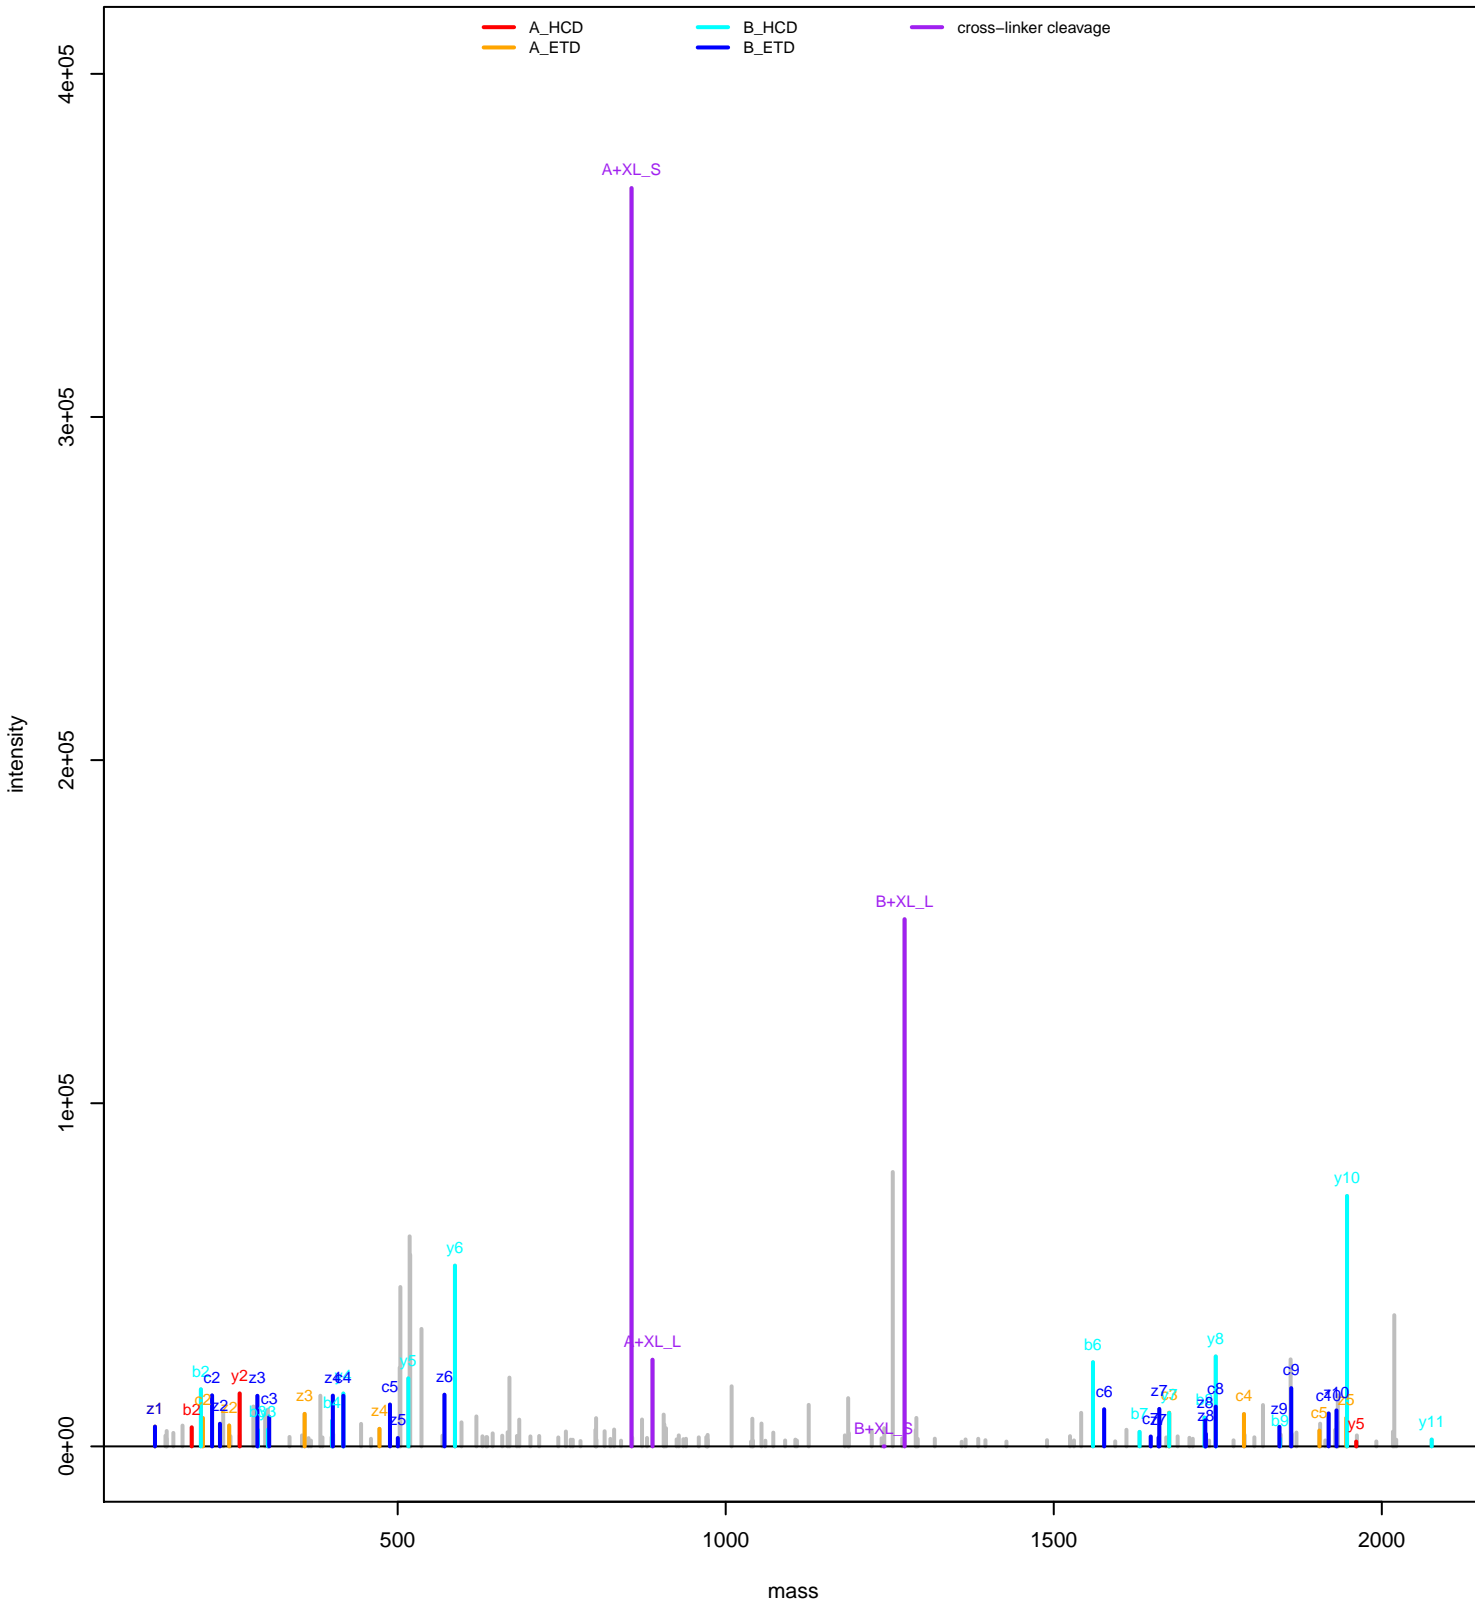

SVKNDLK+XL\_S

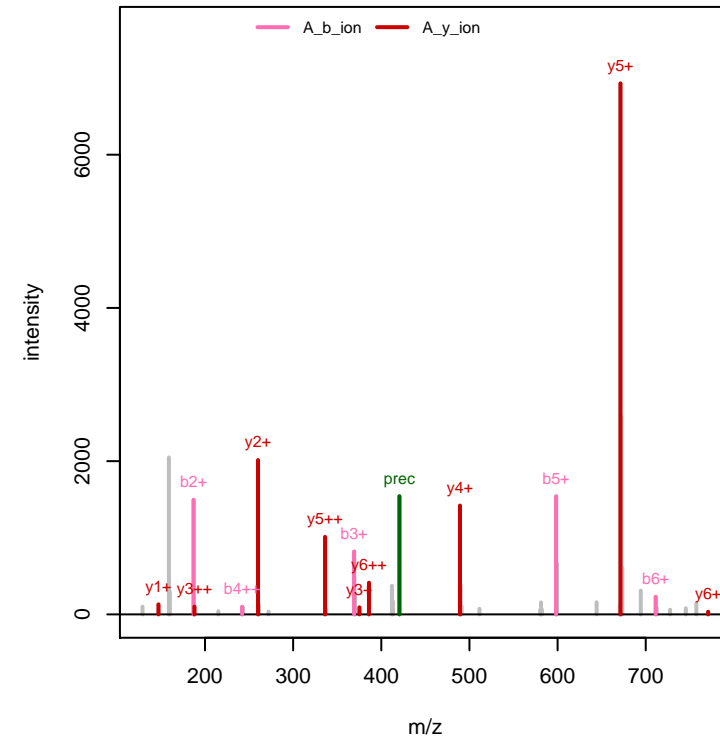

SVKNDLK+XL\_L

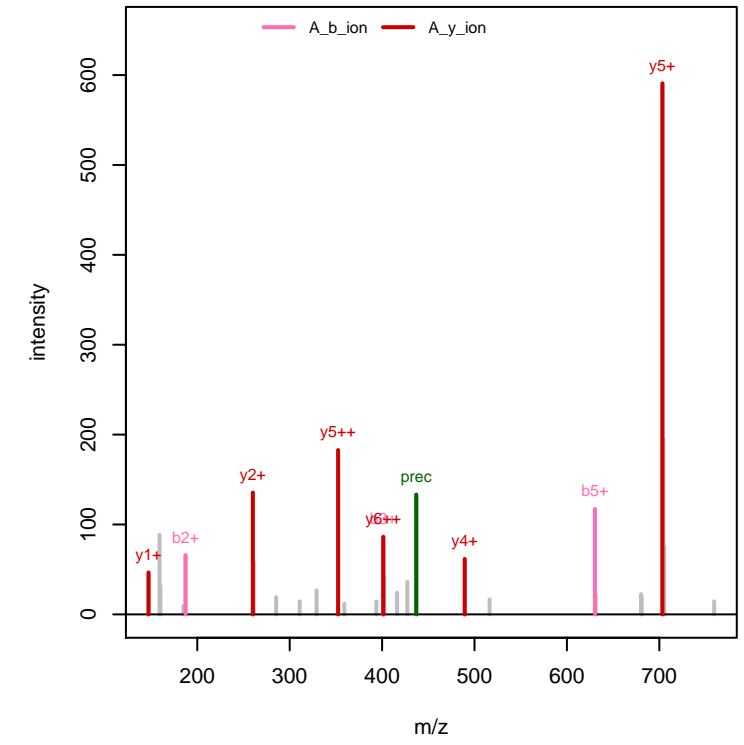

AESIAKAVDGVK+XL\_S

AESIAKAVDGVK+XL\_L

LGAKGIK  
KPELDAK

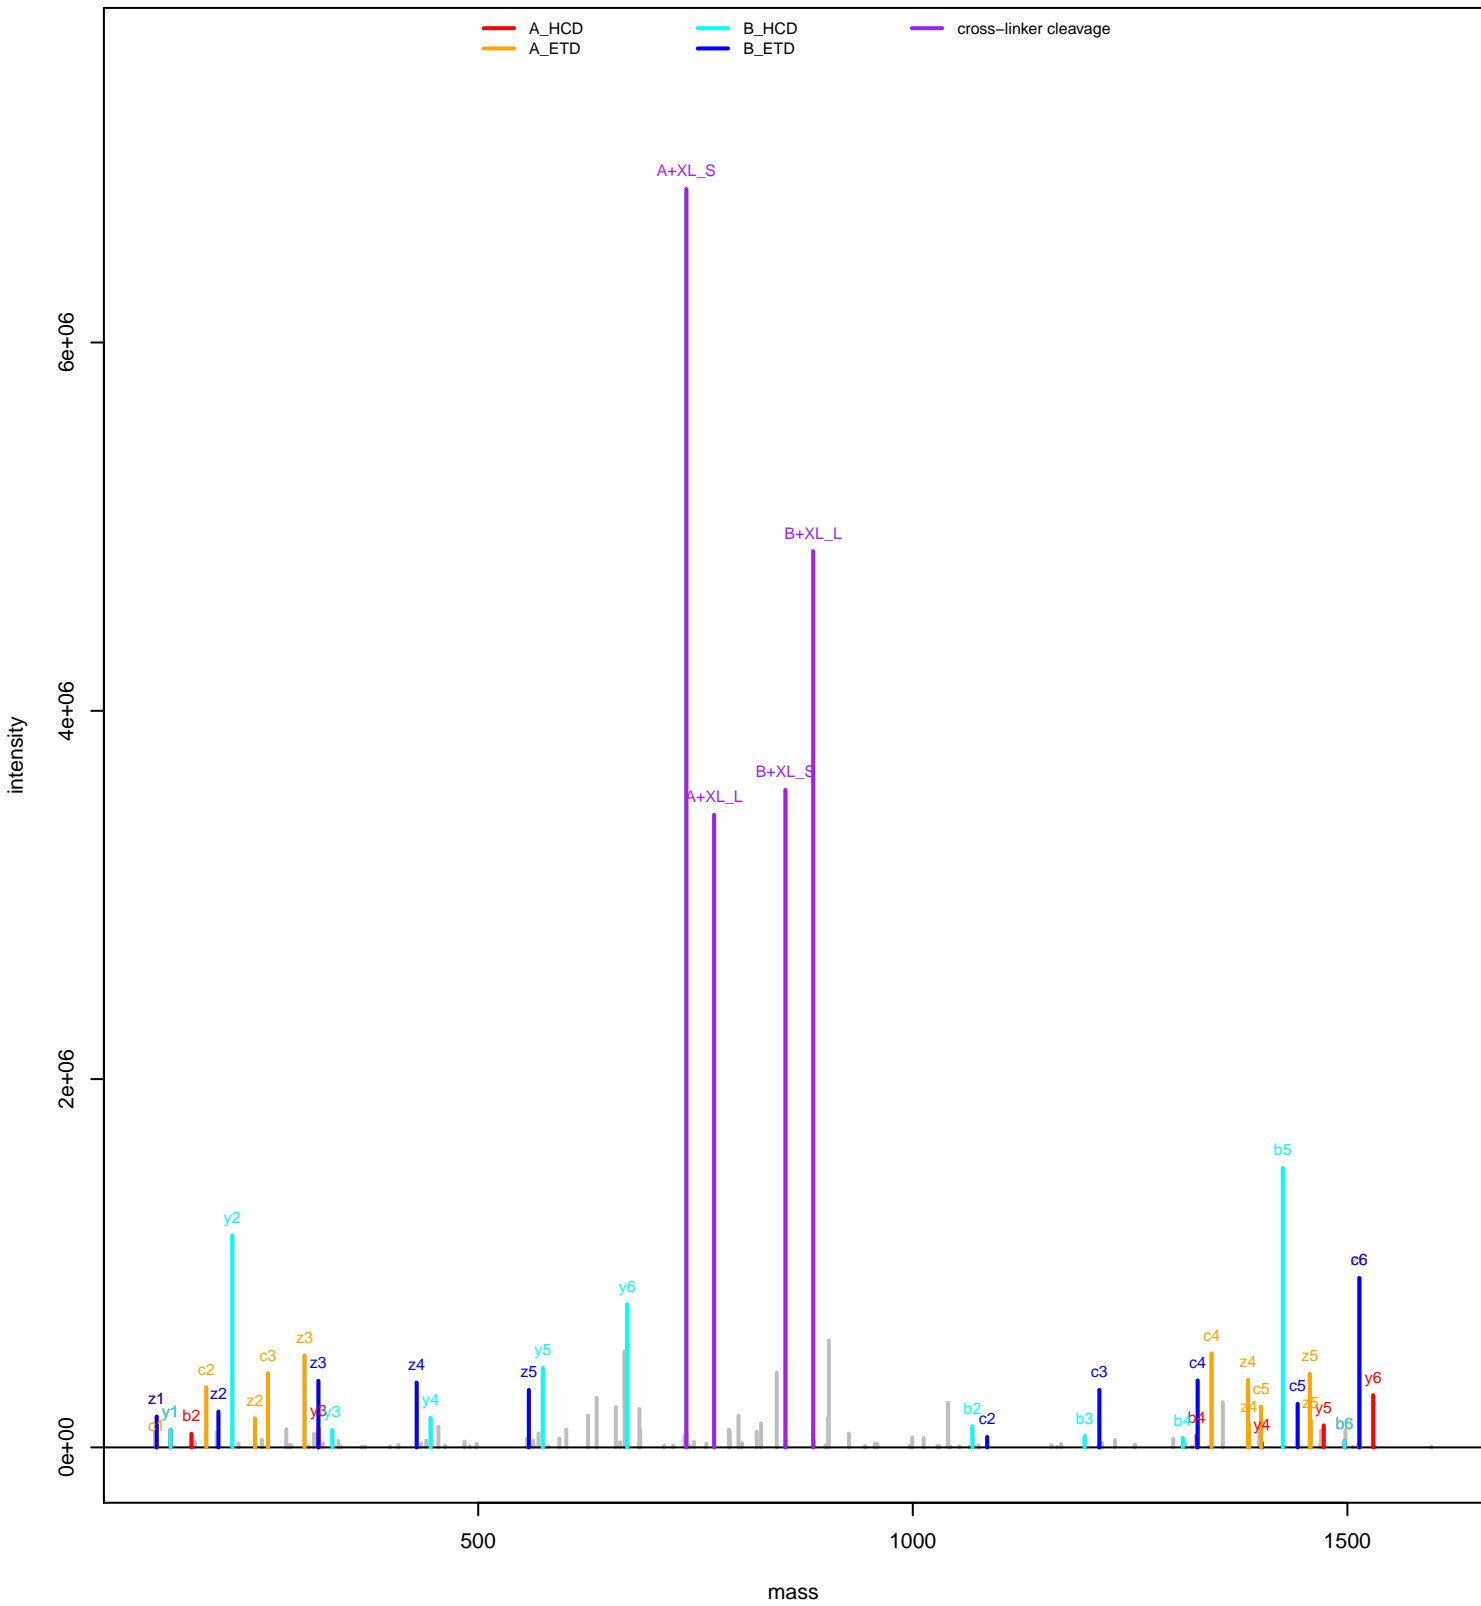

LGAKGIK+XL\_S

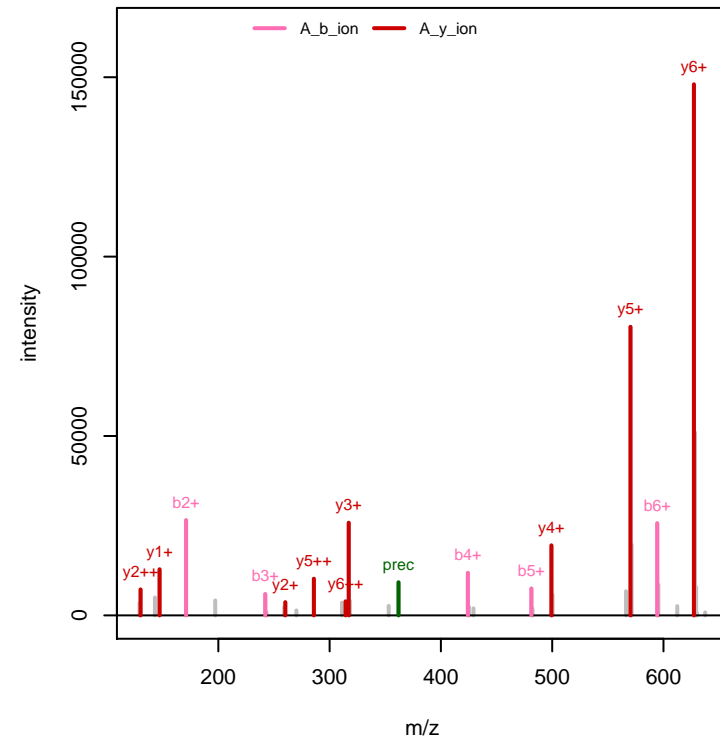

LGAKGIK+XL\_L

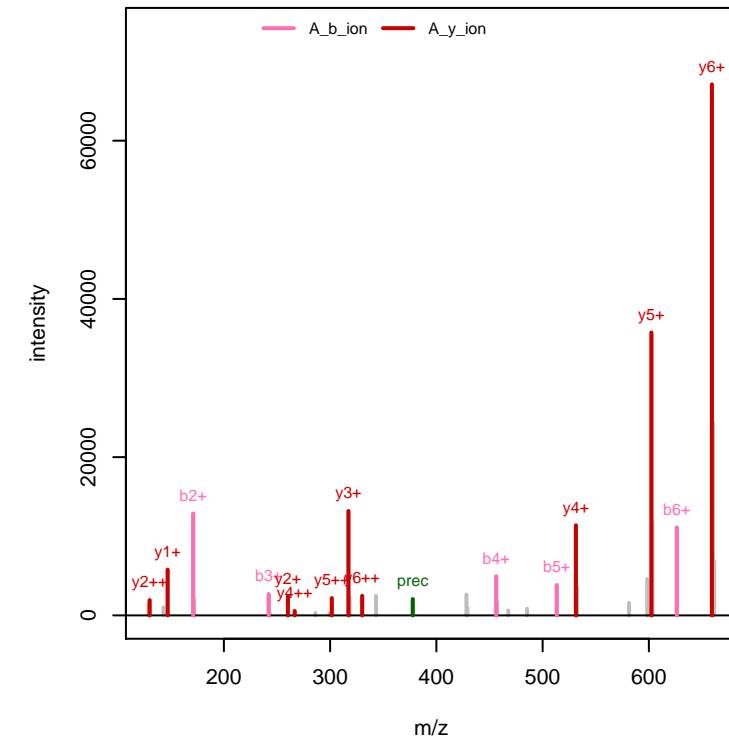

KPELDAK+XL\_S

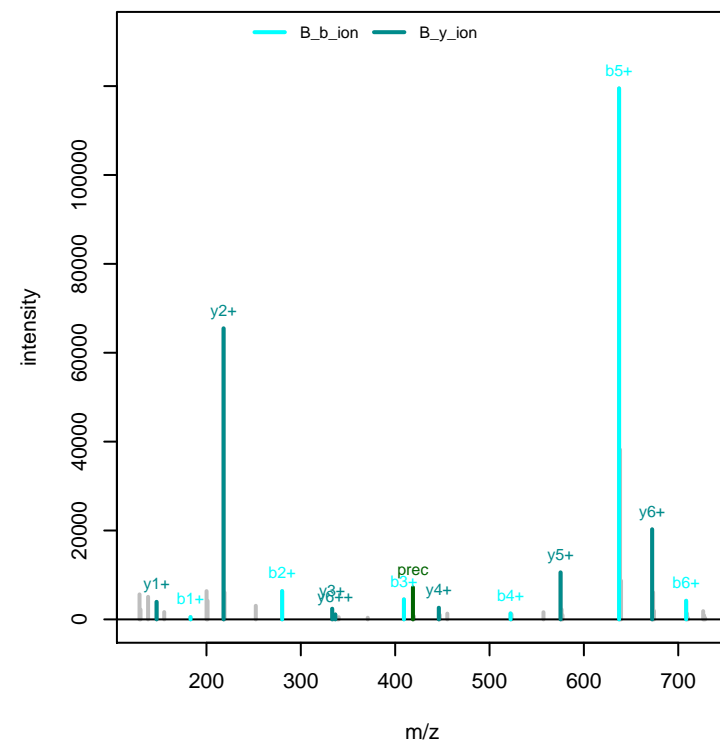

KPELDAK+XL\_L

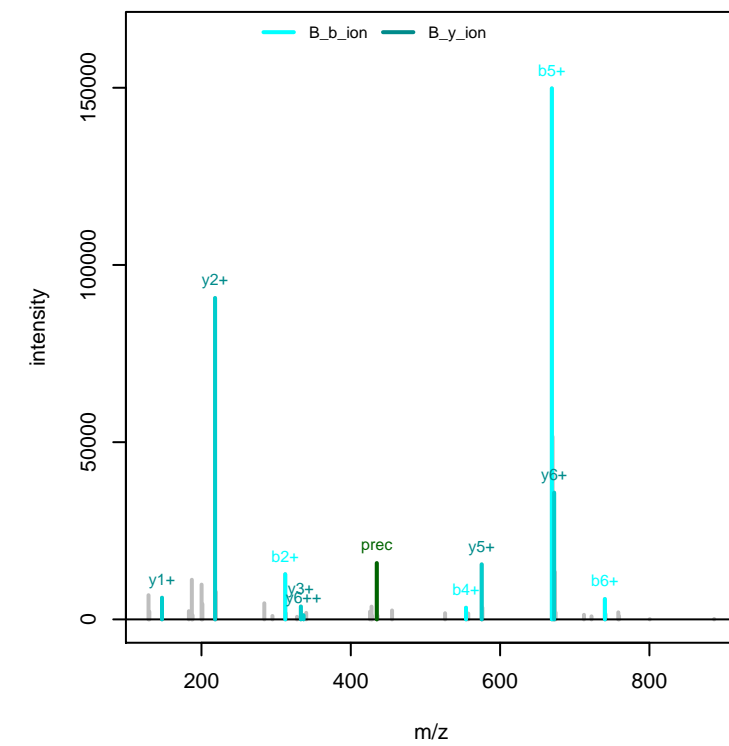

VYVEKGR  
TAGGKDLRPALK

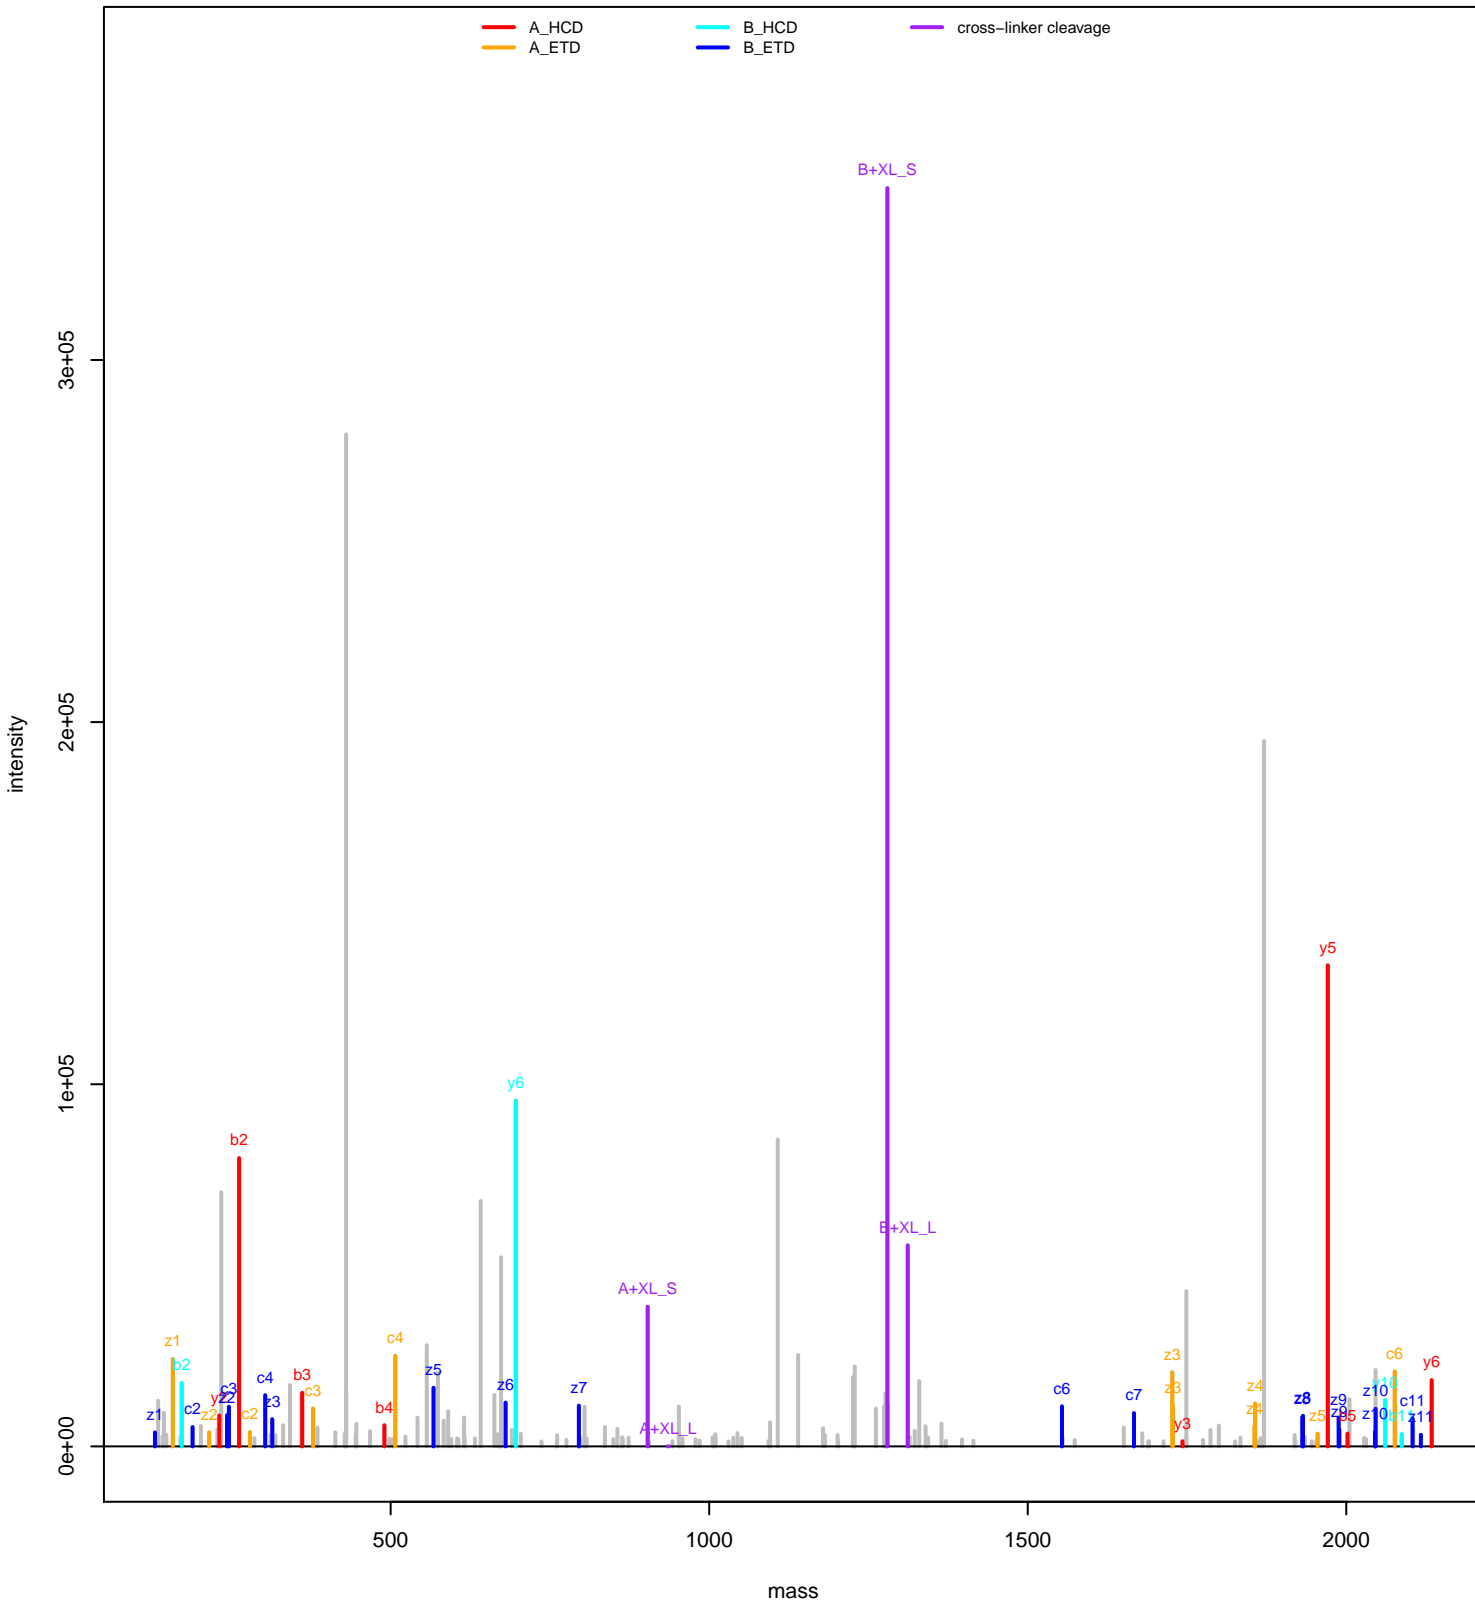

VYVEKGR+XL\_S

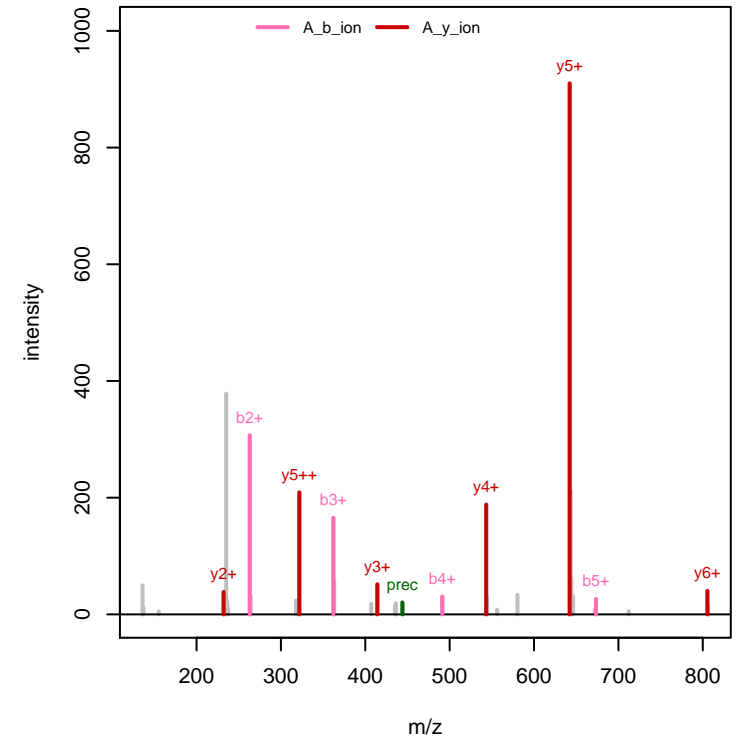

VYVEKGR+XL\_L

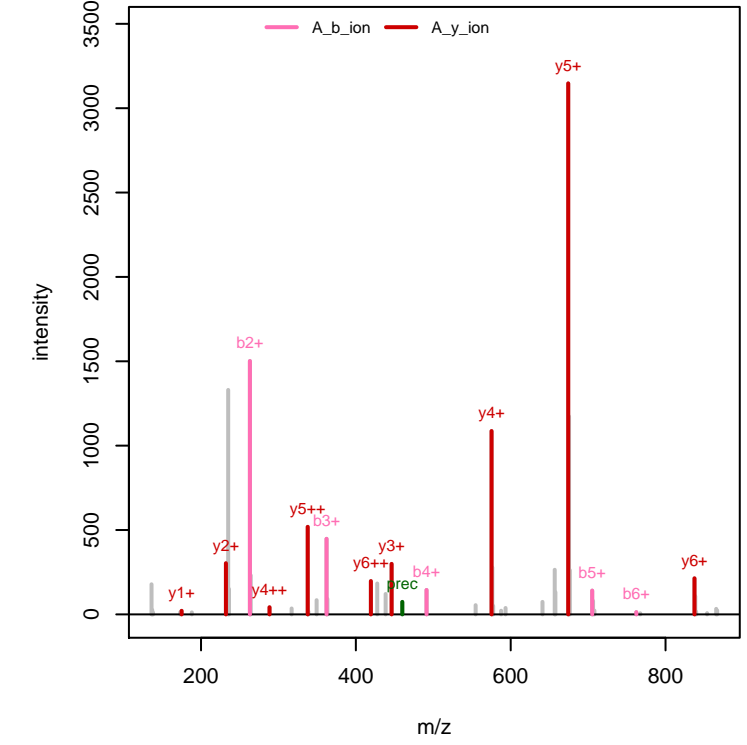

TAGGKDLRPALK+XL\_S

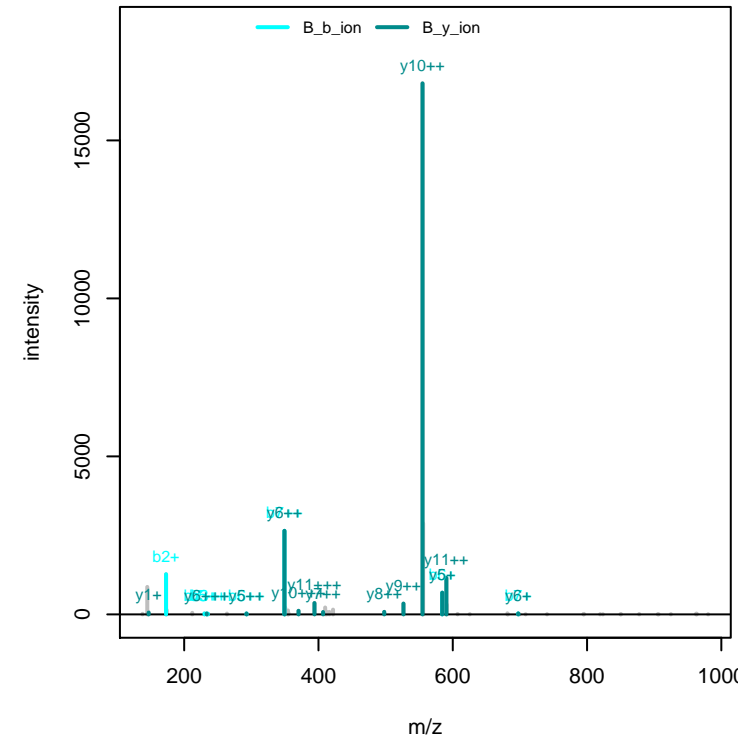

TAGGKDLRPALK+XL\_L

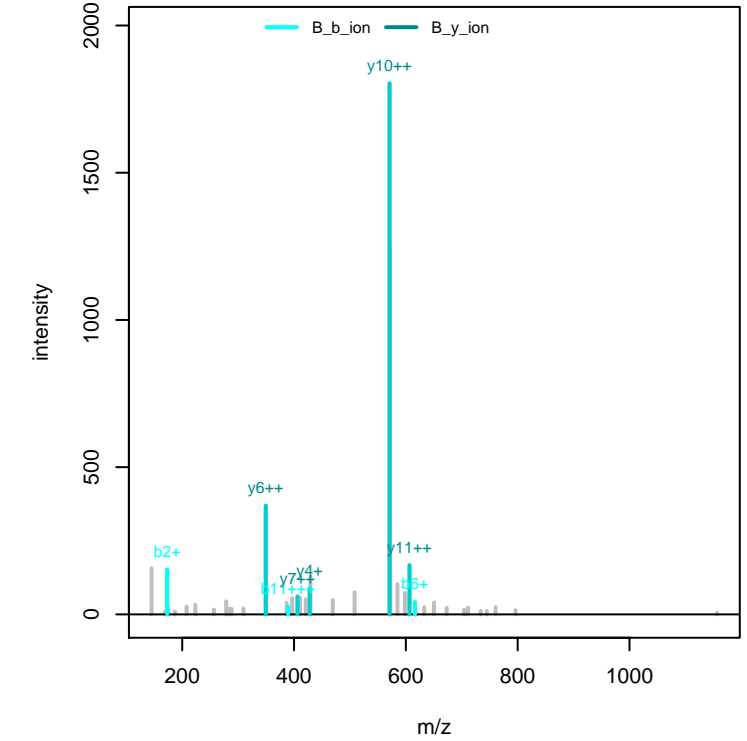

LGAKGIK  
ELAKASVSR

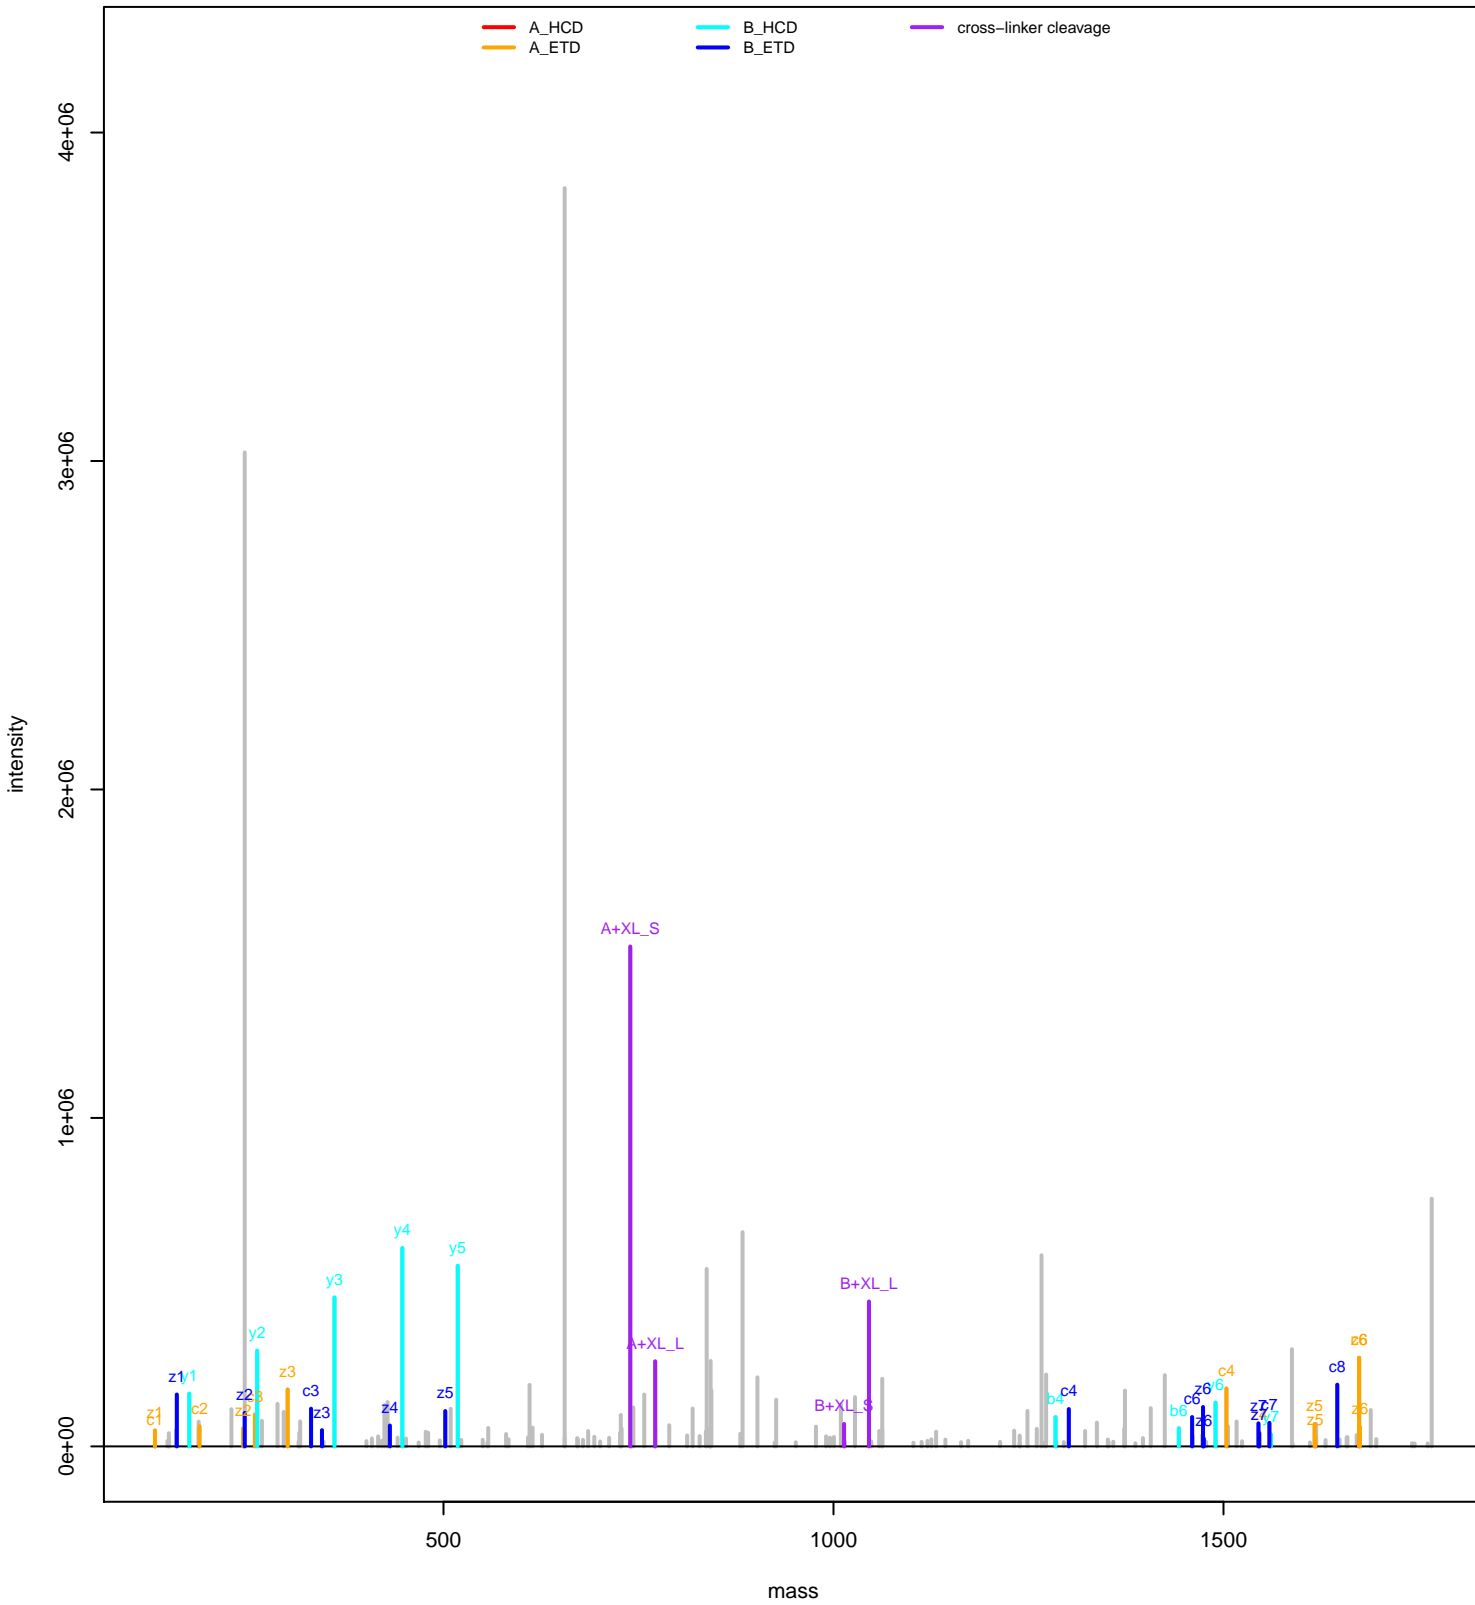

LGAKGIK+XL\_S

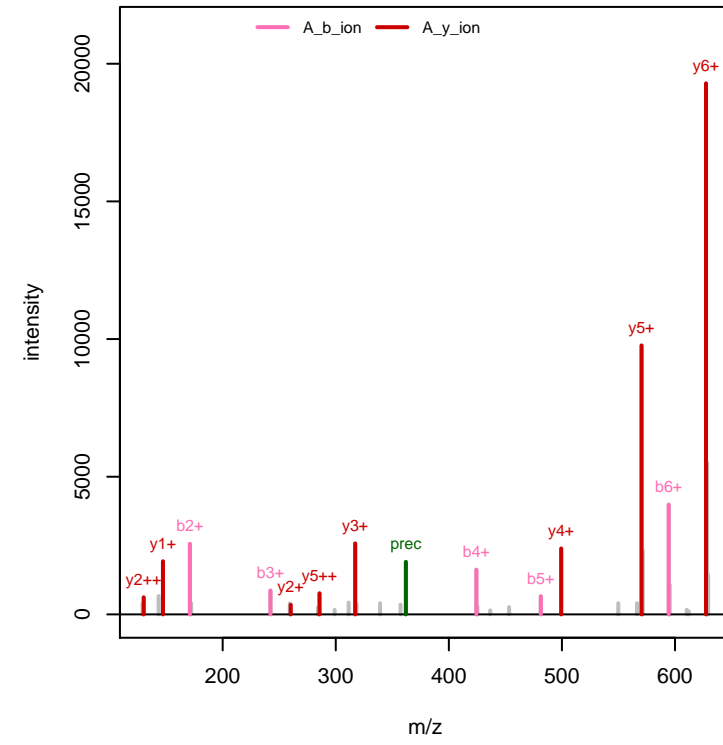

LGAKGIK+XL\_L

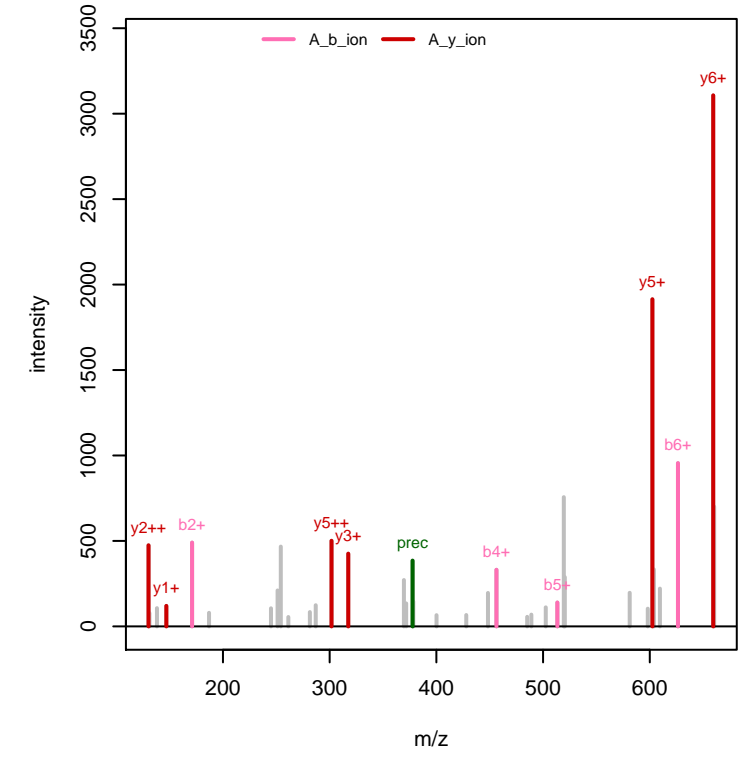

ELAKASVSR+XL\_S

ELAKASVSR+XL\_L



GKGFAGTVK  
KVDVTGTSK

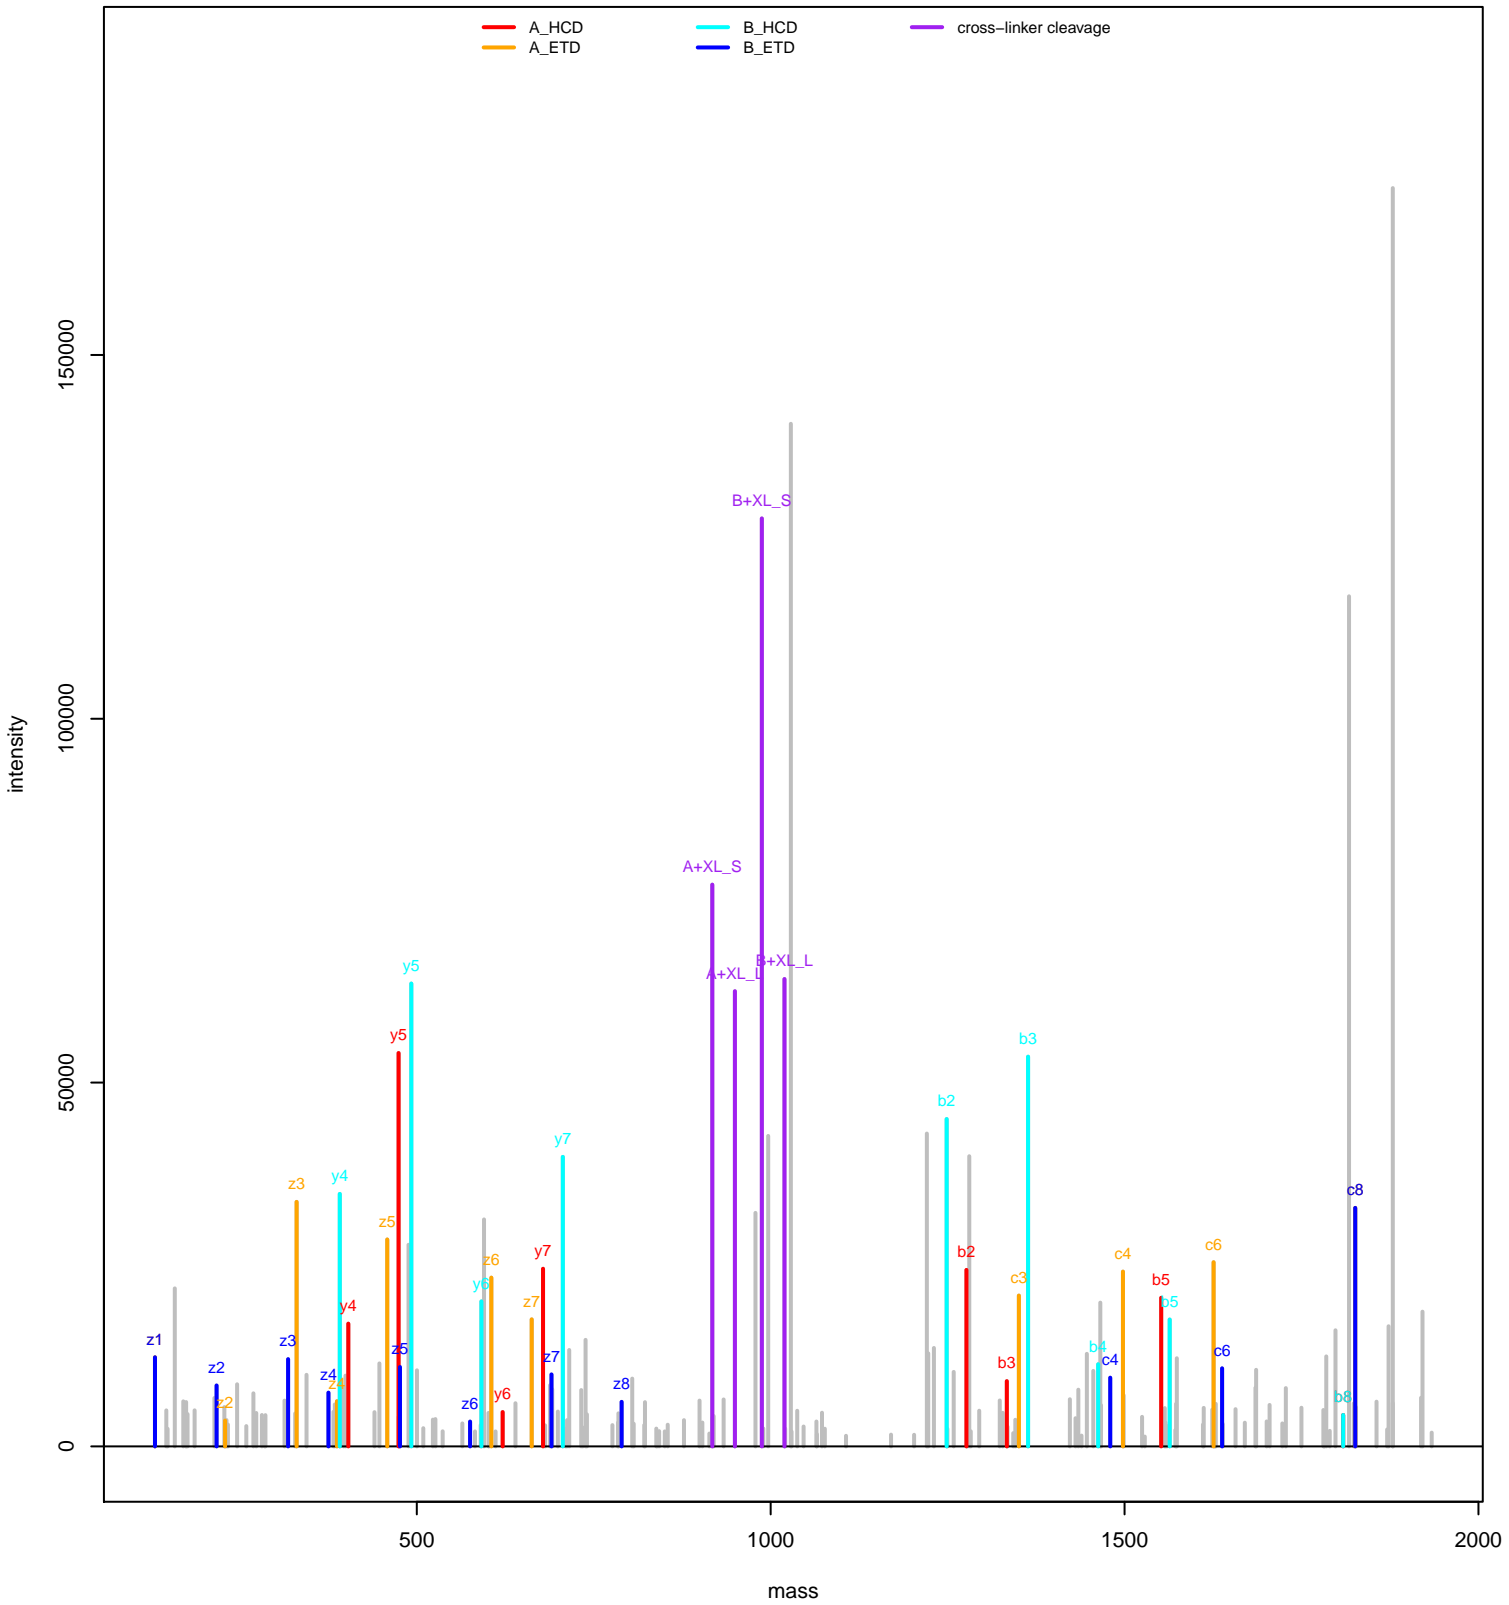

GKGFAGTVK+XL\_S

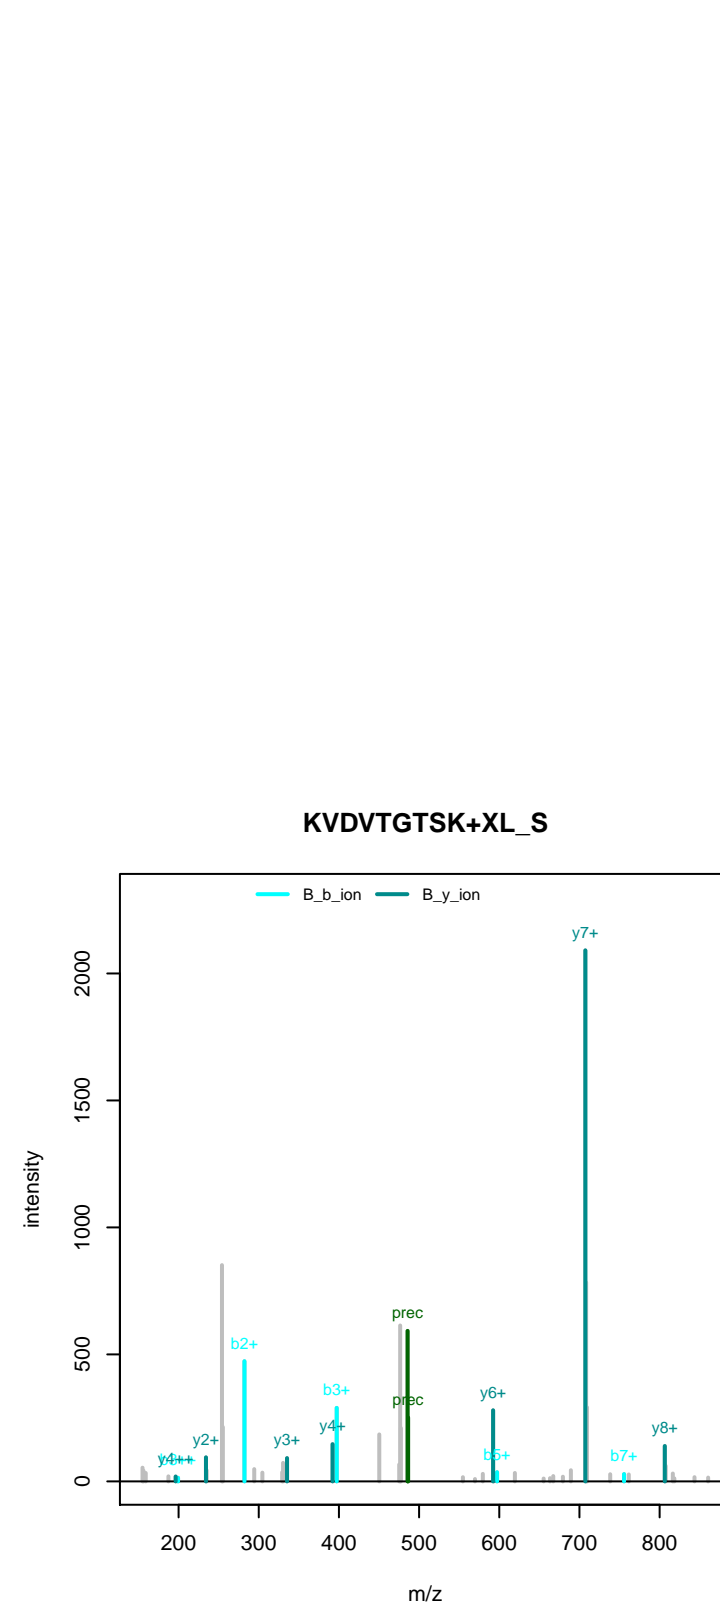

GKGFAGTVK+XL\_L

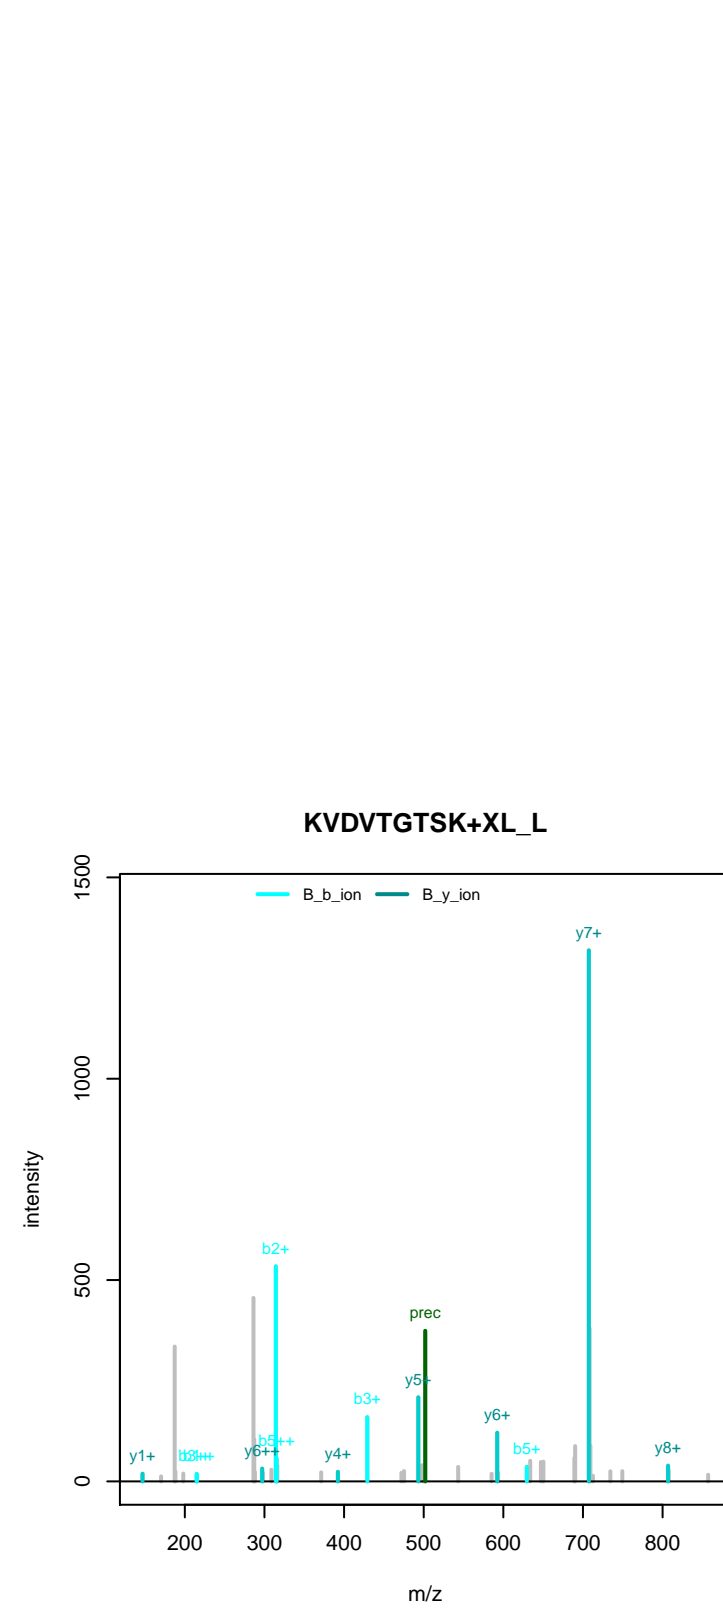

KVDVTGTSK+XL\_S

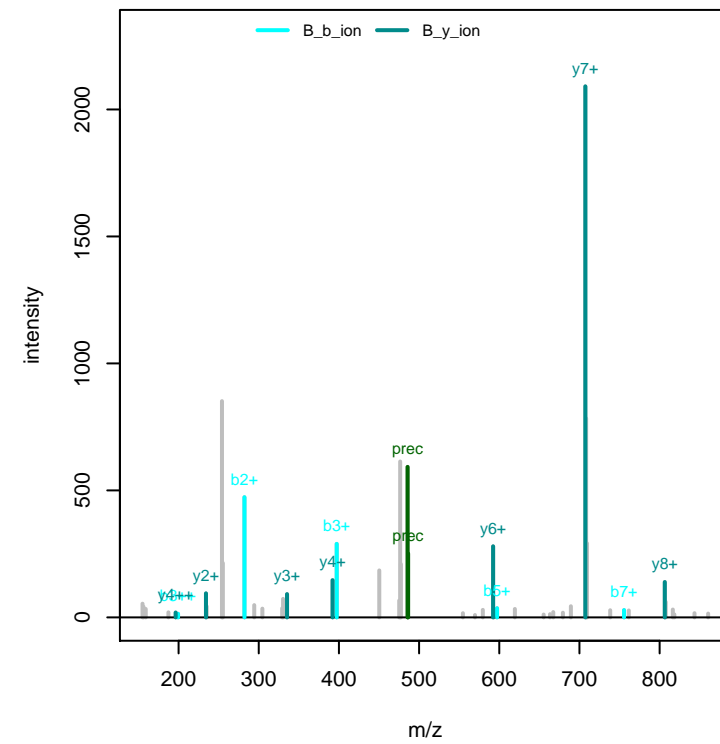

KVDVTGTSK+XL\_L

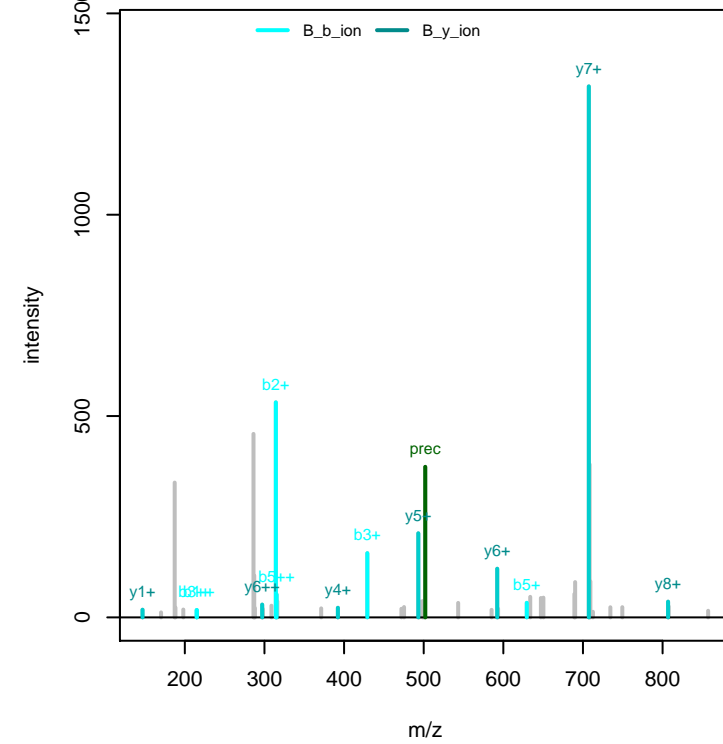

KEALMR  
DLETQSQDGTDFDKLTK

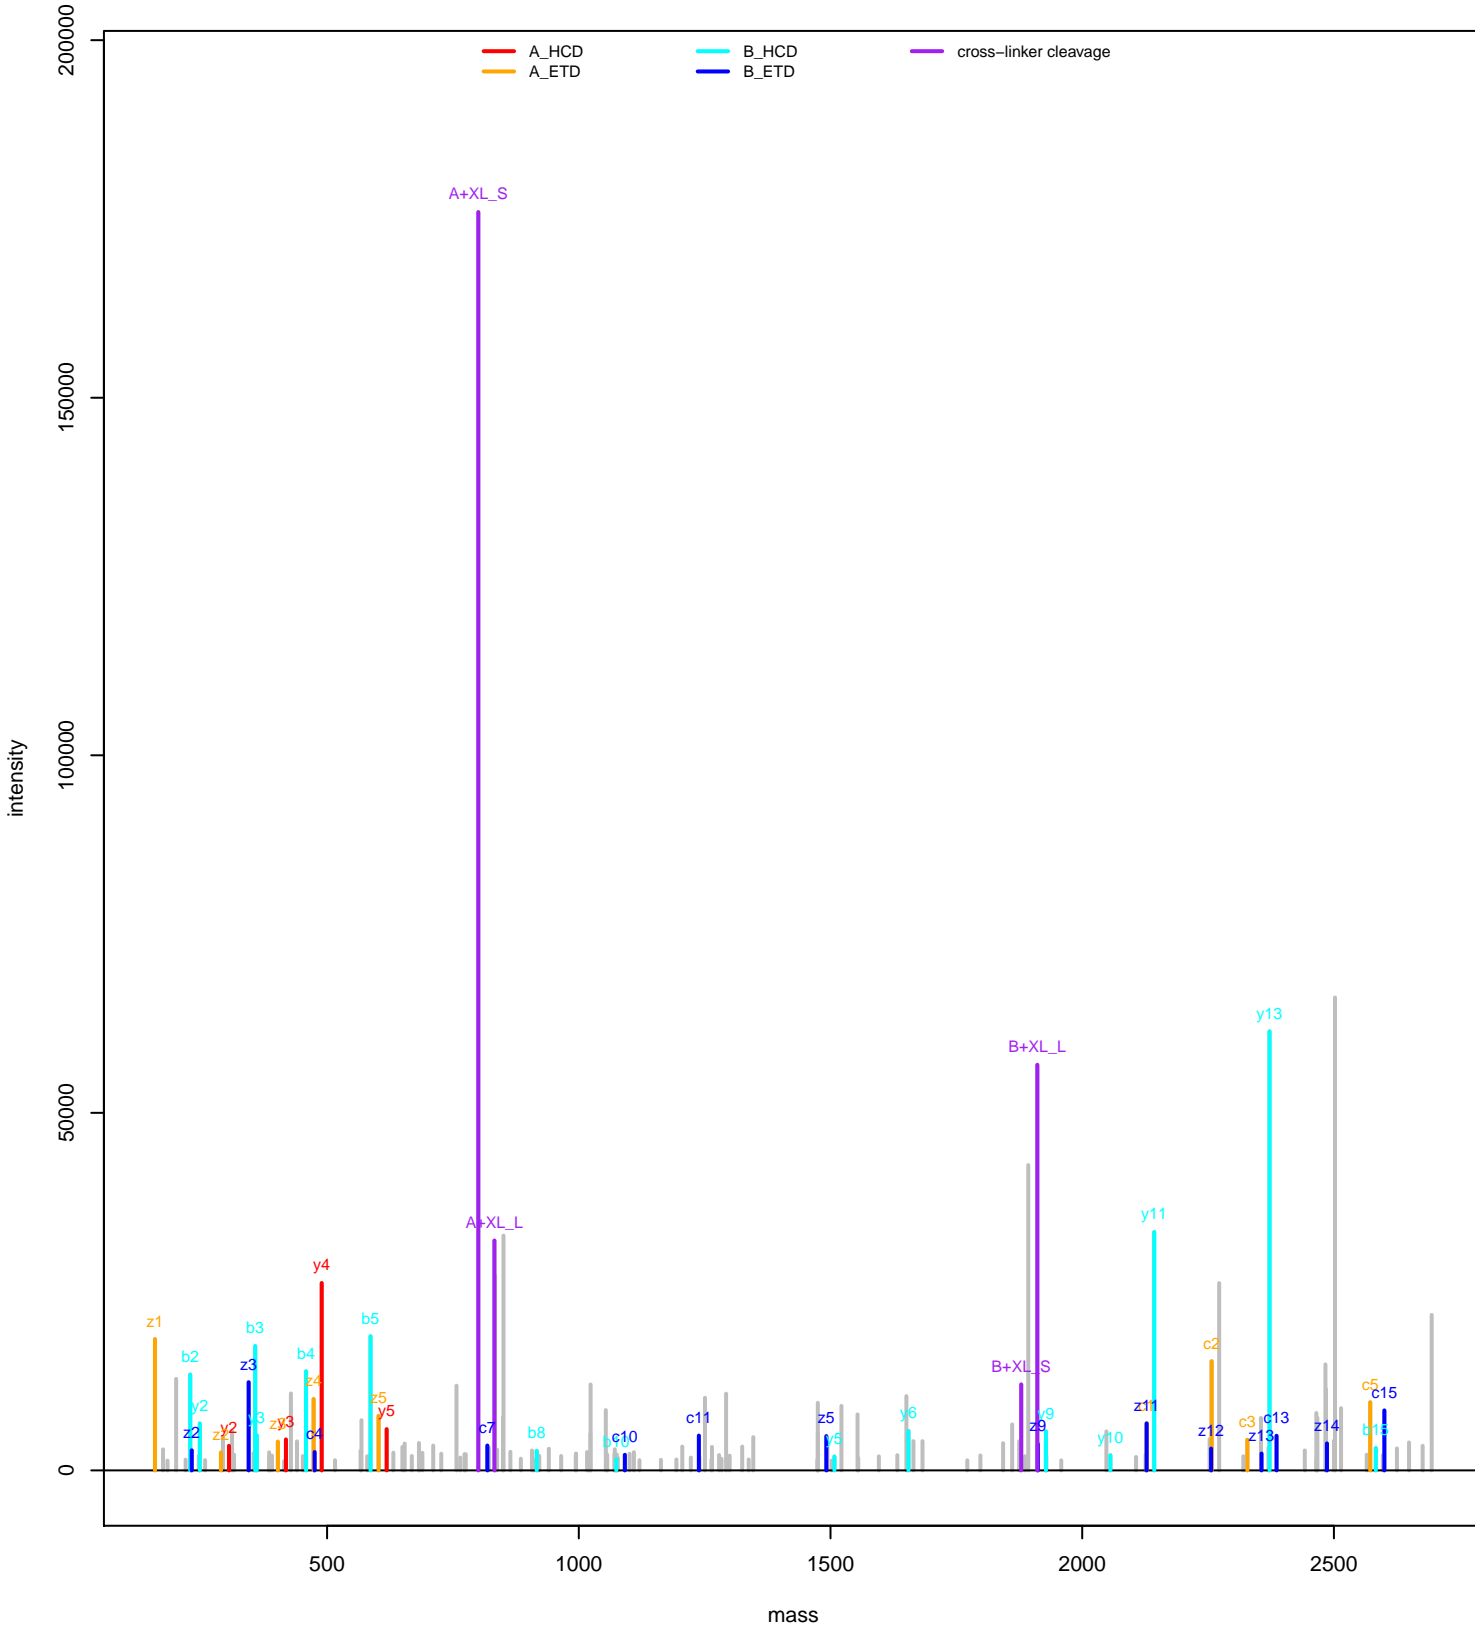

KEALMR+XL\_S

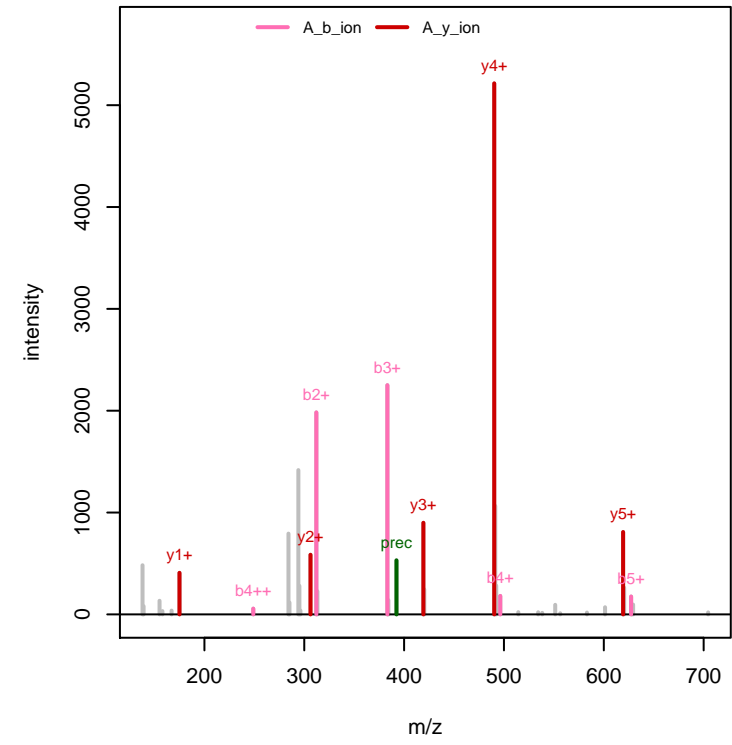

KEALMR+XL\_L

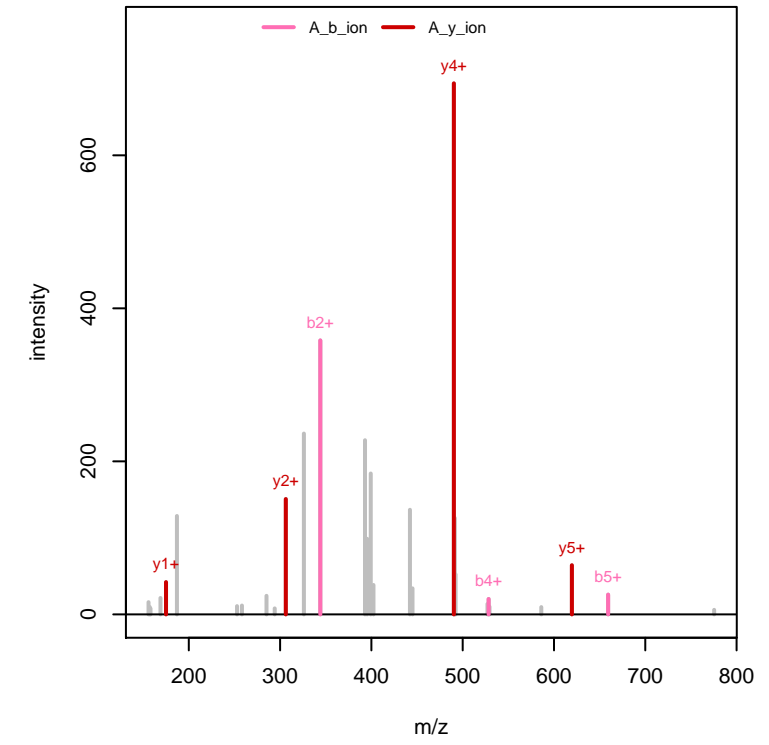

DLETQSQDGTDFDKLTK+XL\_S

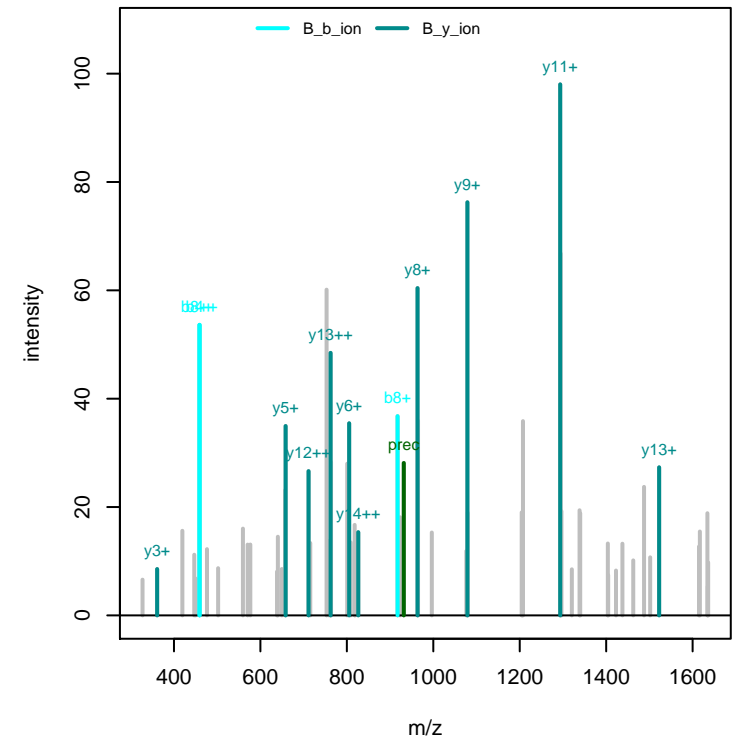

DLETQSQDGTDFDKLTK+XL\_L

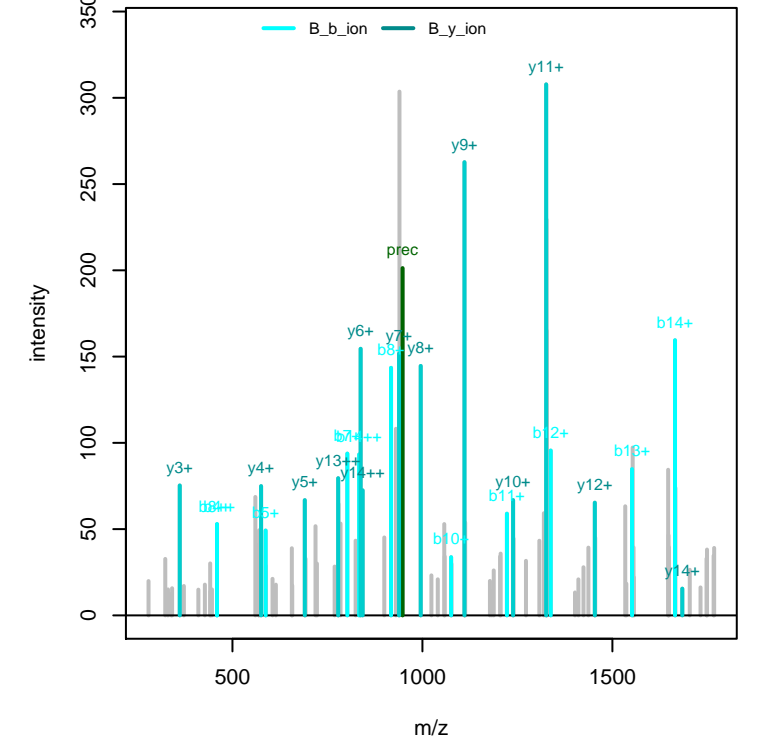



ANKPSAEELKK  
YIKDLSHGMQR

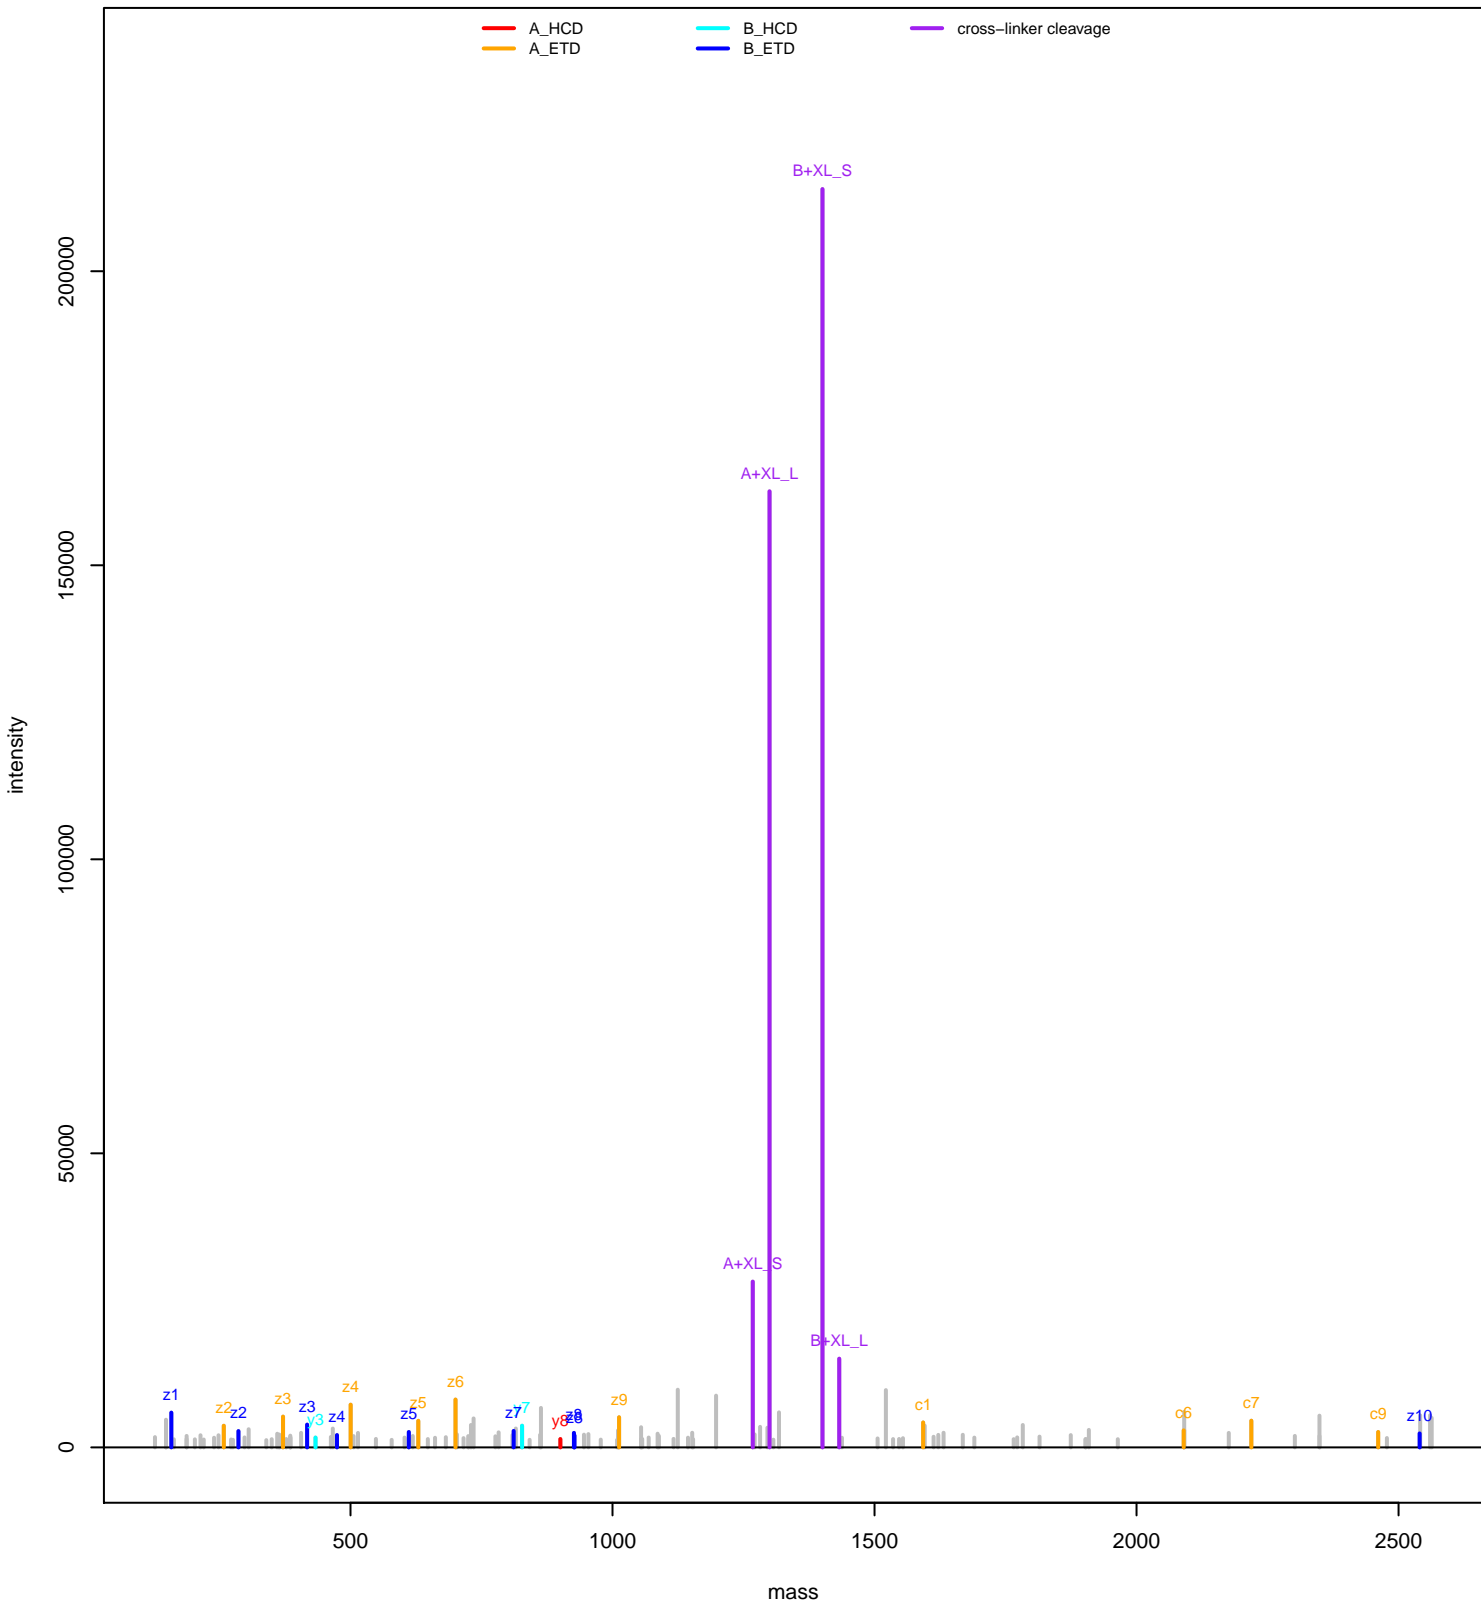

ANKPSAEELKK+XL\_S

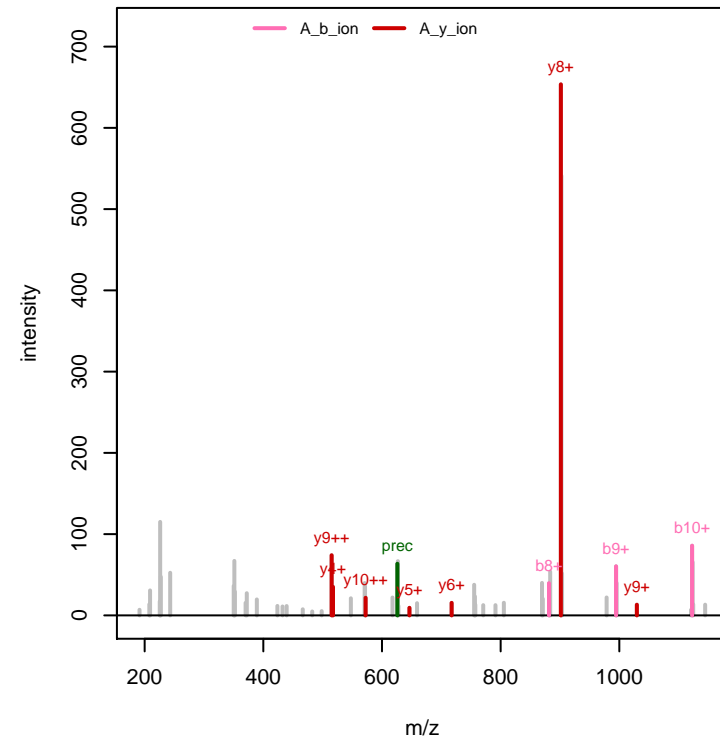

ANKPSAEELKK+XL\_L

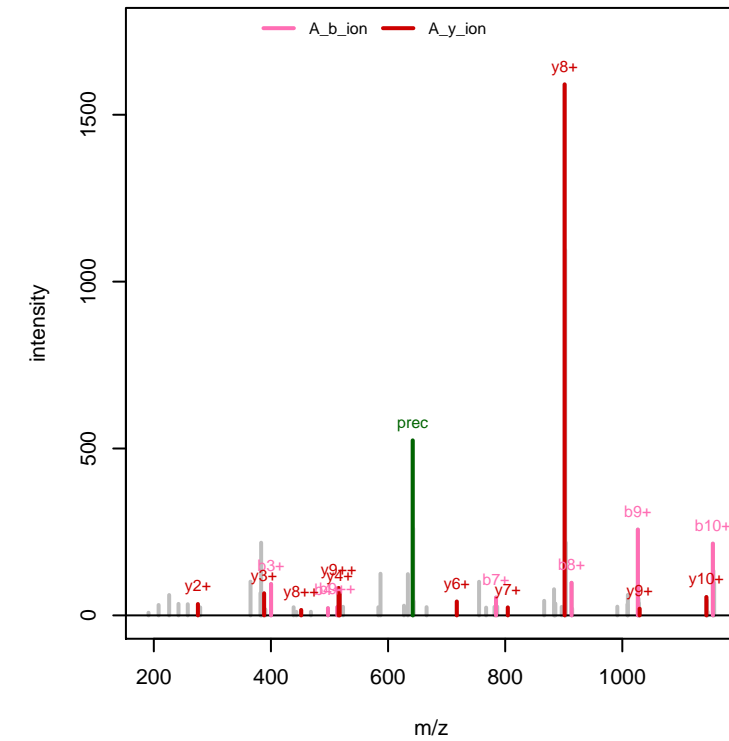

YIKDLSHGMQR+XL\_S

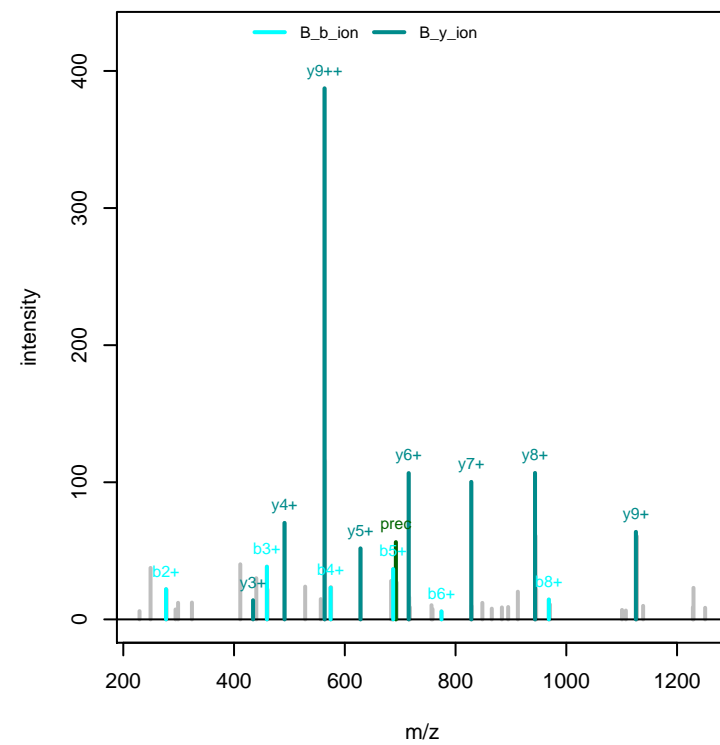

YIKDLSHGMQR+XL\_L

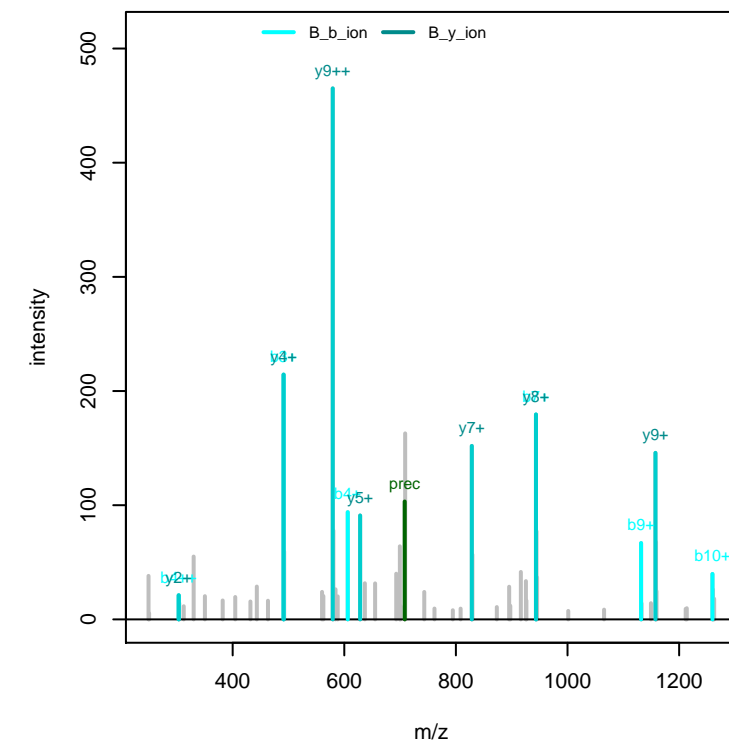

NNKGQTPAQK  
INADKVVVTRPGGEQ GK

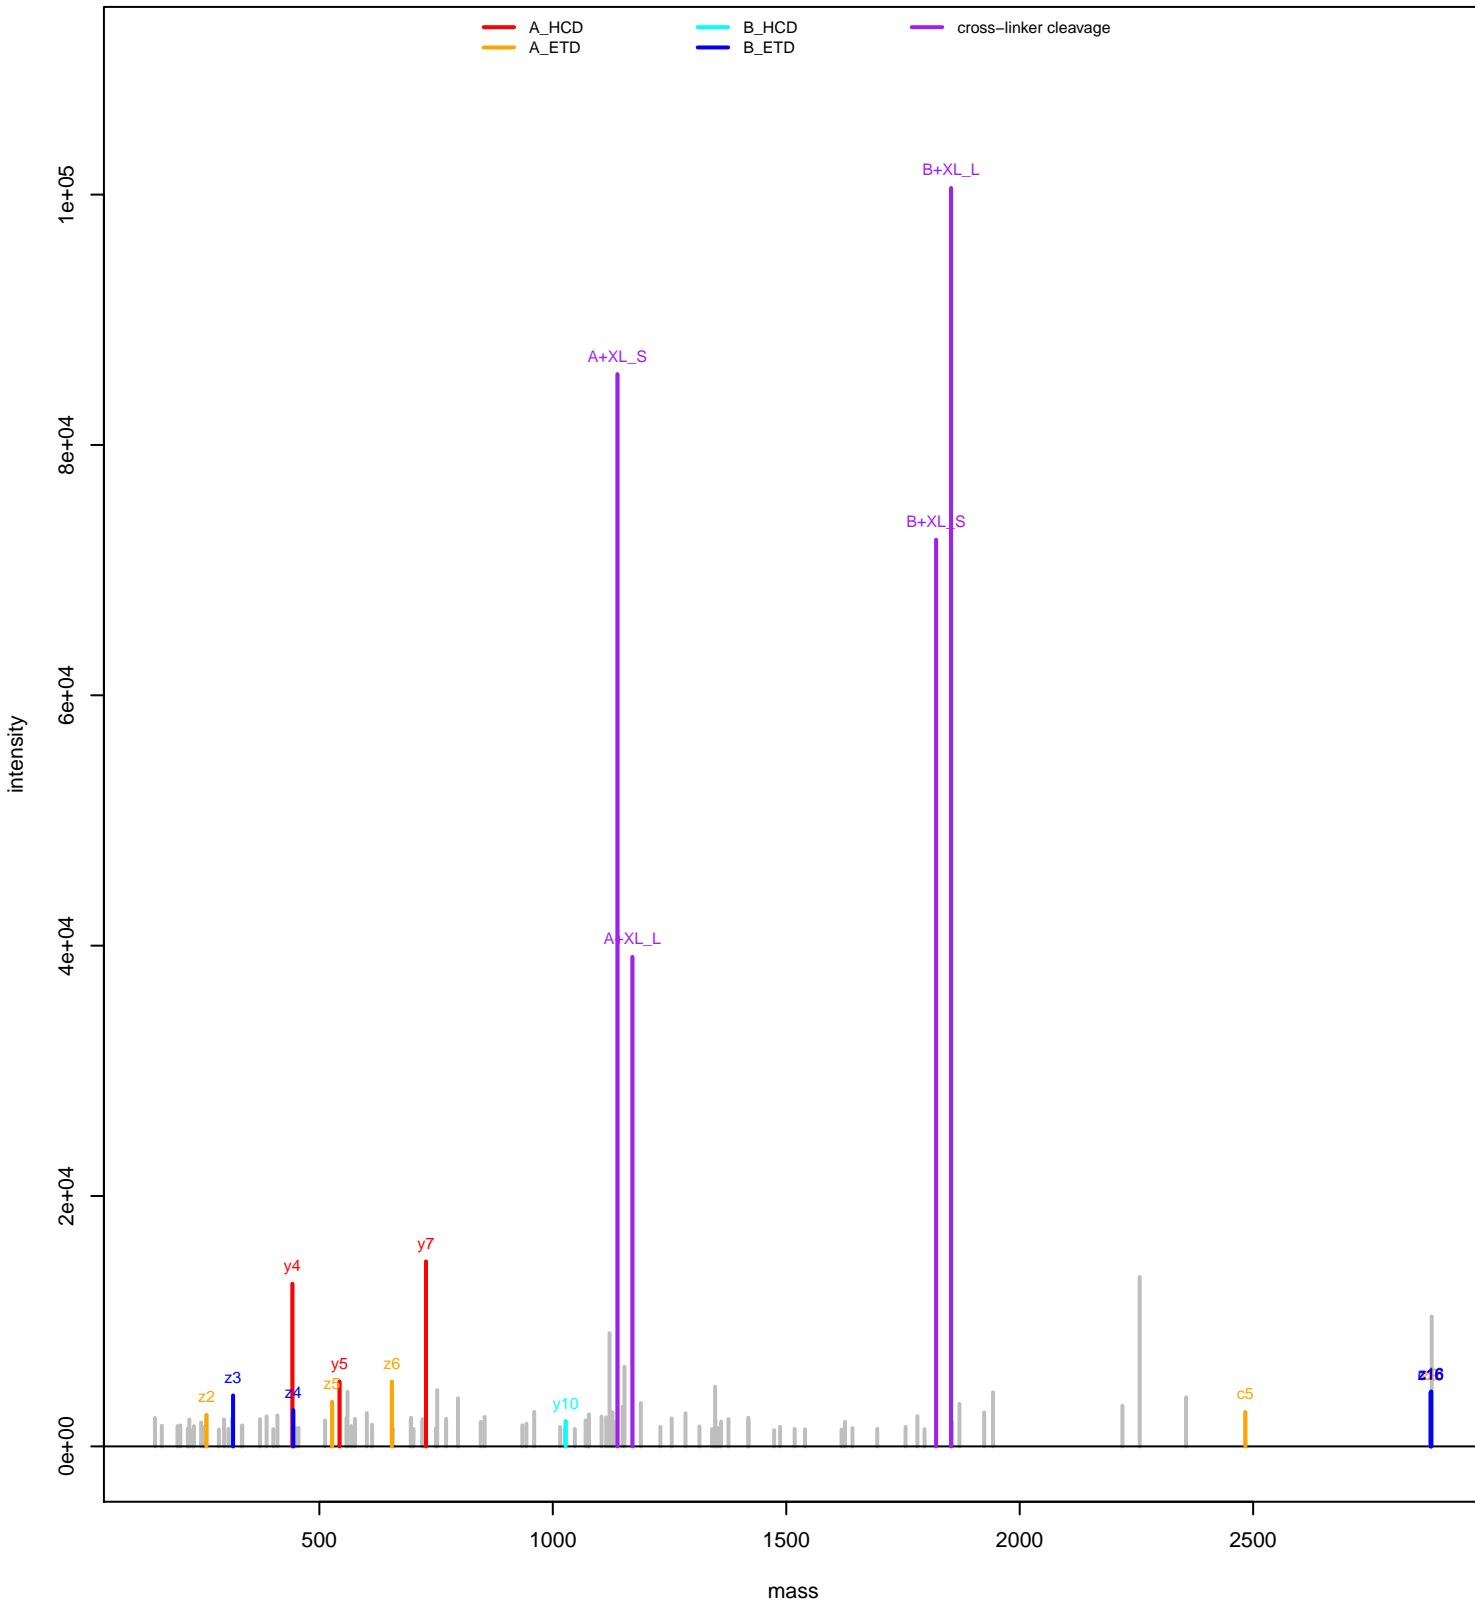

NNKGQTPAQK+XL\_S

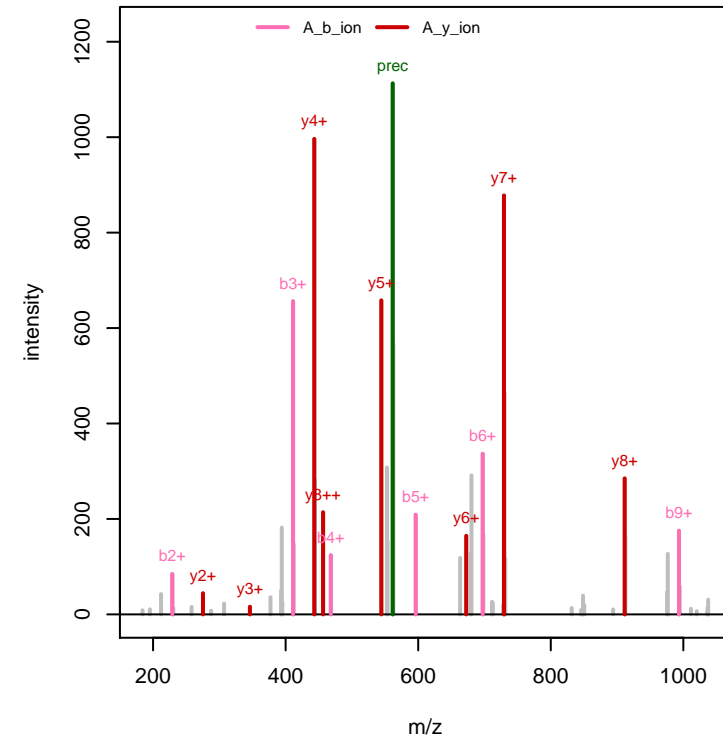

NNKGQTPAQK+XL\_L

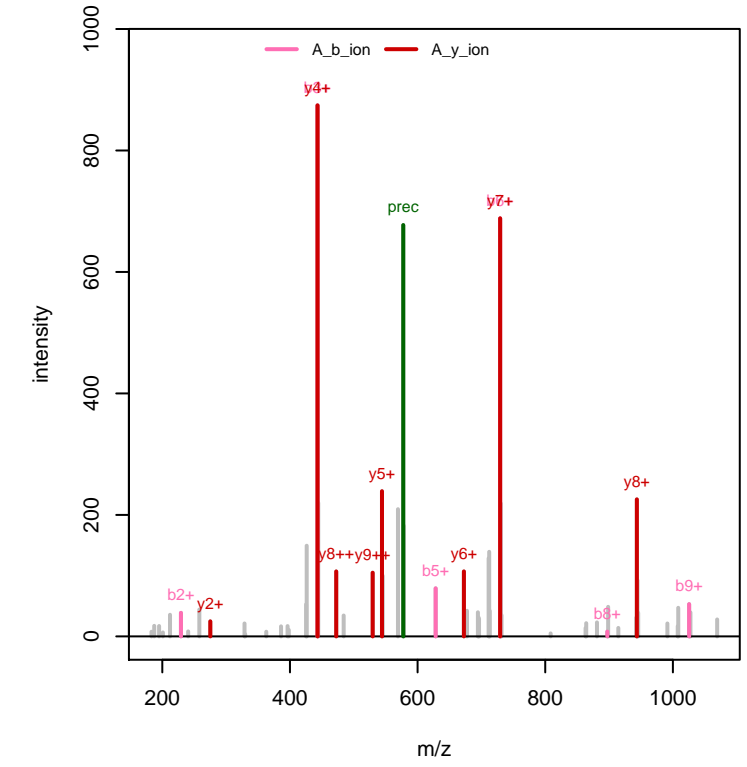

INADKVVVTRPGGEQ GK+XL\_S

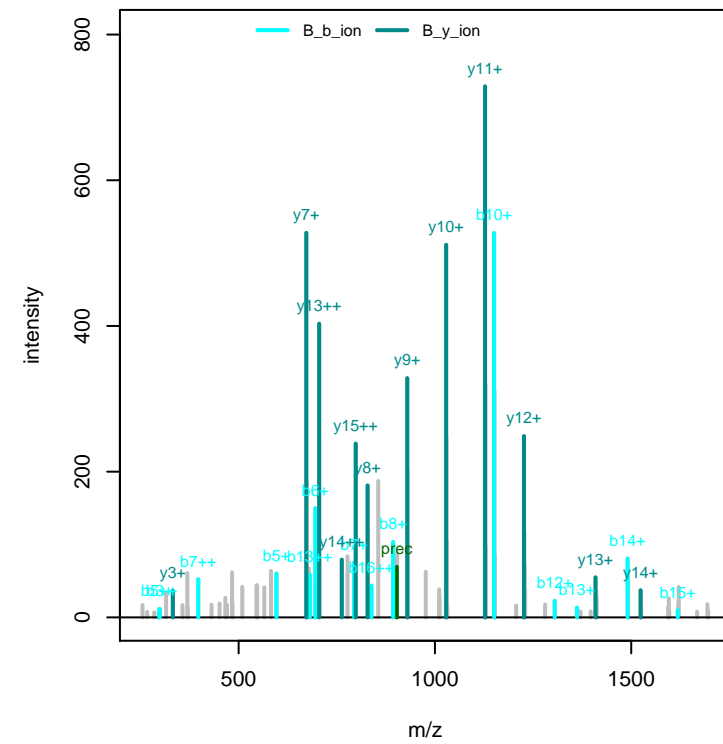

INADKVVVTRPGGEQ GK+XL\_L

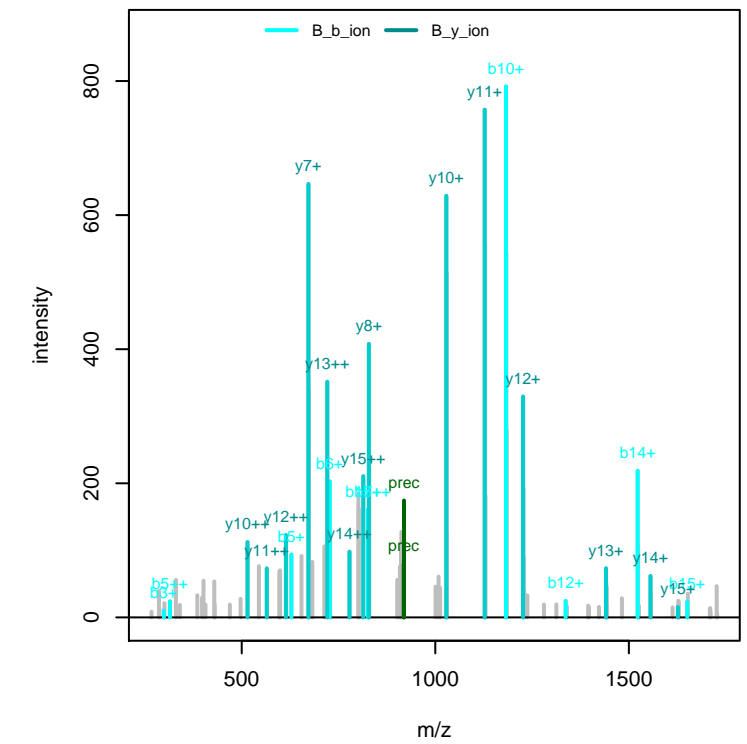

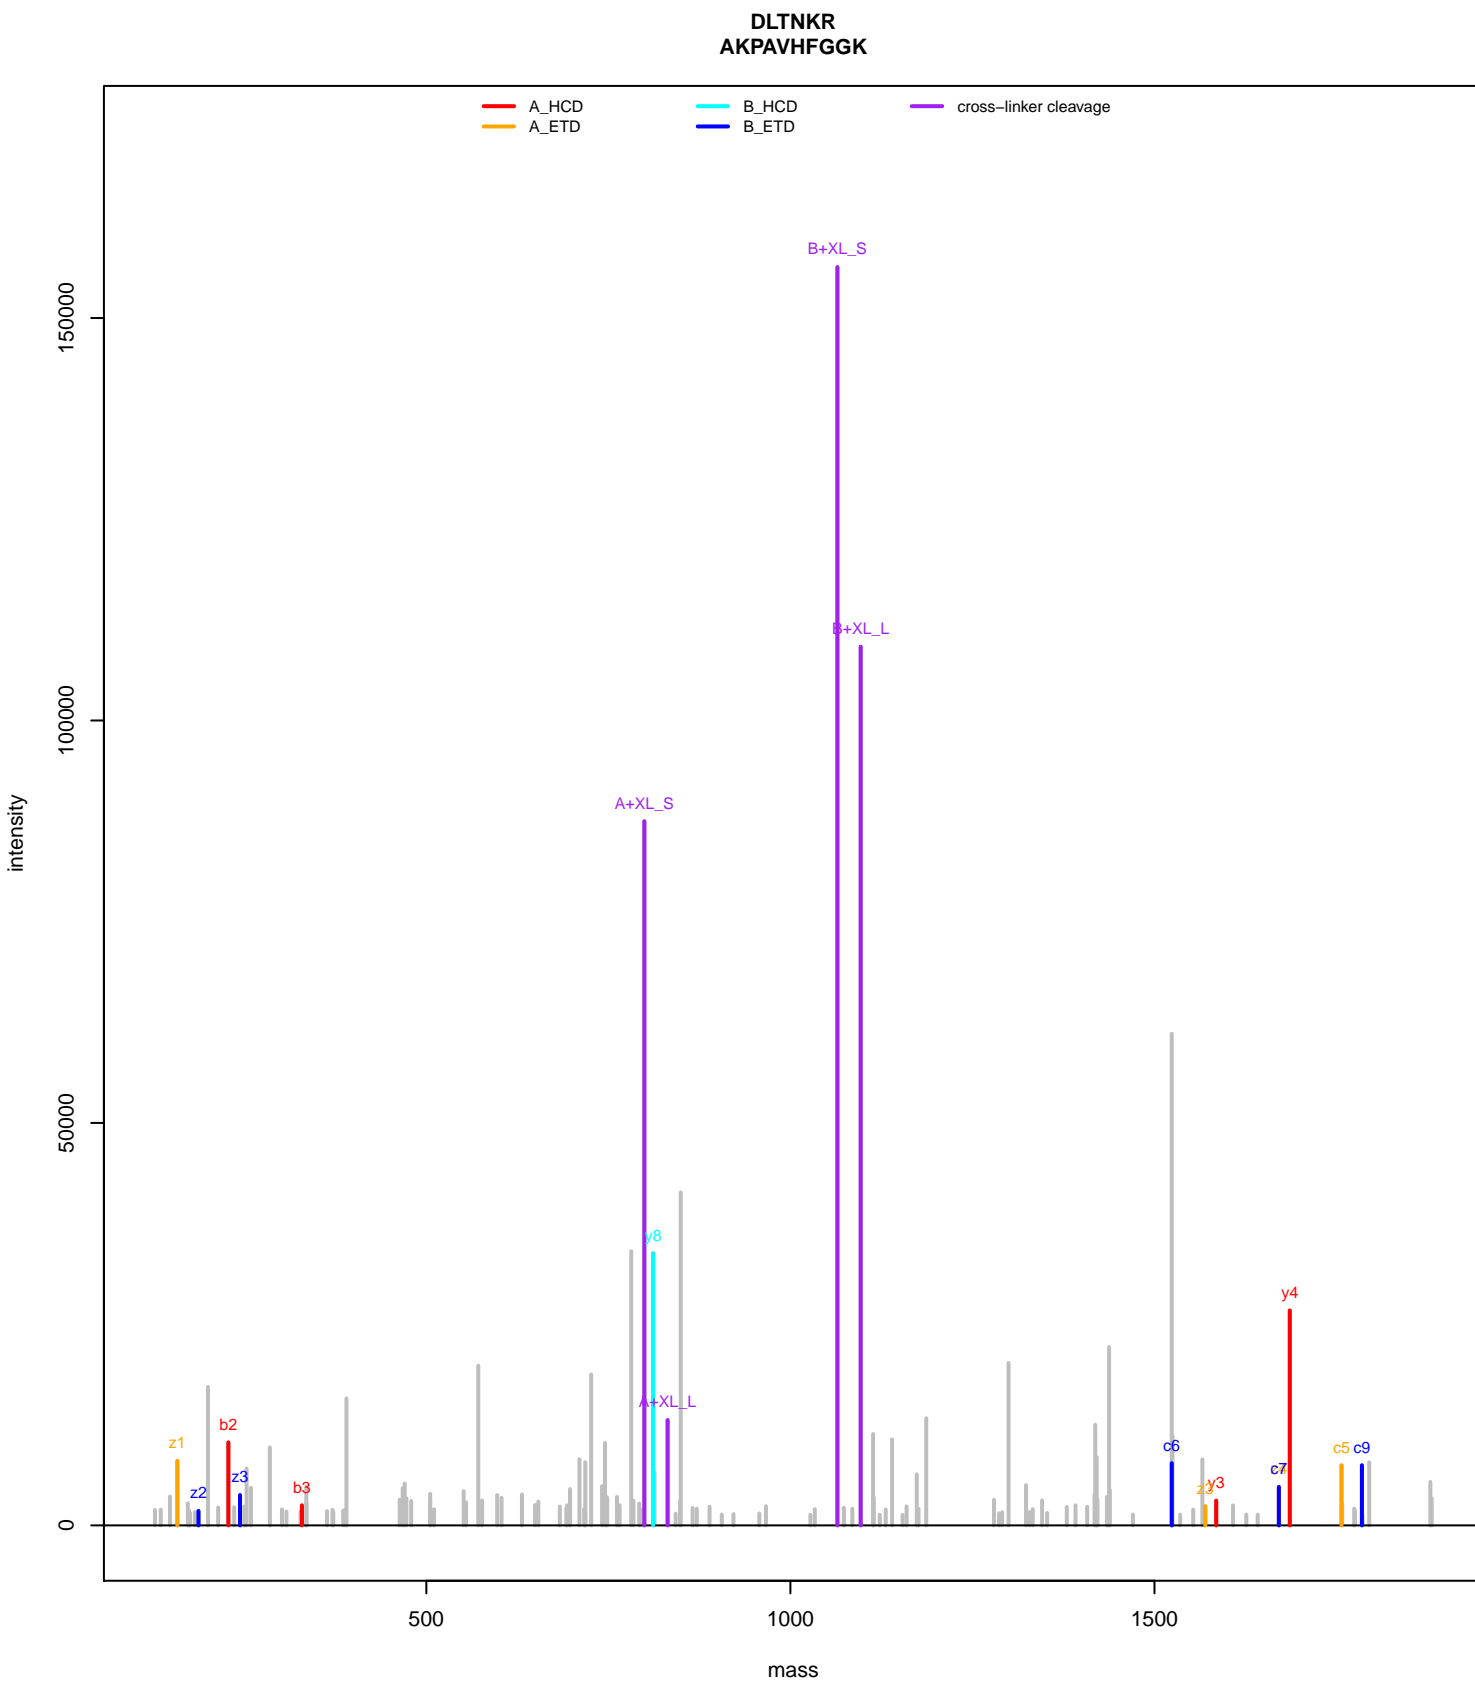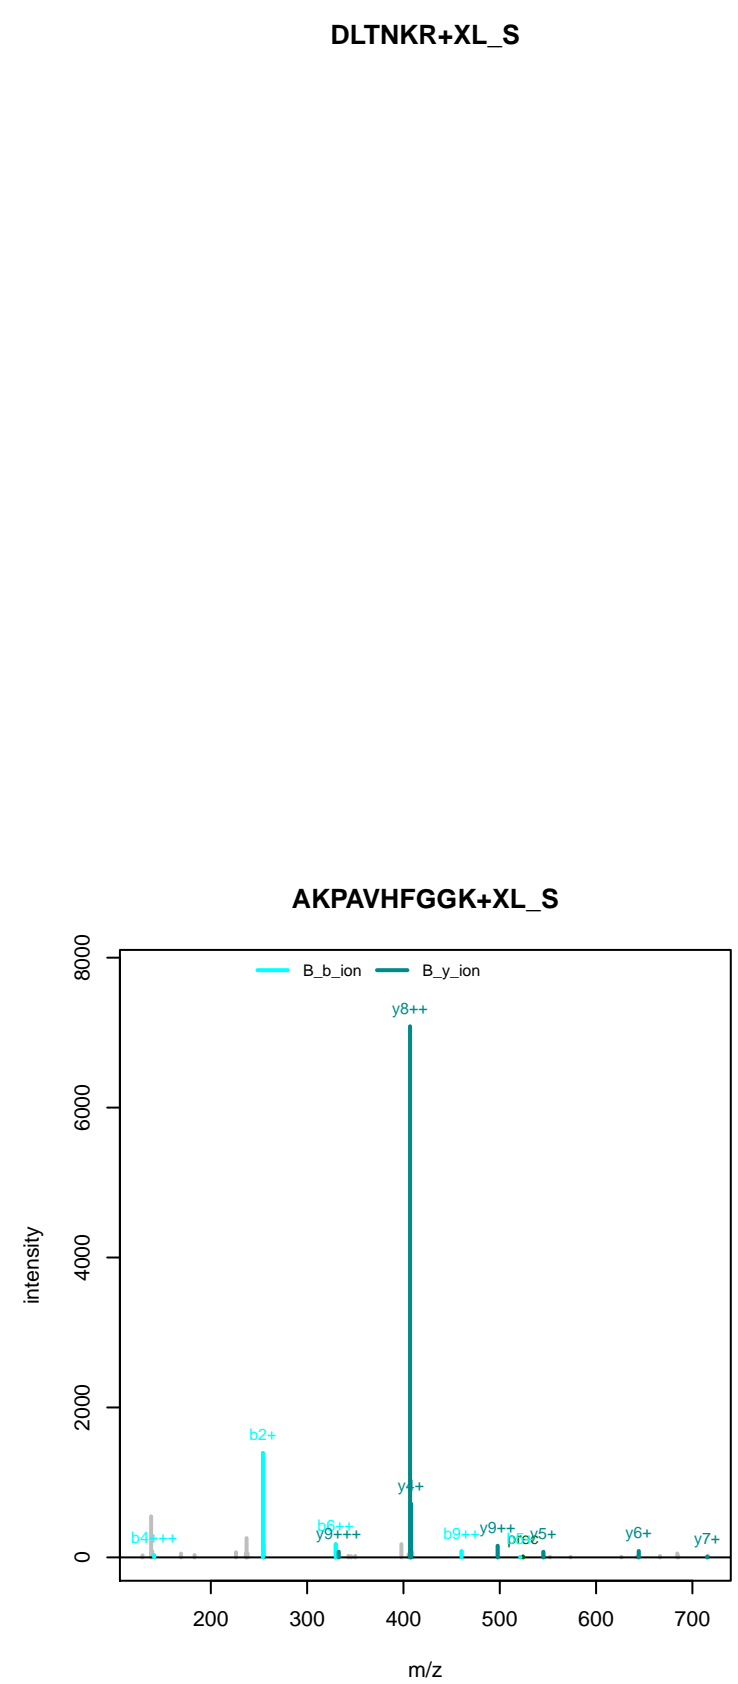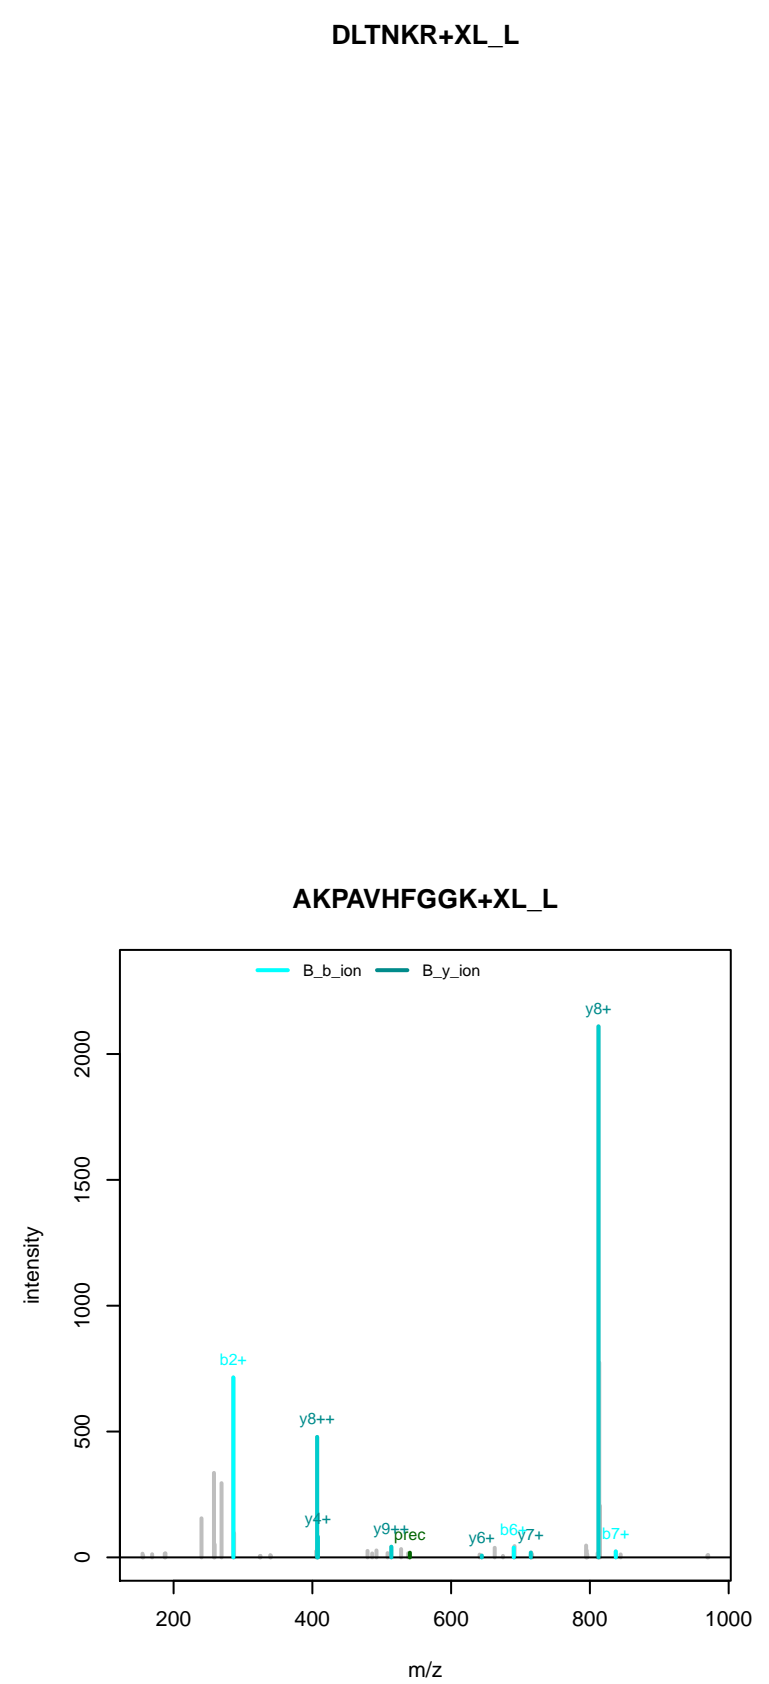

**AAGSLVKR**  
**AAGSLVKR**

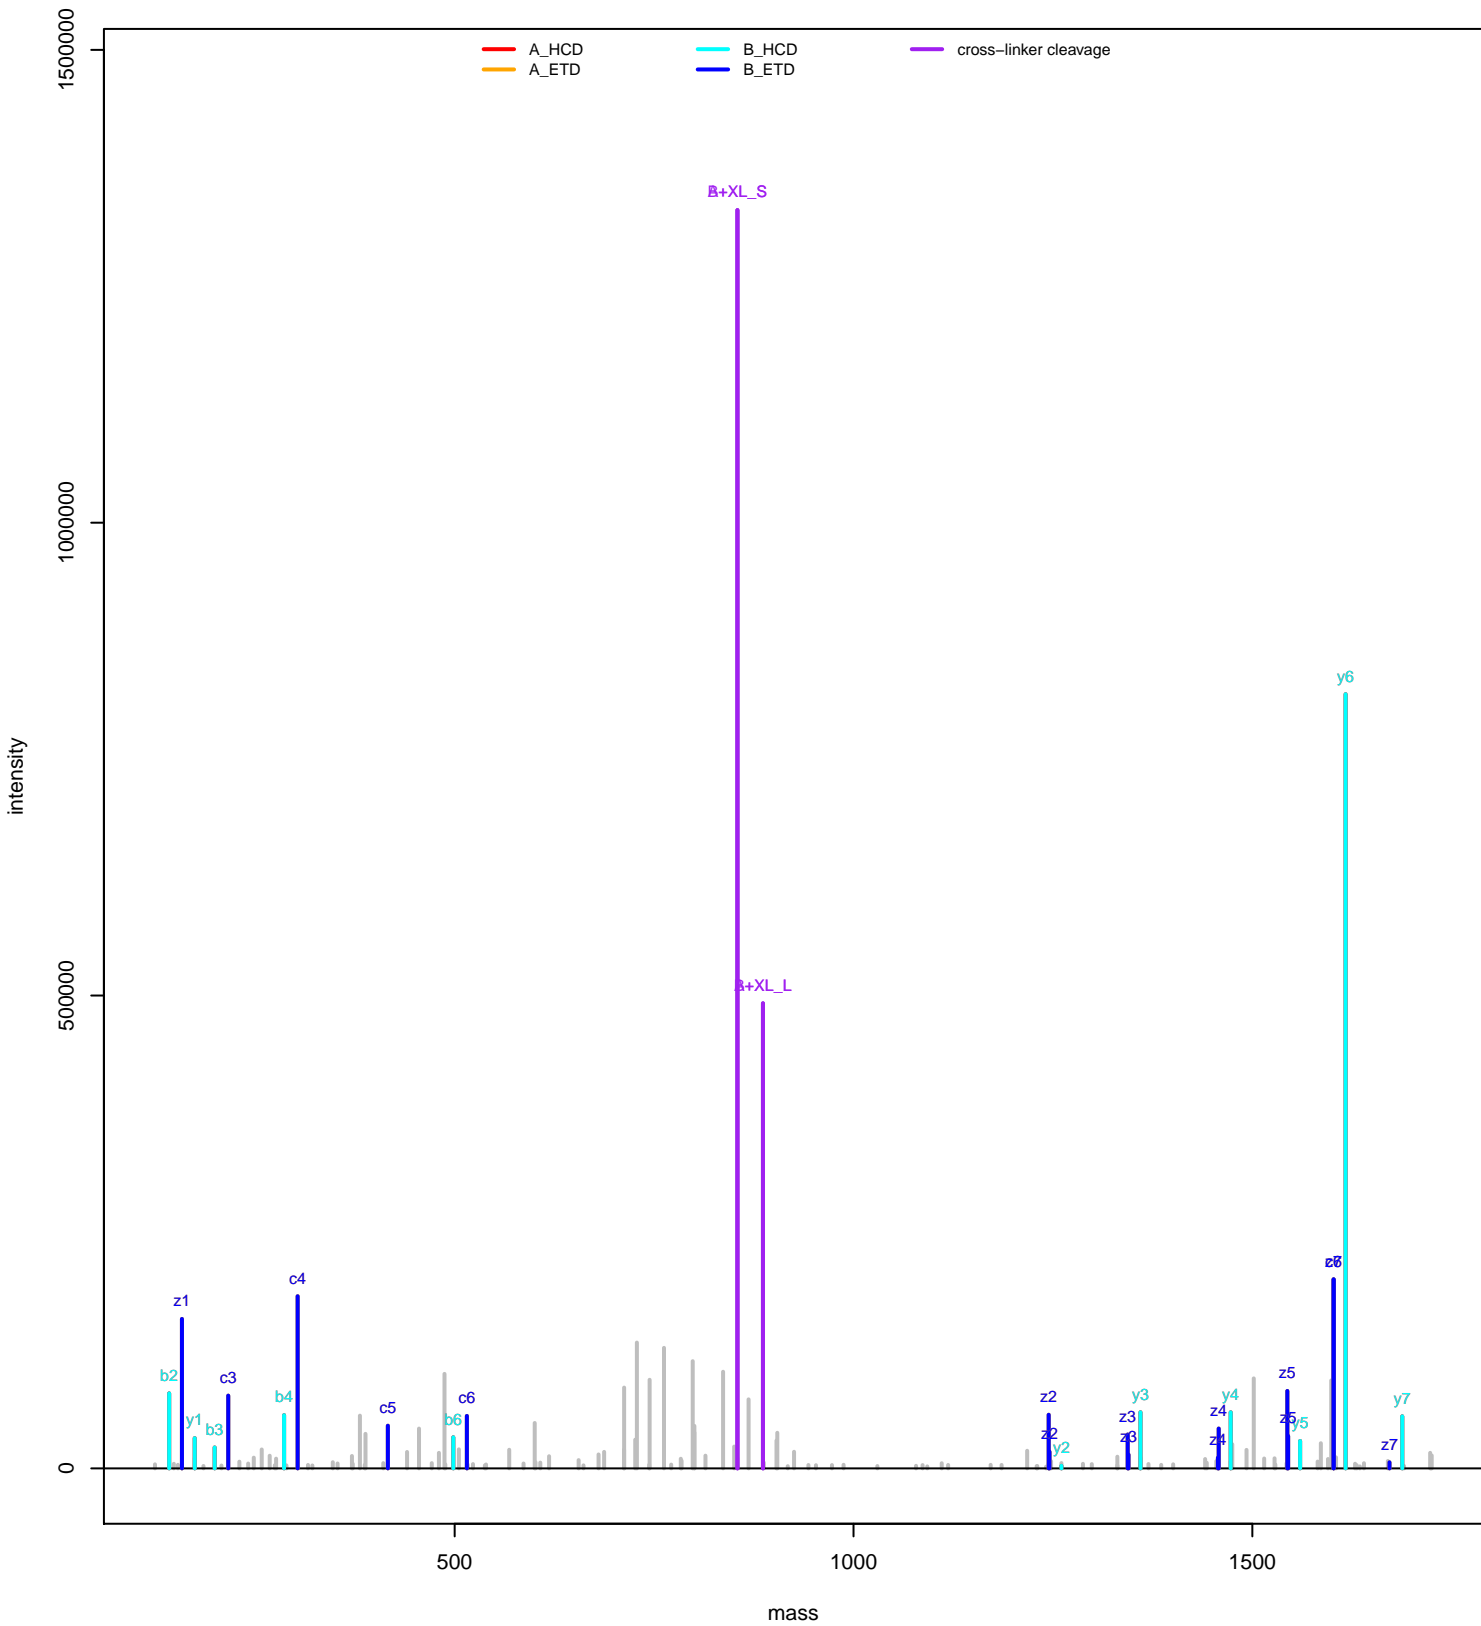

**AAGSLVKR+XL\_S**

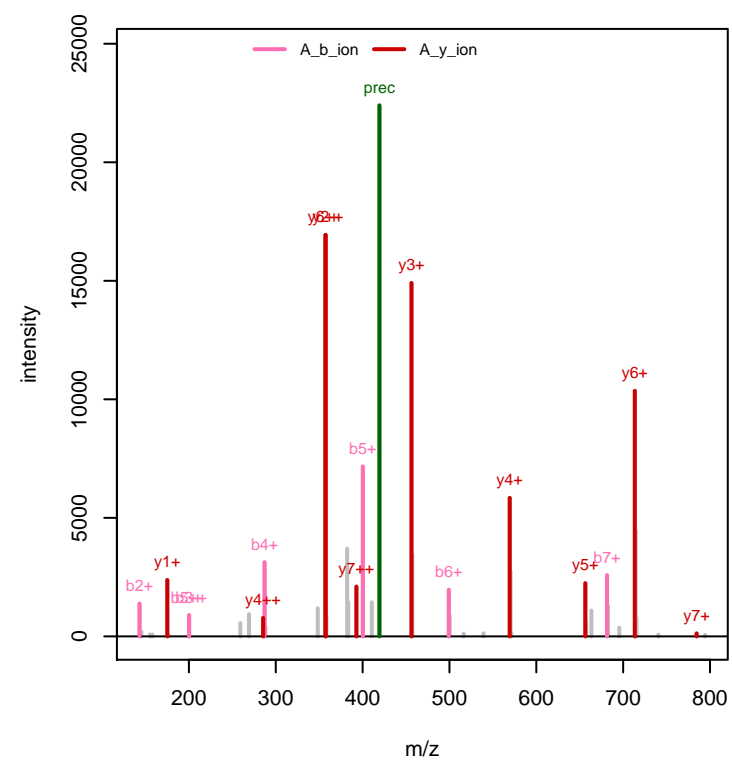

**AAGSLVKR+XL\_L**

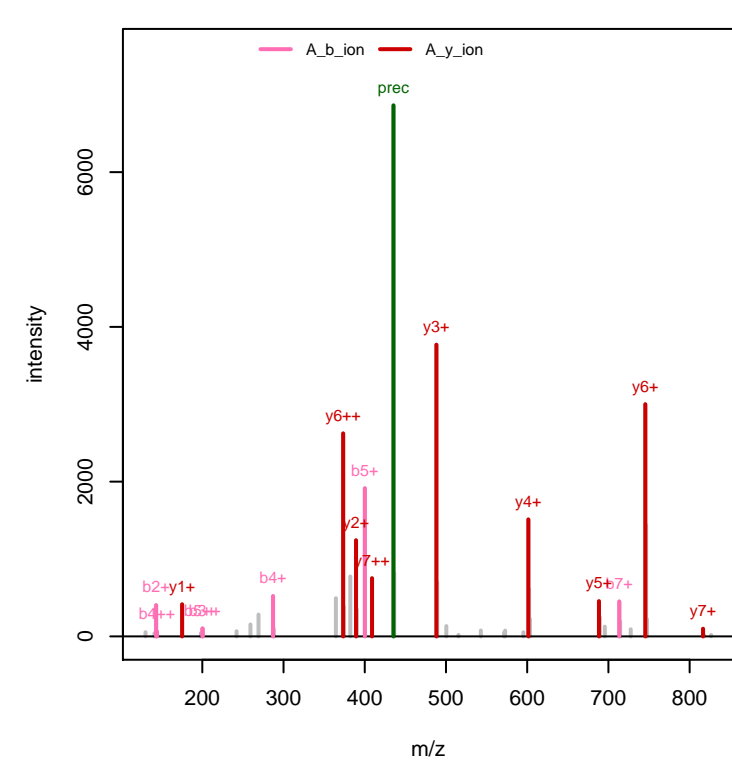

**AAGSLVKR+XL\_S**

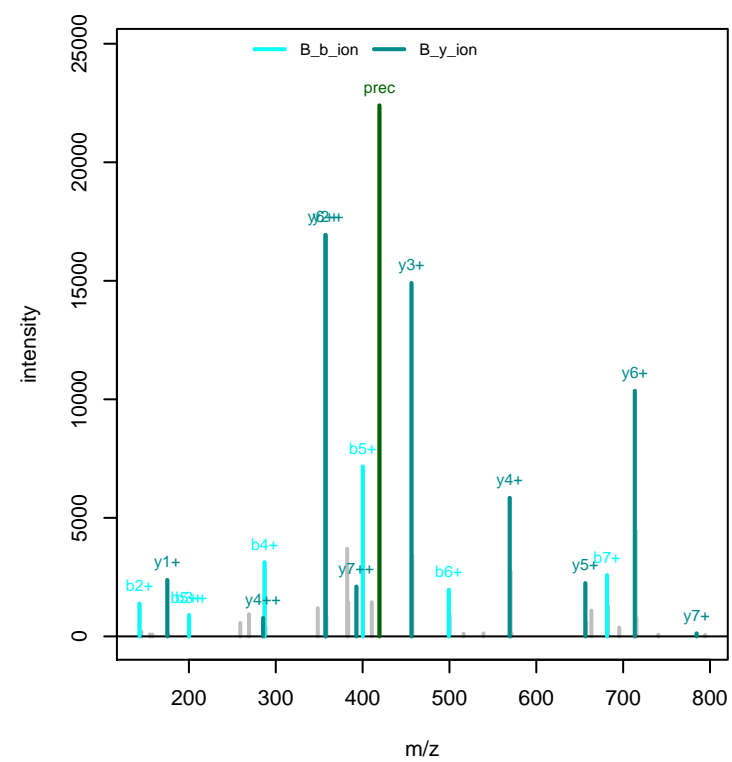

**AAGSLVKR+XL\_L**

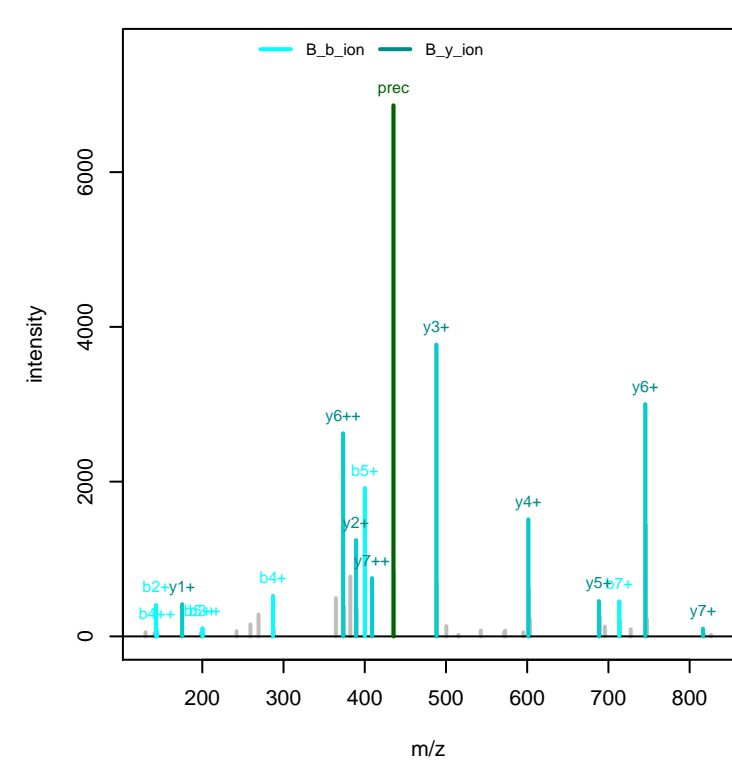





**GDKQGAR**  
**VQVQLKQADAALK**

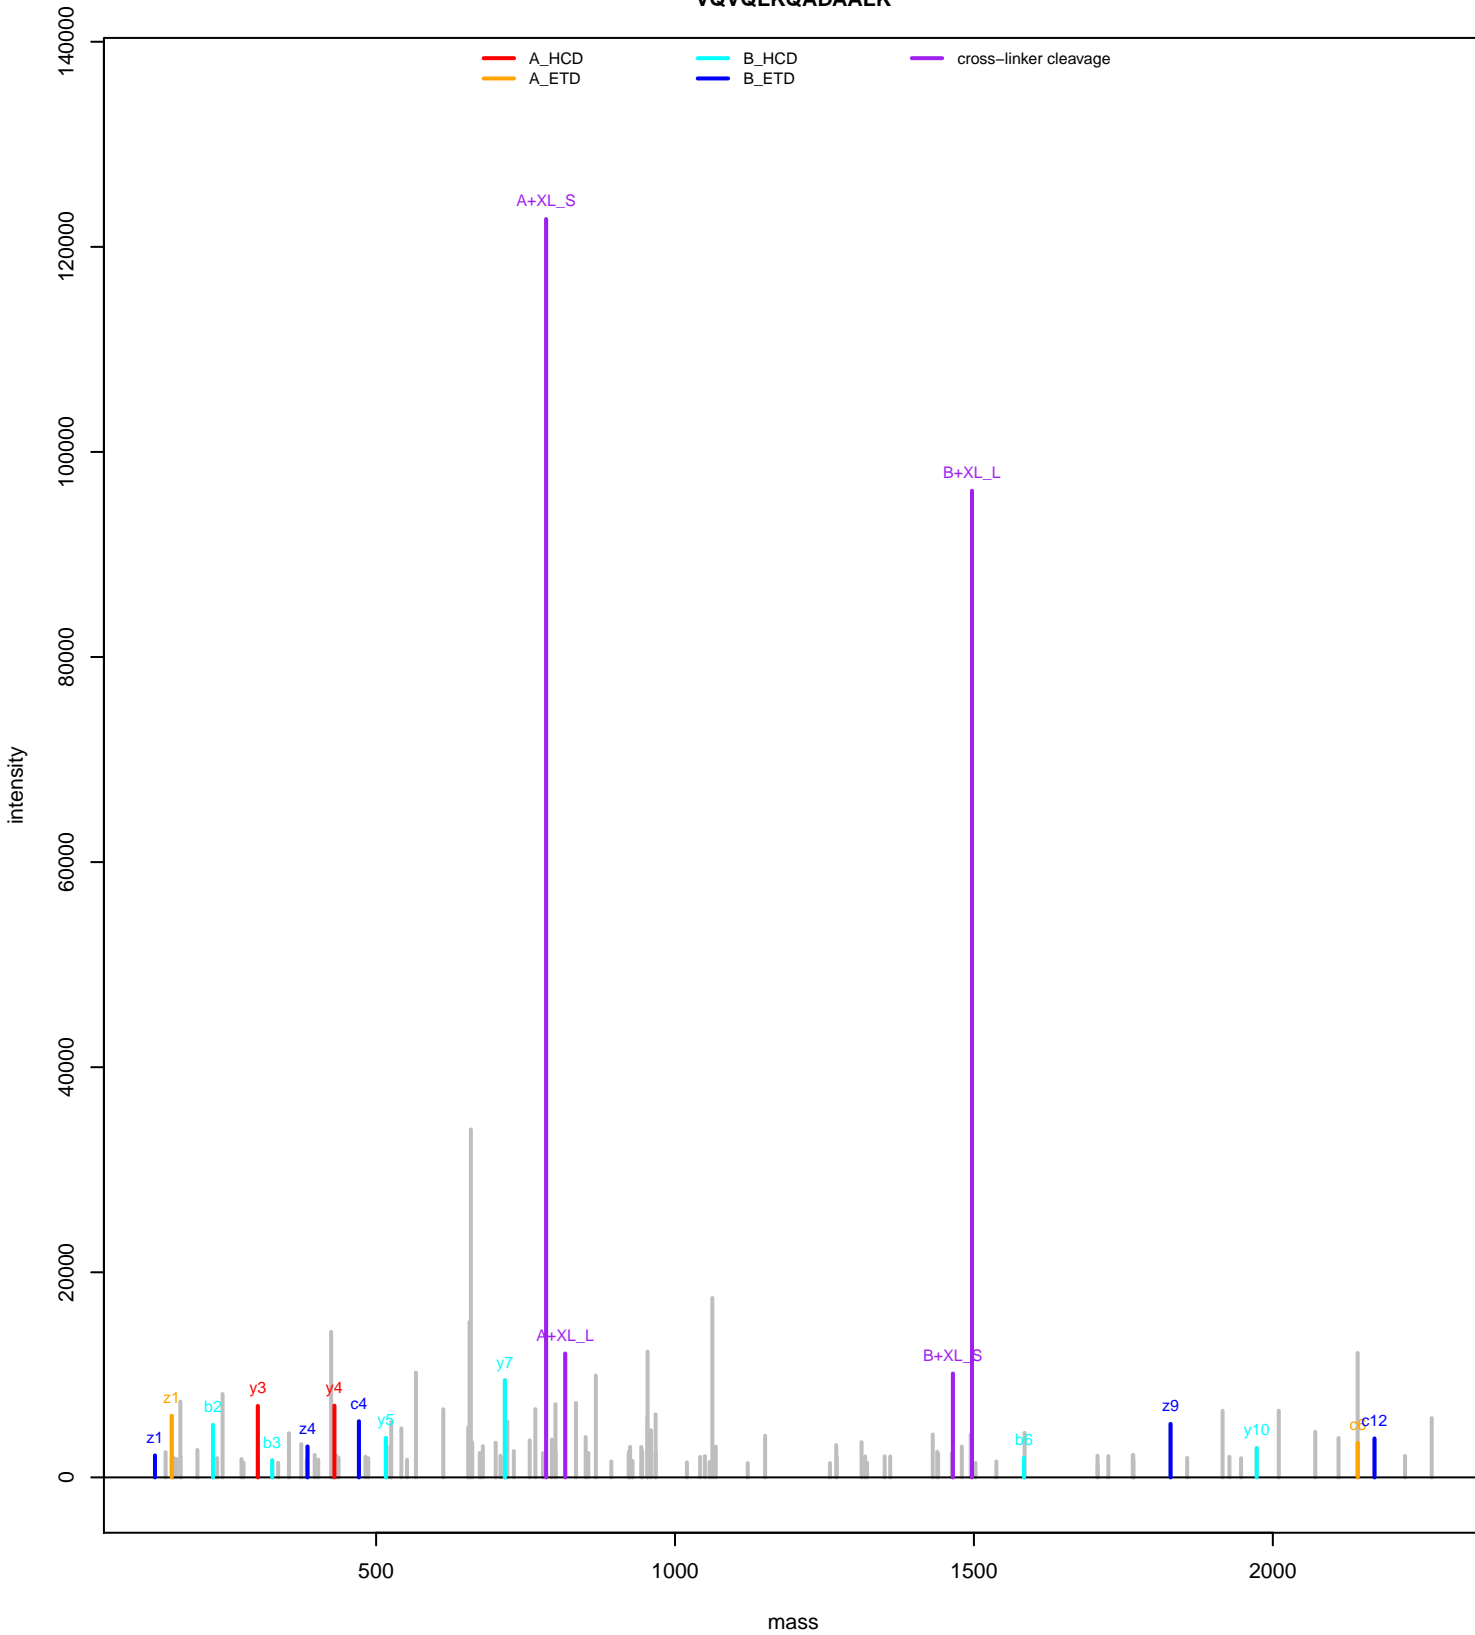

**GDKQGAR+XL\_S**

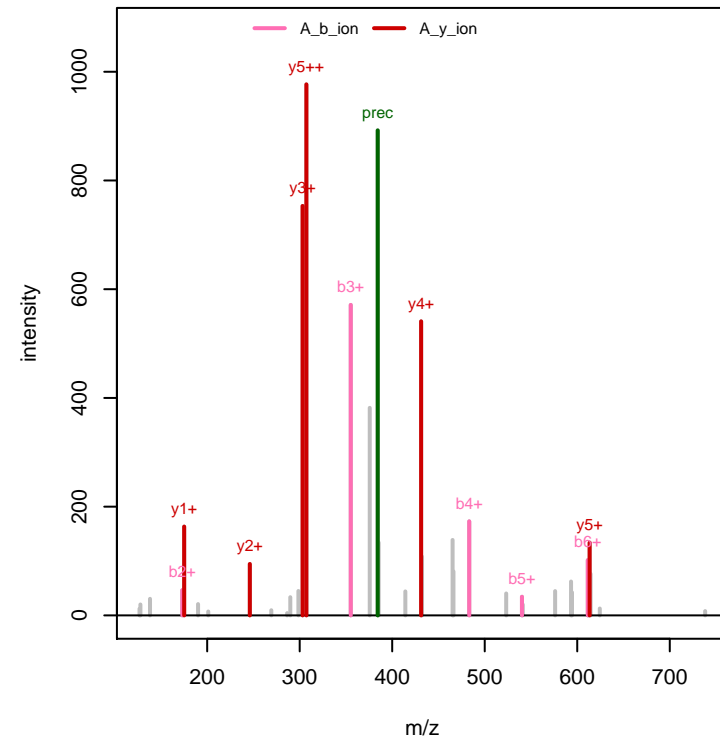

**GDKQGAR+XL\_L**

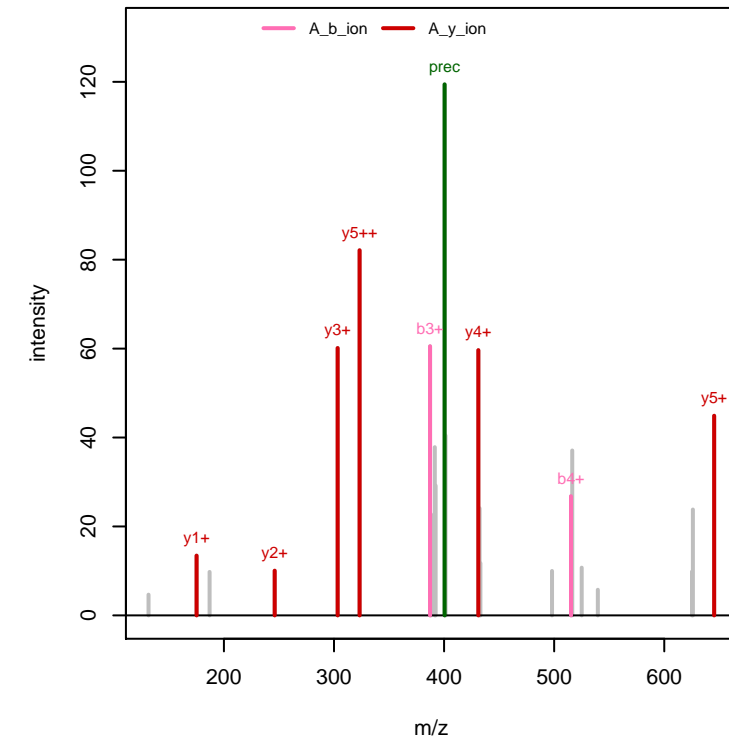

**VQVQLKQADAALK+XL\_S**

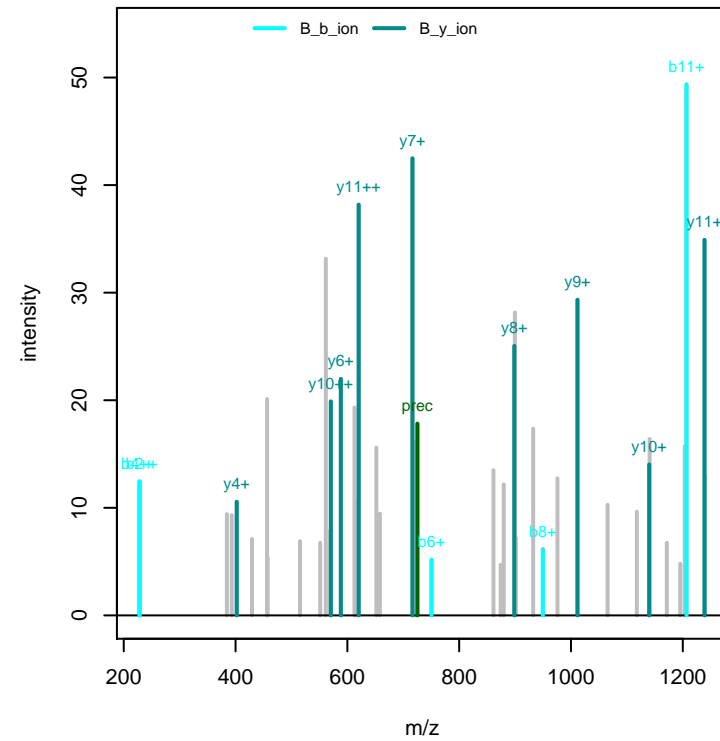

**VQVQLKQADAALK+XL\_L**

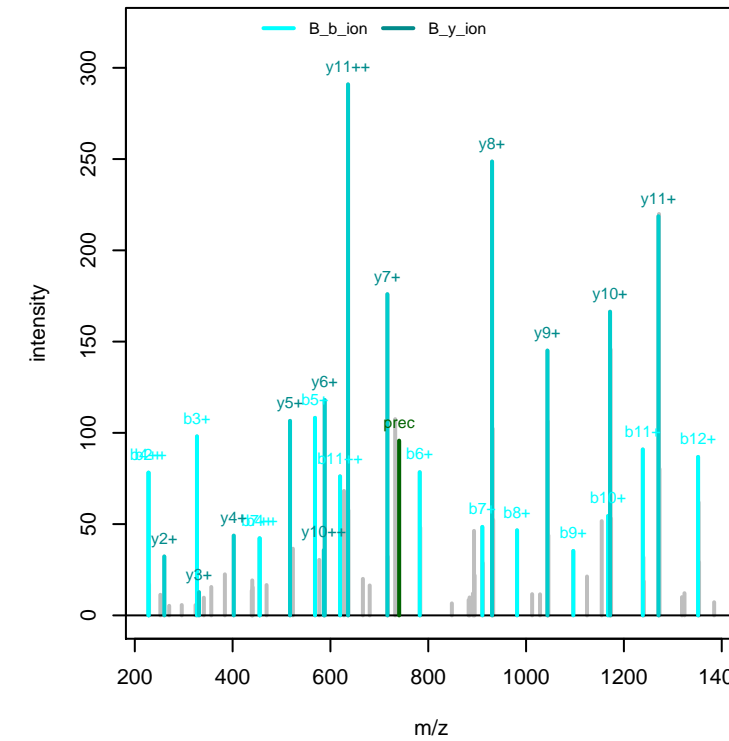

MNIENLKTK  
NTGKEVSEIR

MNIENLKTK+XL\_S

MNIENLKTK+XL\_L

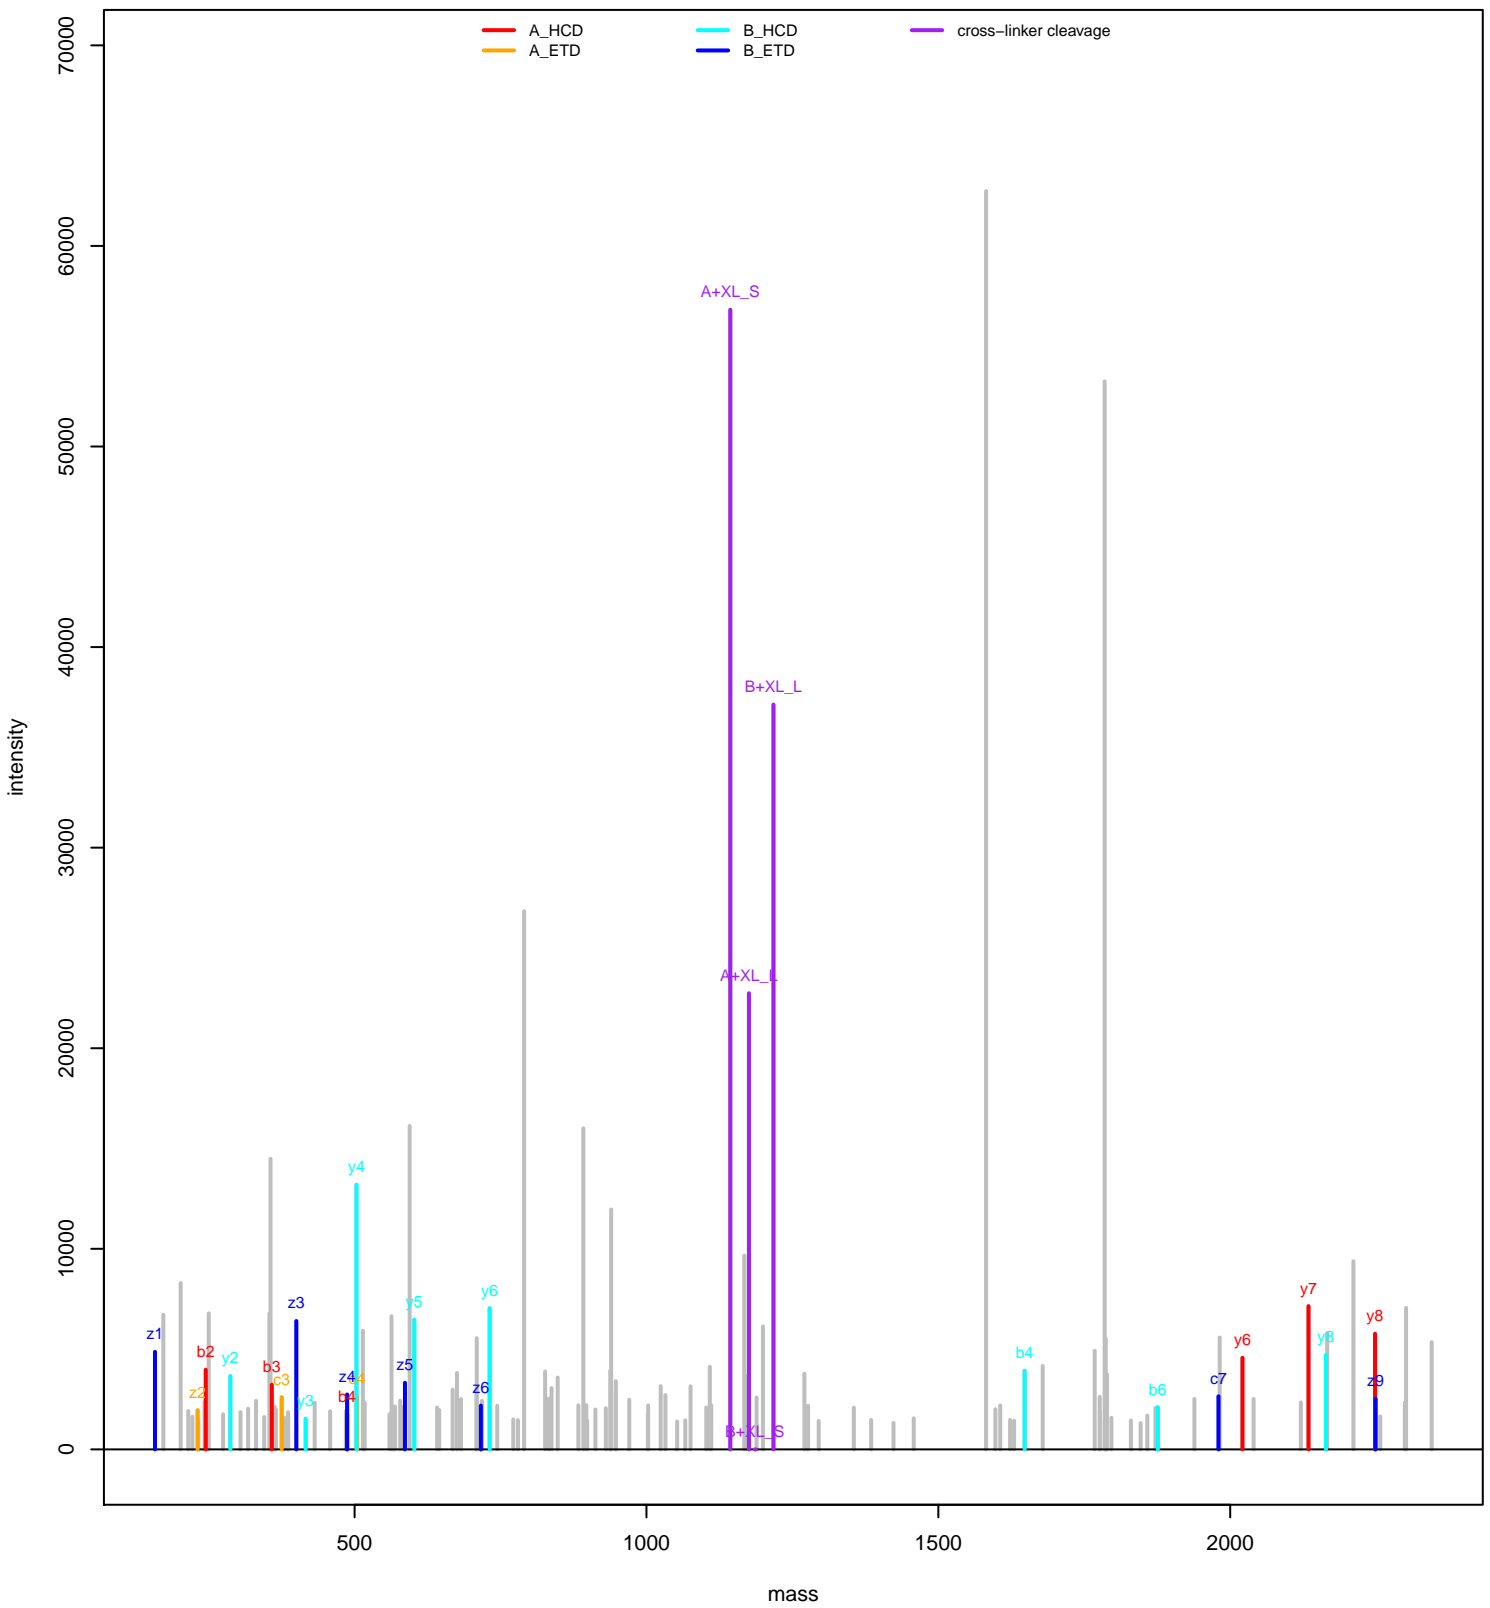

NTGKEVSEIR+XL\_S

NTGKEVSEIR+XL\_L

**AMoEKAR**  
**VGFGYGKAR**

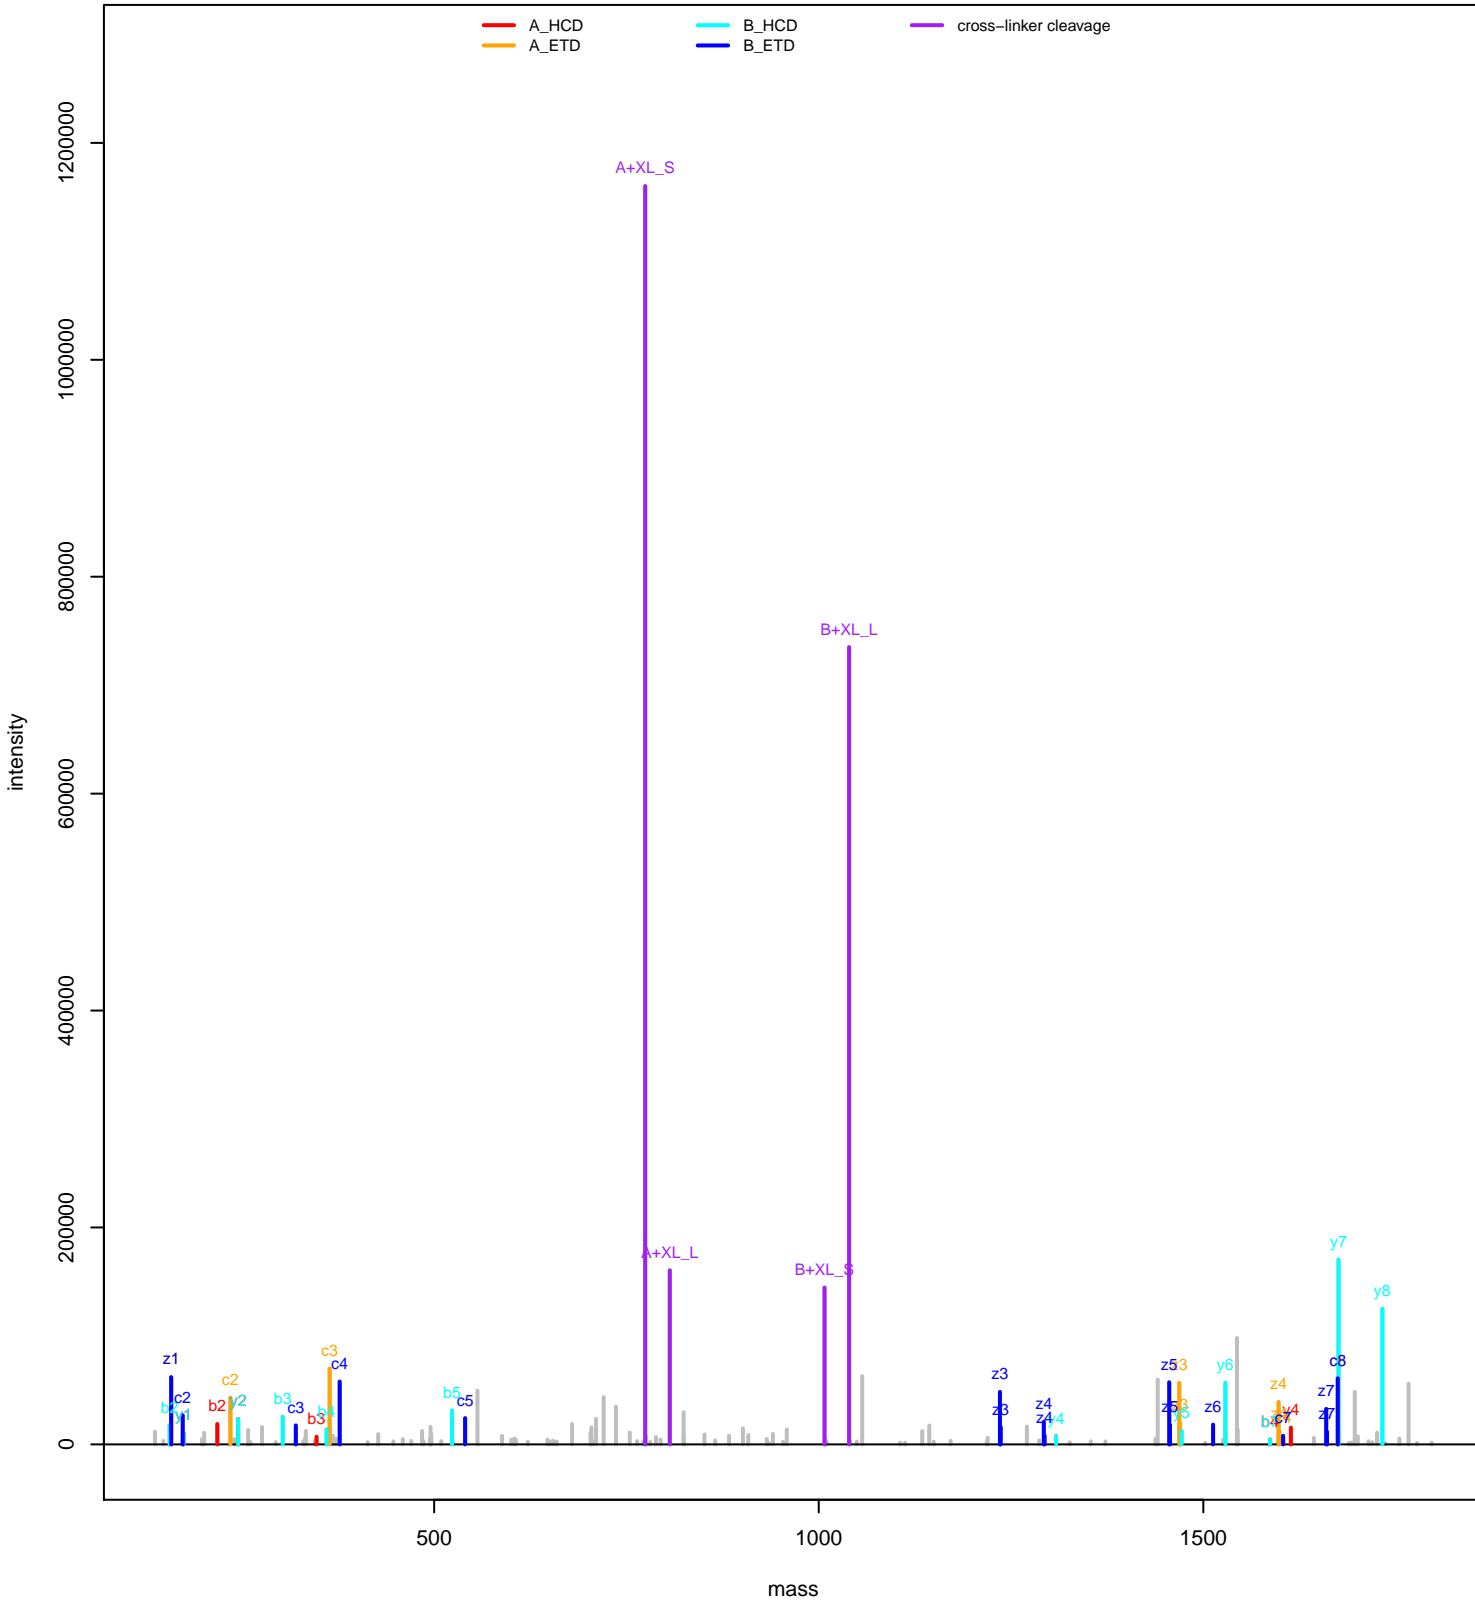

**AMoEKAR+XL\_S**

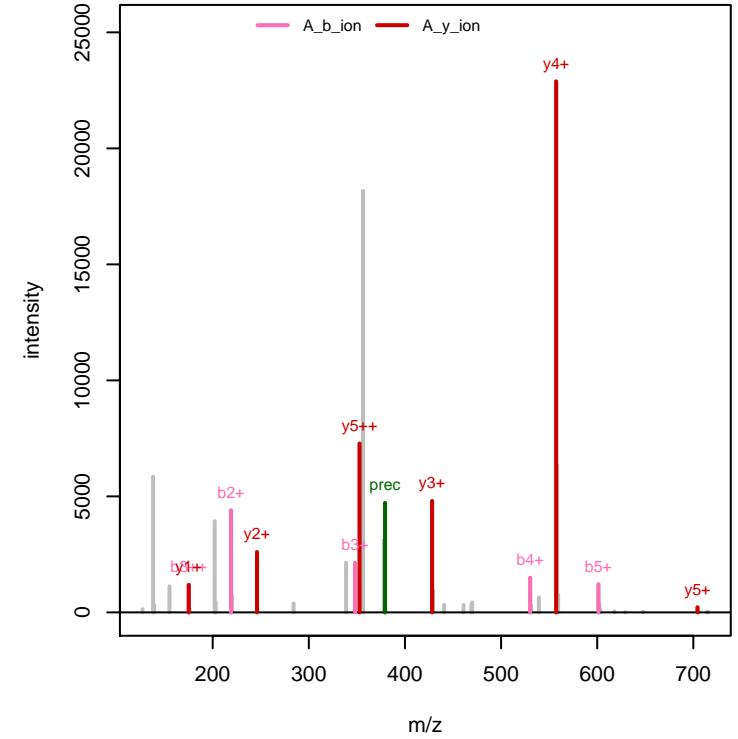

**AMoEKAR+XL\_L**

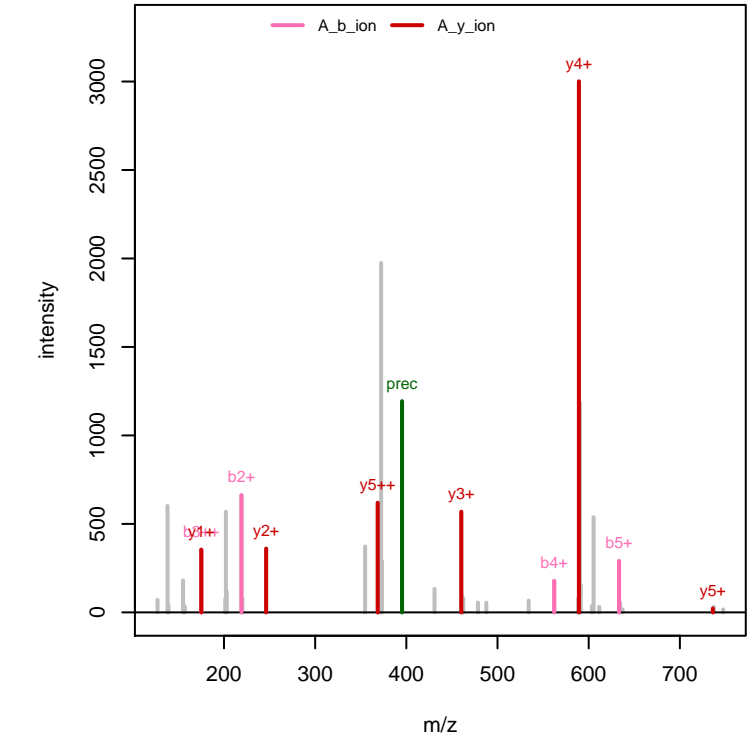

**VGFGYGKAR+XL\_S**

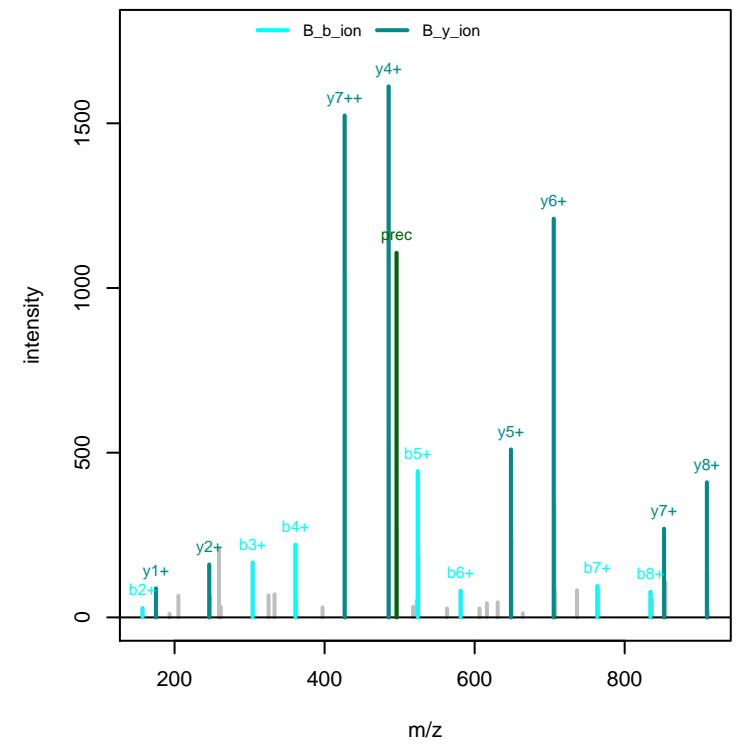

**VGFGYGKAR+XL\_L**

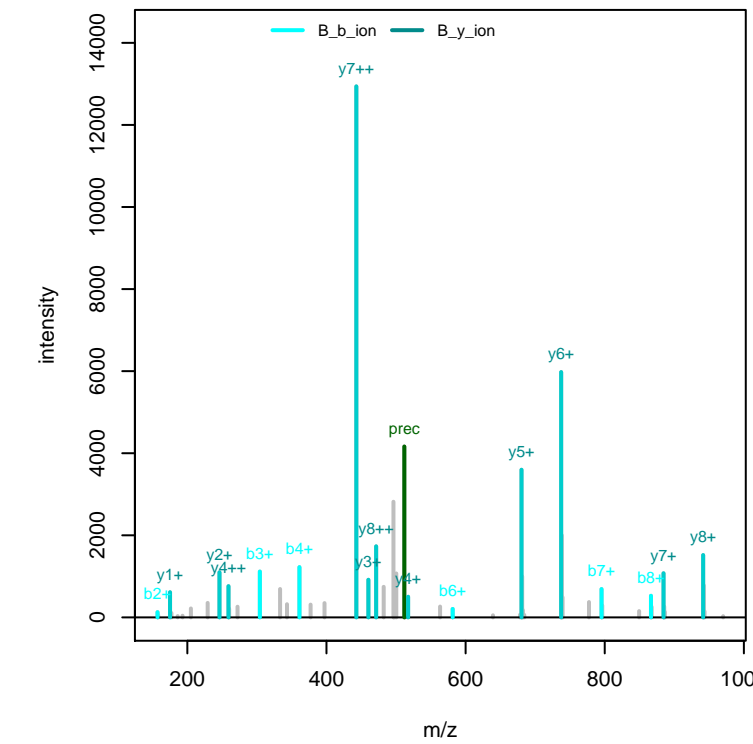

FLKAQTK  
QMQVGGKDPLVPEENDK

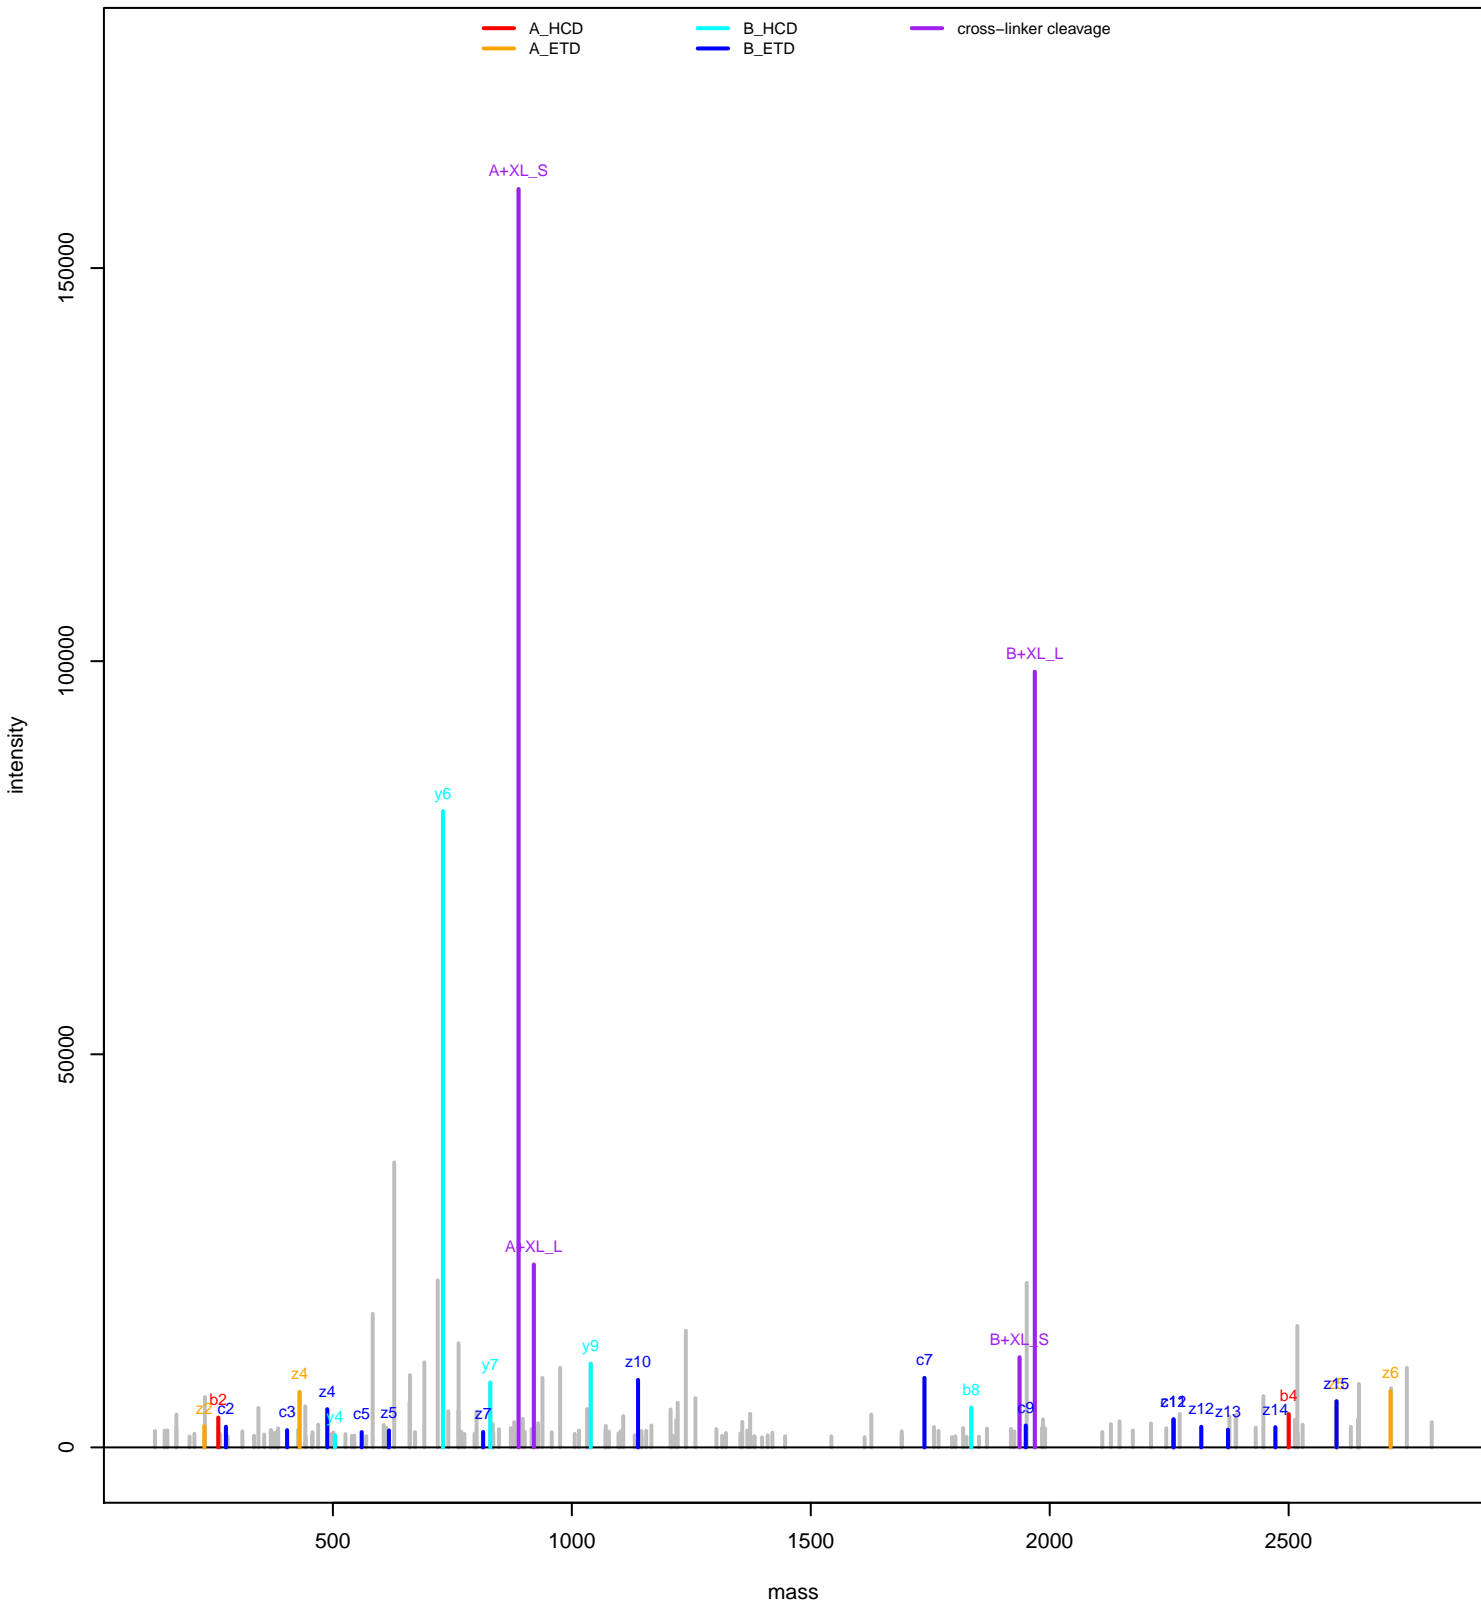

FLKAQTK+XL\_S

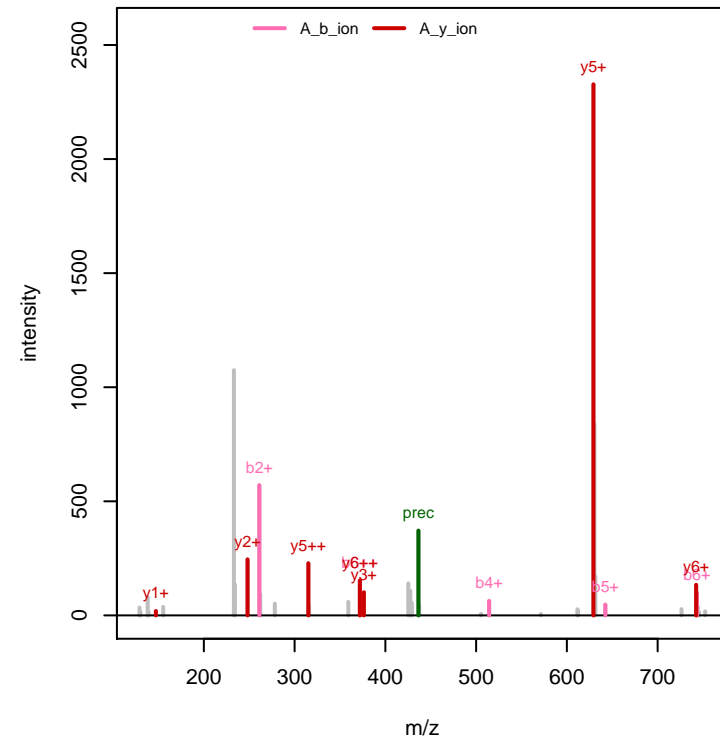

FLKAQTK+XL\_L

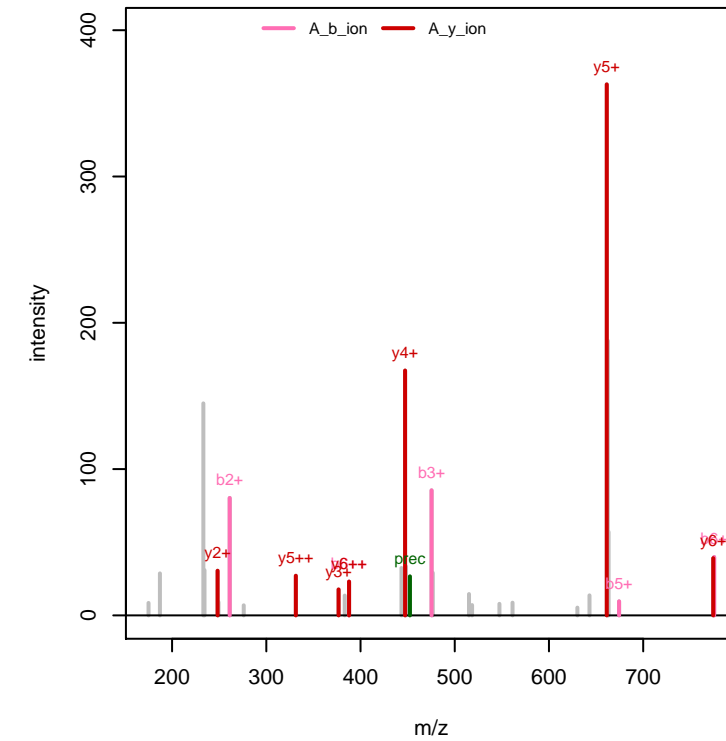

QMQVGGKDPLVPEENDK+XL\_S

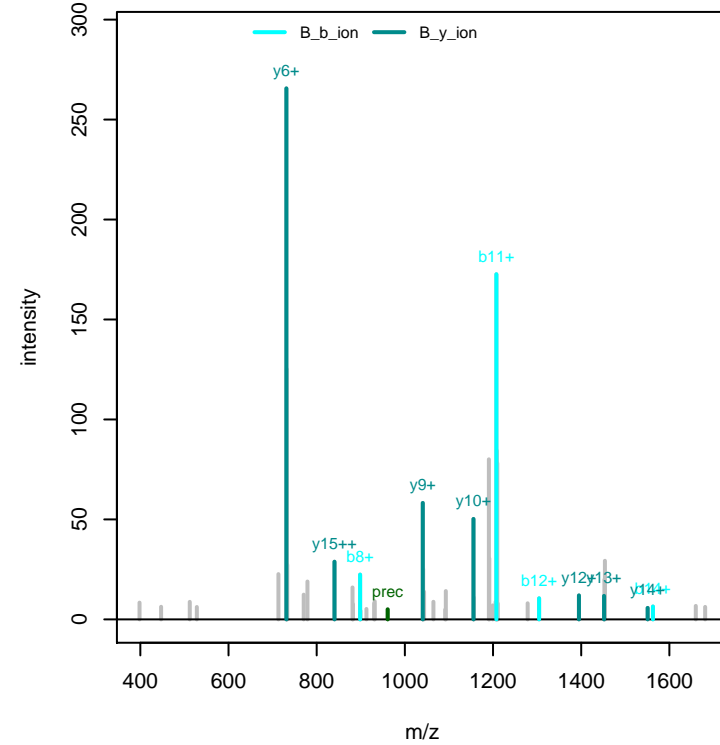

QMQVGGKDPLVPEENDK+XL\_L

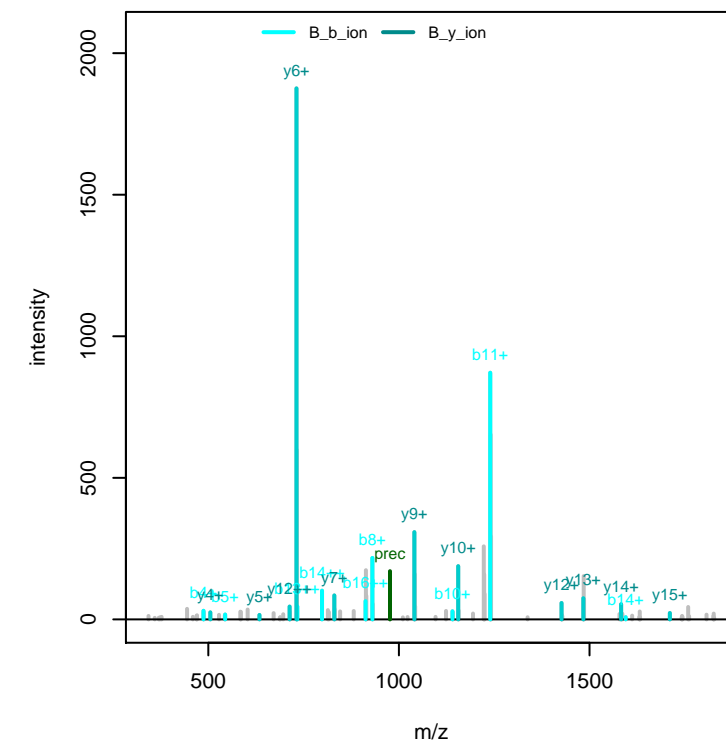

NLTGKEADAALGR  
ANITVNKNSVPNDPK

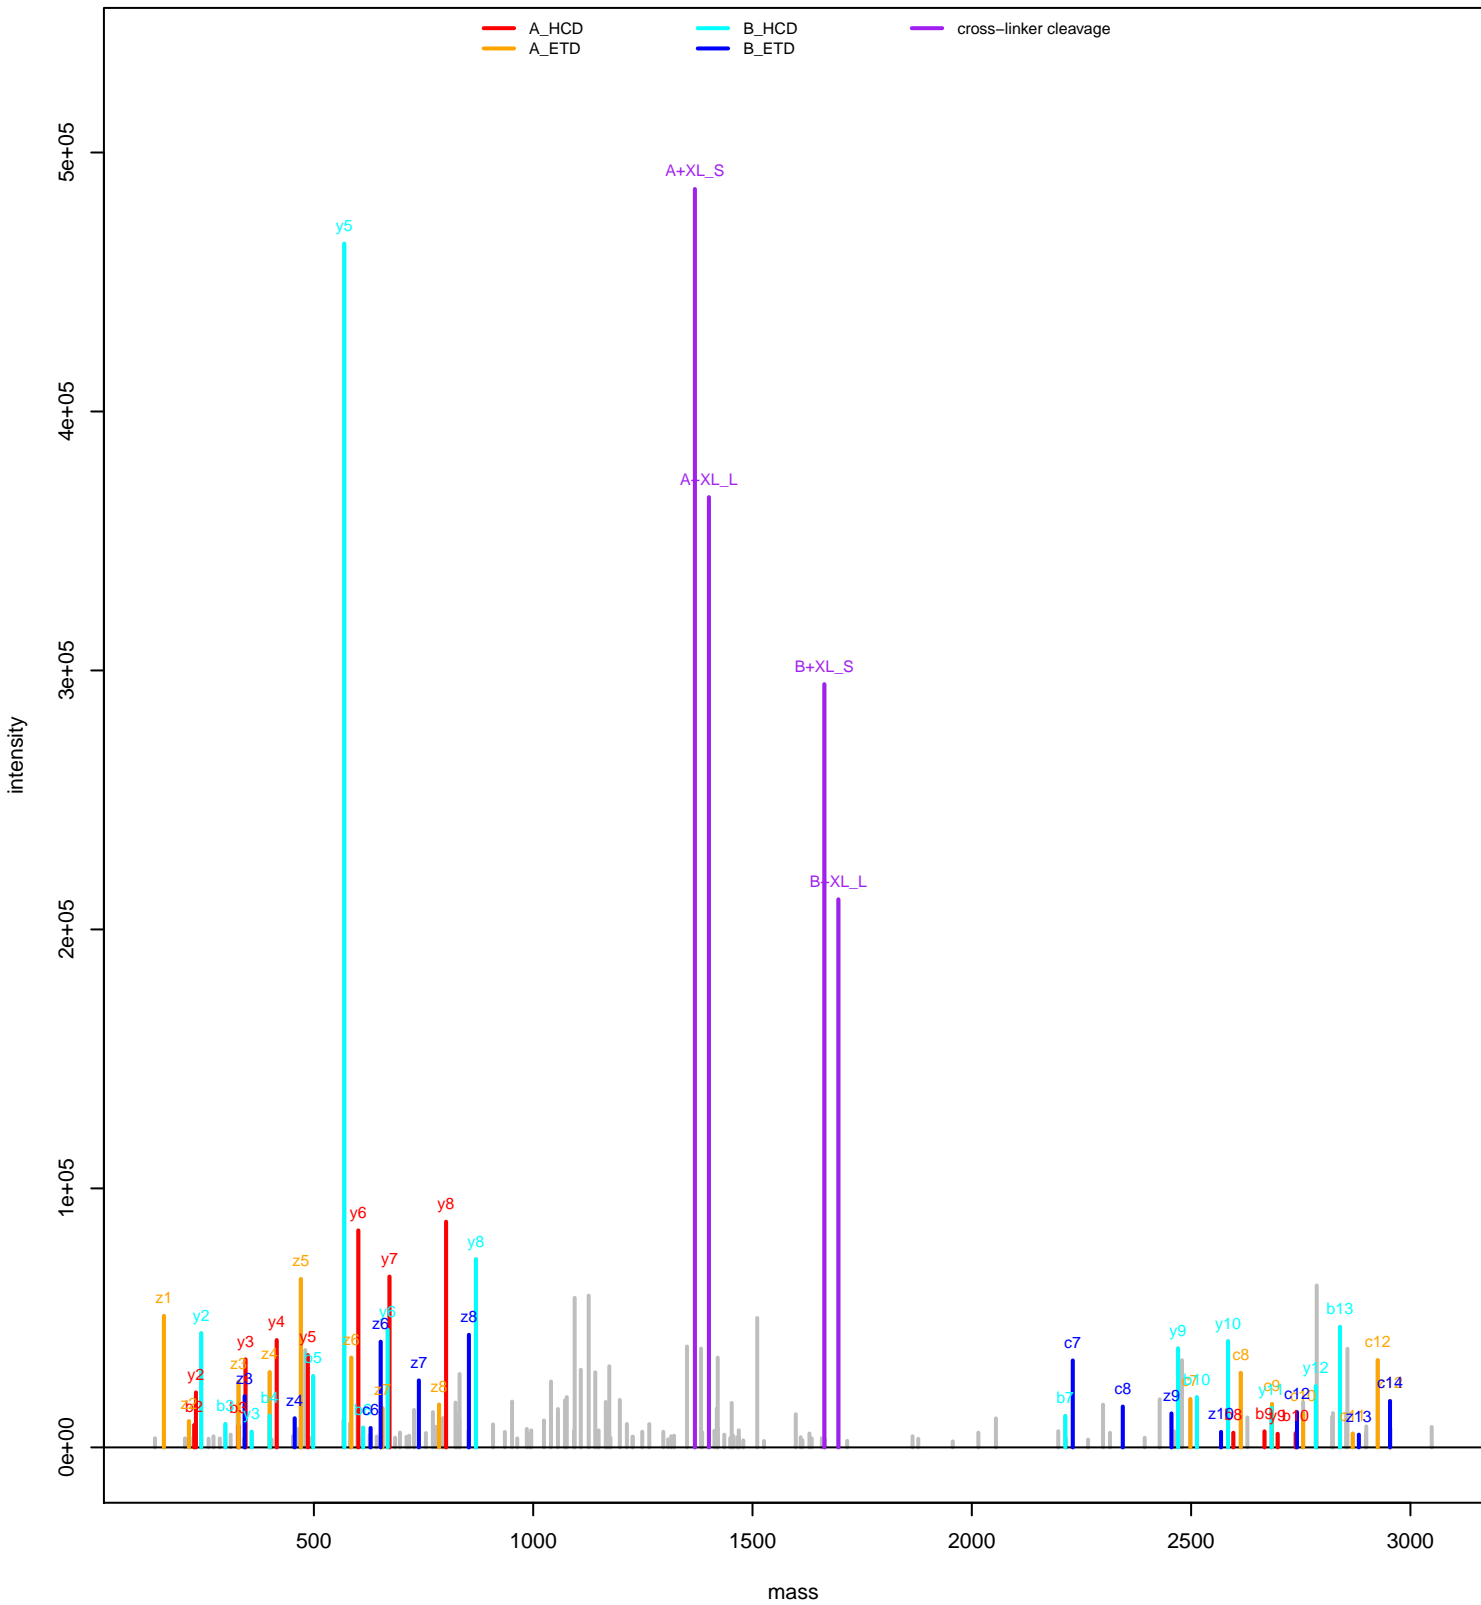

NLTGKEADAALGR+XL\_S

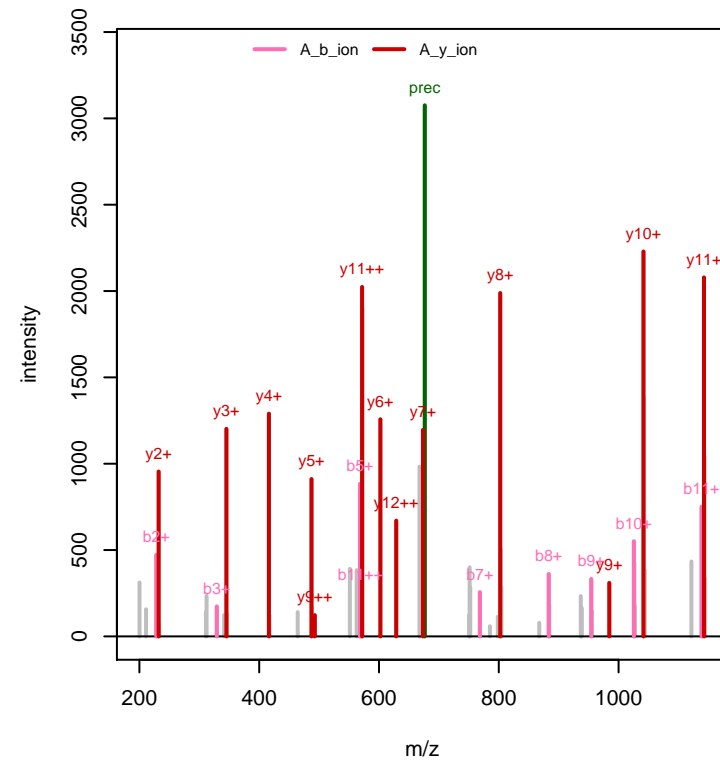

NLTGKEADAALGR+XL\_L

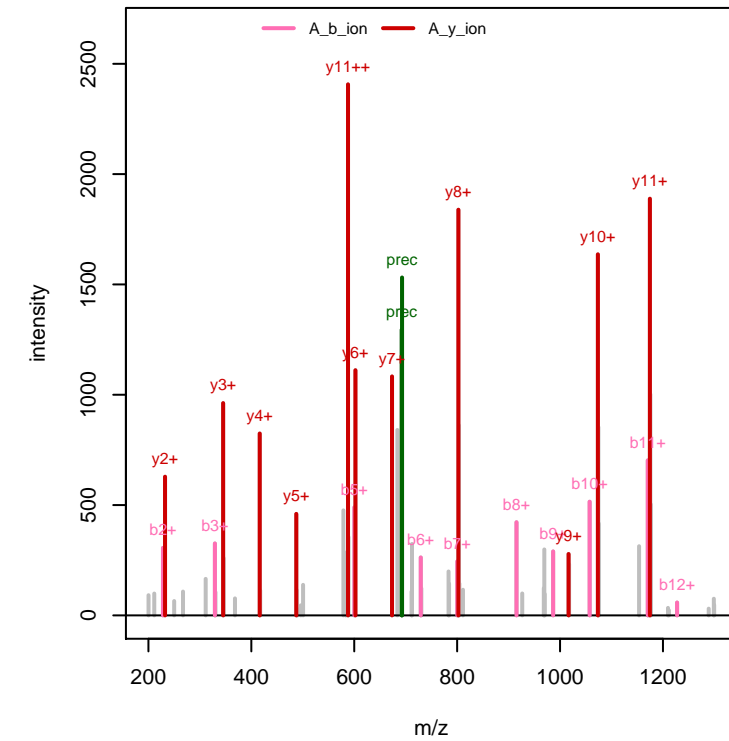

ANITVNKNSVPNDPK+XL\_S

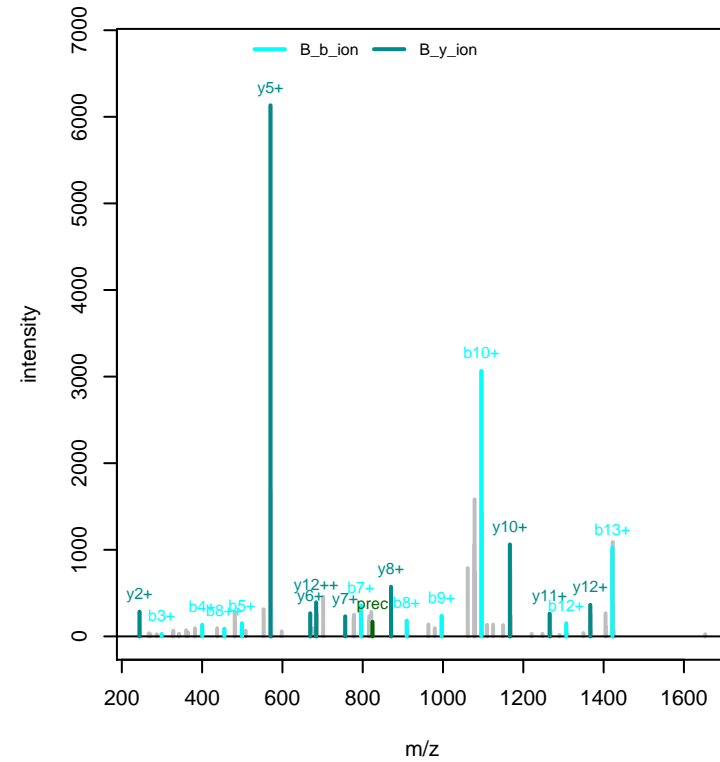

ANITVNKNSVPNDPK+XL\_L

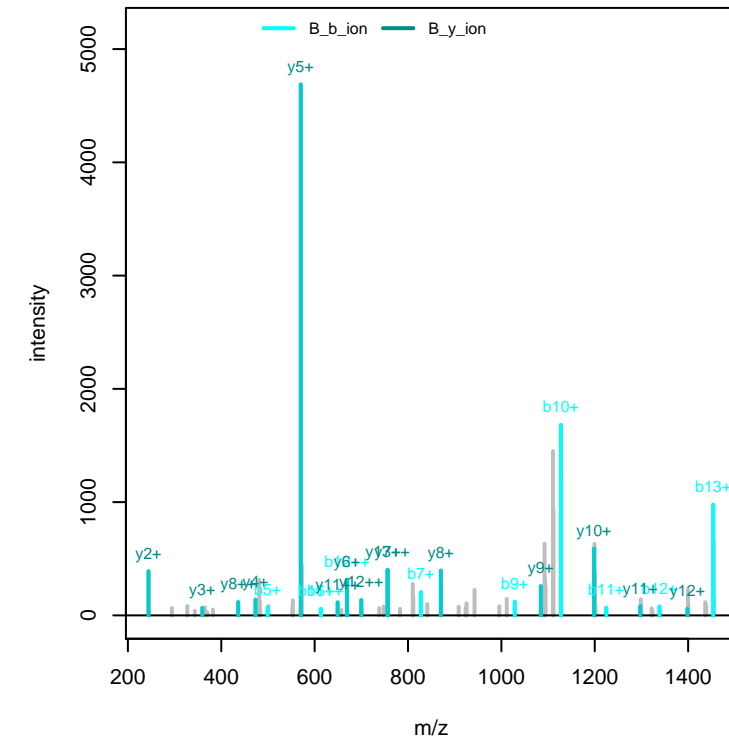

VPSYTASKSGVMGVTR  
VPSYTASKSGVM<sub>o</sub>GVTR

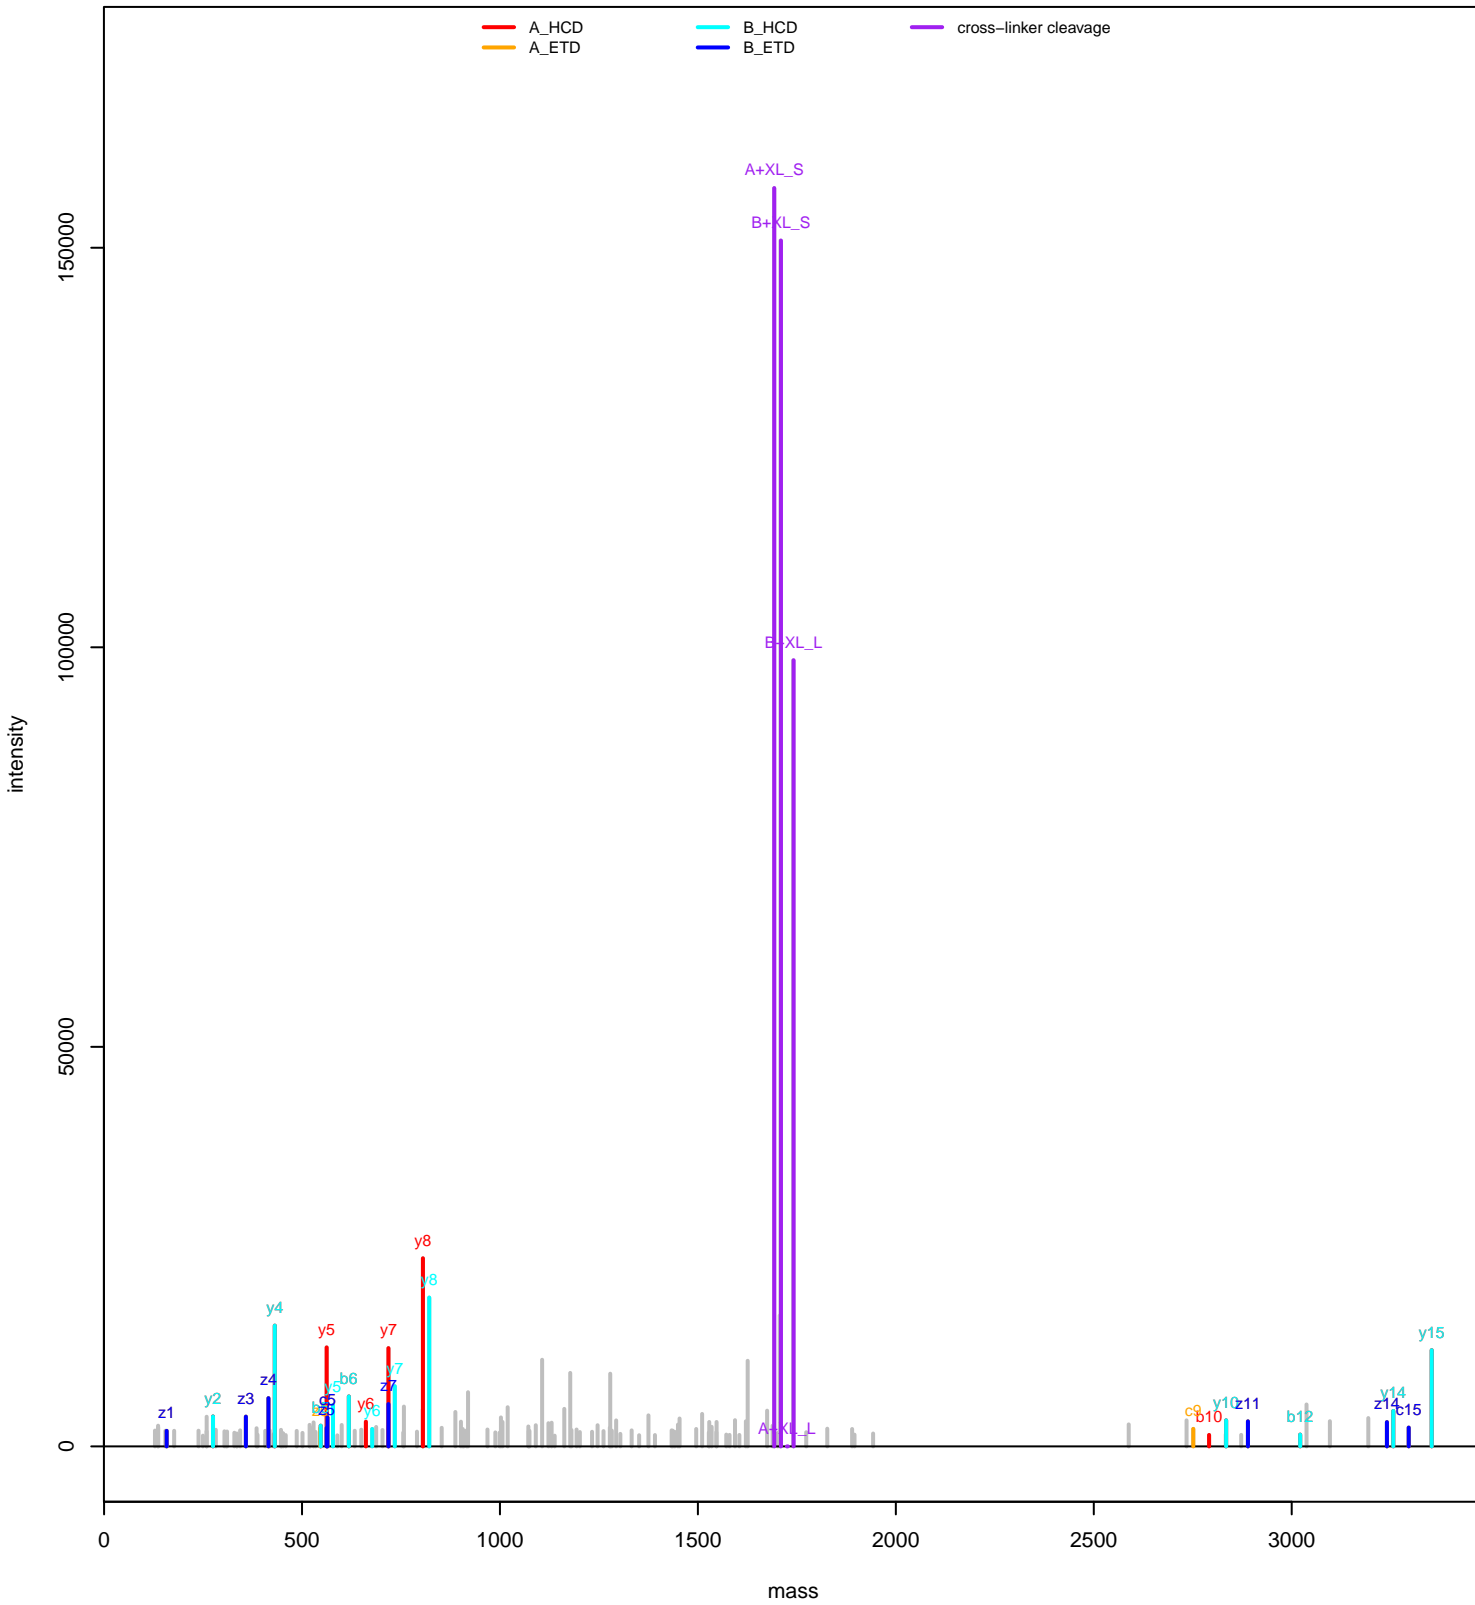

VPSYTASKSGVMGVTR+XL\_S

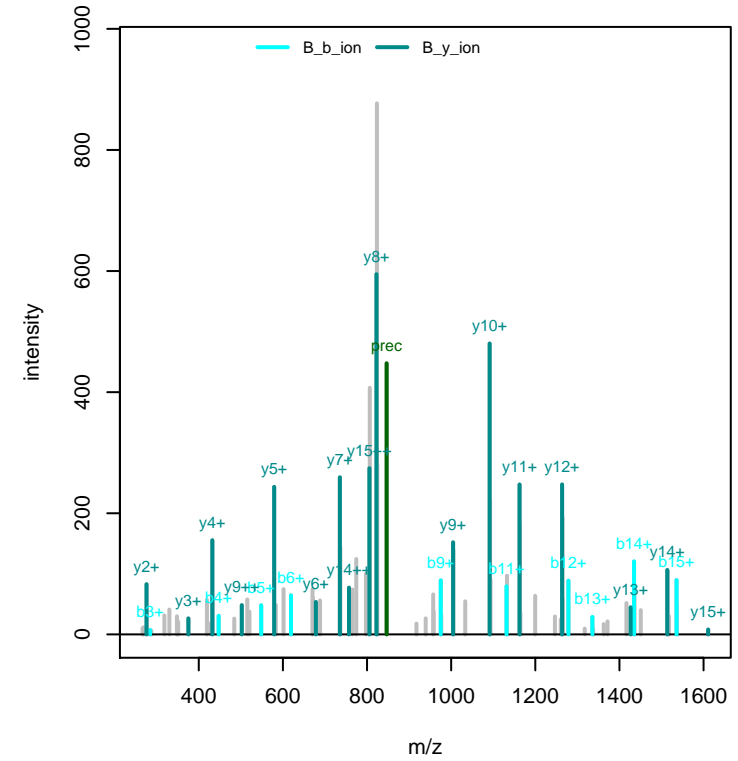

VPSYTASKSGVMGVTR+XL\_L

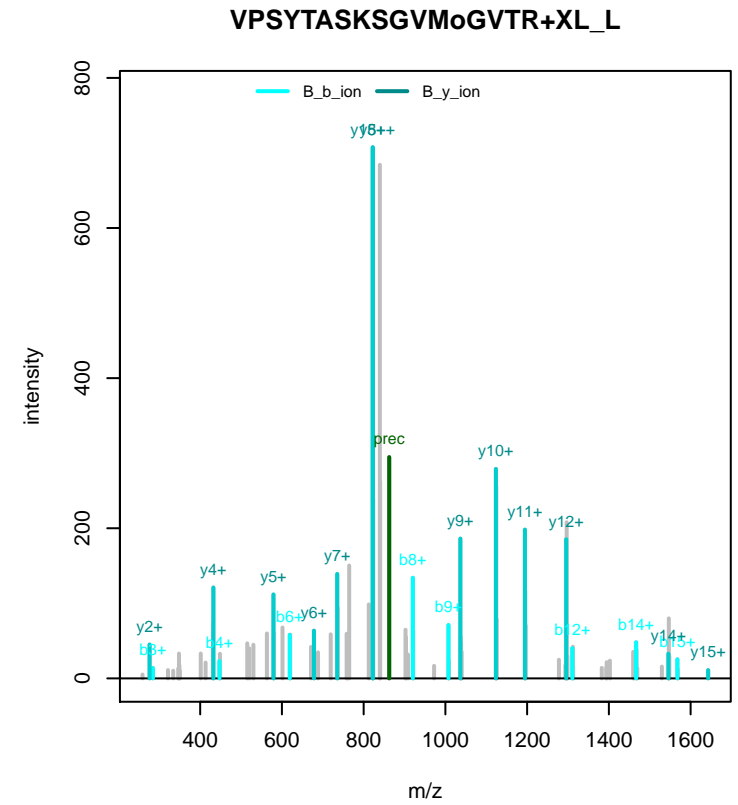

**KMAGQMGNER**  
**GAVPGATGSDLIVKPAVKA**

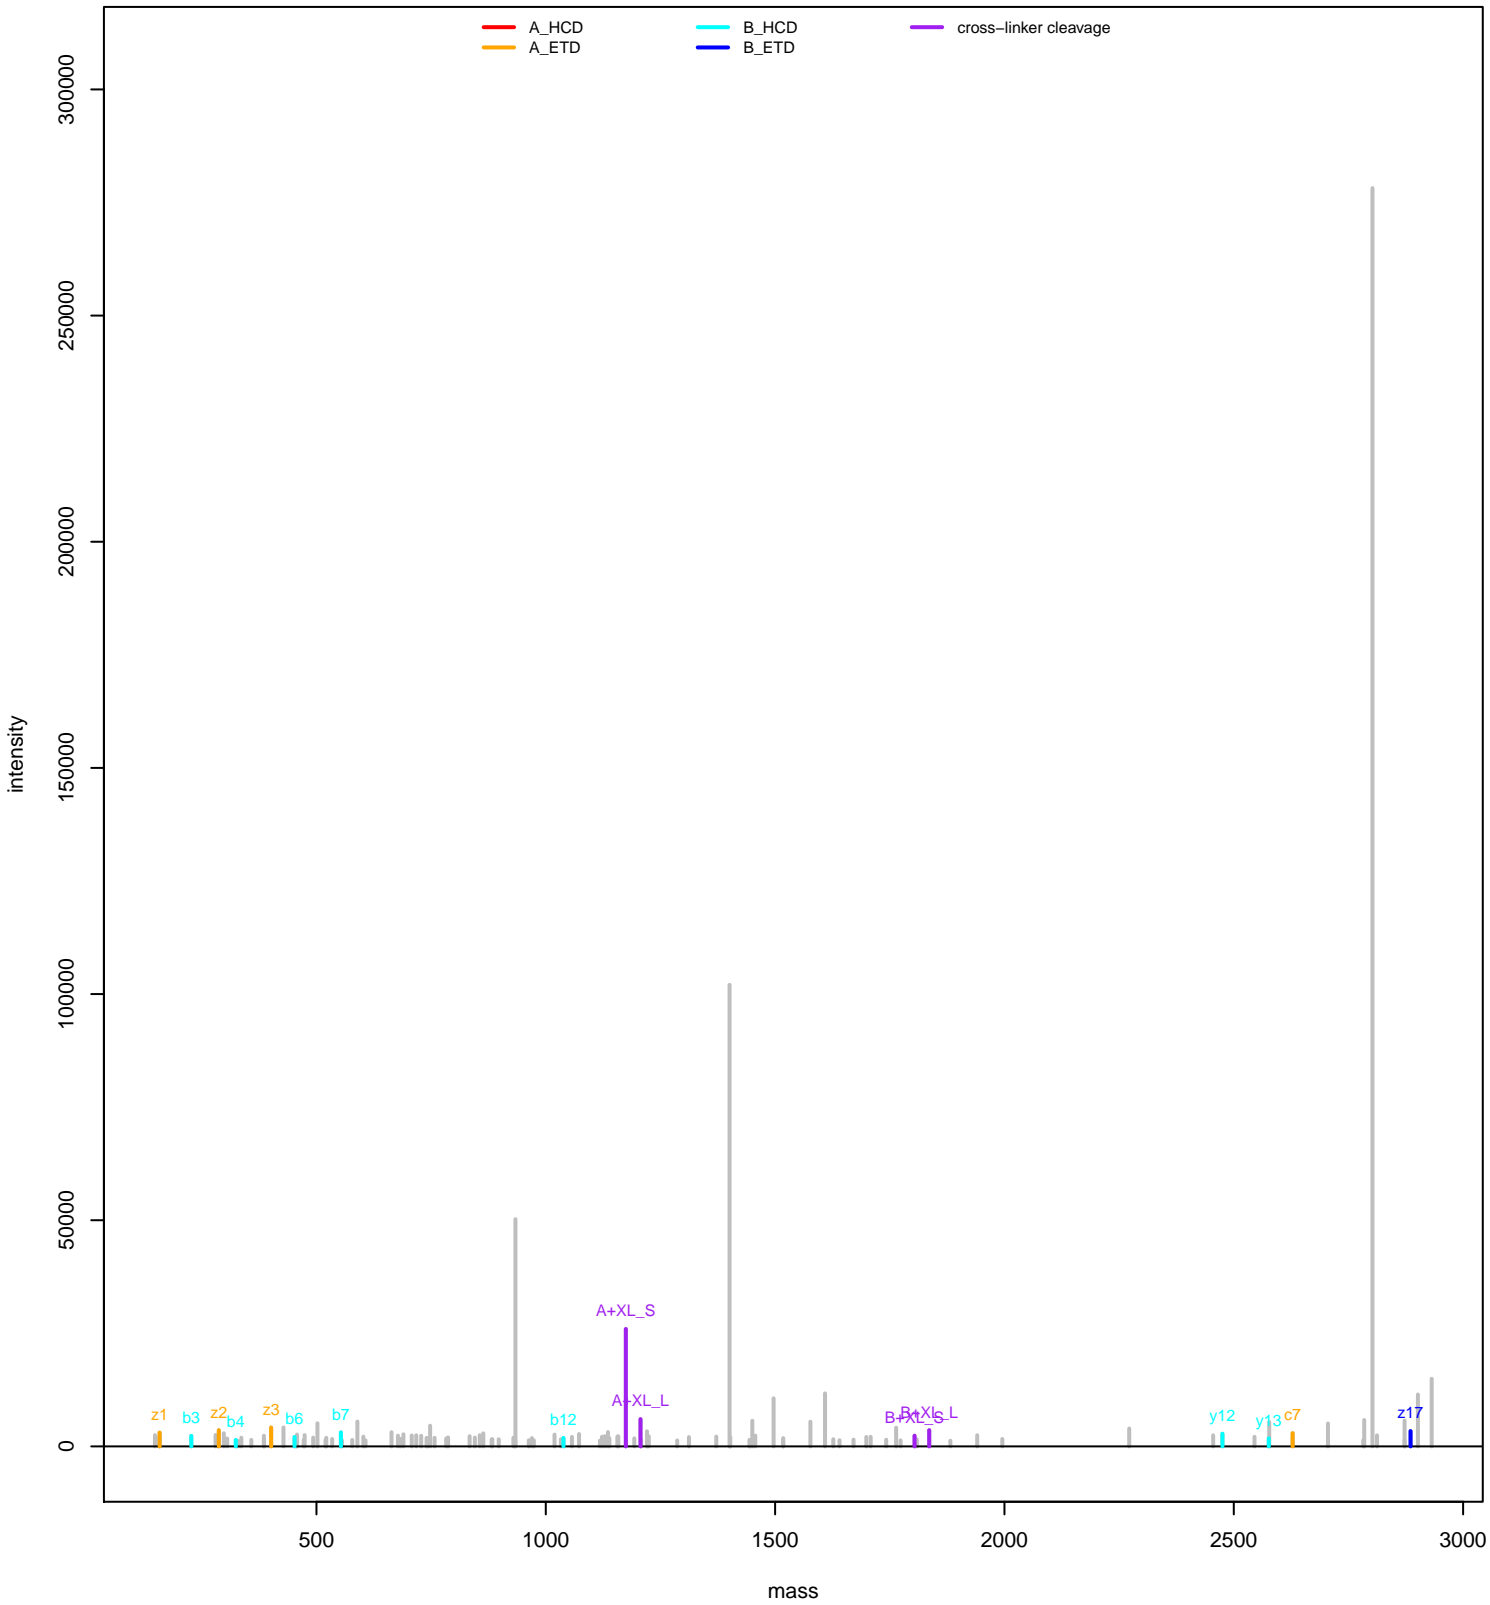

**KMAGQMGNER+XL\_S**

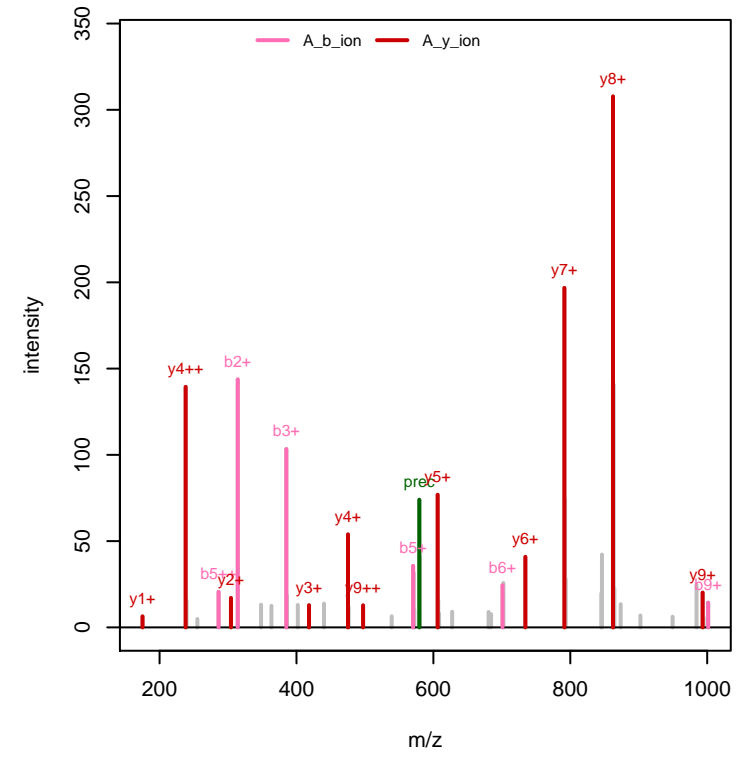

**KMAGQMGNER+XL\_L**

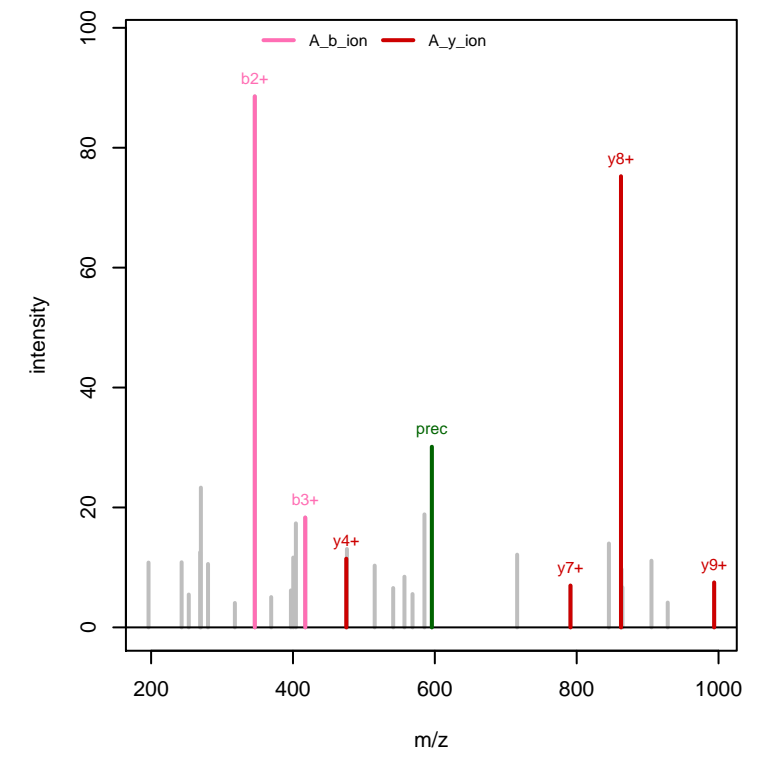

**GAVPGATGSDLIVKPAVKA+XL\_S**

**GAVPGATGSDLIVKPAVKA+XL\_L**

ELRKEGR  
NAGFINKR

ELRKEGR+XL\_S

ELRKEGR+XL\_L

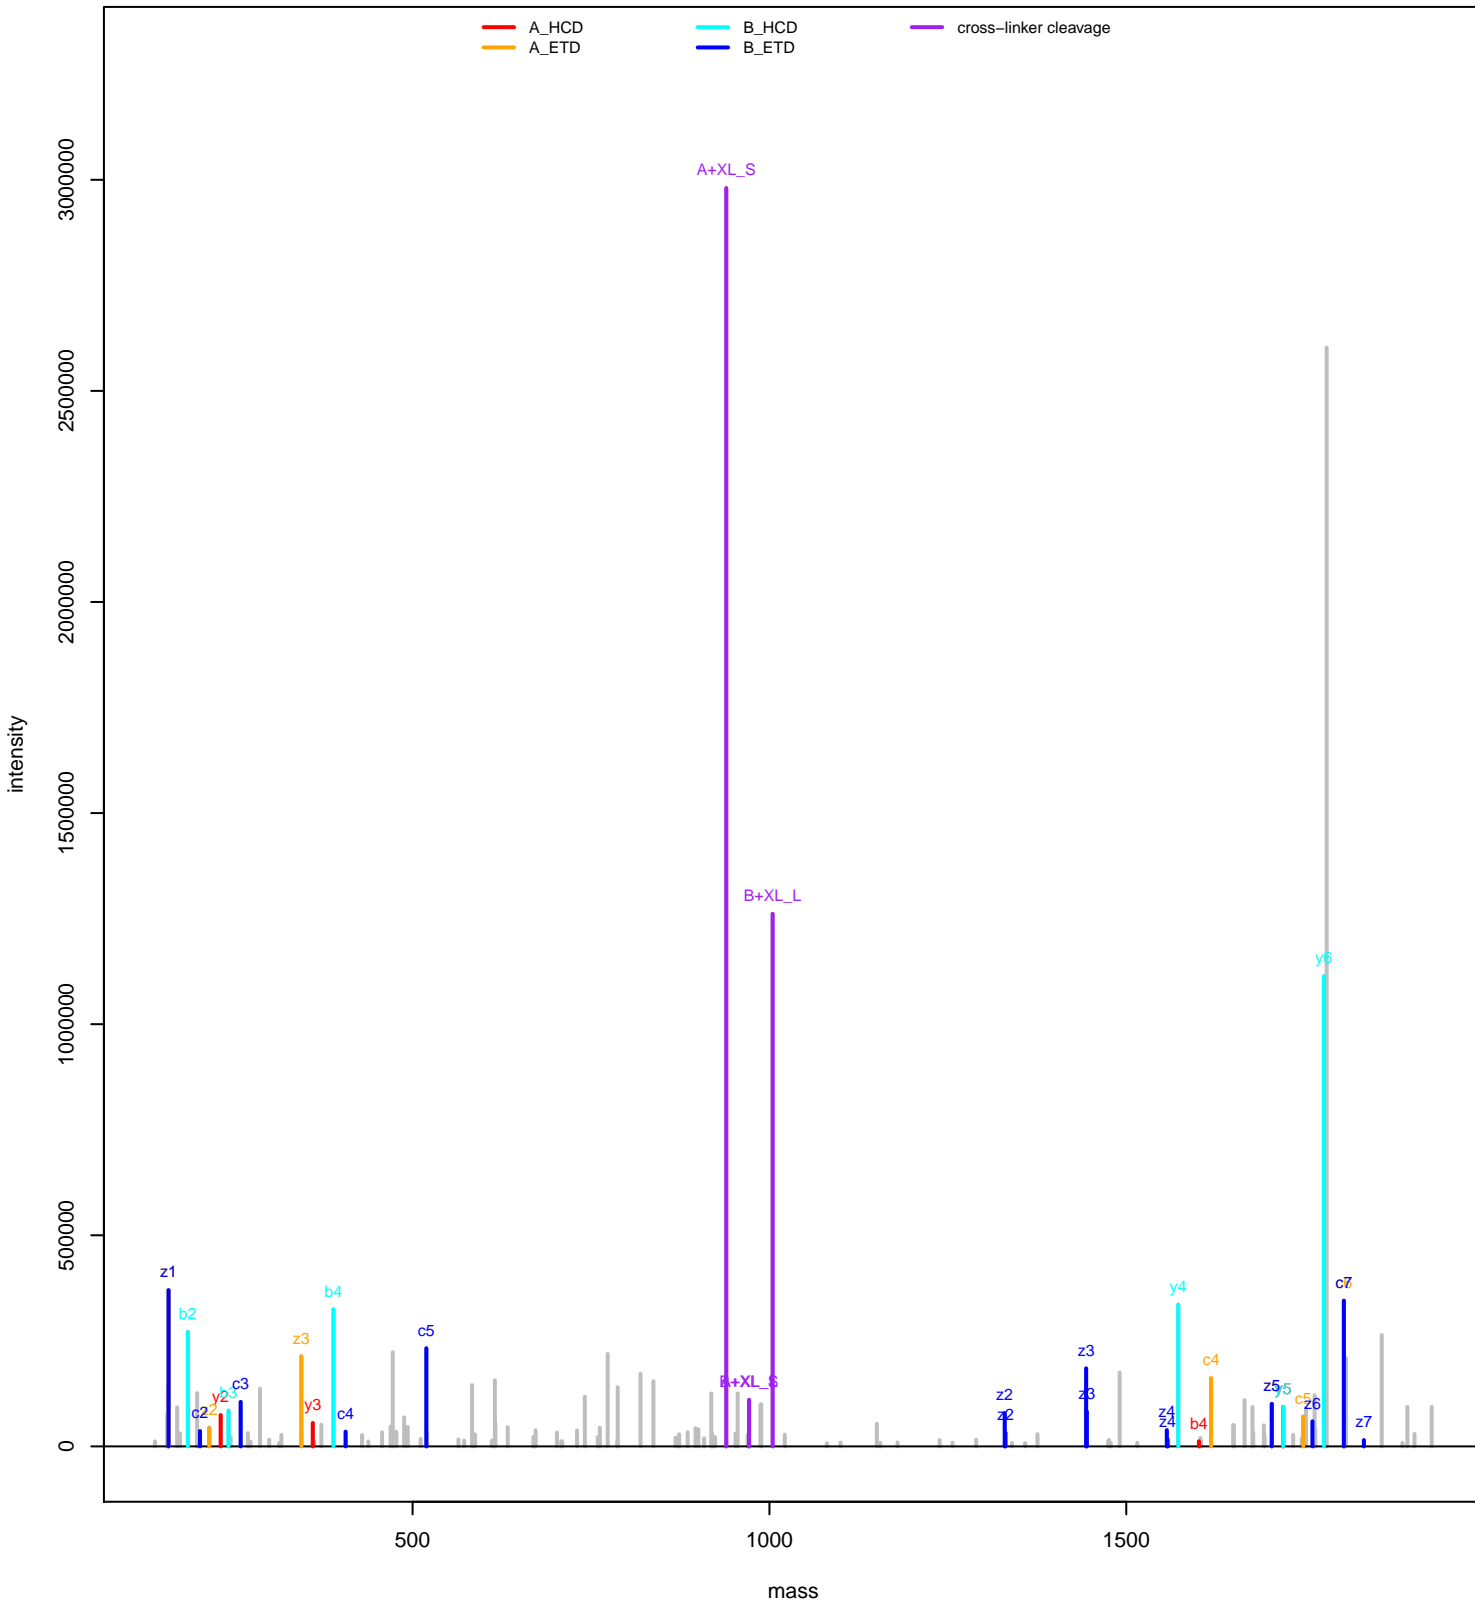

NAGFINKR+XL\_S

NAGFINKR+XL\_L



EGKFTSR  
VMDSNDLEKER

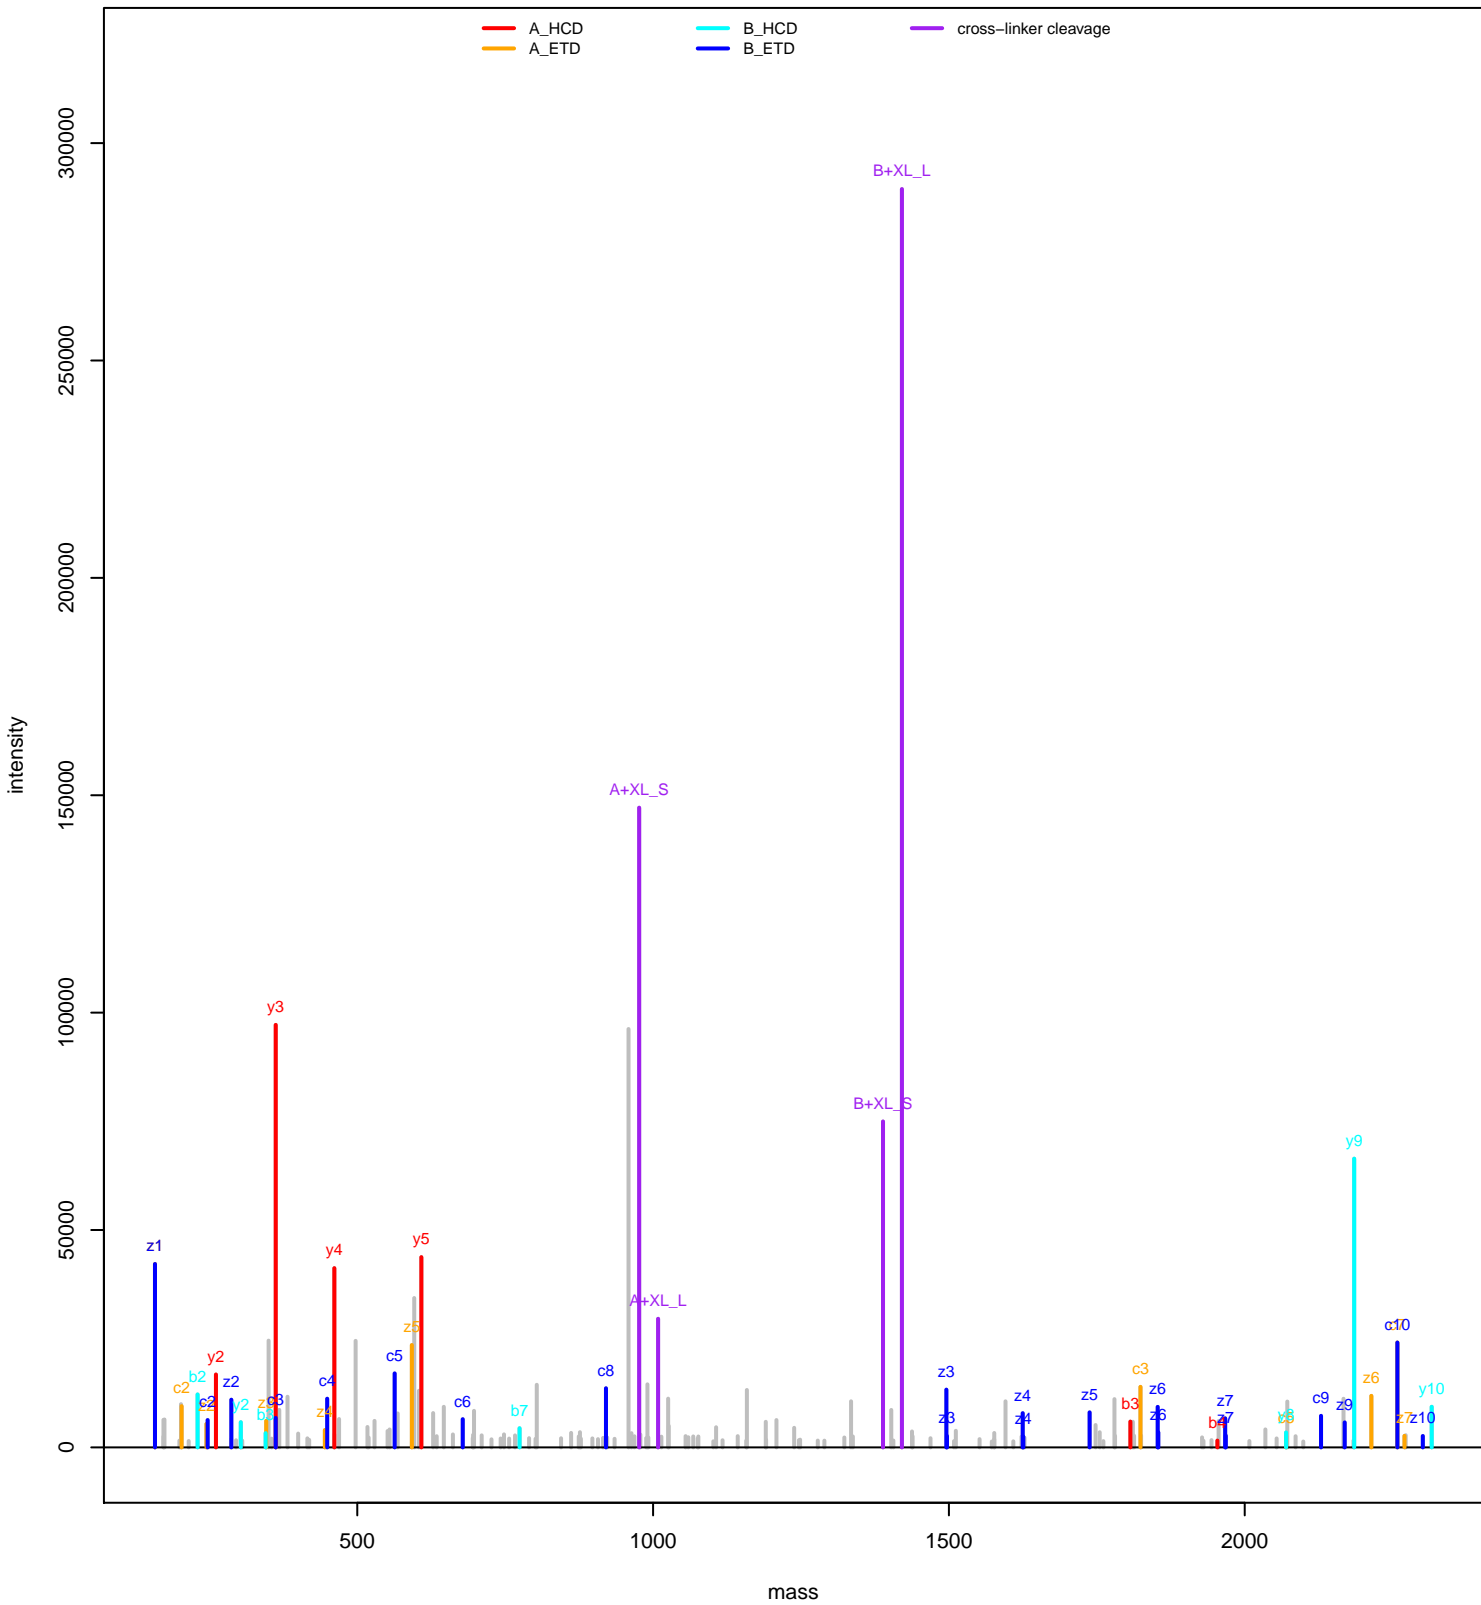

EGKFTSR+XL\_S

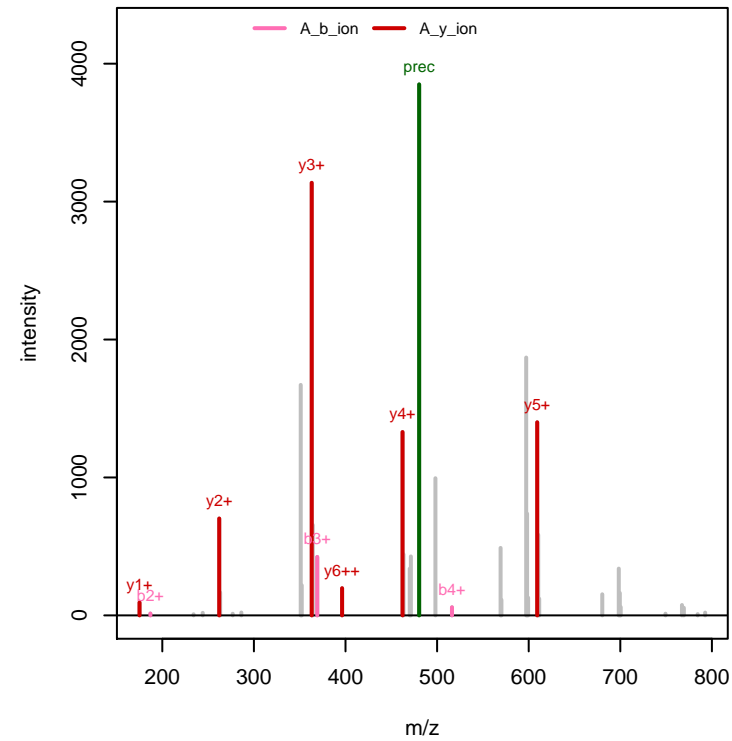

EGKFTSR+XL\_L

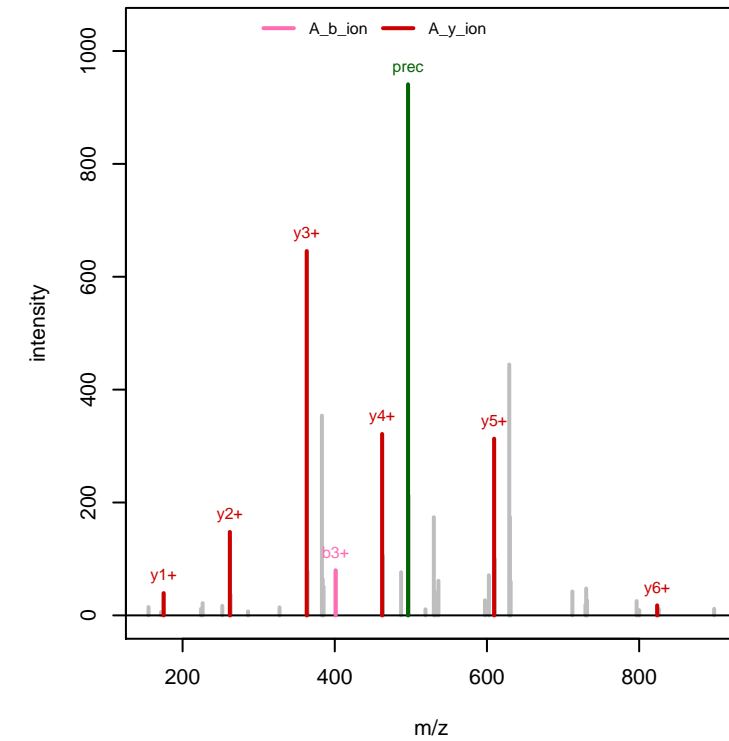

VMDSNDLEKER+XL\_S

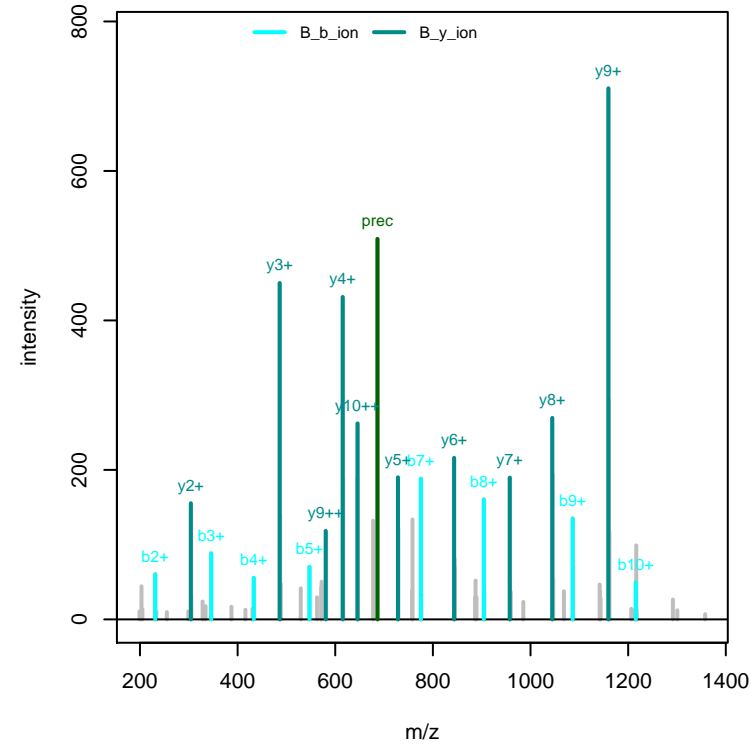

VMDSNDLEKER+XL\_L

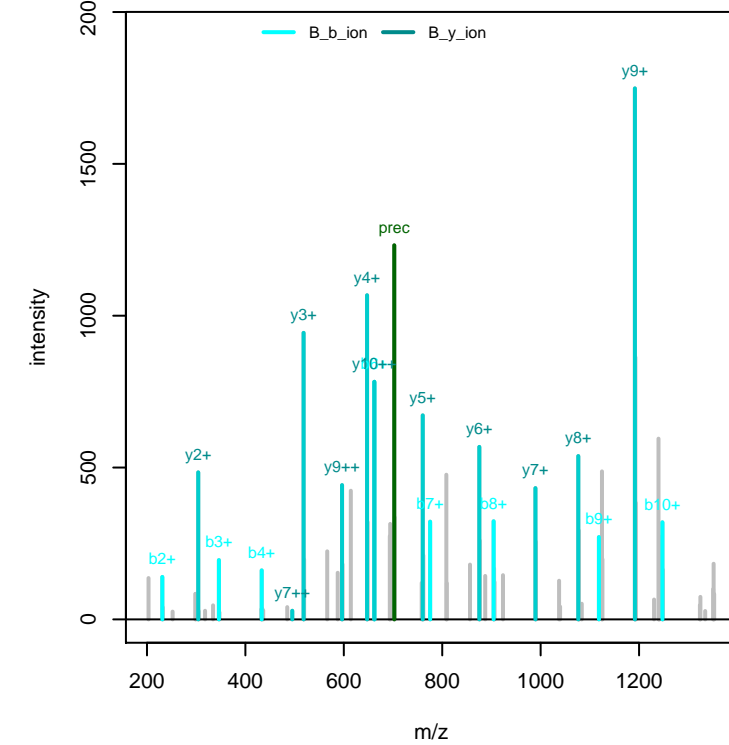

QANKYK  
LAKEDPSFR

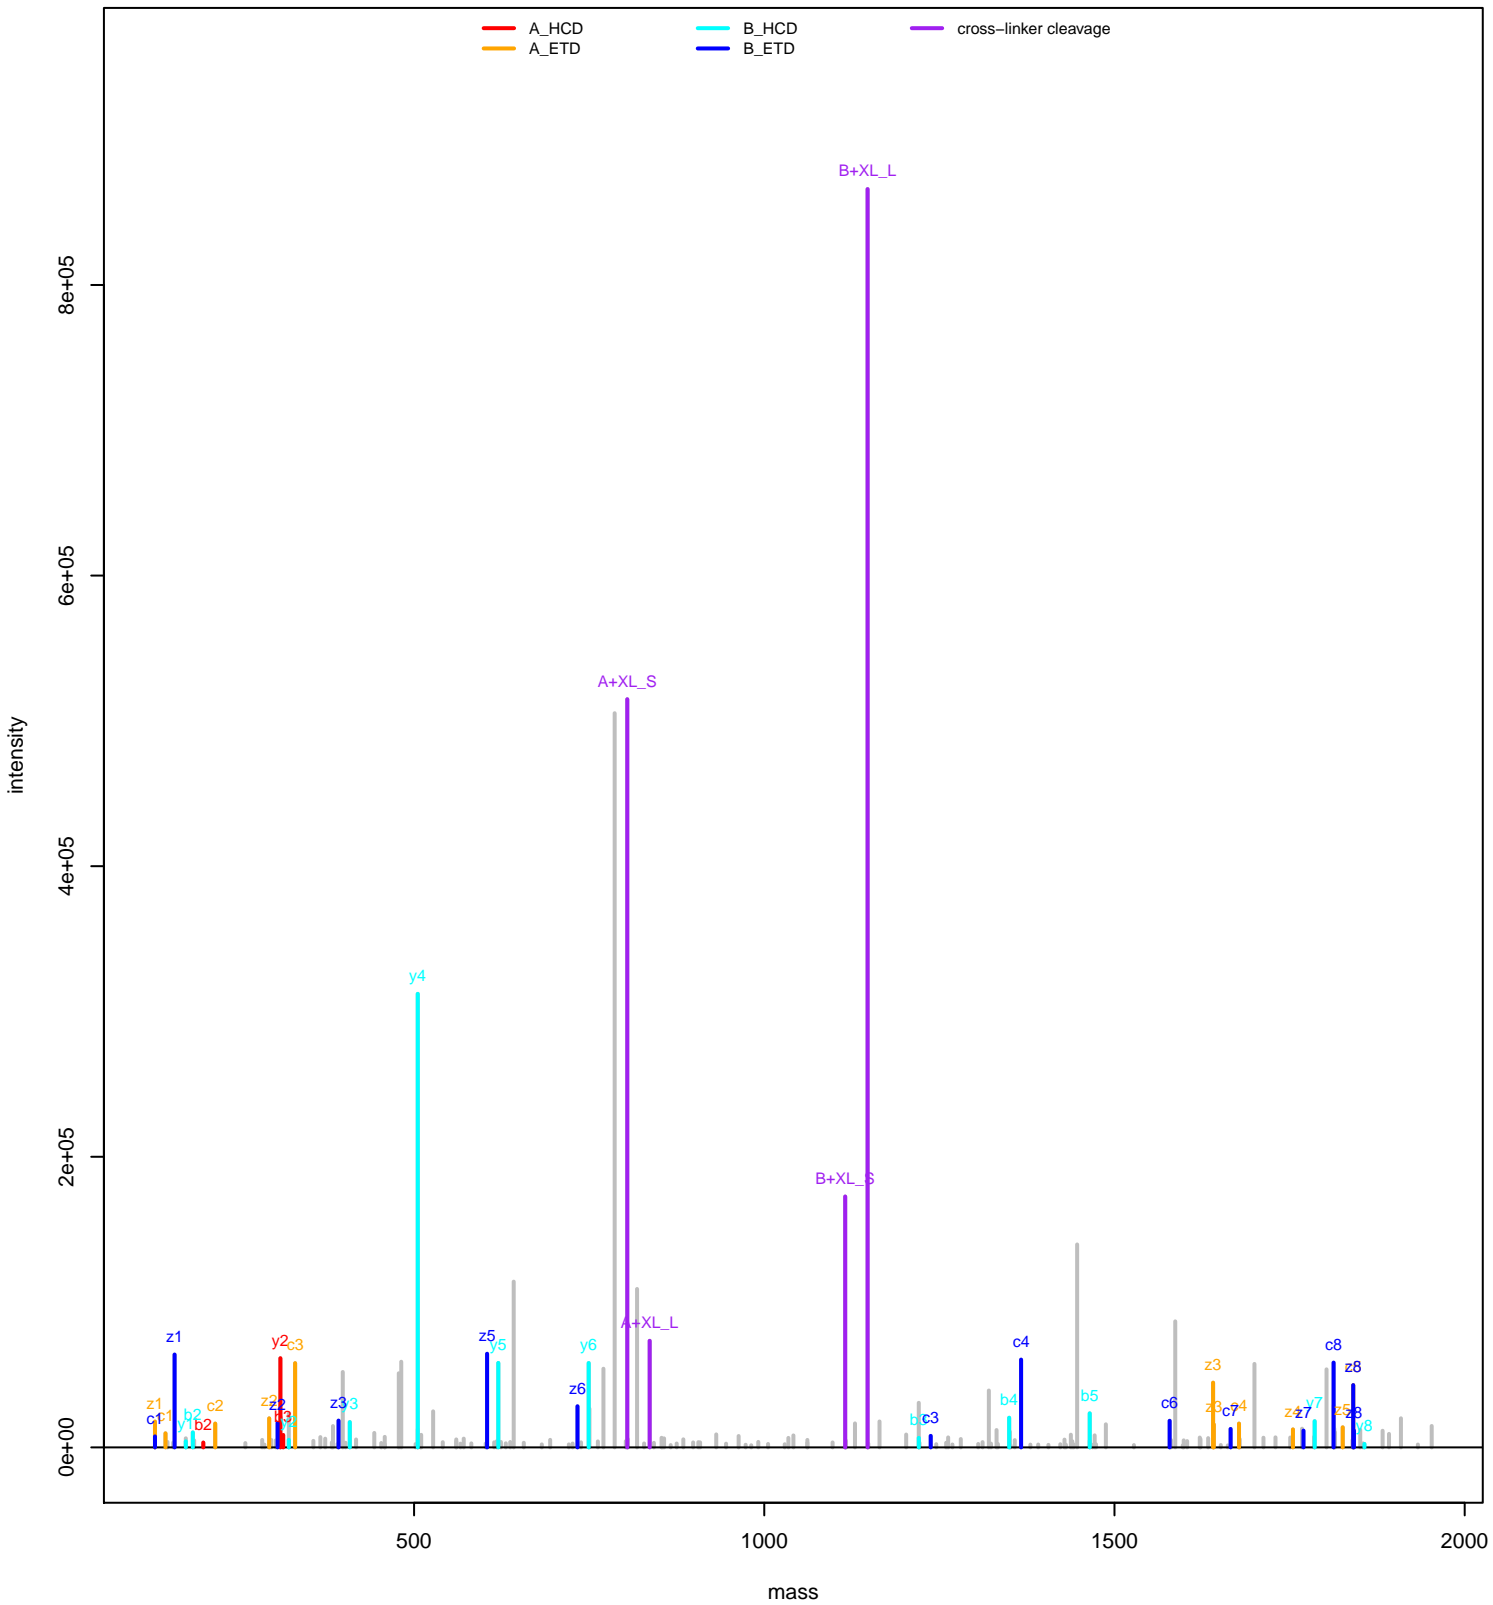

QANKYK+XL\_S

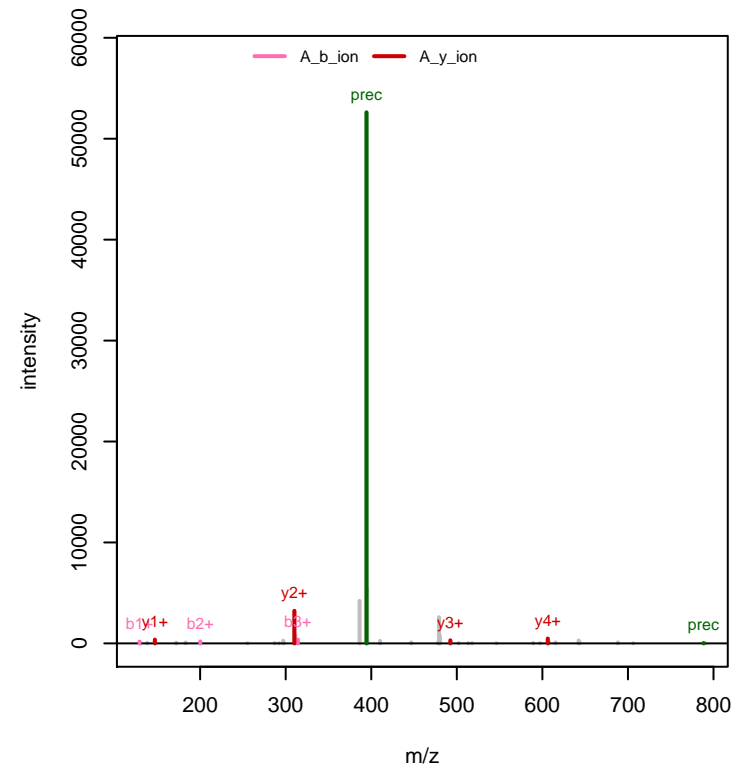

QANKYK+XL\_L

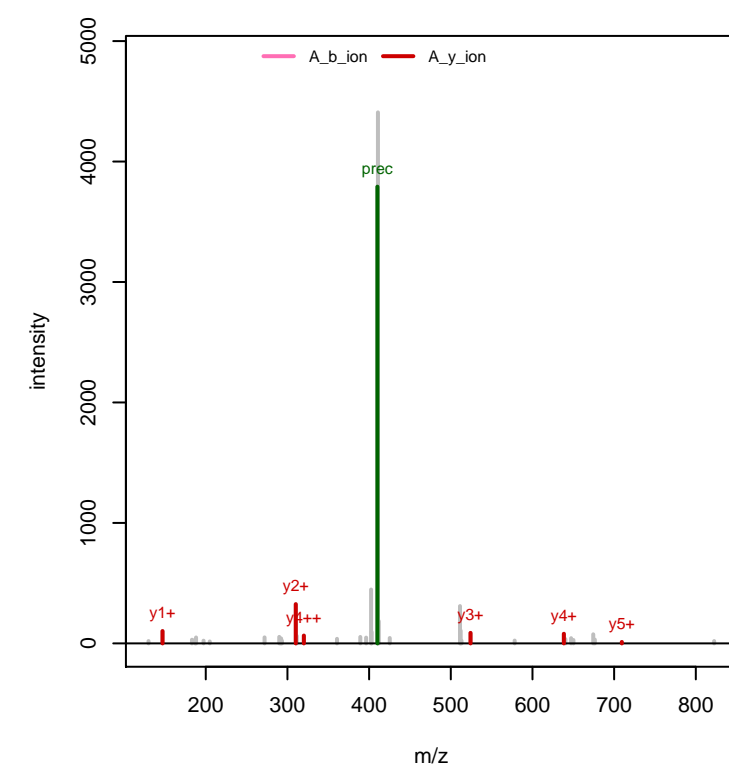

LAKEDPSFR+XL\_S

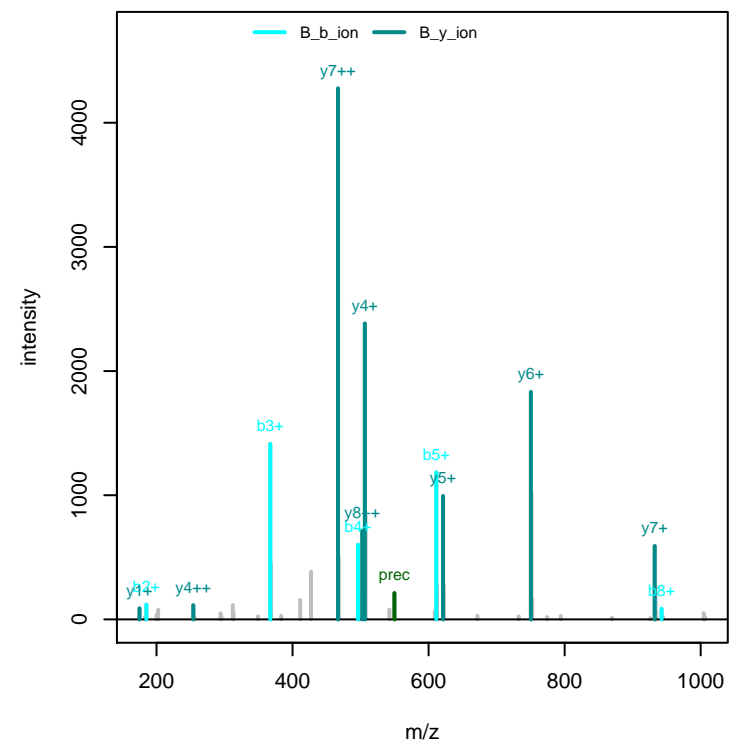

LAKEDPSFR+XL\_L

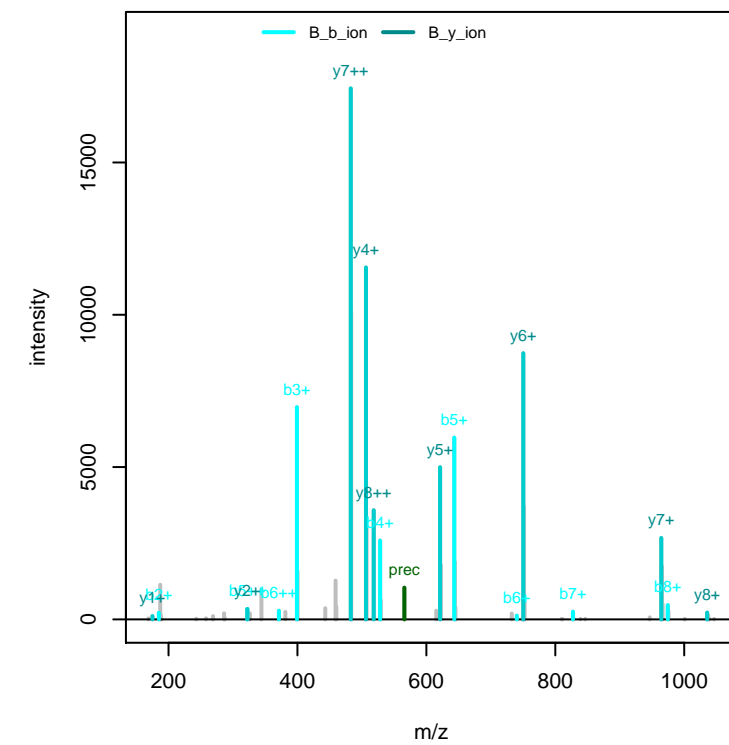

FTSNIKGLTQAAR  
INSAKDDAAGQAIANR

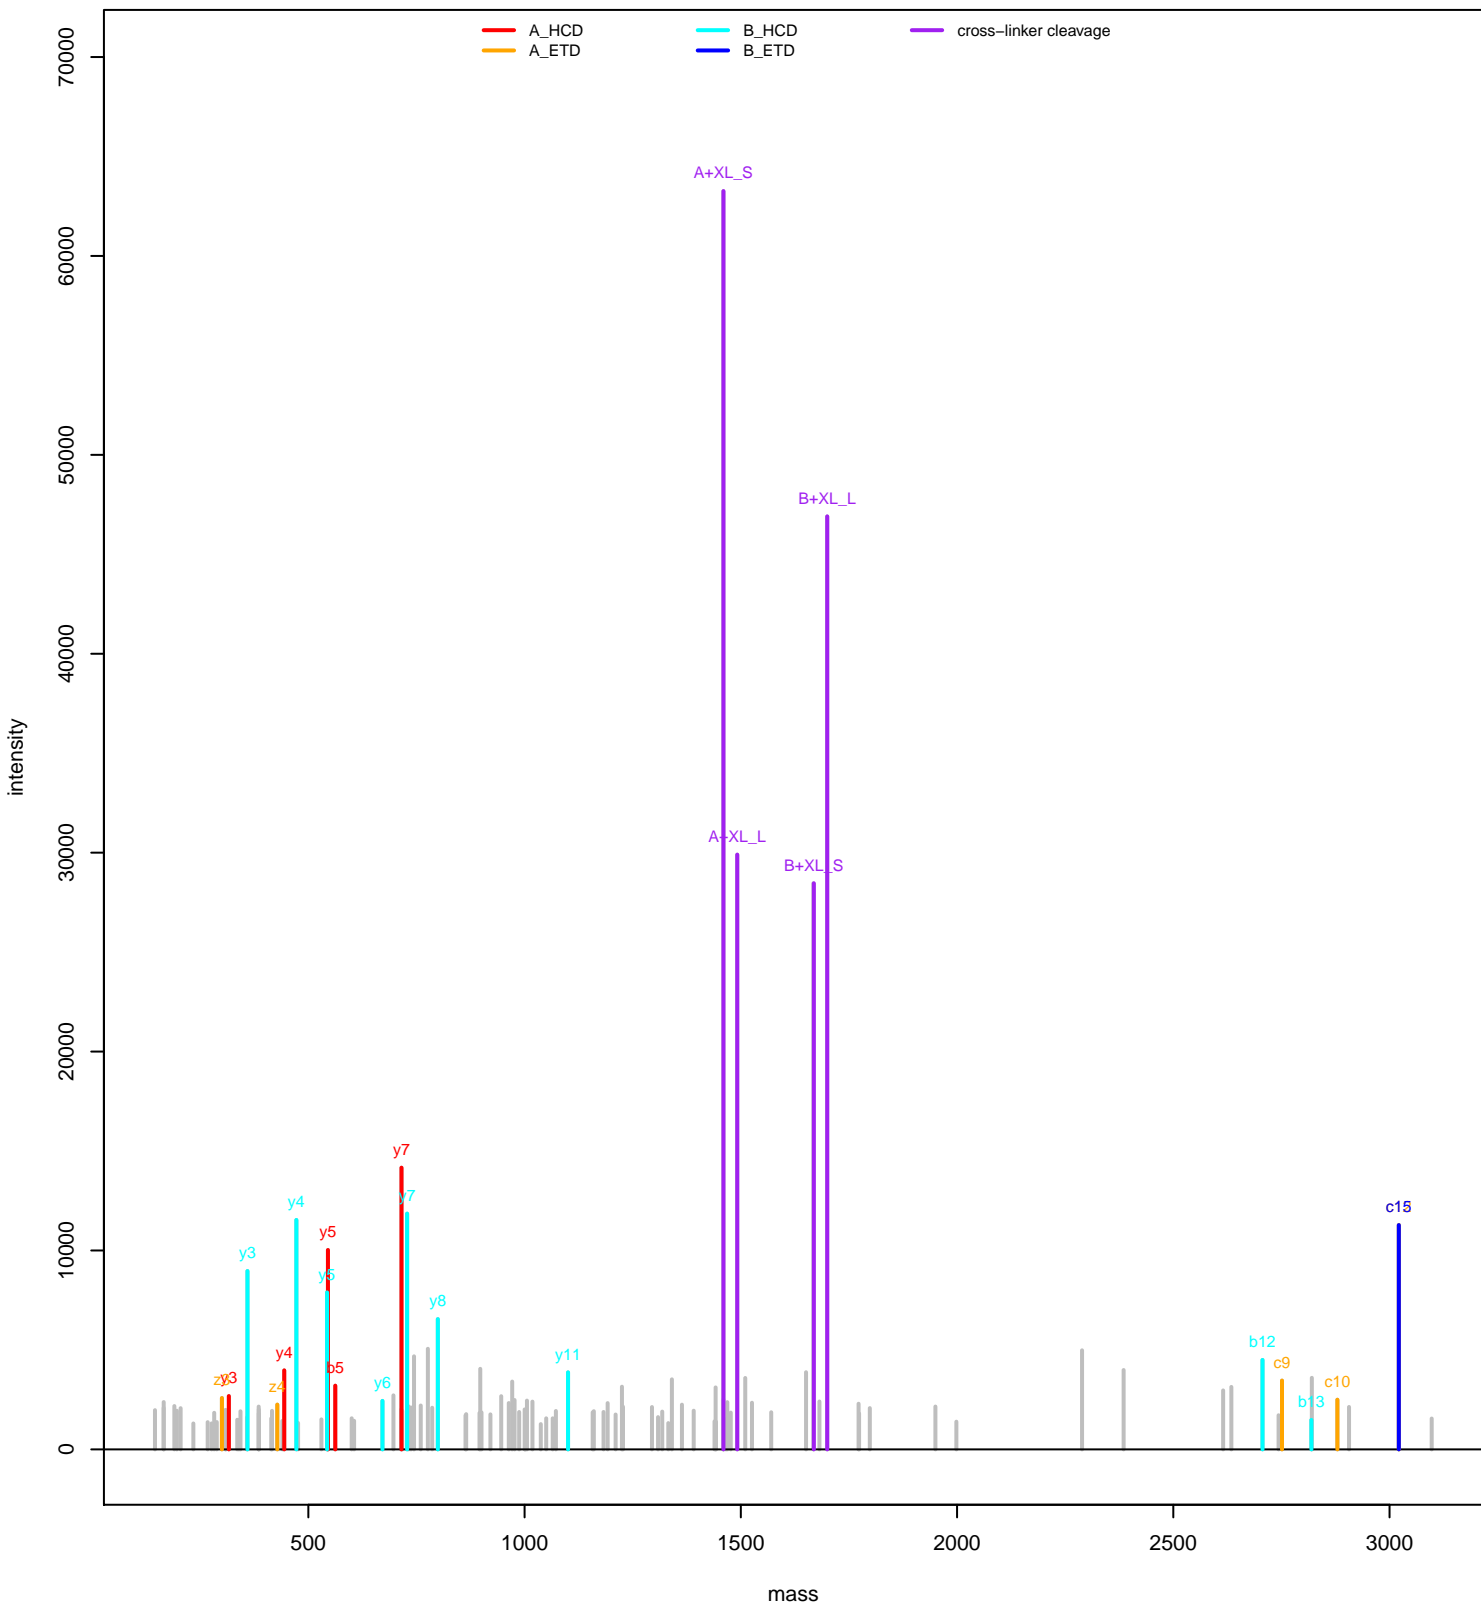

FTSNIKGLTQAAR+XL\_S

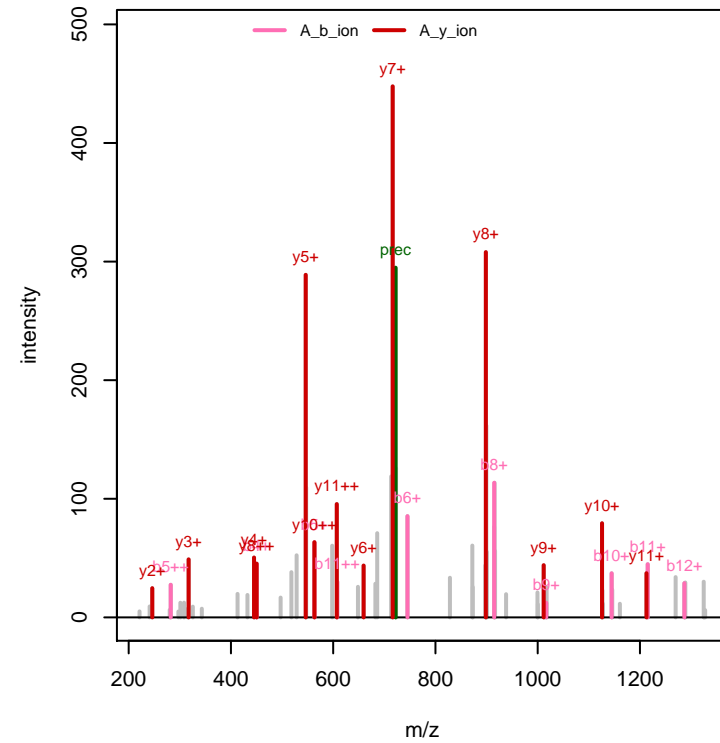

FTSNIKGLTQAAR+XL\_L

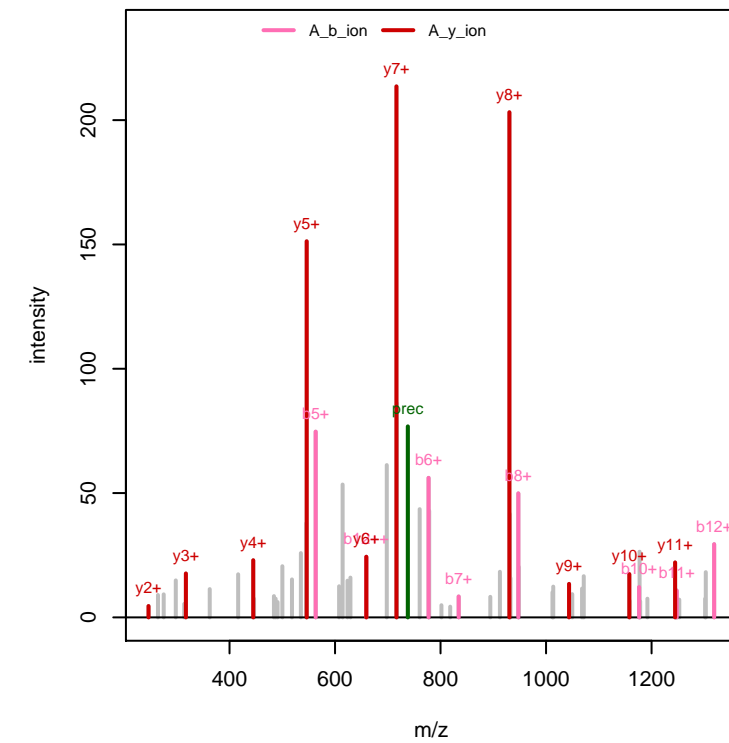

INSAKDDAAGQAIANR+XL\_S

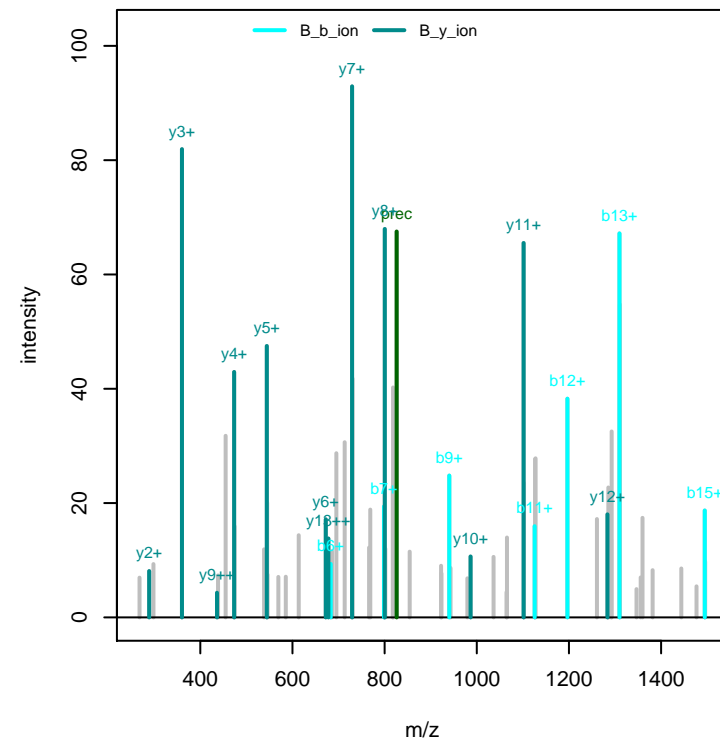

INSAKDDAAGQAIANR+XL\_L

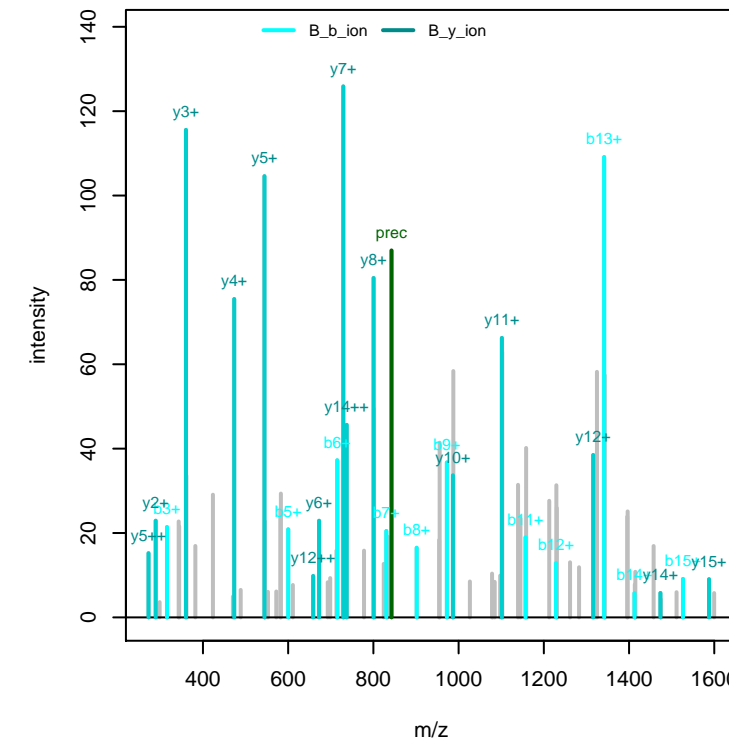

QYLTKELAK  
KGEDVEKLRK

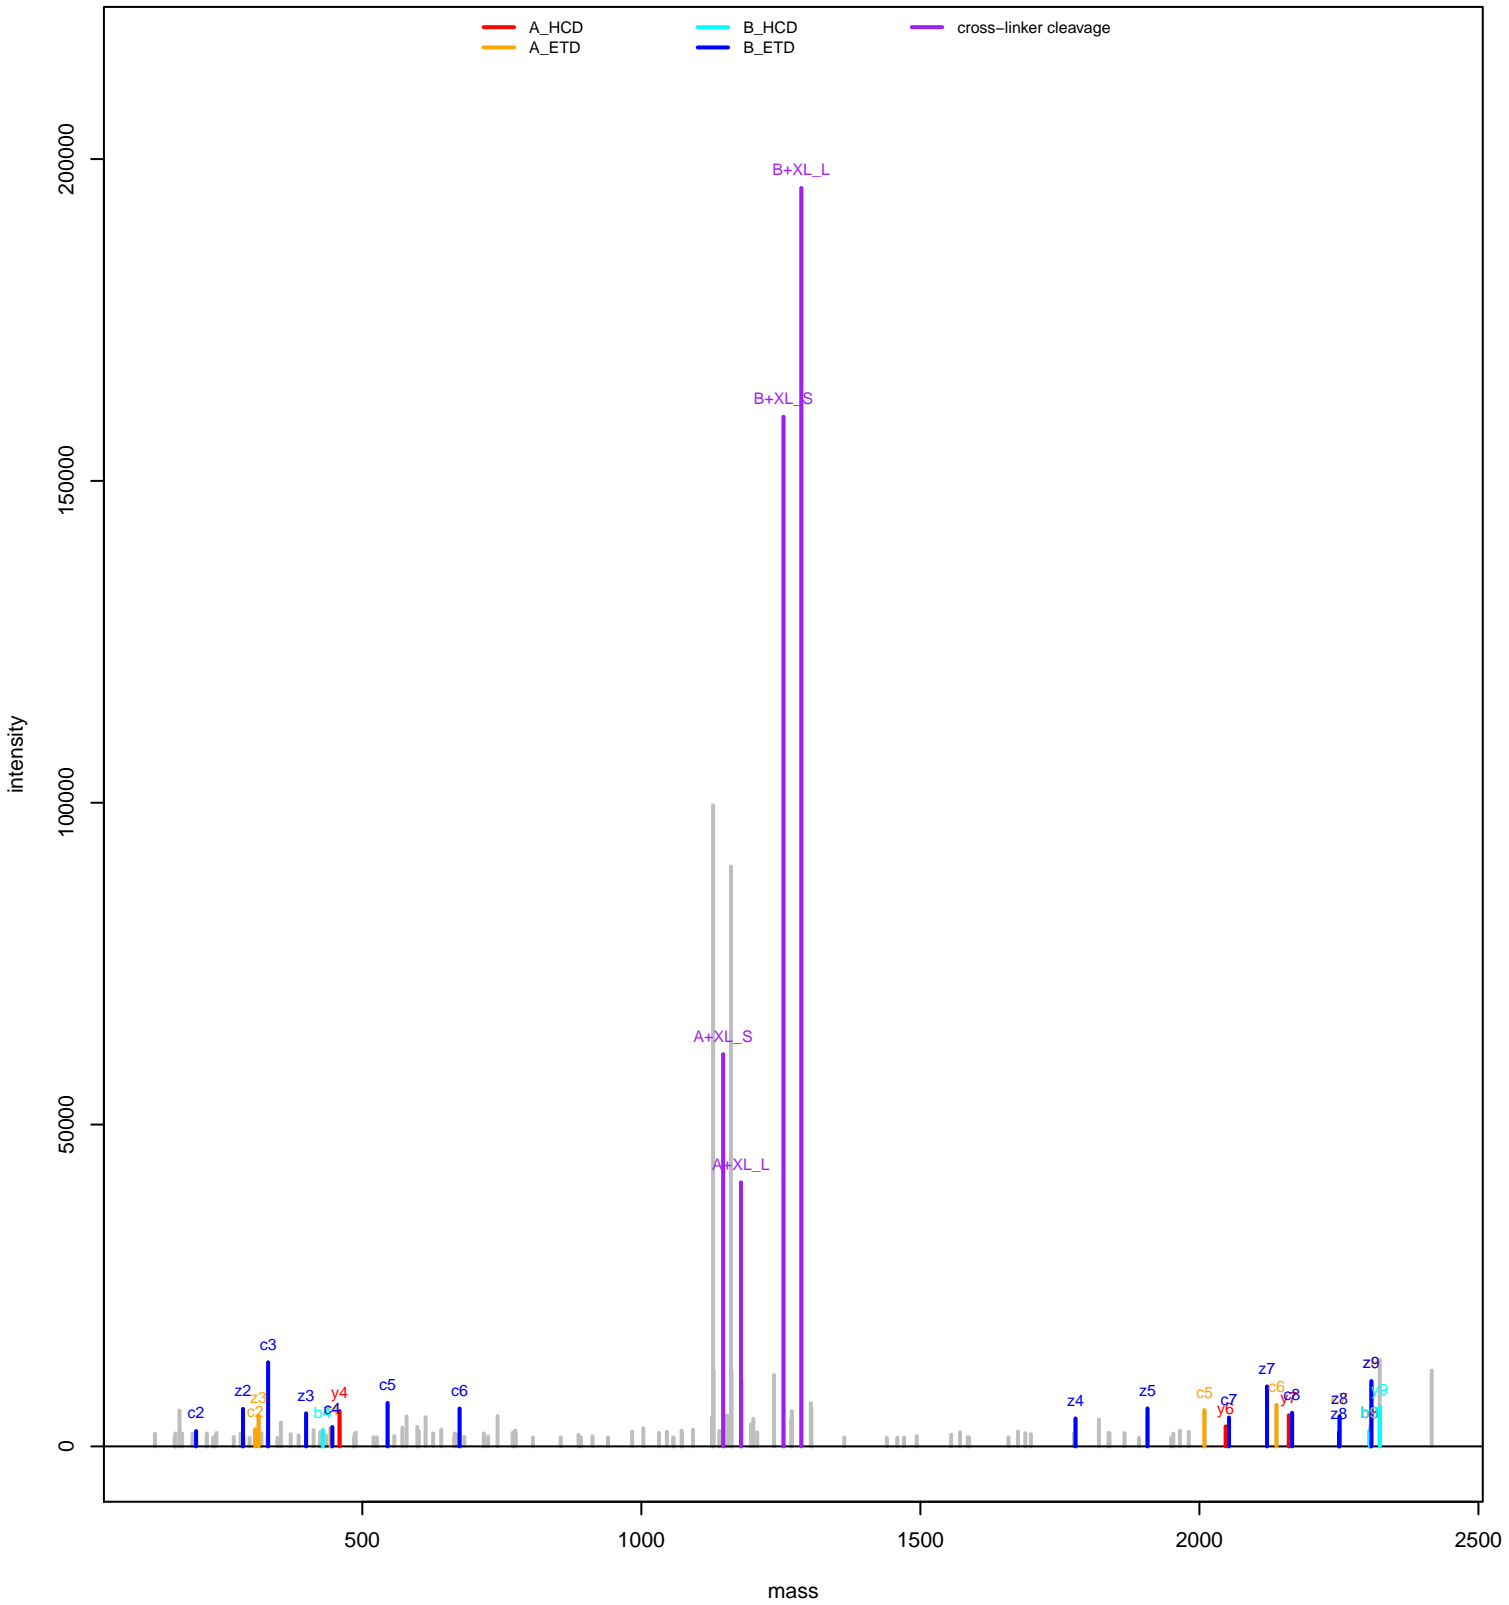

QYLTKELAK+XL\_S

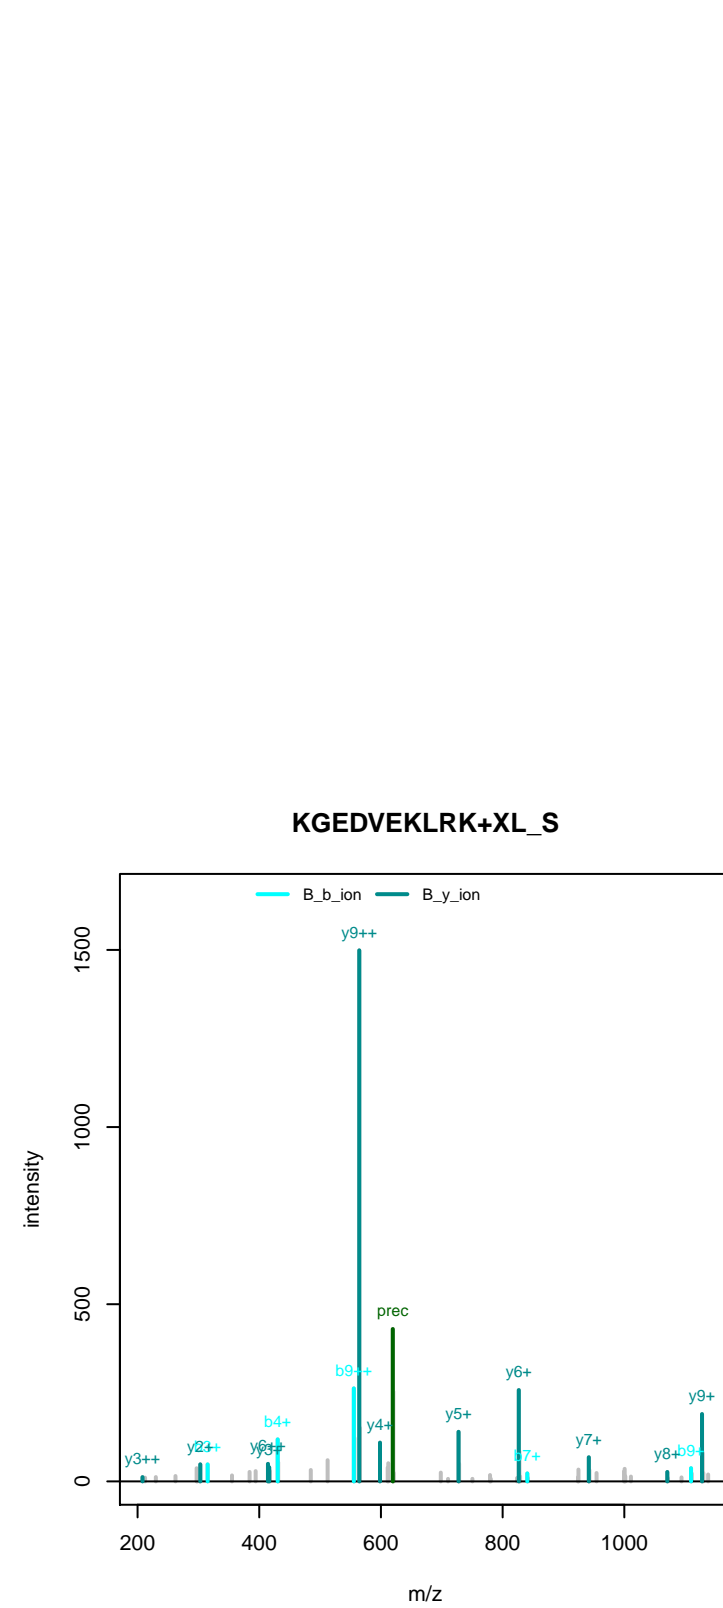

QYLTKELAK+XL\_L

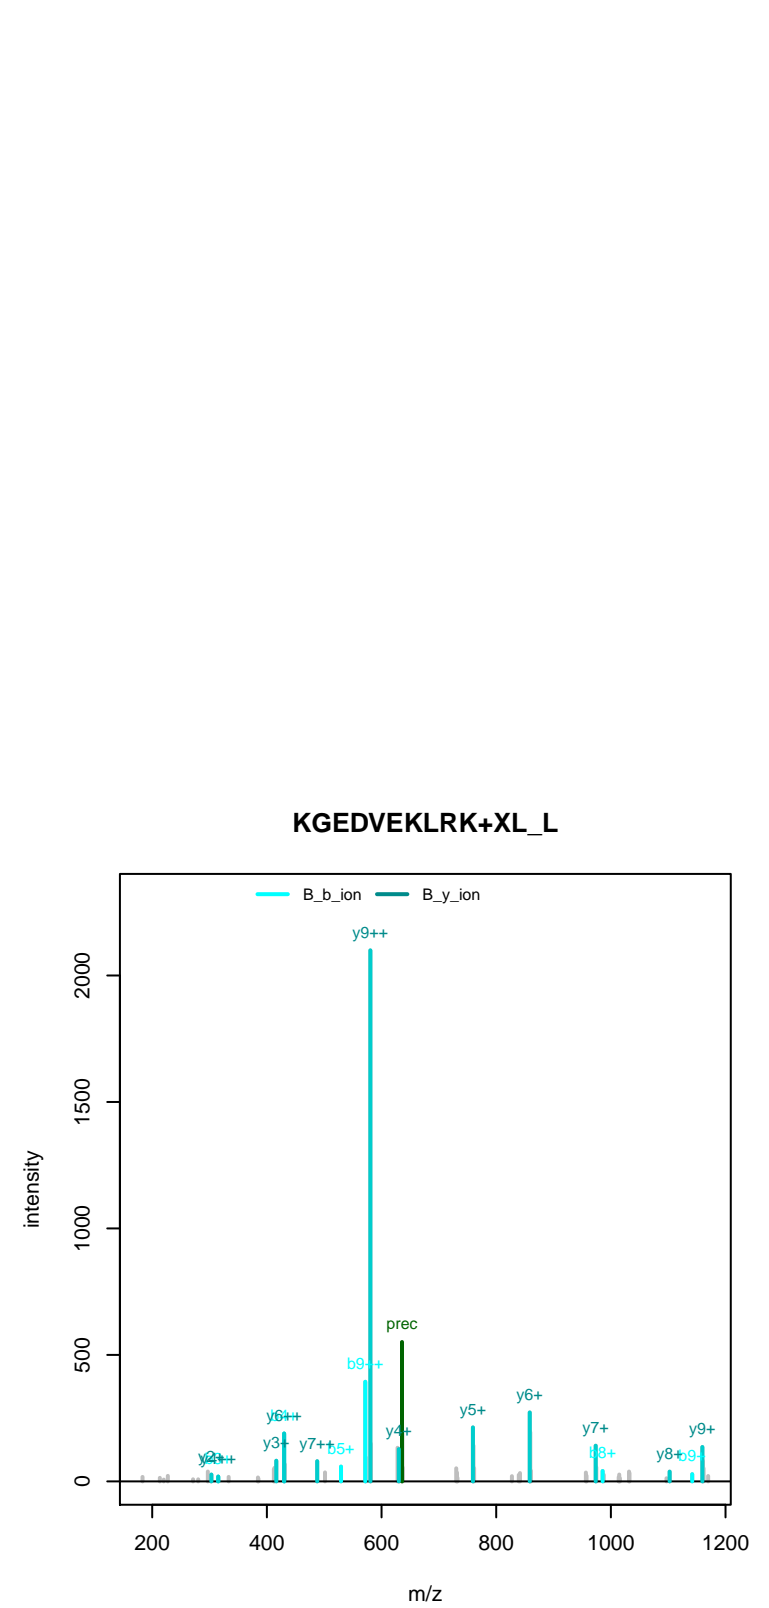

YGYQKDQAEK  
MNKDEAGGNWK

A\_HCD B\_HCD cross-linker cleavage  
A\_ETD B\_ETD

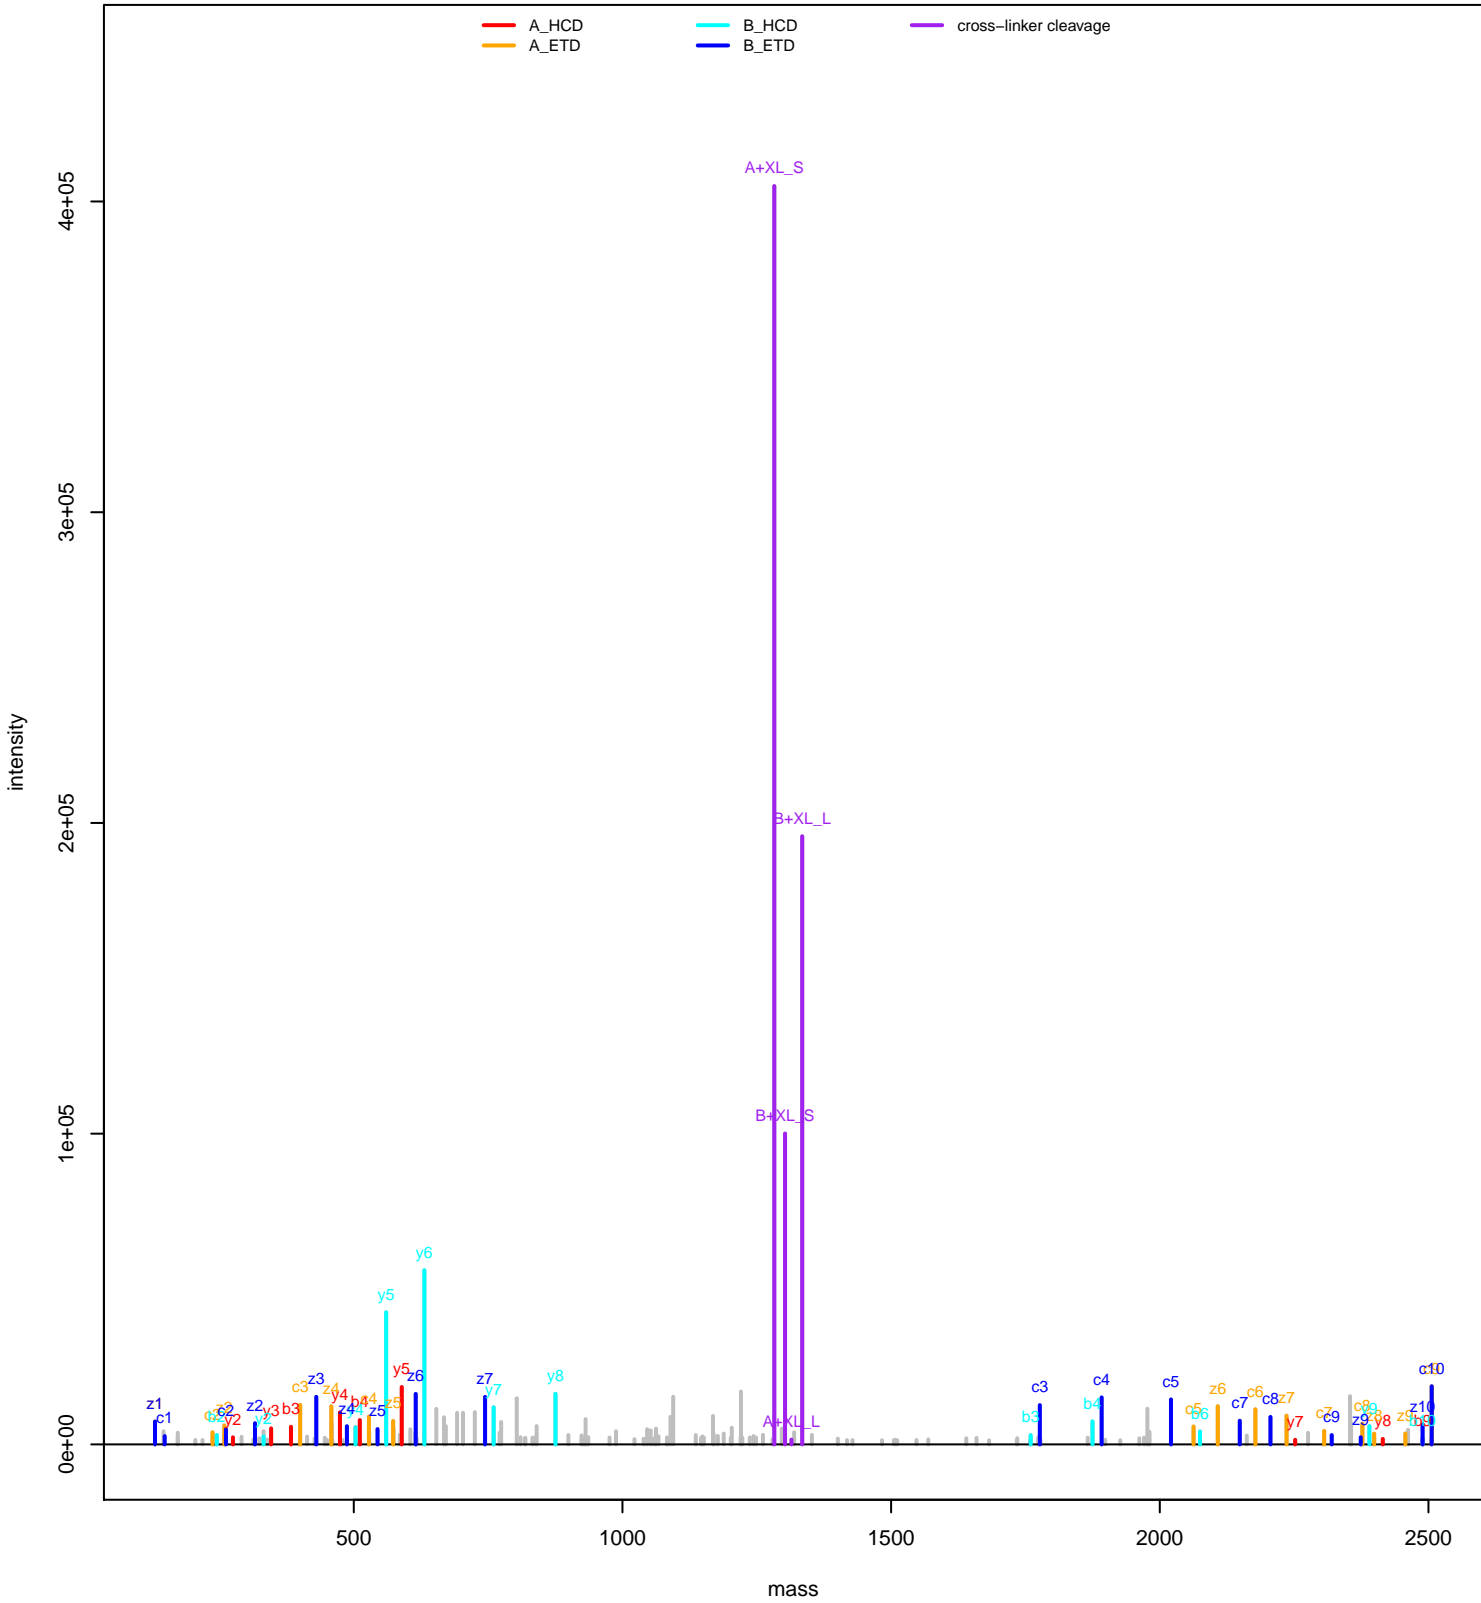

YGYQKDQAEK+XL\_S

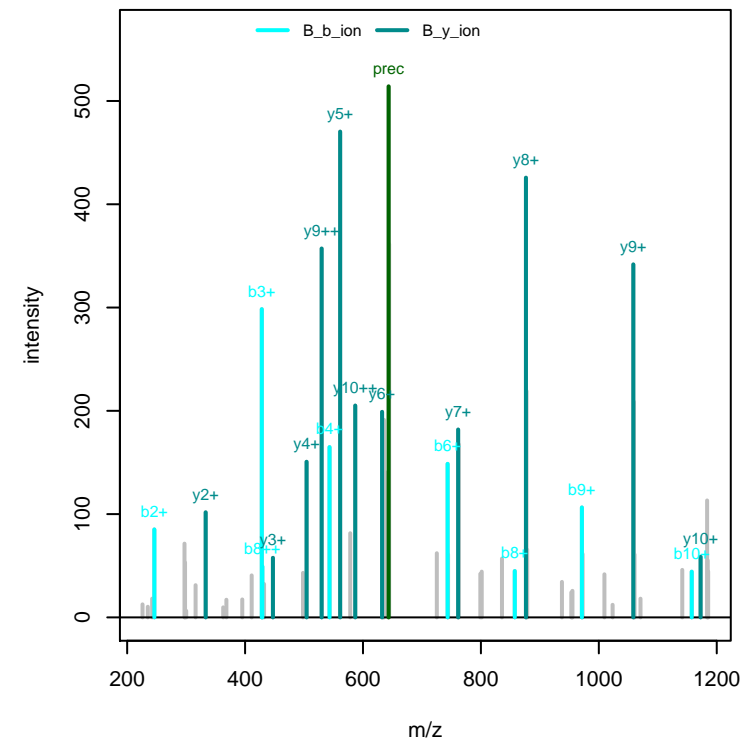

YGYQKDQAEK+XL\_L

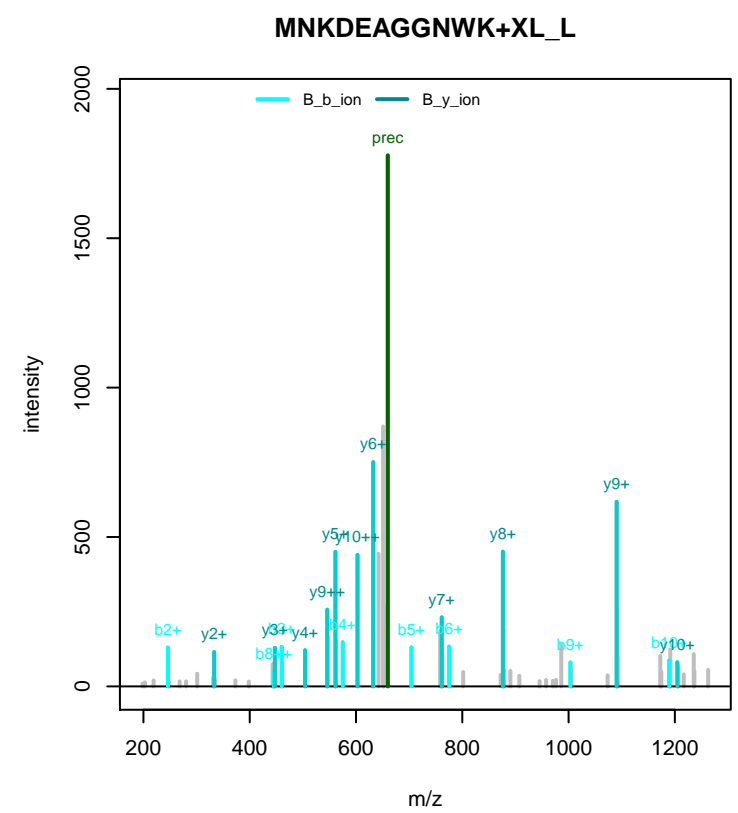

MNKDEAGGNWK+XL\_S

MNKDEAGGNWK+XL\_L

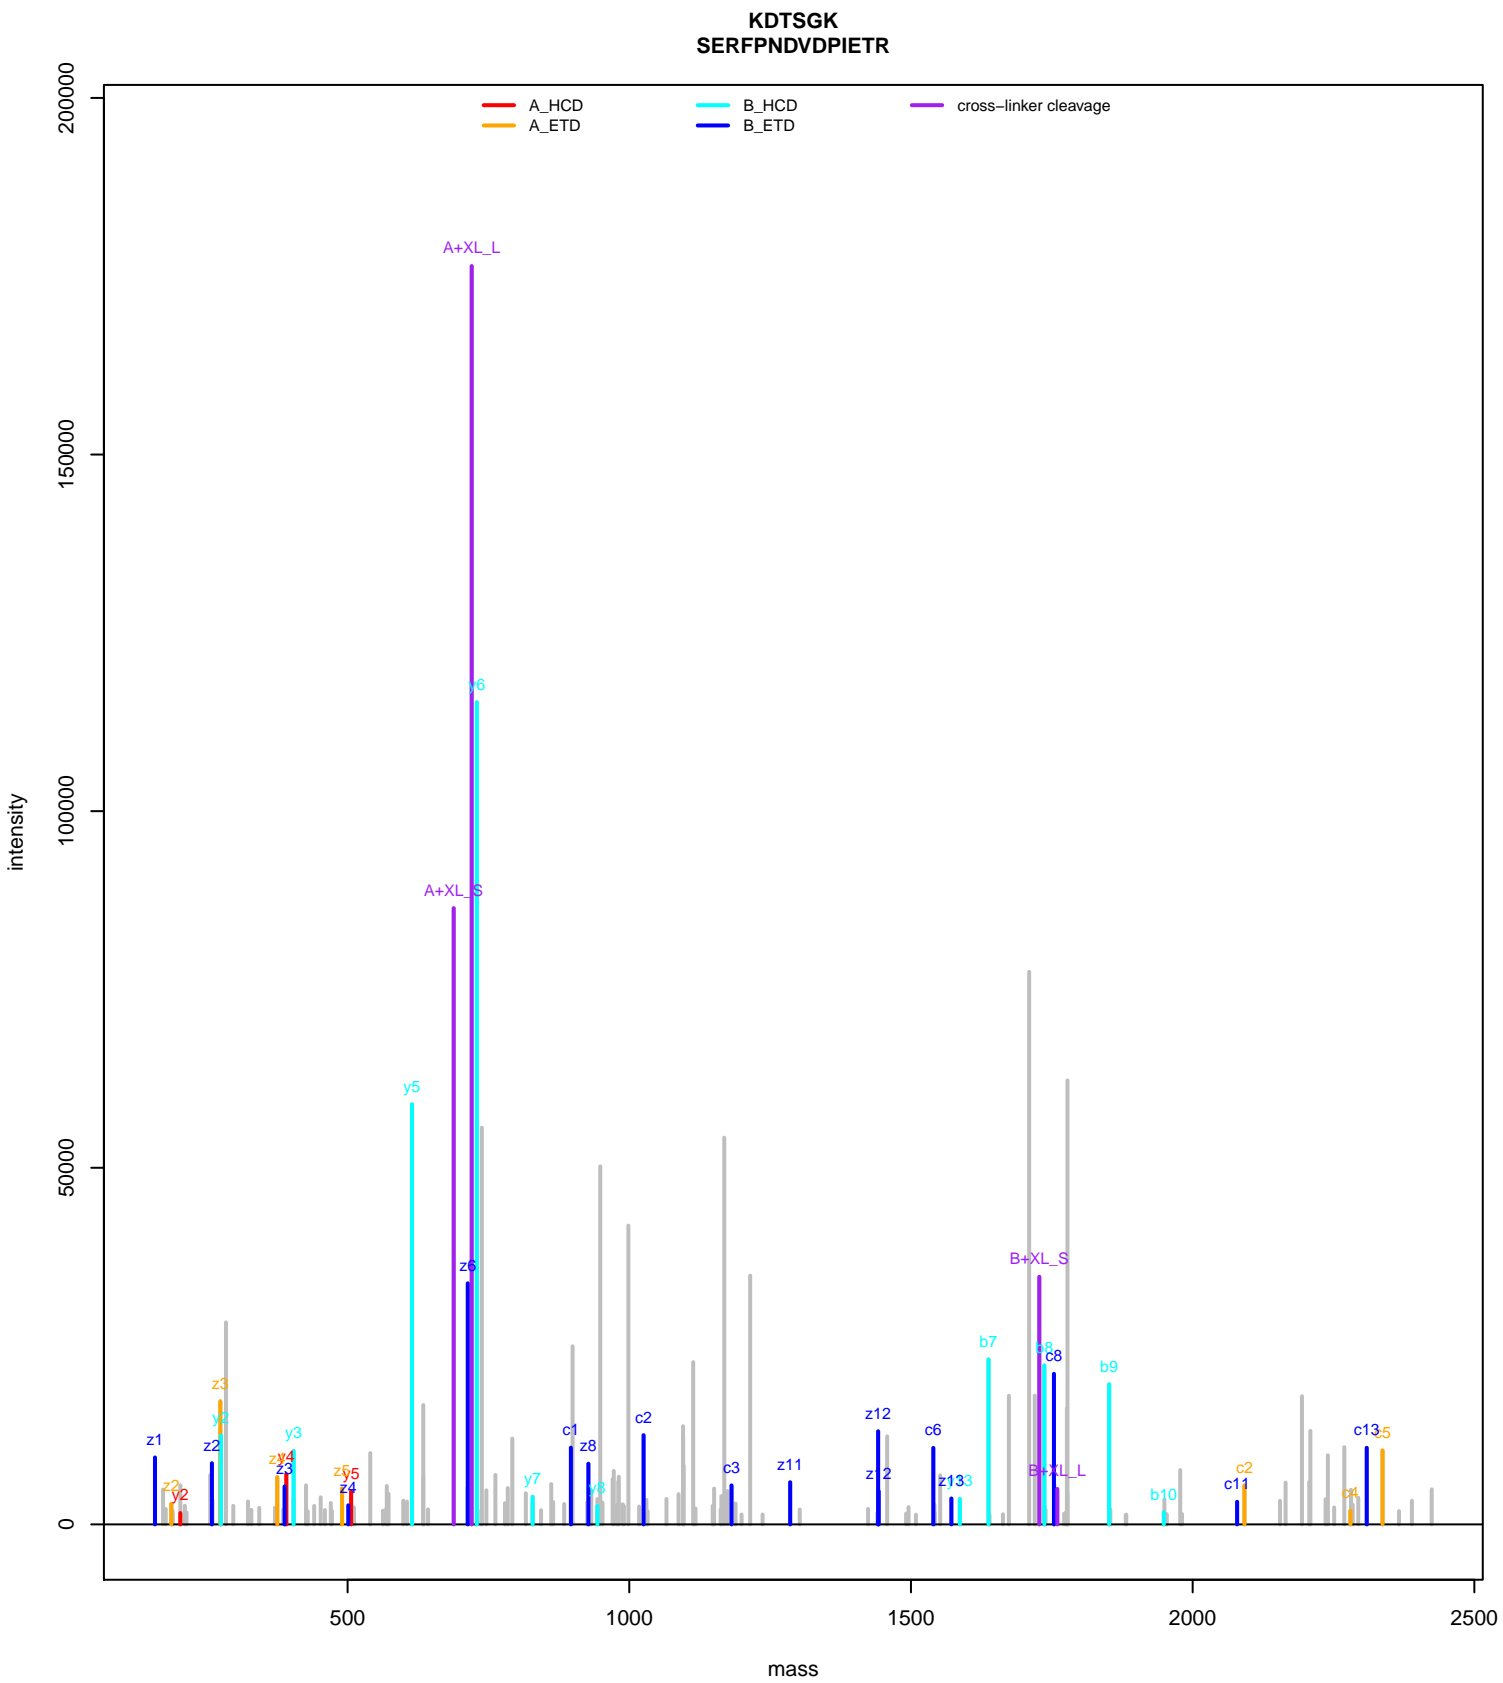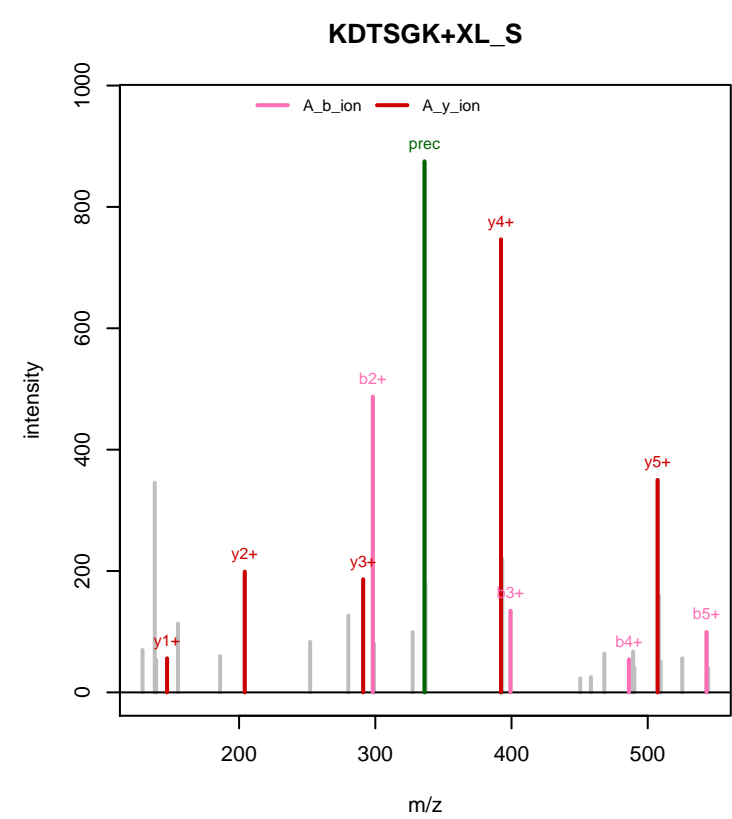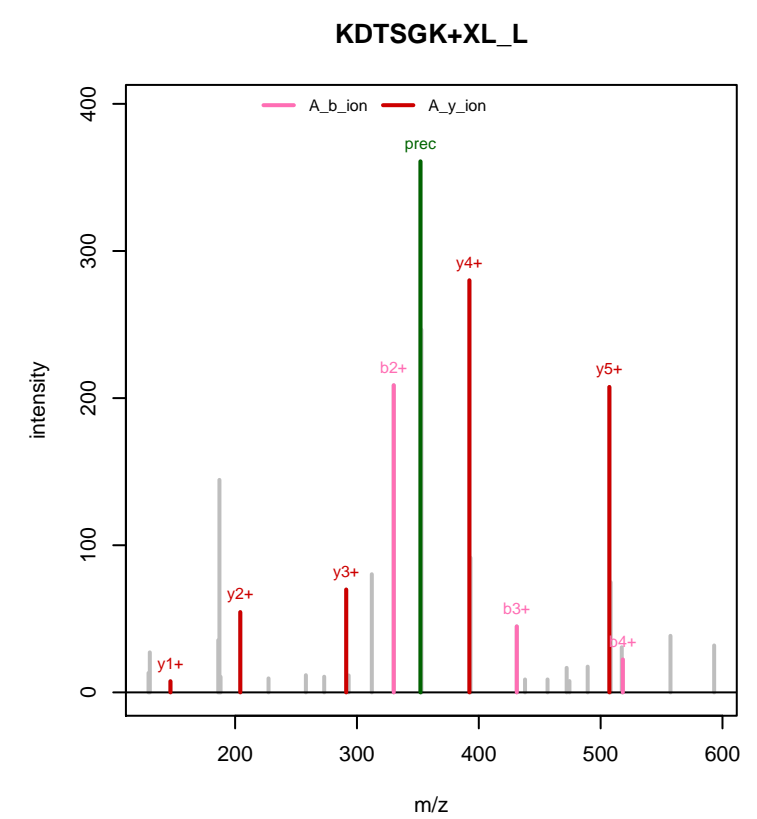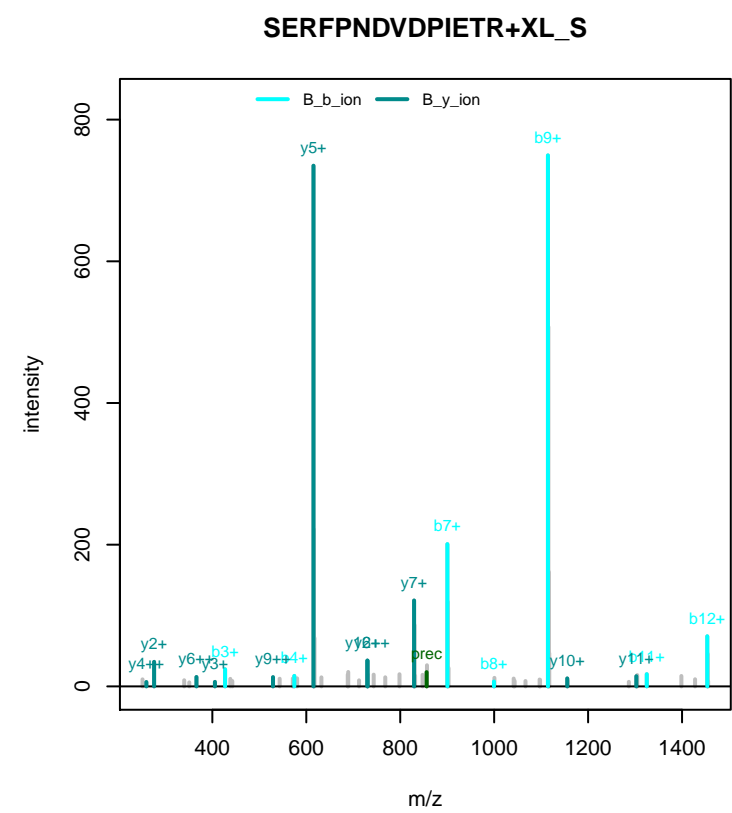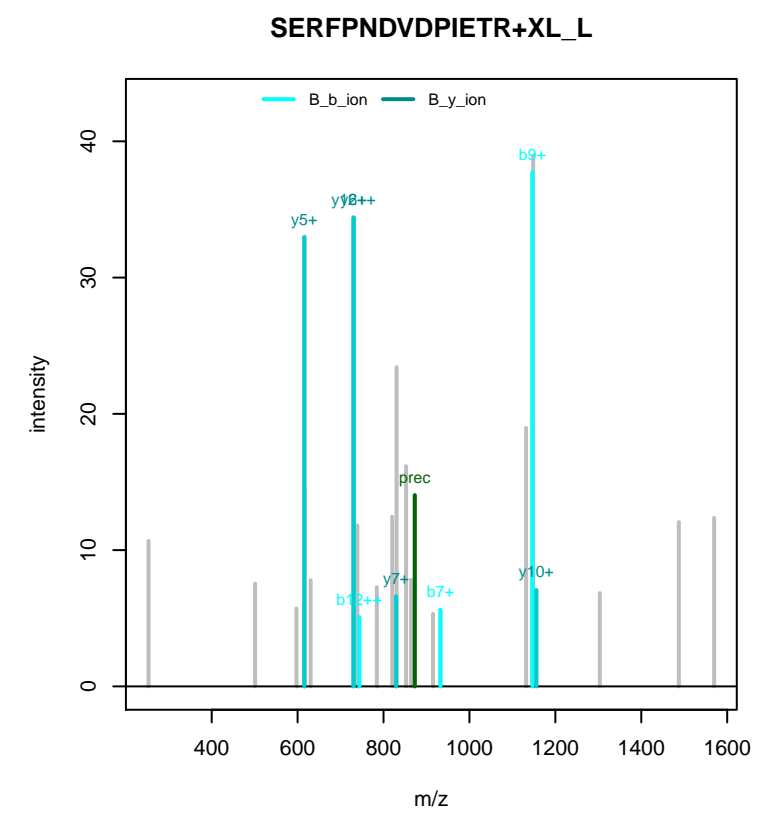

**MAVKGSQVIK**  
**KGSSLQQGFQK**

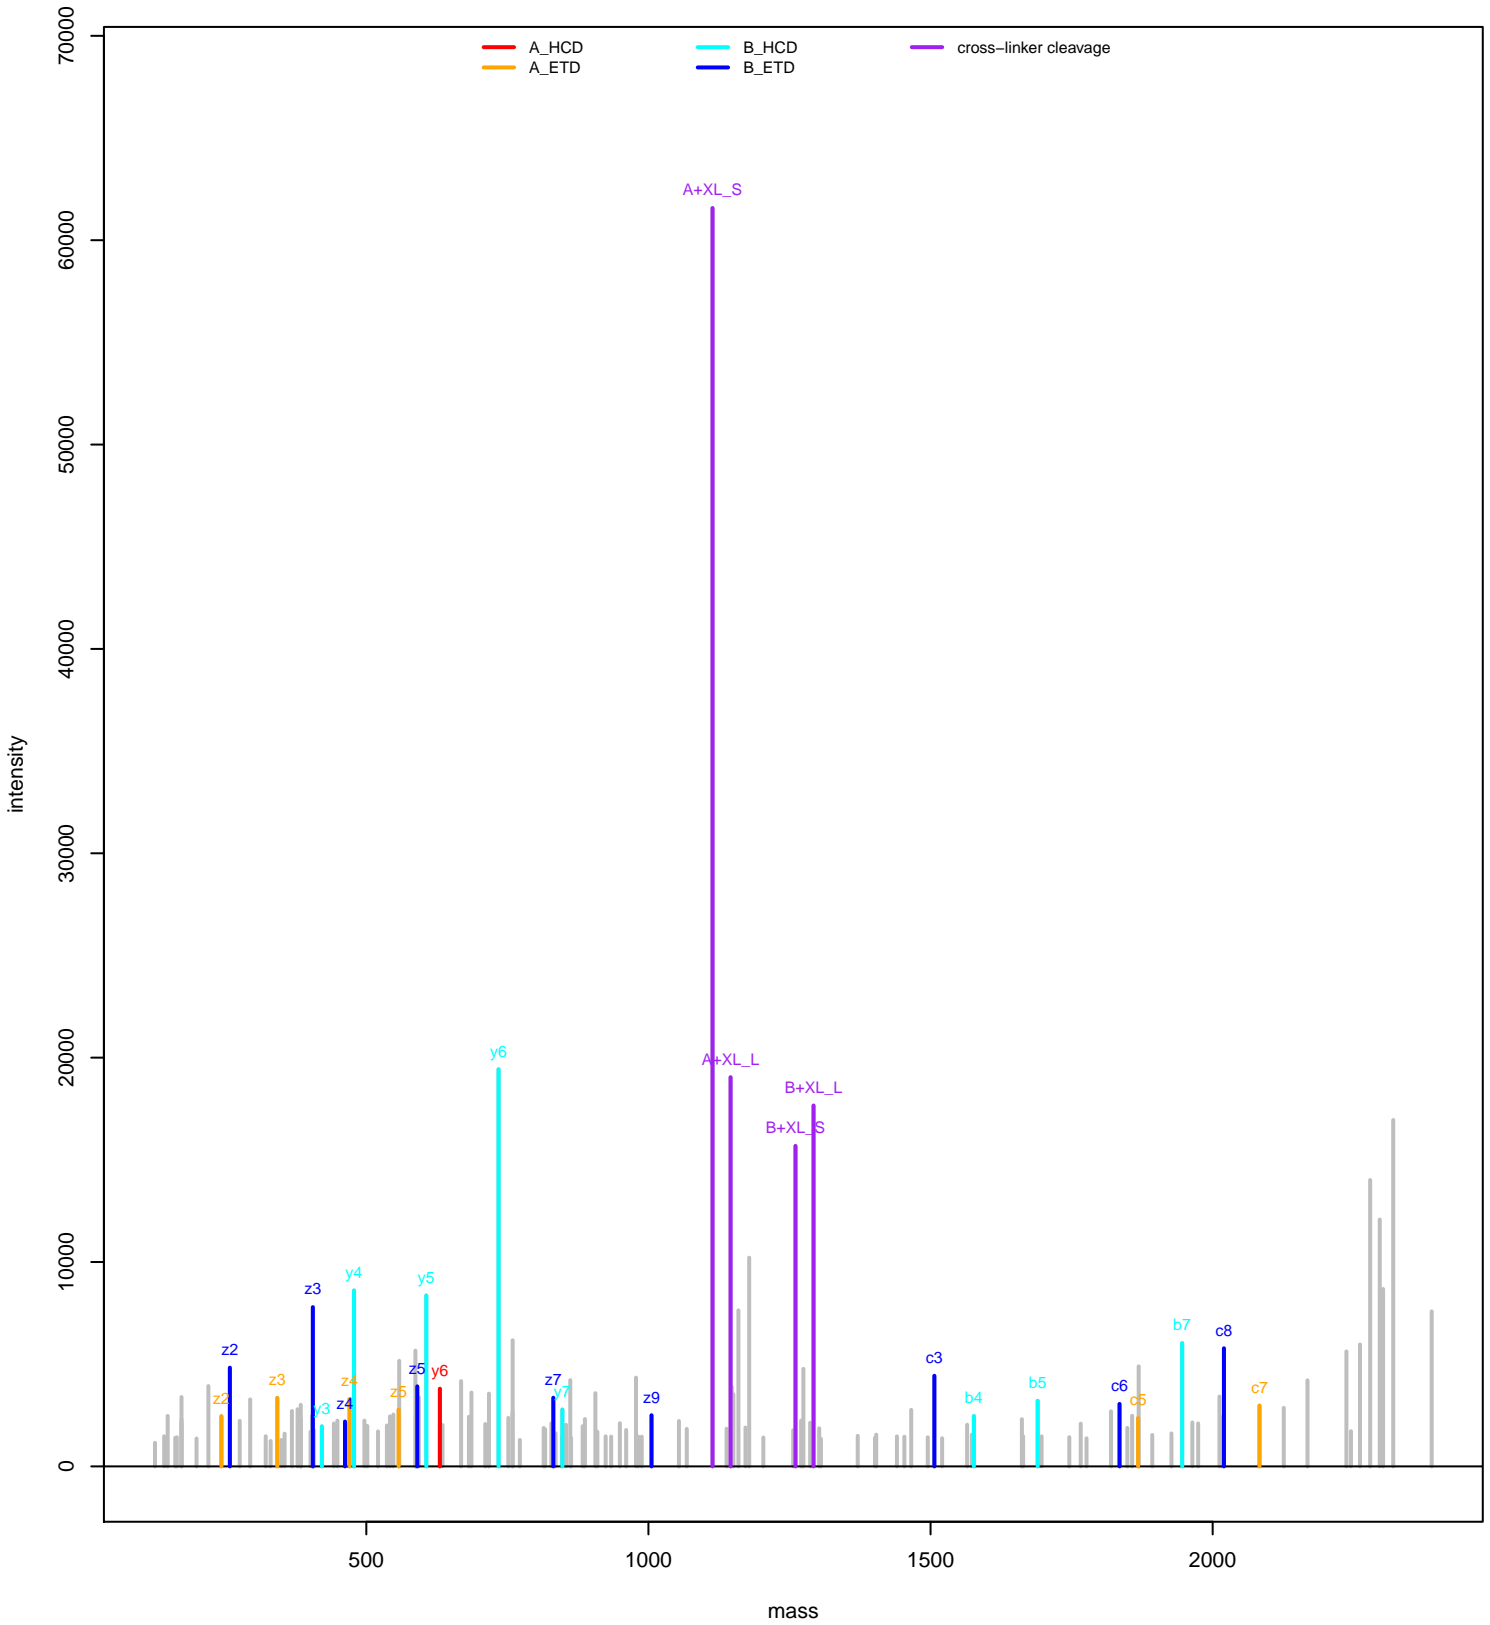

**MAVKGSQVIK+XL\_S**

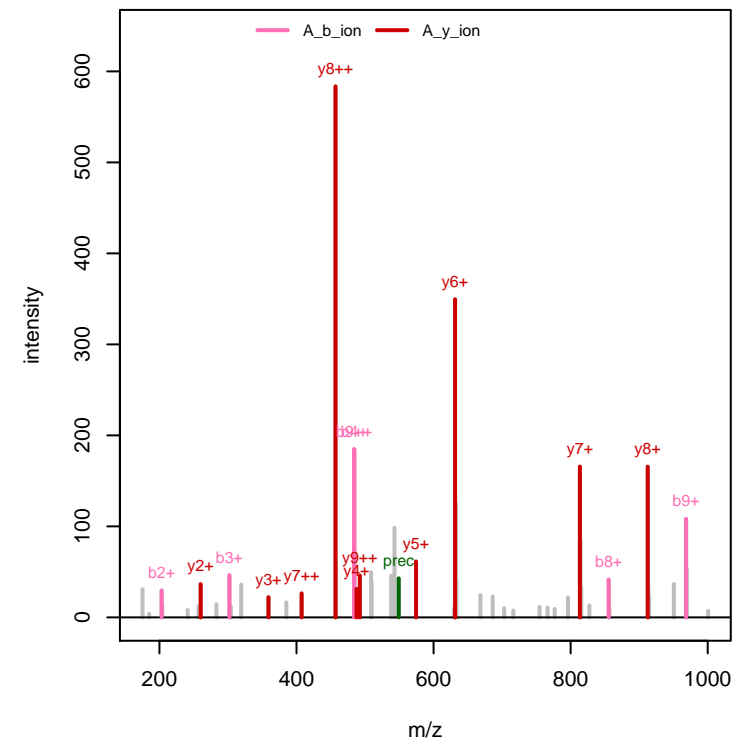

**MAVKGSQVIK+XL\_L**

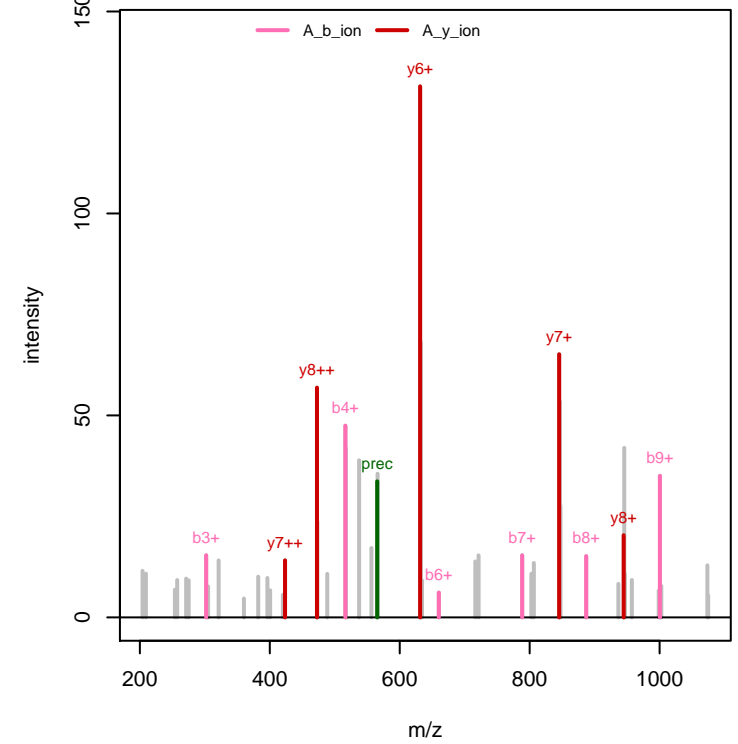

**KGSSLQQGFQK+XL\_S**

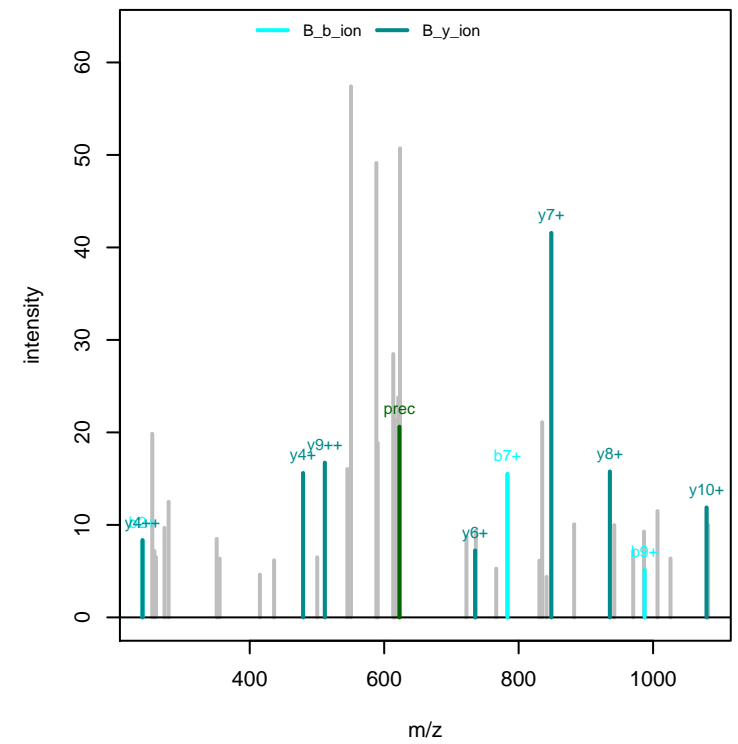

**KGSSLQQGFQK+XL\_L**

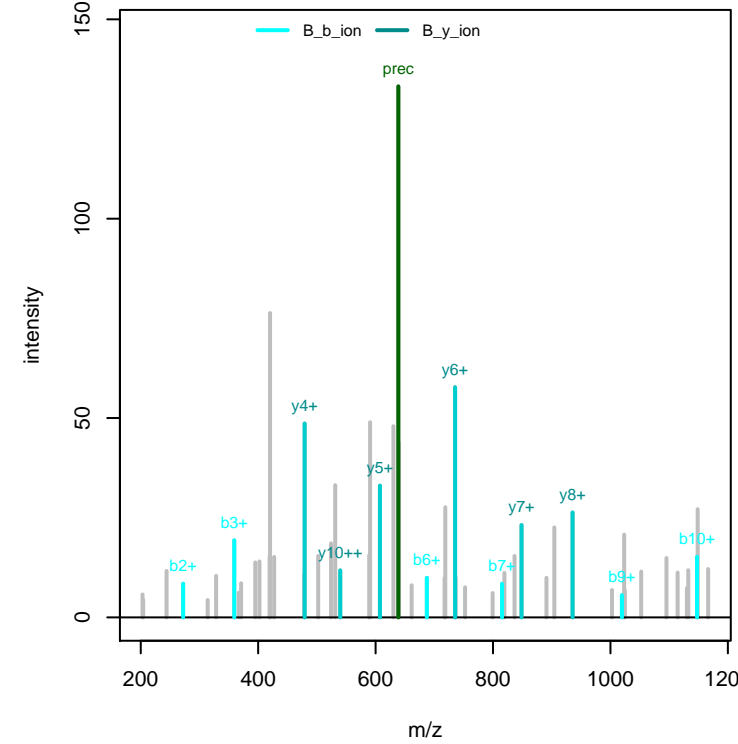

SEEKASTPAQR  
LTREDVEKHLAK

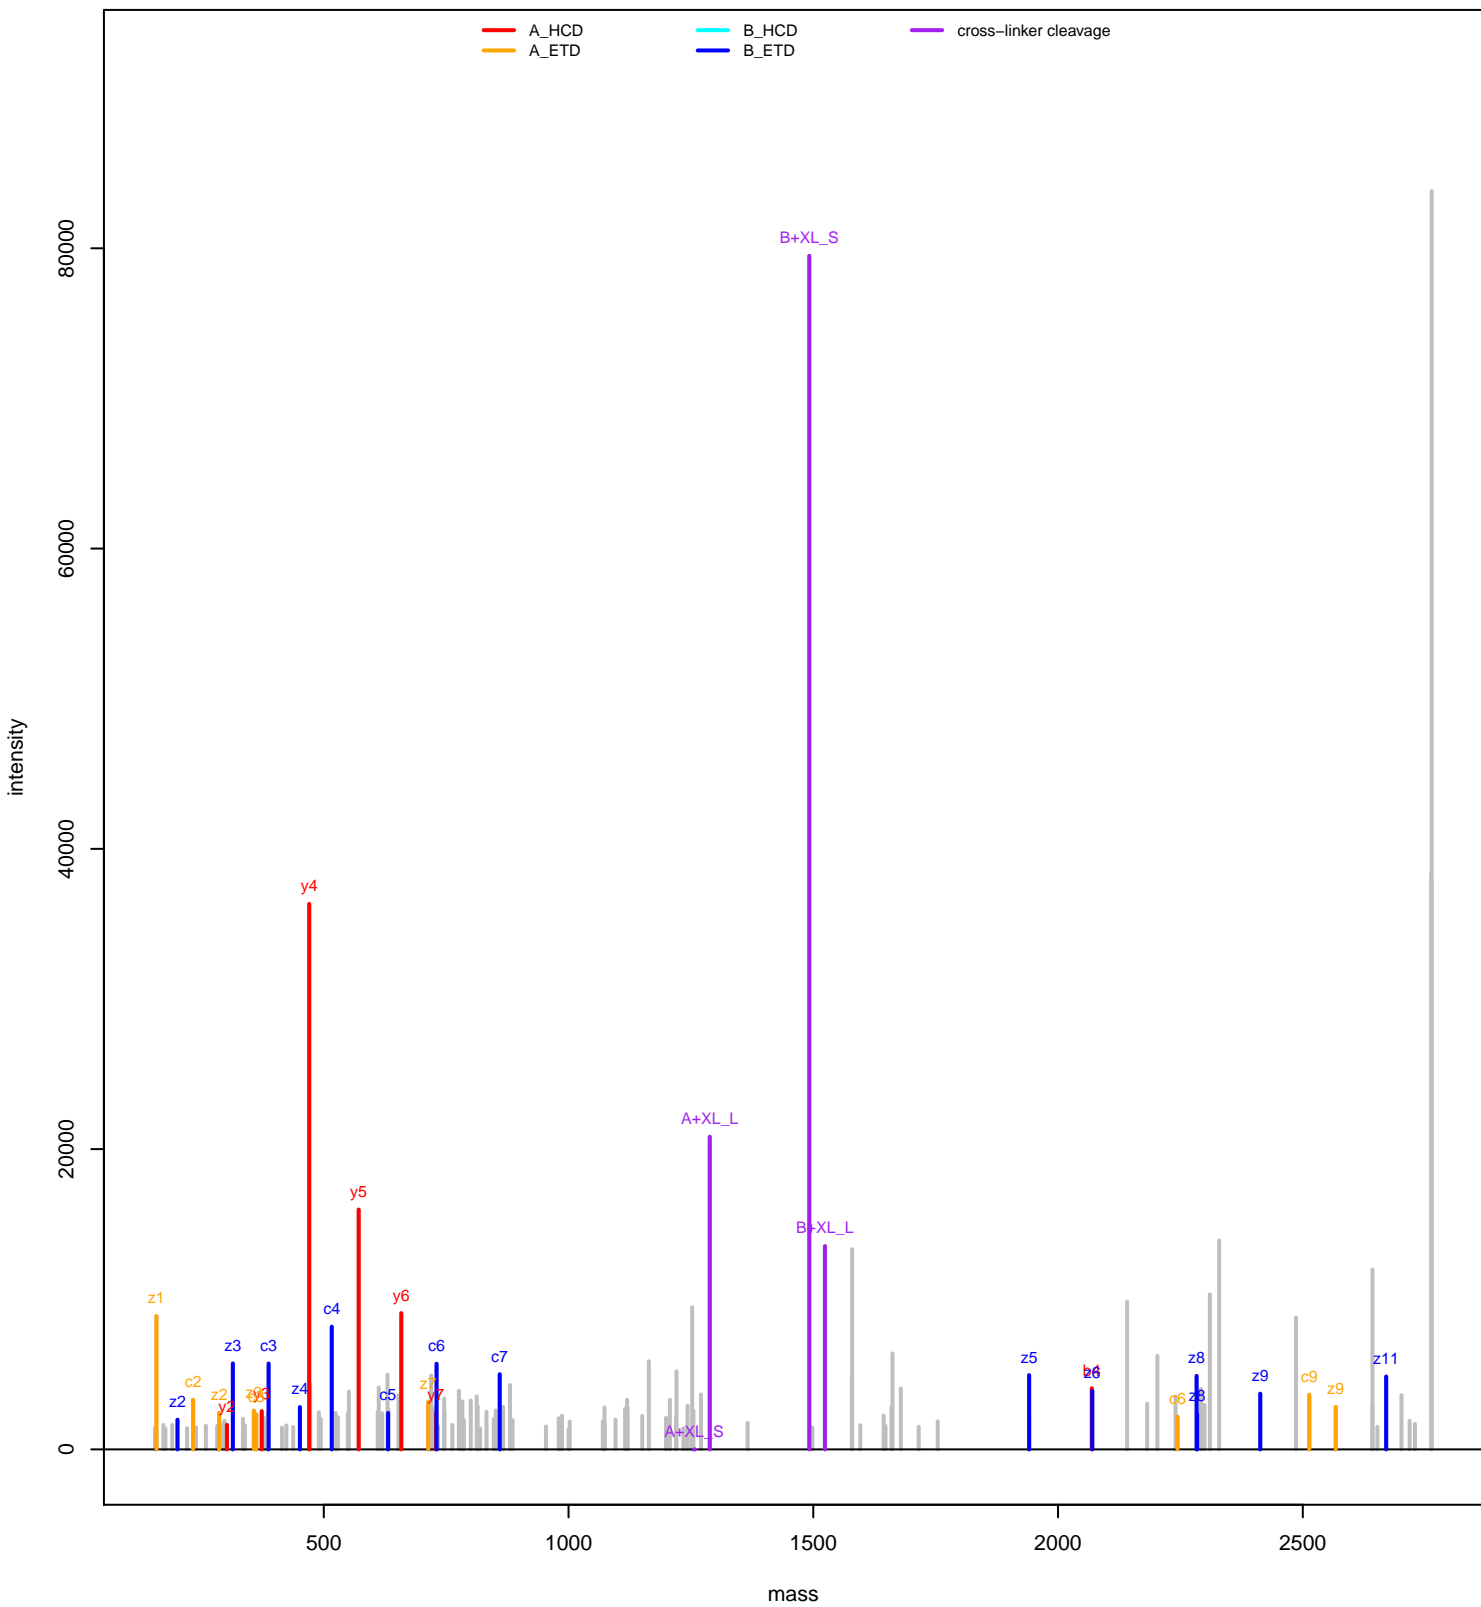

SEEKASTPAQR+XL\_S

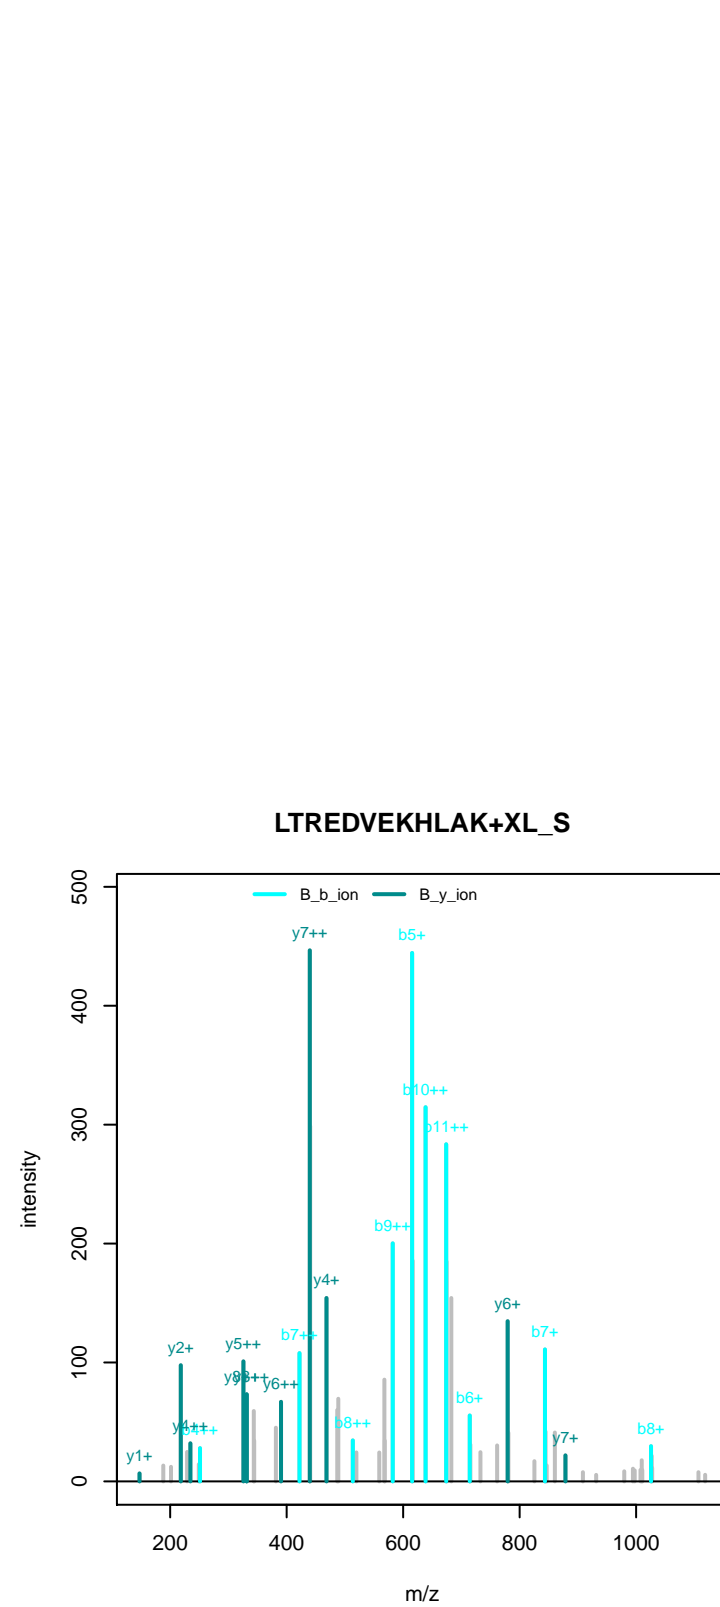

SEEKASTPAQR+XL\_L

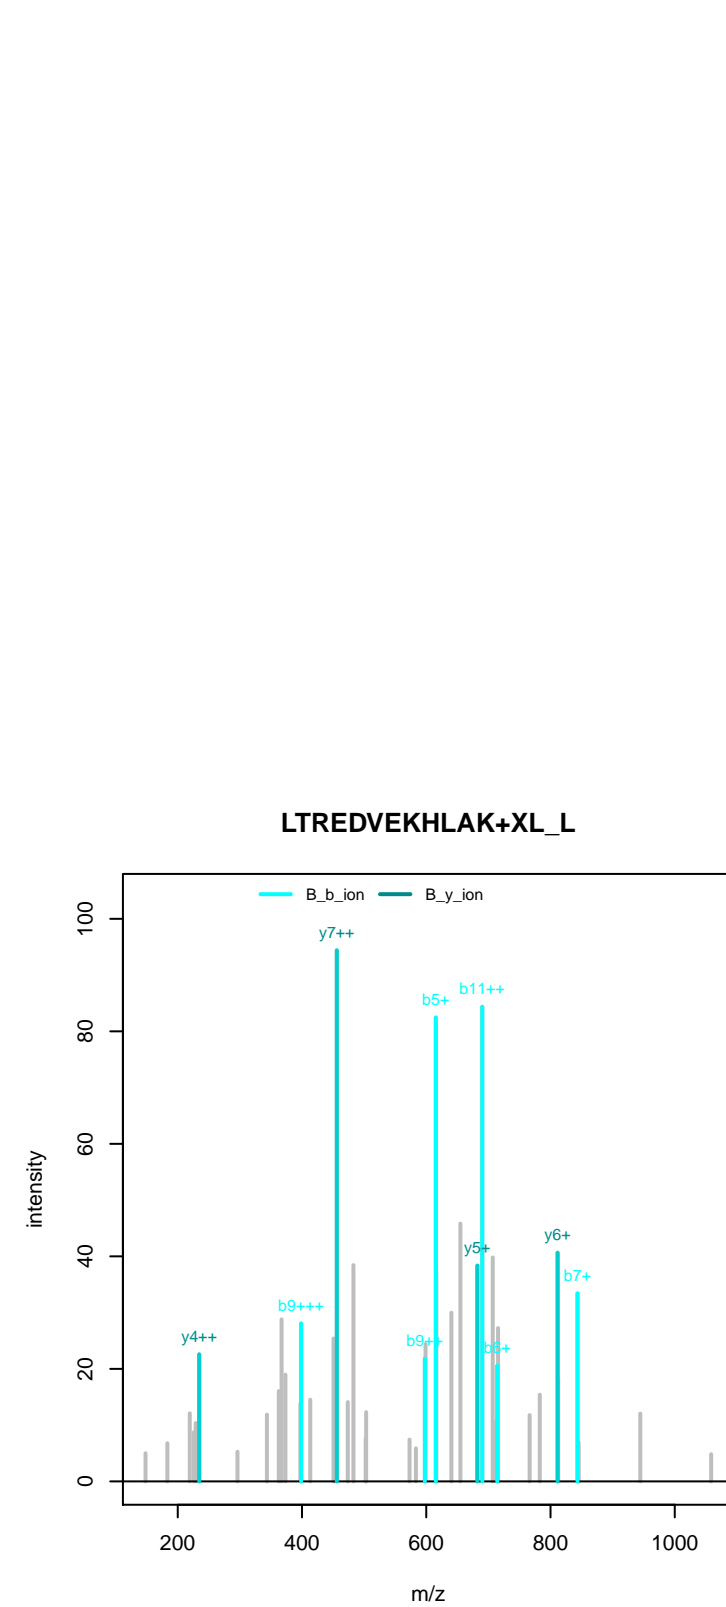

LTREDVEKHLAK+XL\_S

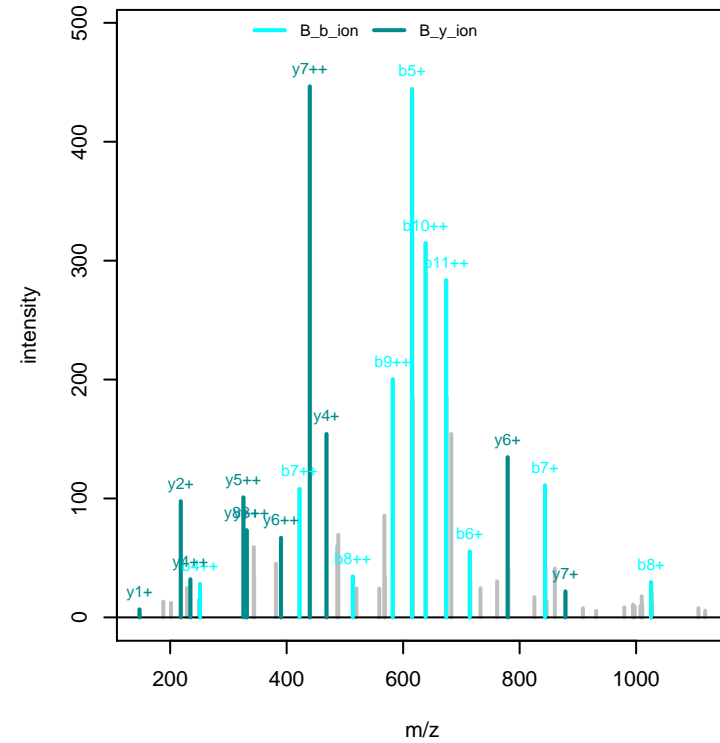

LTREDVEKHLAK+XL\_L

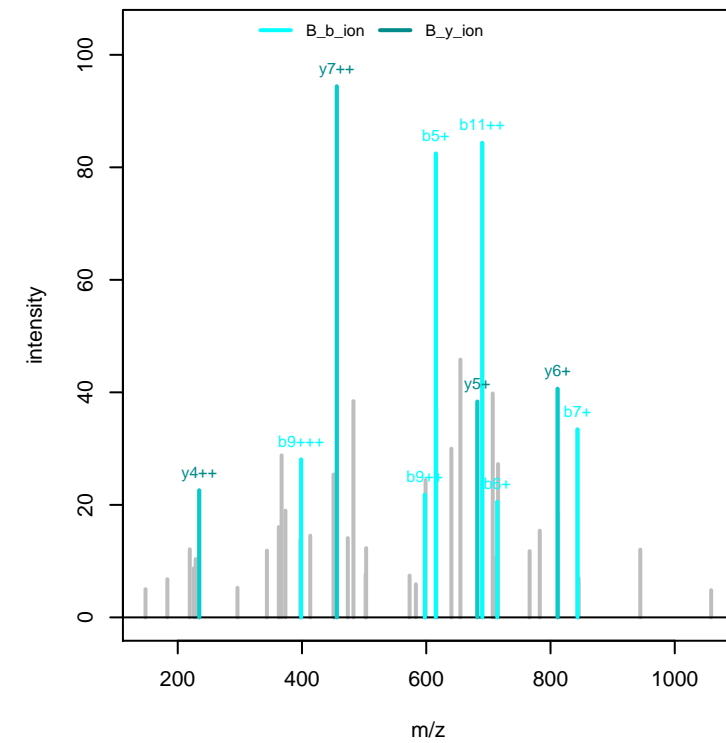



**AAMVTVAKAK**  
**IIAADNGDAWVEVKGQK**

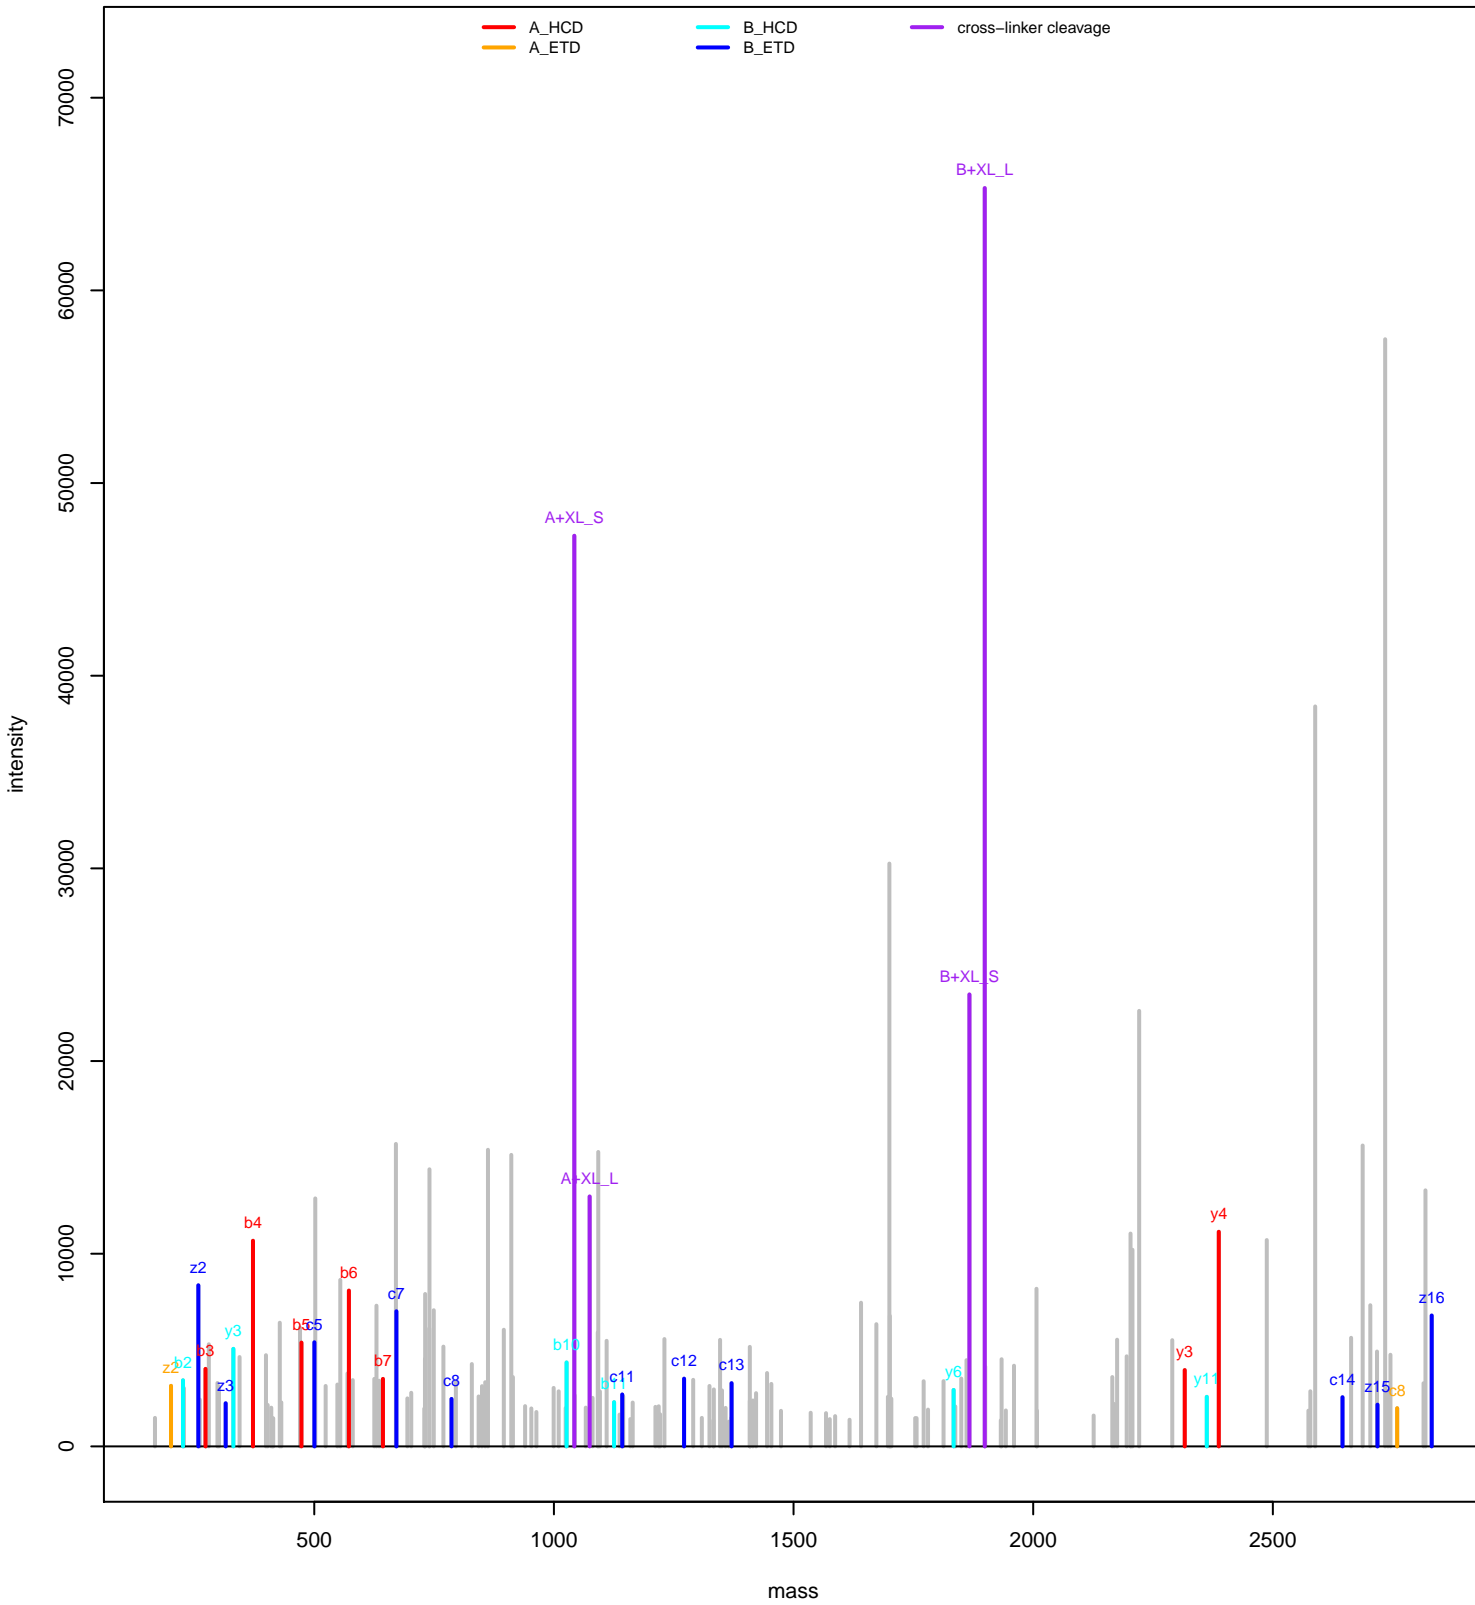

**AAMVTVAKAK+XL\_S**

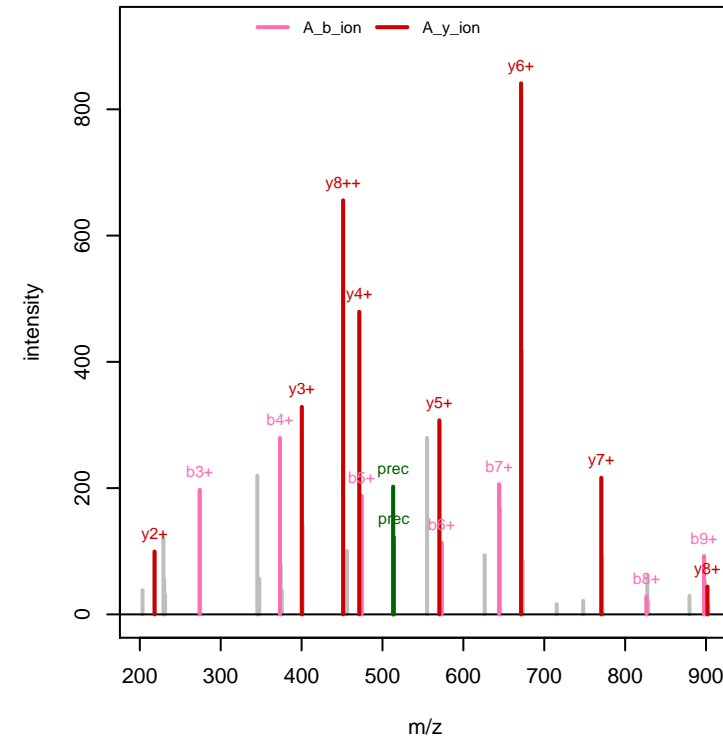

**AAMVTVAKAK+XL\_L**

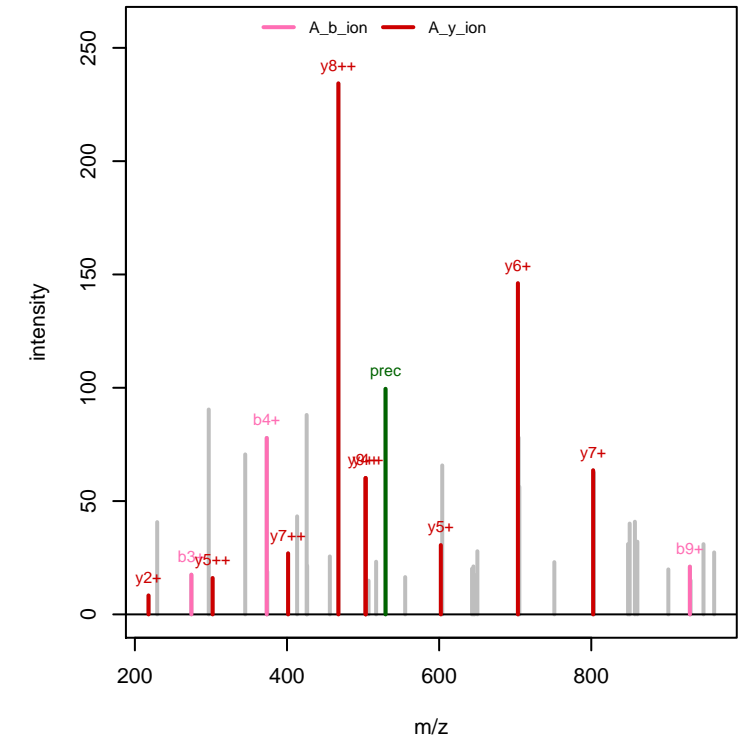

**IIAADNGDAWVEVKGQK+XL\_S**

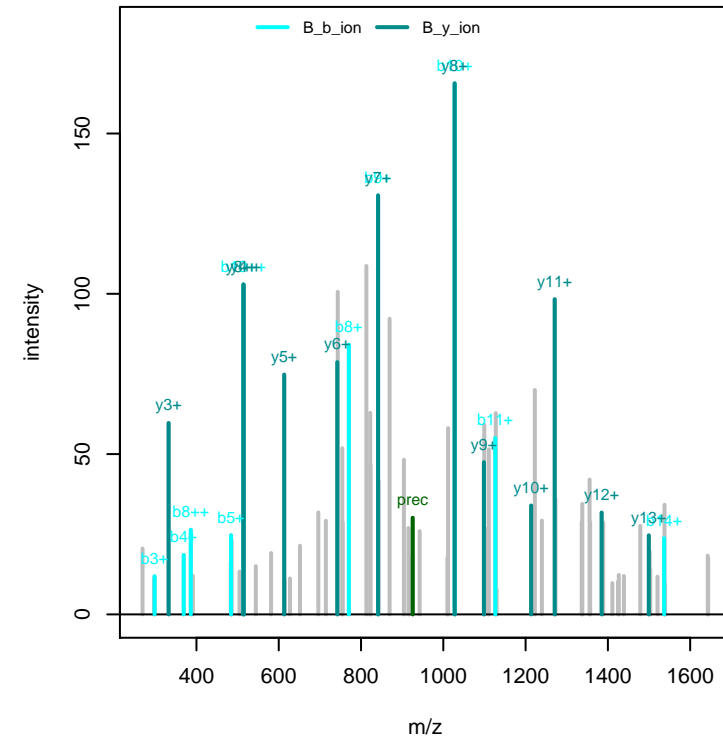

**IIAADNGDAWVEVKGQK+XL\_L**

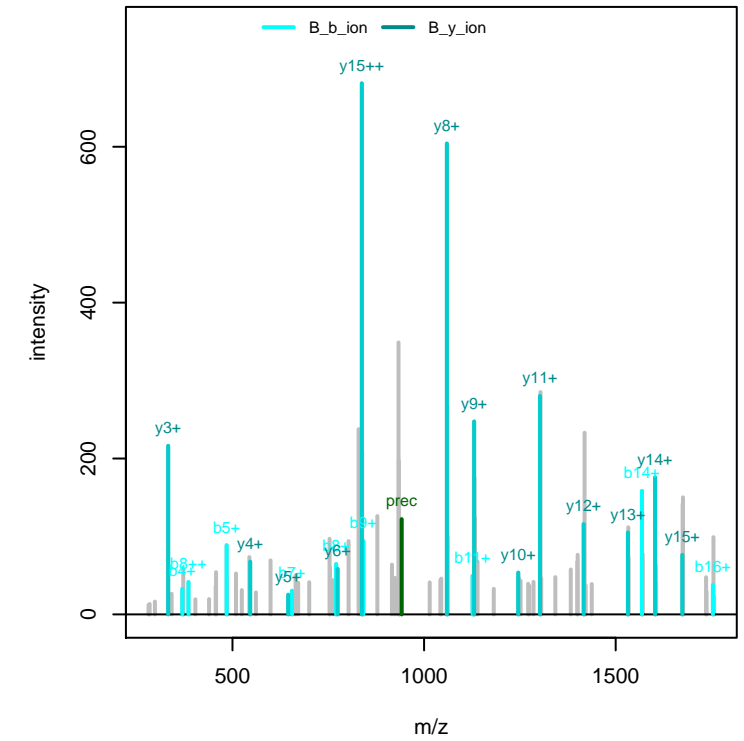

GKGFAGTVK  
KMAGQMGNER

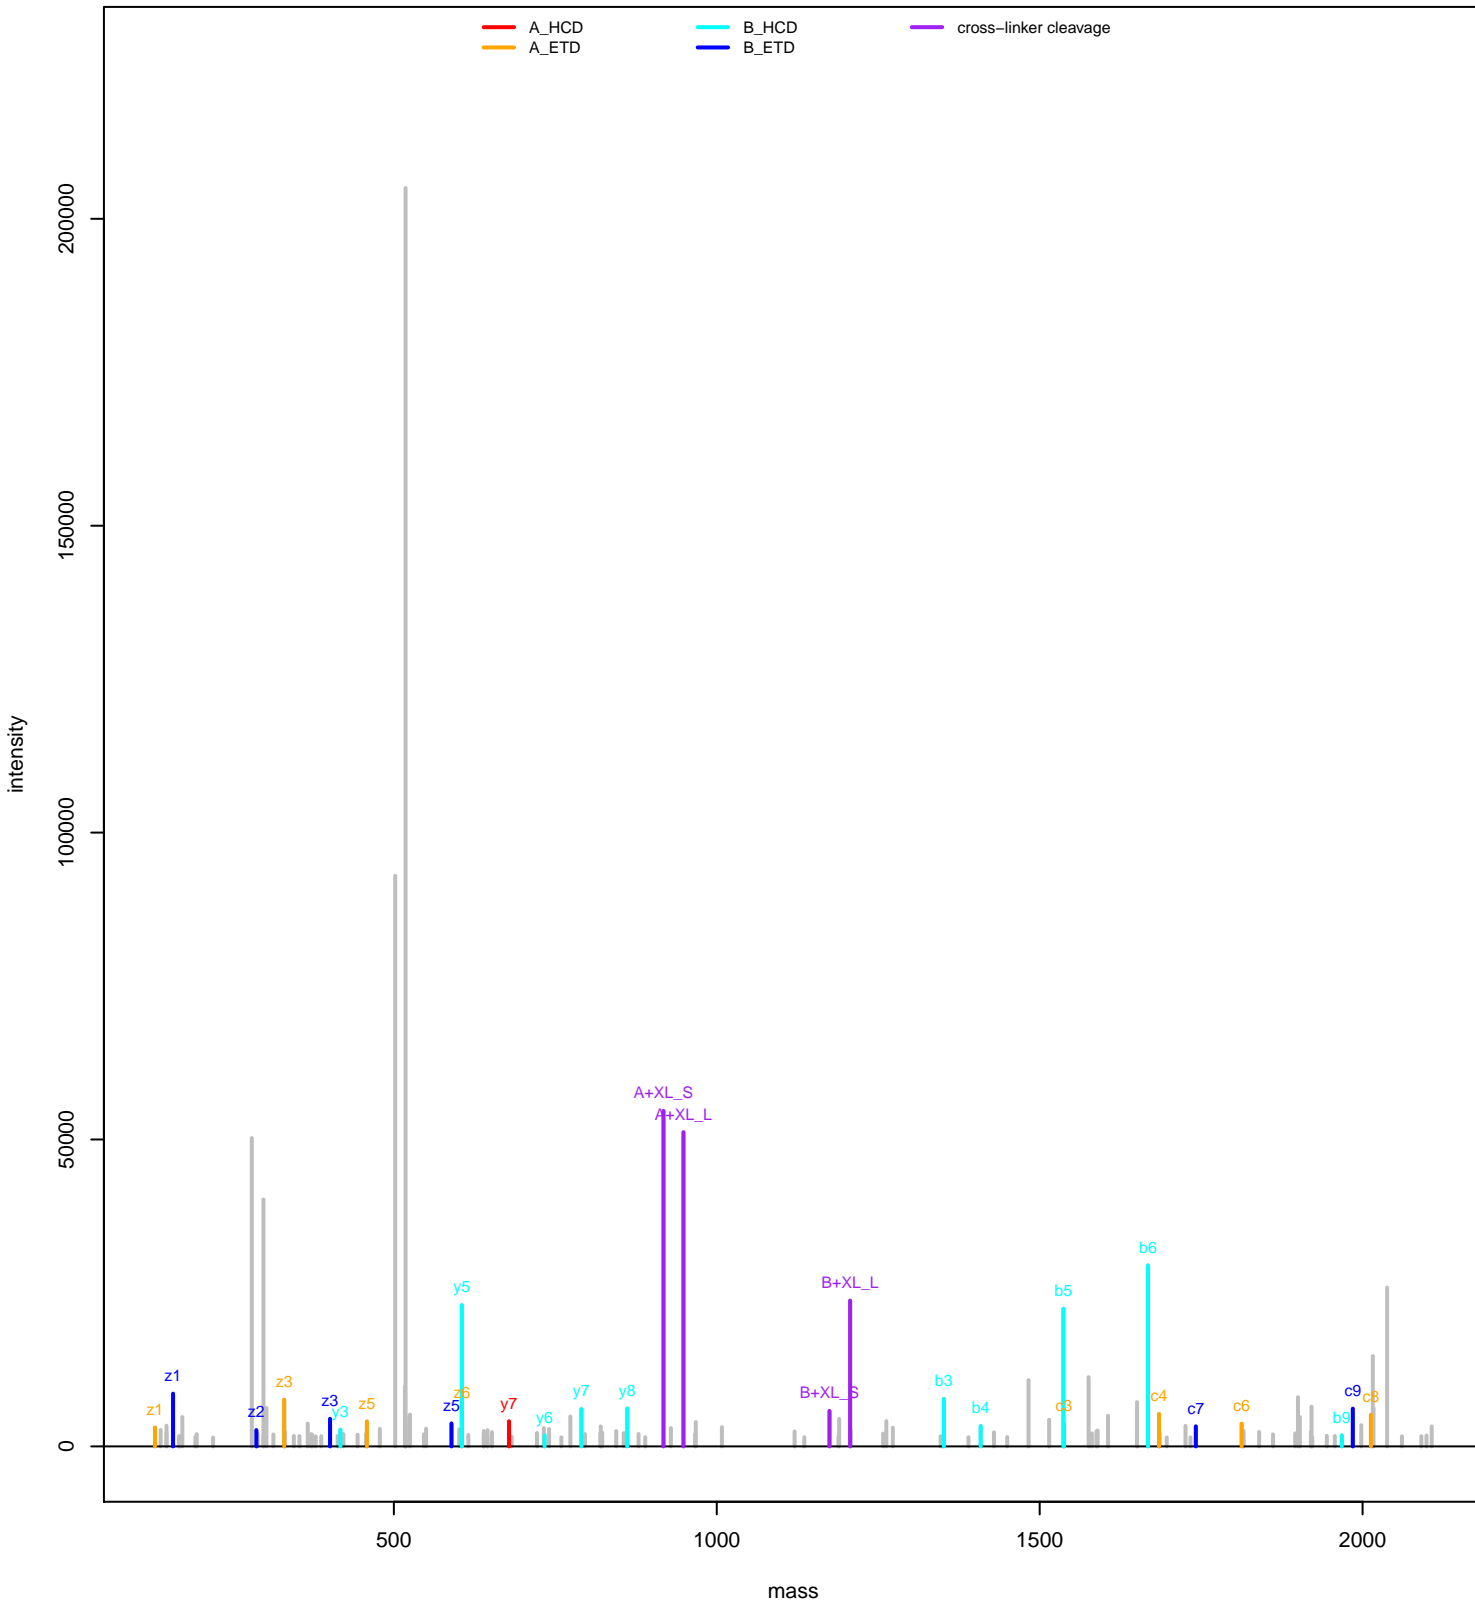

GKGFAGTVK+XL\_S

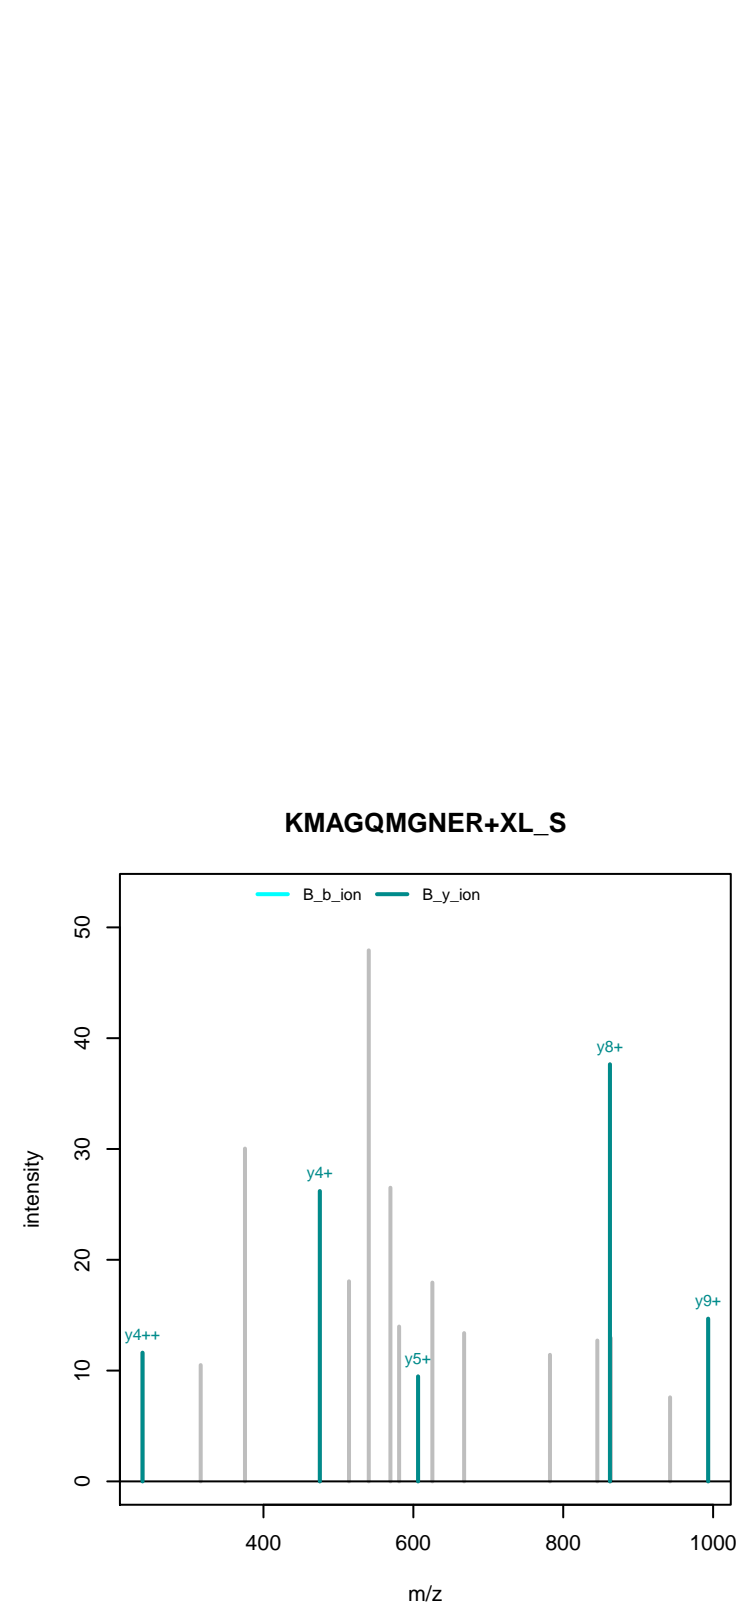

GKGFAGTVK+XL\_L

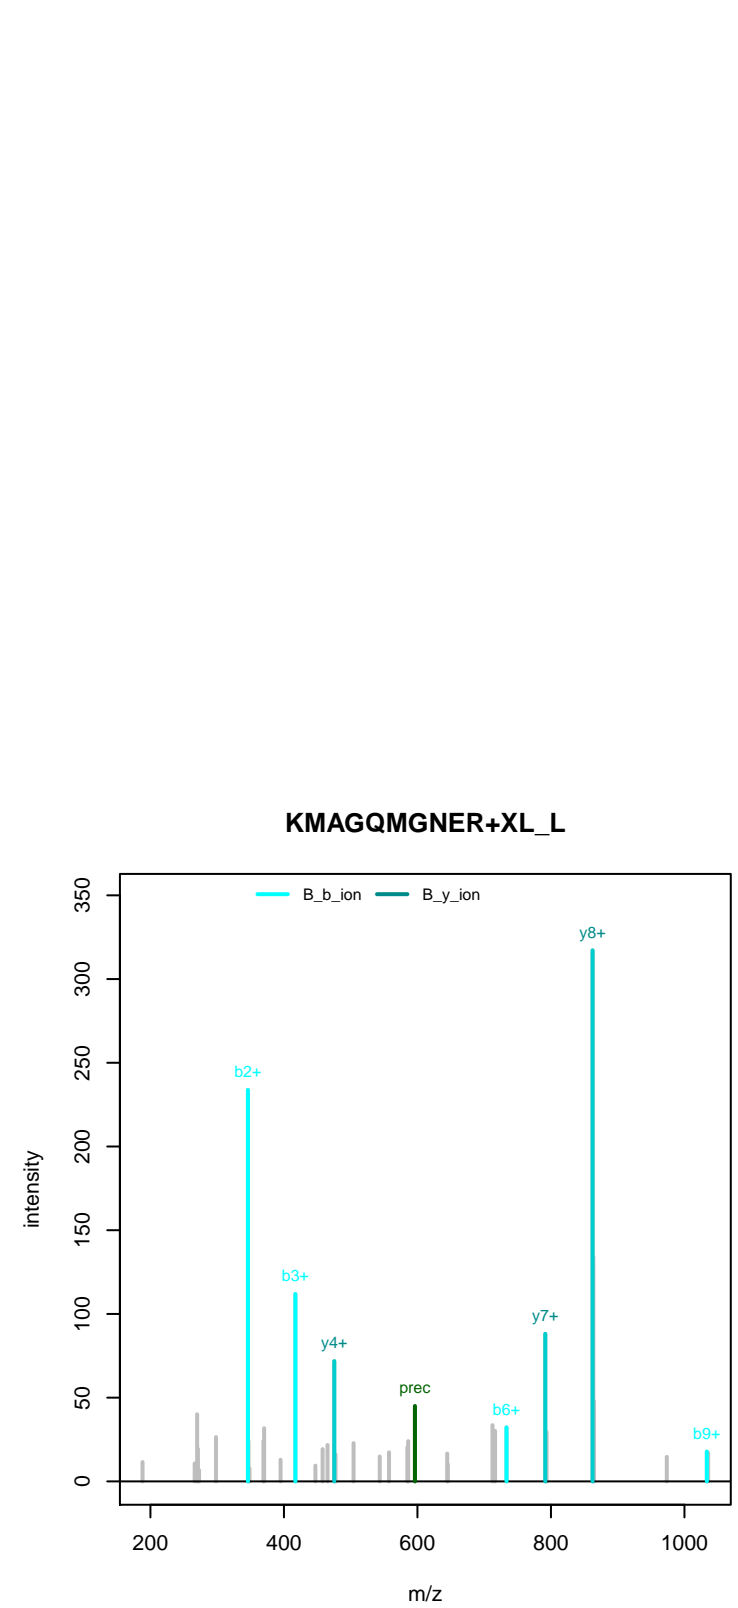

KMAGQMGNER+XL\_S

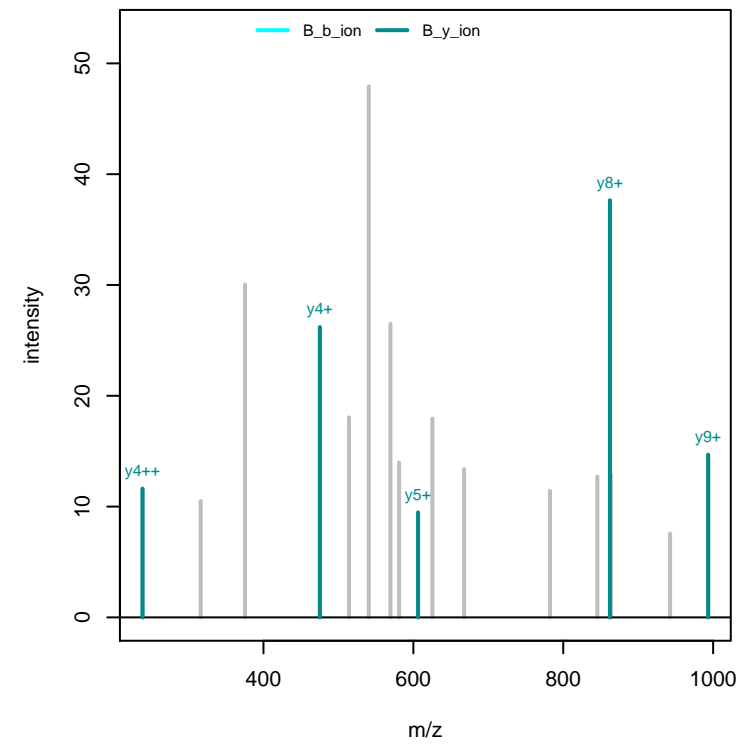

KMAGQMGNER+XL\_L

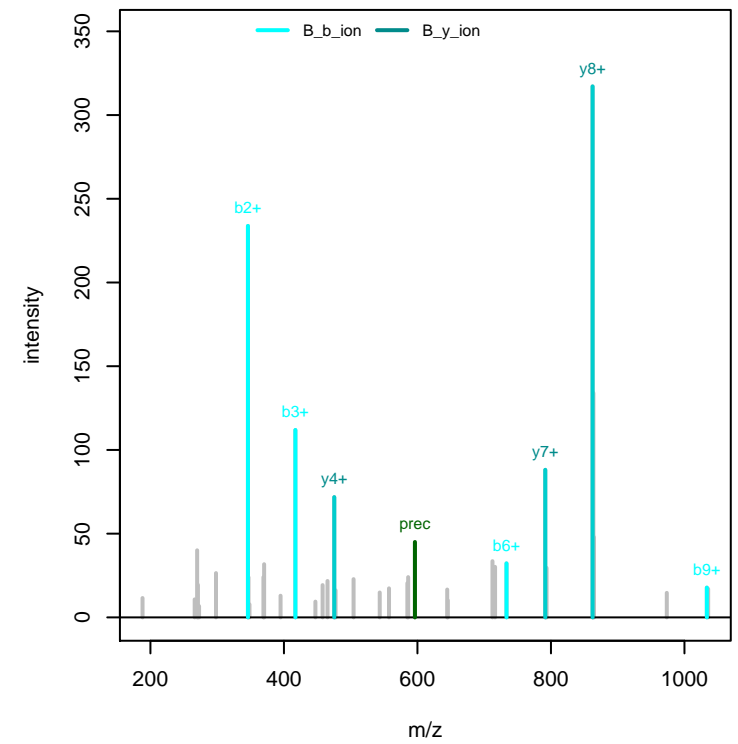

**AAGAKR**  
DNTPMFVKGANFDK

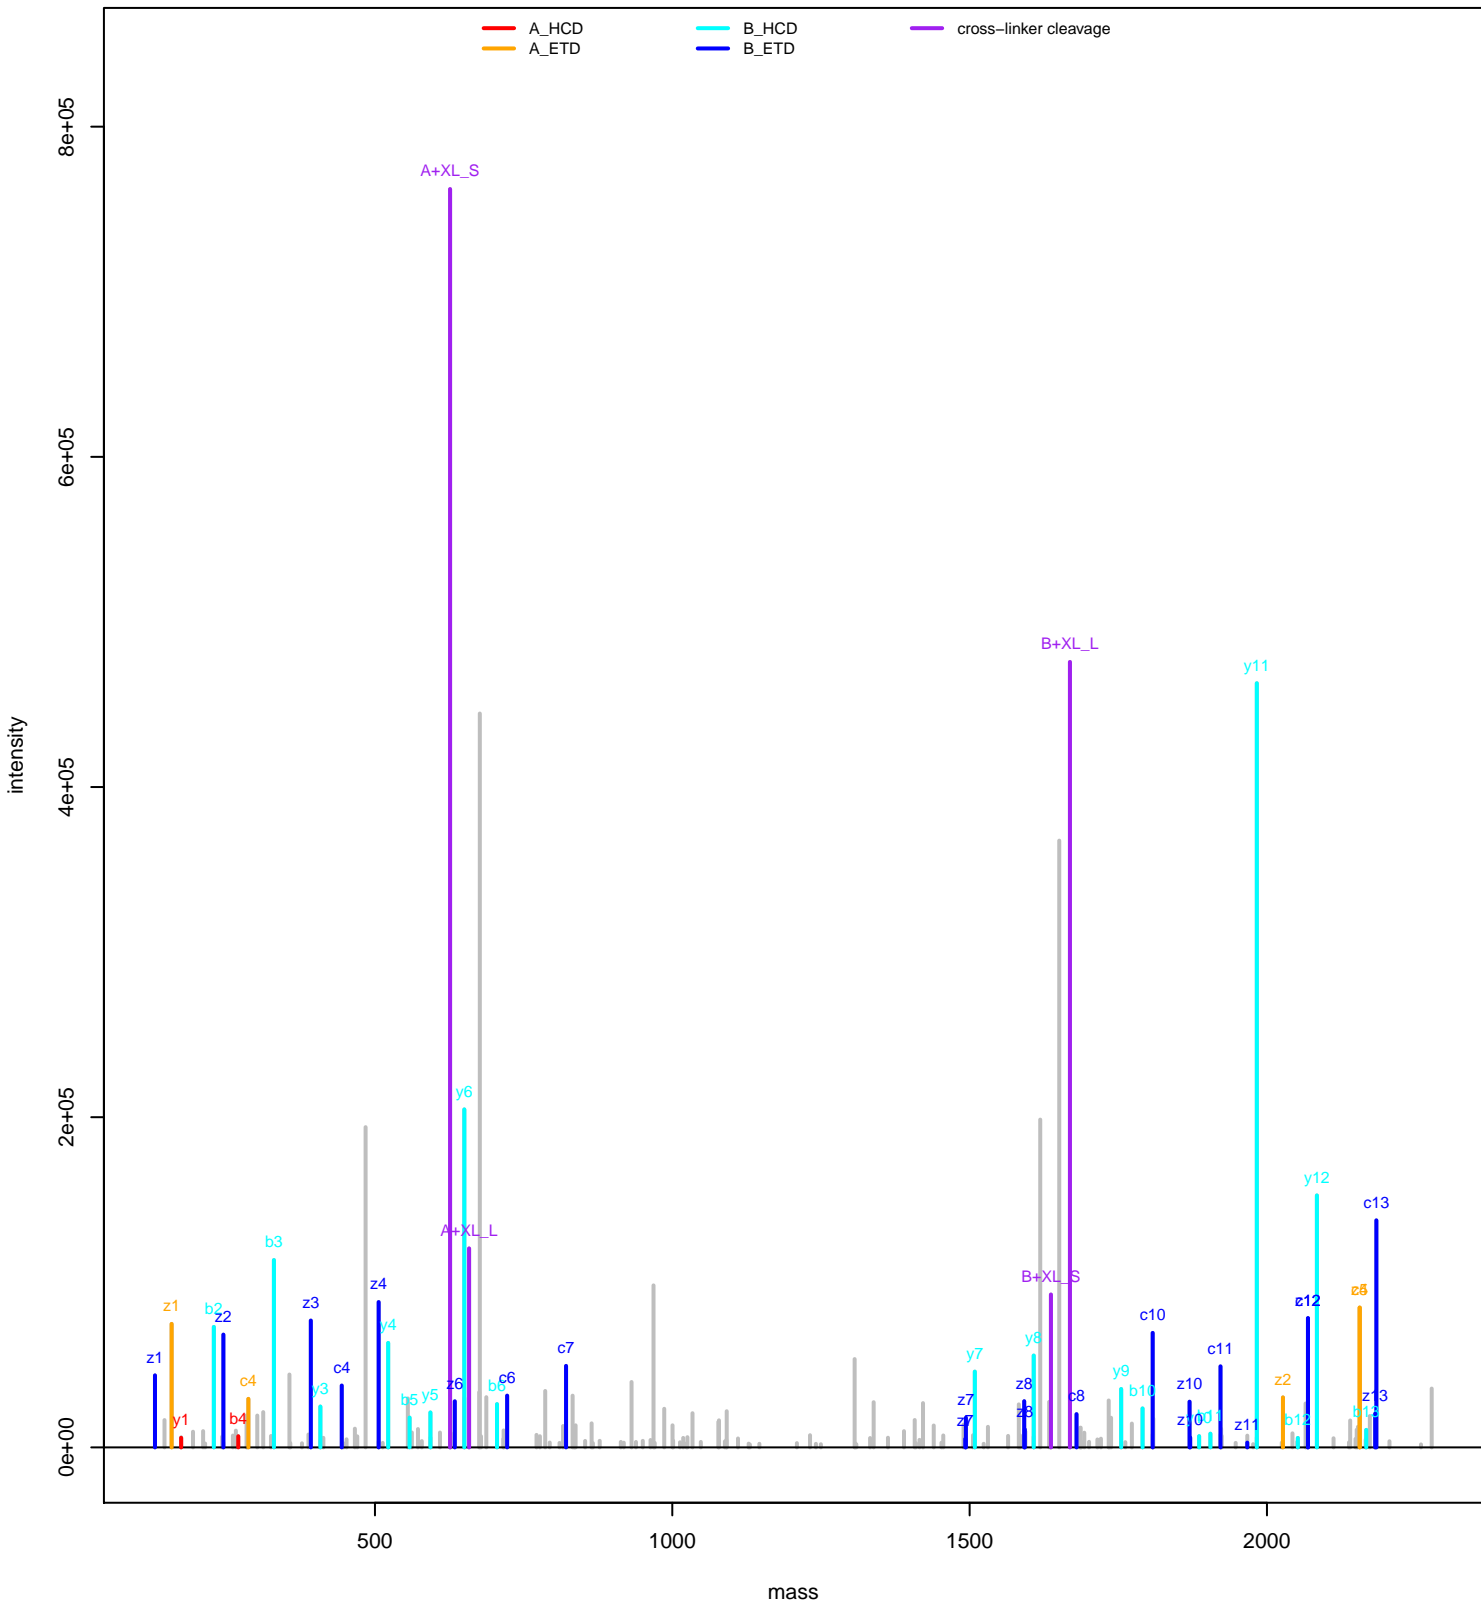

**AAGAKR+XL\_S**

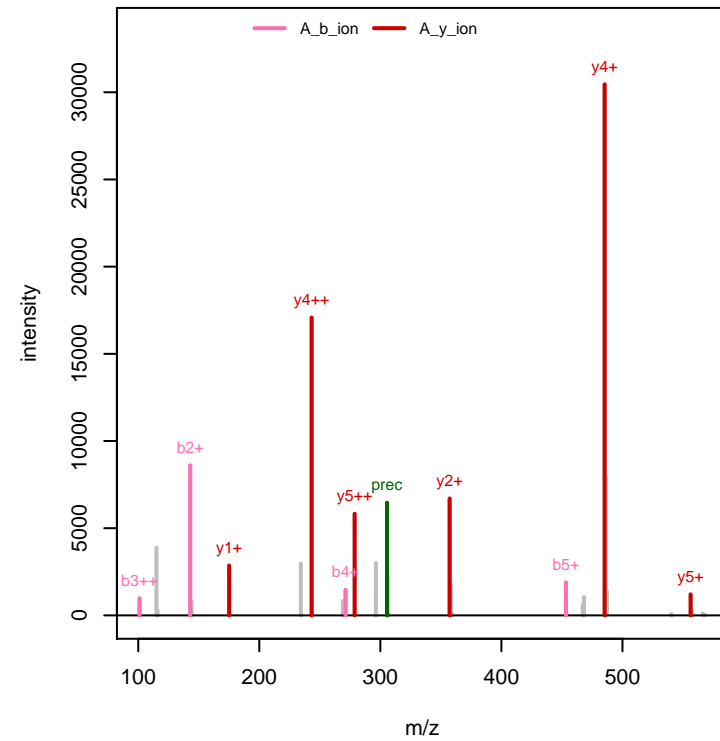

**AAGAKR+XL\_L**

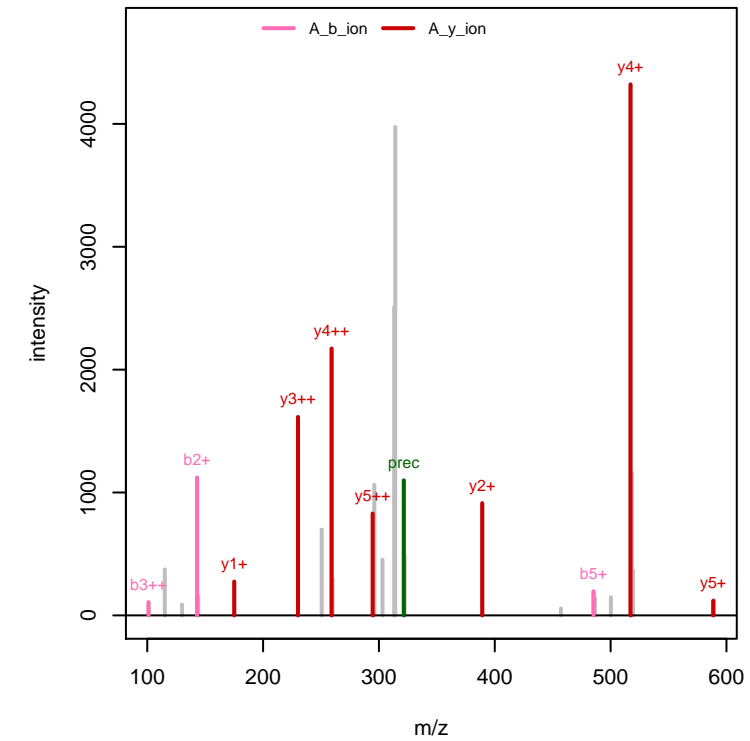

**DNTPMFVKGANFDK+XL\_S**

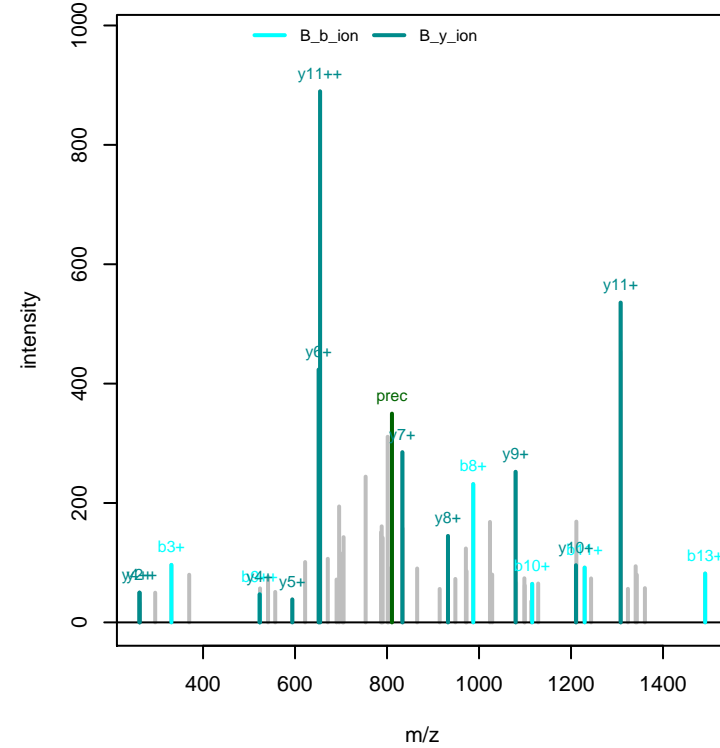

**DNTPMFVKGANFDK+XL\_L**

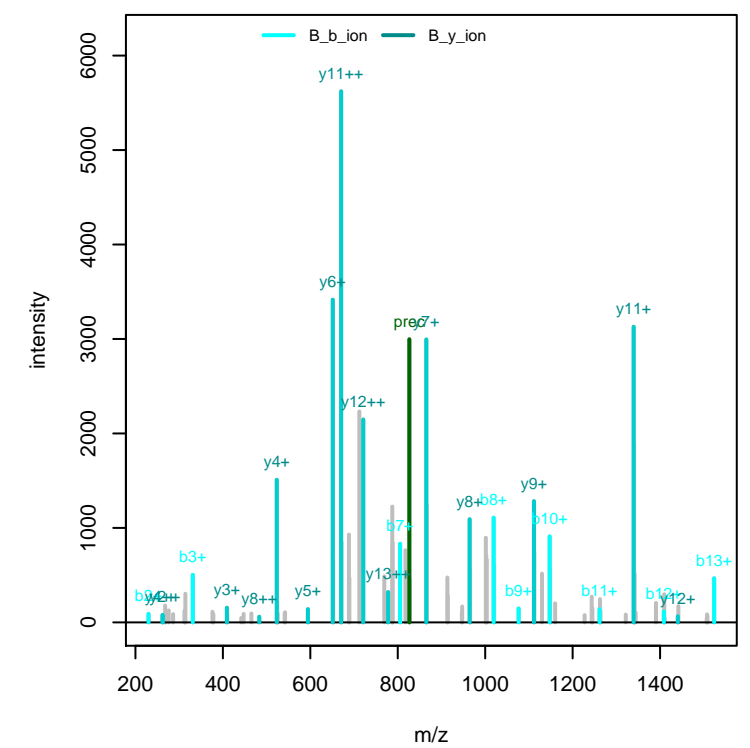

TFKPER  
GVICEKCGVEVTQTK

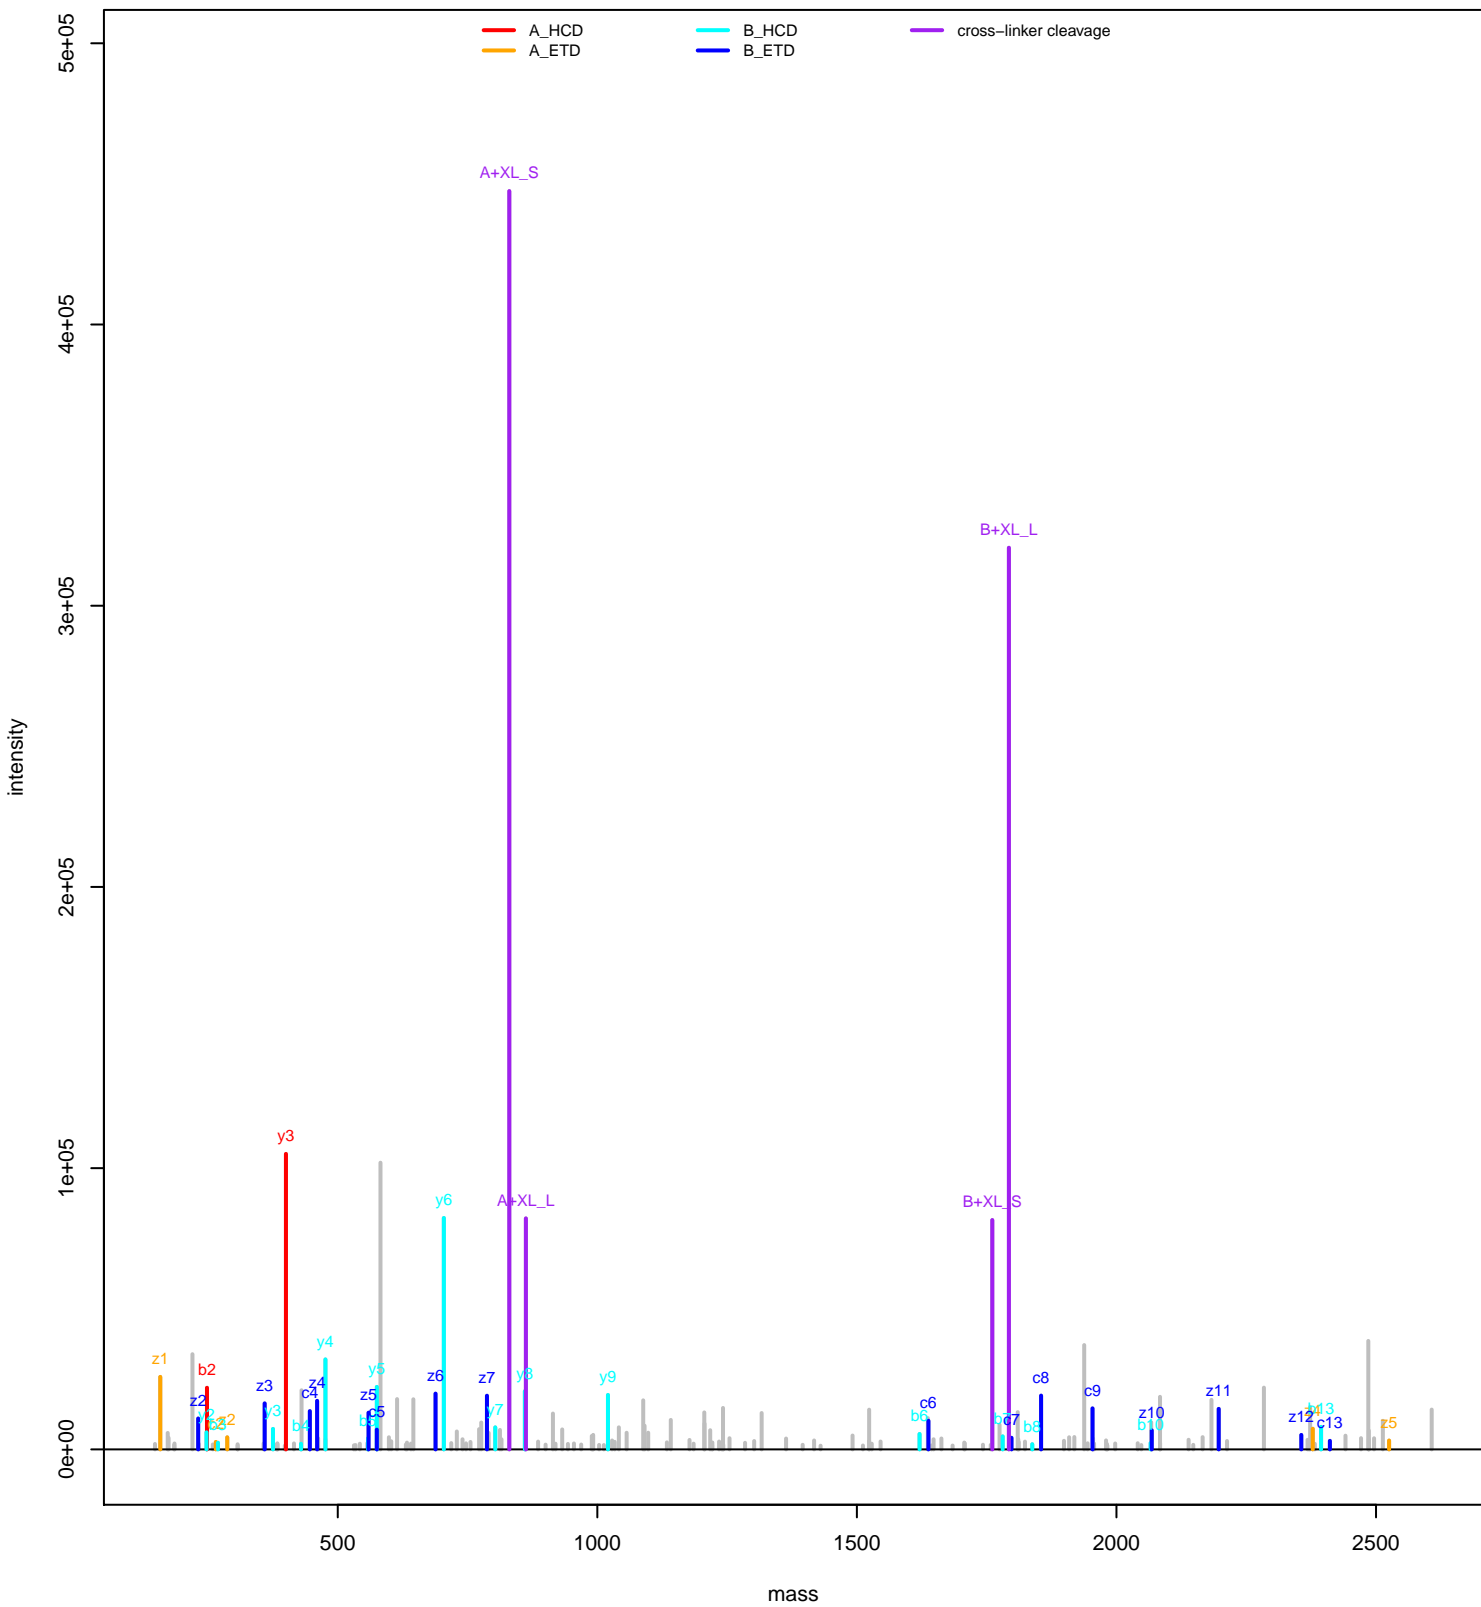

TFKPER+XL\_S

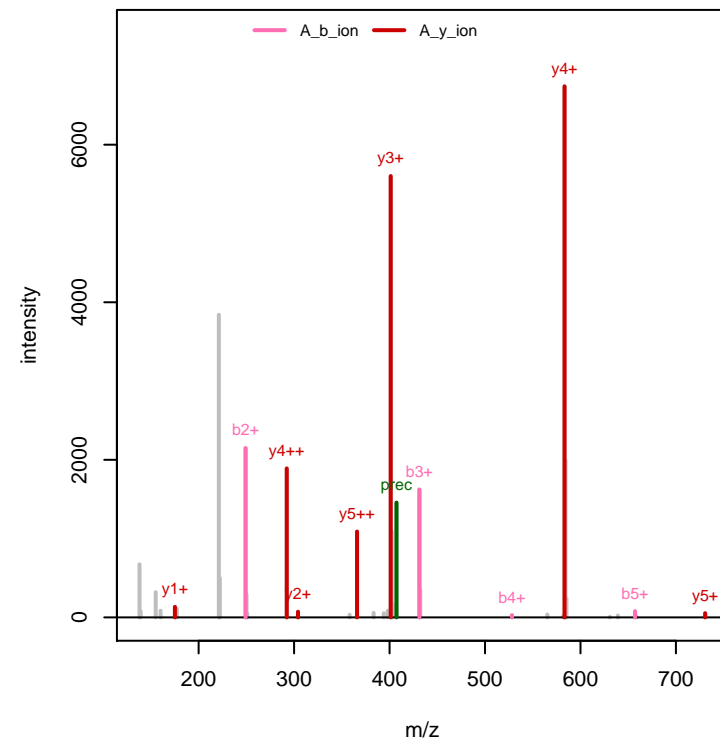

TFKPER+XL\_L

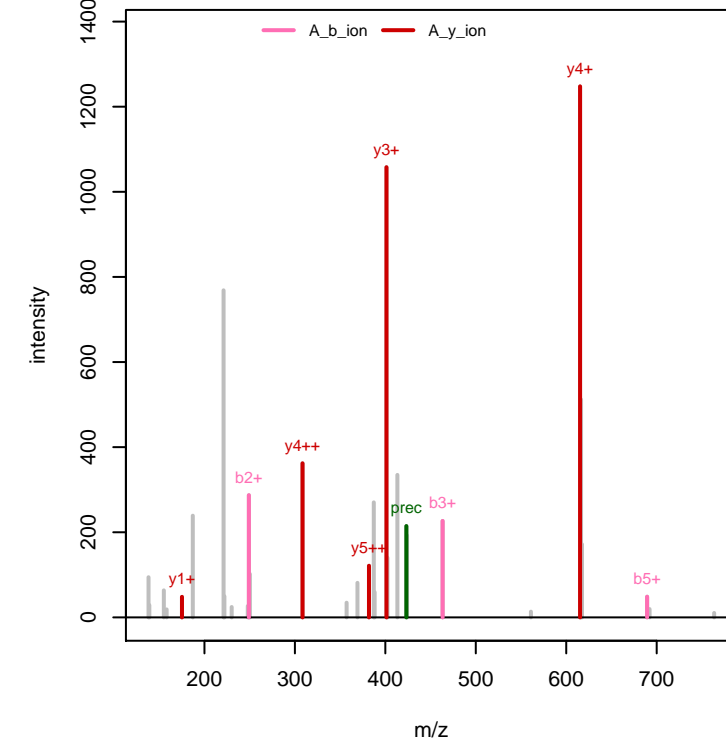

GVICEKCGVEVTQTK+XL\_S

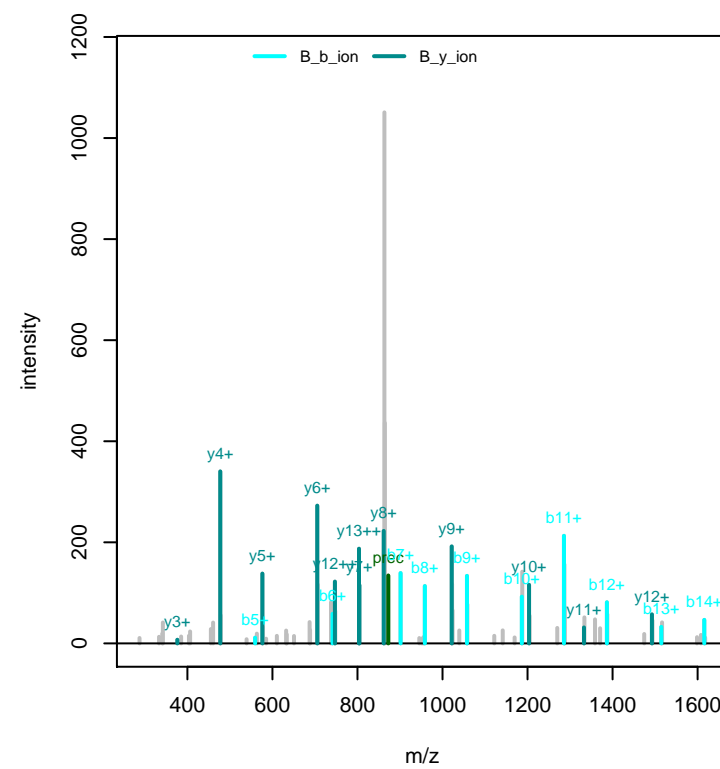

GVICEKCGVEVTQTK+XL\_L

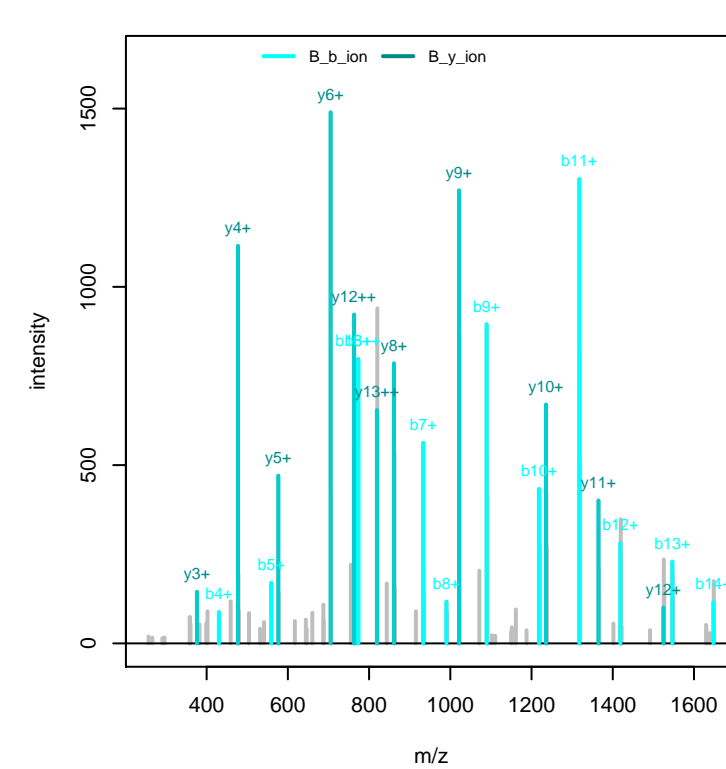

**KVASEPIGQR**  
**STTHNVPQGDLVLR**

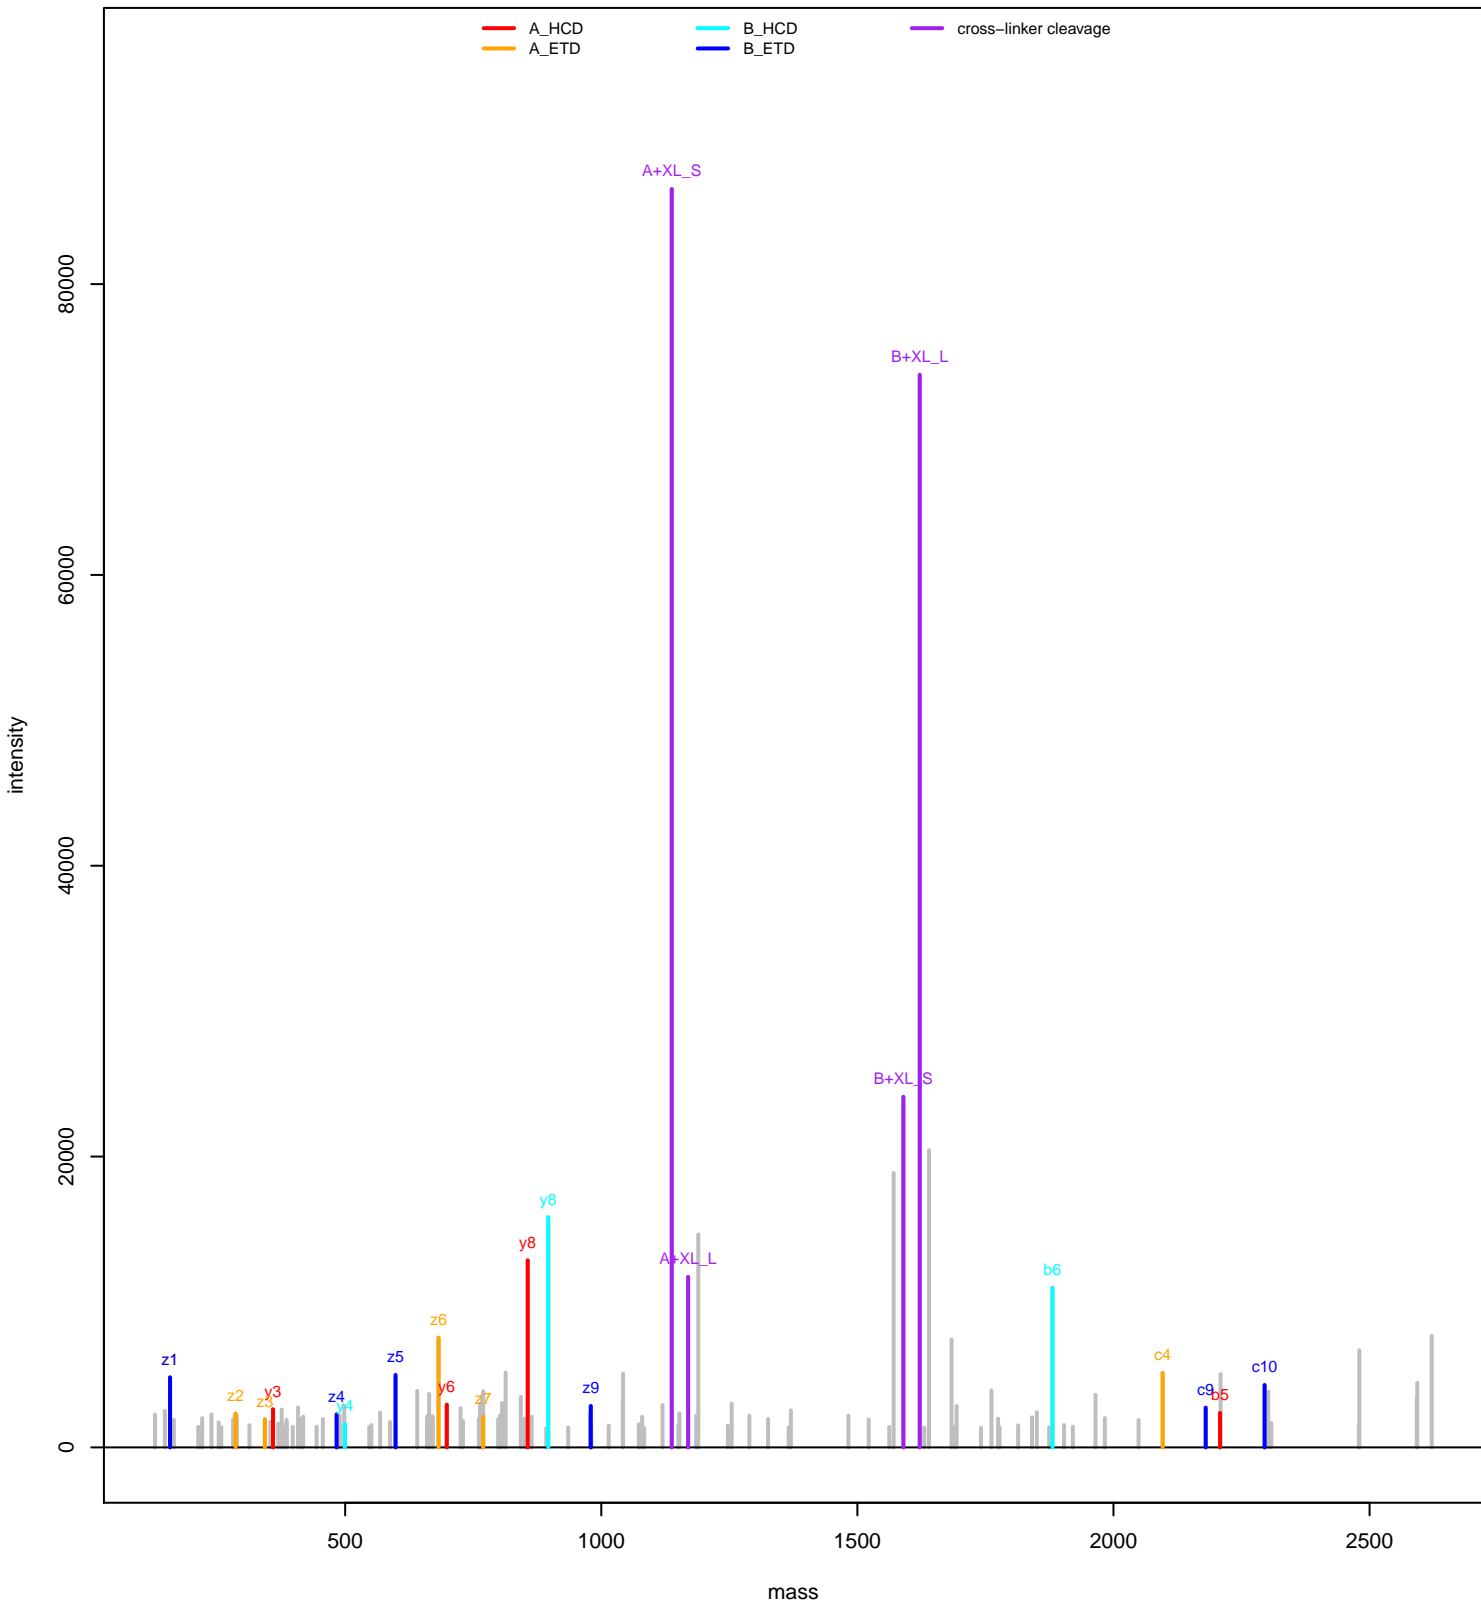

**KVASEPIGQR+XL\_S**

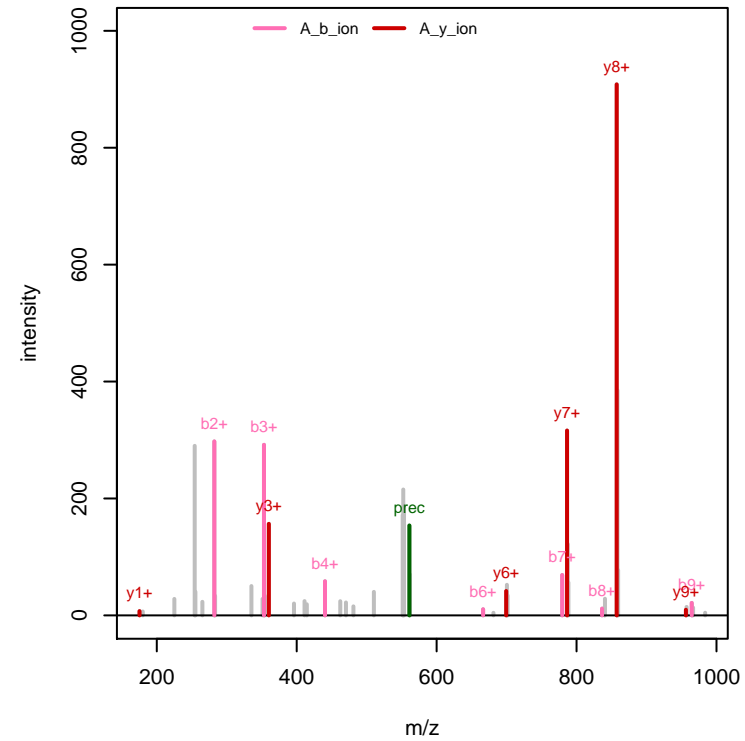

**KVASEPIGQR+XL\_L**

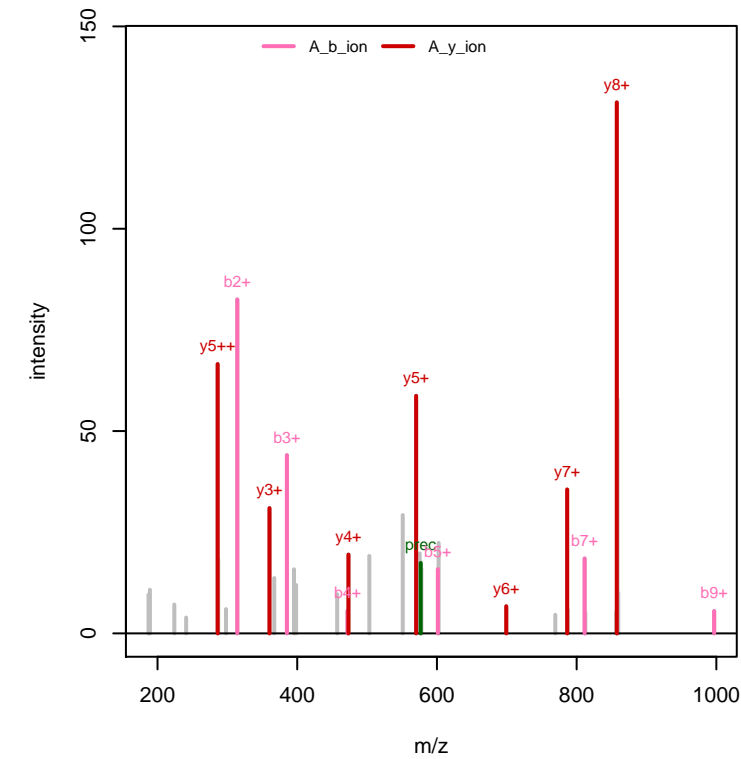

**STTHNVPQGDLVLR+XL\_S**

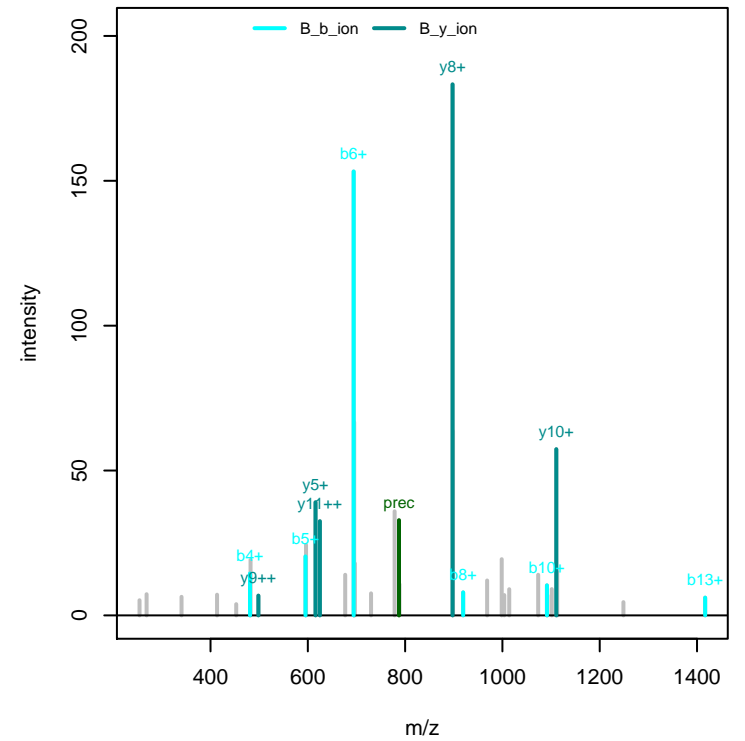

**STTHNVPQGDLVLR+XL\_L**

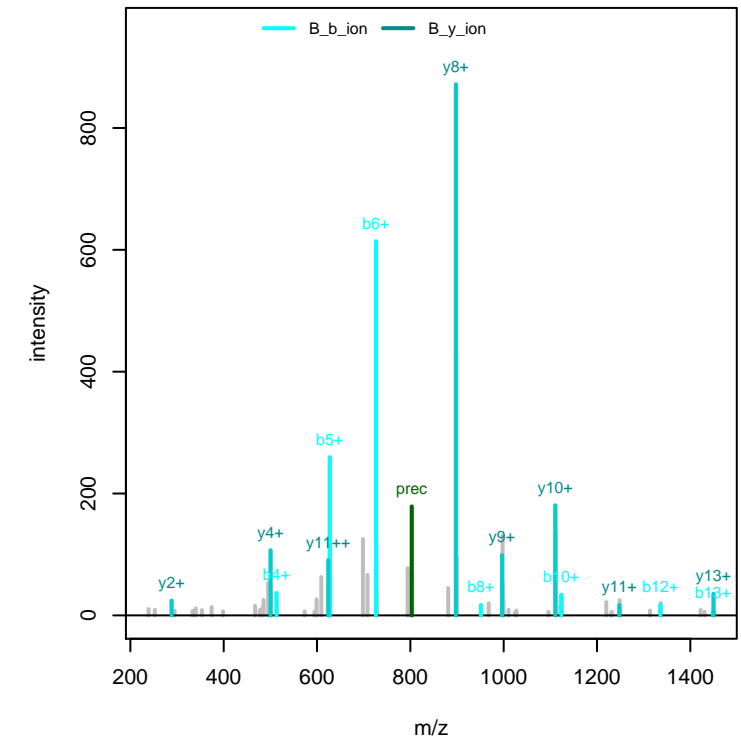

VKADLRNEK  
LKEYQYQEVK

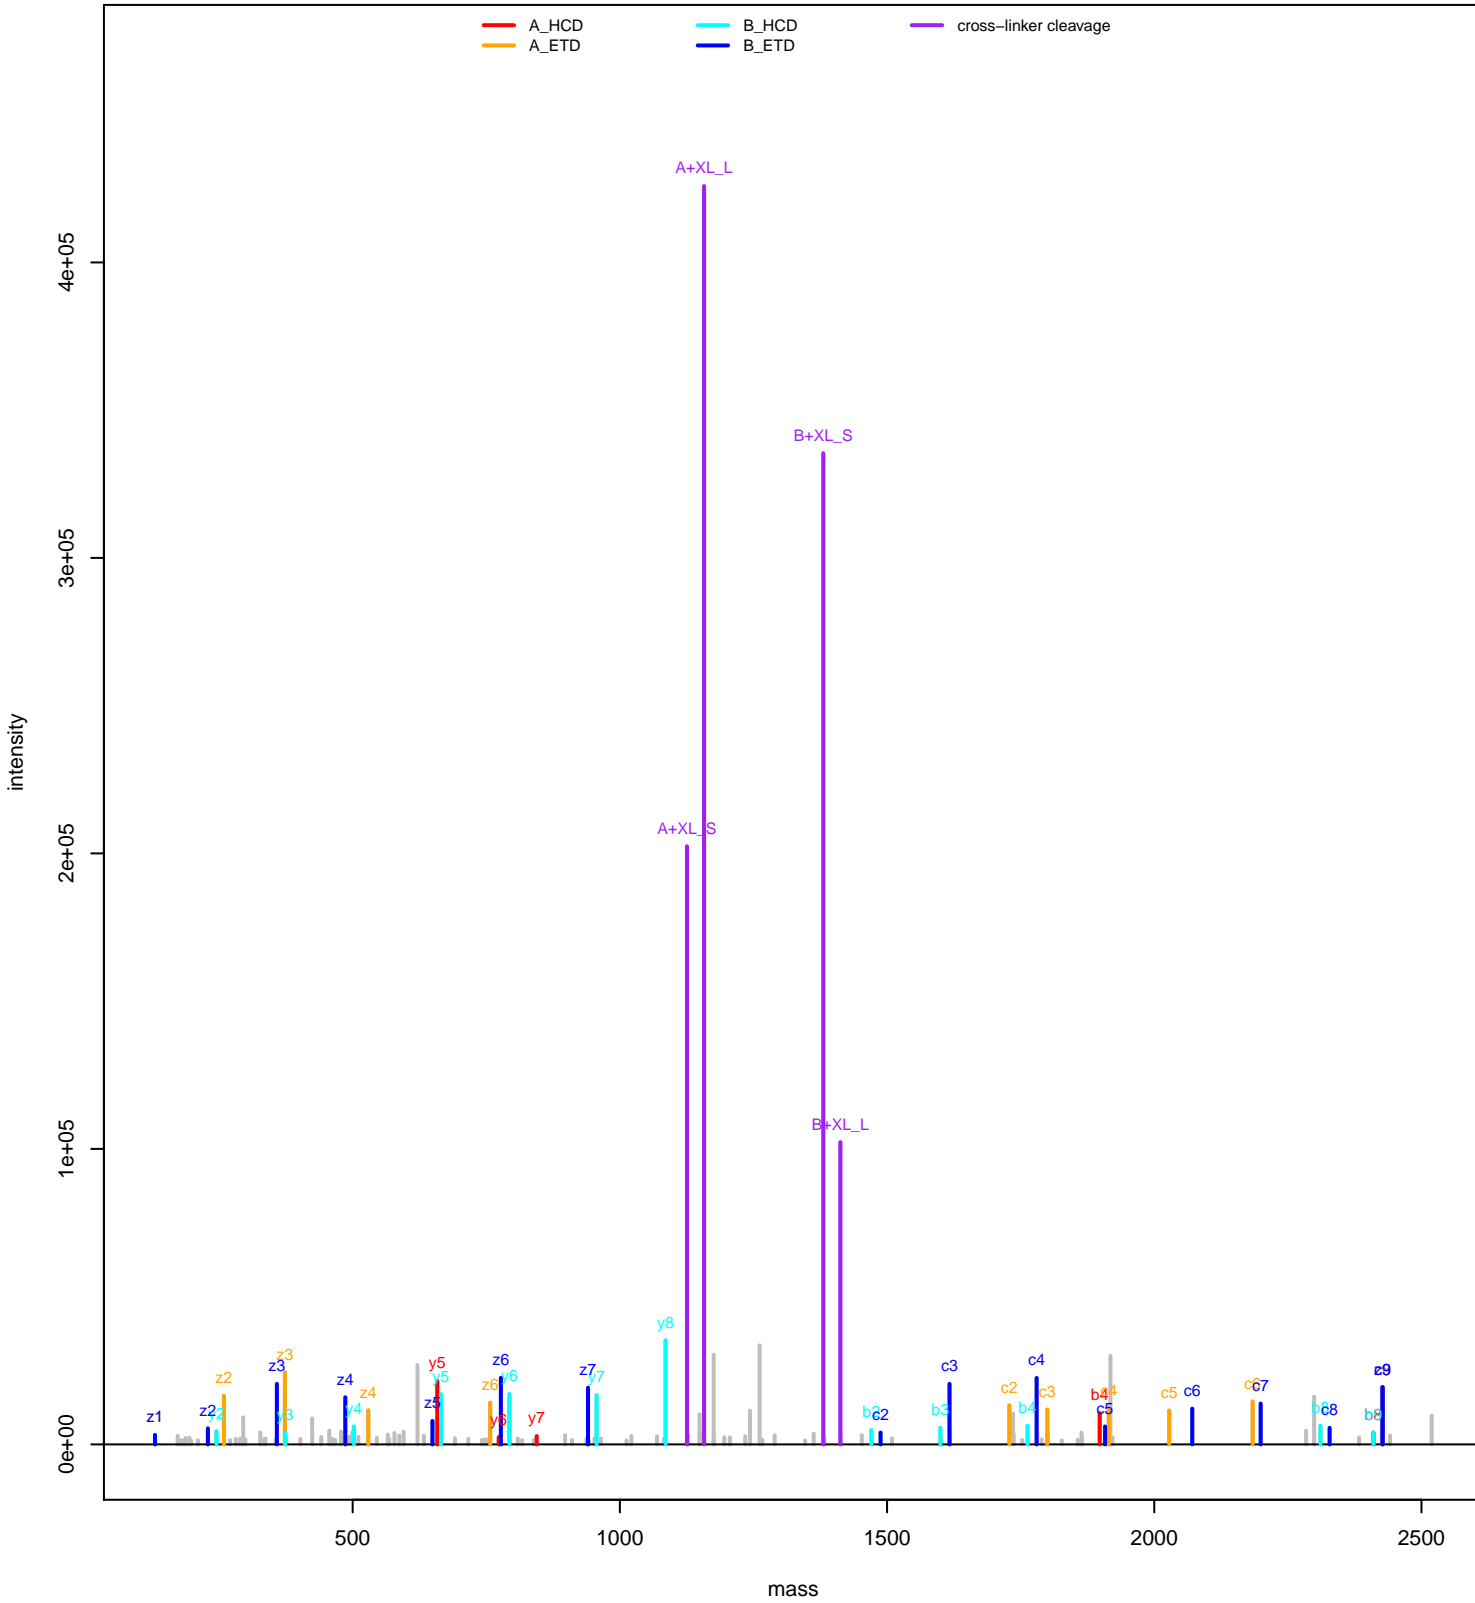

VKADLRNEK+XL\_S

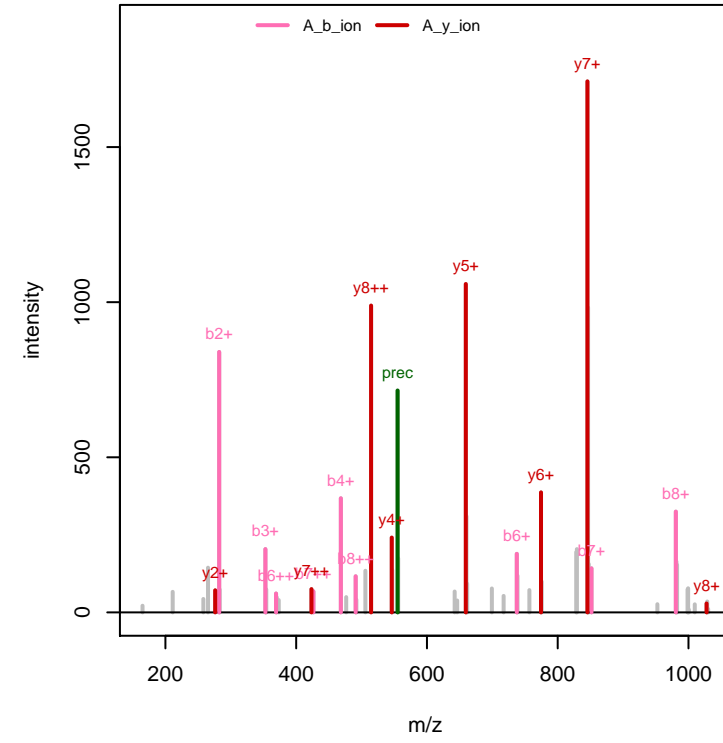

VKADLRNEK+XL\_L

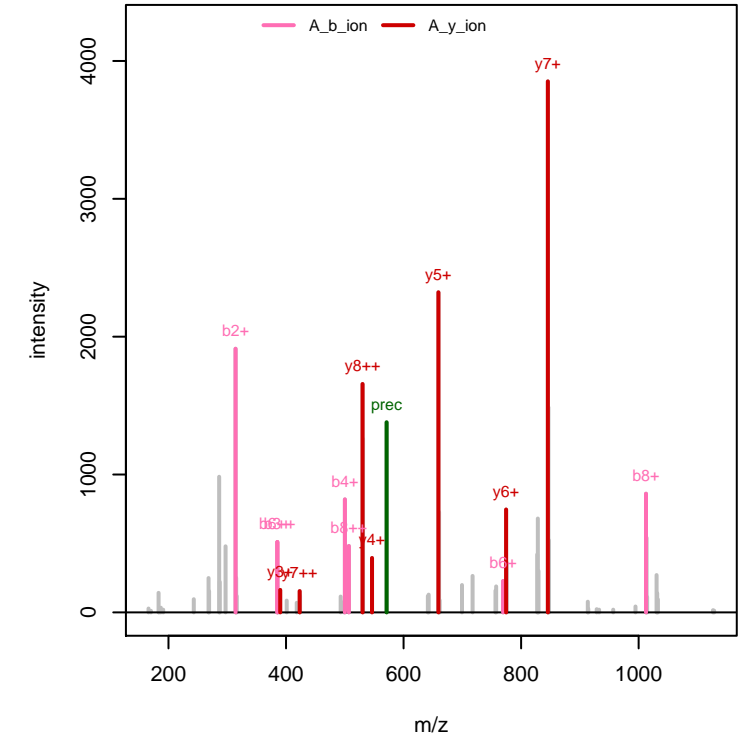

LKEYQYQEVK+XL\_S

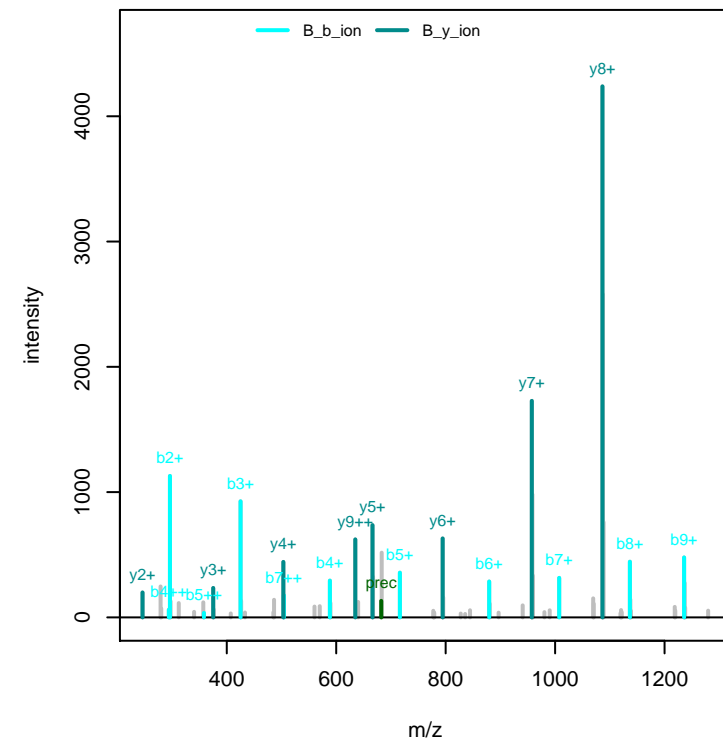

LKEYQYQEVK+XL\_L

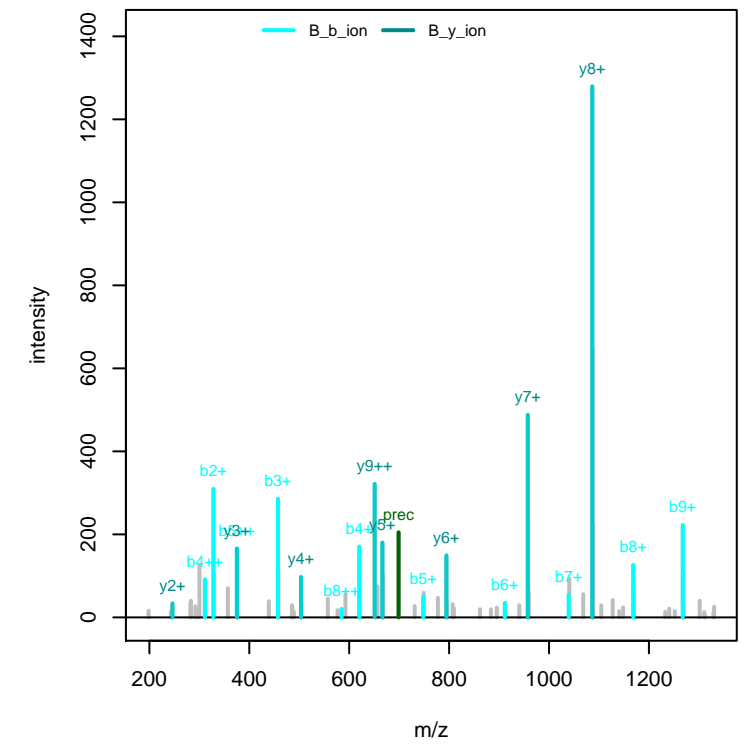

KIEAALADK  
CVEAFKTQISK

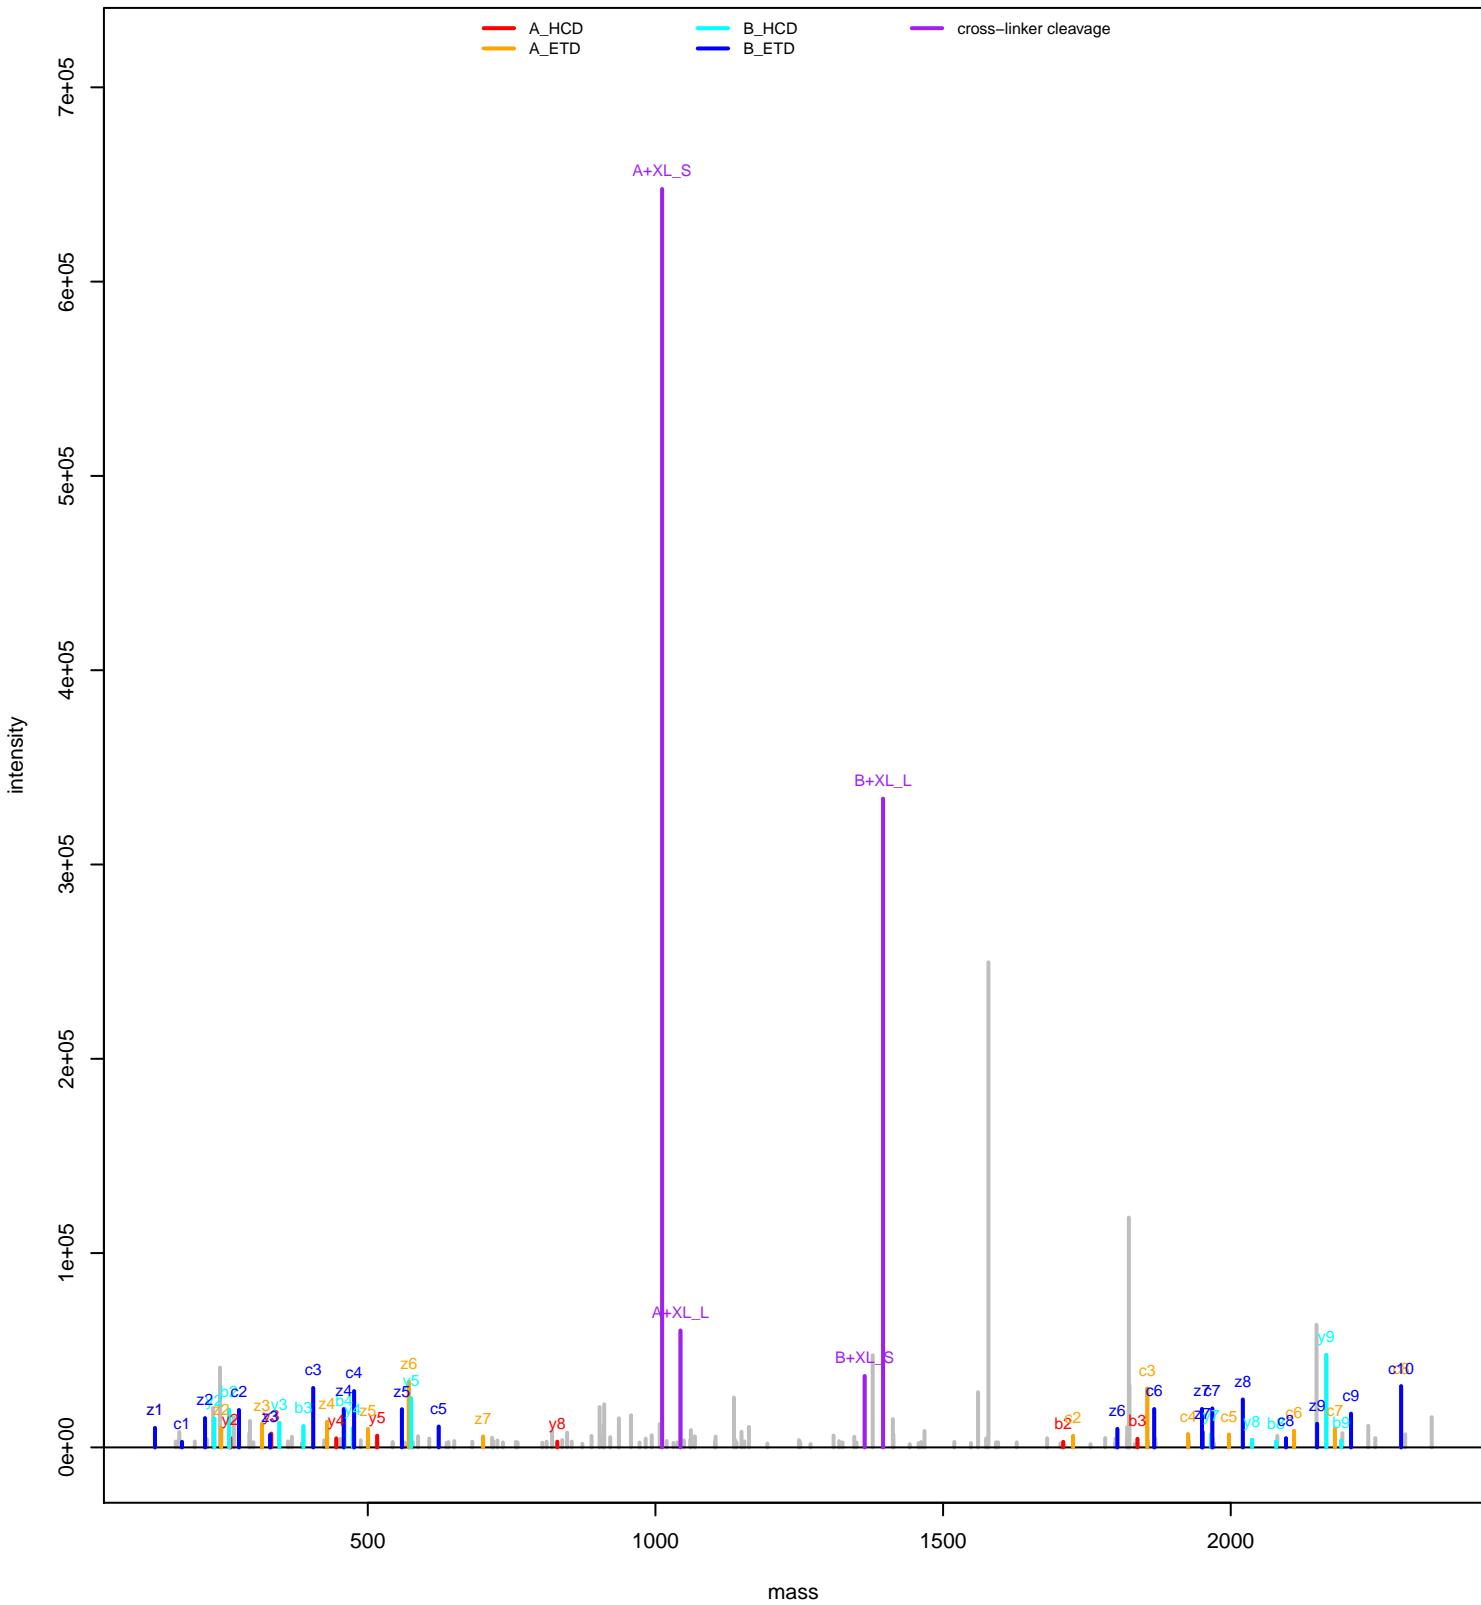

KIEAALADK+XL\_S

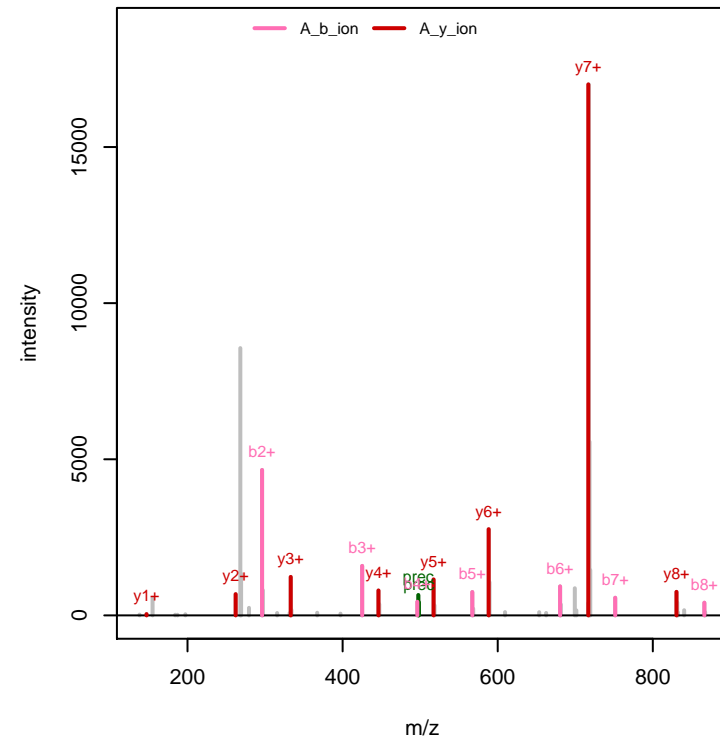

KIEAALADK+XL\_L

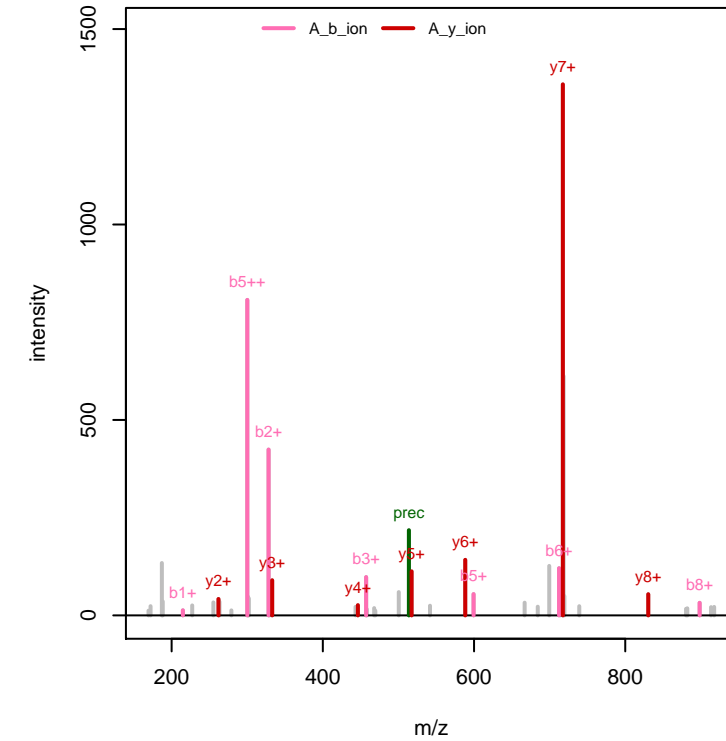

CVEAFKTQISK+XL\_S

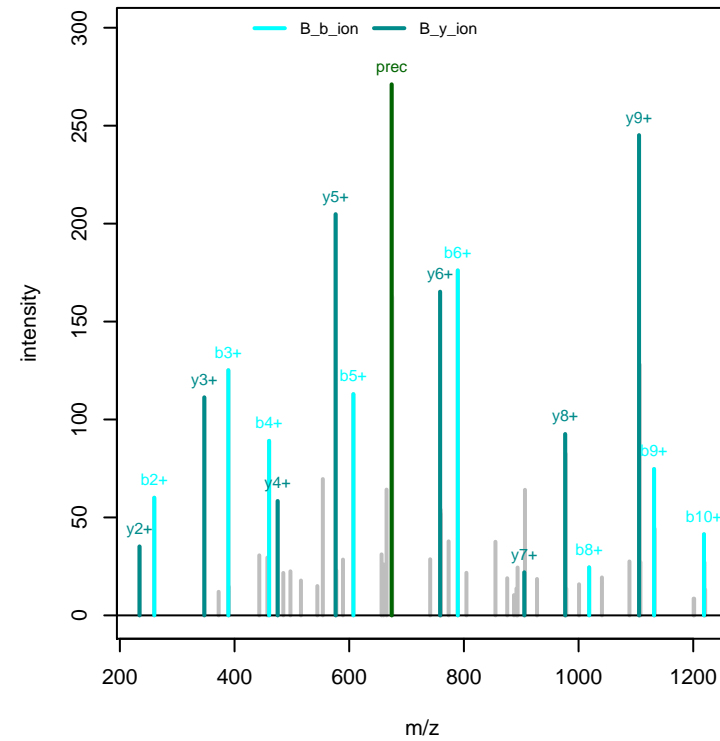

CVEAFKTQISK+XL\_L

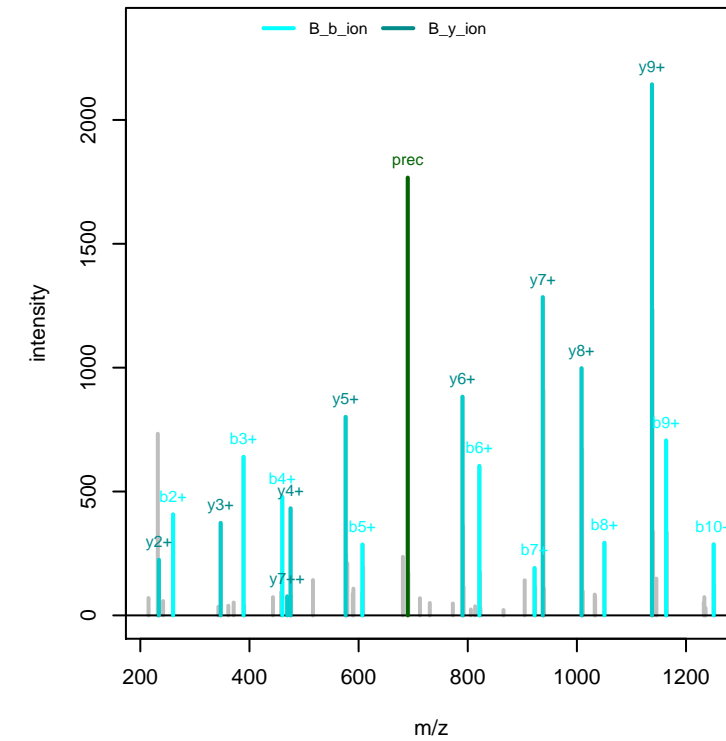

VKALLK  
DKEISEDDRRSQDDVQK

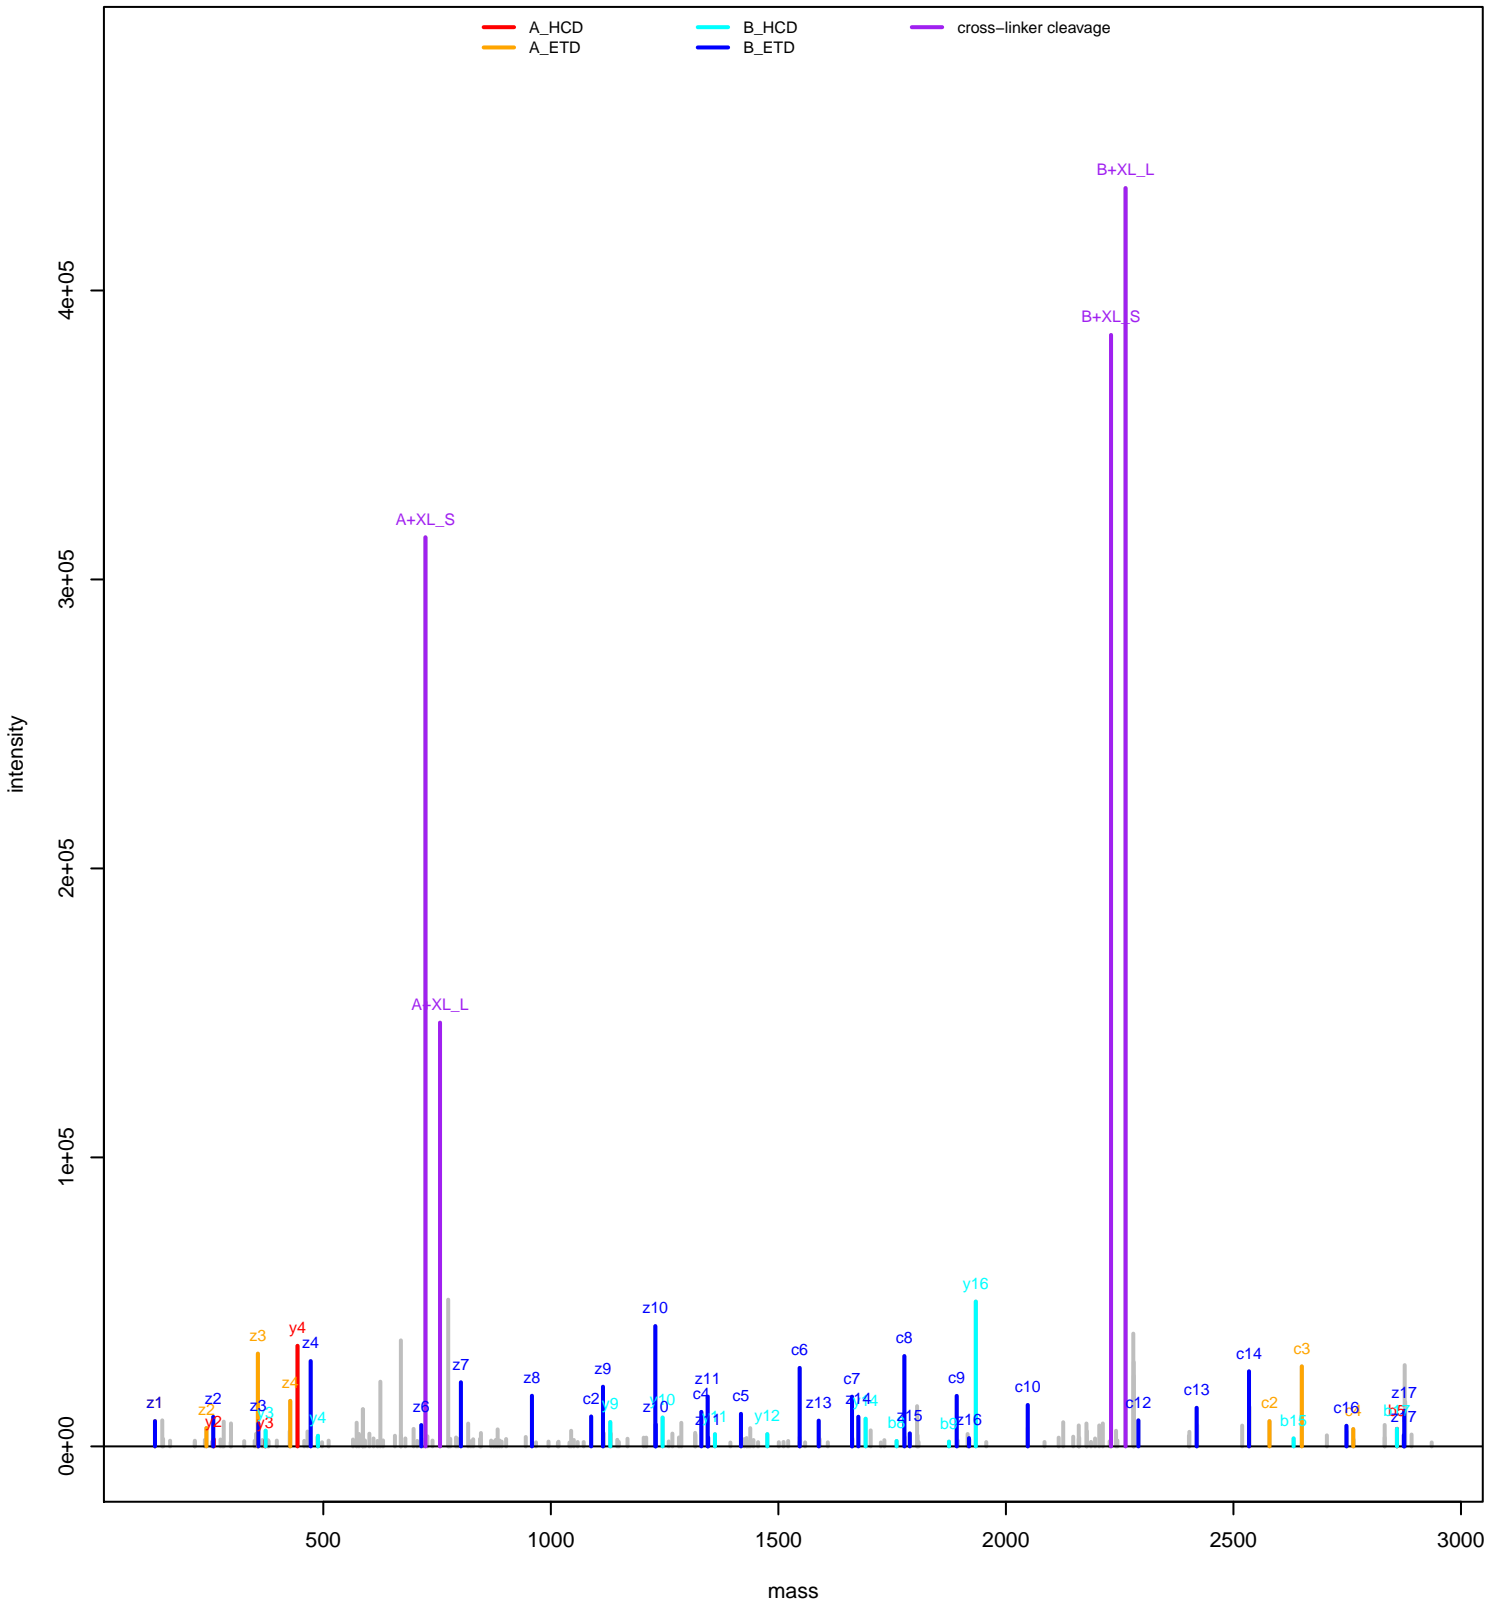

VKALLK+XL\_S

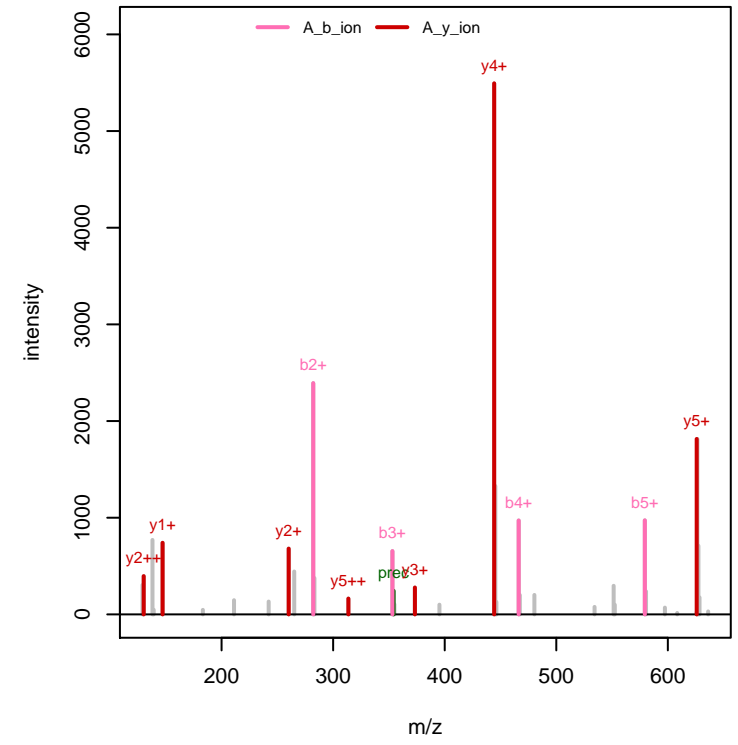

VKALLK+XL\_L

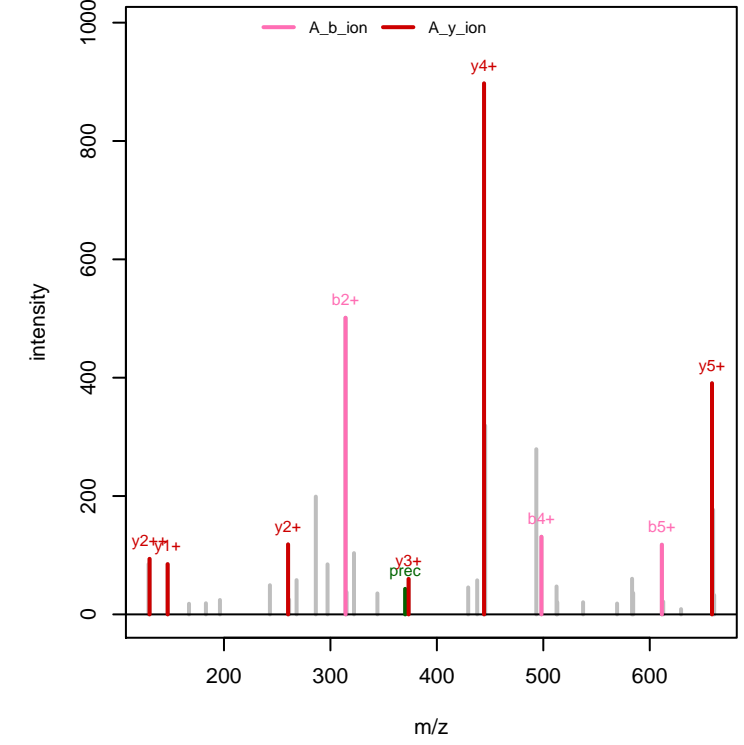

DKEISEDDRRSQDDVQK+XL\_S

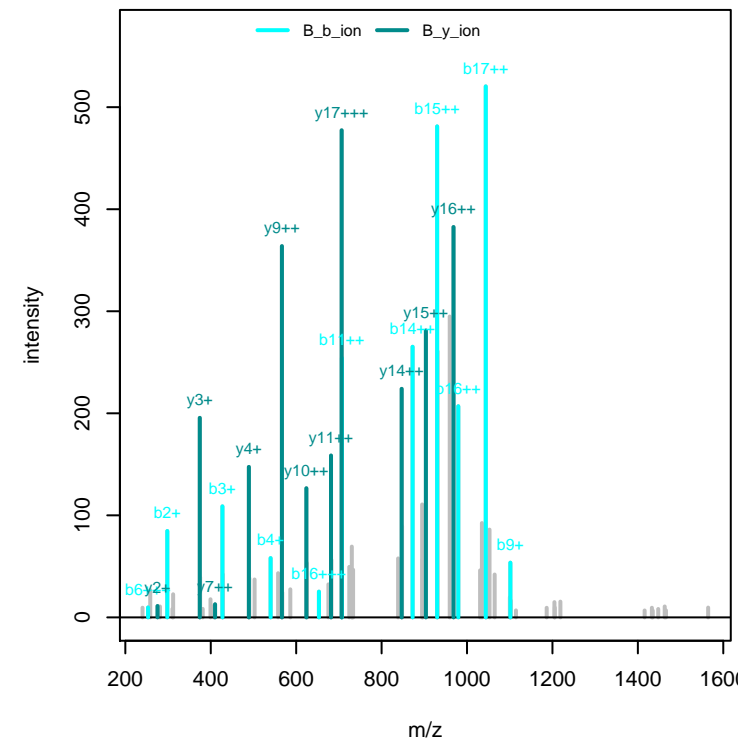

DKEISEDDRRSQDDVQK+XL\_L

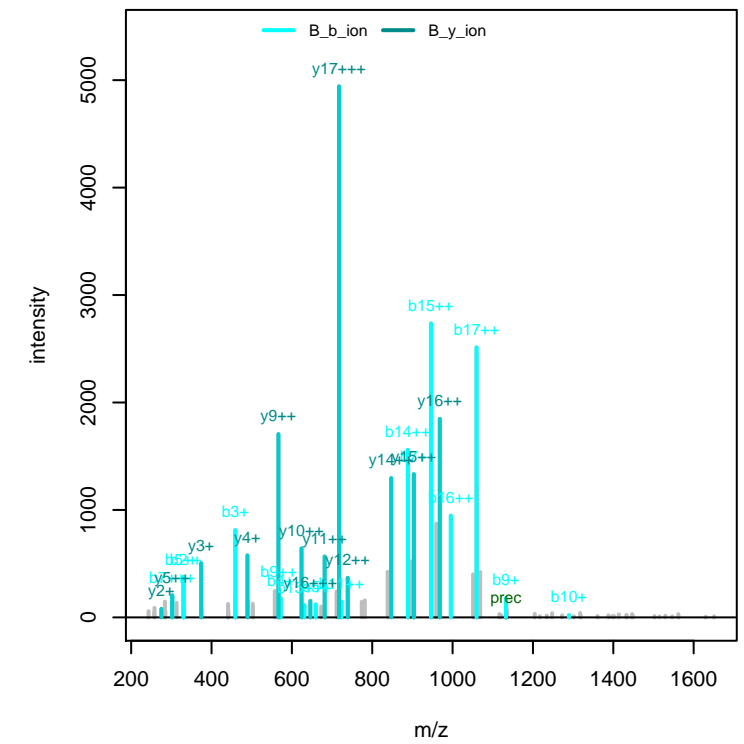



QAQQMQEKMQK  
EKMASVSSGMQLPPGFK

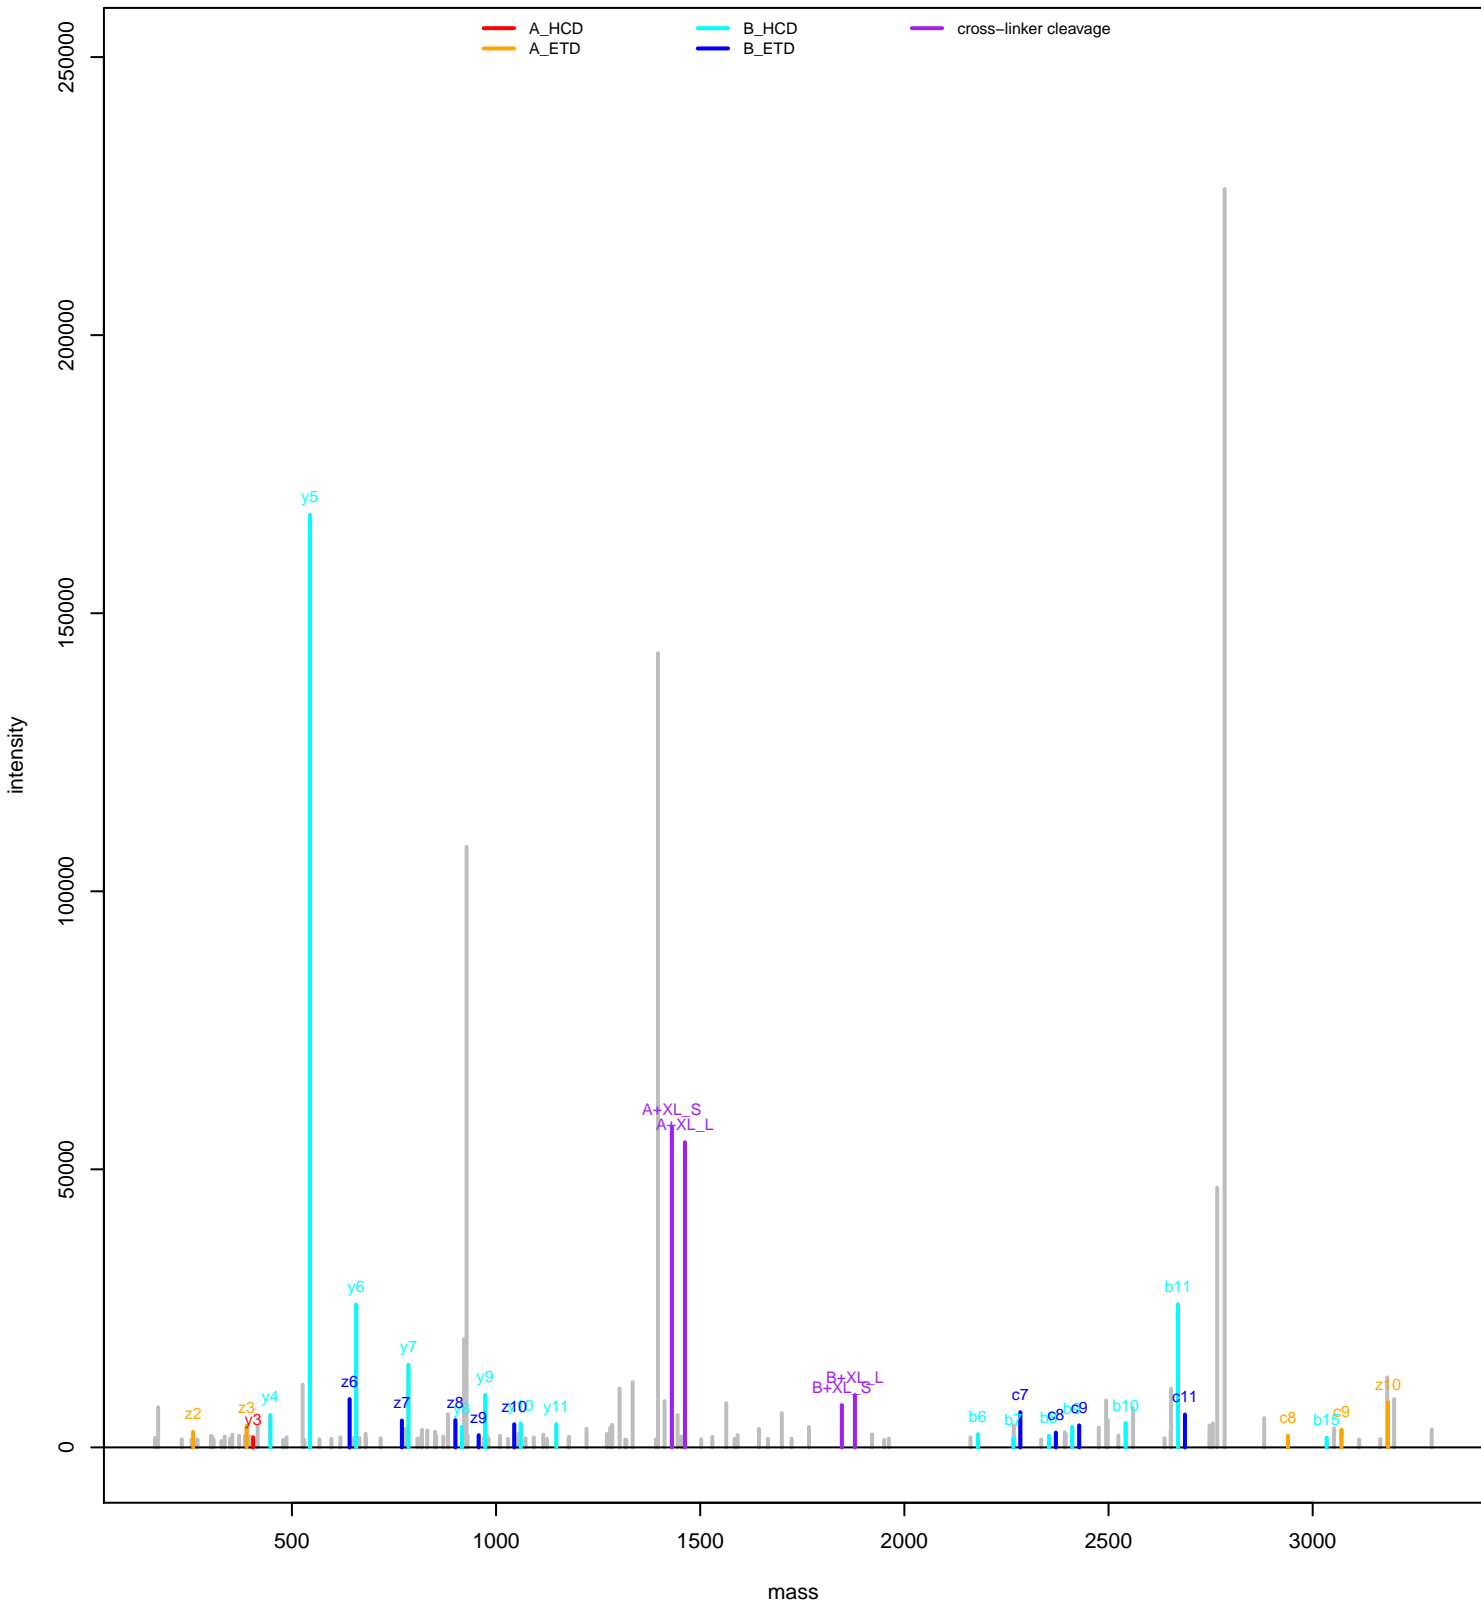

QAQQMQEKMQK+XL\_S

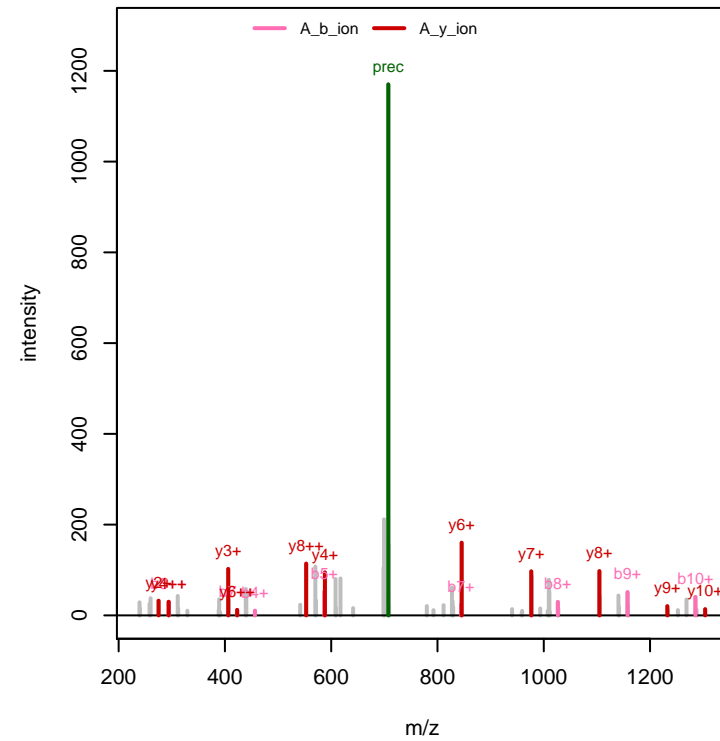

QAQQMQEKMQK+XL\_L

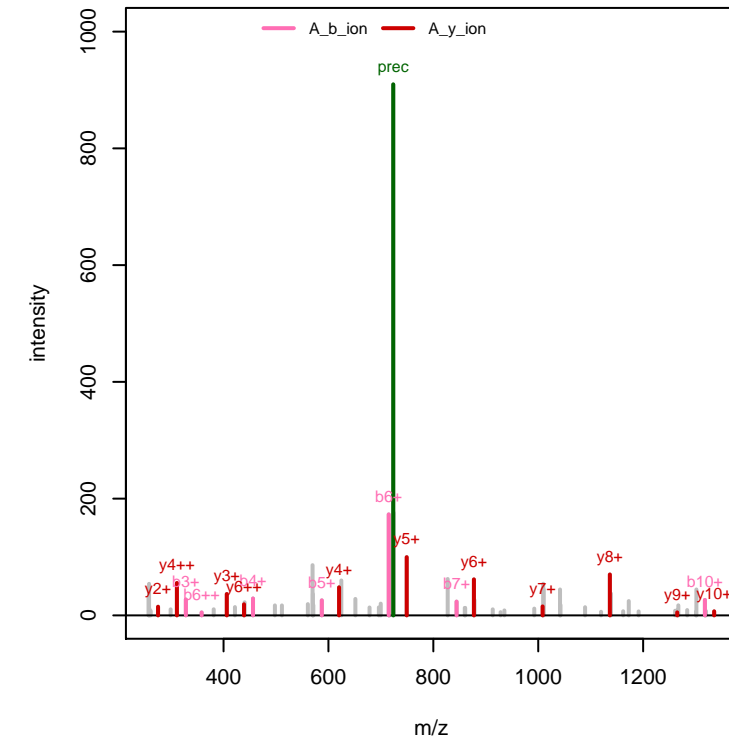

EKMASVSSGMQLPPGFK+XL\_S

EKMASVSSGMQLPPGFK+XL\_L

DVQGKMK  
KAGQPWEK

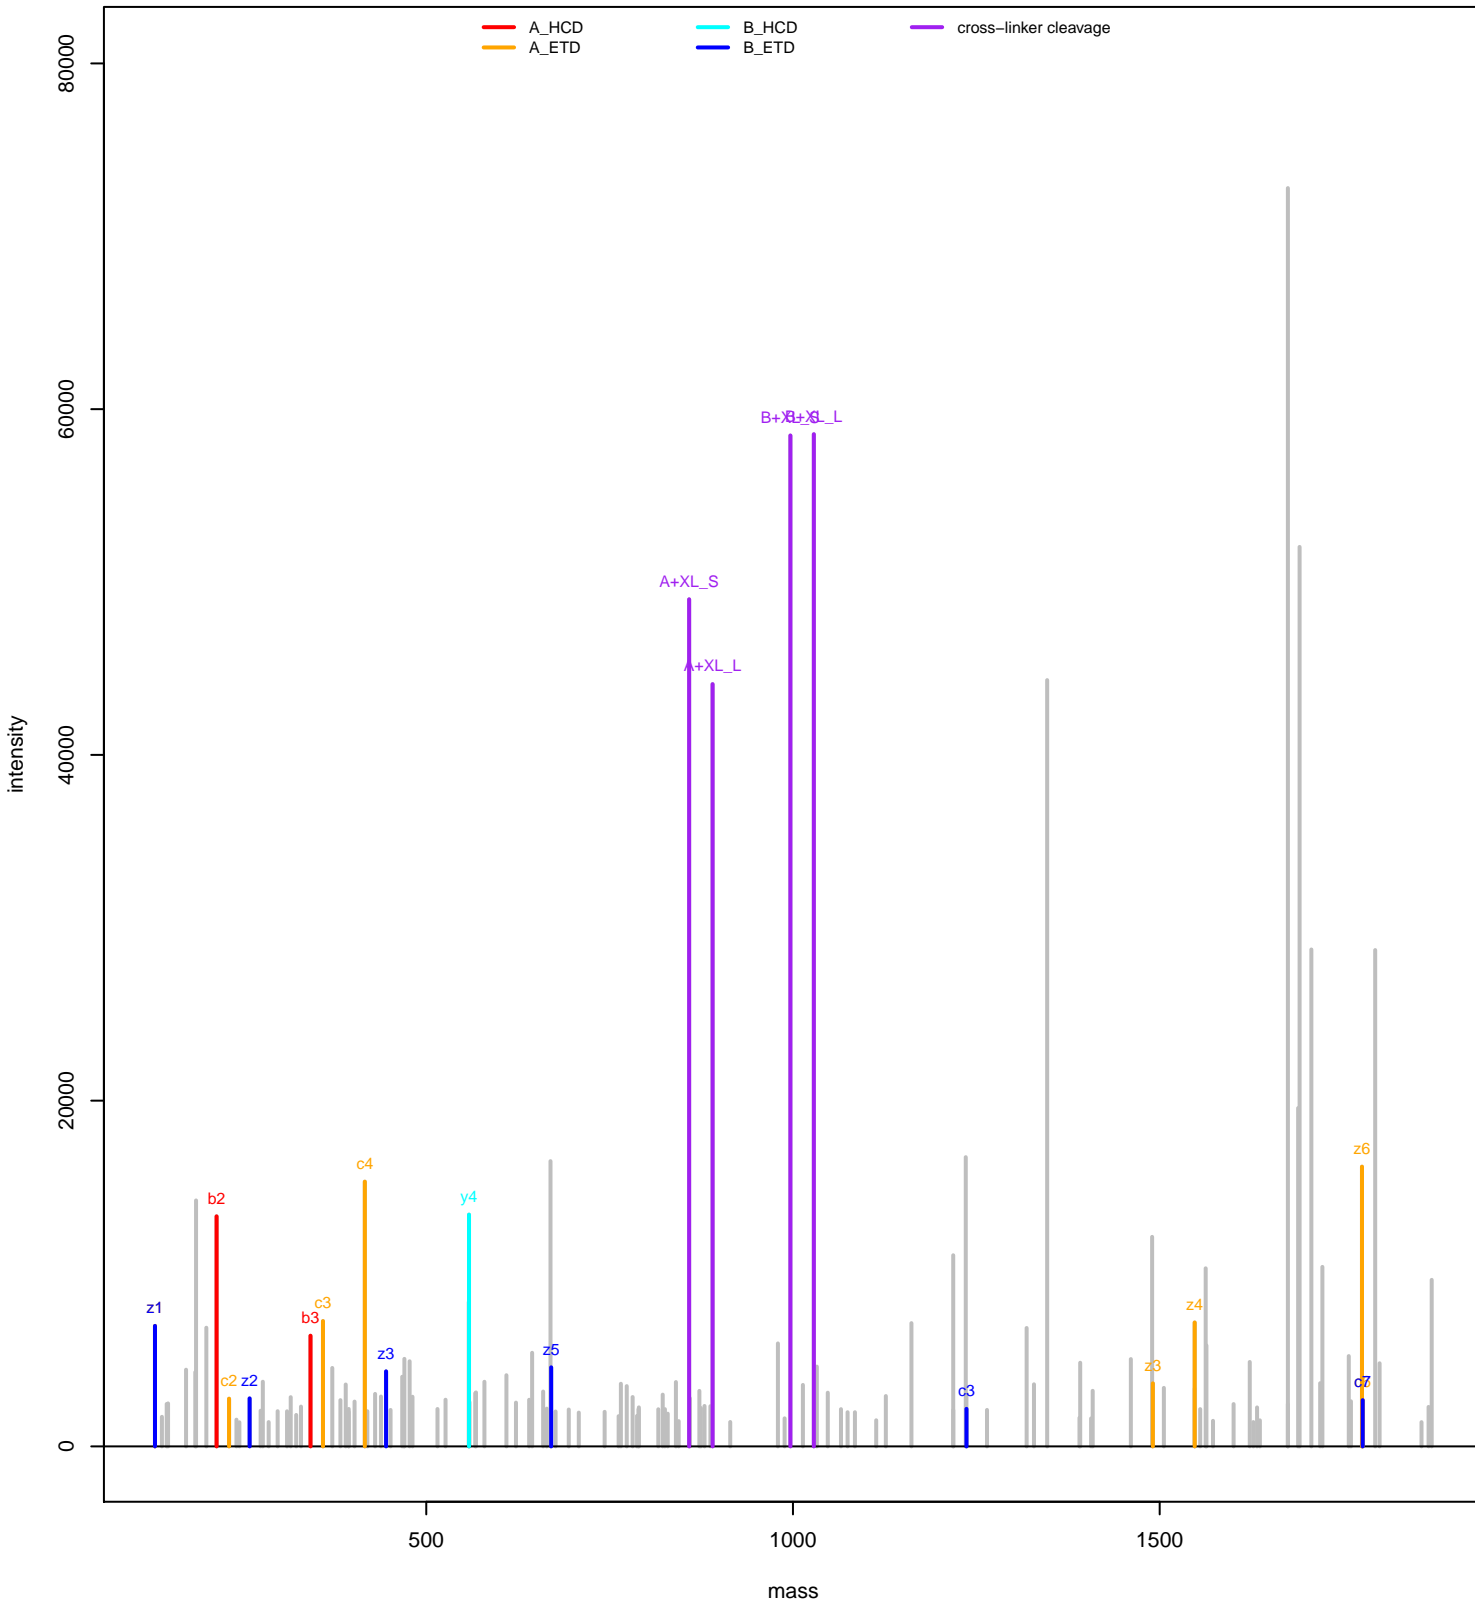

DVQGKMK+XL\_S

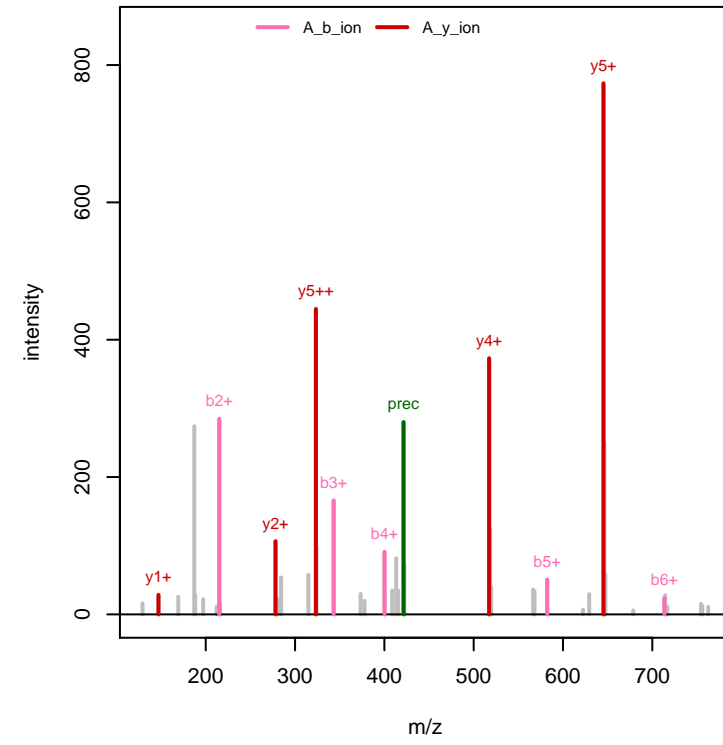

DVQGKMK+XL\_L

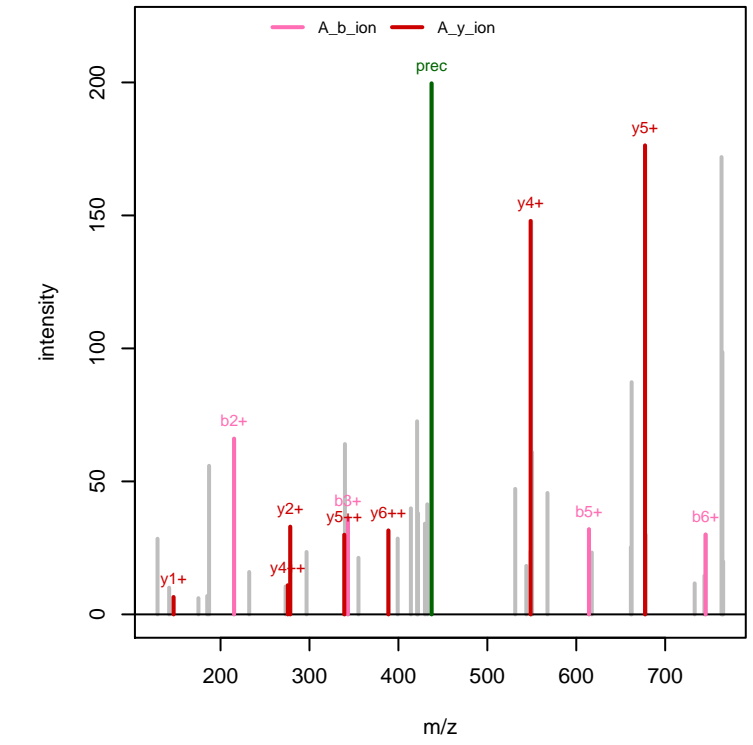

KAGQPWEK+XL\_S

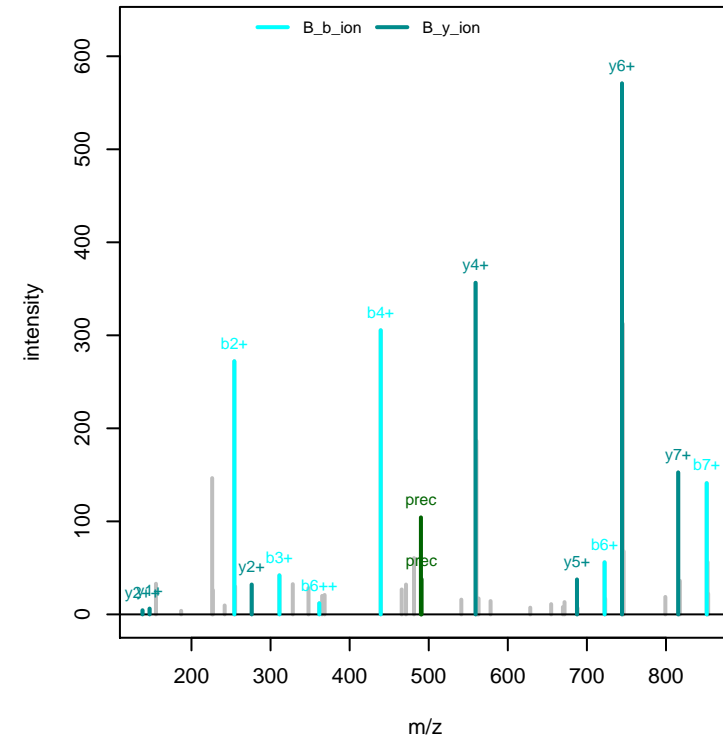

KAGQPWEK+XL\_L

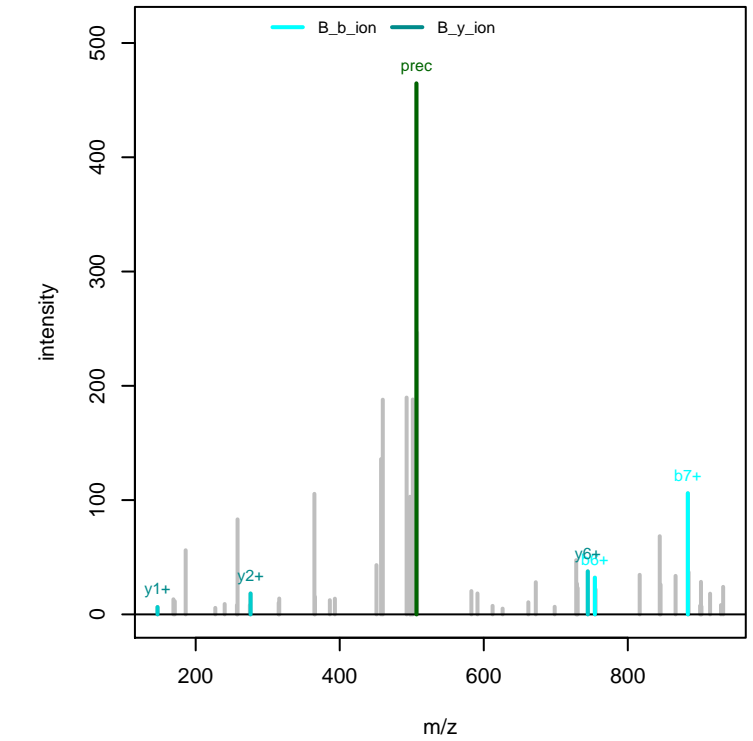

MNKSQLIDK  
IAAGADISKAAGR

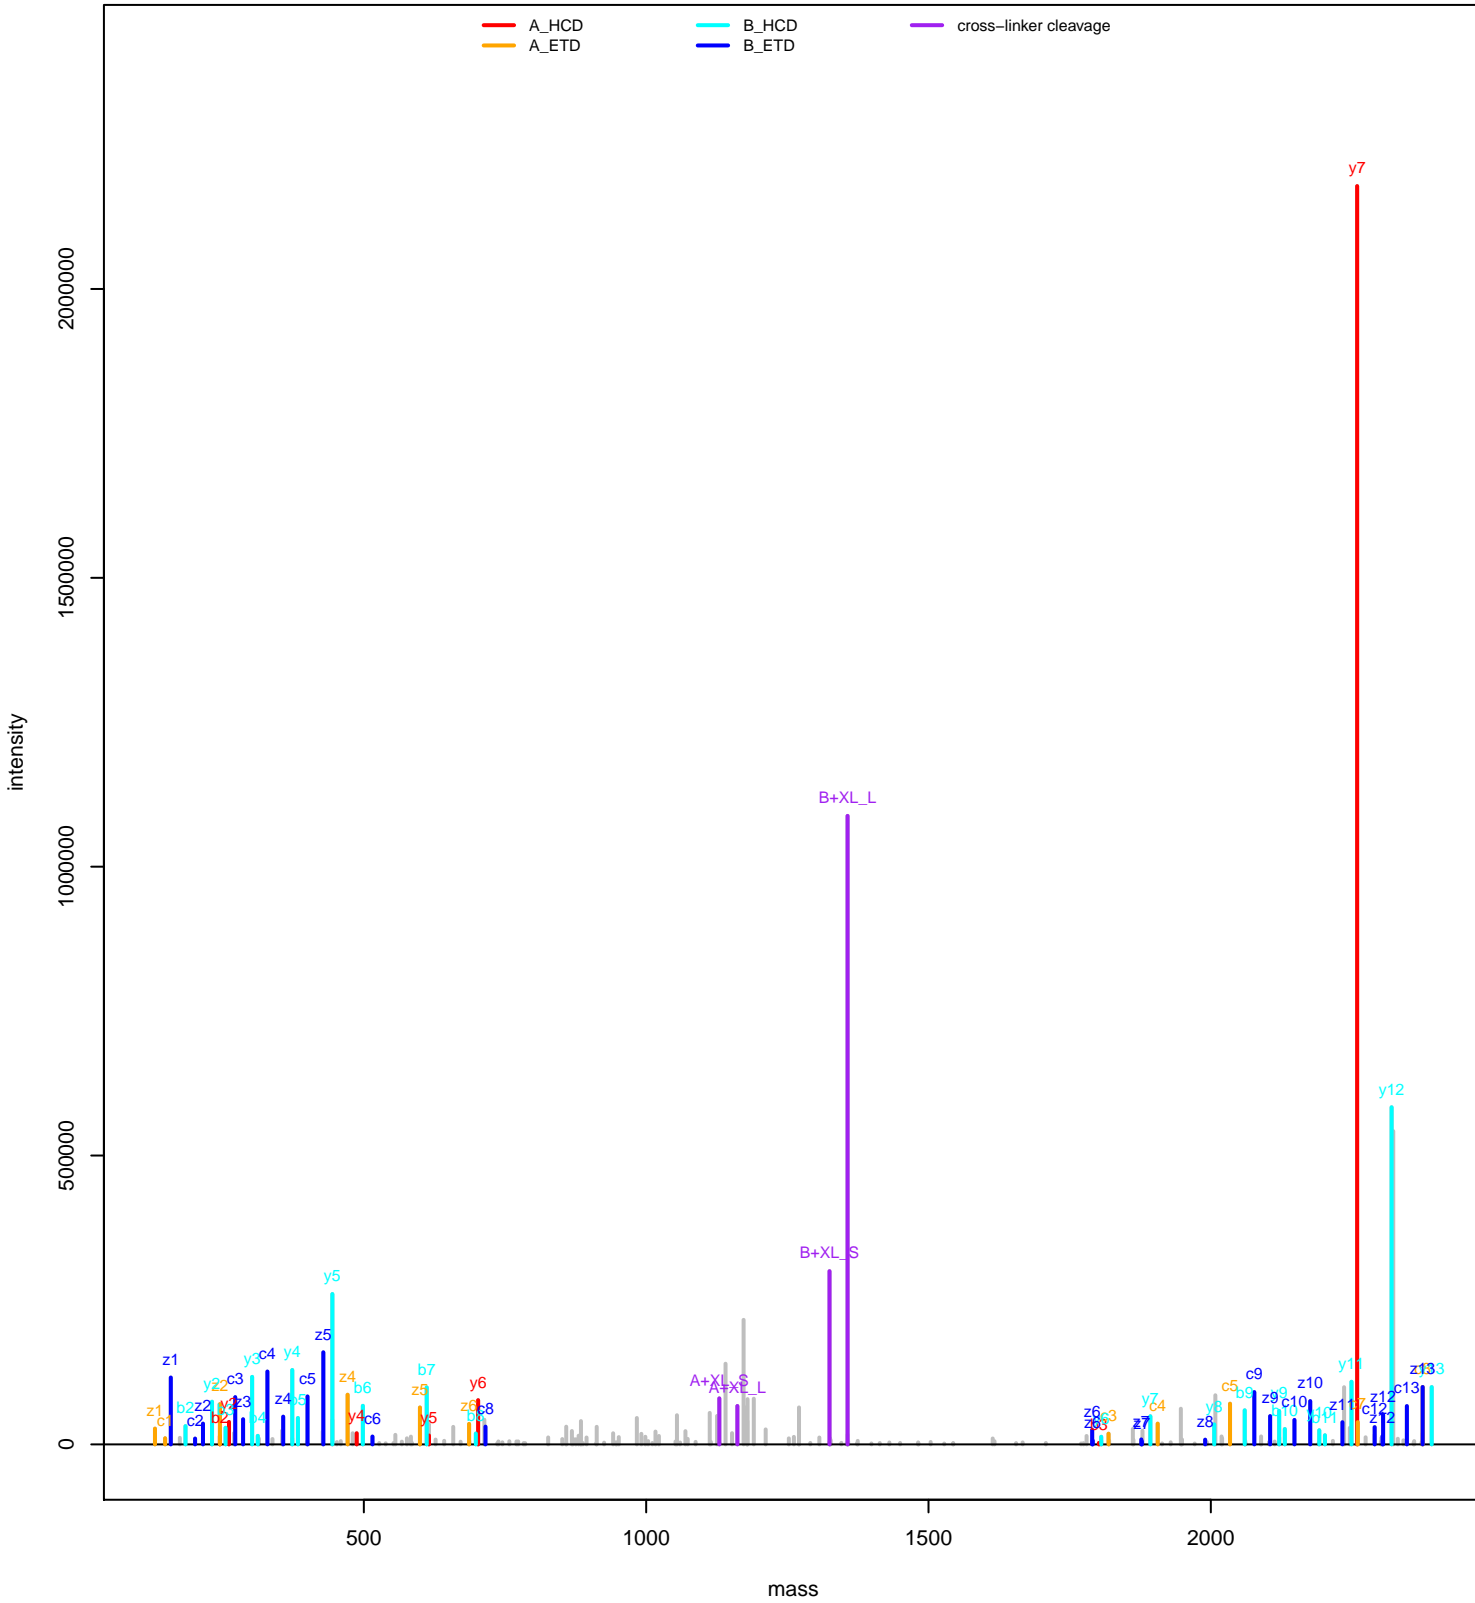

MNKSQLIDK+XL\_S

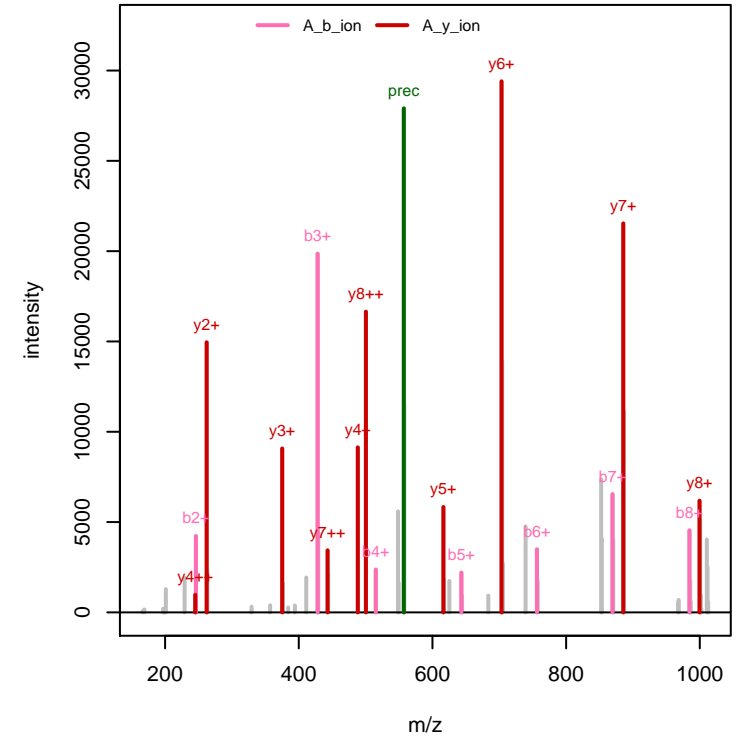

MNKSQLIDK+XL\_L

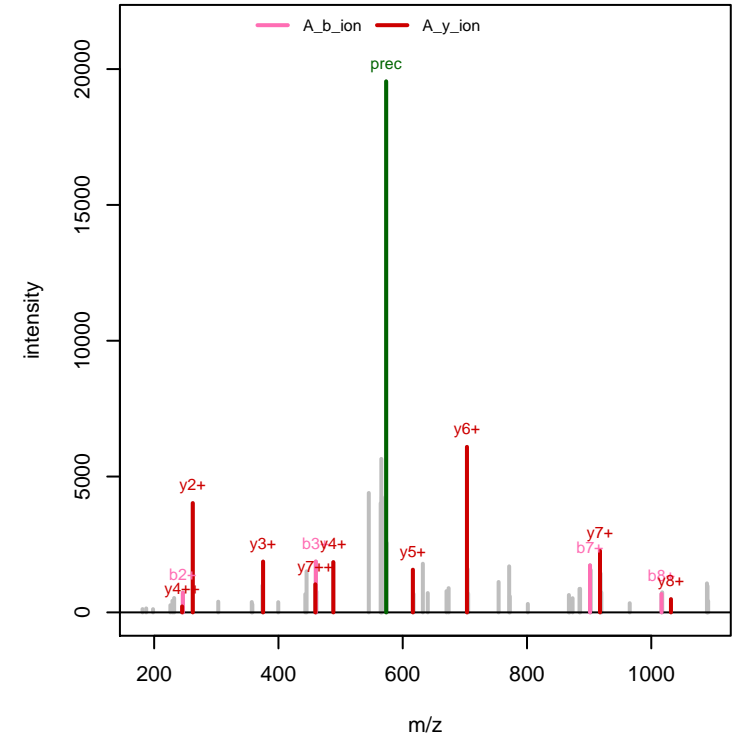

IAAGADISKAAGR+XL\_S

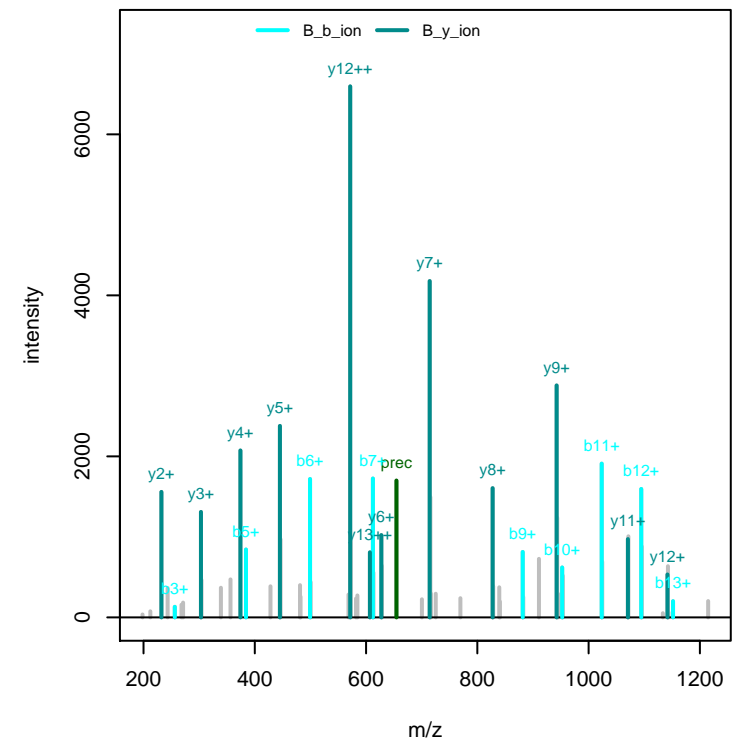

IAAGADISKAAGR+XL\_L

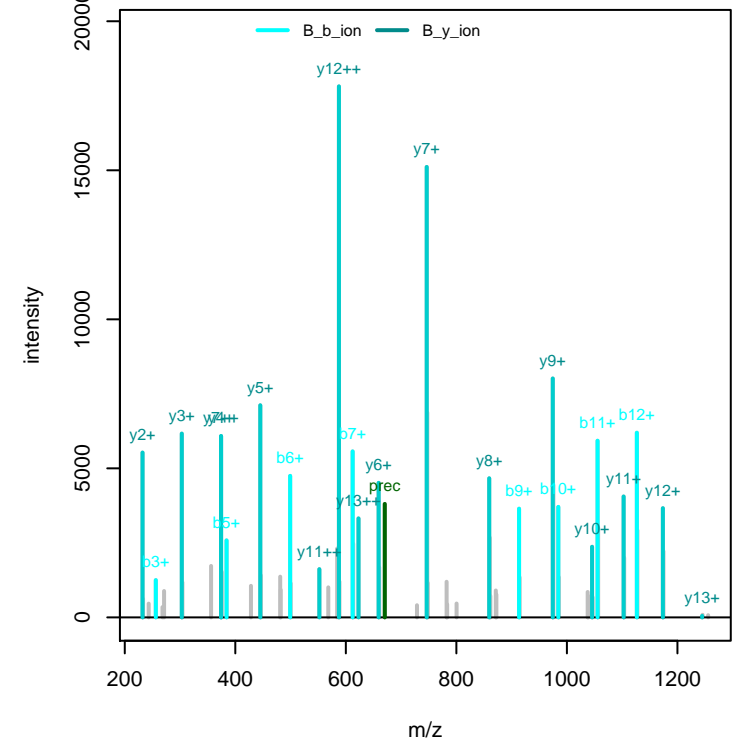

EGVSKDDAEALKK  
EGVSKDDAEALKK

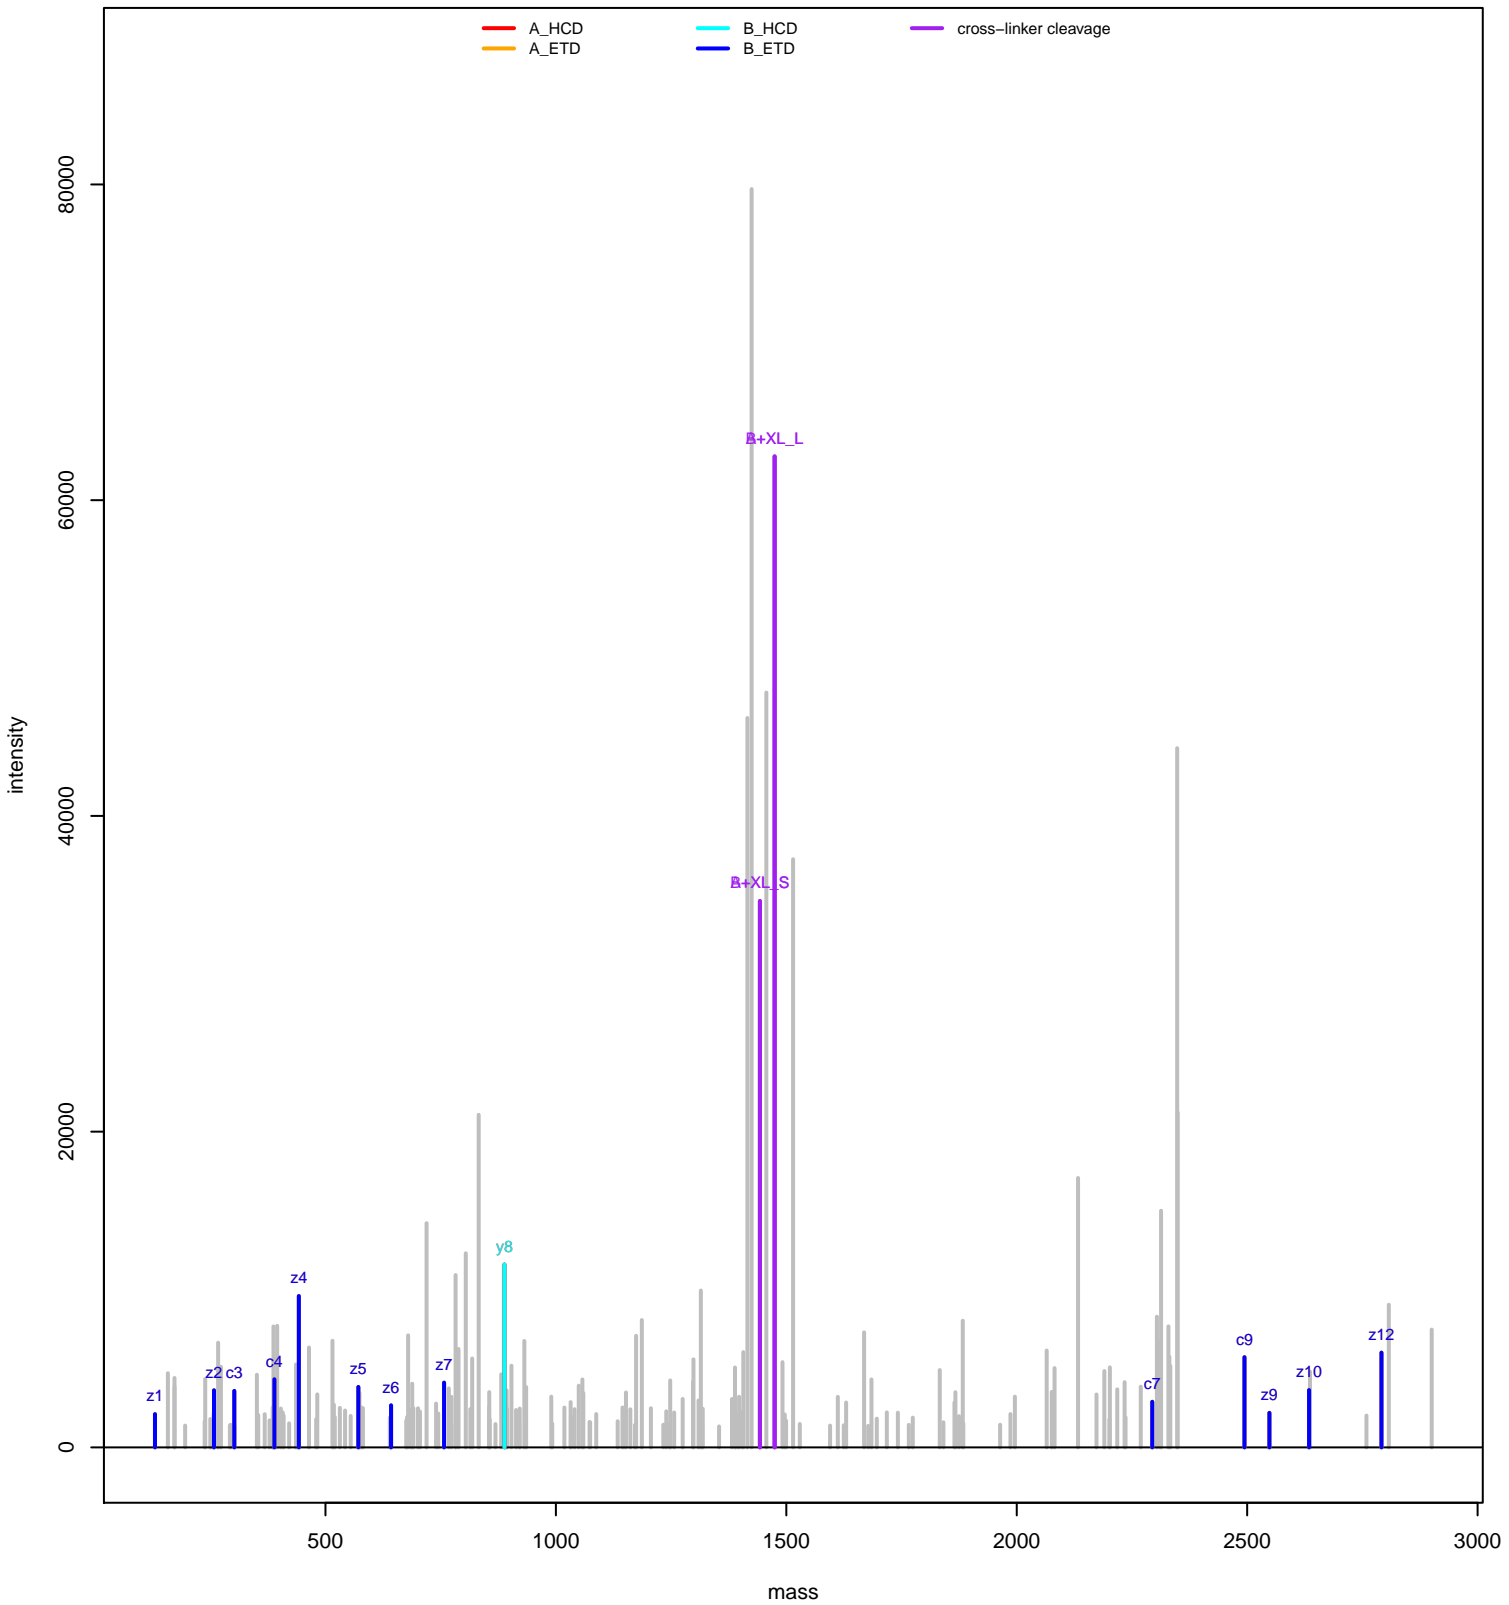

EGVSKDDAEALKK+XL\_S

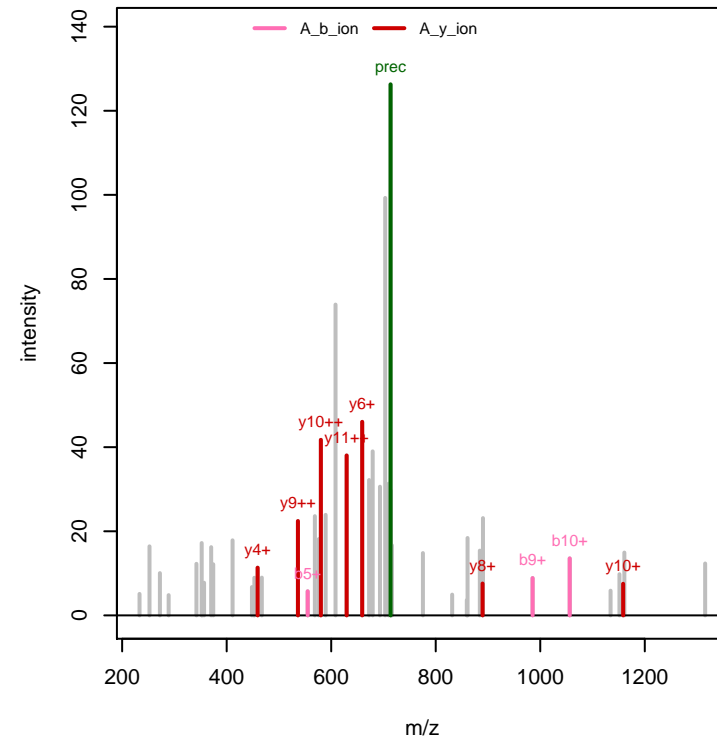

EGVSKDDAEALKK+XL\_L

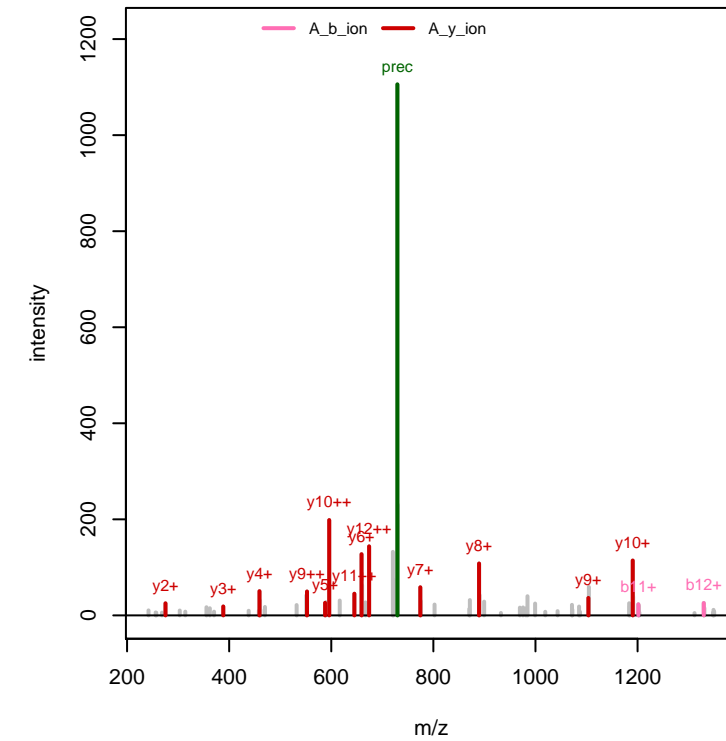

EGVSKDDAEALKK+XL\_S

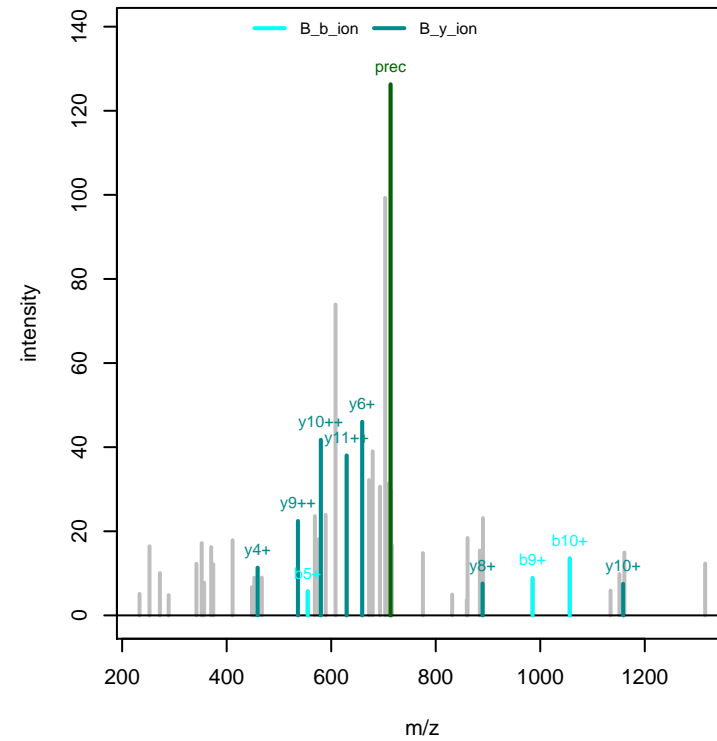

EGVSKDDAEALKK+XL\_L

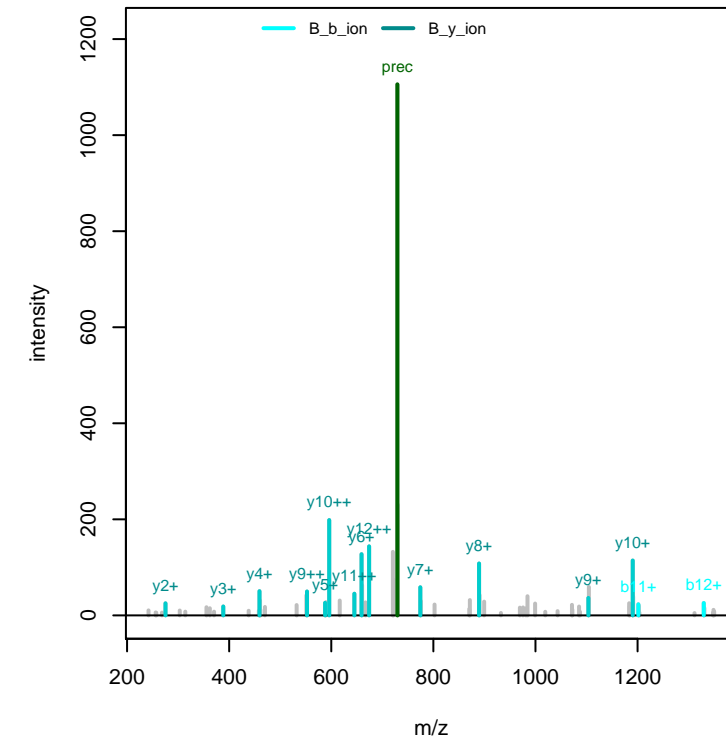

KAAGIK  
VAVIKAVR

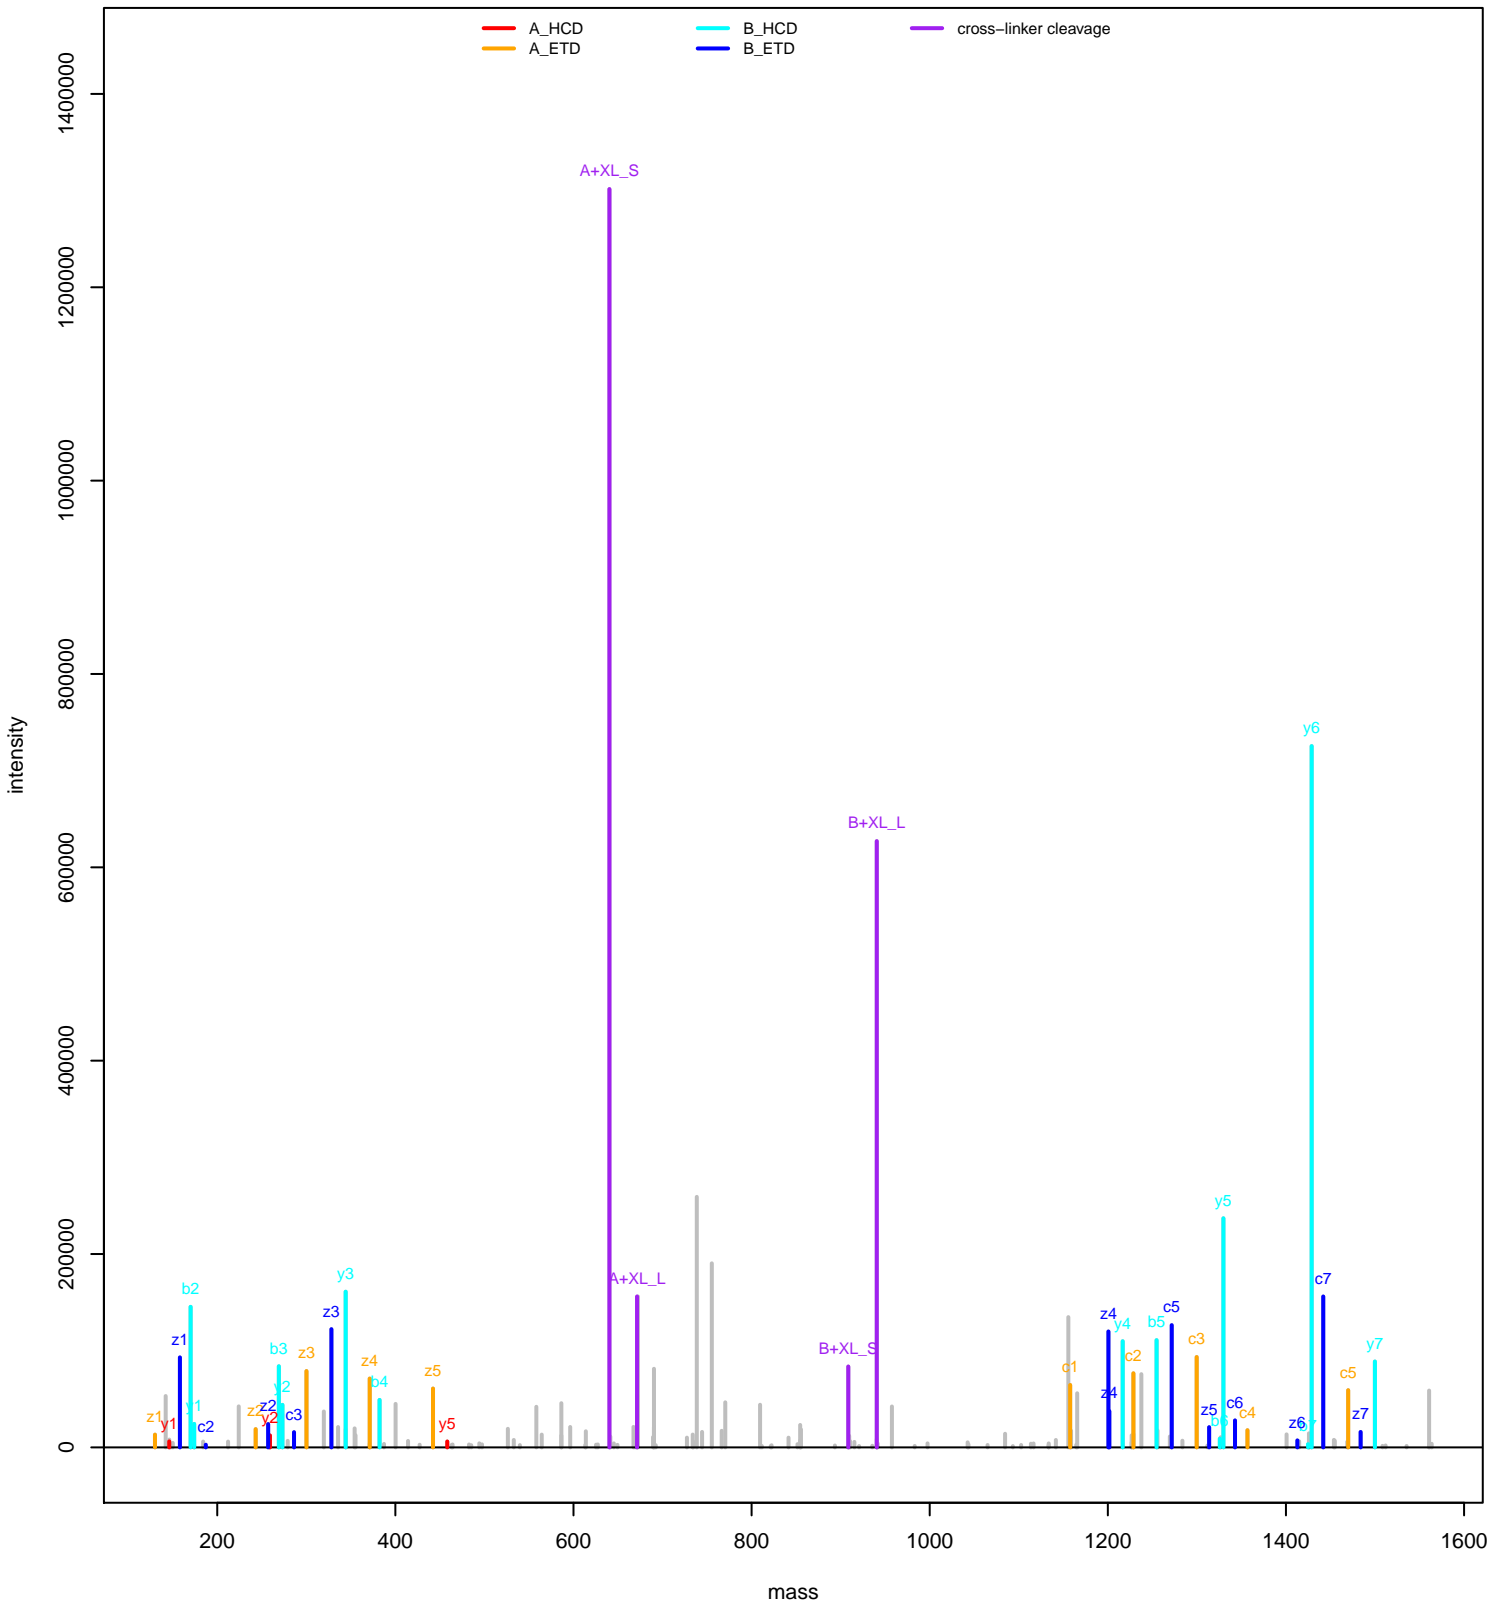

KAAGIK+XL\_S

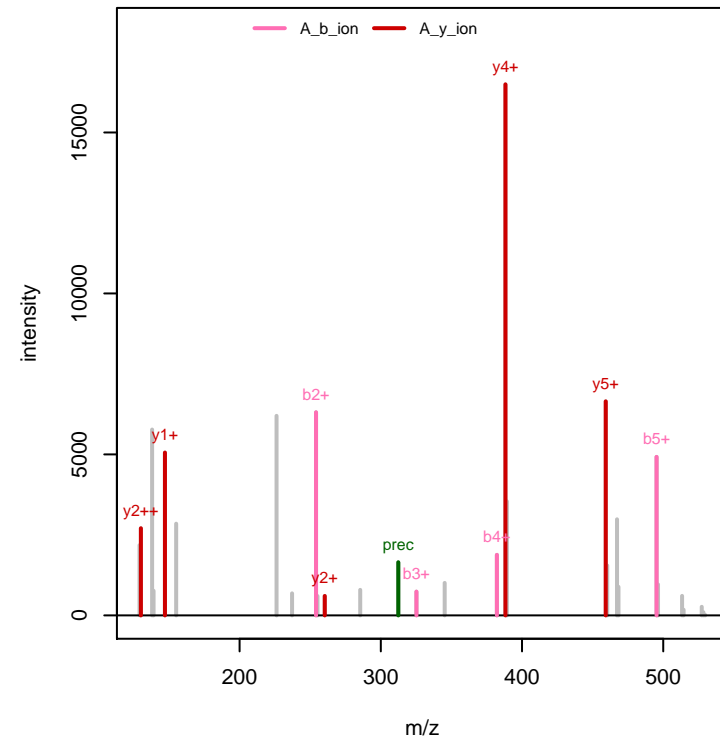

KAAGIK+XL\_L

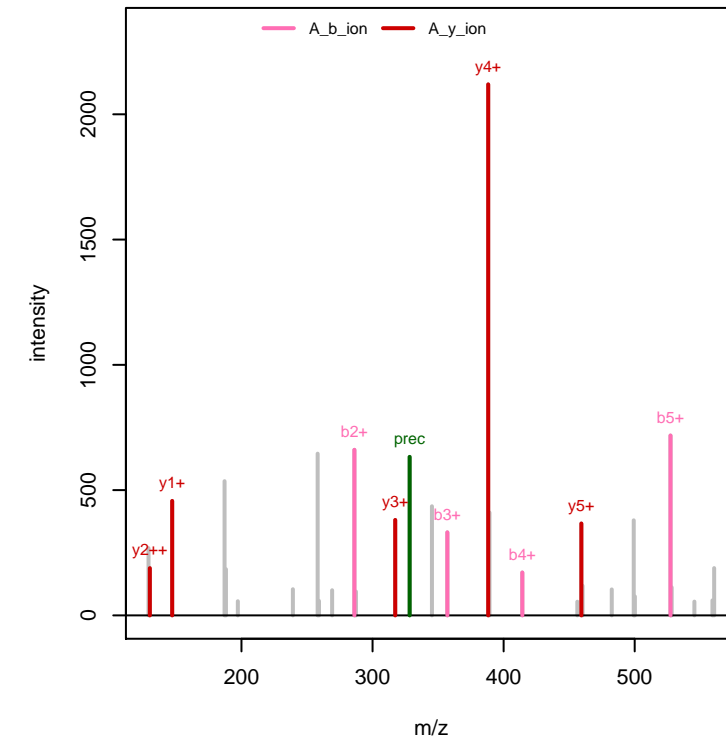

VAVIKAVR+XL\_S

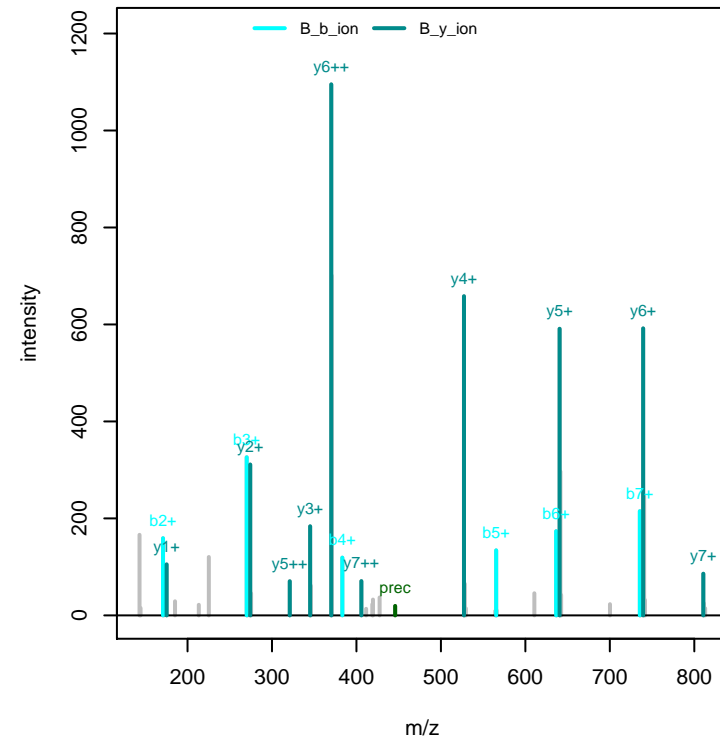

VAVIKAVR+XL\_L

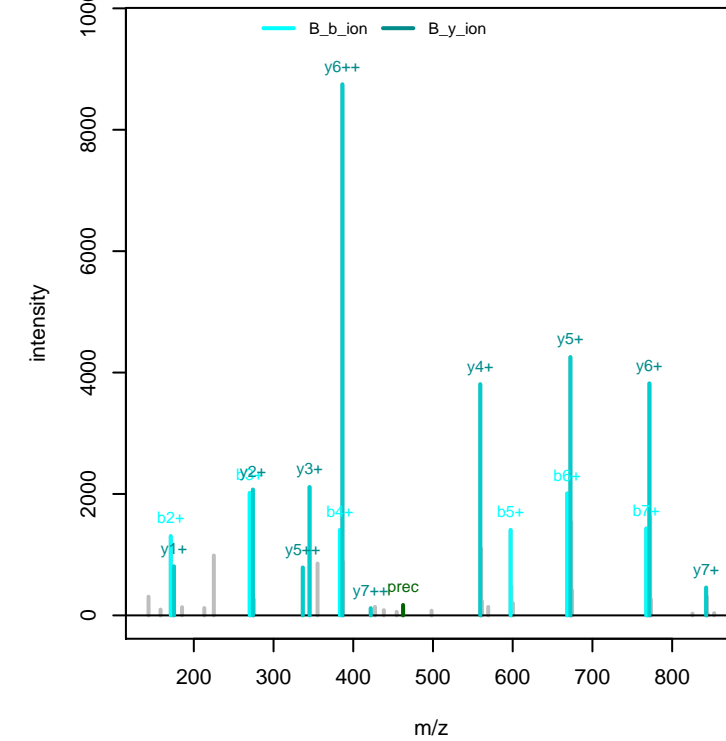

VAVIKAVR  
GKNGELTR

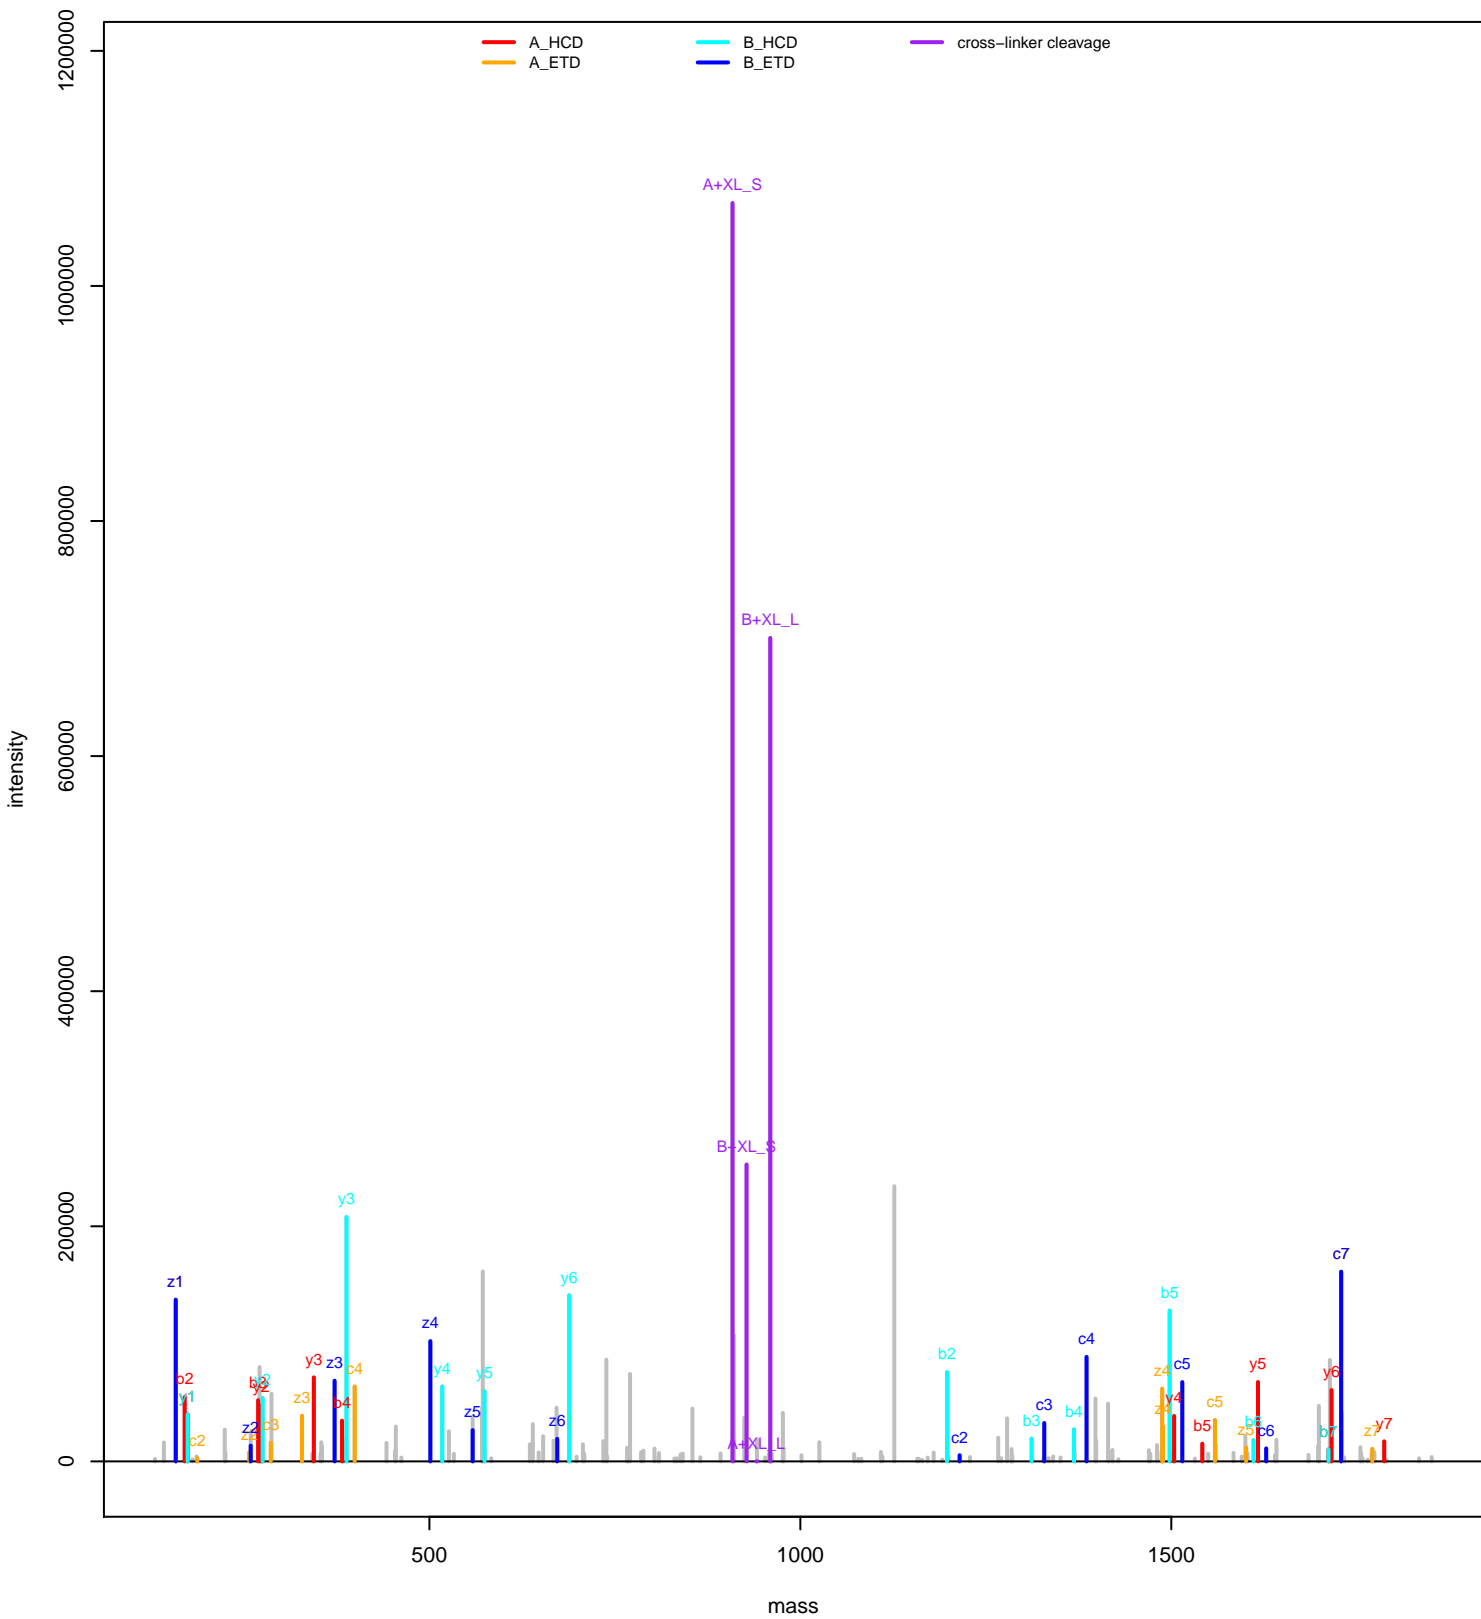

VAVIKAVR+XL\_S

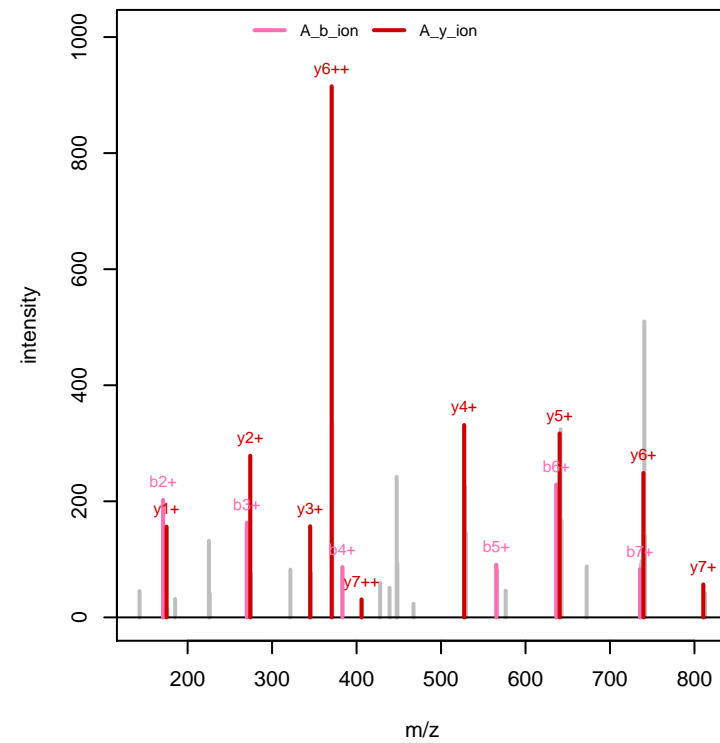

VAVIKAVR+XL\_L

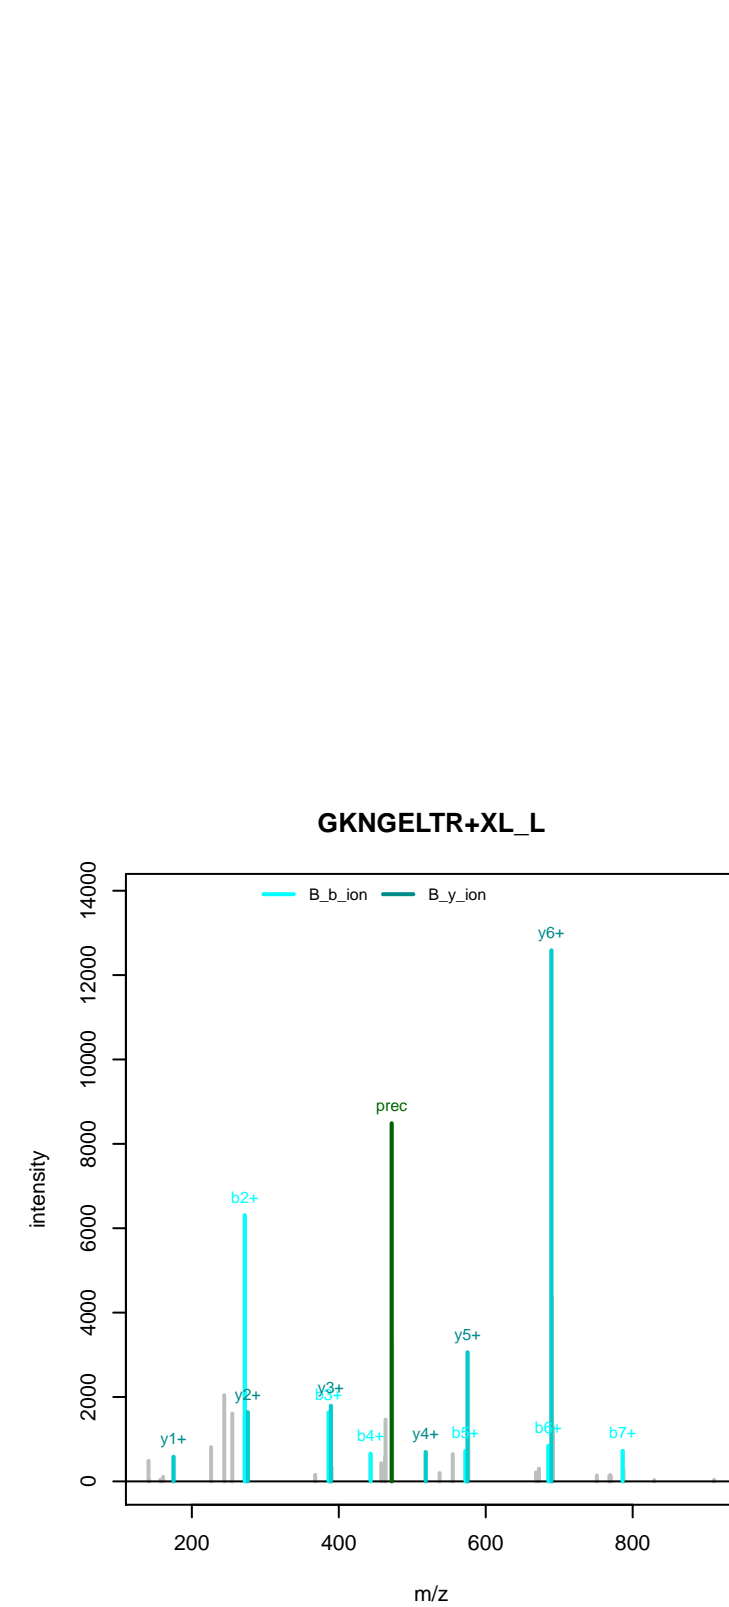

GKNGELTR+XL\_S

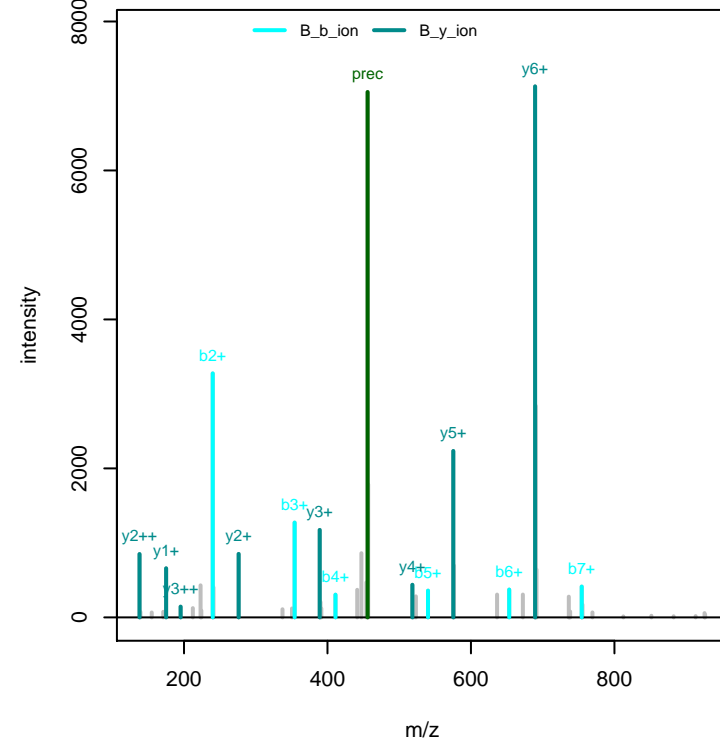

GKNGELTR+XL\_L

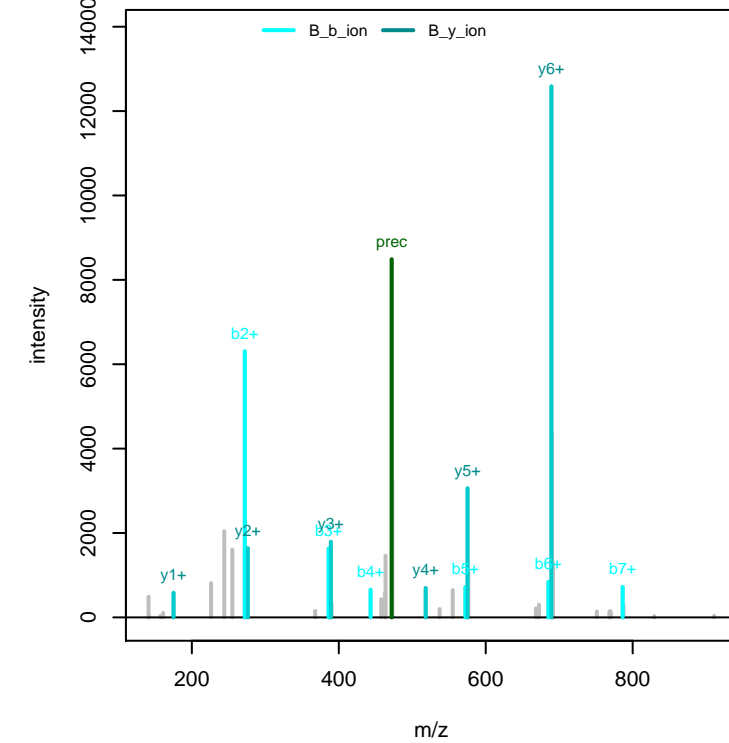

VFIKPGNGK  
GALDCSGVKDRK

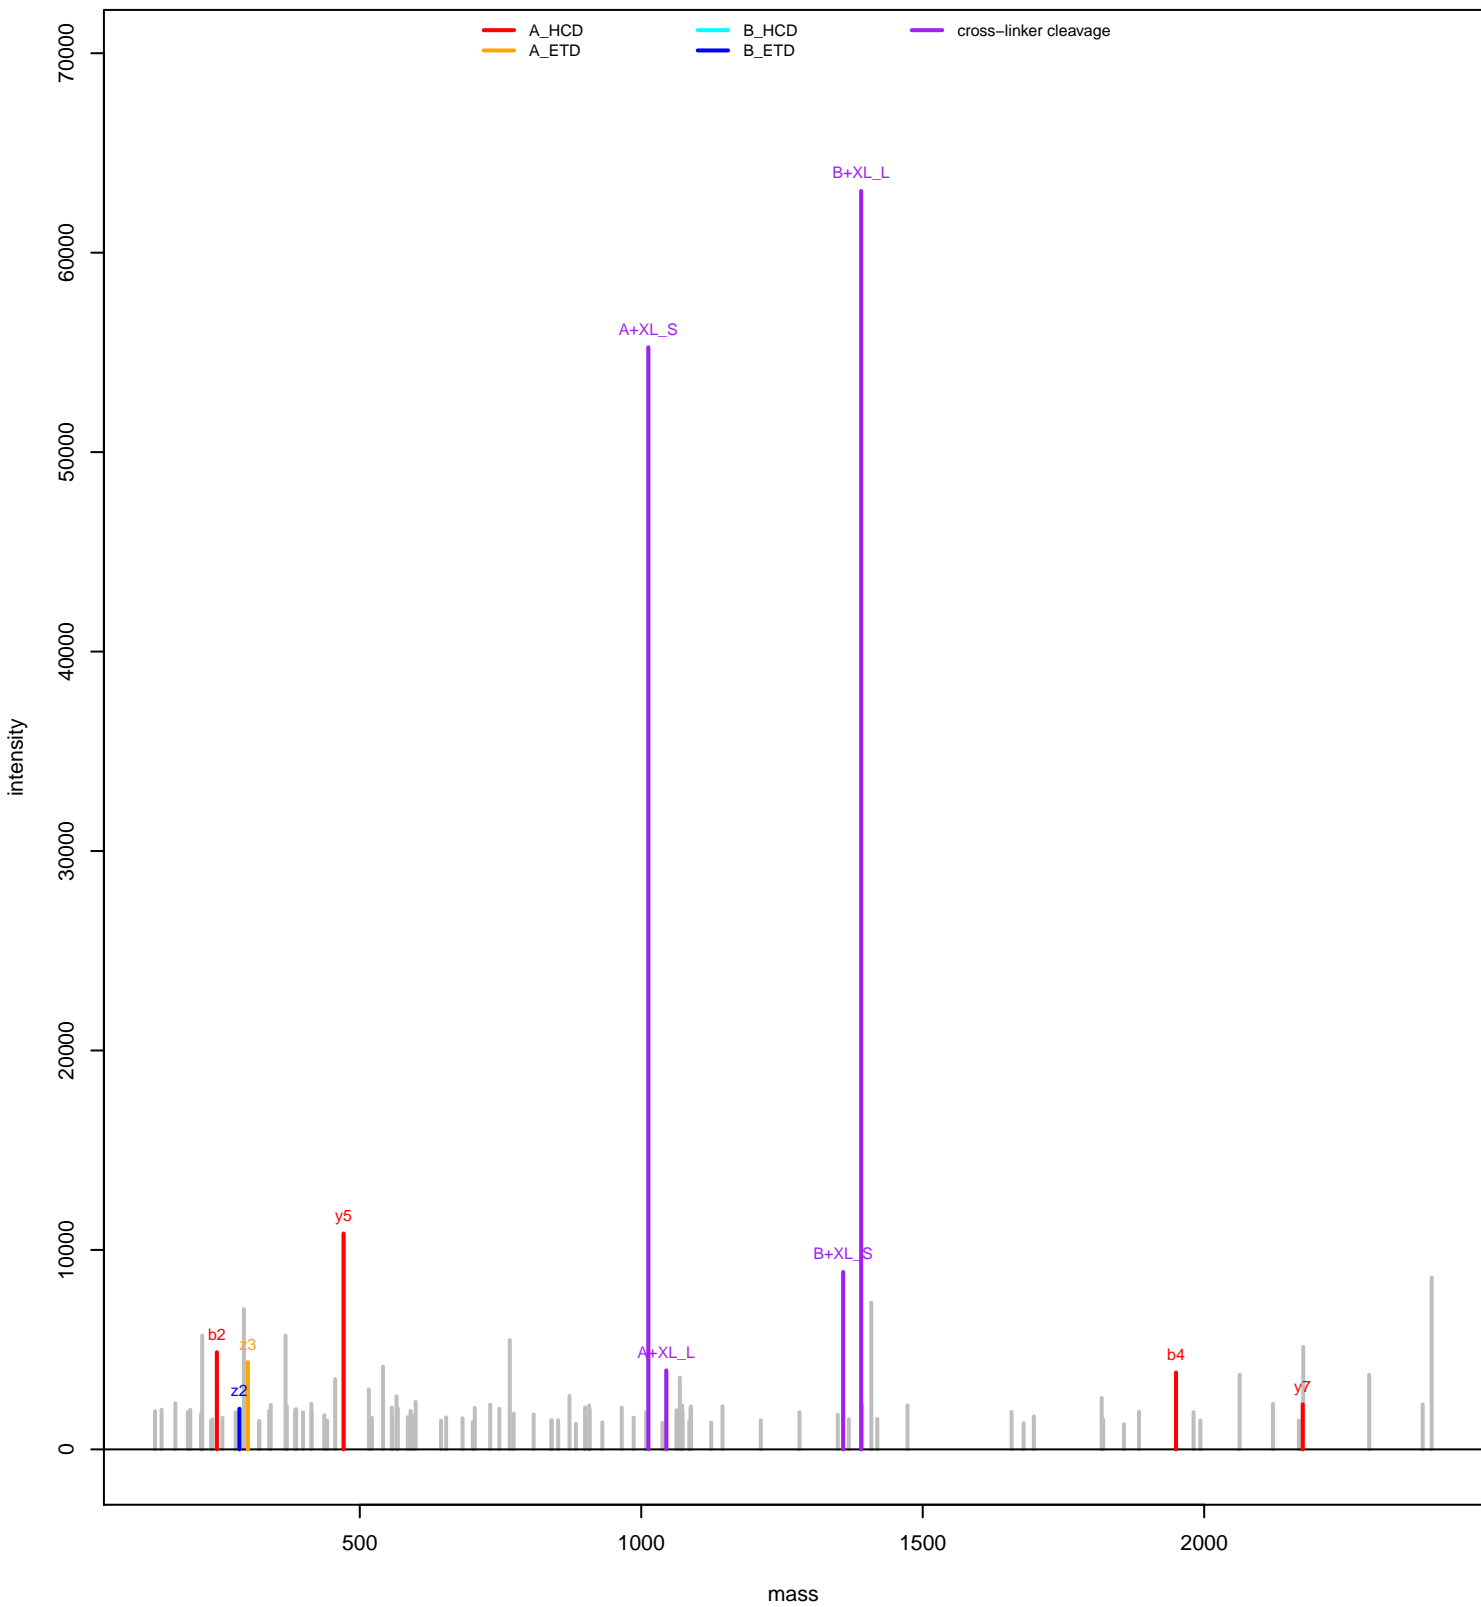

VFIKPGNGK+XL\_S

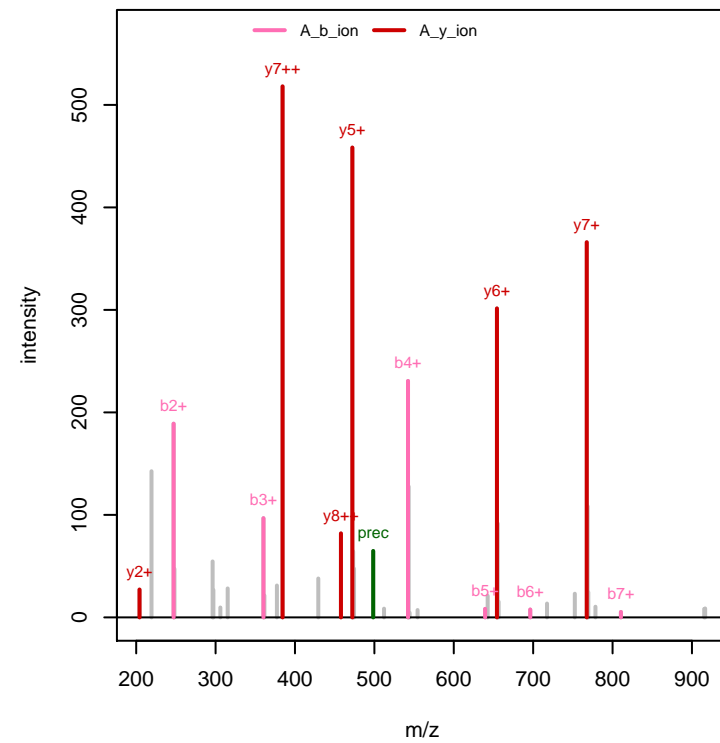

VFIKPGNGK+XL\_L

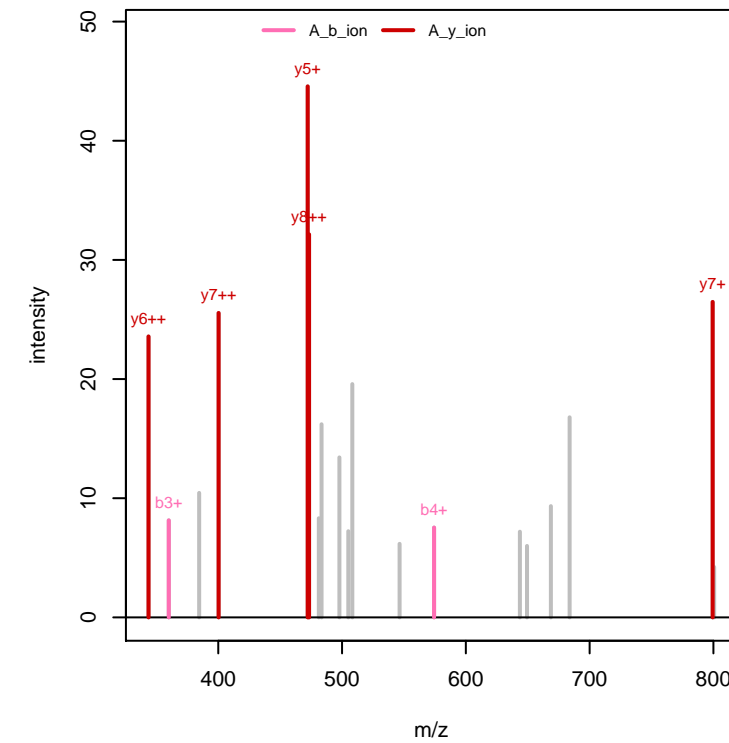

GALDCSGVKDRK+XL\_S

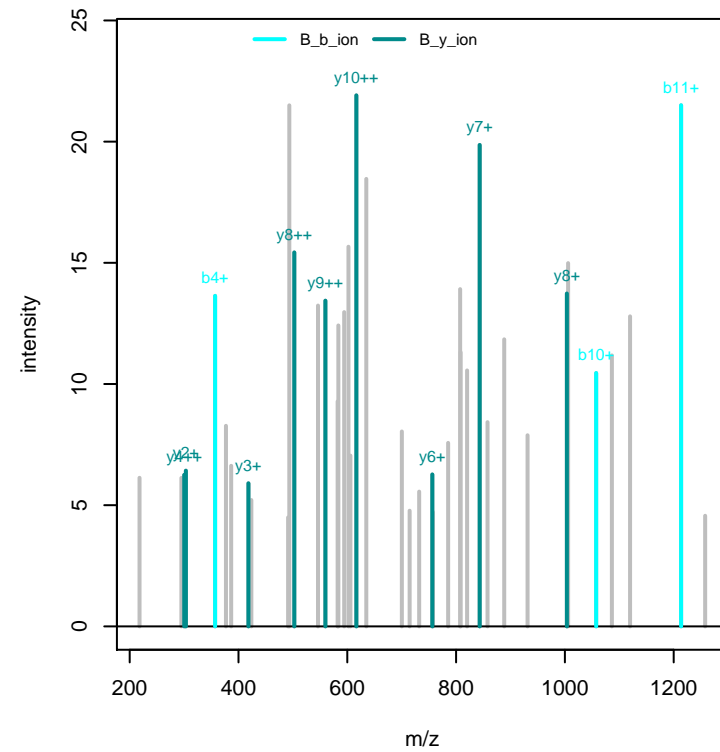

GALDCSGVKDRK+XL\_L

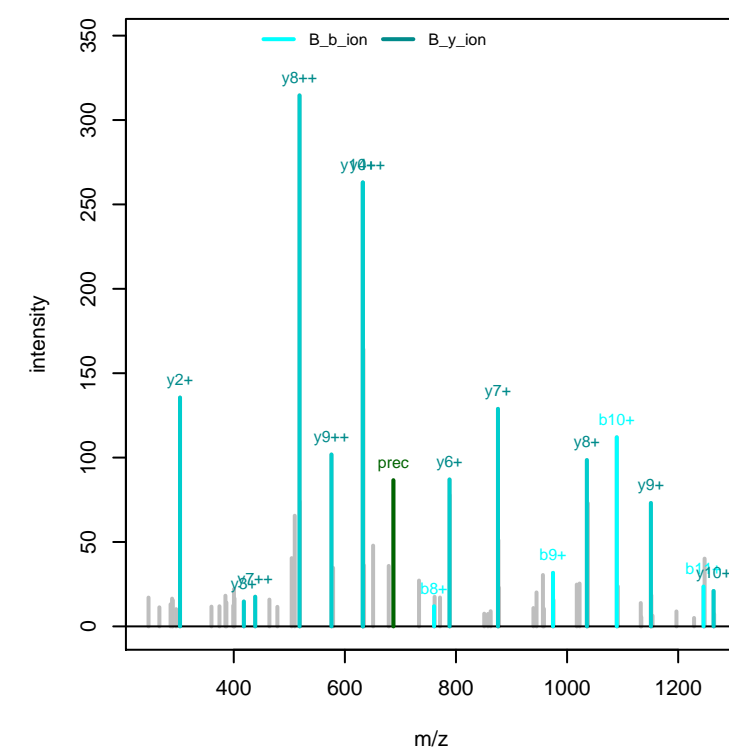

KEVETK  
MNIRPLHDR

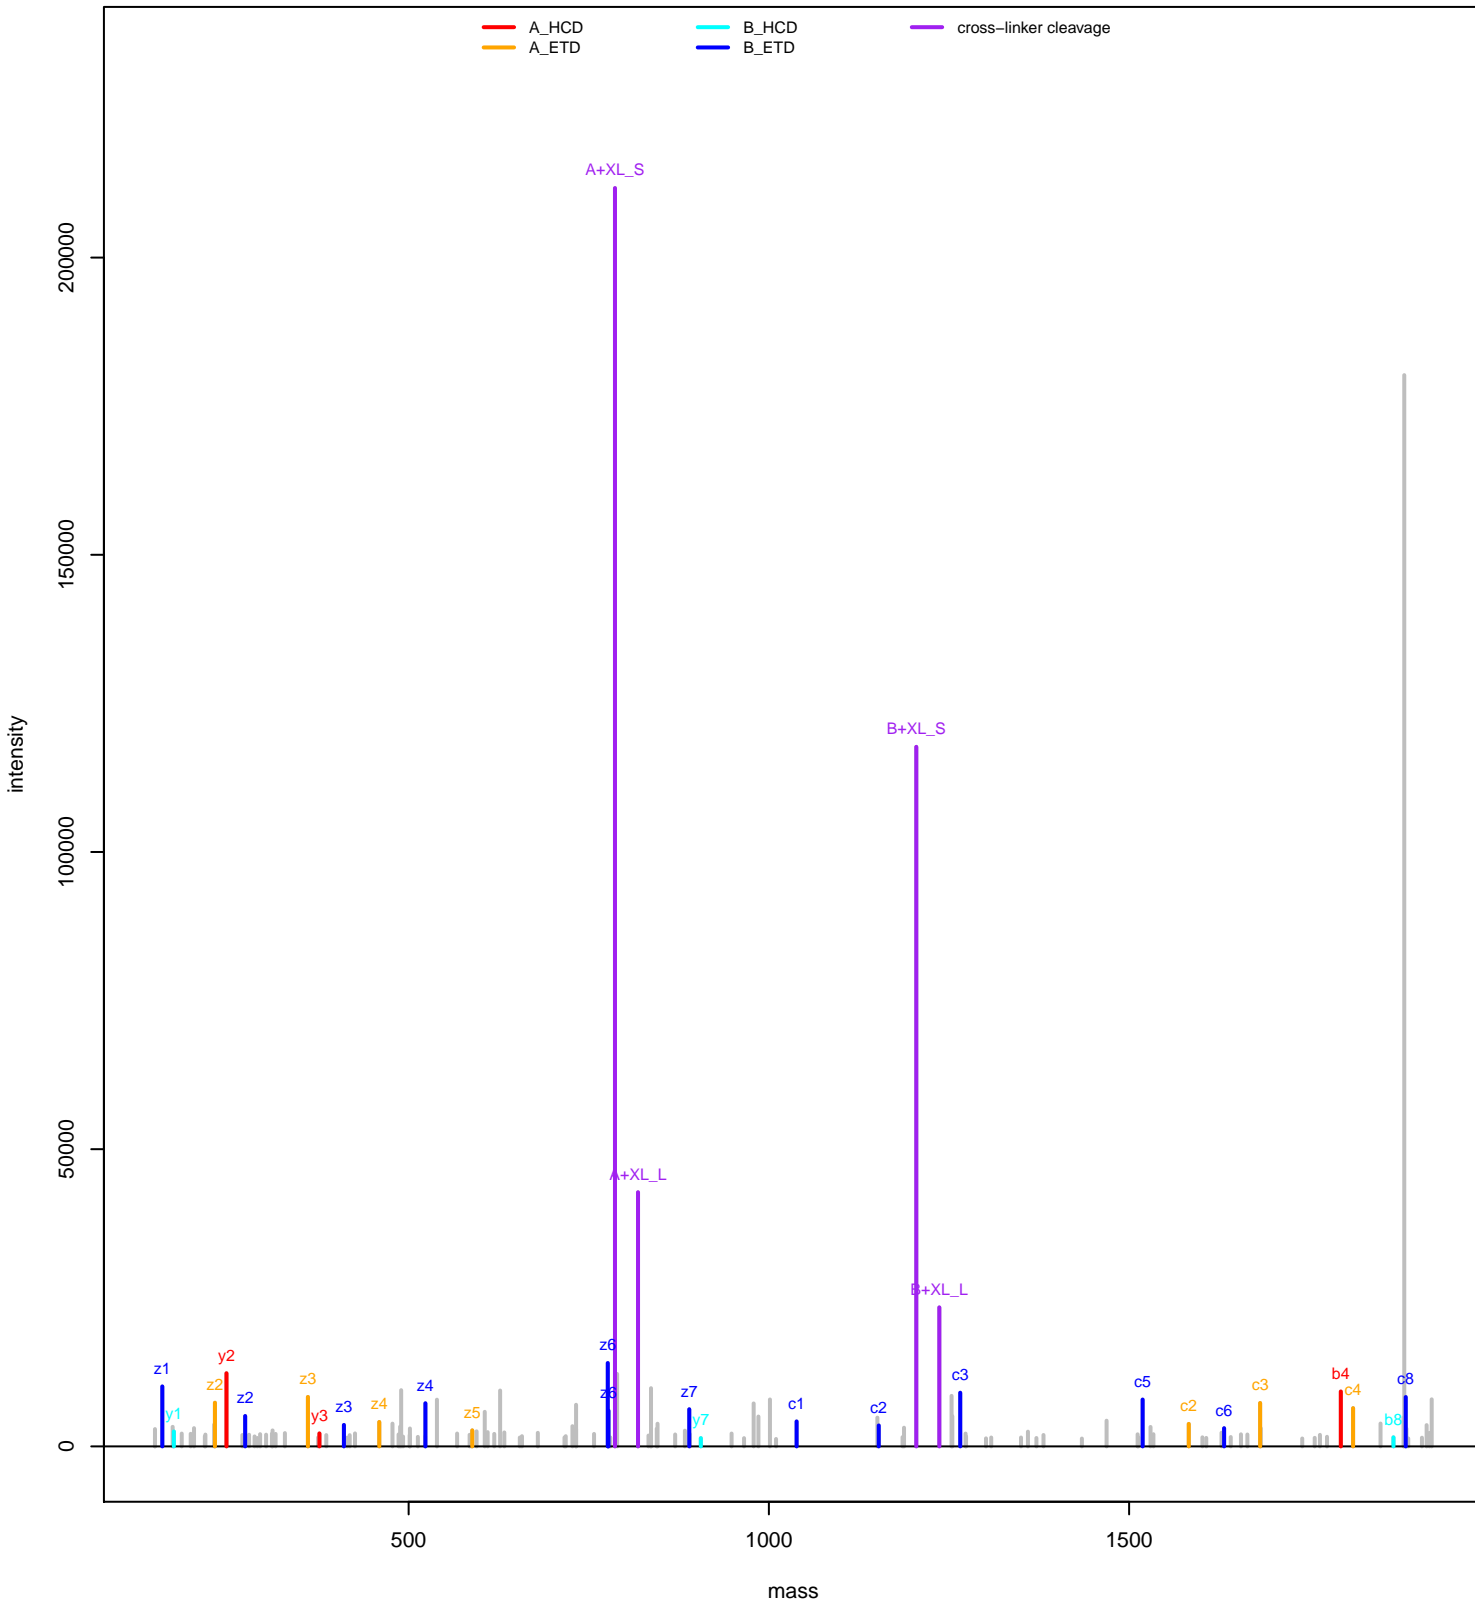

KEVETK+XL\_S

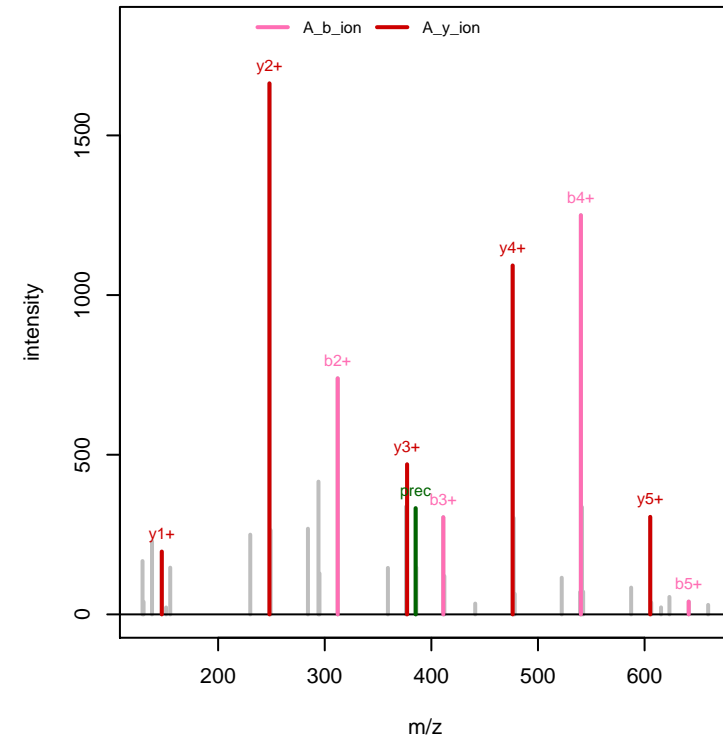

KEVETK+XL\_L

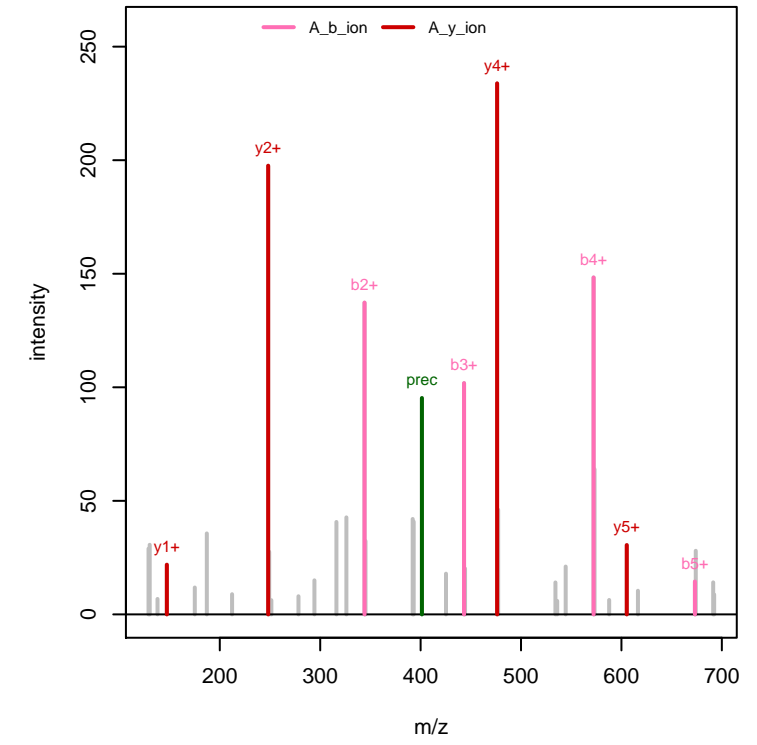

MNIRPLHDR+XL\_S

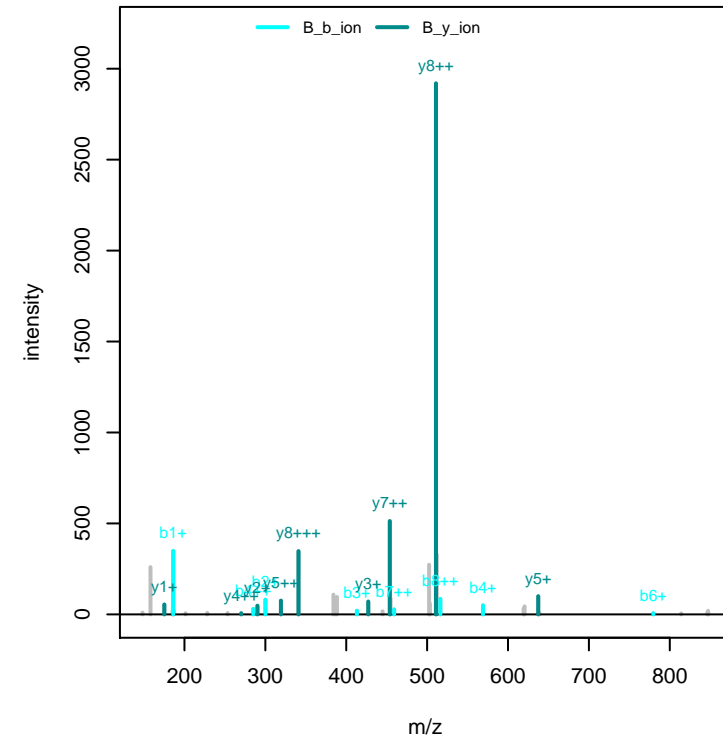

MNIRPLHDR+XL\_L

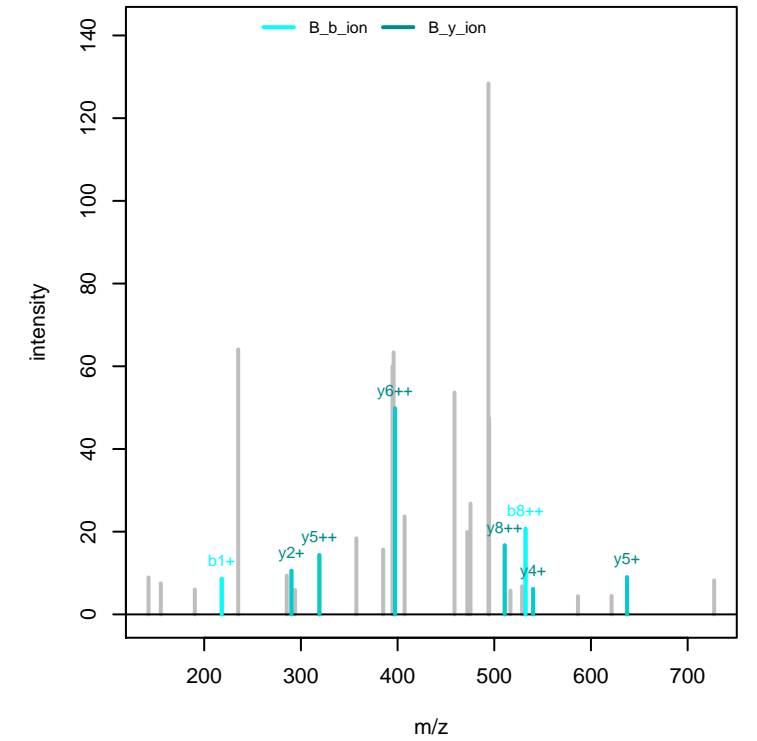



GKHIITSK  
GAANFYQKK

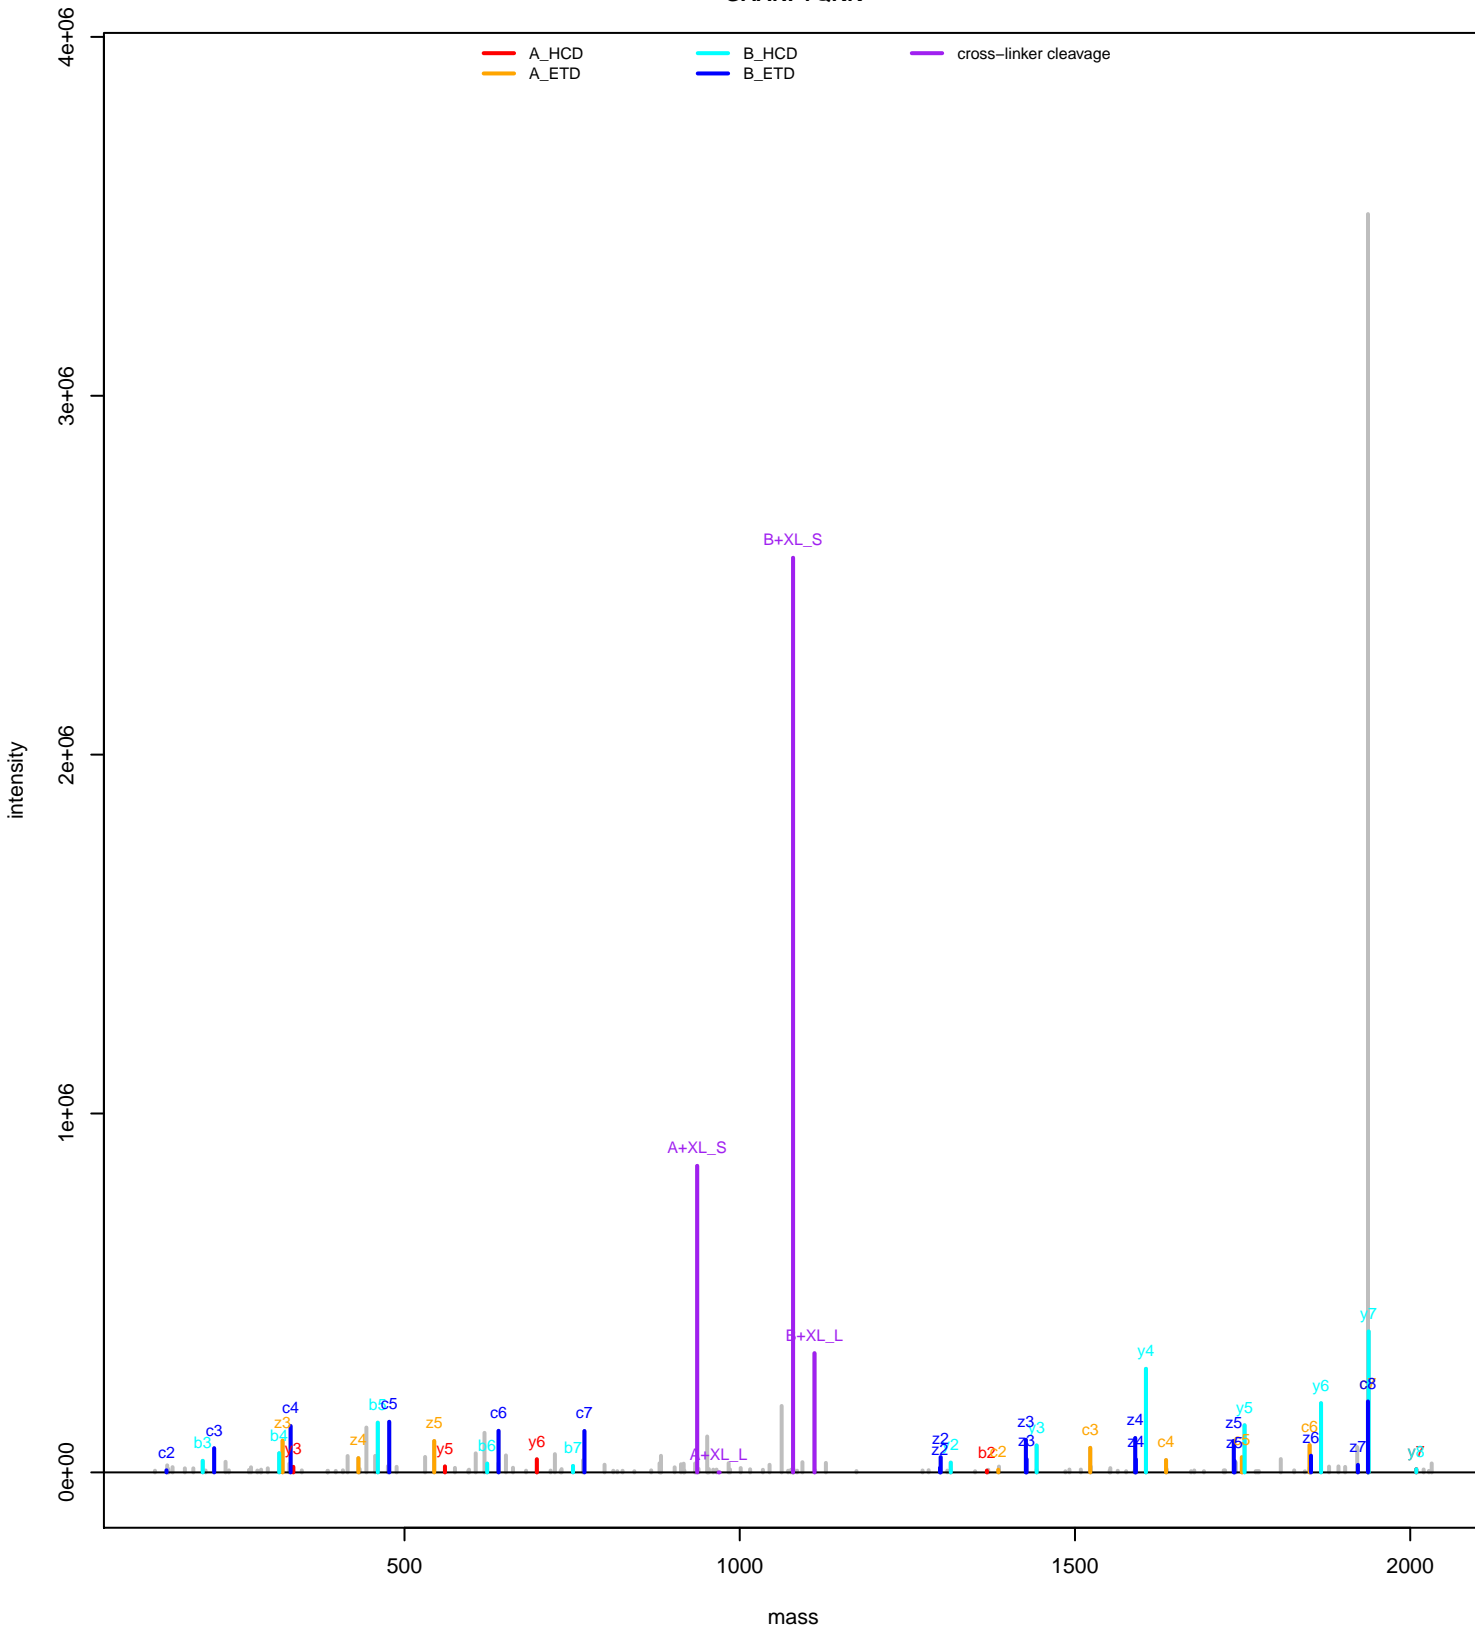

GKHIITSK+XL\_S

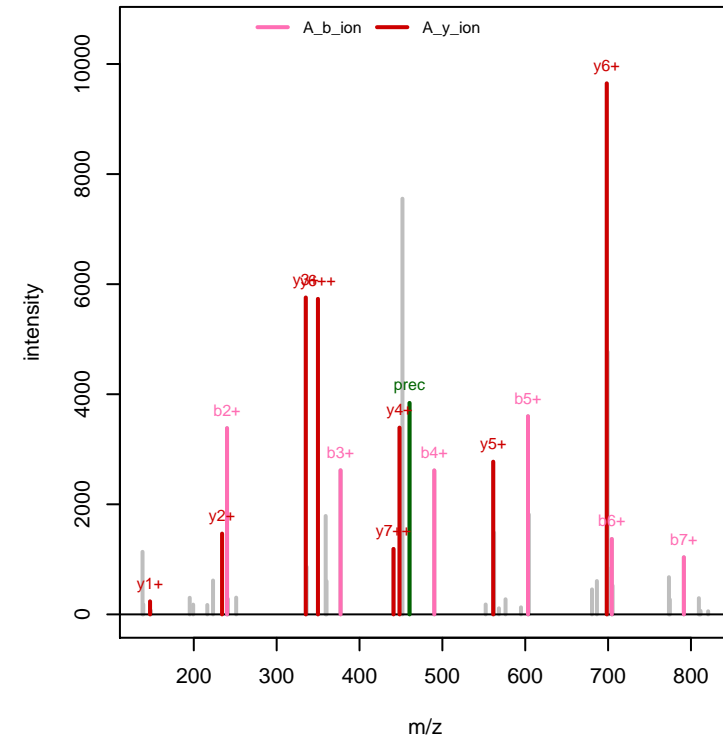

GKHIITSK+XL\_L

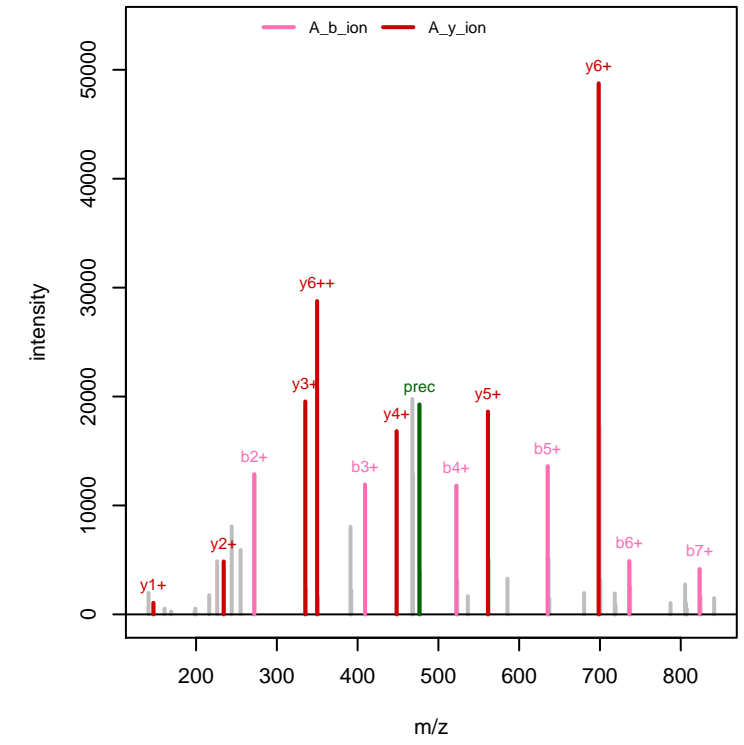

GAANFYQKK+XL\_S

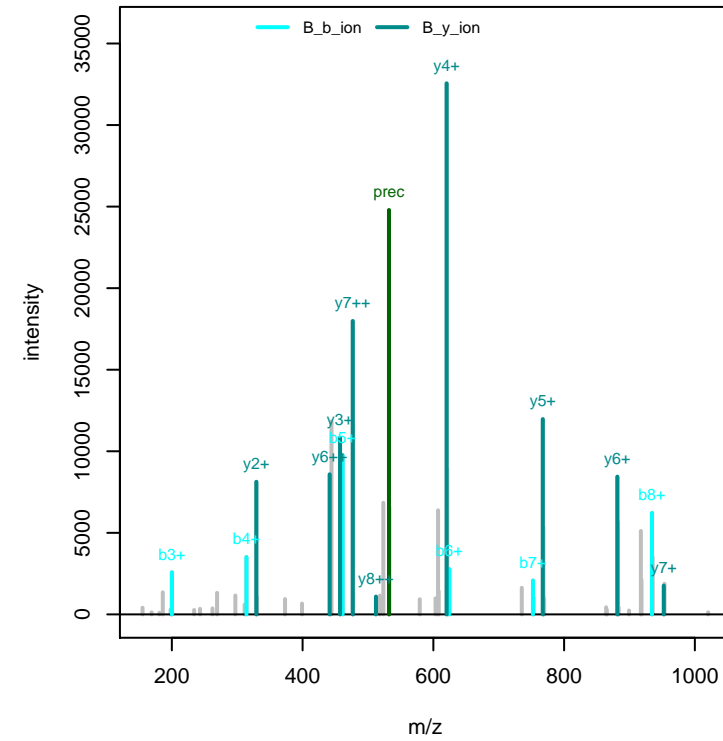

GAANFYQKK+XL\_L

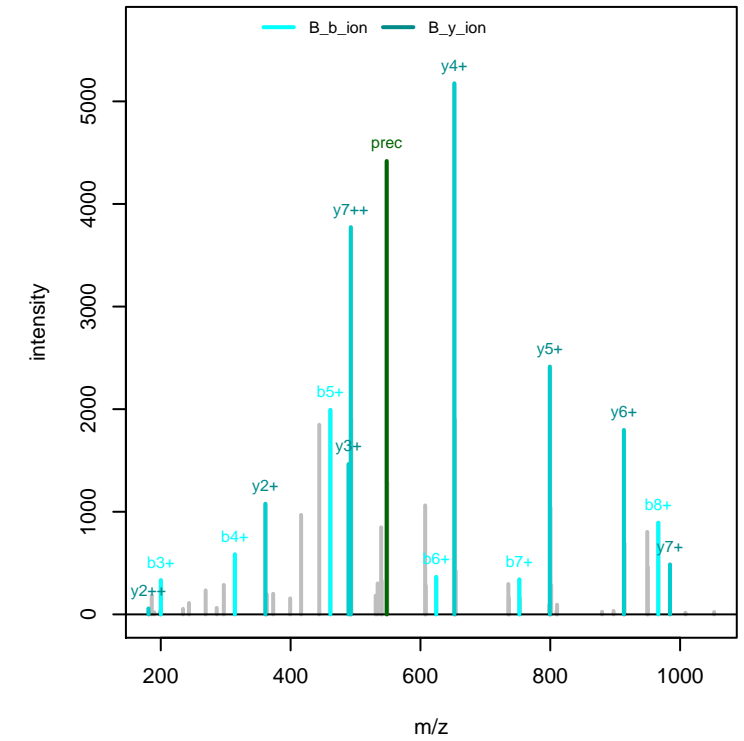

**GFAGTVKR**  
**KMAGQMGNER**

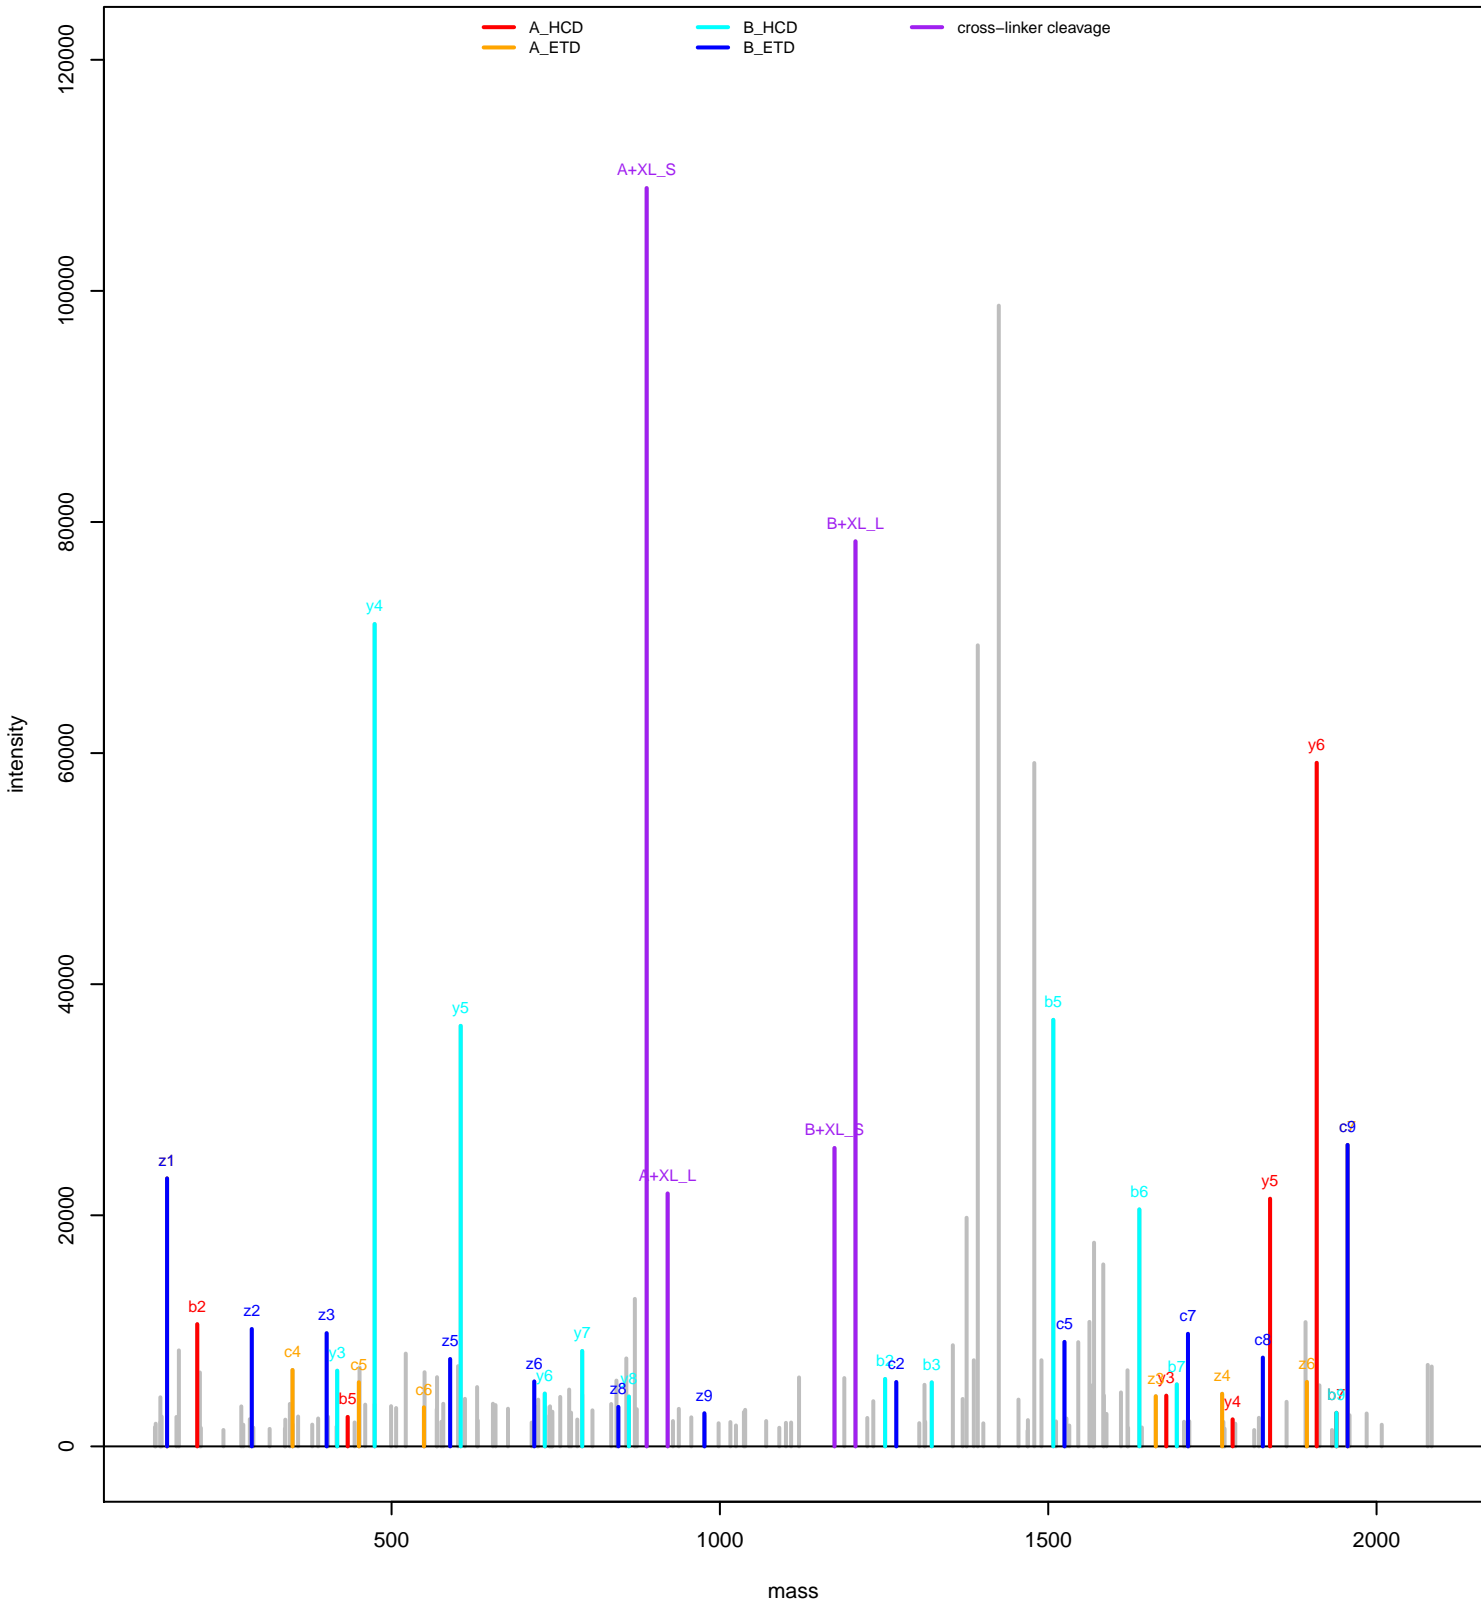

**GFAGTVKR+XL\_S**

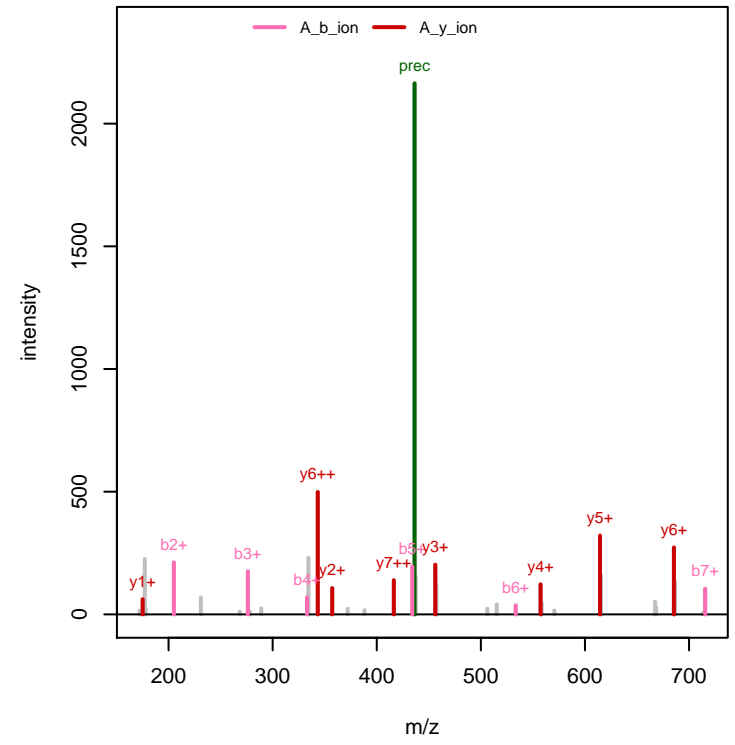

**GFAGTVKR+XL\_L**

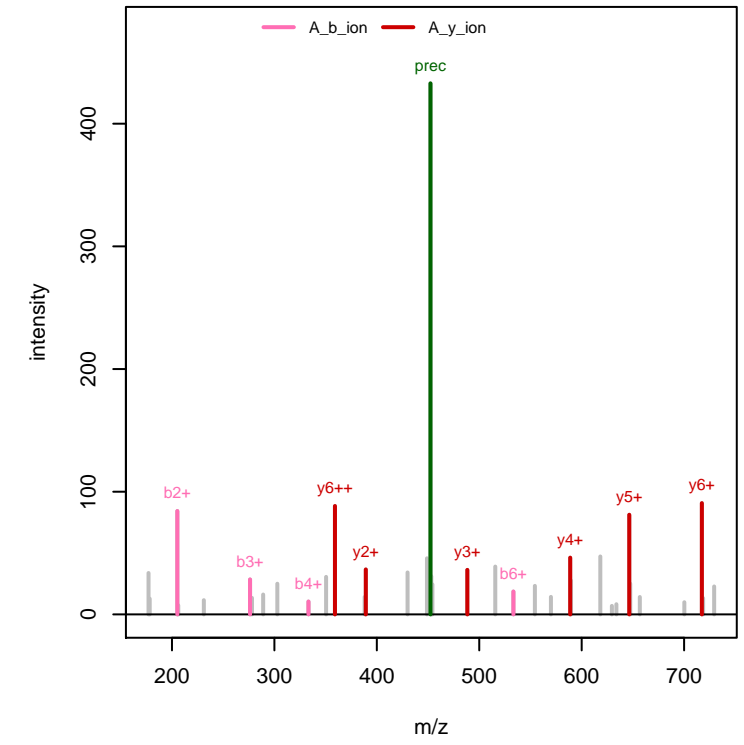

**KMAGQMGNER+XL\_S**

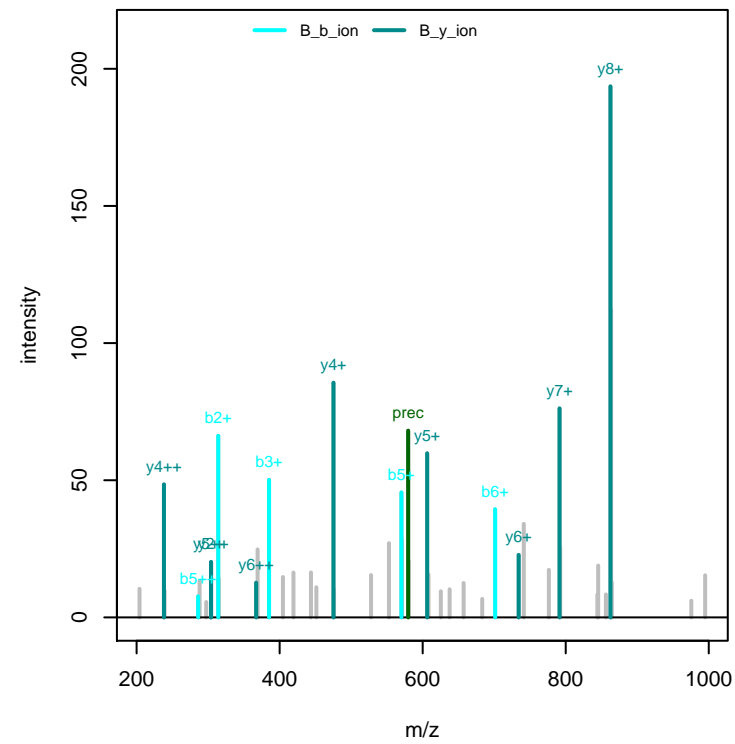

**KMAGQMGNER+XL\_L**

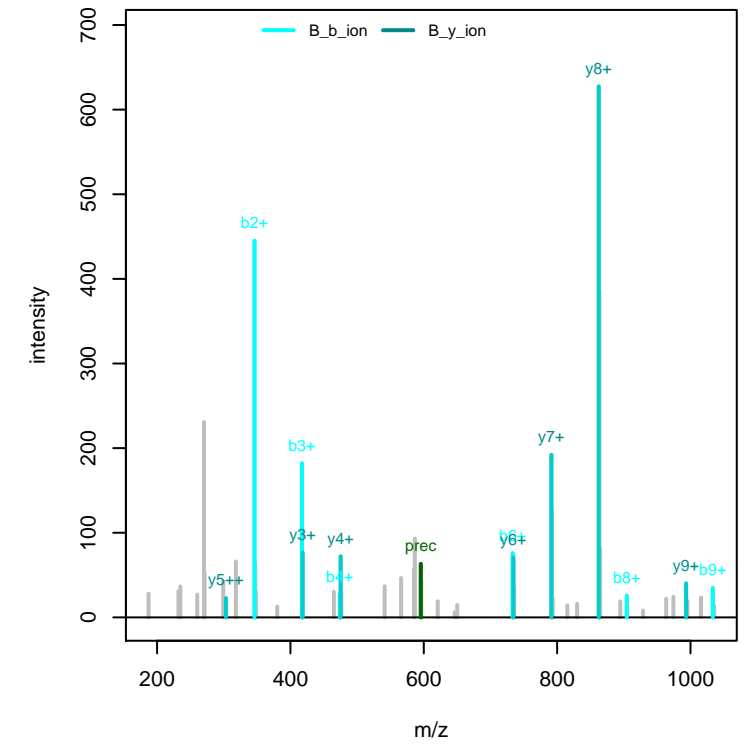

EGSVKGYAGDTATTSEIK  
AALVDHDKSTDISVK

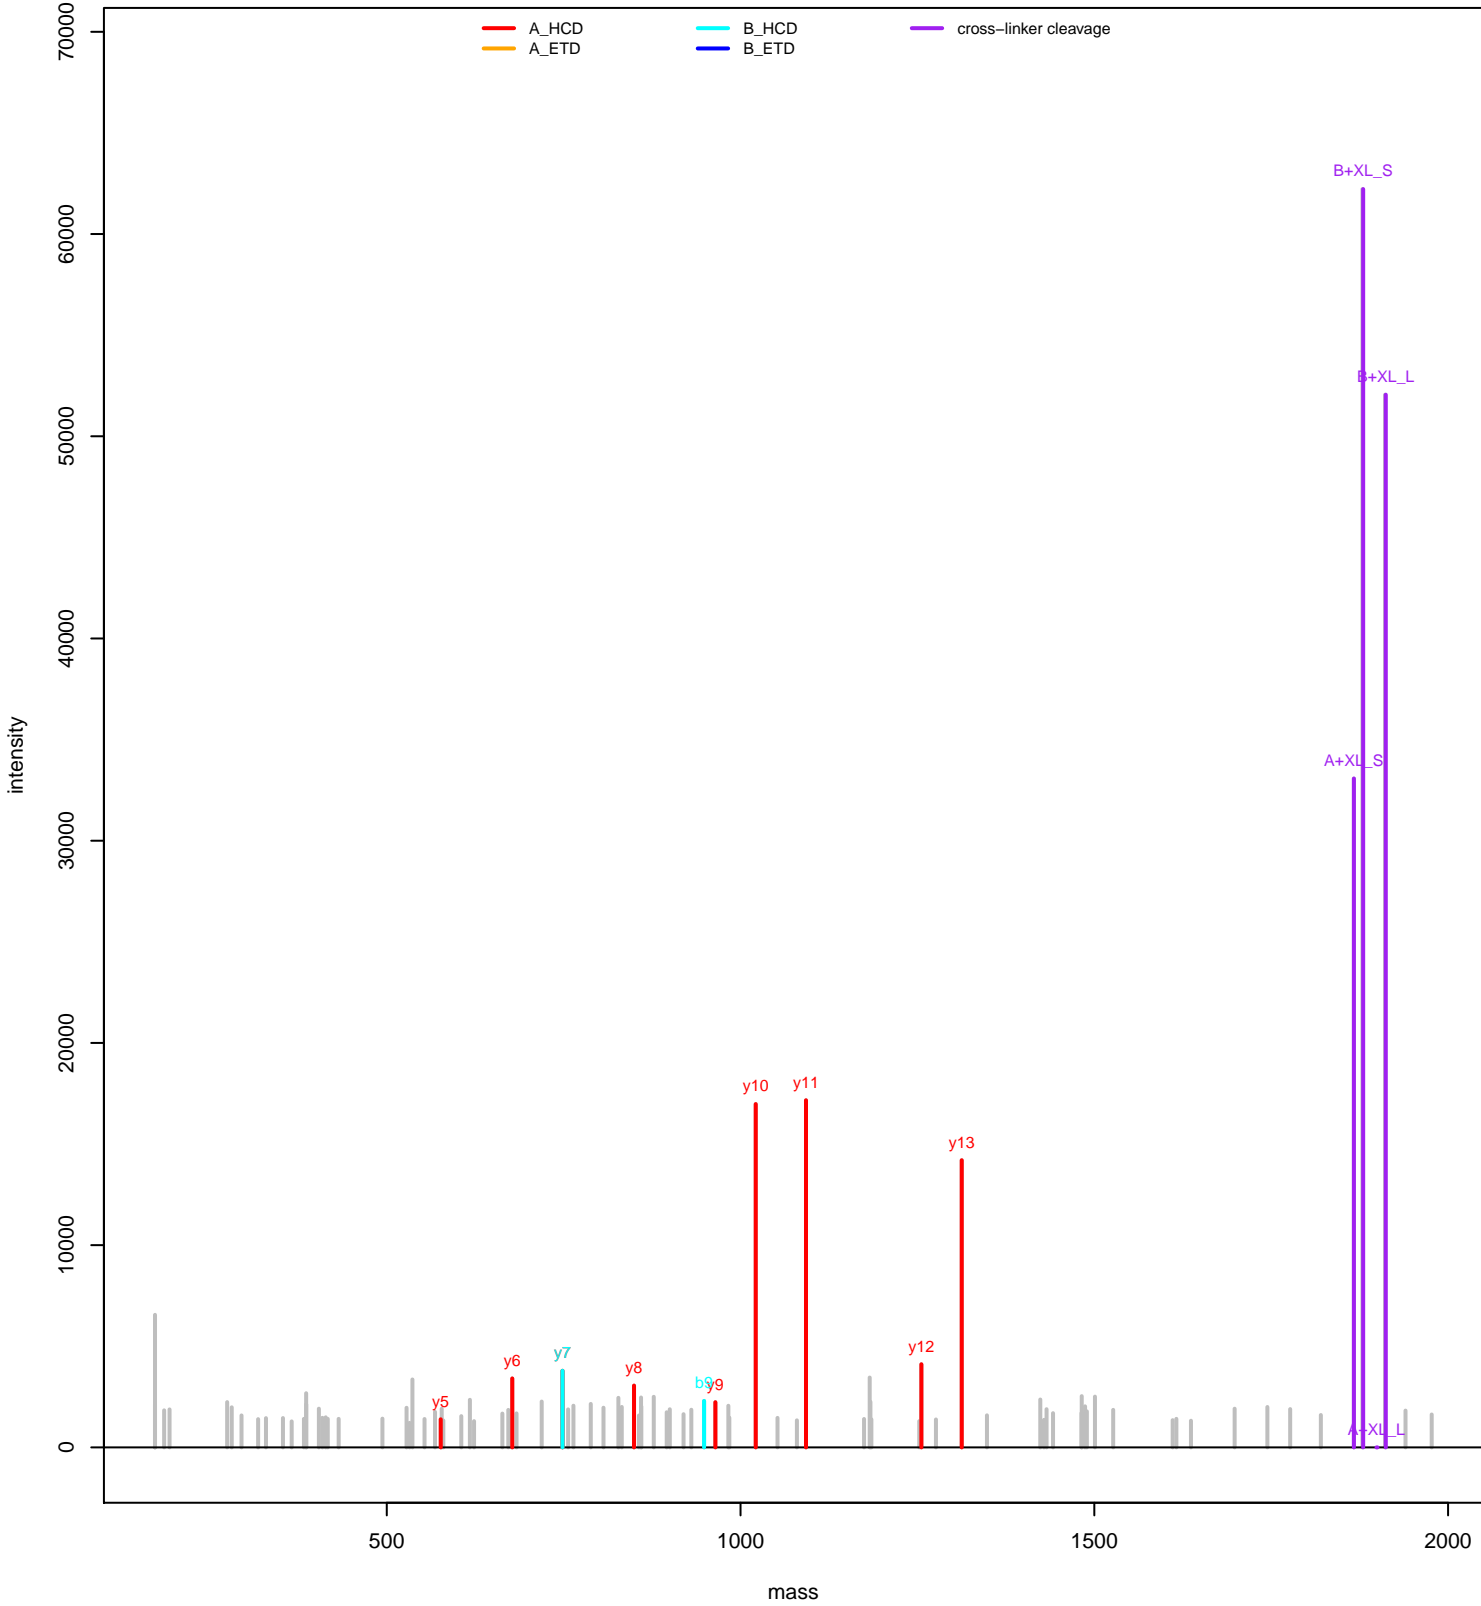

EGSVKGYAGDTATTSEIK+XL\_S

AALVDHDKSTDISVK+XL\_S

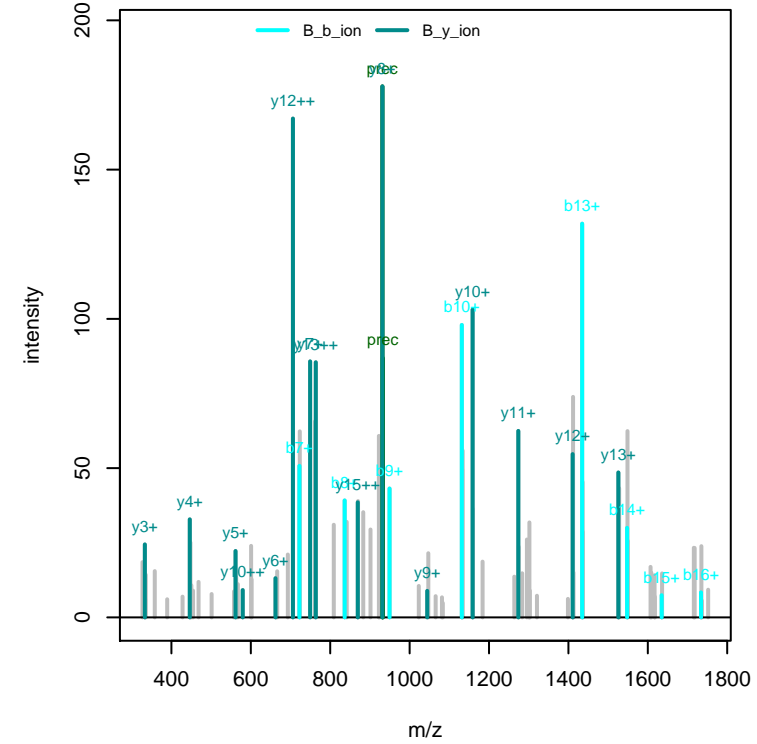

EGSVKGYAGDTATTSEIK+XL\_L

AALVDHDKSTDISVK+XL\_L

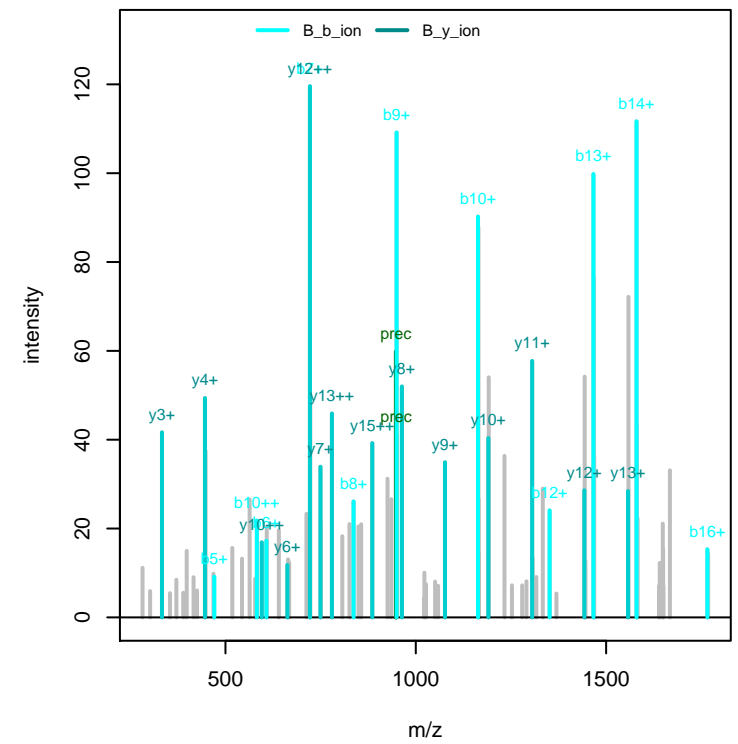

NAFNQKR  
AFCSGGDQKVR

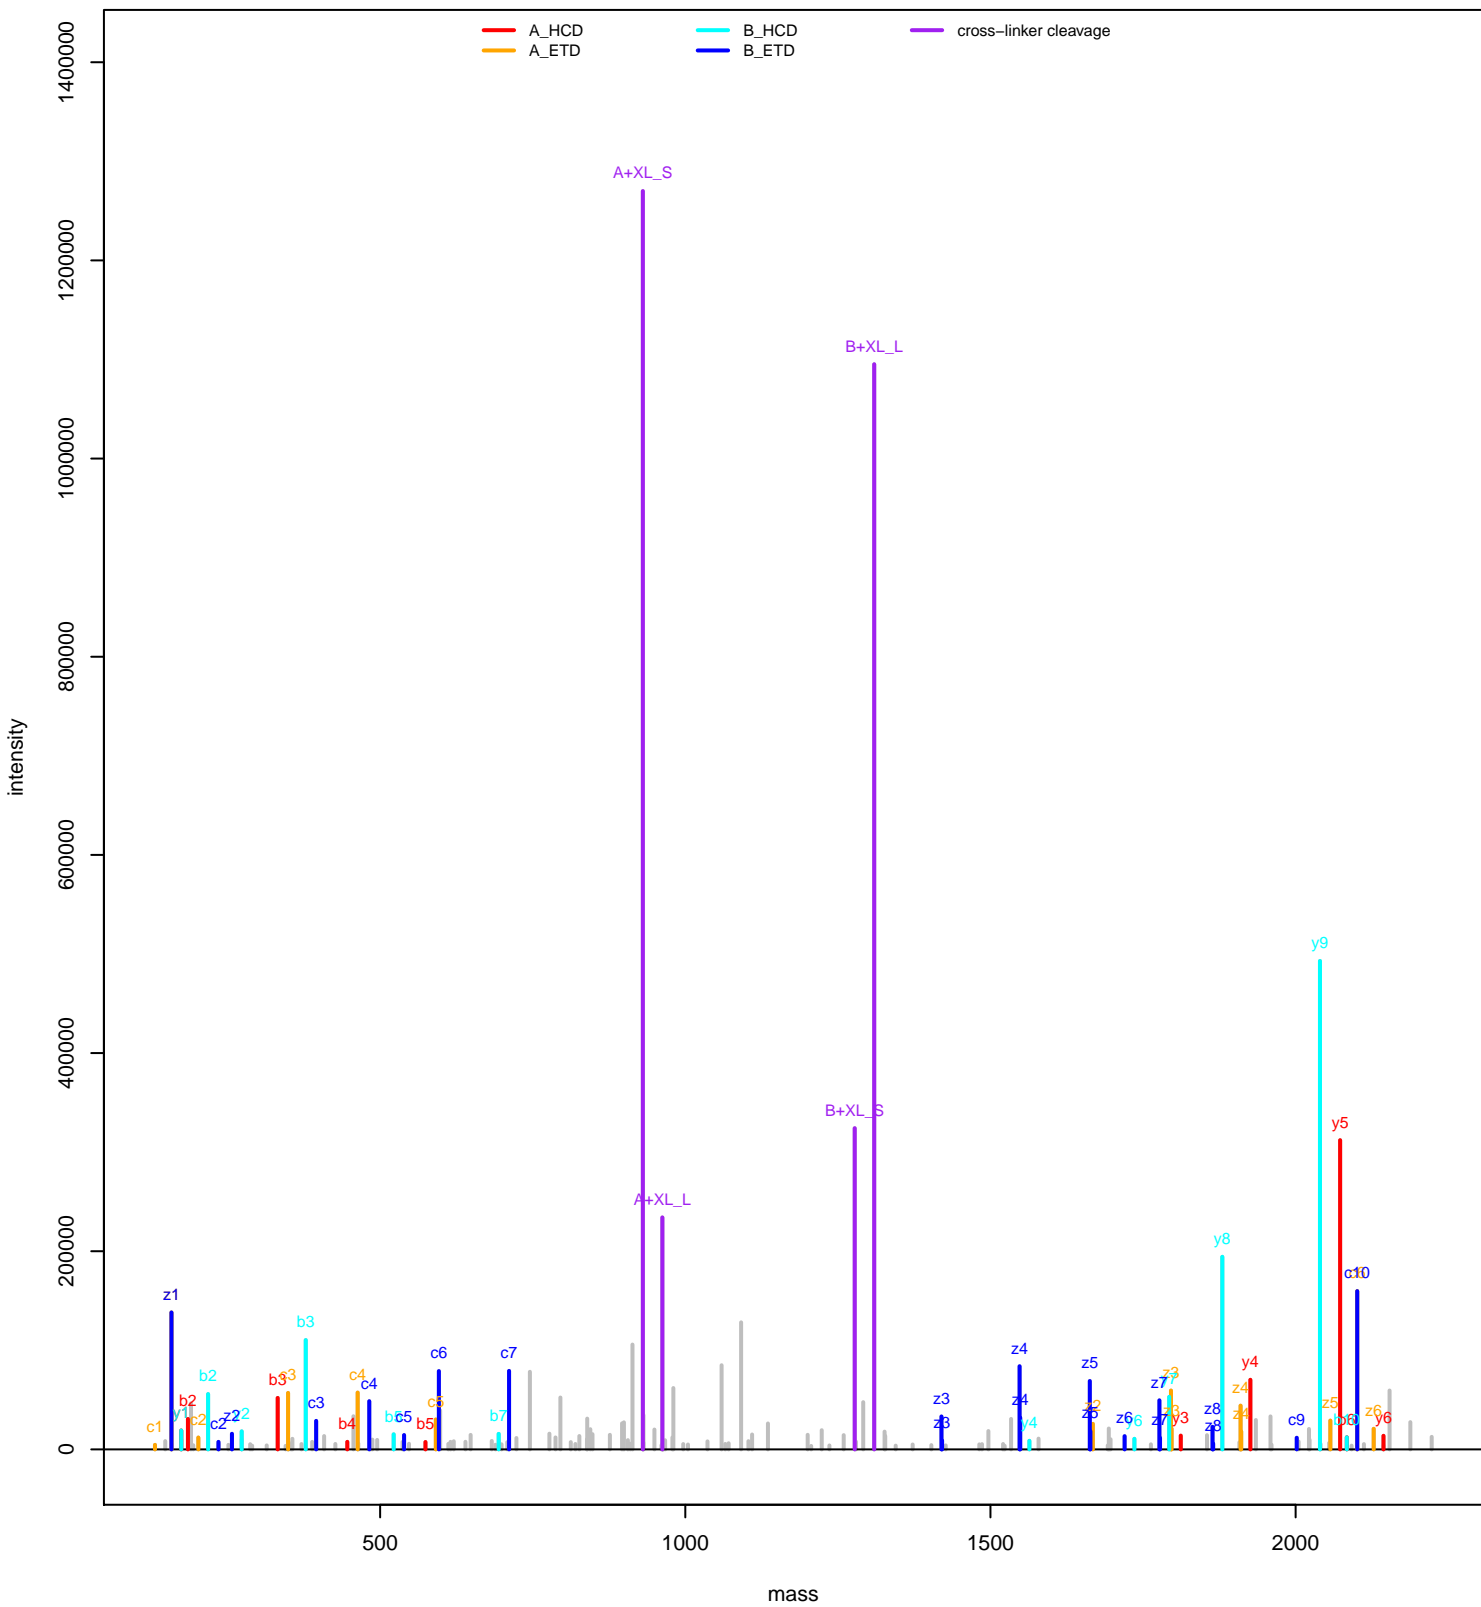

NAFNQKR+XL\_S

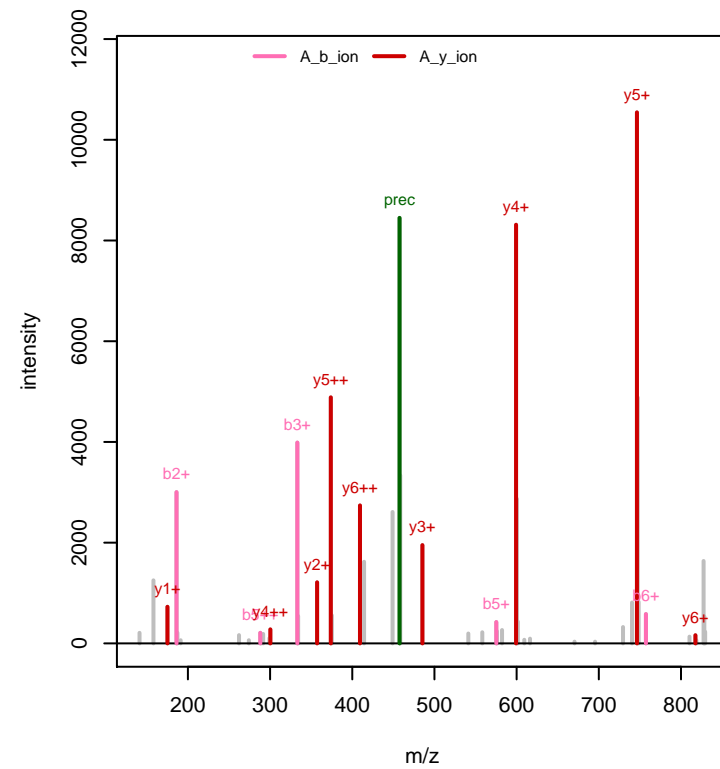

NAFNQKR+XL\_L

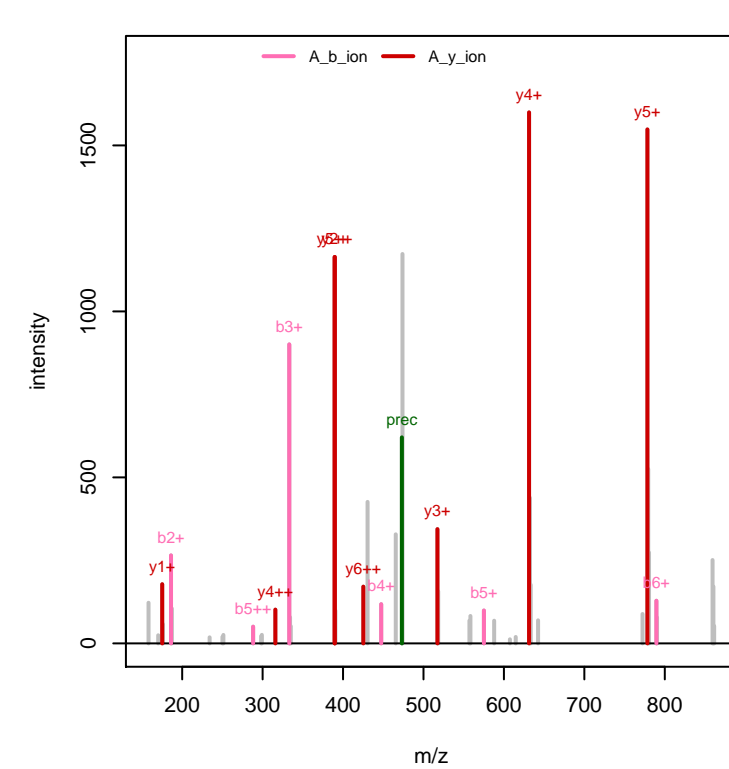

AFCSGGDQKVR+XL\_S

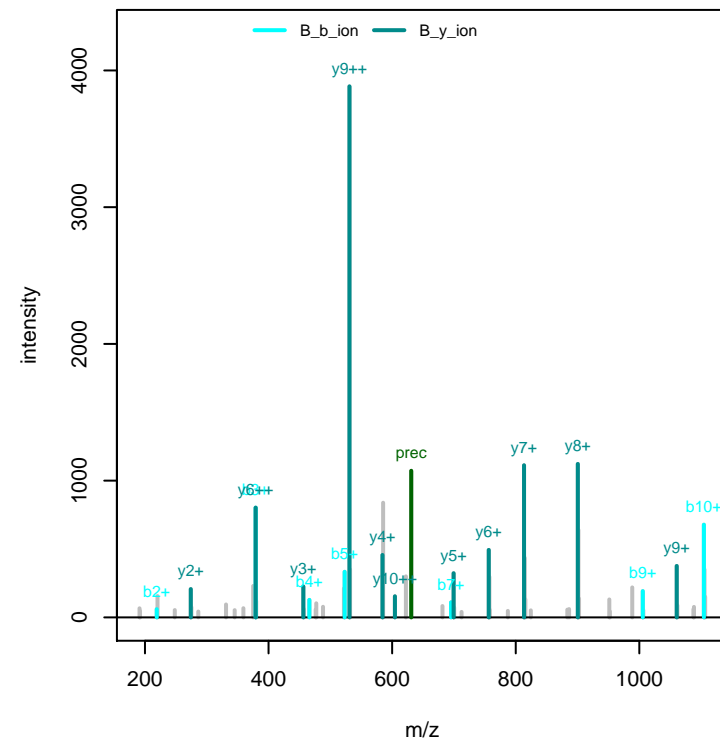

AFCSGGDQKVR+XL\_L

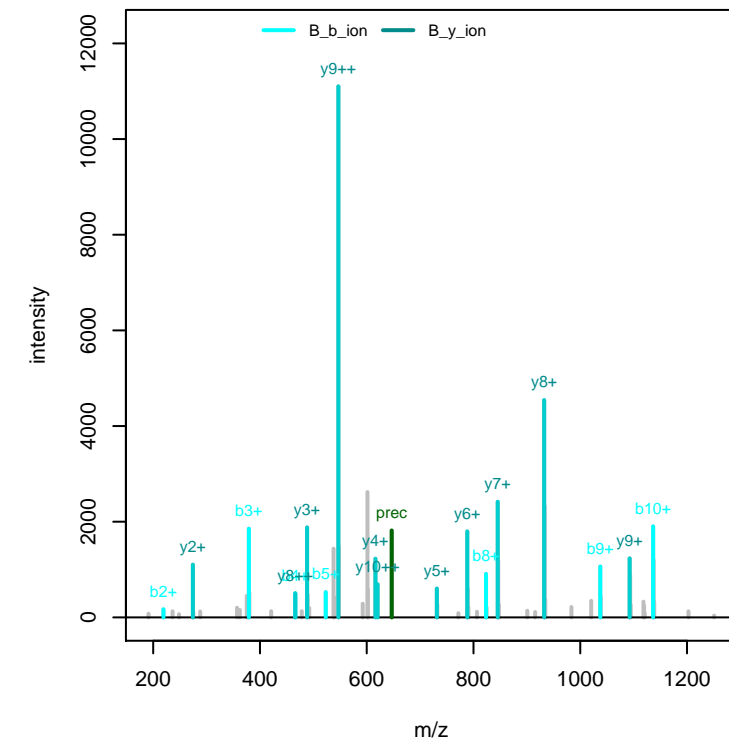

LSHNIATLKR  
LSHNIATLKR

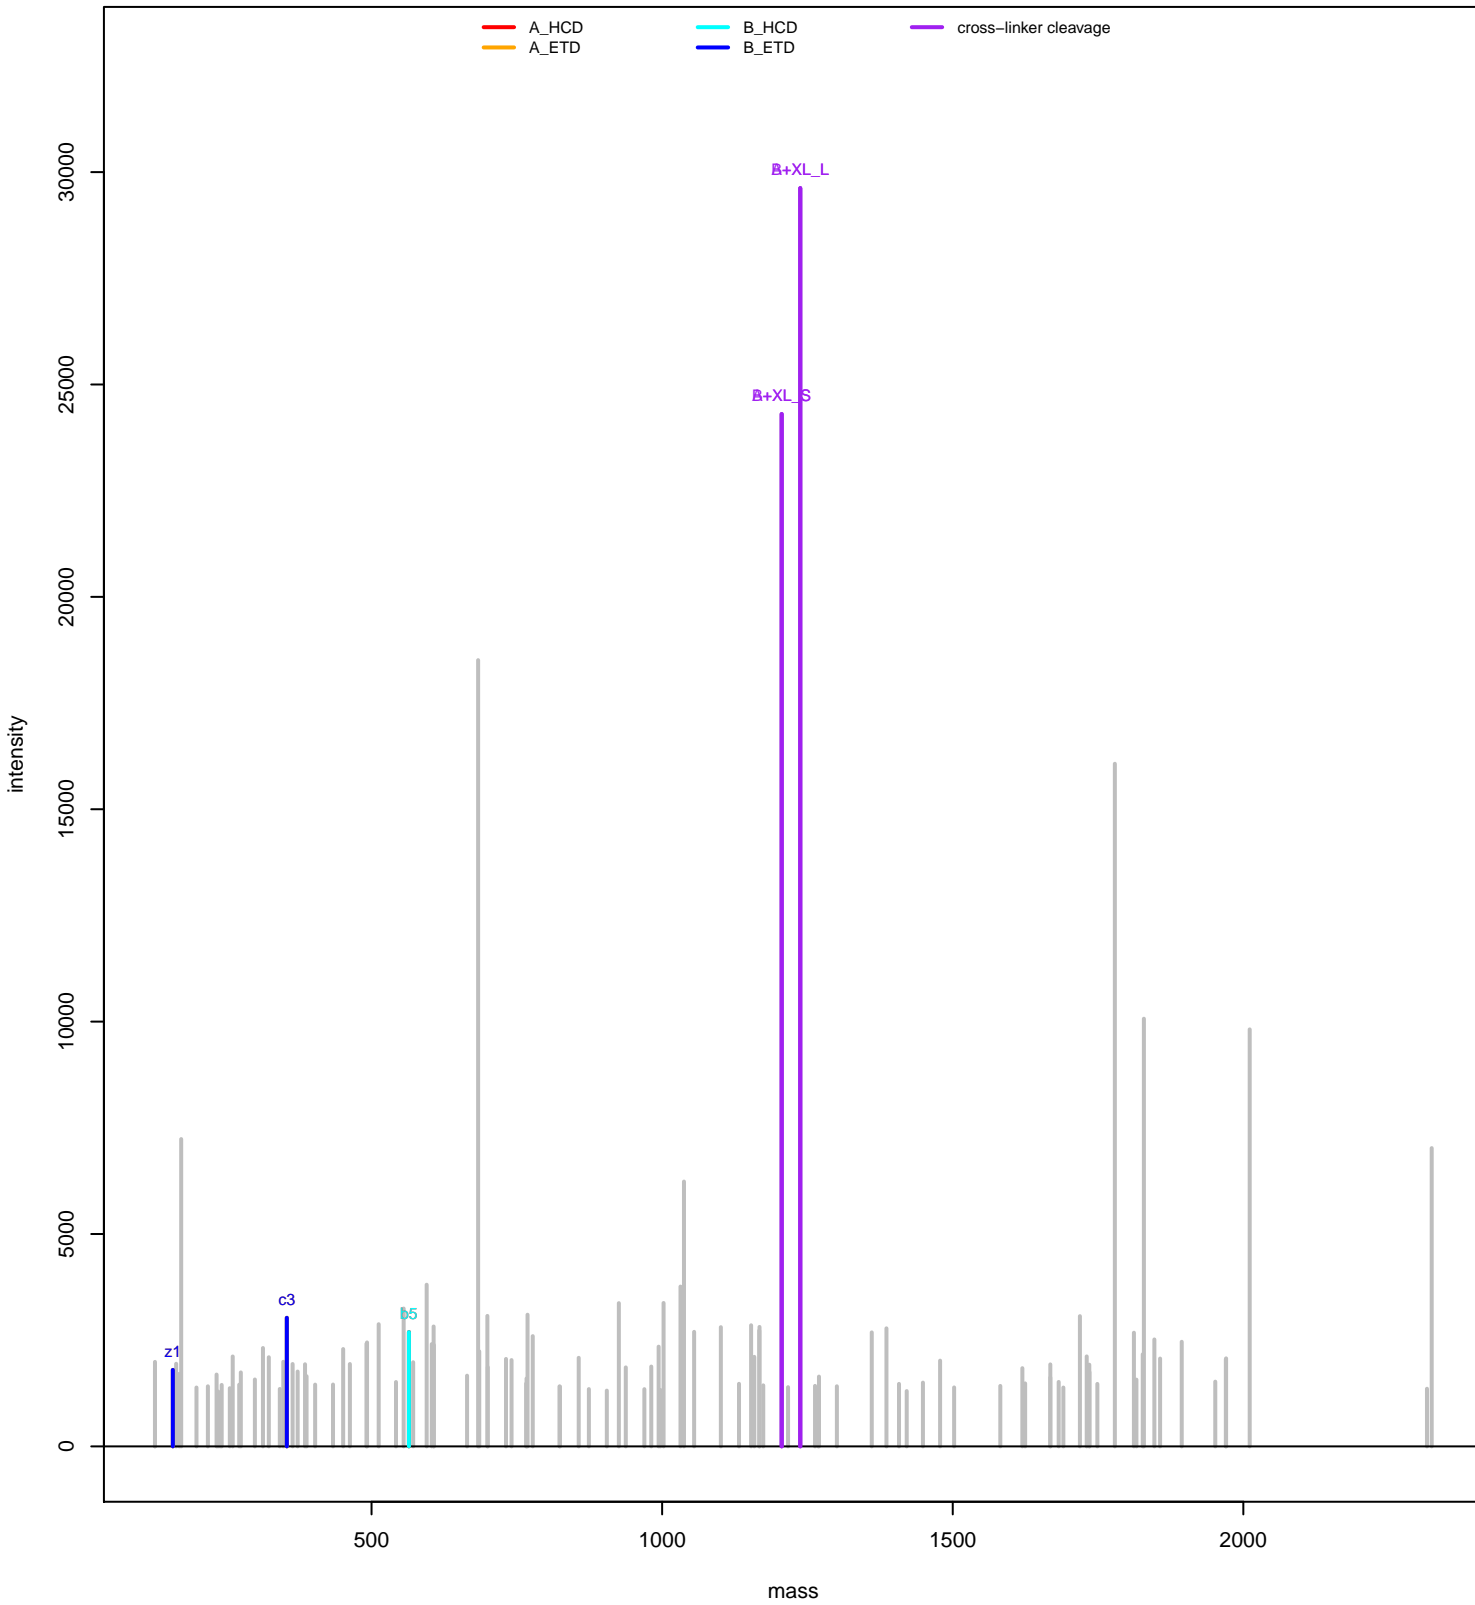

LSHNIATLKR+XL\_S

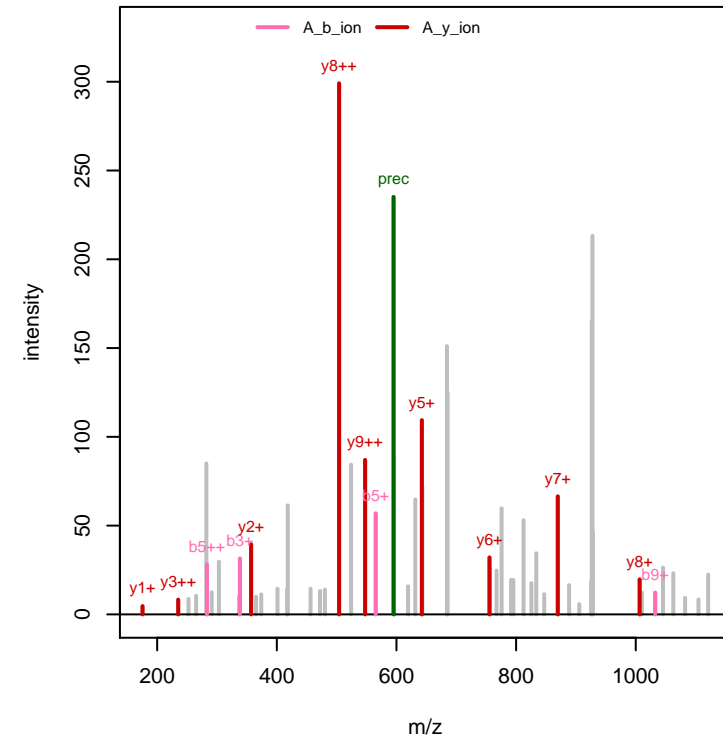

LSHNIATLKR+XL\_L

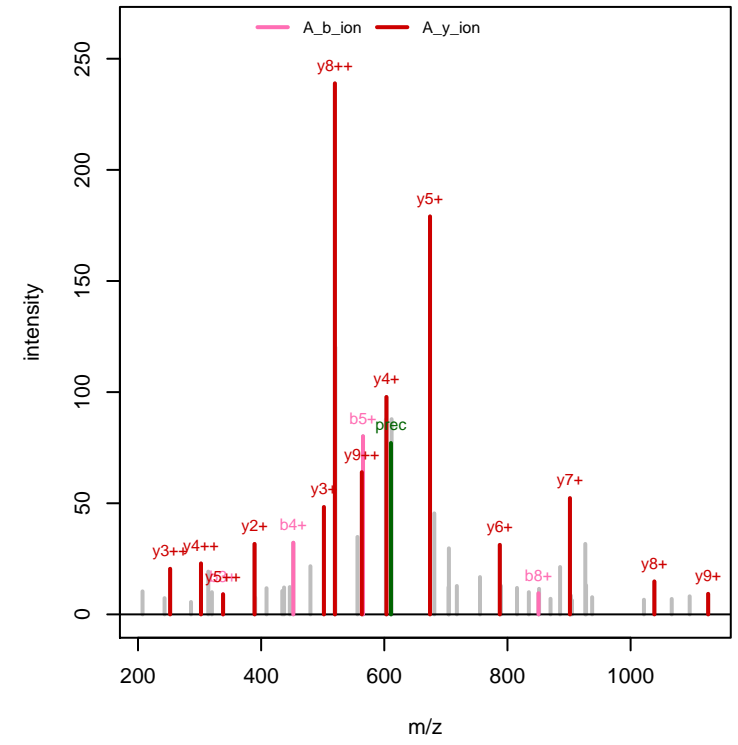

LSHNIATLKR+XL\_S

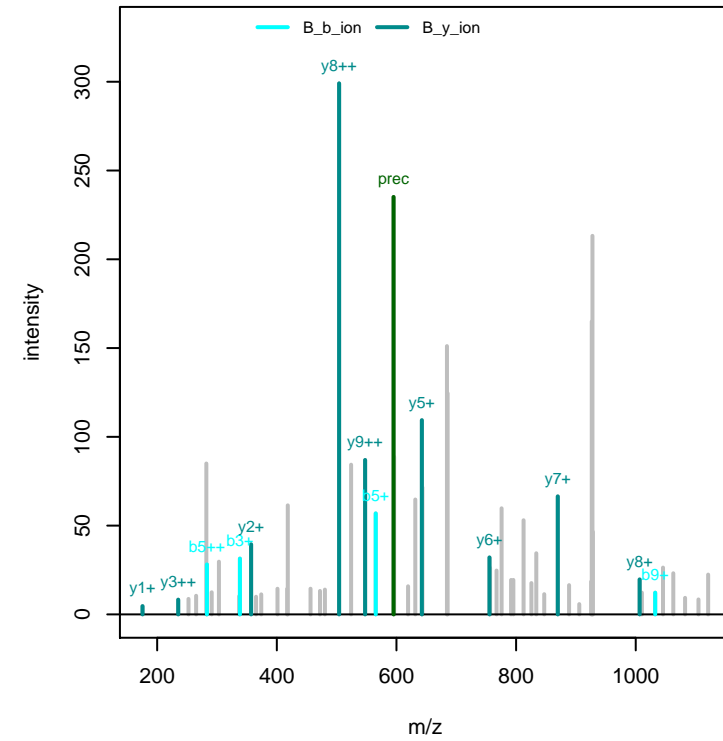

LSHNIATLKR+XL\_L

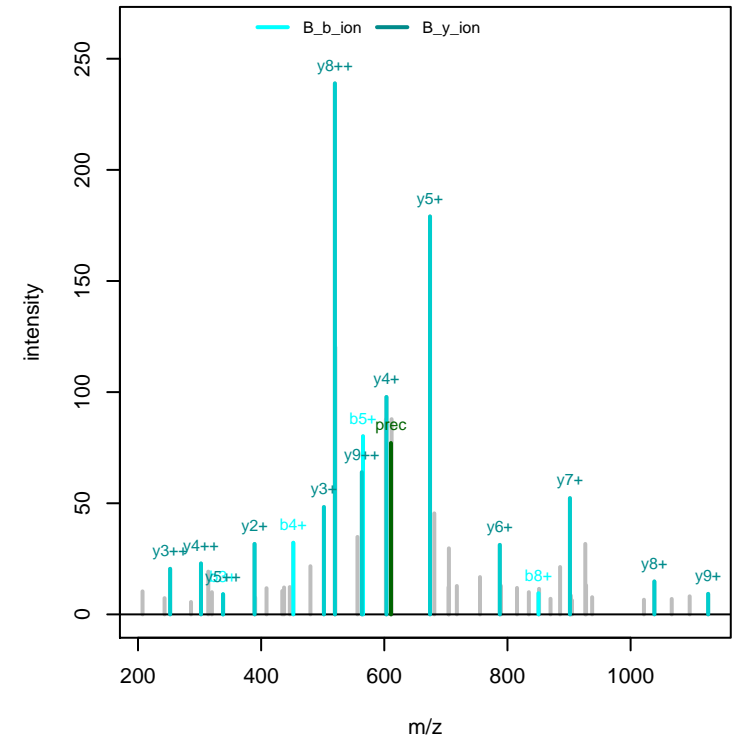

**GKNGELTR  
AAGANKVAVIK**

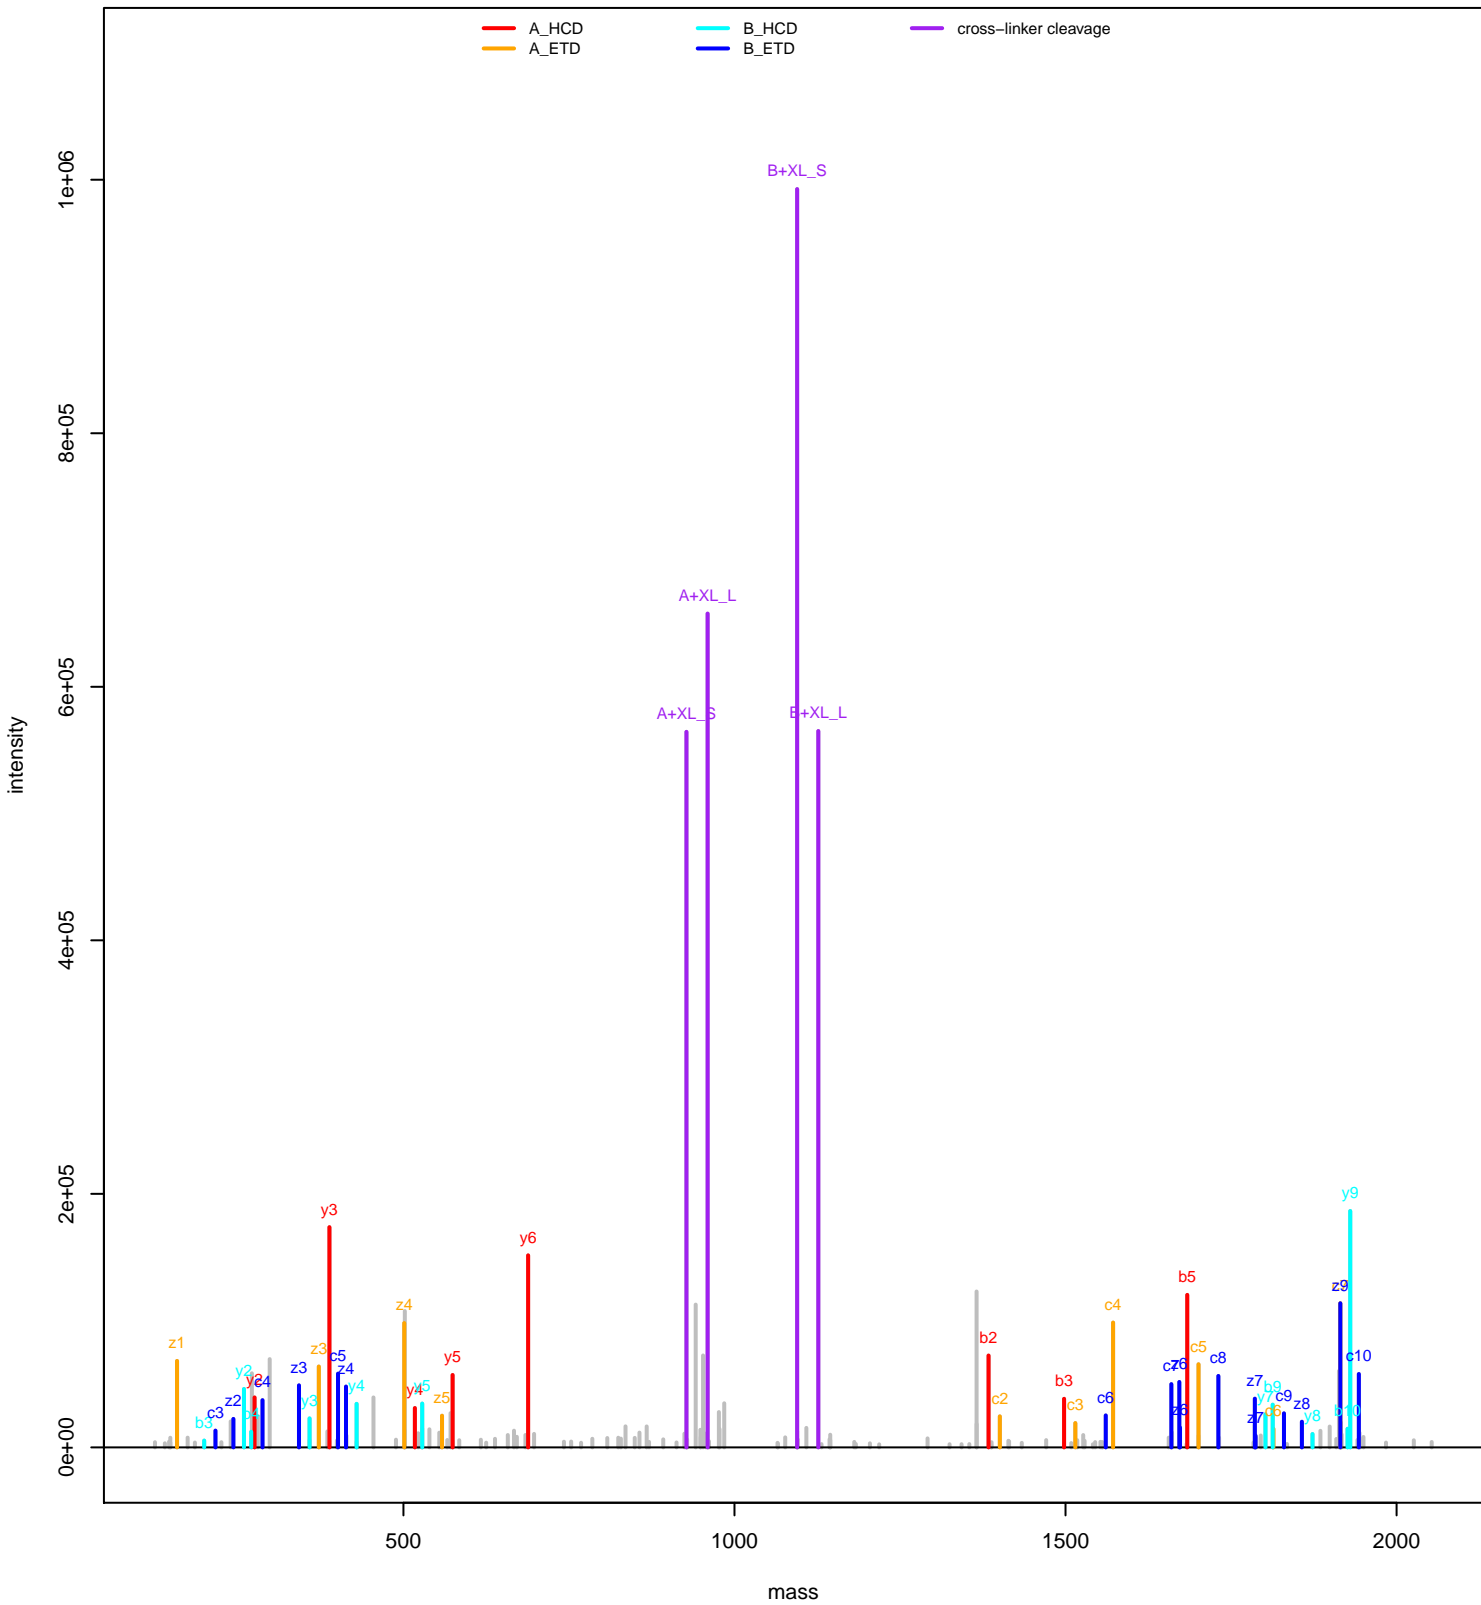

**GKNGELTR+XL\_S**

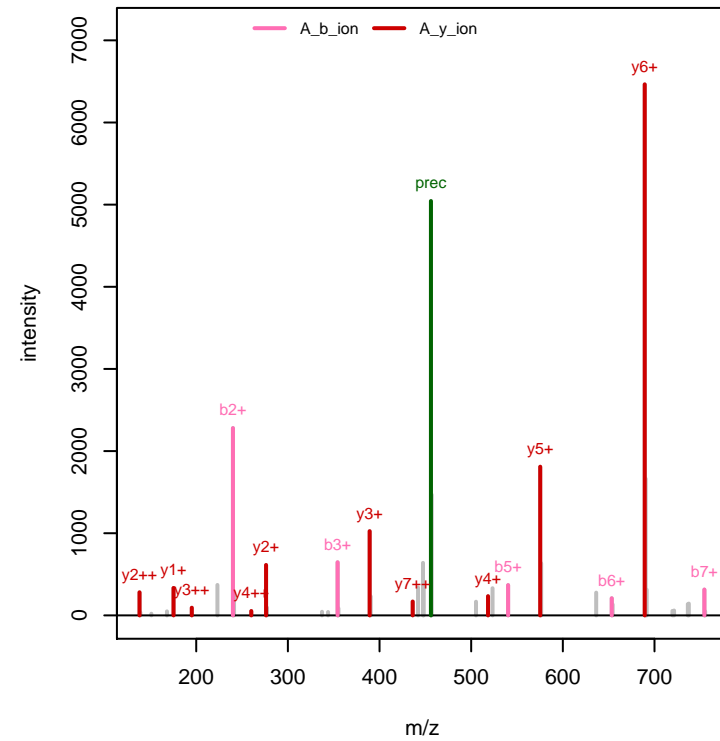

**GKNGELTR+XL\_L**

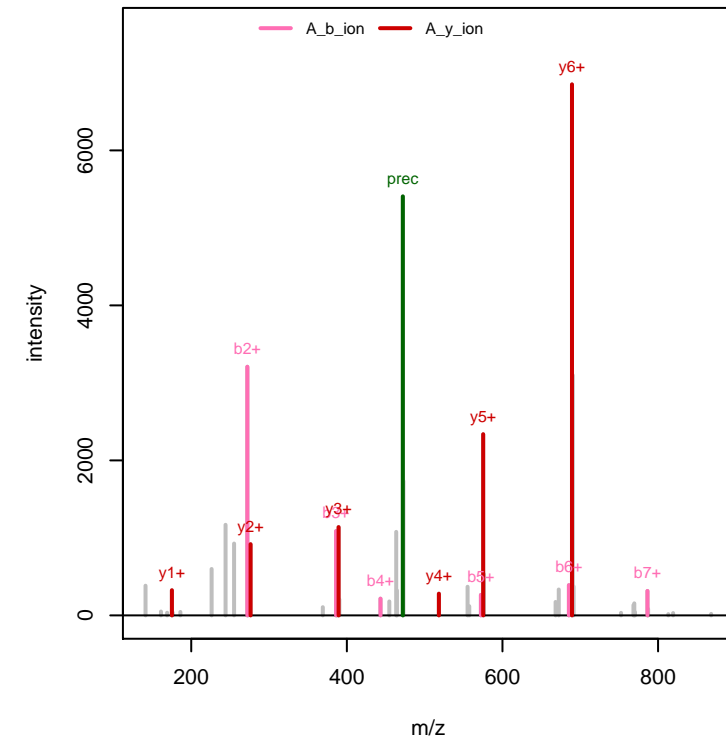

**AAGANKVAVIK+XL\_S**

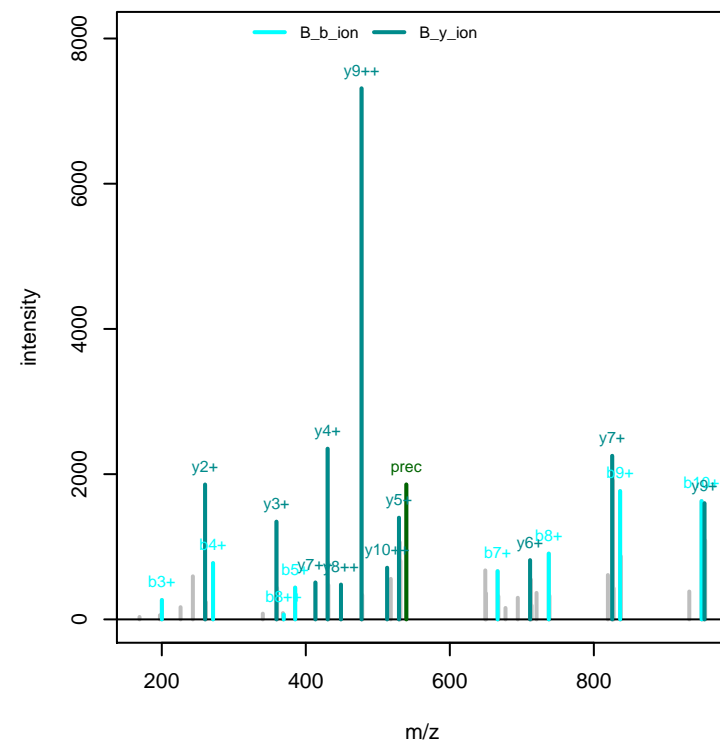

**AAGANKVAVIK+XL\_L**

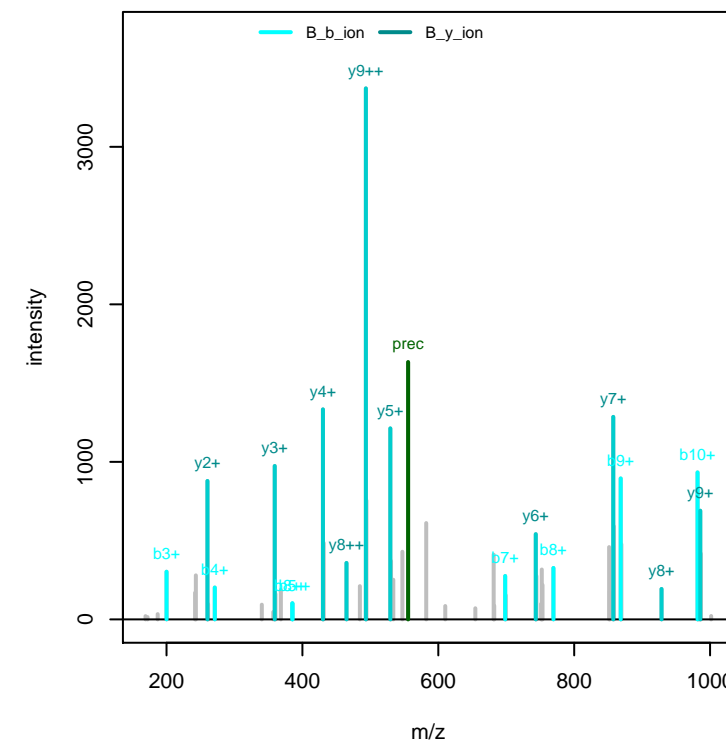

**EQKLAISR  
KNAVDEEIER**

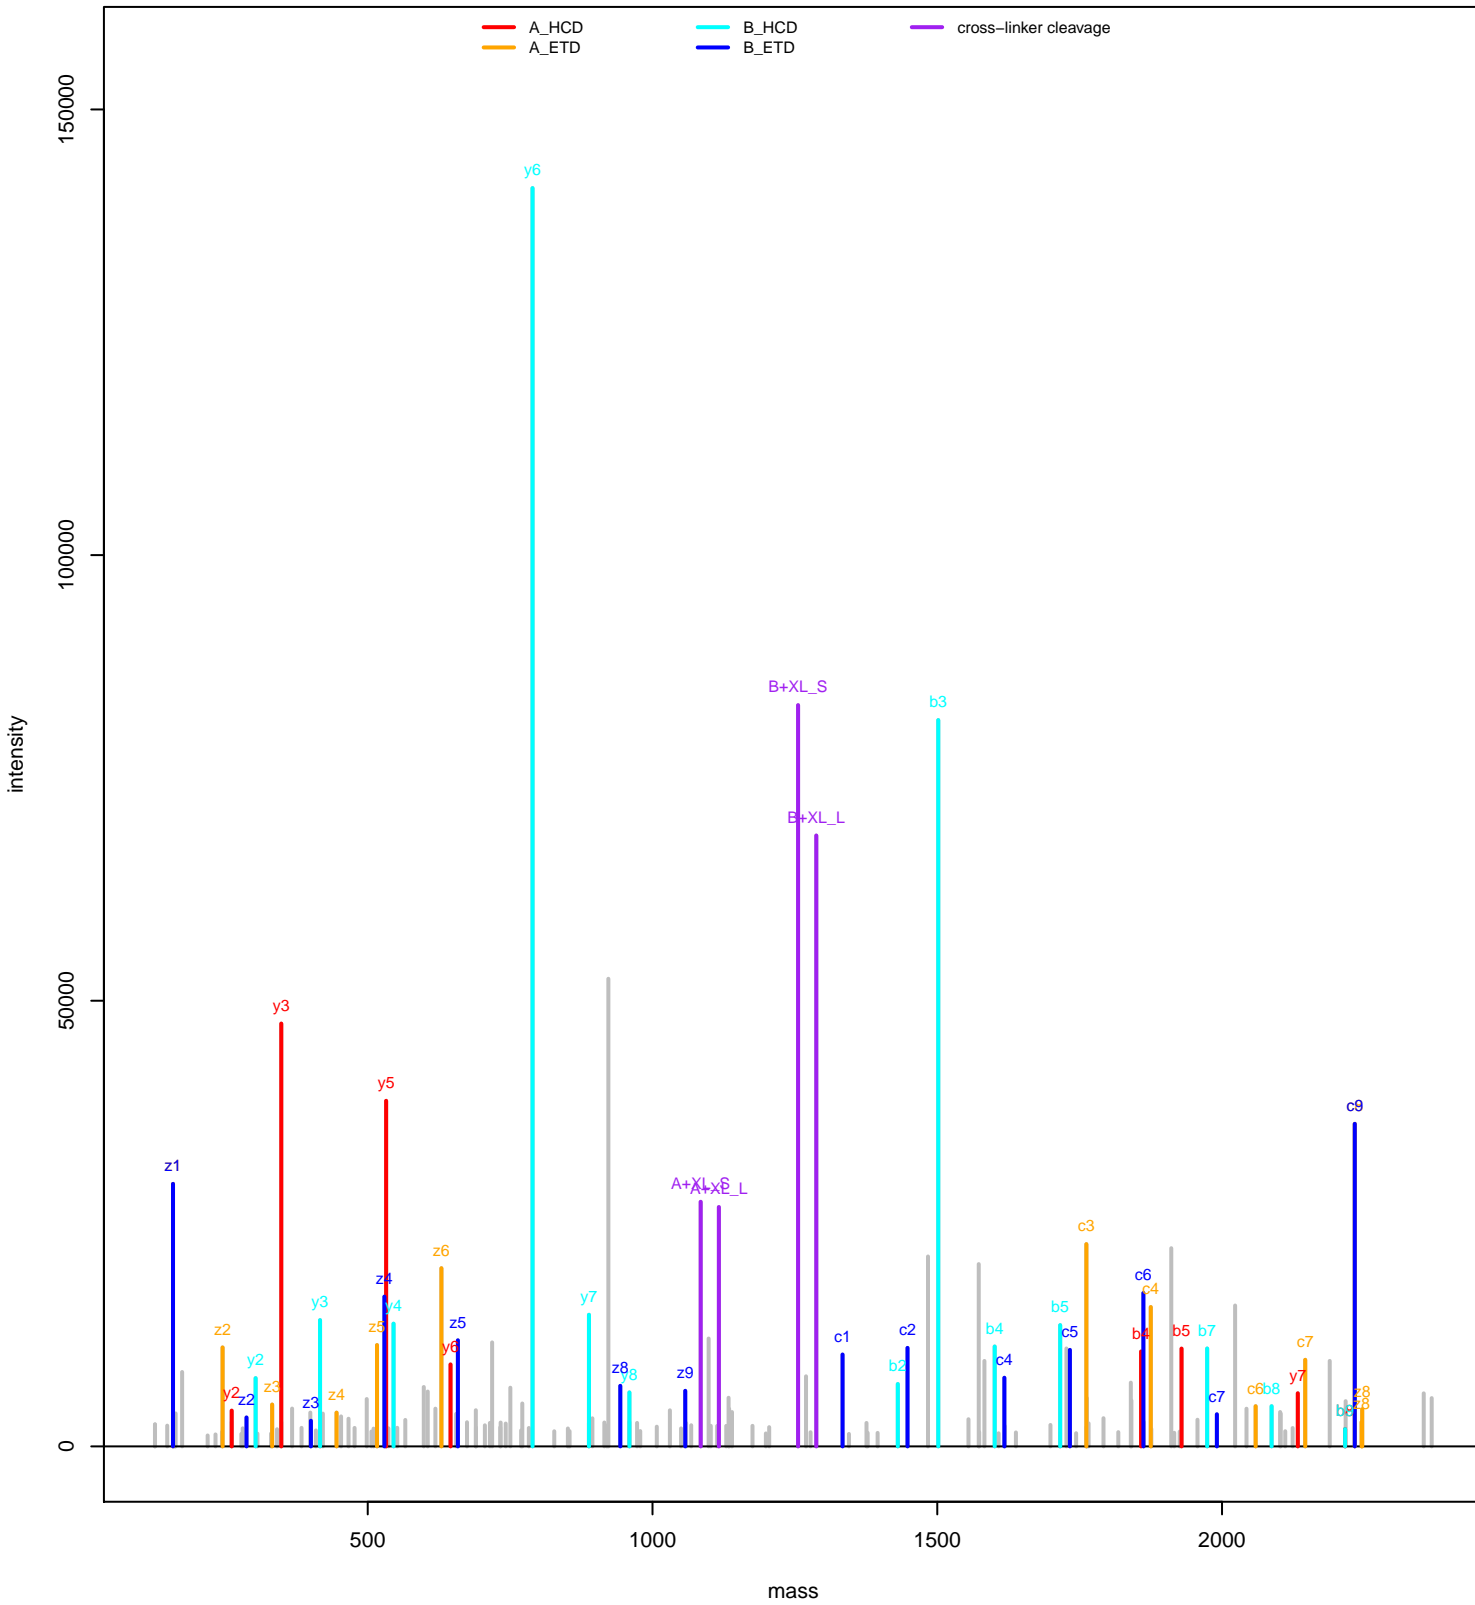

**EQKLAISR+XL\_S**

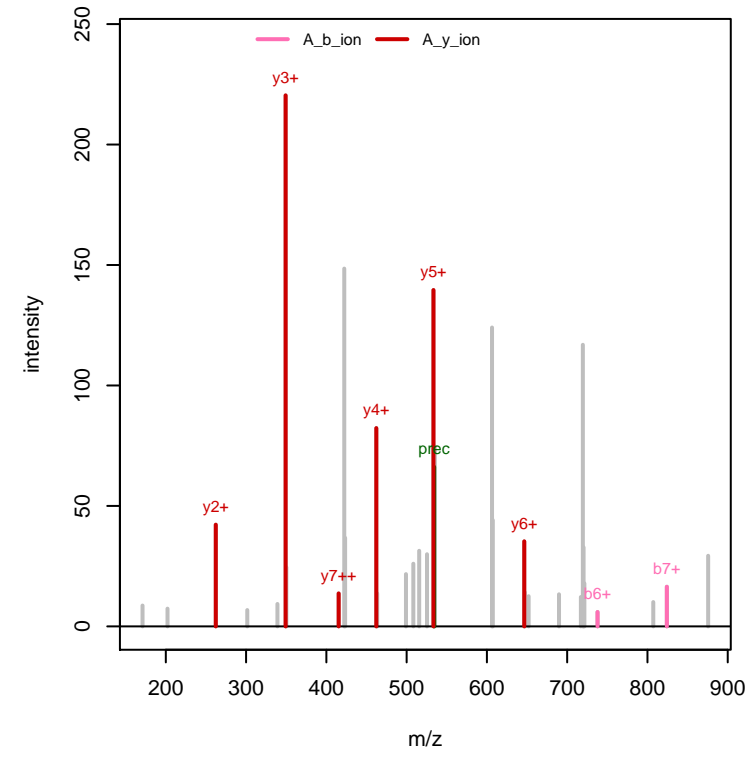

**EQKLAISR+XL\_L**

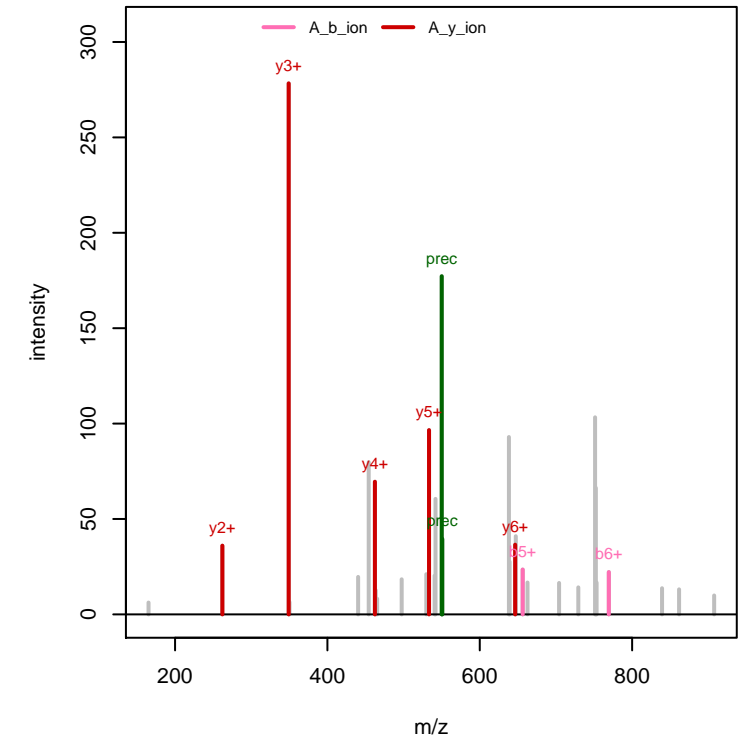

**KNAVDEEIER+XL\_S**

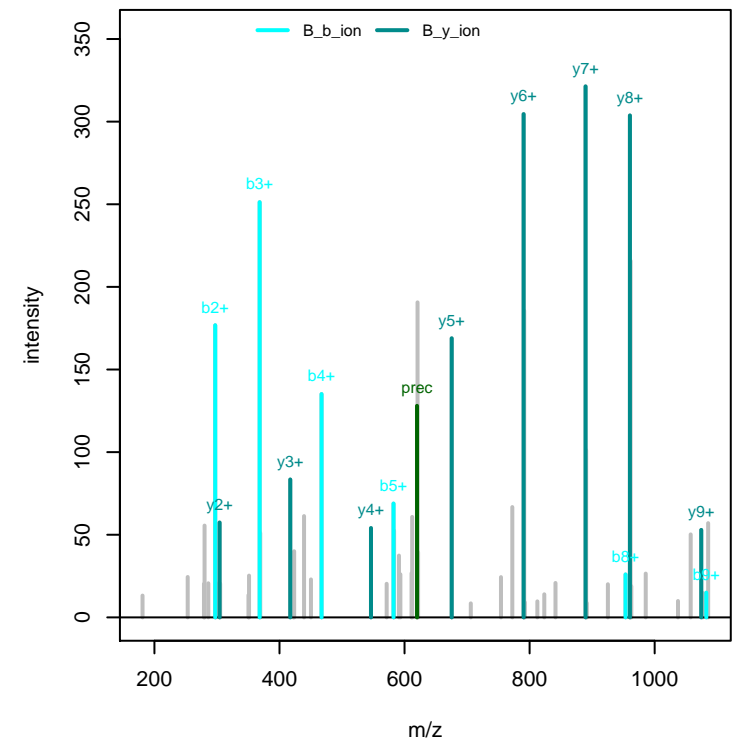

**KNAVDEEIER+XL\_L**

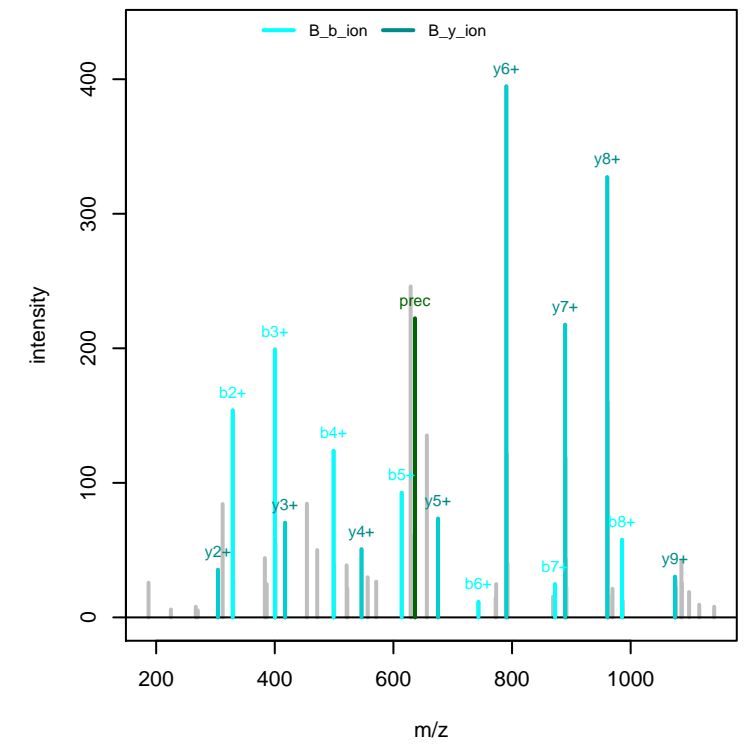

LTDAAIKK  
CVEAFKTQISK

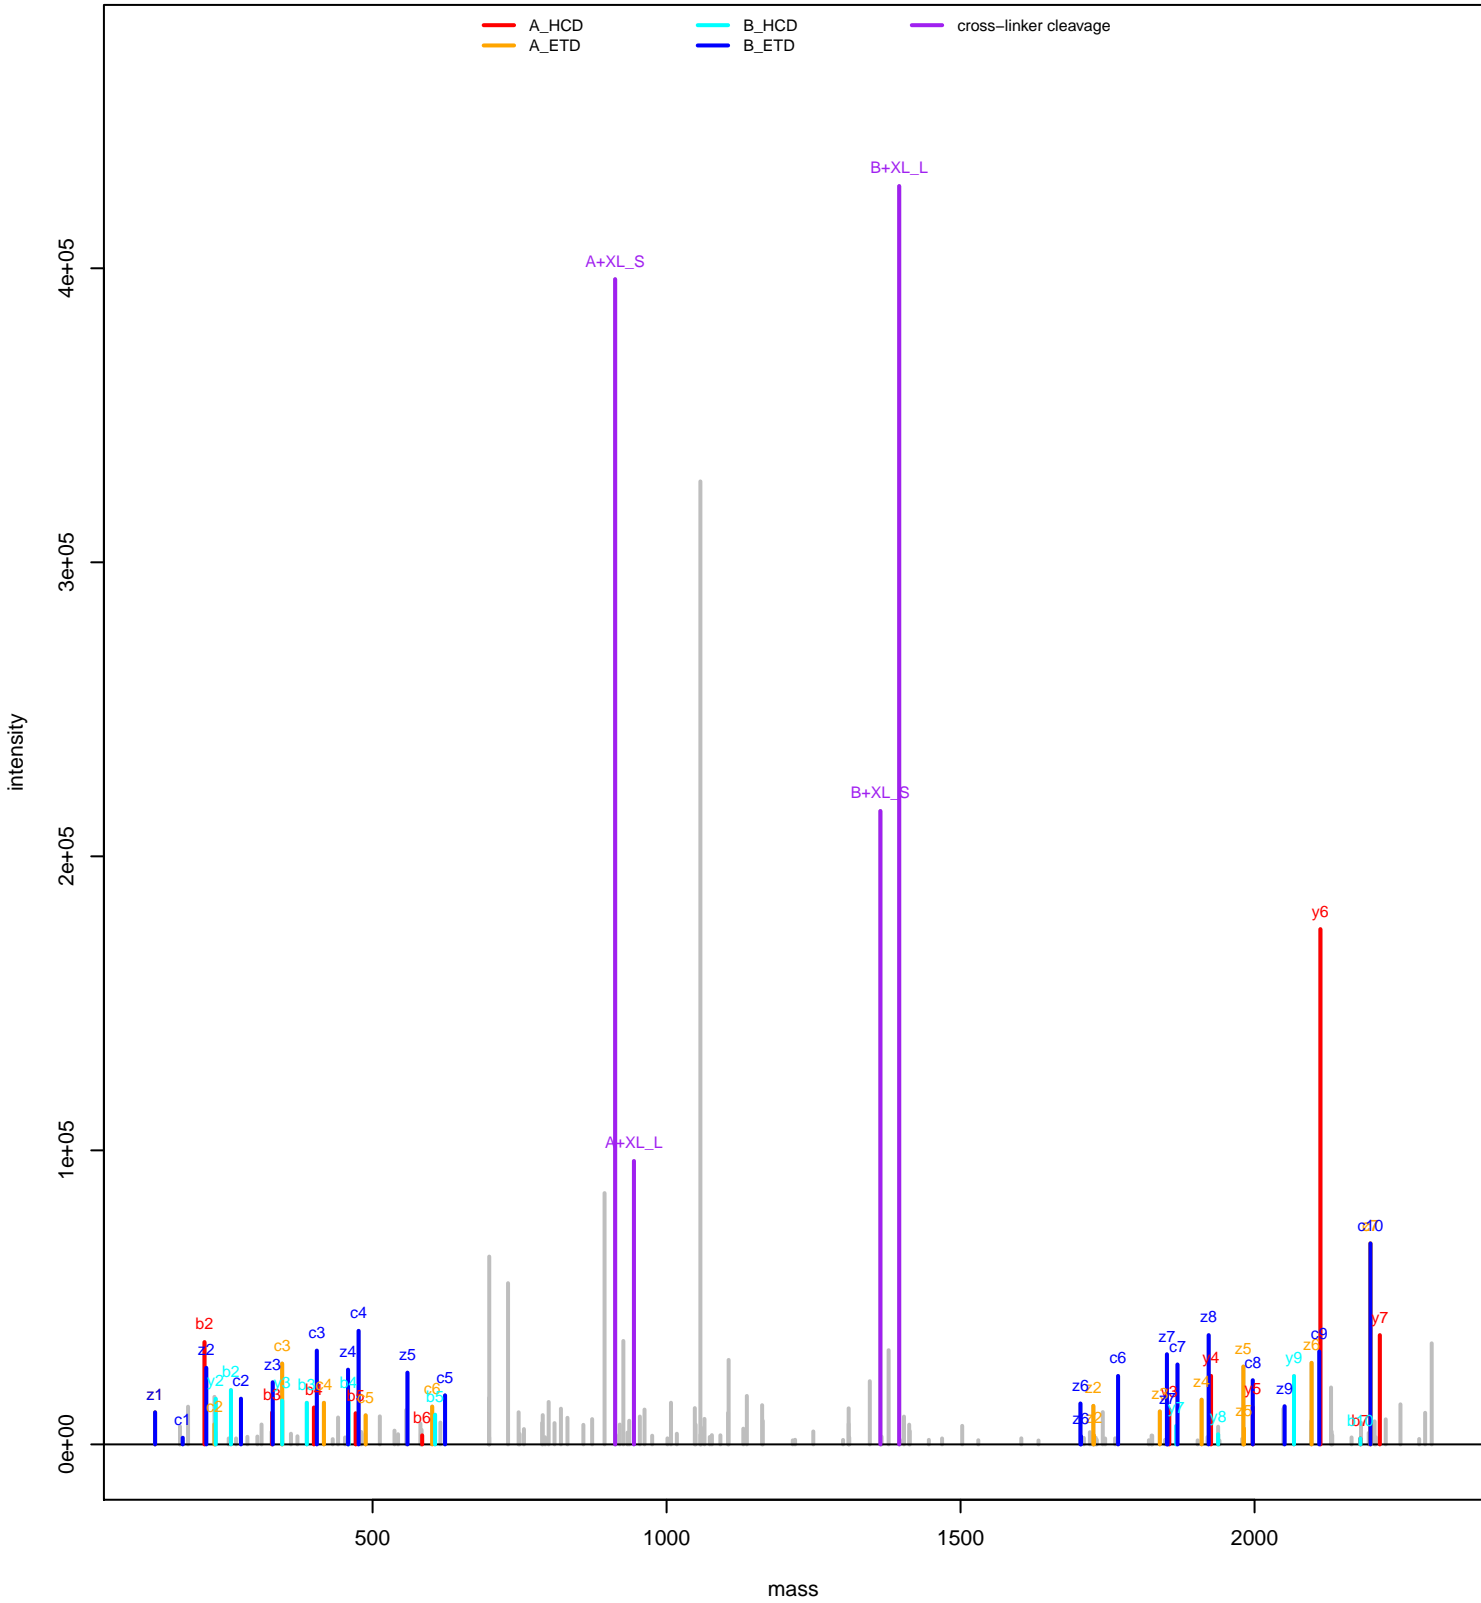

LTDAAIKK+XL\_S

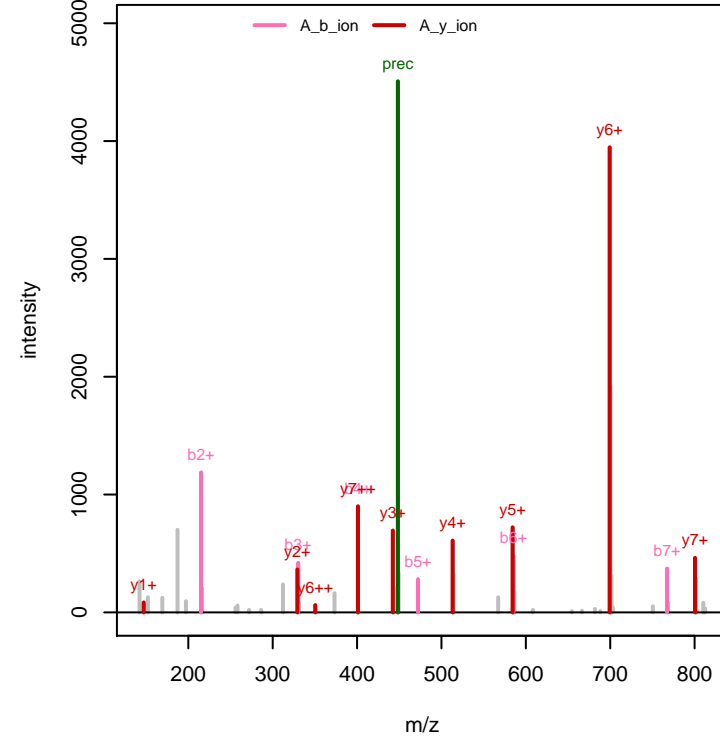

LTDAAIKK+XL\_L

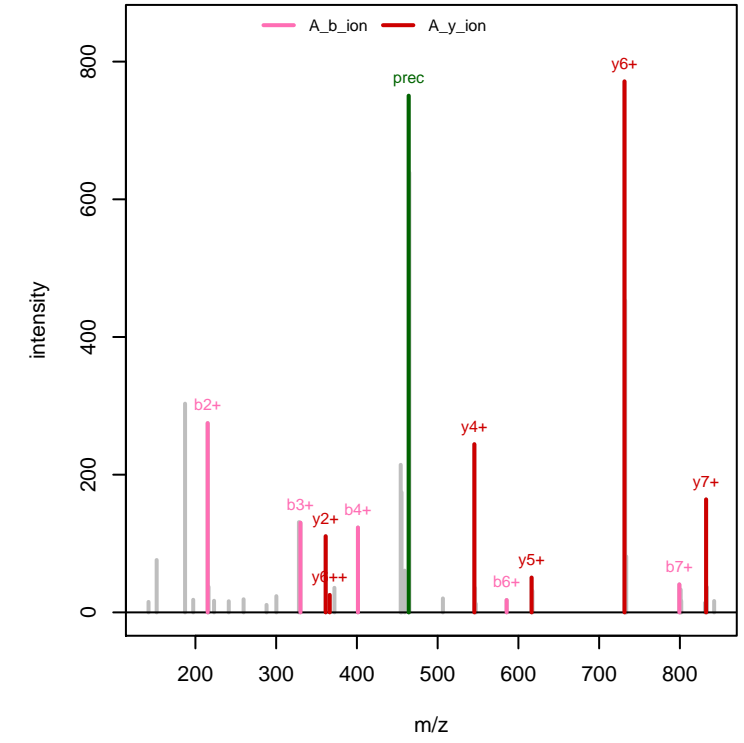

CVEAFKTQISK+XL\_S

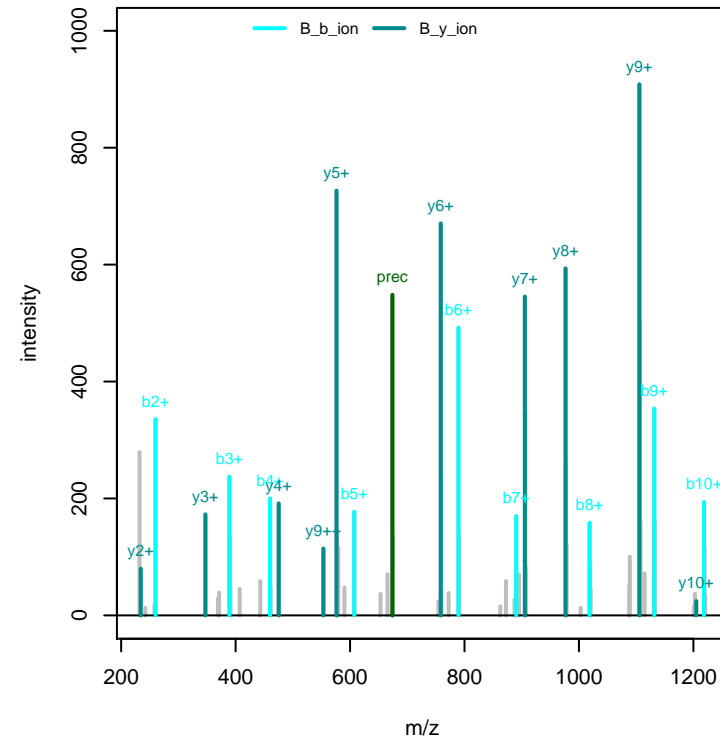

CVEAFKTQISK+XL\_L

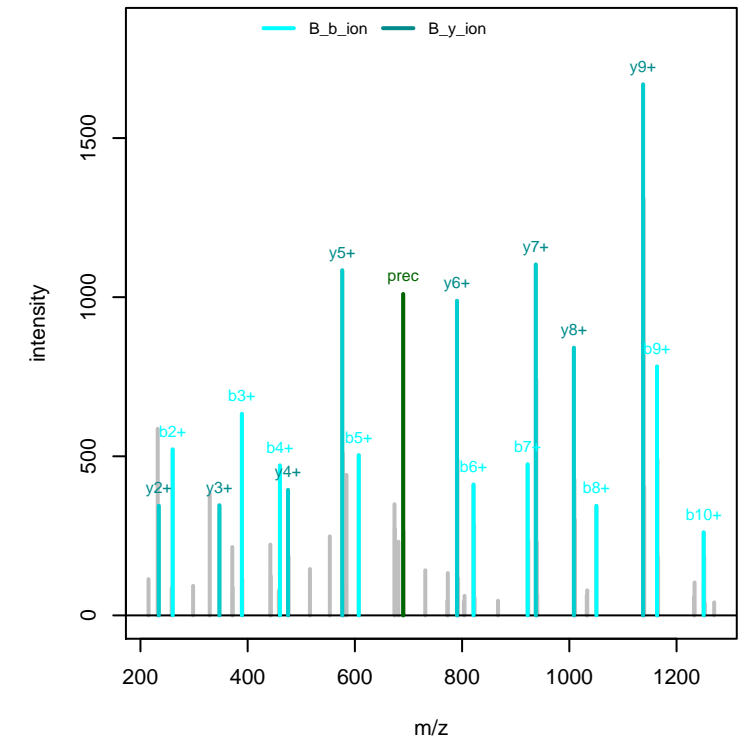



LKD GALYDEALK  
V NPGY GP KQAGPDGER

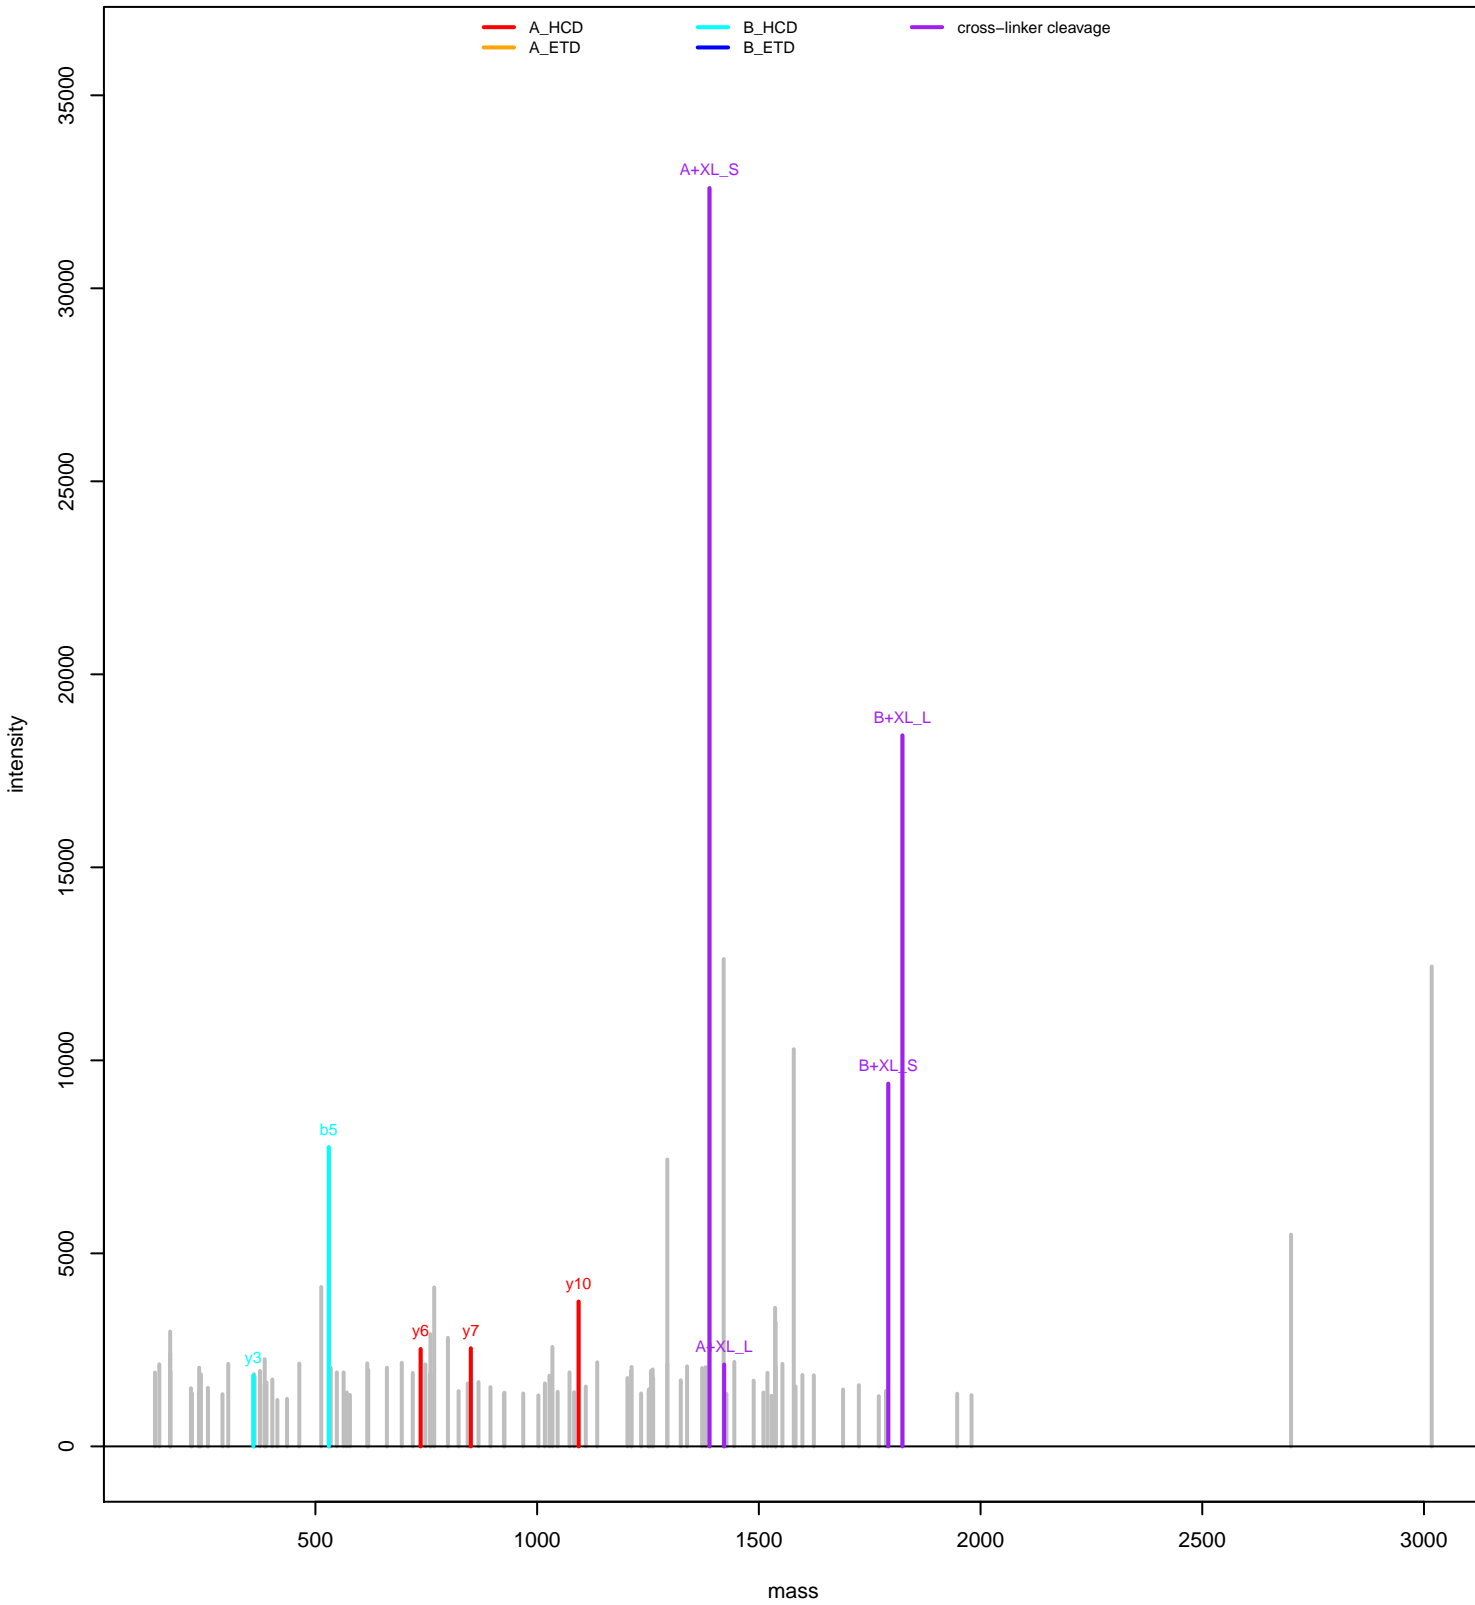

LKD GALYDEALK+XL\_S

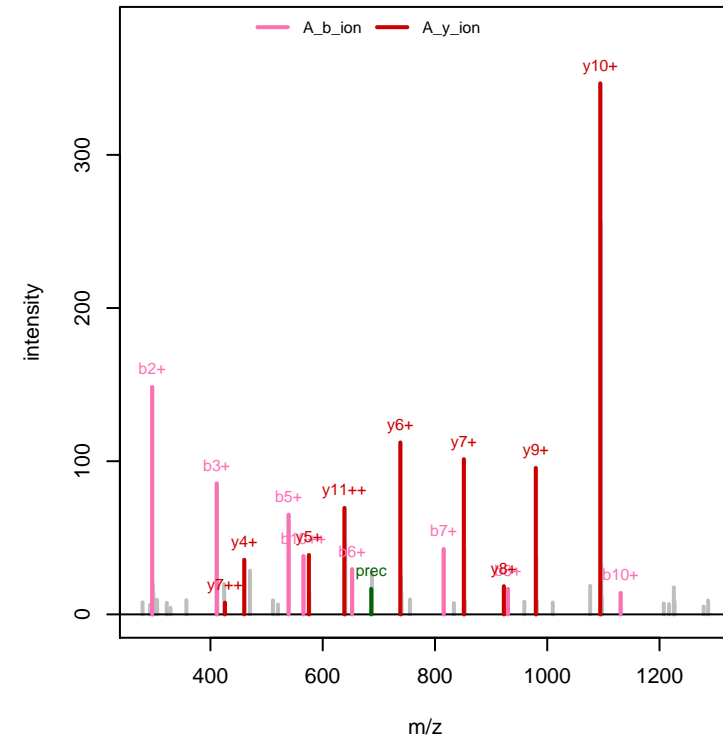

LKD GALYDEALK+XL\_L

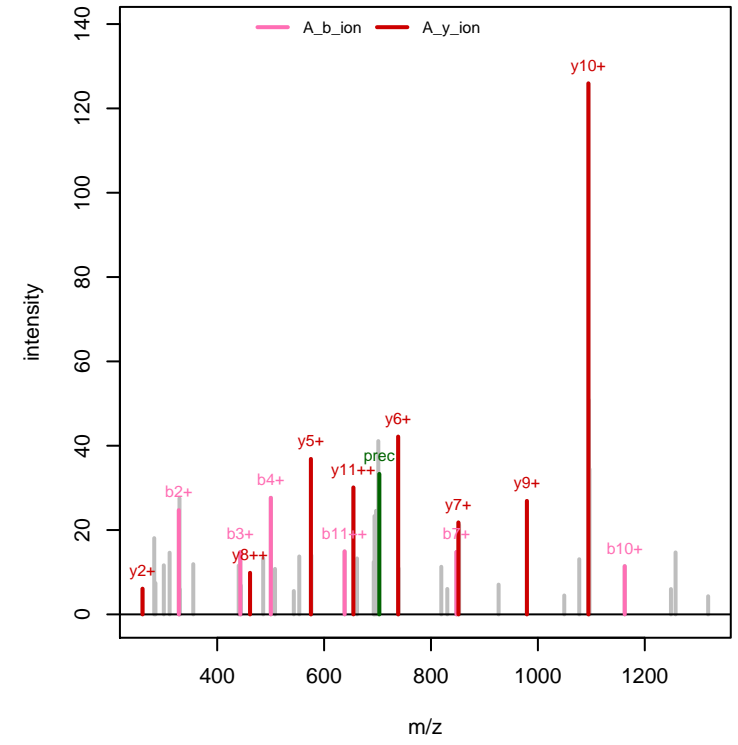

V NPGY GP KQAGPDGER+XL\_S

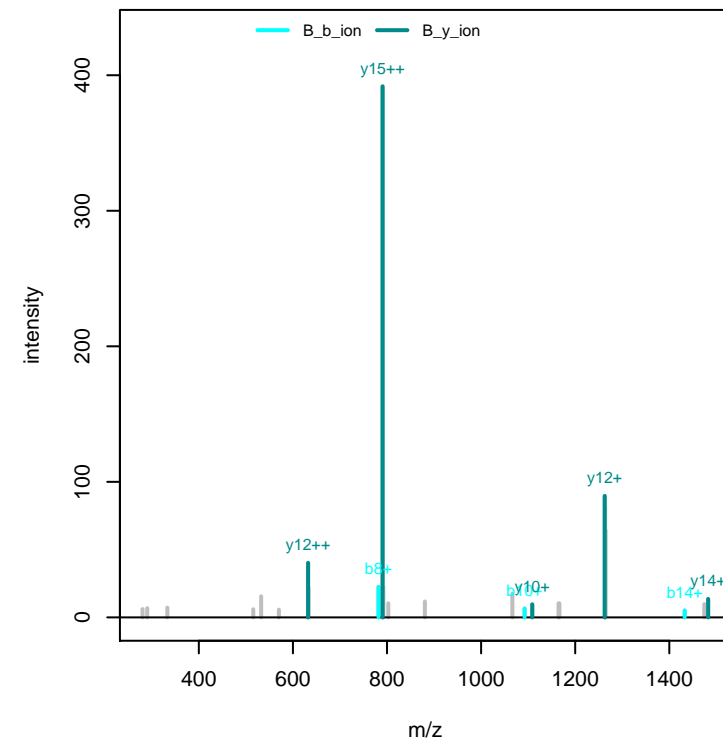

V NPGY GP KQAGPDGER+XL\_L

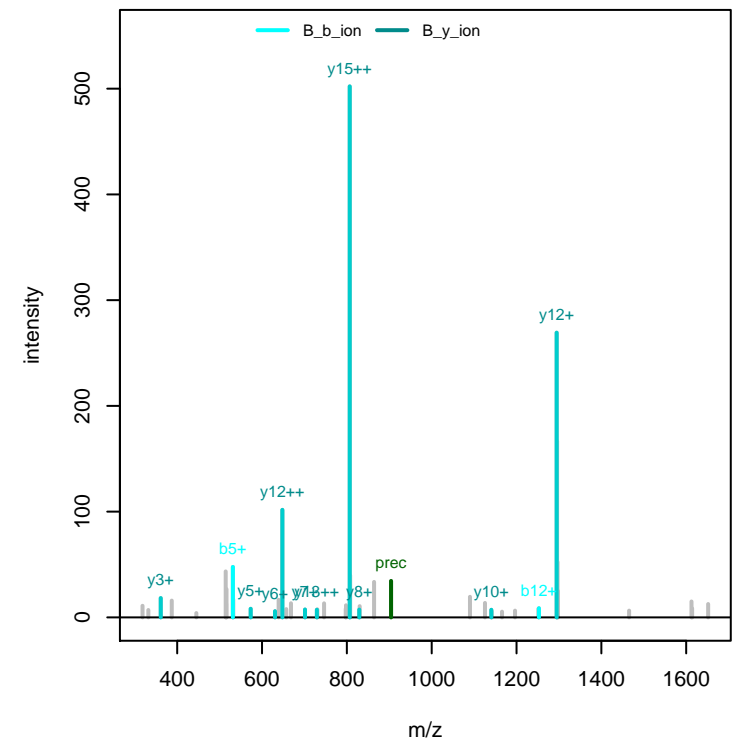

LVAVPHSKLSK  
LVAVPHSKLSK

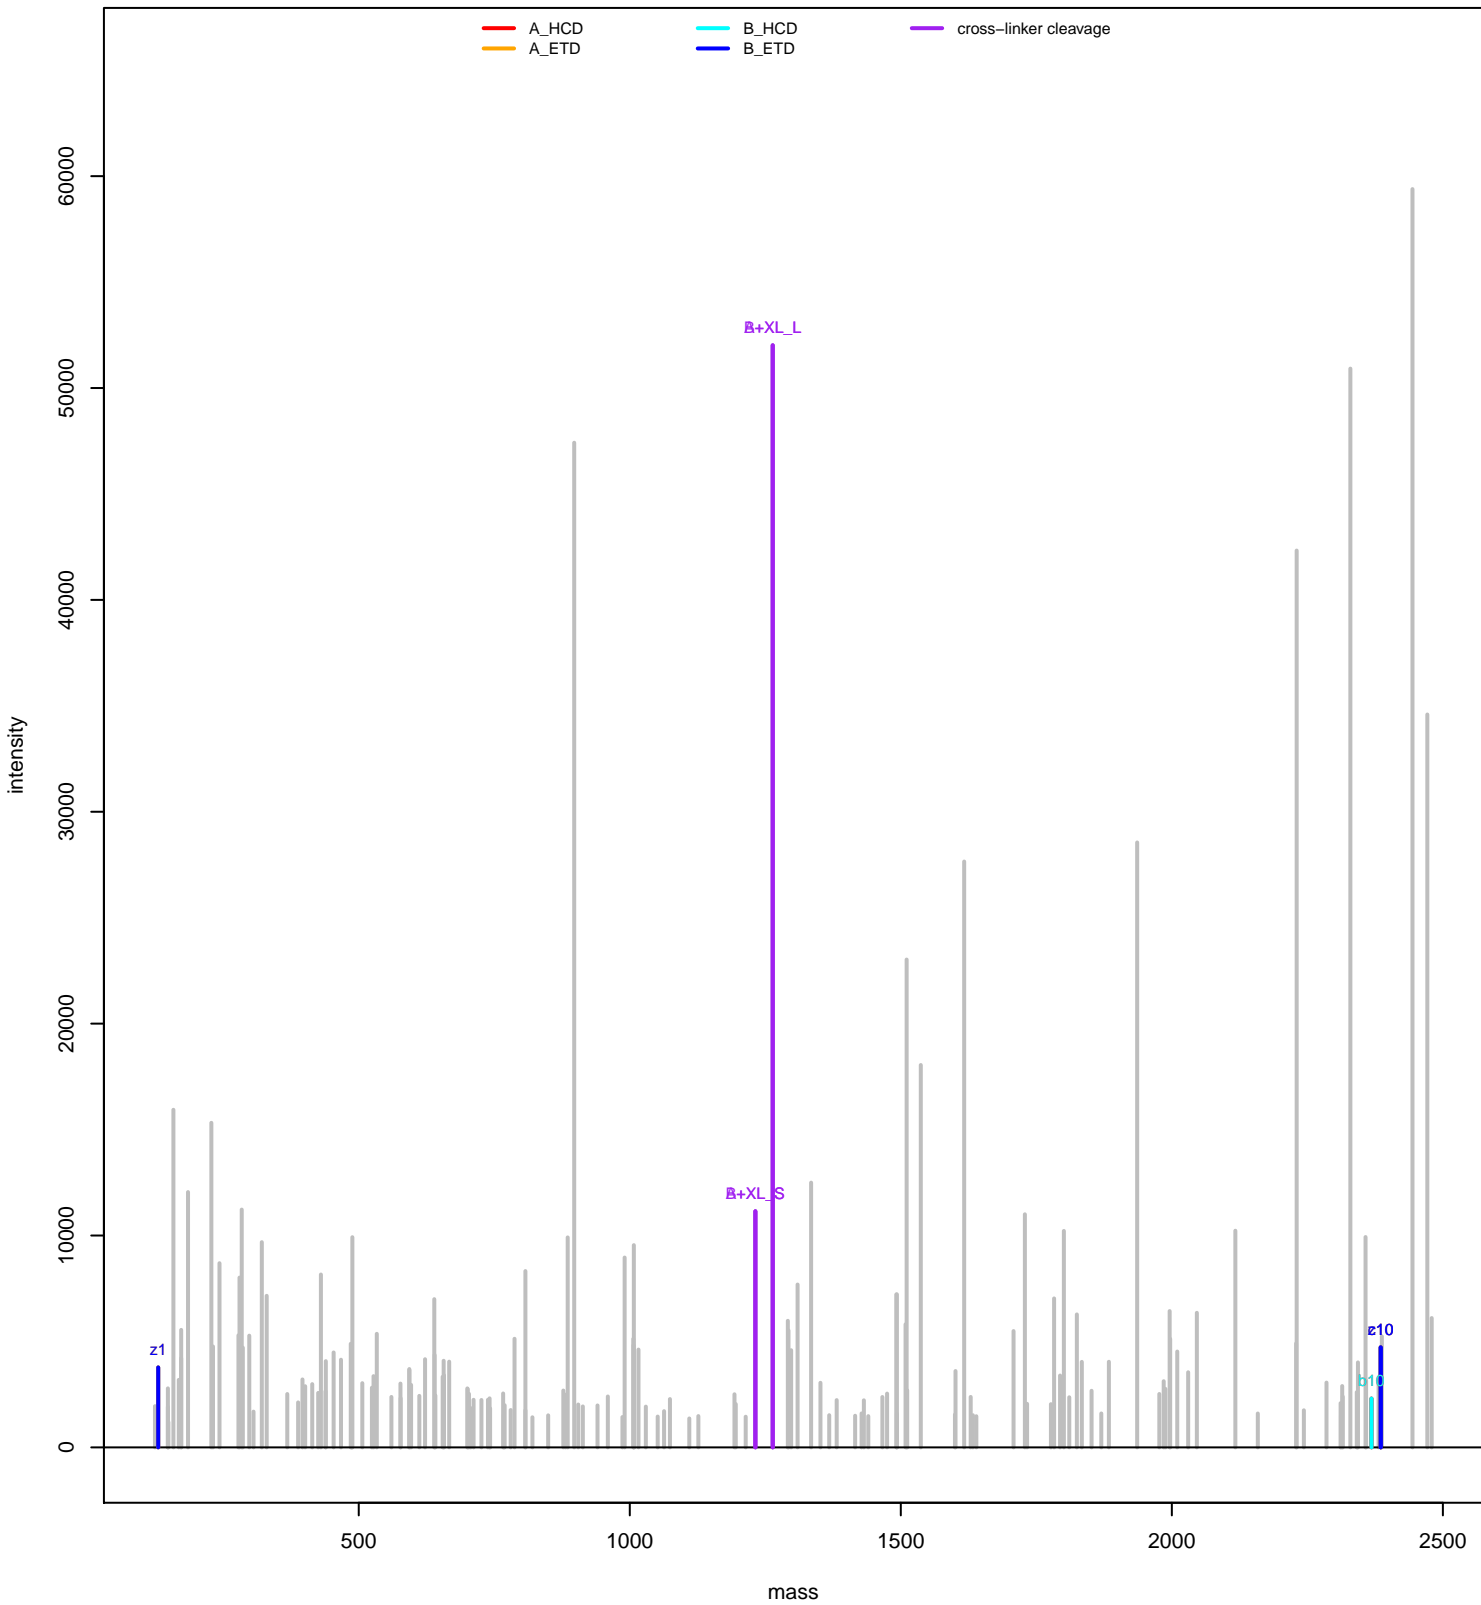

LVAVPHSKLSK+XL\_S

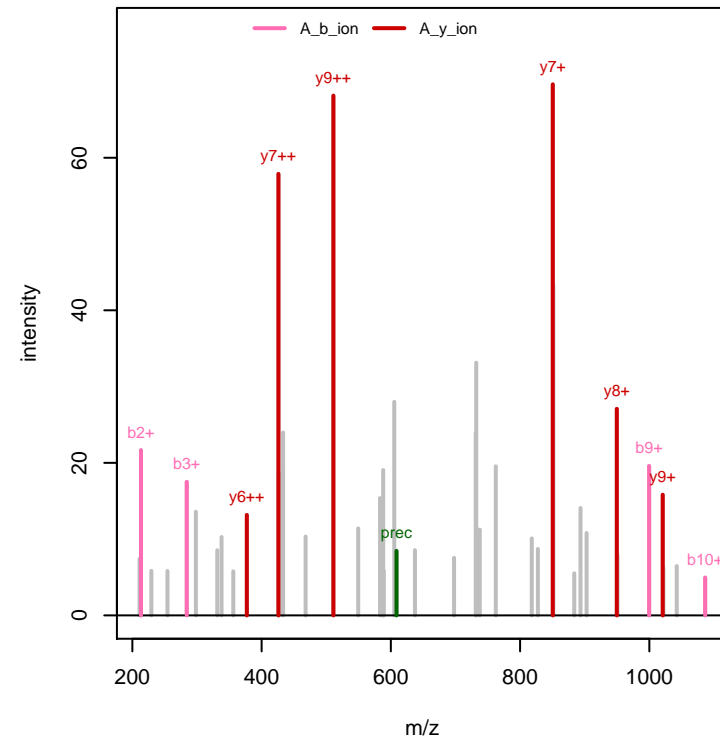

LVAVPHSKLSK+XL\_L

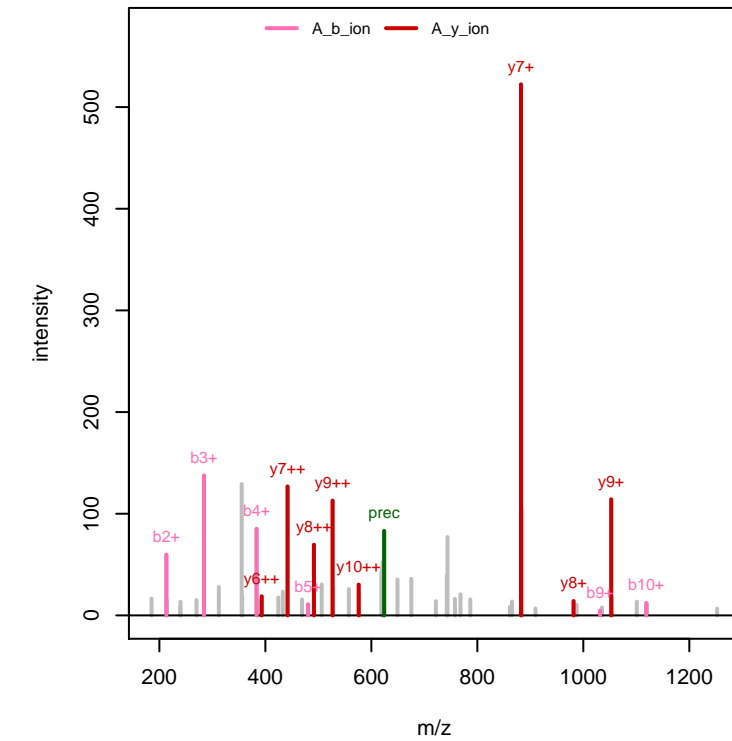

LVAVPHSKLSK+XL\_S

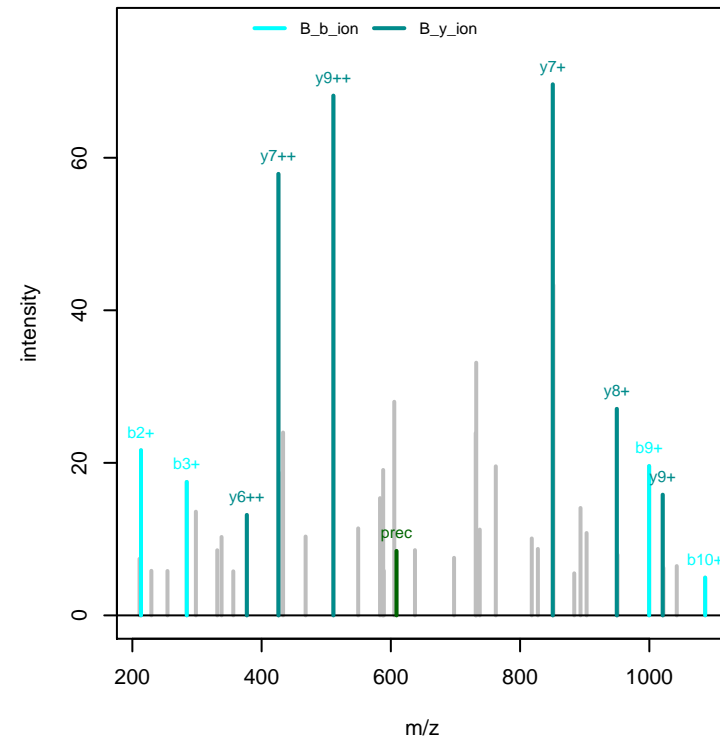

LVAVPHSKLSK+XL\_L

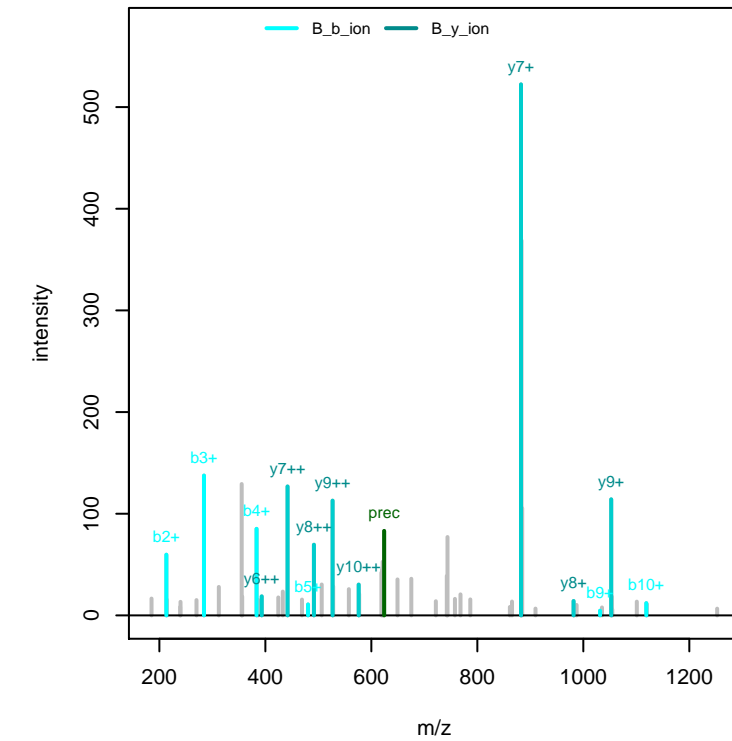

GKALALEK  
EYEDKVLTSK

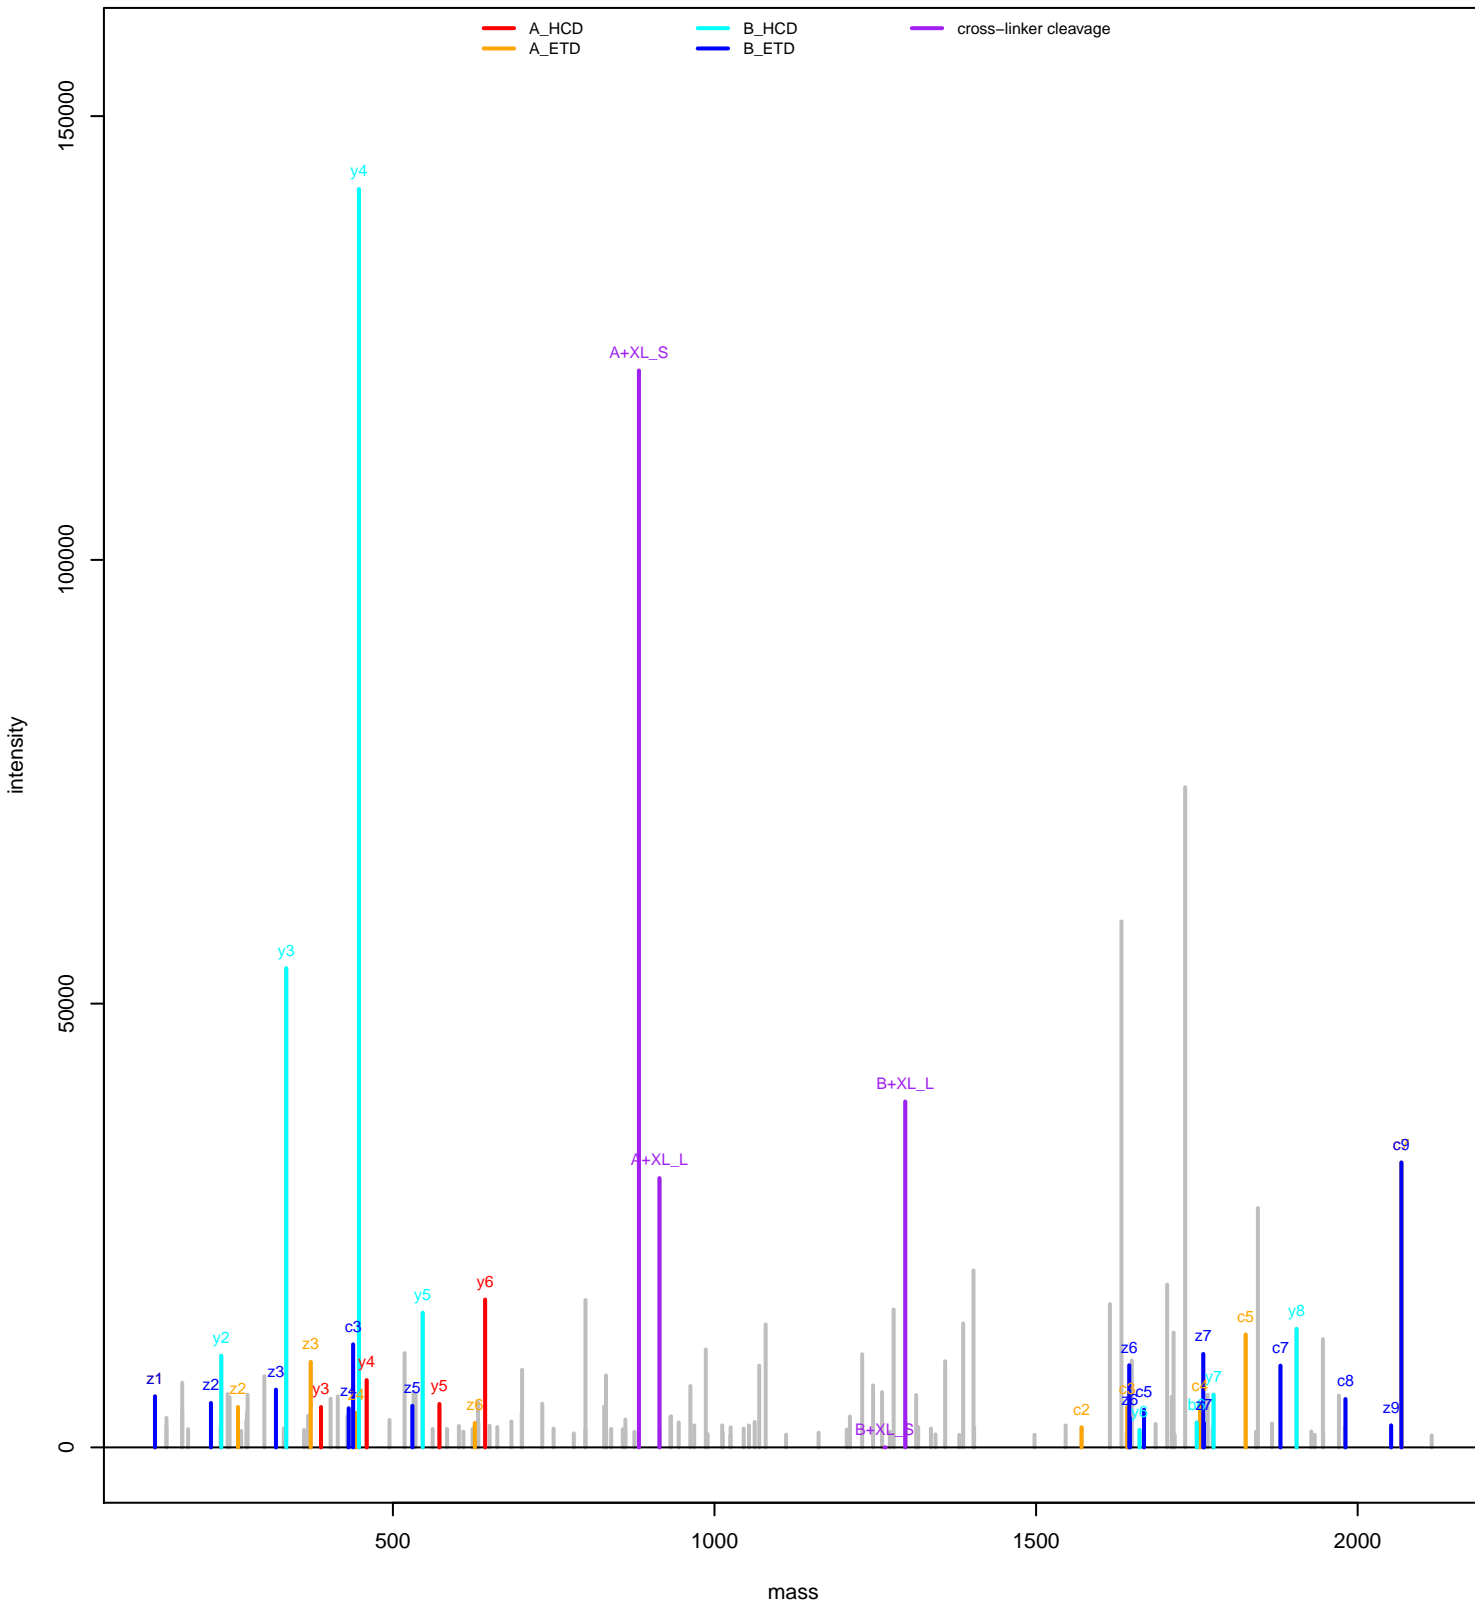

GKALALEK+XL\_S

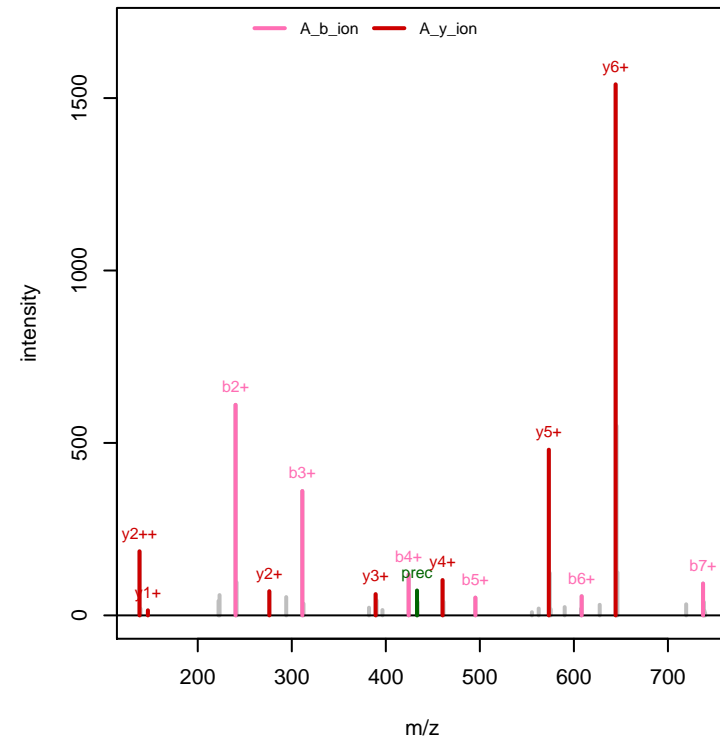

GKALALEK+XL\_L

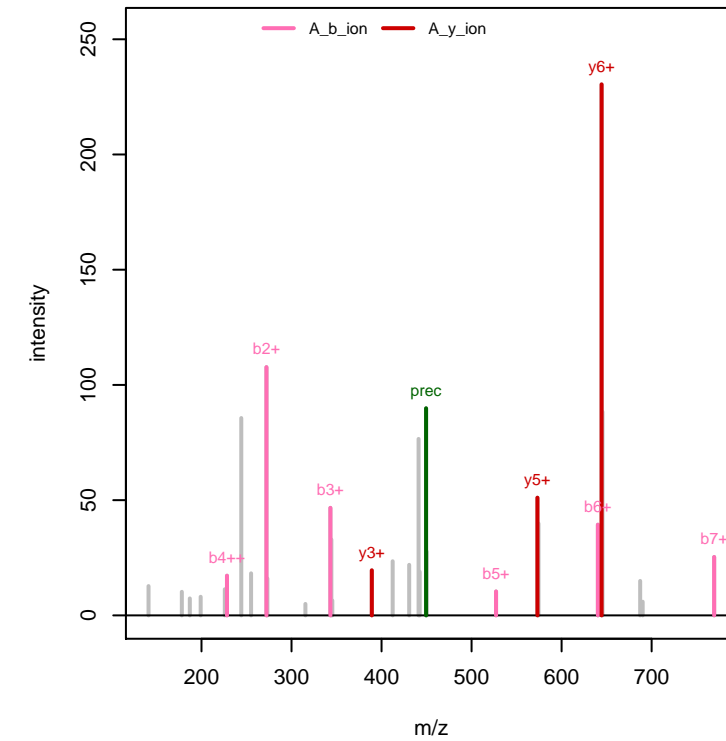

EYEDKVLTSK+XL\_S

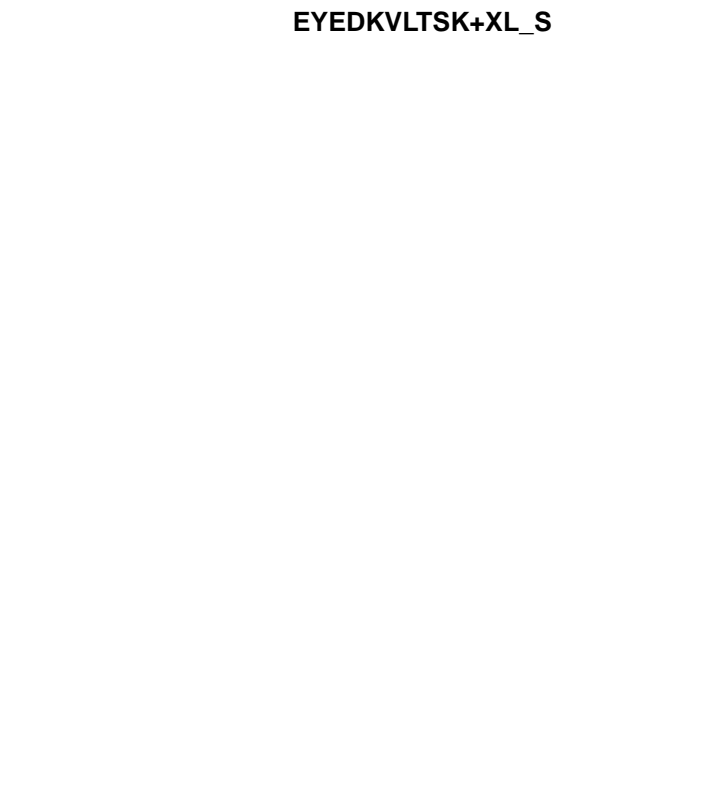

EYEDKVLTSK+XL\_L

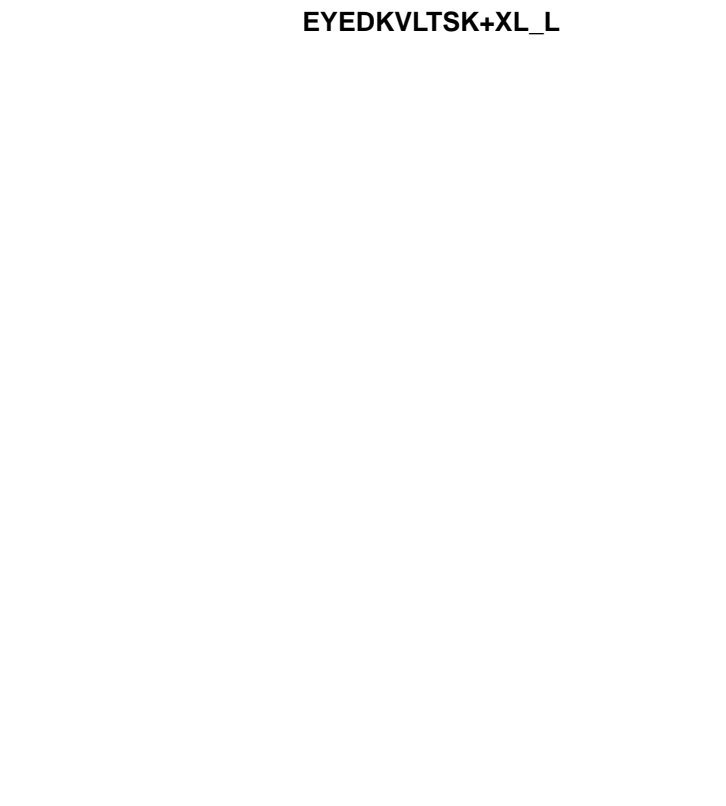

AQKIQK  
HLGTKAEIALQK

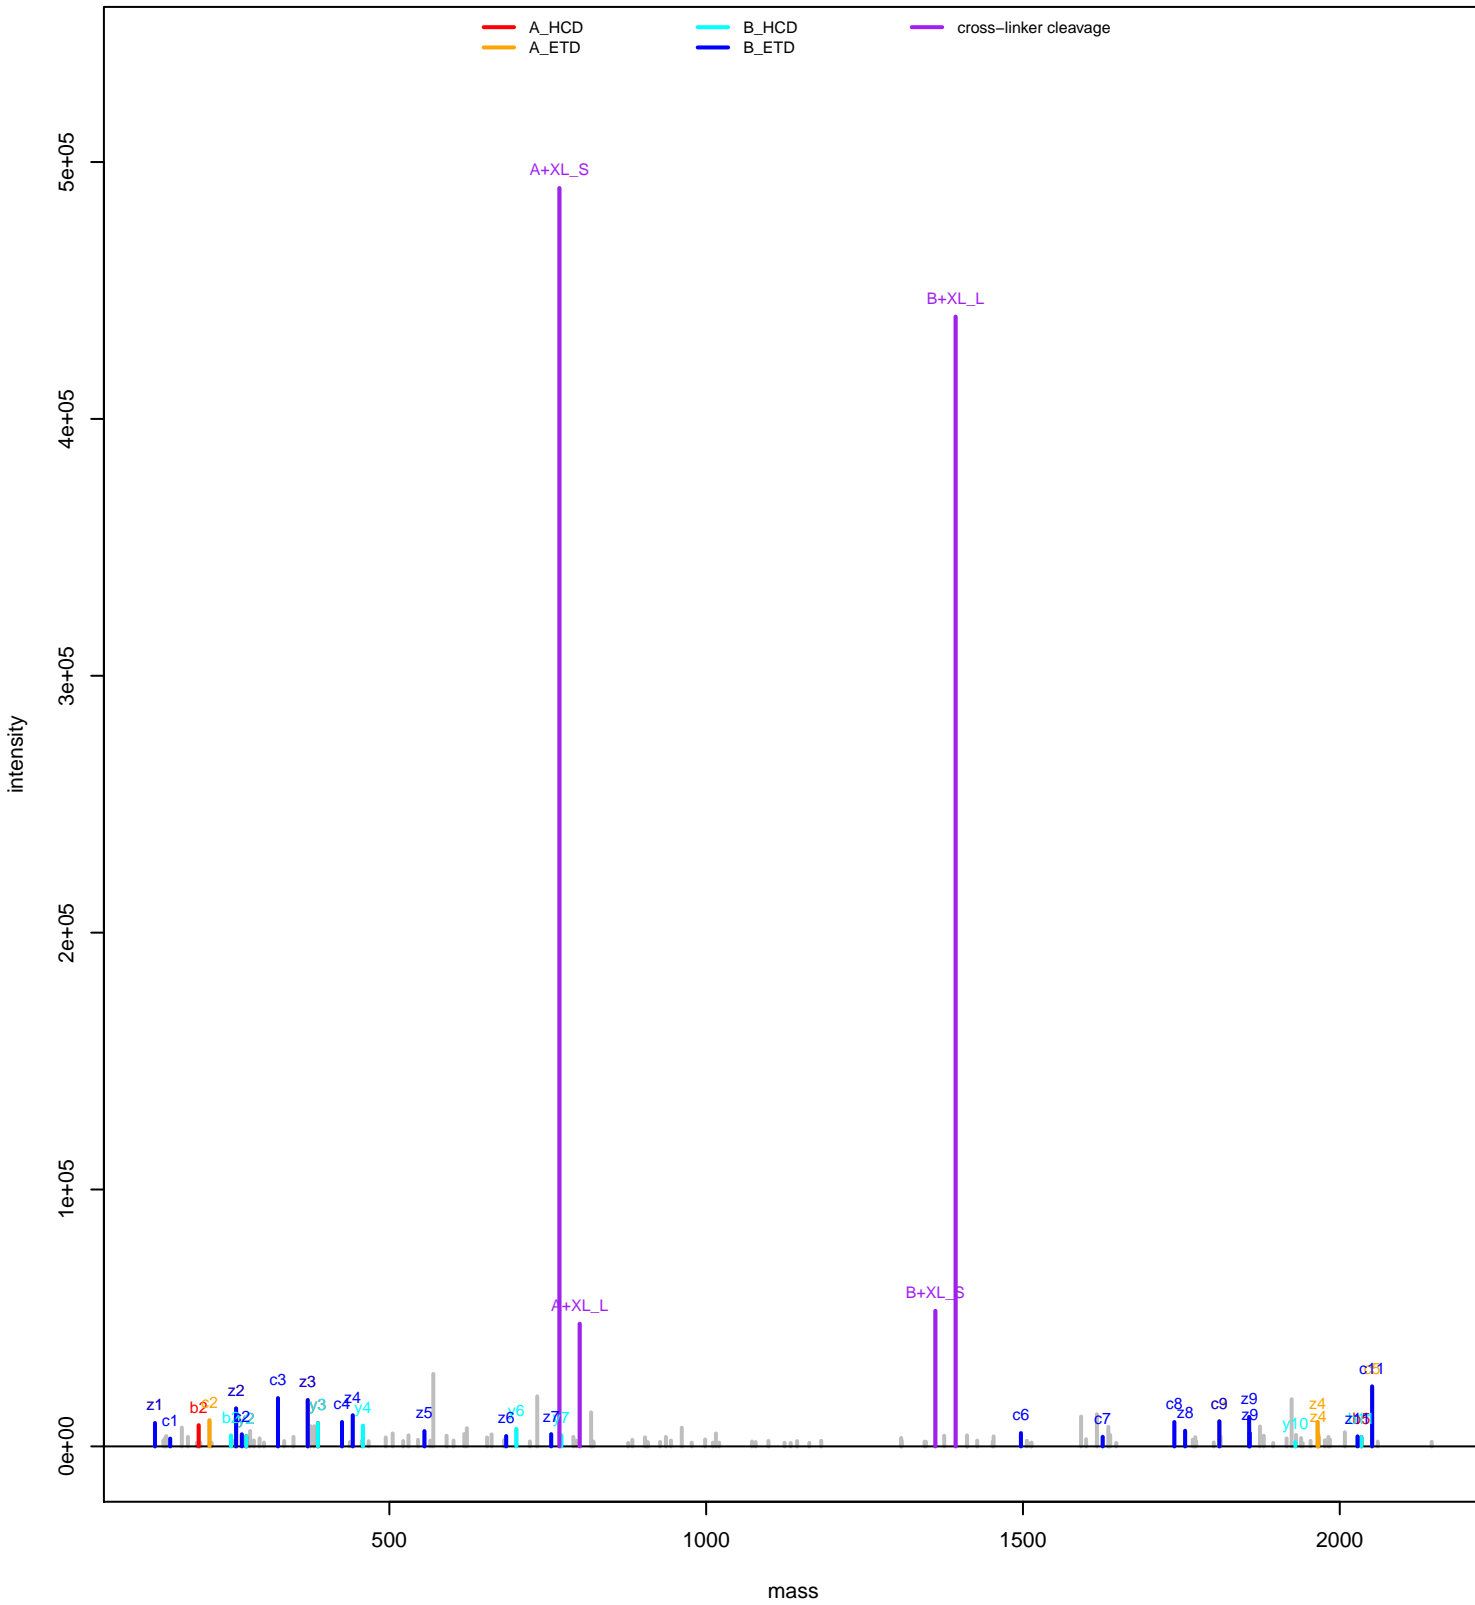

AQKIQK+XL\_S

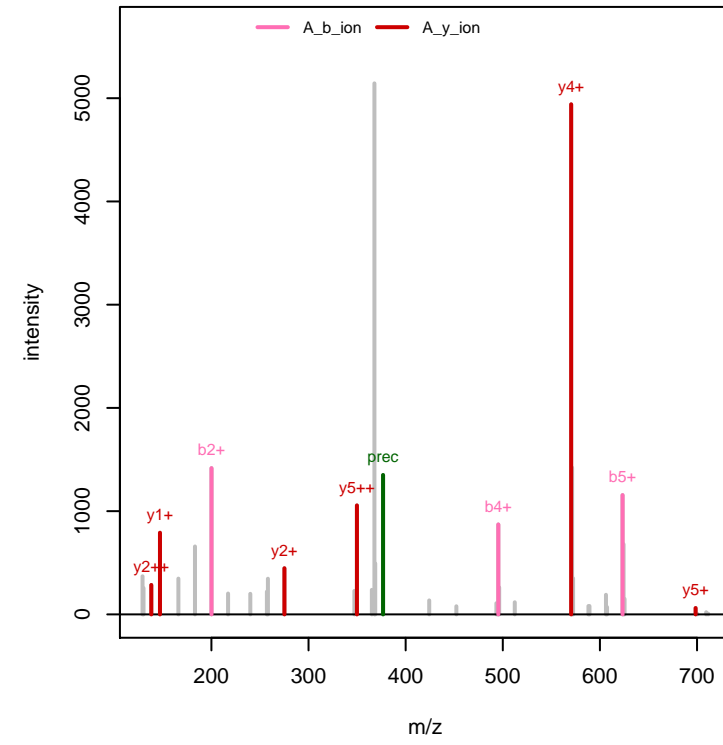

AQKIQK+XL\_L

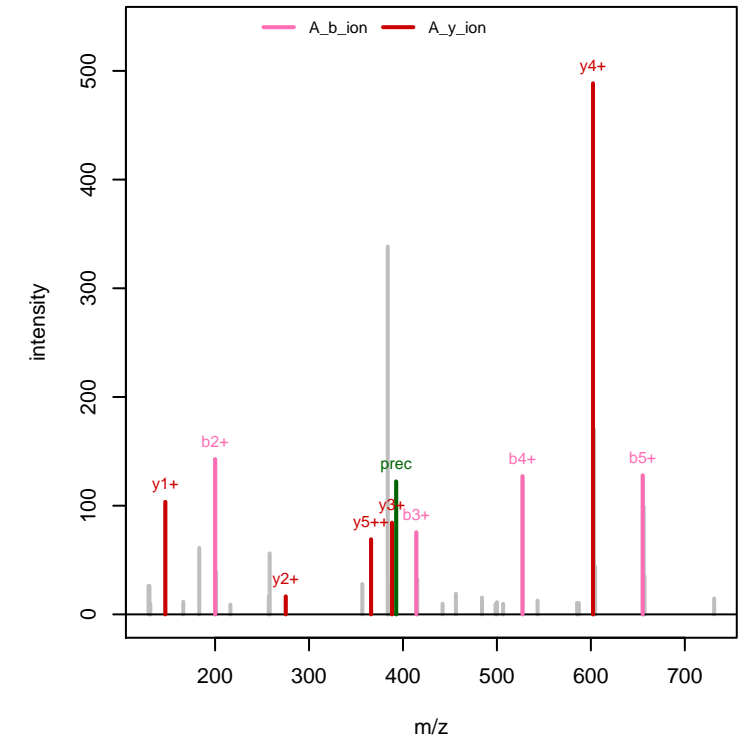

HLGTKAEIALQK+XL\_S

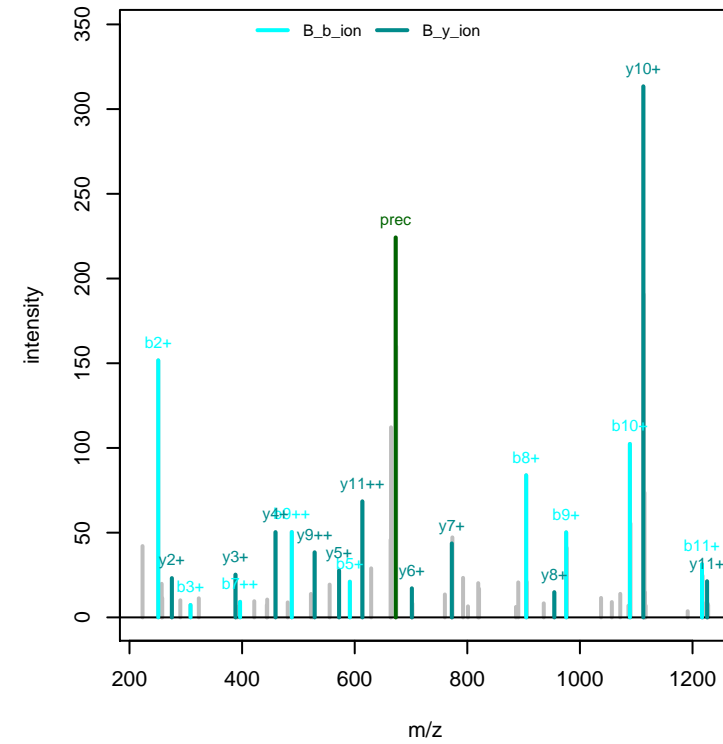

HLGTKAEIALQK+XL\_L

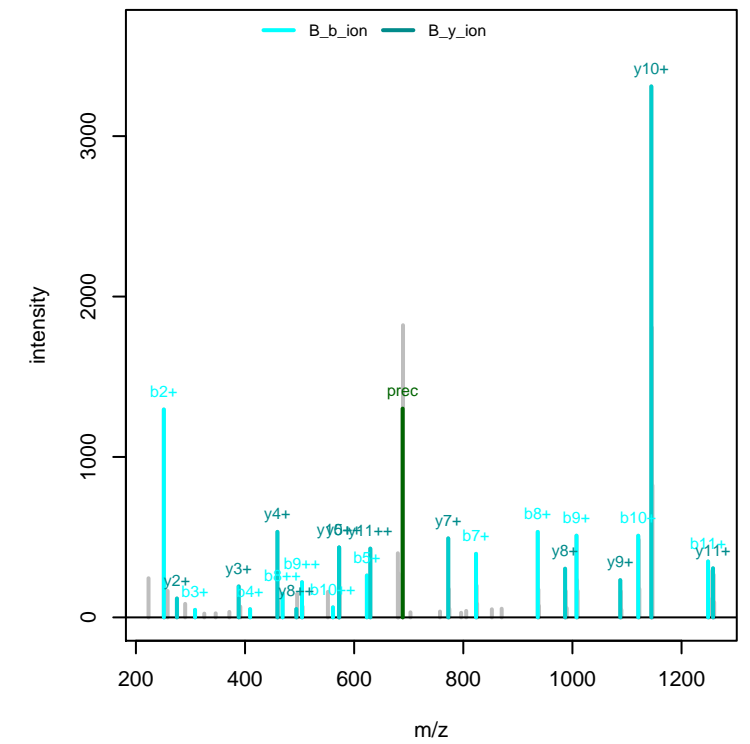

ILVGPDASKDK  
AAPTGKAYVVQLGALK

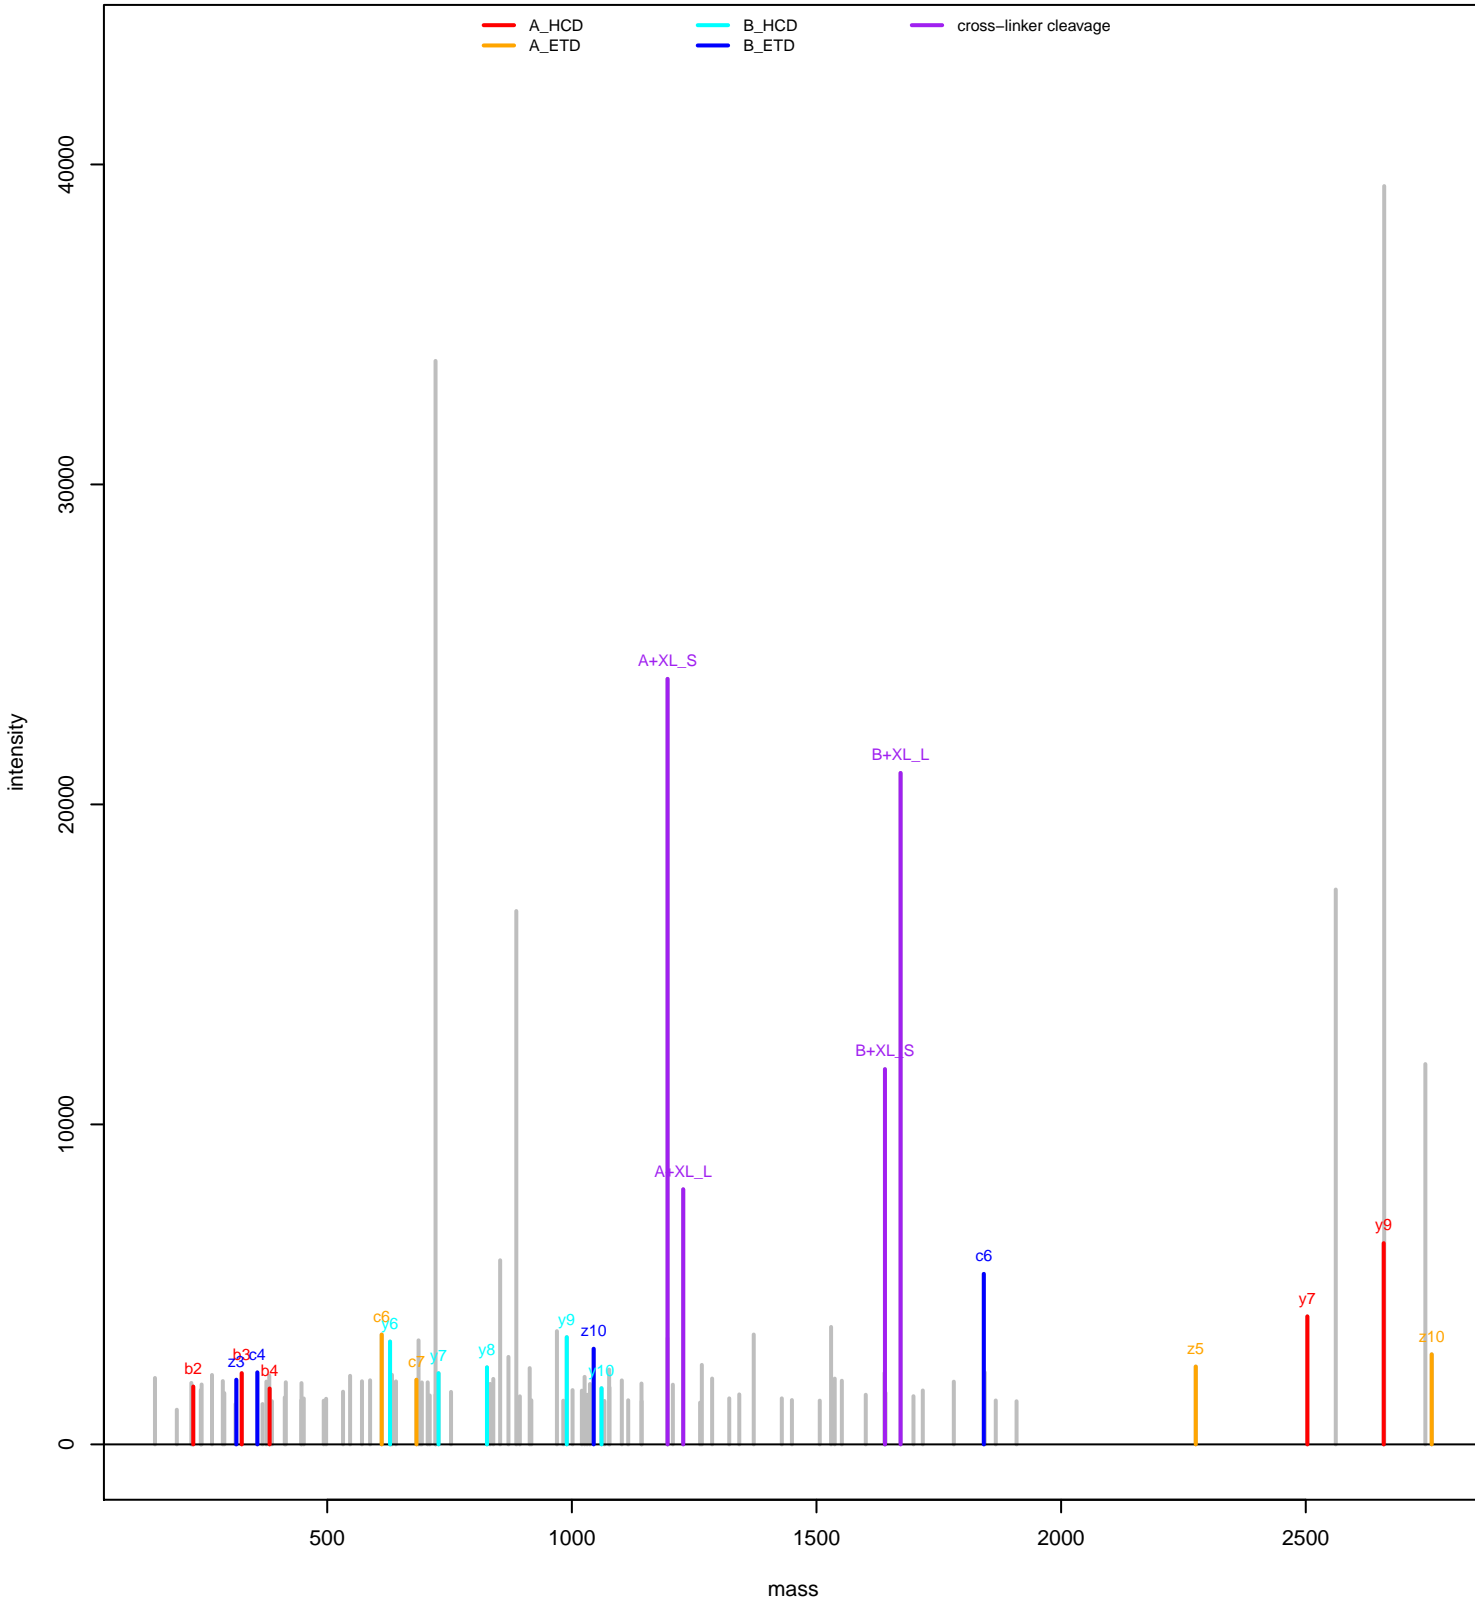

ILVGPDASKDK+XL\_S

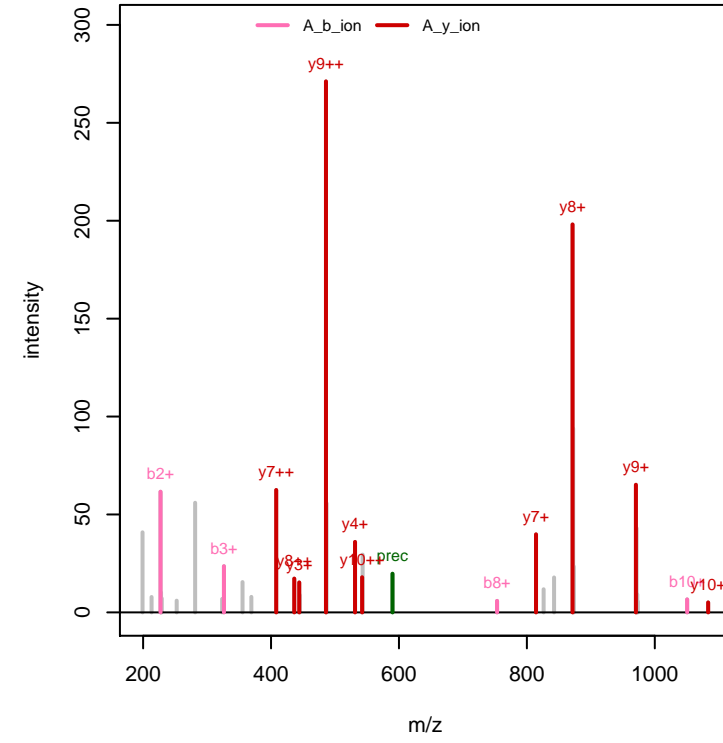

ILVGPDASKDK+XL\_L

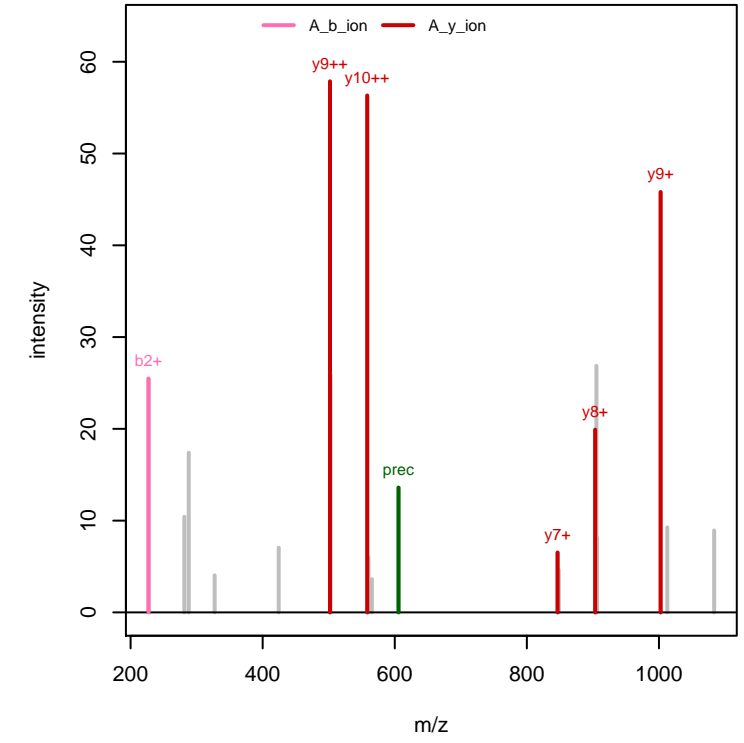

AAPTGKAYVVQLGALK+XL\_S

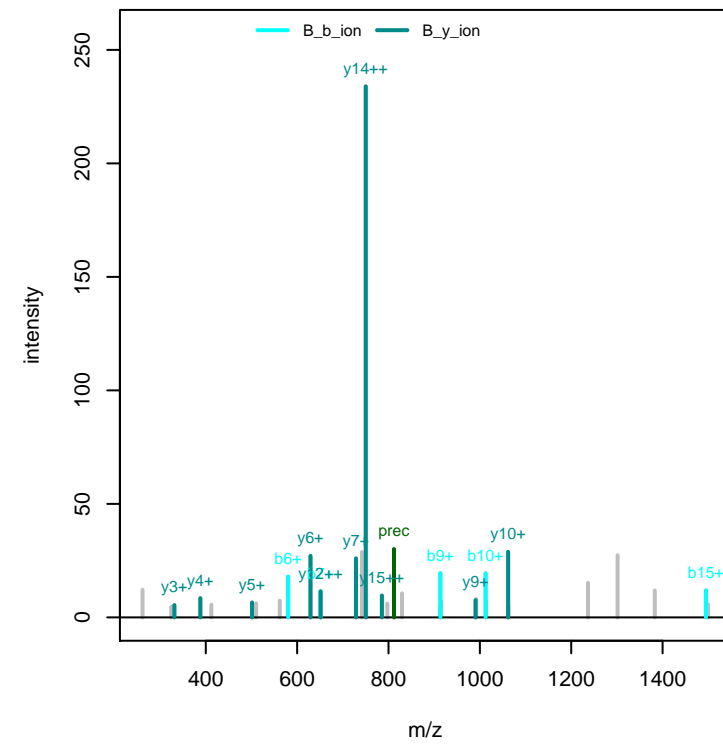

AAPTGKAYVVQLGALK+XL\_L

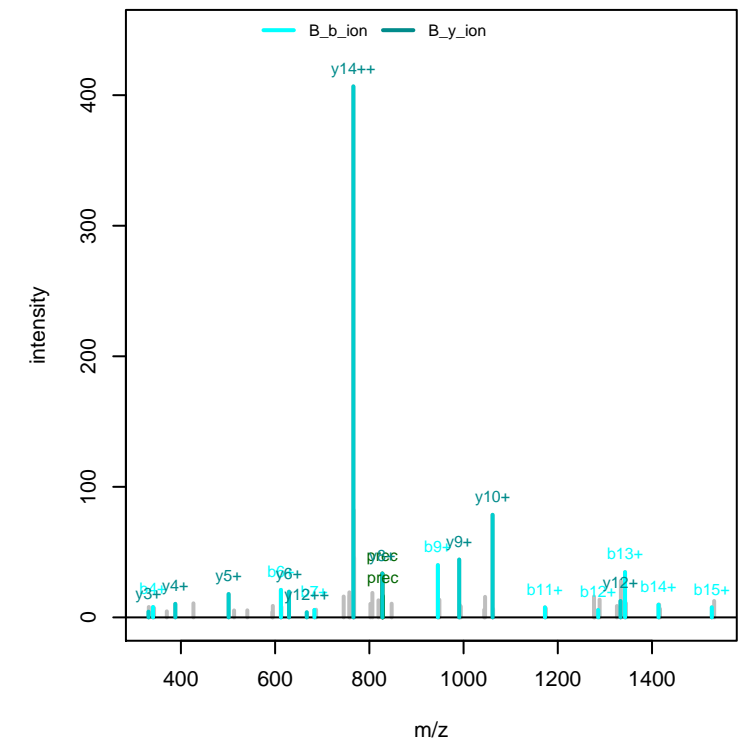

EITGGKK  
ALGAKLIGTVGTAQK

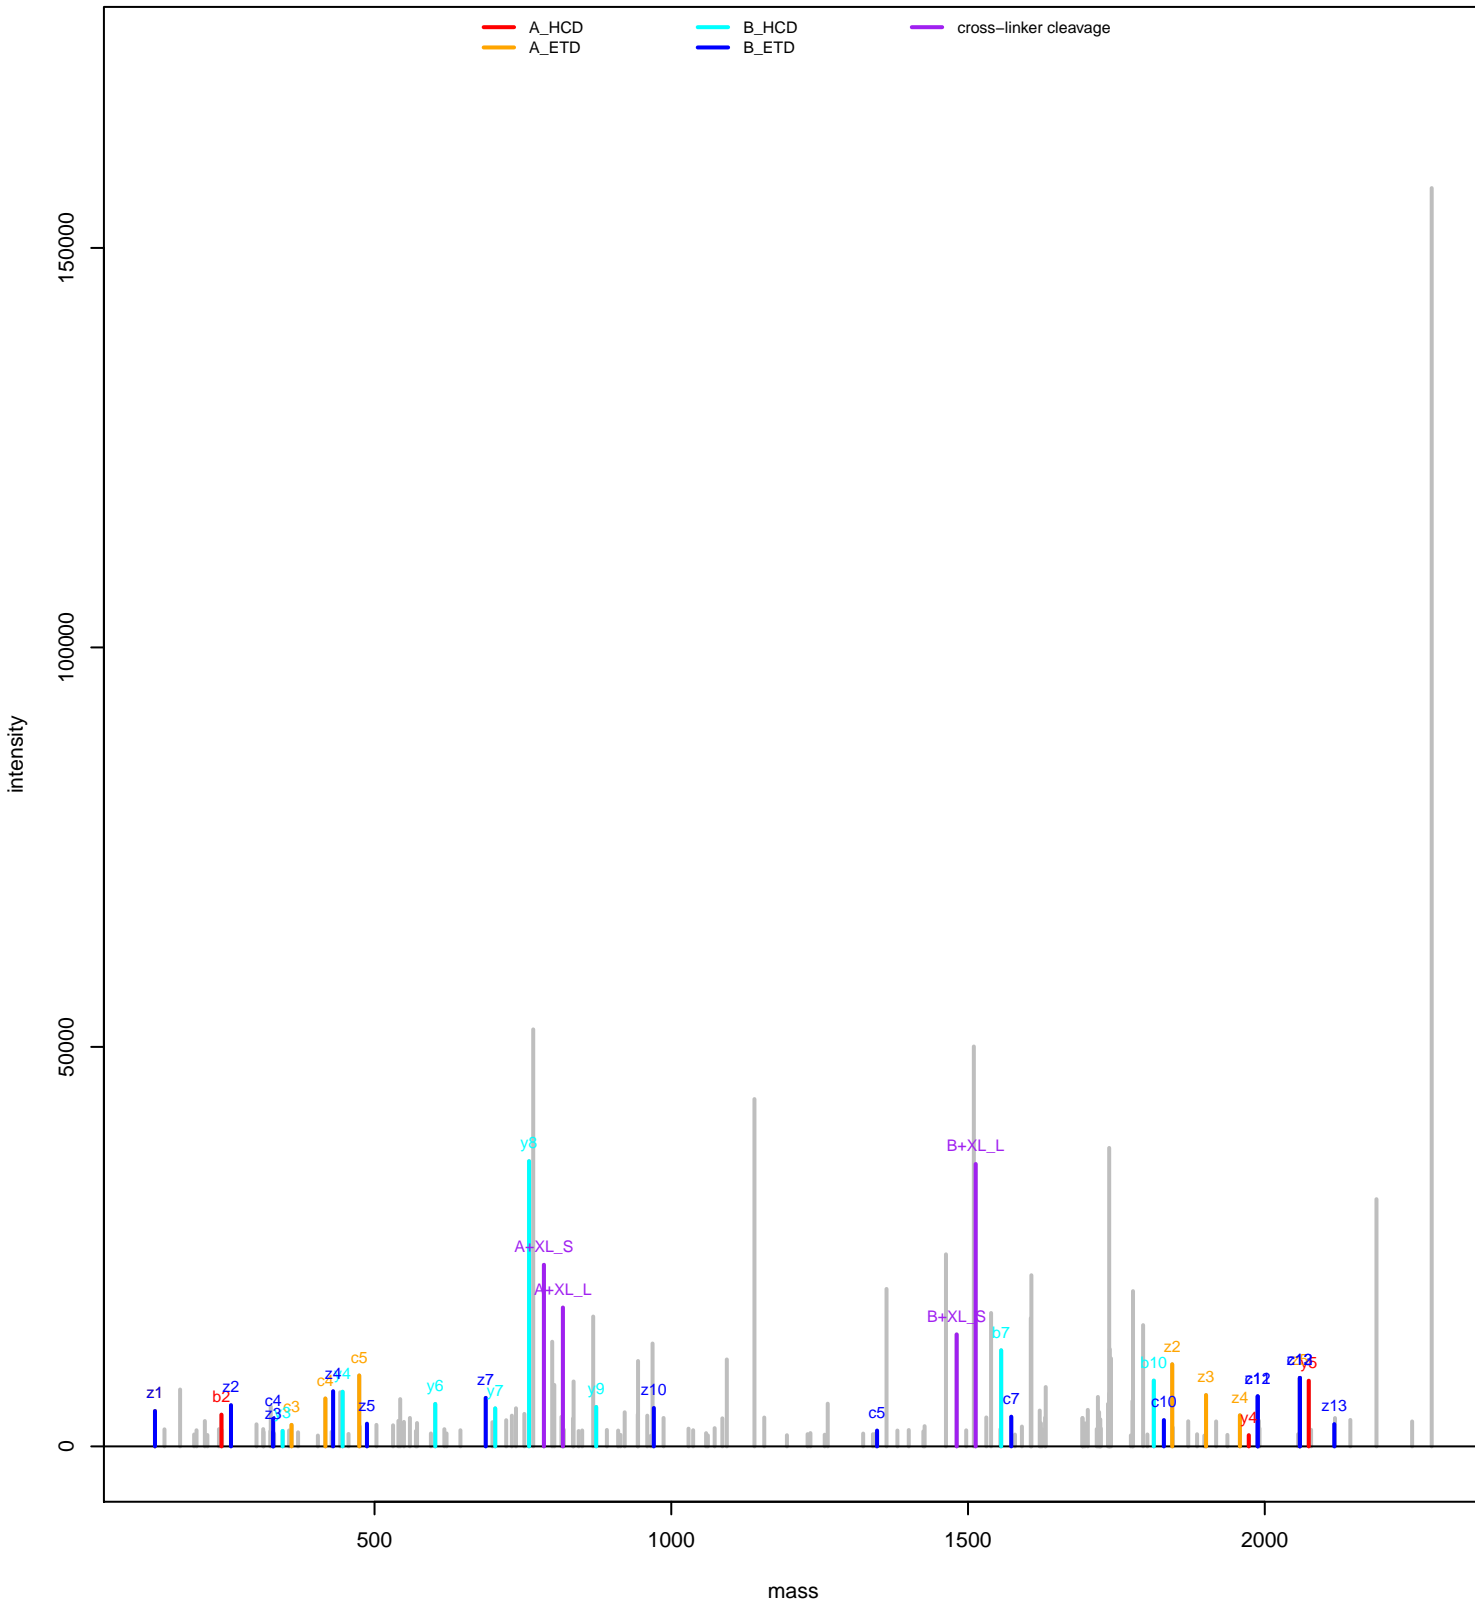

EITGGKK+XL\_S

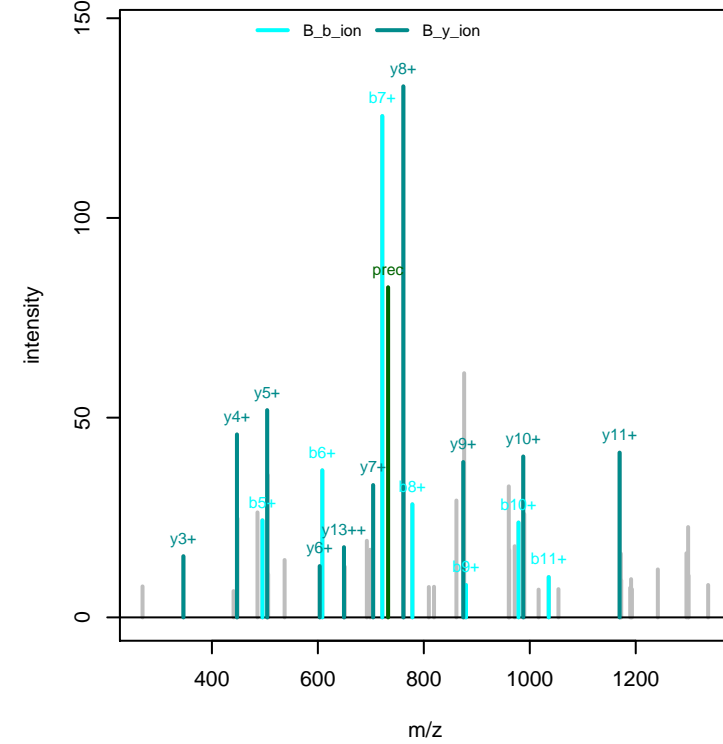

EITGGKK+XL\_L

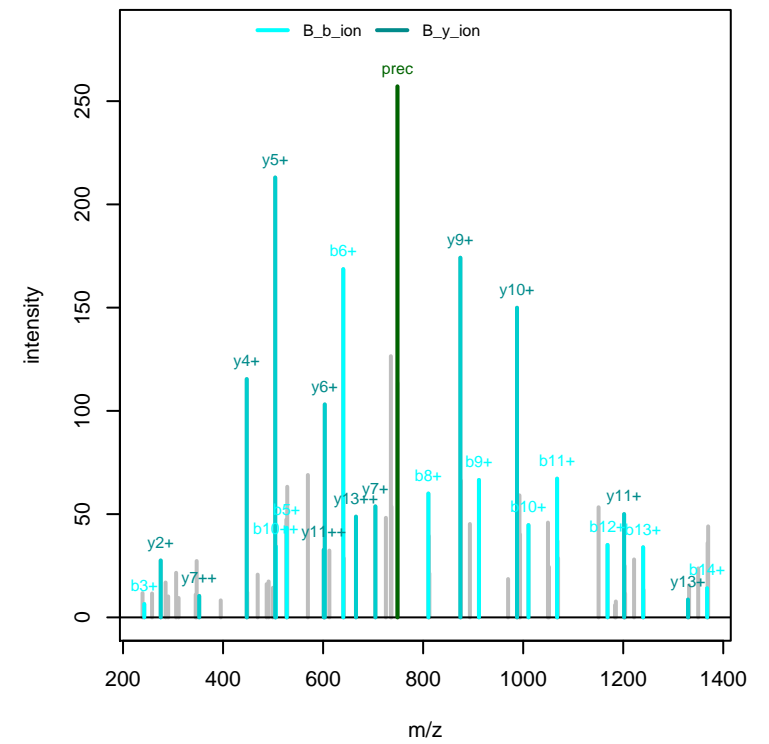

ALGAKLIGTVGTAQK+XL\_S

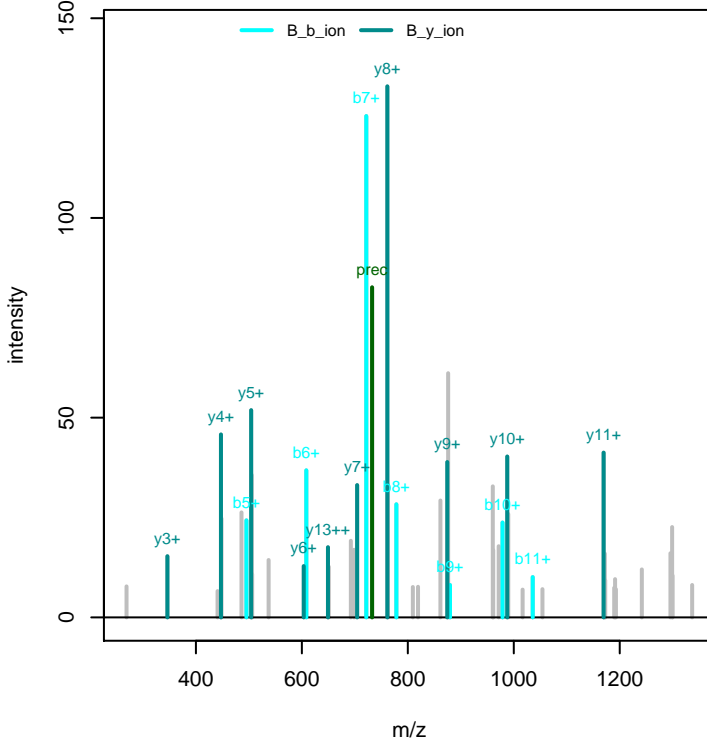

ALGAKLIGTVGTAQK+XL\_L



ITAAKQNV  
IAGIKAADEGLEVK

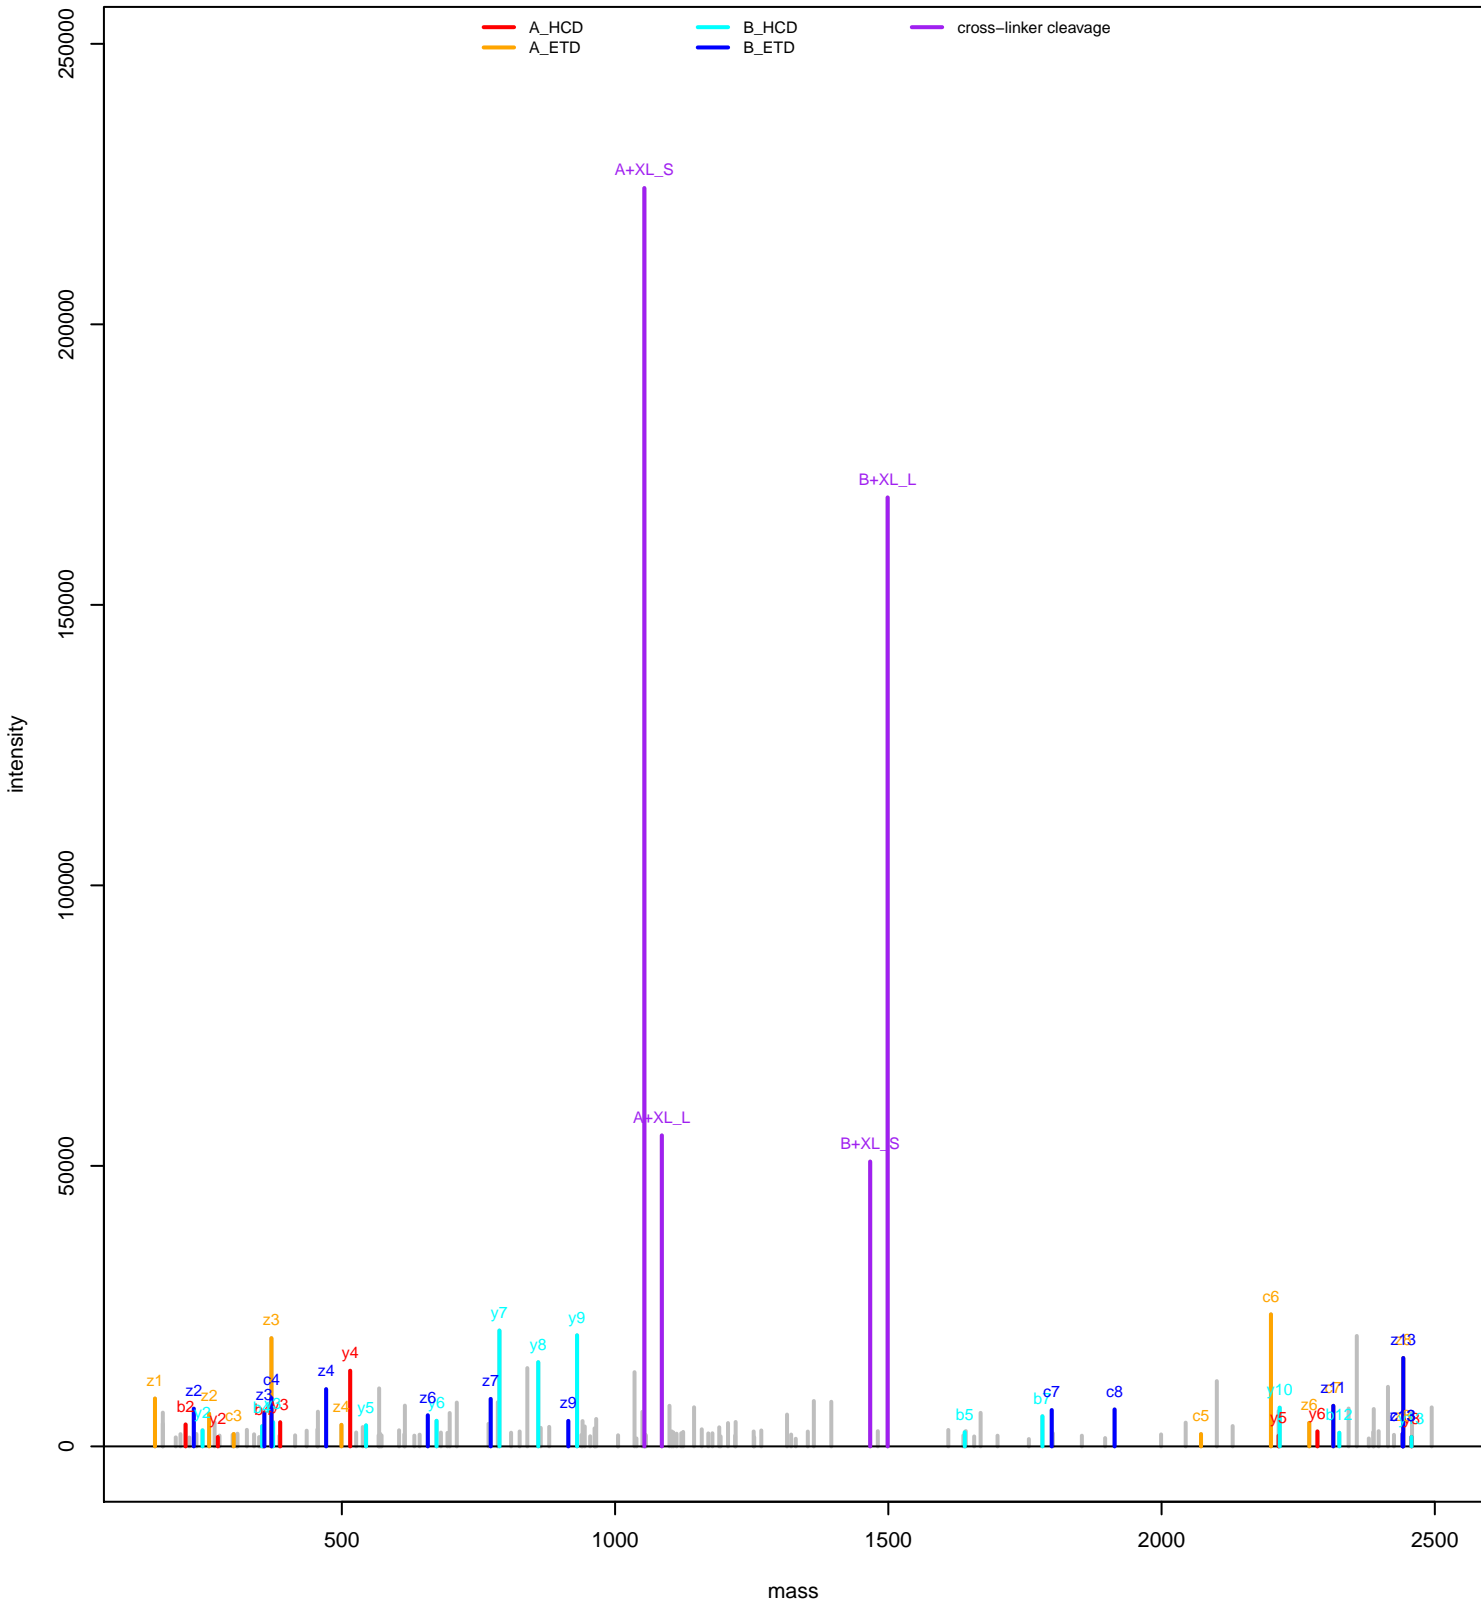

ITAAKQNV+XL\_S

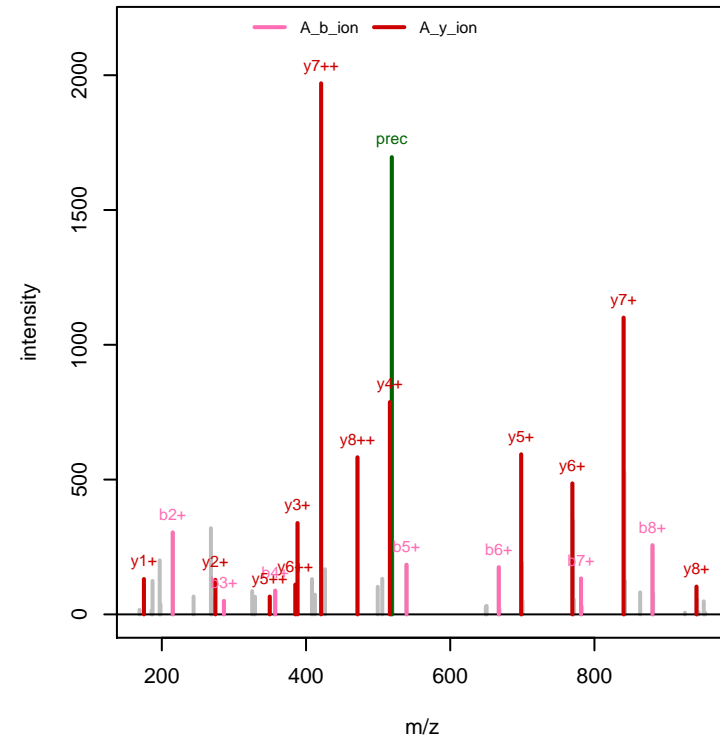

ITAAKQNV+XL\_L

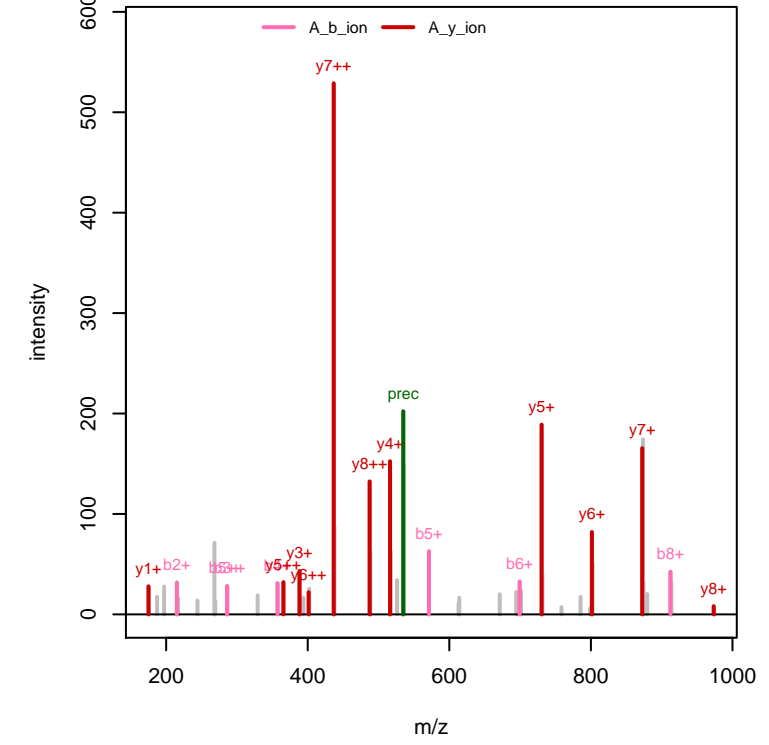

IAGIKAADEGLEVK+XL\_S

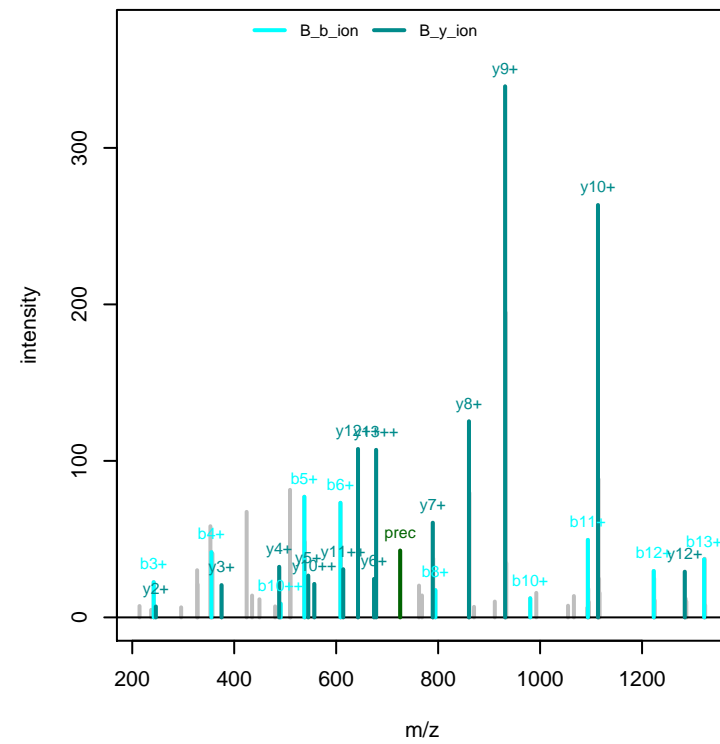

IAGIKAADEGLEVK+XL\_L

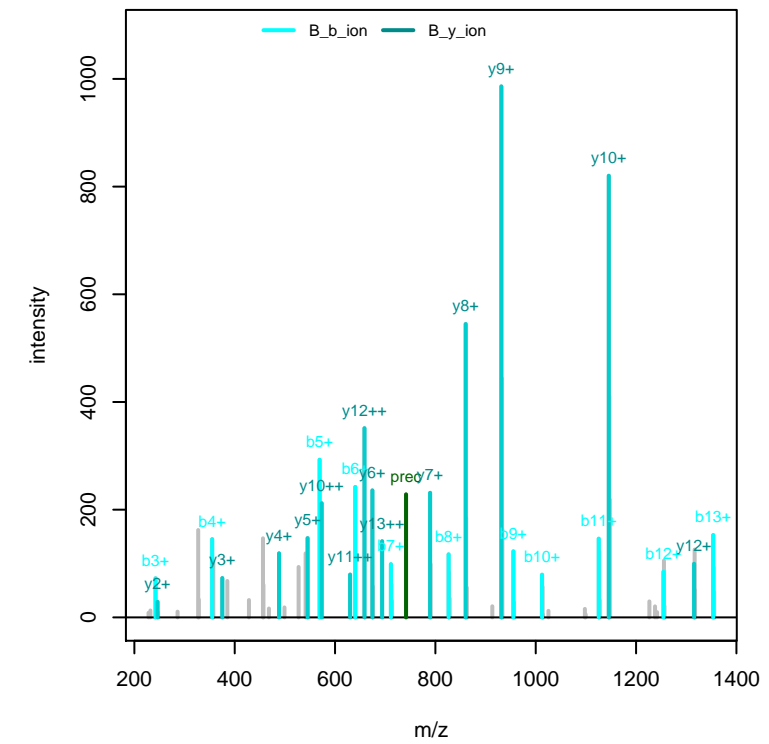

**YGSDKPDLR  
VGKDLGLTDESK**

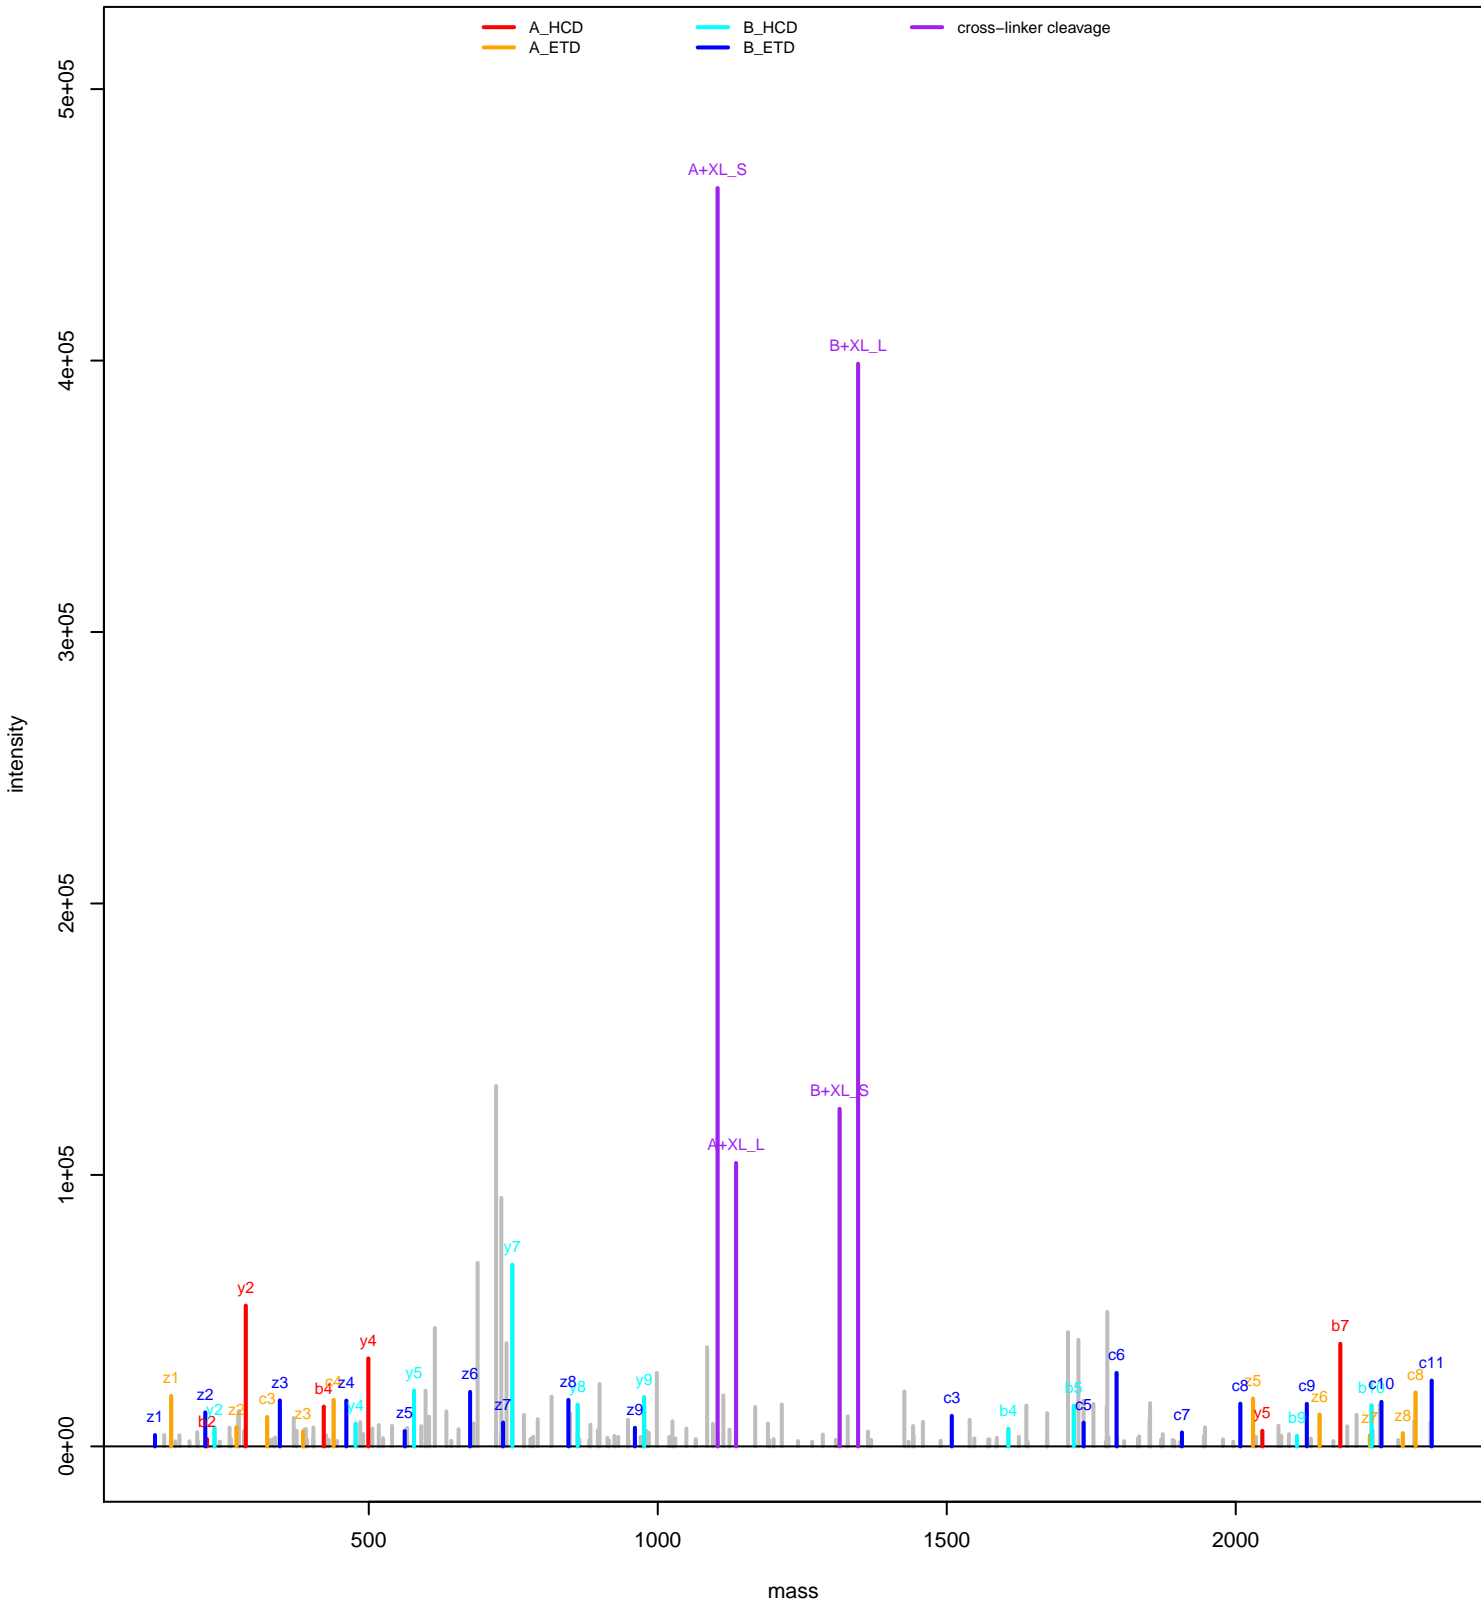

**YGSDKPDLR+XL\_S**

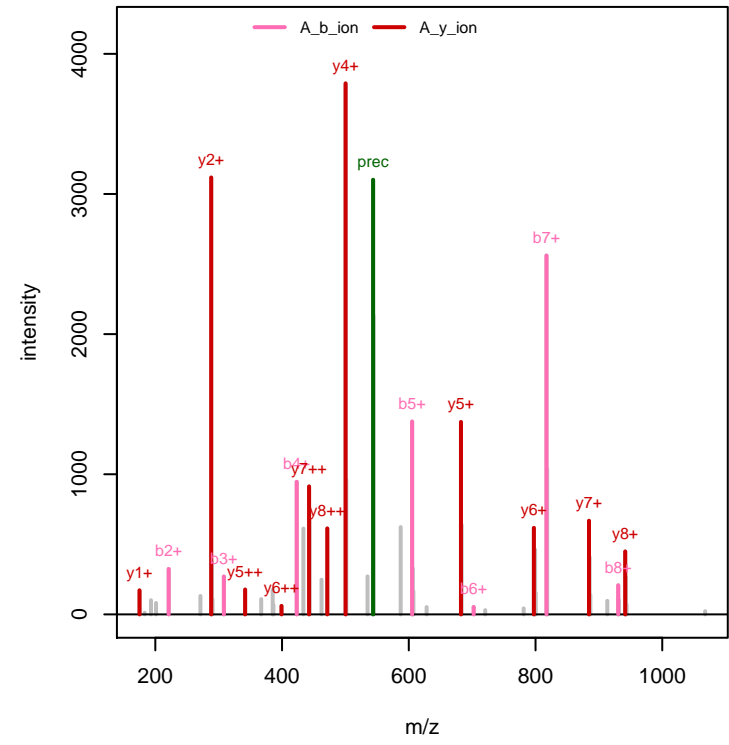

**YGSDKPDLR+XL\_L**

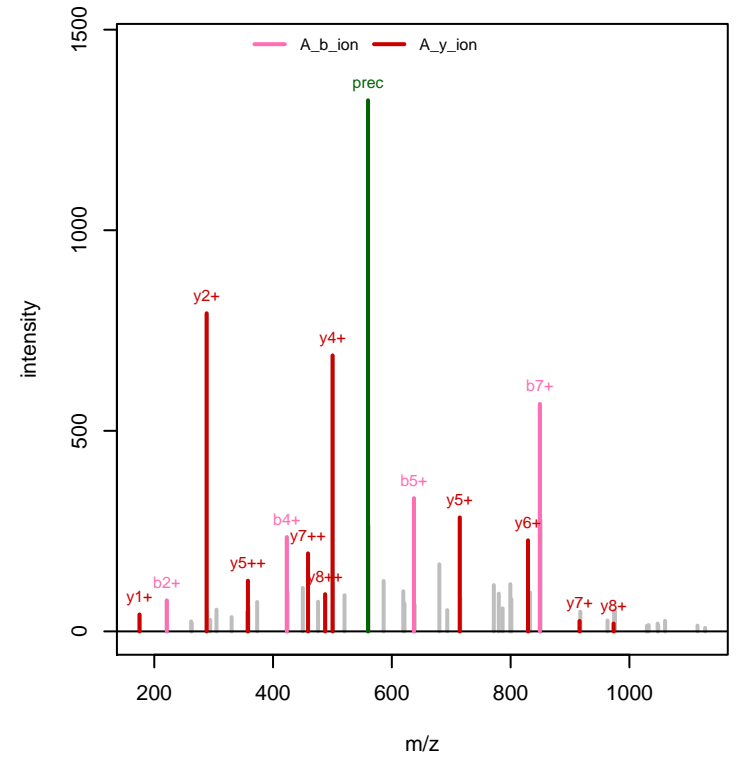

**VGKDLGLTDESK+XL\_S**

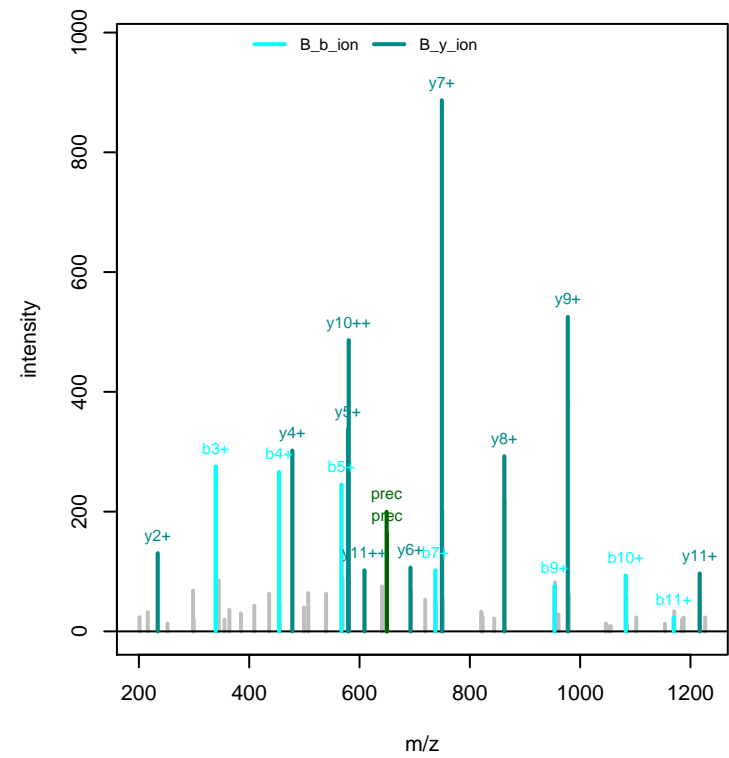

**VGKDLGLTDESK+XL\_L**

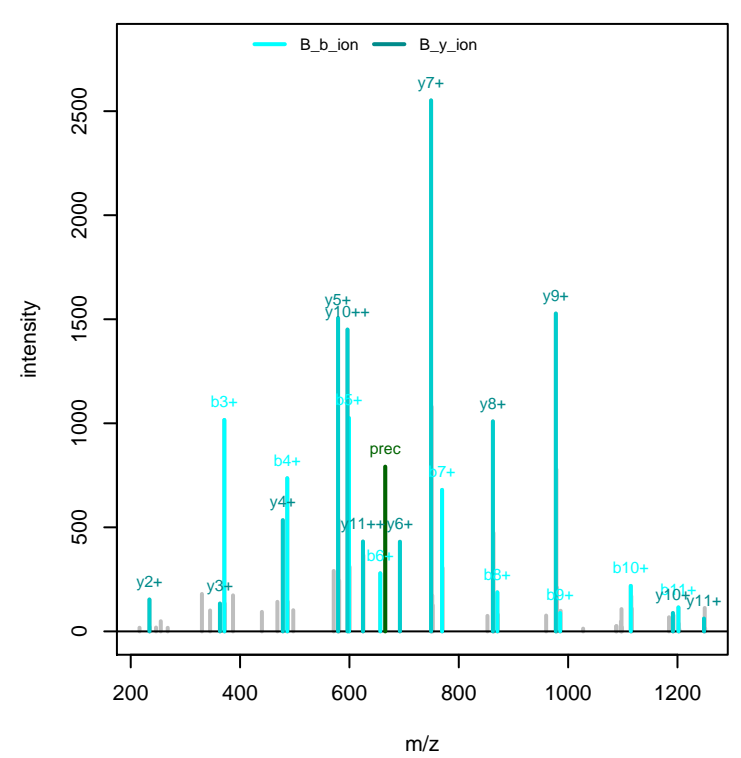



### HGNKGVISK IQPGDKMAGR

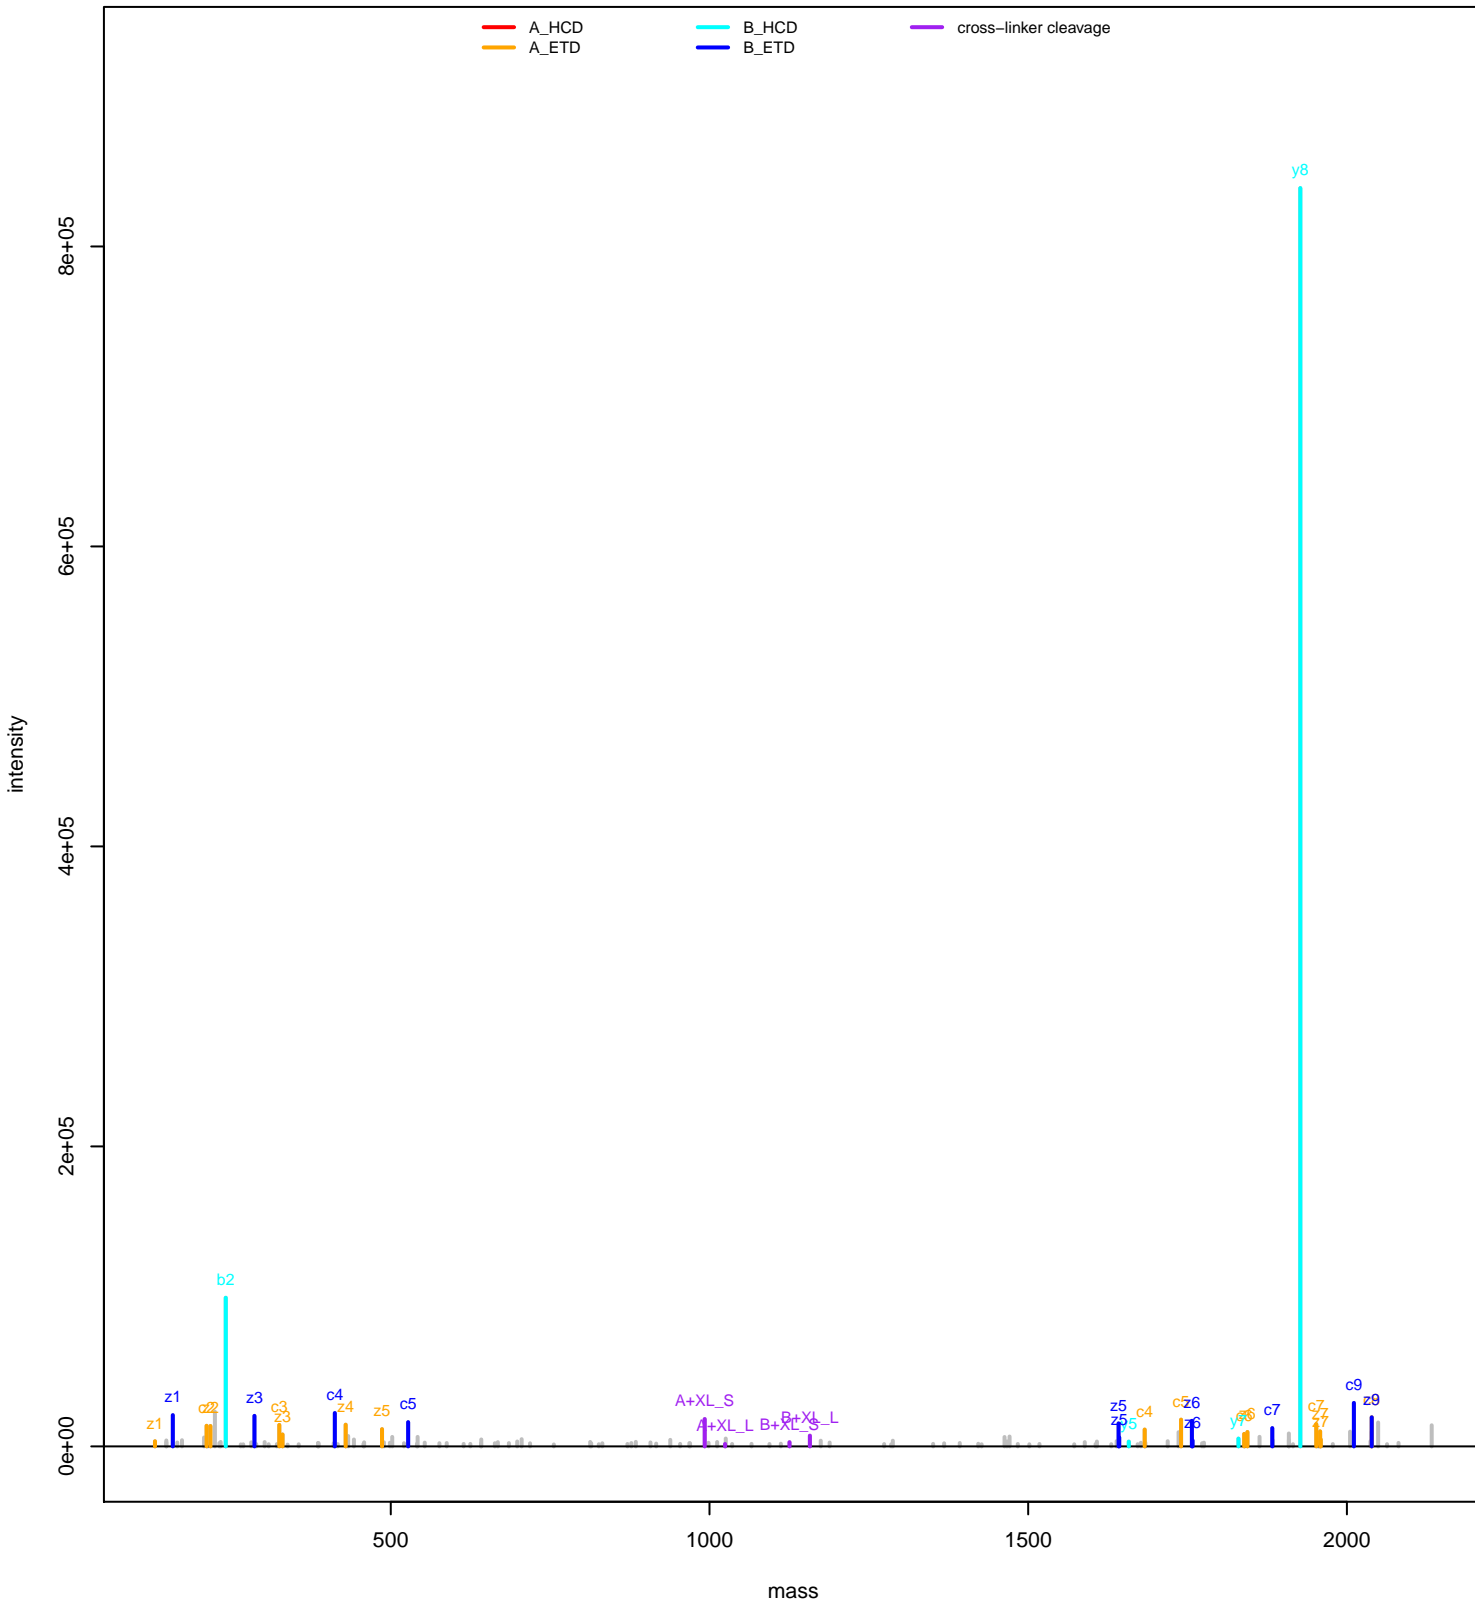

### HGNKGVISK+XL\_S

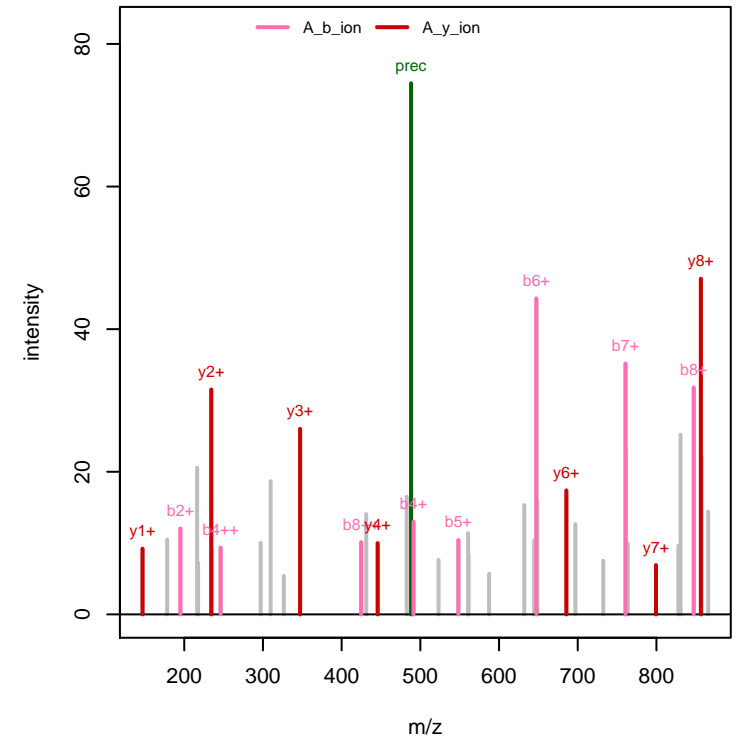

### HGNKGVISK+XL\_L

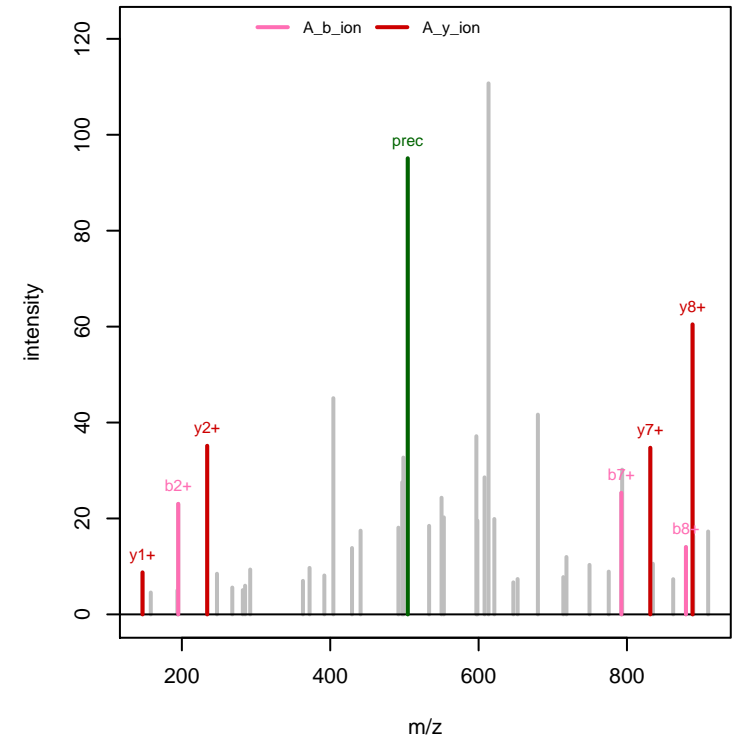

### IQPGDKMAGR+XL\_S

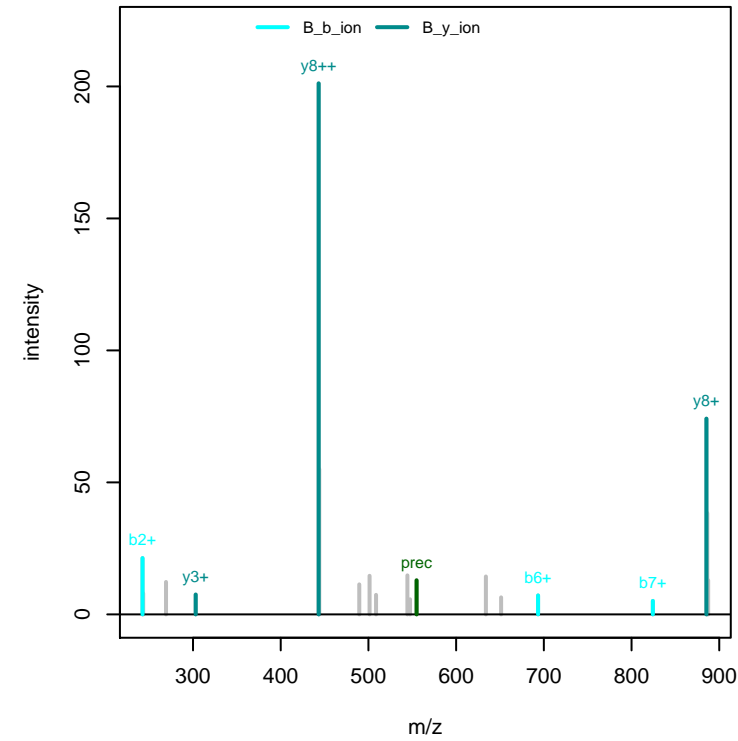

### IQPGDKMAGR+XL\_L

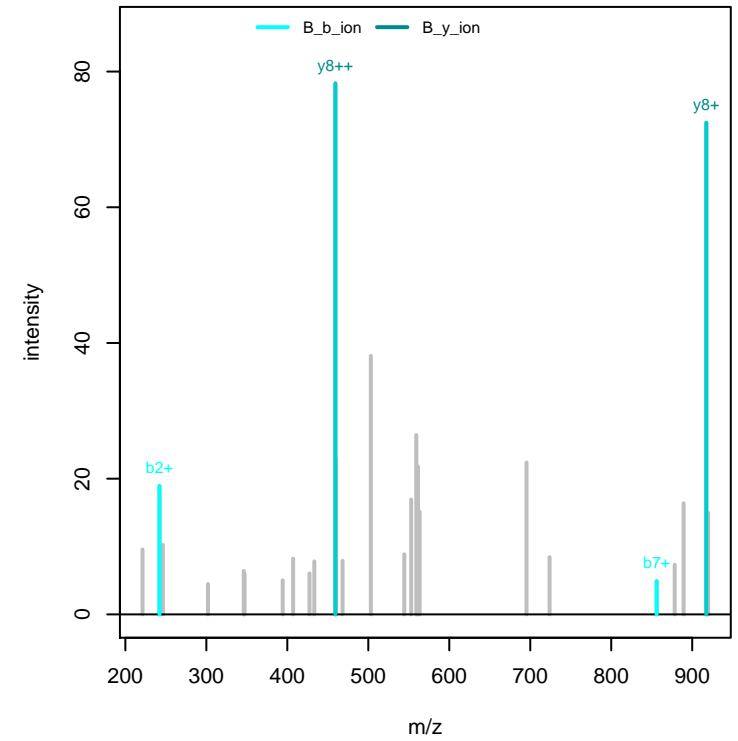

**DFANLKDK**  
**LNEEQKMMNR**

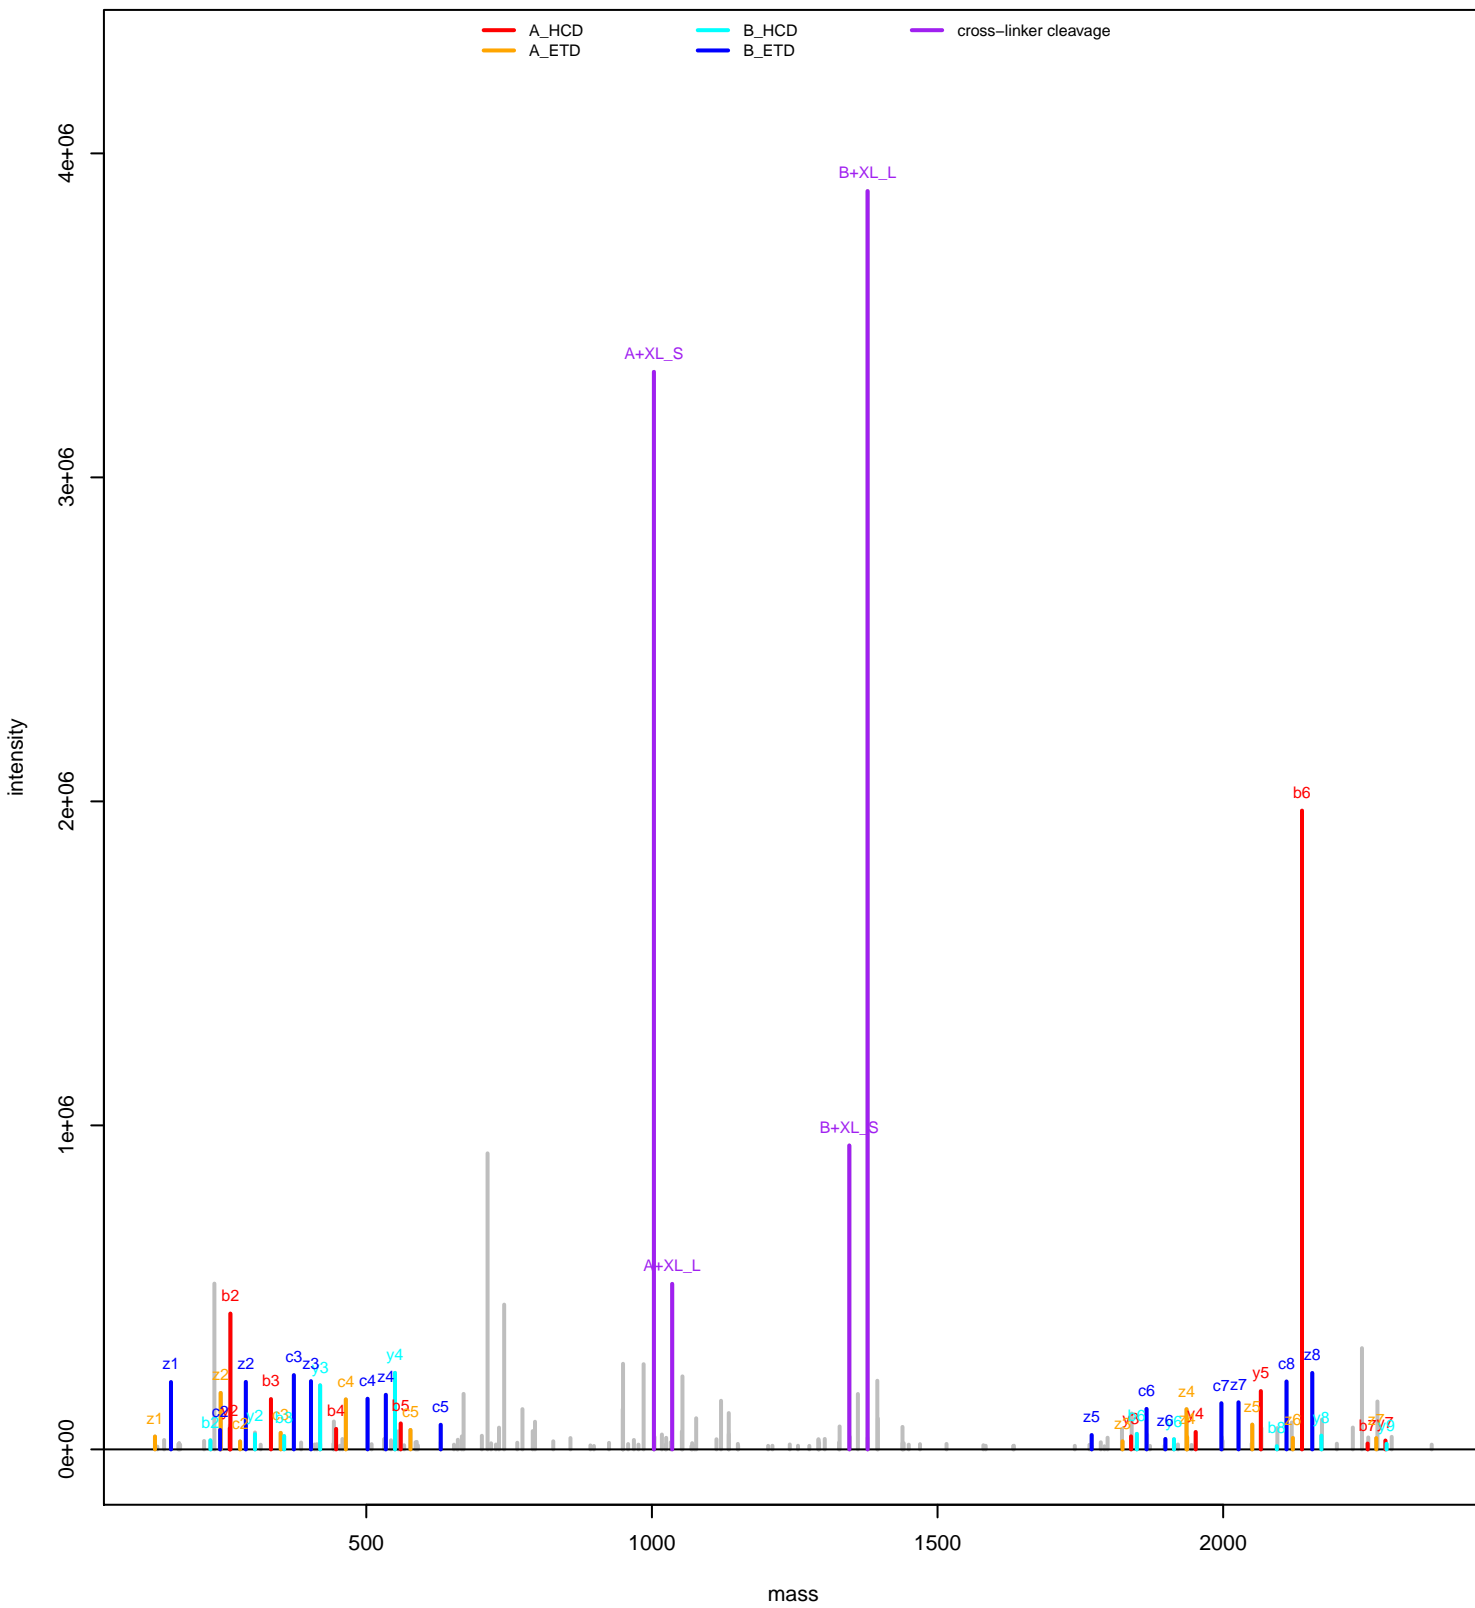

**DFANLKDK+XL\_S**

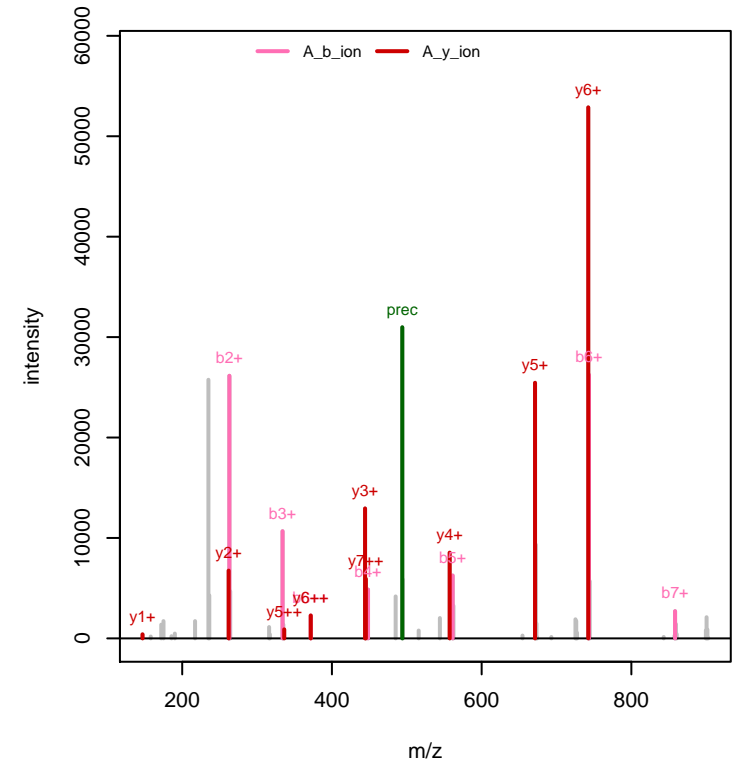

**DFANLKDK+XL\_L**

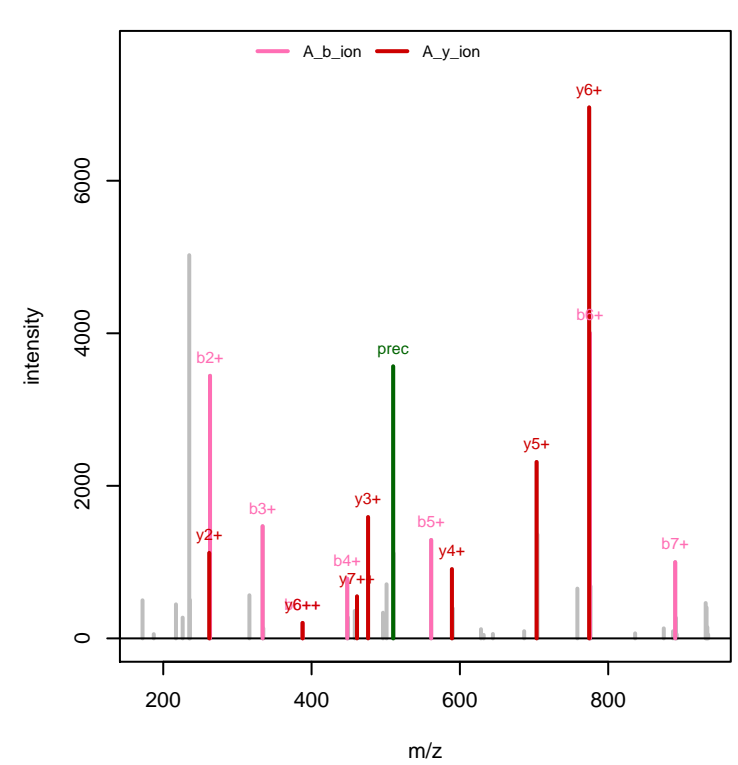

**LNEEQKMMNR+XL\_S**

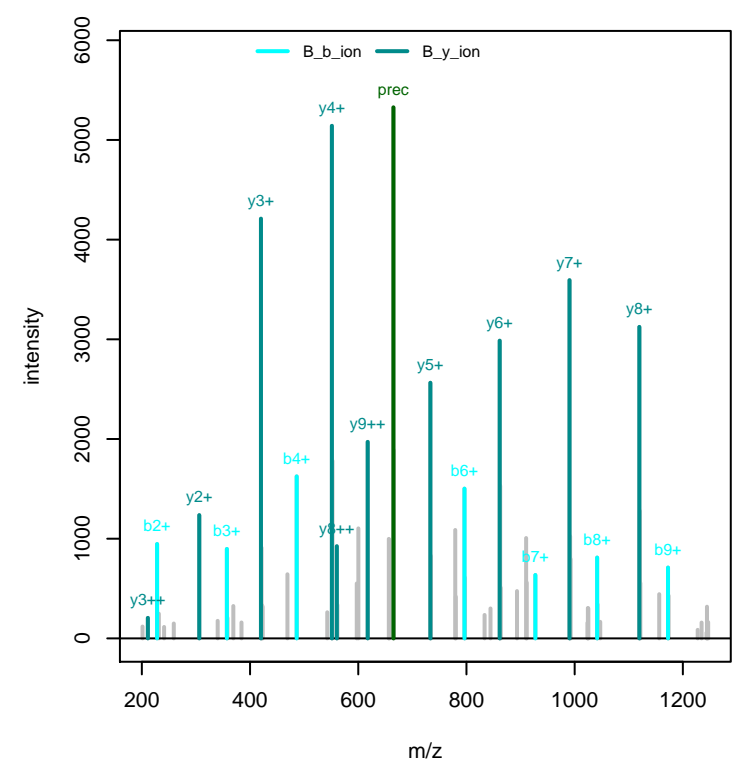

**LNEEQKMMNR+XL\_L**

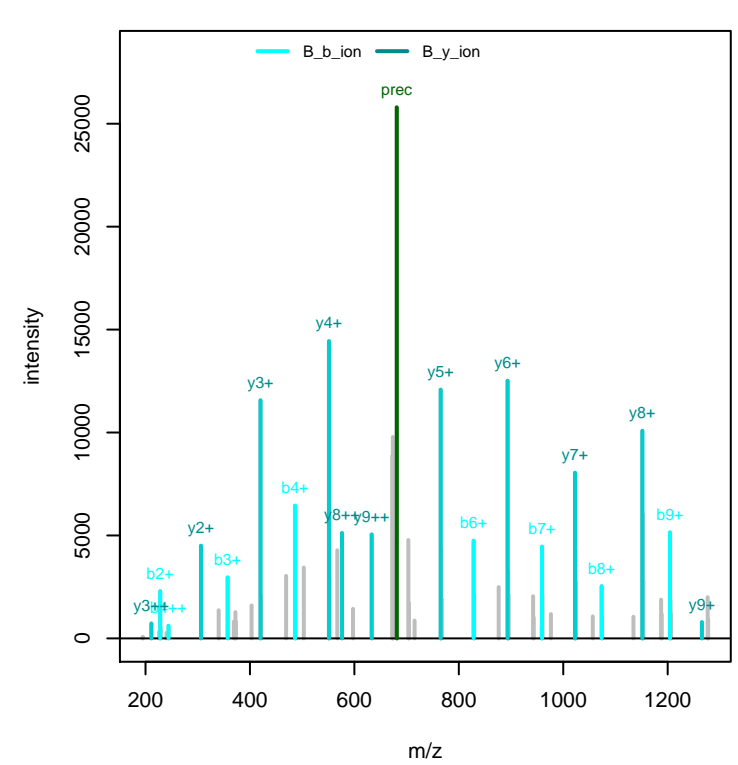

**KPNSALRK  
VGFGYGKAR**

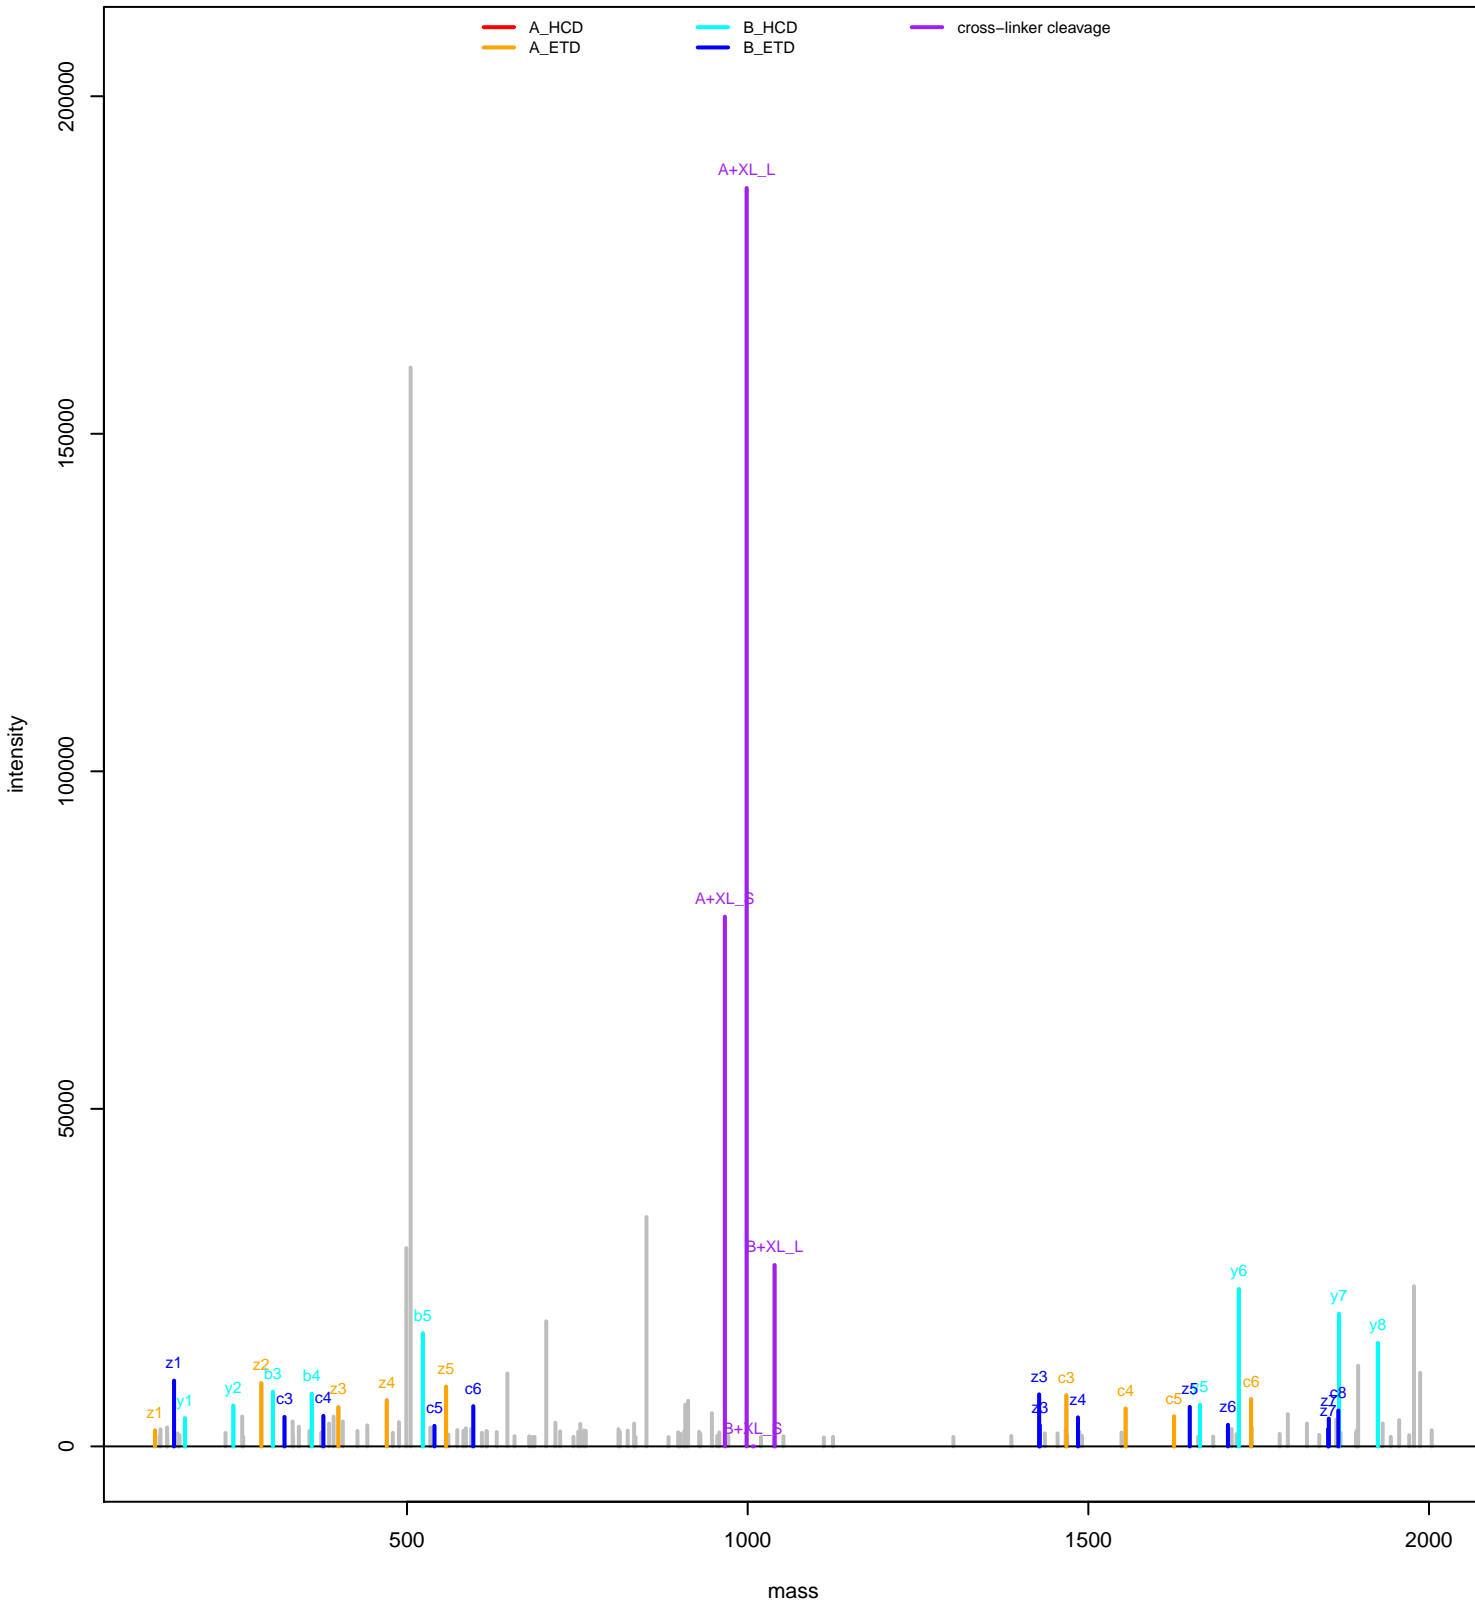

**KPNSALRK+XL\_S**

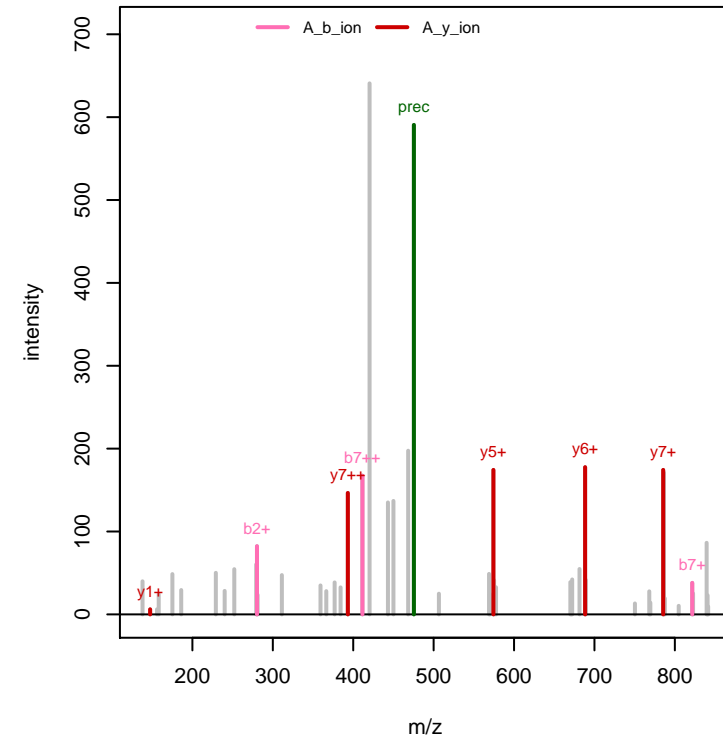

**KPNSALRK+XL\_L**

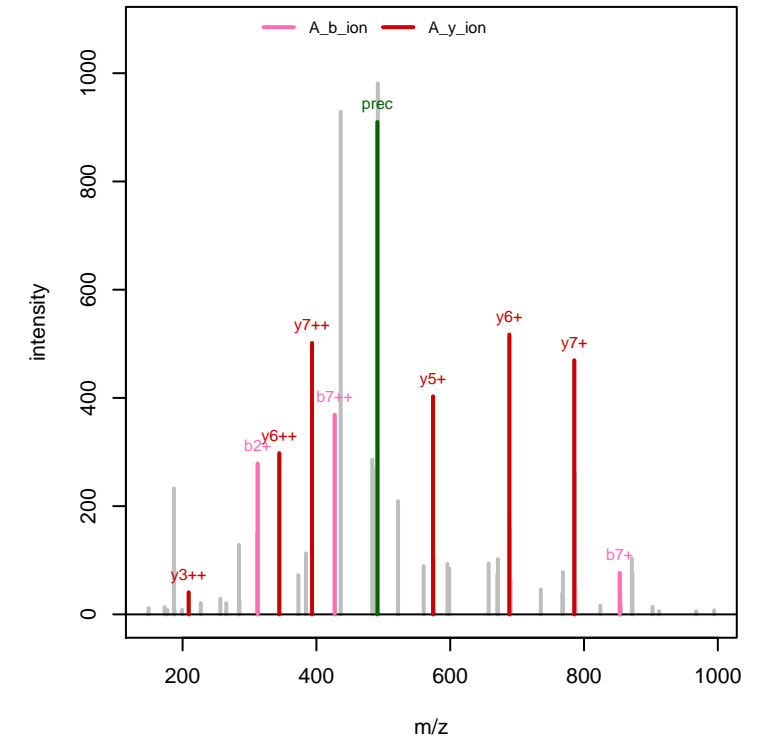

**VGFGYGKAR+XL\_S**

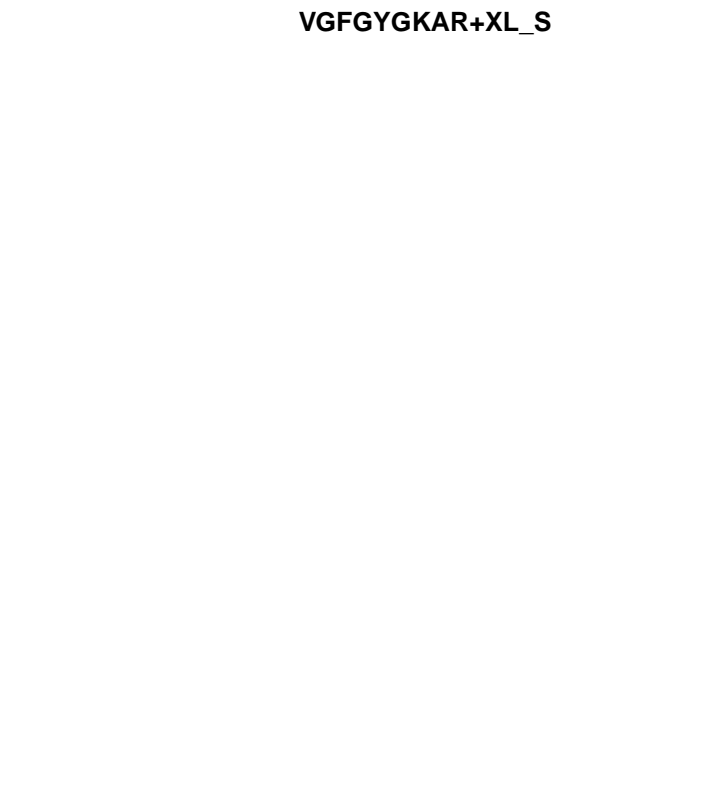

**VGFGYGKAR+XL\_L**

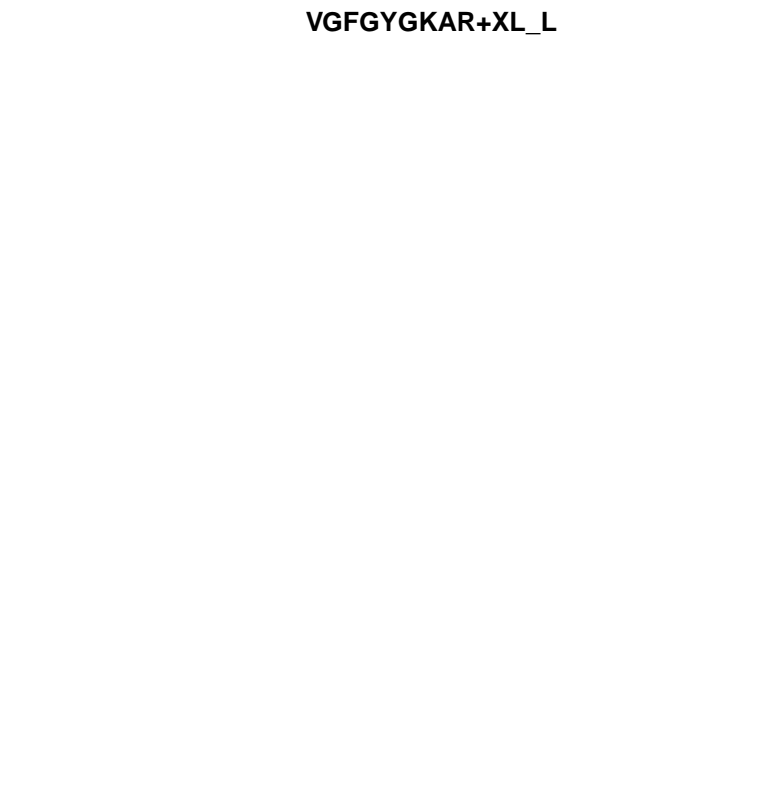

LLAQKLK  
ECRPLSKTK

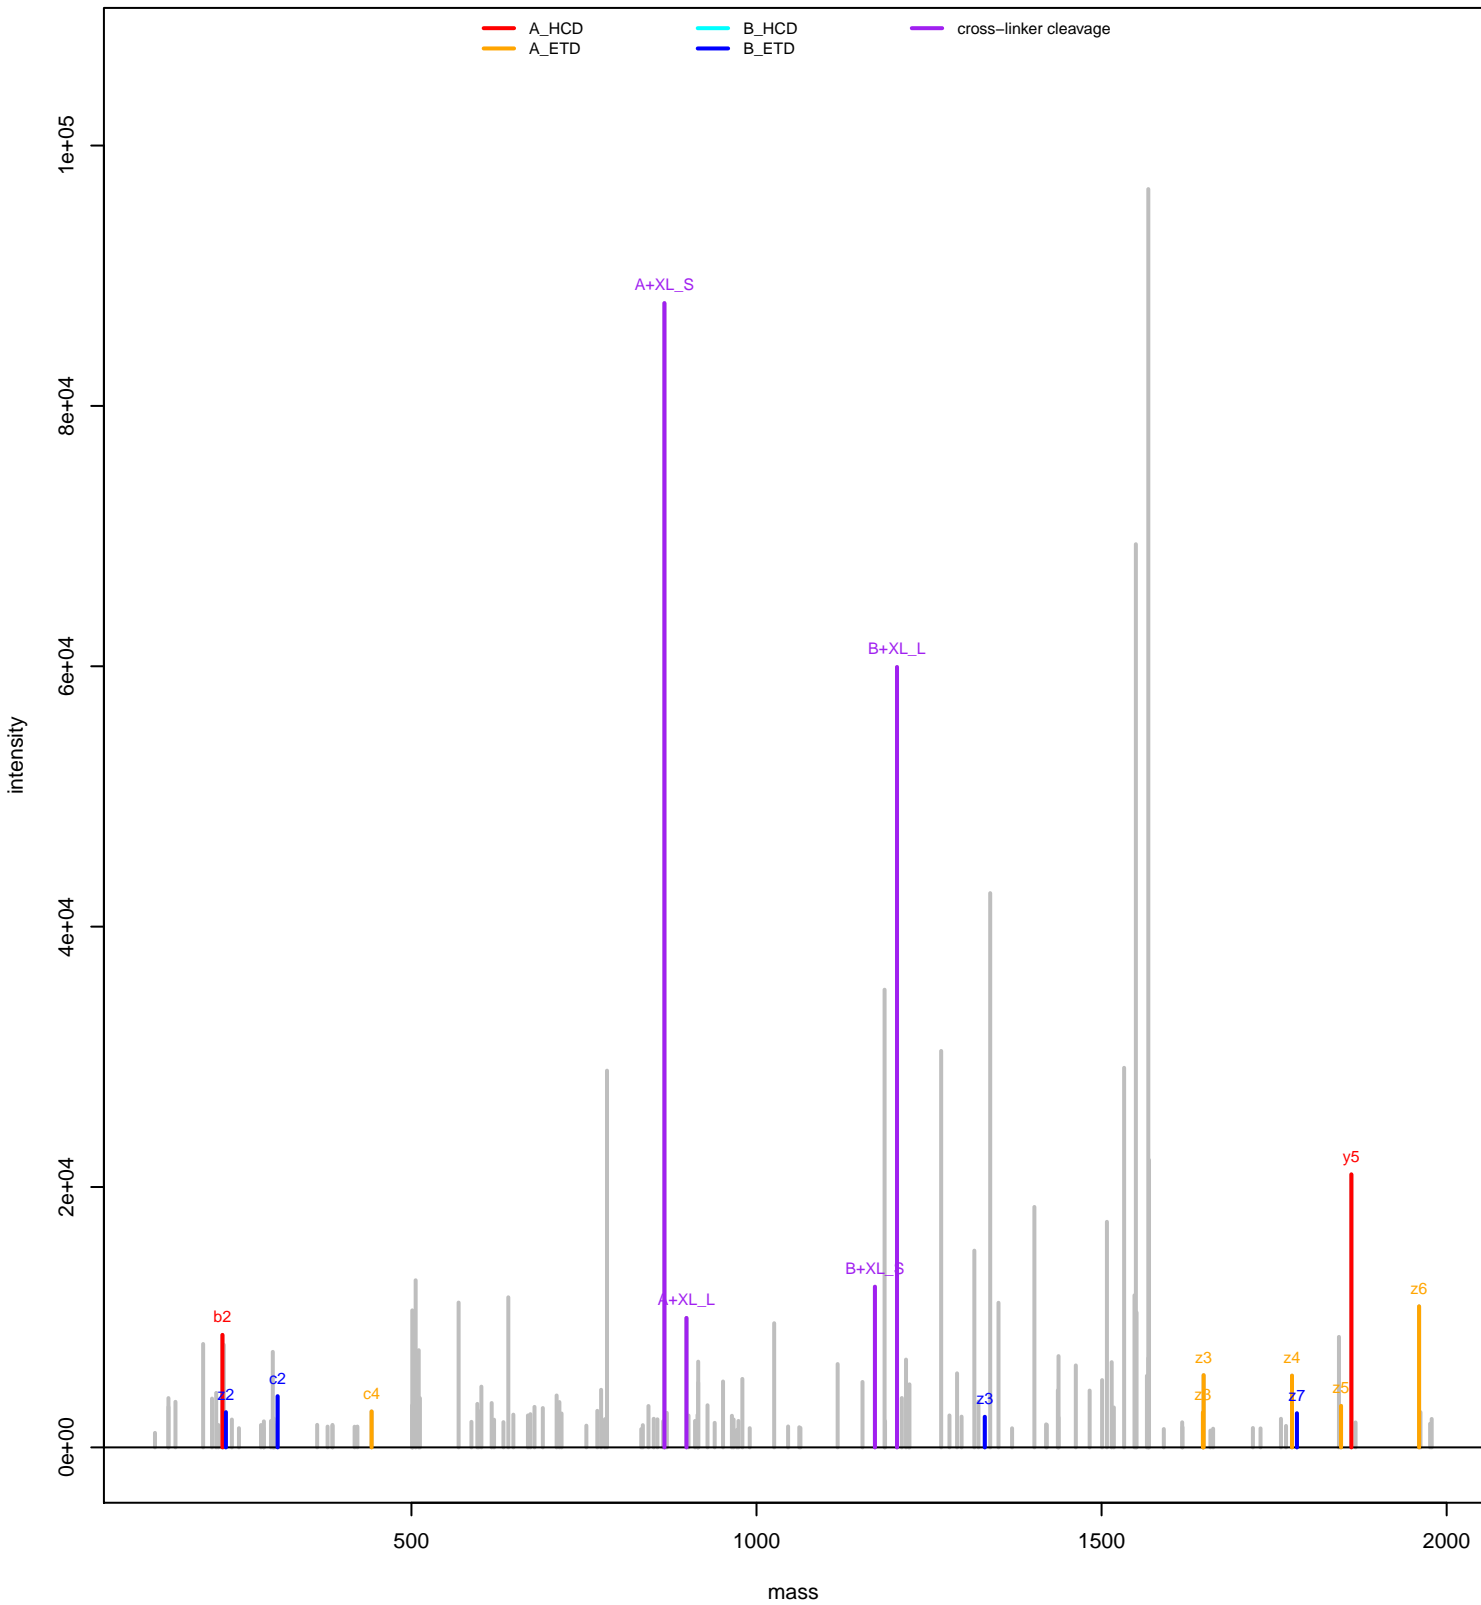

LLAQKLK+XL\_S

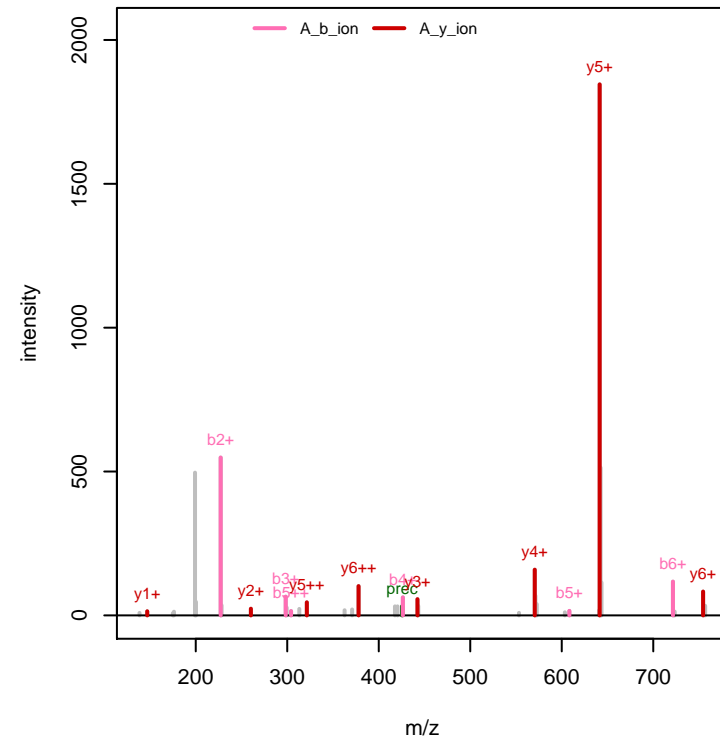

LLAQKLK+XL\_L

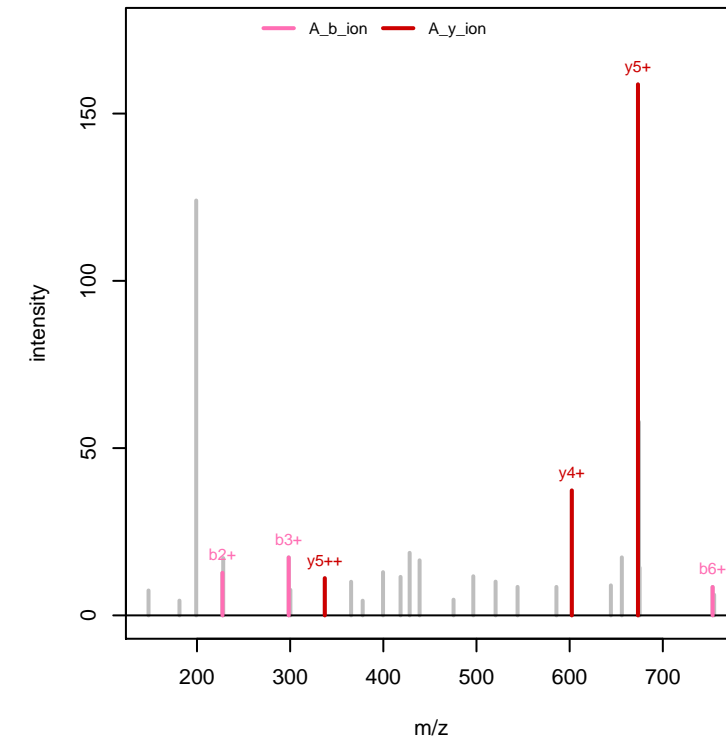

ECRPLSKTK+XL\_S

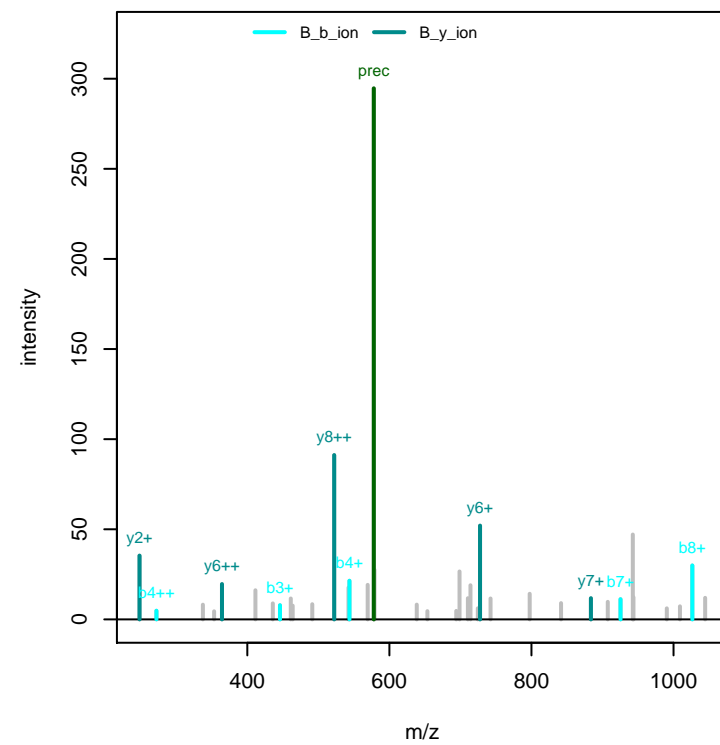

ECRPLSKTK+XL\_L

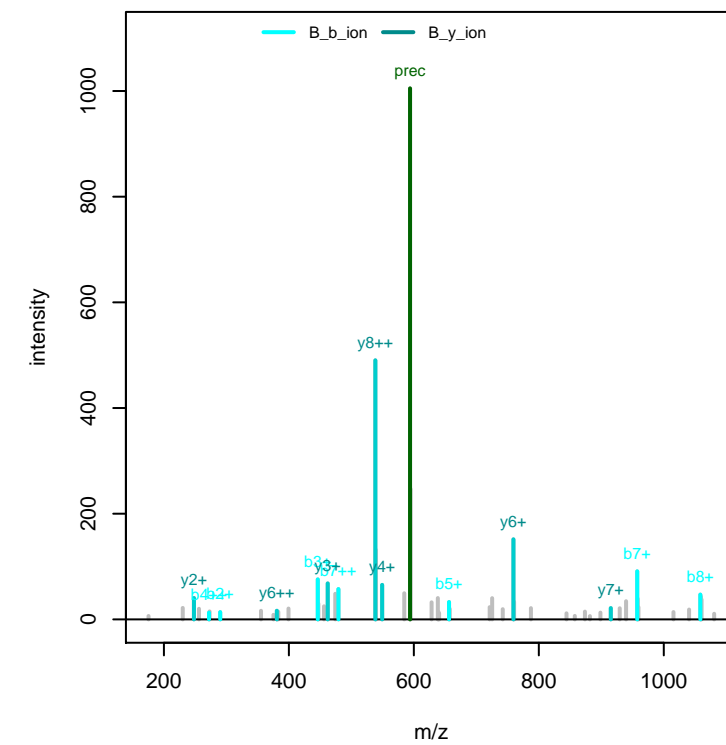

AGVSKATVSR  
TTMLEVAKR

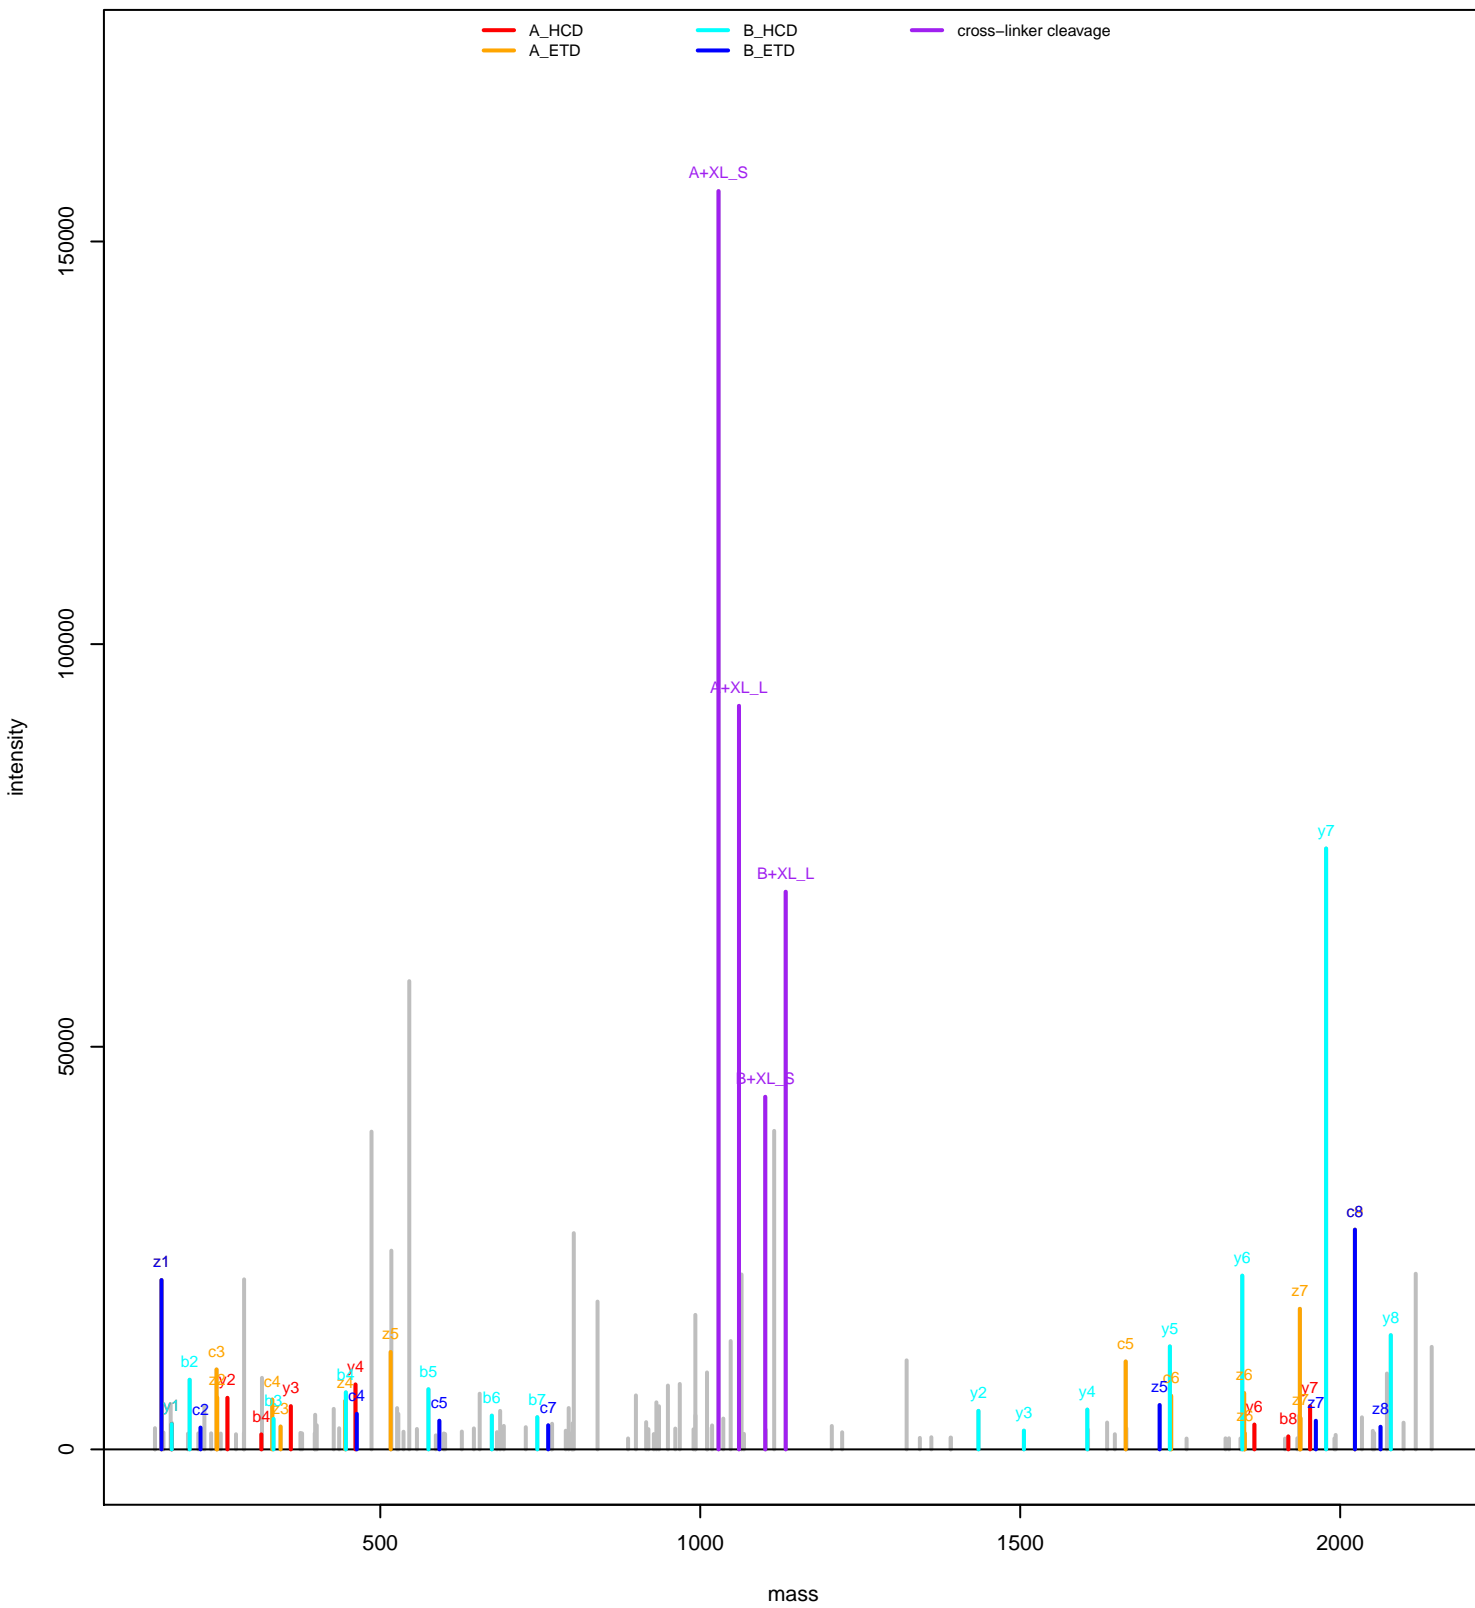

AGVSKATVSR+XL\_S

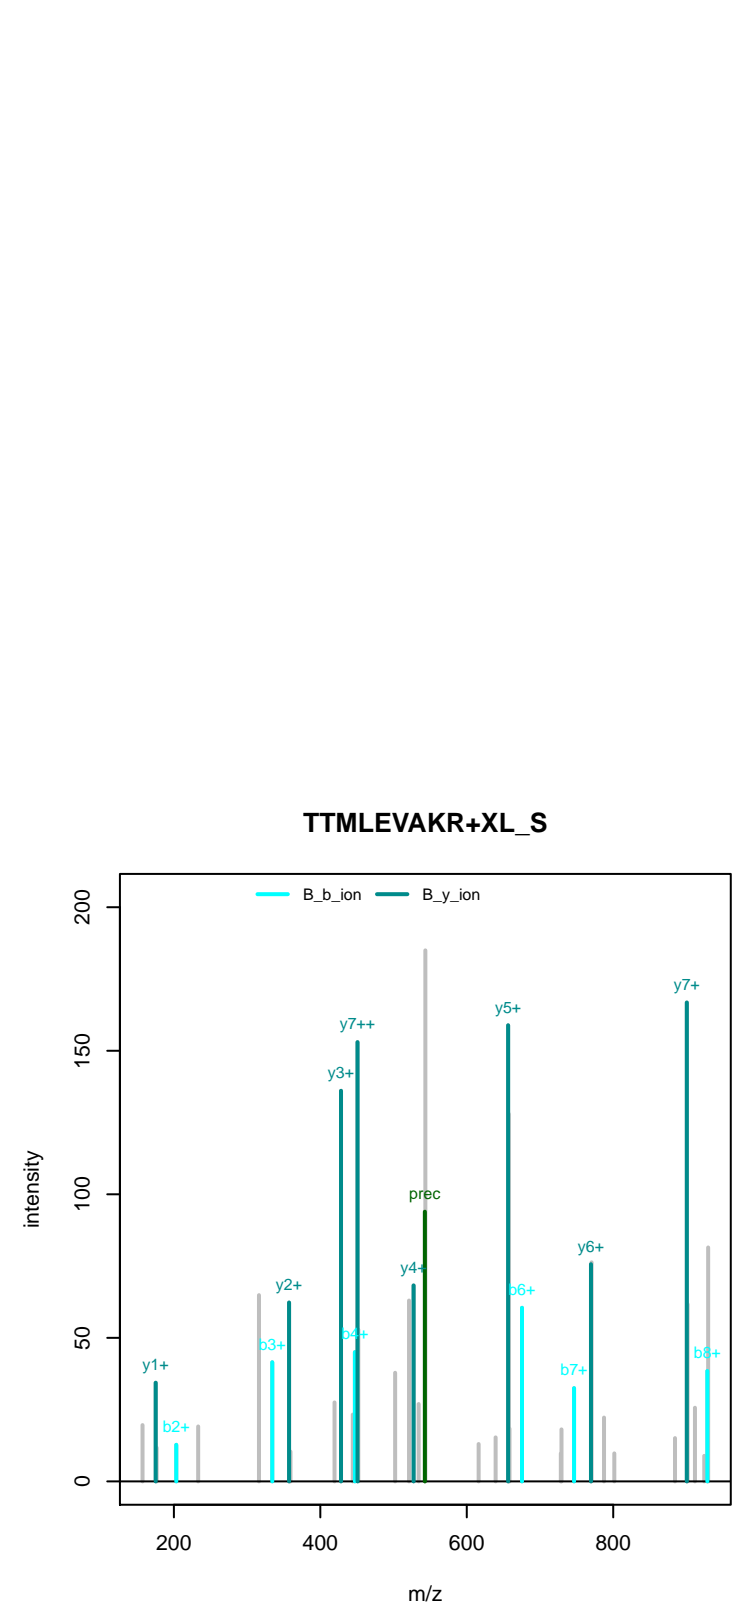

AGVSKATVSR+XL\_L

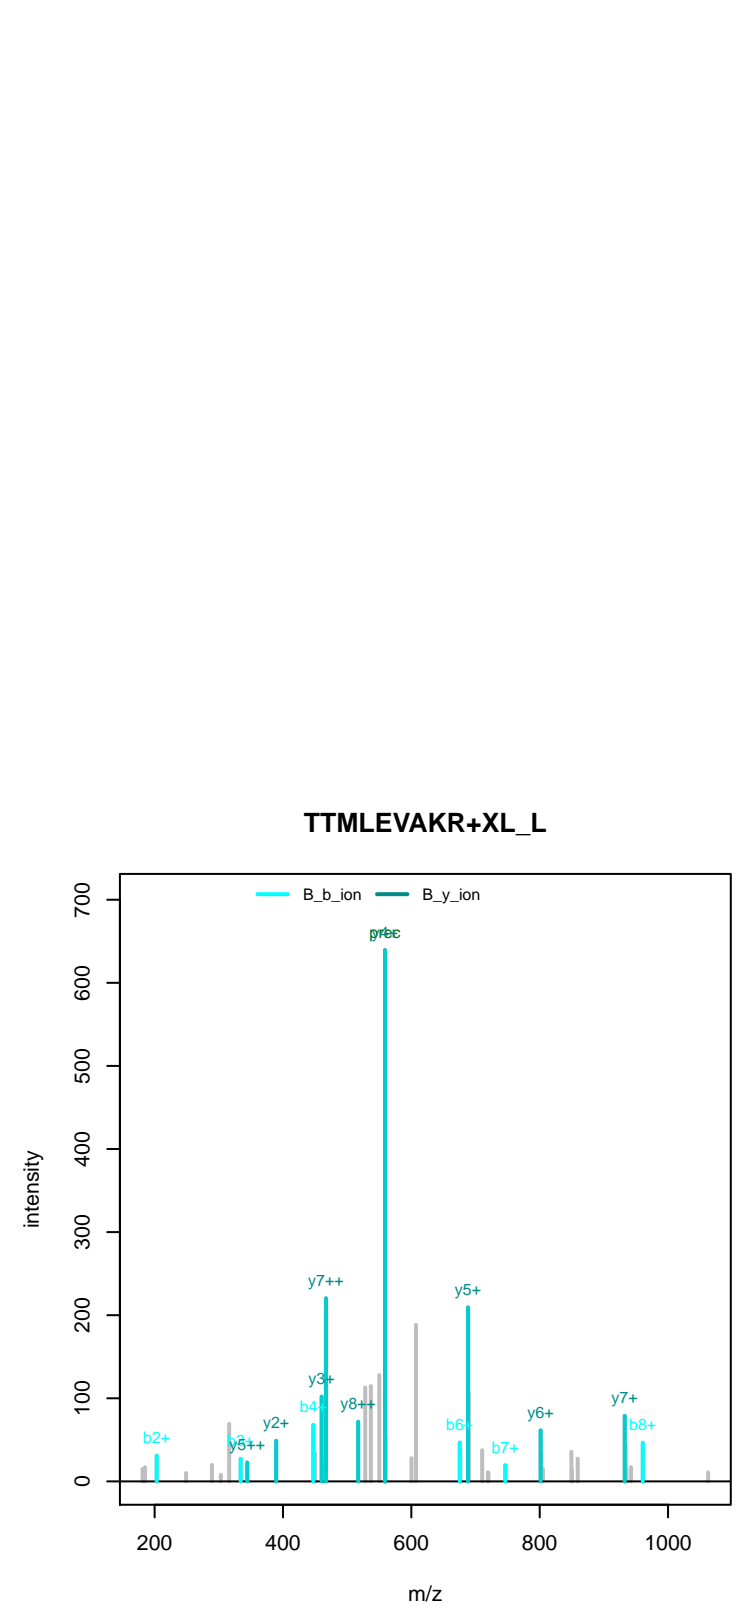

TTMLEVAKR+XL\_S

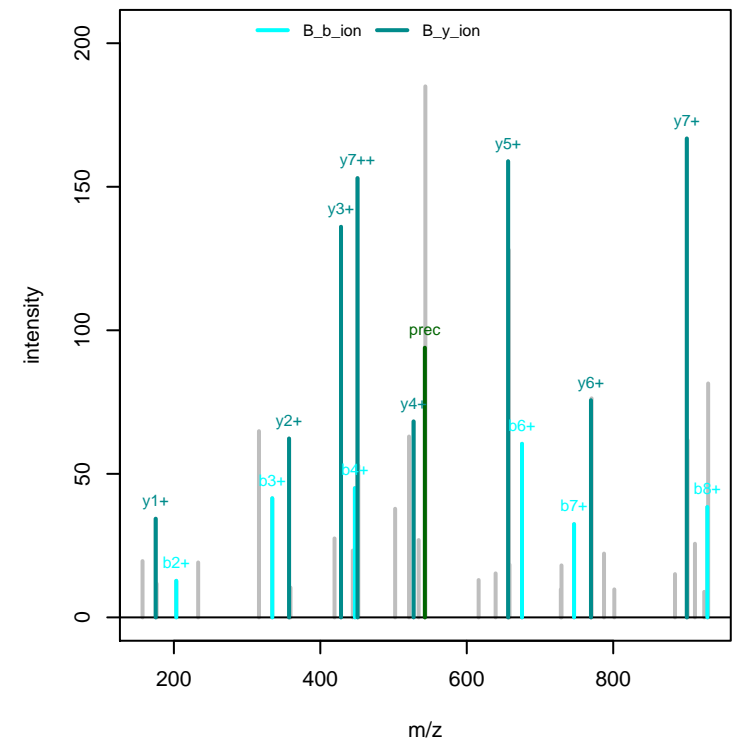

TTMLEVAKR+XL\_L

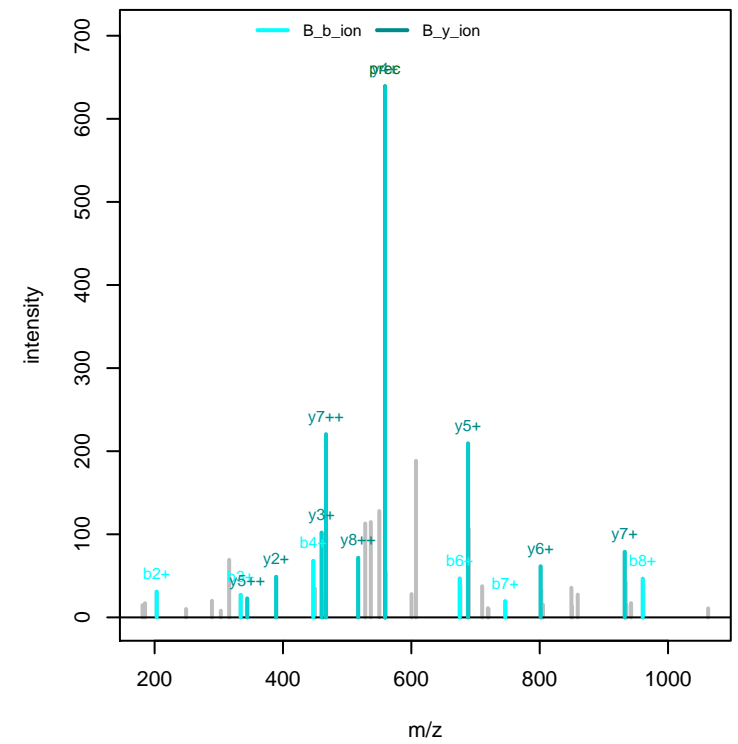

TSKTPGR  
SSALNTLTNQKSLAR

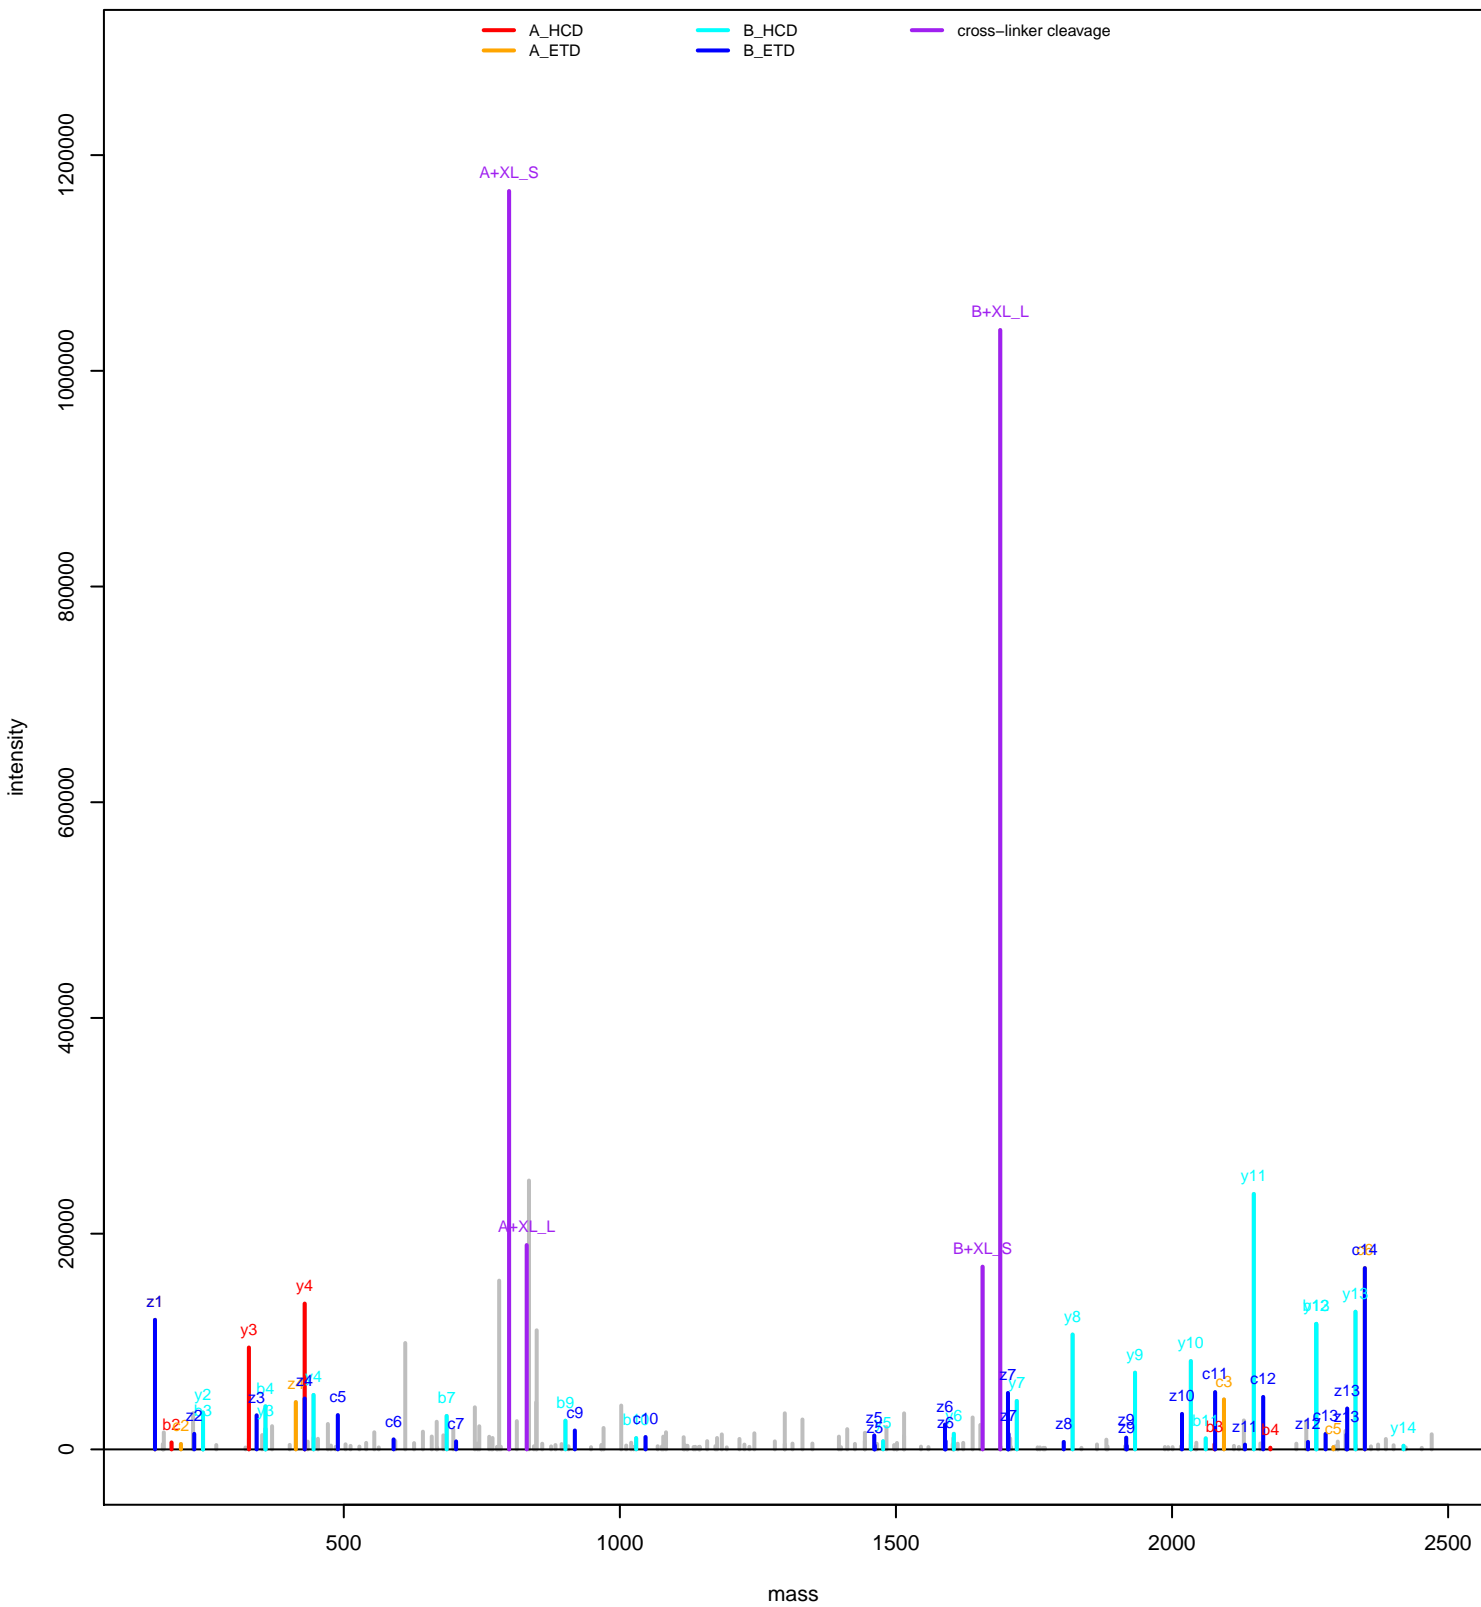

TSKTPGR+XL\_S

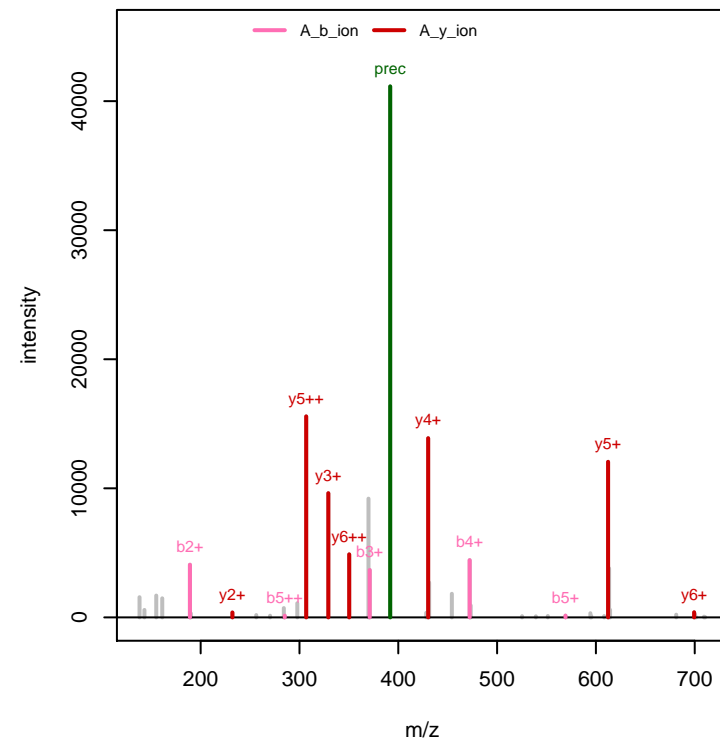

TSKTPGR+XL\_L

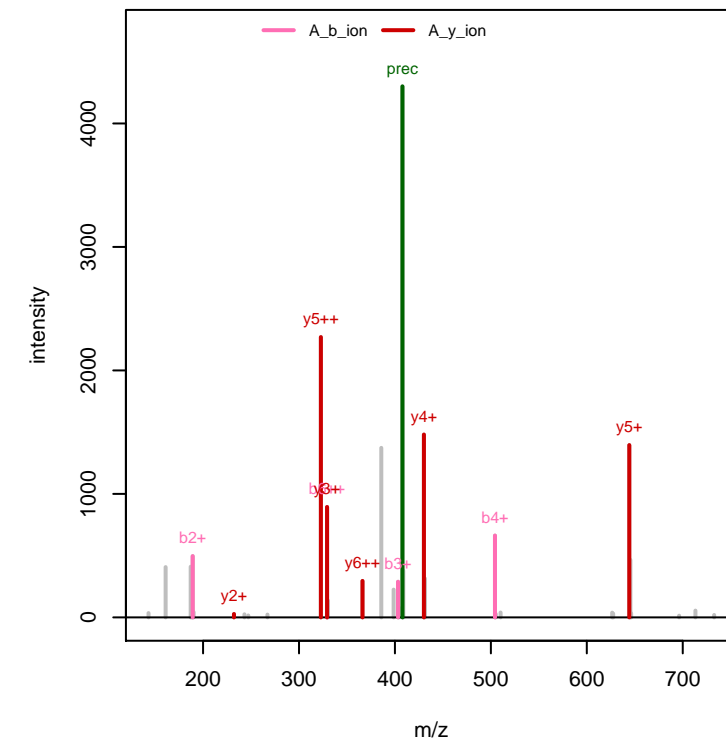

SSALNTLTNQKSLAR+XL\_S

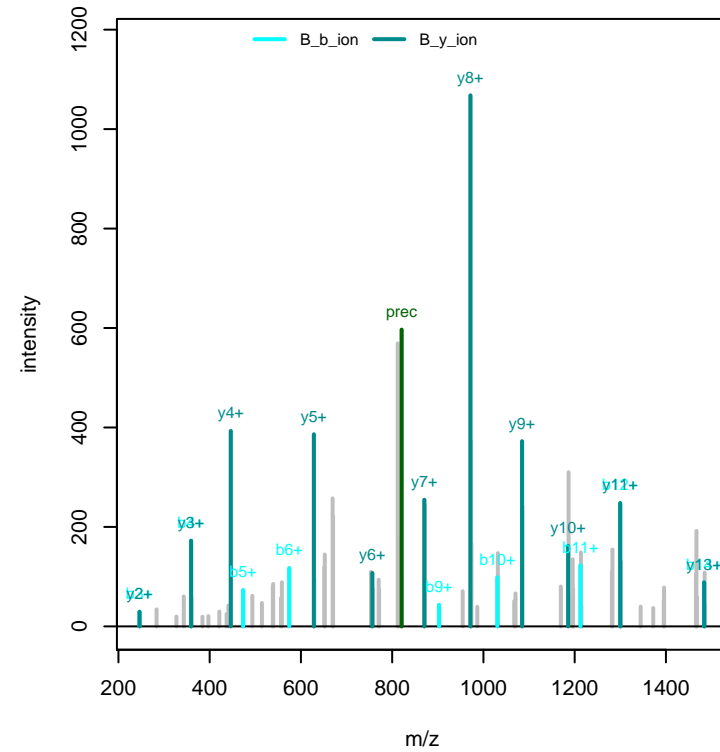

SSALNTLTNQKSLAR+XL\_L

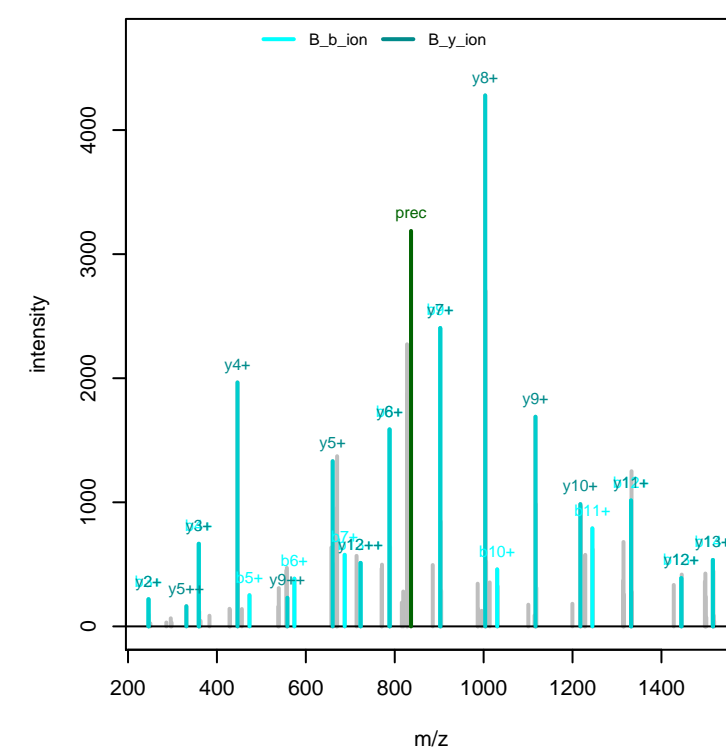

VYTGKVTR  
IHTIKINPDK

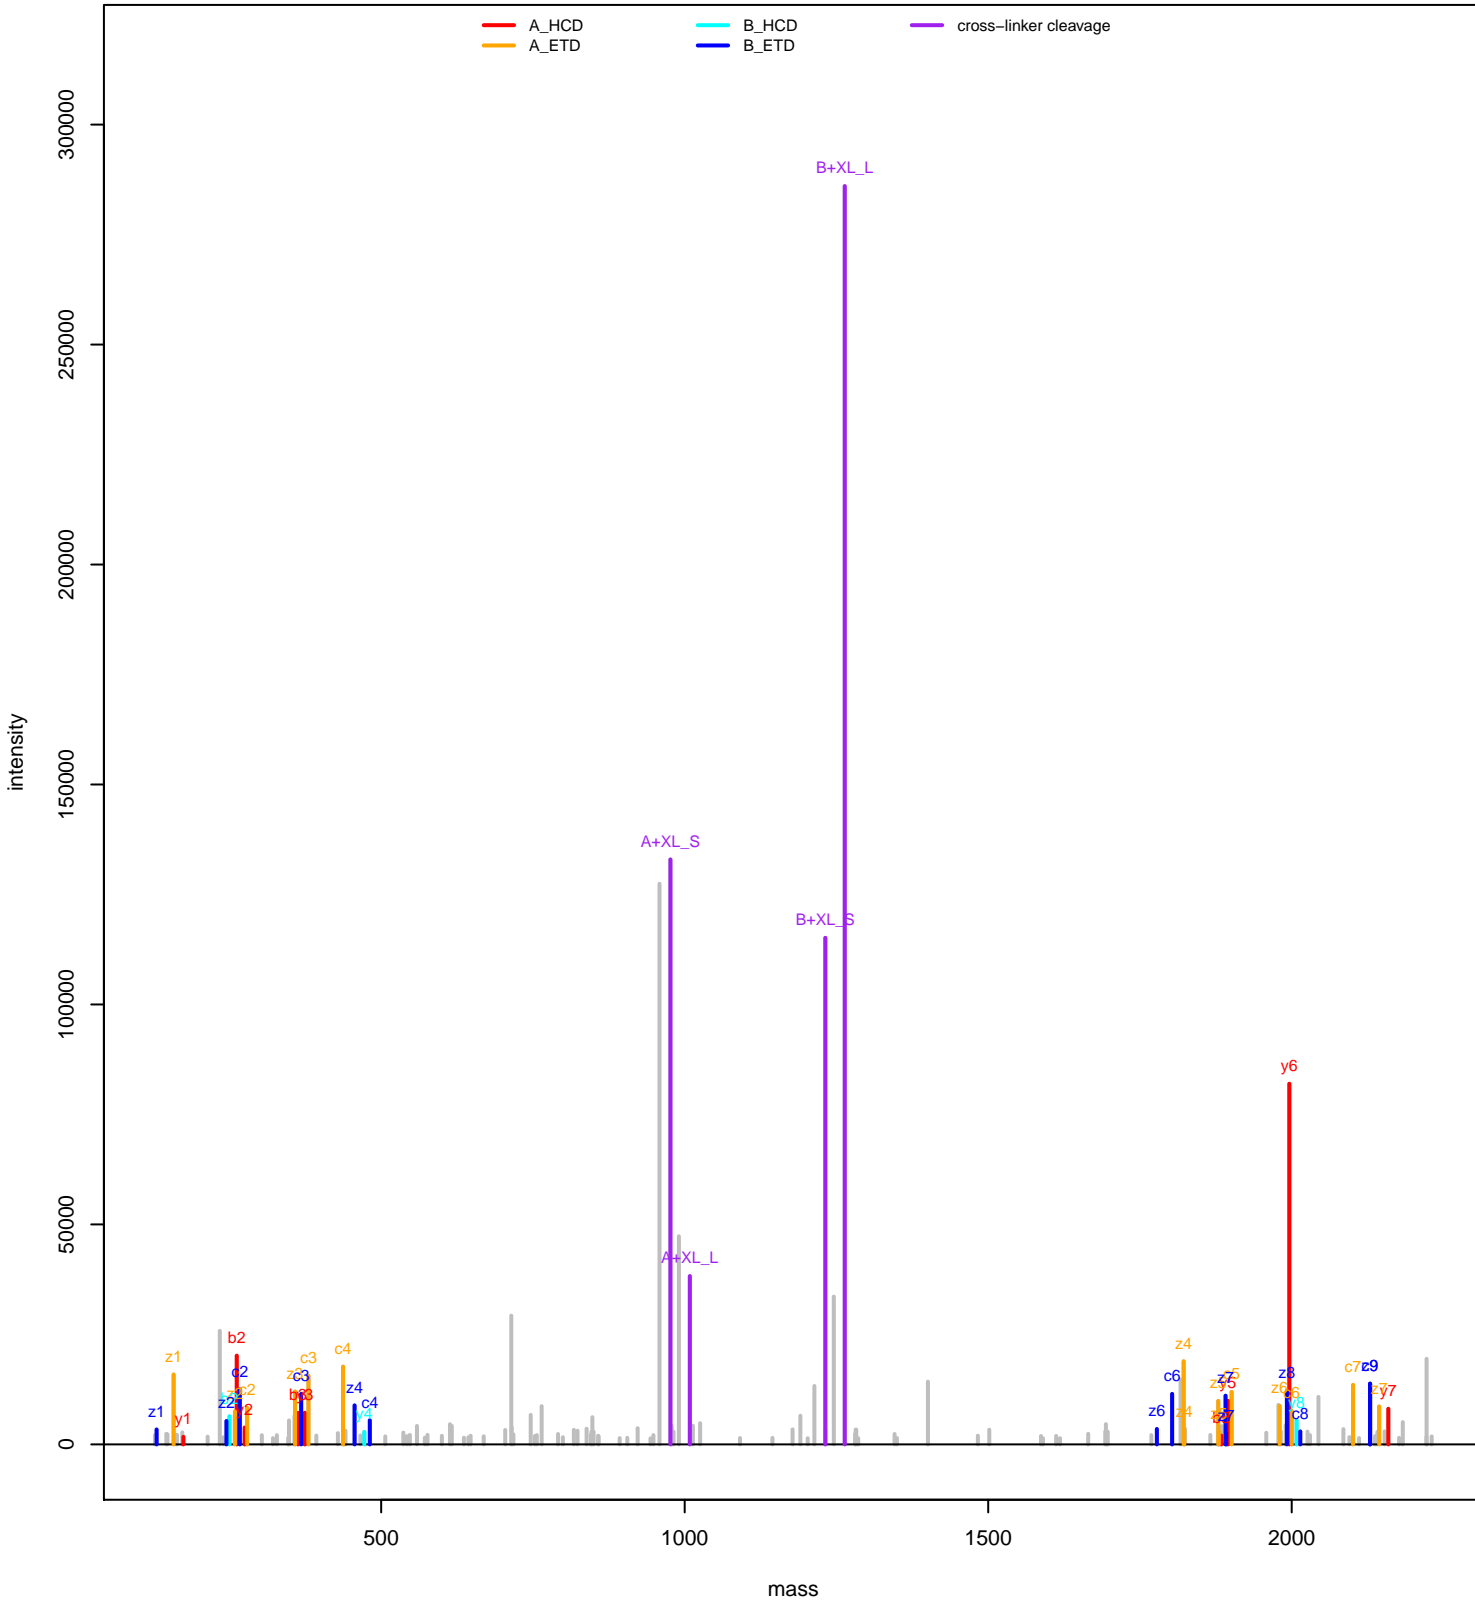

VYTGKVTR+XL\_S

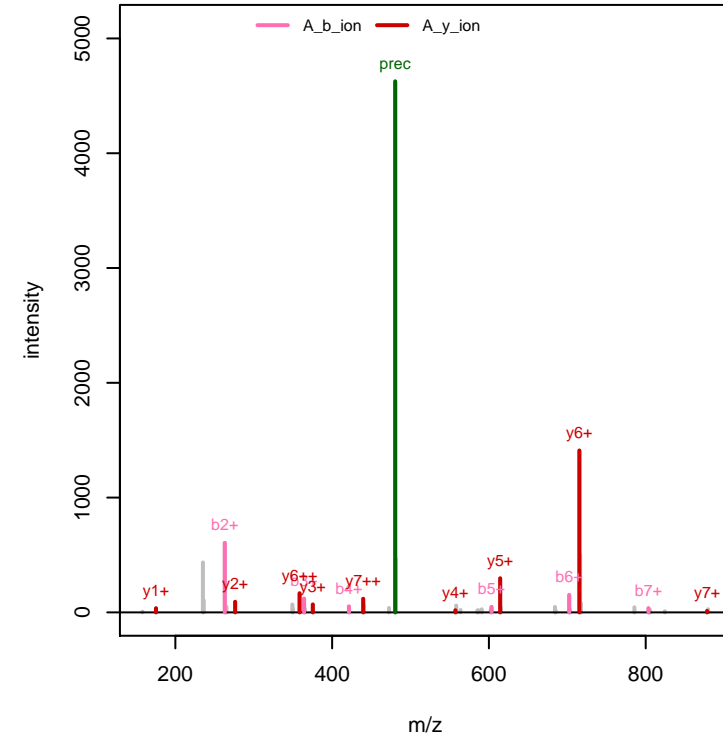

VYTGKVTR+XL\_L

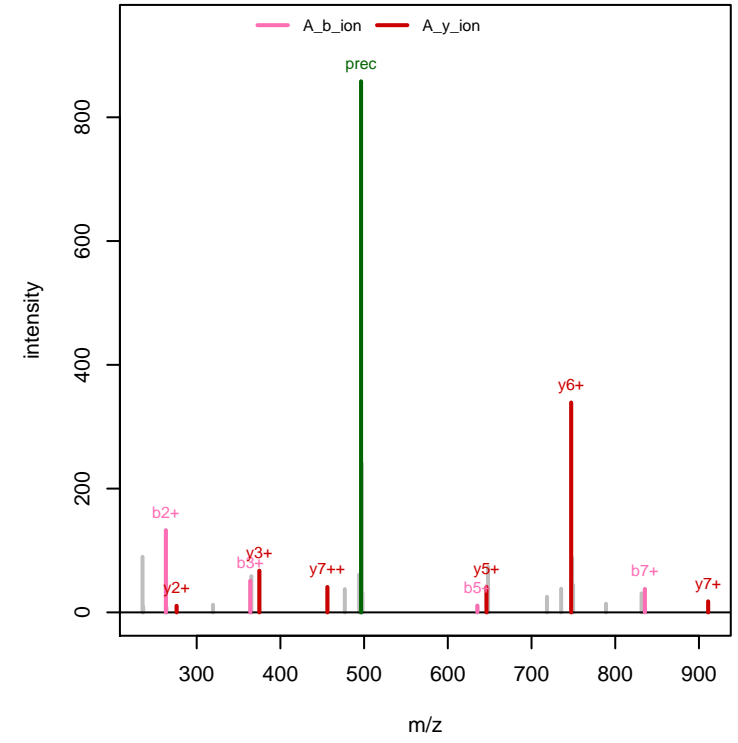

IHTIKINPDK+XL\_S

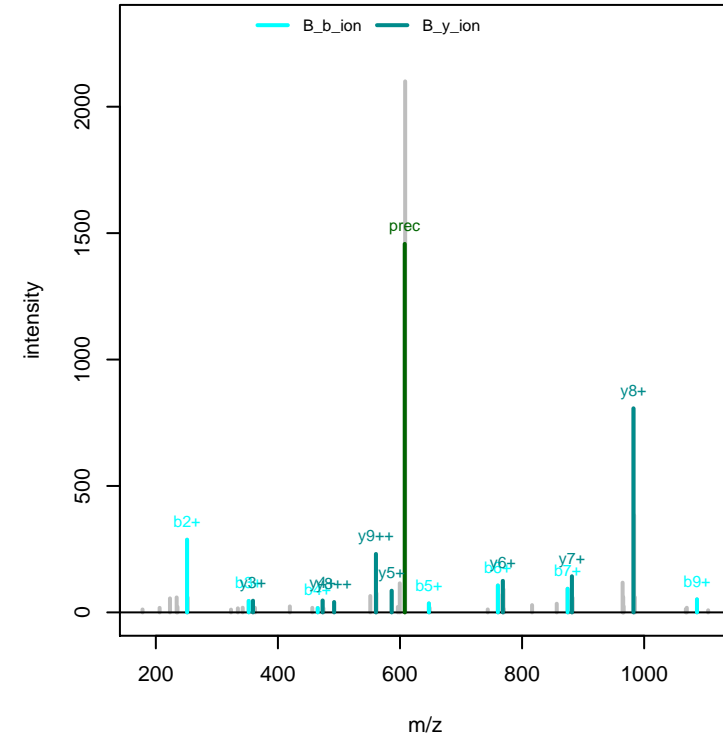

IHTIKINPDK+XL\_L

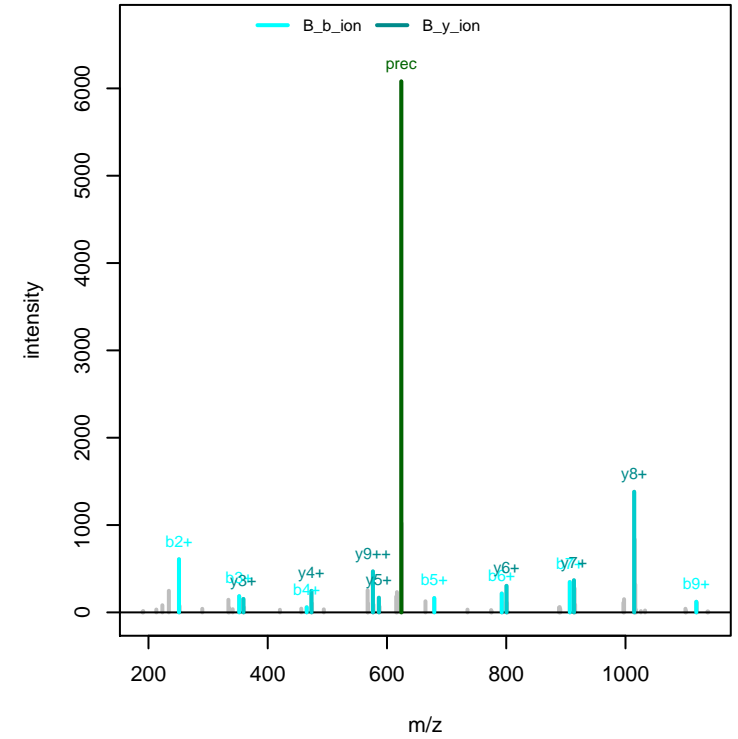

SIKTISSQK  
LSPKESEVLR

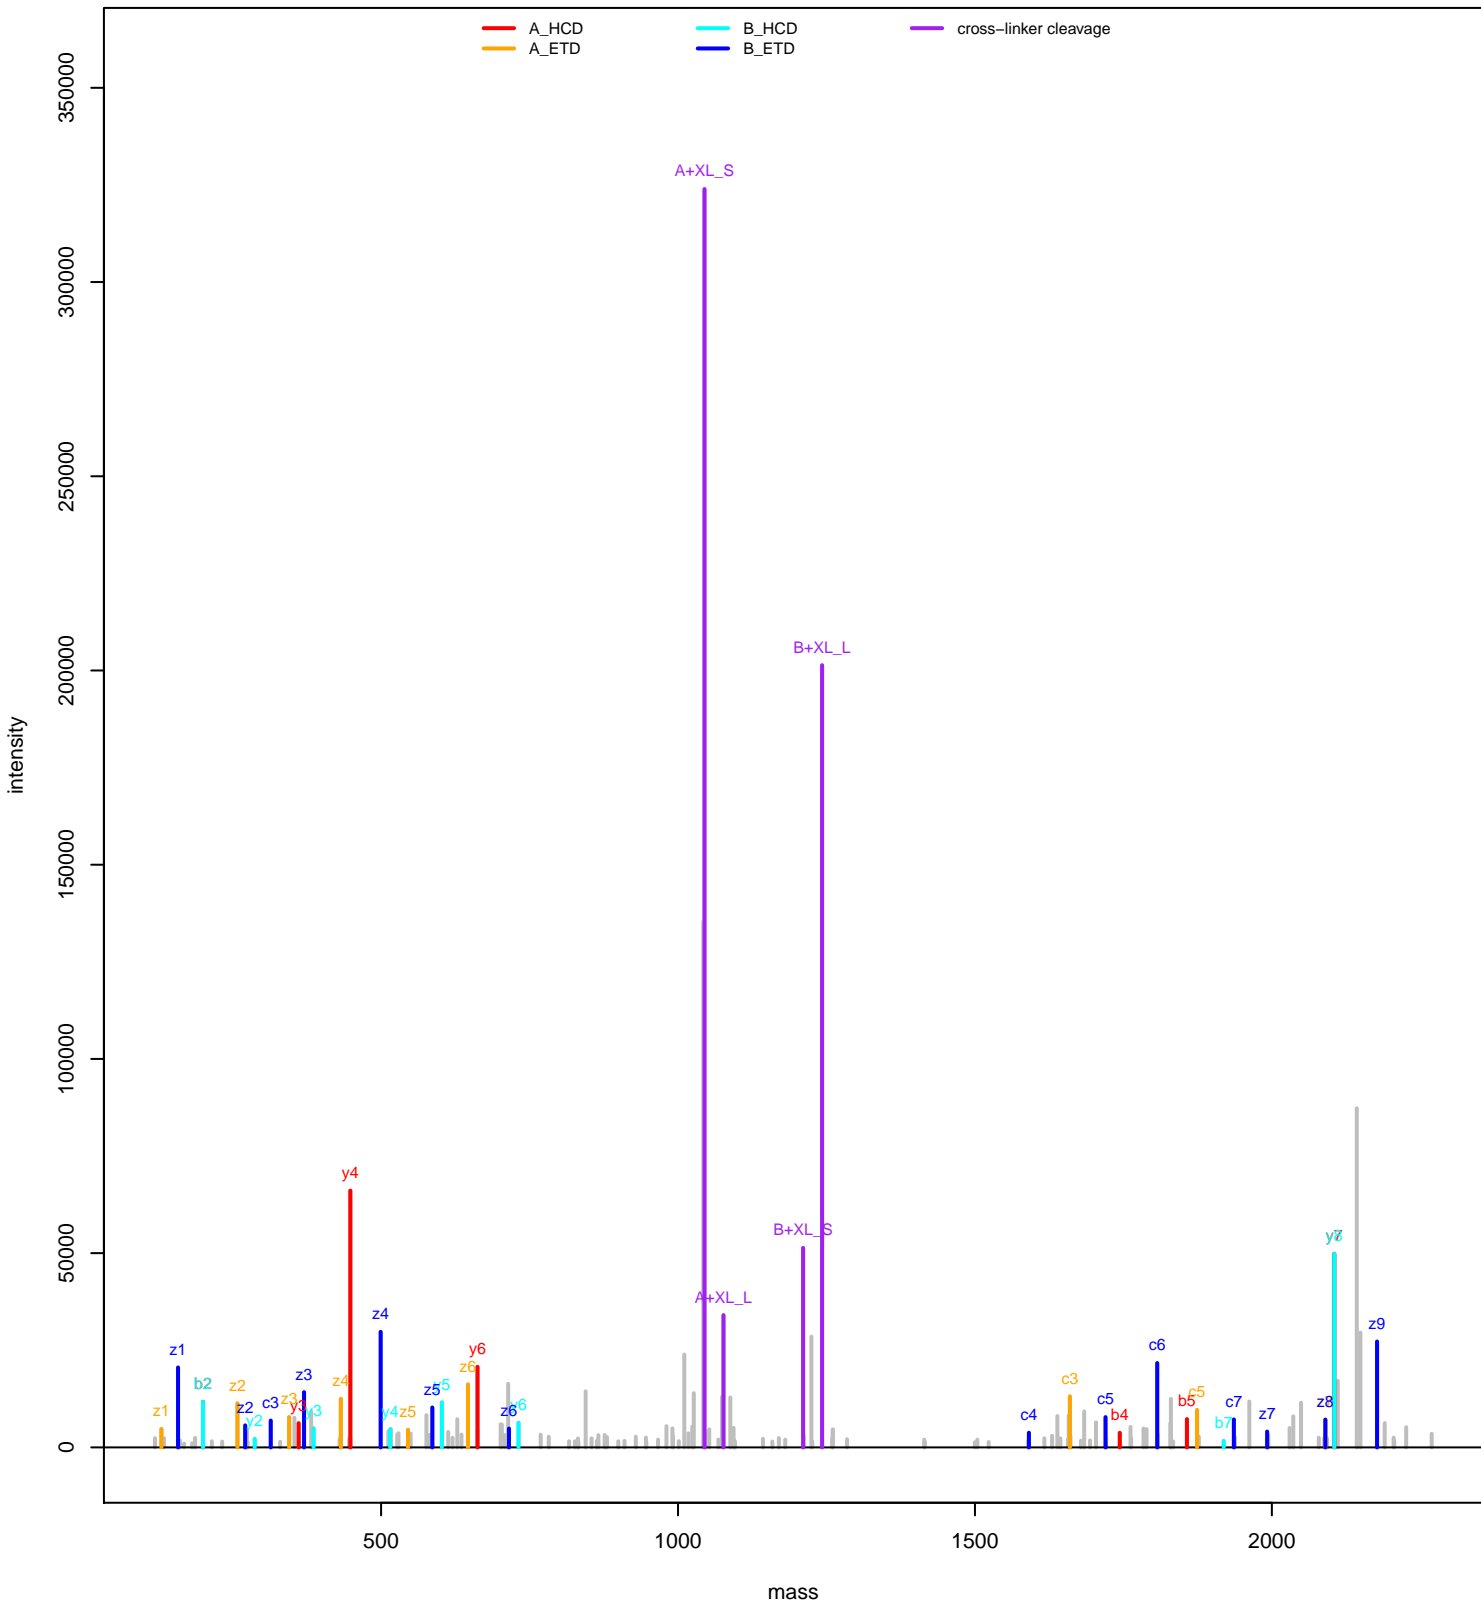

SIKTISSQK+XL\_S

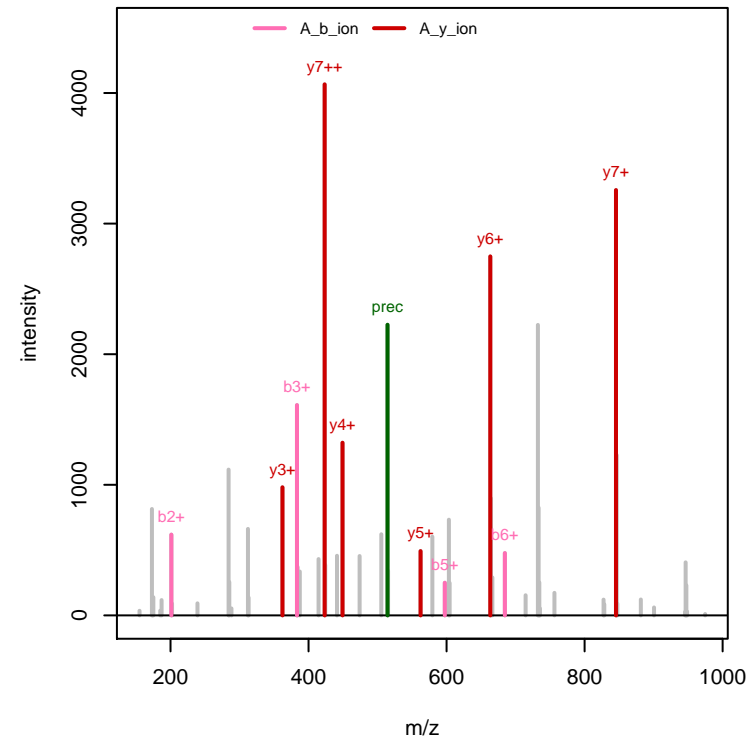

SIKTISSQK+XL\_L

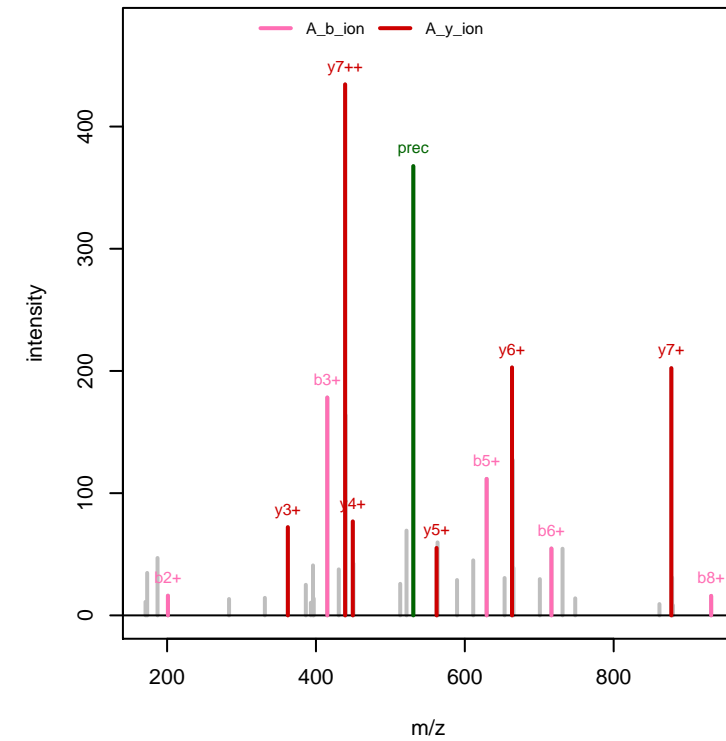

LSPKESEVLR+XL\_S

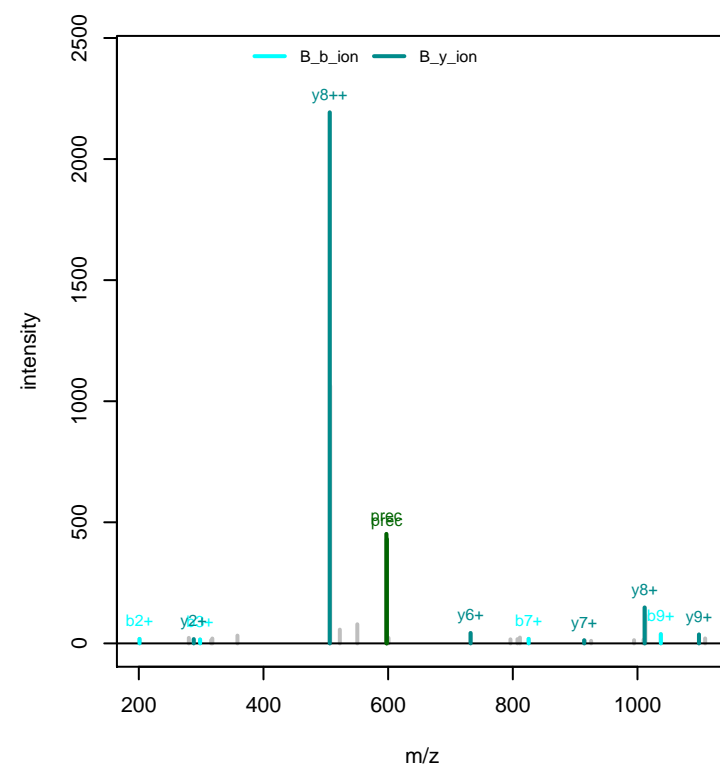

LSPKESEVLR+XL\_L

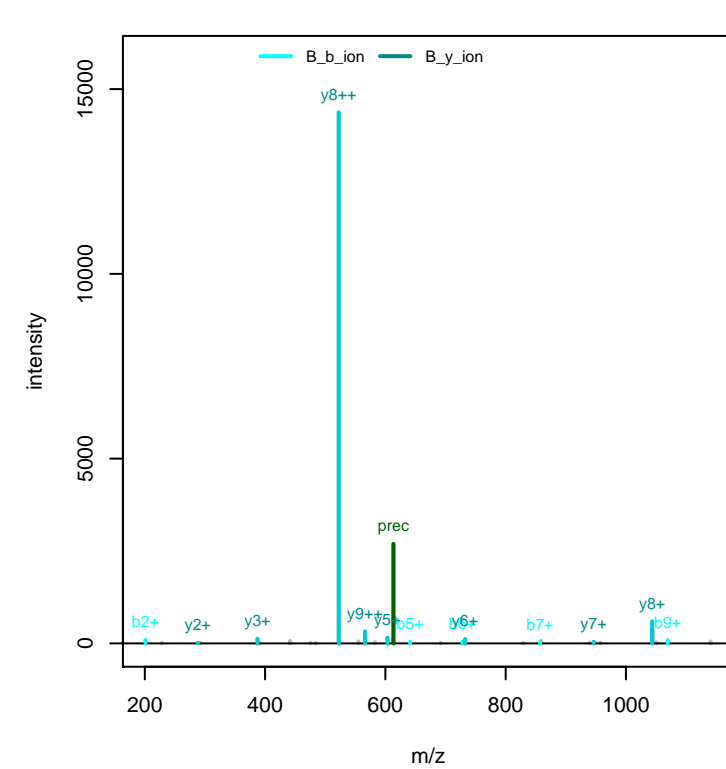



YLSEKK  
KLPEGVKMTK

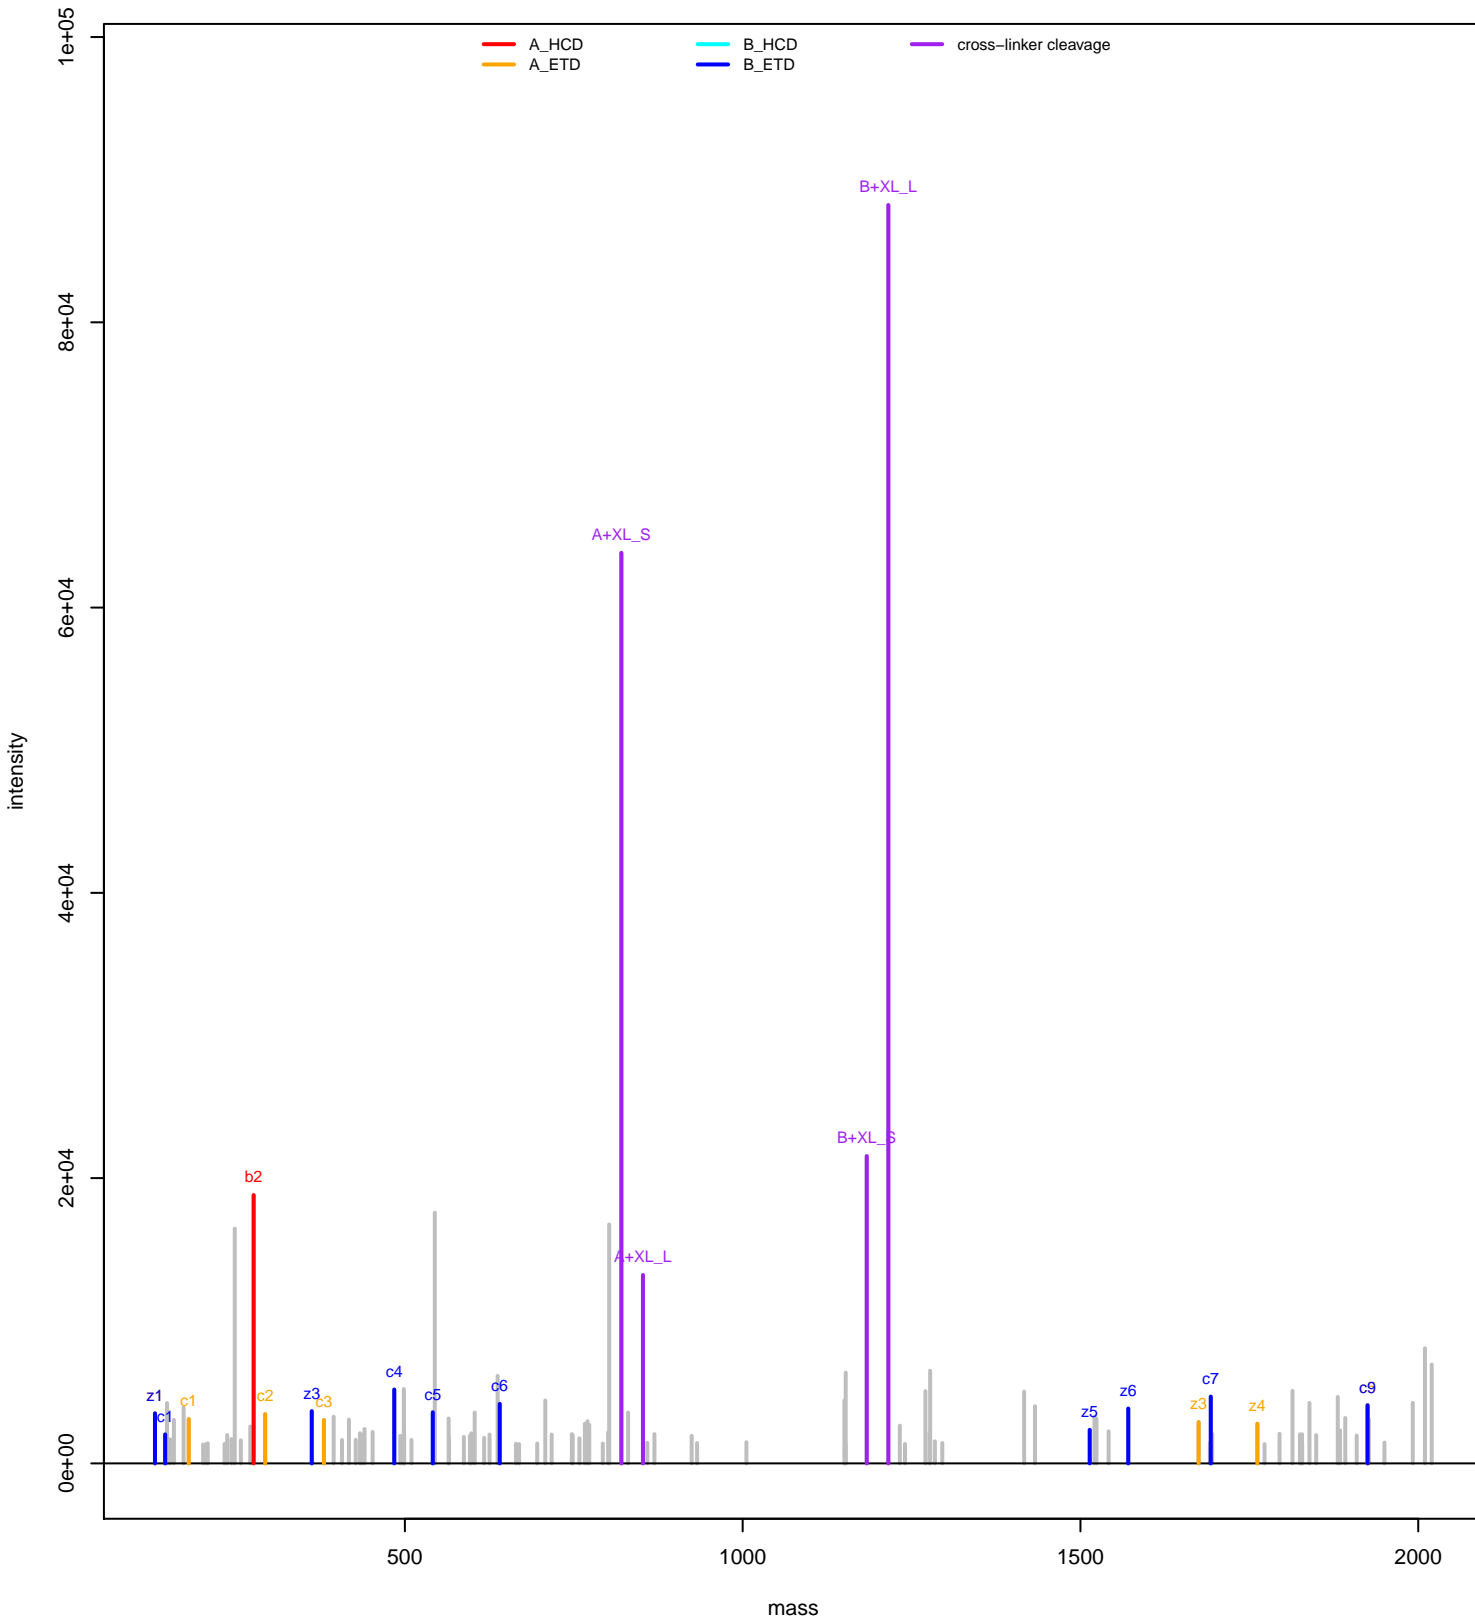

YLSEKK+XL\_S

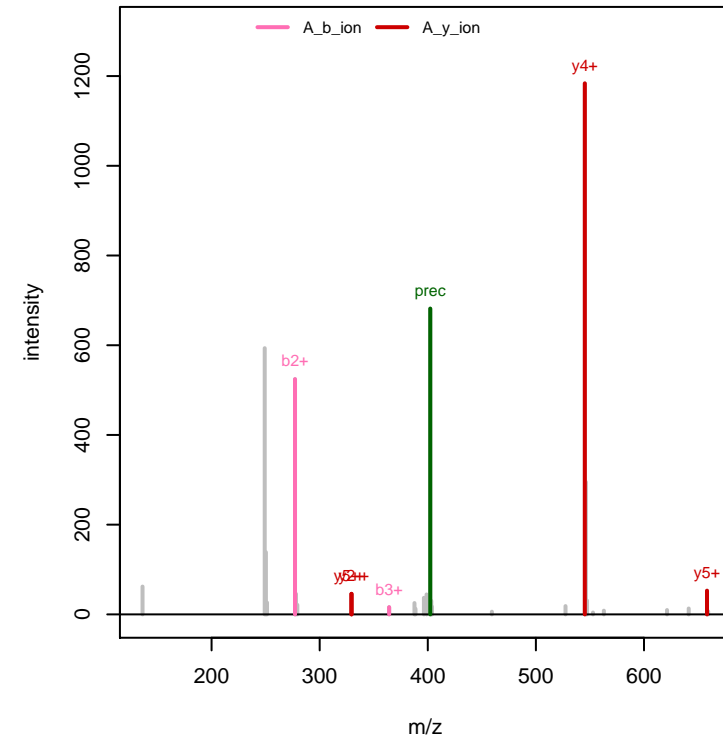

YLSEKK+XL\_L

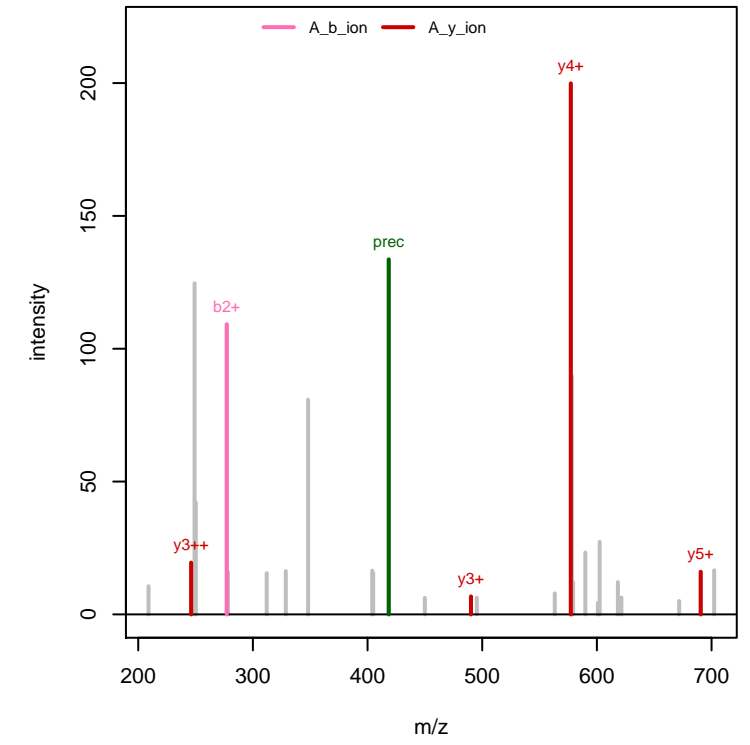

KLPEGVKMTK+XL\_S

KLPEGVKMTK+XL\_L

SNSYDSSSIK  
VLKGLDAVRK

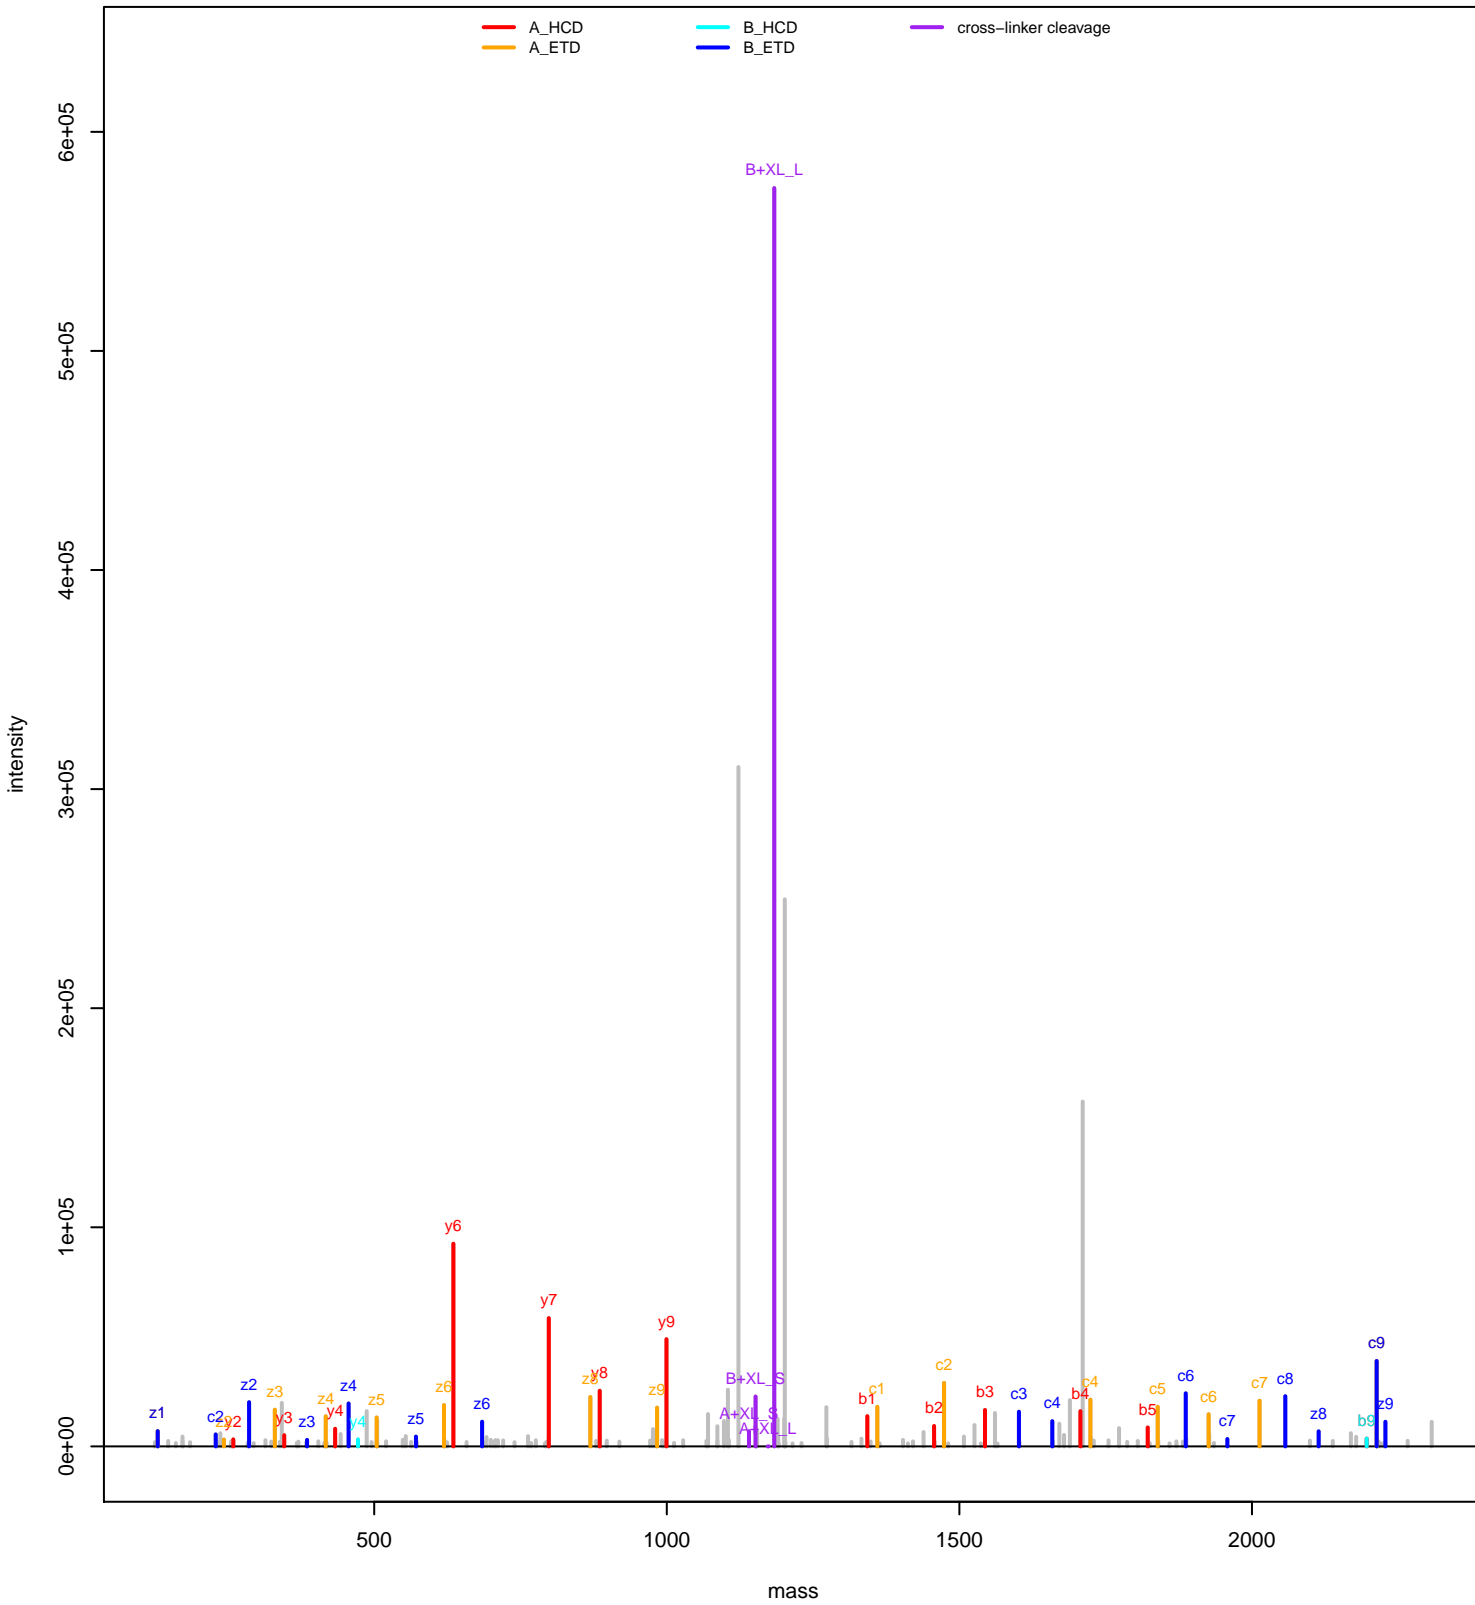

SNSYDSSSIK+XL\_S

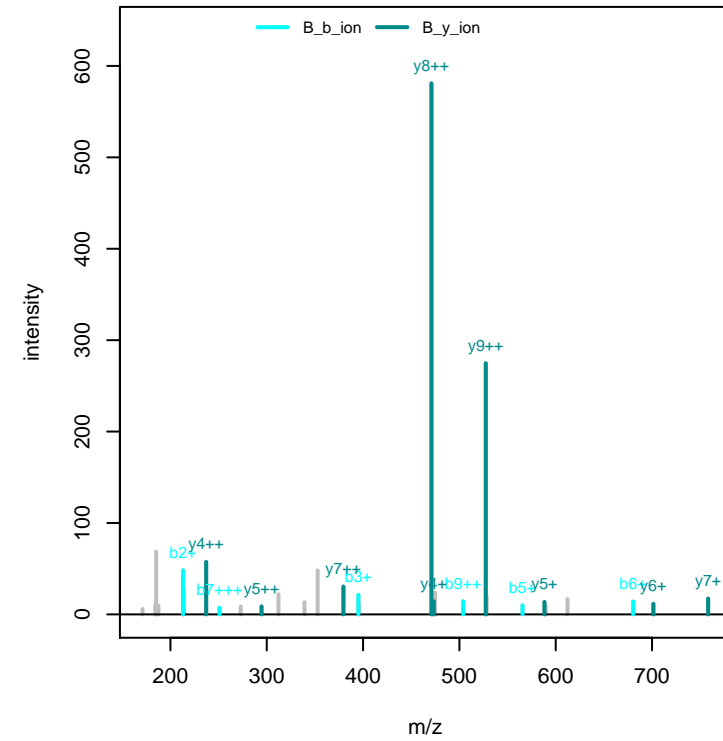

SNSYDSSSIK+XL\_L

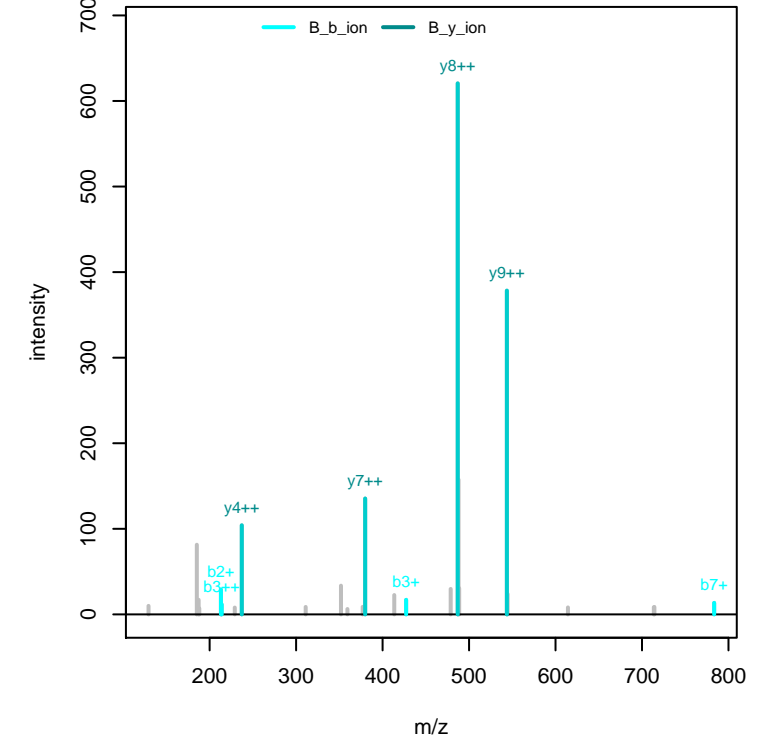

VLKGLDAVRK+XL\_S



VLKGLDAVRK+XL\_L



LQSMKAGSDR  
TKLEKDVMAQR

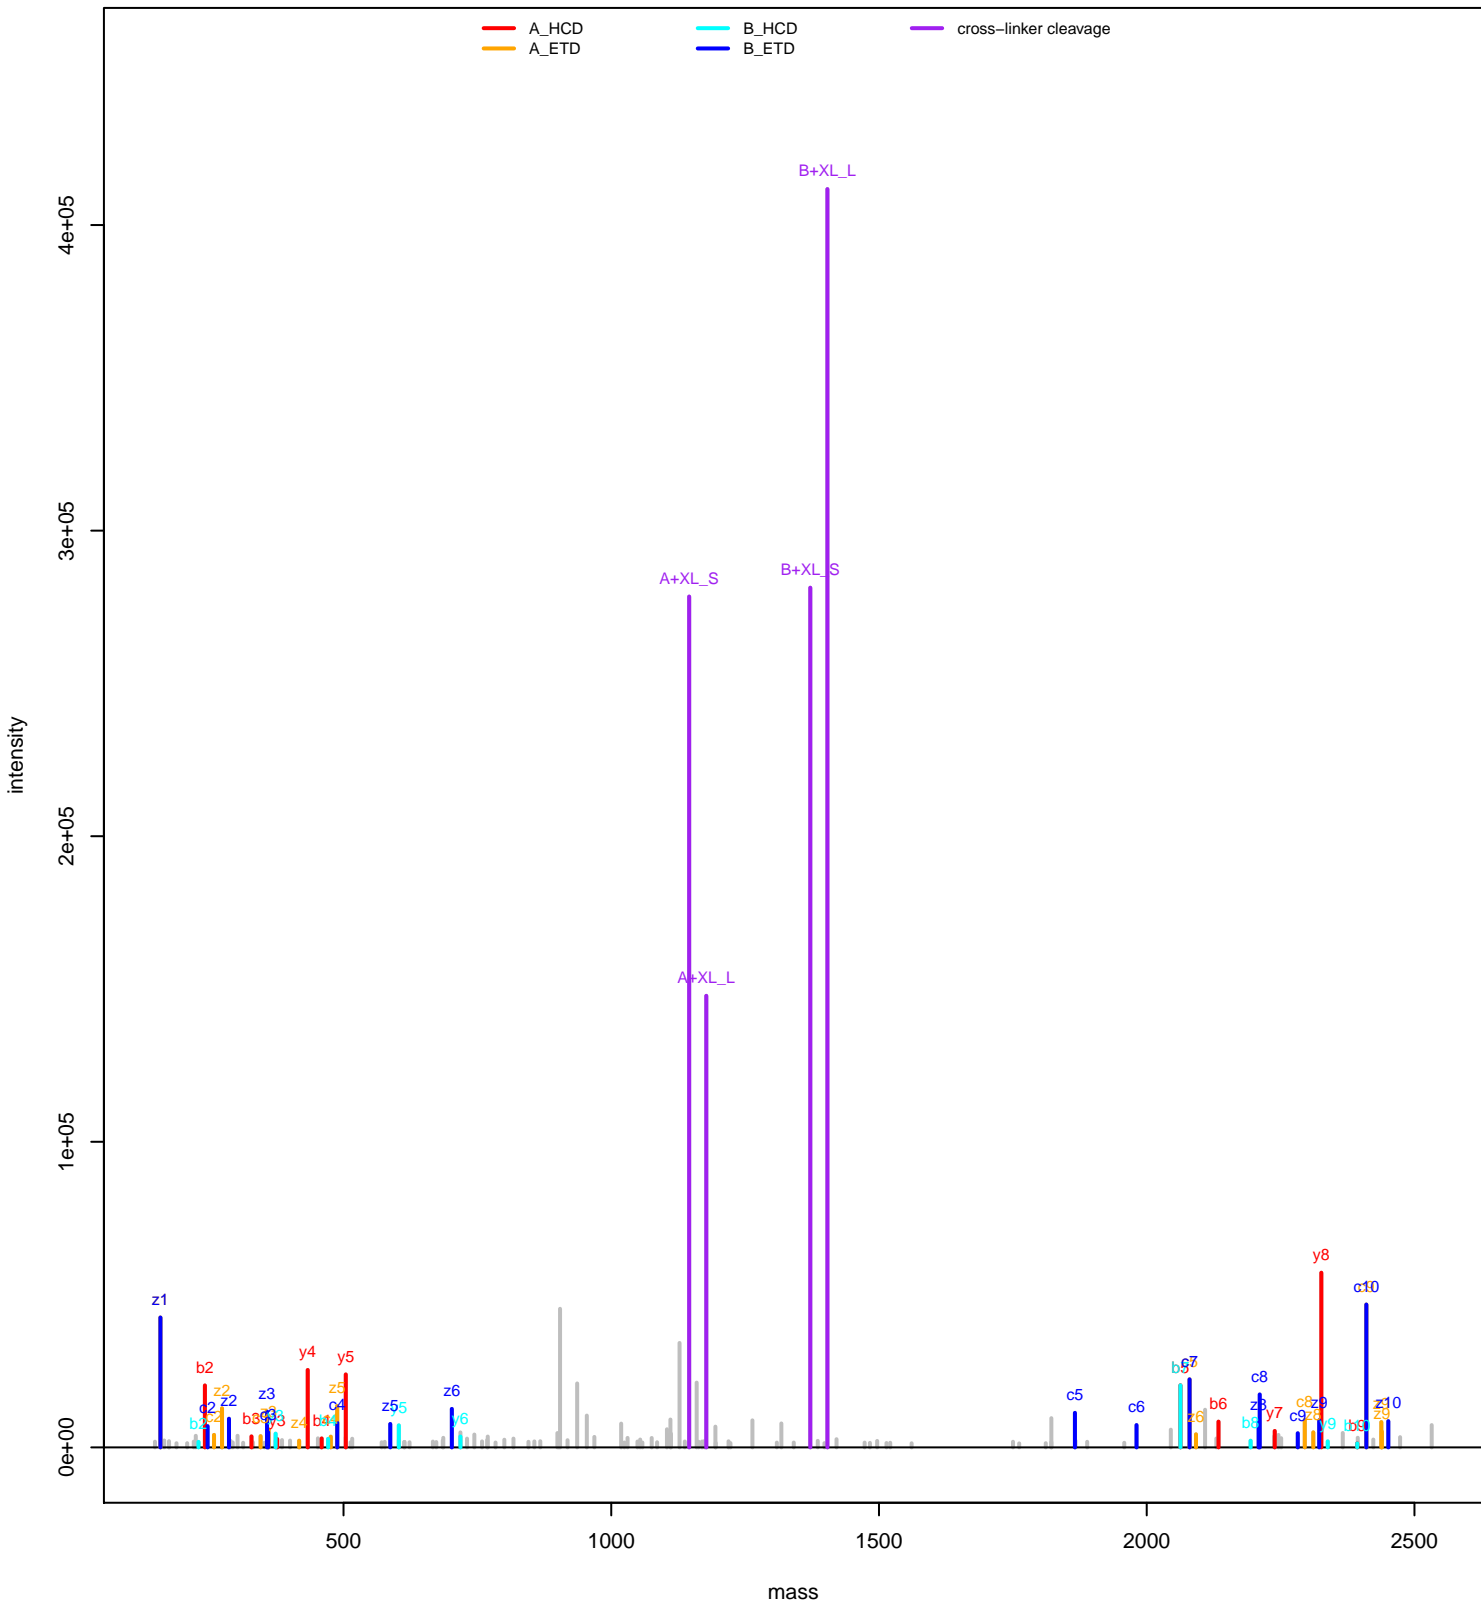

LQSMKAGSDR+XL\_S

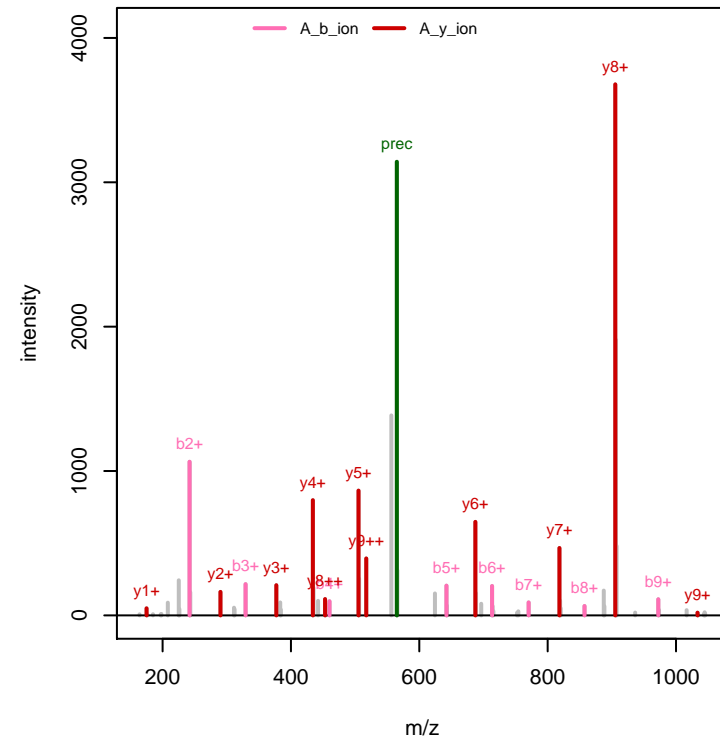

LQSMKAGSDR+XL\_L

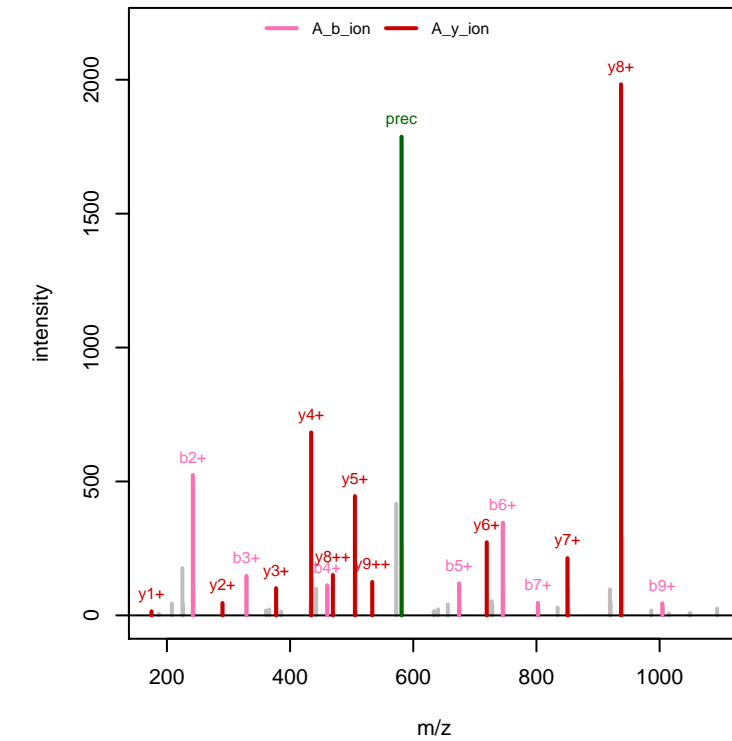

TKLEKDVMAQR+XL\_S

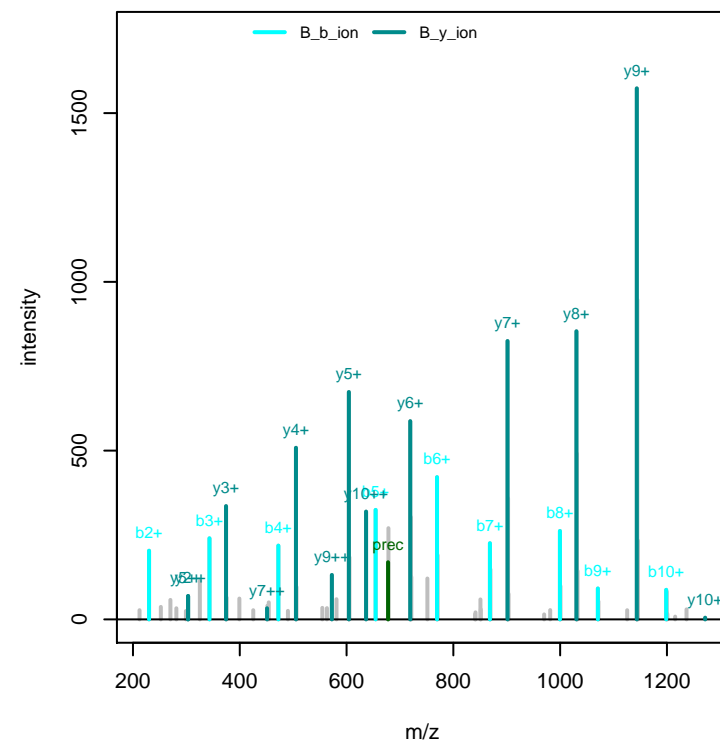

TKLEKDVMAQR+XL\_L

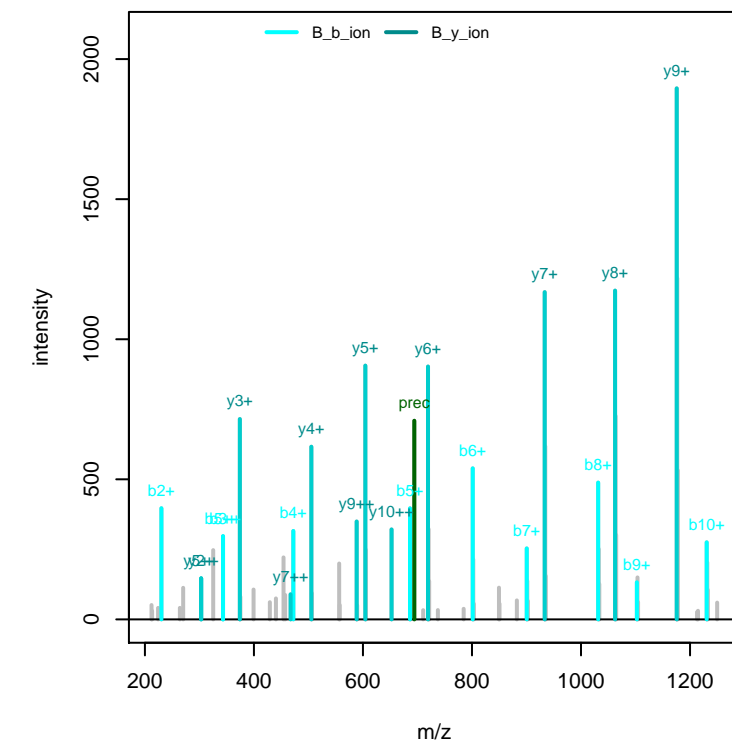

GGSEELYKK  
YAEGYPGKR

GGSEELYKK+XL\_S

GGSEELYKK+XL\_L

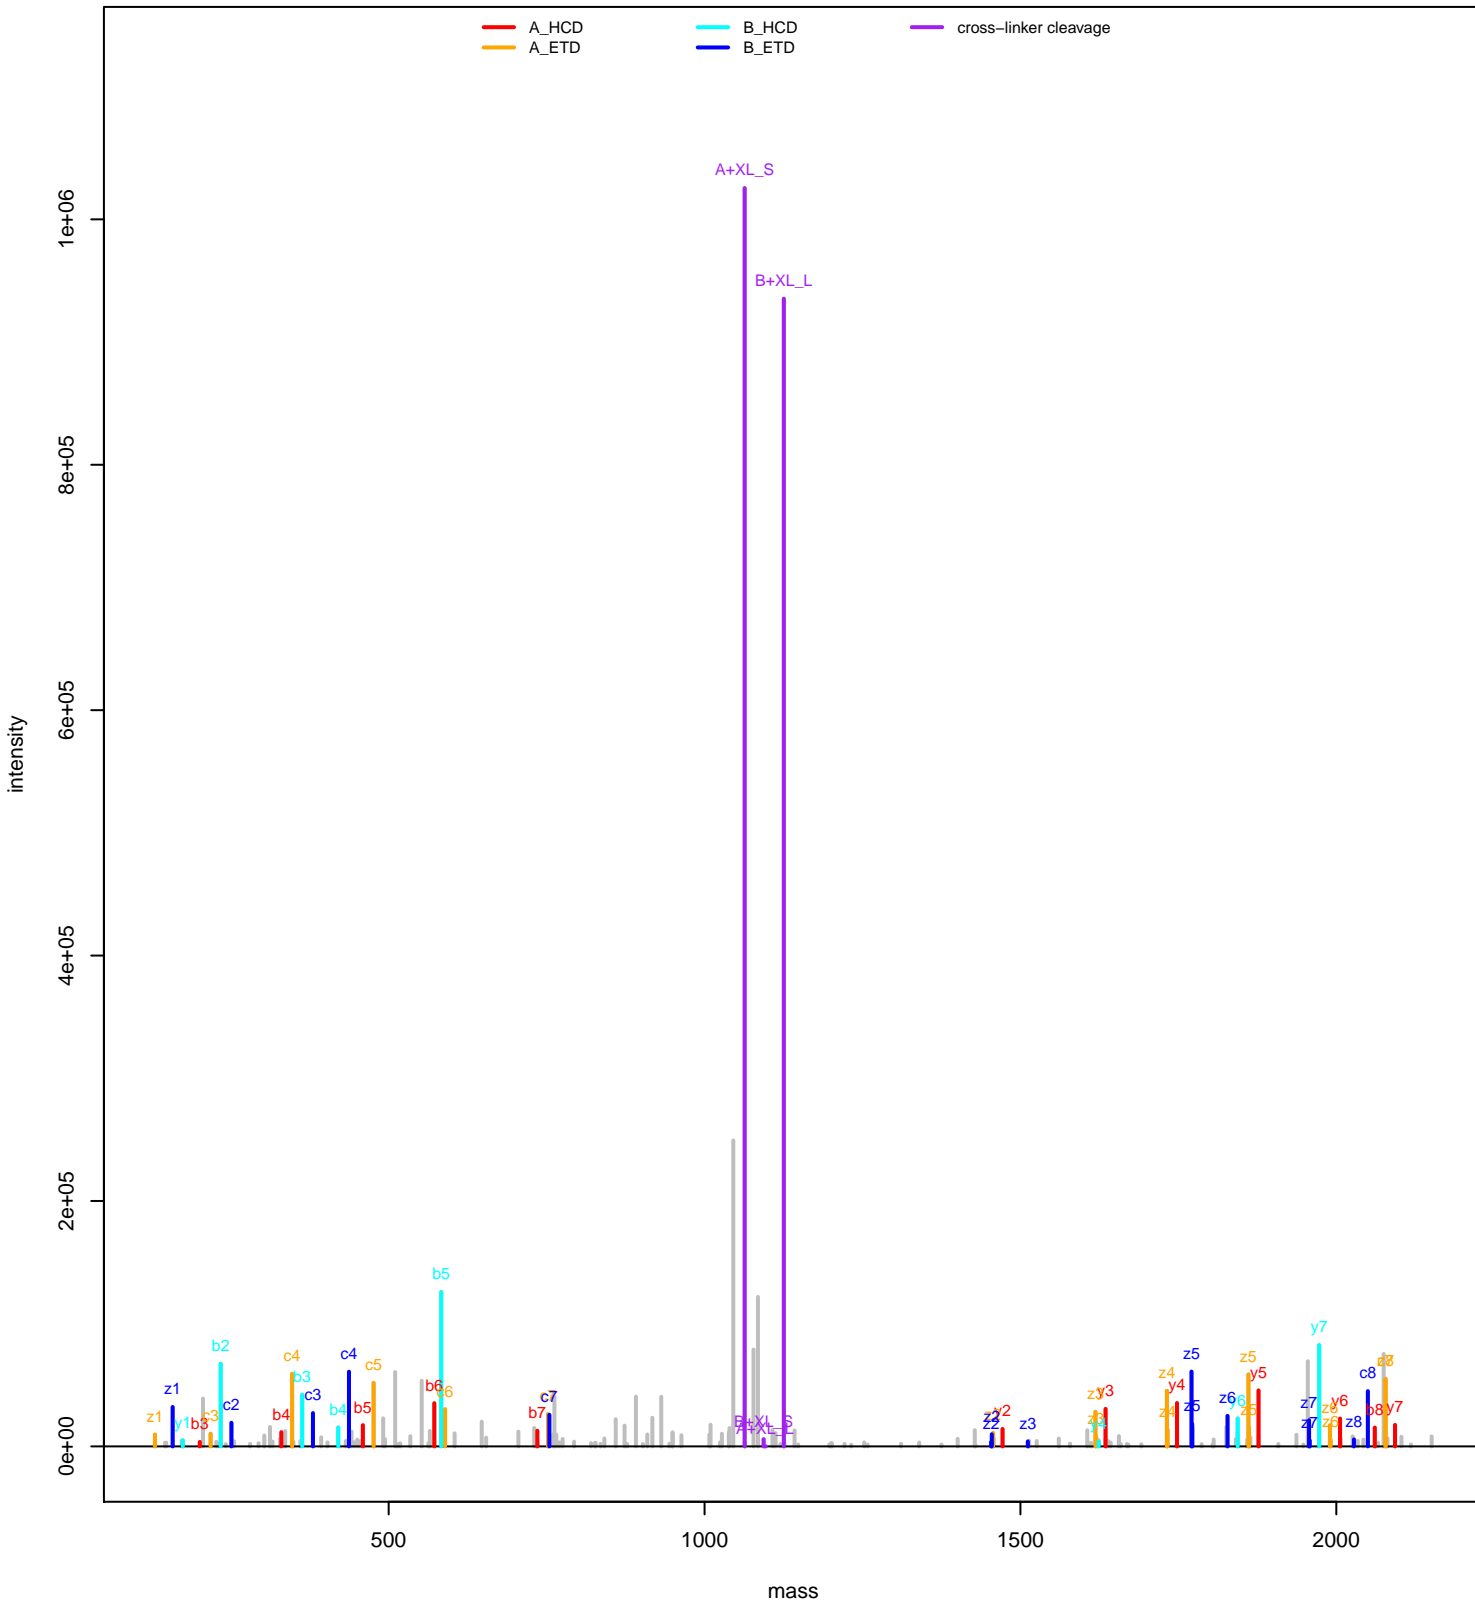

YAEGYPGKR+XL\_S

YAEGYPGKR+XL\_L

**KGAIVTGK**  
**LIDQATAEIVETAKR**

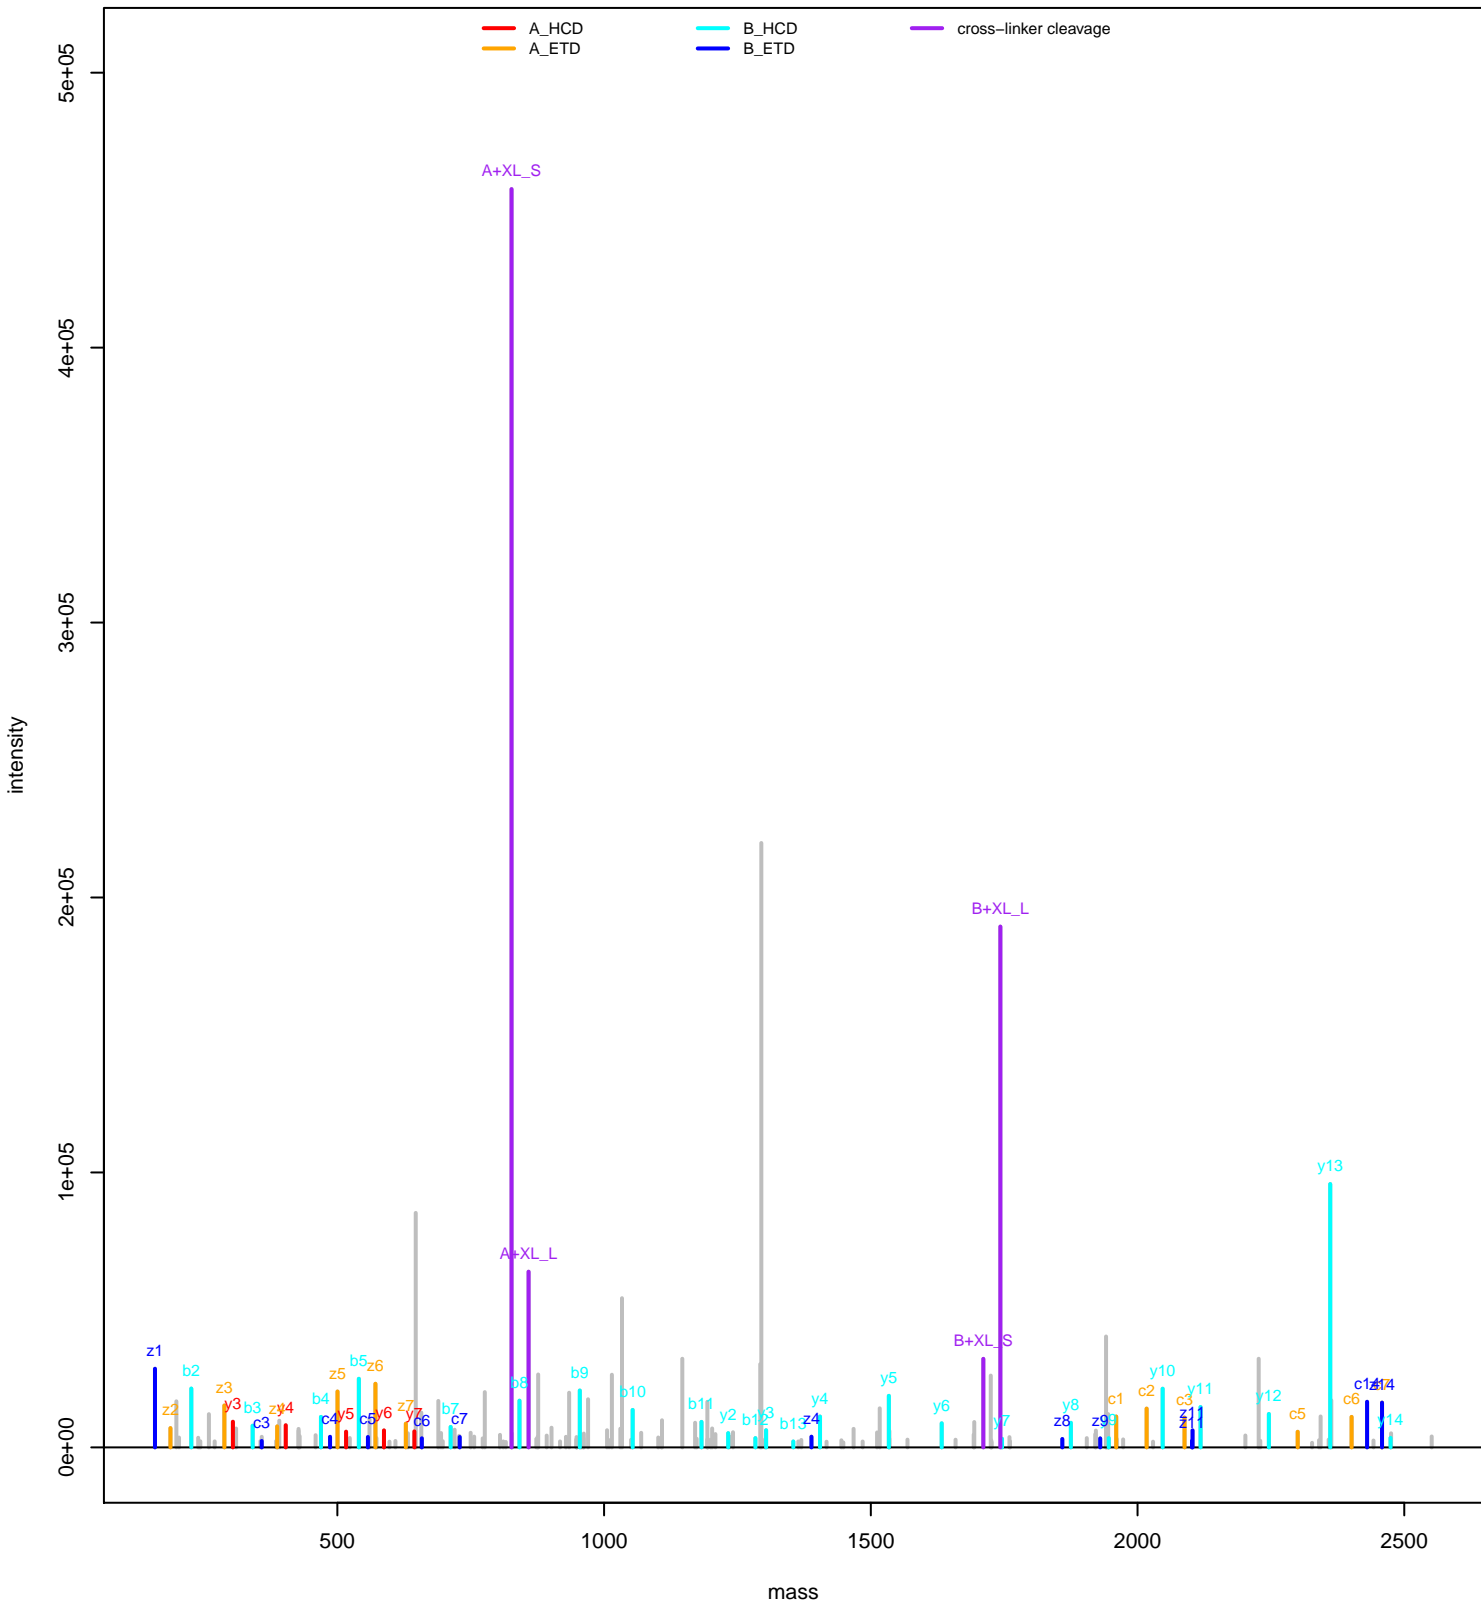

**KGAIVTGK+XL\_S**

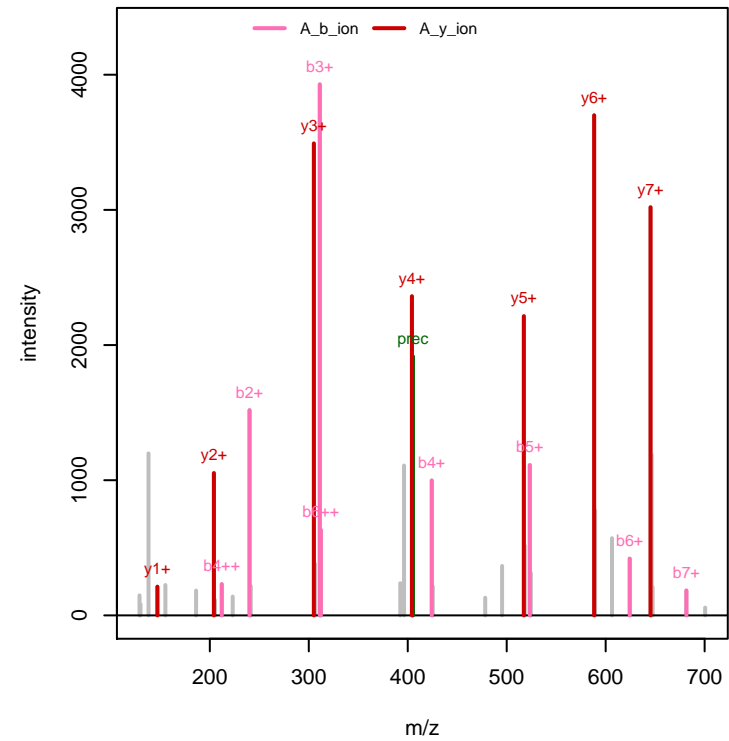

**KGAIVTGK+XL\_L**

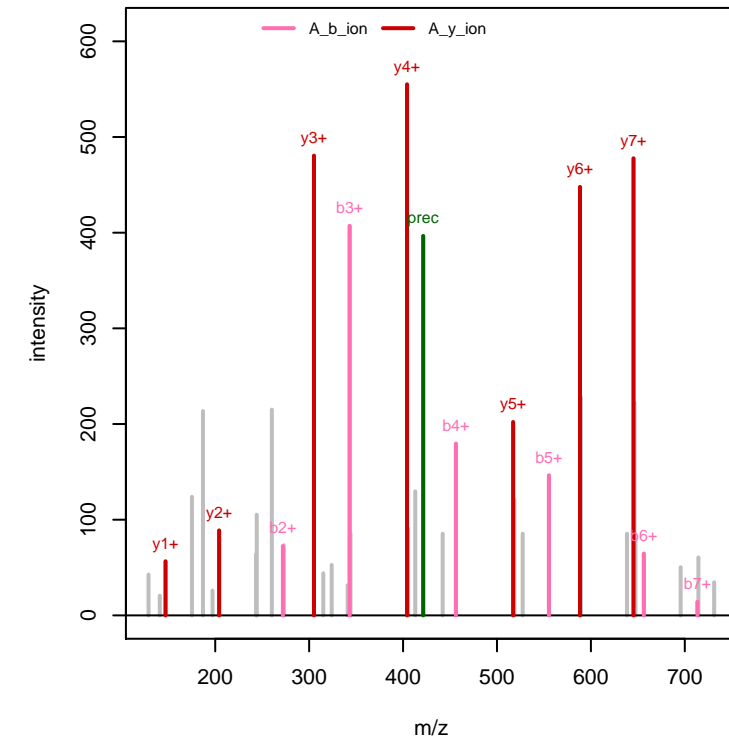

**LIDQATAEIVETAKR+XL\_S**

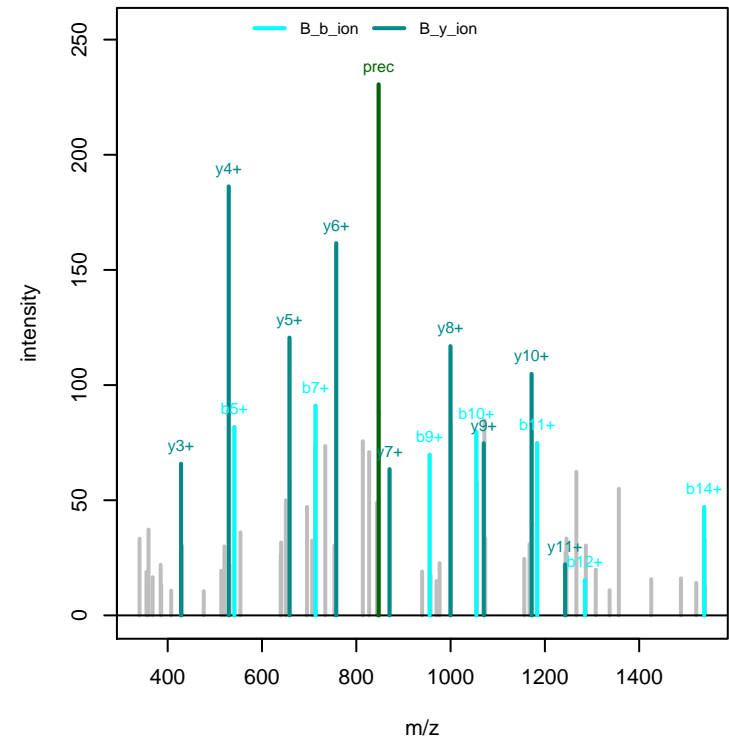

**LIDQATAEIVETAKR+XL\_L**

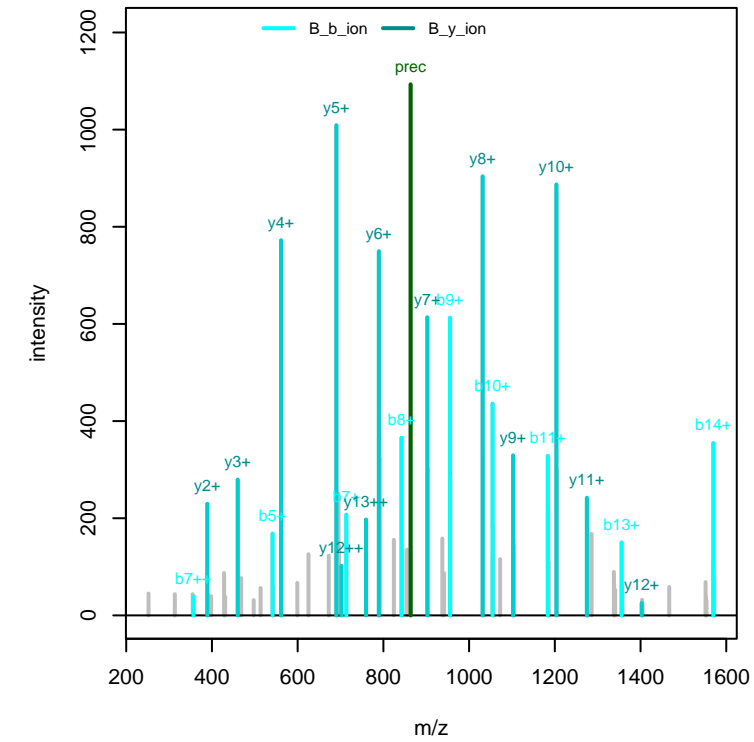

**KAALGR**  
**GQQEQYVALKQPAVK**

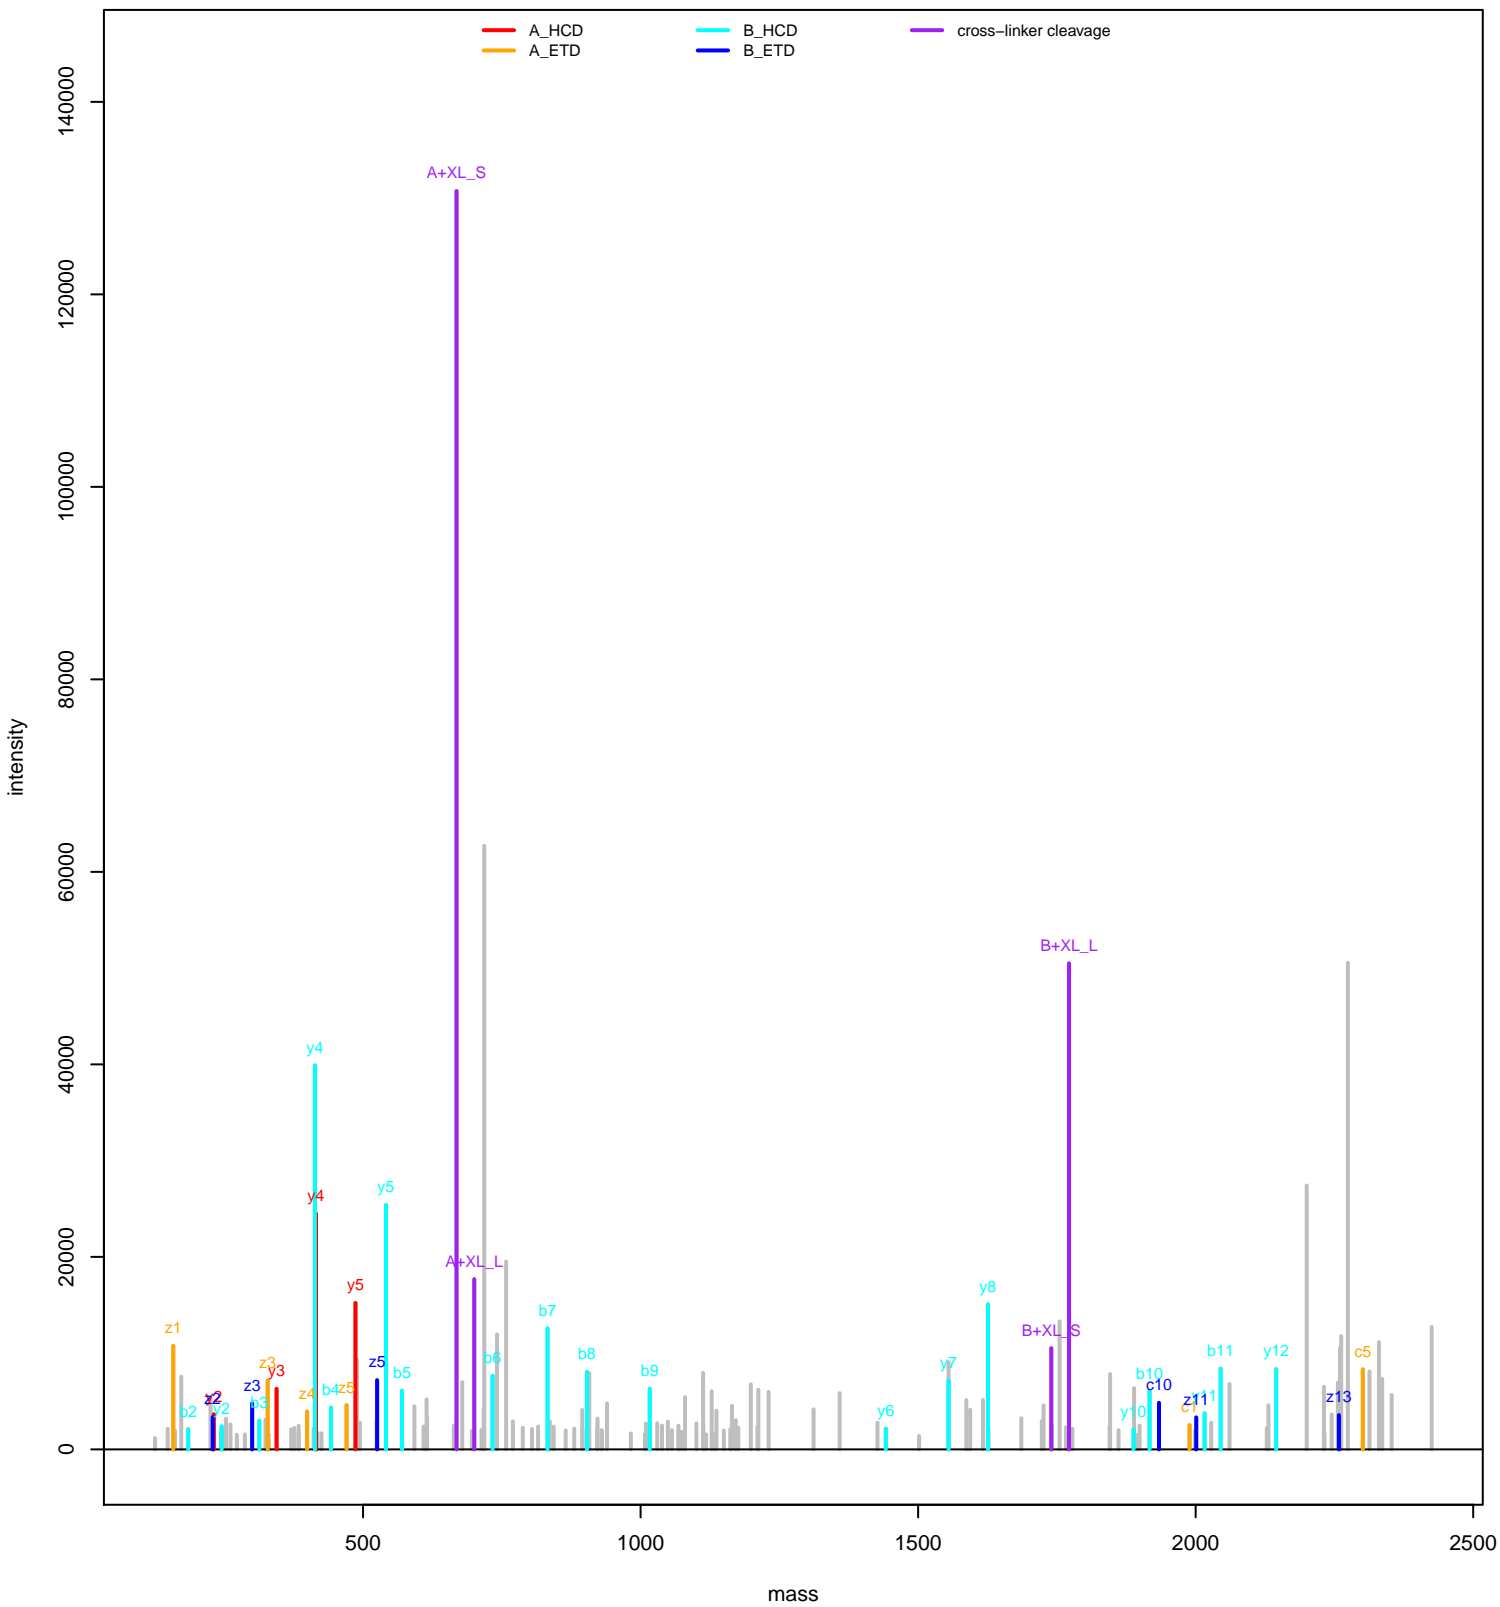

**KAALGR+XL\_S**

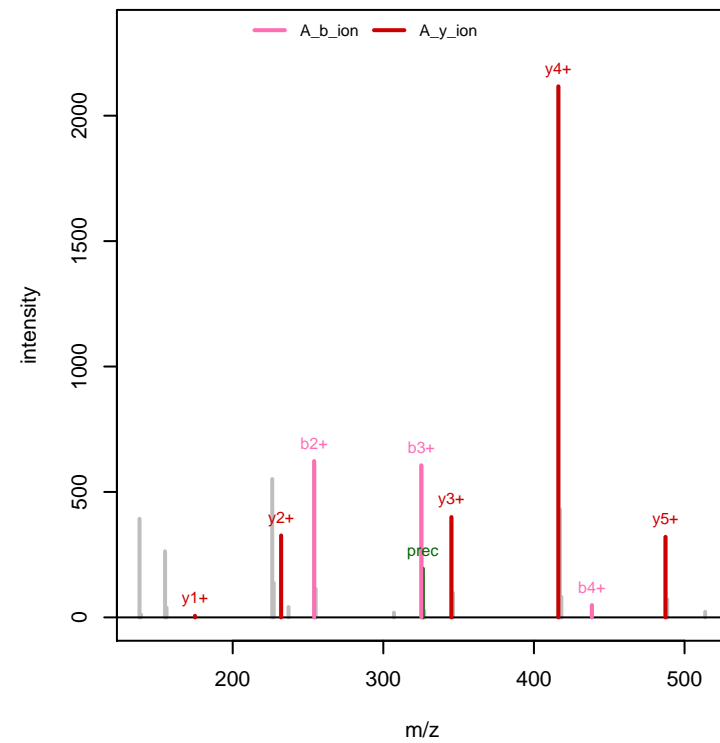

**KAALGR+XL\_L**

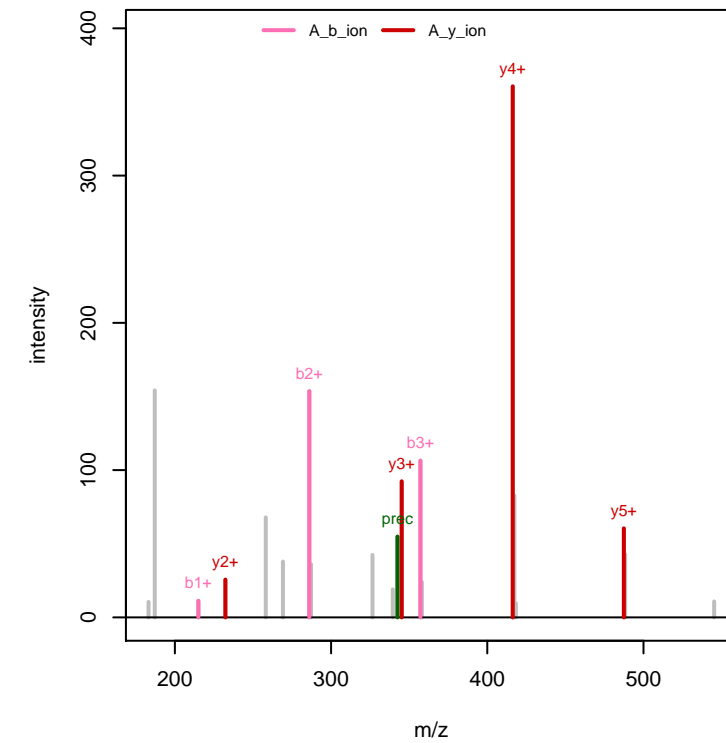

**GQQEQYVALKQPAVK+XL\_S**

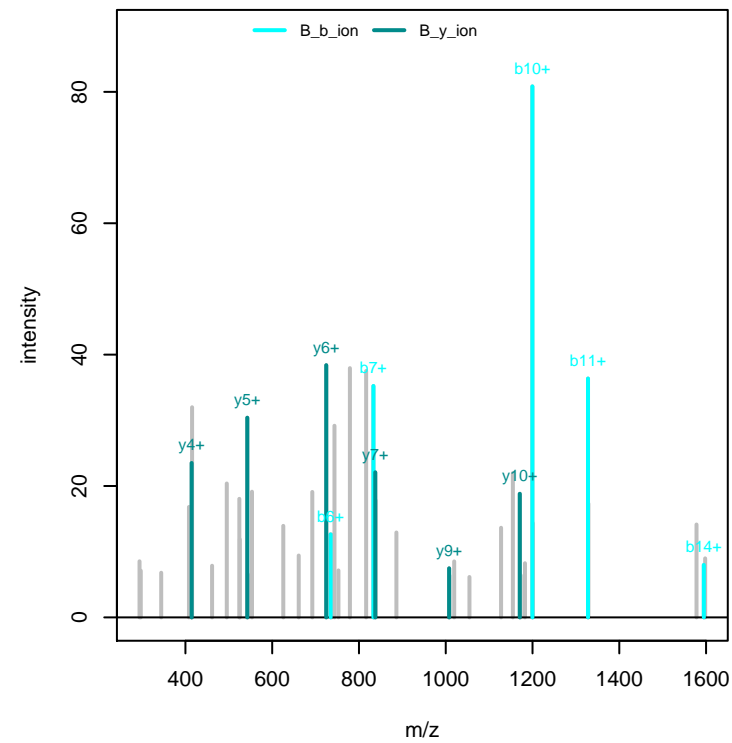

**GQQEQYVALKQPAVK+XL\_L**

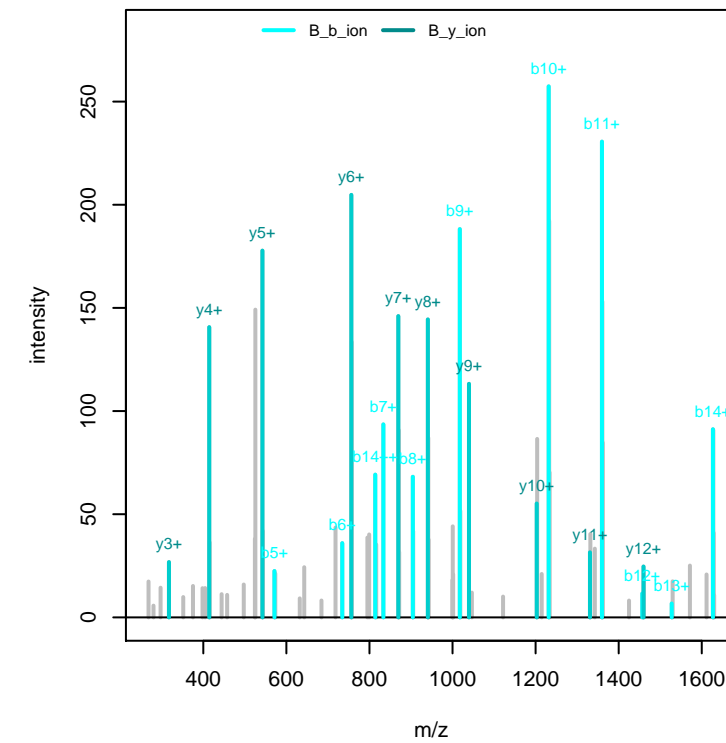

HVIDKAIKDK  
AKGGGDETFVQGR

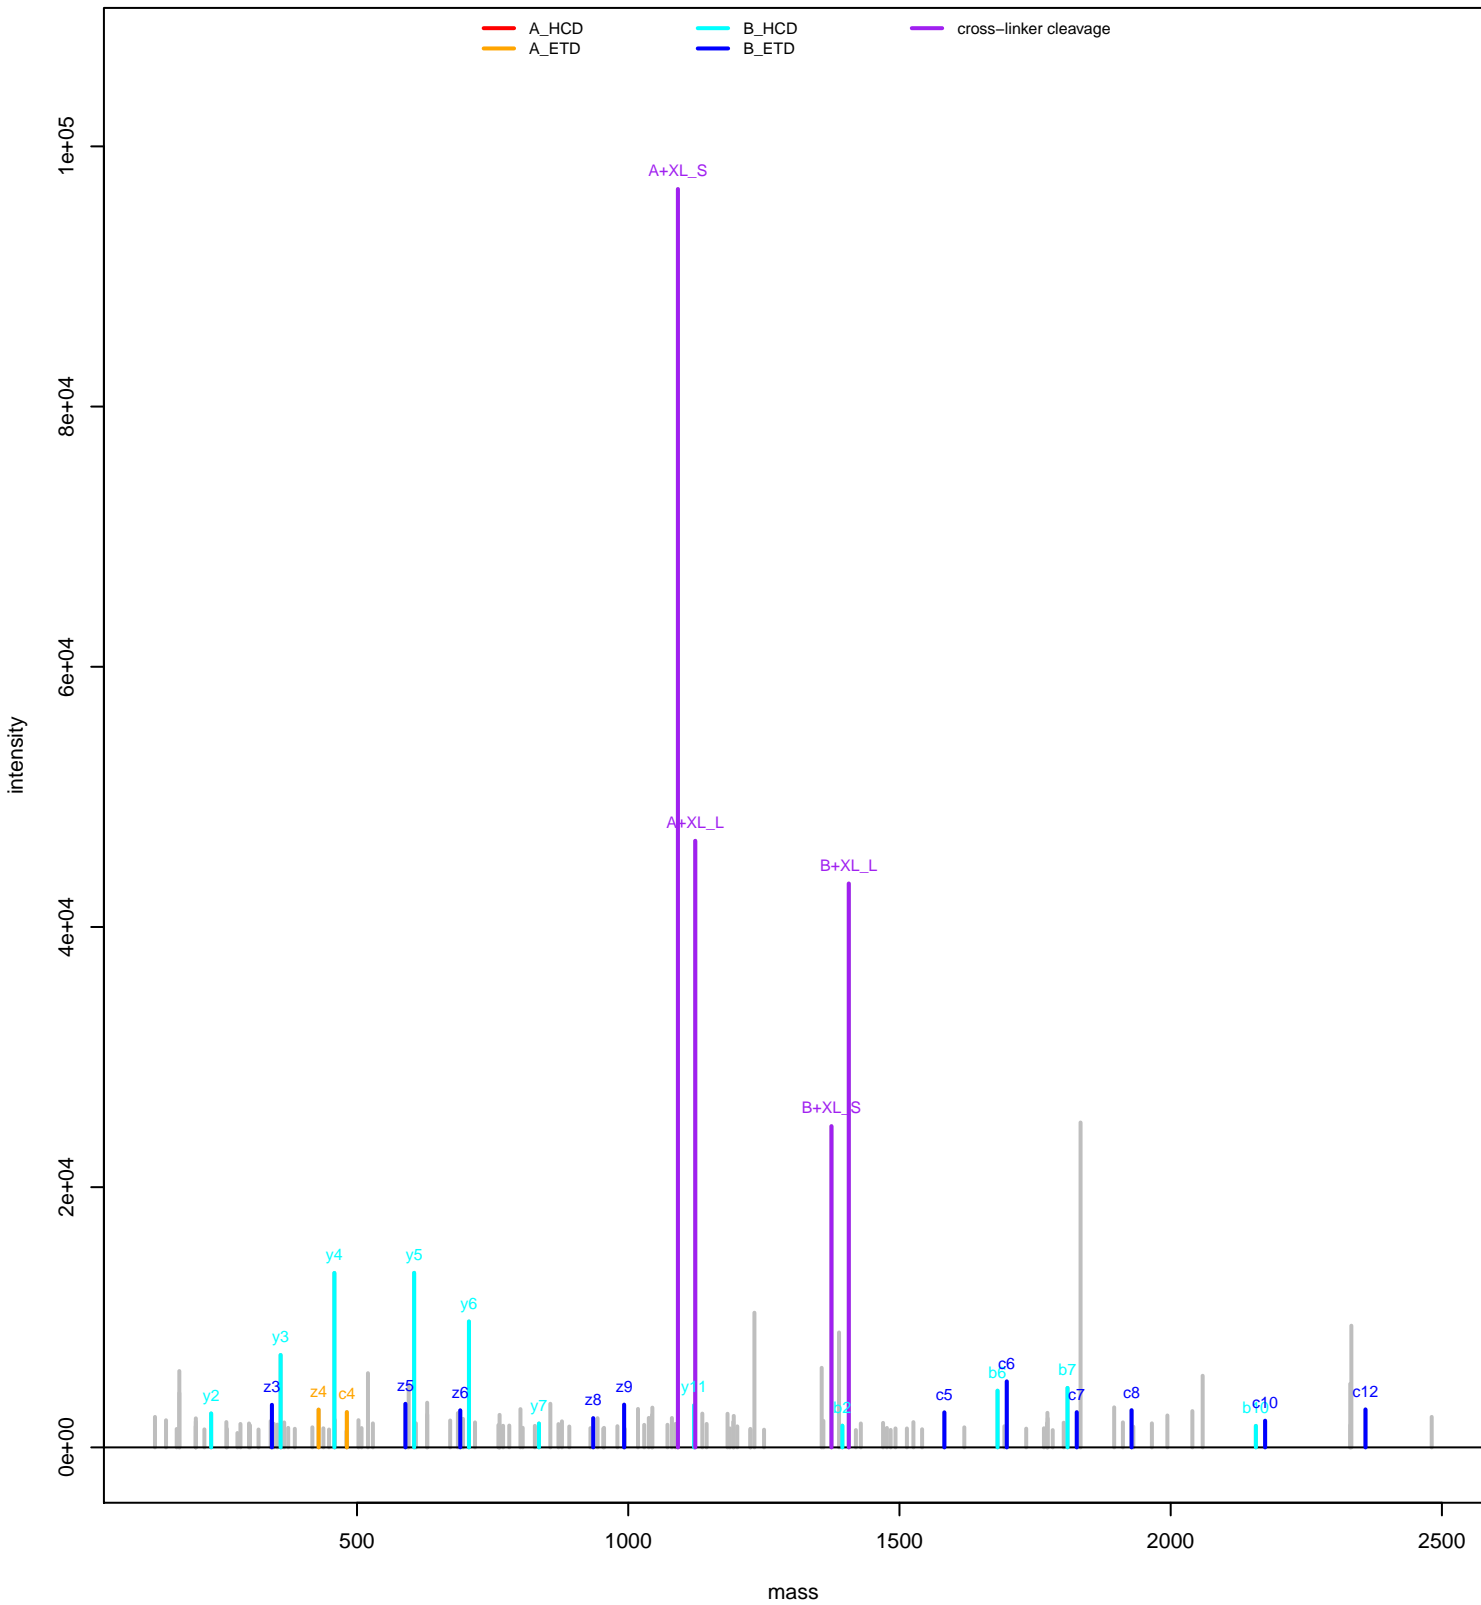

HVIDKAIKDK+XL\_S

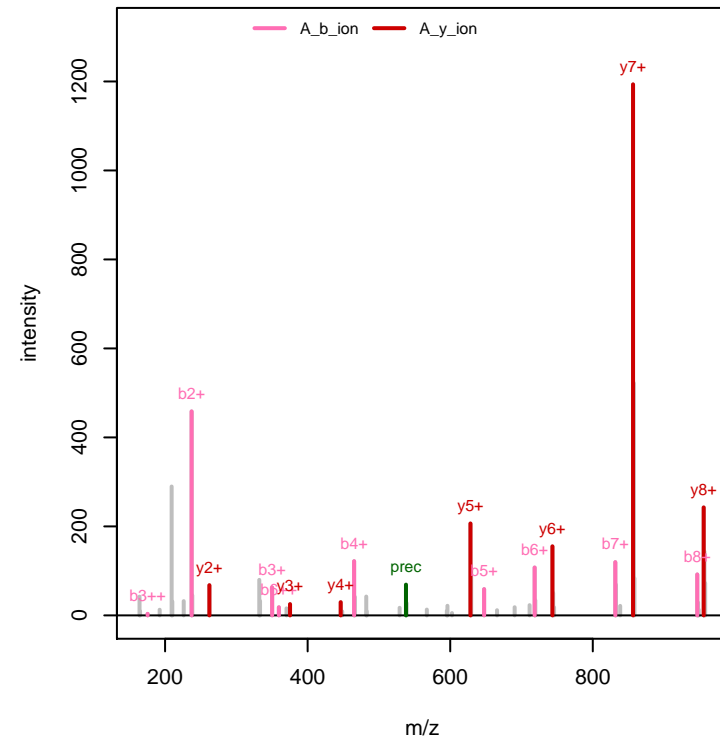

HVIDKAIKDK+XL\_L

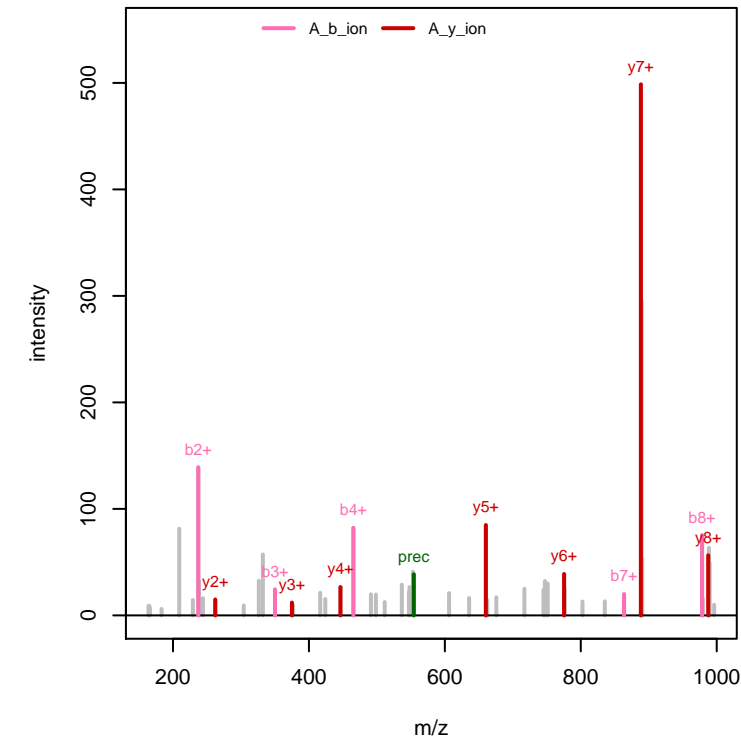

AKGGGDETFVQGR+XL\_S

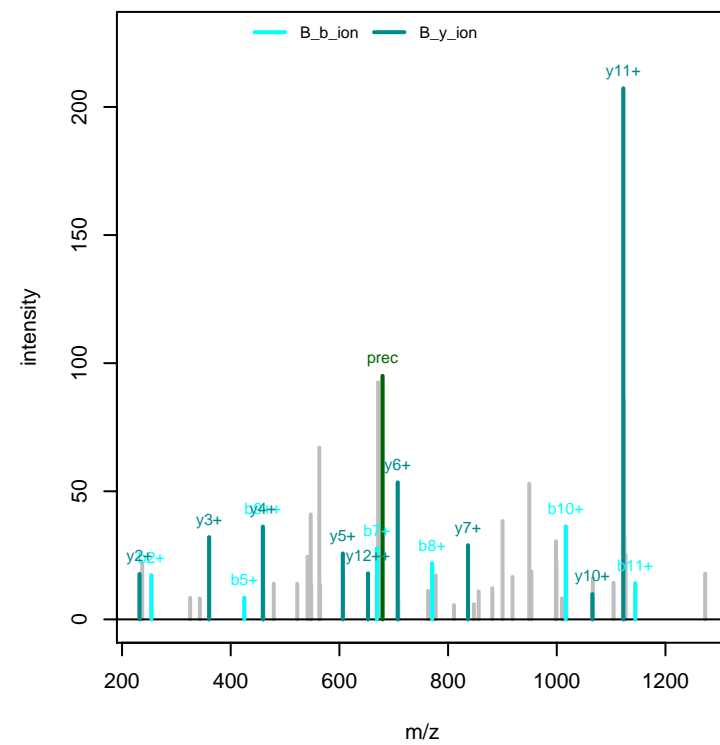

AKGGGDETFVQGR+XL\_L

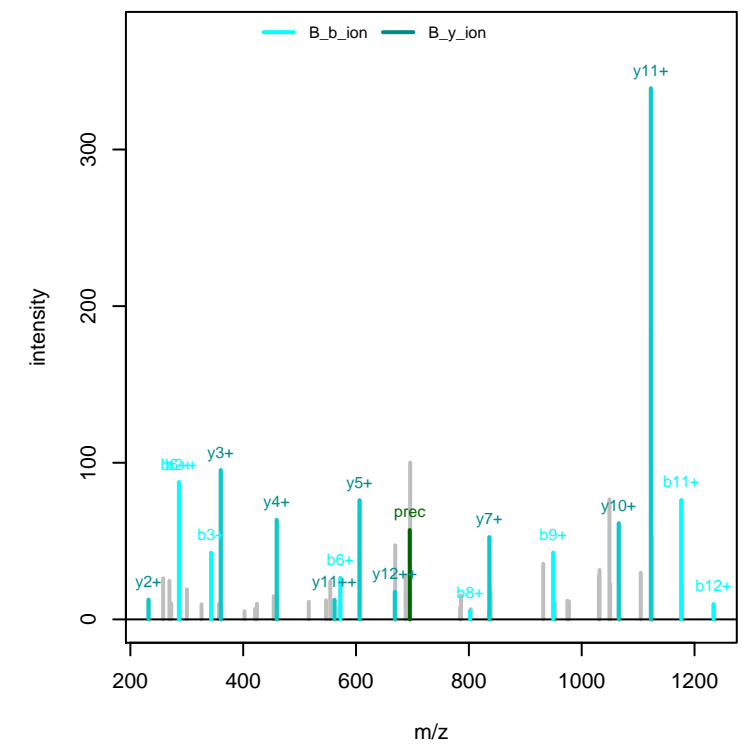

VGAATEVEMKEK  
NVVLDKSFGAPTITK

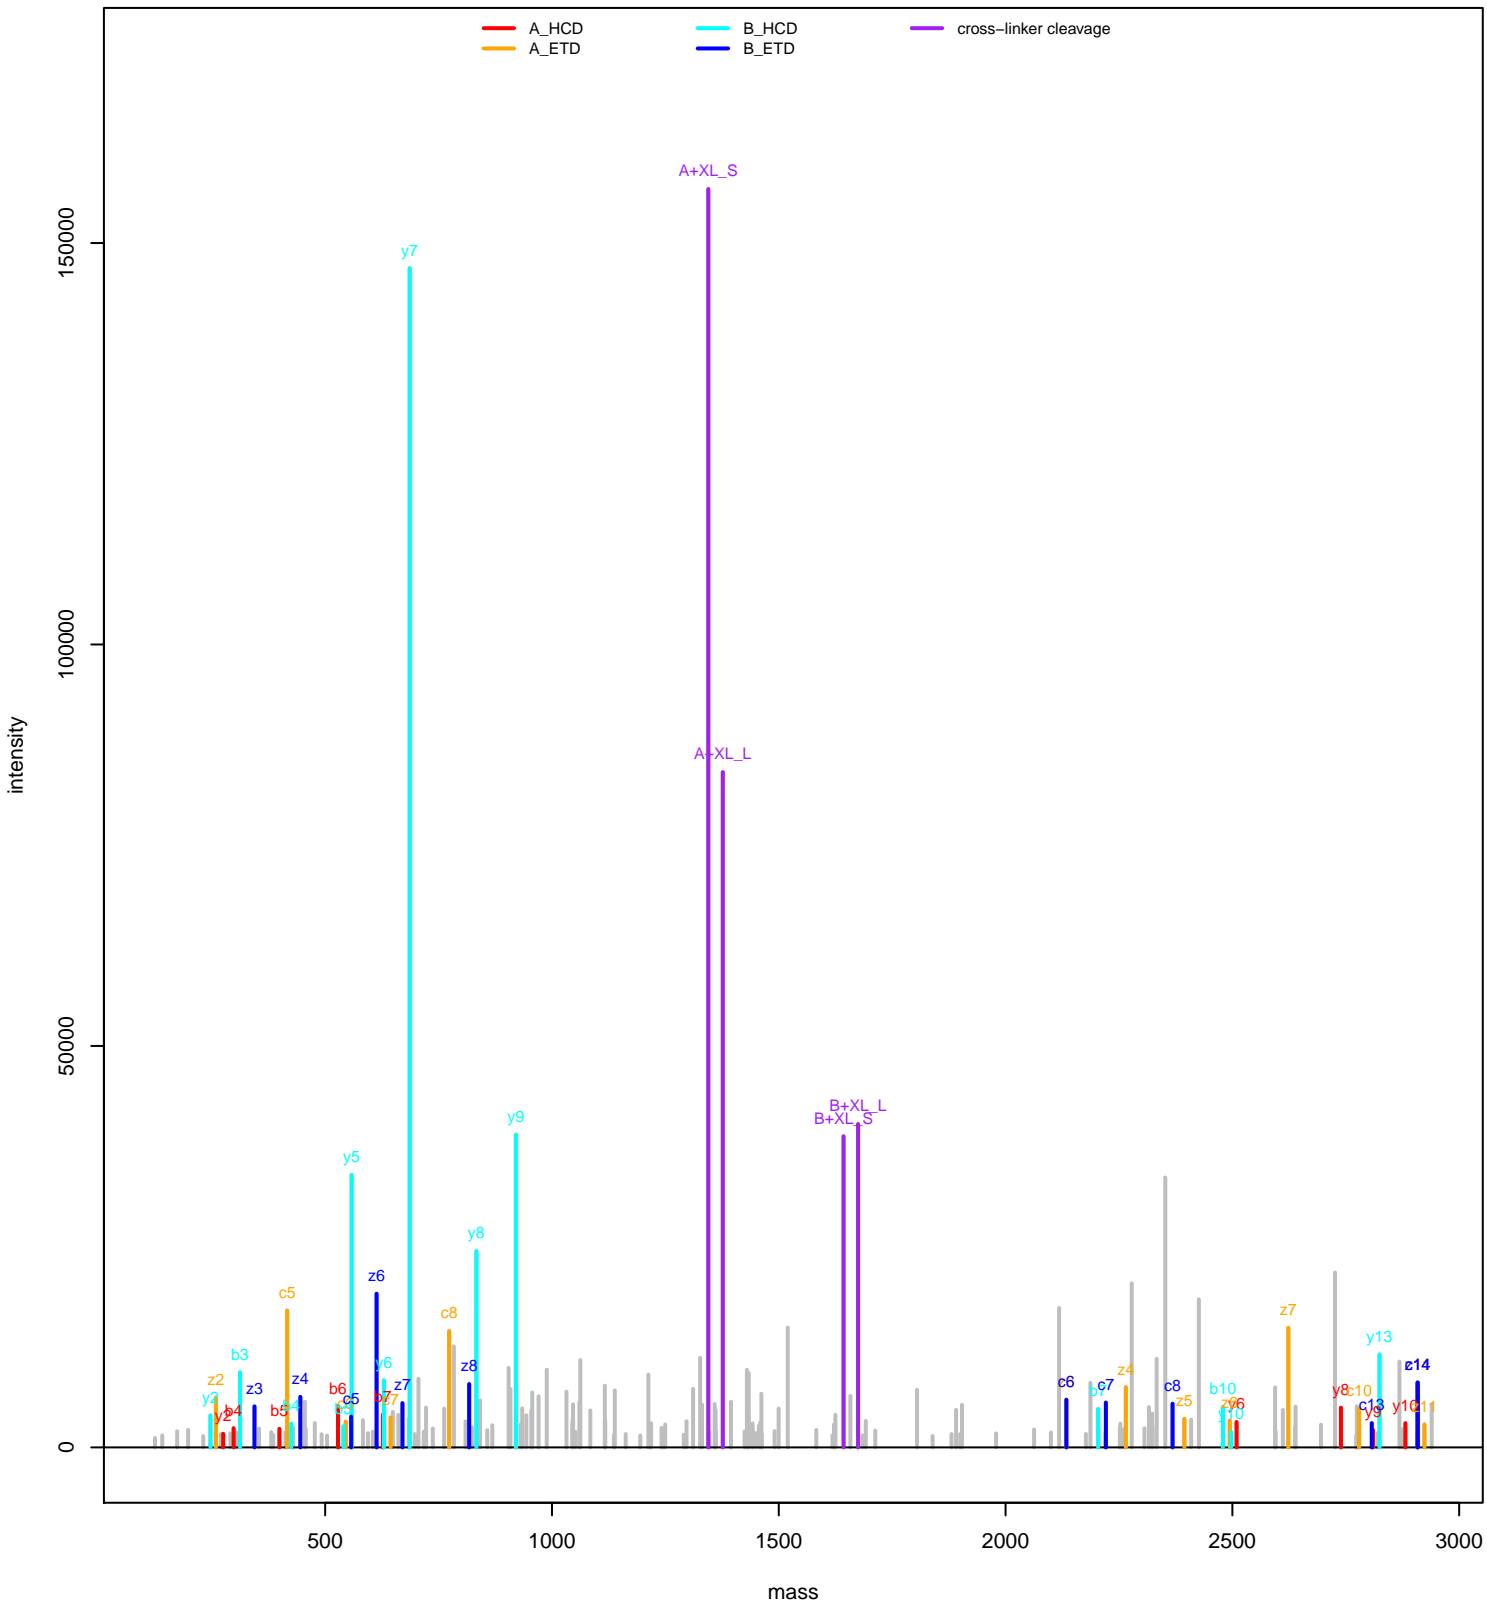

VGAATEVEMKEK+XL\_S

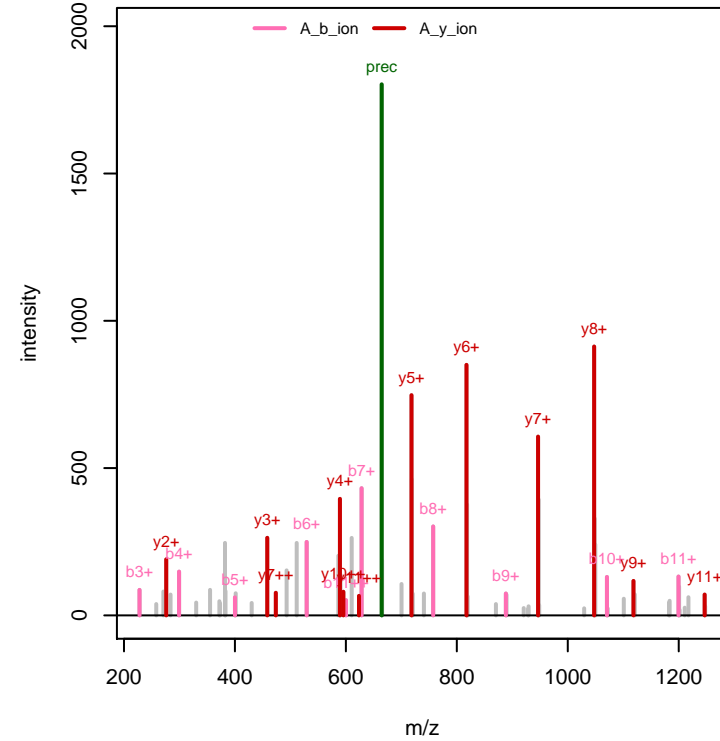

VGAATEVEMKEK+XL\_L

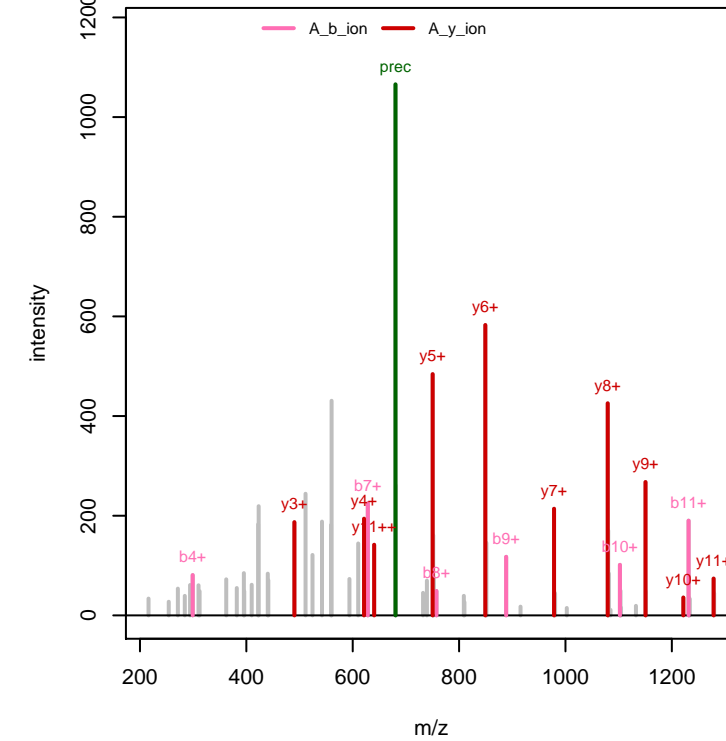

NVVLDKSFGAPTITK+XL\_S

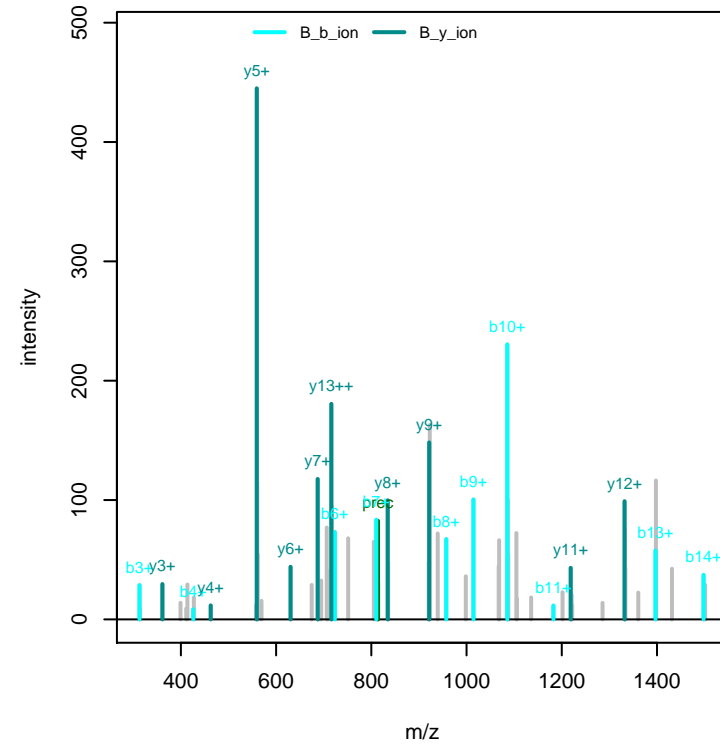

NVVLDKSFGAPTITK+XL\_L

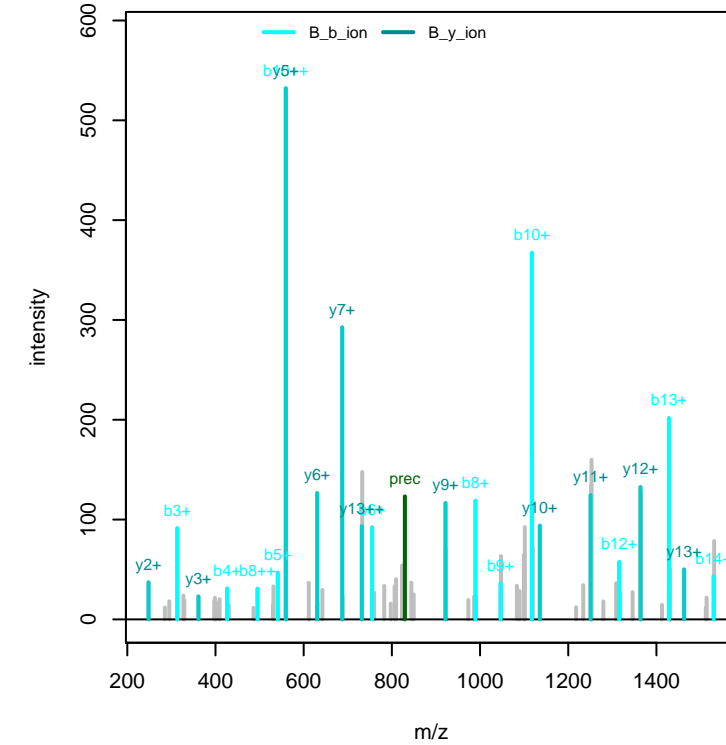



KGLADTALK  
IPQESGGTKDITGGLPR

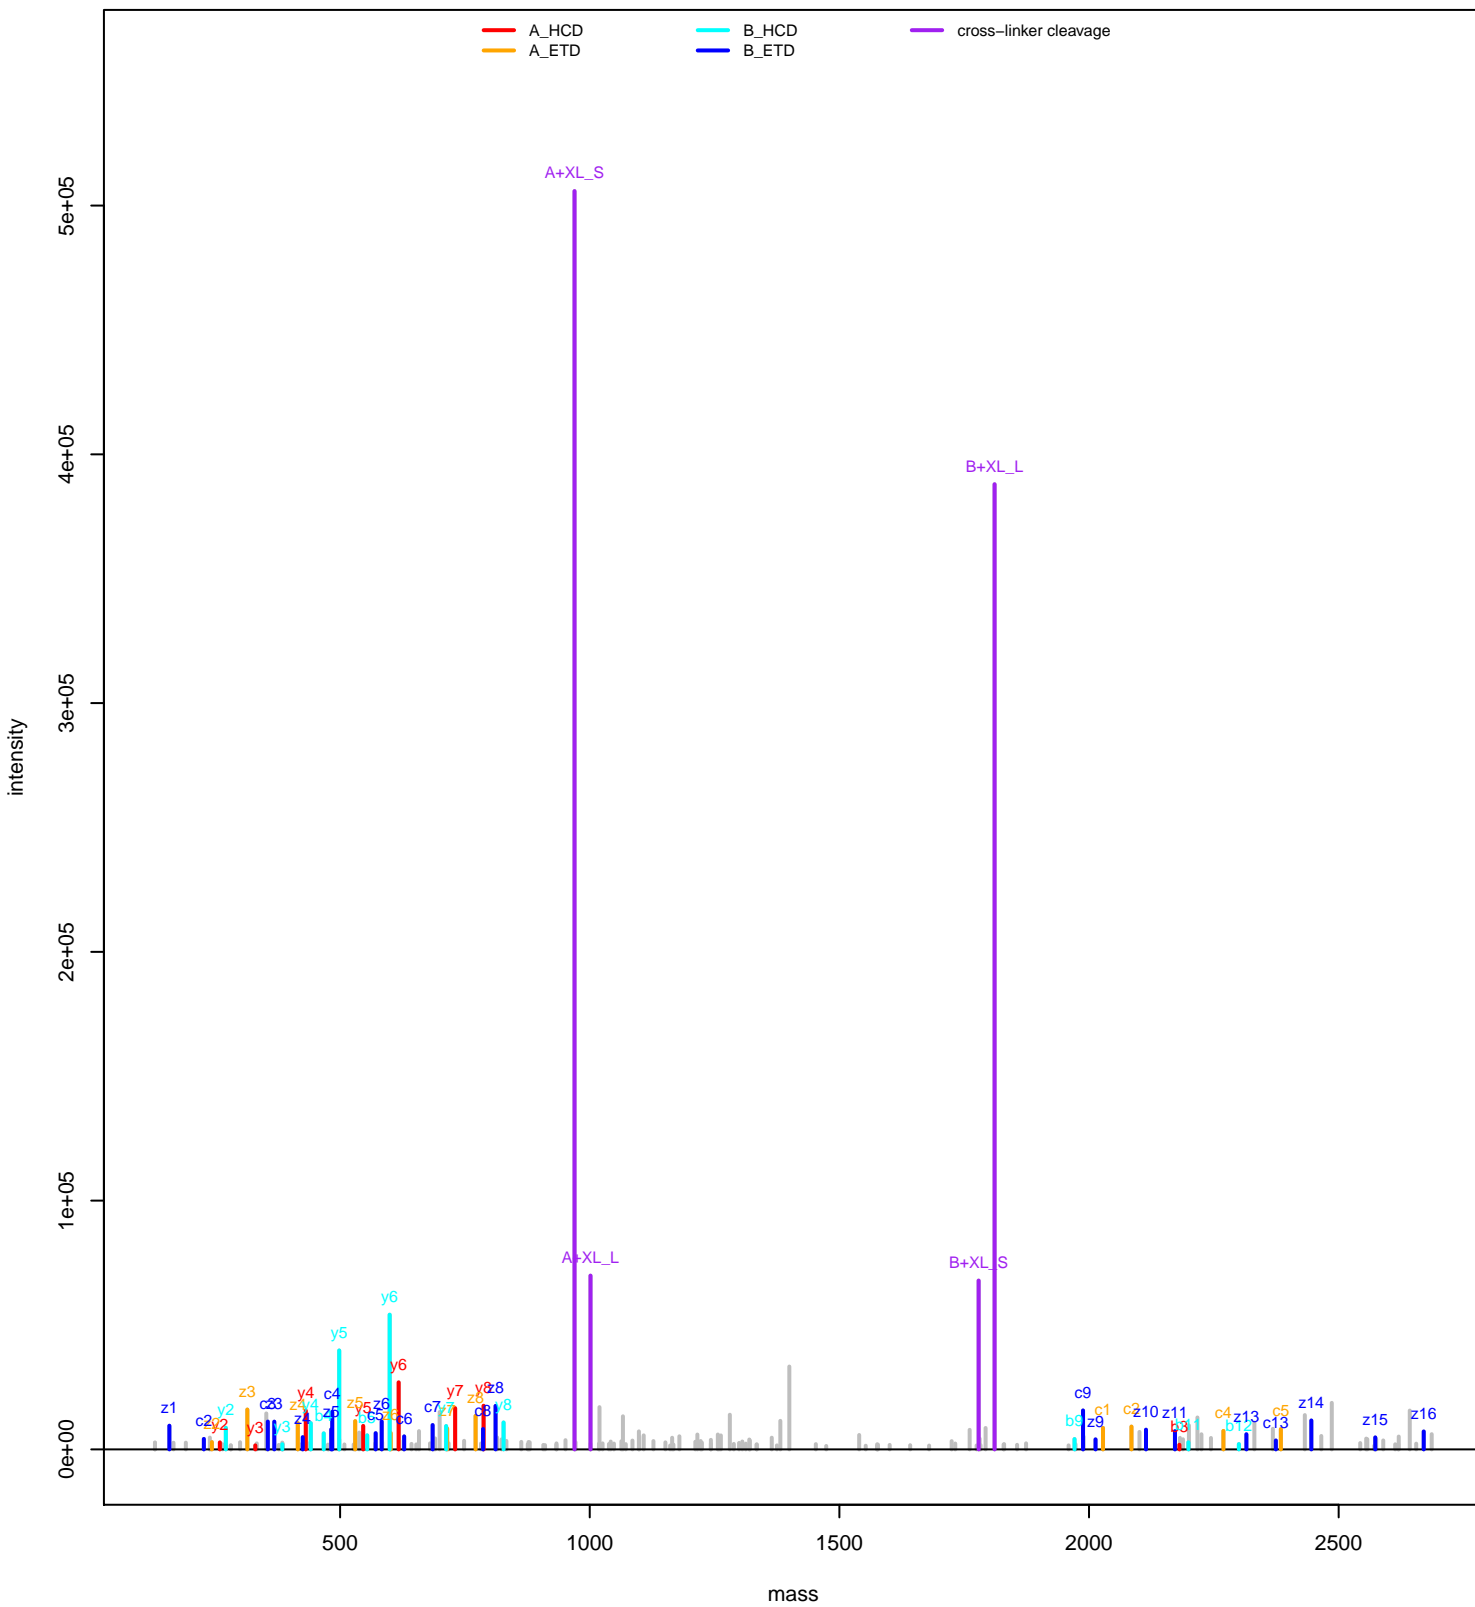

KGLADTALK+XL\_S

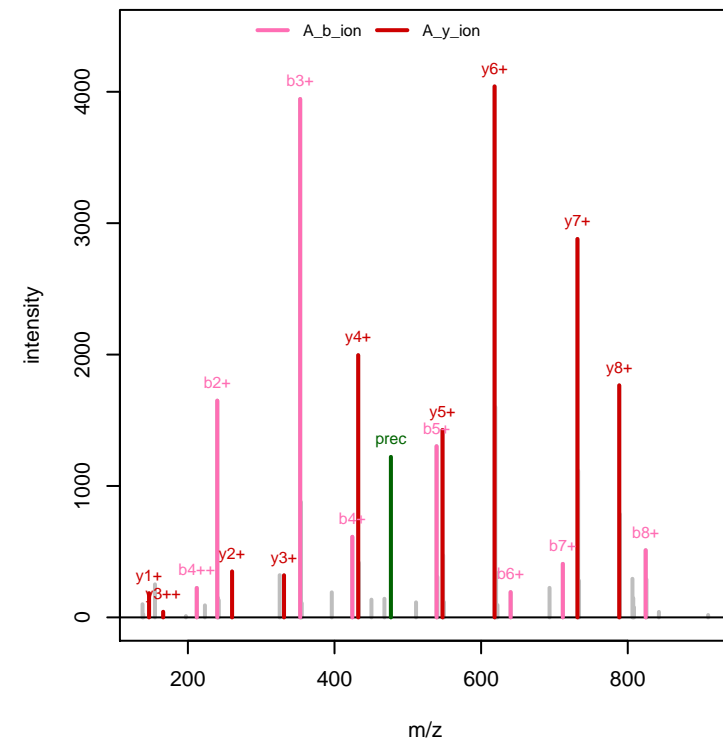

KGLADTALK+XL\_L

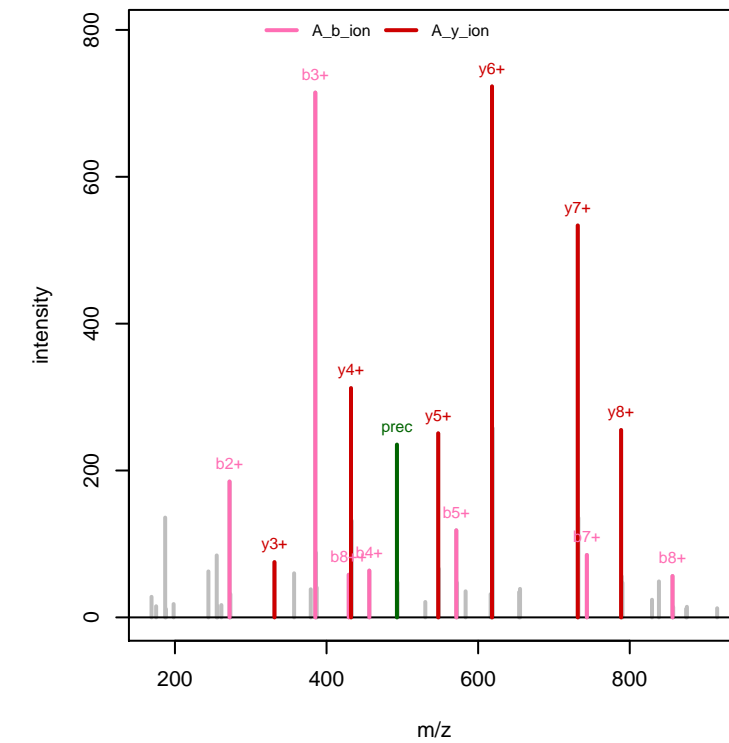

IPQESGGTKDITGGLPR+XL\_S

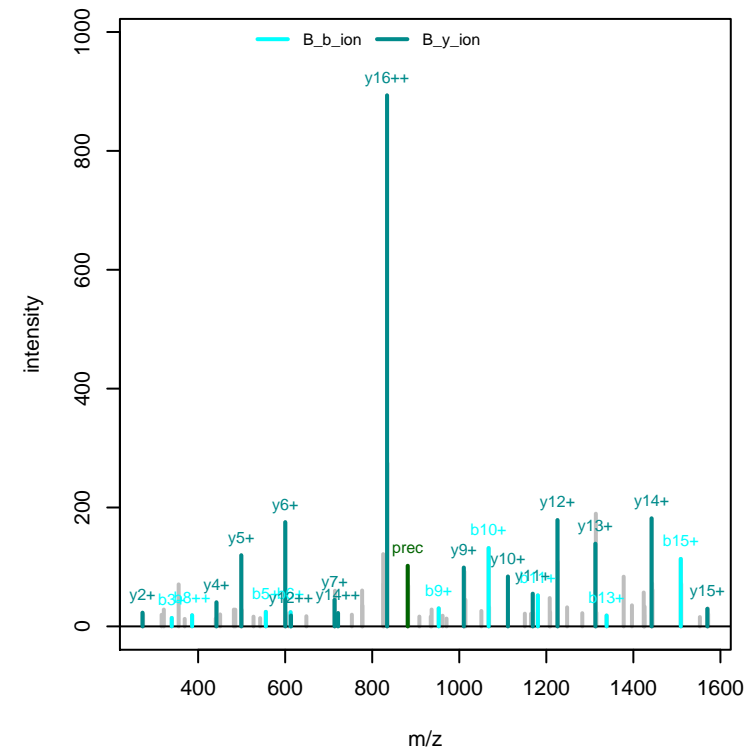

IPQESGGTKDITGGLPR+XL\_L

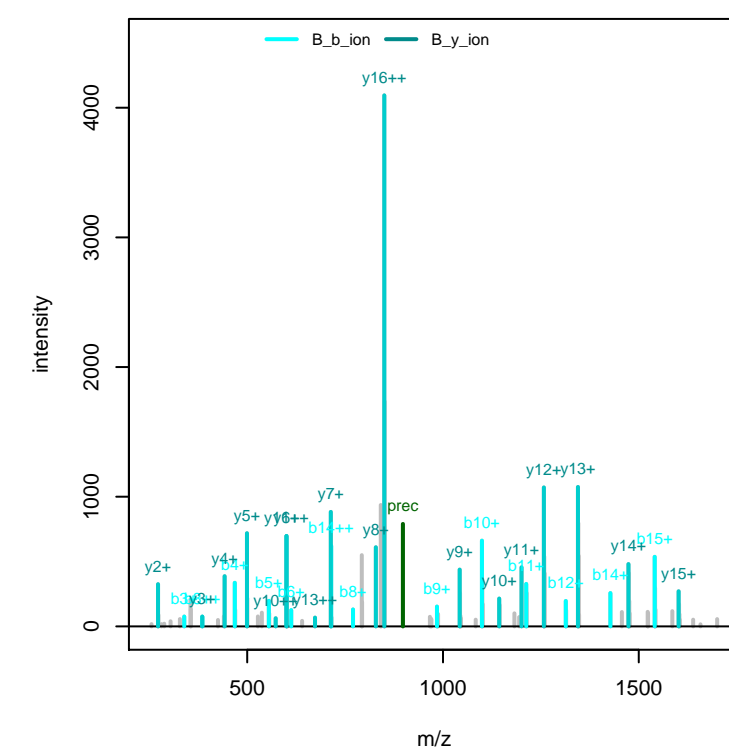

TAKDGATSK  
WANIVAKK

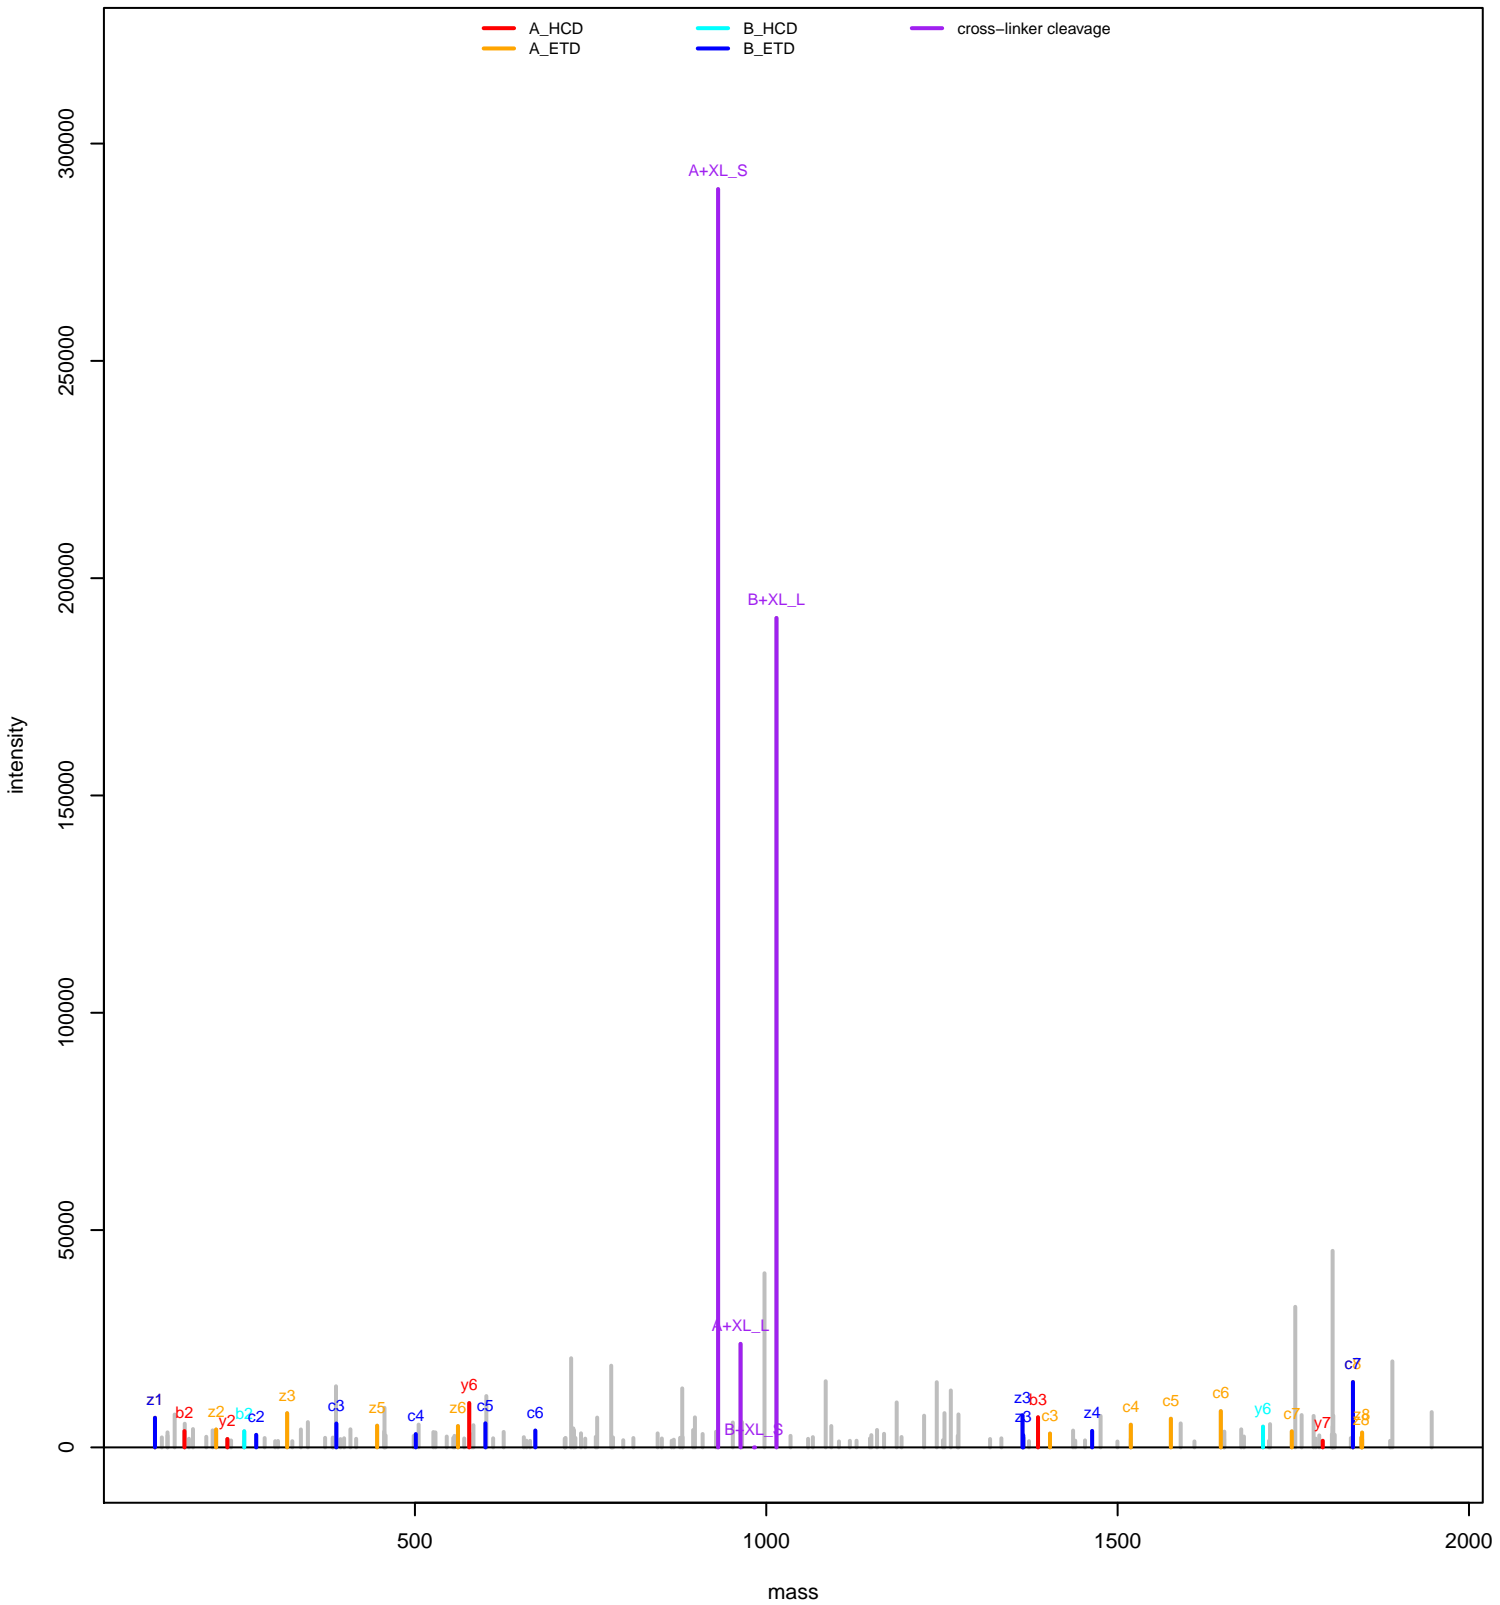

TAKDGATSK+XL\_S

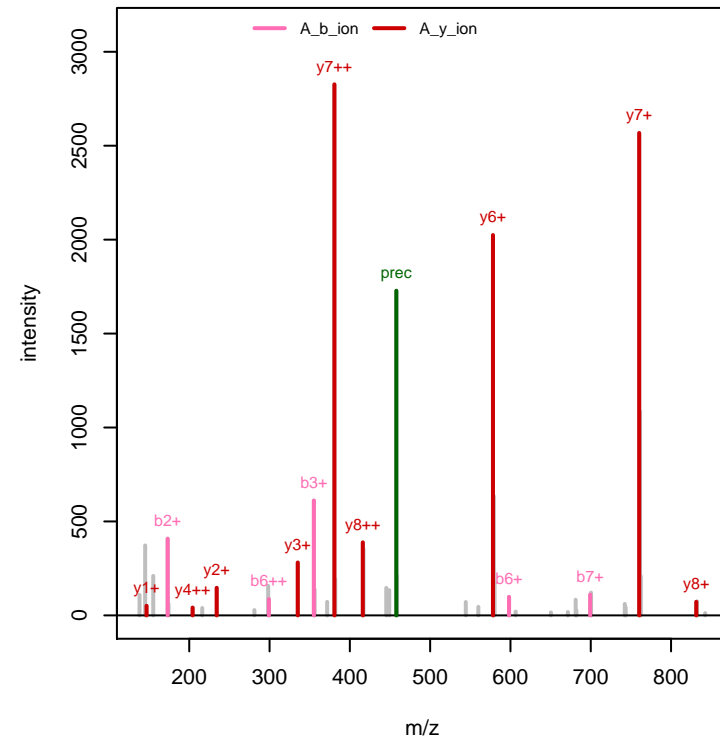

TAKDGATSK+XL\_L

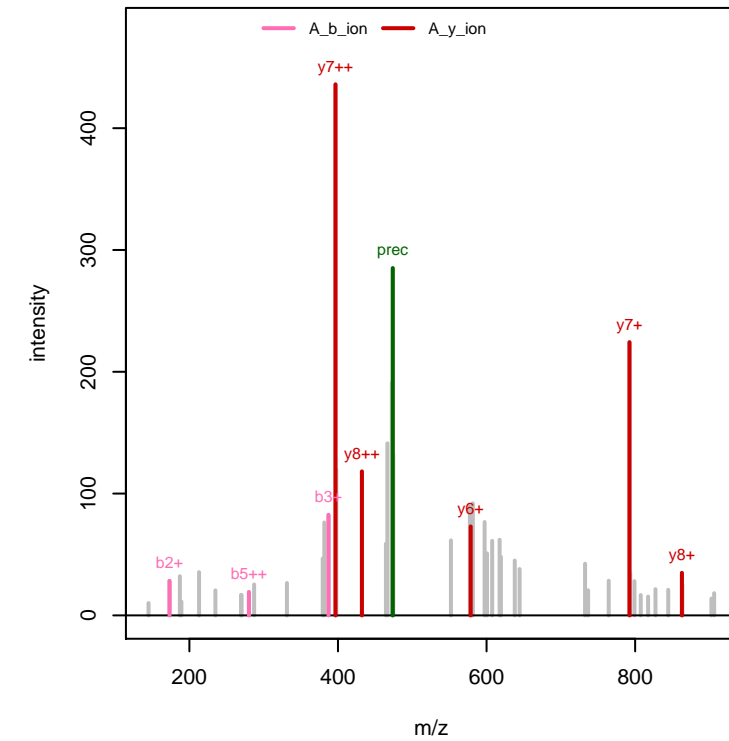

WANIVAKK+XL\_S

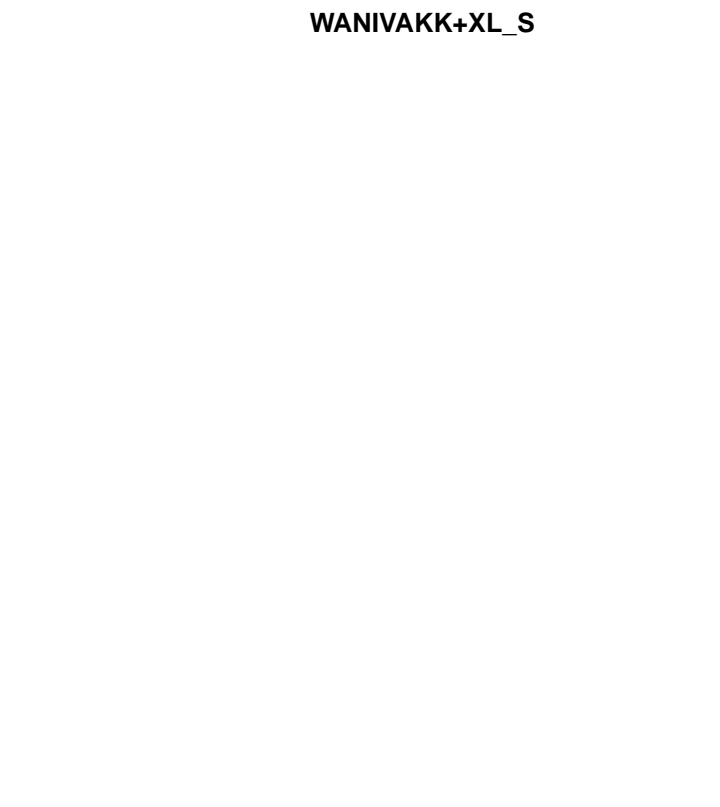

WANIVAKK+XL\_L

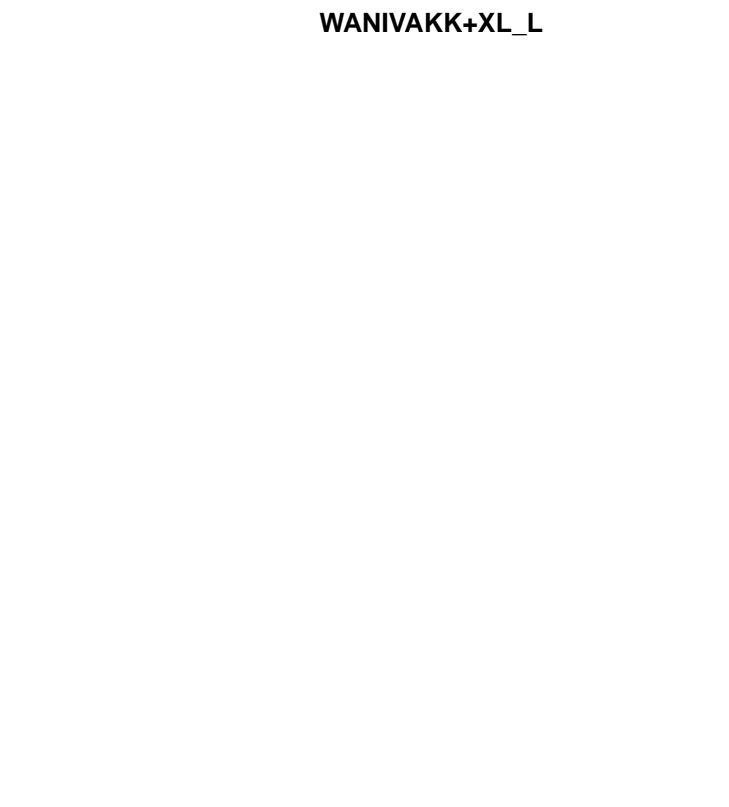

NKLLAAR  
TEQATTTDELAFTRPYGEQEK

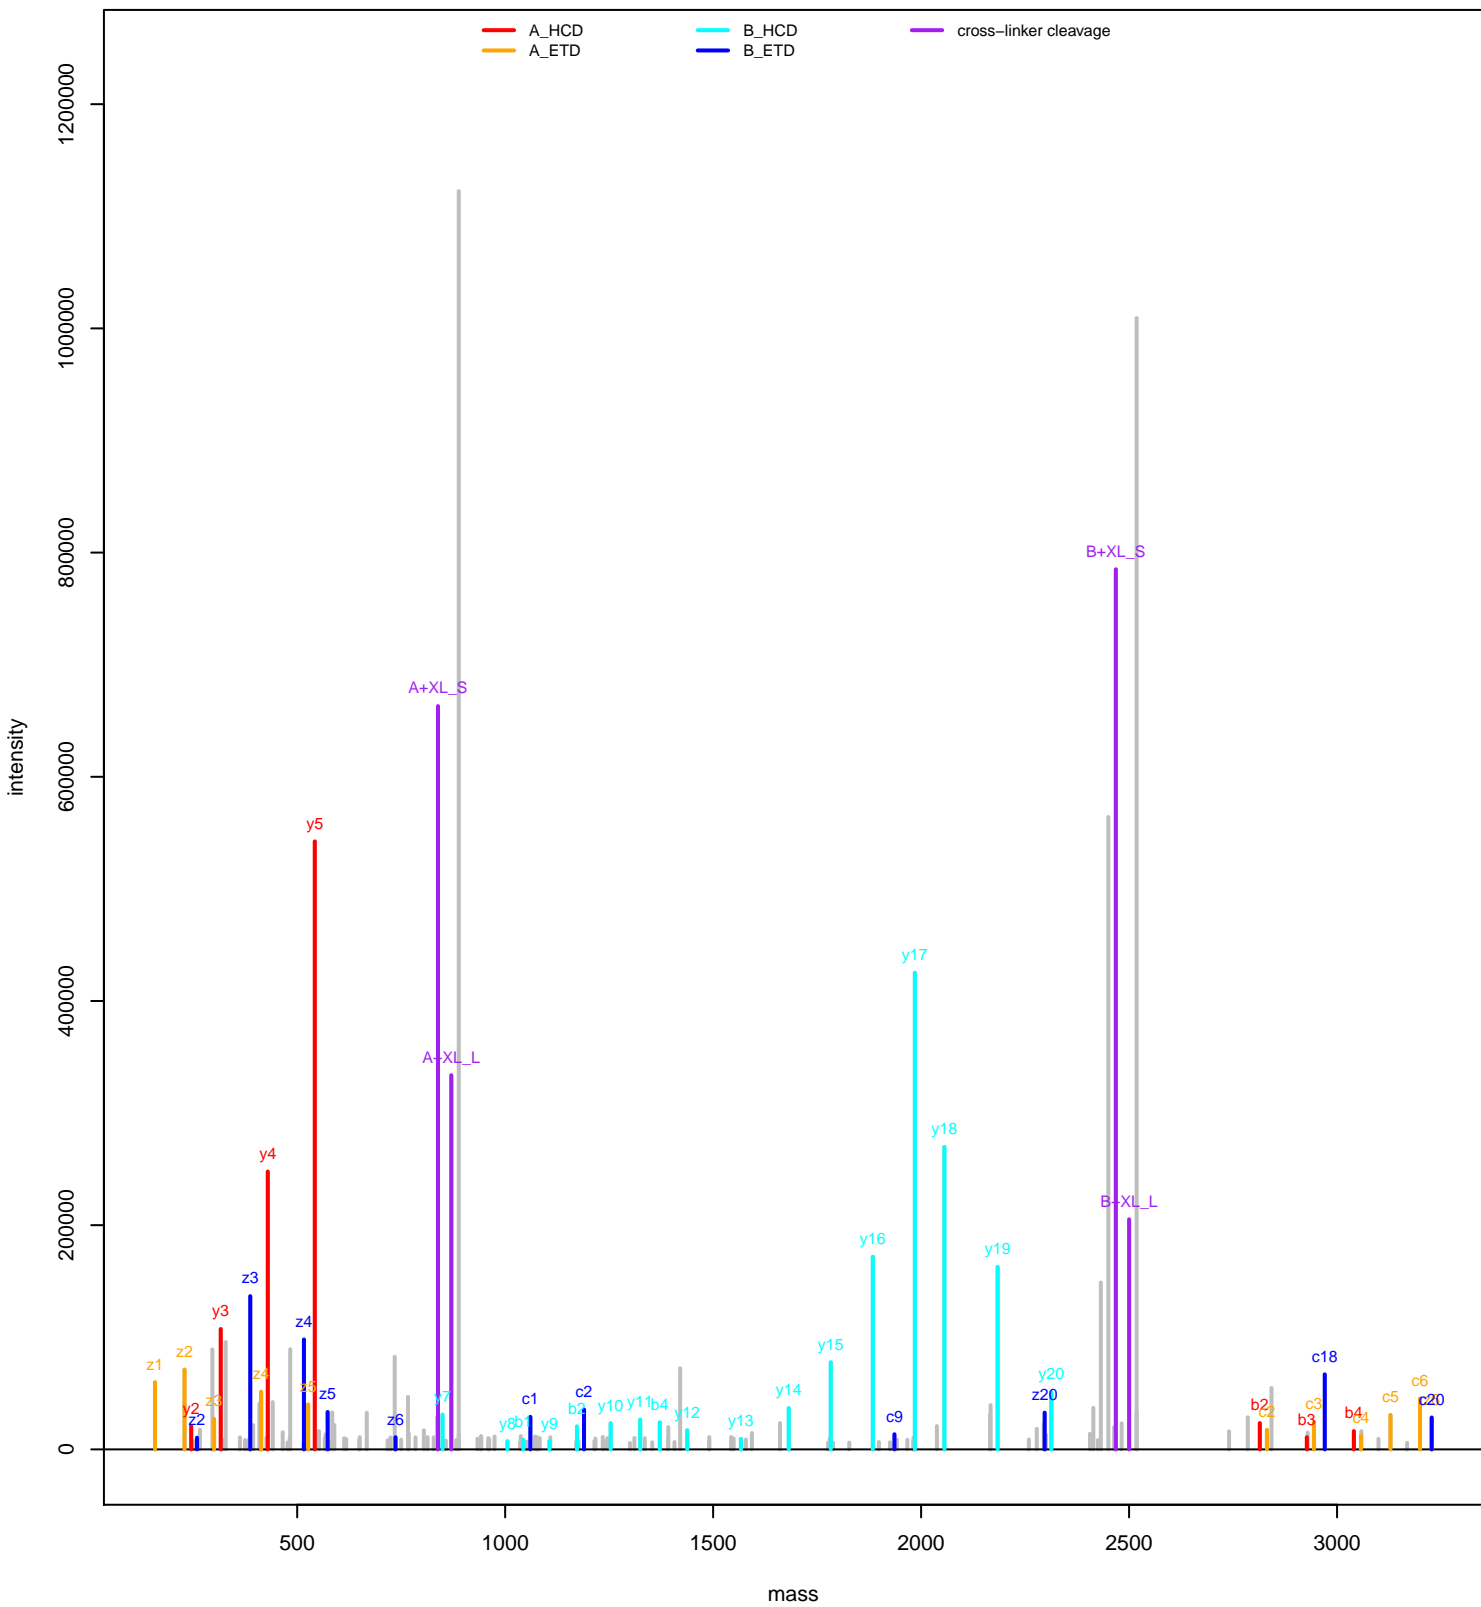

NKLLAAR+XL\_S

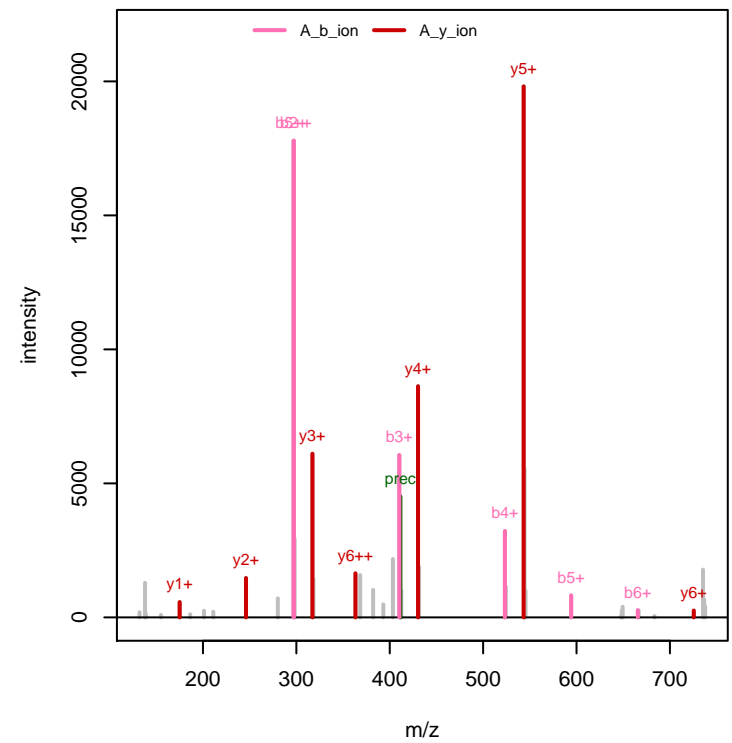

NKLLAAR+XL\_L

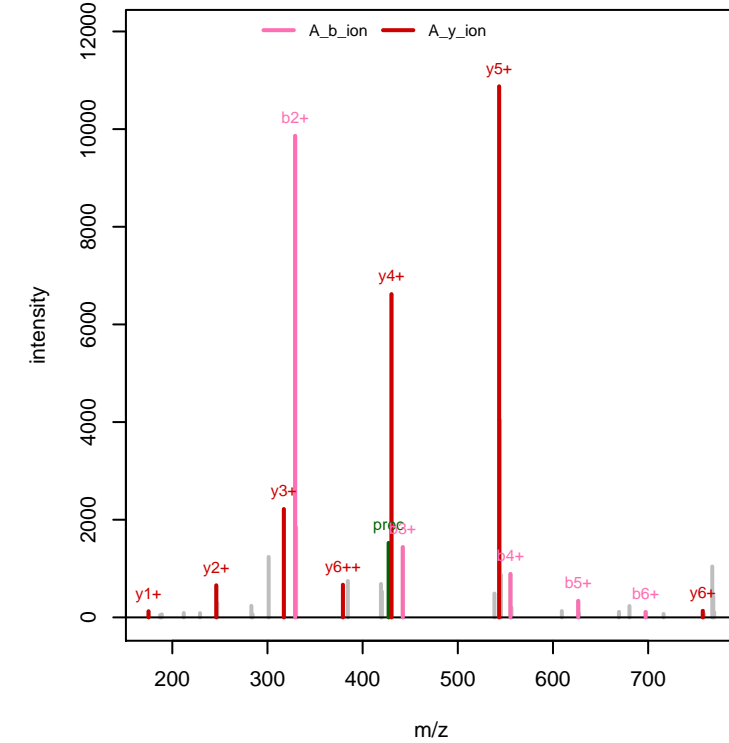

TEQATTTDELAFTRPYGEQEK+XL\_S

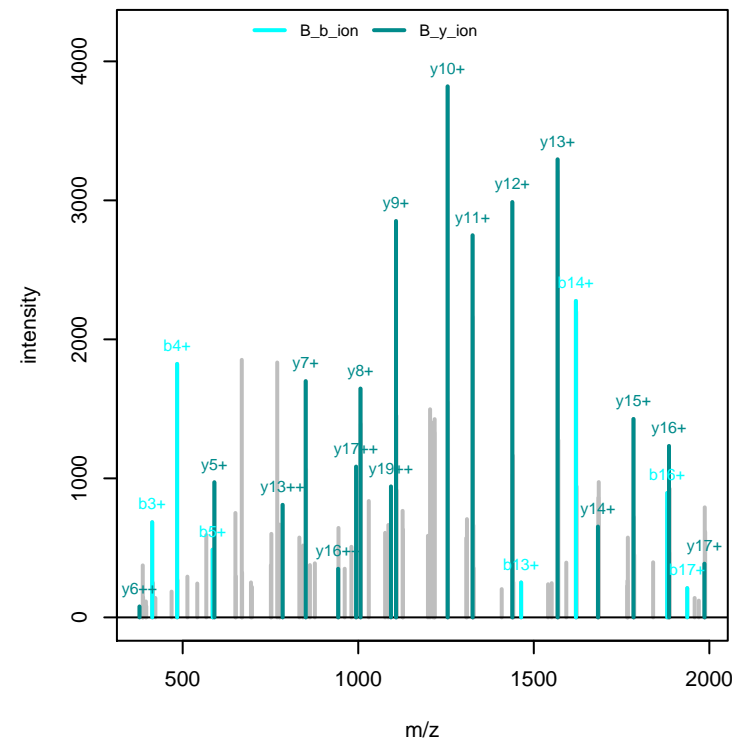

TEQATTTDELAFTRPYGEQEK+XL\_L

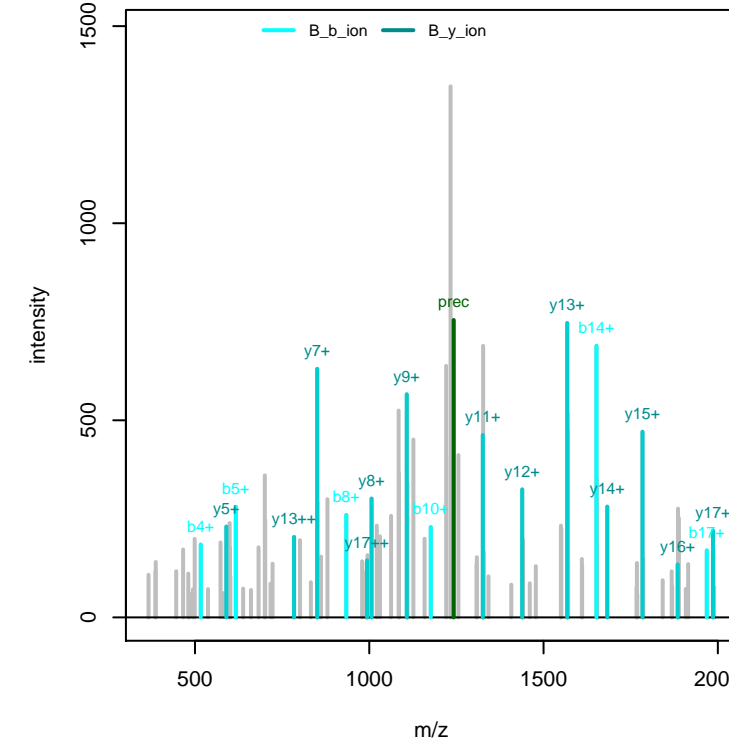

KEAAPAK  
AELGIPKSIR

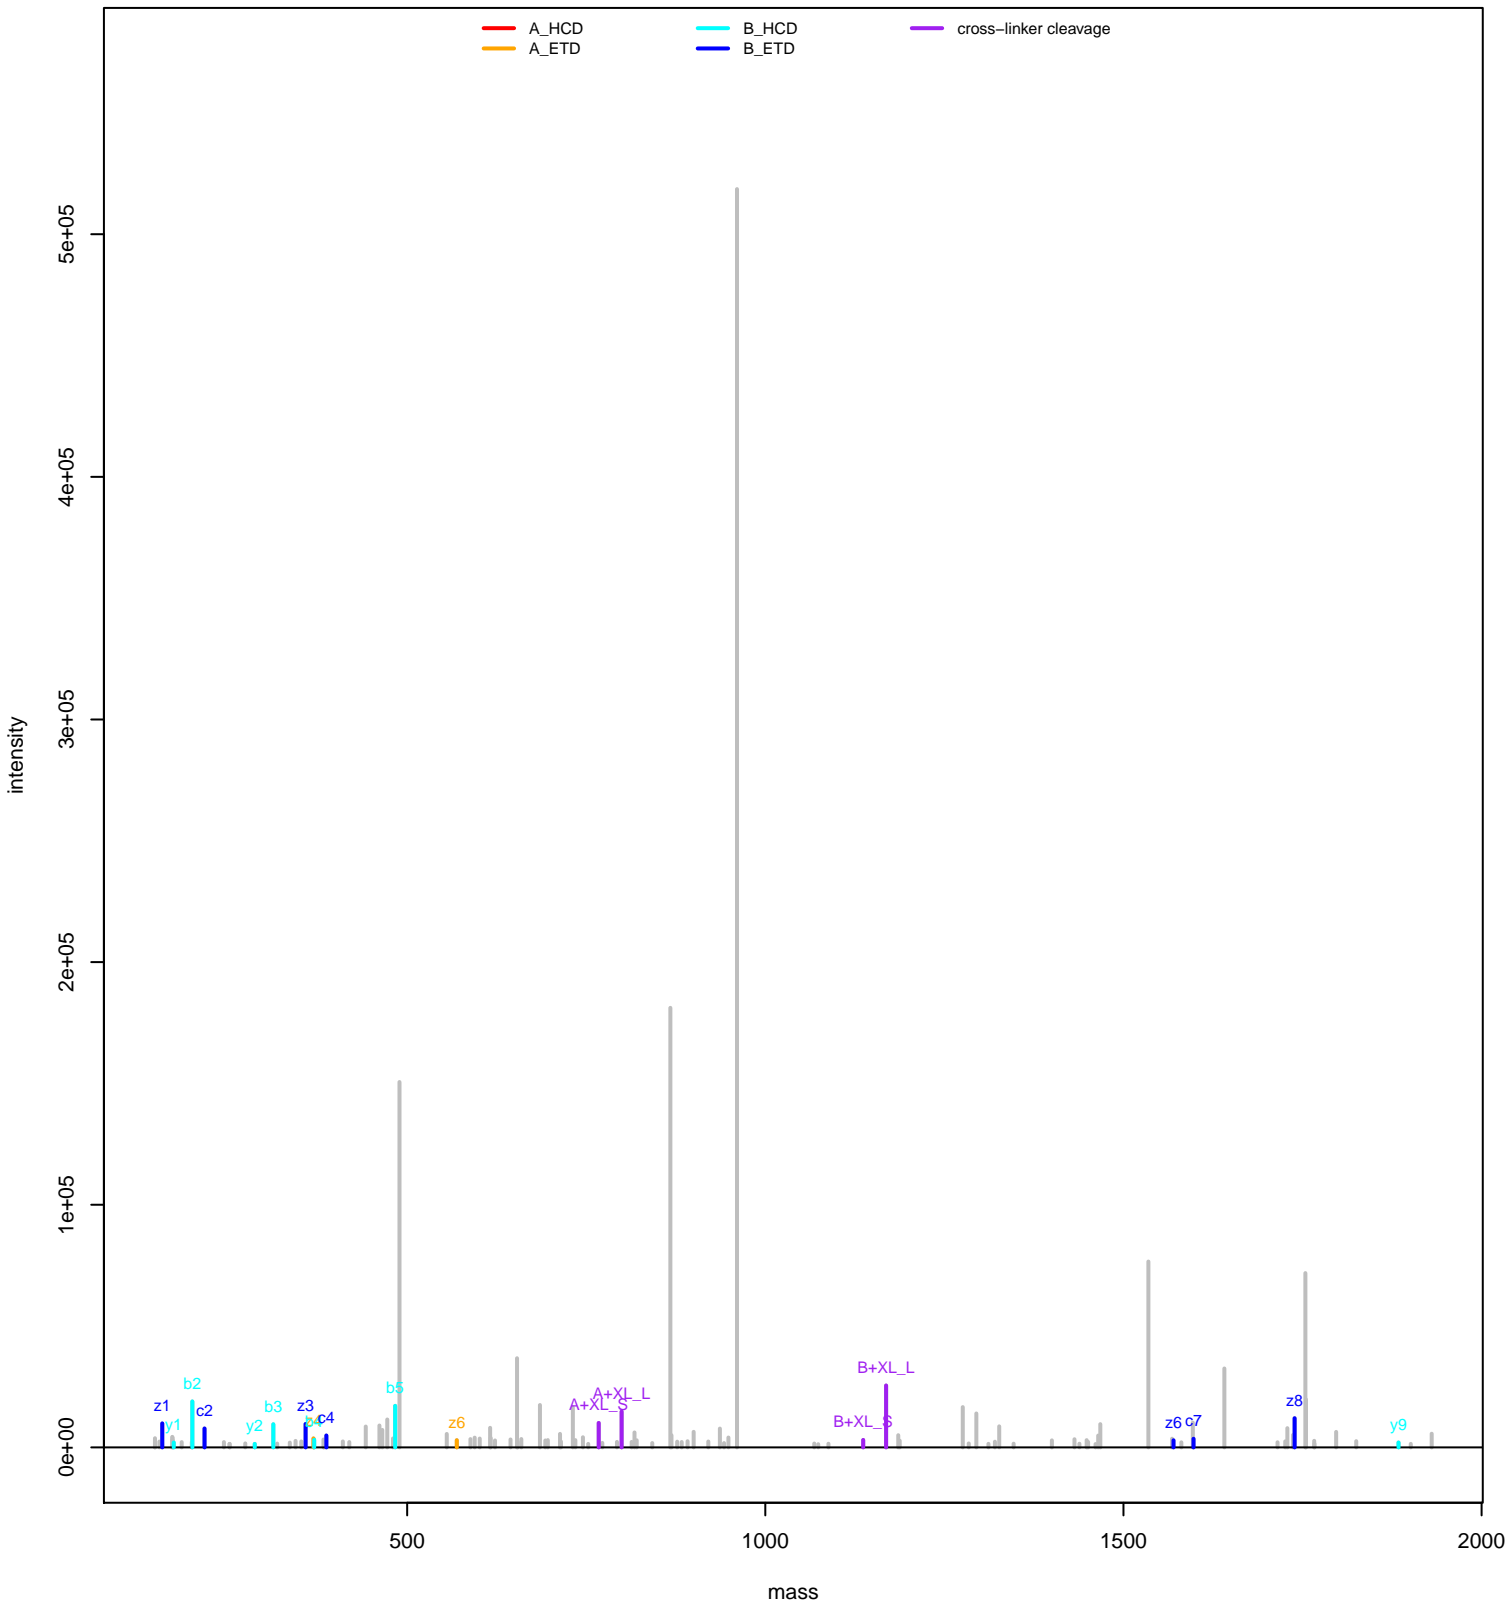

KEAAPAK+XL\_S

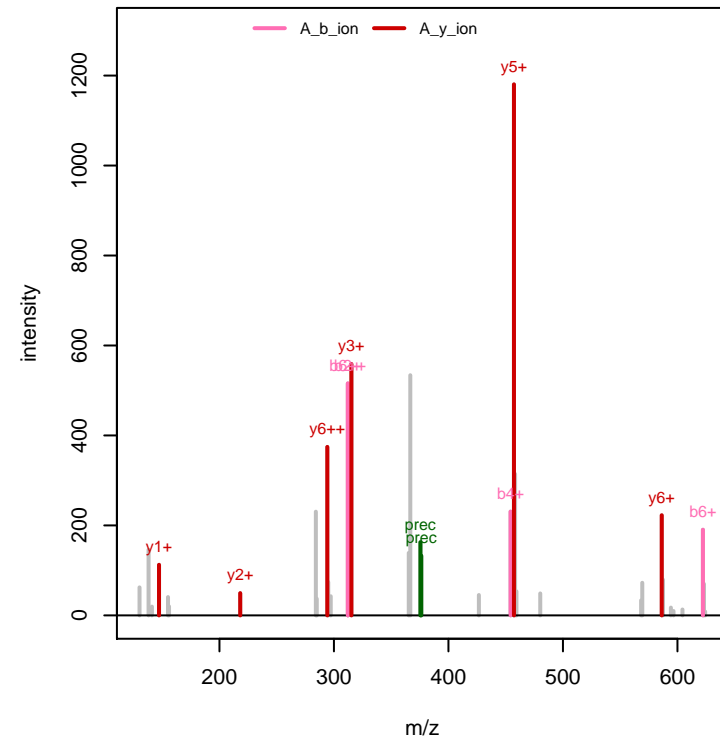

KEAAPAK+XL\_L

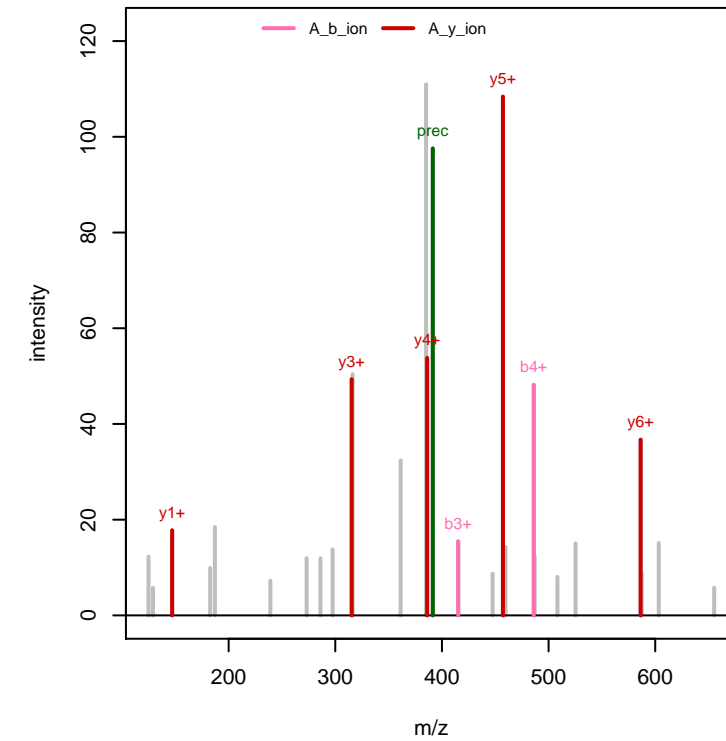

AELGIPKSIR+XL\_S

AELGIPKSIR+XL\_L

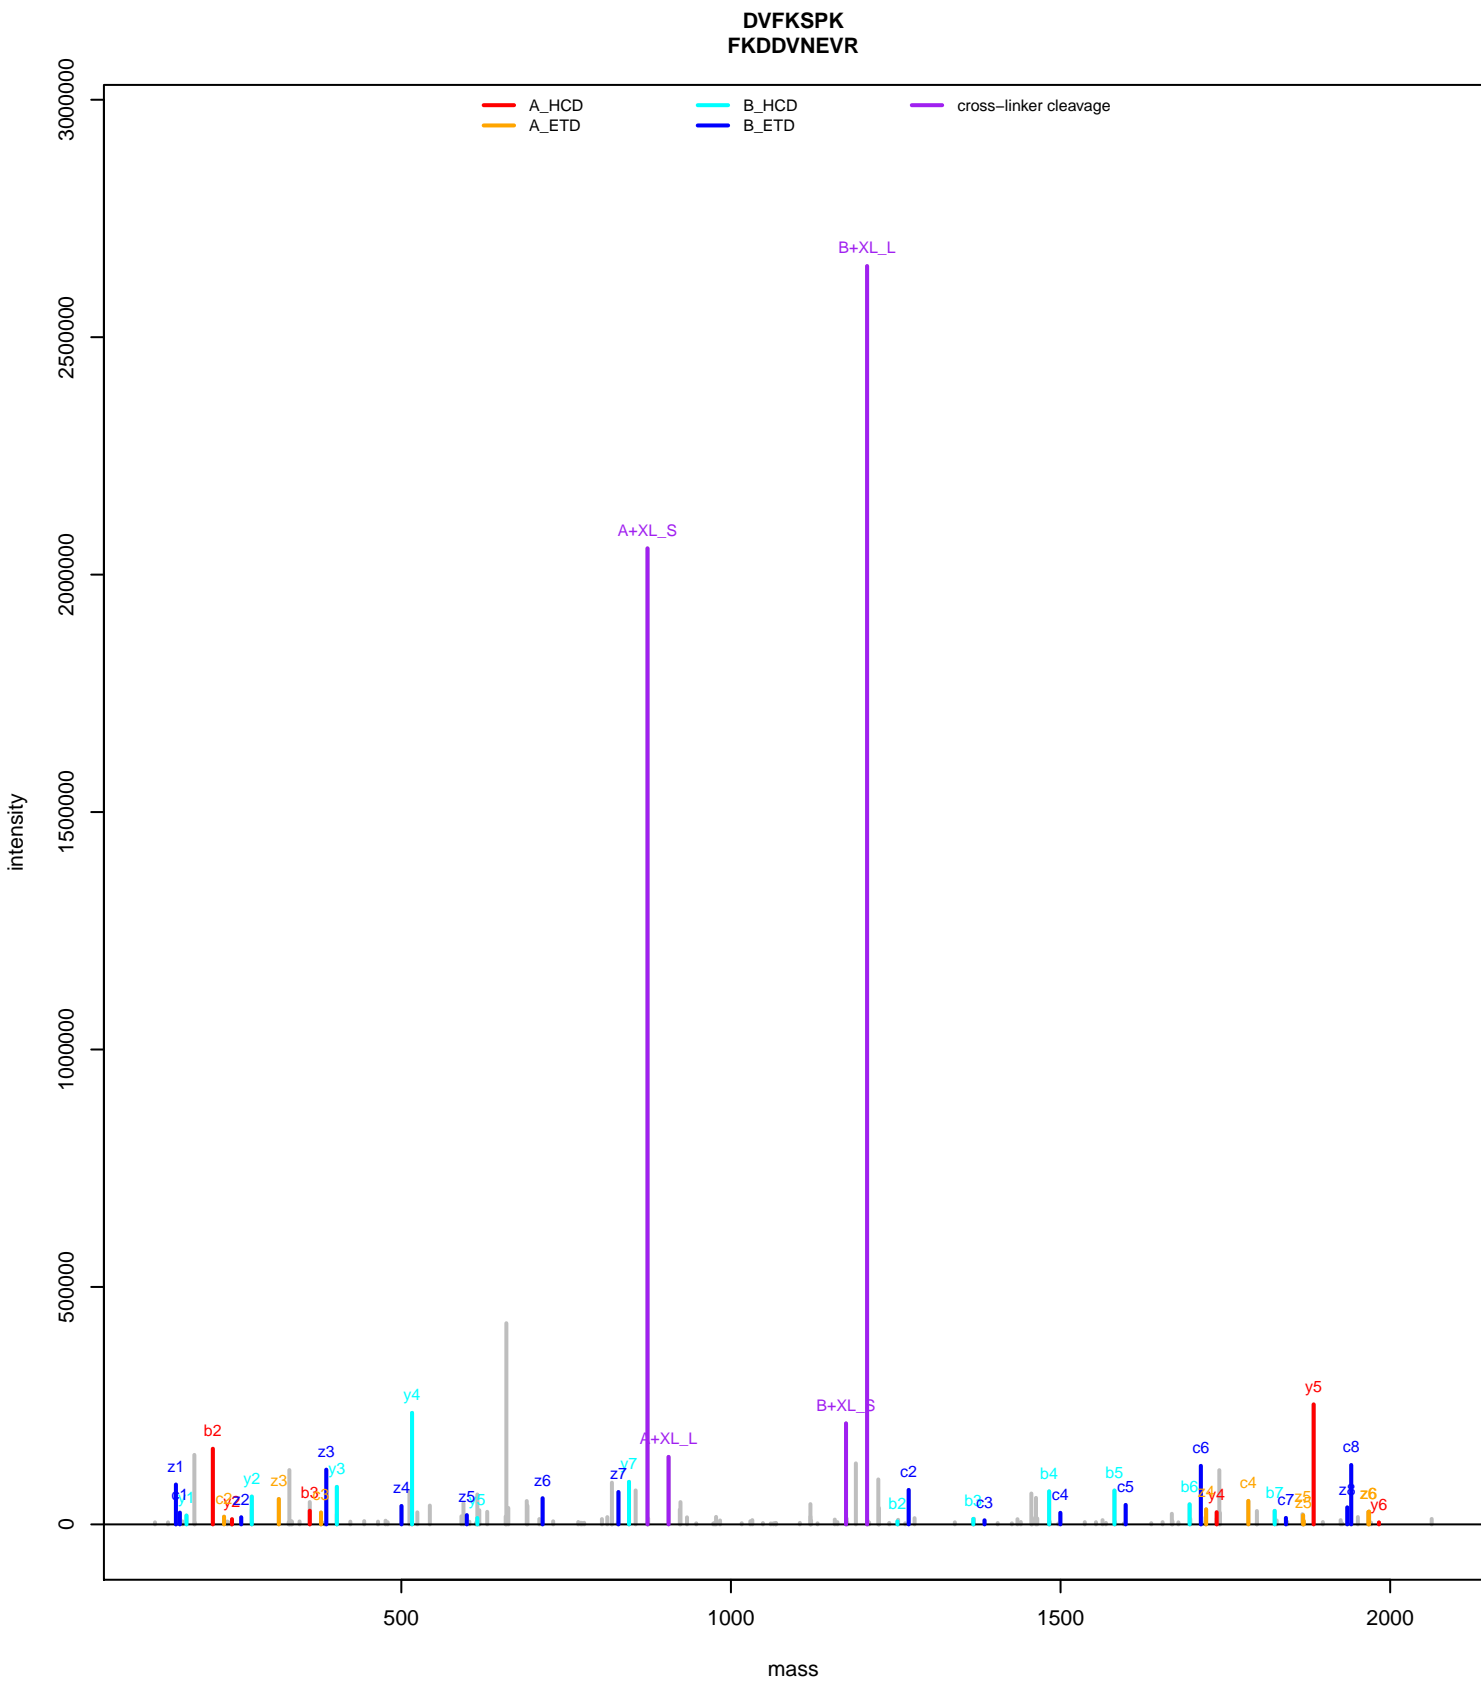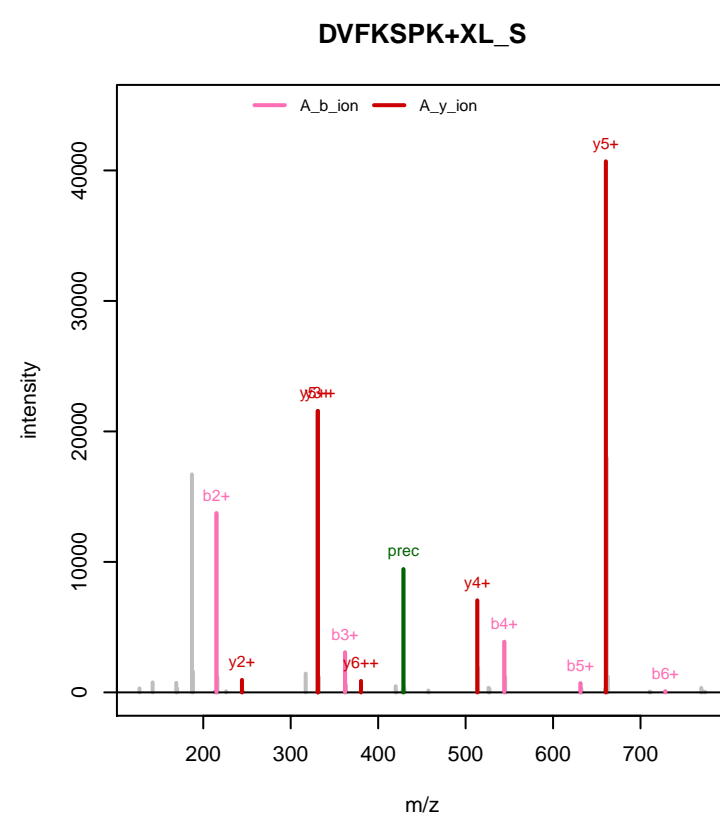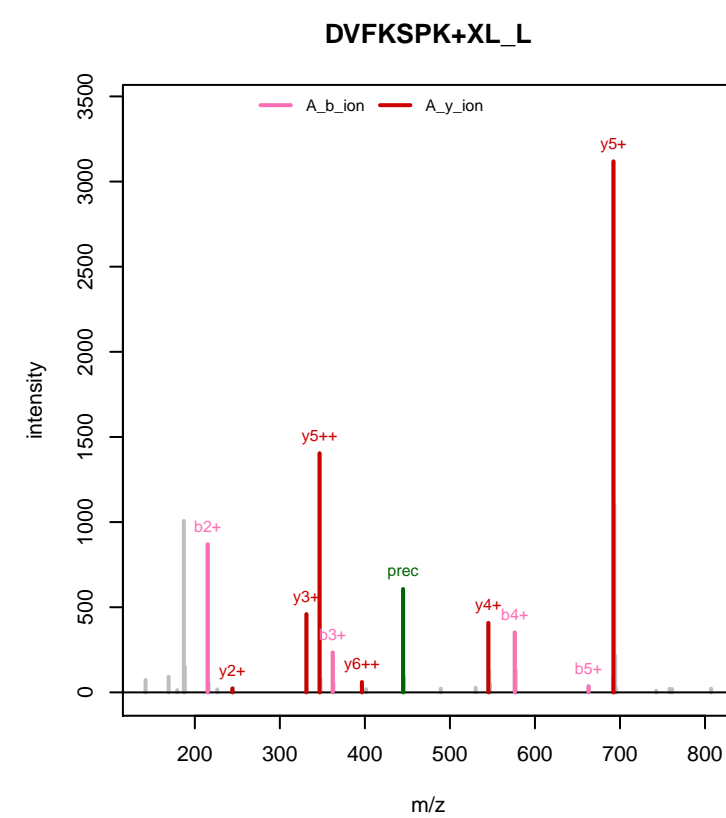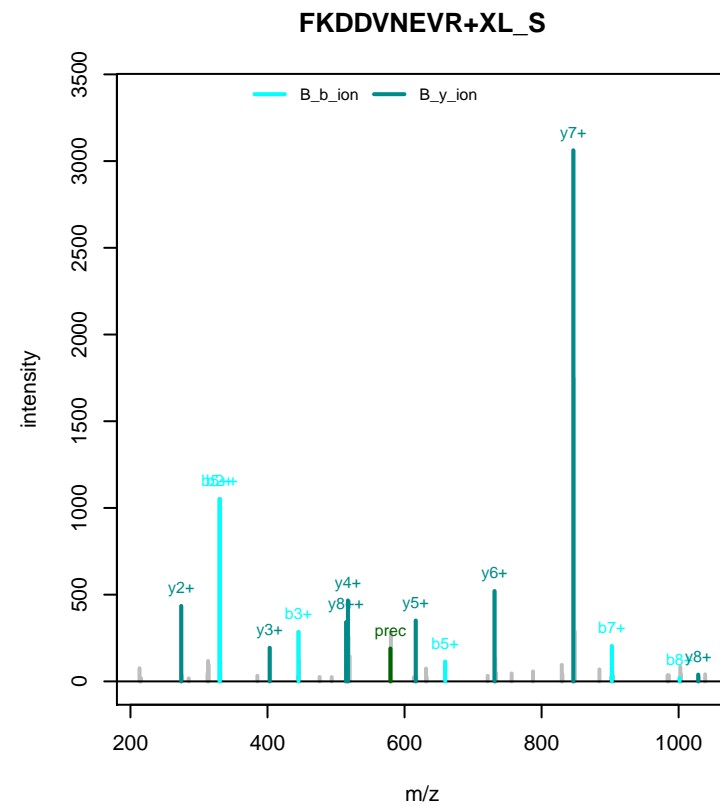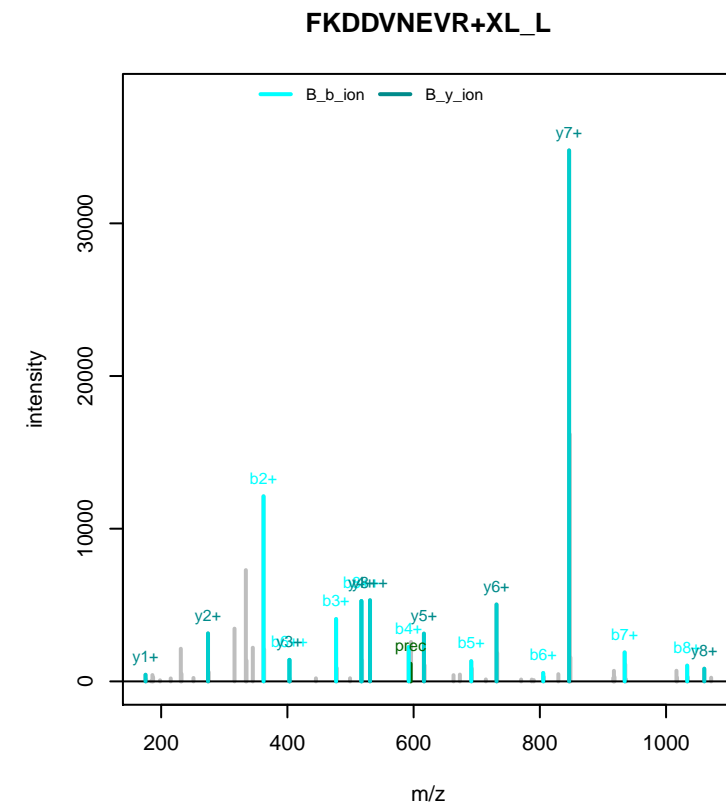

VYTGKVTR  
DVIGKGGSVIR

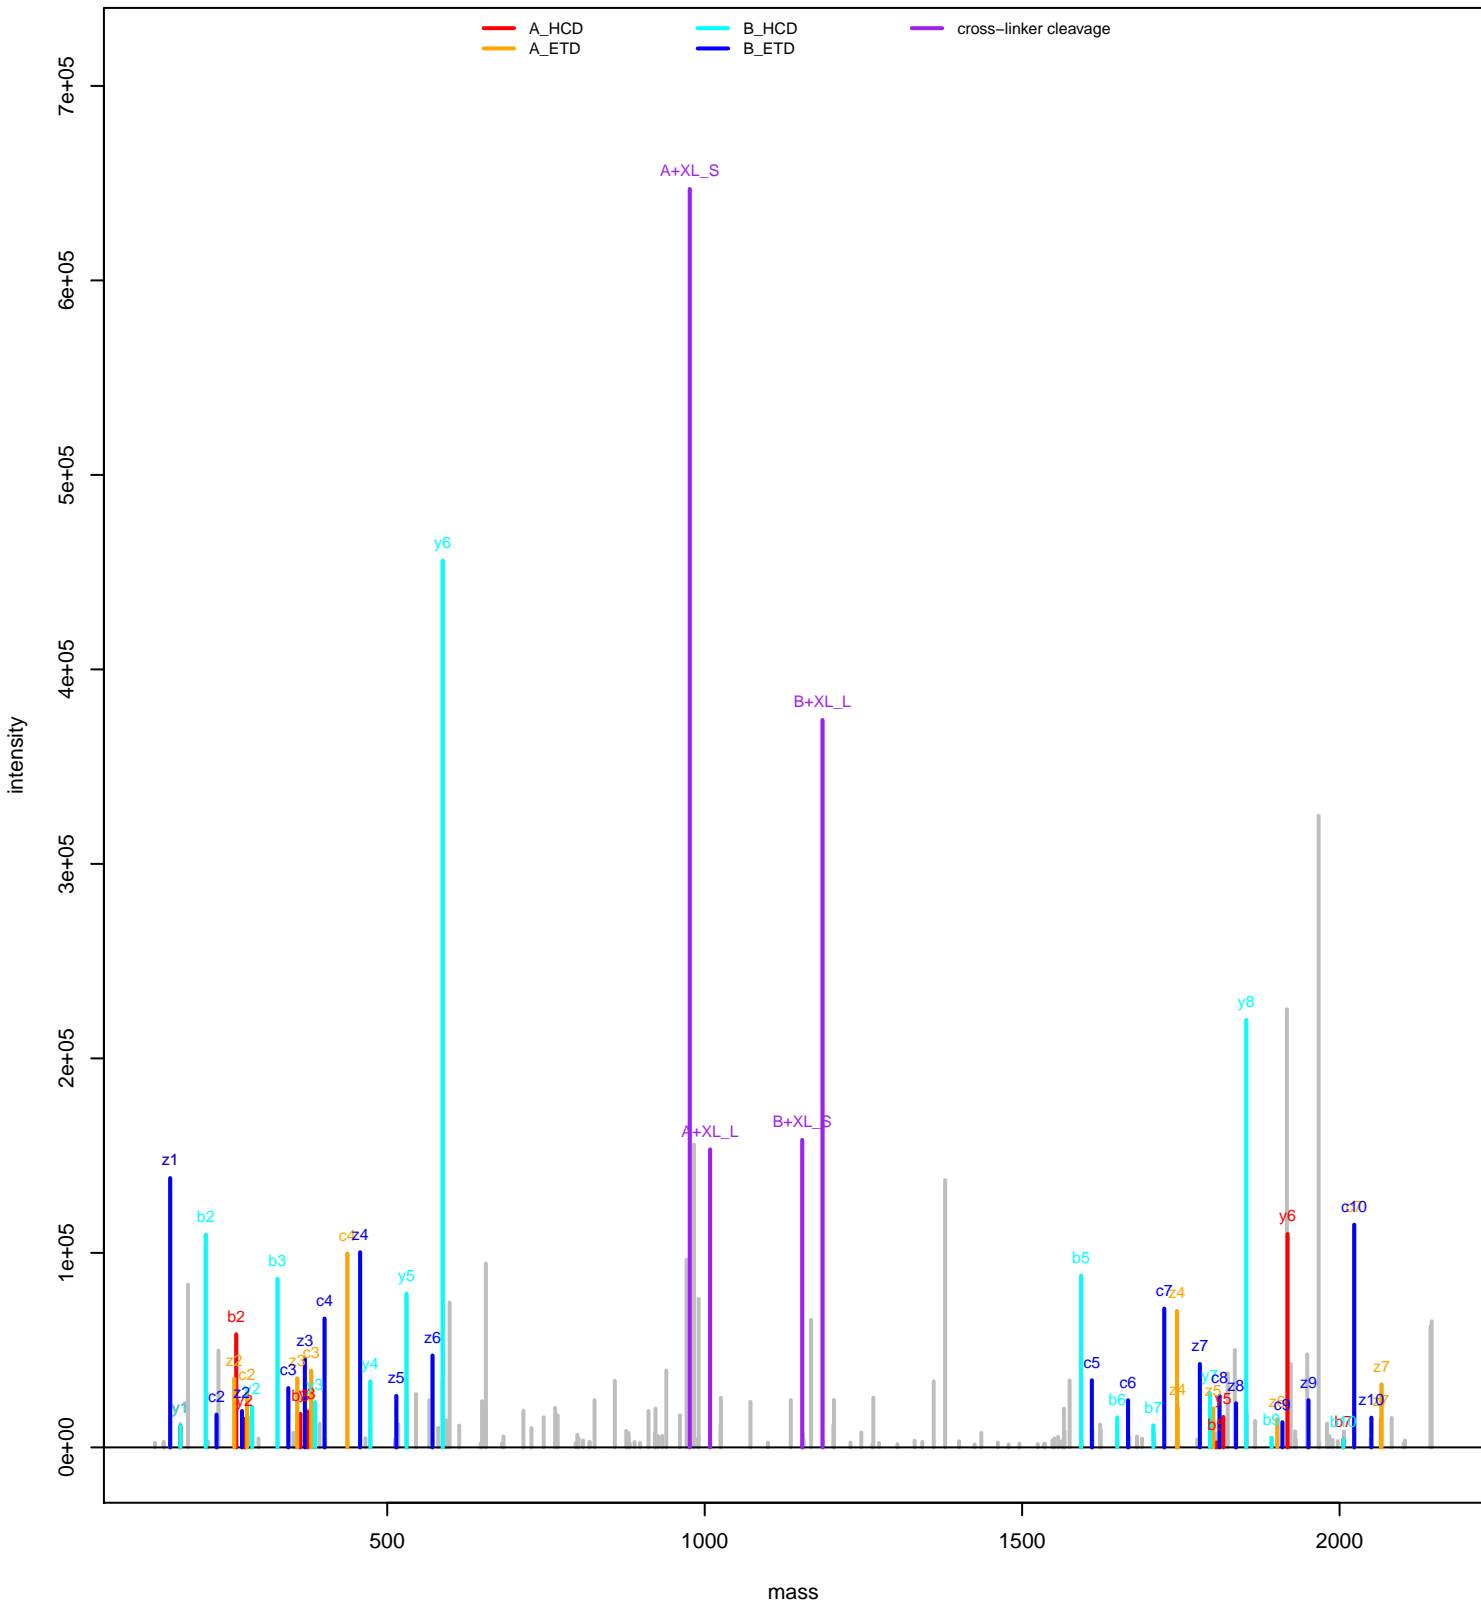

VYTGKVTR+XL\_S

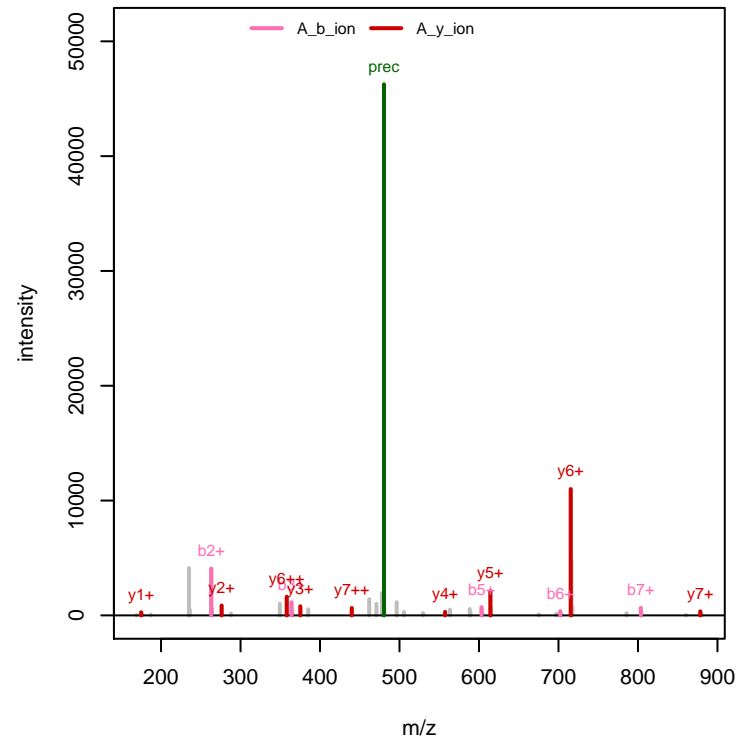

VYTGKVTR+XL\_L

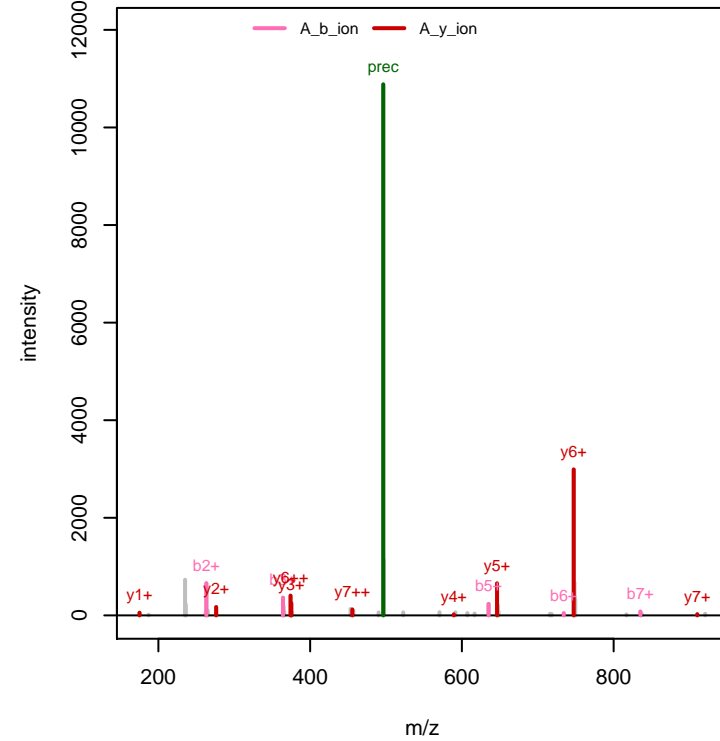

DVIGKGGSVIR+XL\_S

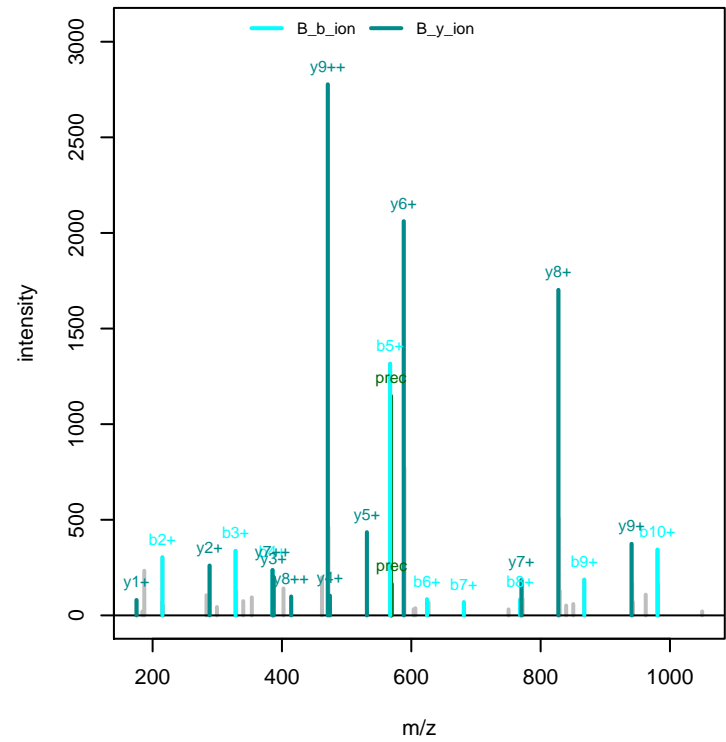

DVIGKGGSVIR+XL\_L

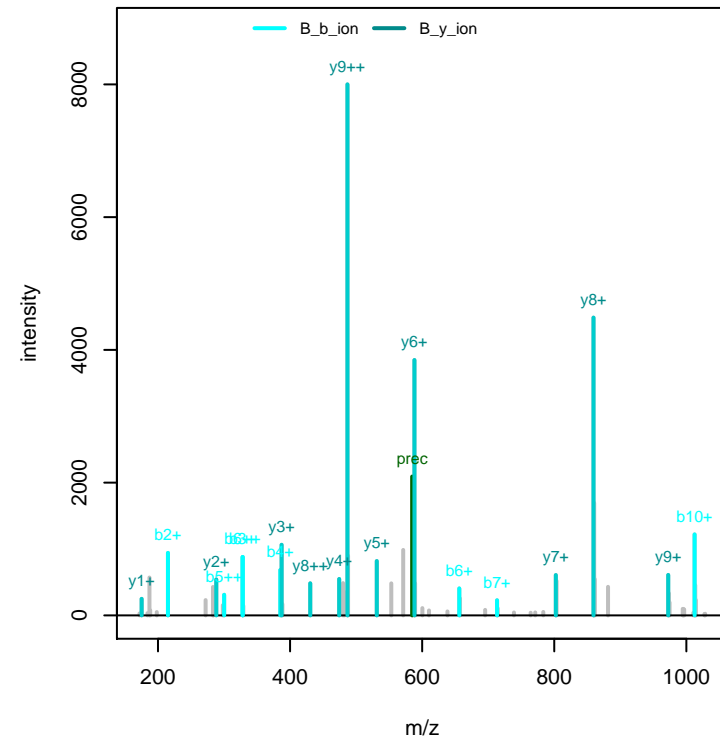

SVKNDLK  
VKAALVDHDK

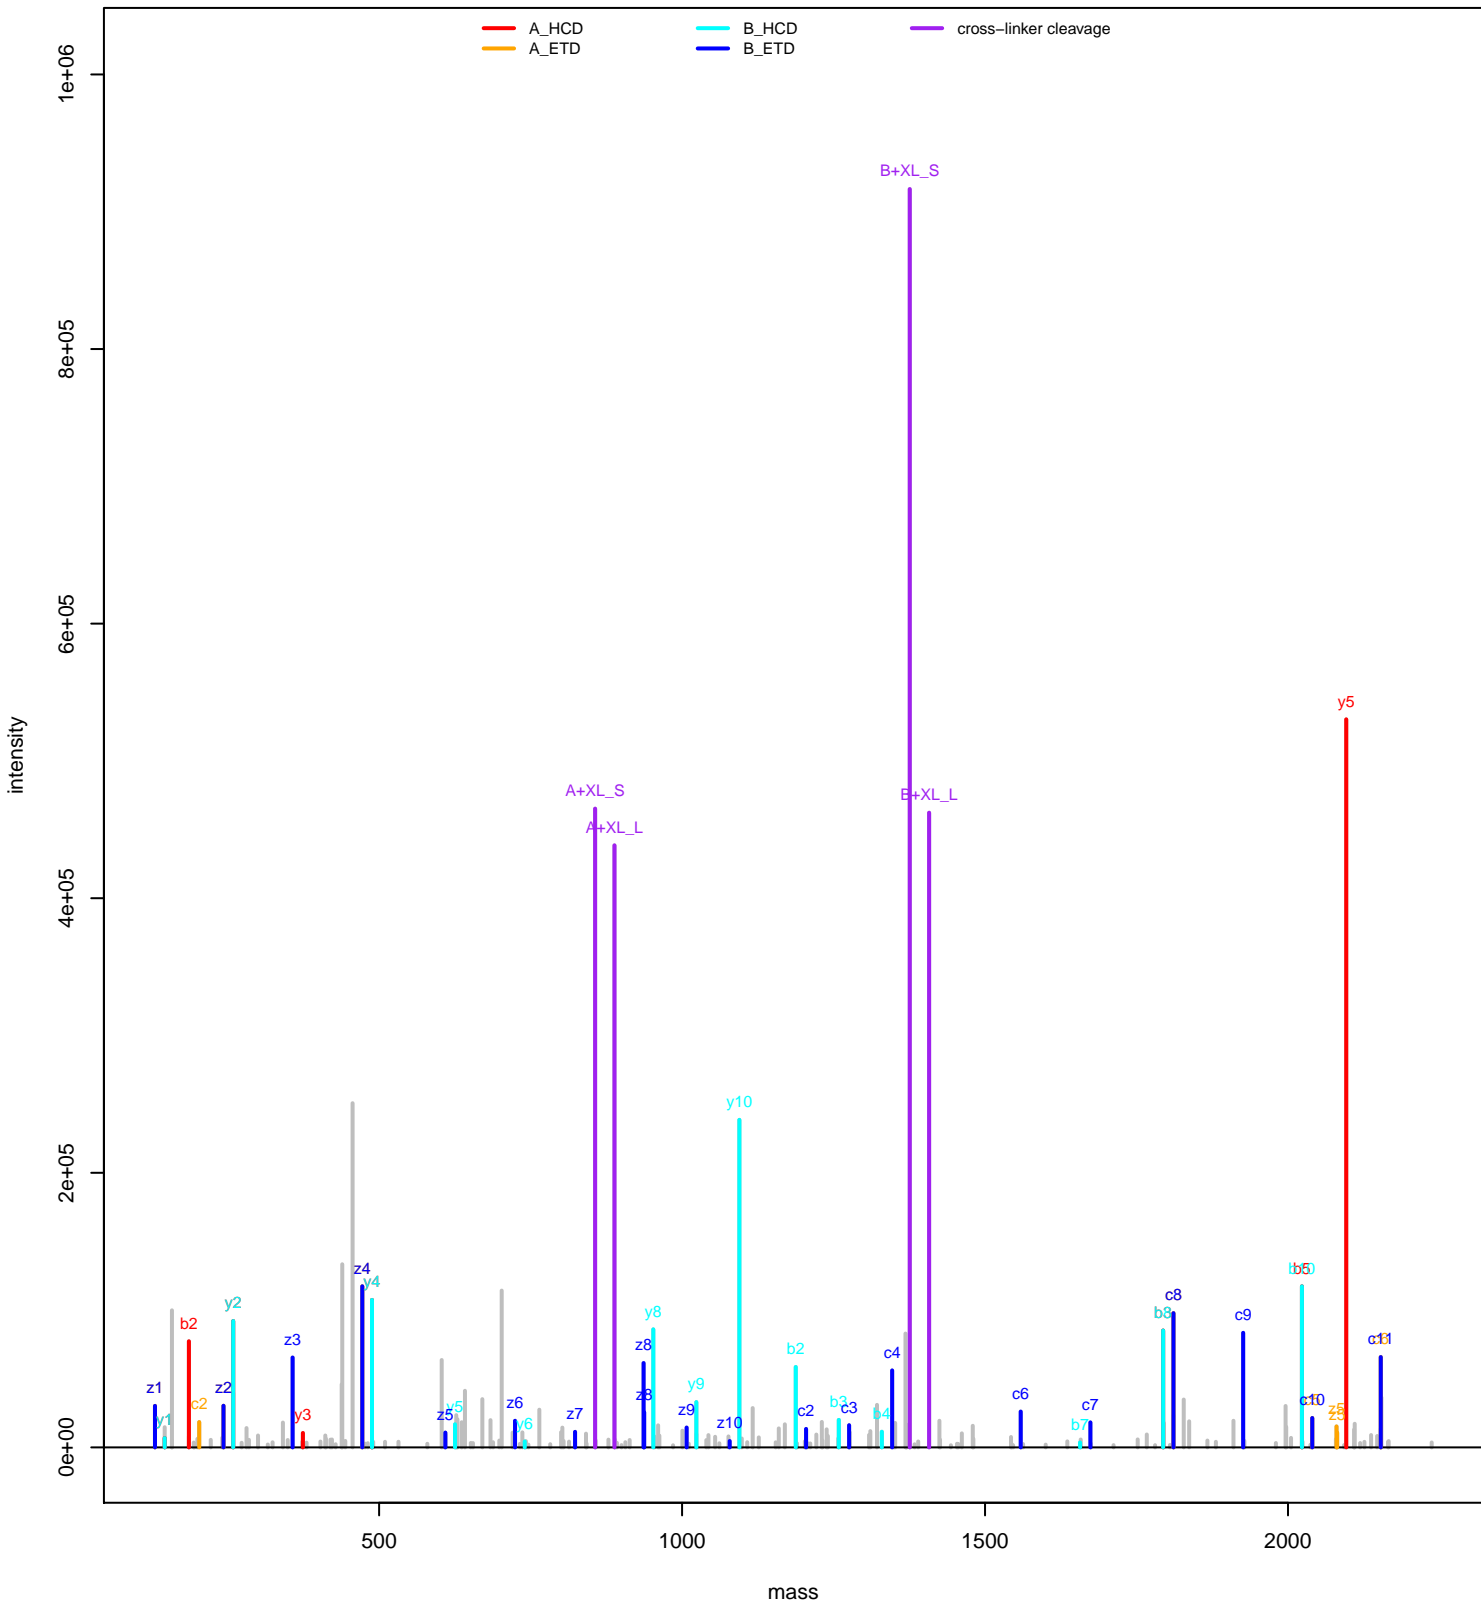

SVKNDLK+XL\_S

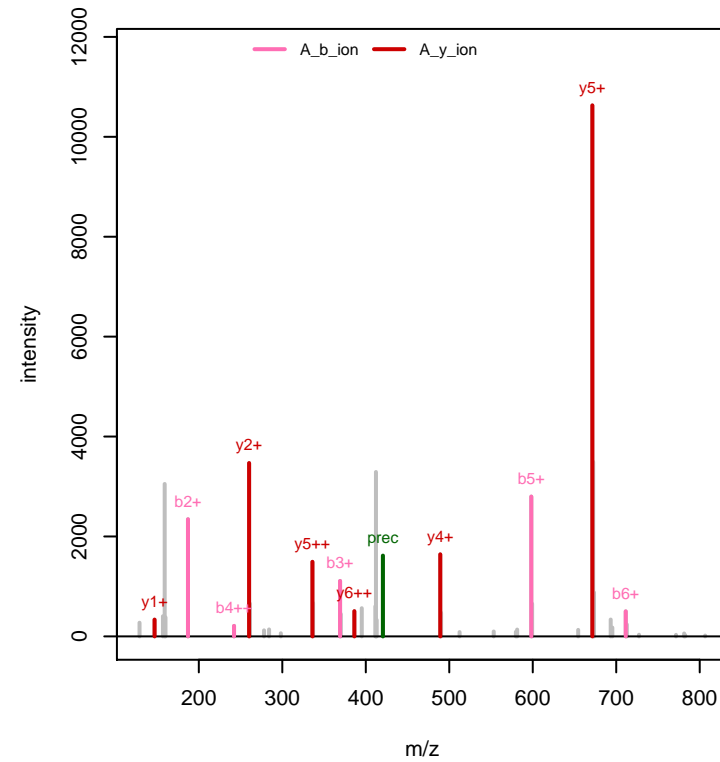

SVKNDLK+XL\_L

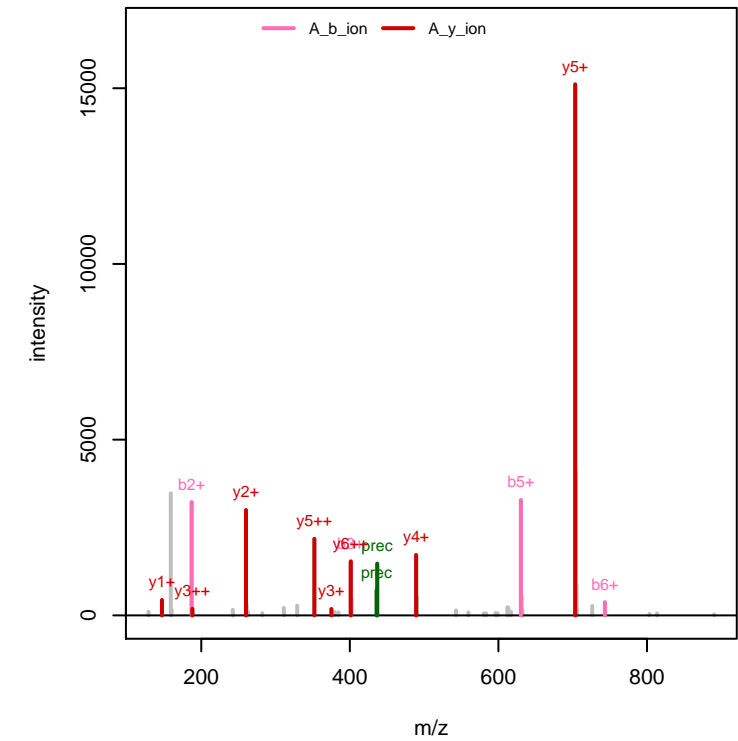

VKAALVDHDK+XL\_S

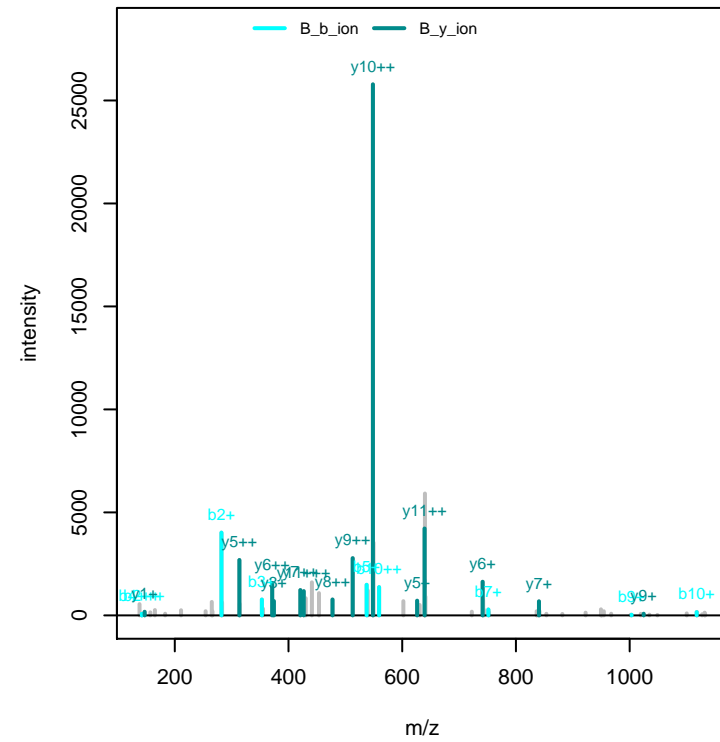

VKAALVDHDK+XL\_L

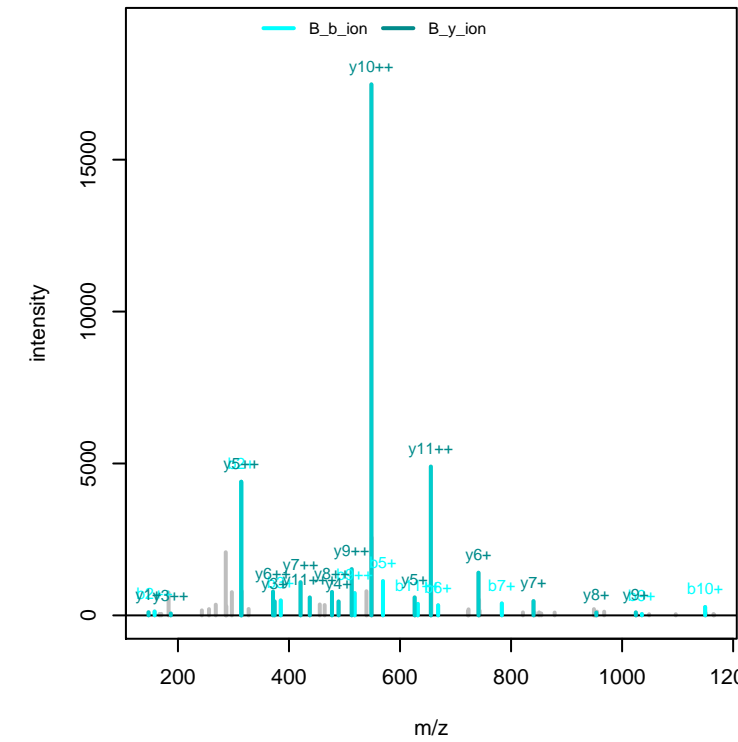

AAAVANQGKAK  
YGDEQVKQWR

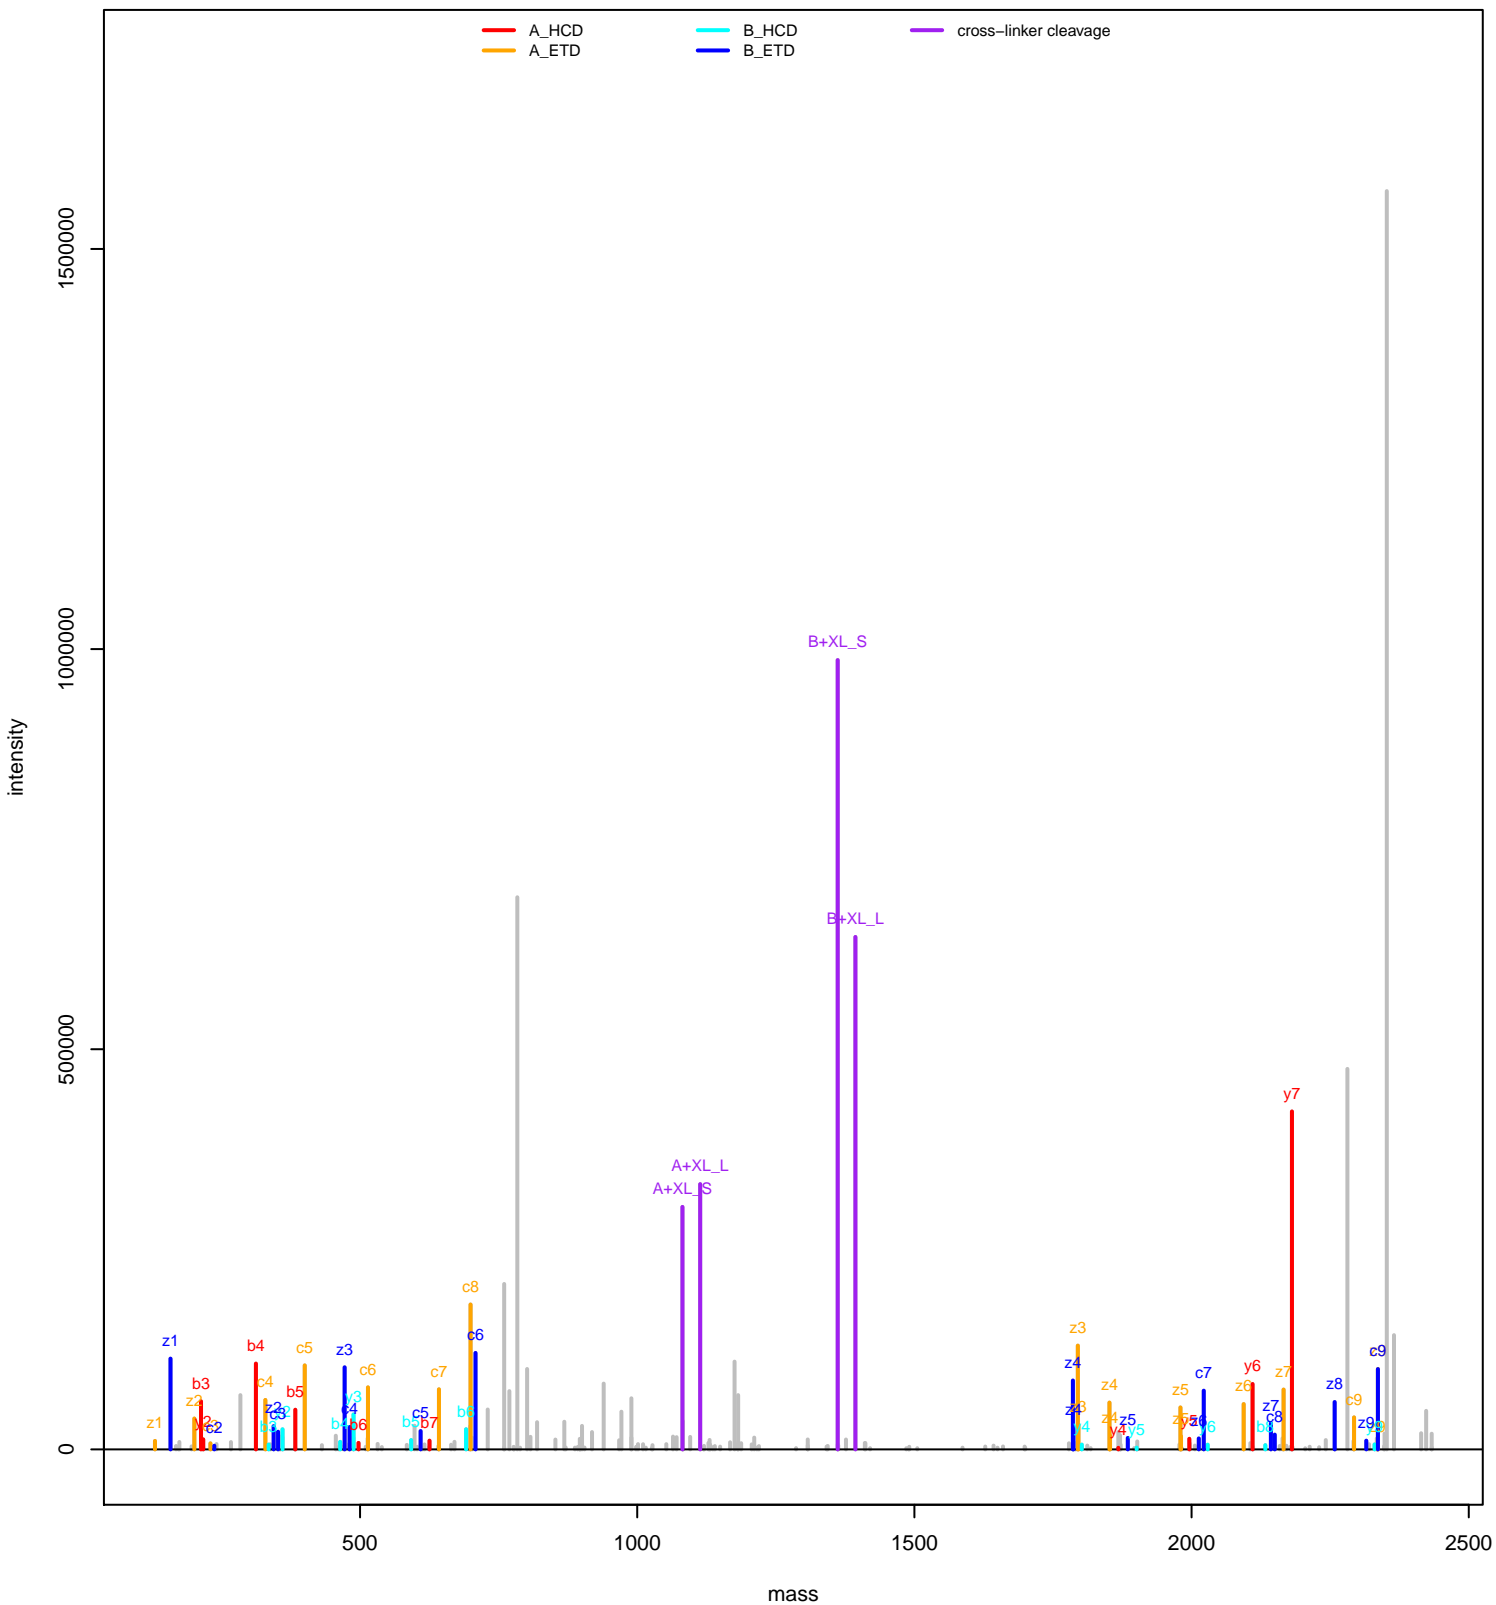

AAAVANQGKAK+XL\_S

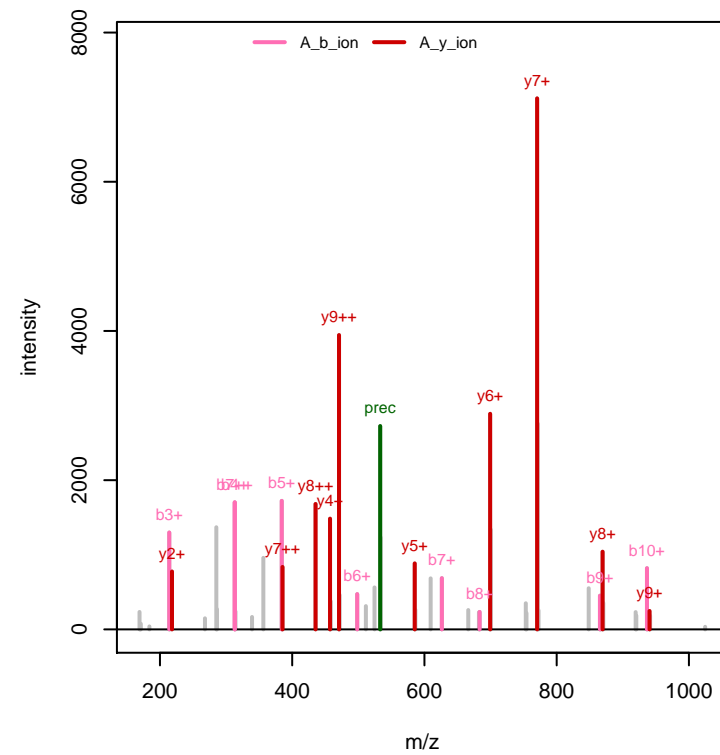

AAAVANQGKAK+XL\_L

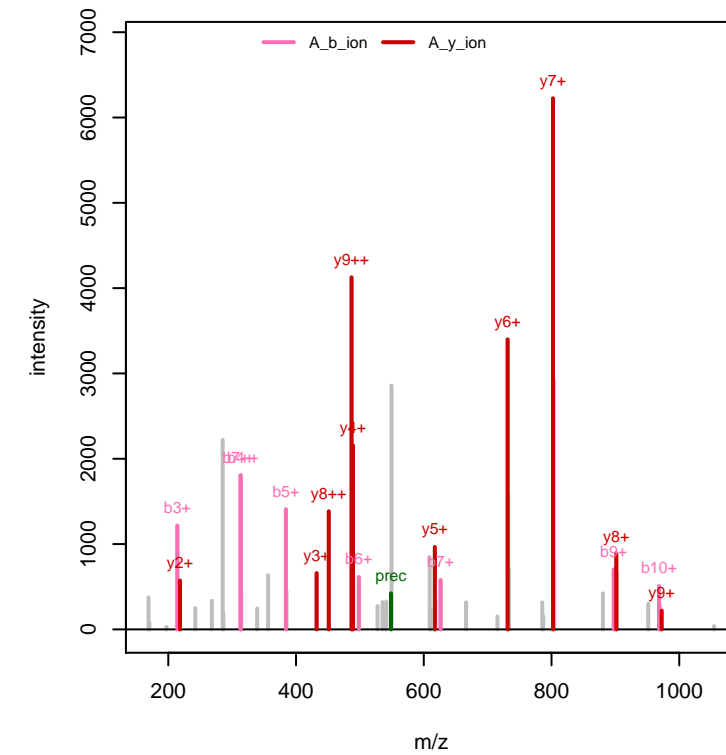

YGDEQVKQWR+XL\_S

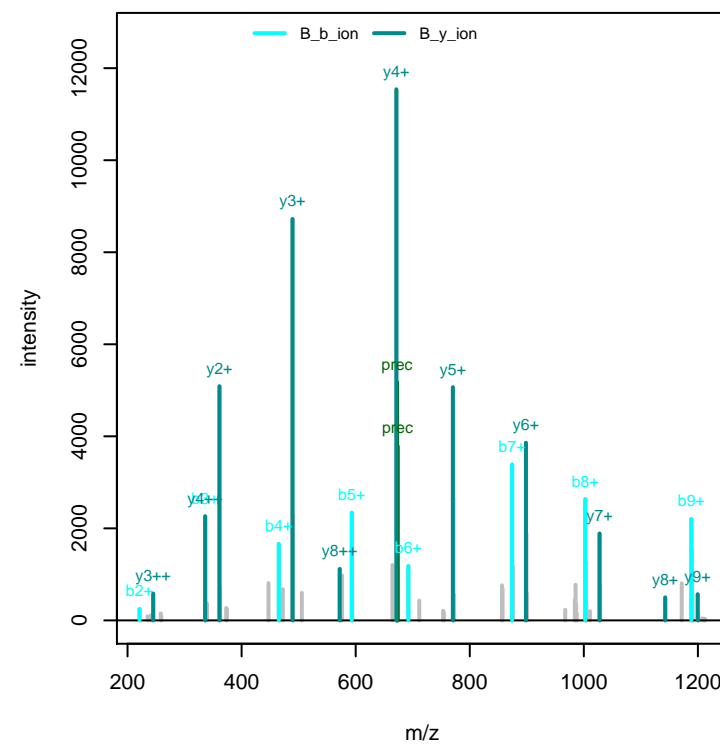

YGDEQVKQWR+XL\_L

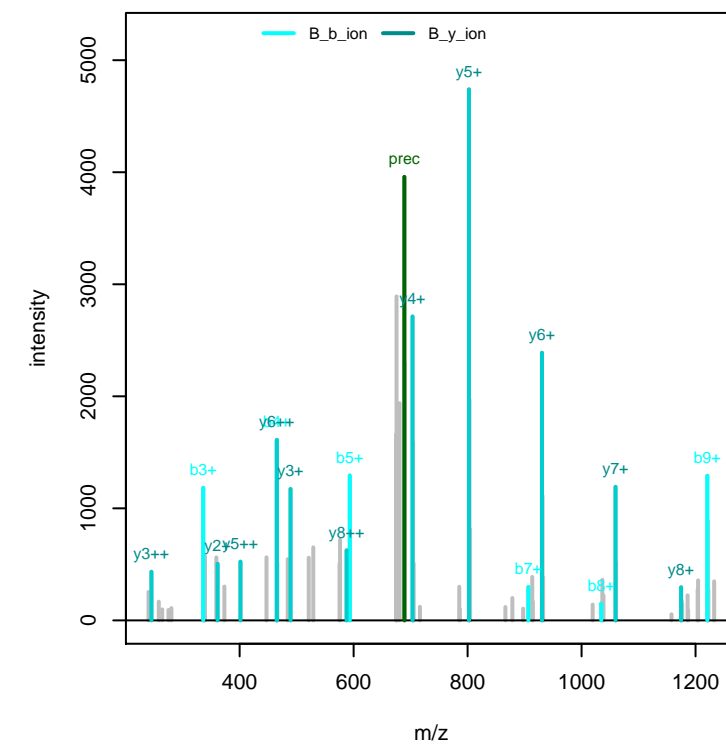



**MQEGQNRK**  
**TLAEIREKQMAG**

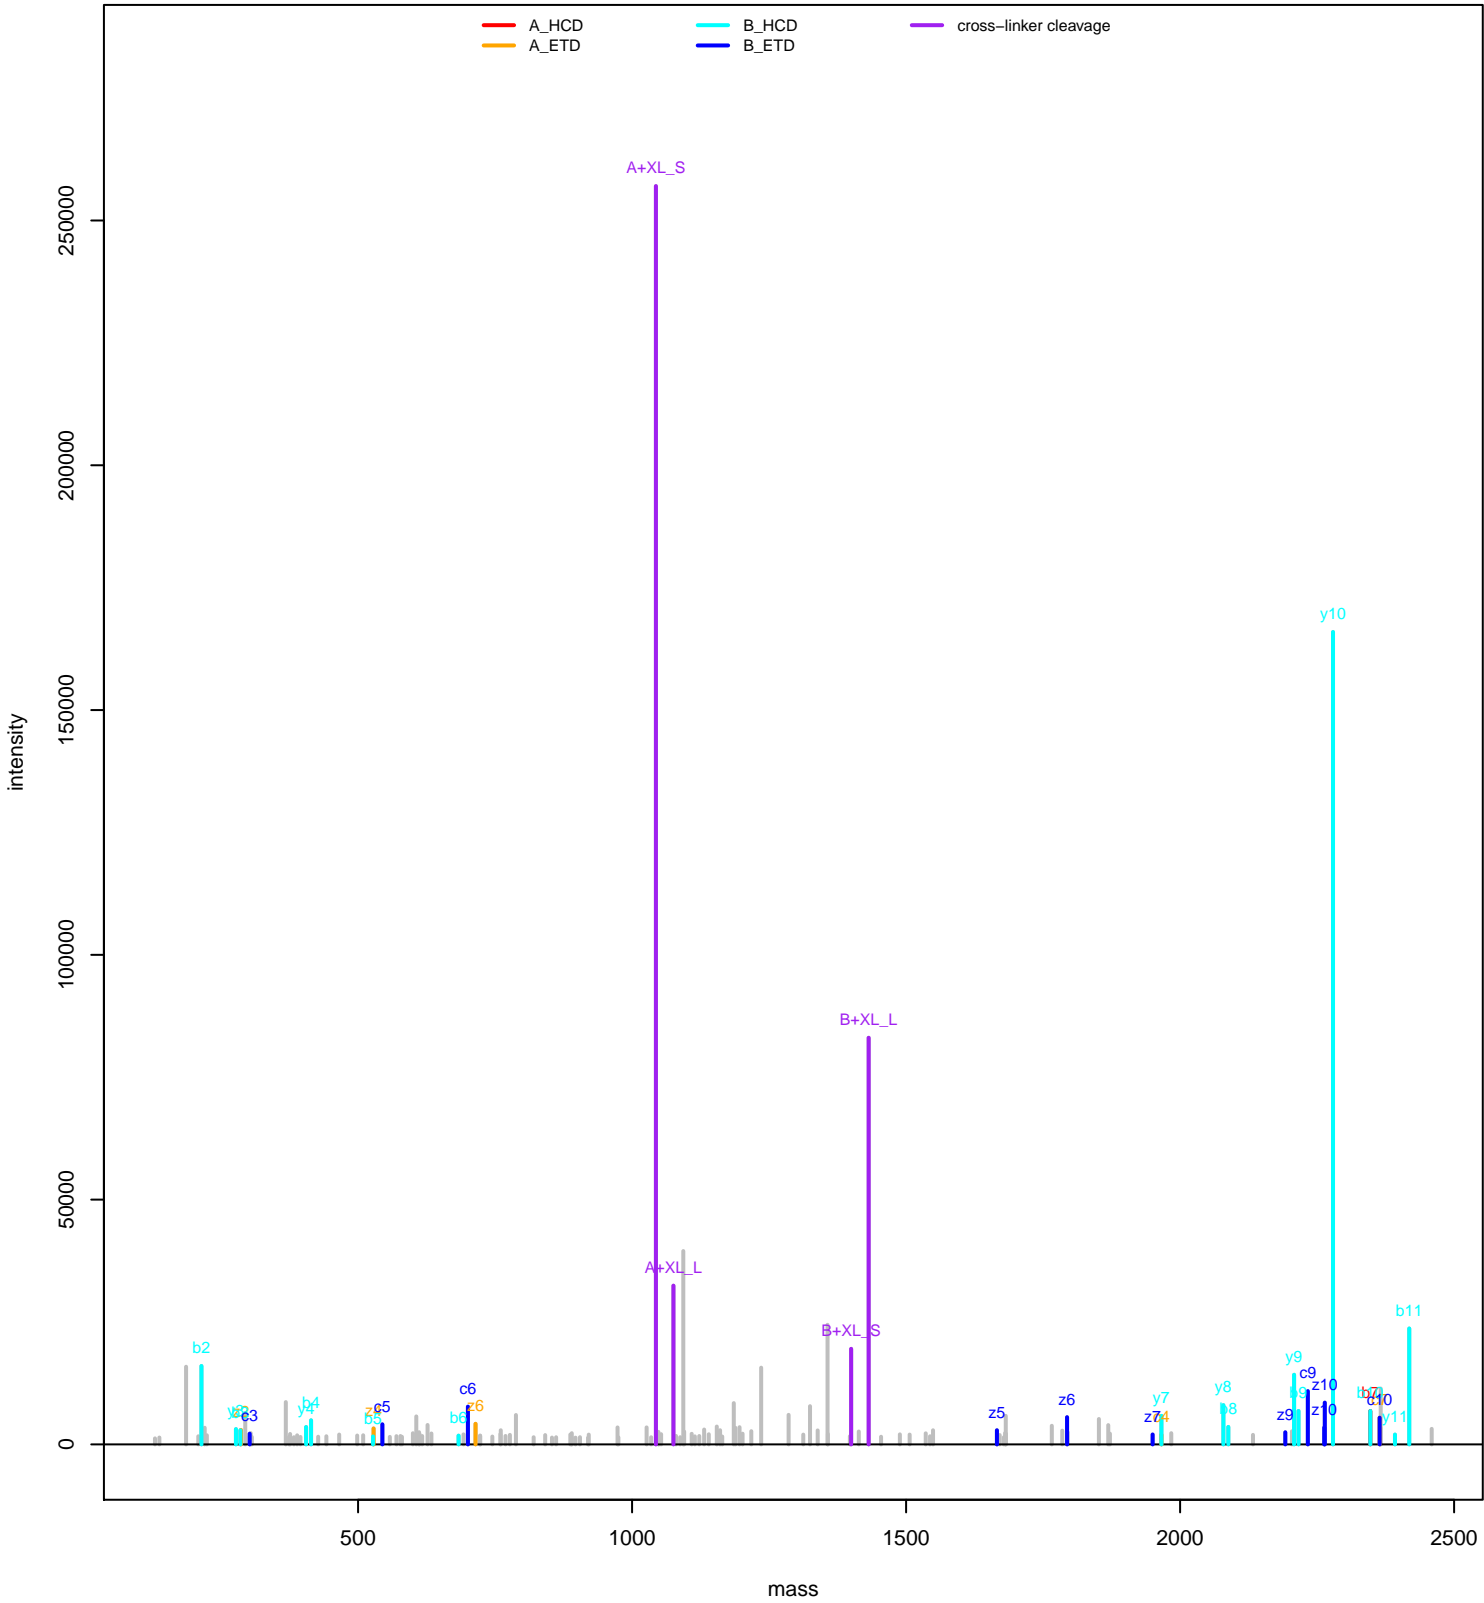

**MQEGQNRK+XL\_S**

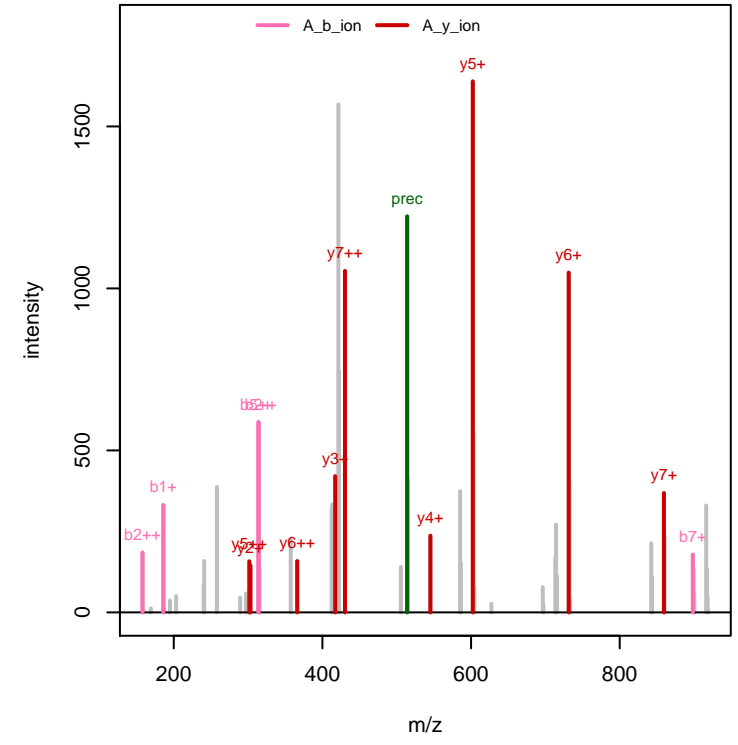

**MQEGQNRK+XL\_L**

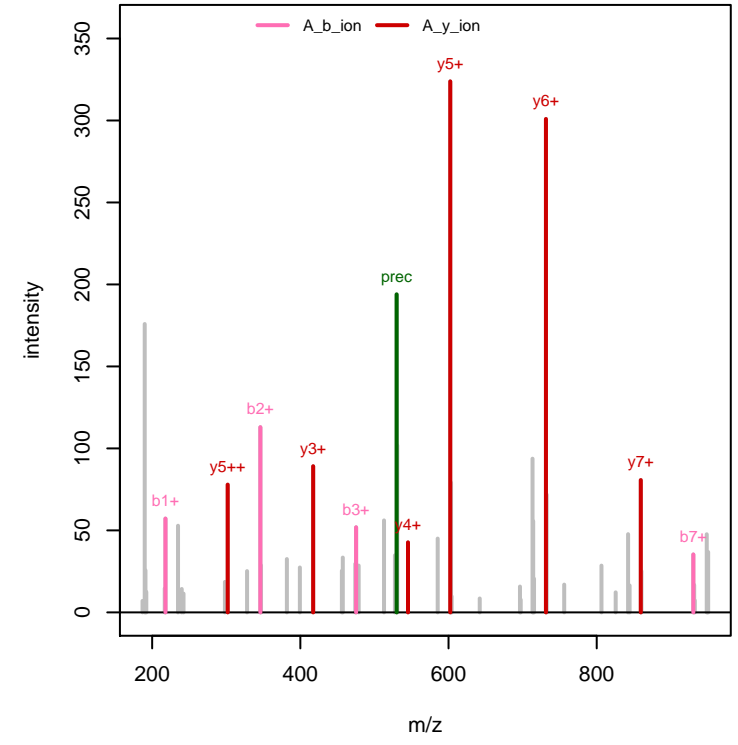

**TLAEIREKQMAG+XL\_S**

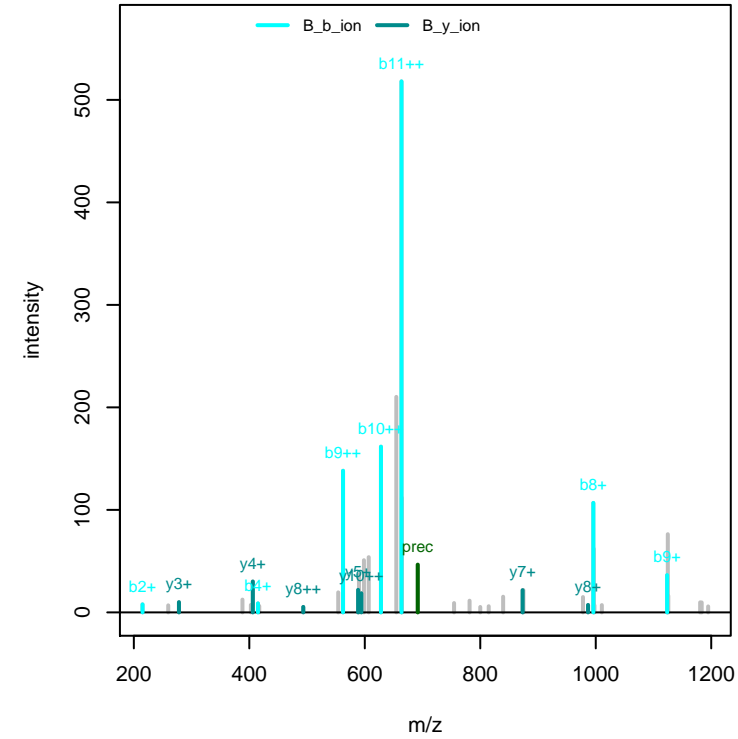

**TLAEIREKQMAG+XL\_L**

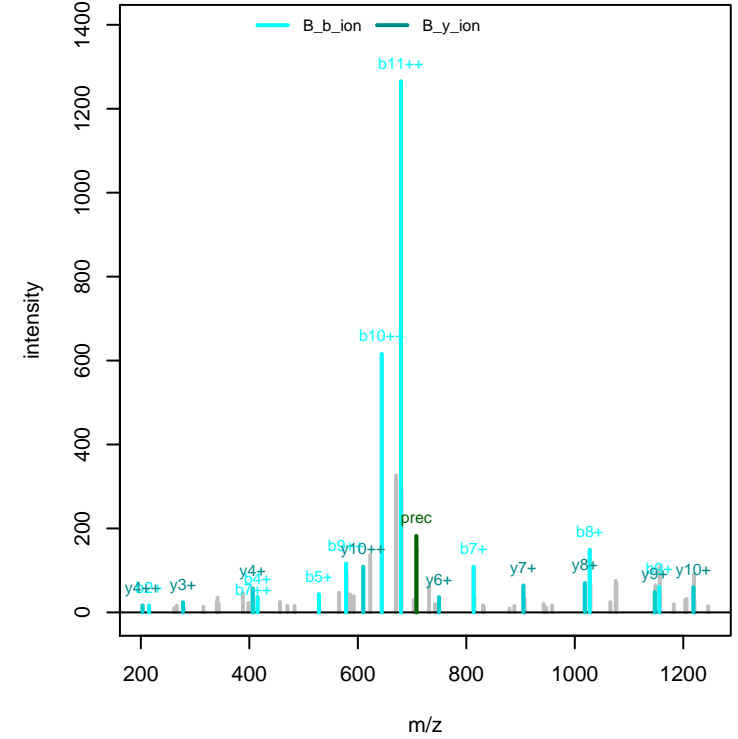

KAYVTLK  
APHVSEKASTAMEK

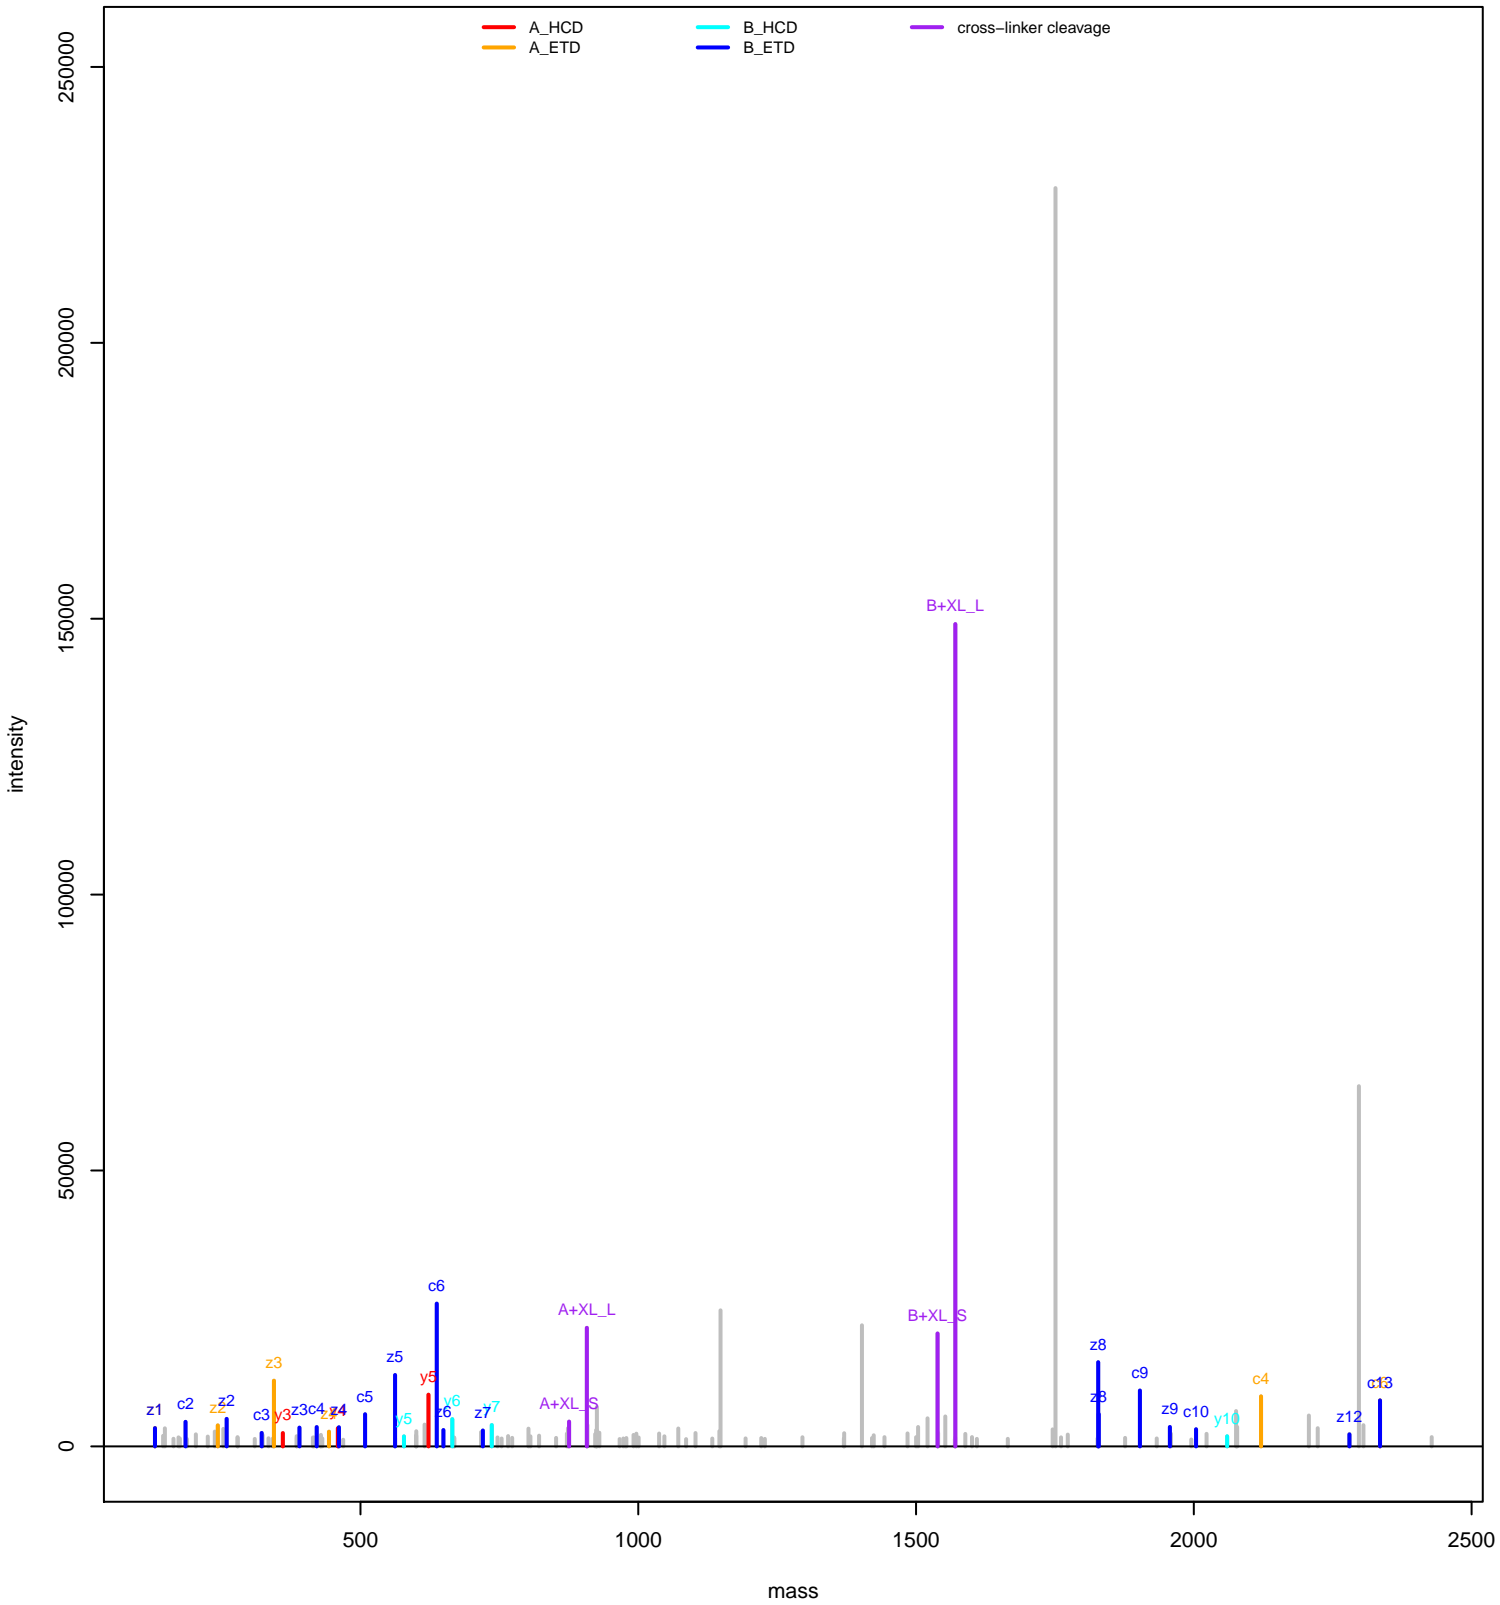

KAYVTLK+XL\_S

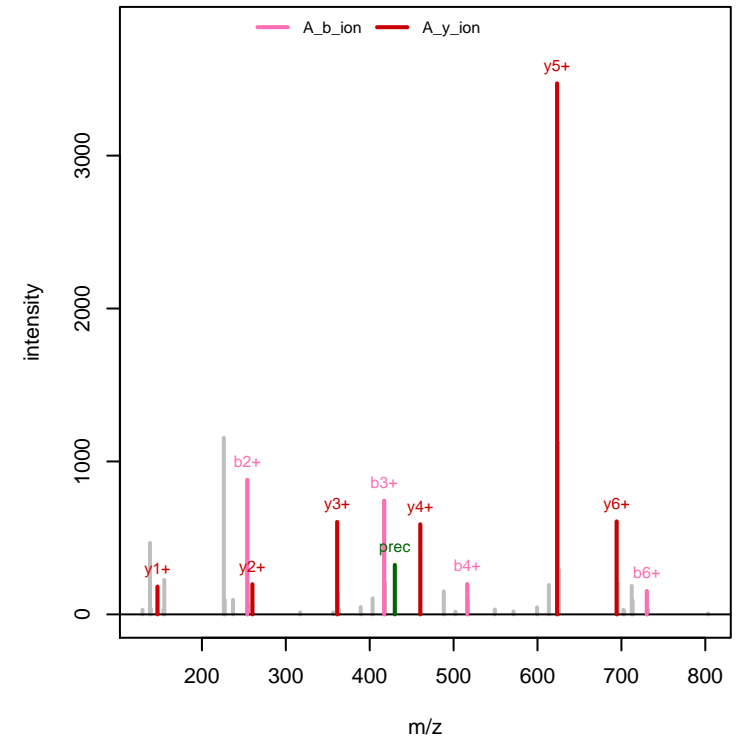

KAYVTLK+XL\_L

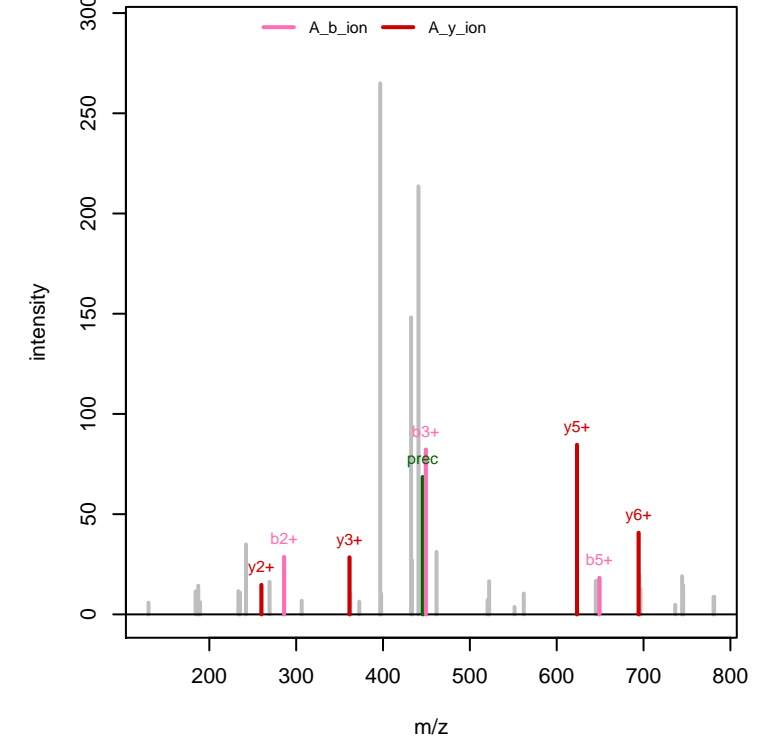

APHVSEKASTAMEK+XL\_S

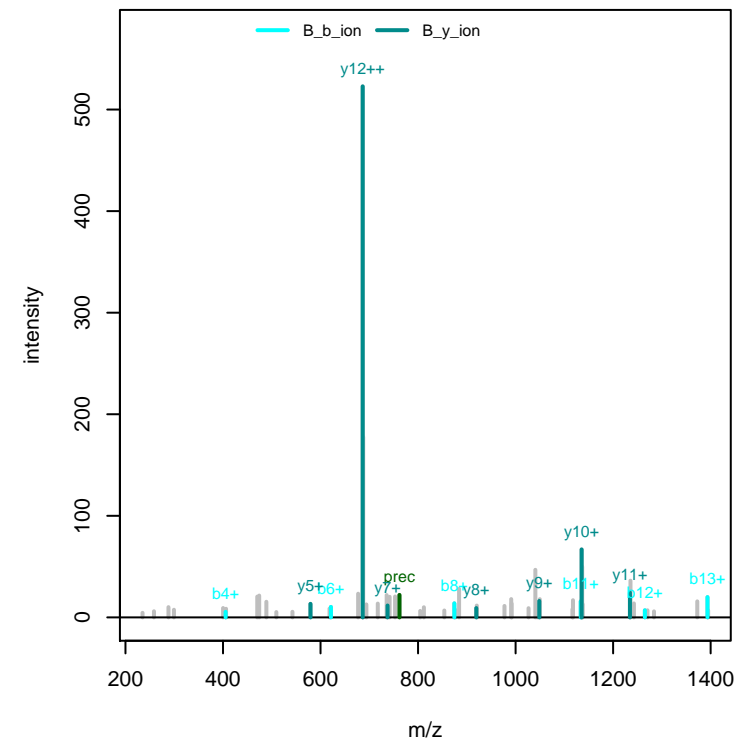

APHVSEKASTAMEK+XL\_L

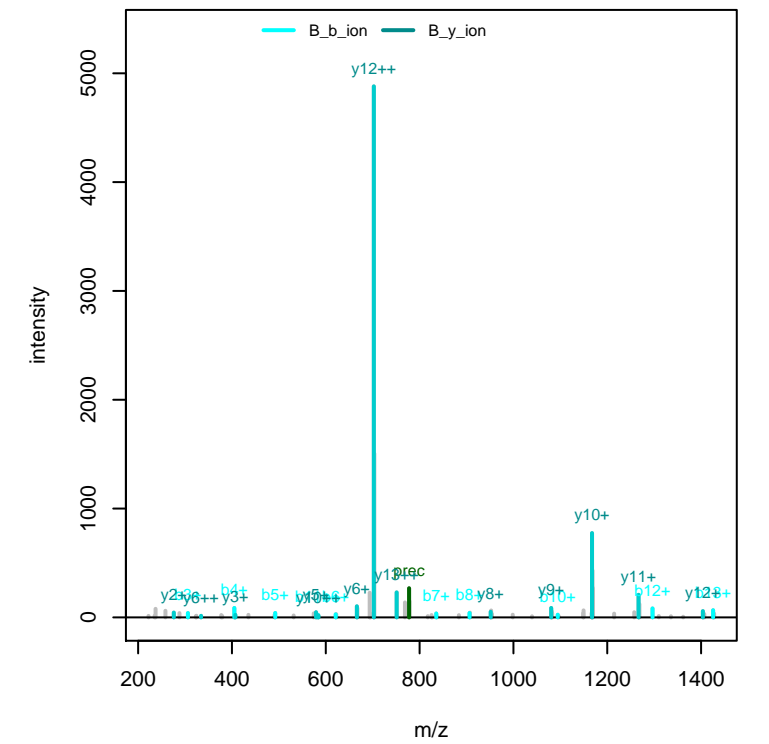

KDAEVR  
MDKCVEAFK

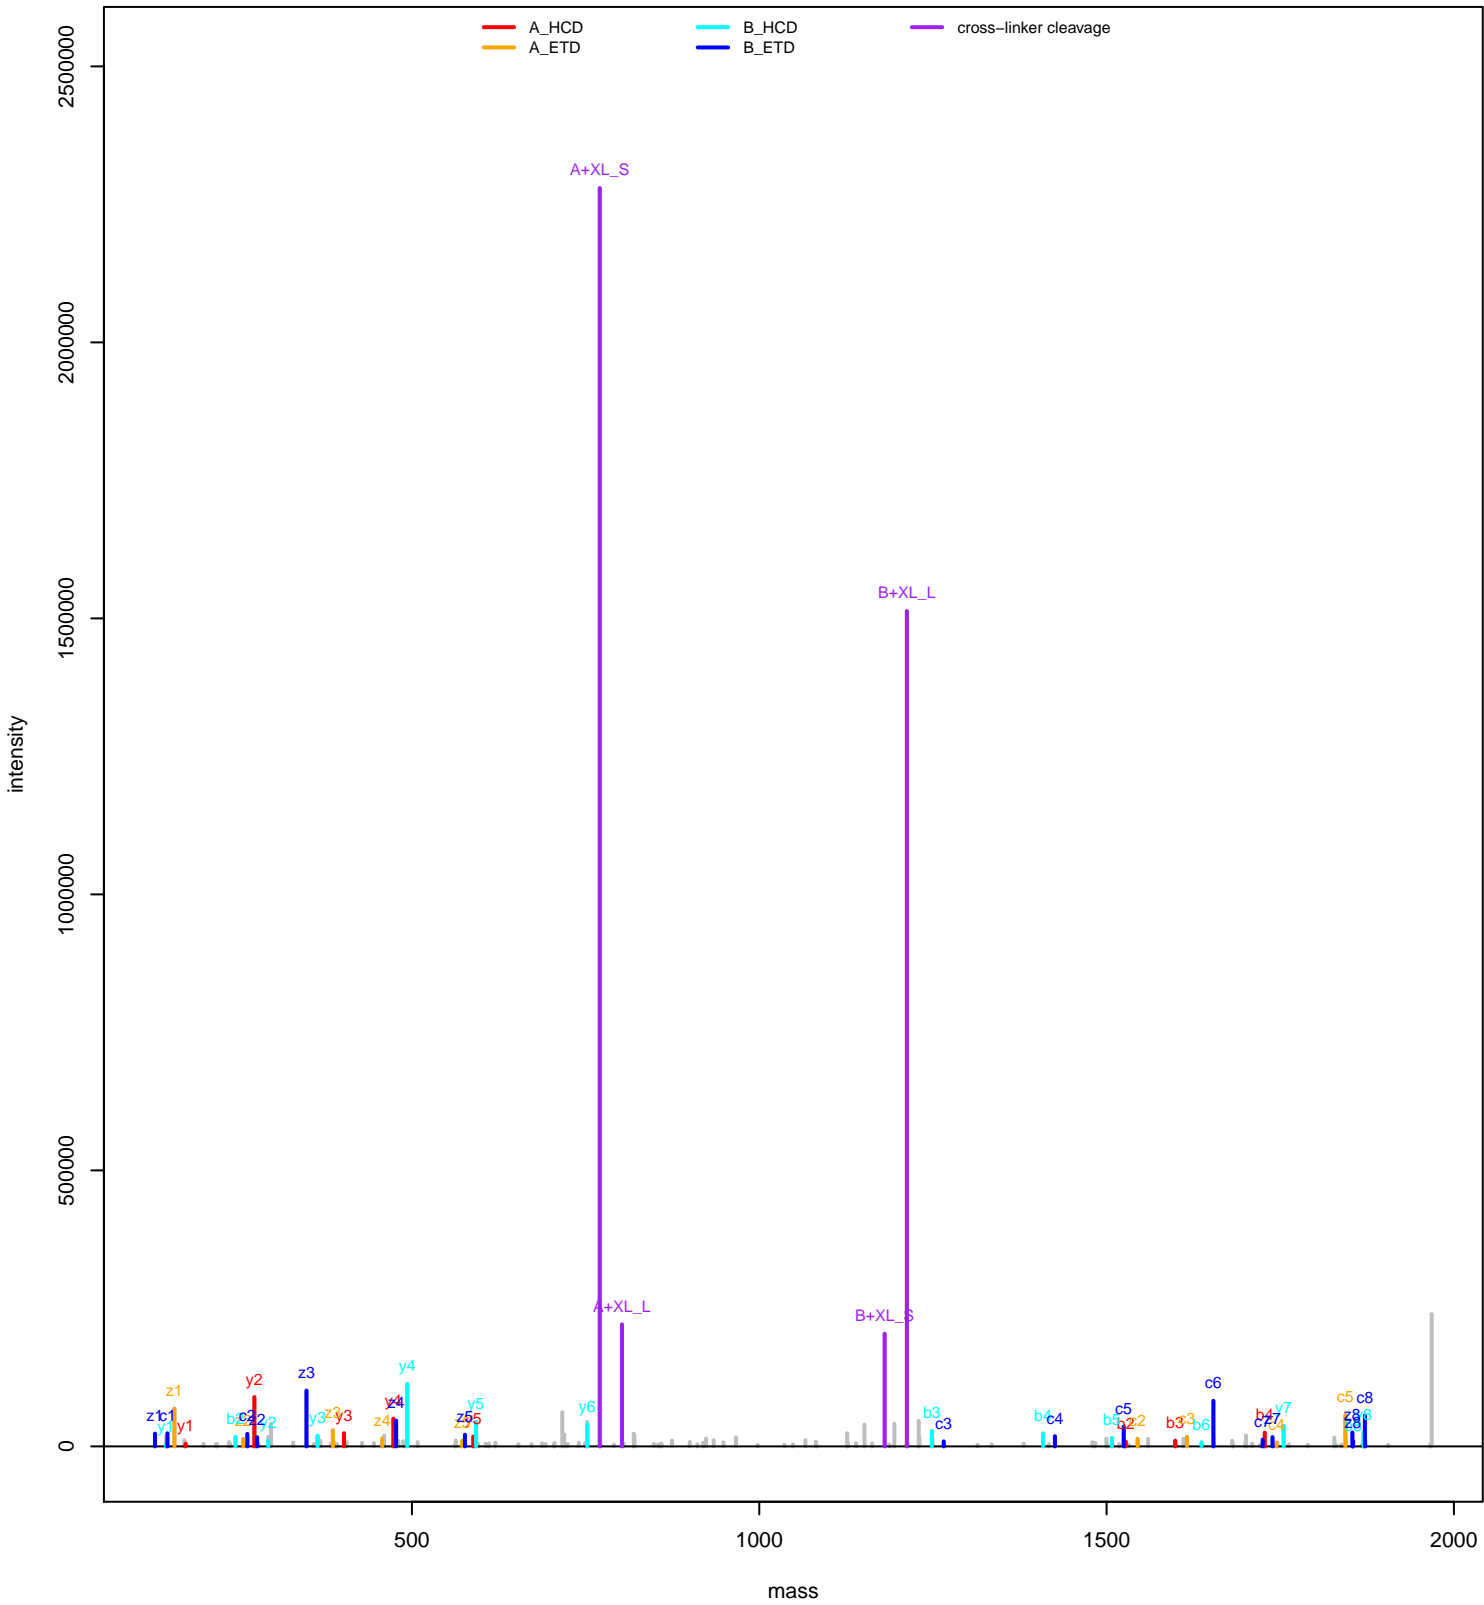

KDAEVR+XL\_S

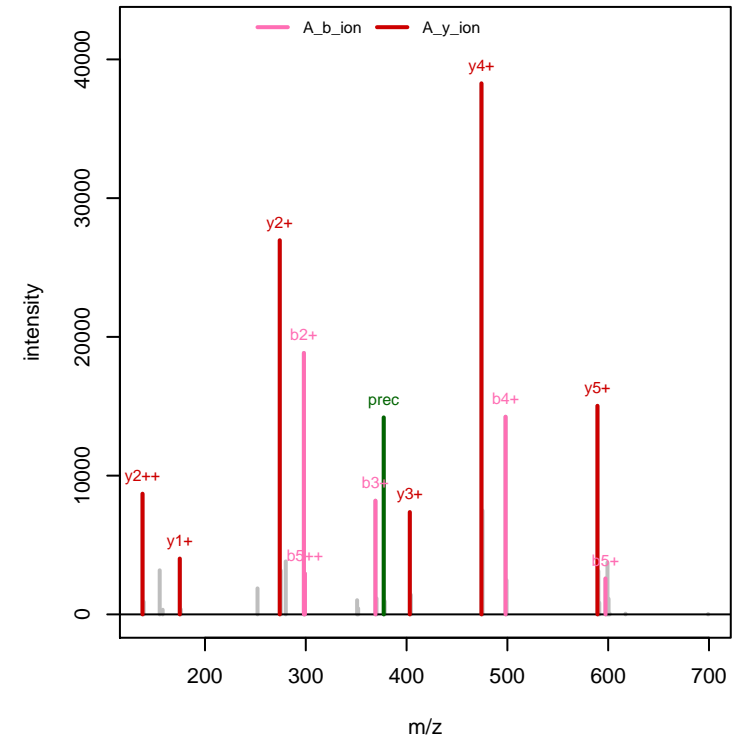

KDAEVR+XL\_L

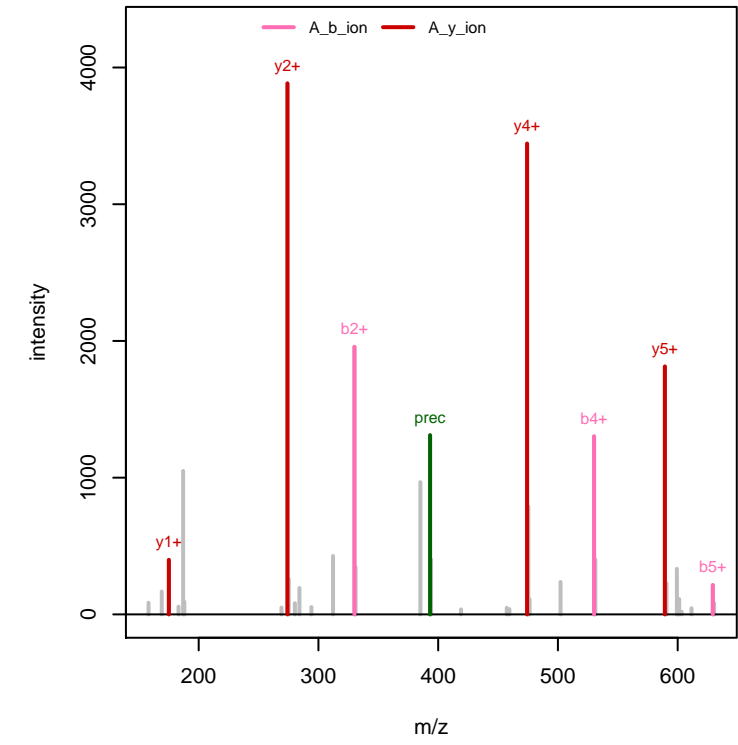

MDKCVEAFK+XL\_S

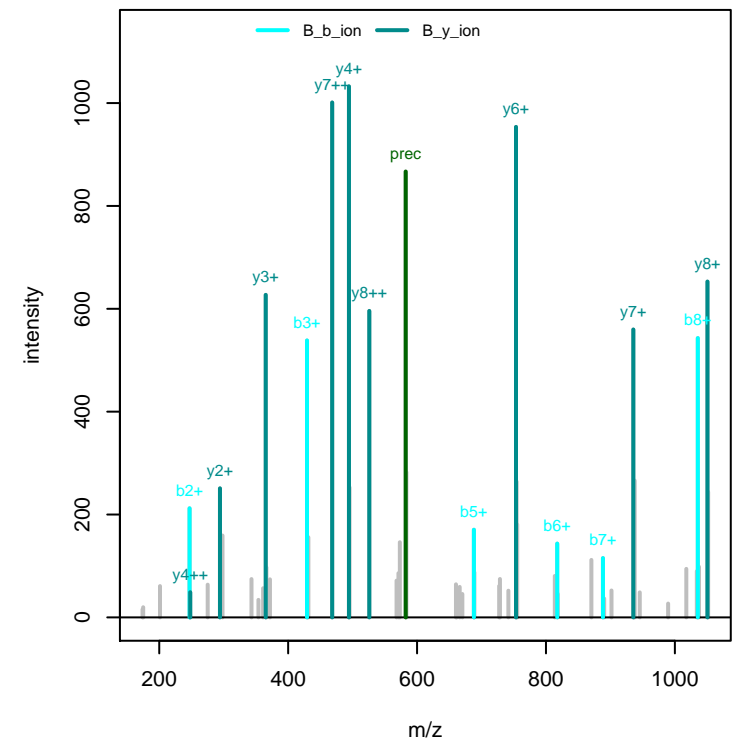

MDKCVEAFK+XL\_L

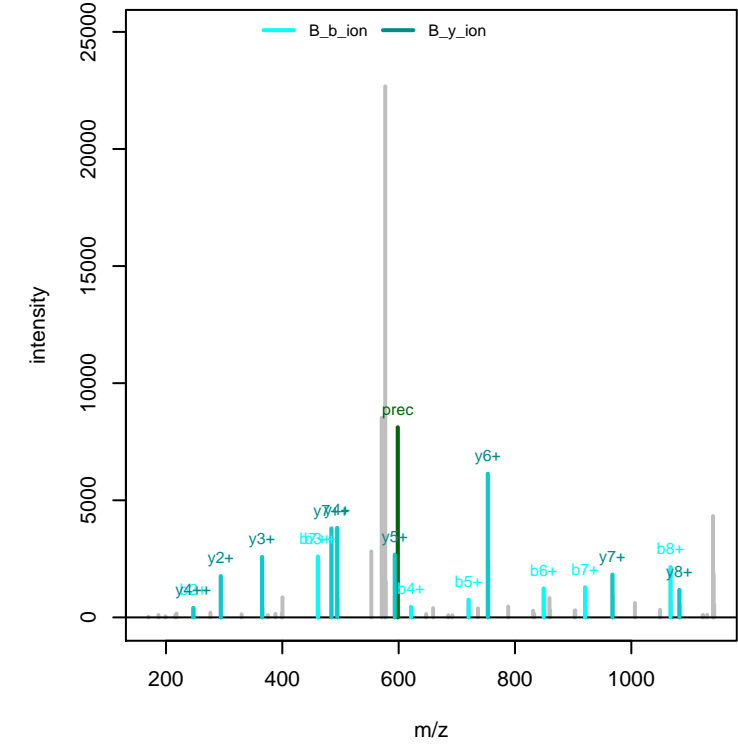

### AKELRR ILKCGFR

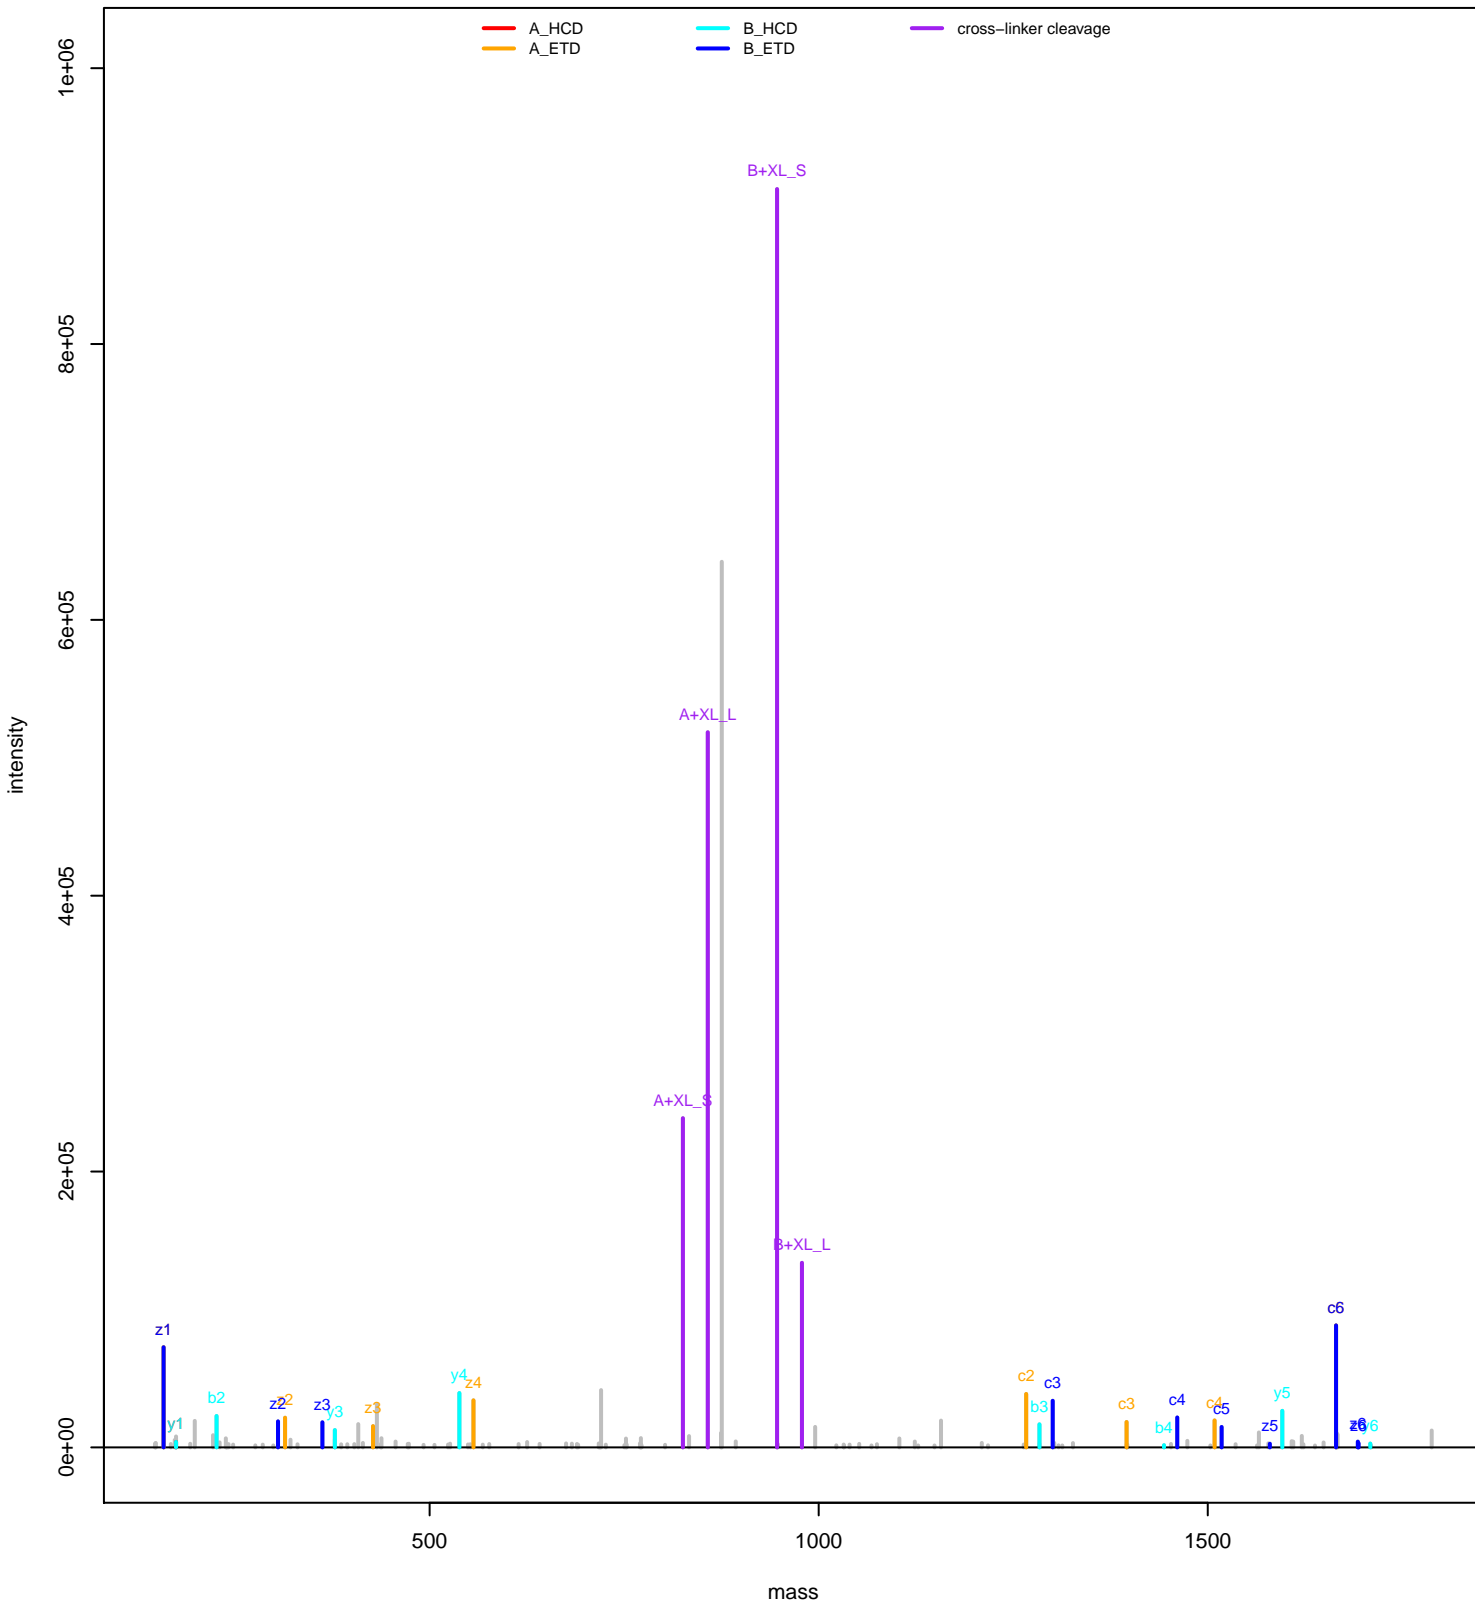

### AKELRR+XL\_S

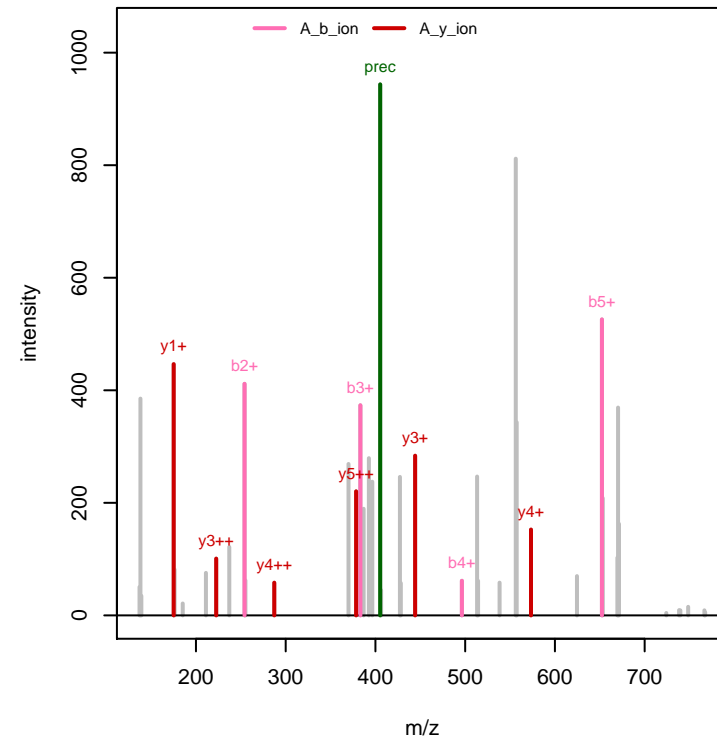

### AKELRR+XL\_L

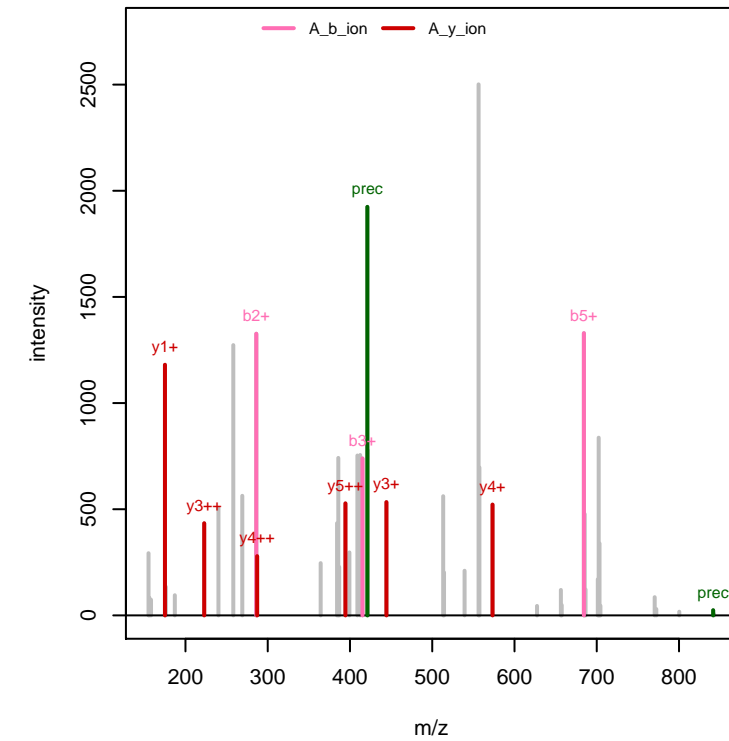

### ILKCGFR+XL\_S

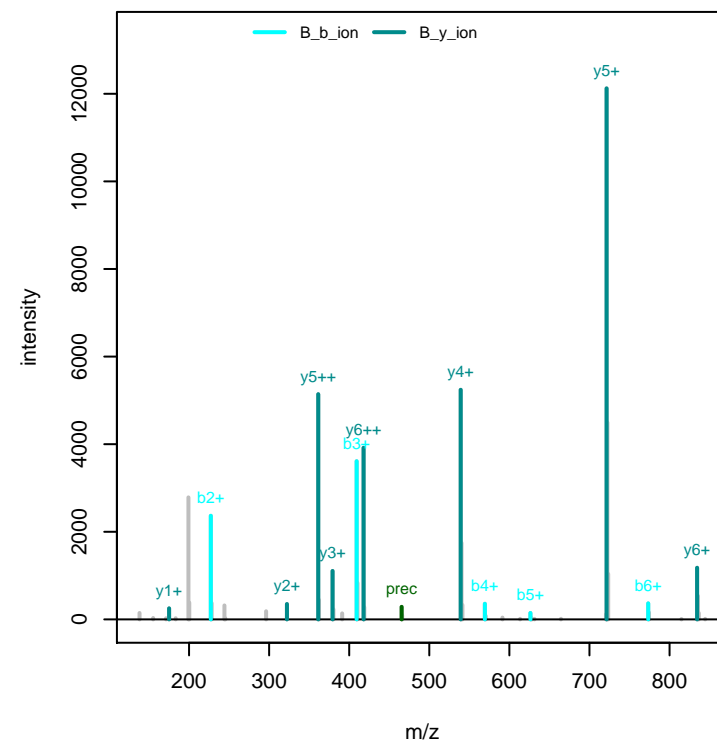

### ILKCGFR+XL\_L

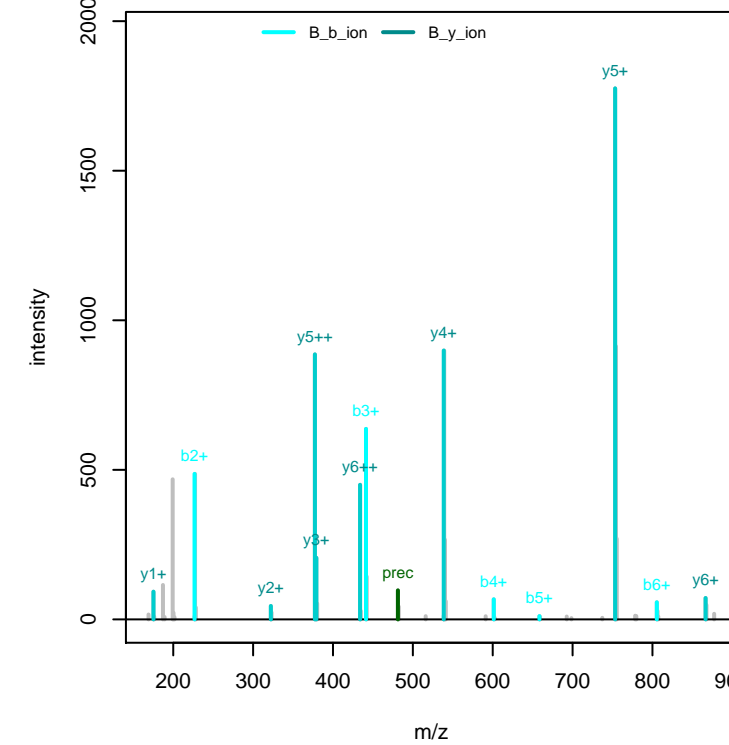

LLQKLR  
NPEKHDAIDR

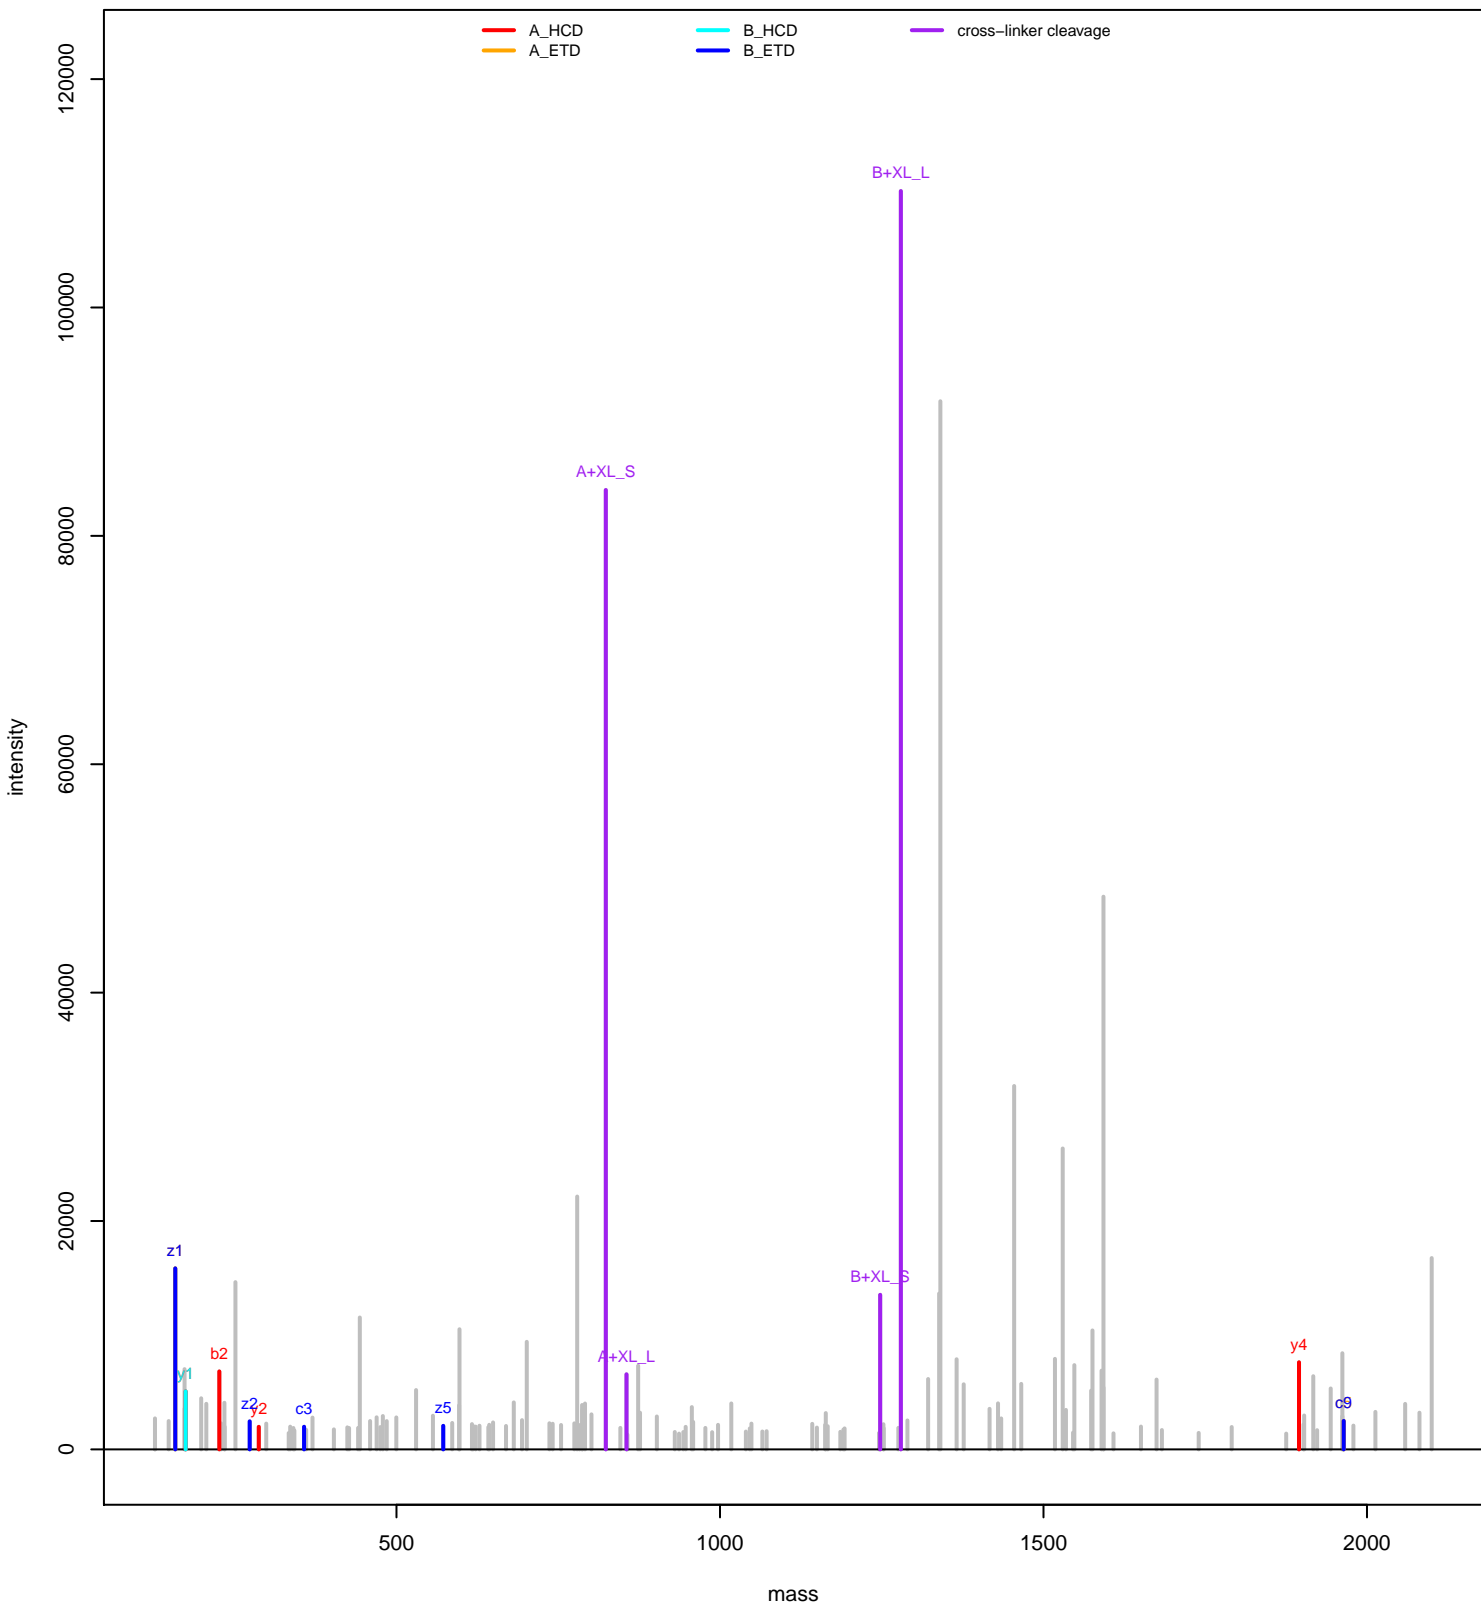

LLQKLR+XL\_S

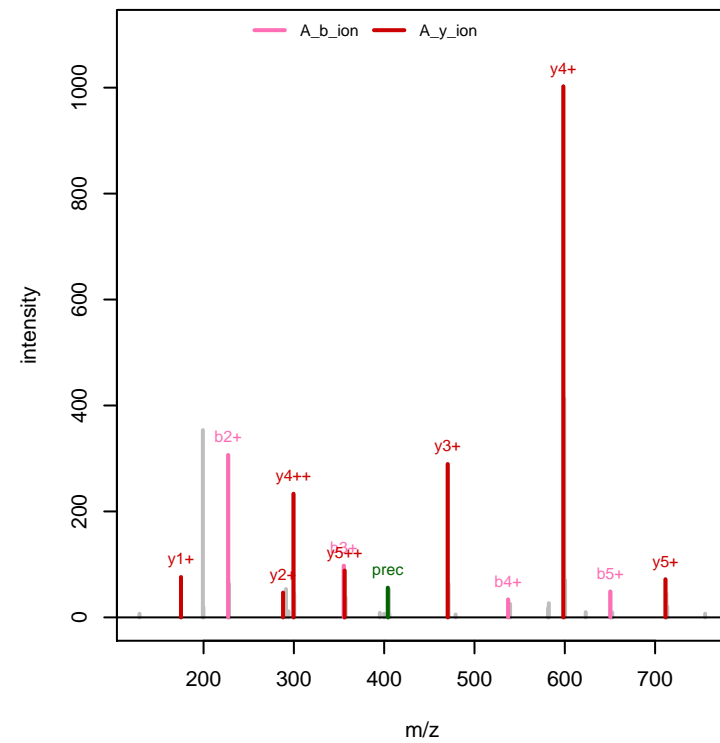

LLQKLR+XL\_L

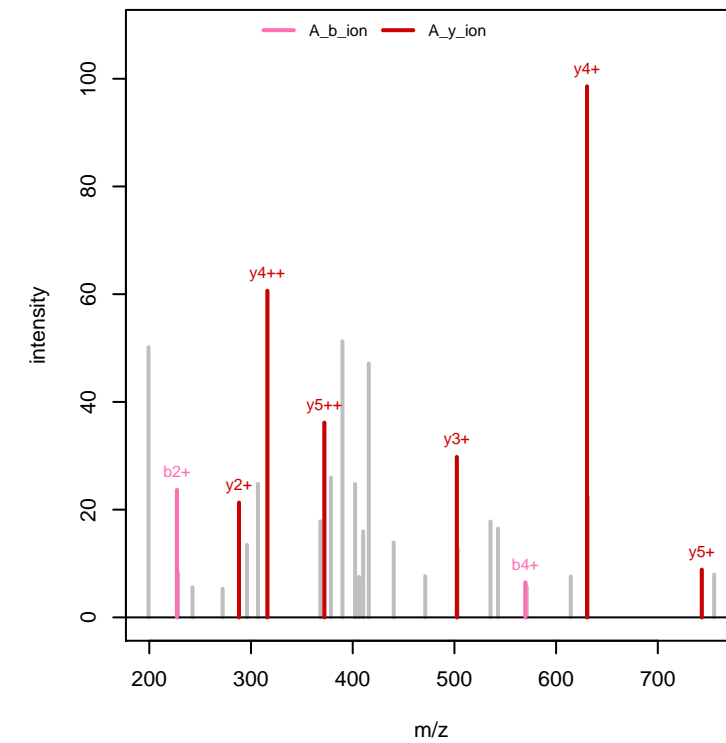

NPEKHDAIDR+XL\_S

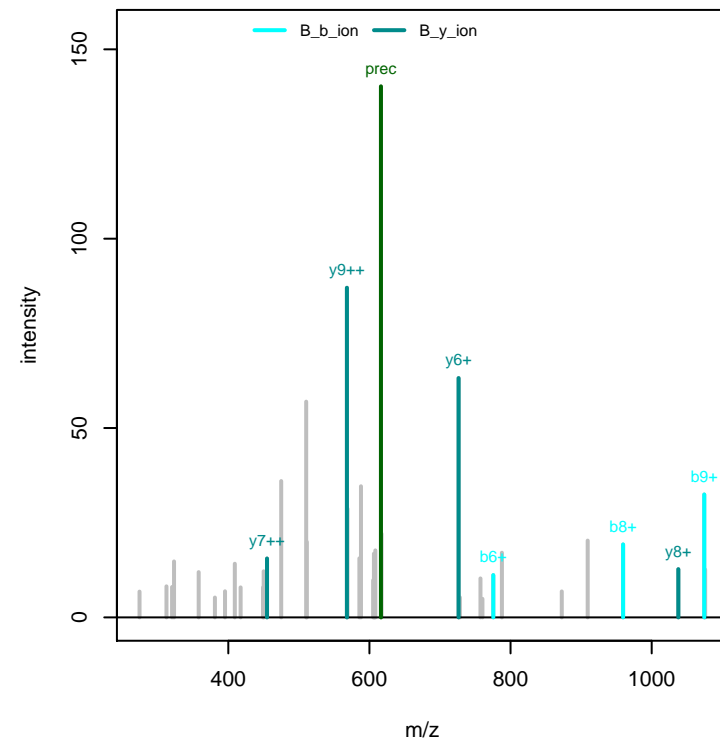

NPEKHDAIDR+XL\_L

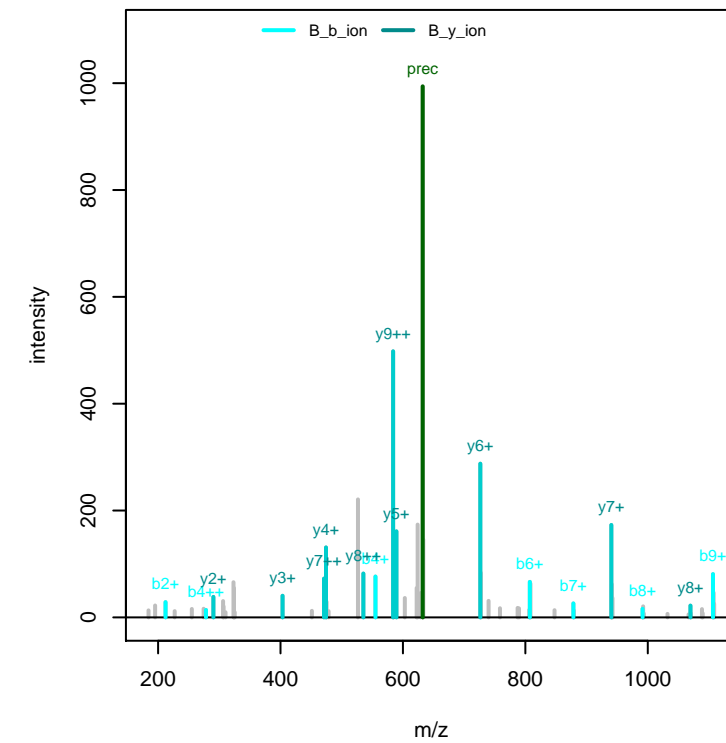

**DNLAEFSKK**  
**GAADGTNWKIDNK**

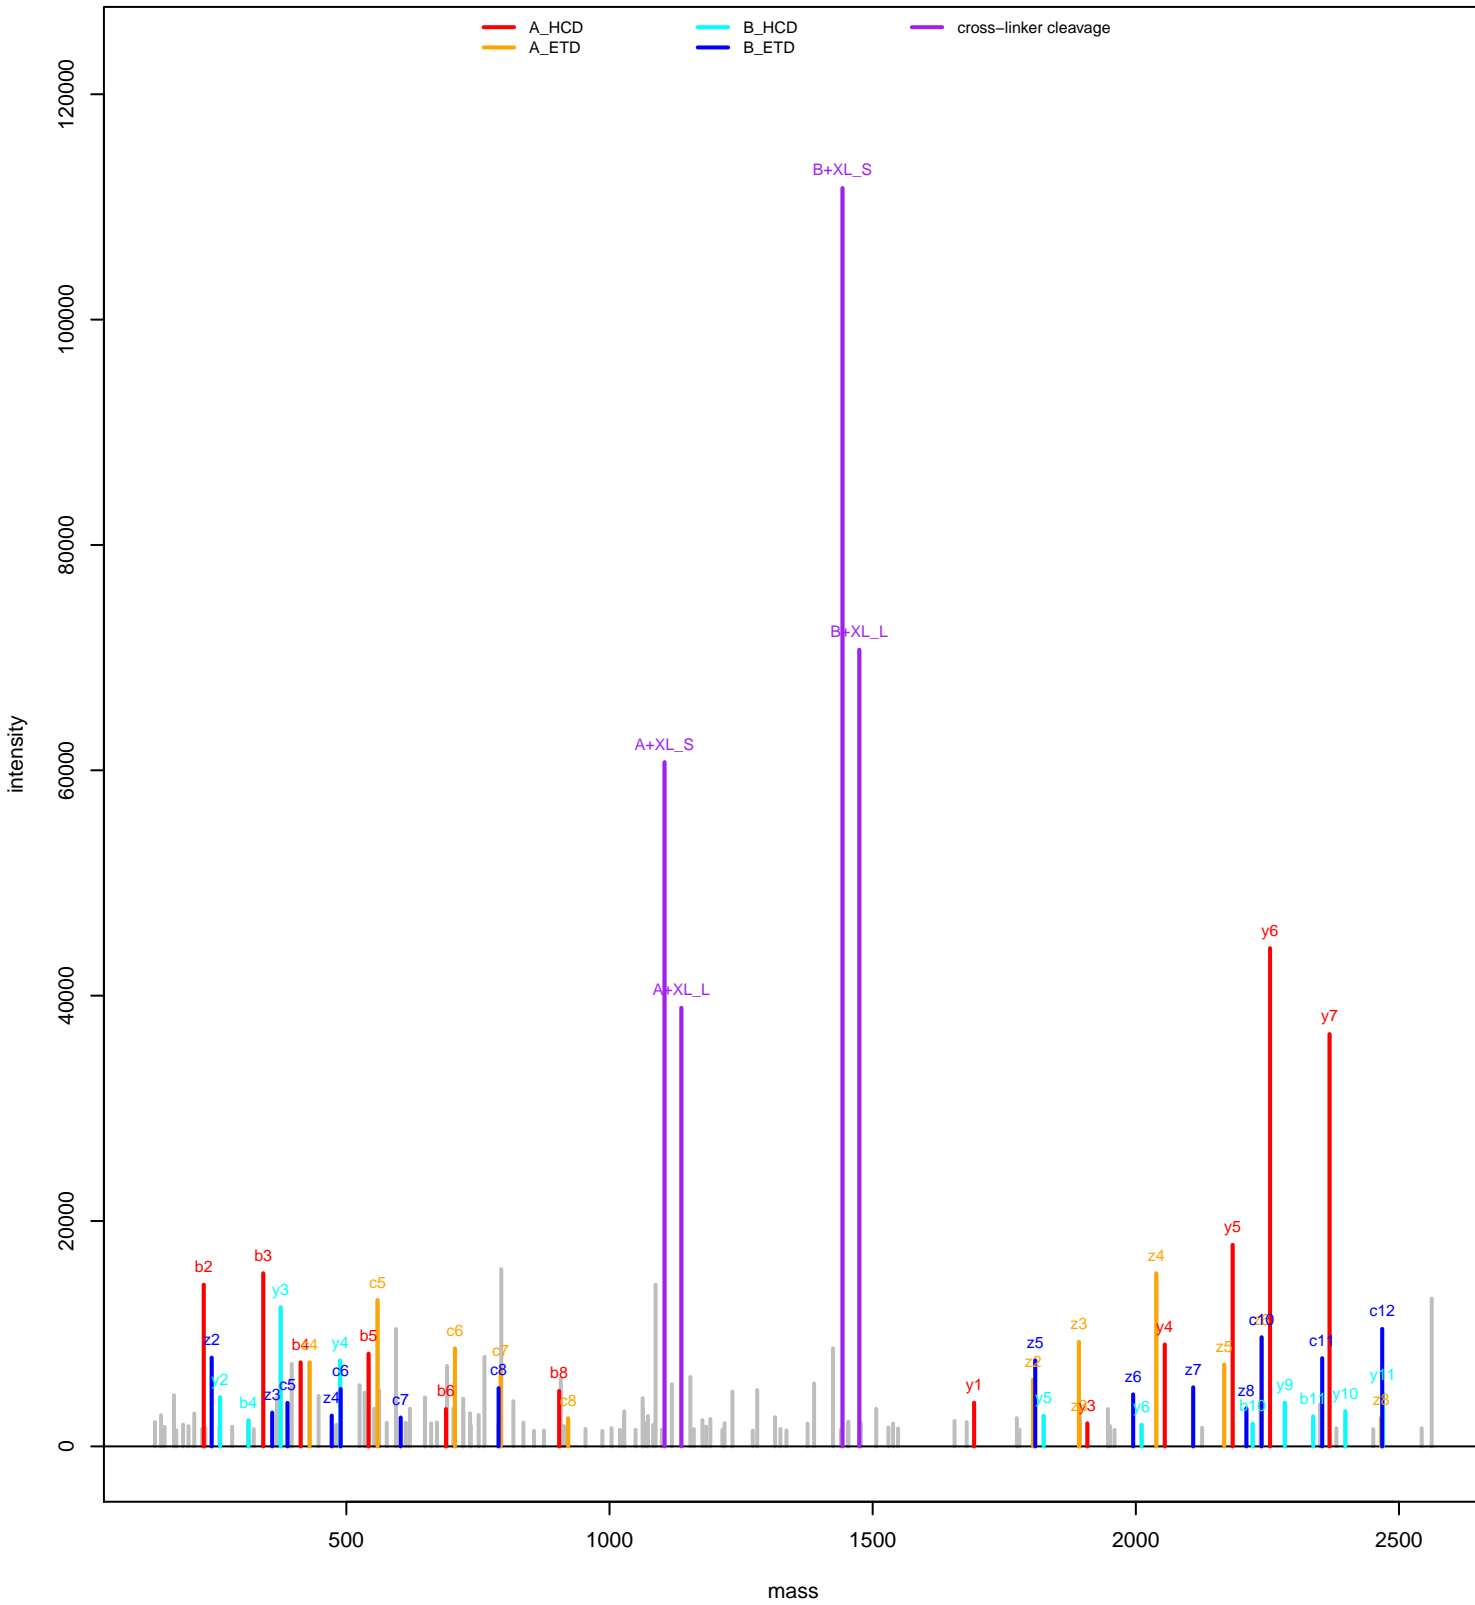

**DNLAEFSKK+XL\_S**

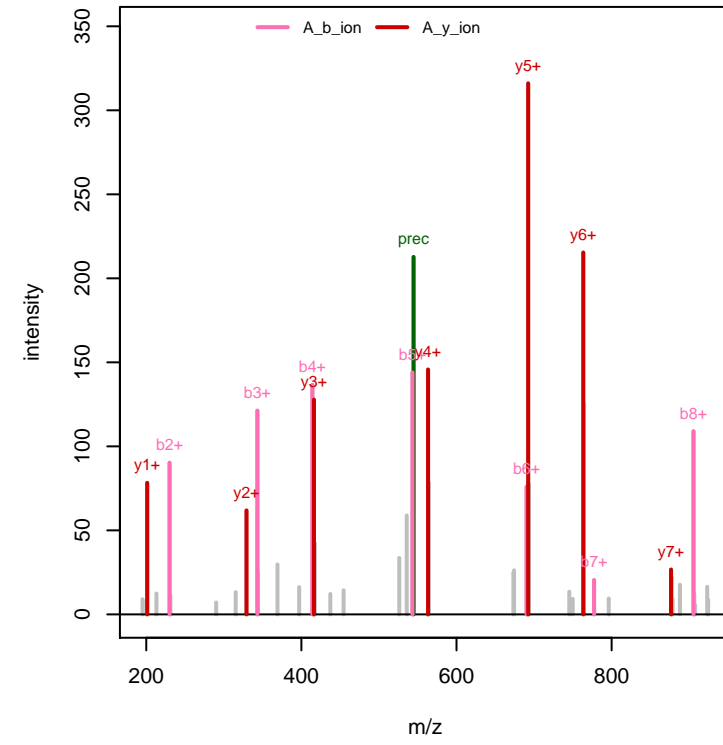

**DNLAEFSKK+XL\_L**

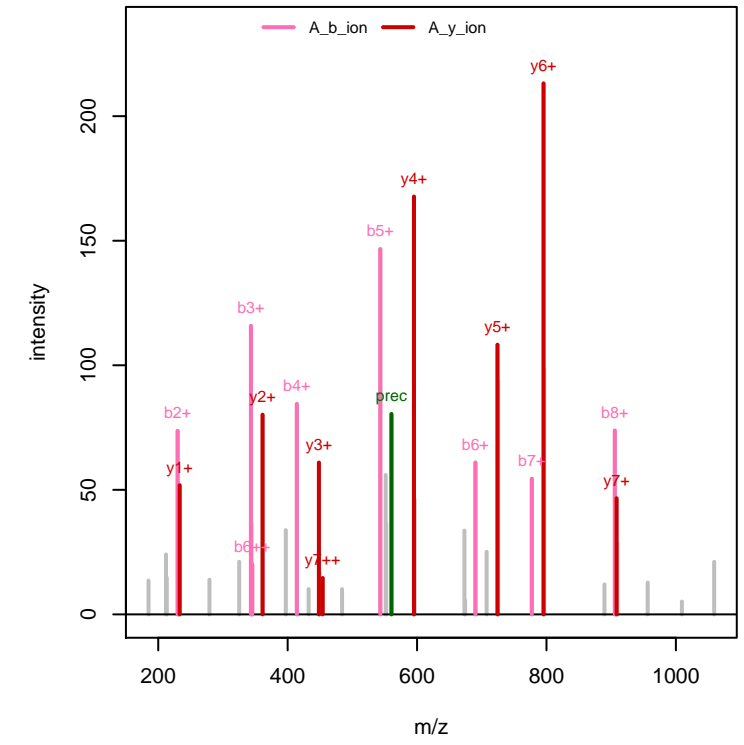

**GAADGTNWKIDNK+XL\_S**

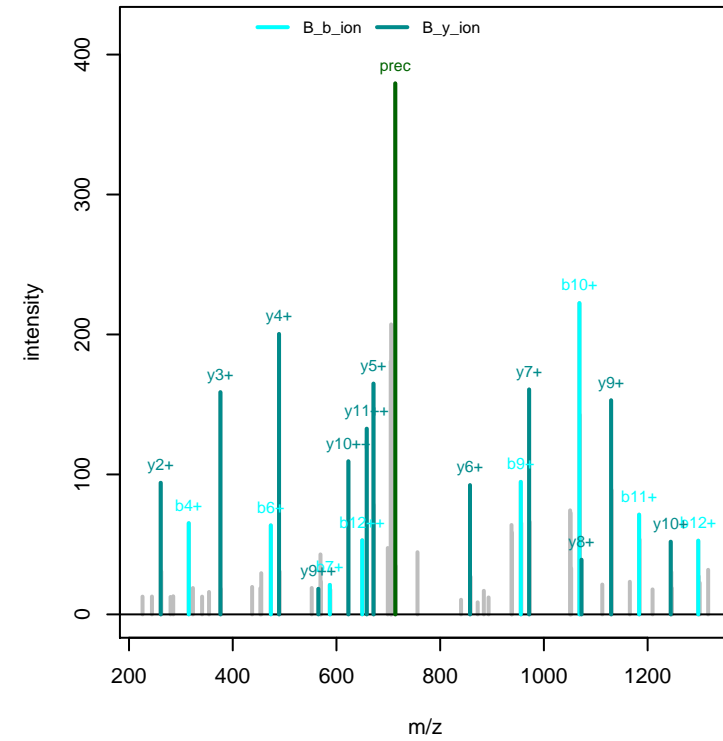

**GAADGTNWKIDNK+XL\_L**

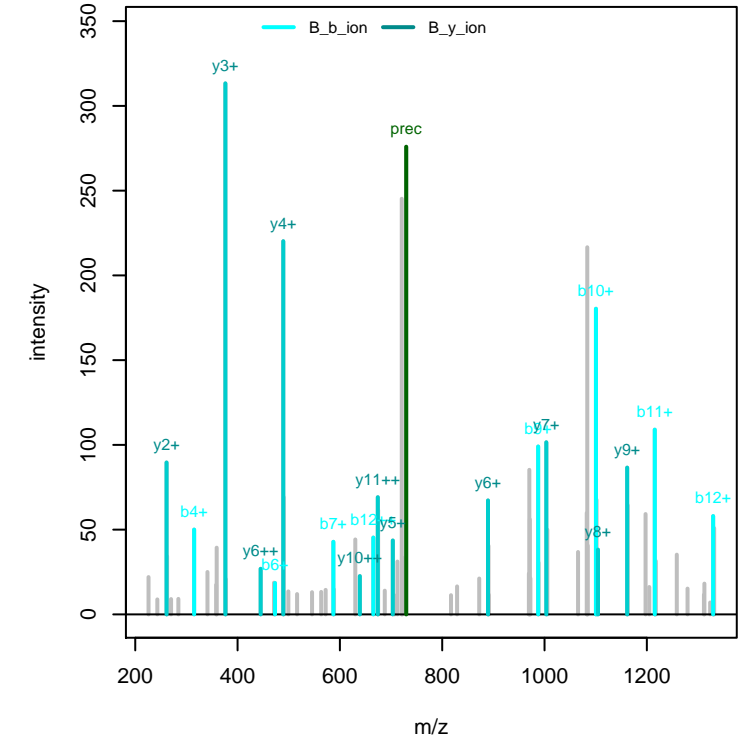

MAVKGSQVIK  
GSSLQQGFQKPAQAVNR

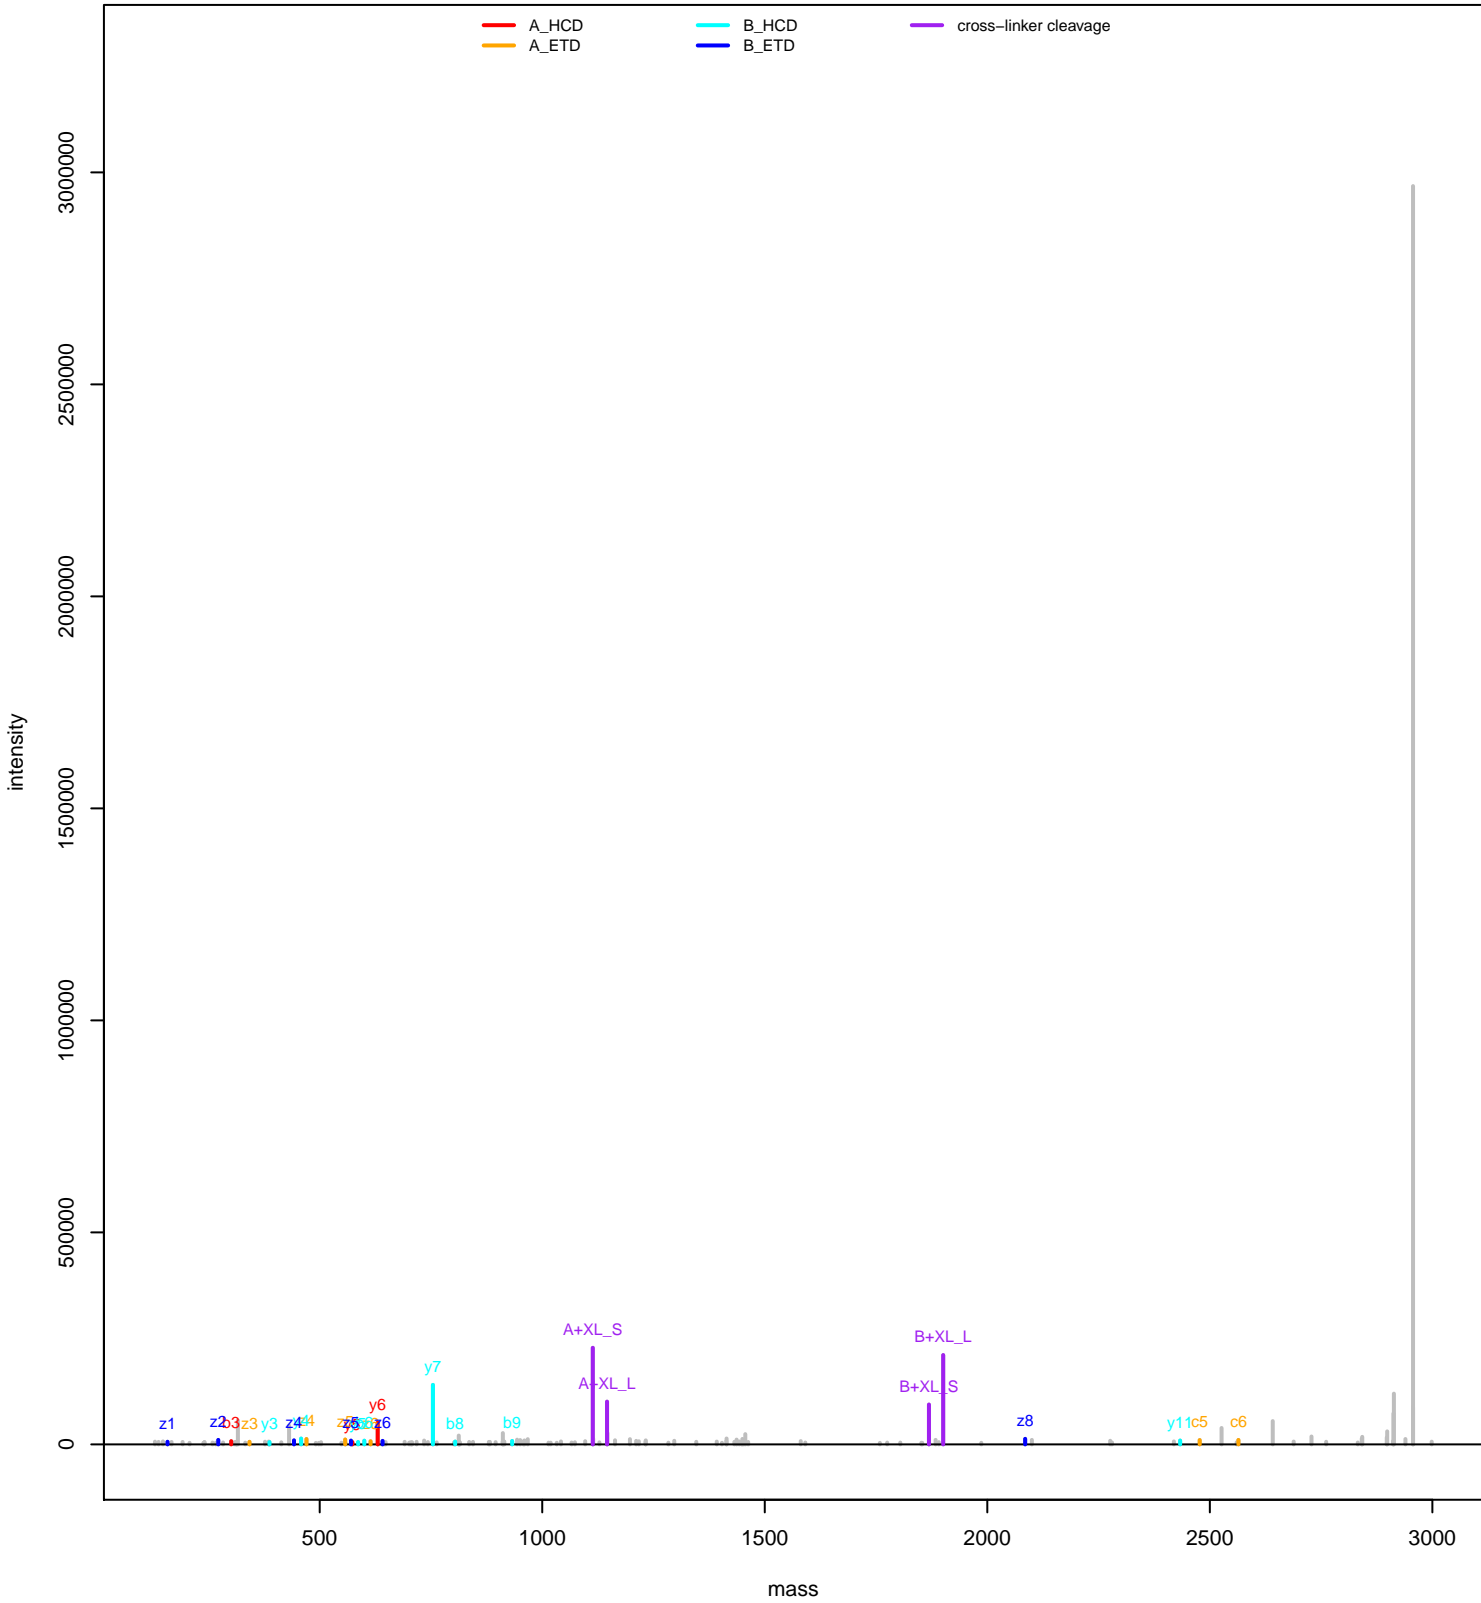

MAVKGSQVIK+XL\_S

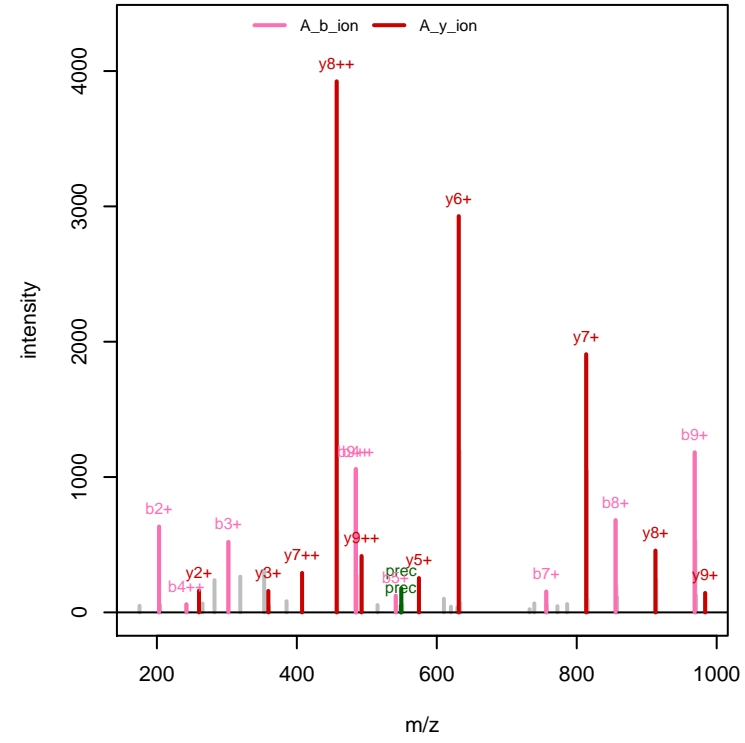

MAVKGSQVIK+XL\_L

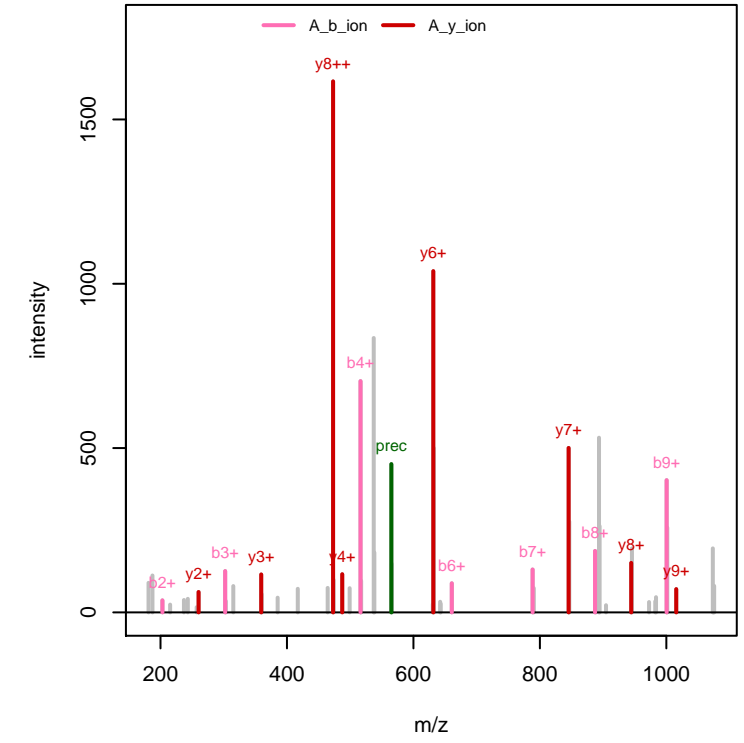

GSSLQQGFQKPAQAVNR+XL\_S

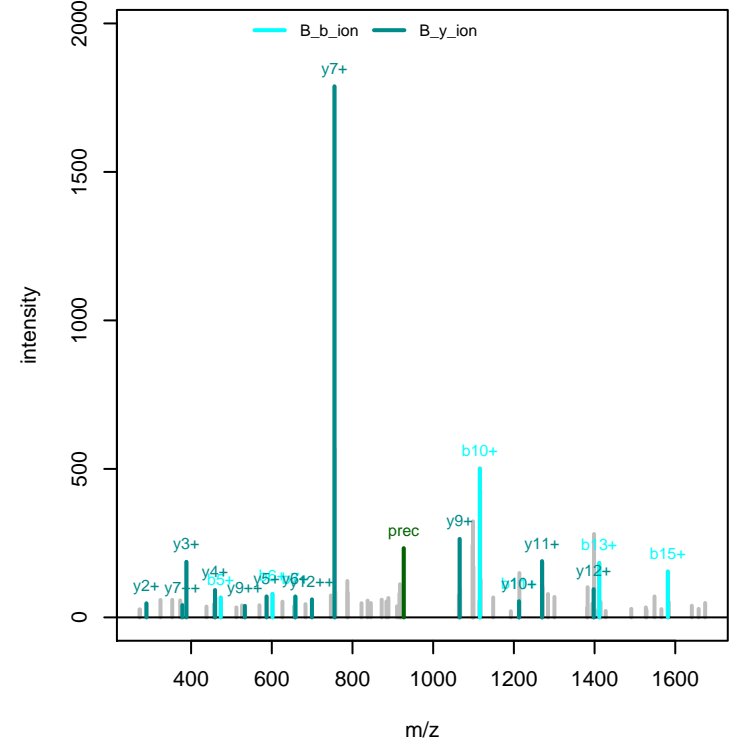

GSSLQQGFQKPAQAVNR+XL\_L

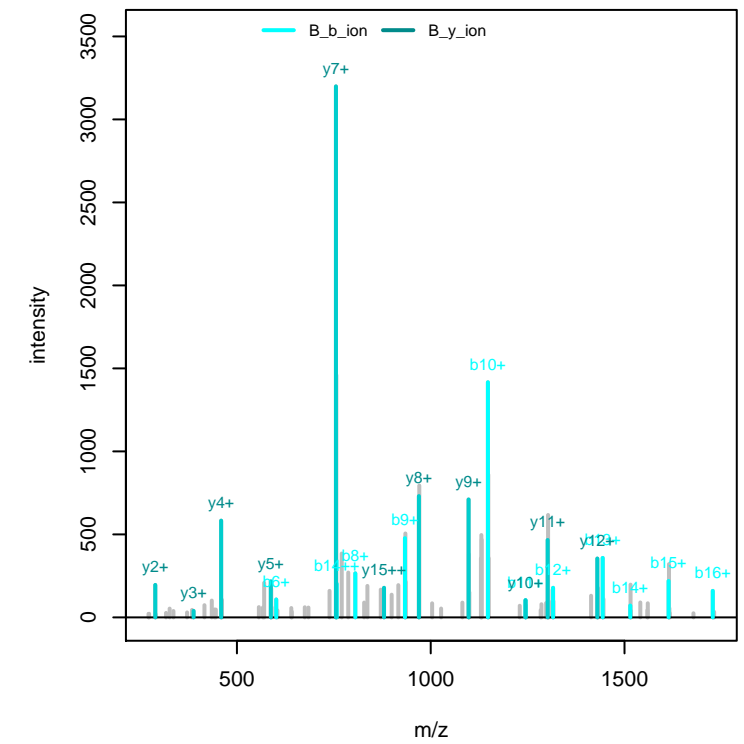

AAGSLVKR  
ETLEKMDK

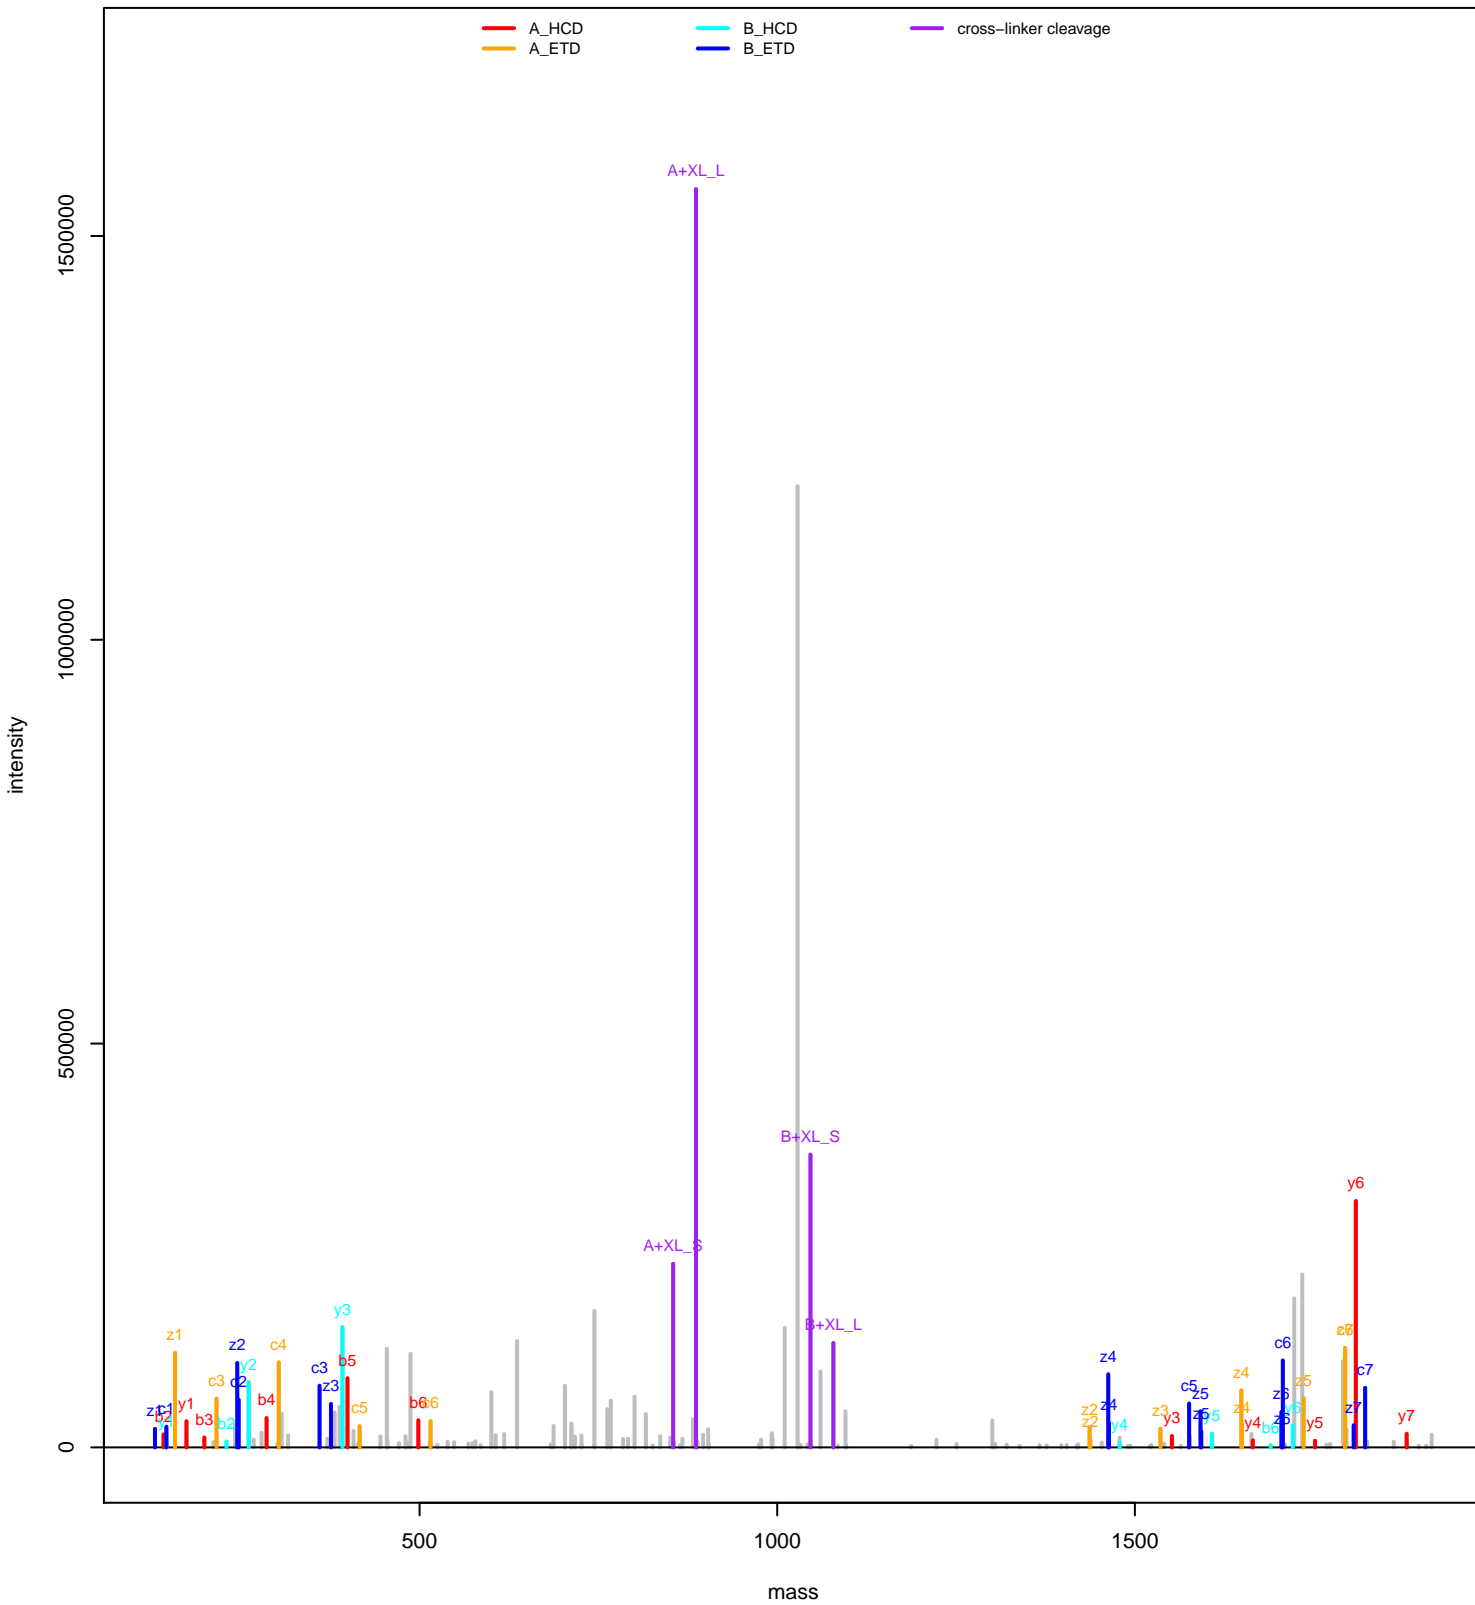

AAGSLVKR+XL\_S

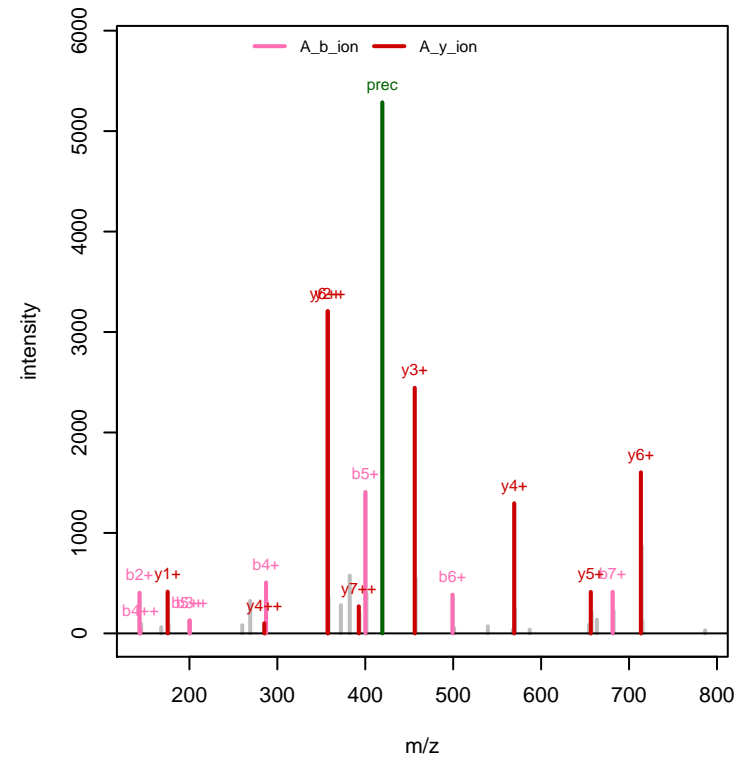

AAGSLVKR+XL\_L

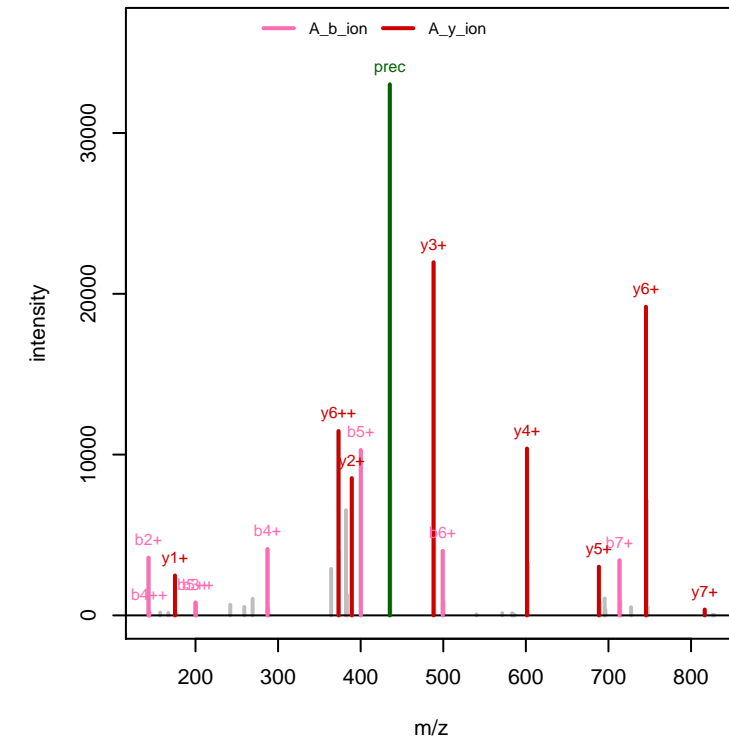

ETLEKMDK+XL\_S

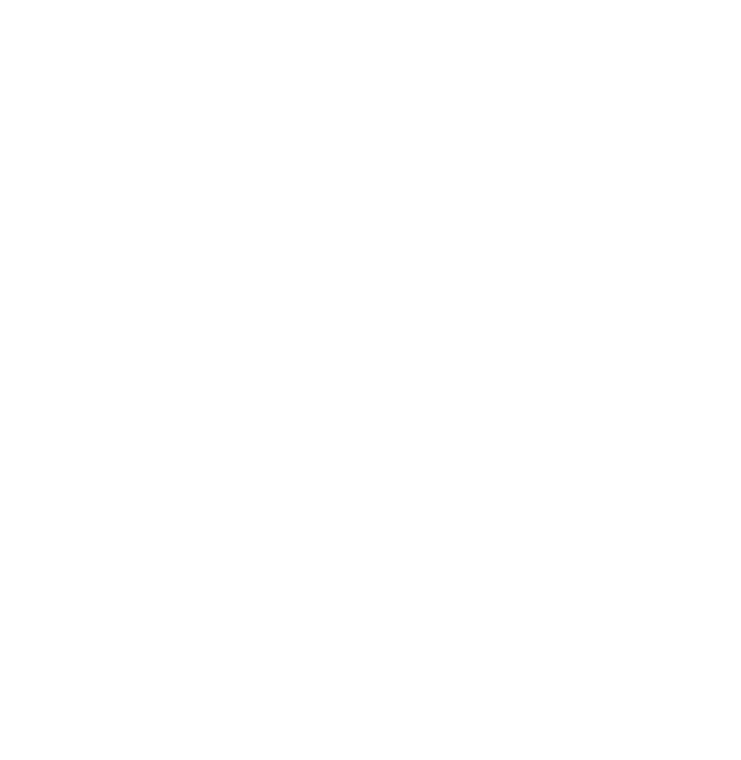

ETLEKMDK+XL\_L

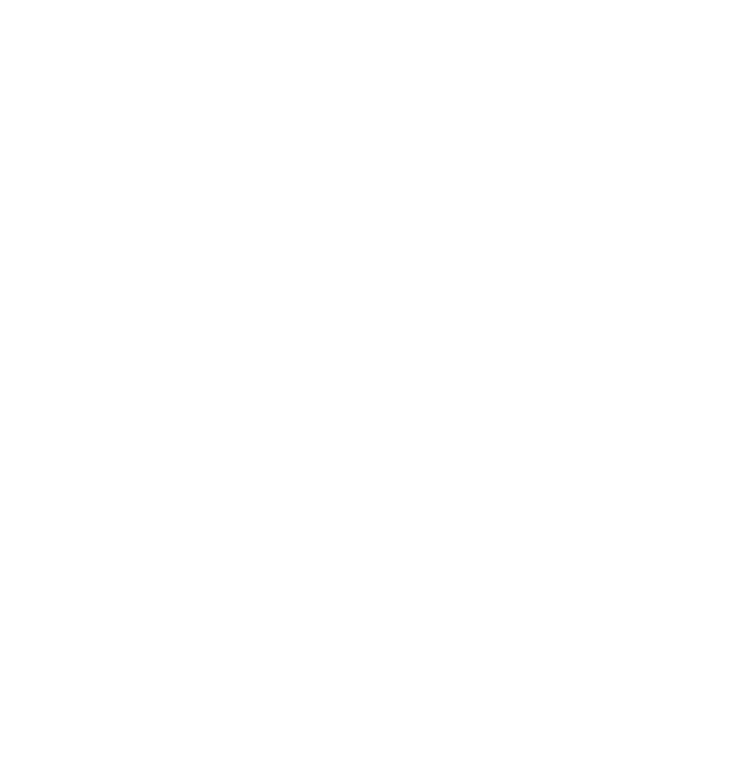



KEAVGR  
ETYNILKK

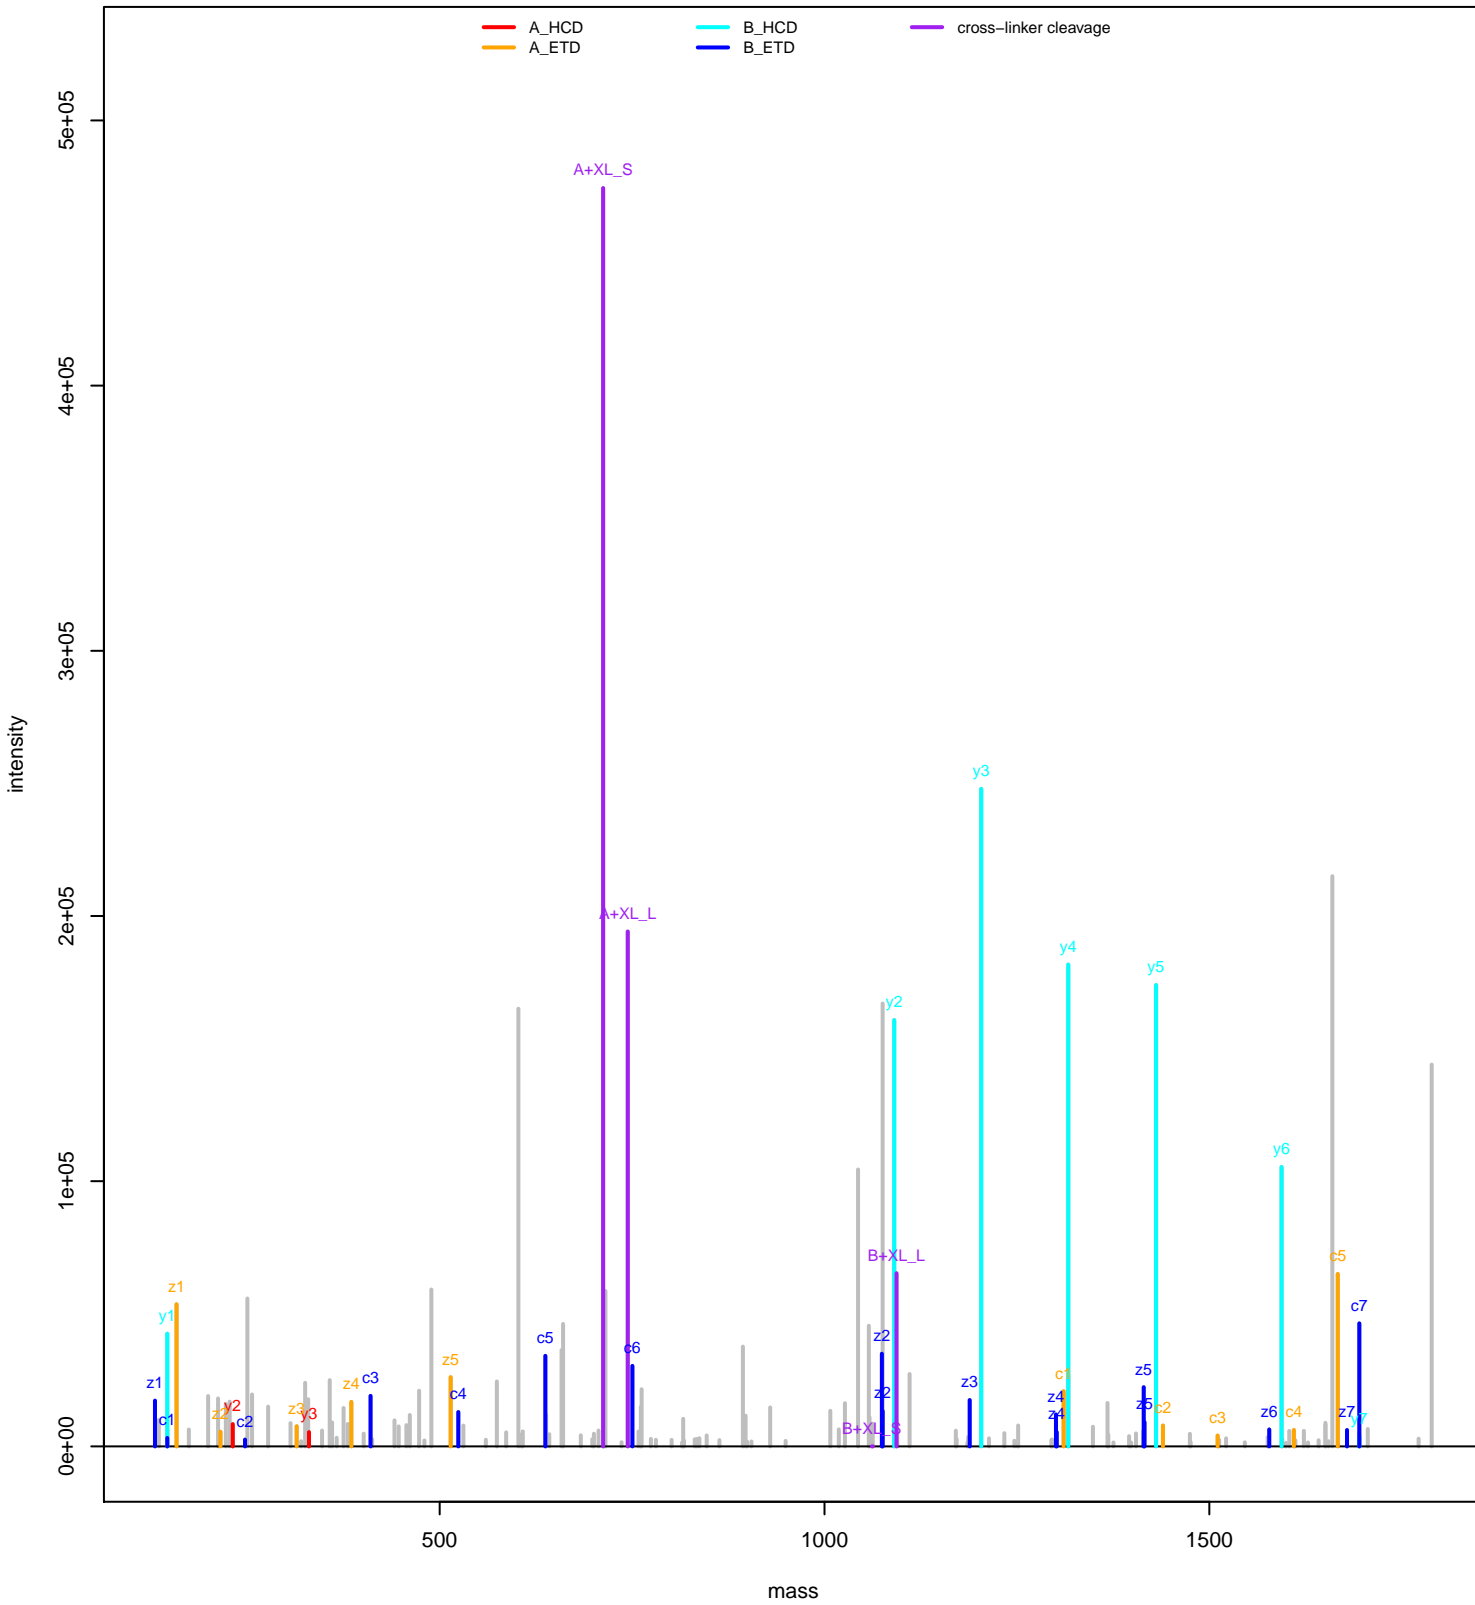

KEAVGR+XL\_S

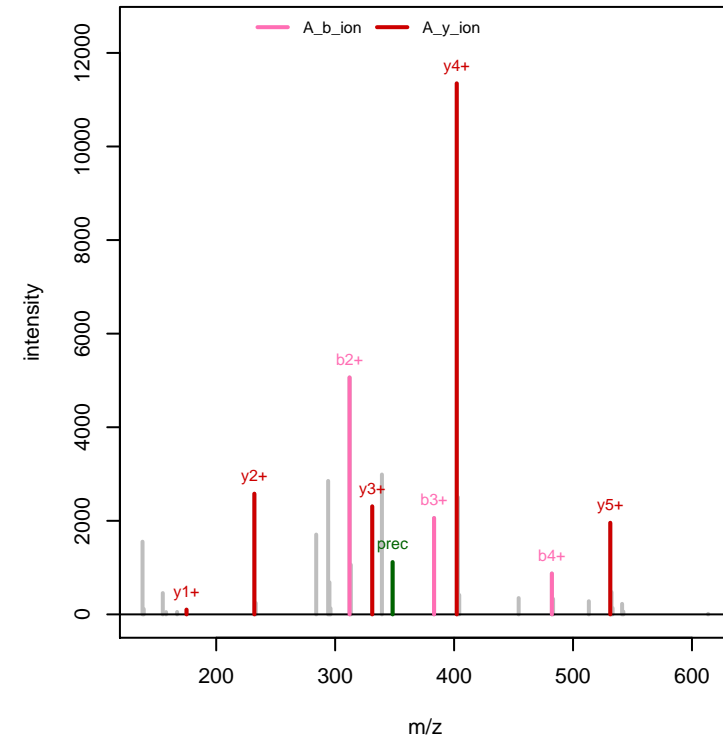

KEAVGR+XL\_L

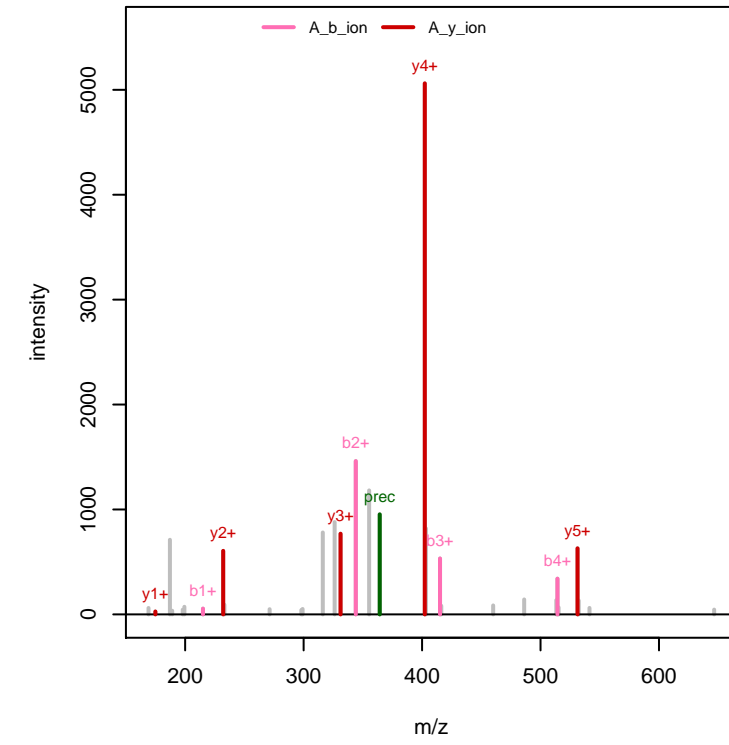

ETYNILKK+XL\_S

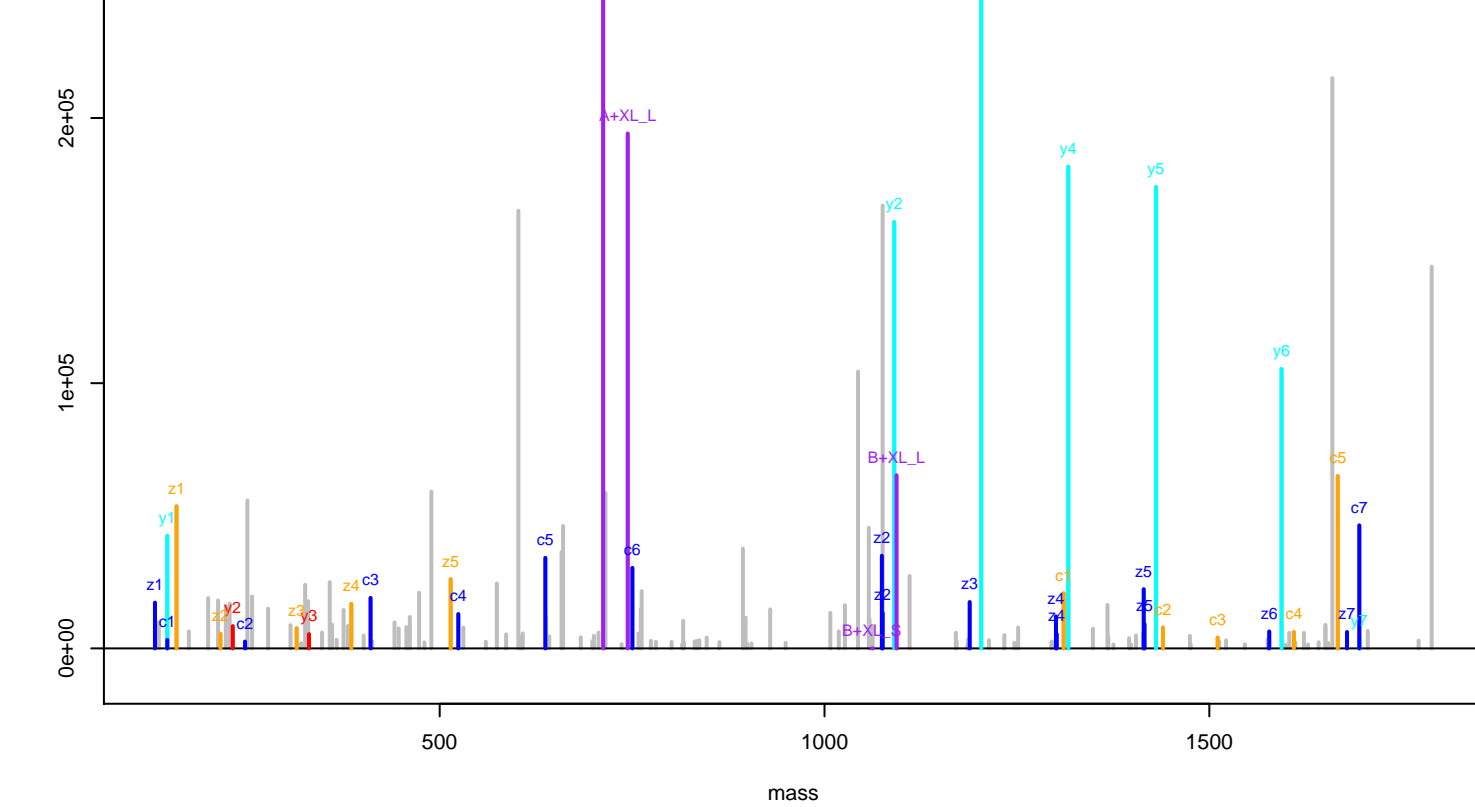

ETYNILKK+XL\_L



**KLLDEGR**  
**AFDQIDNAPEEKAR**

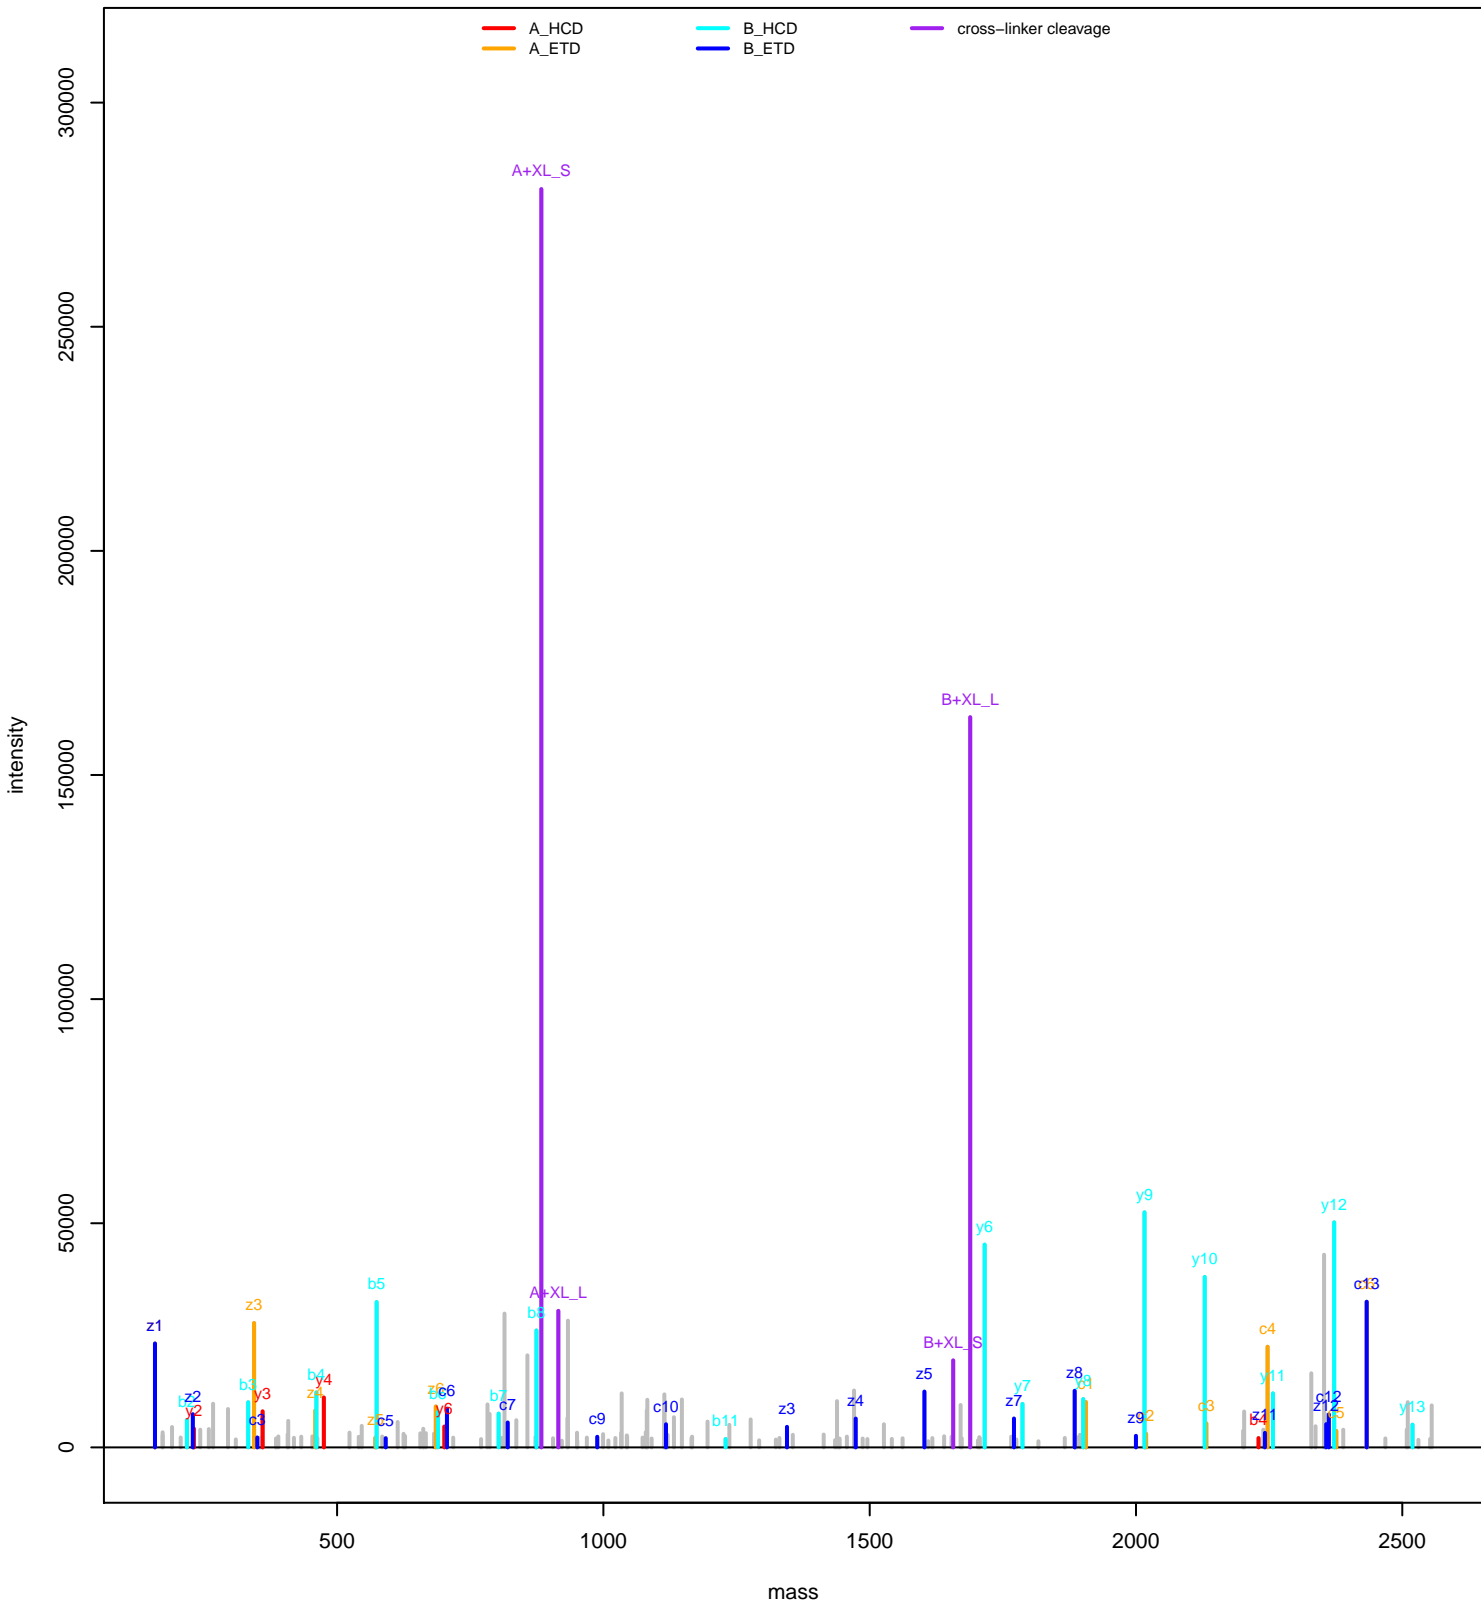

**KLLDEGR+XL\_S**

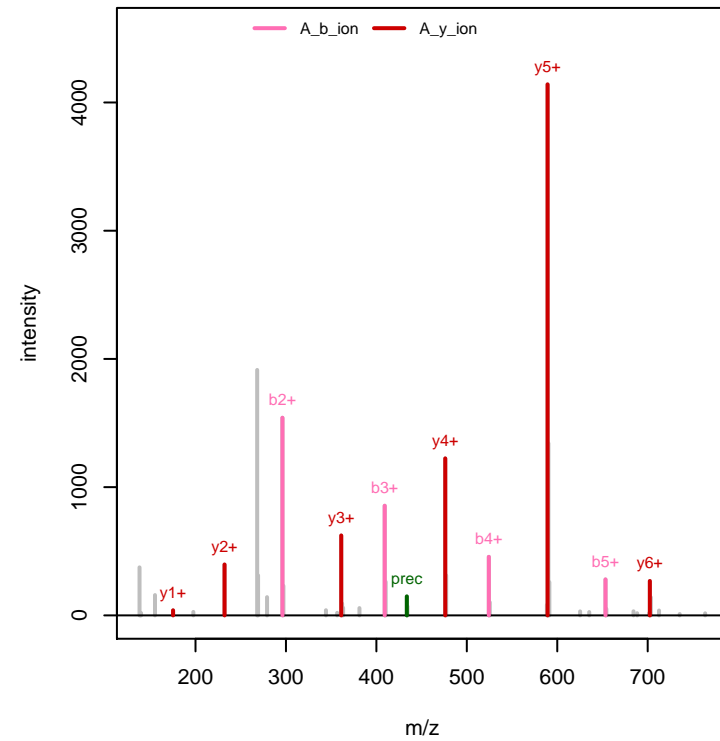

**KLLDEGR+XL\_L**

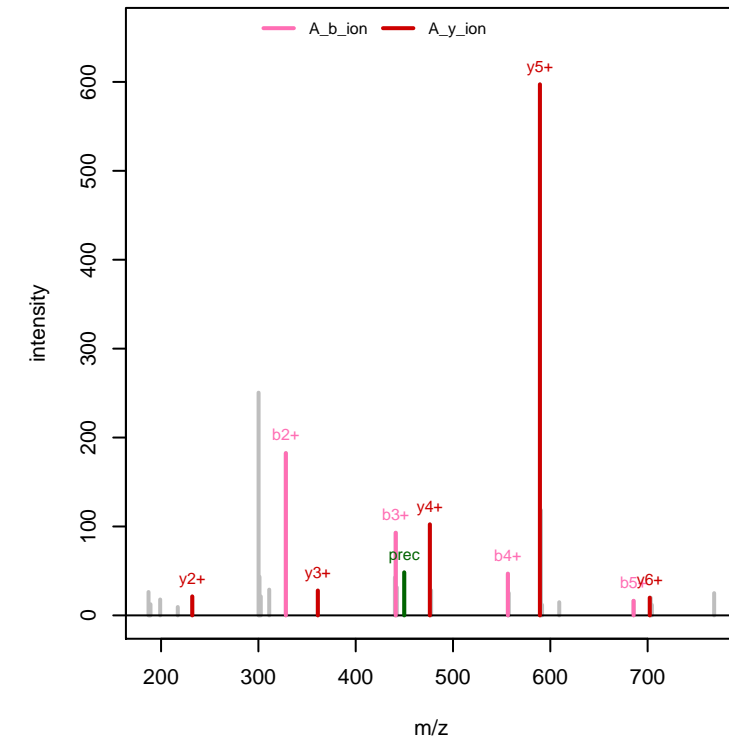

**AFDQIDNAPEEKAR+XL\_S**

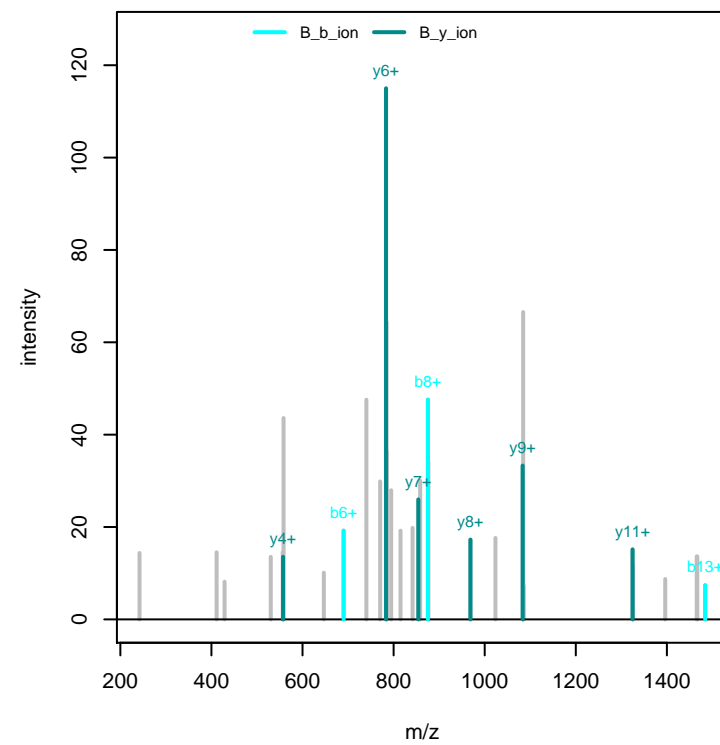

**AFDQIDNAPEEKAR+XL\_L**

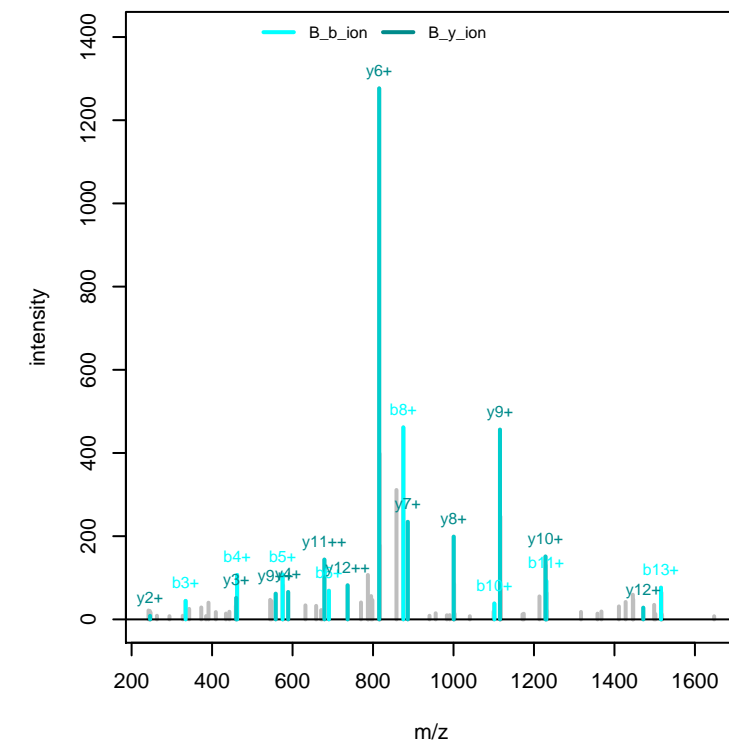

VKNQPGINGVK  
VKNQPGINGVK

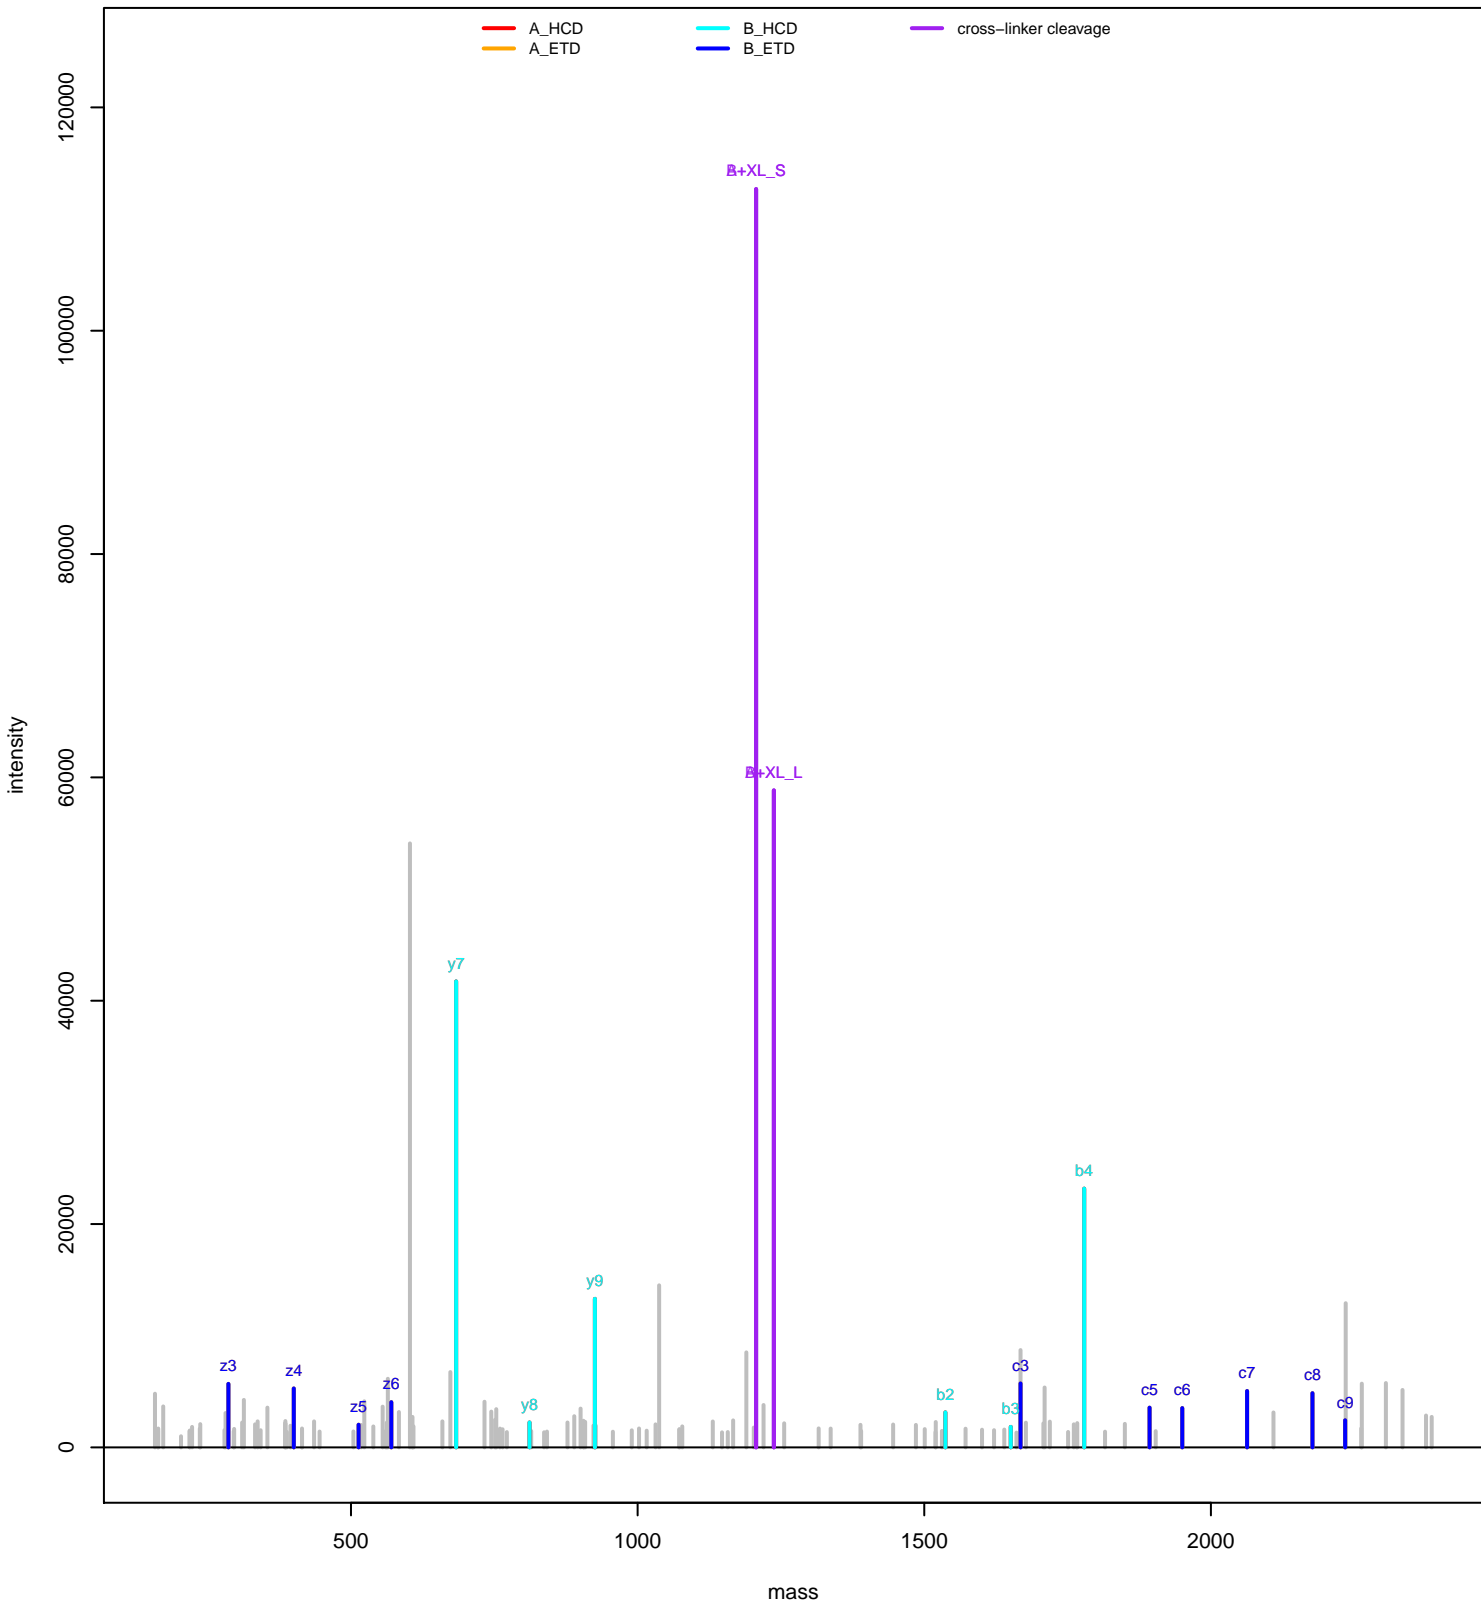

VKNQPGINGVK+XL\_S

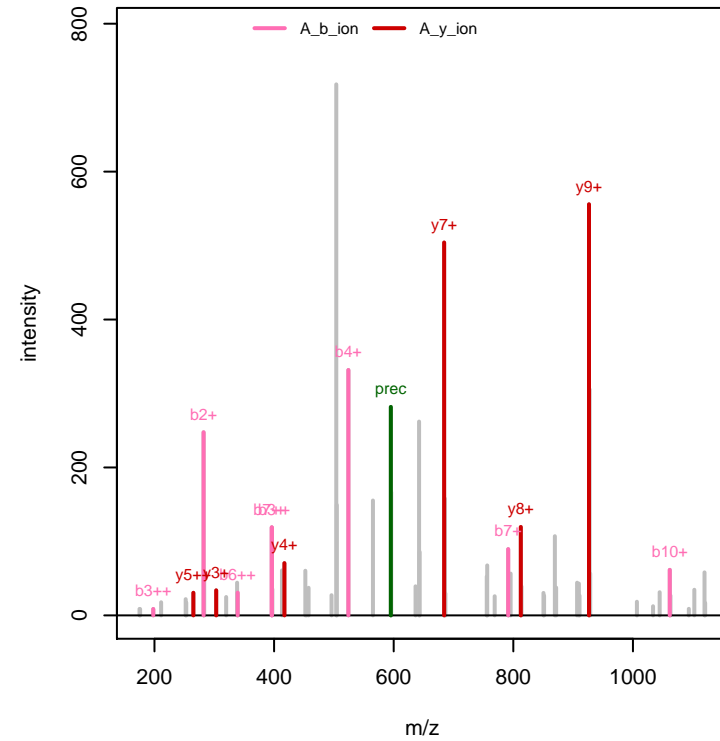

VKNQPGINGVK+XL\_L

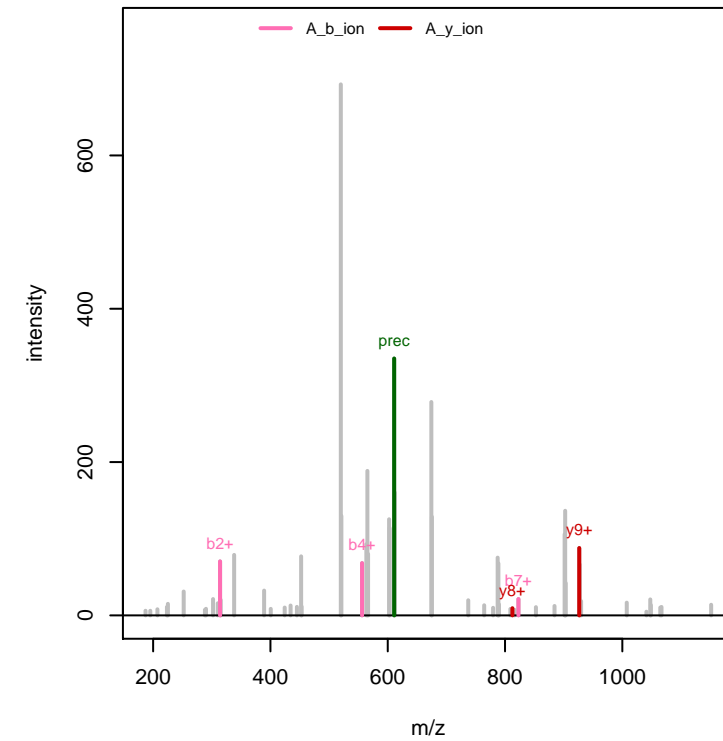

VKNQPGINGVK+XL\_S

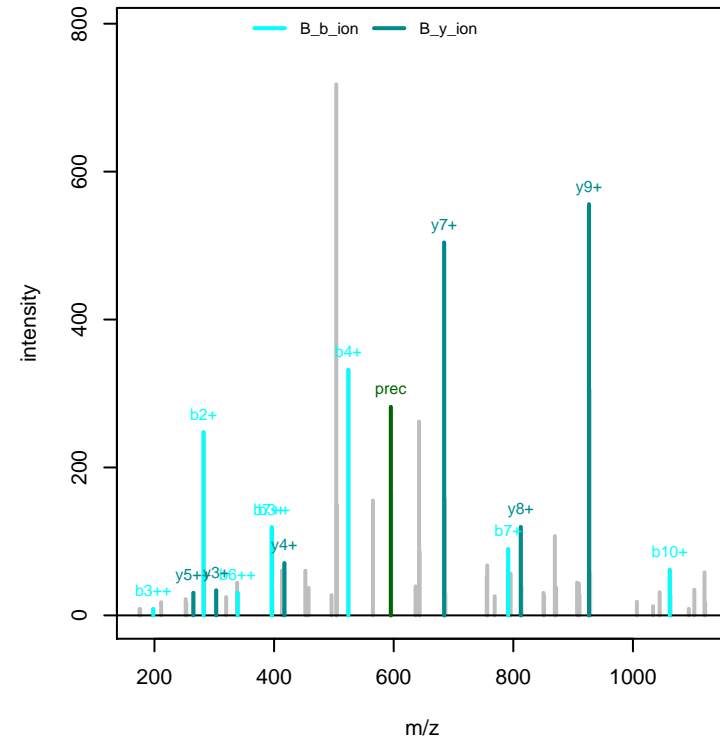

VKNQPGINGVK+XL\_L

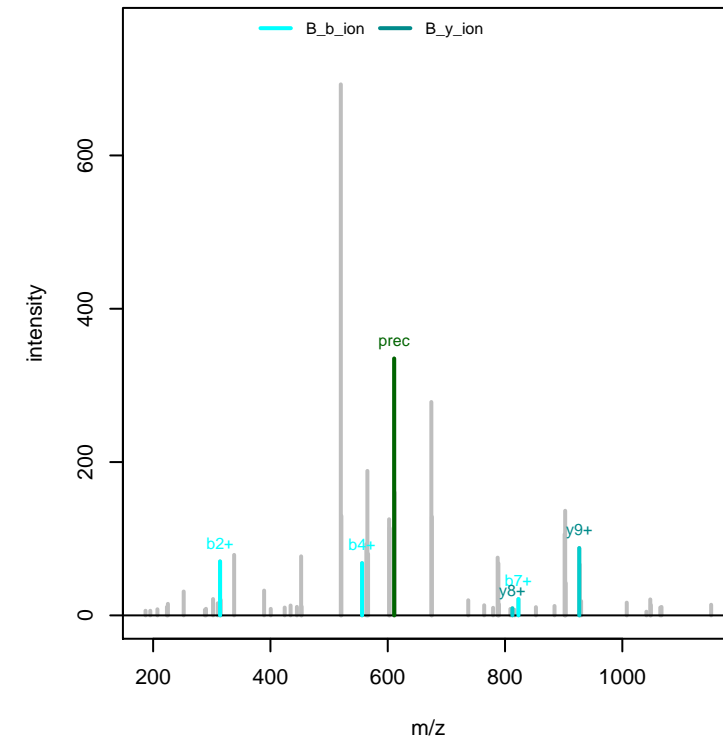

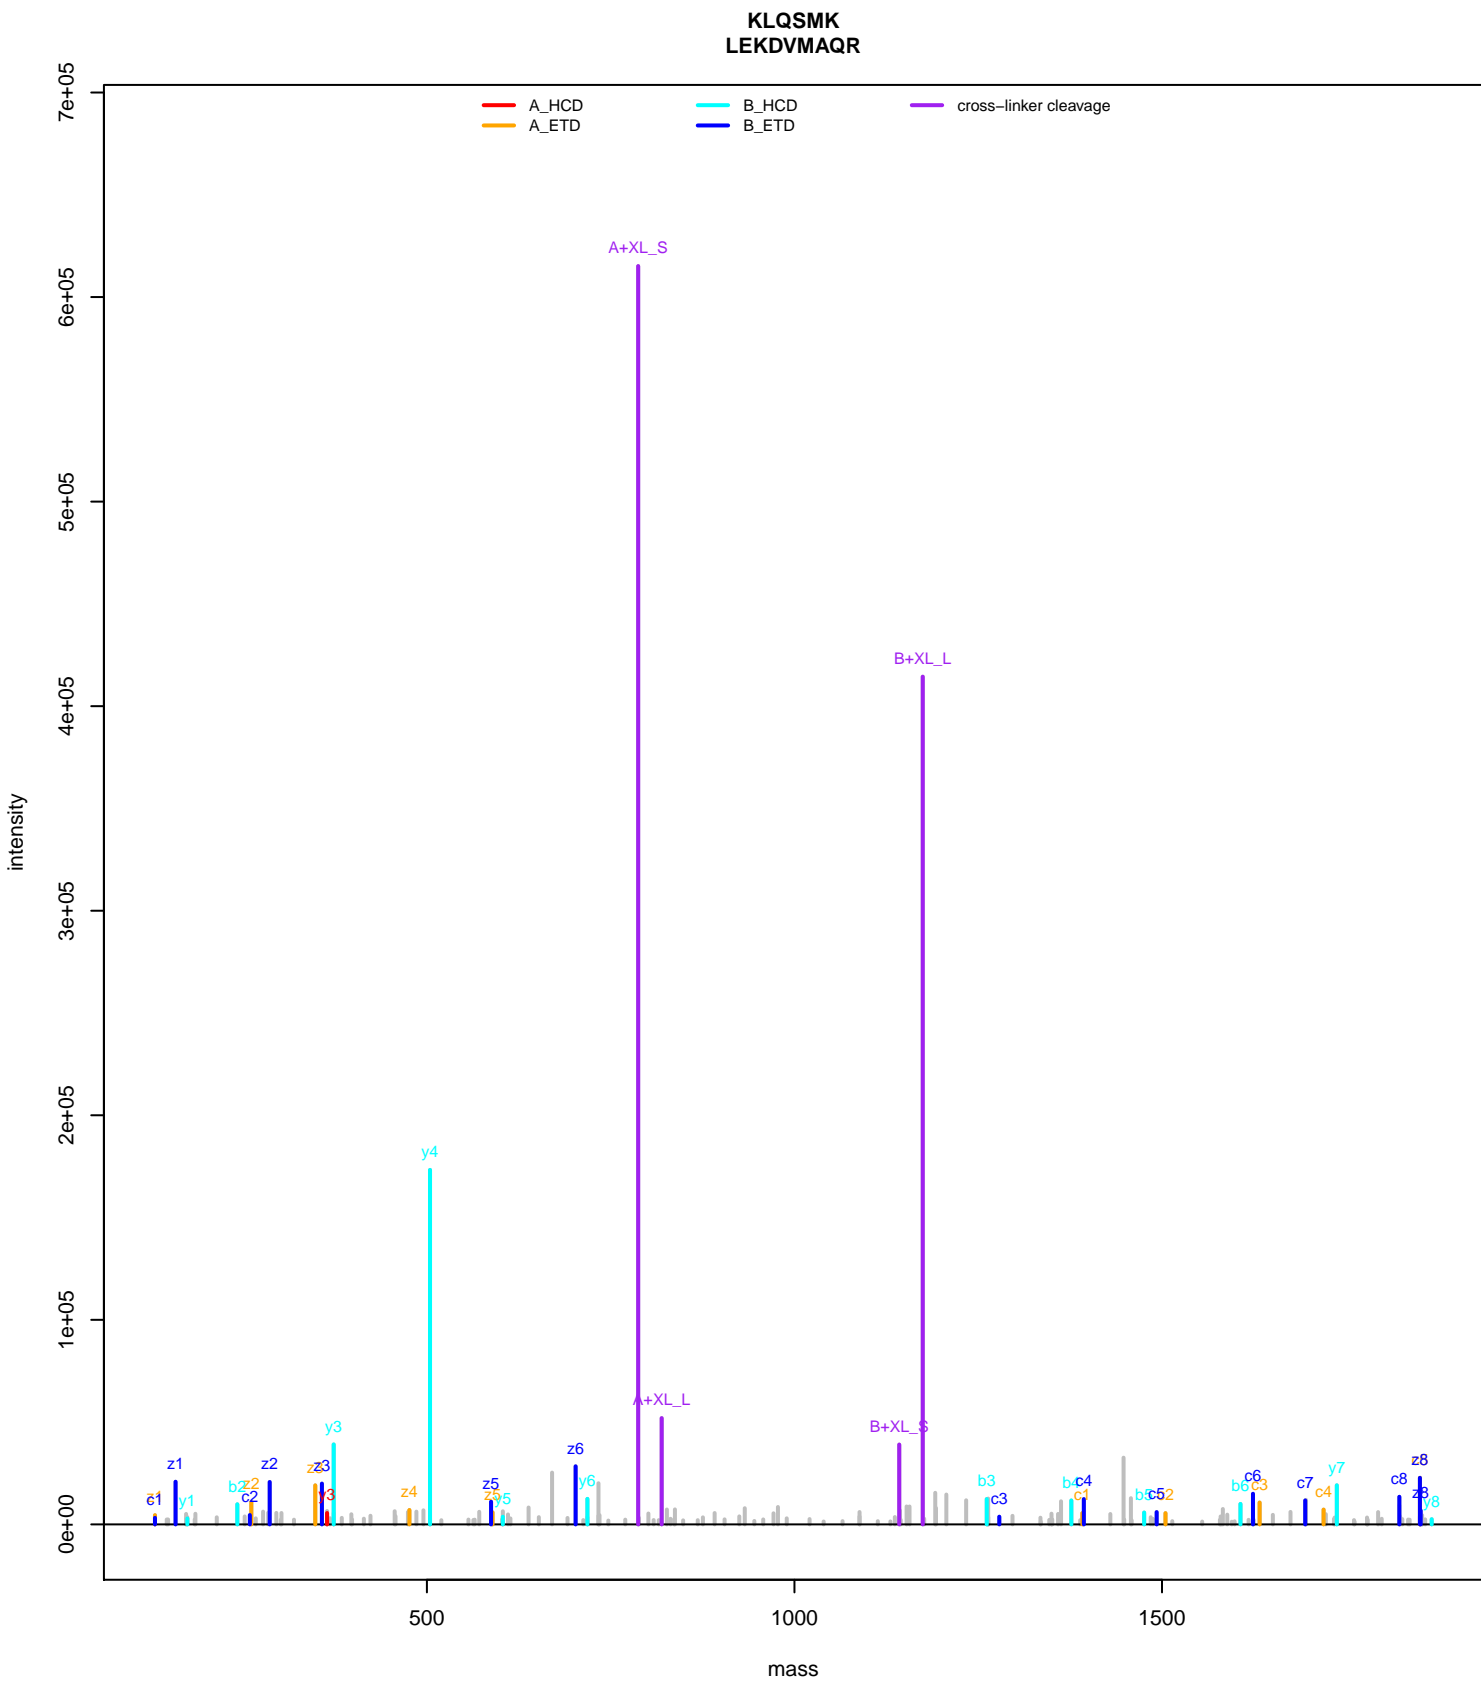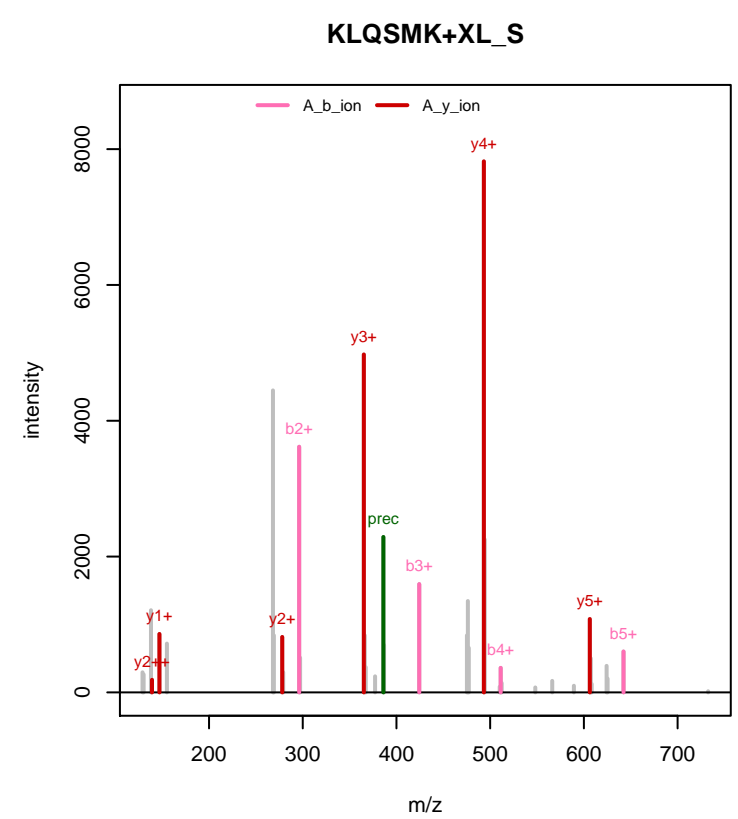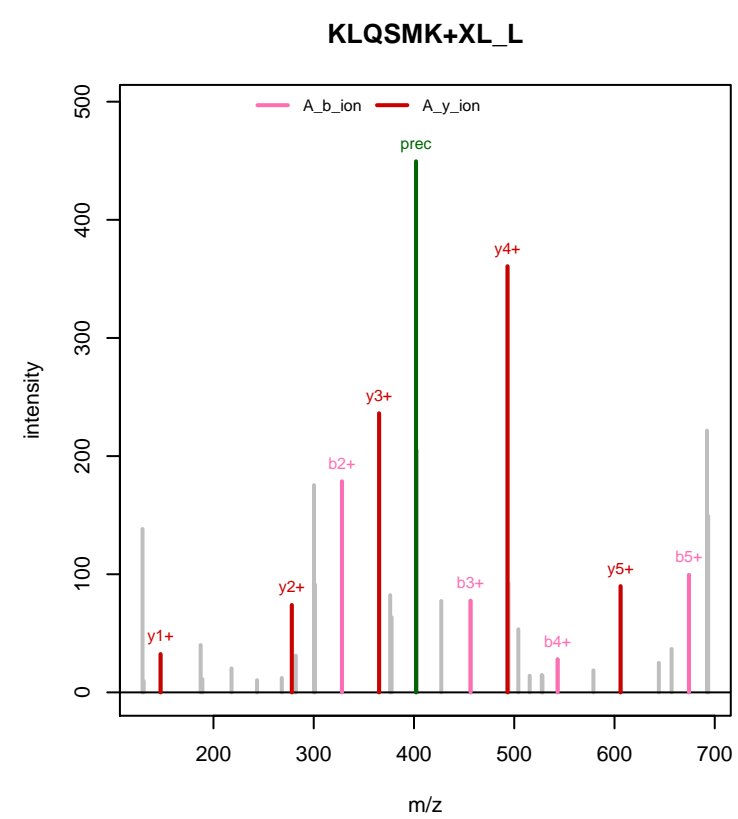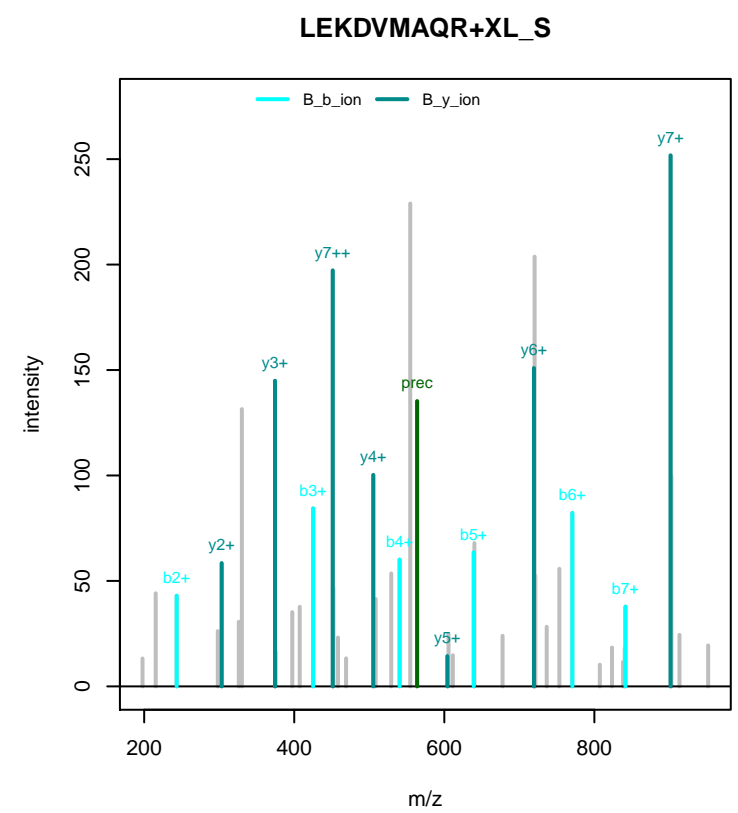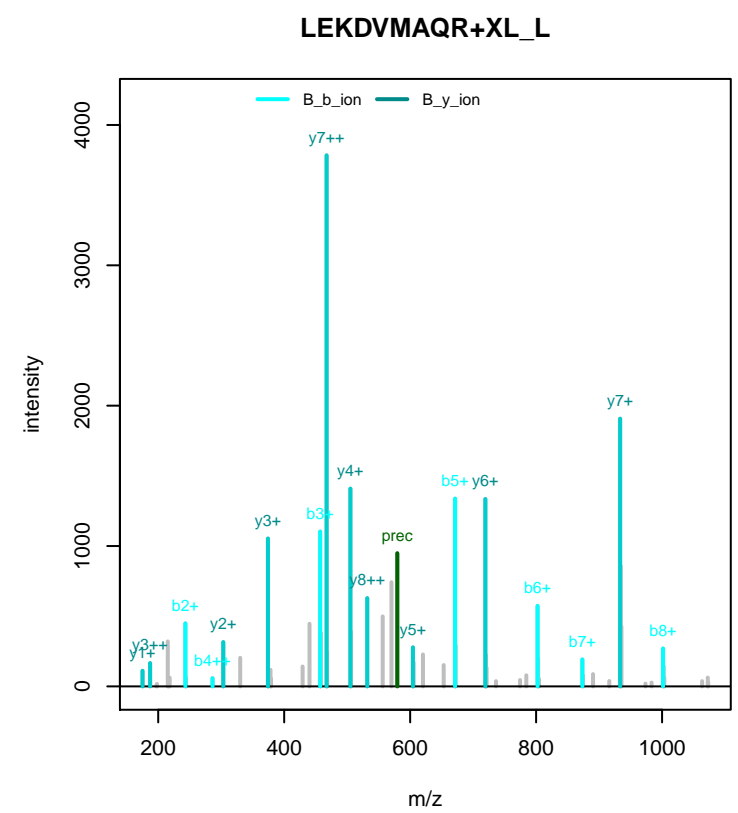

**DNLAEFSKK  
GAADGTNWKIDNK**

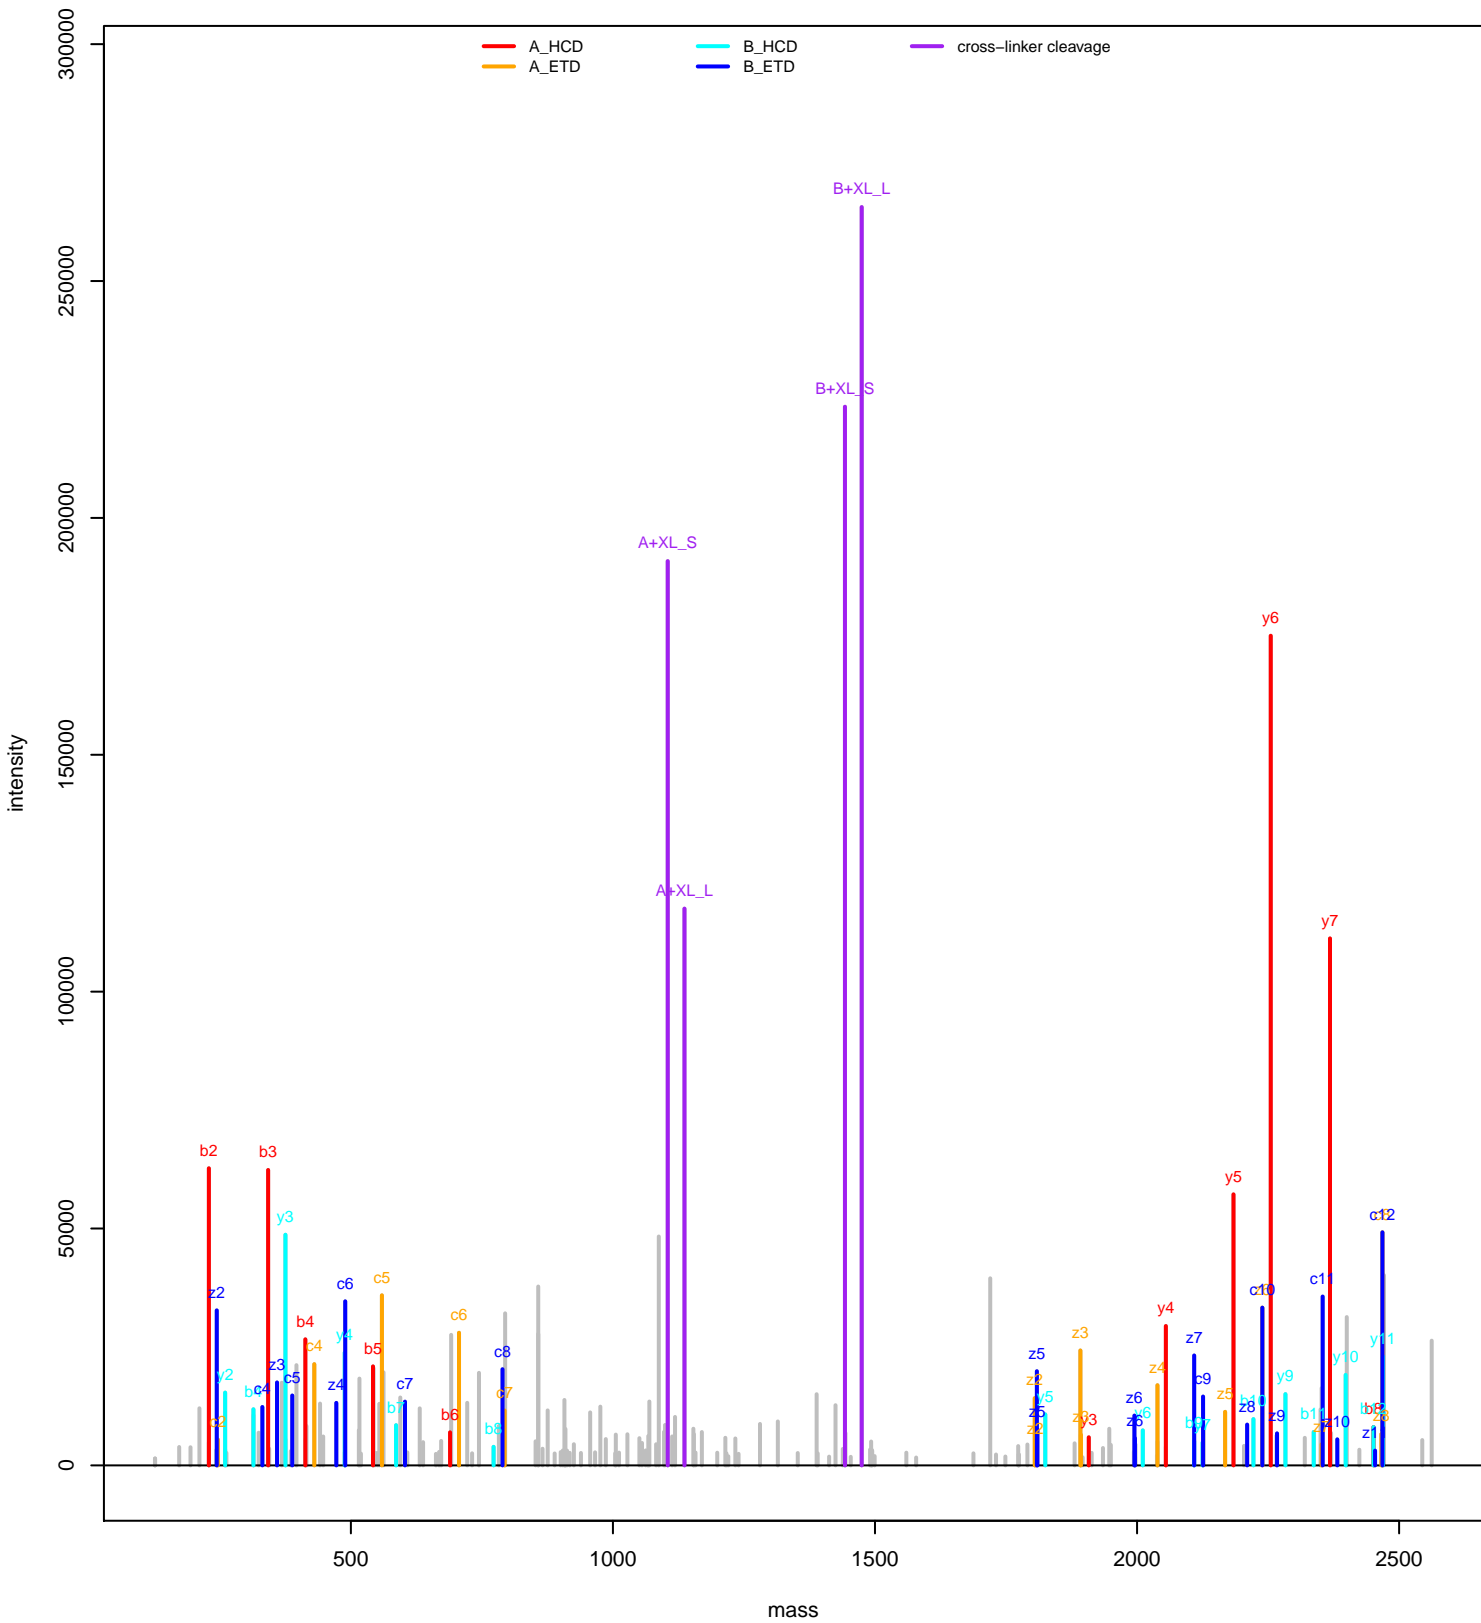

**DNLAEFSKK+XL\_S**

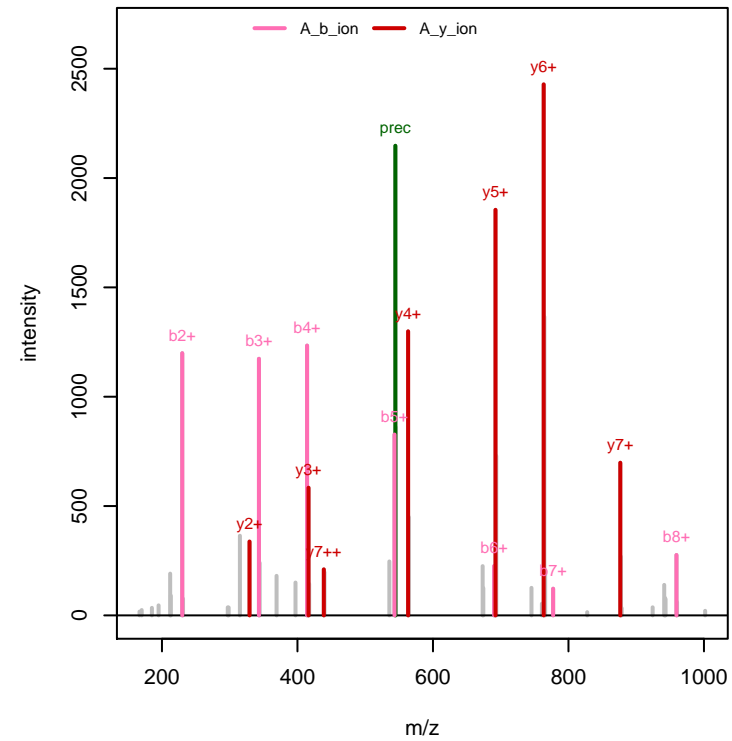

**DNLAEFSKK+XL\_L**

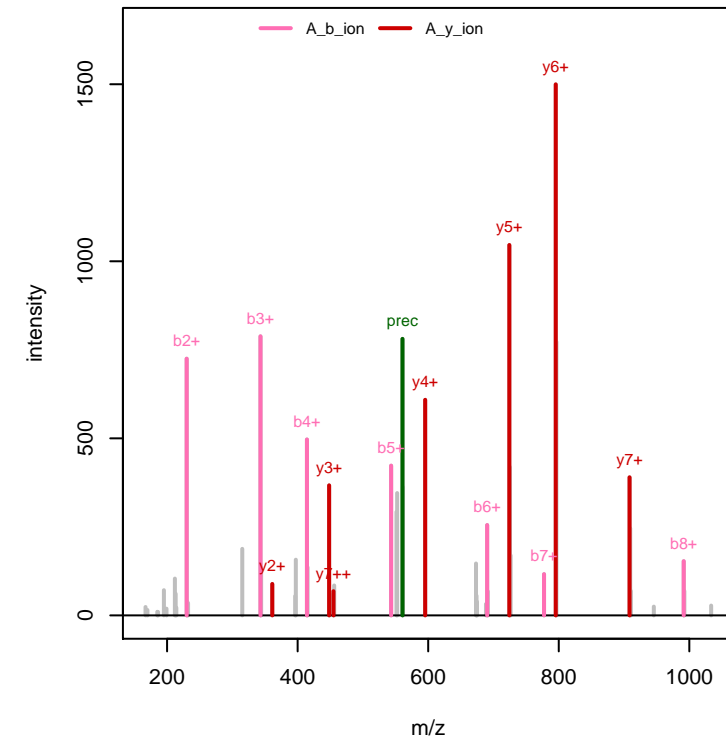

**GAADGTNWKIDNK+XL\_S**

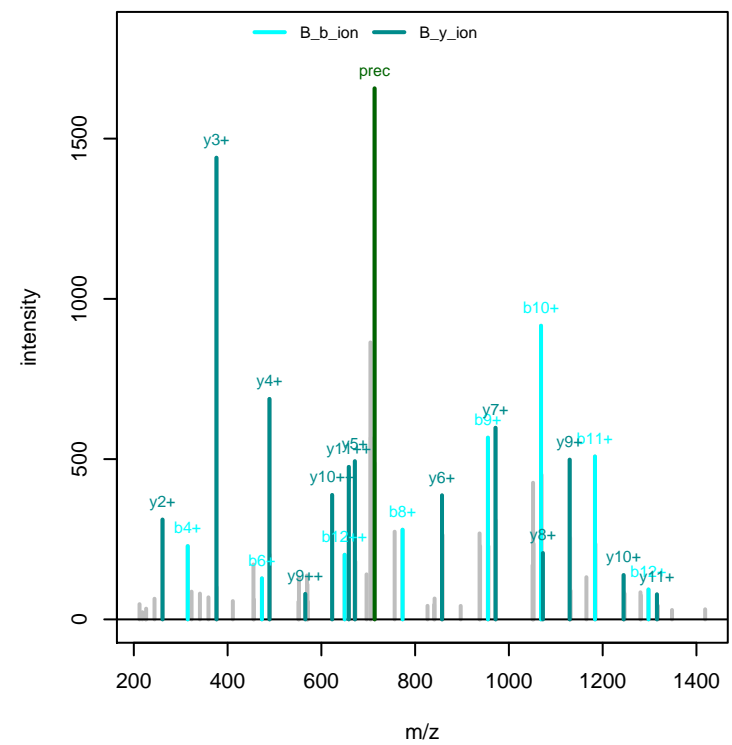

**GAADGTNWKIDNK+XL\_L**

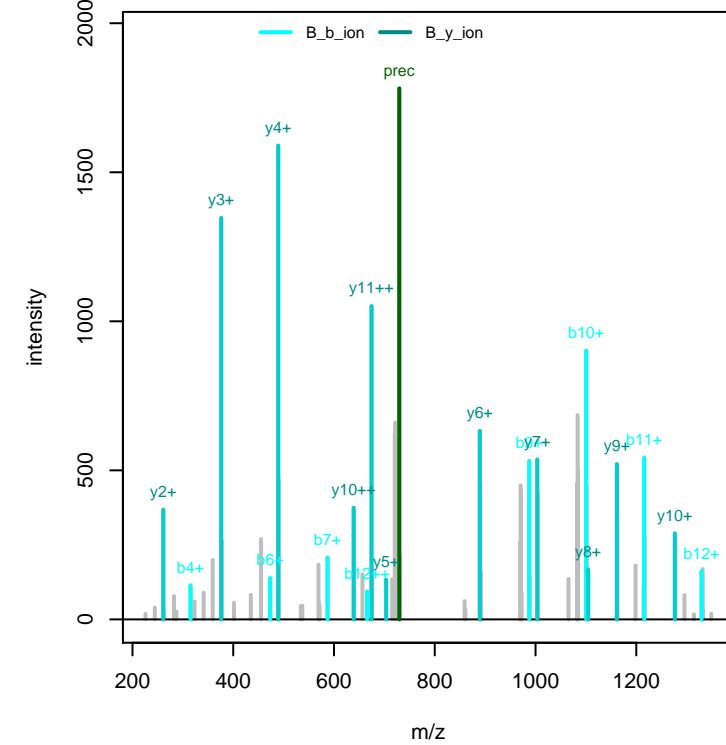

**MKEGQEK**  
**VDESLEKLADEVDESAK**

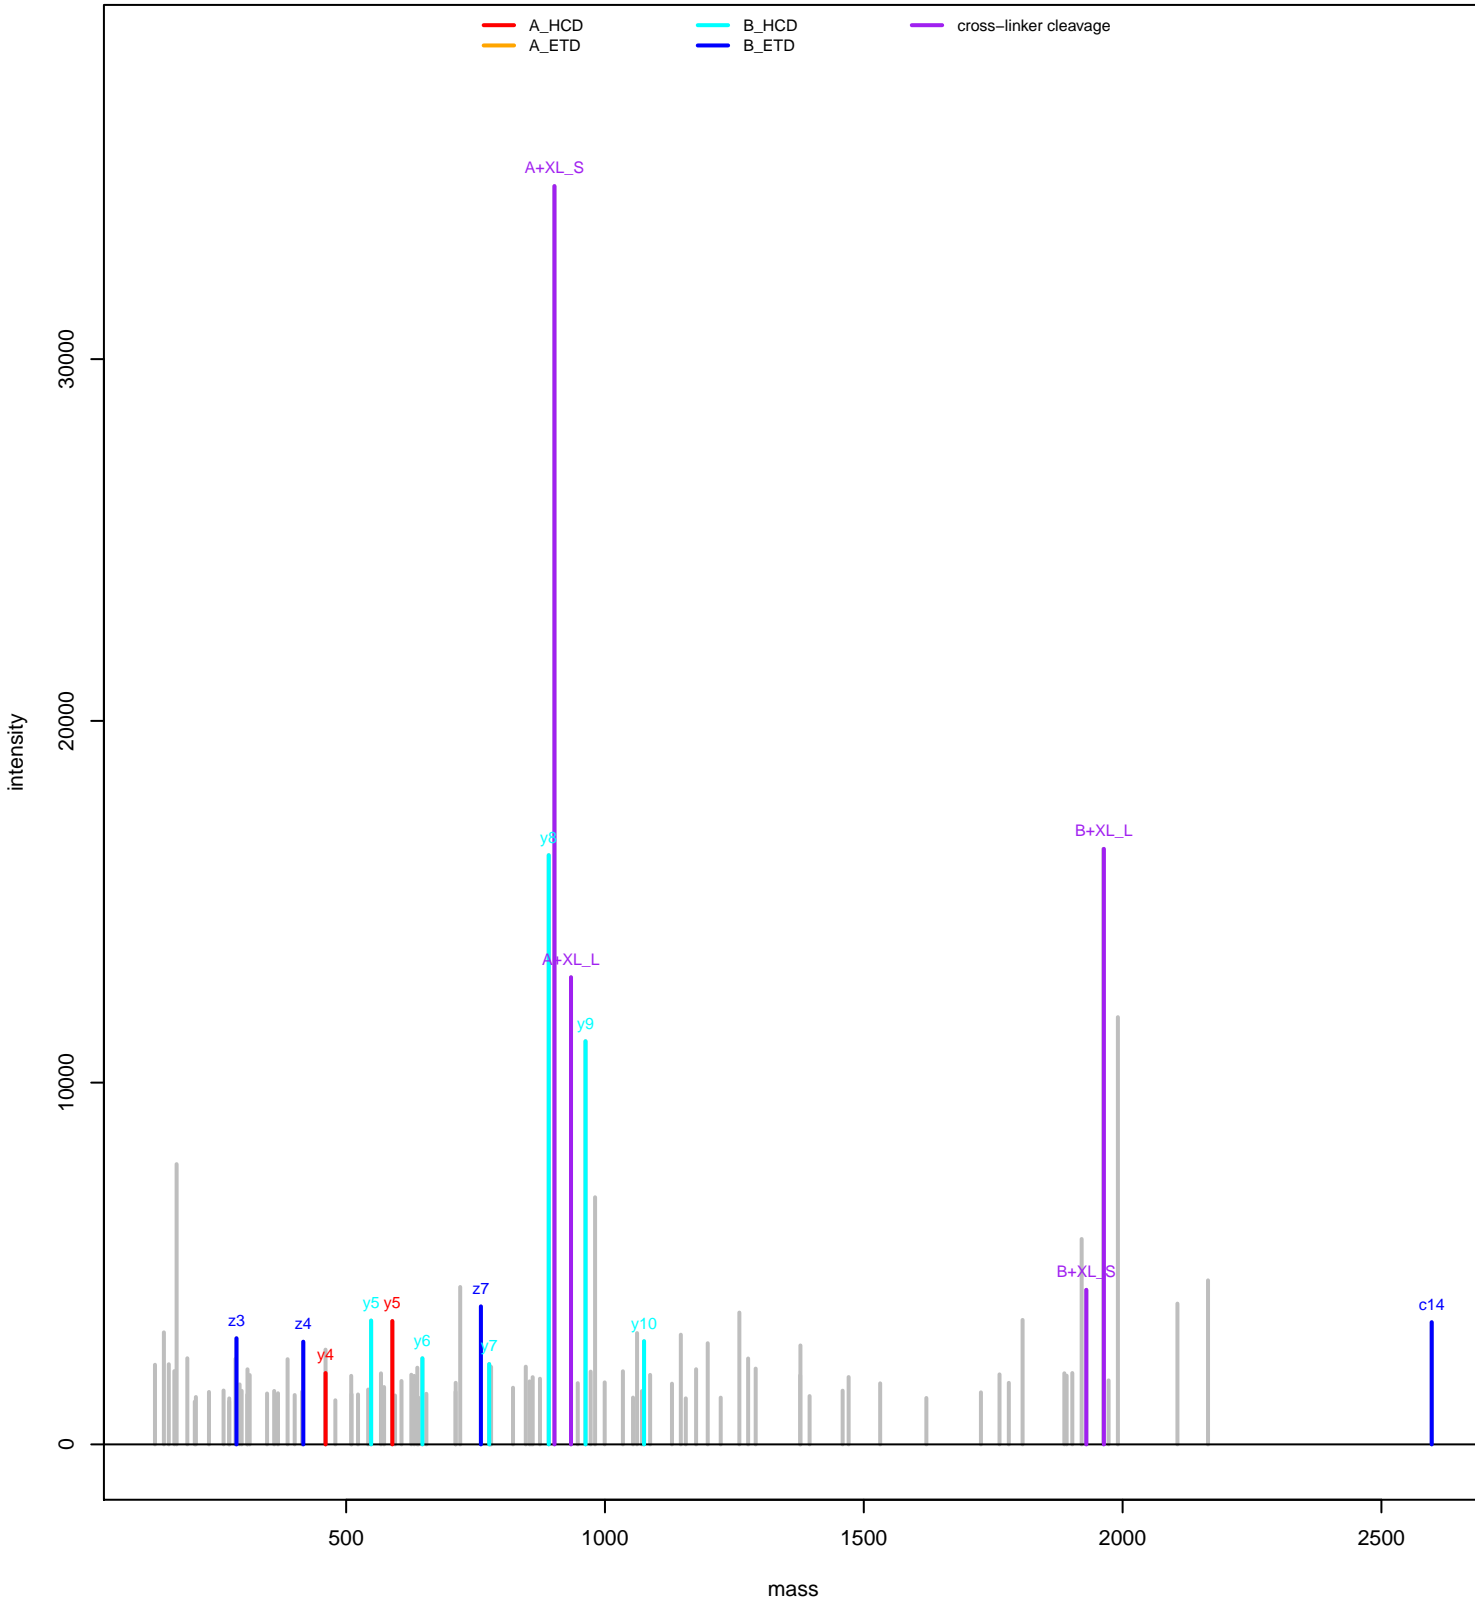

**MKEGQEK+XL\_S**

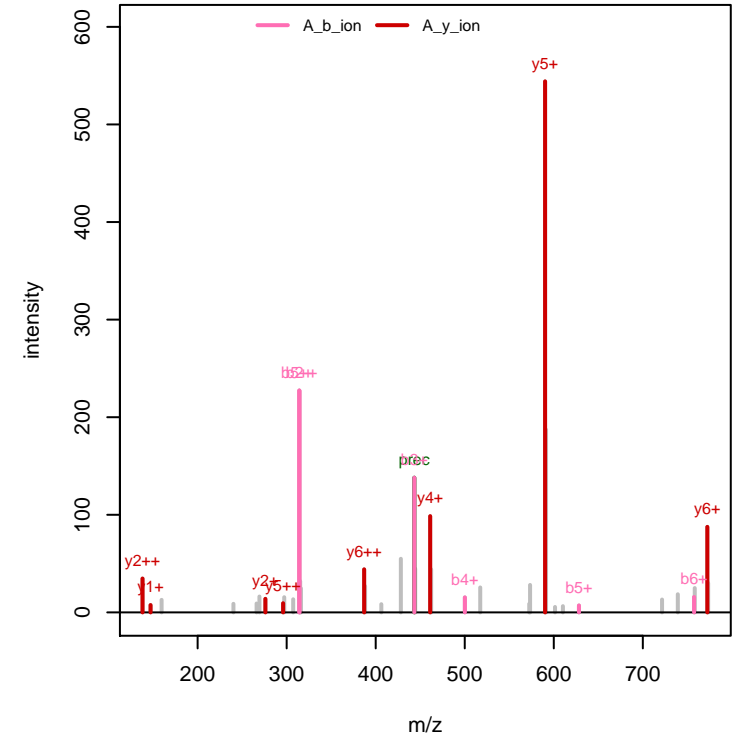

**MKEGQEK+XL\_L**

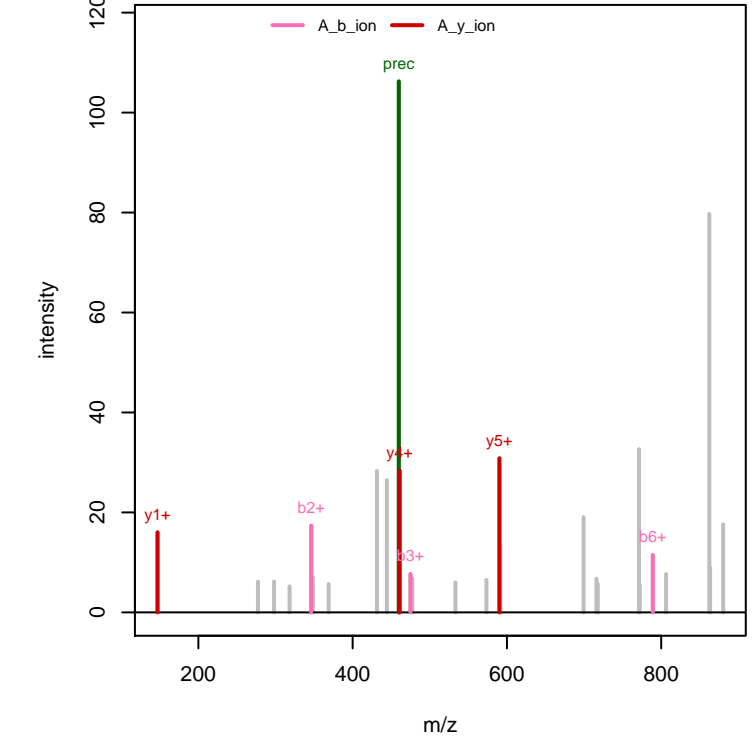

**VDESLEKLADEVDESAK+XL\_S**

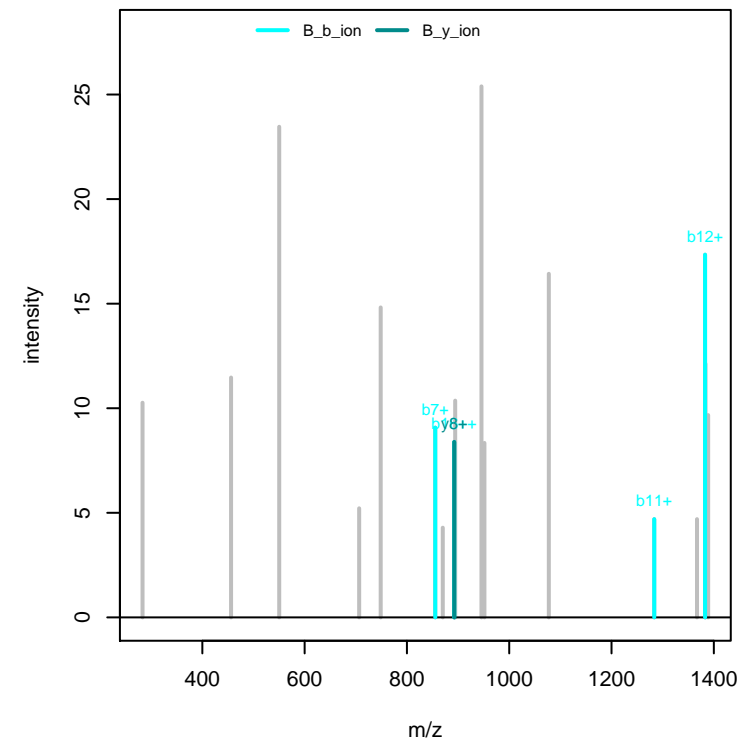

**VDESLEKLADEVDESAK+XL\_L**

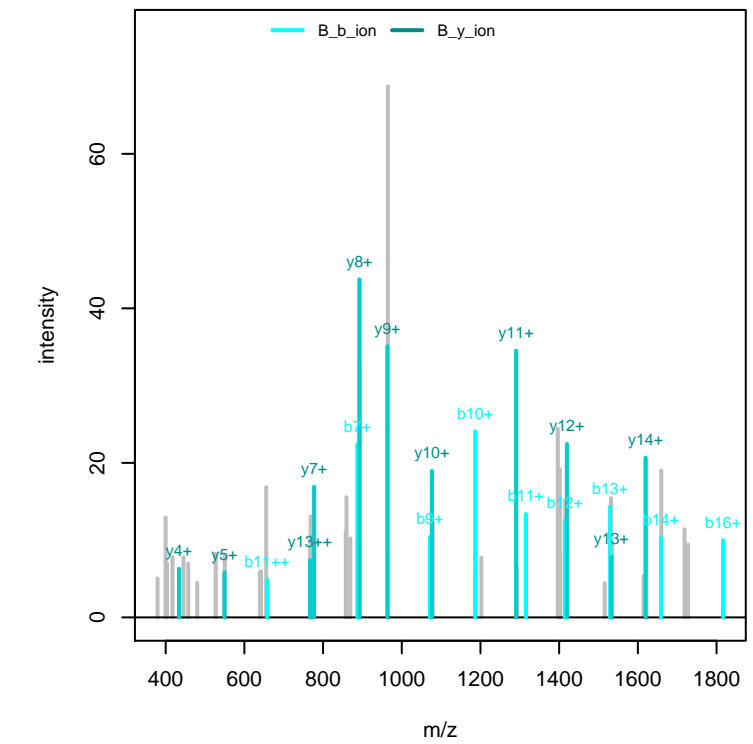

SKDGAYVR  
EQVAYYKEDEK

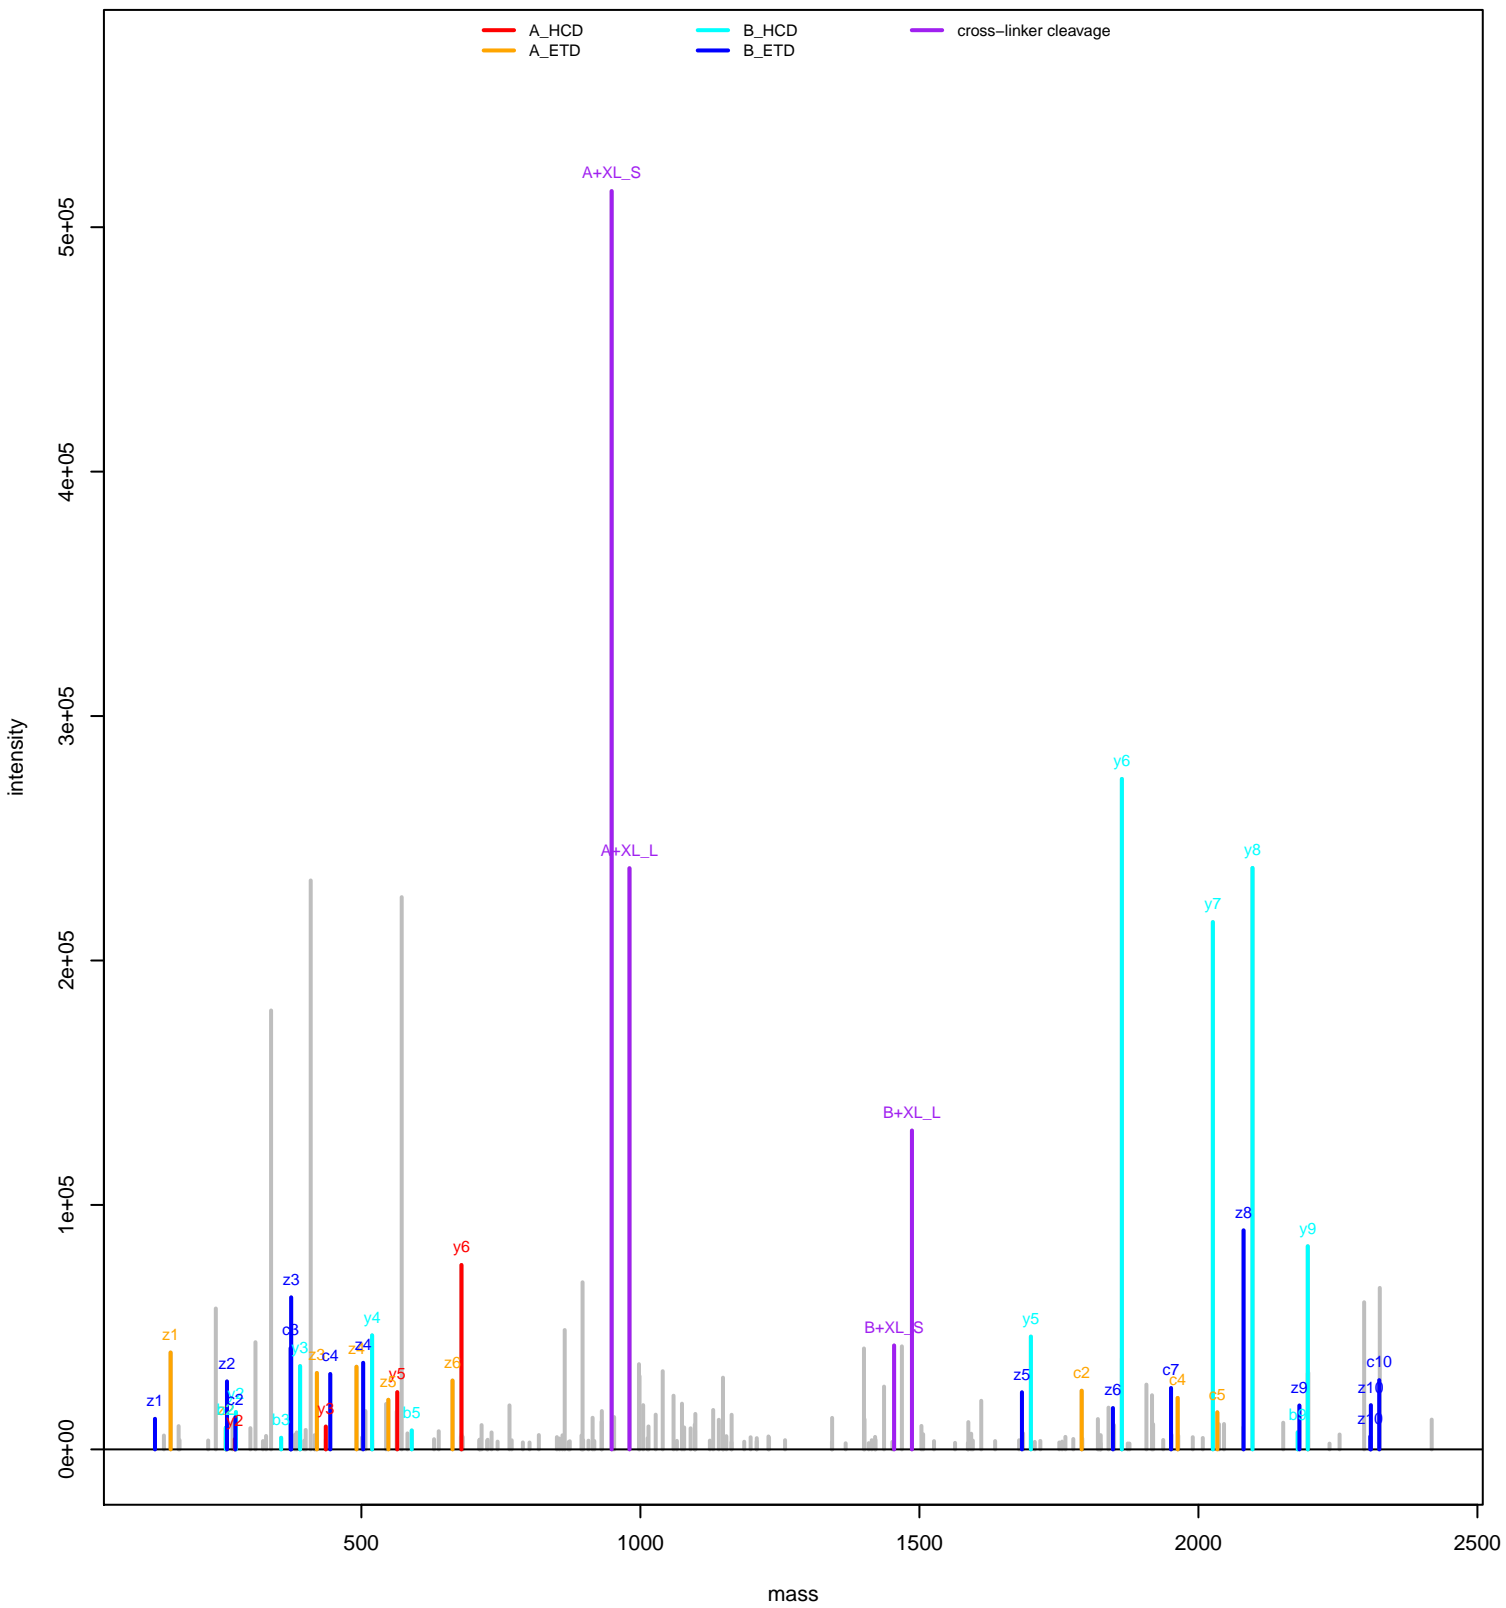

SKDGAYVR+XL\_S

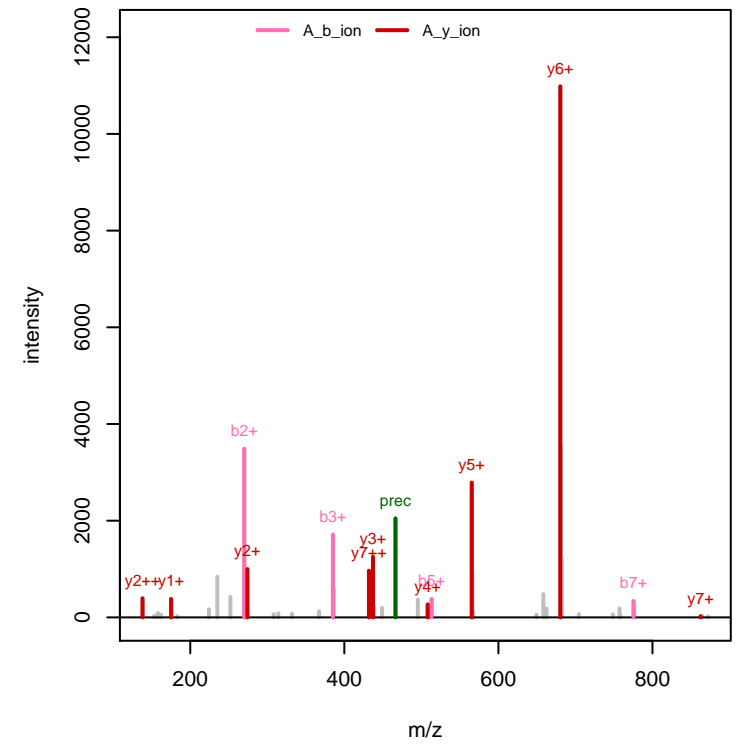

SKDGAYVR+XL\_L

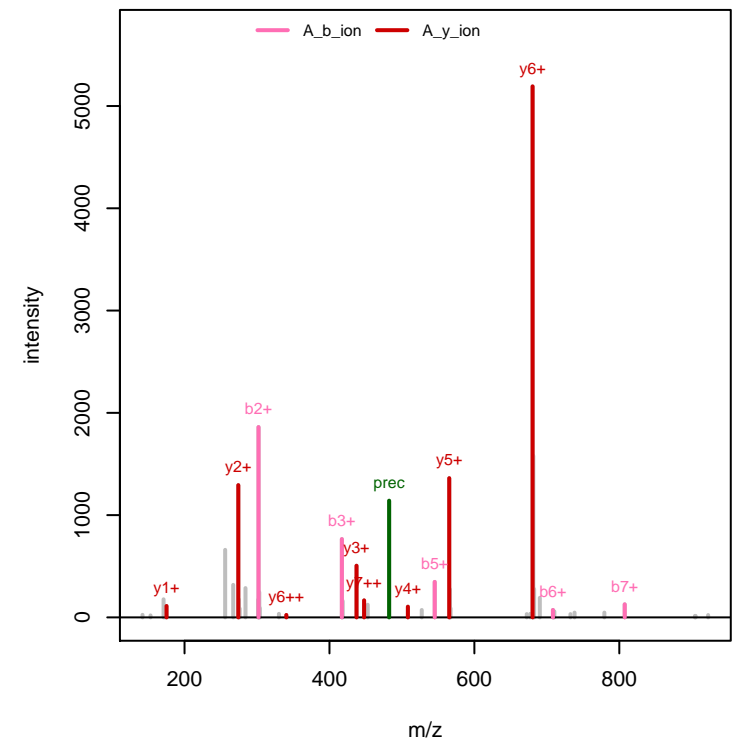

EQVAYYKEDEK+XL\_S

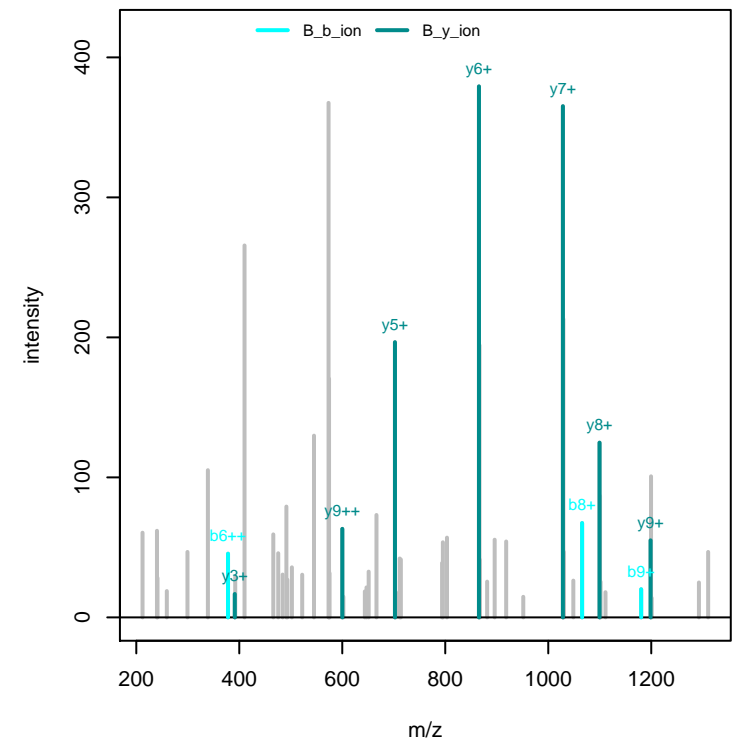

EQVAYYKEDEK+XL\_L

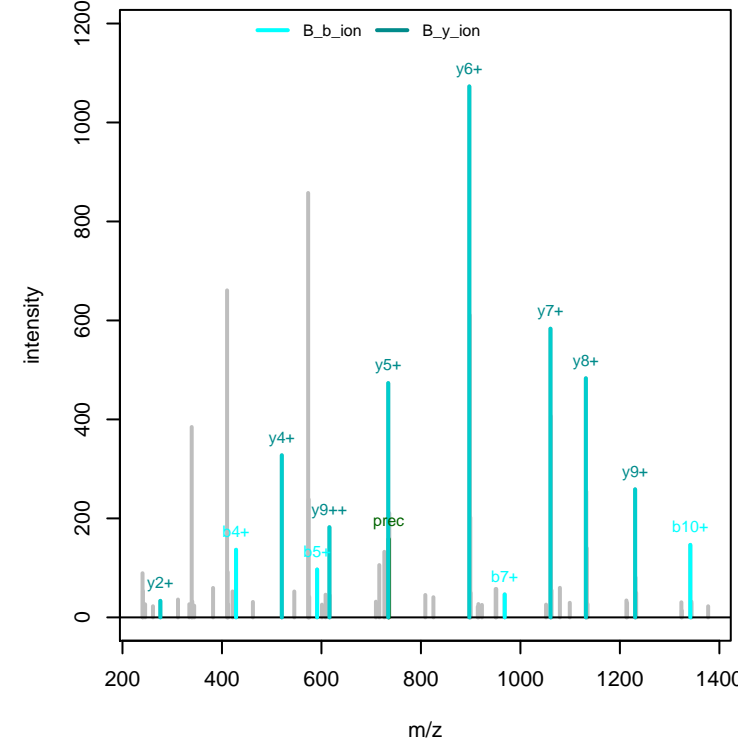

**AAGSLVKR  
MDKDRFR**

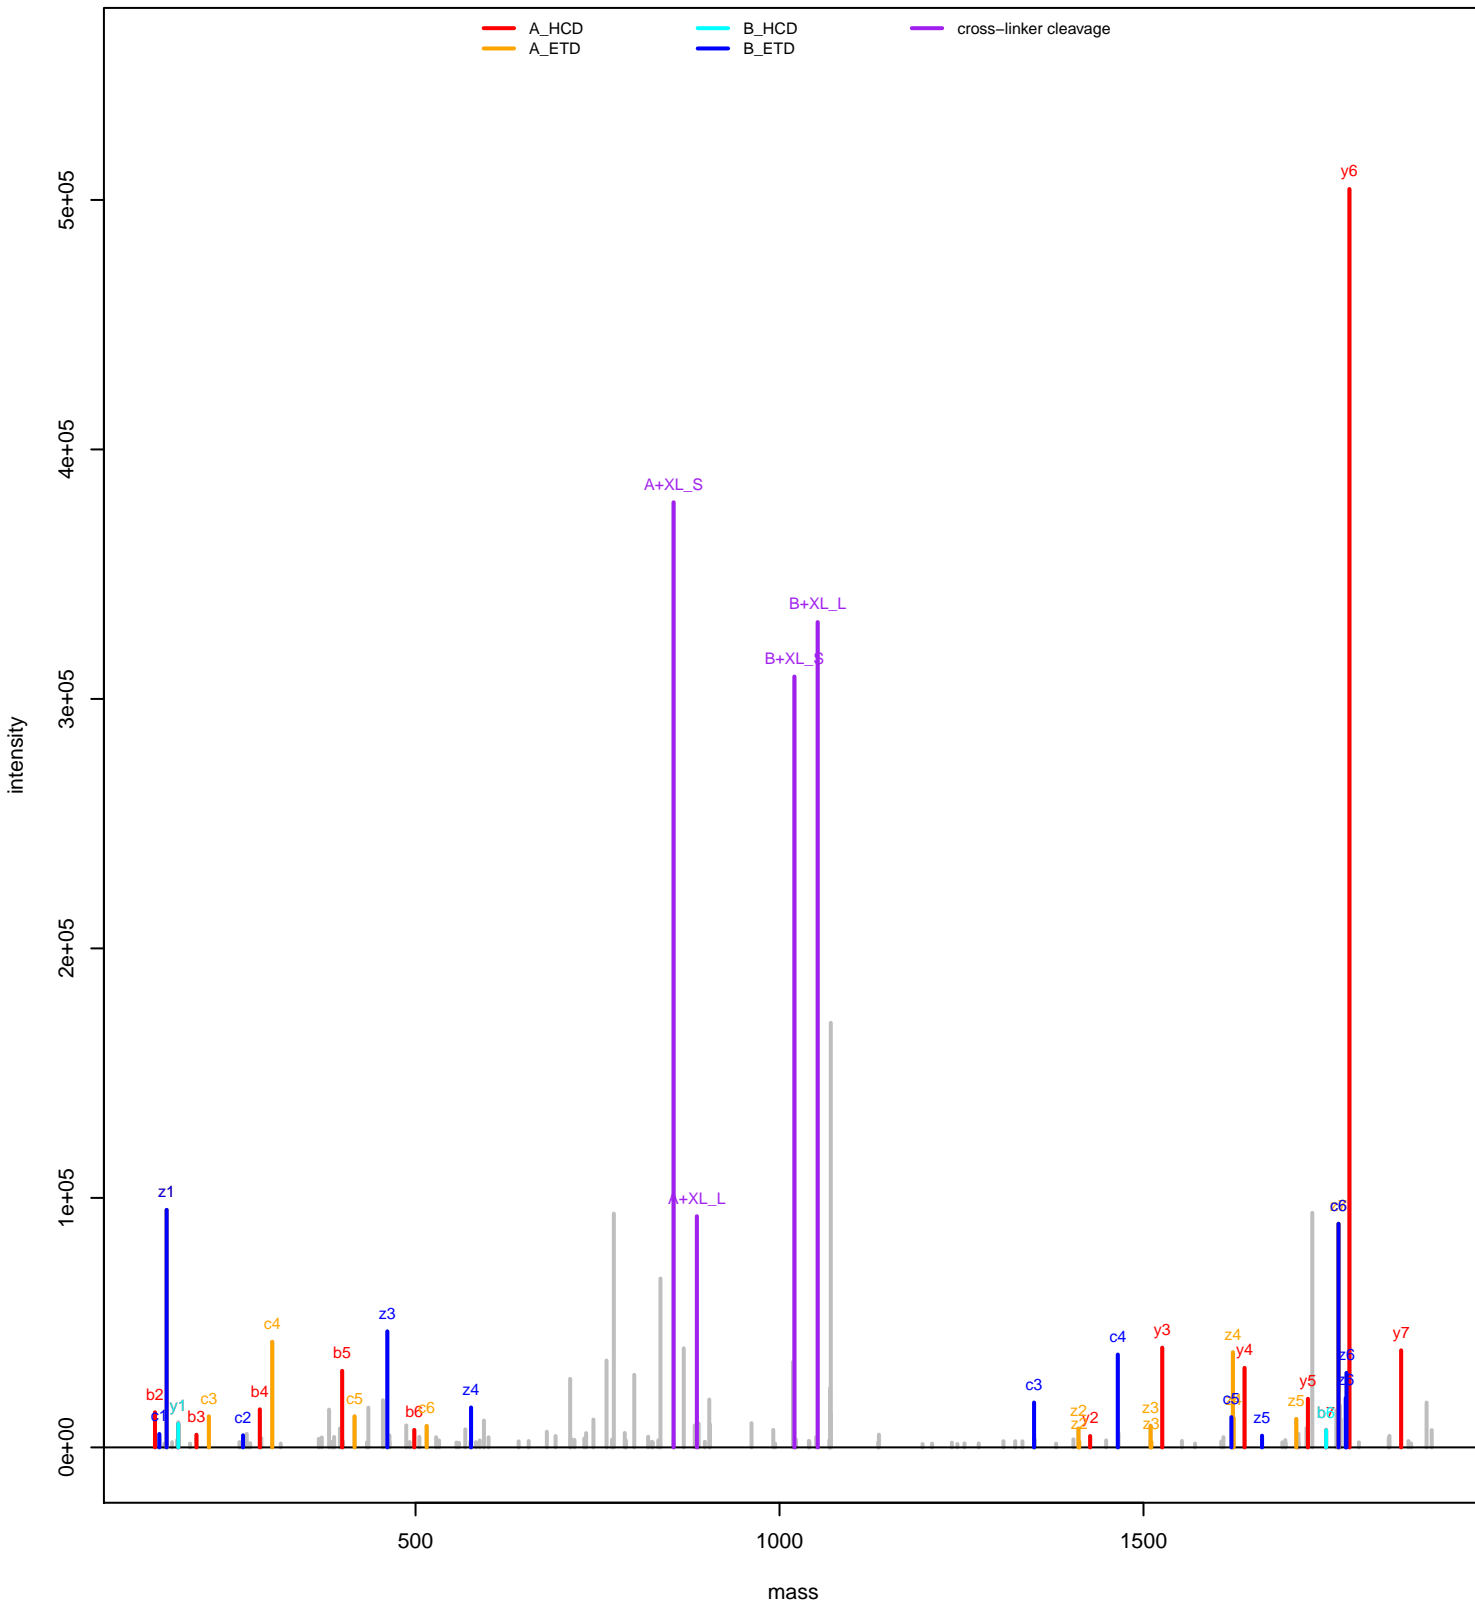

**AAGSLVKR+XL\_S**

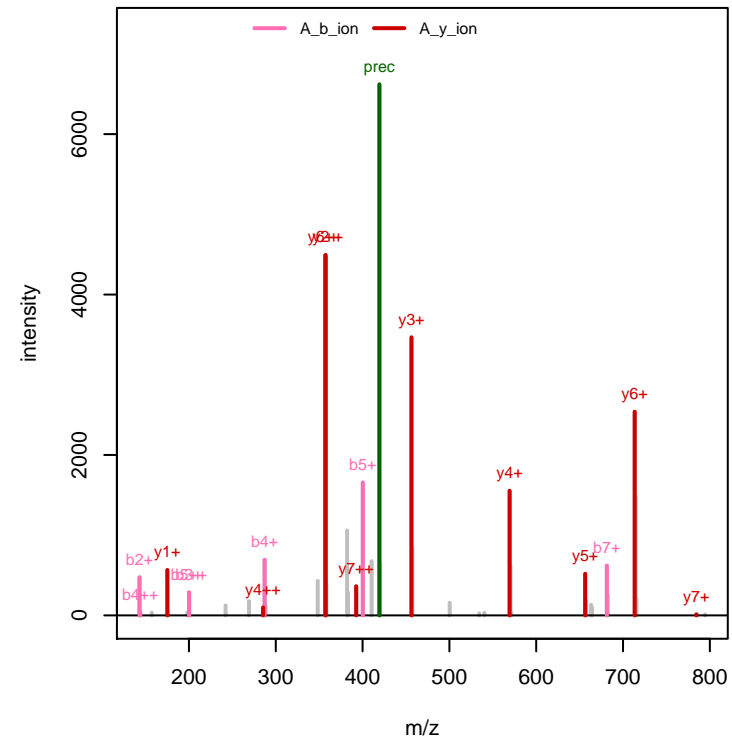

**AAGSLVKR+XL\_L**

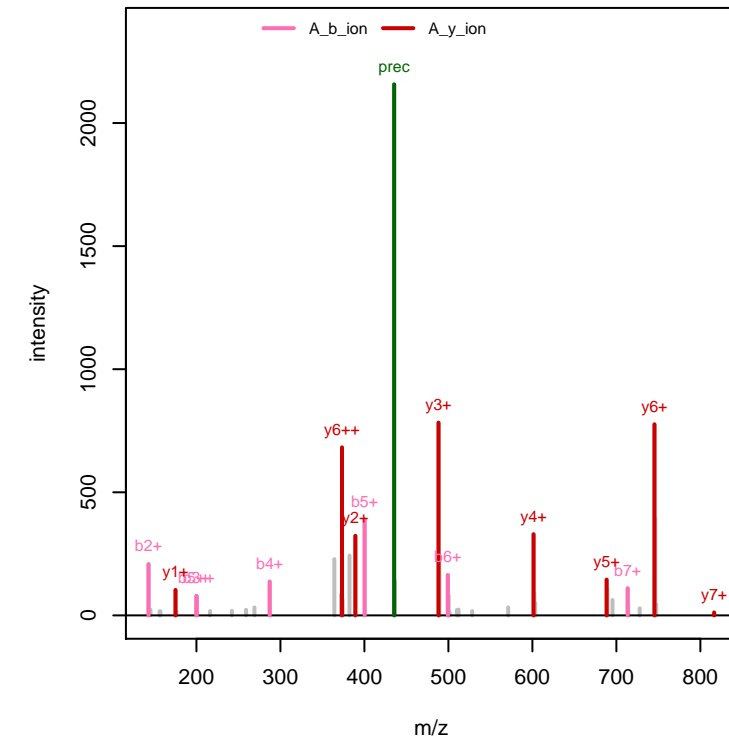

**MDKDRFR+XL\_S**

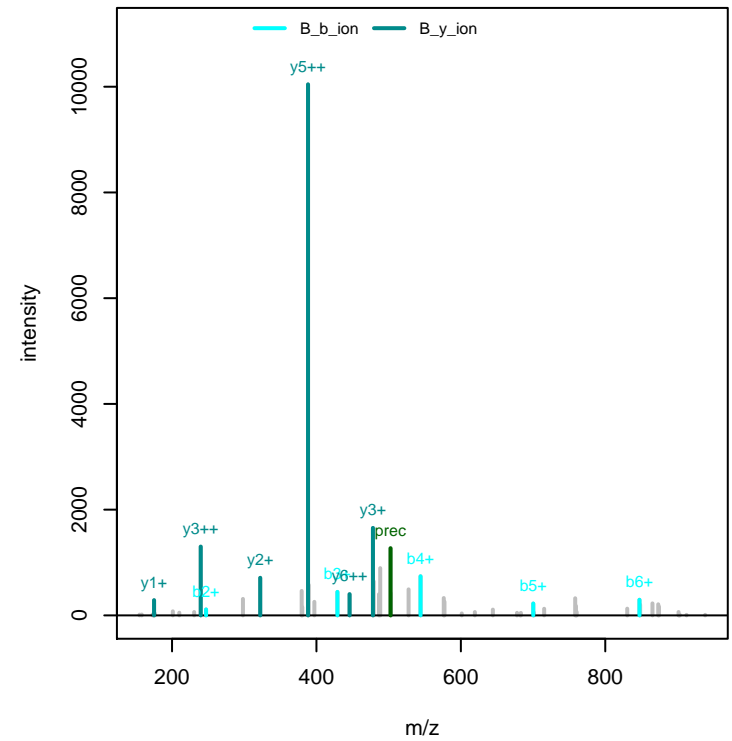

**MDKDRFR+XL\_L**

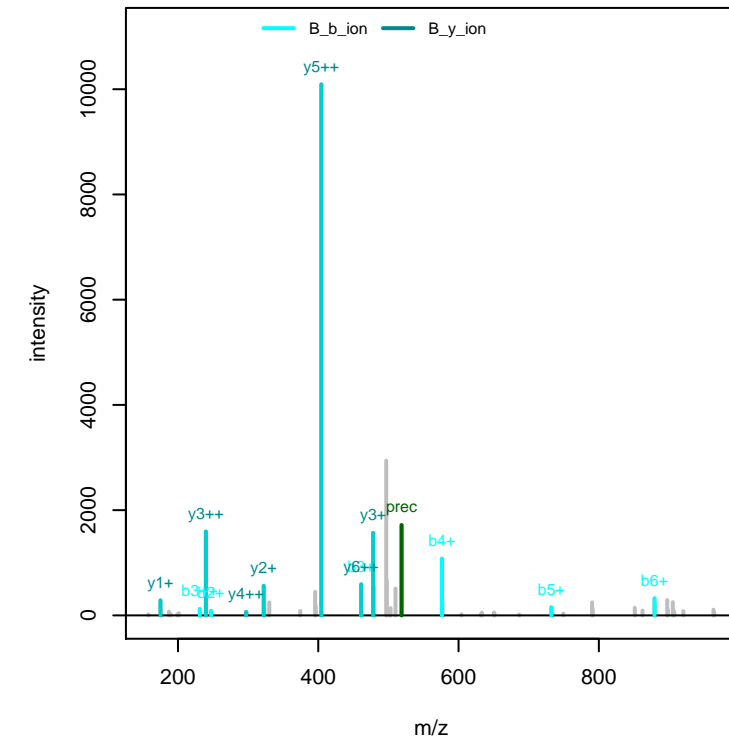



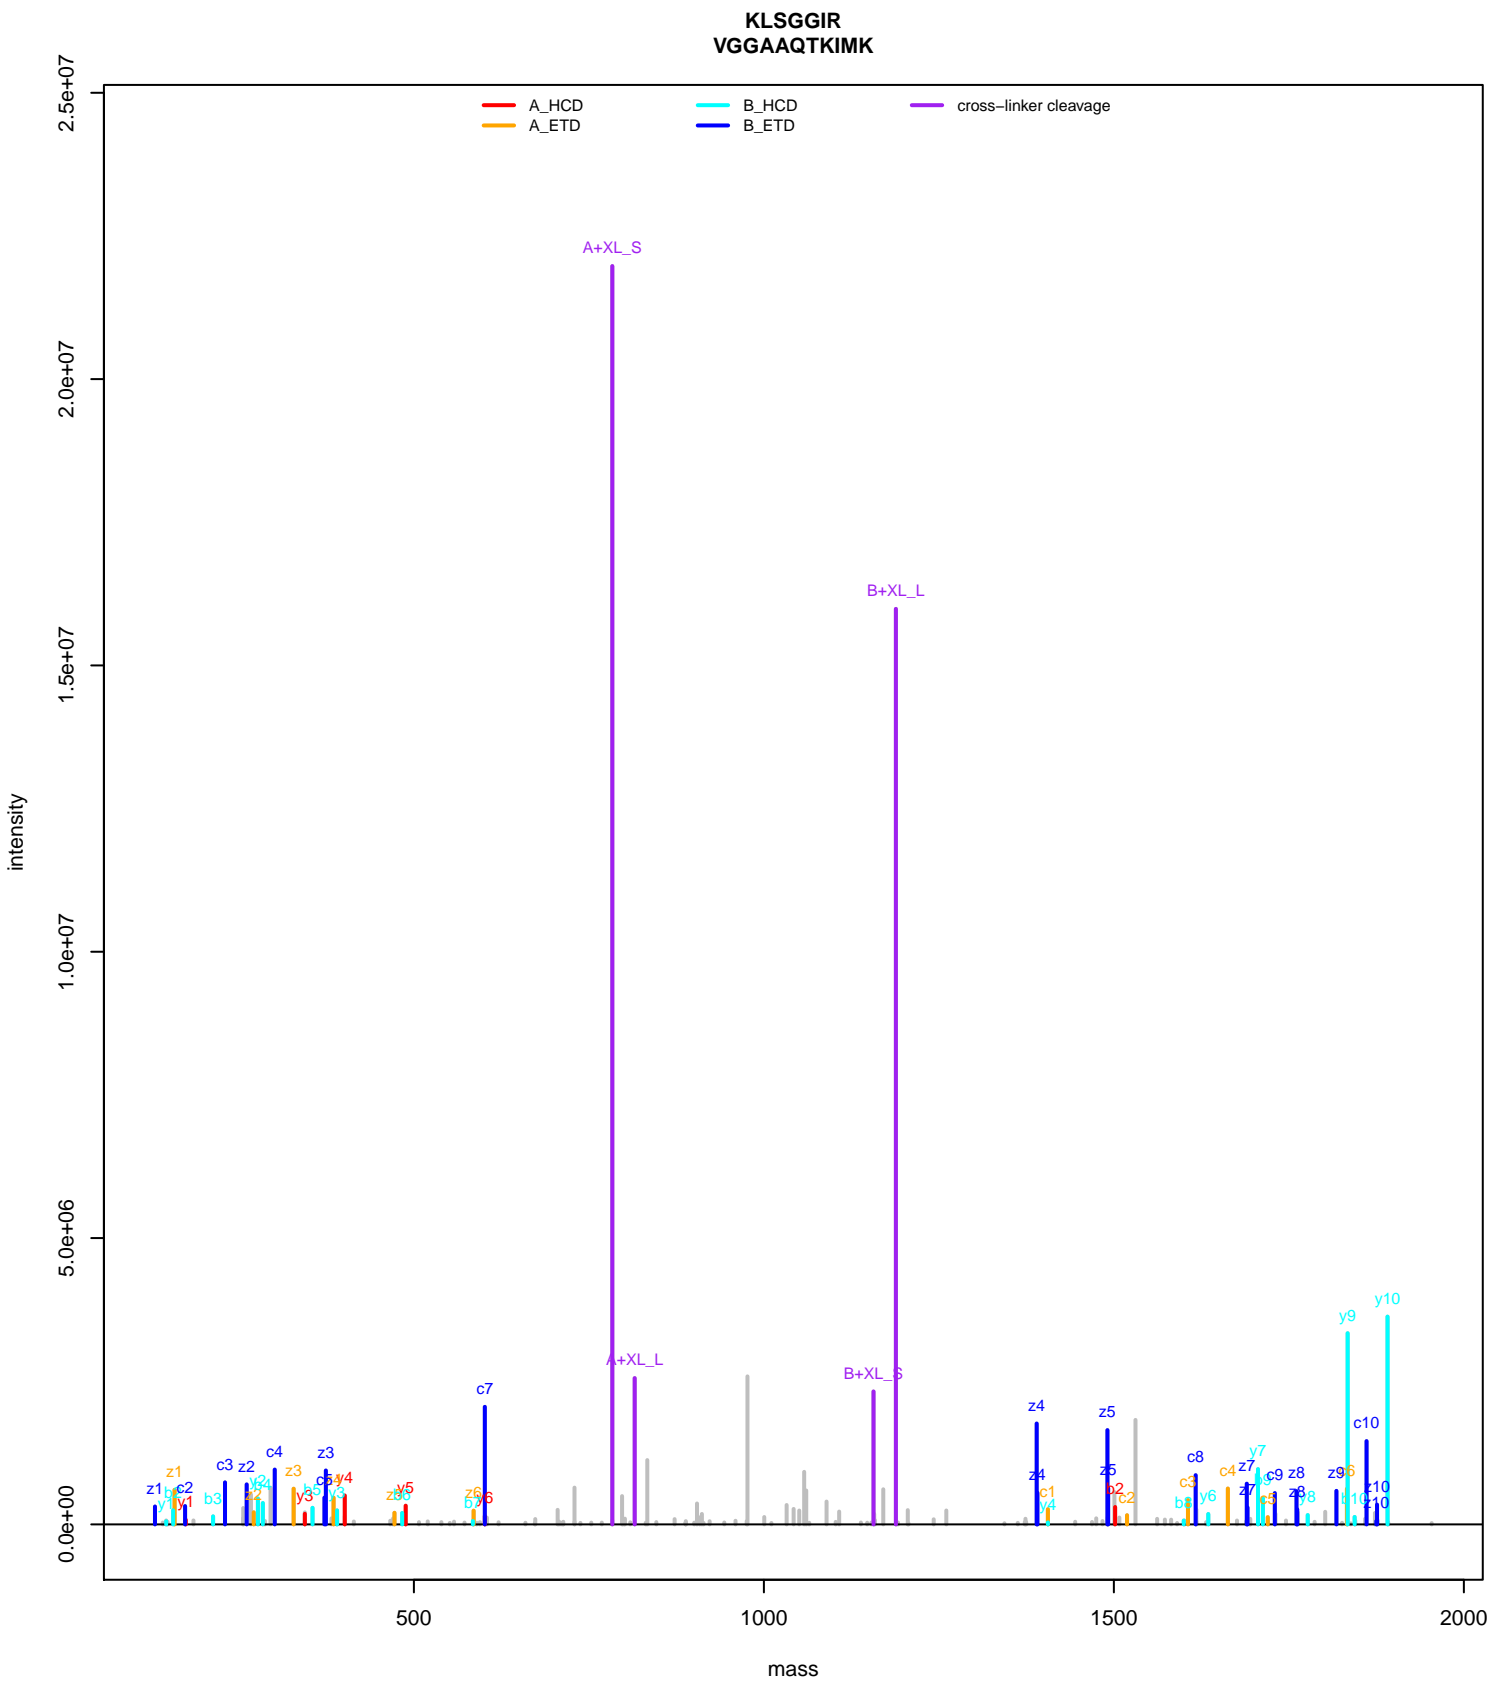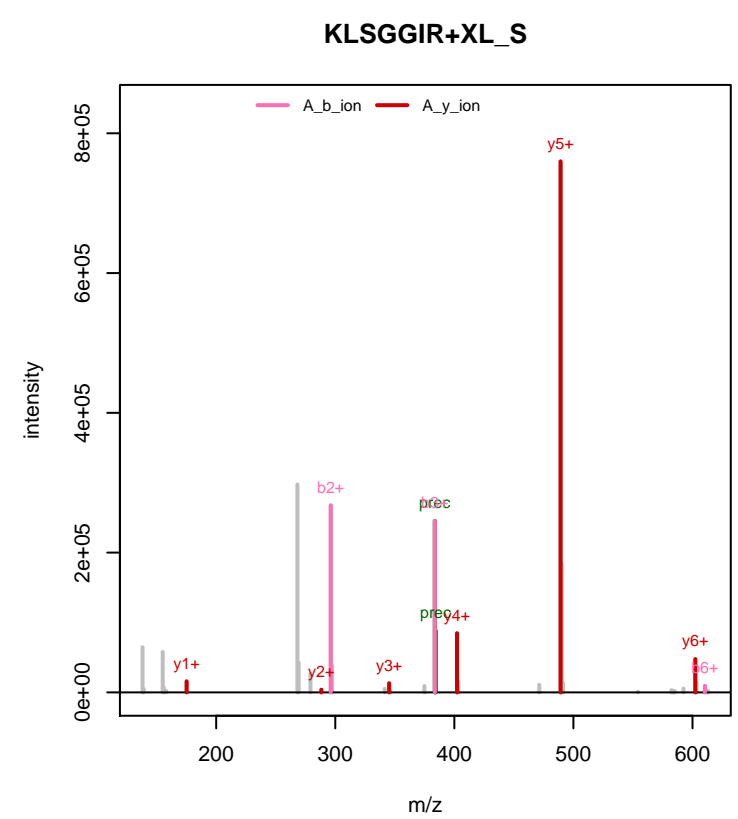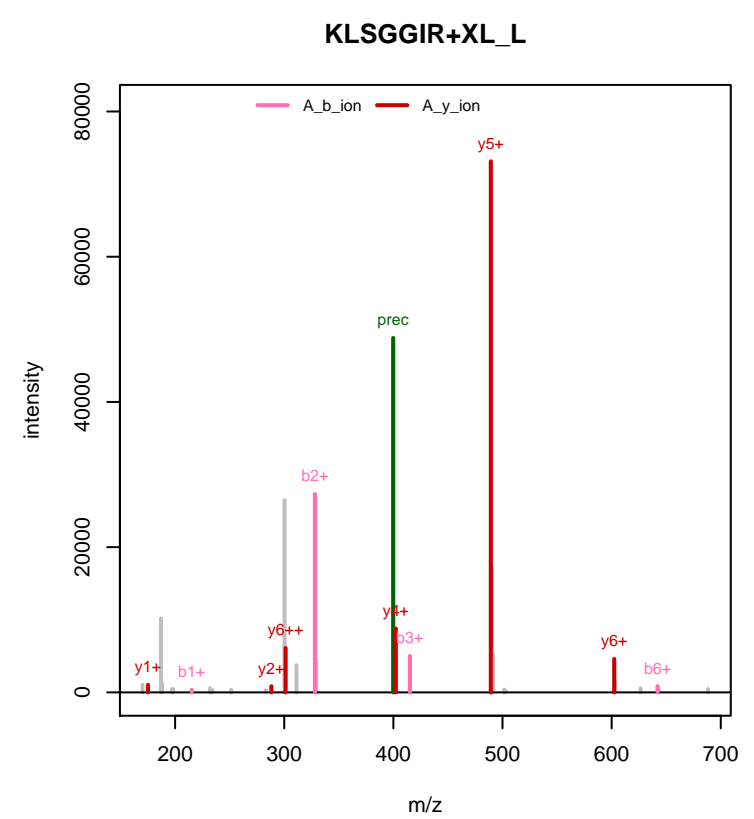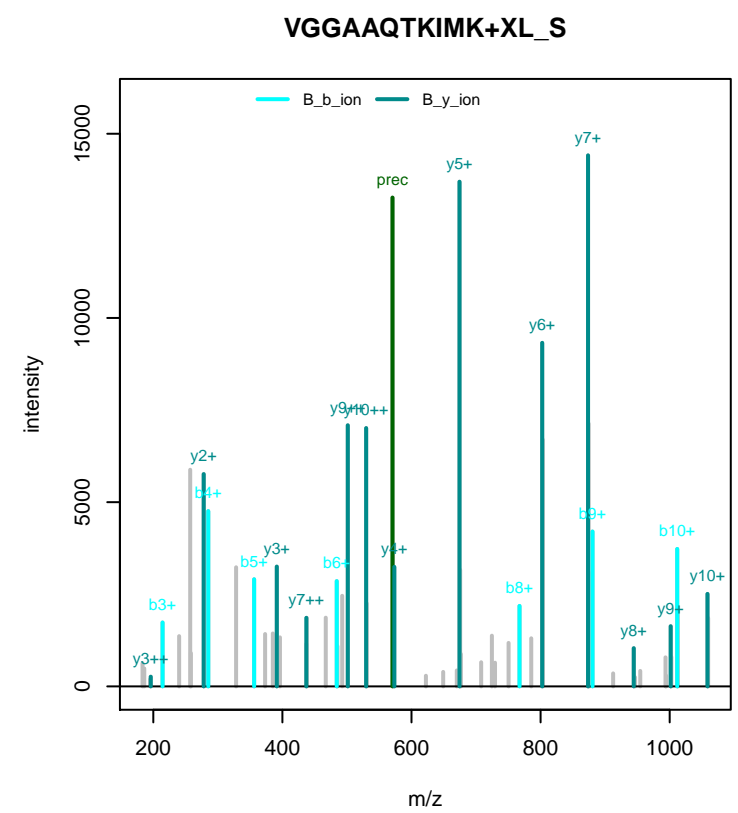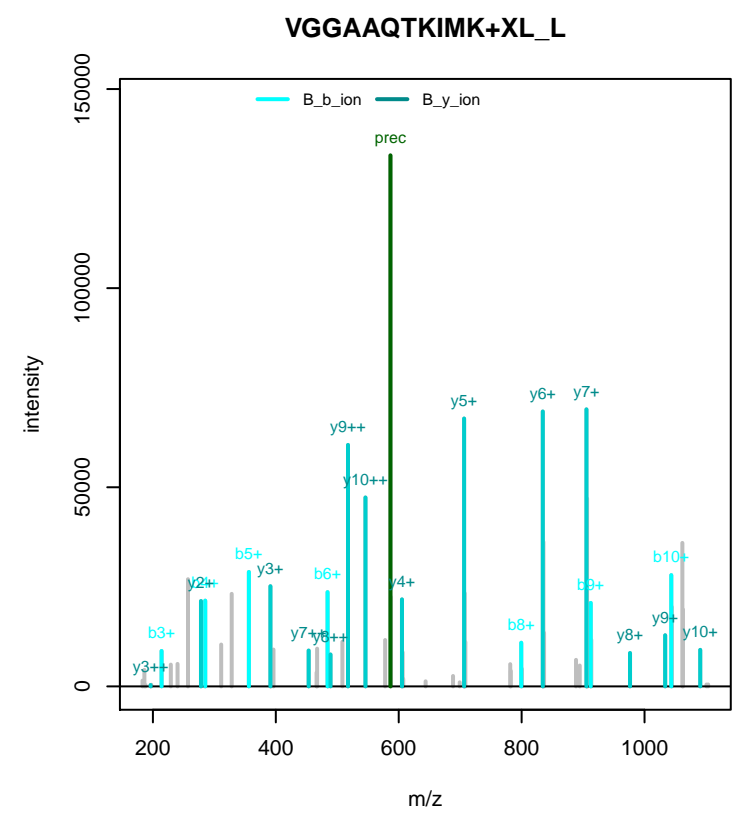

### KELANAIR DIDGHDAASIKR

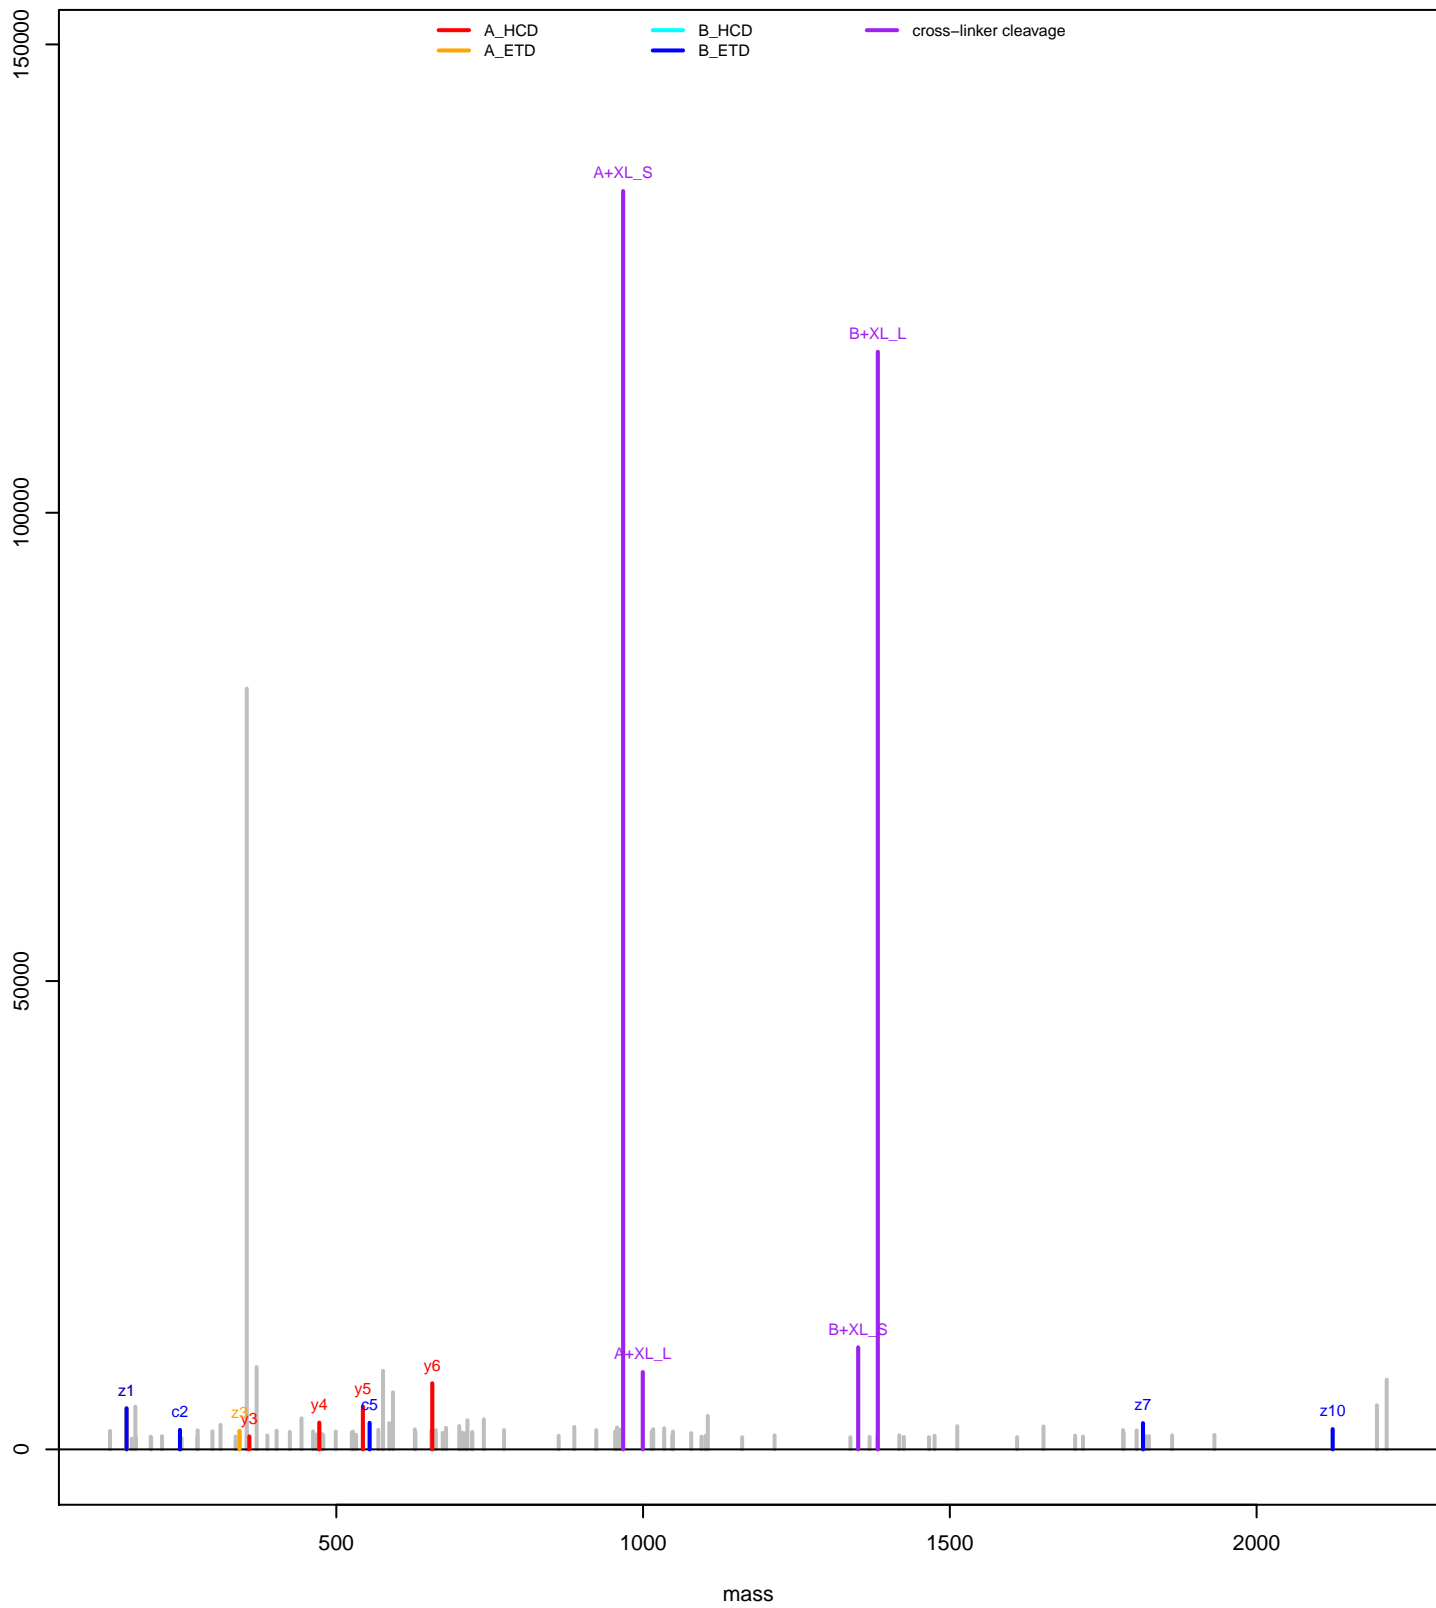

### KELANAIR+XL\_S

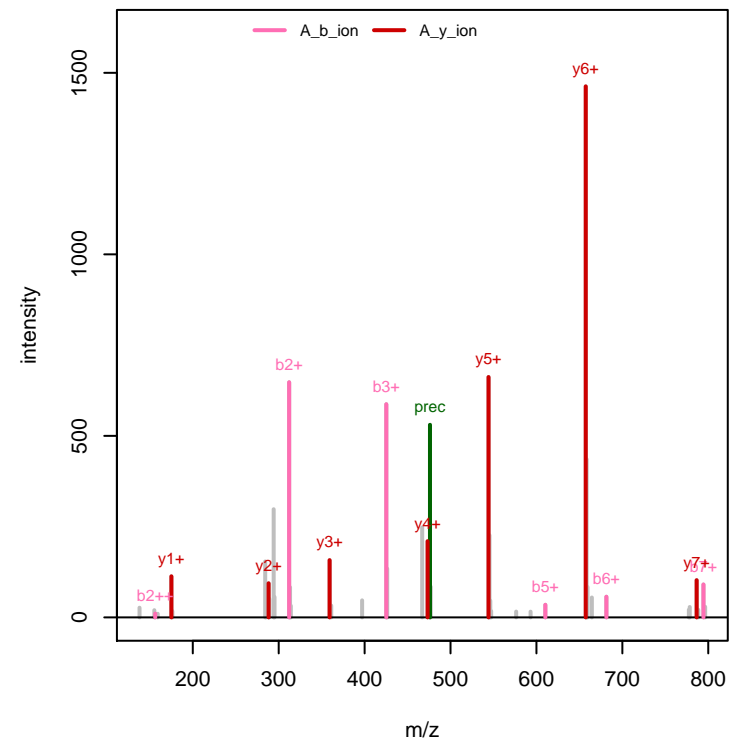

### KELANAIR+XL\_L

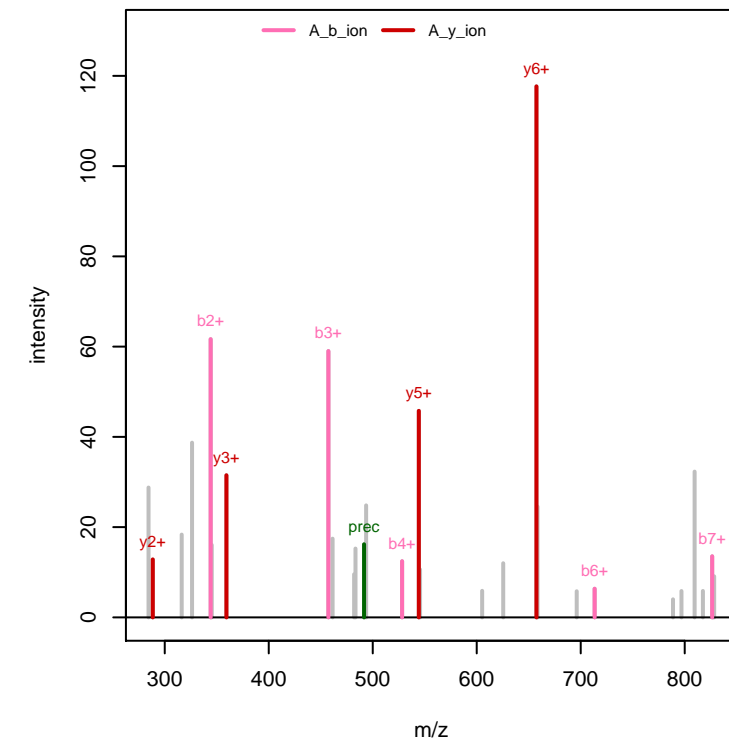

### DIDGHDAASIKR+XL\_S

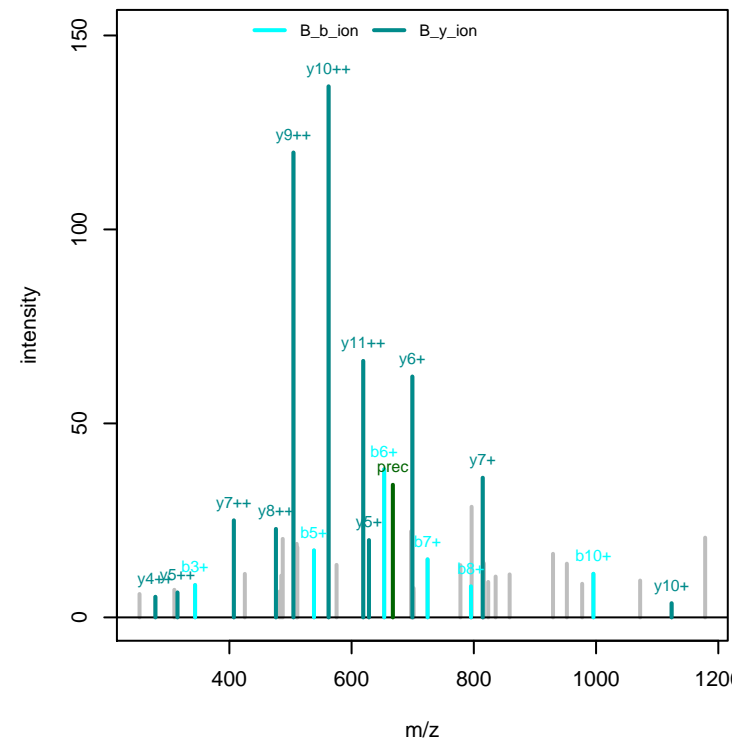

### DIDGHDAASIKR+XL\_L

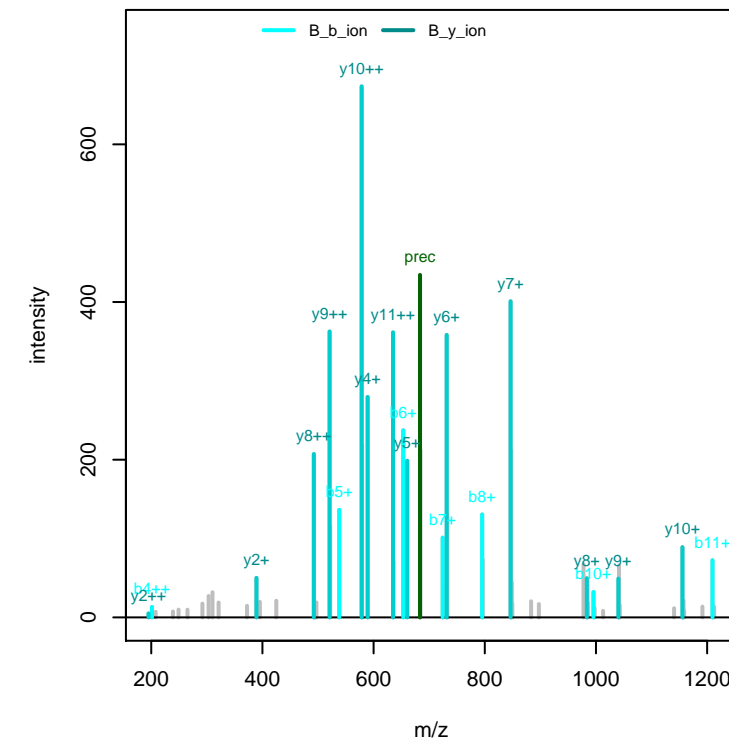

**LAGQKLVAR  
AKPGEYVQGINGK**

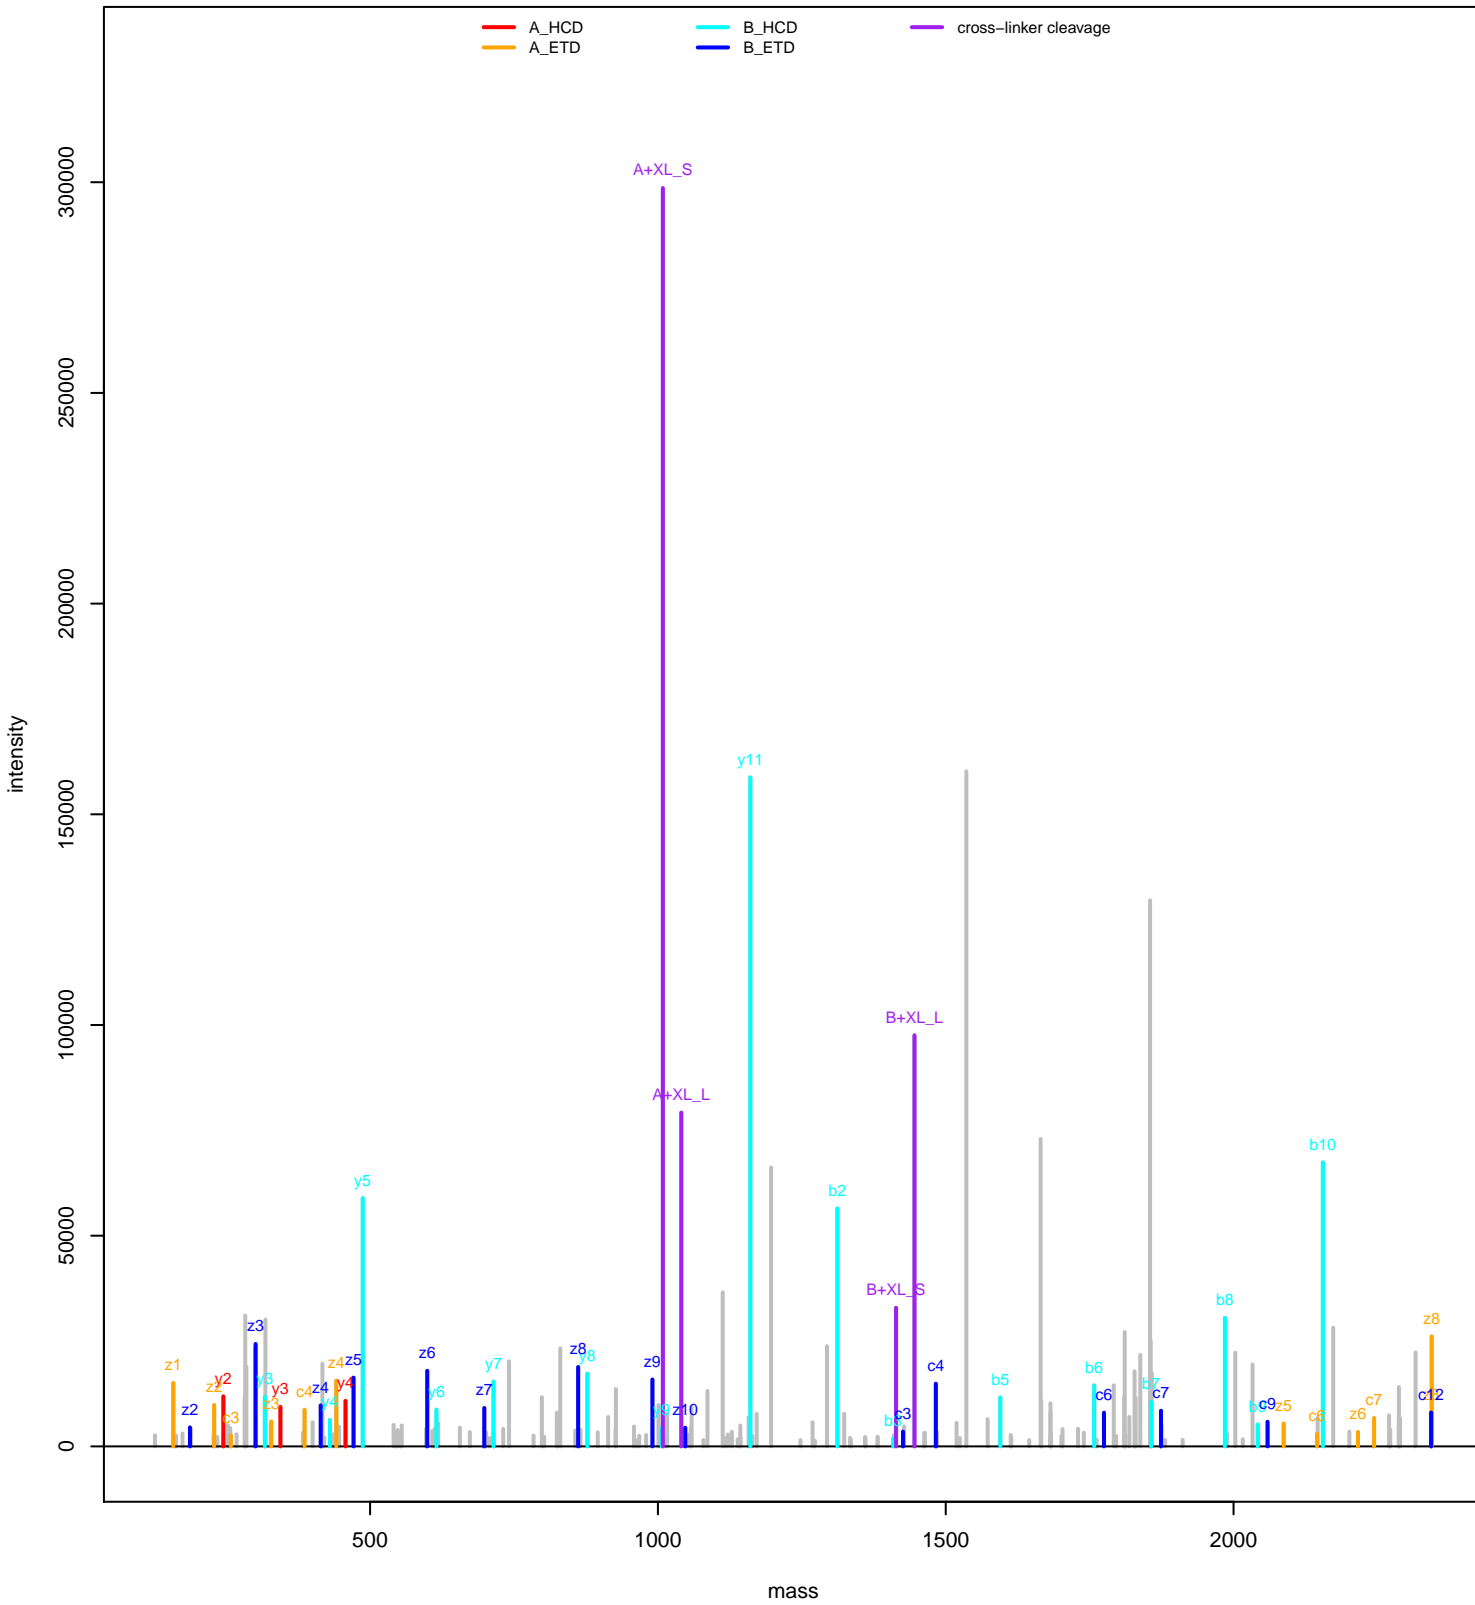

**LAGQKLVAR+XL\_S**

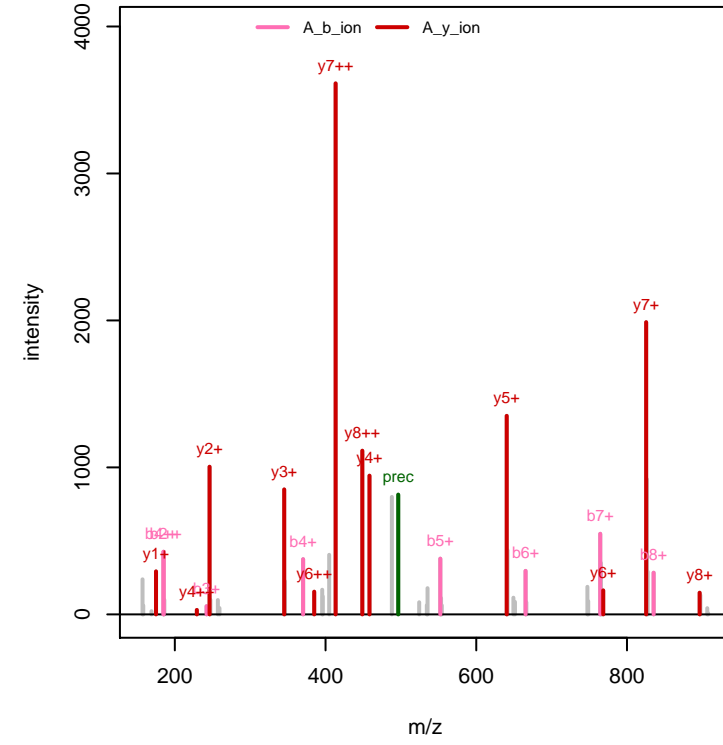

**LAGQKLVAR+XL\_L**

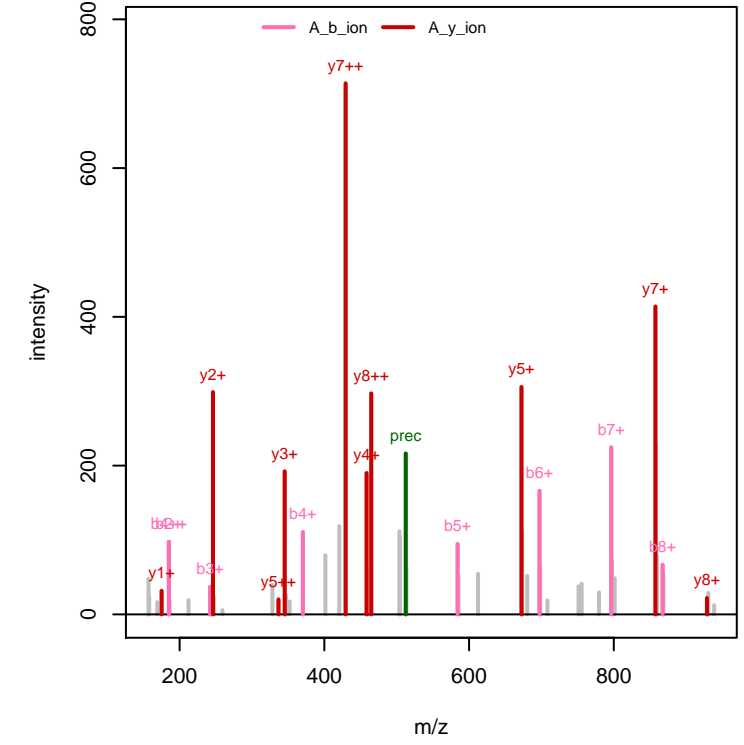

**AKPGEYVQGINGK+XL\_S**

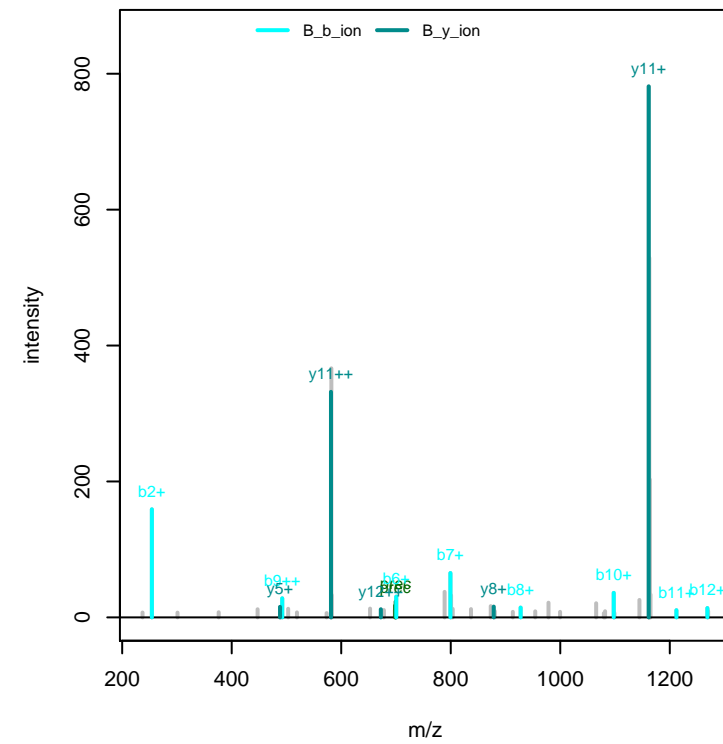

**AKPGEYVQGINGK+XL\_L**

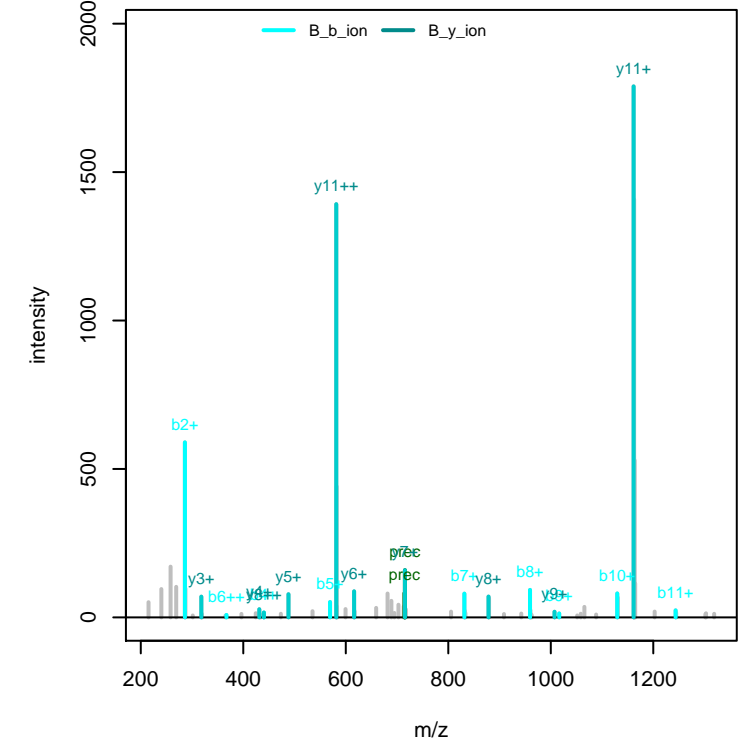

**MQNSALK**  
LLAEHNLDASAIKGTGVGGR

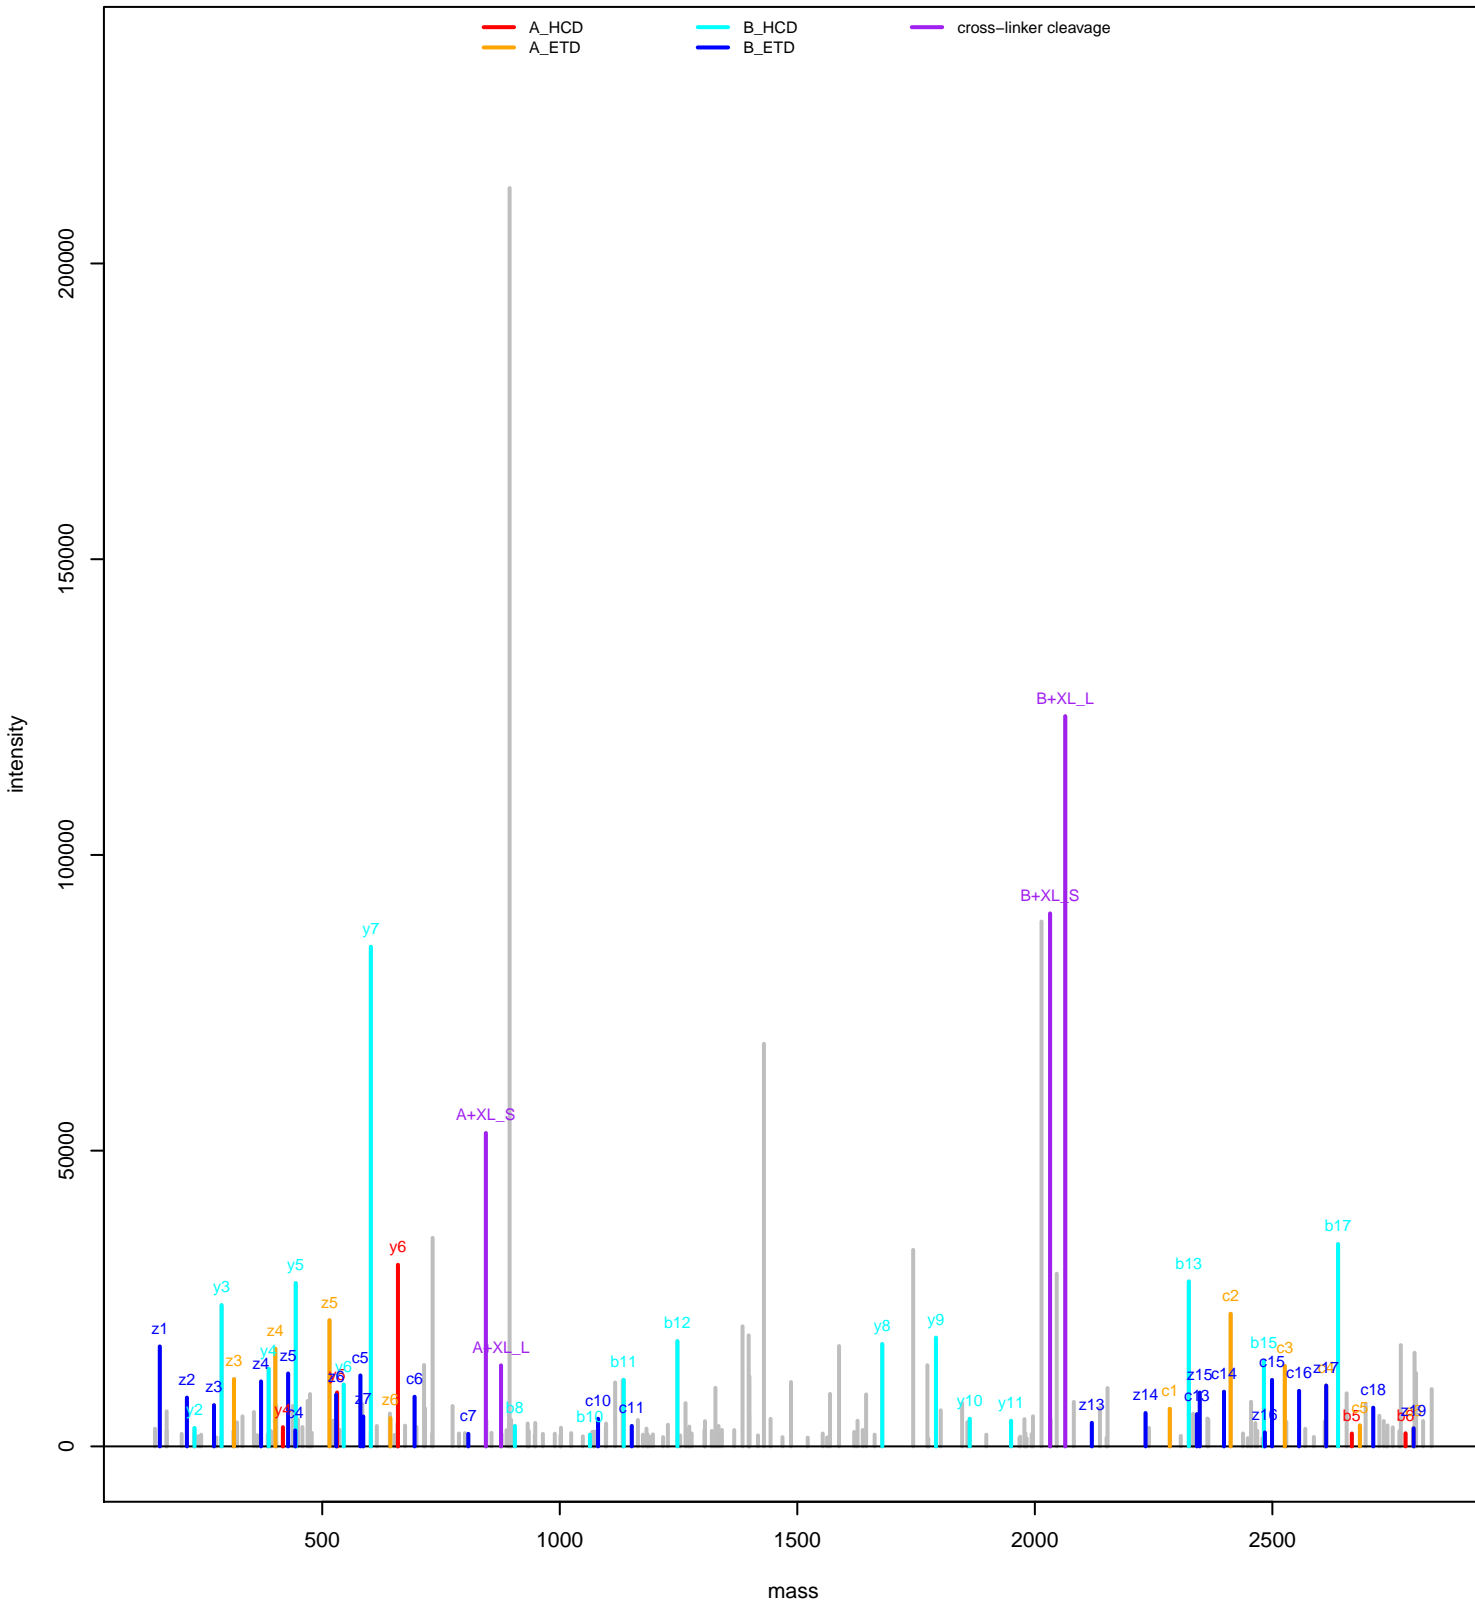

**MQNSALK+XL\_S**

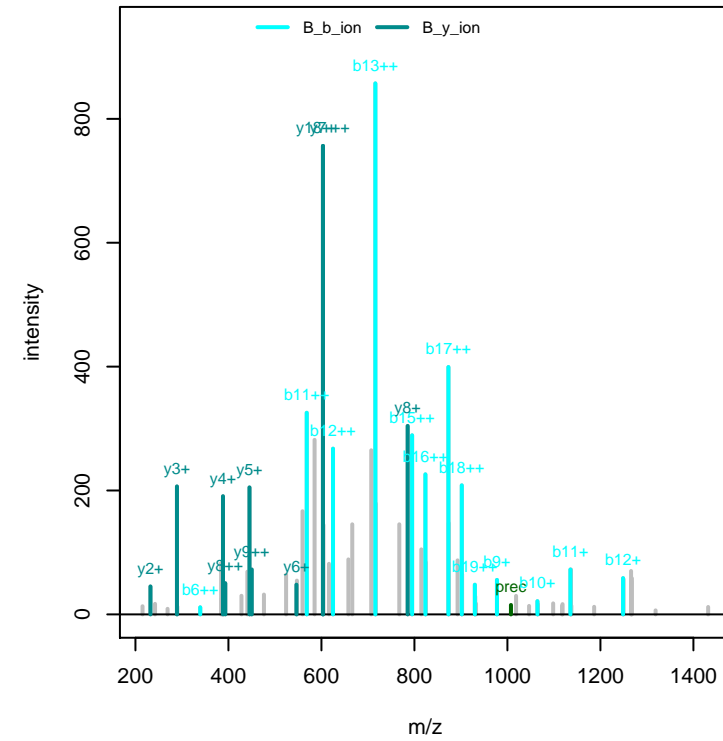

**MQNSALK+XL\_L**

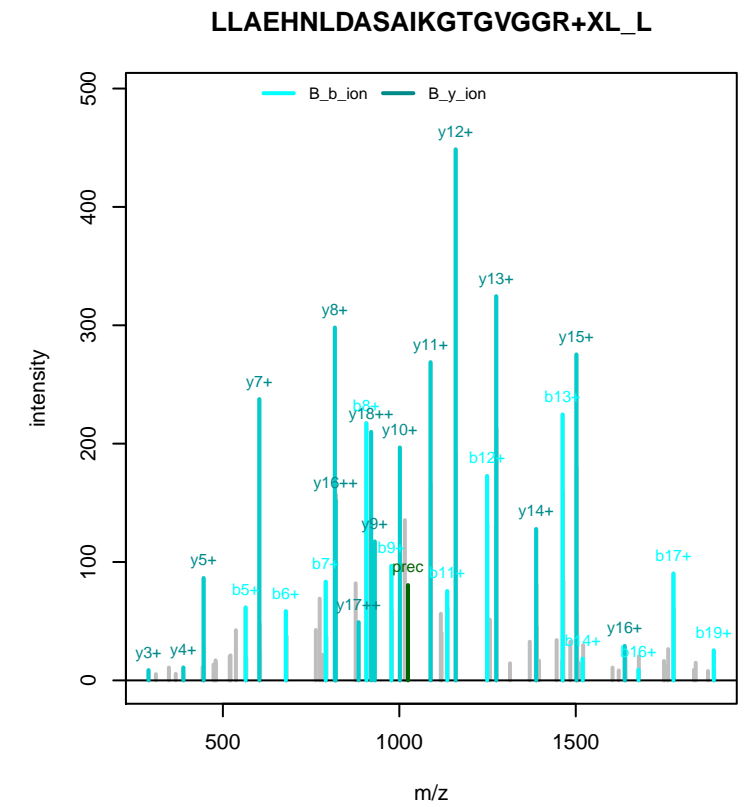

**LLAEHNLDASAIKGTGVGGR+XL\_S**



**LLAEHNLDASAIKGTGVGGR+XL\_L**

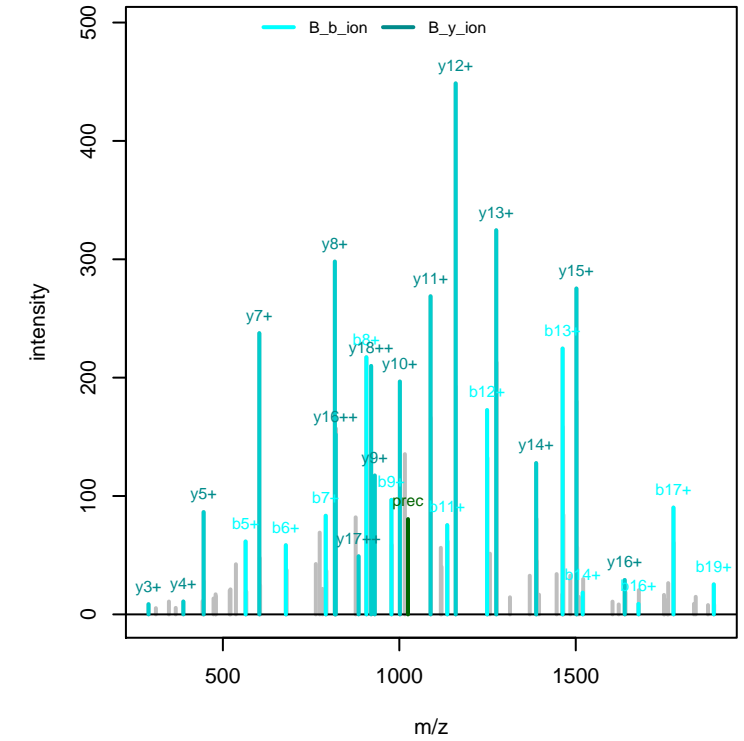

VSKTVK  
VGFGYGKAR

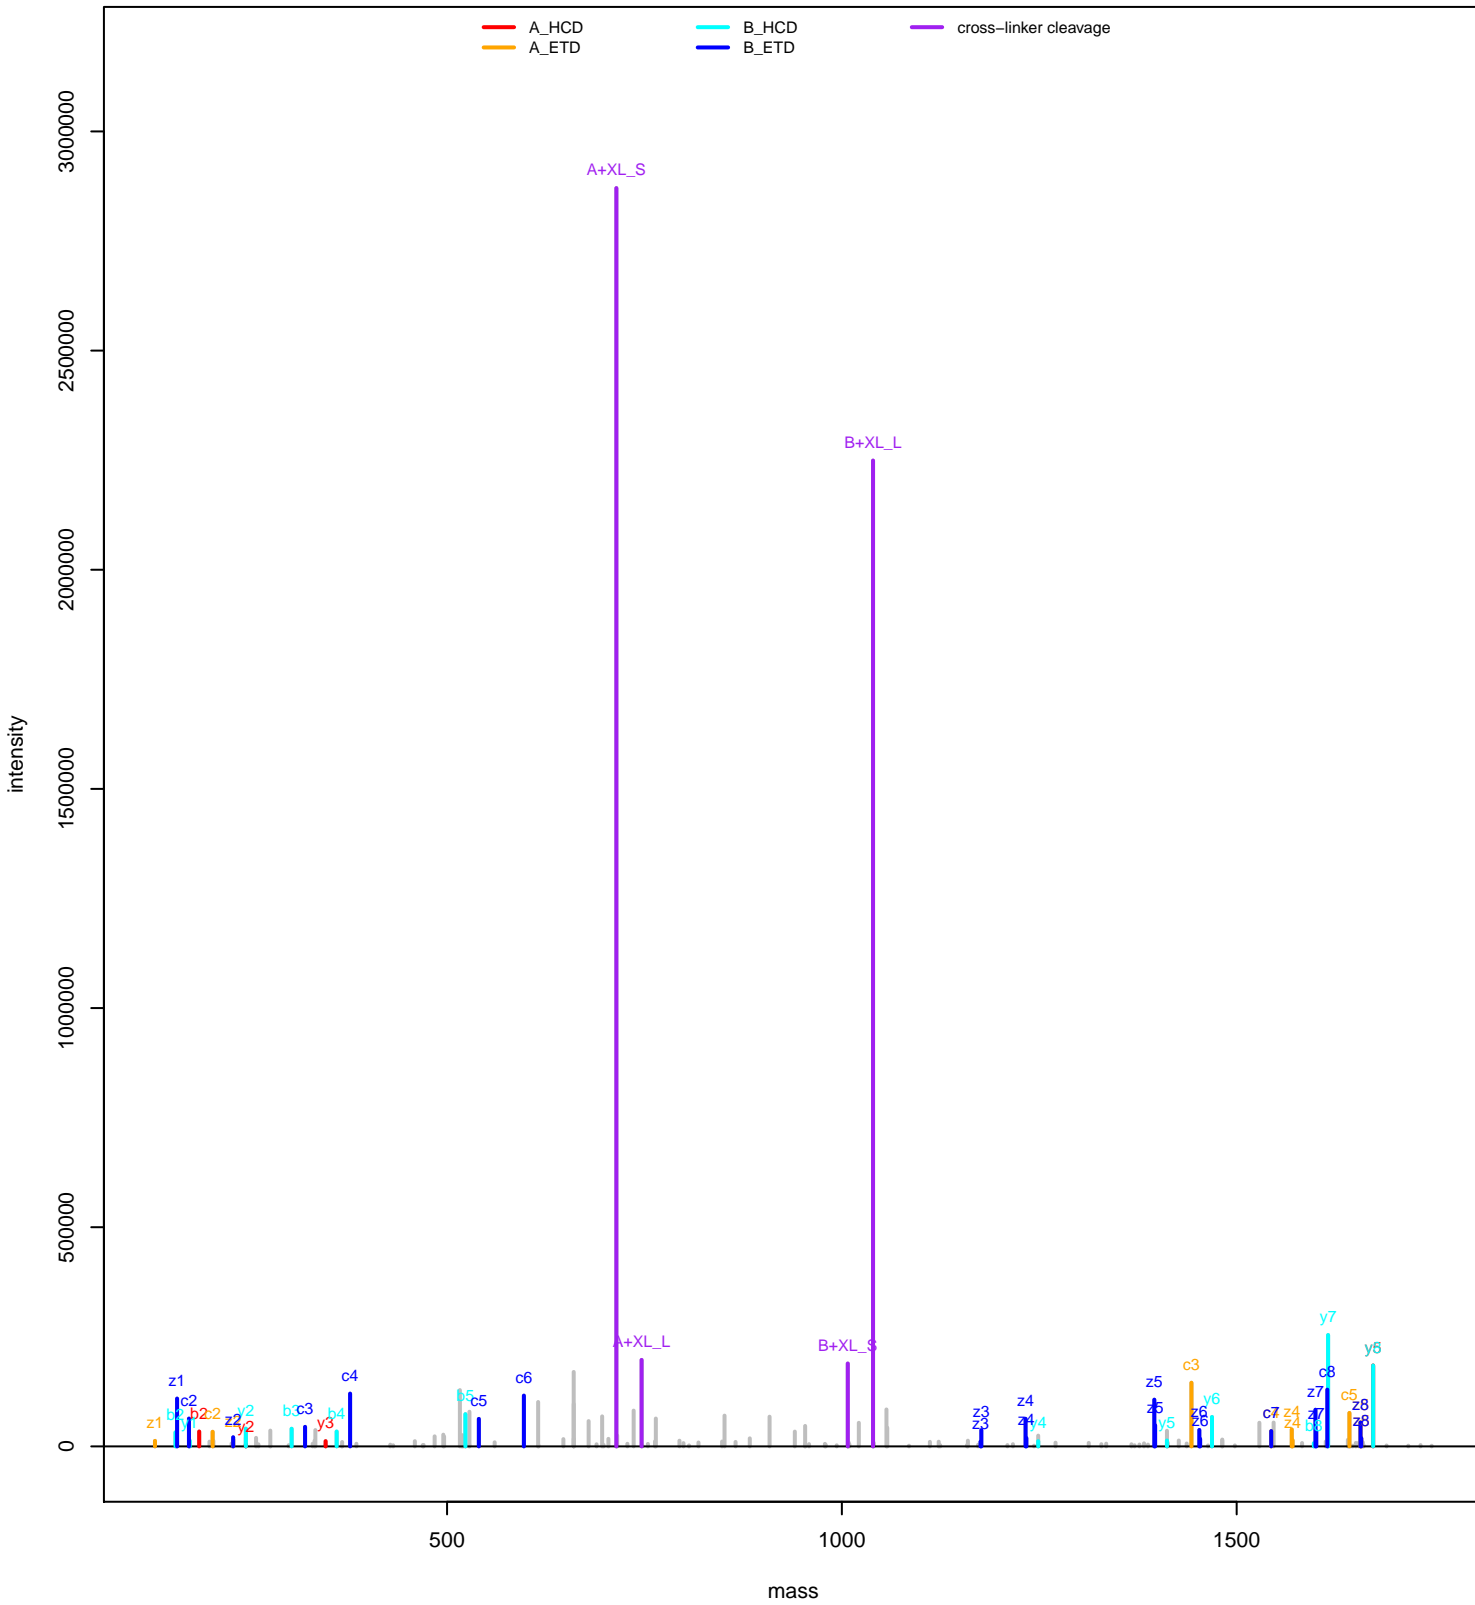

VSKTVK+XL\_S

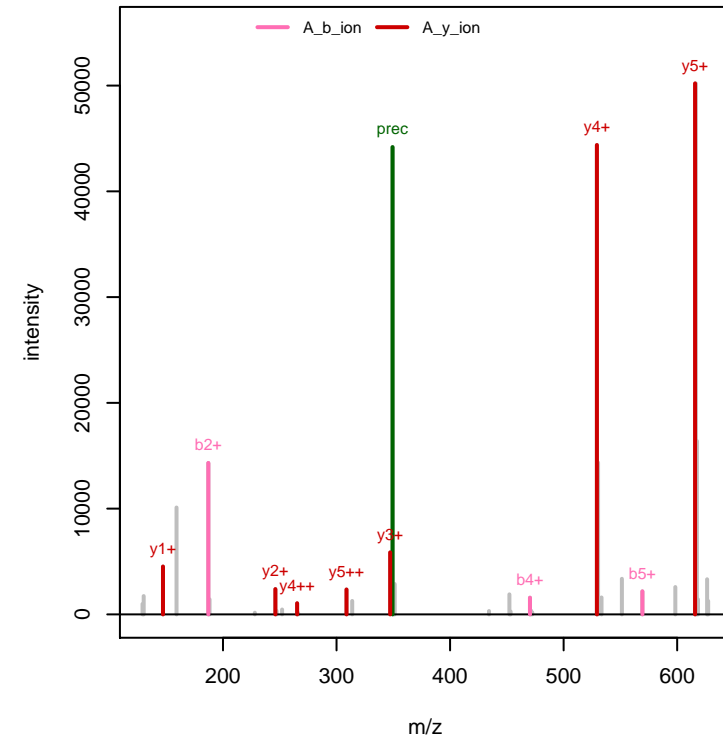

VSKTVK+XL\_L

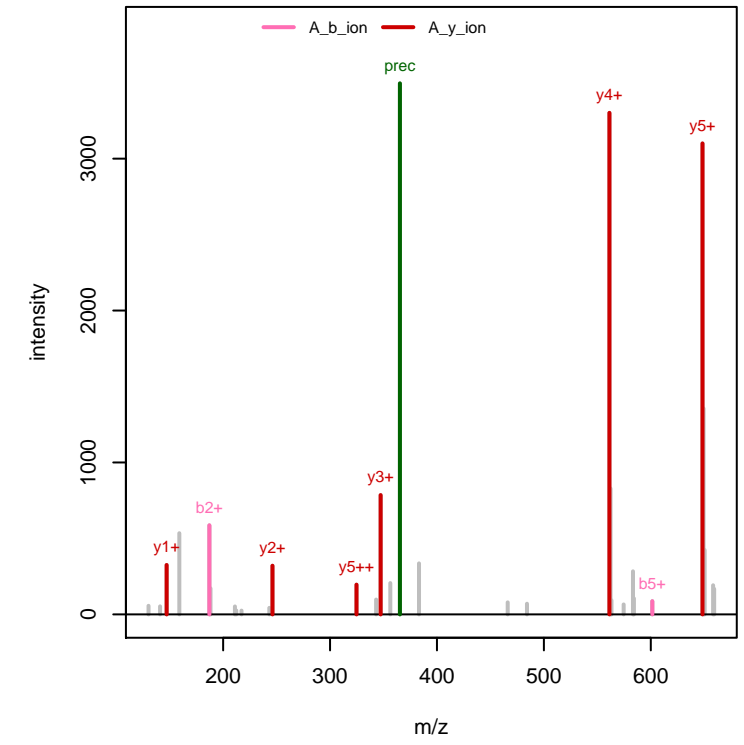

VGFGYGKAR+XL\_S

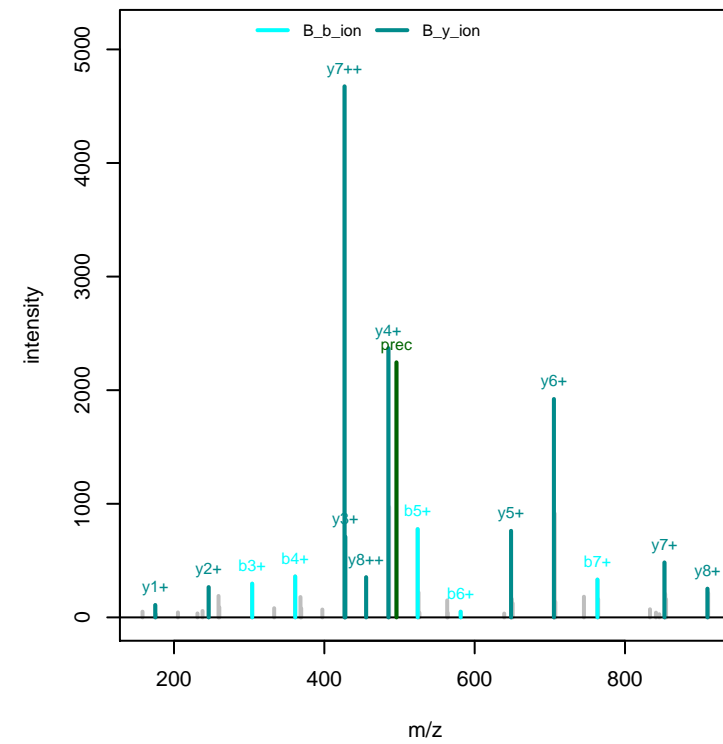

VGFGYGKAR+XL\_L

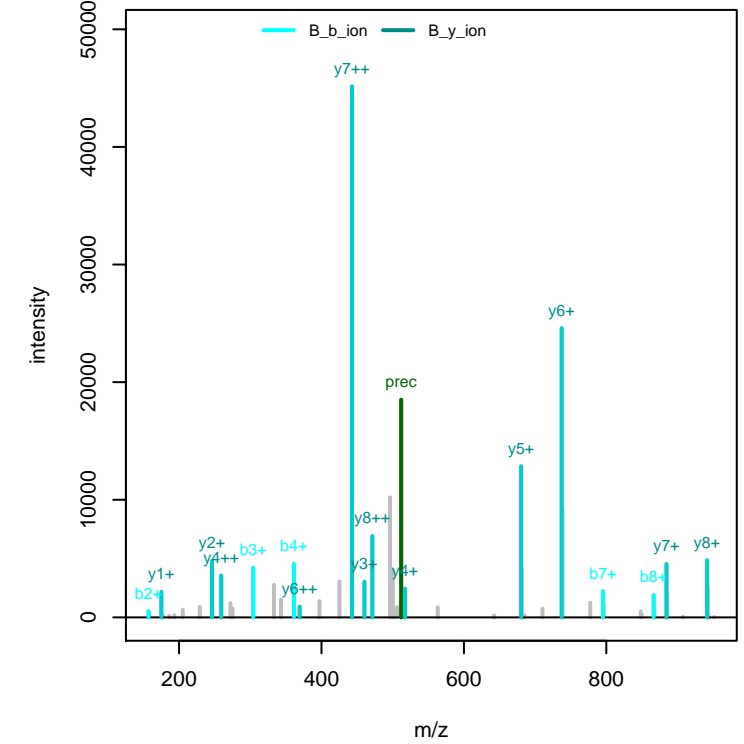

**GKNGELTR  
GATGLGLKEAK**

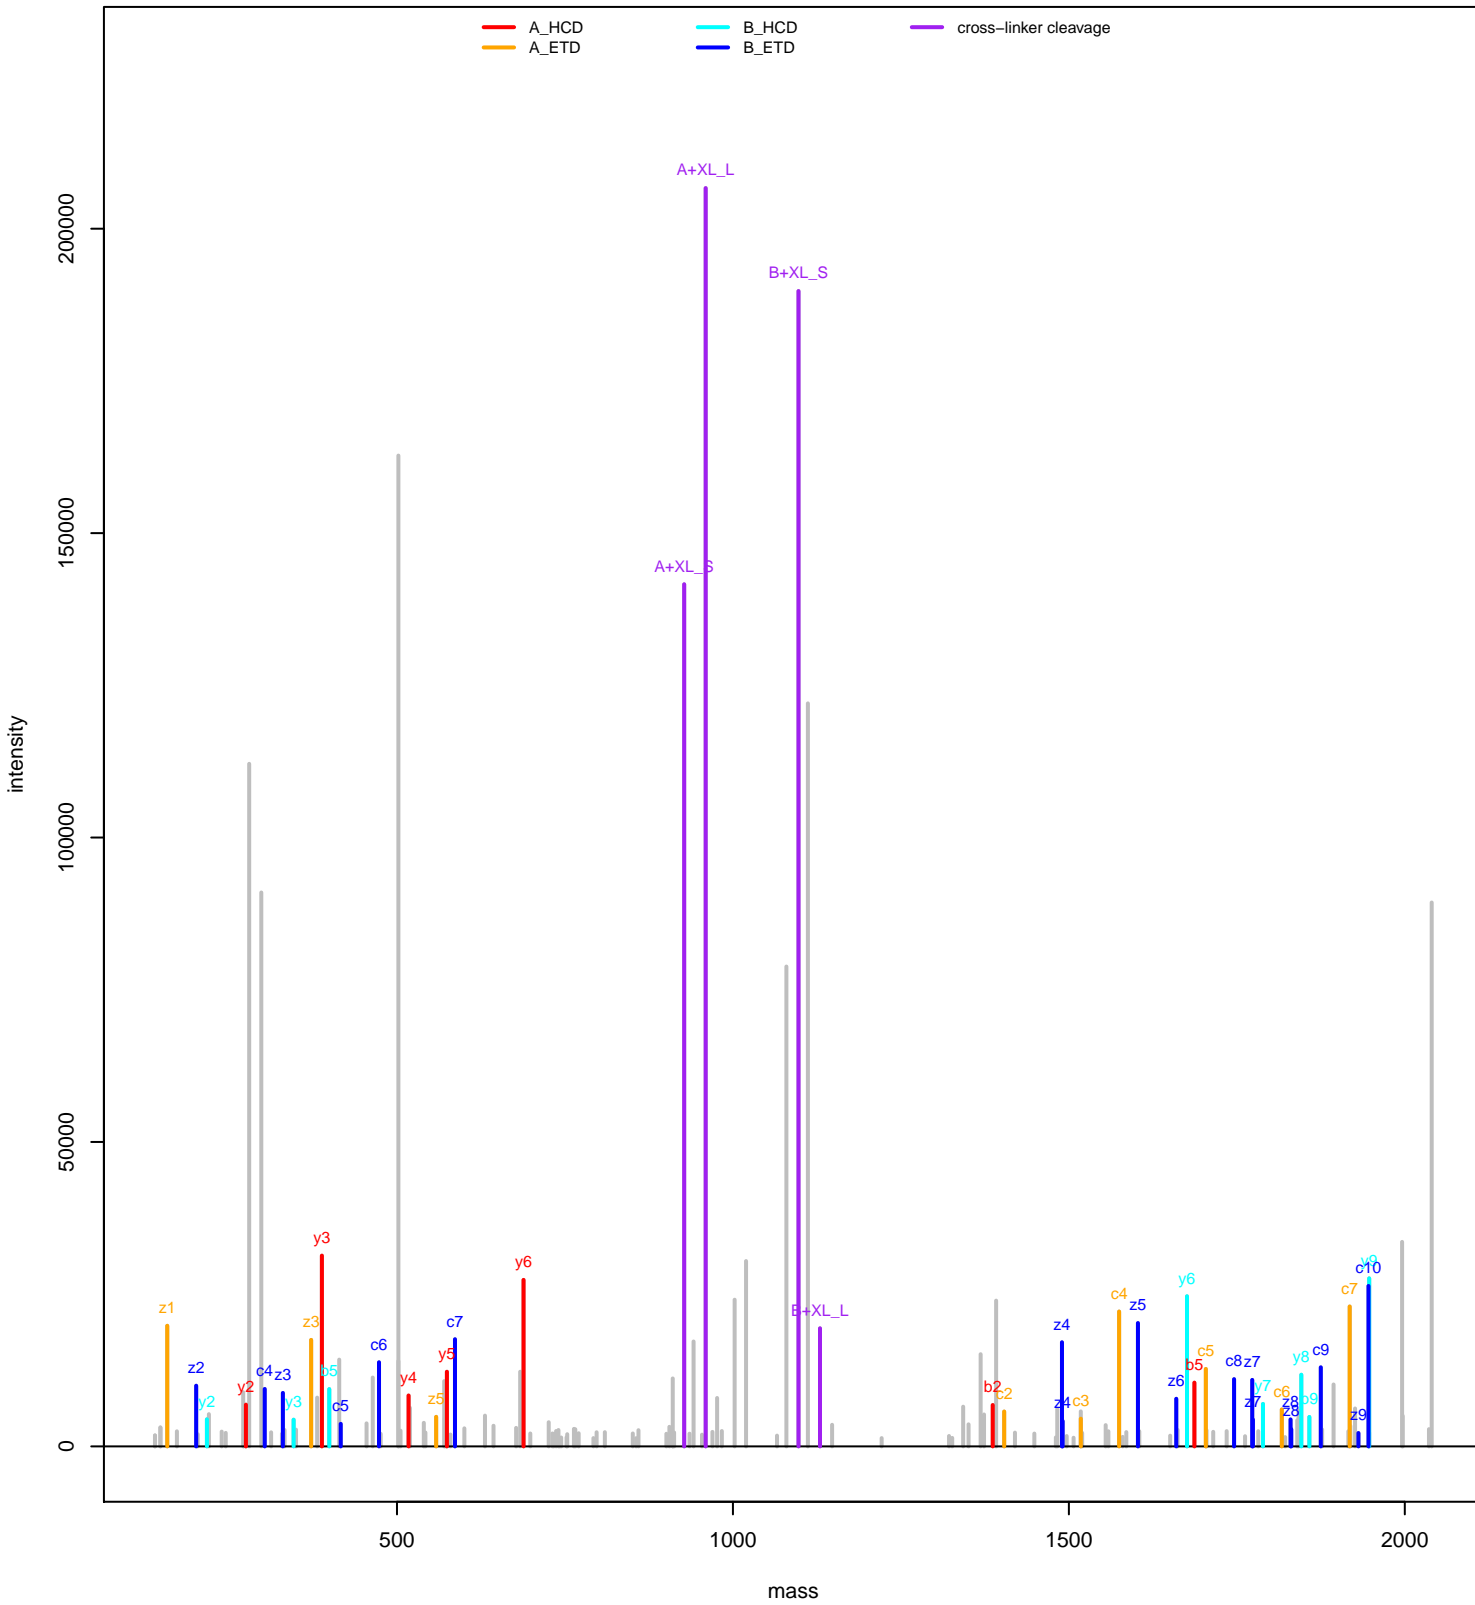

**GKNGELTR+XL\_S**

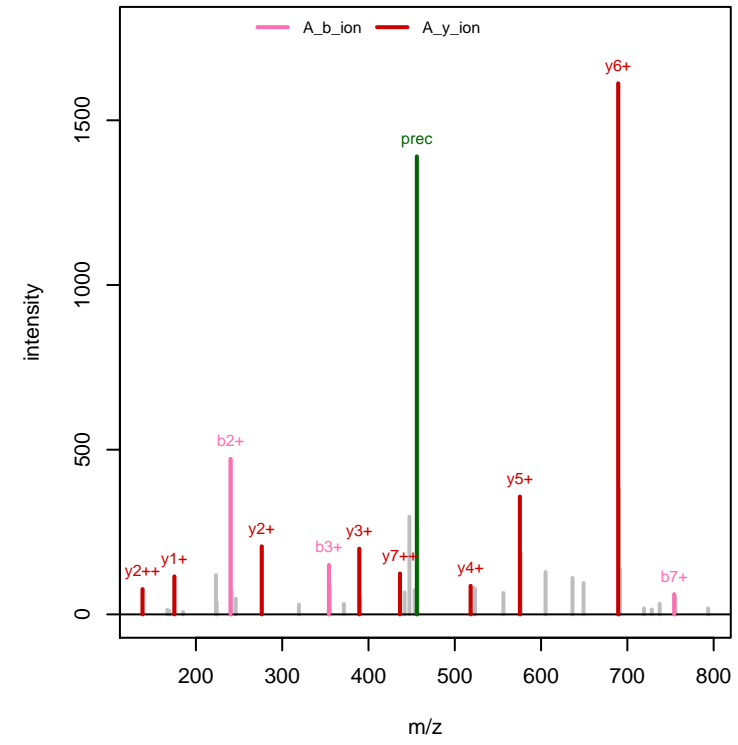

**GKNGELTR+XL\_L**

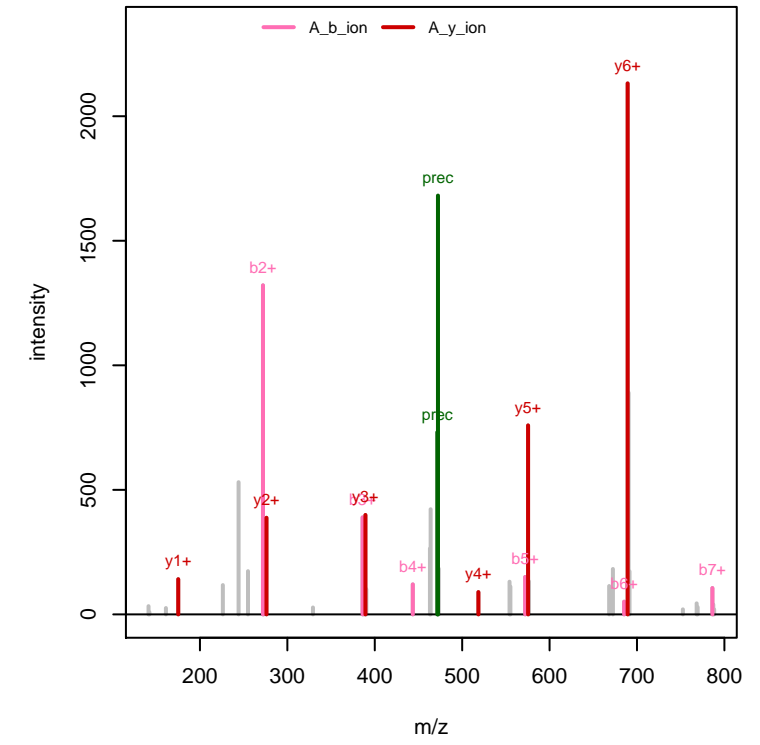

**GATGLGLKEAK+XL\_S**

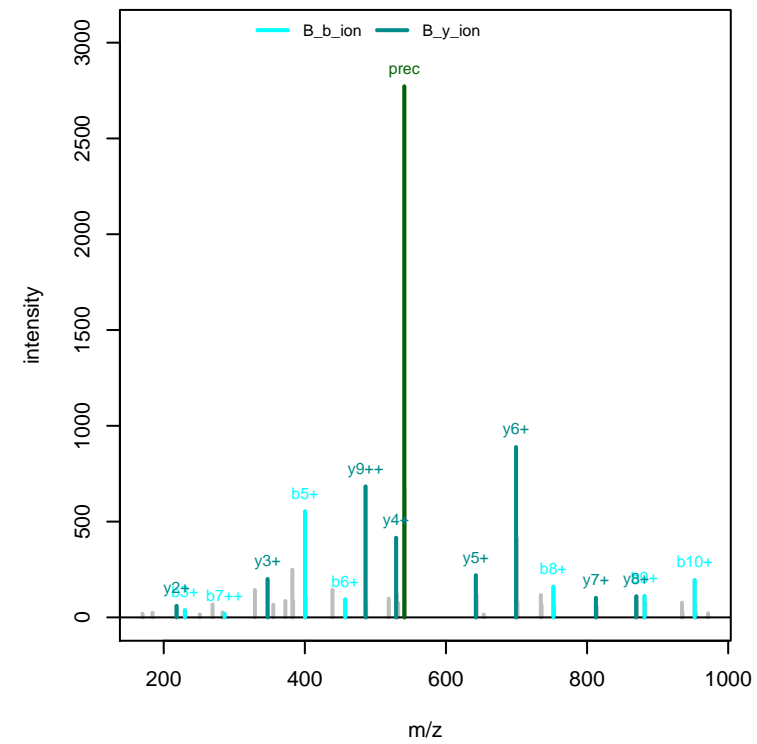

**GATGLGLKEAK+XL\_L**

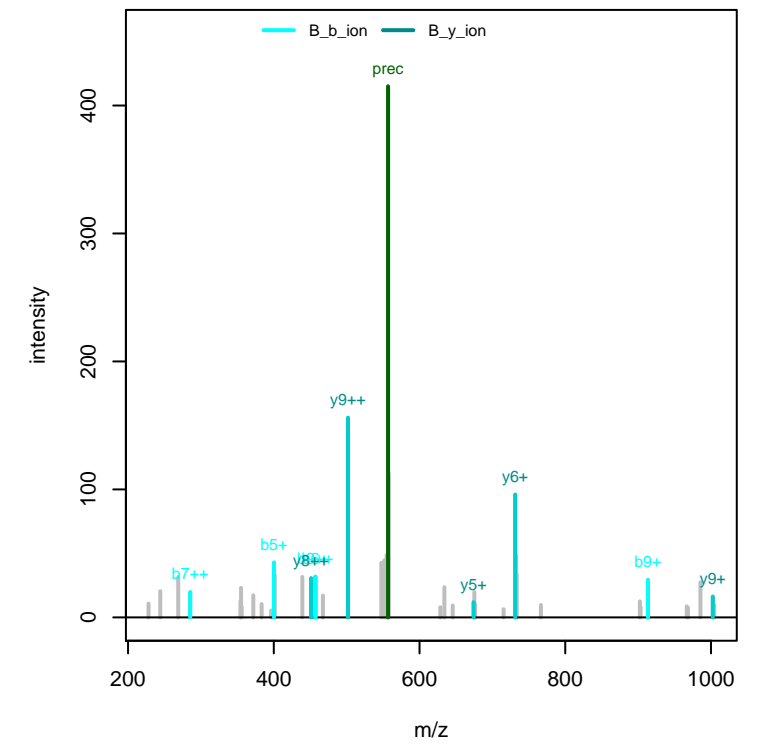

VDKQLR  
KHYFDPK

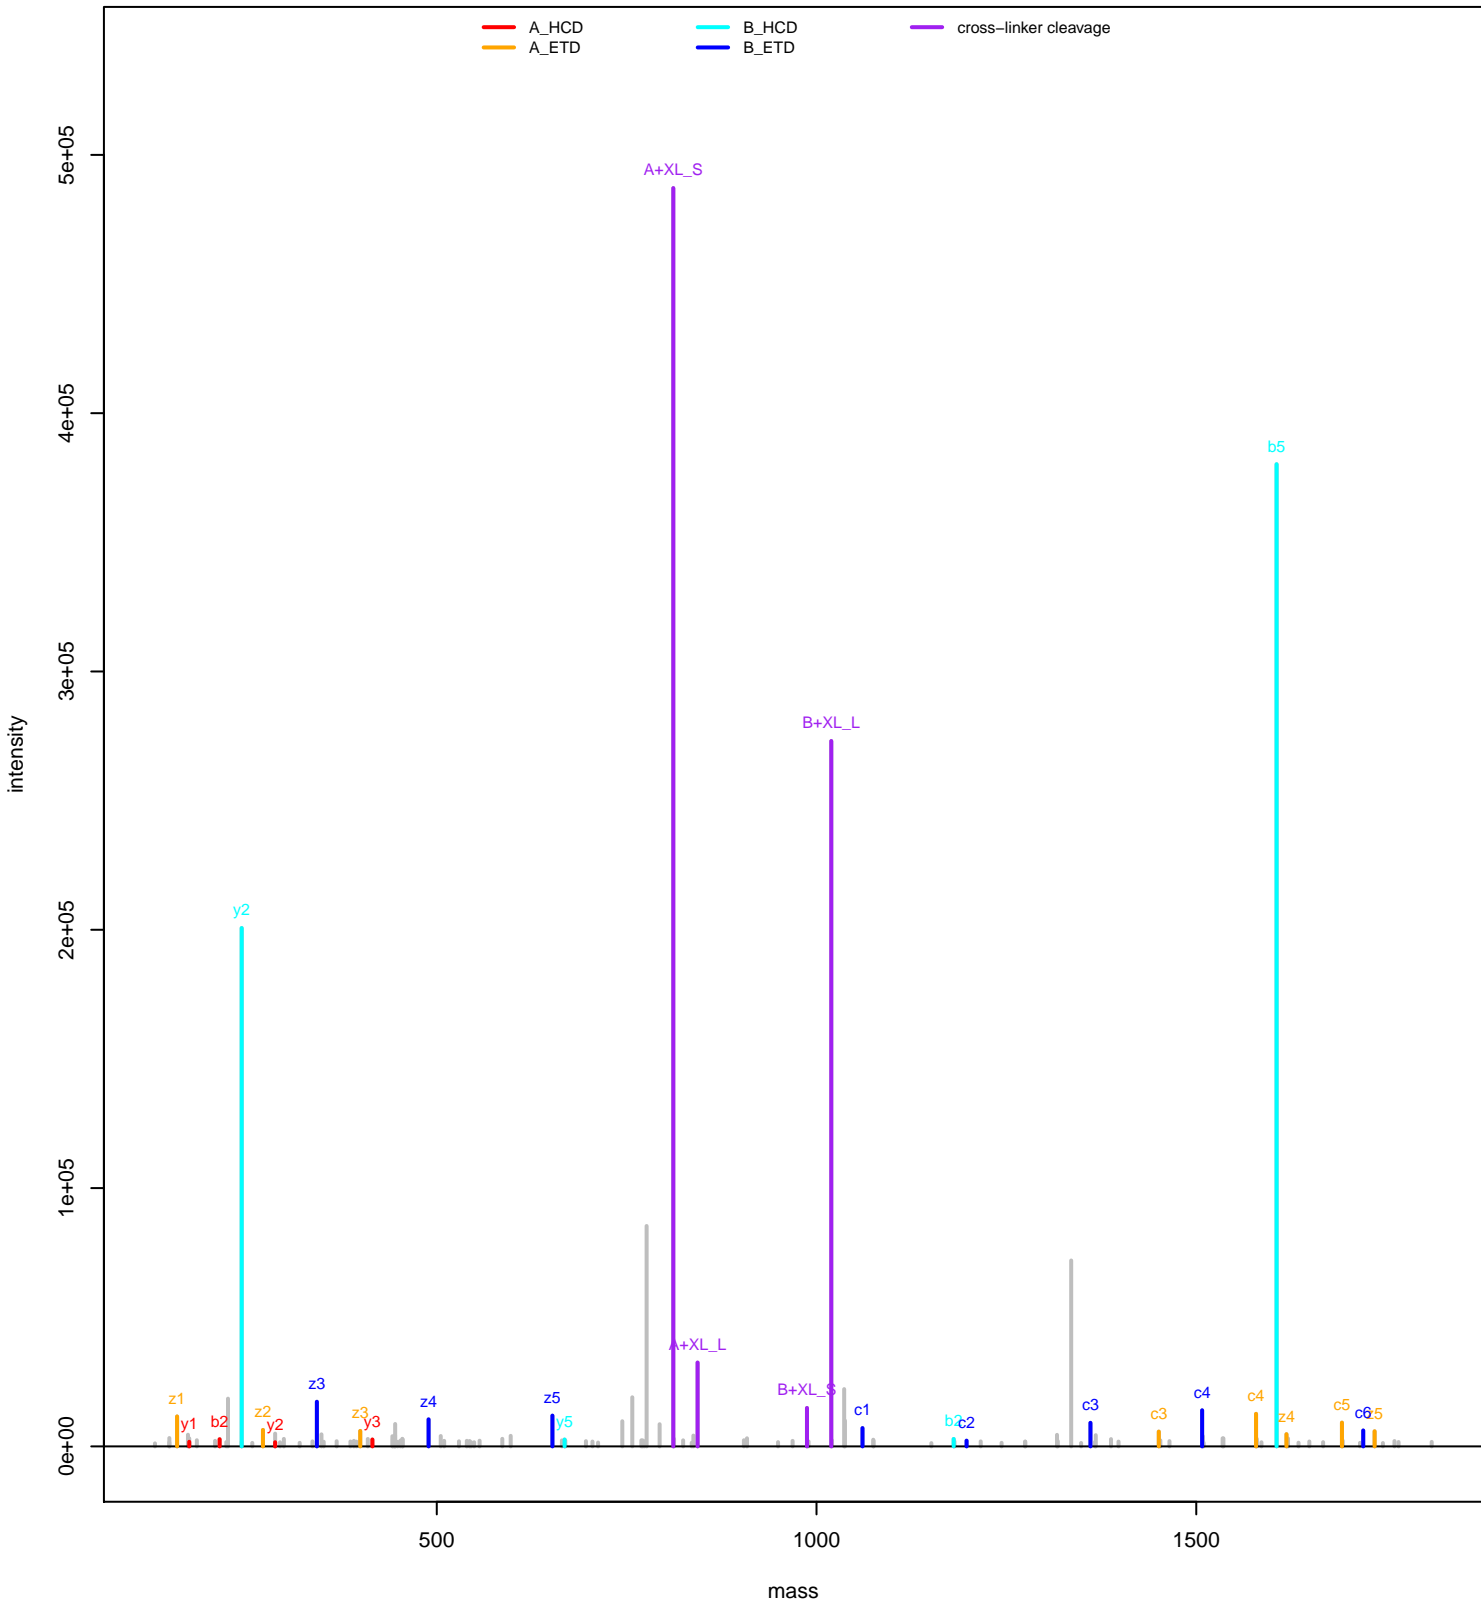

VDKQLR+XL\_S

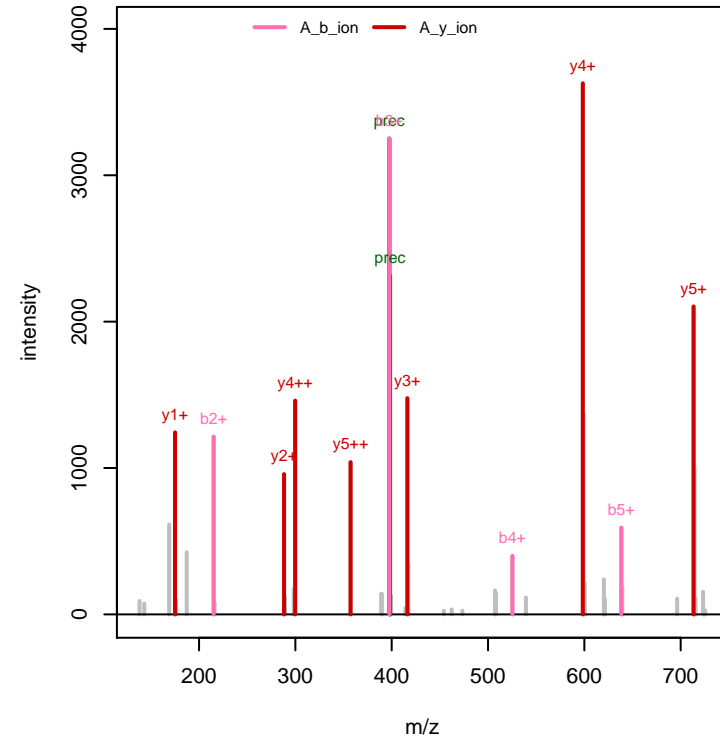

VDKQLR+XL\_L

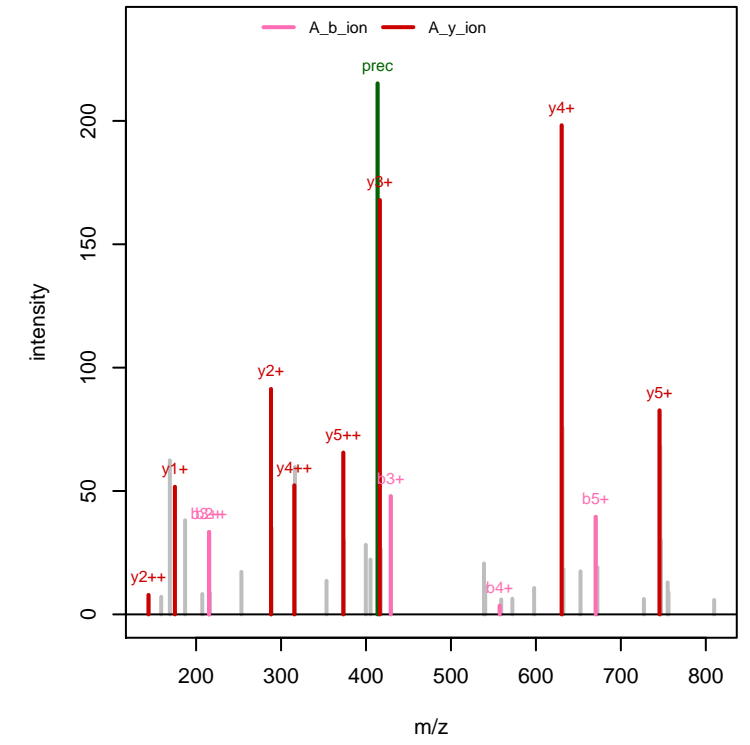

KHYFDPK+XL\_S

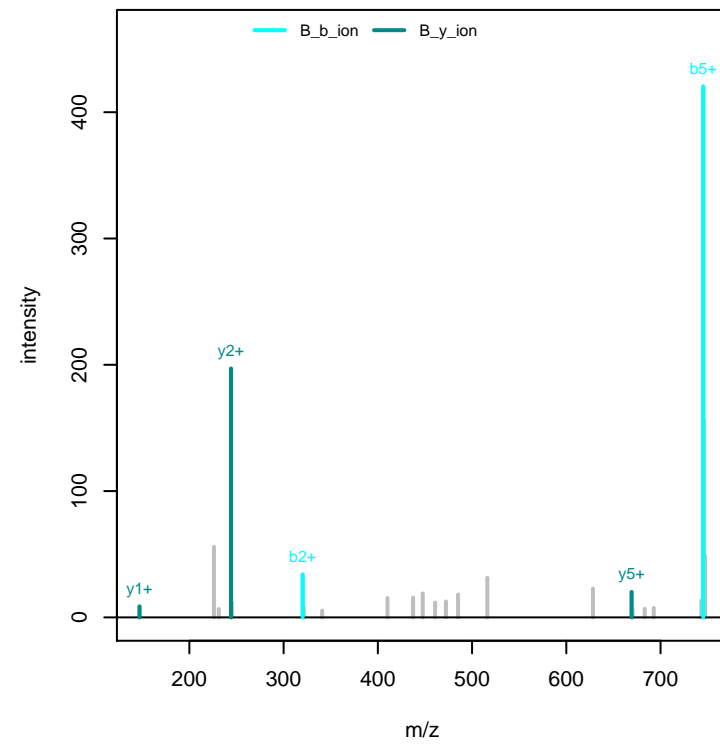

KHYFDPK+XL\_L

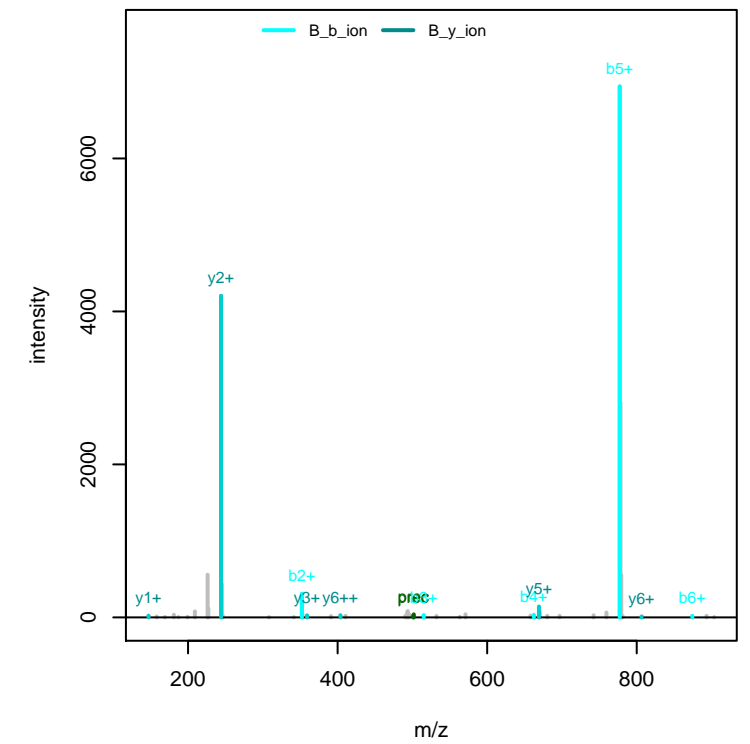

VTPKGETQLTPEEK  
IFGPKDYECLCGK

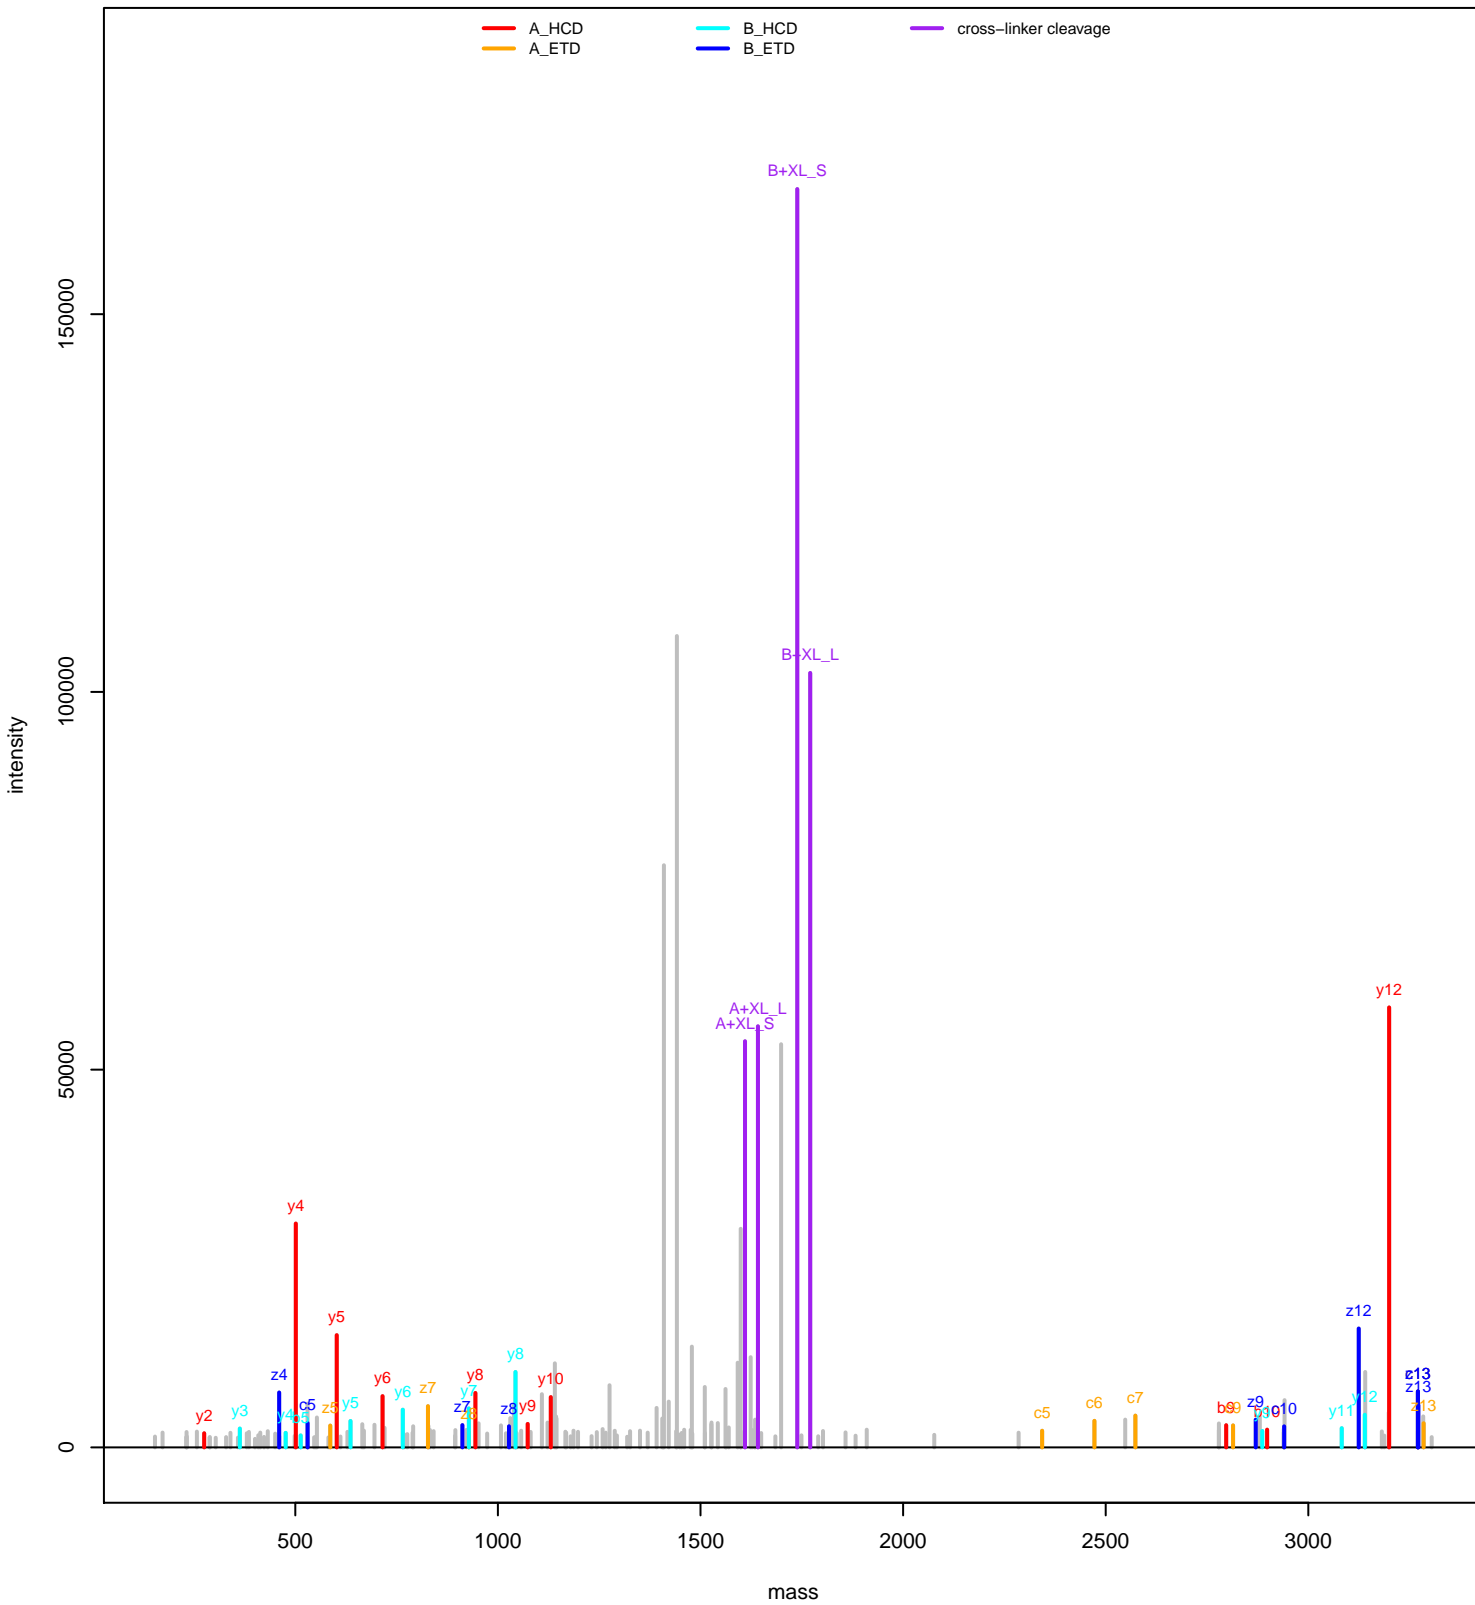

VTPKGETQLTPEEK+XL\_S

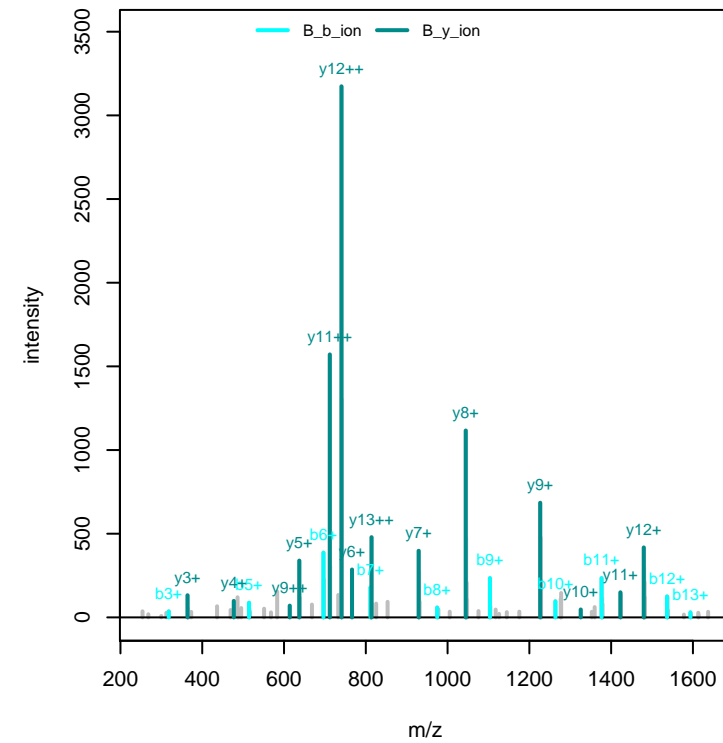

VTPKGETQLTPEEK+XL\_L

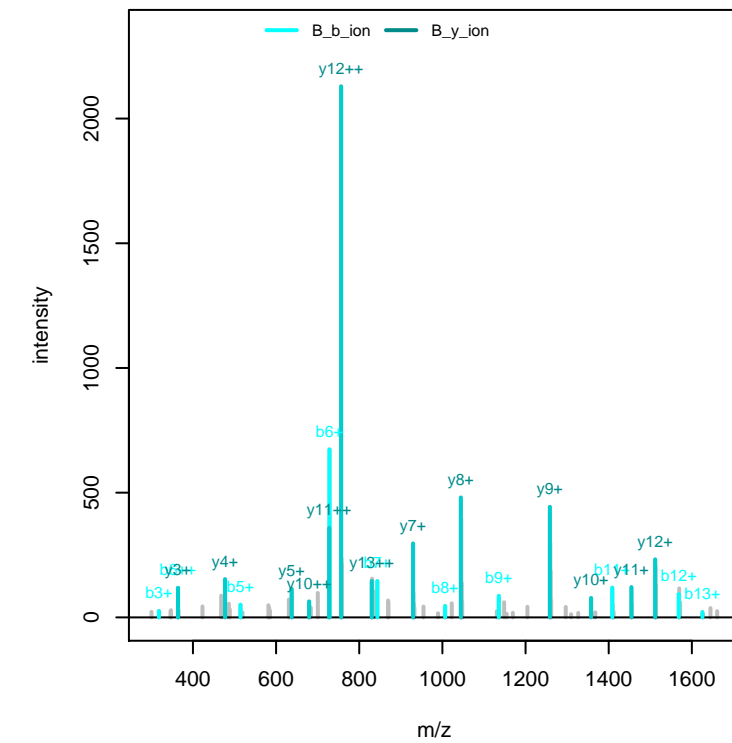

IFGPKDYECLCGK+XL\_S



IFGPKDYECLCGK+XL\_L





AVDGVKSVK  
VKAALVDHDIK

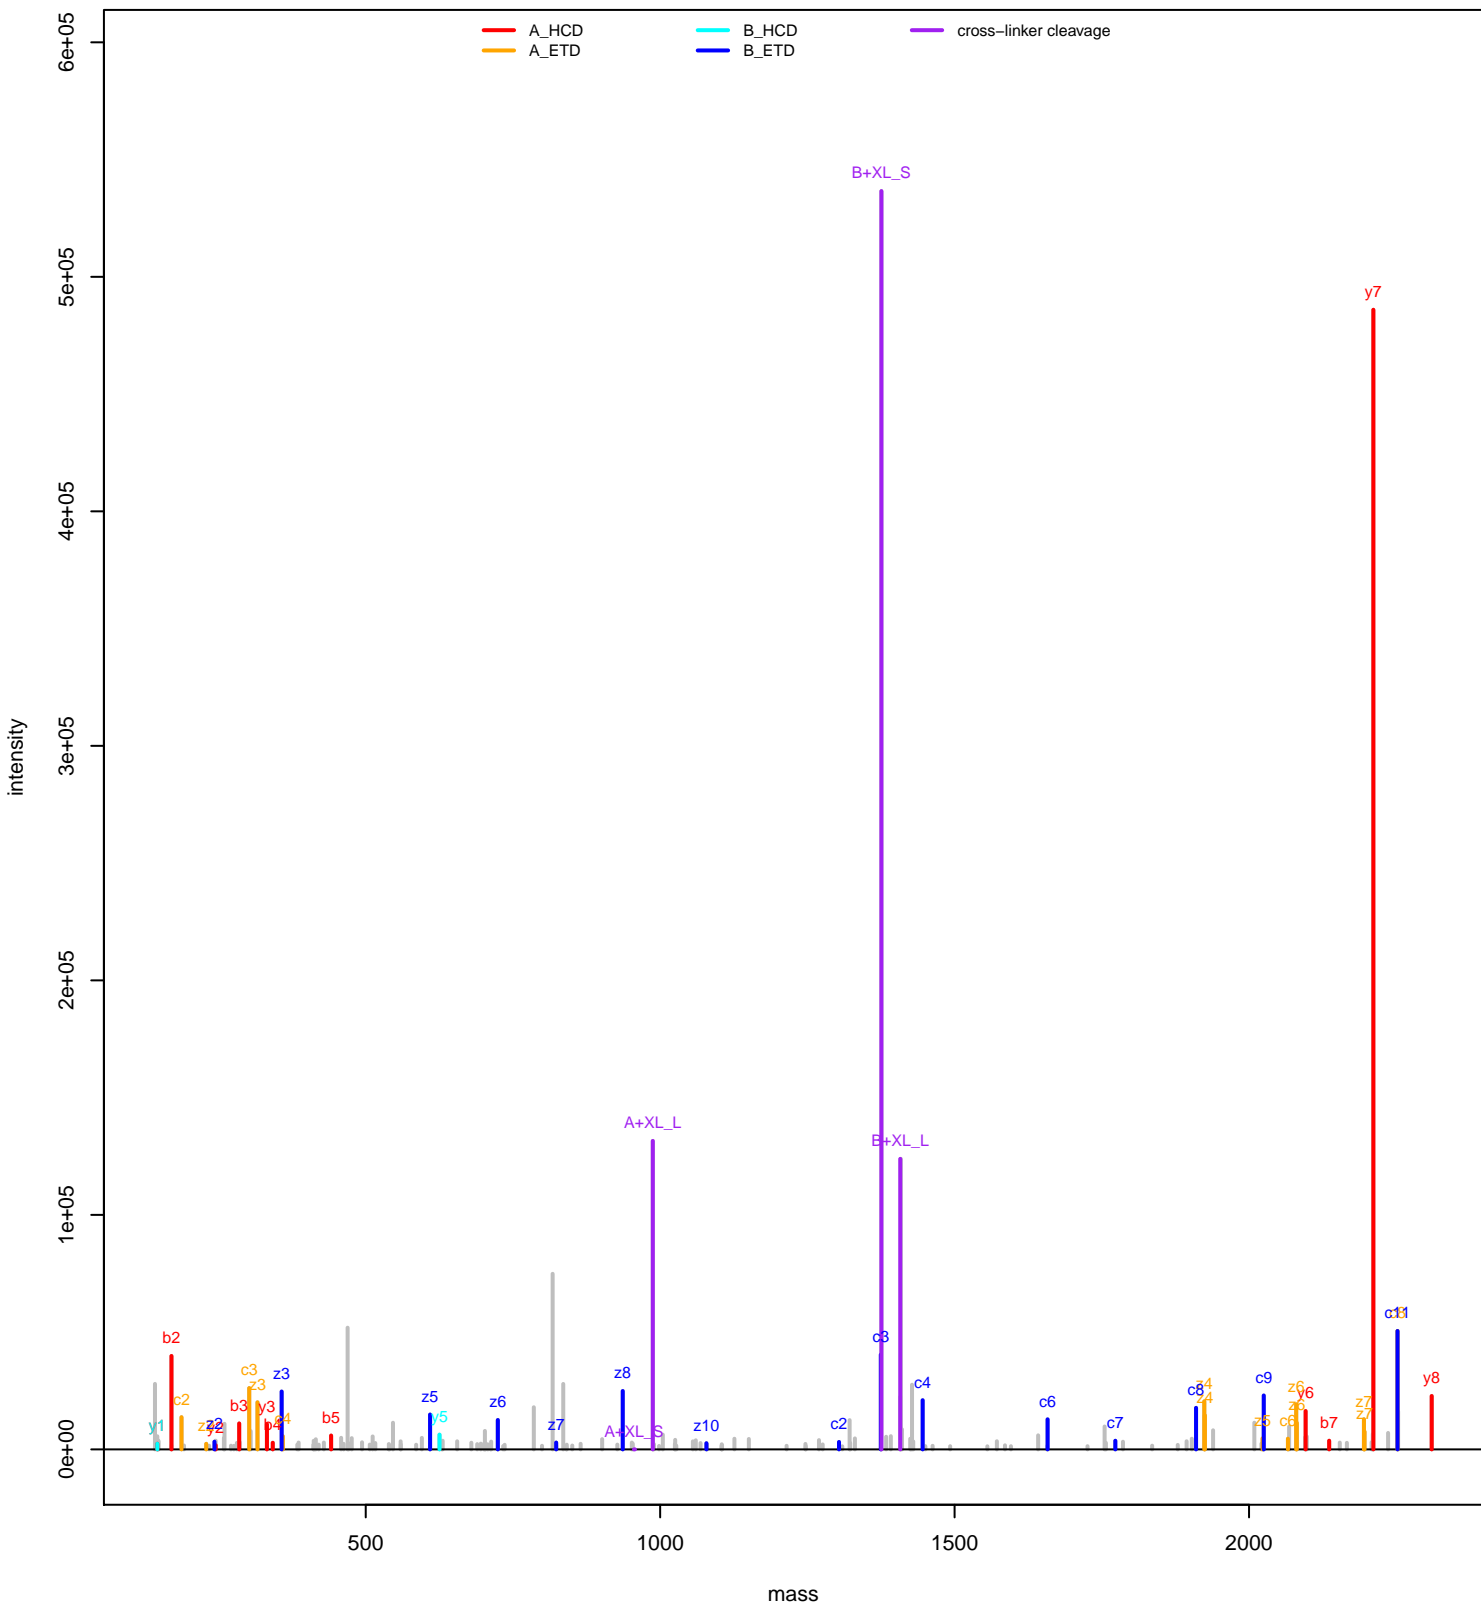

AVDGVKSVK+XL\_S

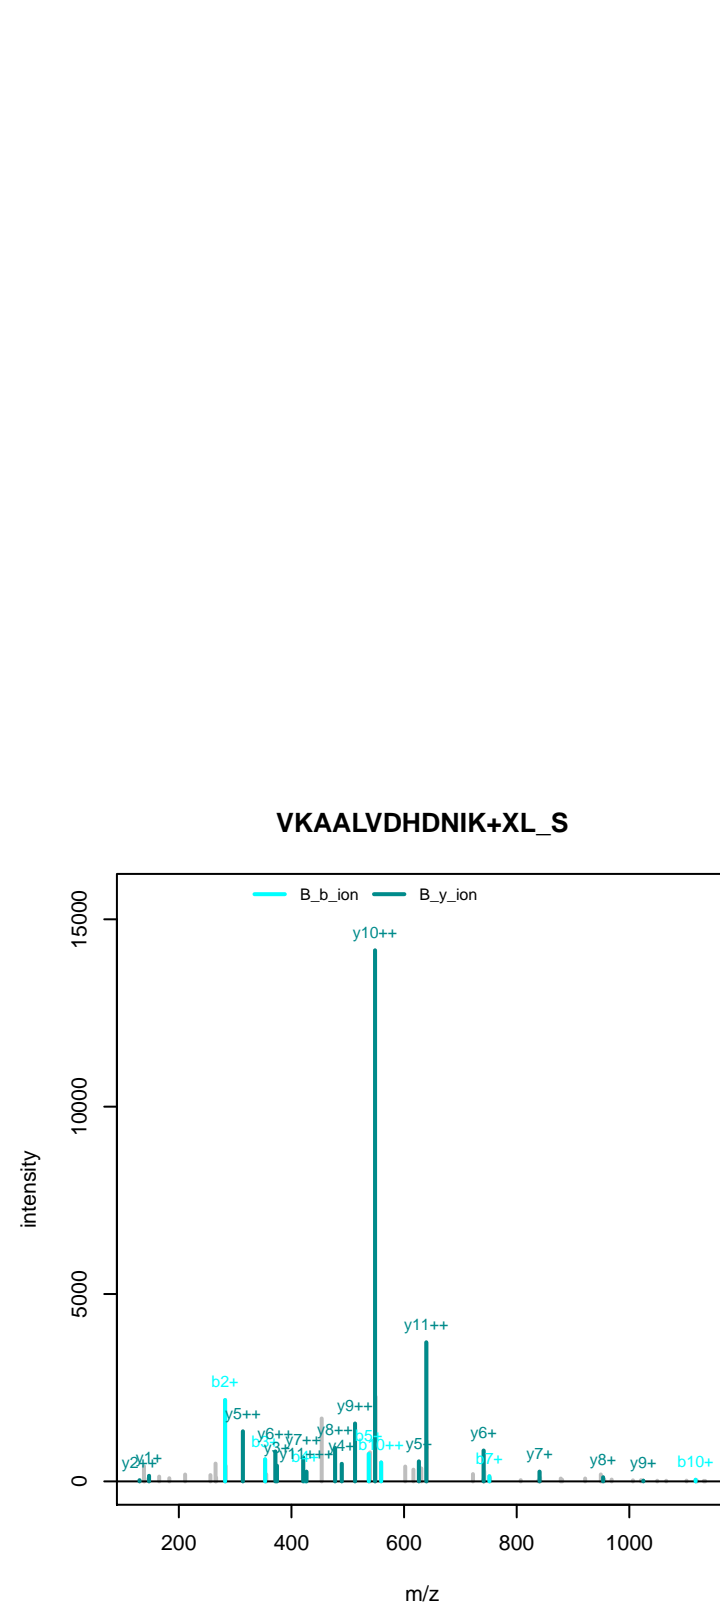

AVDGVKSVK+XL\_L

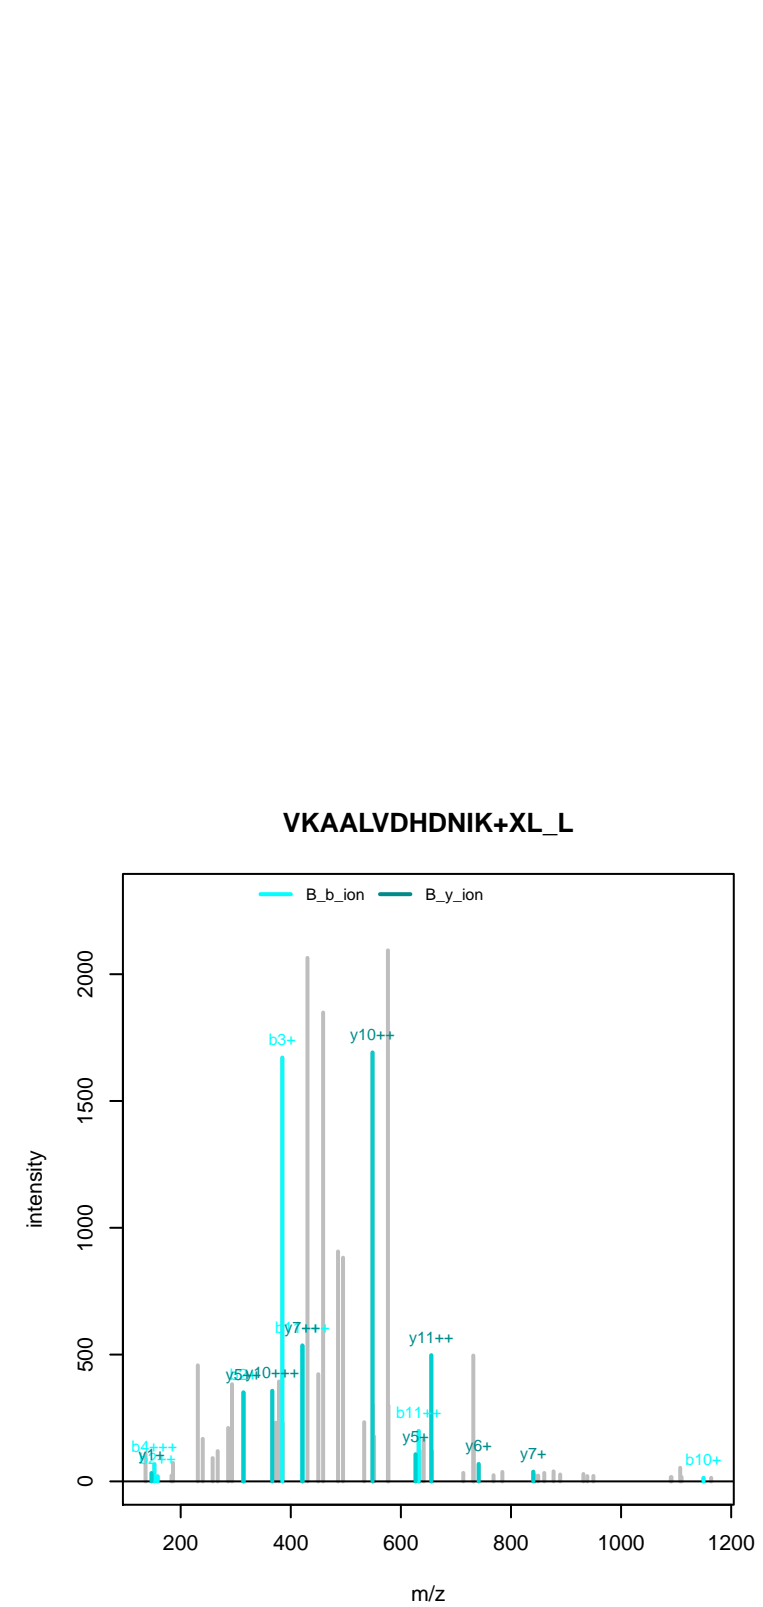

VKAALVDHDIK+XL\_S

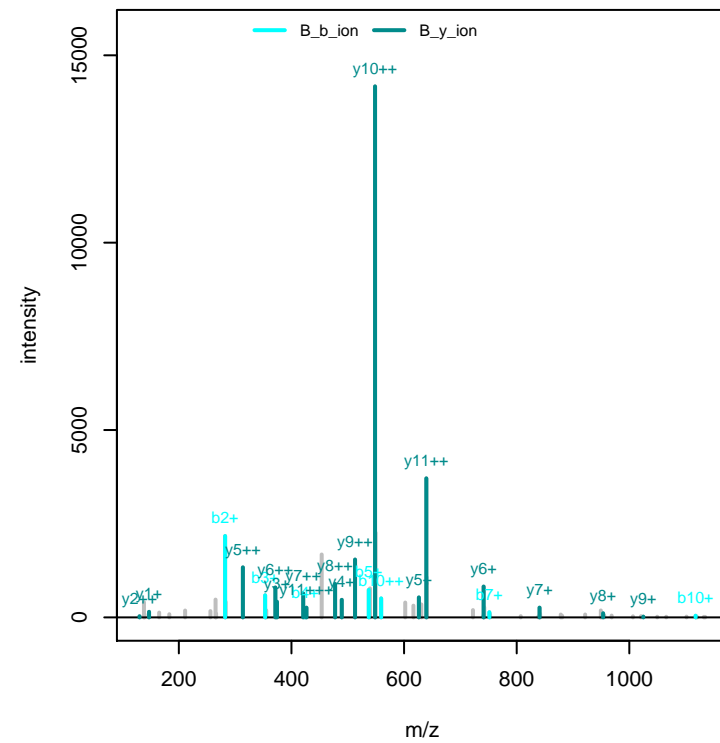

VKAALVDHDIK+XL\_L

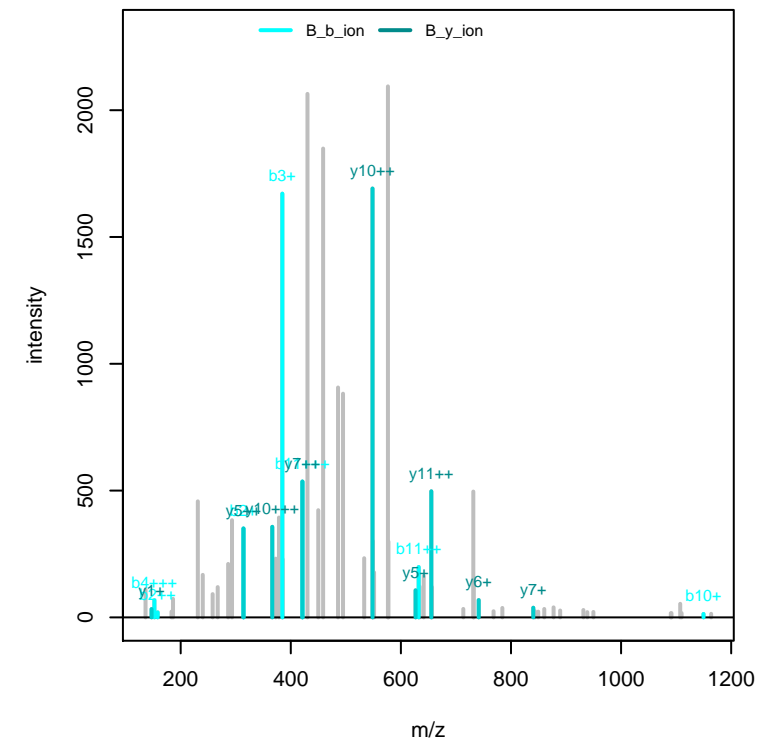

### KLLDEGR EKFERTK

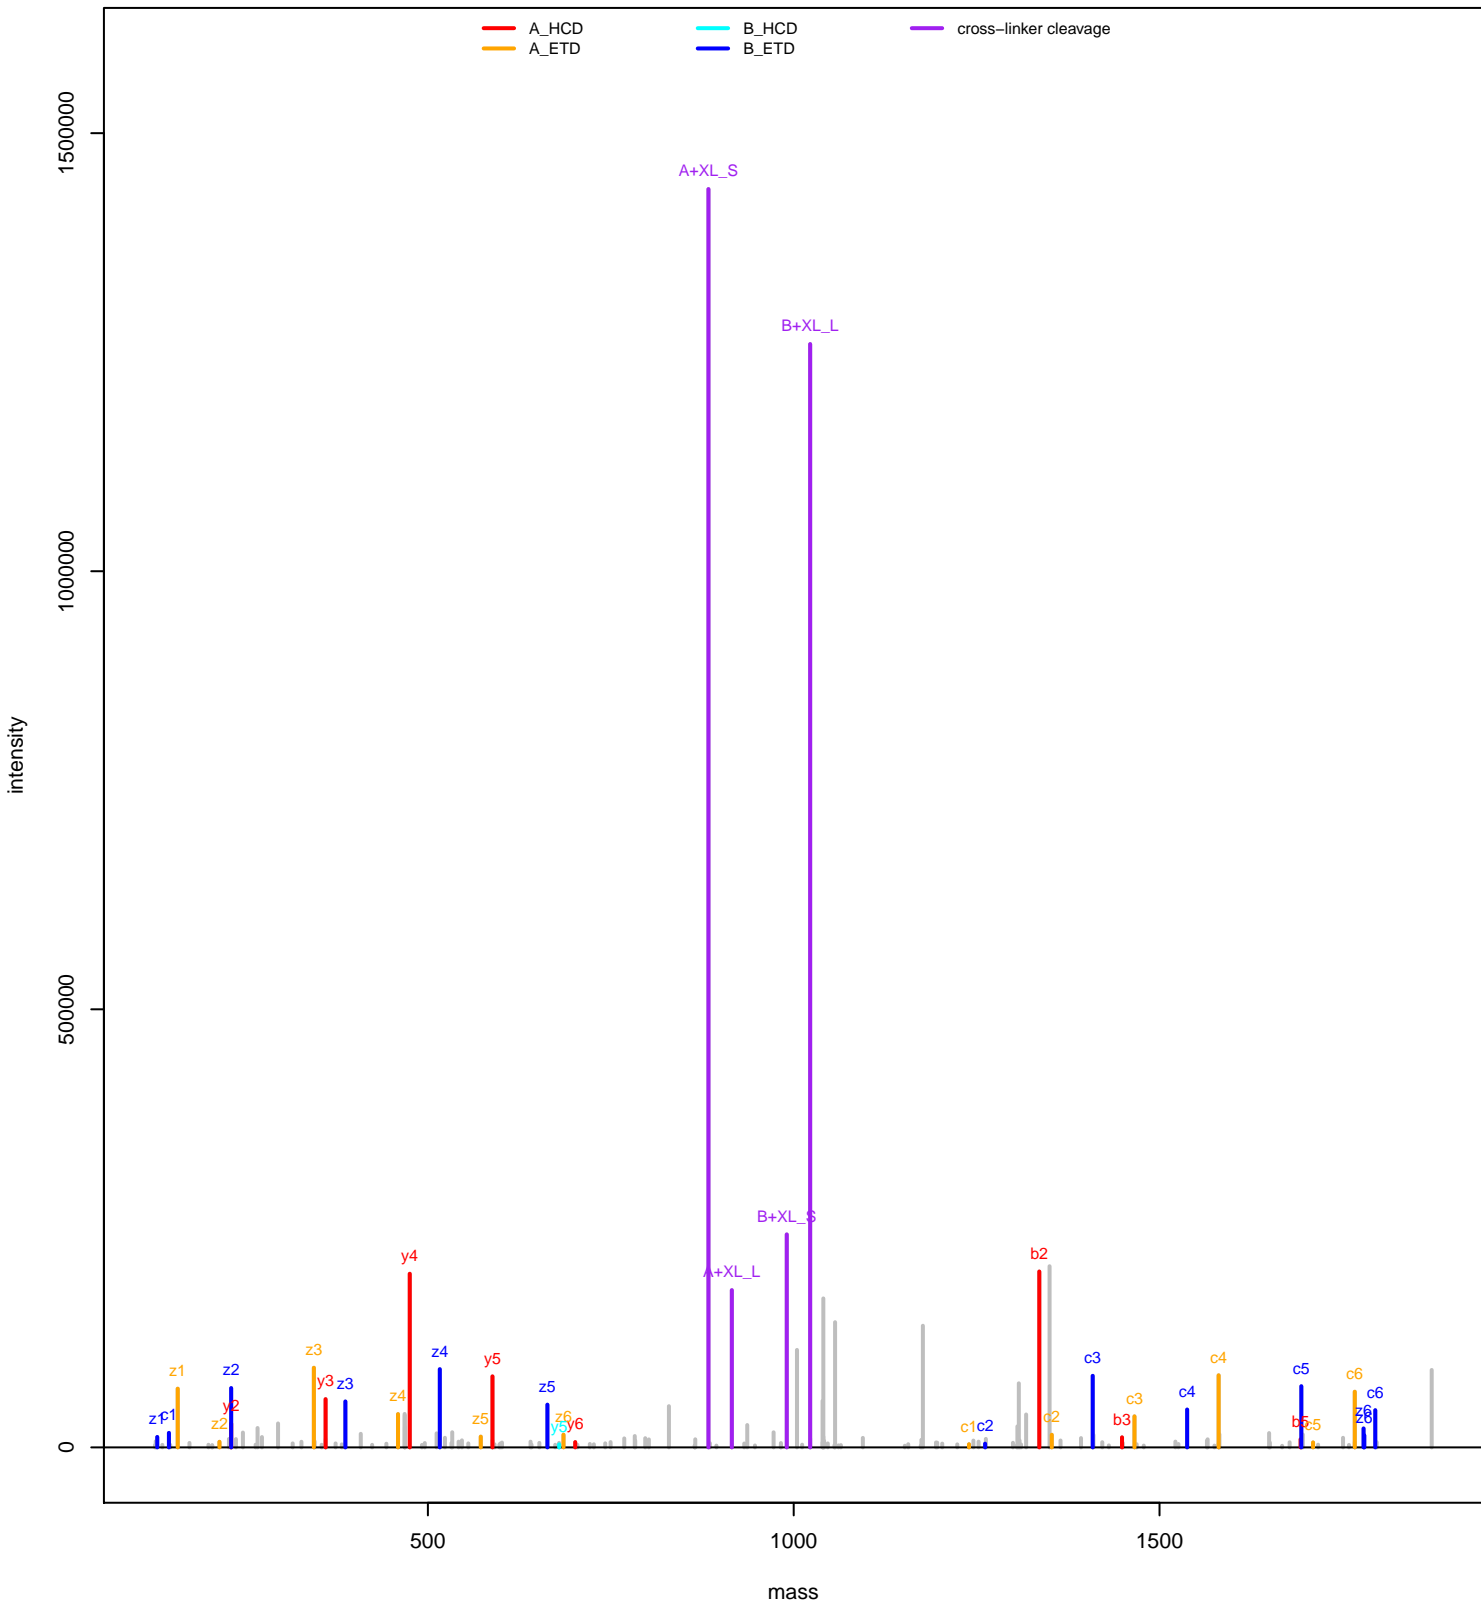

### KLLDEGR+XL\_S

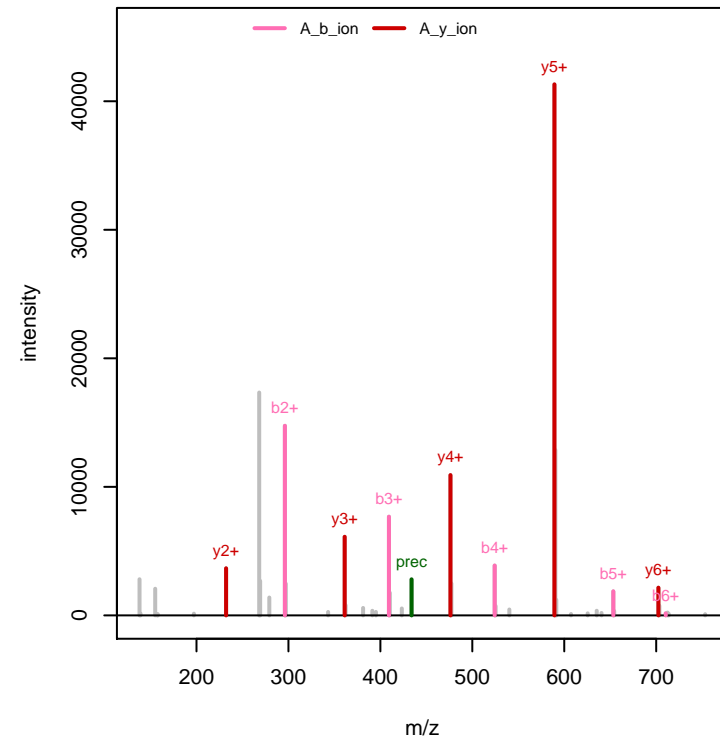

### KLLDEGR+XL\_L

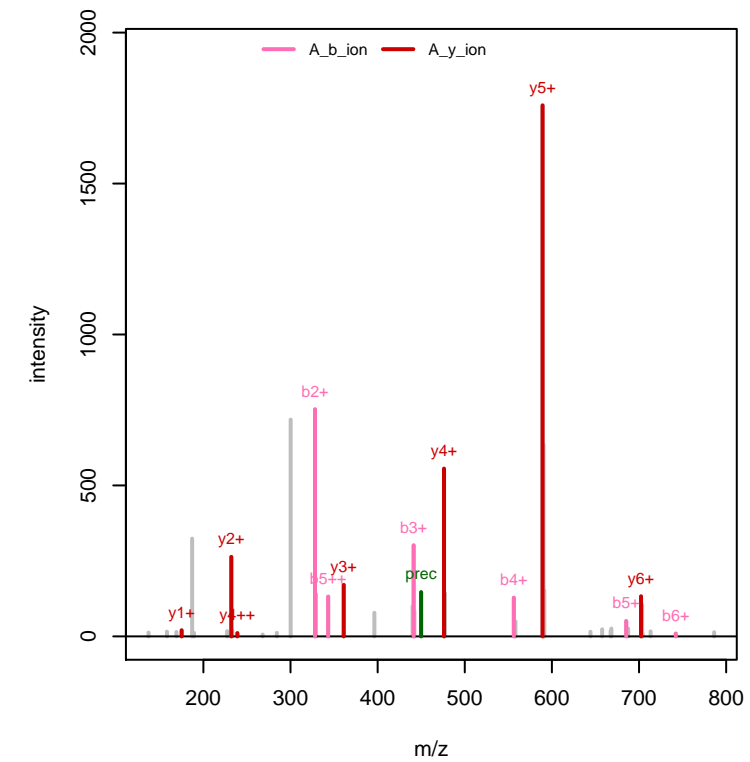

### EKFERTK+XL\_S

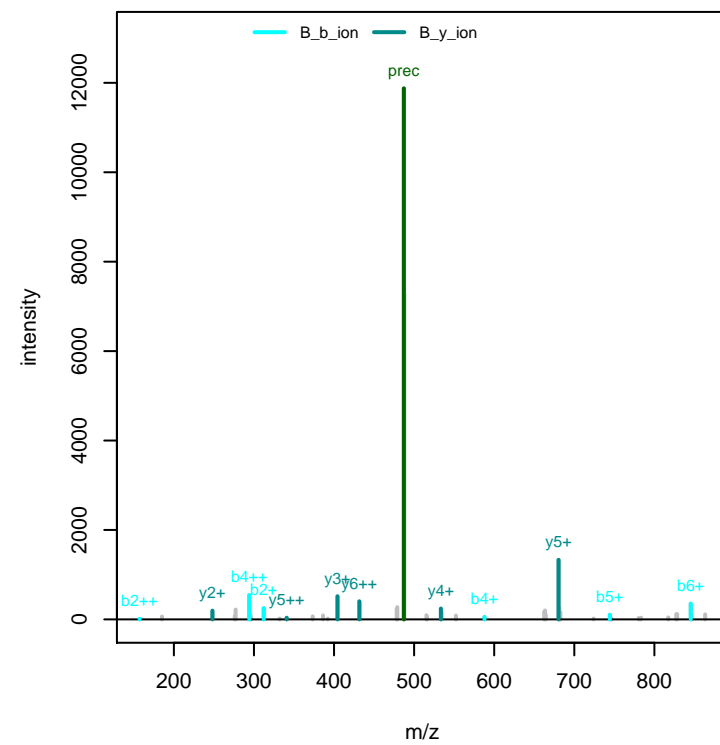

### EKFERTK+XL\_L

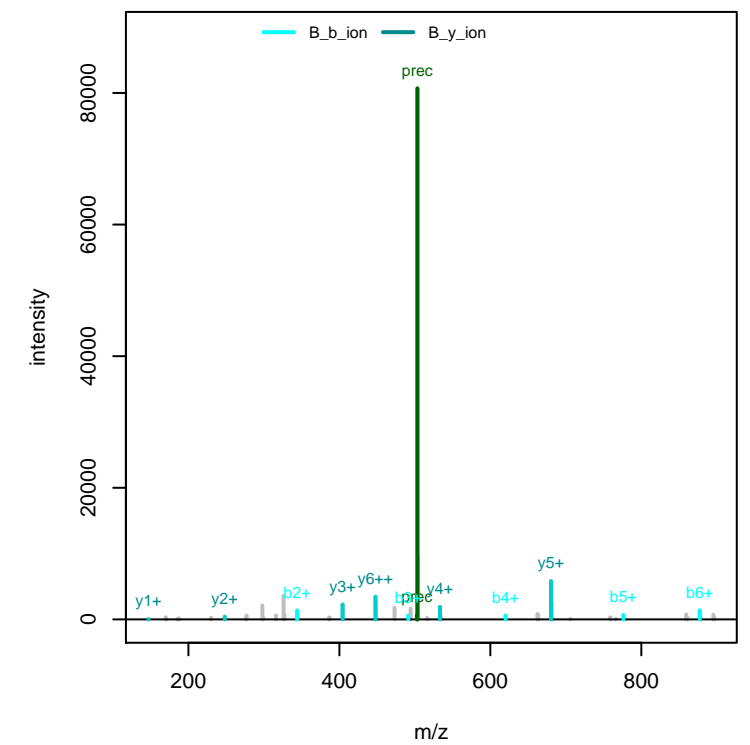

NYPKSPK  
AVYQQVISKYPGTDGAK

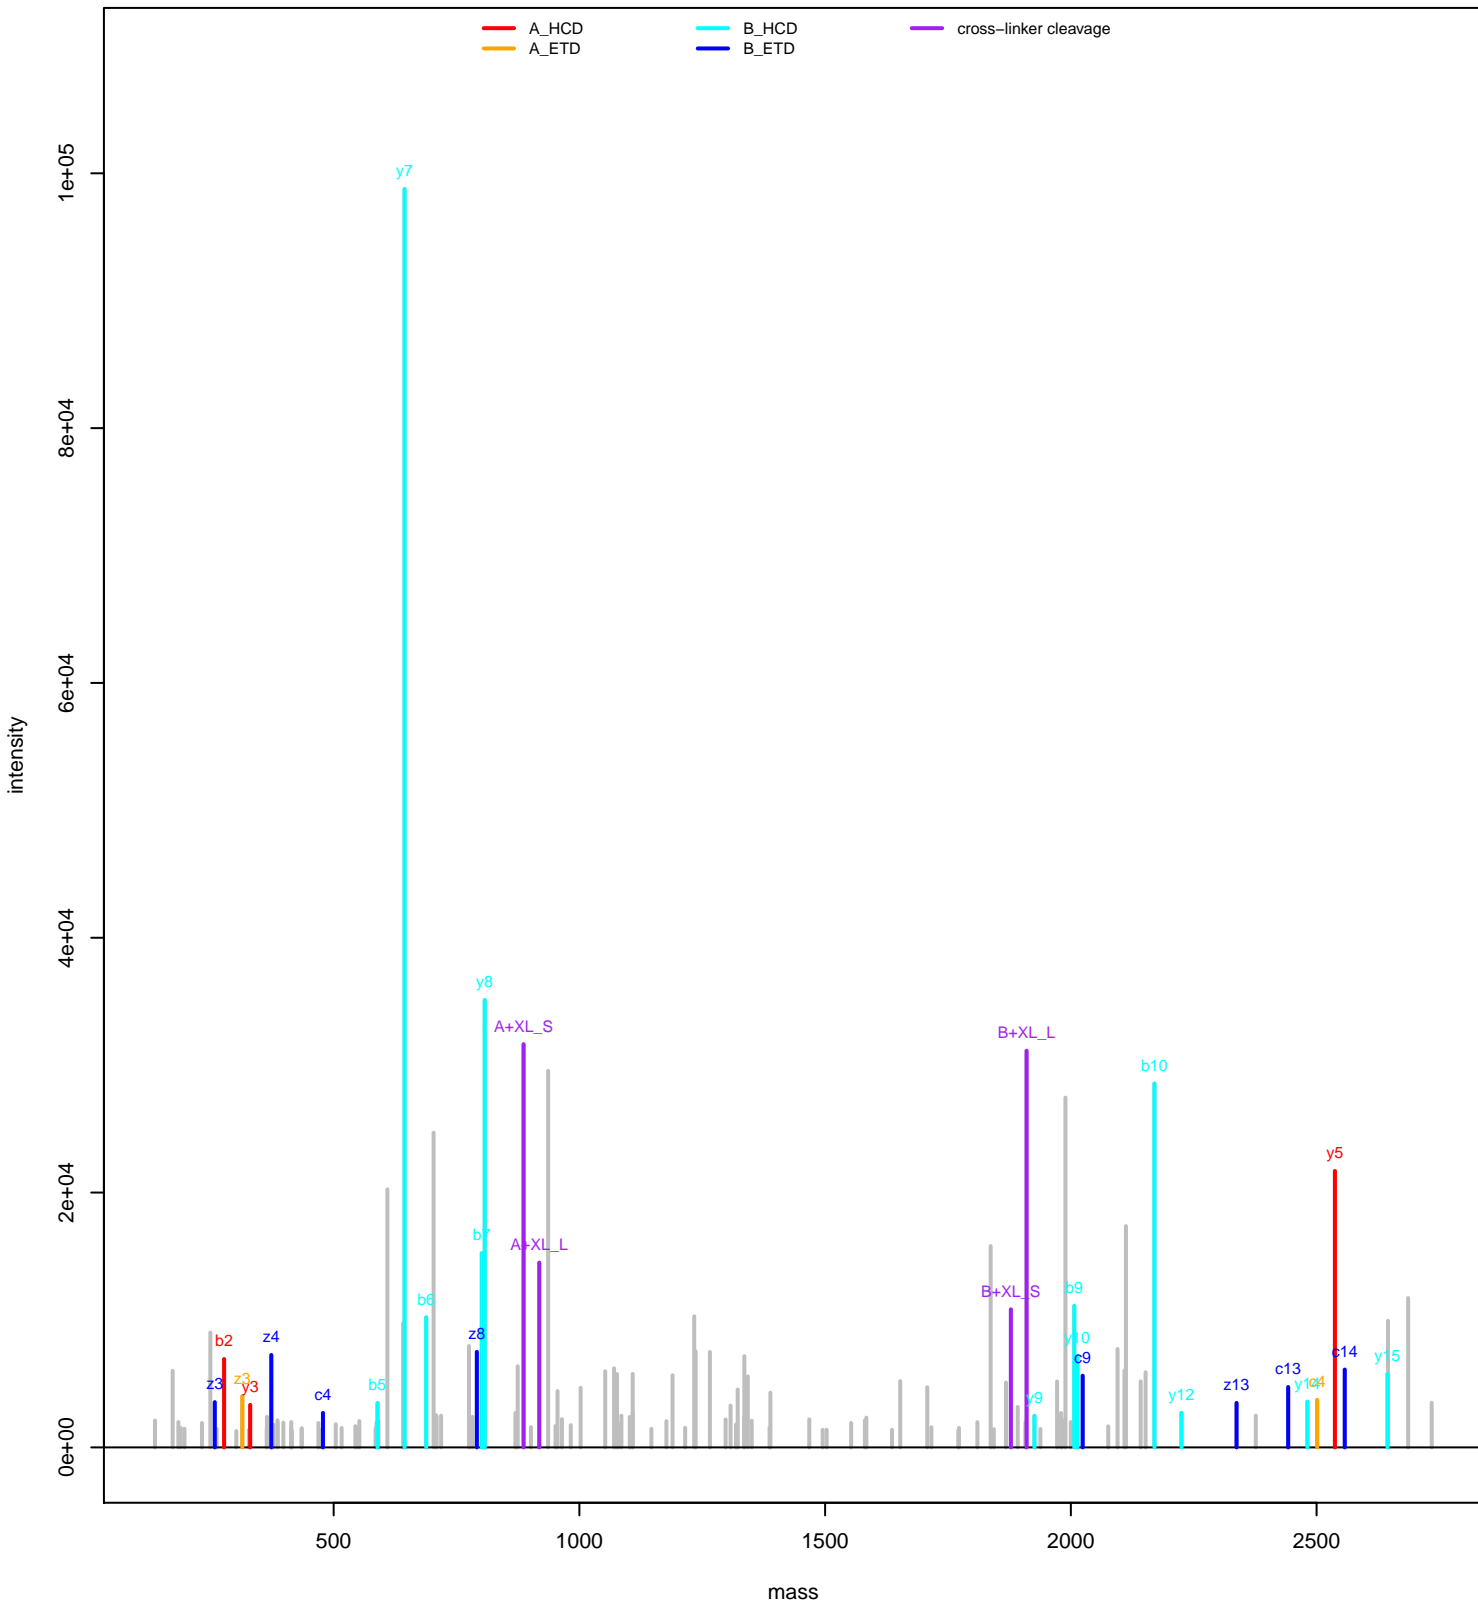

NYPKSPK+XL\_S

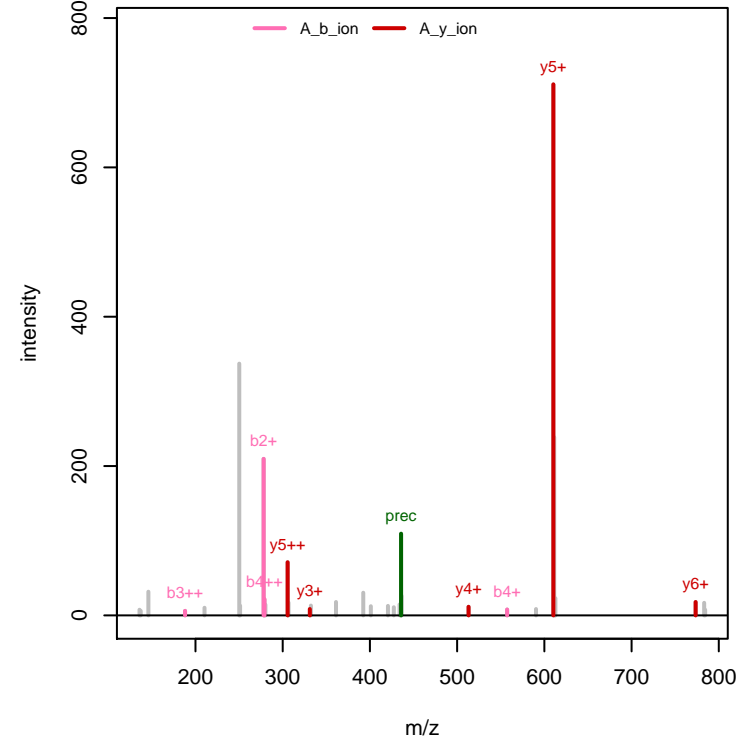

NYPKSPK+XL\_L

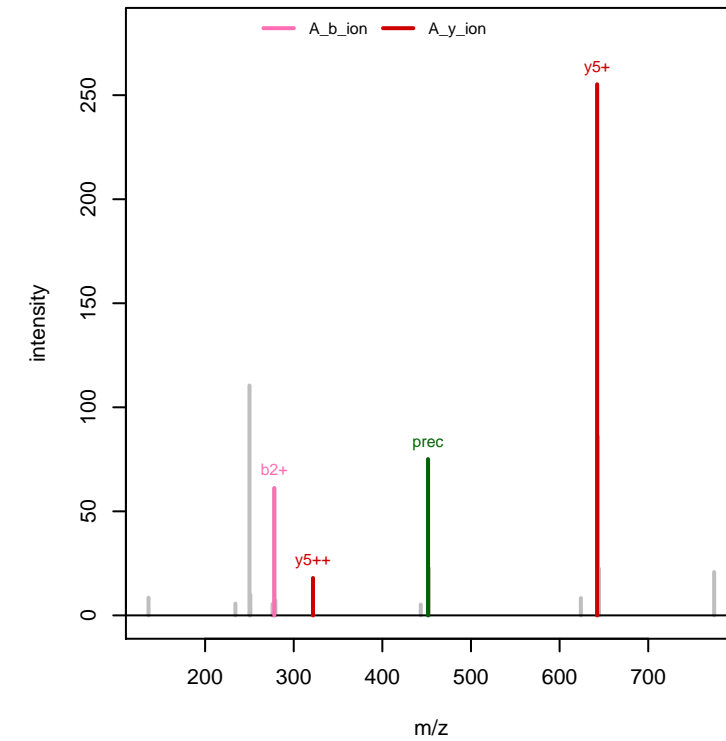

AVYQQVISKYPGTDGAK+XL\_S

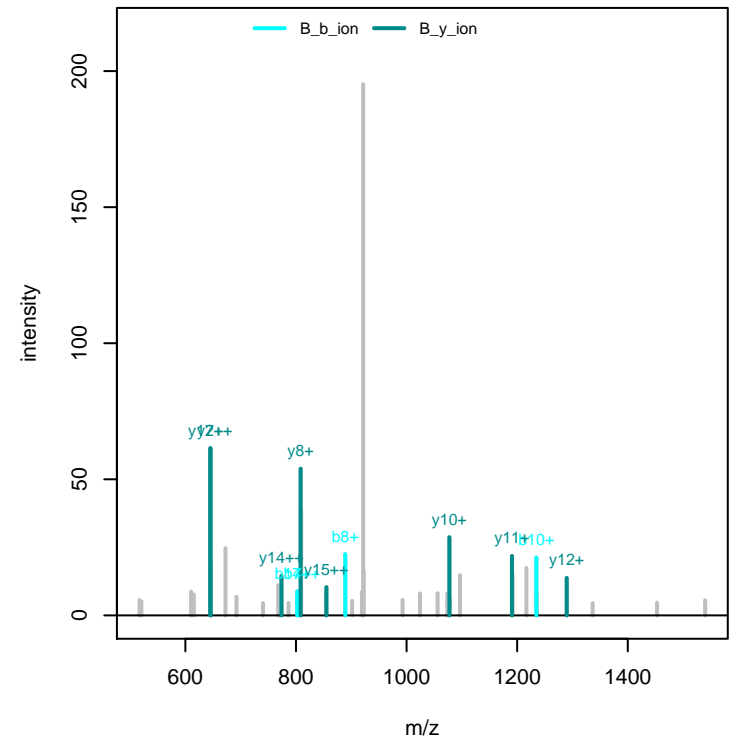

AVYQQVISKYPGTDGAK+XL\_L

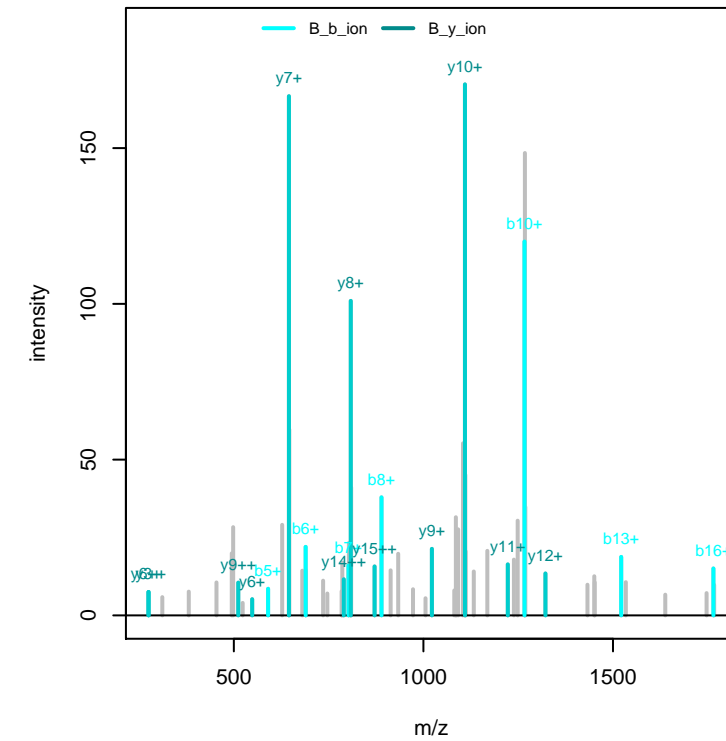

**KSDQNVR**  
**GLMPNPKVGTVPNVAEAVK**

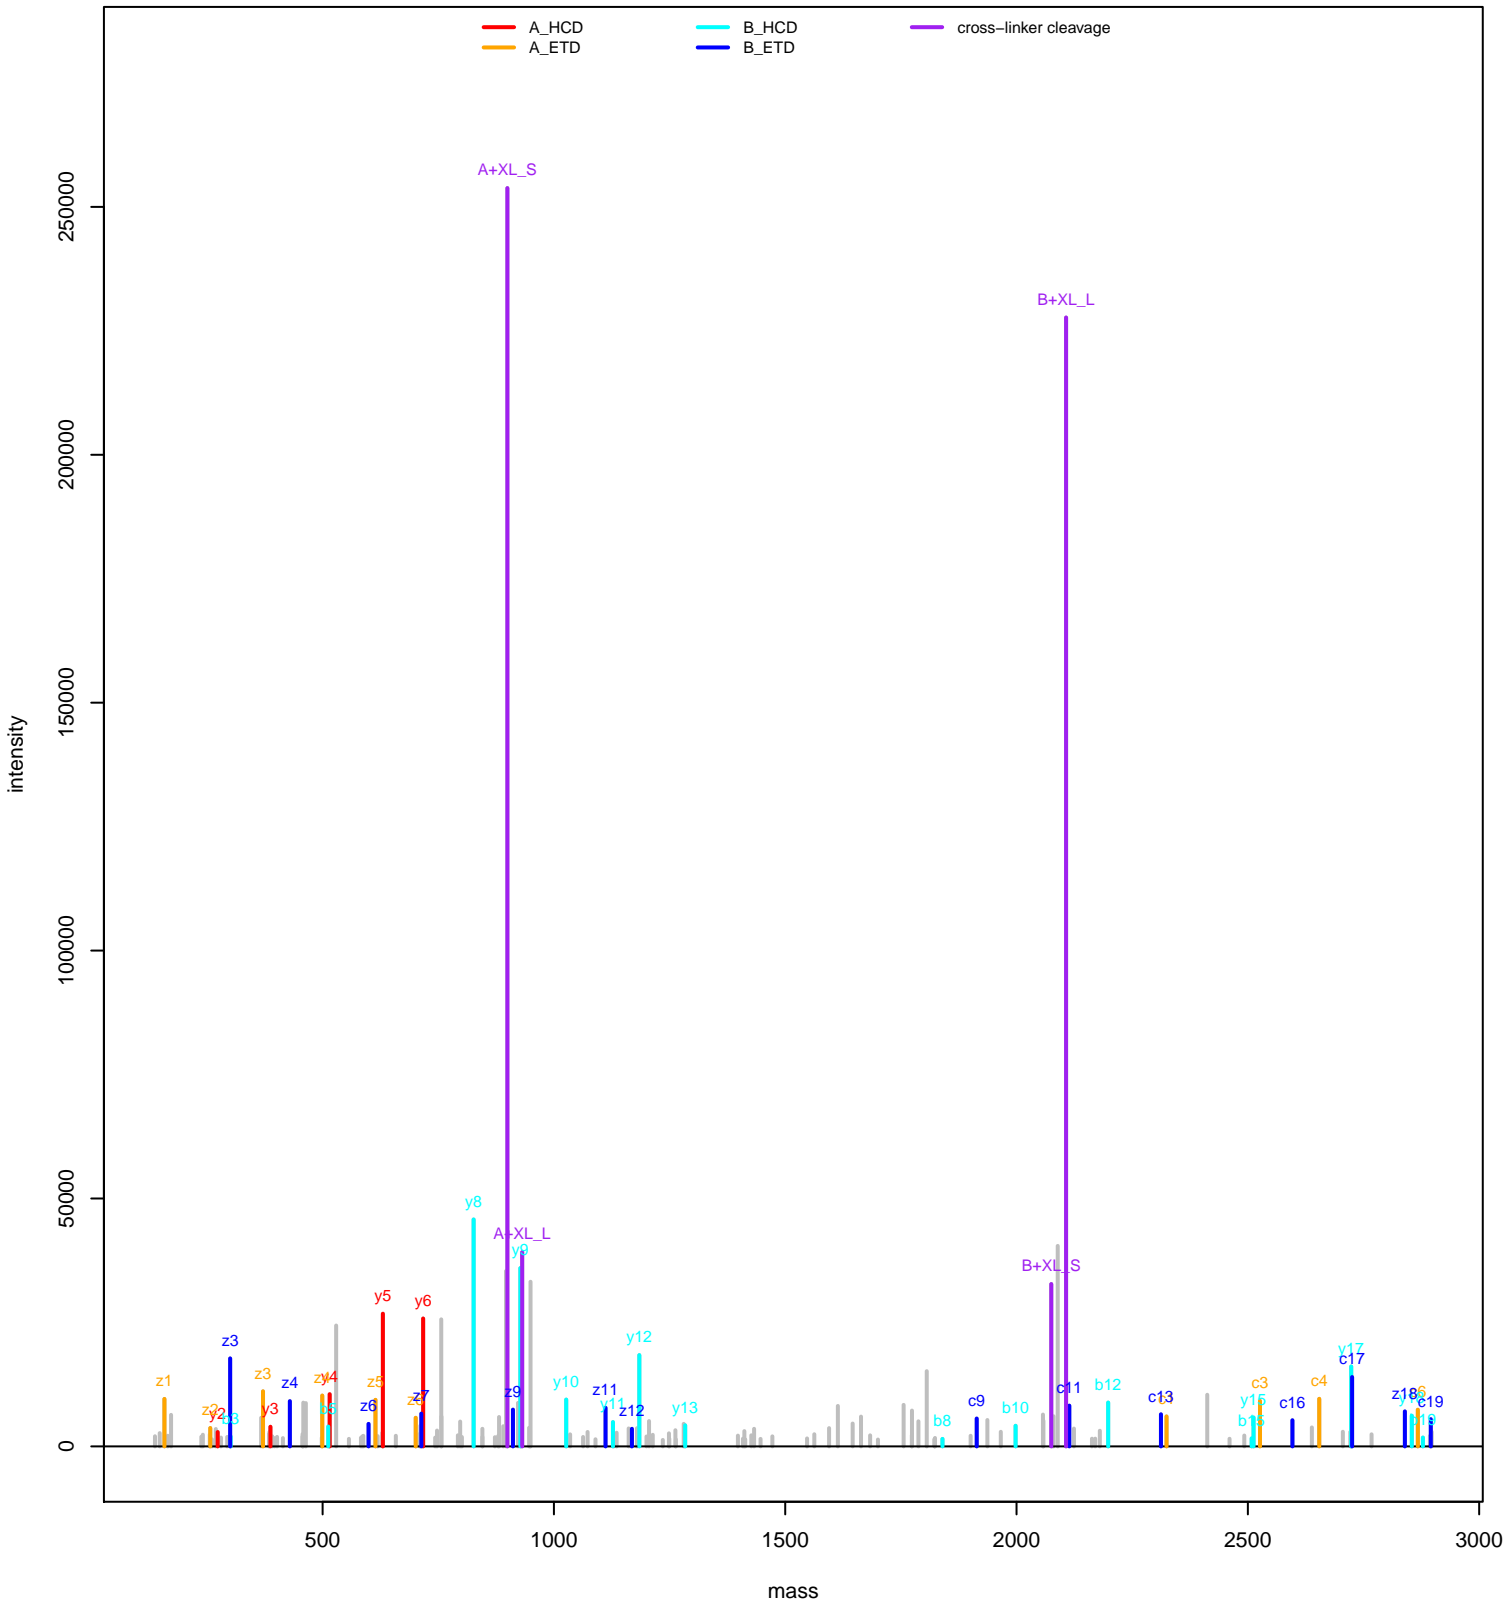

**KSDQNVR+XL\_S**

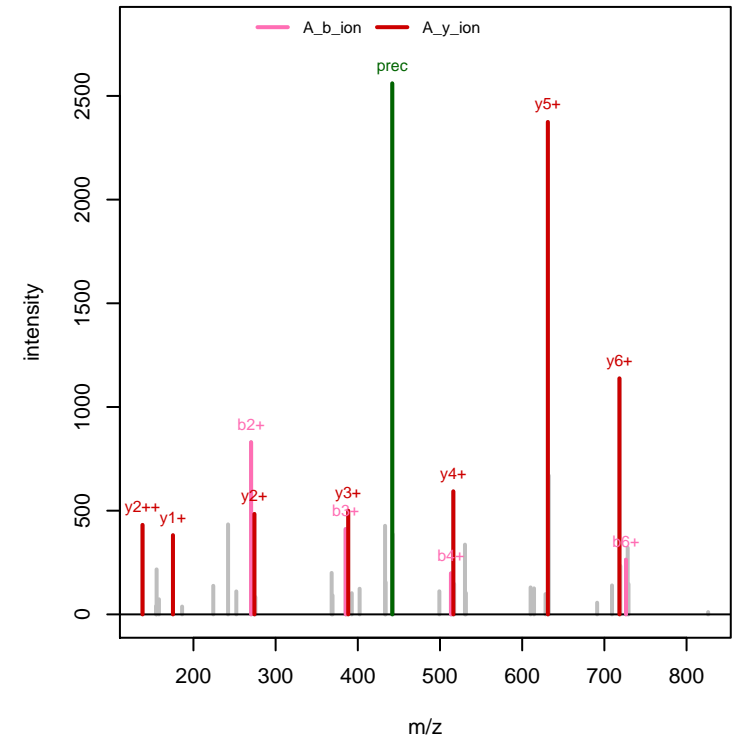

**KSDQNVR+XL\_L**

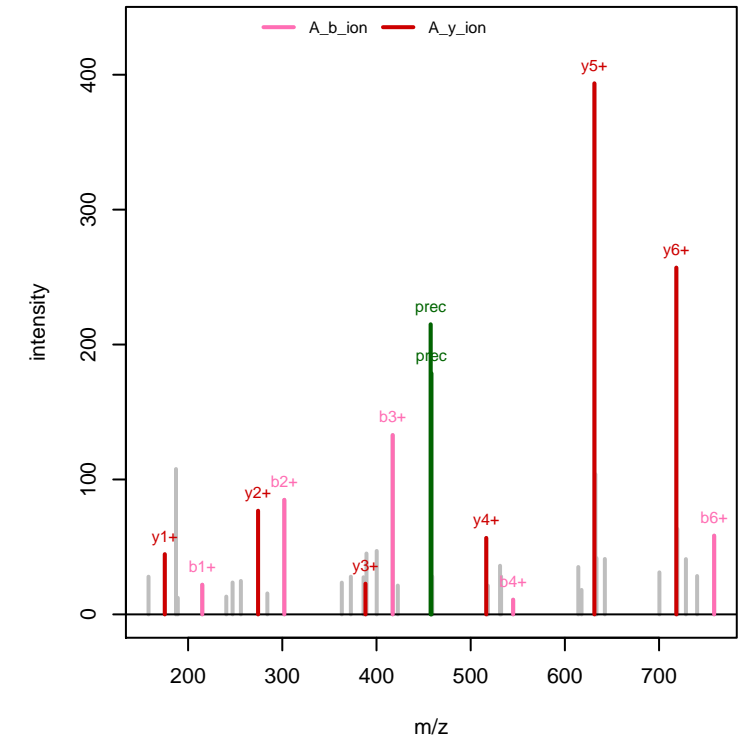

**GLMPNPKVGTVPNVAEAVK+XL\_S**

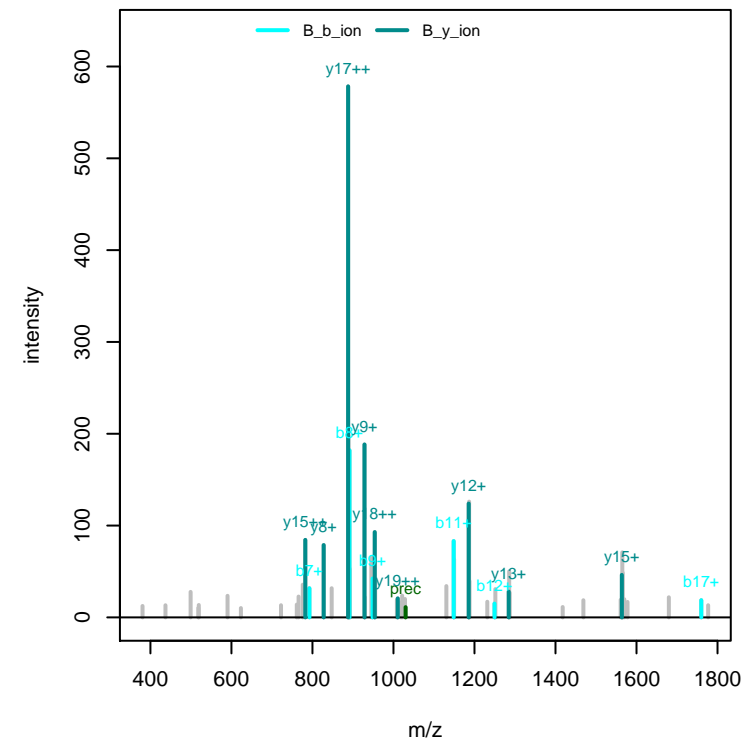

**GLMPNPKVGTVPNVAEAVK+XL\_L**

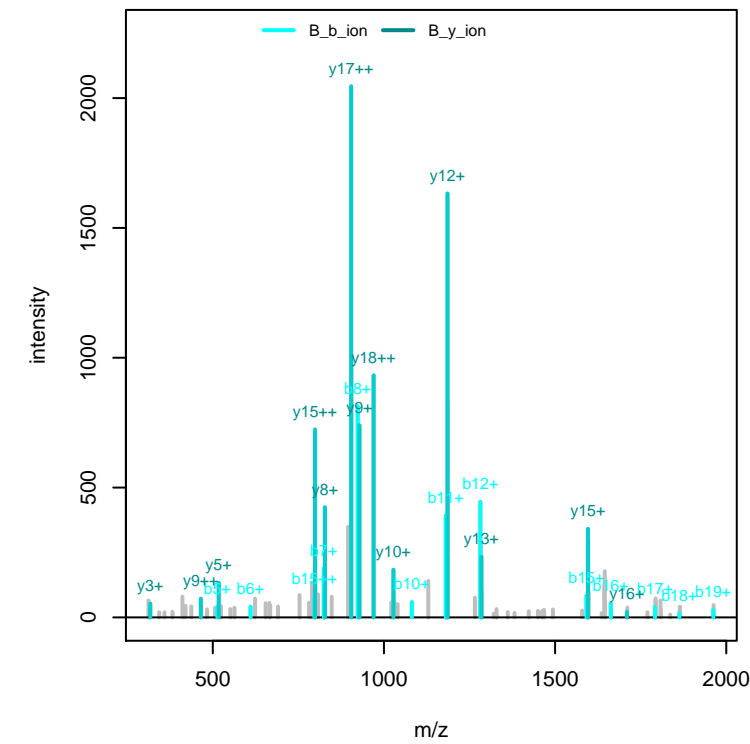

KVLVIEK  
DSLASKAHR

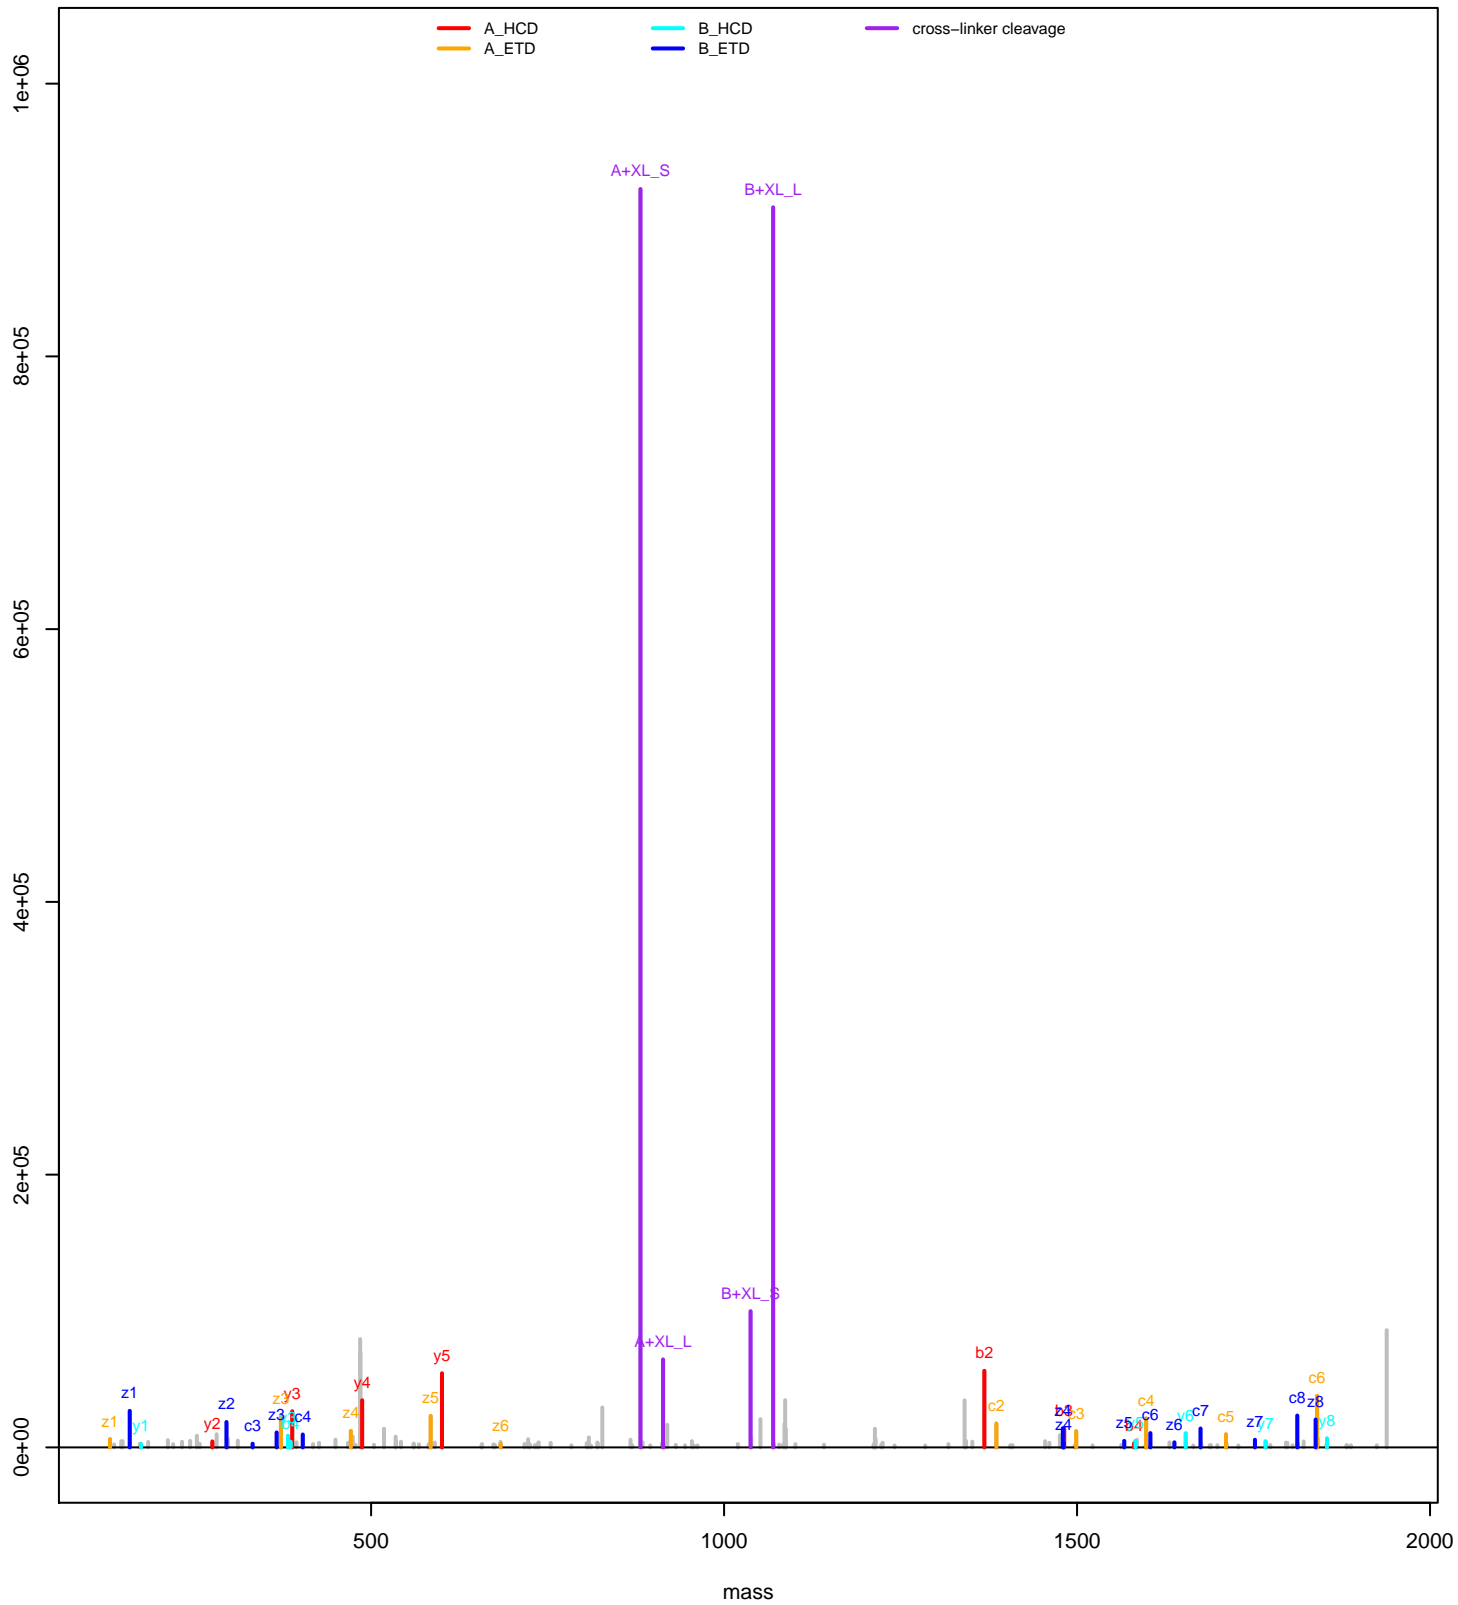

KVLVIEK+XL\_S

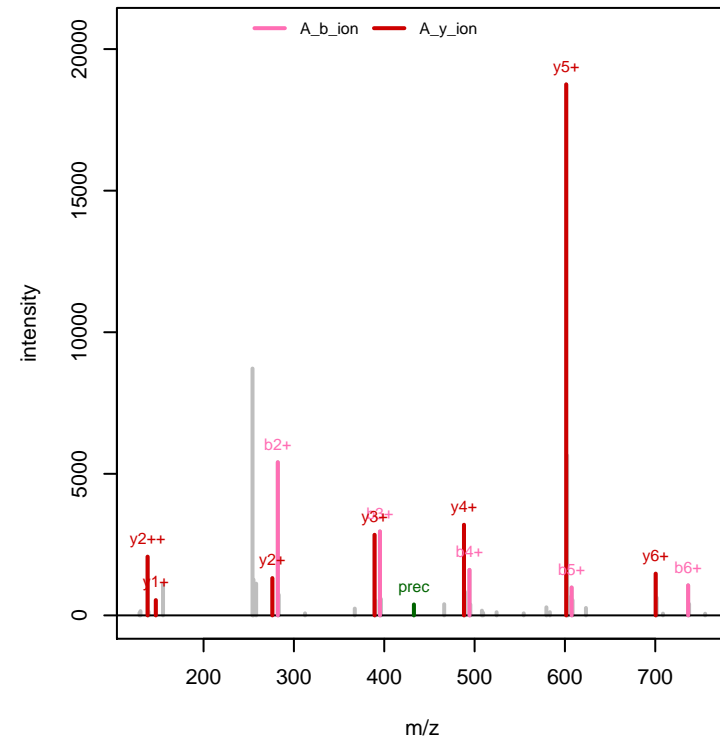

KVLVIEK+XL\_L

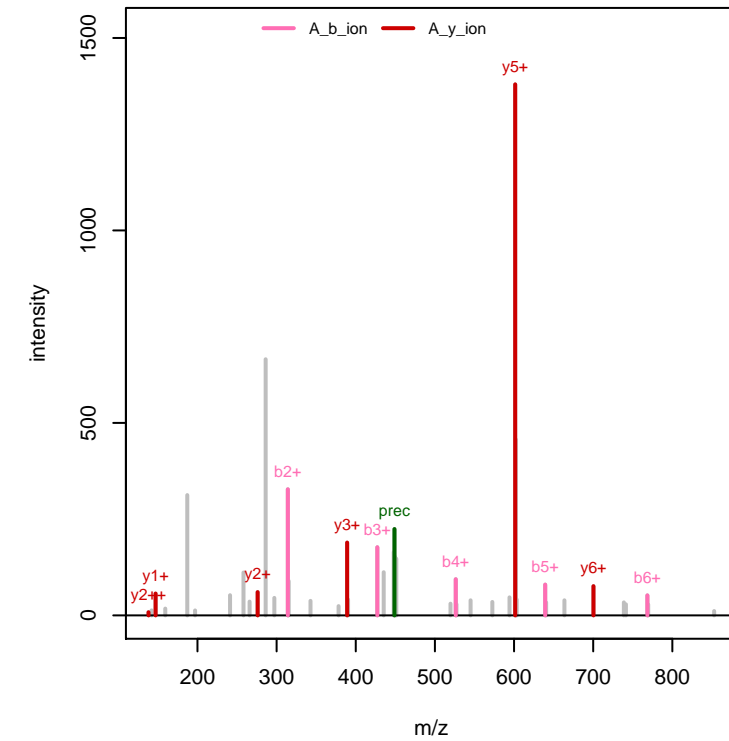

DSLASKAHR+XL\_S

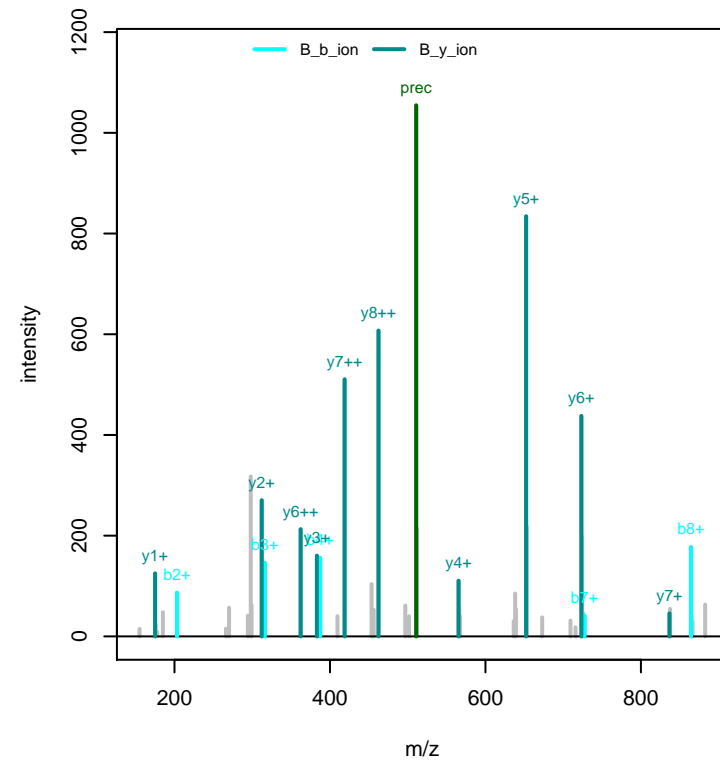

DSLASKAHR+XL\_L

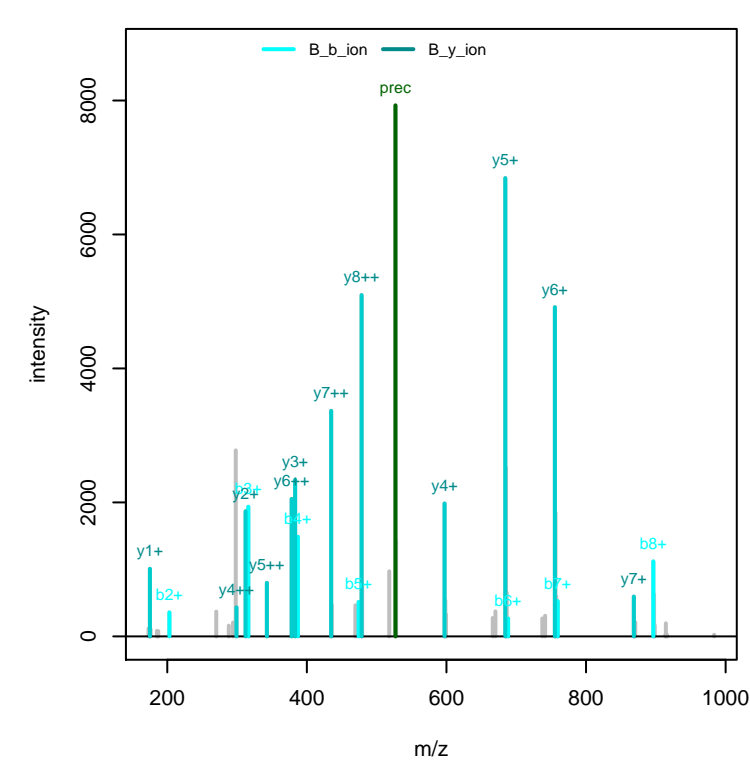

**PTKPPYPR  
KRYEDPDKE**

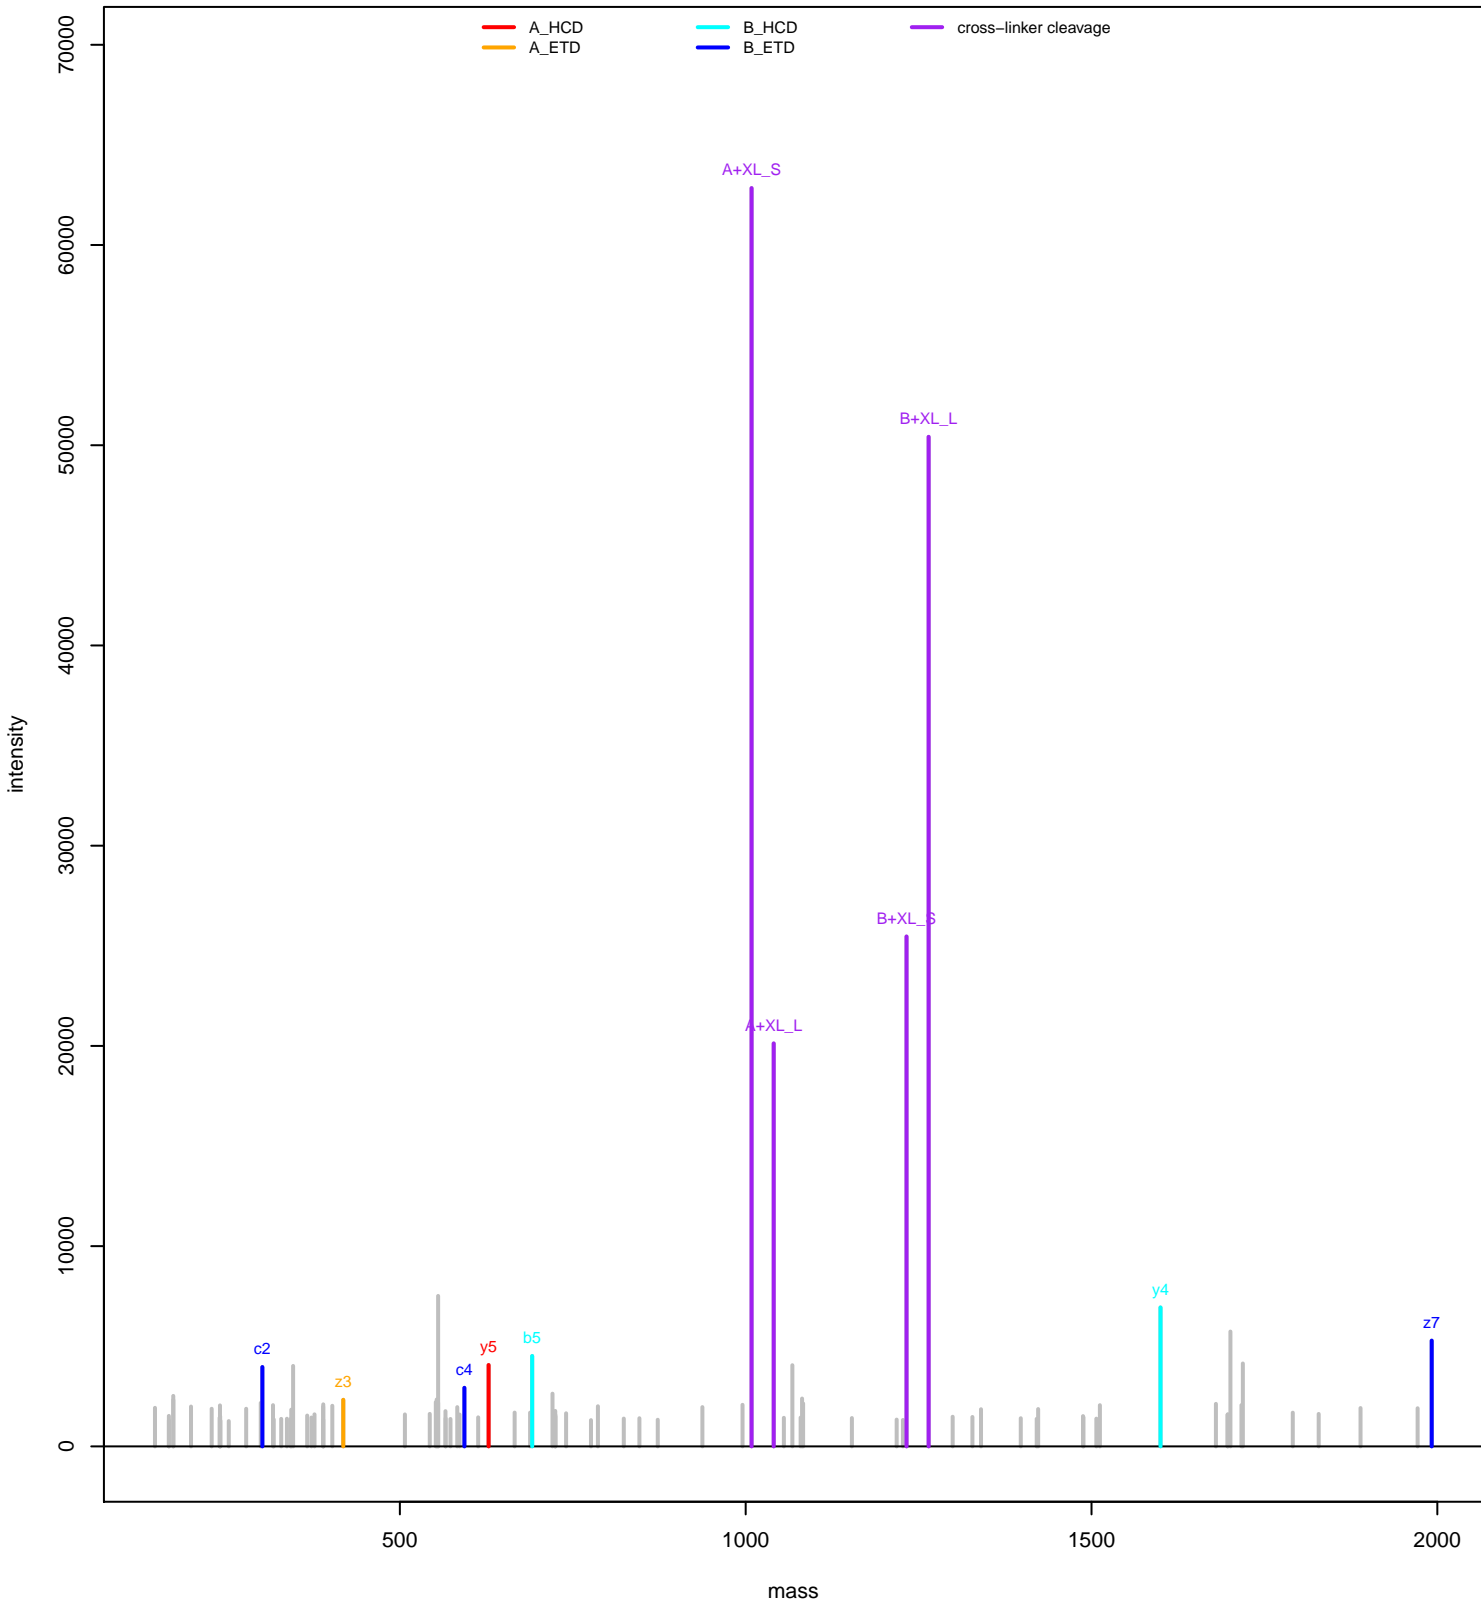

**PTKPPYPR+XL\_S**

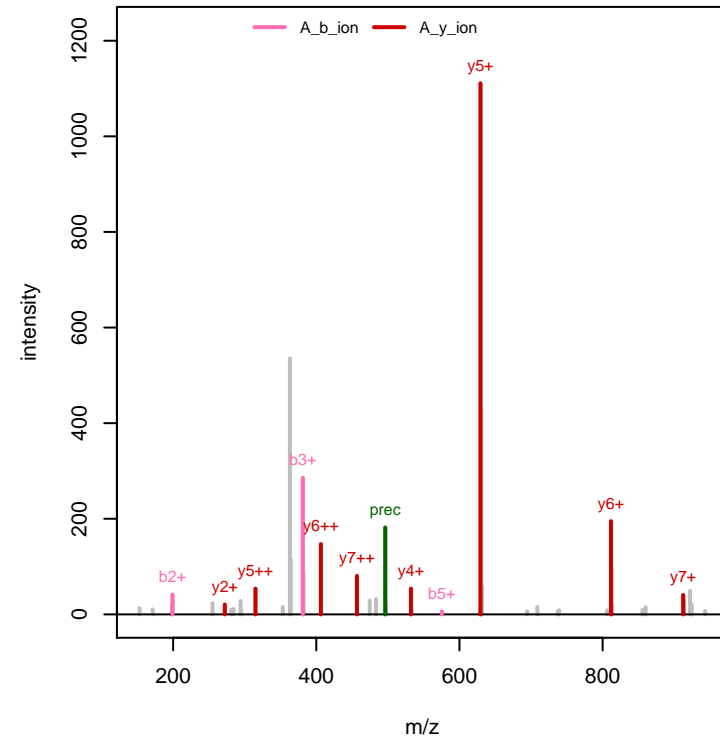

**PTKPPYPR+XL\_L**

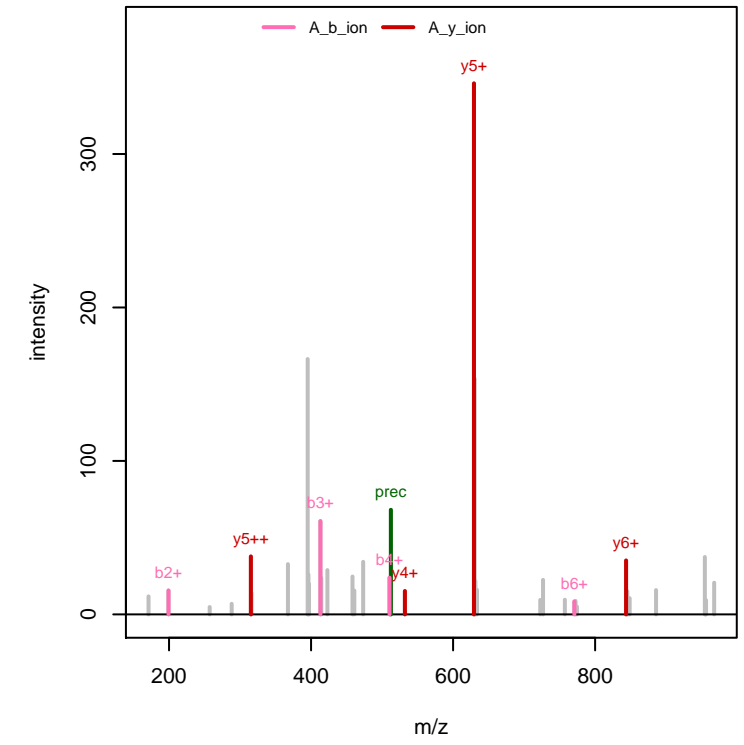

**KRYEDPDKE+XL\_S**

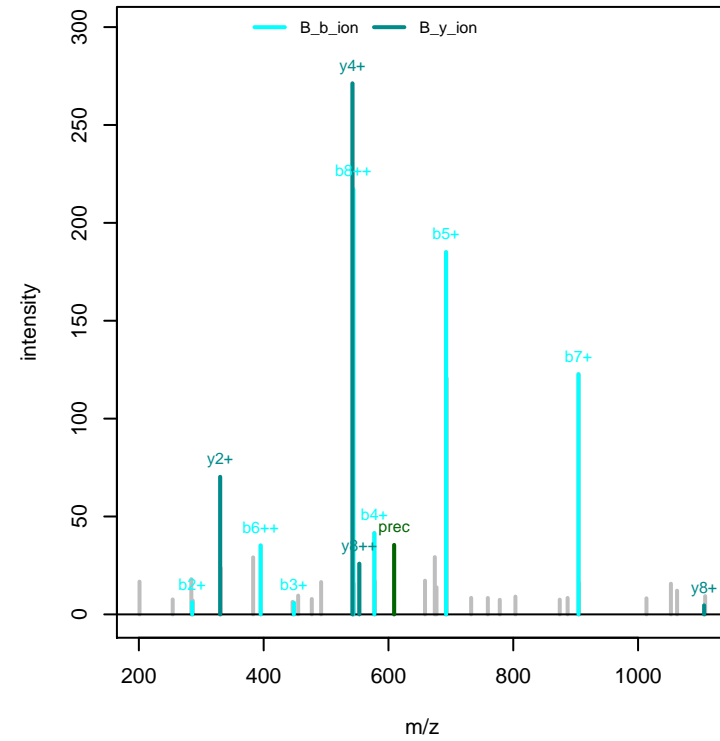

**KRYEDPDKE+XL\_L**

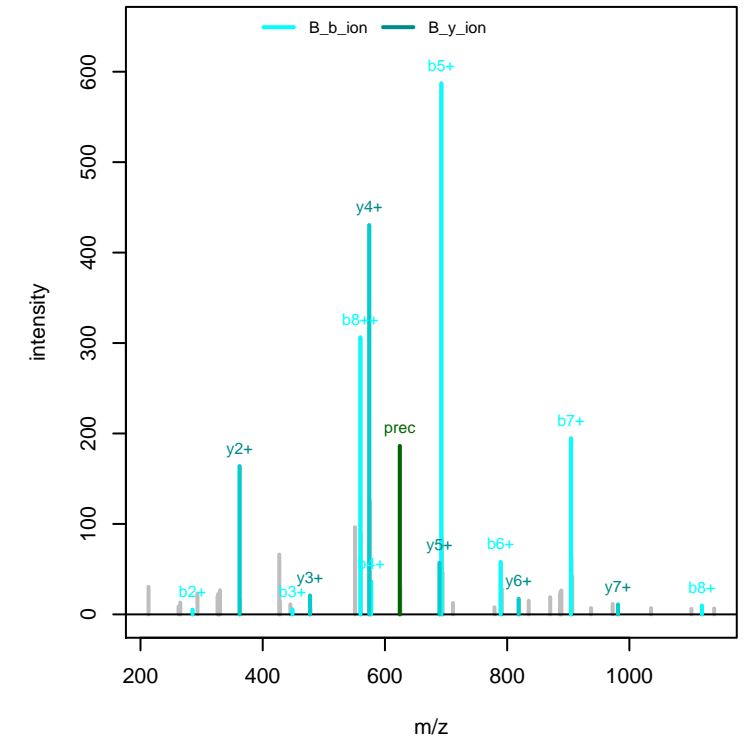

**LLAGKSDK  
KVDQEYEGIVR**

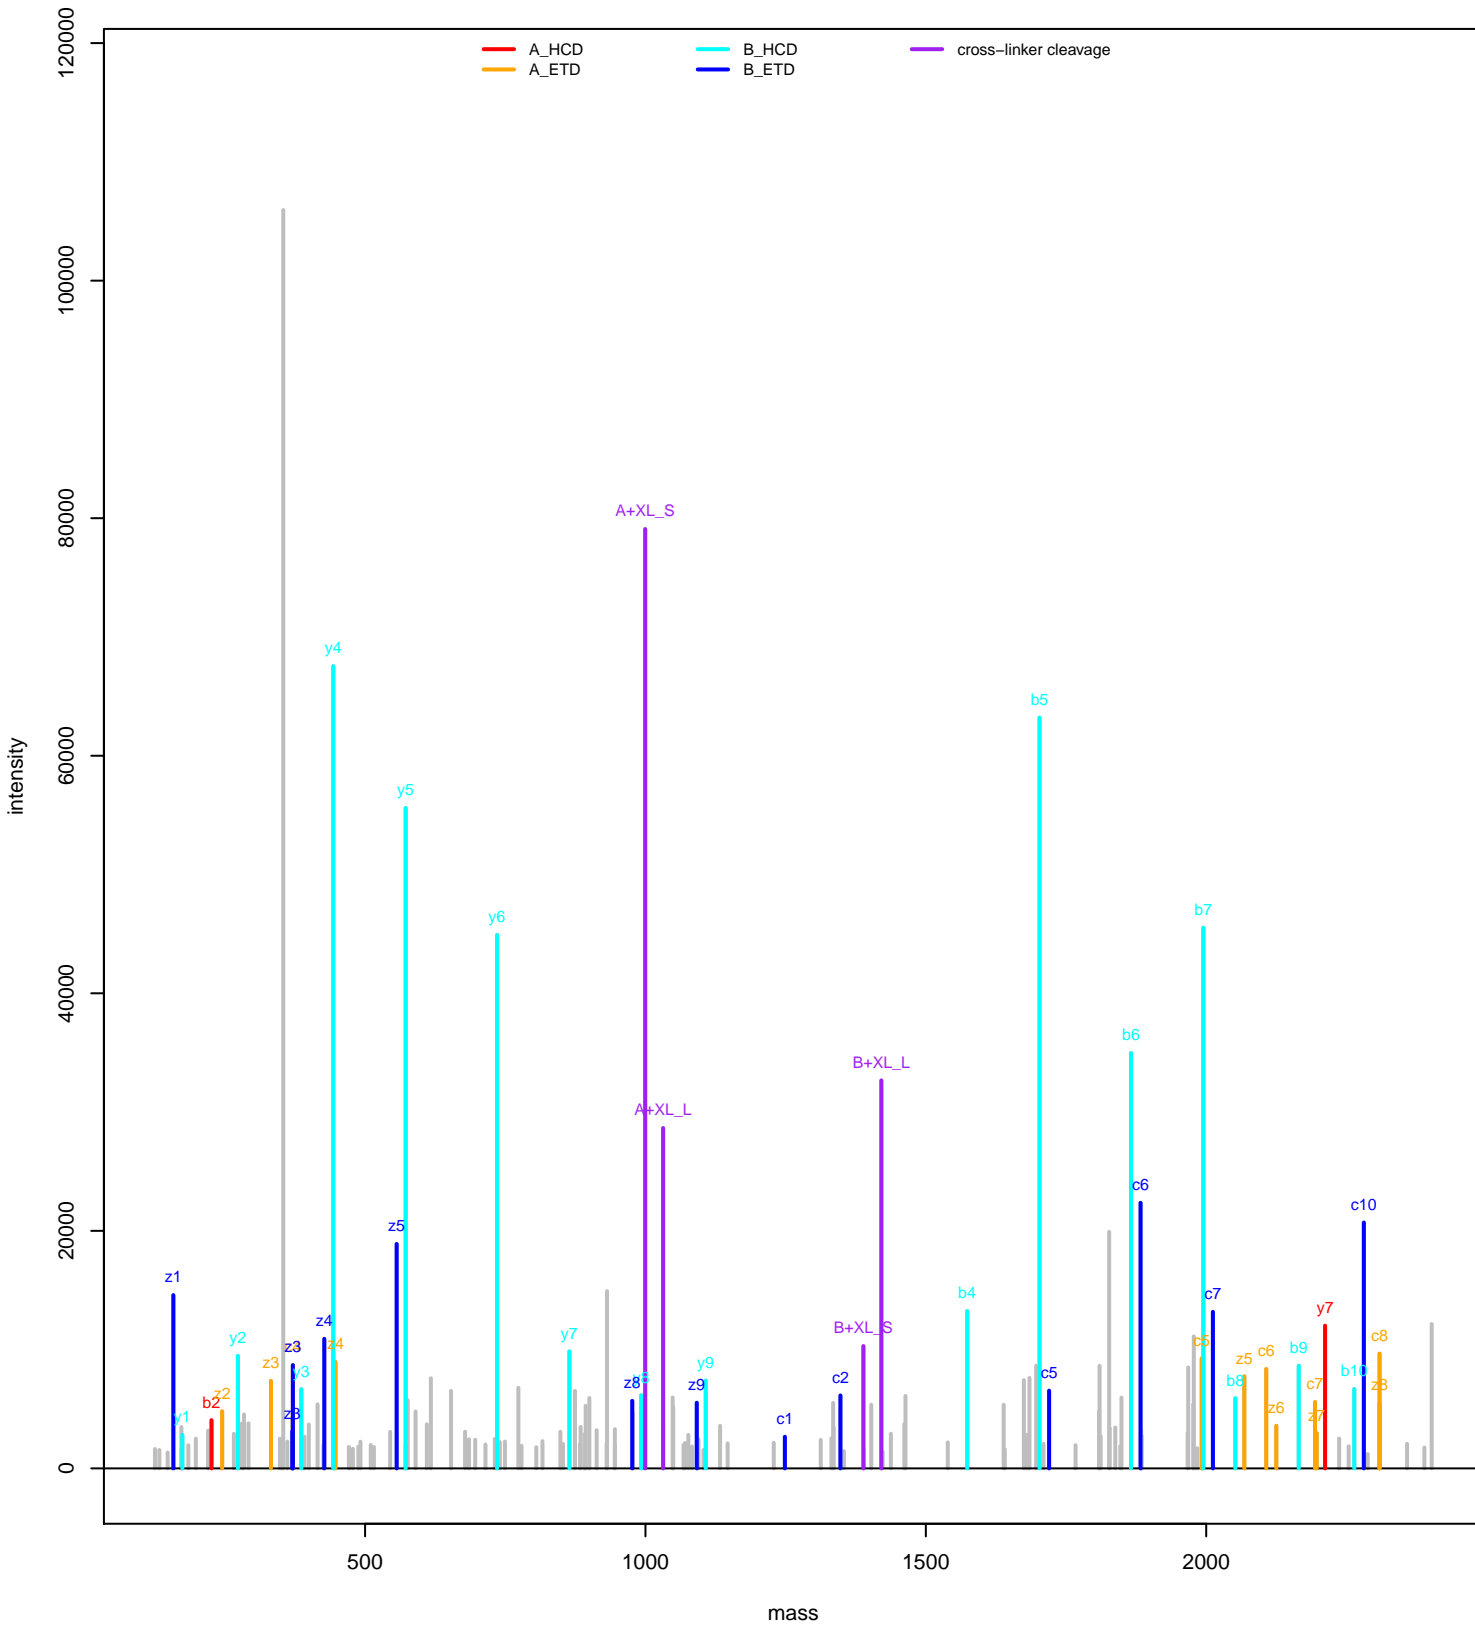

**LLAGKSDK+XL\_S**

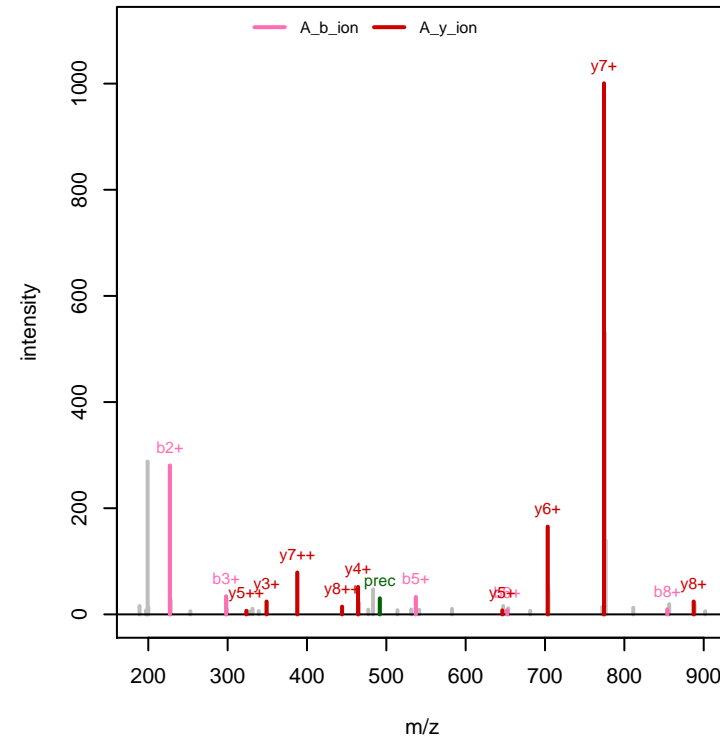

**LLAGKSDK+XL\_L**

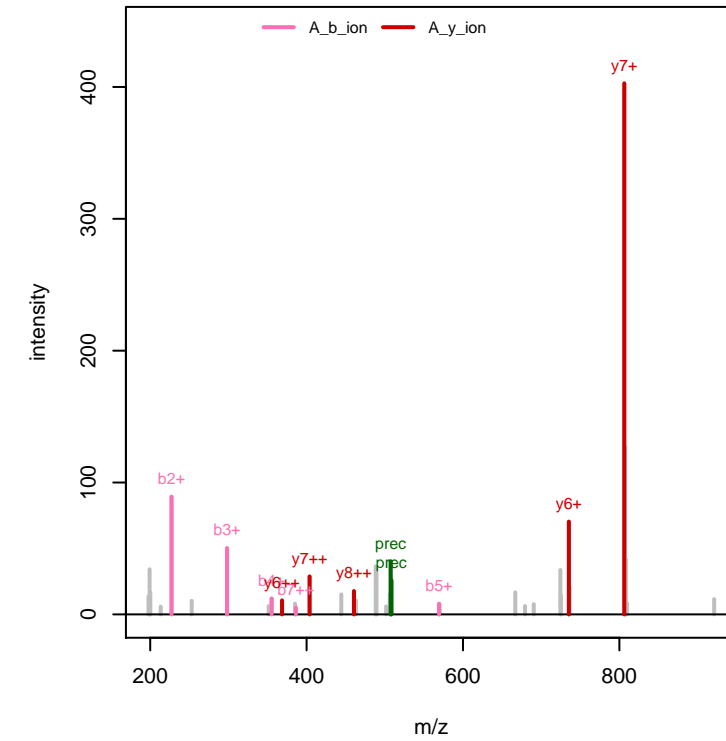

**KVDQEYEGIVR+XL\_S**

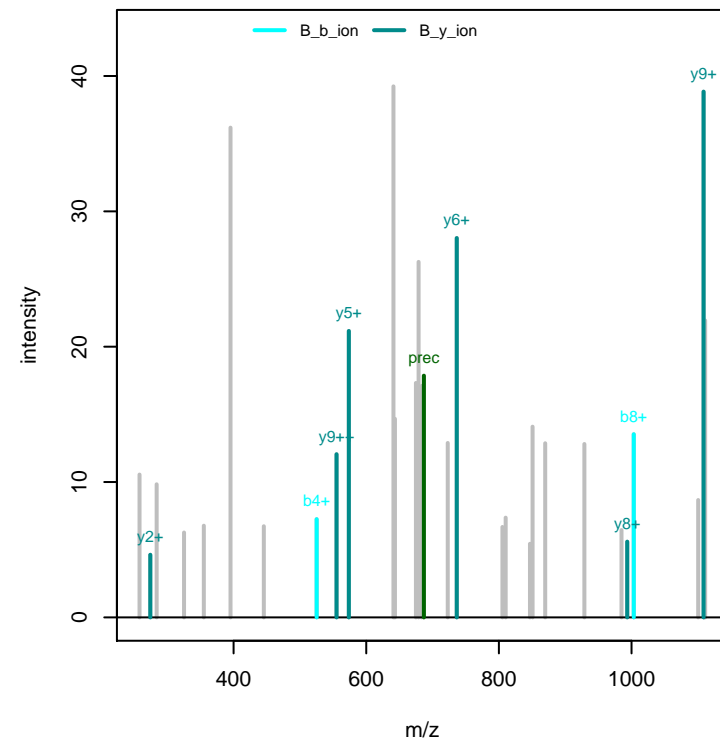

**KVDQEYEGIVR+XL\_L**

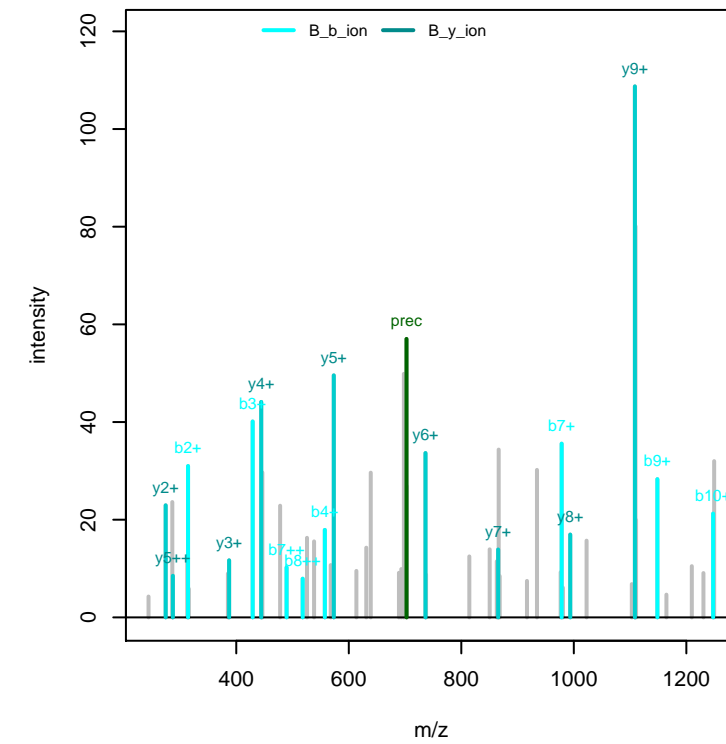

VAVIKAVR  
KALEEGAEVEVK

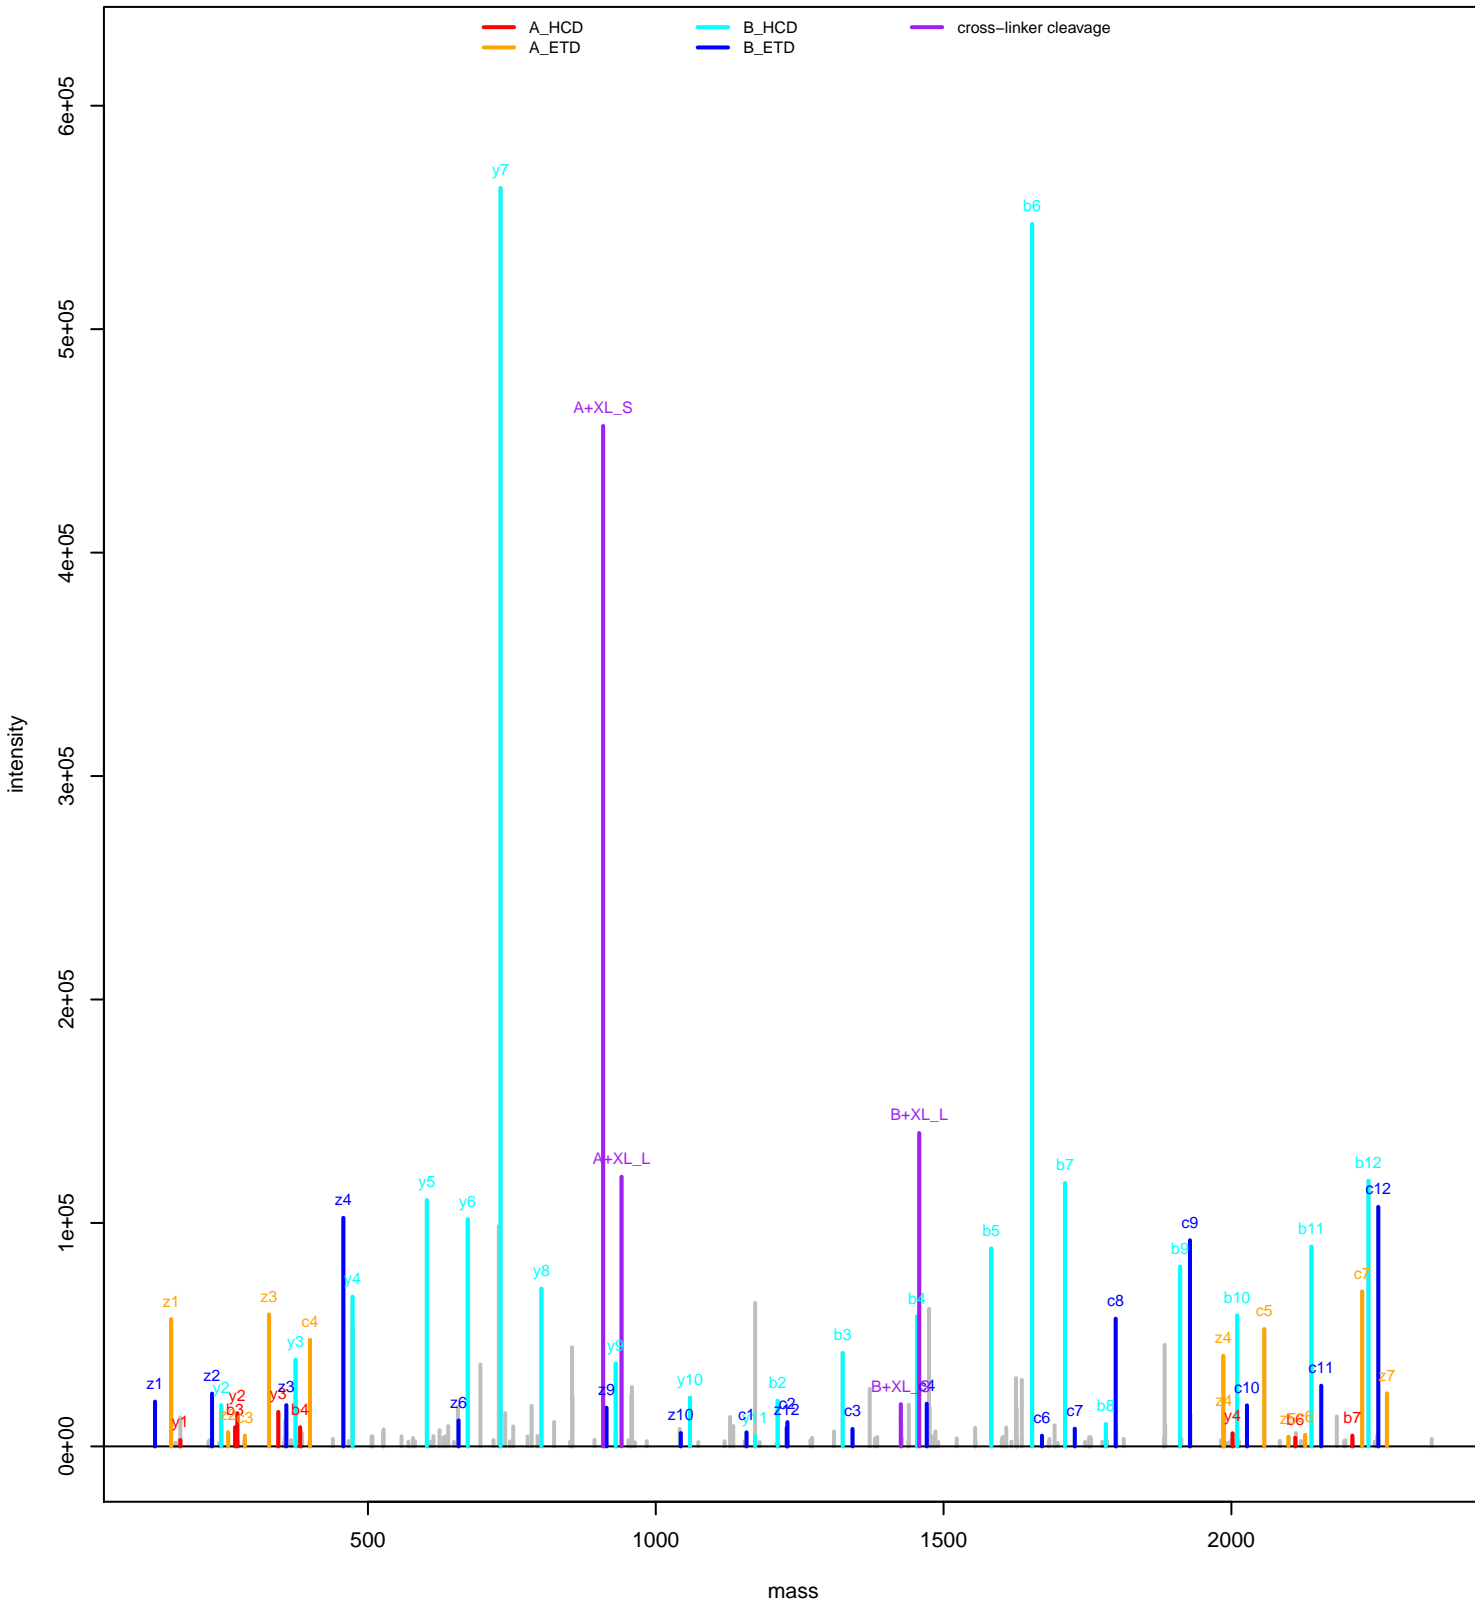

VAVIKAVR+XL\_S

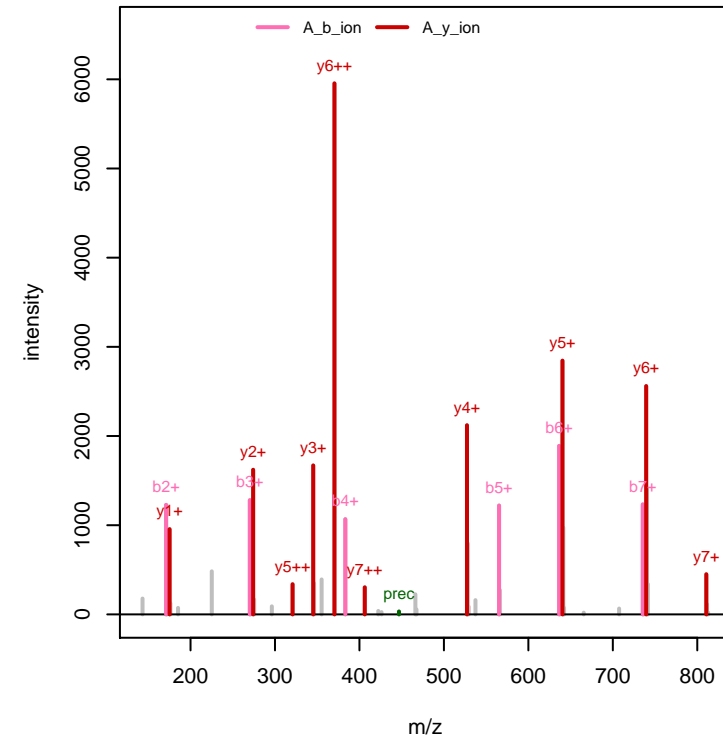

VAVIKAVR+XL\_L

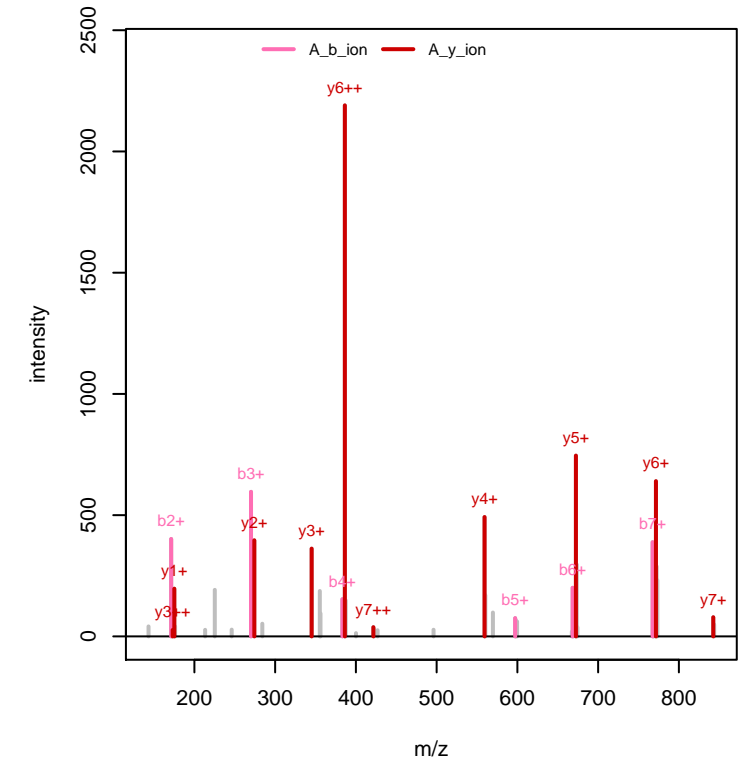

KALEEGAEVEVK+XL\_S

KALEEGAEVEVK+XL\_S

KALEEGAEVEVK+XL\_L

KALEEGAEVEVK+XL\_L



LSKSSR  
NEQYSALRSNVSMGLGK

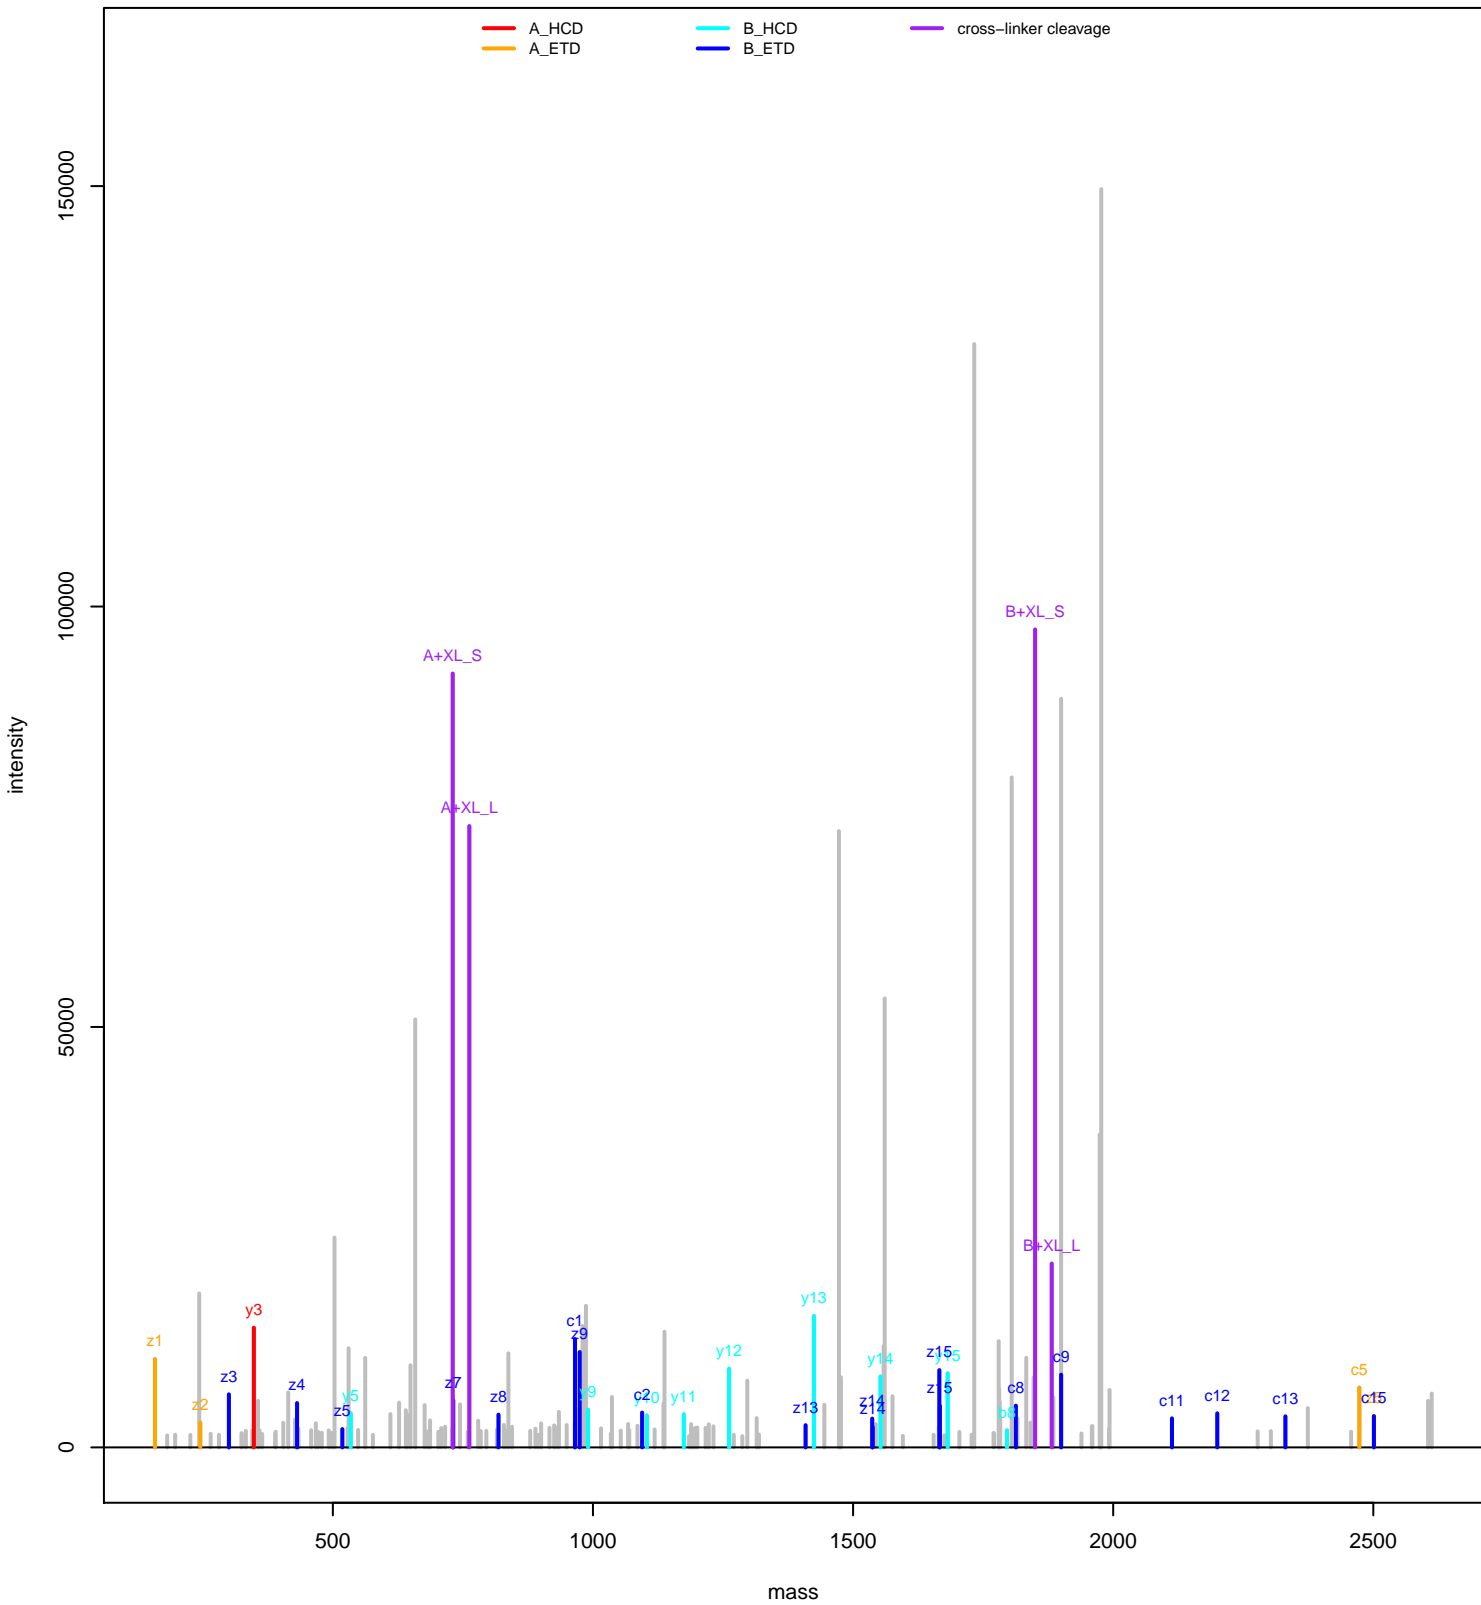

LSKSSR+XL\_S

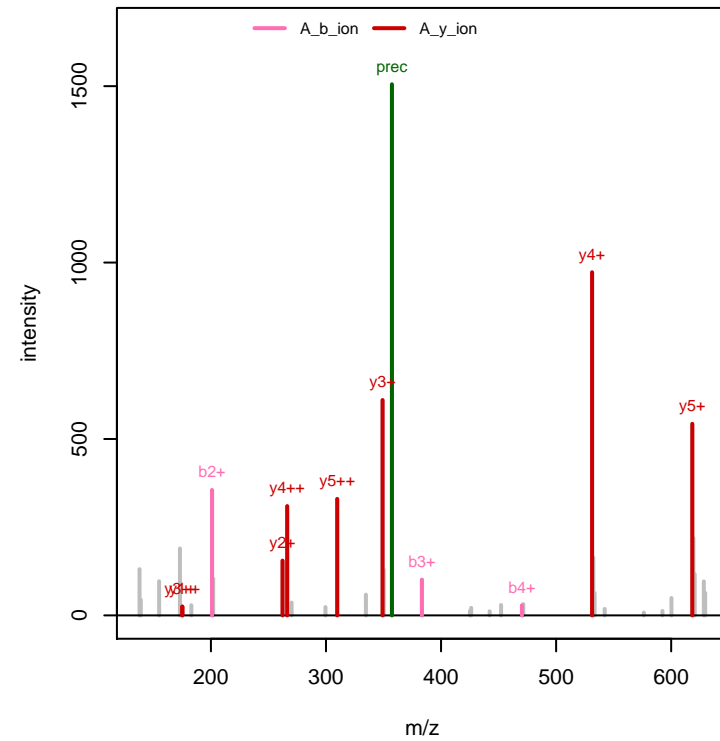

LSKSSR+XL\_L

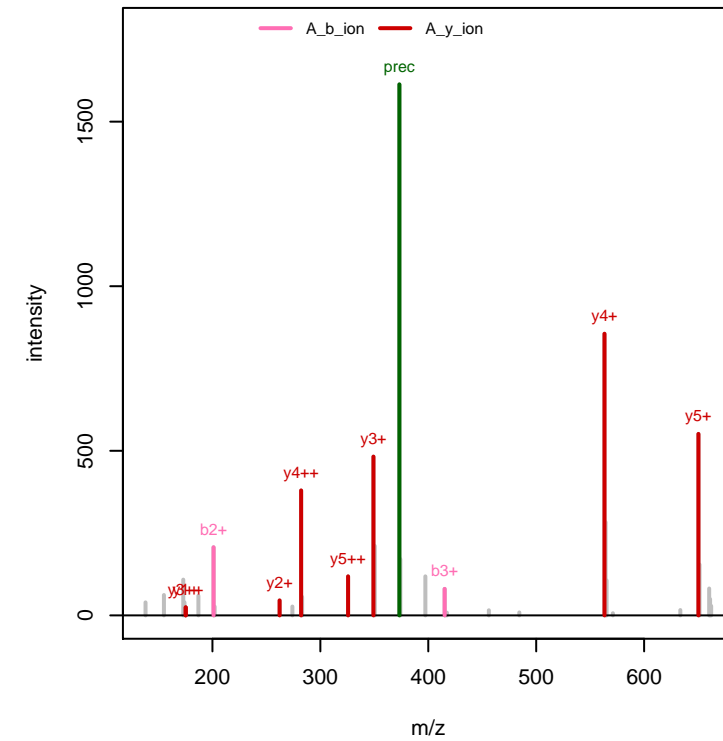

NEQYSALRSNVSMGLGK+XL\_S

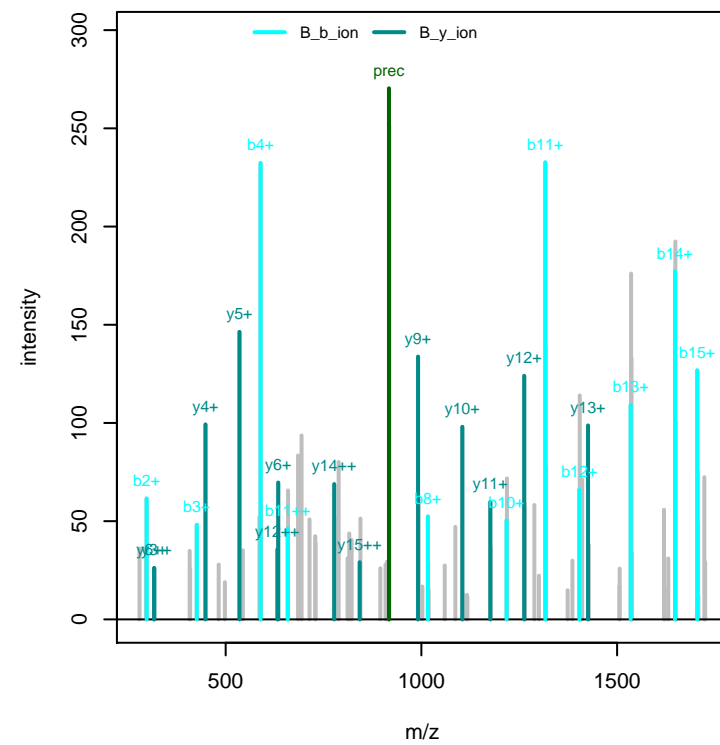

NEQYSALRSNVSMGLGK+XL\_L

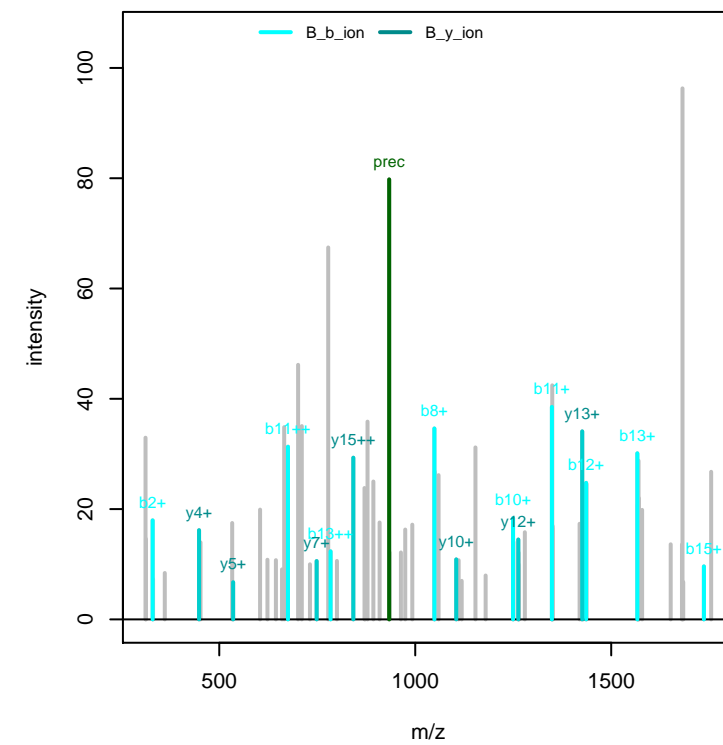

**VLGKAGAAR**  
**HVVKVVNPELHK**

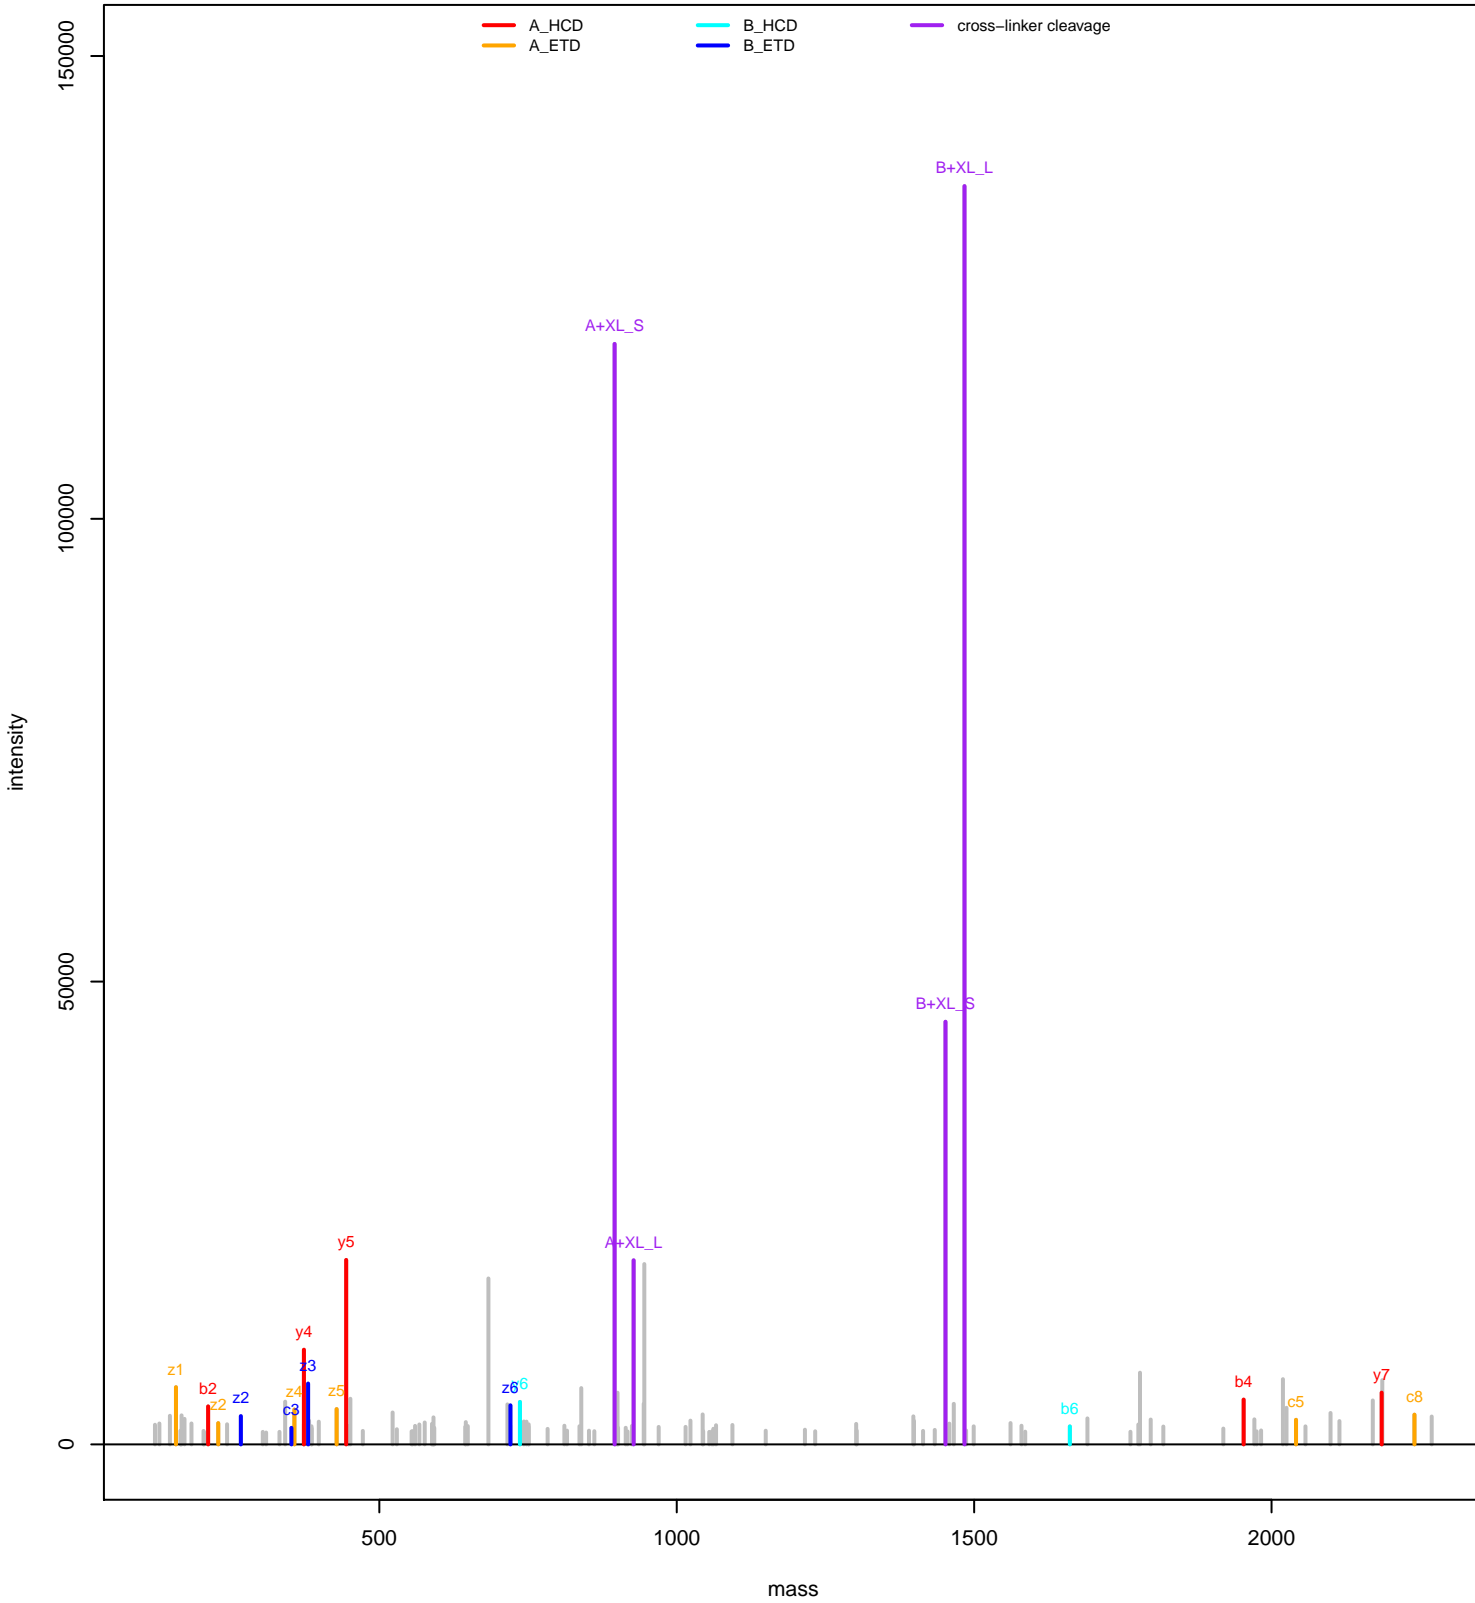

**VLGKAGAAR+XL\_S**

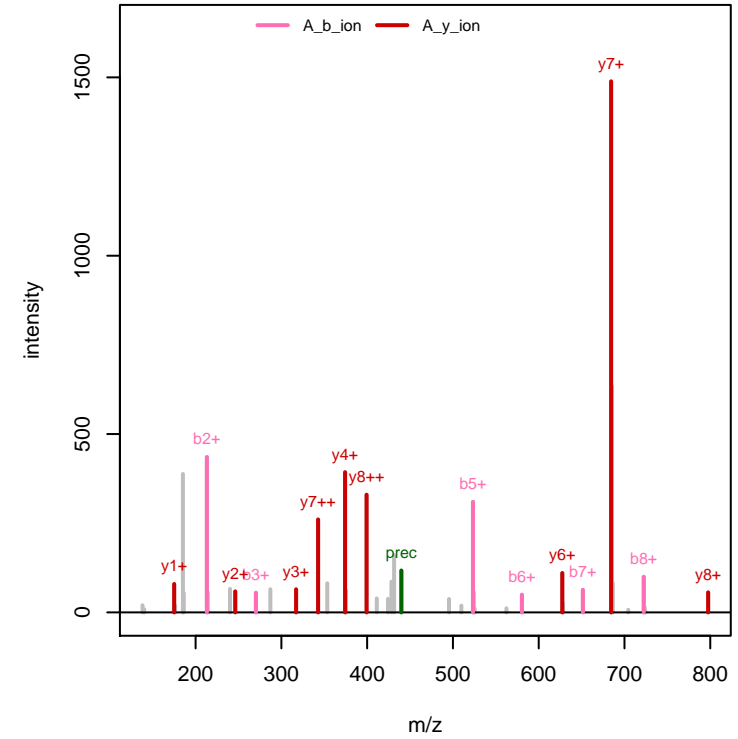

**VLGKAGAAR+XL\_L**

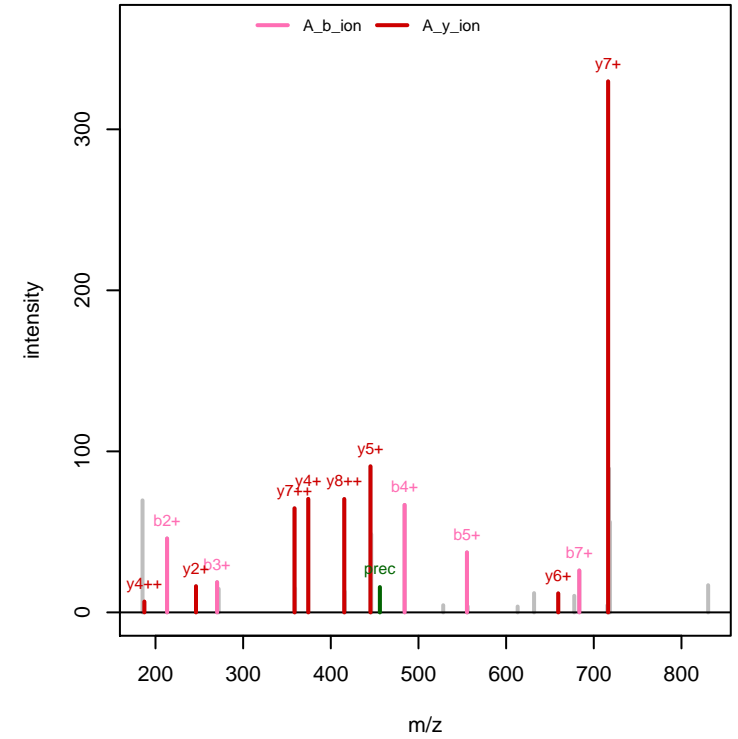

**HVVKVVNPELHK+XL\_S**

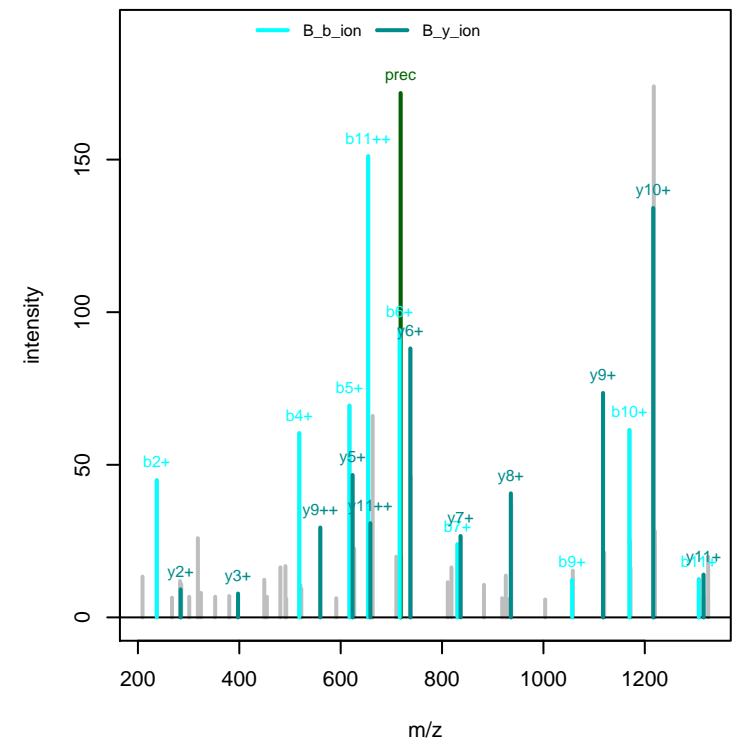

**HVVKVVNPELHK+XL\_L**

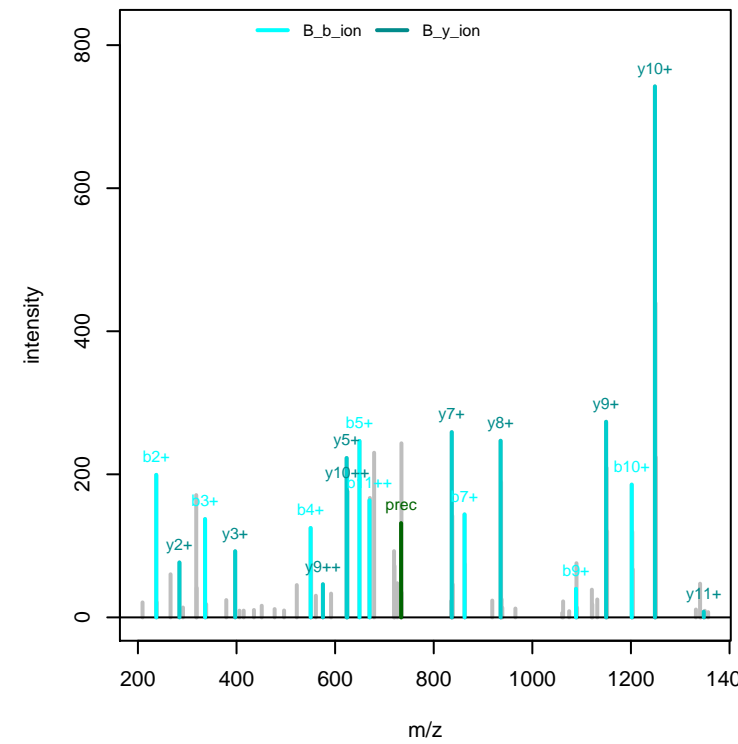

### KHSICPSGK NGADFGKLAK

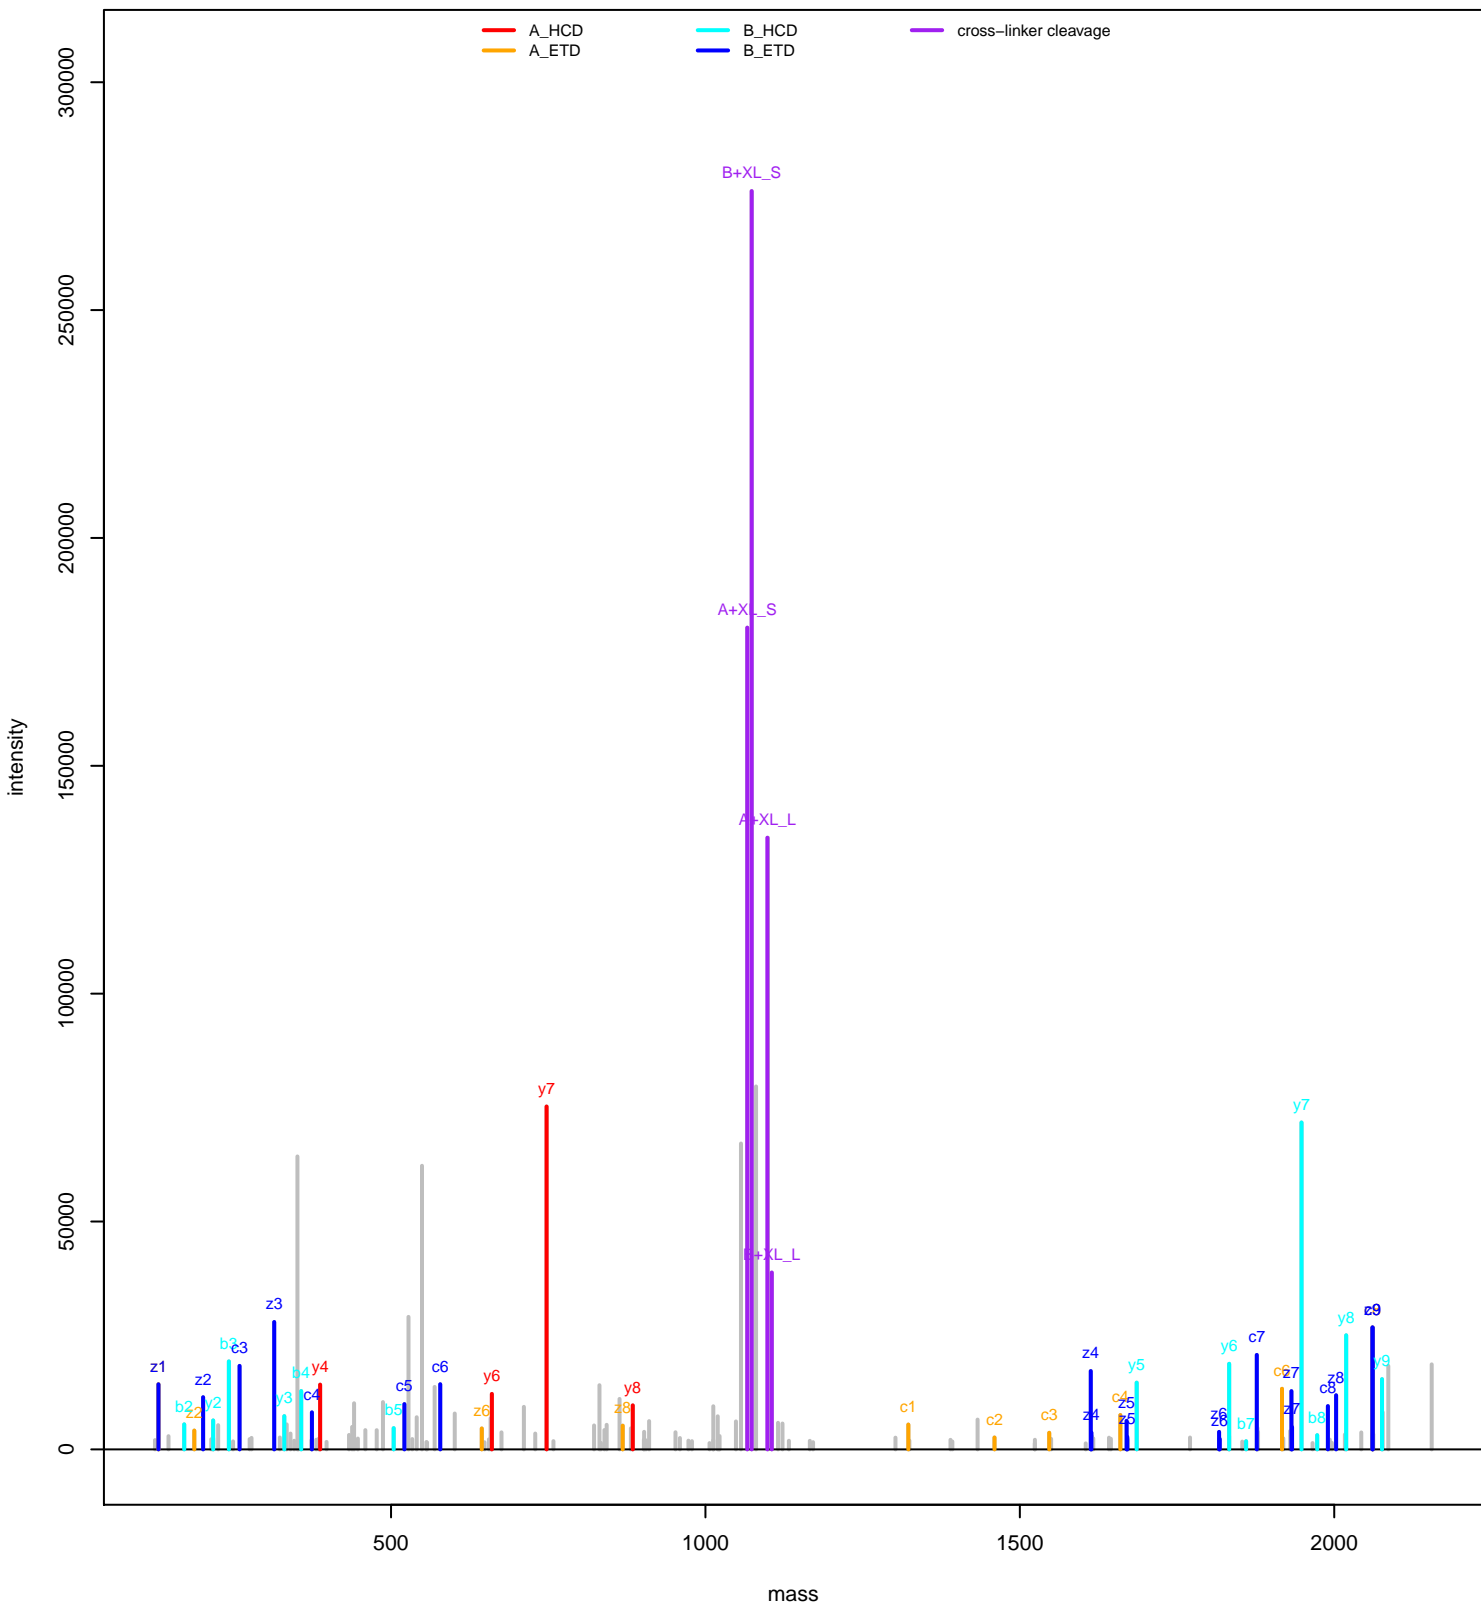

### KHSICPSGK+XL\_S

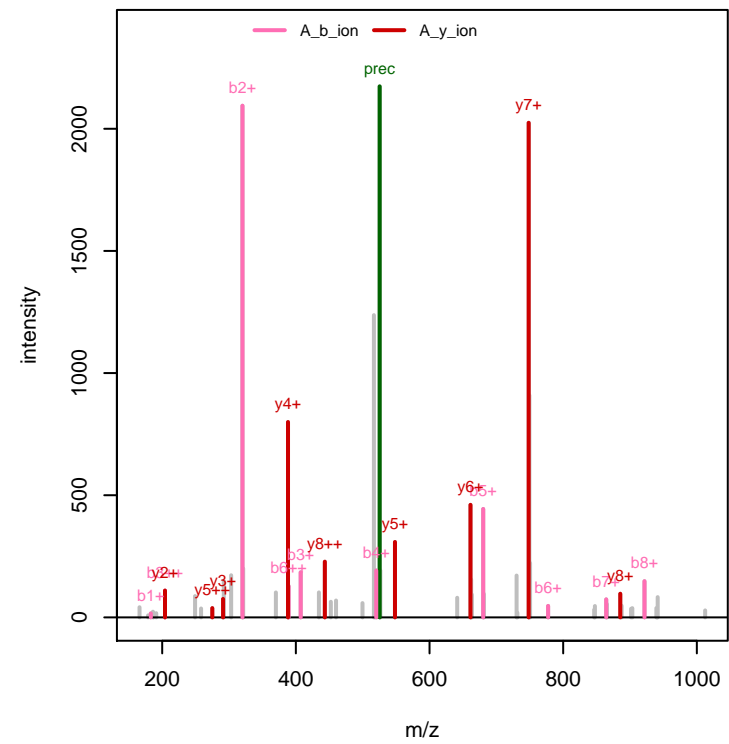

### KHSICPSGK+XL\_L

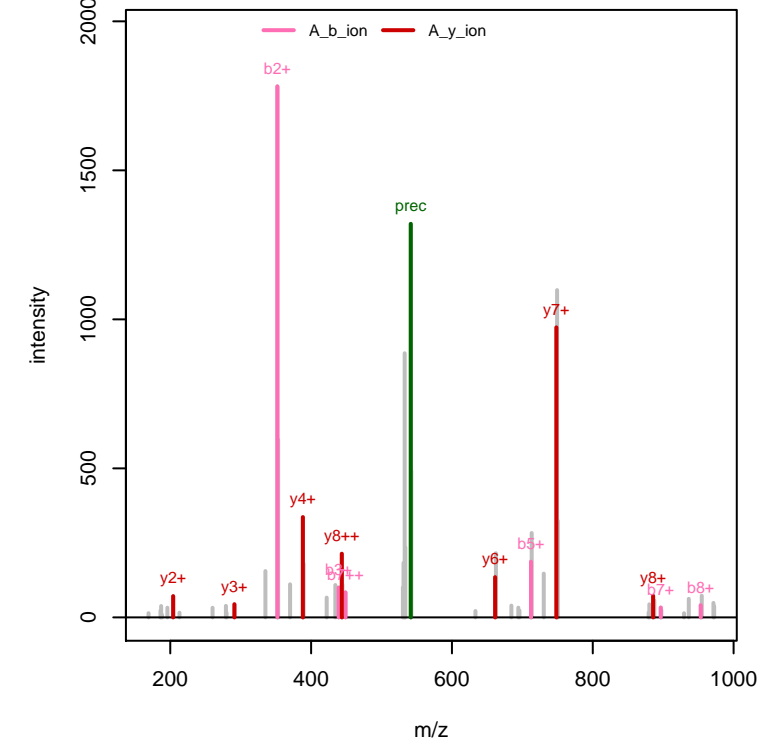

### NGADFGKLAK+XL\_S

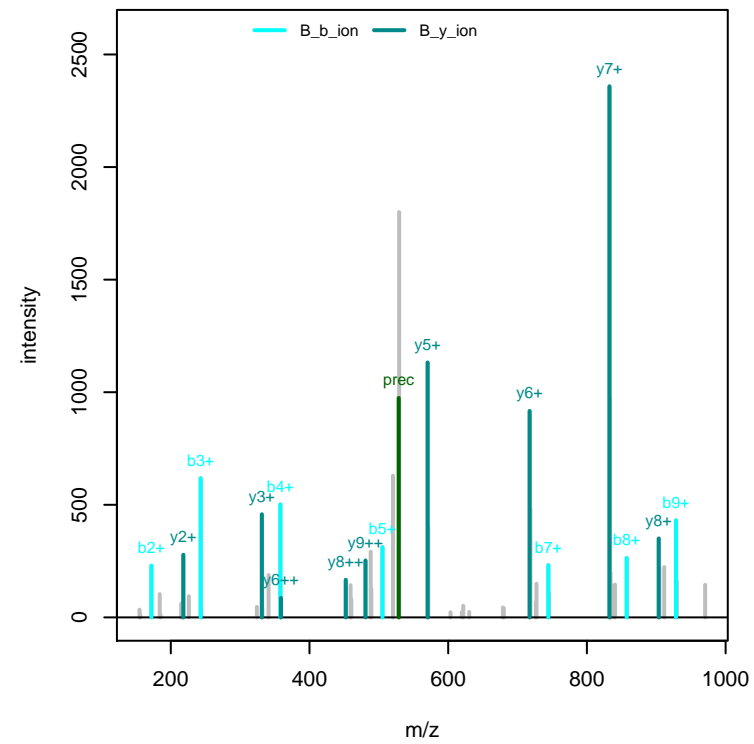

### NGADFGKLAK+XL\_L

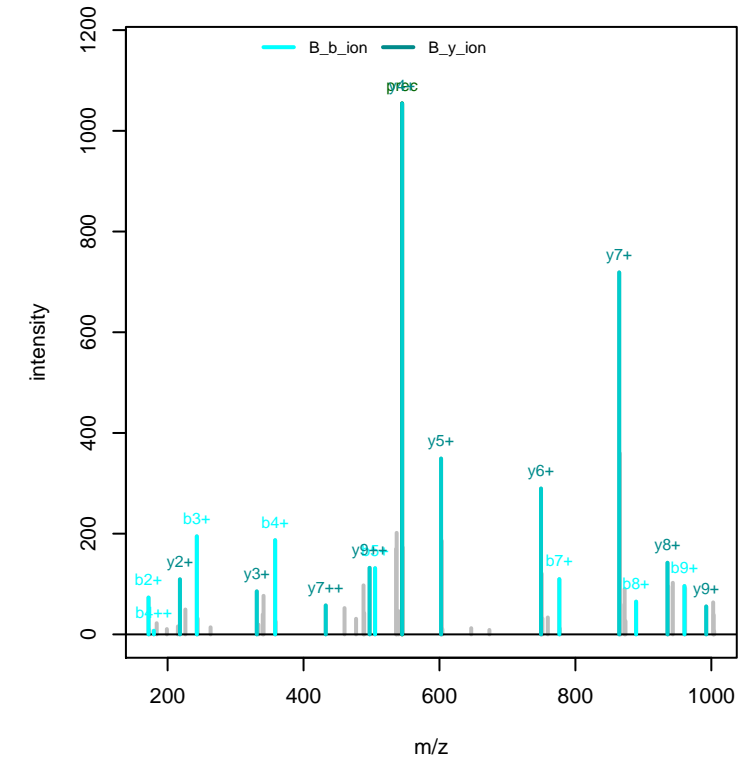

**MQNSALK**  
STFQQLPGTGVKPDQFHSQTR

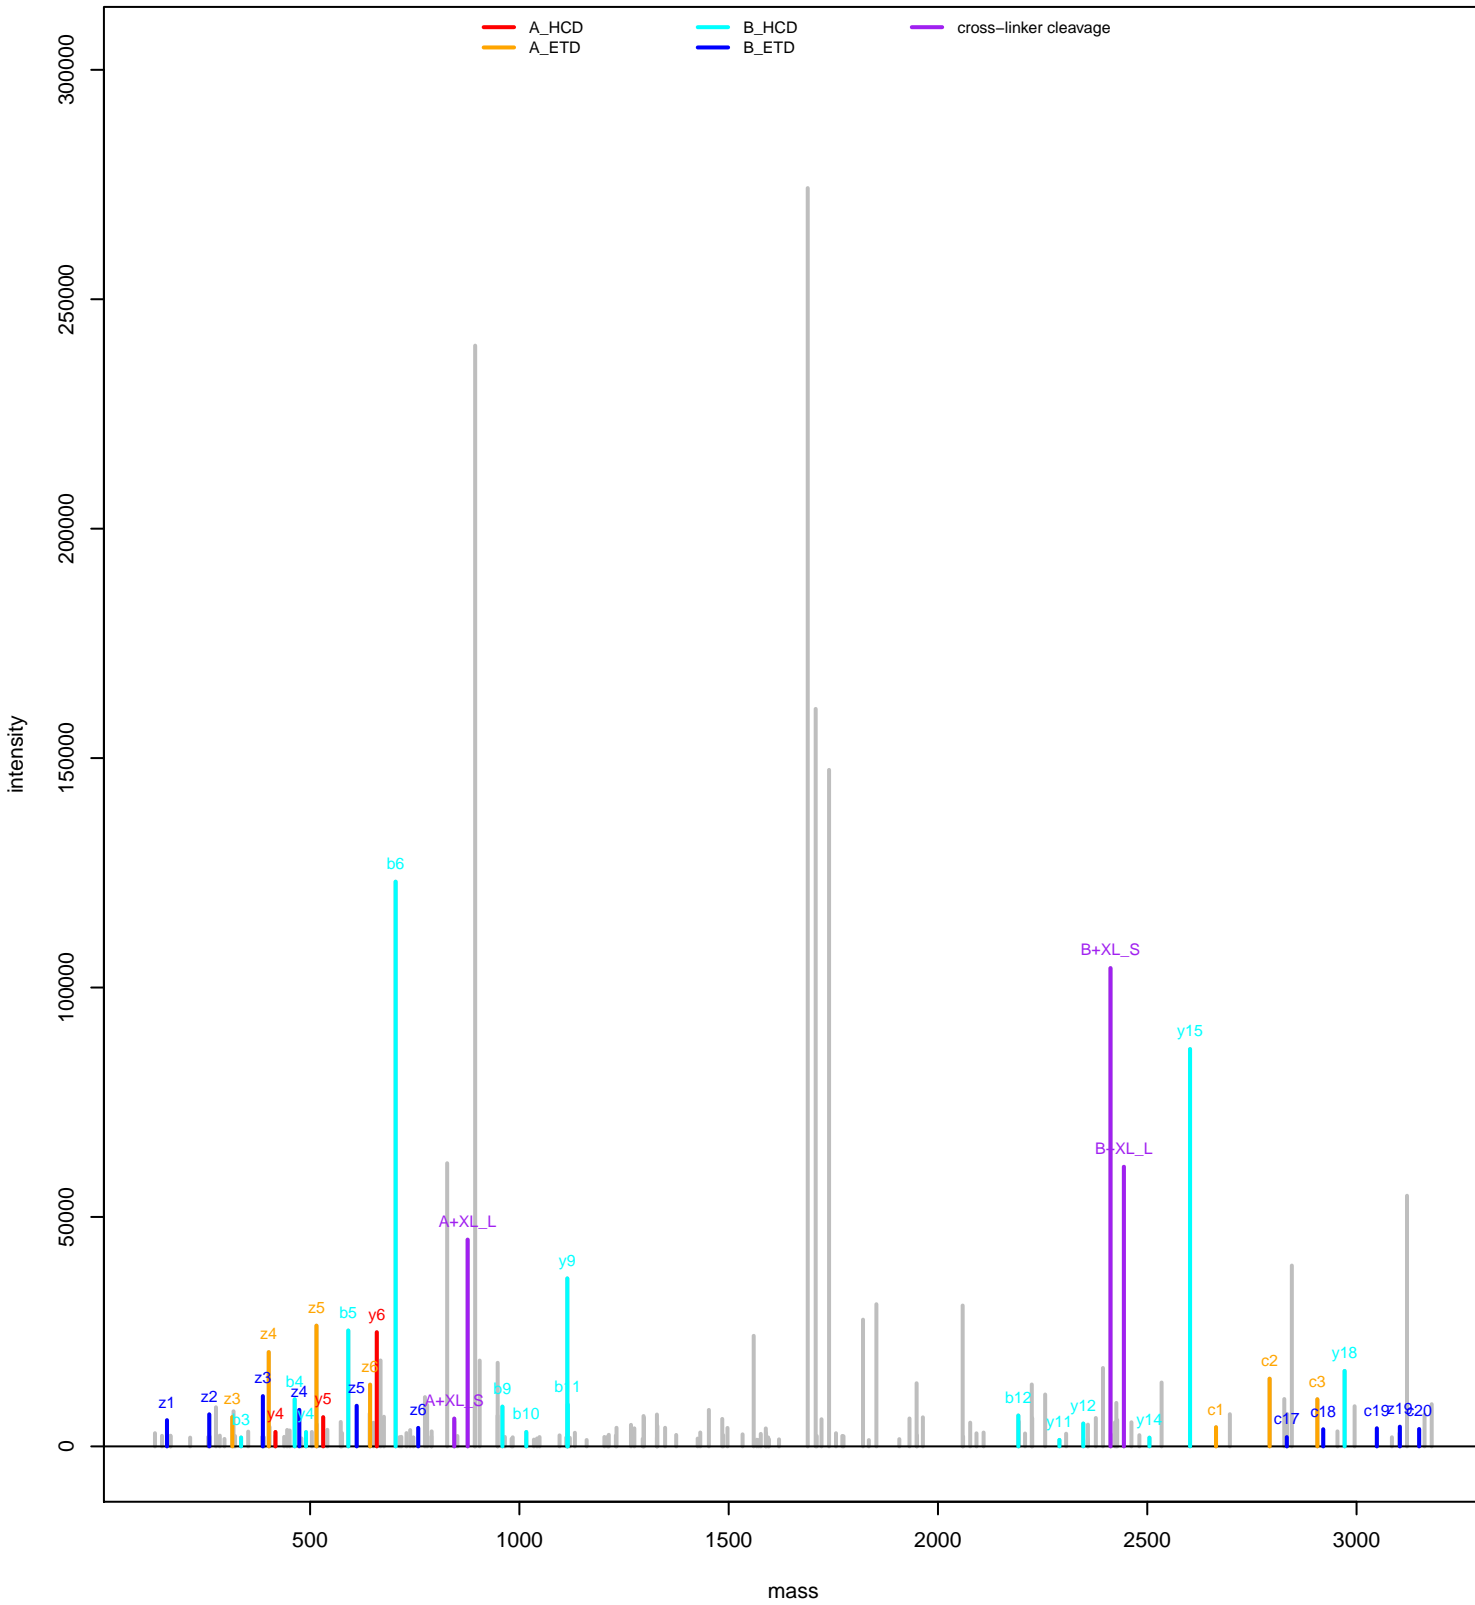

**MQNSALK+XL\_S**

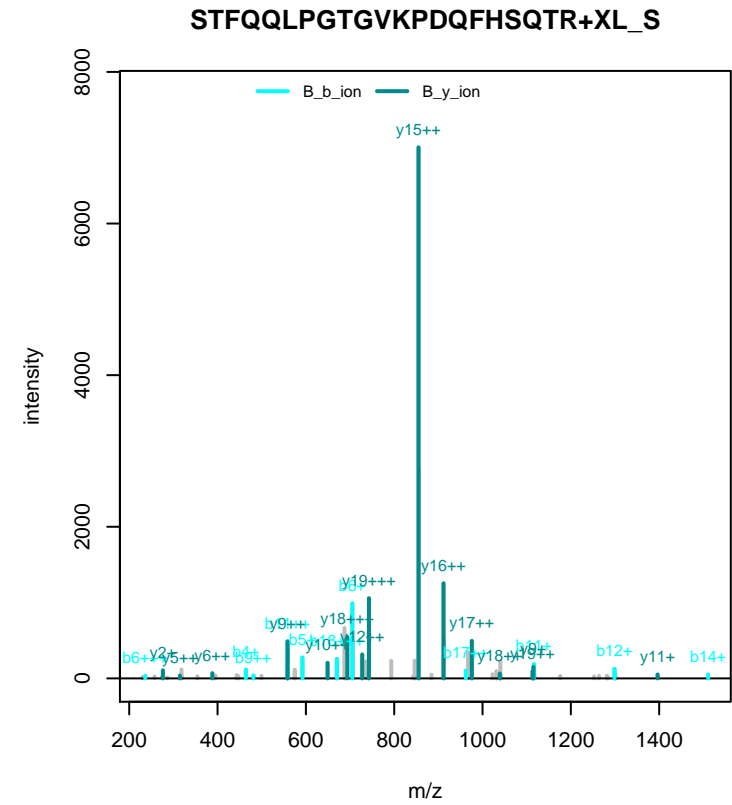

**MQNSALK+XL\_L**

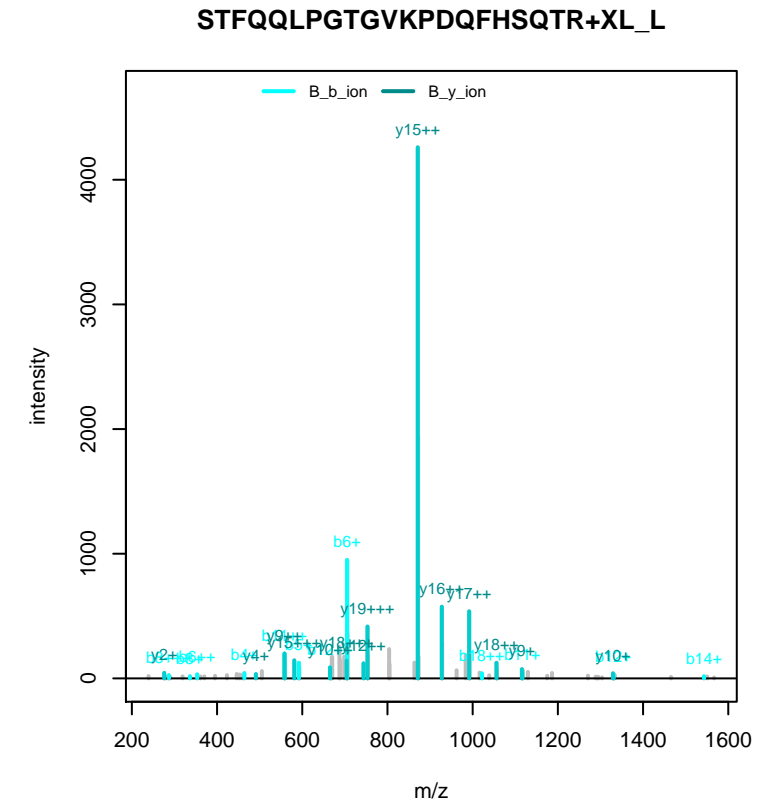

SLSTEATAK  
LLDYLKRK

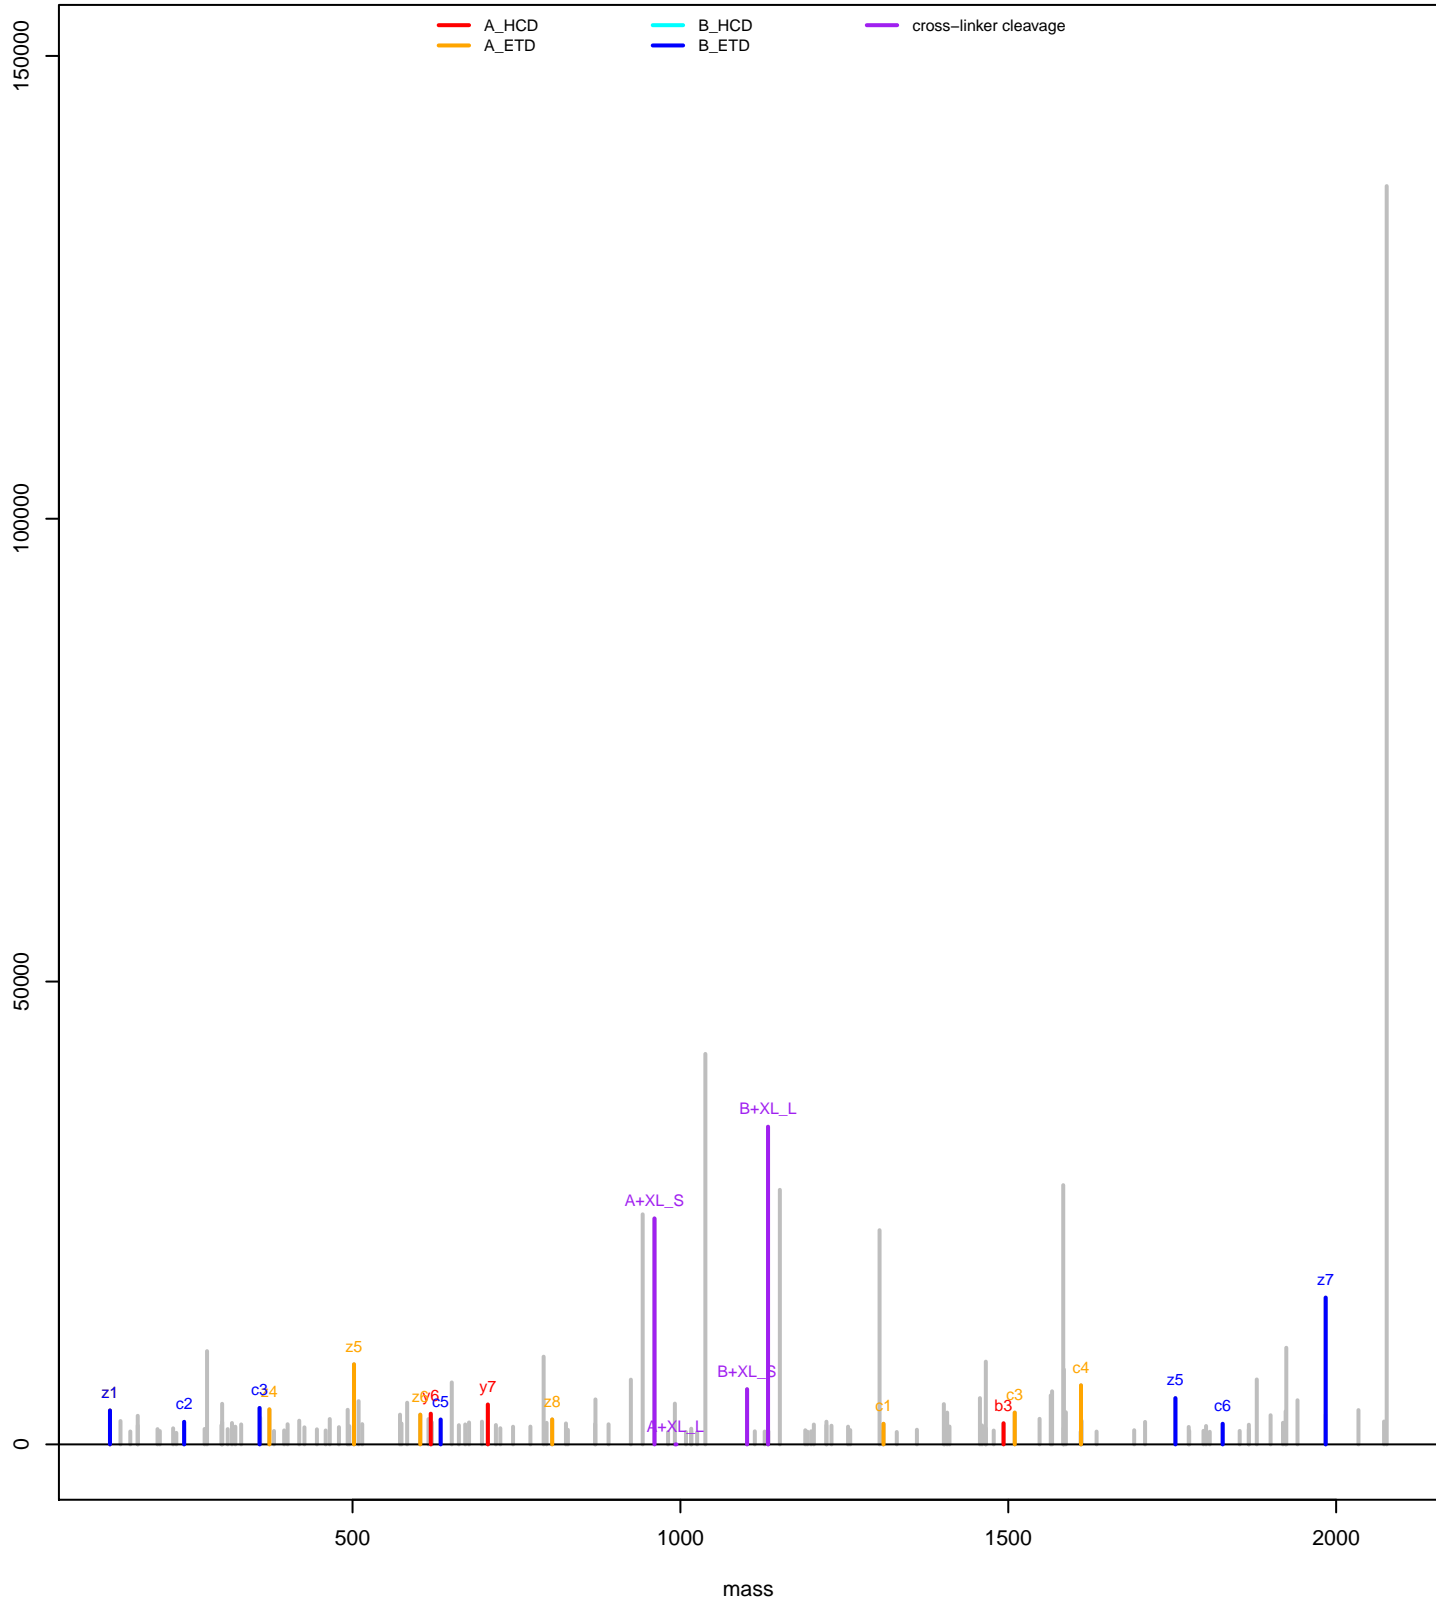

SLSTEATAK+XL\_S

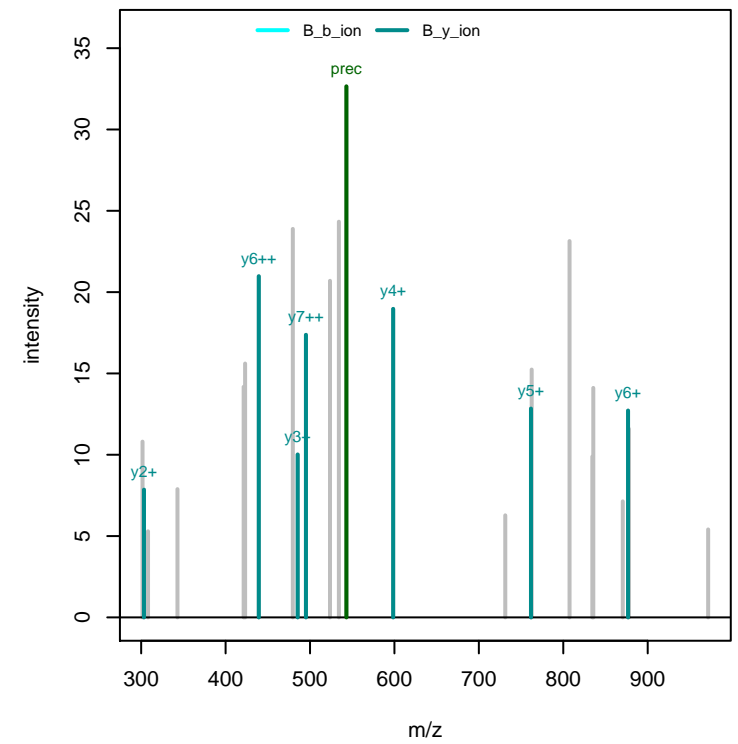

SLSTEATAK+XL\_L

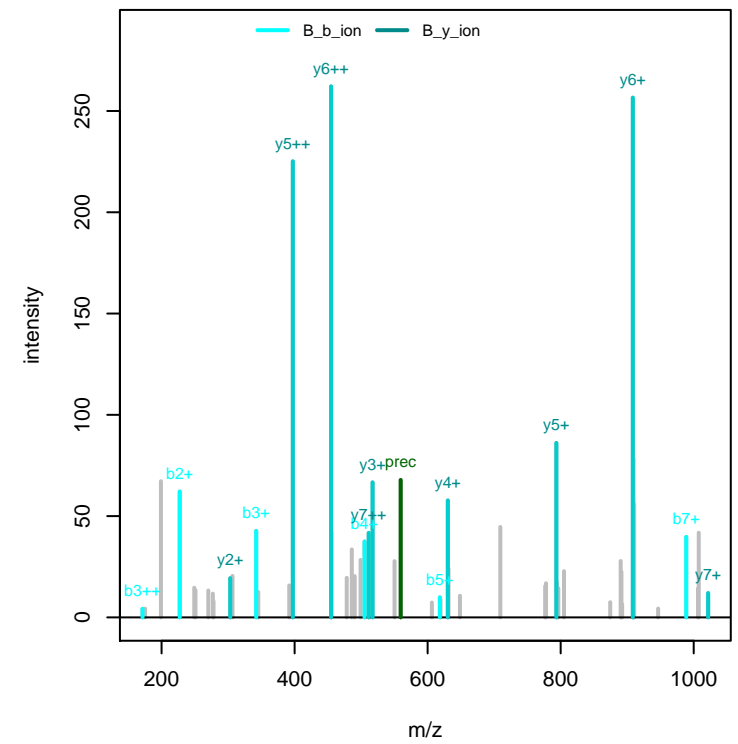

LLDYLKRK+XL\_S



LLDYLKRK+XL\_L



NAKAGQVR  
GLMPNPKVGTVPNVAEAVK

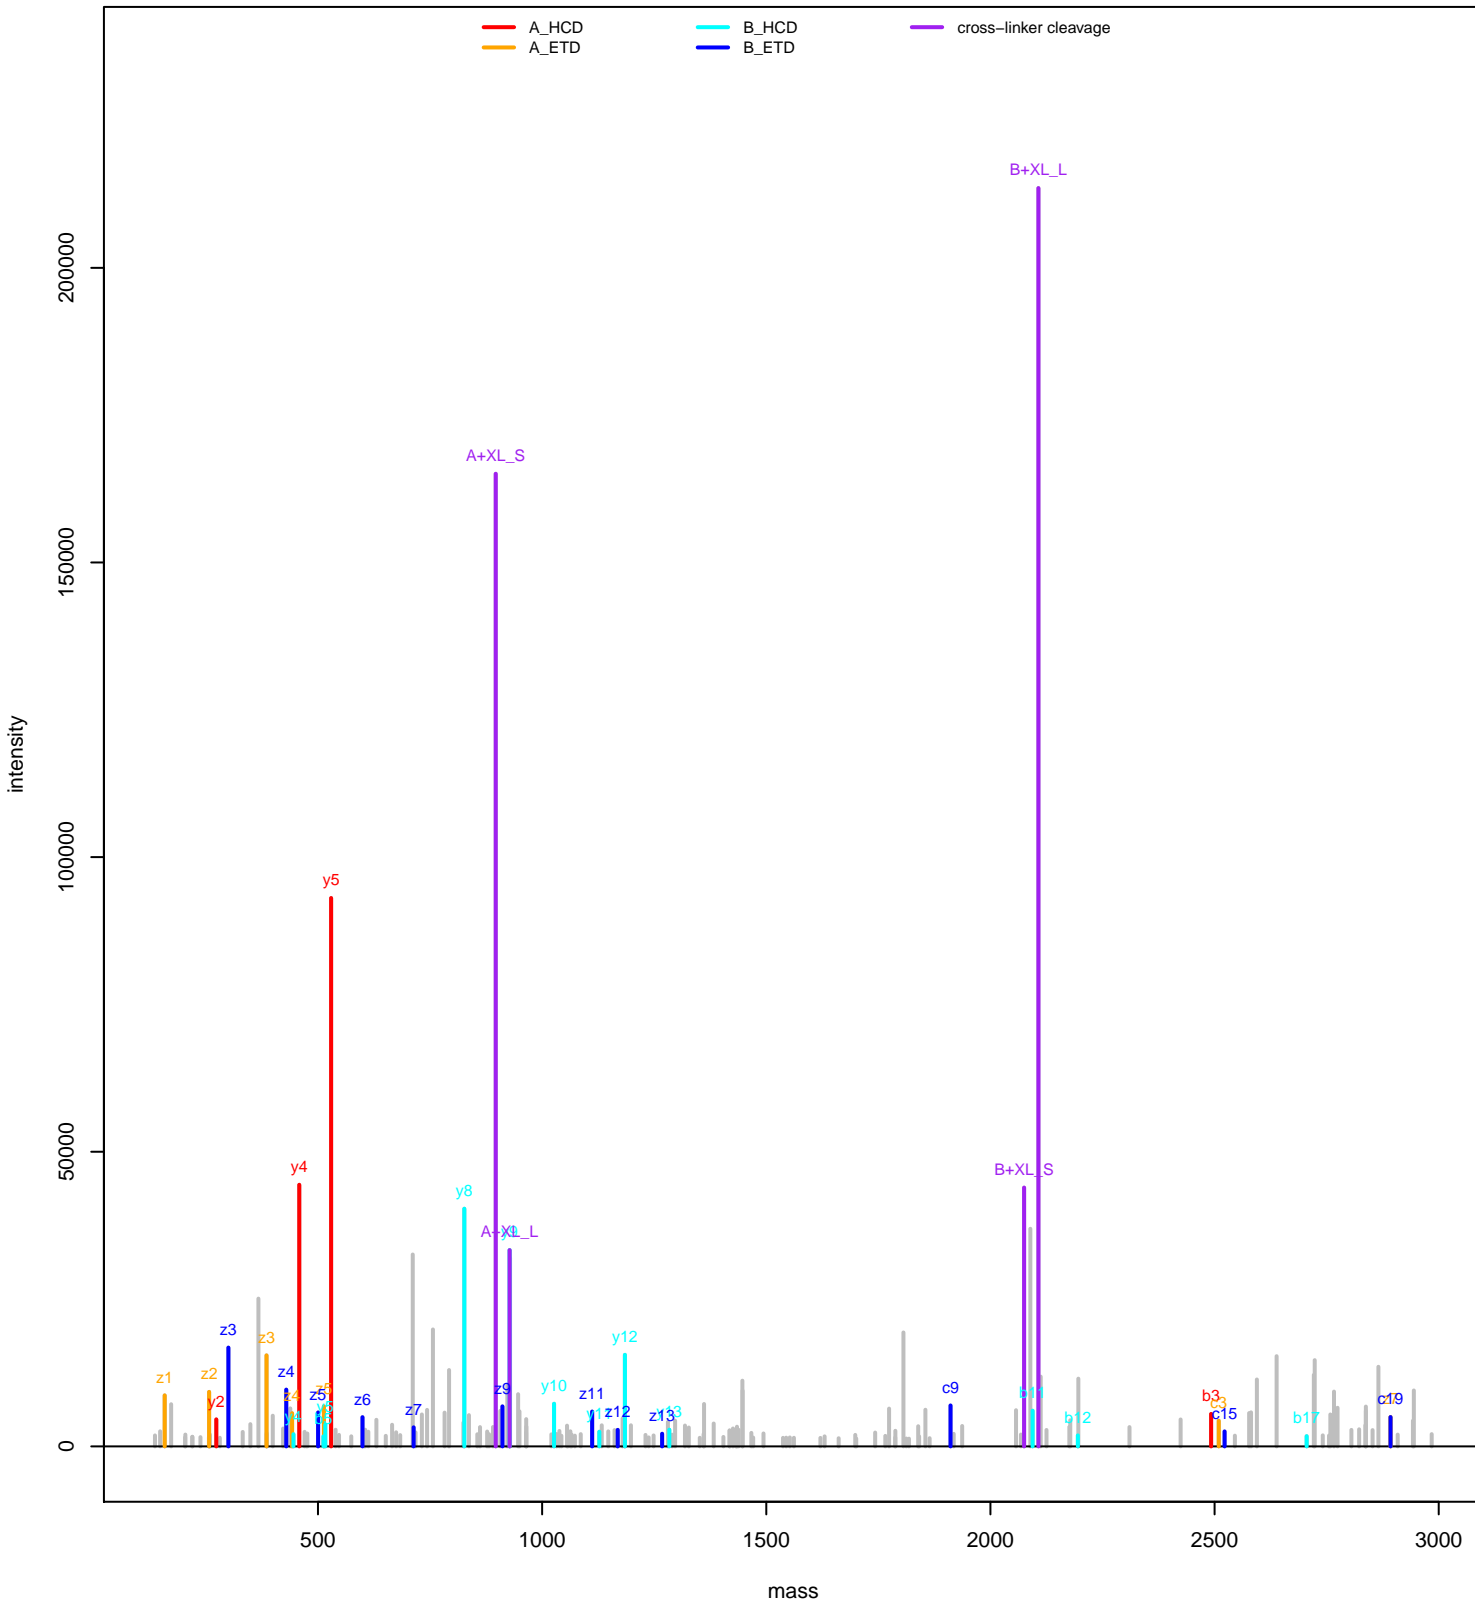

NAKAGQVR+XL\_S

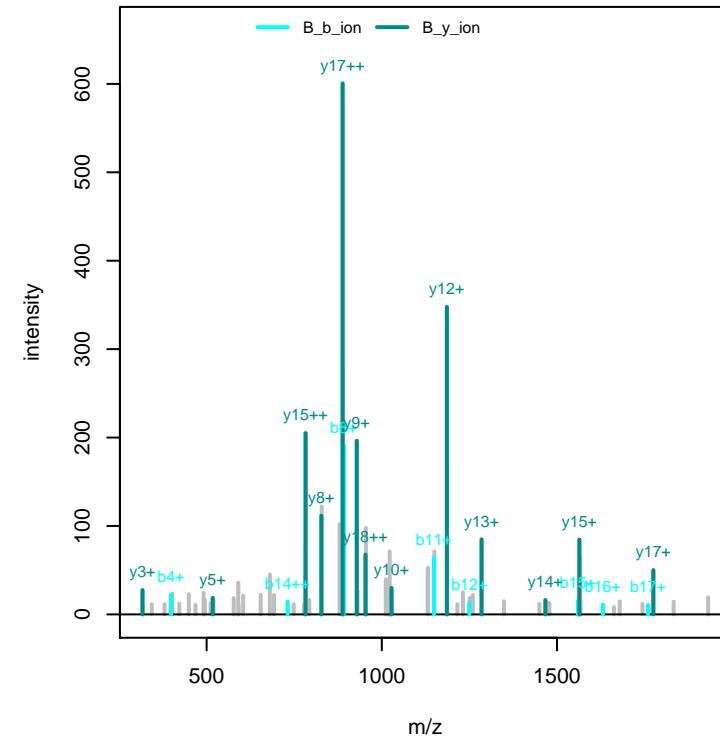

NAKAGQVR+XL\_L

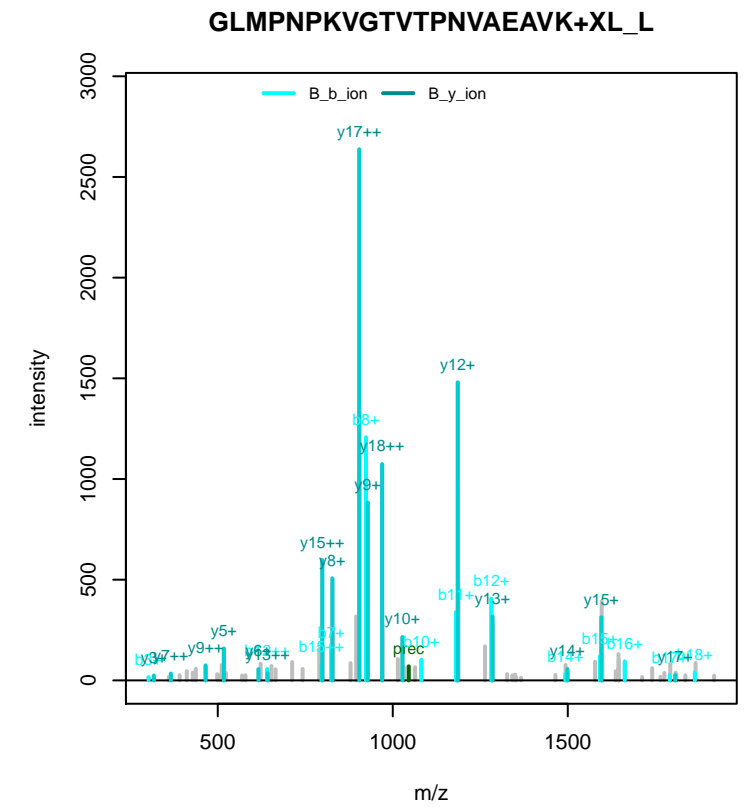

### EAEKAGK LSKEYDHIK

A\_HCD B\_HCD cross-linker cleavage  
A\_ETD B\_ETD

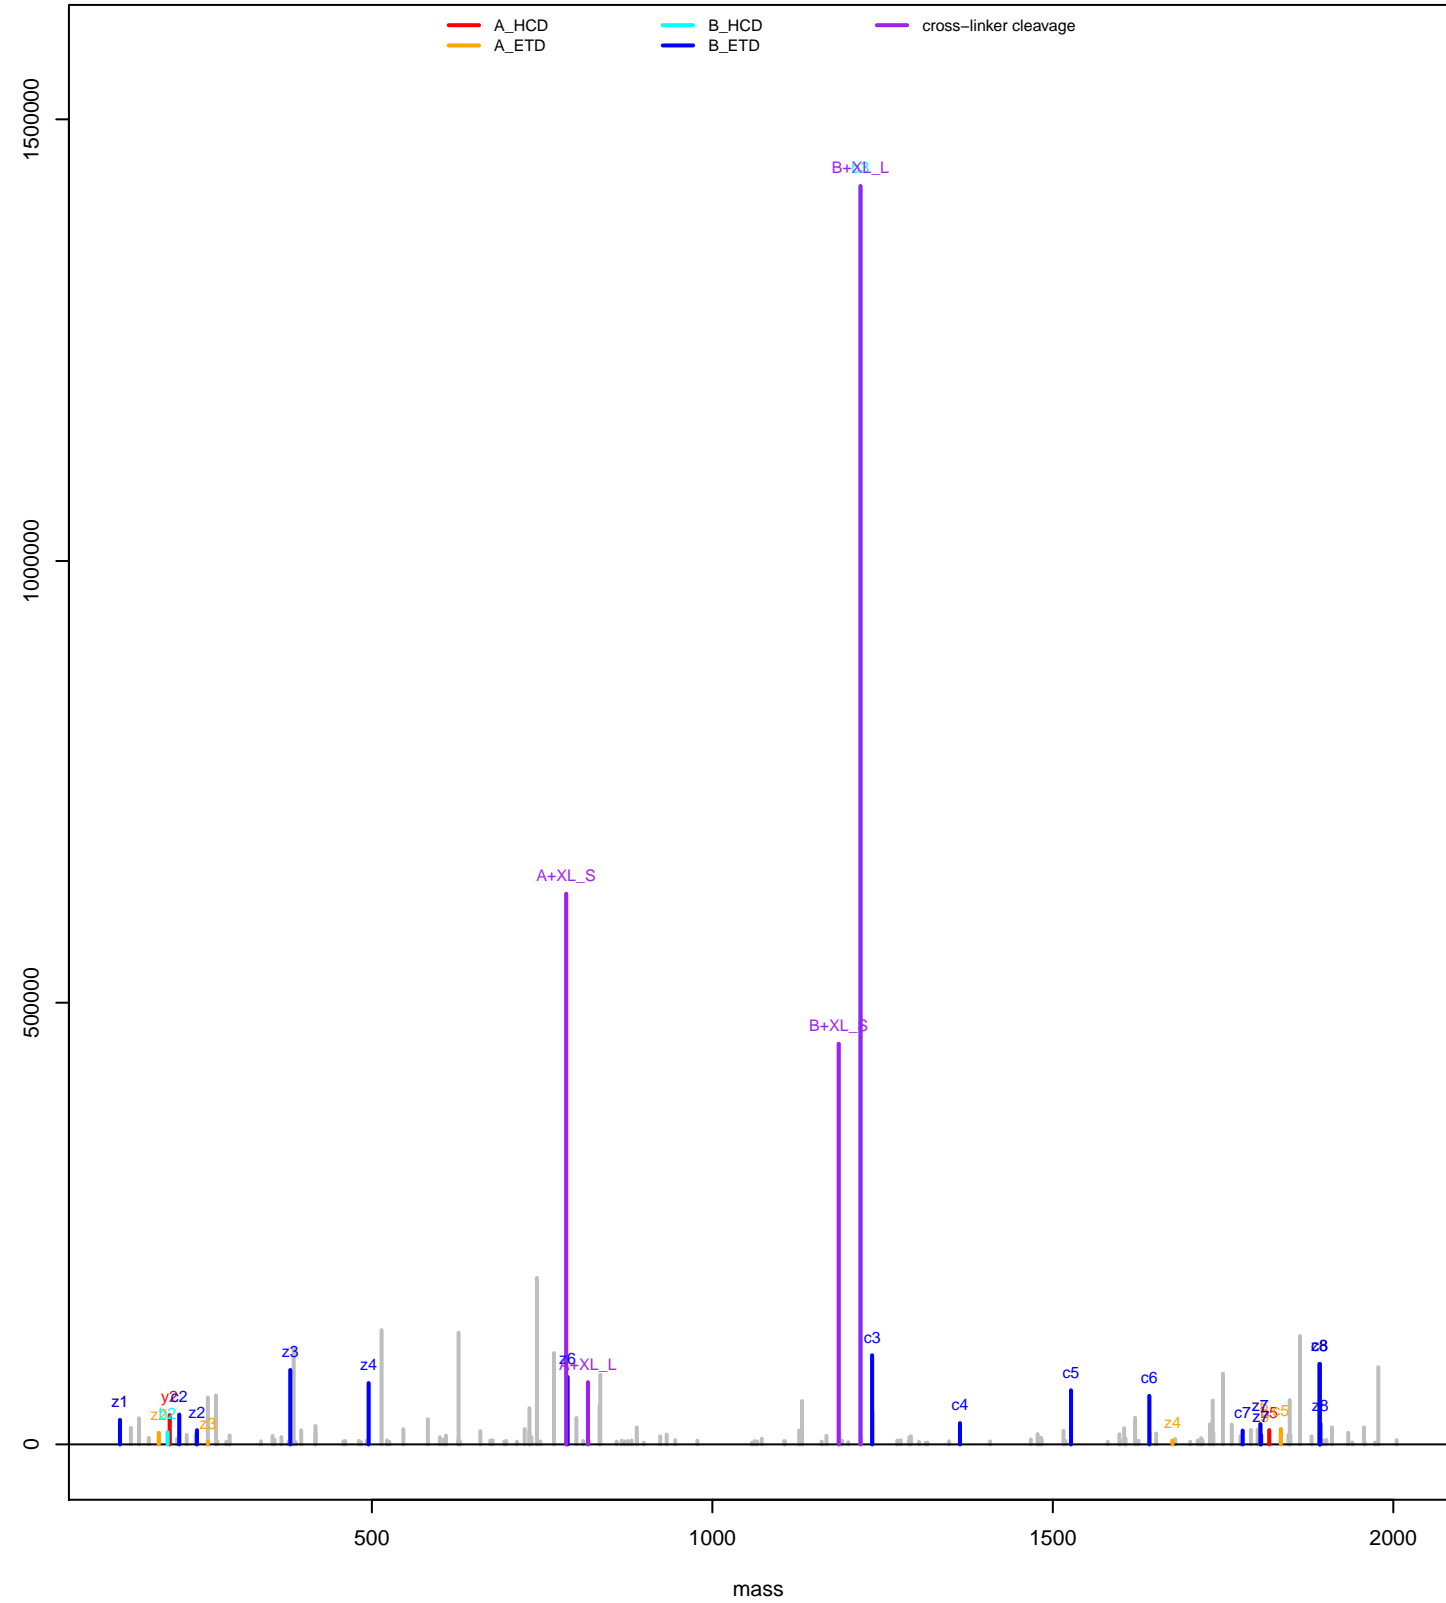

### EAEKAGK+XL\_S

### EAEKAGK+XL\_L

### LSKEYDHIK+XL\_S

### LSKEYDHIK+XL\_L

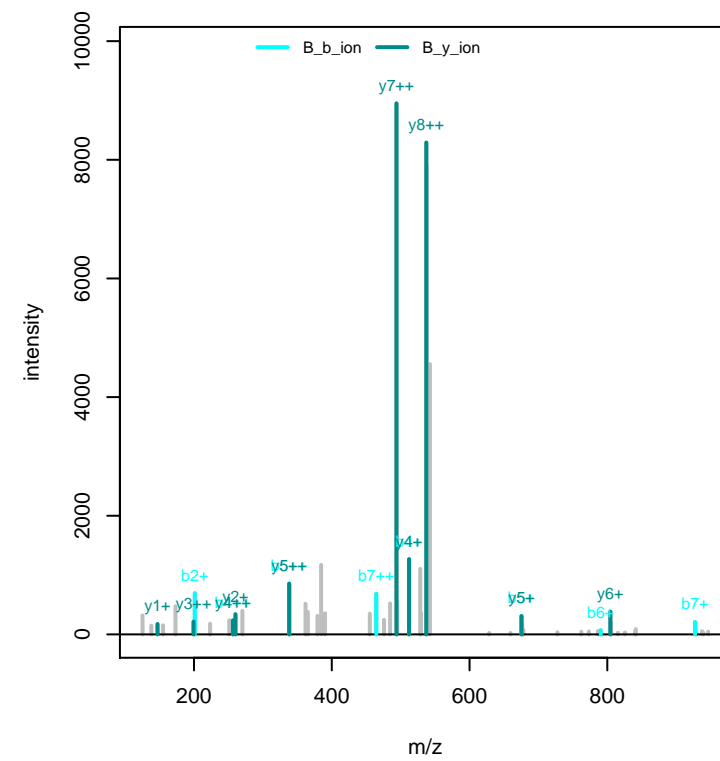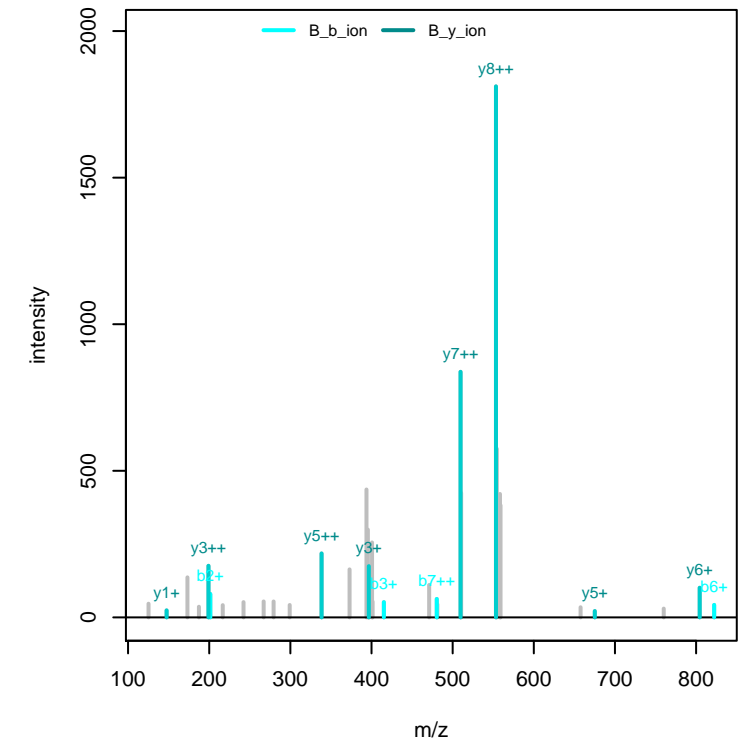

PATAADSKAAFK  
NDDQKSAYALGASLGR

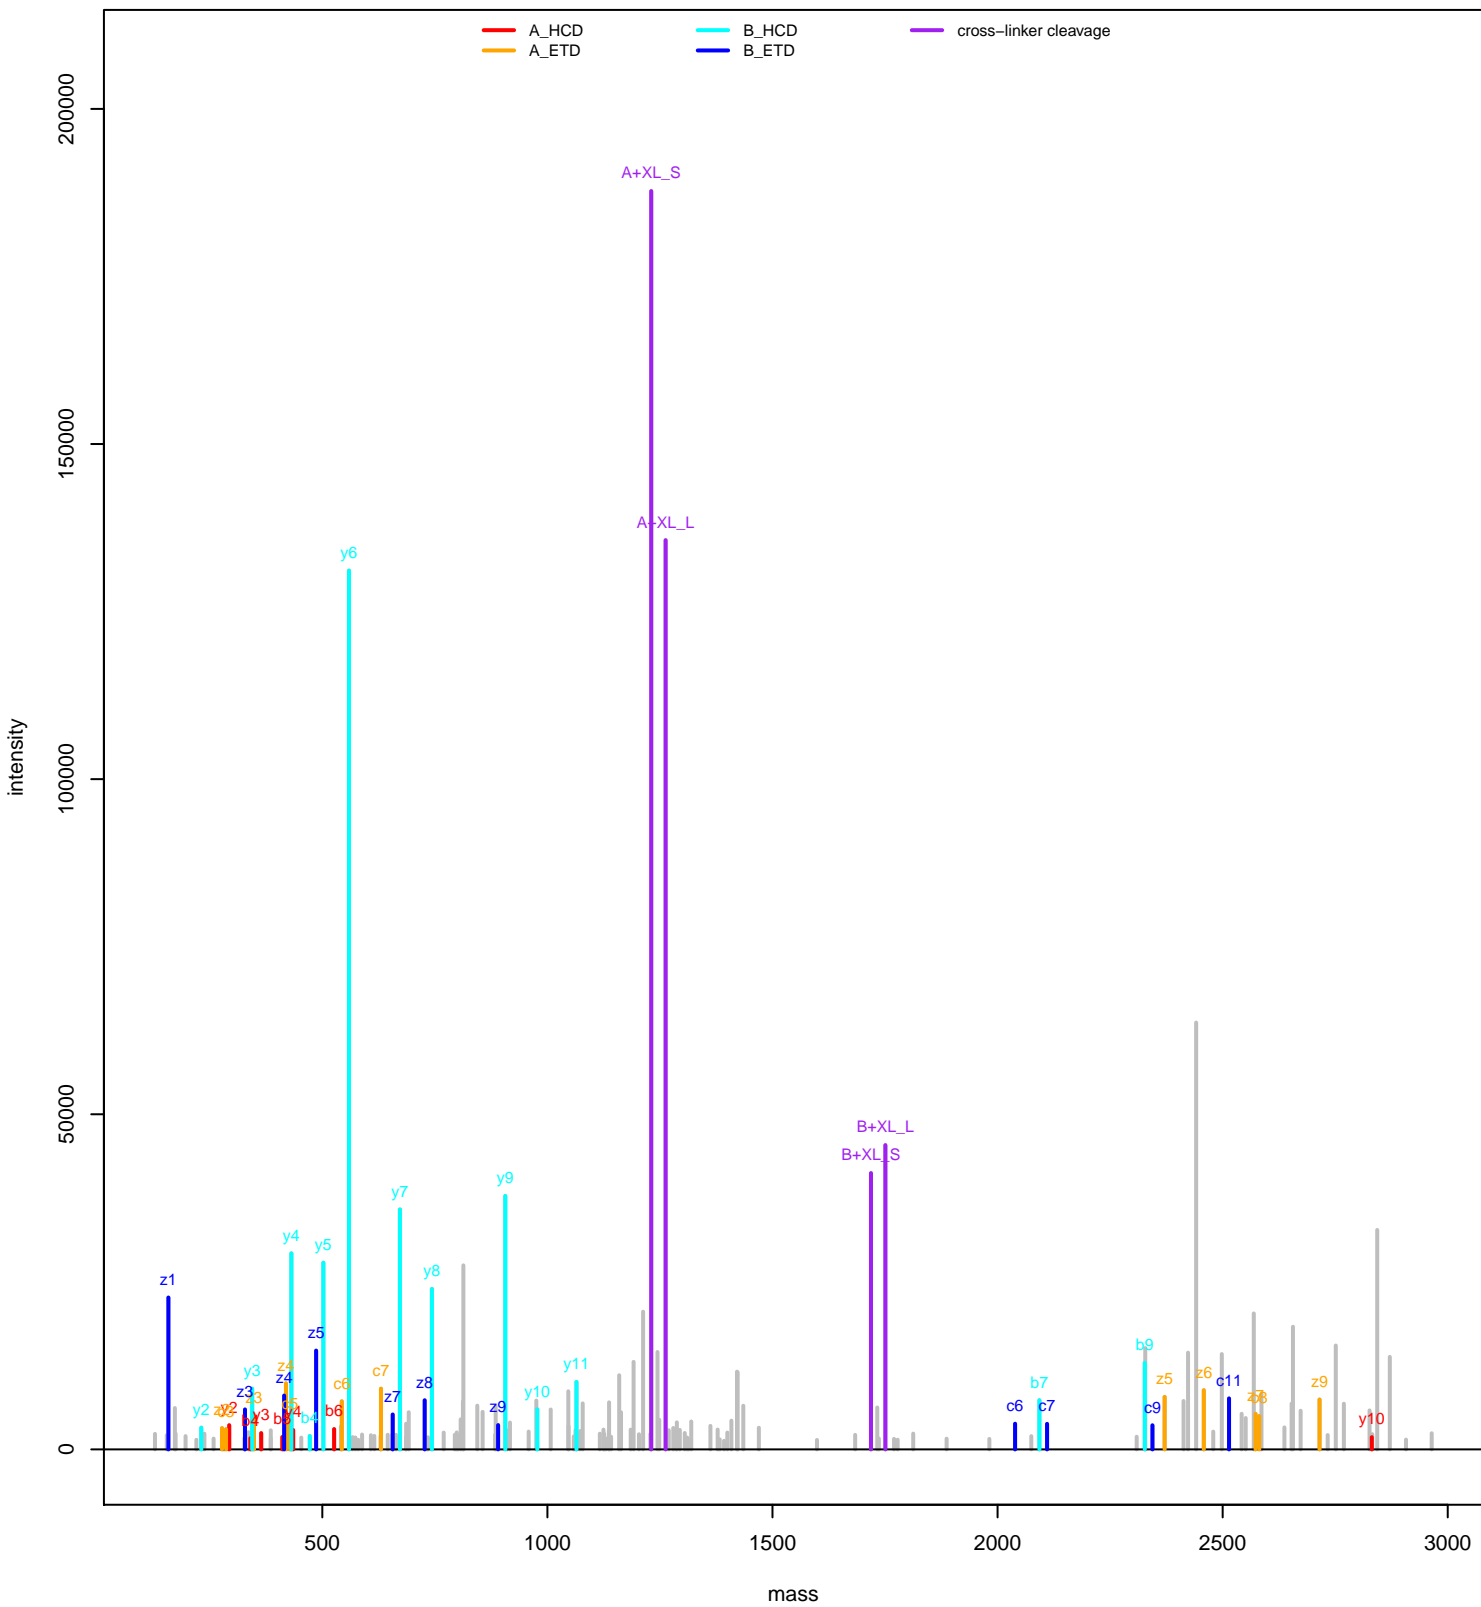

PATAADSKAAFK+XL\_S

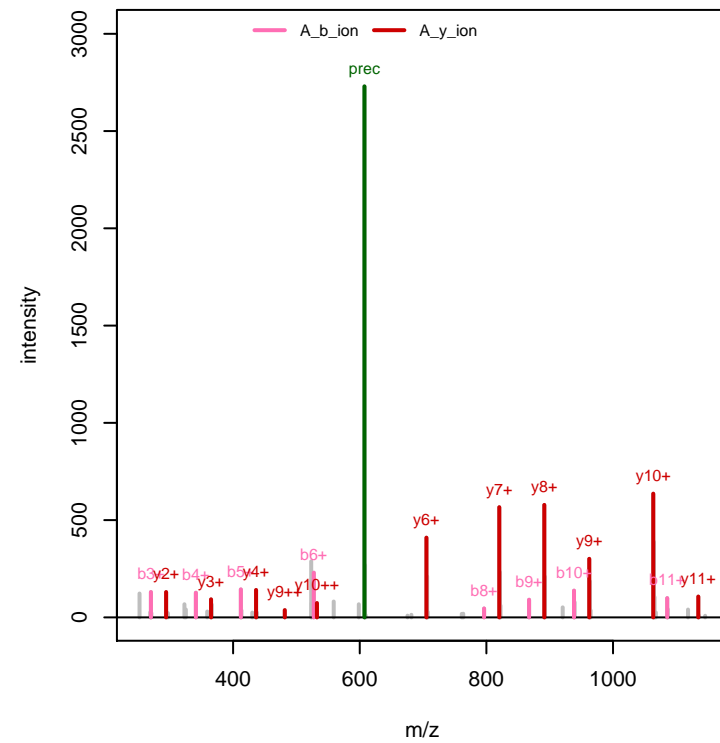

PATAADSKAAFK+XL\_L

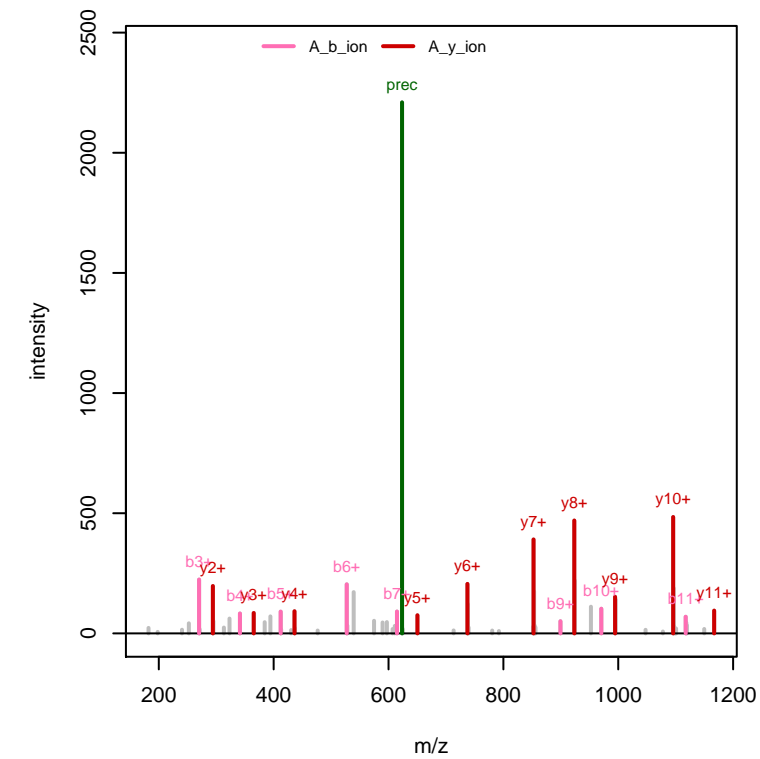

NDDQKSAYALGASLGR+XL\_S

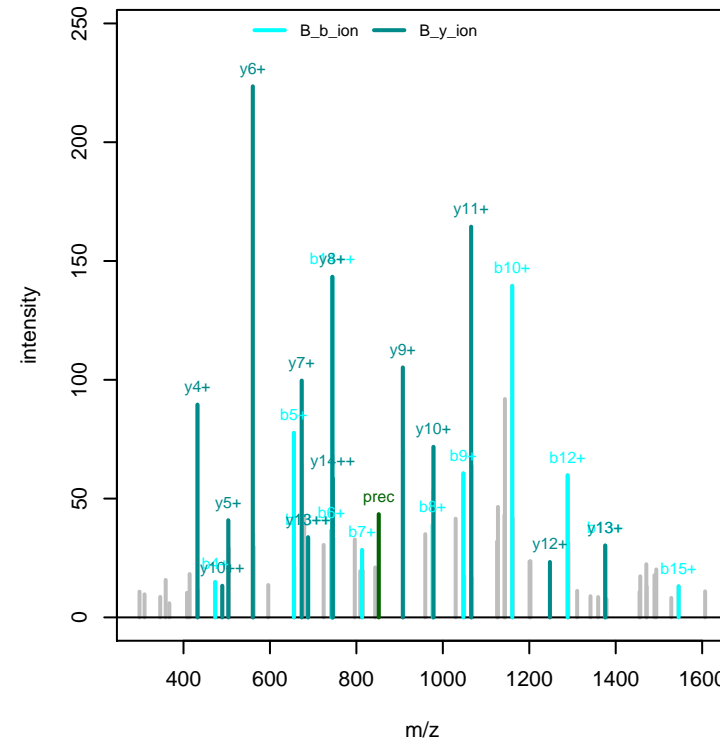

NDDQKSAYALGASLGR+XL\_L

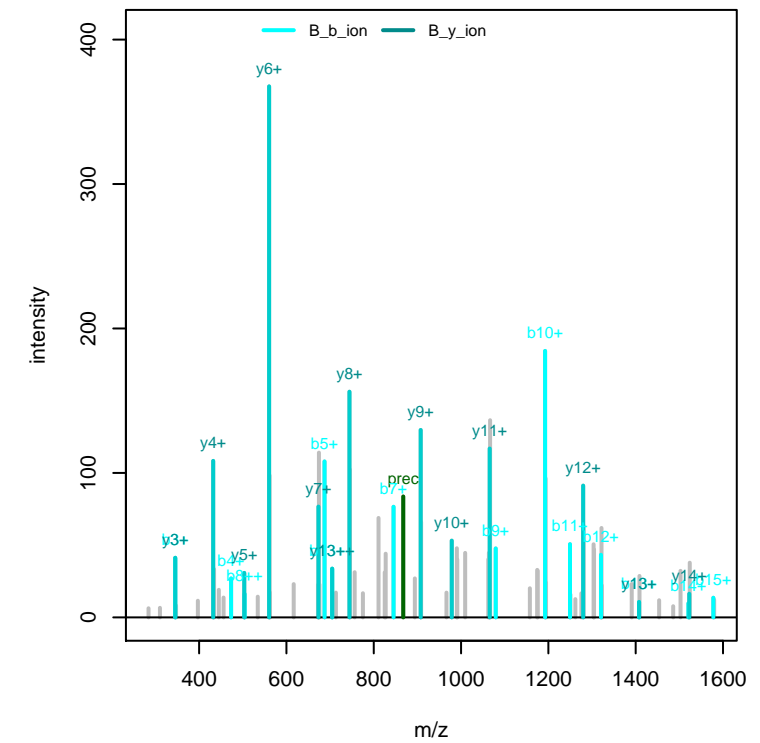



CGIVGAIQR  
TGAEVKRQDIESNLQYDAGDK

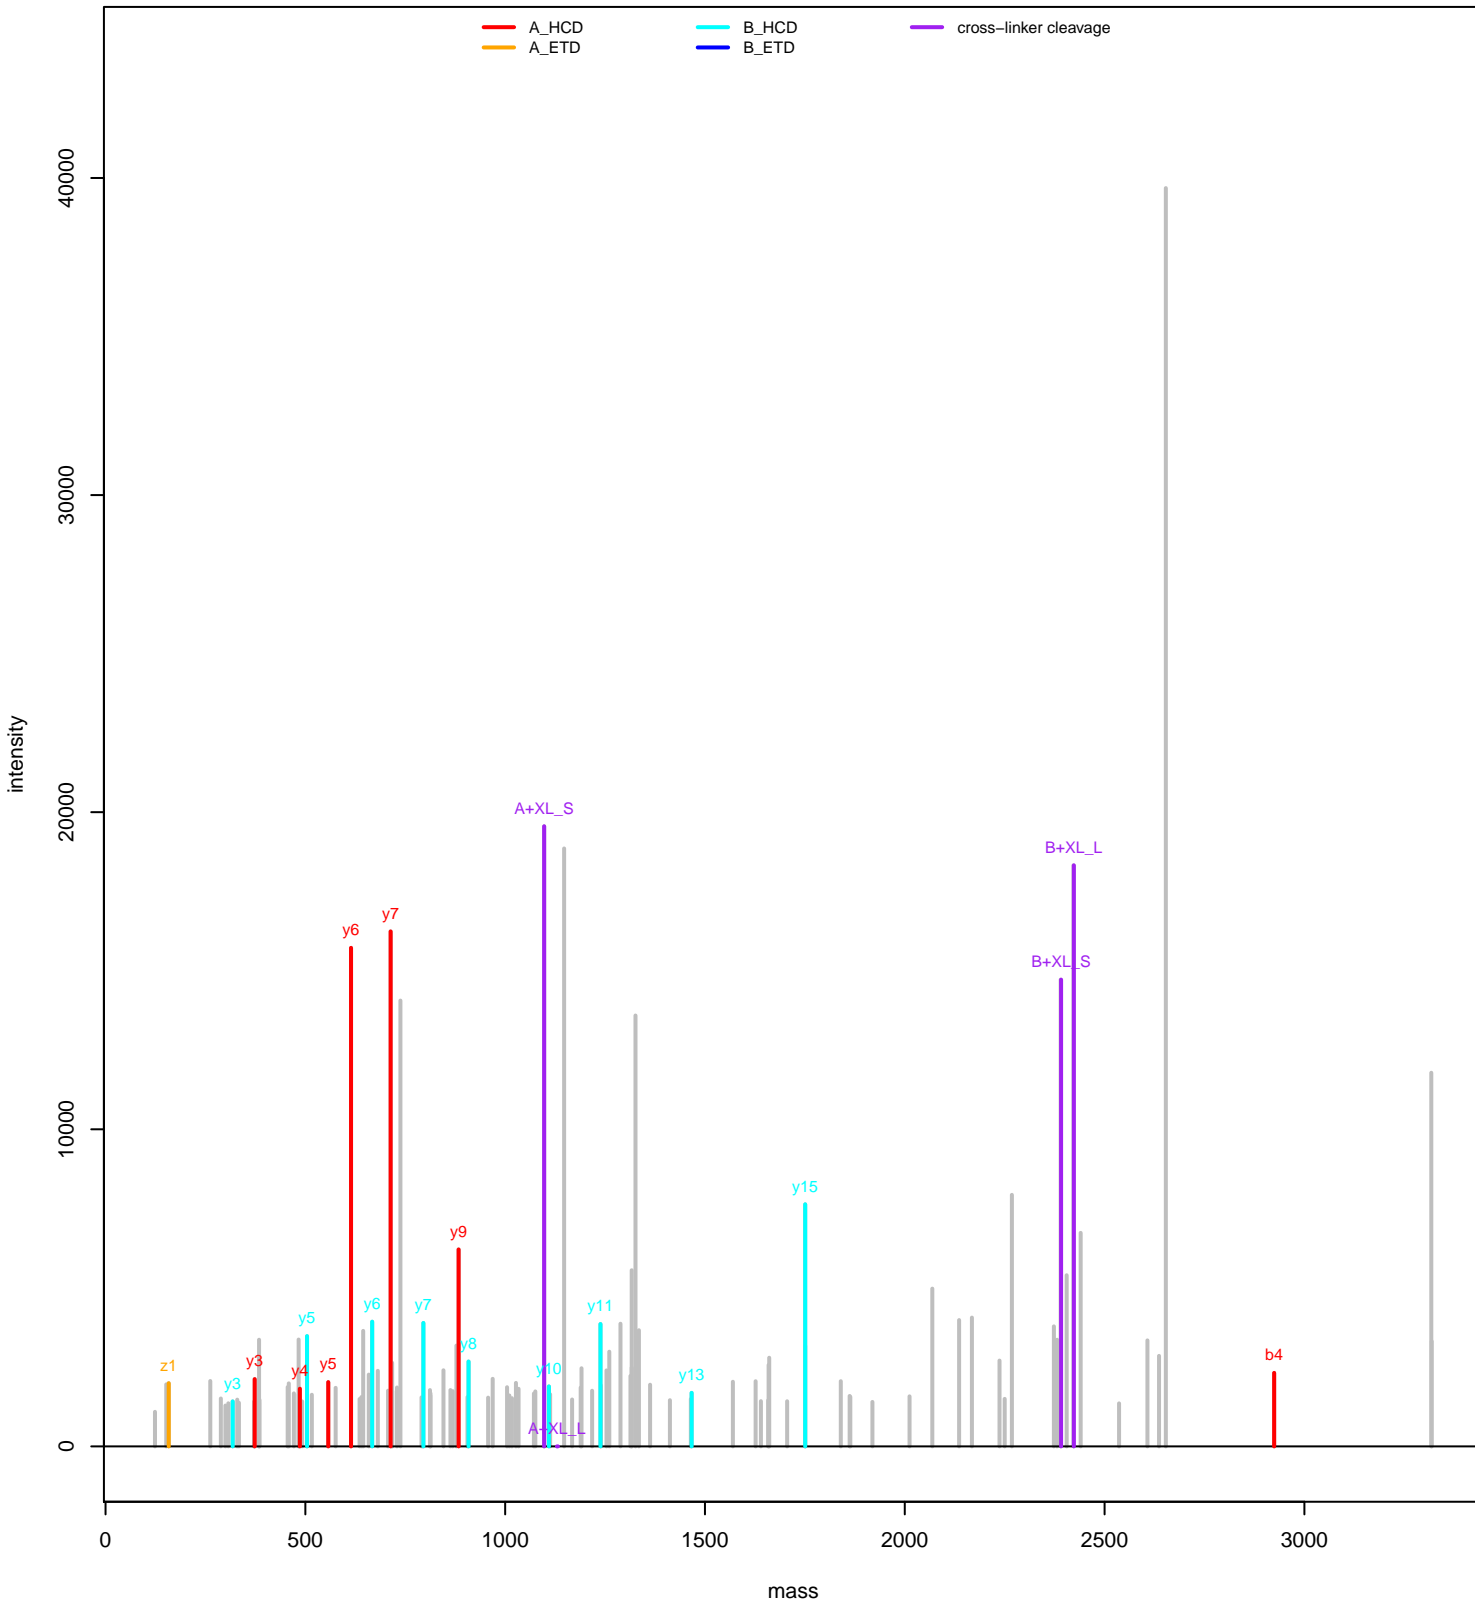

CGIVGAIQR+XL\_S

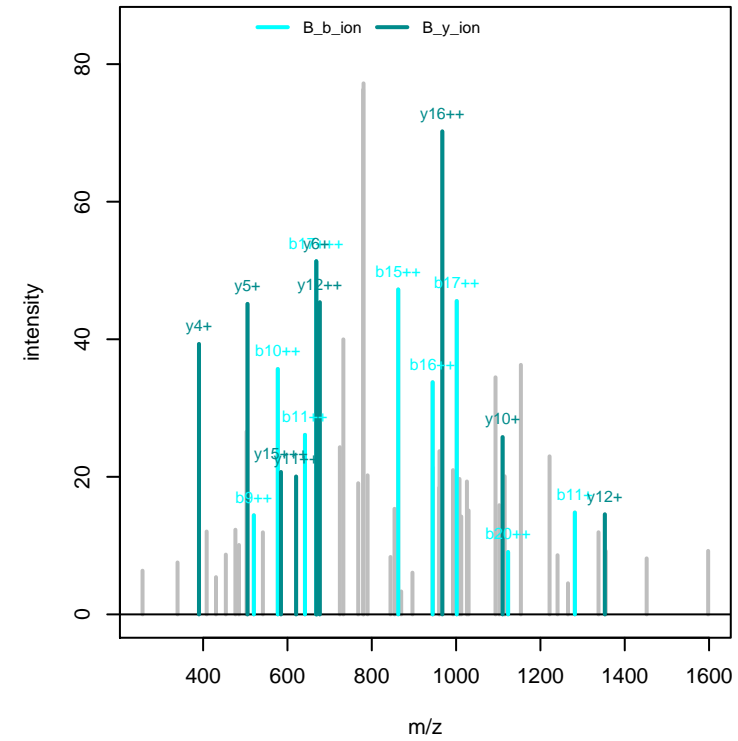

CGIVGAIQR+XL\_L

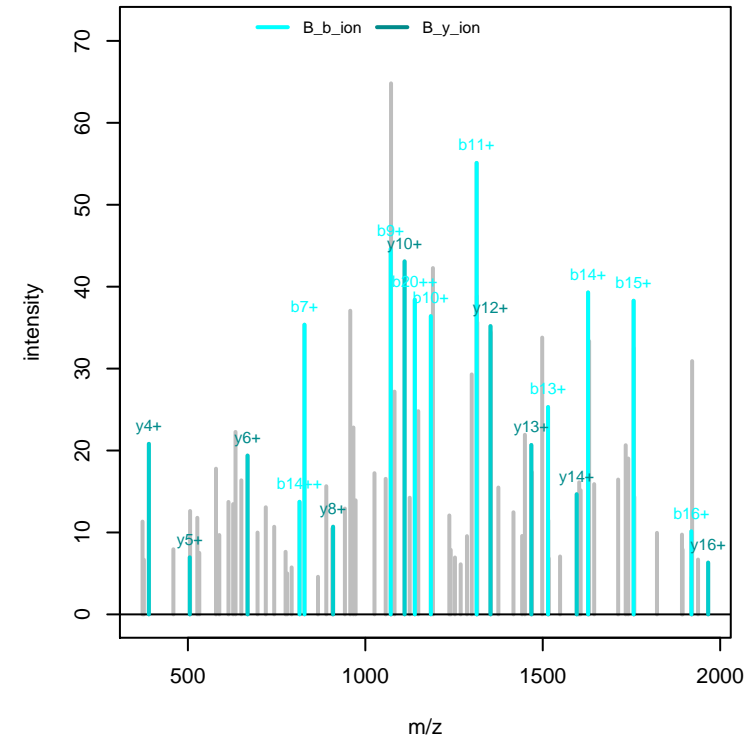

ELEKK  
LTLTKSTLYLPDTAK

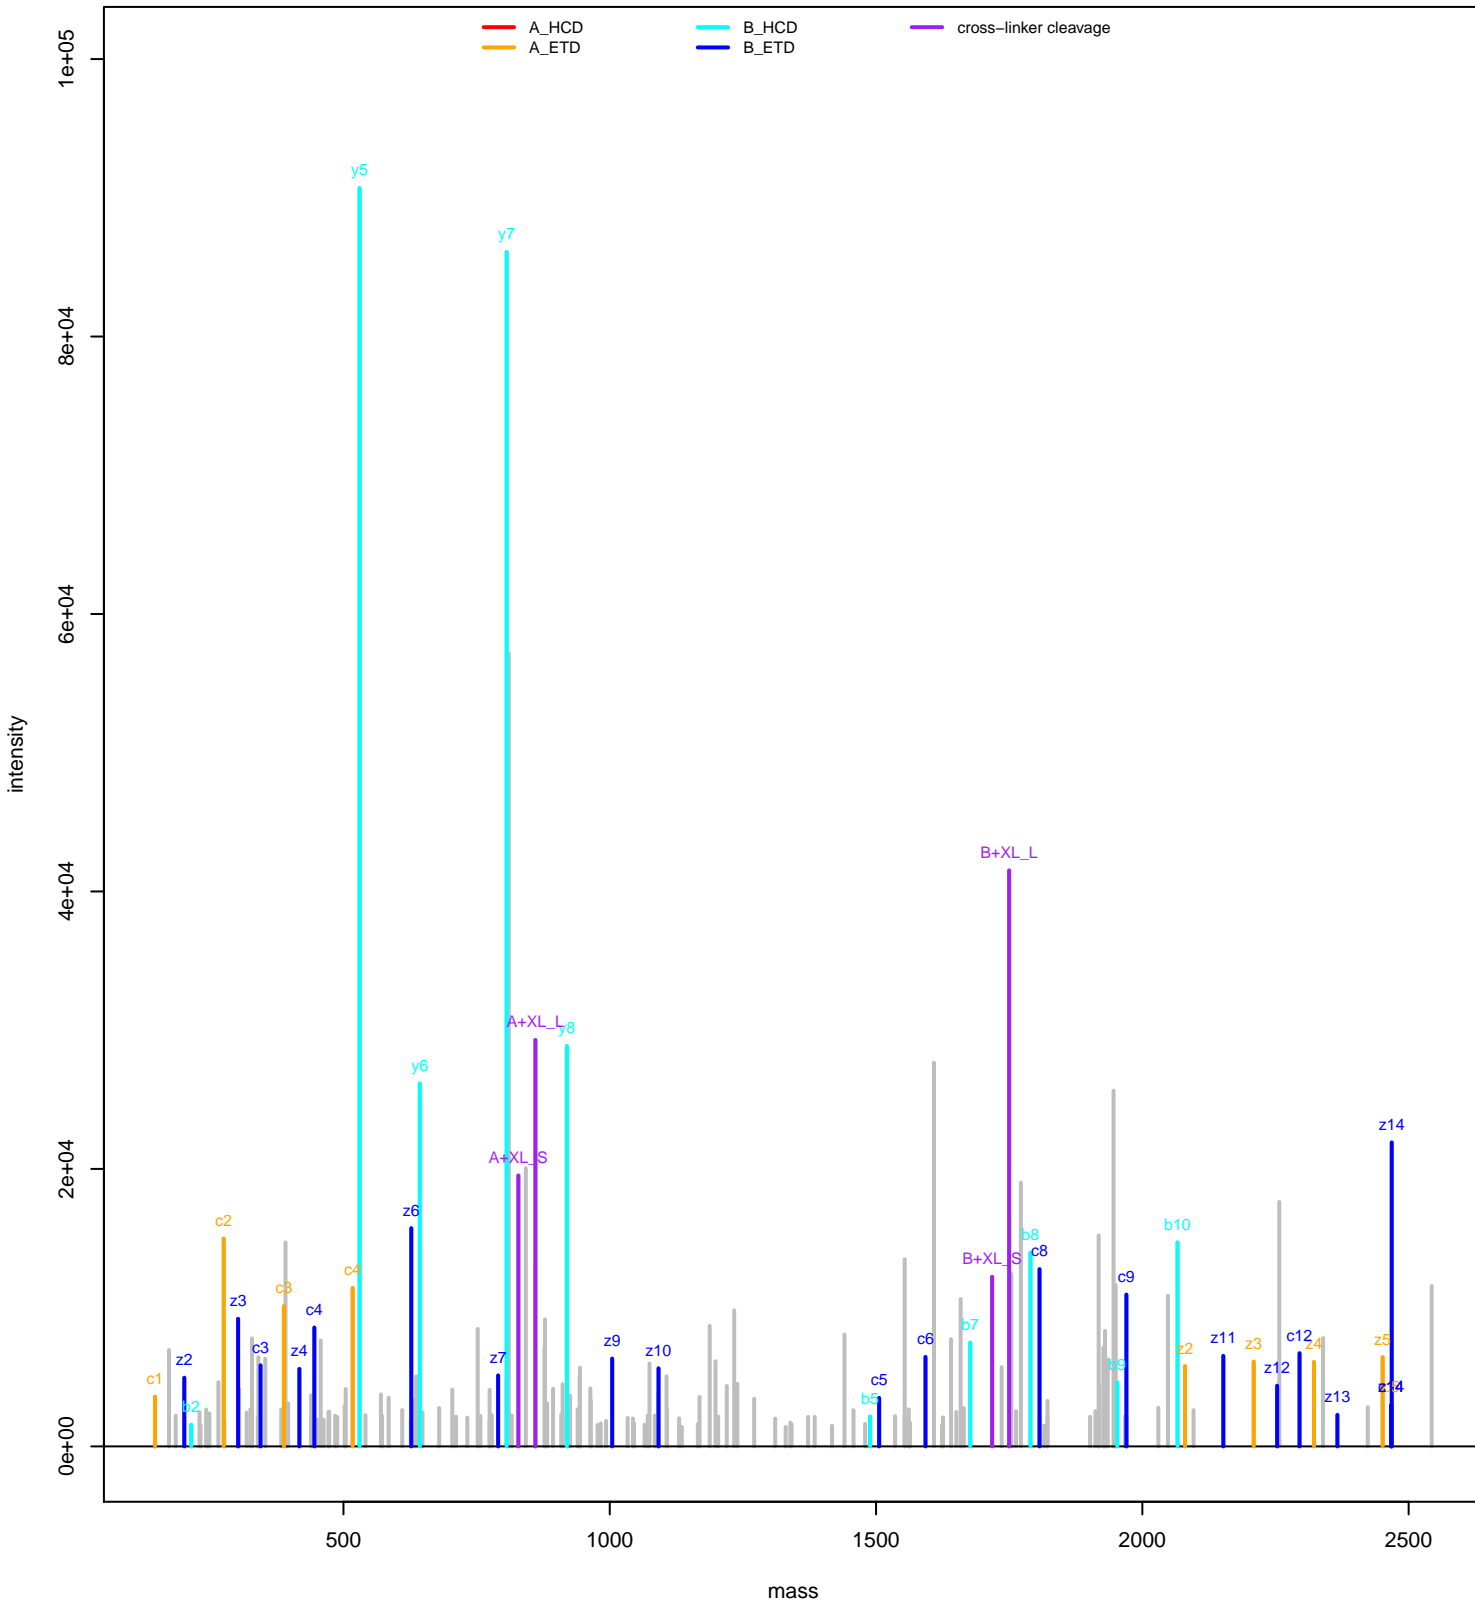

EELEKK+XL\_S

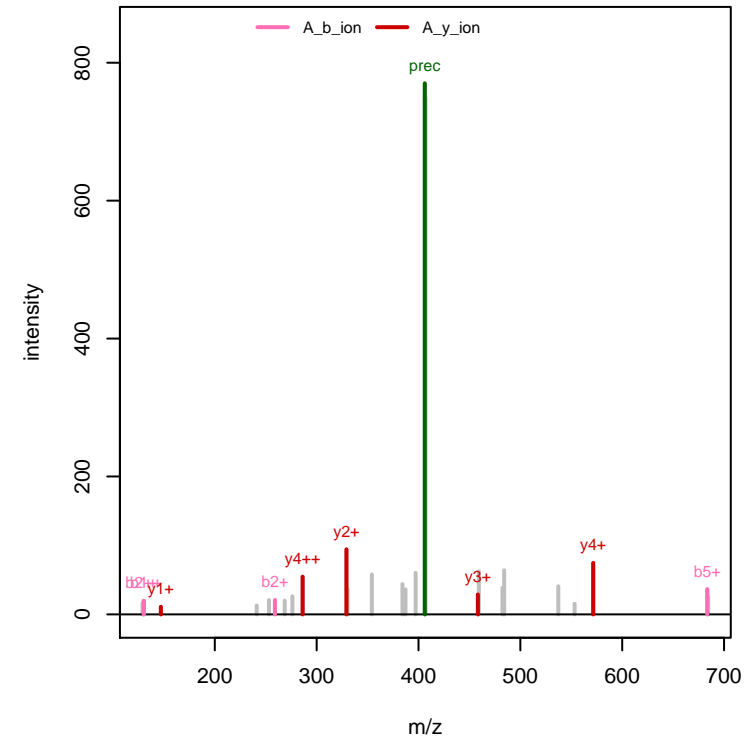

EELEKK+XL\_L

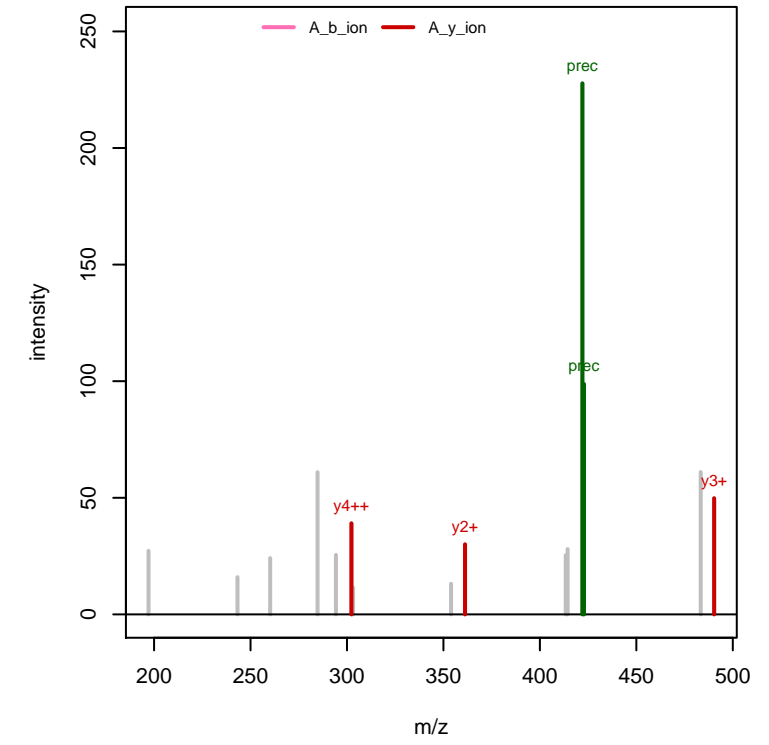

LTLTKSTLYLPDTAK+XL\_S

LTLTKSTLYLPDTAK+XL\_L

DVIGKGGSVIR  
DVIGKGGSVIR

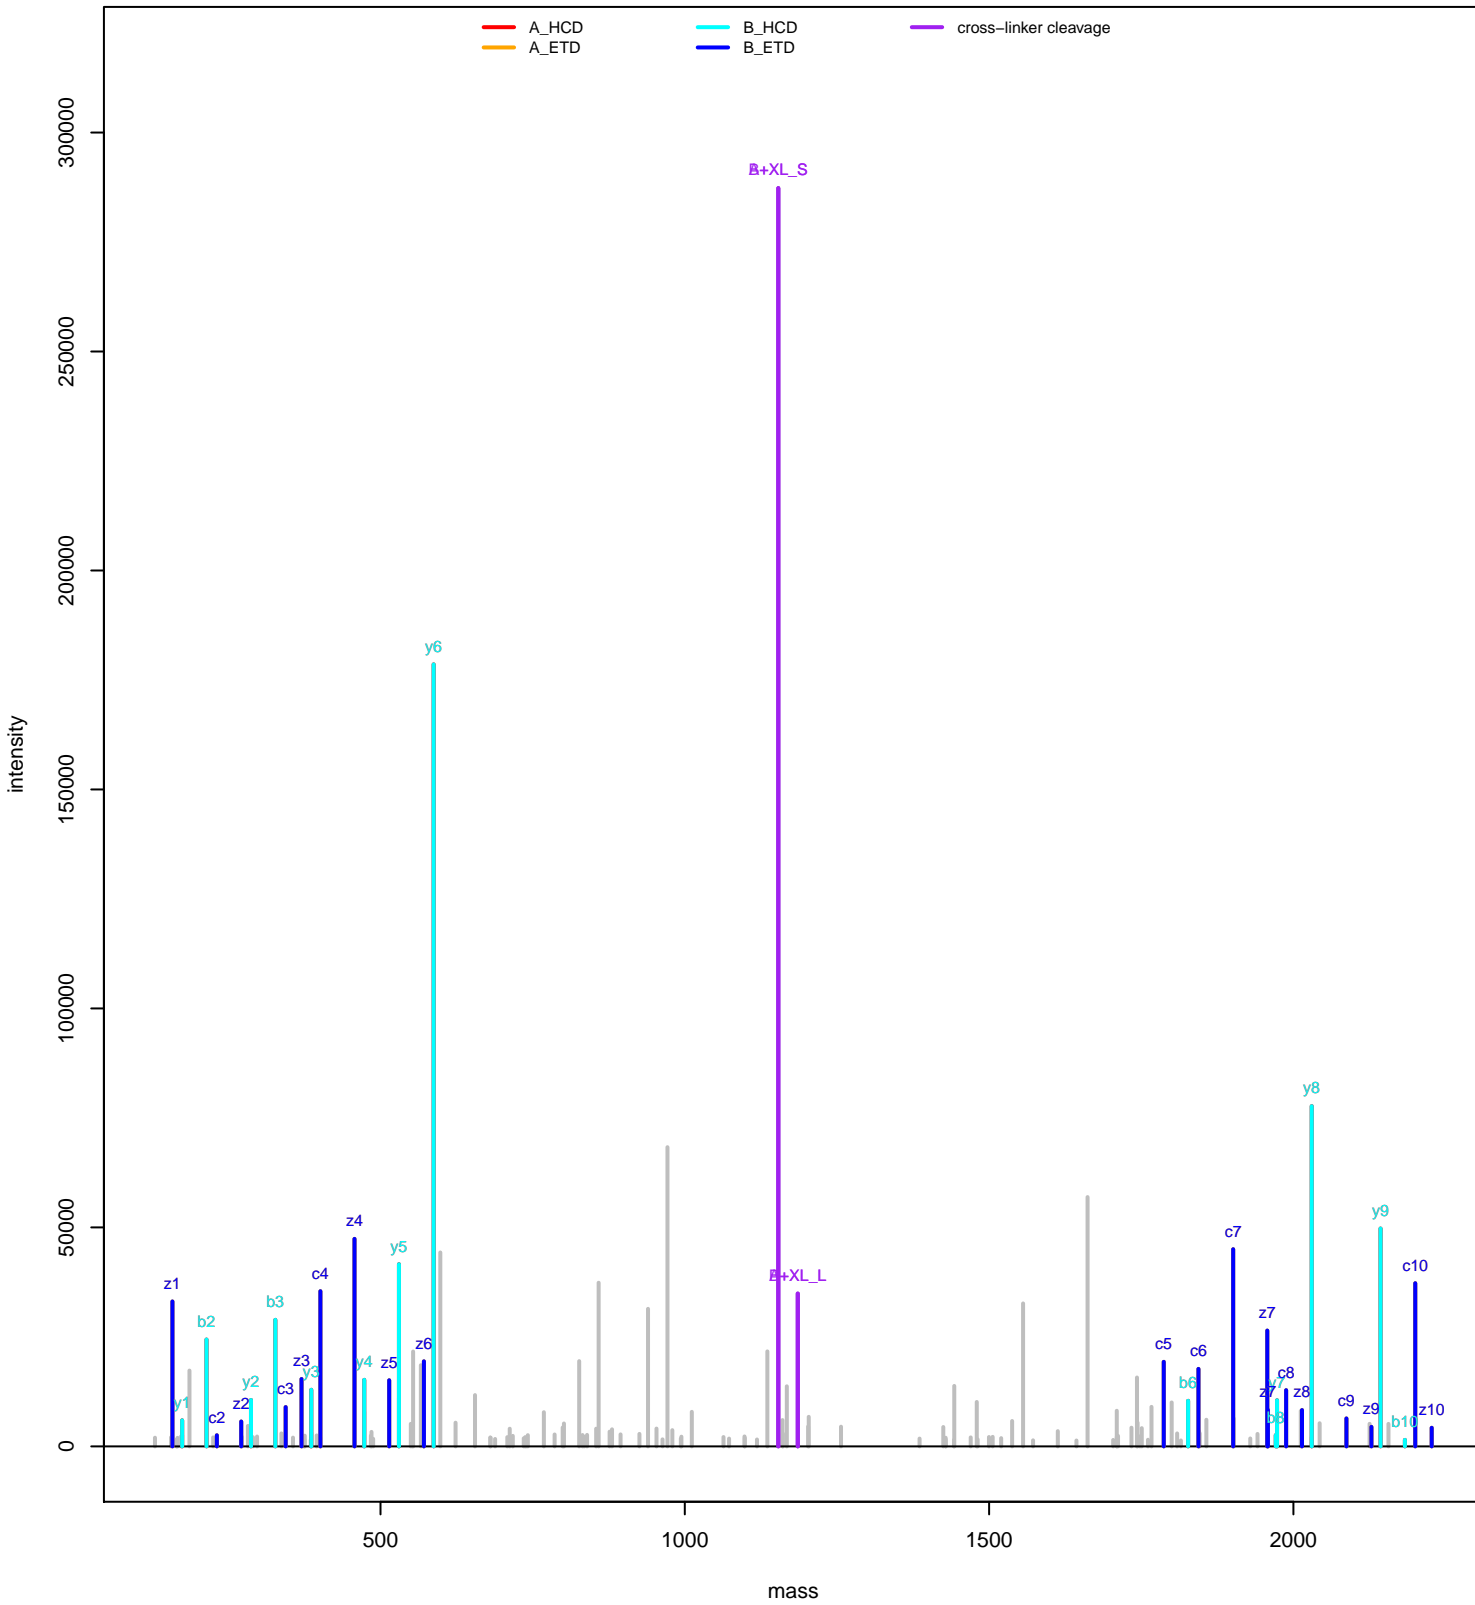

DVIGKGGSVIR+XL\_S

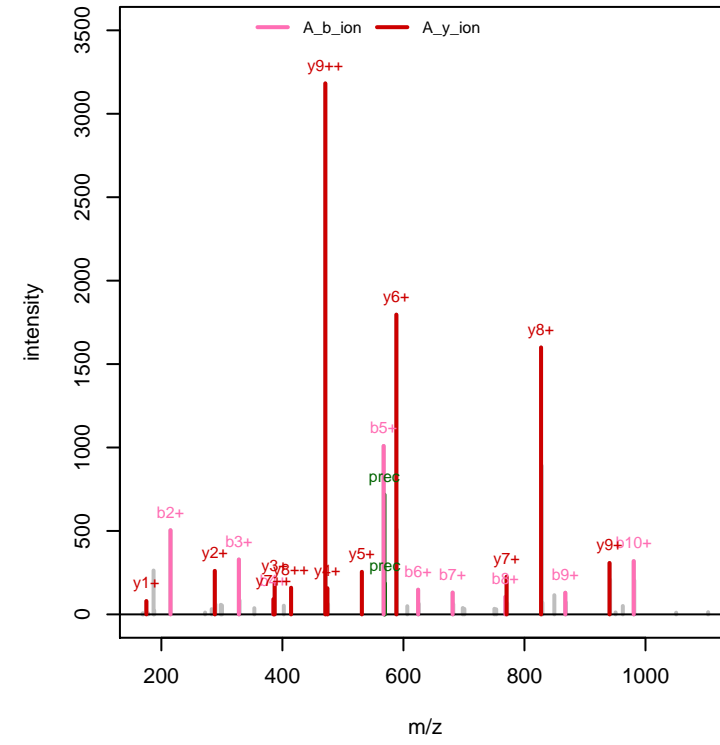

DVIGKGGSVIR+XL\_L

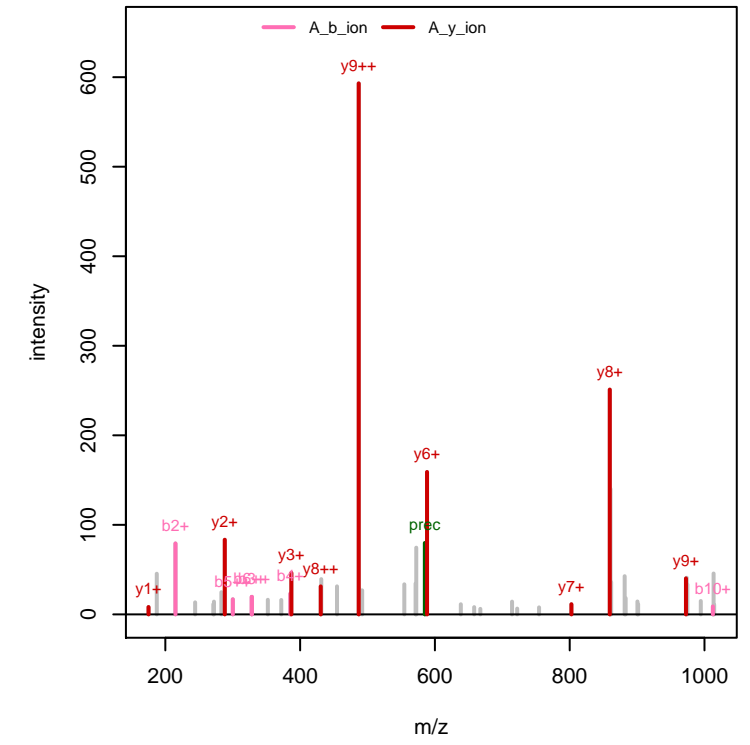

DVIGKGGSVIR+XL\_S

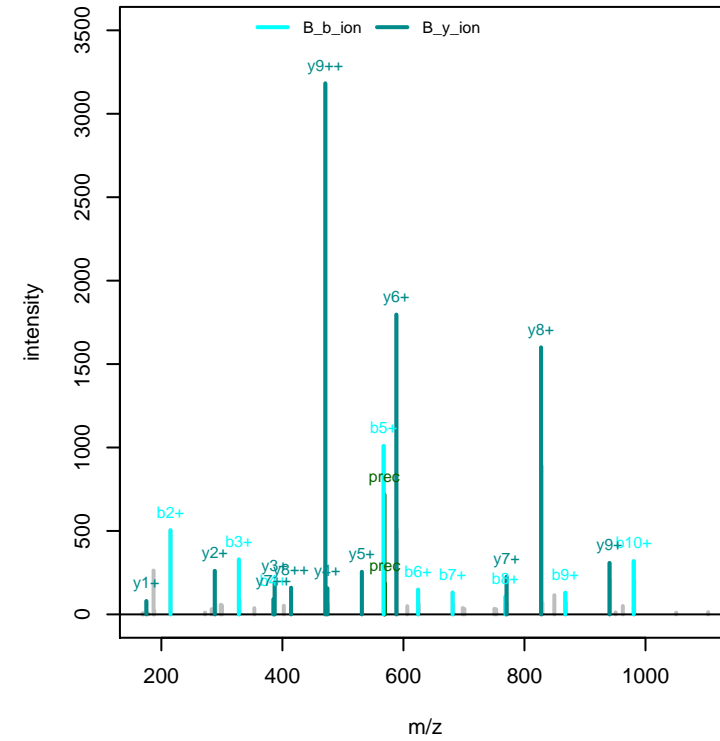

DVIGKGGSVIR+XL\_L

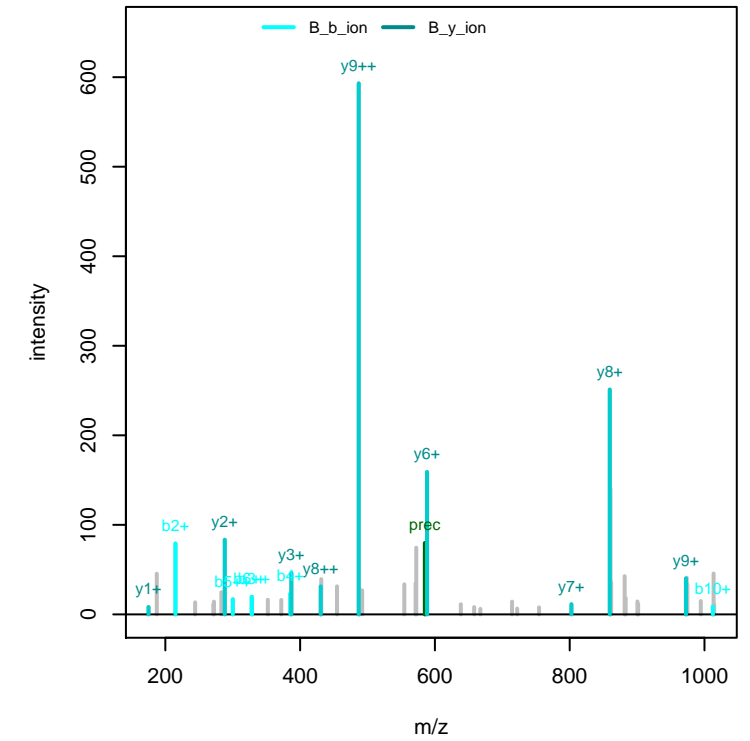

**SNSPQEERYEKK**  
**ETGIASVKANGTSQTVK**

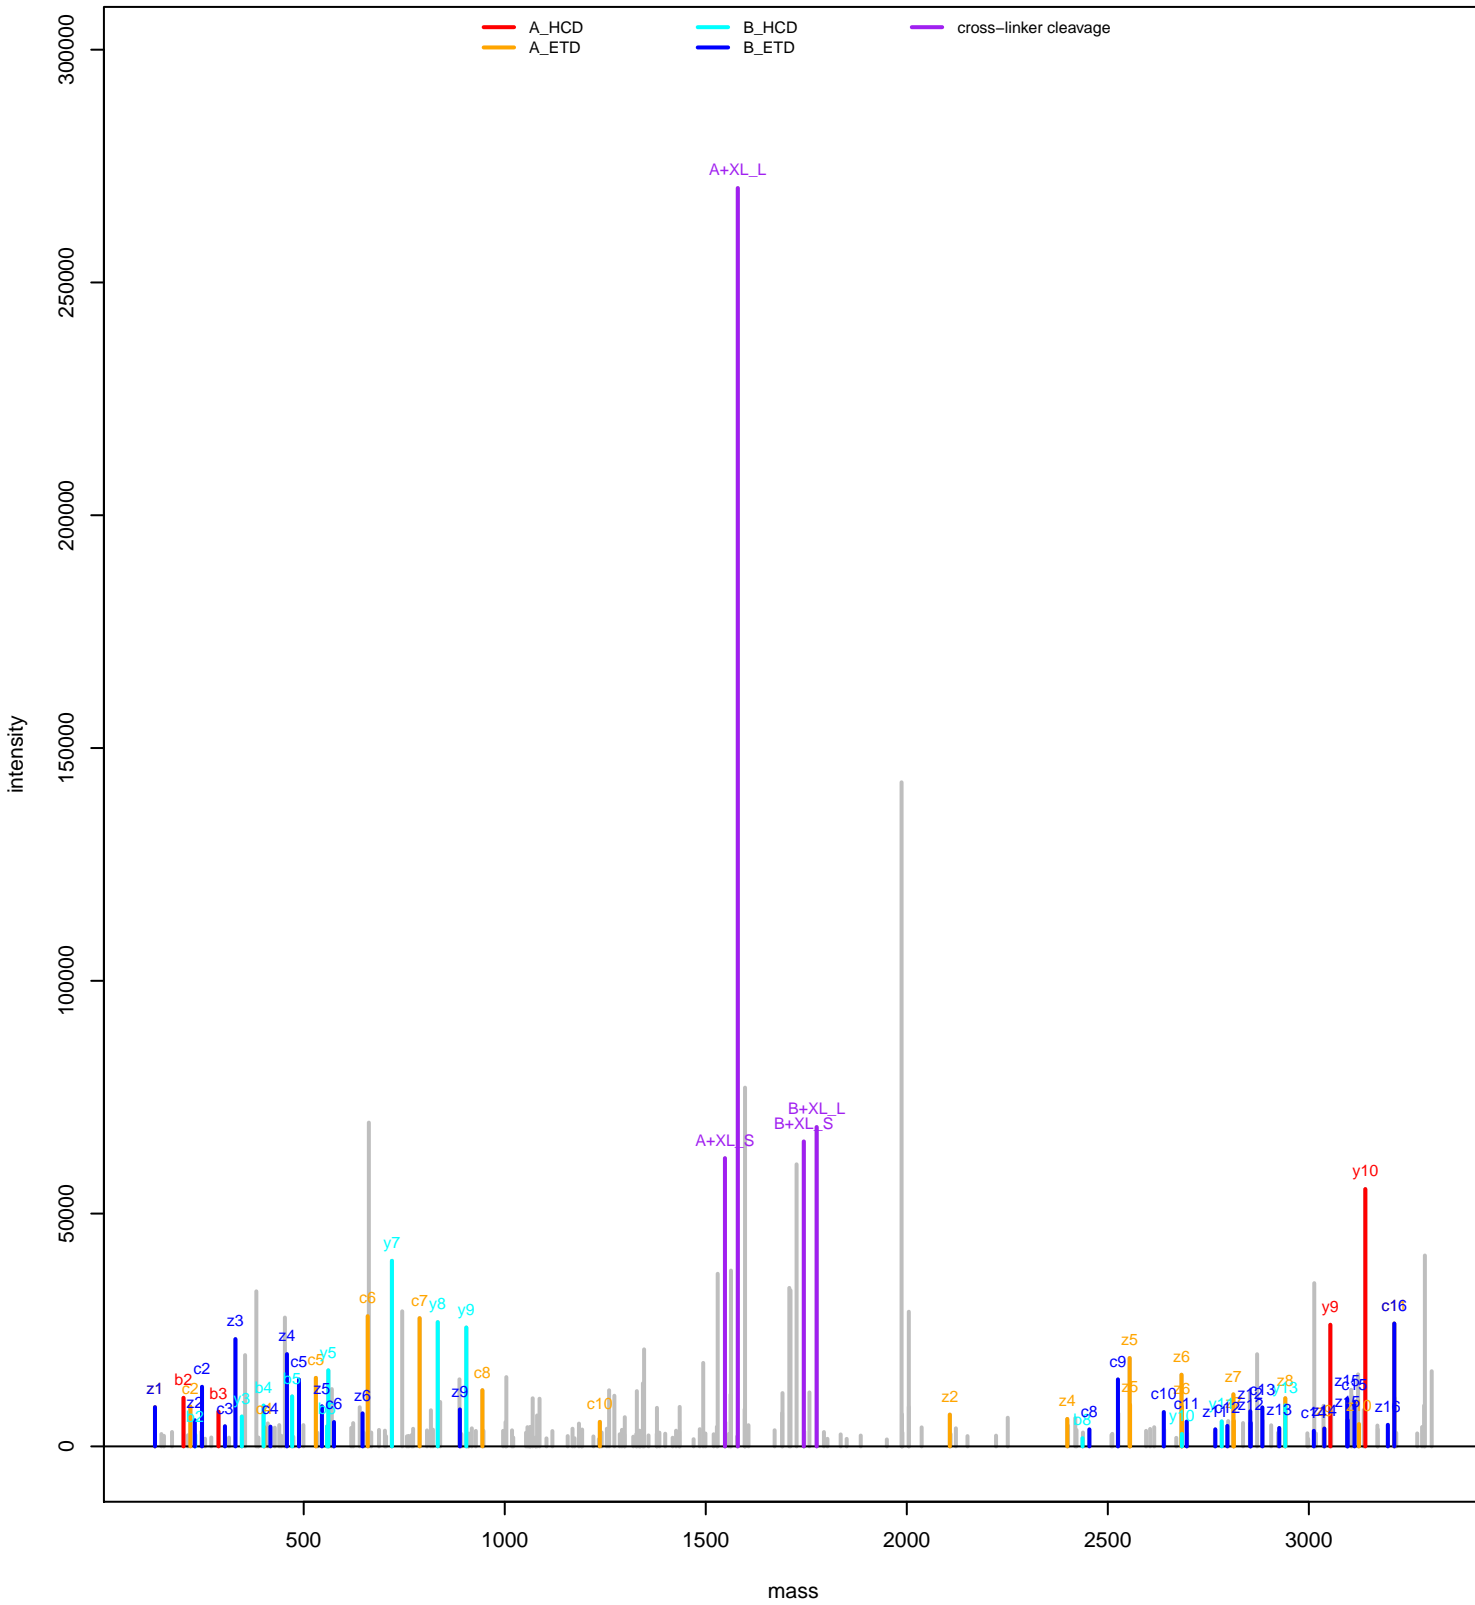

**SNSPQEERYEKK+XL\_S**

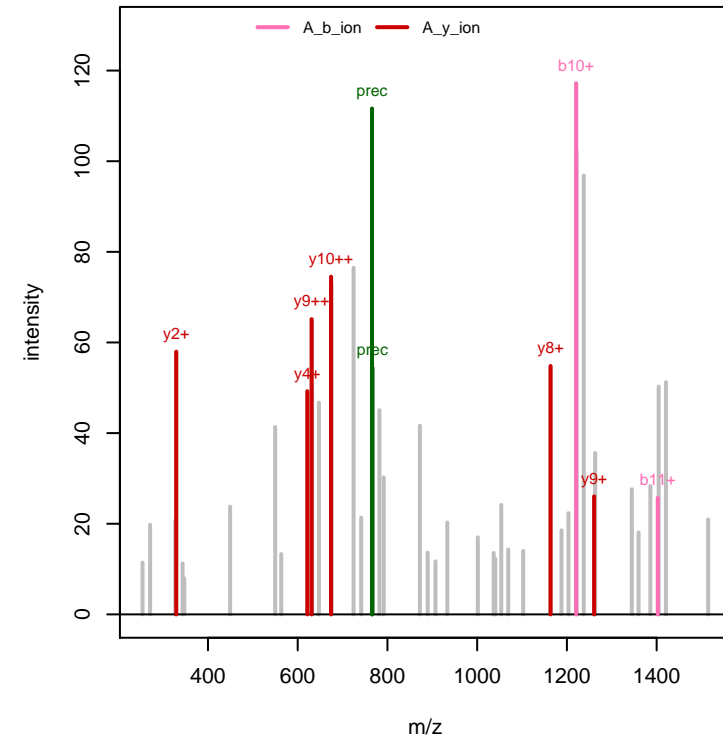

**SNSPQEERYEKK+XL\_L**

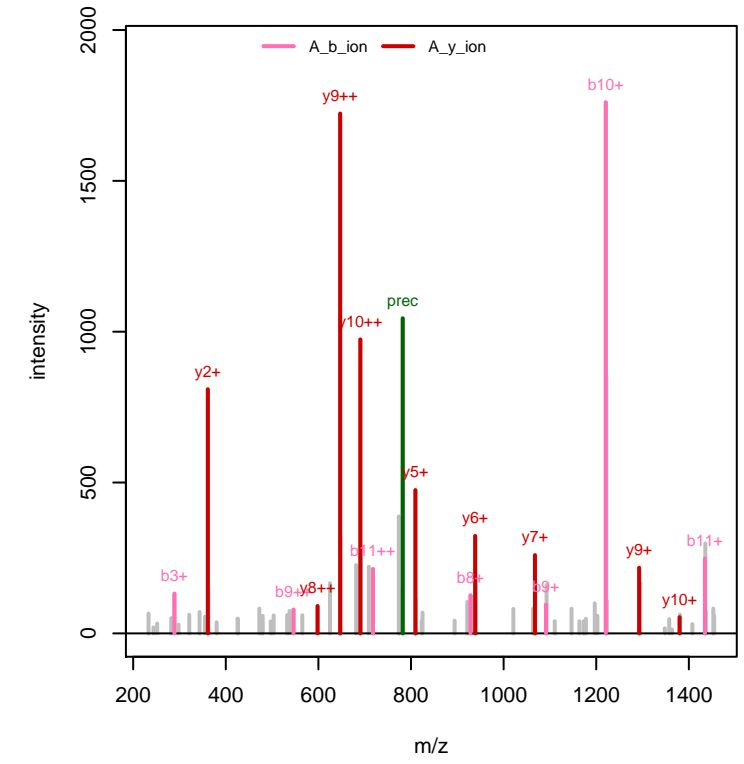

**ETGIASVKANGTSQTVK+XL\_S**

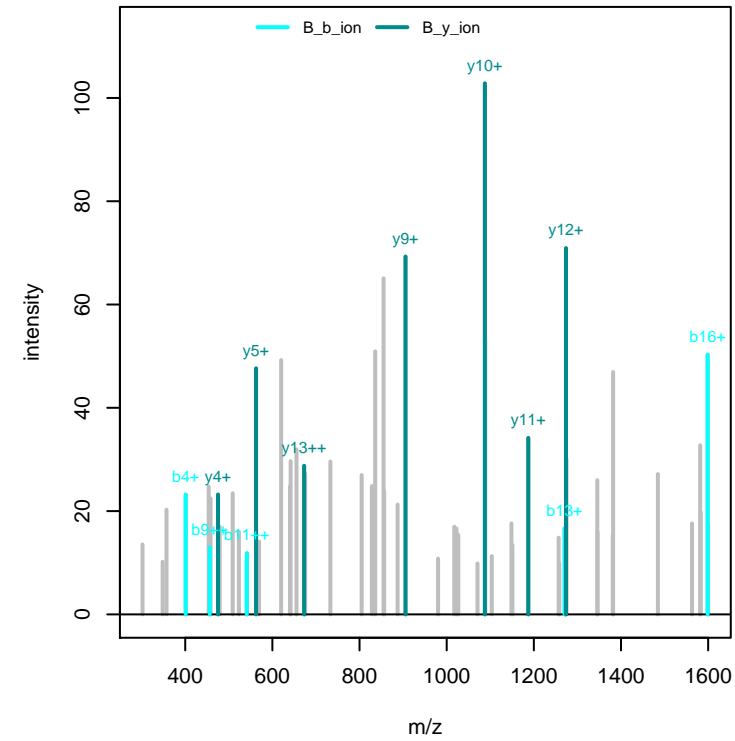

**ETGIASVKANGTSQTVK+XL\_L**

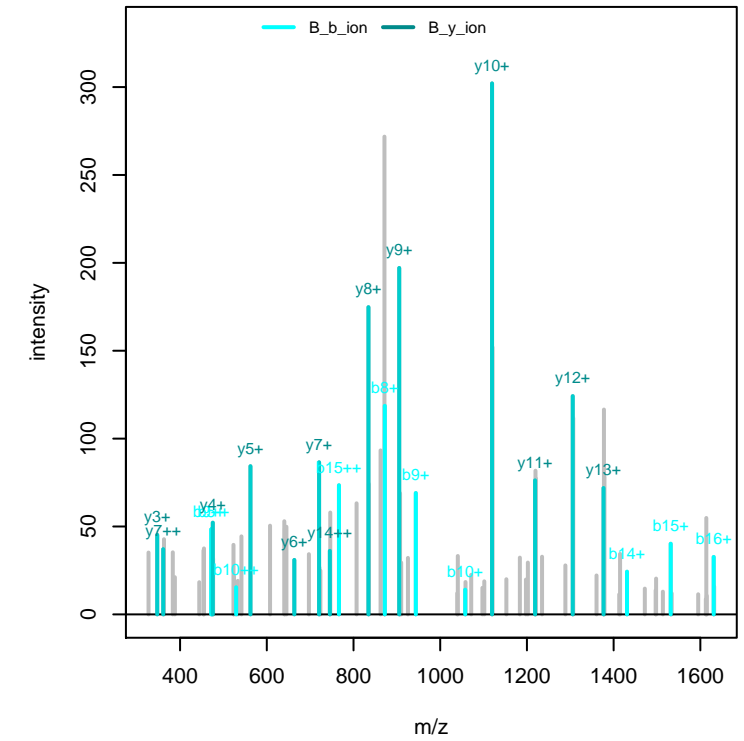

VIVAPKR  
VAVTPVPNVMVYTSQK

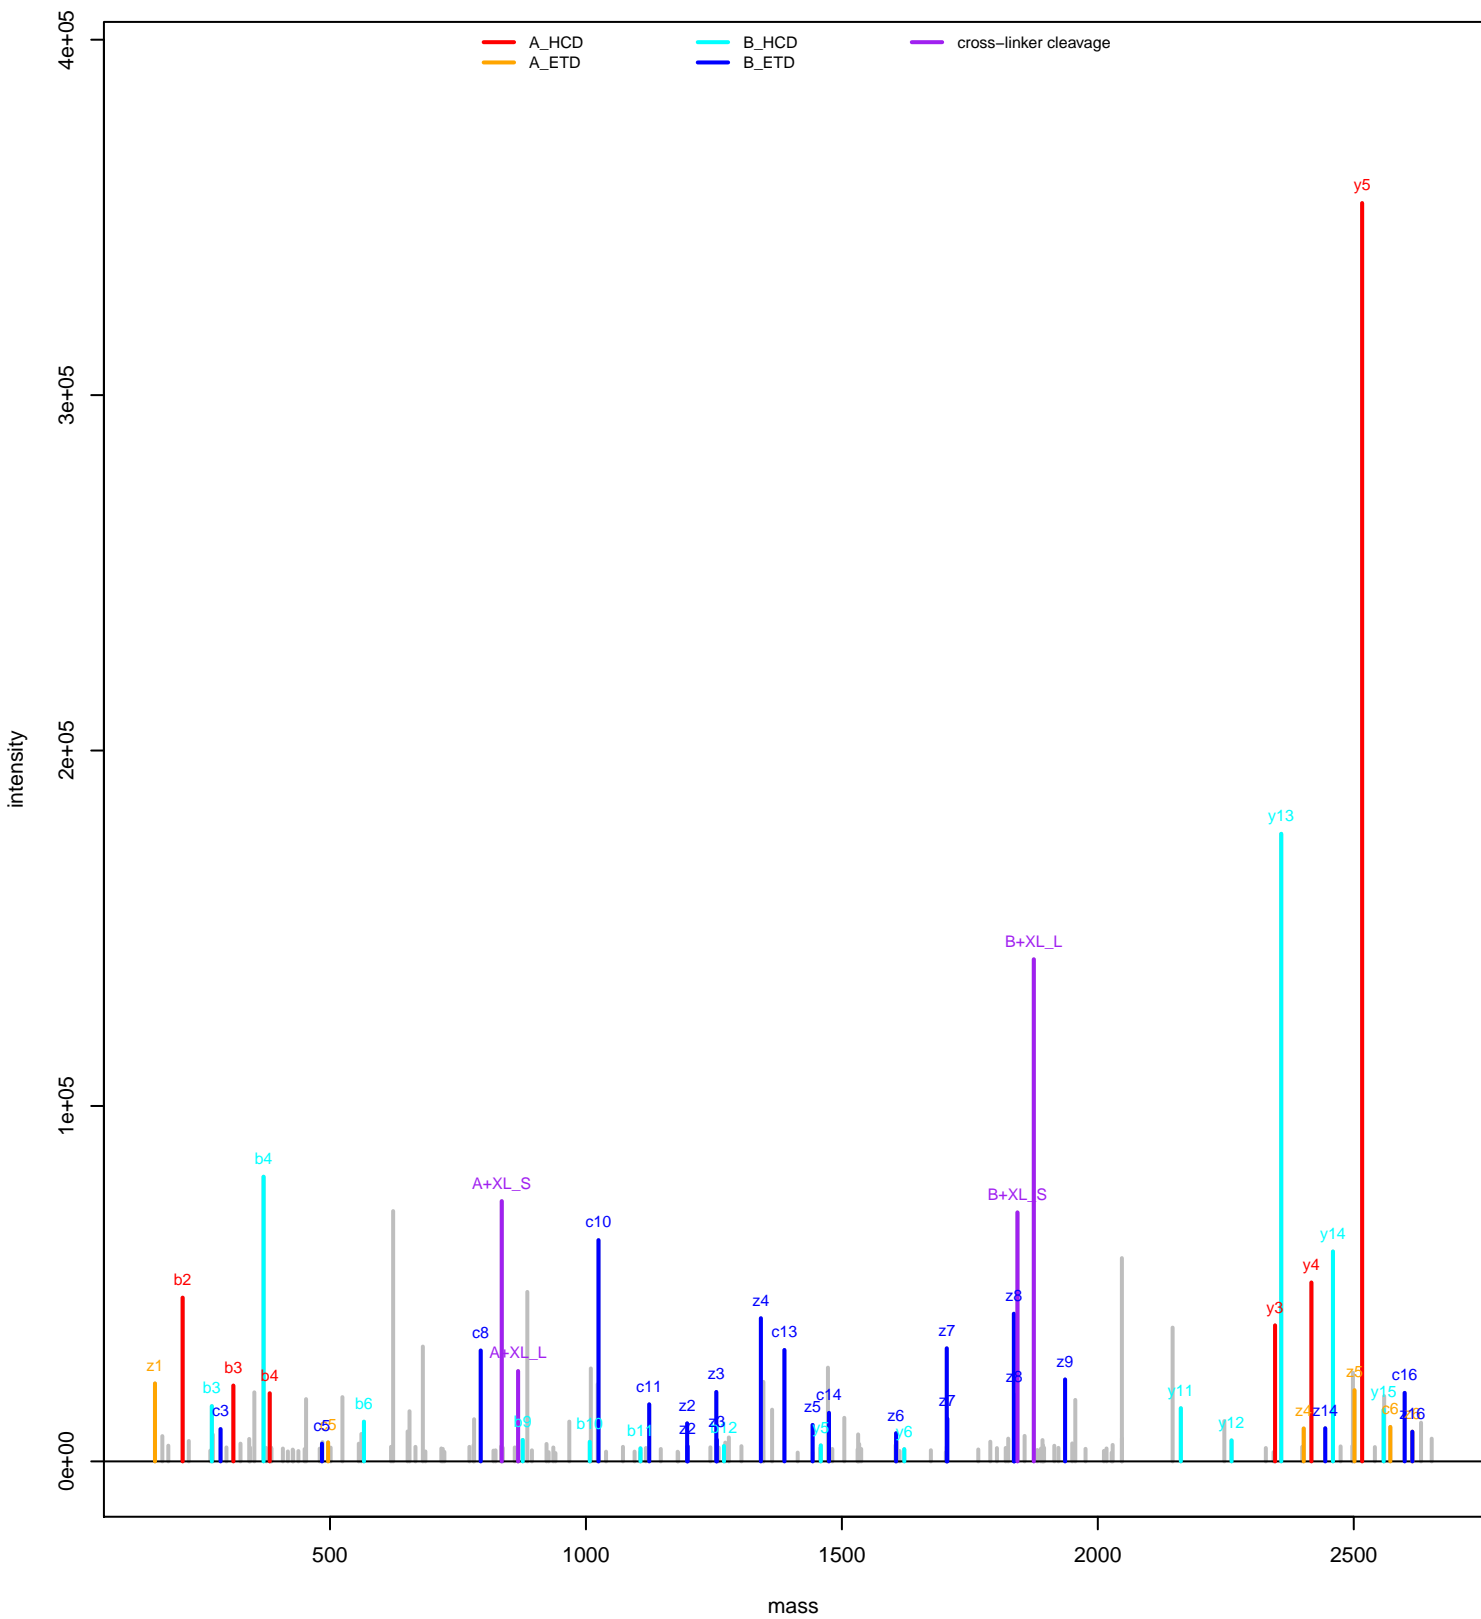

VIVAPKR+XL\_S

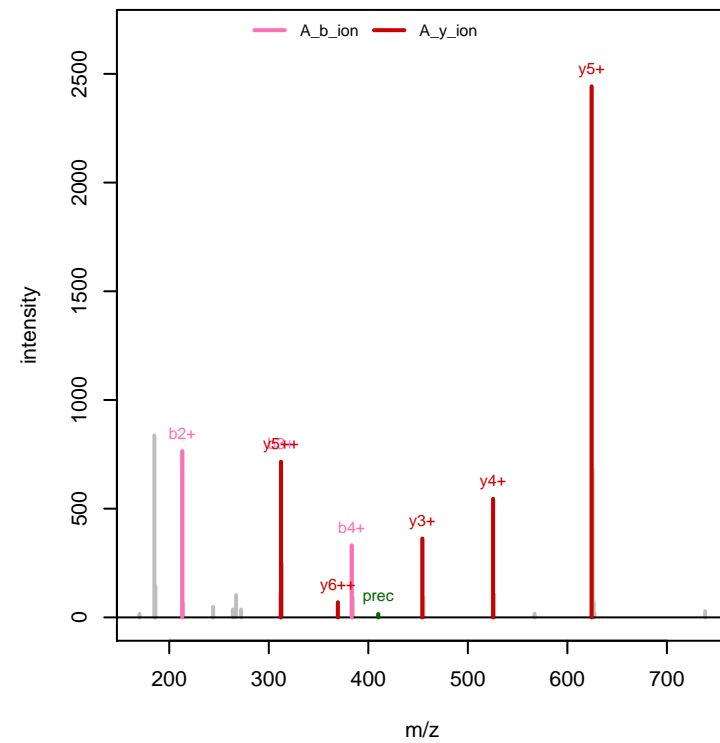

VIVAPKR+XL\_L

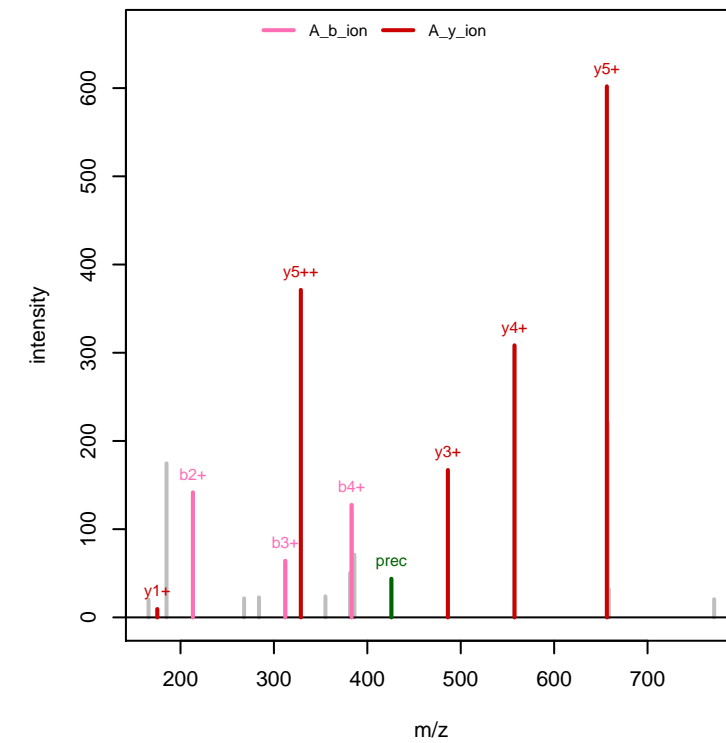

VAVTPVPNVMVYTSQK+XL\_S

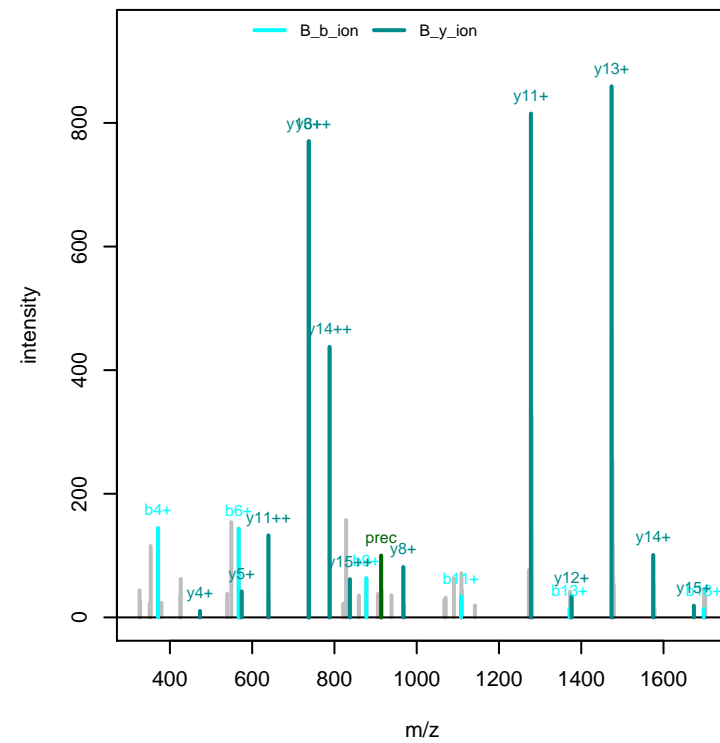

VAVTPVPNVMVYTSQK+XL\_L

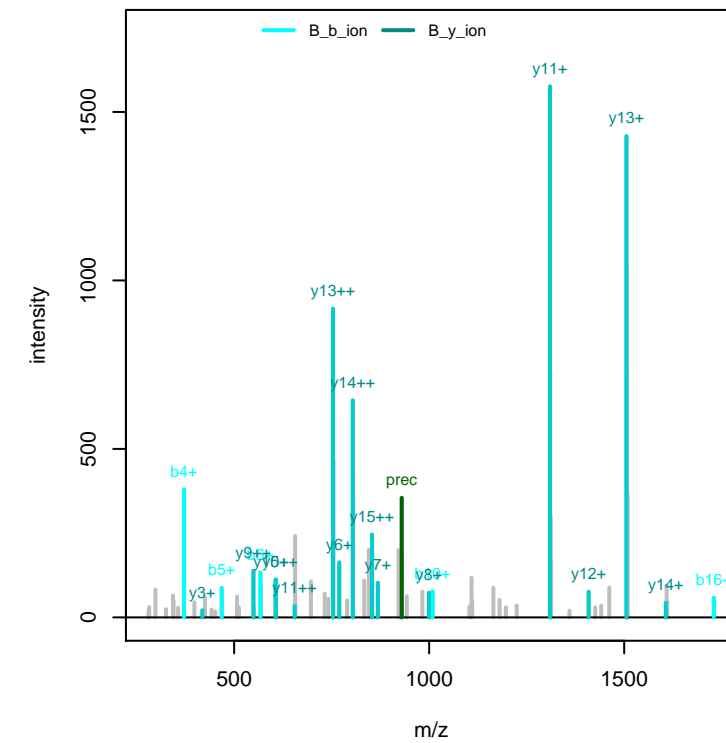

ALFKEPNDKALN  
KLMDDTIAQVQTSGEAEK

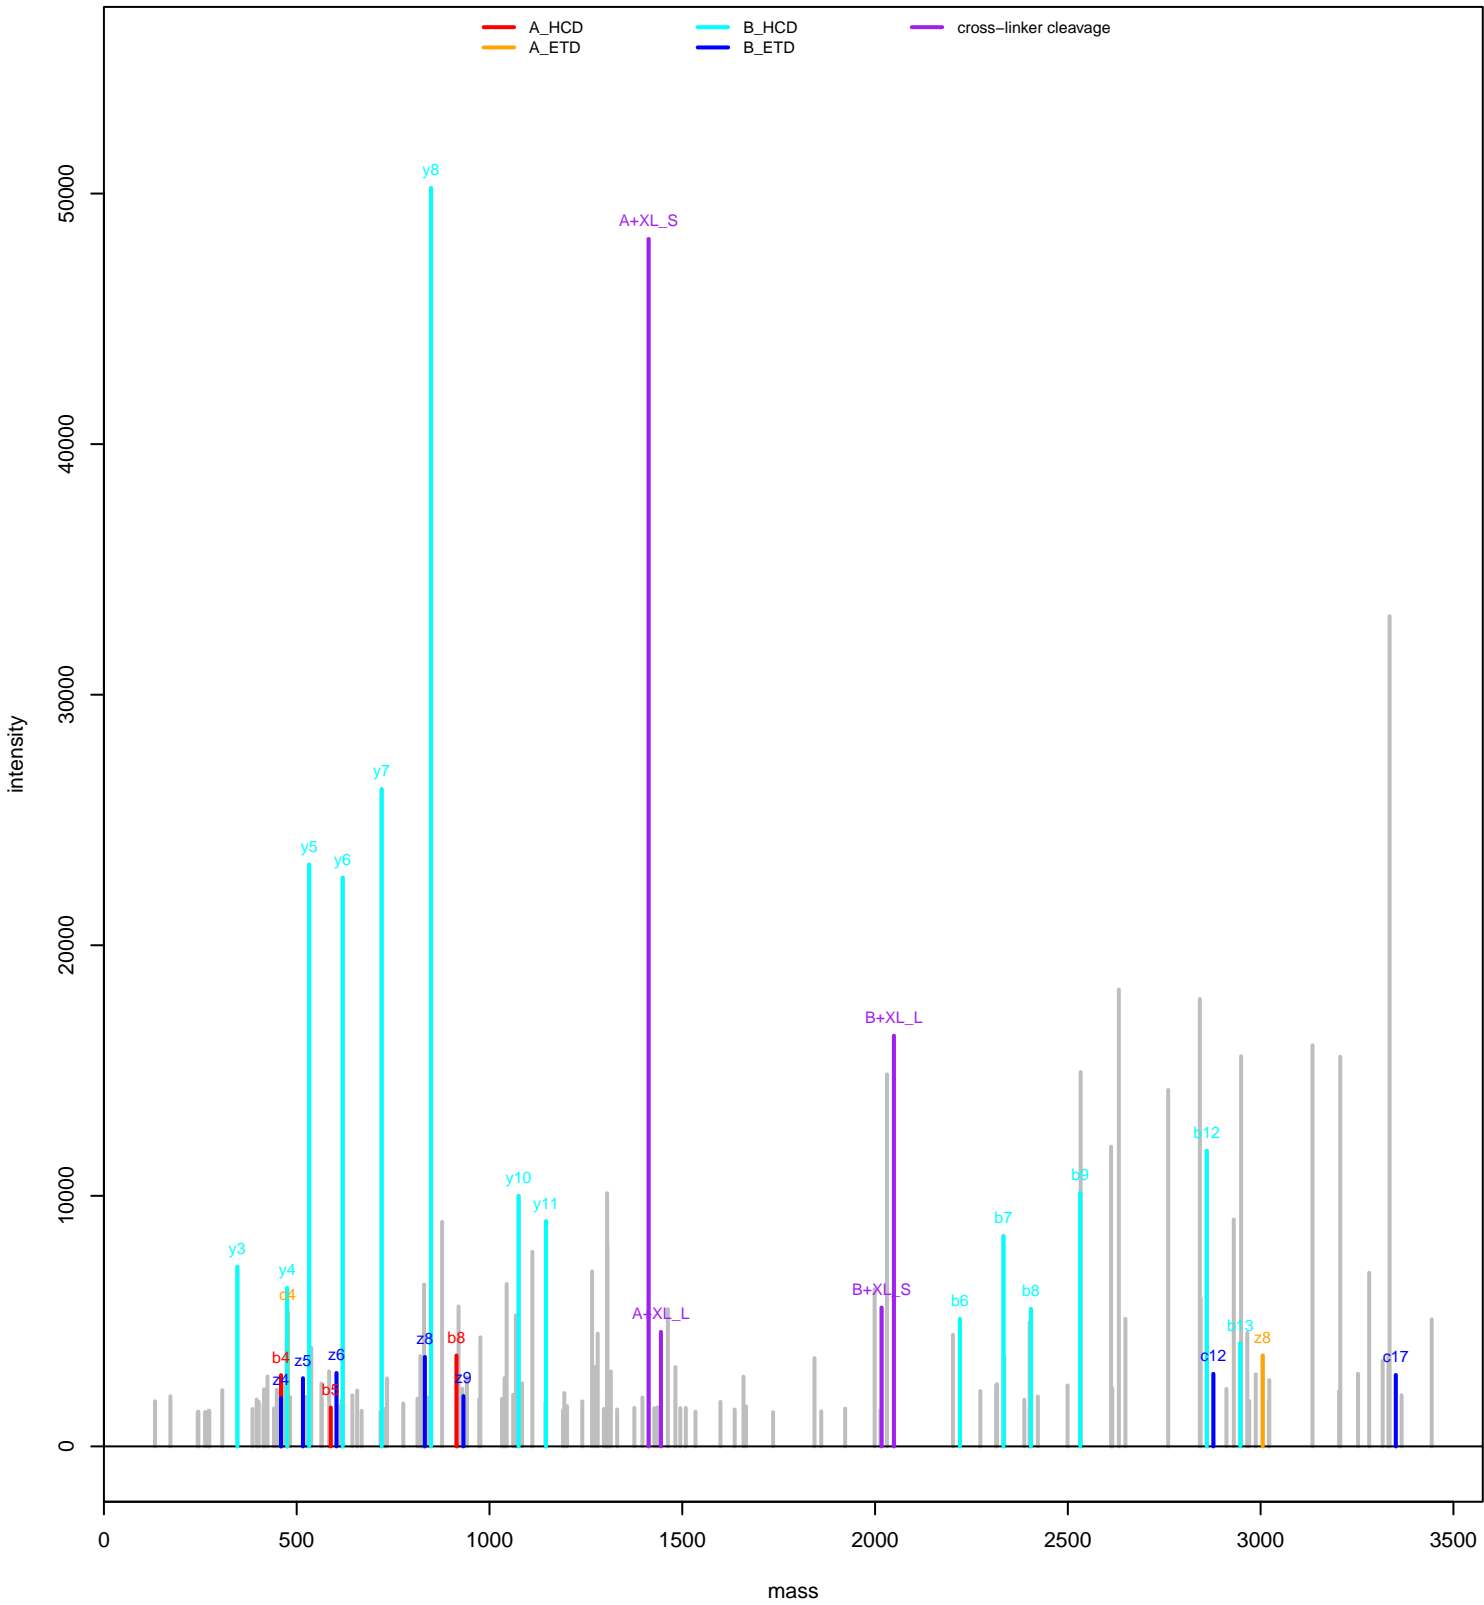

ALFKEPNDKALN+XL\_S

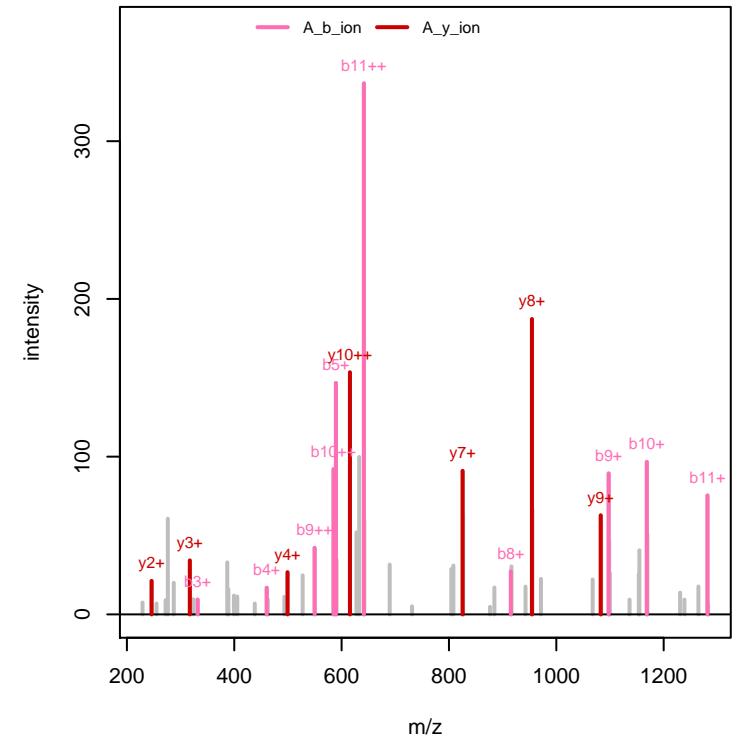

ALFKEPNDKALN+XL\_L

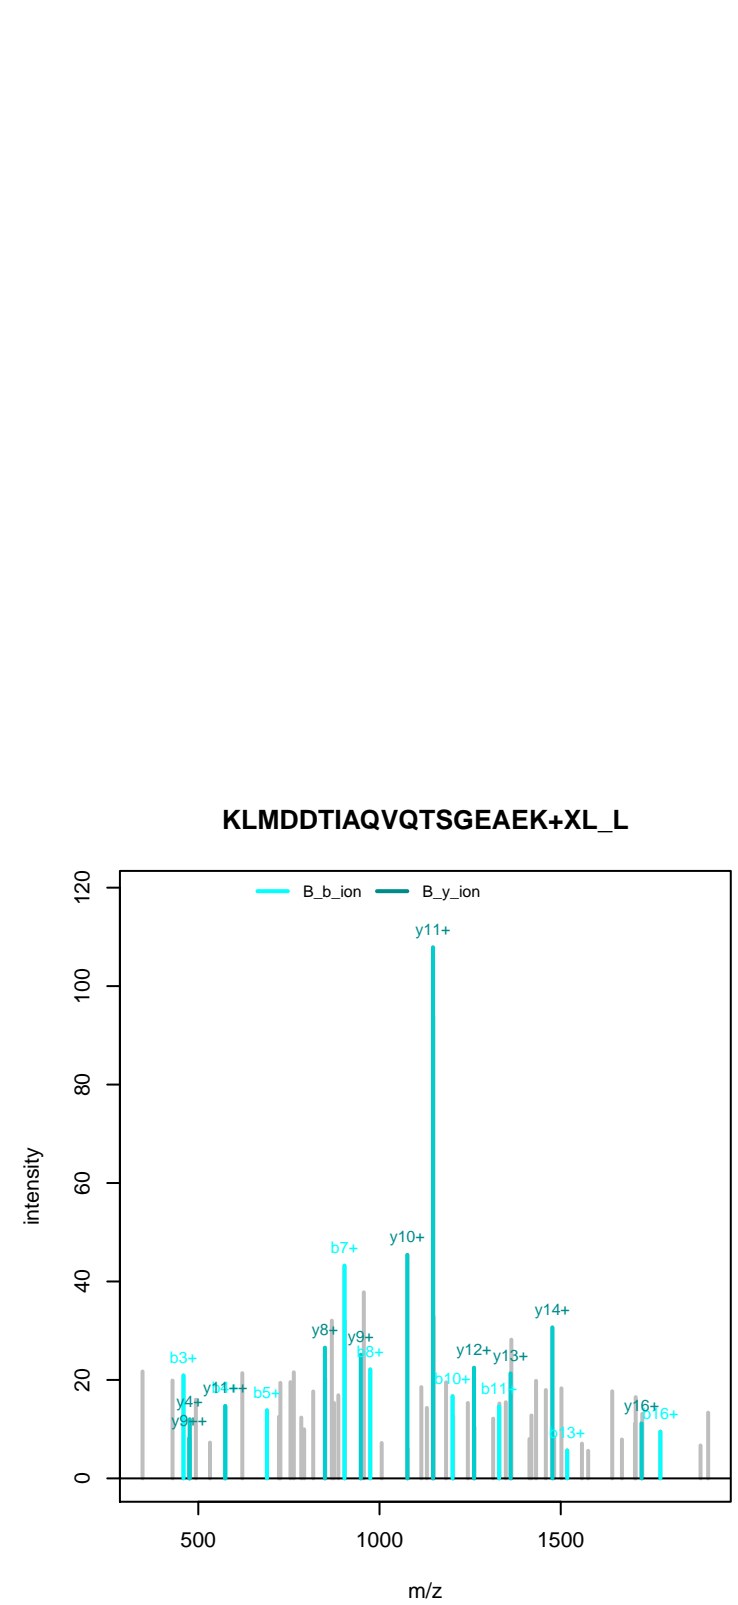

KLMDDTIAQVQTSGEAEK+XL\_S

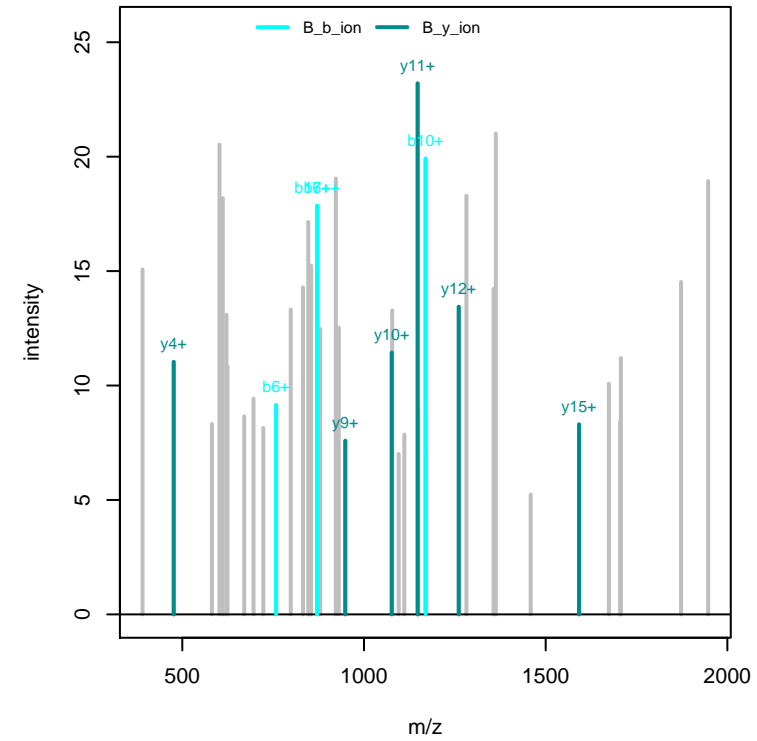

KLMDDTIAQVQTSGEAEK+XL\_L

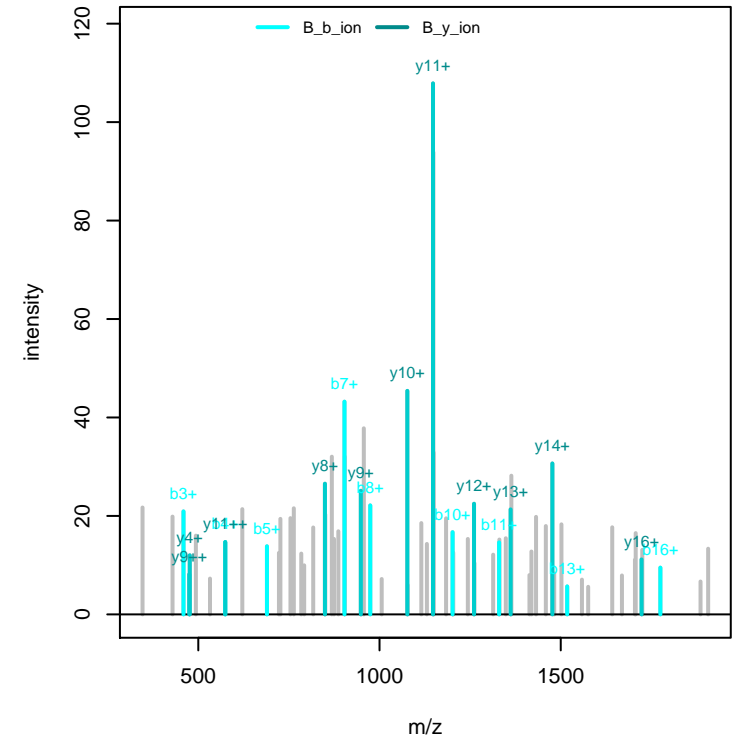

ITLEEKK  
LKNEQPQIR

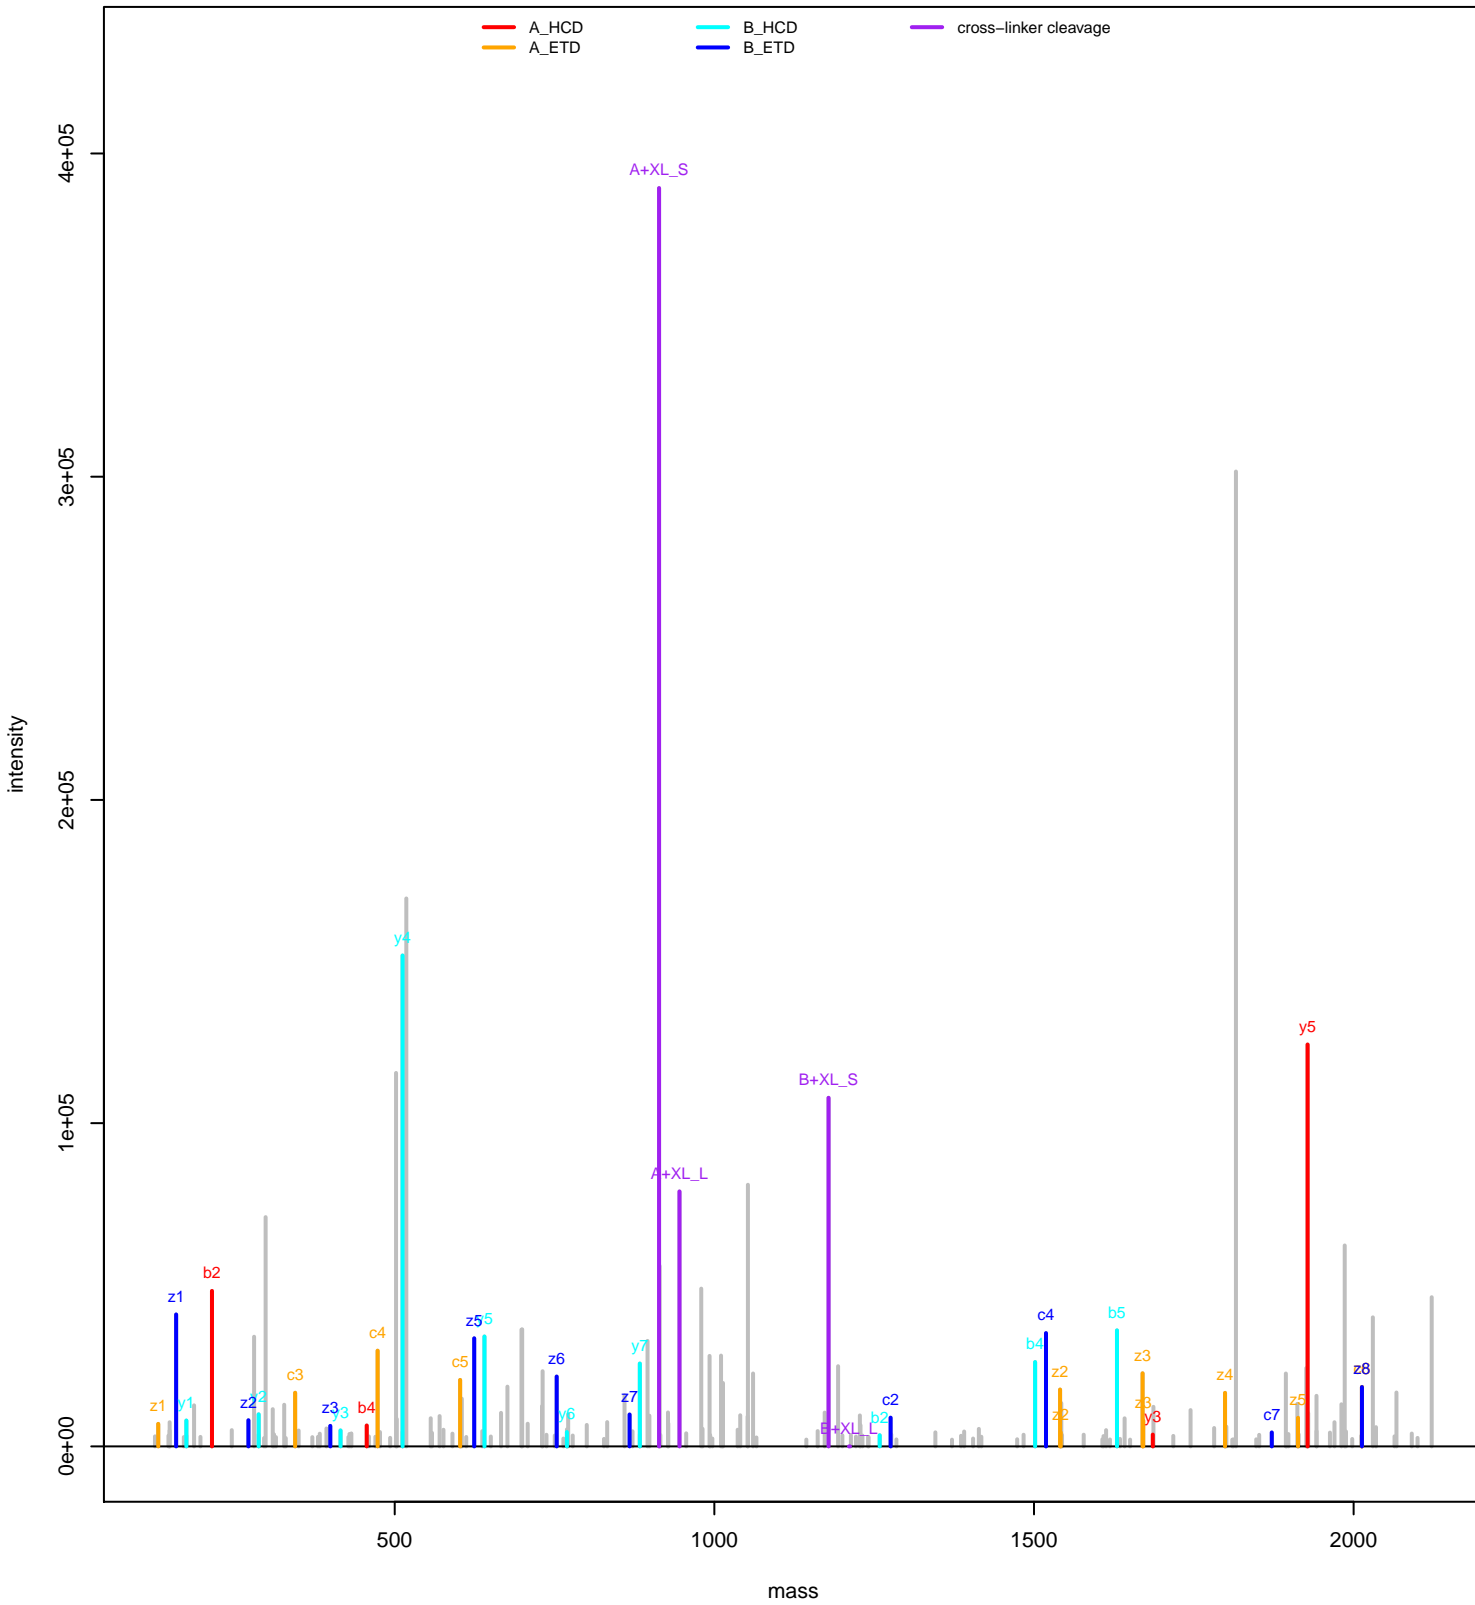

ITLEEKK+XL\_S

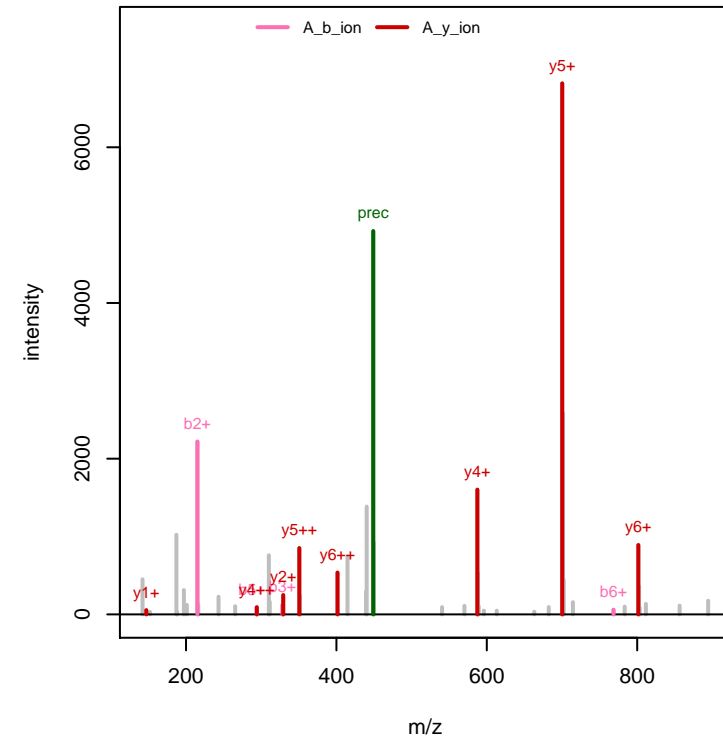

ITLEEKK+XL\_L

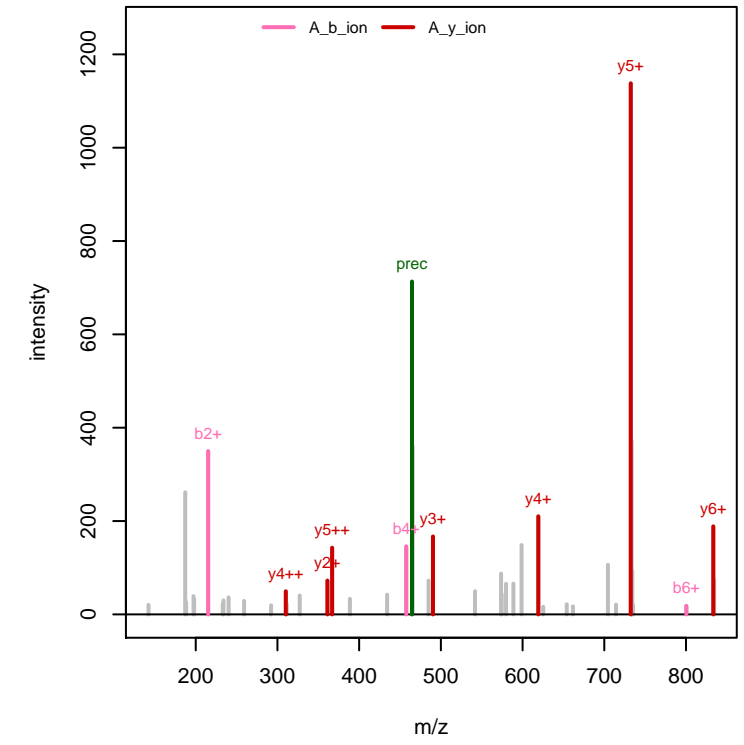

LKNEQPQIR+XL\_S

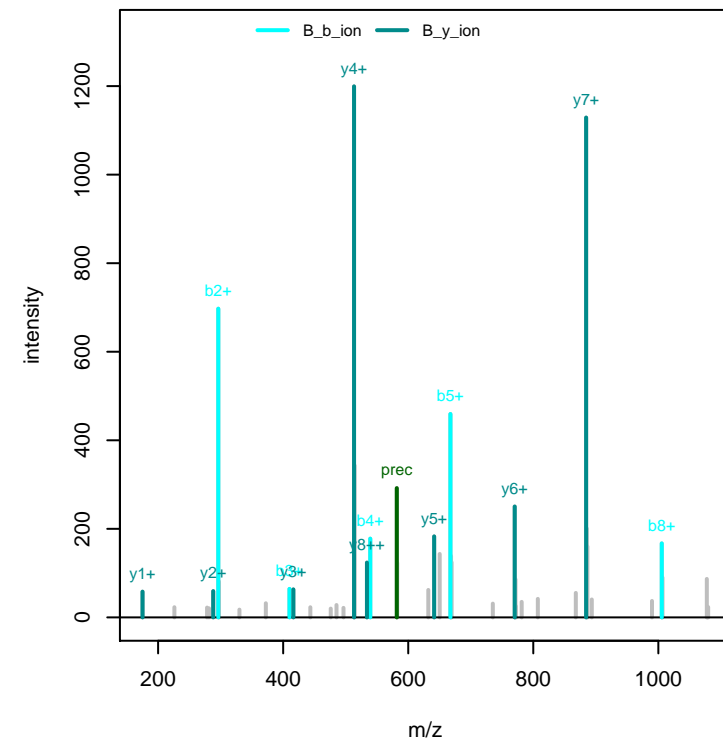

LKNEQPQIR+XL\_L

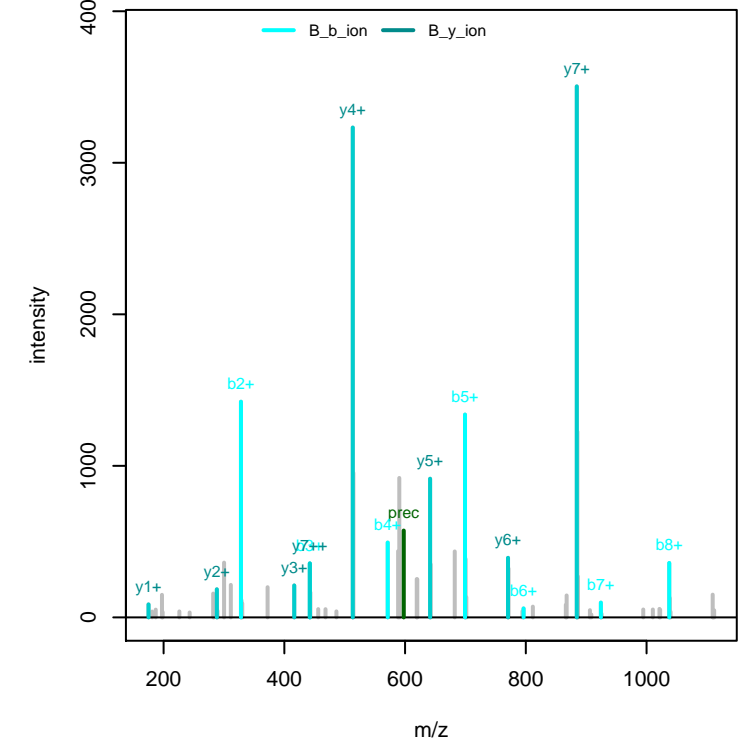

KAQETK  
SERFPNDVDPIETR

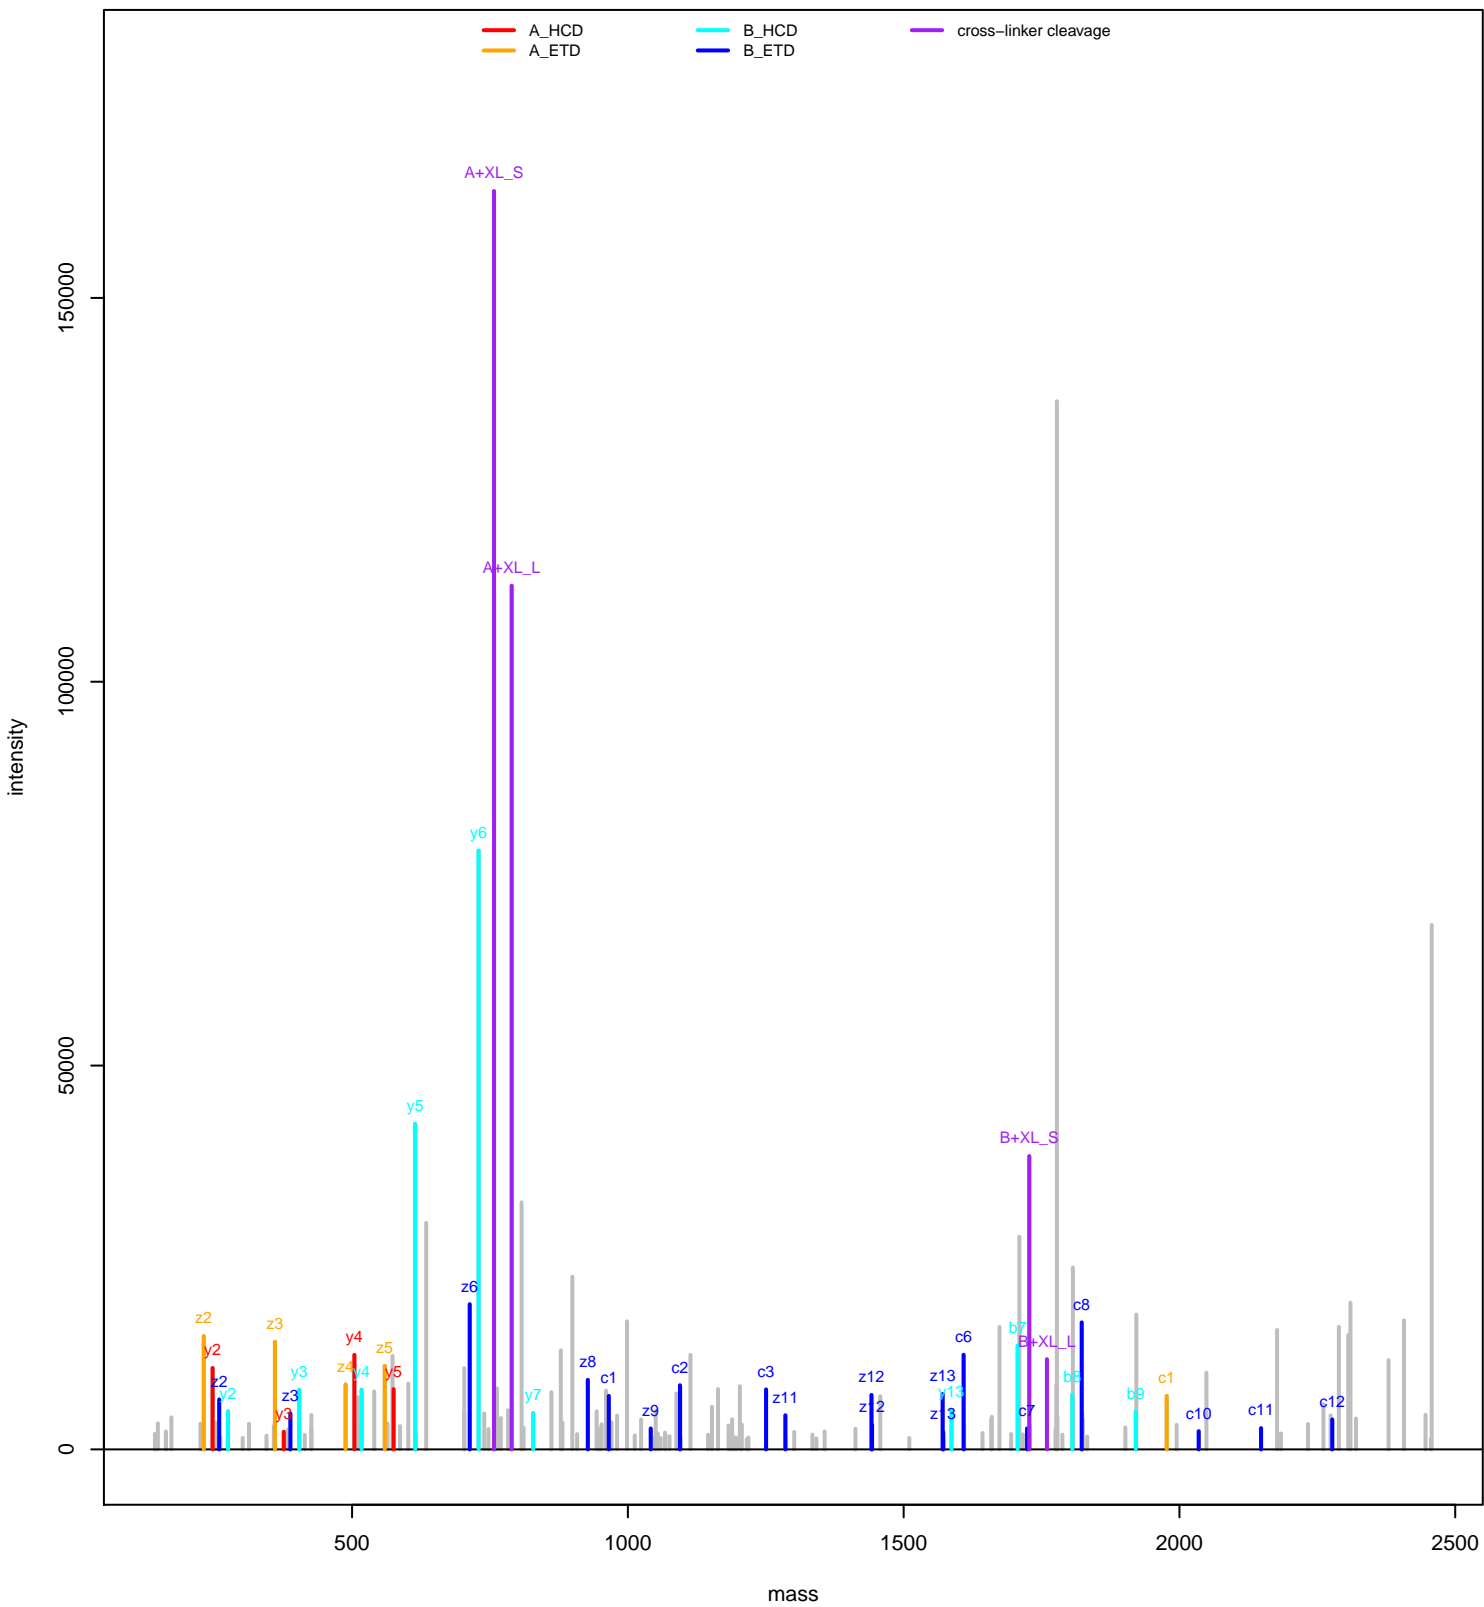

KAQETK+XL\_S

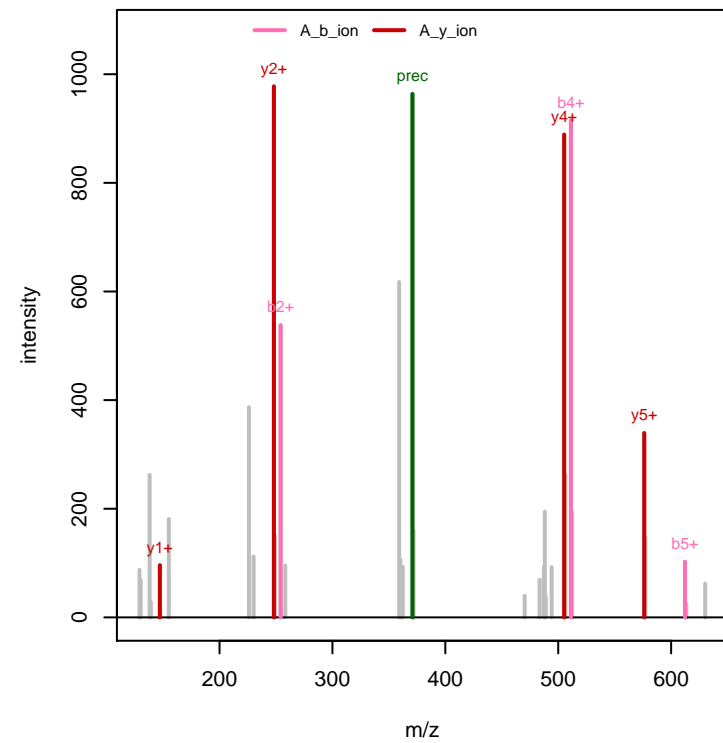

KAQETK+XL\_L

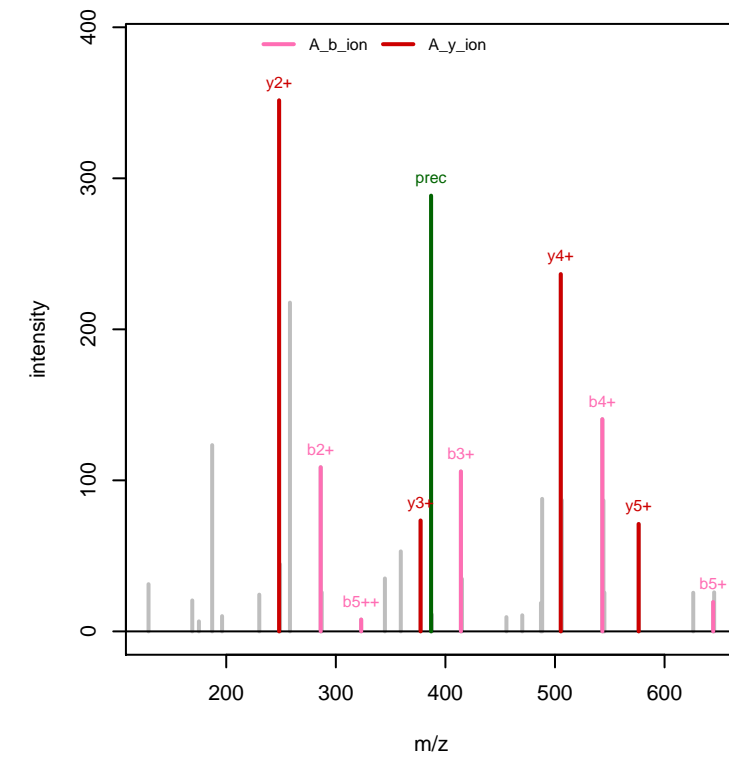

SERFPNDVDPIETR+XL\_S

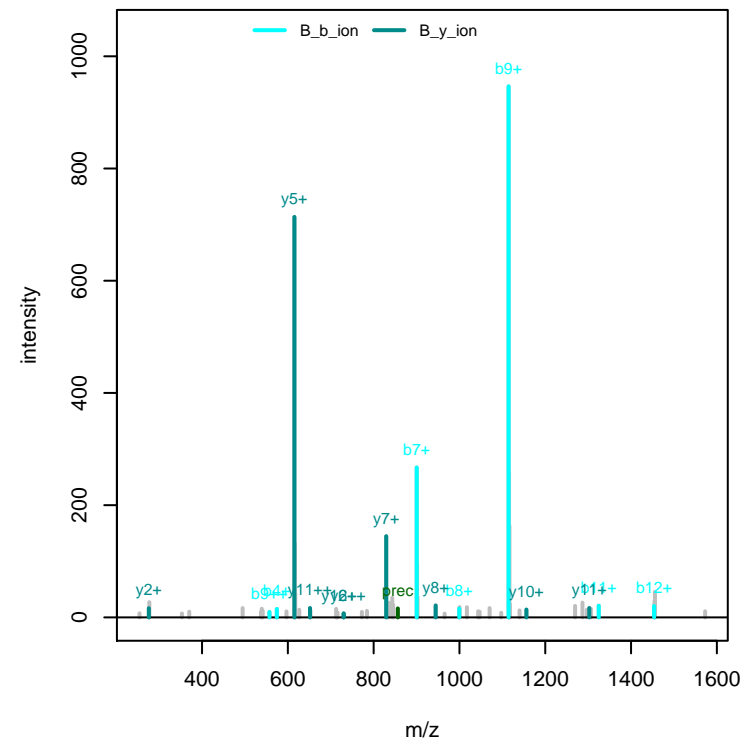

SERFPNDVDPIETR+XL\_L

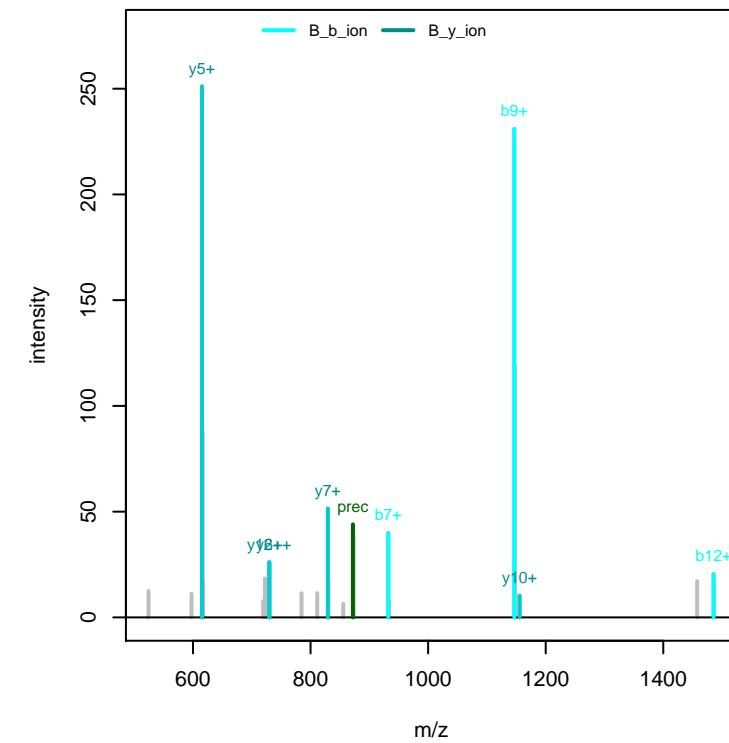



VDRFNKR  
GLSAKSFDR

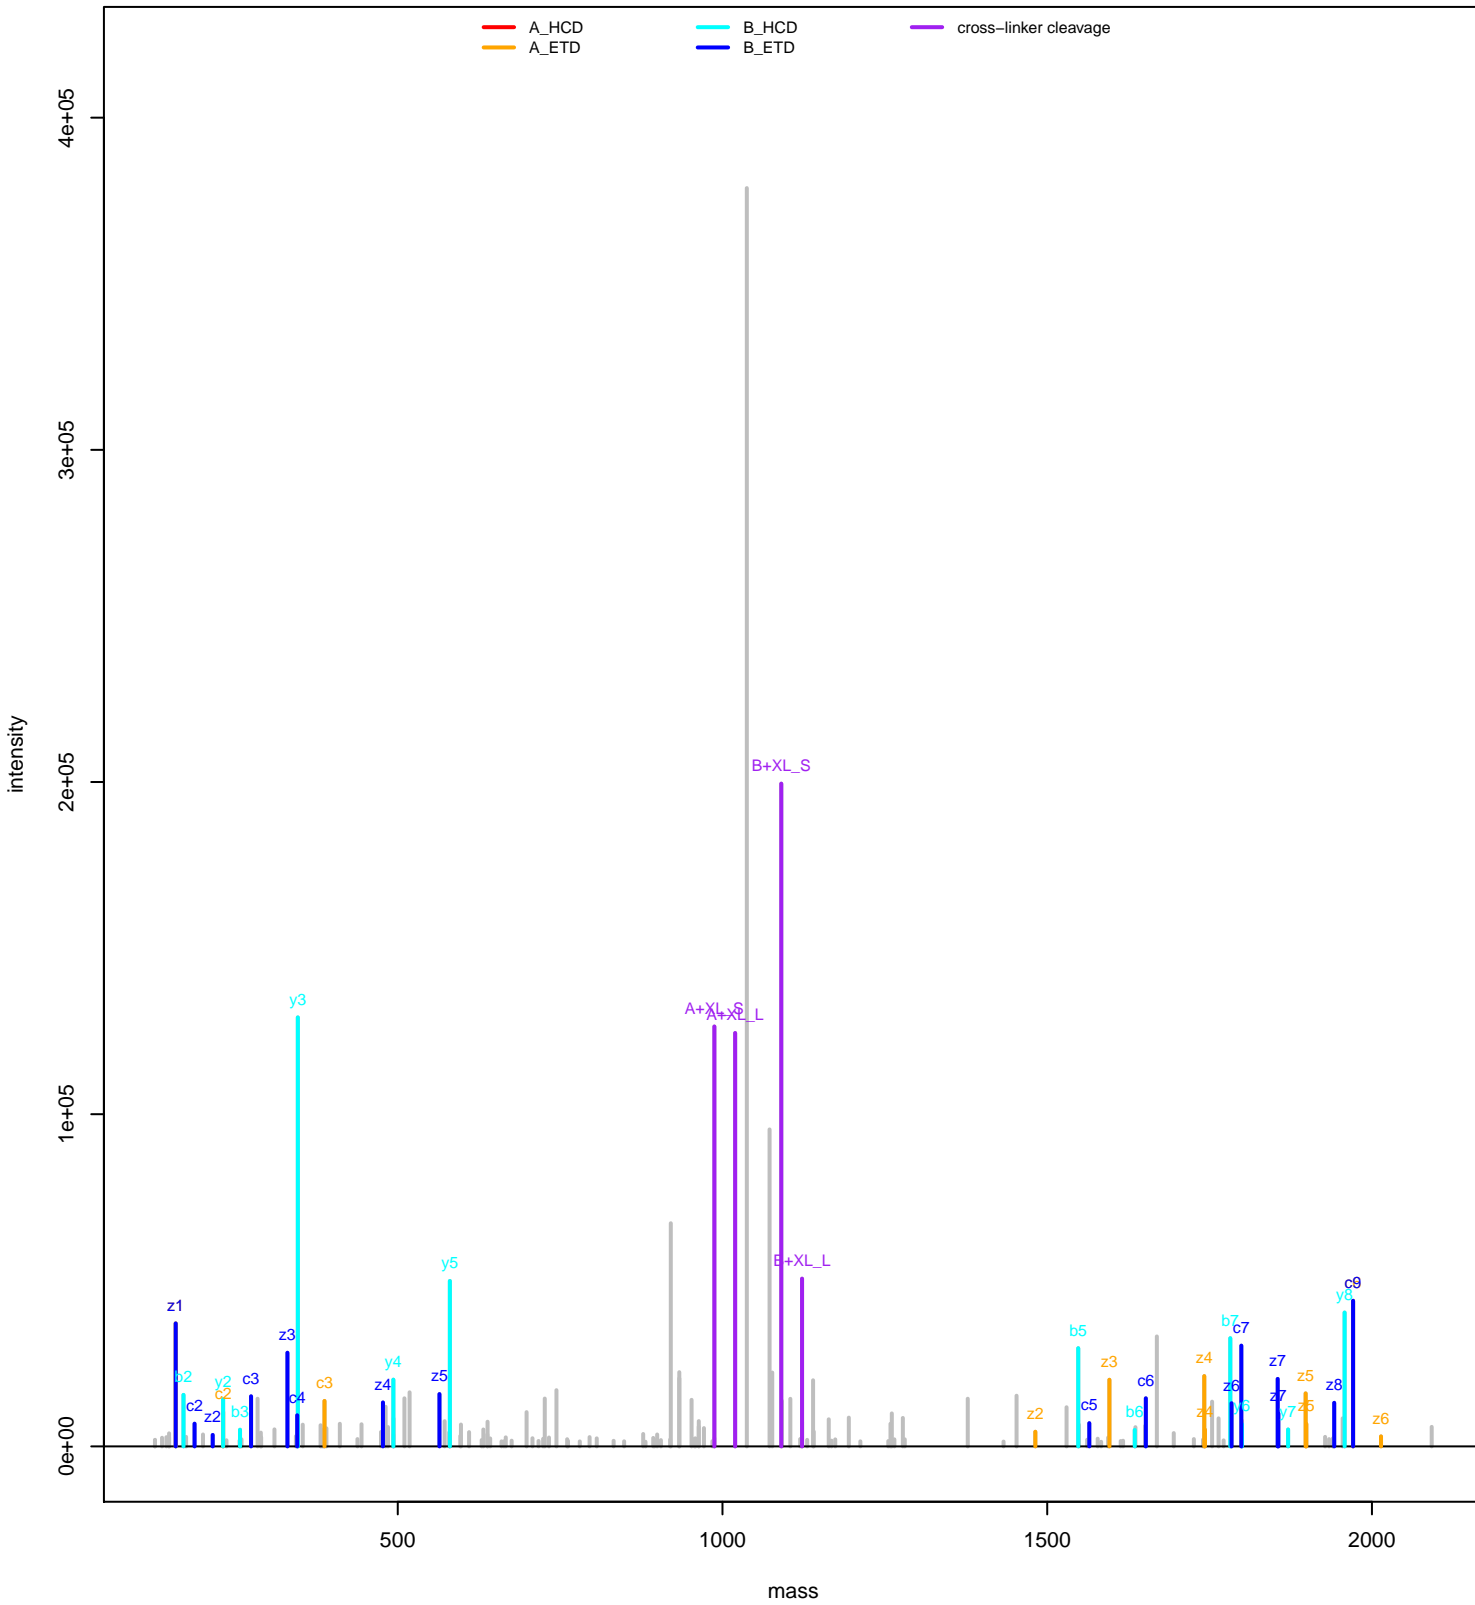

VDRFNKR+XL\_S

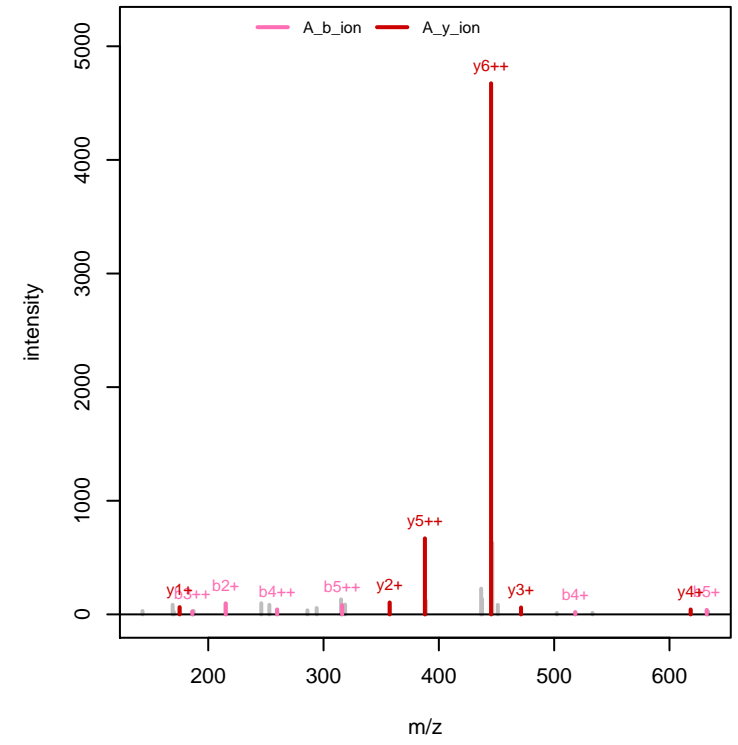

VDRFNKR+XL\_L

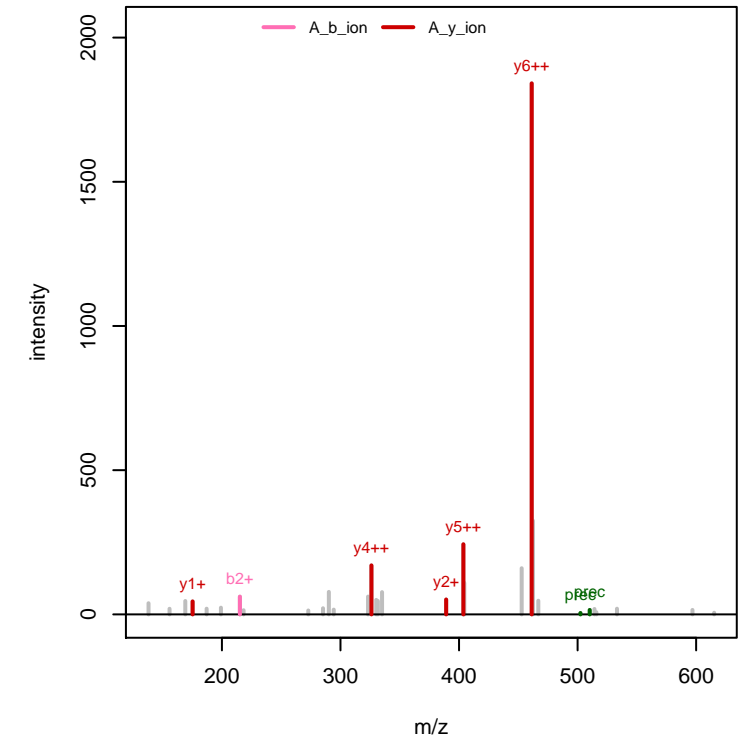

GLSAKSFDR+XL\_S

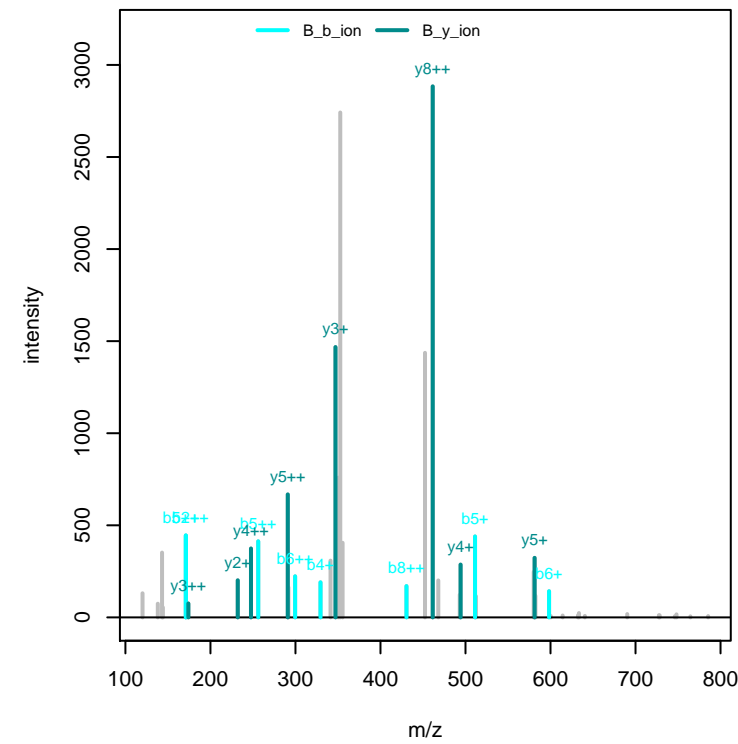

GLSAKSFDR+XL\_L

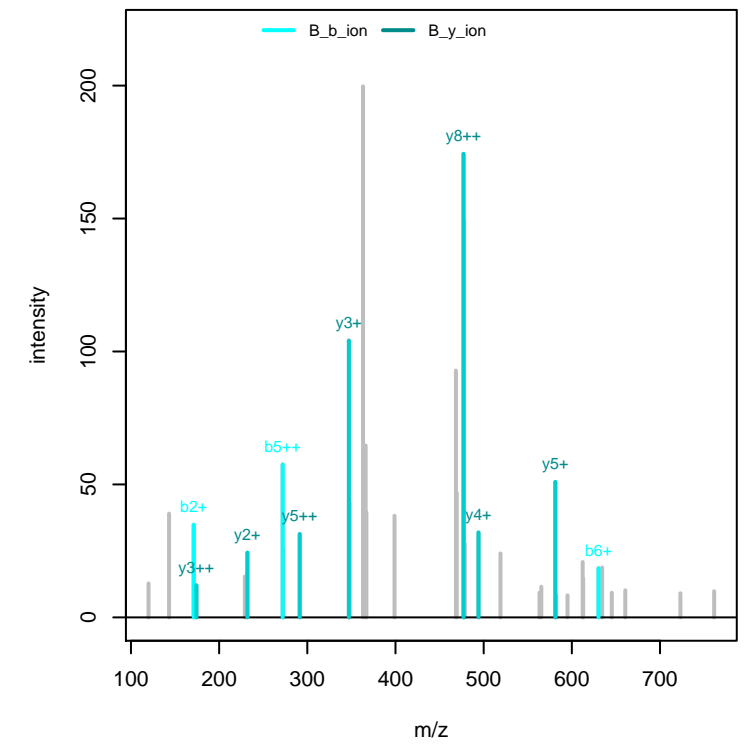

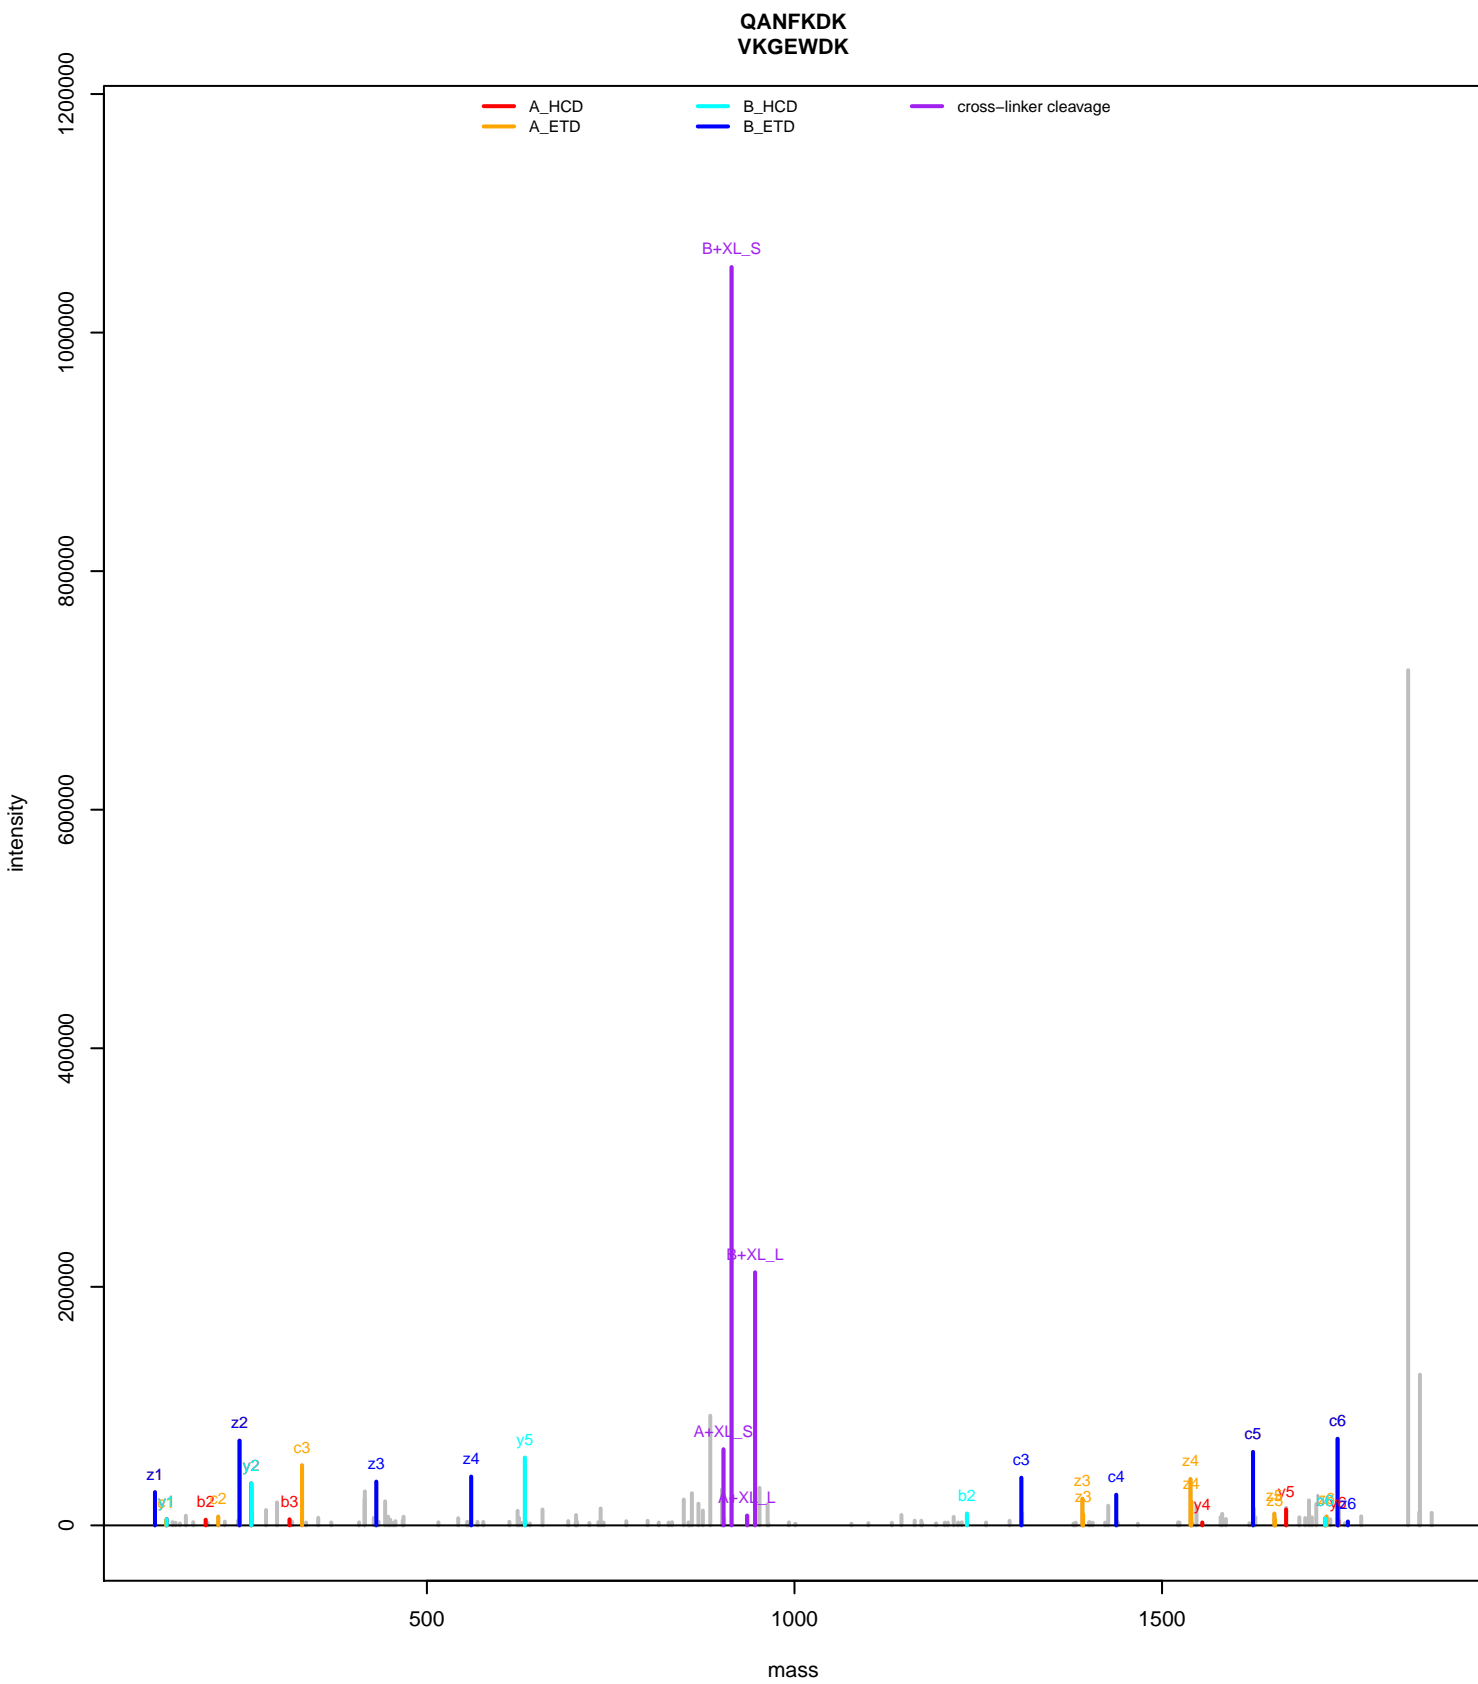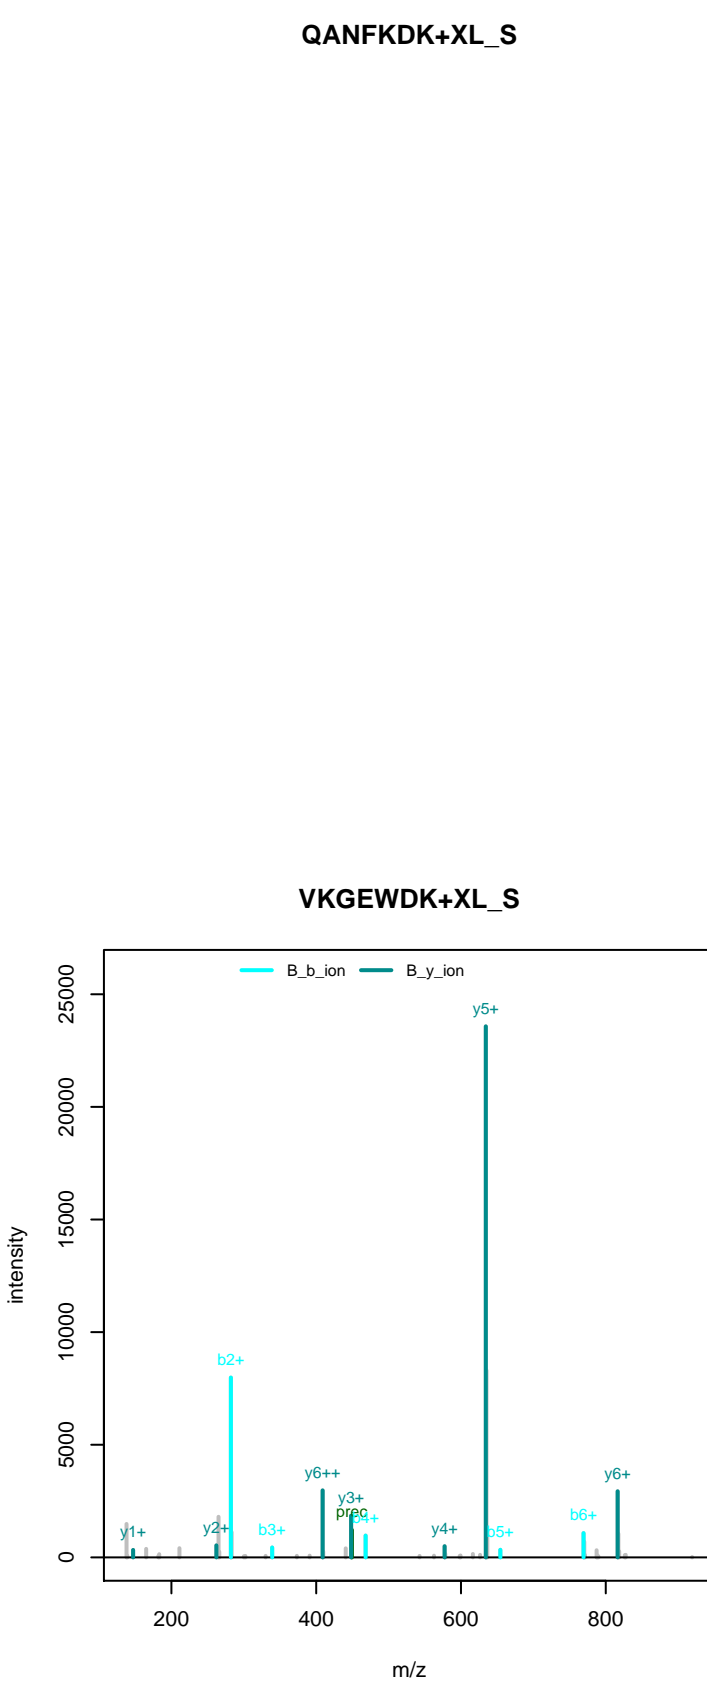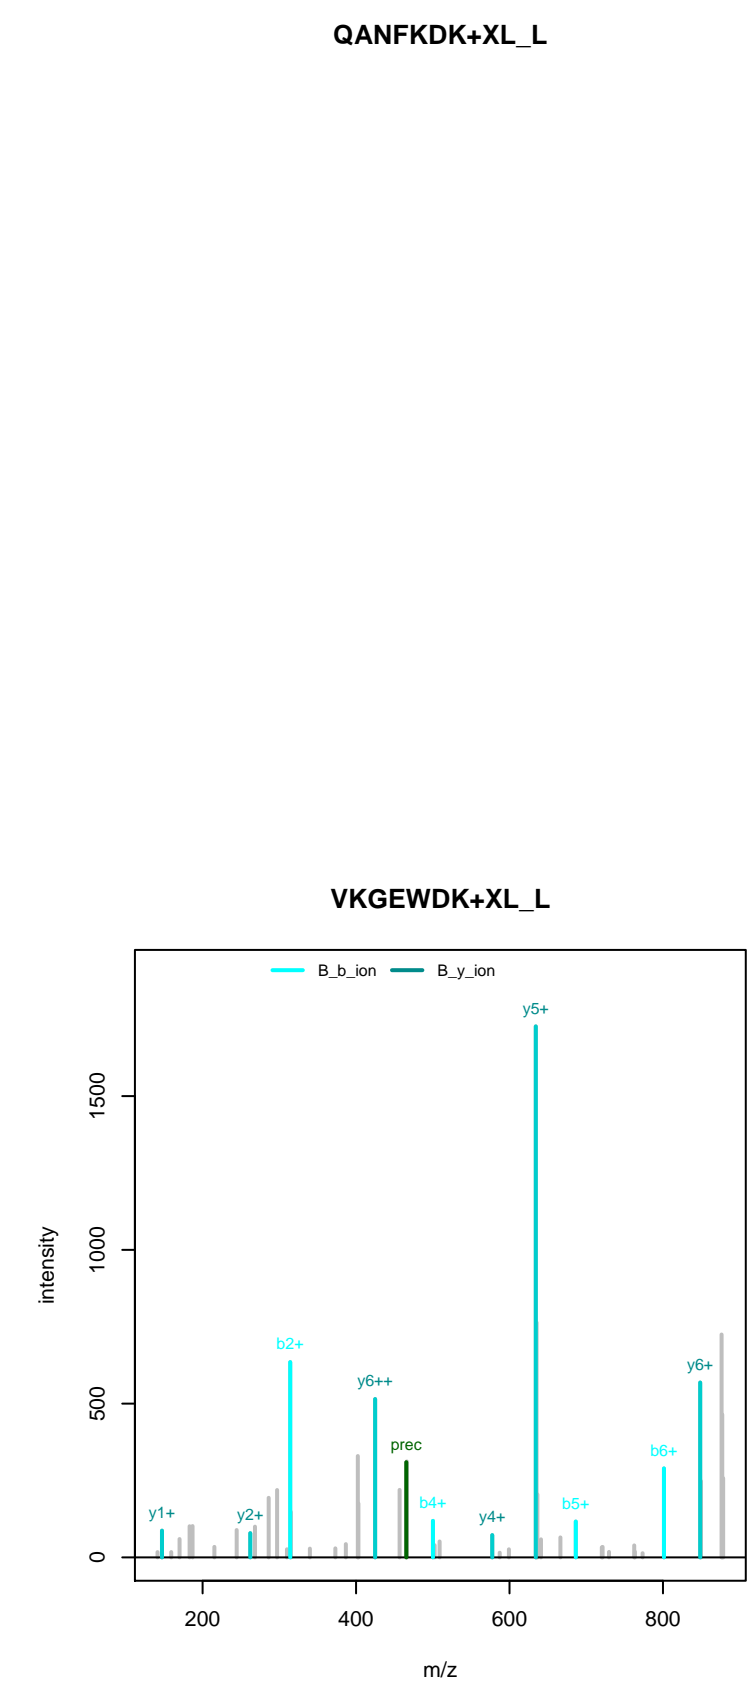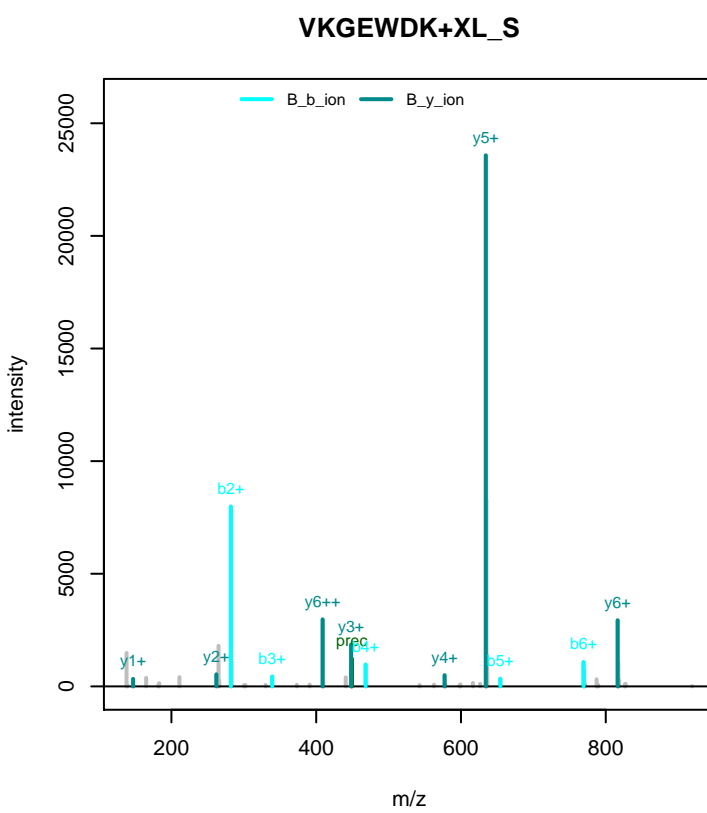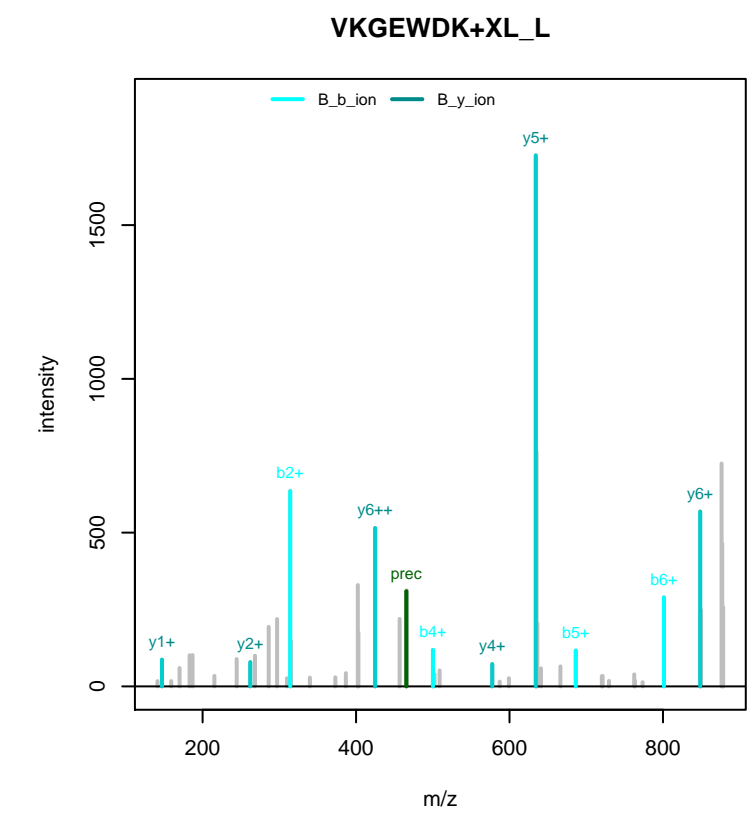

**VGKISR  
VAVIKAVR**

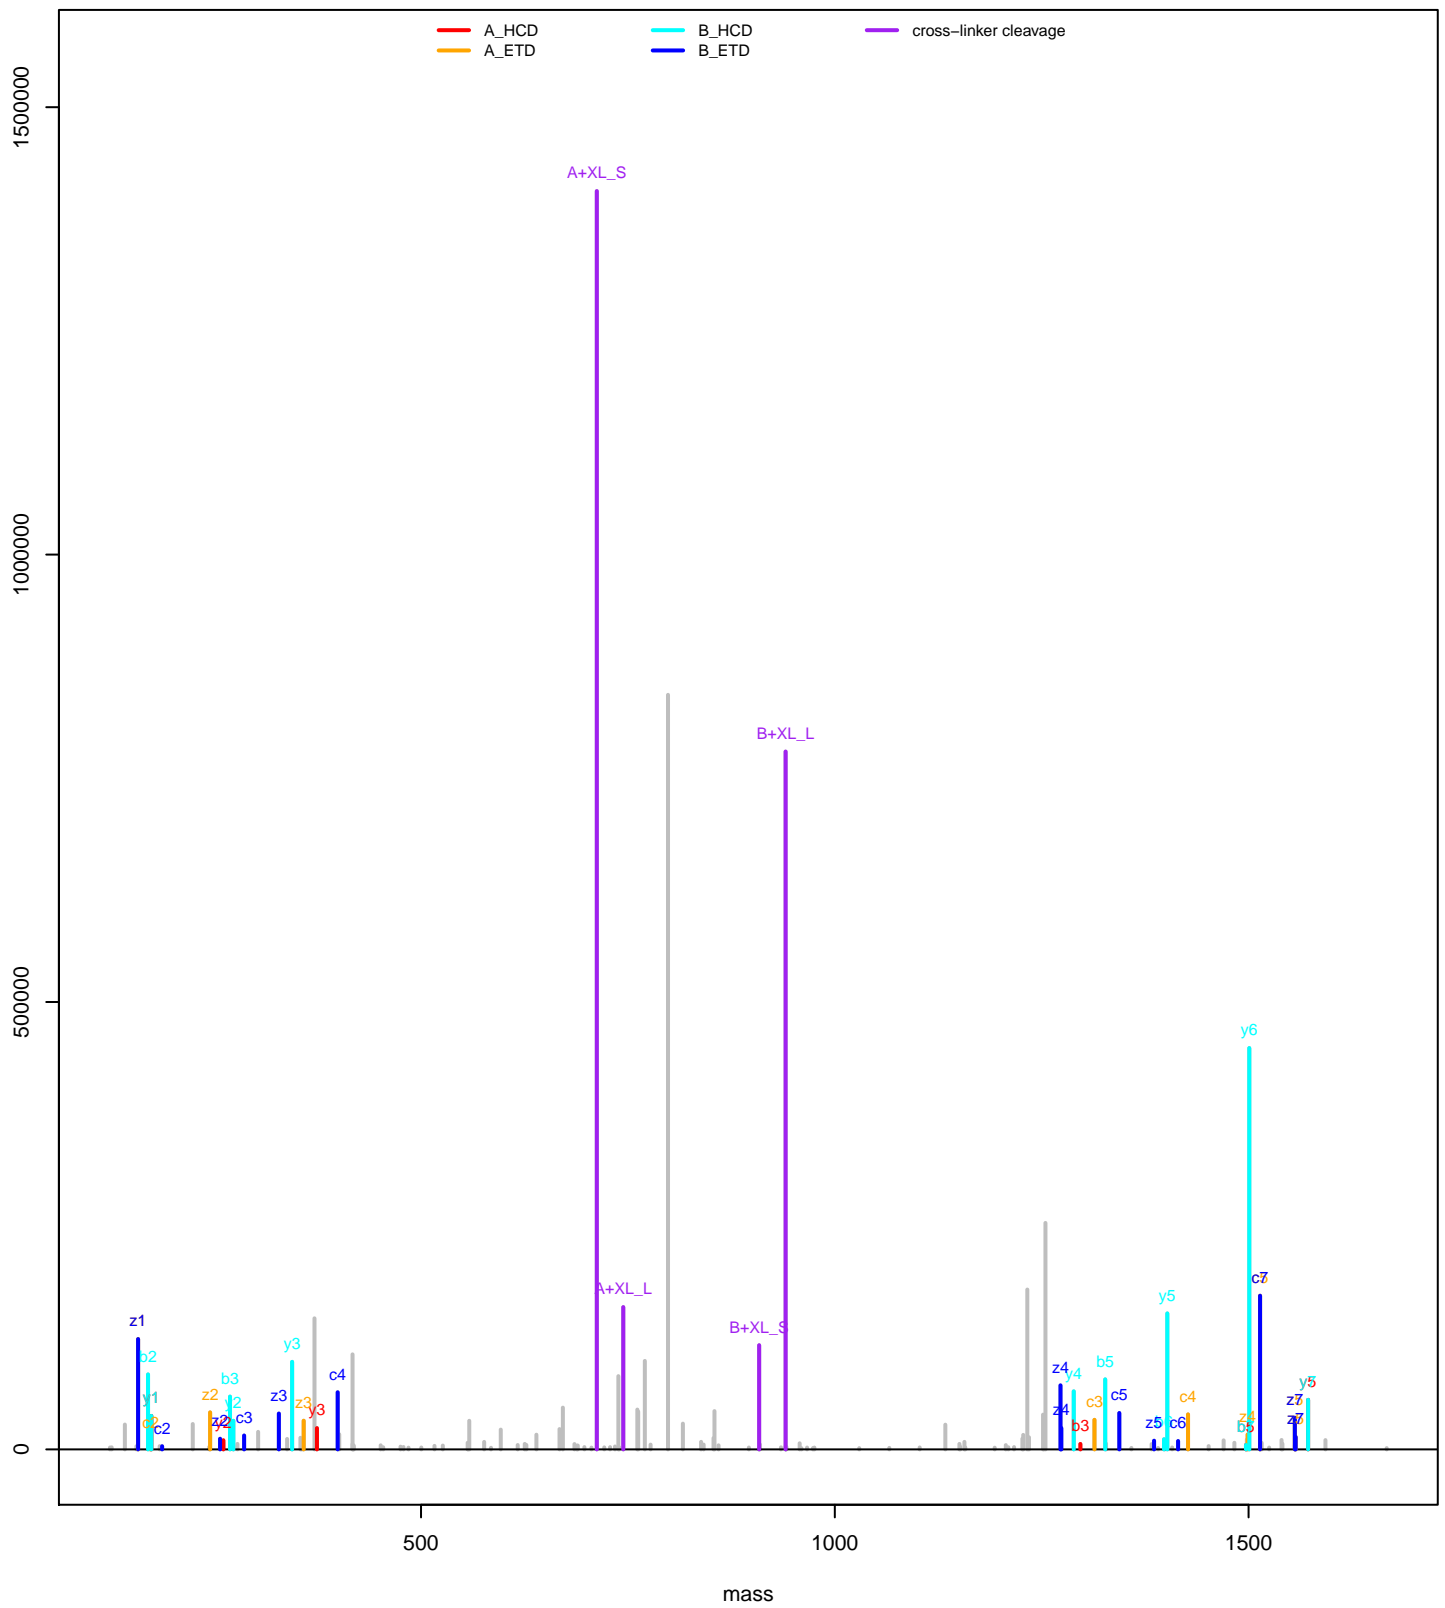

**VGKISR+XL\_S**

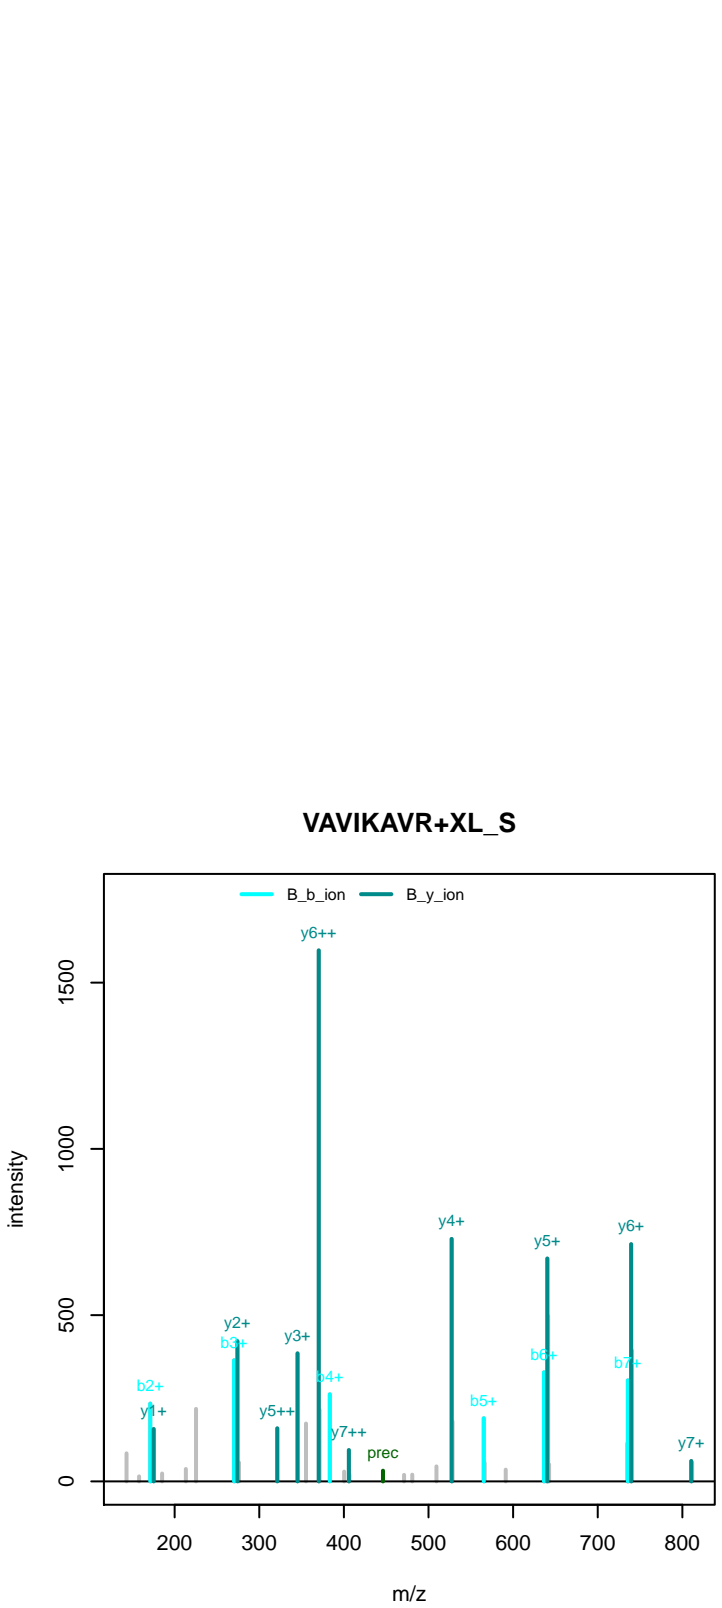

**VGKISR+XL\_L**

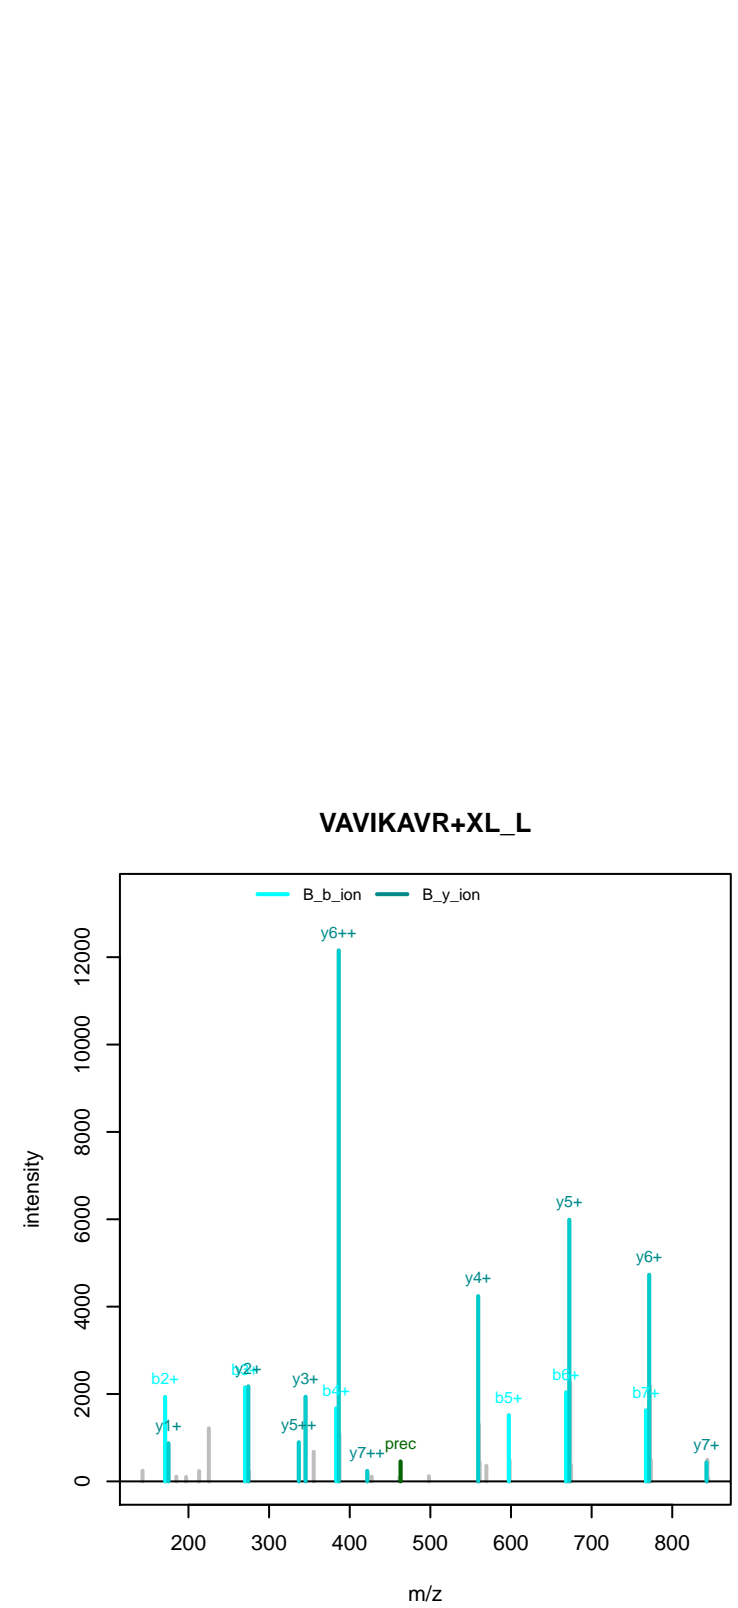

**VAVIKAVR+XL\_S**

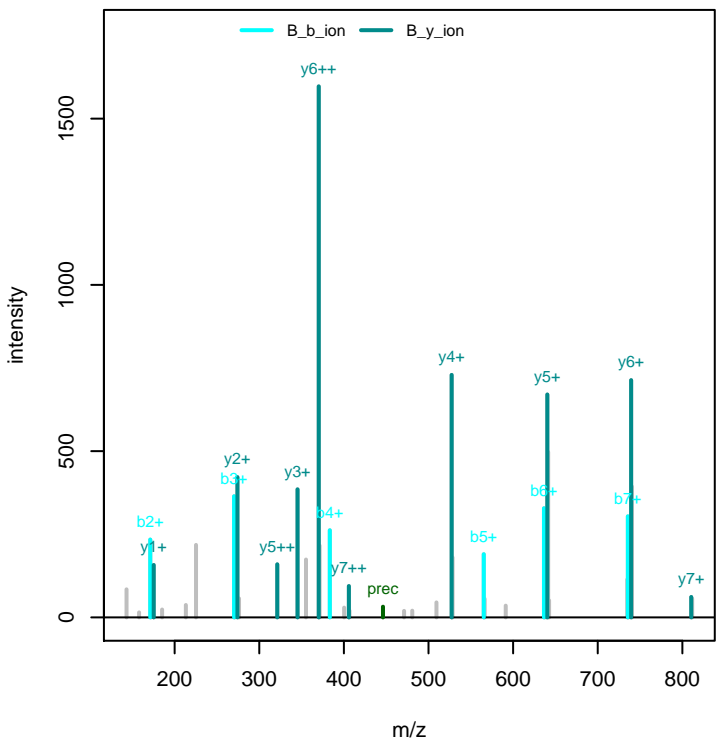

**VAVIKAVR+XL\_L**

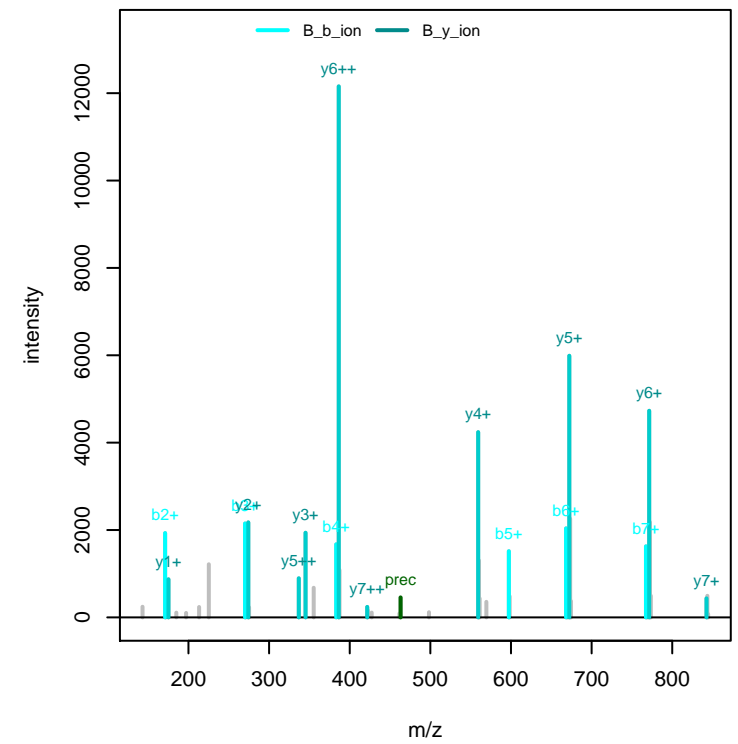

DKNDSFR  
VYKNYDPR

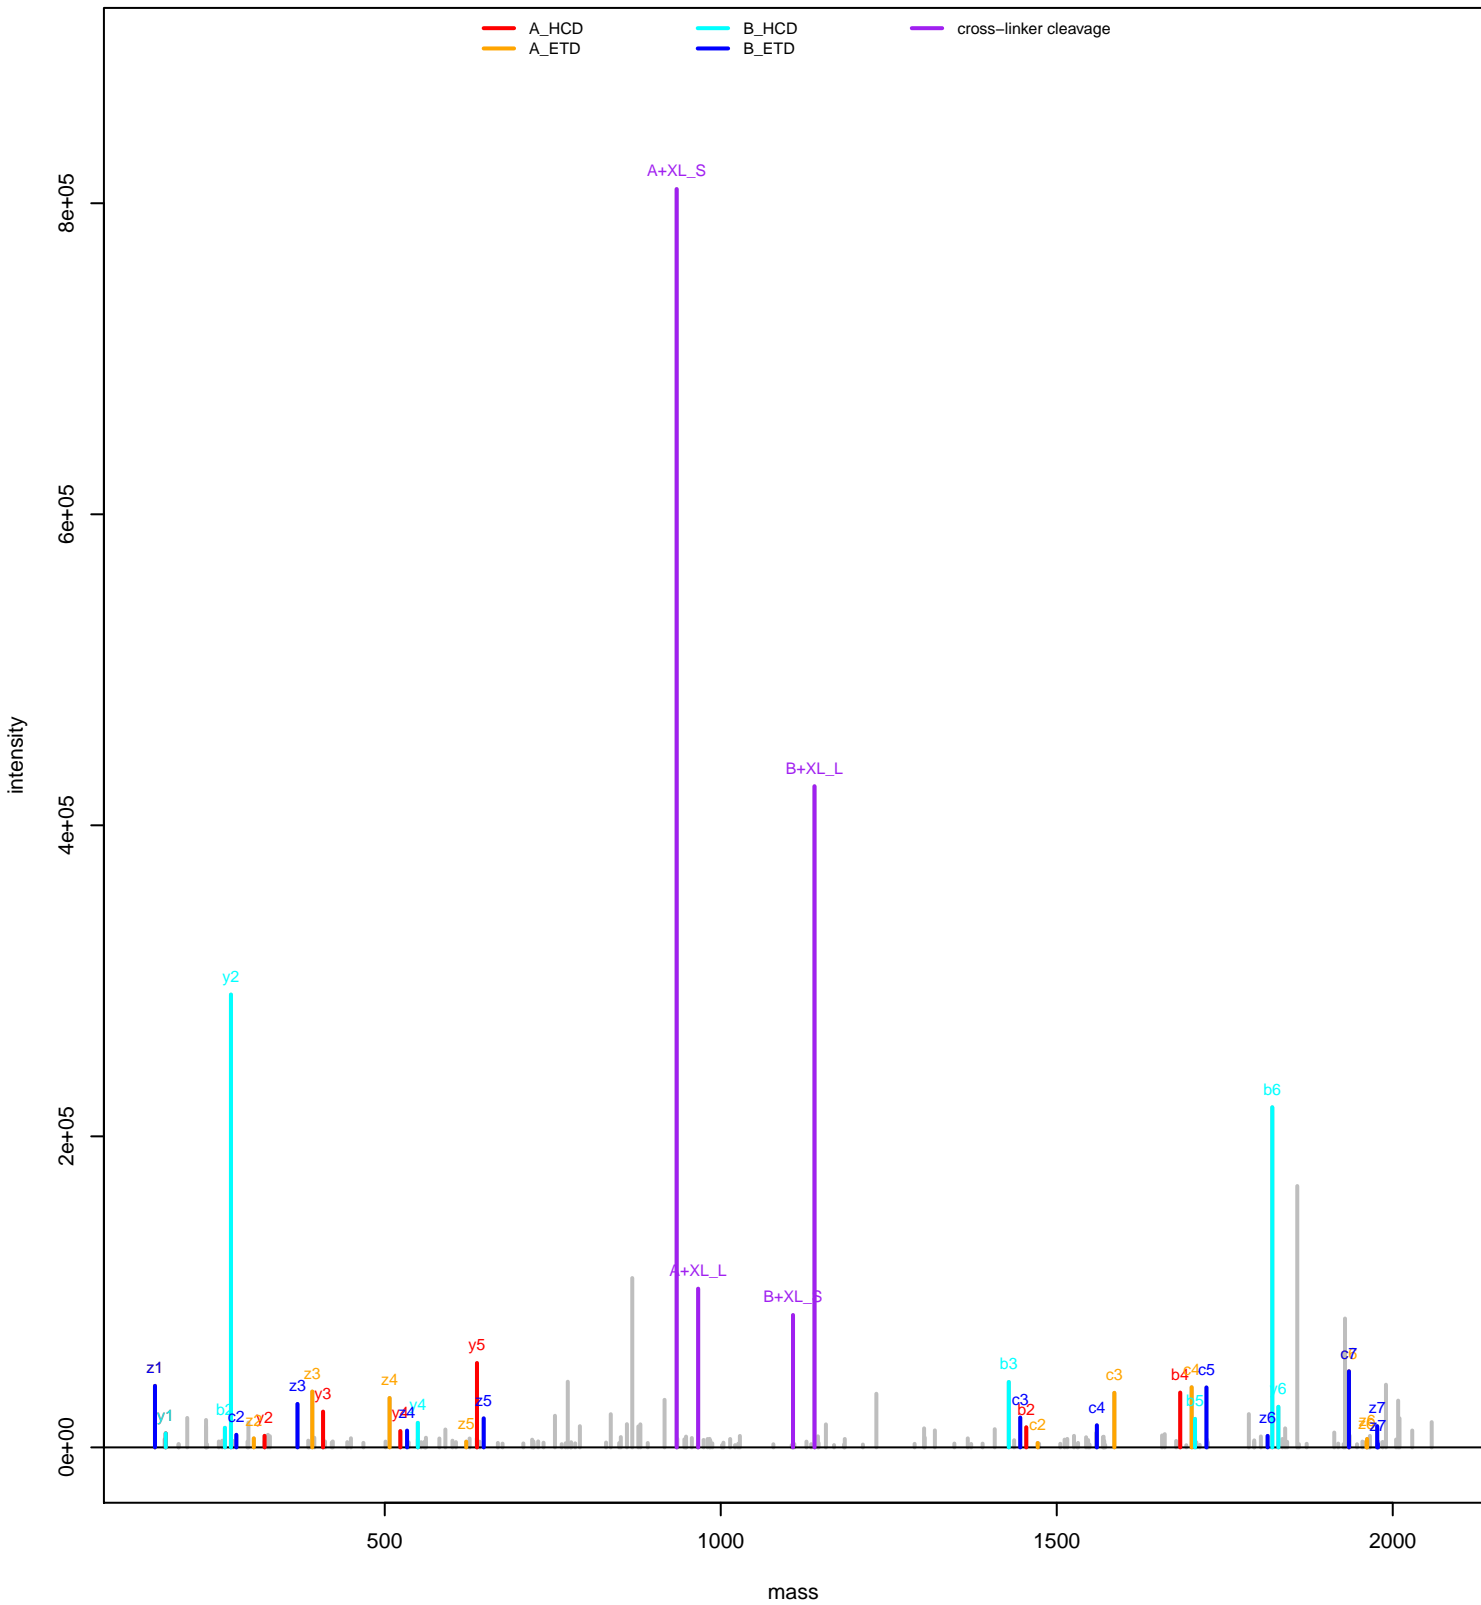

DKNDSFR+XL\_S

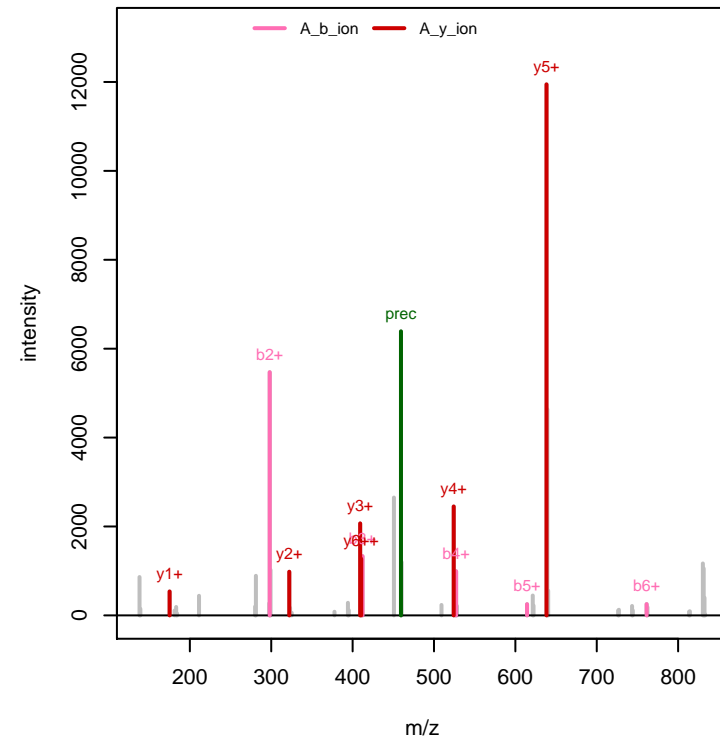

DKNDSFR+XL\_L

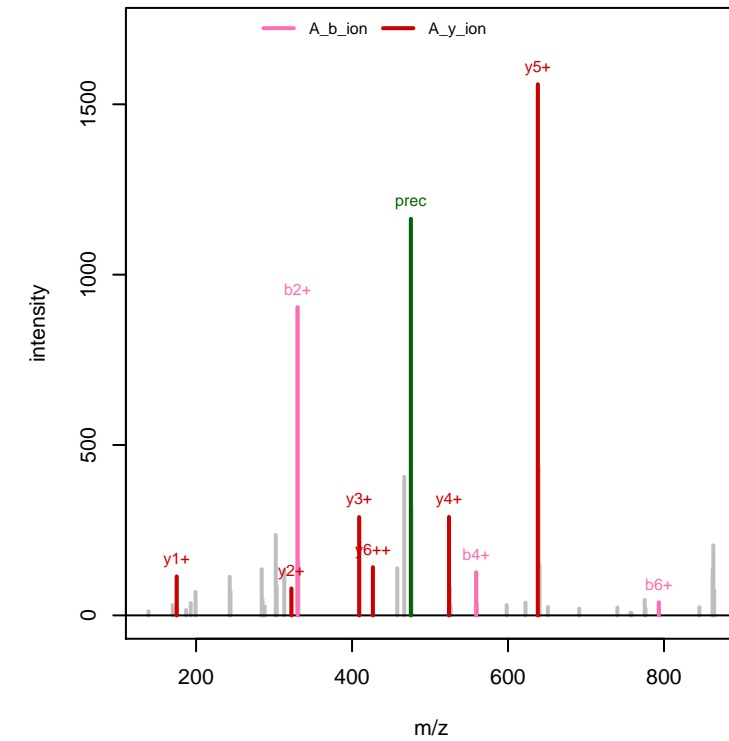

VYKNYDPR+XL\_S

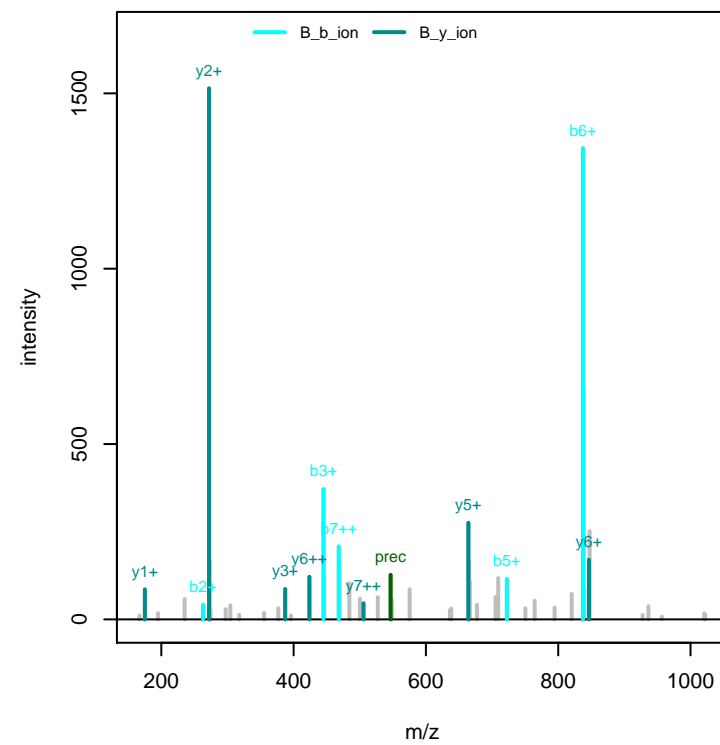

VYKNYDPR+XL\_L

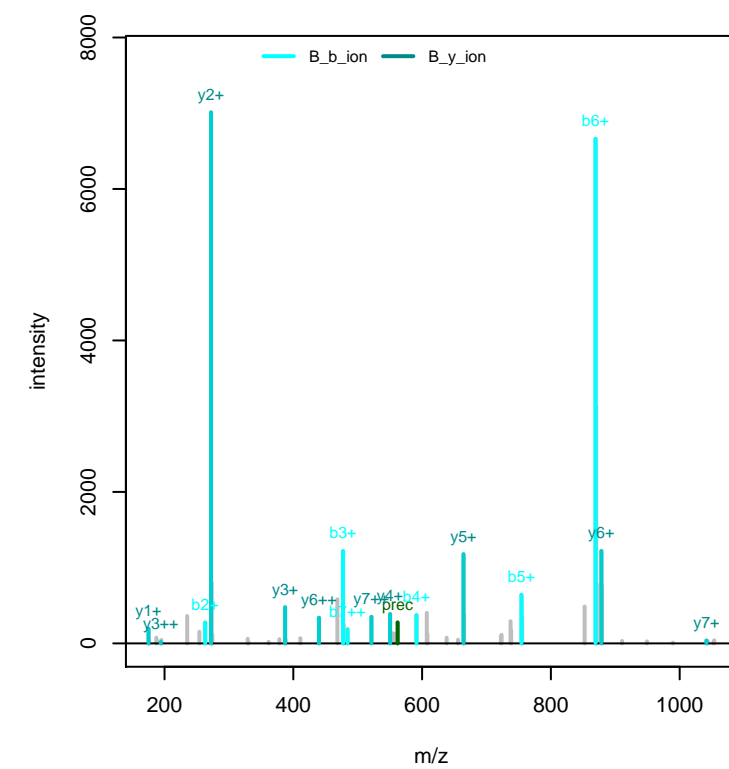

**KEALMR  
VIKLDQK**

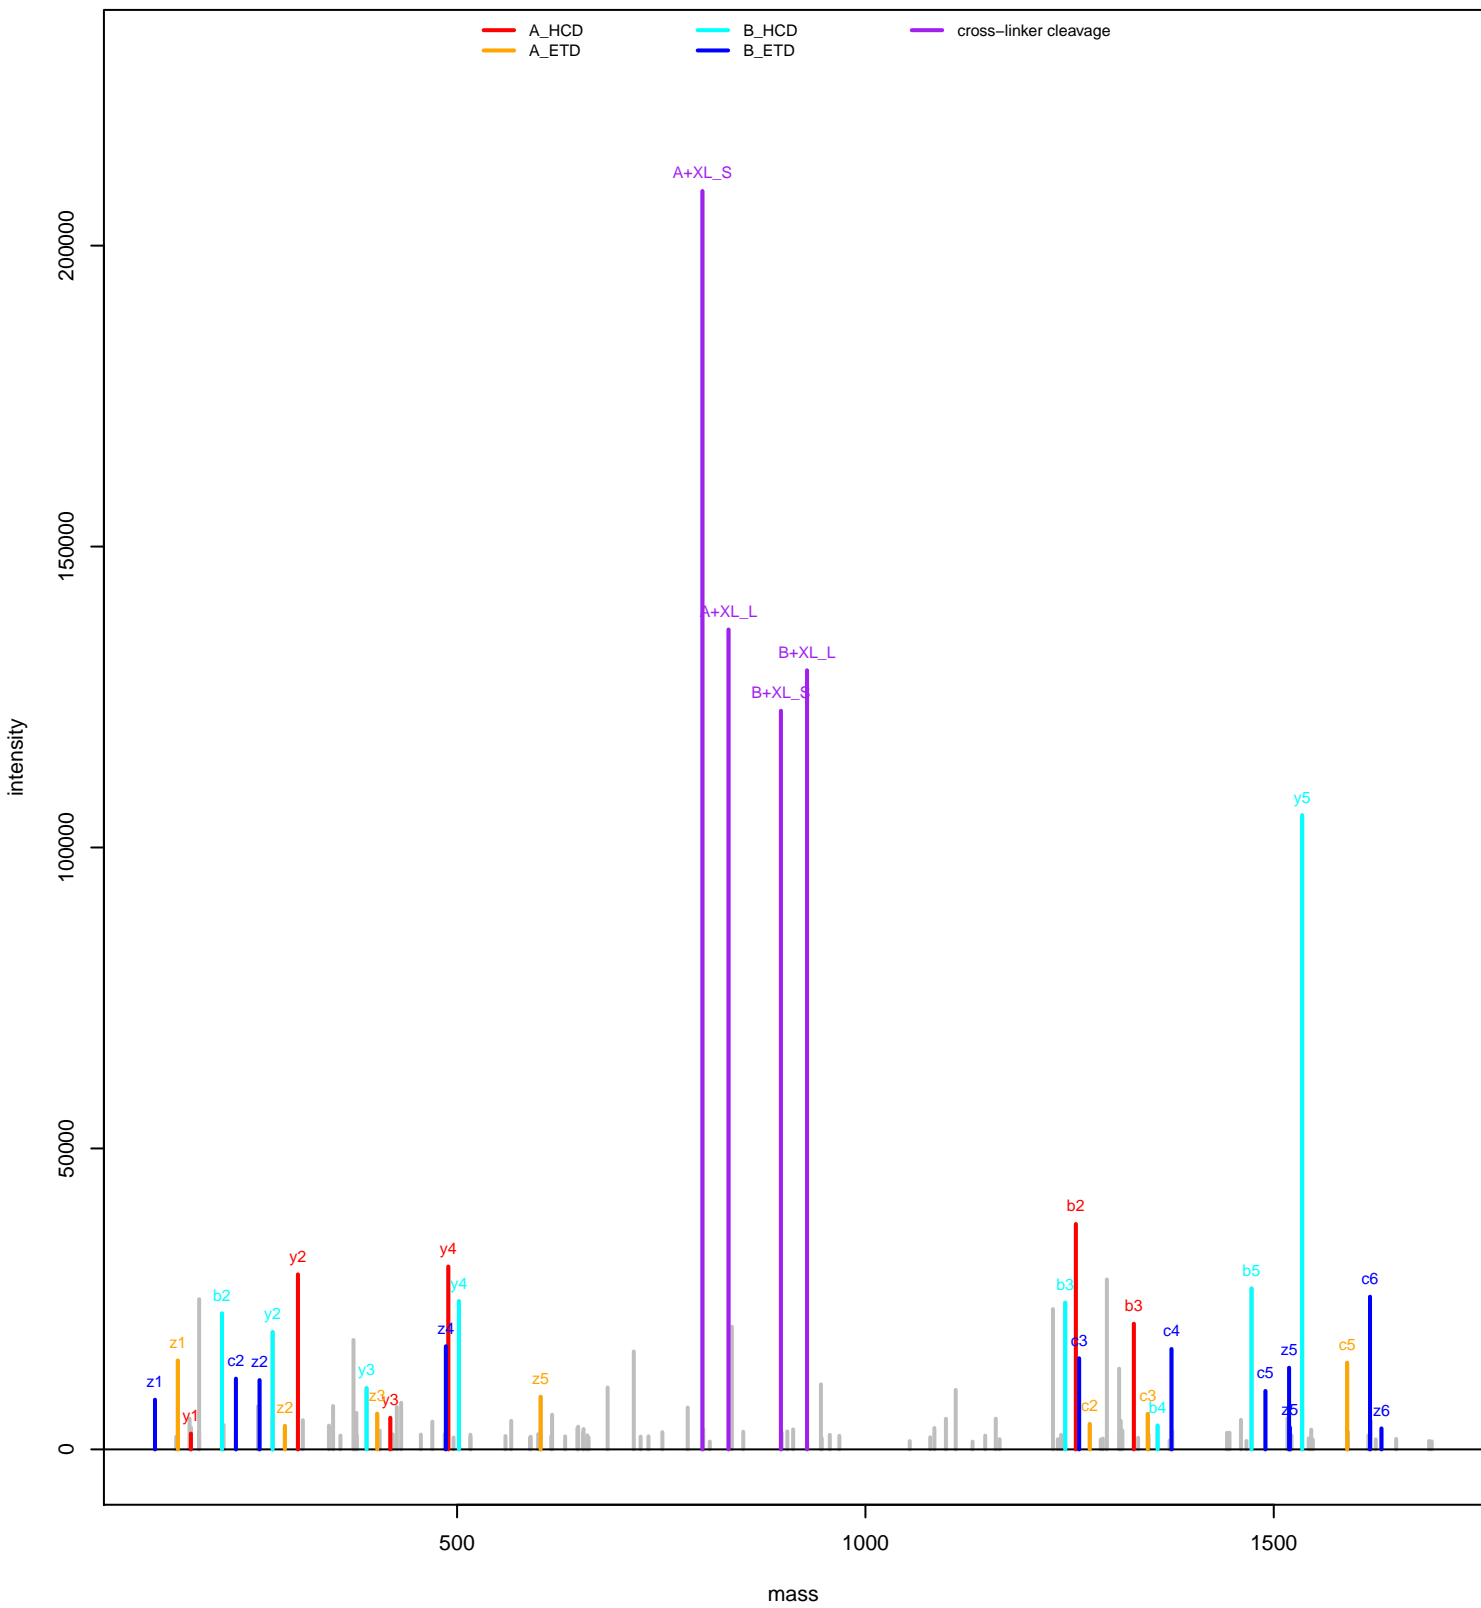

**KEALMR+XL\_S**

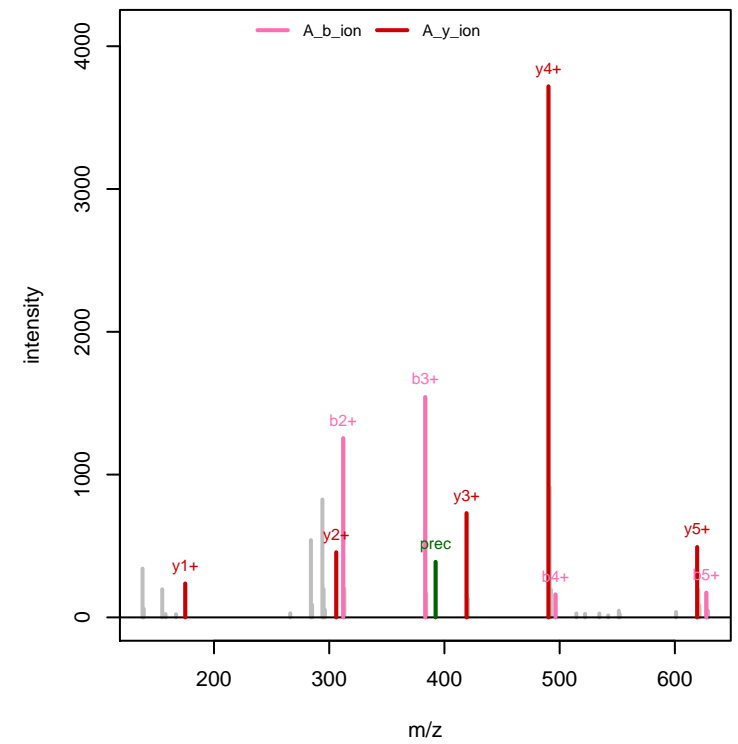

**KEALMR+XL\_L**

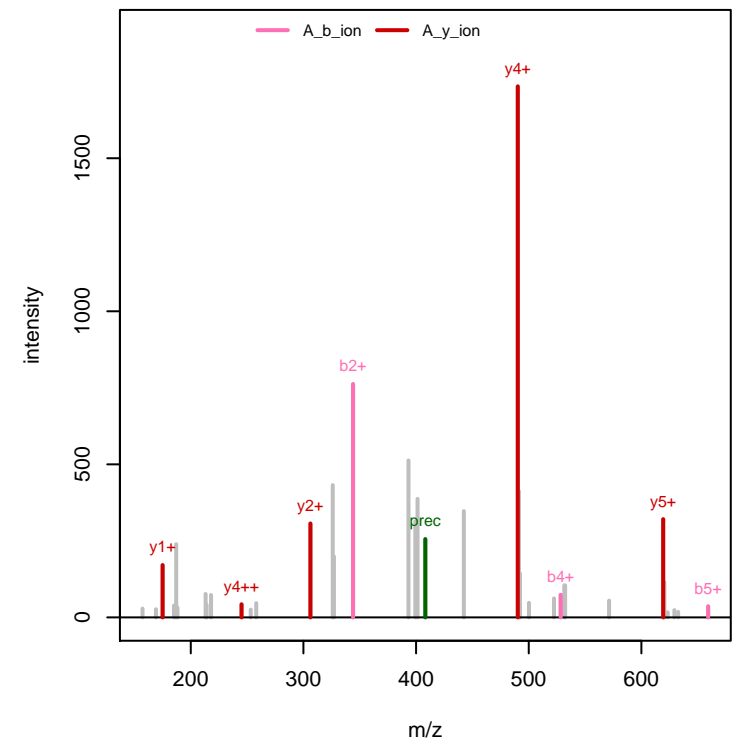

**VIKLDQK+XL\_S**

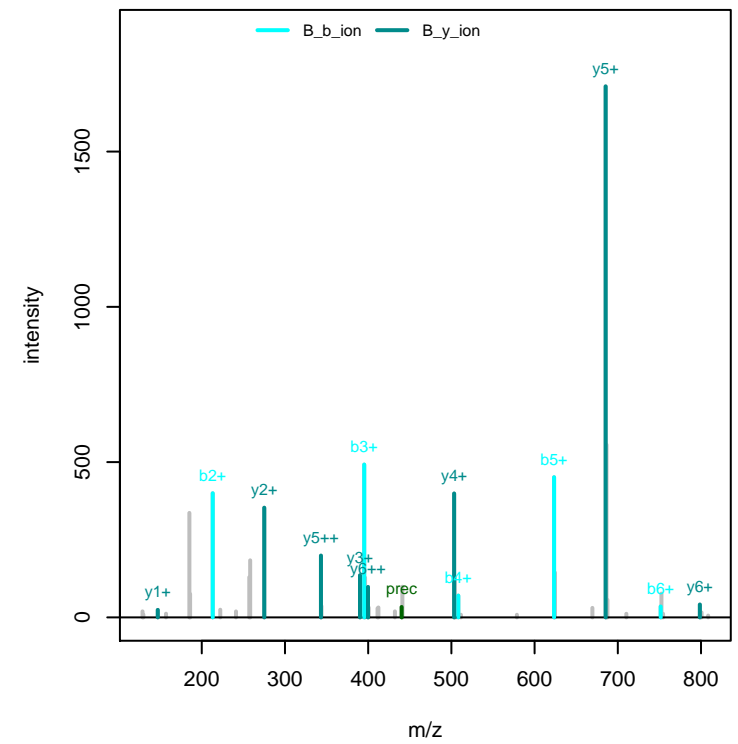

**VIKLDQK+XL\_L**

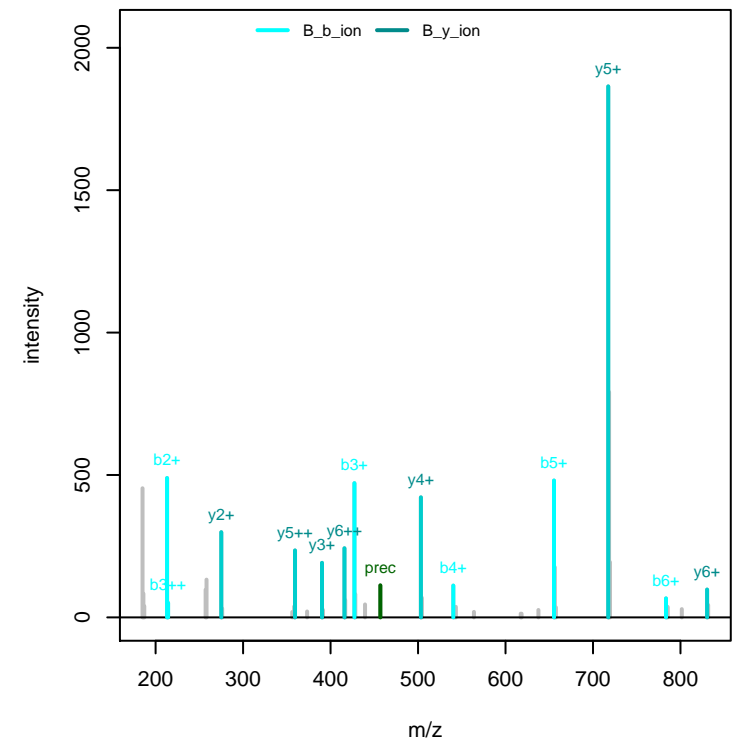

AENQYYGTGR  
VFIKPGNGKIVINQR

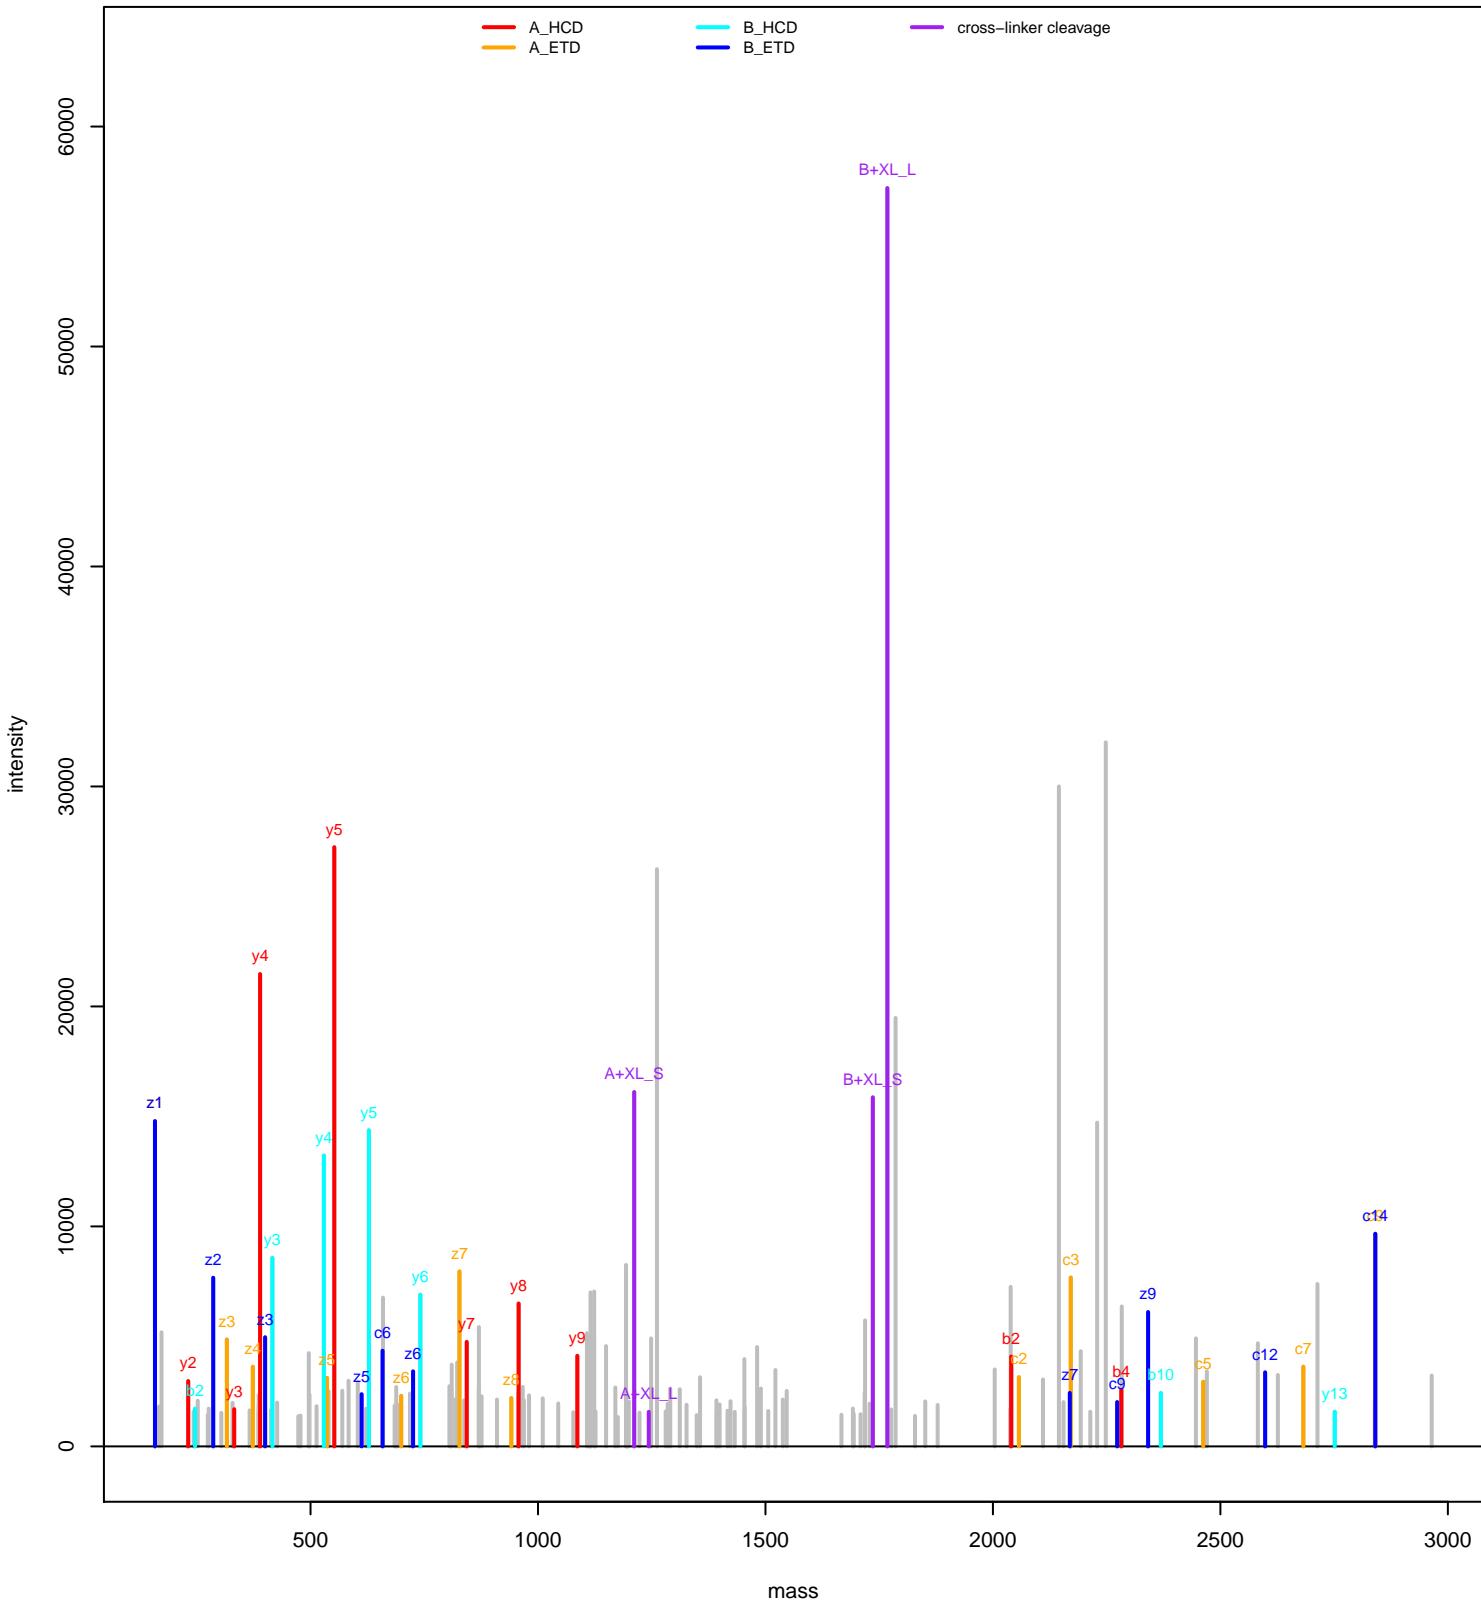

AENQYYGTGR+XL\_S

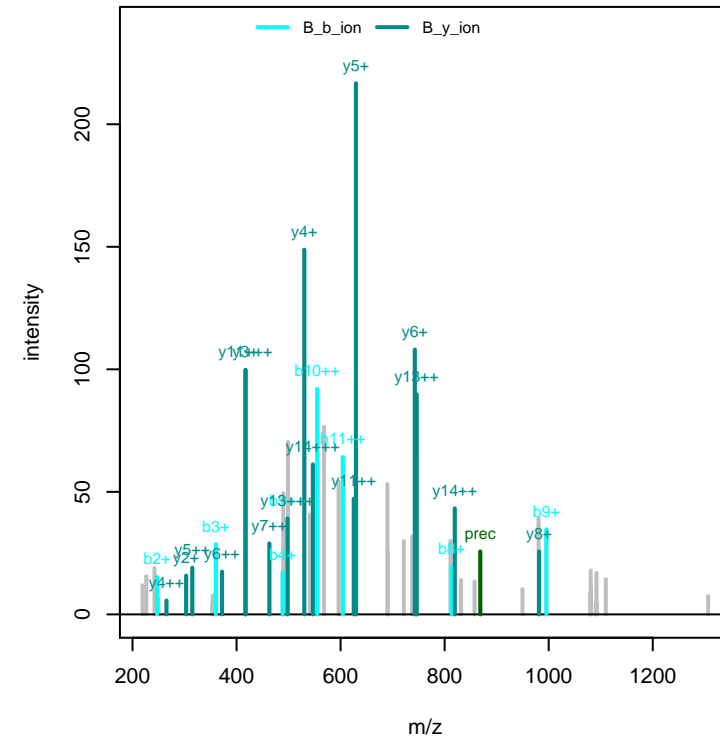

AENQYYGTGR+XL\_L

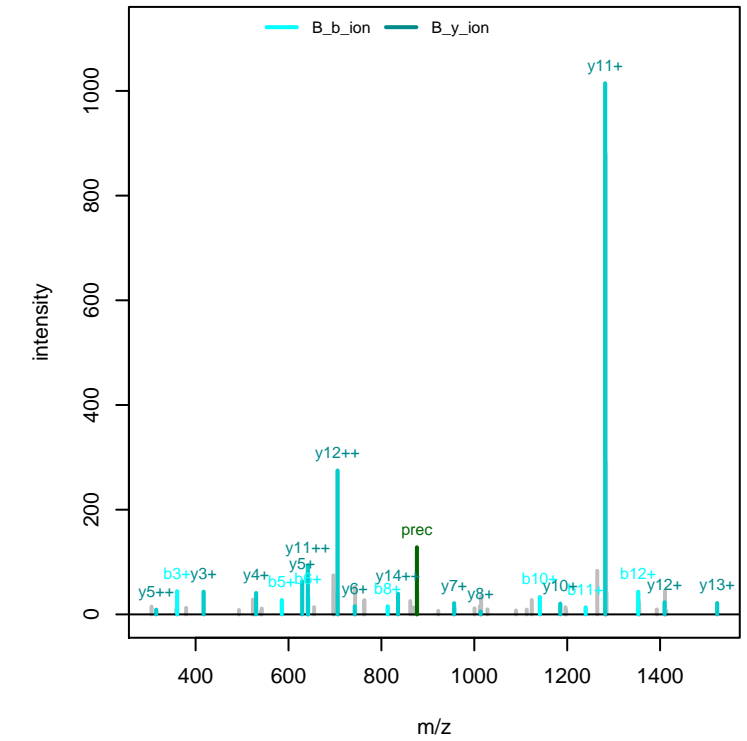

VFIKPGNGKIVINQR+XL\_S

VFIKPGNGKIVINQR+XL\_L

VKNVLSSGK  
KHQKPVPALNQPGGIVEK

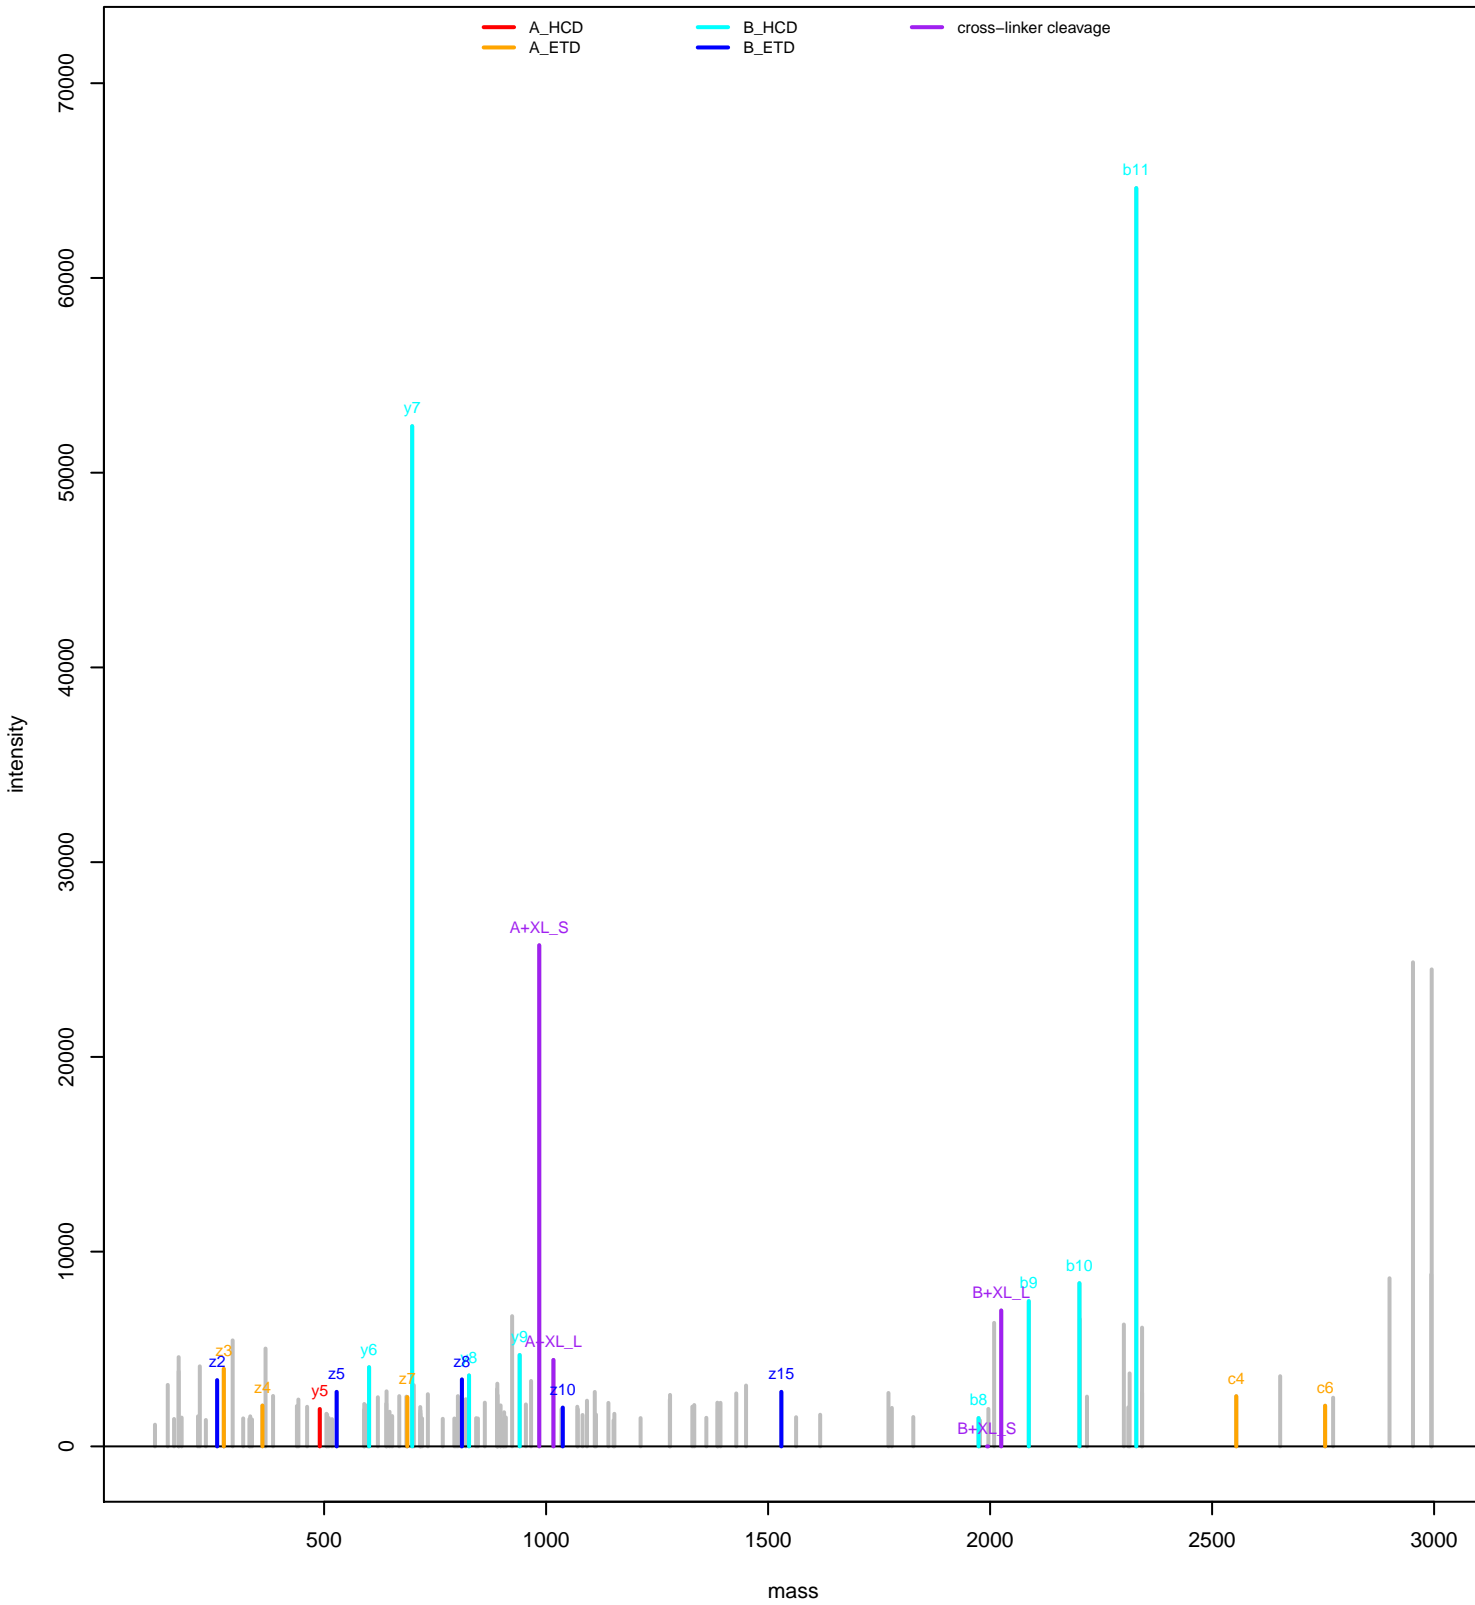

VKNVLSSGK+XL\_S

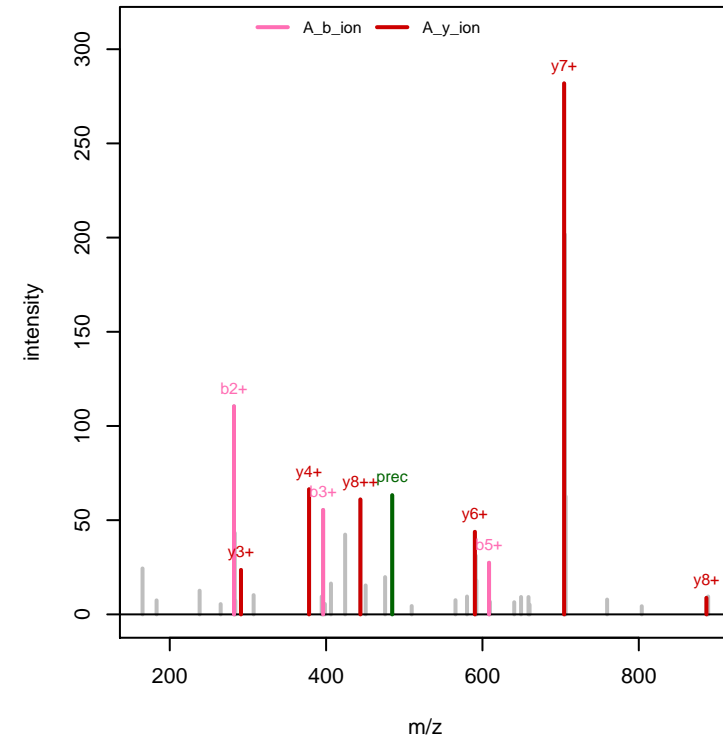

VKNVLSSGK+XL\_L

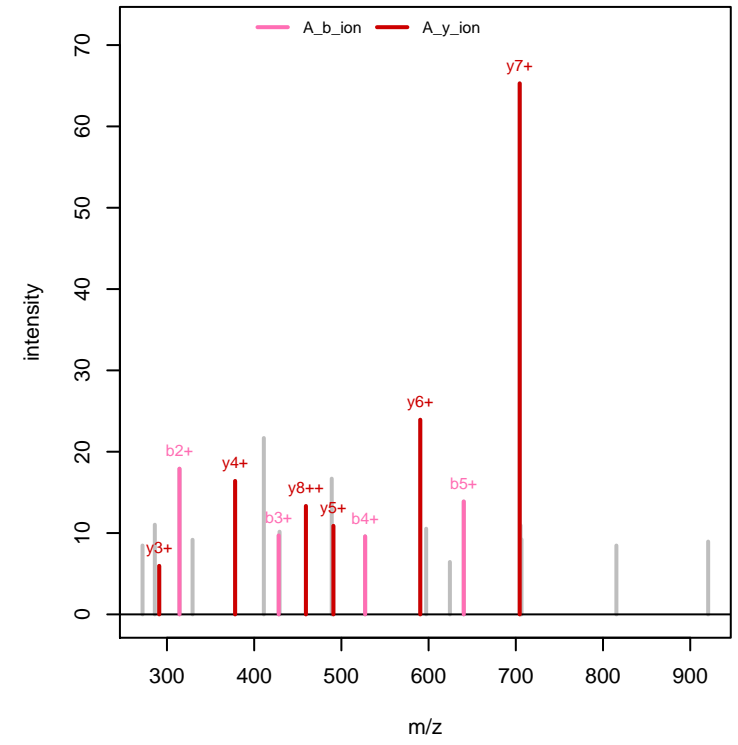

KHQKPVPALNQPGGIVEK+XL\_S

KHQKPVPALNQPGGIVEK+XL\_L

**ANAKFEVK**  
**EAKDLVESAPAALK**

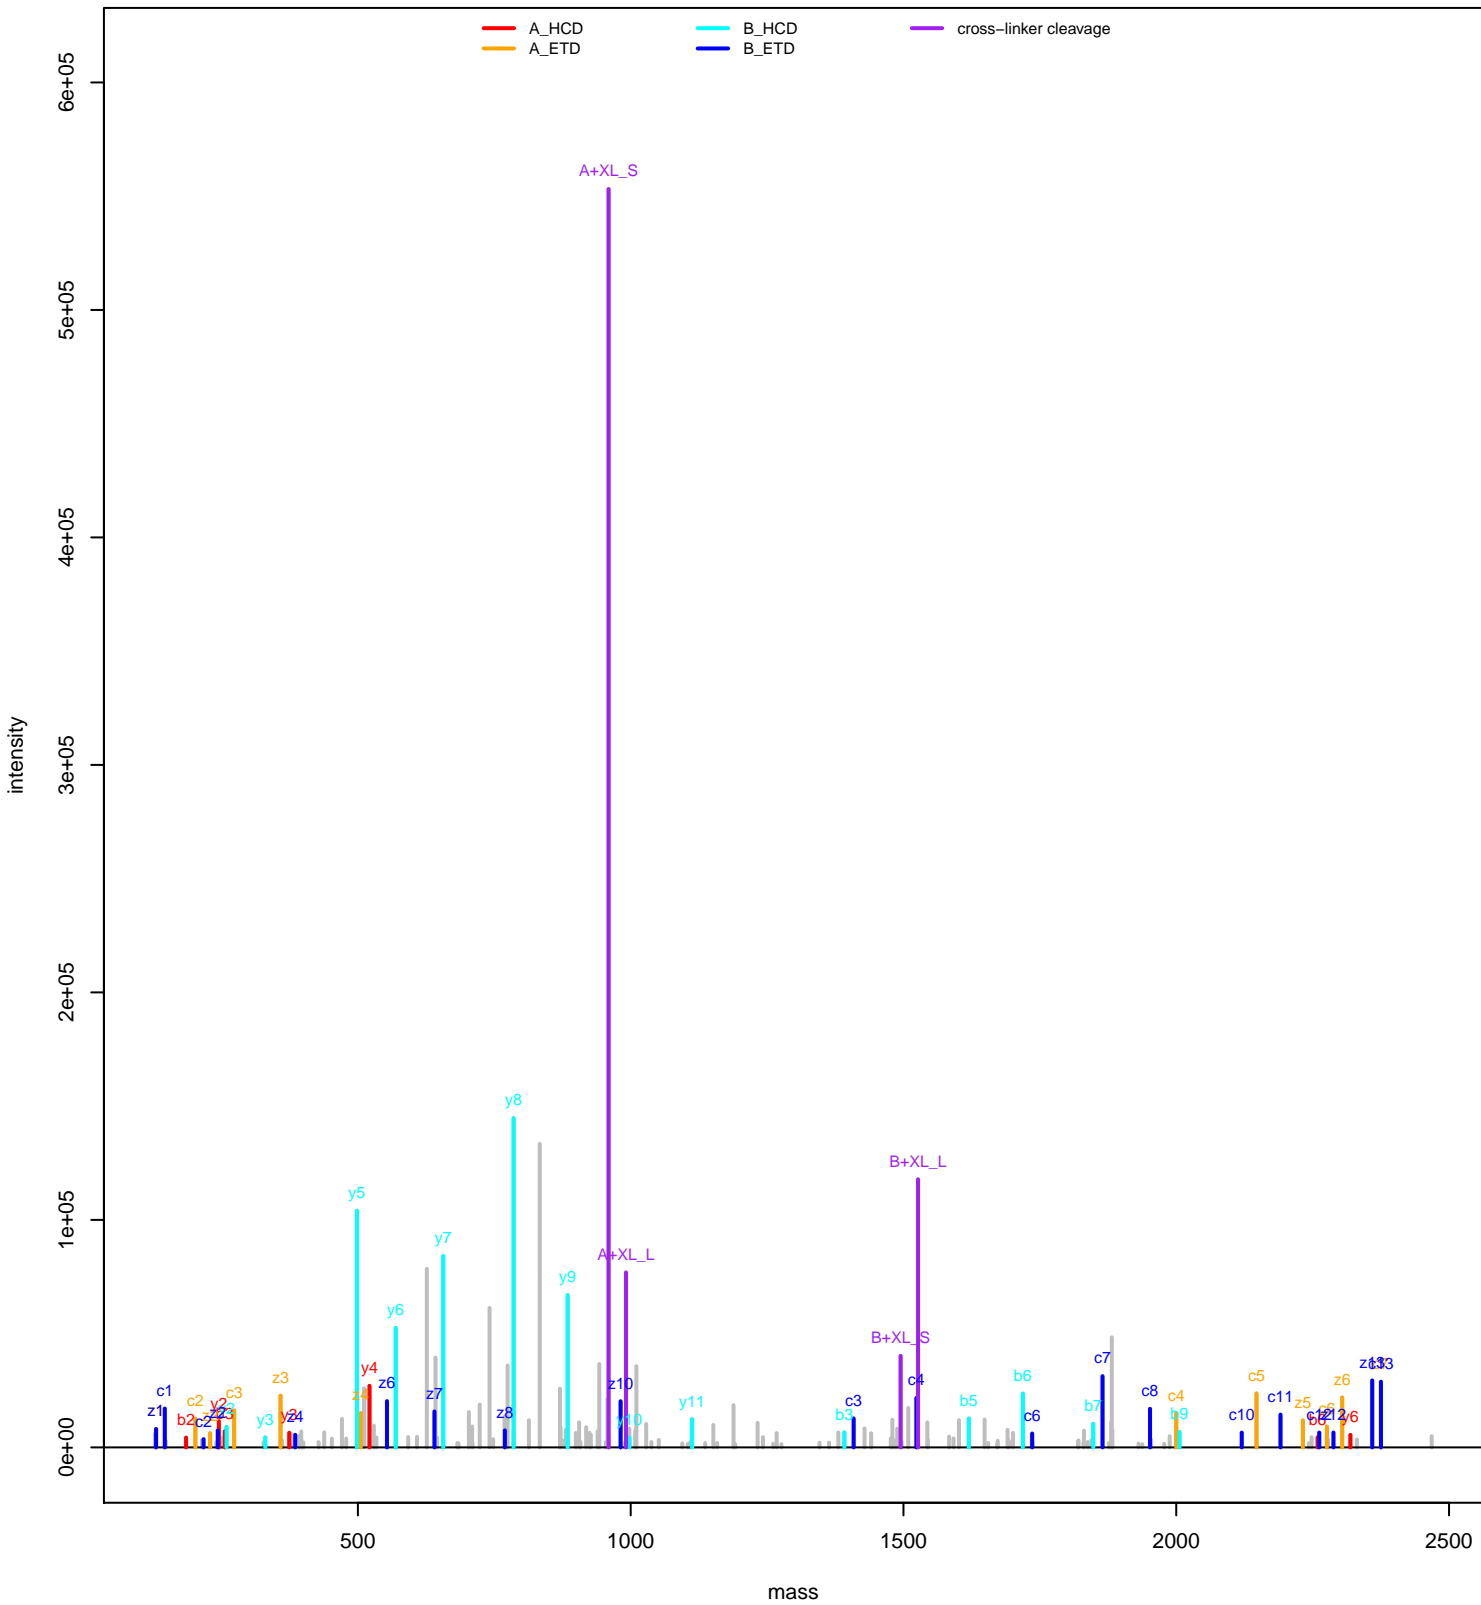

**ANAKFEVK+XL\_S**

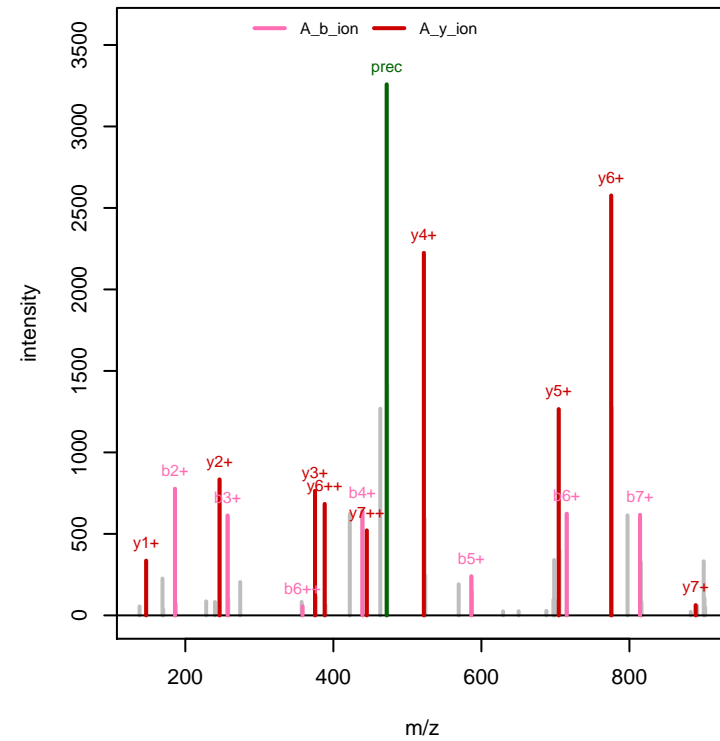

**ANAKFEVK+XL\_L**

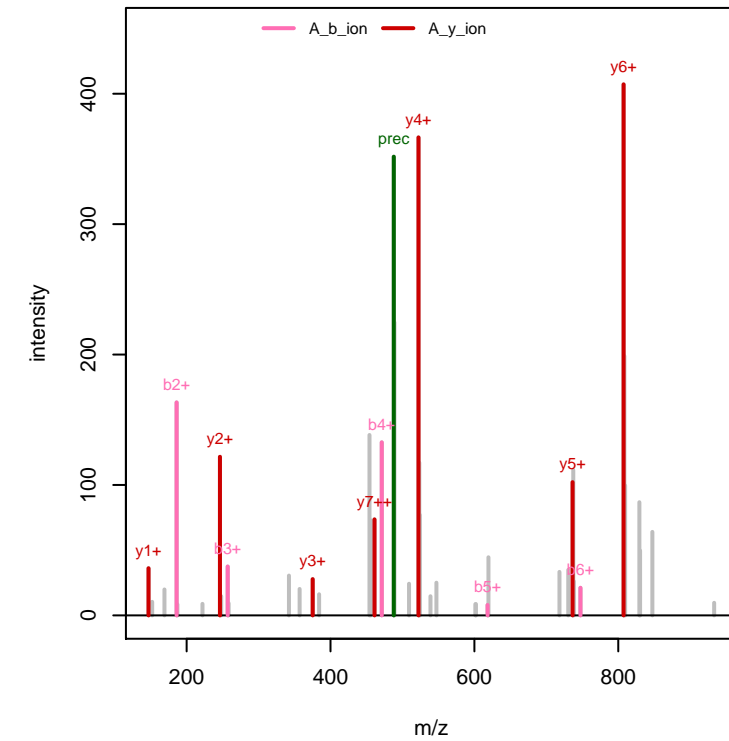

**EAKDLVESAPAALK+XL\_S**

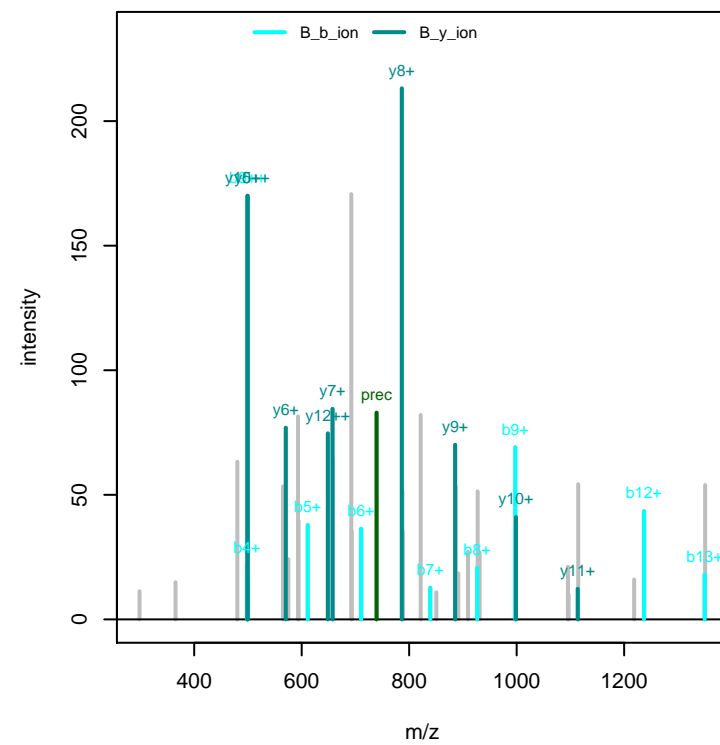

**EAKDLVESAPAALK+XL\_L**

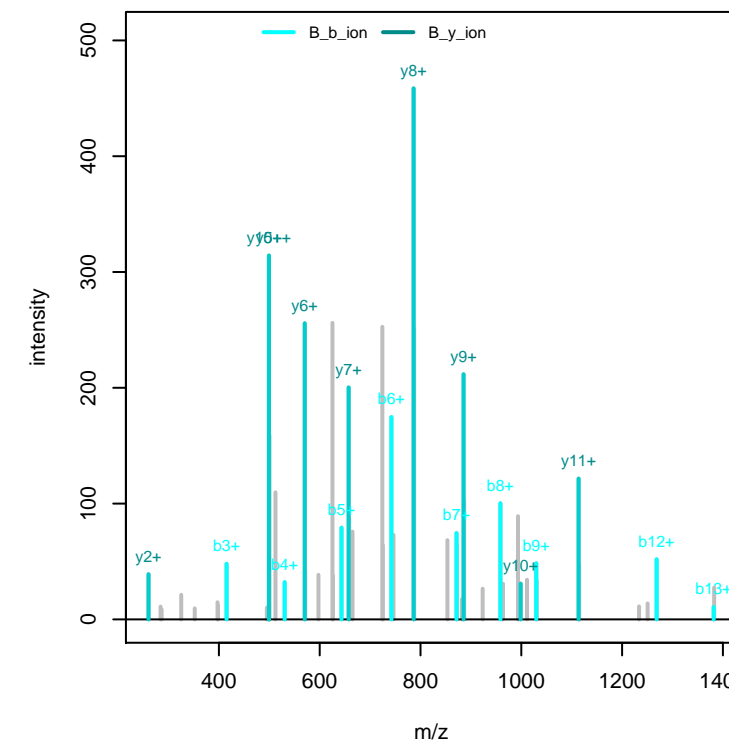



ILENGEVKPLDVK  
ILENGEVKPLDVK

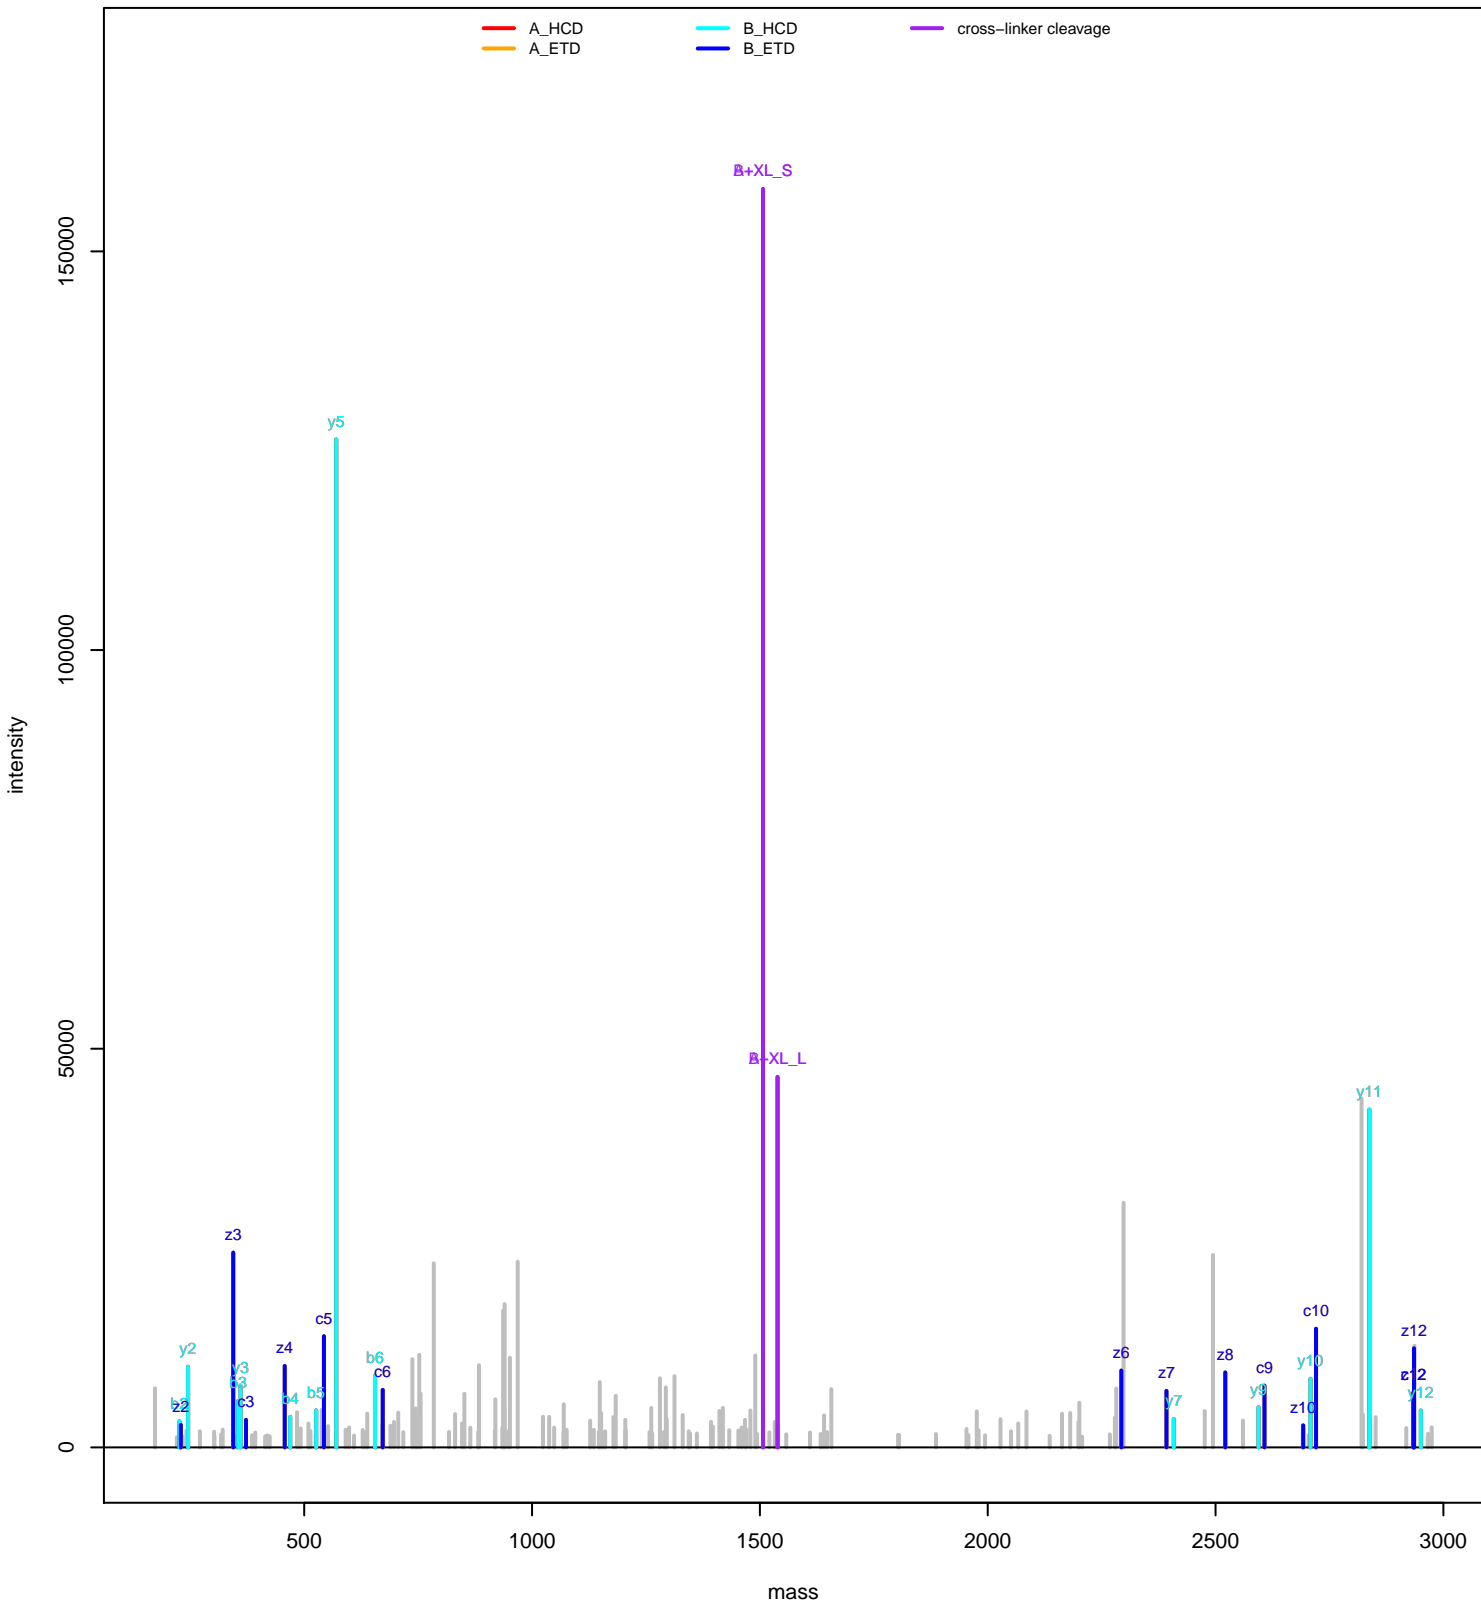

ILENGEVKPLDVK+XL\_S

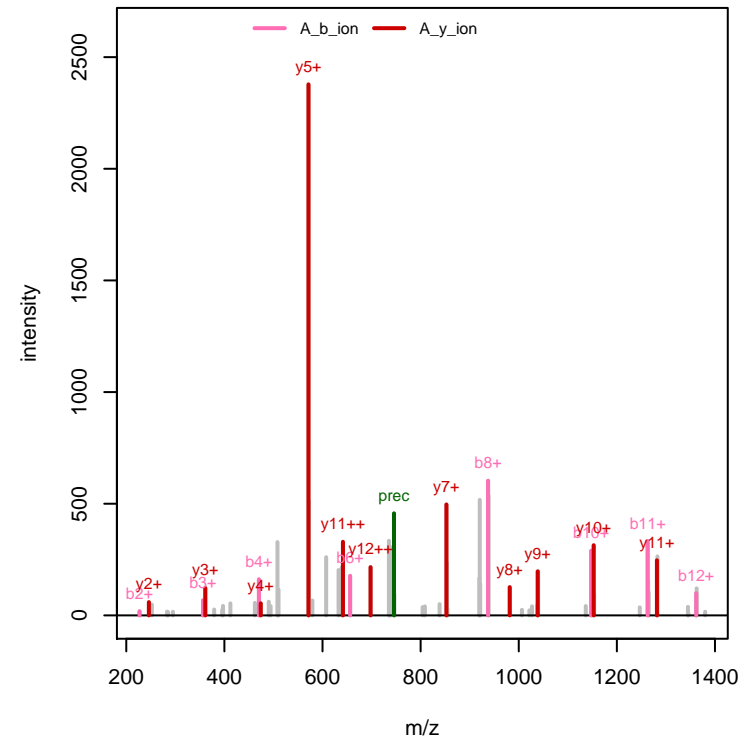

ILENGEVKPLDVK+XL\_L

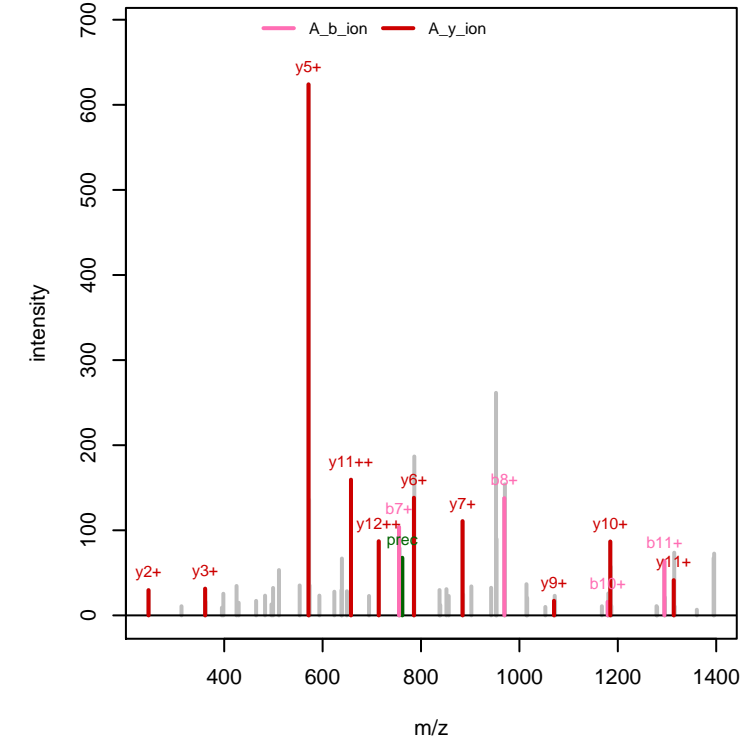

ILENGEVKPLDVK+XL\_S

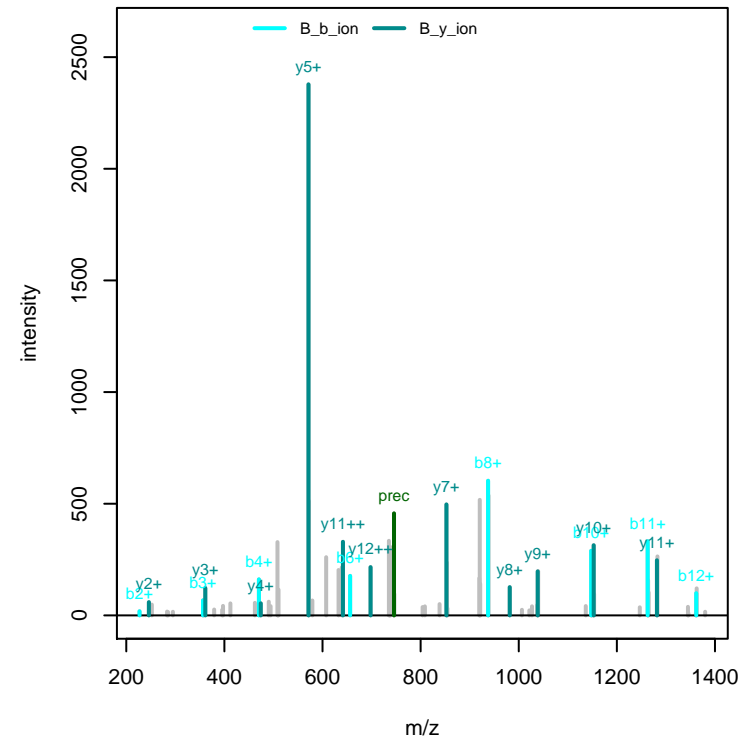

ILENGEVKPLDVK+XL\_L

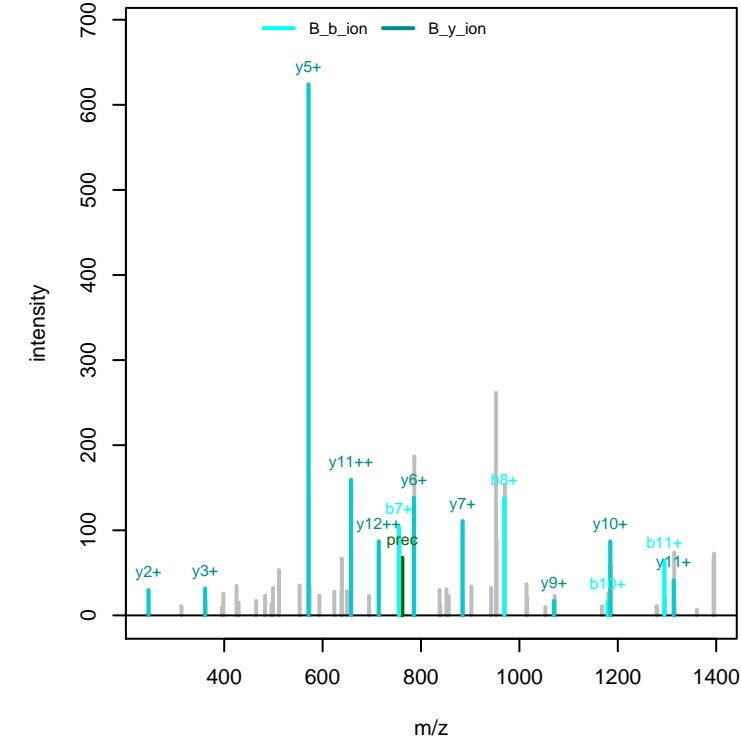

KIIGK  
EISCVDSAELGKASR

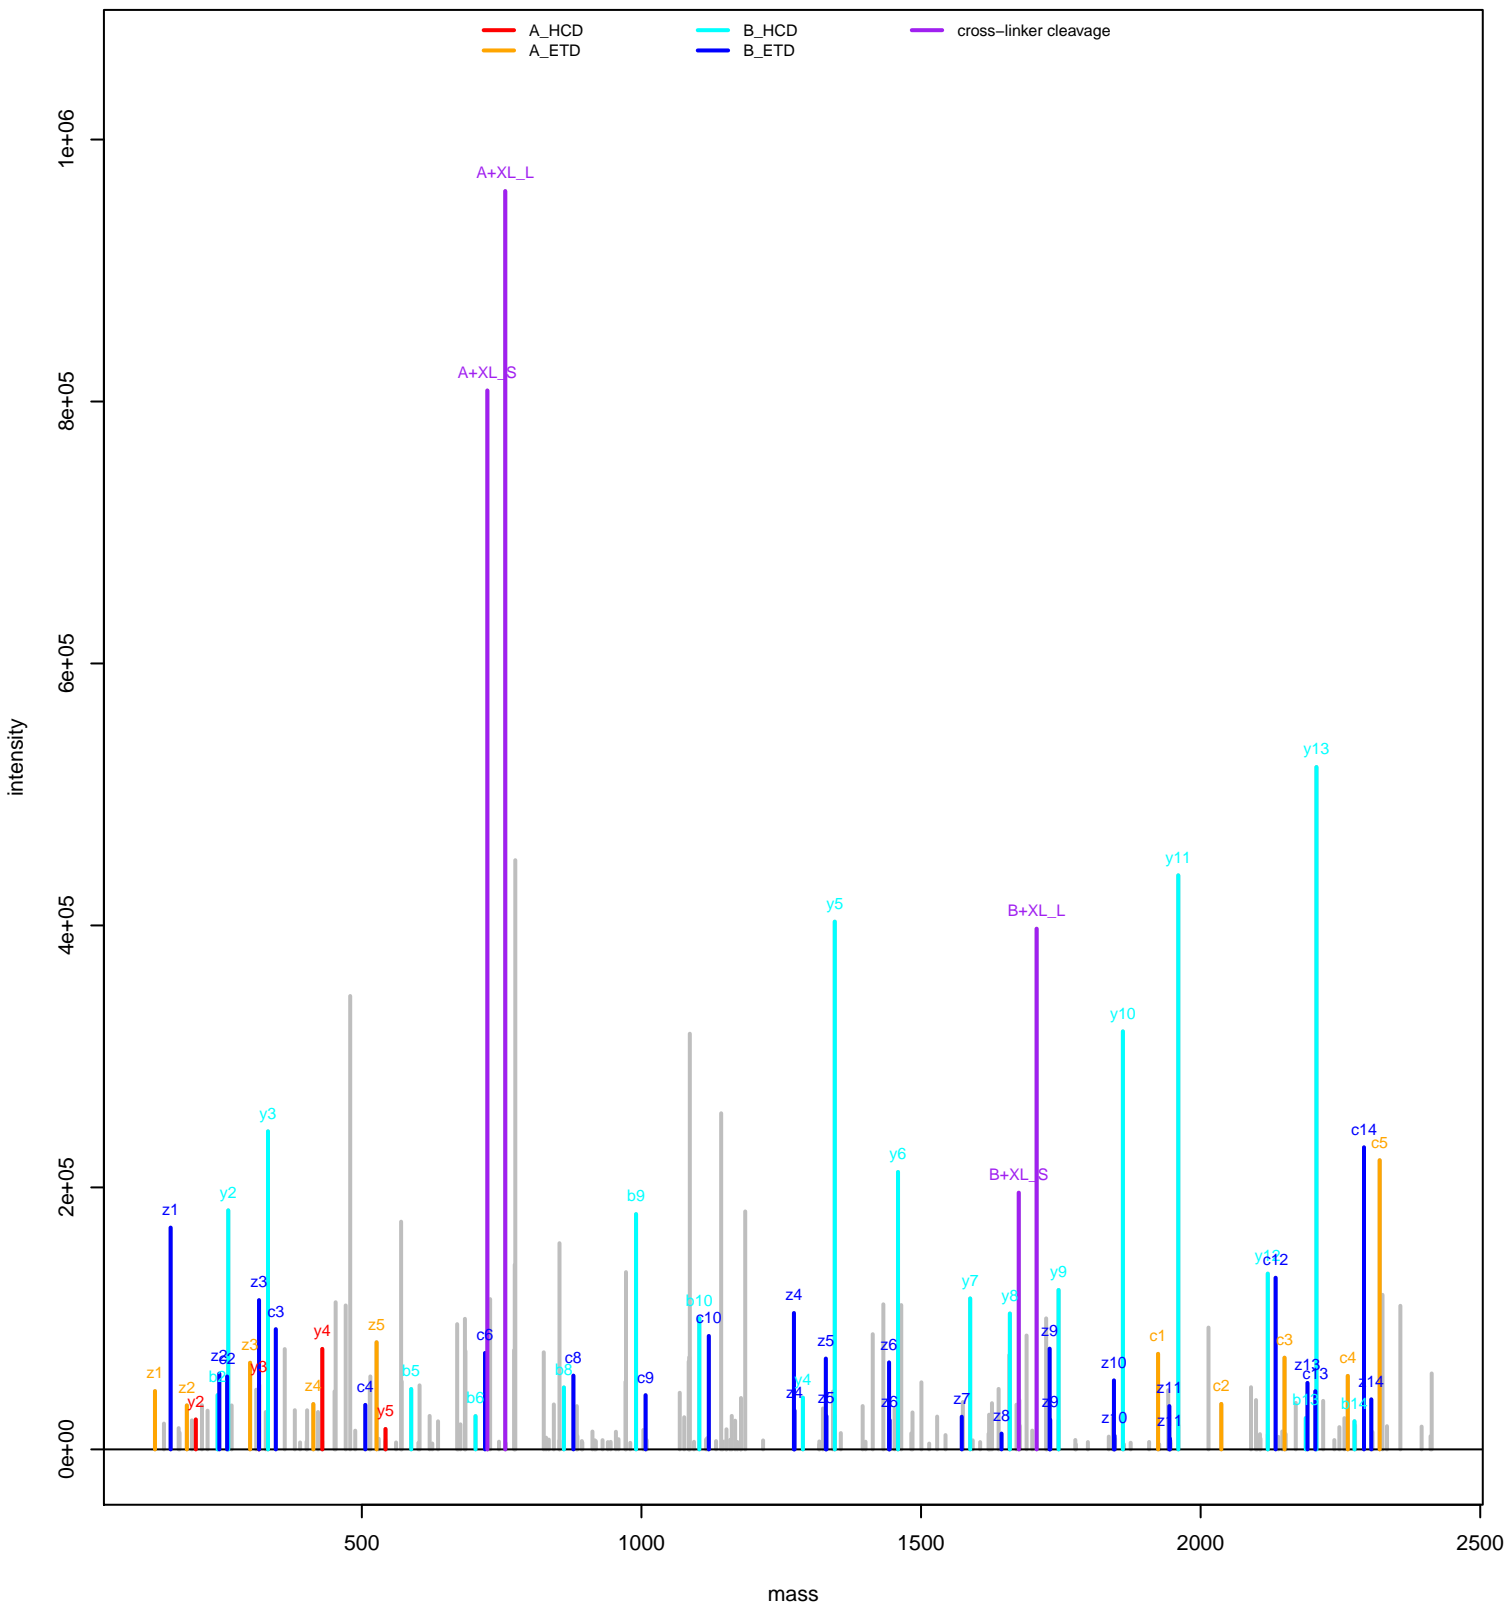

KIIGK+XL\_S

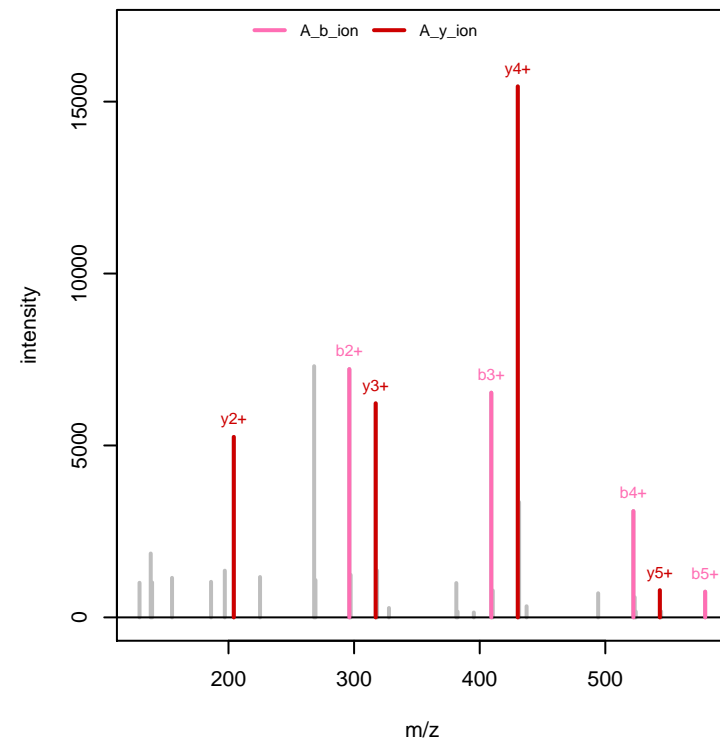

KIIGK+XL\_L

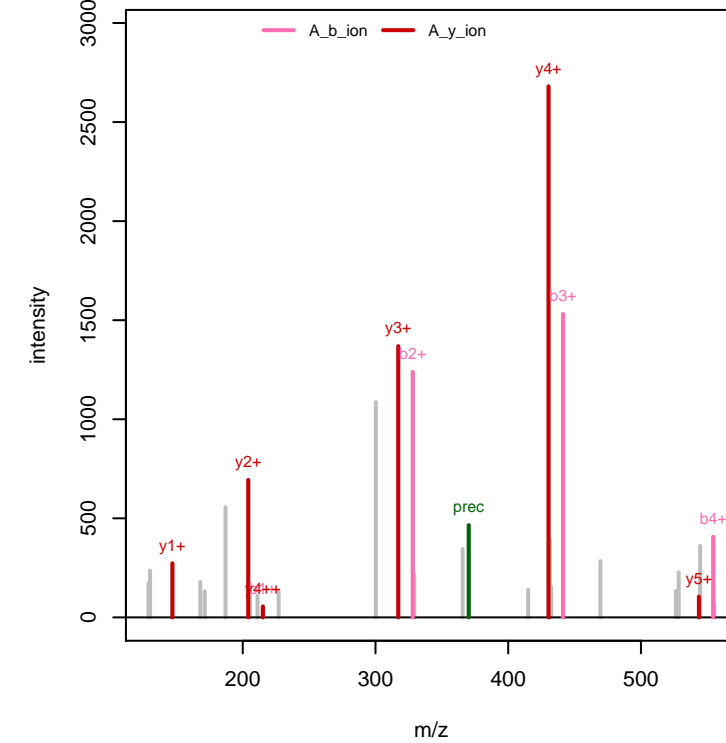

EISCVDSAELGKASR+XL\_S

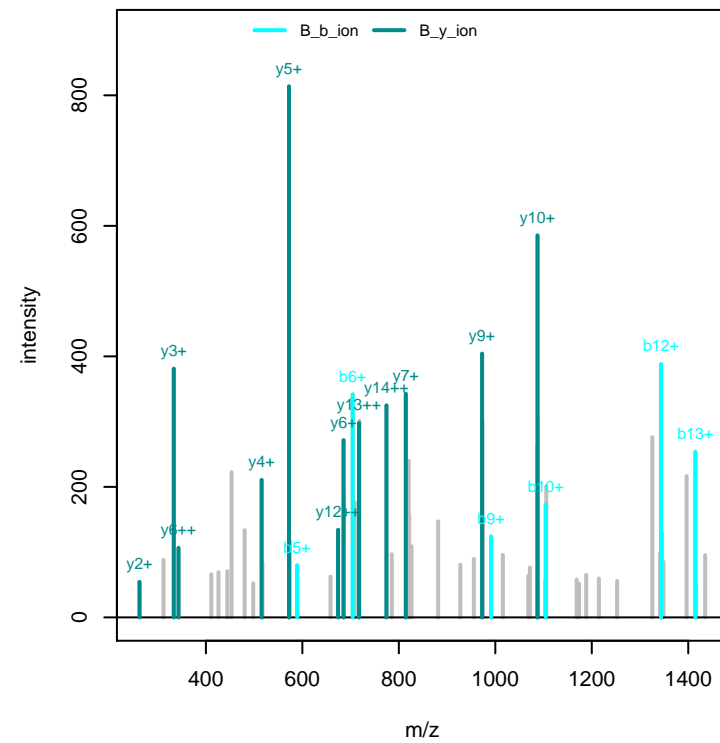

EISCVDSAELGKASR+XL\_L

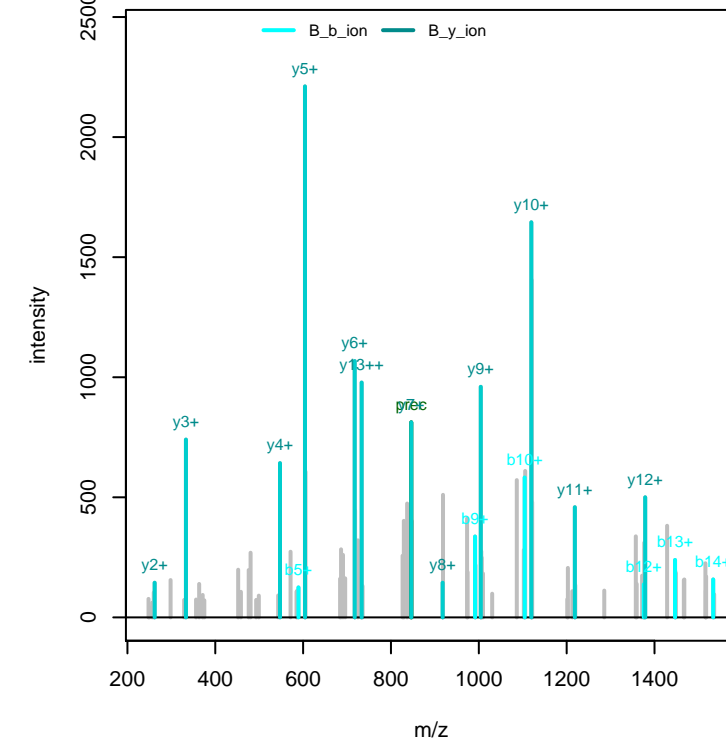

IVKMIK  
QGIESATQKK

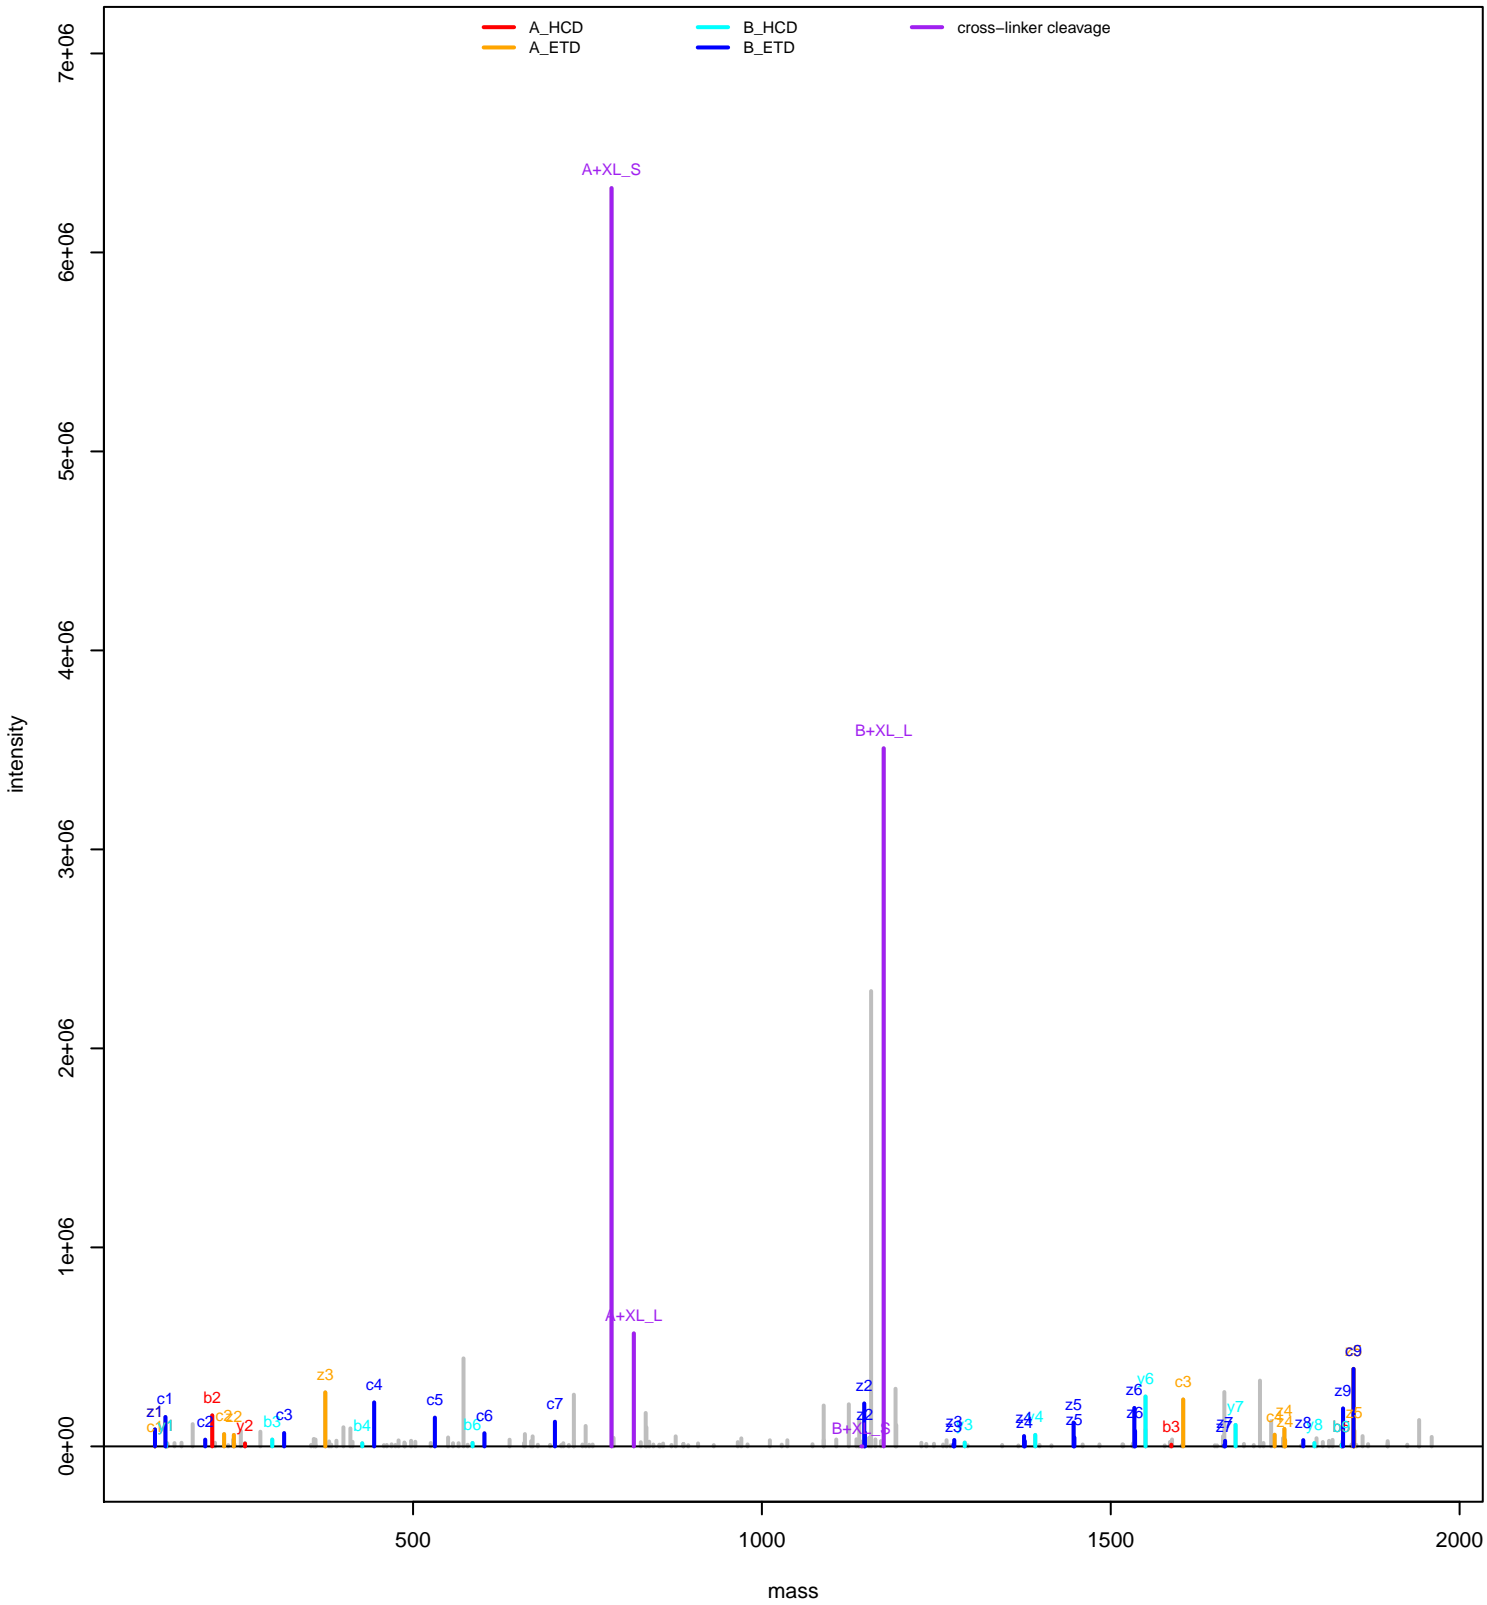

IVKMIK+XL\_S

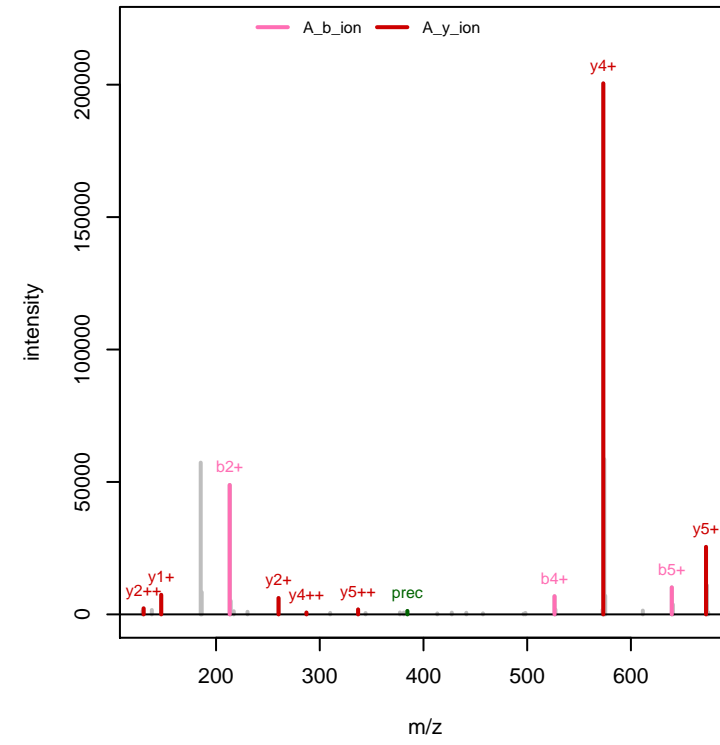

IVKMIK+XL\_L

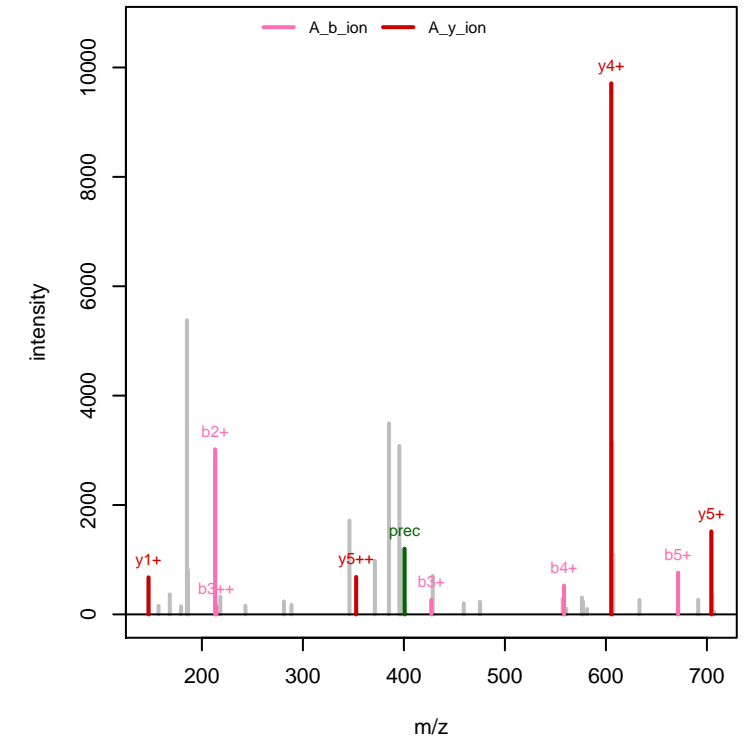

QGIESATQKK+XL\_S

QGIESATQKK+XL\_L

AGSDRTKLEK  
METDLQAKMK

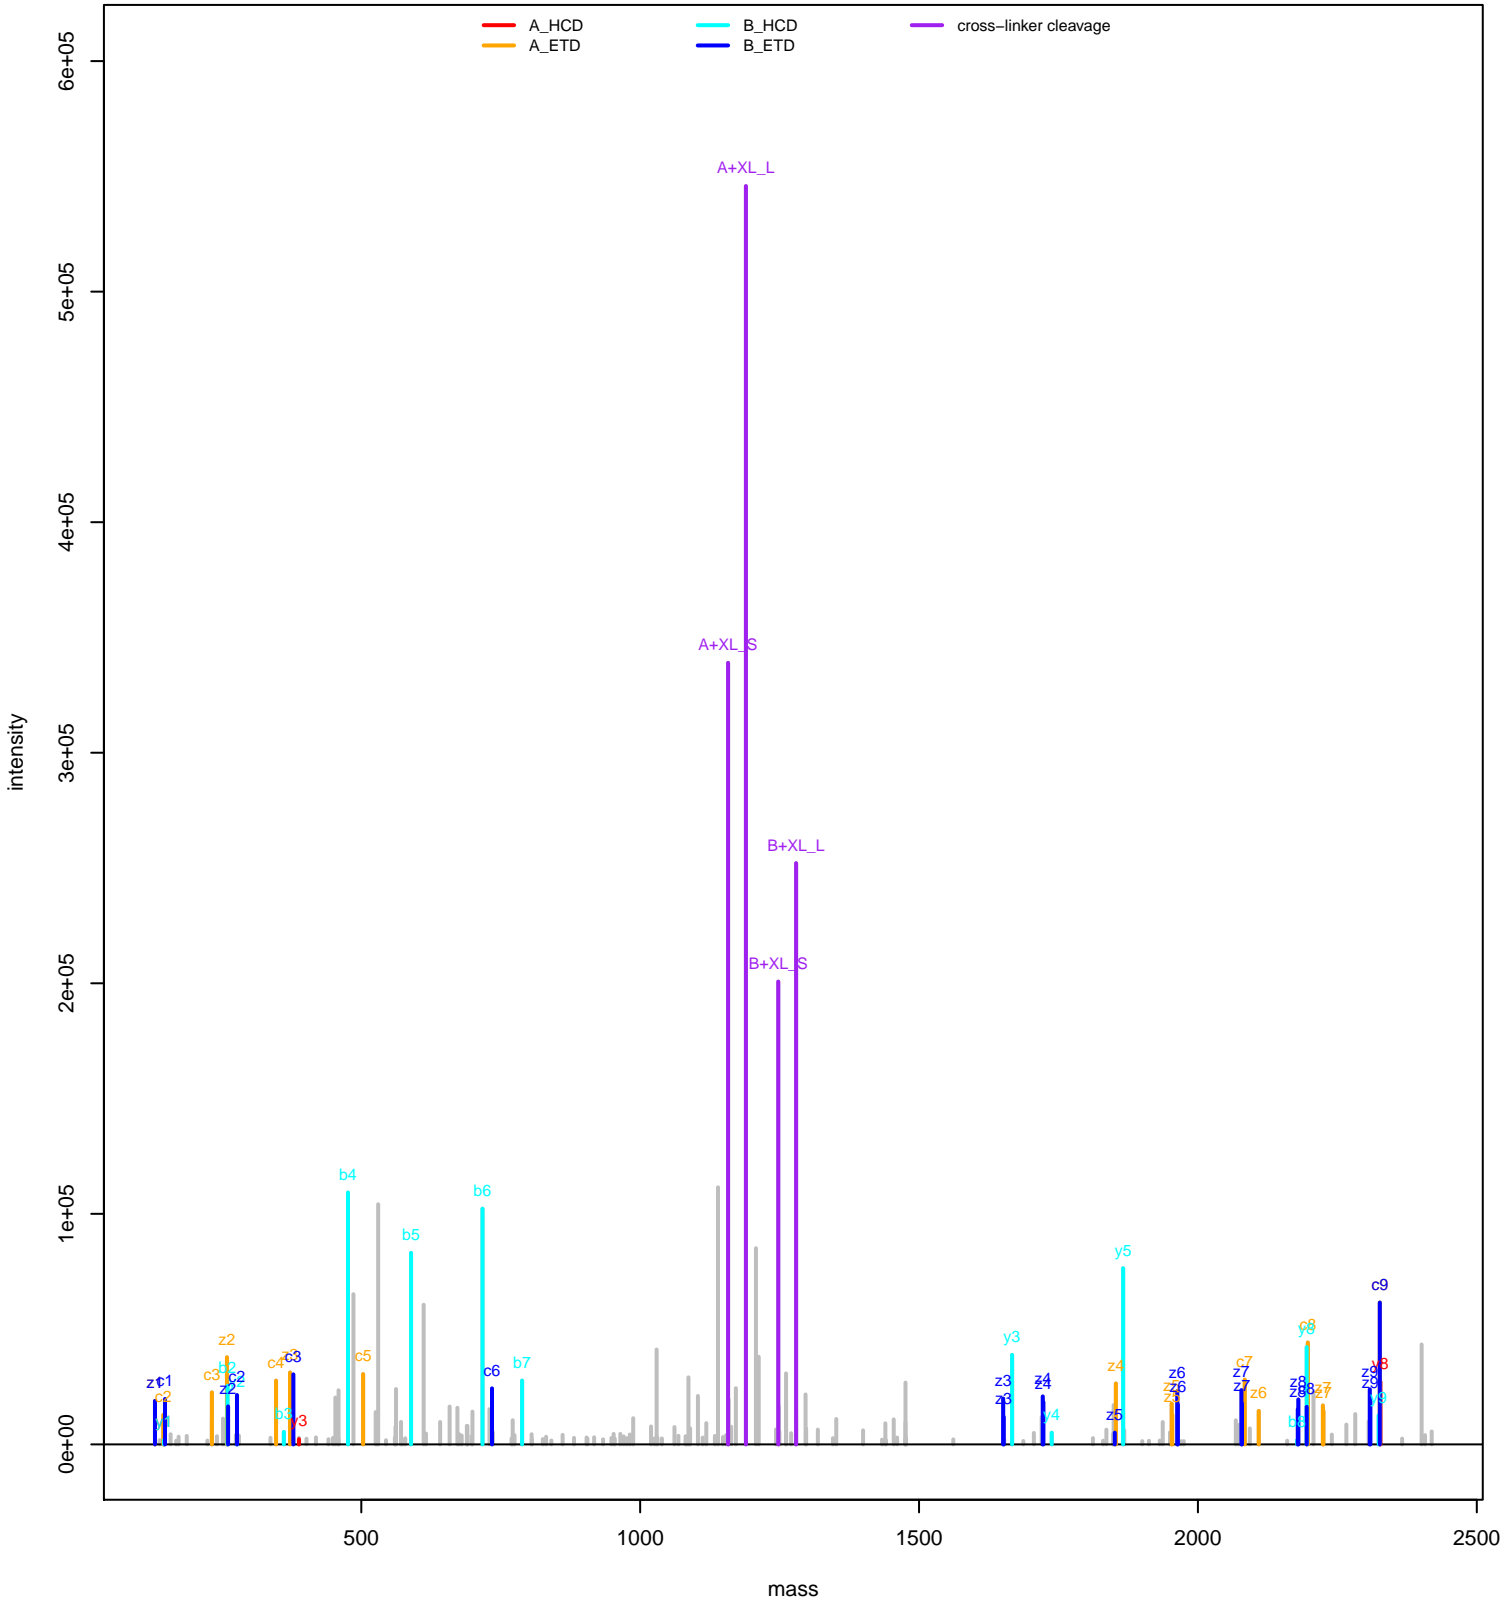

AGSDRTKLEK+XL\_S

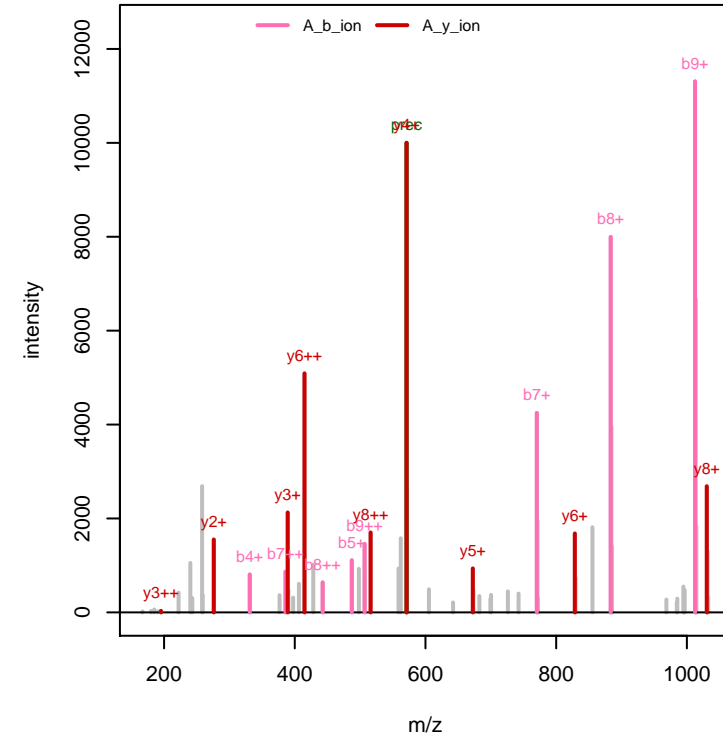

AGSDRTKLEK+XL\_L

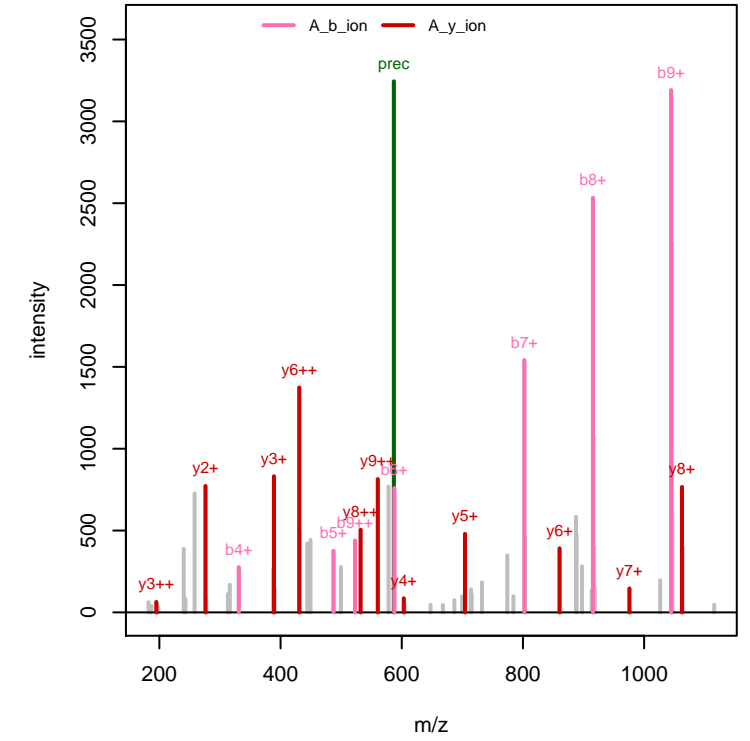

METDLQAKMK+XL\_S

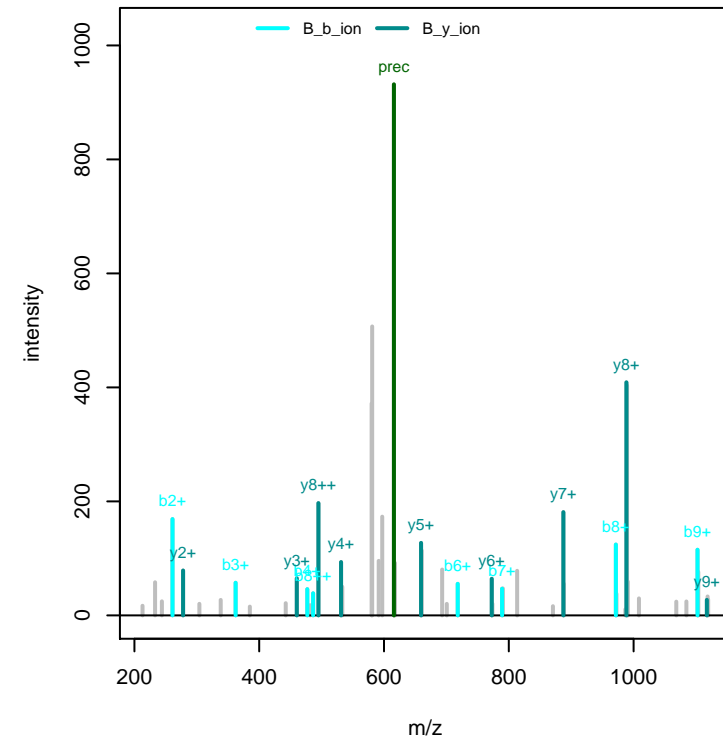

METDLQAKMK+XL\_L

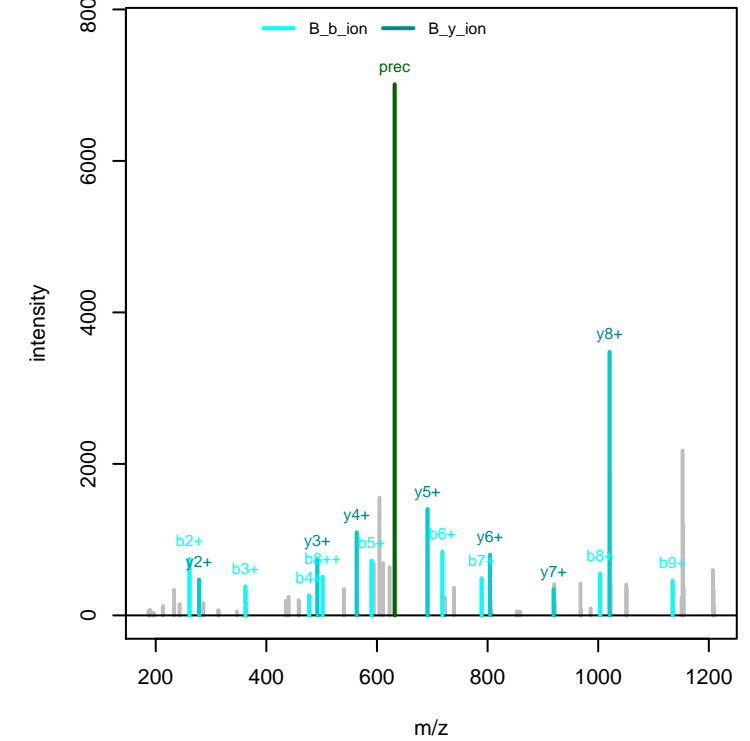

**LYELEMQKK  
NAEKQAMEDNK**

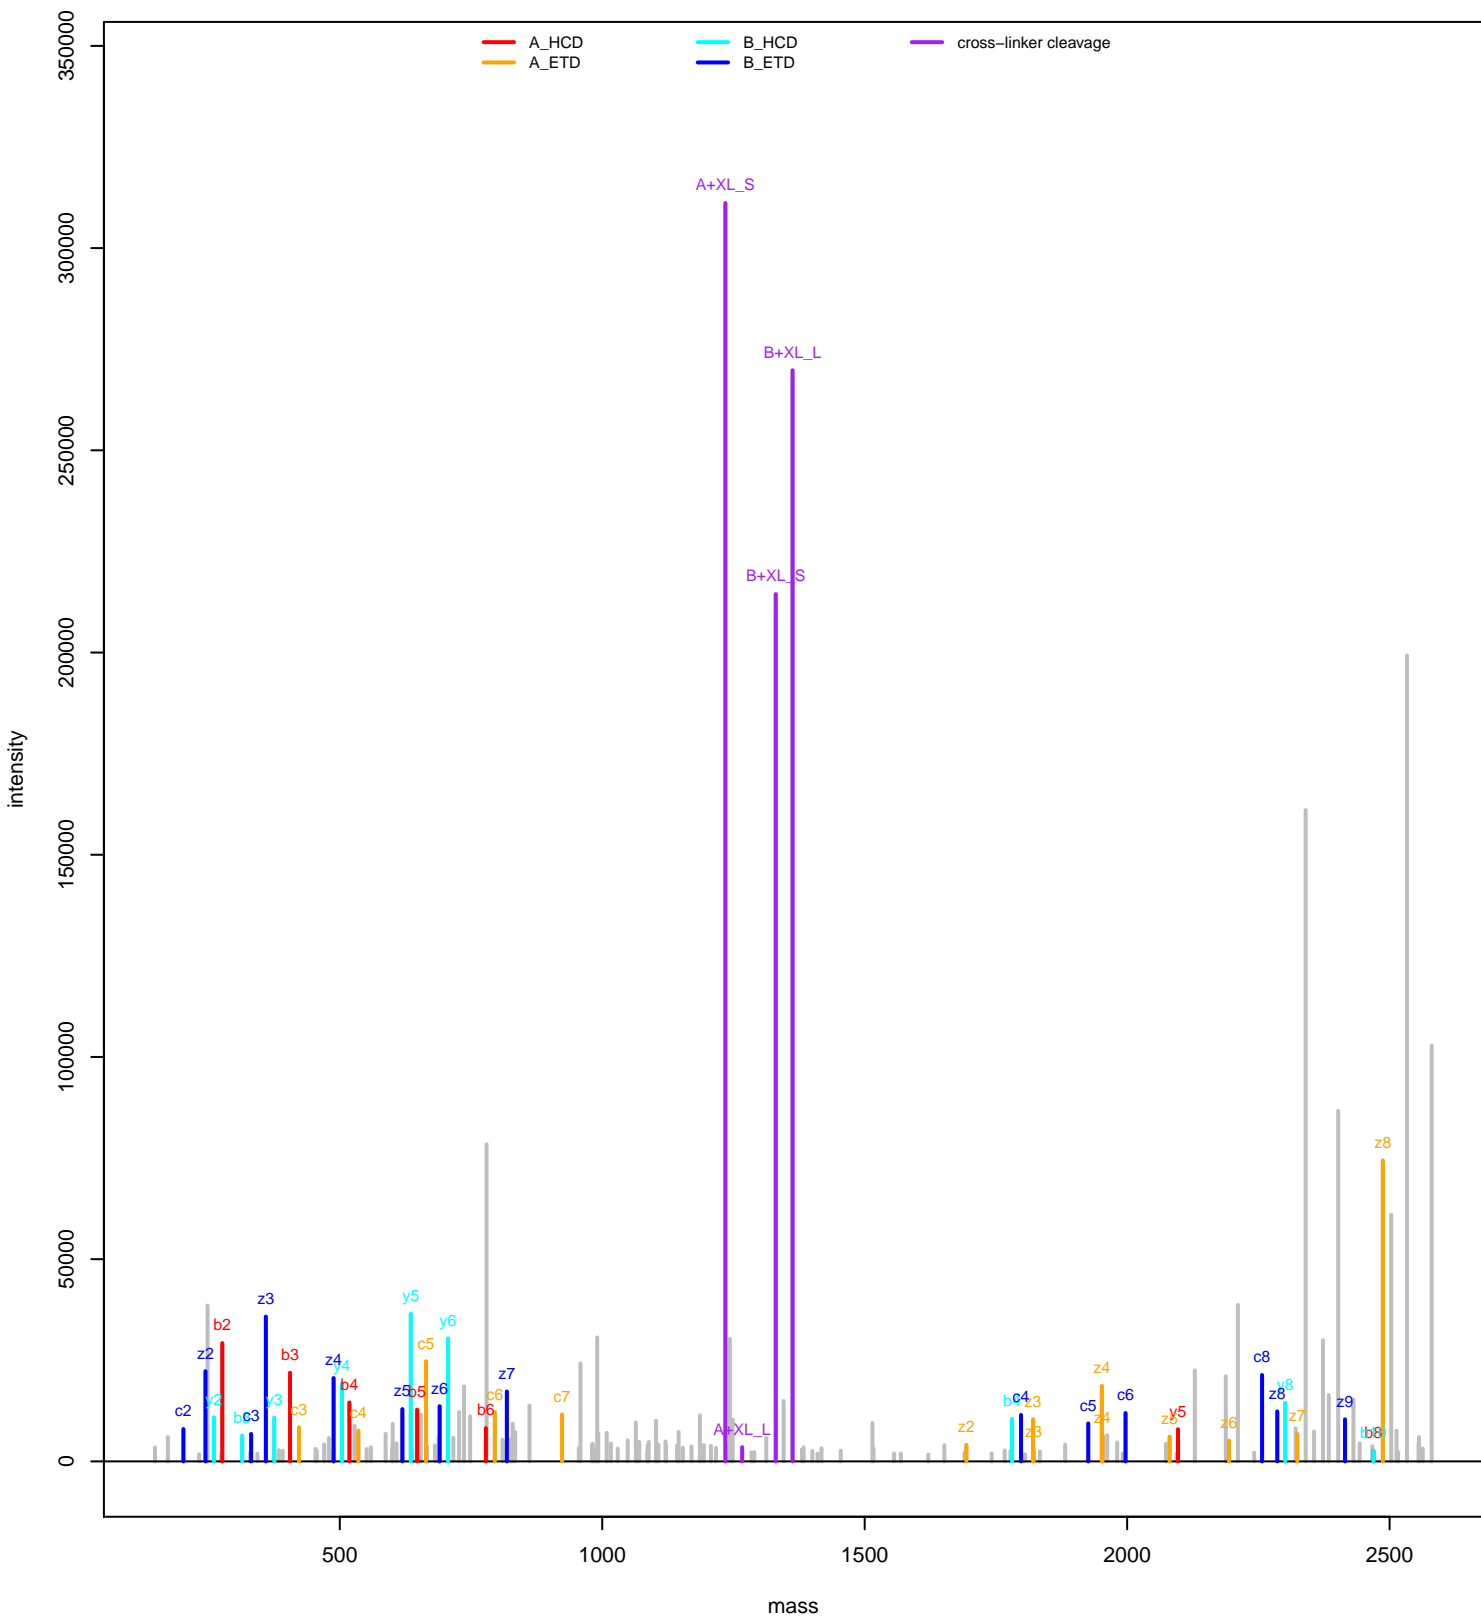

**LYELEMQKK+XL\_S**

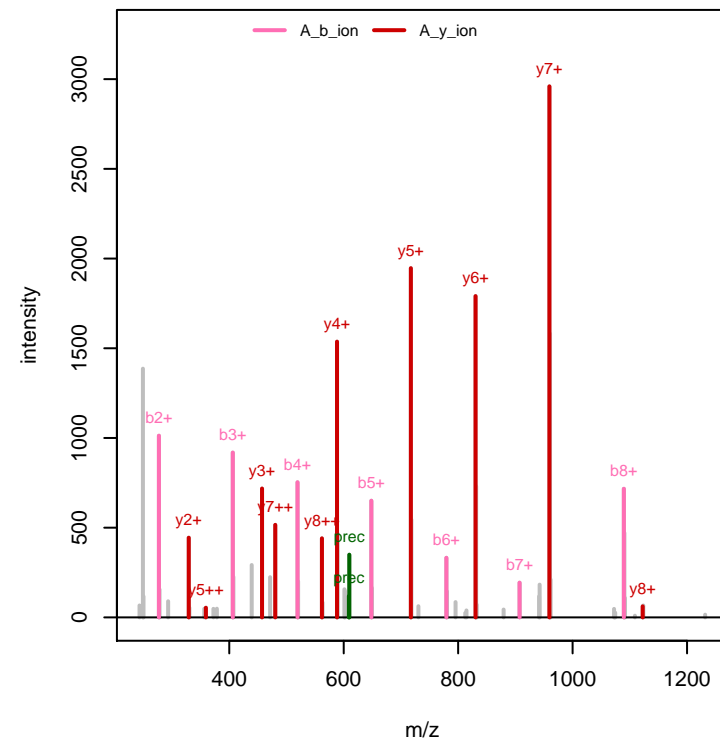

**LYELEMQKK+XL\_L**

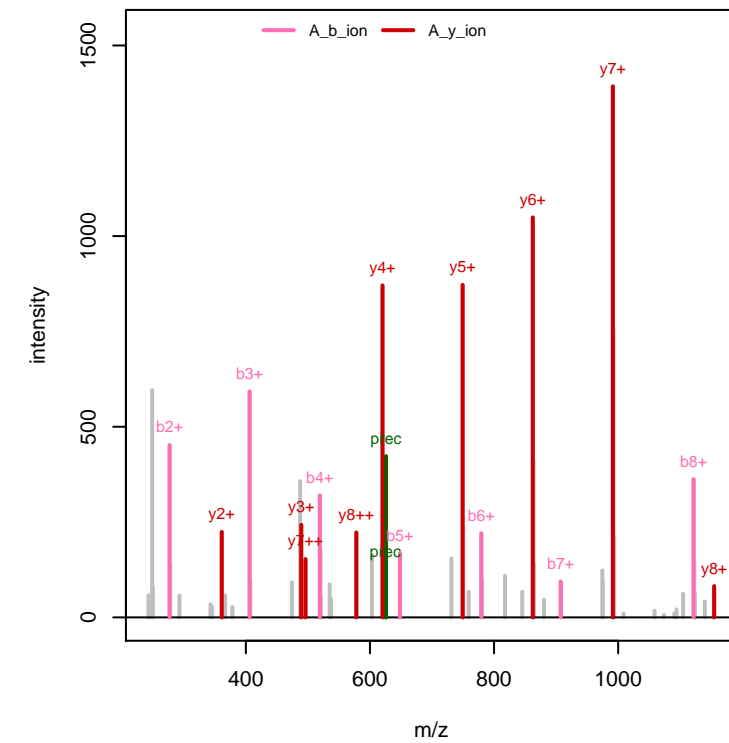

**NAEKQAMEDNK+XL\_S**

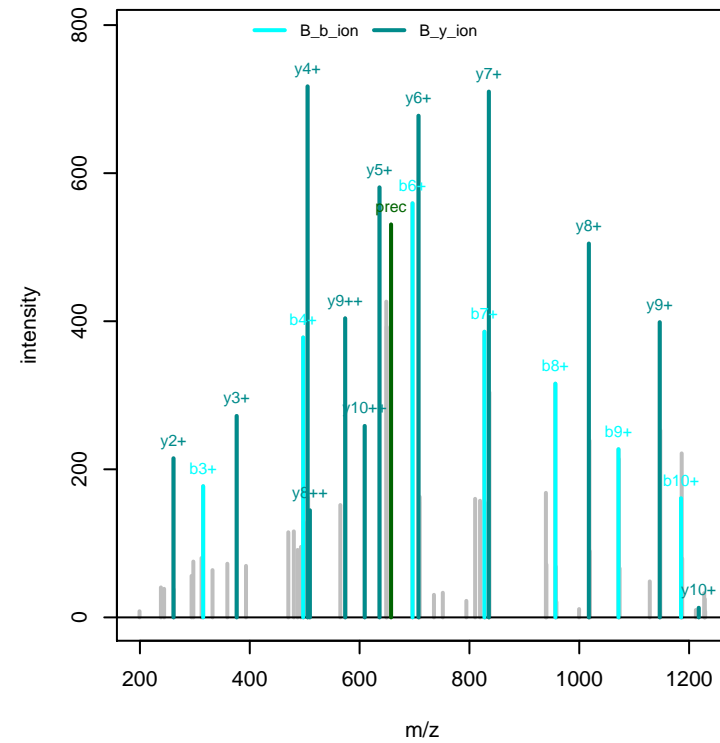

**NAEKQAMEDNK+XL\_L**

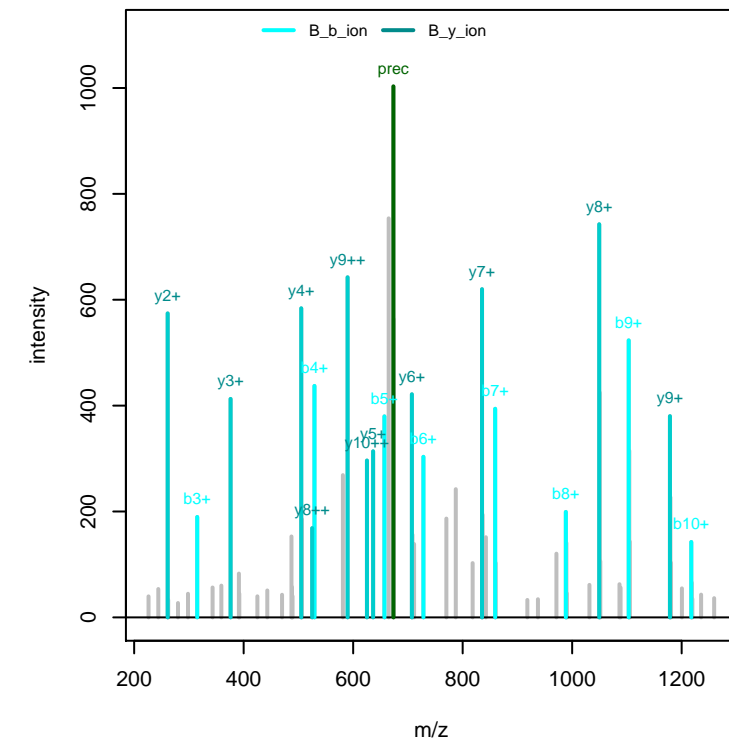

**QMTKHLR**  
**DTQQLKETR**

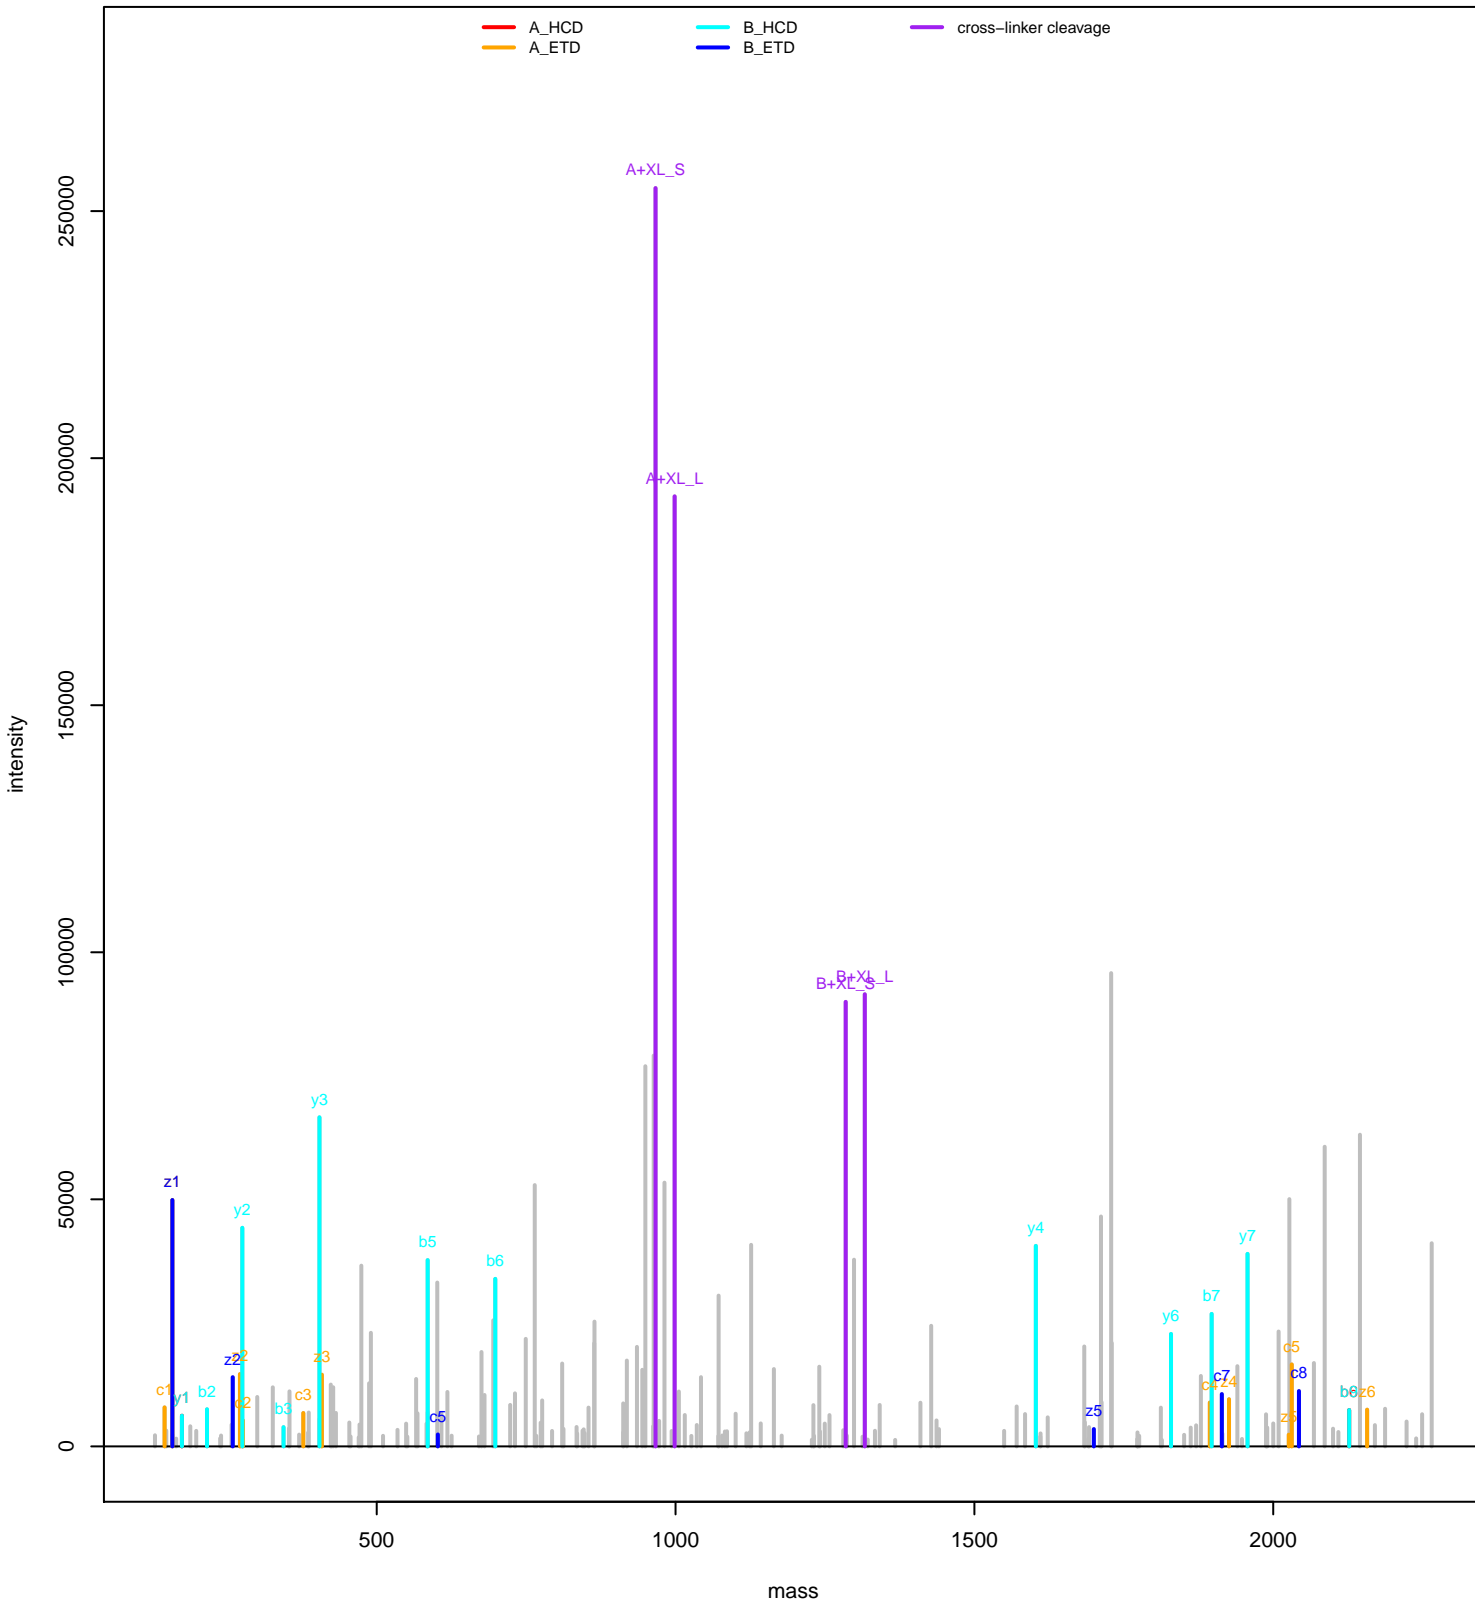

**QMTKHLR+XL\_S**

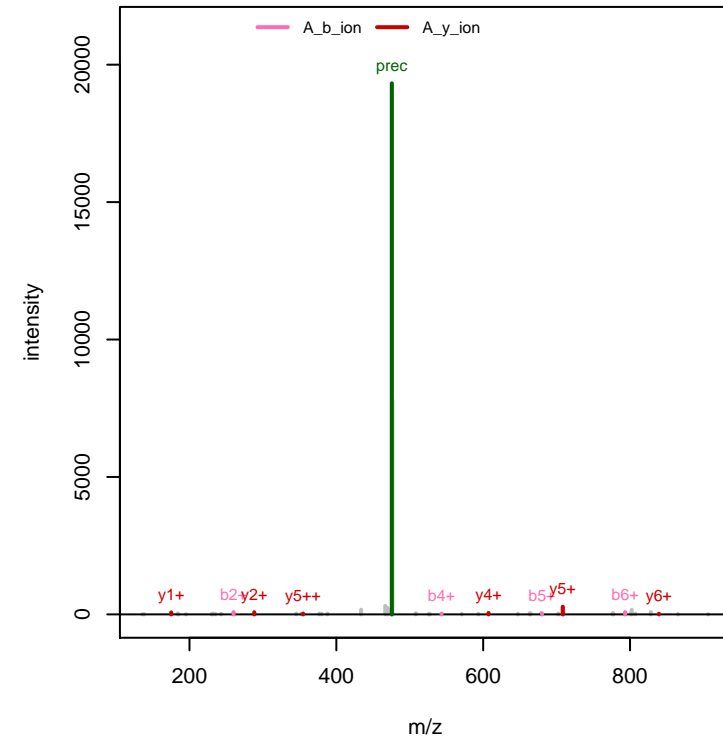

**QMTKHLR+XL\_L**

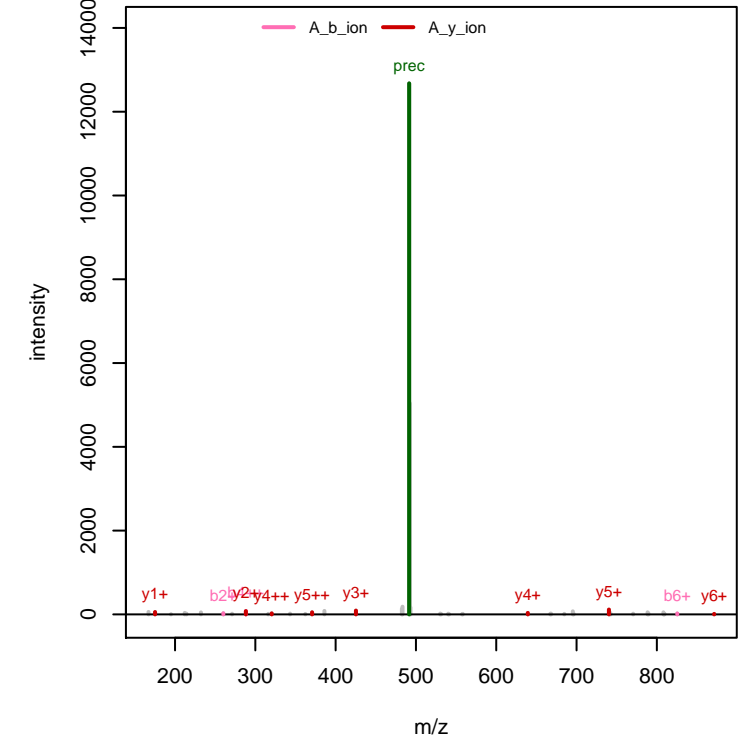

**DTQQLKETR+XL\_S**

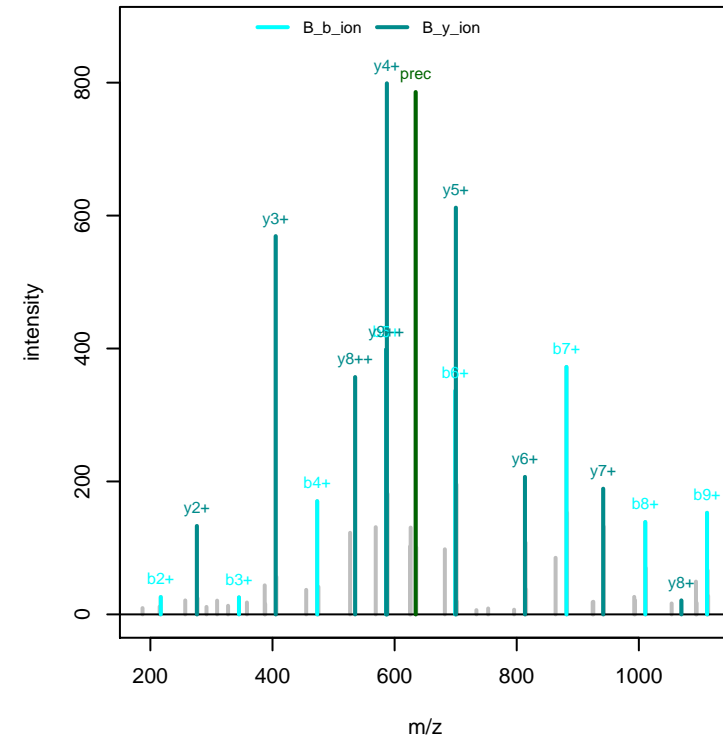

**DTQQLKETR+XL\_L**

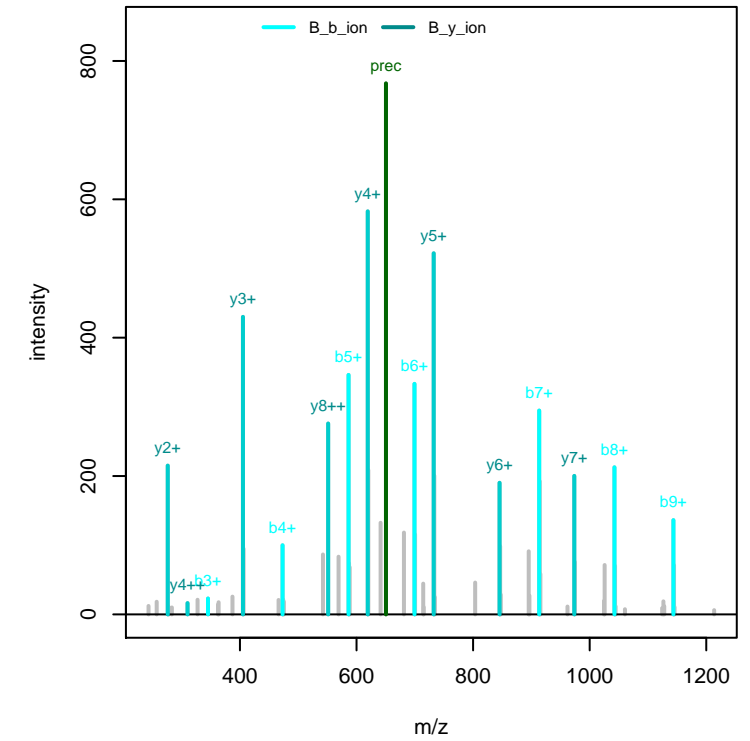

FFETQSSKGGR  
VVADLYKADA EK

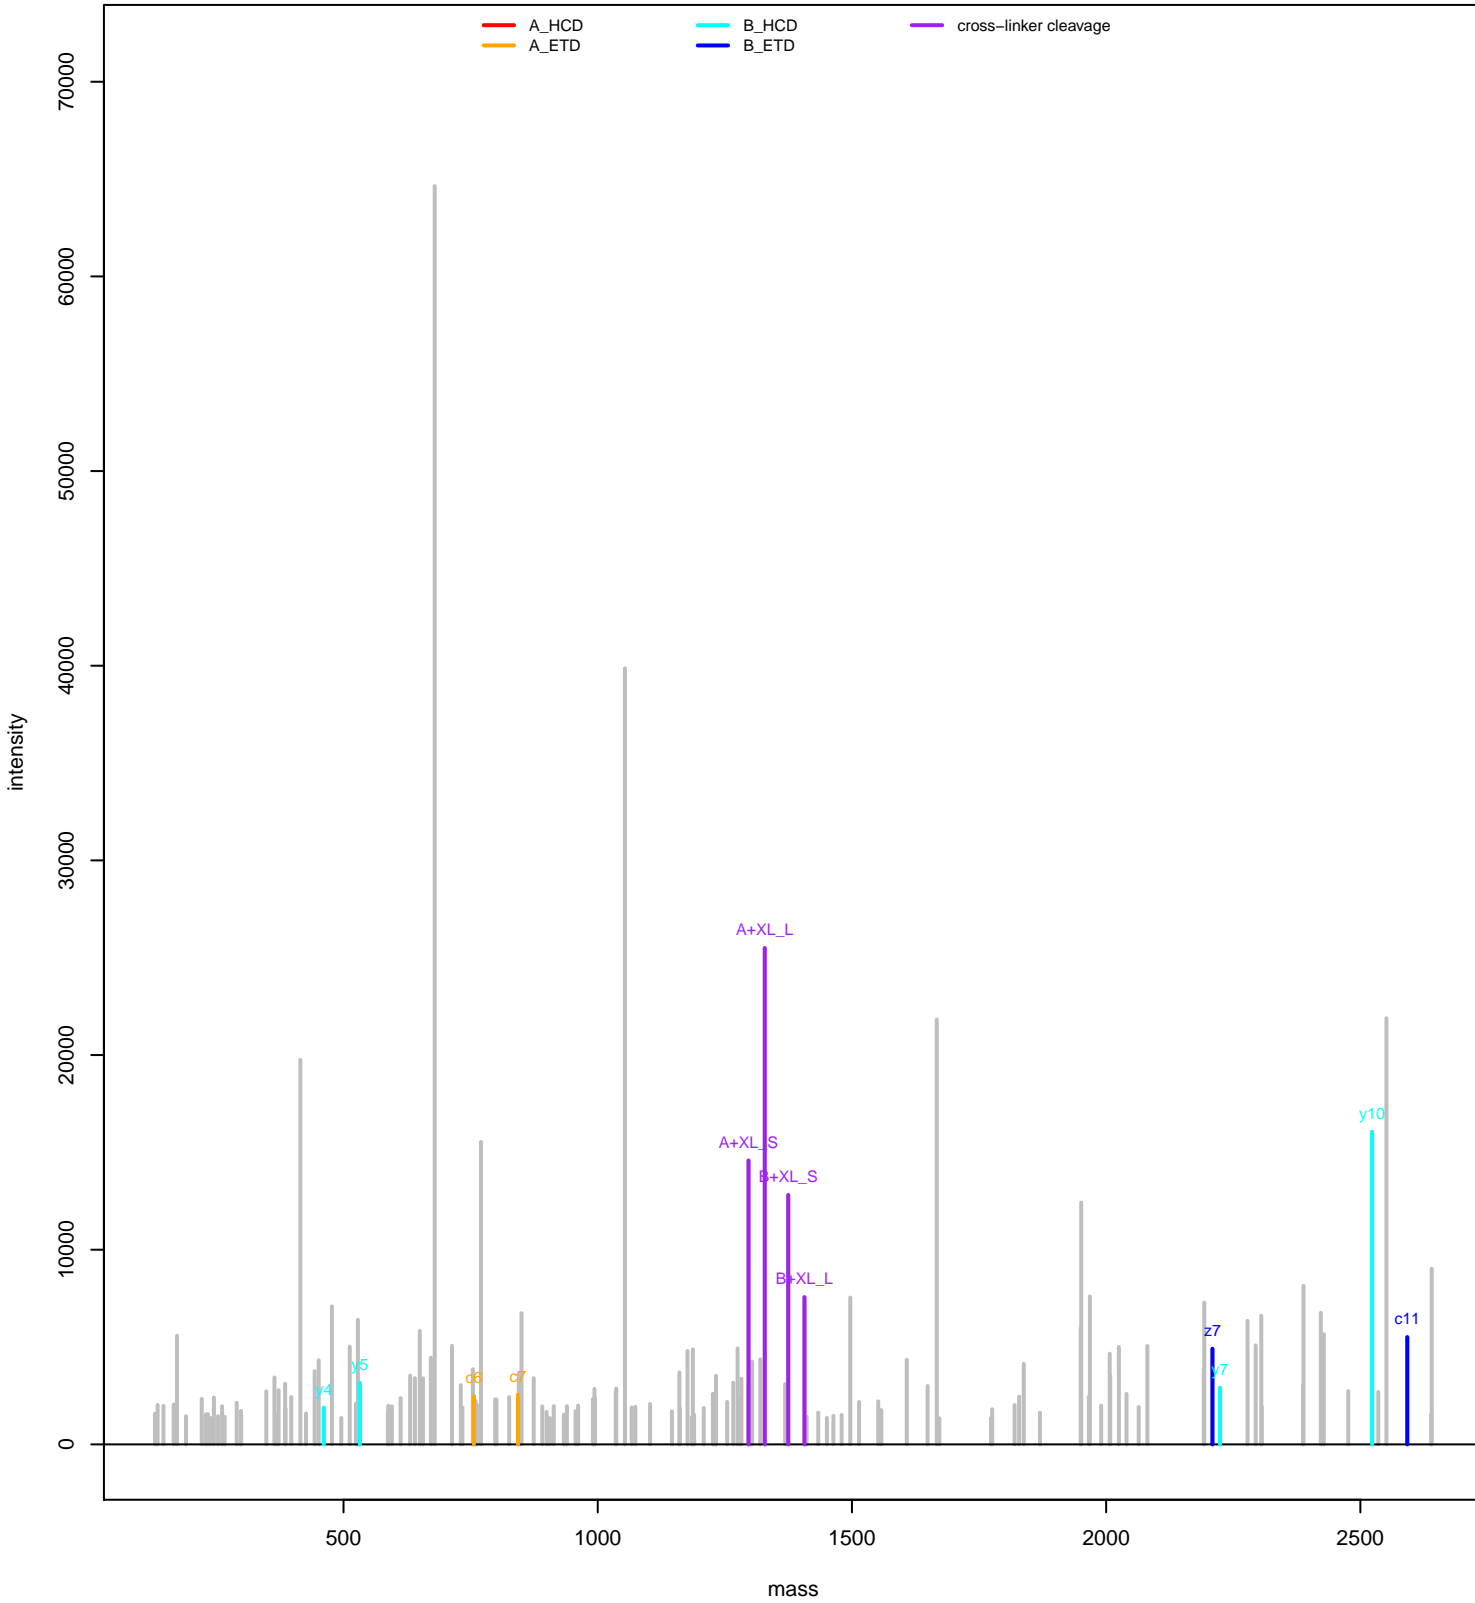

FFETQSSKGGR+XL\_S

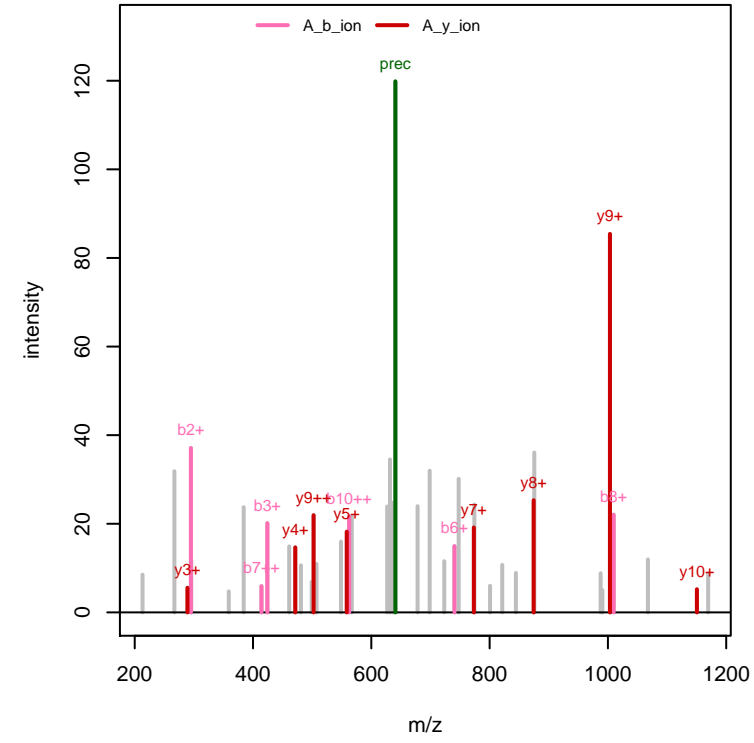

FFETQSSKGGR+XL\_L

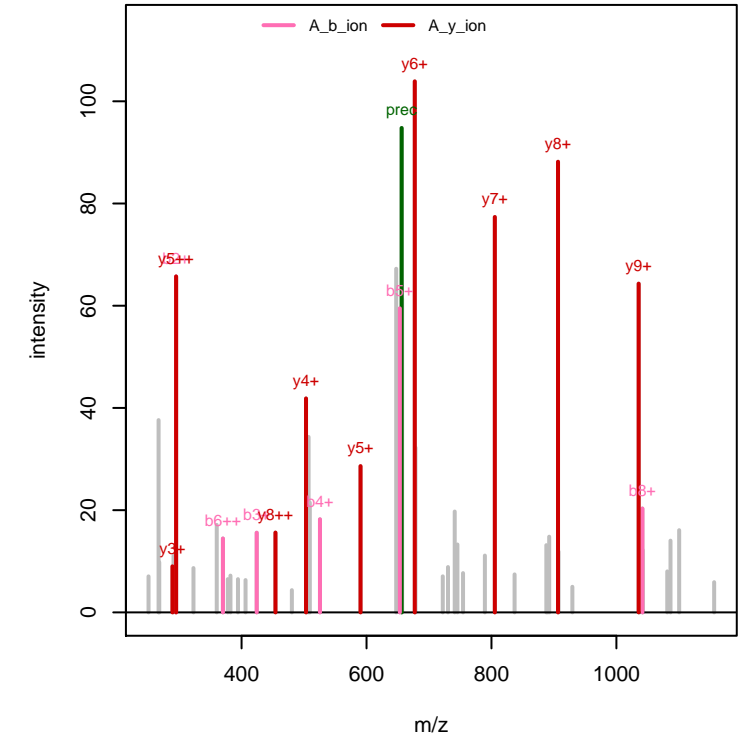

VVADLYKADA EK+XL\_S

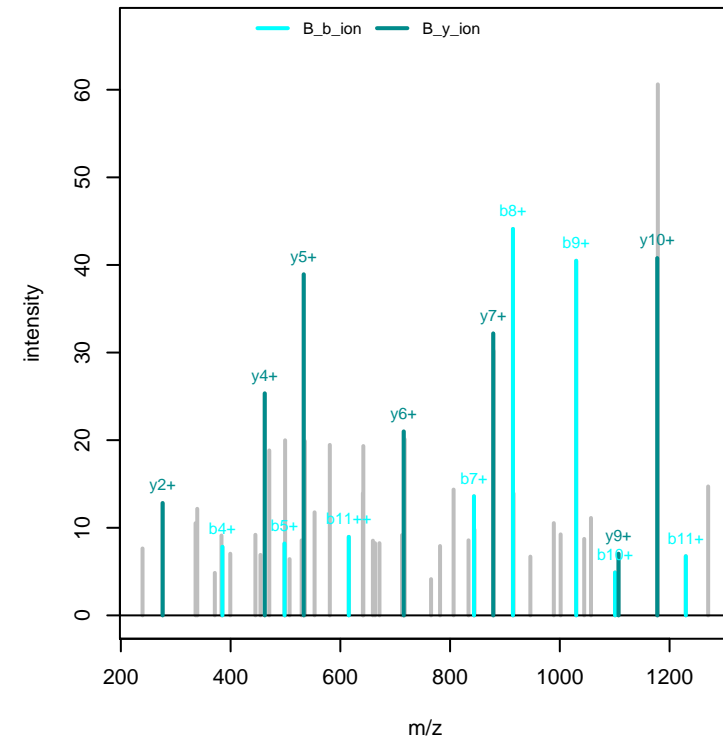

VVADLYKADA EK+XL\_L

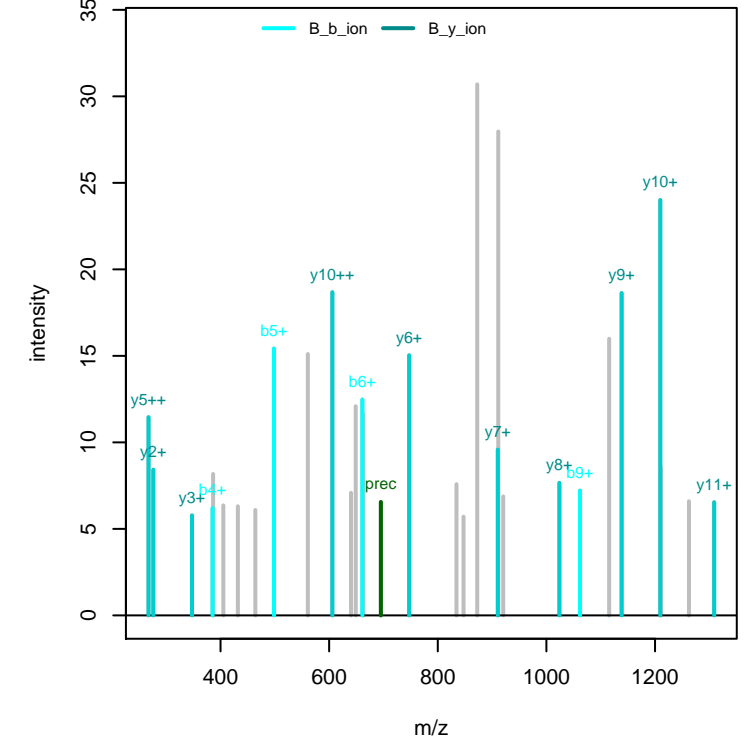

KVEADCR  
INALETVTIASKAGDEGK

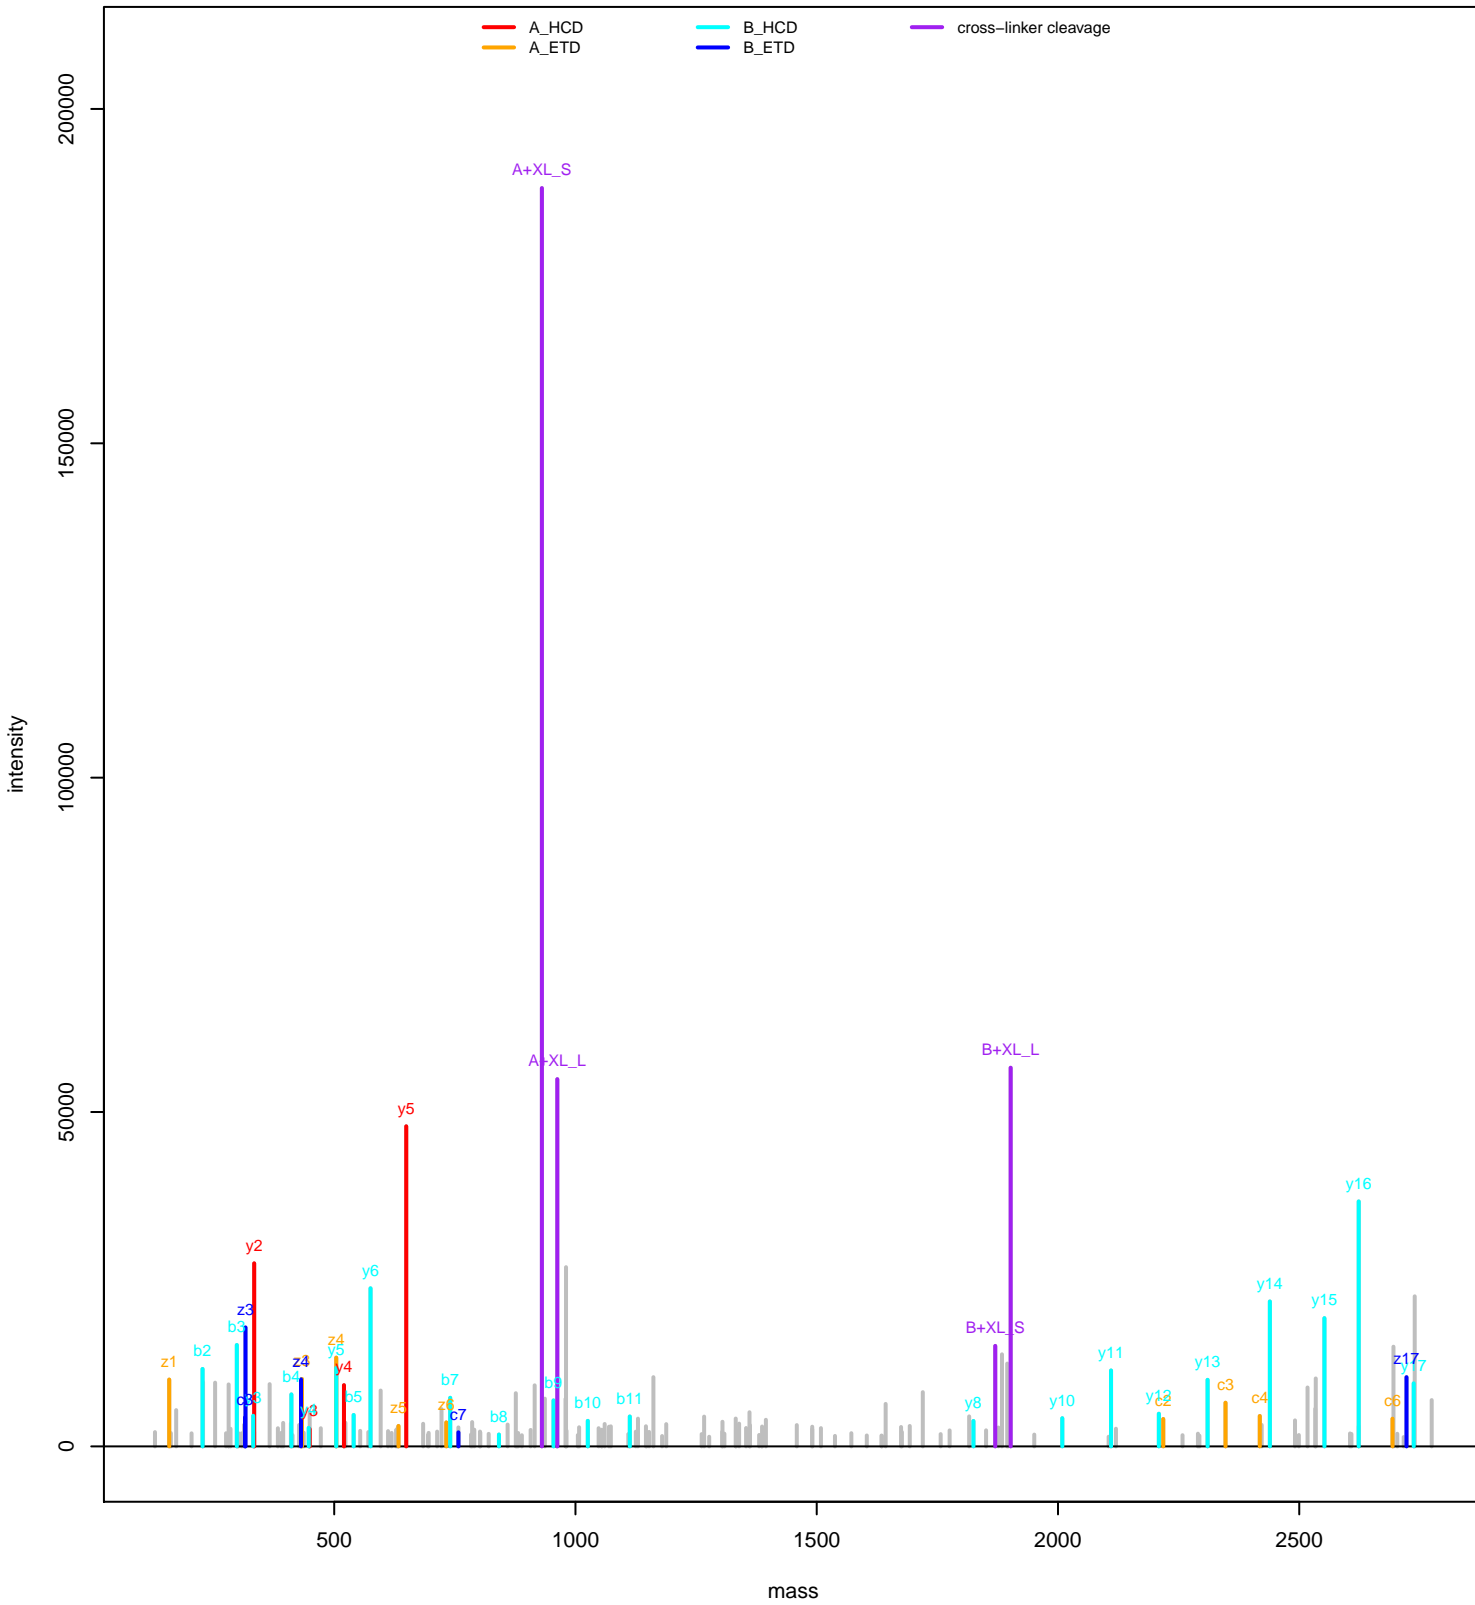

KVEADCR+XL\_S

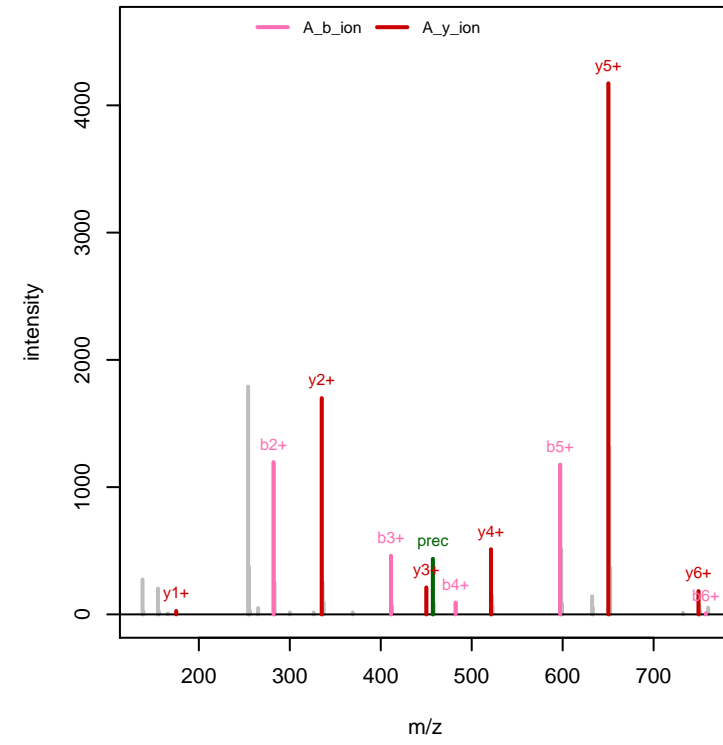

KVEADCR+XL\_L

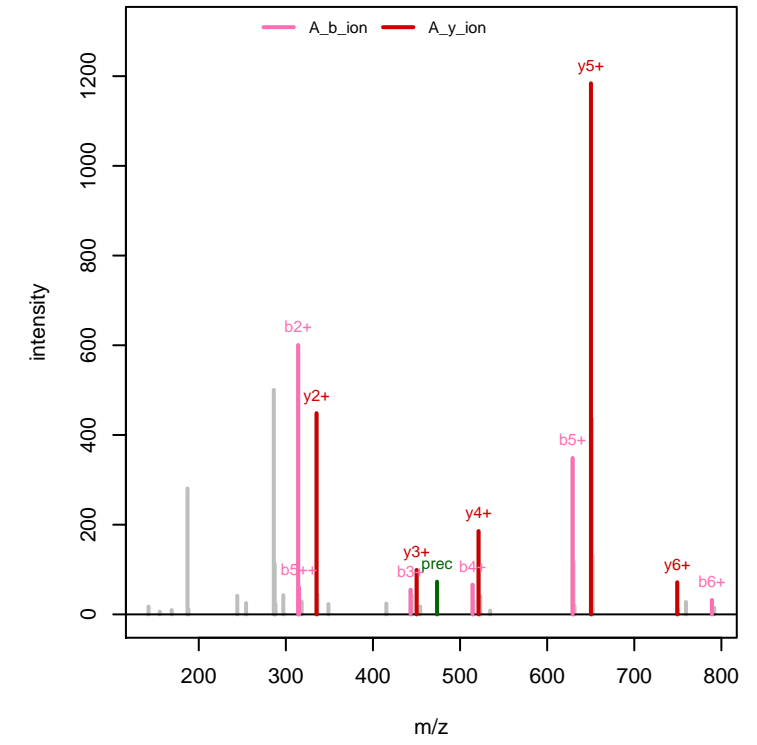

INALETVTIASKAGDEGK+XL\_S

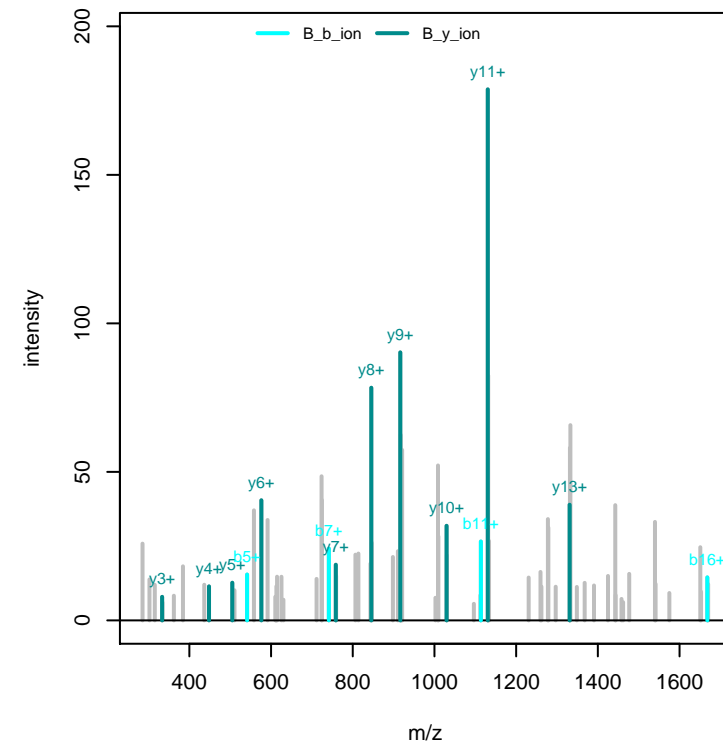

INALETVTIASKAGDEGK+XL\_L

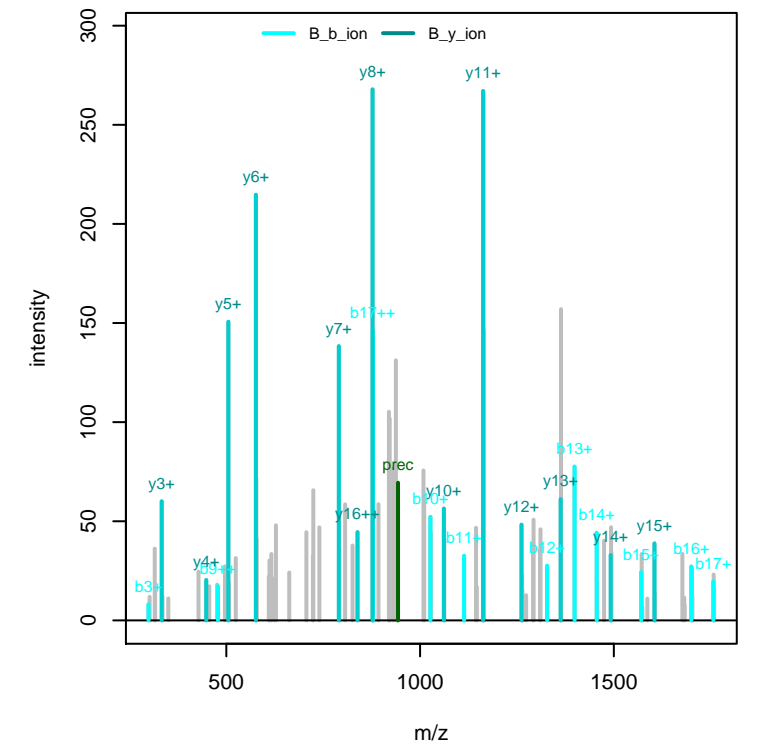



**KVGLRK  
KILPDPK**

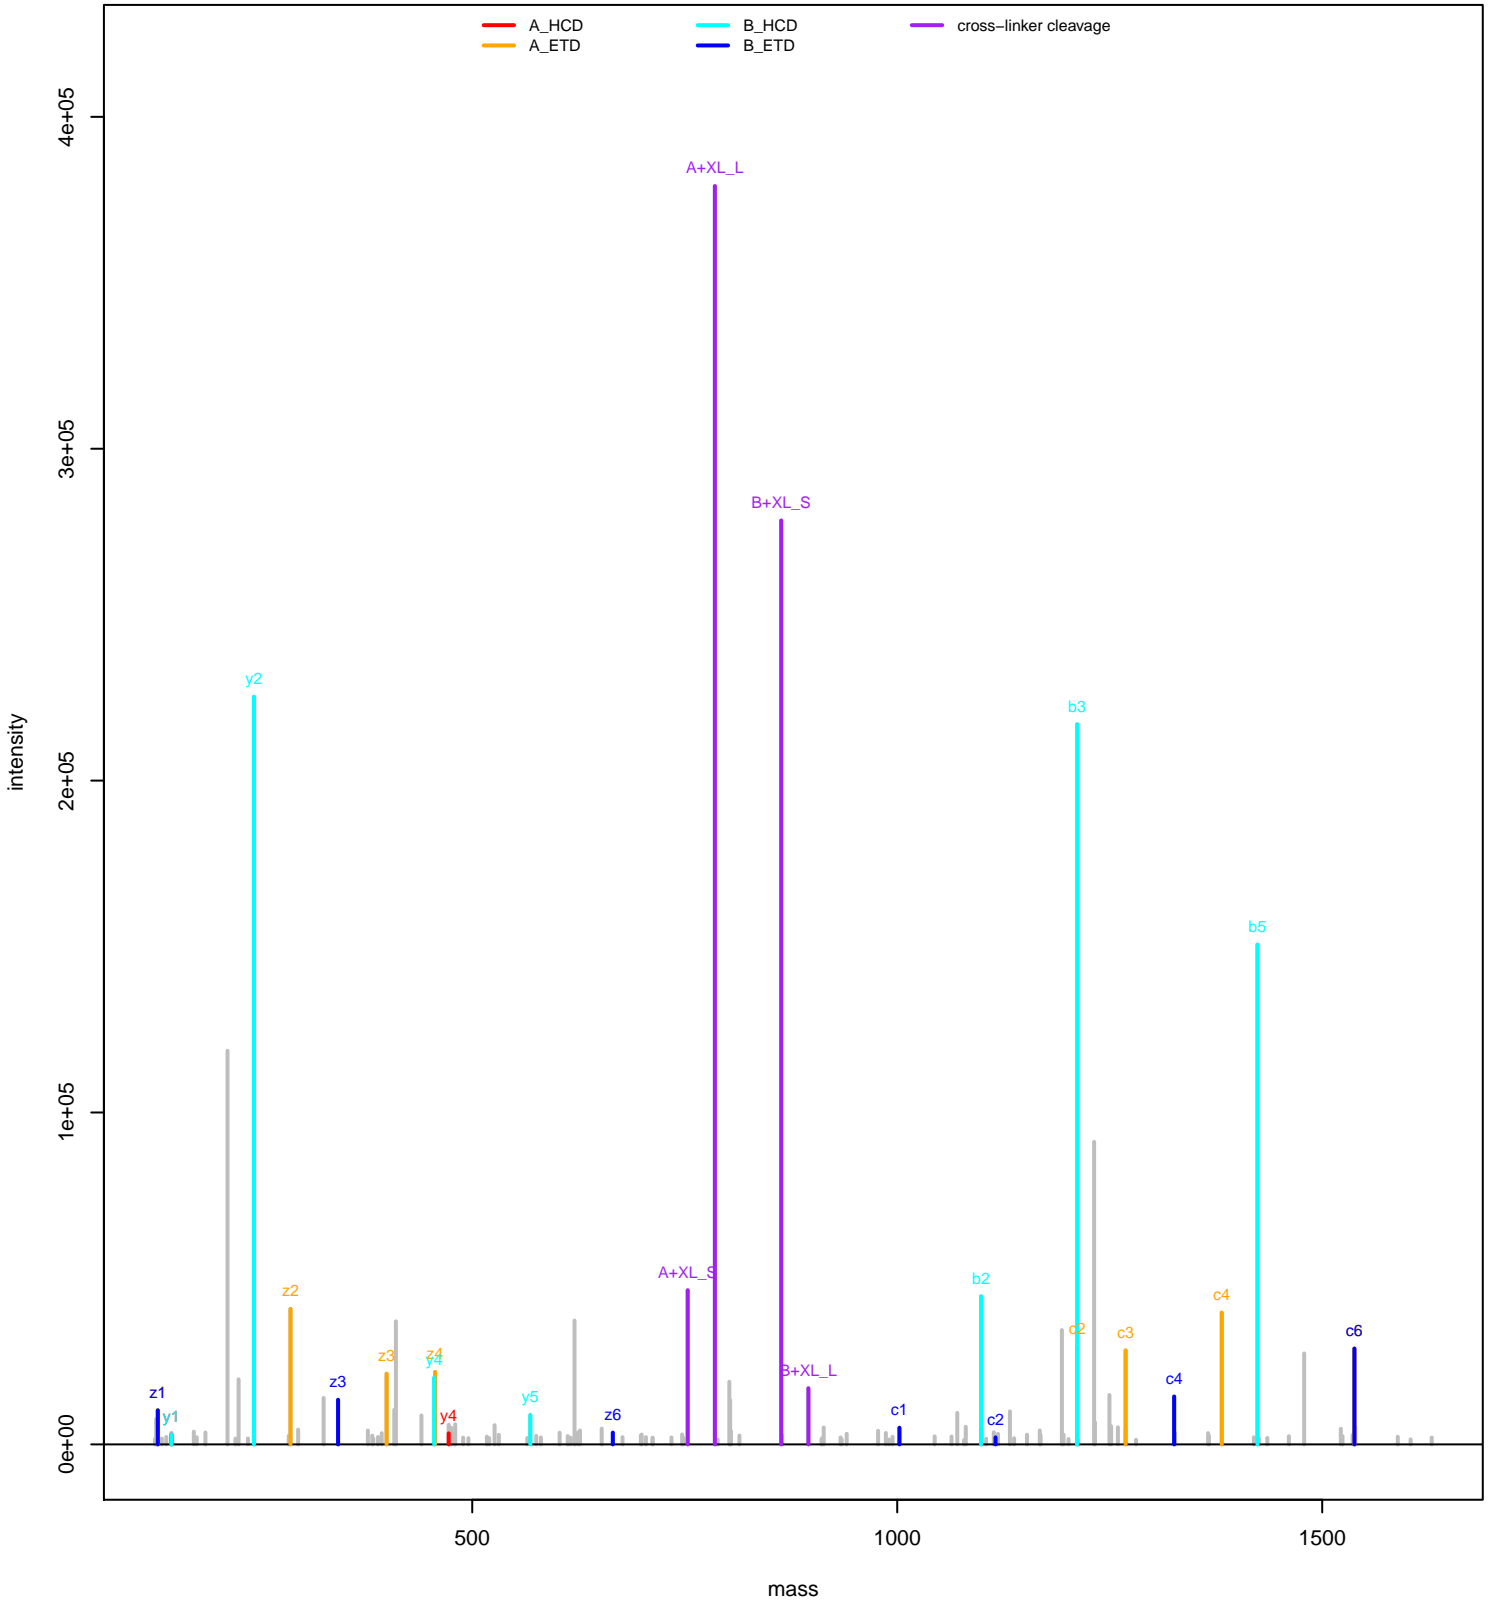

**KVGLRK+XL\_S**

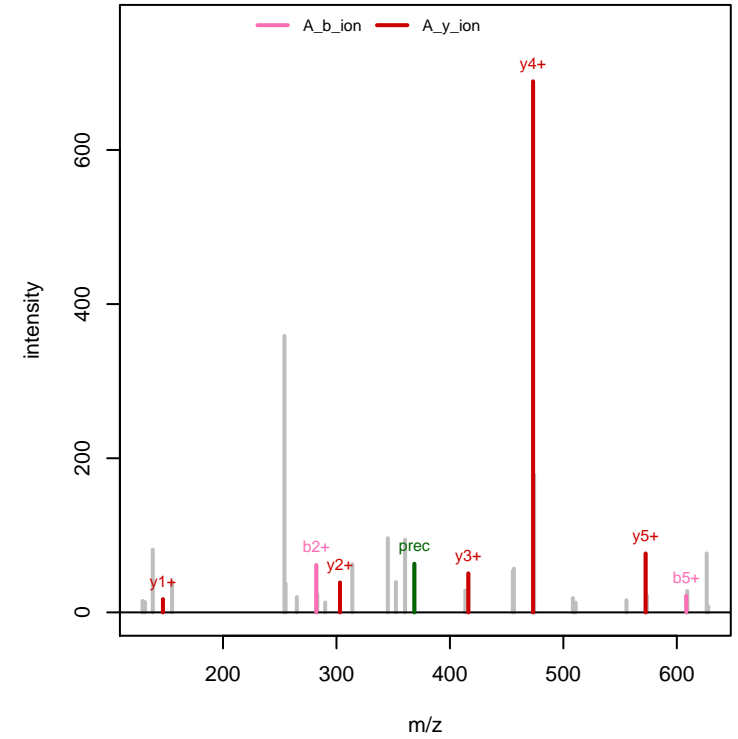

**KVGLRK+XL\_L**

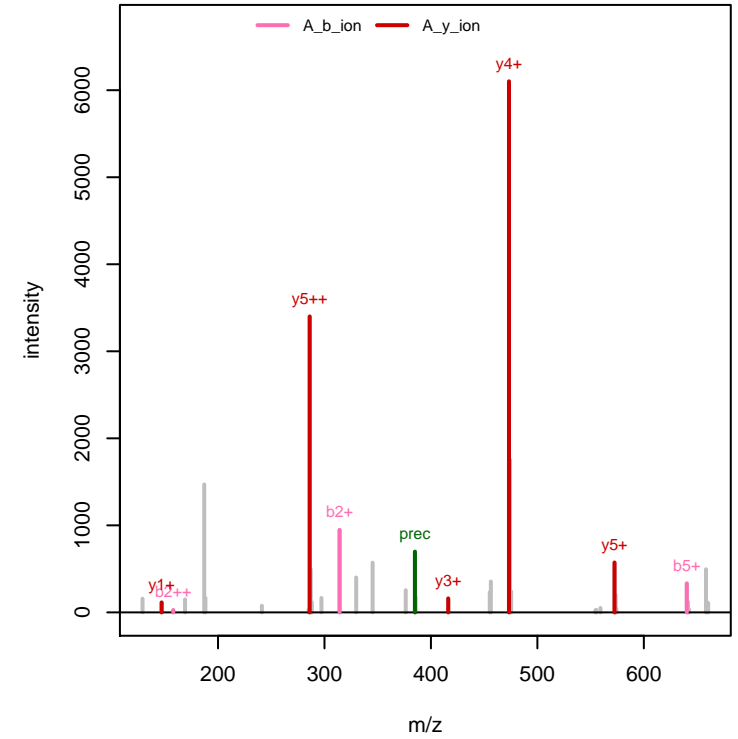

**KILPDPK+XL\_S**

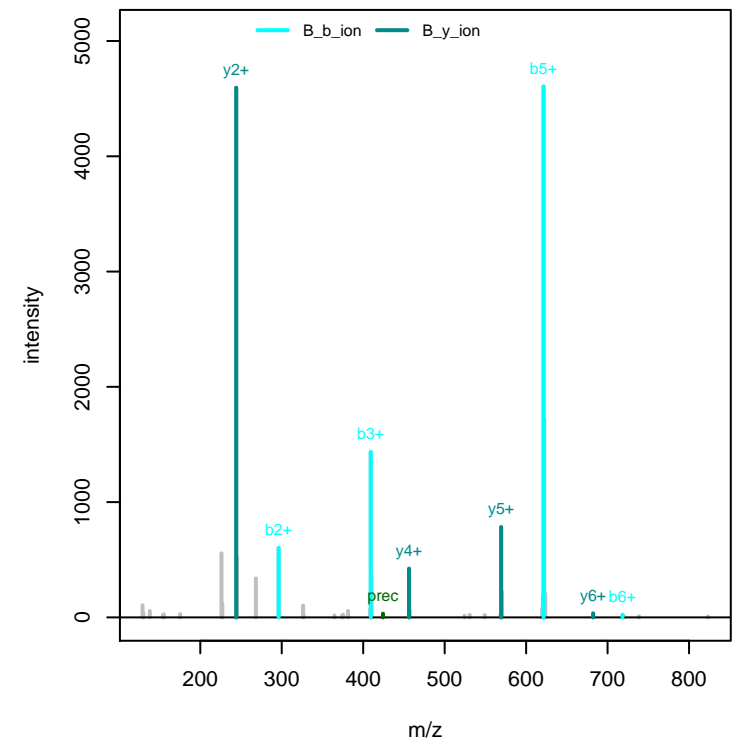

**KILPDPK+XL\_L**

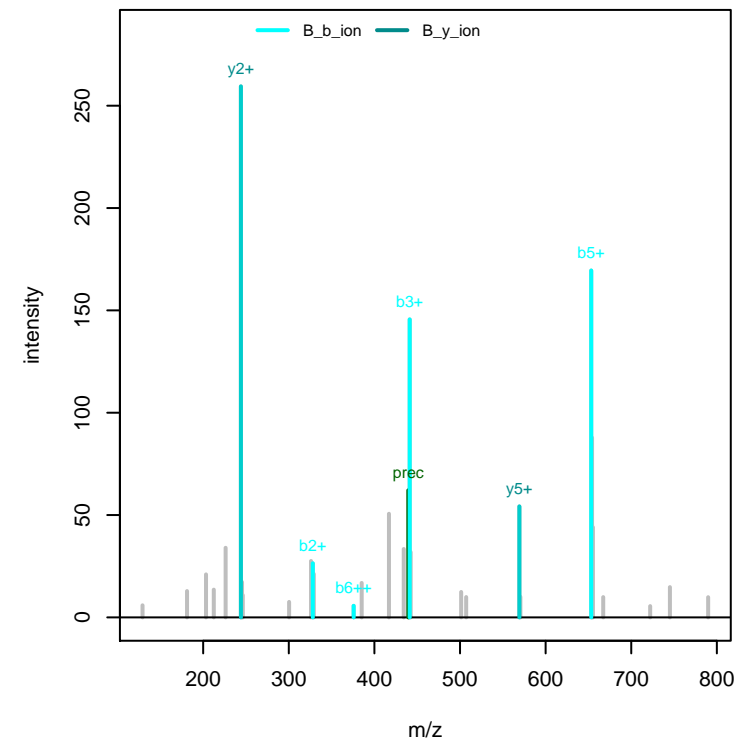

LPIKTTFVTK  
ASTAMEKSNTIVLK

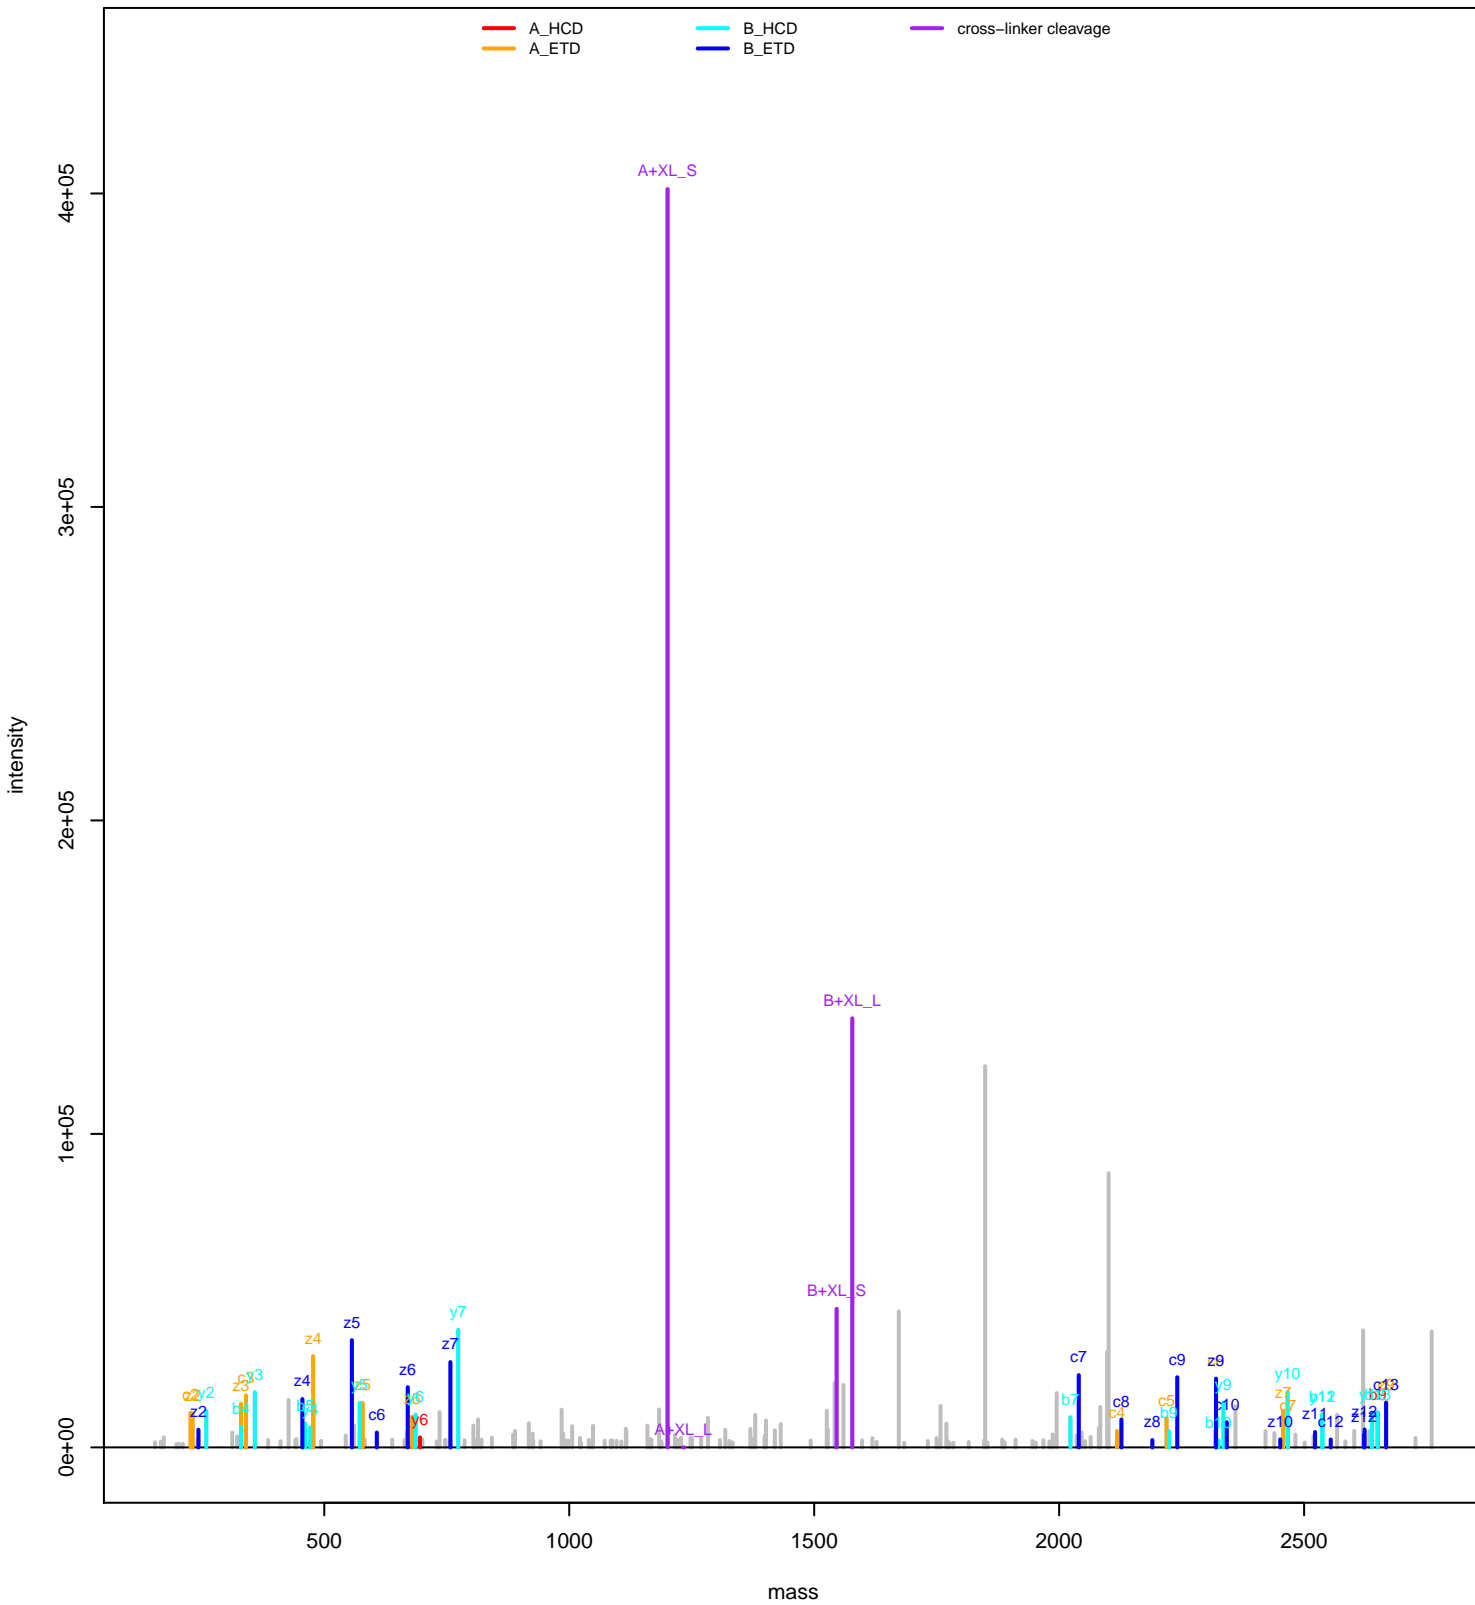

LPIKTTFVTK+XL\_S

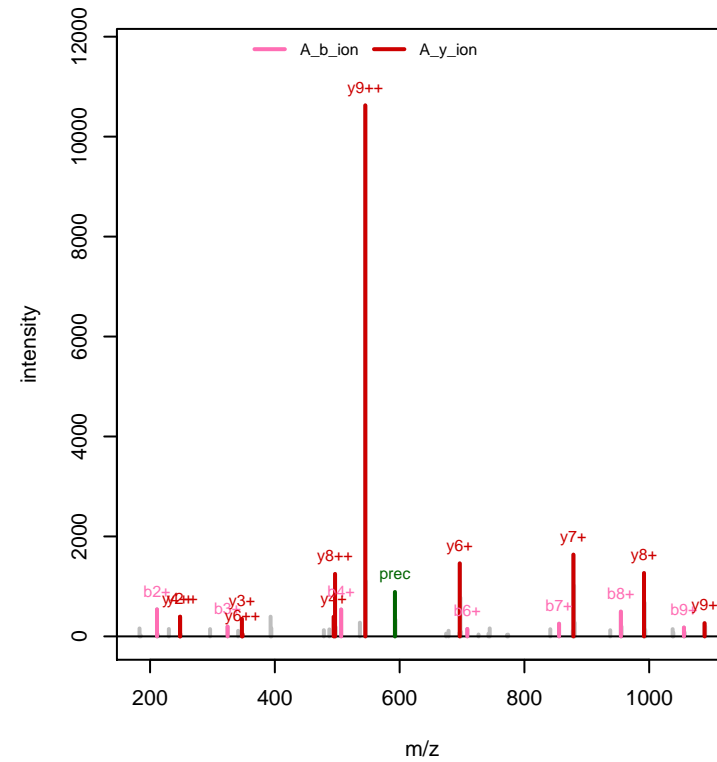

LPIKTTFVTK+XL\_L

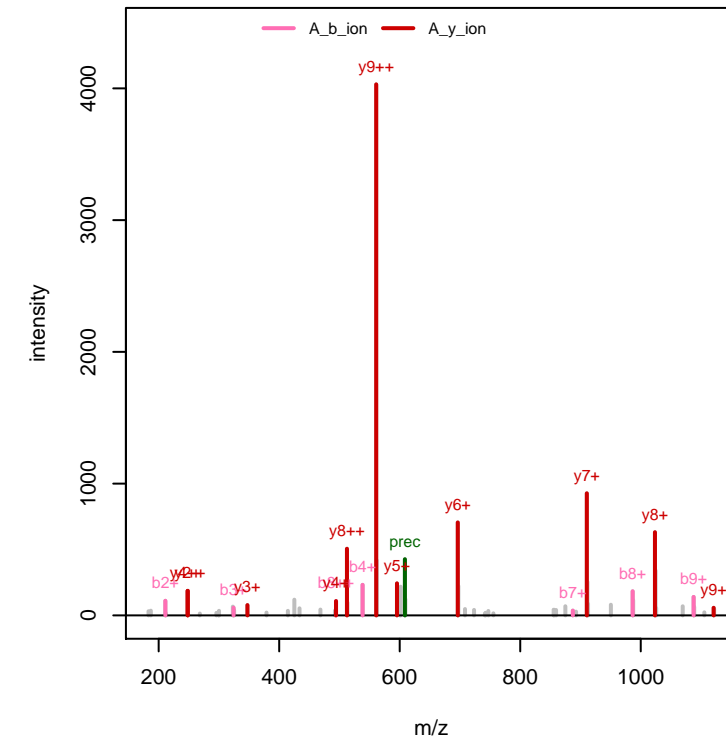

ASTAMEKSNTIVLK+XL\_S

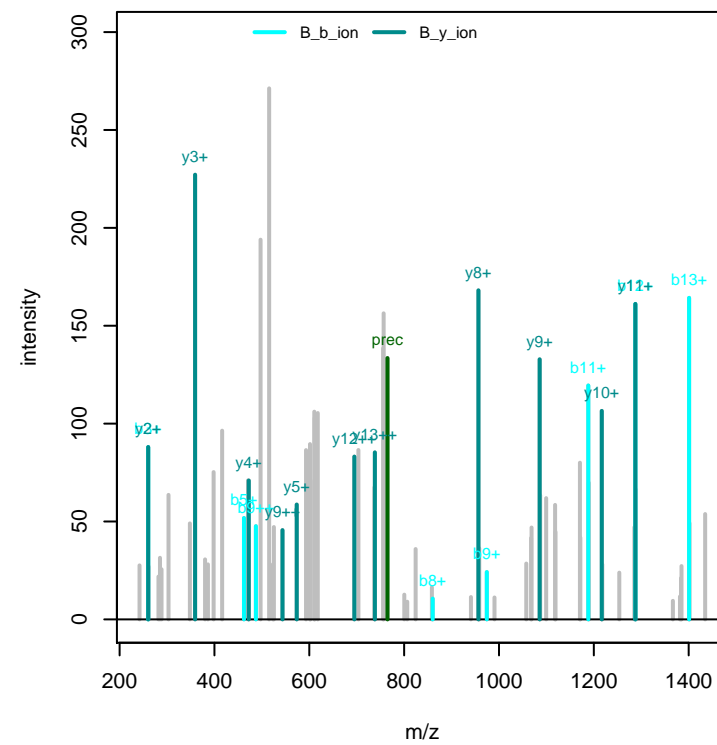

ASTAMEKSNTIVLK+XL\_L

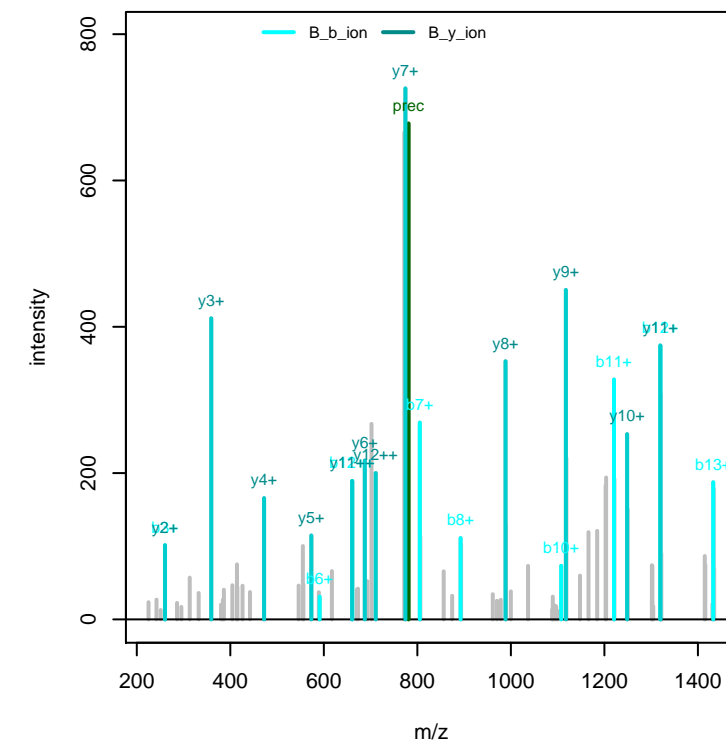

VAVIKAVR  
AAGANKVAVIK

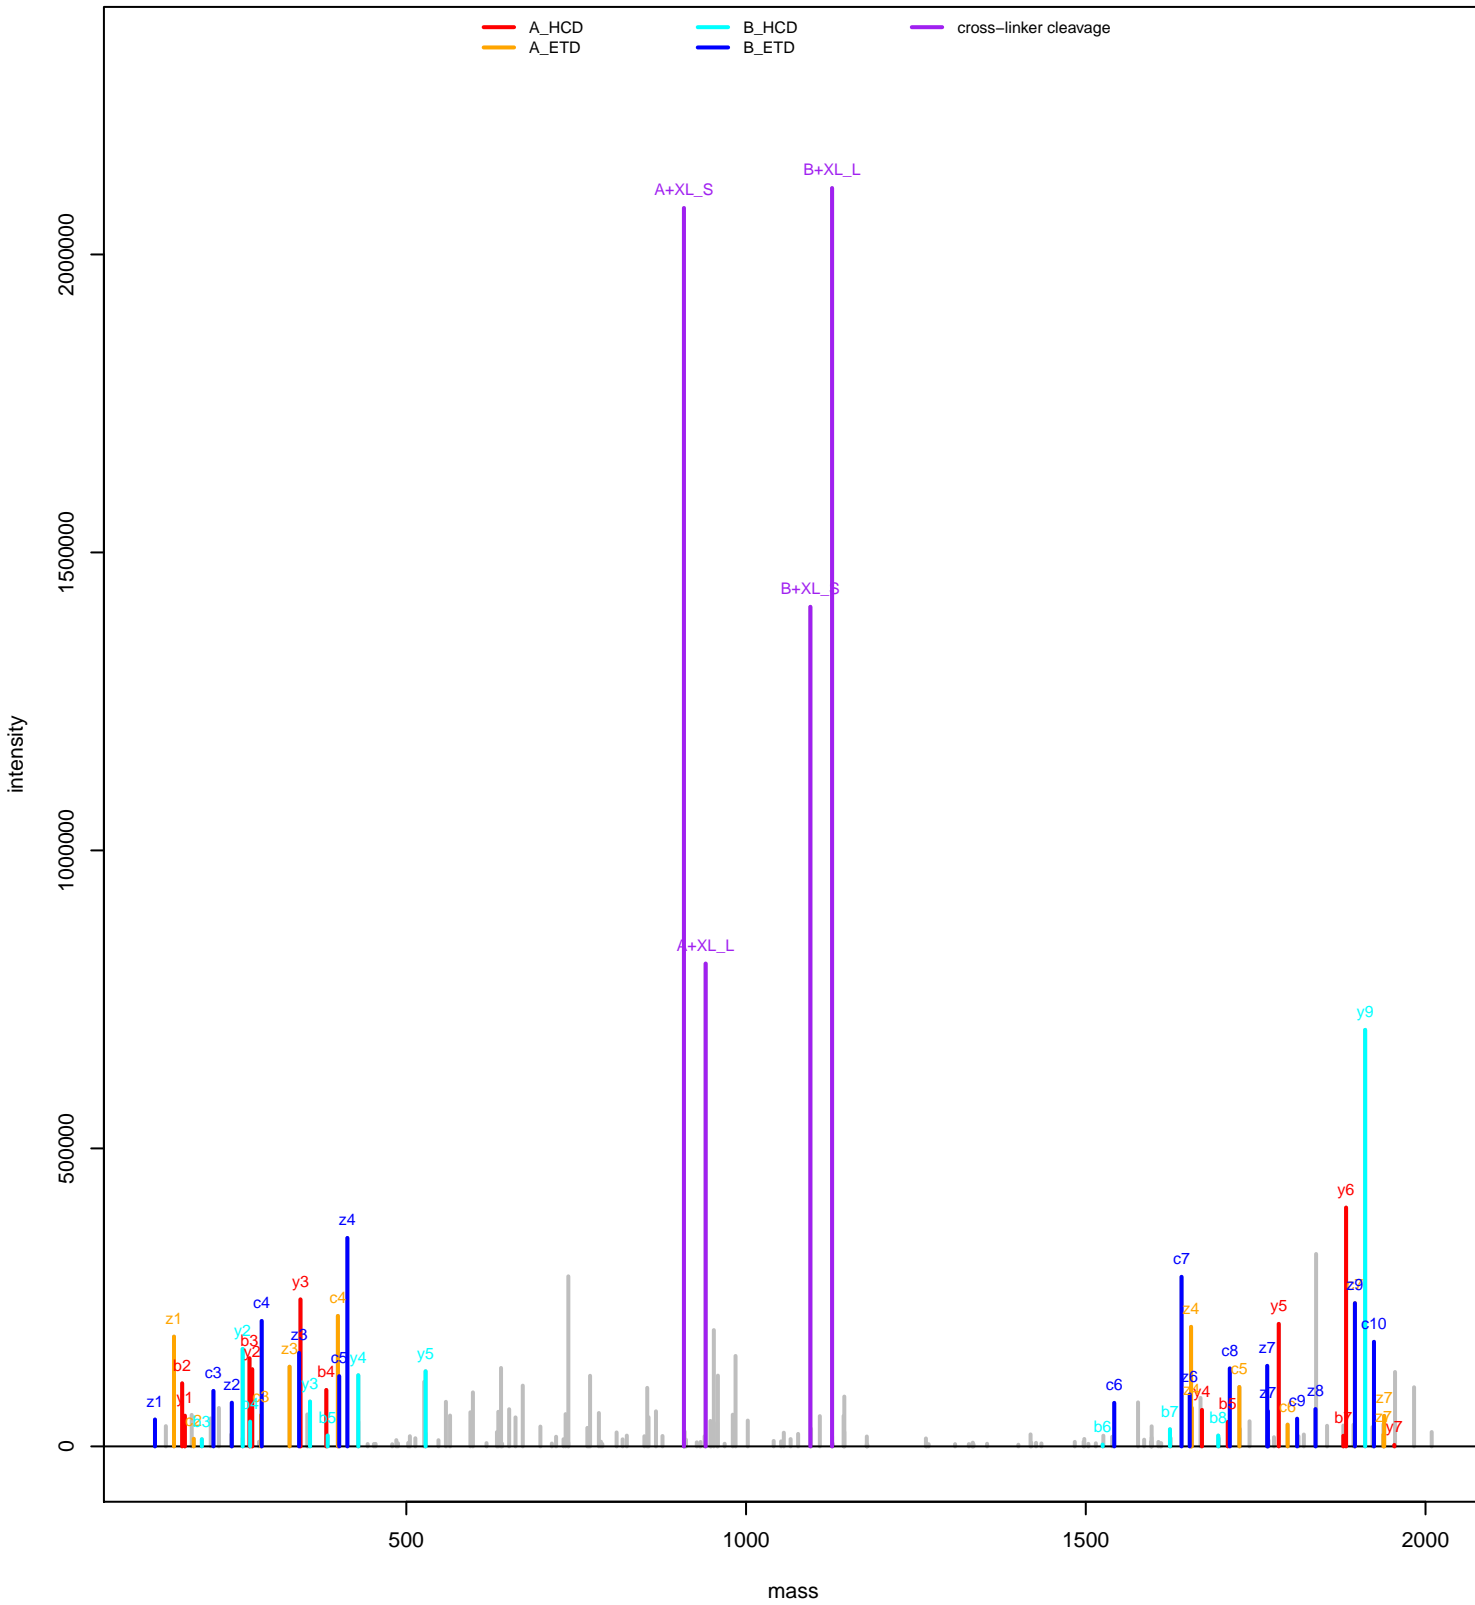

VAVIKAVR+XL\_S

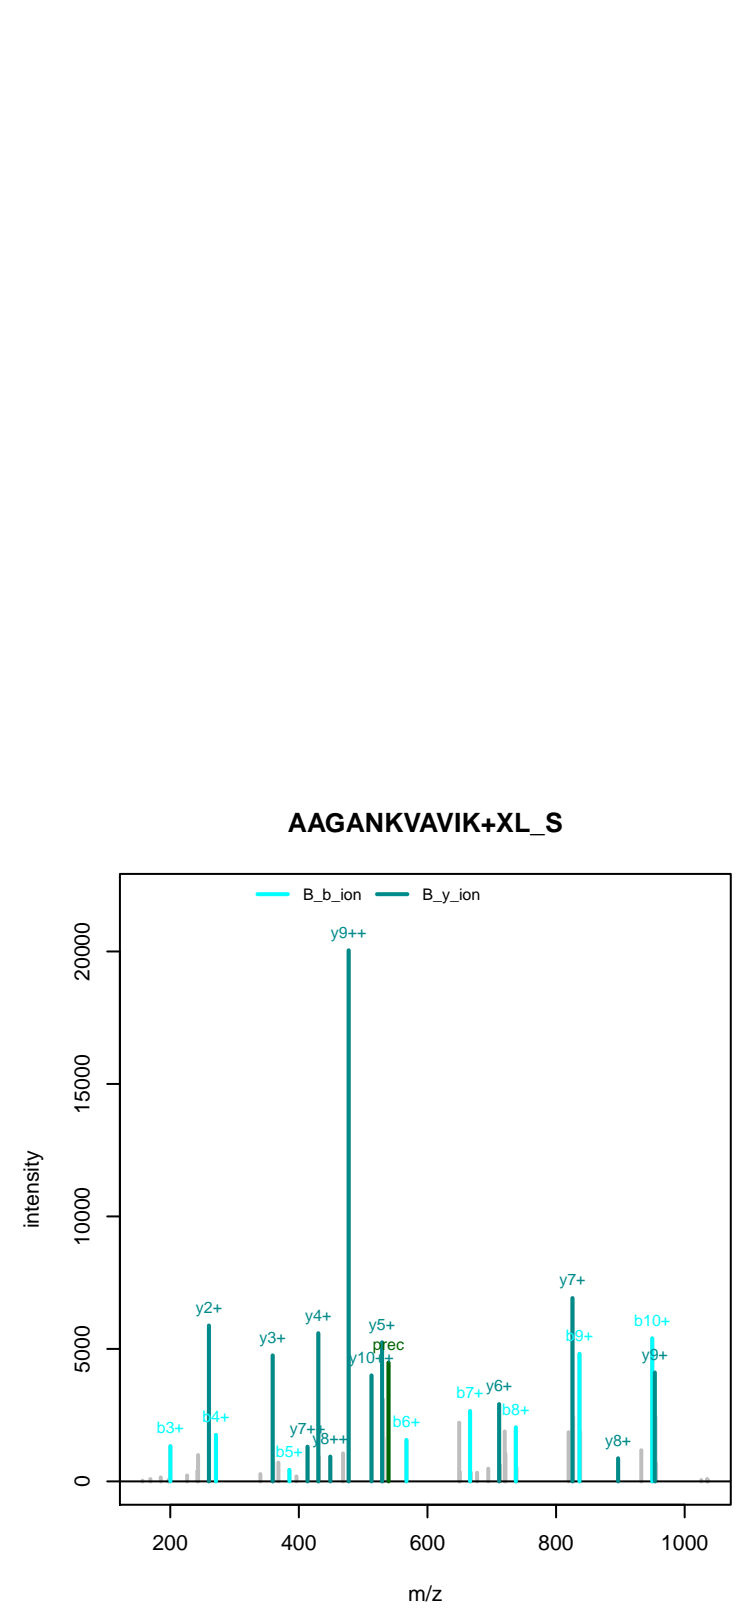

VAVIKAVR+XL\_L

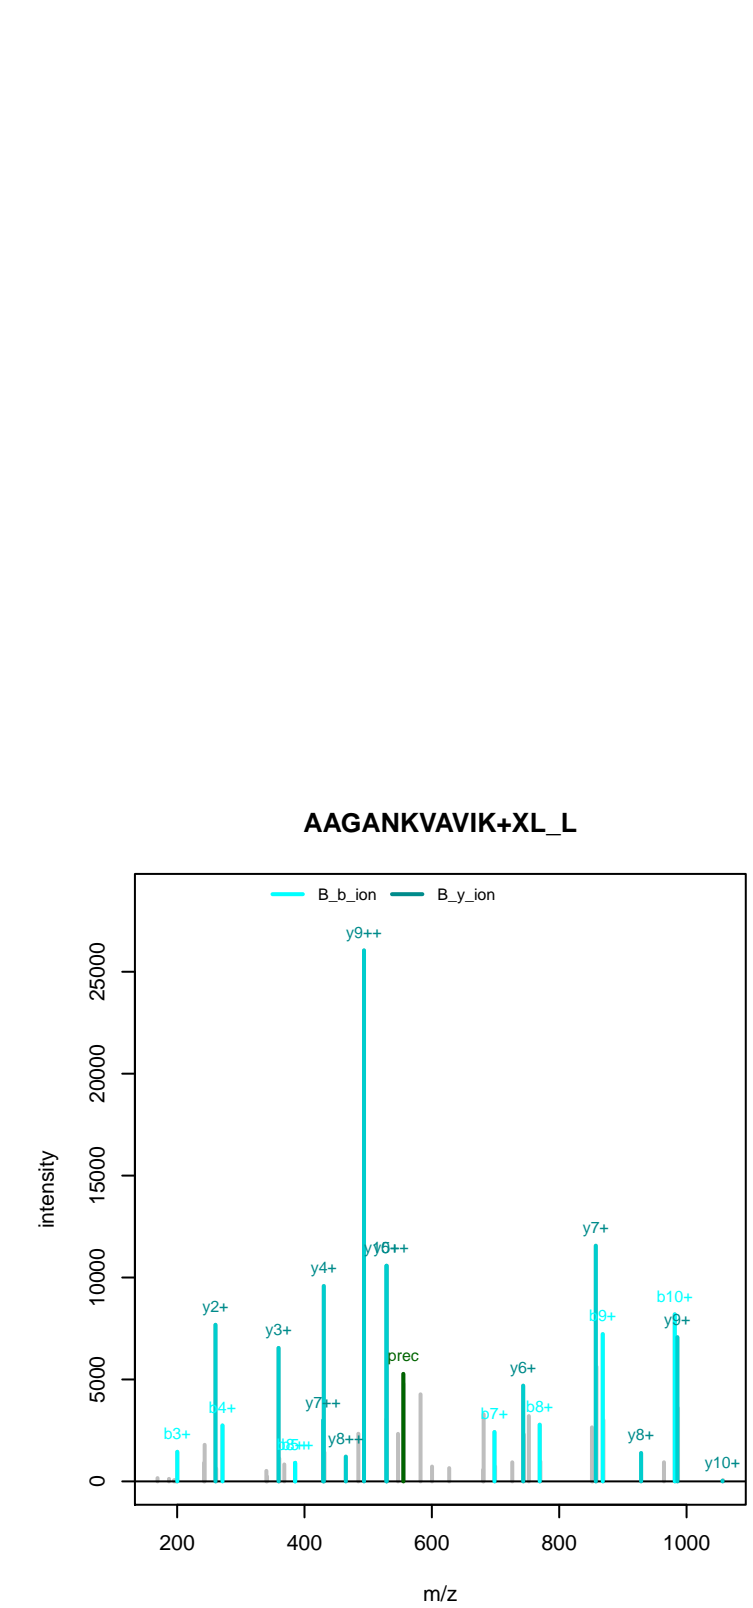

AAGANKVAVIK+XL\_S

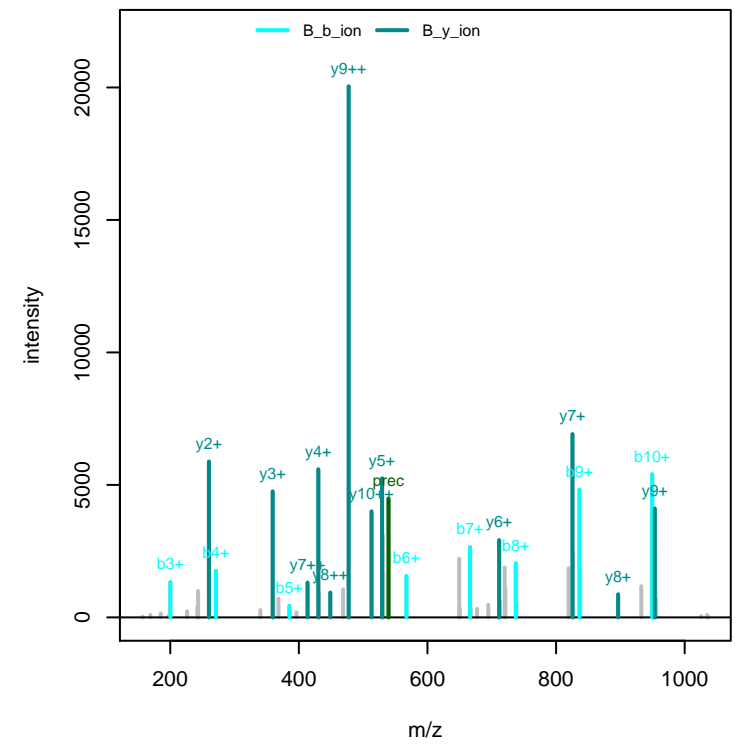

AAGANKVAVIK+XL\_L

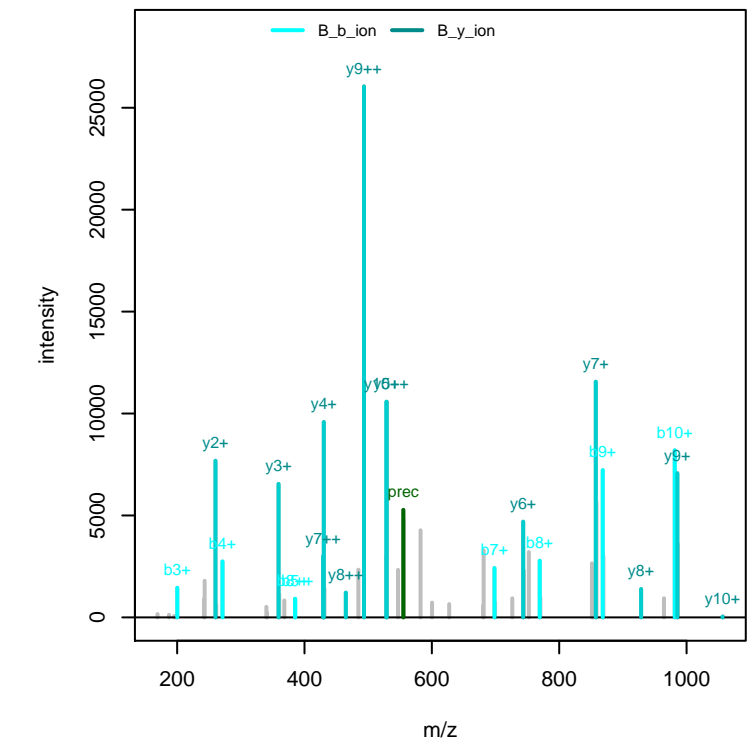

GLGEAKLNAK  
LGAMLDQKNR

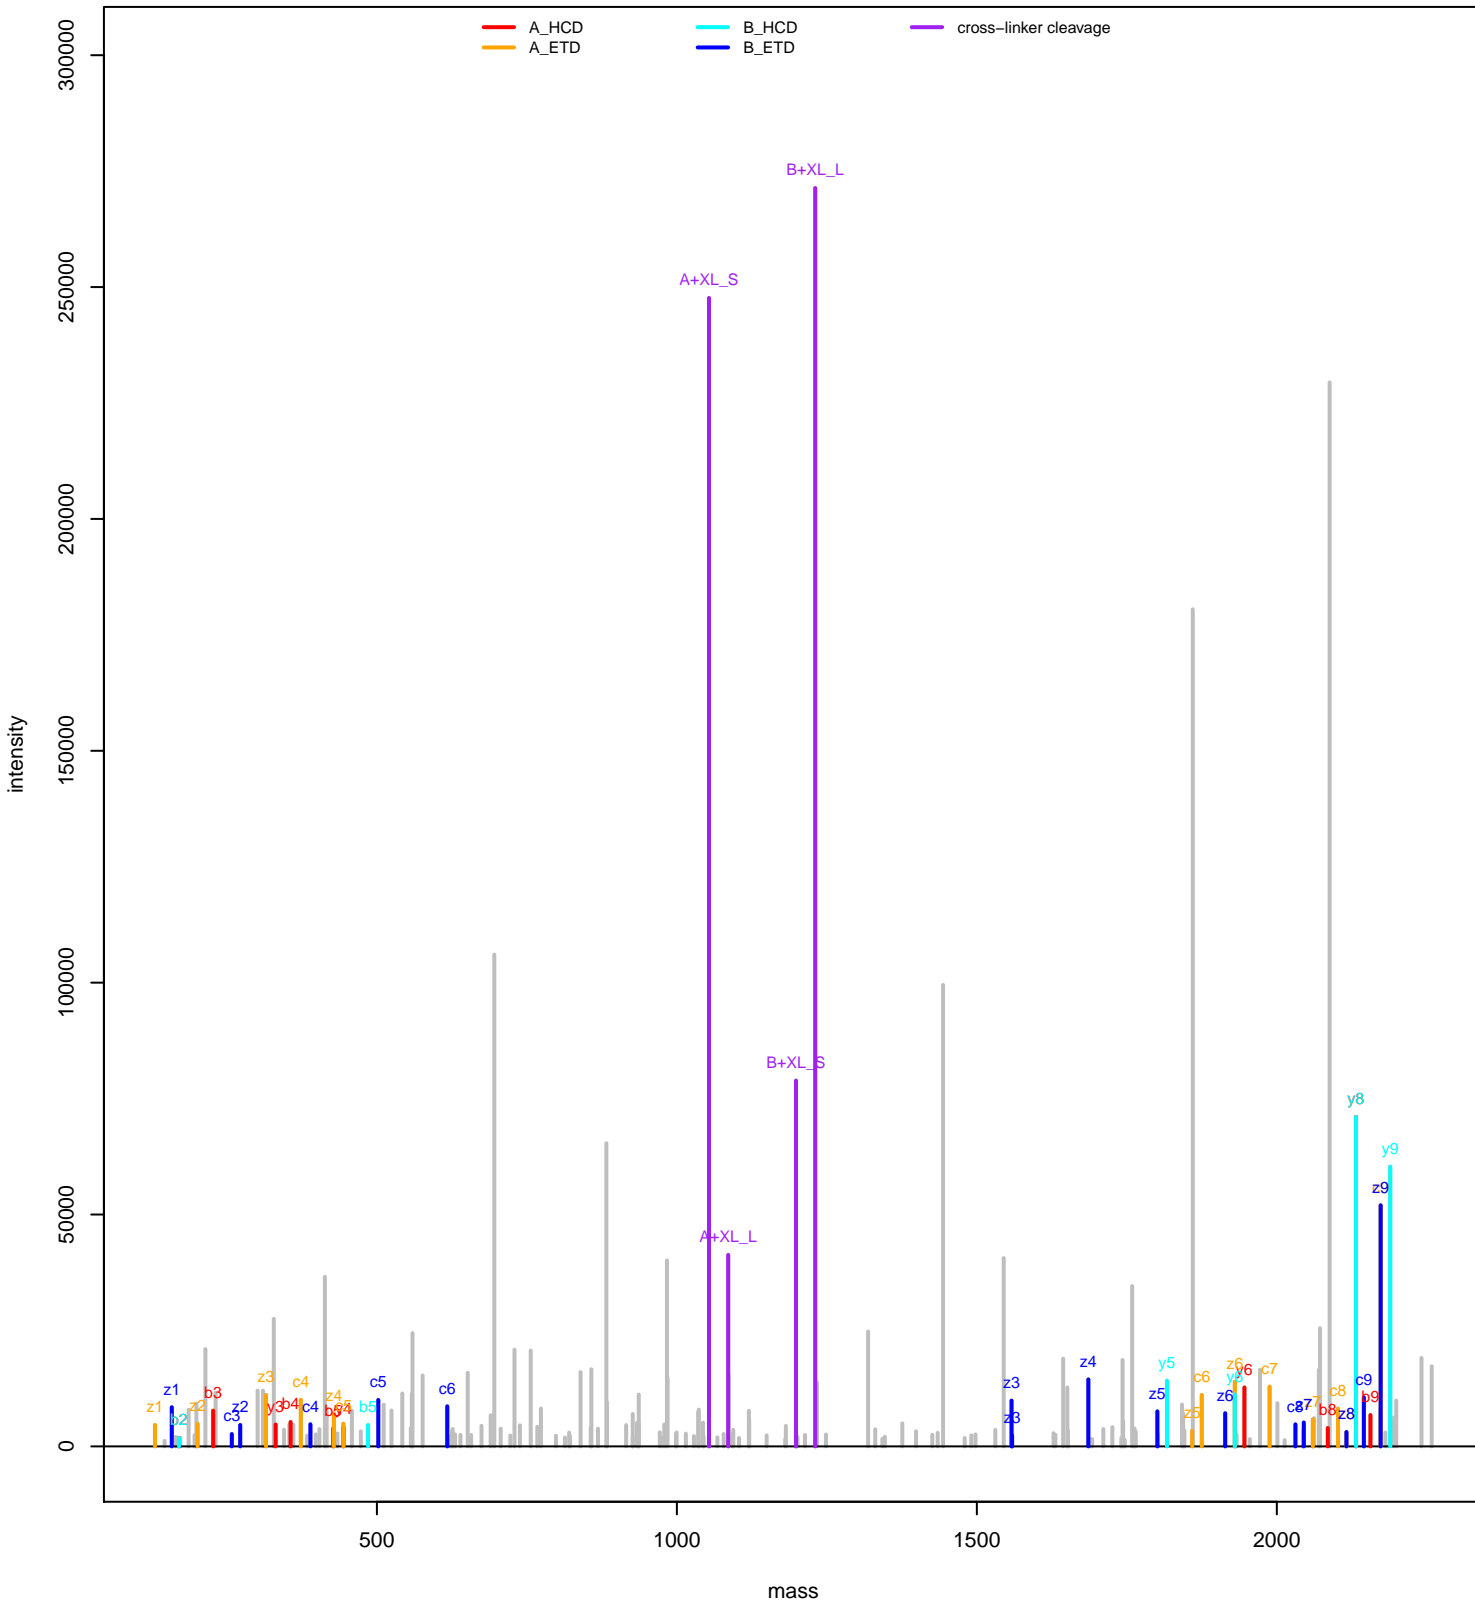

GLGEAKLNAK+XL\_S

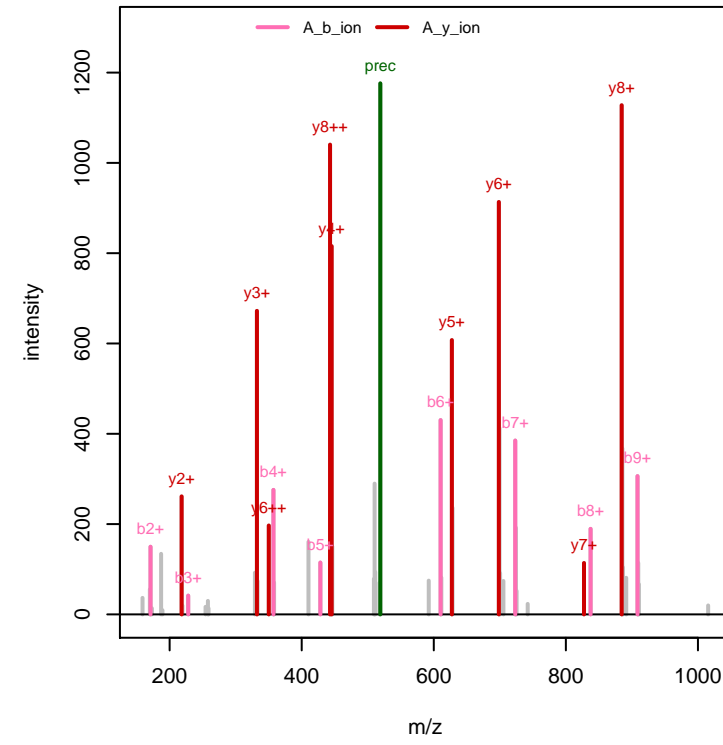

GLGEAKLNAK+XL\_L

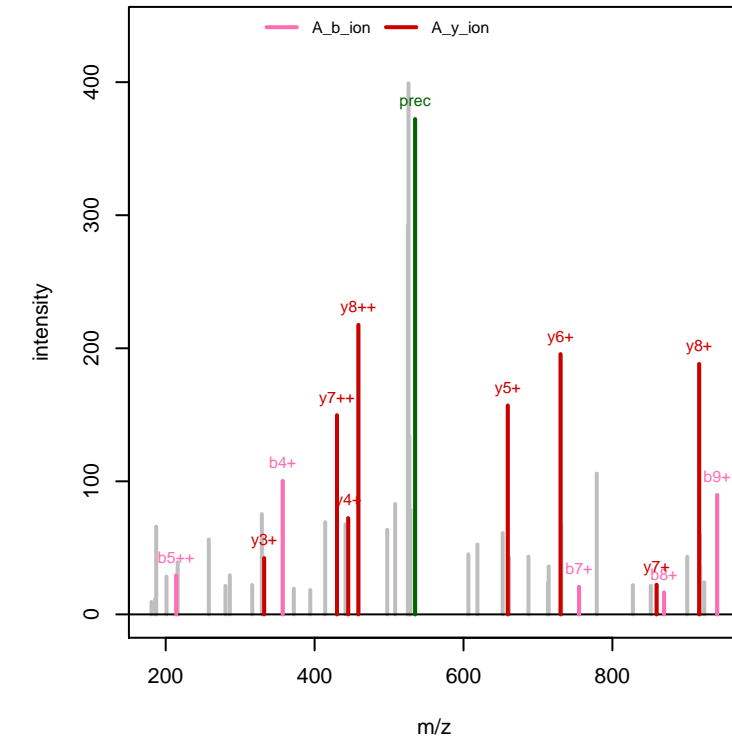

LGAMLDQKNR+XL\_S

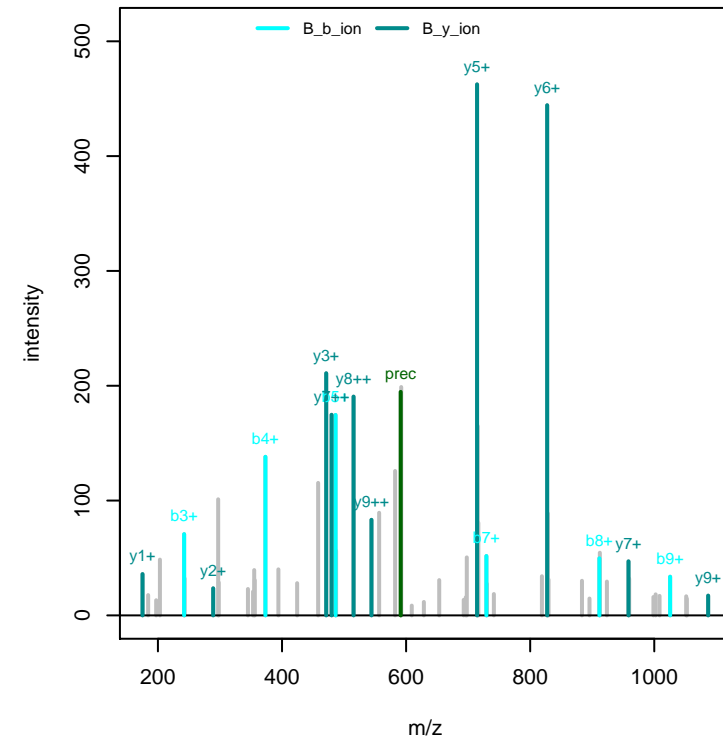

LGAMLDQKNR+XL\_L

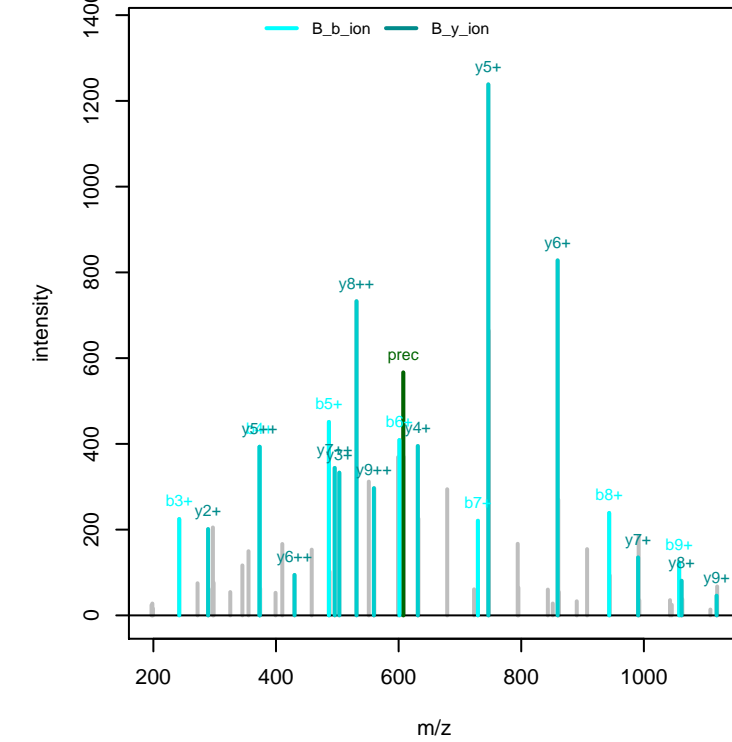

IIIGKDTR  
EISCVDSAELGKASR

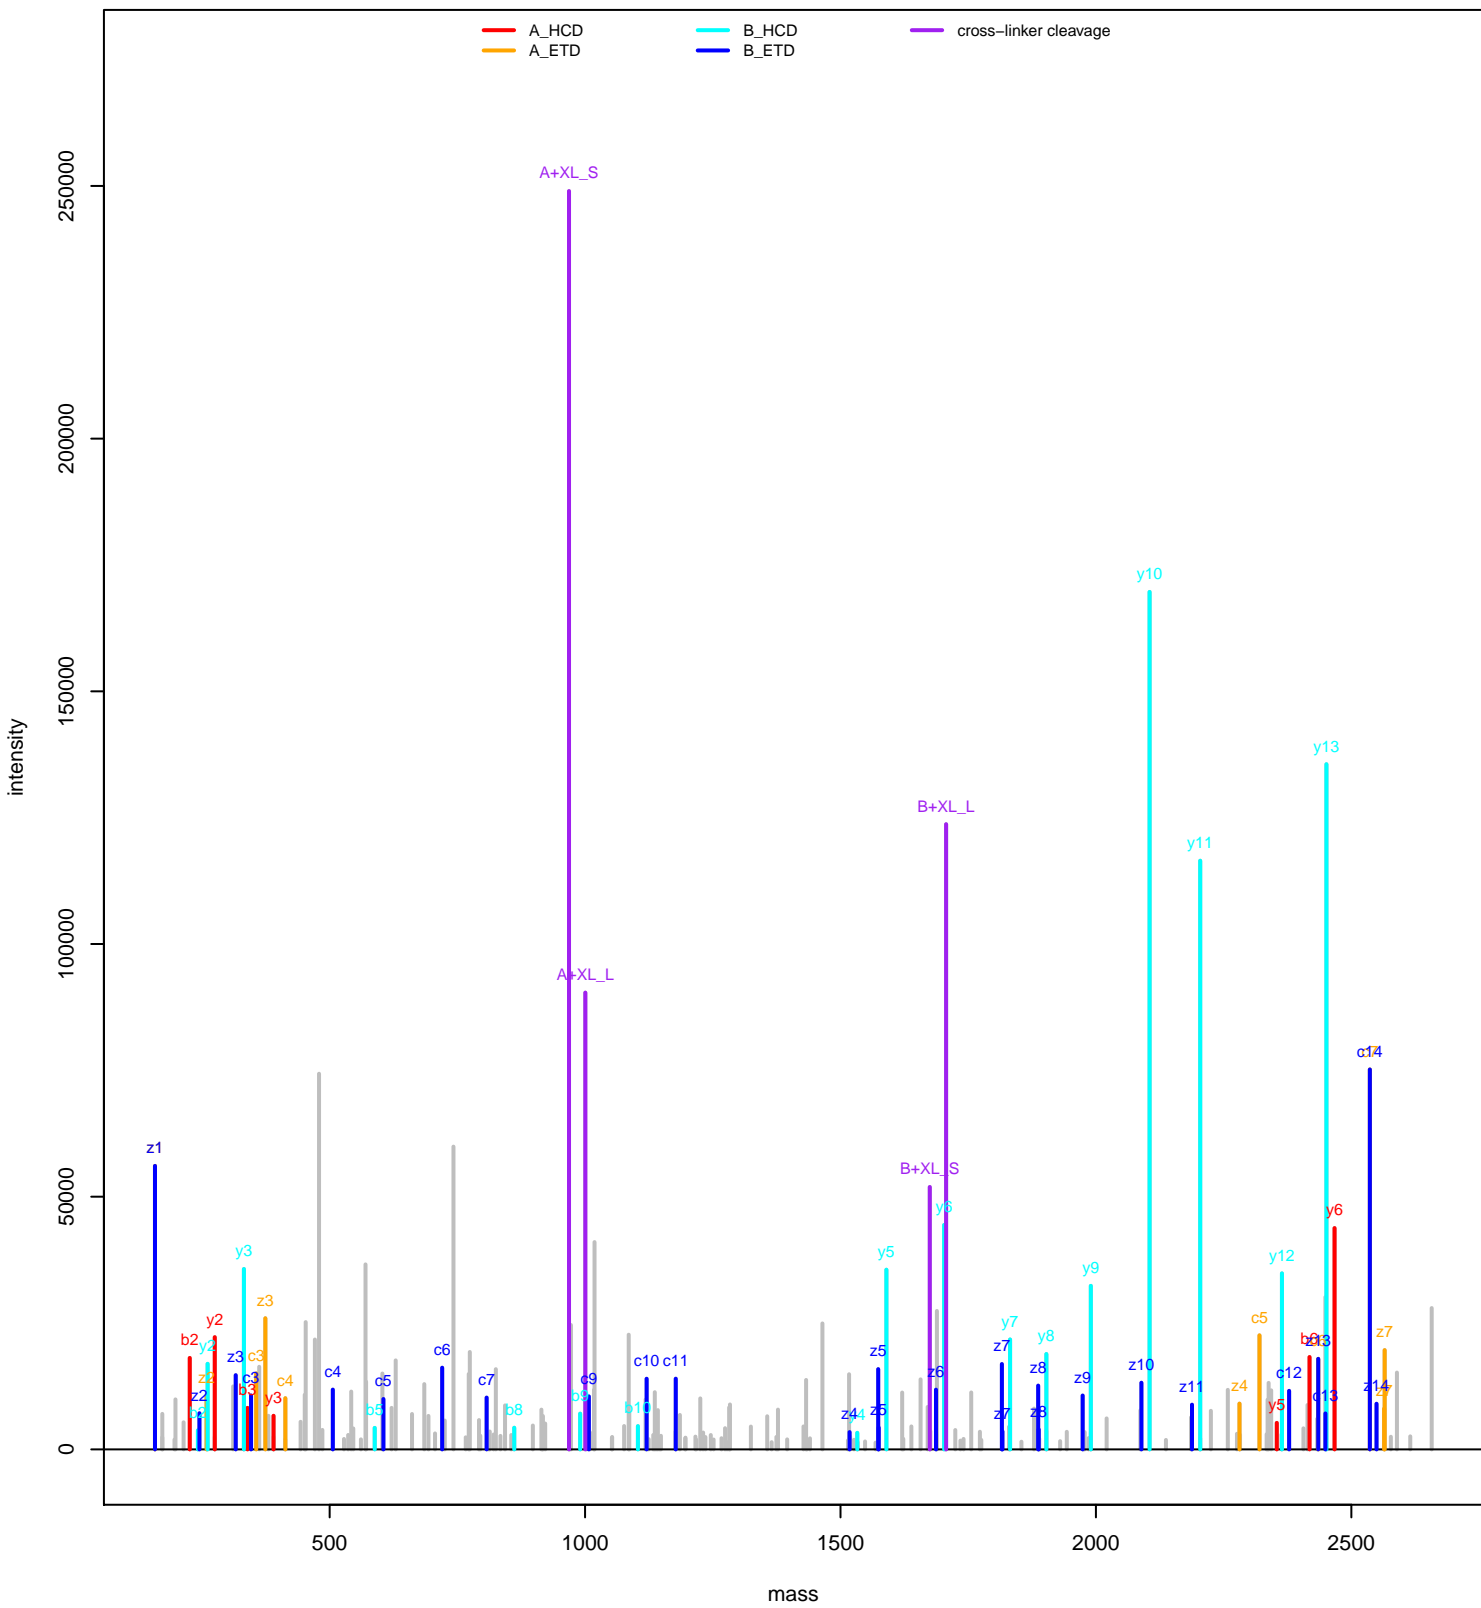

IIIGKDTR+XL\_S

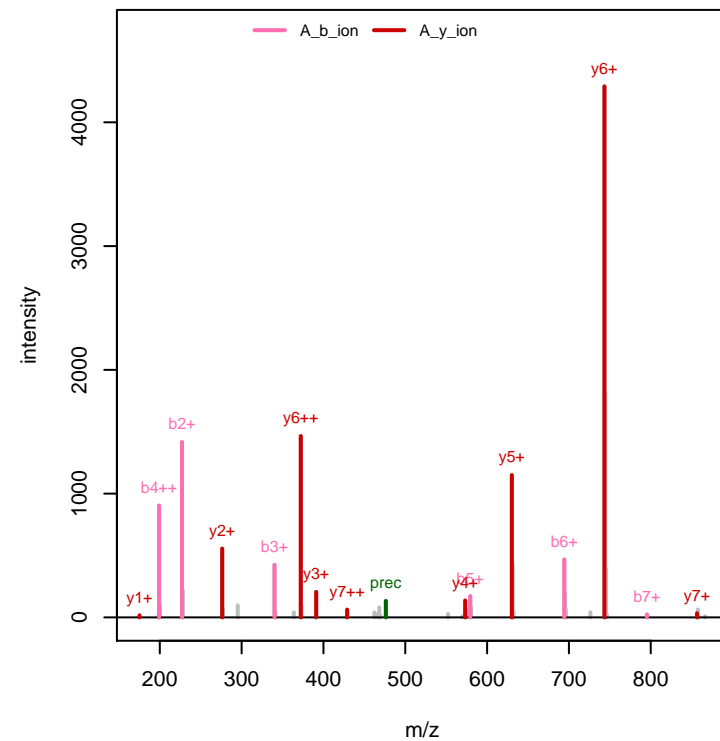

IIIGKDTR+XL\_L

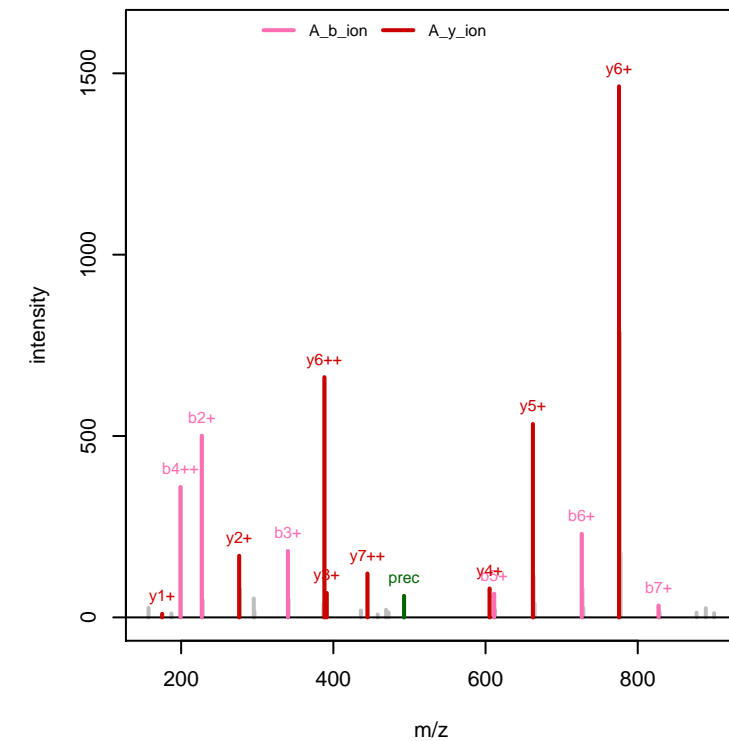

EISCVDSAELGKASR+XL\_S

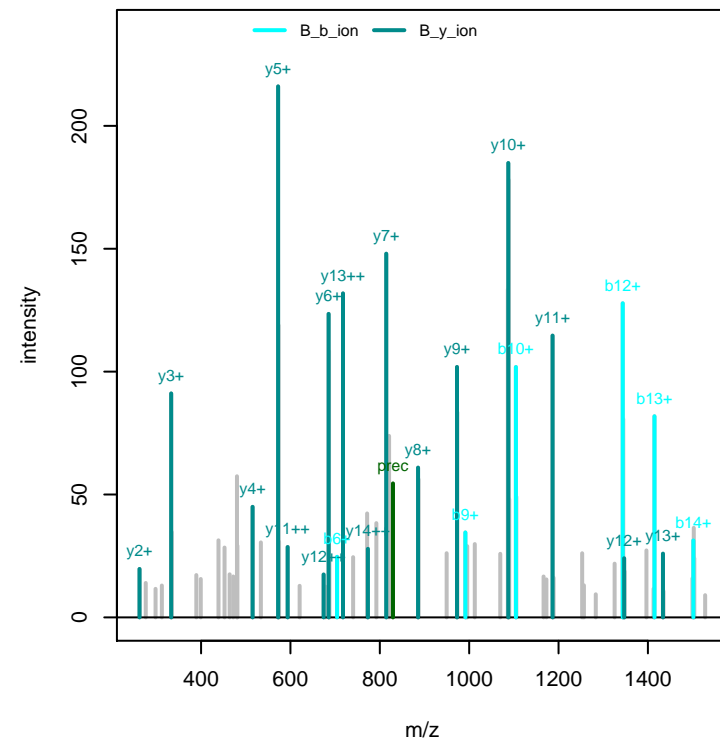

EISCVDSAELGKASR+XL\_L

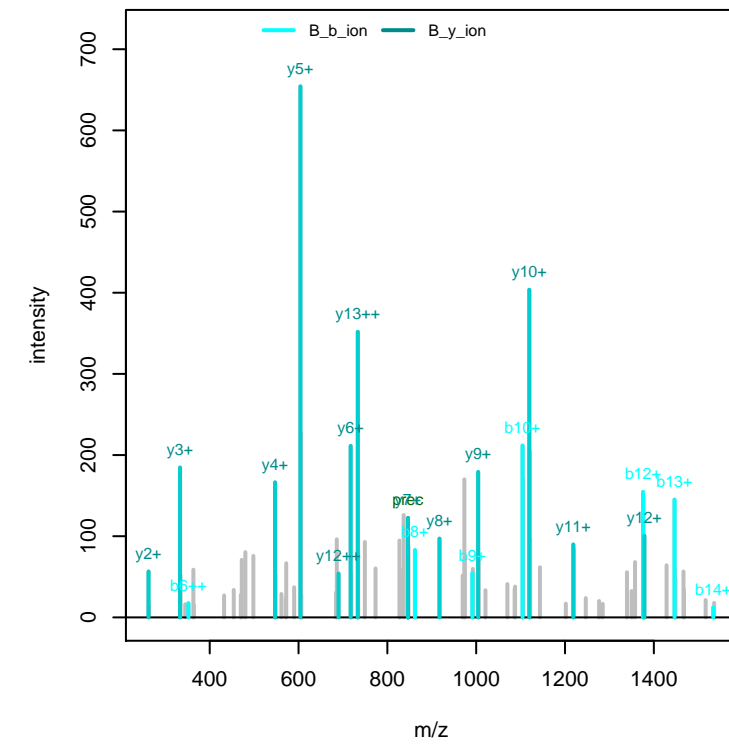

VAVIKAVR  
PAENIVEVHHLKK

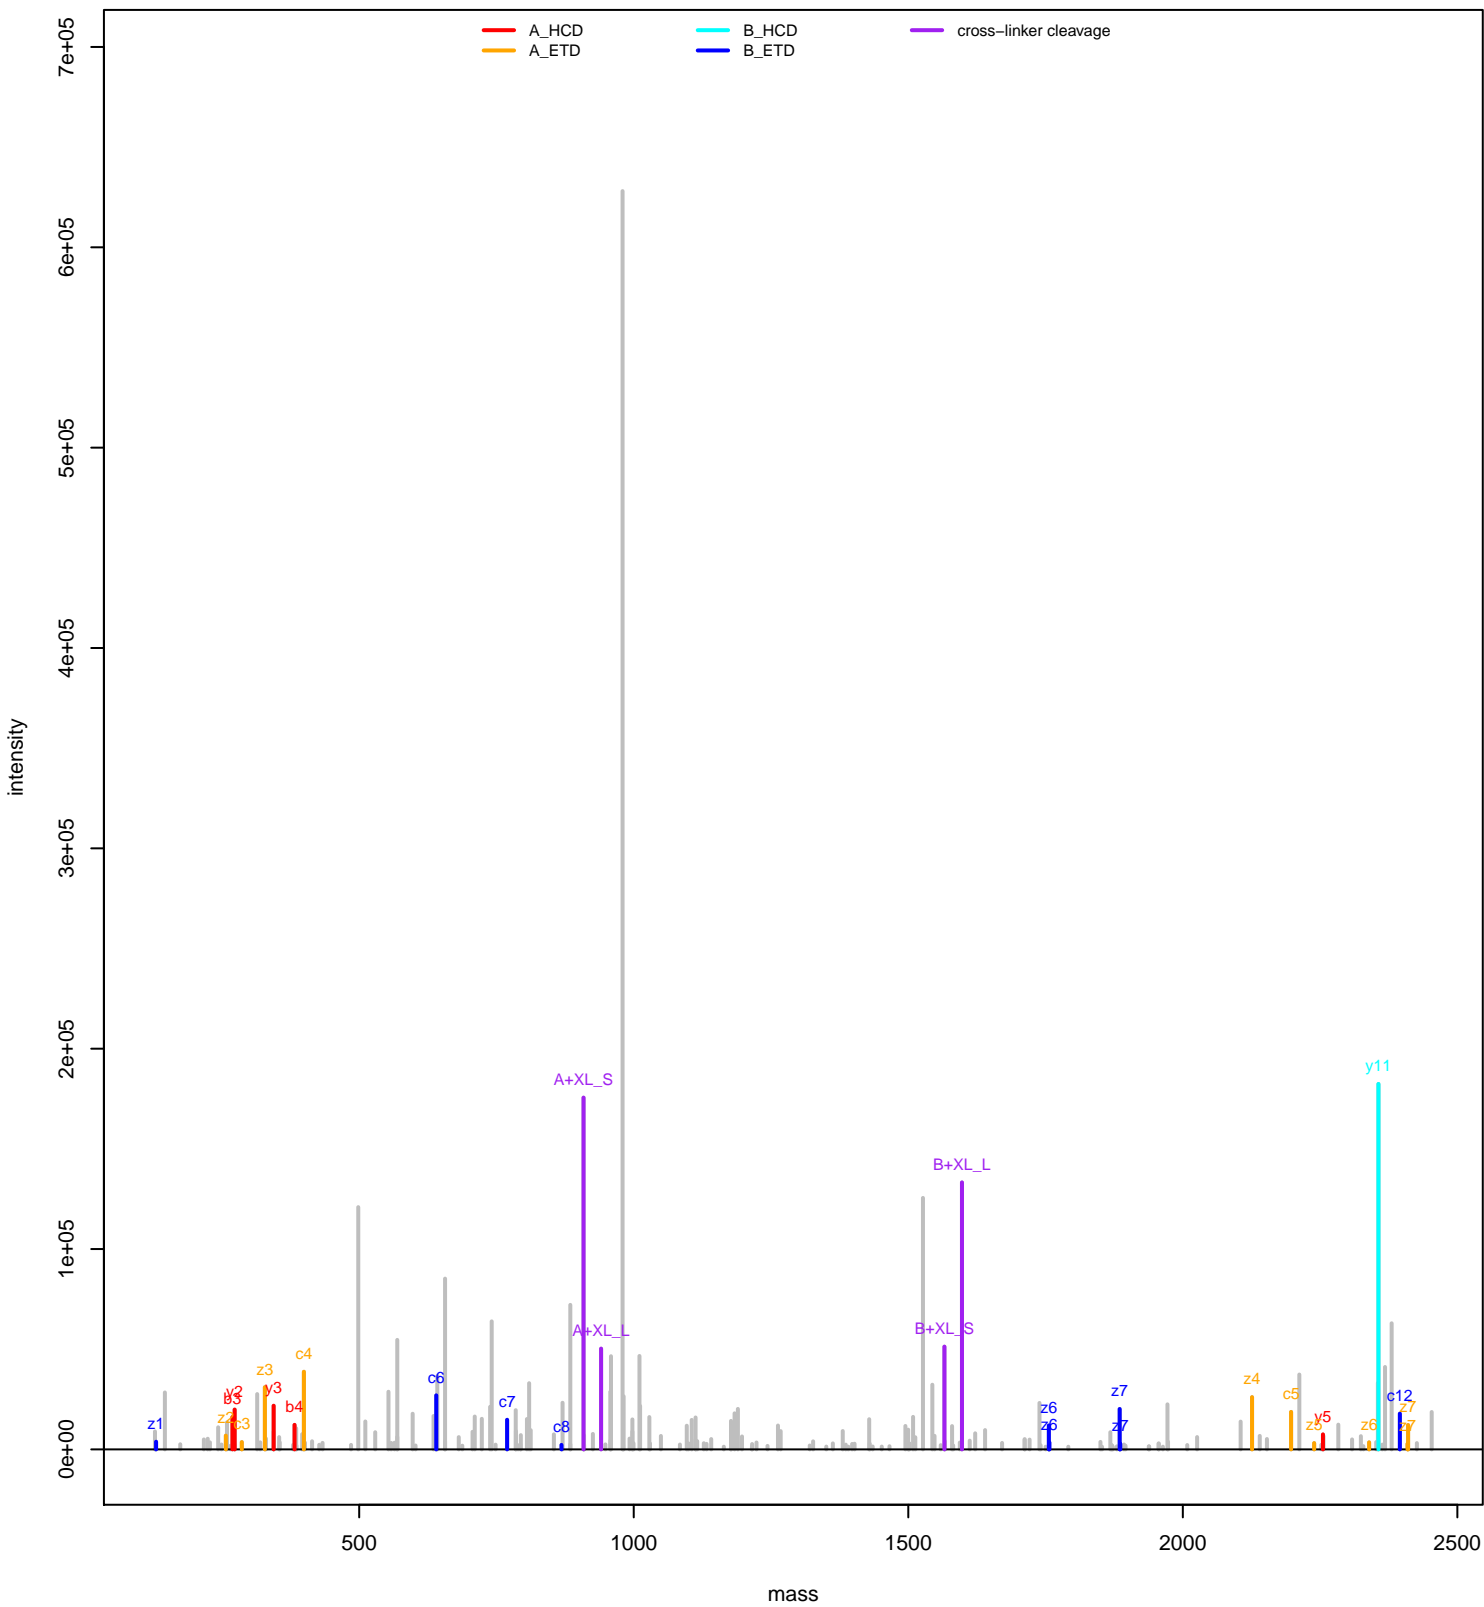

VAVIKAVR+XL\_S

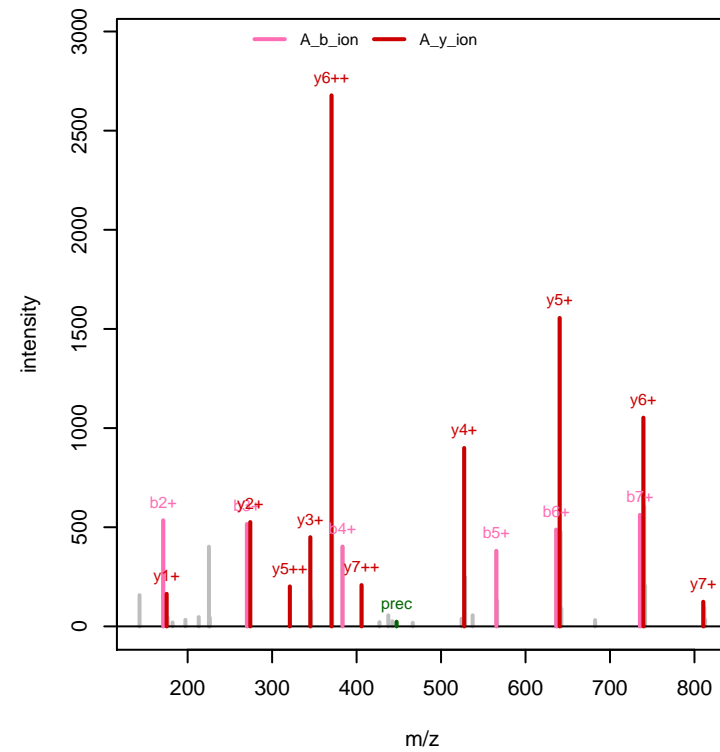

VAVIKAVR+XL\_L

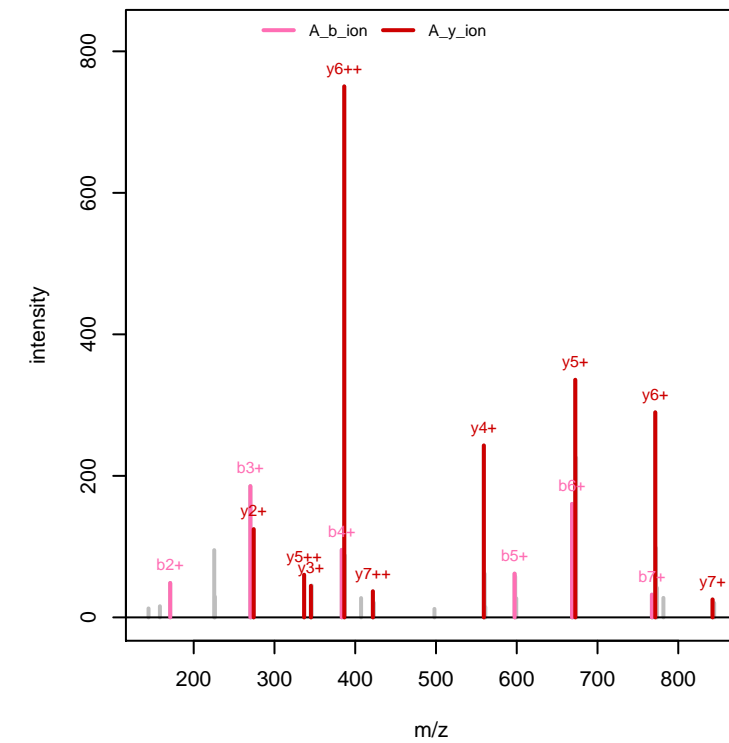

PAENIVEVHHLKK+XL\_S

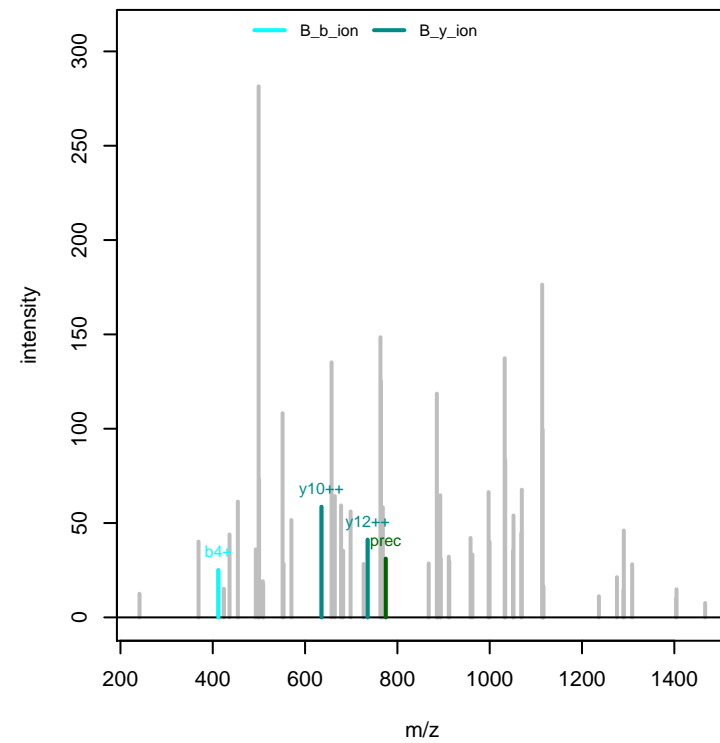

PAENIVEVHHLKK+XL\_L

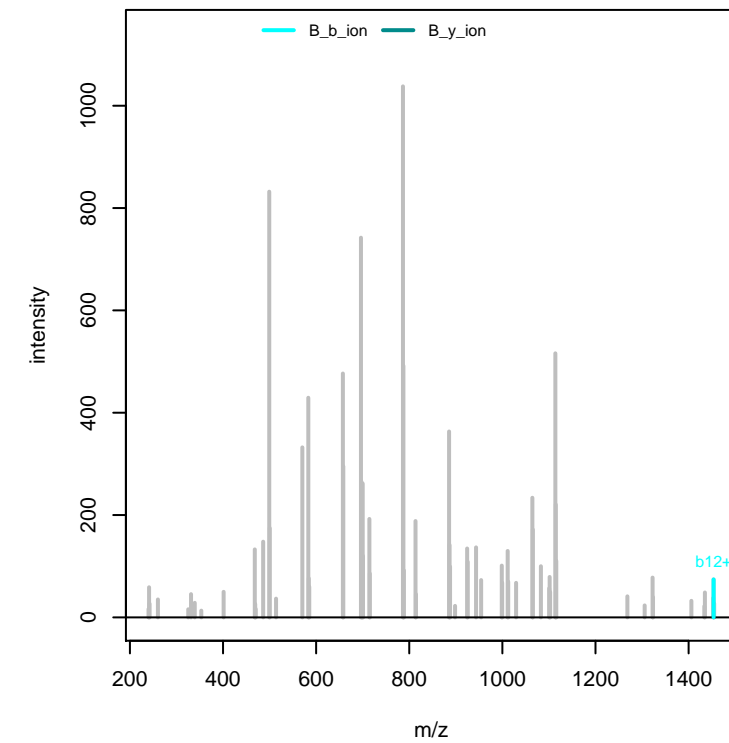

KAQETK  
GKATVILAHTIK

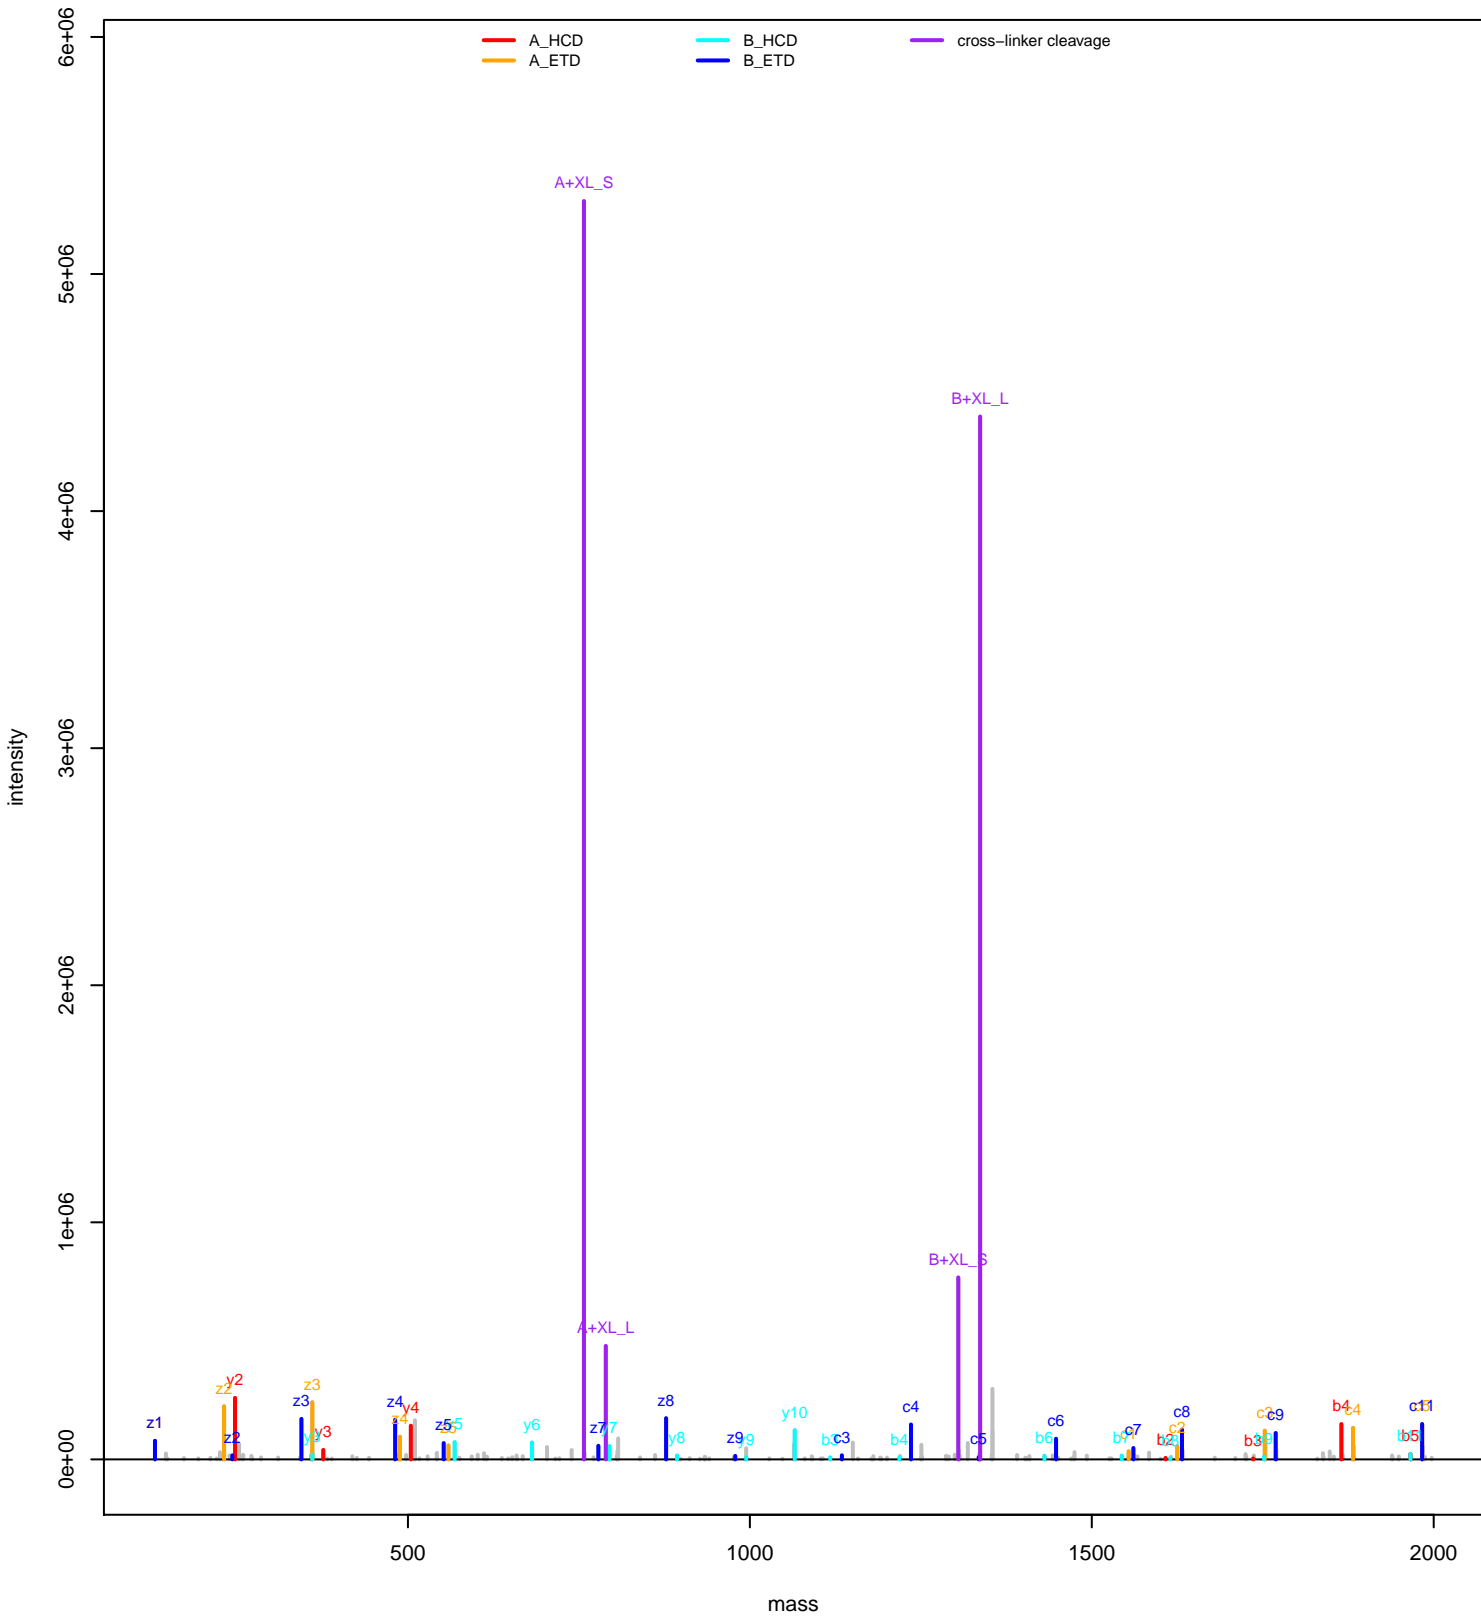

KAQETK+XL\_S

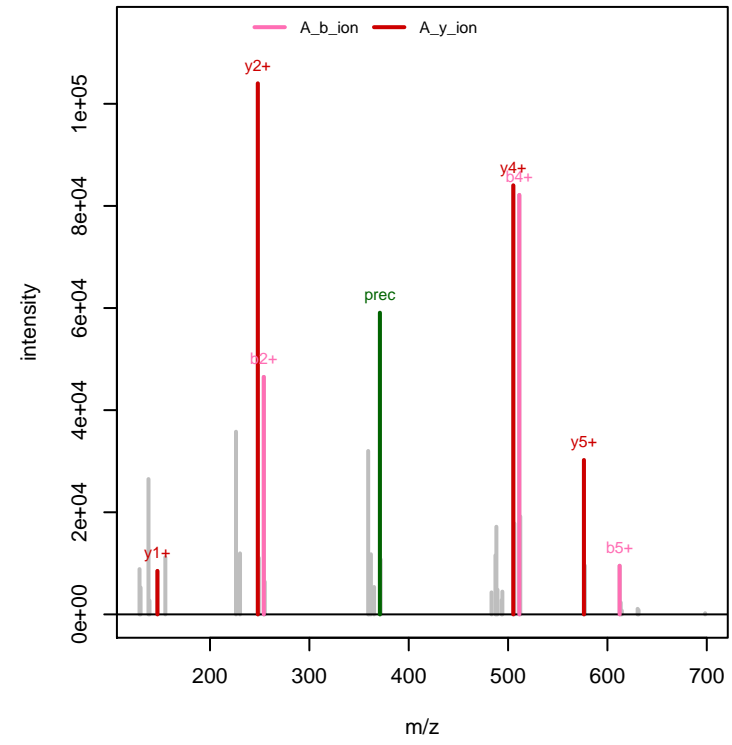

KAQETK+XL\_L

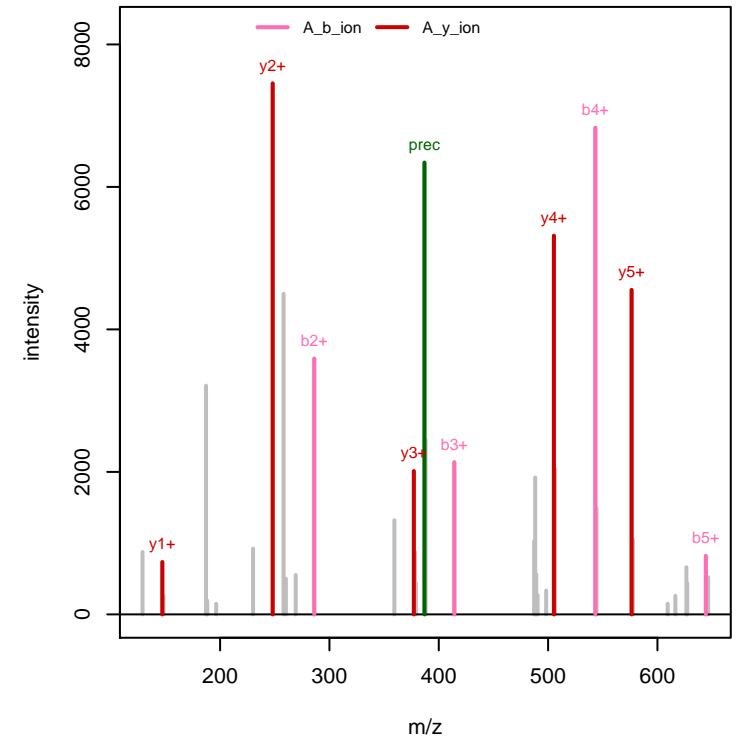

GKATVILAHTIK+XL\_S

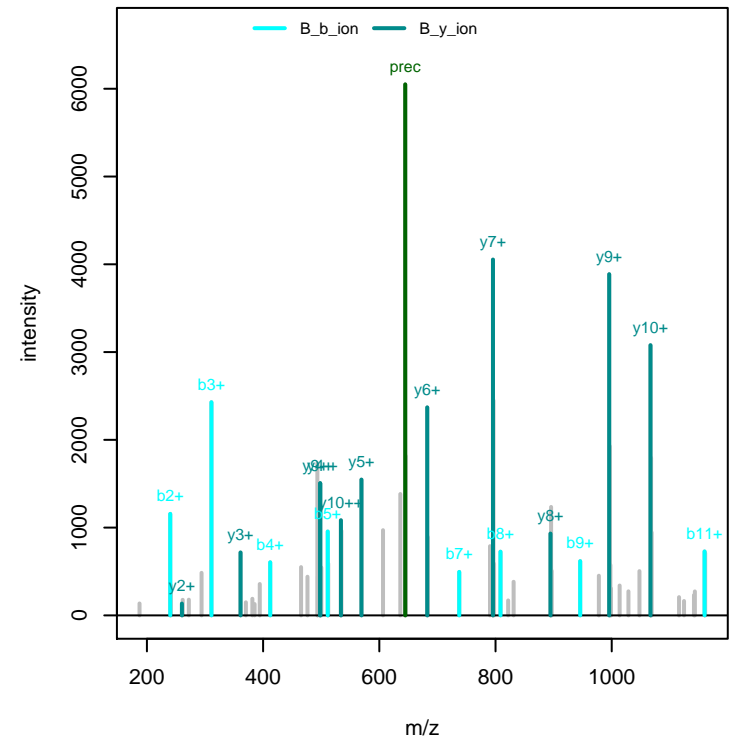

GKATVILAHTIK+XL\_L

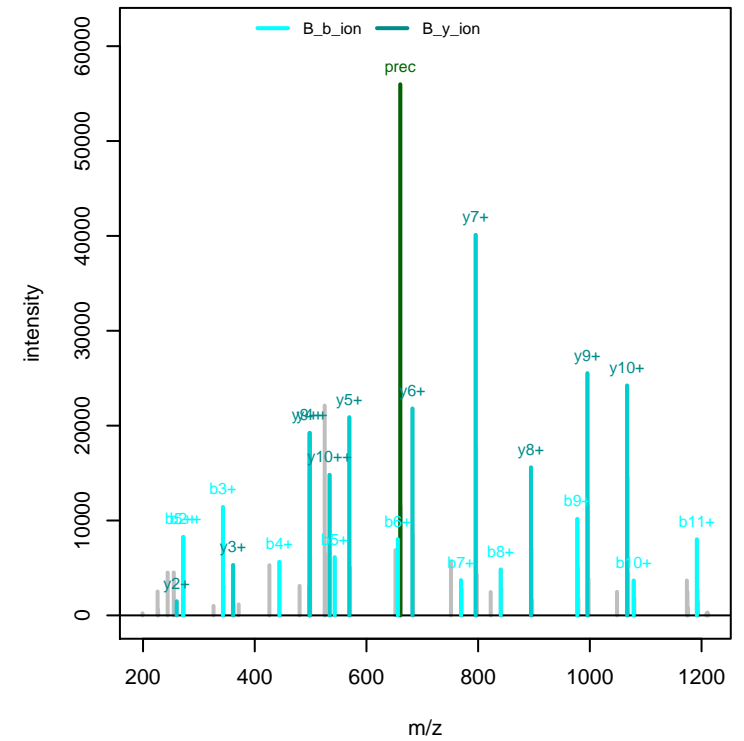

KGMPATPVFDGAK  
INAMLKQQQEVAK

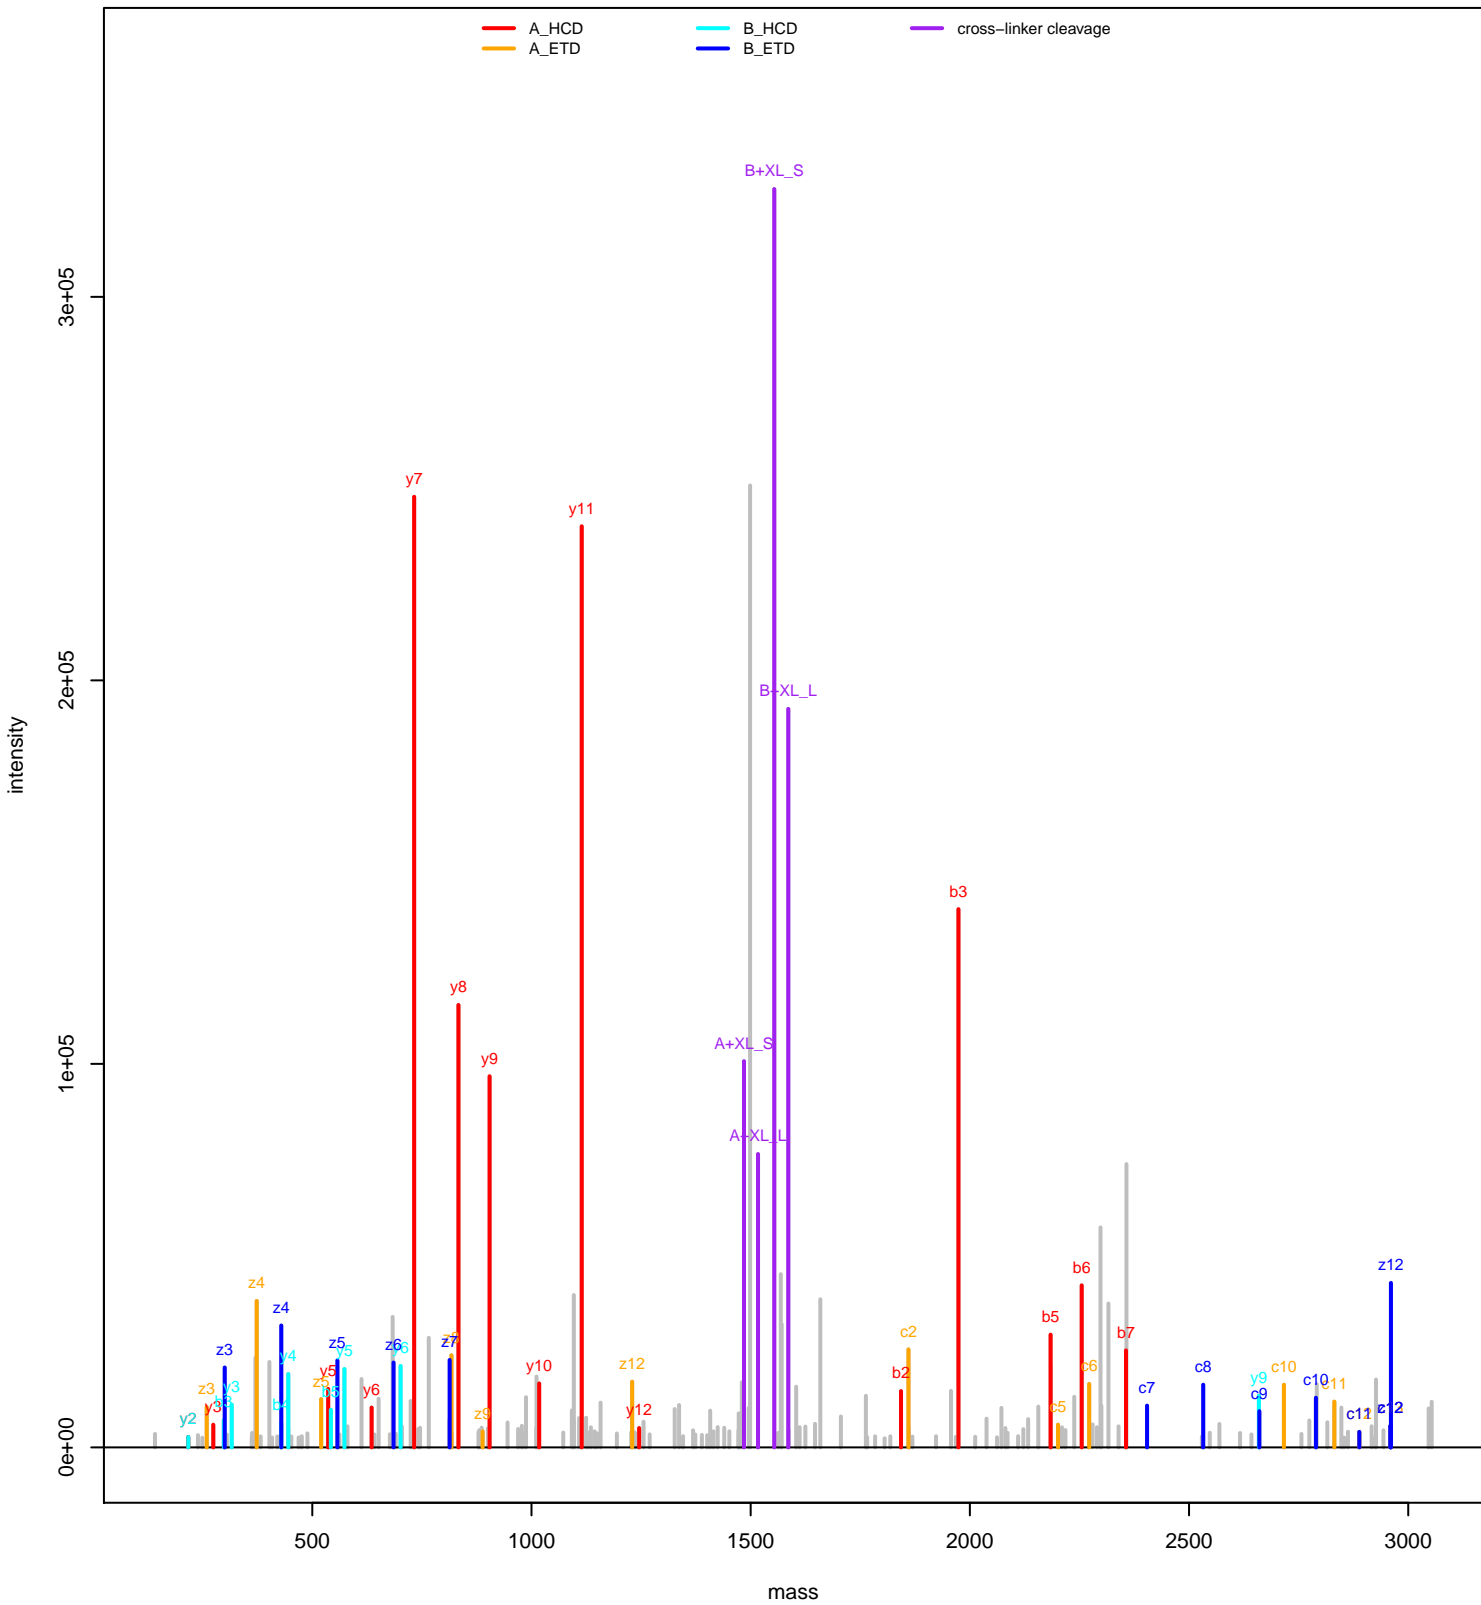

KGMPATPVFDGAK+XL\_S

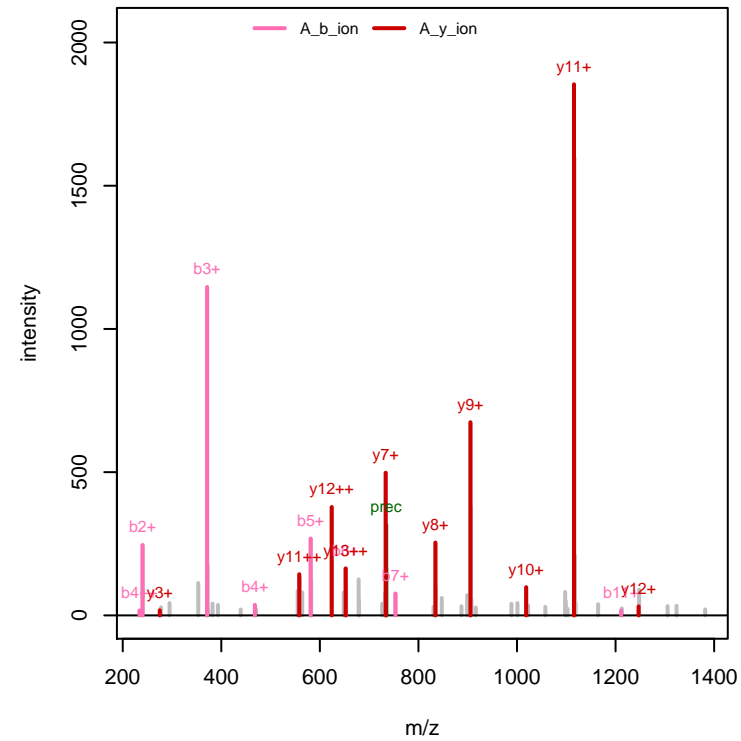

KGMPATPVFDGAK+XL\_L

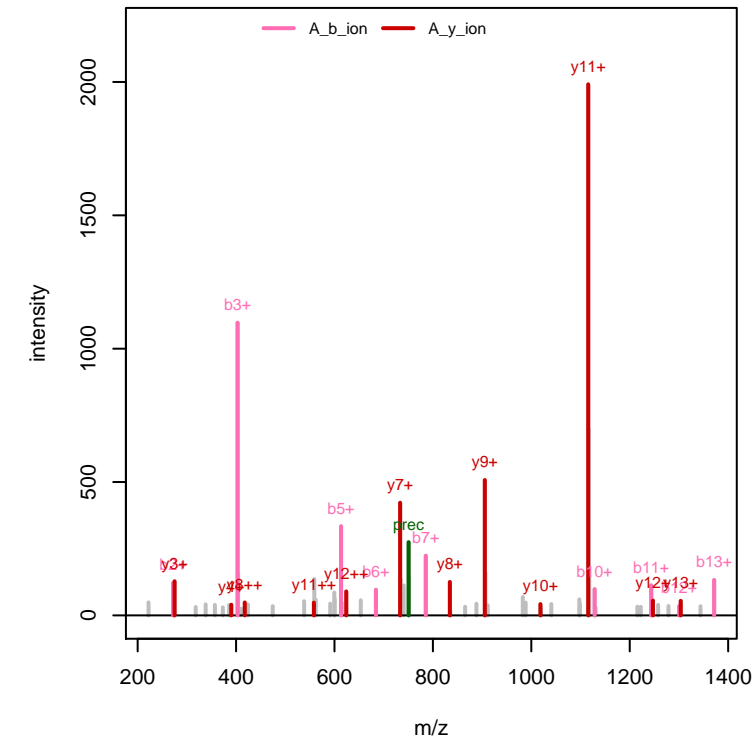

INAMLKQQQEVAK+XL\_S

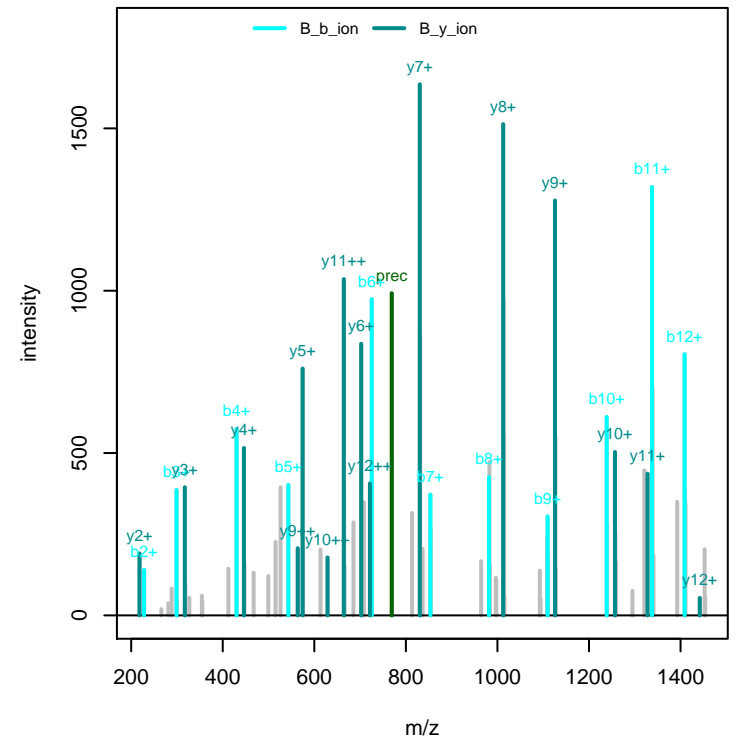

INAMLKQQQEVAK+XL\_L

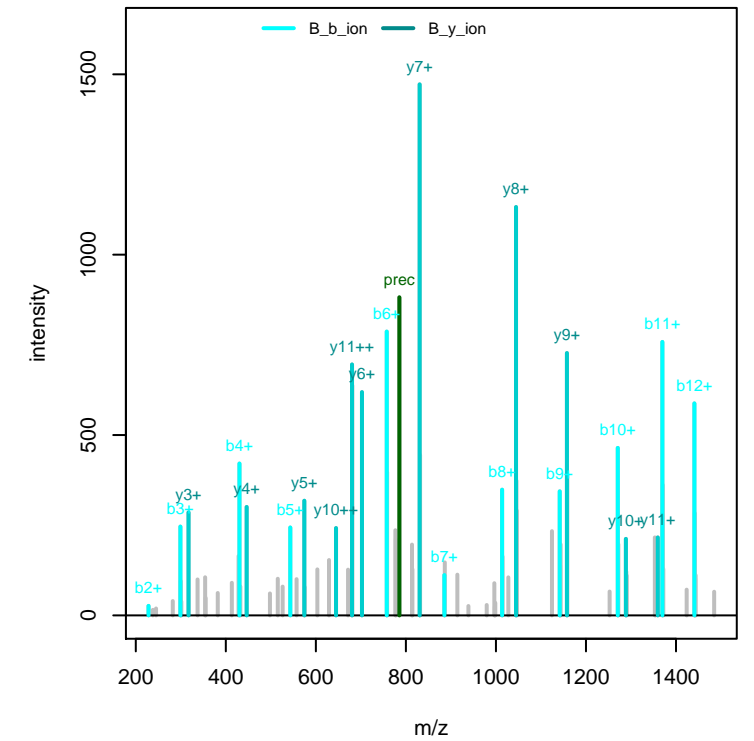



**MIGLVGKK**  
**AIQVTTGAKK**

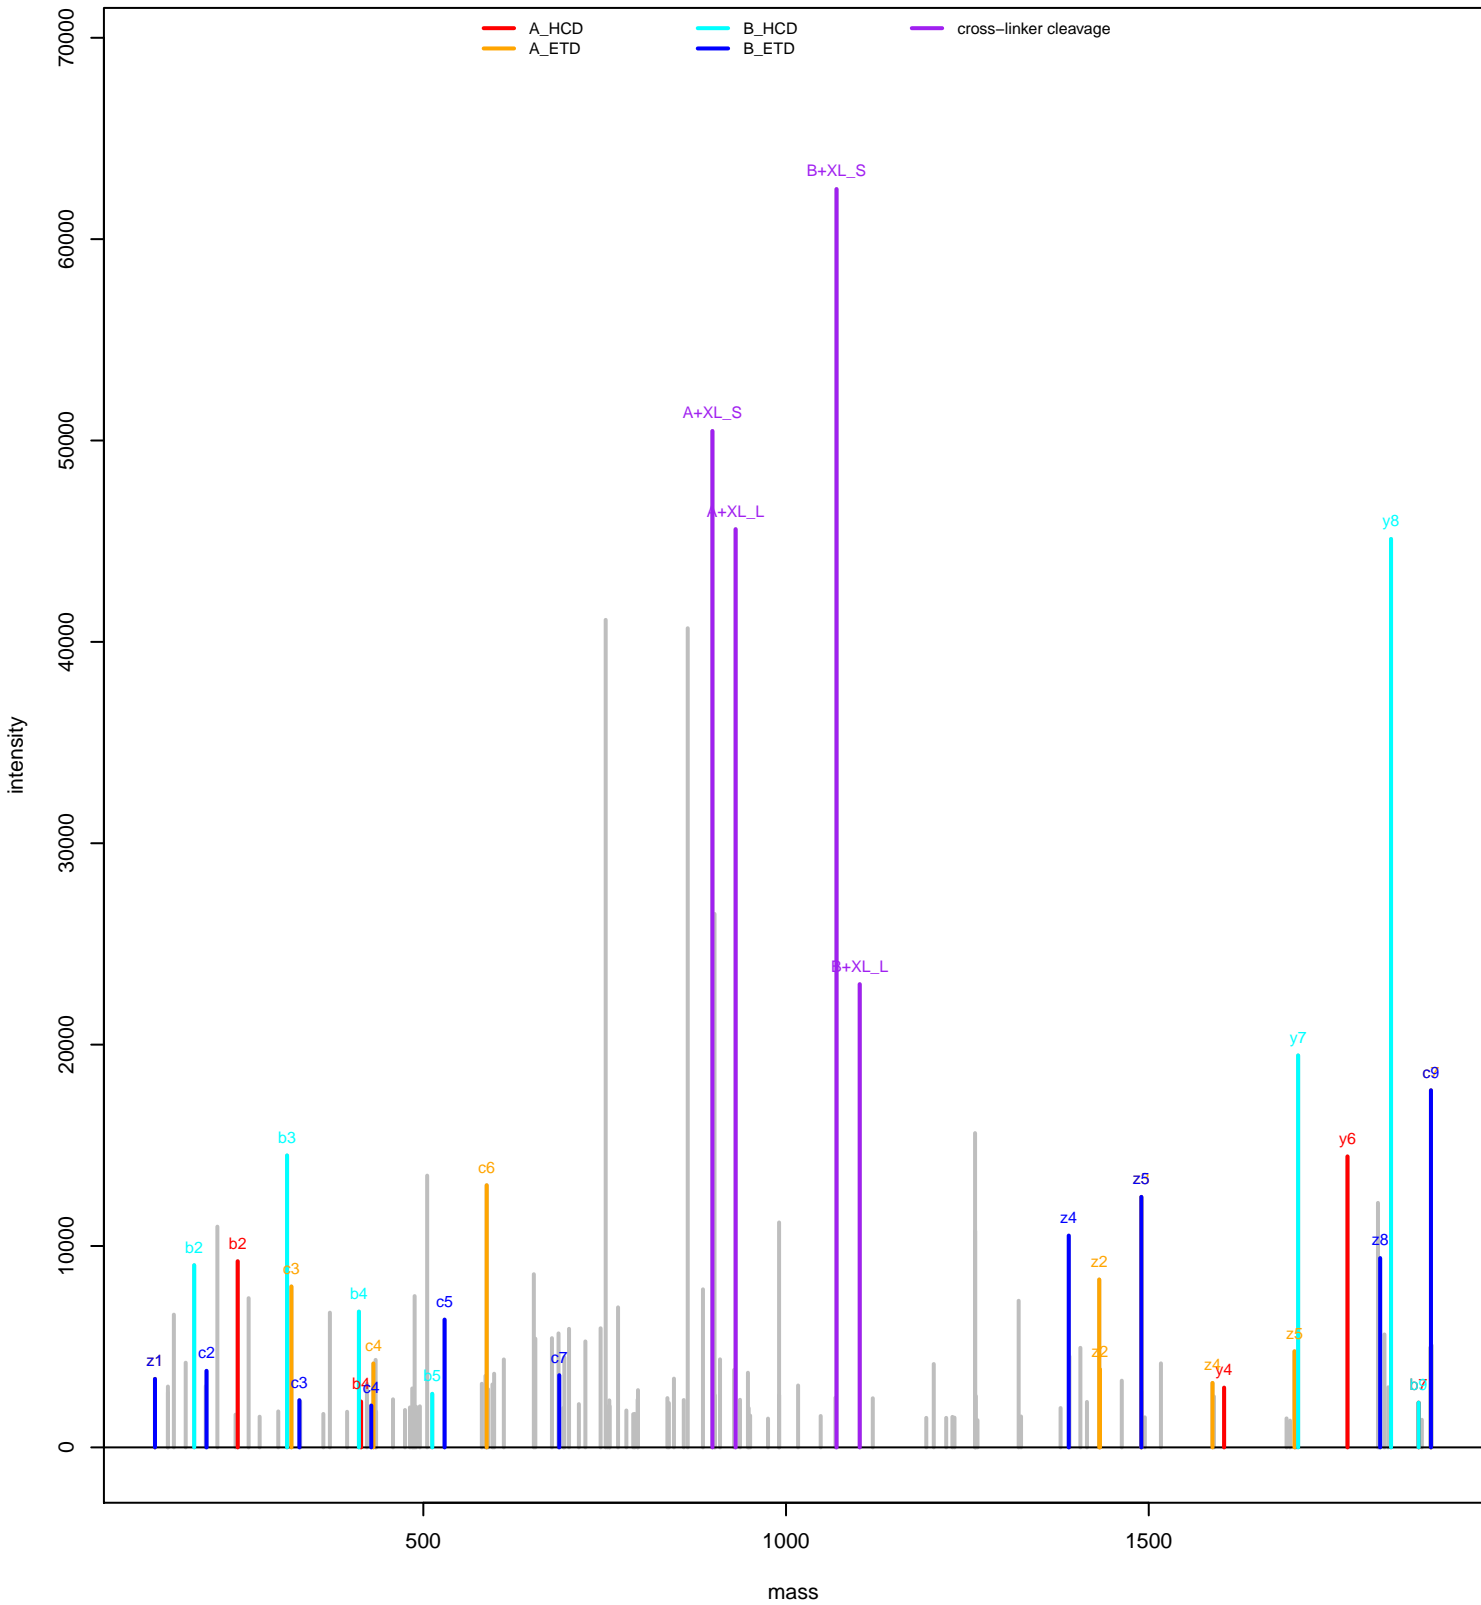

**MIGLVGKK+XL\_S**

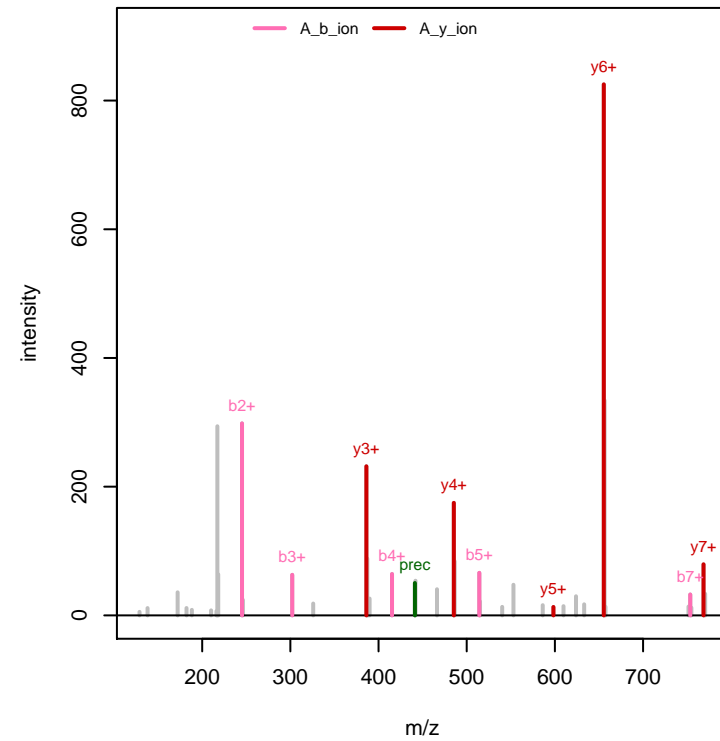

**MIGLVGKK+XL\_L**

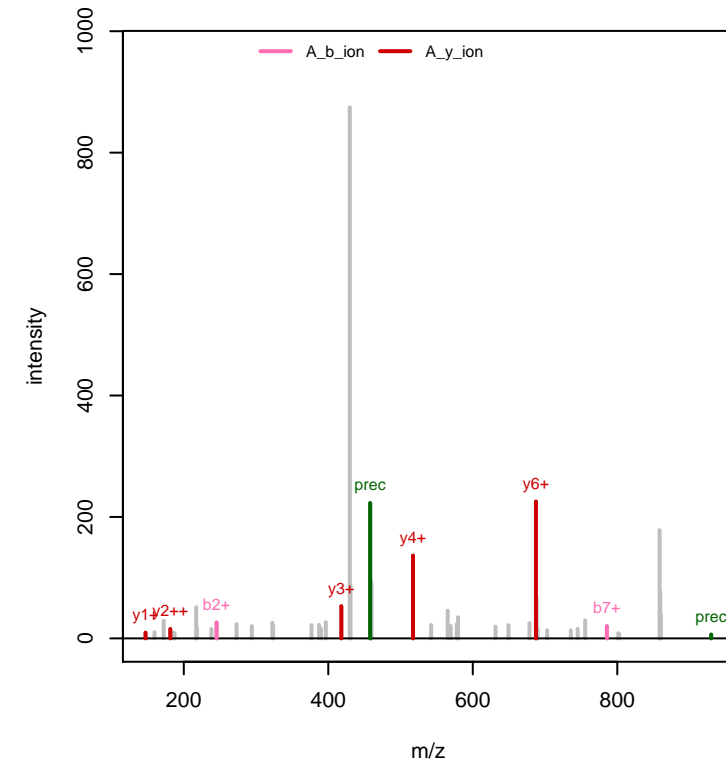

**AIQVTTGAKK+XL\_S**

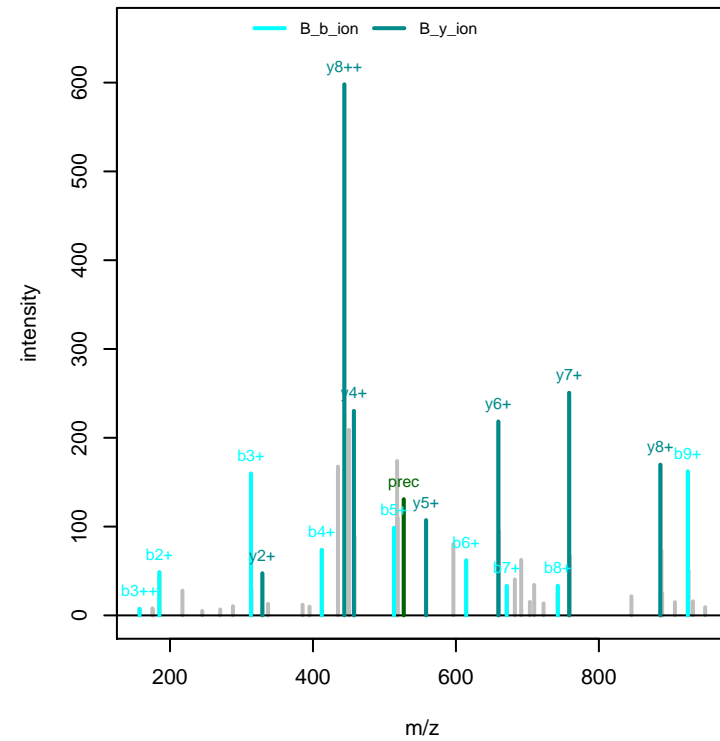

**AIQVTTGAKK+XL\_L**

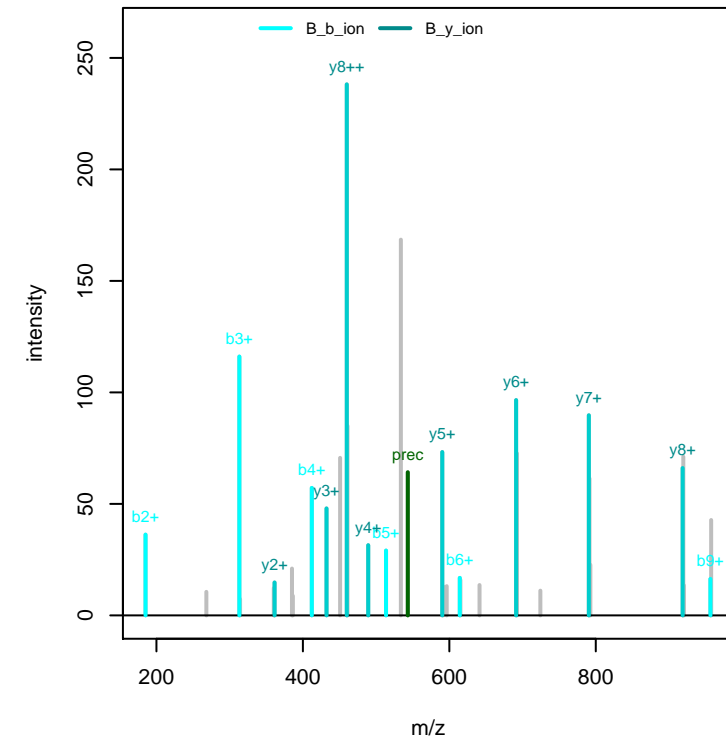

KVEADCR  
NIPVGSTVHNVEMKPGK

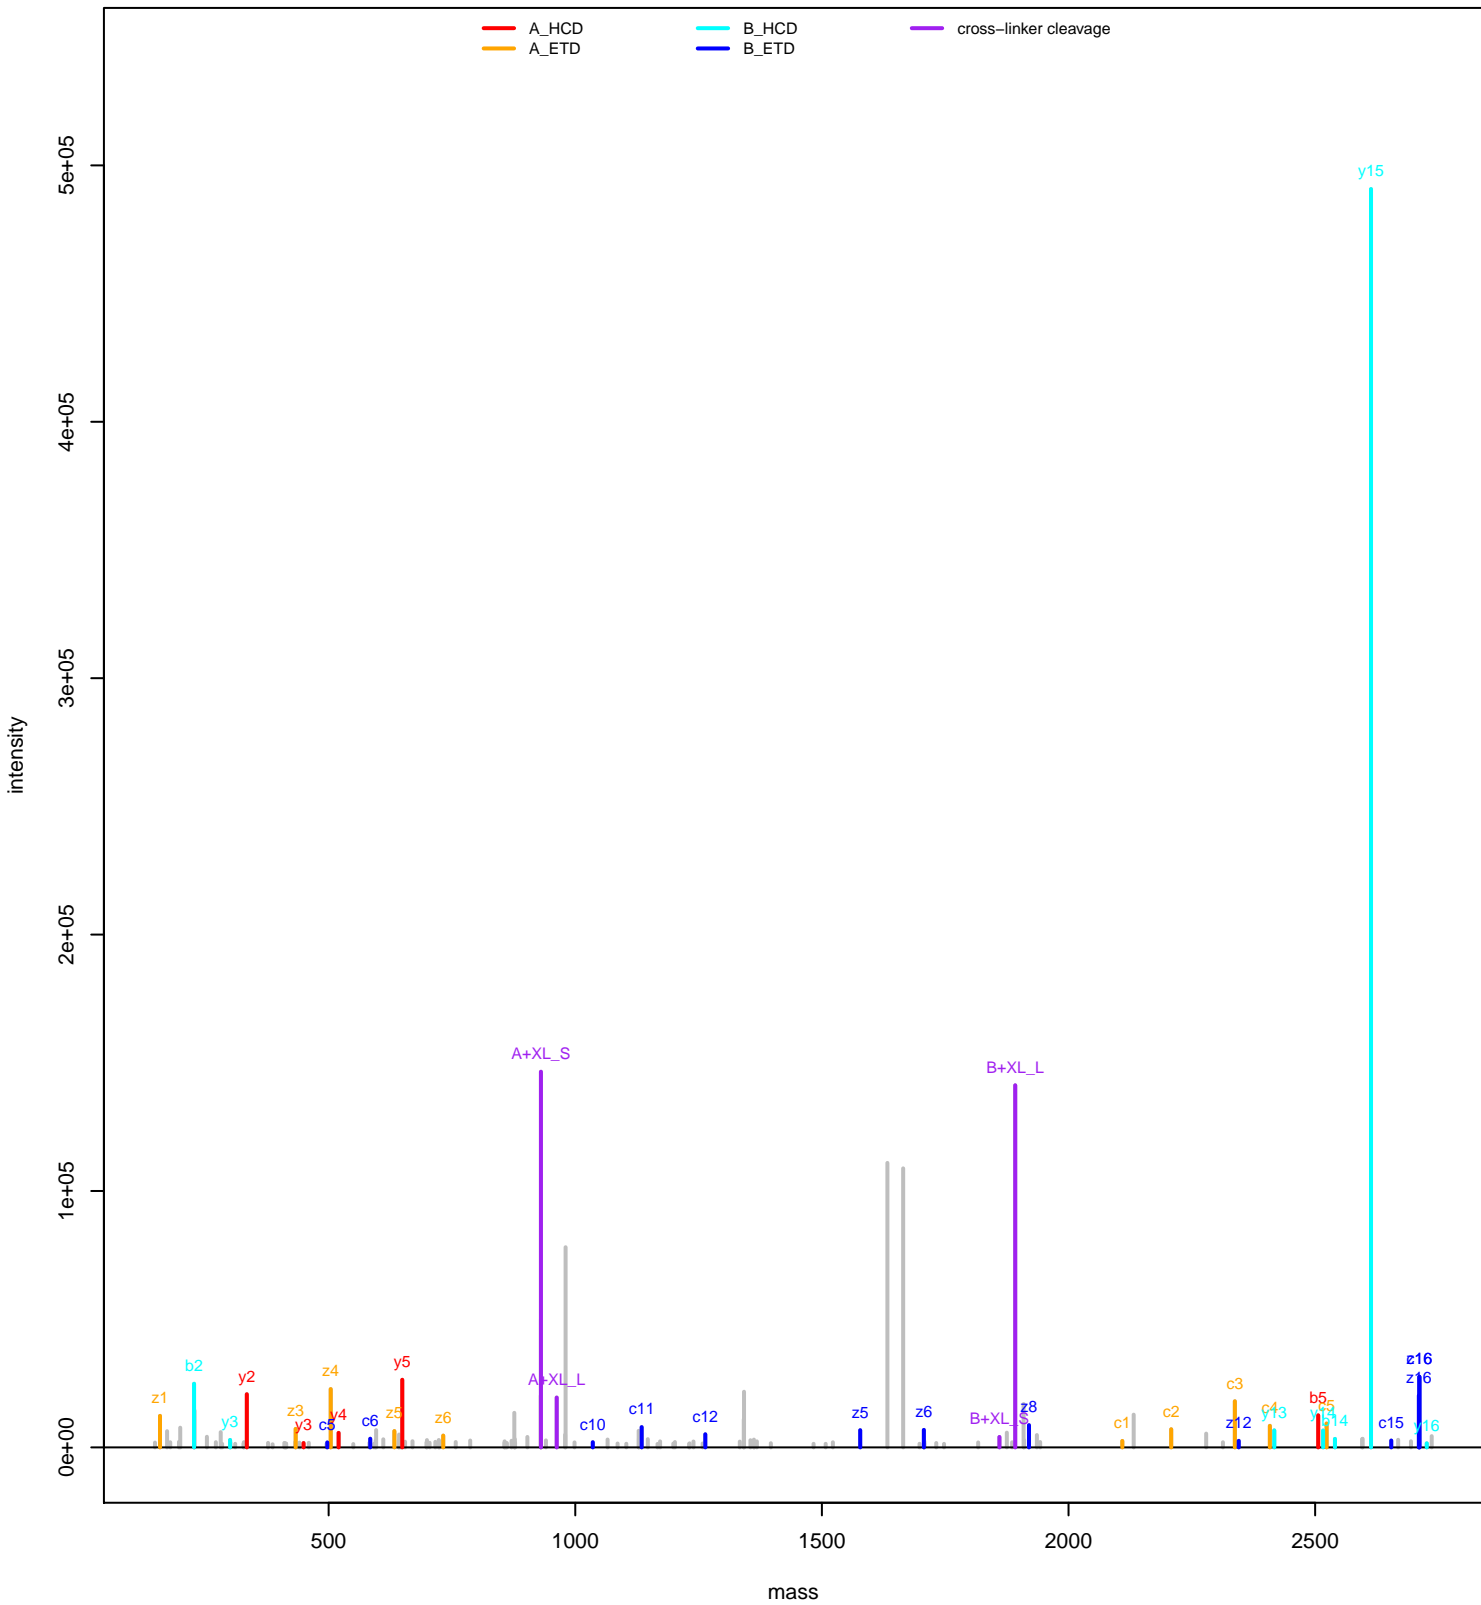

KVEADCR+XL\_S

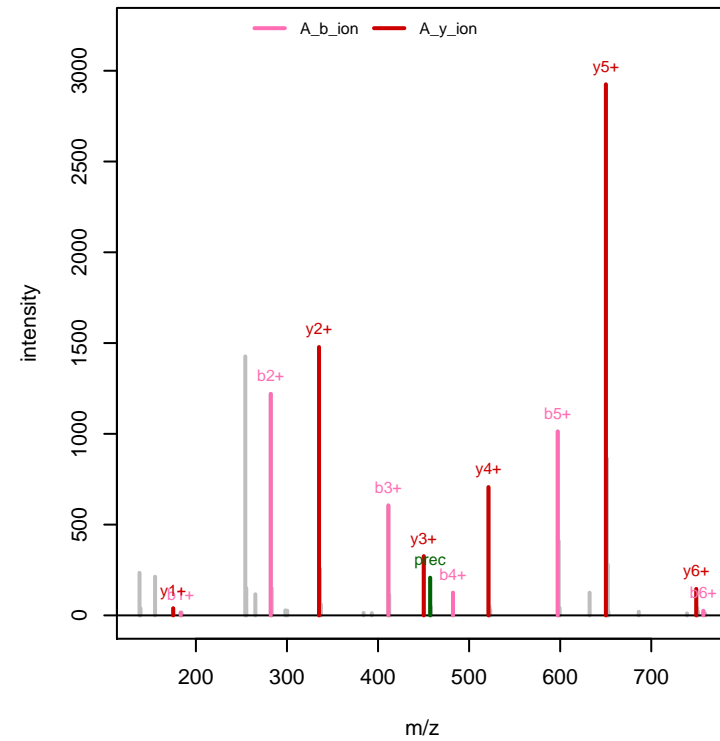

KVEADCR+XL\_L

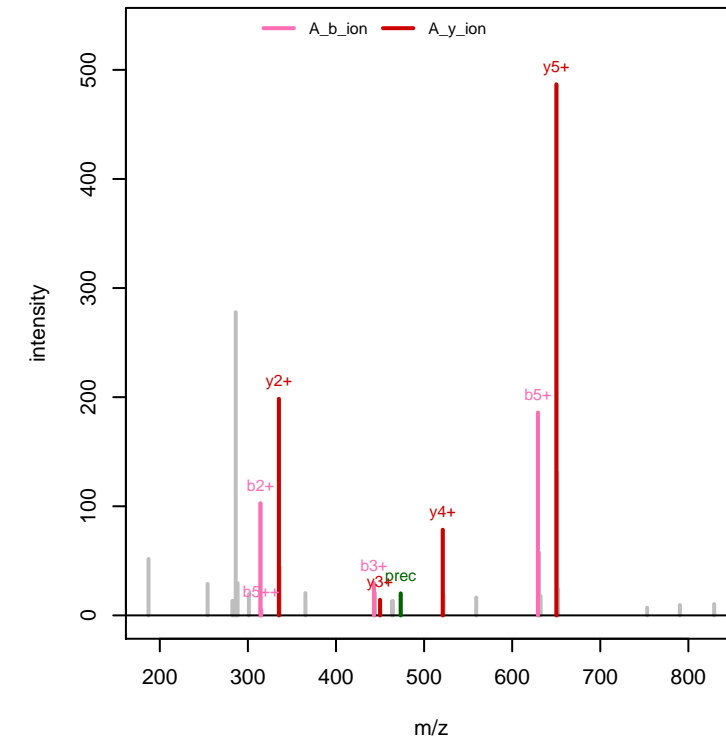

NIPVGSTVHNVEMKPGK+XL\_S

NIPVGSTVHNVEMKPGK+XL\_L

ESDELIAKK  
TYHKESEDELIAK

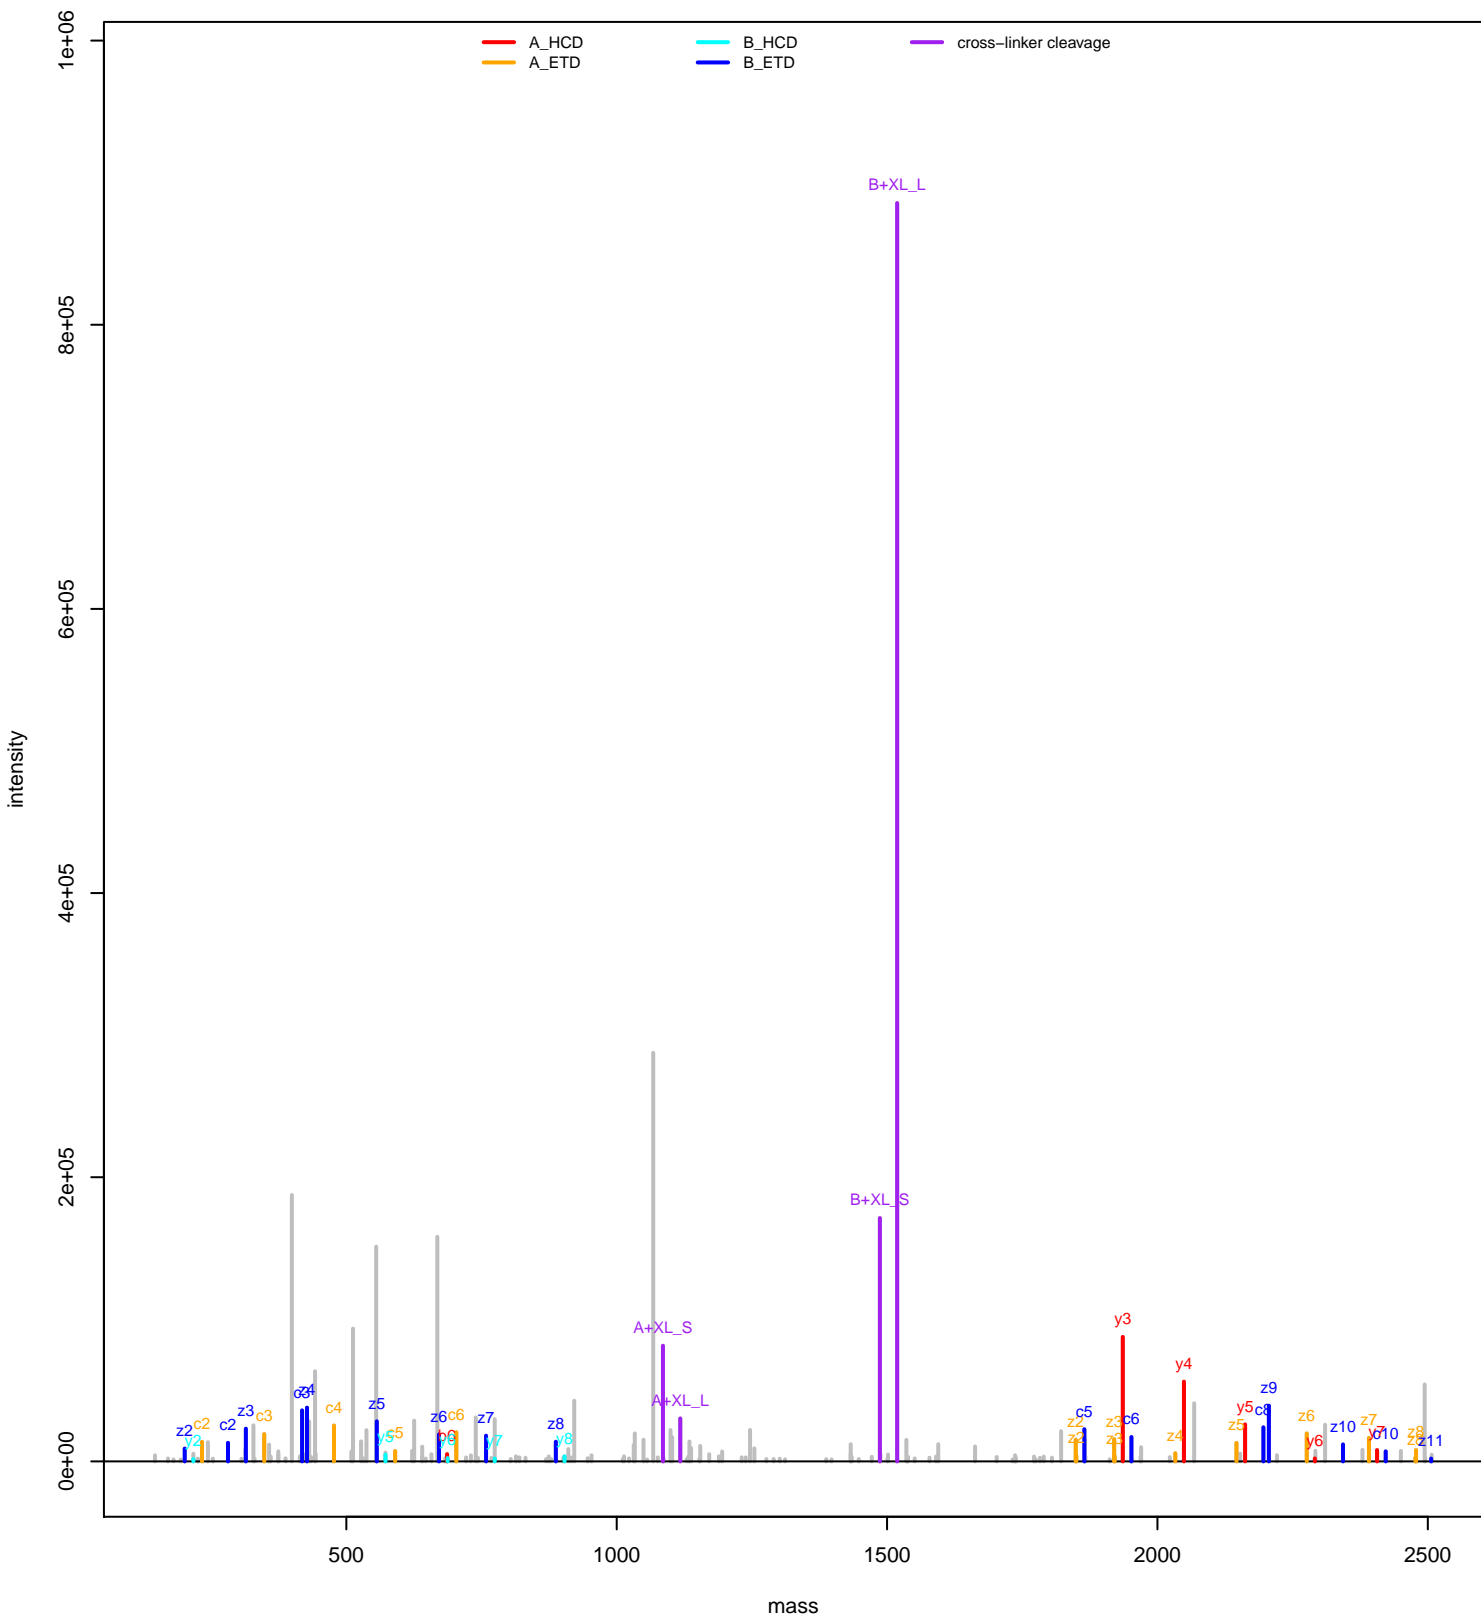

ESDELIAKK+XL\_S

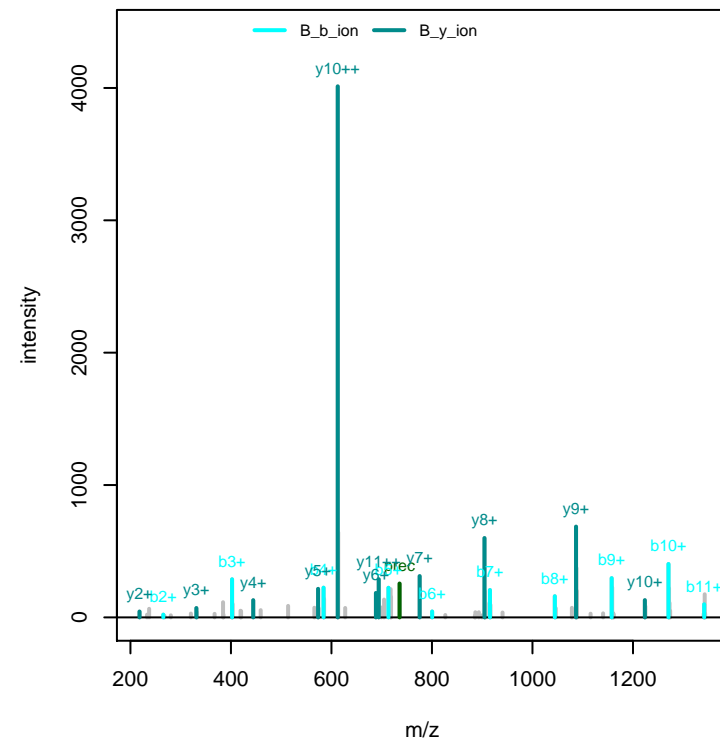

ESDELIAKK+XL\_L

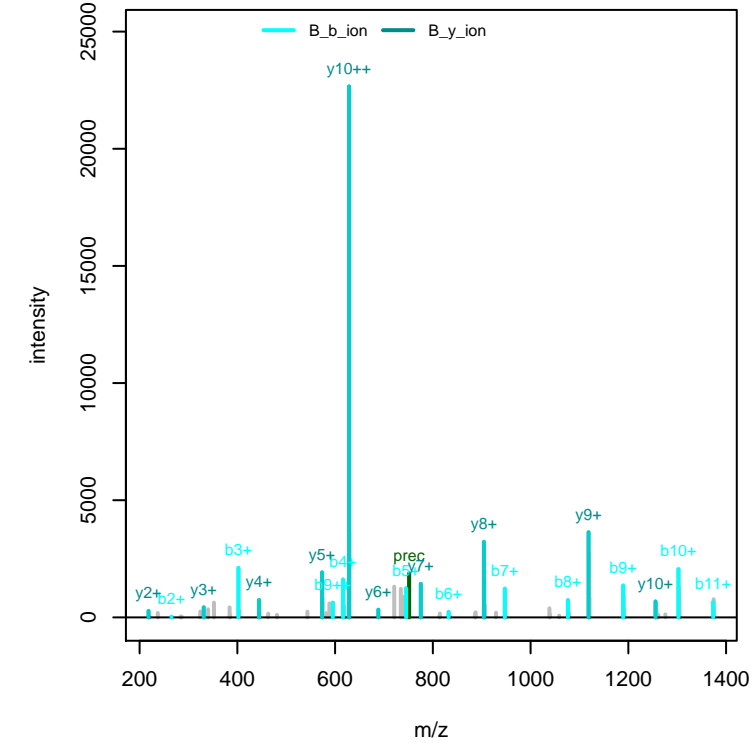

TYHKESEDELIAK+XL\_S



TYHKESEDELIAK+XL\_L



**IKDVIGK  
DVIGKGGSVIR**

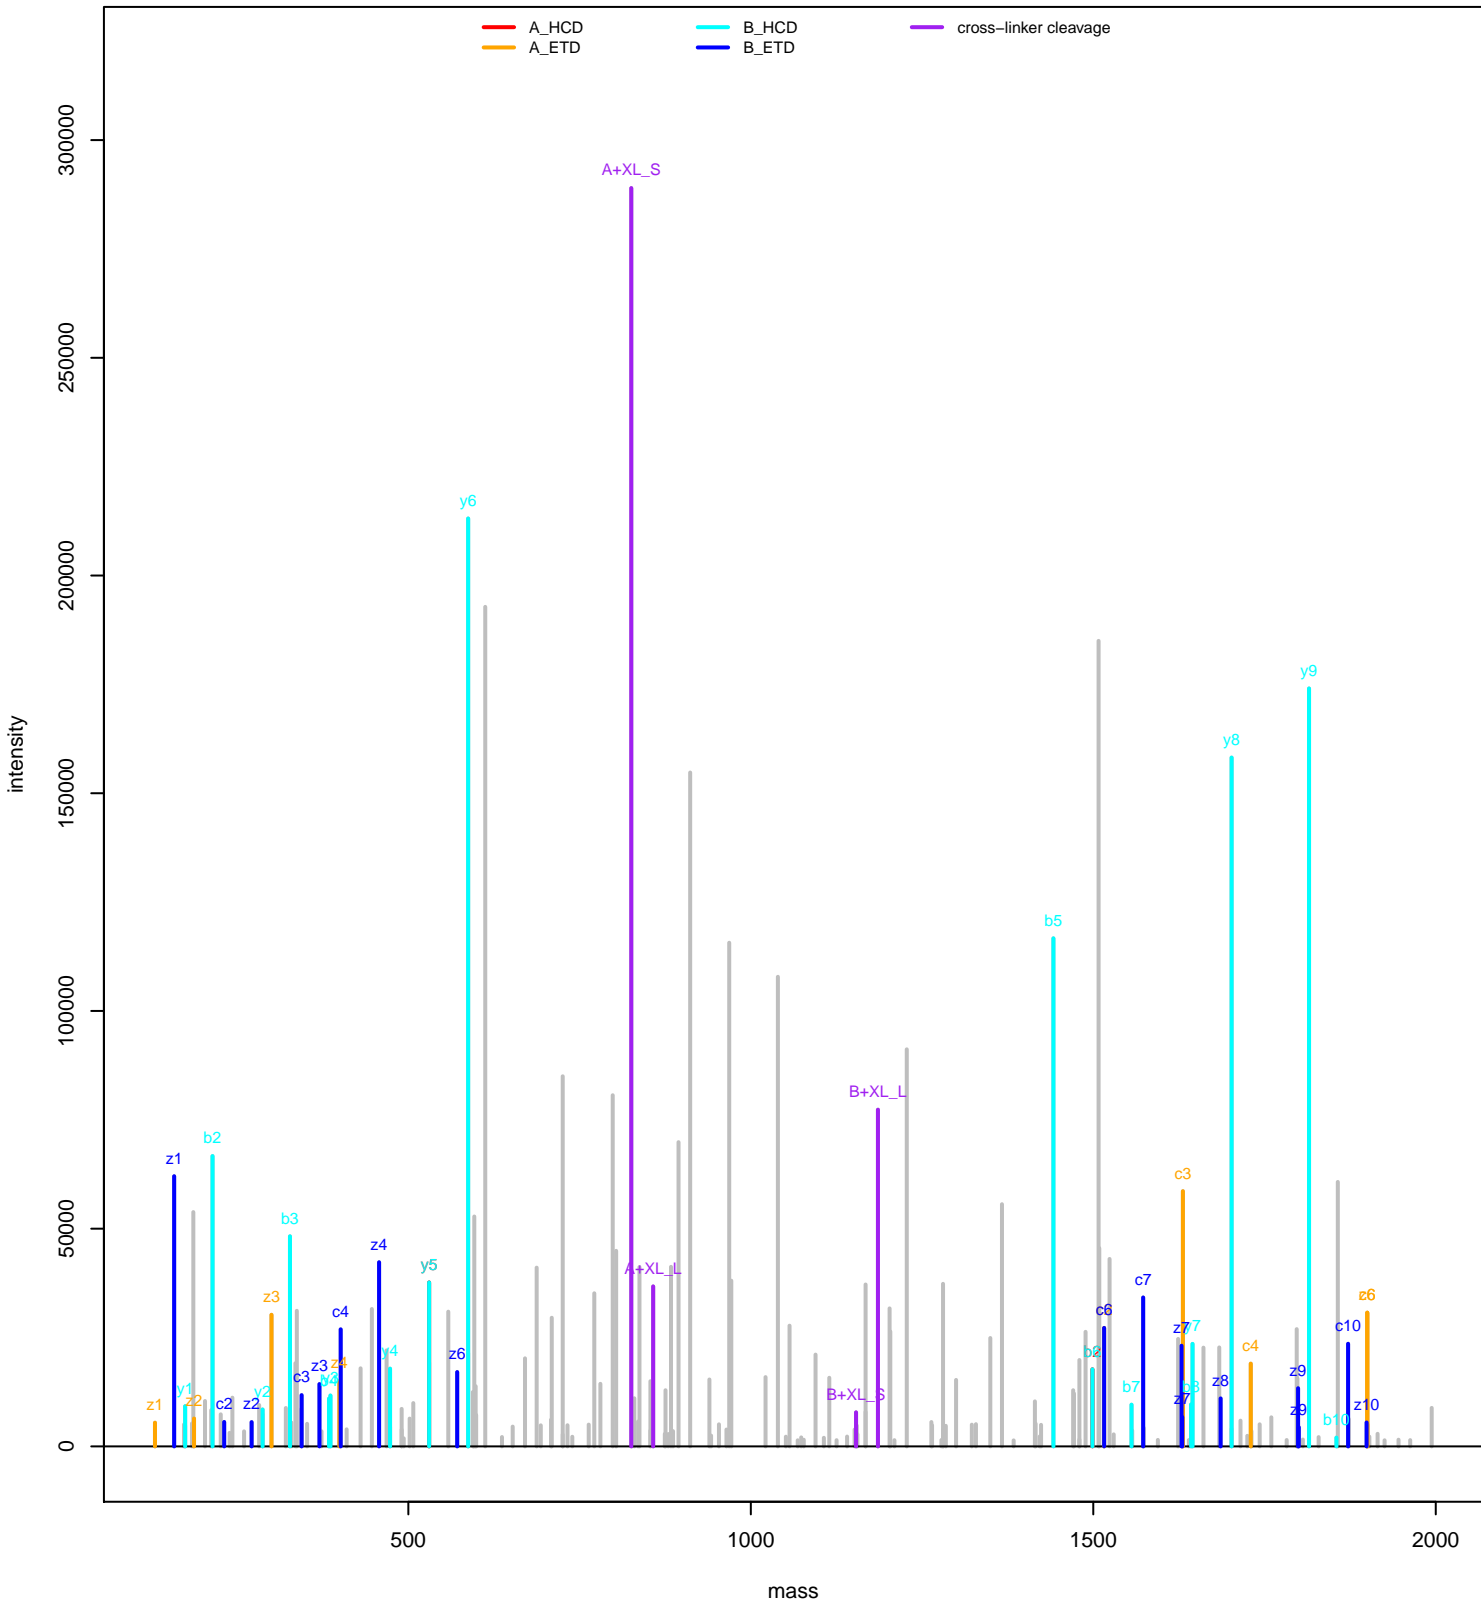

**IKDVIGK+XL\_S**

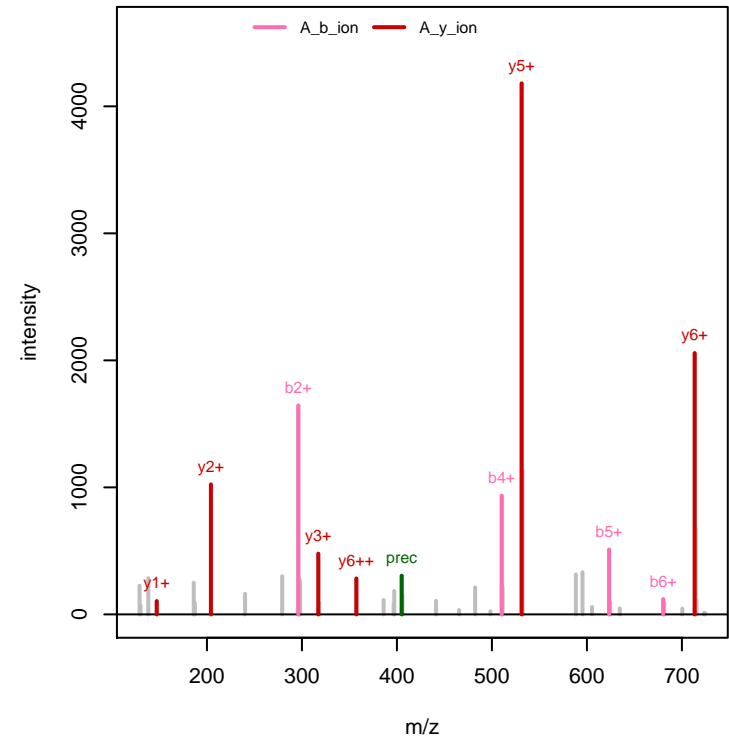

**IKDVIGK+XL\_L**

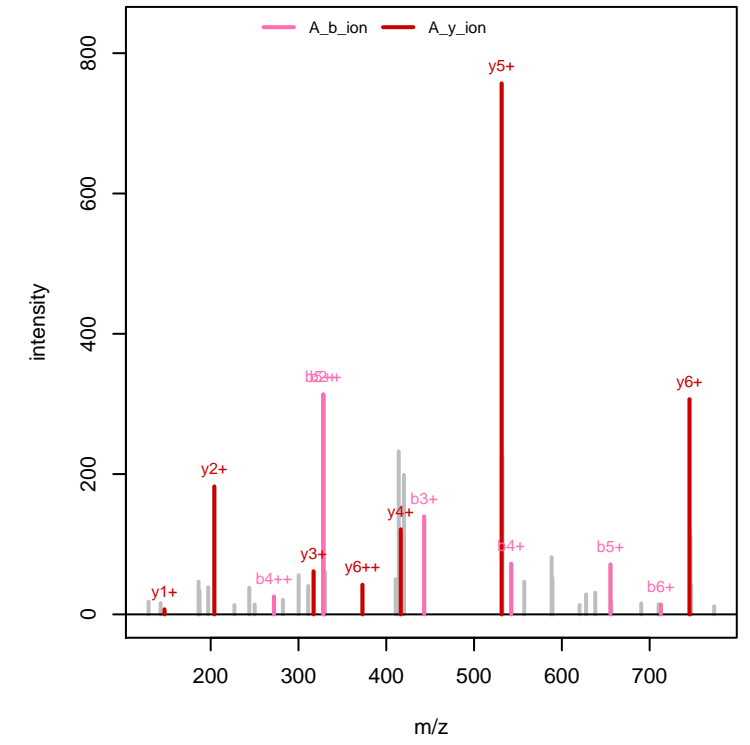

**DVIGKGGSVIR+XL\_S**

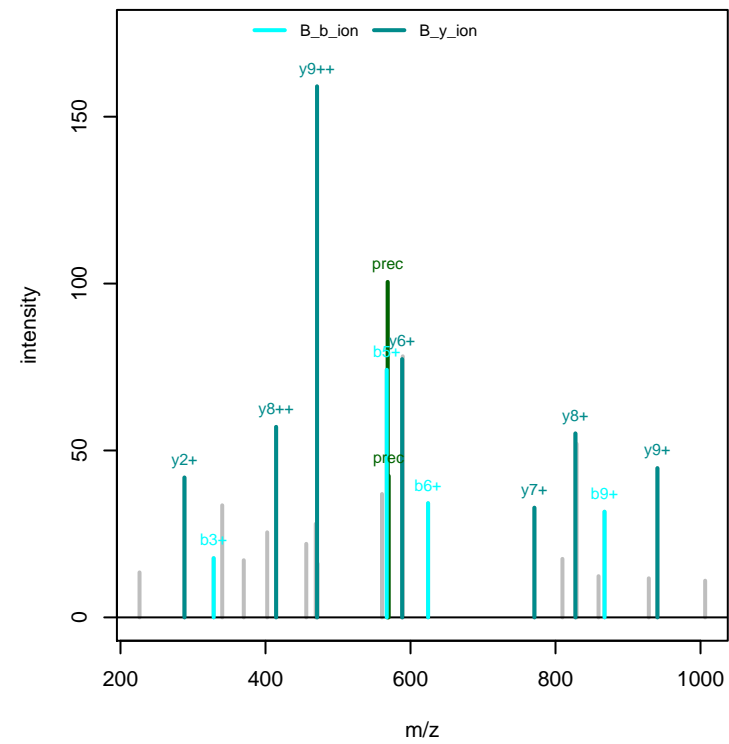

**DVIGKGGSVIR+XL\_L**

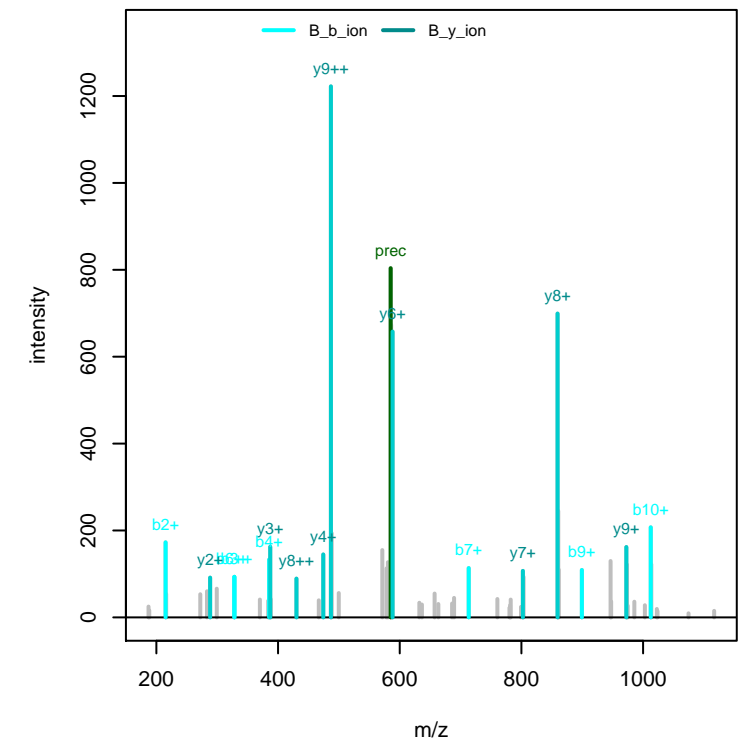

KPNSALR  
SNVPALEACPQKR

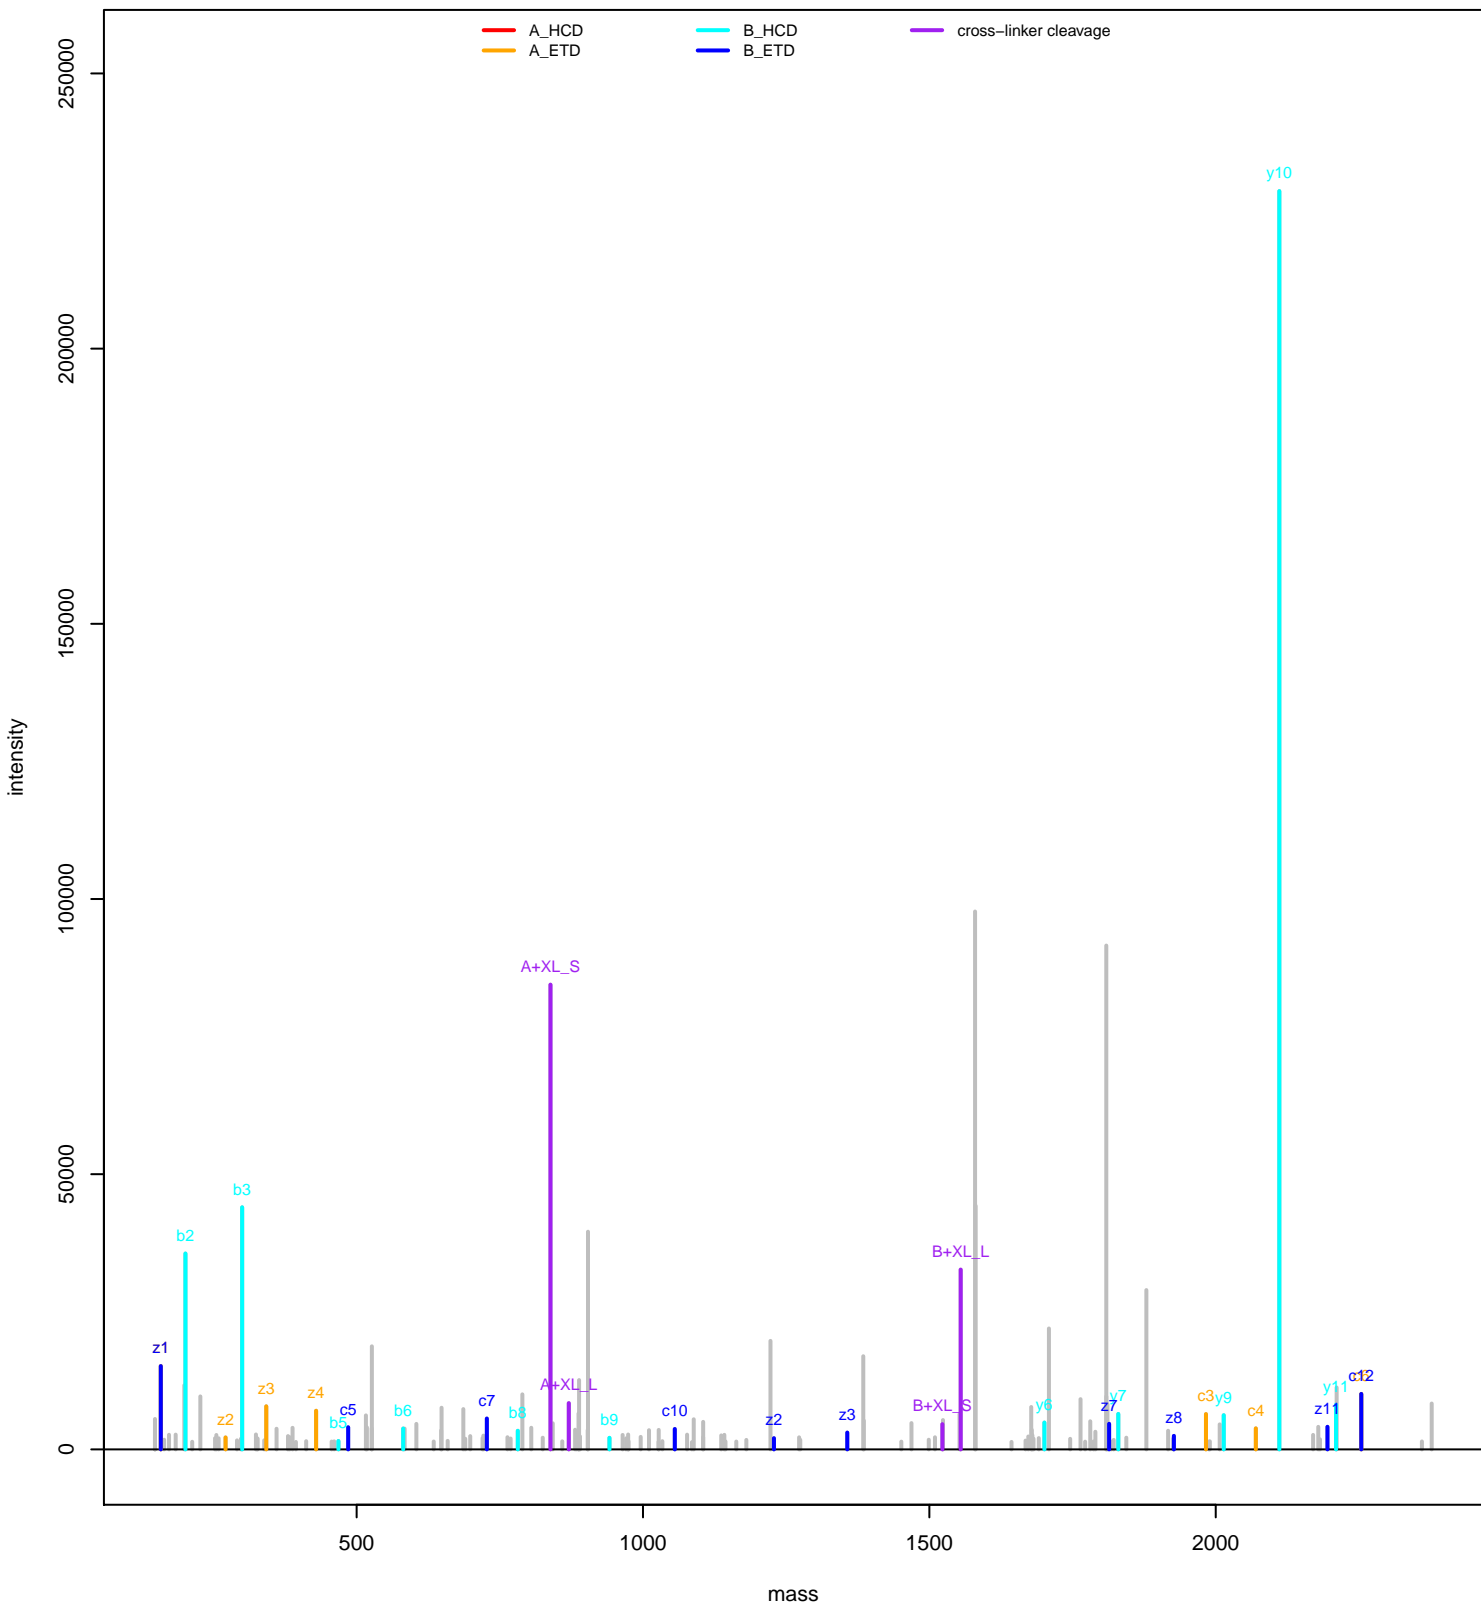

KPNSALR+XL\_S

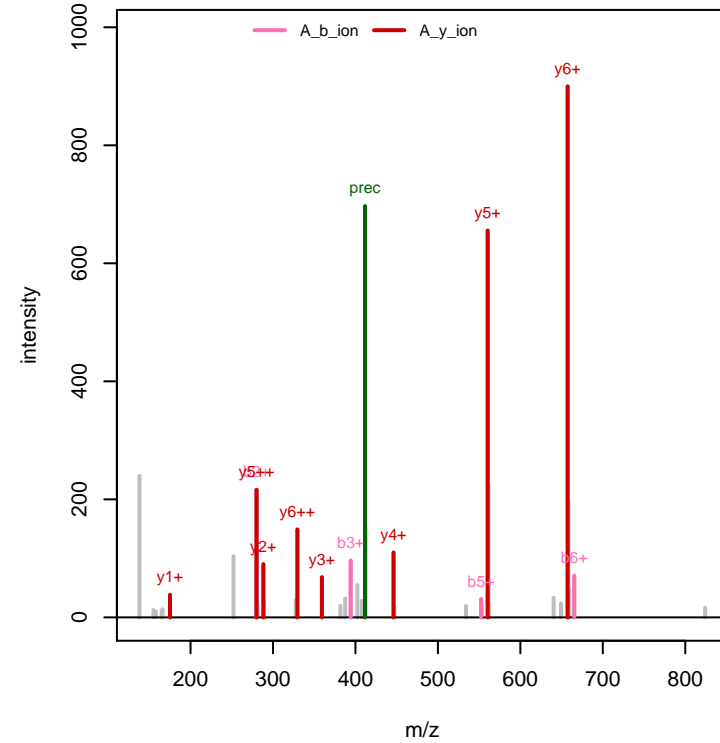

KPNSALR+XL\_L

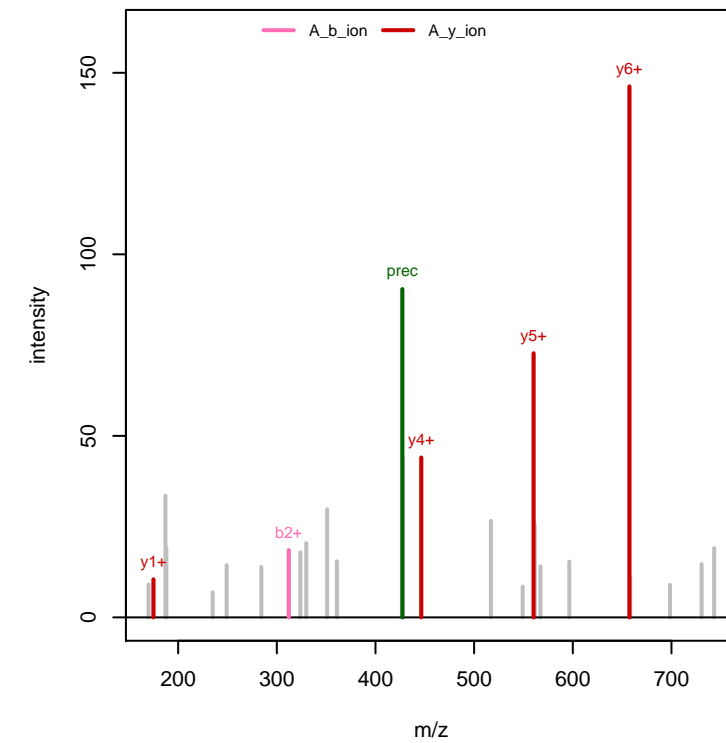

SNVPALEACPQKR+XL\_S

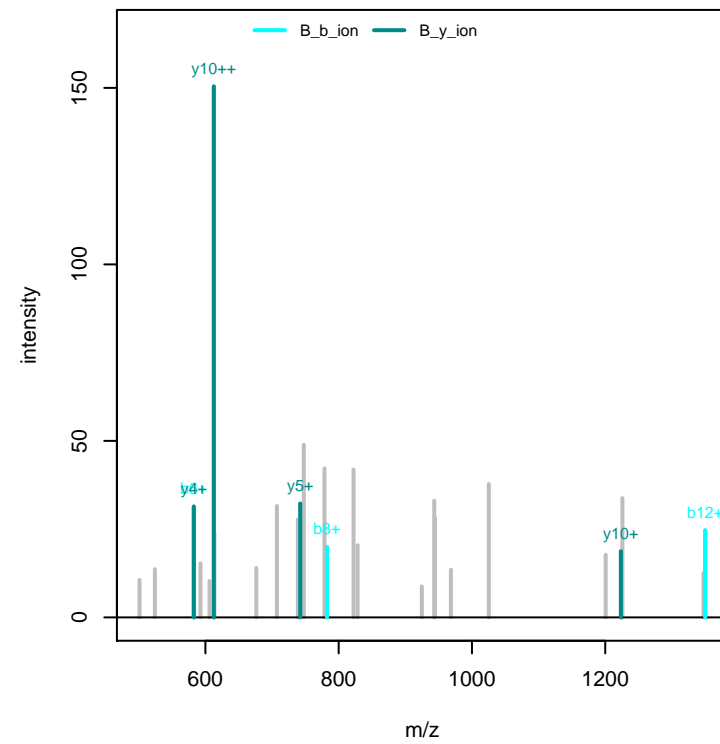

SNVPALEACPQKR+XL\_L

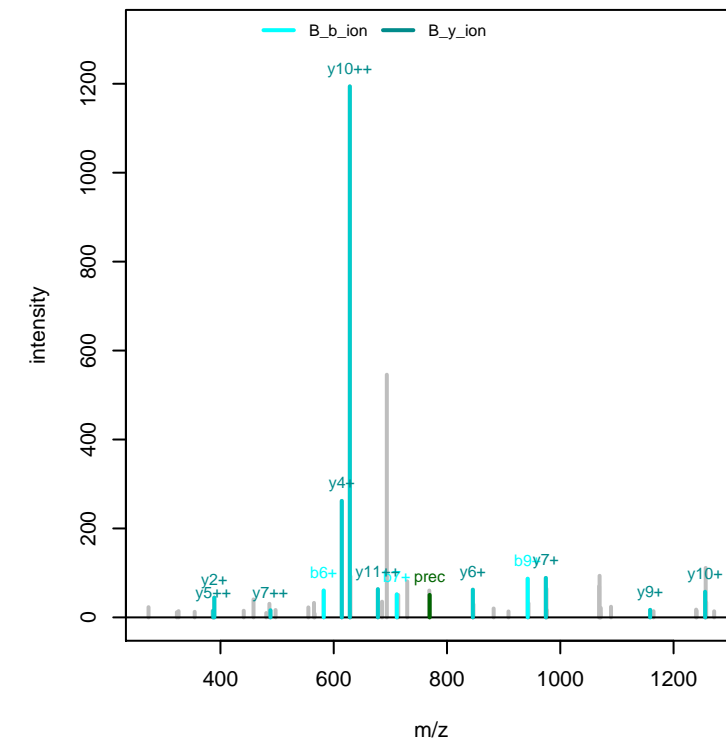

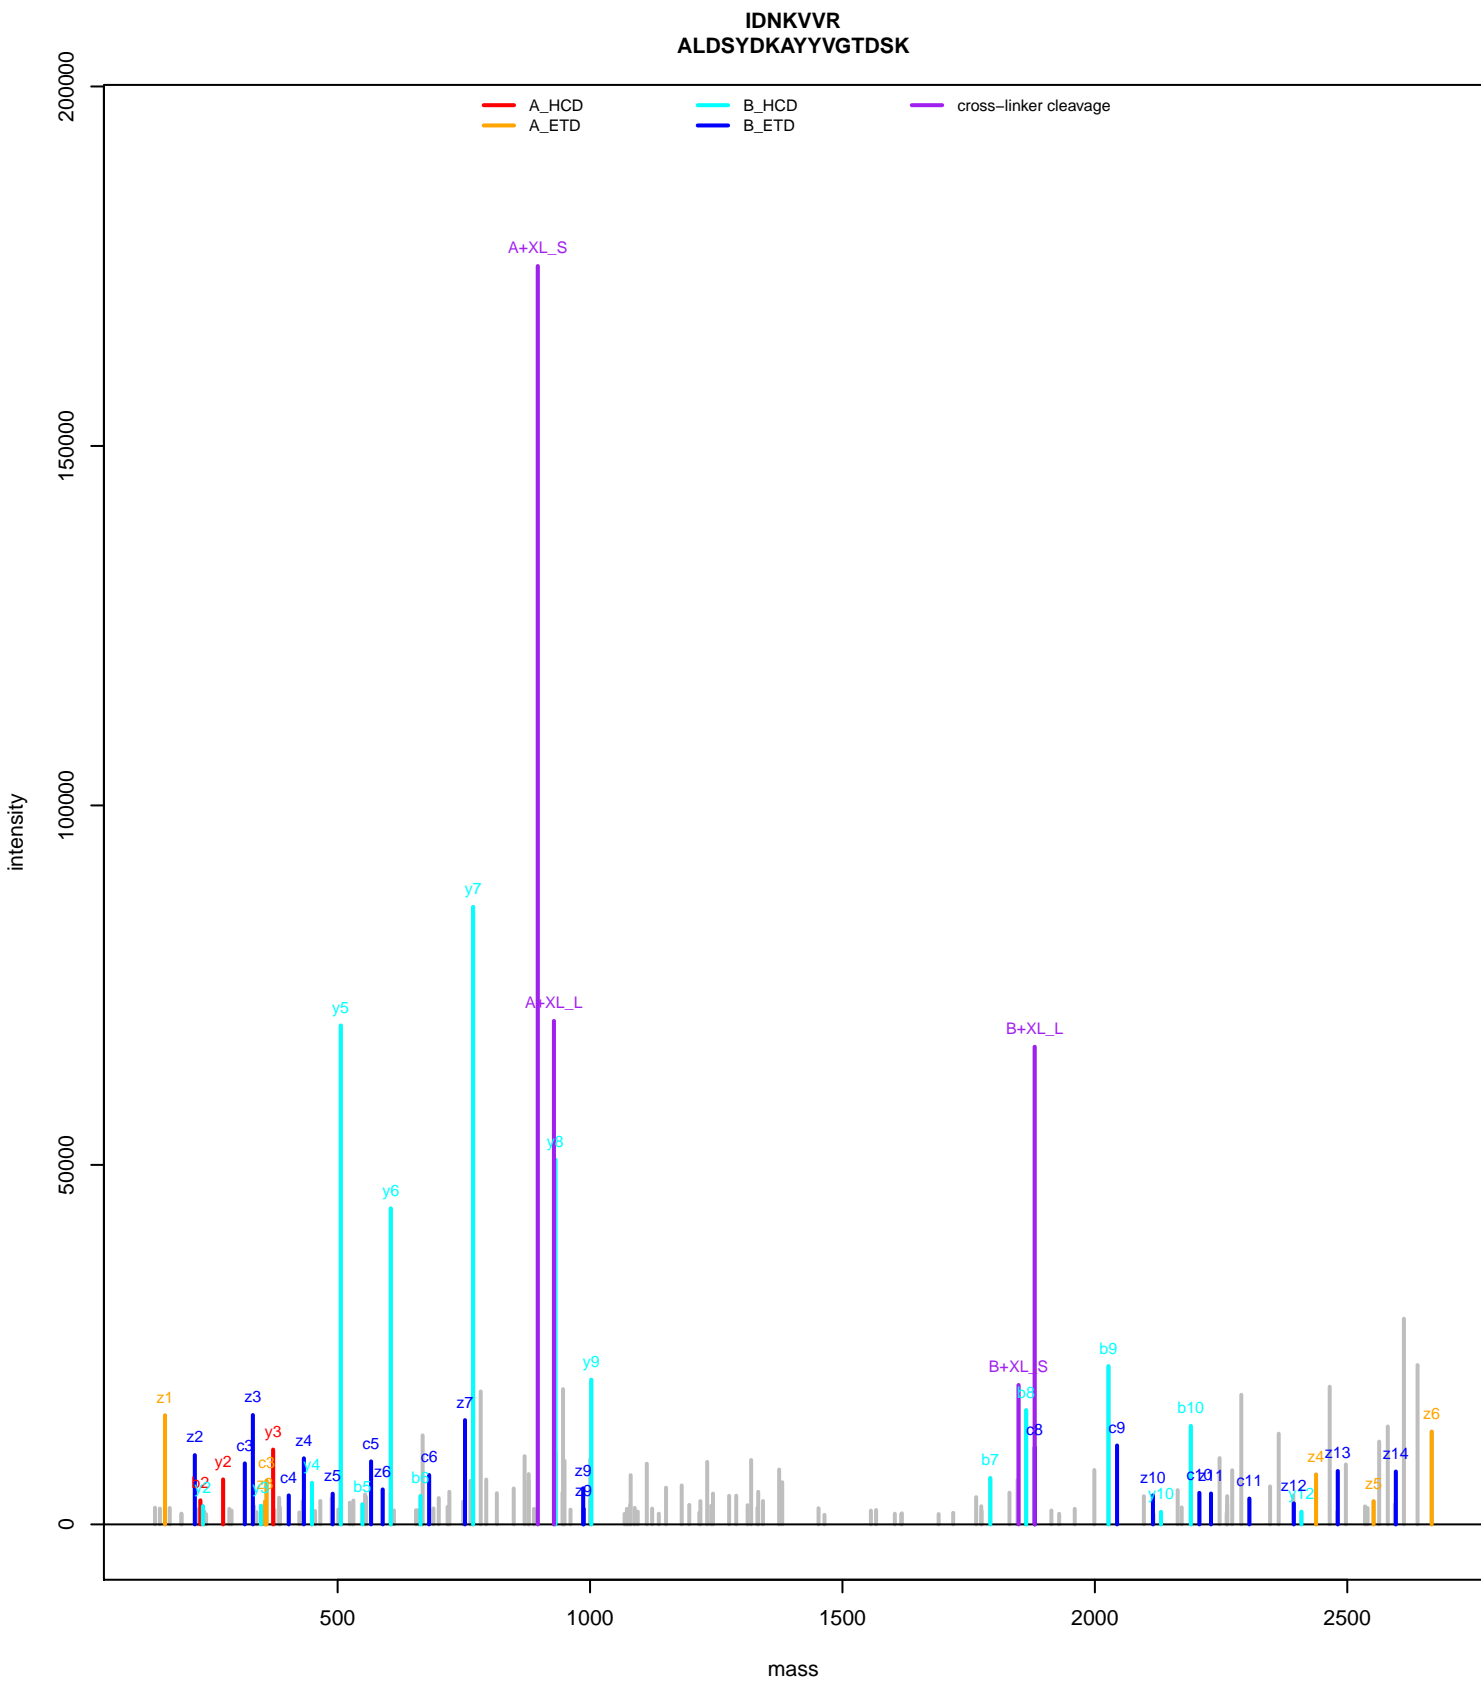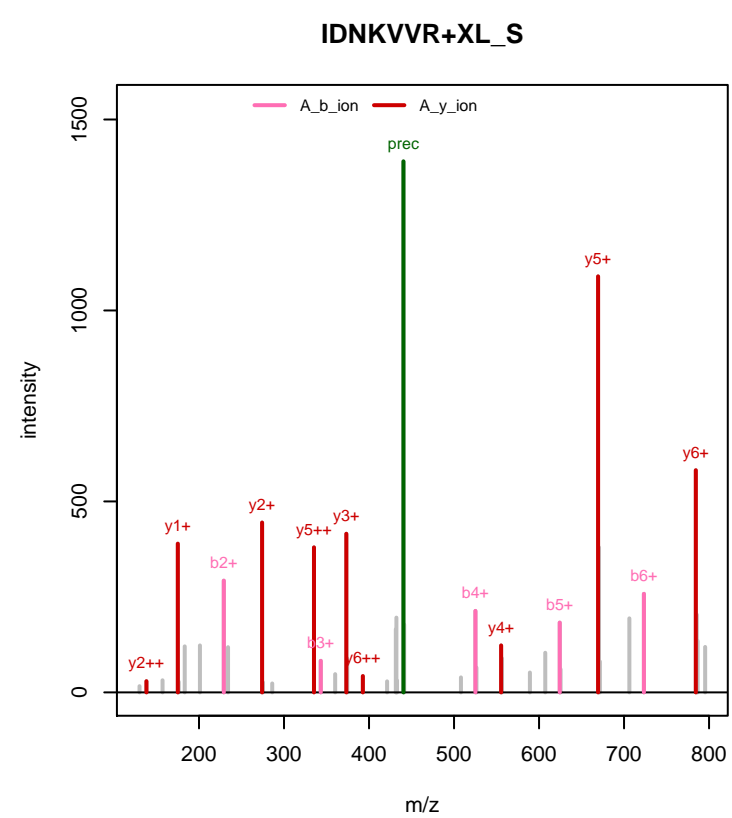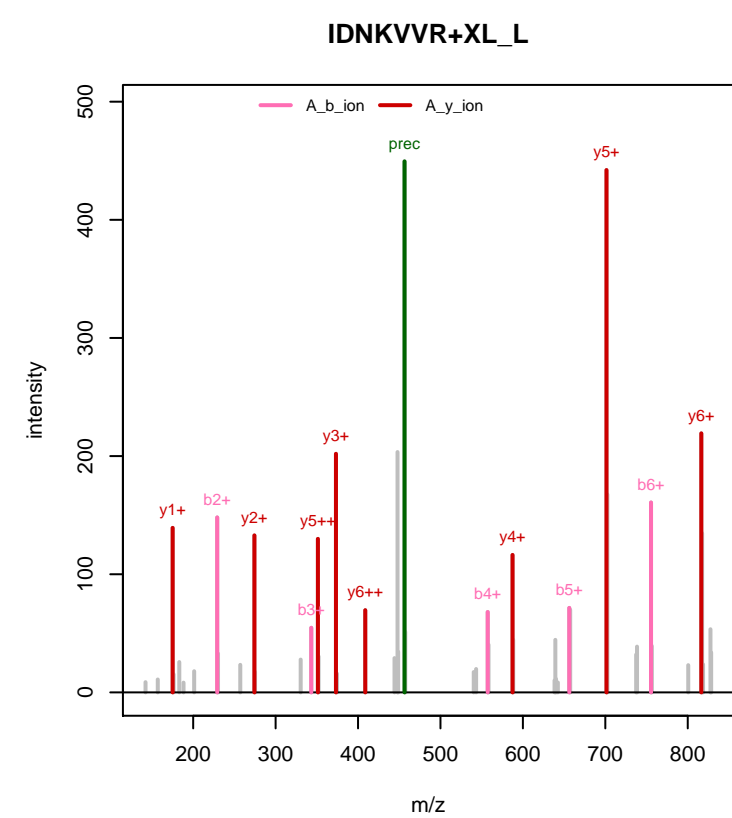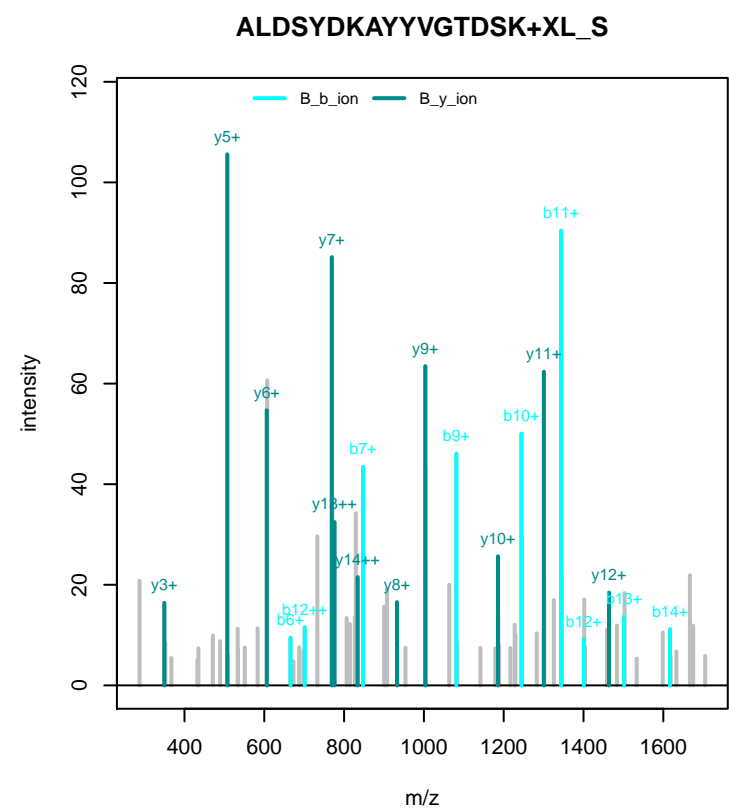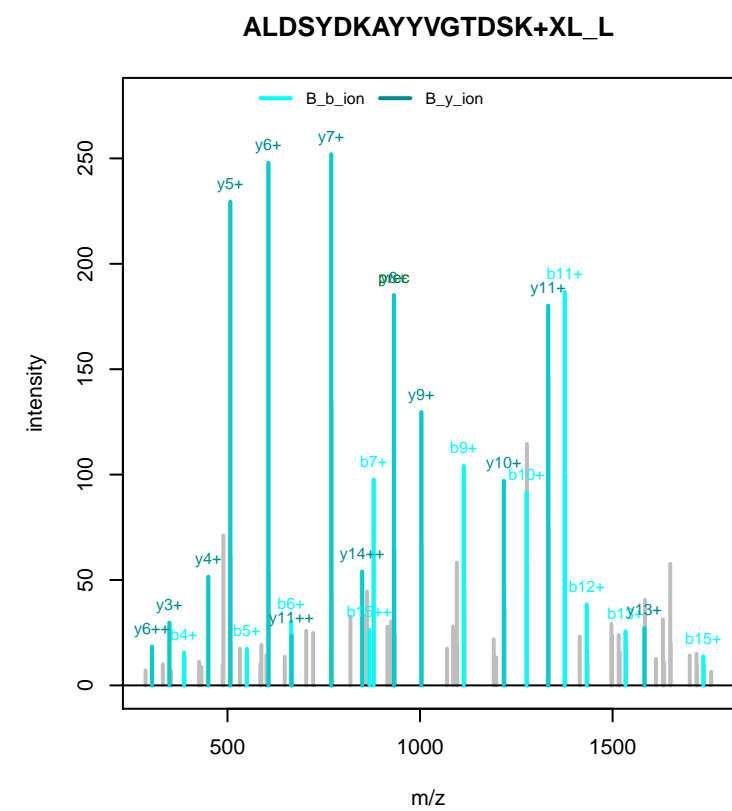

MISDIRK  
DKEISEDDRRSQDDVQK

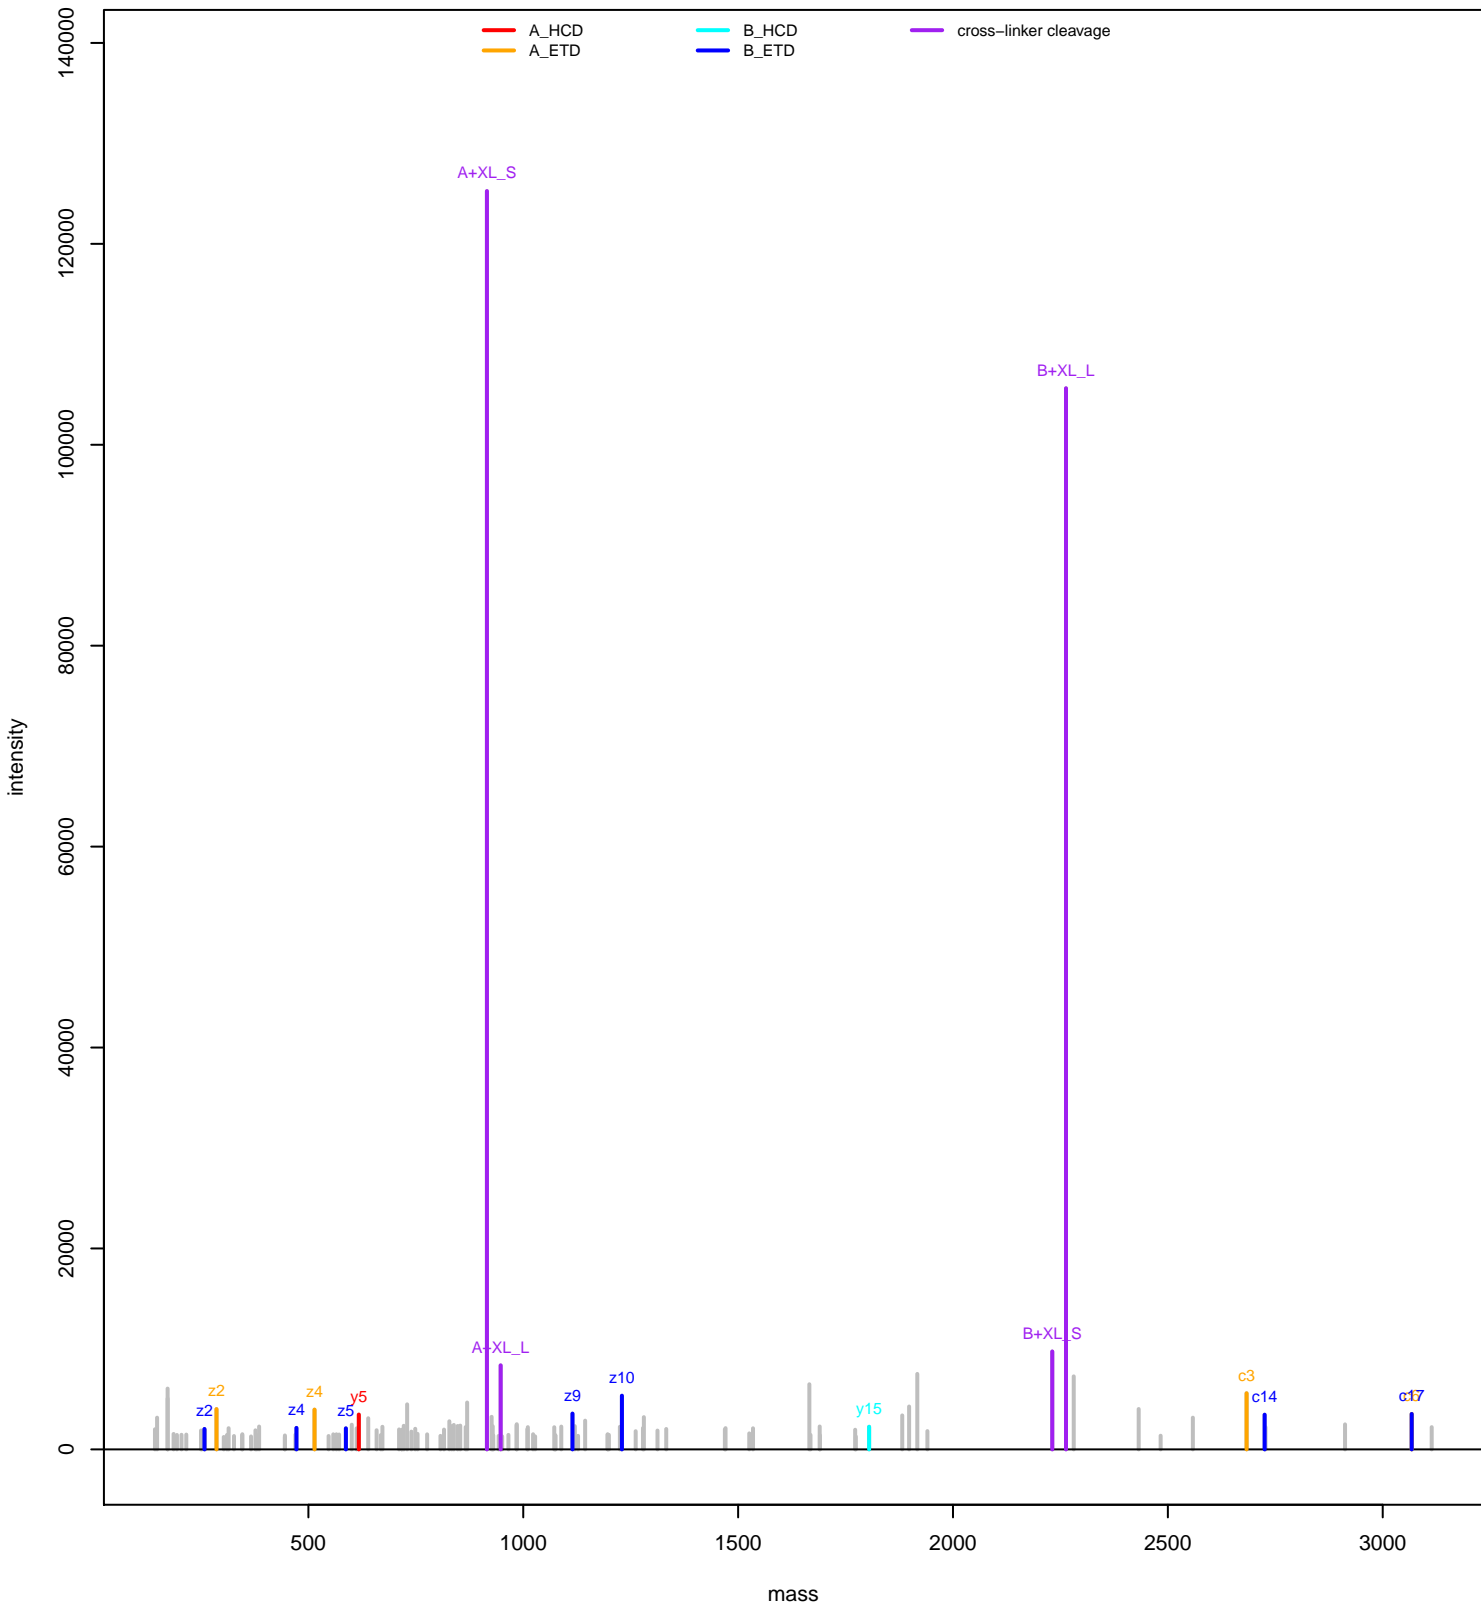

MISDIRK+XL\_S

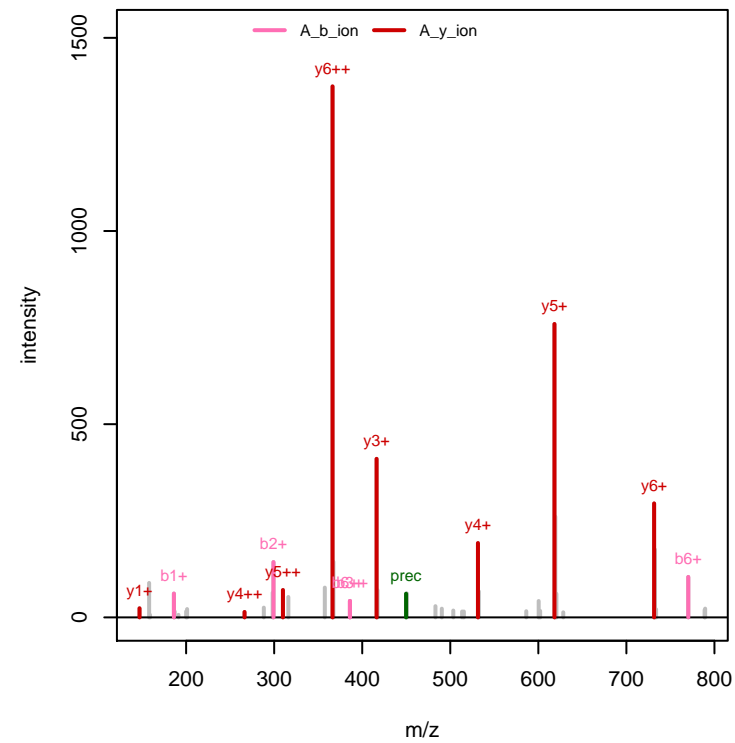

MISDIRK+XL\_L

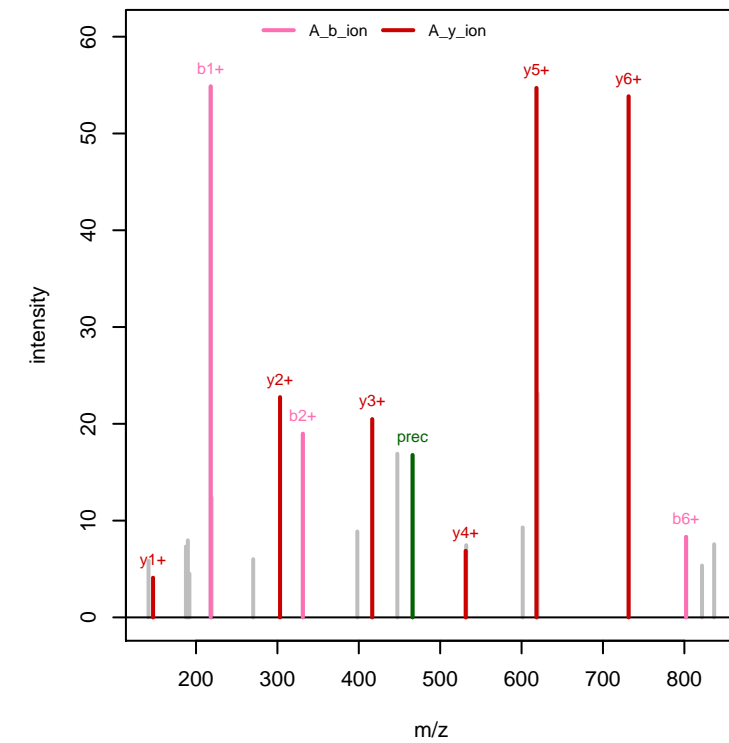

DKEISEDDRRSQDDVQK+XL\_S

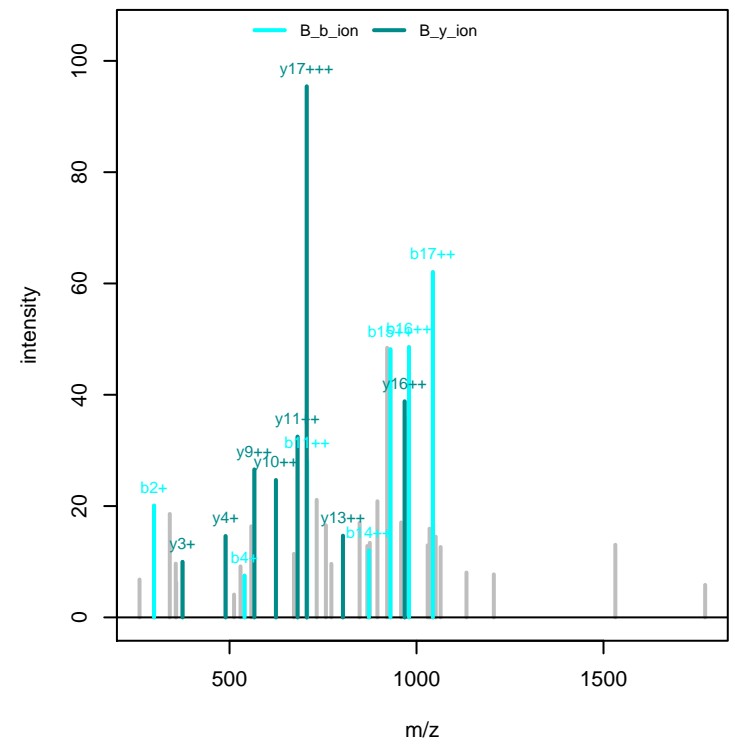

DKEISEDDRRSQDDVQK+XL\_L

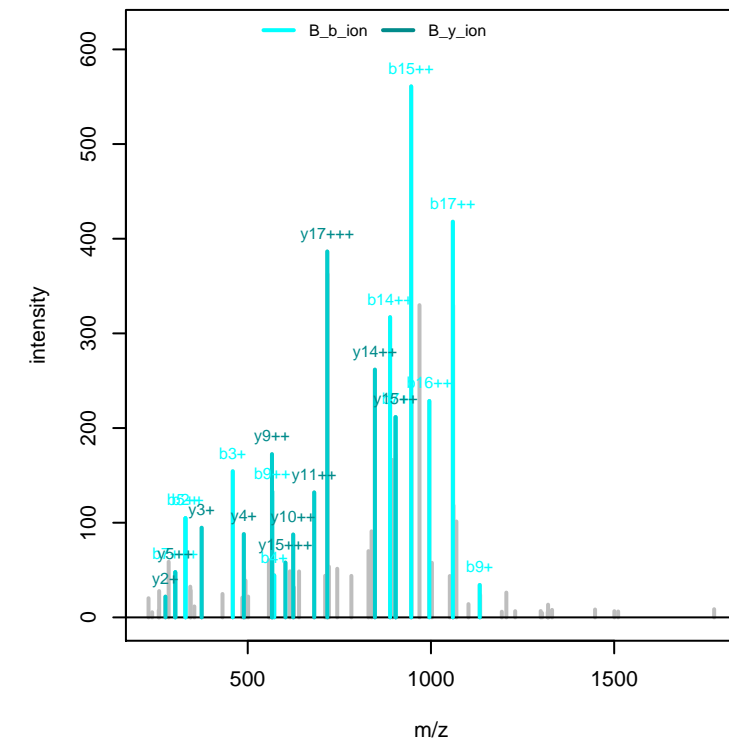

ASDVKDSSLR  
STGSYSLVTTQQPLGGKAQFGGQR

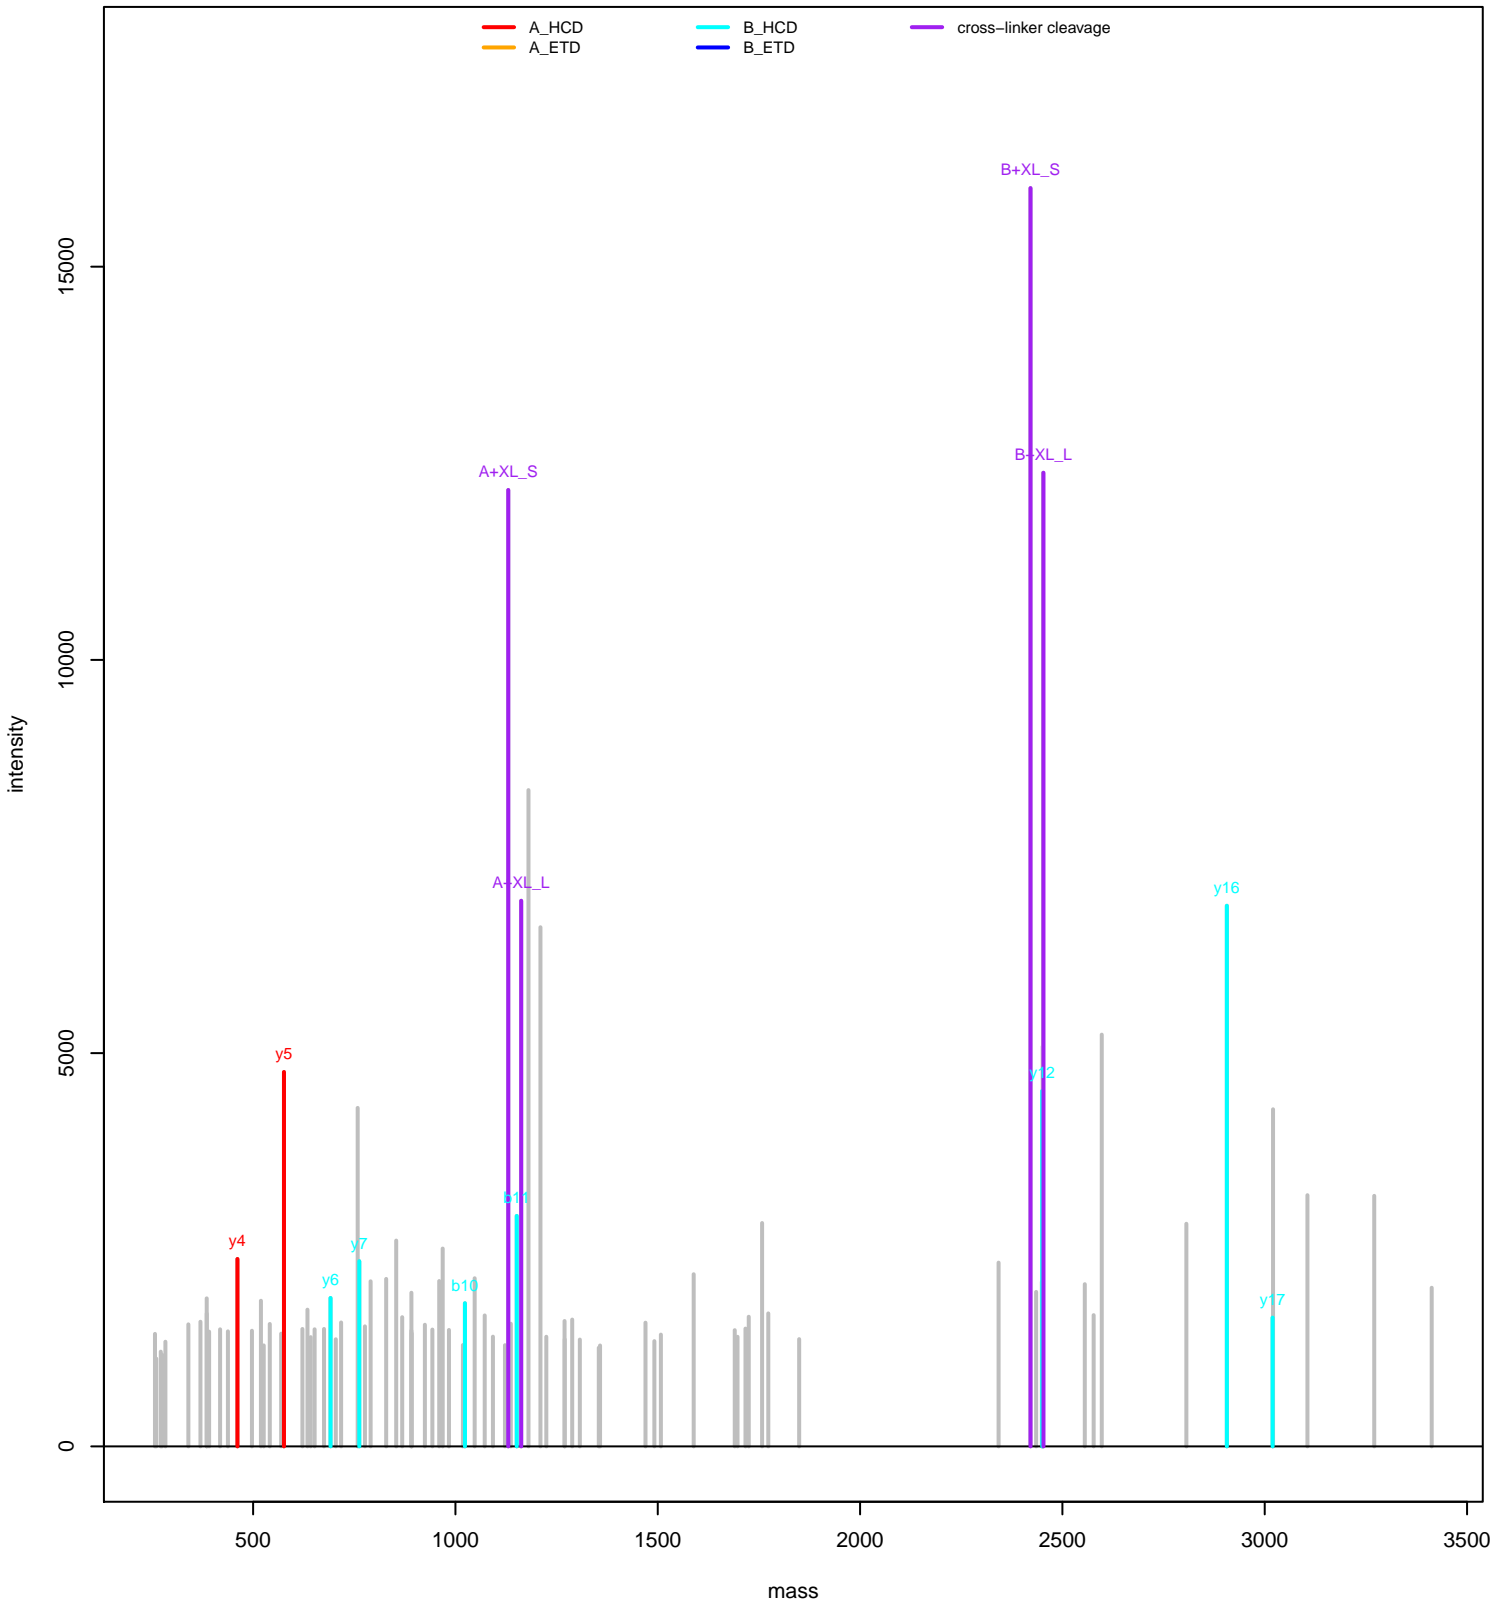

ASDVKDSSLR+XL\_S

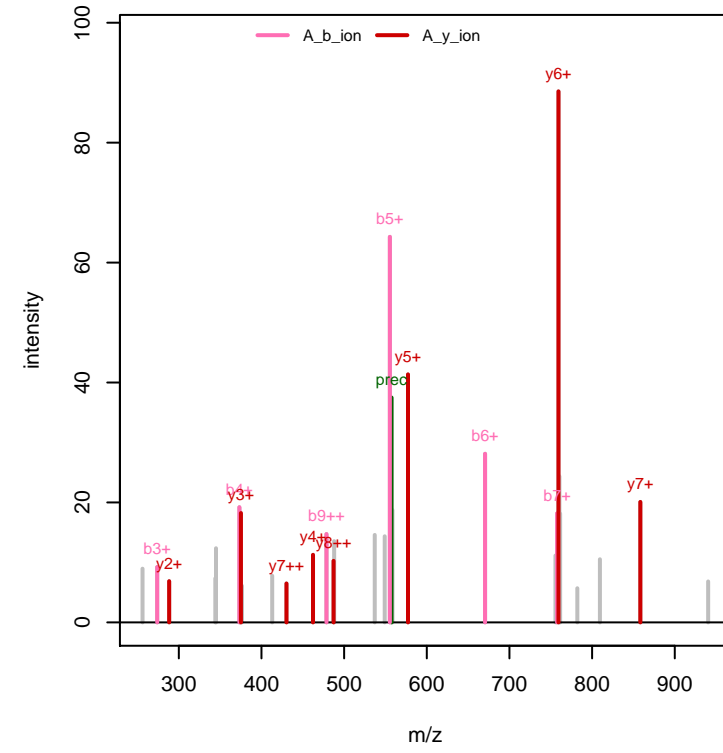

ASDVKDSSLR+XL\_L

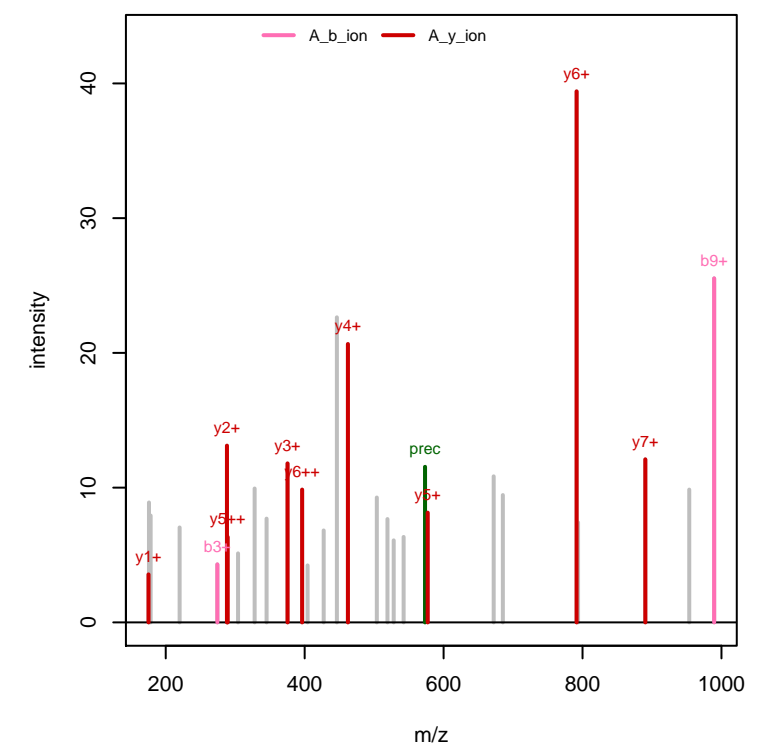

STGSYSLVTTQQPLGGKAQFGGQR+XL\_S

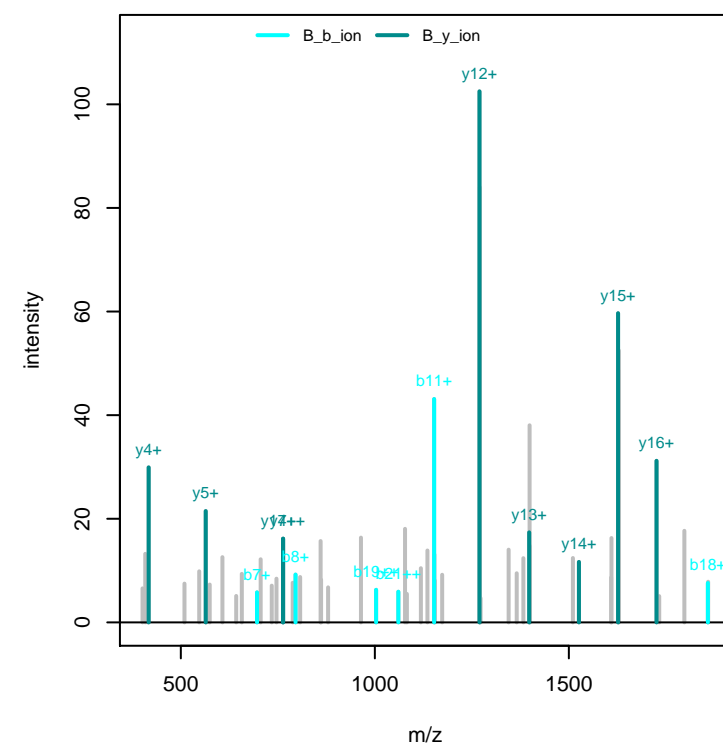

STGSYSLVTTQQPLGGKAQFGGQR+XL\_L

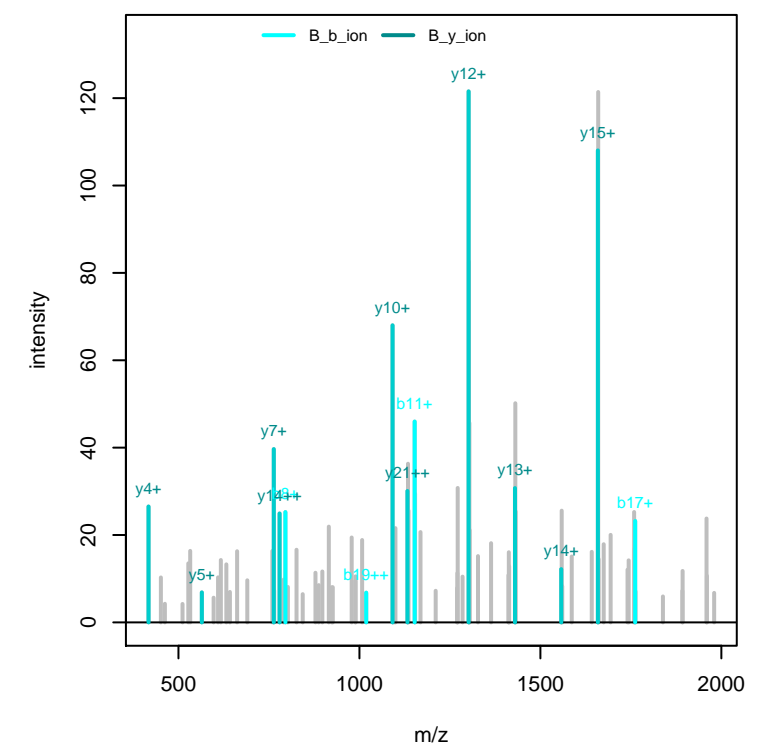



### GITILAKNTAIK VMDSNDLEKER

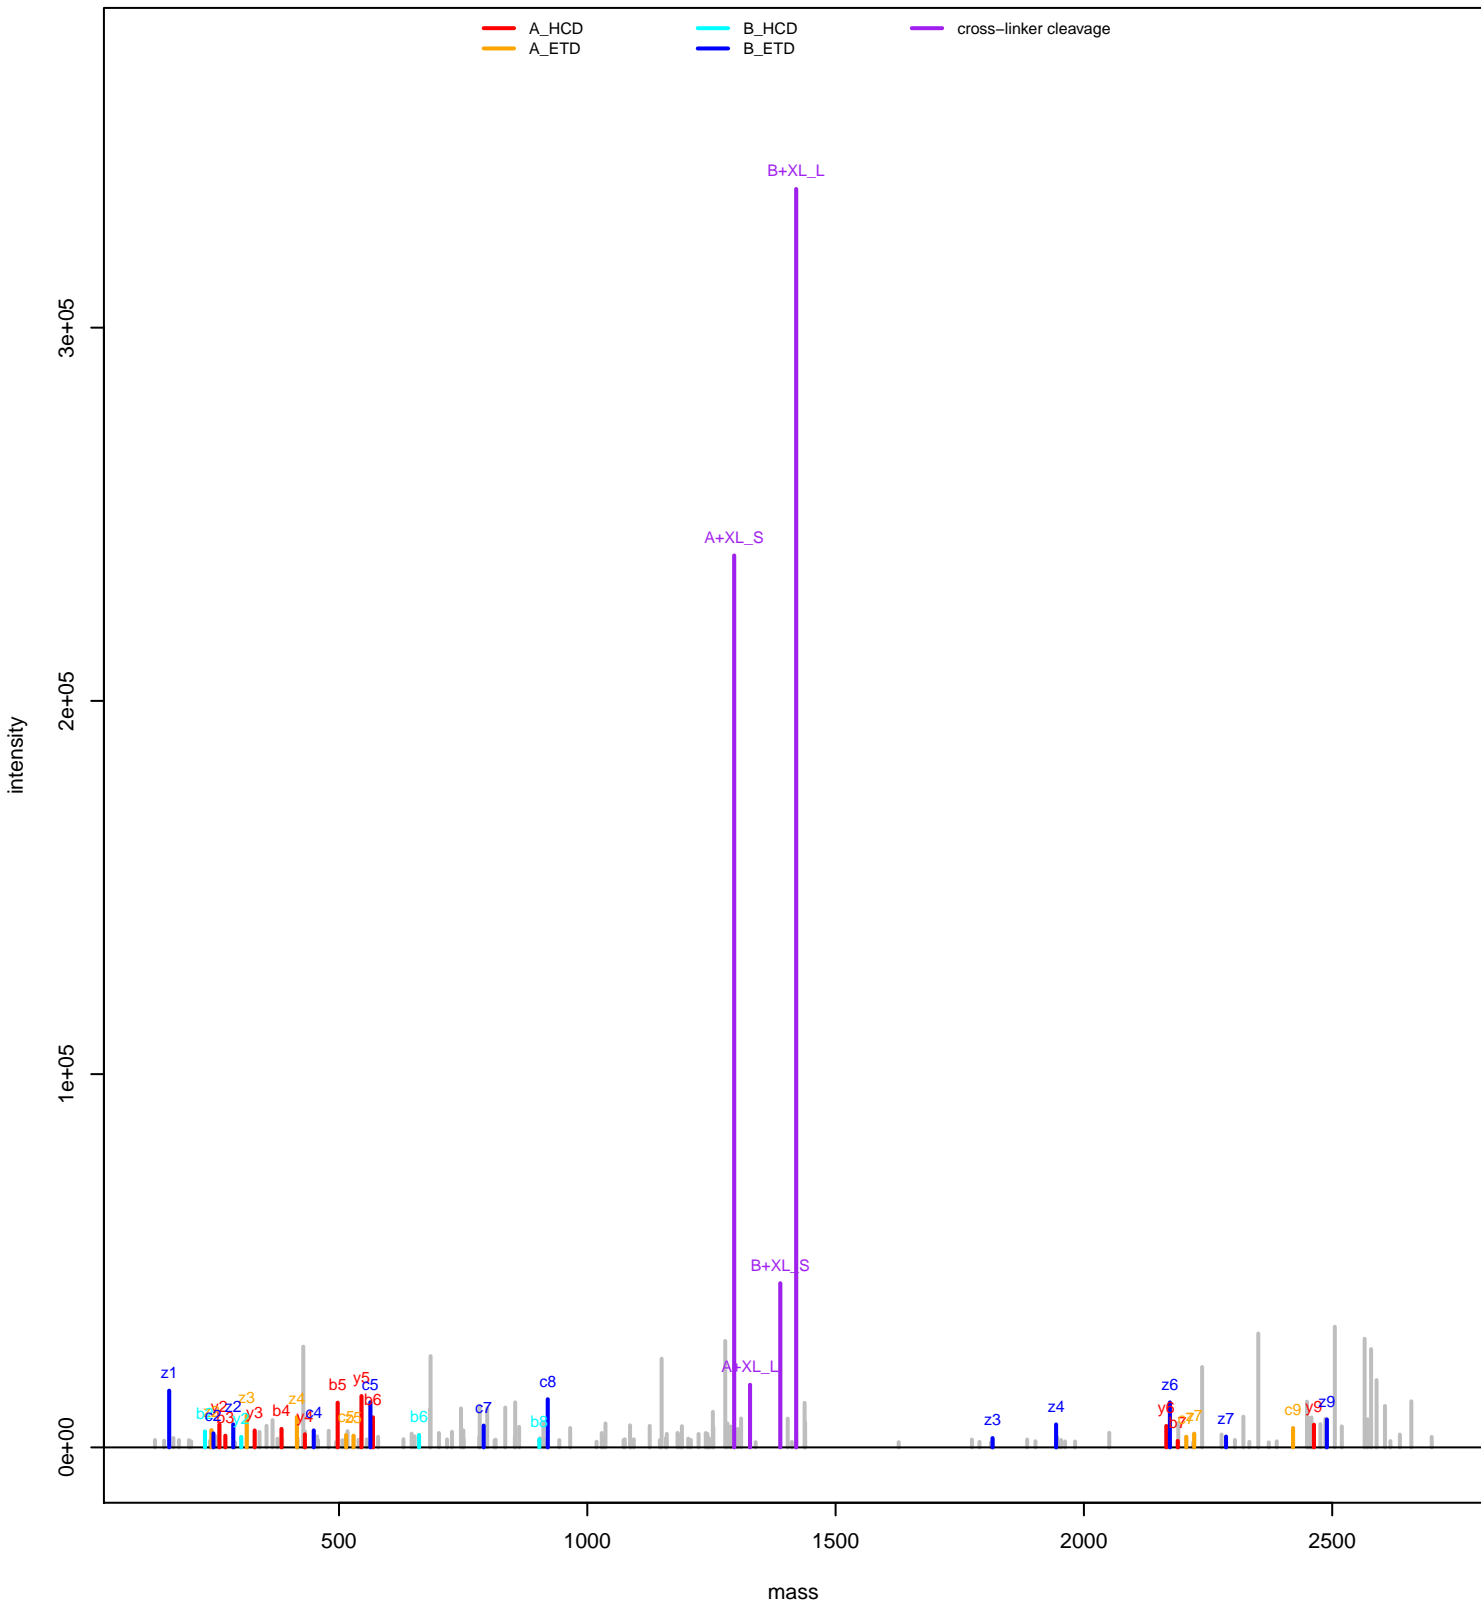

### GITILAKNTAIK+XL\_S

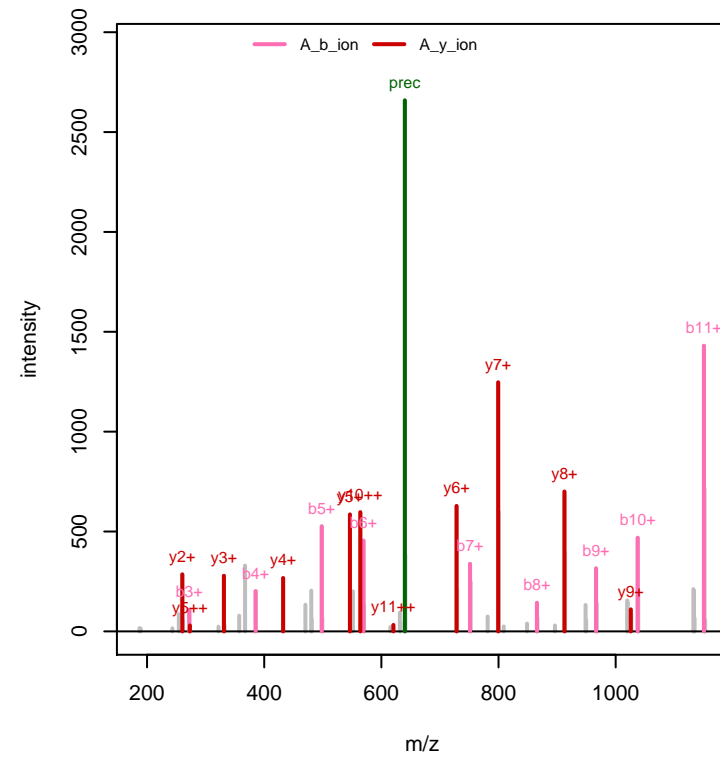

### GITILAKNTAIK+XL\_L

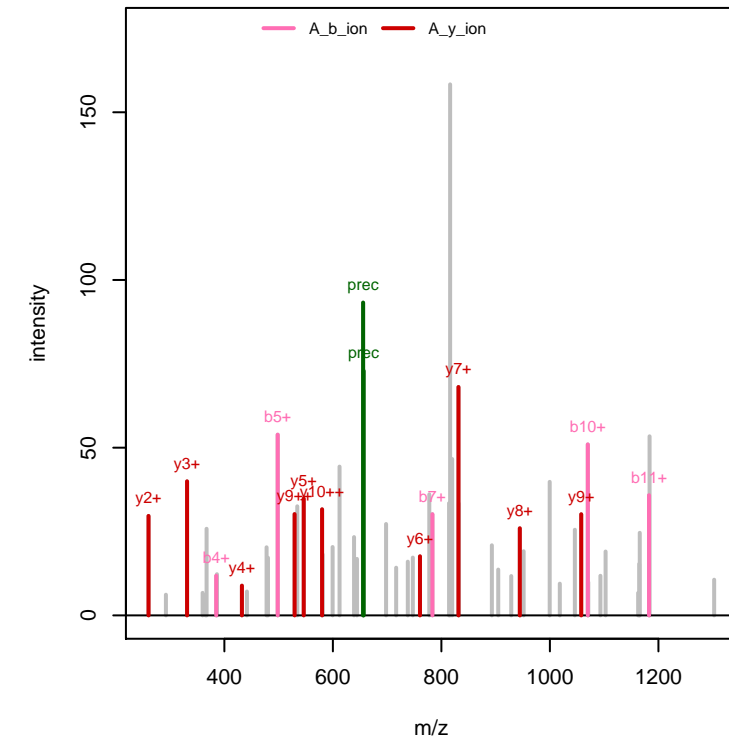

### VMDSNDLEKER+XL\_S

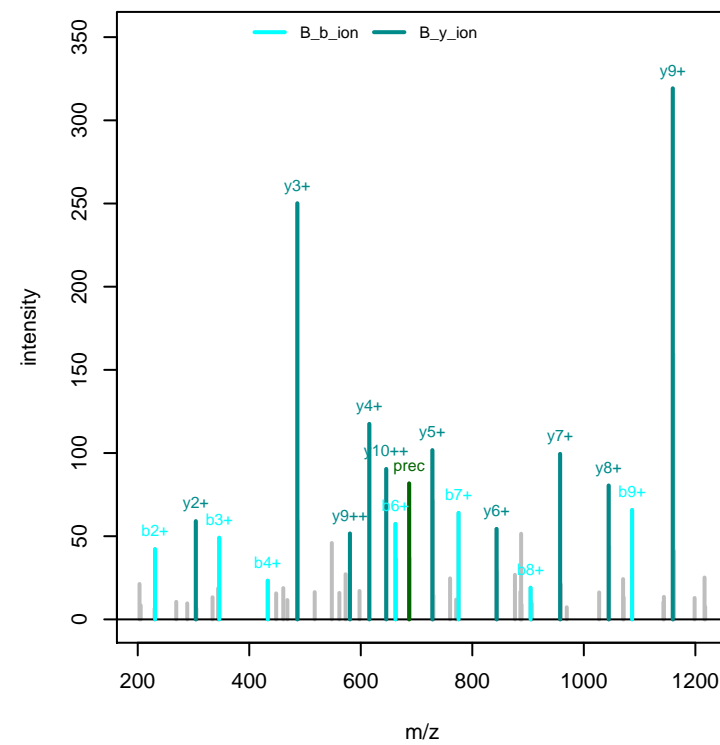

### VMDSNDLEKER+XL\_L

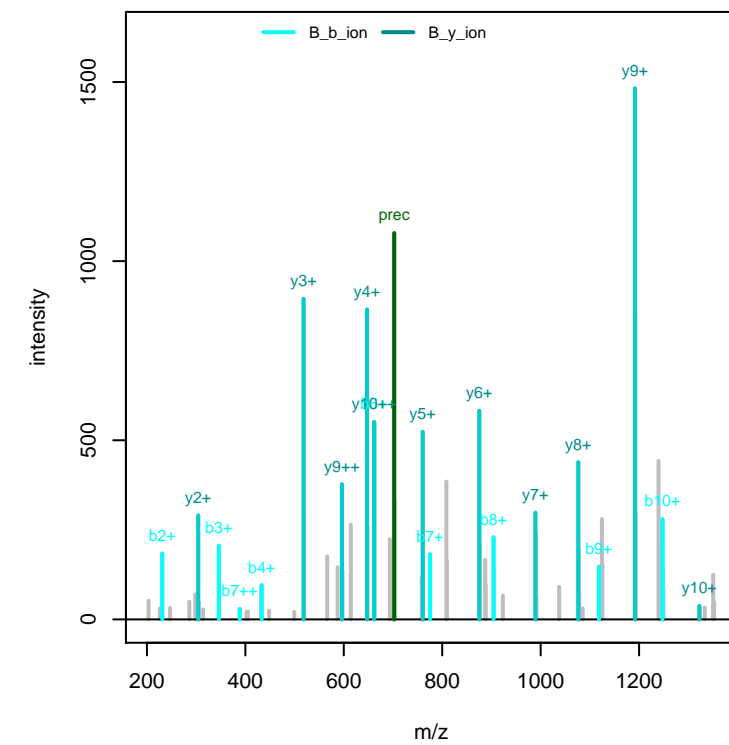

GKILFVGTK  
AHIEKQAGELQEK

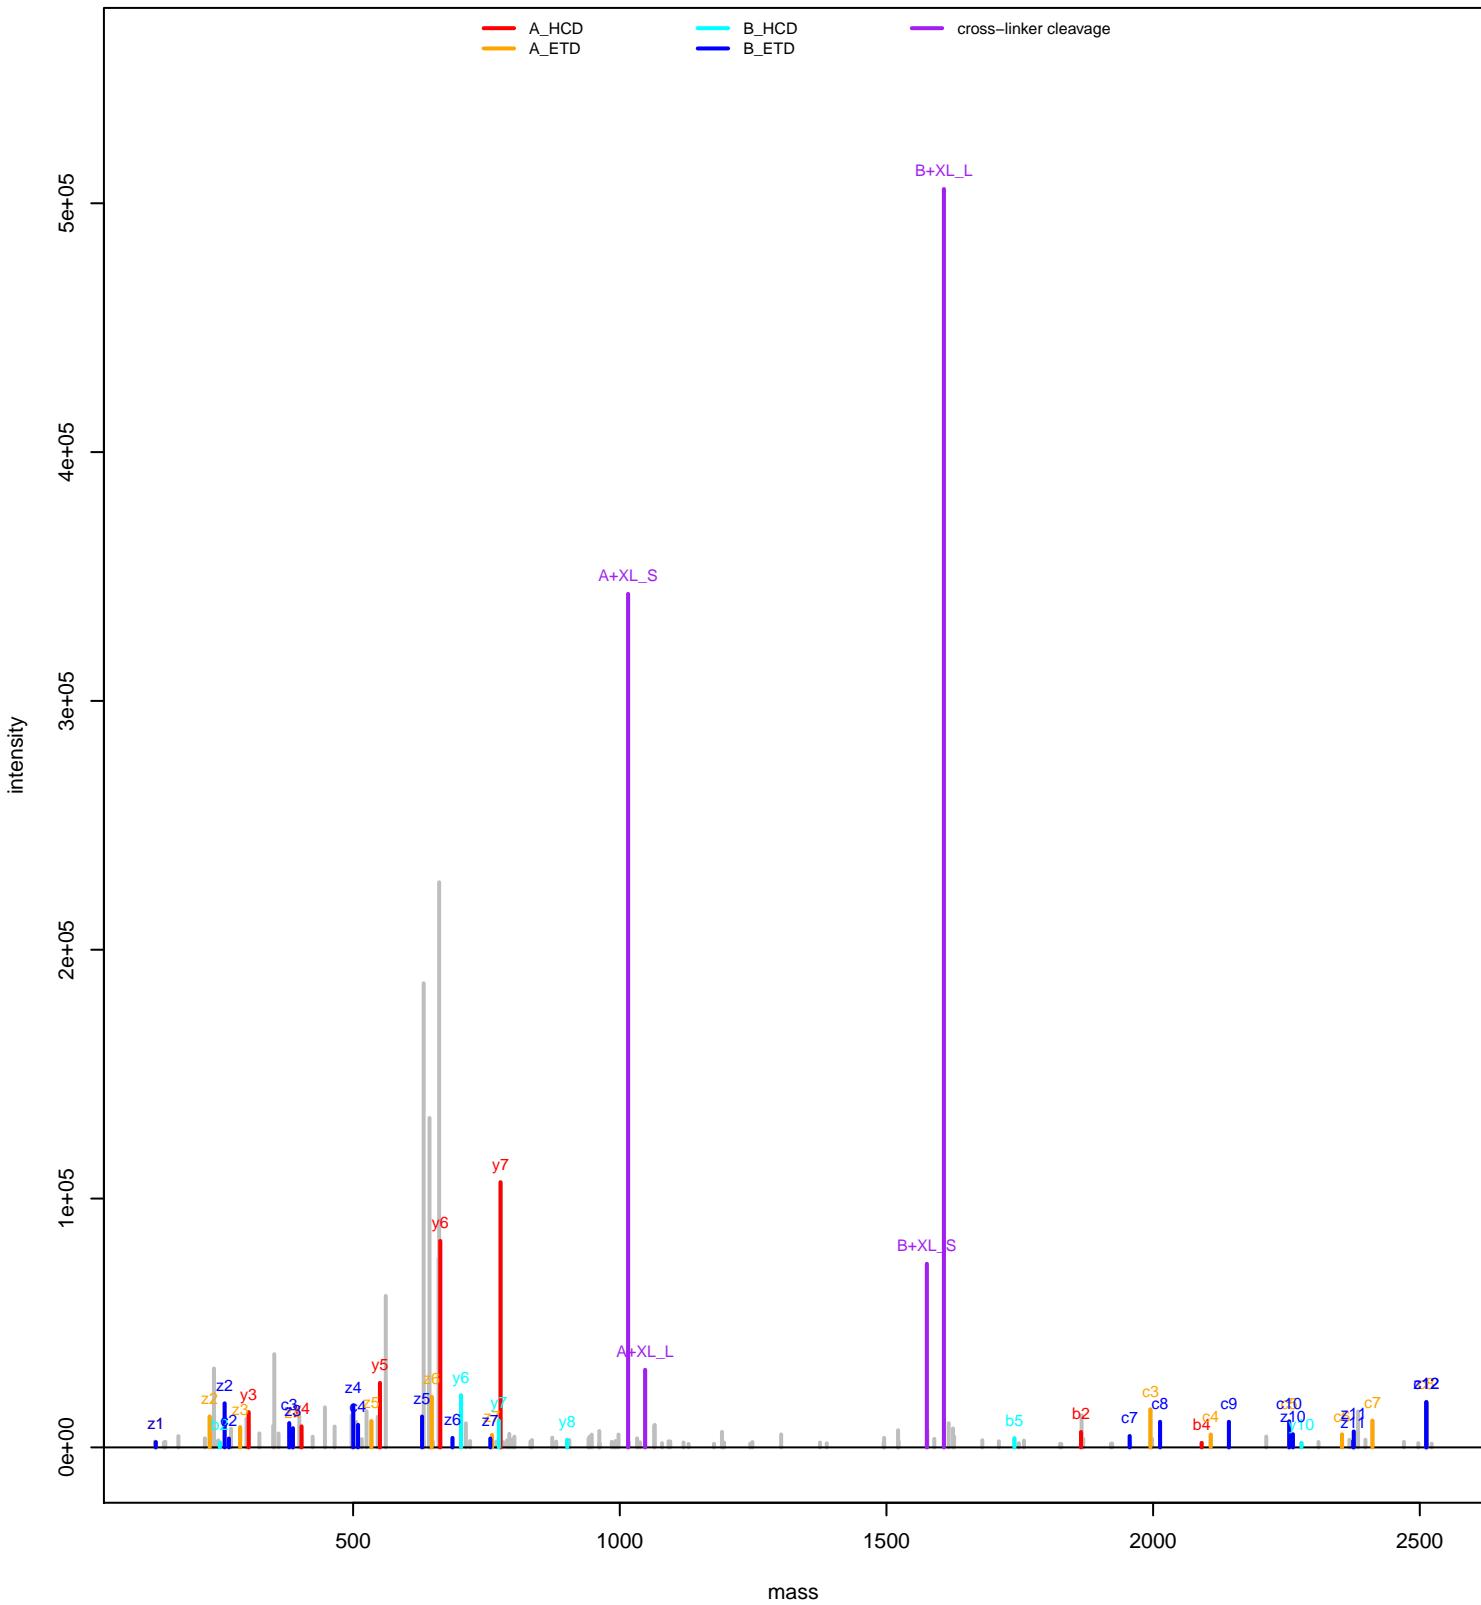

GKILFVGTK+XL\_S

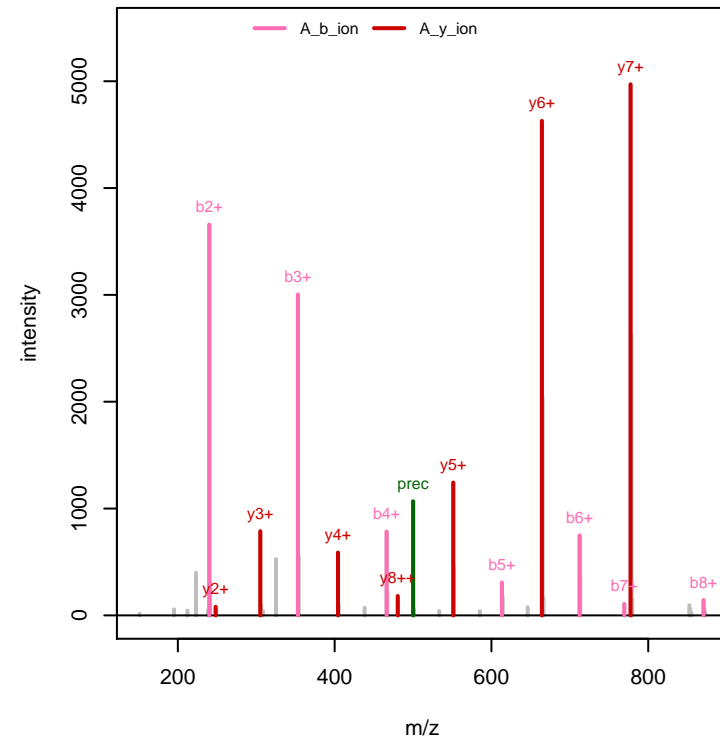

GKILFVGTK+XL\_L

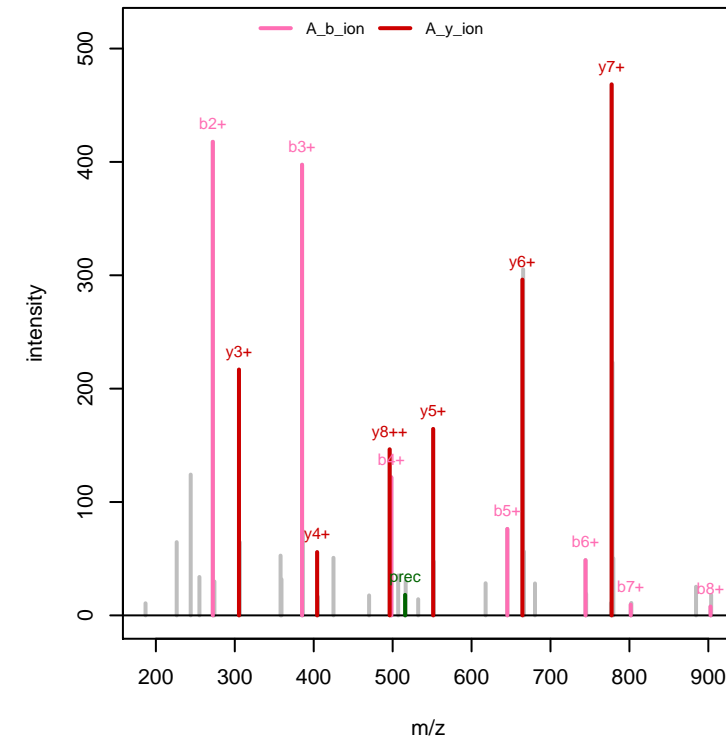

AHIEKQAGELQEK+XL\_S

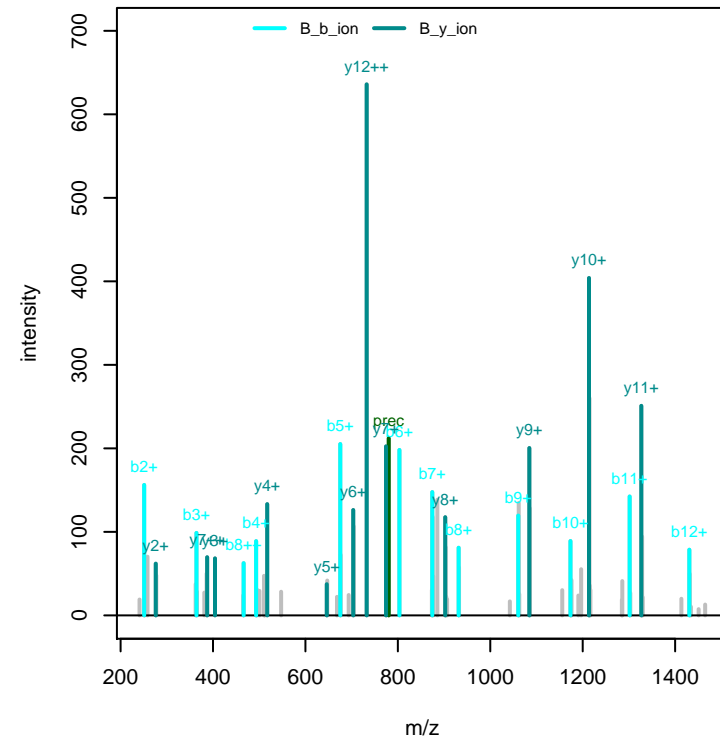

AHIEKQAGELQEK+XL\_L

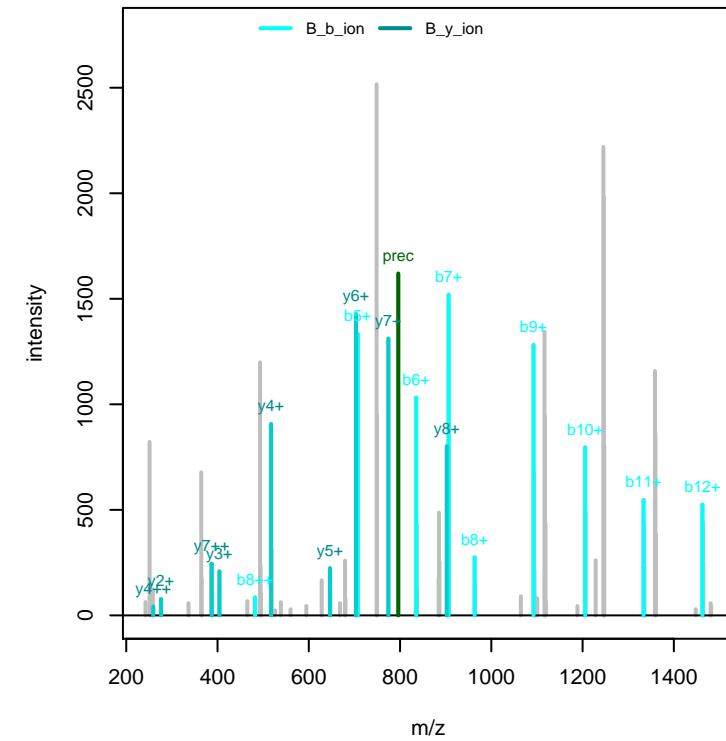

SIINKLNR  
SKATNLLYTRNDVSDSEK

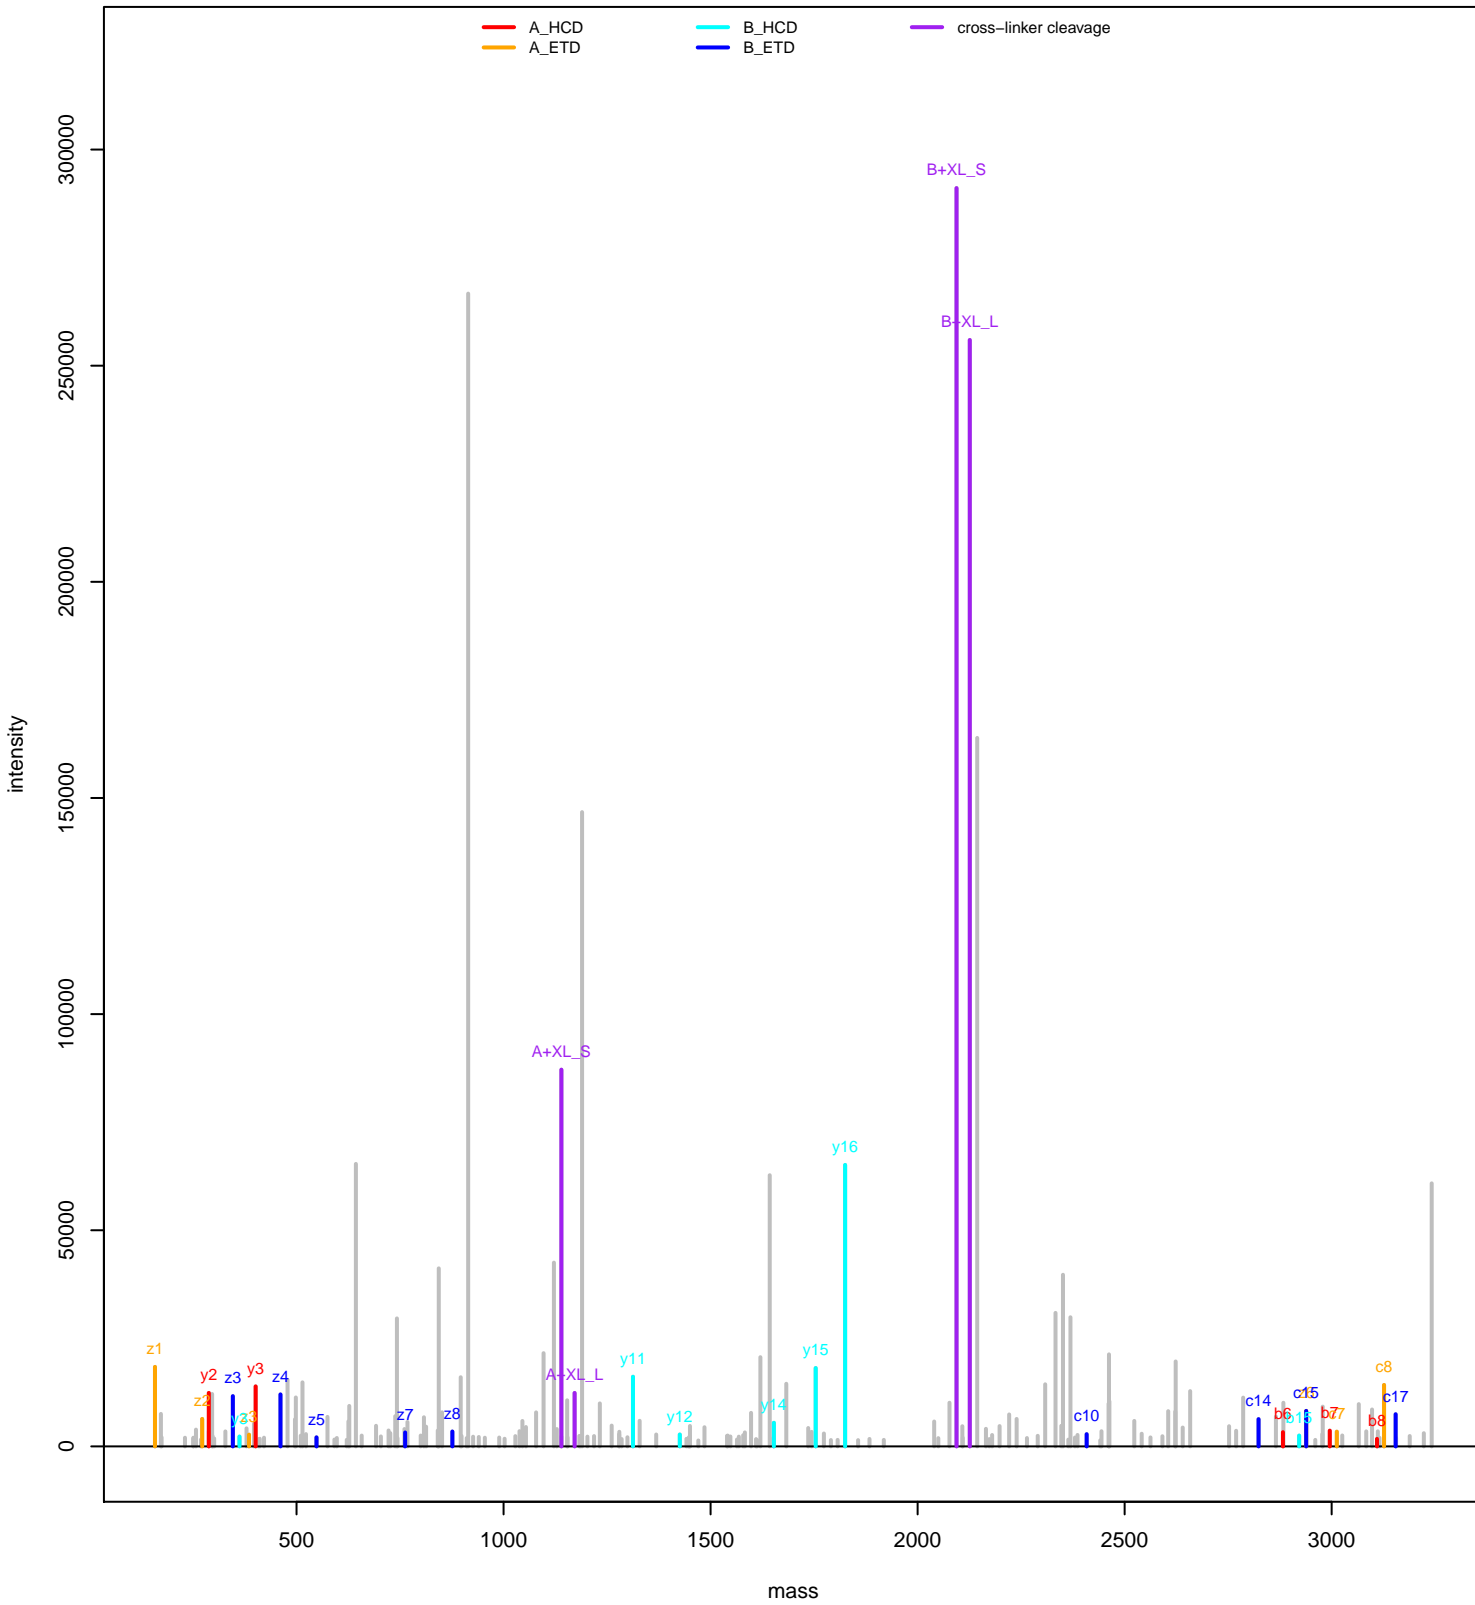

SIINKLNR+XL\_S

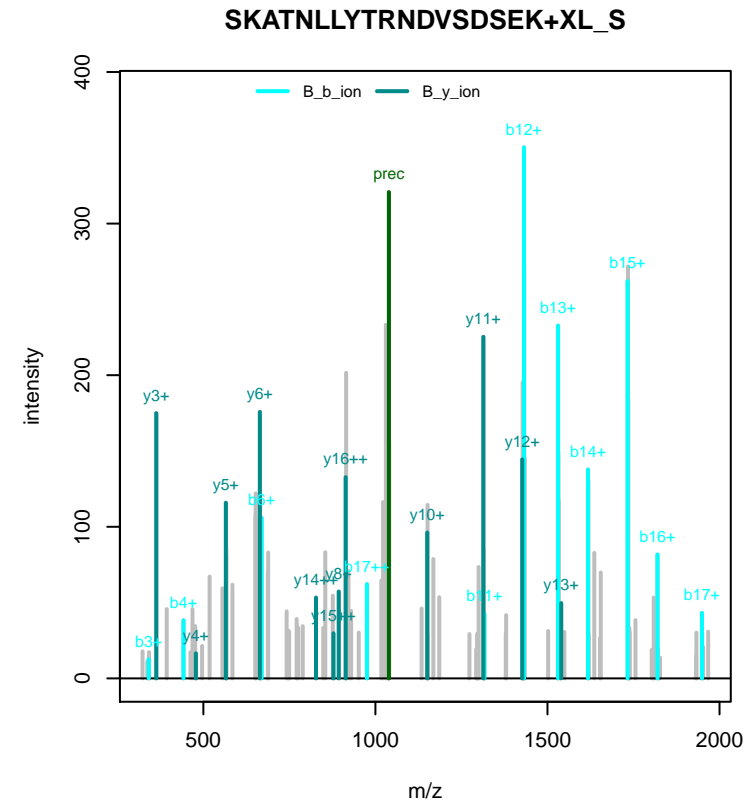

SIINKLNR+XL\_L

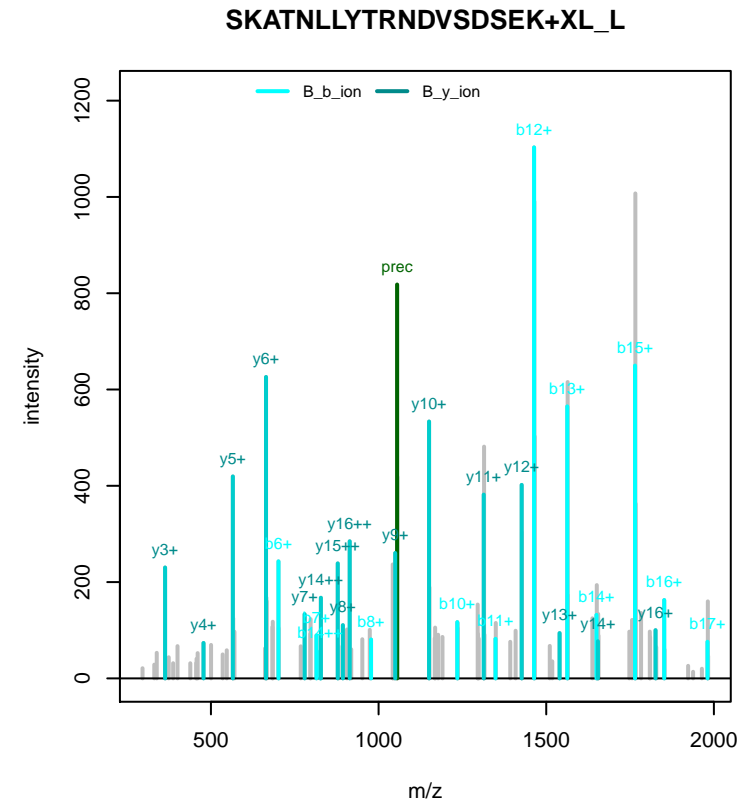

SKATNLLYTRNDVSDSEK+XL\_S

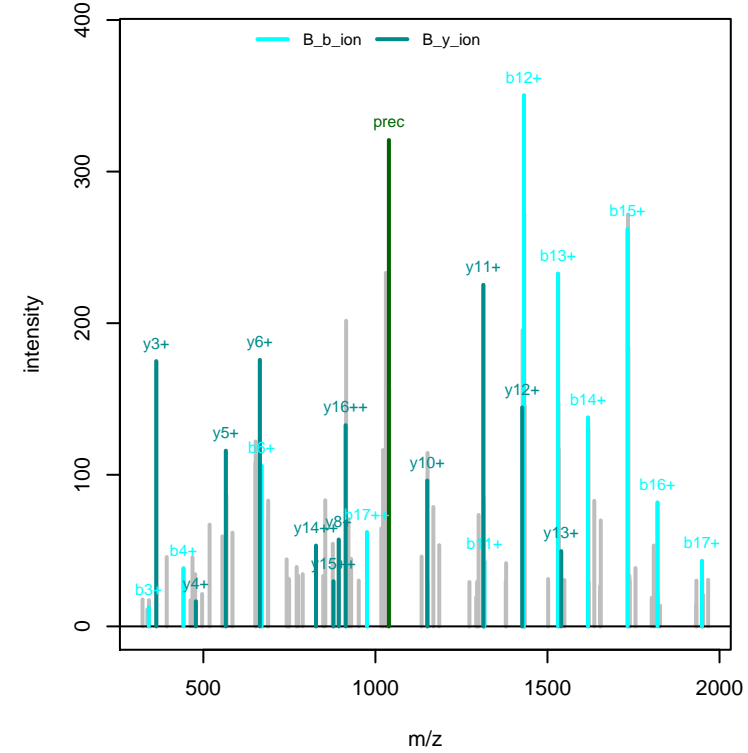

SKATNLLYTRNDVSDSEK+XL\_L

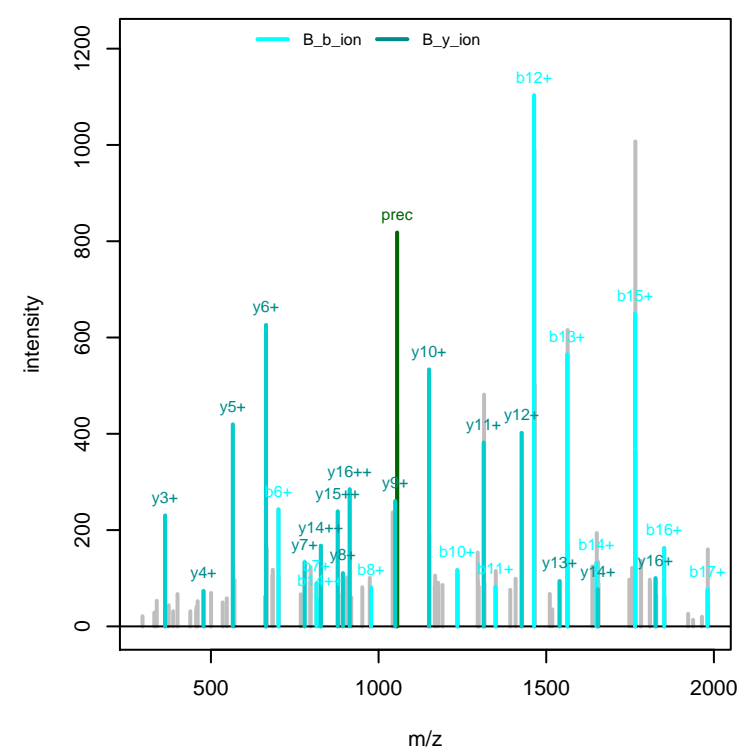

AEKVDAR  
LGWKA EKVDAR

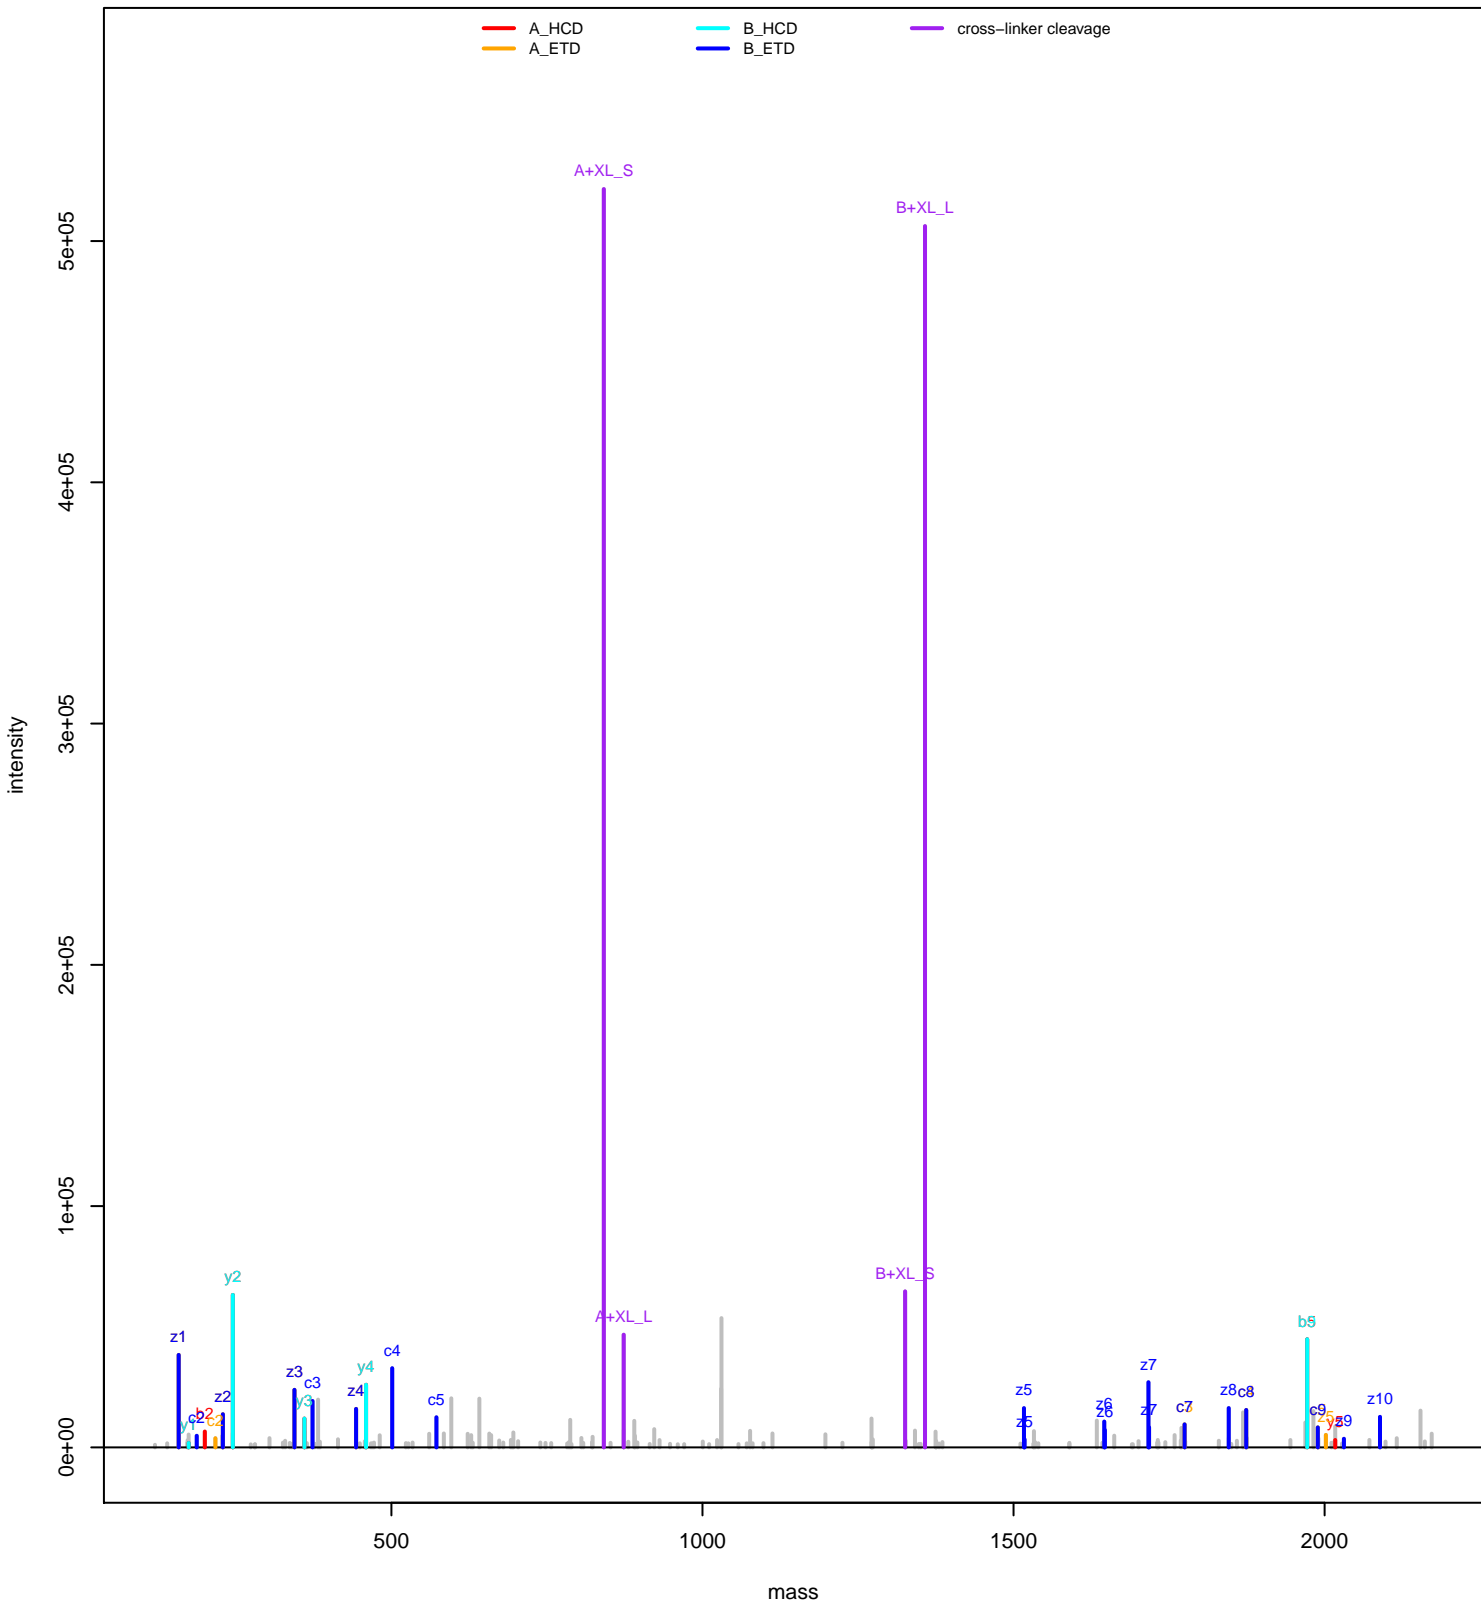

AEKVDAR+XL\_S

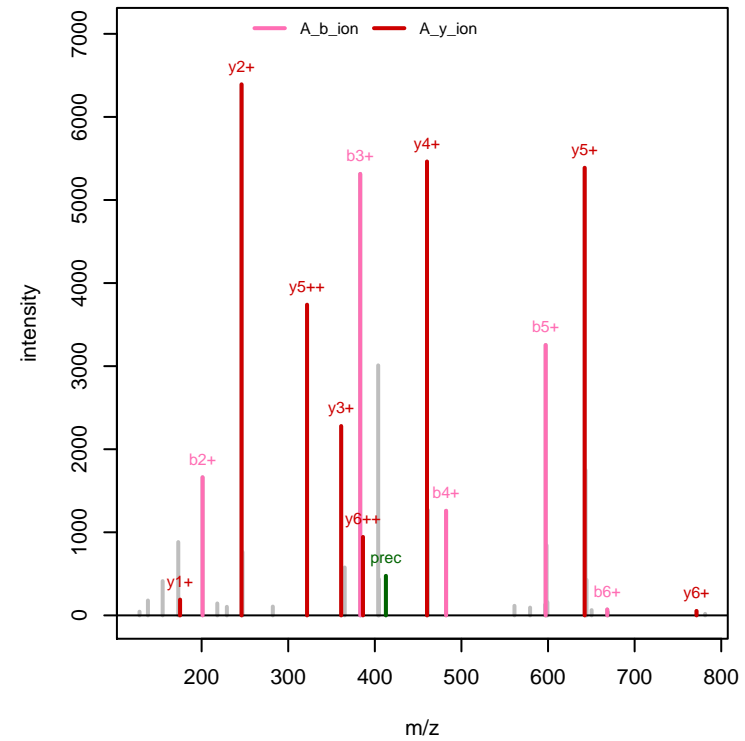

AEKVDAR+XL\_L

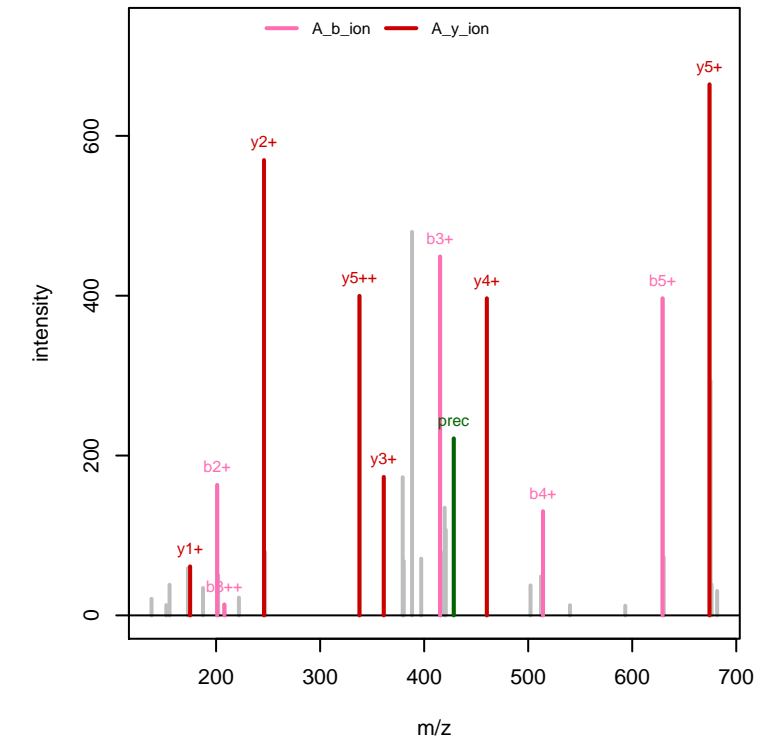

LGWKA EKVDAR+XL\_S

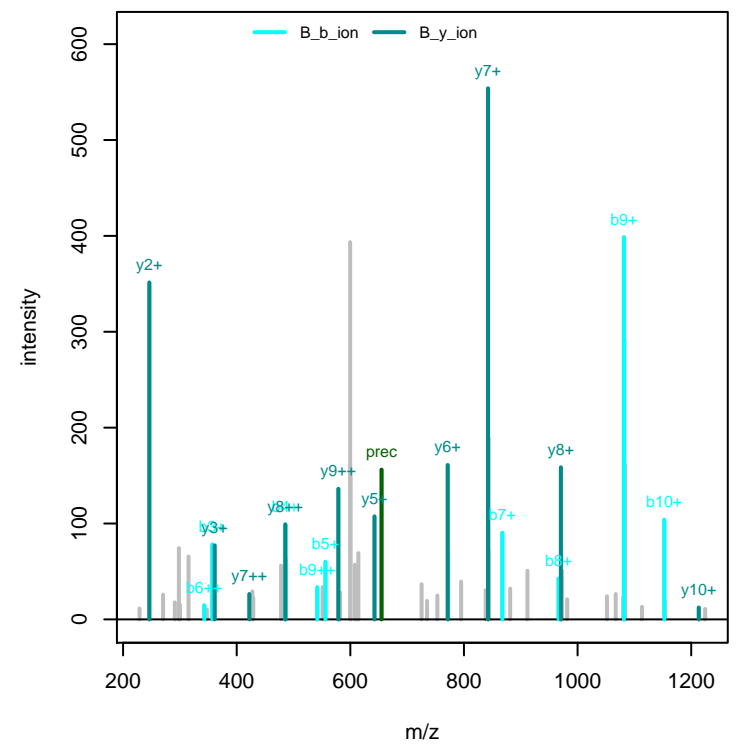

LGWKA EKVDAR+XL\_L

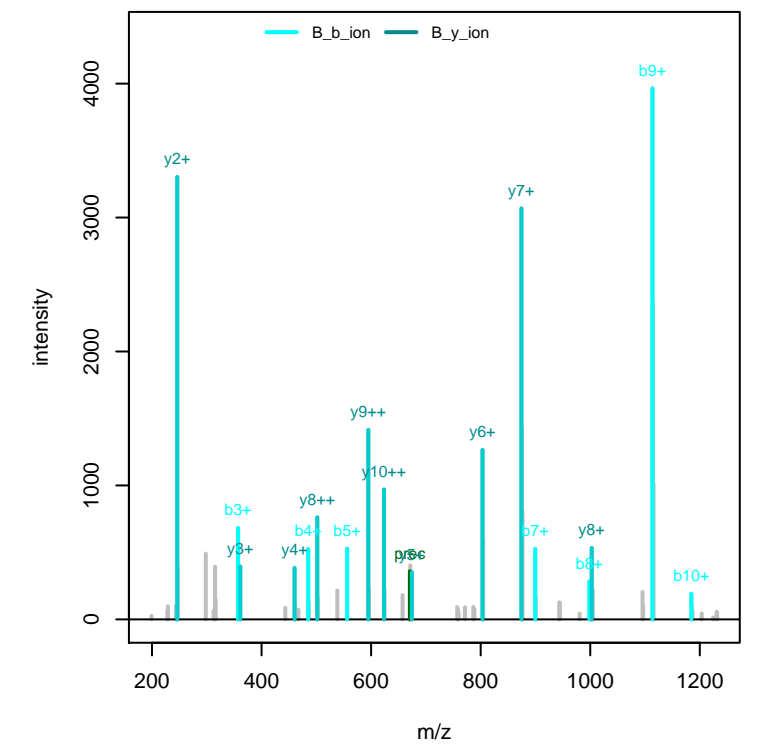

EEANKQYK  
RLVLGKEVR

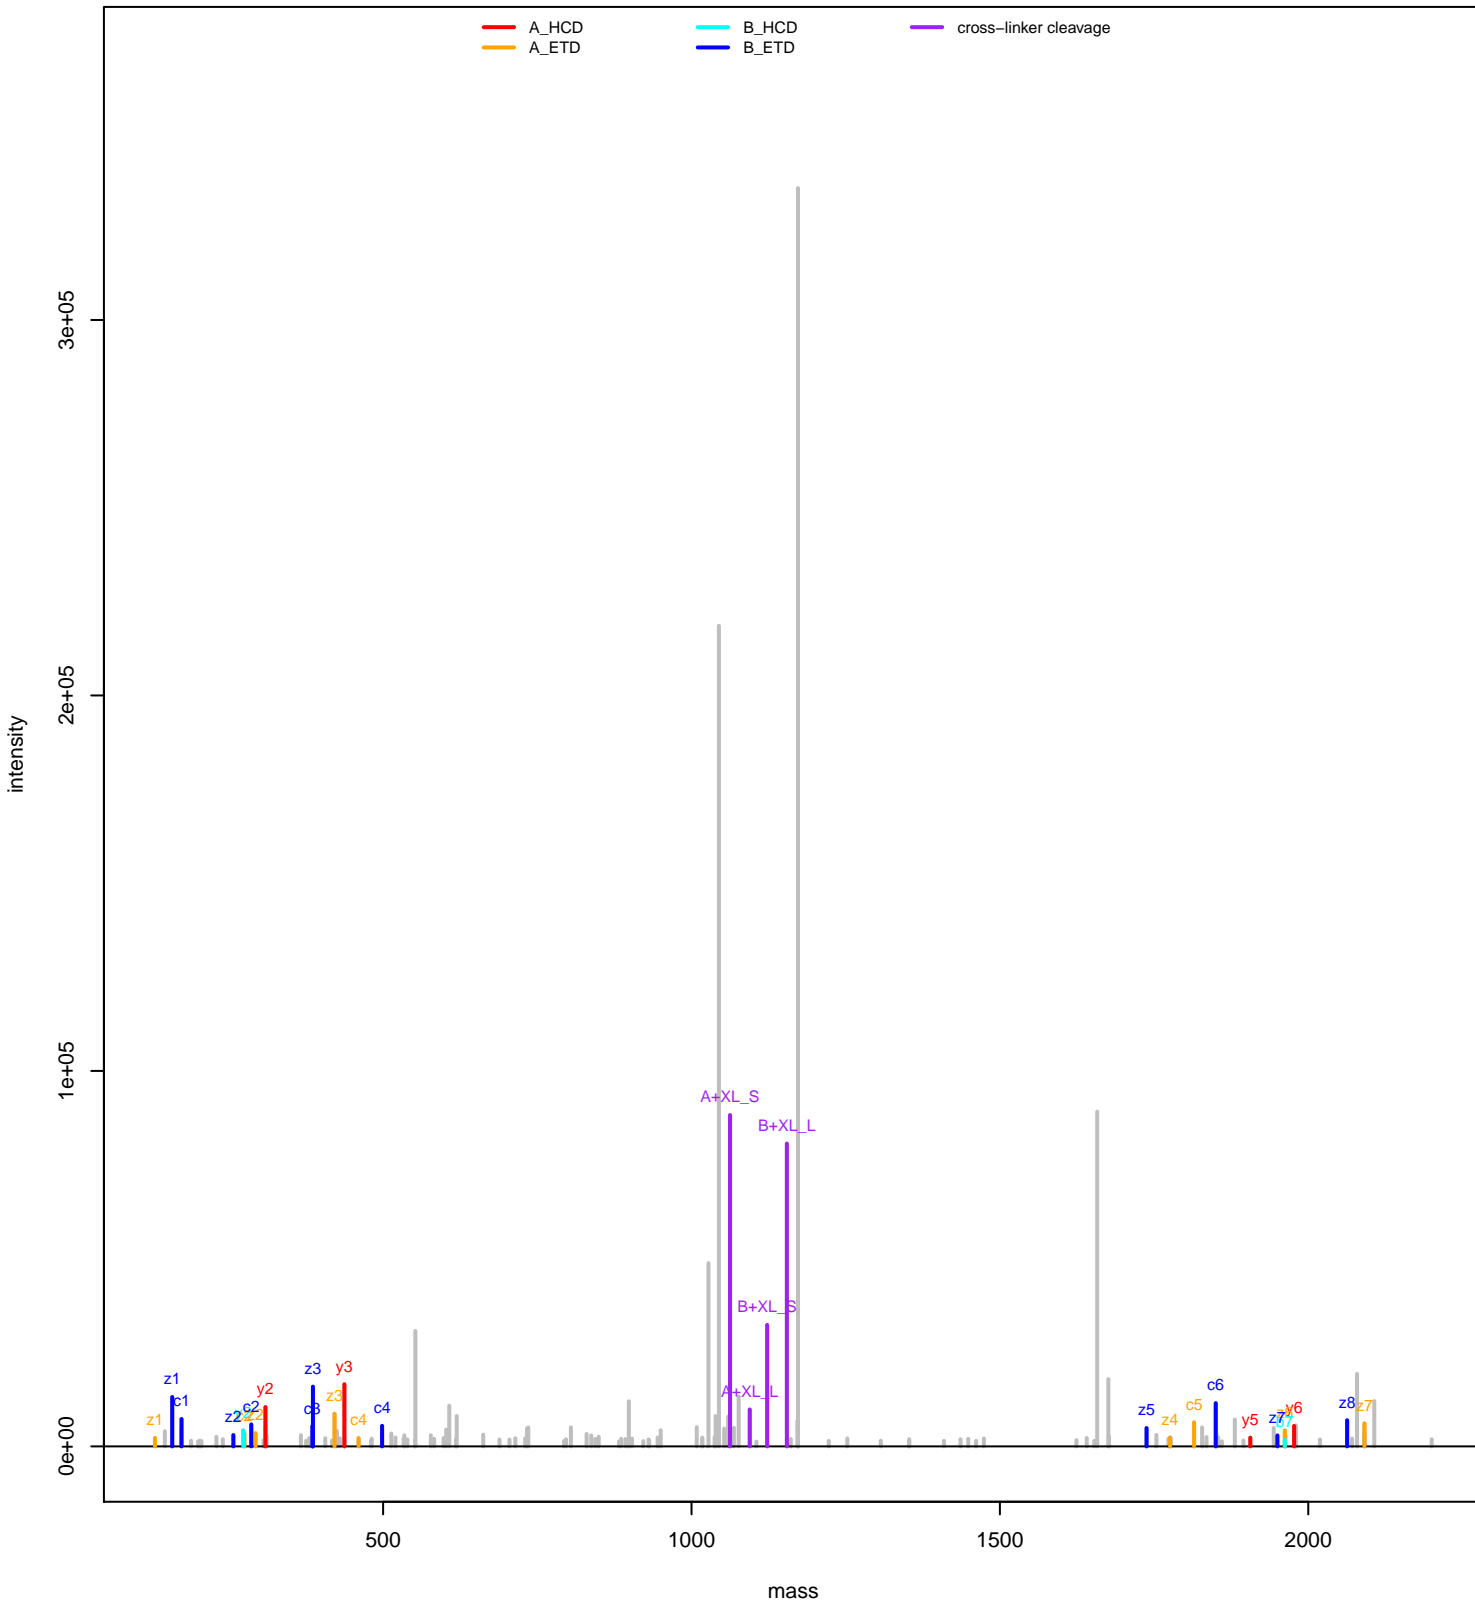

EEANKQYK+XL\_S

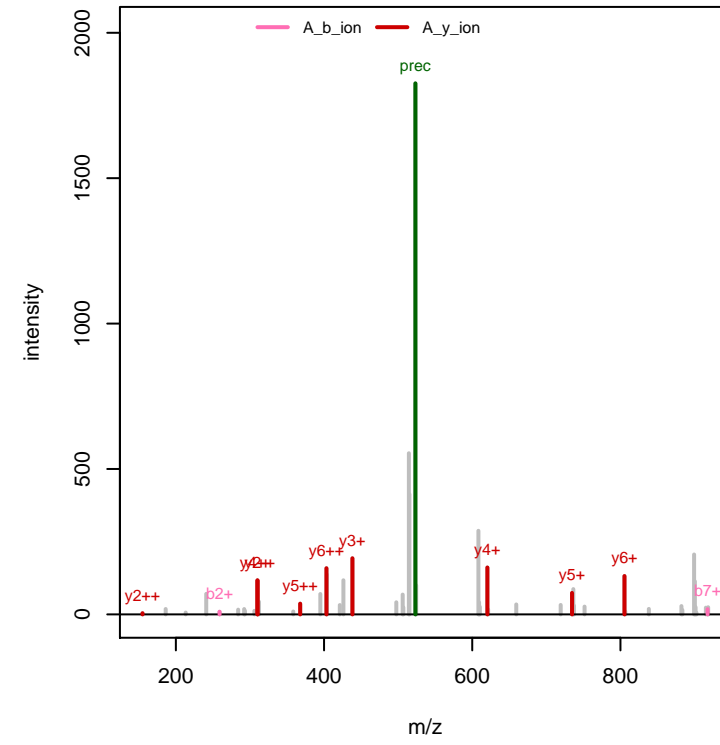

EEANKQYK+XL\_L

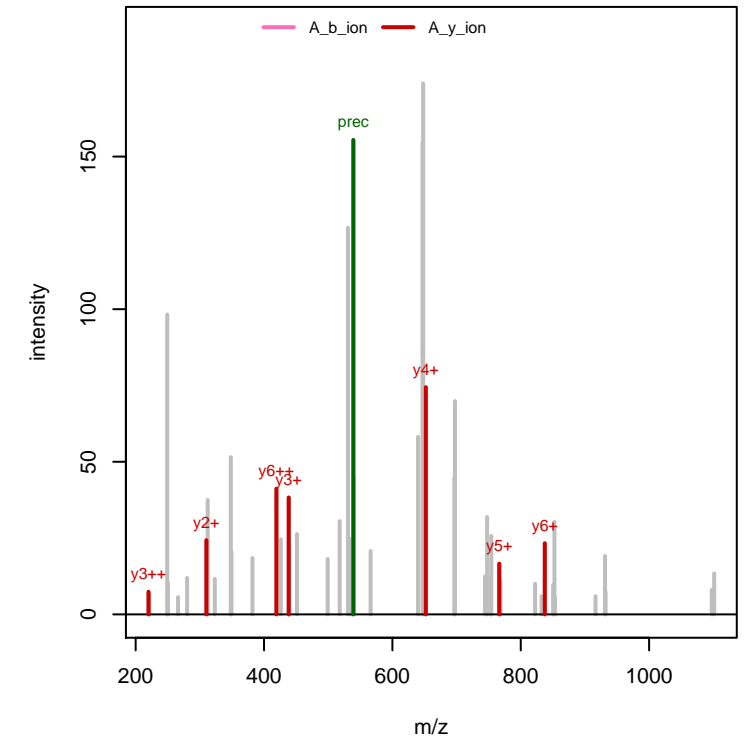

RLVLGKEVR+XL\_S

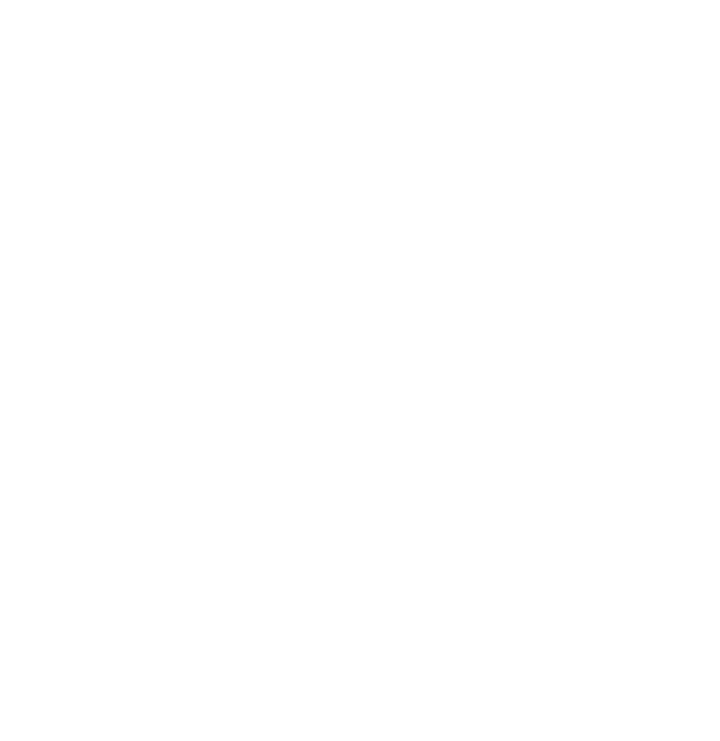

RLVLGKEVR+XL\_L

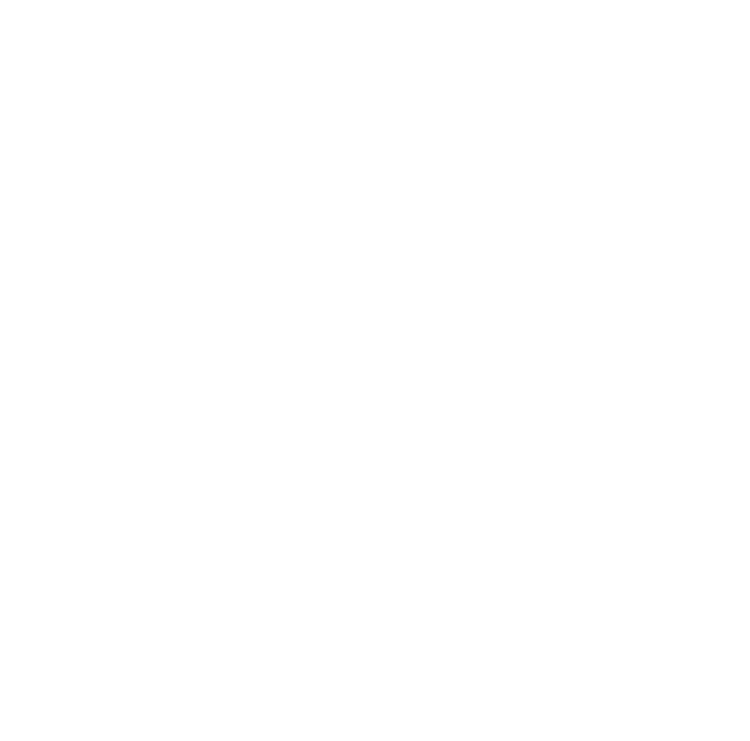

**KIEAALADK  
SQDDVQKLTDAAIK**

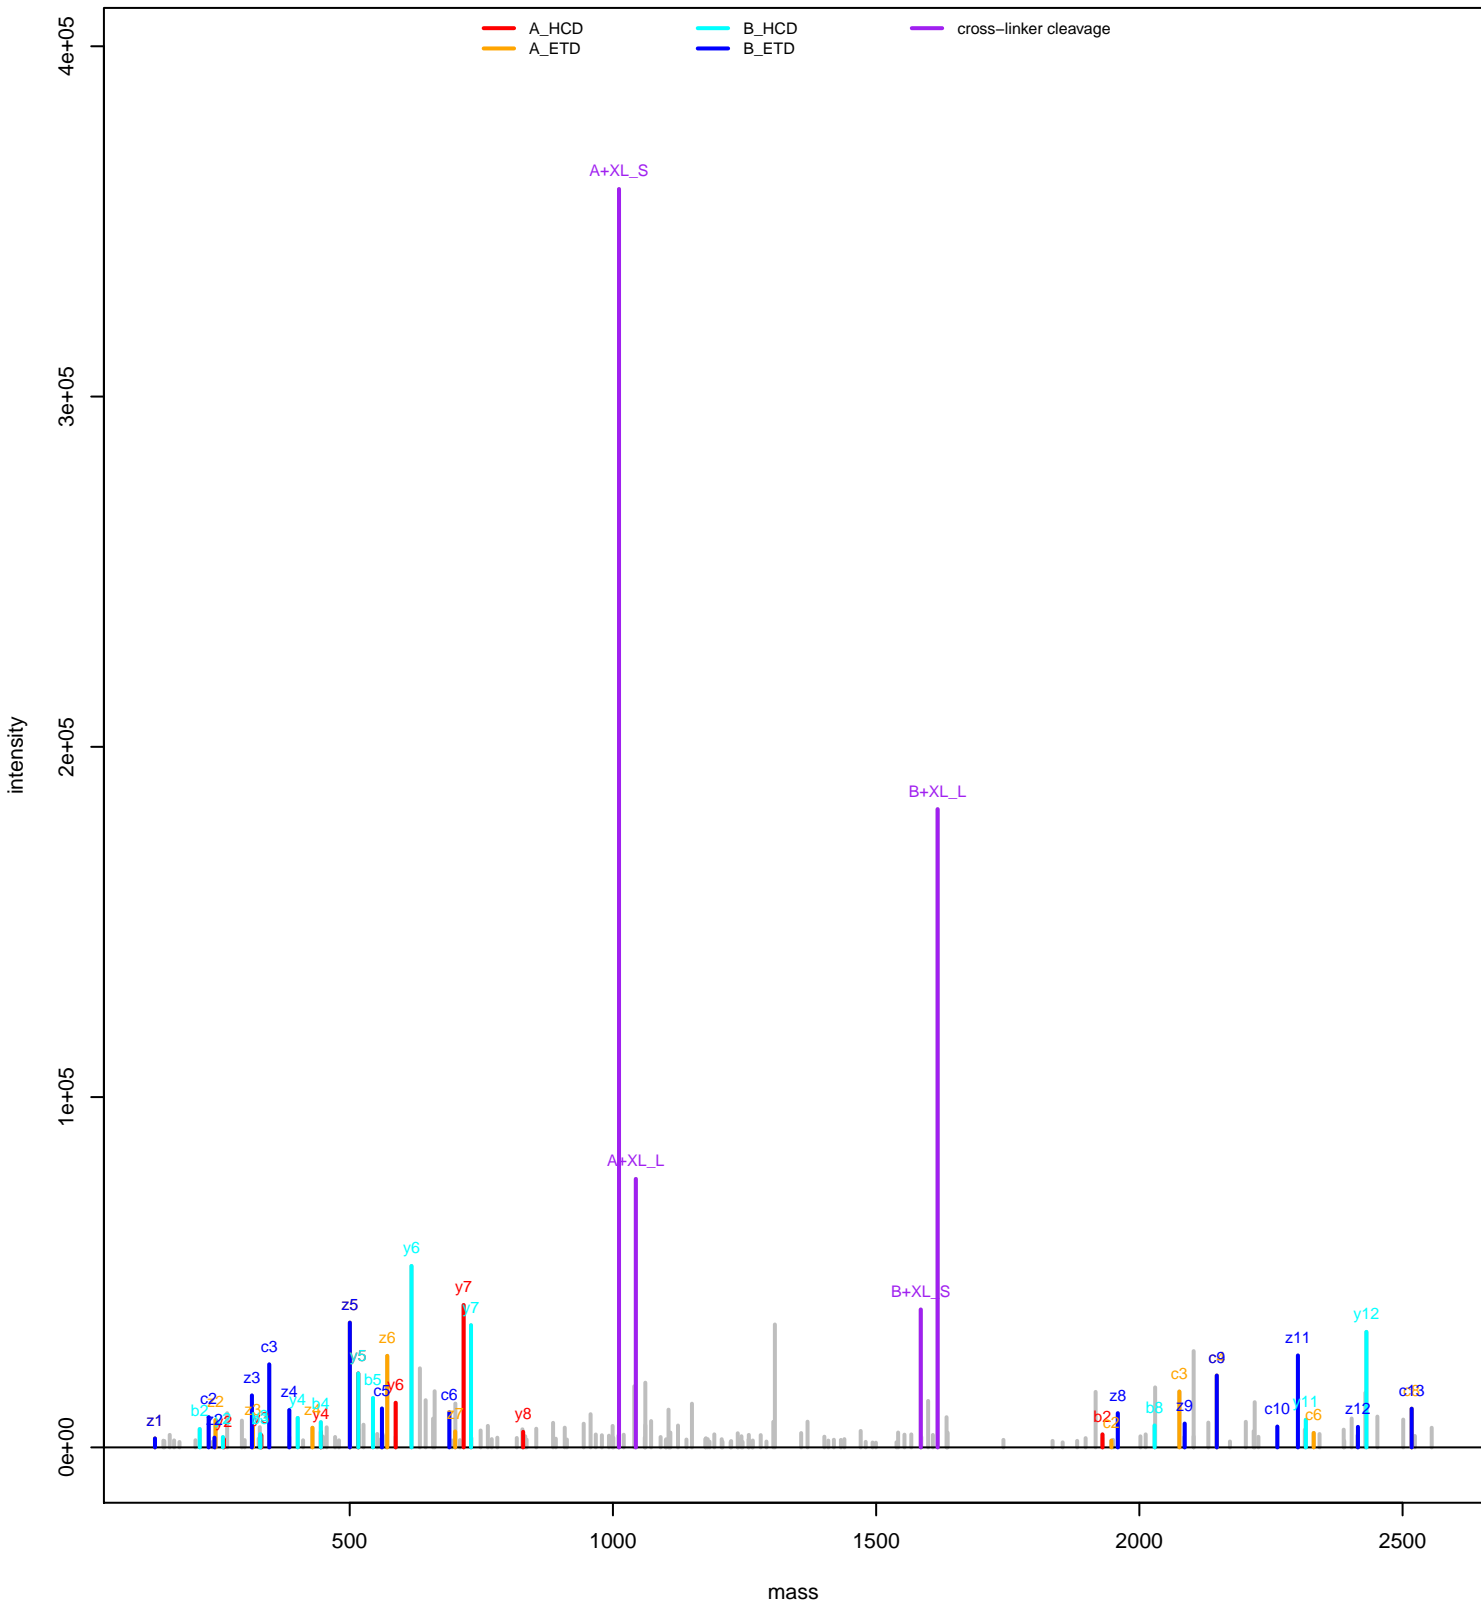

**KIEAALADK+XL\_S**

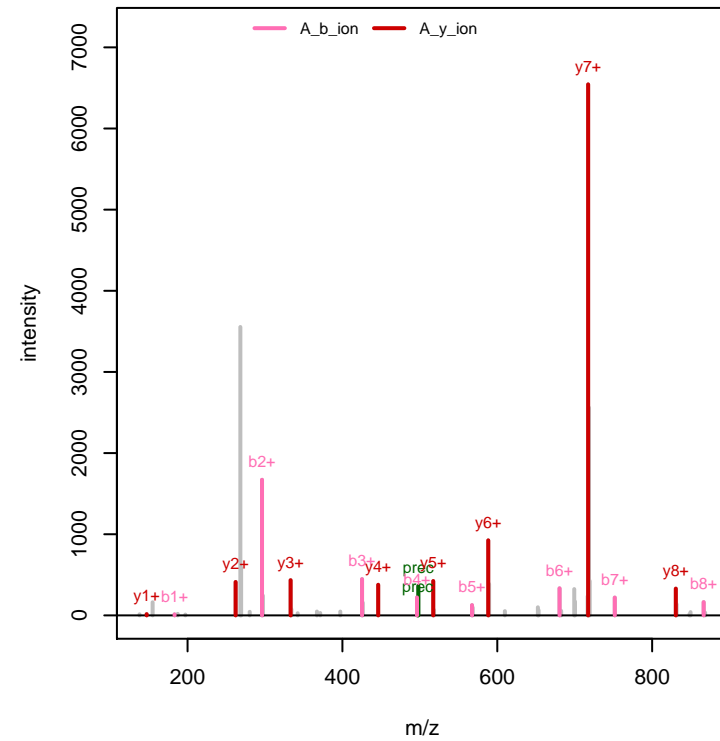

**KIEAALADK+XL\_L**

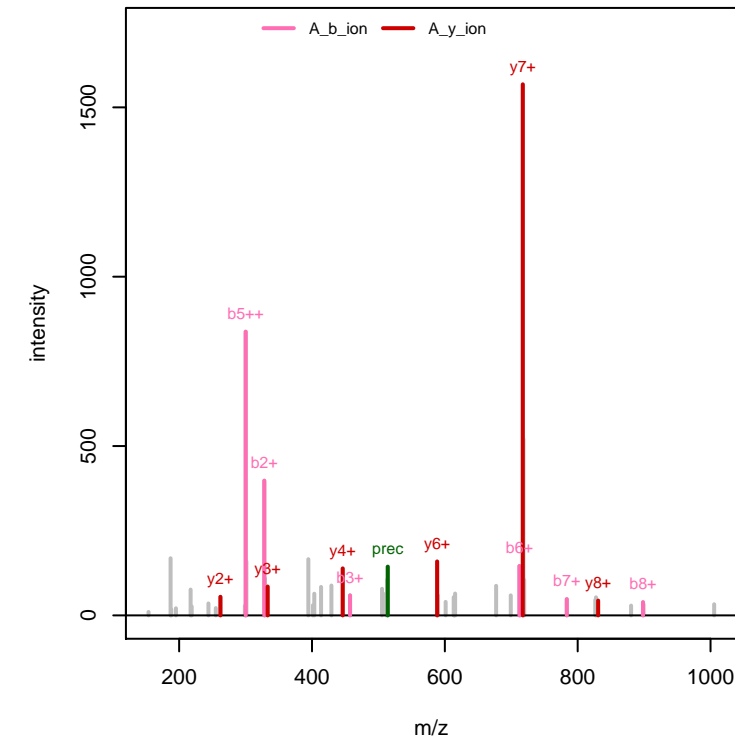

**SQDDVQKLTDAAIK+XL\_S**

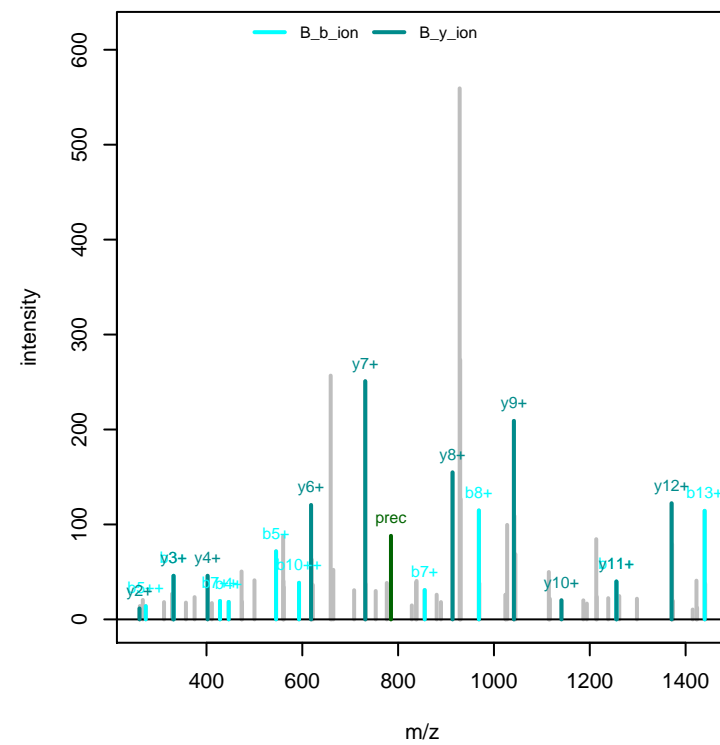

**SQDDVQKLTDAAIK+XL\_L**

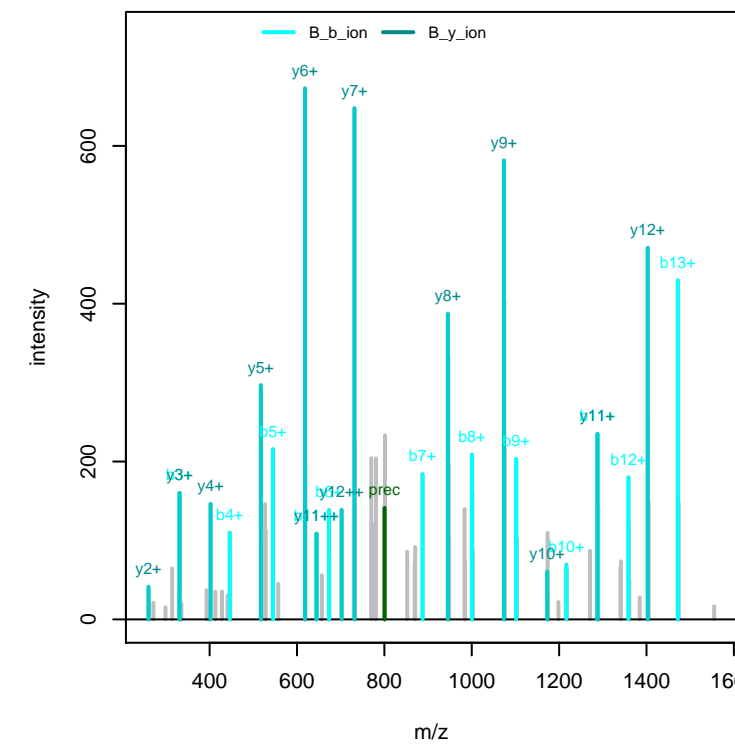

VLGQLKATVR  
FKEDPRSDK

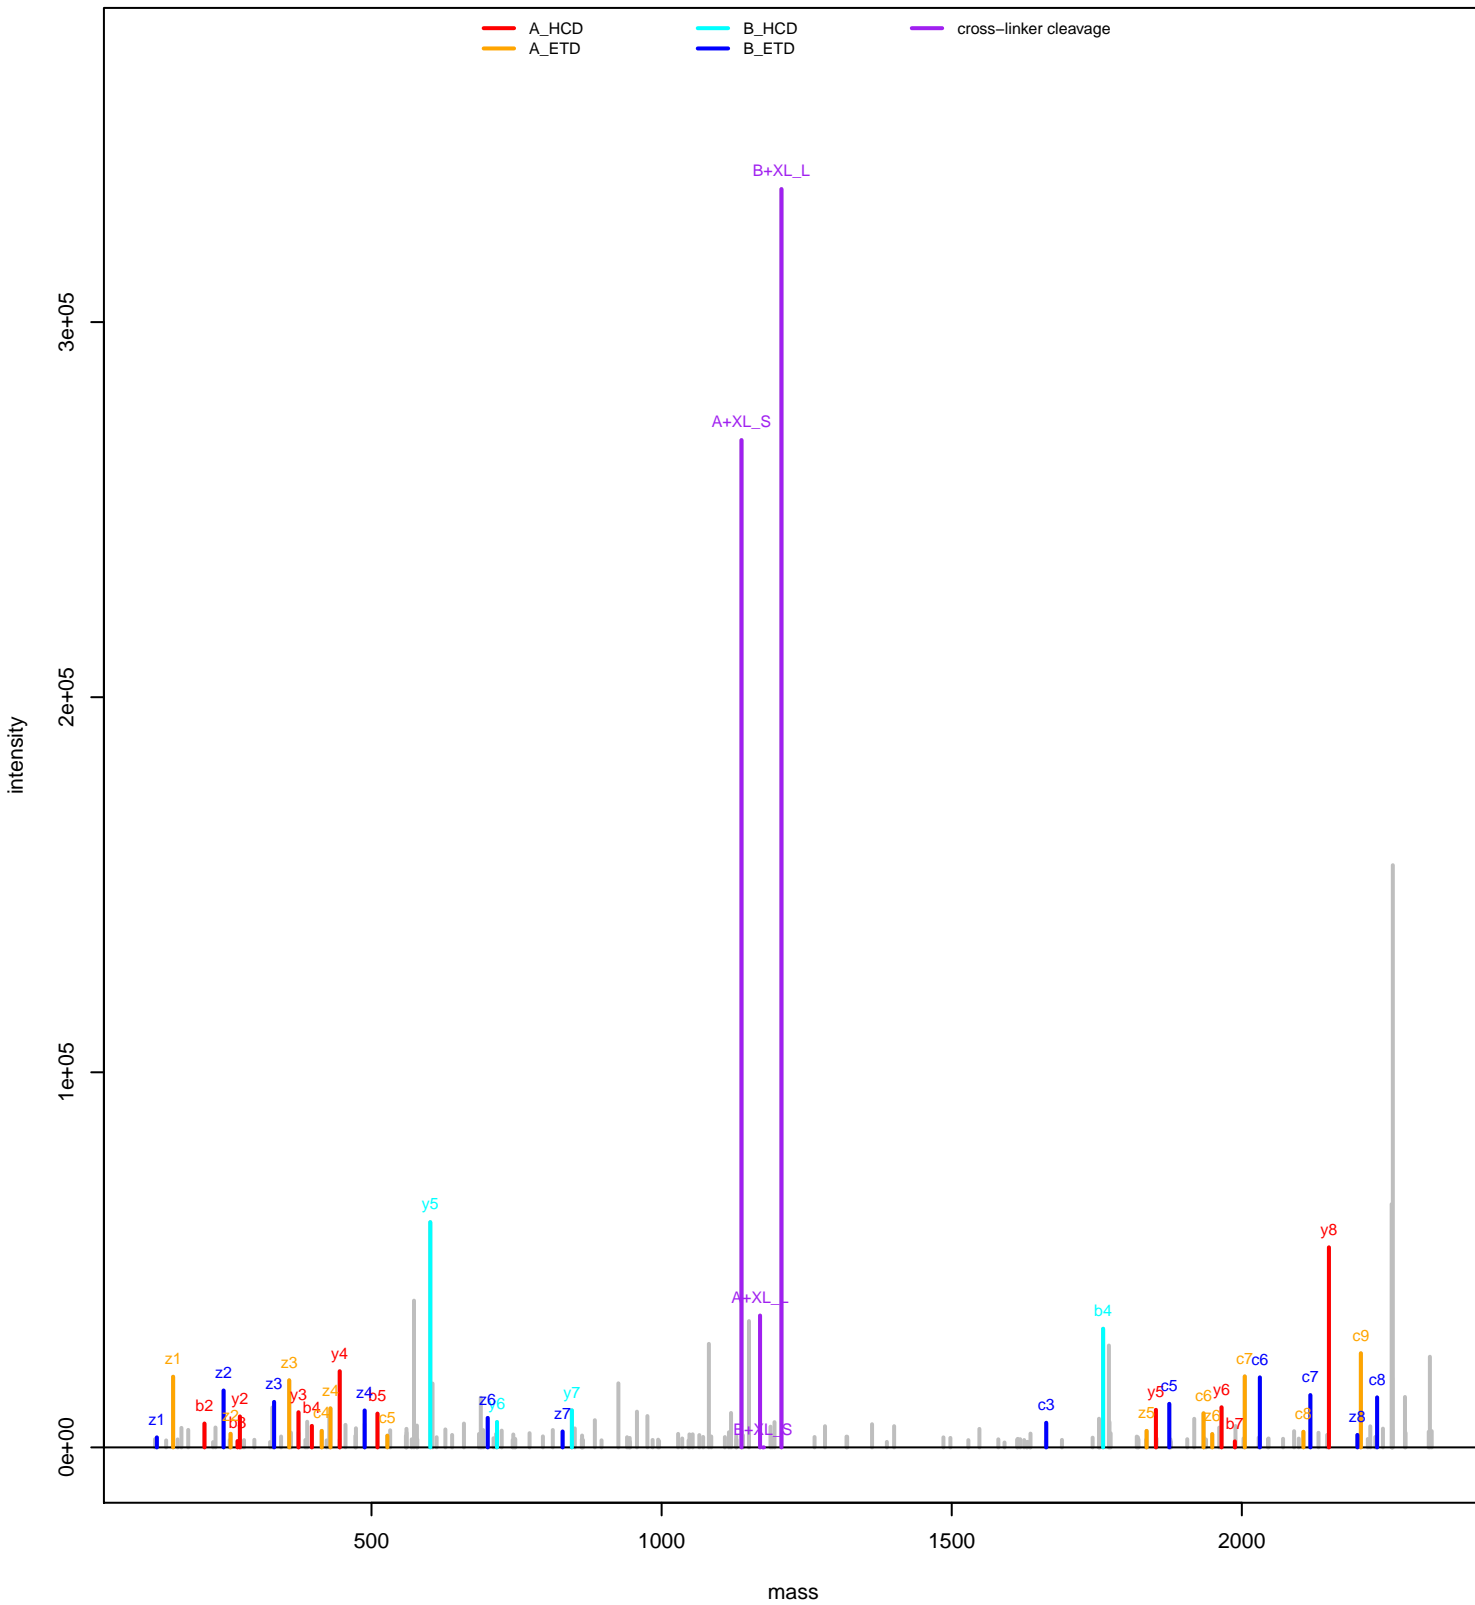

VLGQLKATVR+XL\_S

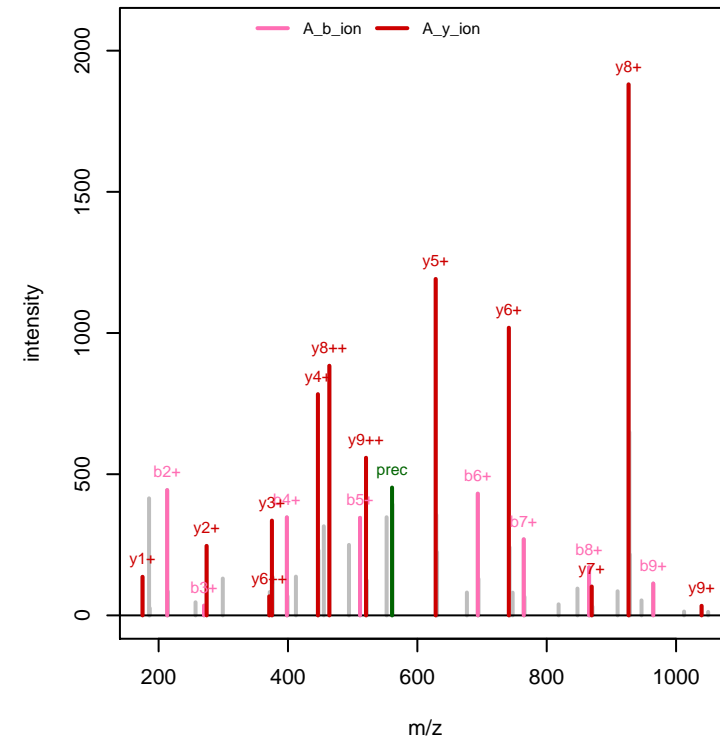

VLGQLKATVR+XL\_L

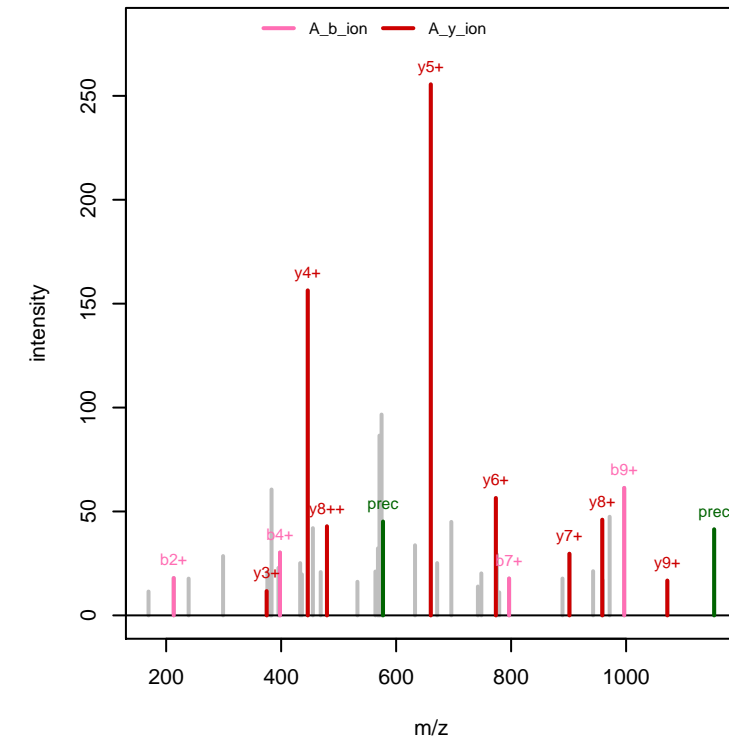

FKEDPRSDK+XL\_S

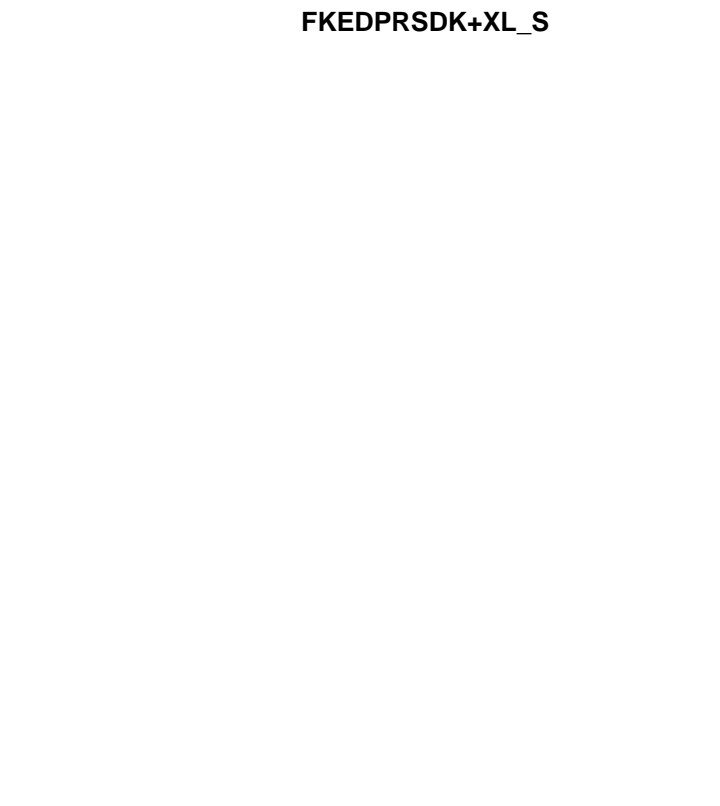

FKEDPRSDK+XL\_L

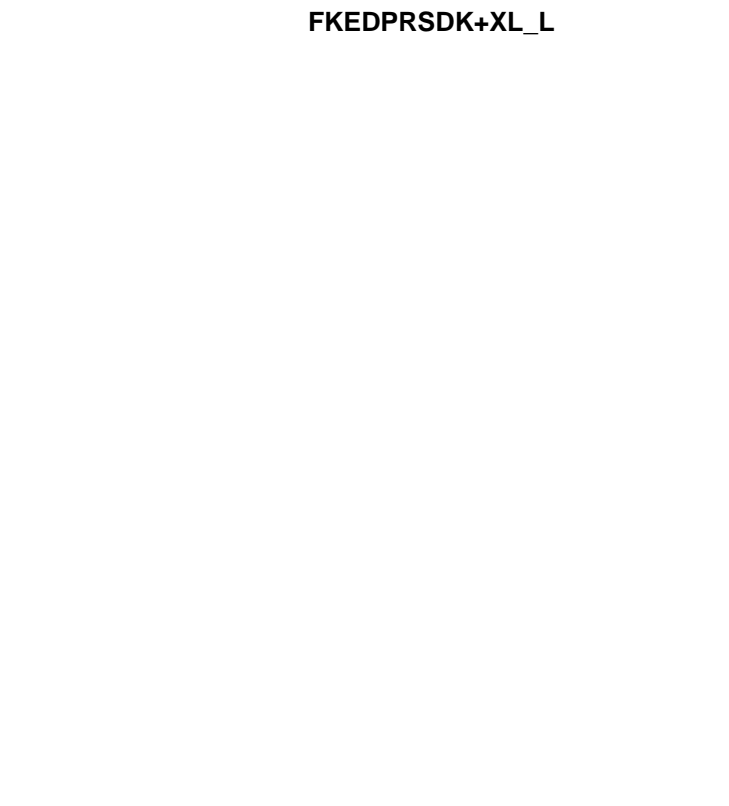

**KSEQVKK  
VLKILTDER**

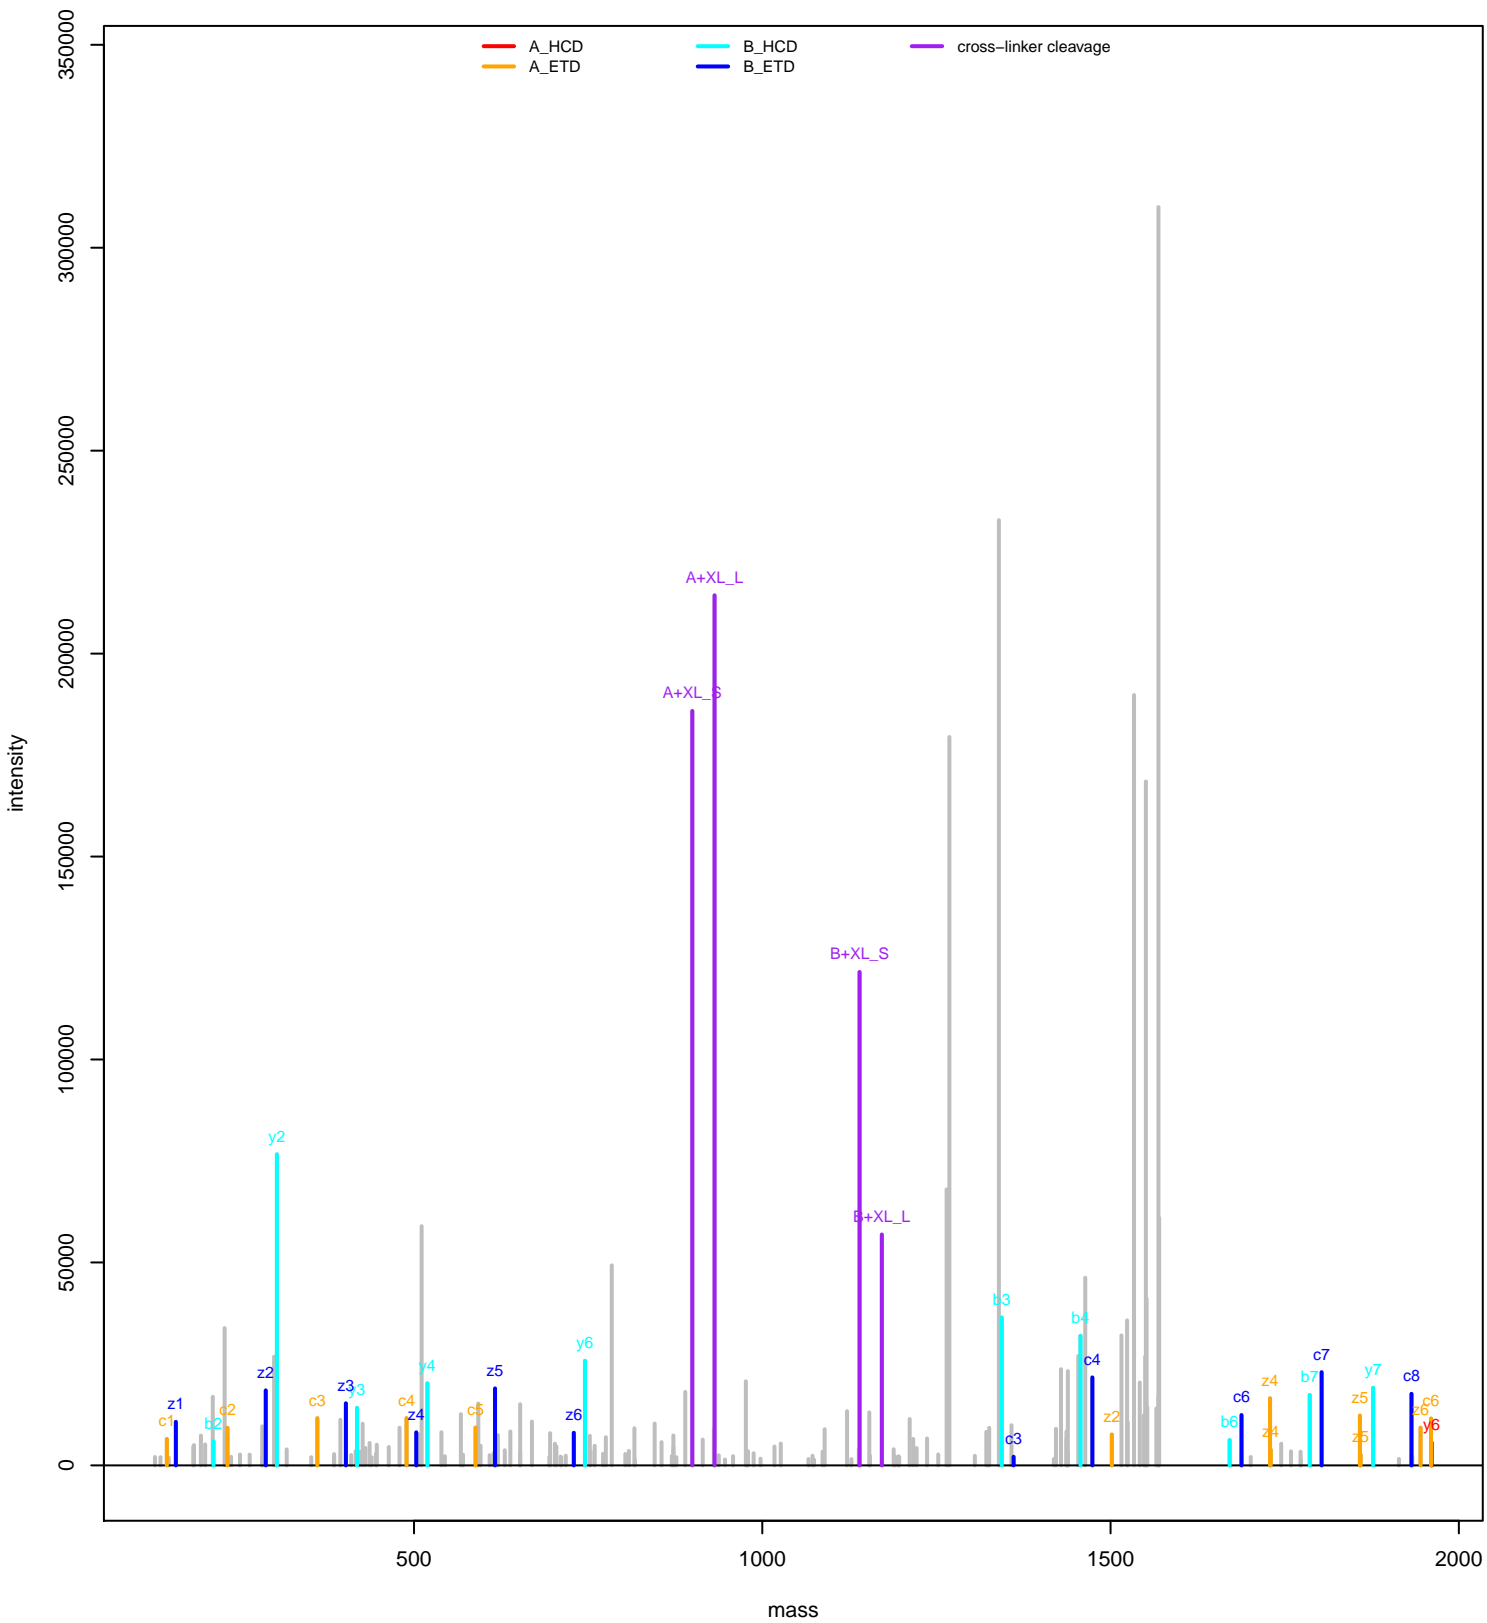

**KSEQVKK+XL\_S**

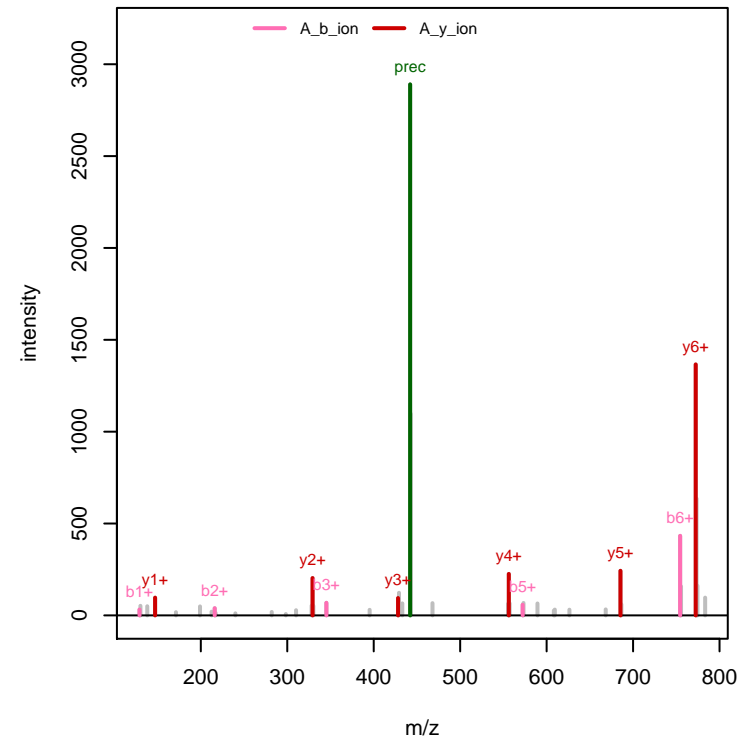

**KSEQVKK+XL\_L**

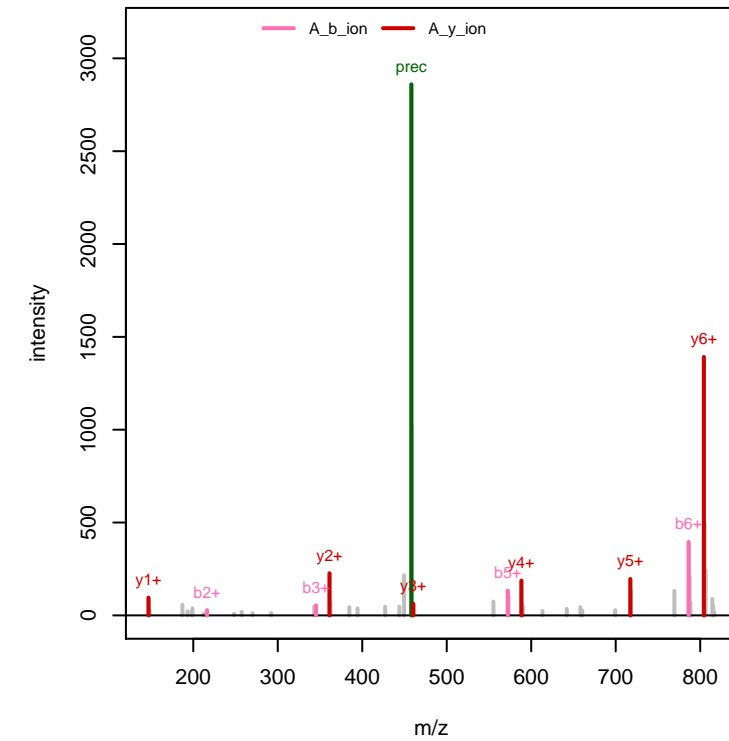

**VLKILTDER+XL\_S**

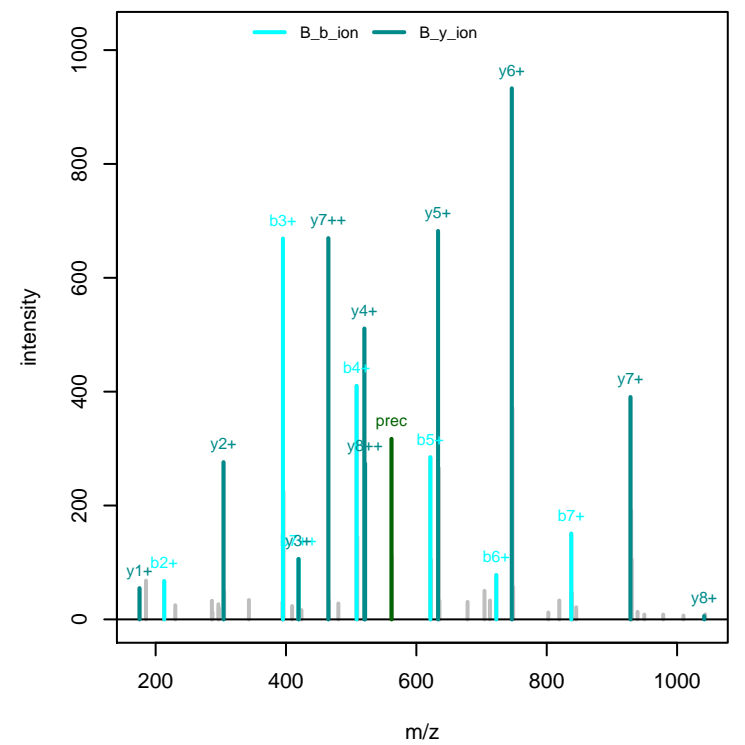

**VLKILTDER+XL\_L**

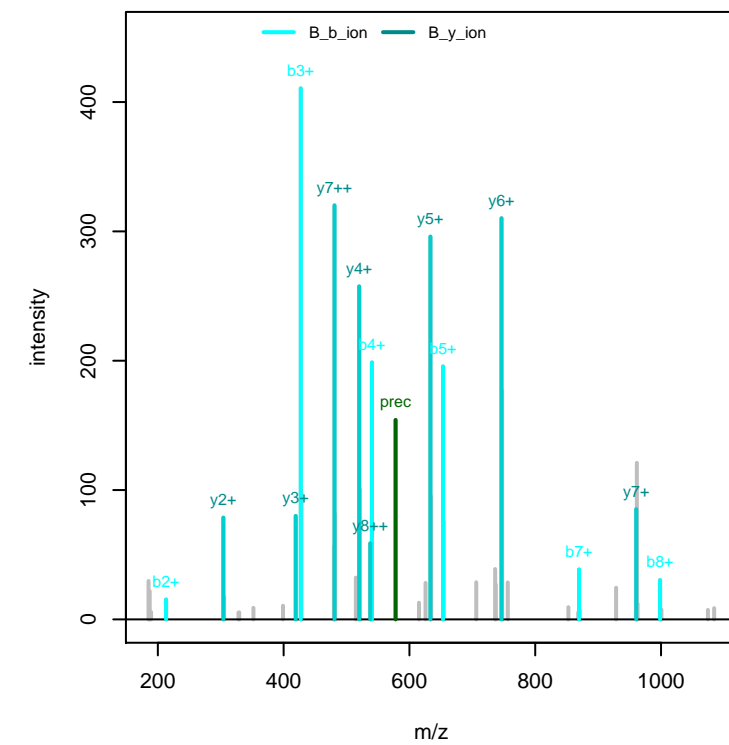



TGKAAR  
VFQTHSPVVDISIVKR

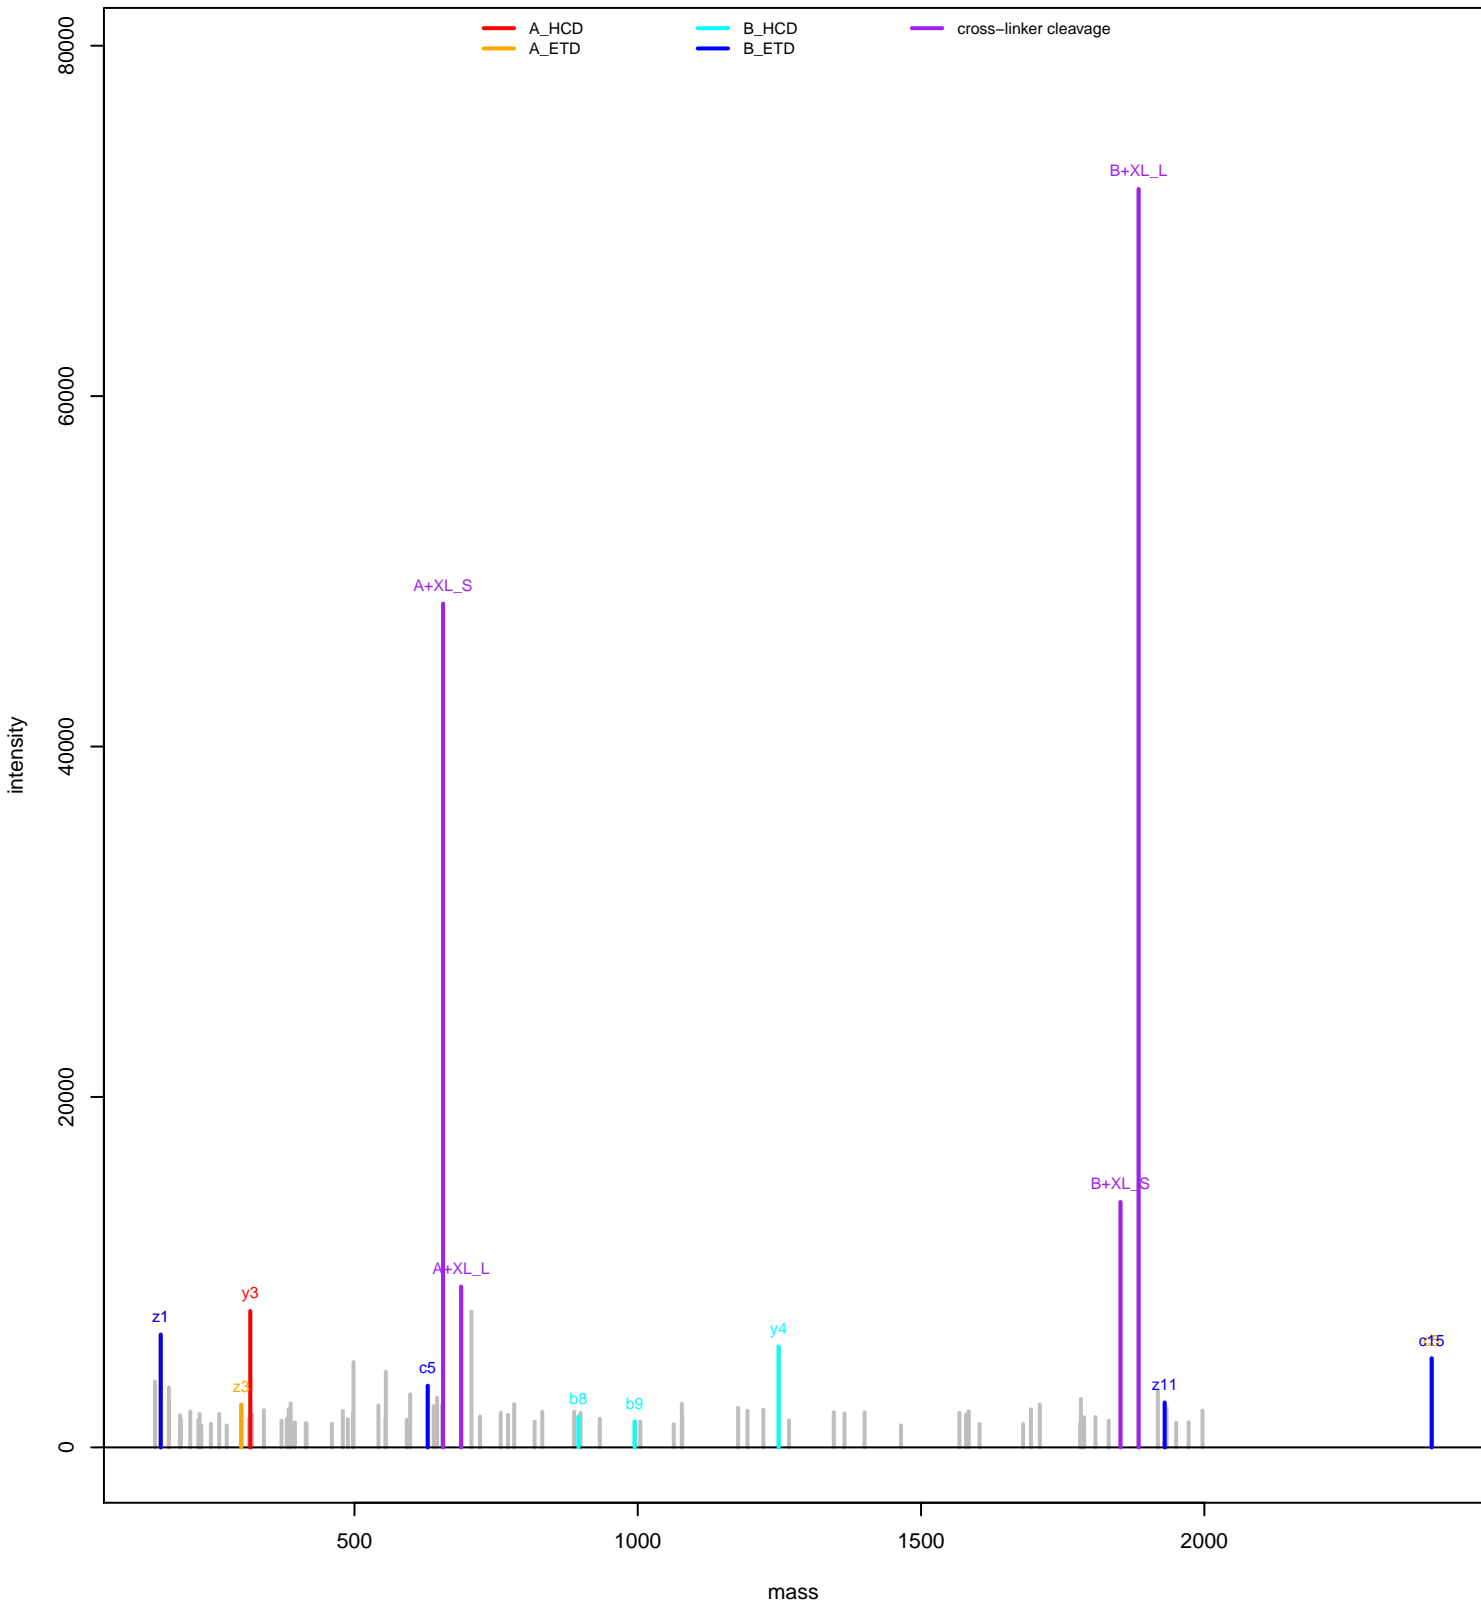

TGKAAR+XL\_S

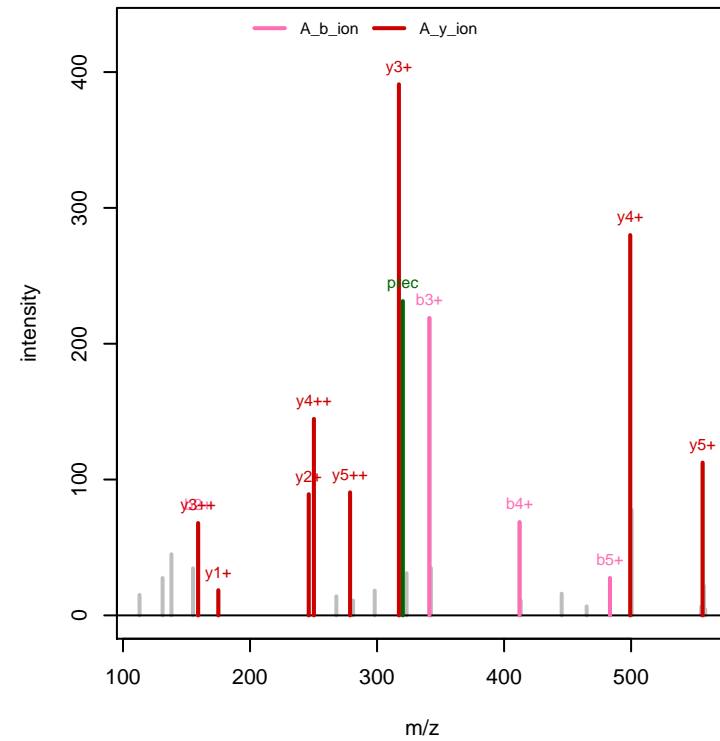

TGKAAR+XL\_L

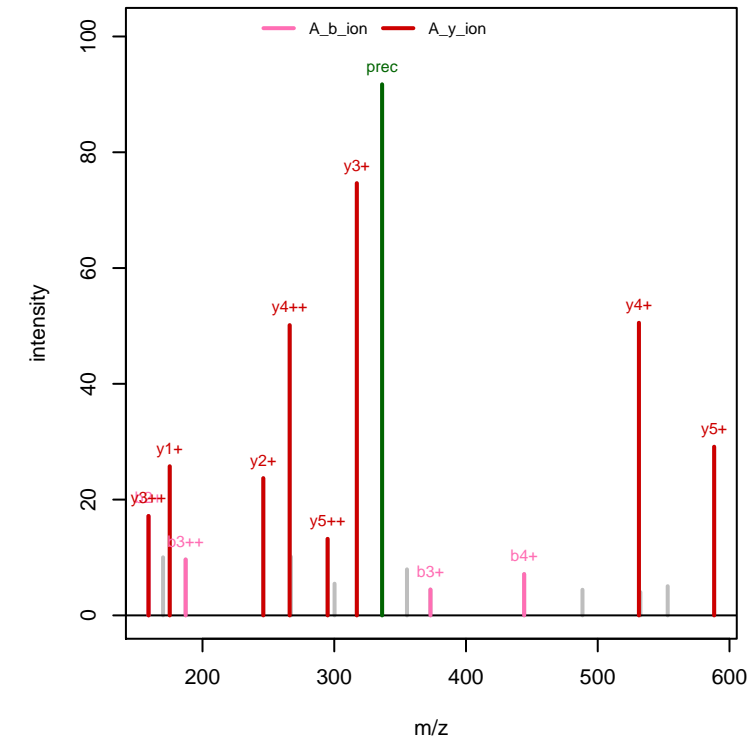

VFQTHSPVVDISIVKR+XL\_S

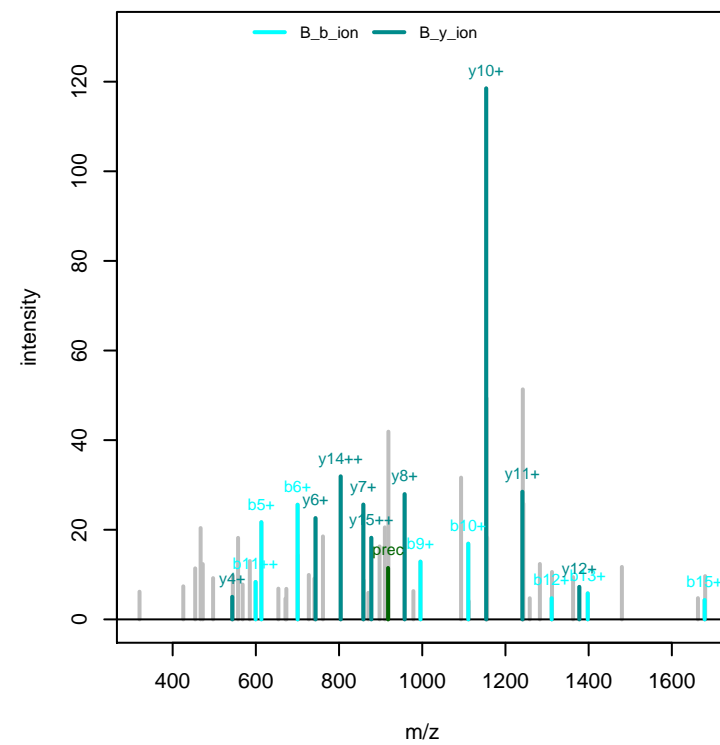

VFQTHSPVVDISIVKR+XL\_L

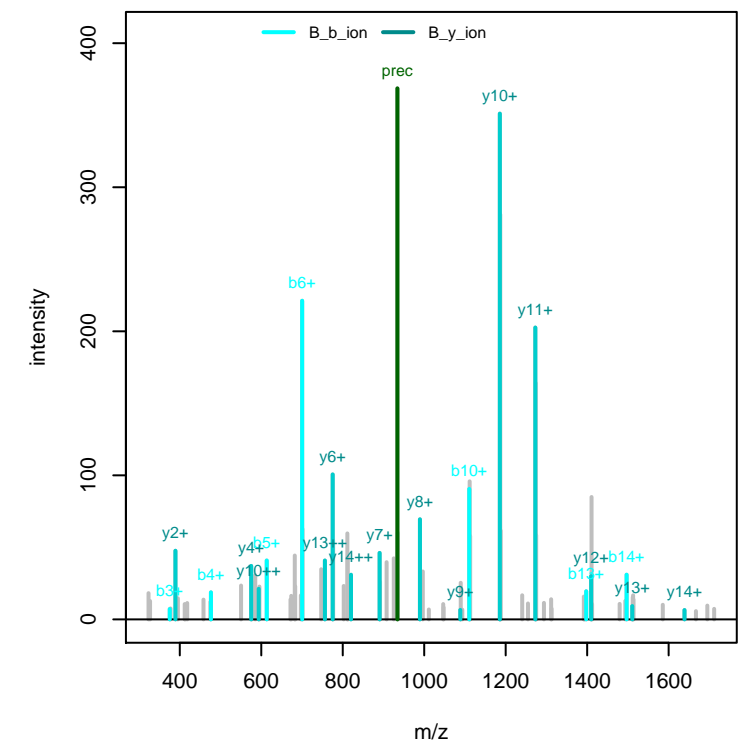

**ALEKGIK  
RKLQELGATR**

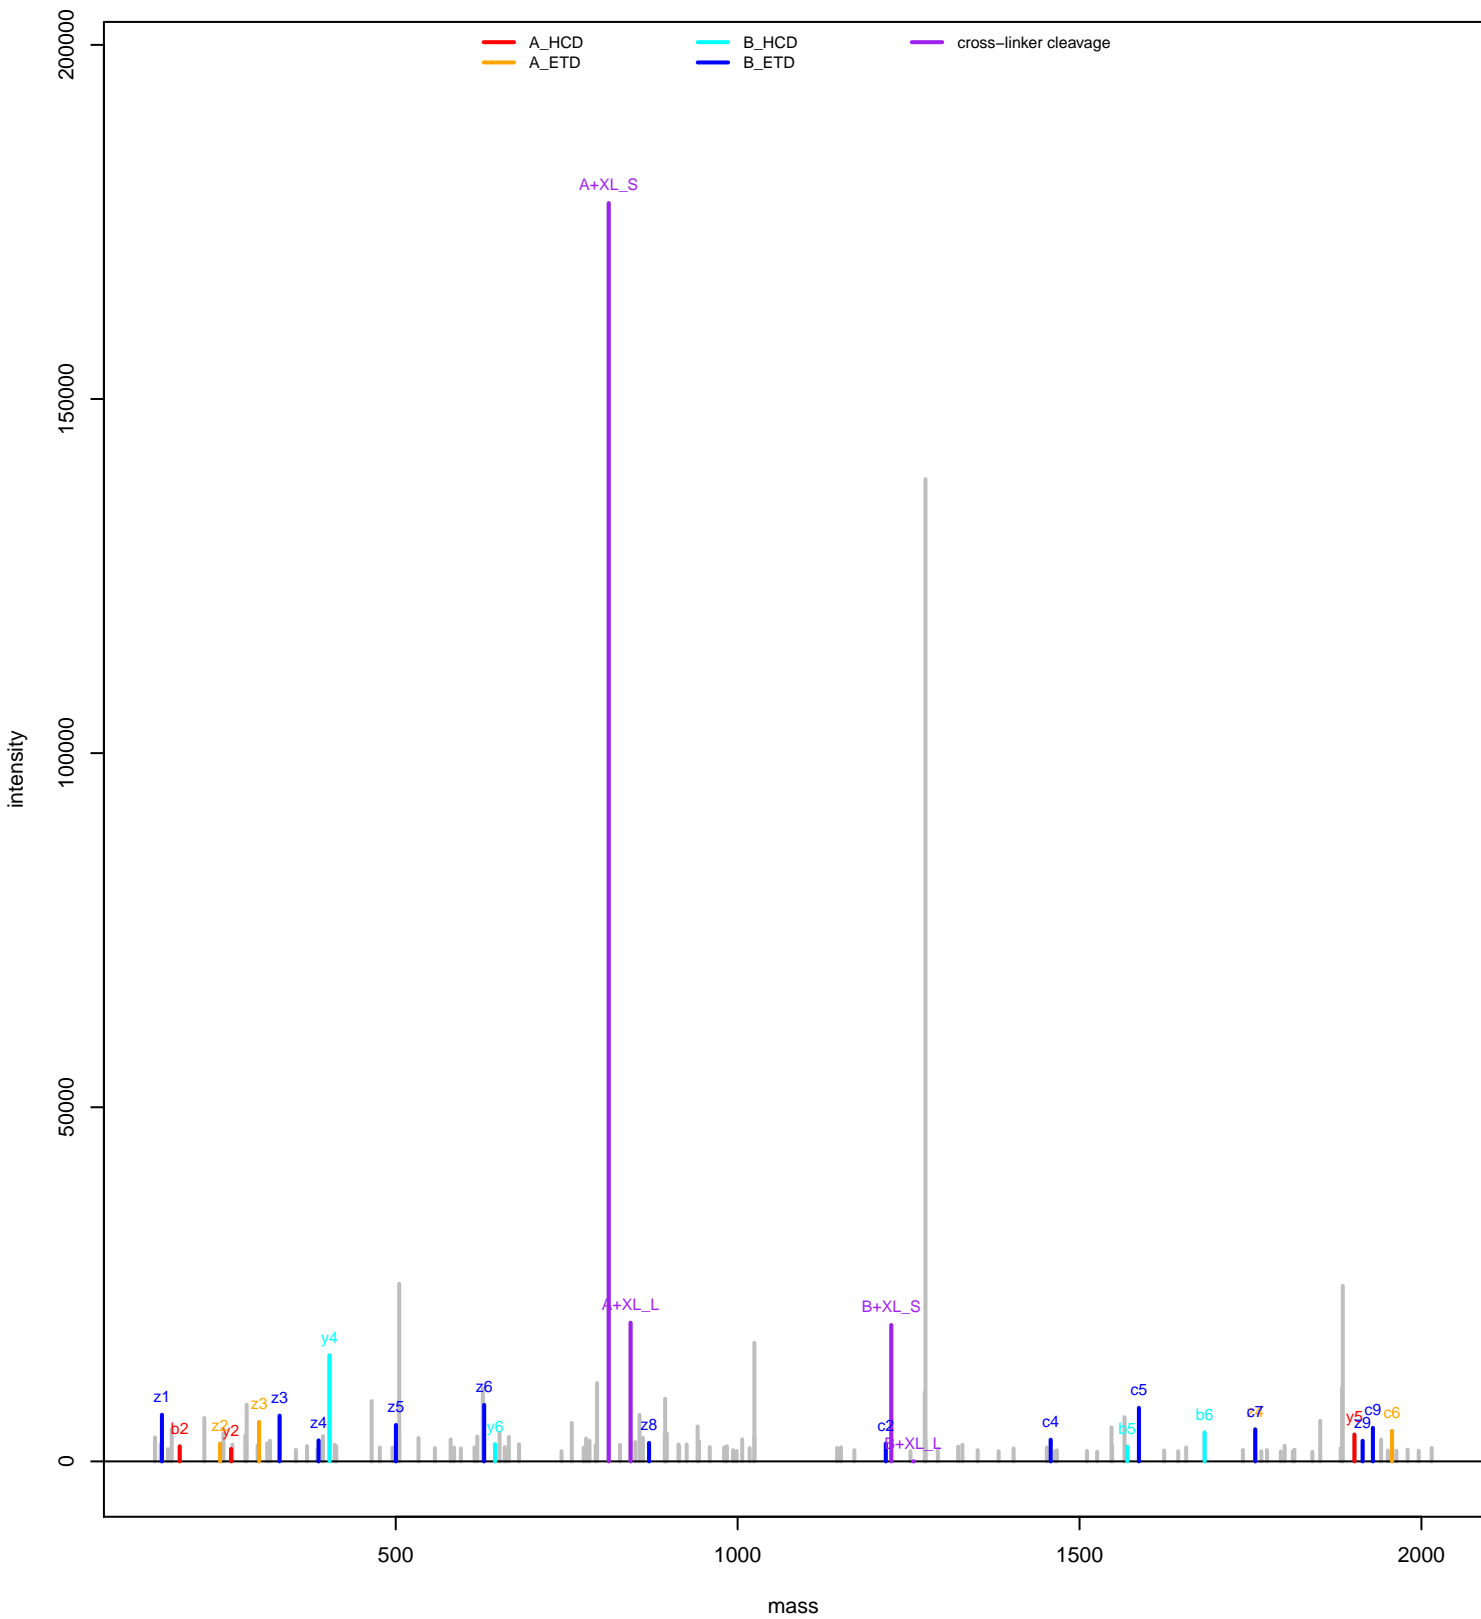

**ALEKGIK+XL\_S**

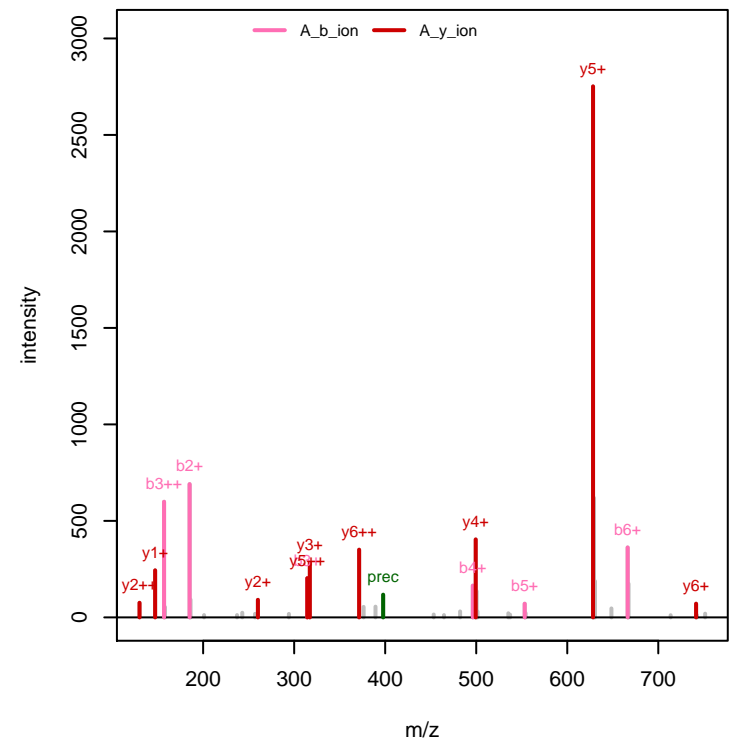

**ALEKGIK+XL\_L**

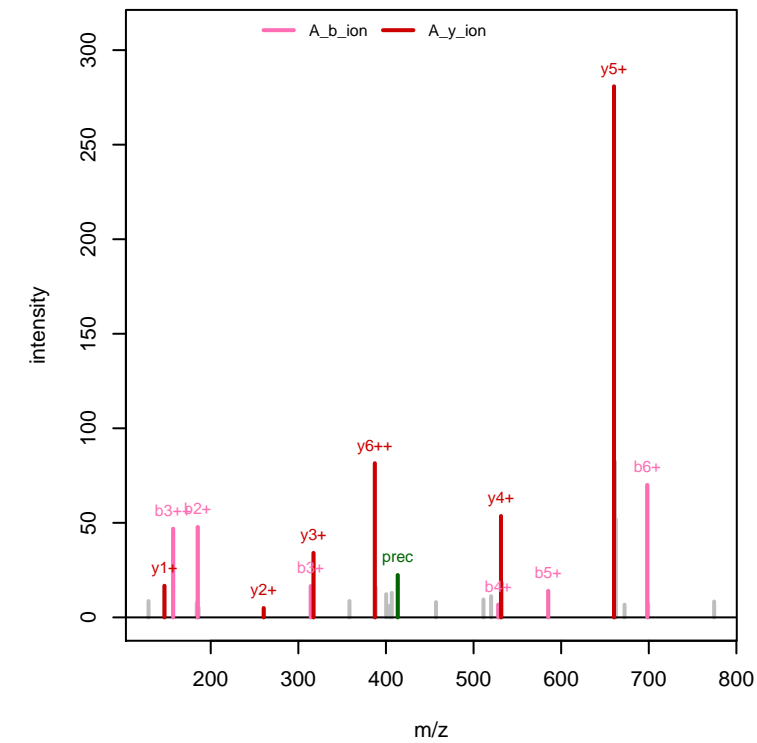

**RKLQELGATR+XL\_S**

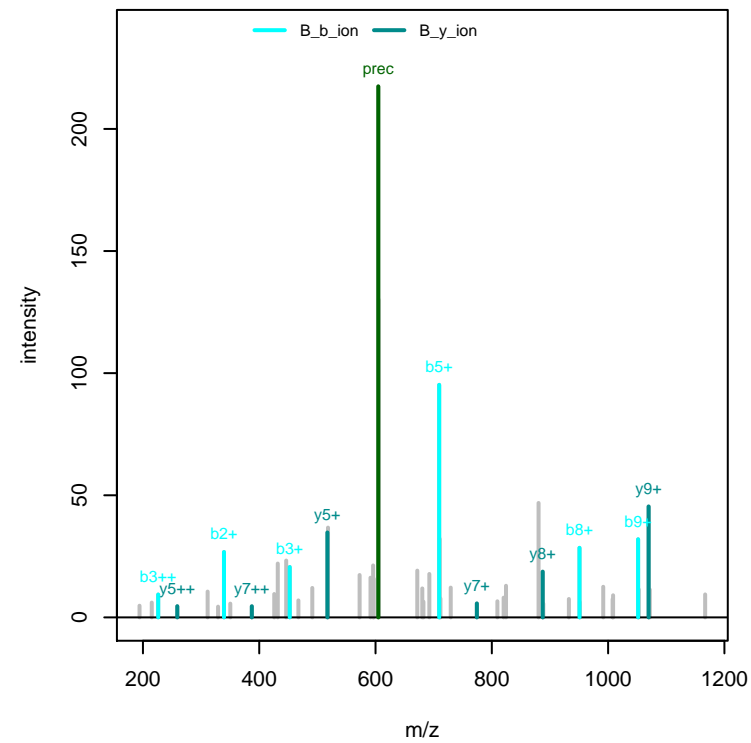

**RKLQELGATR+XL\_L**

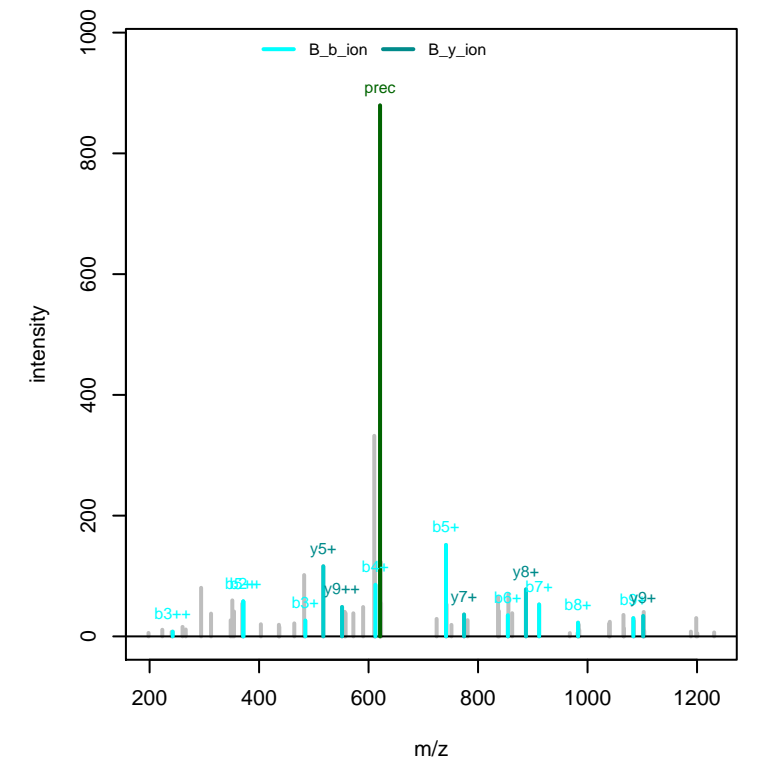

VTKPEAGHFAK  
VTQVKDLANDGYR

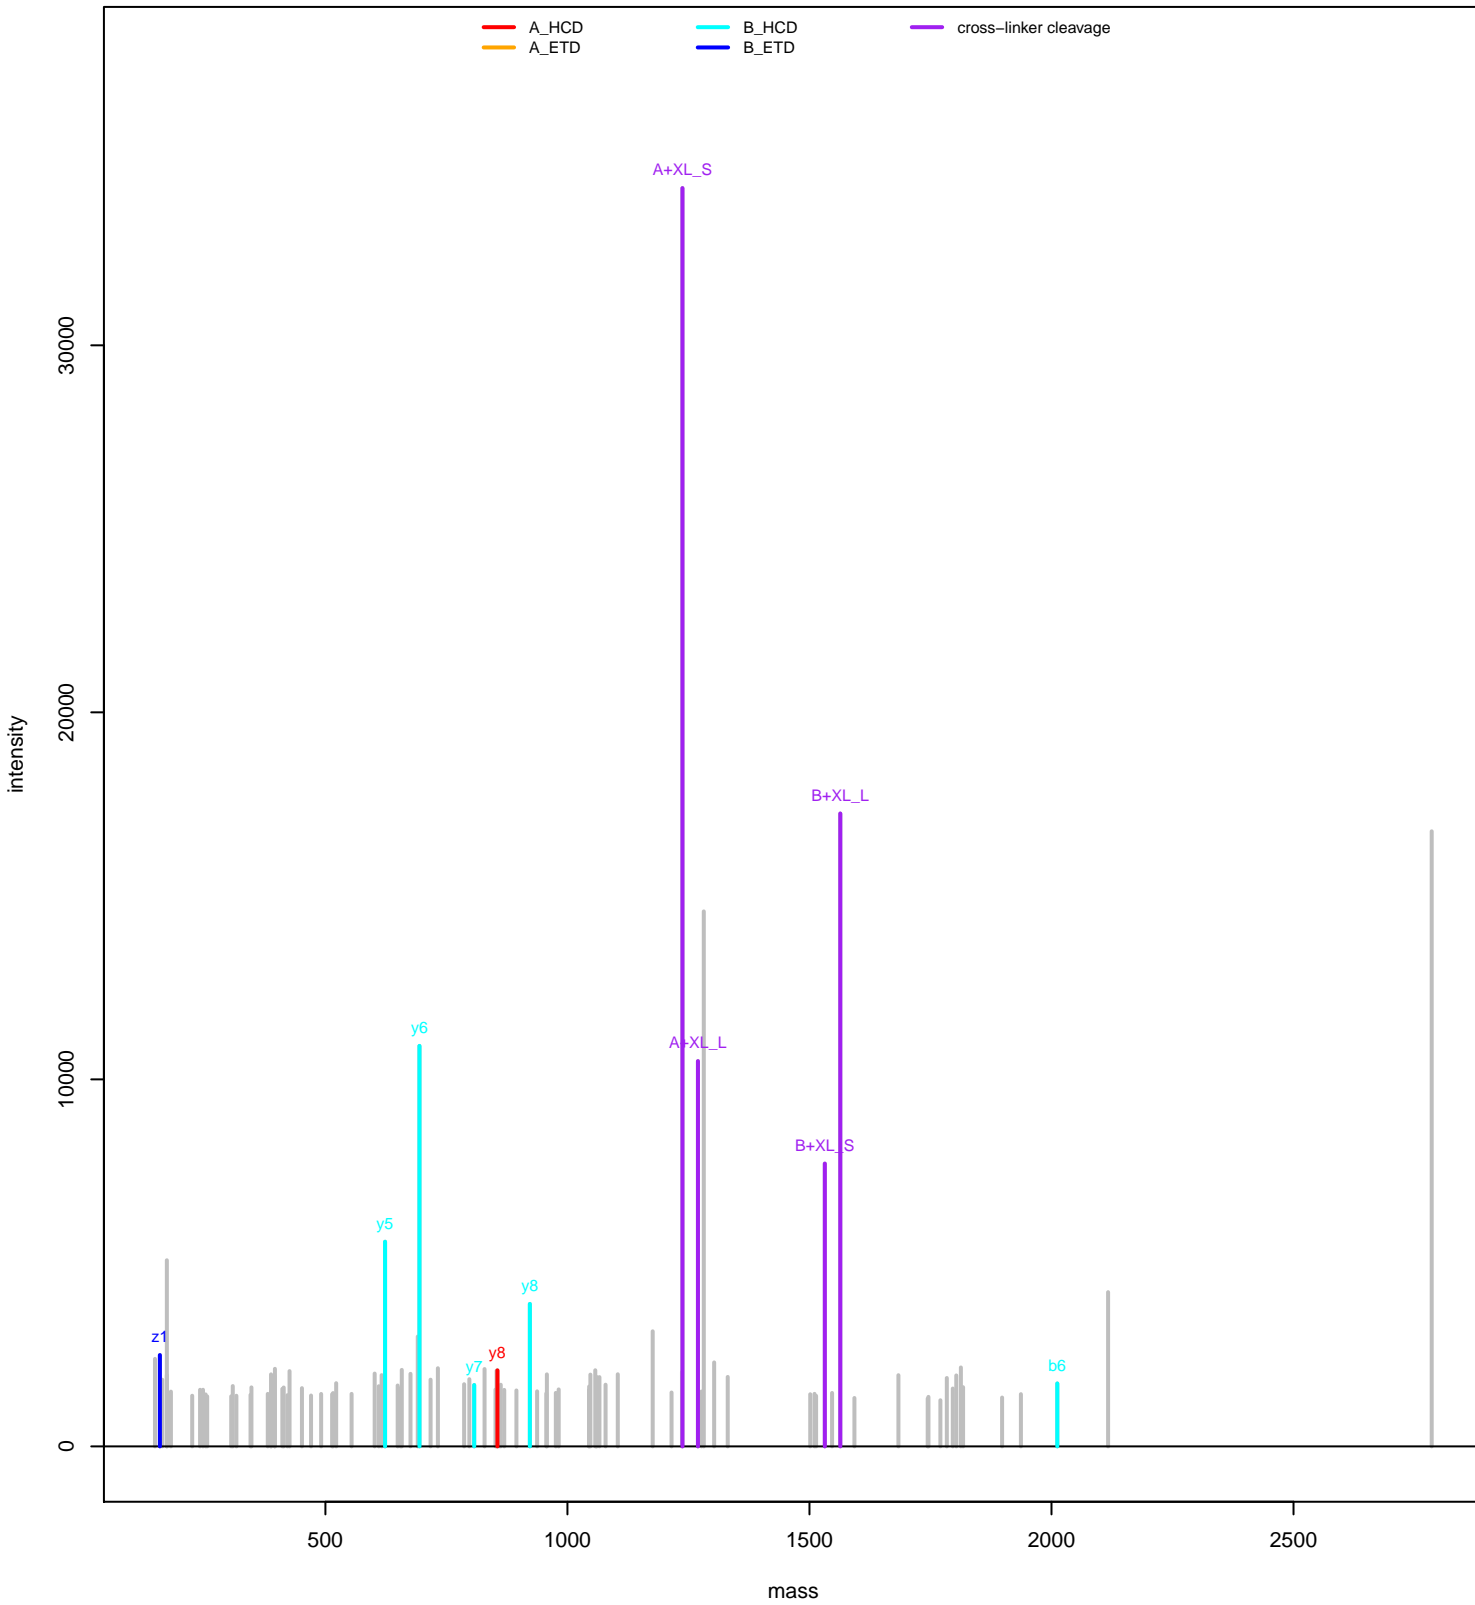

VTKPEAGHFAK+XL\_S

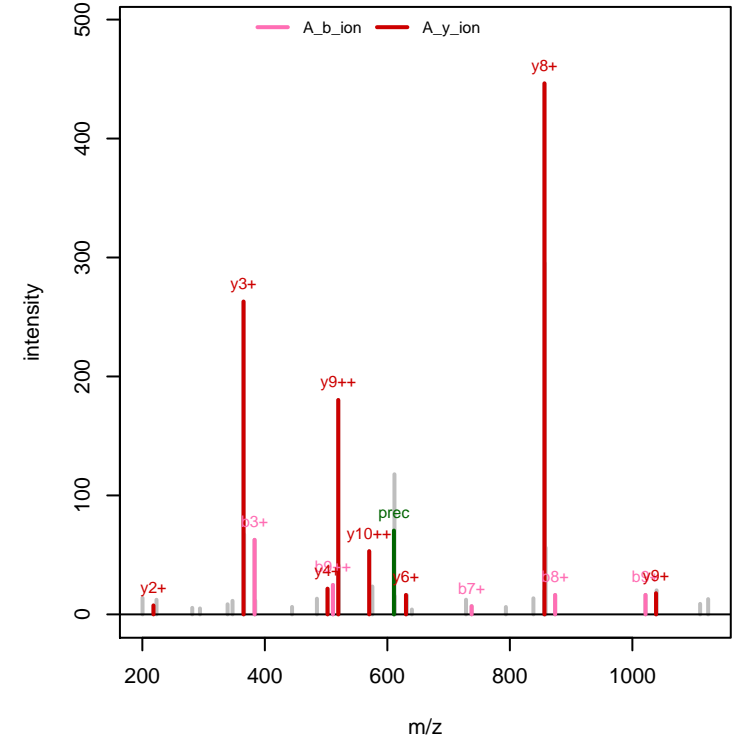

VTKPEAGHFAK+XL\_L

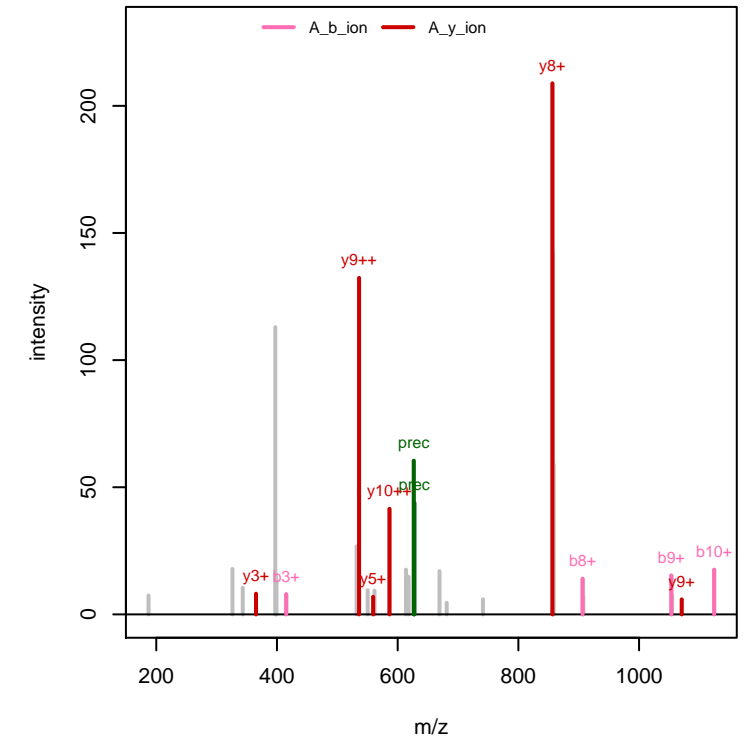

VTQVKDLANDGYR+XL\_S

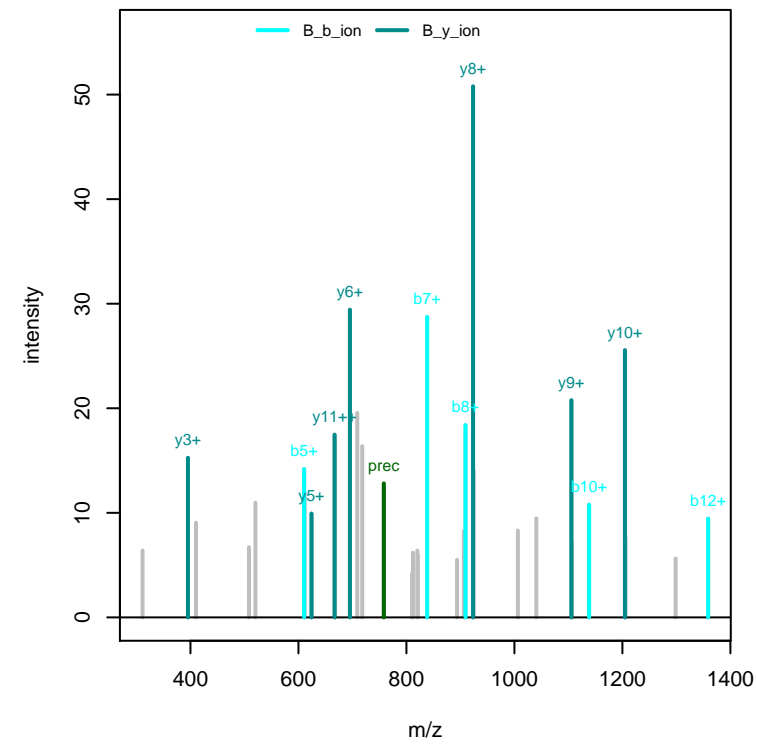

VTQVKDLANDGYR+XL\_L

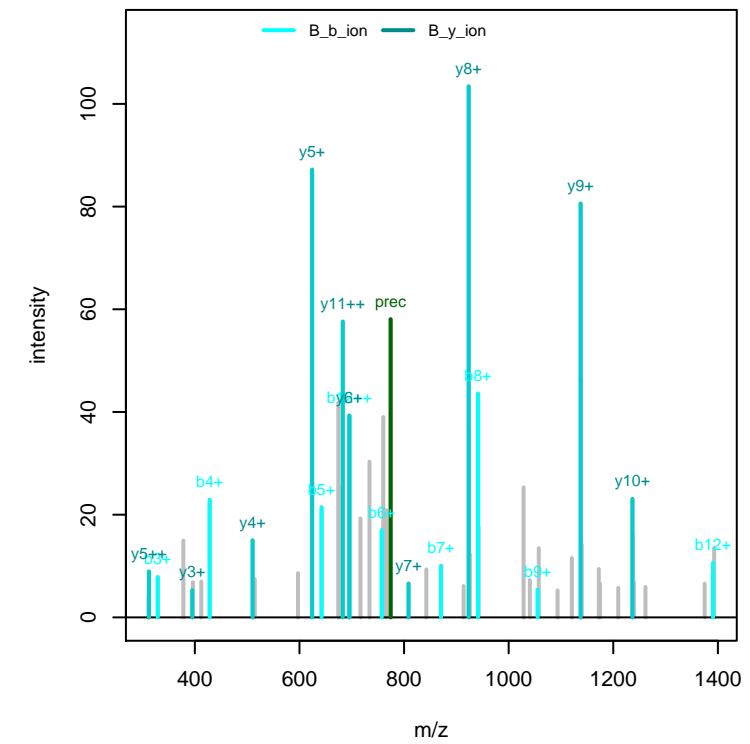

**KPNACK**  
LKEIIHQMGGLR

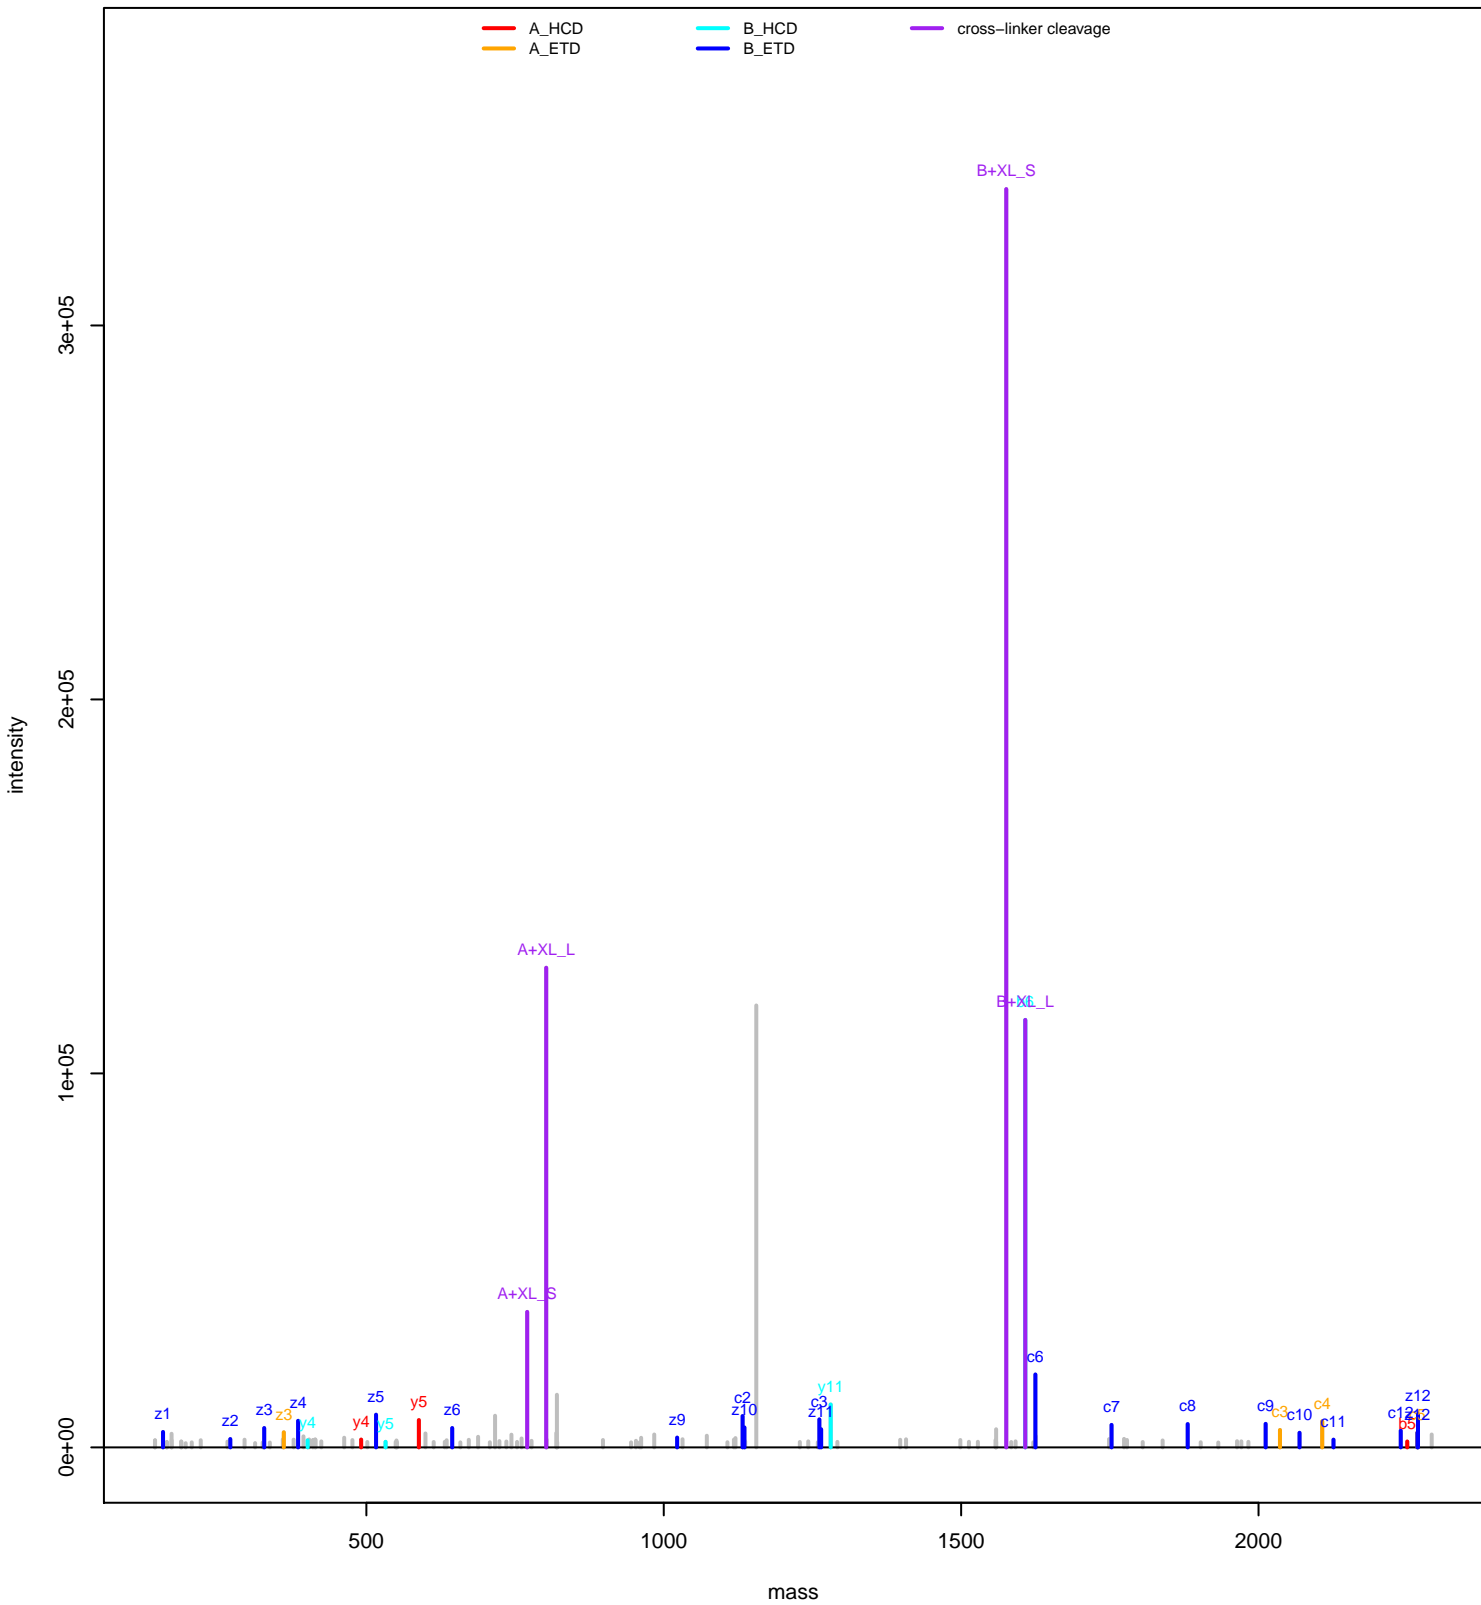

**KPNACK+XL\_S**

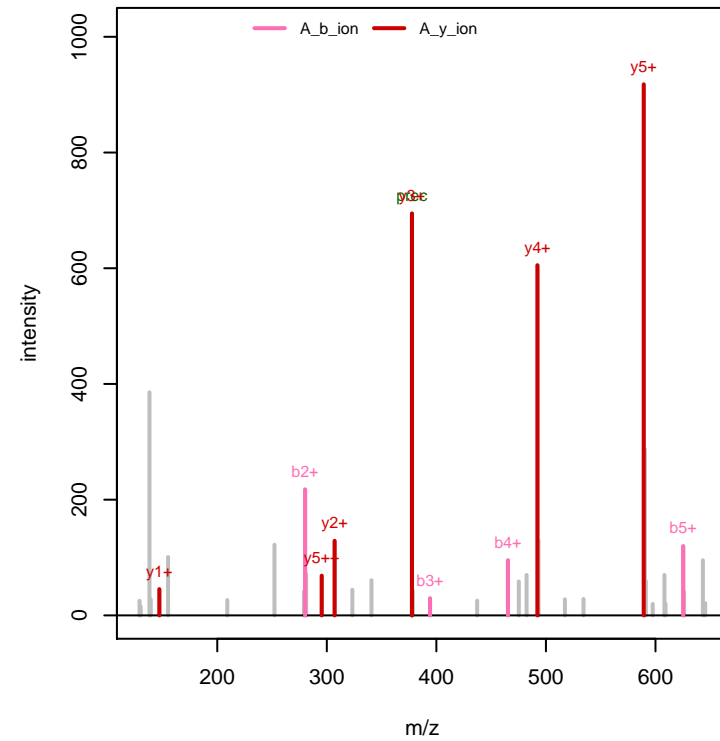

**KPNACK+XL\_L**

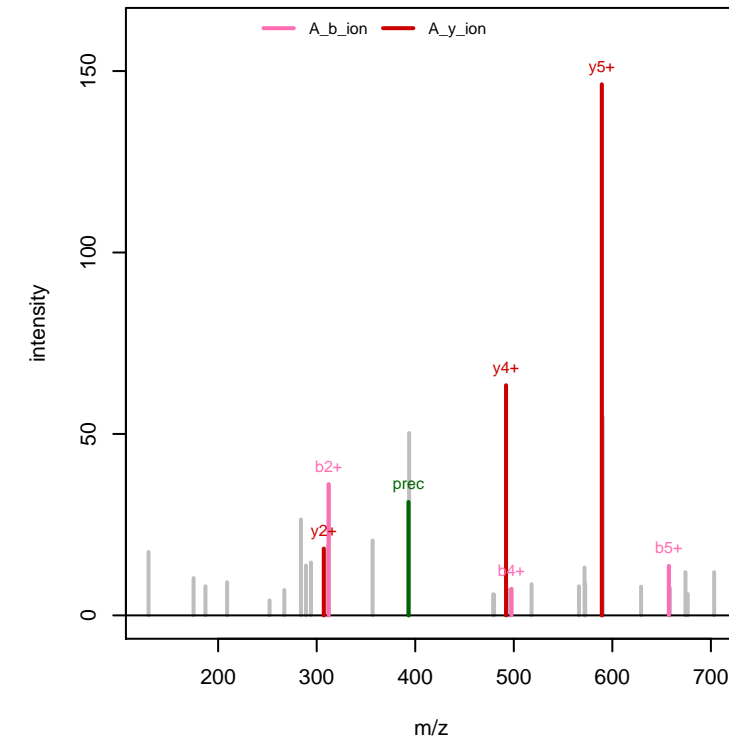

**LKEIIHQMGGLR+XL\_S**

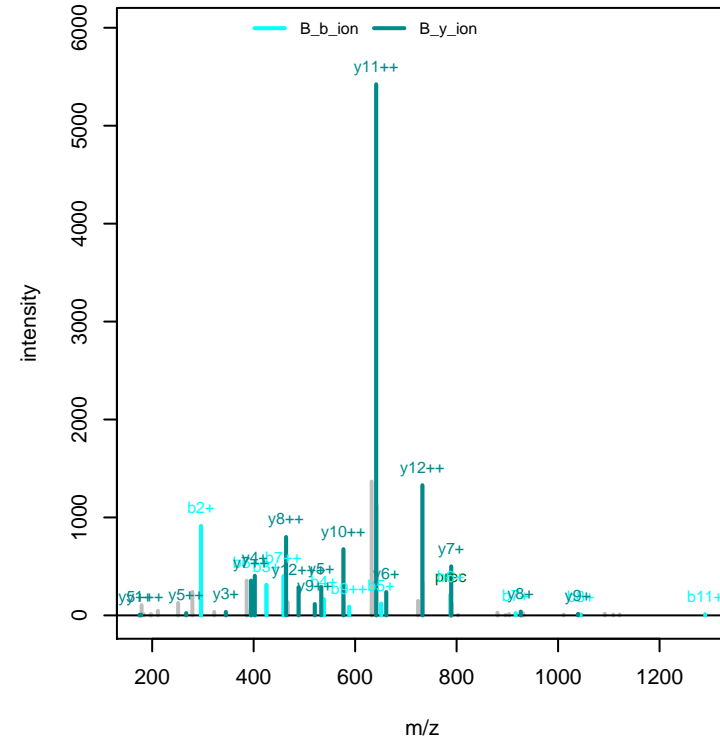

**LKEIIHQMGGLR+XL\_L**

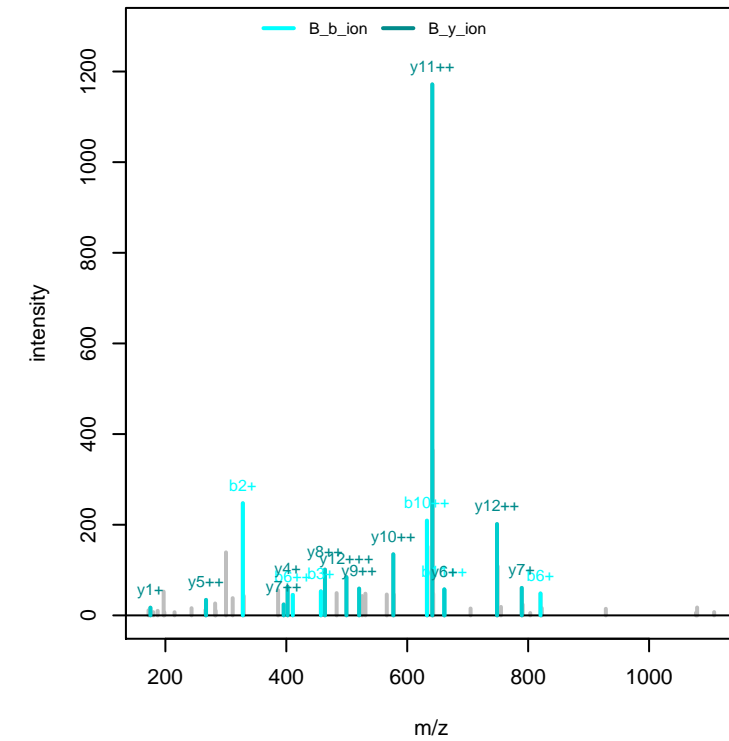

AKGGDK  
DAKAELAVLEK

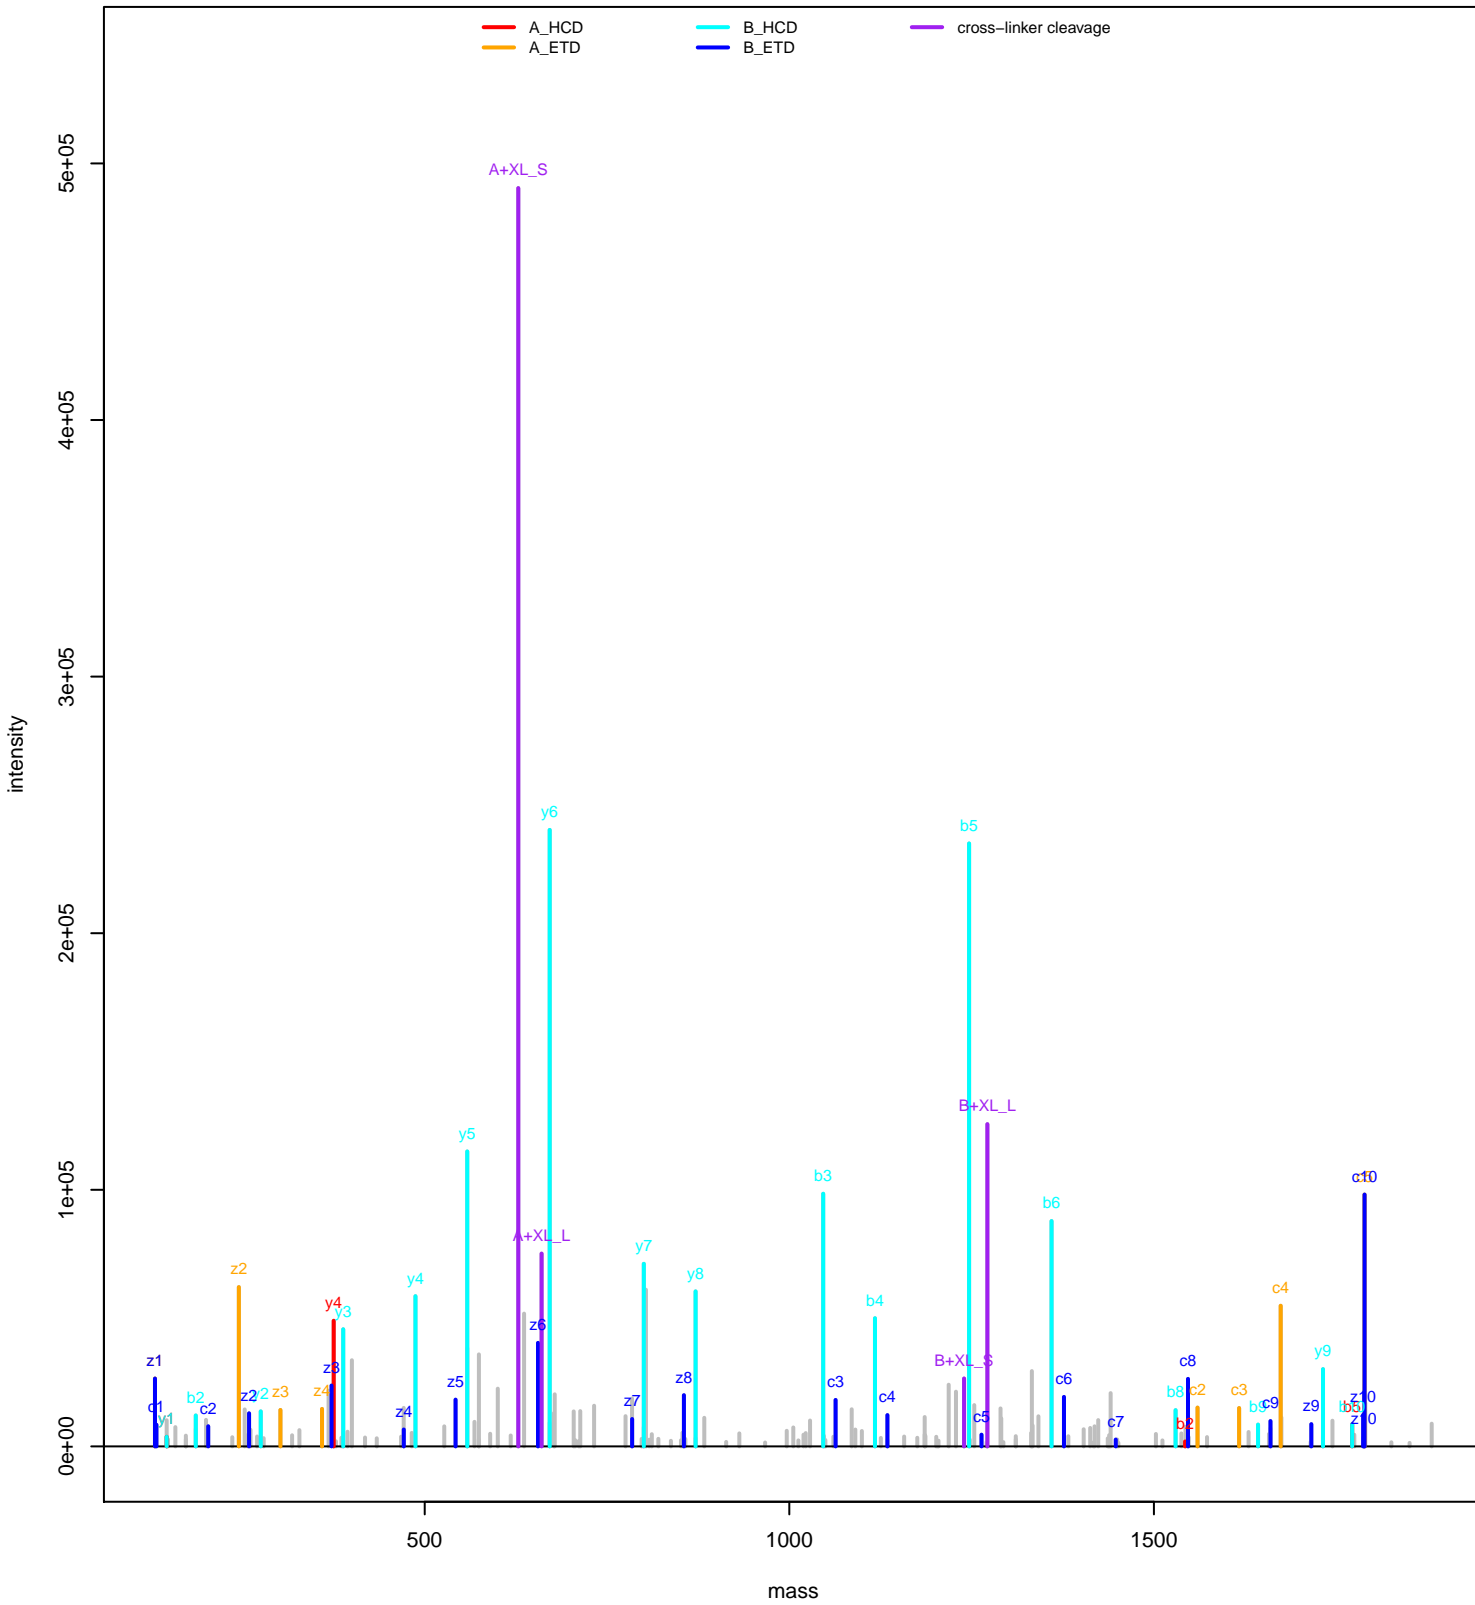

AKGGDK+XL\_S

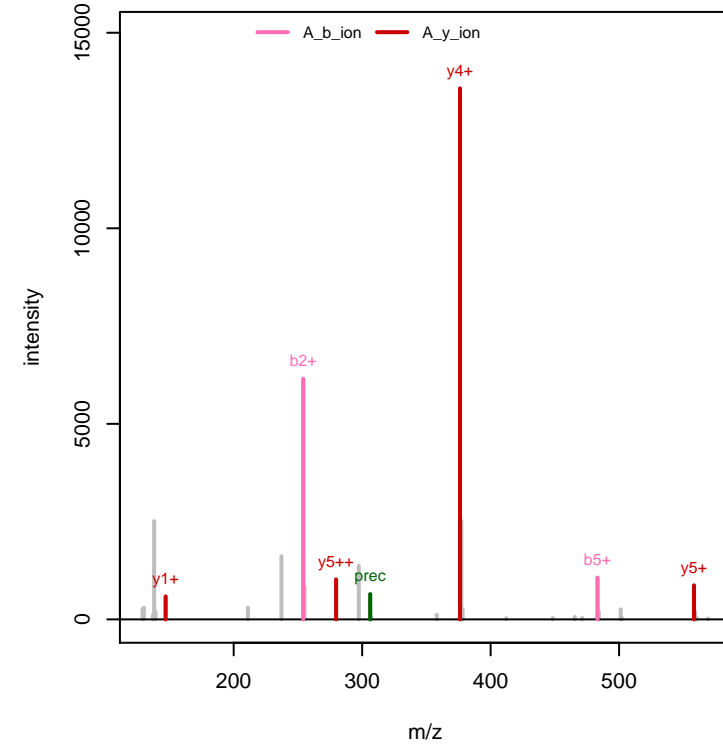

AKGGDK+XL\_L

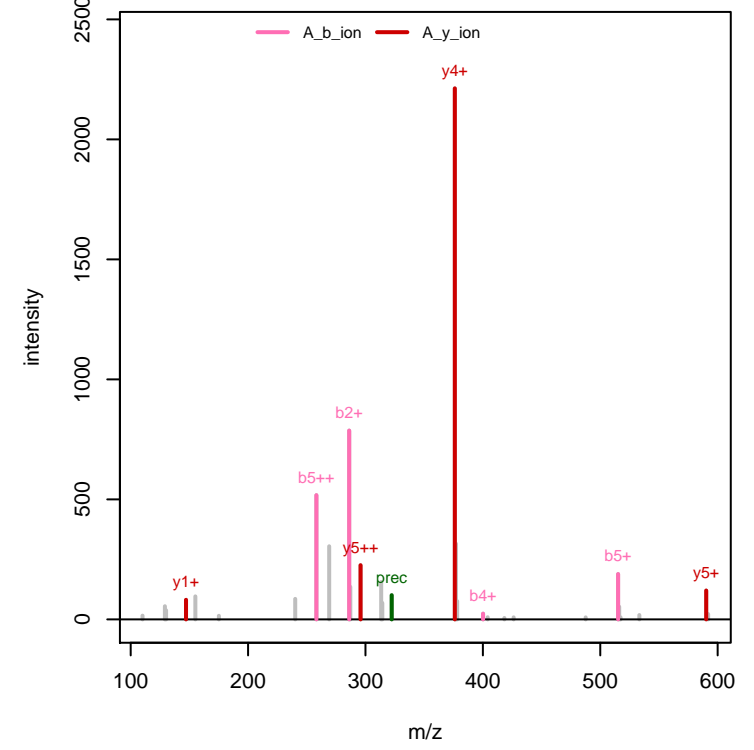

DAKAELAVLEK+XL\_S

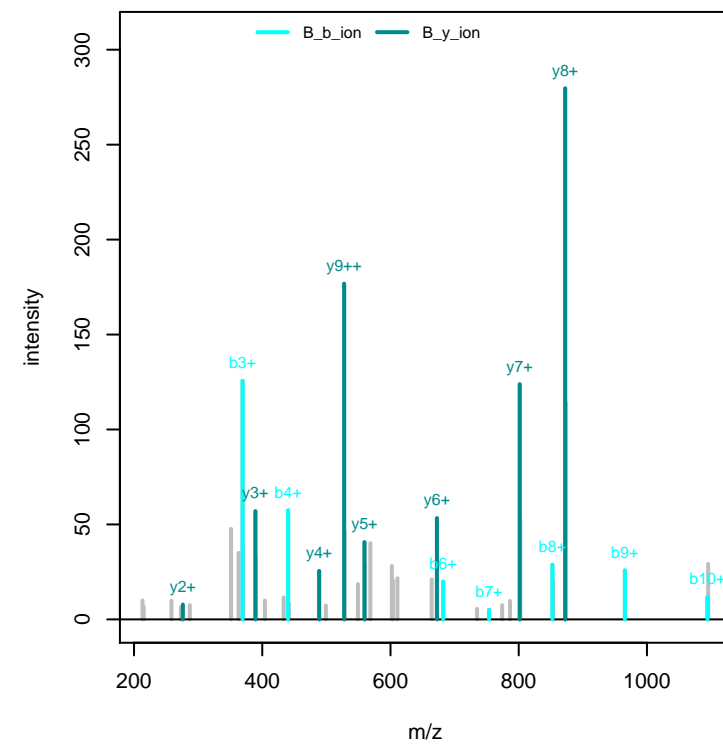

DAKAELAVLEK+XL\_L

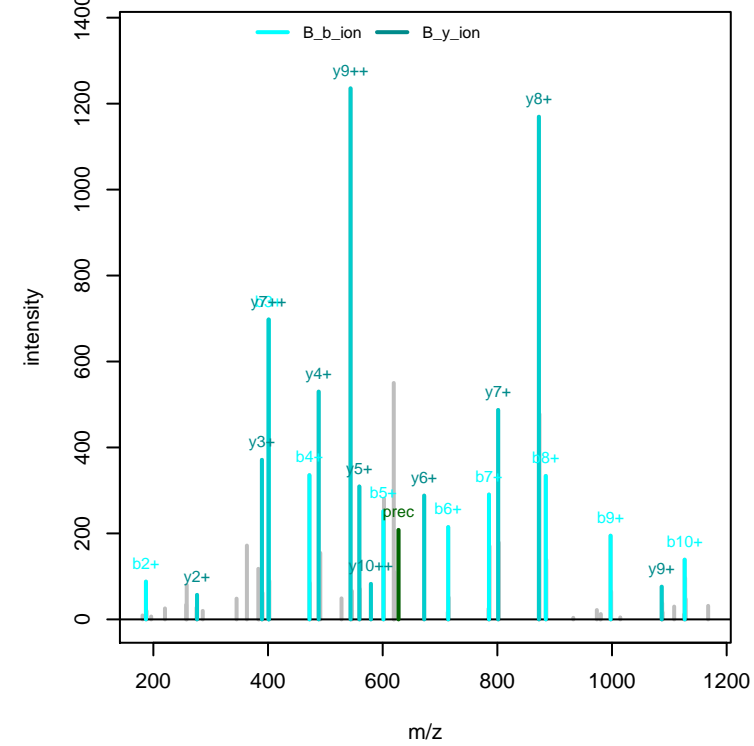

**DPKIAK  
TADQYKITNIAQLK**

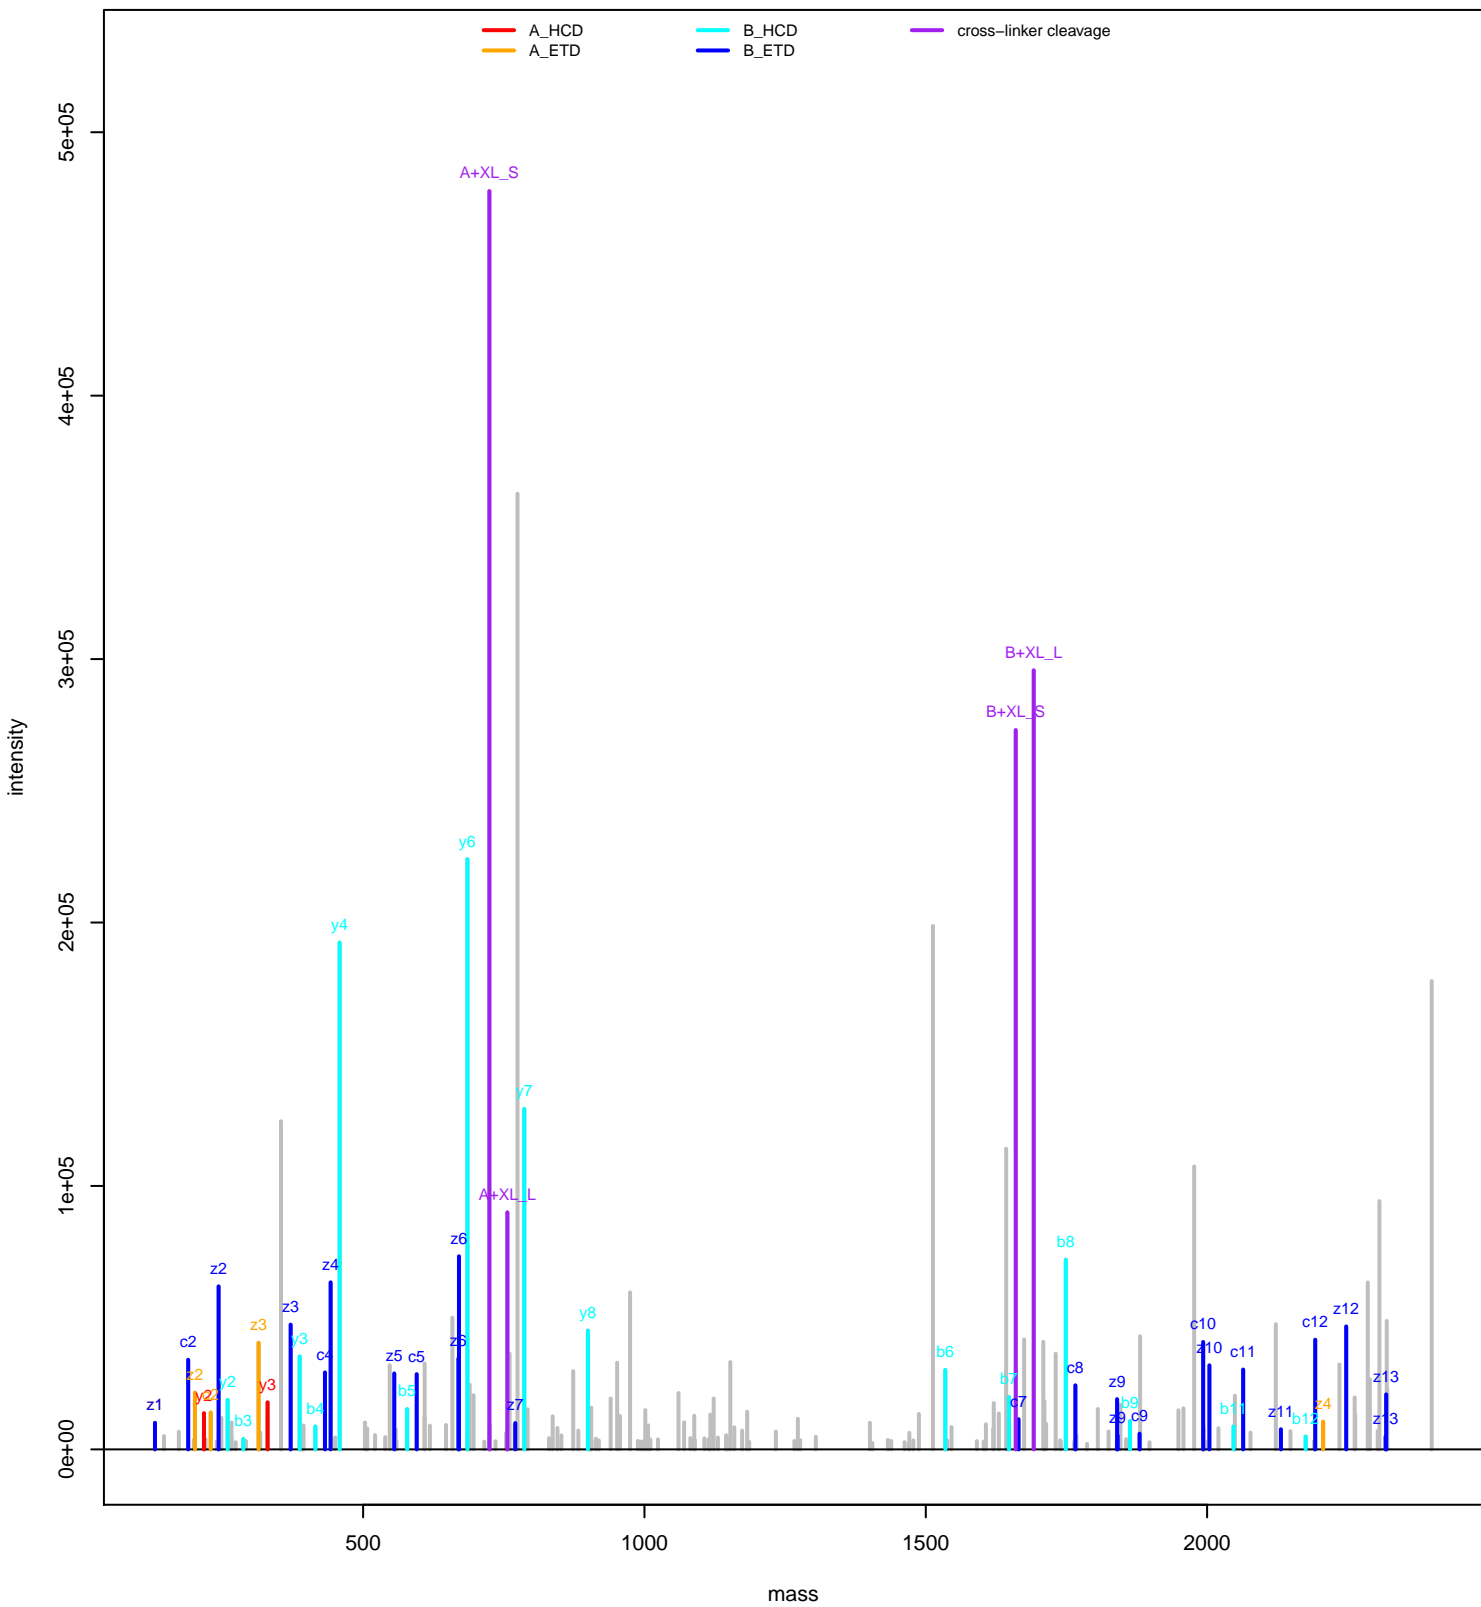

**DPKIAK+XL\_S**

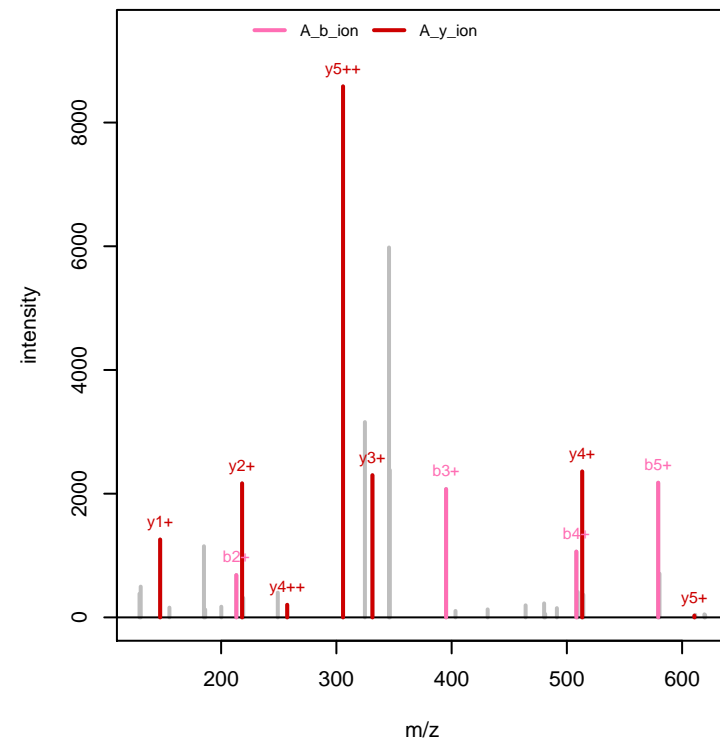

**DPKIAK+XL\_L**

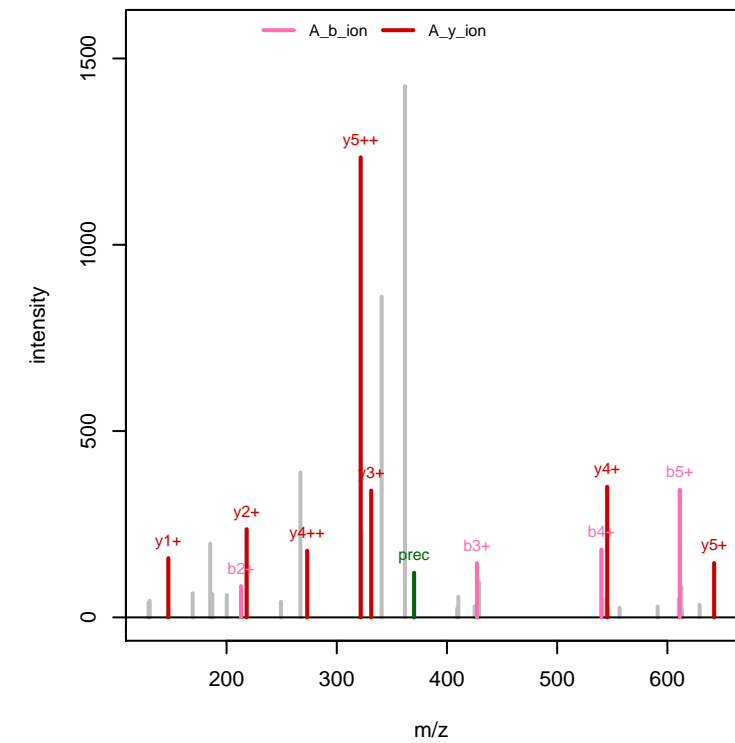

**TADQYKITNIAQLK+XL\_S**

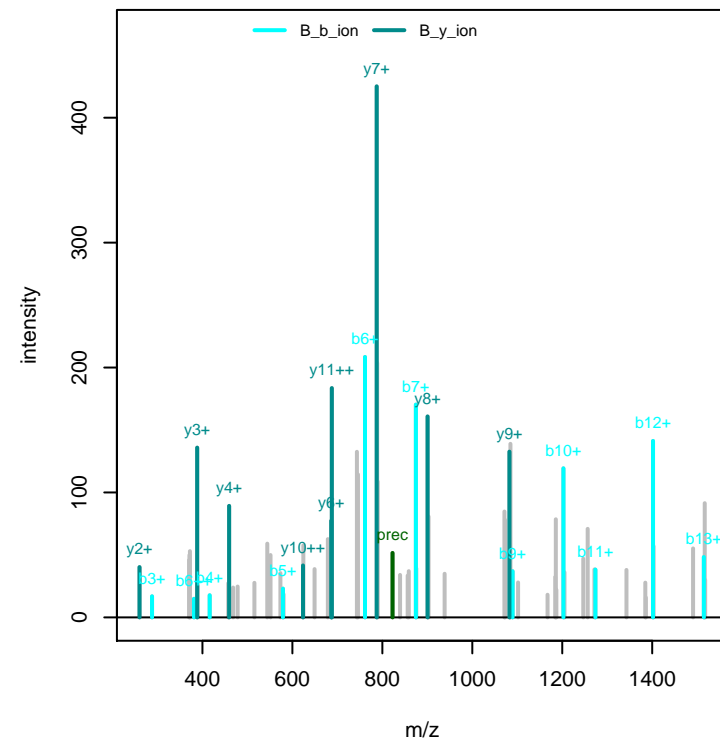

**TADQYKITNIAQLK+XL\_L**

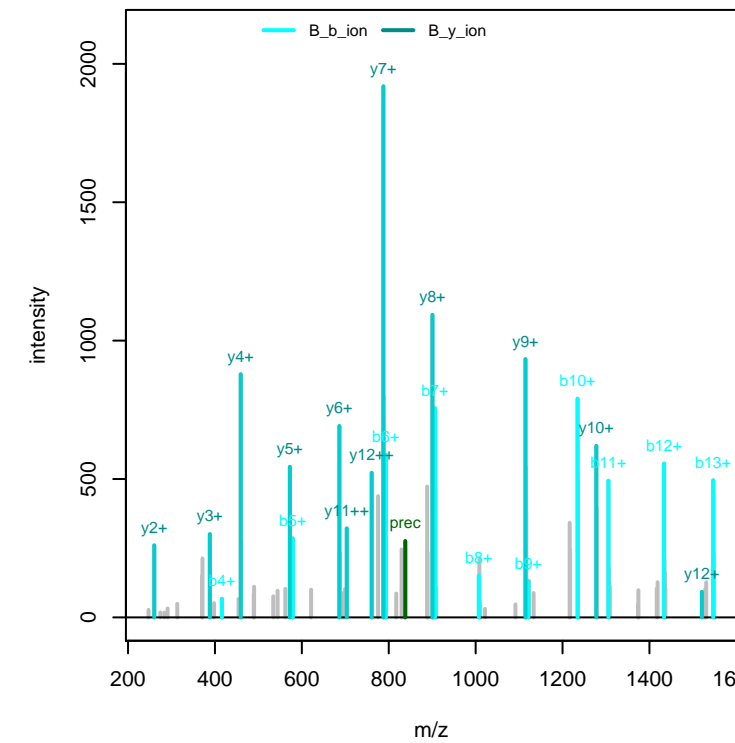

**VTLGPKGR**  
**AVAAGMNPModLKR**

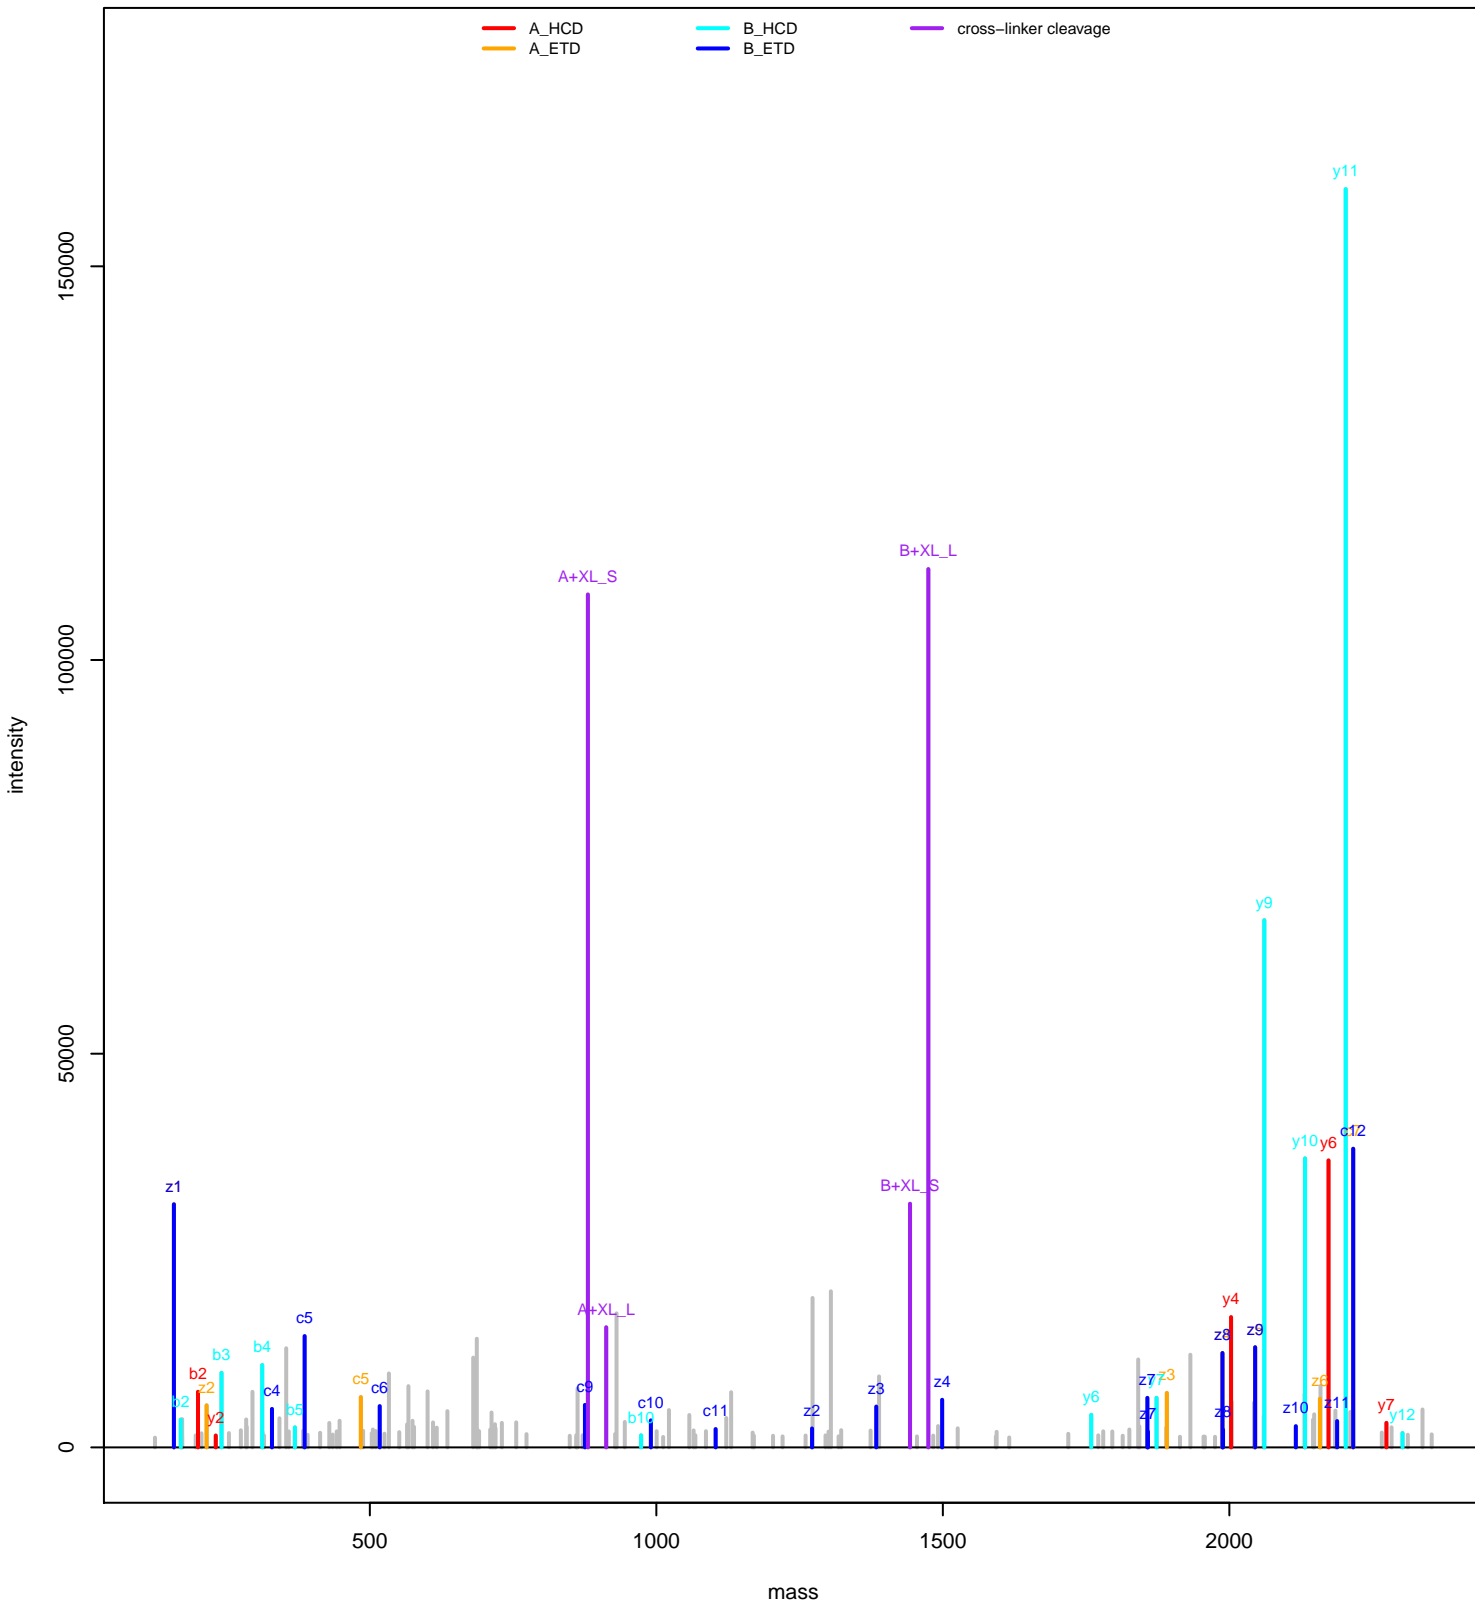

**VTLGPKGR+XL\_S**

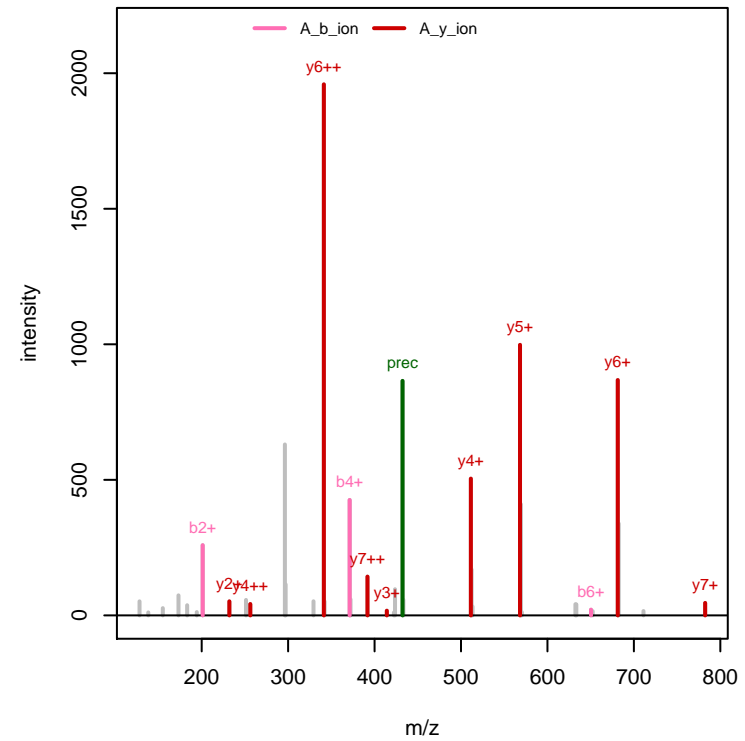

**VTLGPKGR+XL\_L**

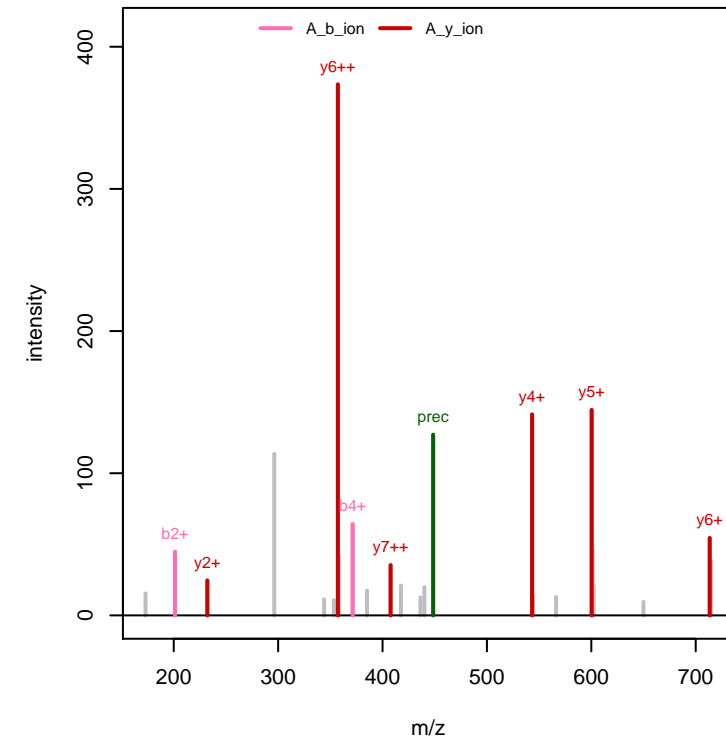

**AVAAGMNPModLKR+XL\_S**

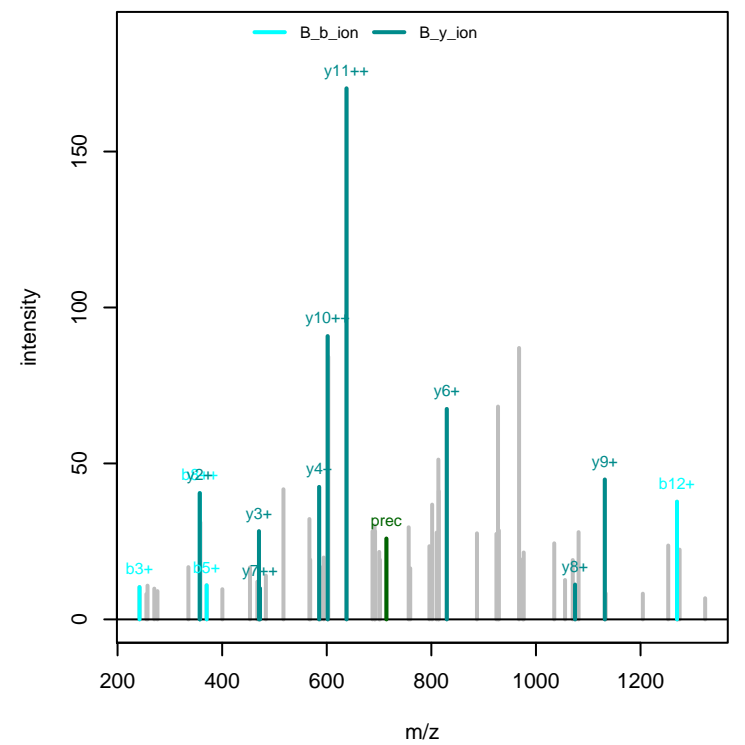

**AVAAGMNPModLKR+XL\_L**

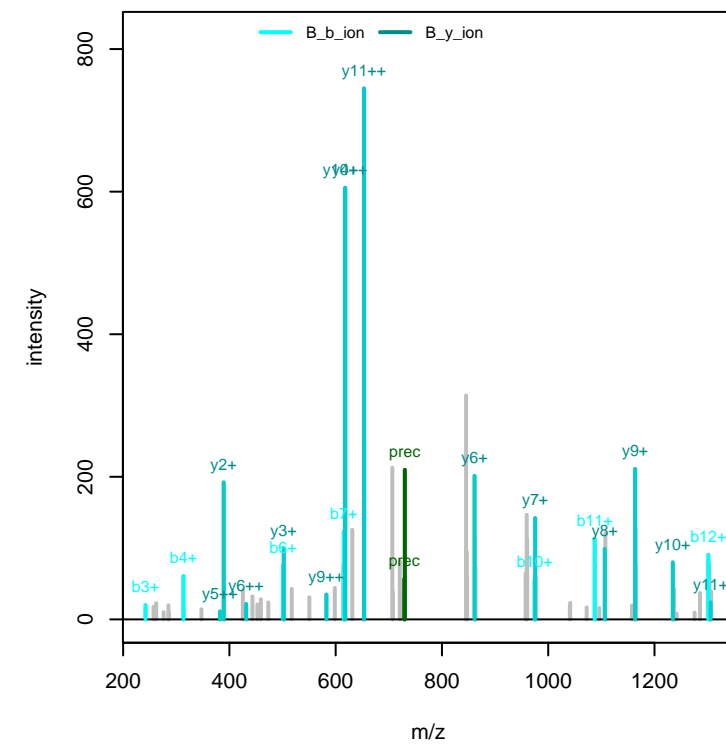

**KTGNTPDGR**  
**TMLYAINGGVDEKLK**

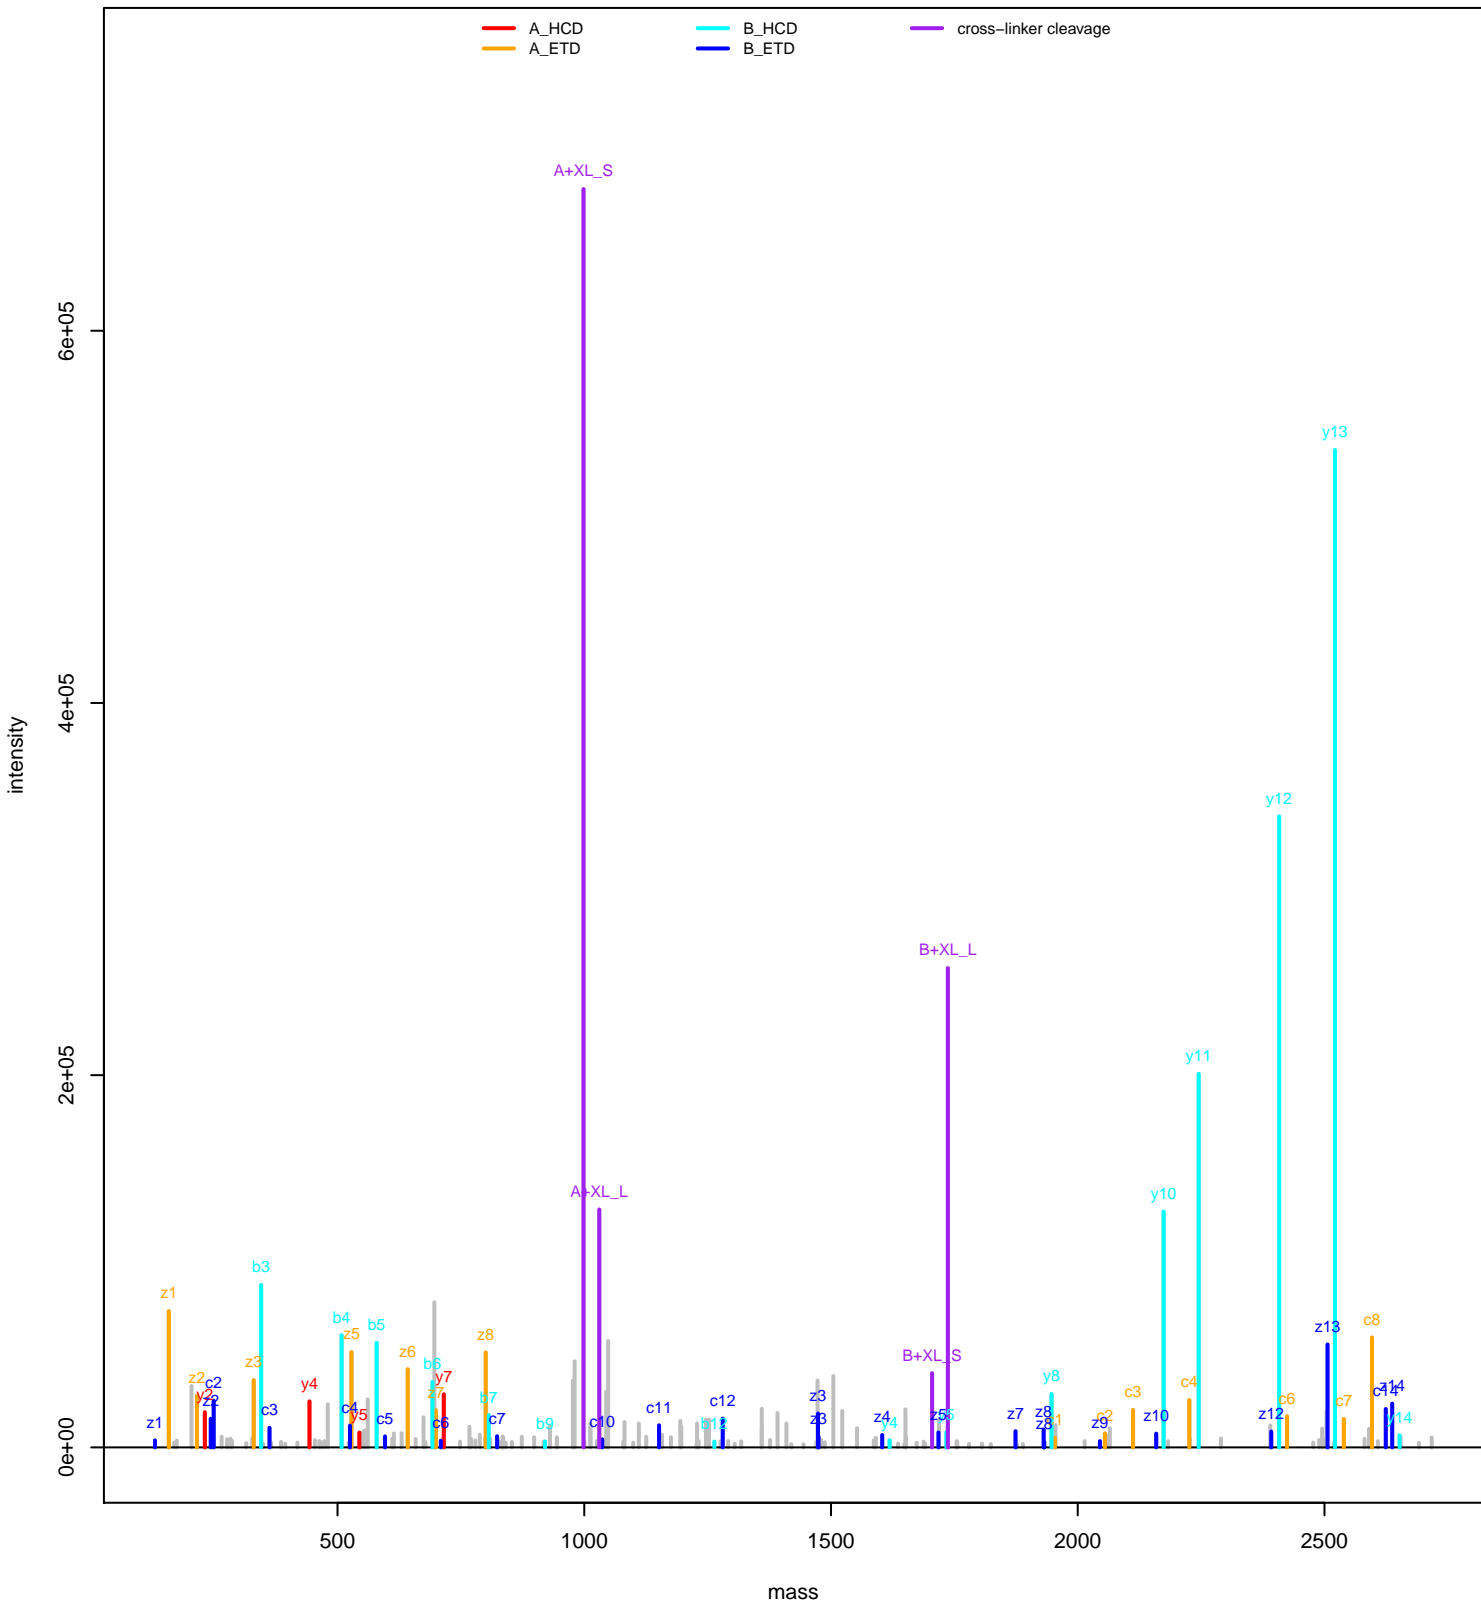

**KTGNTPDGR+XL\_S**

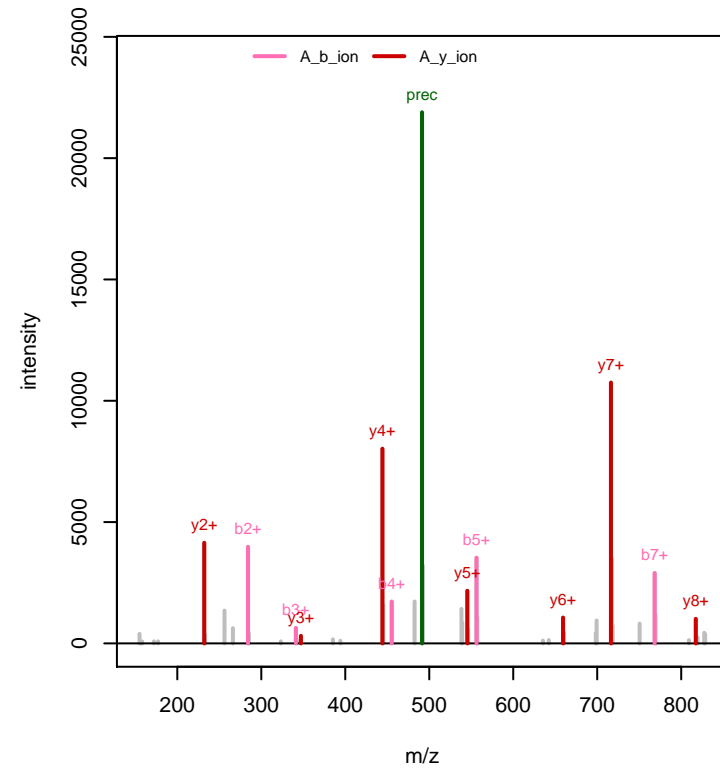

**KTGNTPDGR+XL\_L**

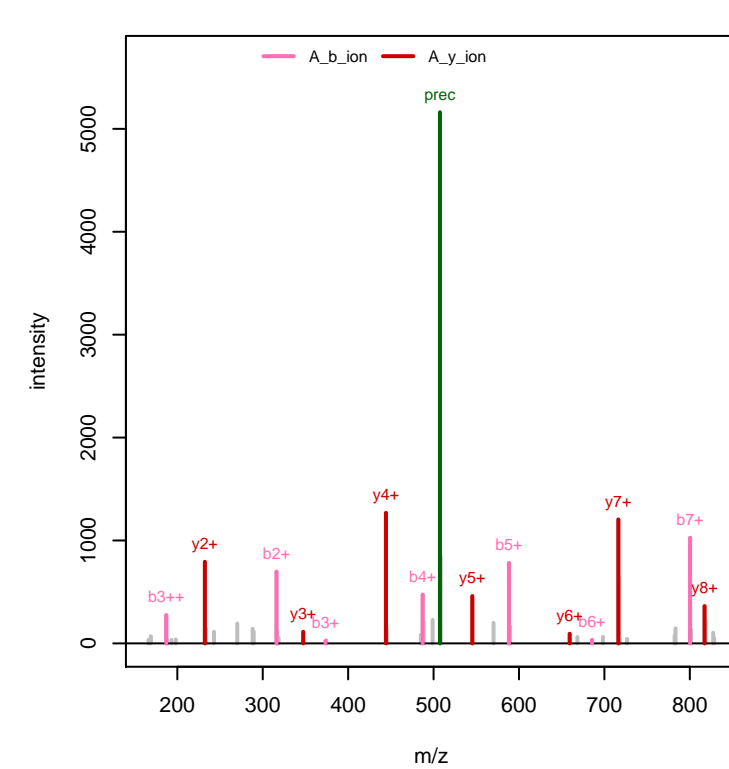

**TMLYAINGGVDEKLK+XL\_S**

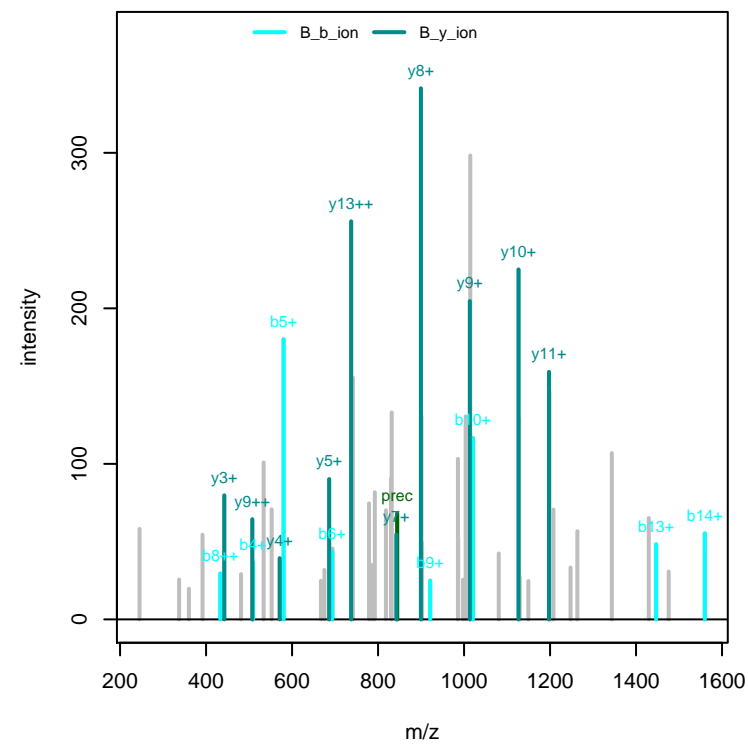

**TMLYAINGGVDEKLK+XL\_L**

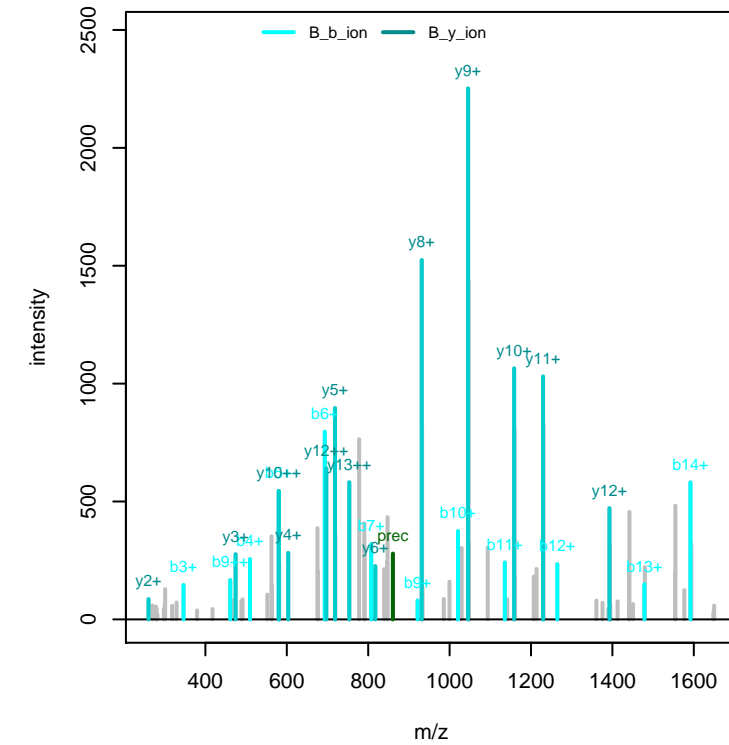



**LGFGVKK  
TKQQYVSSEK**

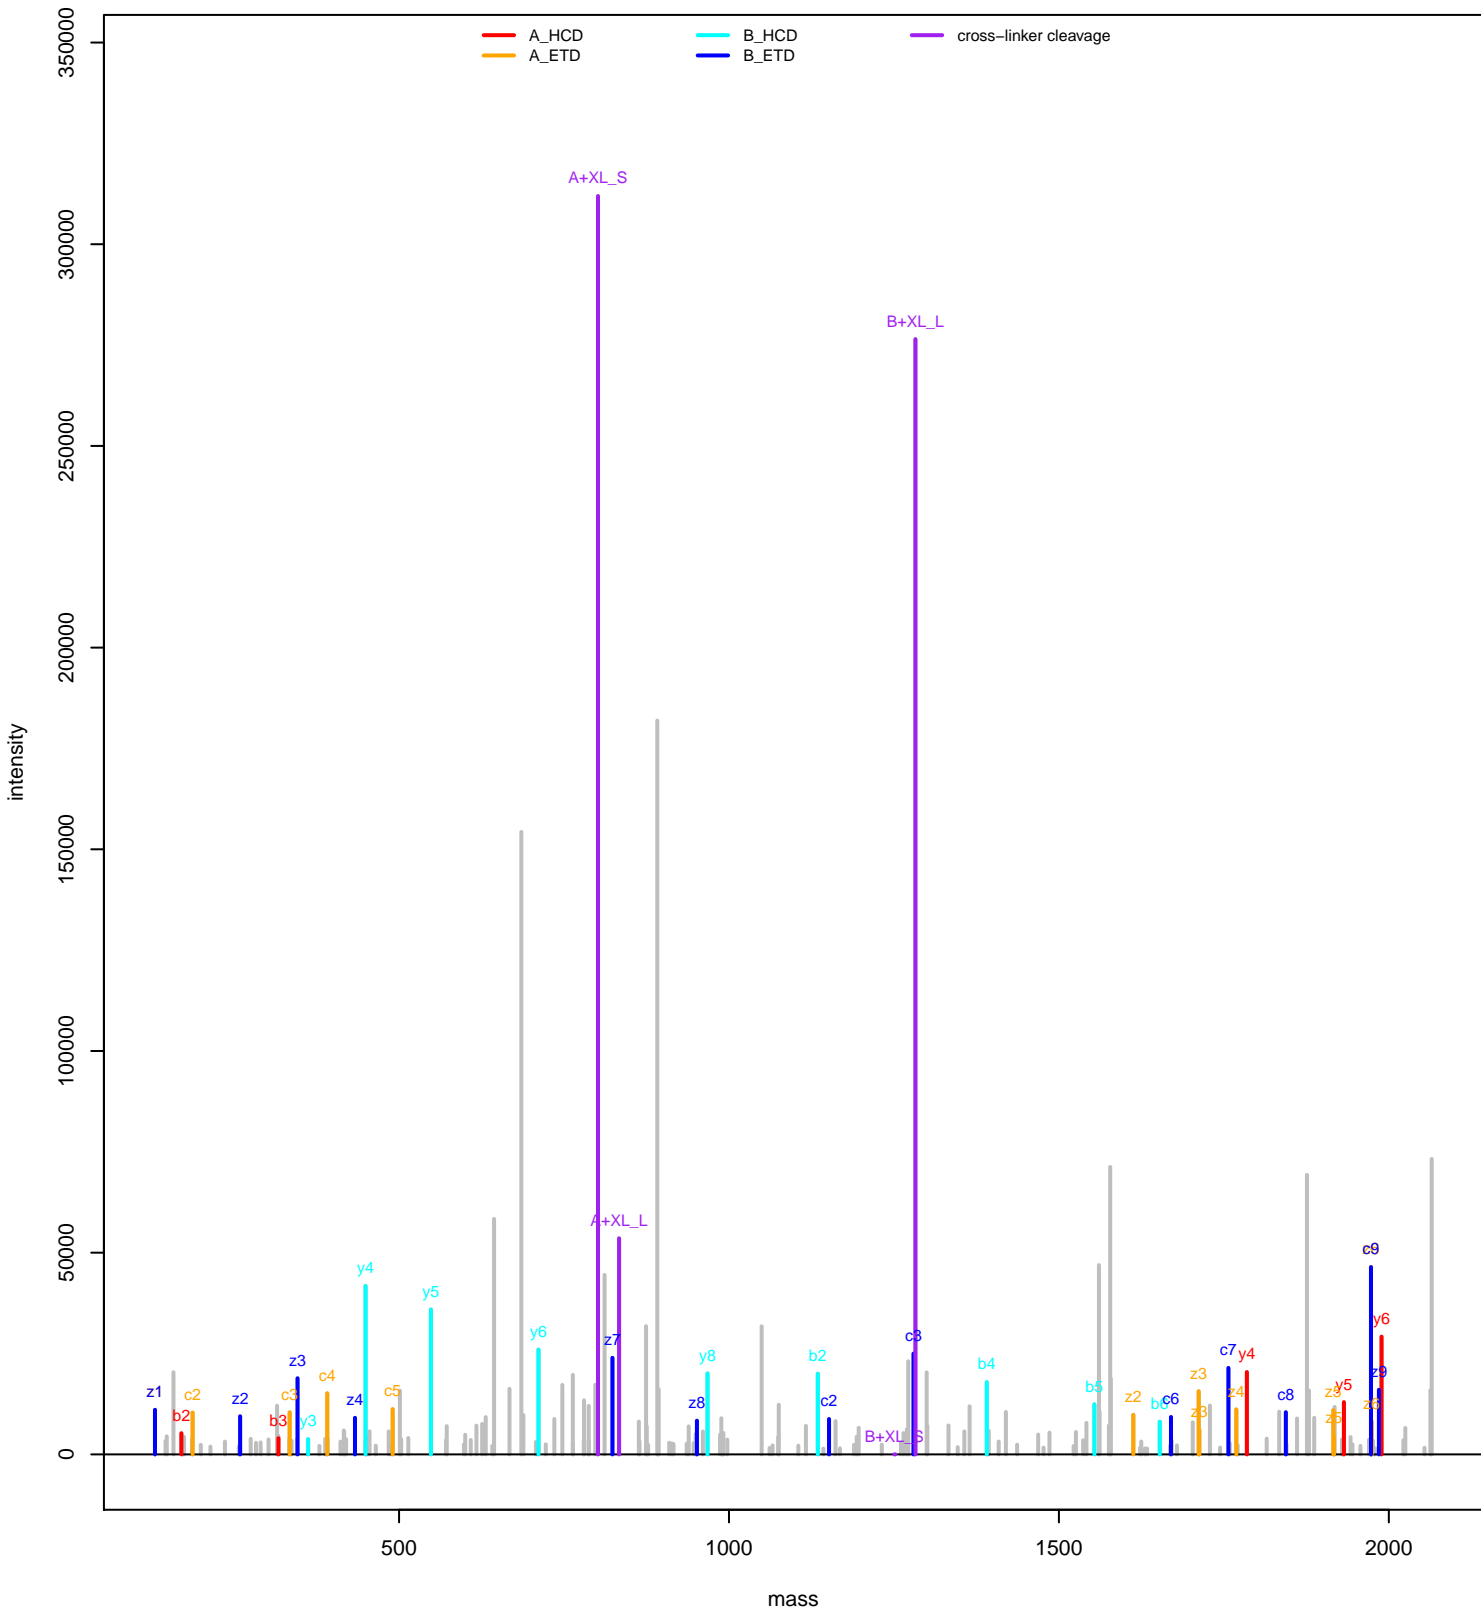

**LGFGVKK+XL\_S**

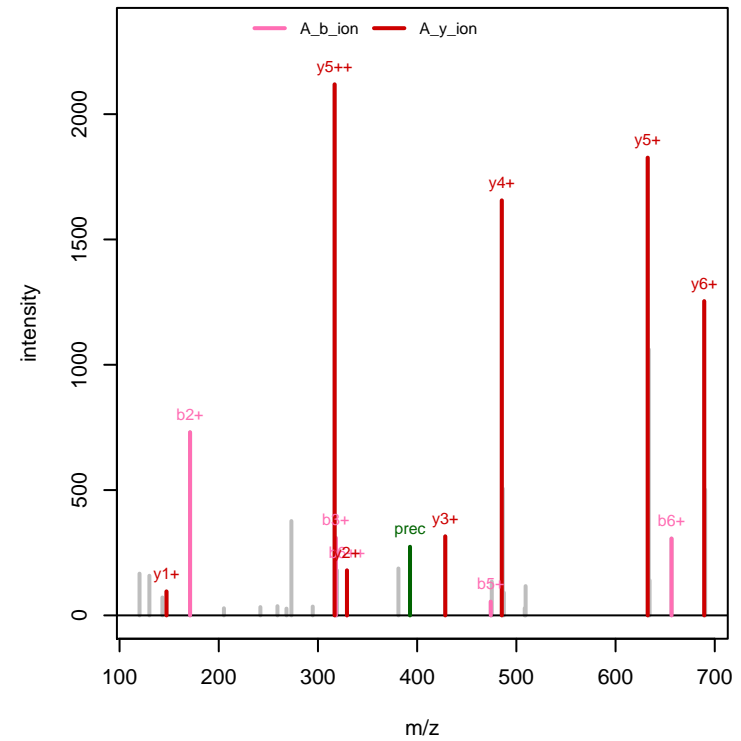

**LGFGVKK+XL\_L**

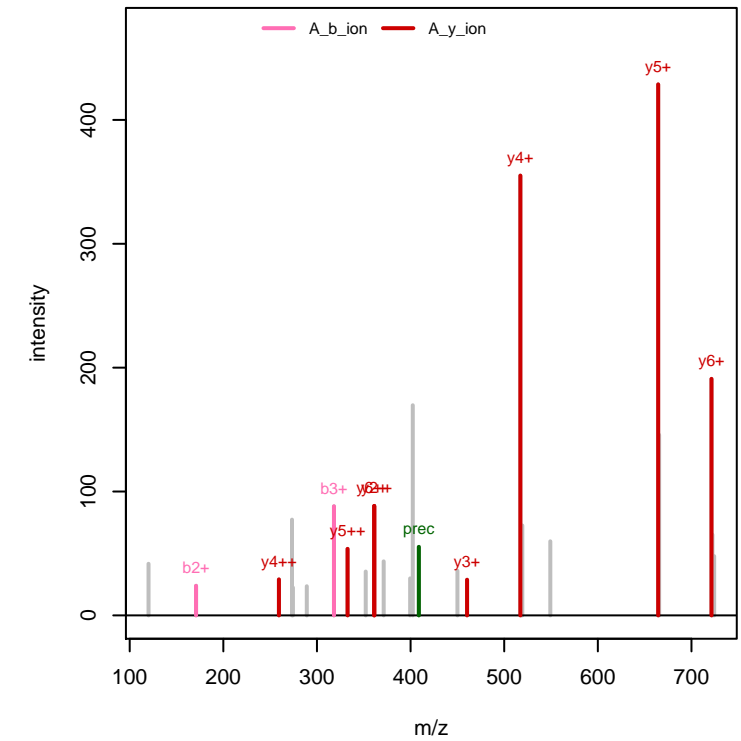

**TKQQYVSSEK+XL\_S**

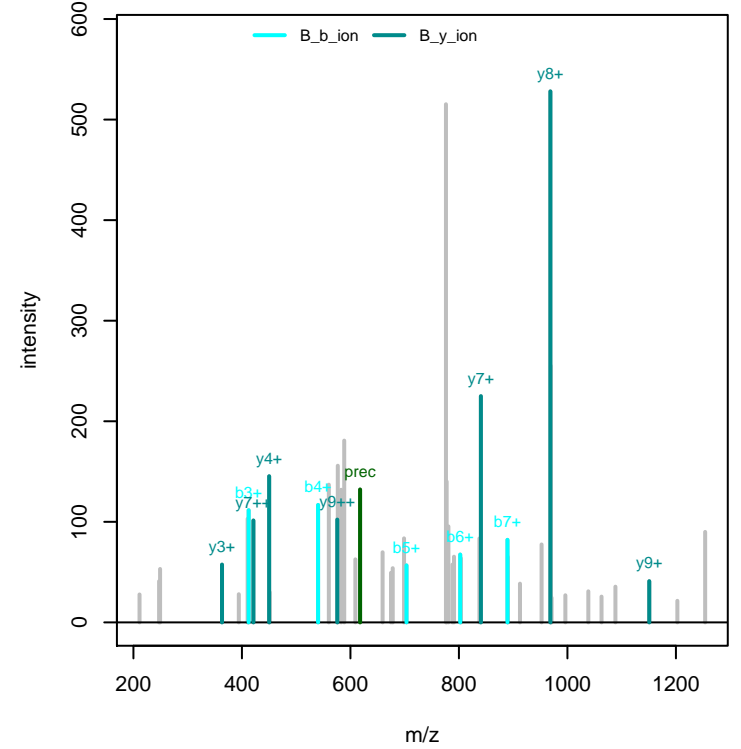

**TKQQYVSSEK+XL\_L**

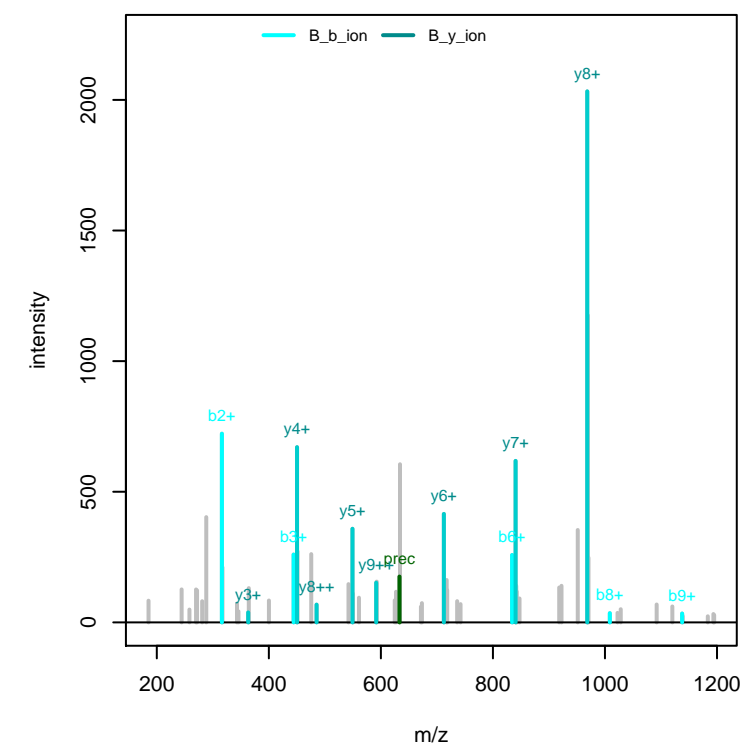

MQAFSDKGK  
GDKITYLVK

MQAFSDKGK+XL\_S

MQAFSDKGK+XL\_L

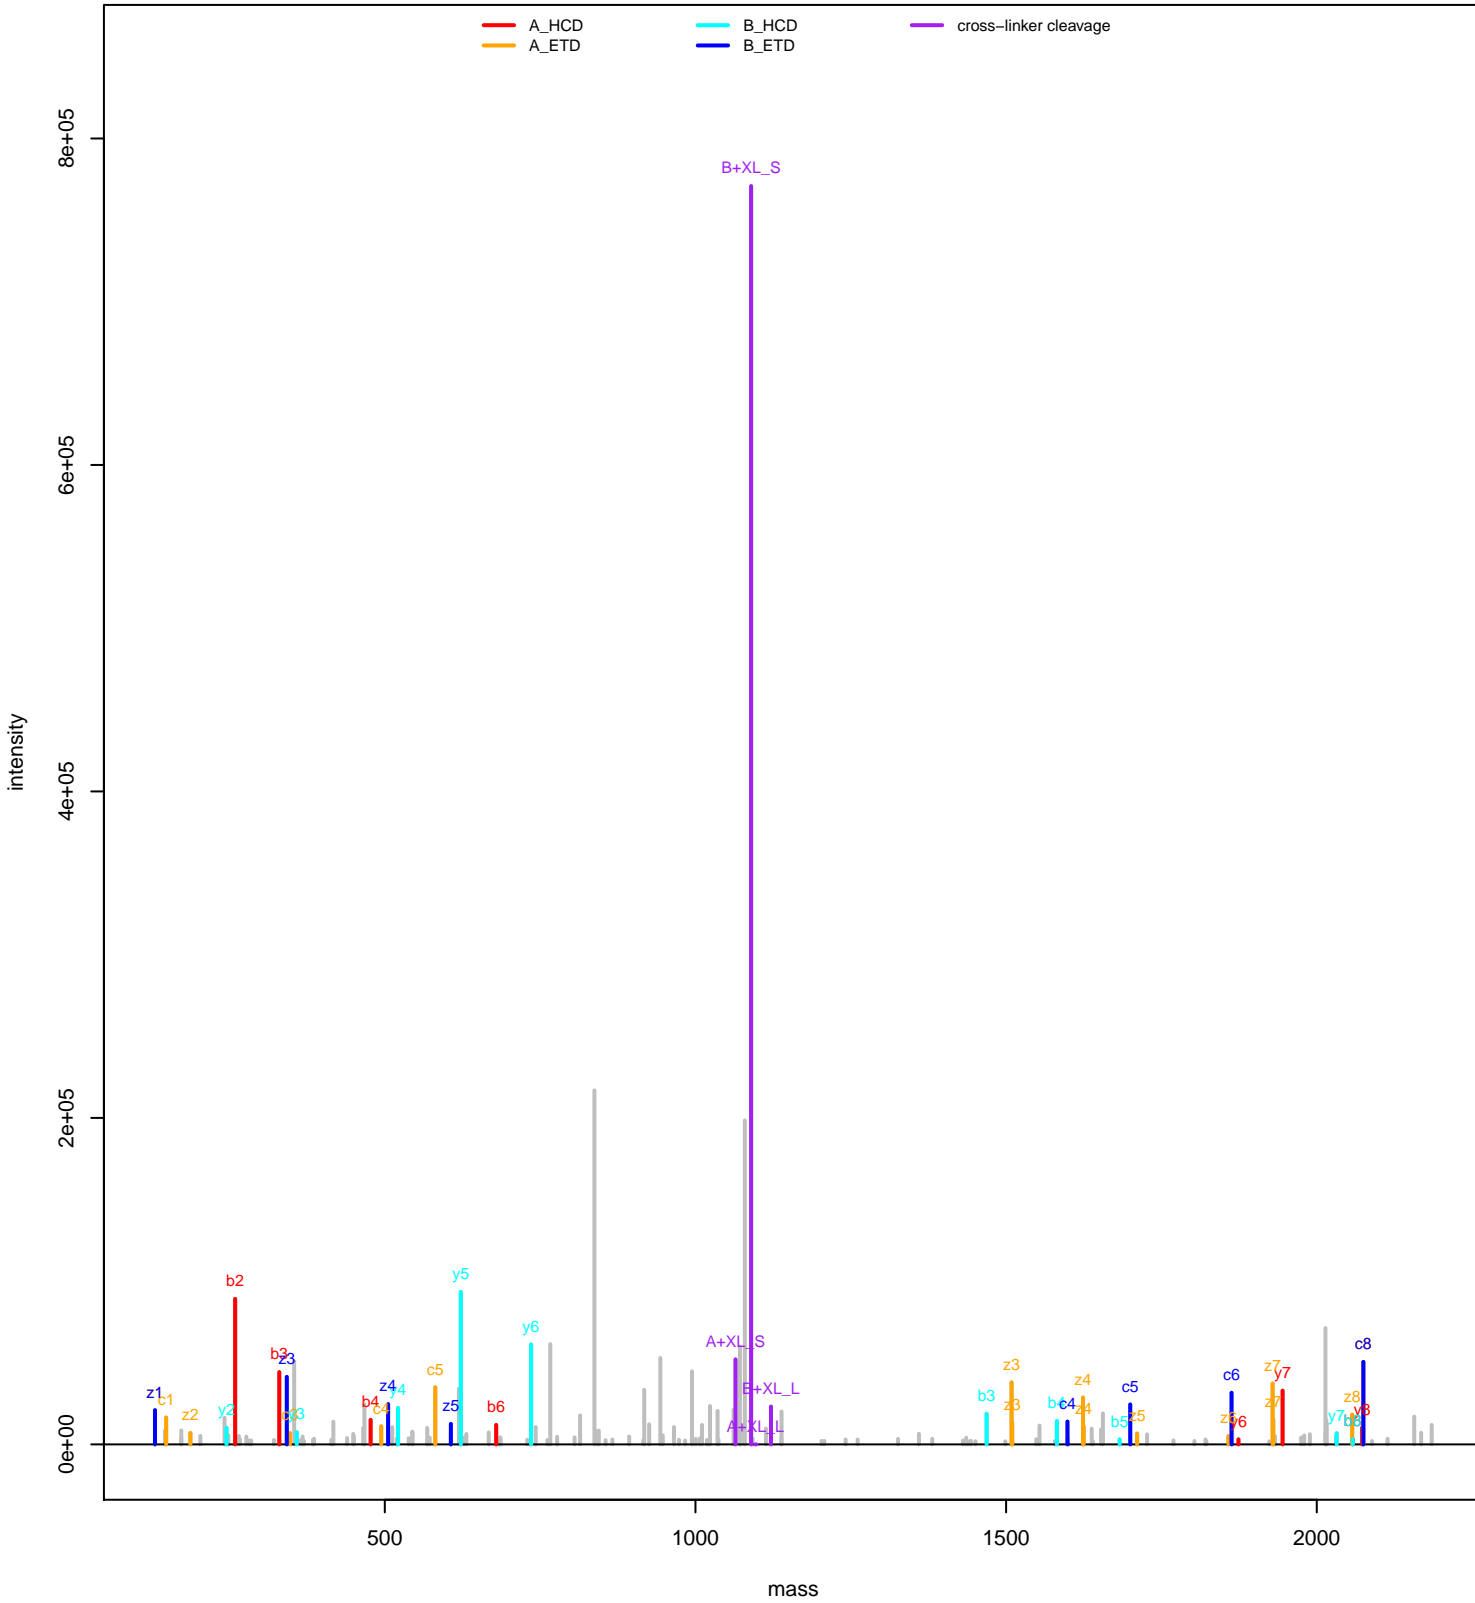

GDKITYLVK+XL\_S

GDKITYLVK+XL\_L

VTGKSR  
LKVQAQIQGDEIR

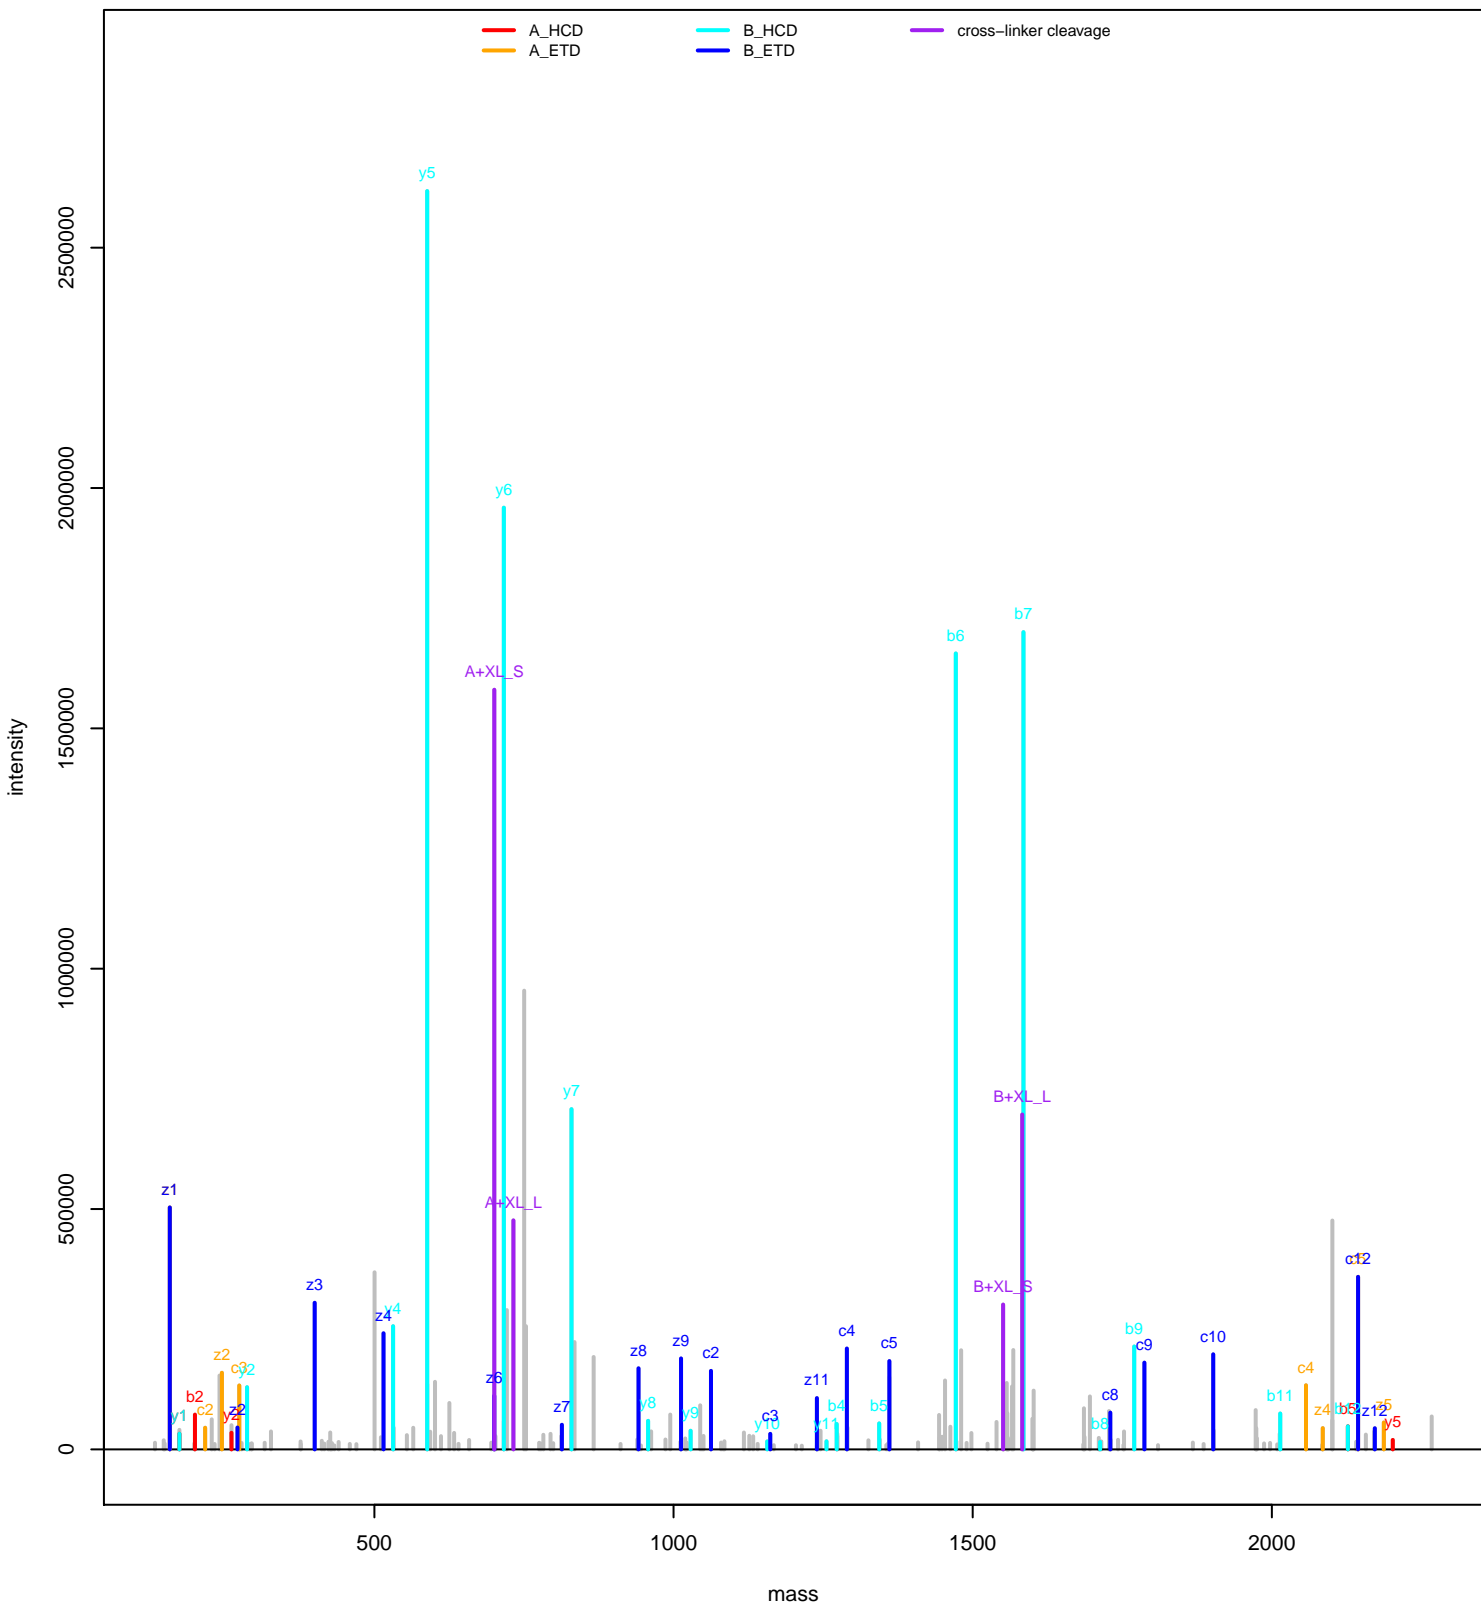

VTGKSR+XL\_S

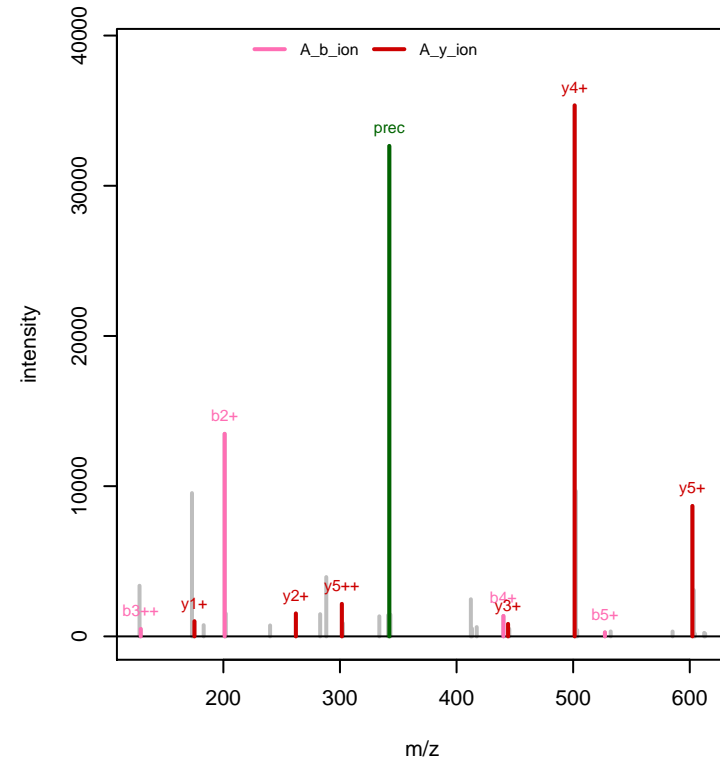

VTGKSR+XL\_L

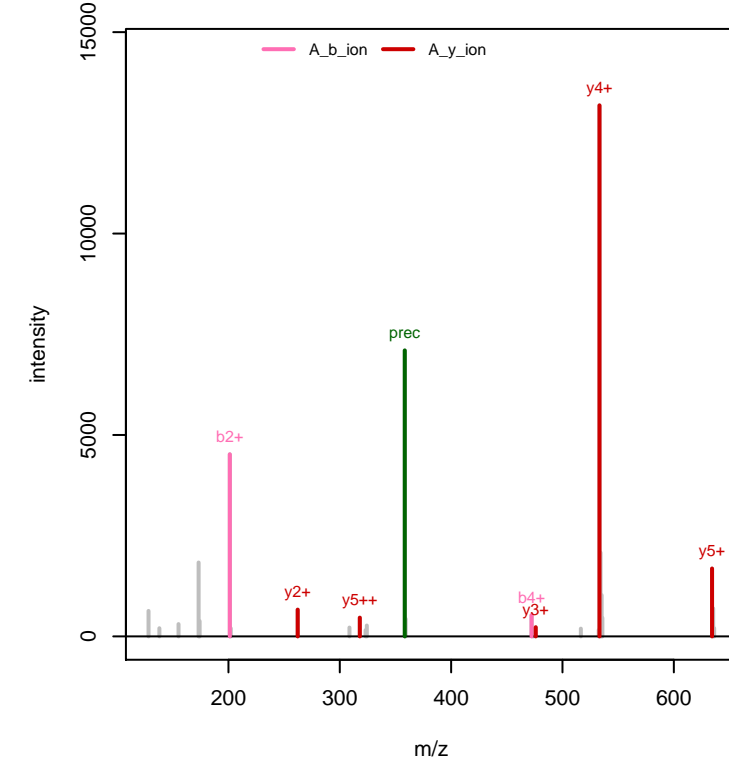

LKVQAQIQGDEIR+XL\_S

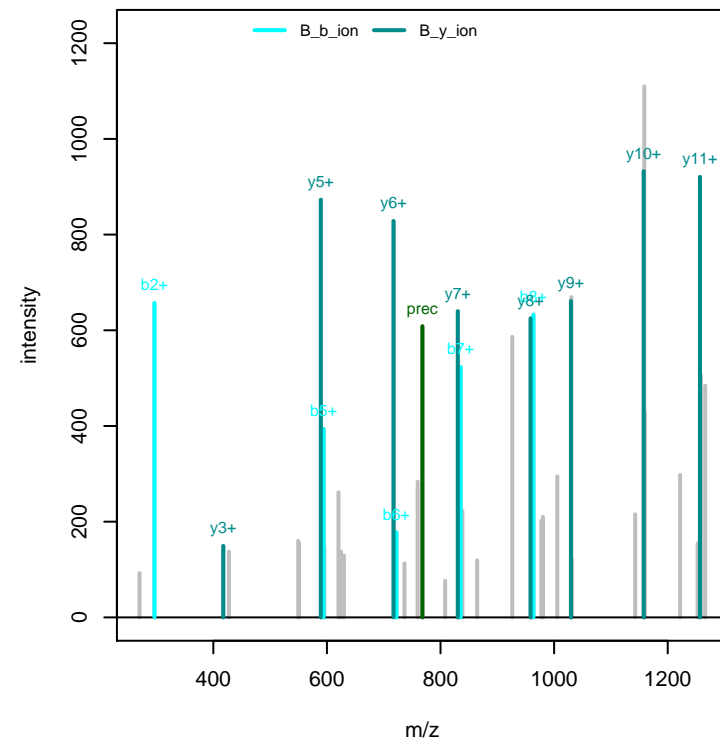

LKVQAQIQGDEIR+XL\_L

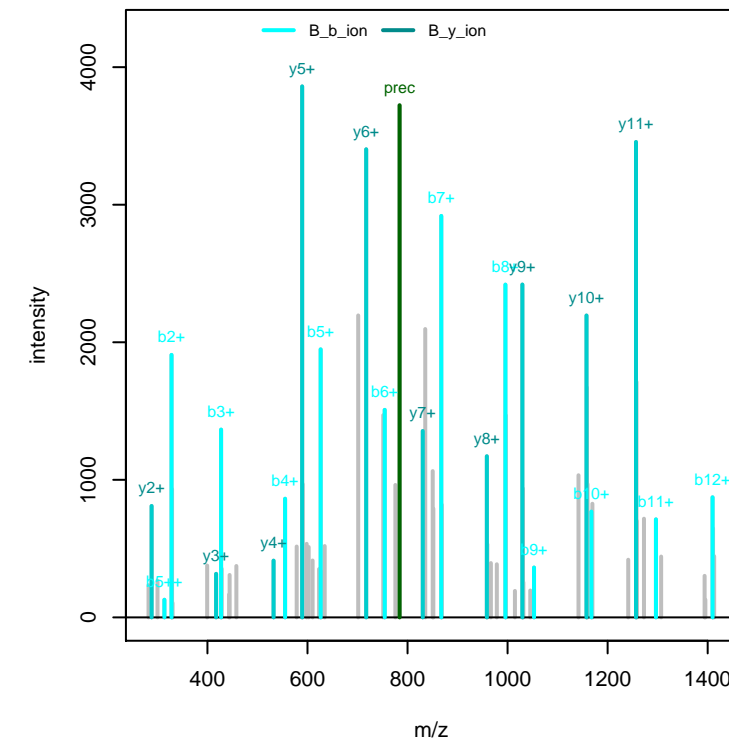

GKVPMNIVAQR  
ASTAMEKSNTIVLK

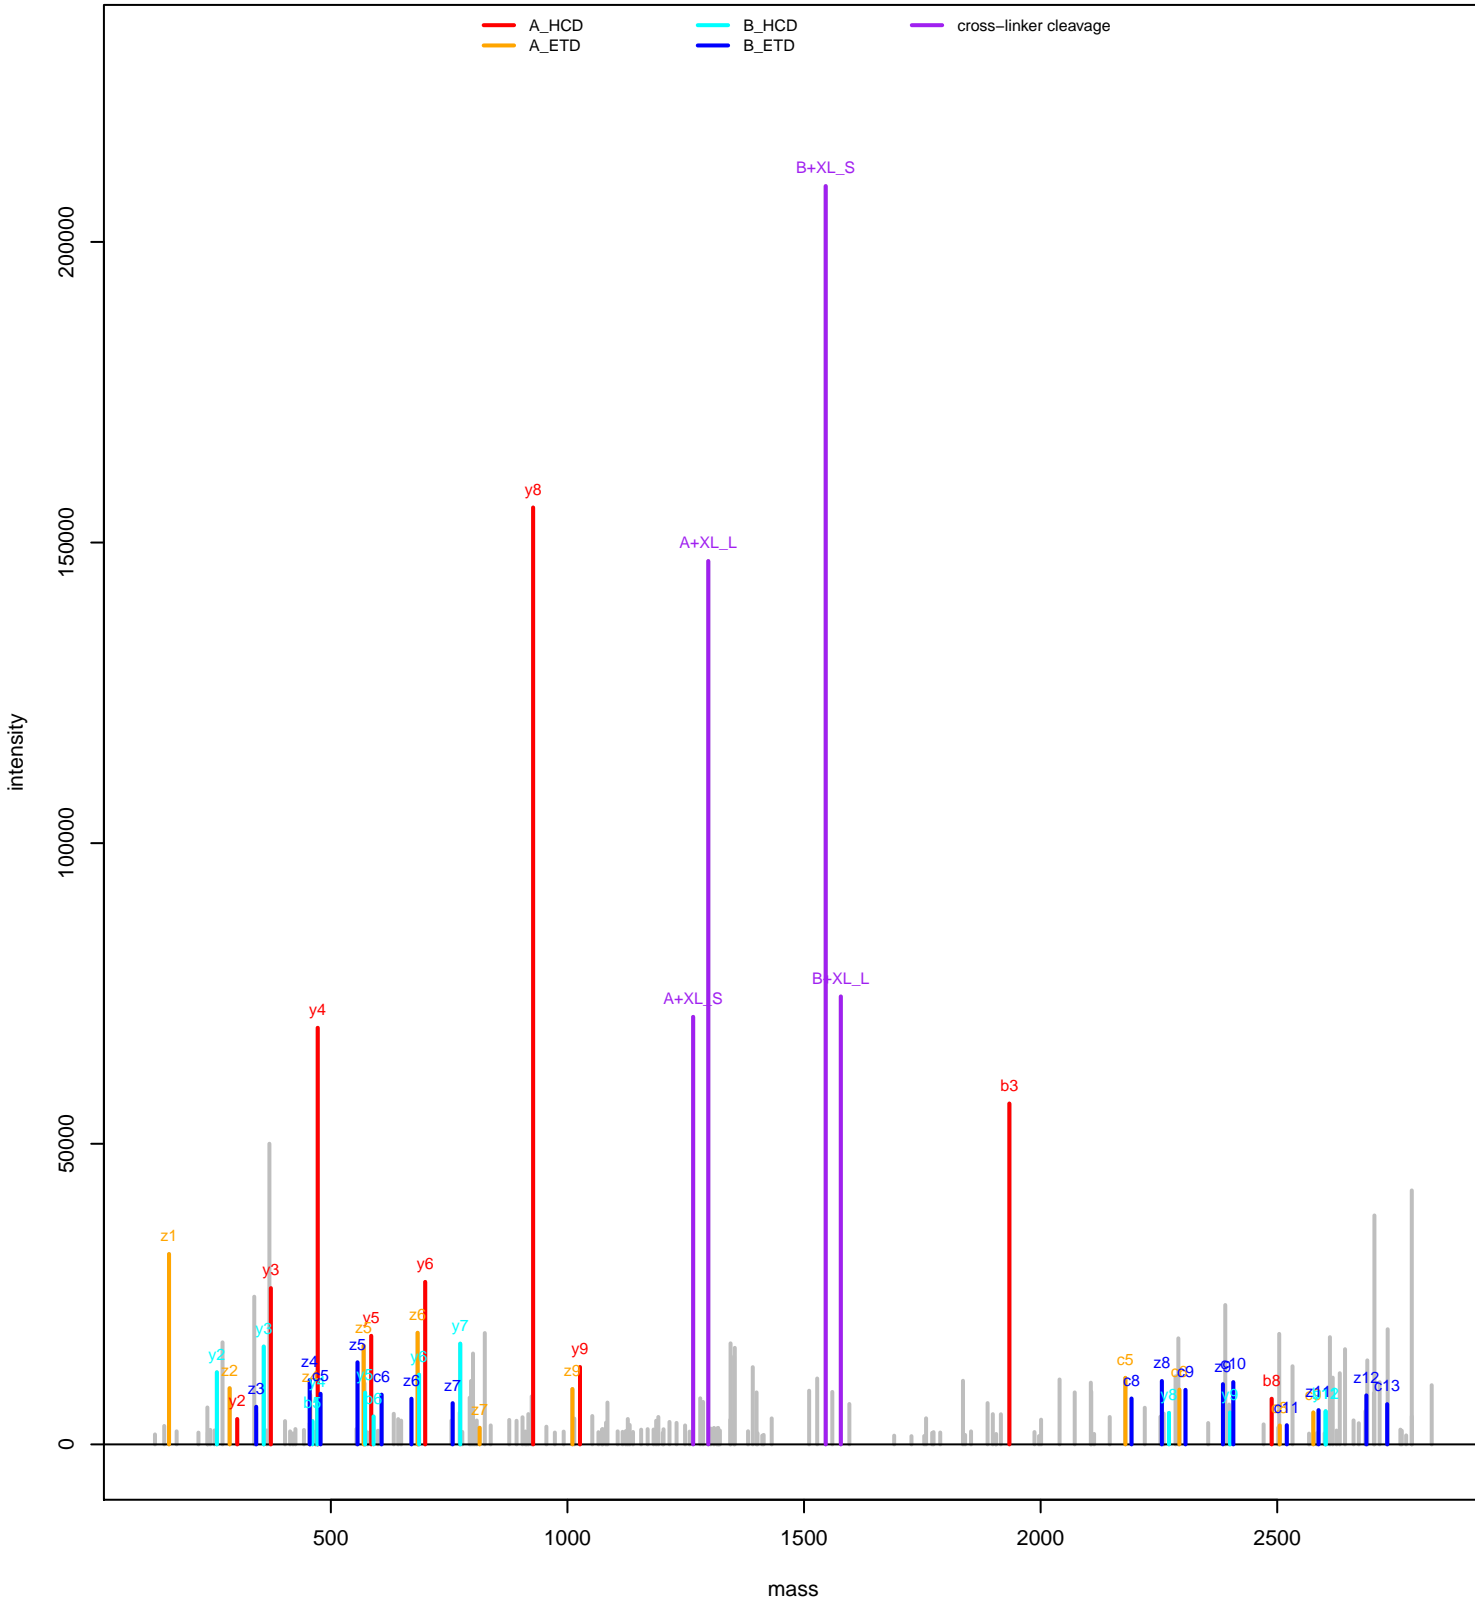

GKVPMNIVAQR+XL\_S

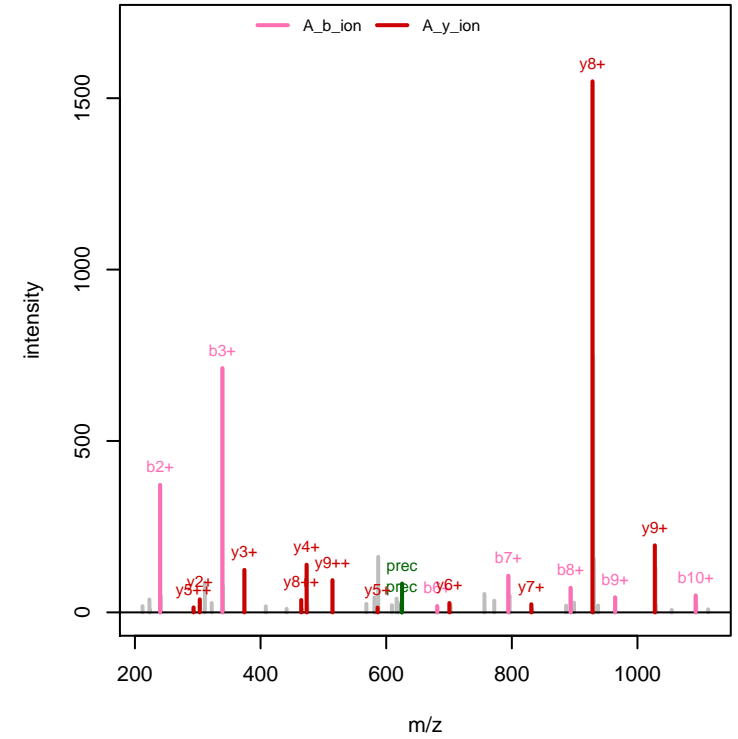

GKVPMNIVAQR+XL\_L

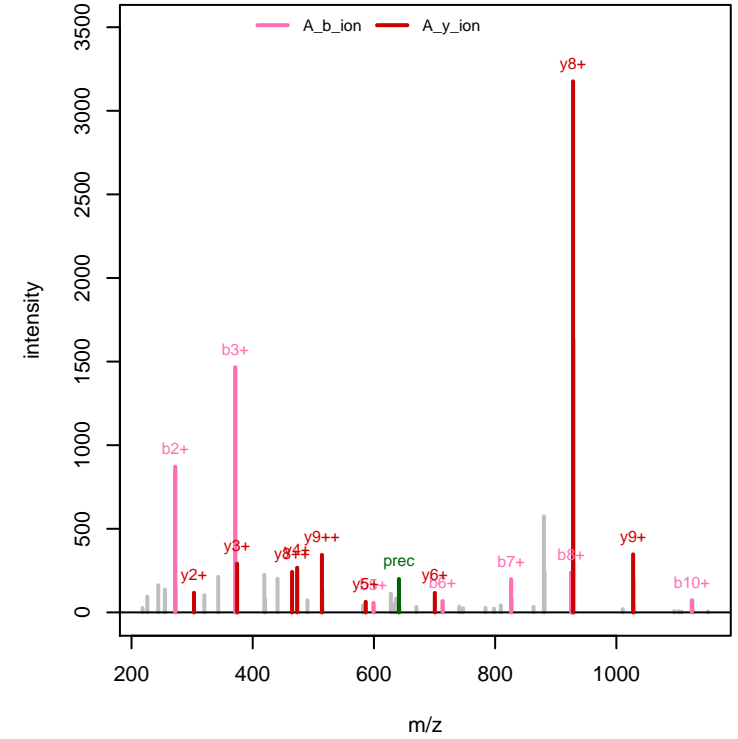

ASTAMEKSNTIVLK+XL\_S

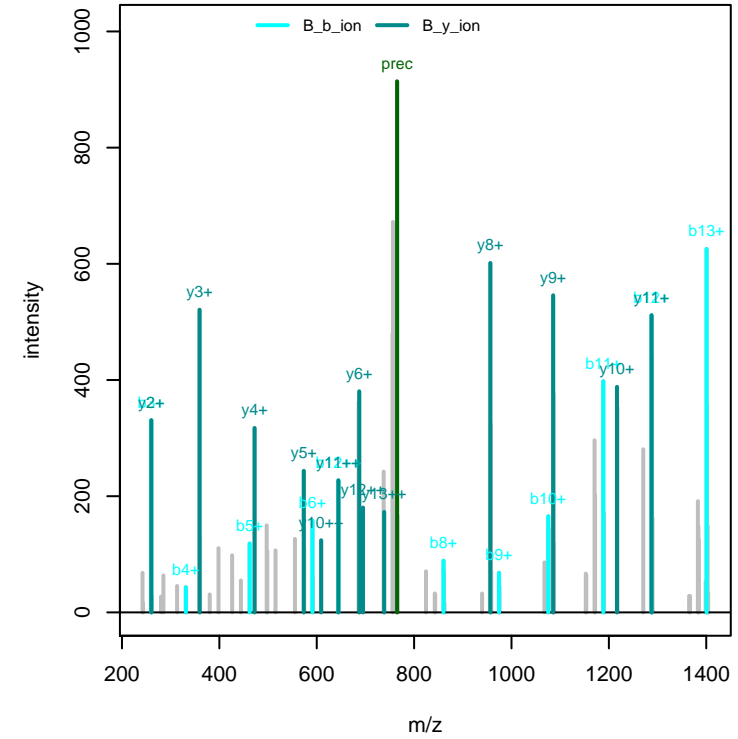

ASTAMEKSNTIVLK+XL\_L

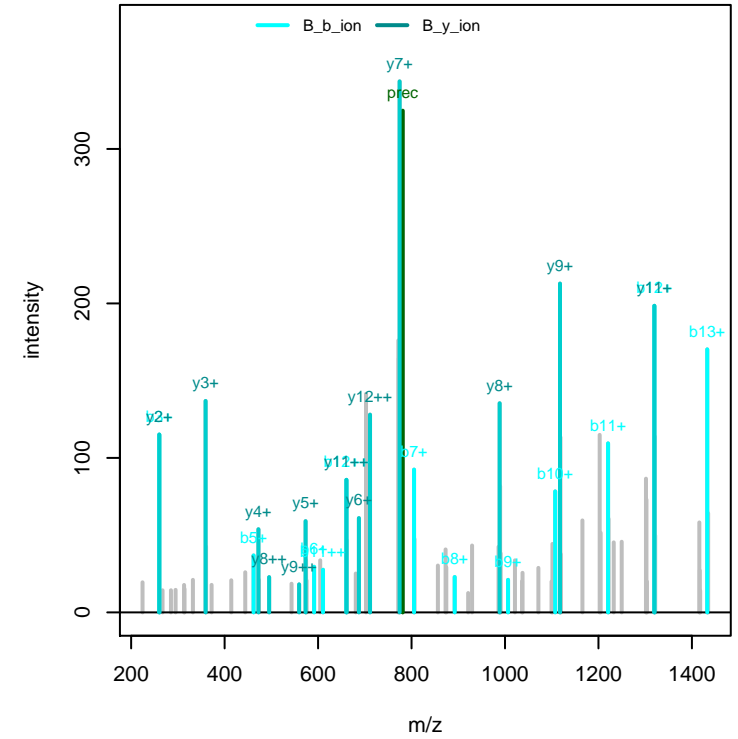

NVDKTDAAQK  
VNDLRGESKNISVTEVHAR

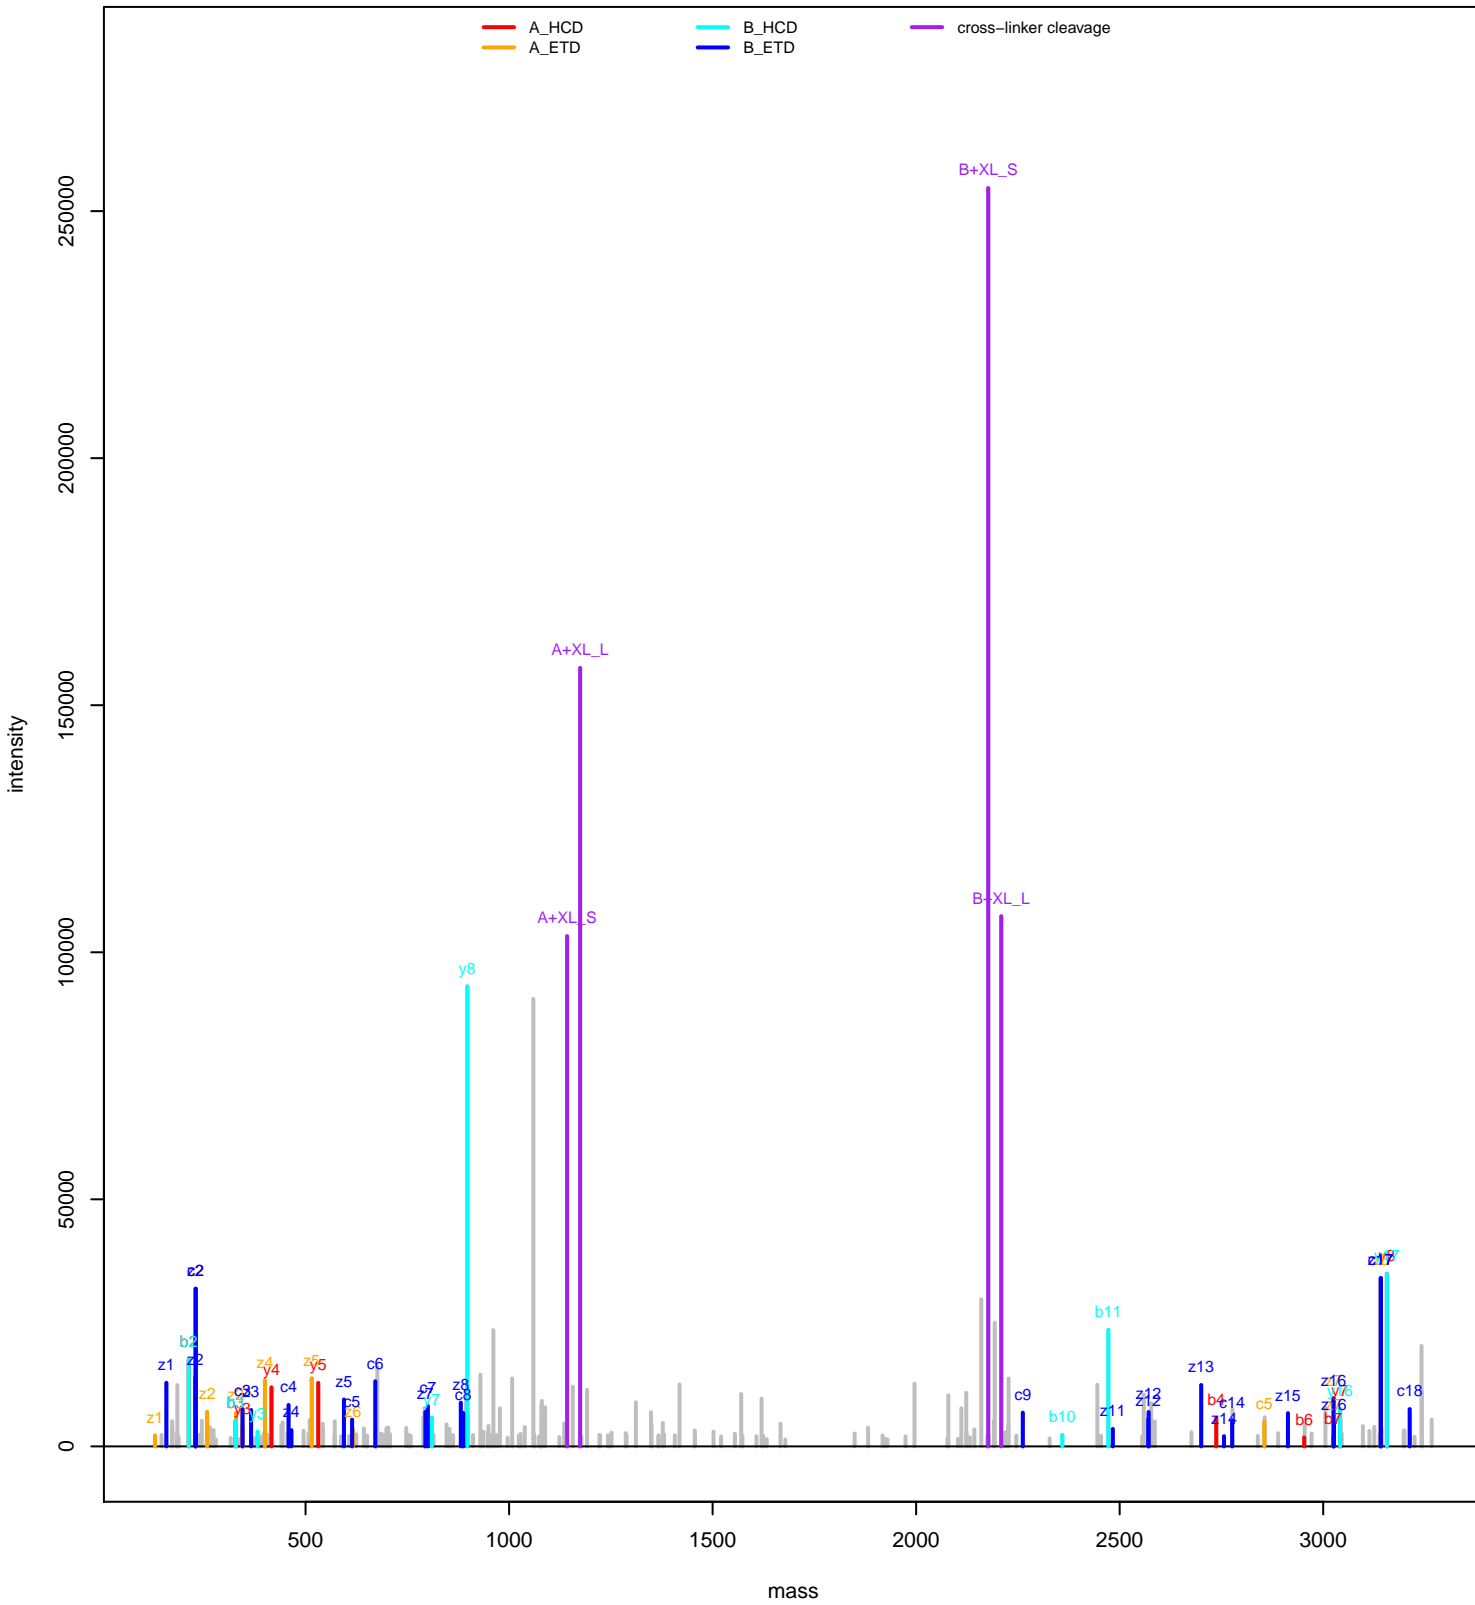

NVDKTDAAQK+XL\_S

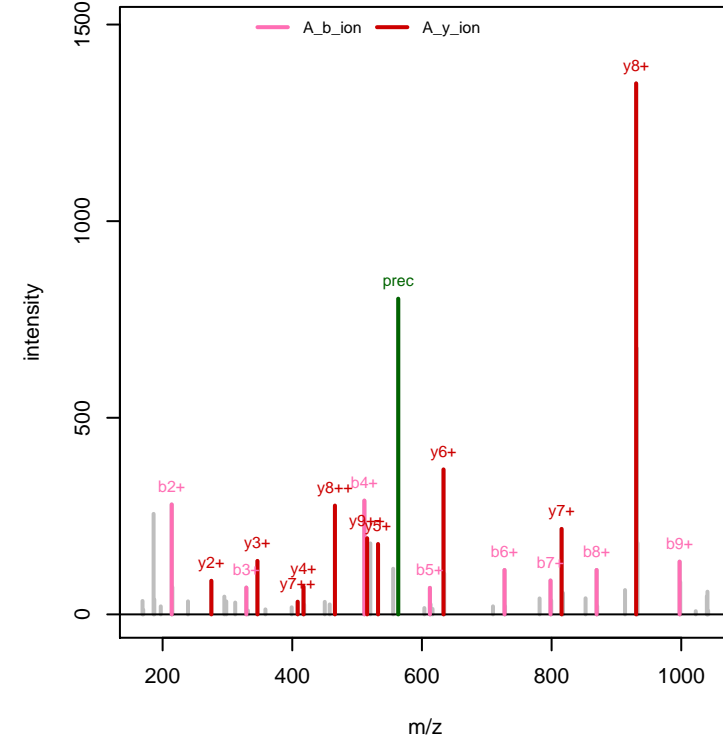

NVDKTDAAQK+XL\_L

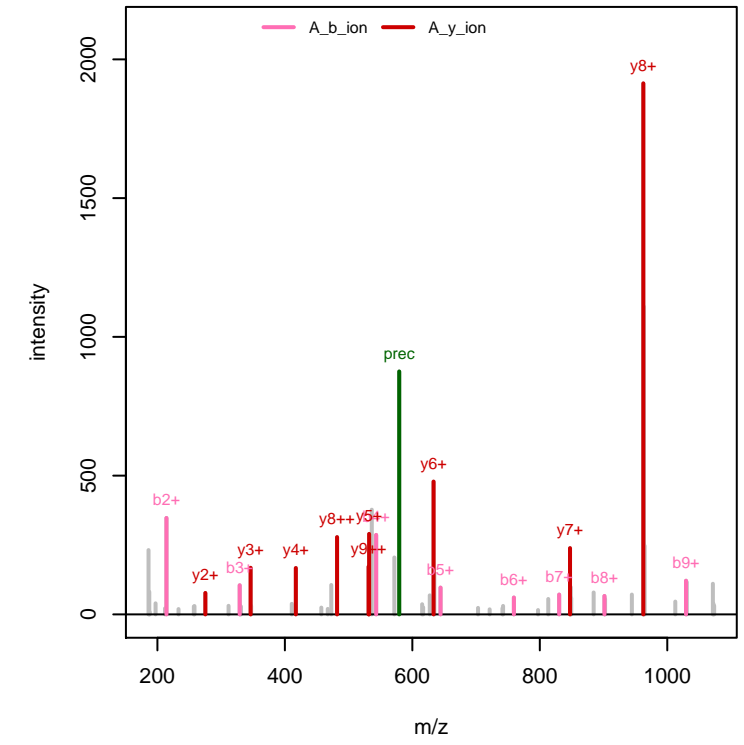

VNDLRGESKNISVTEVHAR+XL\_S

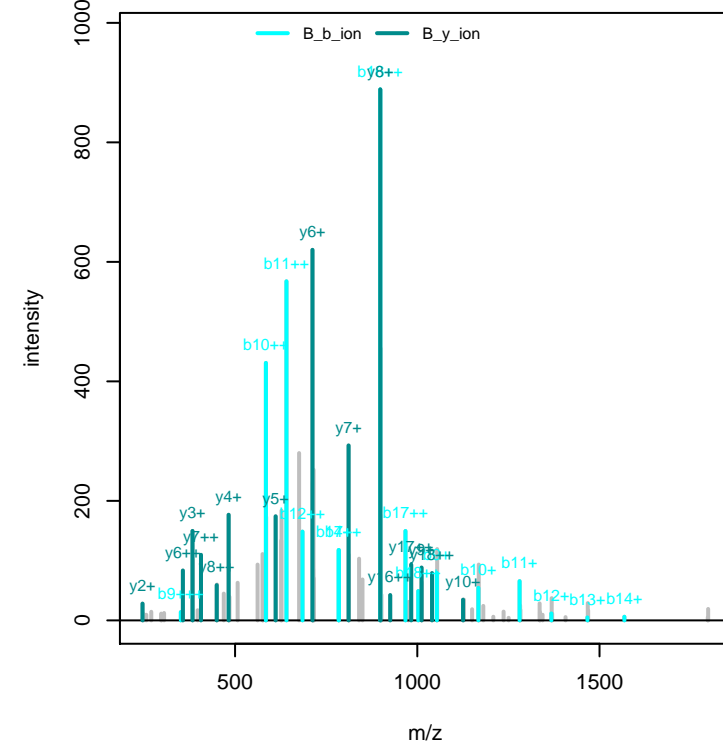

VNDLRGESKNISVTEVHAR+XL\_L

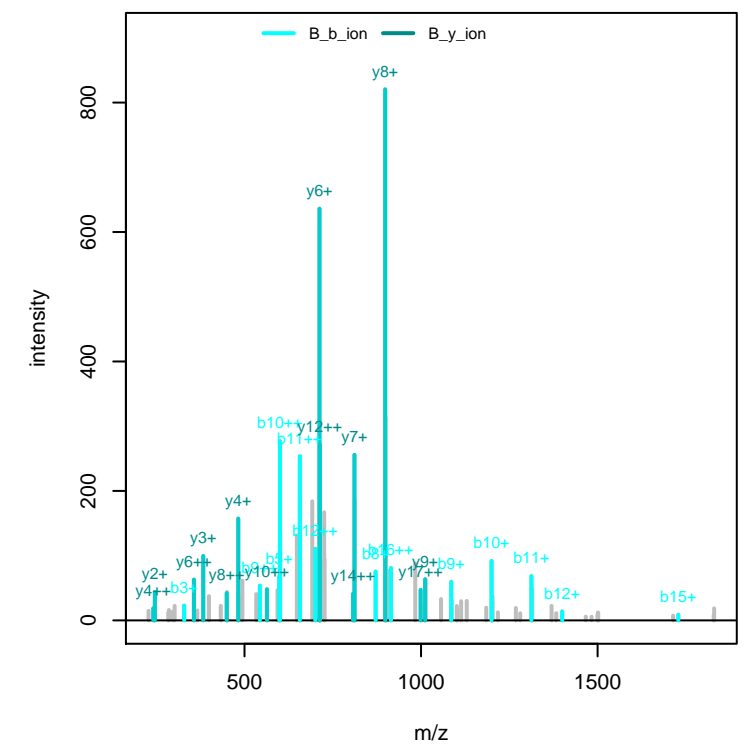

LTKLDAQLK  
IIVQEMGESSKMR

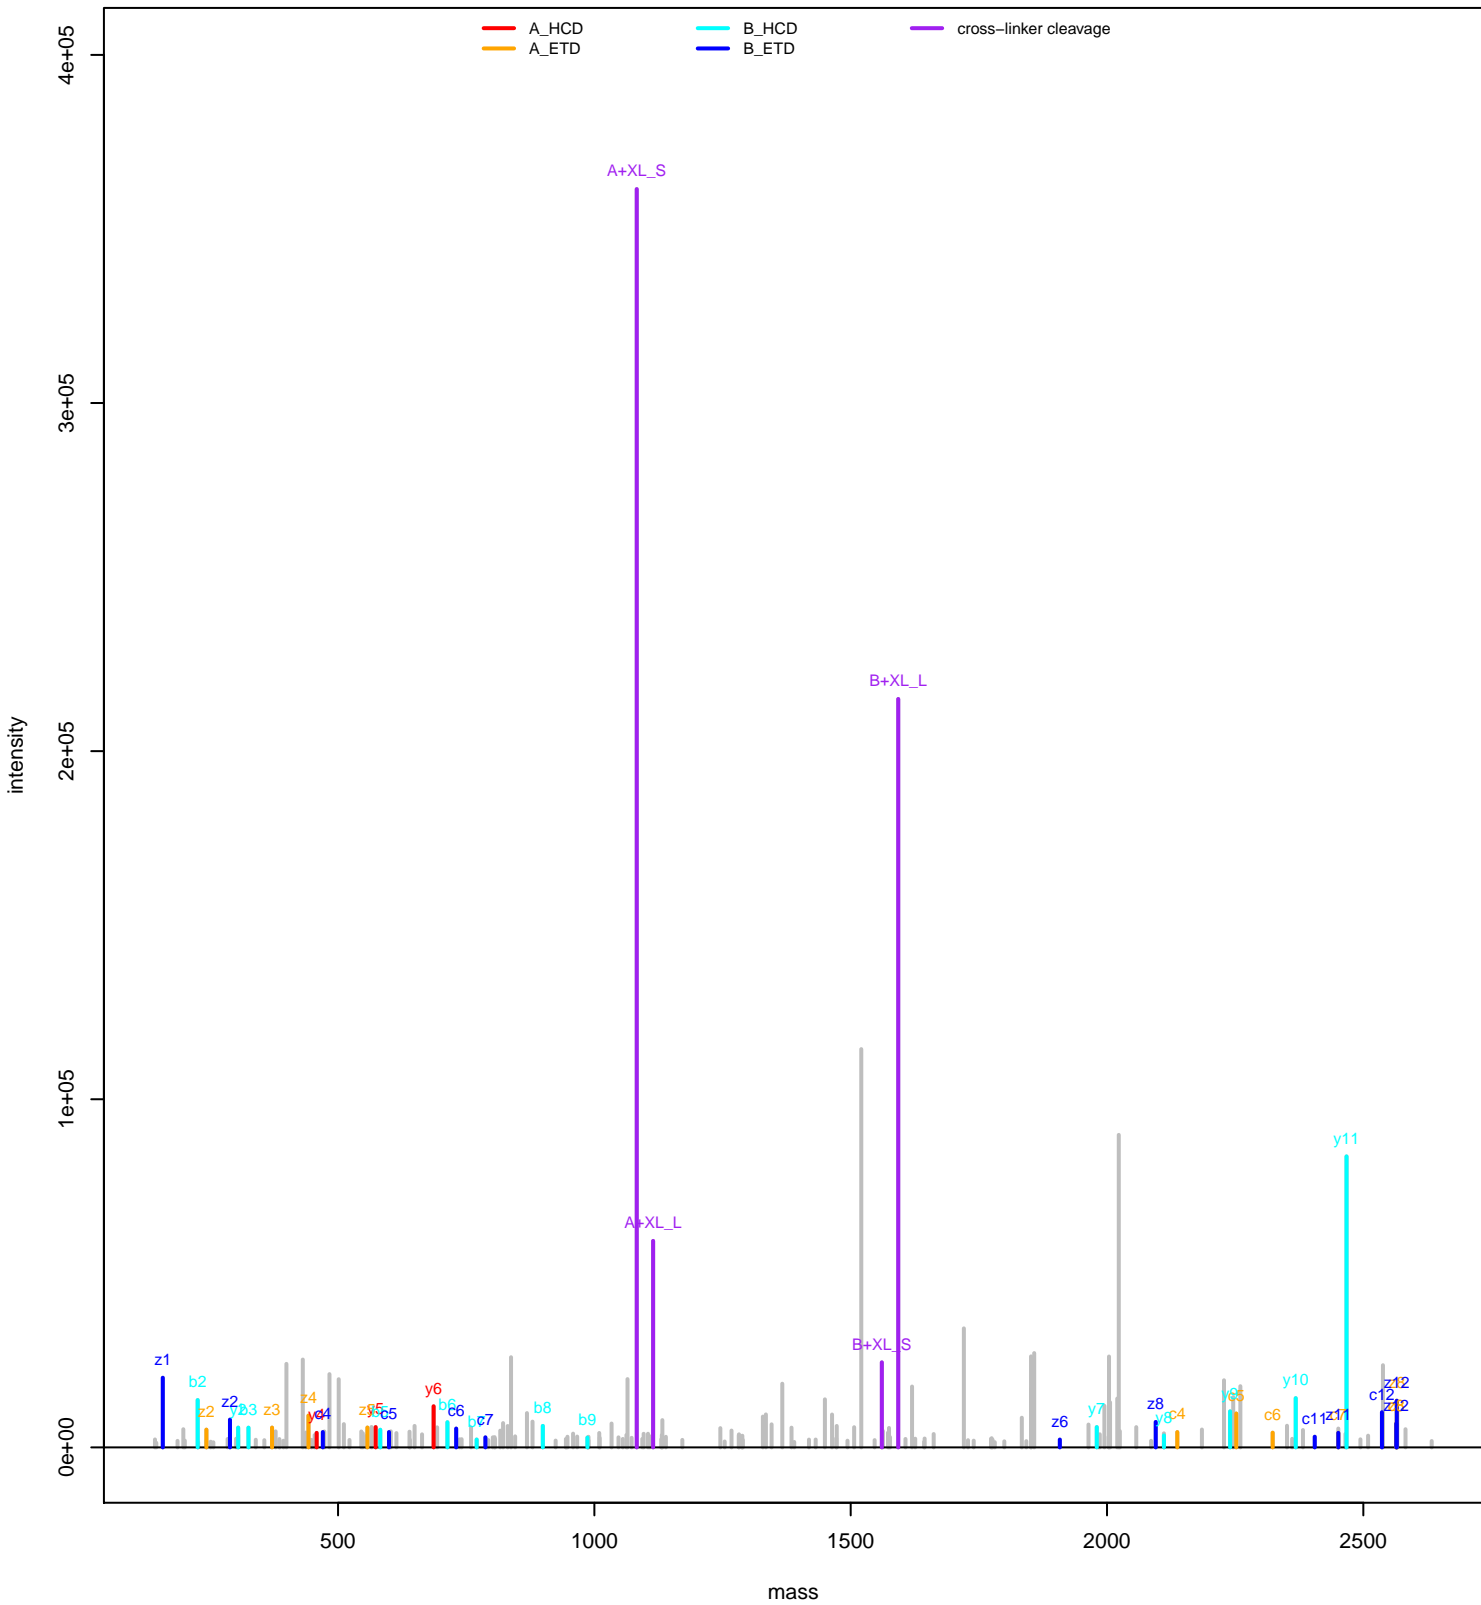

LTKLDAQLK+XL\_S

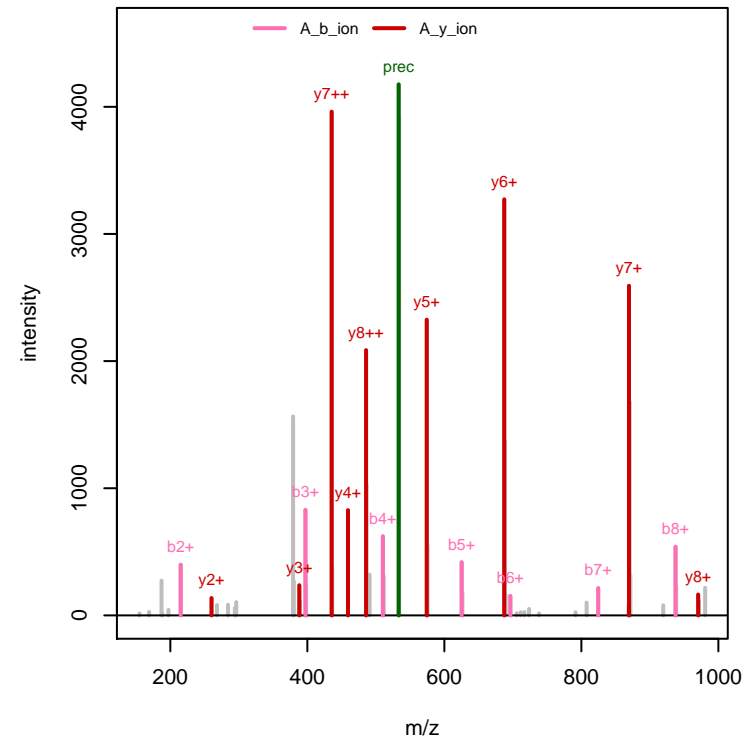

LTKLDAQLK+XL\_L

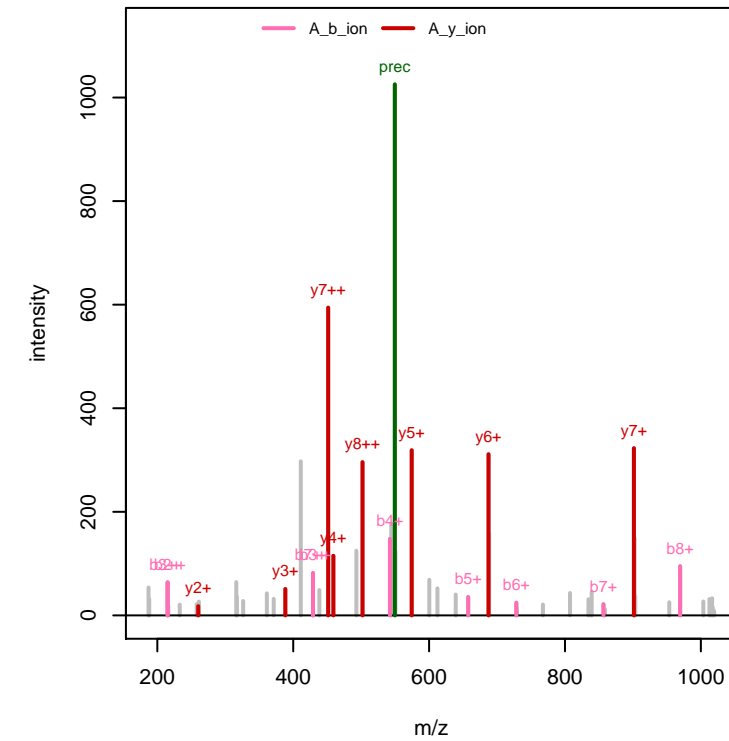

IIVQEMGESSKMR+XL\_S

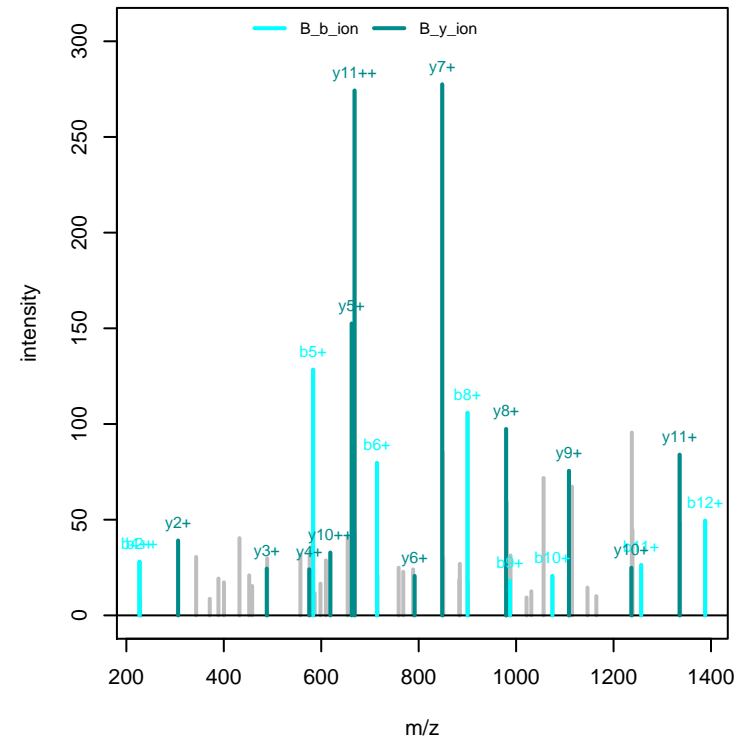

IIVQEMGESSKMR+XL\_L

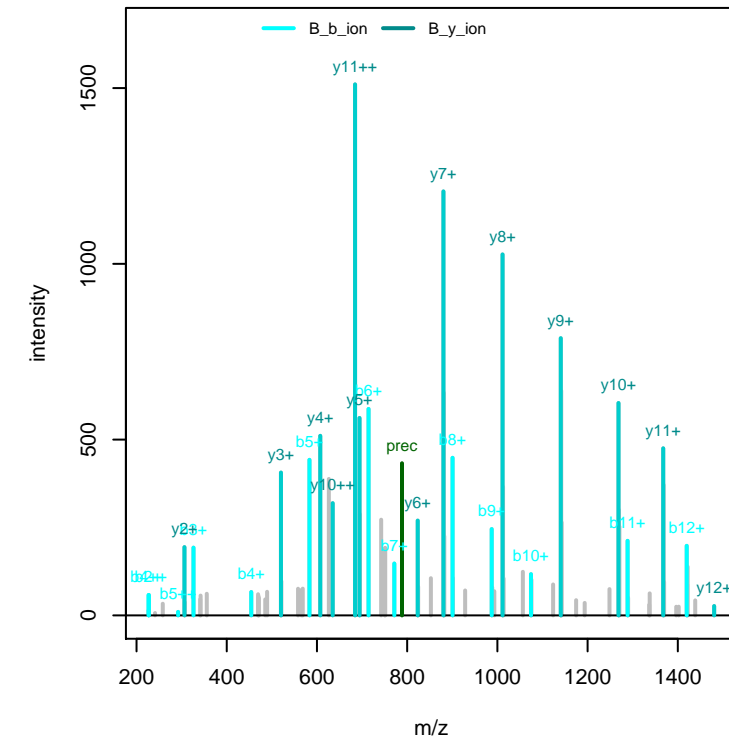

LGAKGIK  
VTIHTARPGIVIGKK

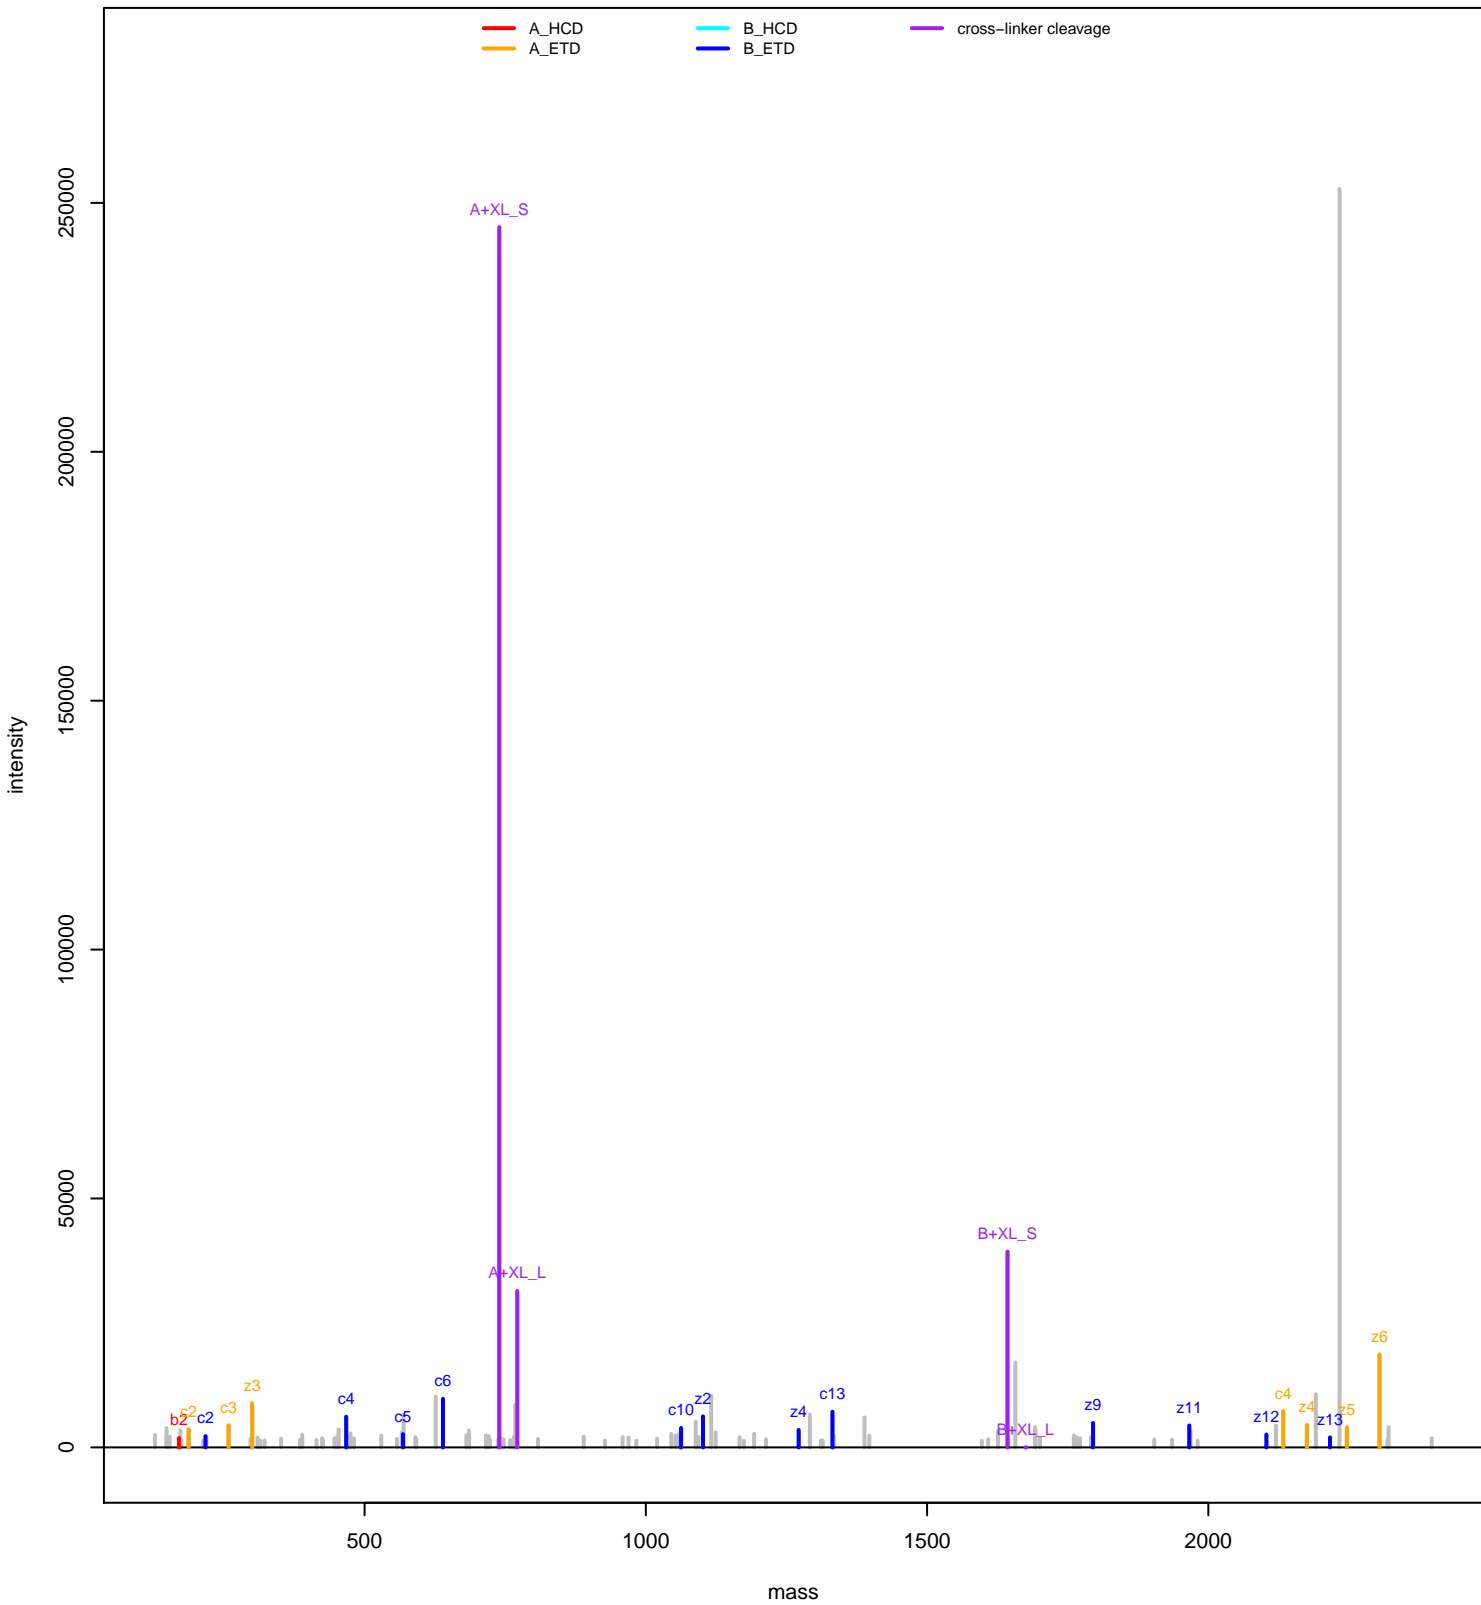

LGAKGIK+XL\_S

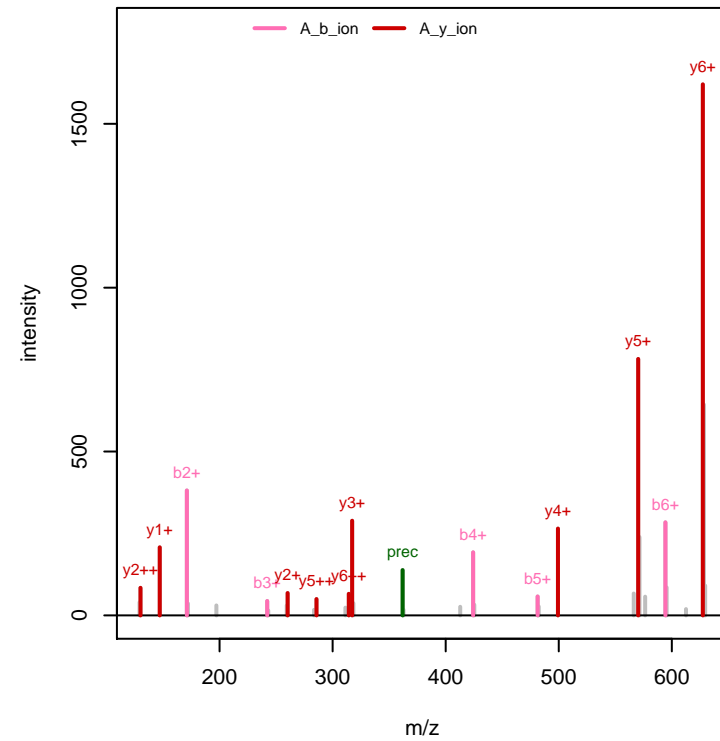

LGAKGIK+XL\_L

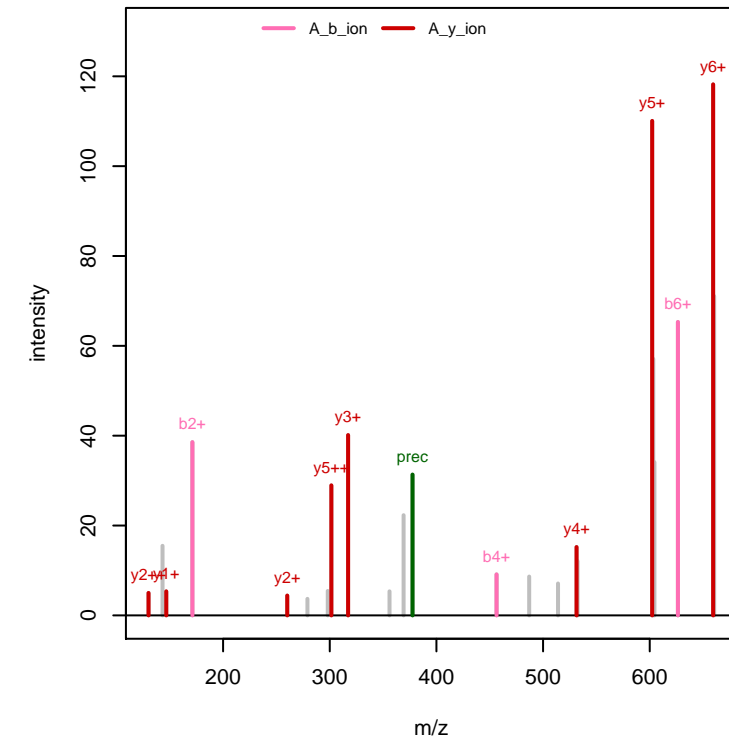

VTIHTARPGIVIGKK+XL\_S

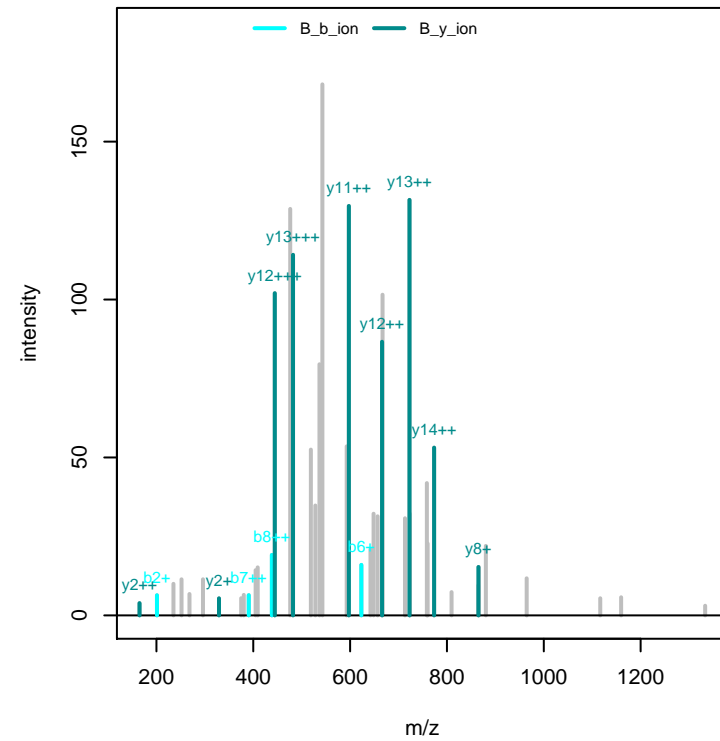

VTIHTARPGIVIGKK+XL\_L

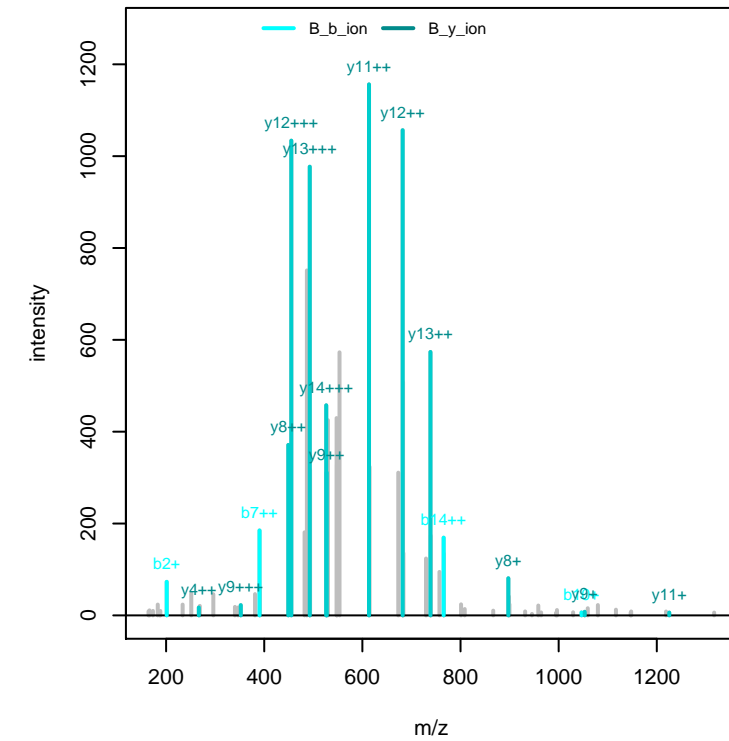

FEDGKK  
FFKSNSETIK

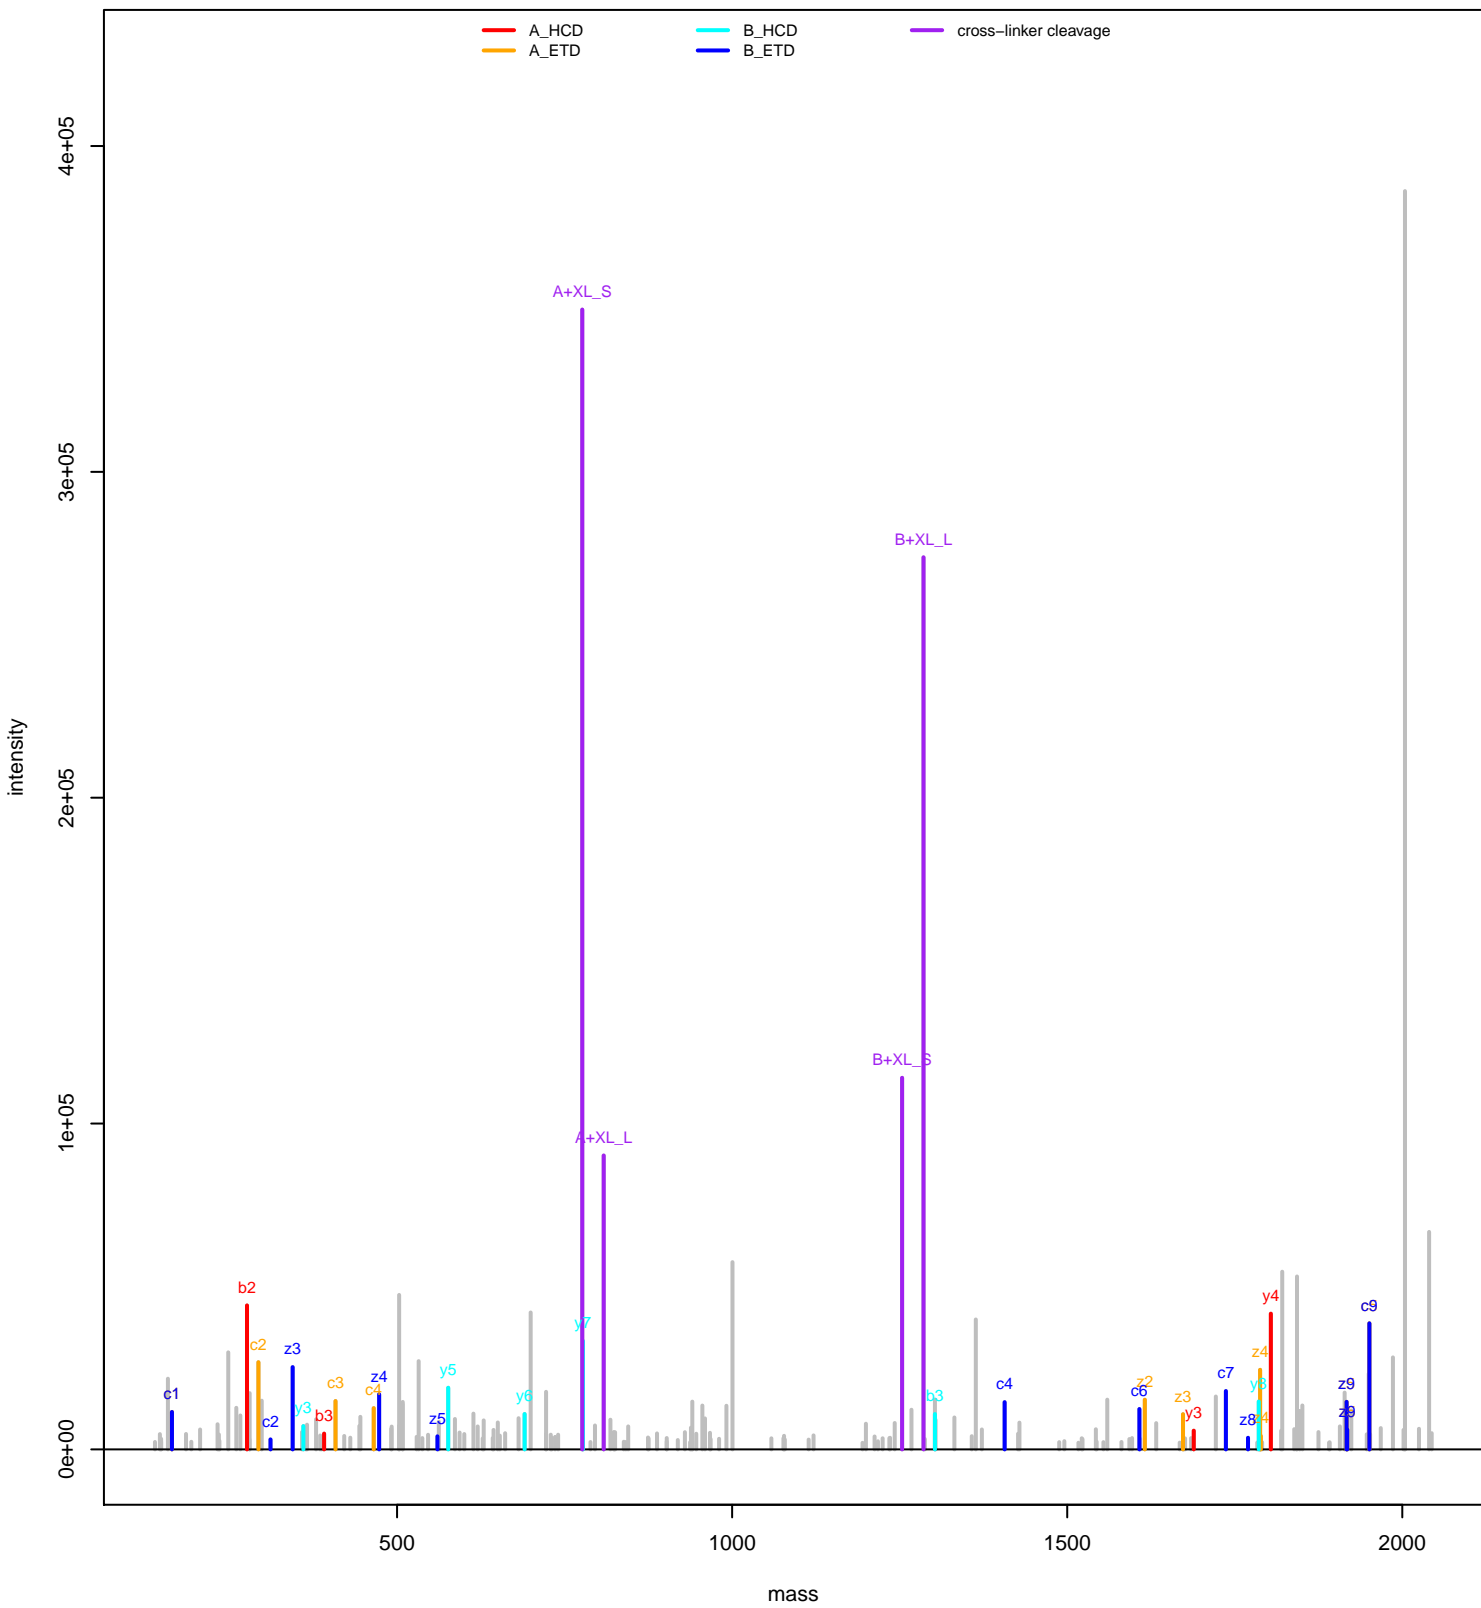

FEDGKK+XL\_S

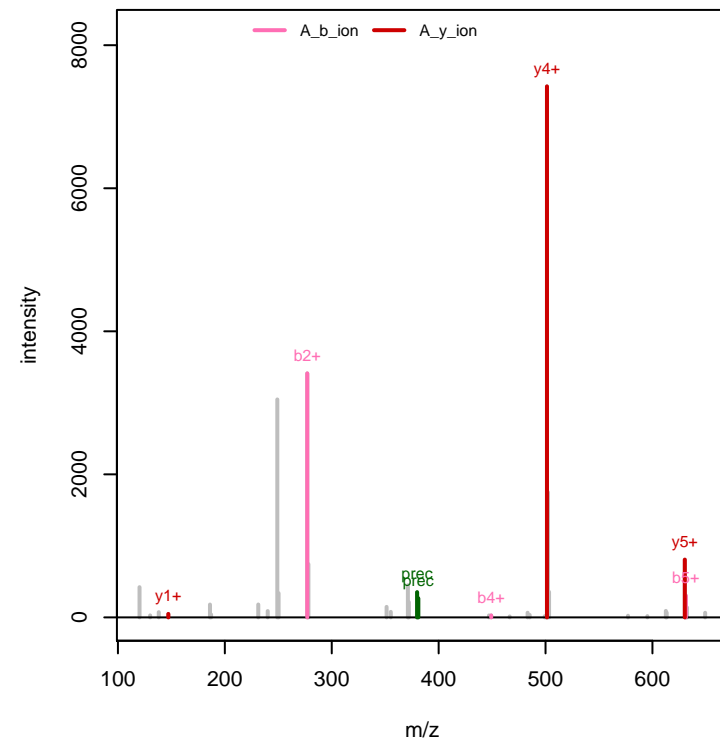

FEDGKK+XL\_L

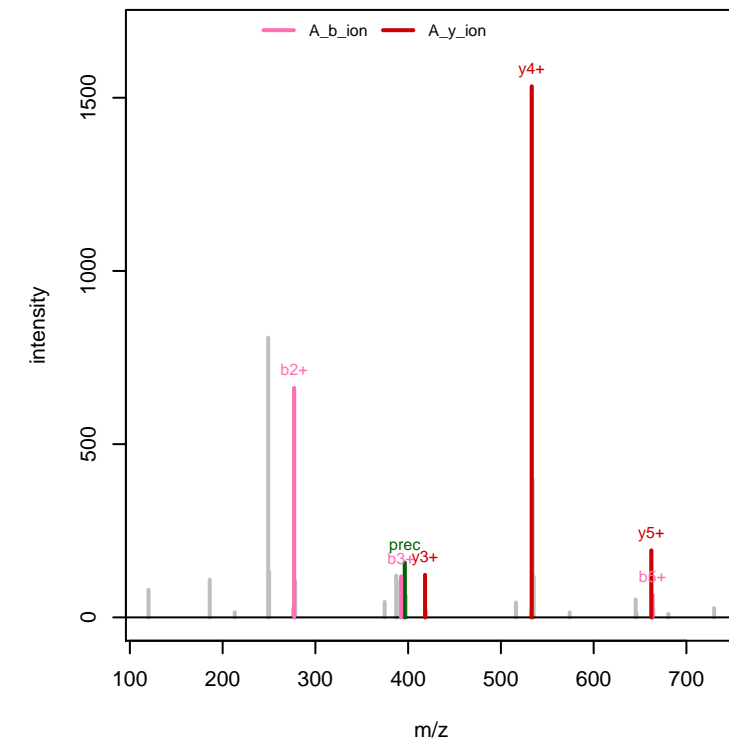

FFKSNSETIK+XL\_S

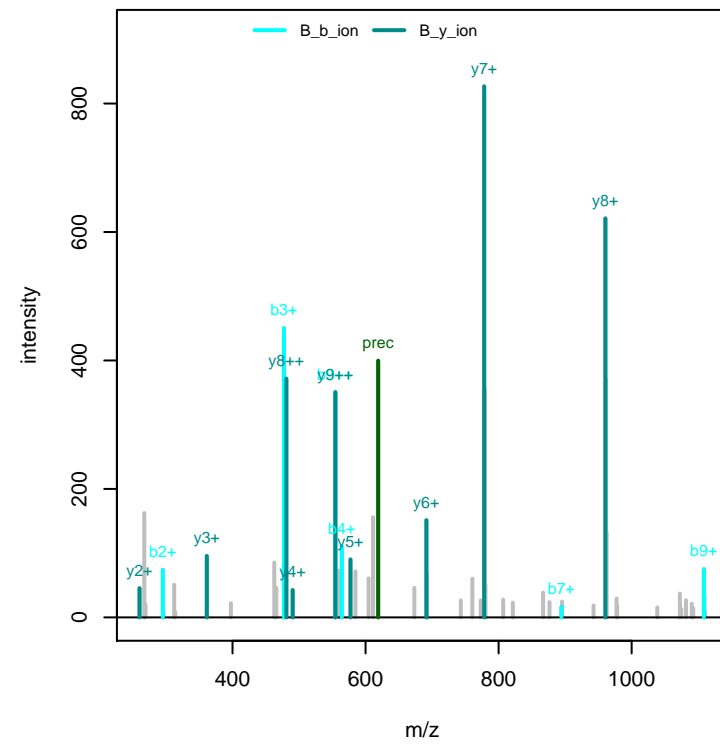

FFKSNSETIK+XL\_L

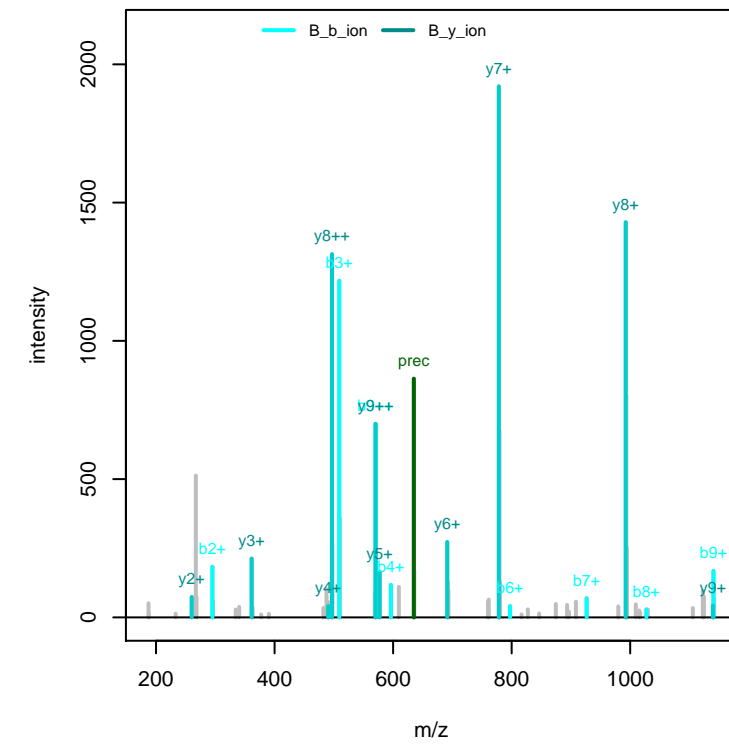



HEFDKTR  
GQGIGKQLVAK

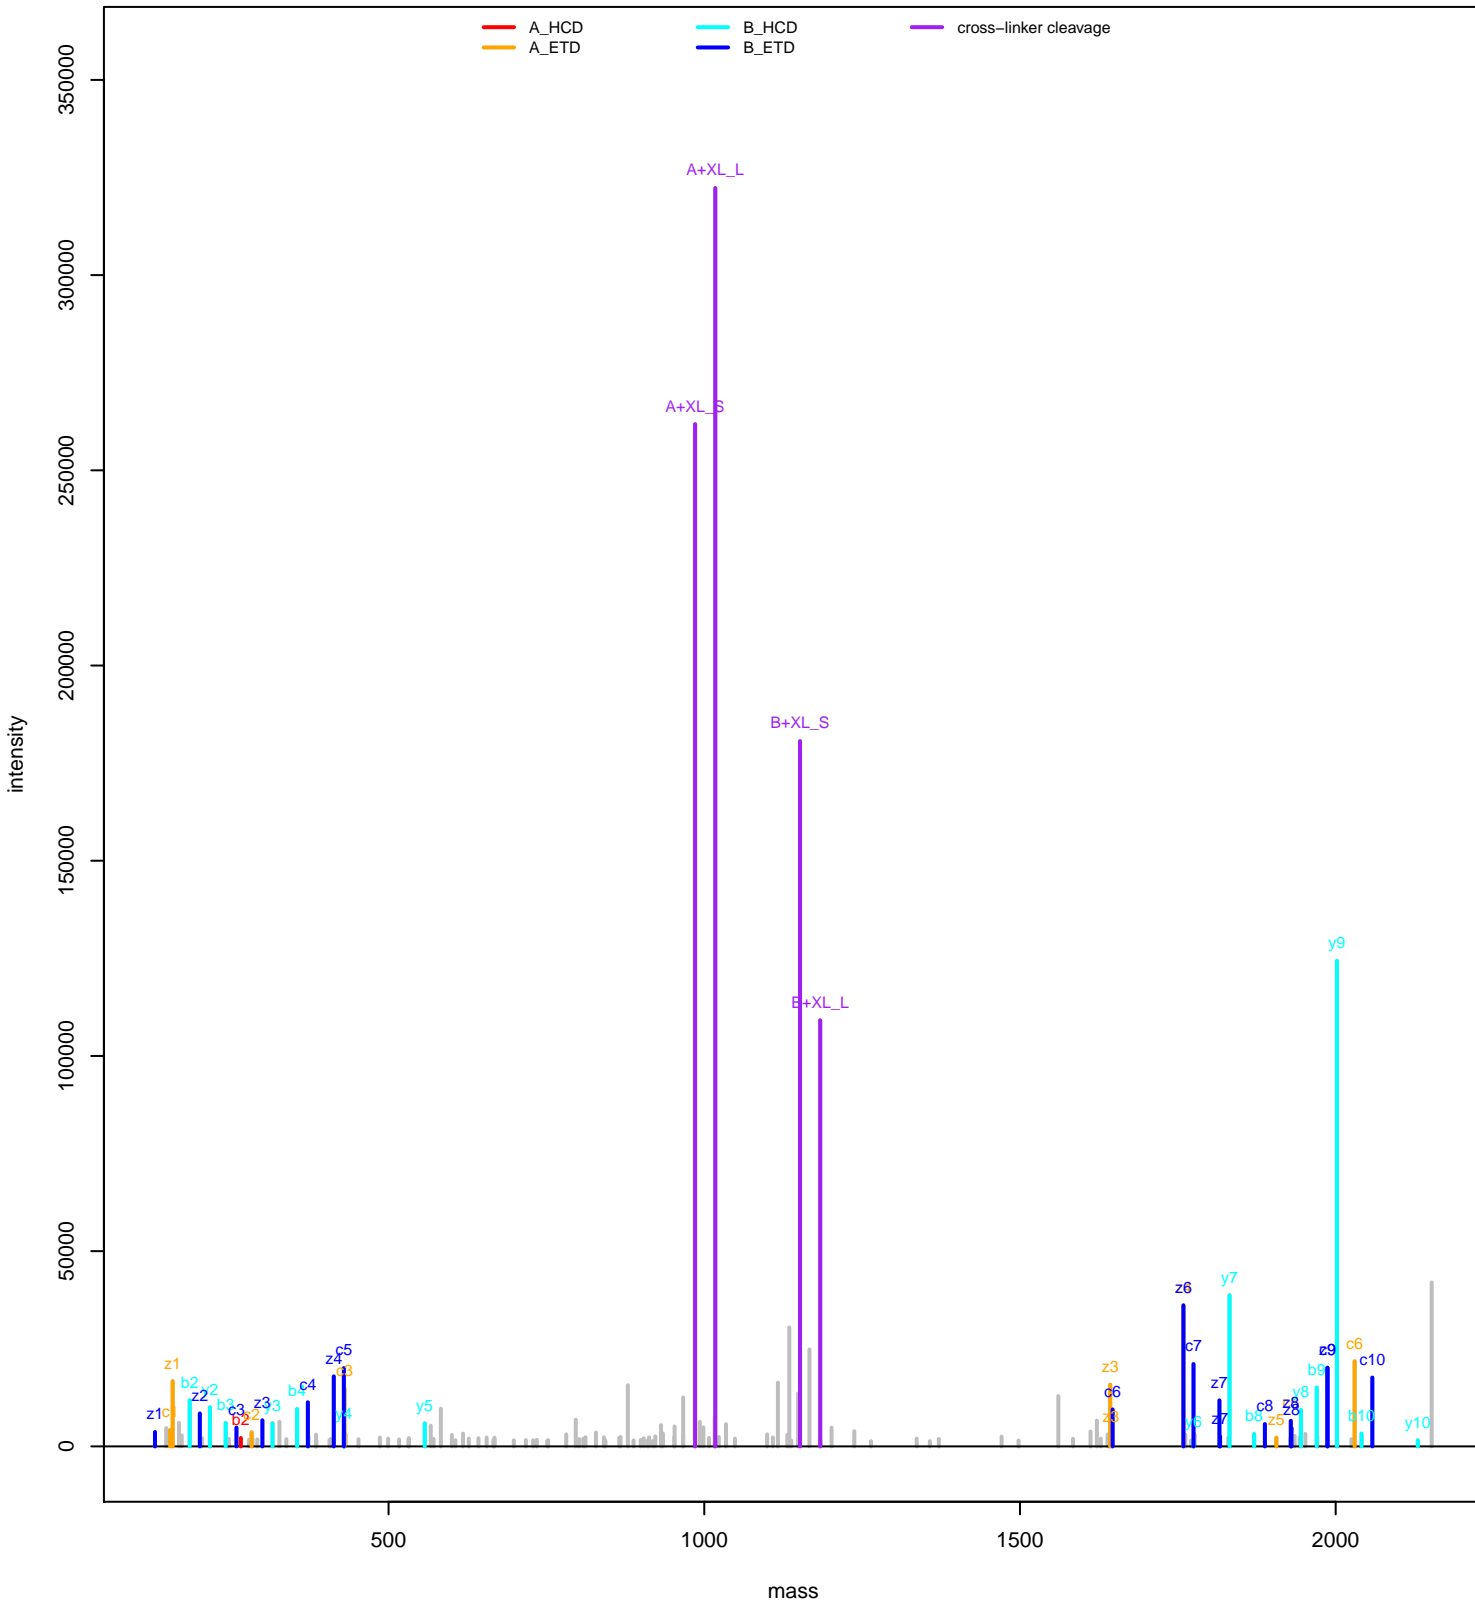

HEFDKTR+XL\_S

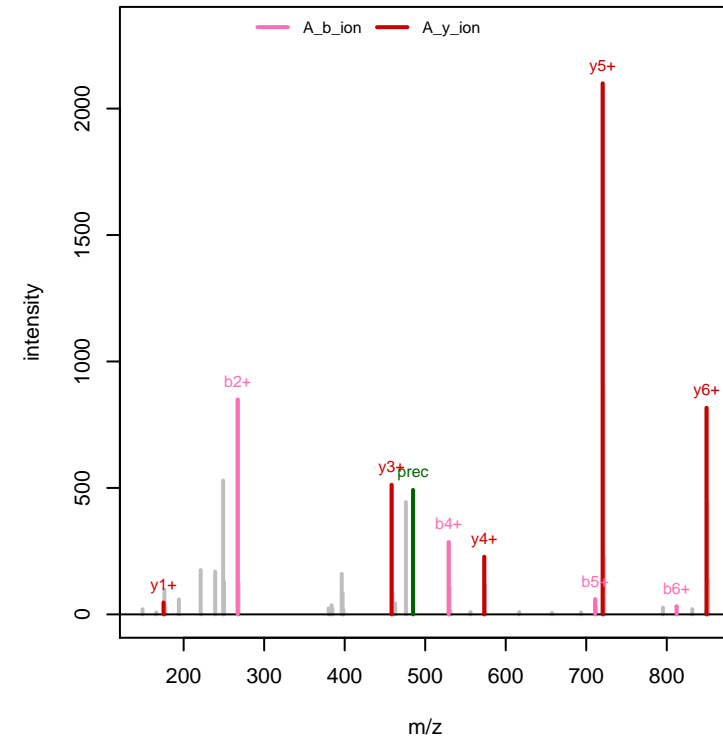

HEFDKTR+XL\_L

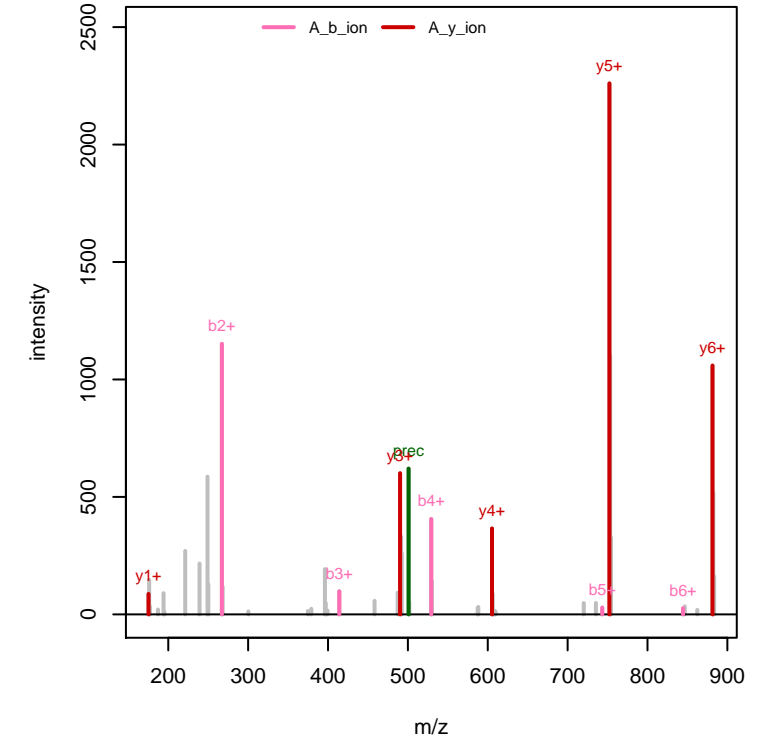

GQGIGKQLVAK+XL\_S

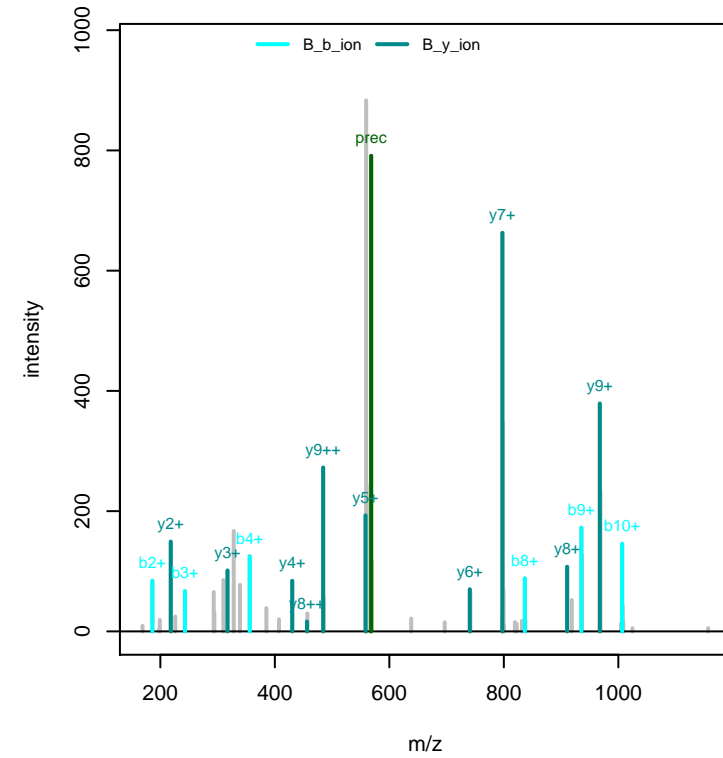

GQGIGKQLVAK+XL\_L

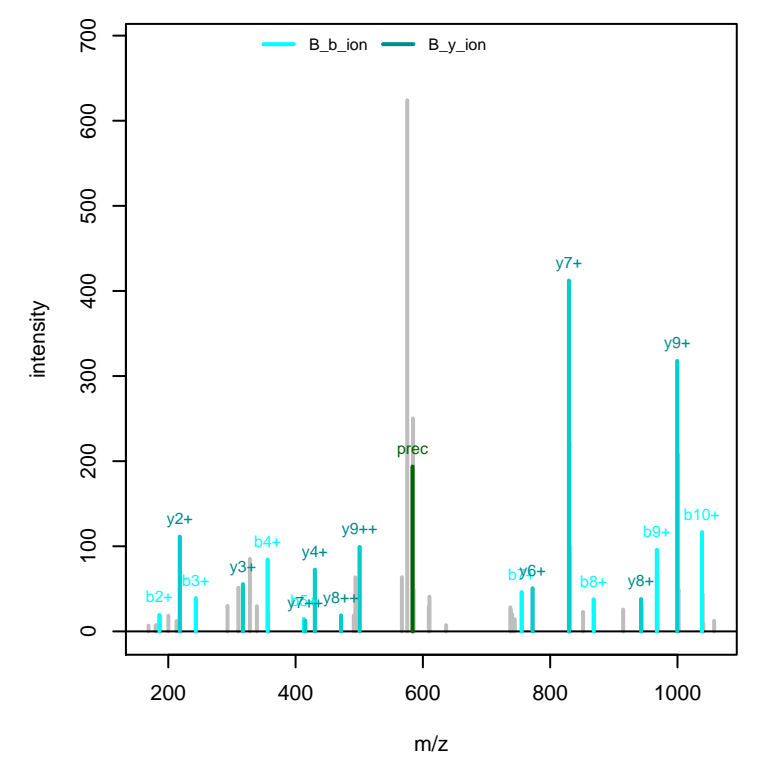

ALNLQDK  
KAGREAGVYMR

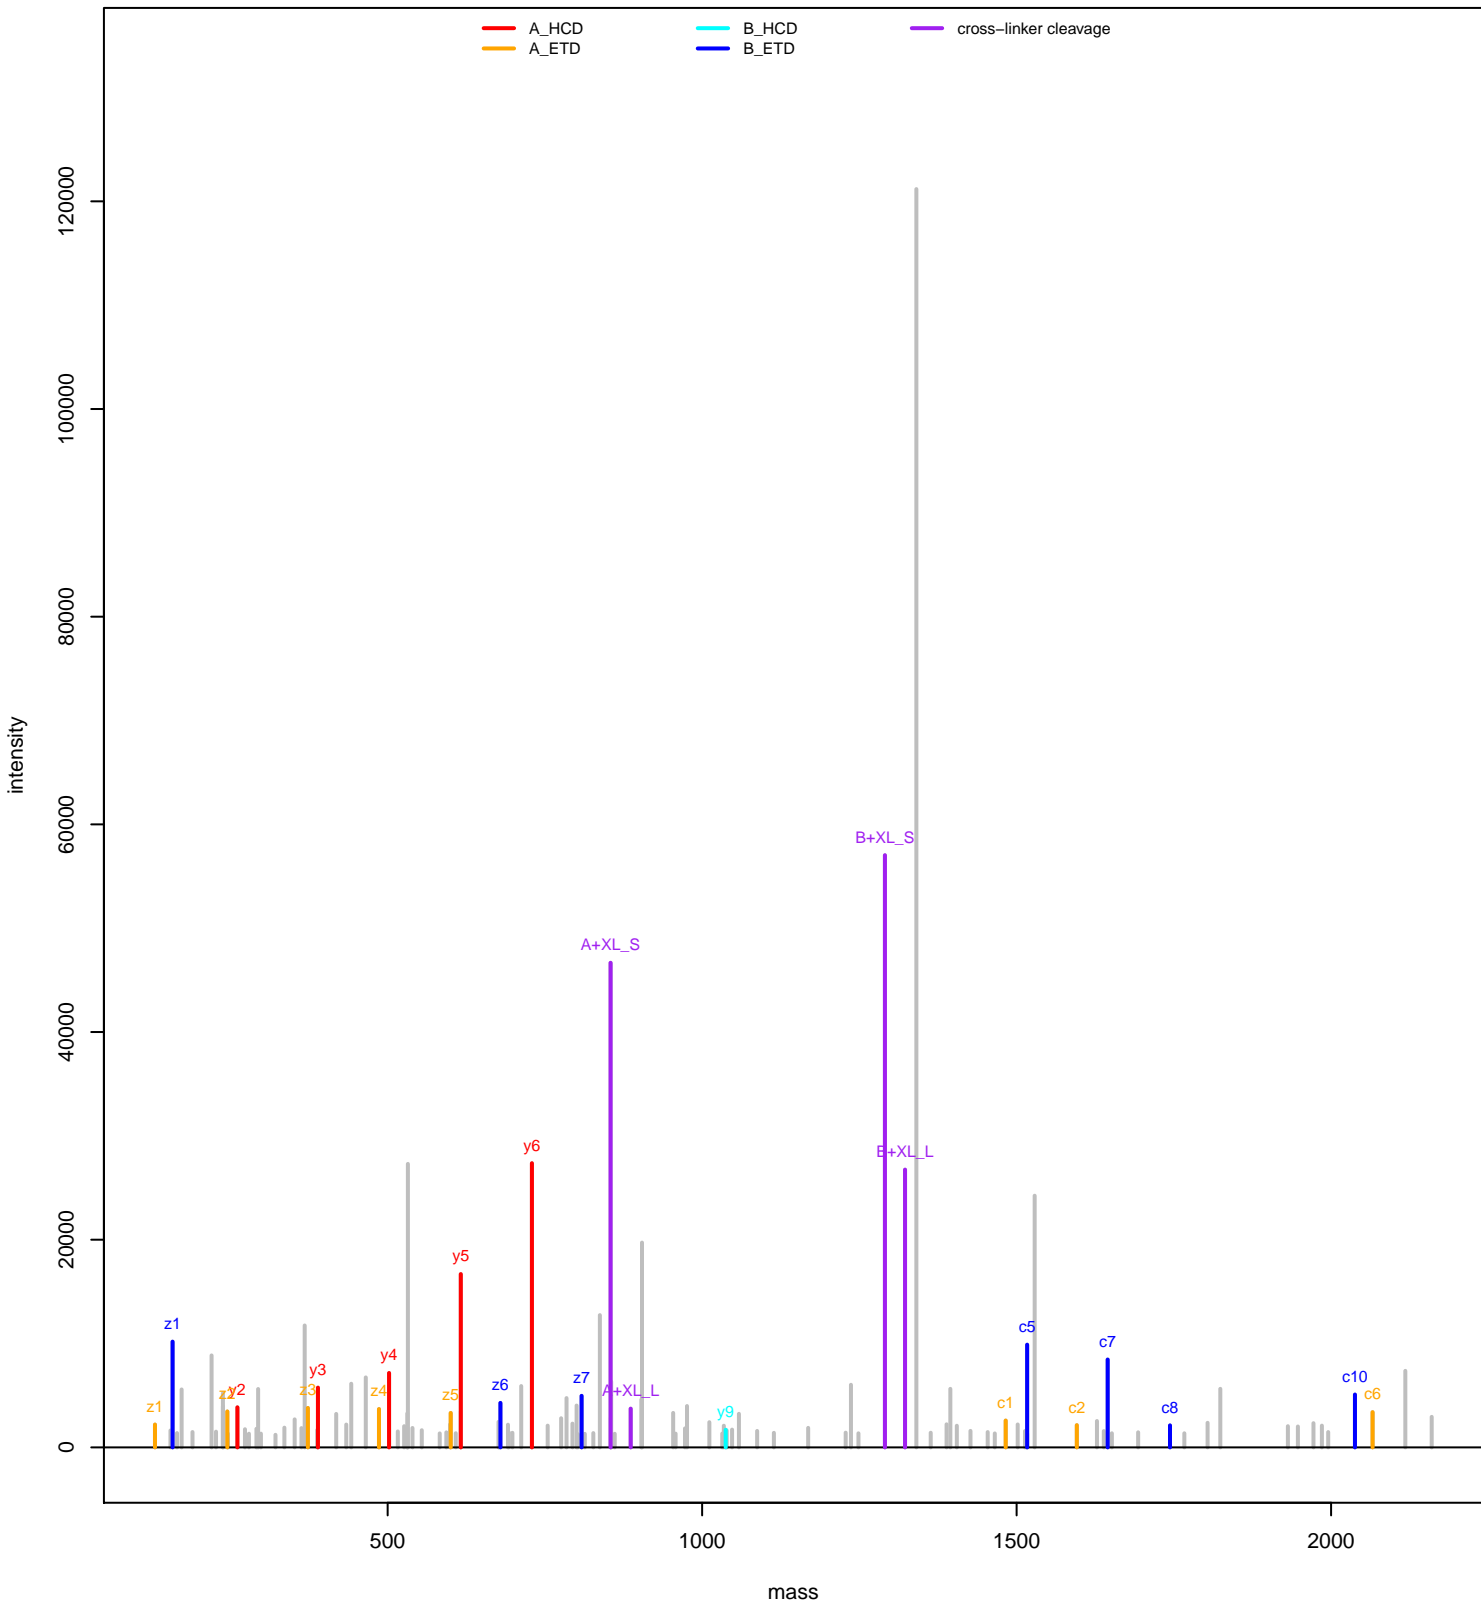

ALNLQDK+XL\_S

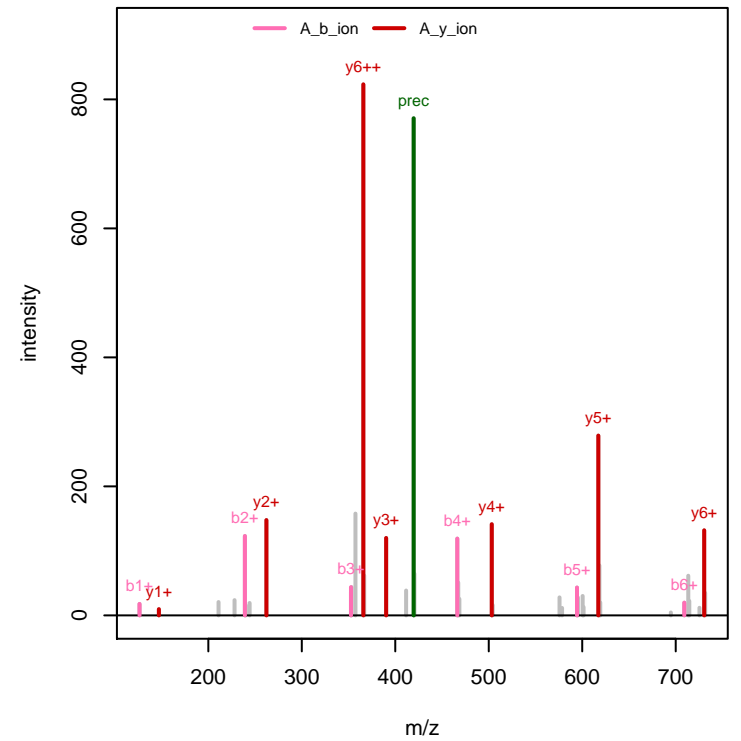

ALNLQDK+XL\_L

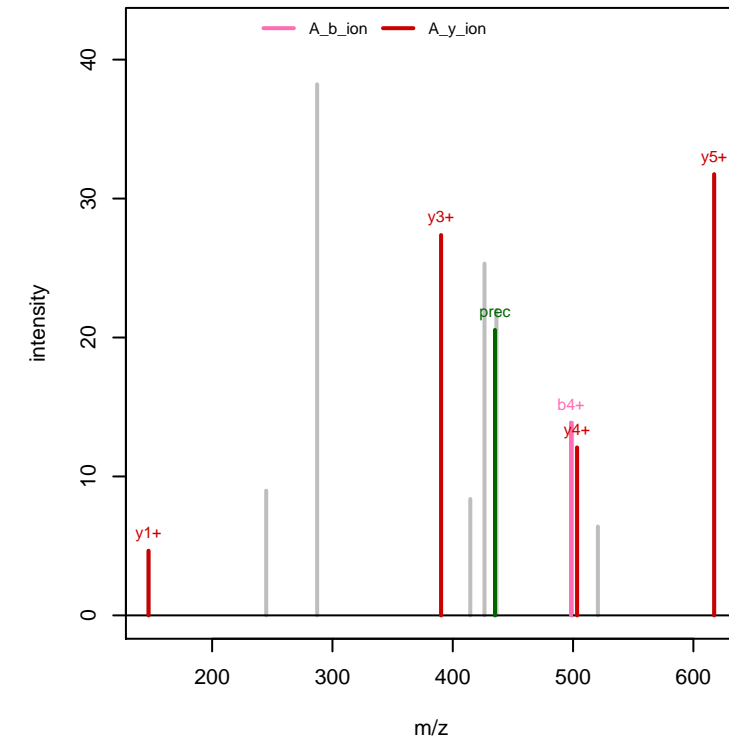

KAGREAGVYMR+XL\_S

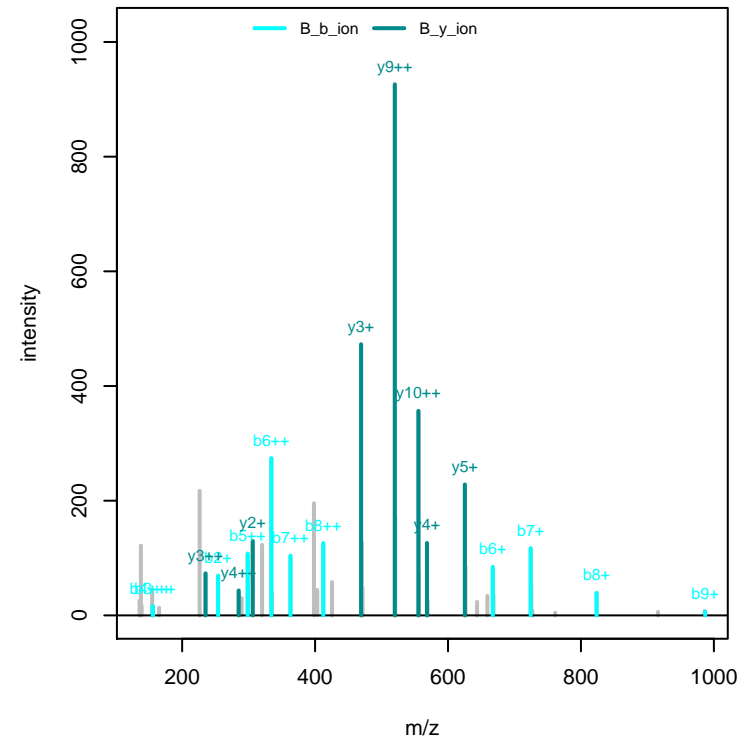

KAGREAGVYMR+XL\_L

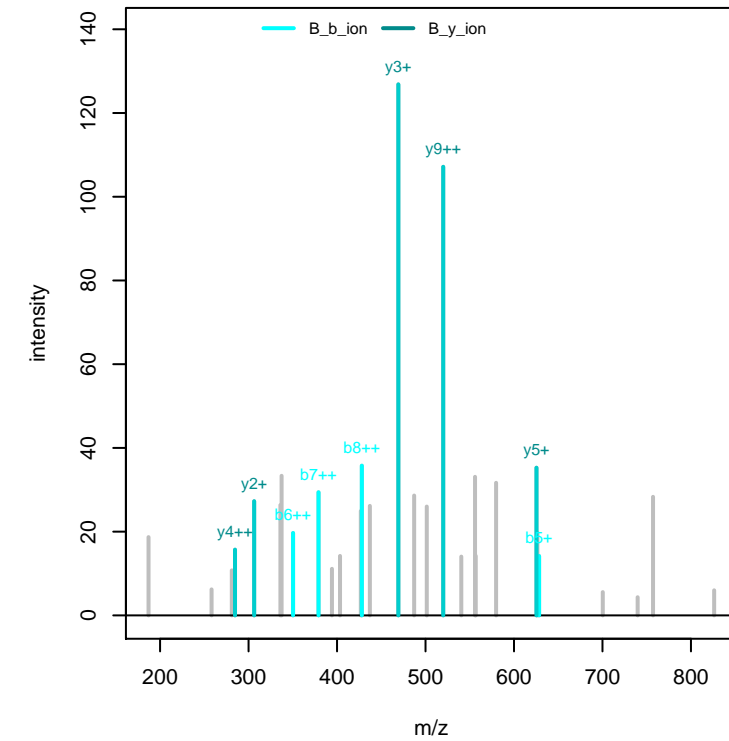

**KGAIVTQK**  
**AKDEADEKDAIATVNK**

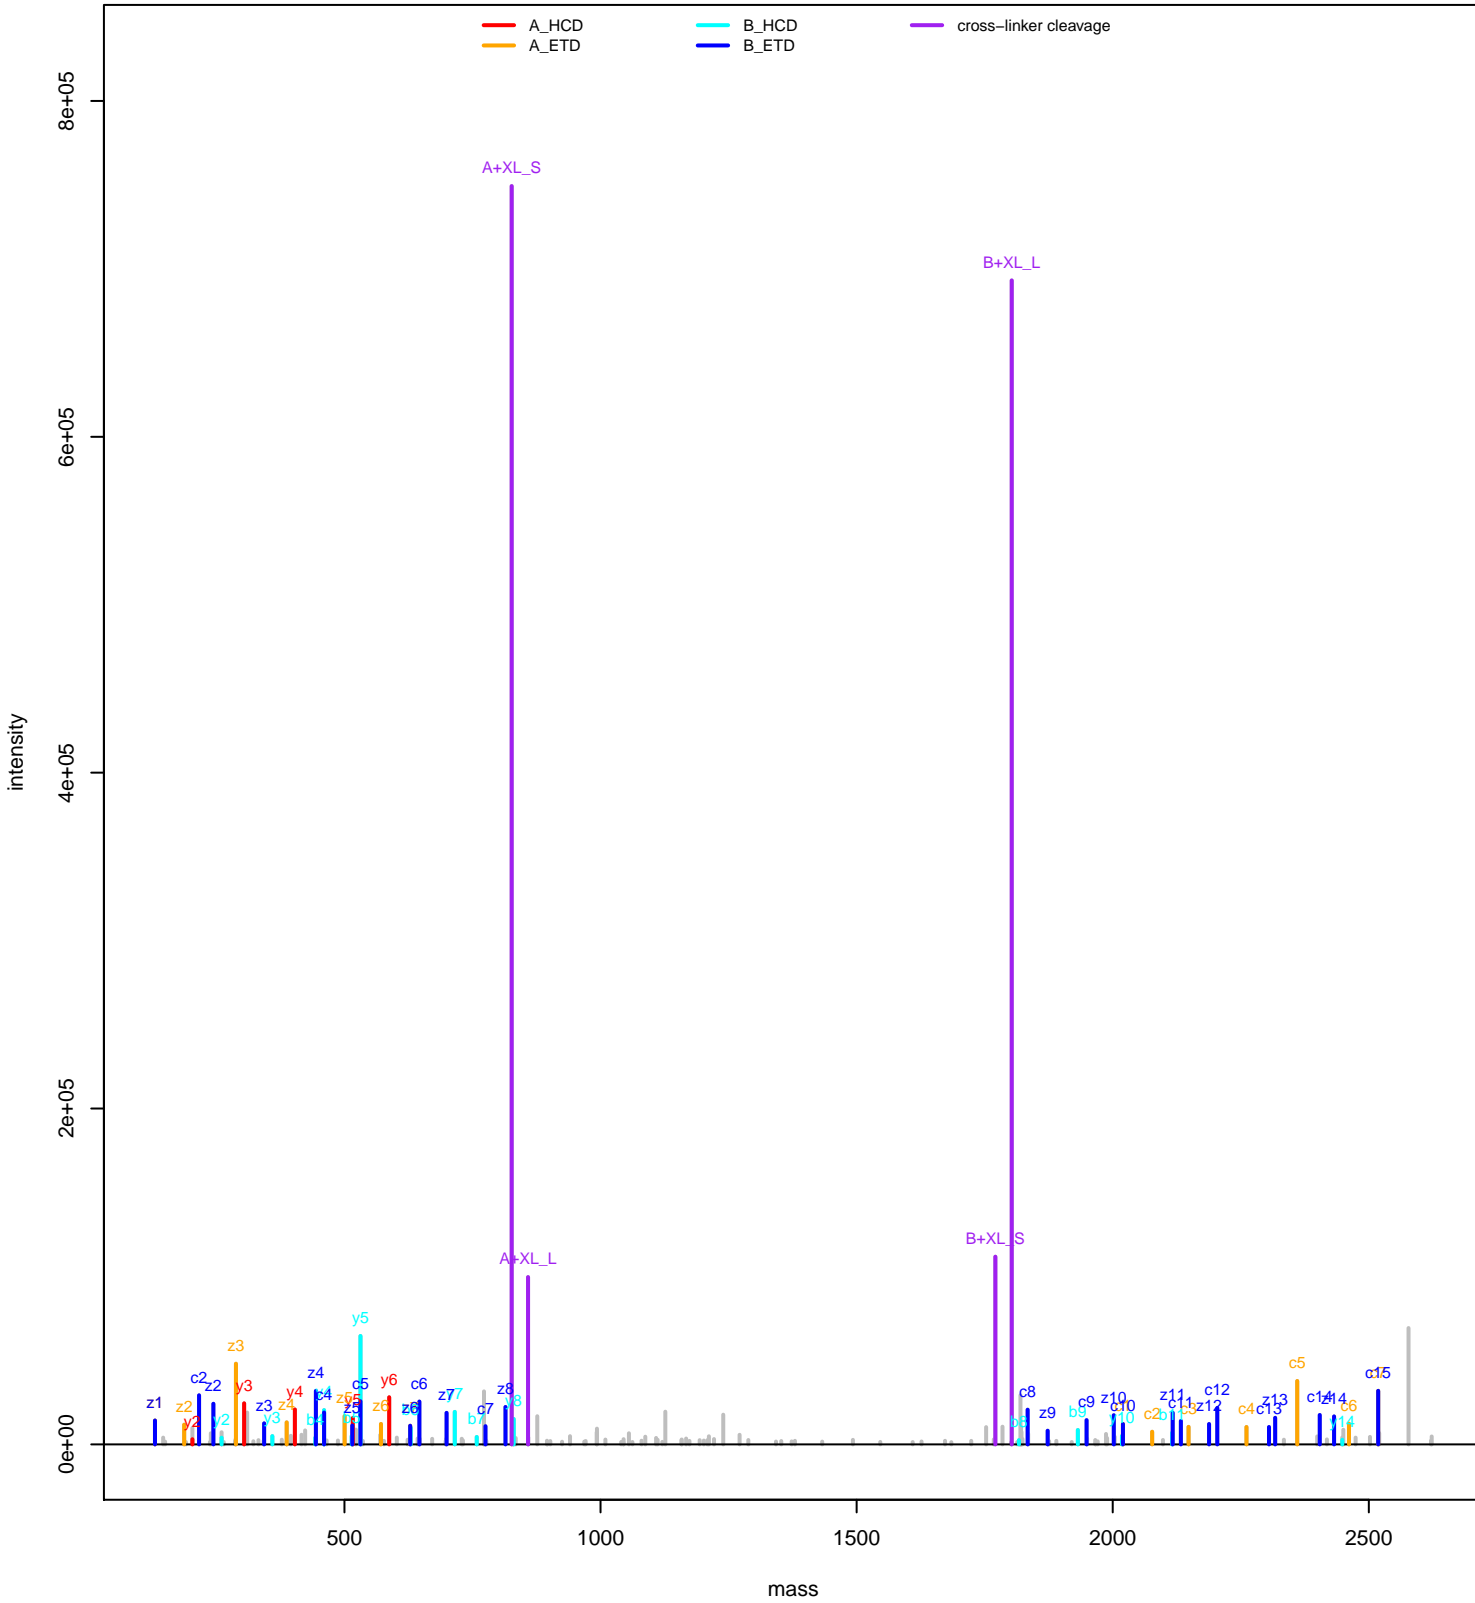

**KGAIVTQK+XL\_S**

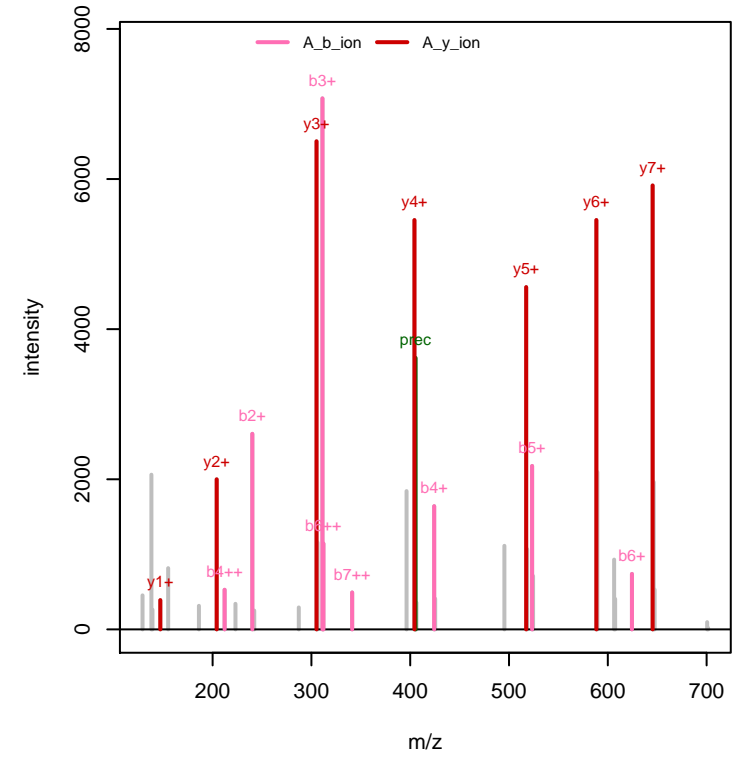

**KGAIVTQK+XL\_L**

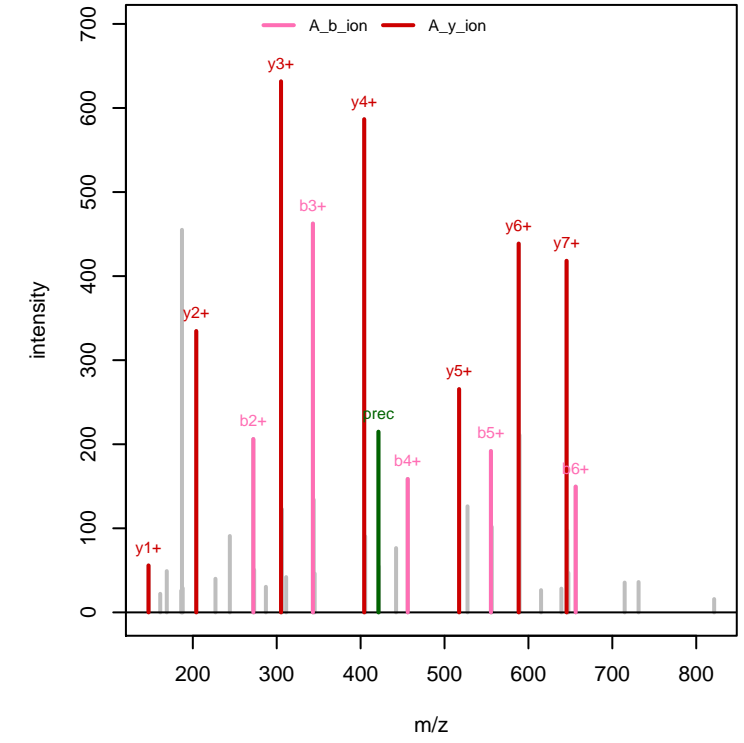

**AKDEADEKDAIATVNK+XL\_S**

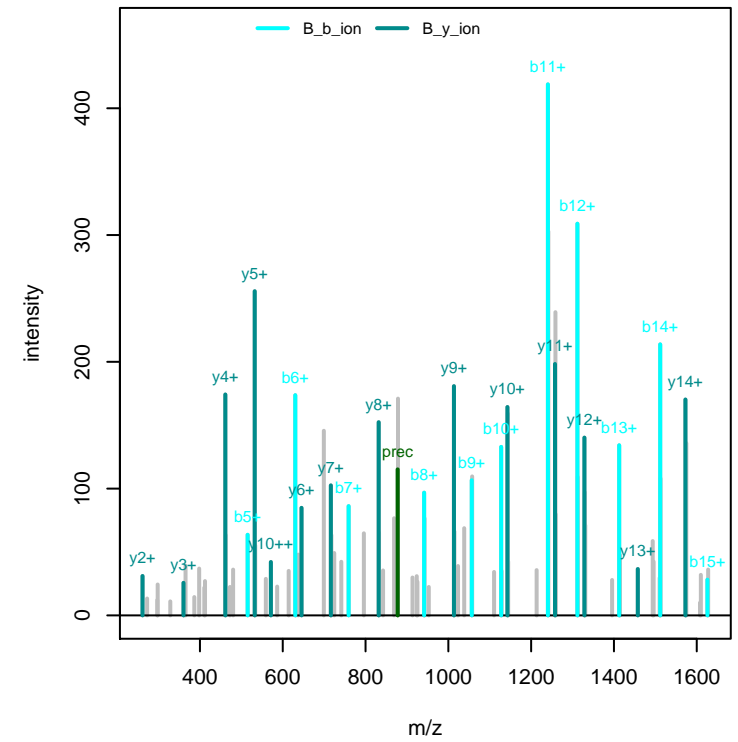

**AKDEADEKDAIATVNK+XL\_L**

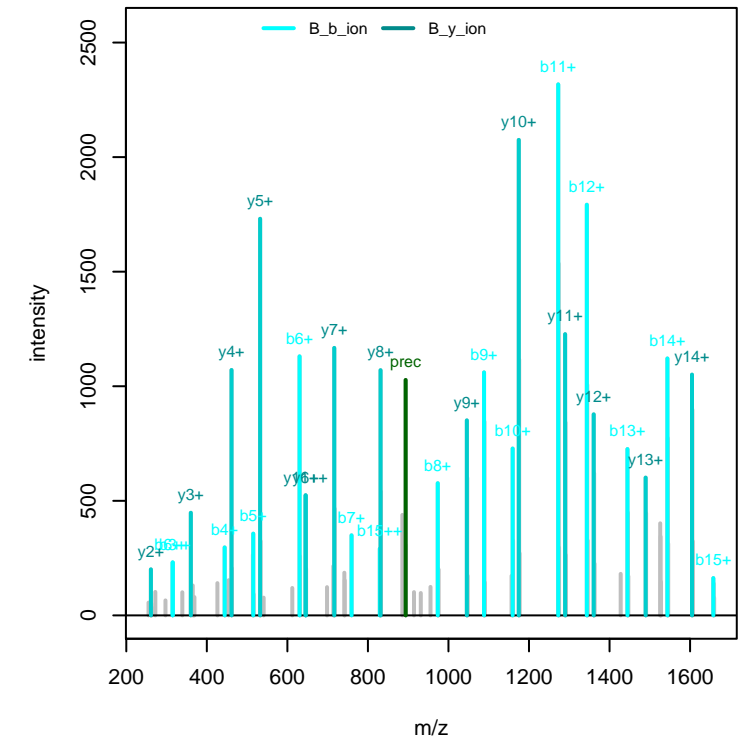

**ATKGVISIK**  
**RTAVAEYPTKSR**

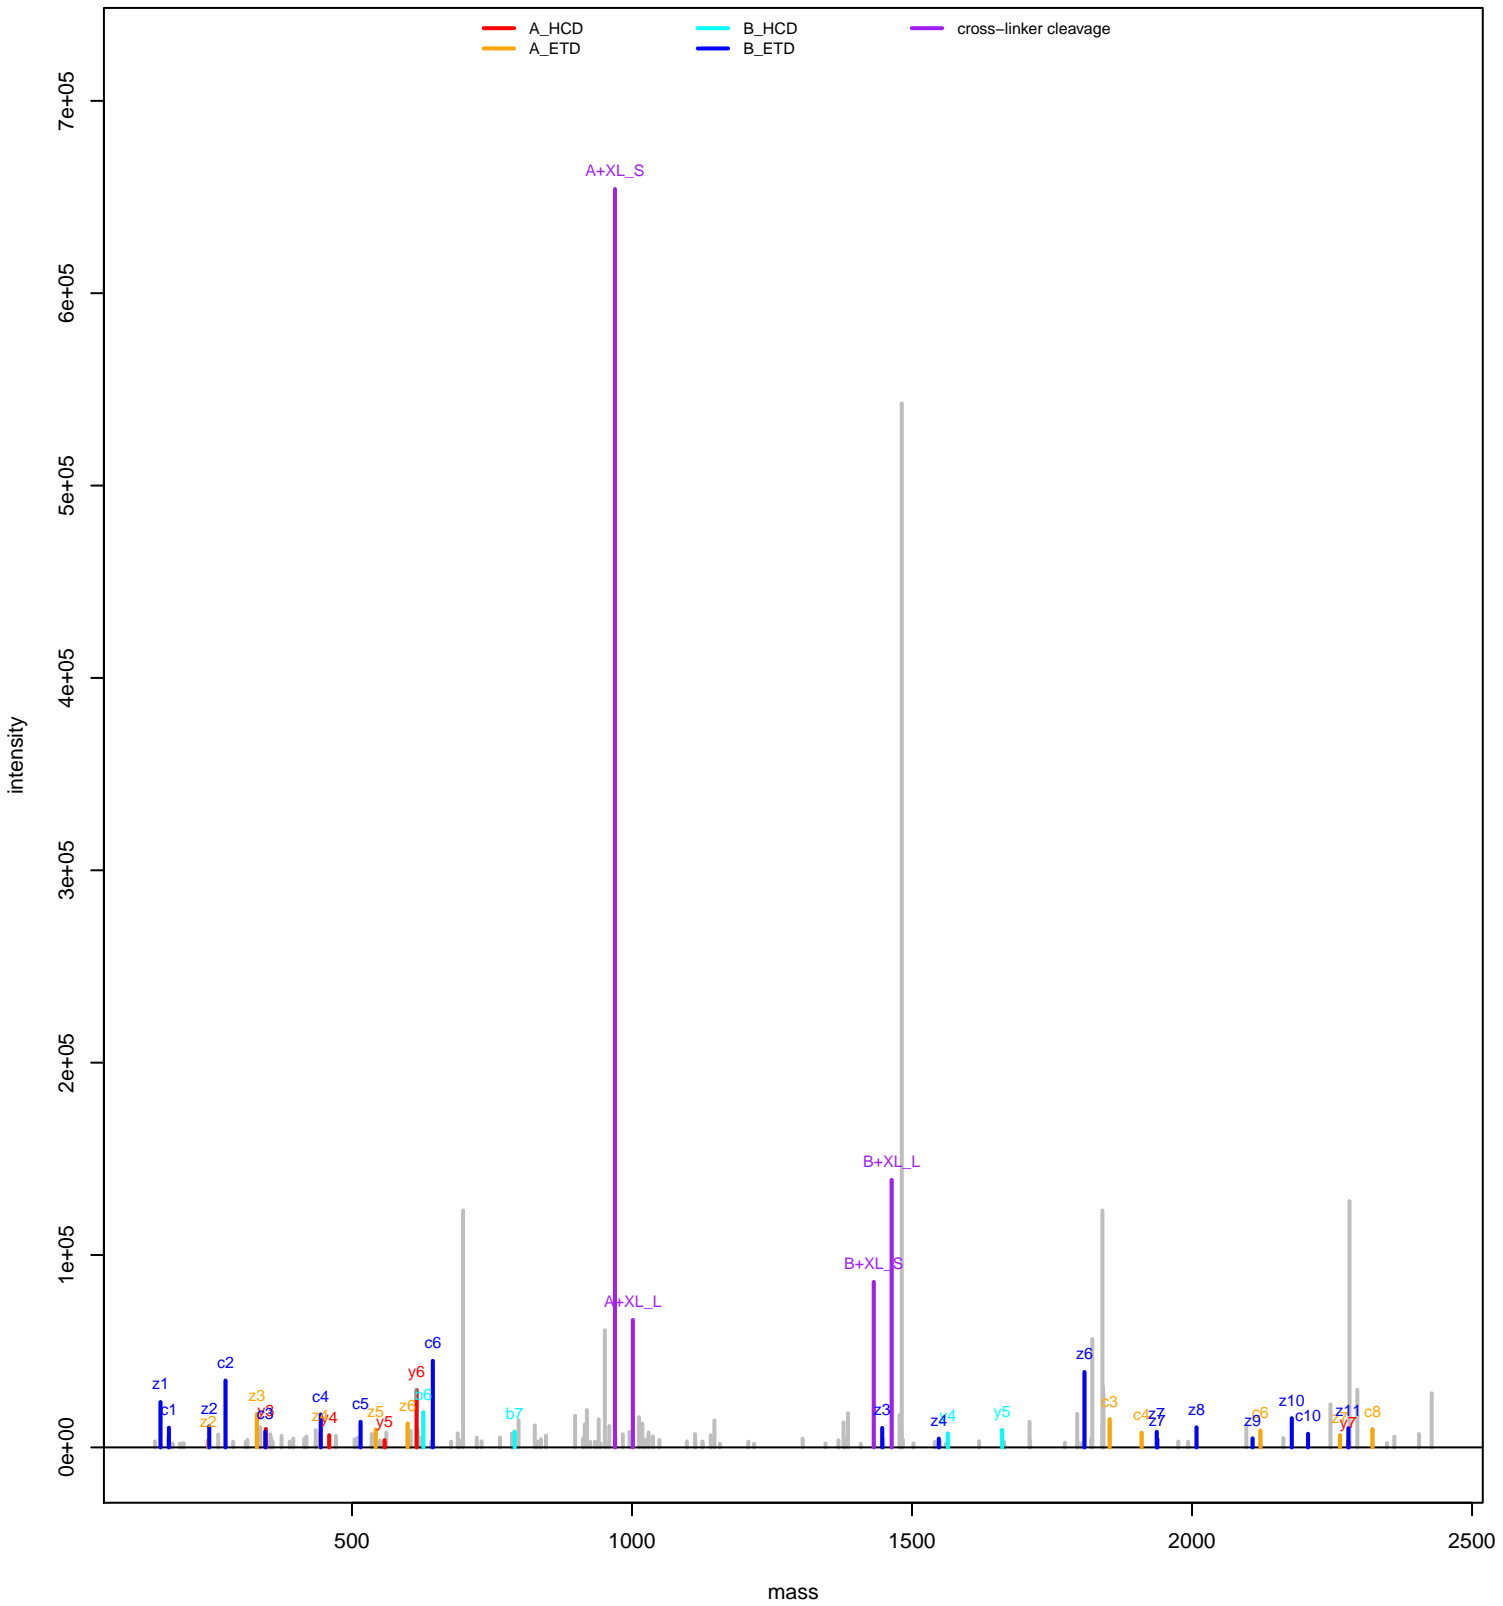

**ATKGVISIK+XL\_S**

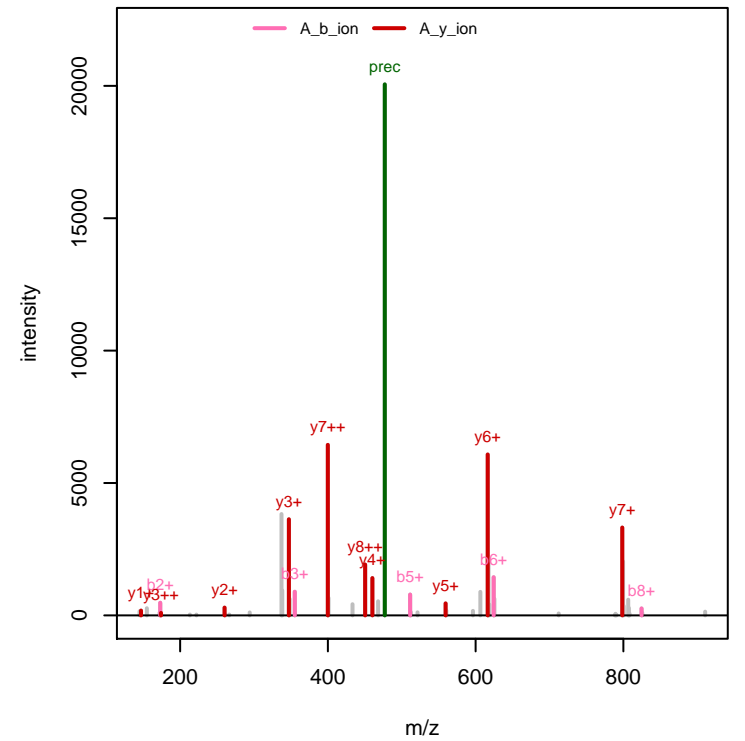

**ATKGVISIK+XL\_L**

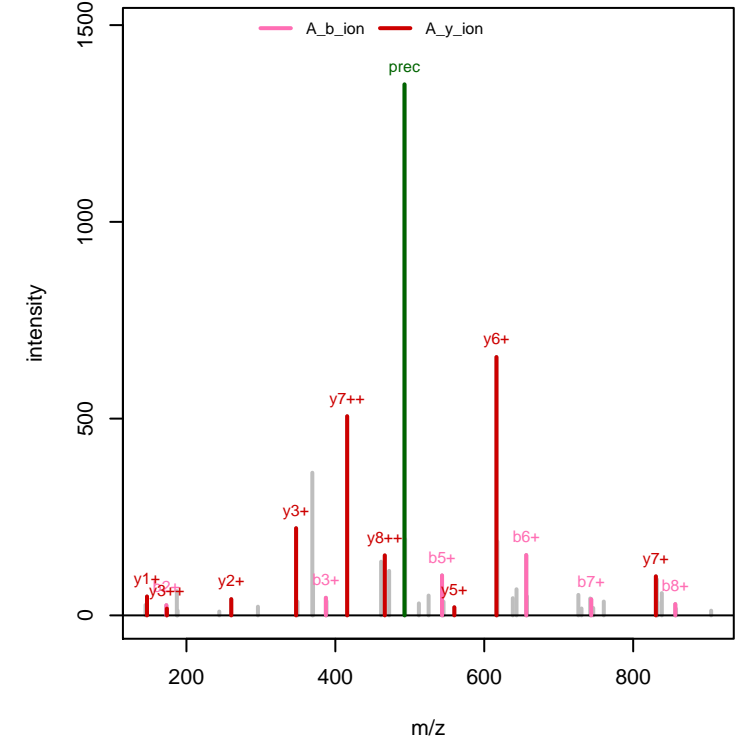

**RTAVAEYPTKSR+XL\_S**

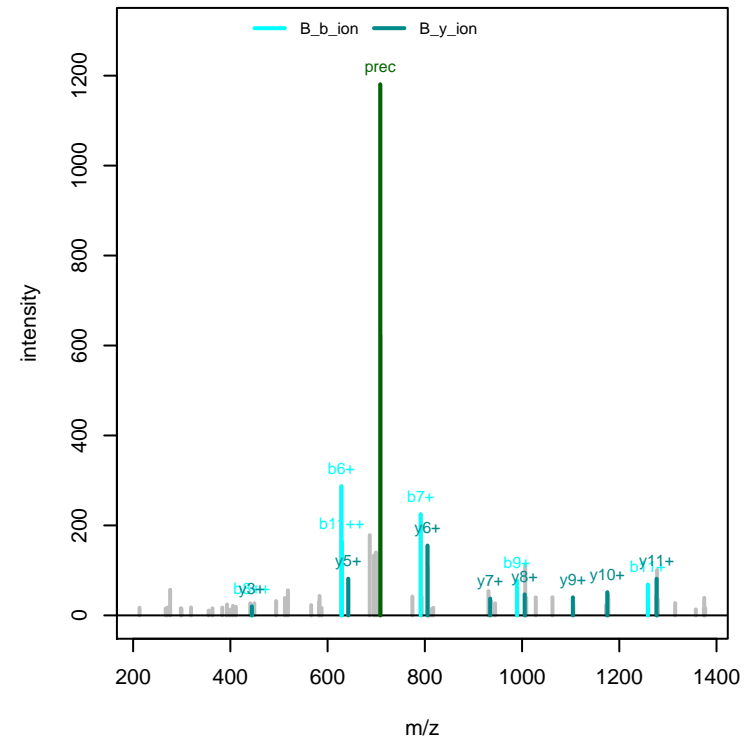

**RTAVAEYPTKSR+XL\_L**

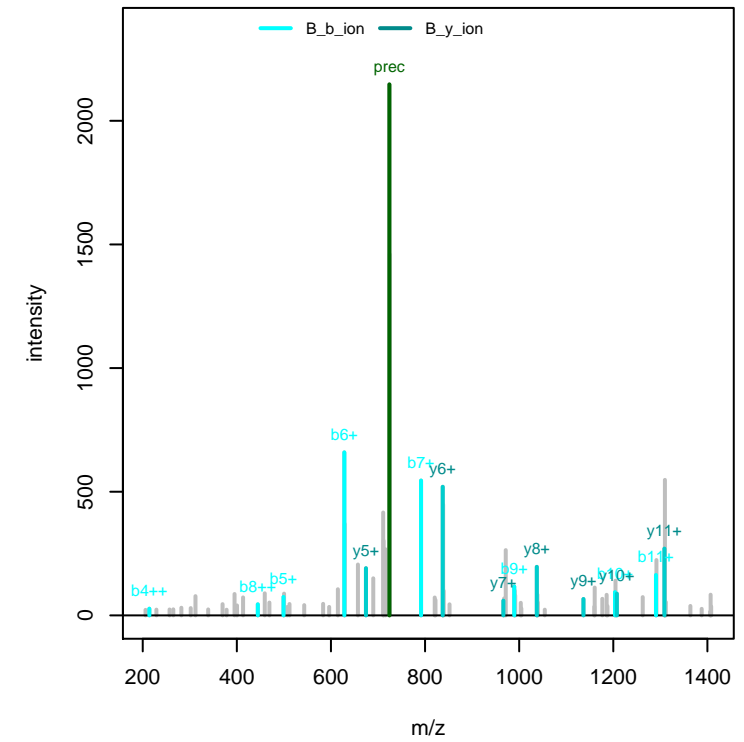

EALLDSLKK  
NEEGVGKALK

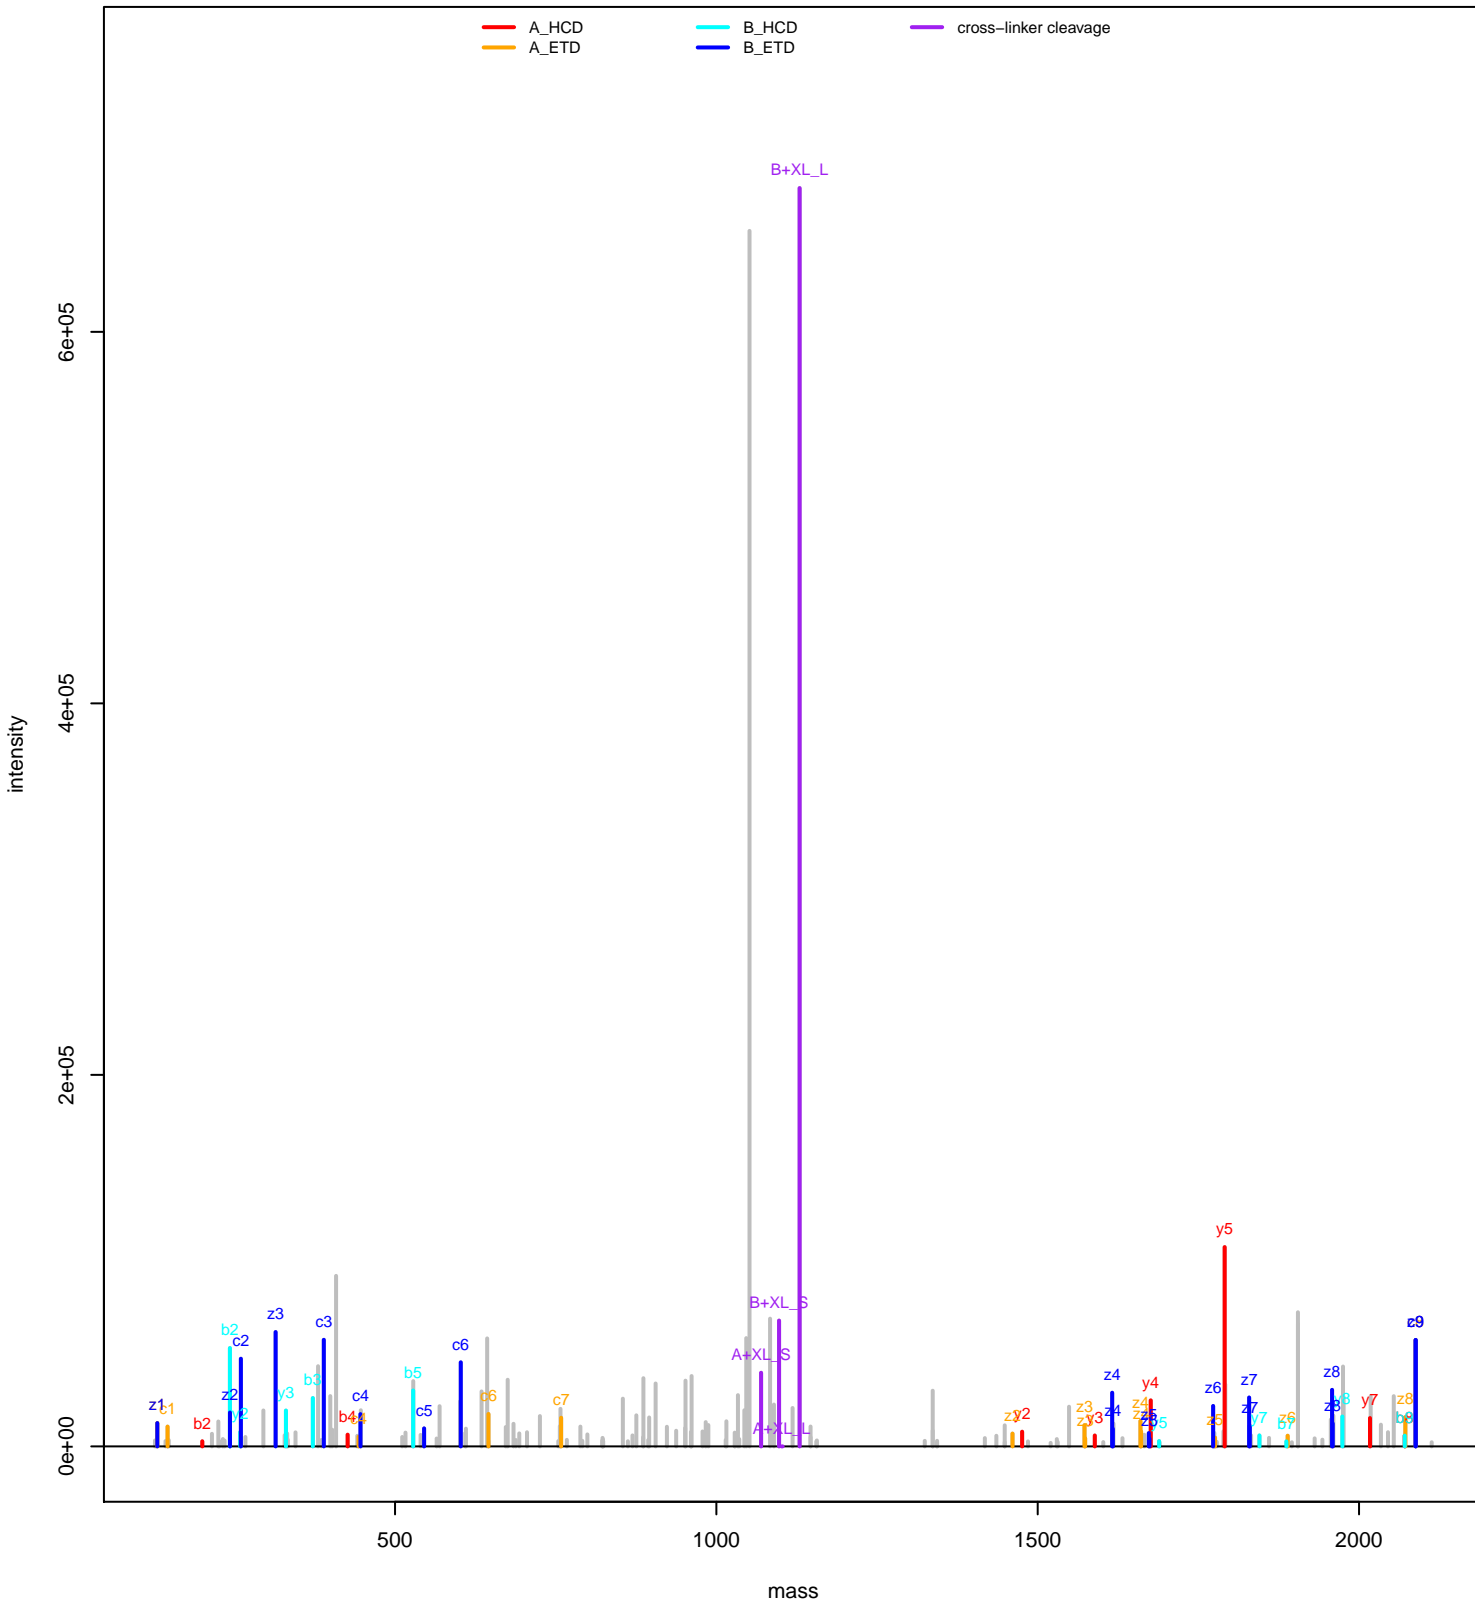

EALLDSLKK+XL\_S

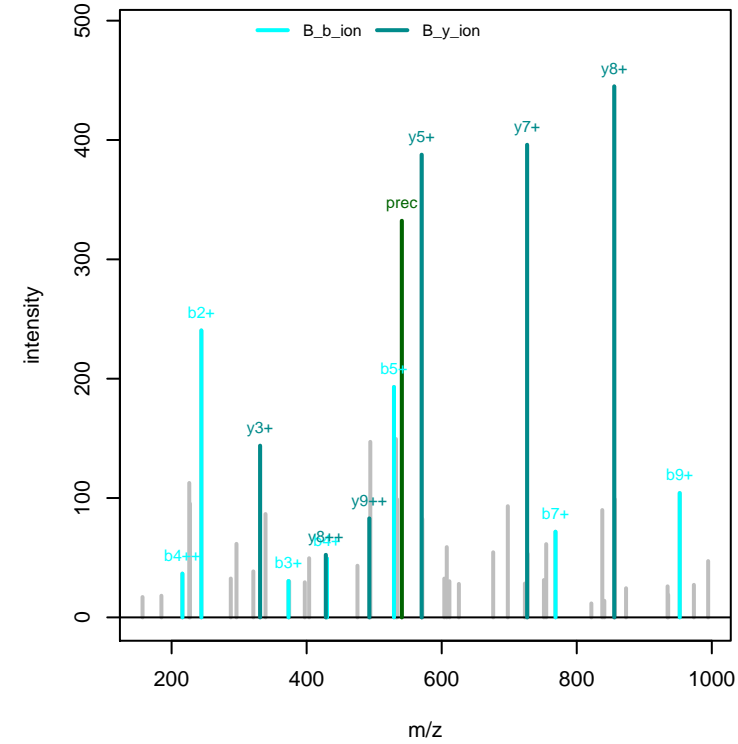

EALLDSLKK+XL\_L

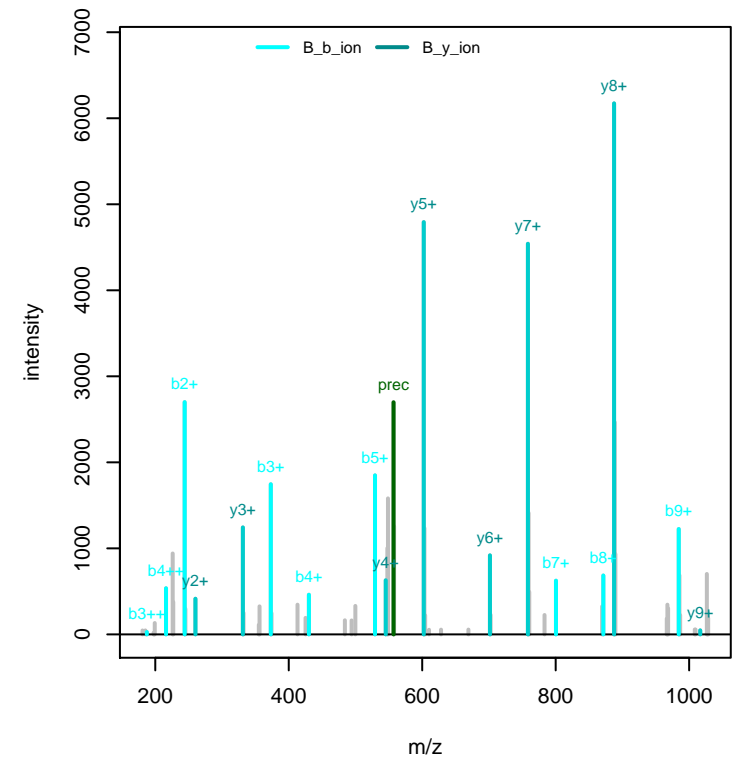

NEEGVGKALK+XL\_S



NEEGVGKALK+XL\_L





**KNLGV DVK  
LMTEKVLGTGEK**

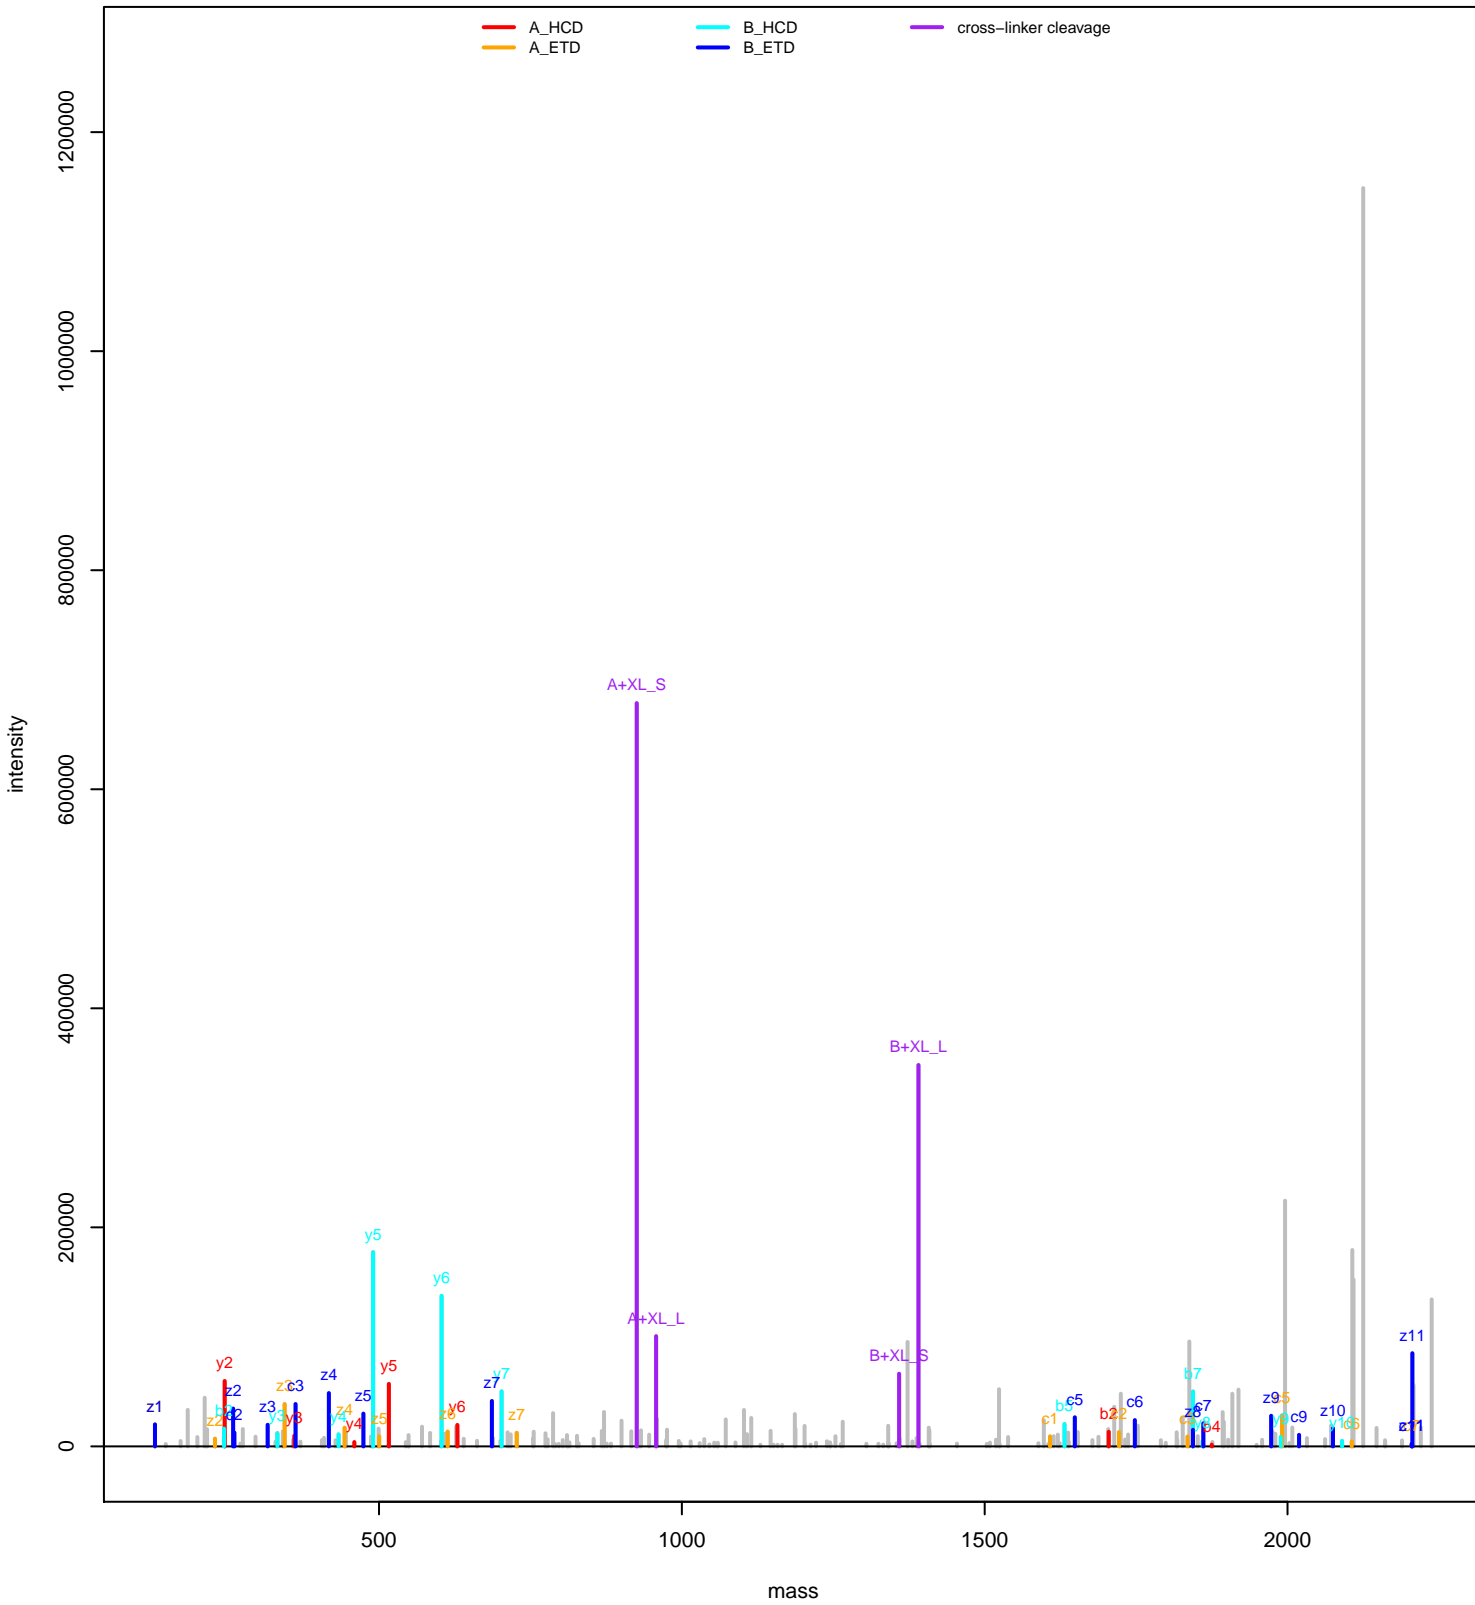

**KNLGV DVK+XL\_S**

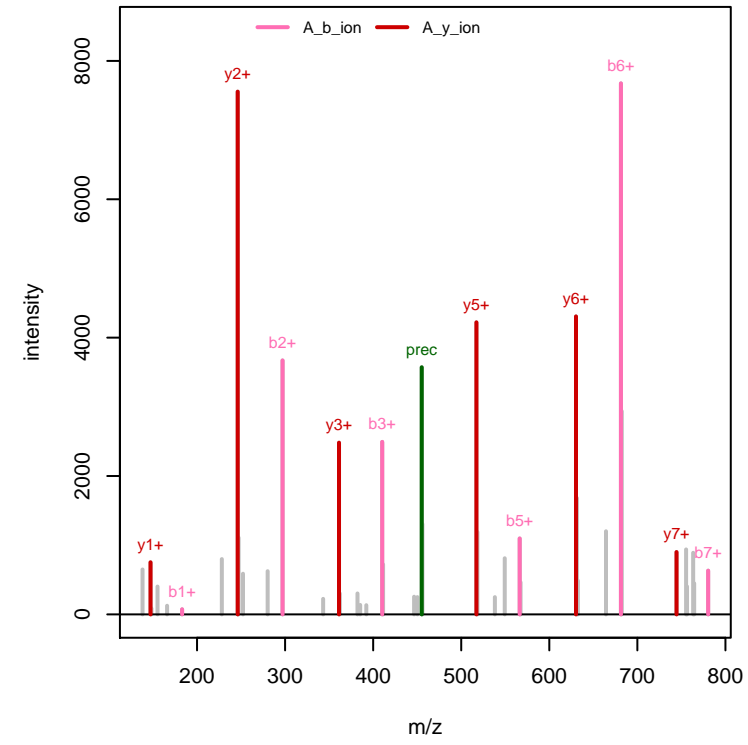

**KNLGV DVK+XL\_L**

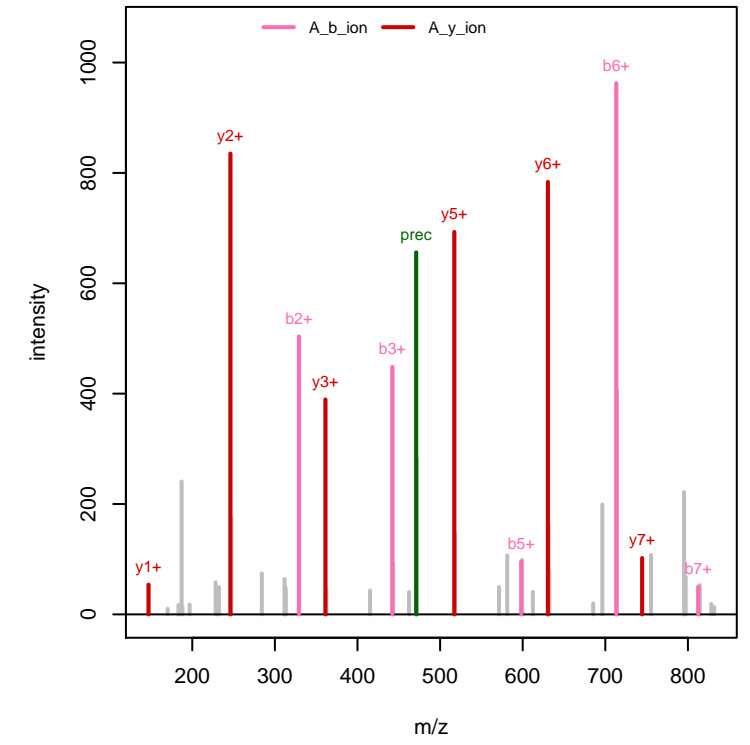

**LMTEKVLGTGEK+XL\_S**

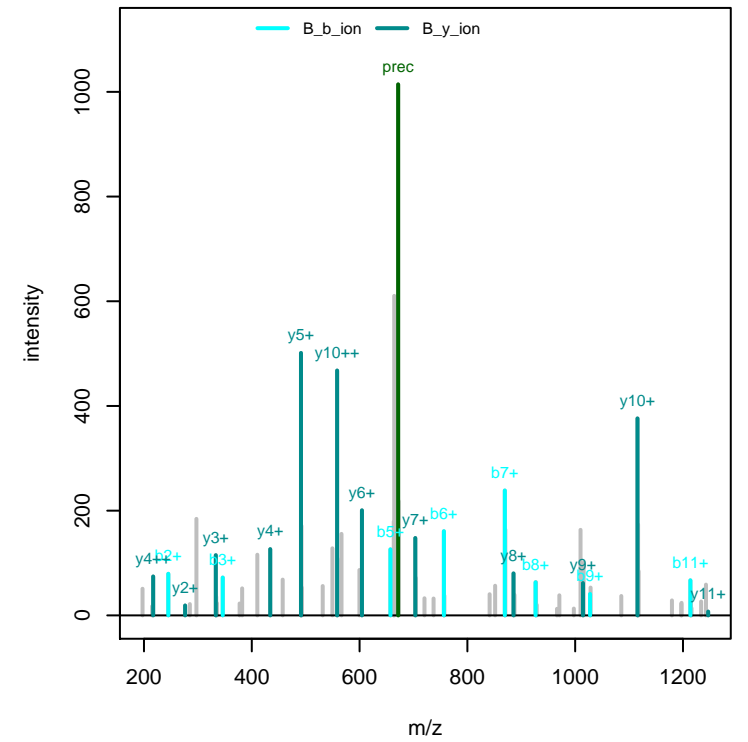

**LMTEKVLGTGEK+XL\_L**

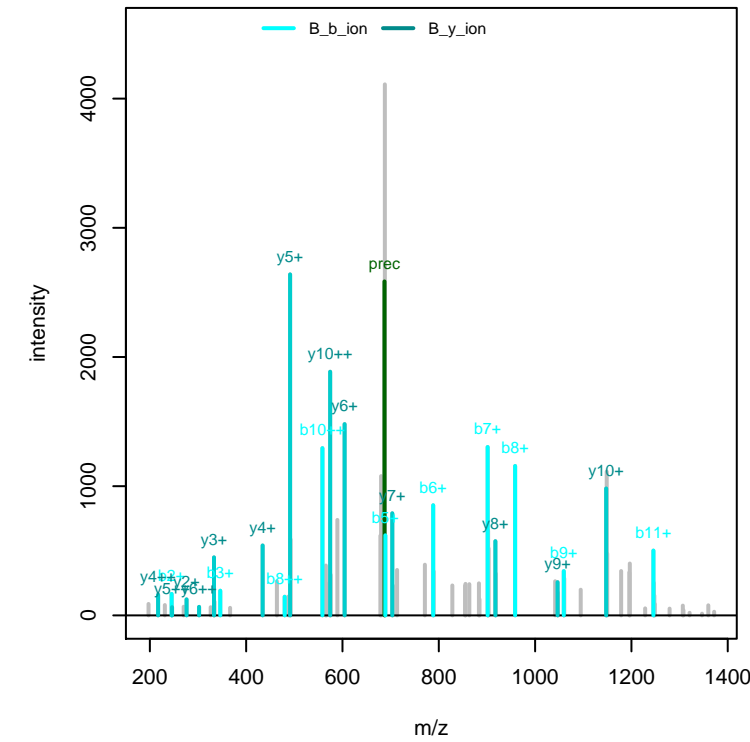

TMoNITSK  
QHVADRLAKLEK

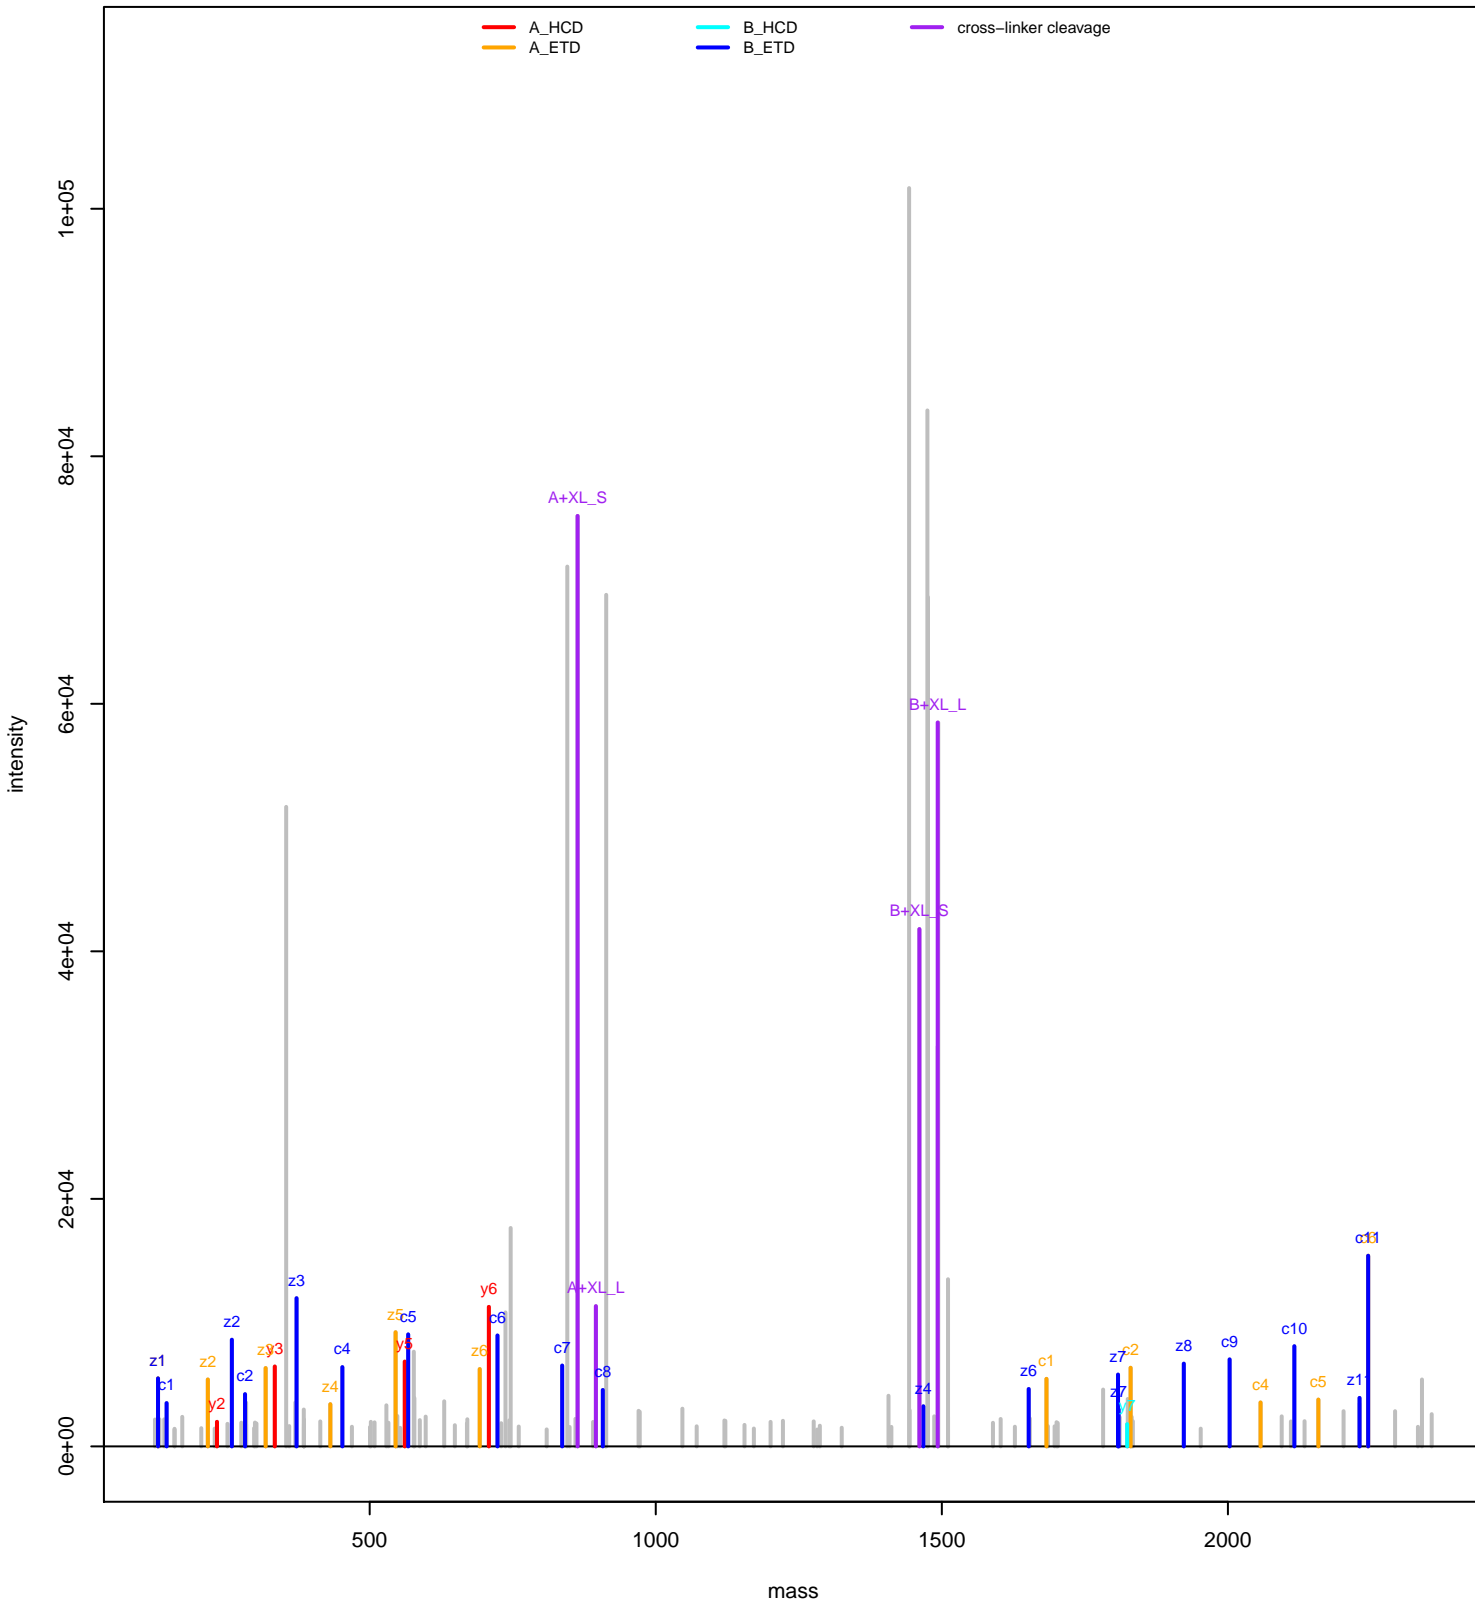

TMoNITSK+XL\_S

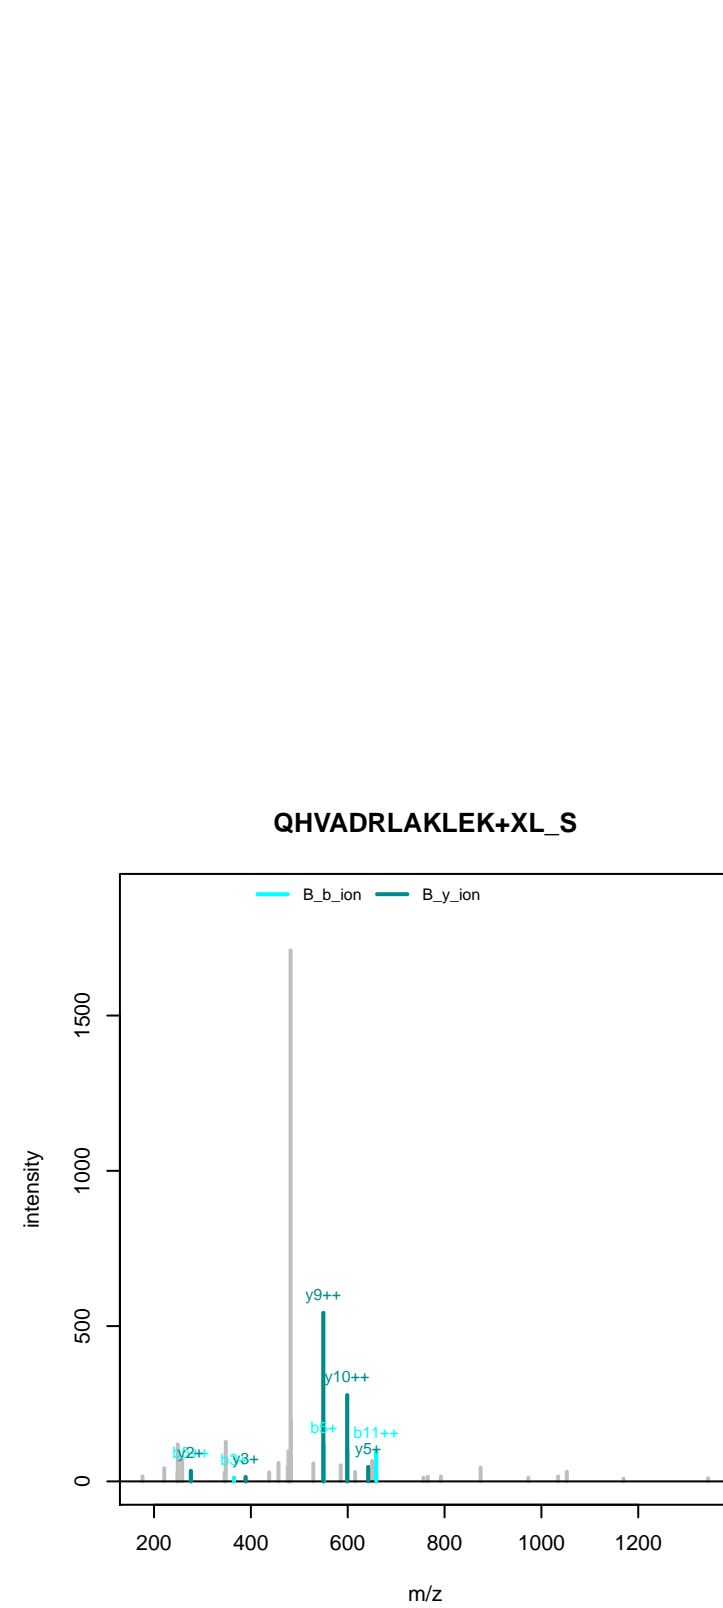

TMoNITSK+XL\_L

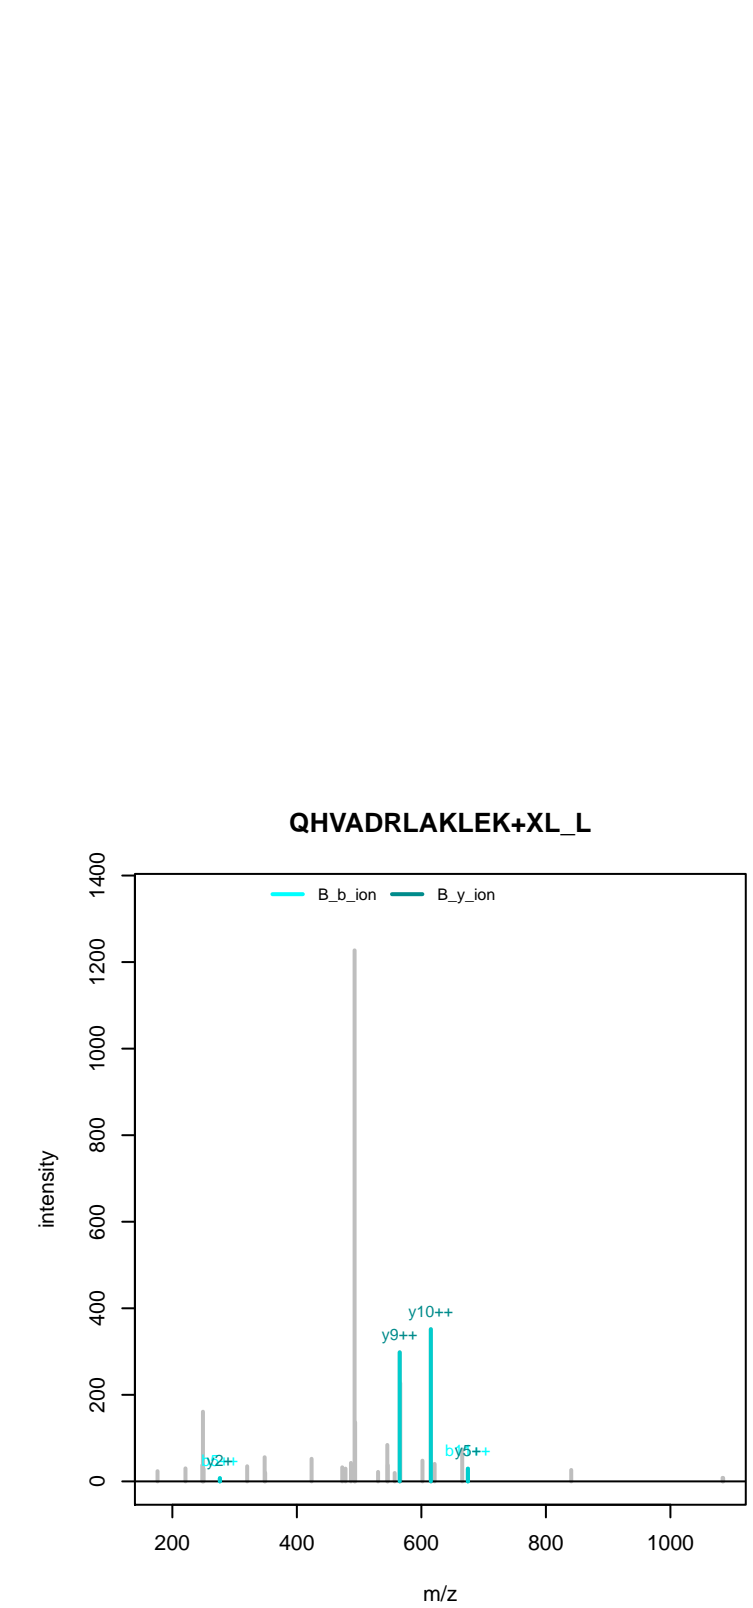

QHVADRLAKLEK+XL\_S

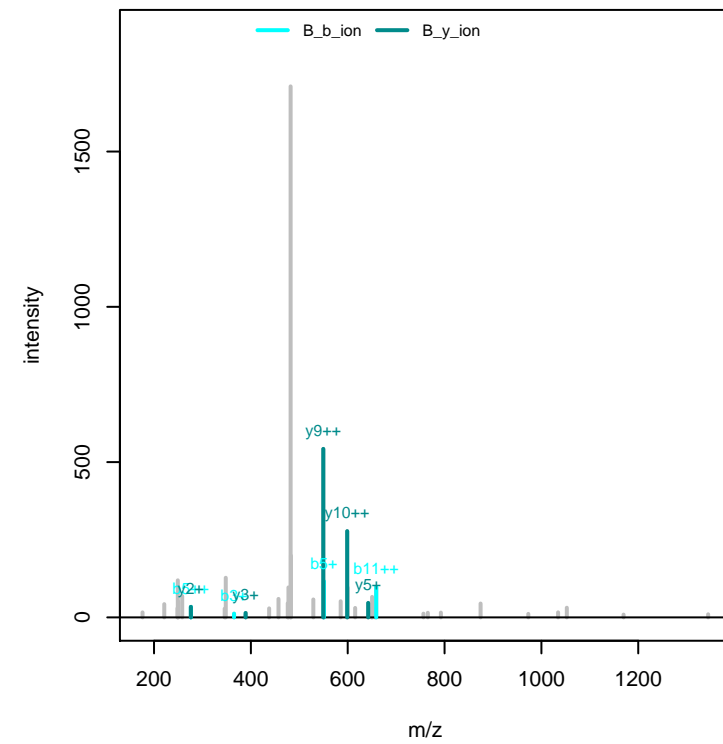

QHVADRLAKLEK+XL\_L

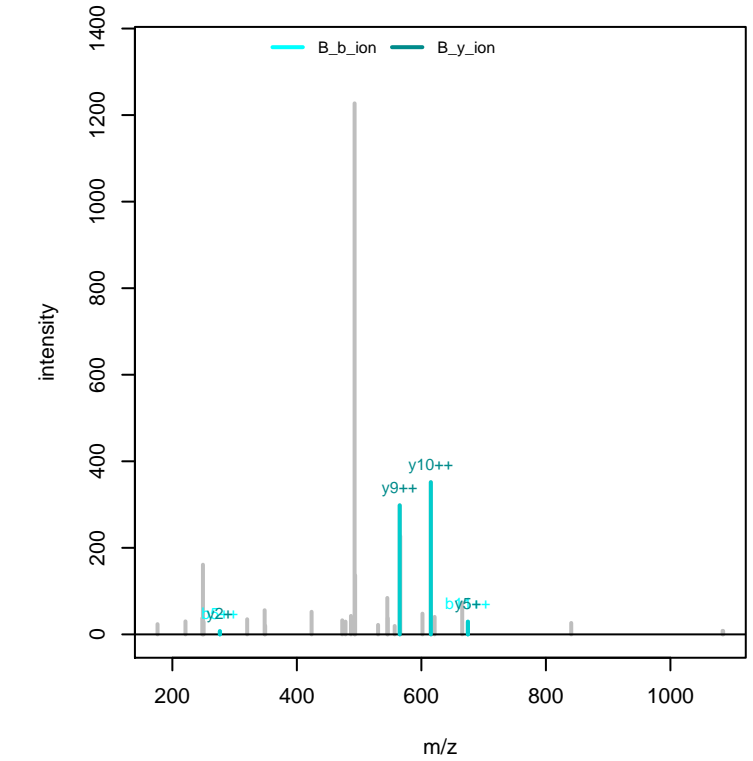



LEKDVMAQR  
TKLEKDVMAQR

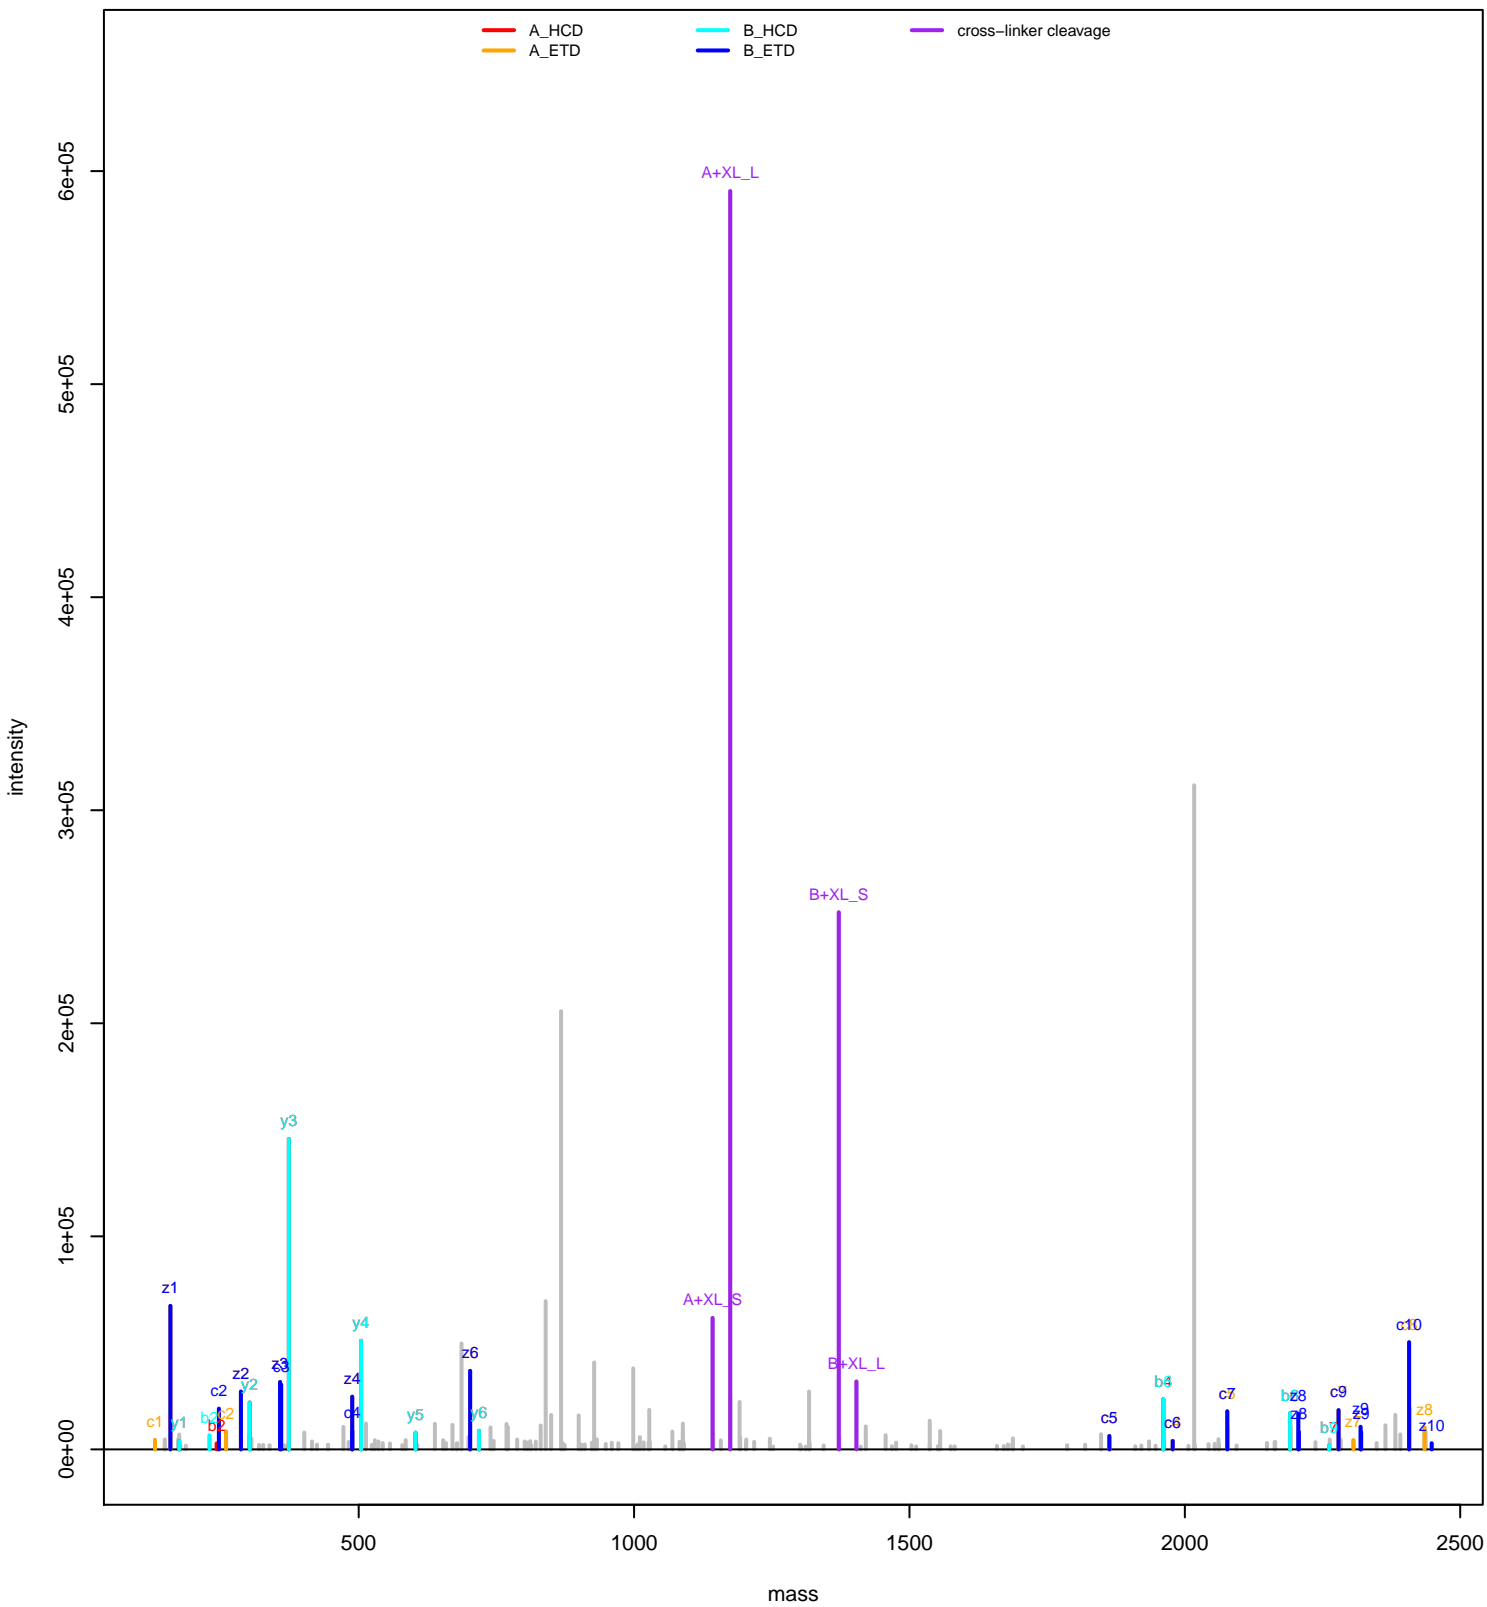

LEKDVMAQR+XL\_S

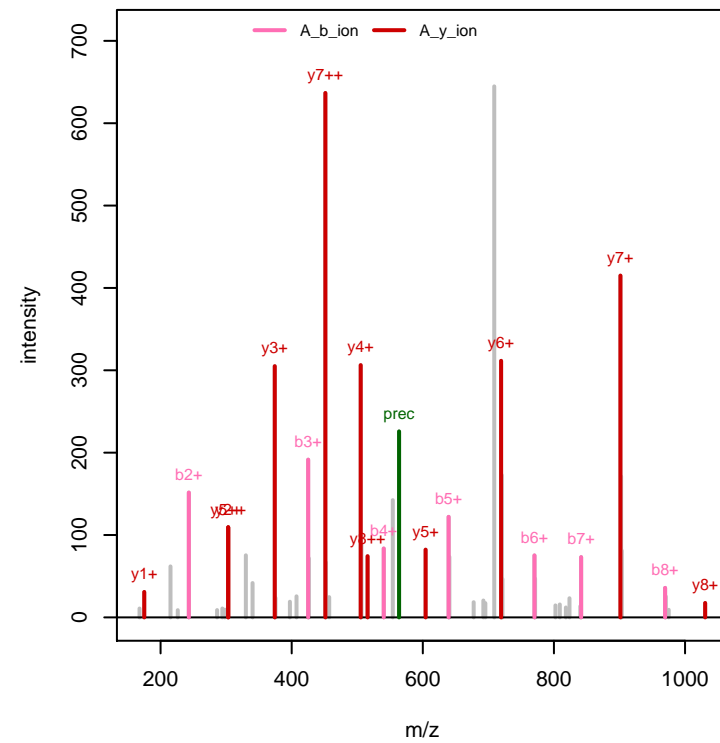

LEKDVMAQR+XL\_L

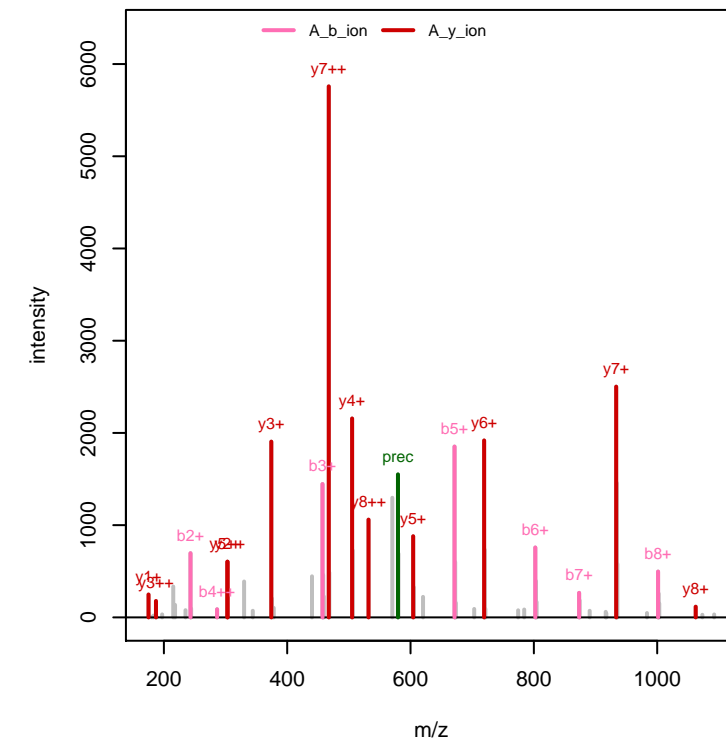

TKLEKDVMAQR+XL\_S

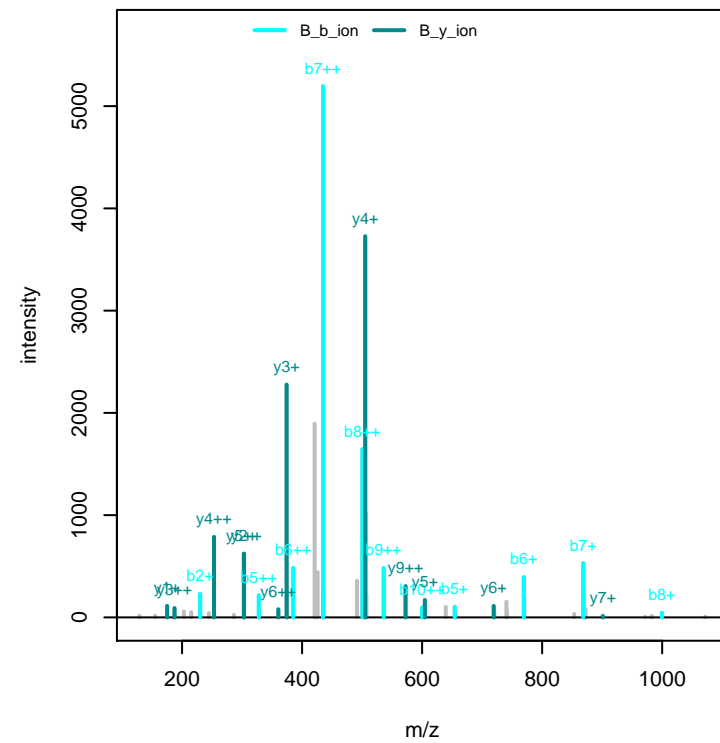

TKLEKDVMAQR+XL\_L

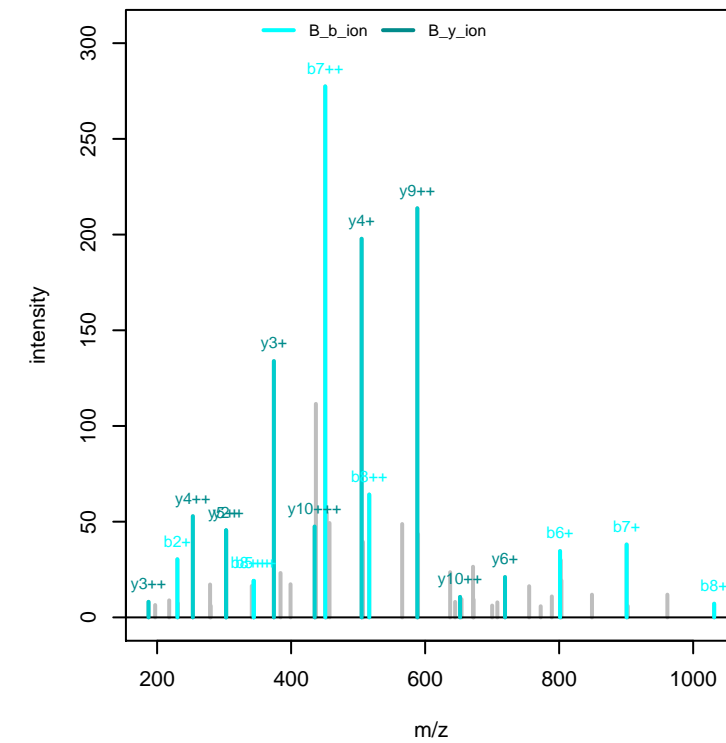

VVNSKEDIR  
EAEAAASKIGAGPWVVK

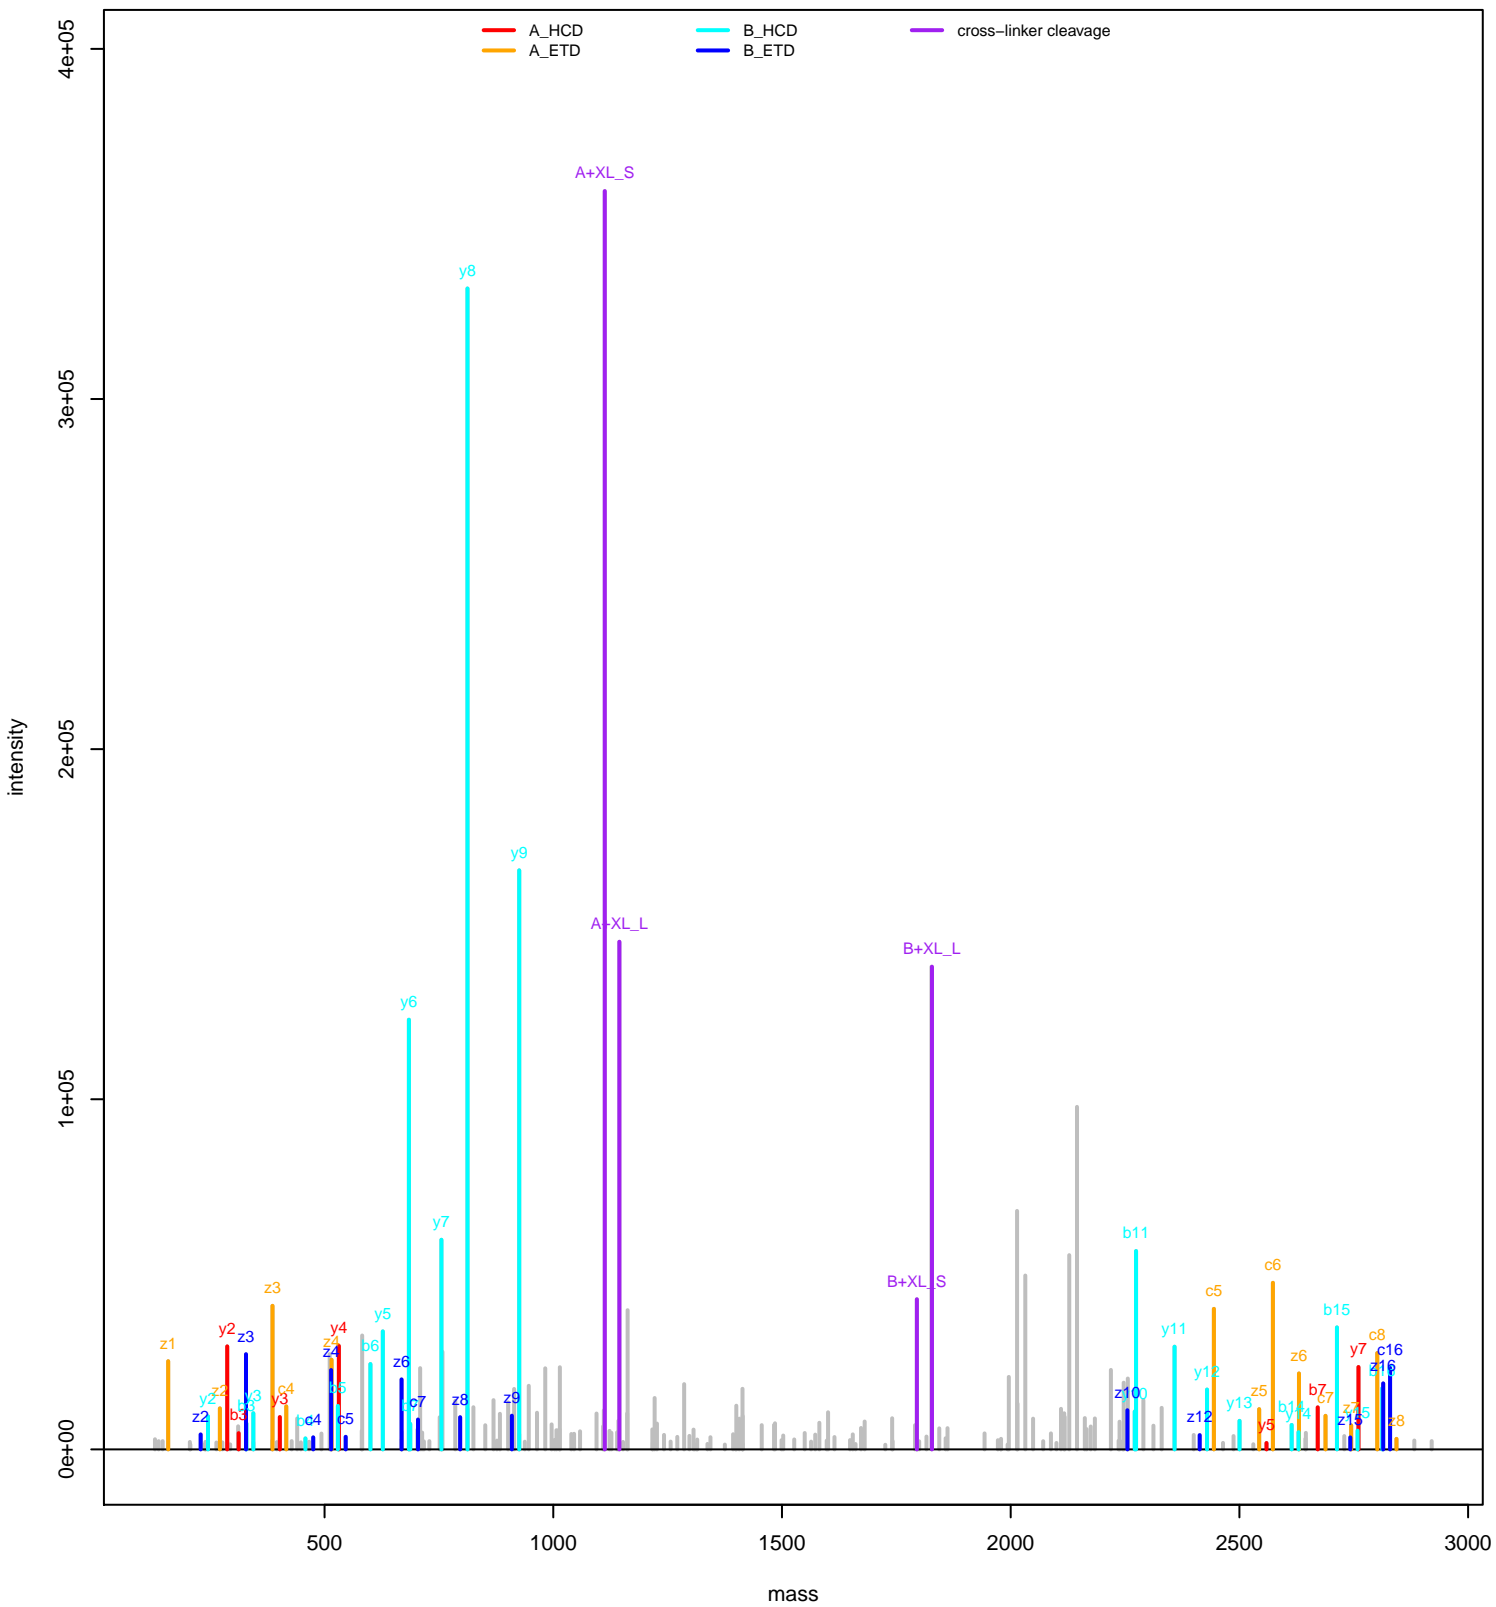

VVNSKEDIR+XL\_S

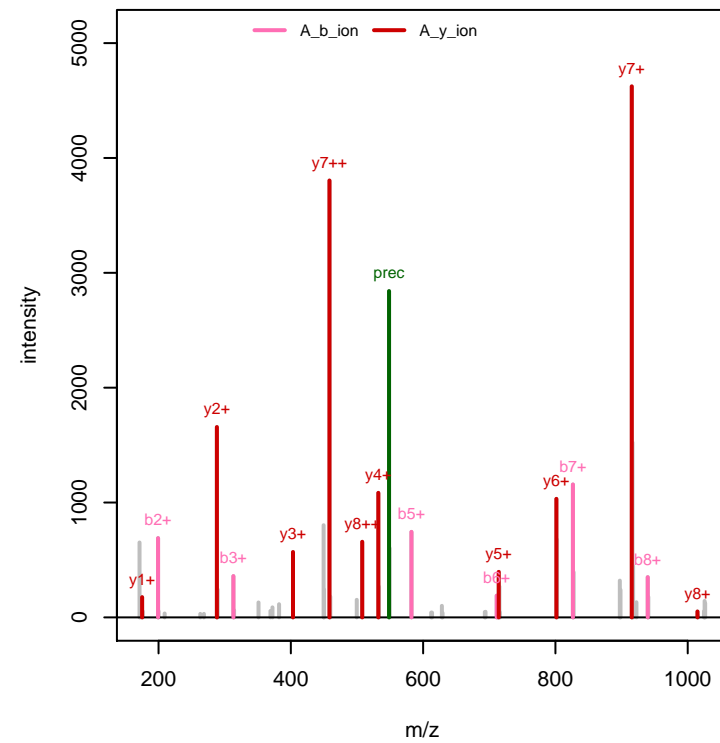

VVNSKEDIR+XL\_L

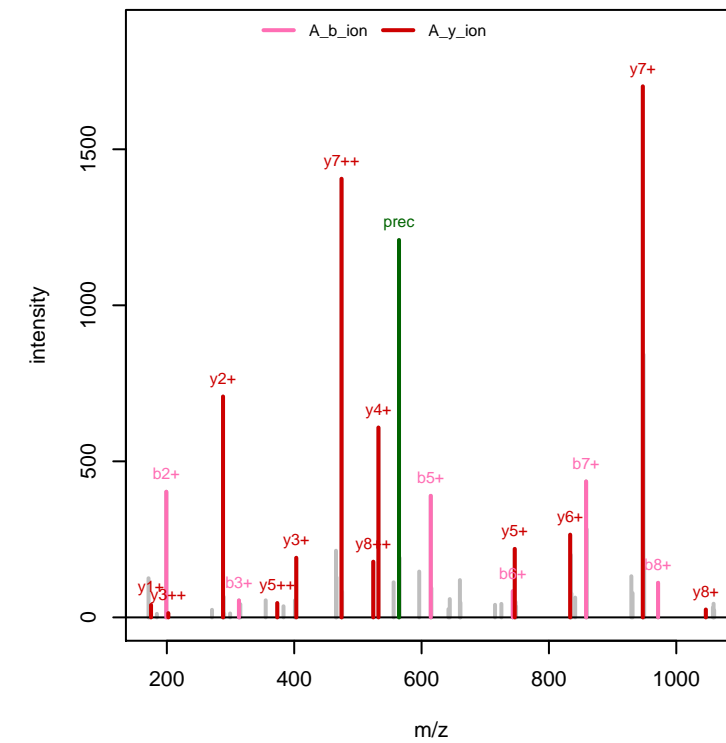

EAEAAASKIGAGPWVVK+XL\_S

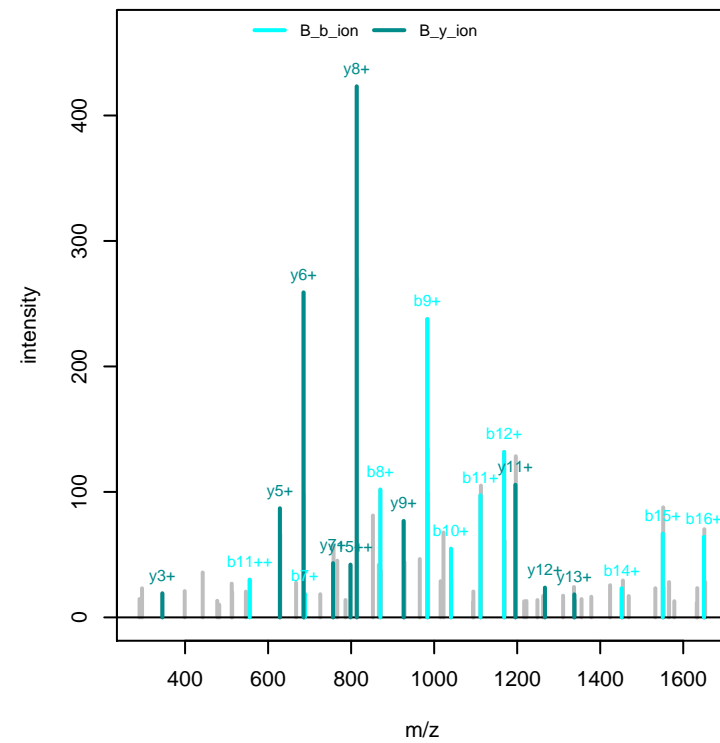

EAEAAASKIGAGPWVVK+XL\_L

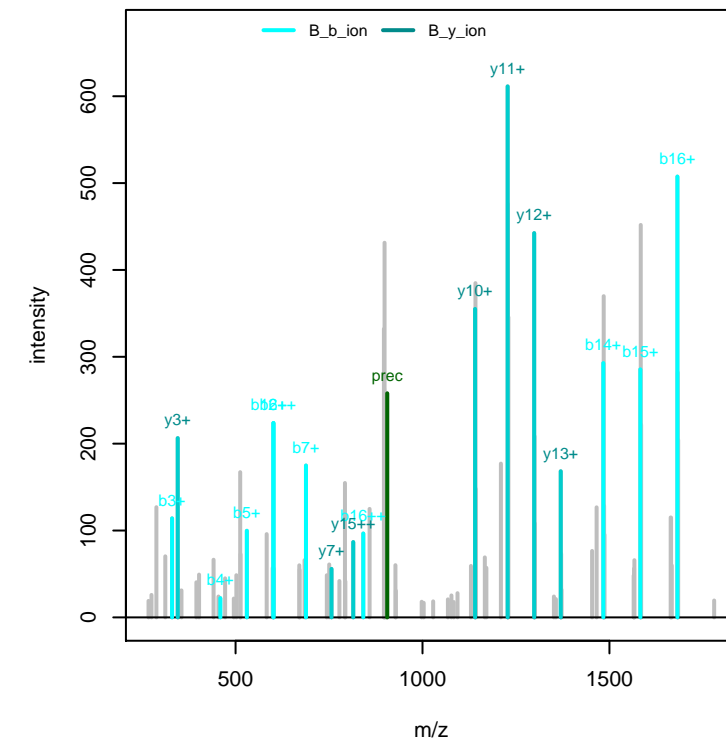

IVDFKR  
PGKGGQLAR

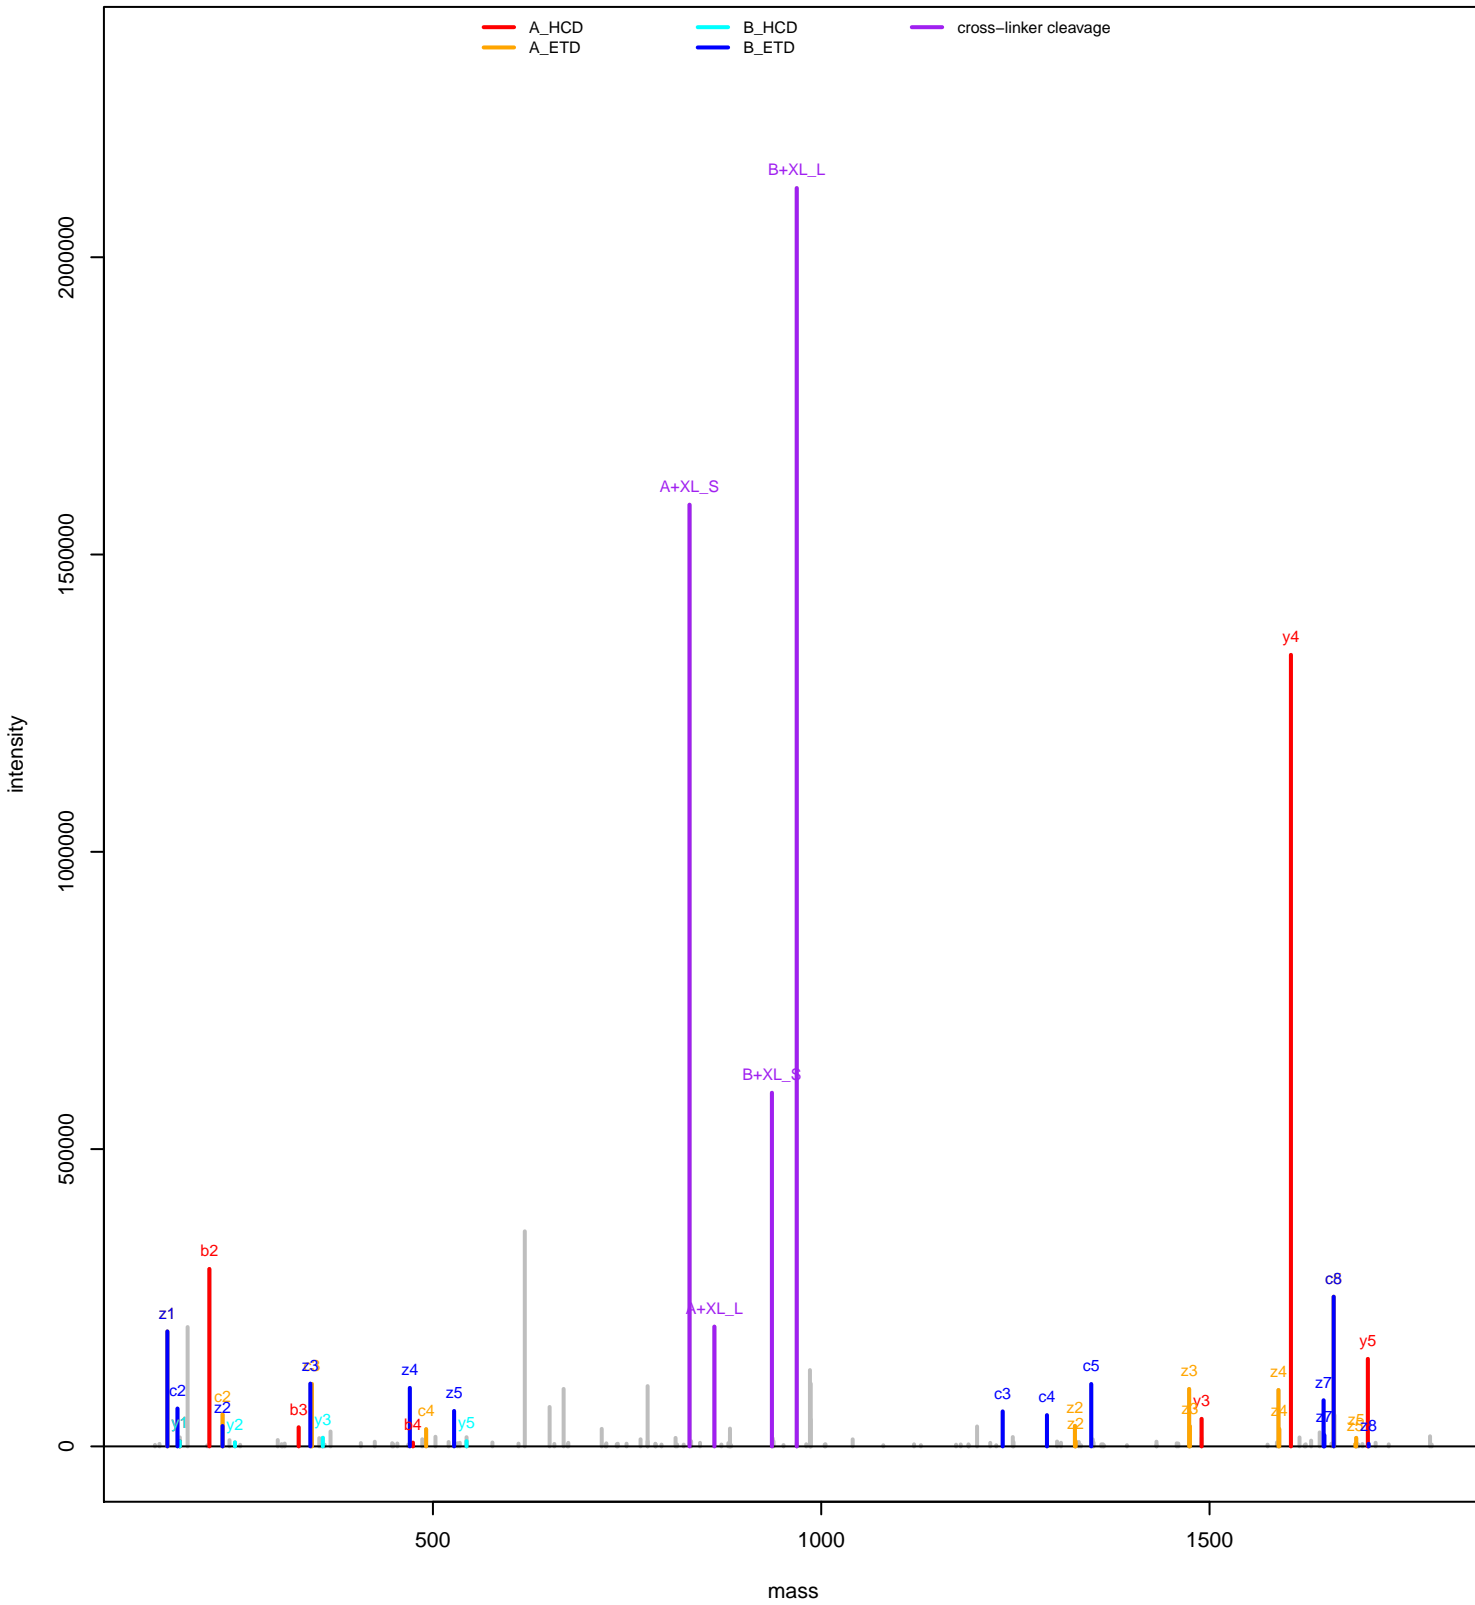

IVDFKR+XL\_S

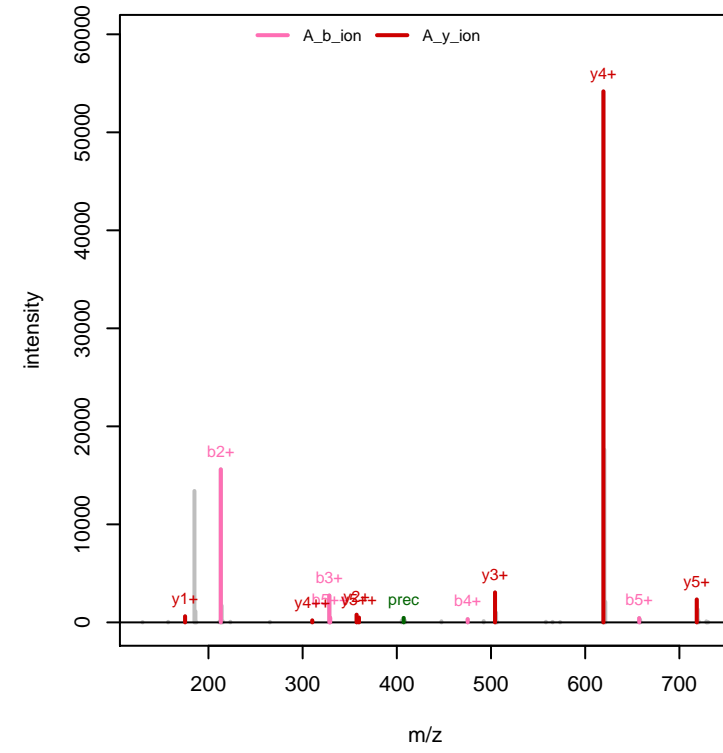

IVDFKR+XL\_L

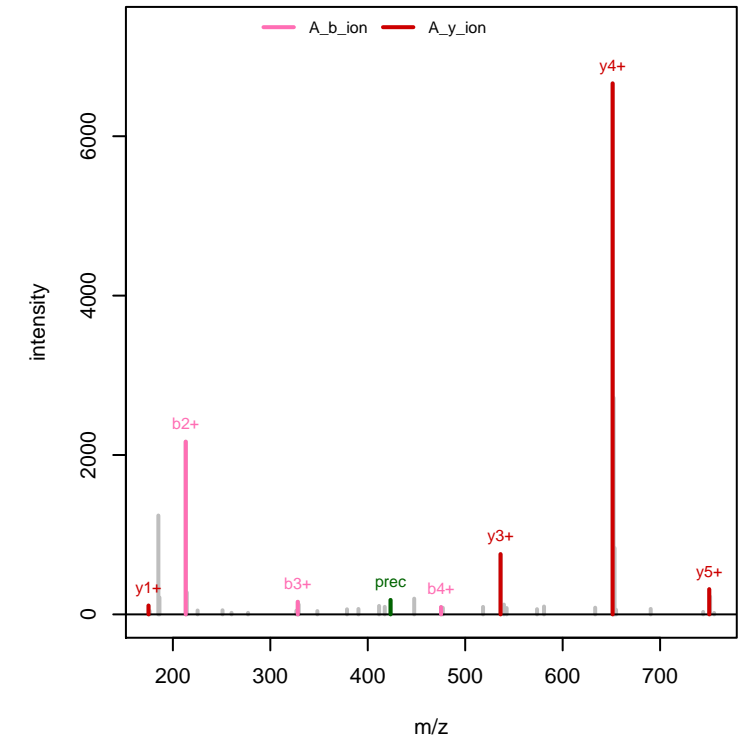

PGKGGQLAR+XL\_S

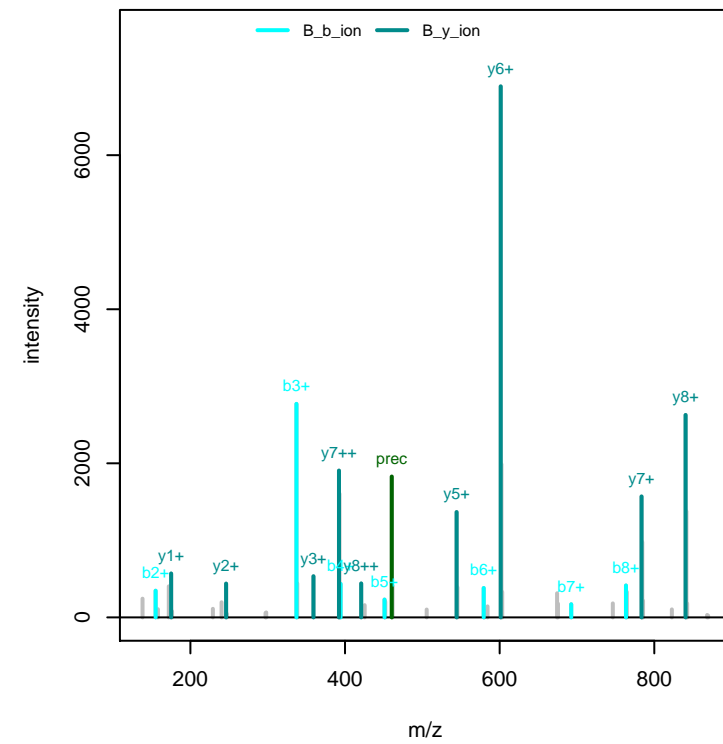

PGKGGQLAR+XL\_L

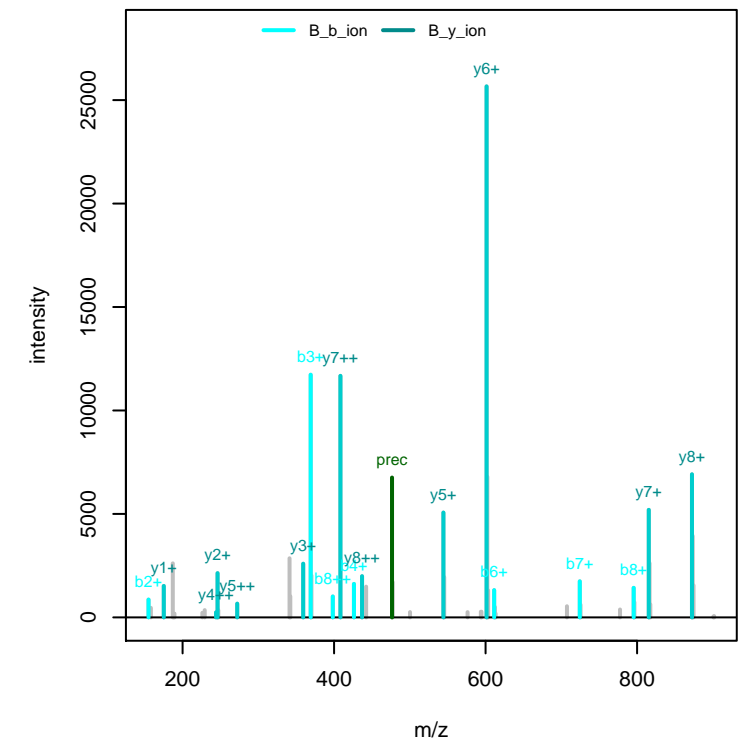

VAVIKAVR  
GATGLGLKEAK

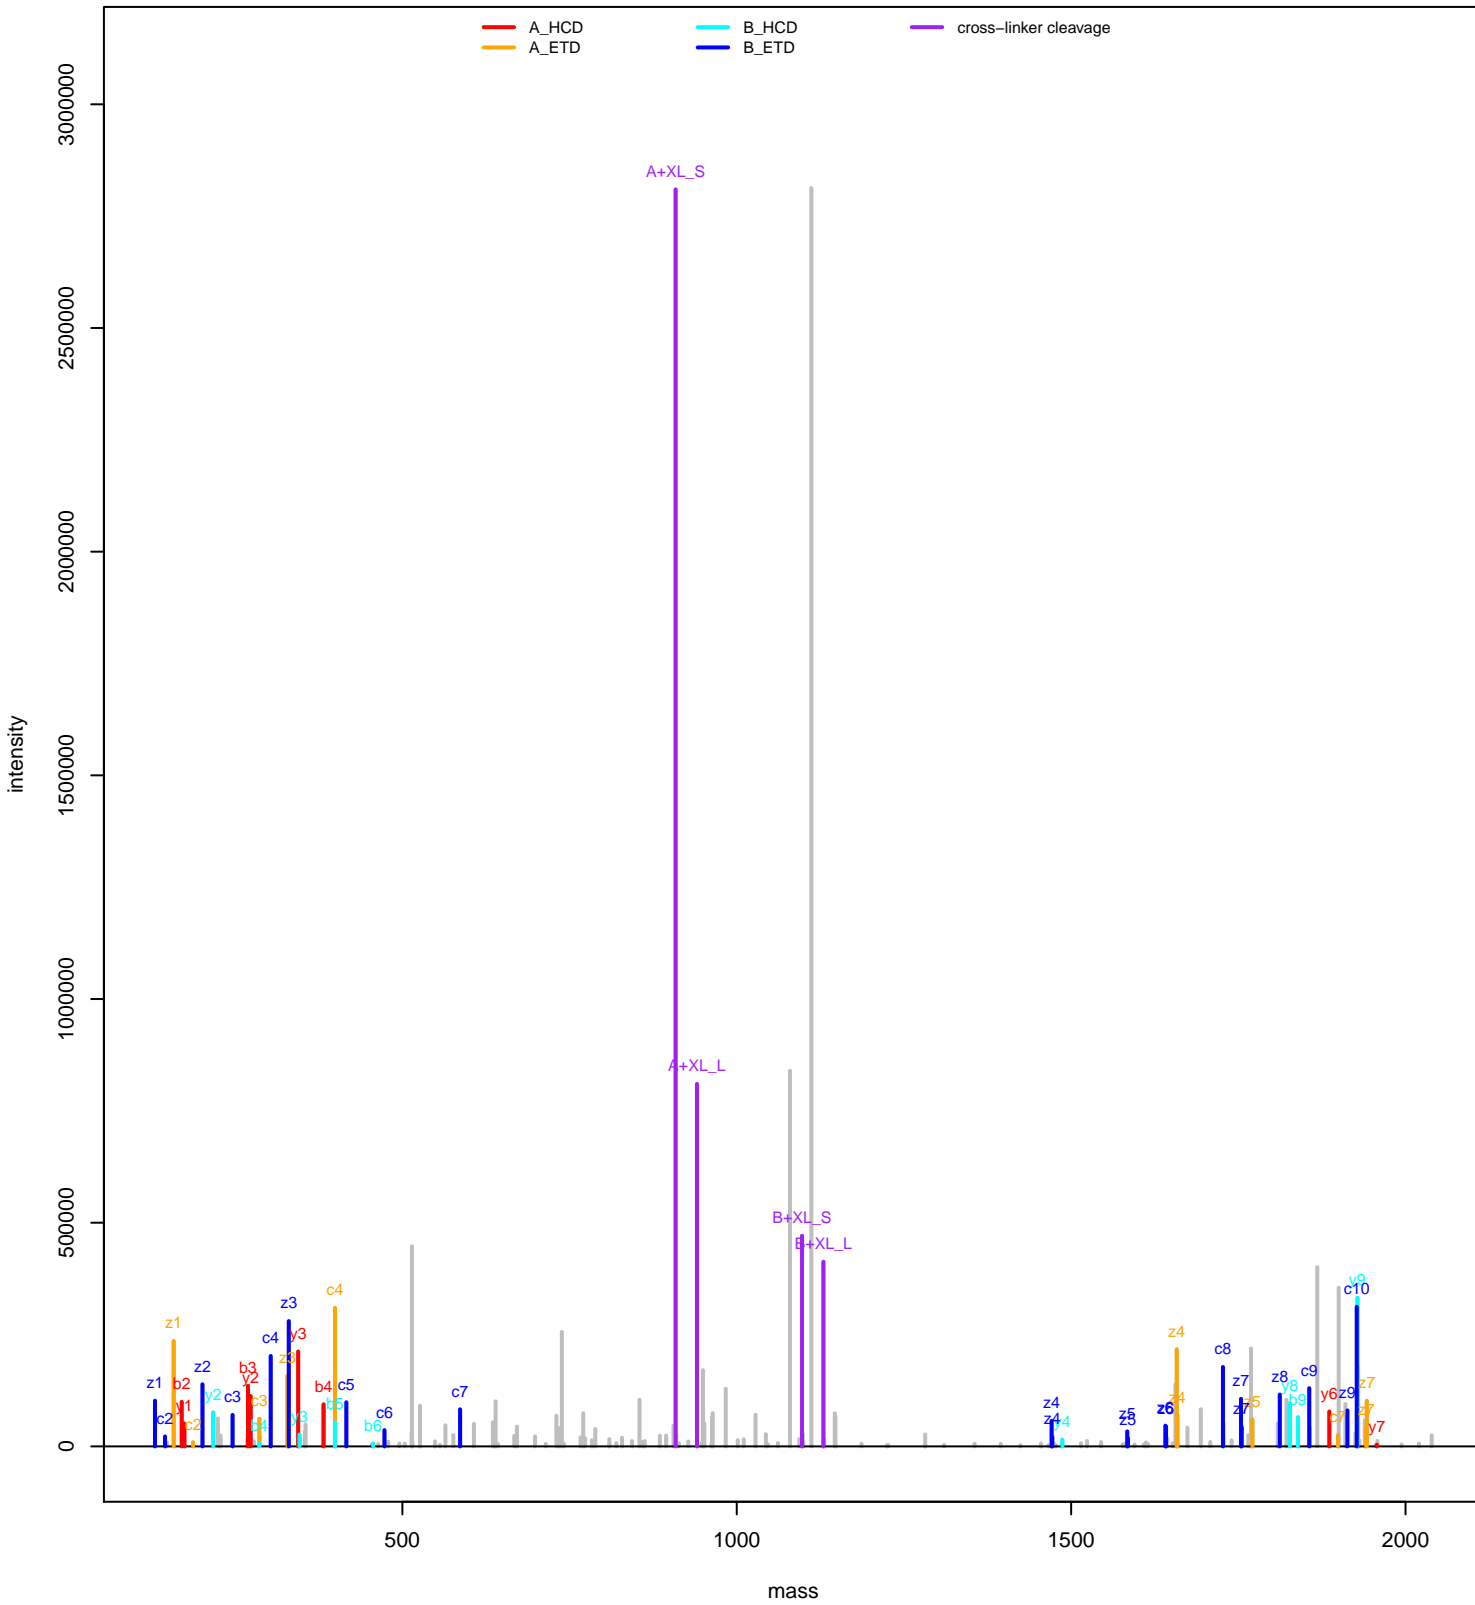

VAVIKAVR+XL\_S

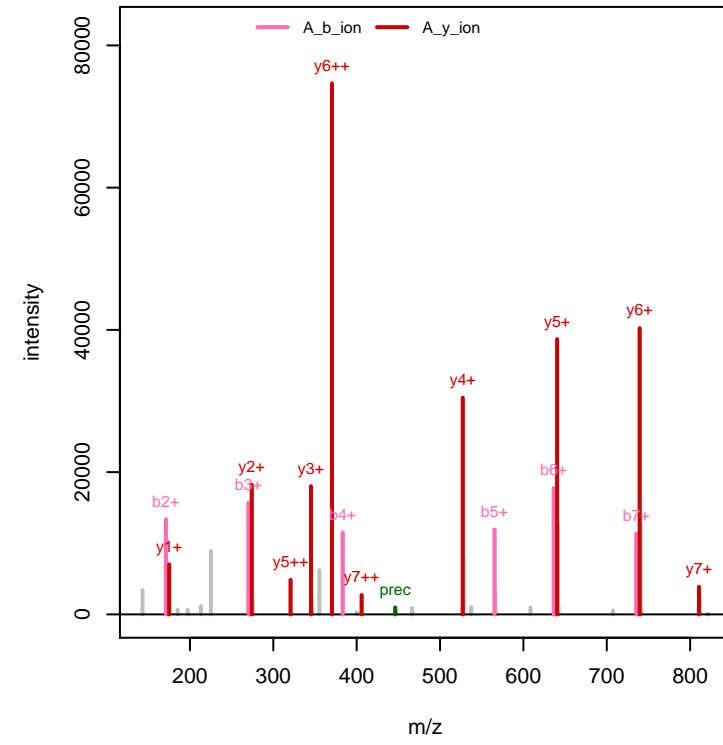

VAVIKAVR+XL\_L

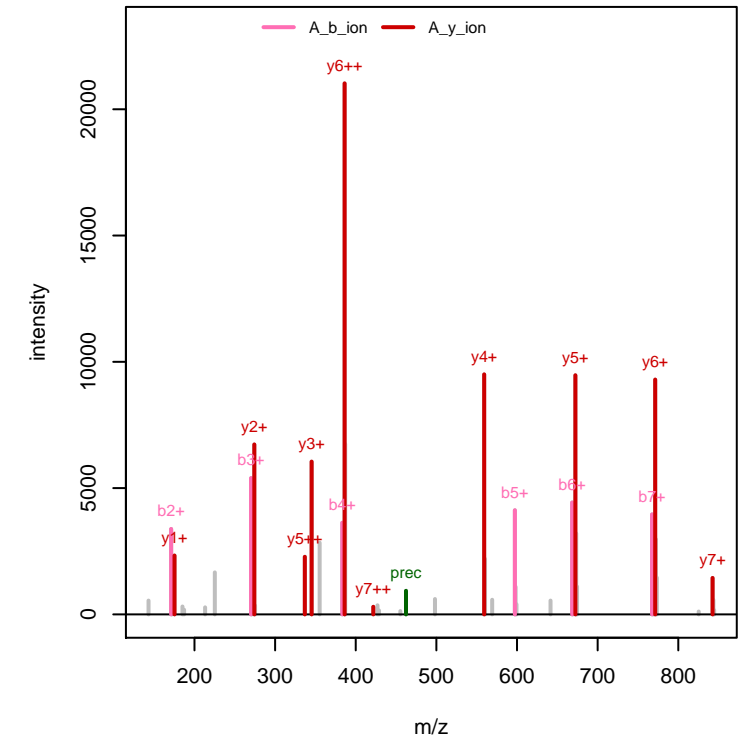

GATGLGLKEAK+XL\_S

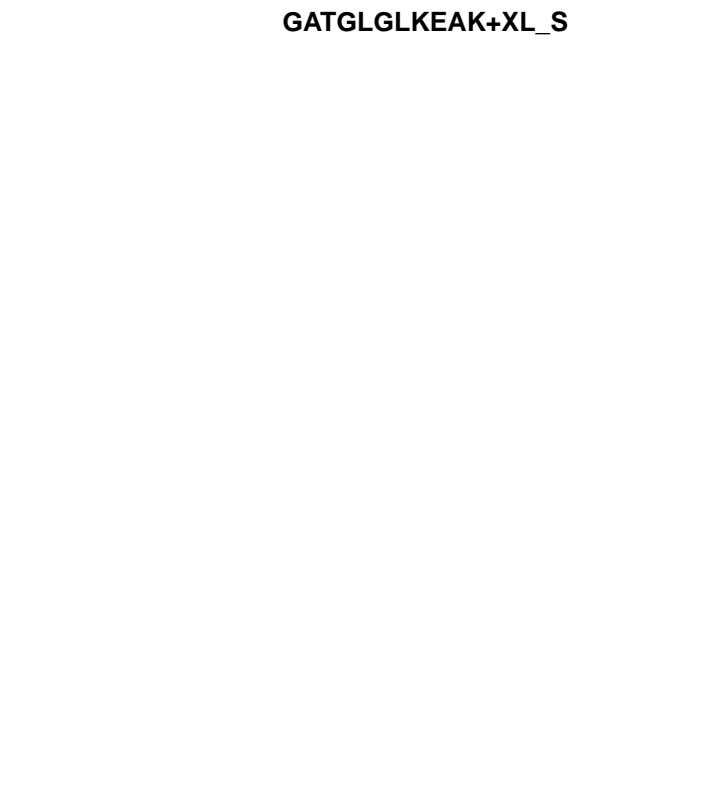

GATGLGLKEAK+XL\_L

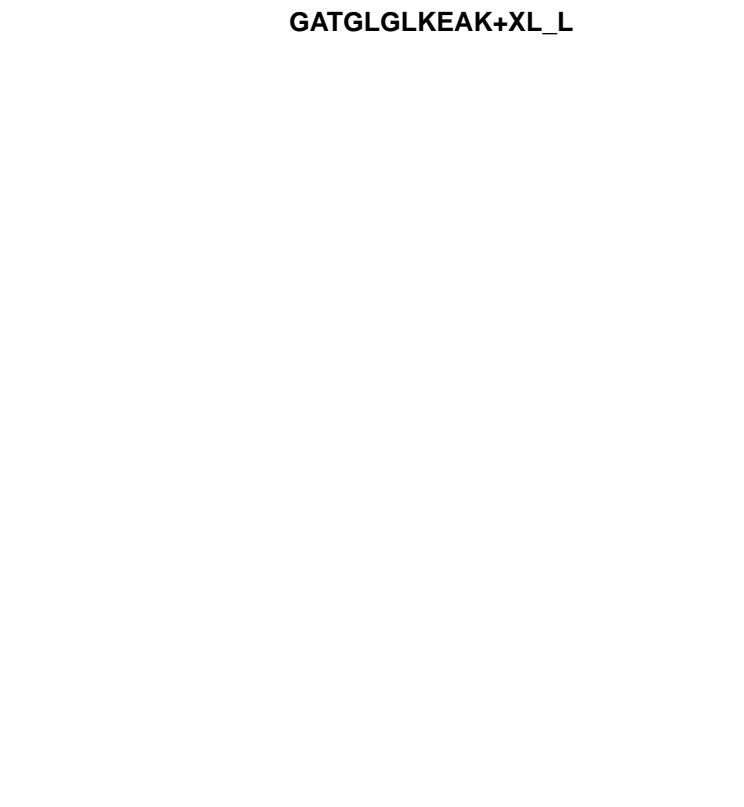

ELKTLDDR  
VLTNSETNSIKK

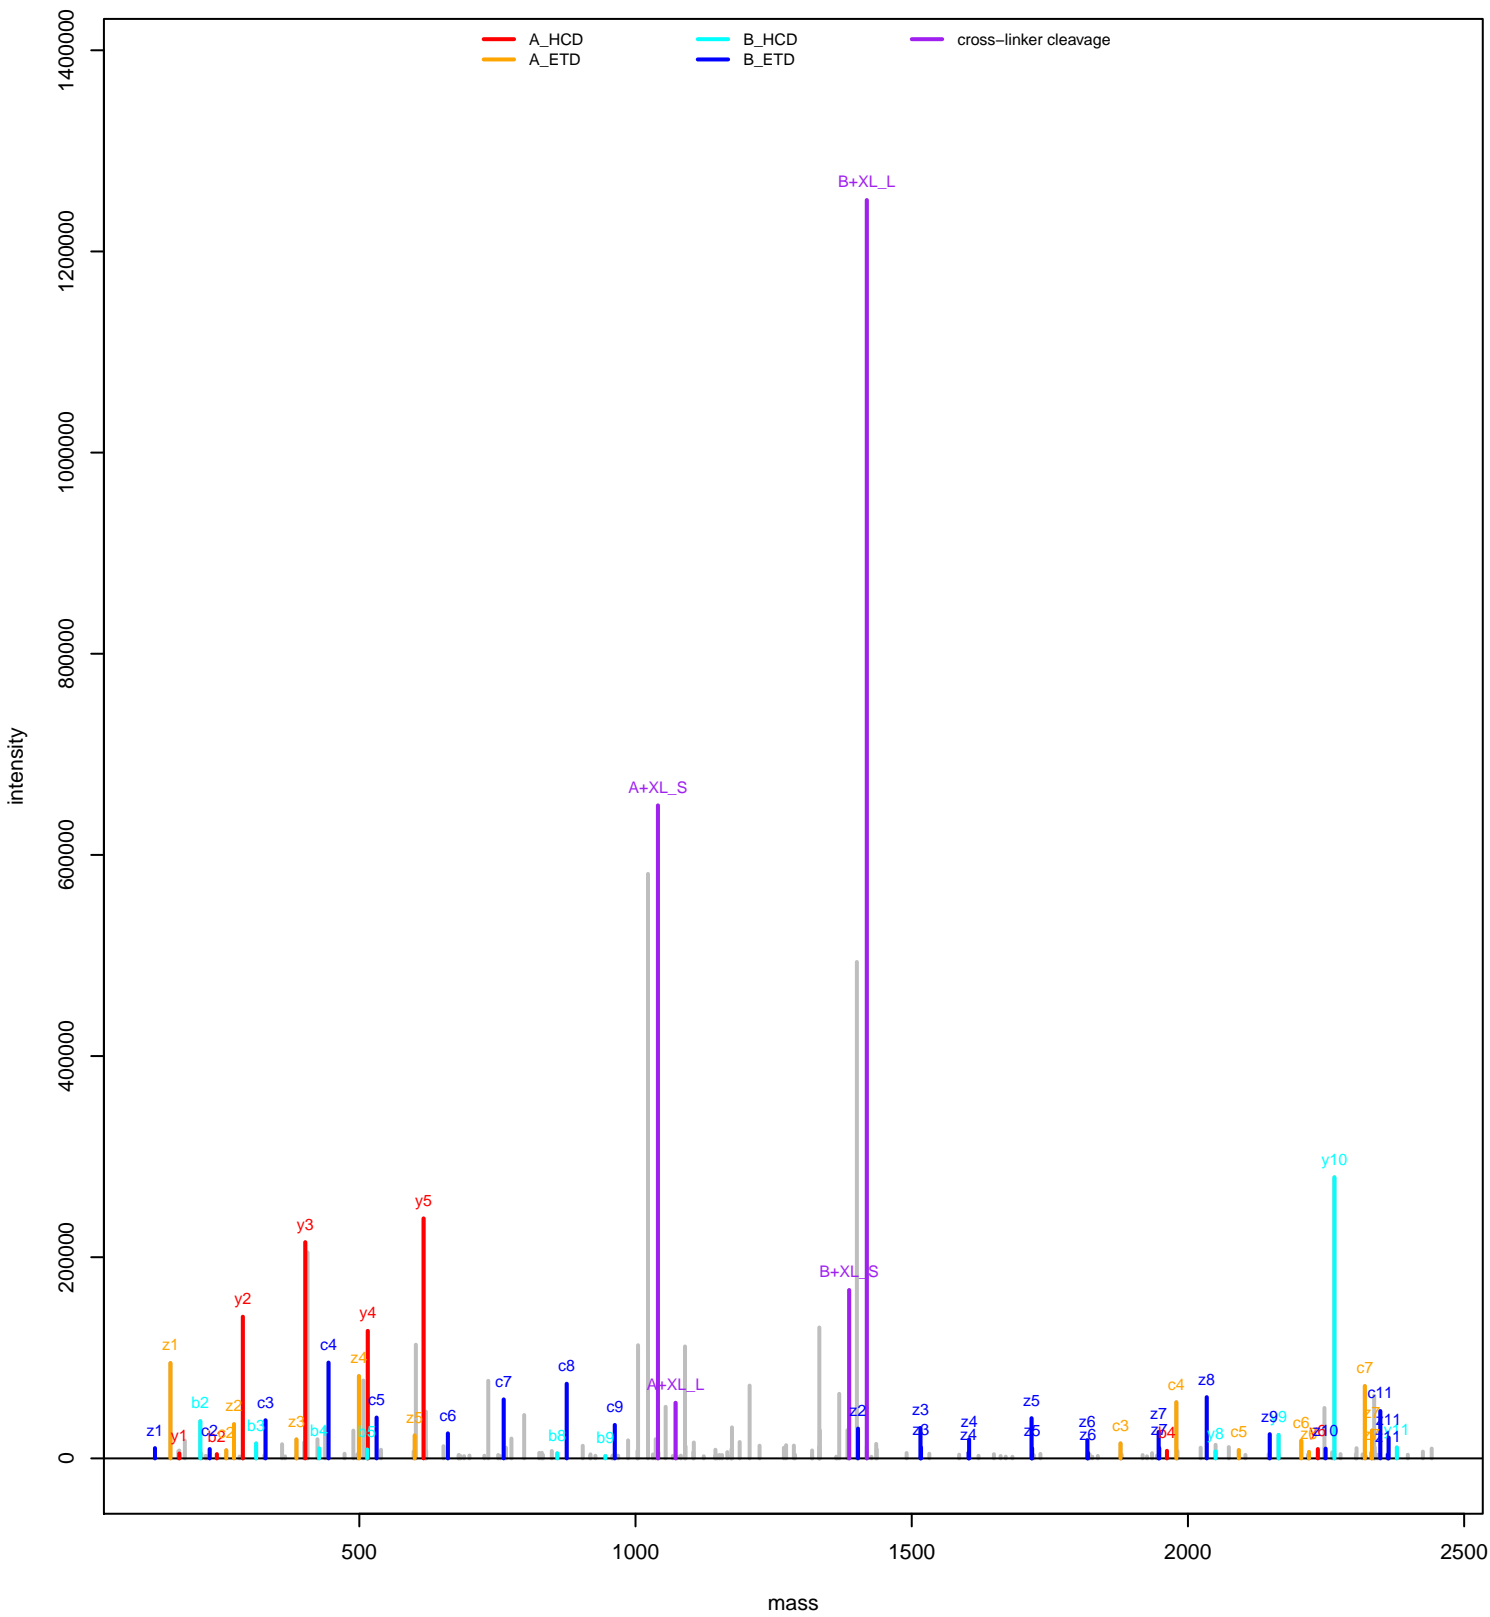

ELKTLDDR+XL\_S

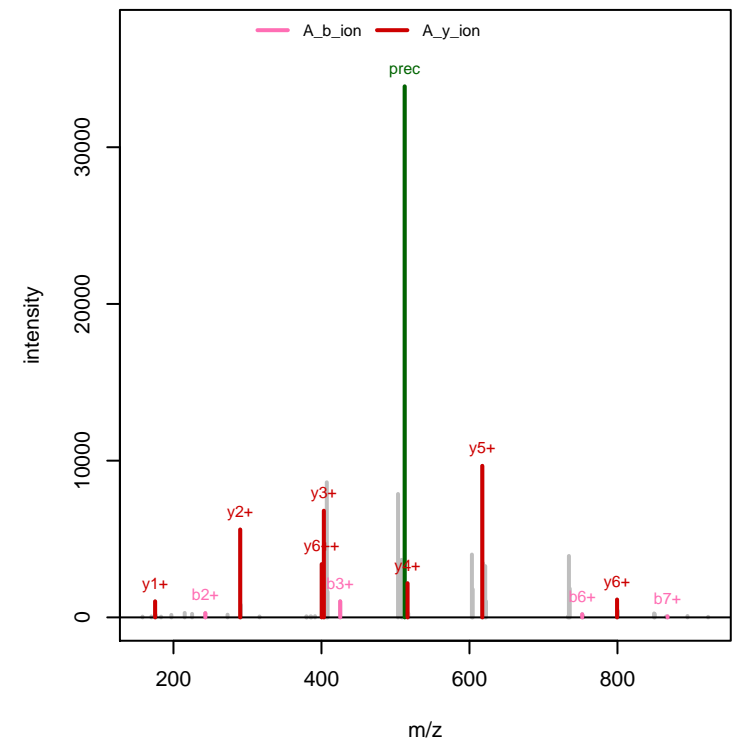

ELKTLDDR+XL\_L

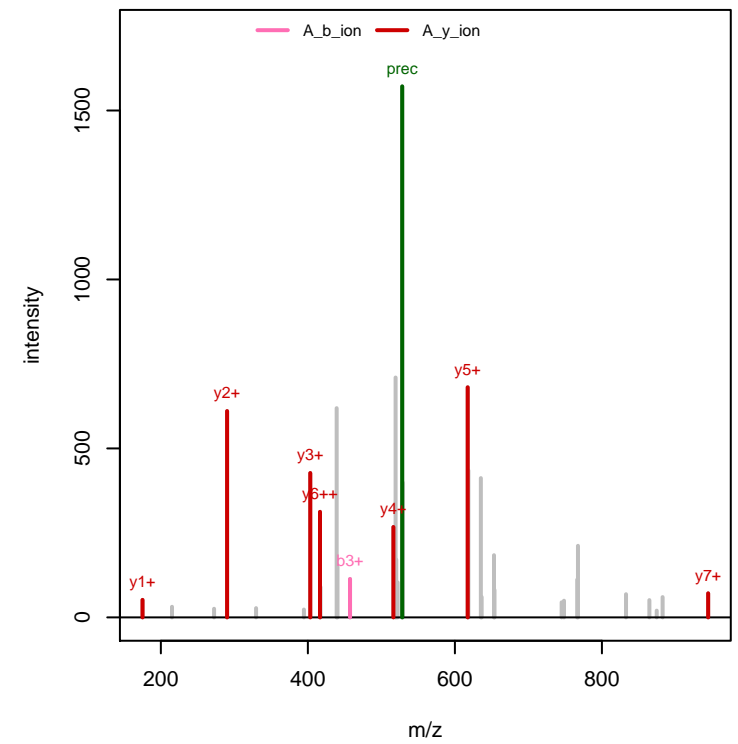

VLTNSETNSIKK+XL\_S

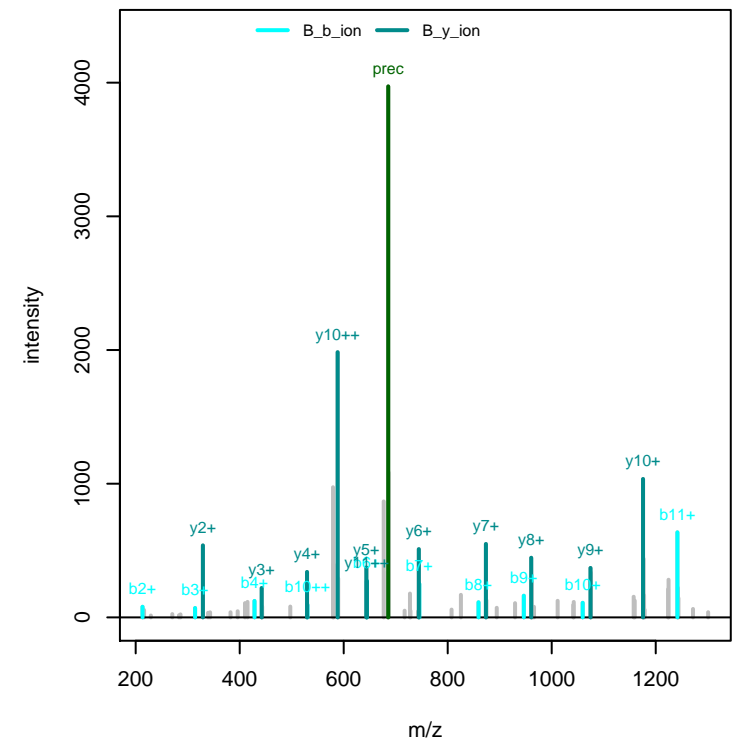

VLTNSETNSIKK+XL\_L

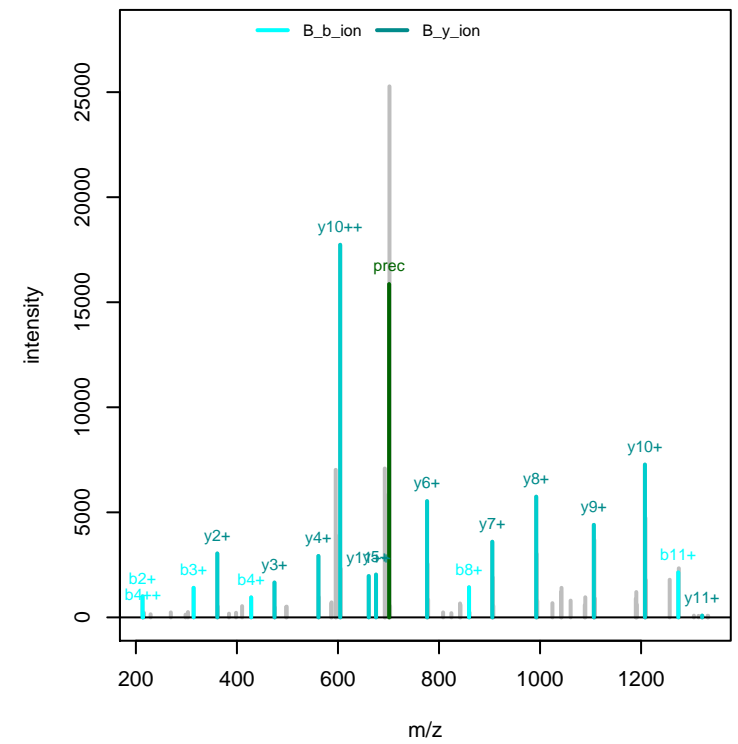

TPPAVLLKK  
AAGIKSGSGKPNK

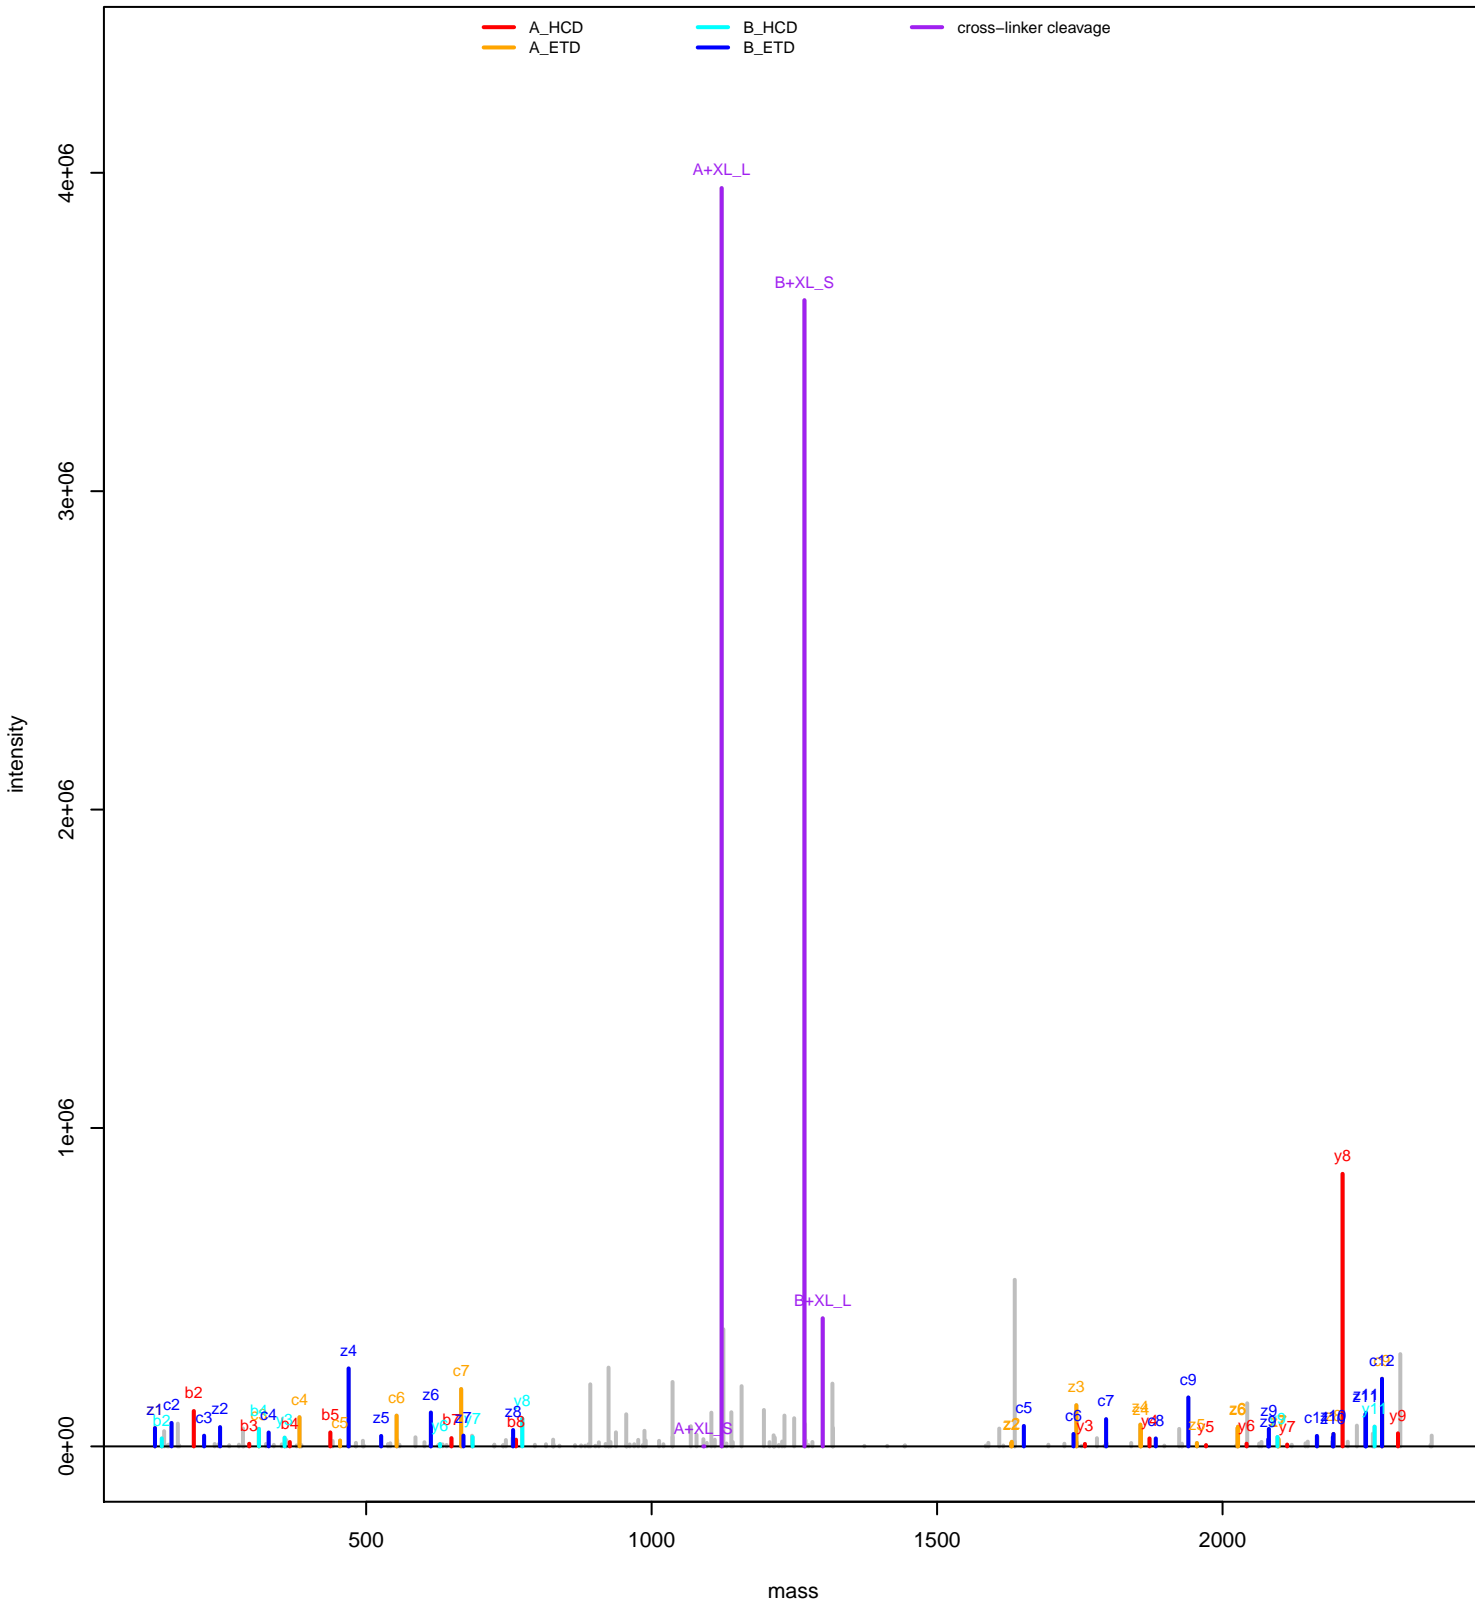

TPPAVLLKK+XL\_S

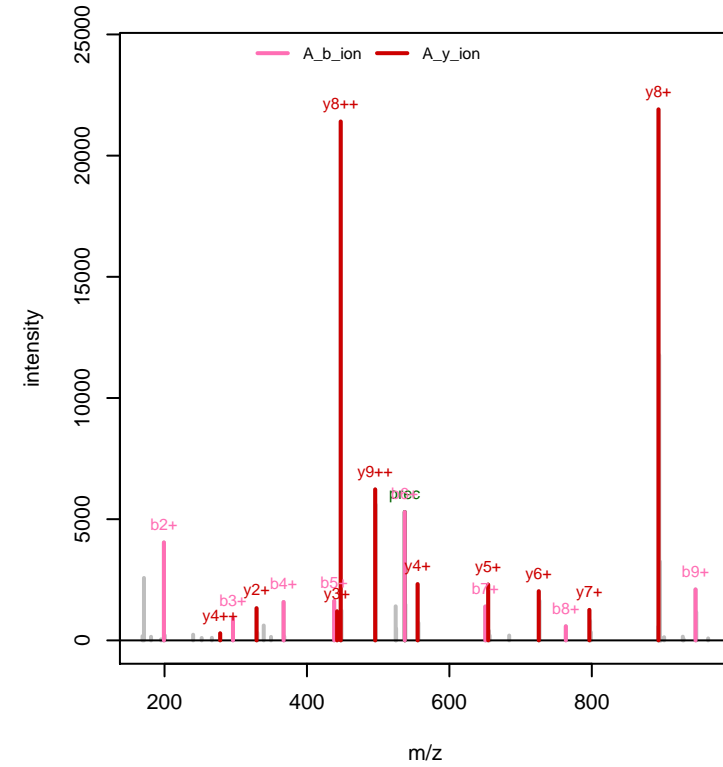

TPPAVLLKK+XL\_L

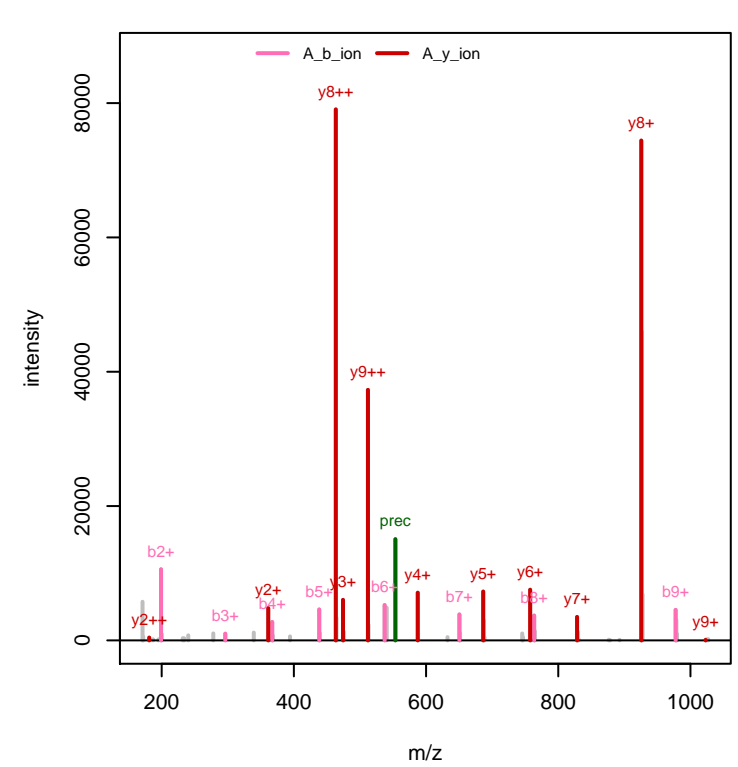

AAGIKSGSGKPNK+XL\_S

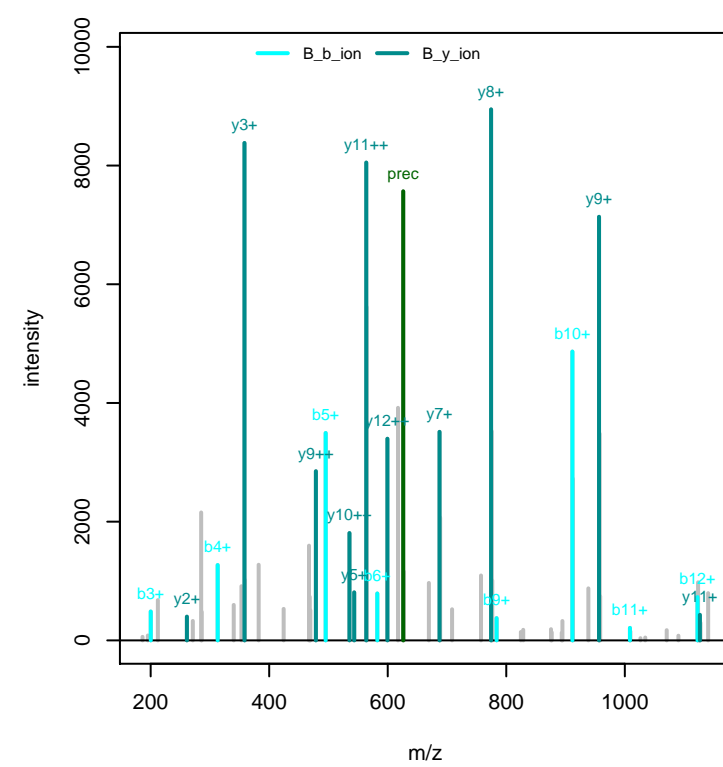

AAGIKSGSGKPNK+XL\_L

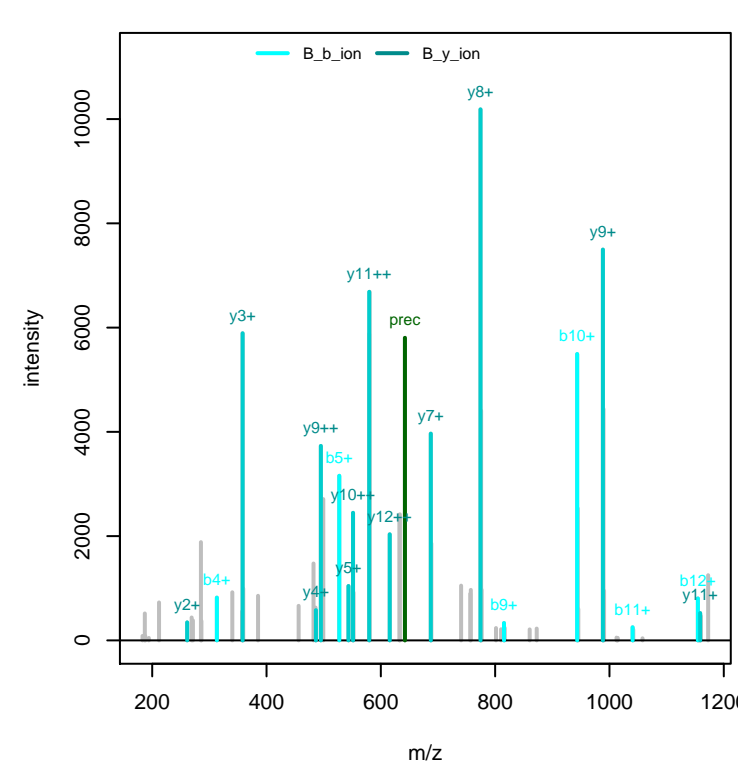

**SELVNVAKK  
GKVPMNIVAQR**

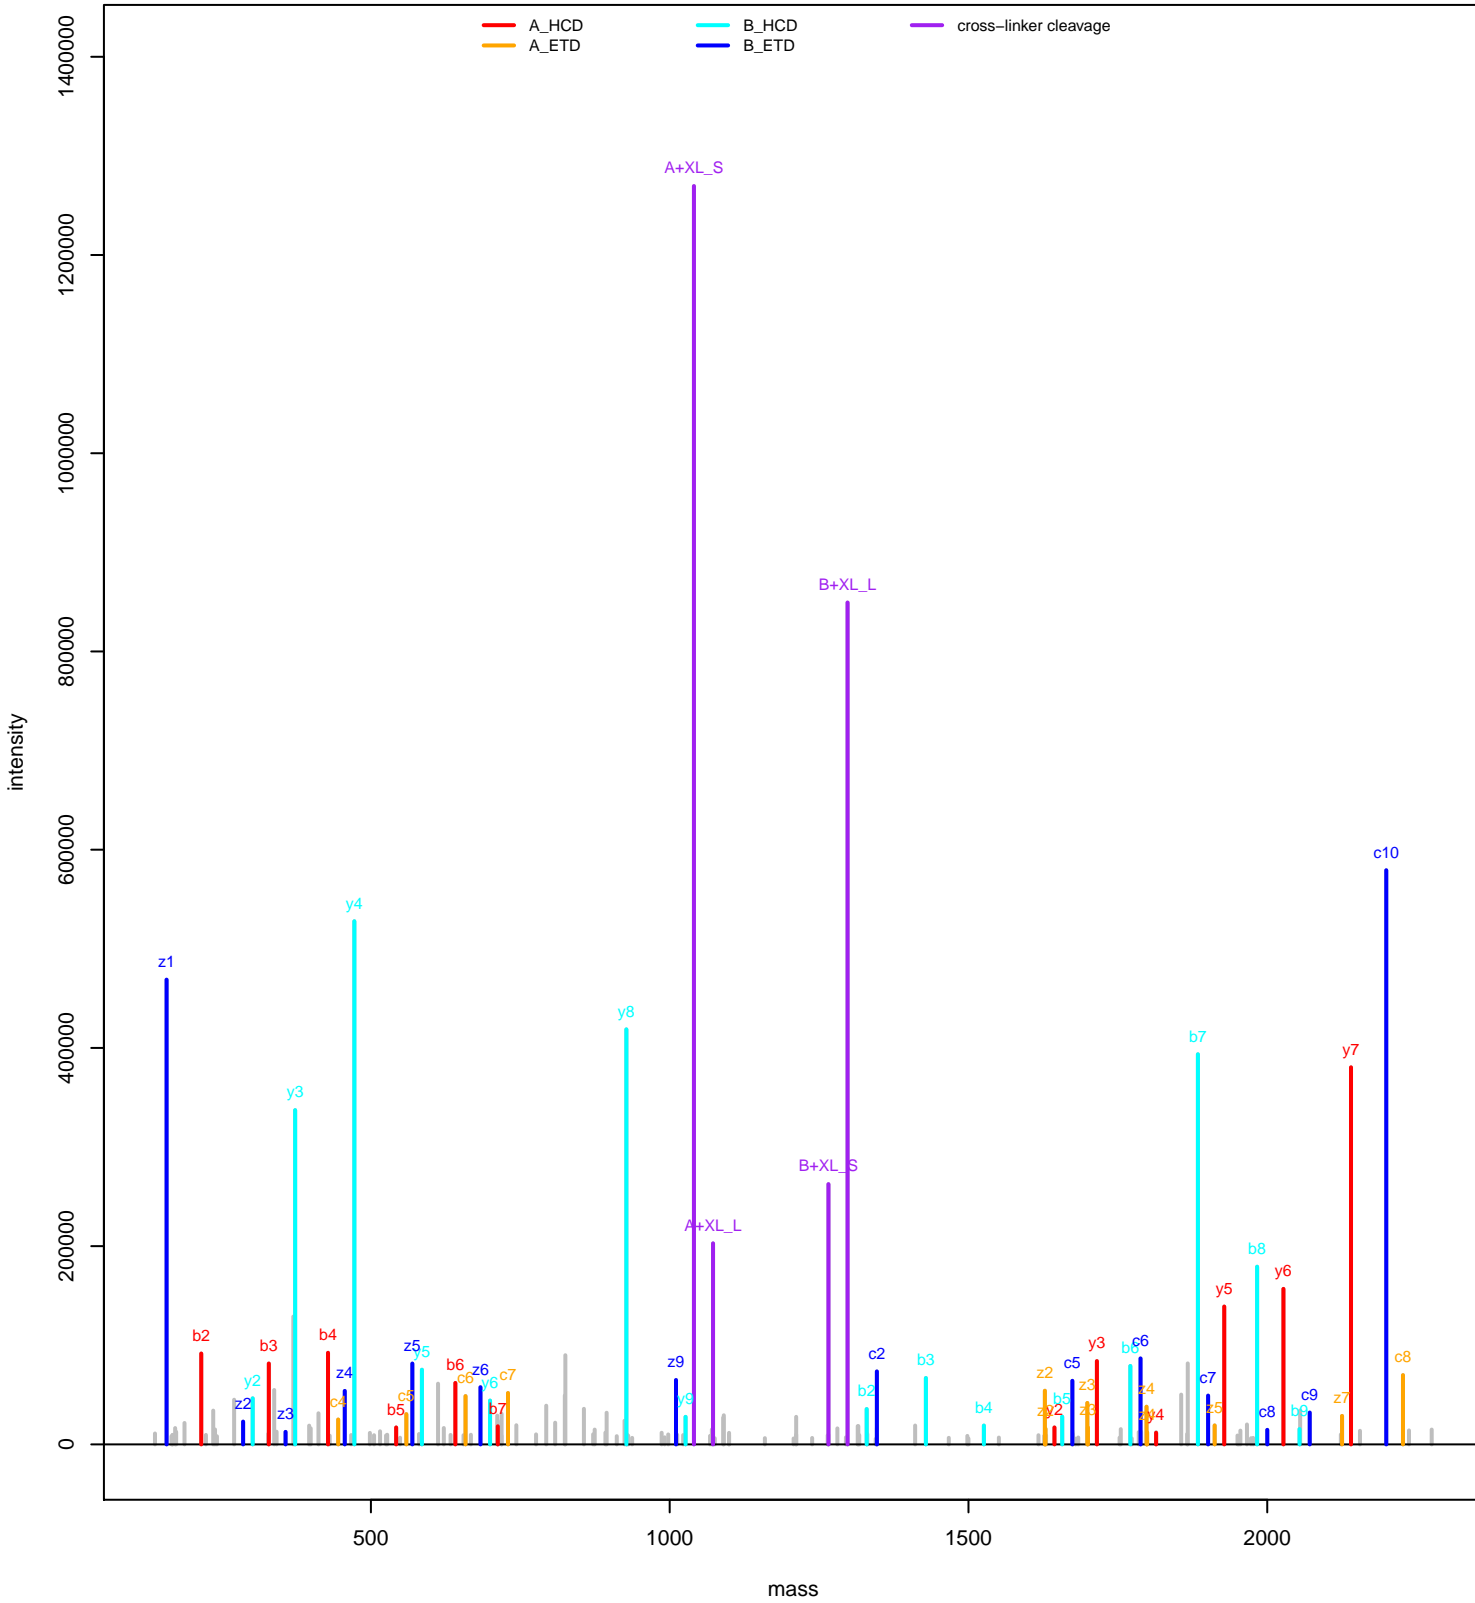

**SELVNVAKK+XL\_S**

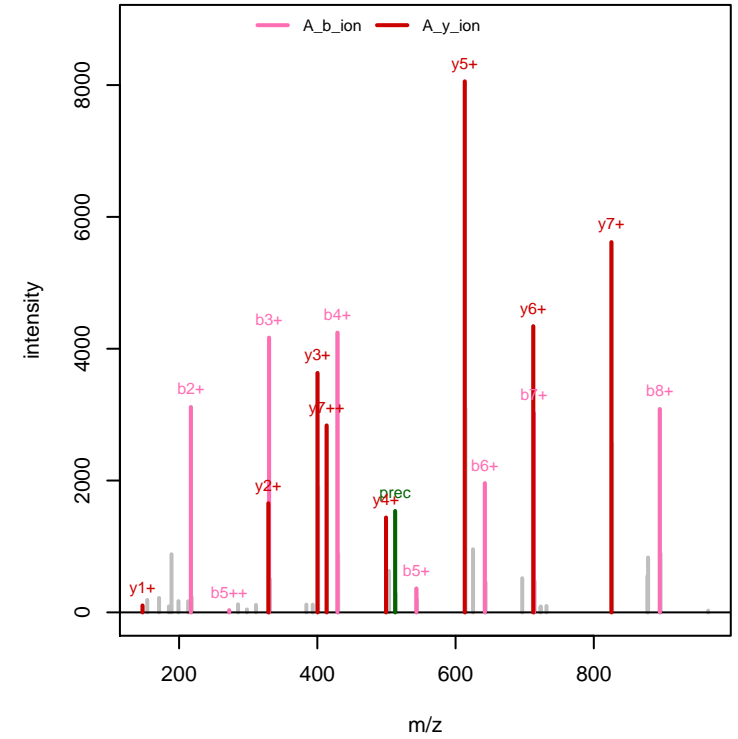

**SELVNVAKK+XL\_L**

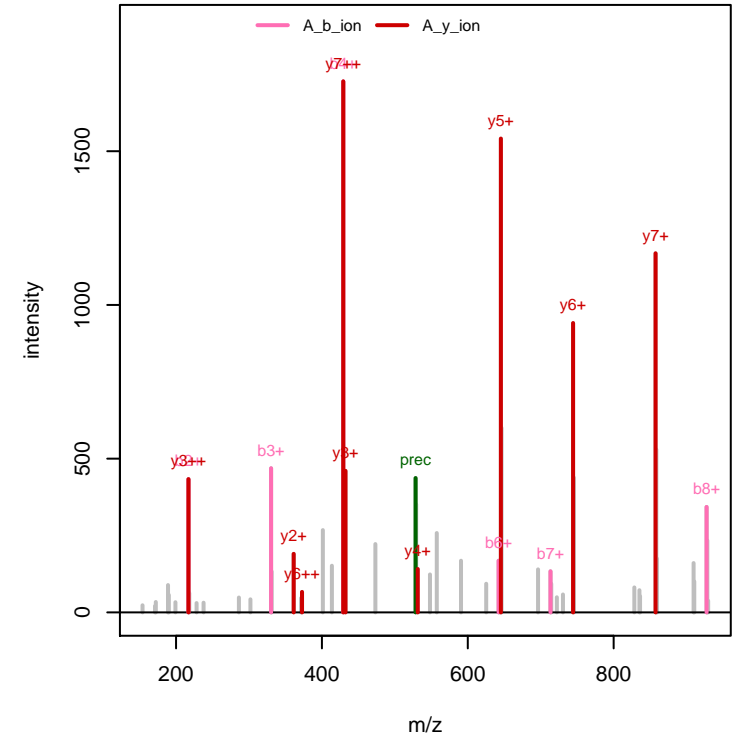

**GKVPMNIVAQR+XL\_S**

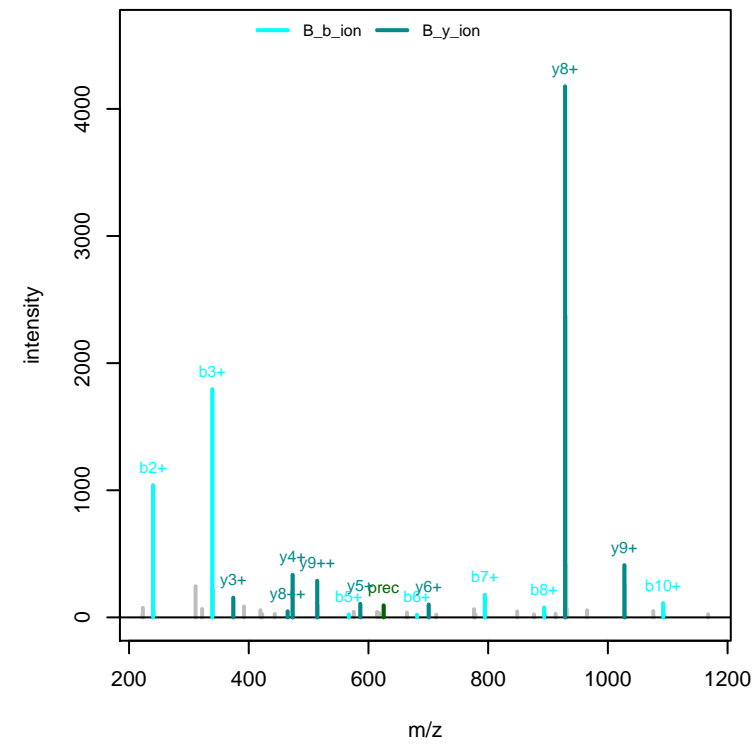

**GKVPMNIVAQR+XL\_L**

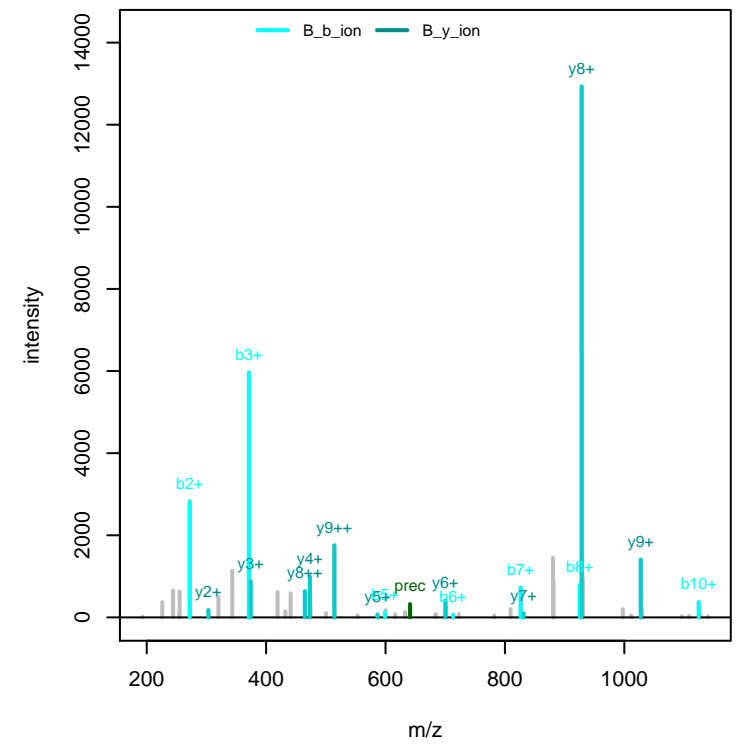

AGLKVTLP  
TDNNTALKK

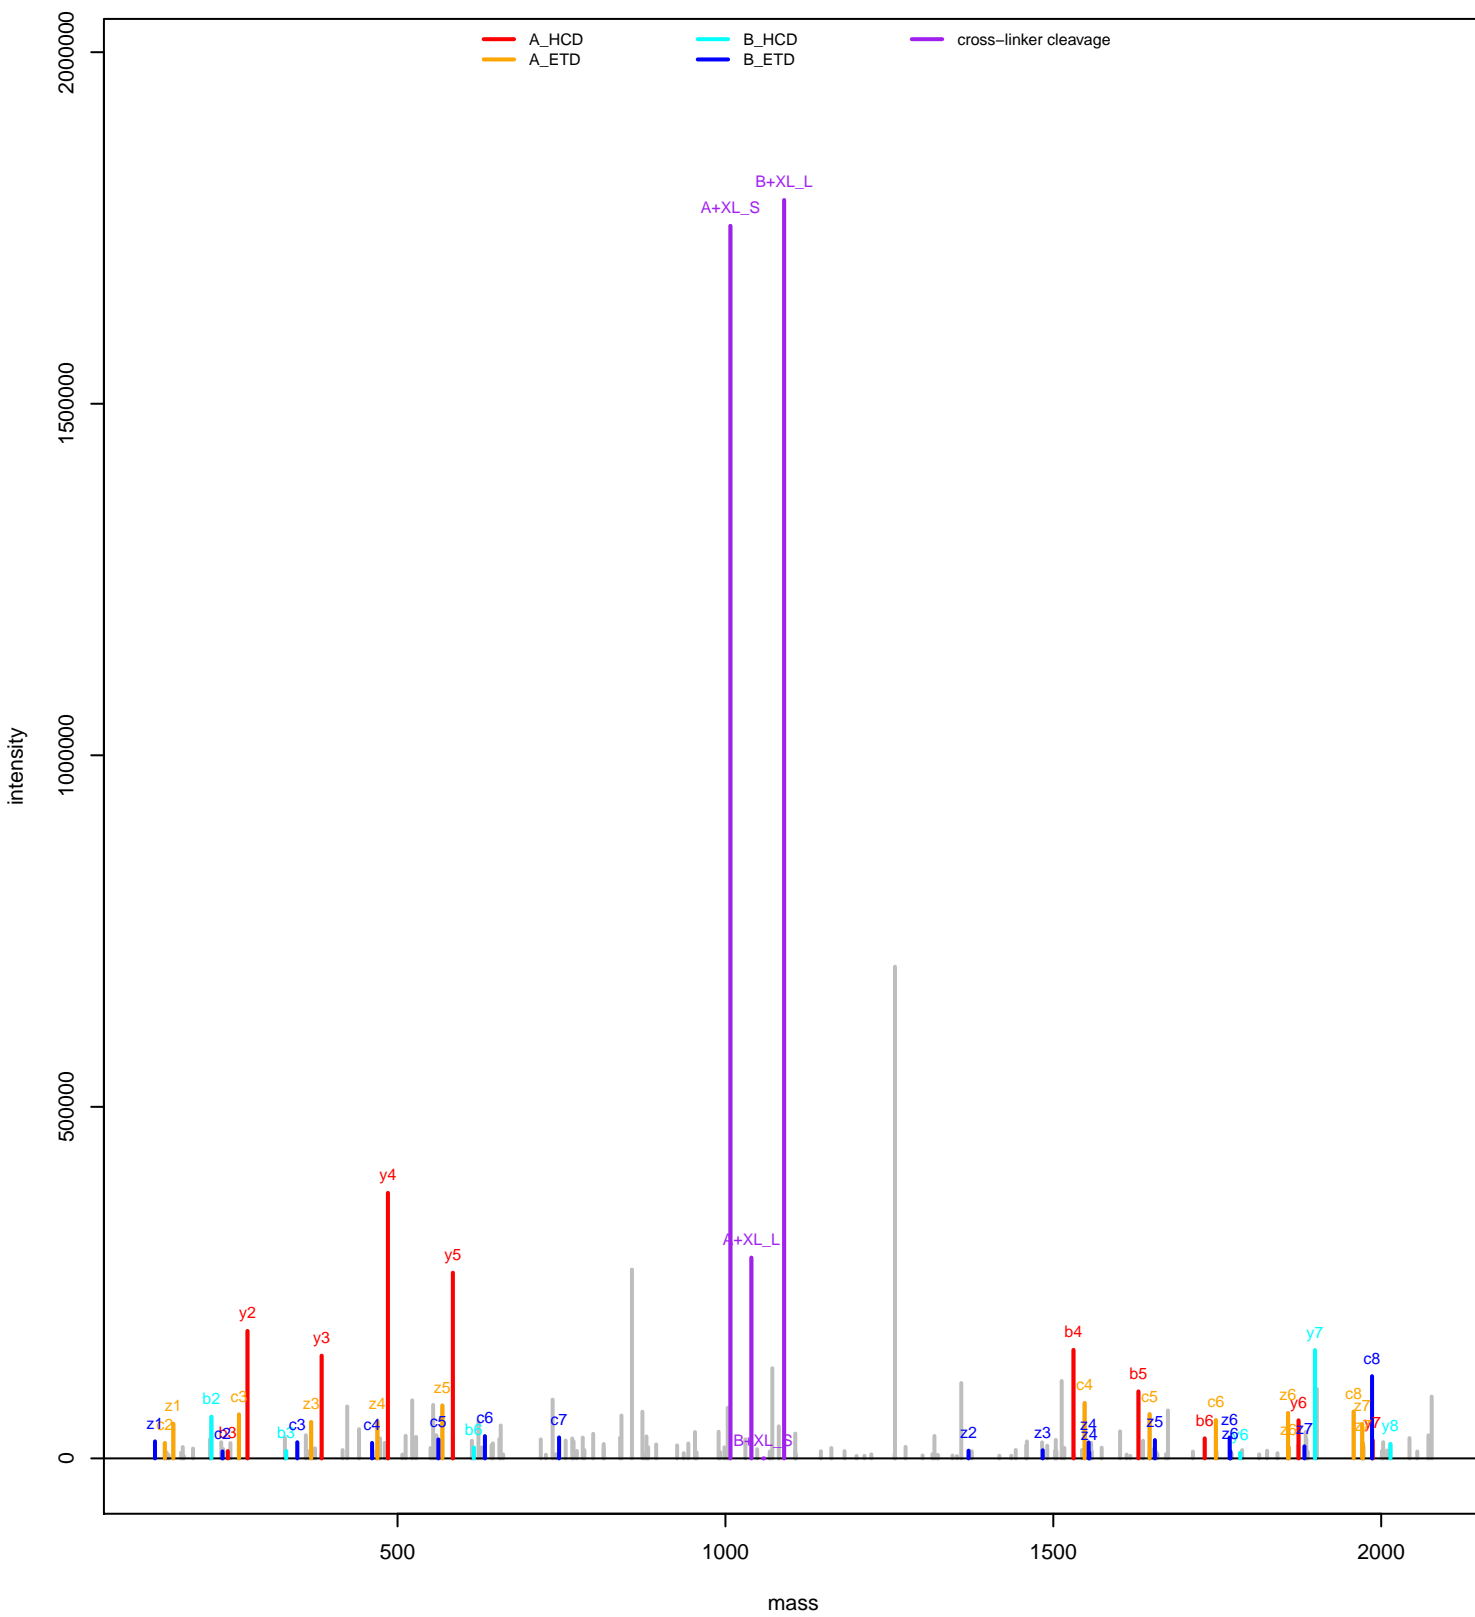

AGLKVTLP+XL\_S

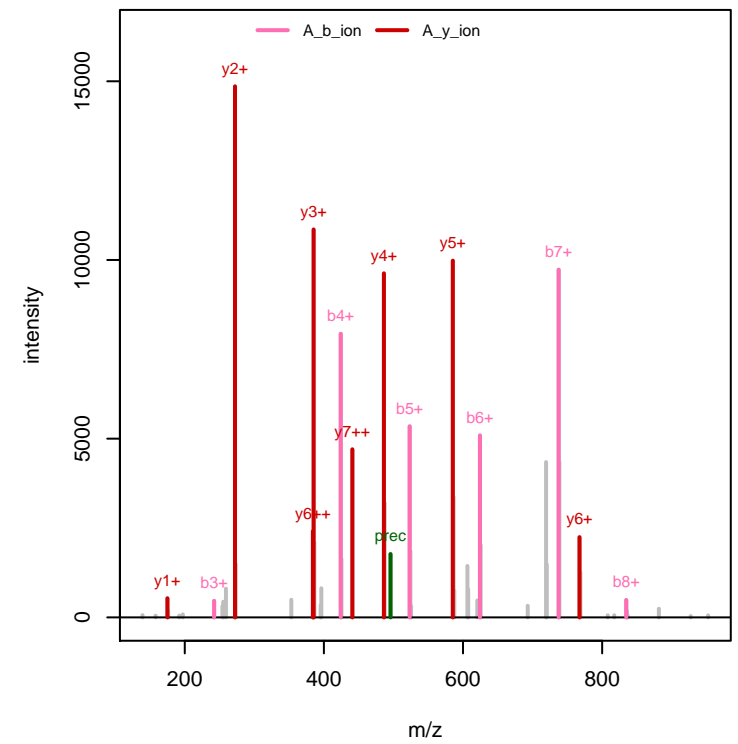

AGLKVTLP+XL\_L

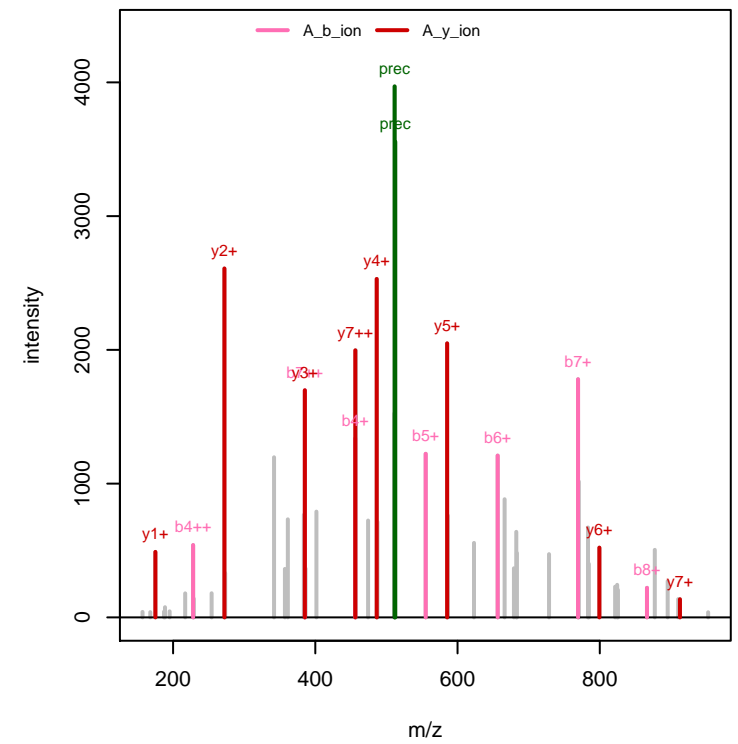

TDNNTALKK+XL\_S

TDNNTALKK+XL\_L



NLTGKEADAALGR  
NSVPNDPKSPFVTSGIR

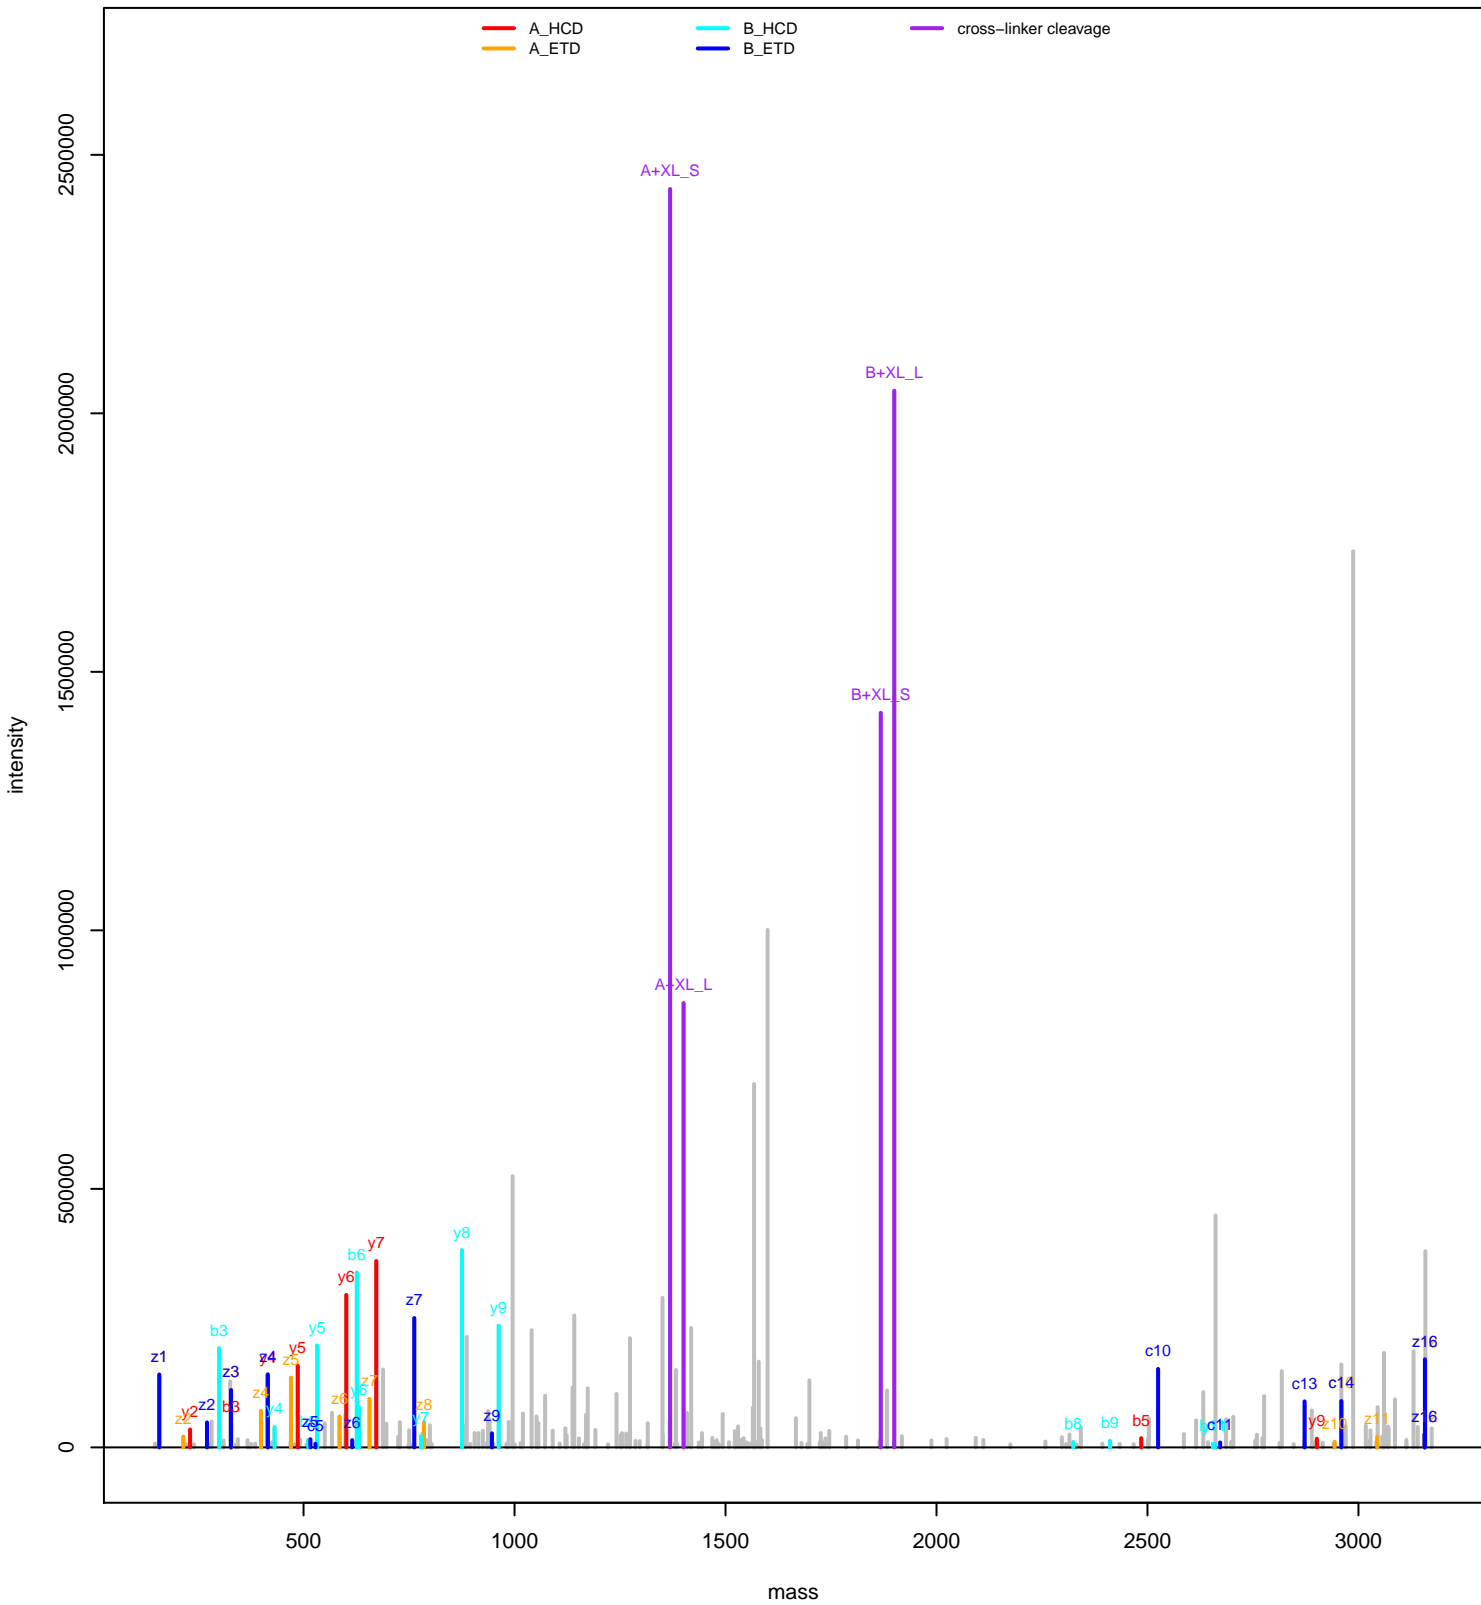

NLTGKEADAALGR+XL\_S

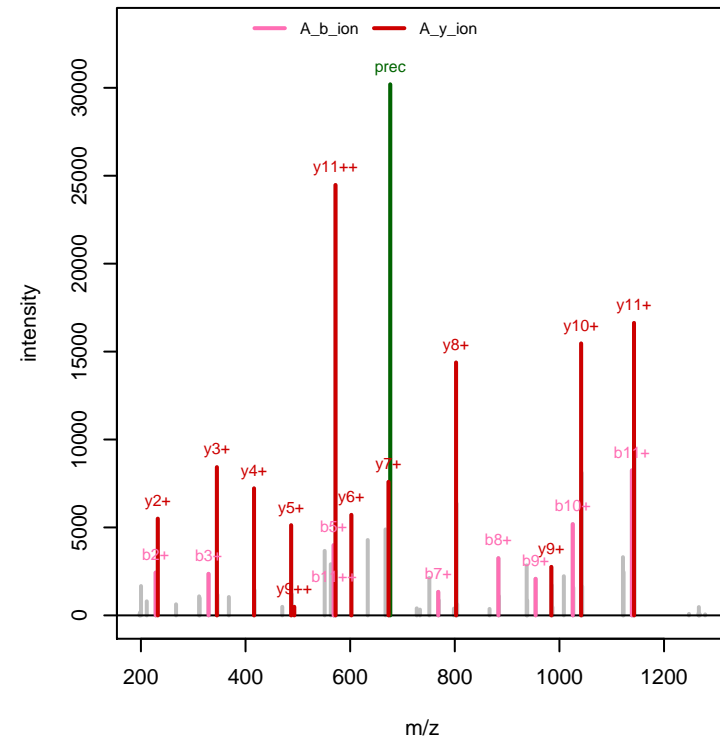

NLTGKEADAALGR+XL\_L

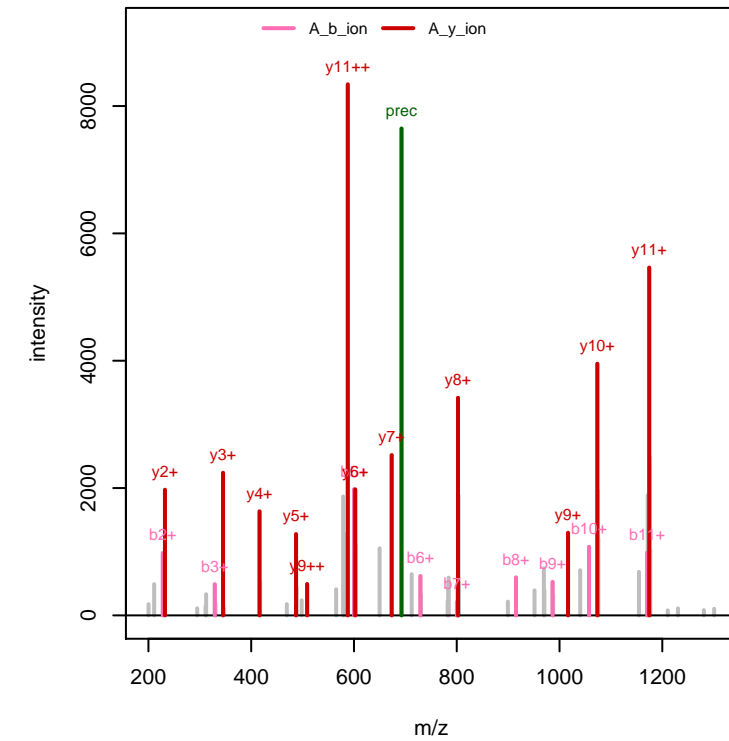

NSVPNDPKSPFVTSGIR+XL\_S

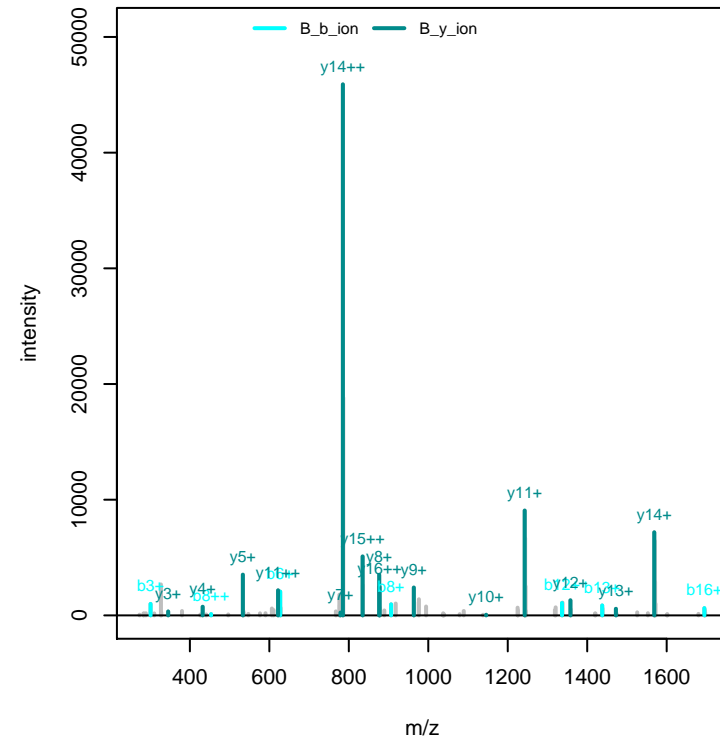

NSVPNDPKSPFVTSGIR+XL\_L

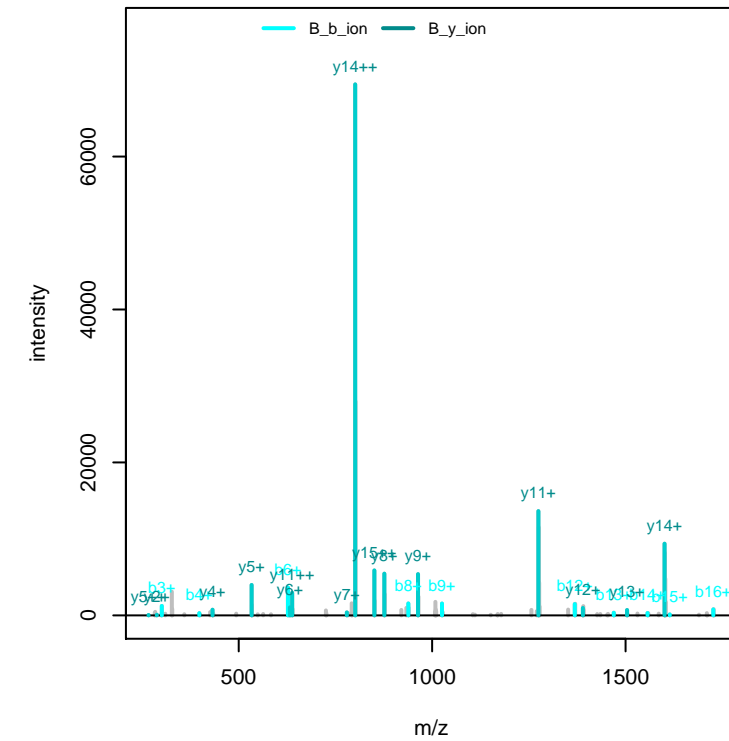

AAETNVAKSEAEK  
RGITLKIADGQQK

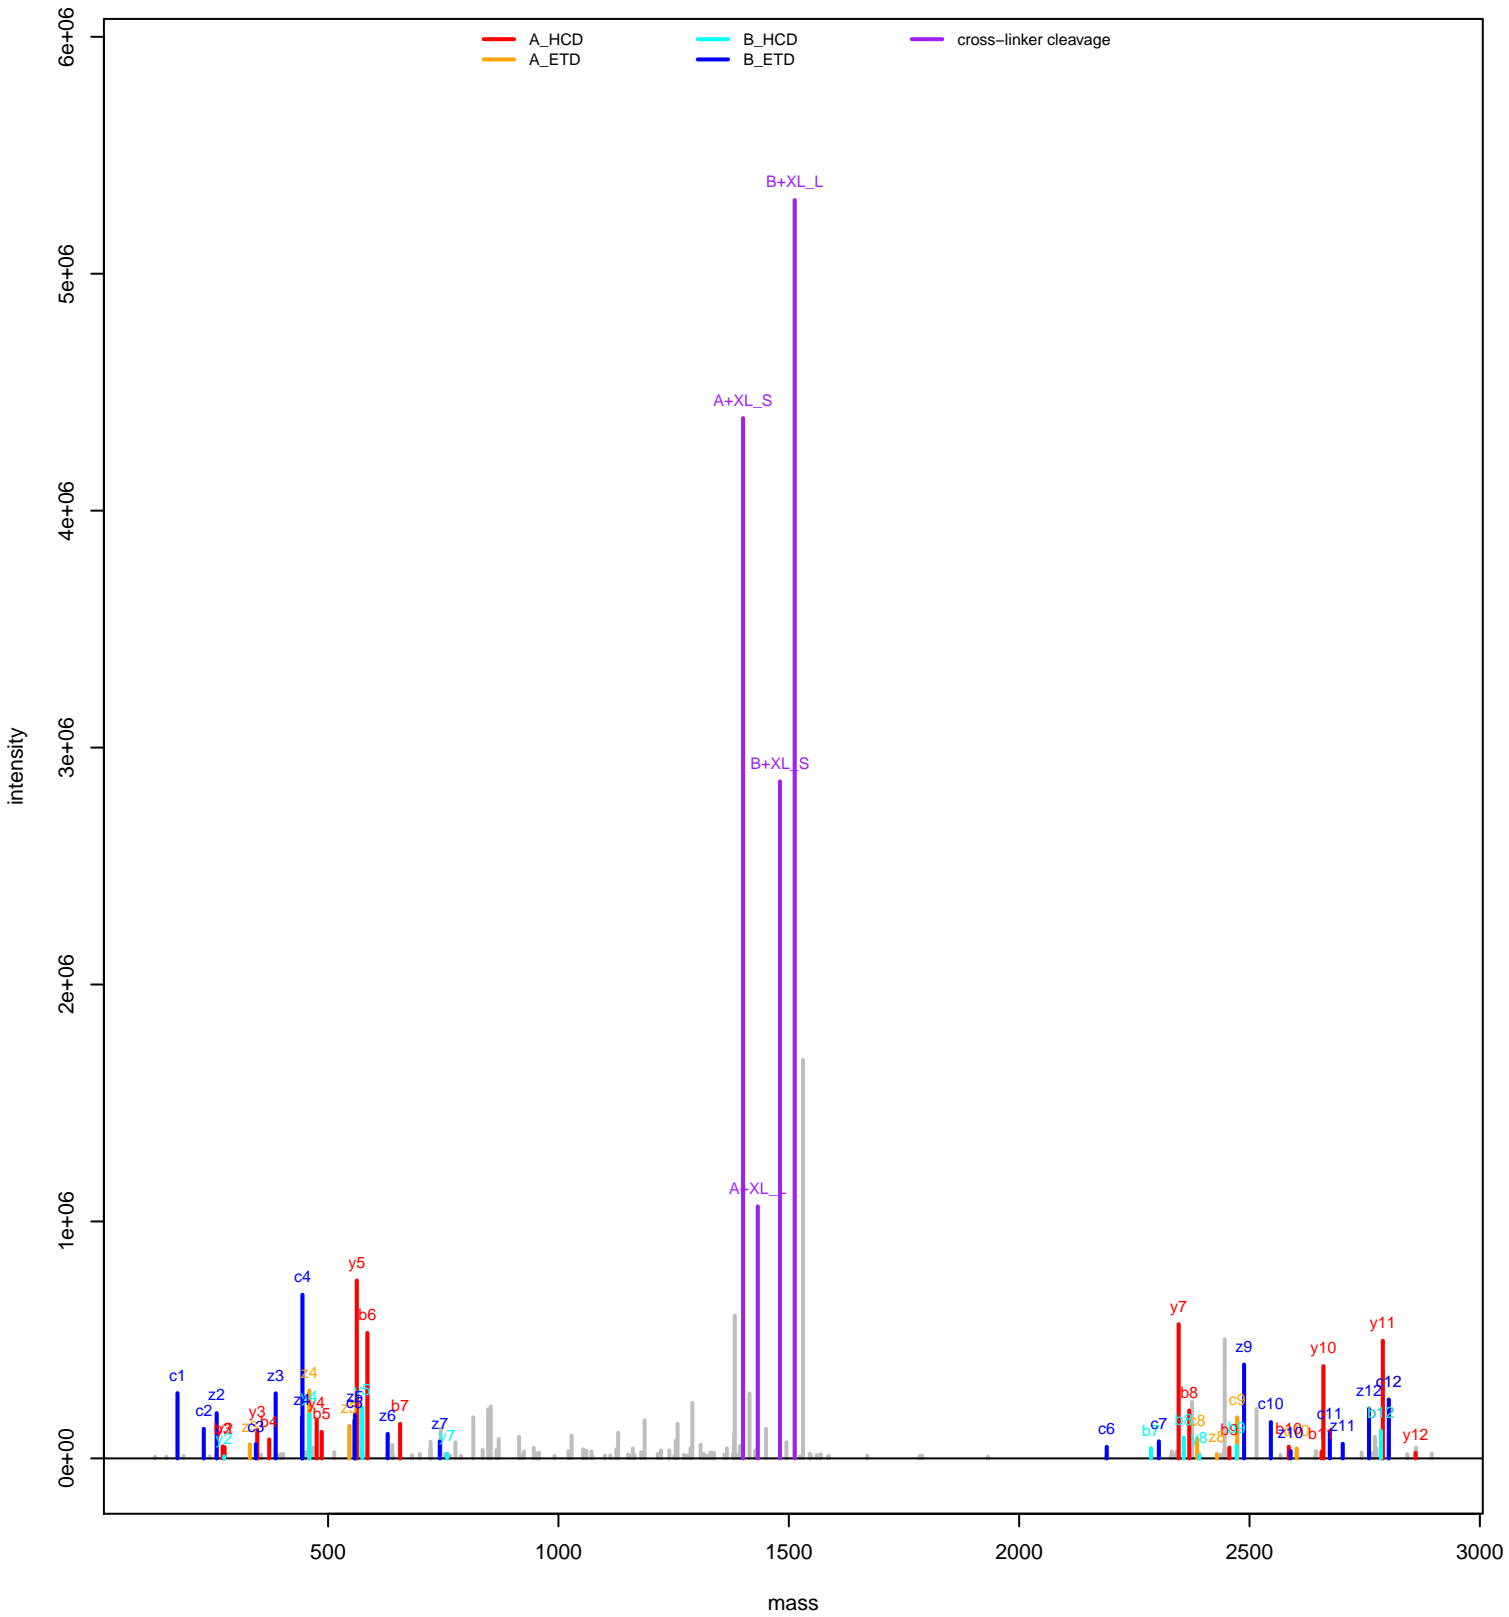

AAETNVAKSEAEK+XL\_S

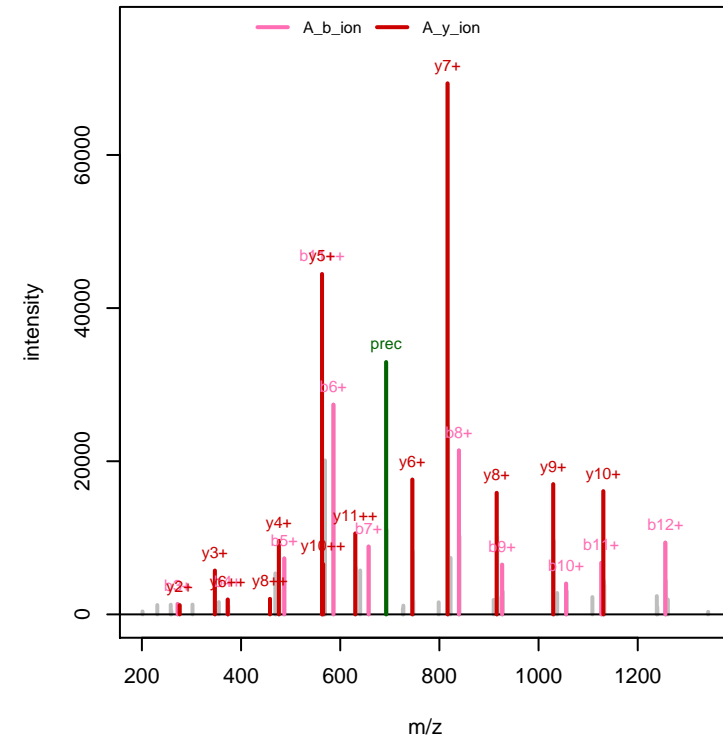

AAETNVAKSEAEK+XL\_L

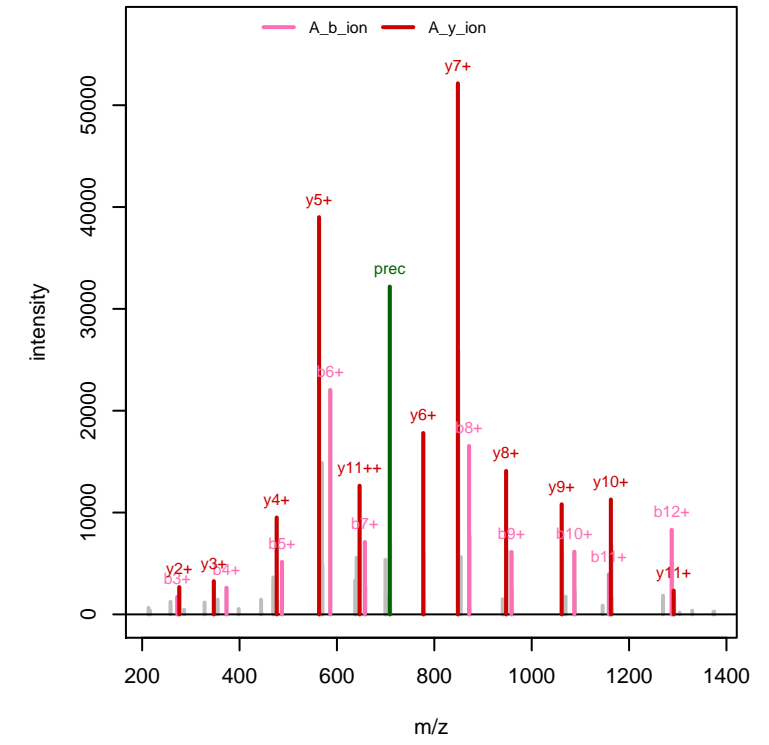

RGITLKIADGQQK+XL\_S

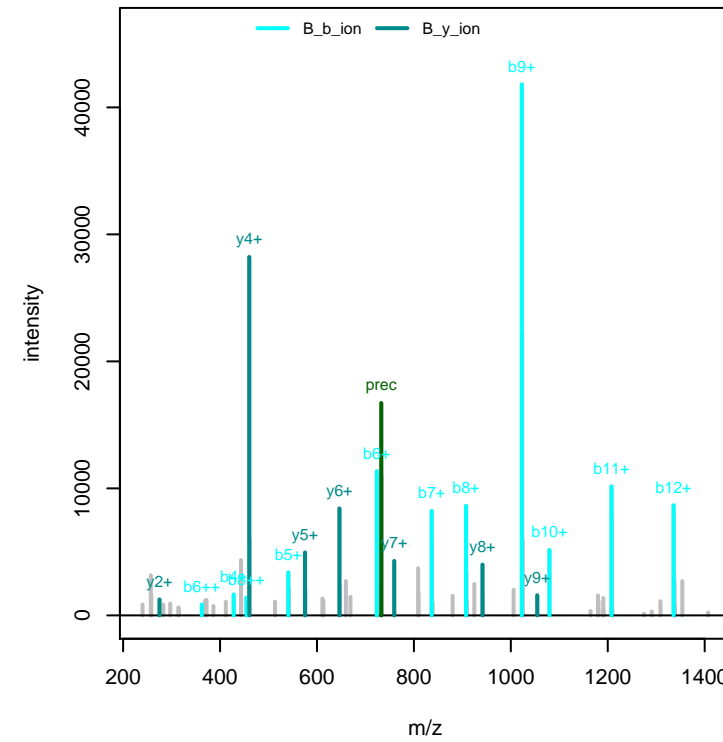

RGITLKIADGQQK+XL\_L

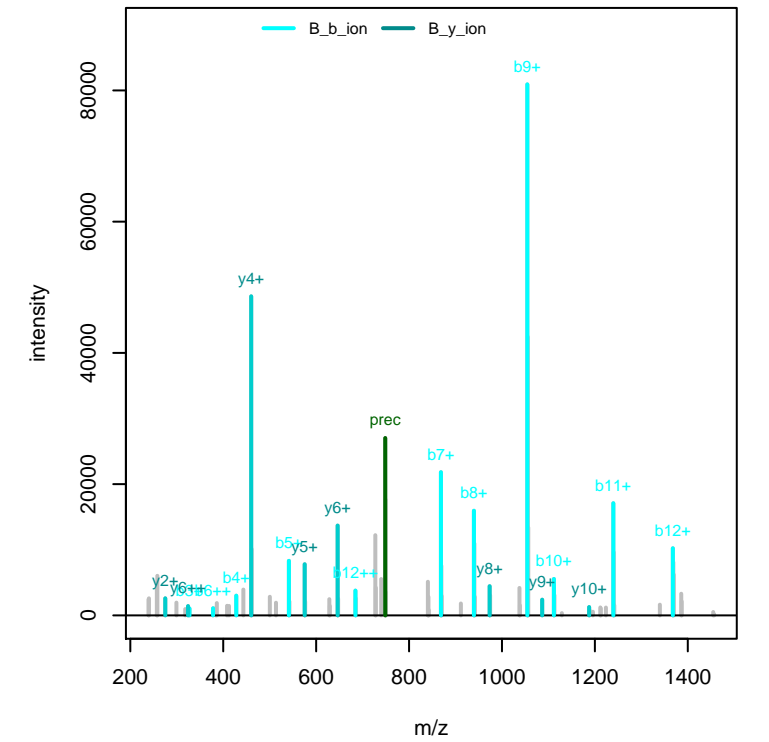

GLATTIKAALK  
AIFGEKASDVK

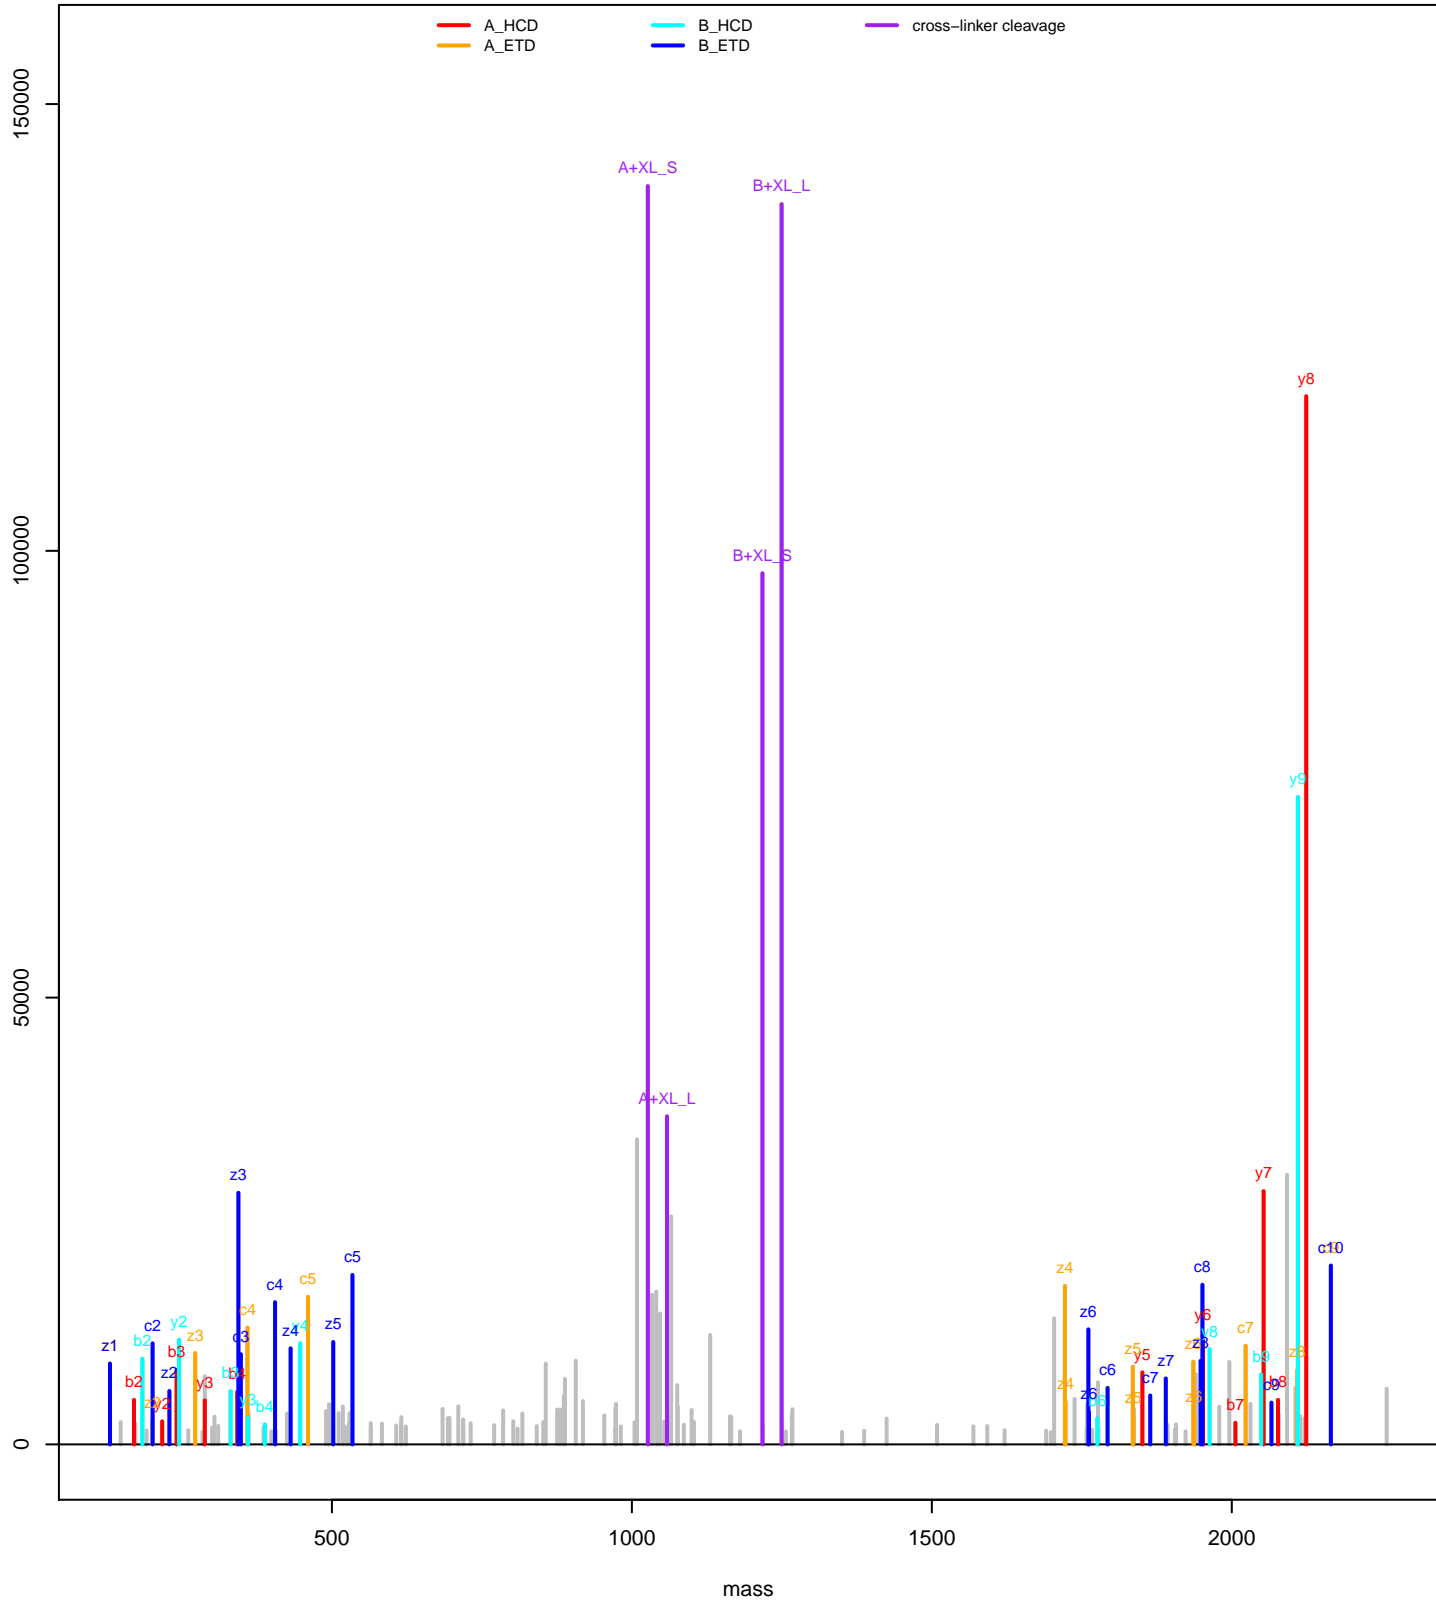

GLATTIKAALK+XL\_S

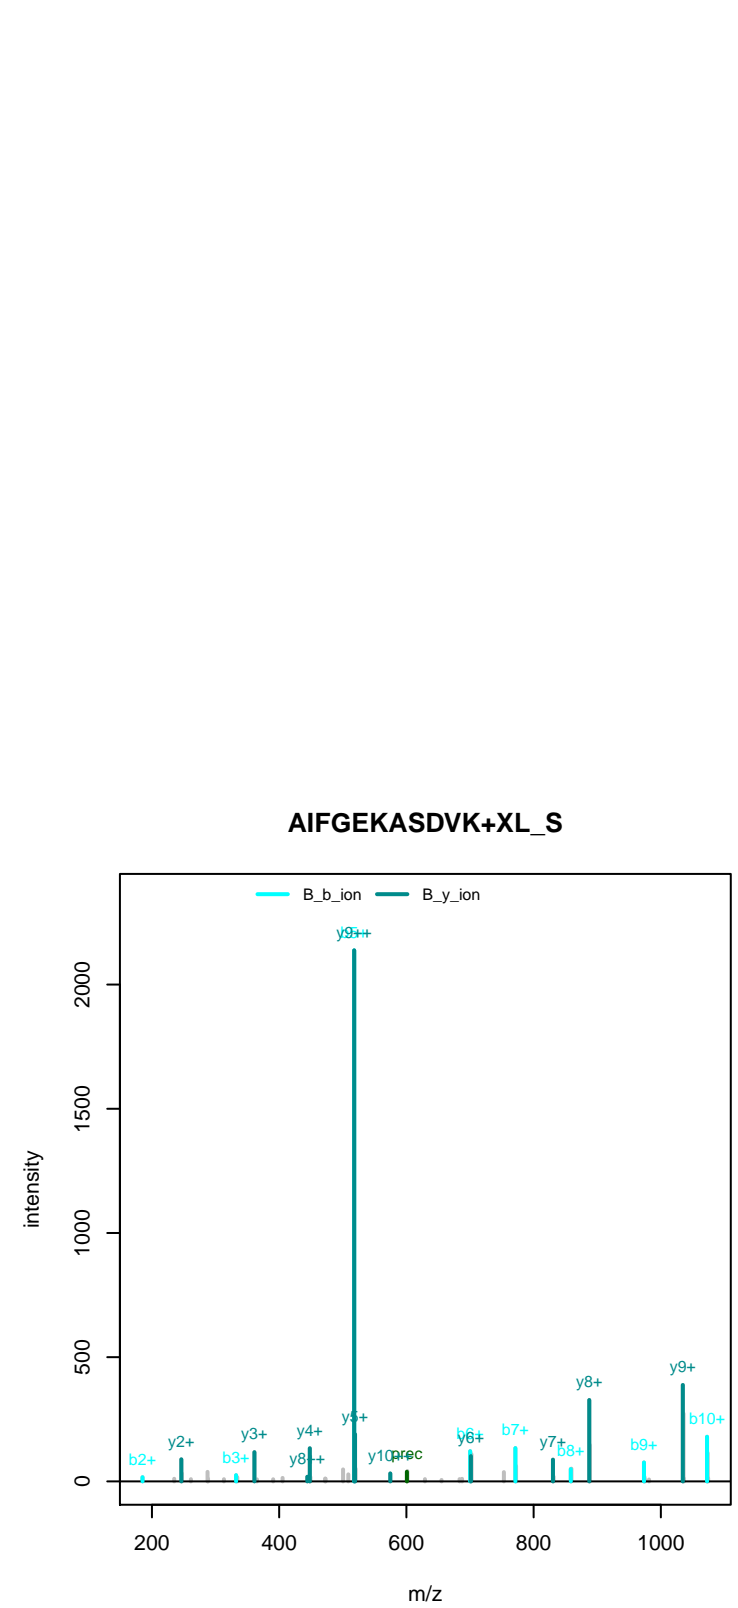

GLATTIKAALK+XL\_L

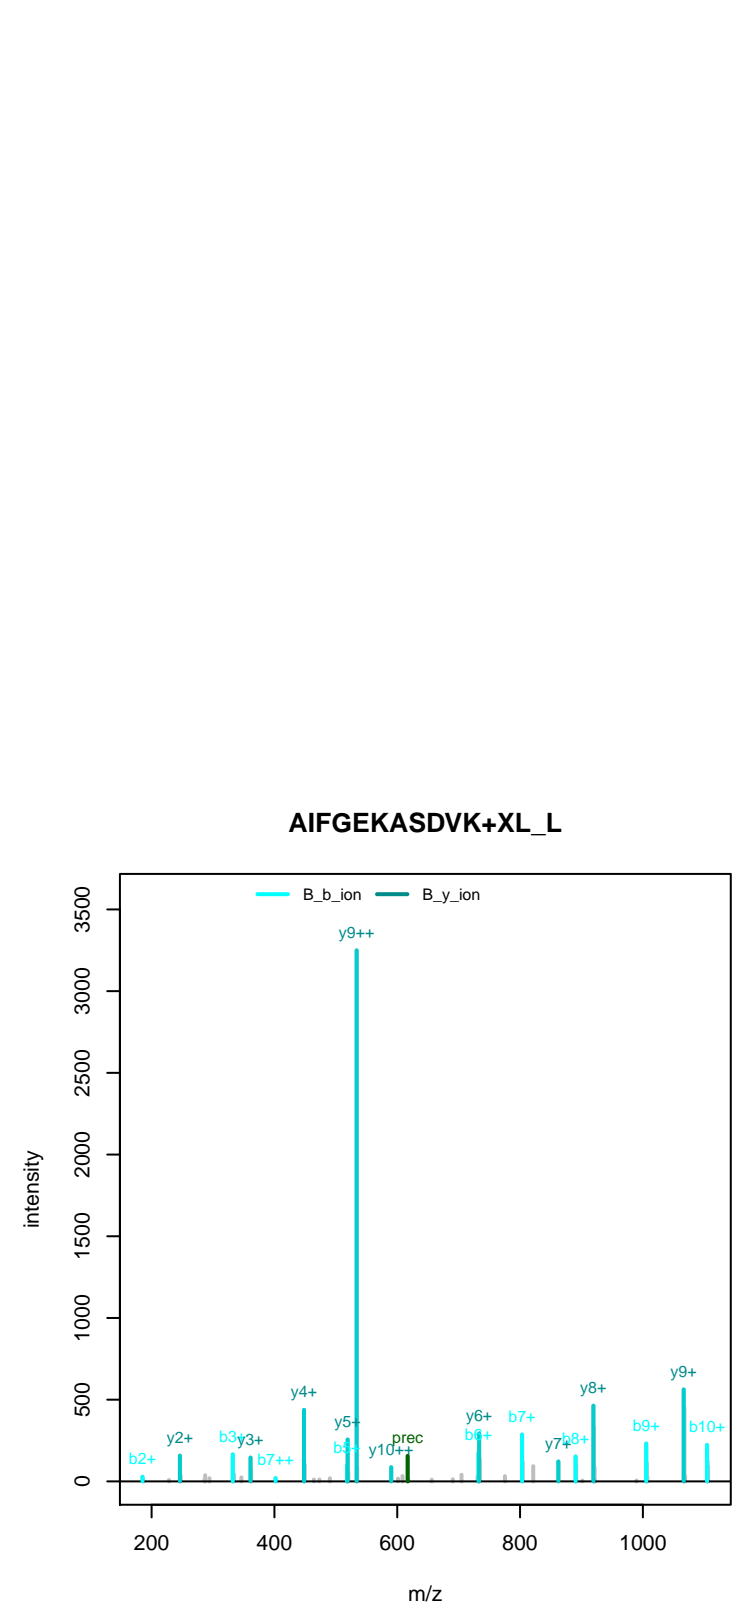

AIFGEKASDVK+XL\_S

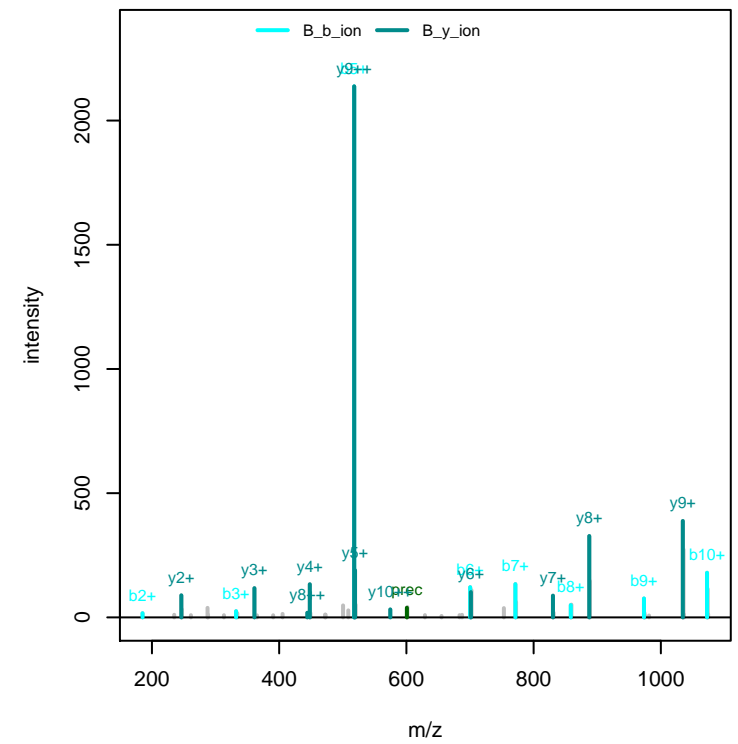

AIFGEKASDVK+XL\_L

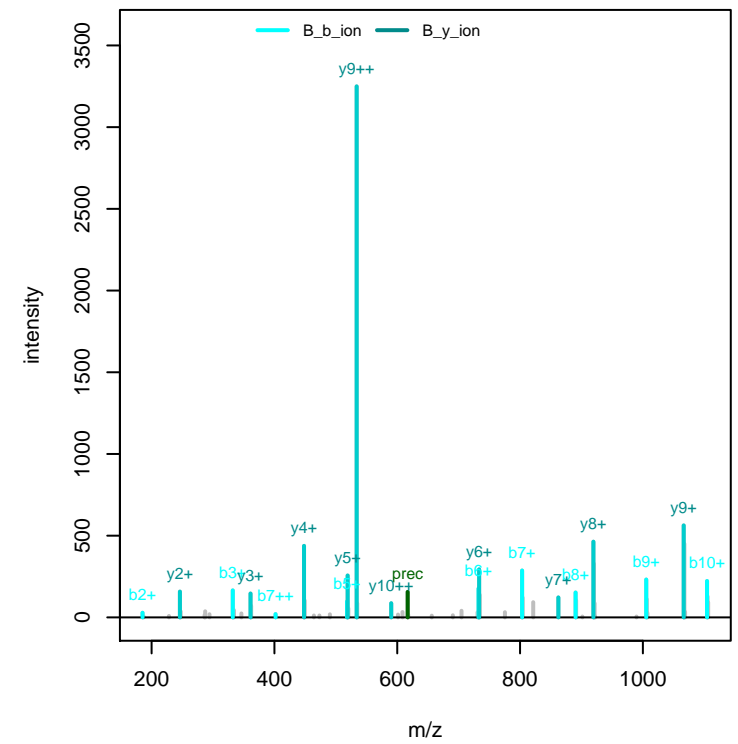

VAVIKAVR  
EGVSKDDAEALKK

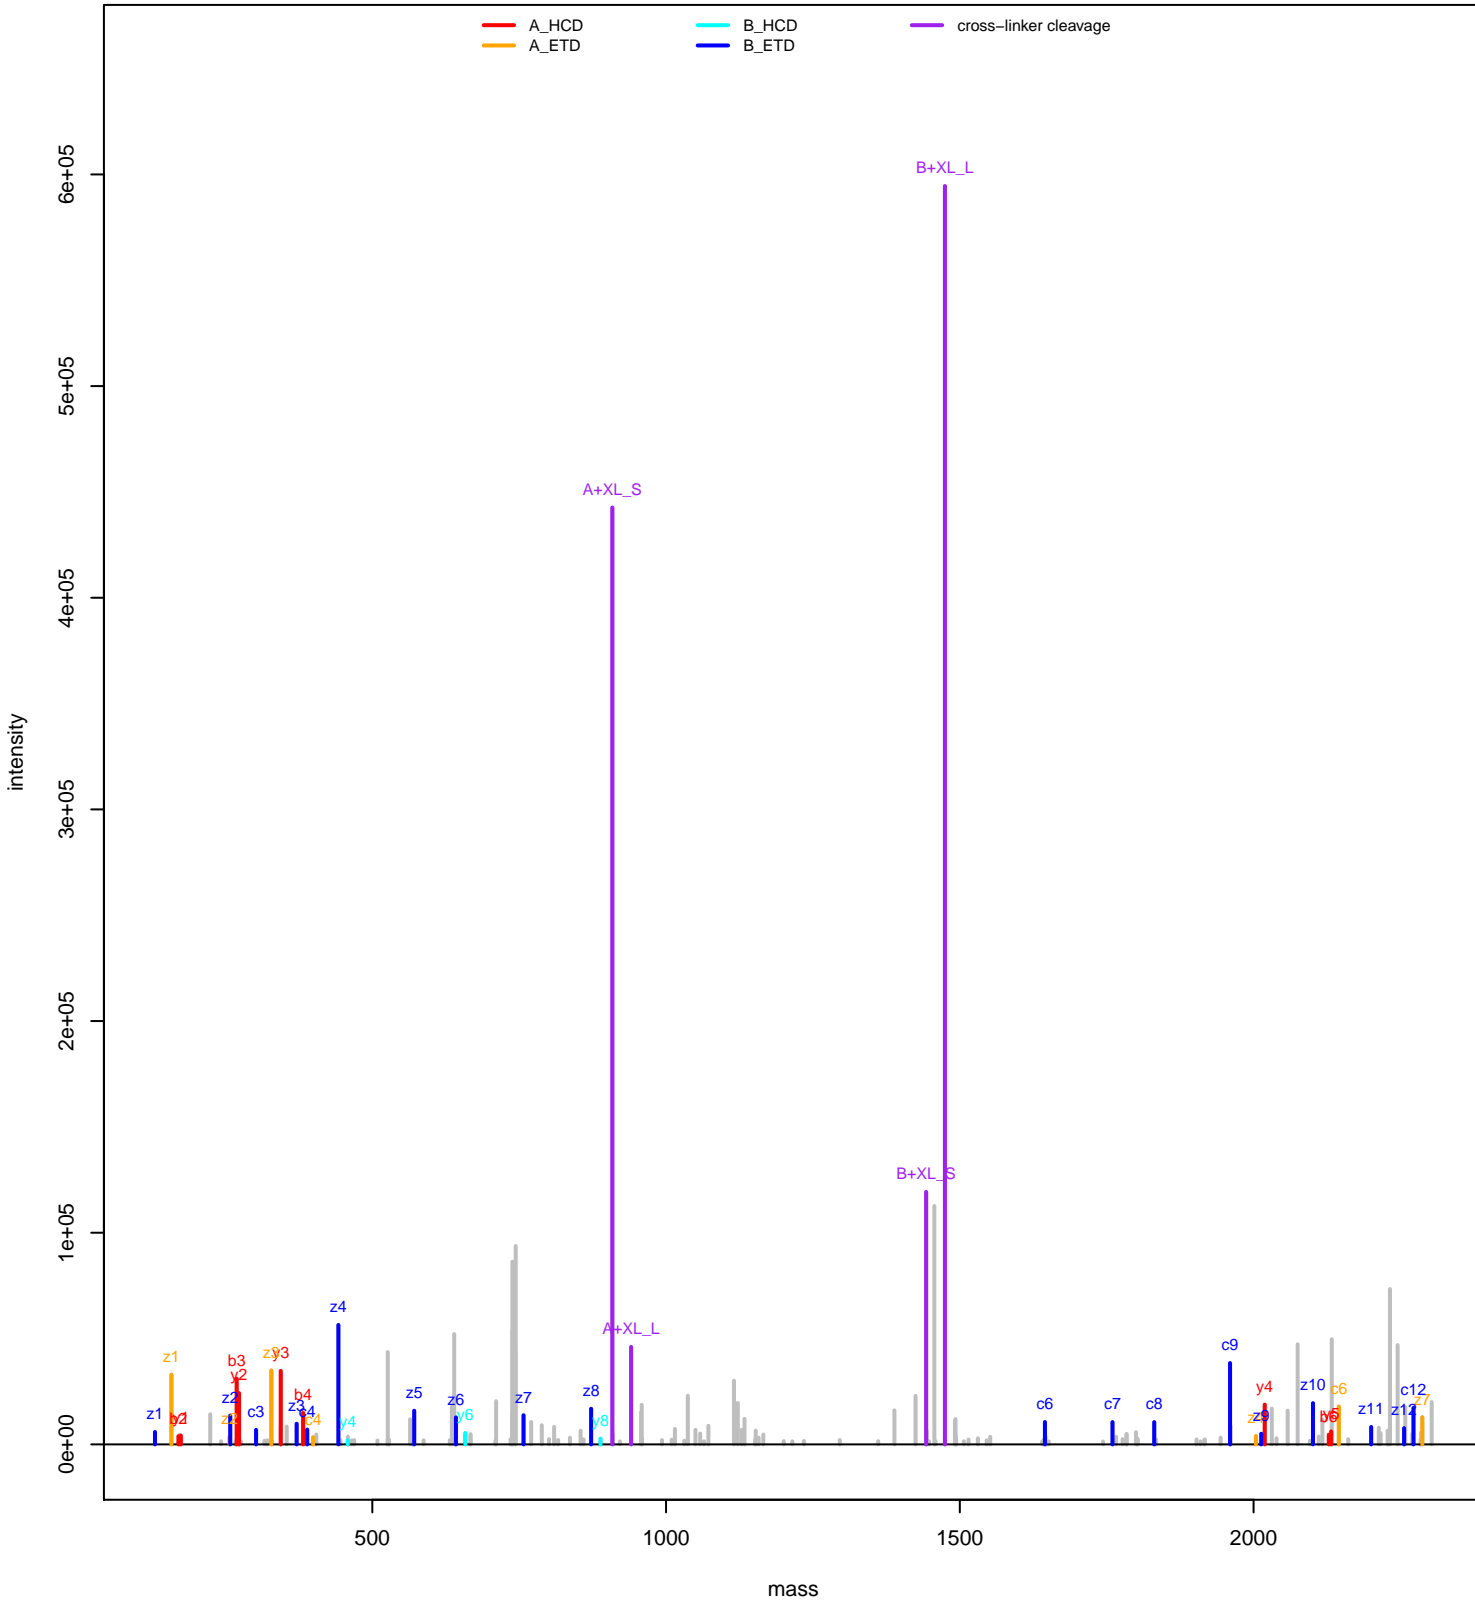

VAVIKAVR+XL\_S

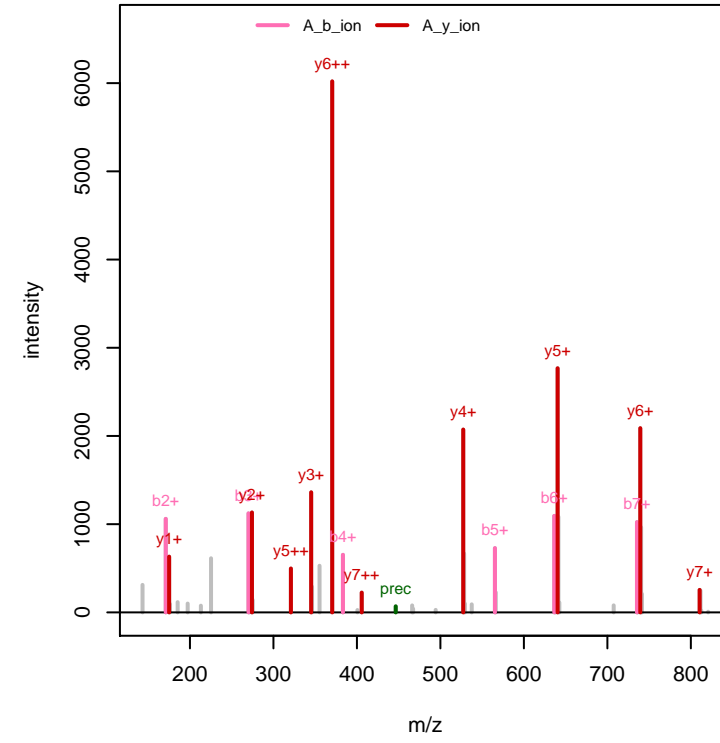

VAVIKAVR+XL\_L

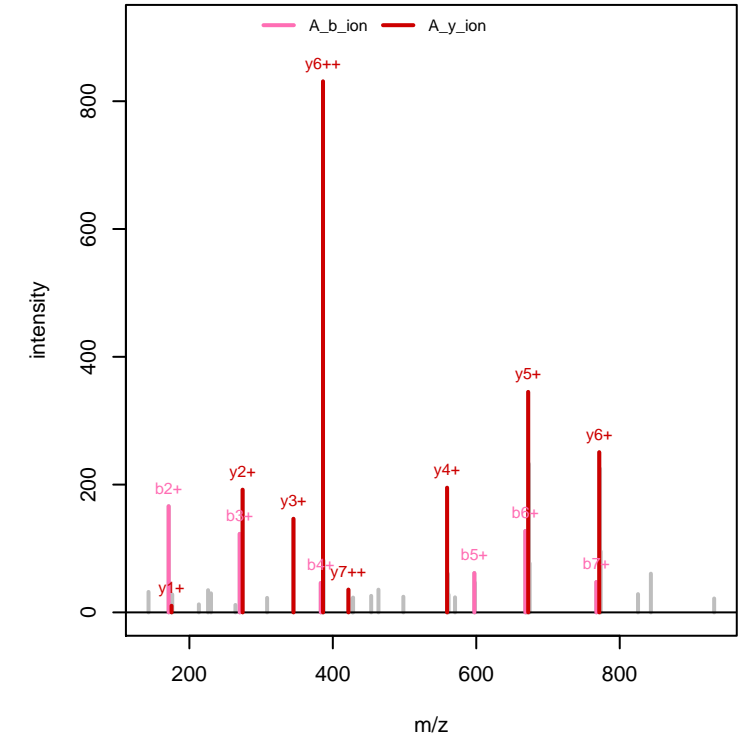

EGVSKDDAEALKK+XL\_S

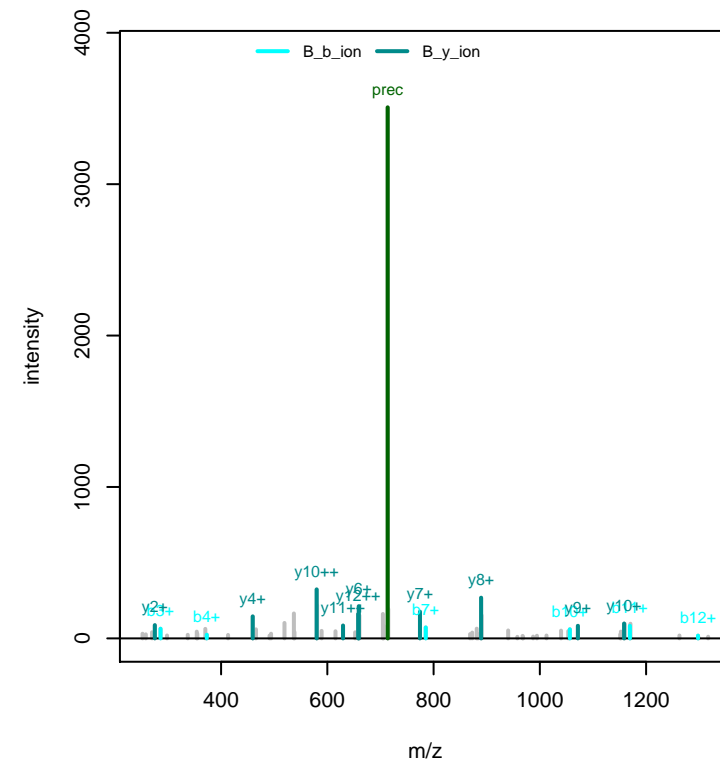

EGVSKDDAEALKK+XL\_L

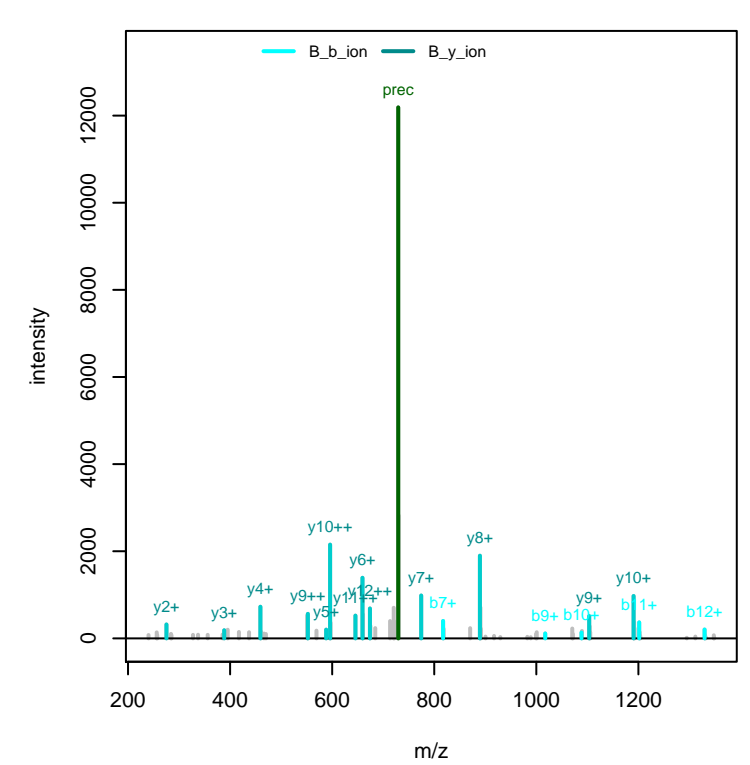

ELAKASVSR  
PGIVIGKKGEDVEK

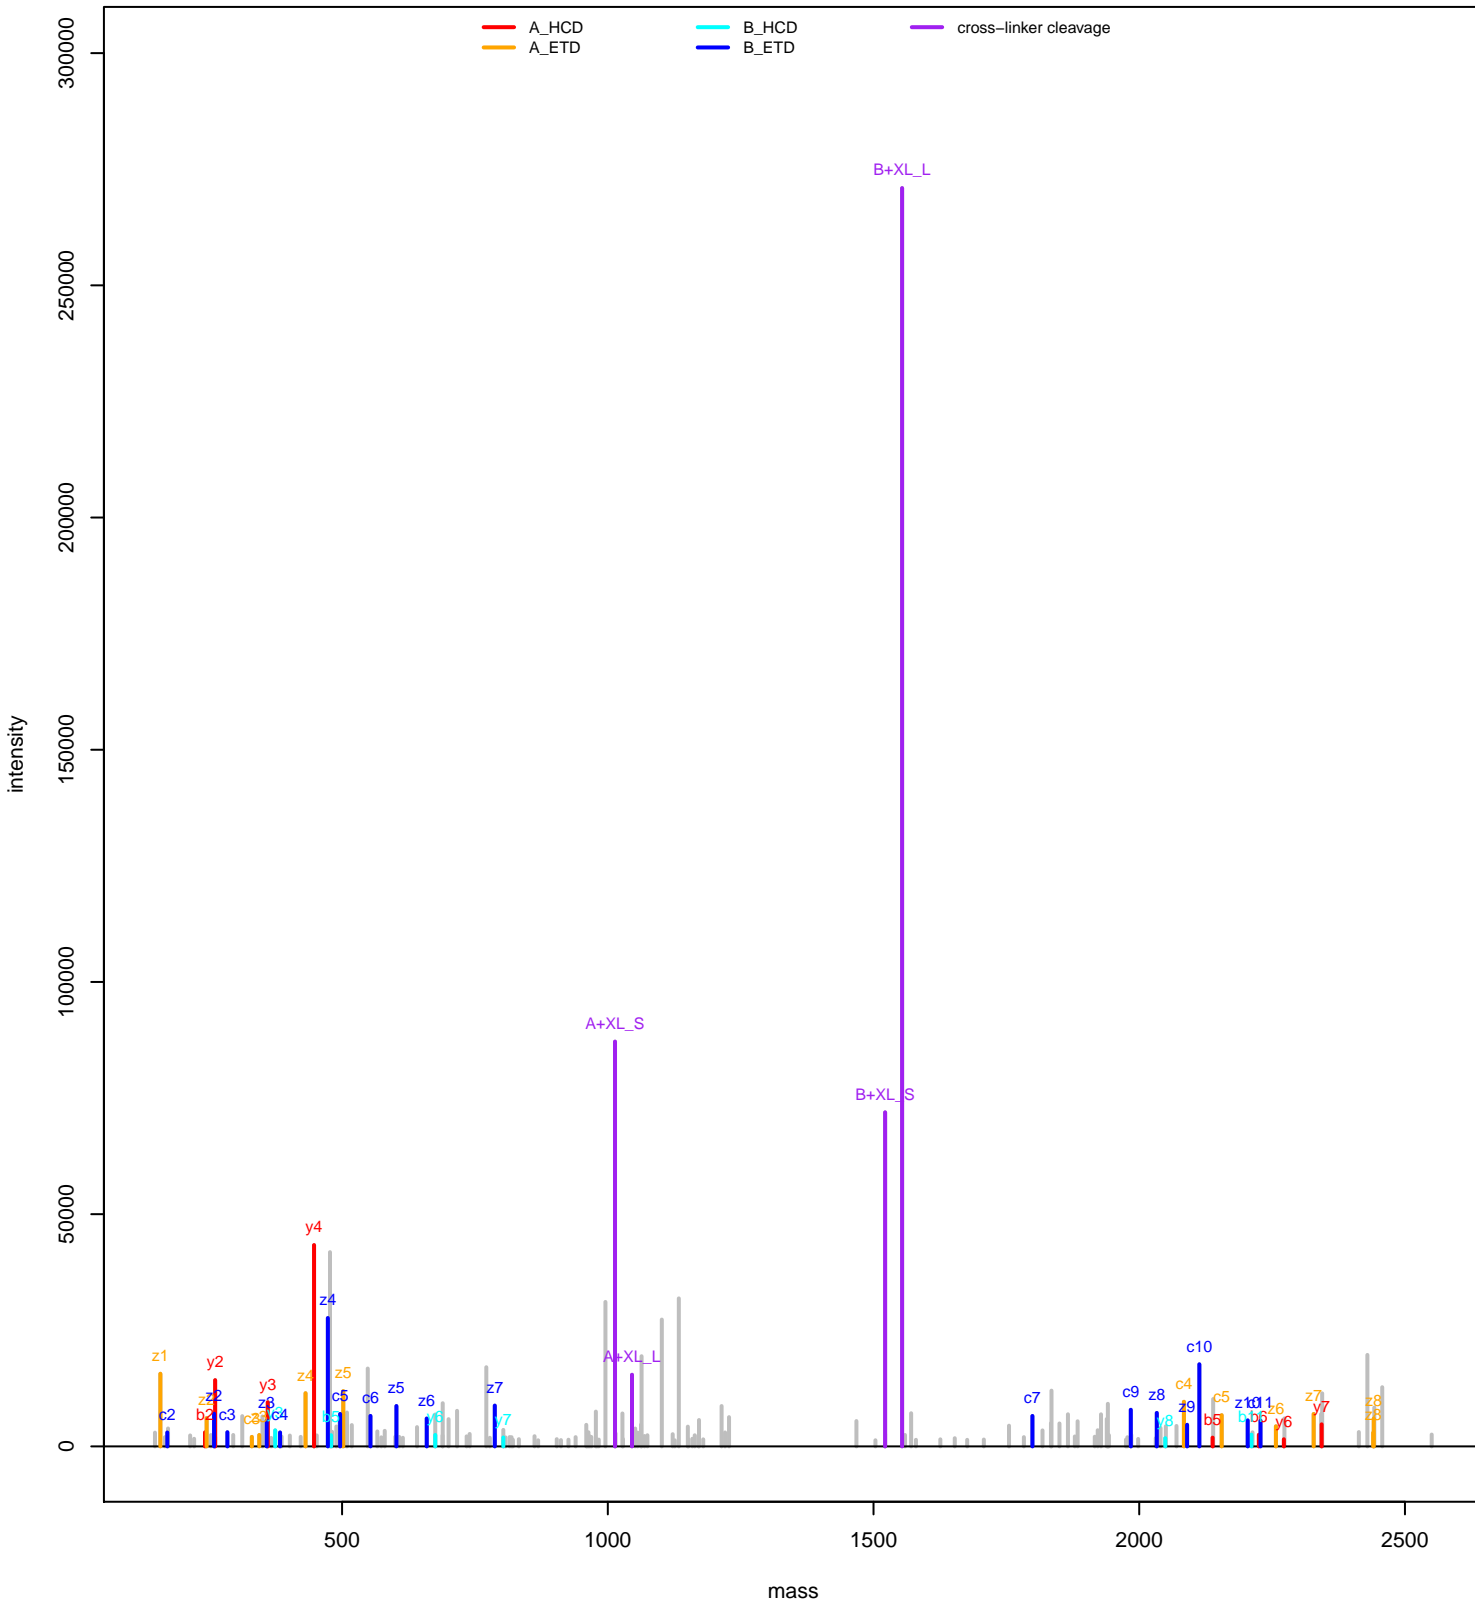

ELAKASVSR+XL\_S

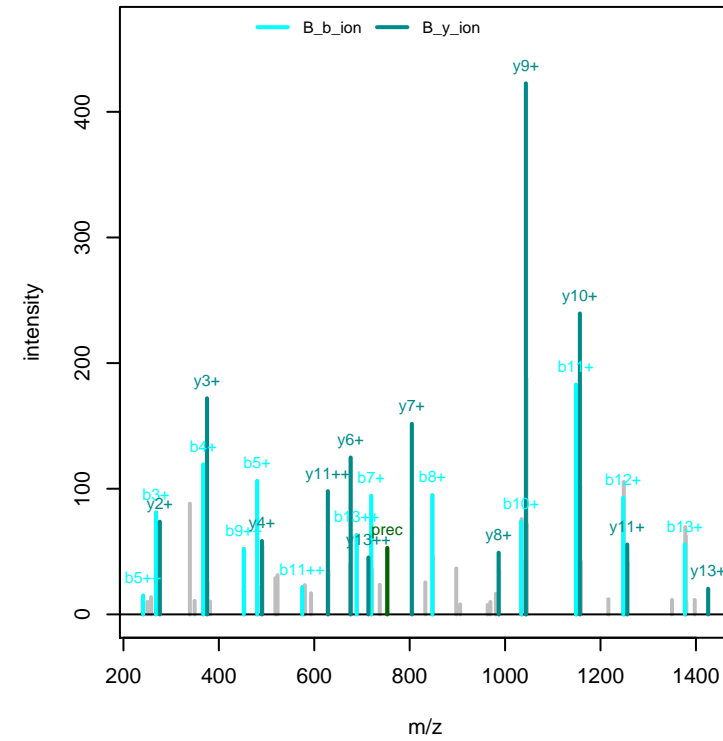

ELAKASVSR+XL\_L

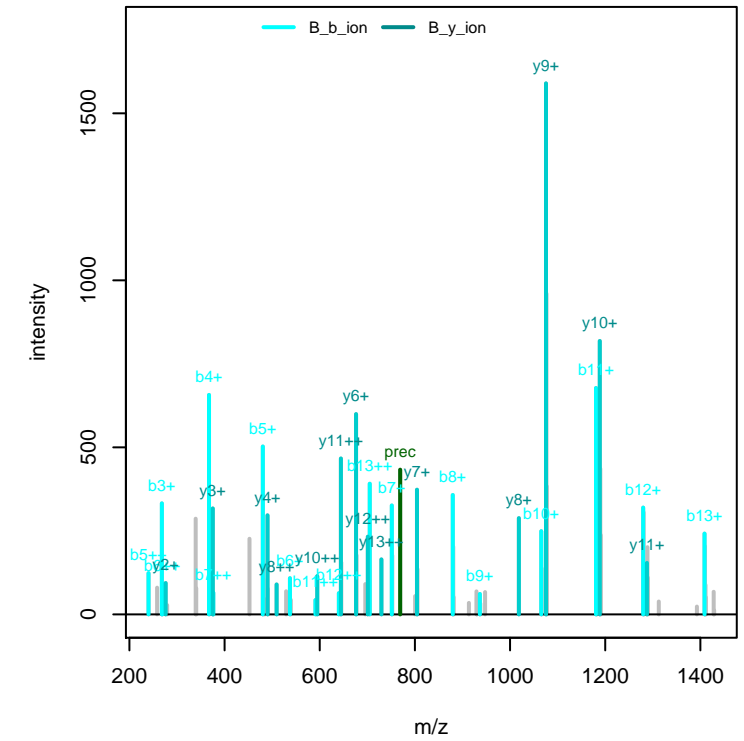

PGIVIGKKGEDVEK+XL\_S

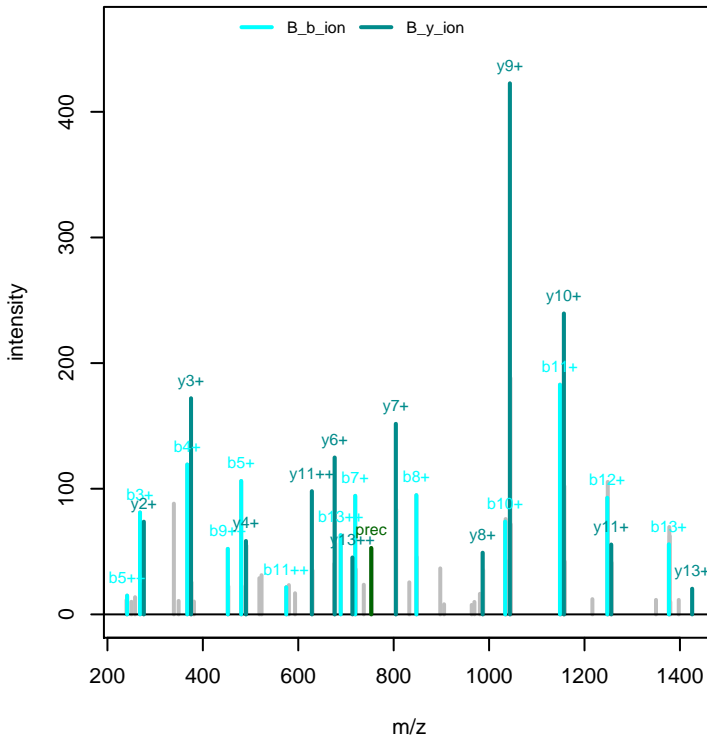

PGIVIGKKGEDVEK+XL\_L



SEKRVPMTR  
APAKESAPAAAAPAAQPALAAR

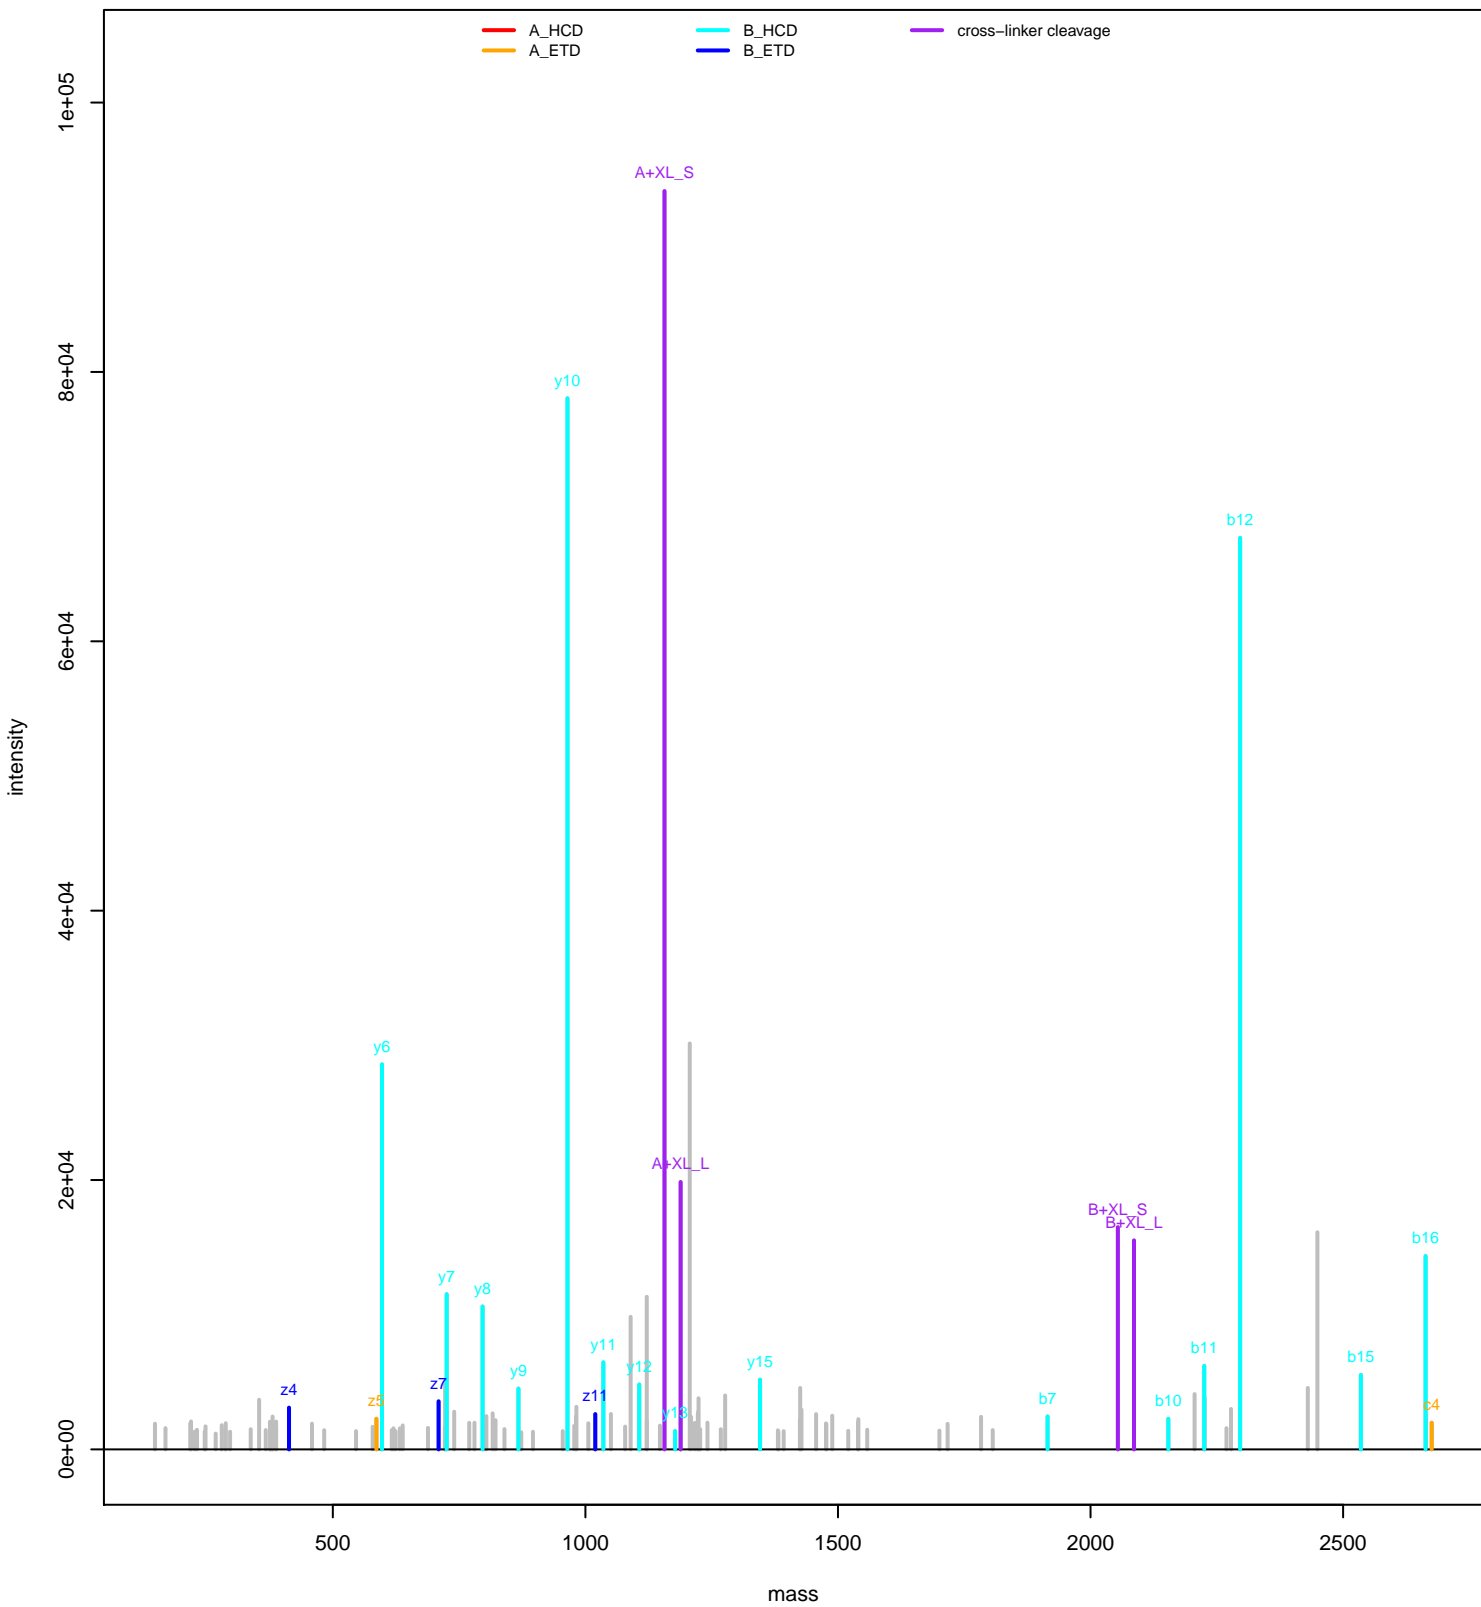

SEKRVPMTR+XL\_S

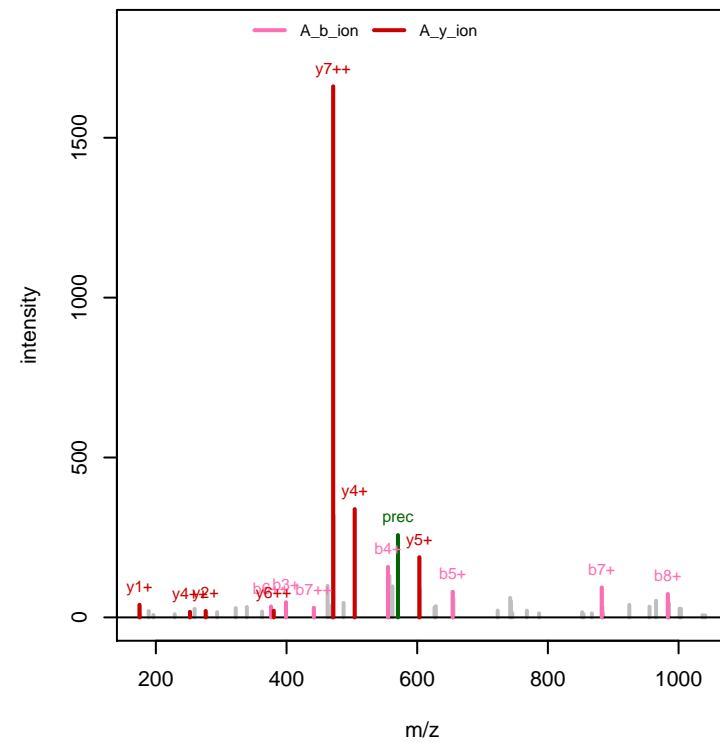

SEKRVPMTR+XL\_L

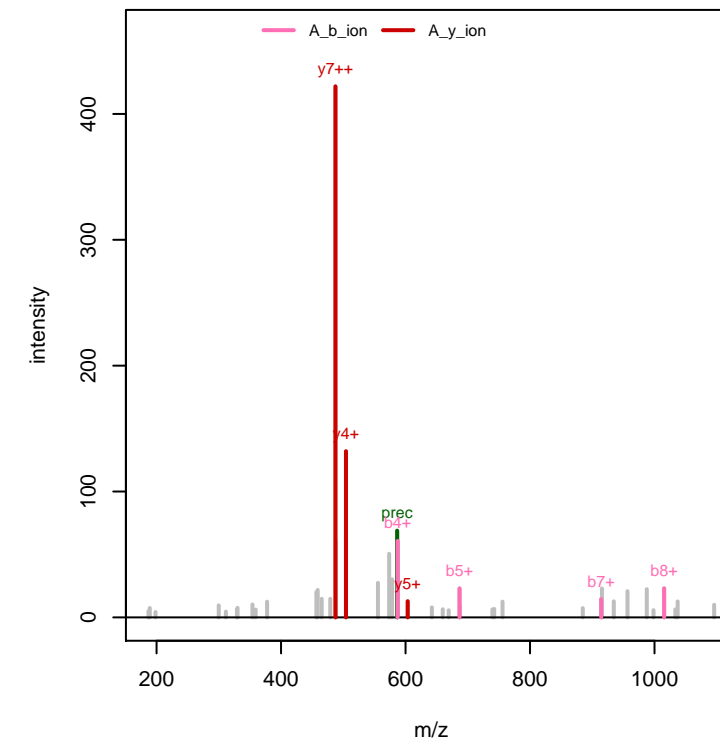

APAKESAPAAAAPAAQPALAAR+XL\_S

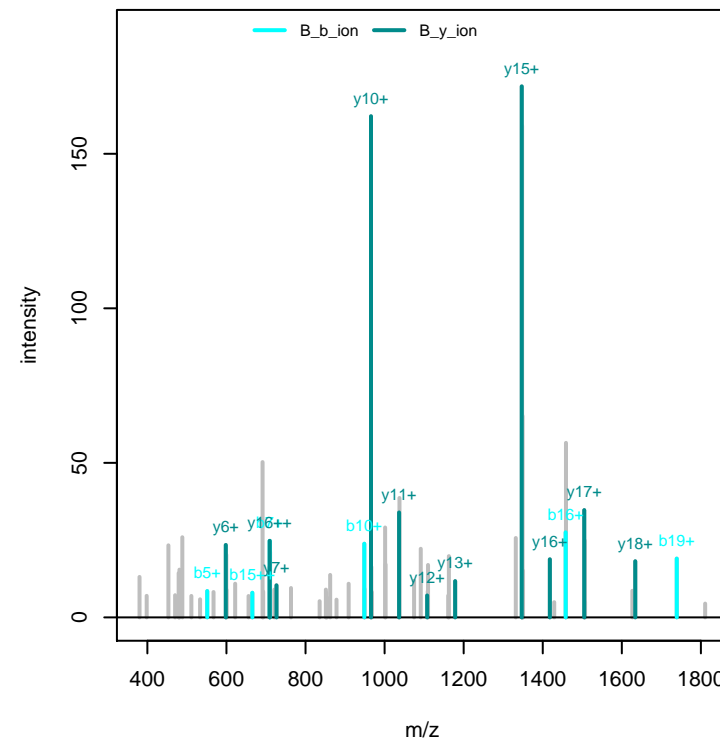

APAKESAPAAAAPAAQPALAAR+XL\_L

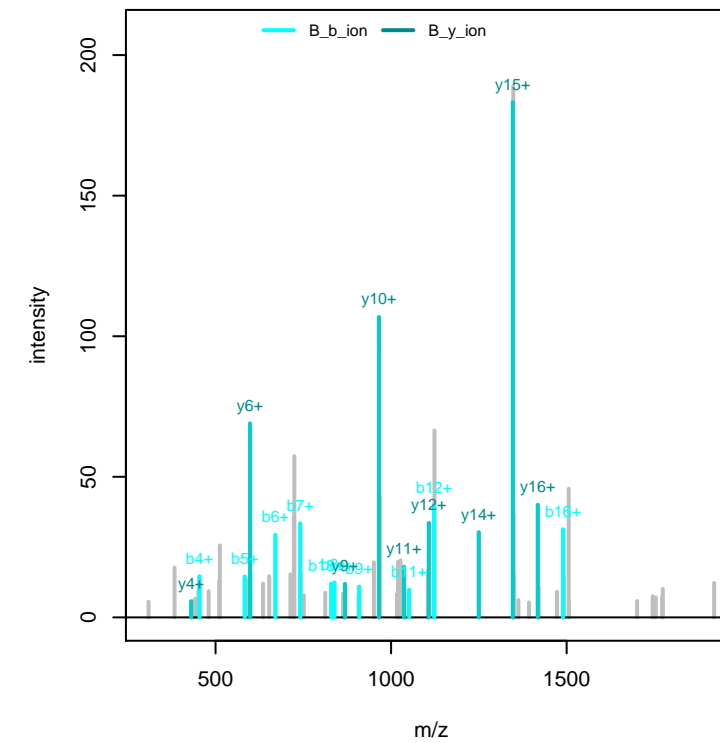

ALKELGEITR  
KAINVSDQVPAK

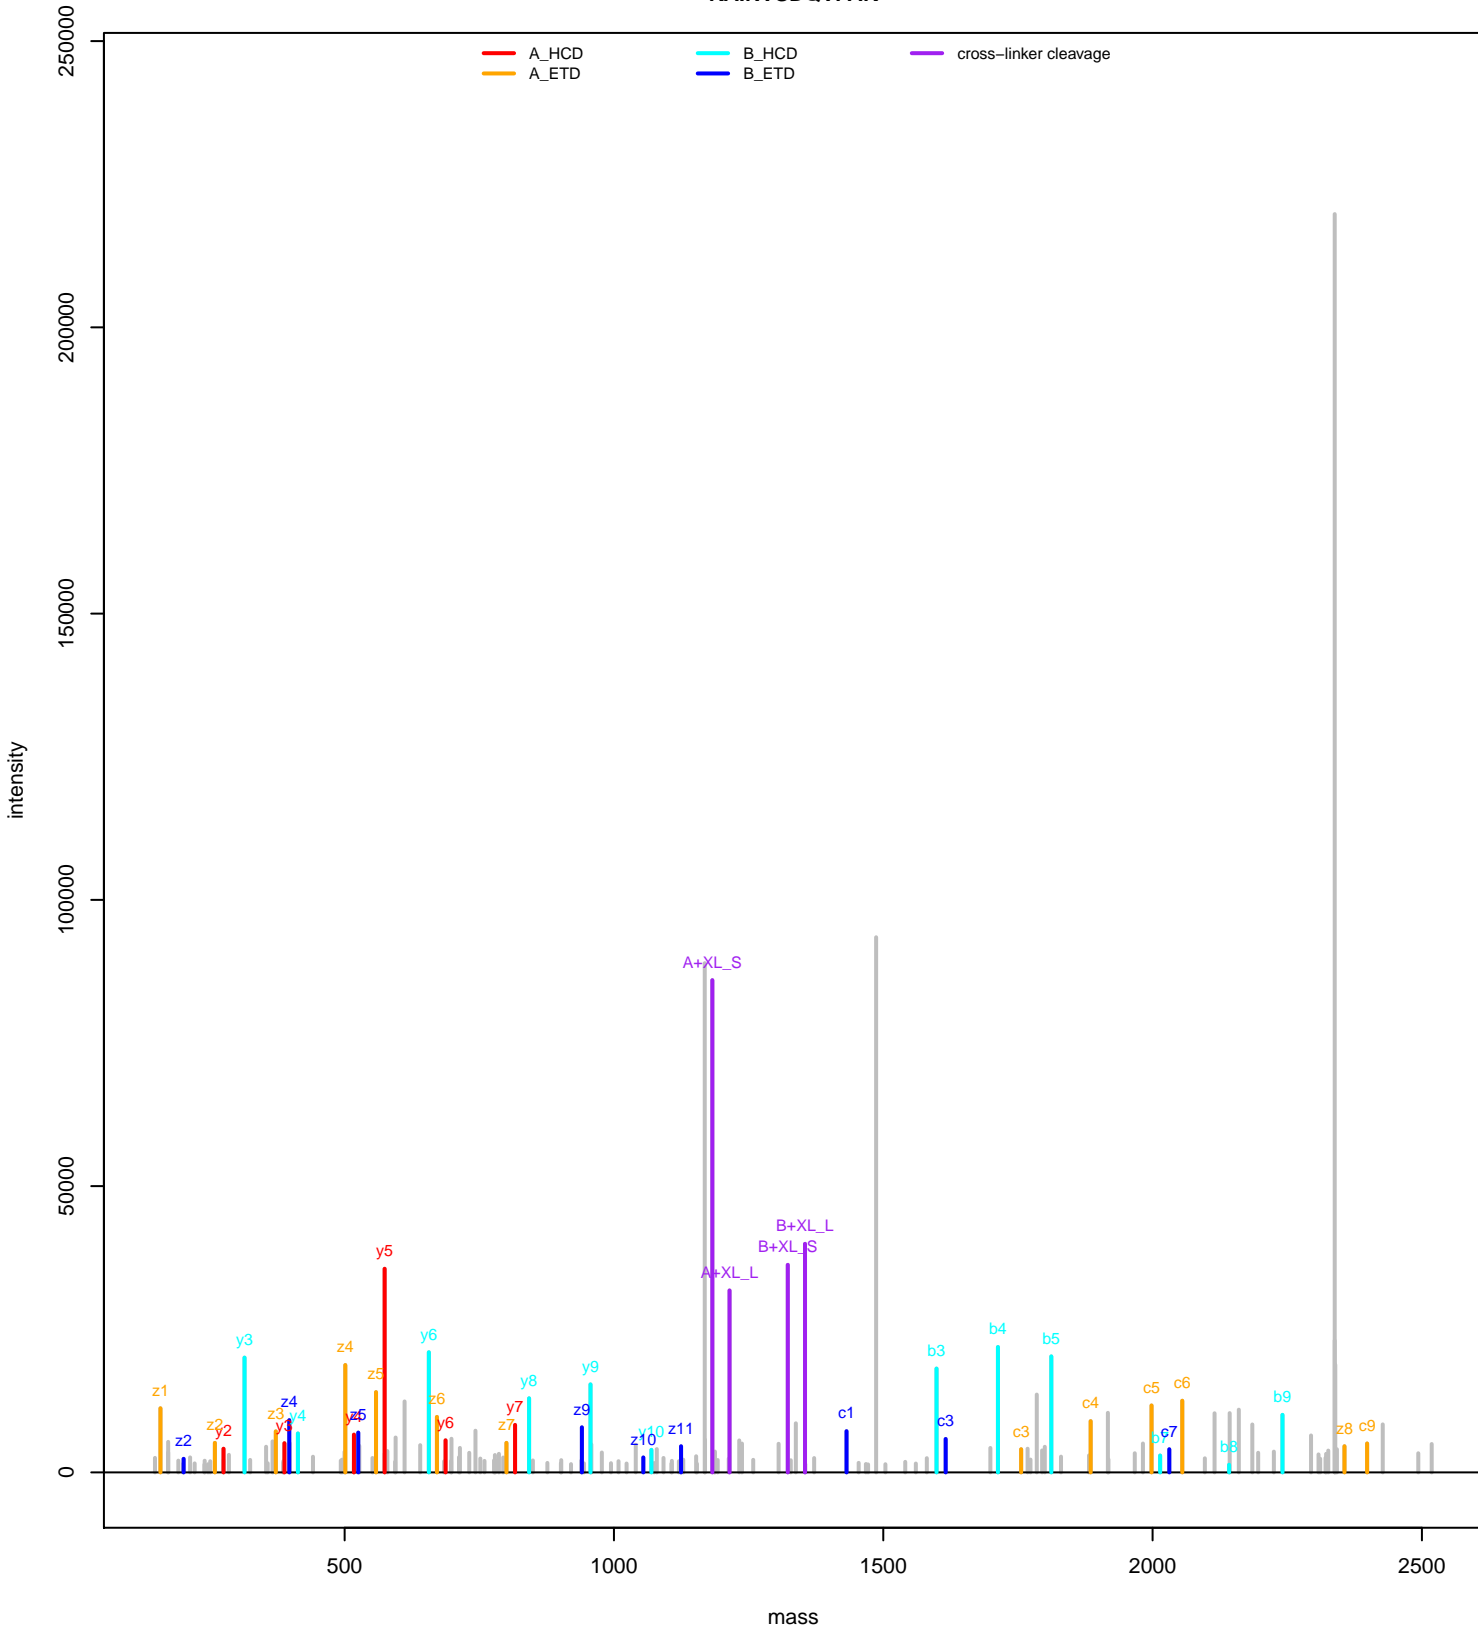

ALKELGEITR+XL\_S

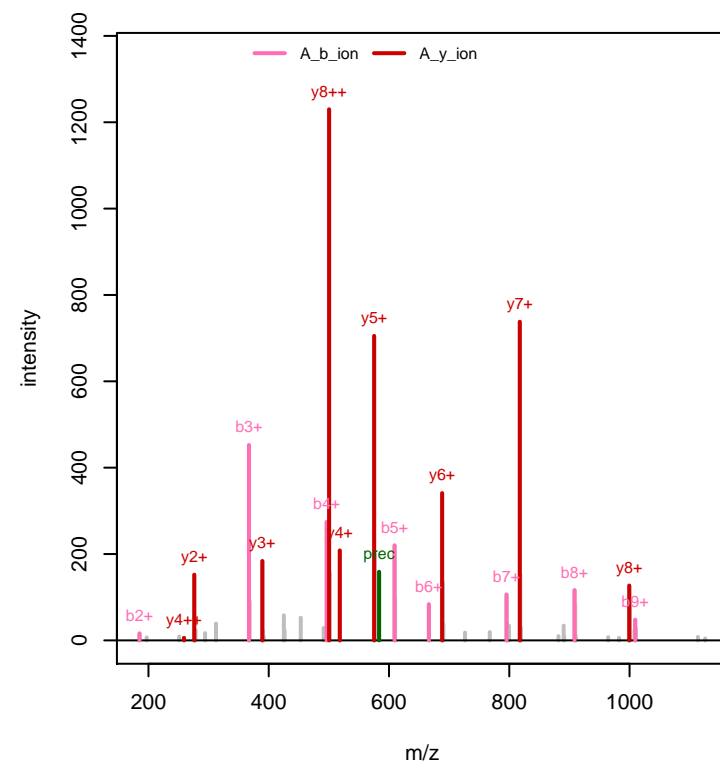

ALKELGEITR+XL\_L

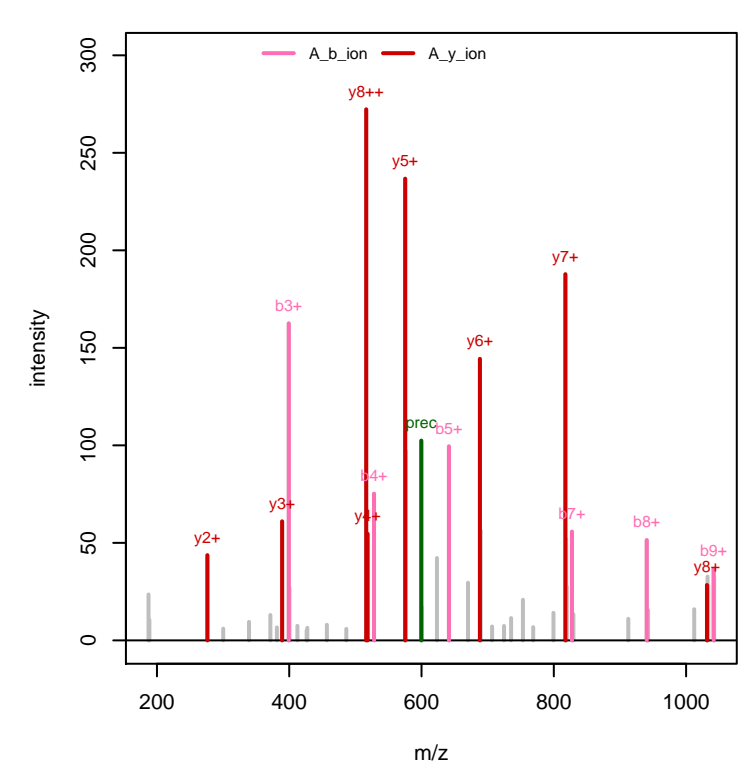

KAINVSDQVPAK+XL\_S

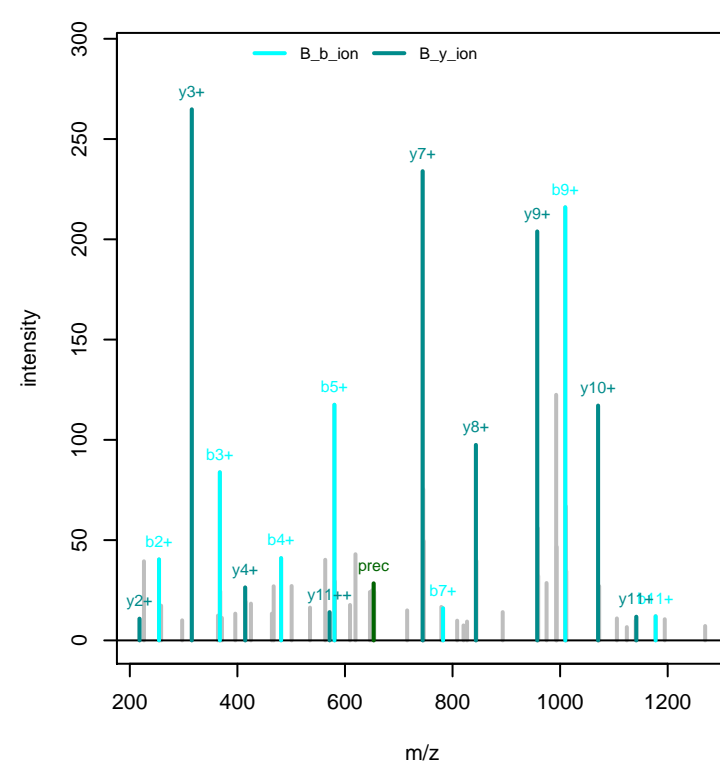

KAINVSDQVPAK+XL\_L

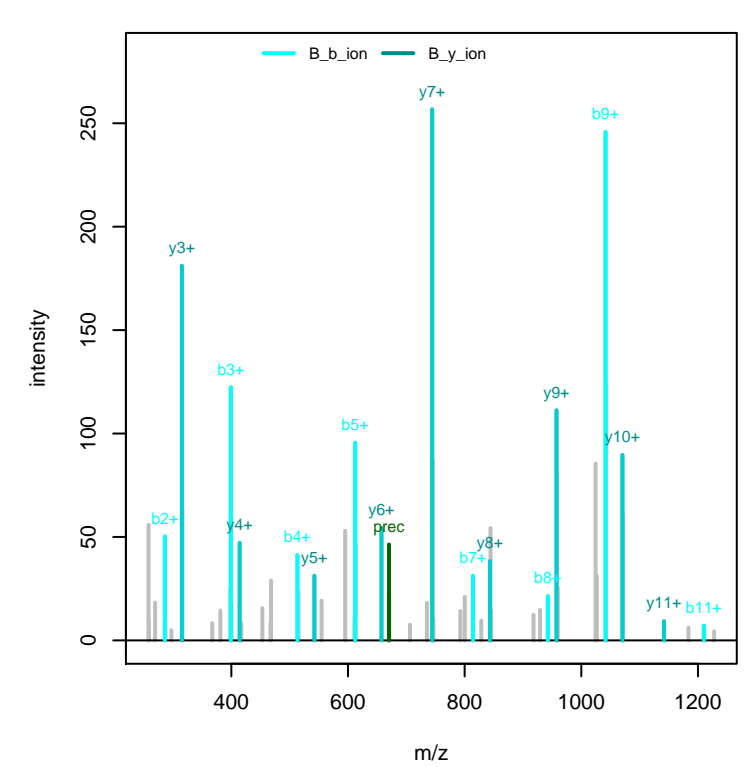

MEKILAR  
ASKAAGDNAMANQYETLANAR

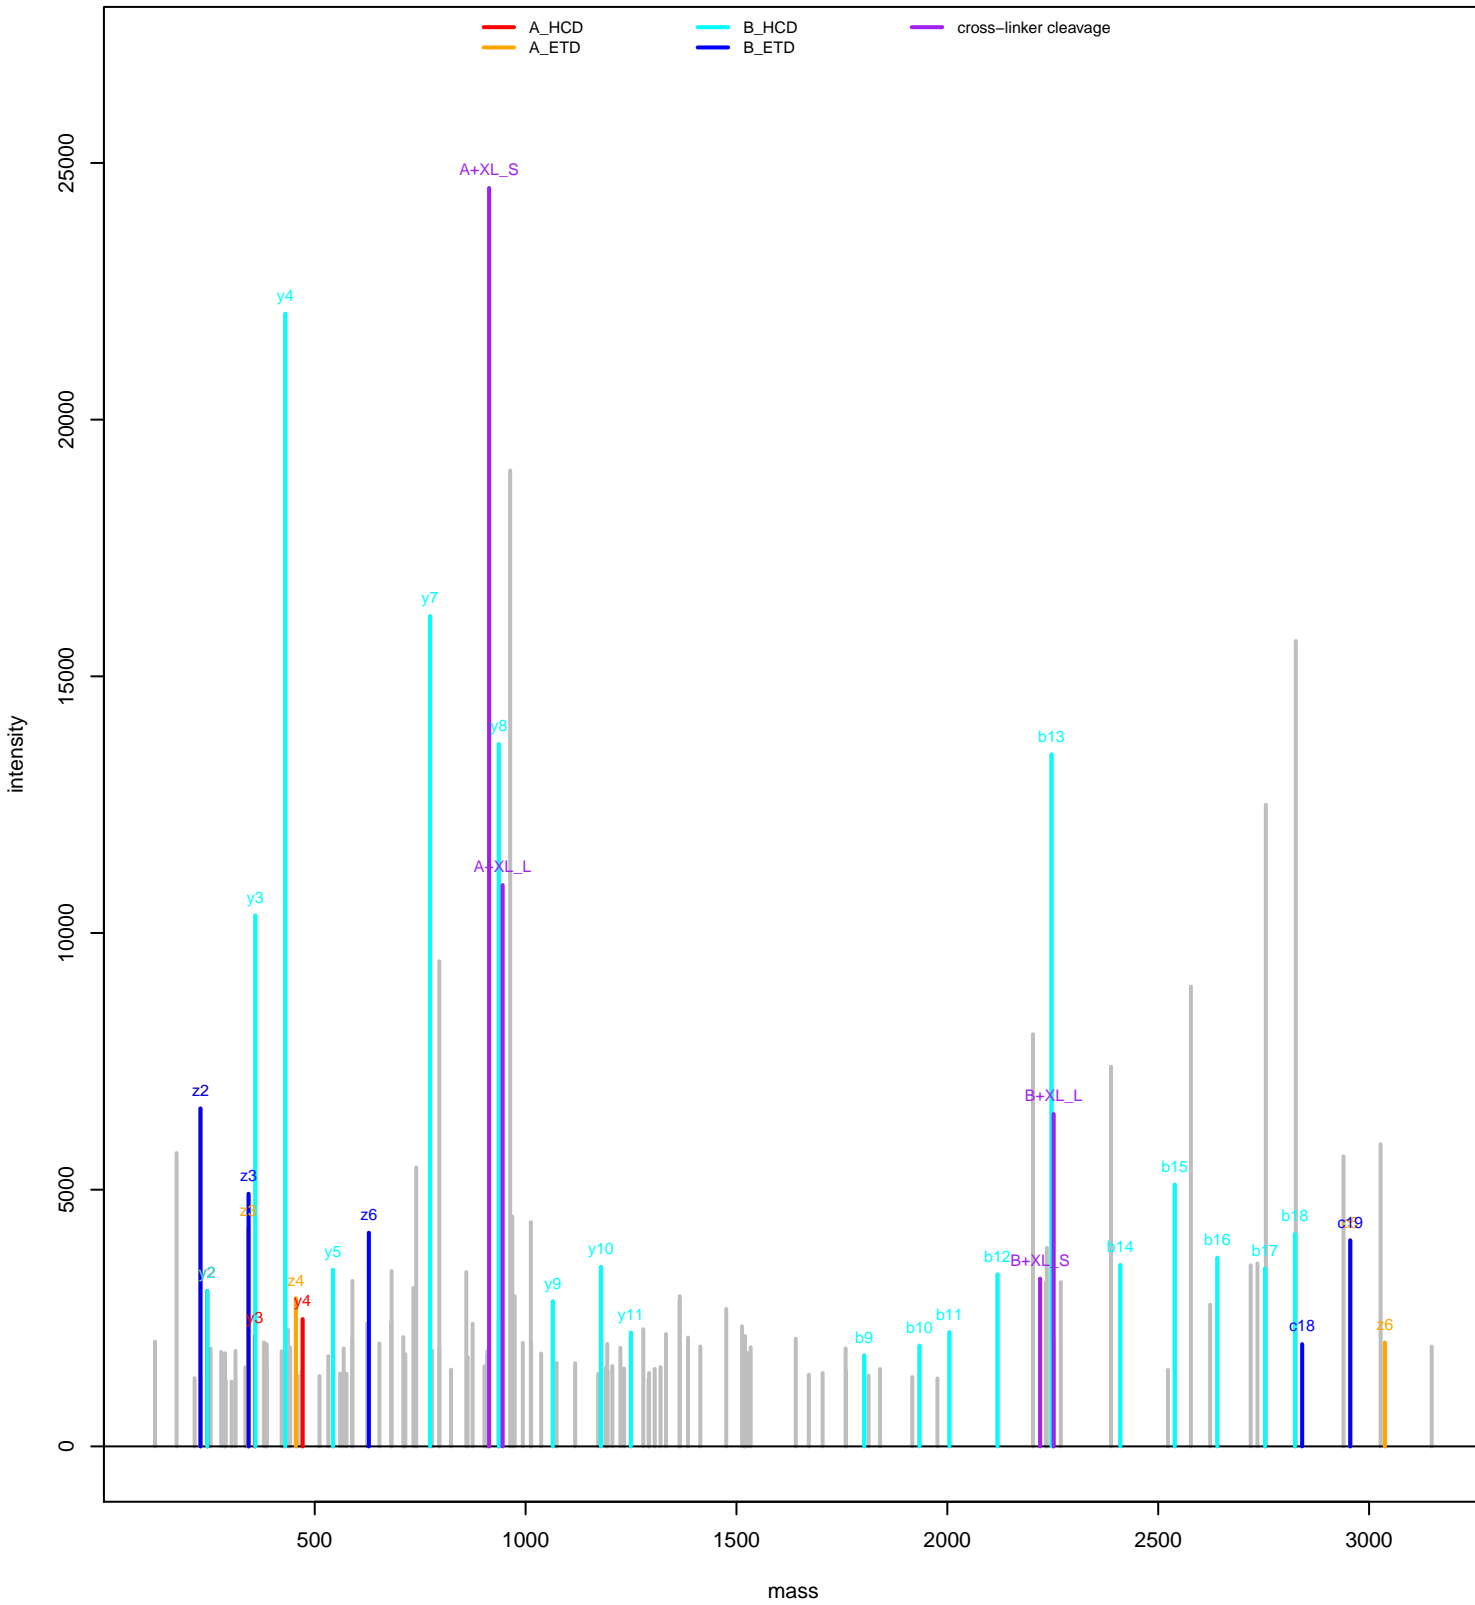

MEKILAR+XL\_S

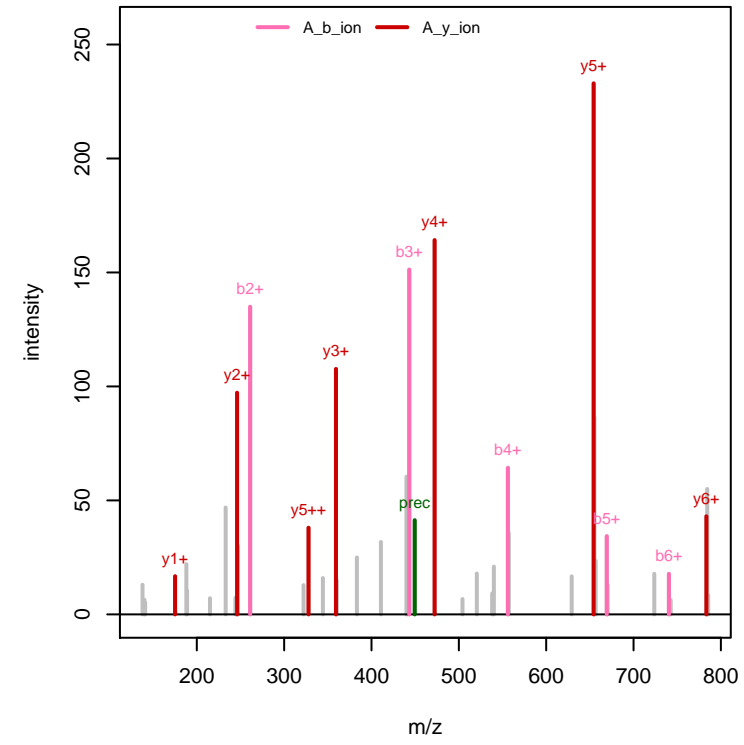

MEKILAR+XL\_L

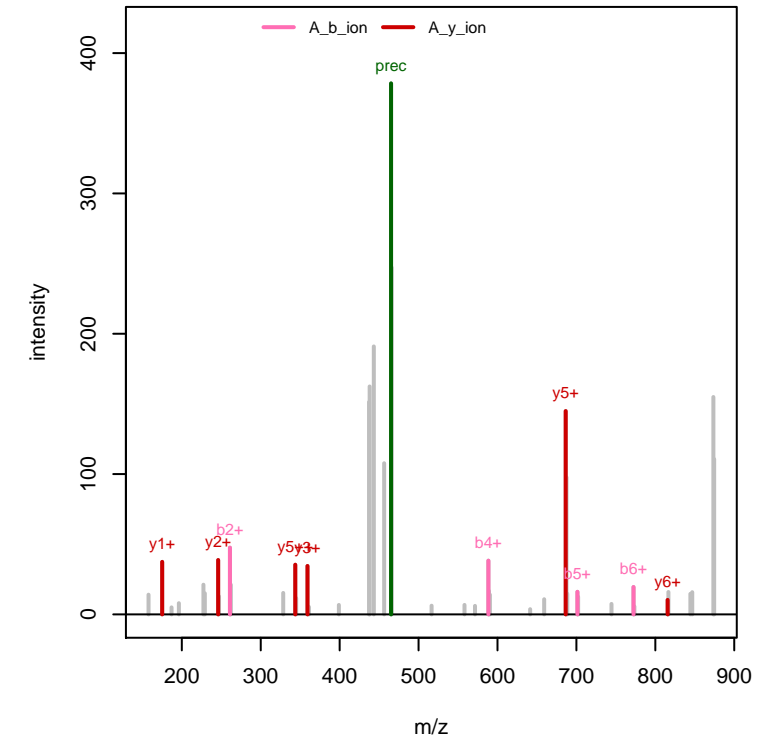

ASKAAGDNAMANQYETLANAR+XL\_S

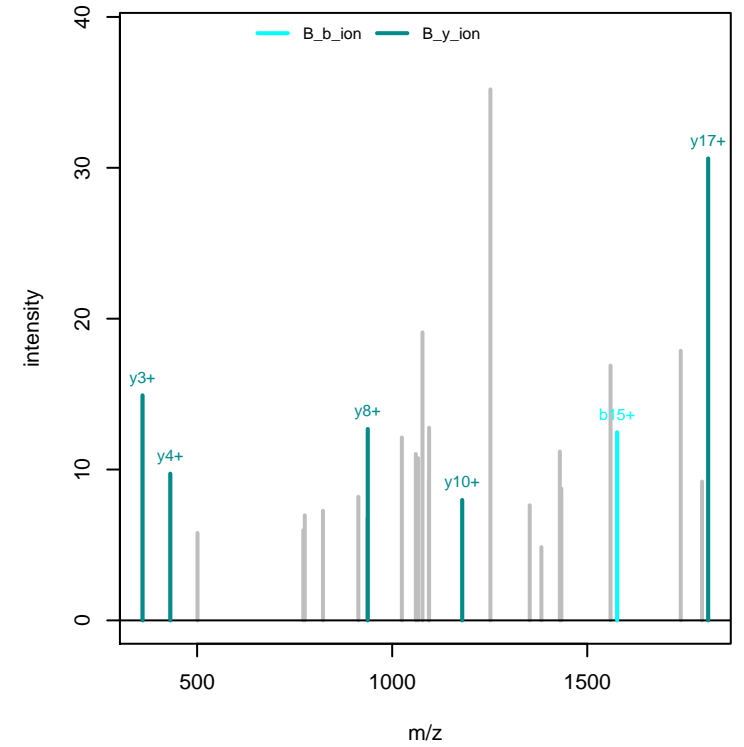

ASKAAGDNAMANQYETLANAR+XL\_L

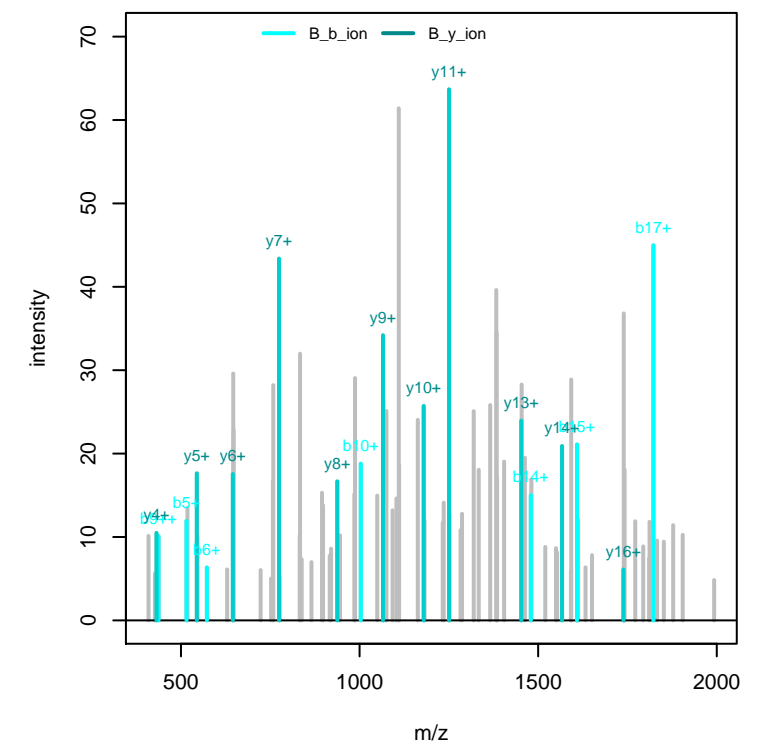



IPVVSSPKAR  
IVIERPAKSIR

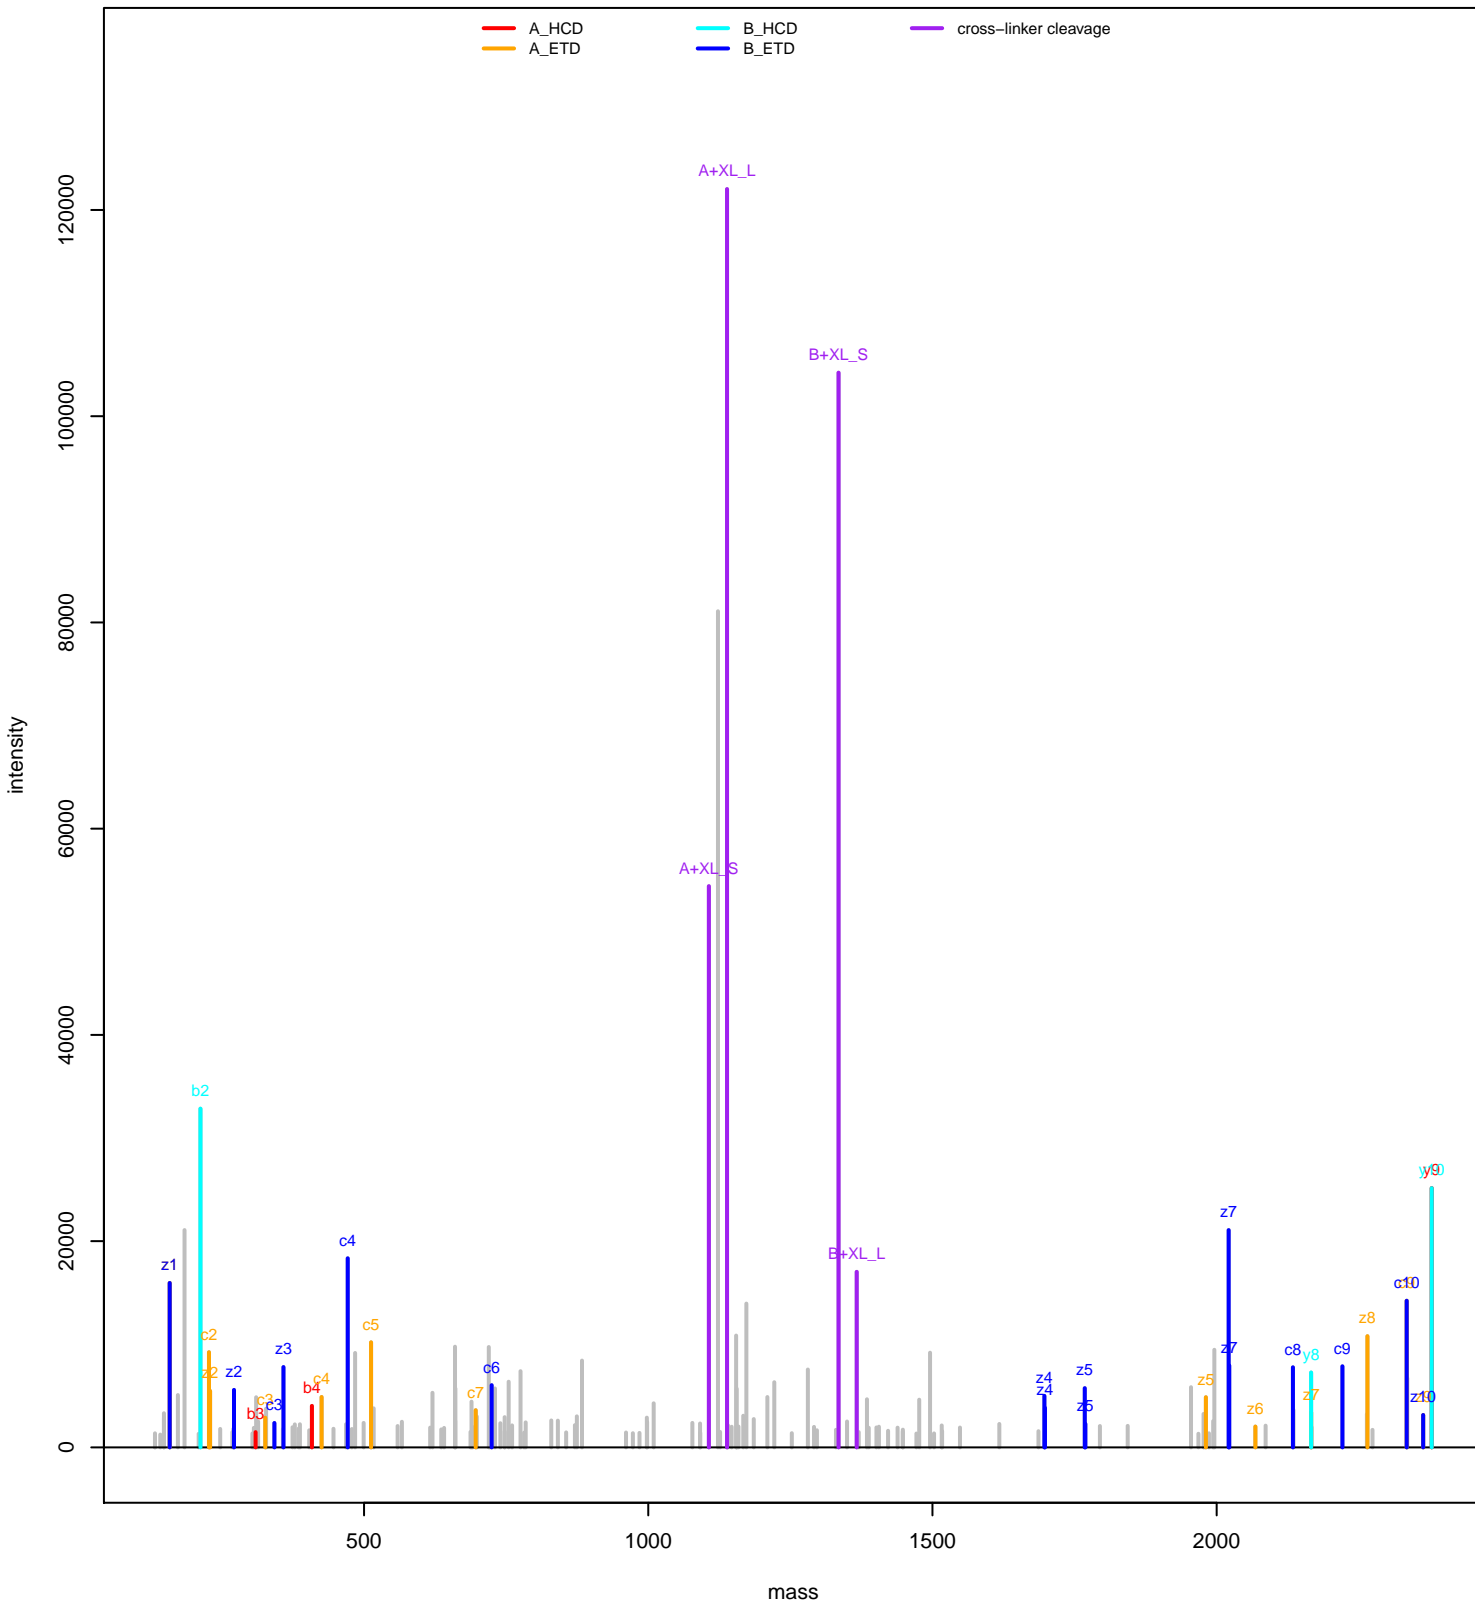

IPVVSSPKAR+XL\_S

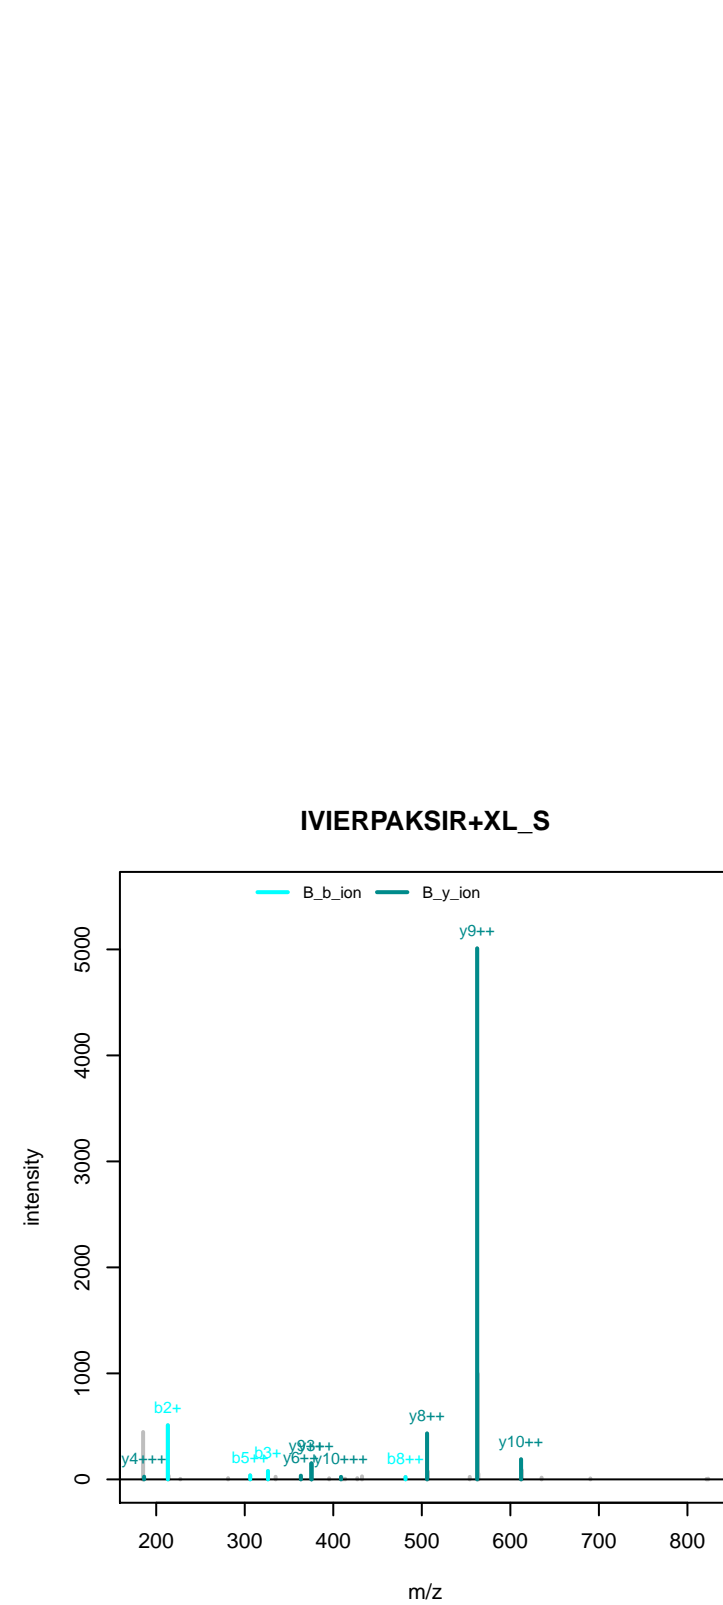

IPVVSSPKAR+XL\_L

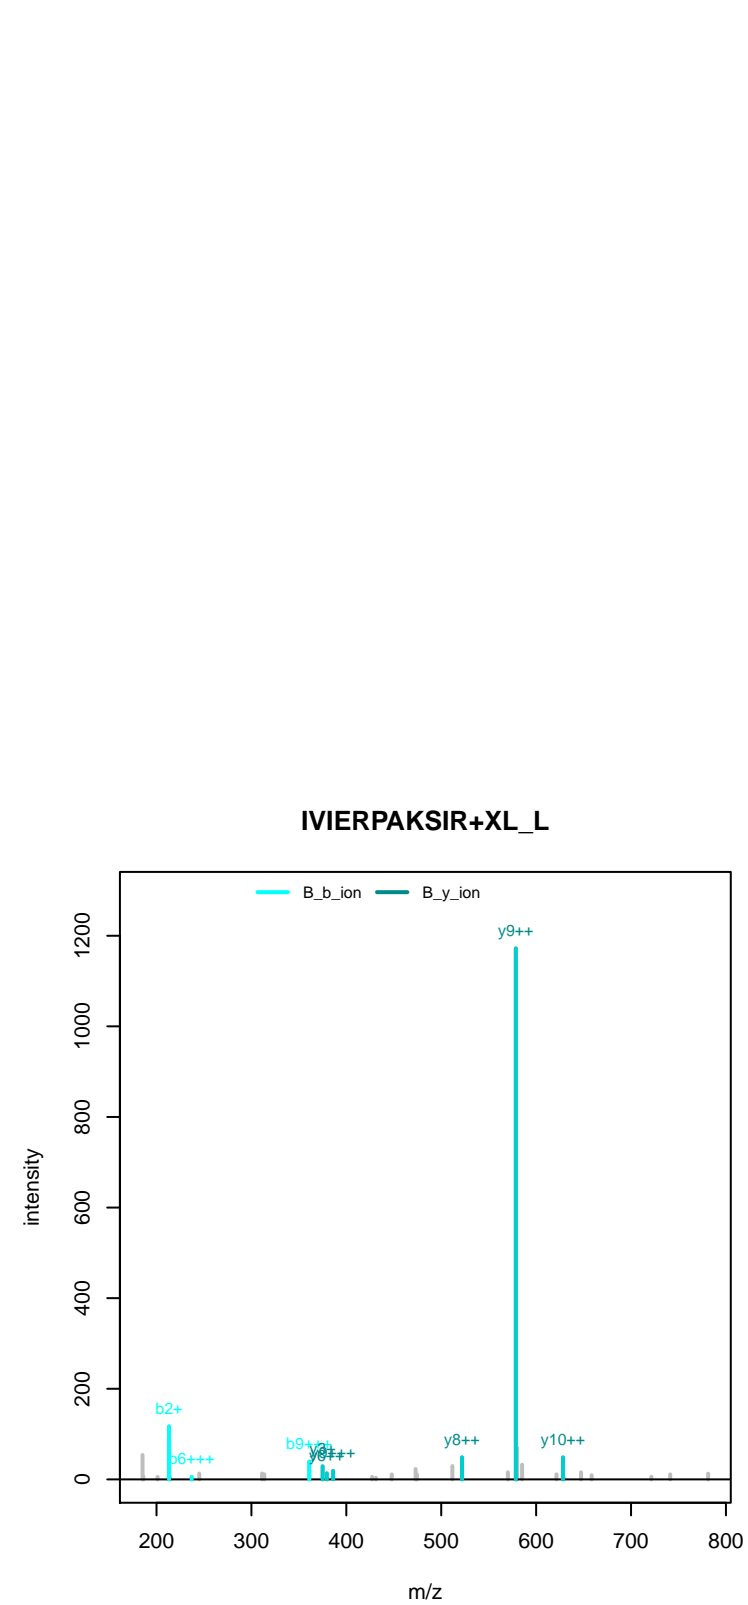

IVIERPAKSIR+XL\_S

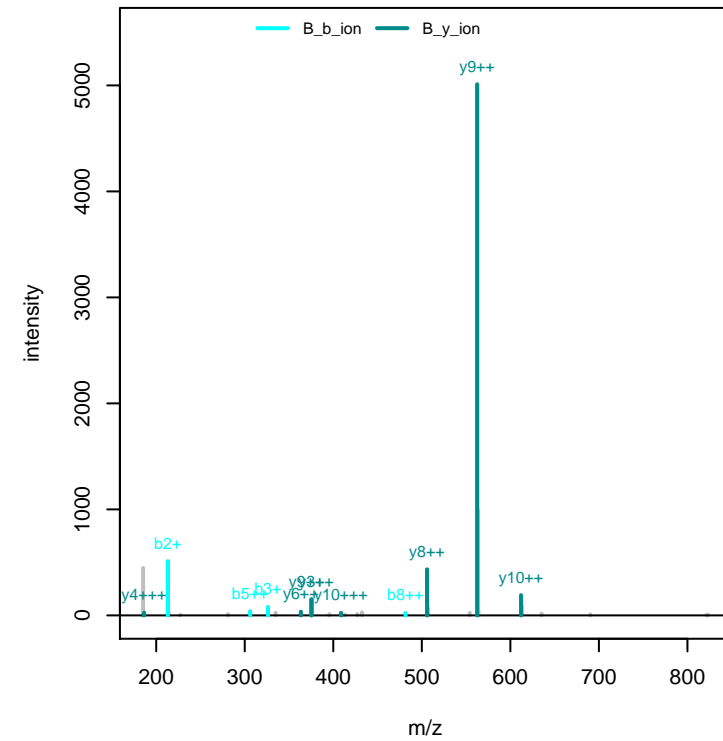

IVIERPAKSIR+XL\_L

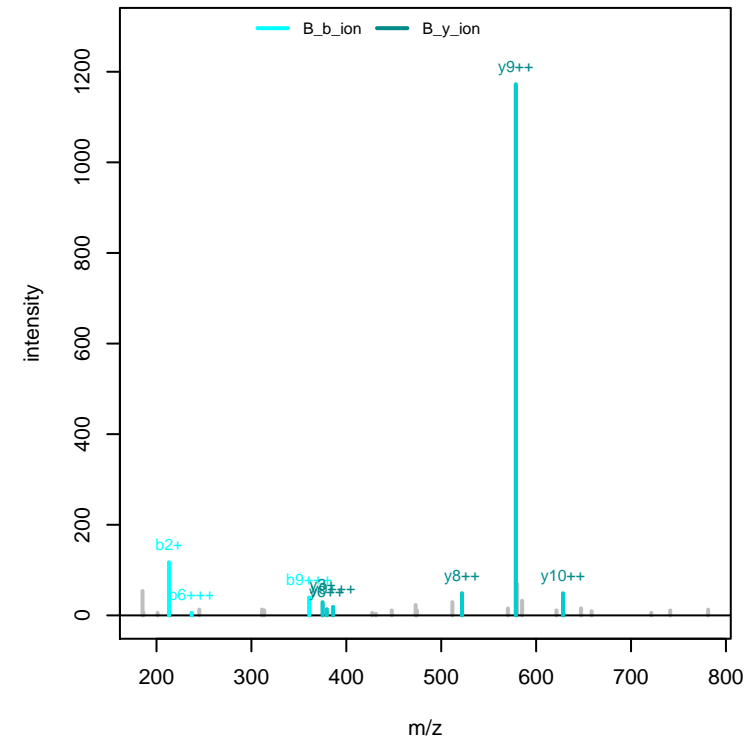

VAGSVSKK  
MGPKSAQNVVNALEK

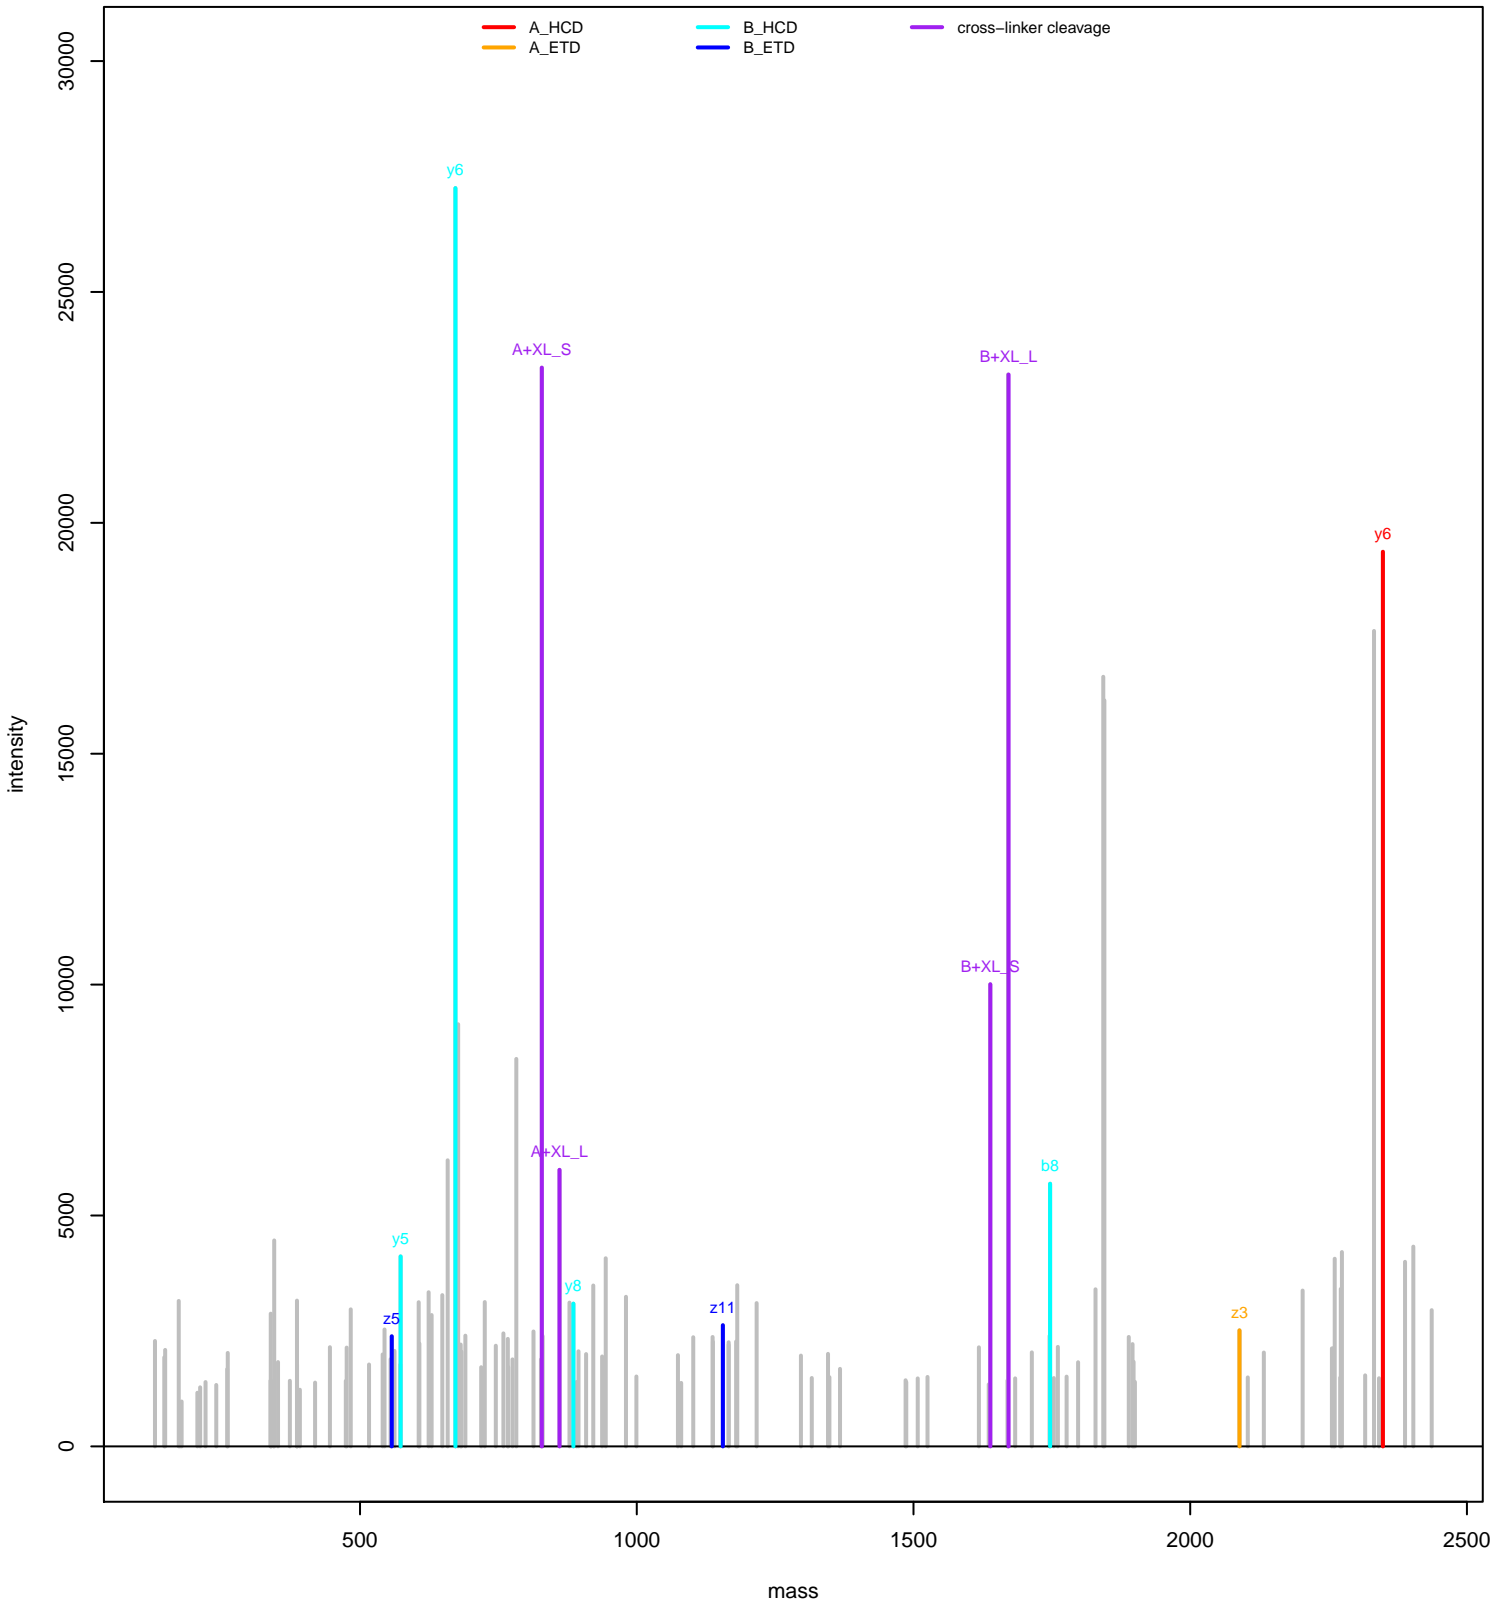

VAGSVSKK+XL\_S

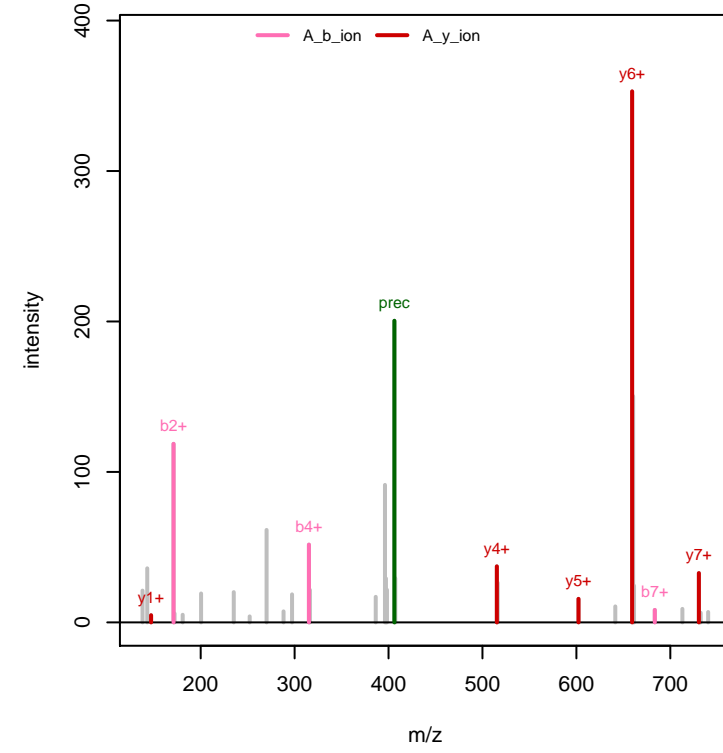

VAGSVSKK+XL\_L

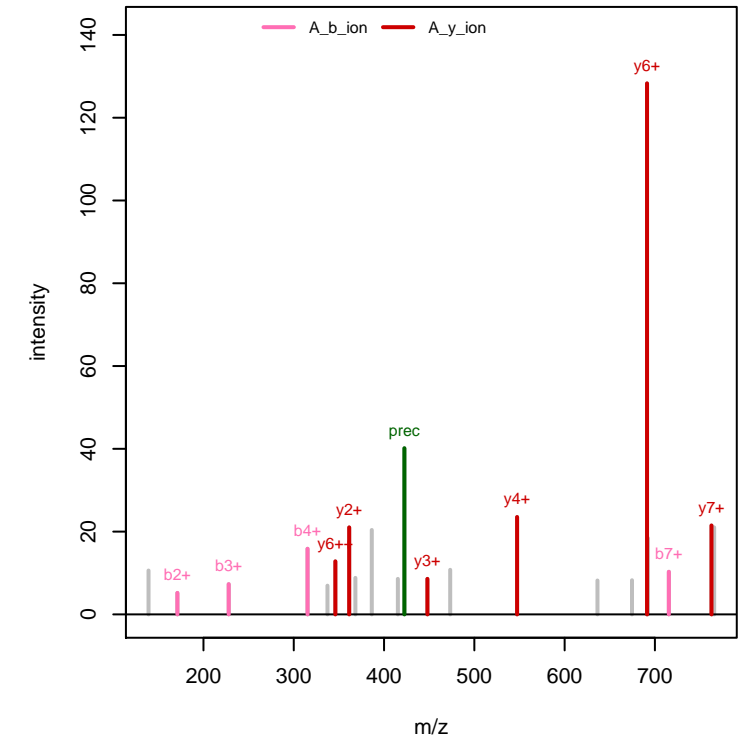

MGPKSAQNVVNALEK+XL\_S

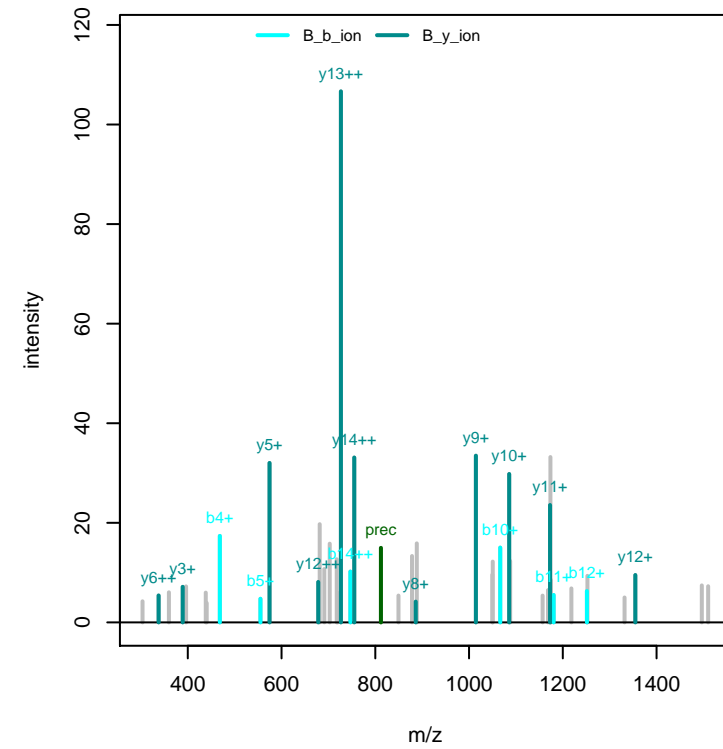

MGPKSAQNVVNALEK+XL\_L

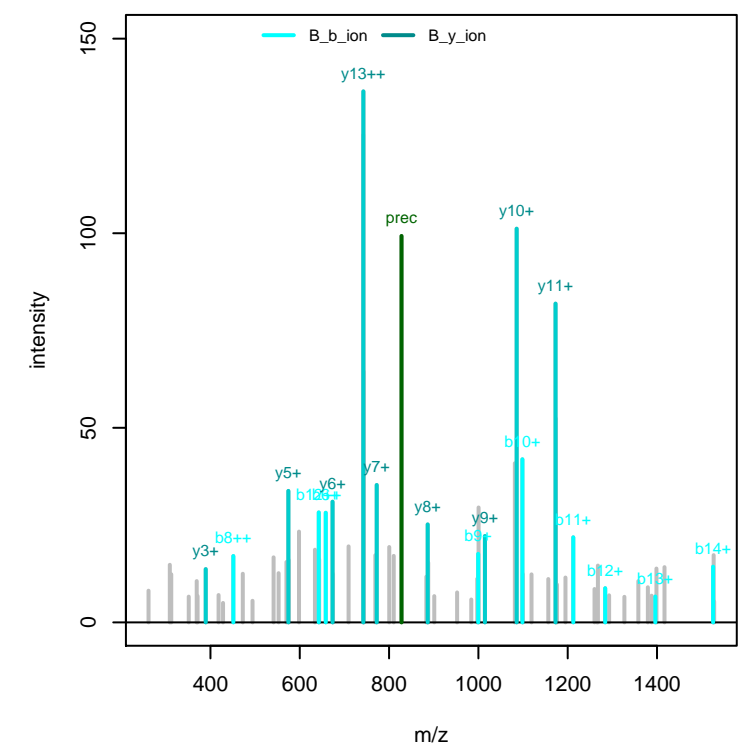

KAYVTLK  
ASTAMEKSNTIVLK

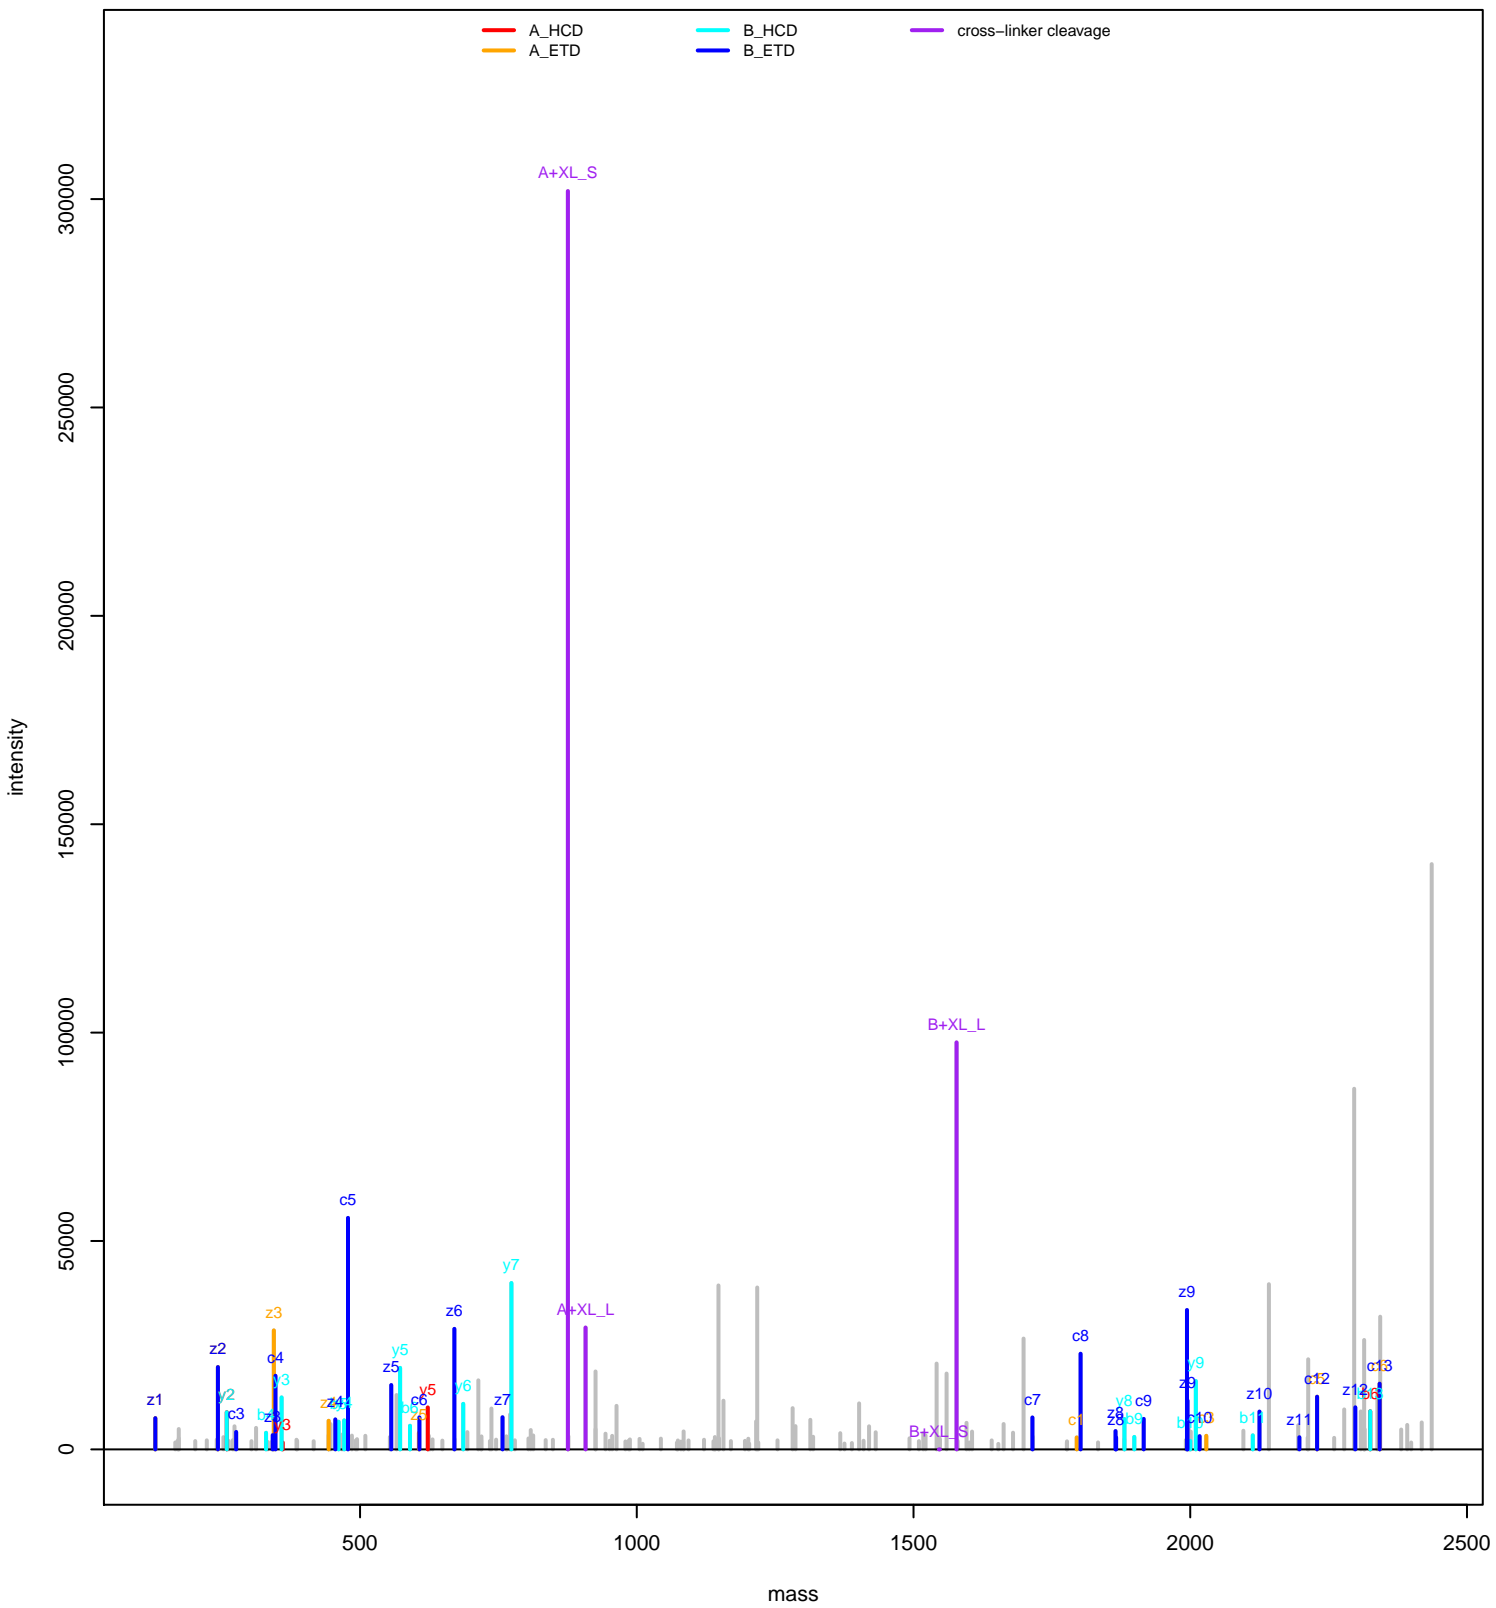

KAYVTLK+XL\_S

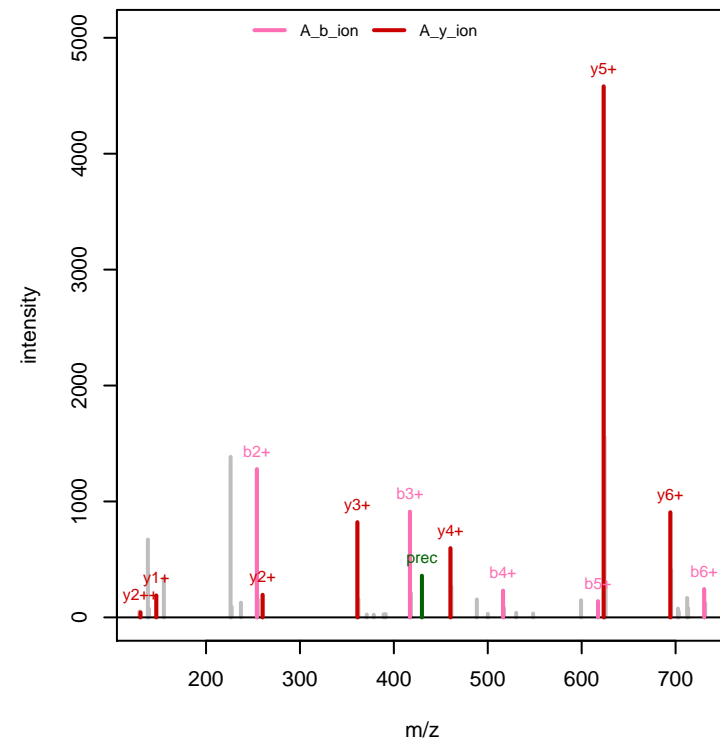

KAYVTLK+XL\_L

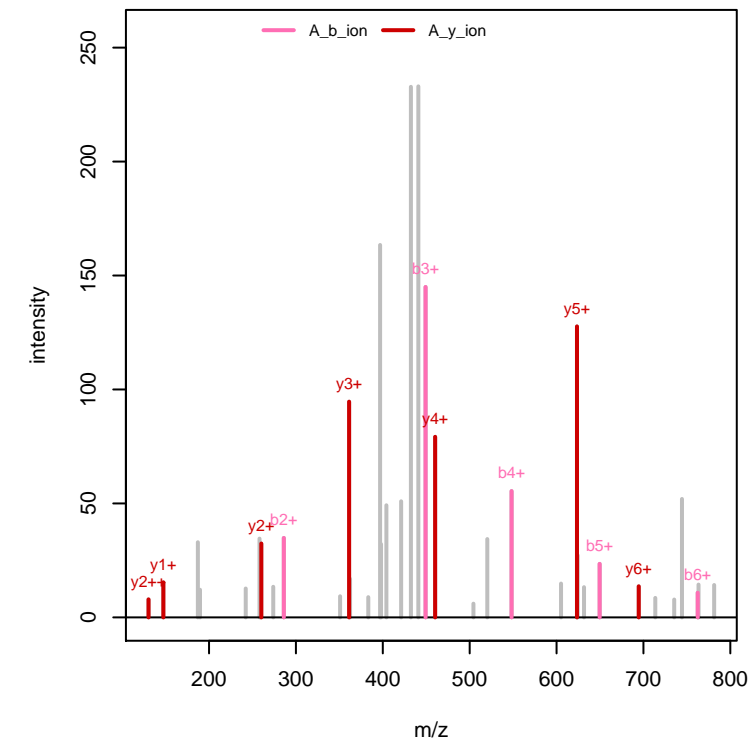

ASTAMEKSNTIVLK+XL\_S

ASTAMEKSNTIVLK+XL\_L

**KMNLLK**  
**KELQADAQAYGDDRR**

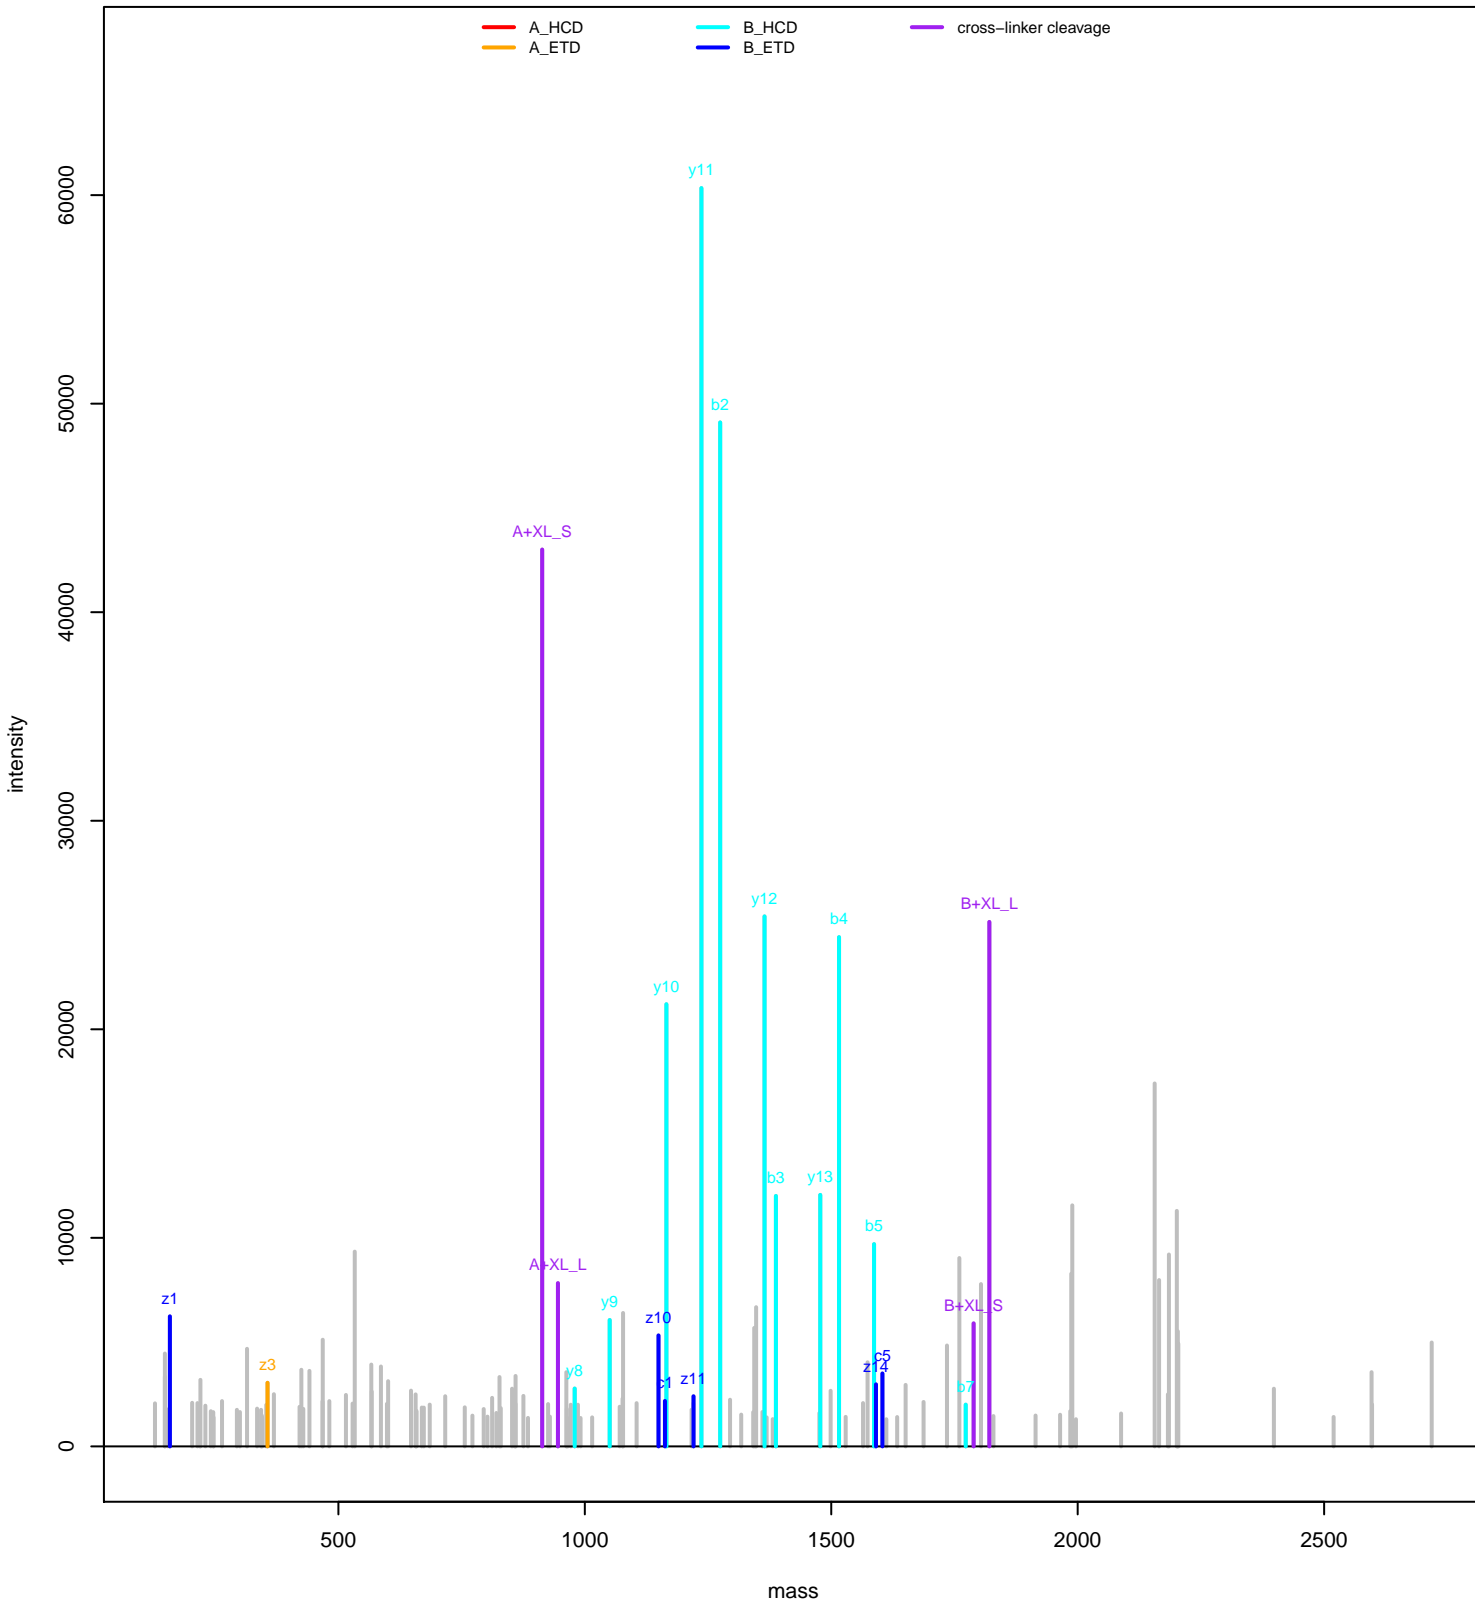

**KMNLLK+XL\_S**

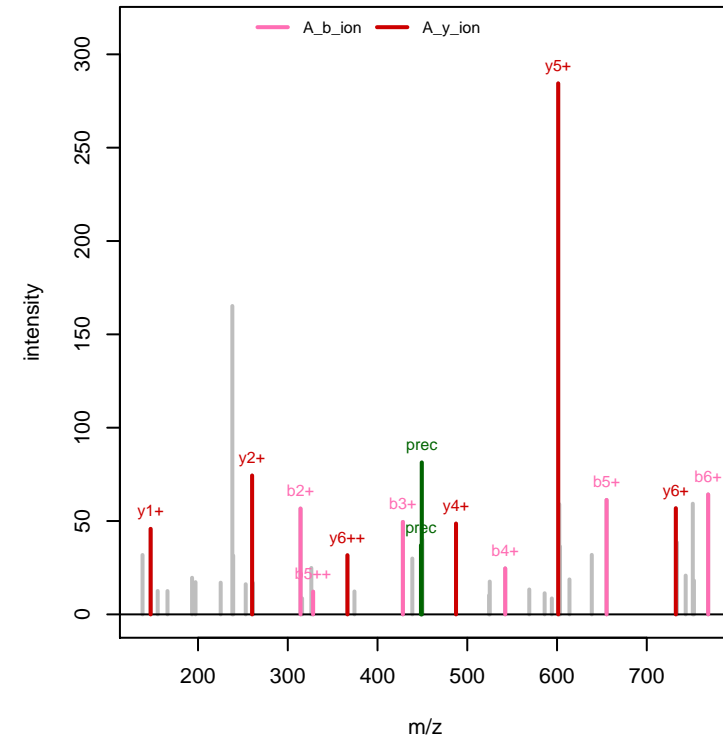

**KMNLLK+XL\_L**

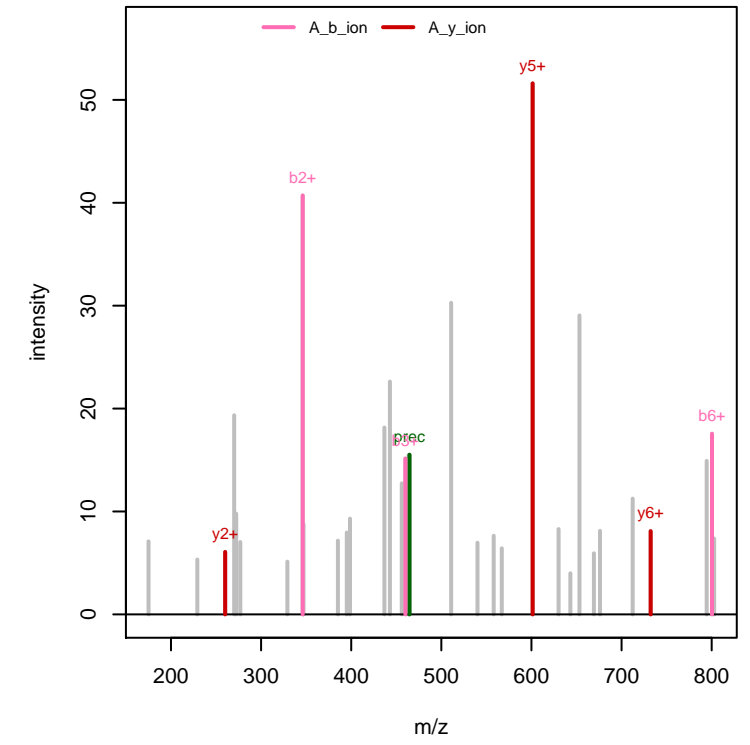

**KELQADAQAYGDDRR+XL\_S**

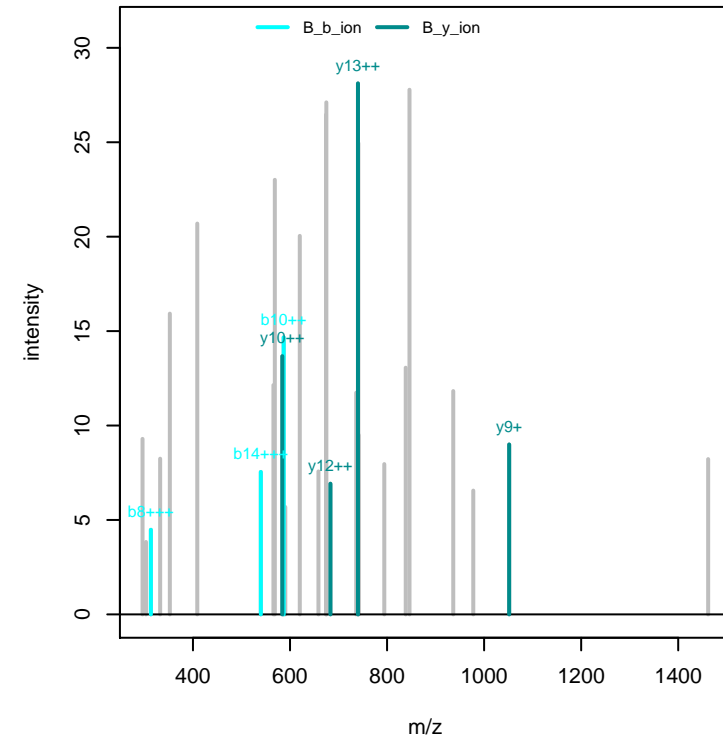

**KELQADAQAYGDDRR+XL\_L**

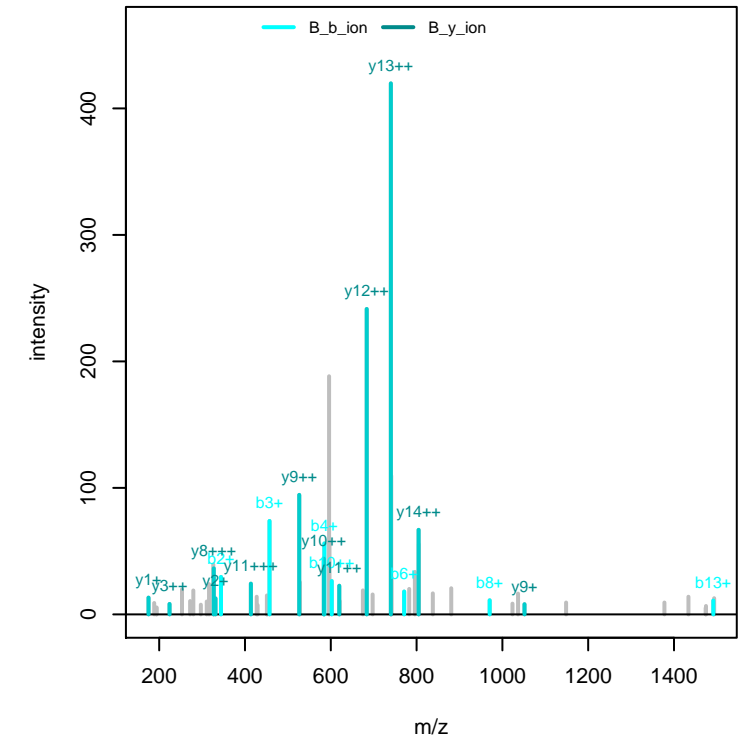

VDAKTR  
YSLYCAVIVKK

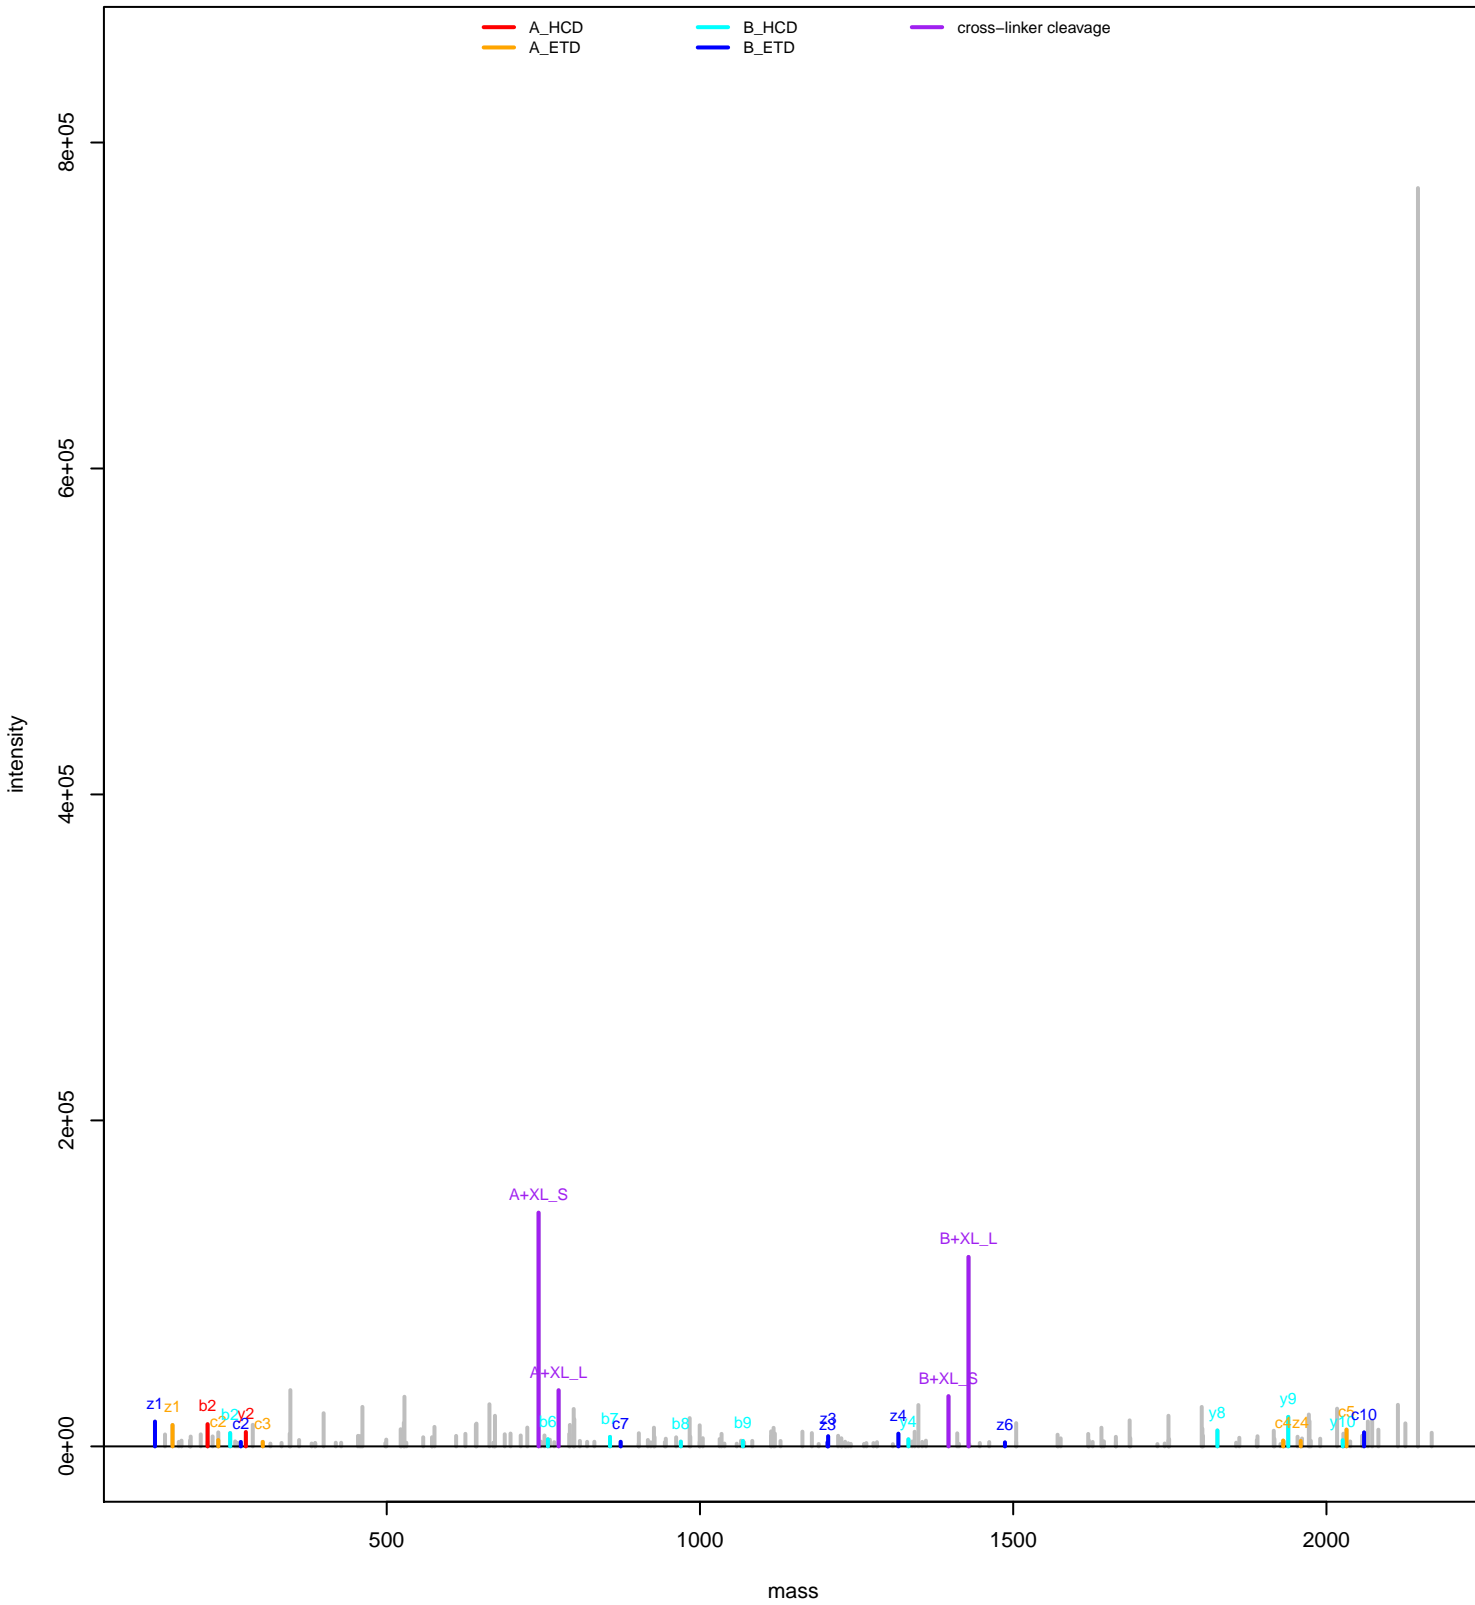

VDAKTR+XL\_S

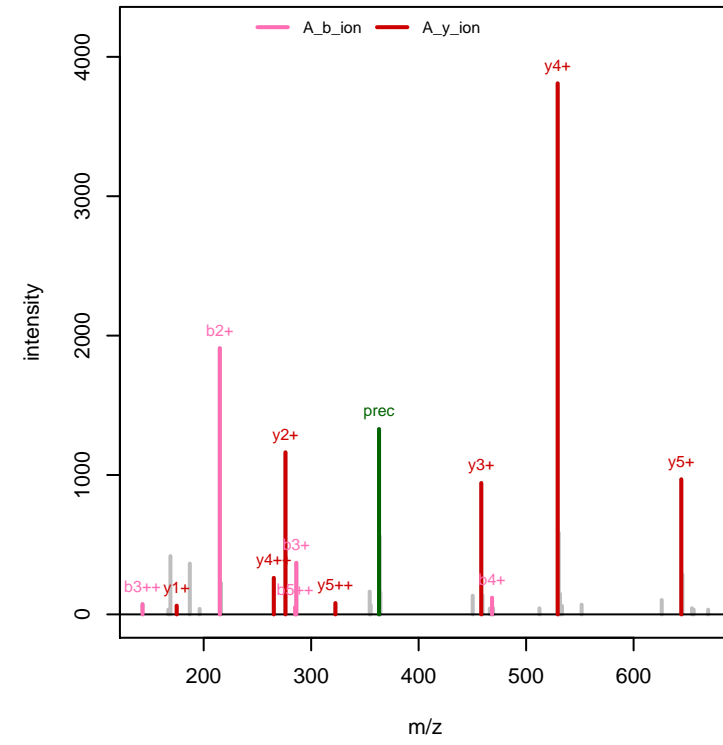

VDAKTR+XL\_L

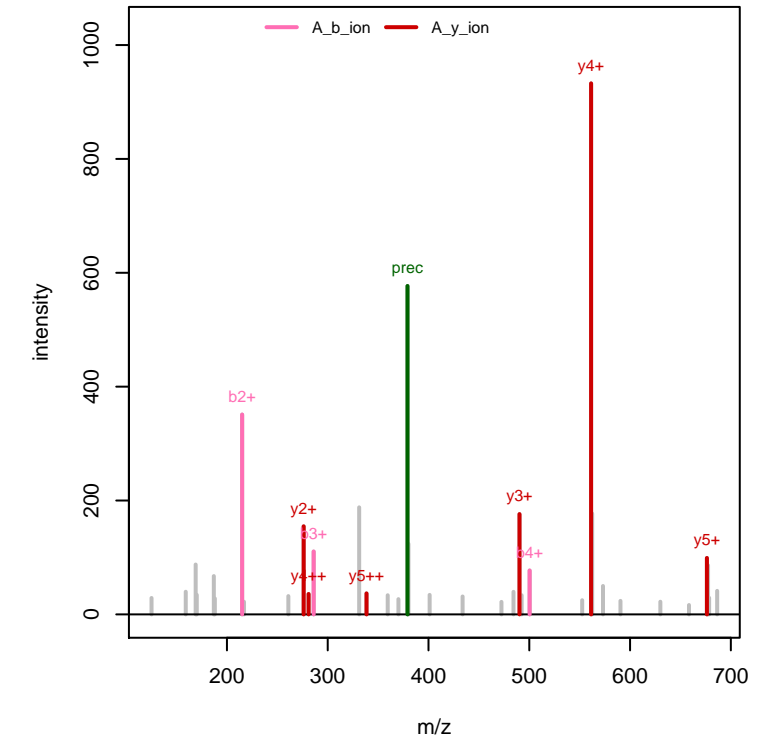

YSLYCAVIVKK+XL\_S

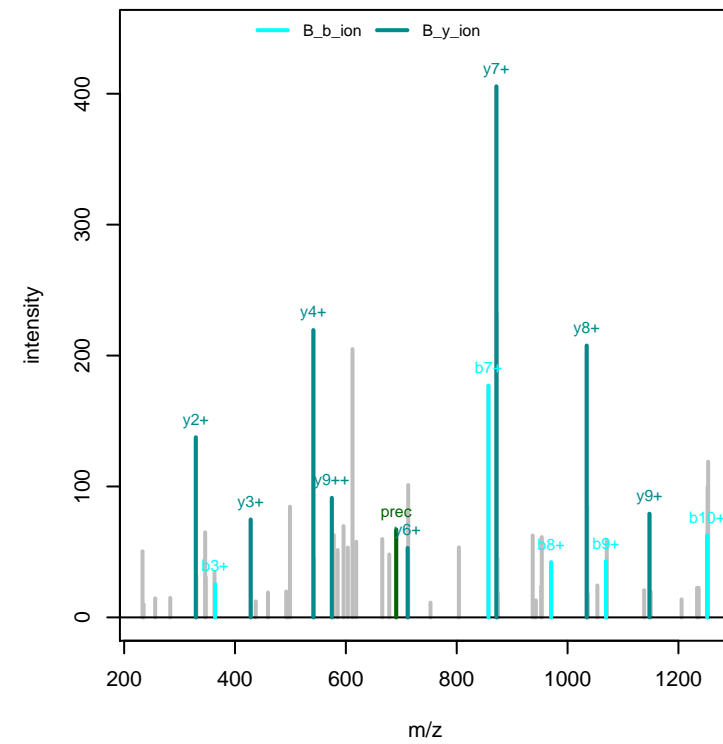

YSLYCAVIVKK+XL\_L

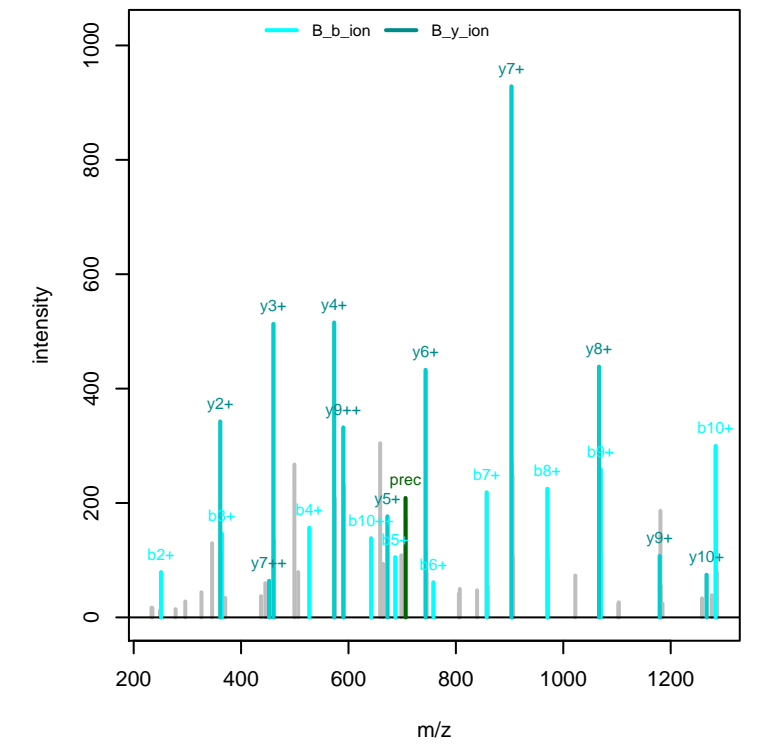

**AKVGDR**  
**YVLEKMQEK**

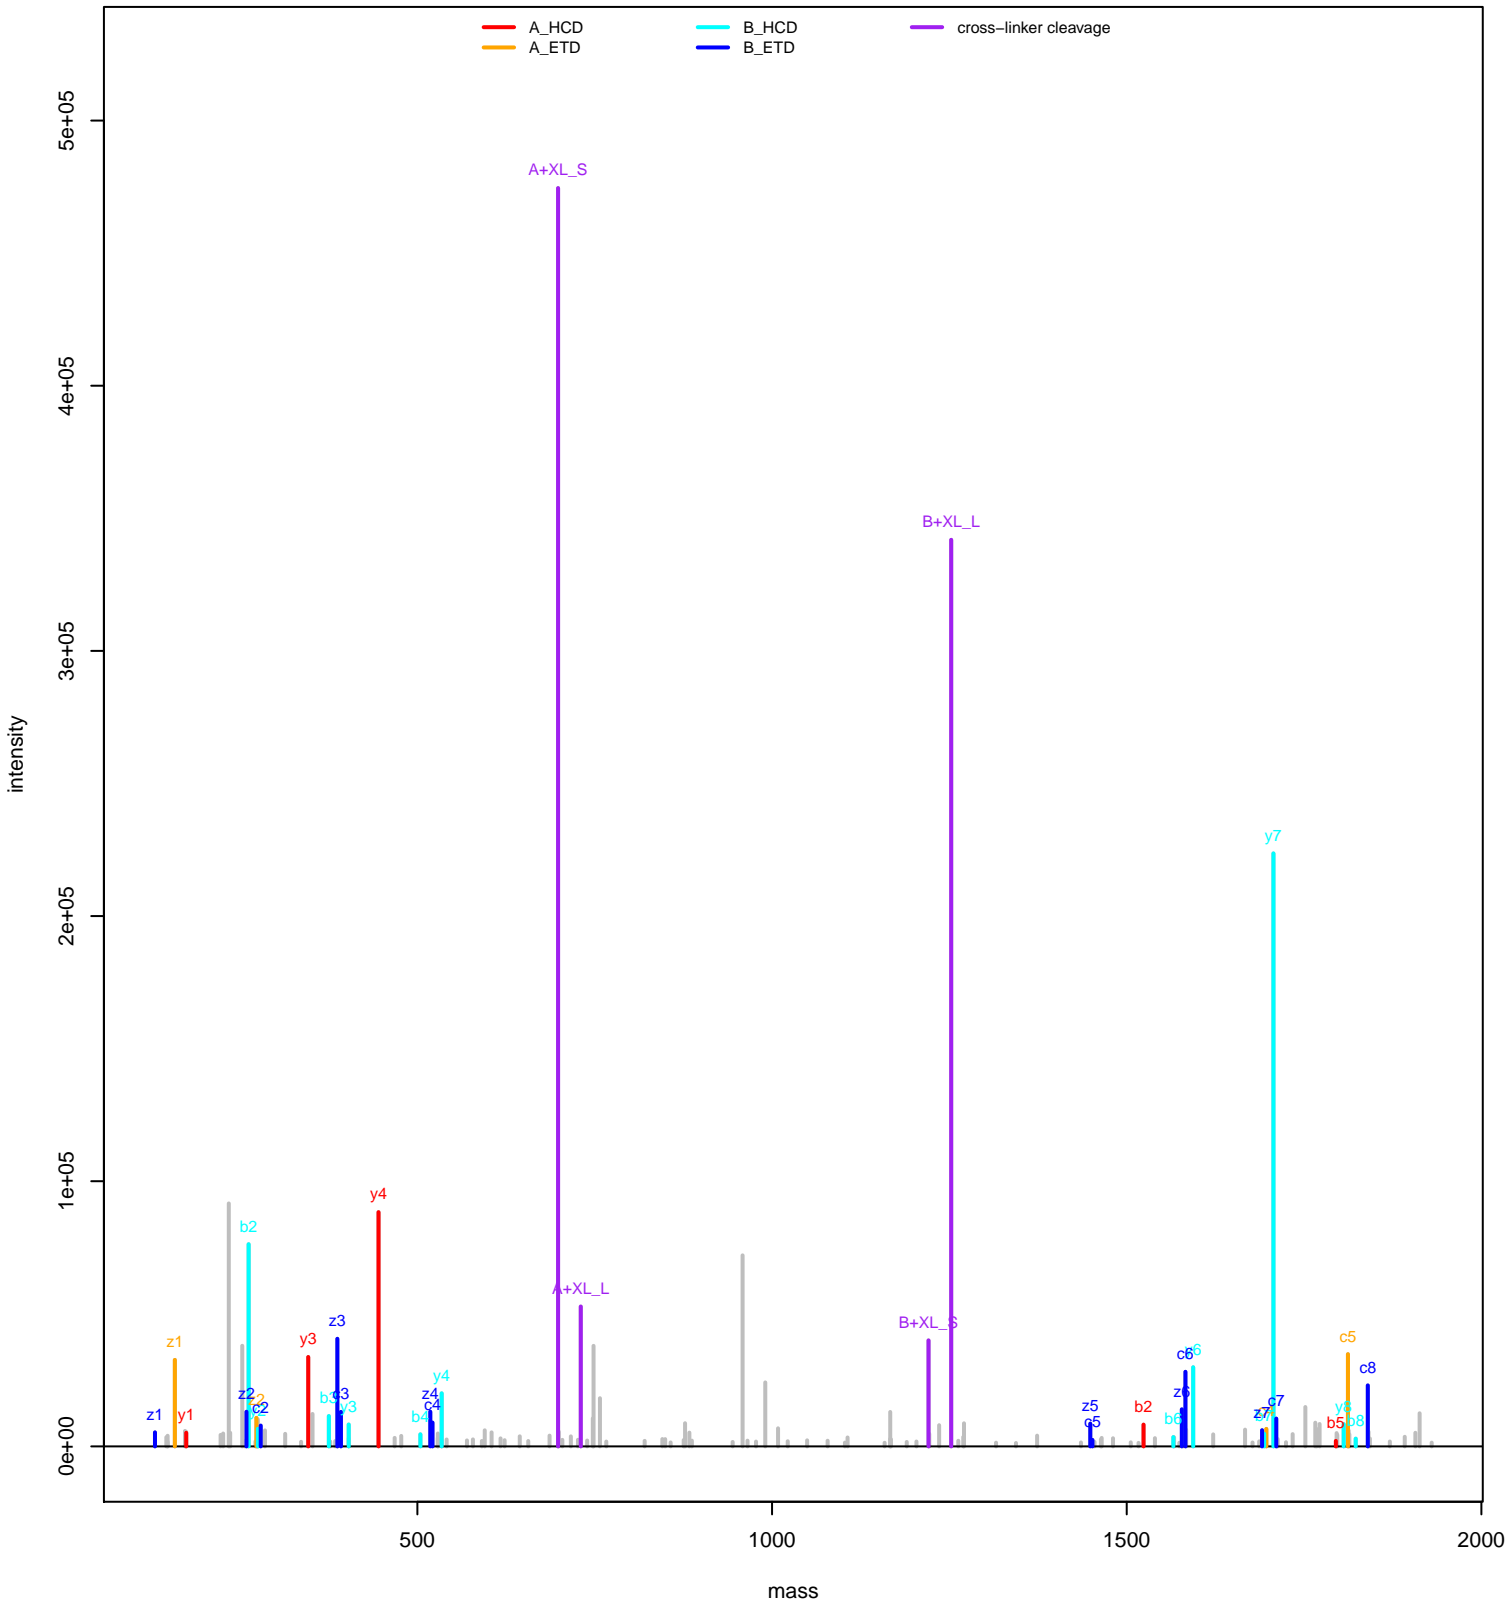

**AKVGDR+XL\_S**

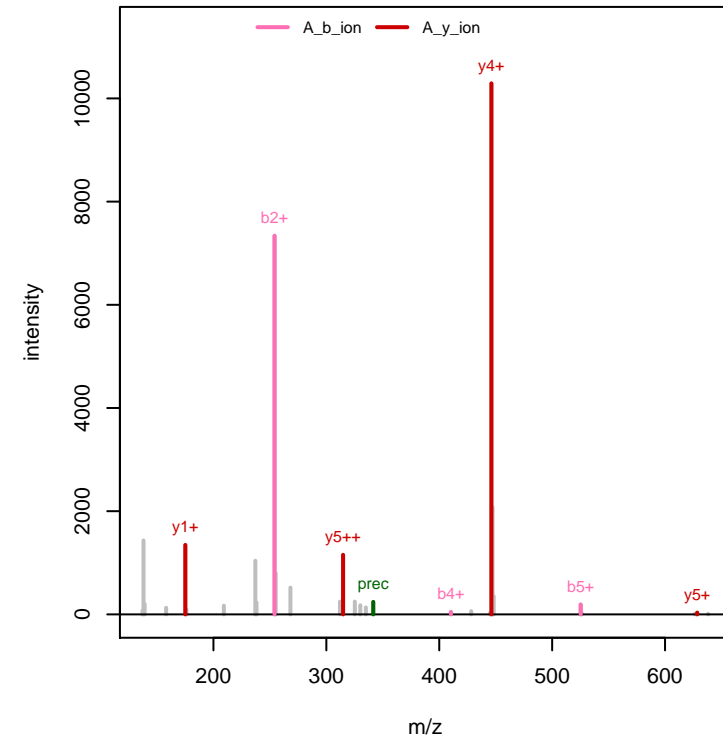

**AKVGDR+XL\_L**

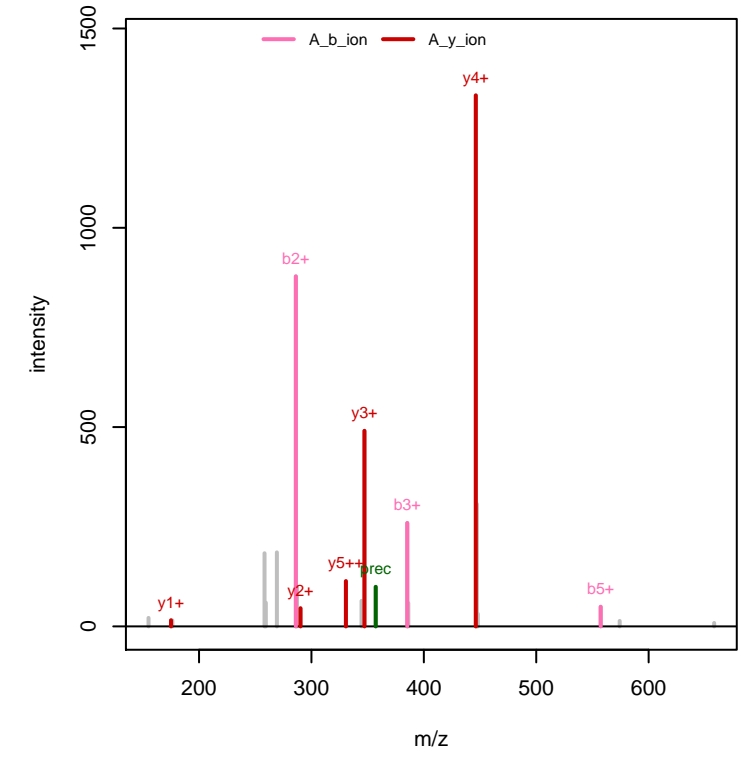

**YVLEKMQEK+XL\_S**

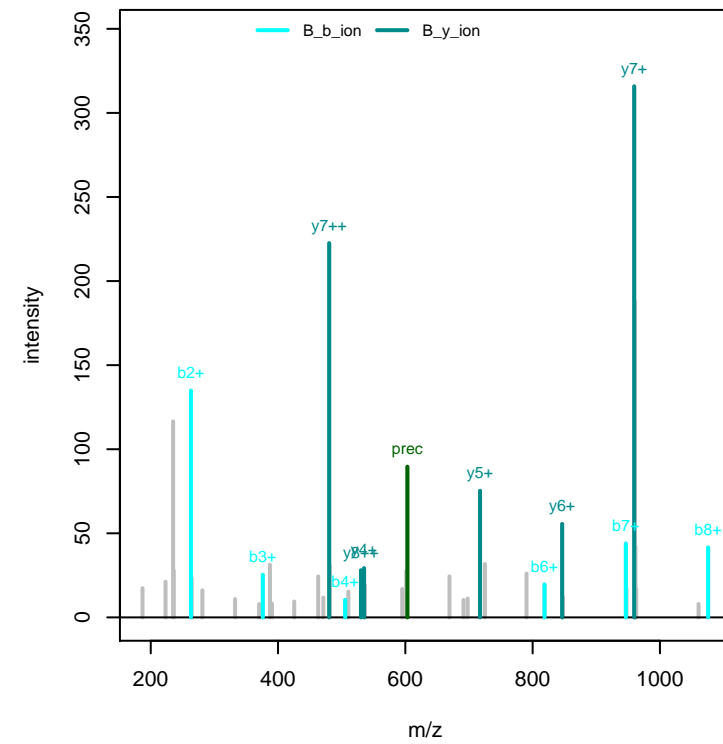

**YVLEKMQEK+XL\_L**

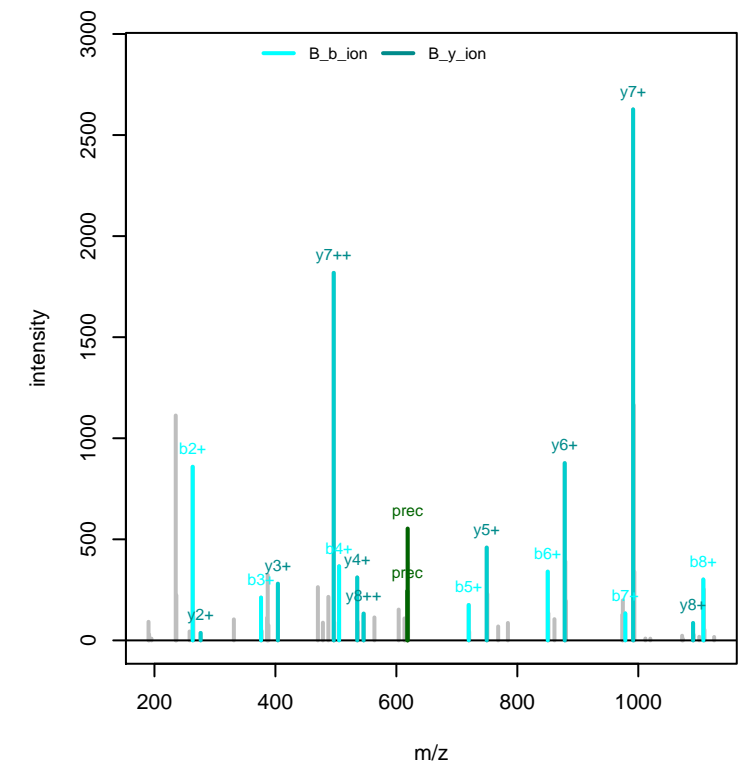

VNALKEQA  
LTAHKNAVTLR

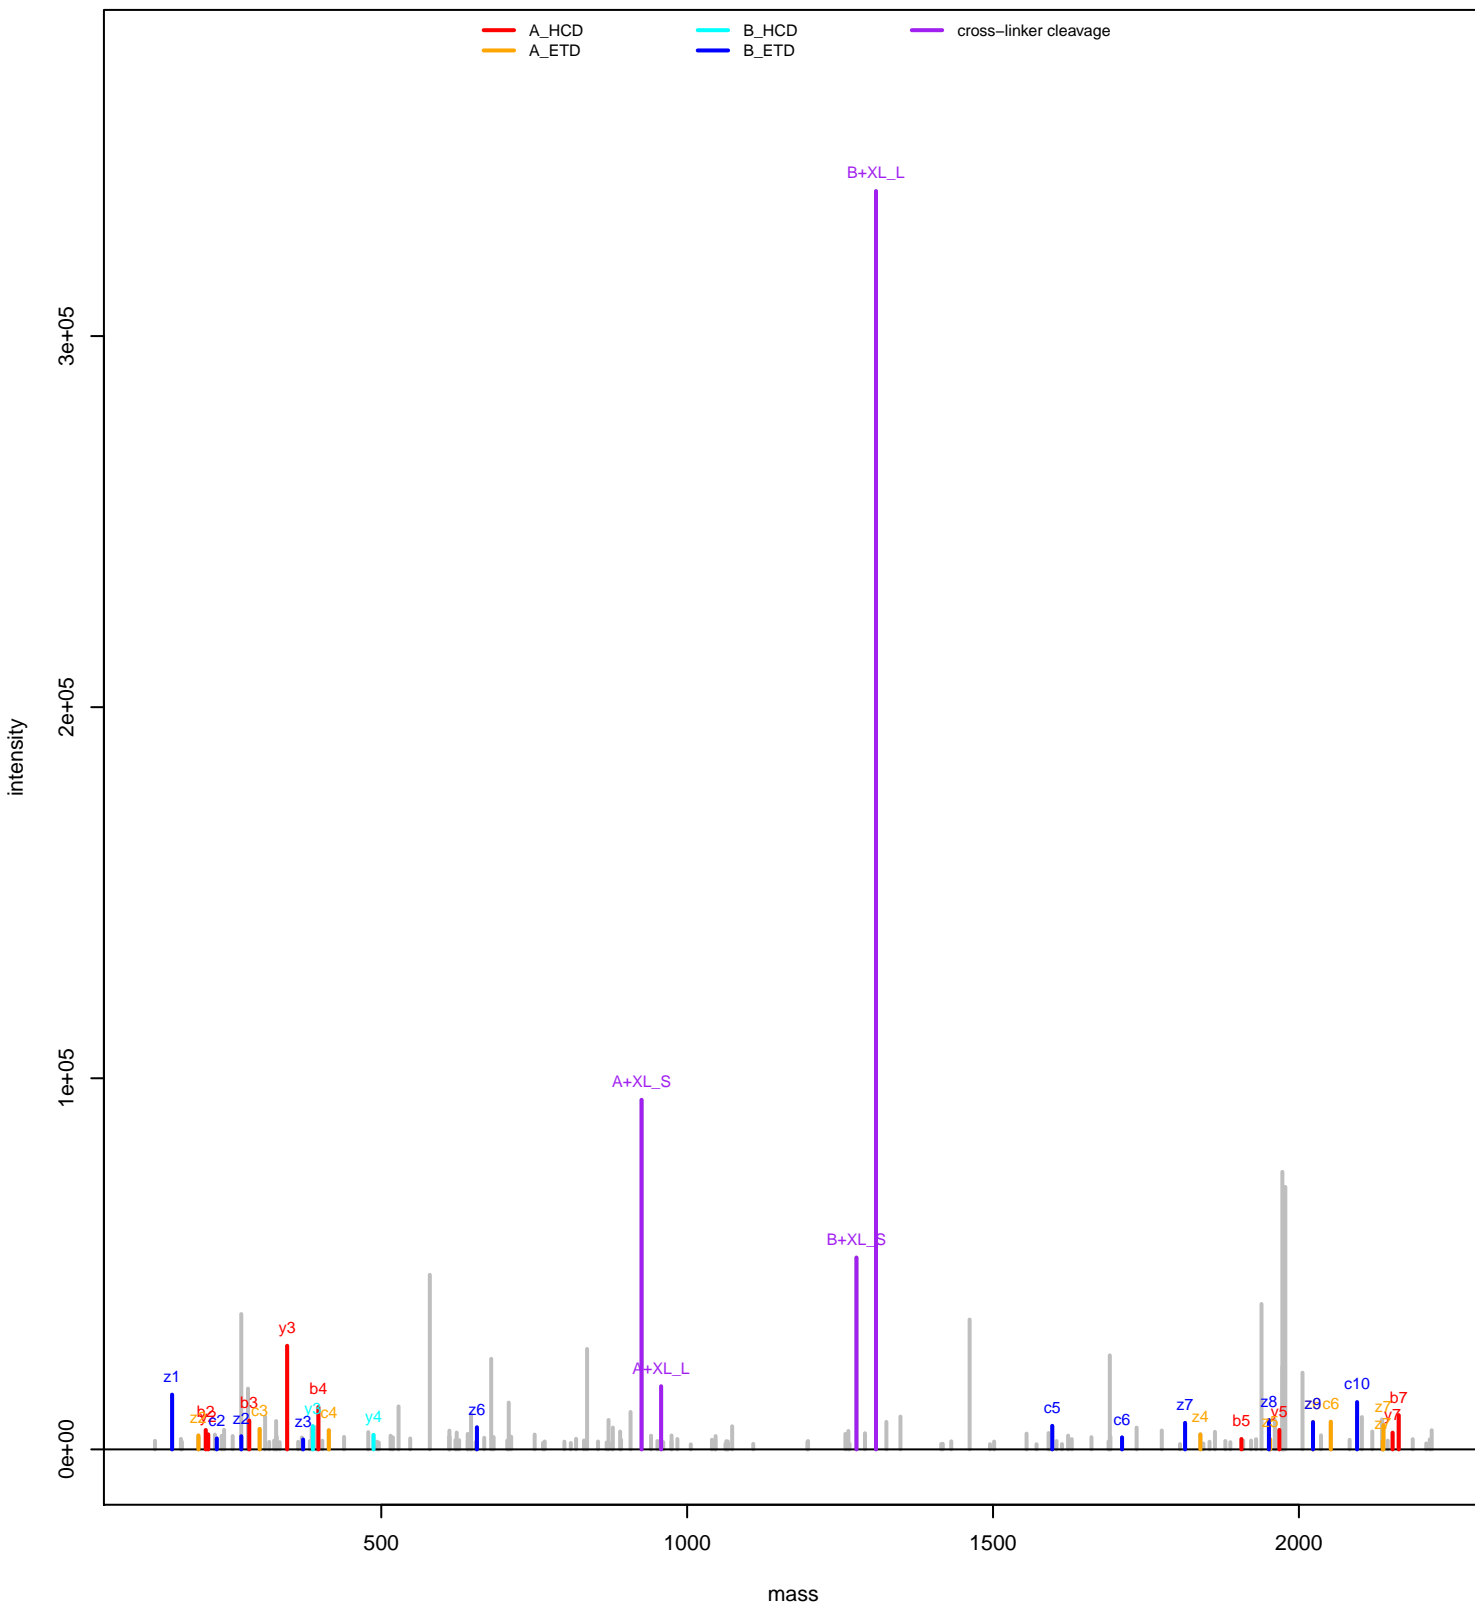

VNALKEQA+XL\_S

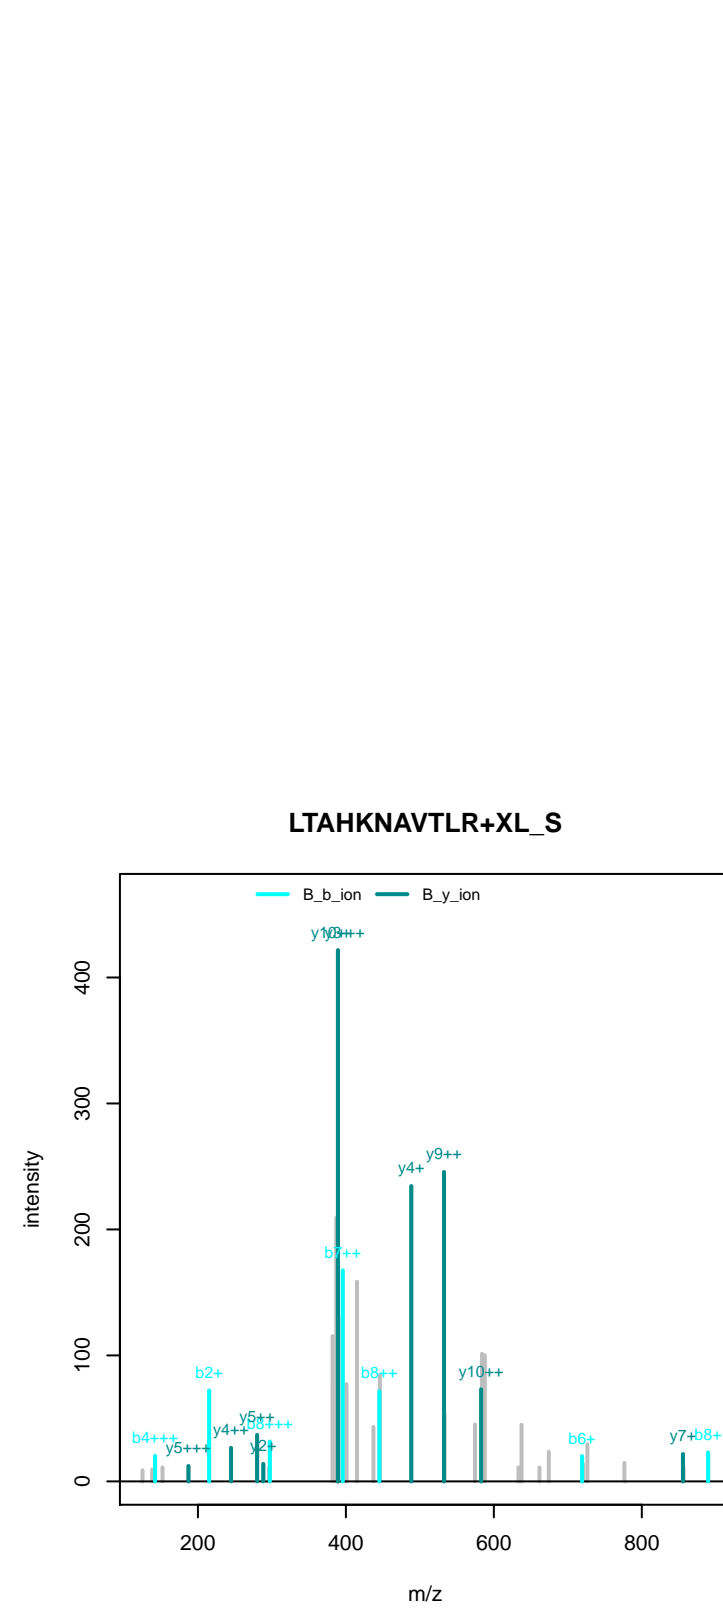

VNALKEQA+XL\_L

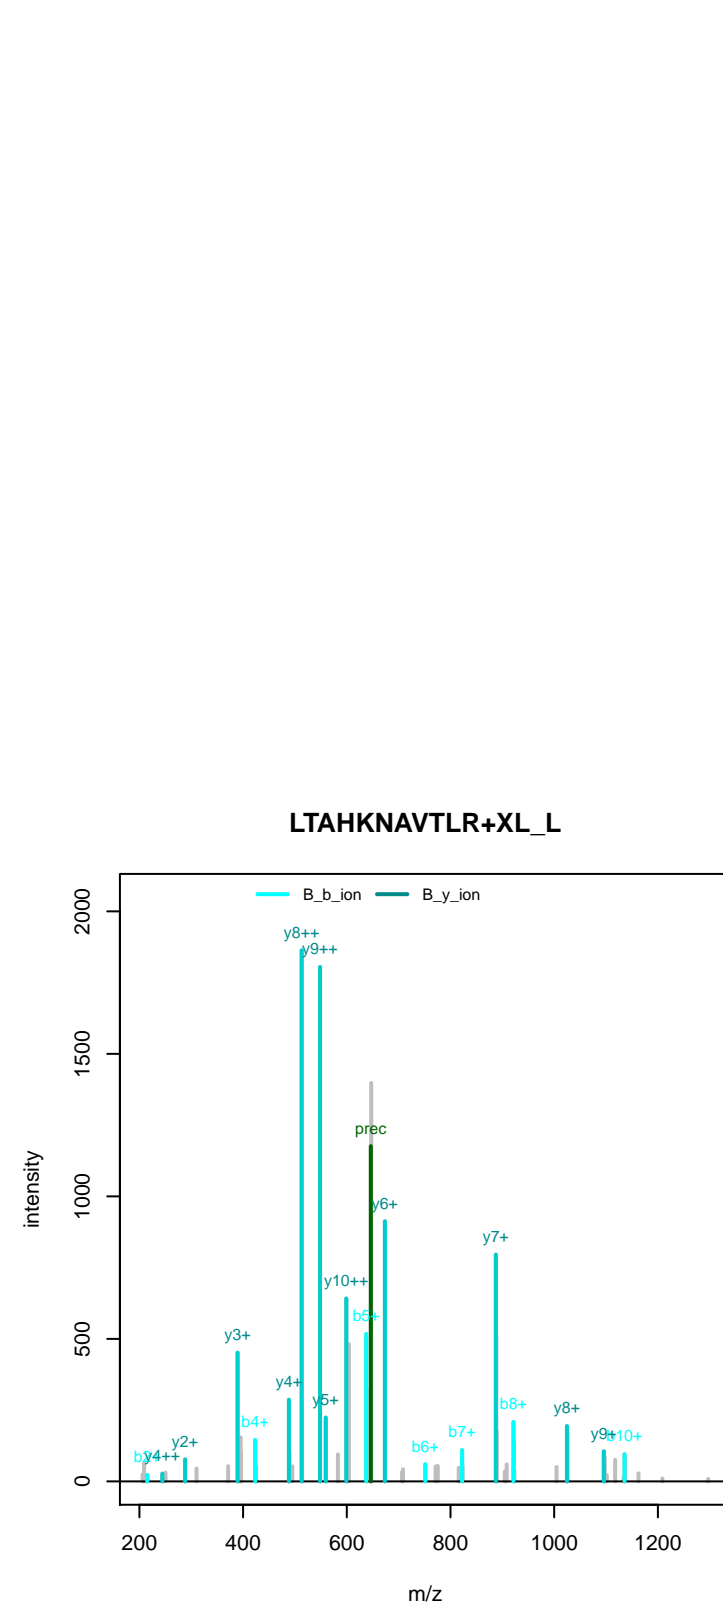

LTAHKNAVTLR+XL\_S

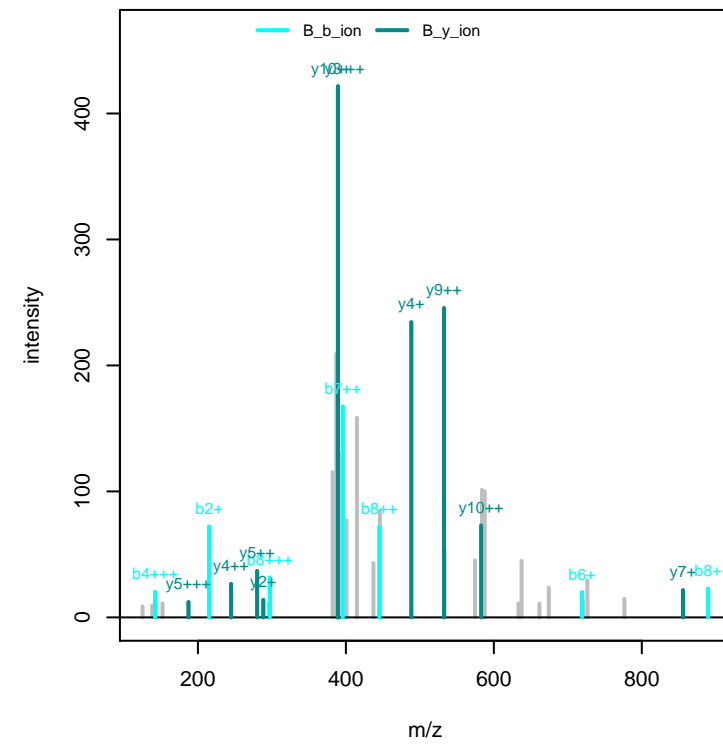

LTAHKNAVTLR+XL\_L

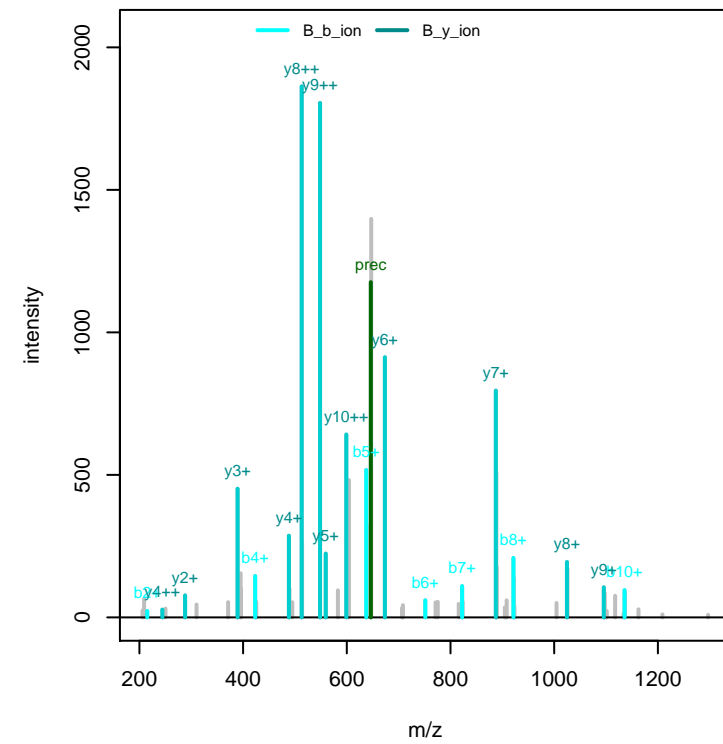

GKDQGVVVNNVK  
NLTSQMVEYGQVKR

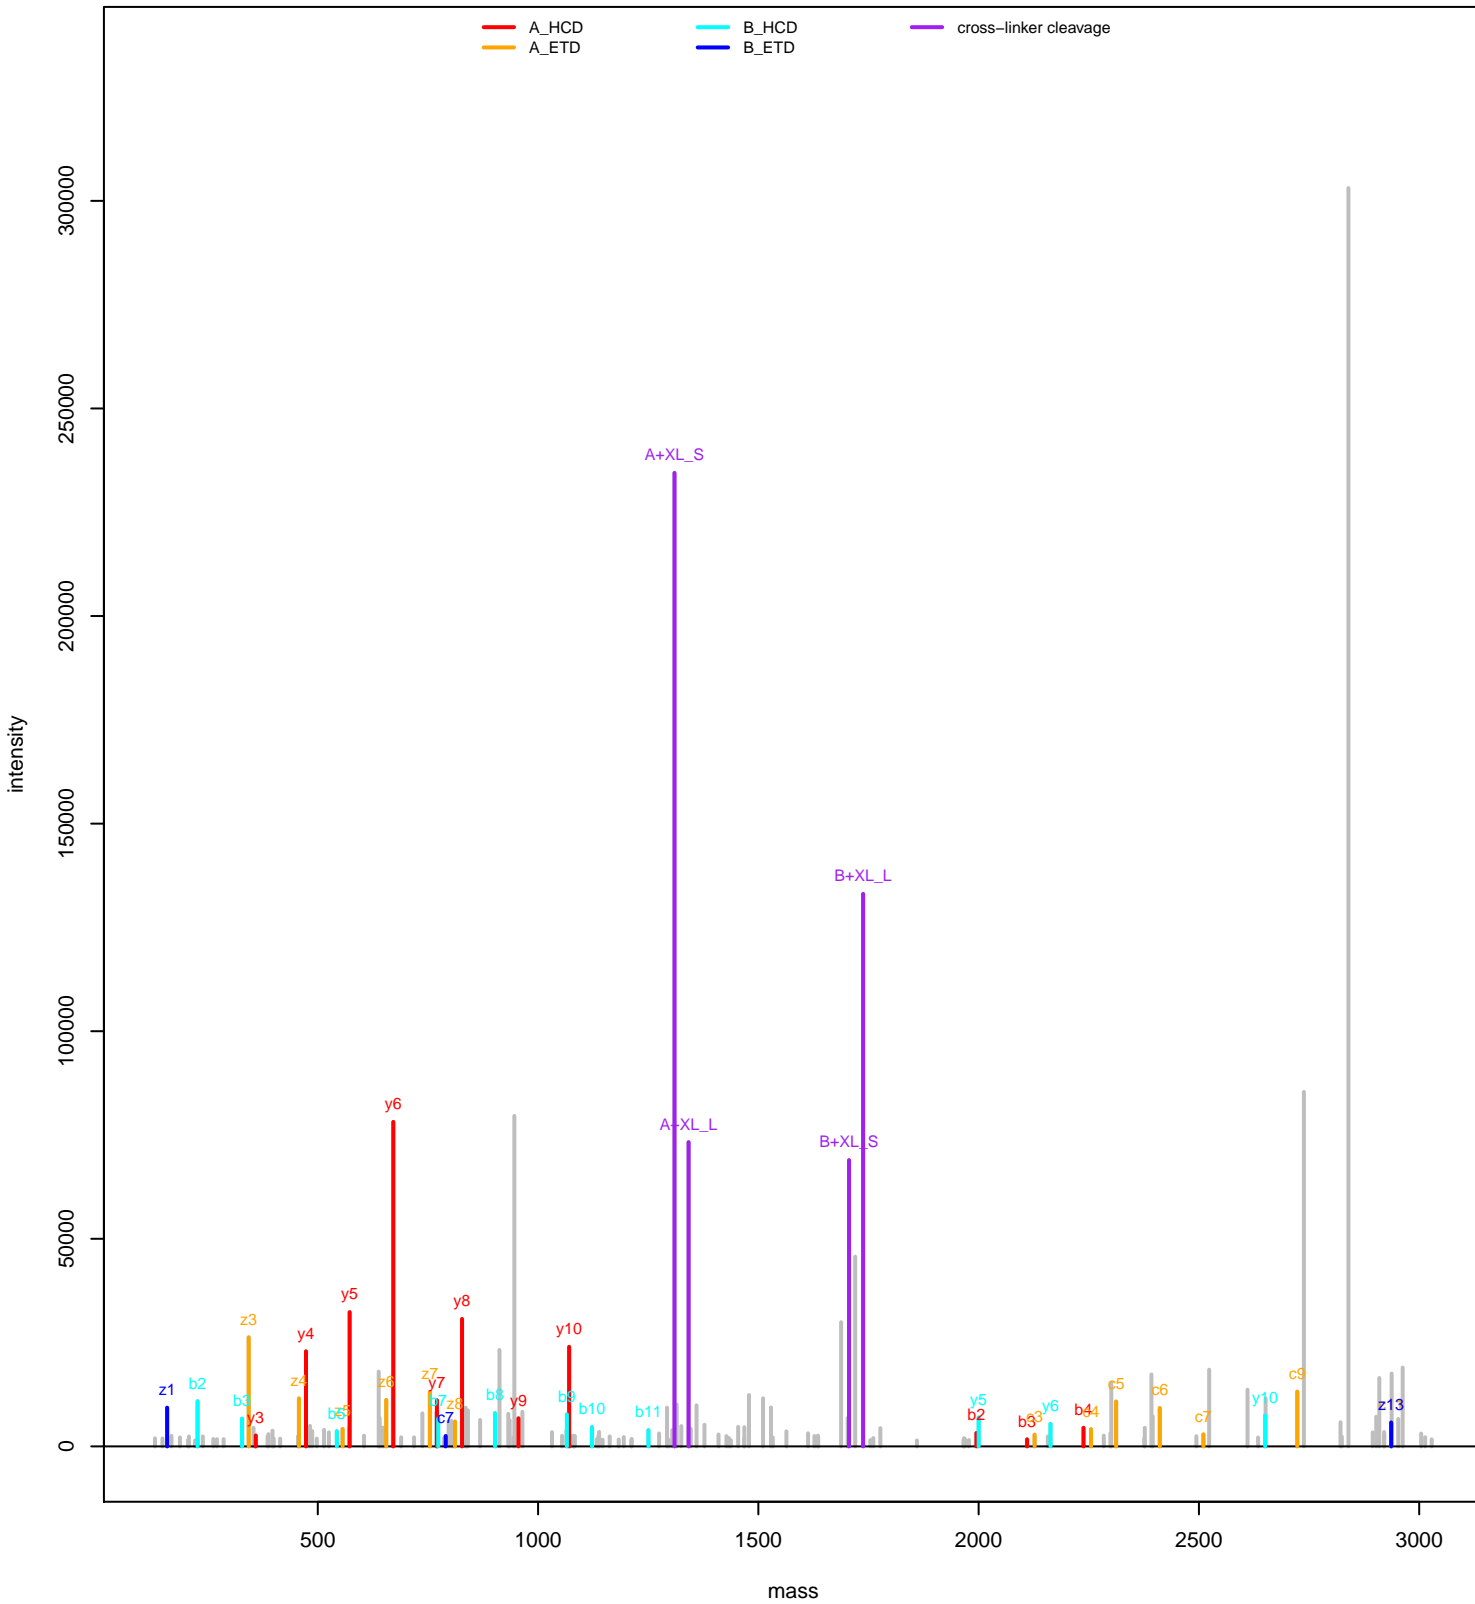

GKDQGVVVNNVK+XL\_S

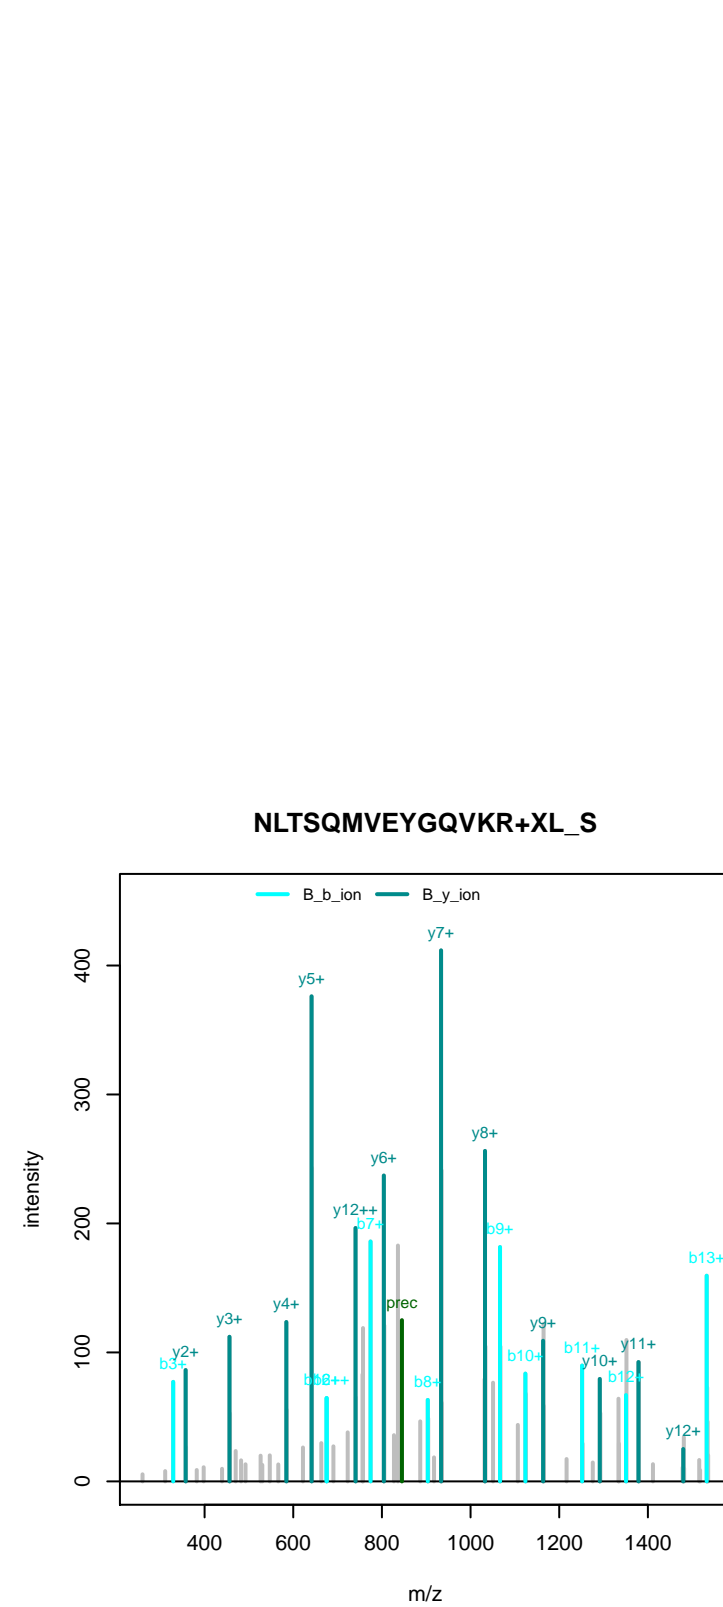

GKDQGVVVNNVK+XL\_L

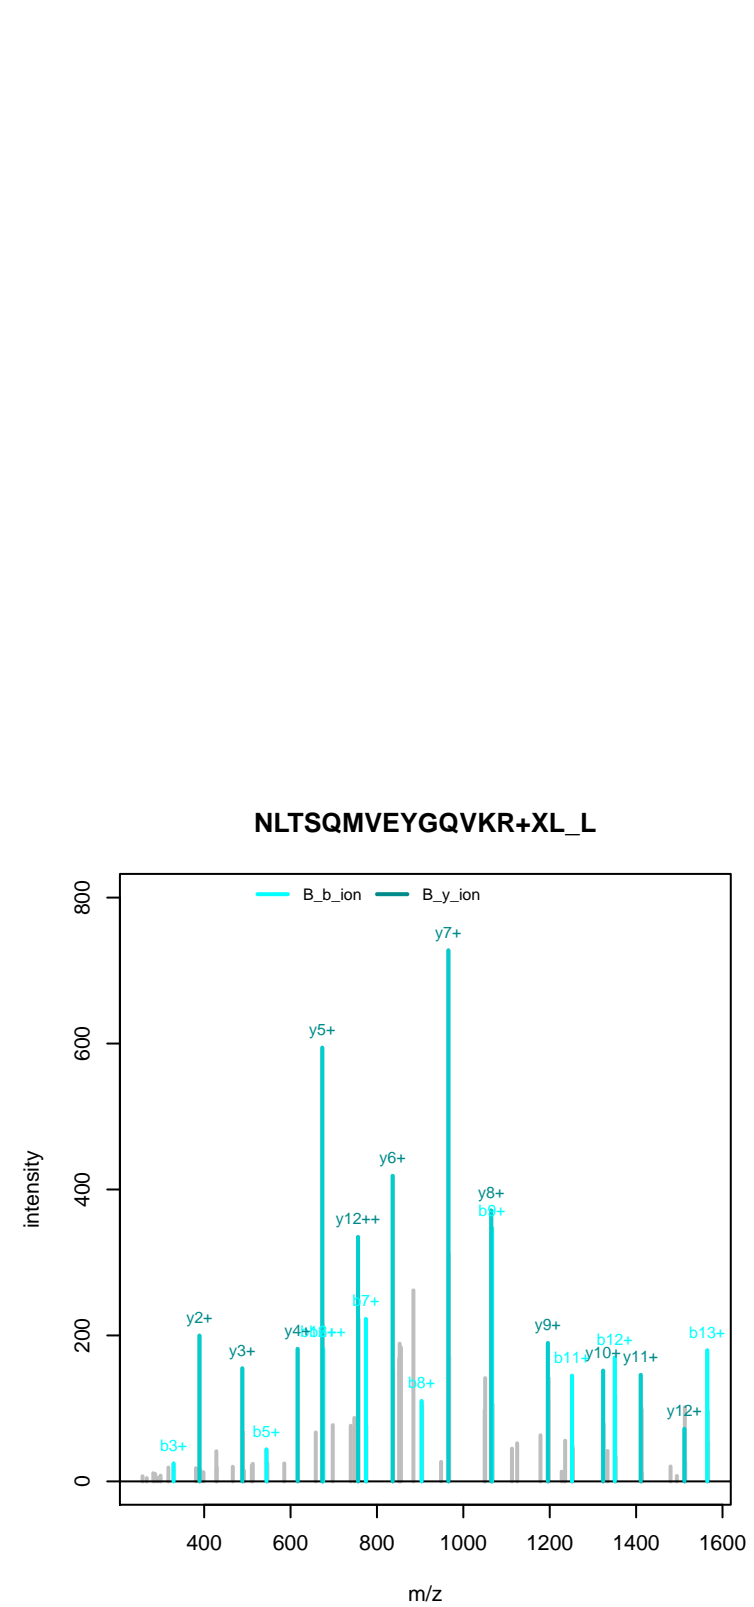

NLTSQMVEYGQVKR+XL\_S

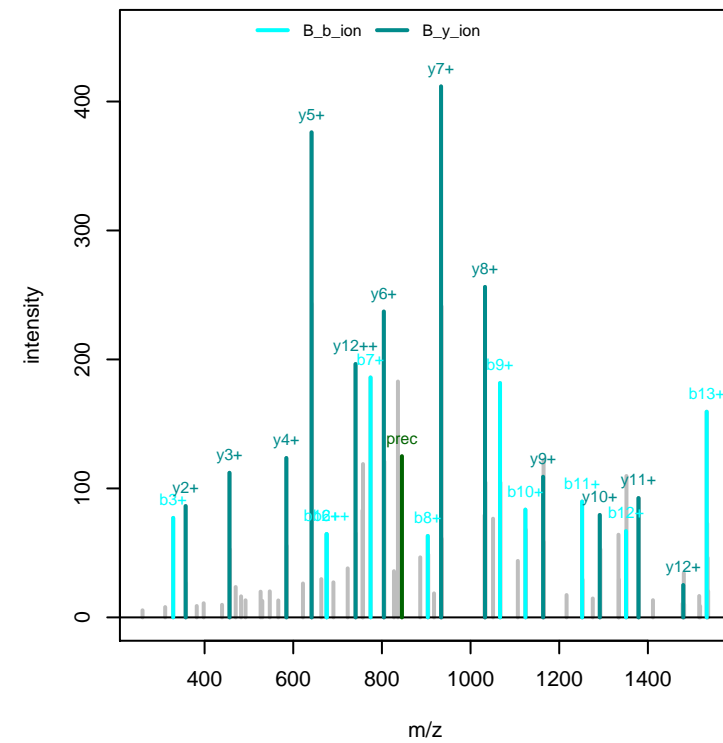

NLTSQMVEYGQVKR+XL\_L

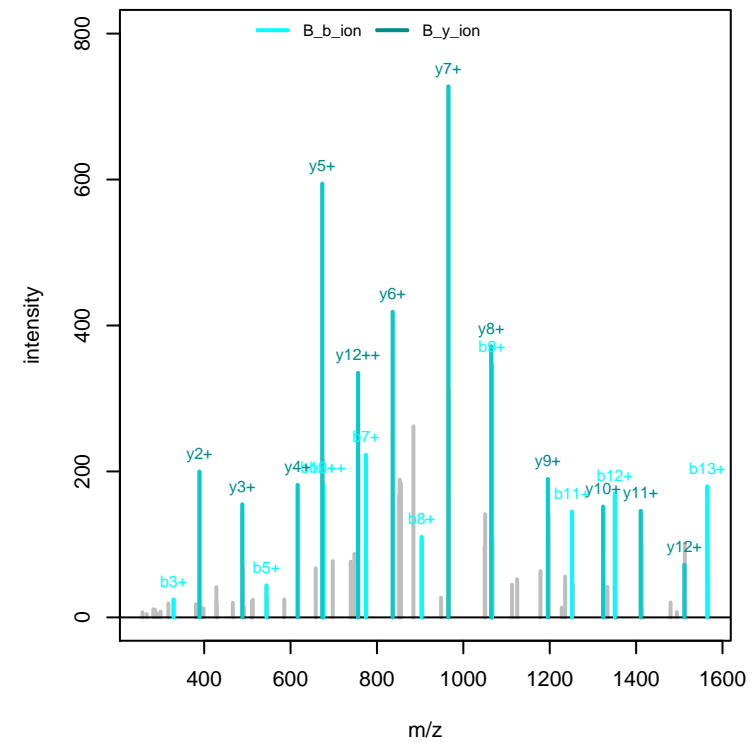



LLAQKLK  
FSVEAPKTK

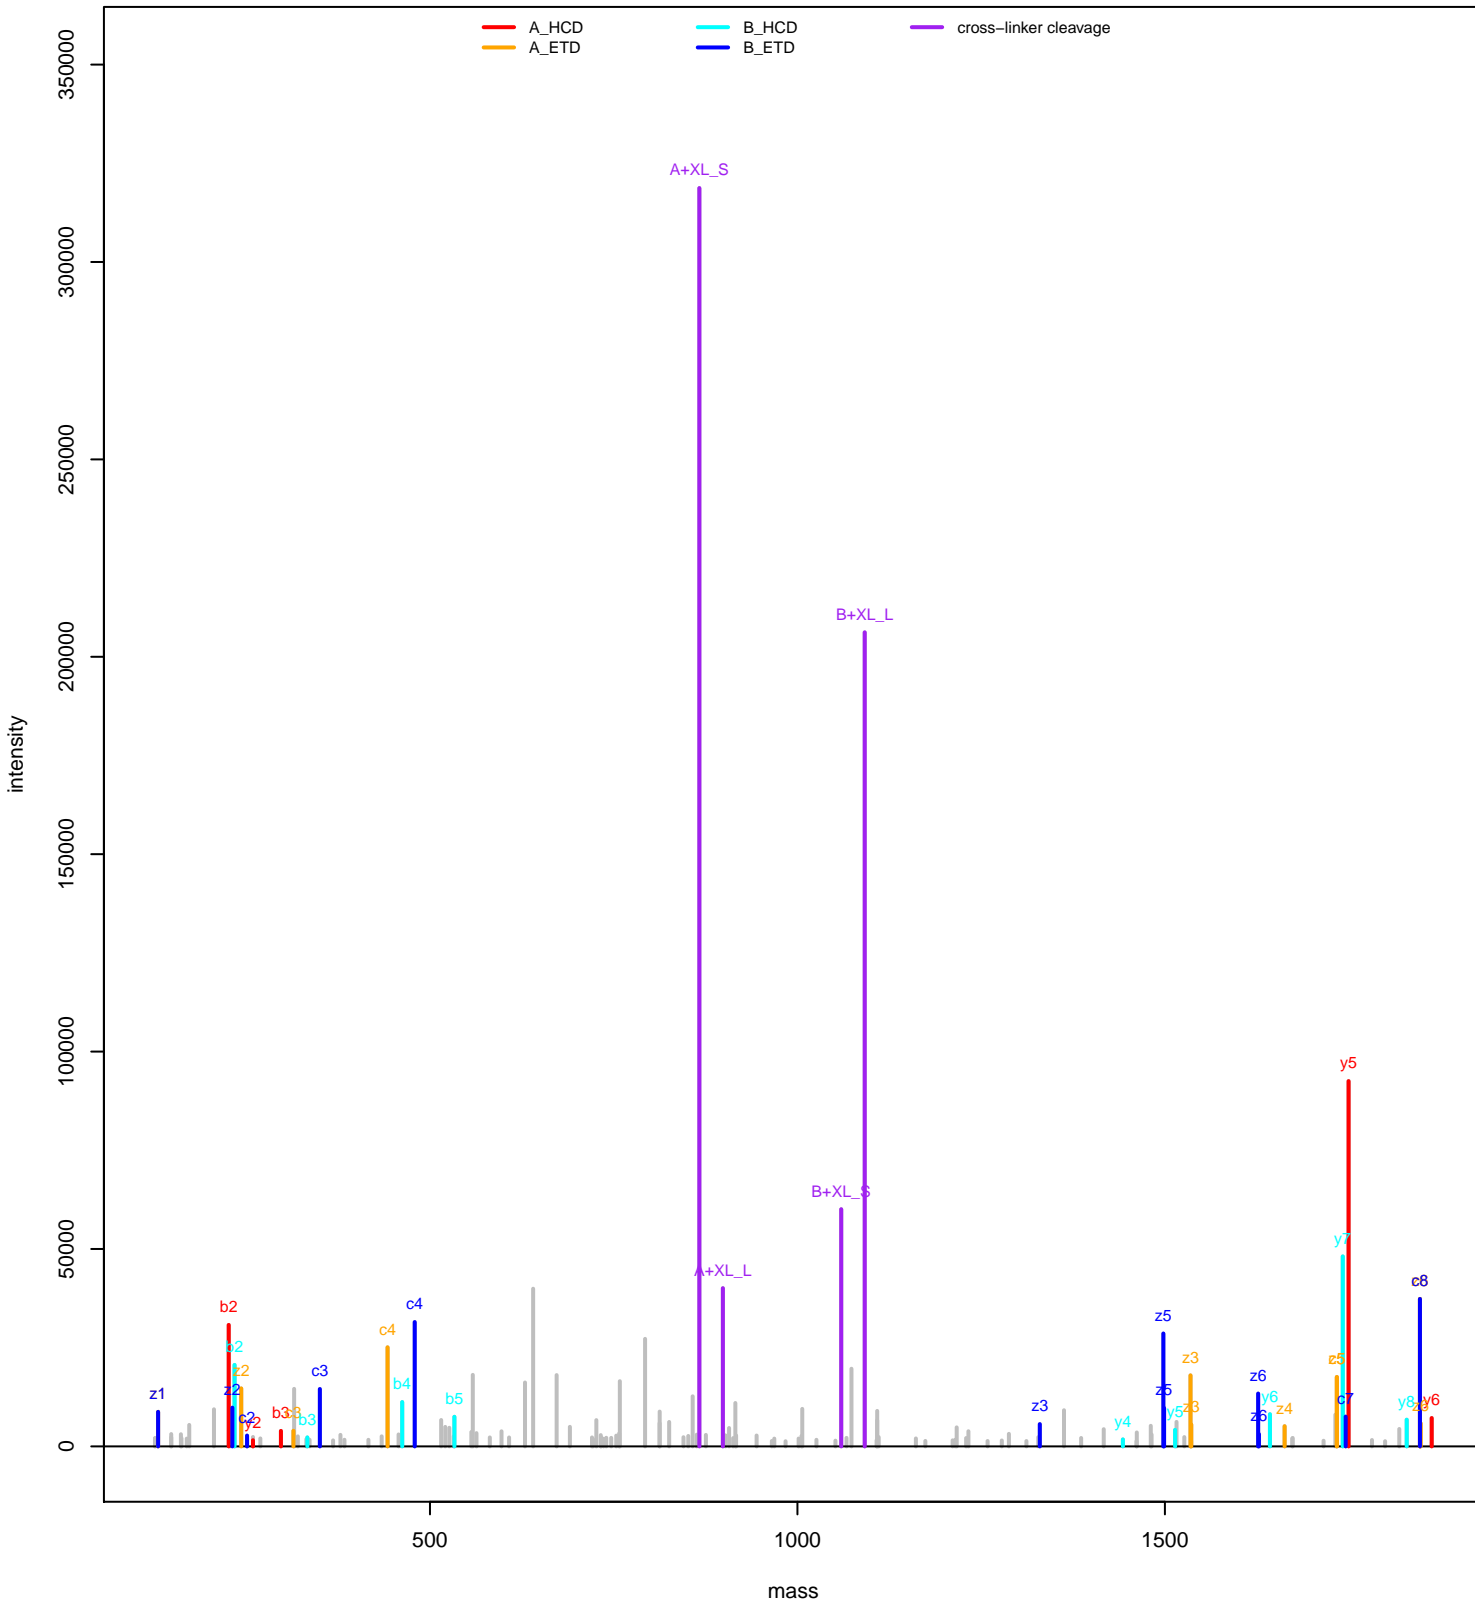

LLAQKLK+XL\_S

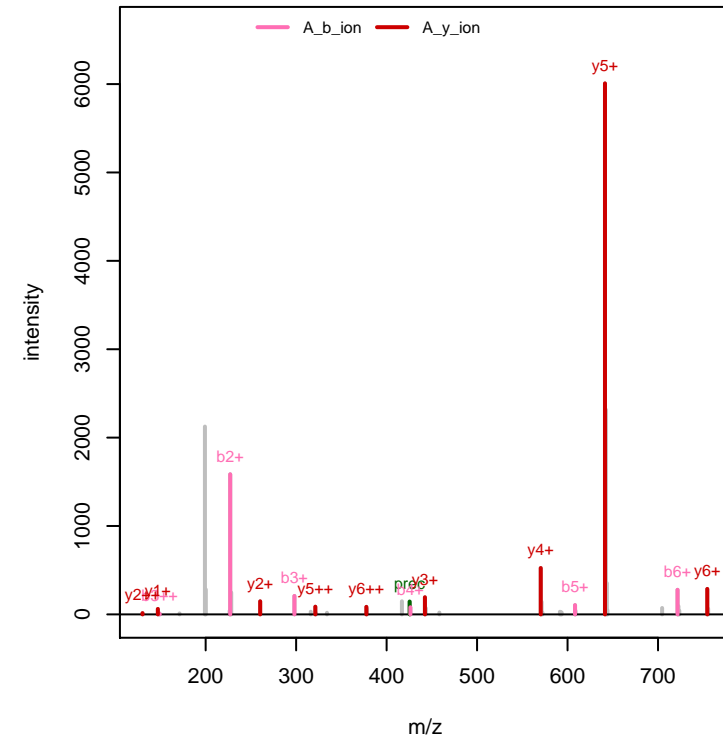

LLAQKLK+XL\_L

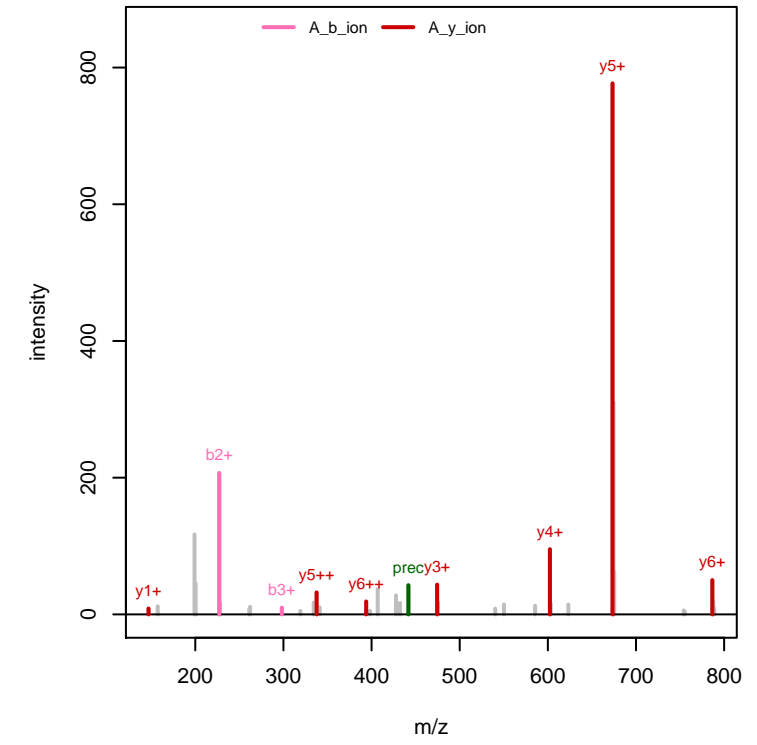

FSVEAPKTK+XL\_S

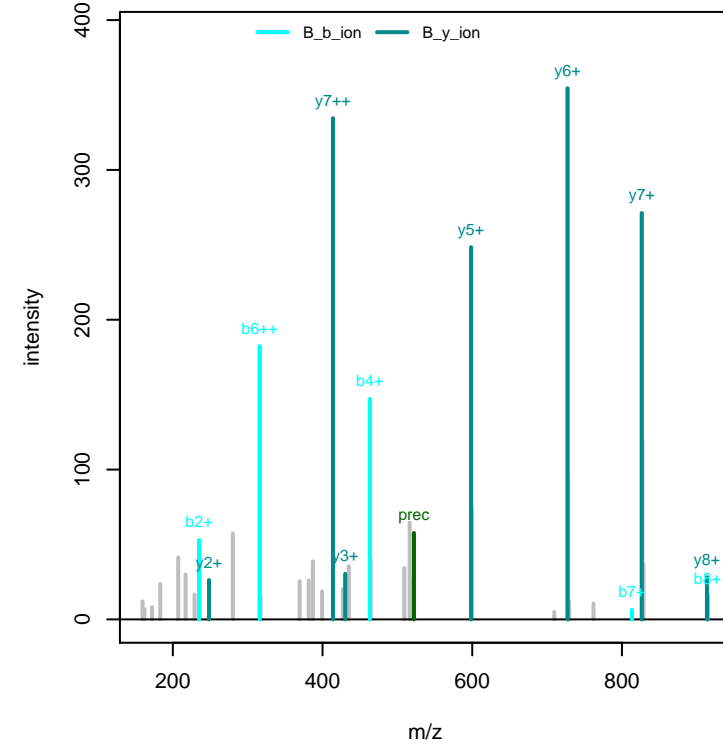

FSVEAPKTK+XL\_L

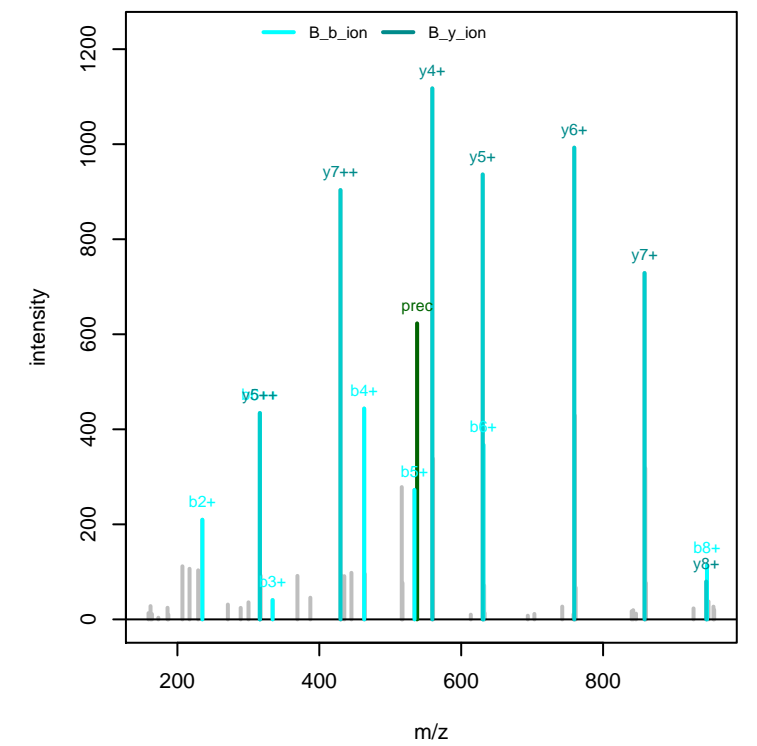

**QKVIQVK  
FLEEGDKAK**

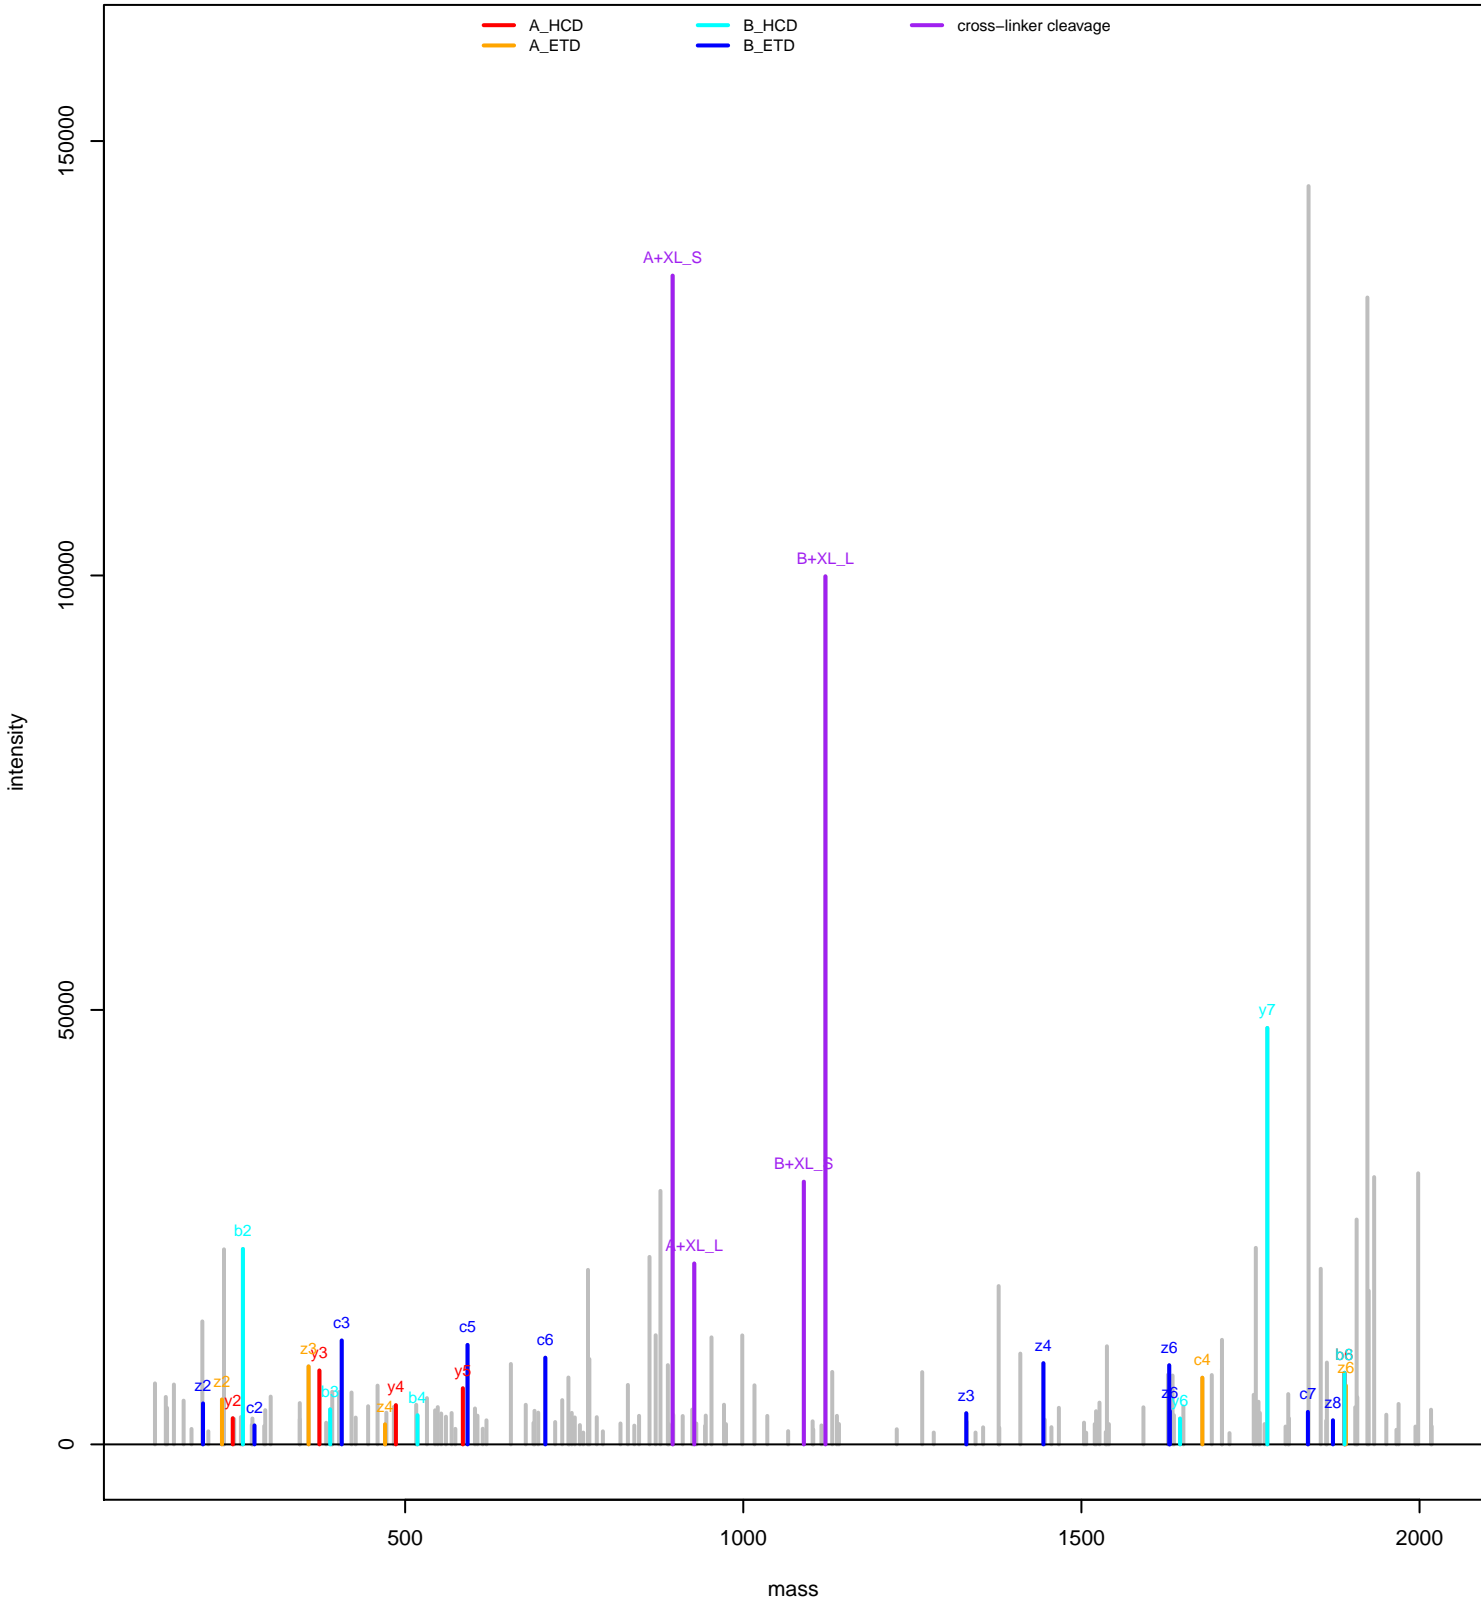

**QKVIQVK+XL\_S**

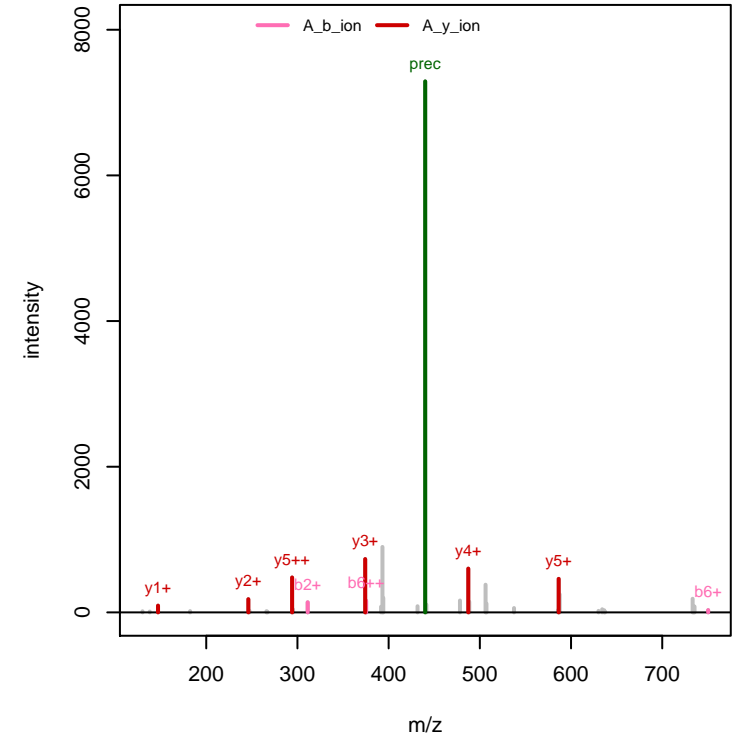

**QKVIQVK+XL\_L**

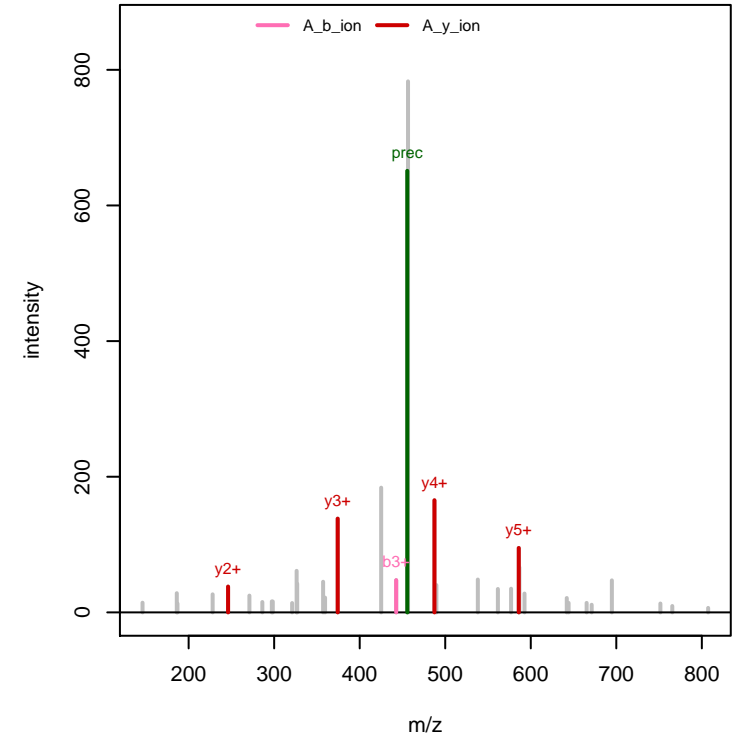

**FLEEGDKAK+XL\_S**

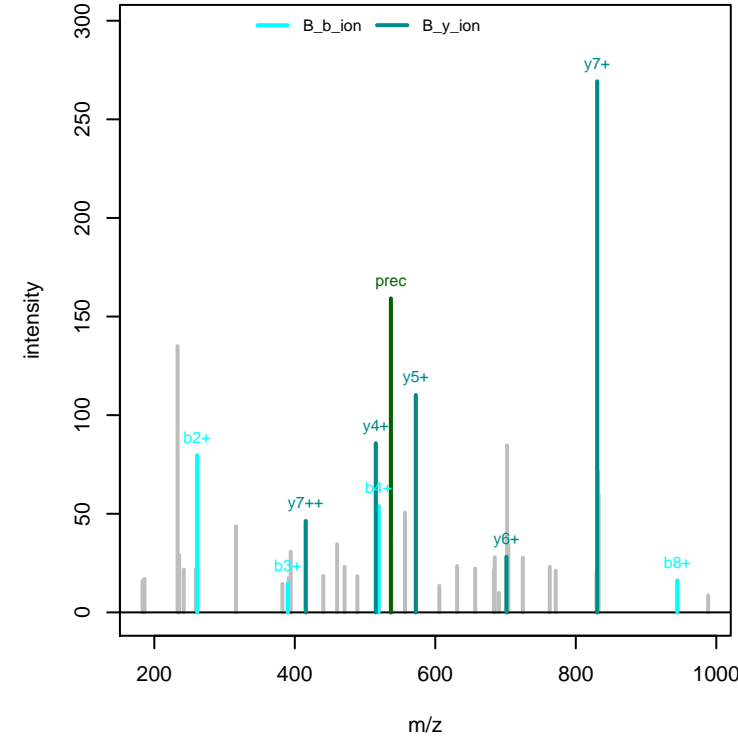

**FLEEGDKAK+XL\_L**

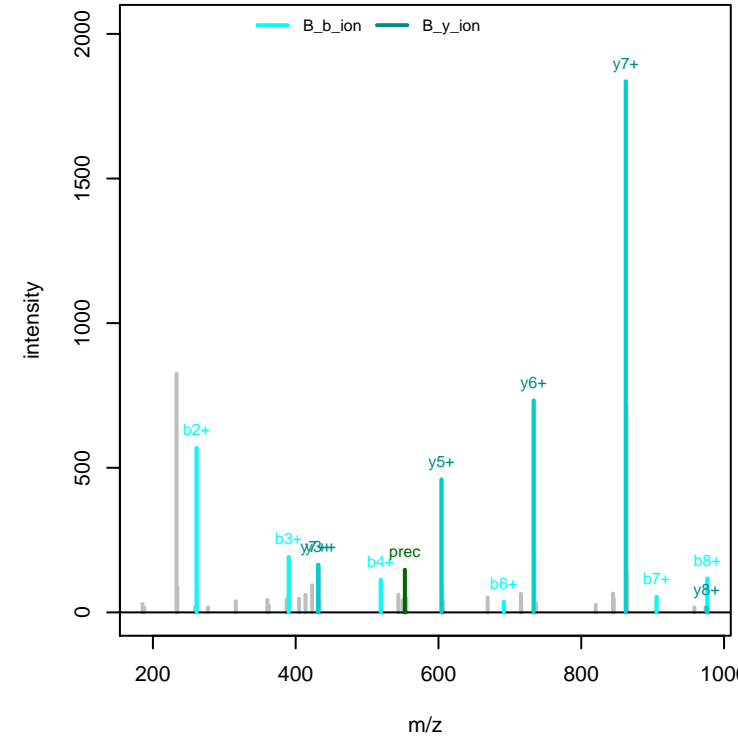

TVQTSK  
FEYWAMPHKDEK

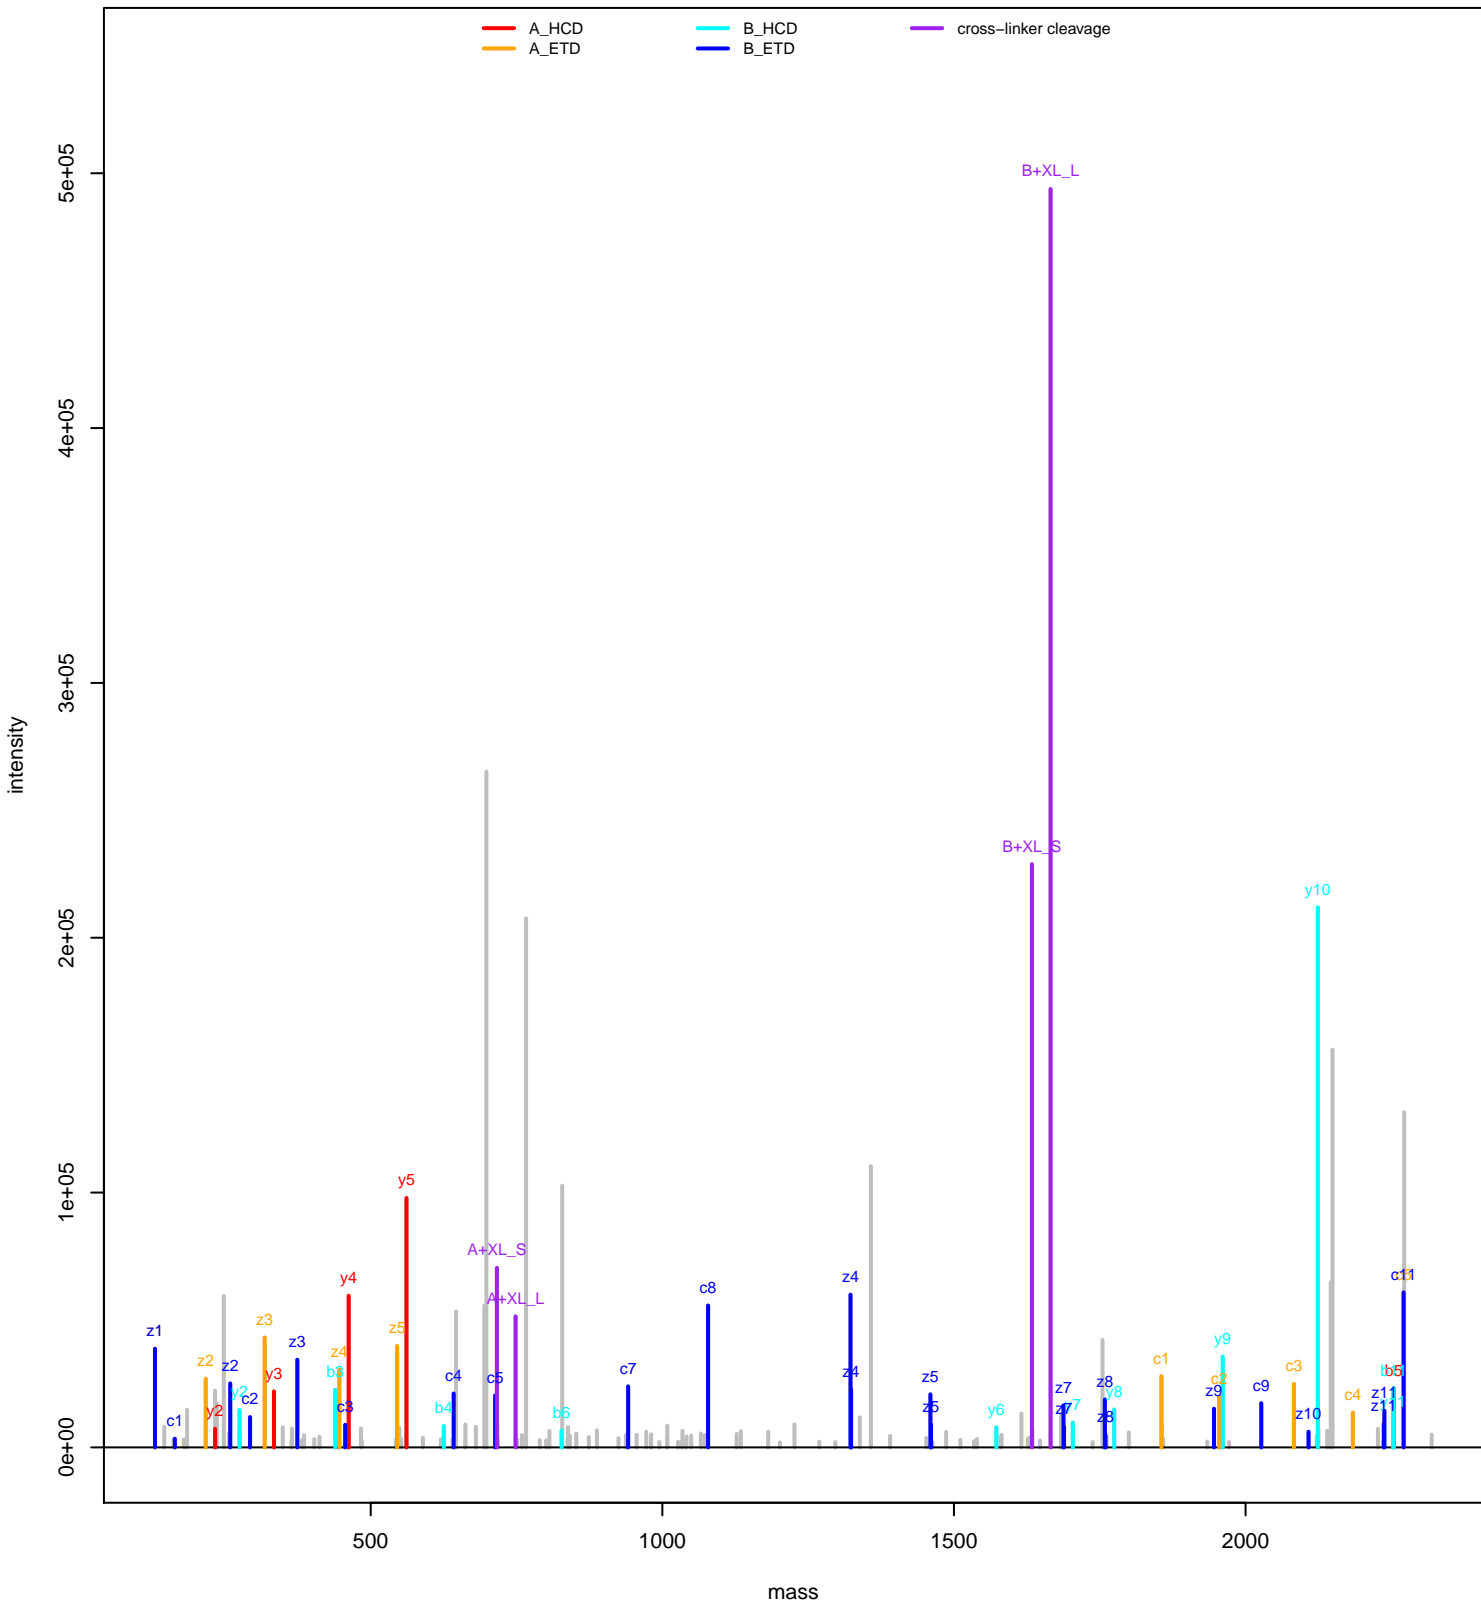

TVQTSK+XL\_S

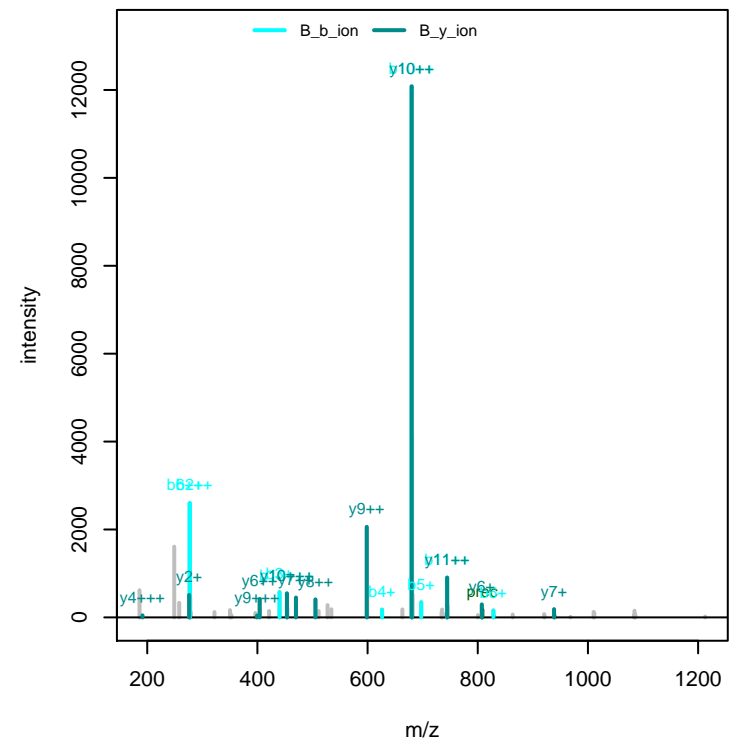

TVQTSK+XL\_L

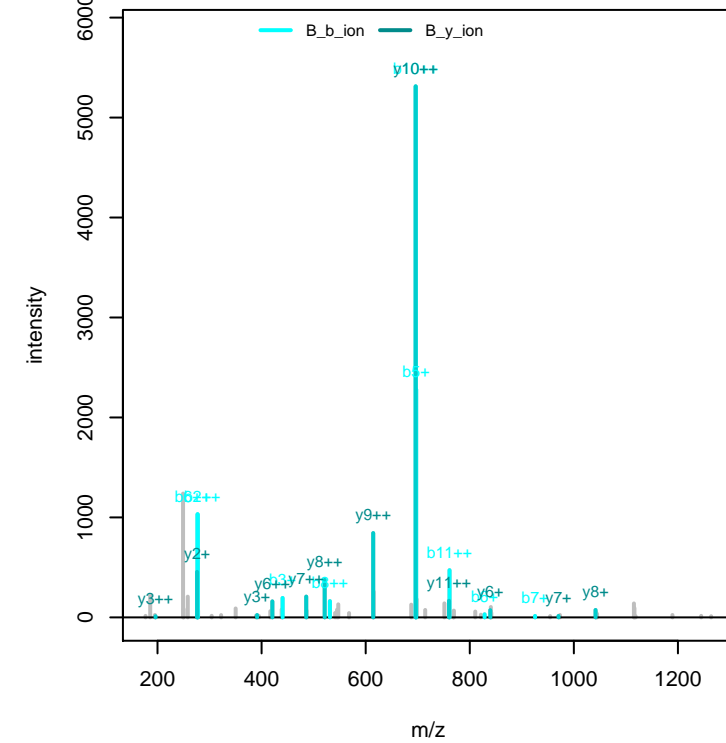

FEYWAMPHKDEK+XL\_S



FEYWAMPHKDEK+XL\_L



IQAEKSQQSSY  
IGVNAPKEVSVHREEIYQR

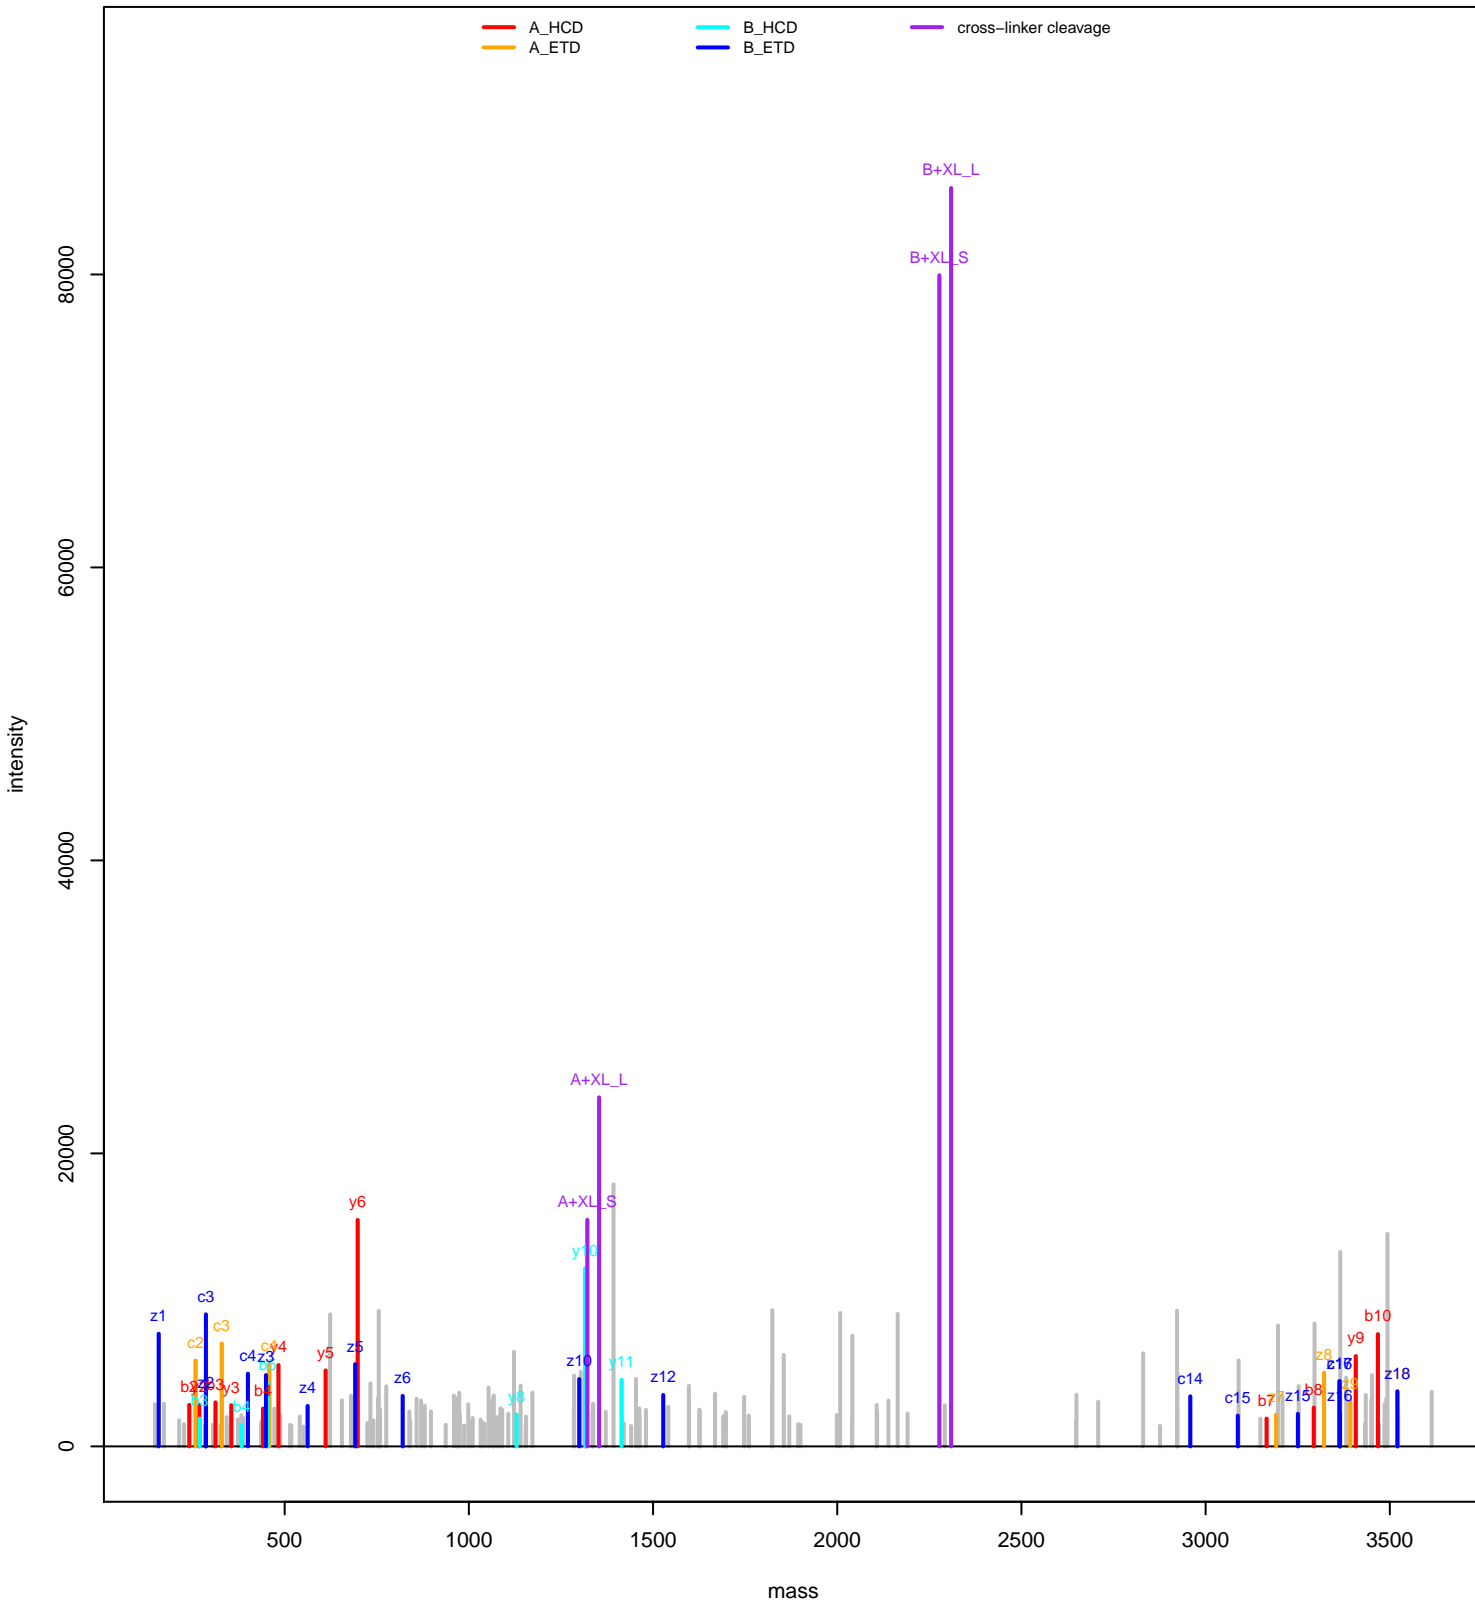

IQAEKSQQSSY+XL\_S

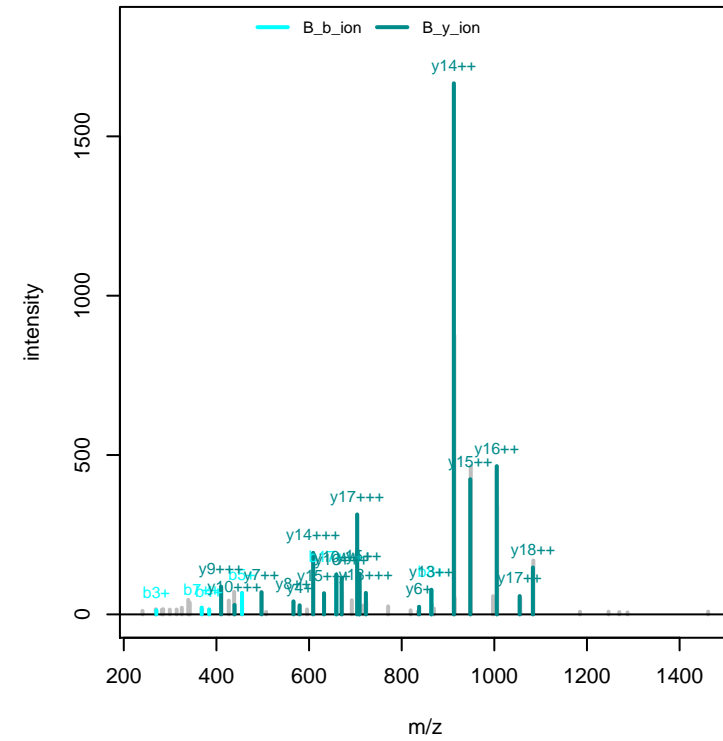

IQAEKSQQSSY+XL\_L

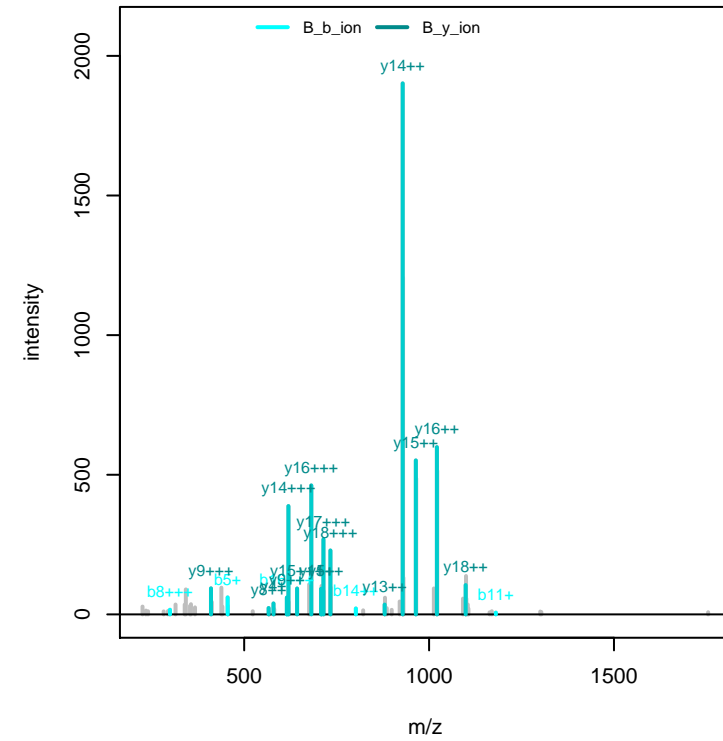

IGVNAPKEVSVHREEIYQR+XL\_S

IGVNAPKEVSVHREEIYQR+XL\_L

MNLHEYQAK  
MGHAGAIAGGKGTADK

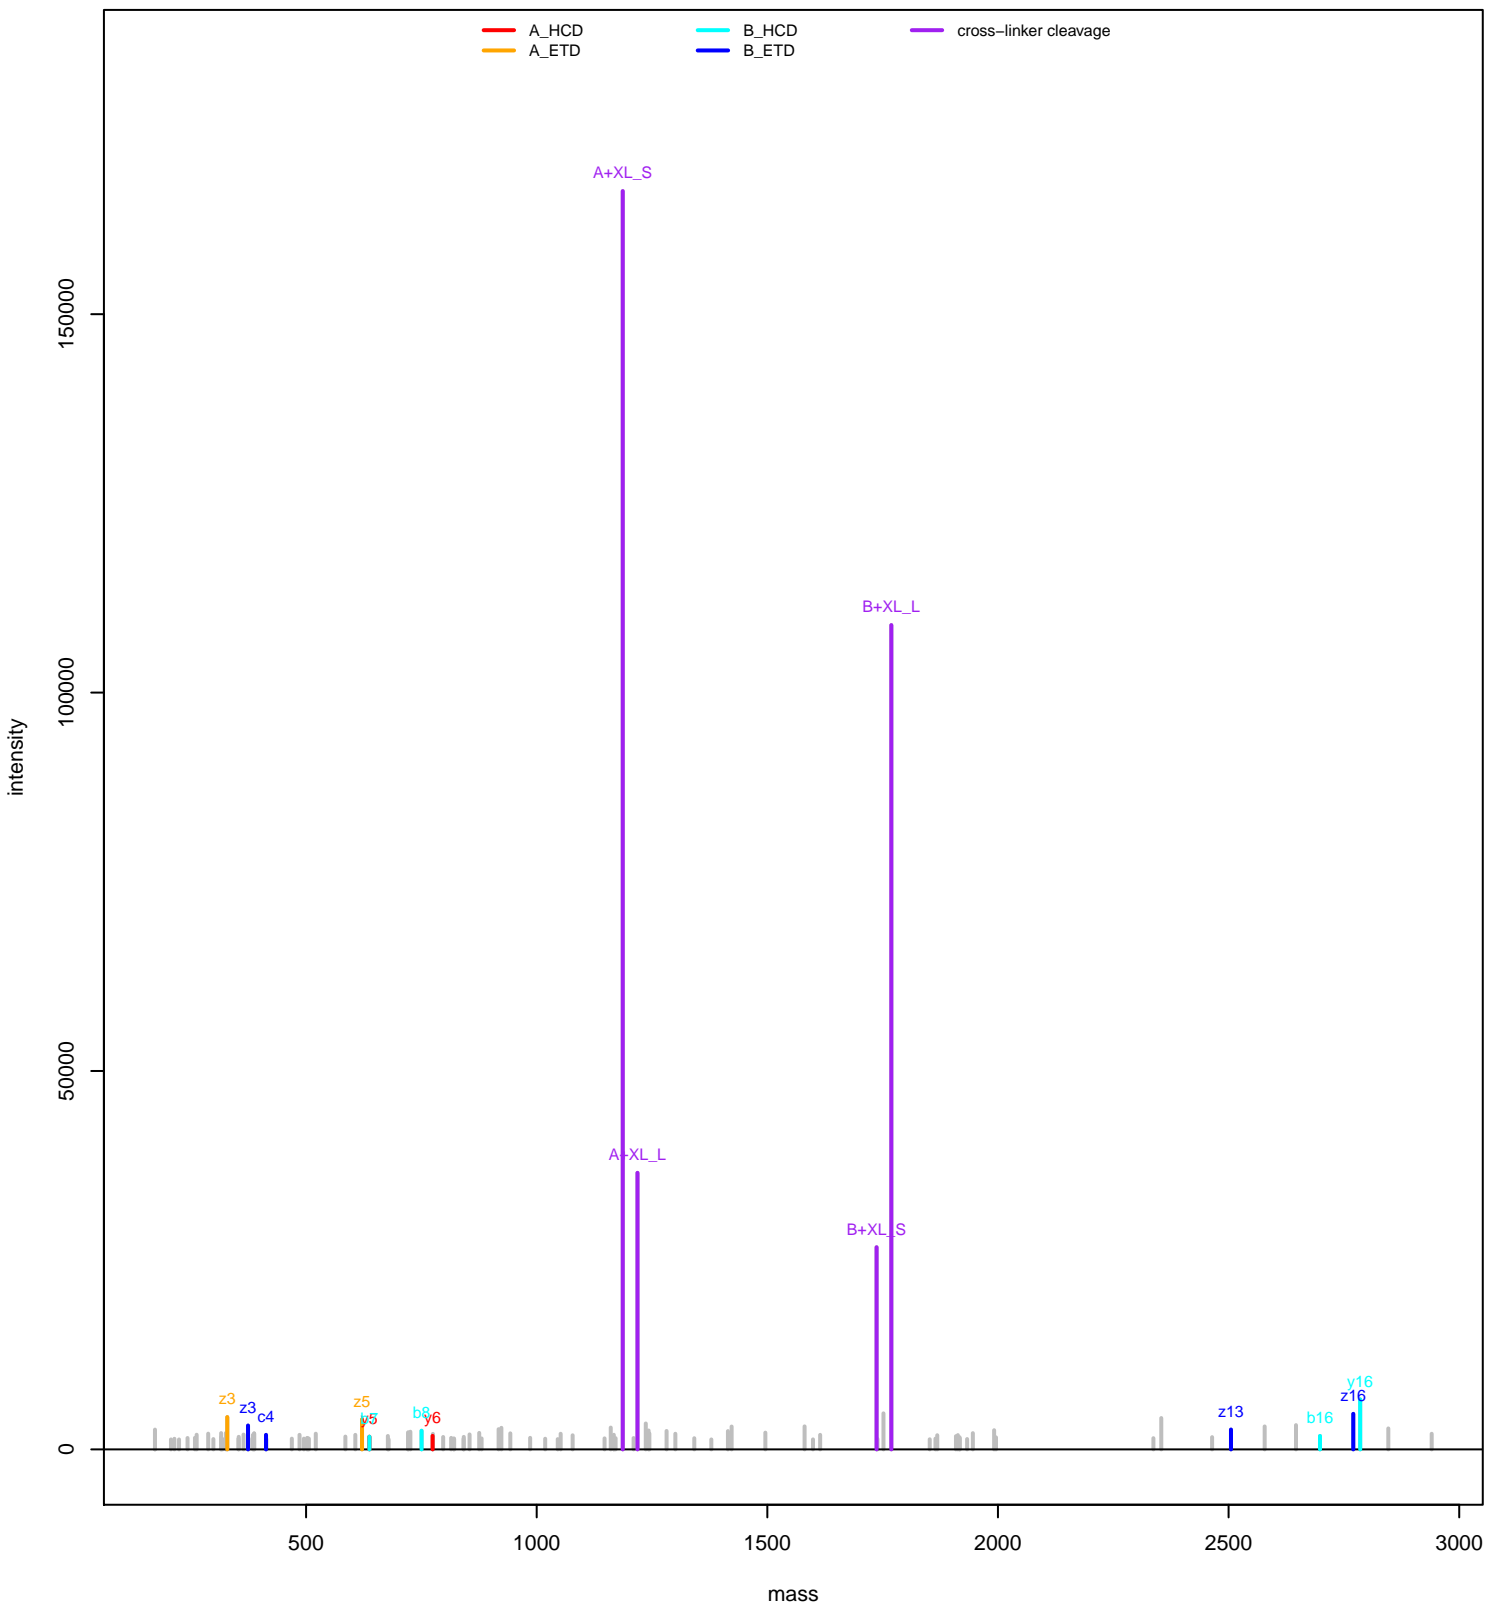

MNLHEYQAK+XL\_S

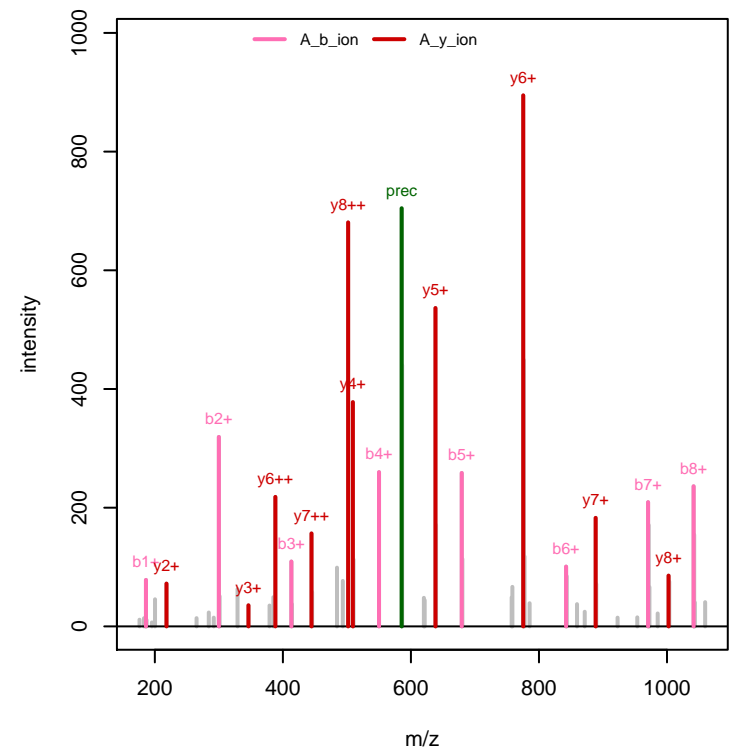

MNLHEYQAK+XL\_L

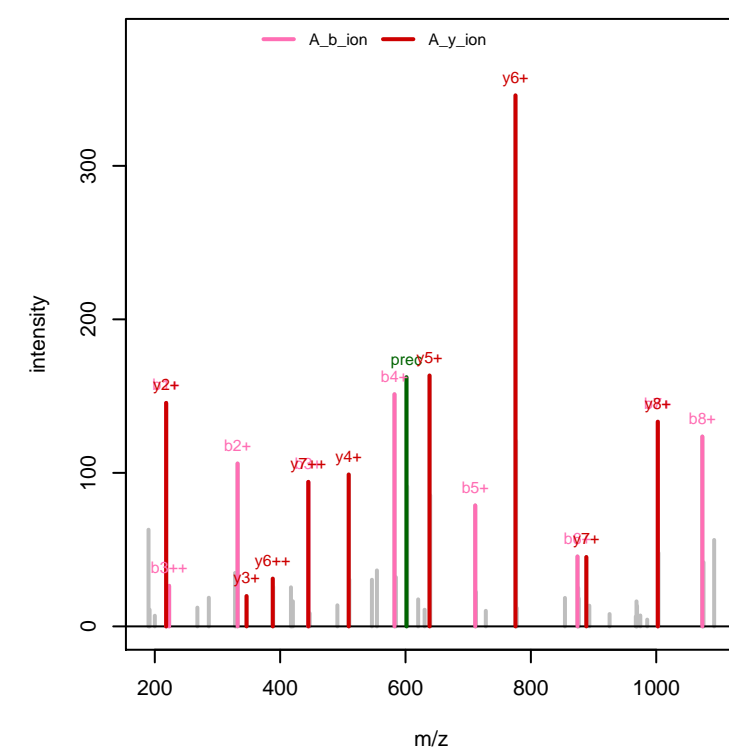

MGHAGAIAGGKGTADK+XL\_S

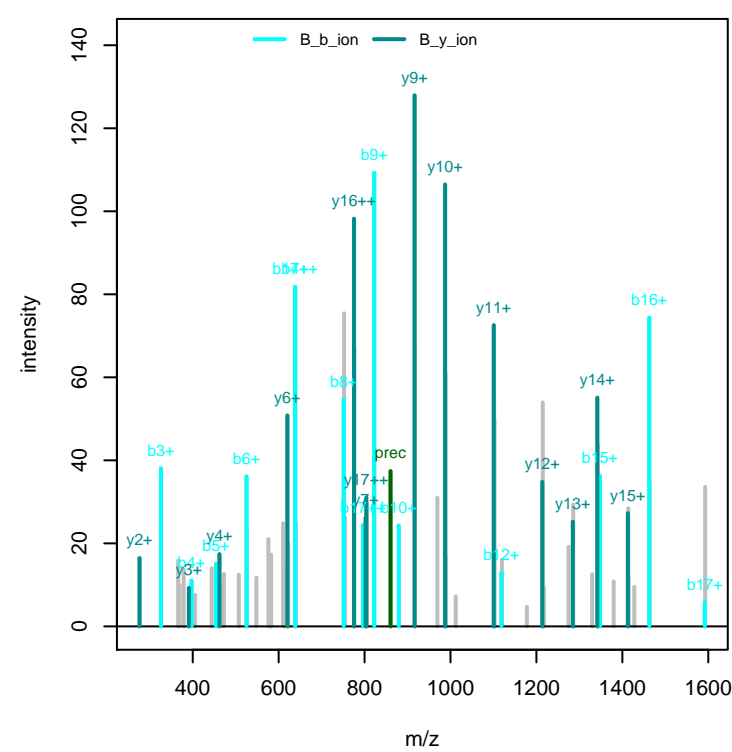

MGHAGAIAGGKGTADK+XL\_L

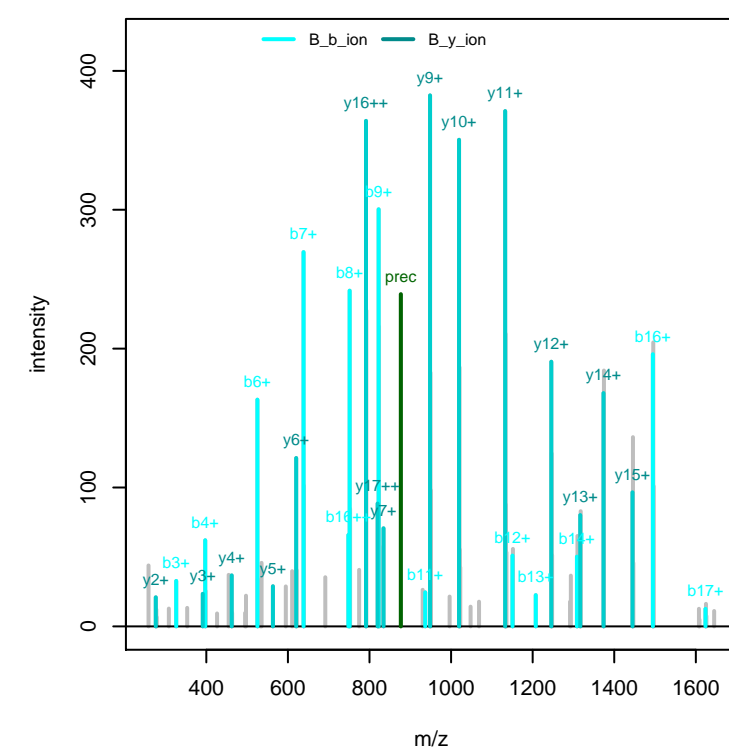

VAVIKAVR  
EAKDLVESAPAALK

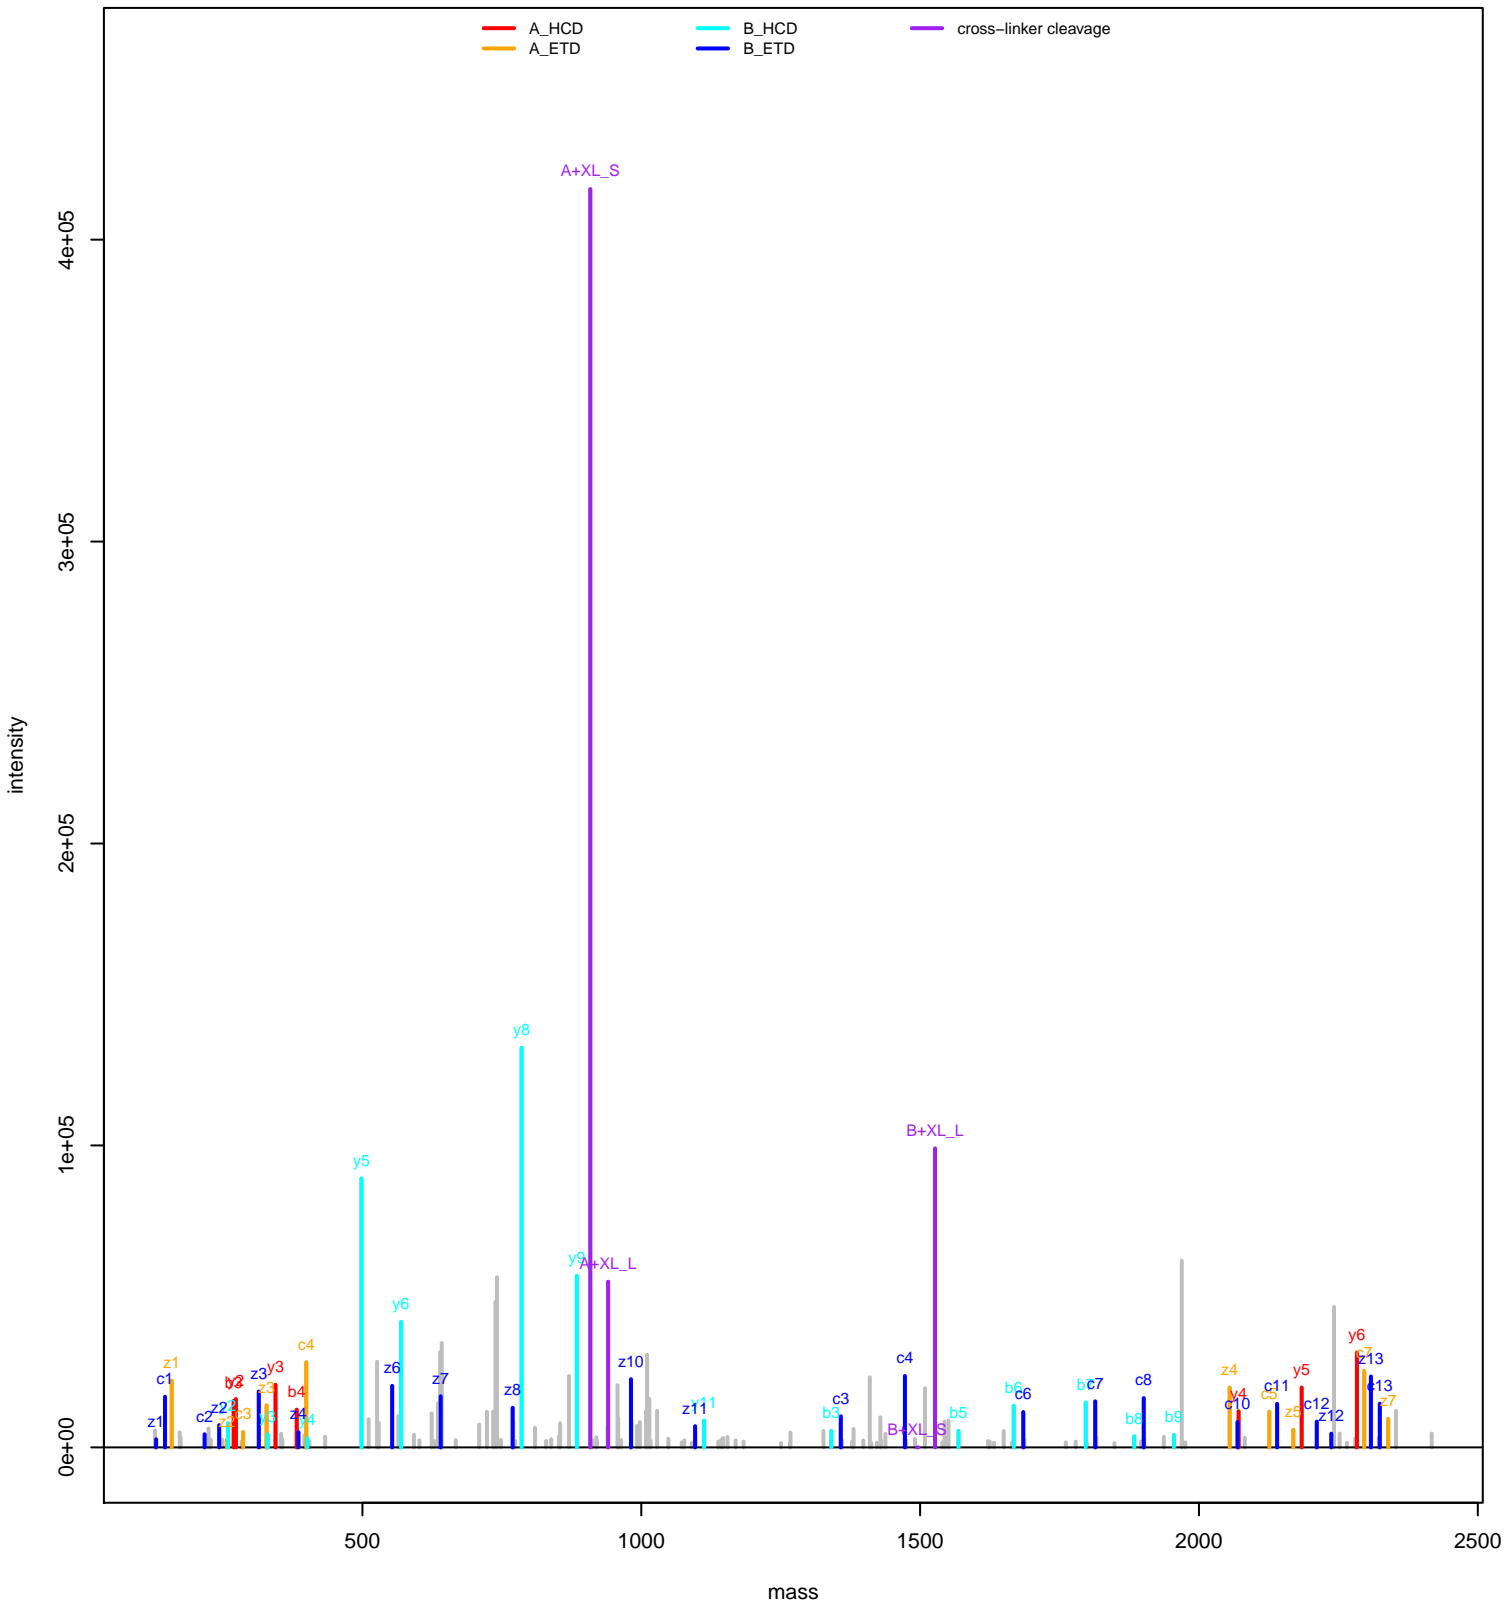

VAVIKAVR+XL\_S

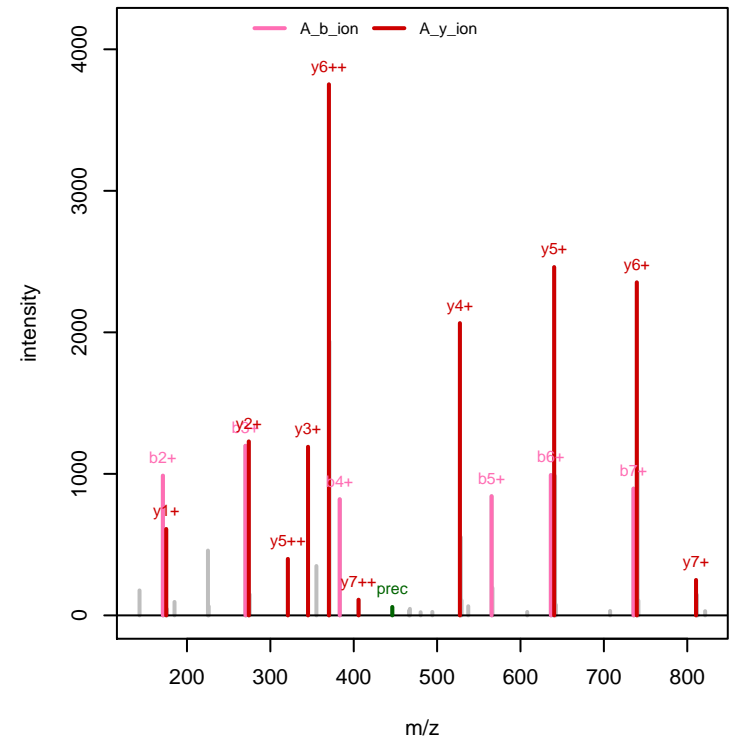

VAVIKAVR+XL\_L

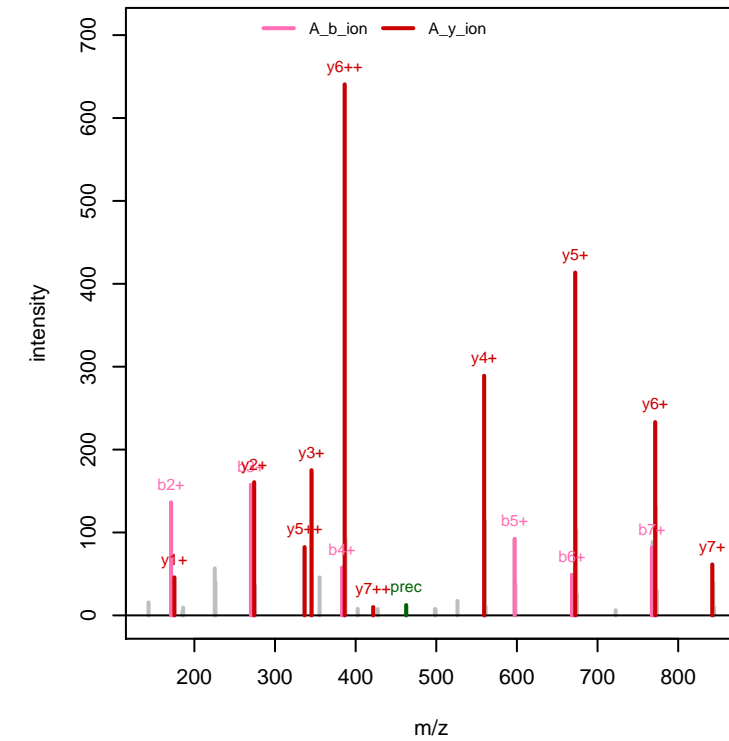

EAKDLVESAPAALK+XL\_S

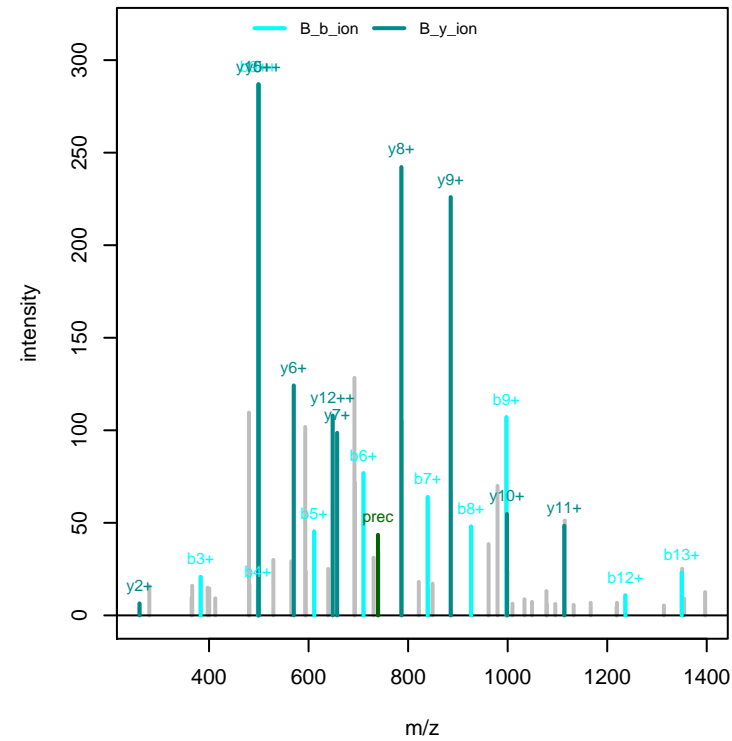

EAKDLVESAPAALK+XL\_L

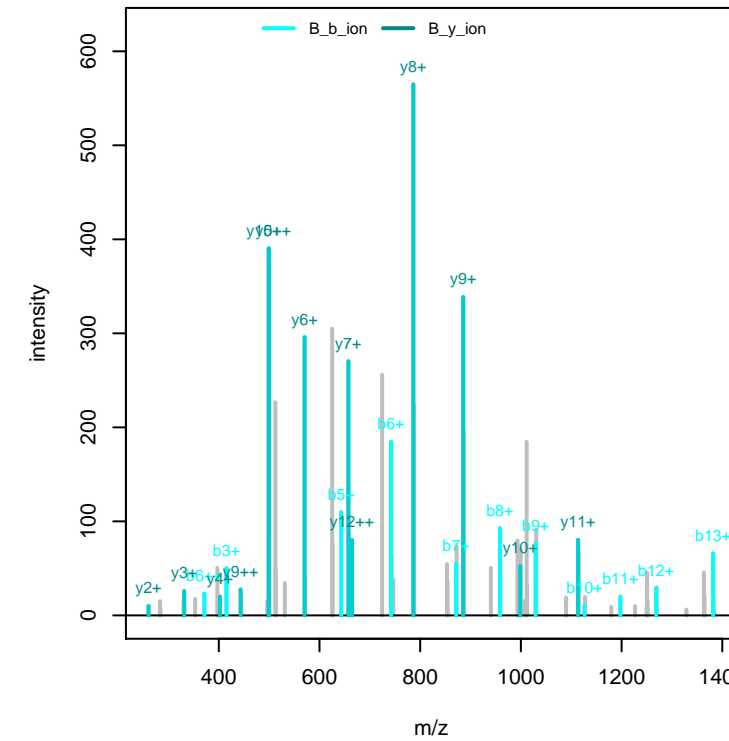

LGMKATVK  
VYDNLKR

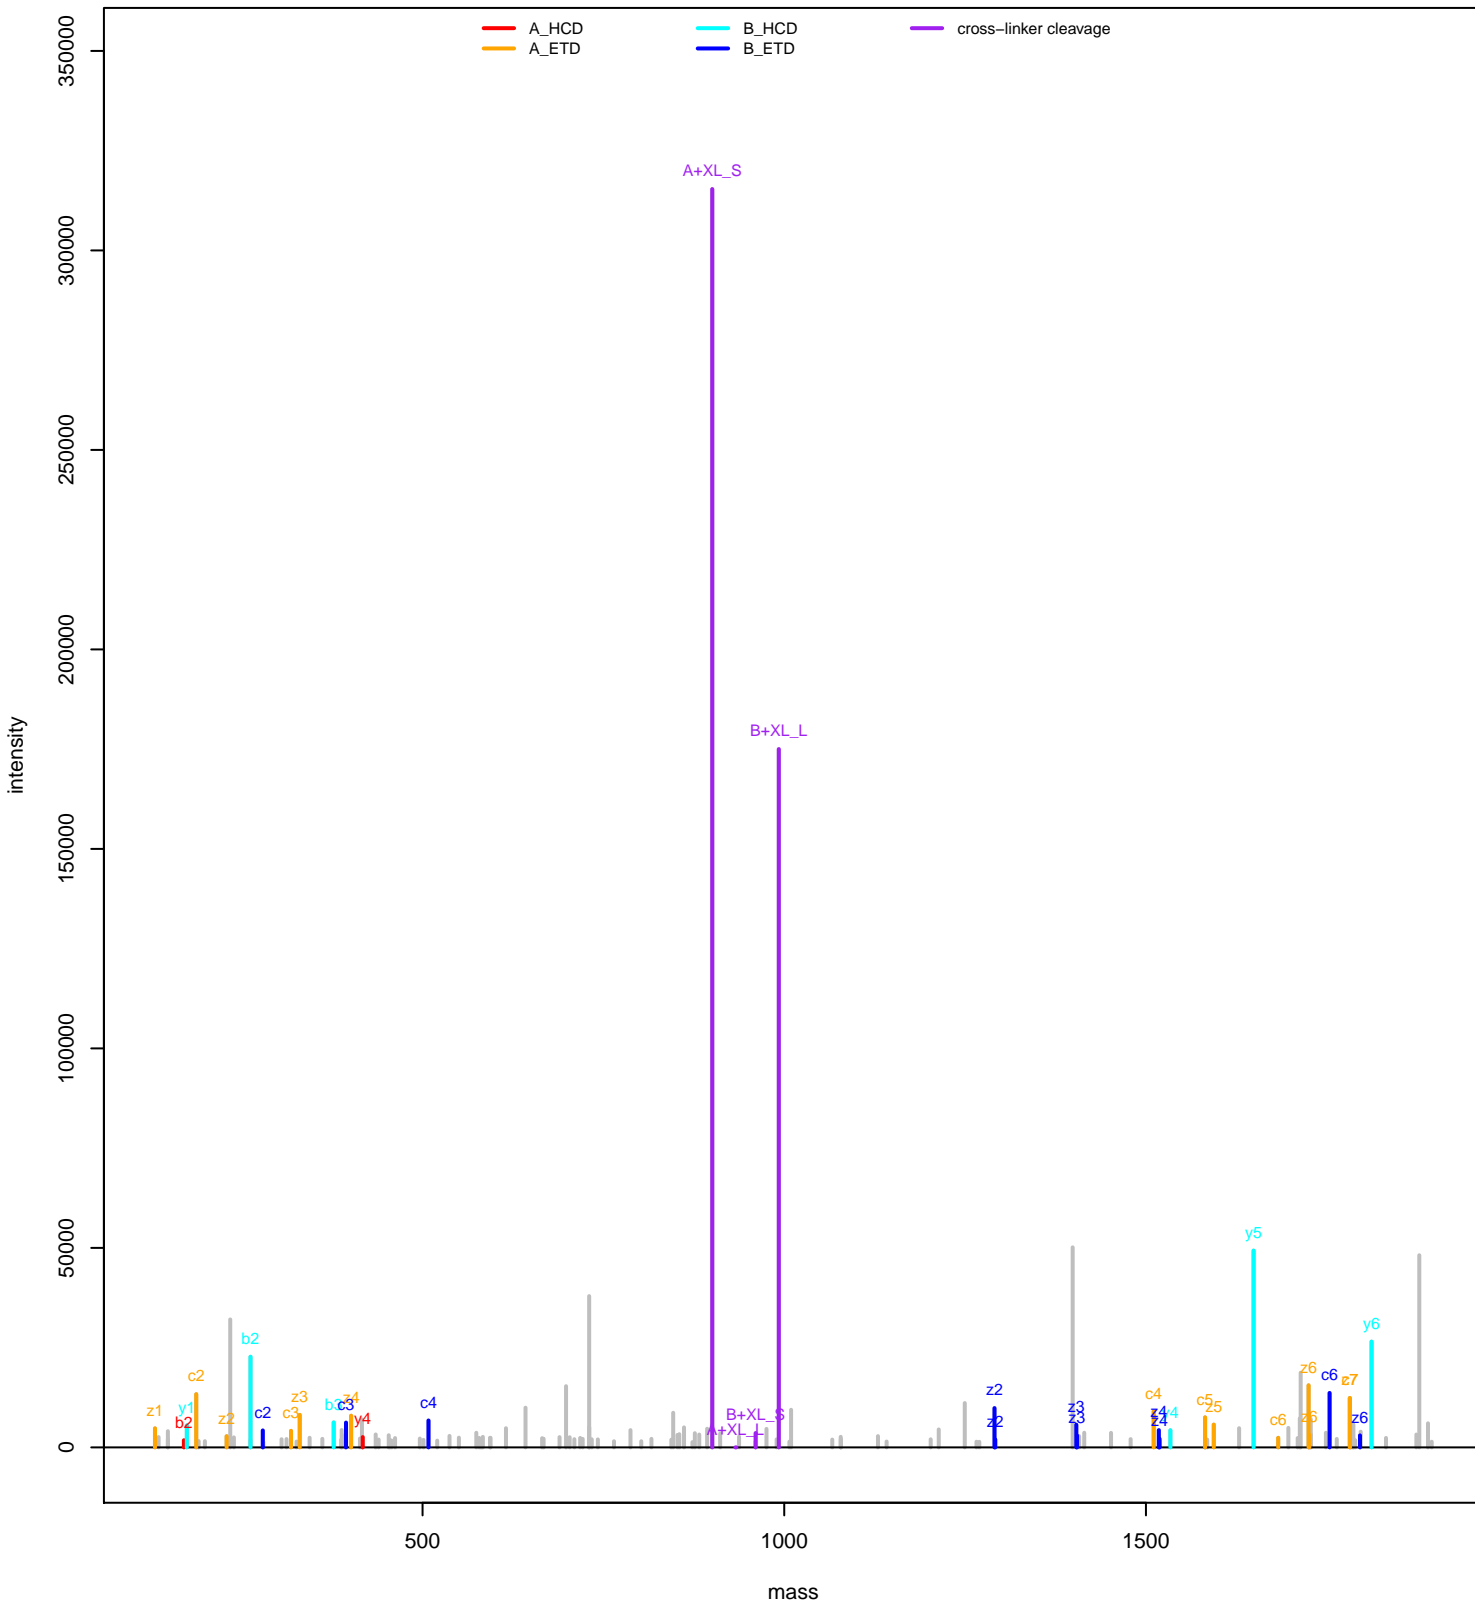

LGMKATVK+XL\_S

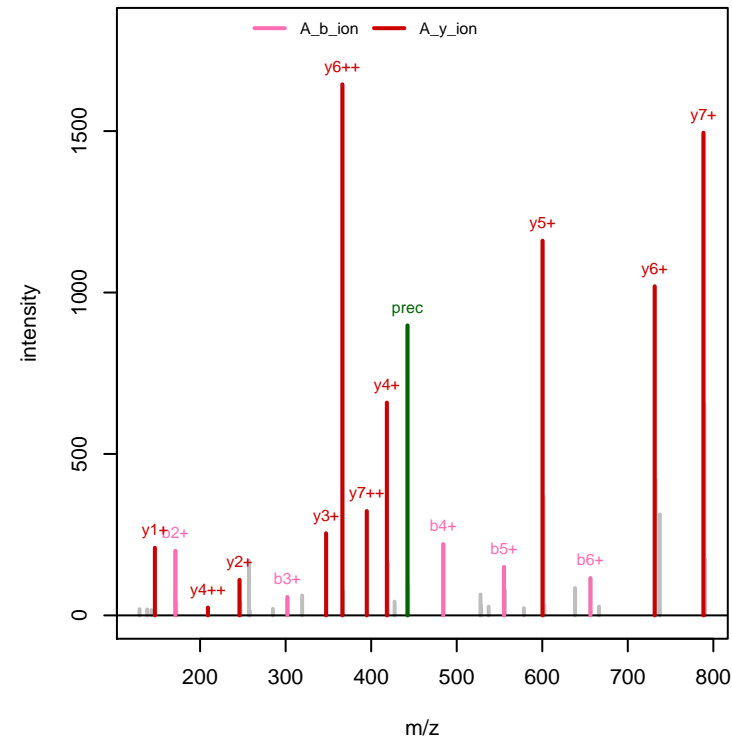

VYDNLKR+XL\_S

LGMKATVK+XL\_L

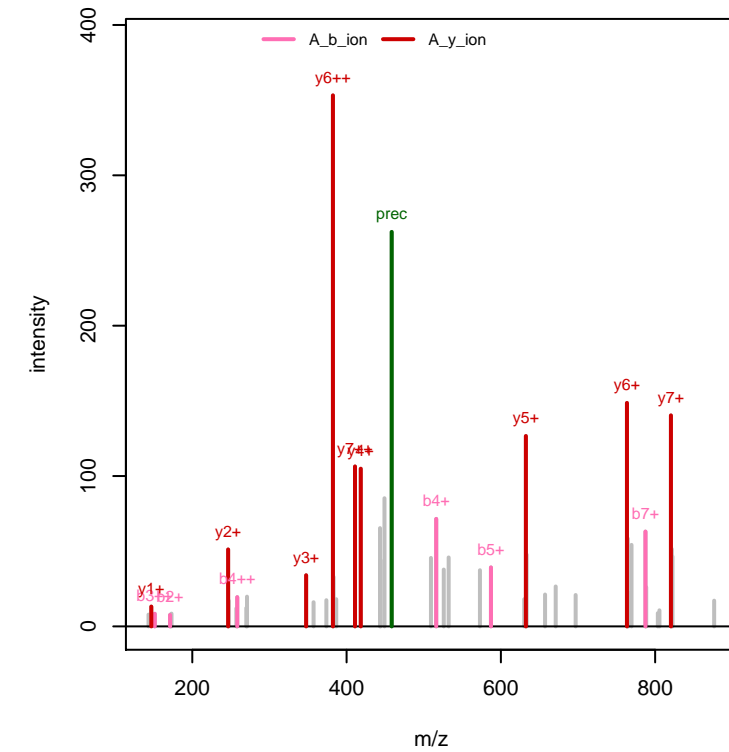

VYDNLKR+XL\_L

LANELSDAAENKGTAVK  
SFSHQAGASSKQPALGYLN

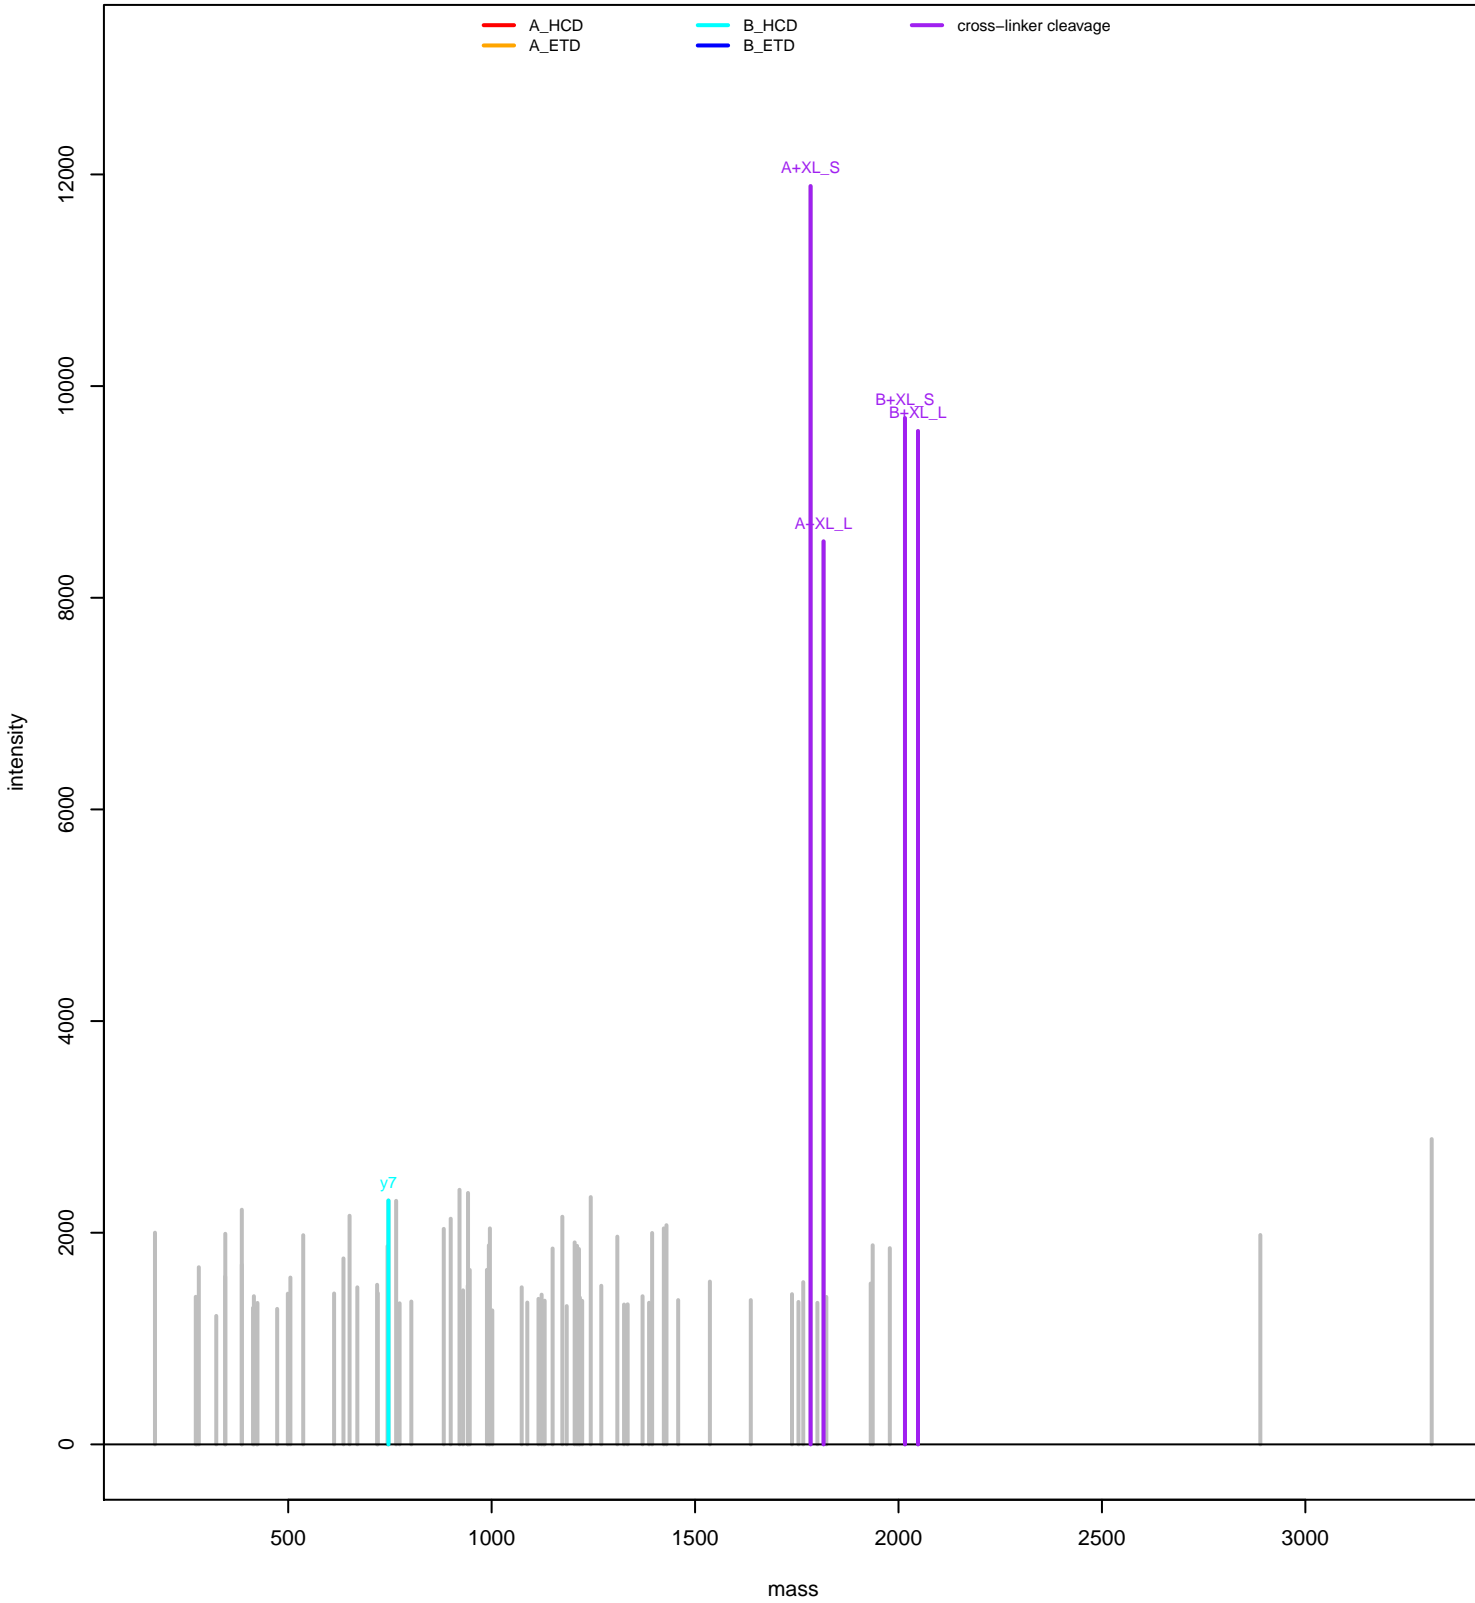

LANELSDAAENKGTAVK+XL\_S

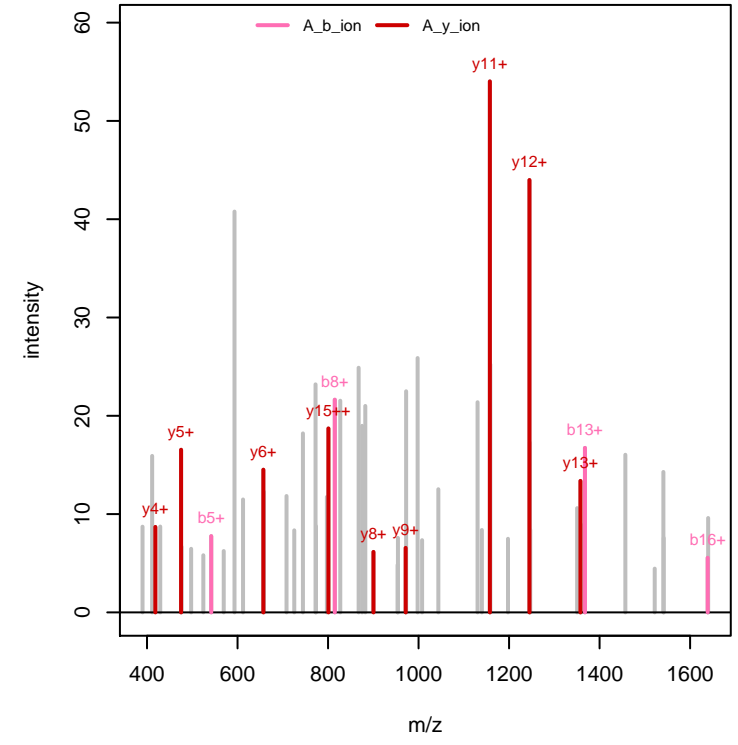

LANELSDAAENKGTAVK+XL\_L

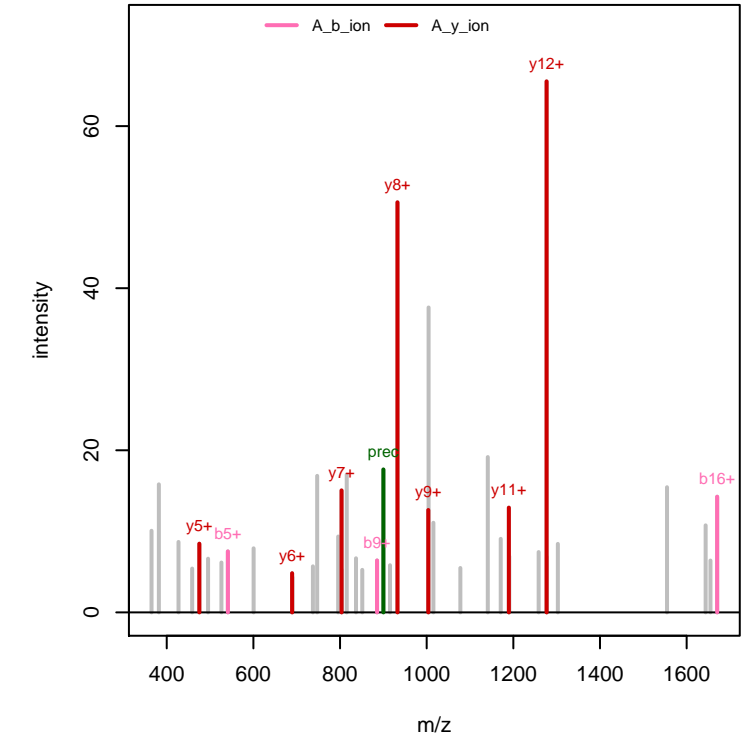

SFSHQAGASSKQPALGYLN+XL\_S

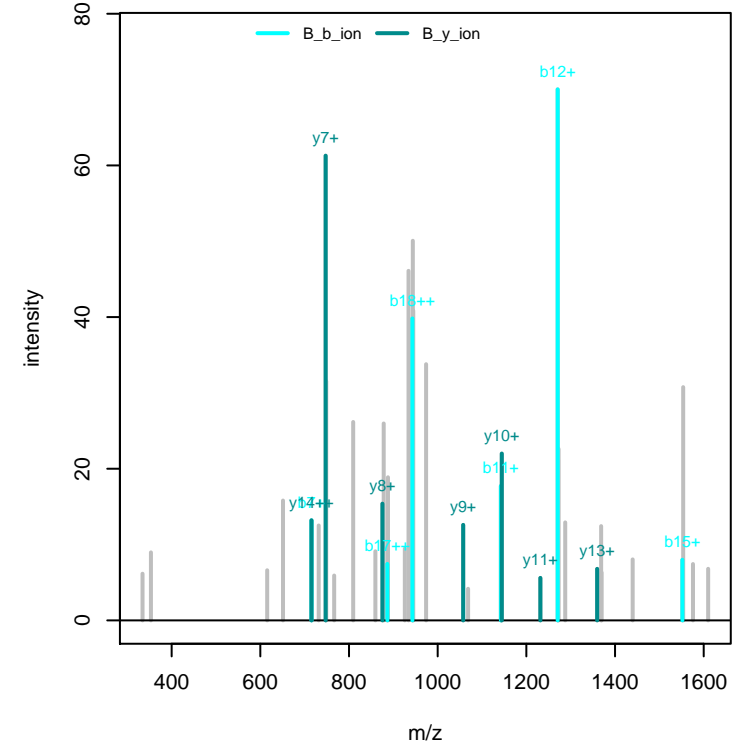

SFSHQAGASSKQPALGYLN+XL\_L

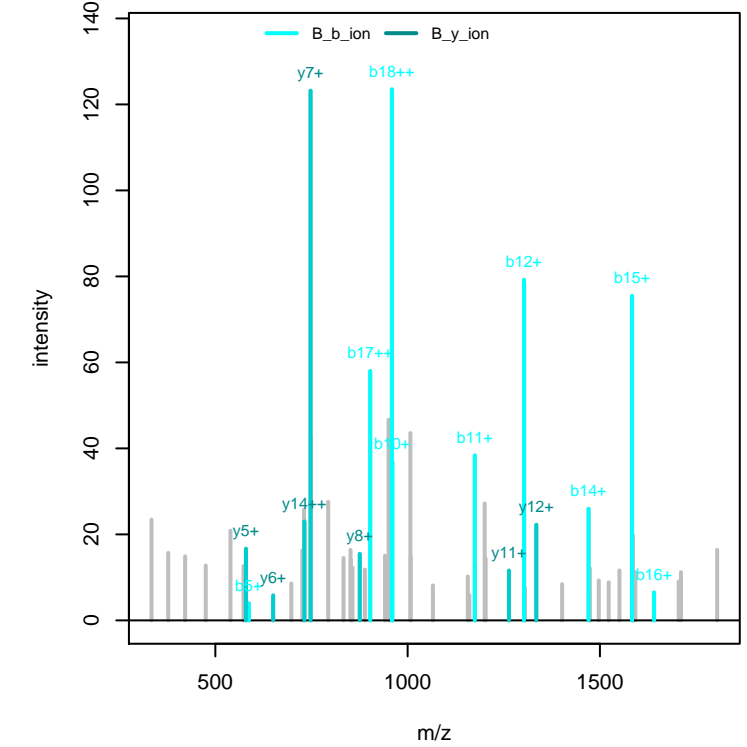



ALAALQK GK  
LLEKISAGGYGDK

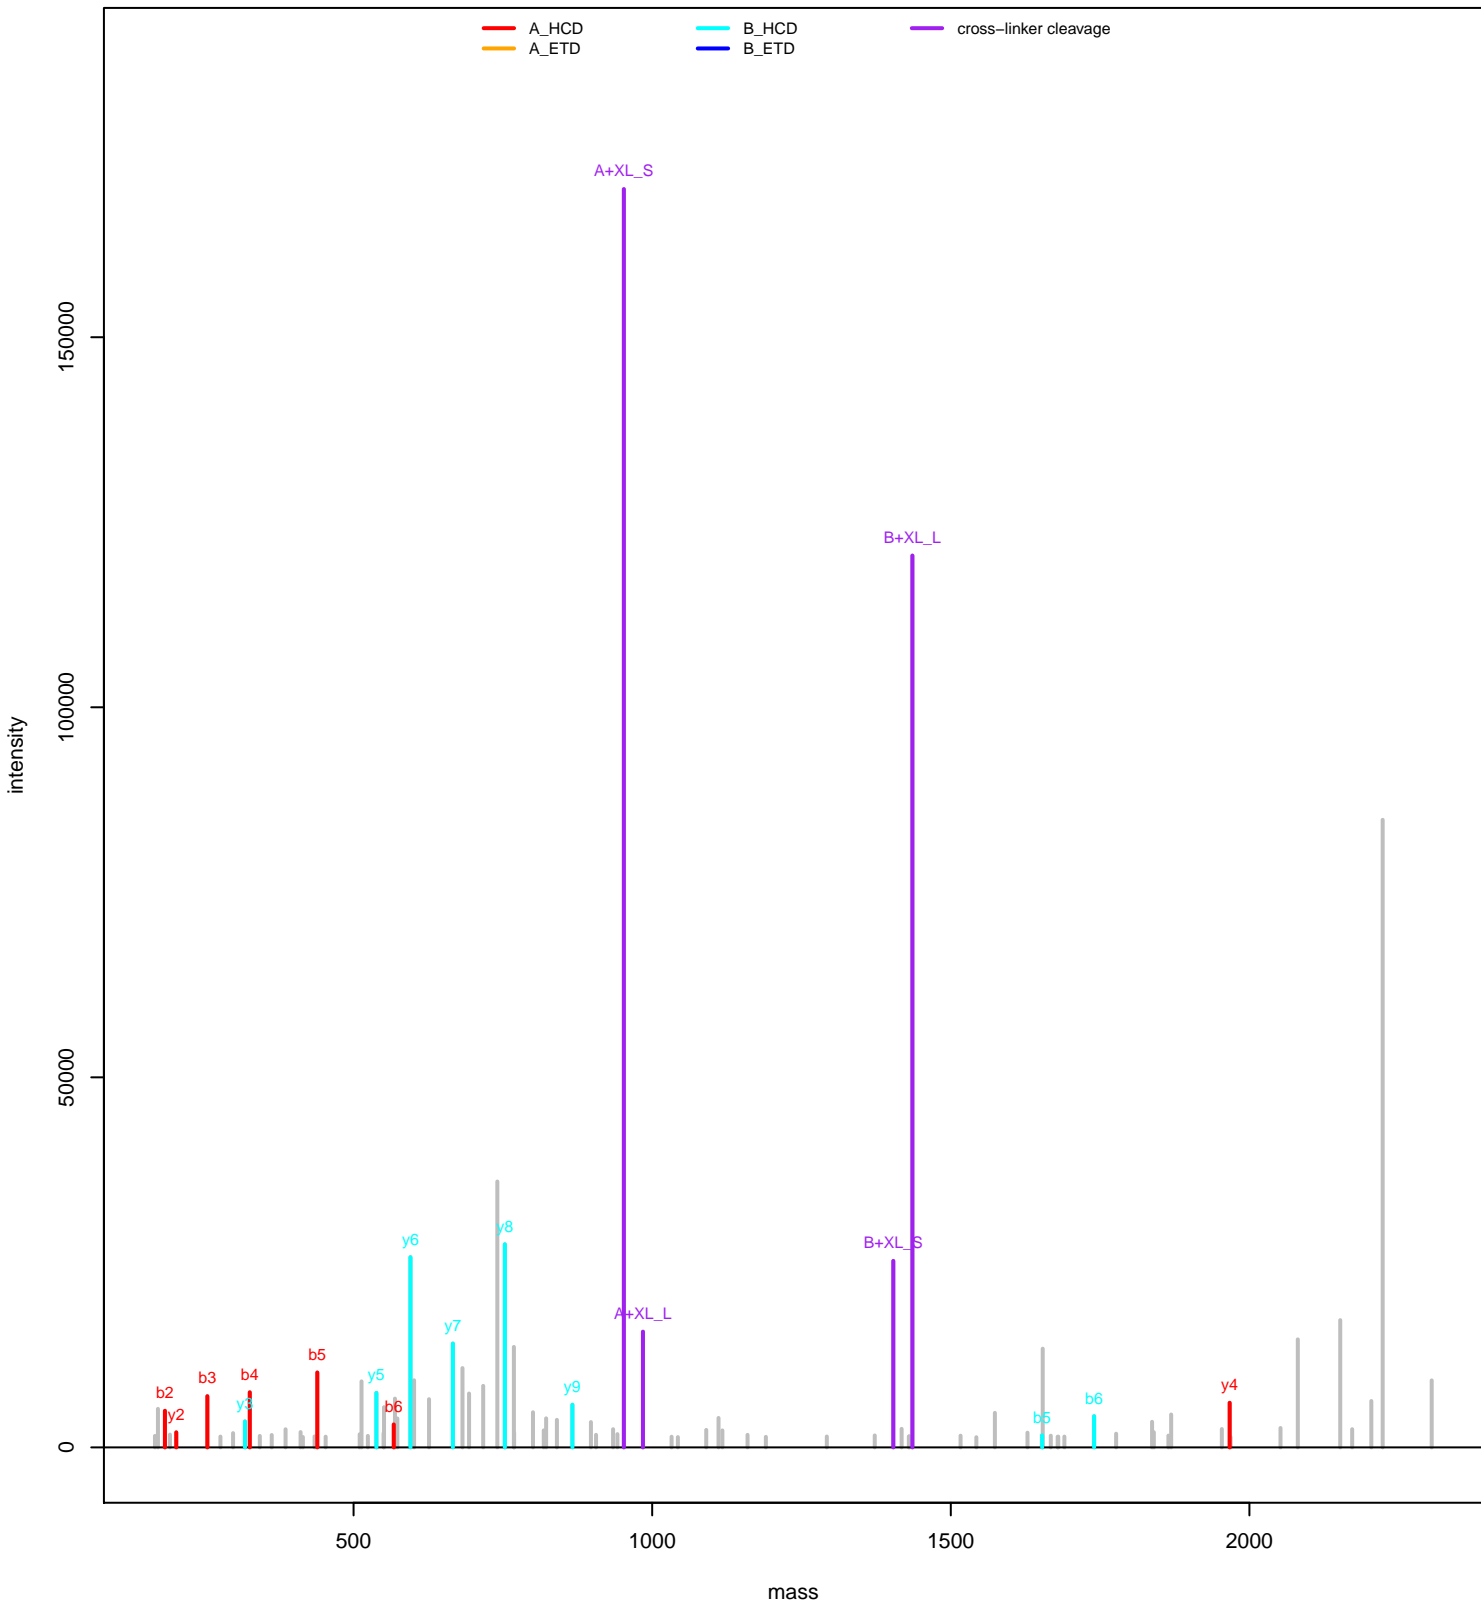

ALAALQK GK+XL\_S

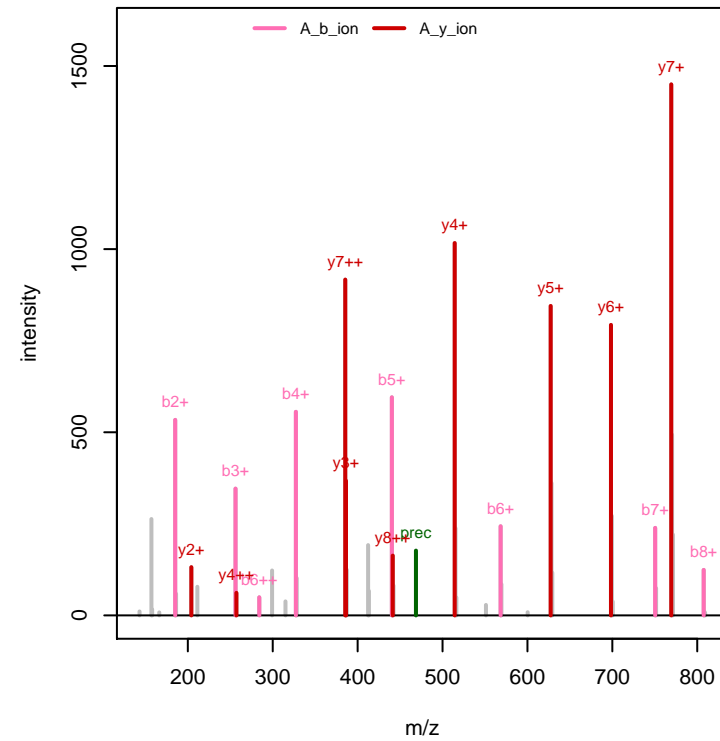

ALAALQK GK+XL\_L

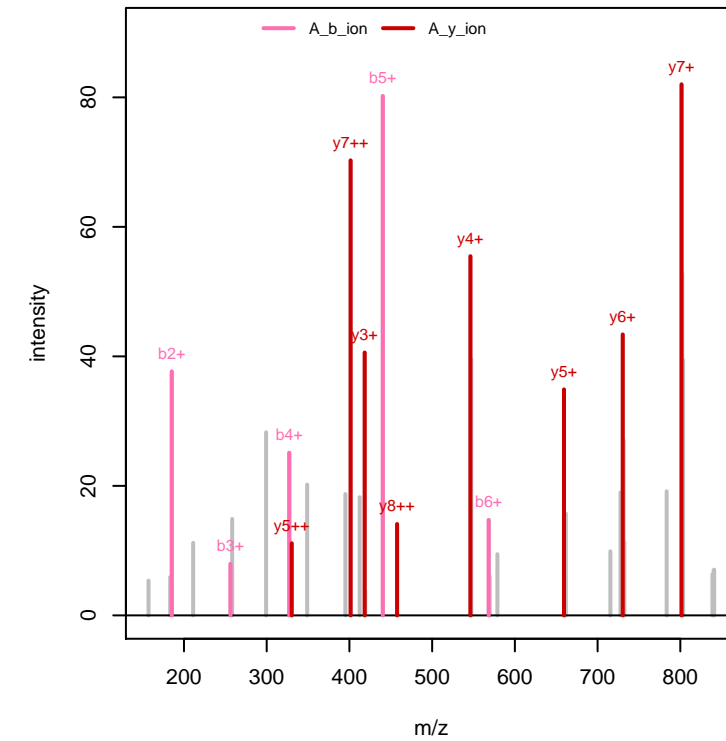

LLEKISAGGYGDK+XL\_S

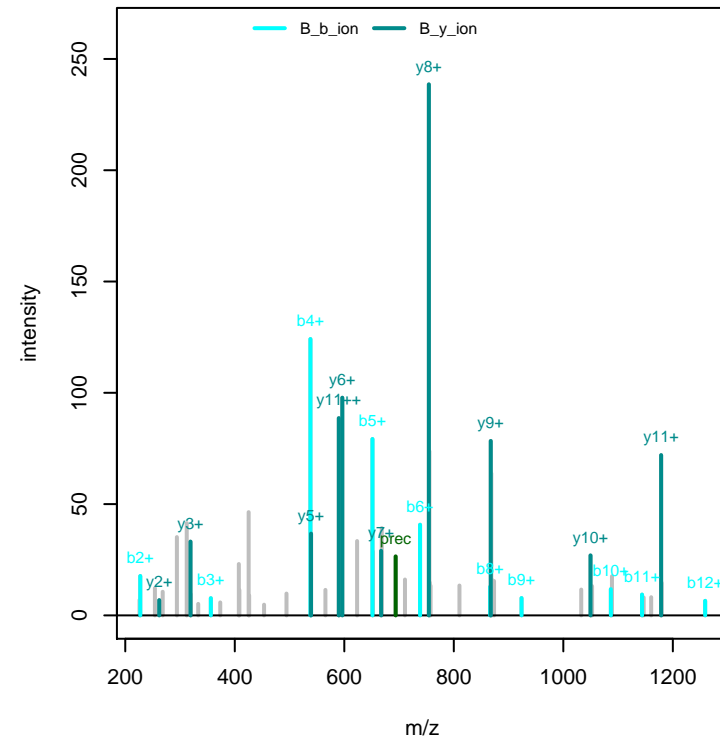

LLEKISAGGYGDK+XL\_L

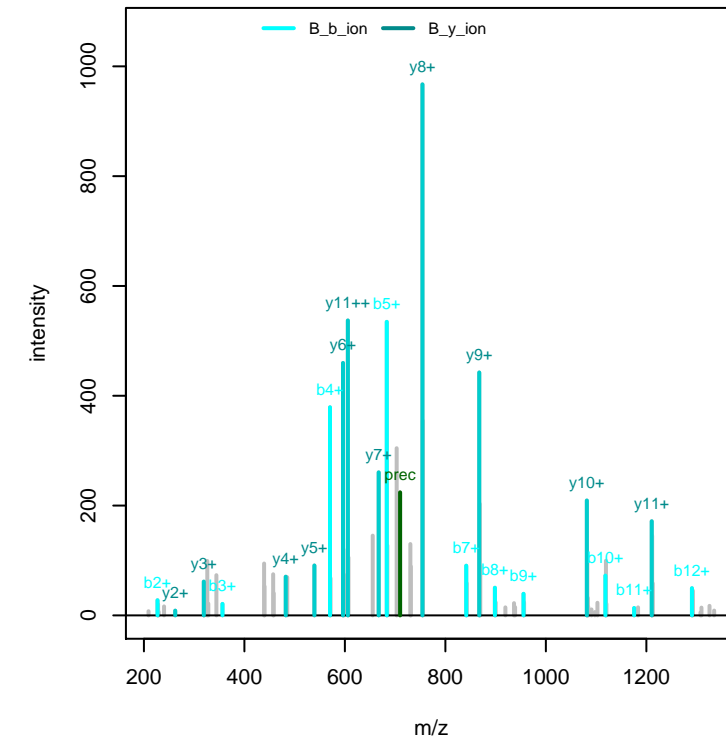

**HLAKAPAK**  
LLAEHNLDASAIKGTGVGGR

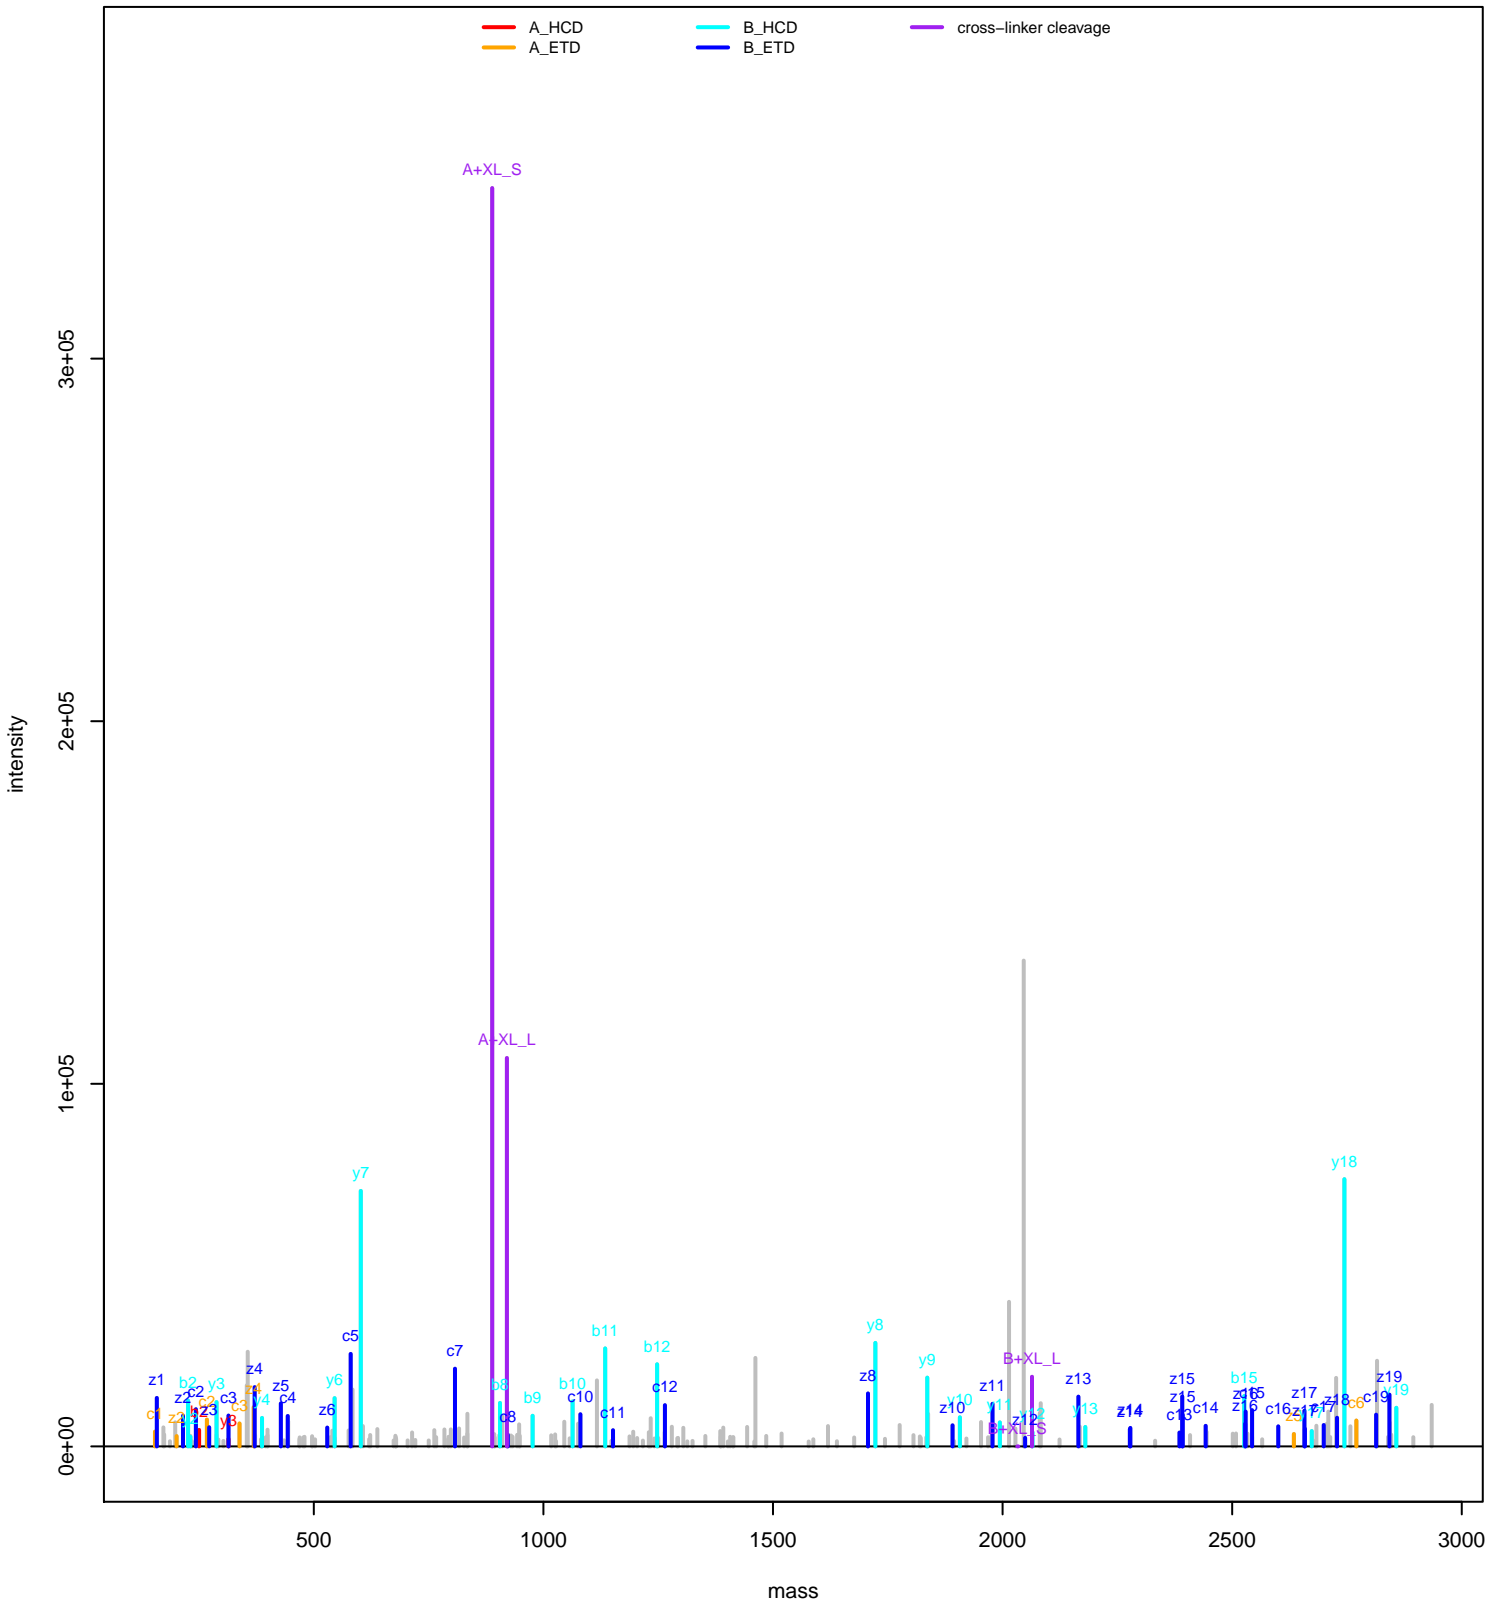

**HLAKAPAK+XL\_S**

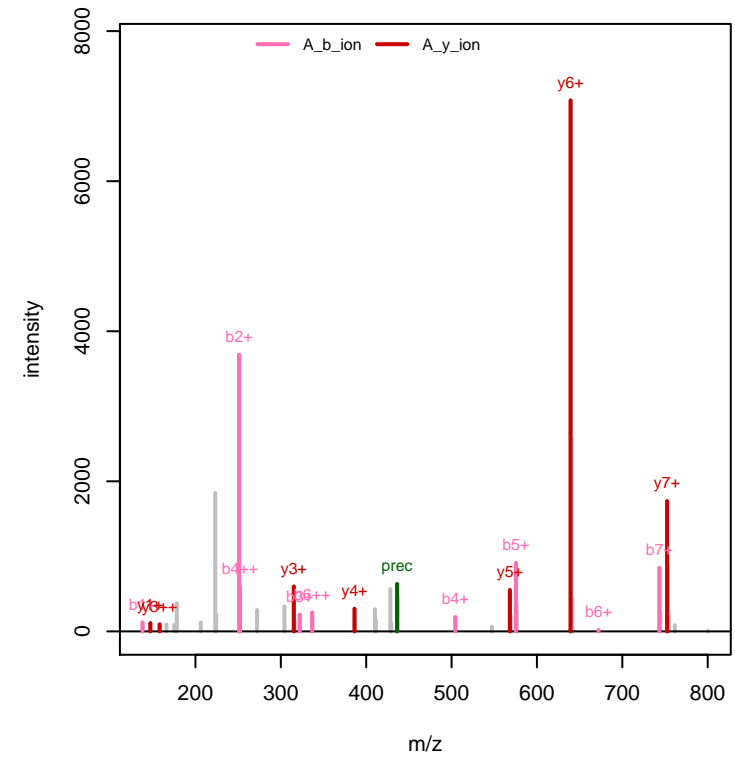

**HLAKAPAK+XL\_L**

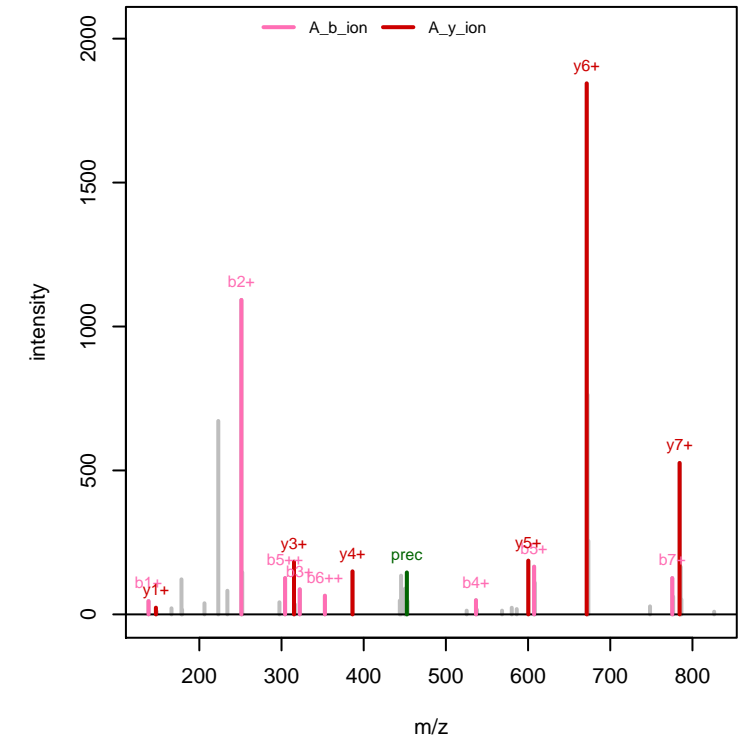

**LLAEHNLDASAIKGTGVGGR+XL\_S**

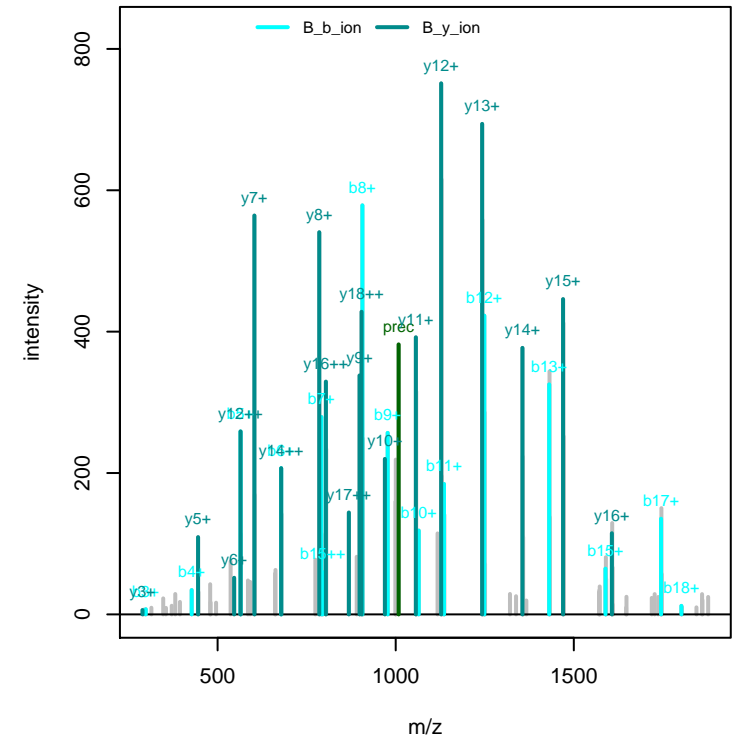

**LLAEHNLDASAIKGTGVGGR+XL\_L**

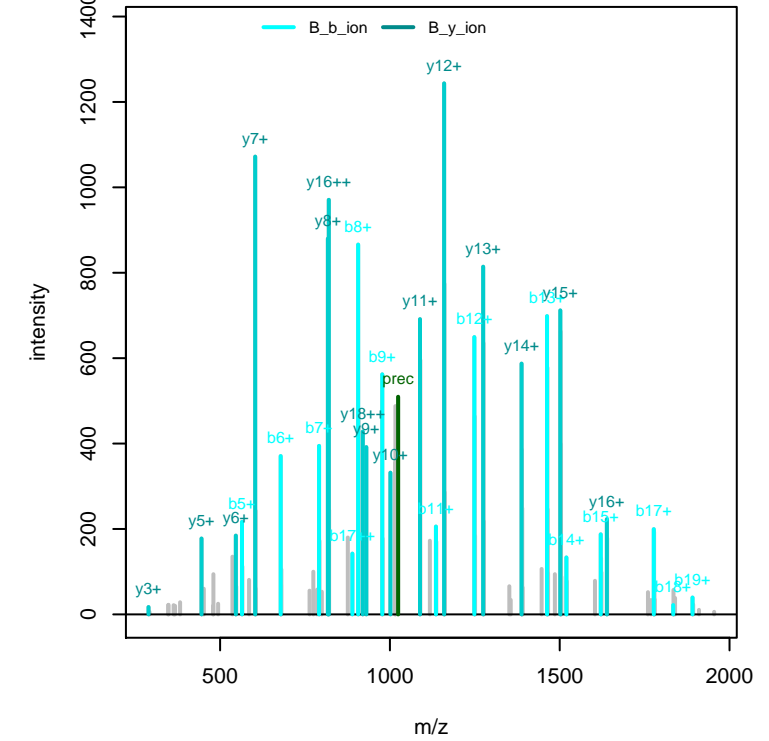

YAEGYPGKR  
NLTGKEADAALGR

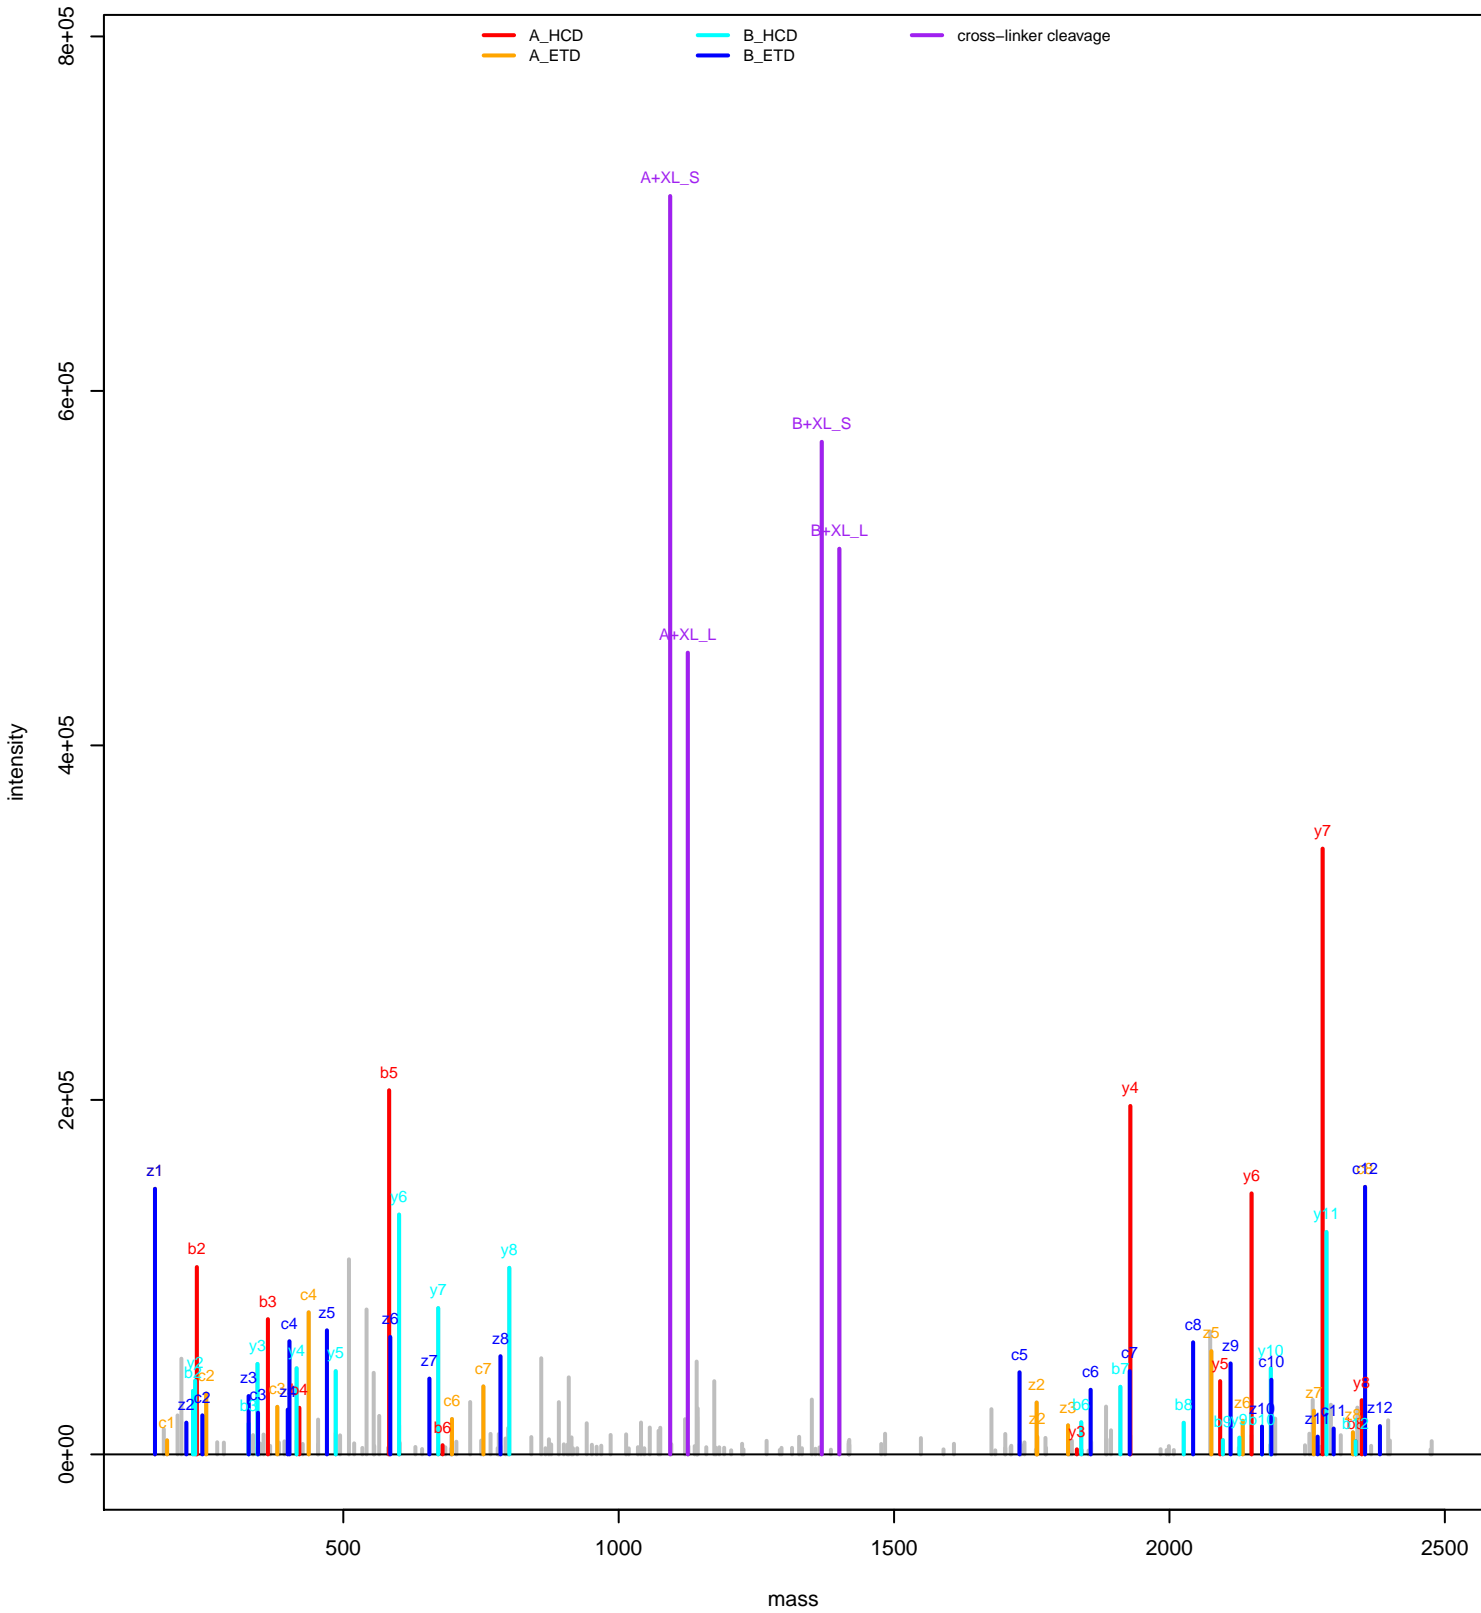

YAEGYPGKR+XL\_S

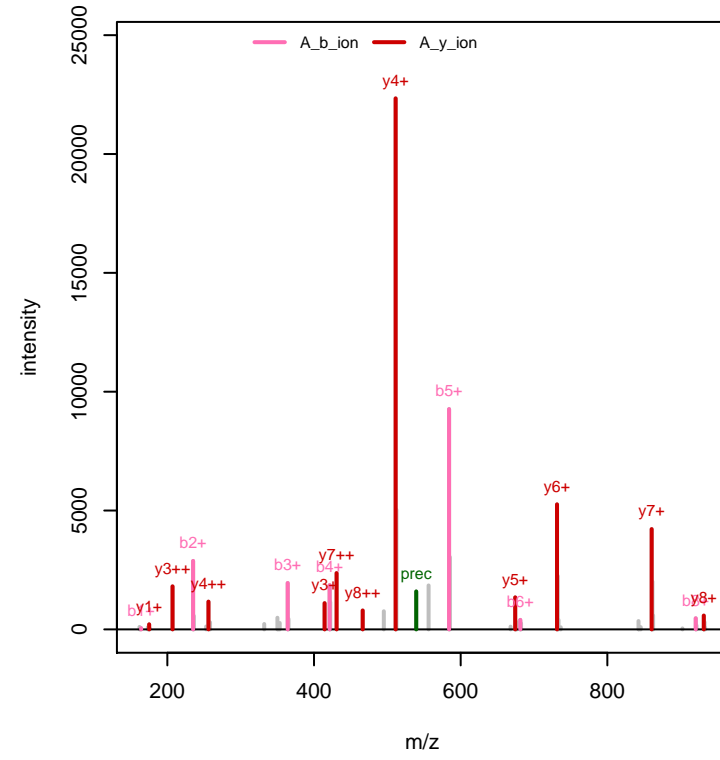

YAEGYPGKR+XL\_L

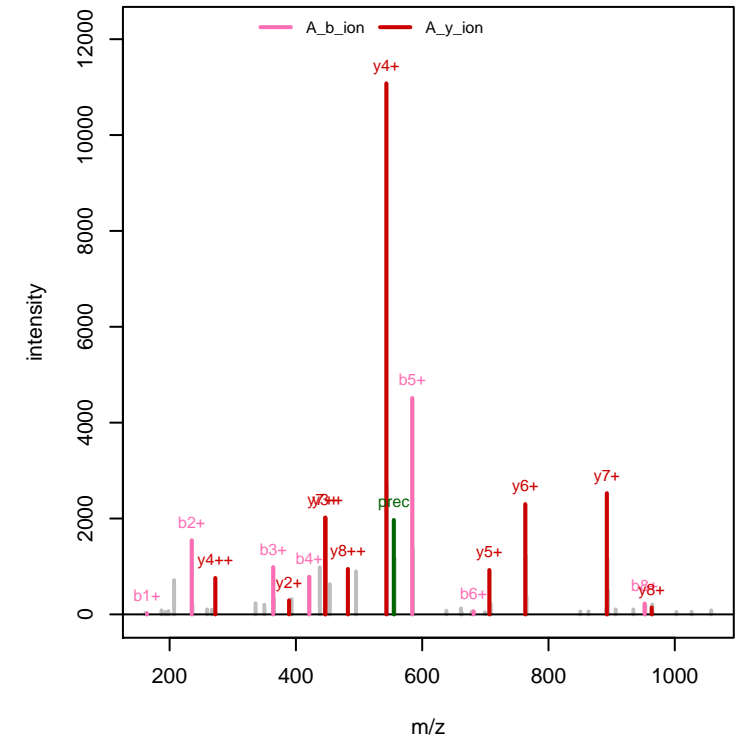

NLTGKEADAALGR+XL\_S

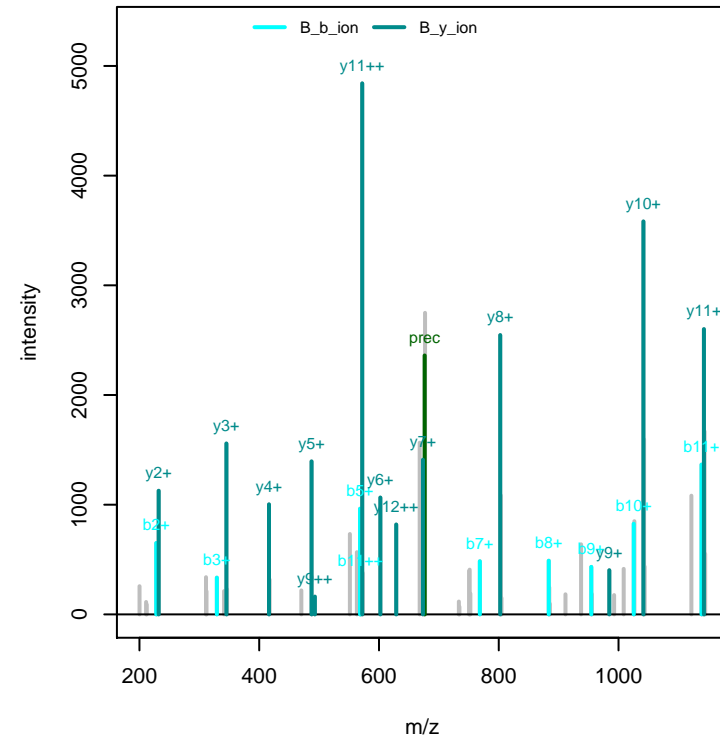

NLTGKEADAALGR+XL\_L

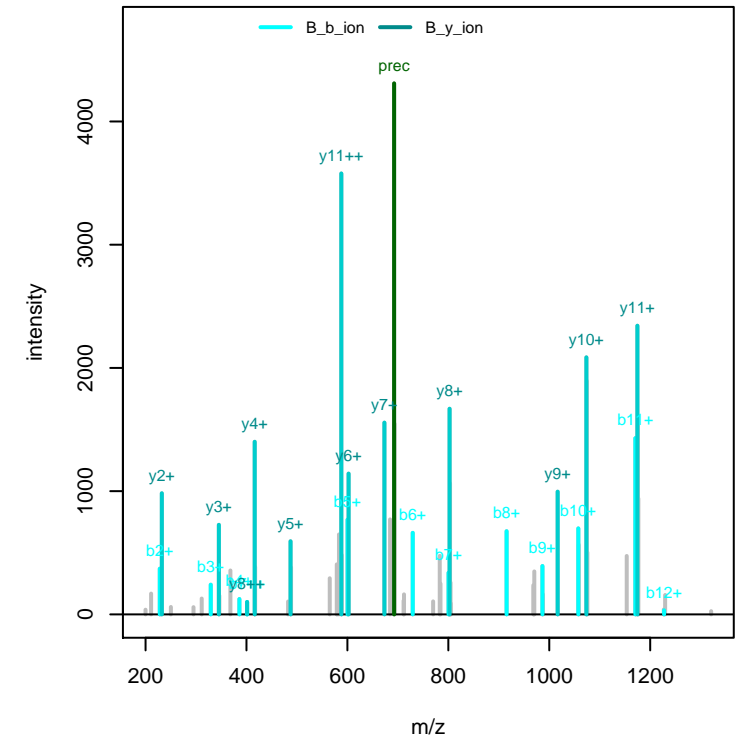

ANKPSAEELKK  
YIKDLSHGMQR

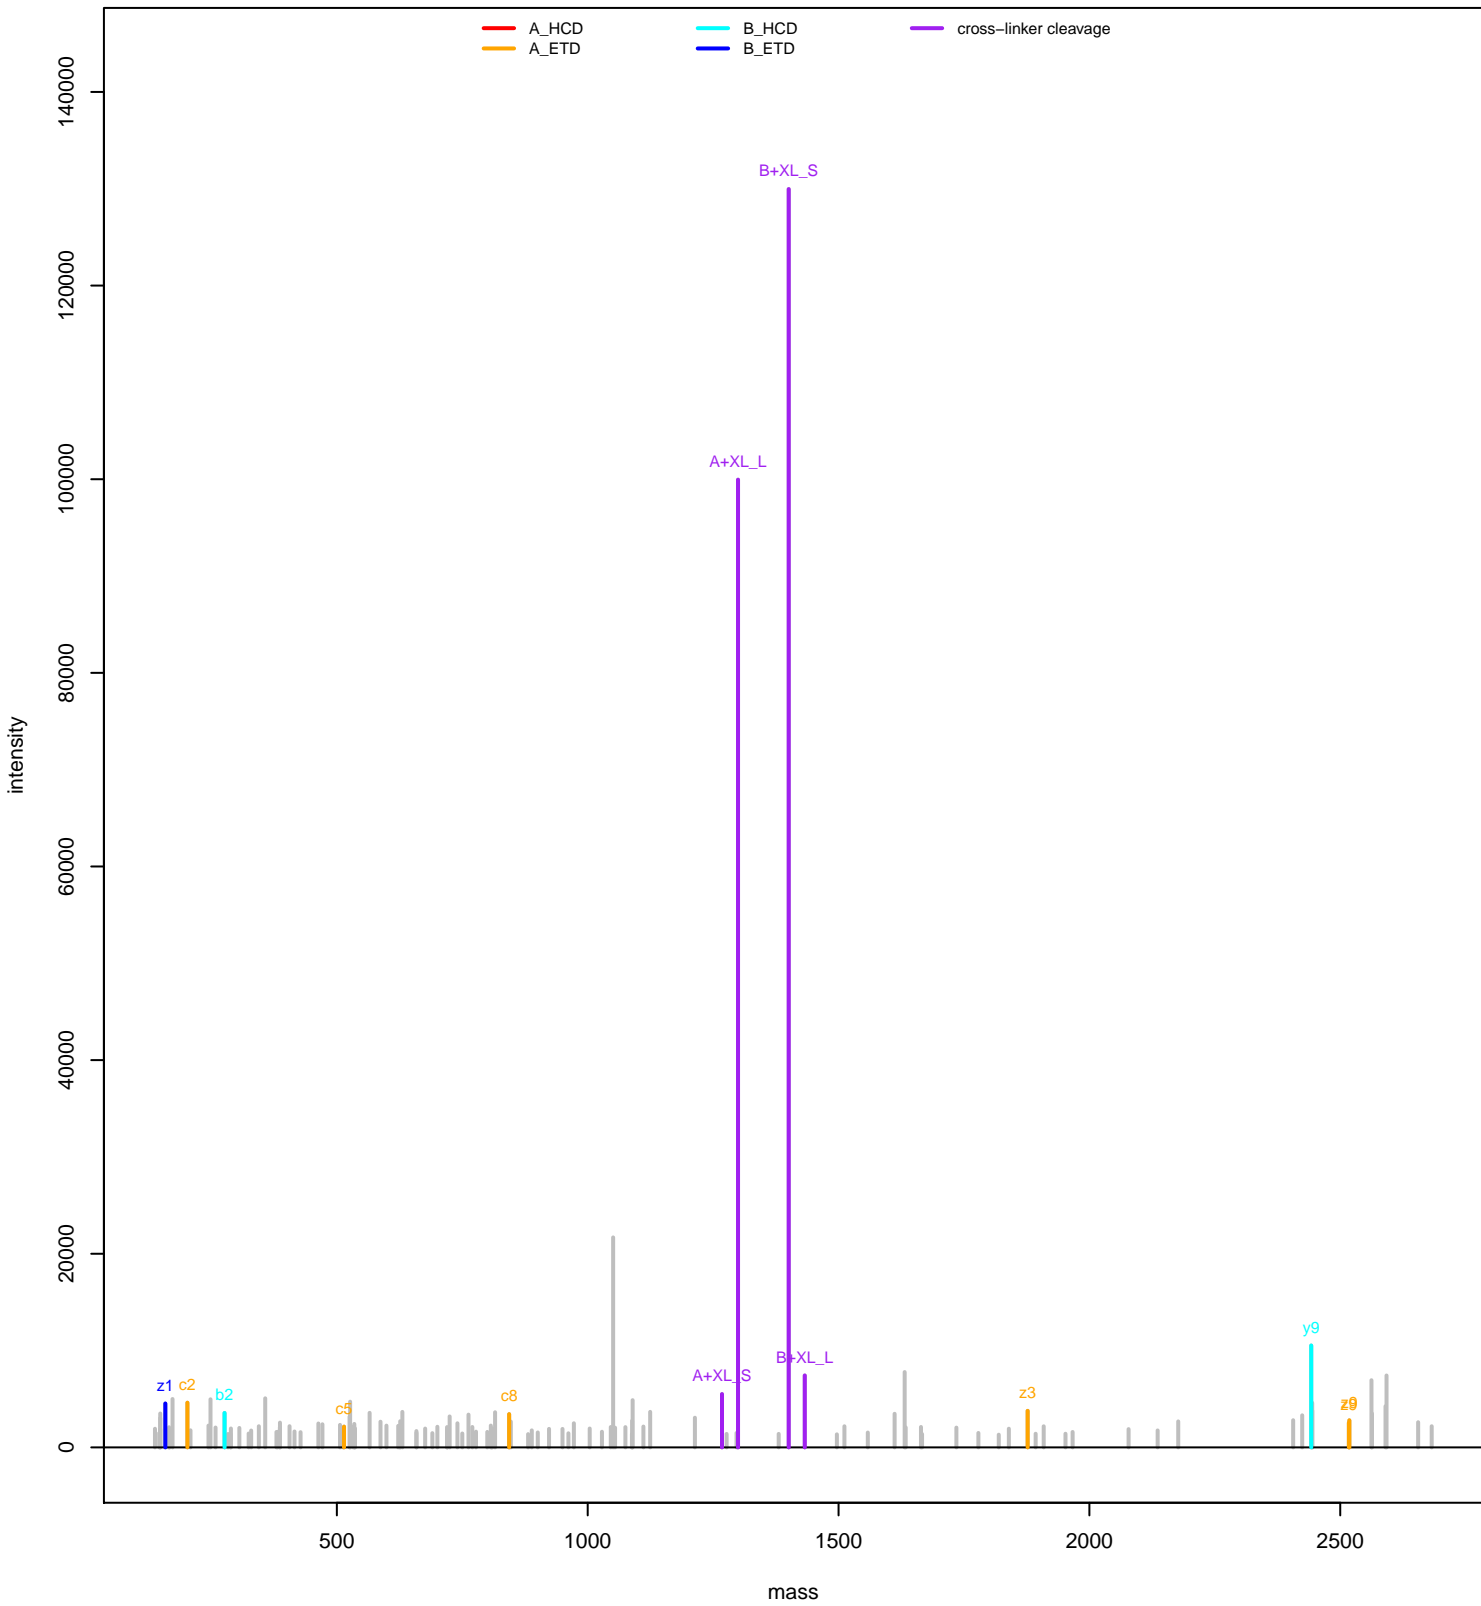

ANKPSAEELKK+XL\_S

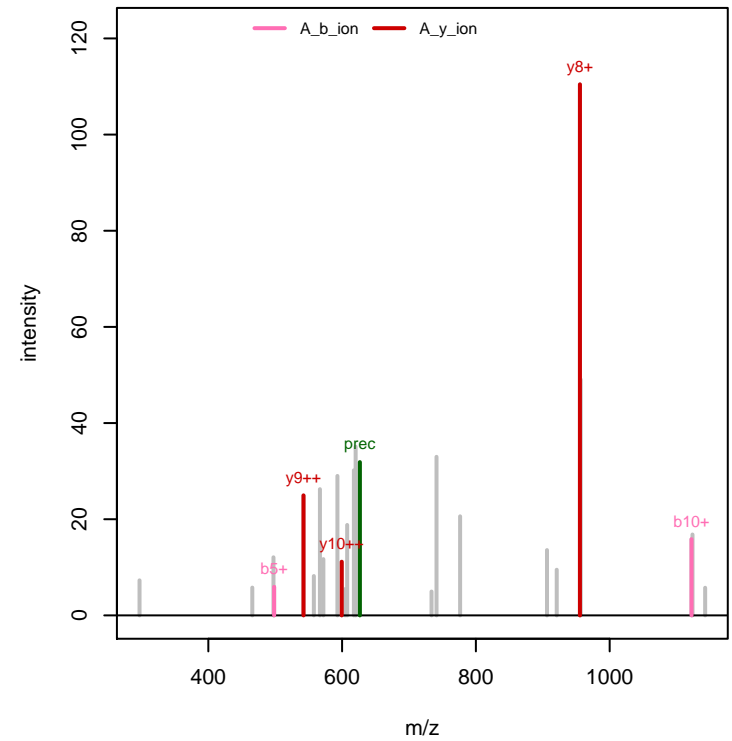

ANKPSAEELKK+XL\_L

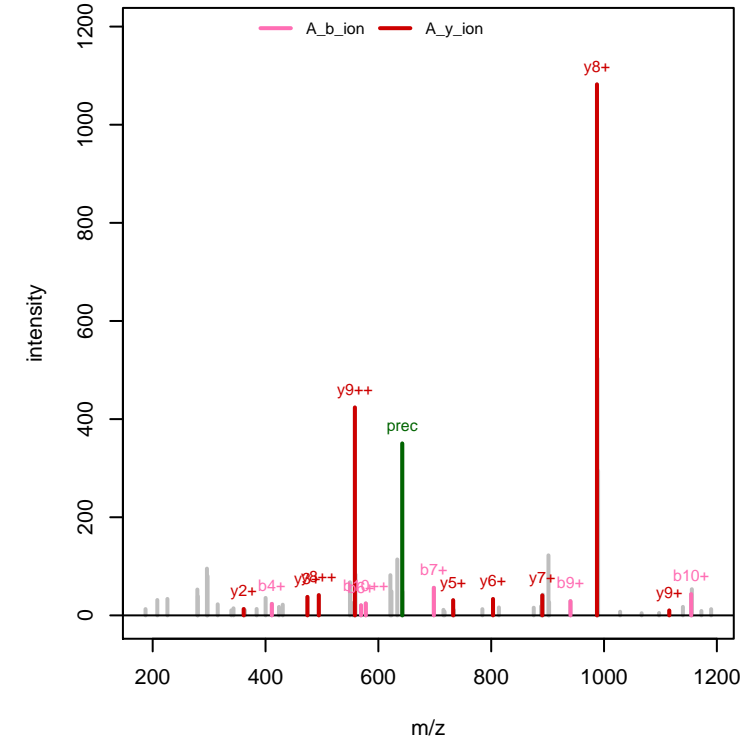

YIKDLSHGMQR+XL\_S

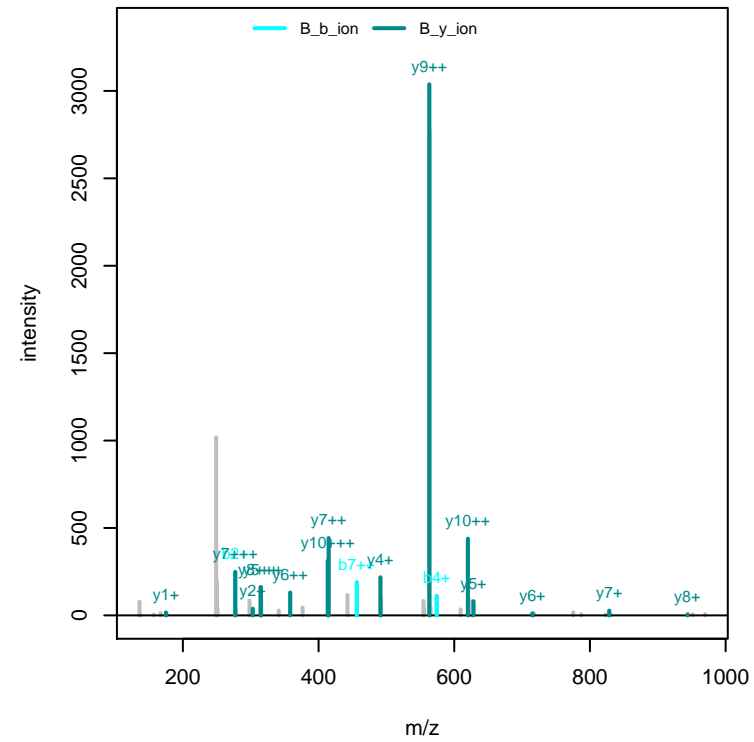

YIKDLSHGMQR+XL\_L

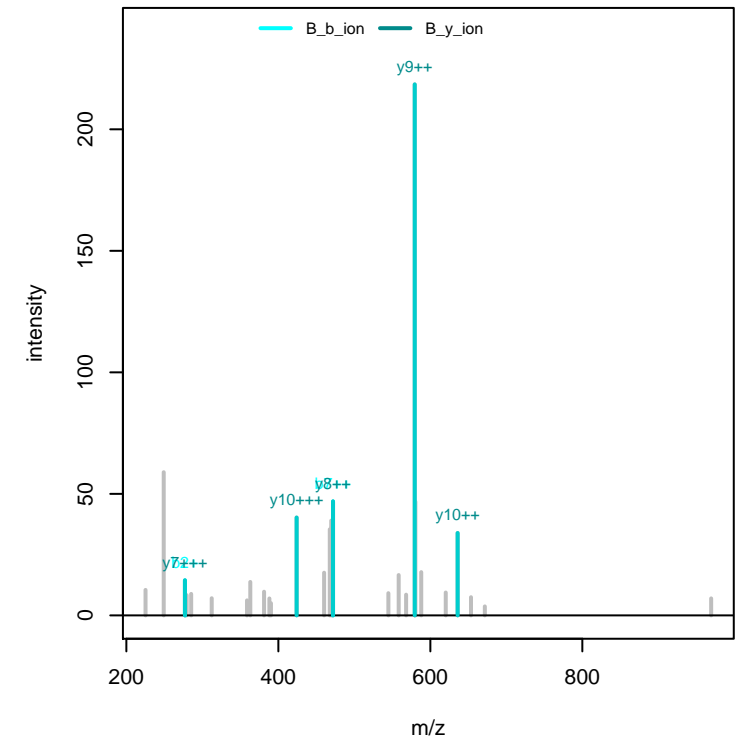

**IKGYDGPIVECEK  
FGKYMACTNEECK**

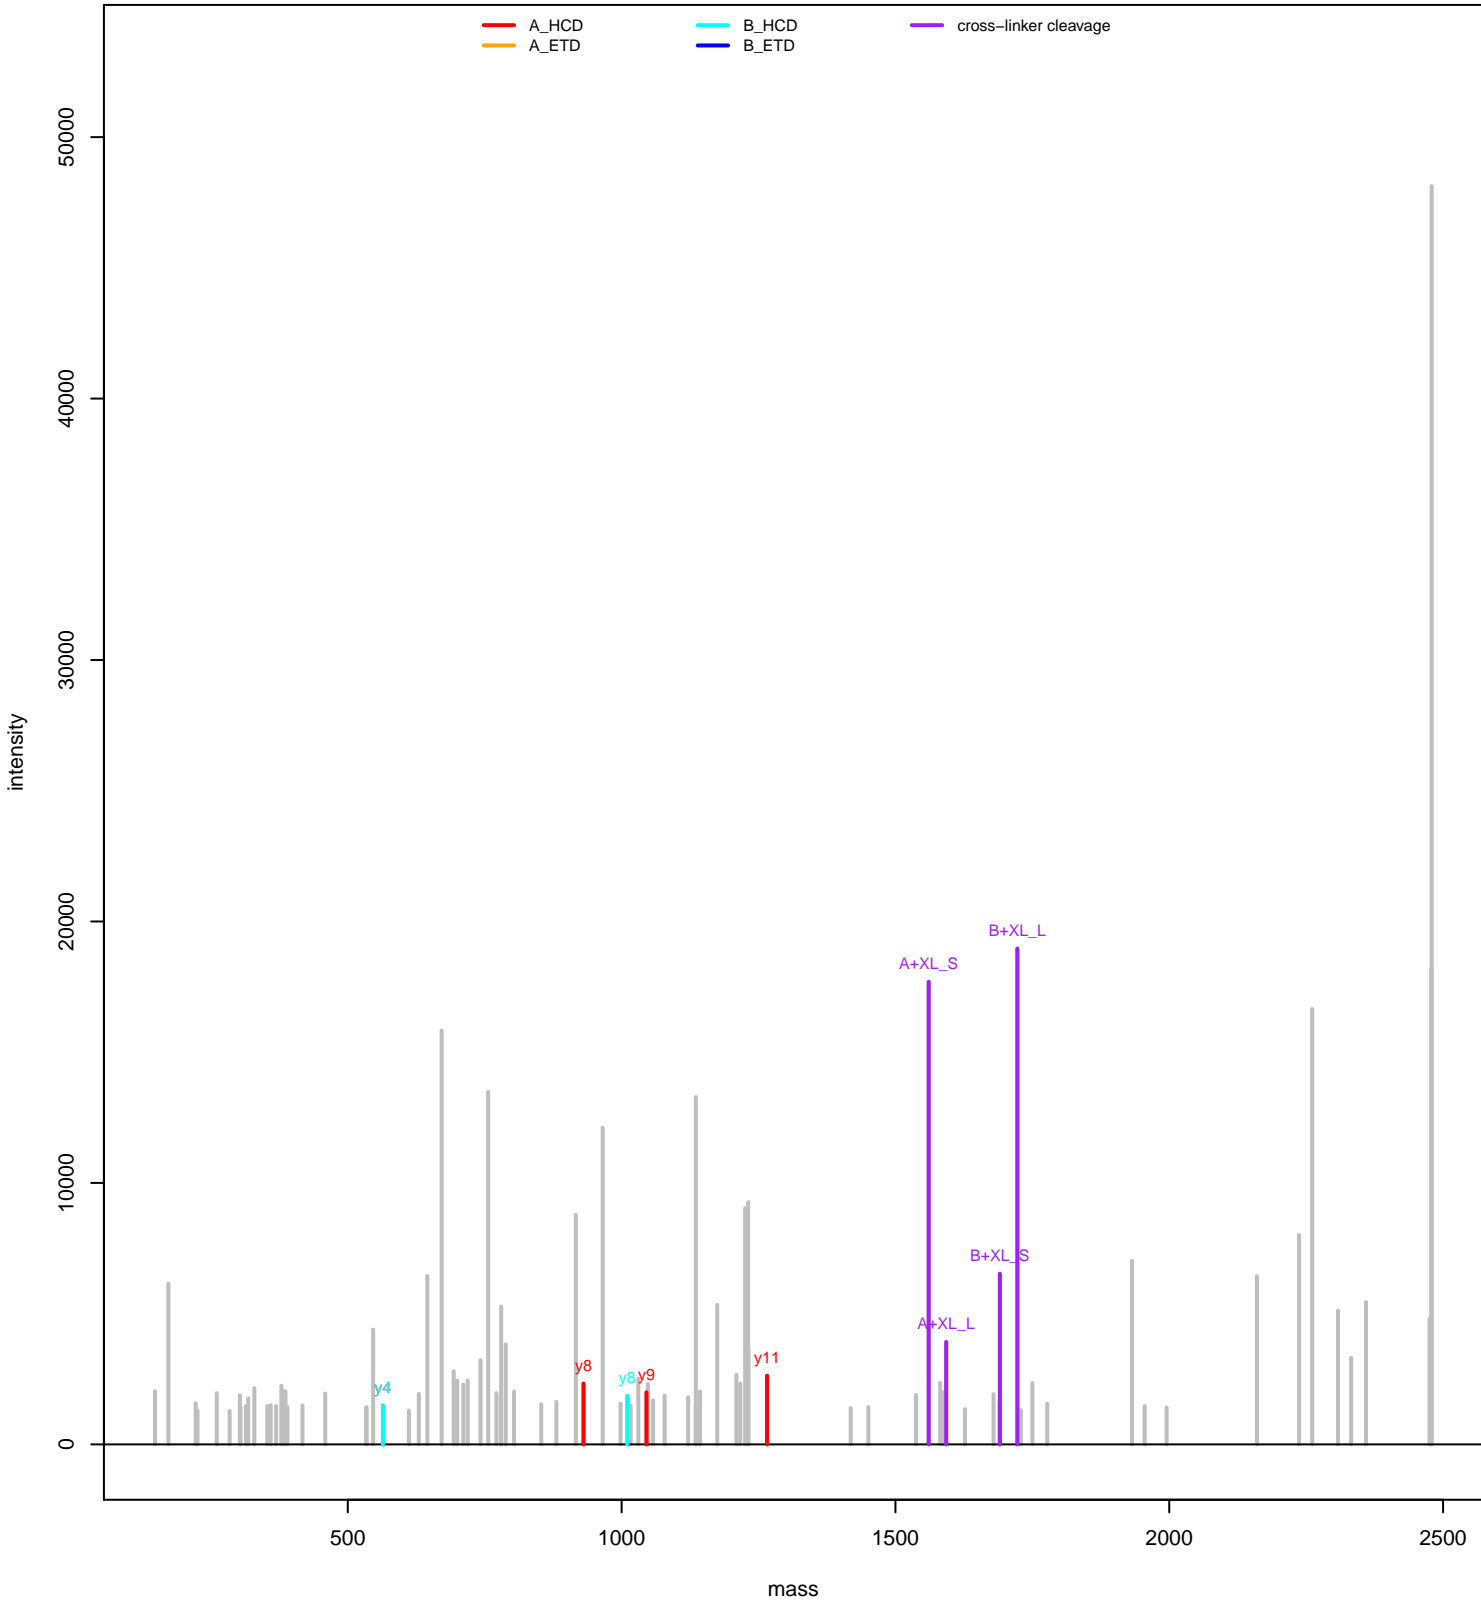

**IKGYDGPIVECEK+XL\_S**

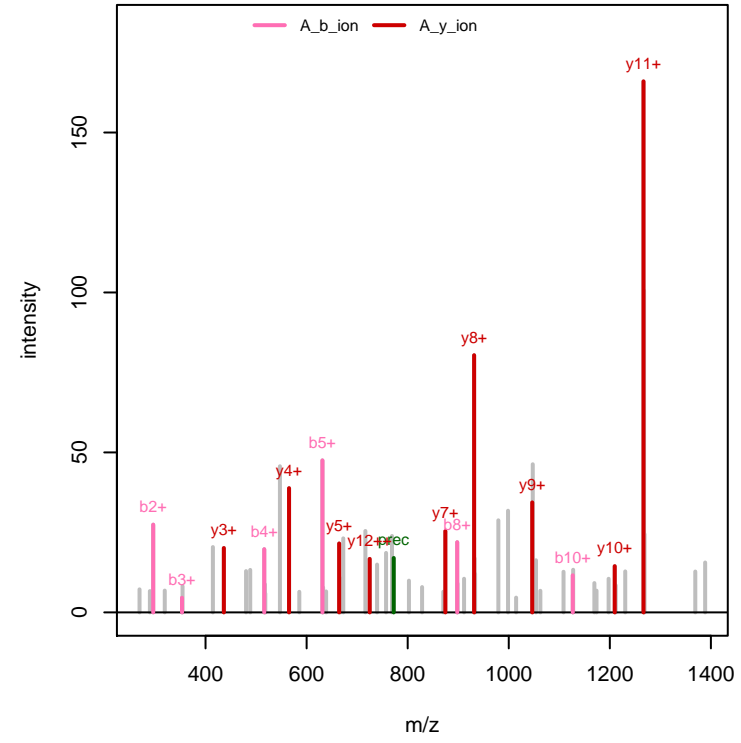

**IKGYDGPIVECEK+XL\_L**

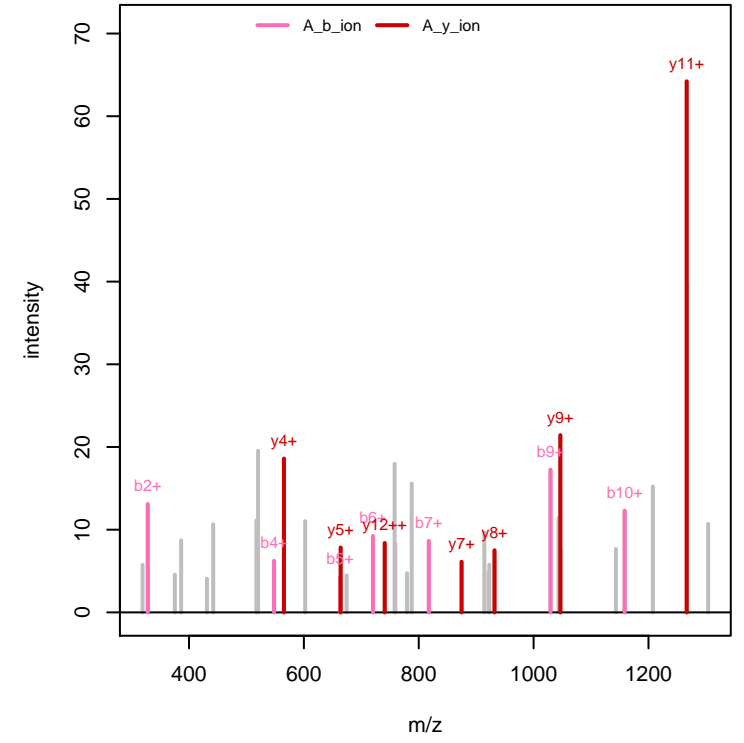

**FGKYMACTNEECK+XL\_S**

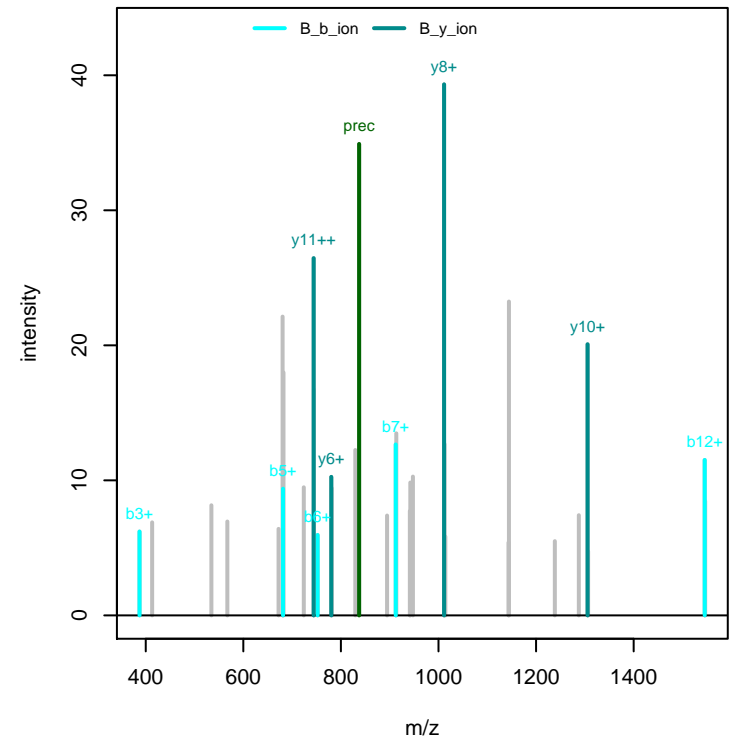

**FGKYMACTNEECK+XL\_L**

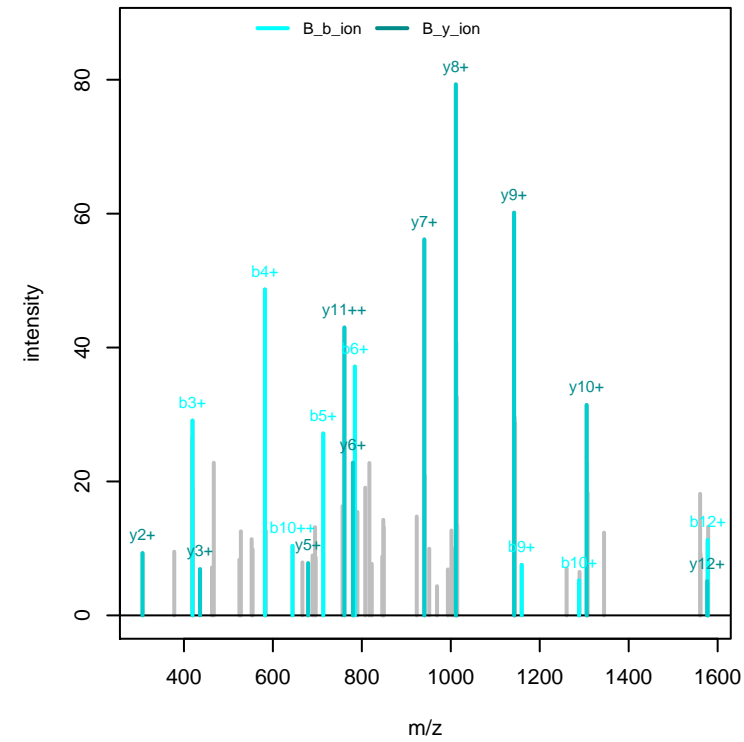

**AALIAKSR**  
**AALIAKSR**

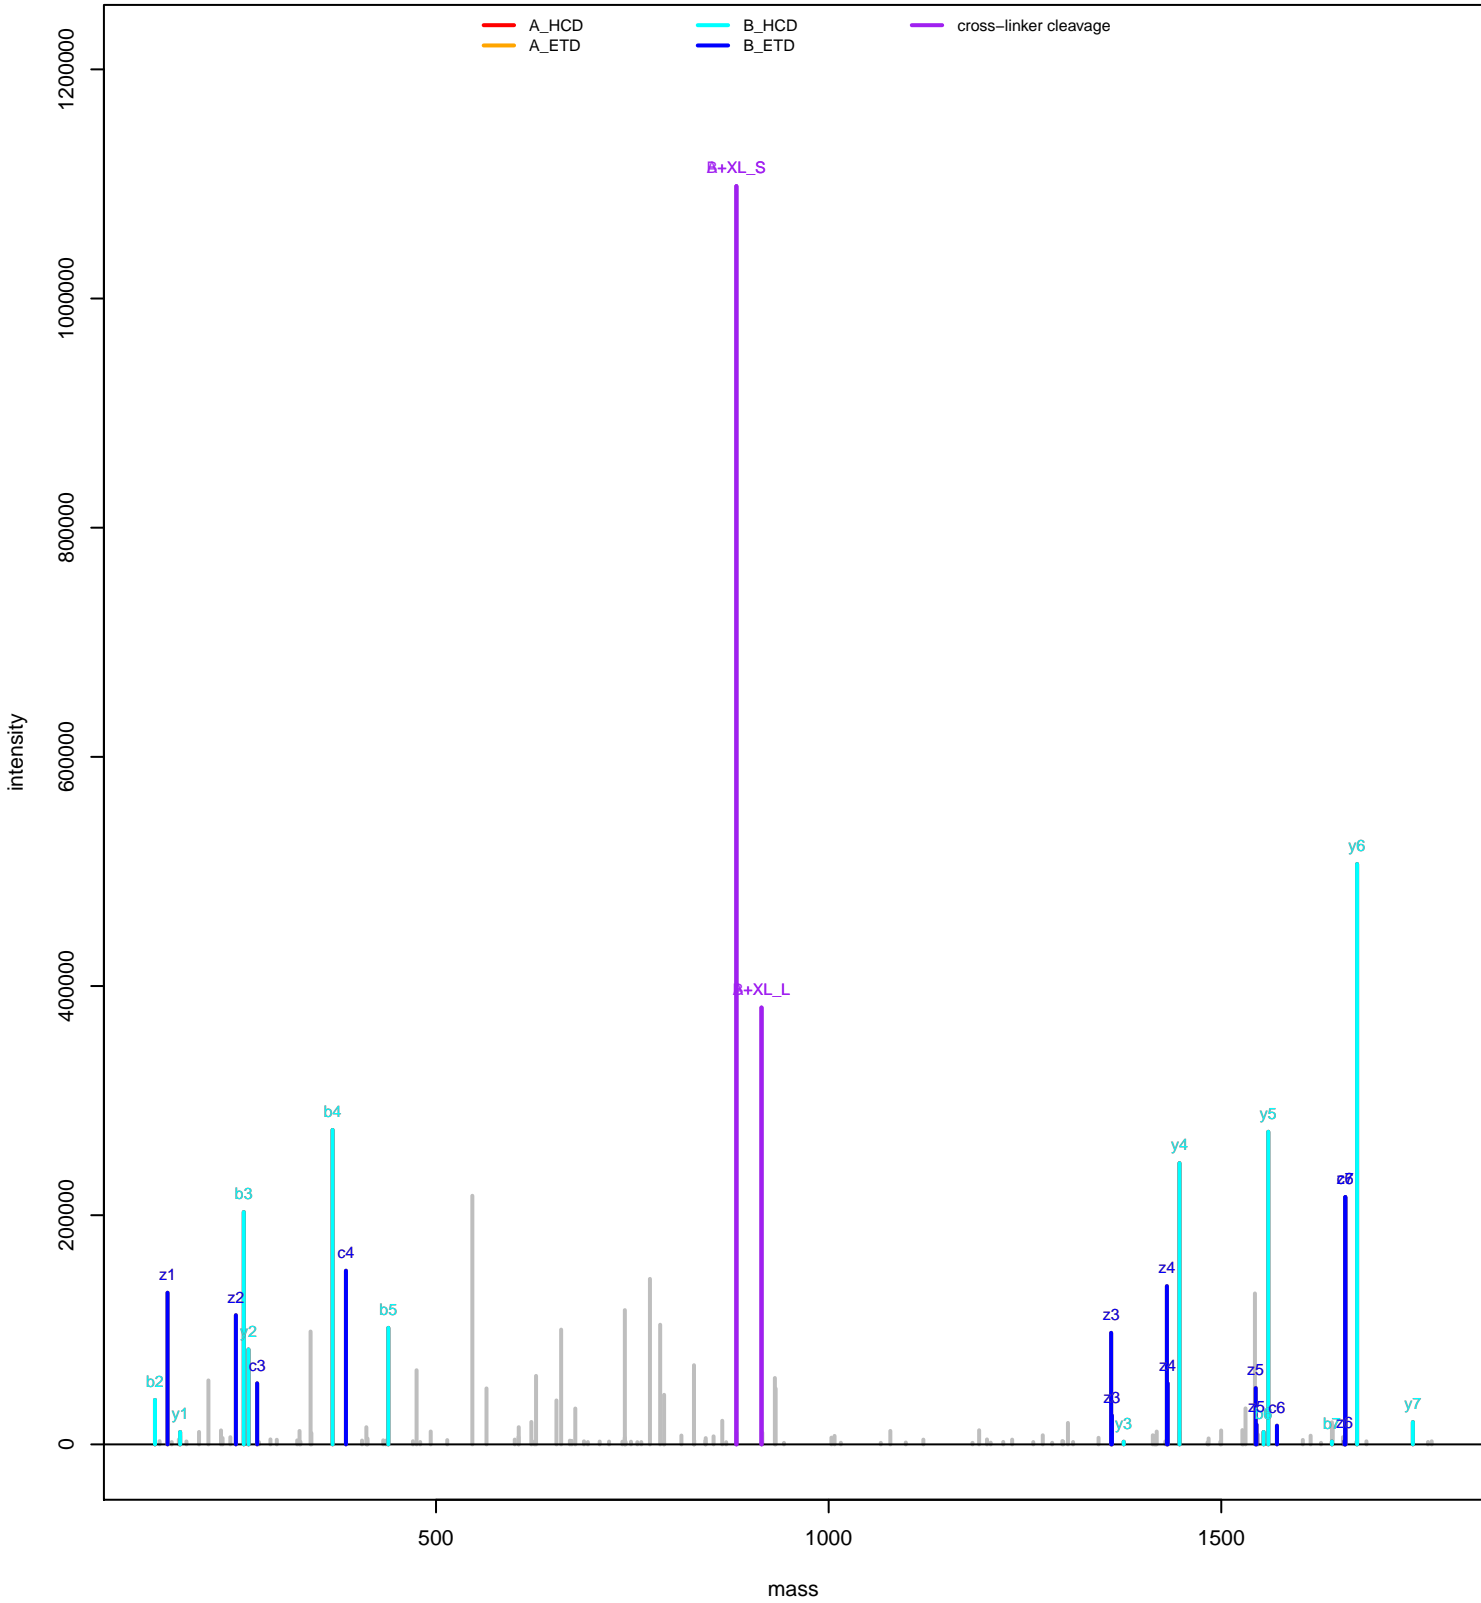

**AALIAKSR+XL\_S**

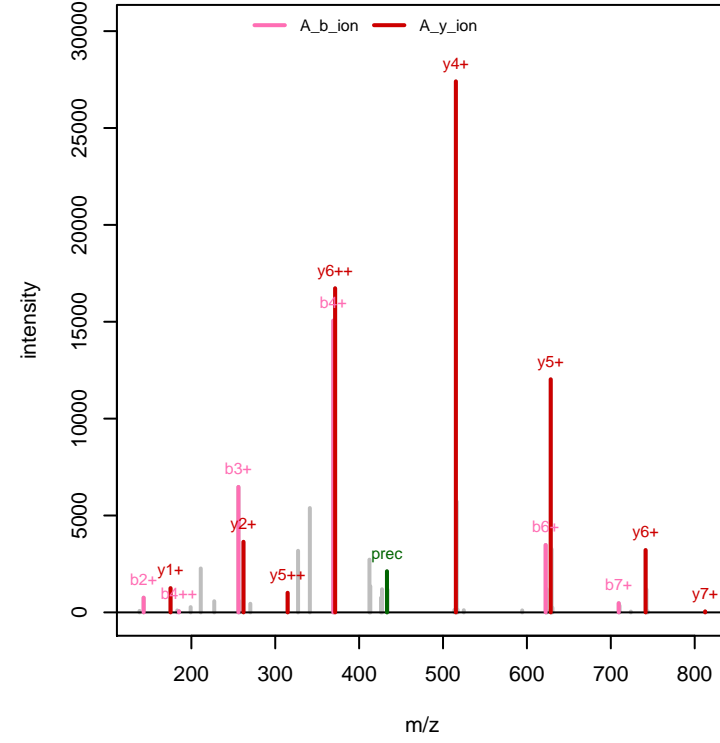

**AALIAKSR+XL\_L**

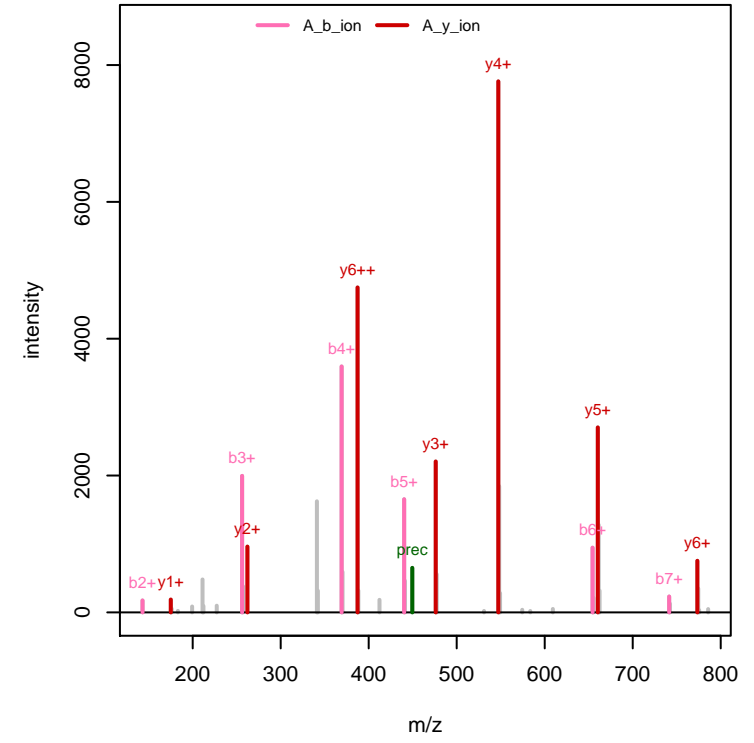

**AALIAKSR+XL\_S**

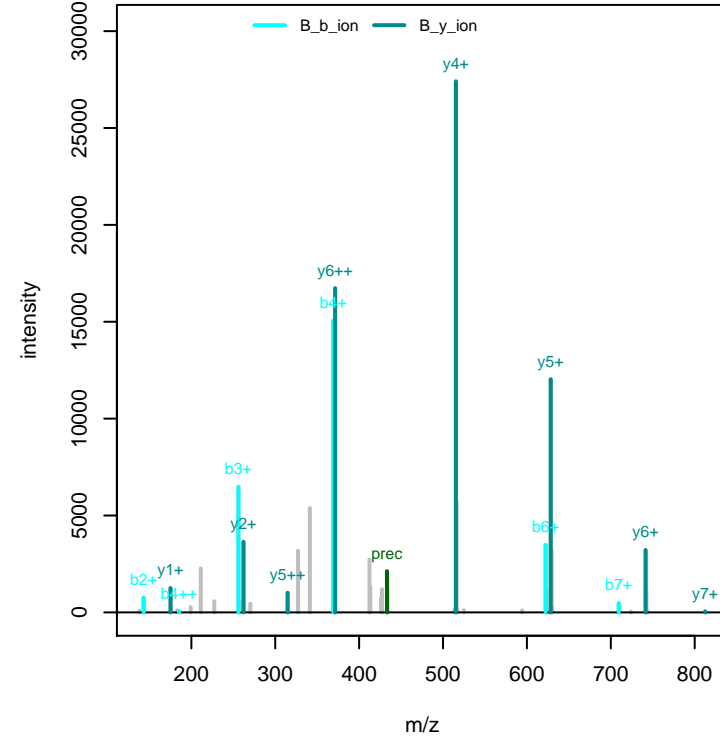

**AALIAKSR+XL\_L**

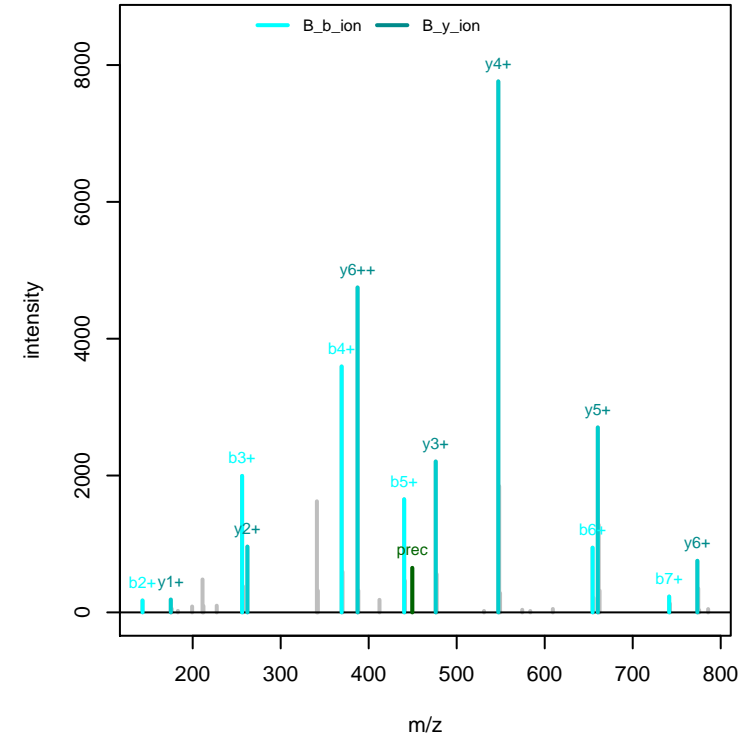

CAKACVDIGYR  
KAGVPCVPGSDGPLGDDMDK

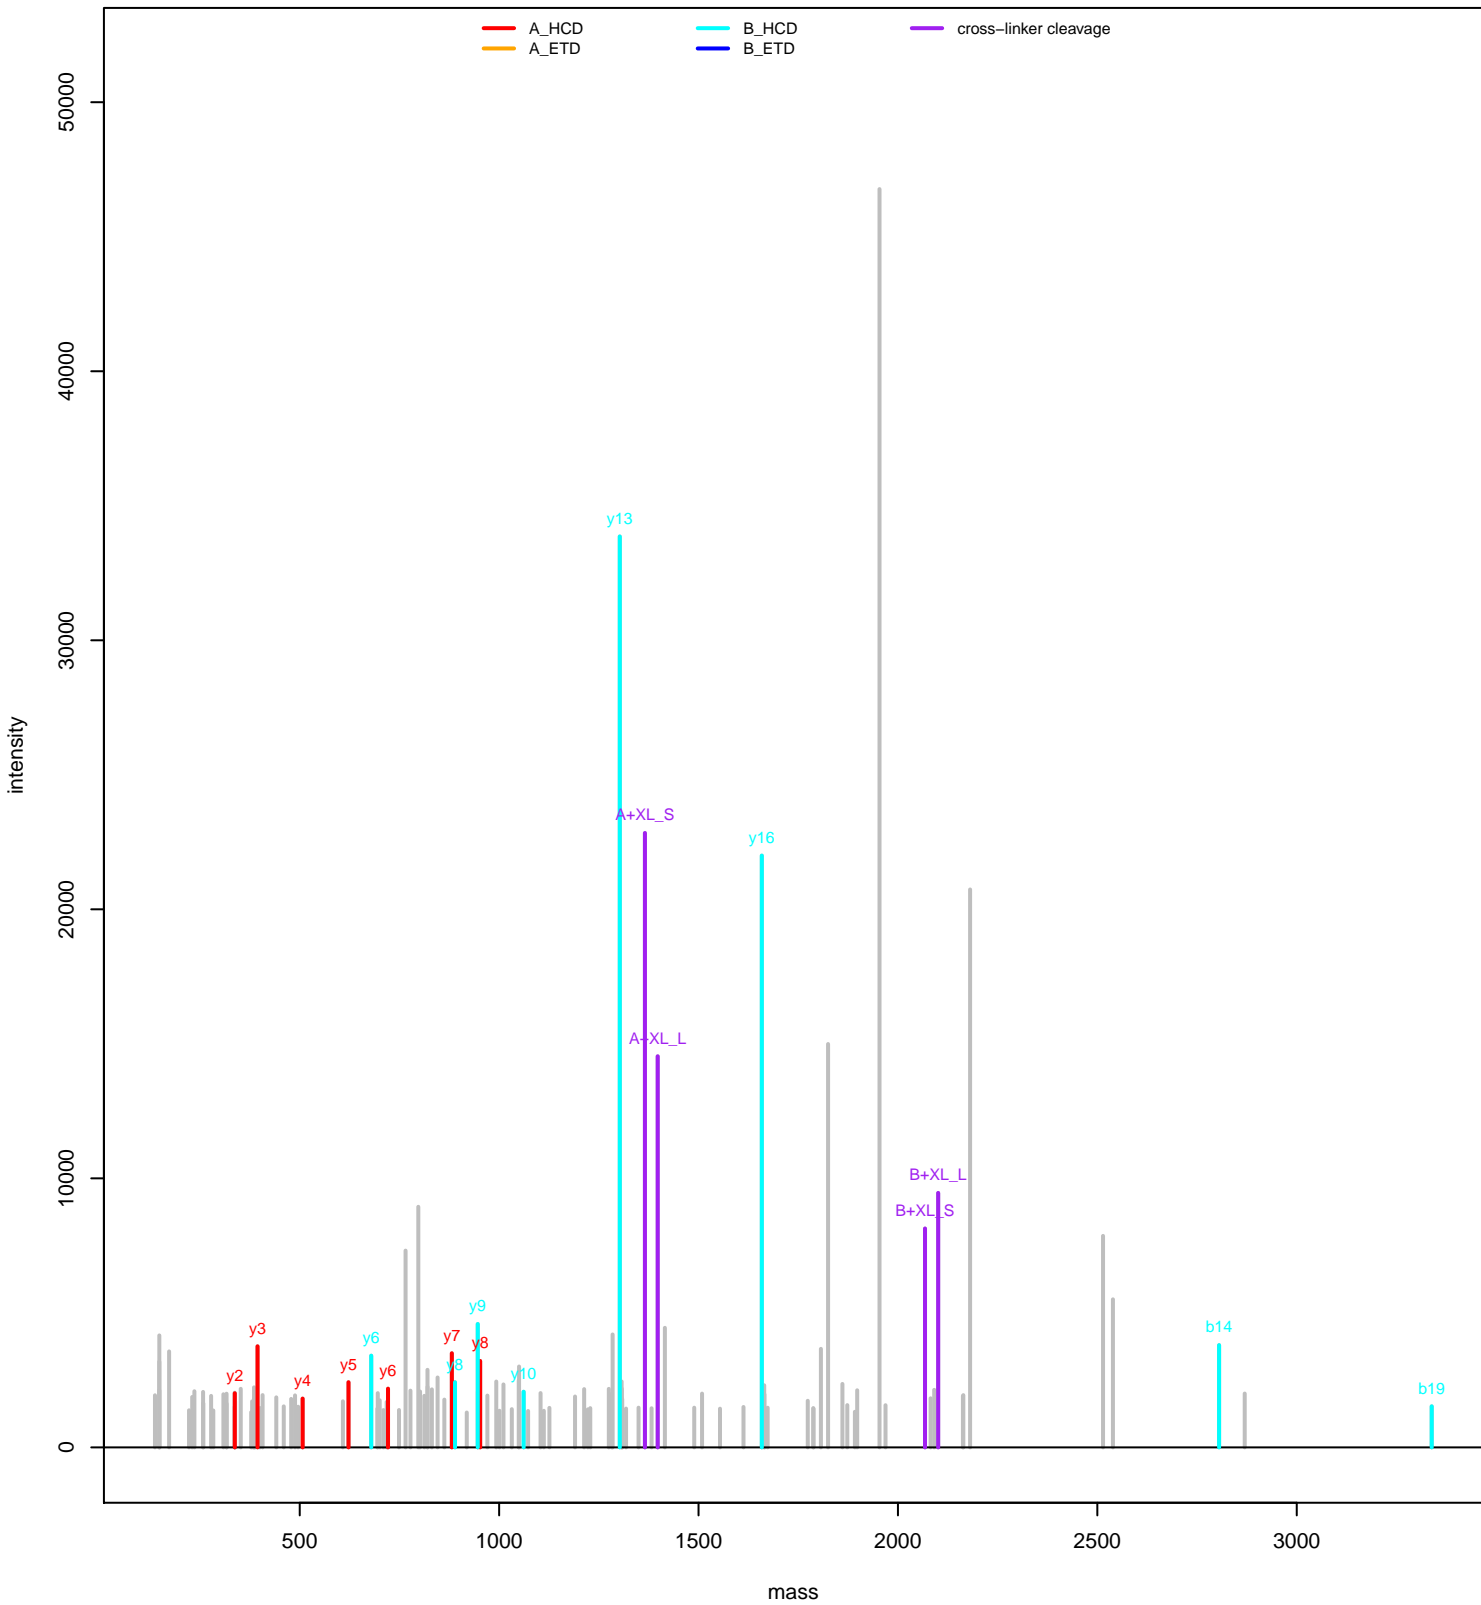

CAKACVDIGYR+XL\_S

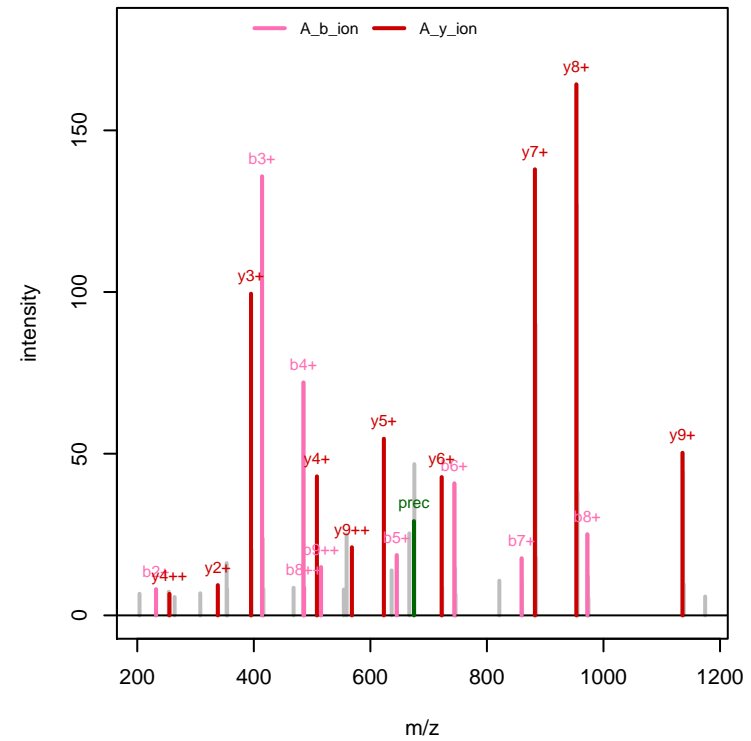

CAKACVDIGYR+XL\_L

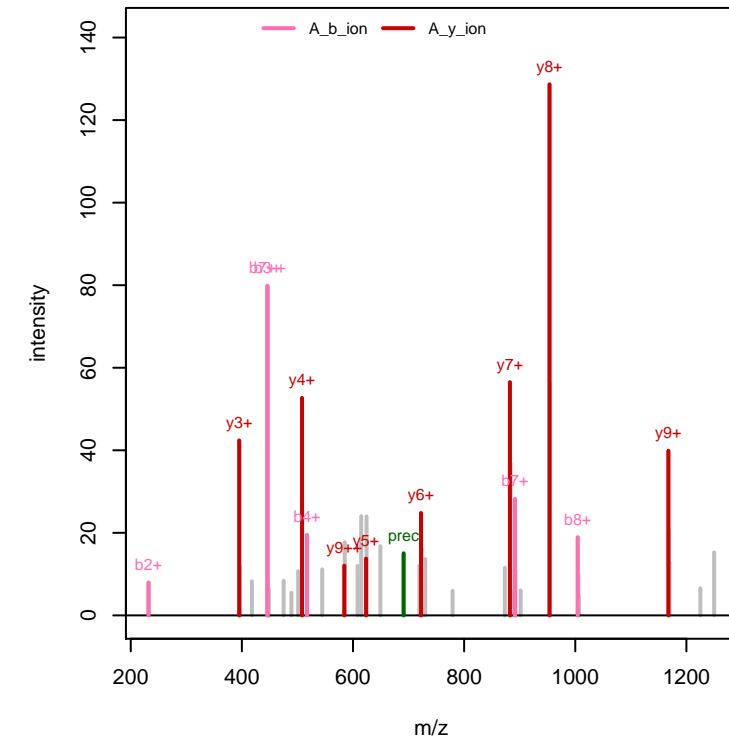

KAGVPCVPGSDGPLGDDMDK+XL\_S

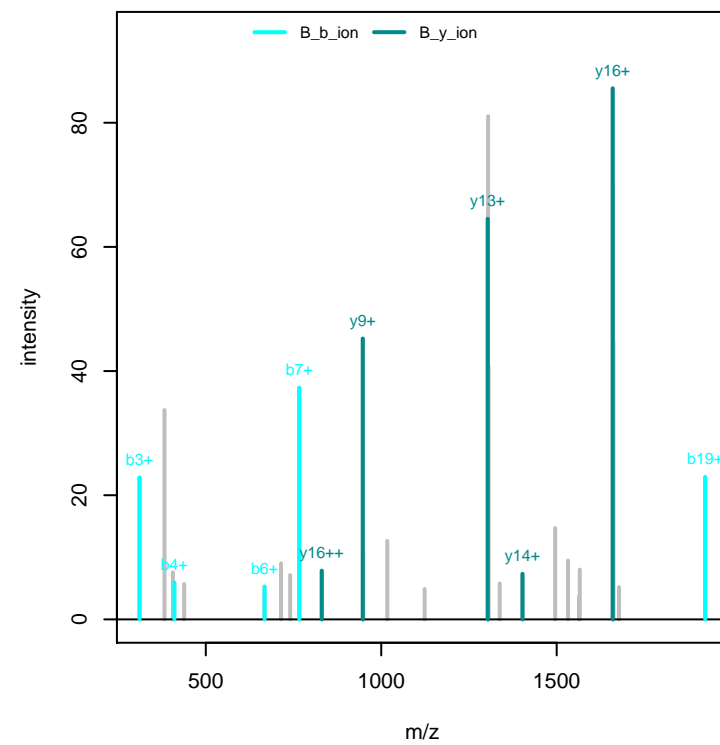

KAGVPCVPGSDGPLGDDMDK+XL\_L

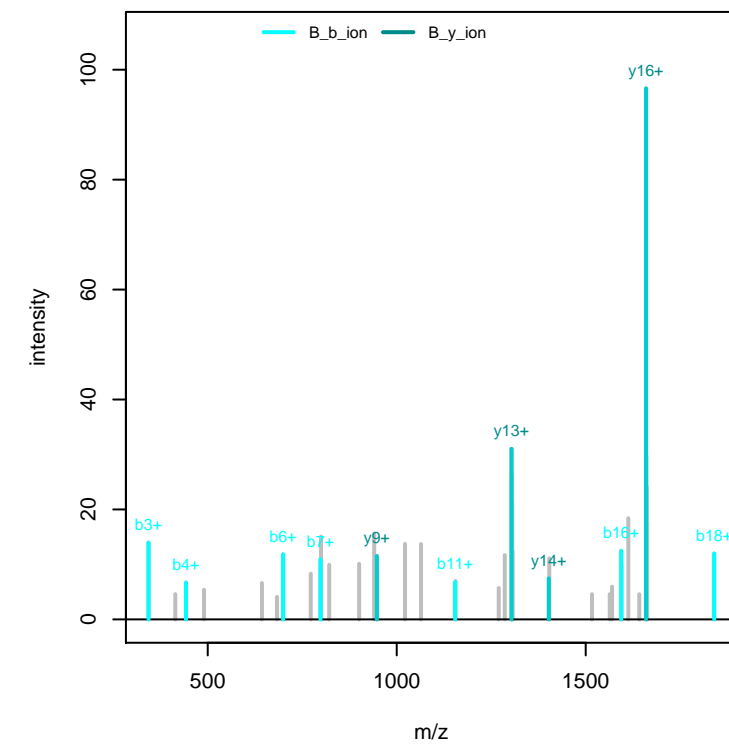

AKITLR  
QKVIQVK

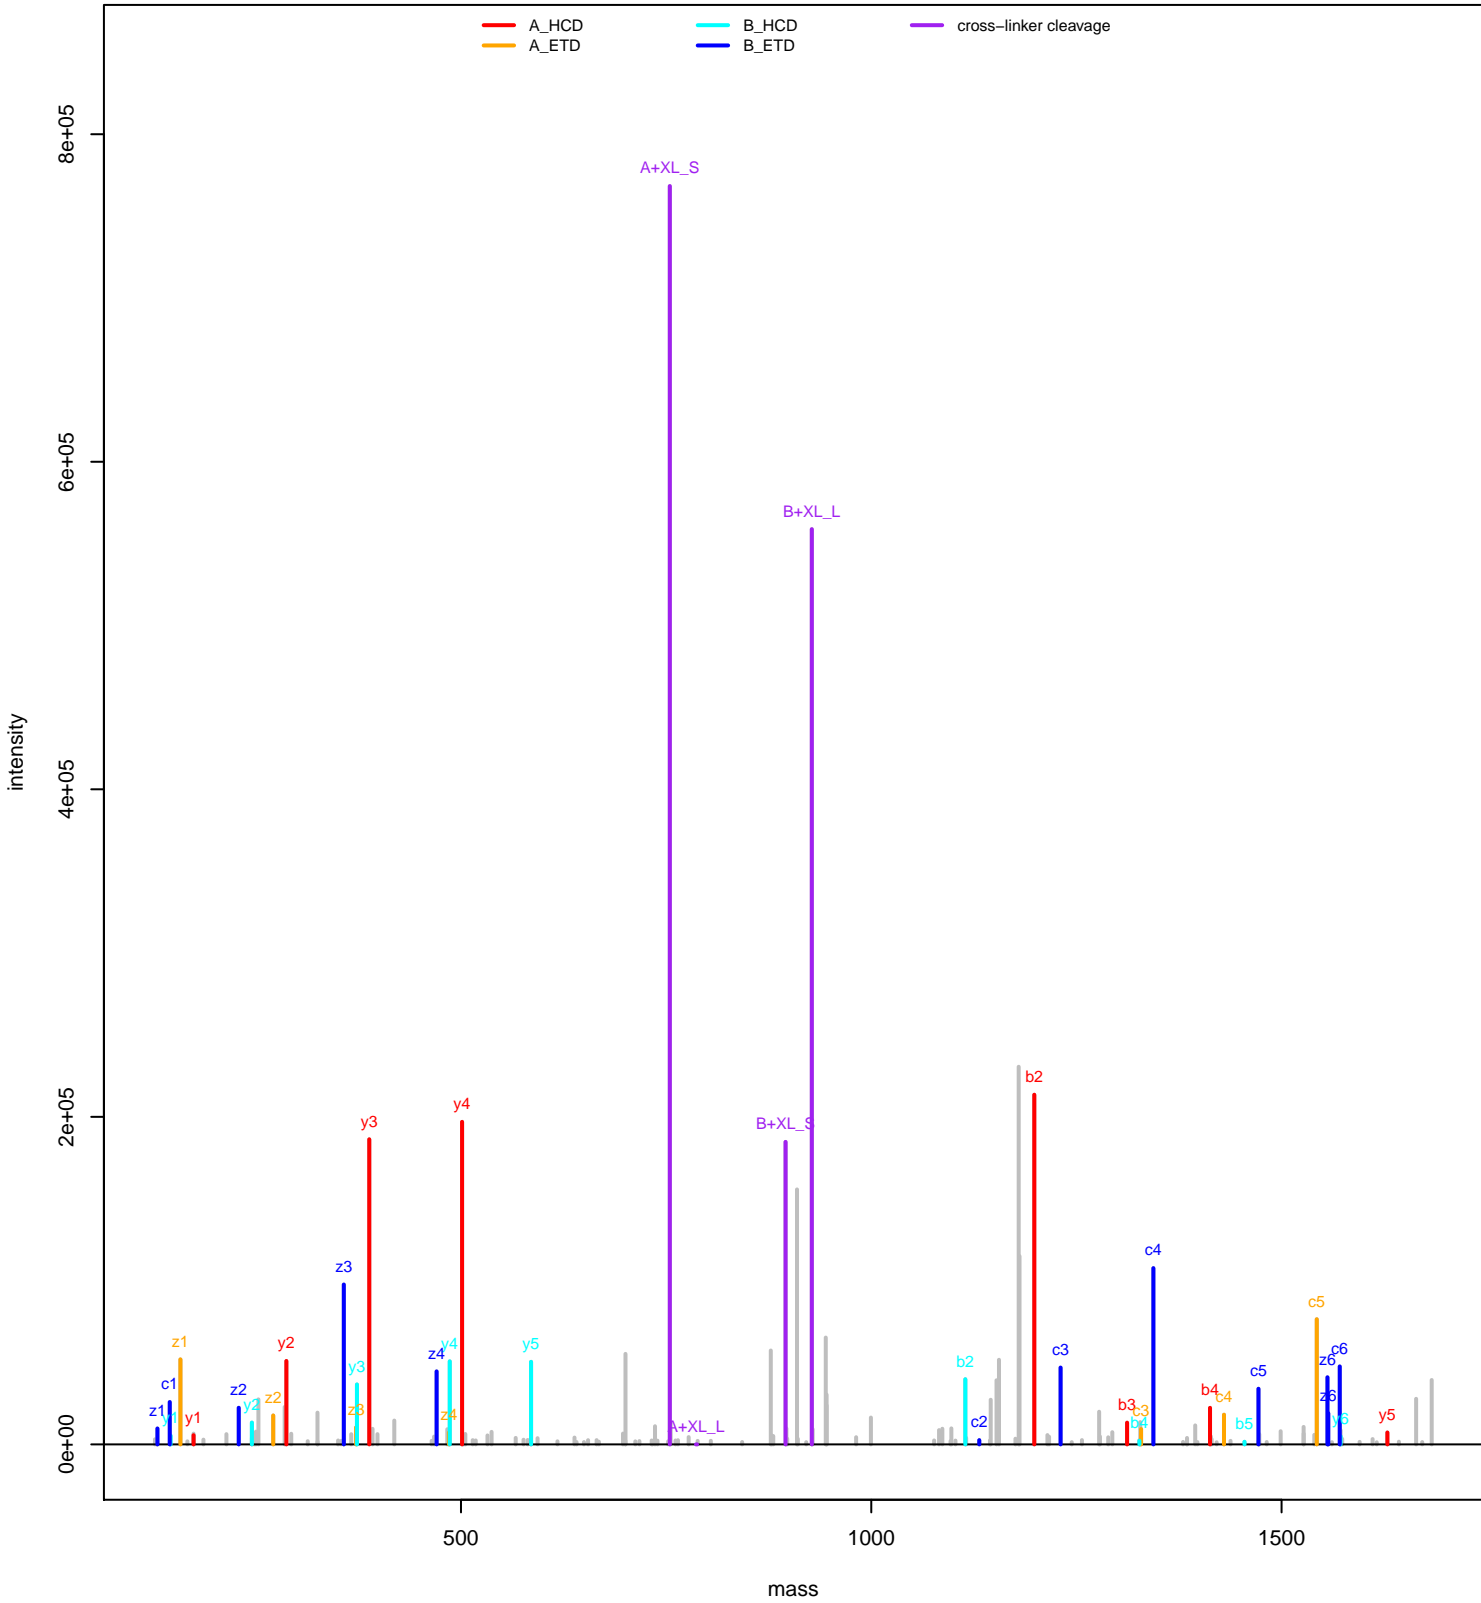

AKITLR+XL\_S

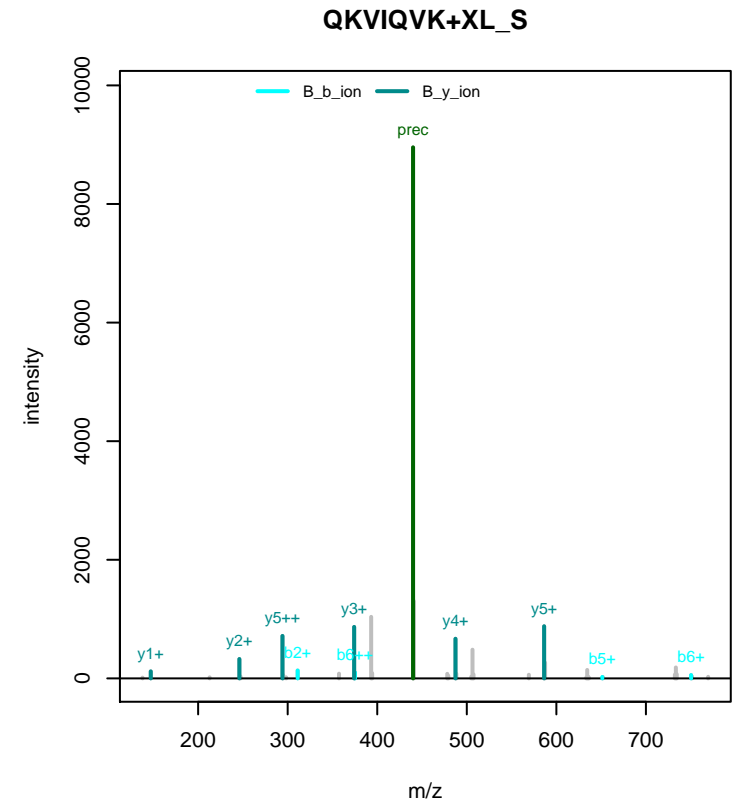

AKITLR+XL\_L

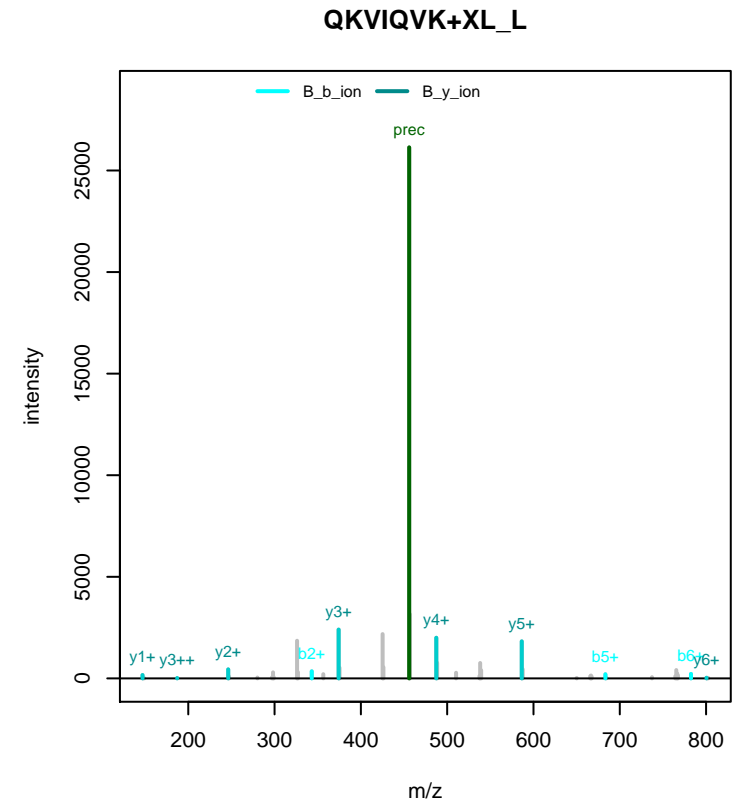

QKVIQVK+XL\_S

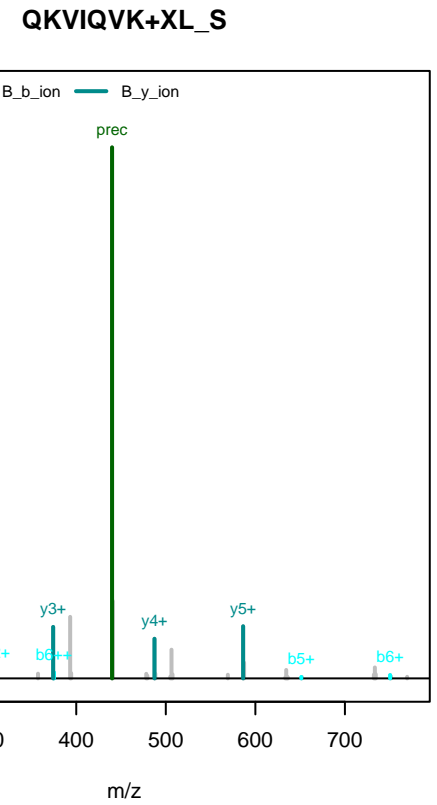

QKVIQVK+XL\_L

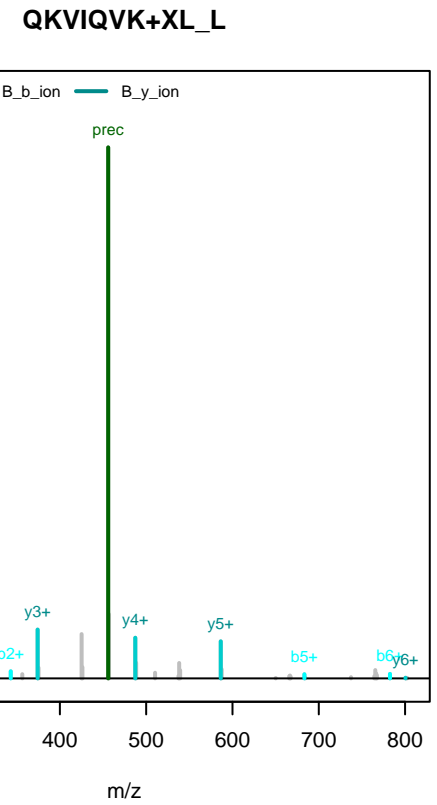



NKGSIK  
LIDEFGRTKESYK

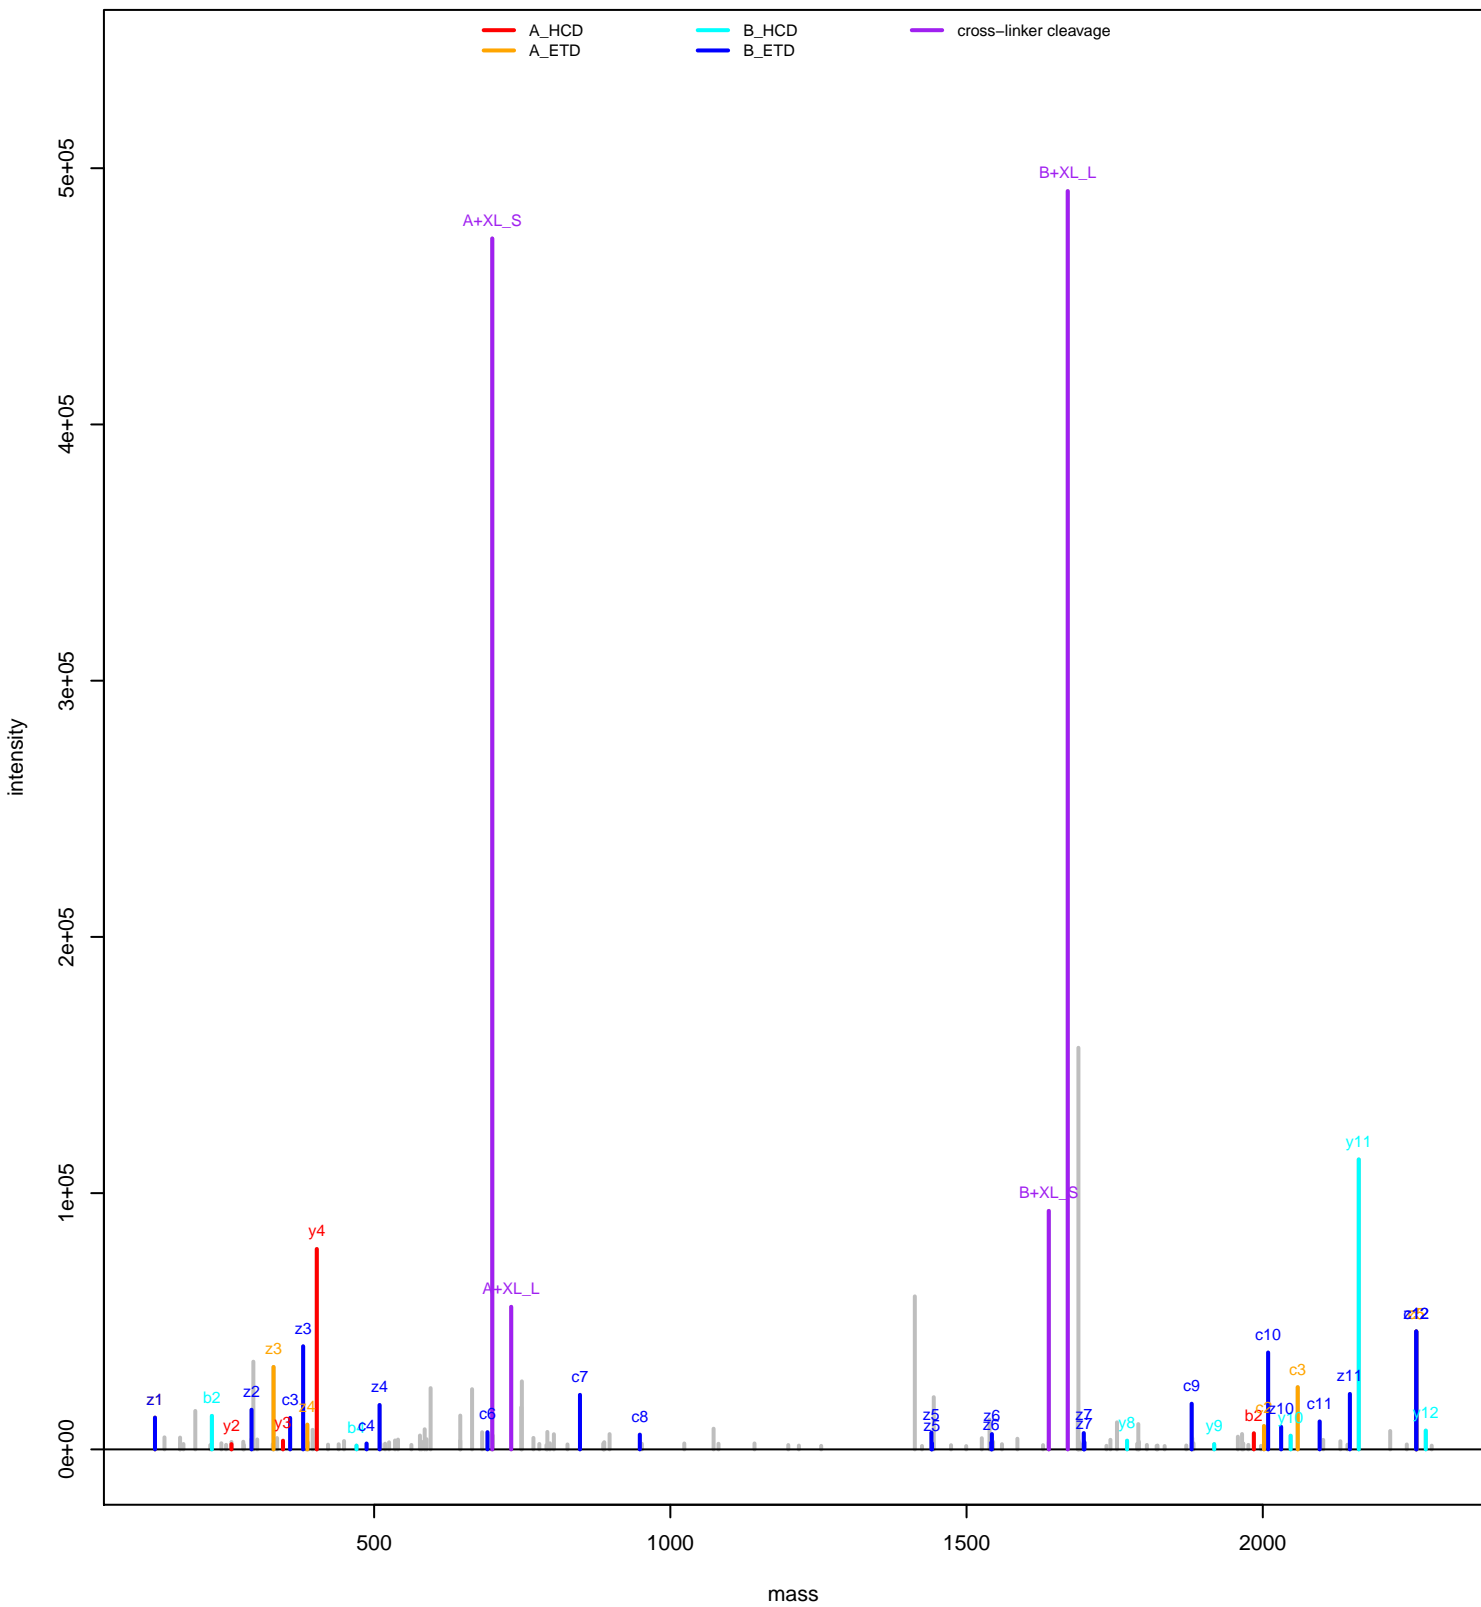

NKGSIK+XL\_S

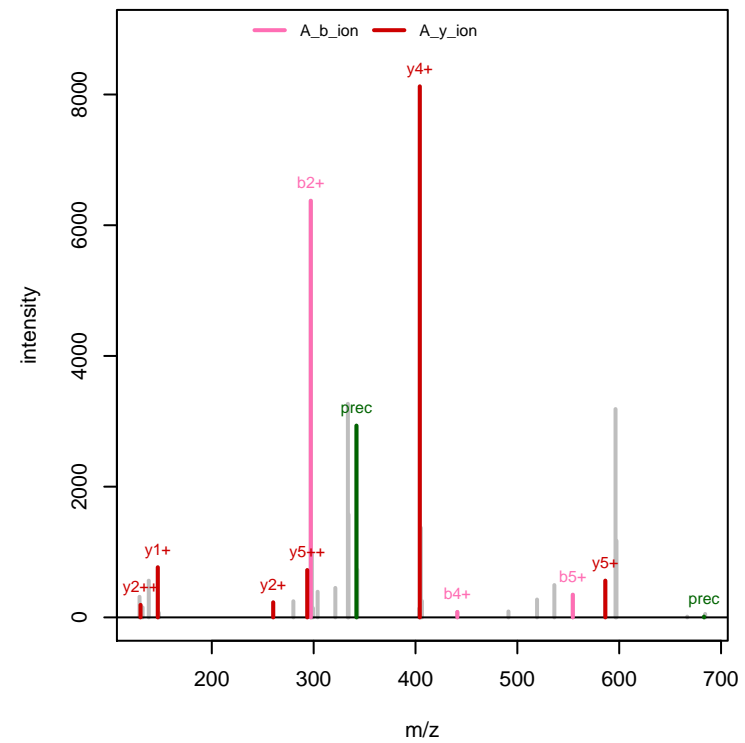

NKGSIK+XL\_L

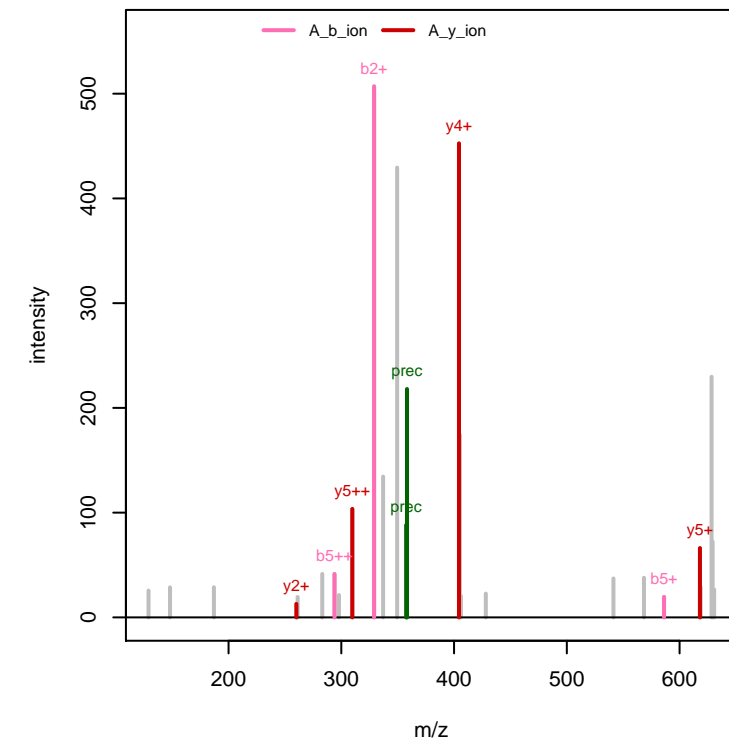

LIDEFGRTKESYK+XL\_S

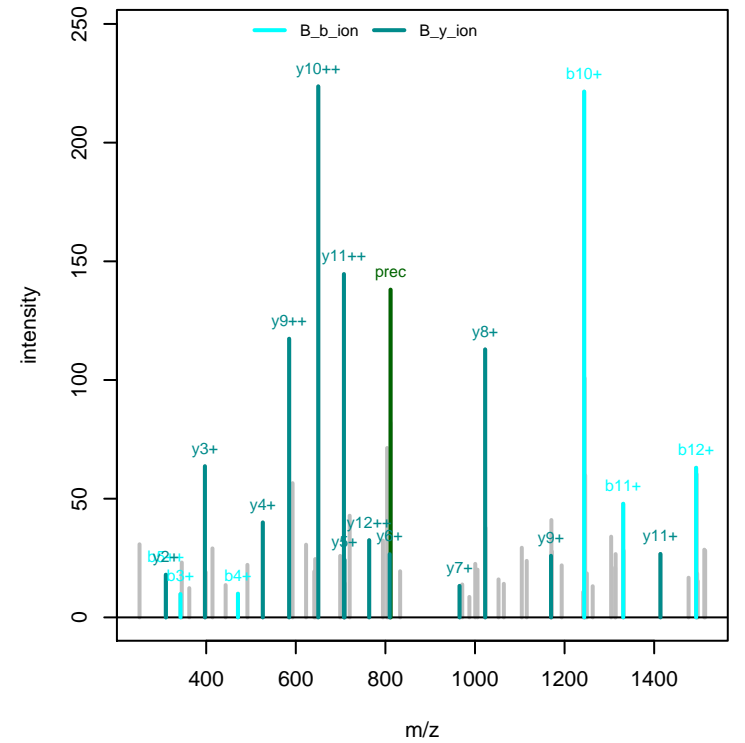

LIDEFGRTKESYK+XL\_L

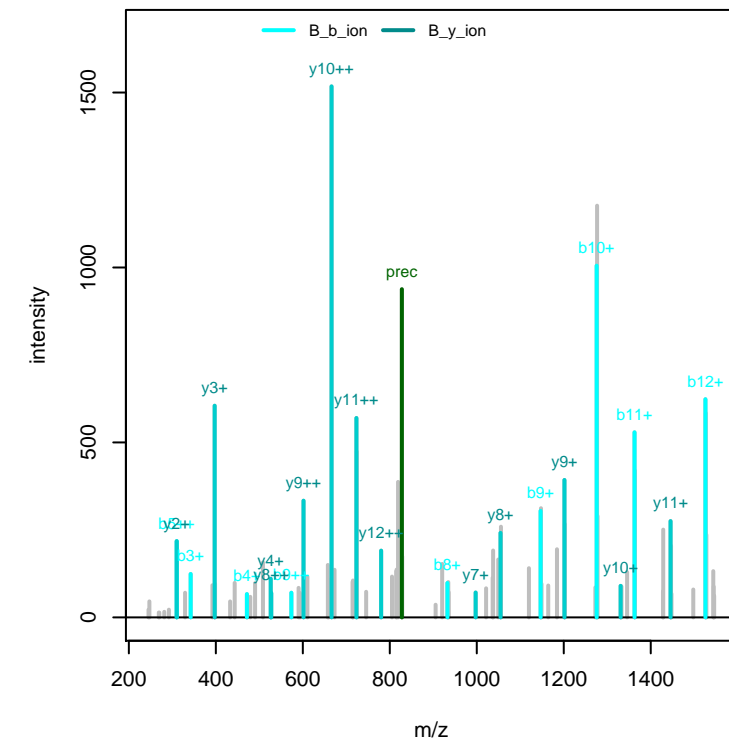

YGYQKDQAEK  
RDQLVGKIQER

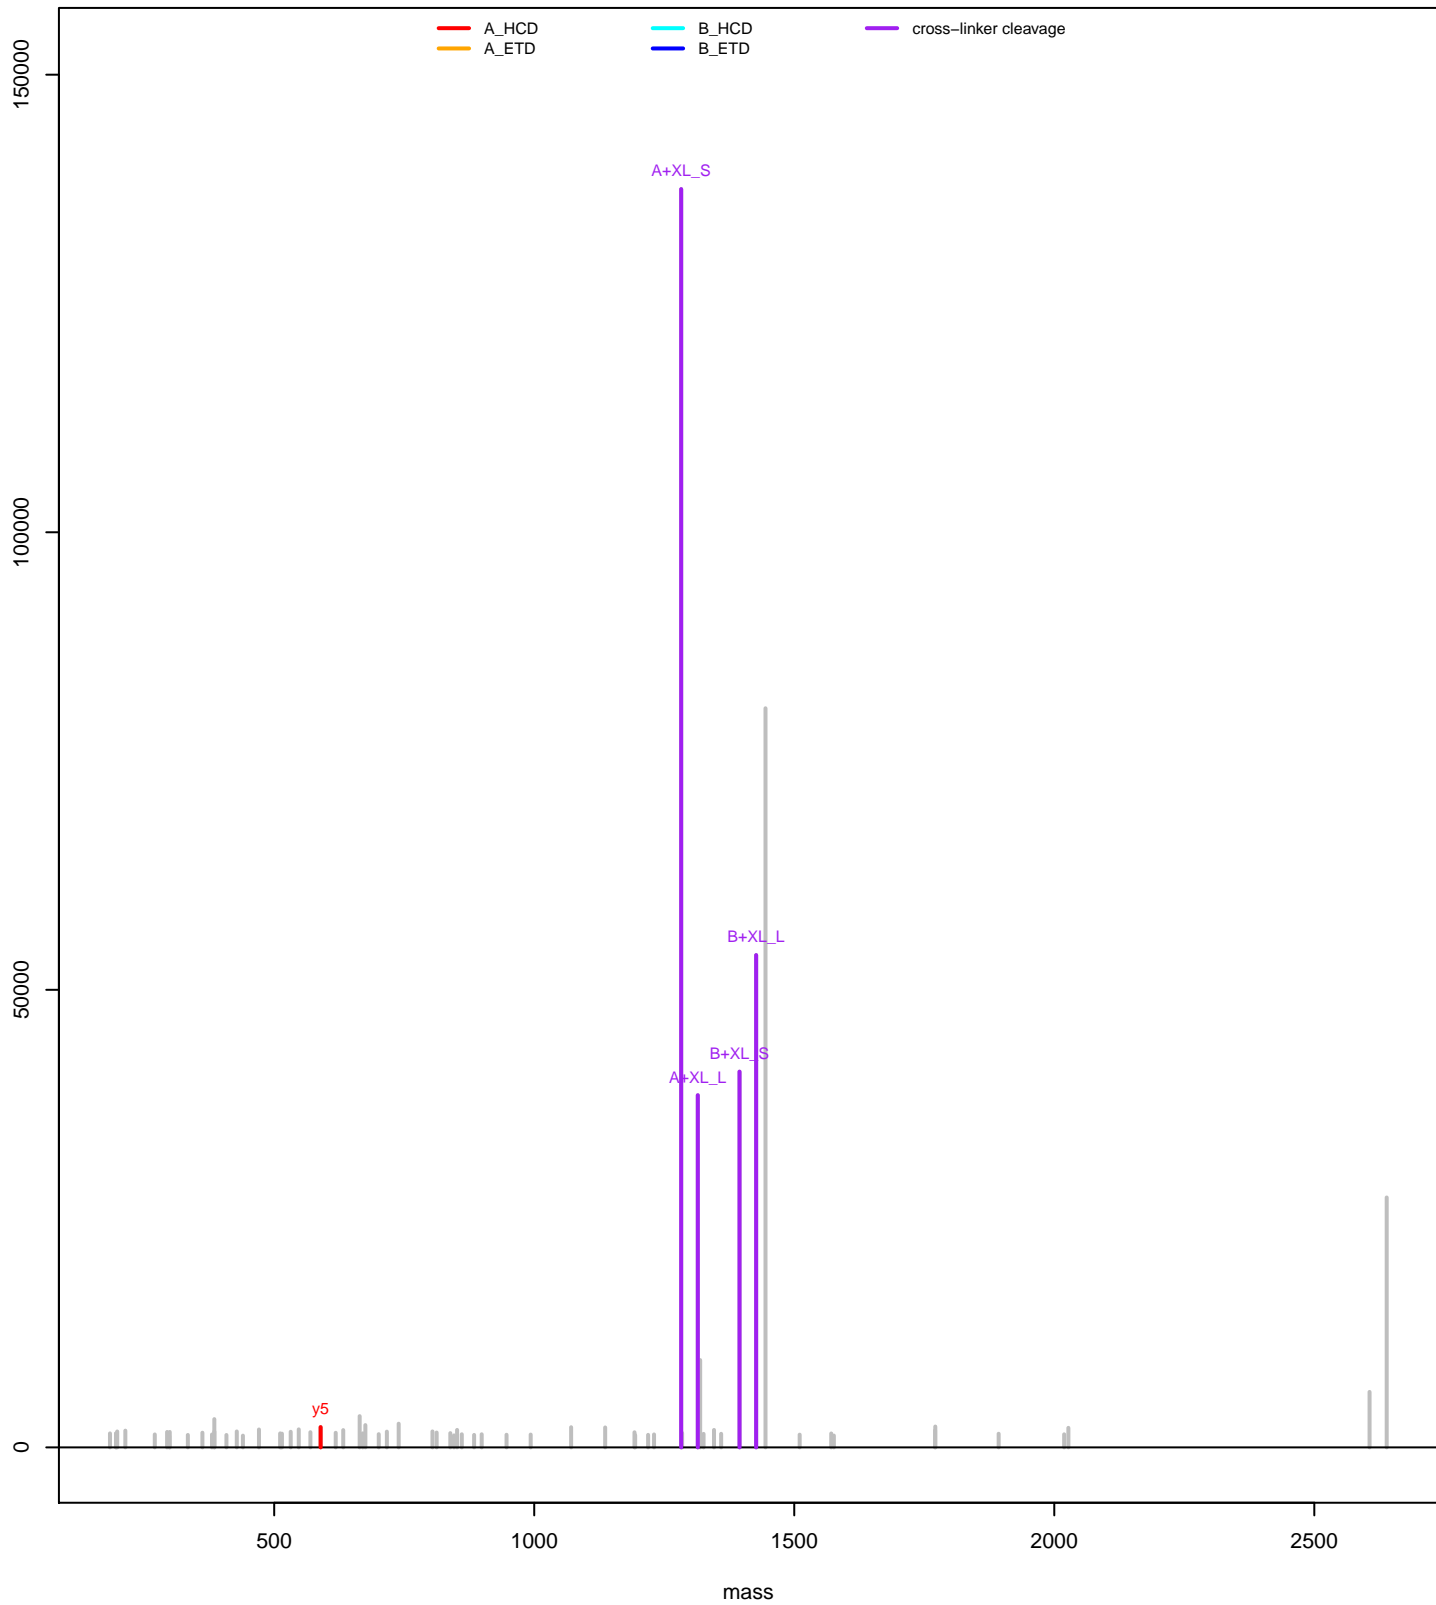

YGYQKDQAEK+XL\_S

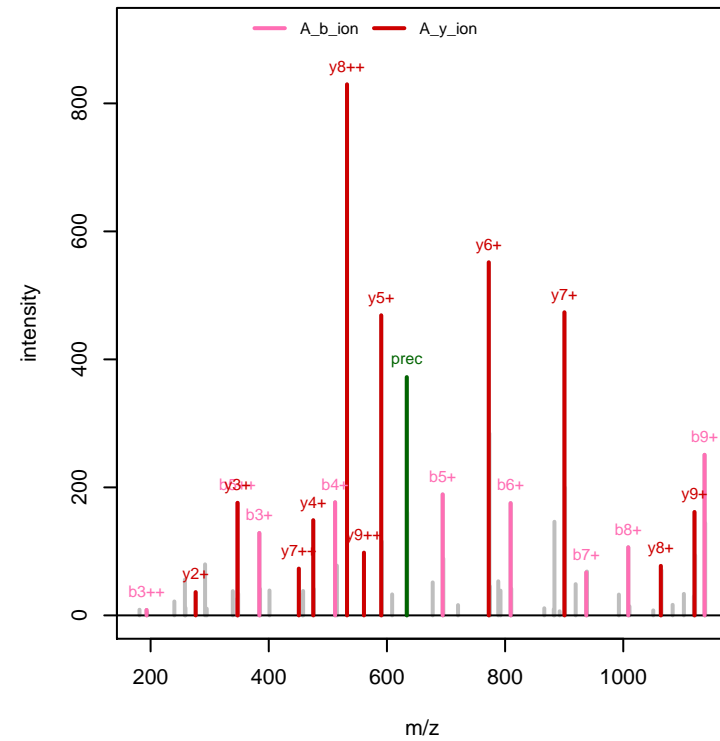

YGYQKDQAEK+XL\_L

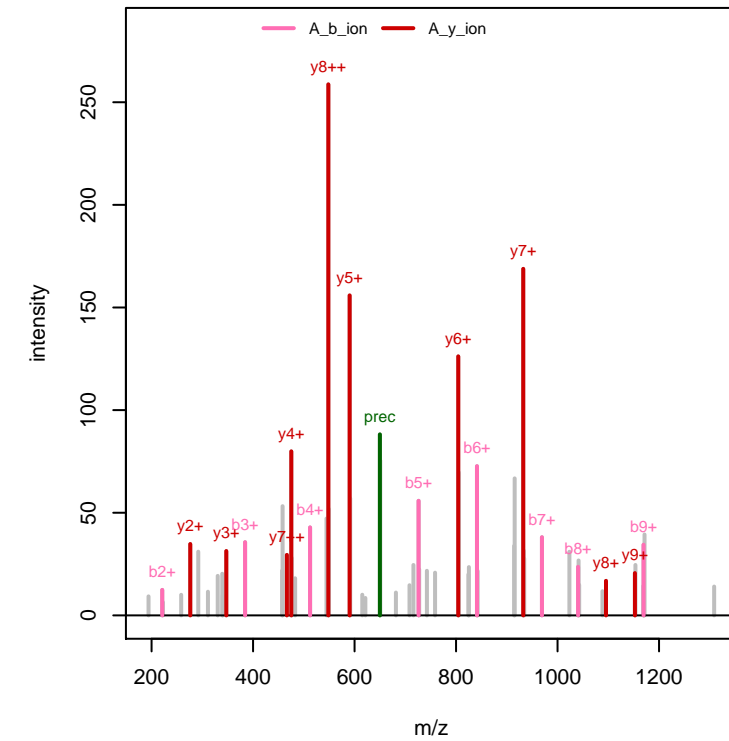

RDQLVGKIQER+XL\_S

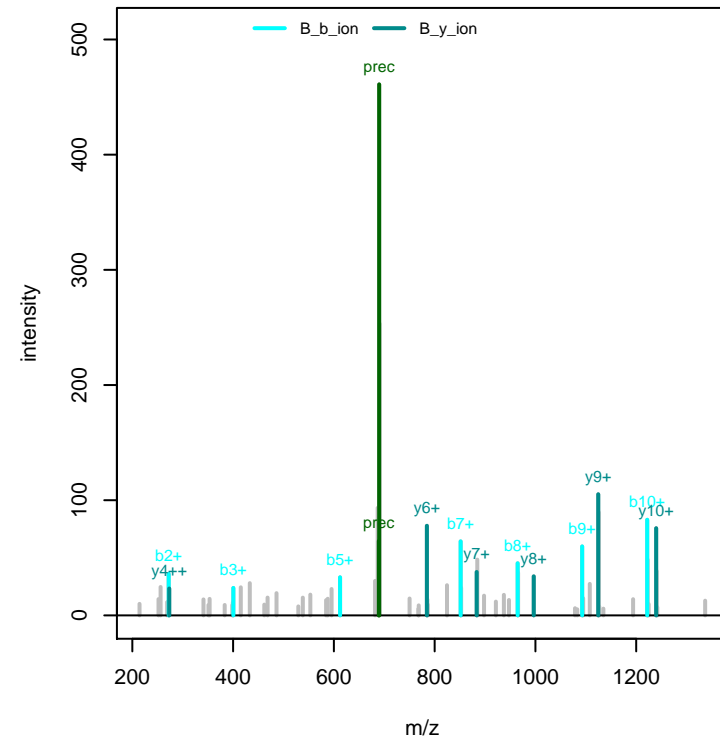

RDQLVGKIQER+XL\_L

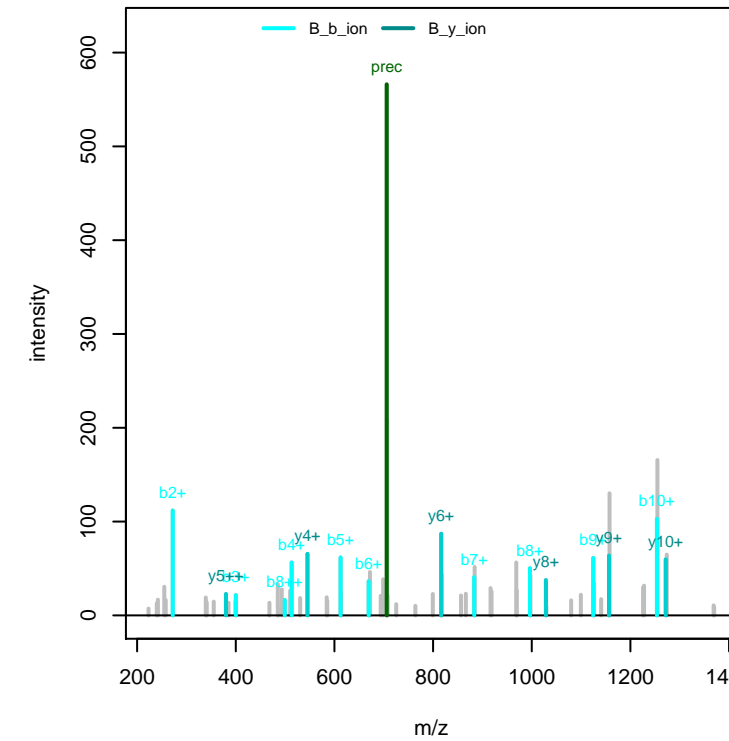

TMKLEGGNDVSLK  
TAAILLDTKGPEIR

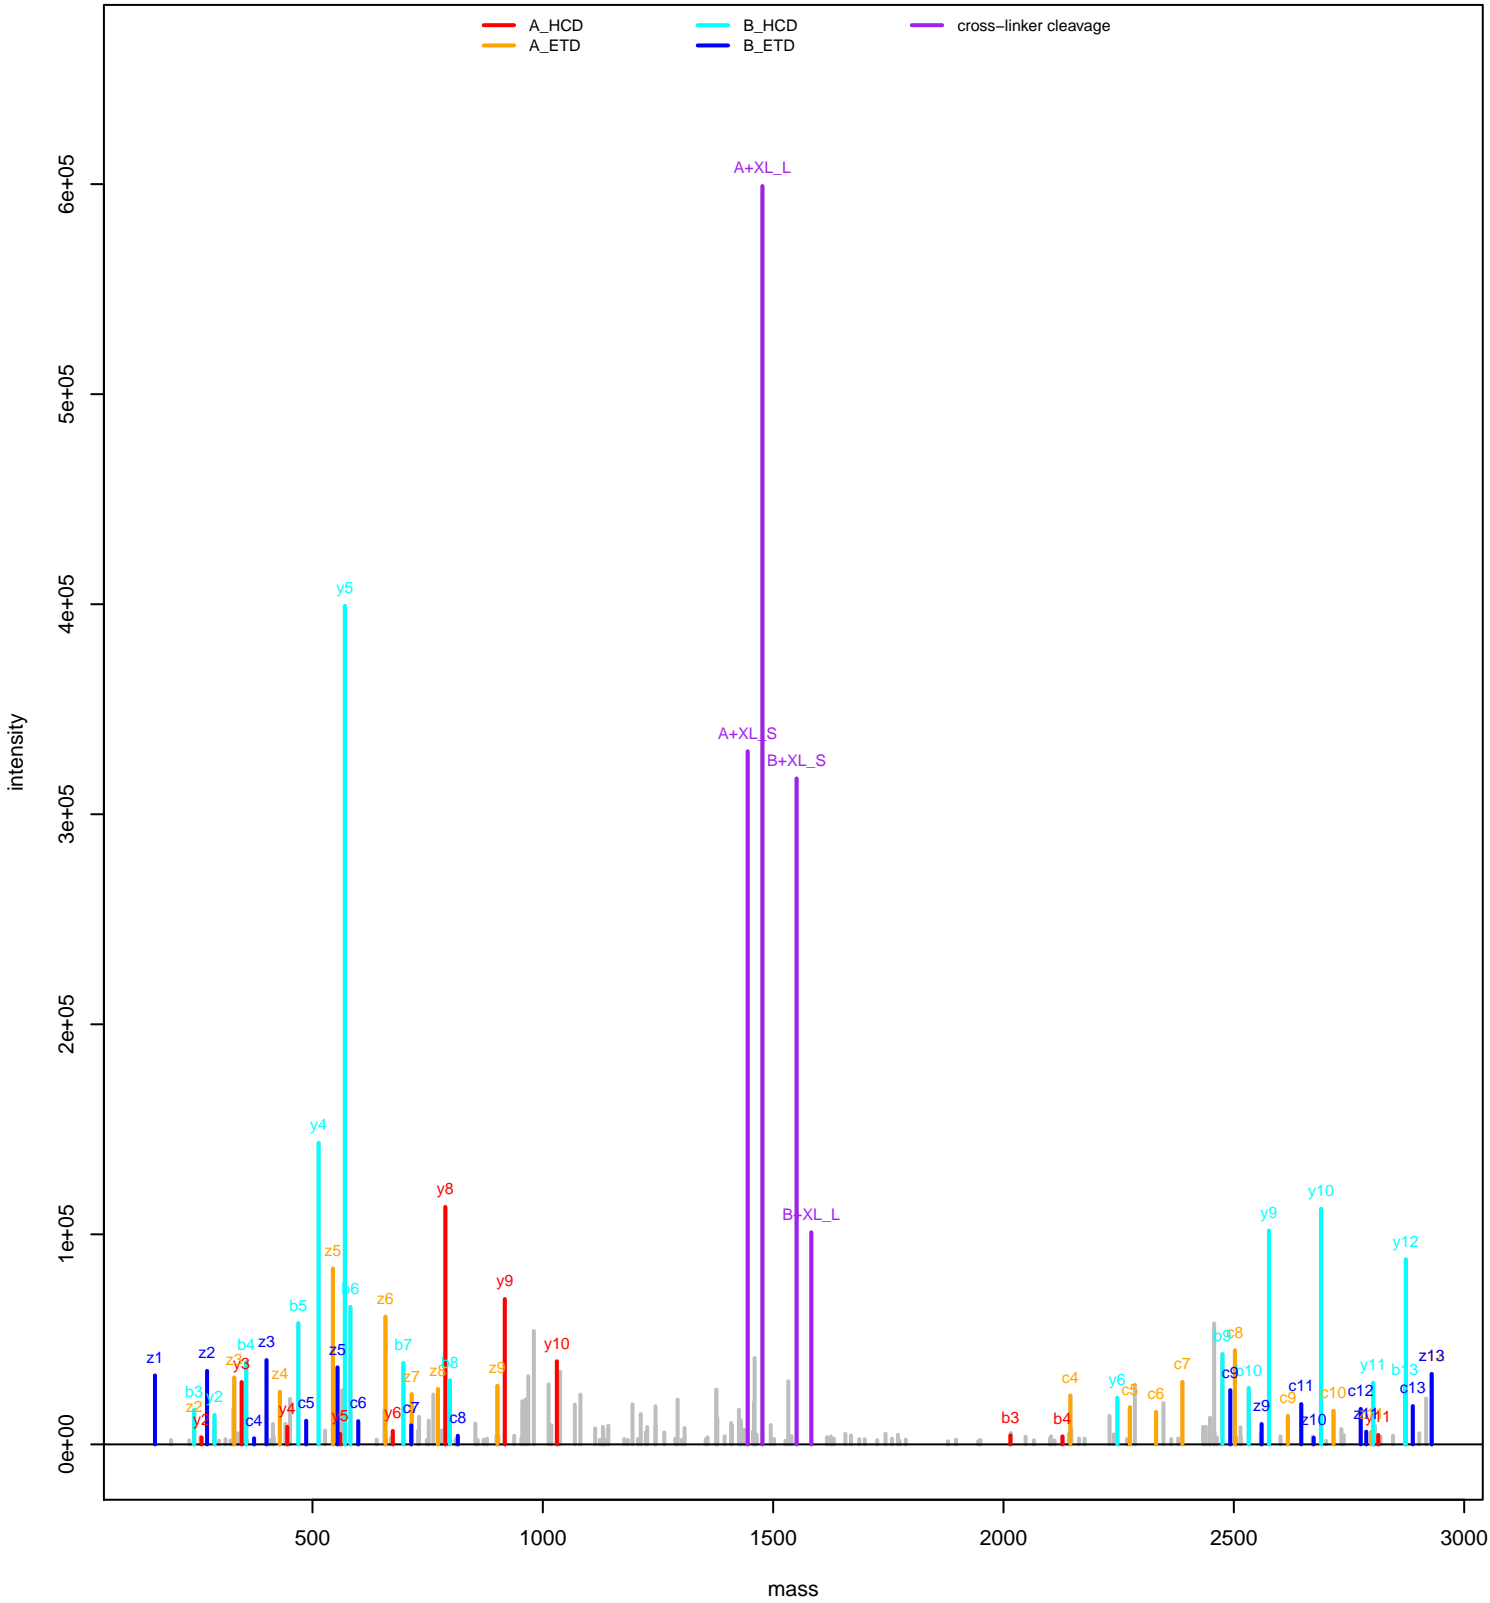

TMKLEGGNDVSLK+XL\_S

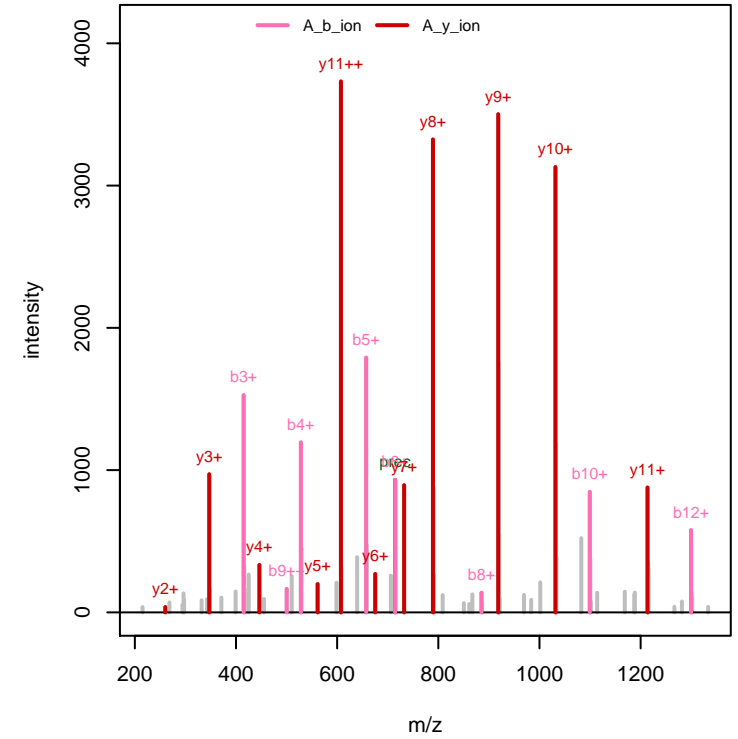

TMKLEGGNDVSLK+XL\_L

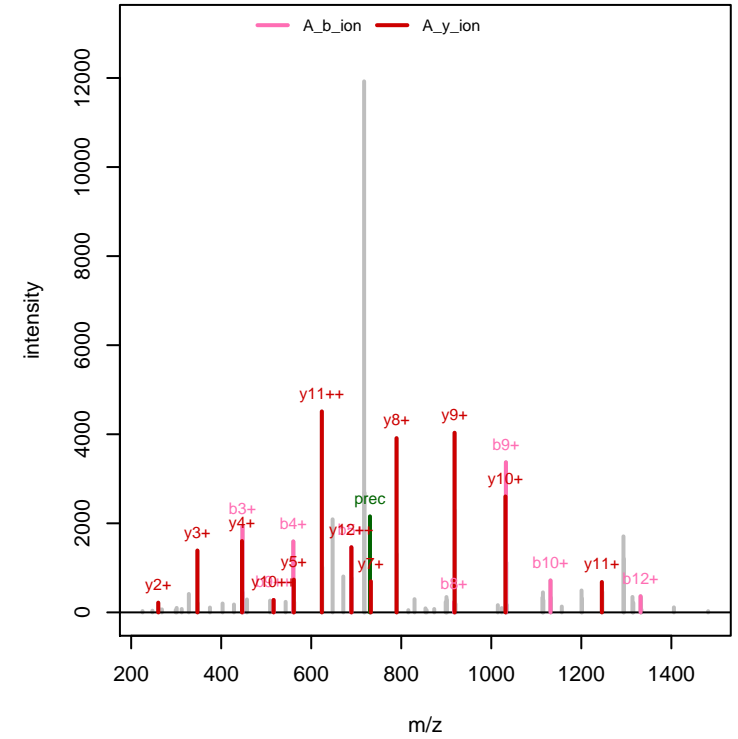

TAAILLDTKGPEIR+XL\_S

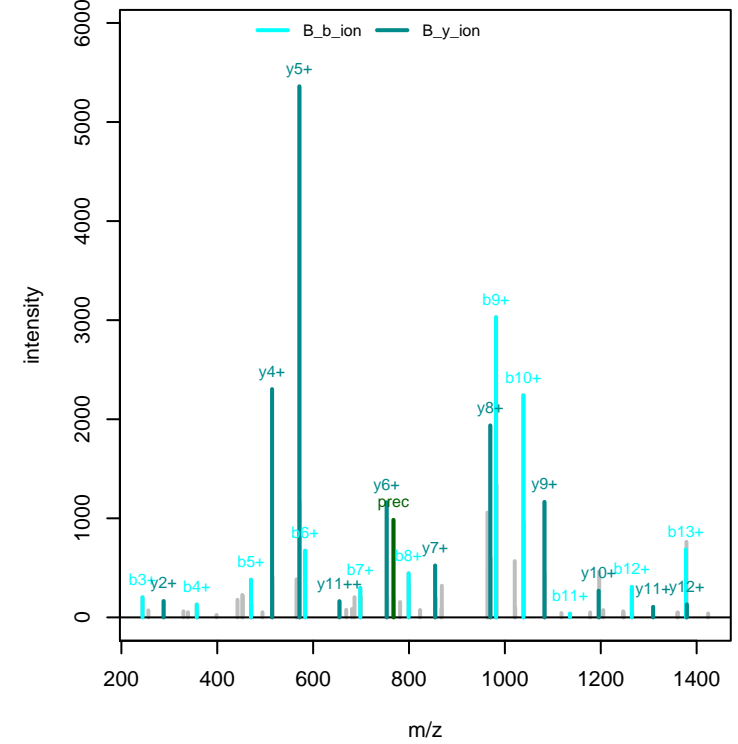

TAAILLDTKGPEIR+XL\_L

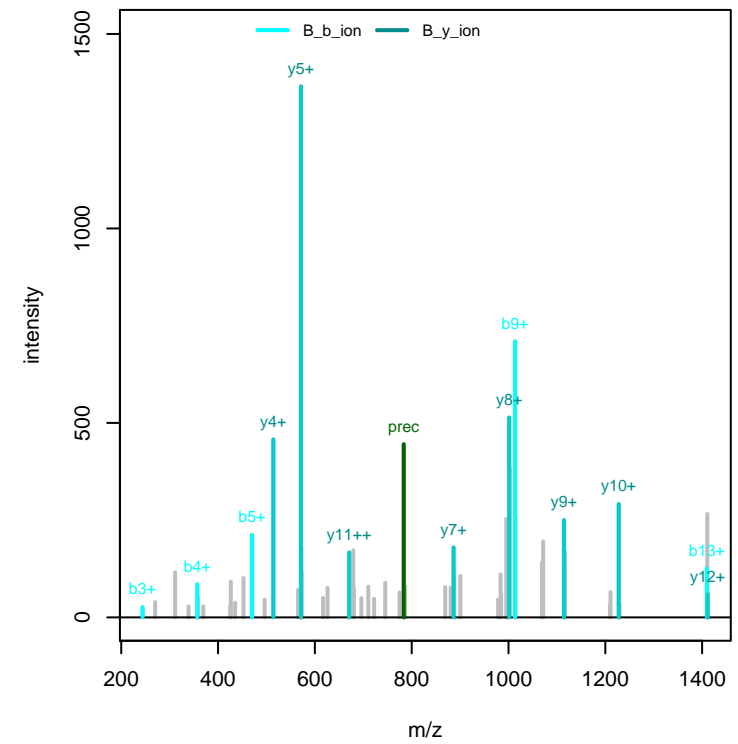

KAKPTQAK  
VGTVTPNVAEAVKNAK

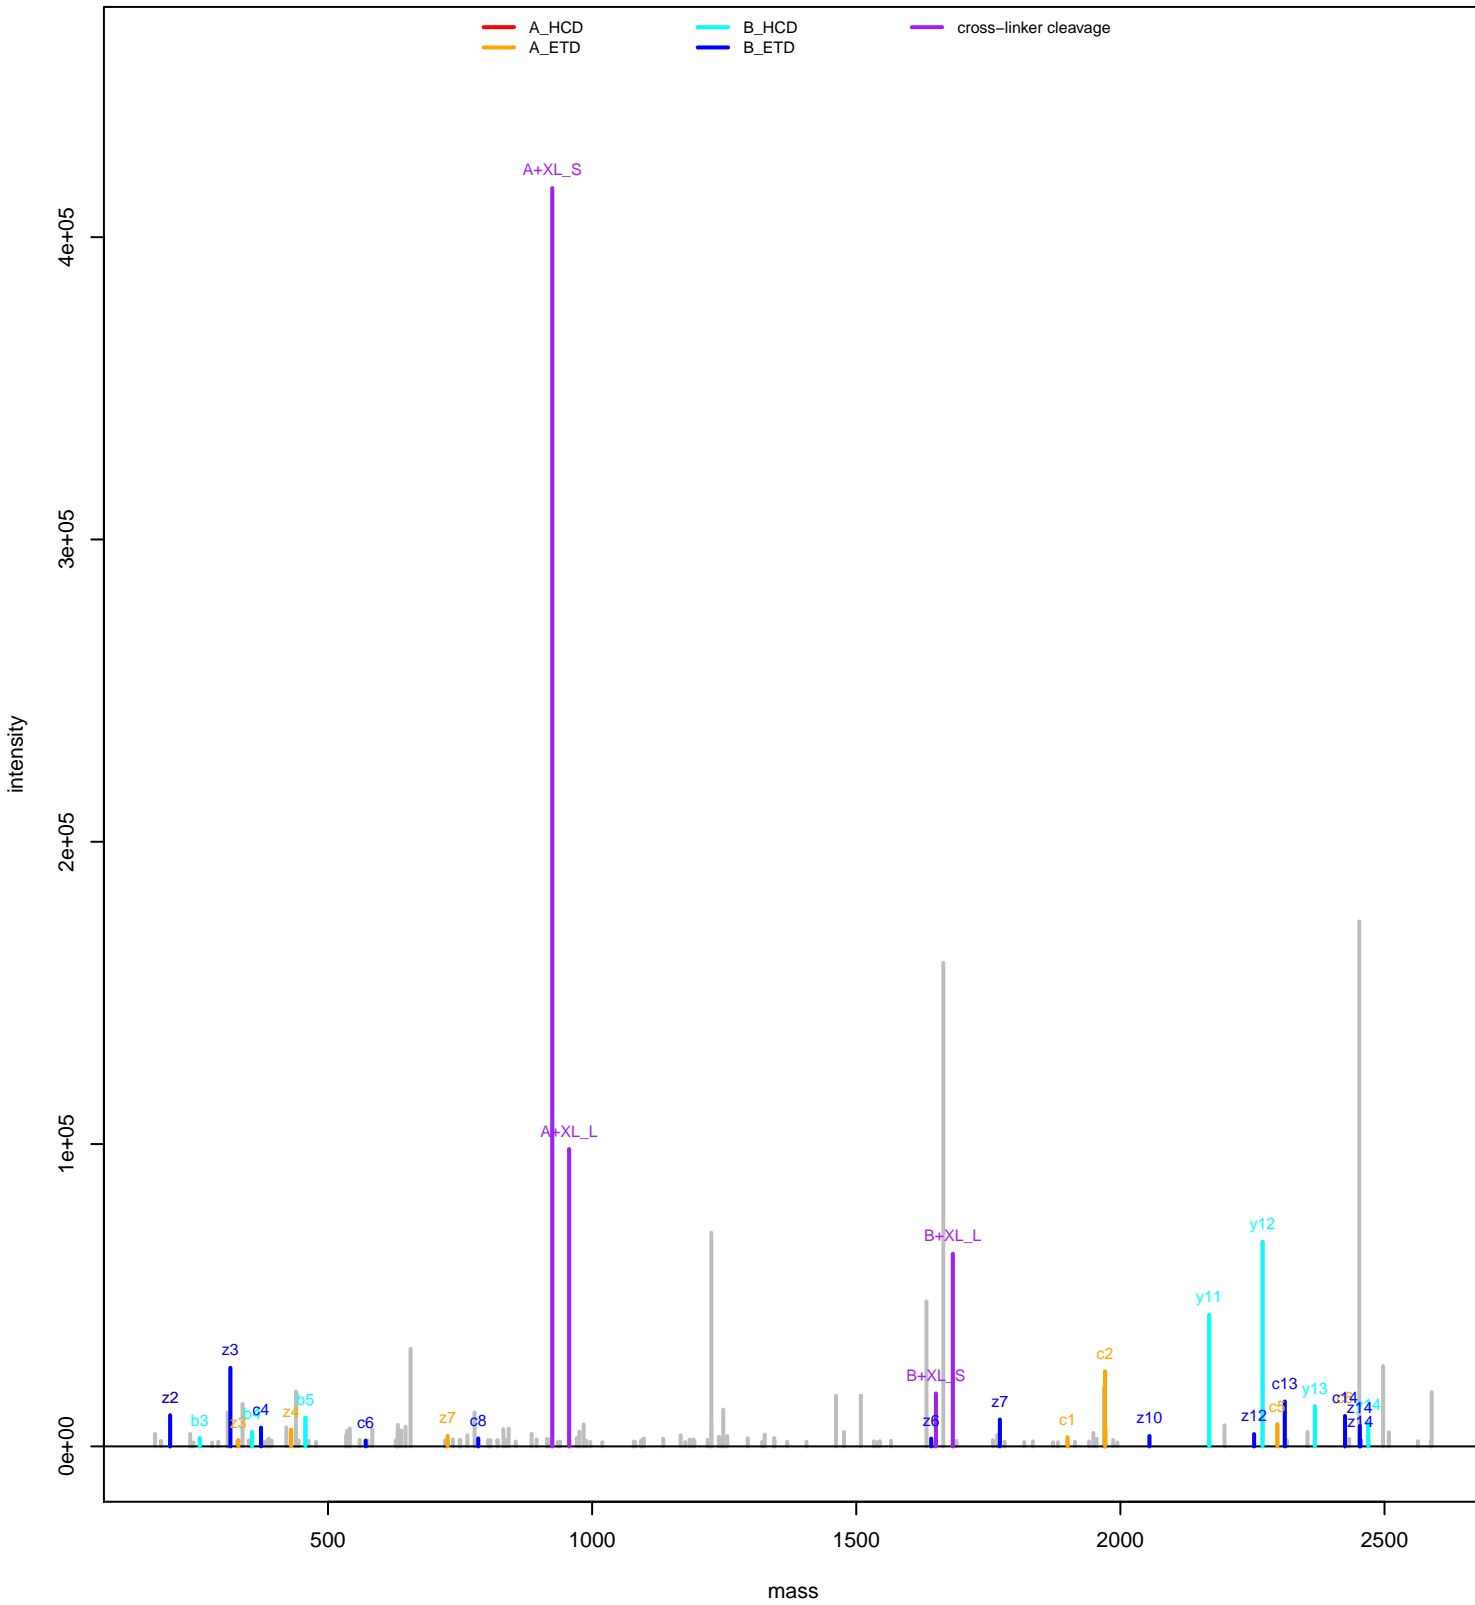

KAKPTQAK+XL\_S

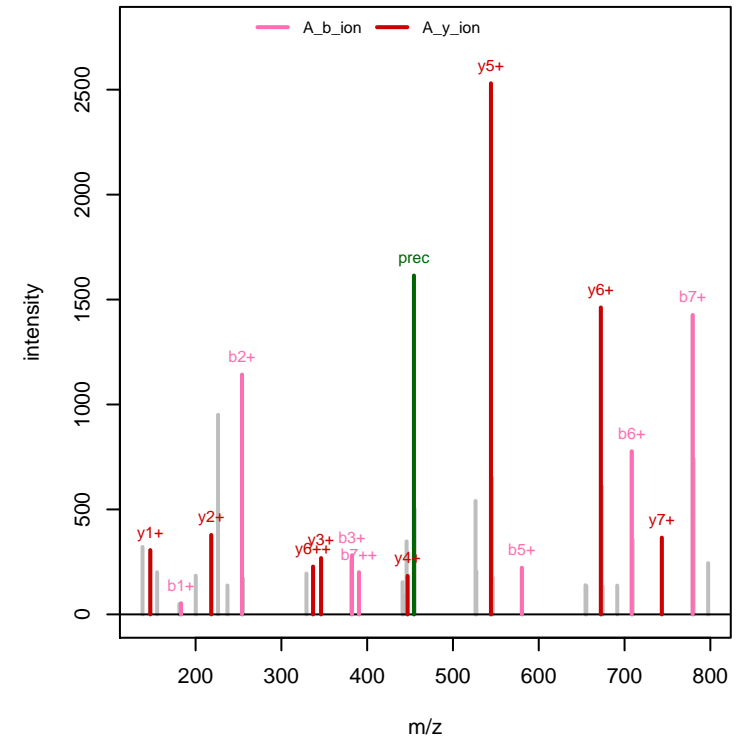

KAKPTQAK+XL\_L

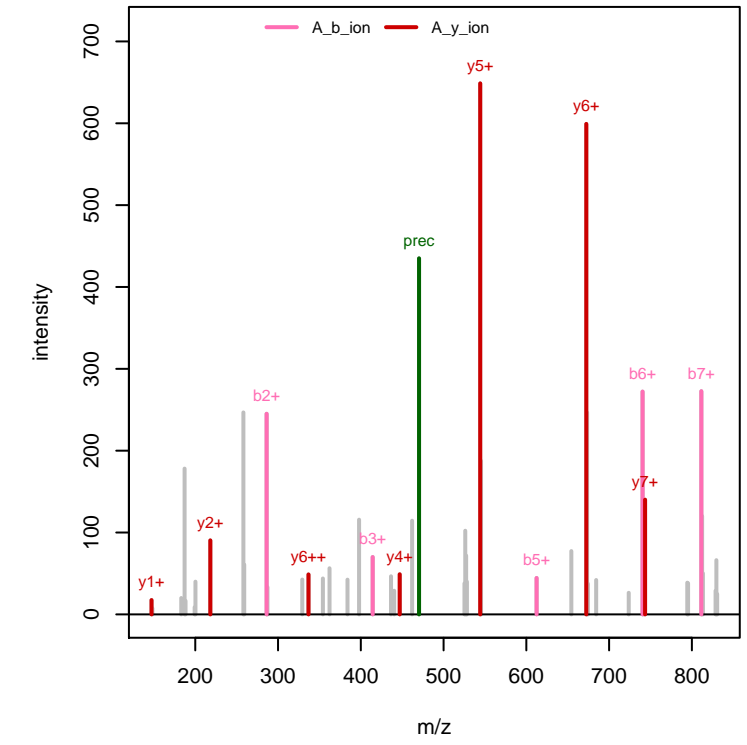

VGTVTPNVAEAVKNAK+XL\_S

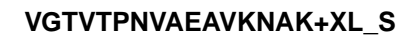

VGTVTPNVAEAVKNAK+XL\_L

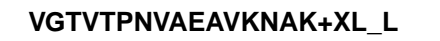

EIAEKMVEGR  
EYQVQLDIAMQSGKPK

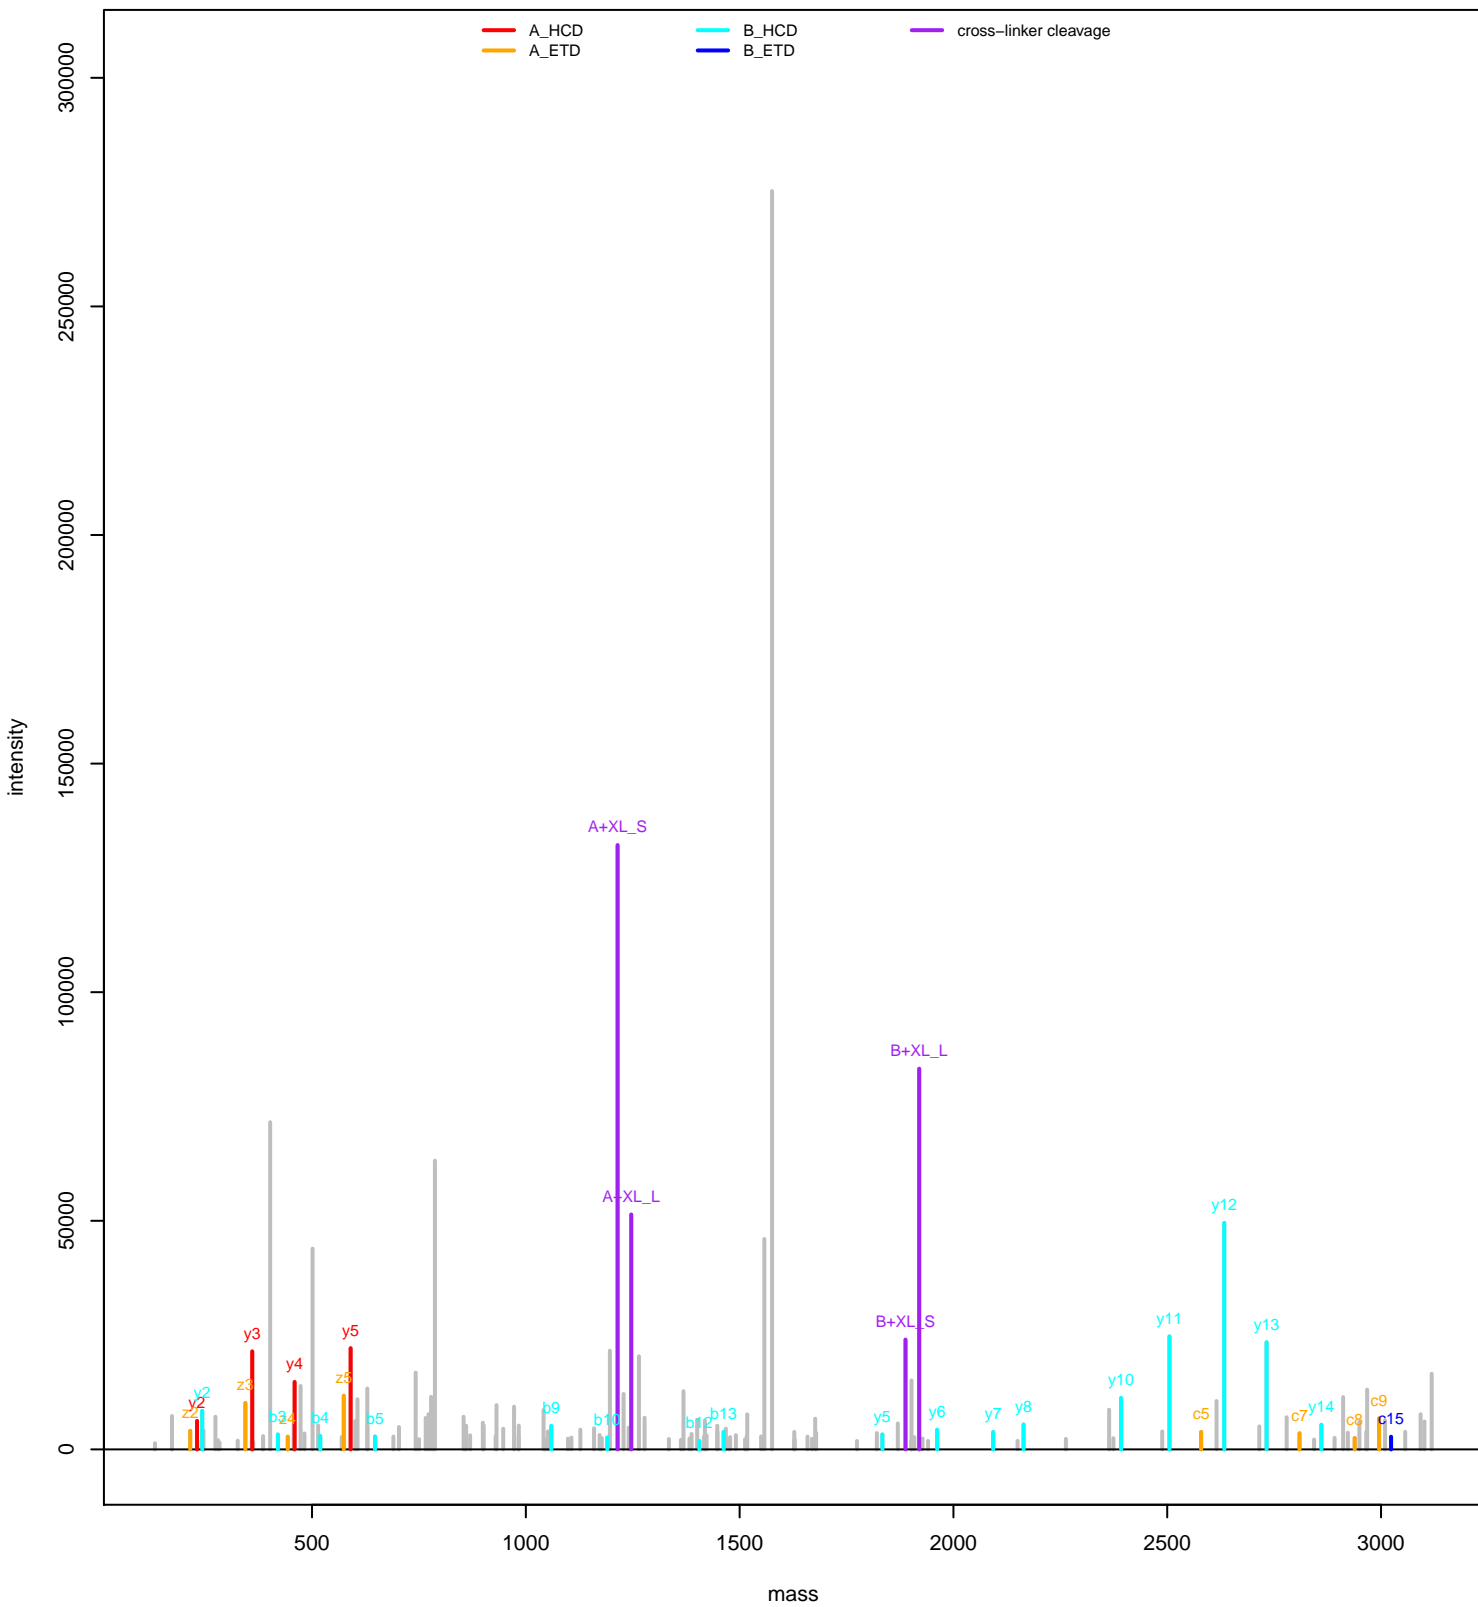

EIAEKMVEGR+XL\_S

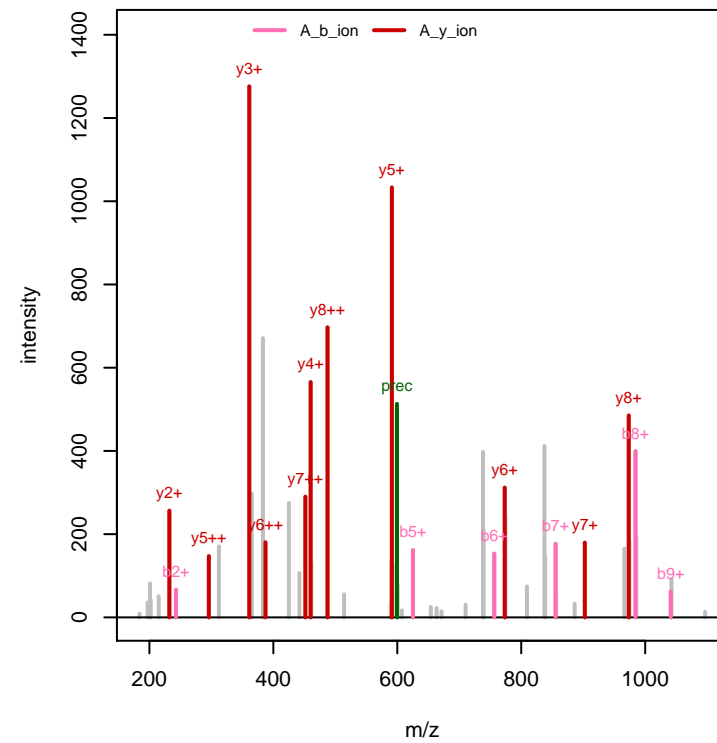

EIAEKMVEGR+XL\_L

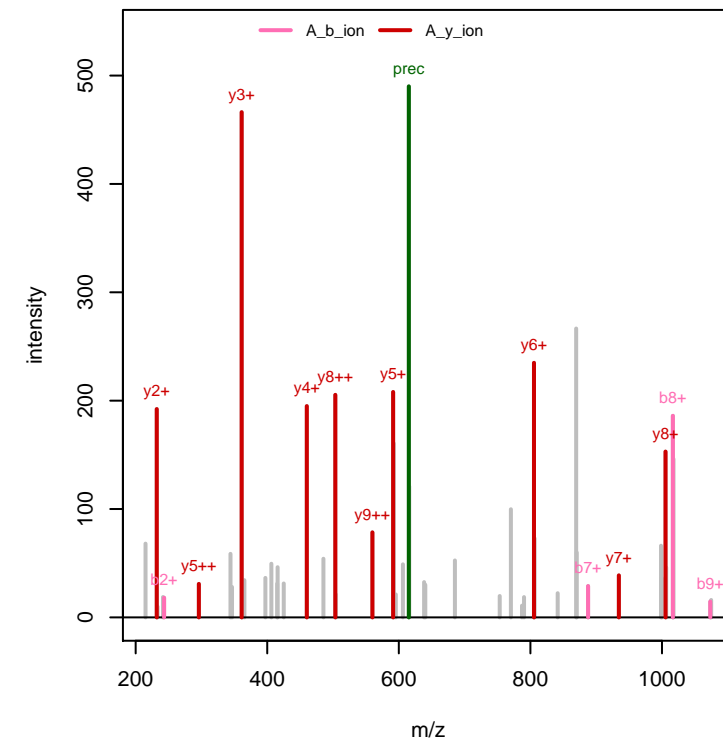

EYQVQLDIAMQSGKPK+XL\_S

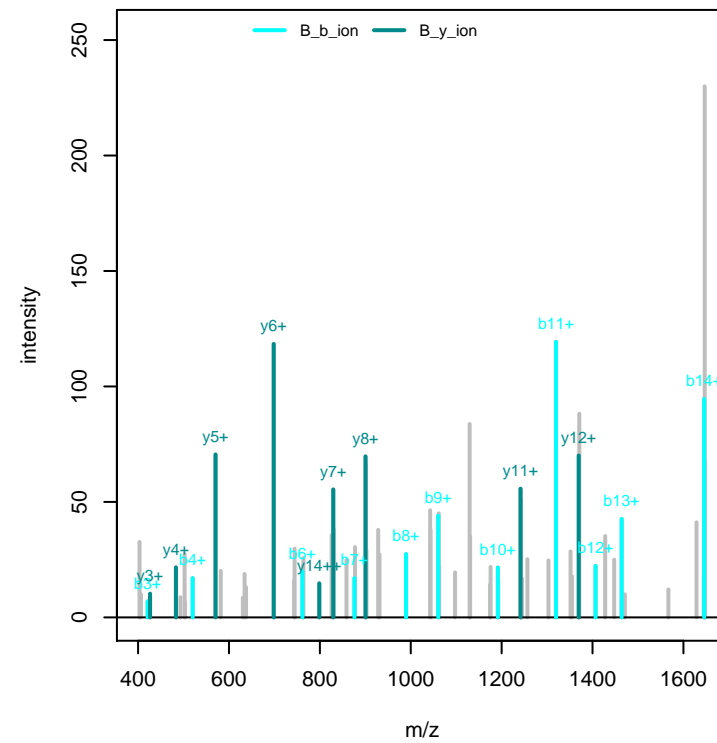

EYQVQLDIAMQSGKPK+XL\_L

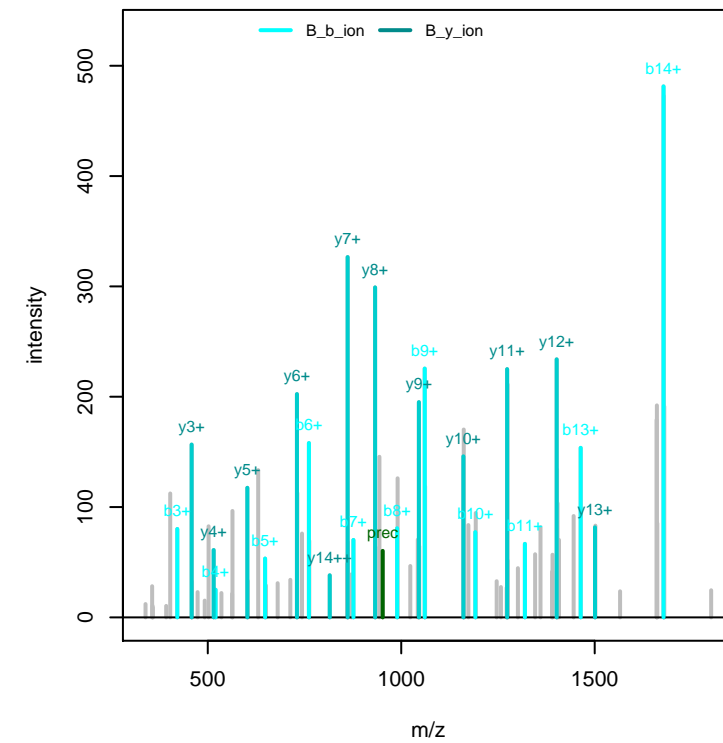

KLEAKR  
KITQGDDLAPGVLK

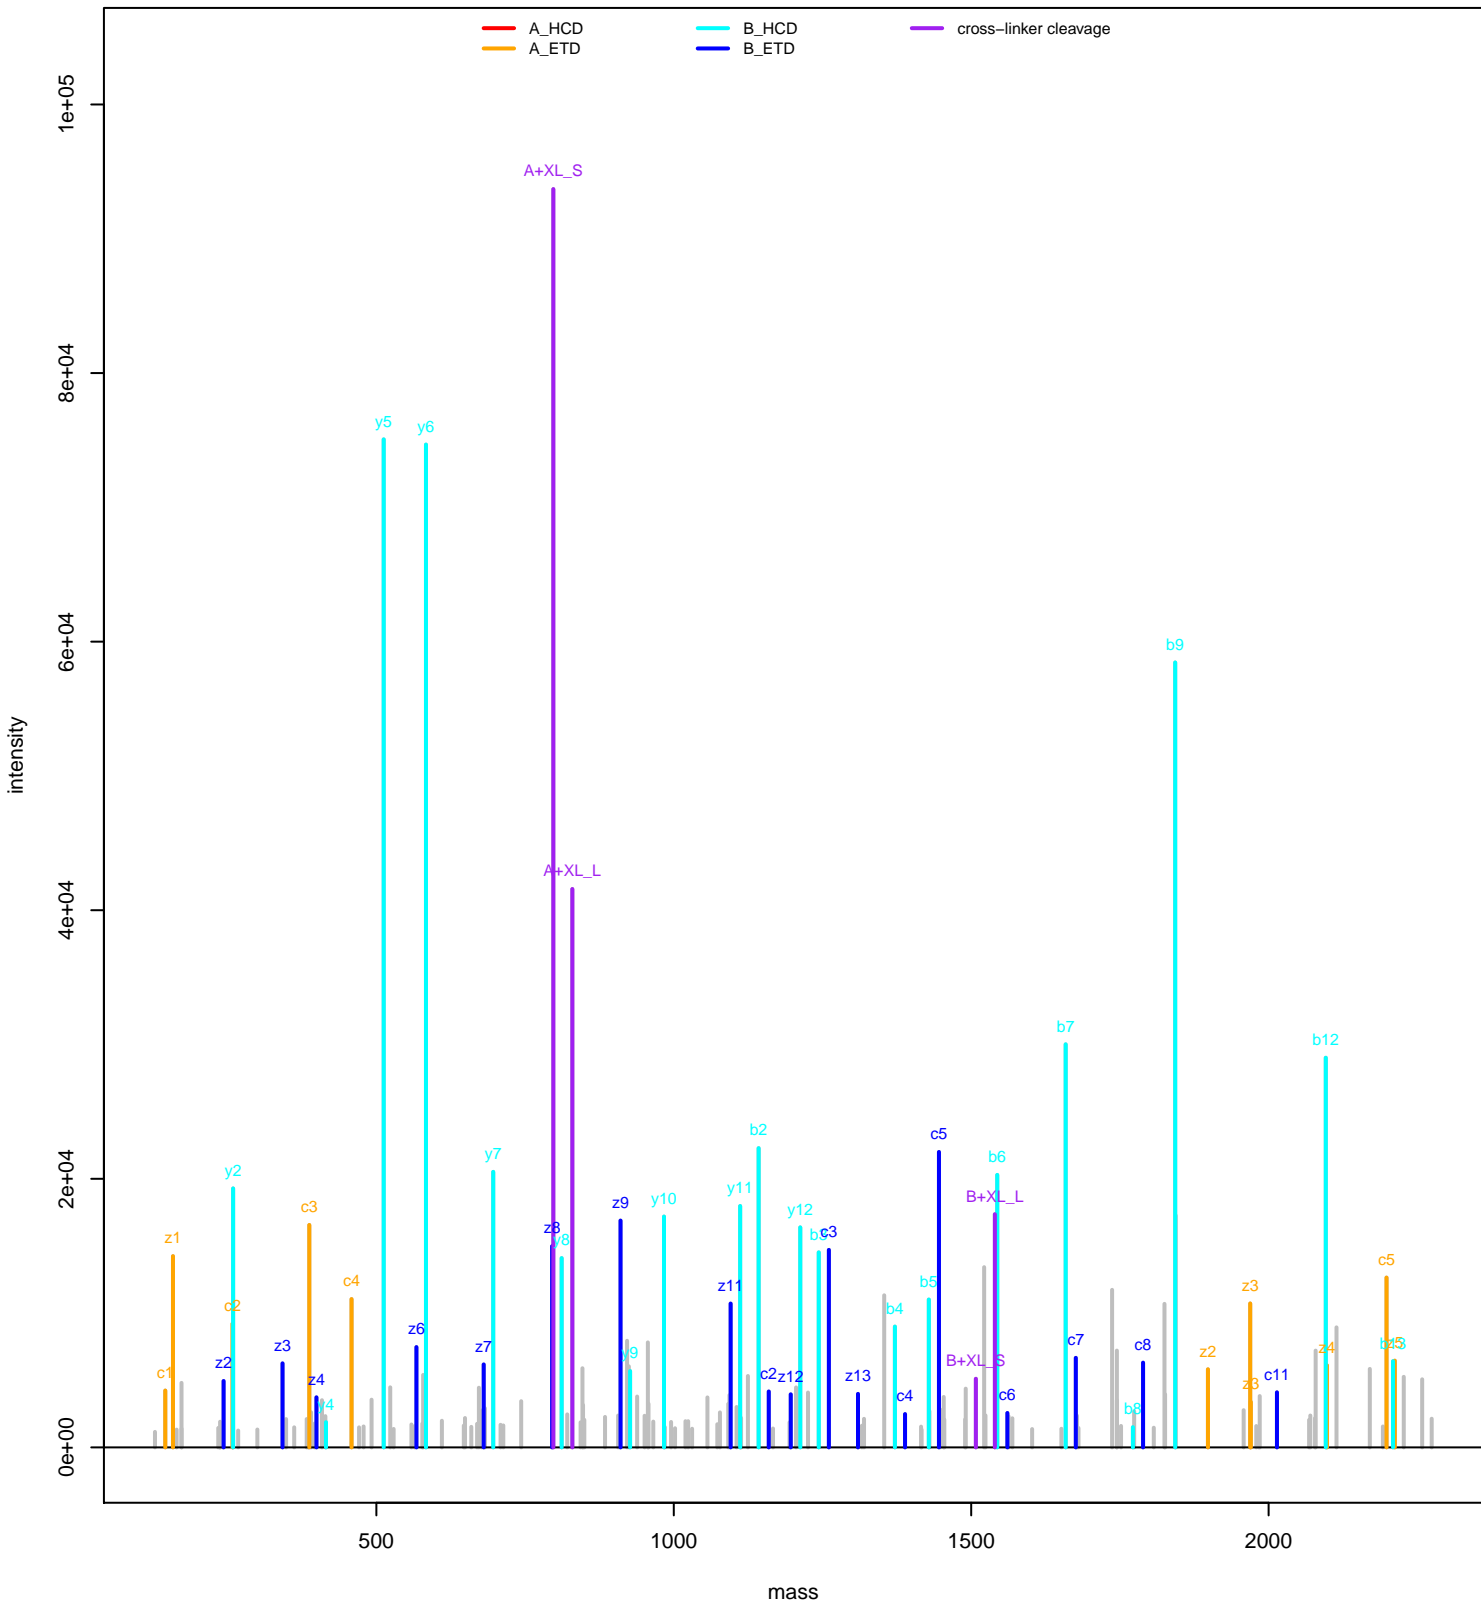

KLEAKR+XL\_S

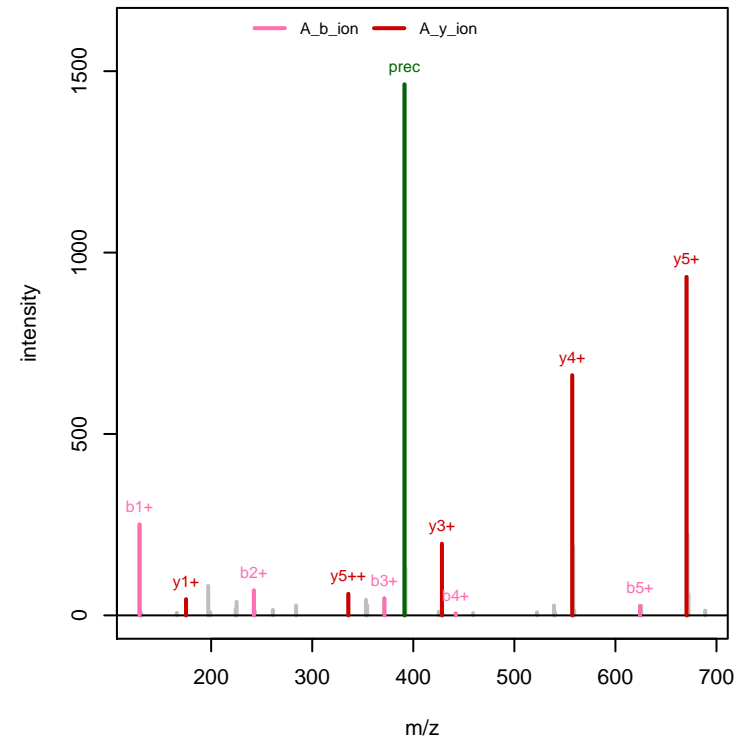

KLEAKR+XL\_L

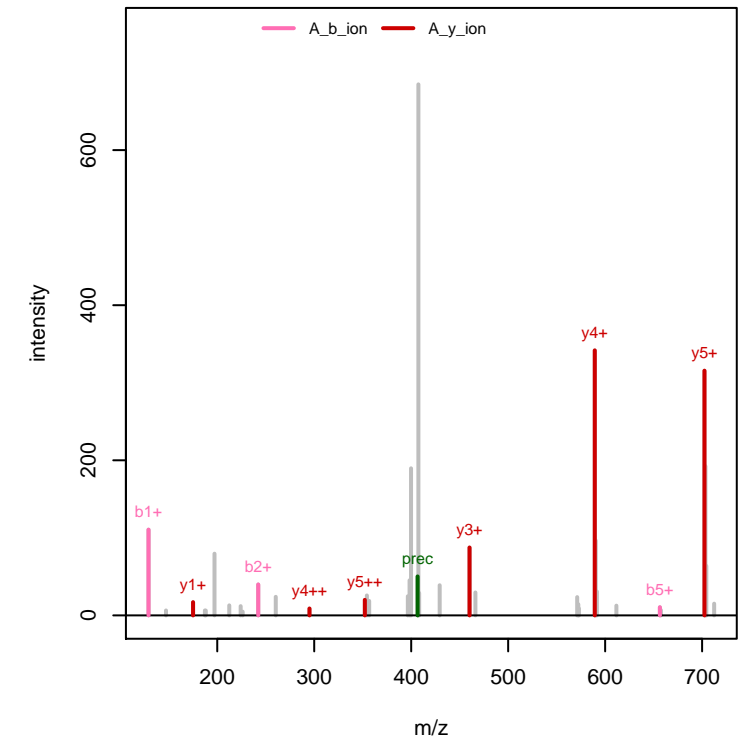

KITQGDDLAPGVLK+XL\_S

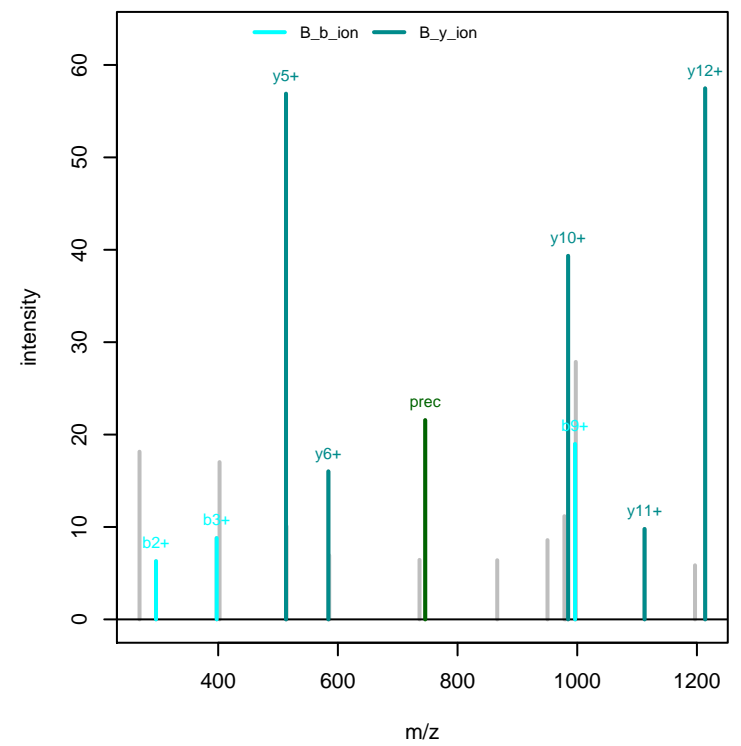

KITQGDDLAPGVLK+XL\_L

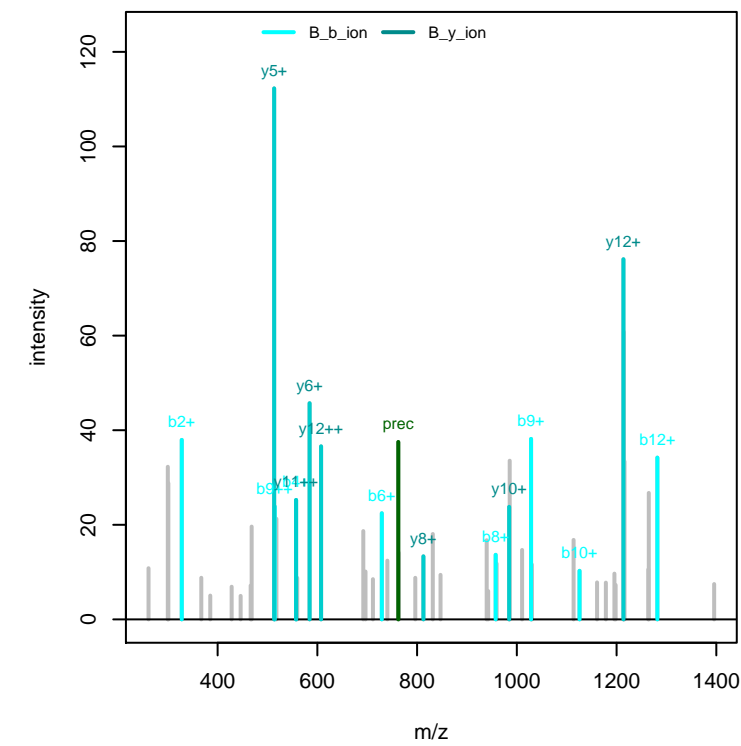

NKELMDNMR  
TNELKADEERVK

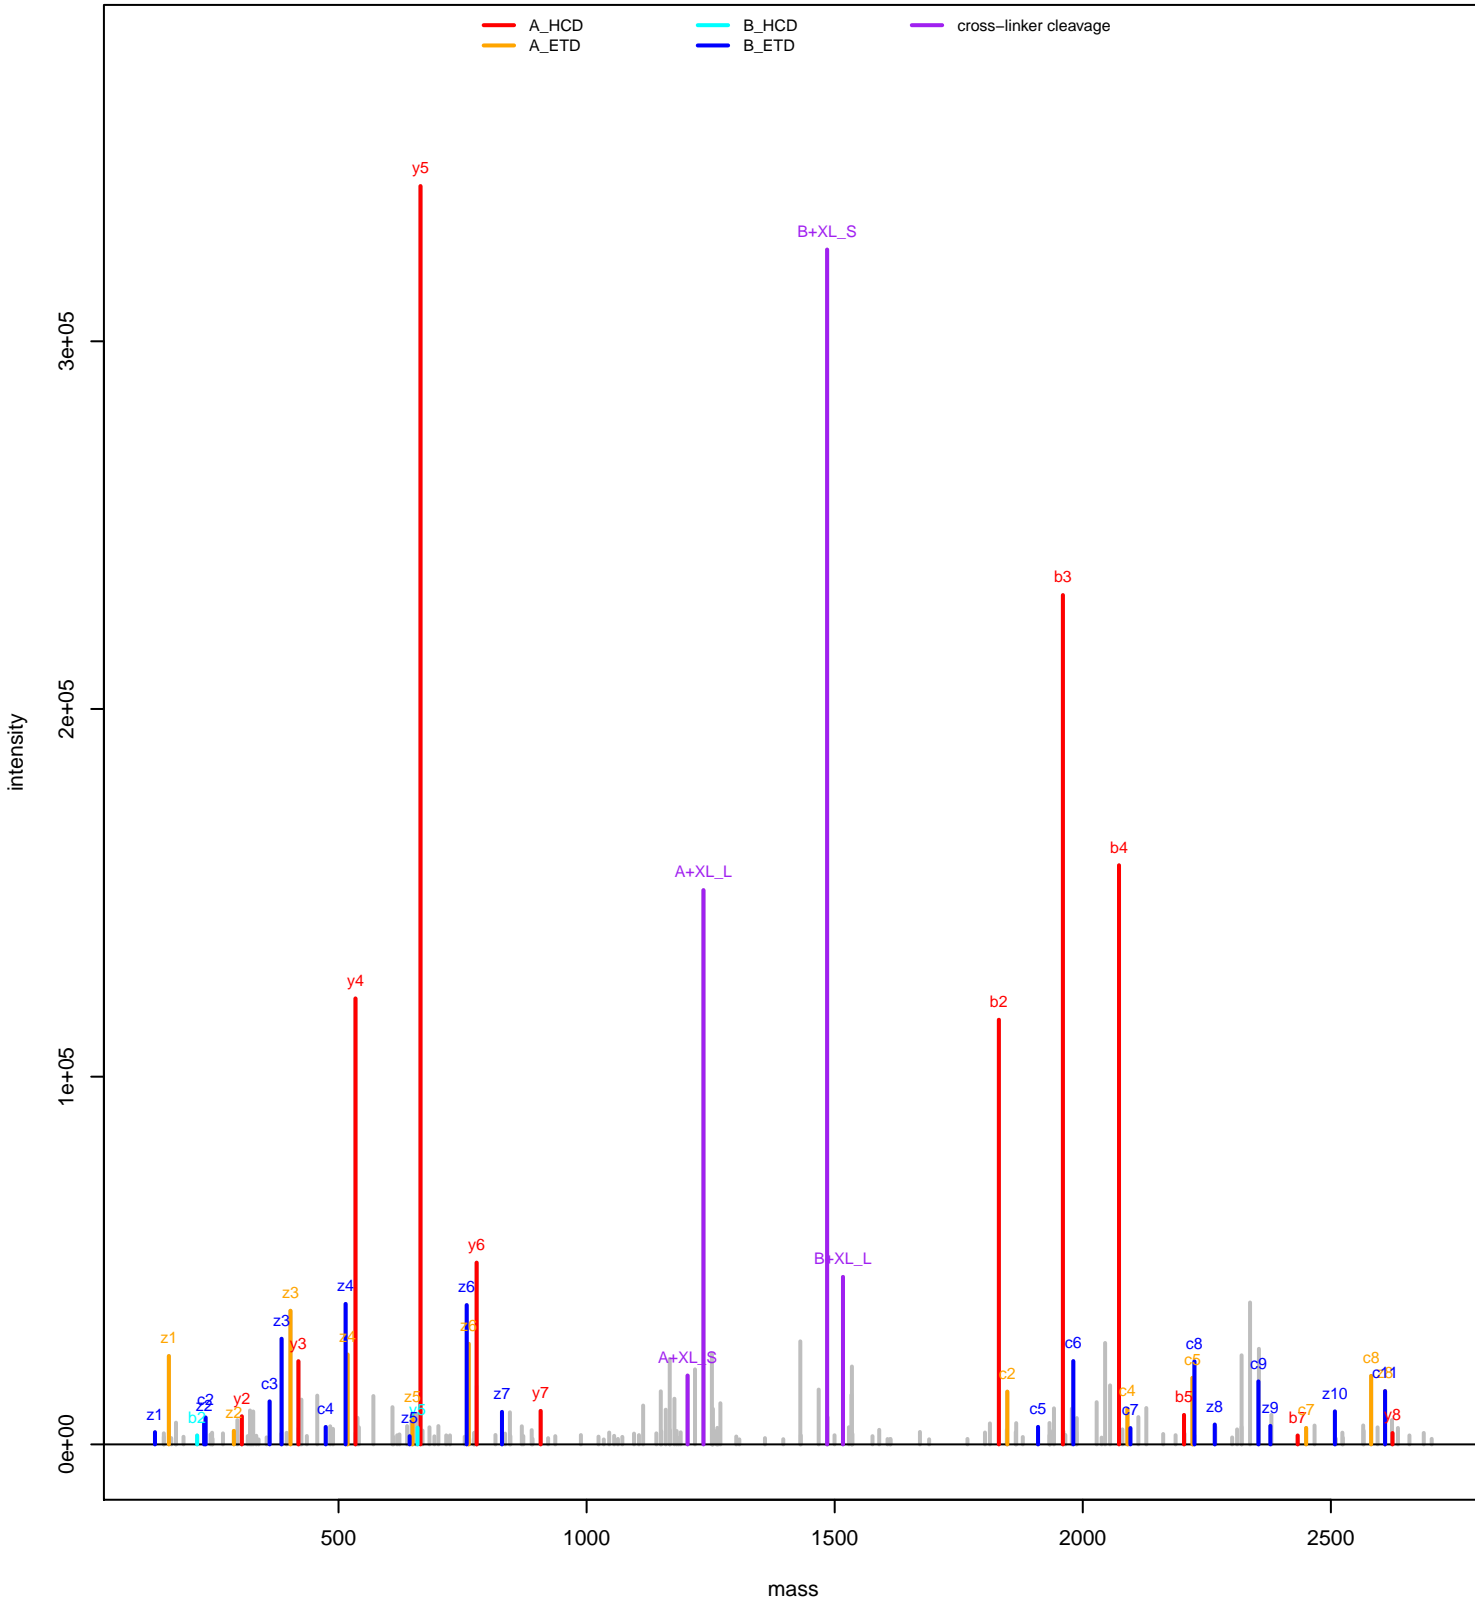

NKELMDNMR+XL\_S

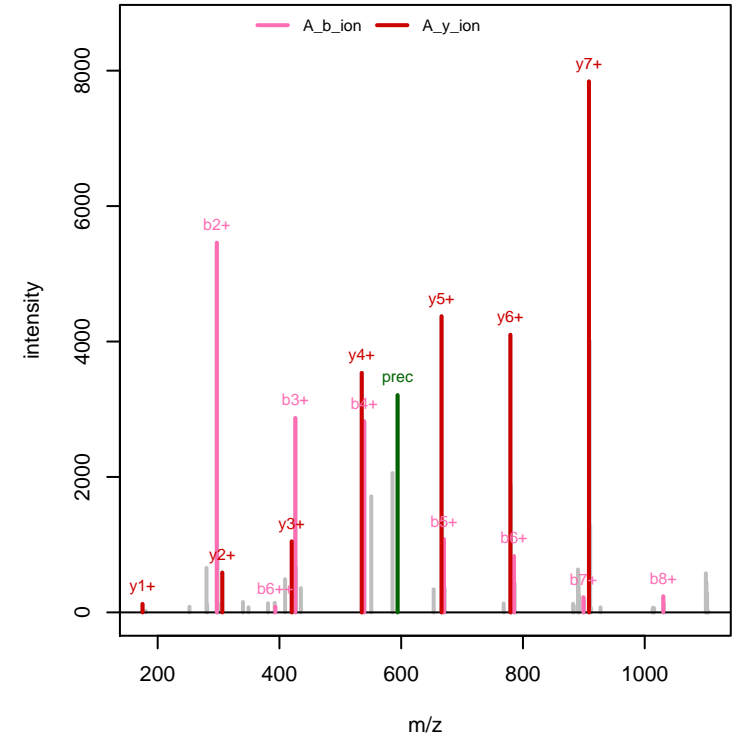

NKELMDNMR+XL\_L

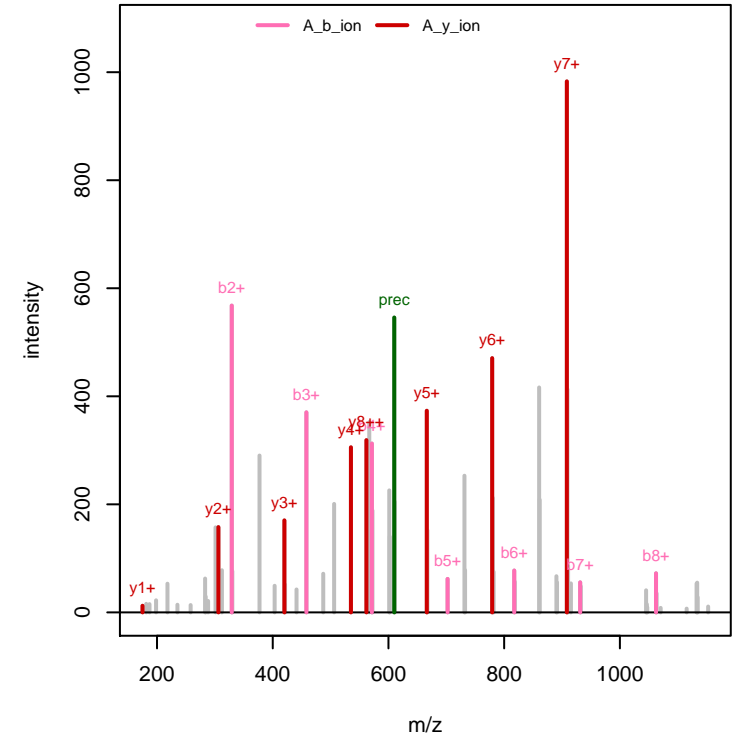

TNELKADEERVK+XL\_S

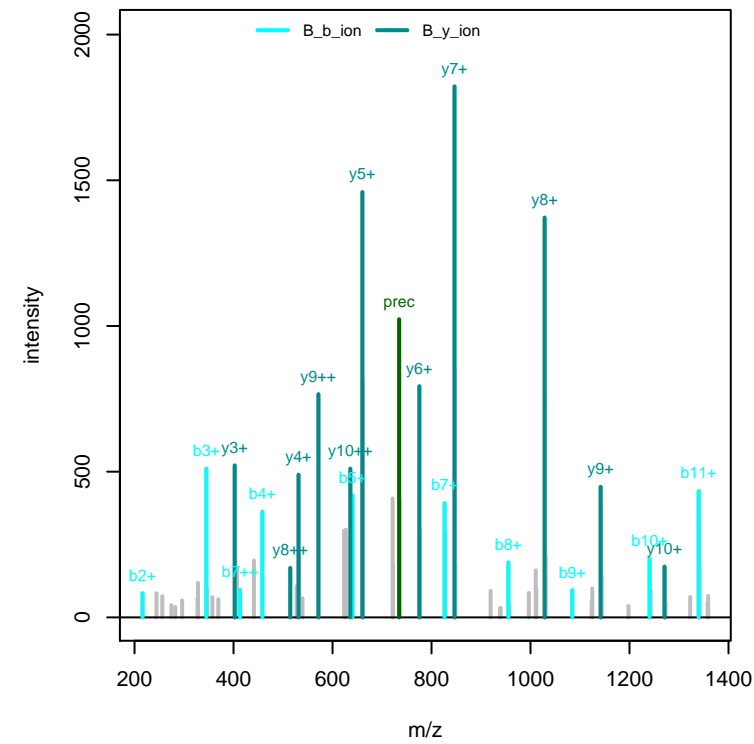

TNELKADEERVK+XL\_L

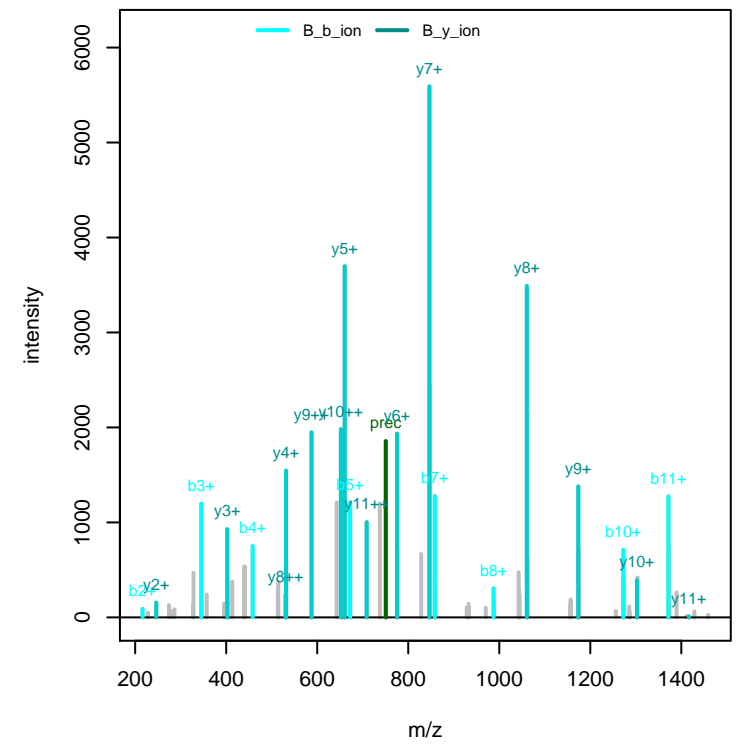





ALKDAVK  
TGRNPQTGKEITIAAAK

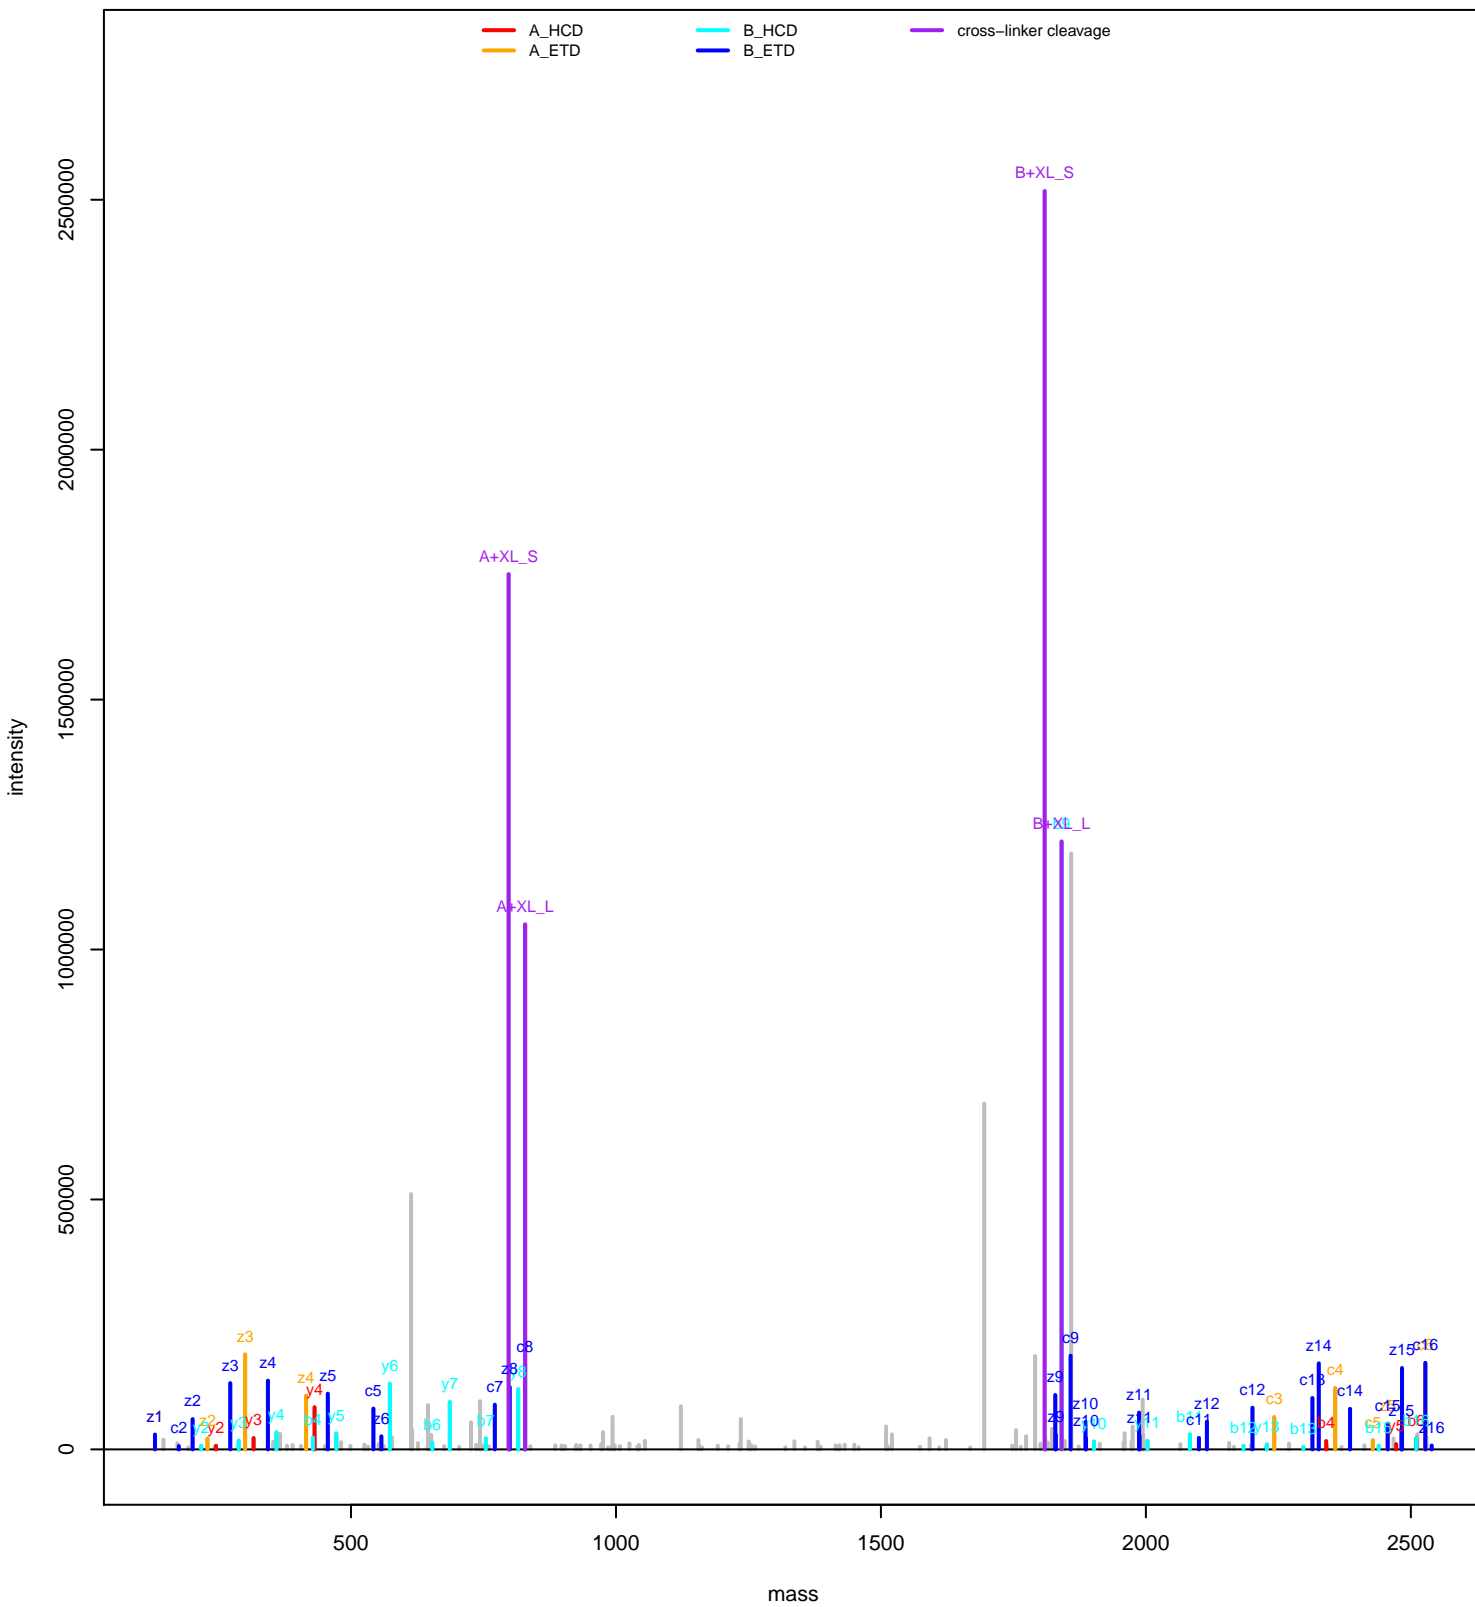

ALKDAVK+XL\_S

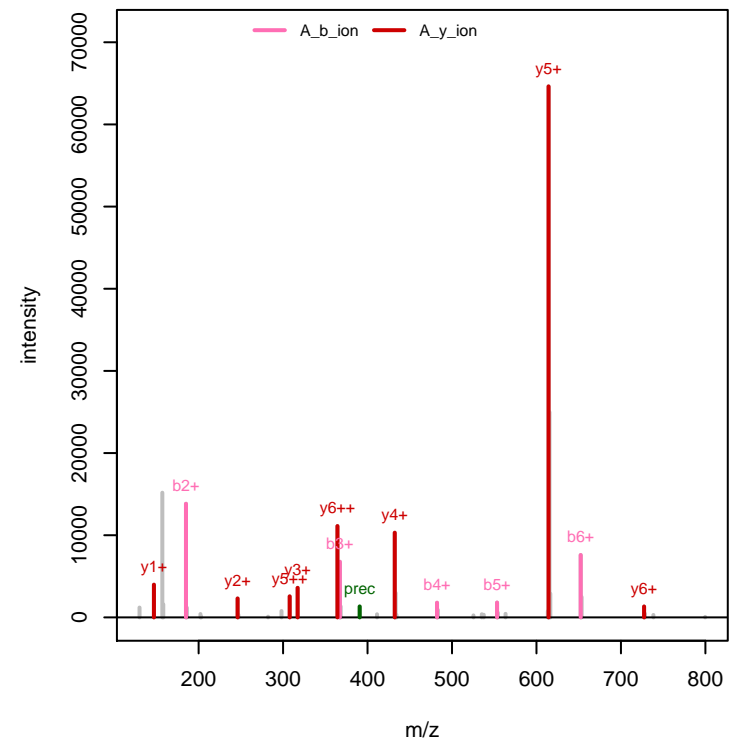

ALKDAVK+XL\_L

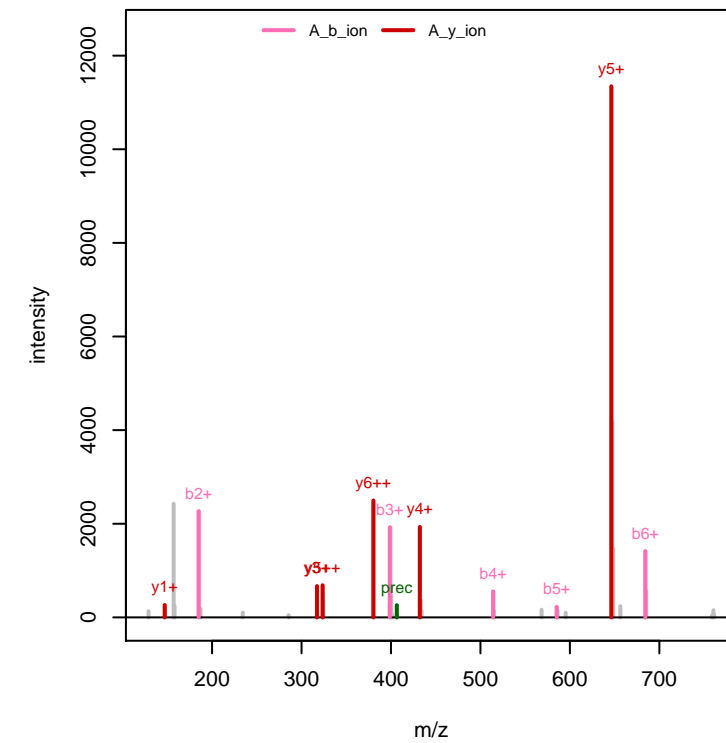

TGRNPQTGKEITIAAAK+XL\_S

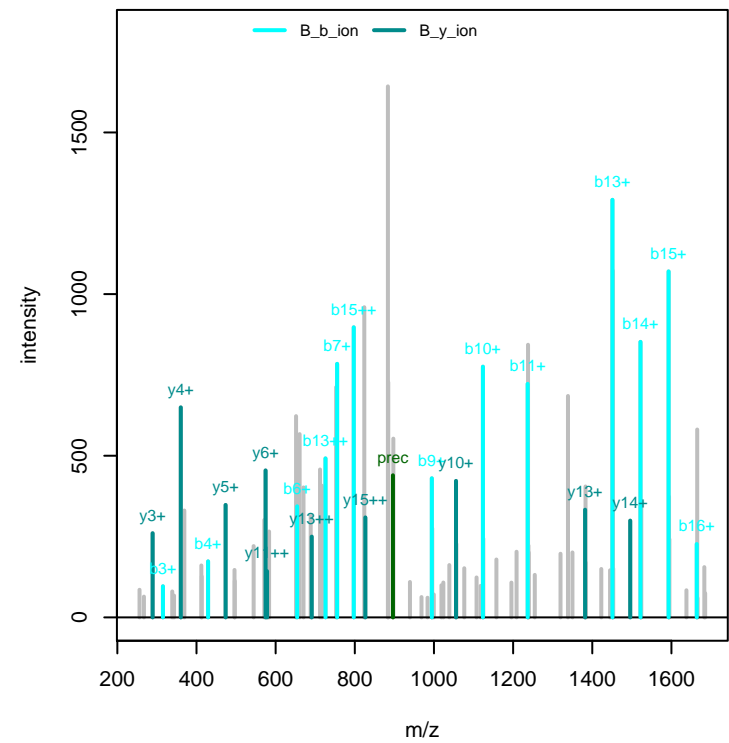

TGRNPQTGKEITIAAAK+XL\_L

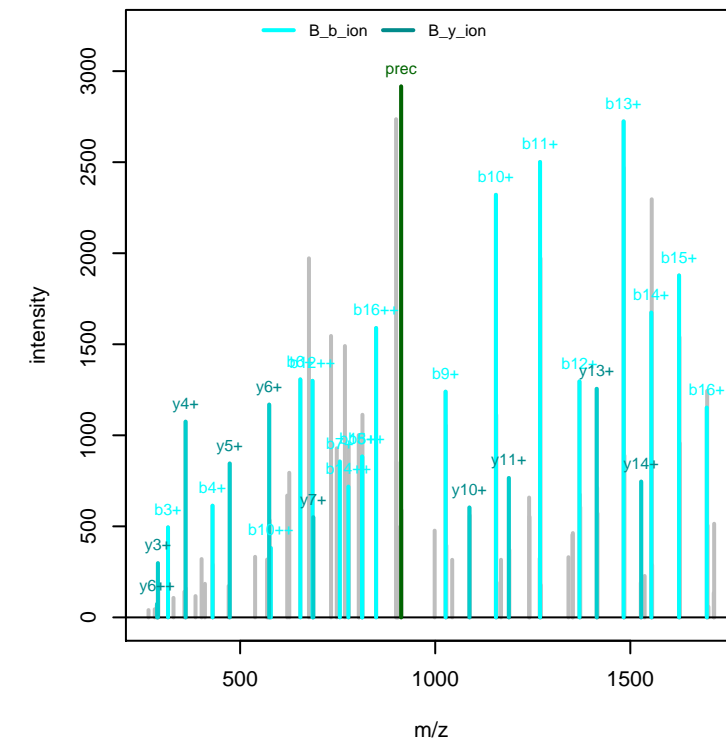

QVIVQKVR  
KKYEQEIDVR

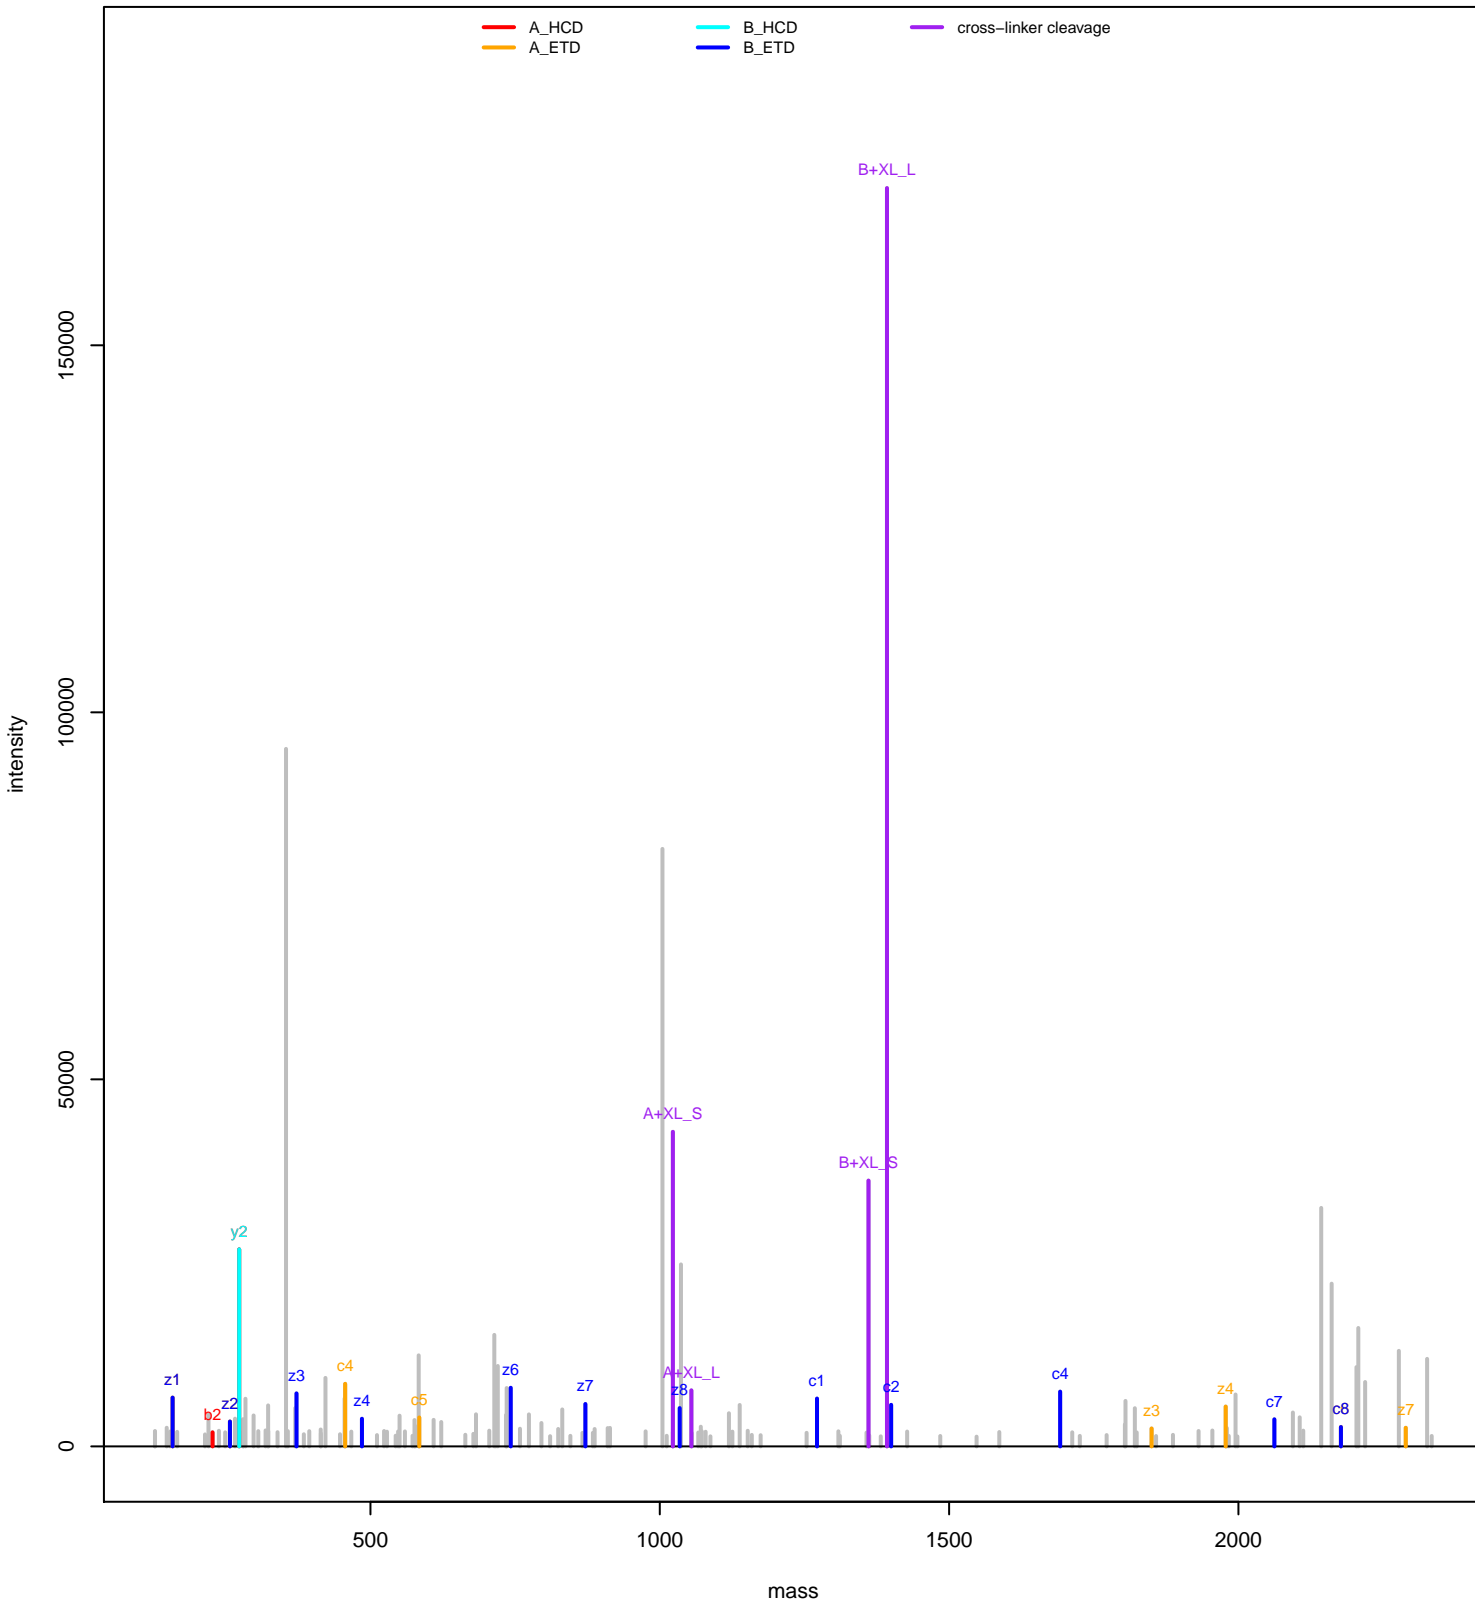

QVIVQKVR+XL\_S

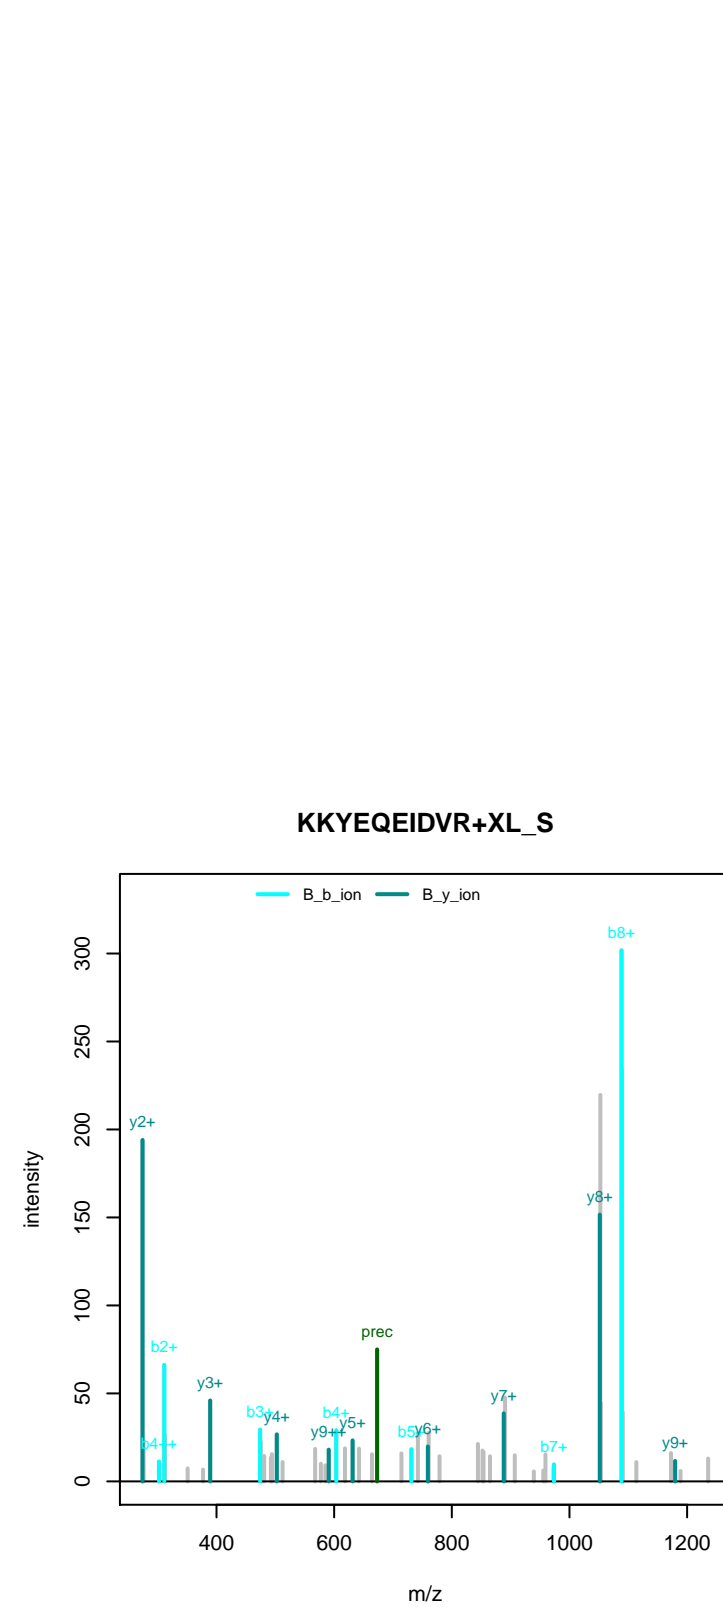

QVIVQKVR+XL\_L

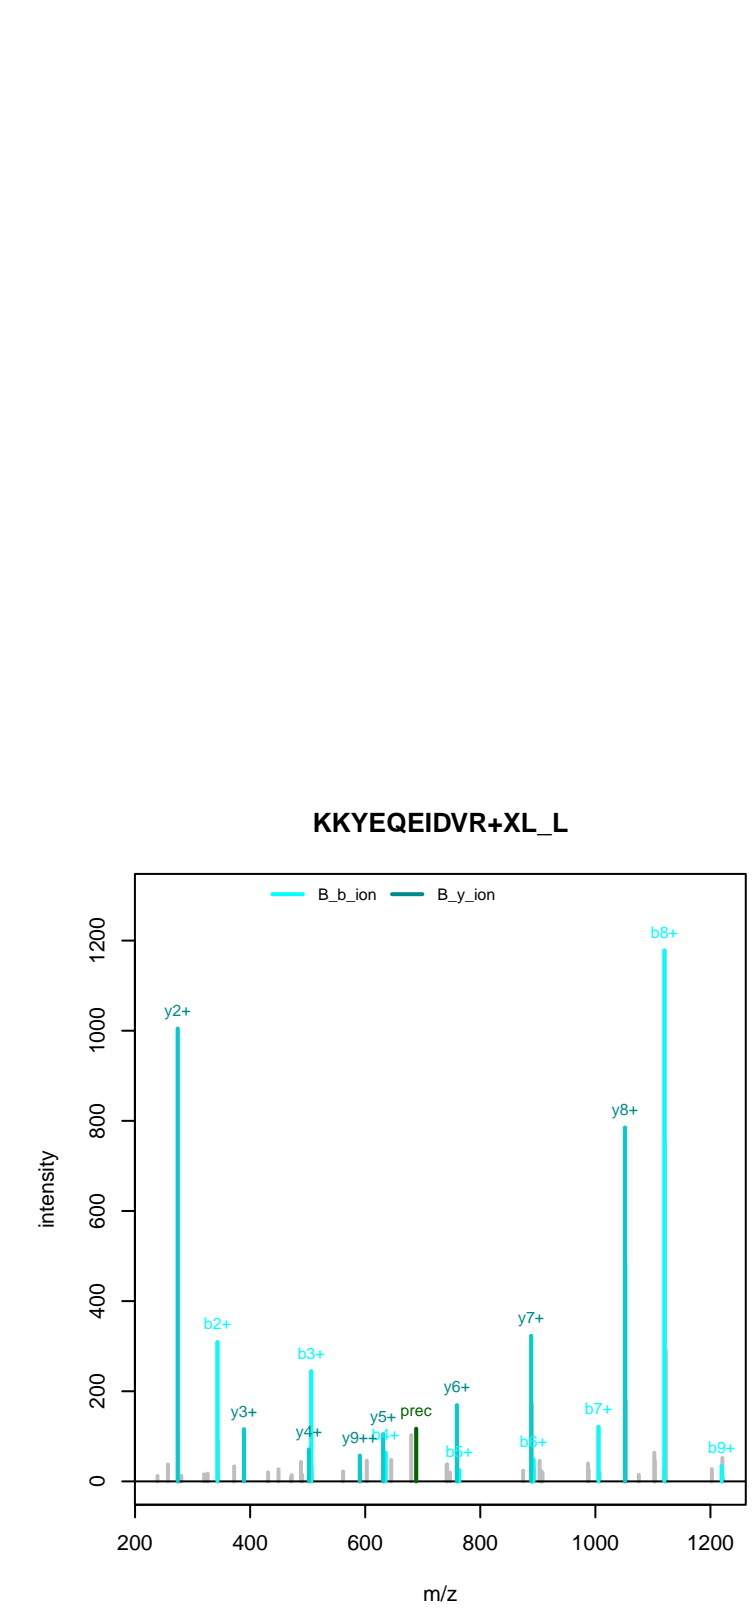

KKYEQEIDVR+XL\_S

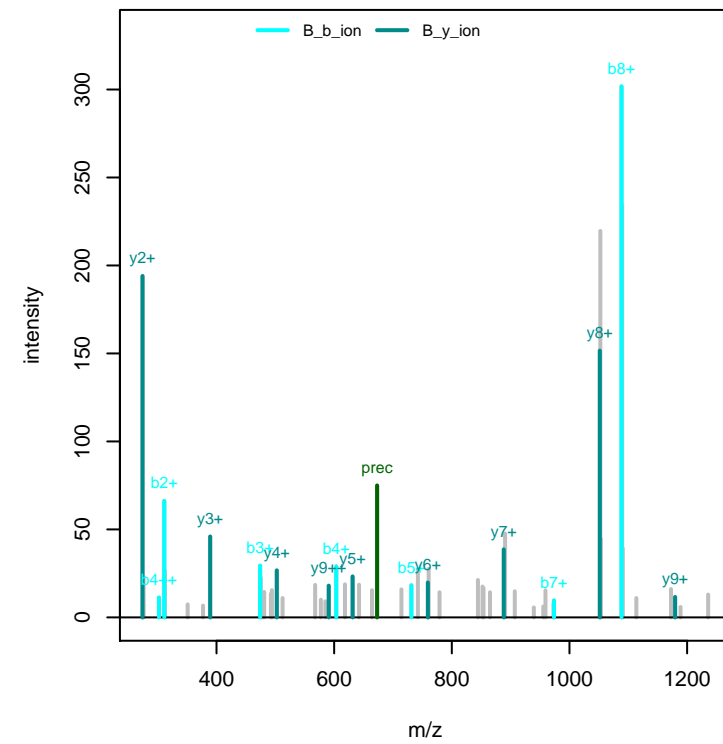

KKYEQEIDVR+XL\_L

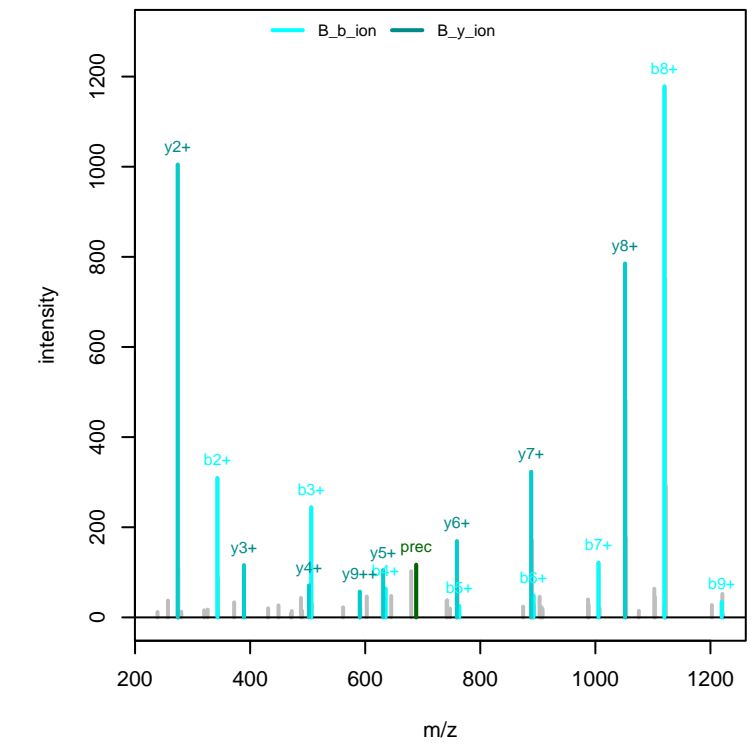

MNIEELKK  
NTGKEVSEIR

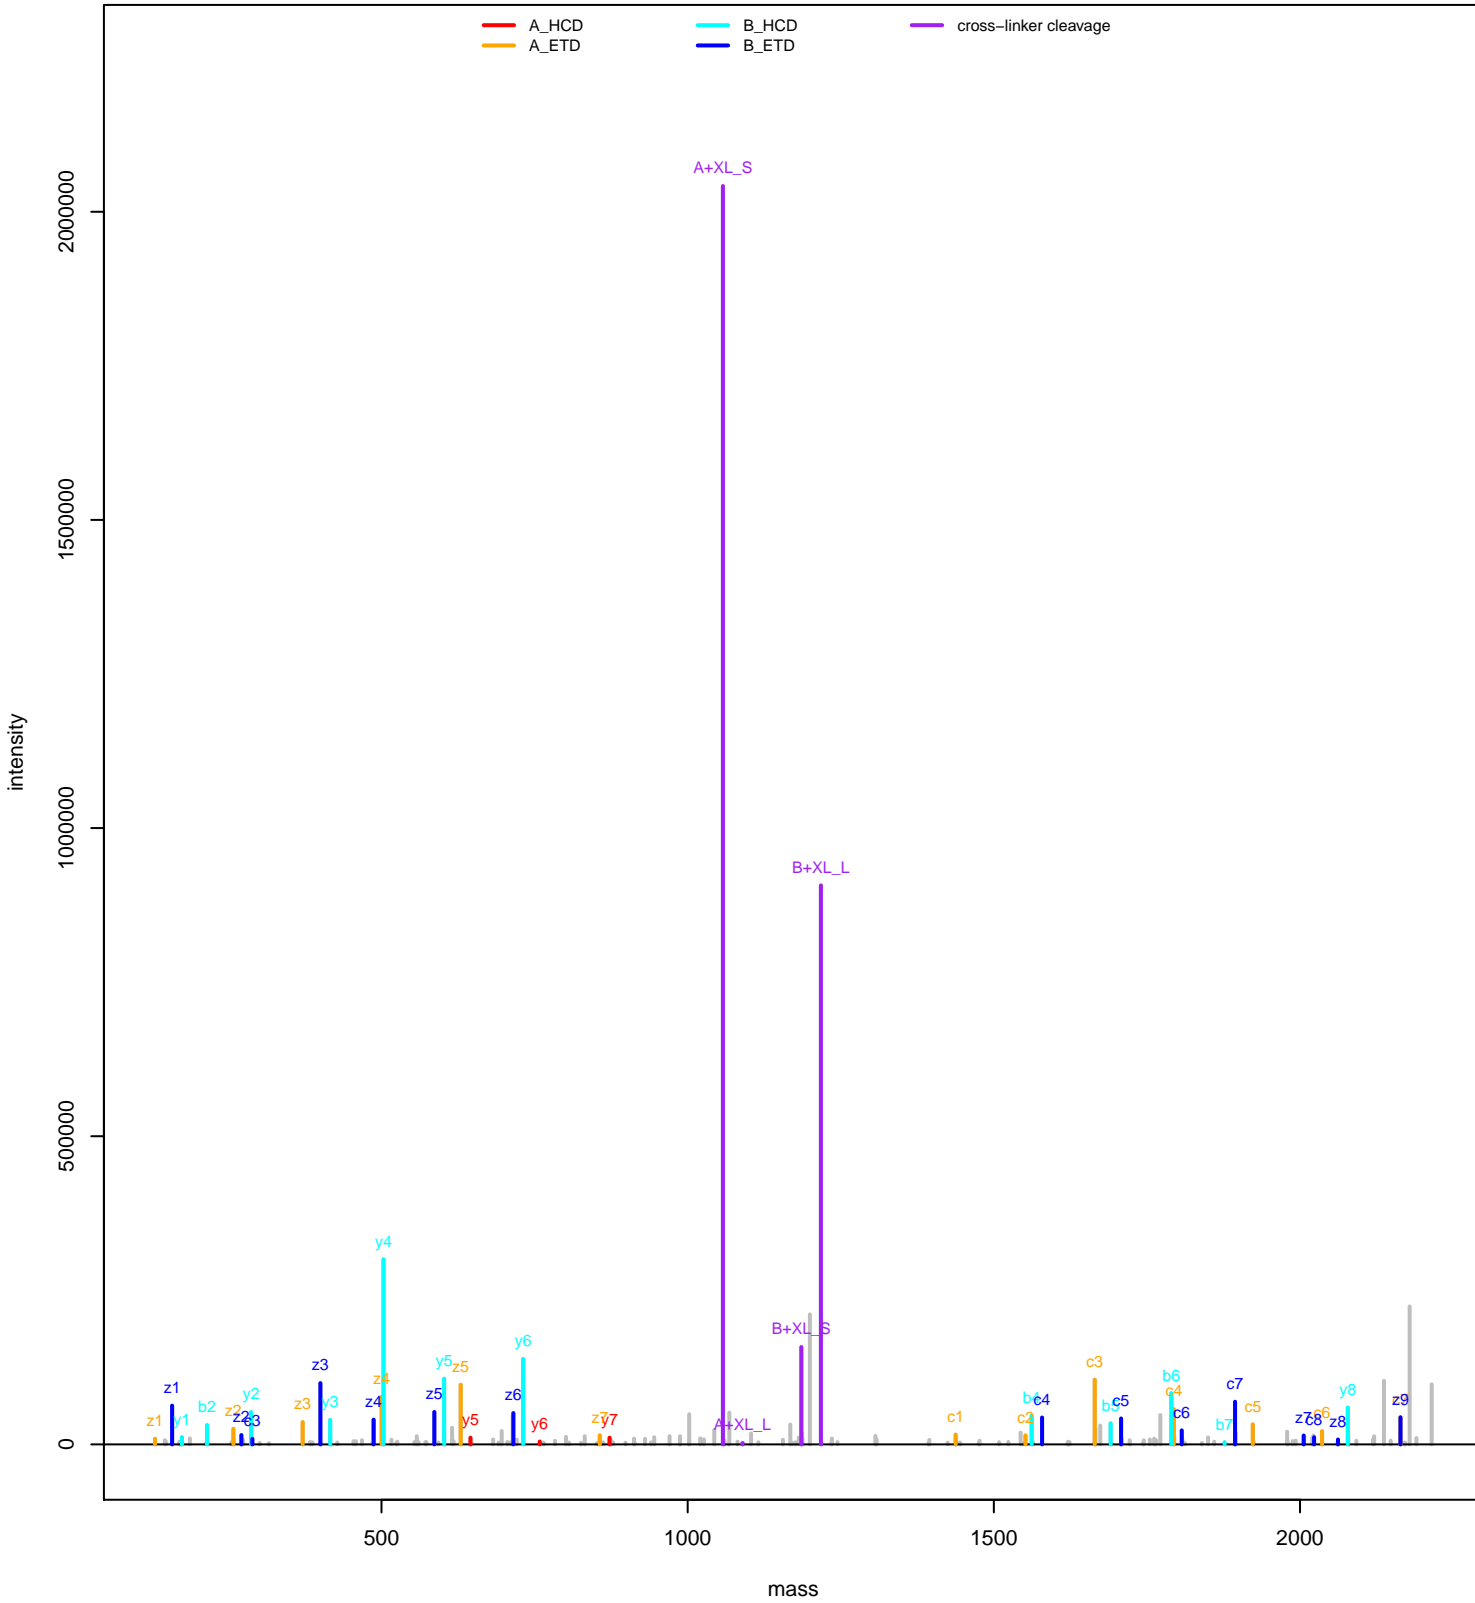

MNIEELKK+XL\_S

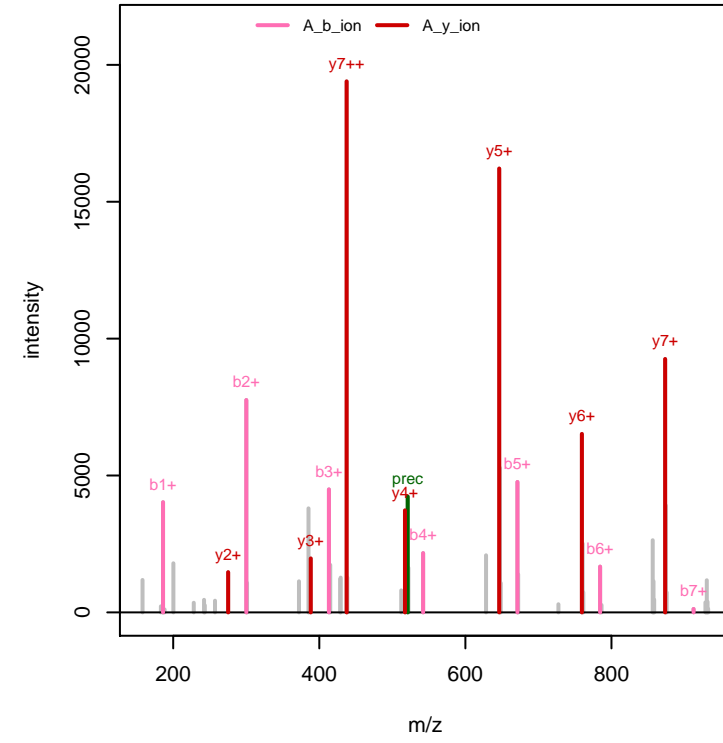

MNIEELKK+XL\_L

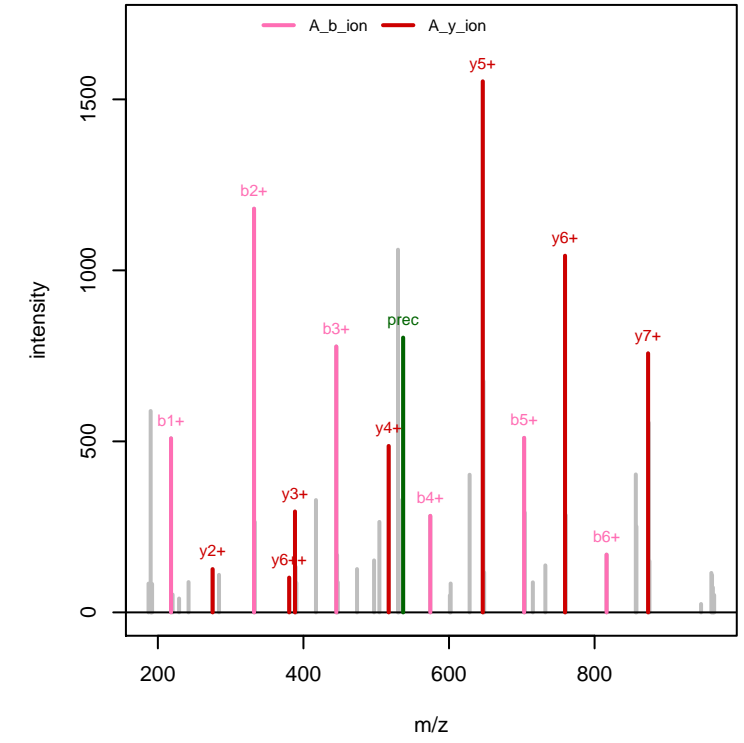

NTGKEVSEIR+XL\_S

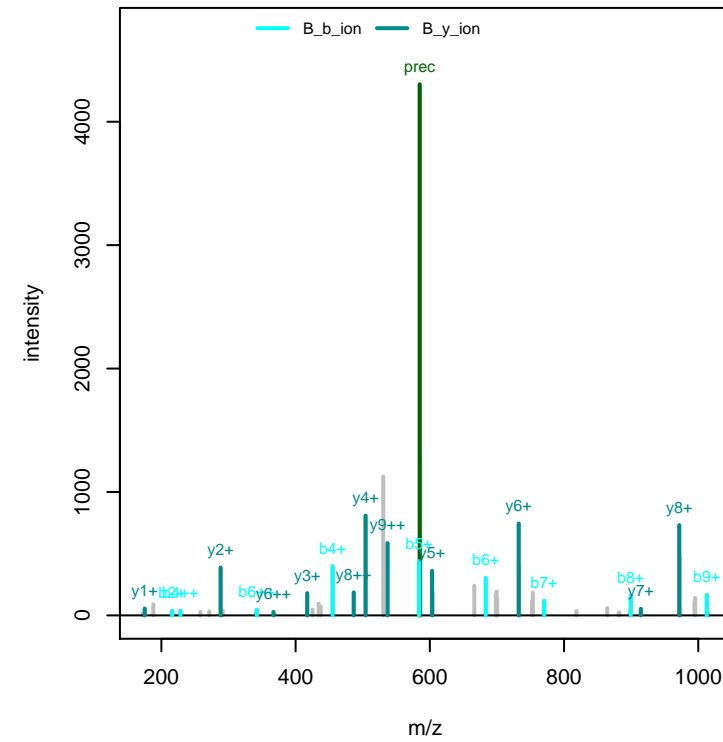

NTGKEVSEIR+XL\_L

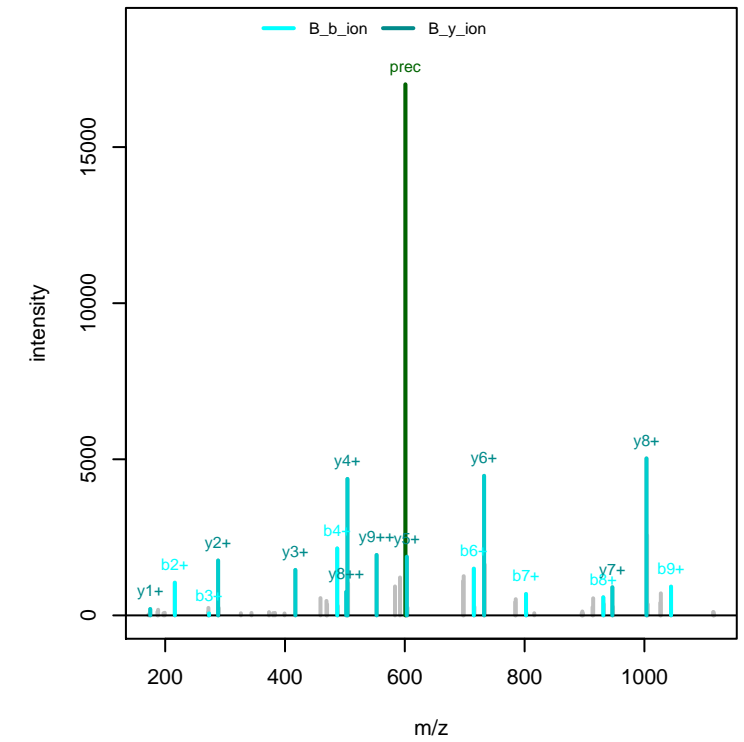

**GEDQPNKK**  
**APVIVQFSNGGASFIAGKGVK**

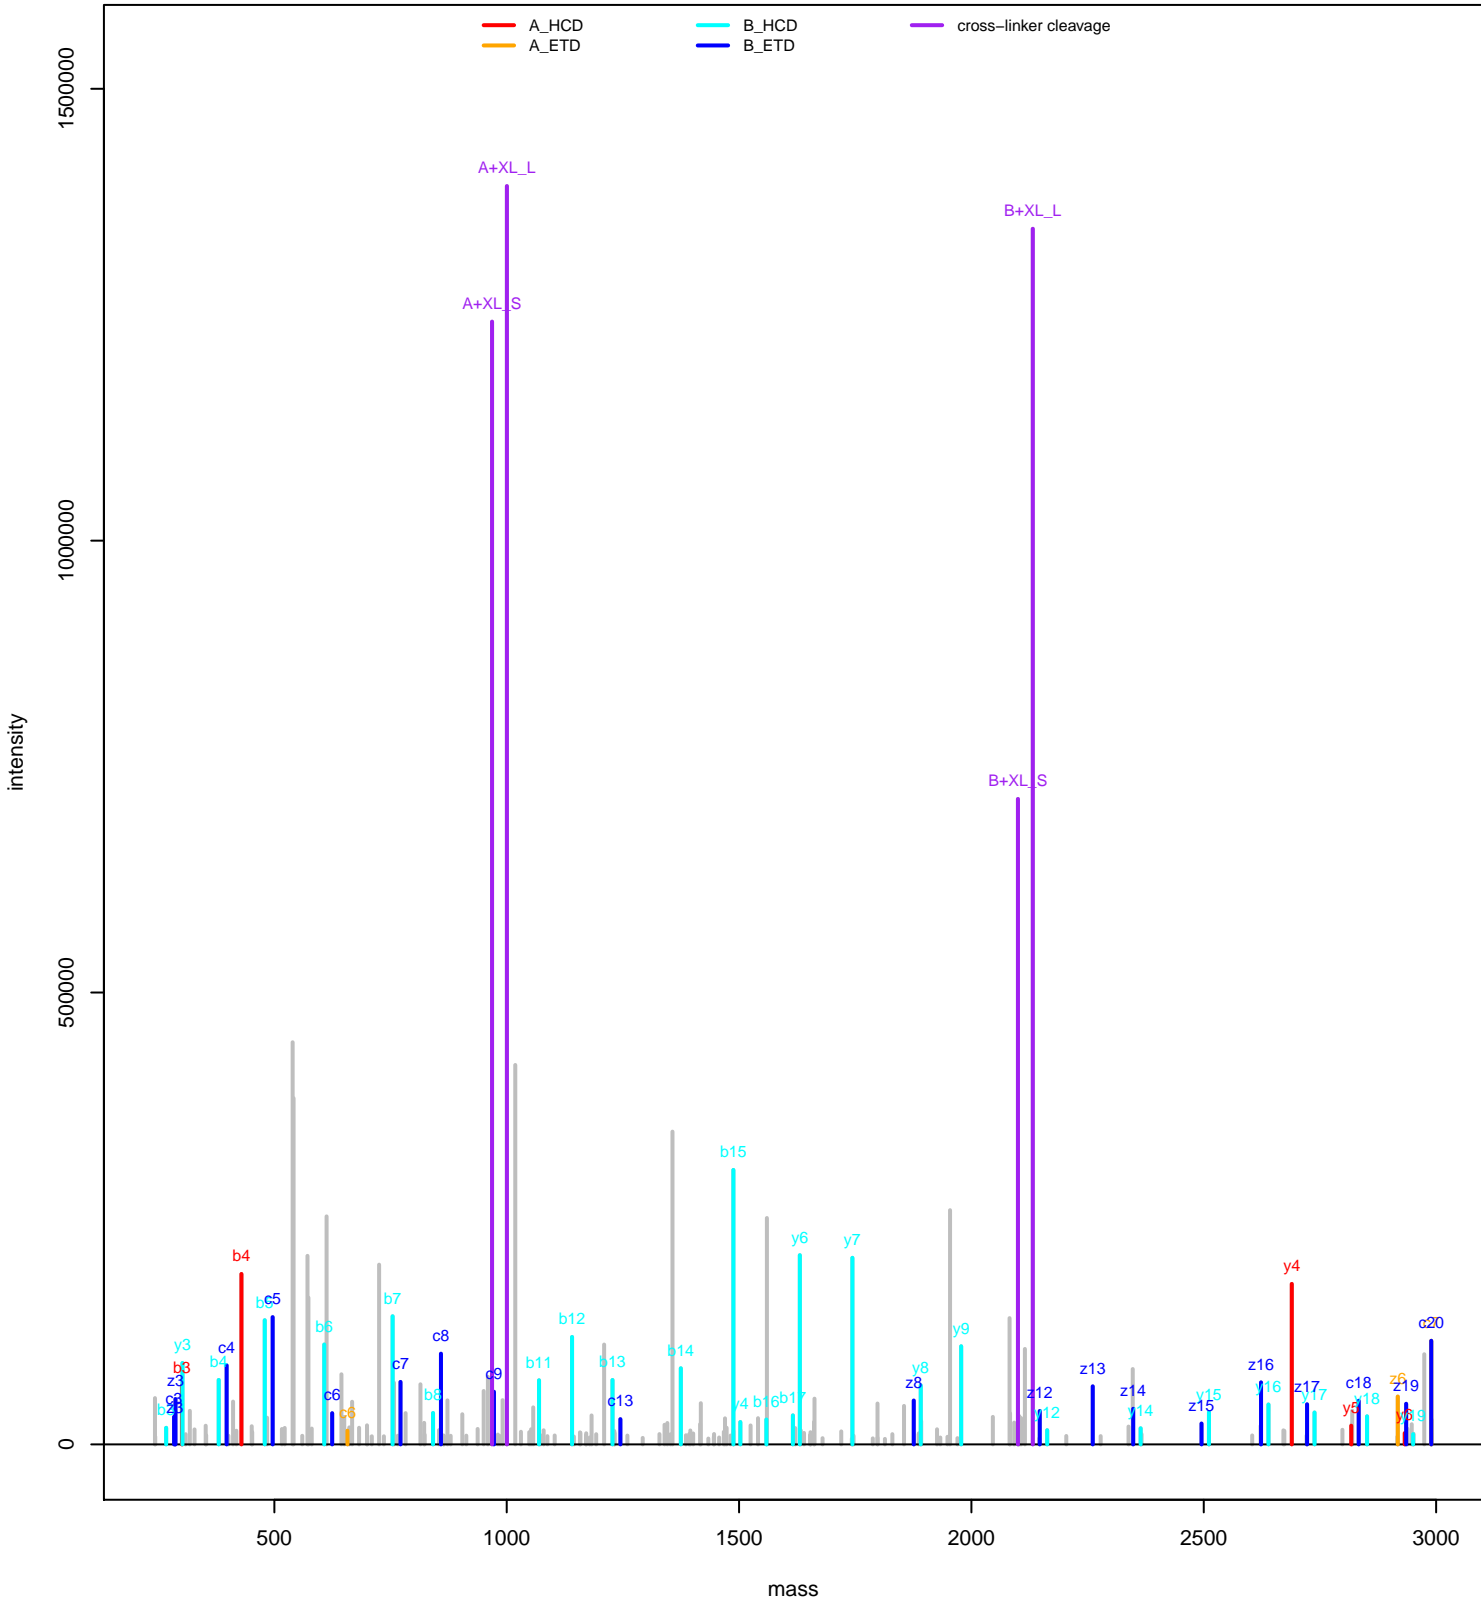

**GEDQPNKK+XL\_S**

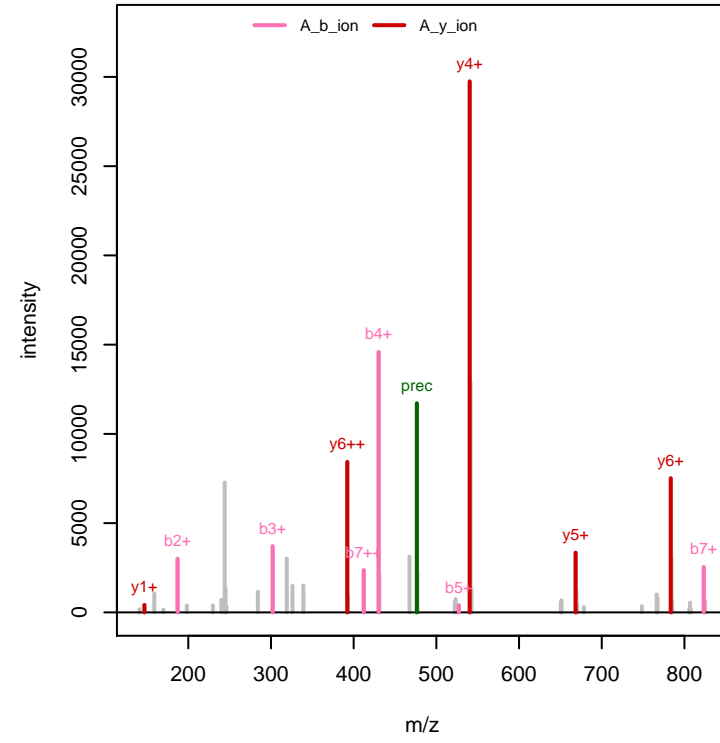

**GEDQPNKK+XL\_L**

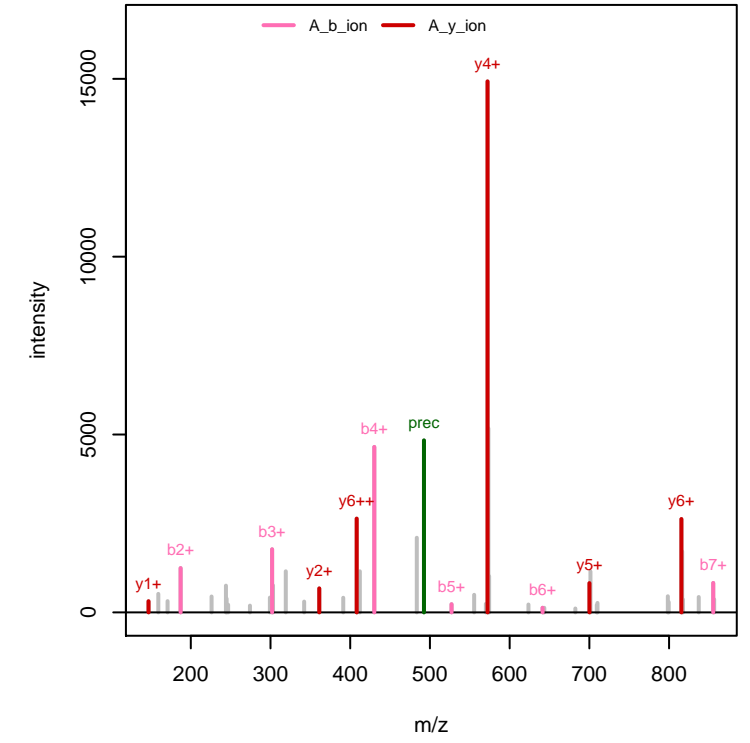

**APVIVQFSNGGASFIAGKGVK+XL\_S**

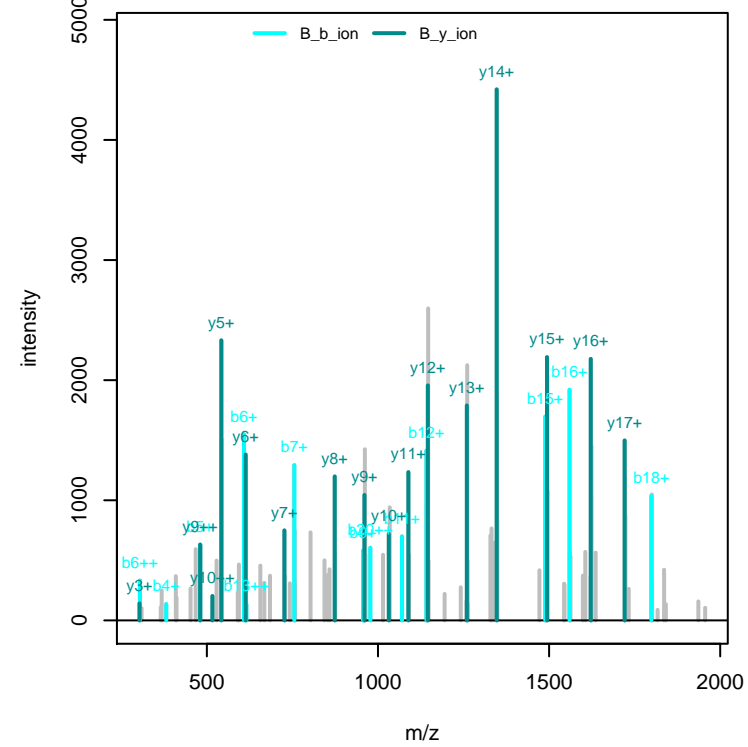

**APVIVQFSNGGASFIAGKGVK+XL\_L**

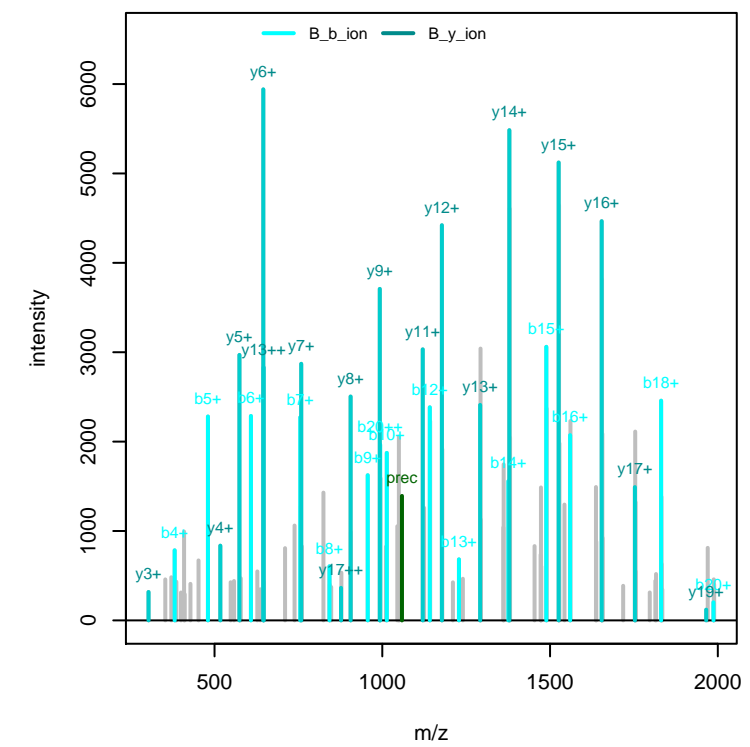

GGSEELYKK  
NSVPNDPKSPFVTSGIR

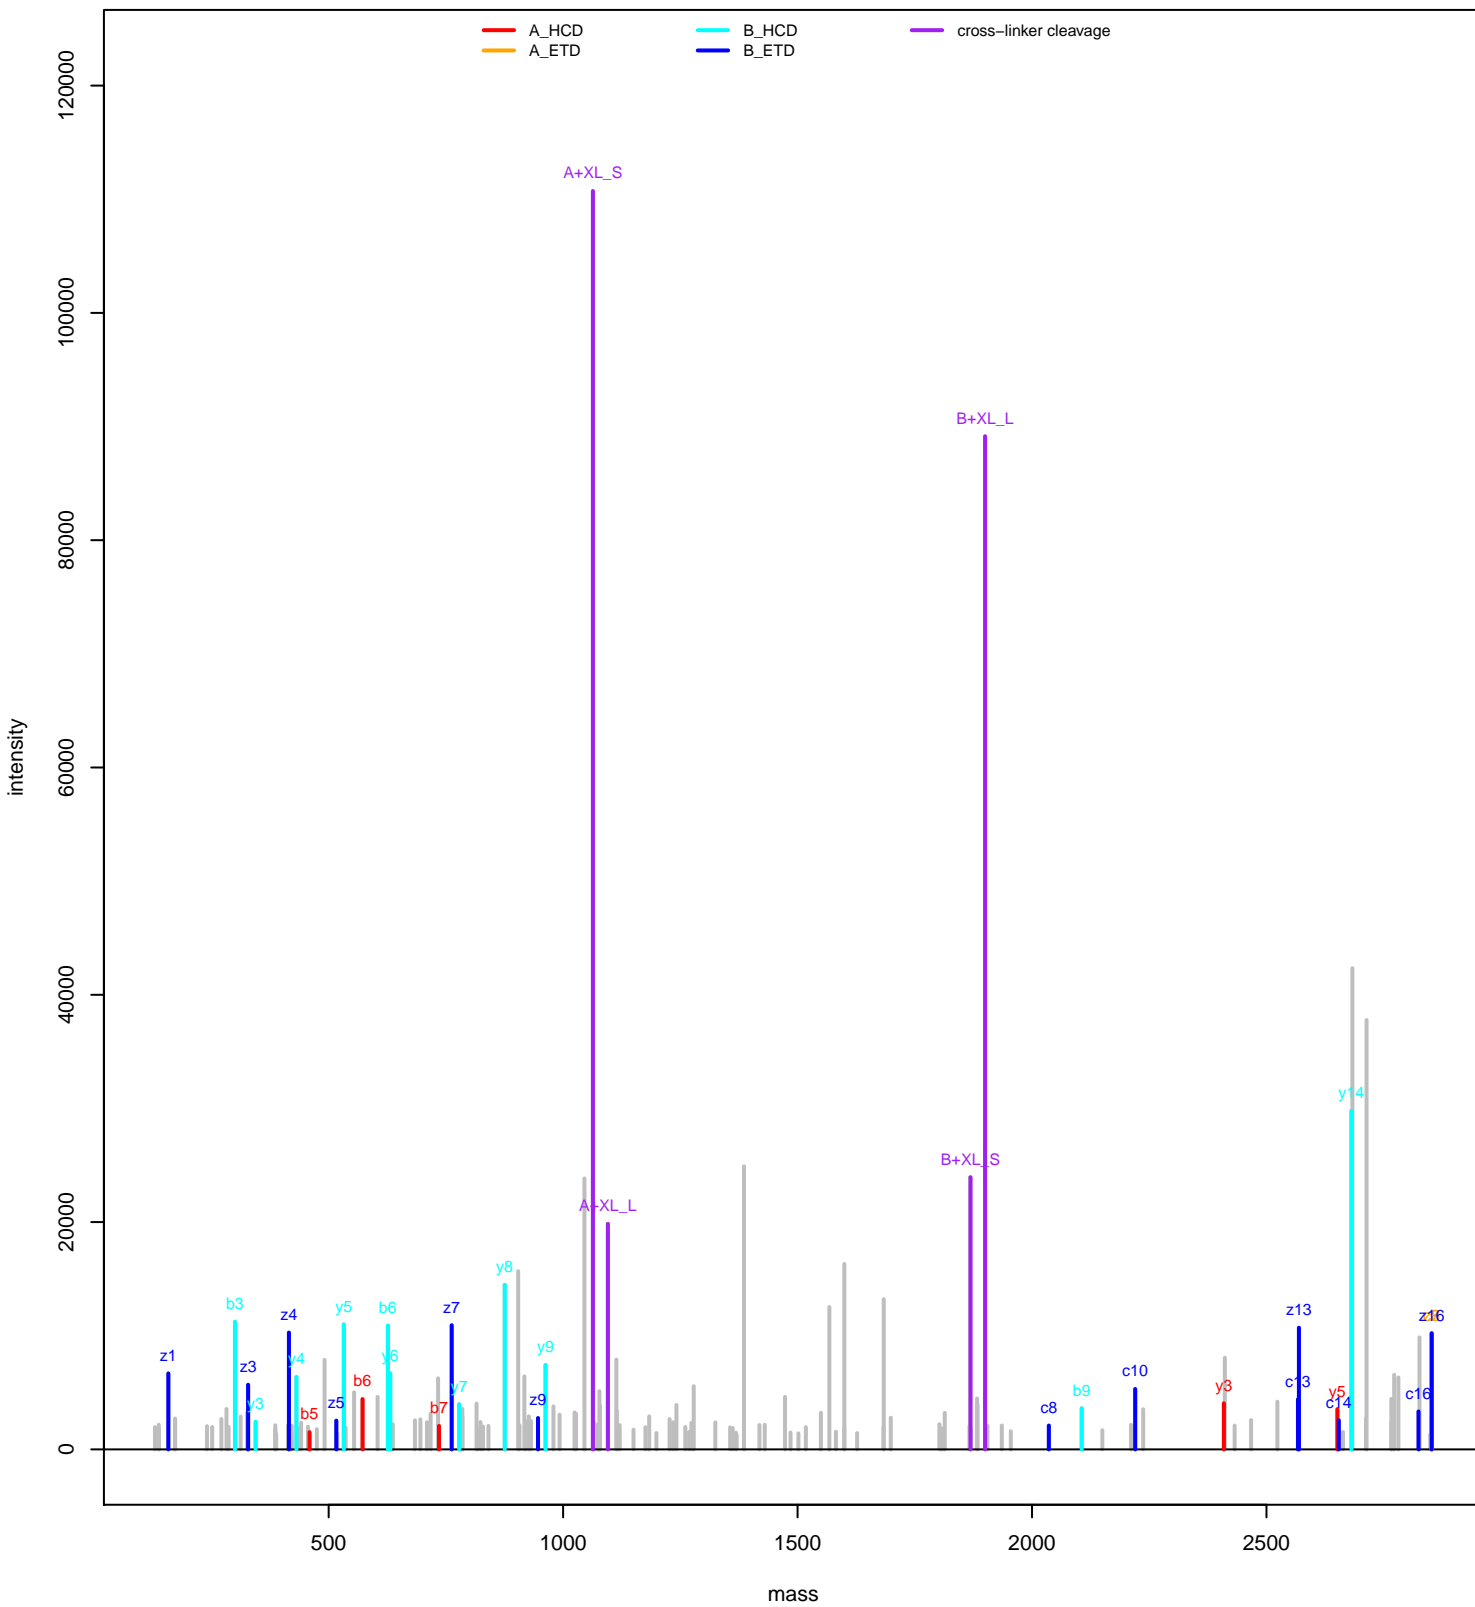

GGSEELYKK+XL\_S

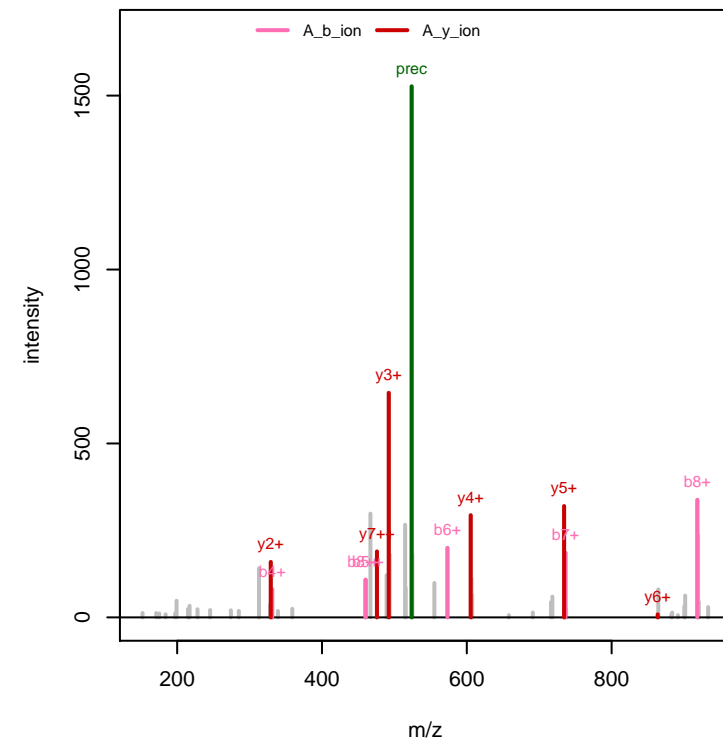

GGSEELYKK+XL\_L

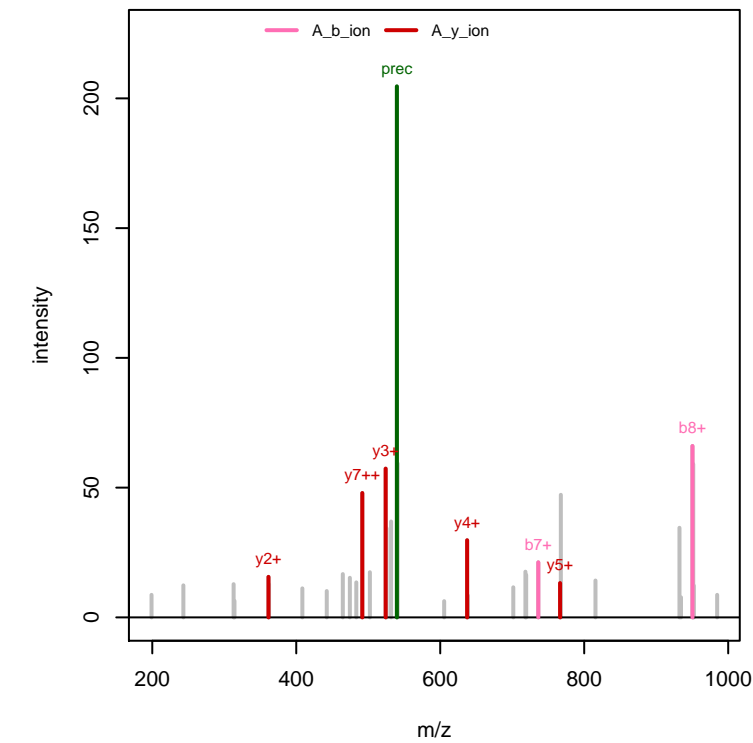

NSVPNDPKSPFVTSGIR+XL\_S

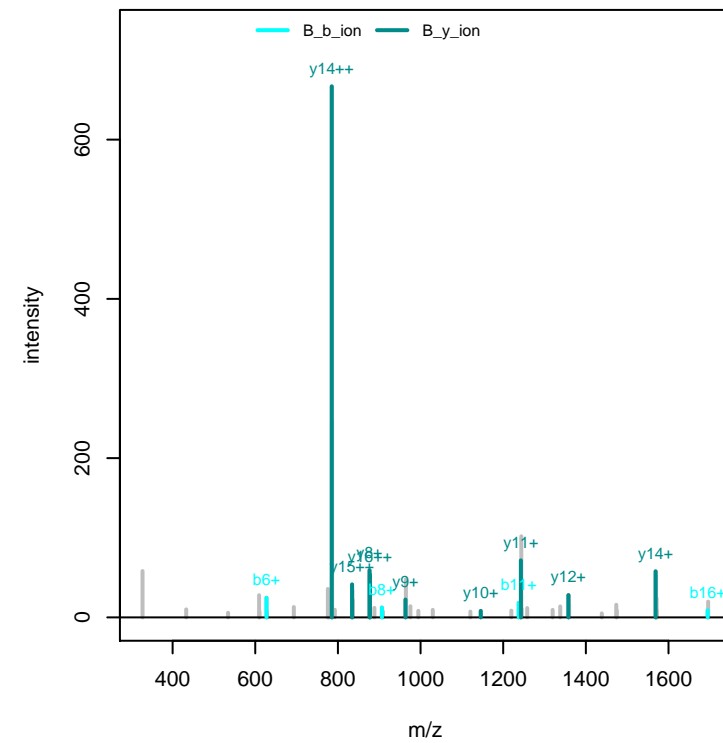

NSVPNDPKSPFVTSGIR+XL\_L

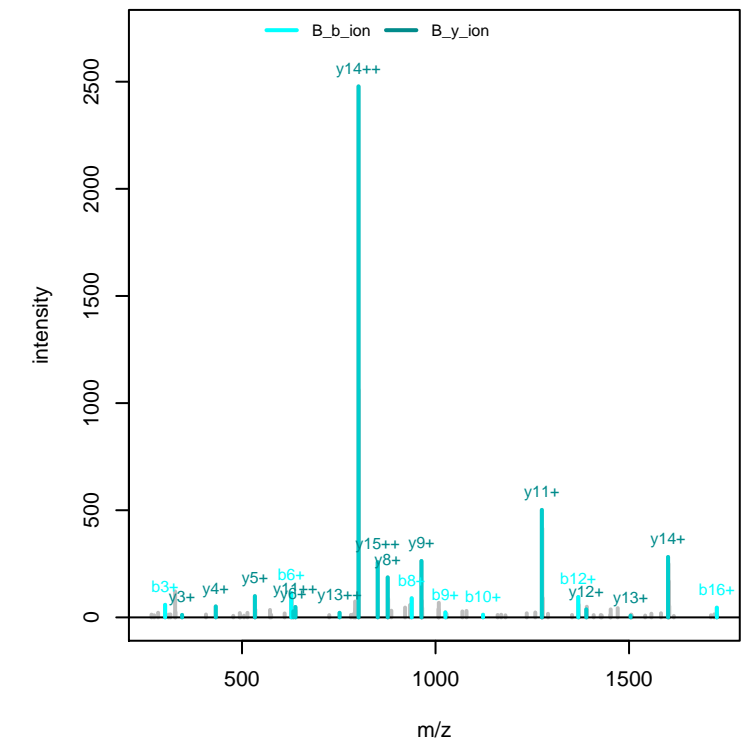

**GKAPYR**  
**ALGKIIGNGLHK**

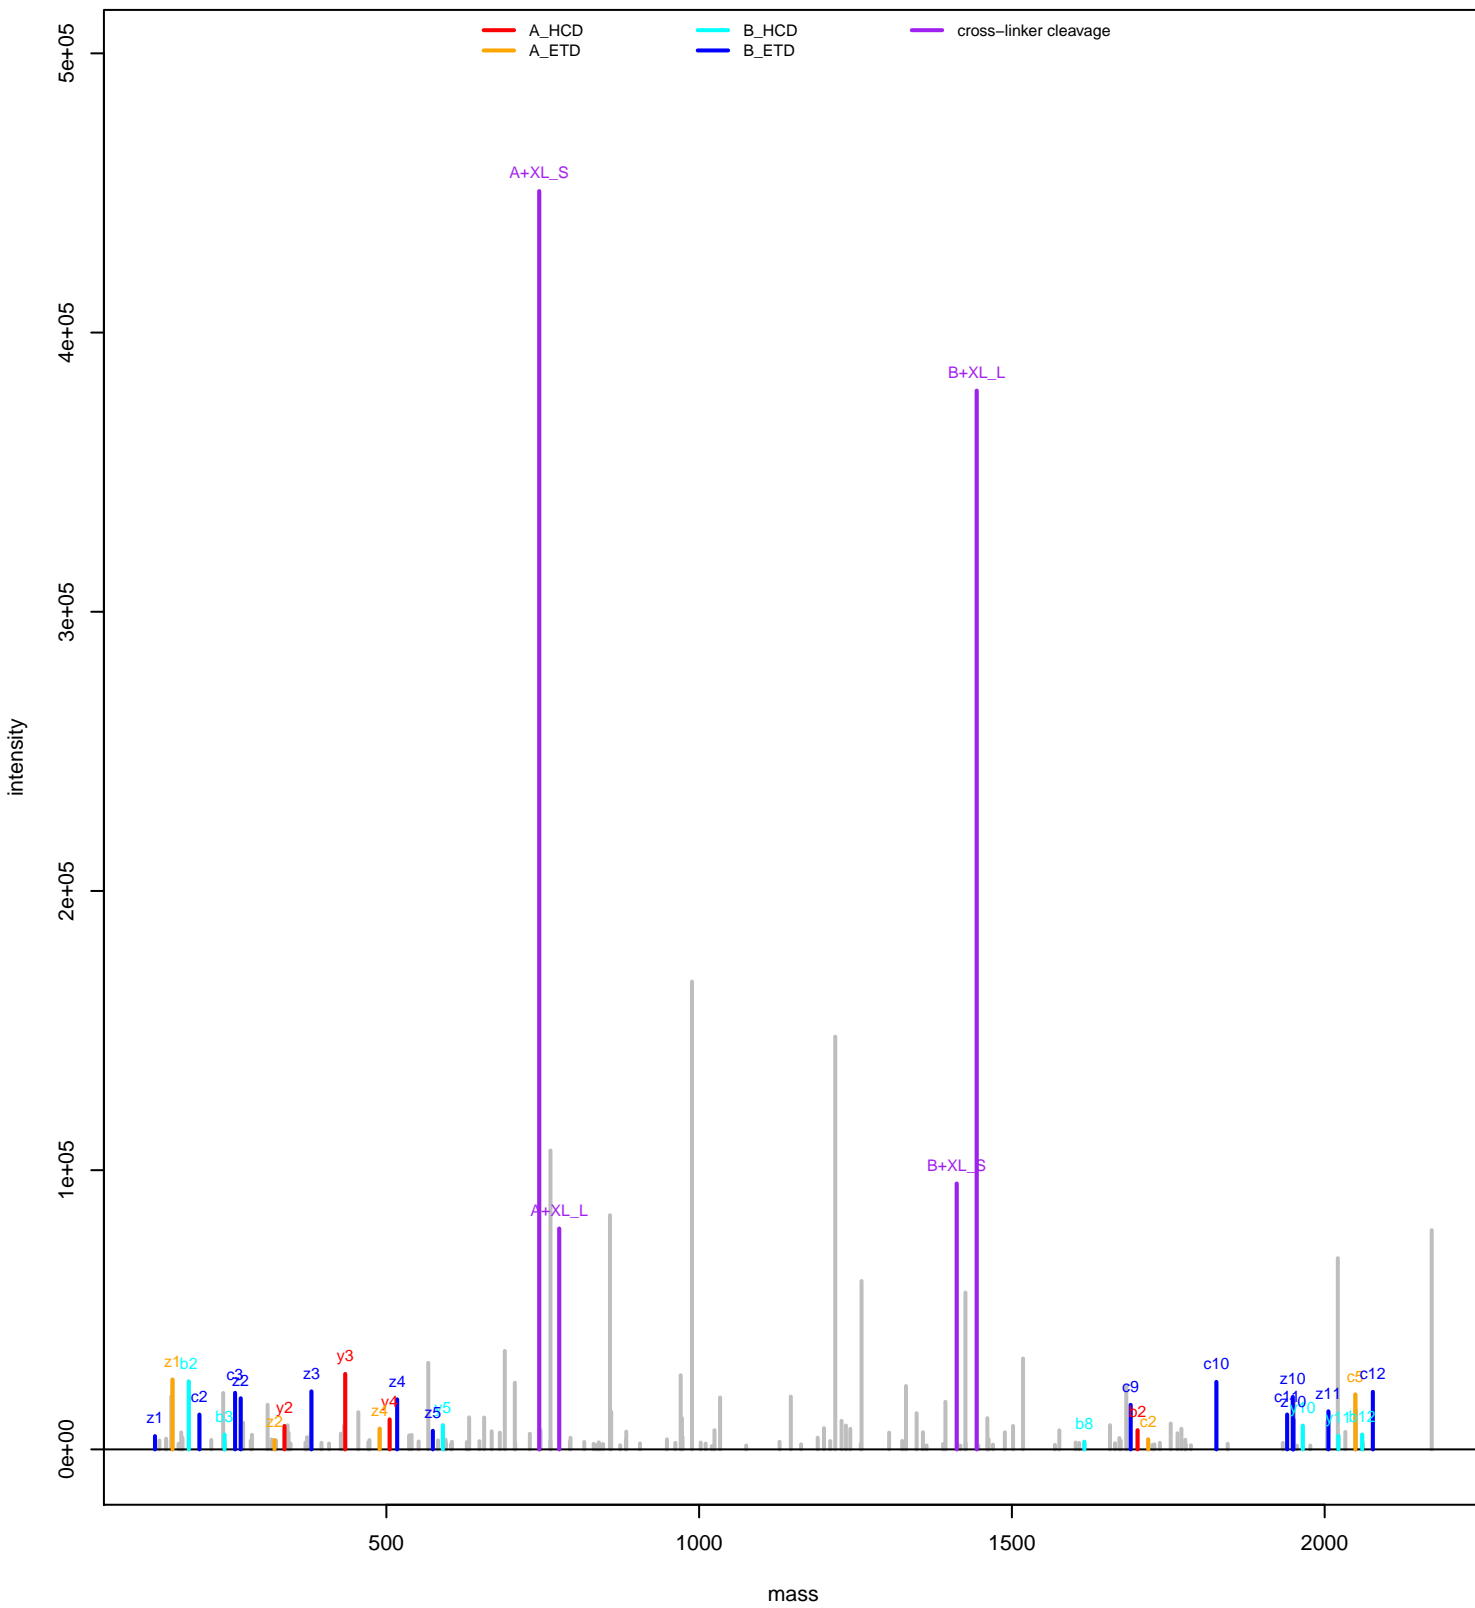

**GKAPYR+XL\_S**

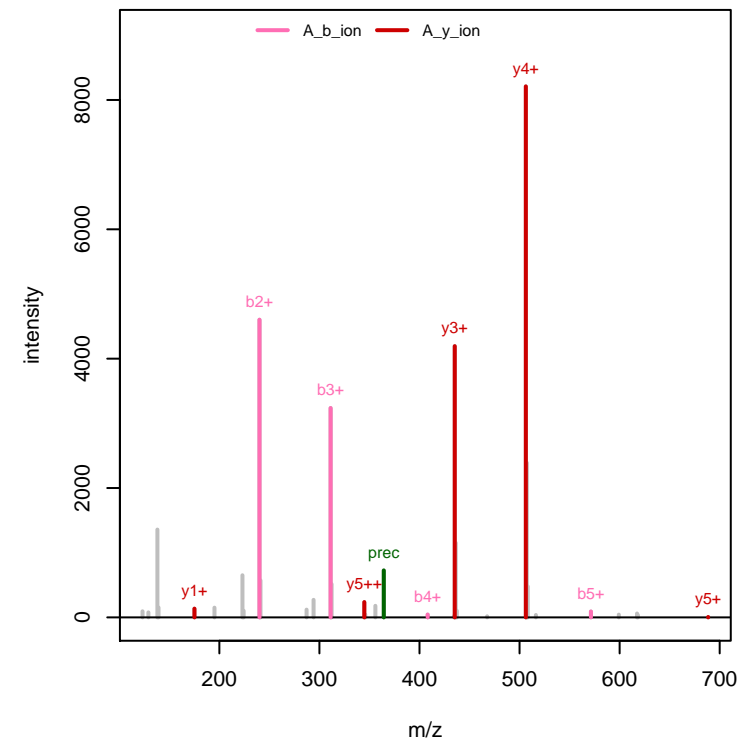

**GKAPYR+XL\_L**

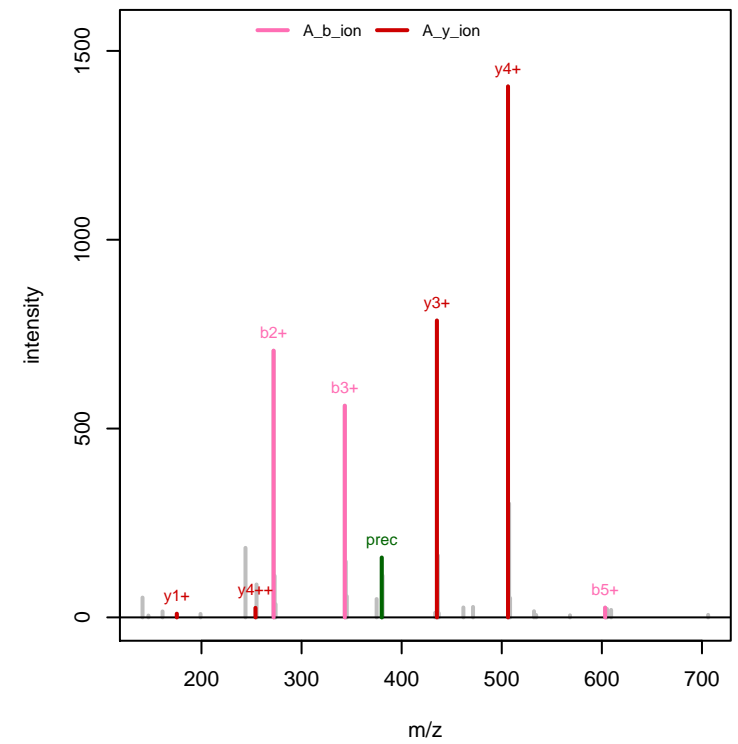

**ALGKIIGNGLHK+XL\_S**

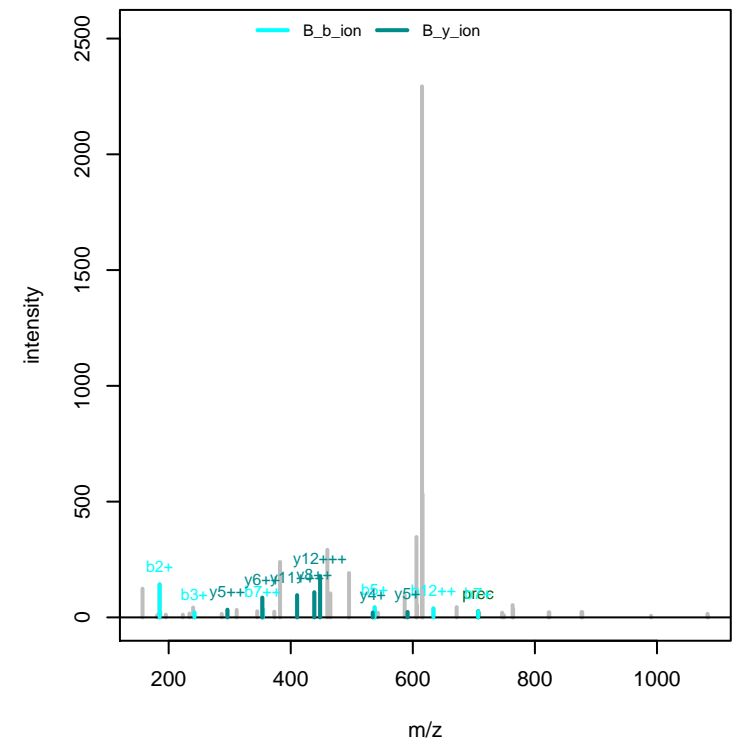

**ALGKIIGNGLHK+XL\_L**

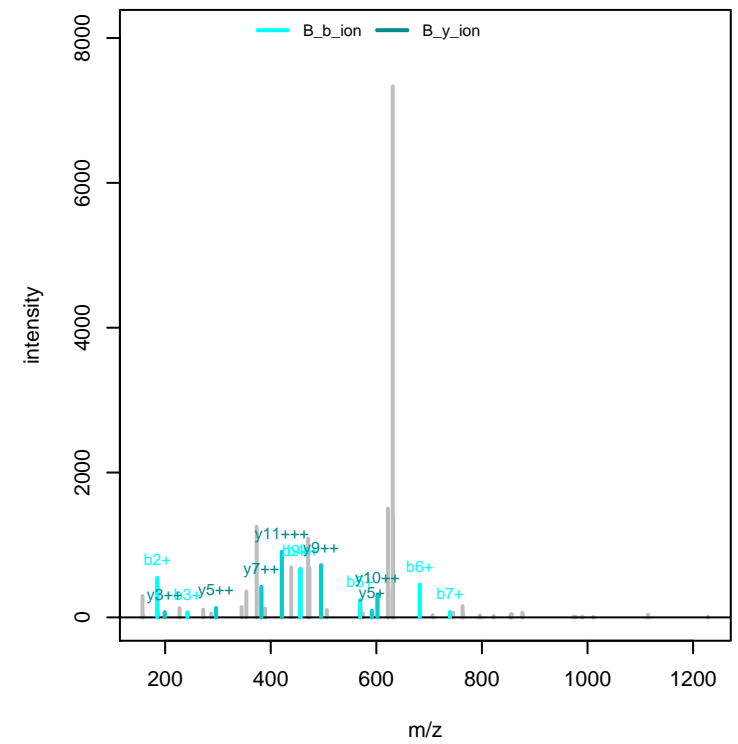

LHVRDAKEGSVK  
GYAGDTATTSEIKAK

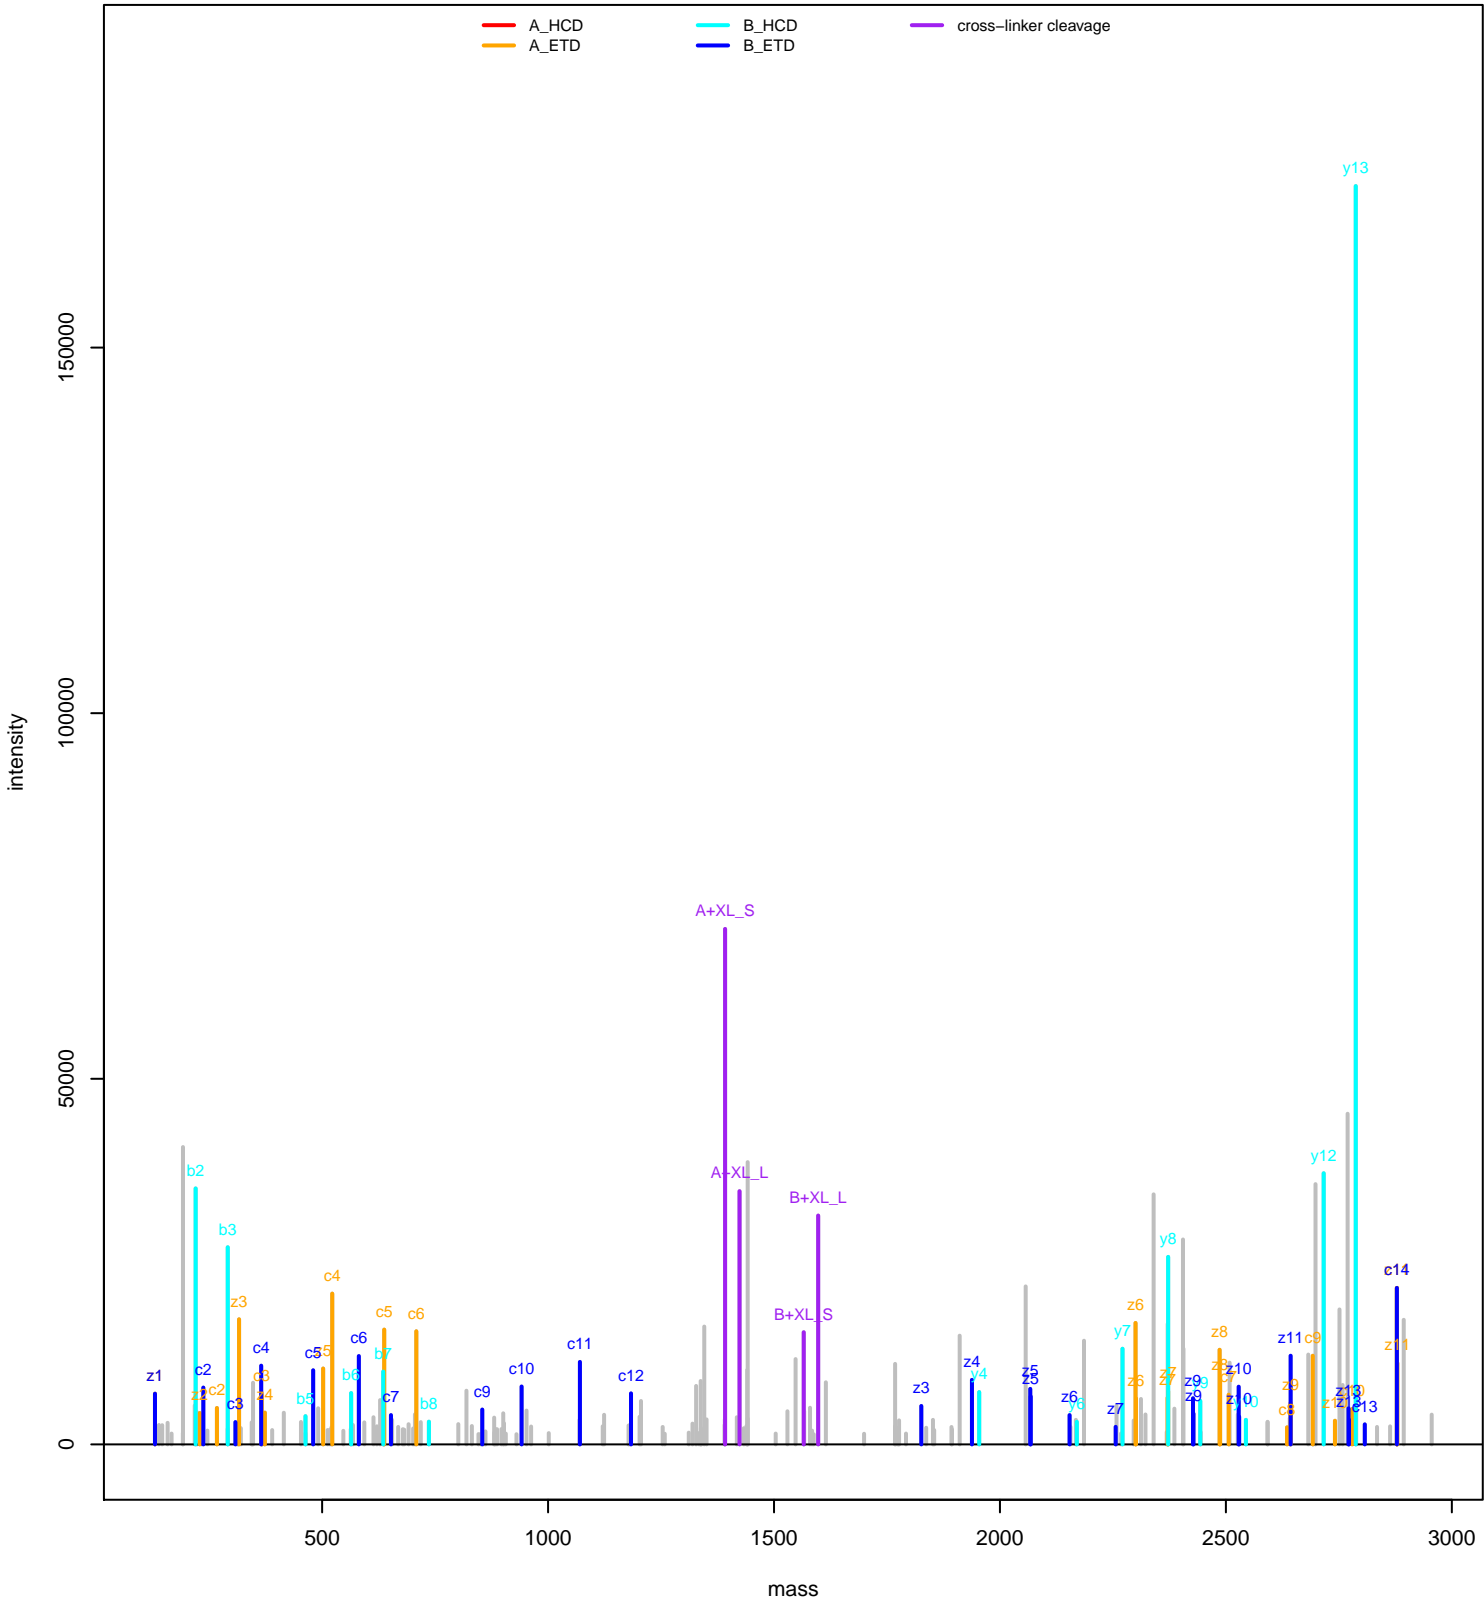

LHVRDAKEGSVK+XL\_S

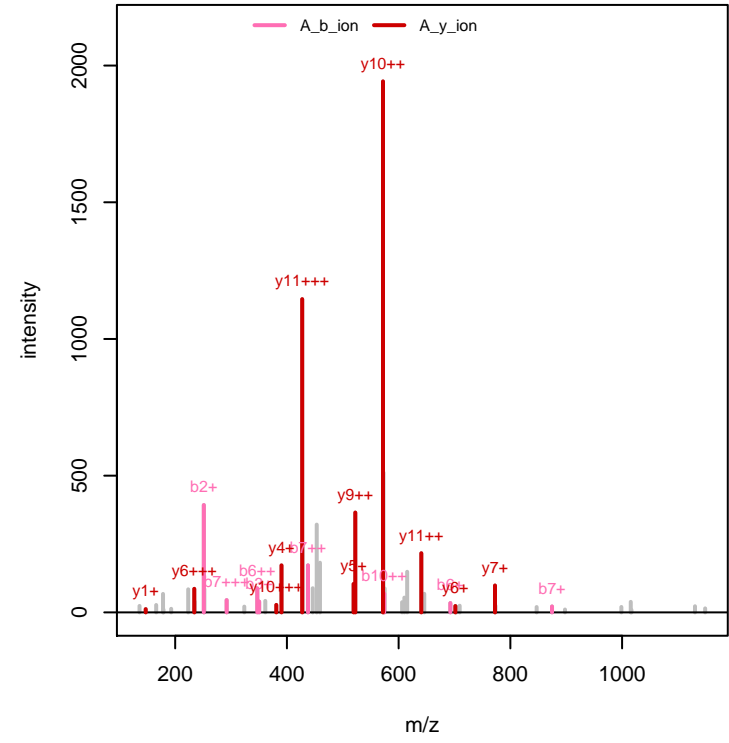

LHVRDAKEGSVK+XL\_L

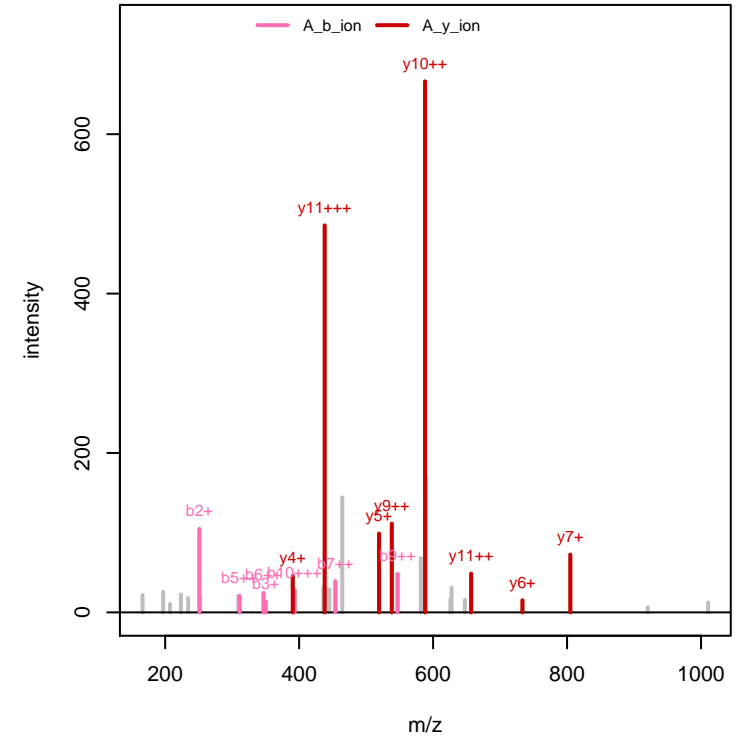

GYAGDTATTSEIKAK+XL\_S

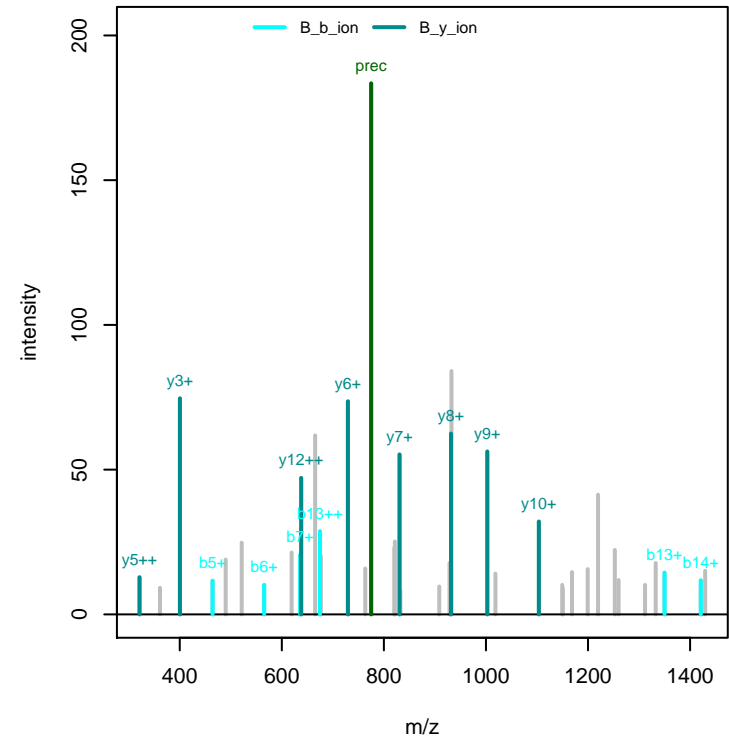

GYAGDTATTSEIKAK+XL\_L

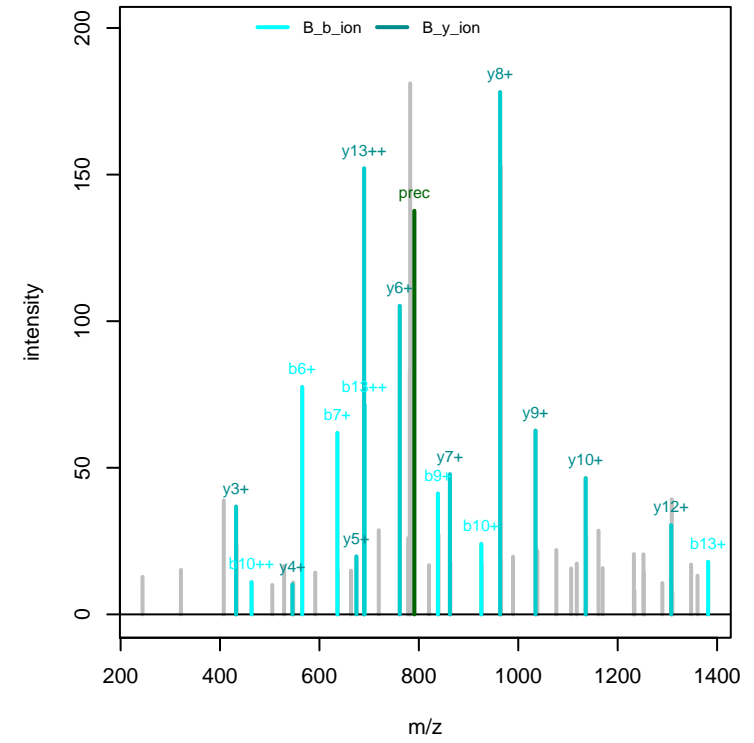

NLKEGAK  
MLPATKAIPK

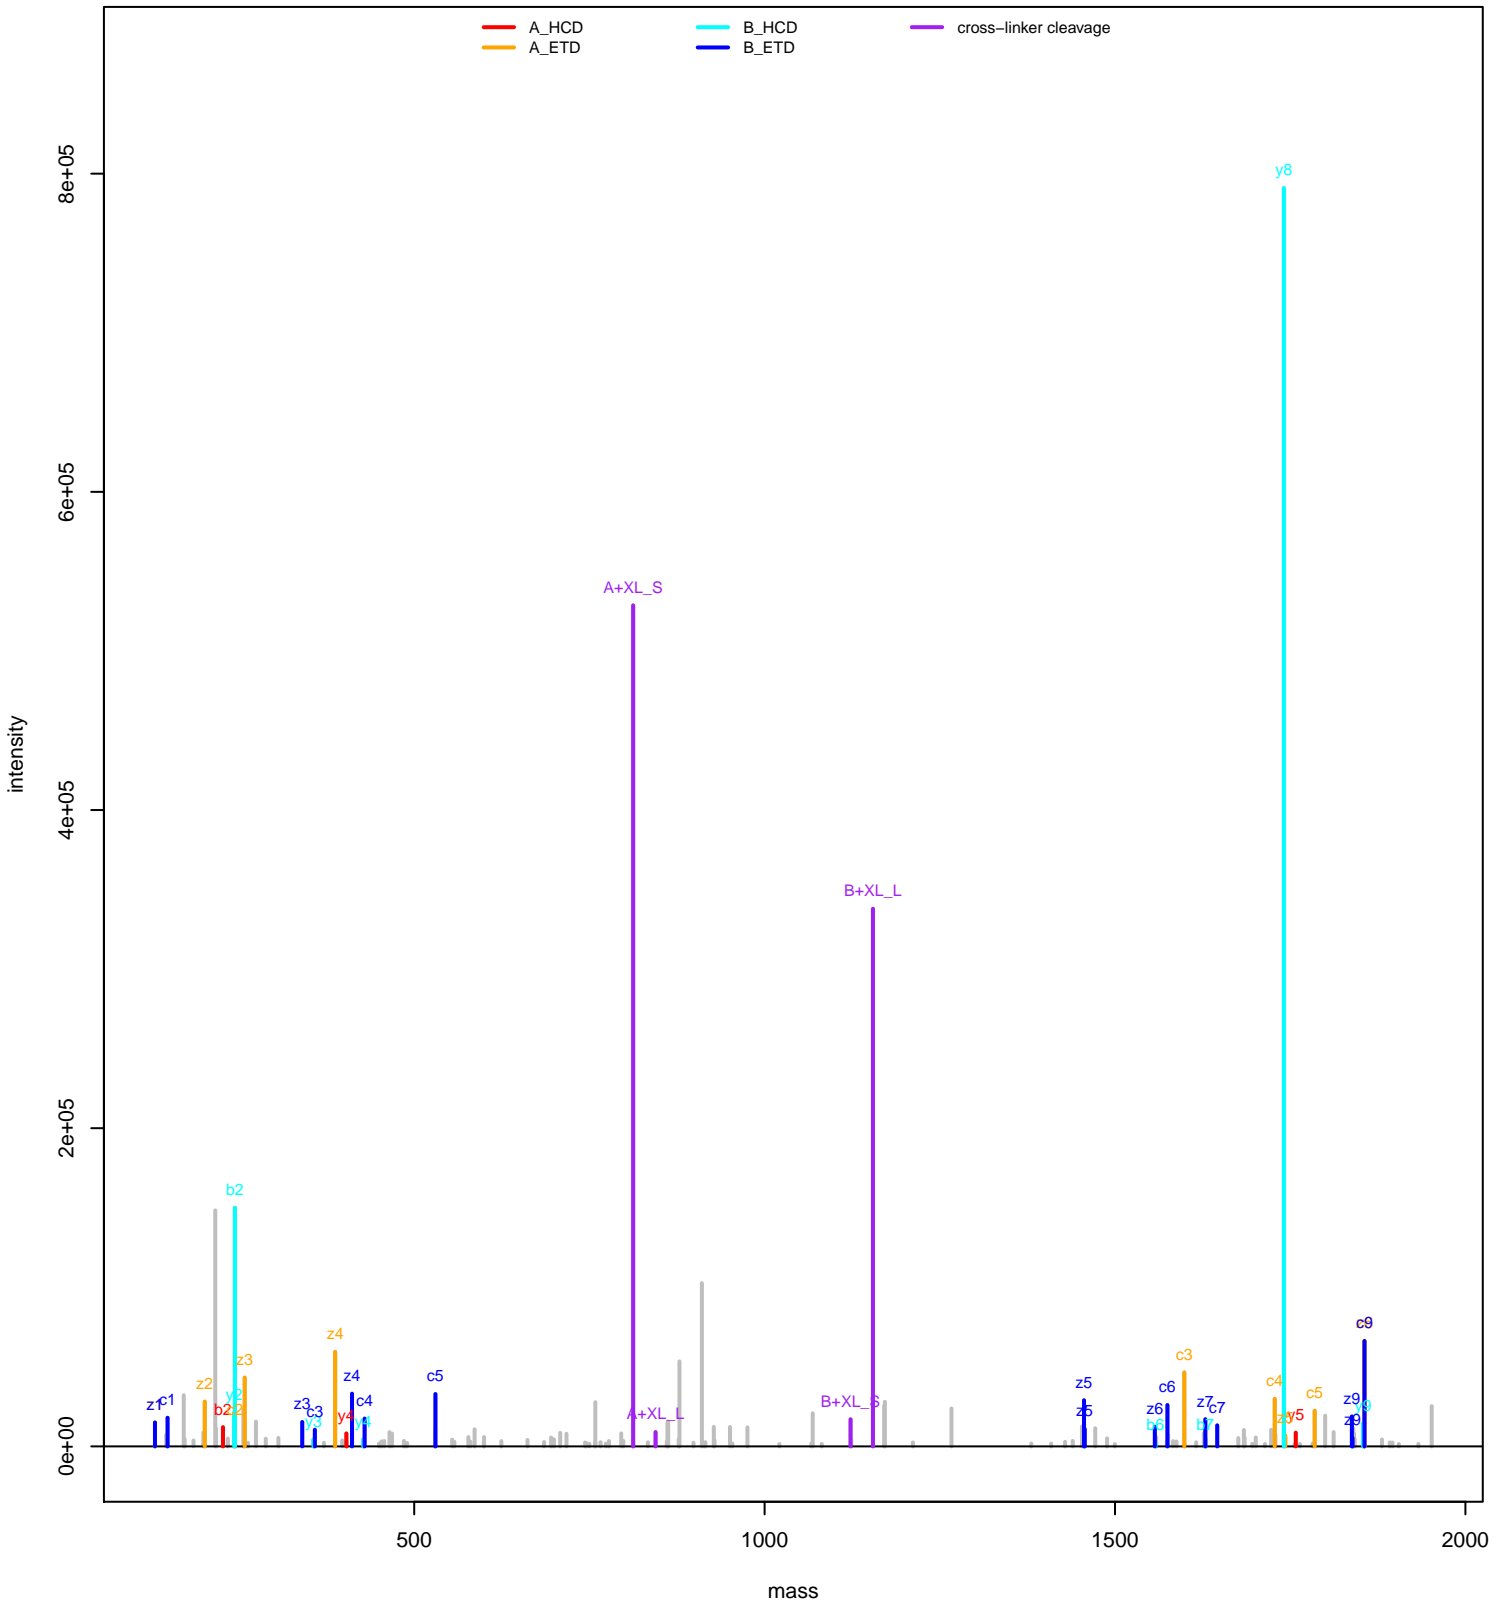

NLKEGAK+XL\_S

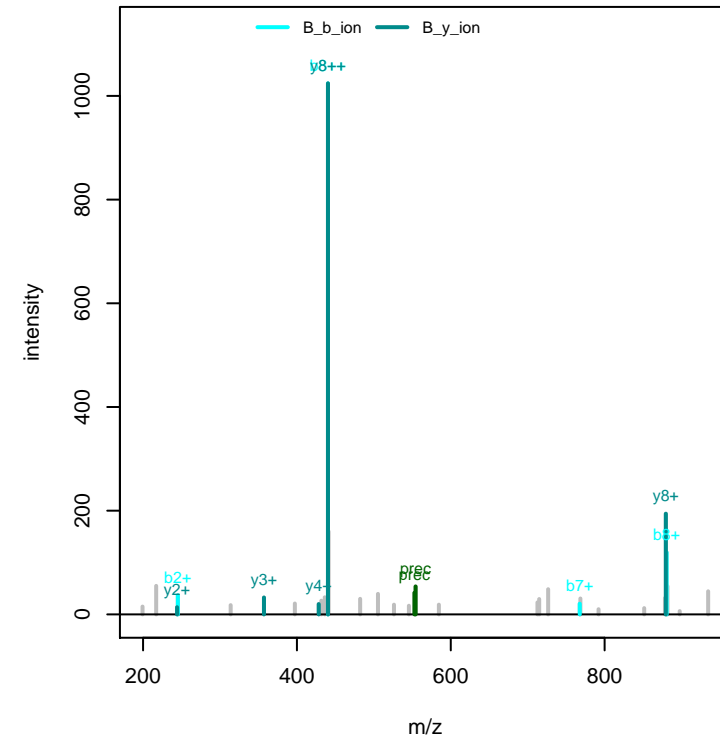

NLKEGAK+XL\_L

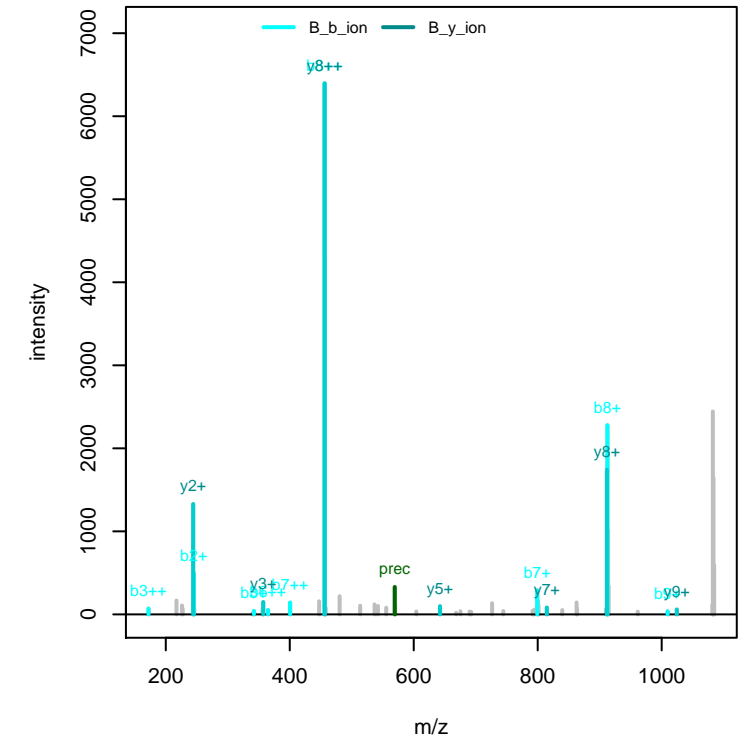

MLPATKAIPK+XL\_S



MLPATKAIPK+XL\_L





**KASIPEGVWTK**  
**DRLASAQKETGEK**

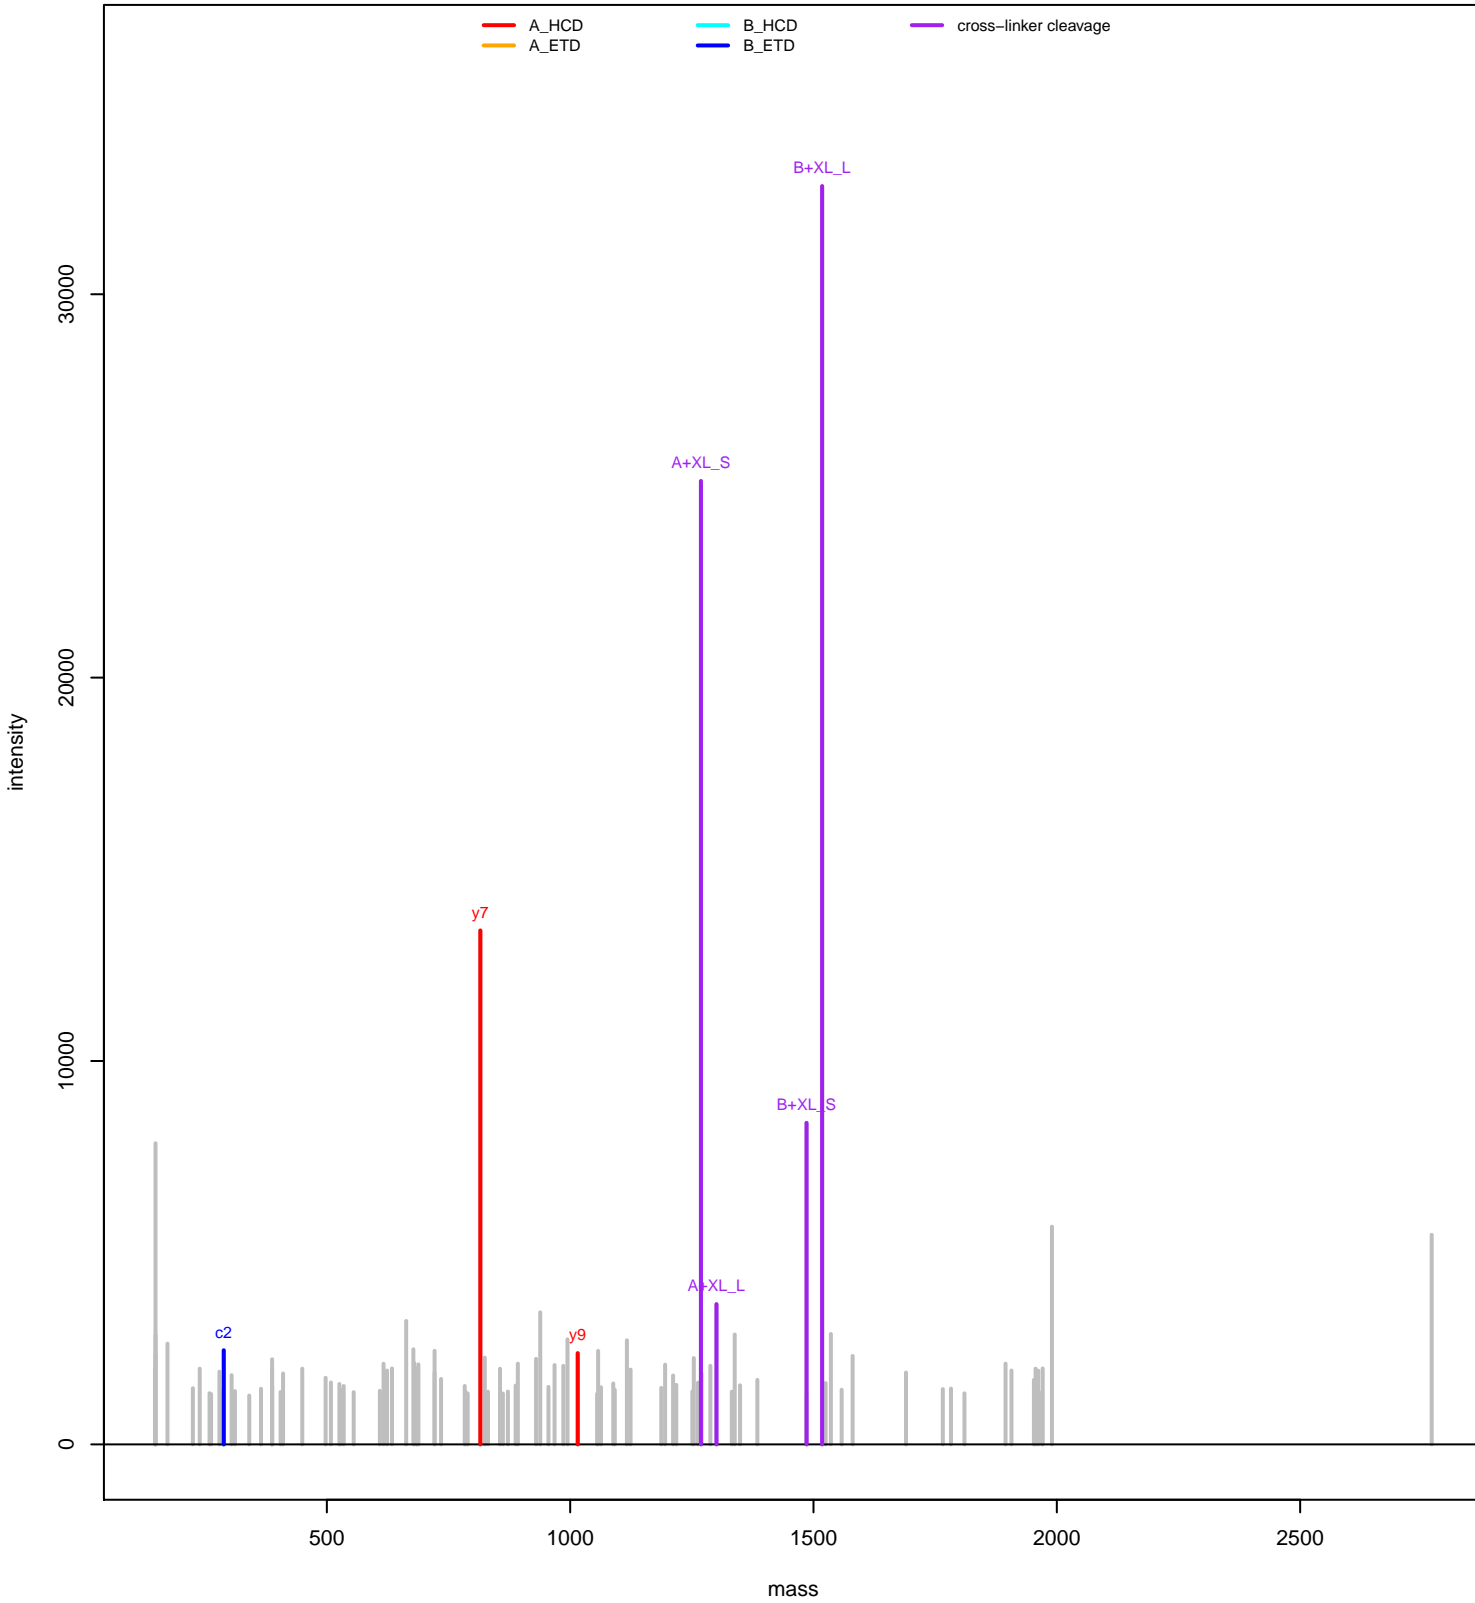

**KASIPEGVWTK+XL\_S**

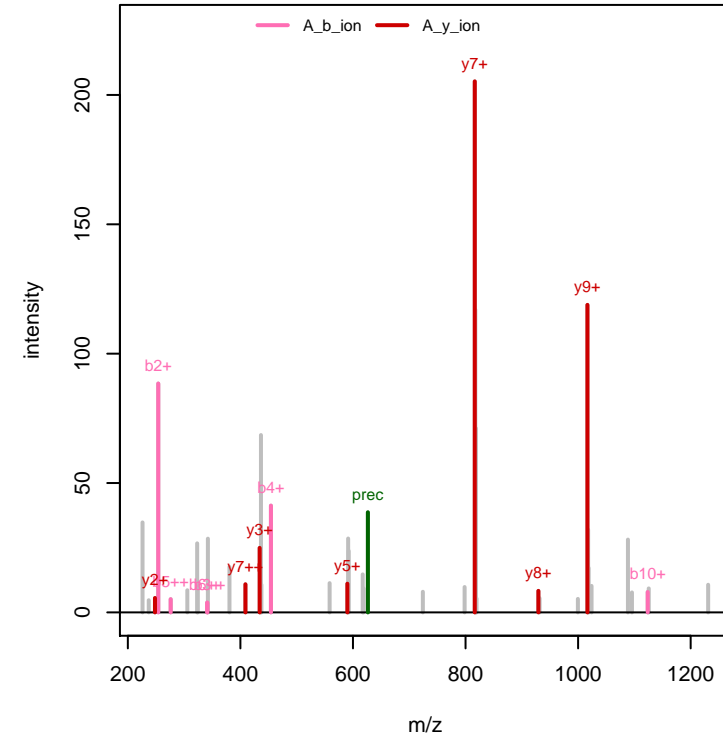

**KASIPEGVWTK+XL\_L**

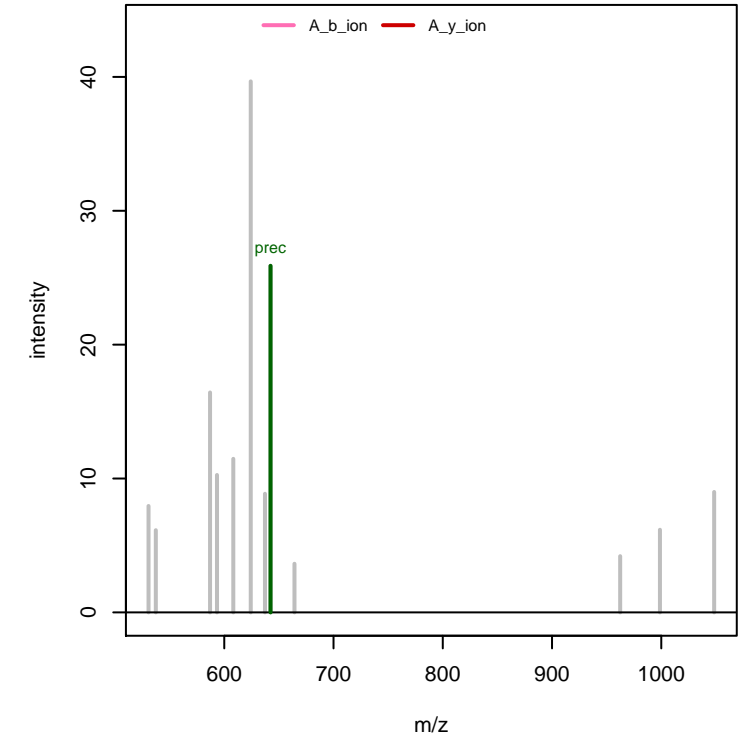

**DRLASAQKETGEK+XL\_S**

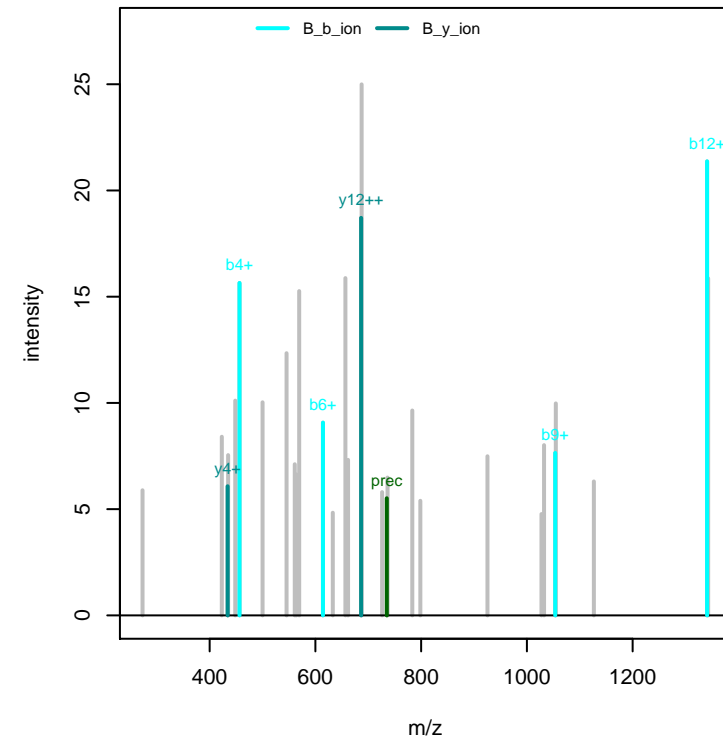

**DRLASAQKETGEK+XL\_L**

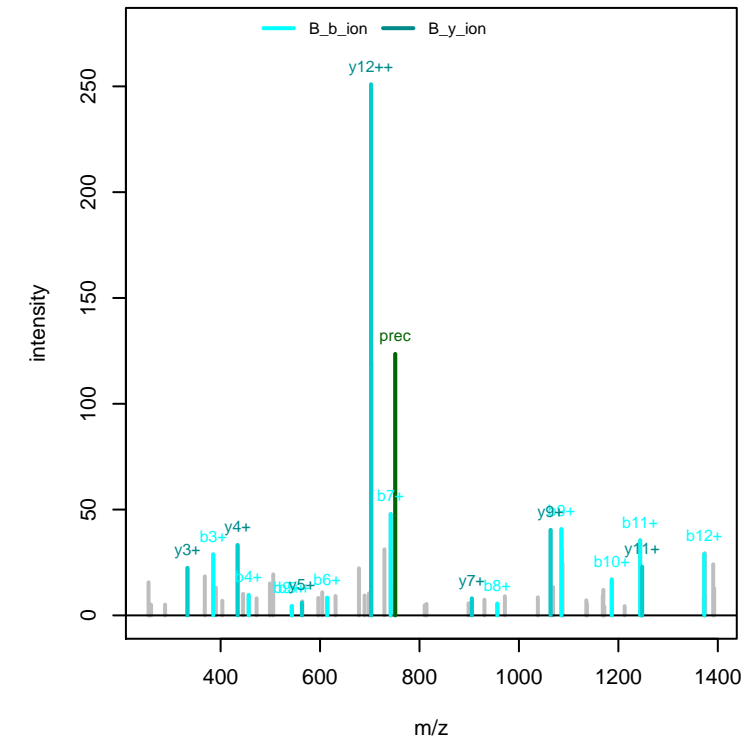

### APEAVIAKER IENKLANEGFVAR

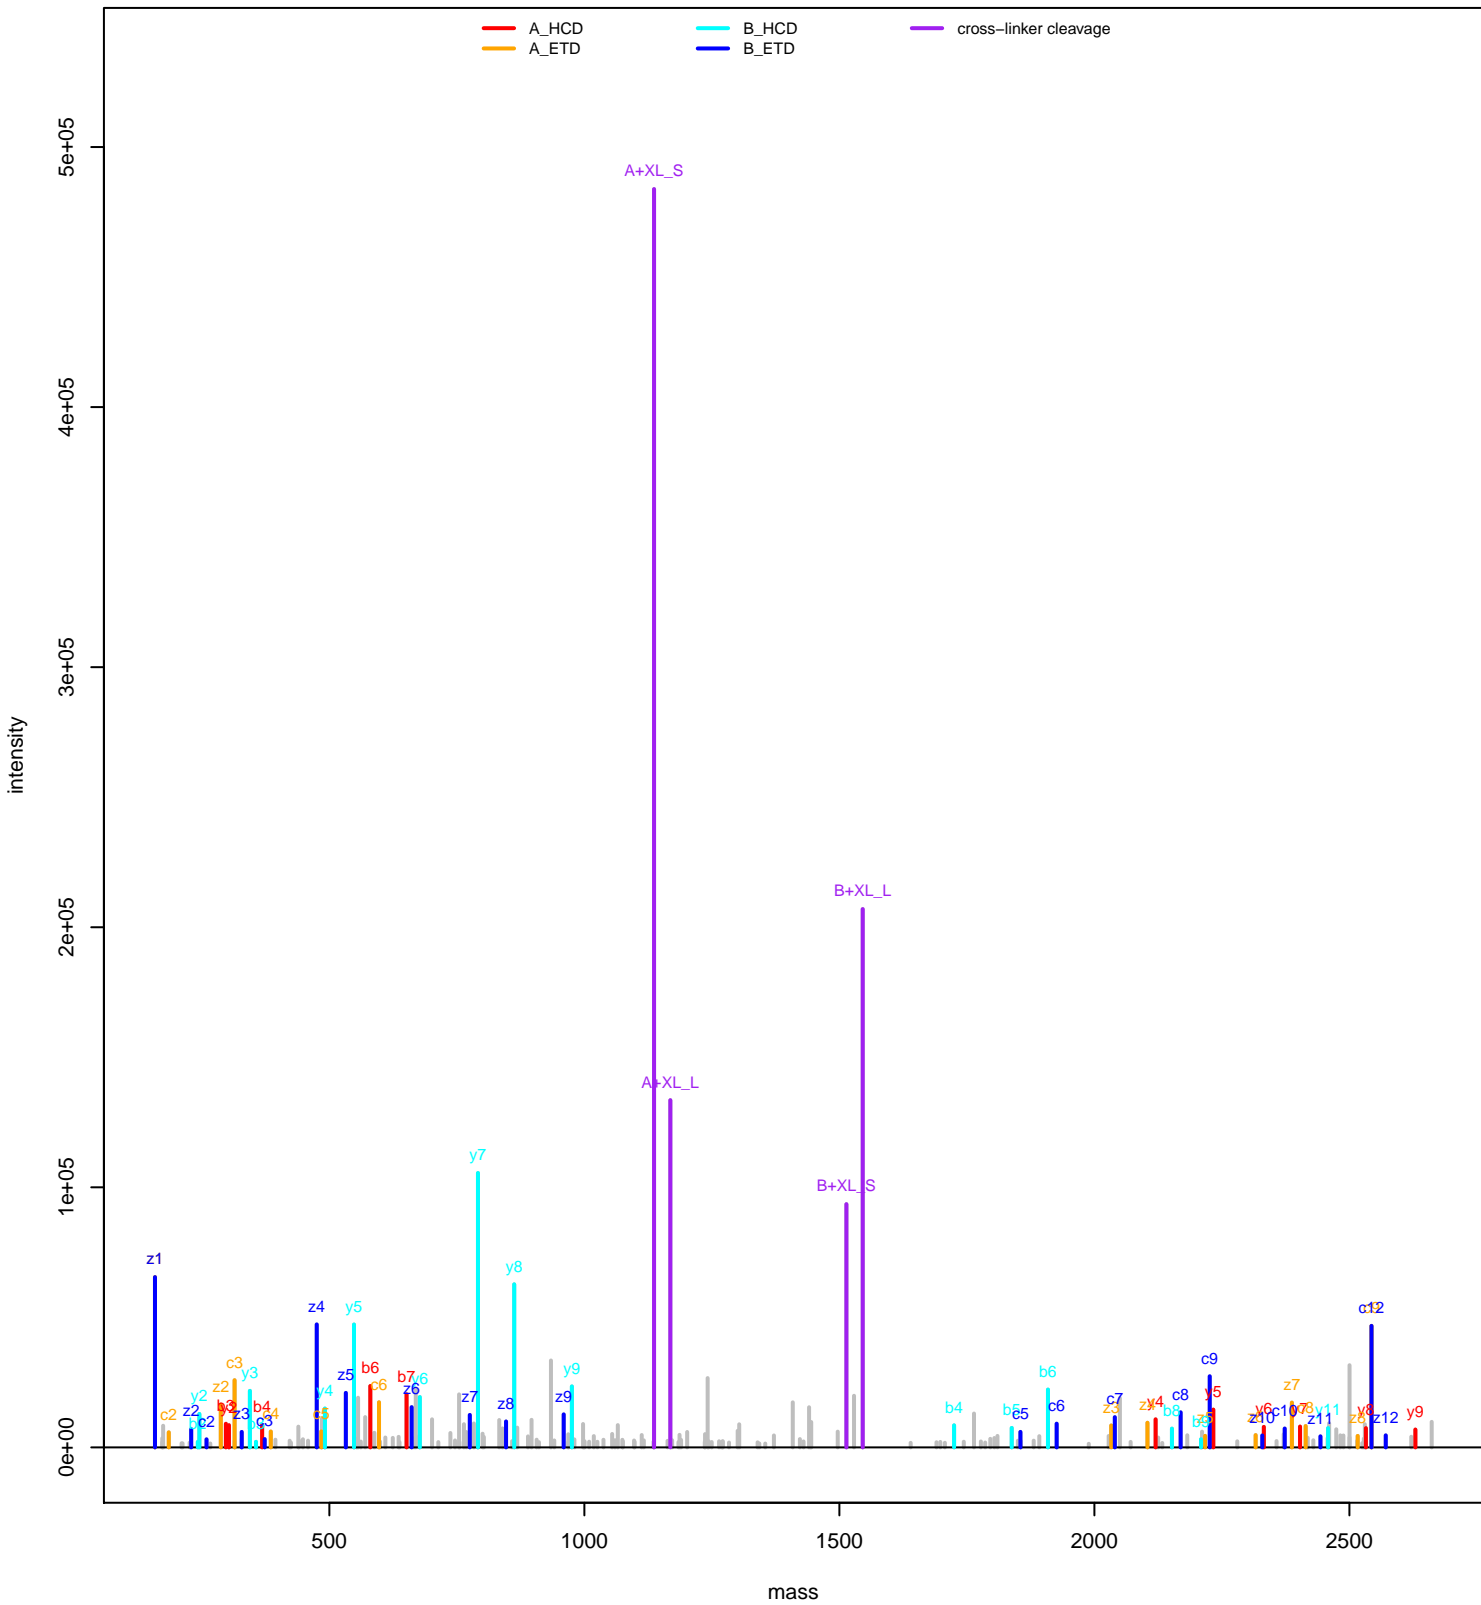

### APEAVIAKER+XL\_S

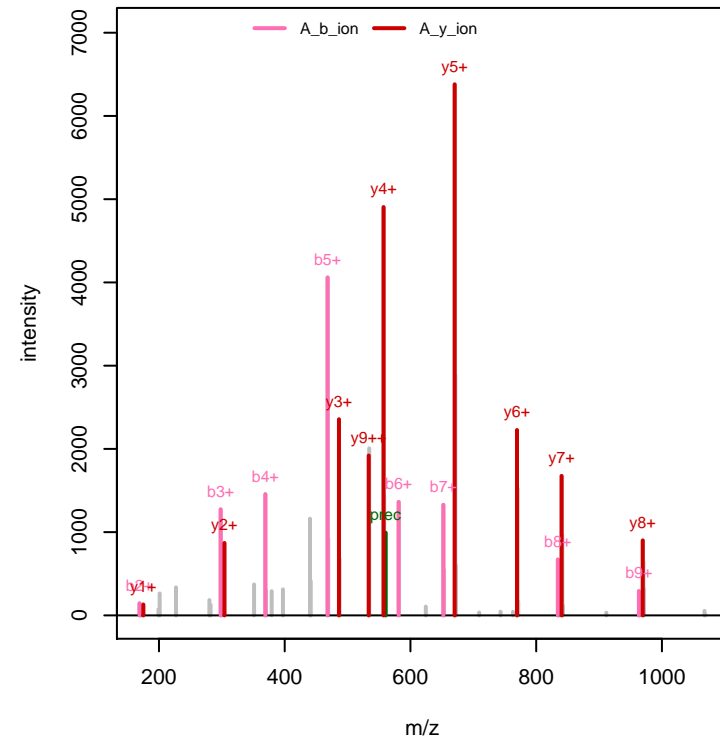

### APEAVIAKER+XL\_L

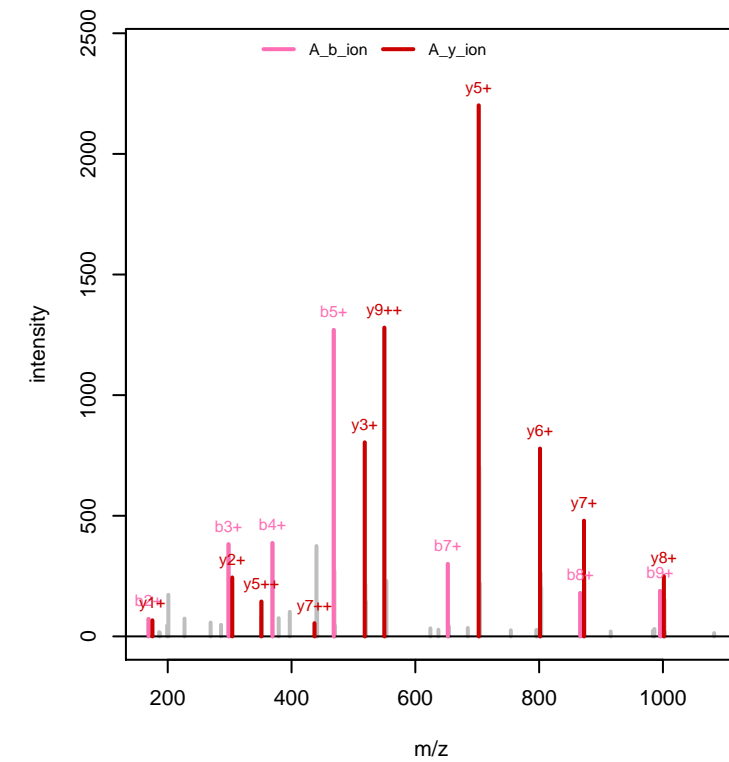

### IENKLANEGFVAR+XL\_S

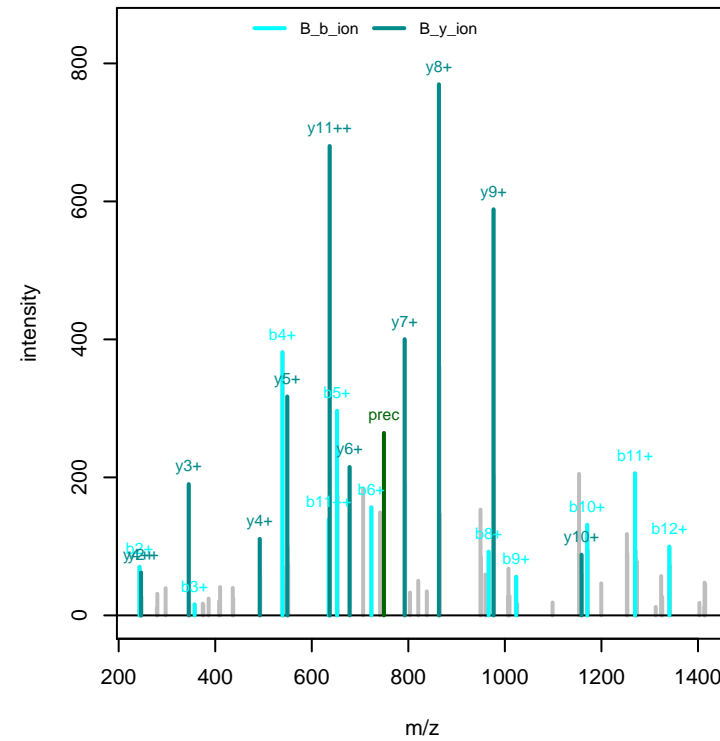

### IENKLANEGFVAR+XL\_L

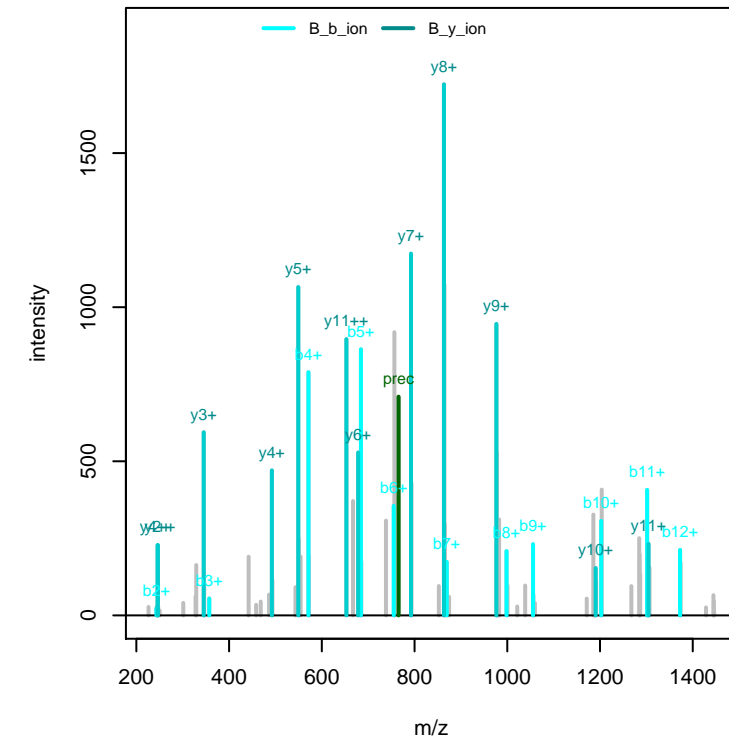

LTREDVEKHLAK  
APAKESAPAAAAPAAQPALAAR

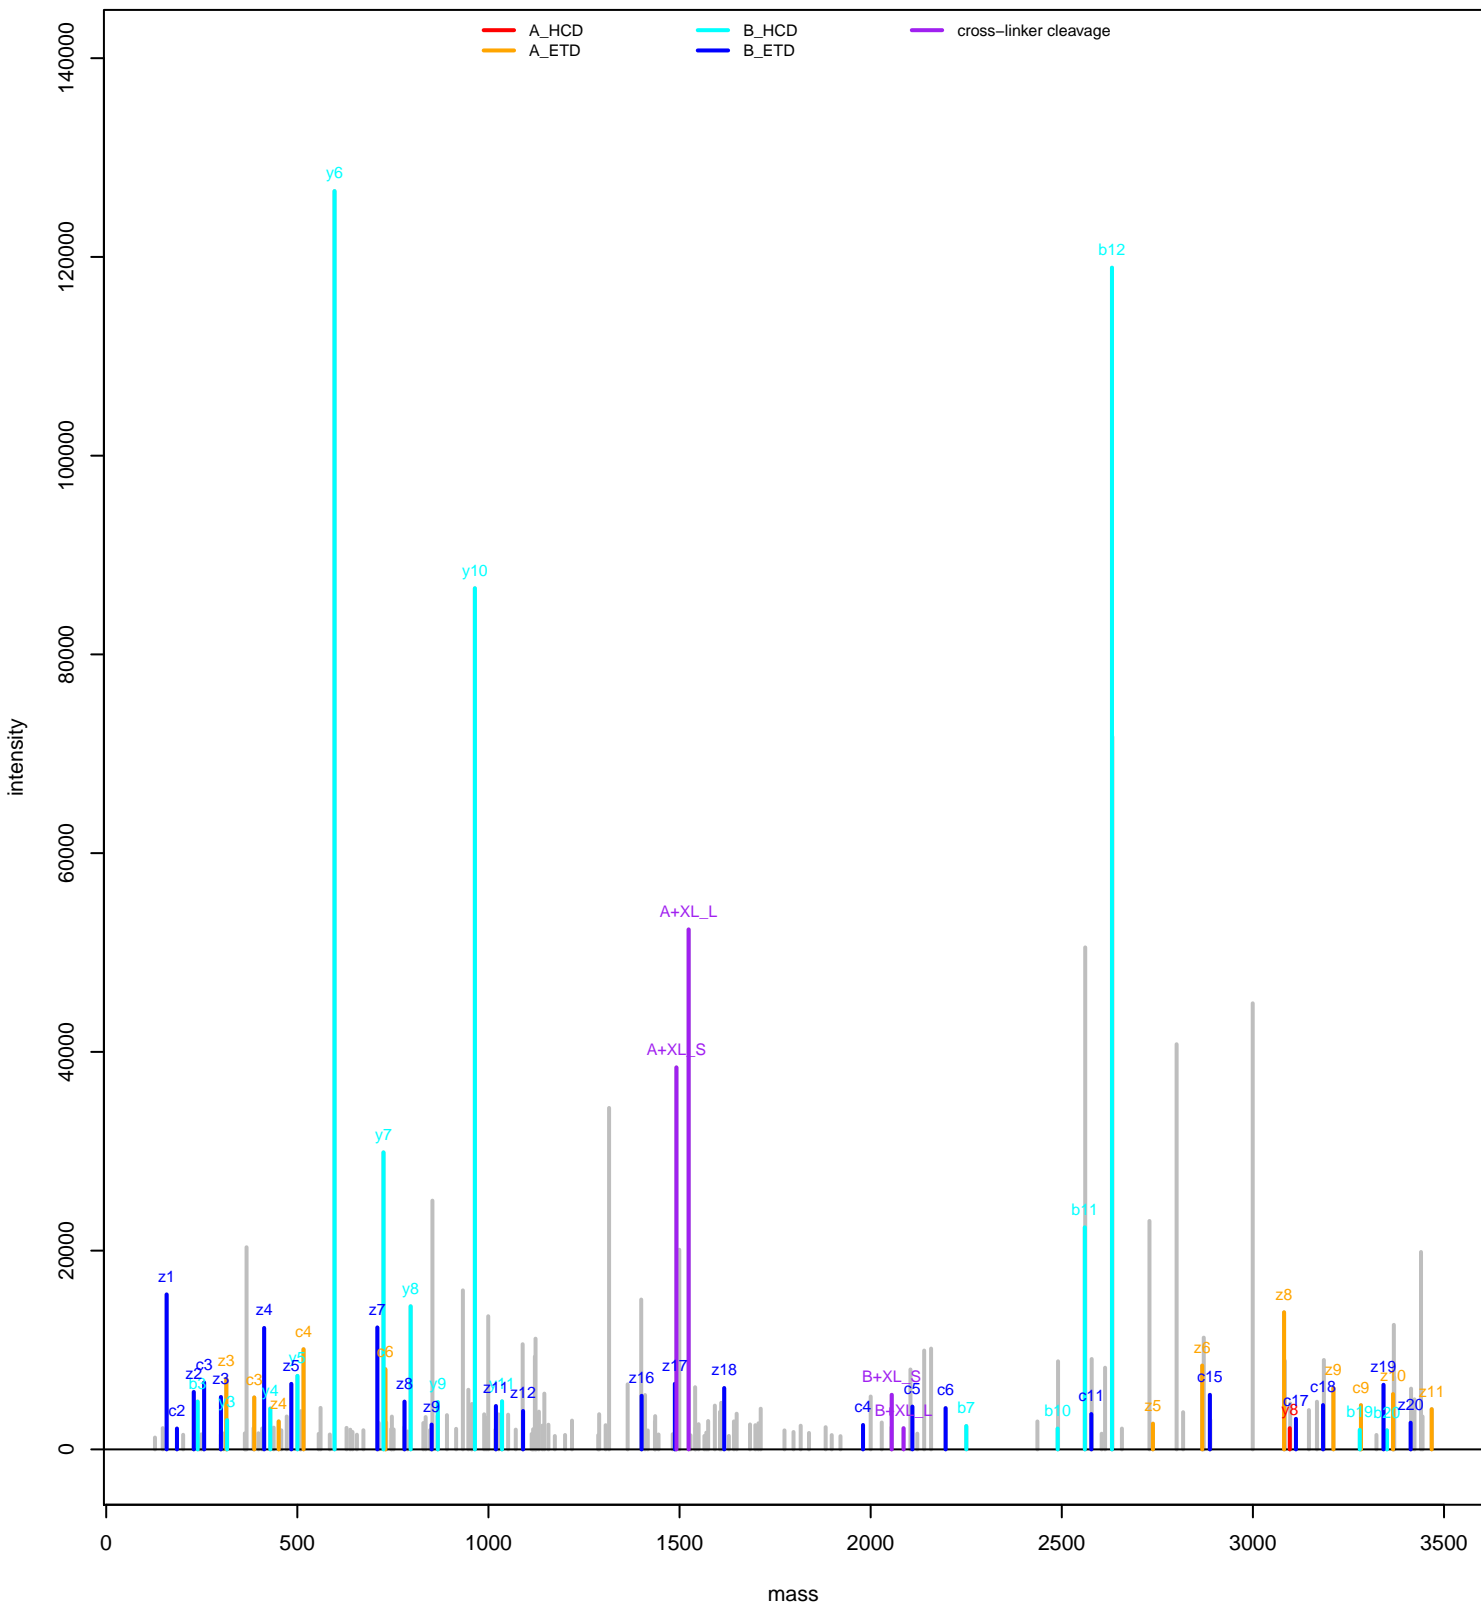

LTREDVEKHLAK+XL\_S

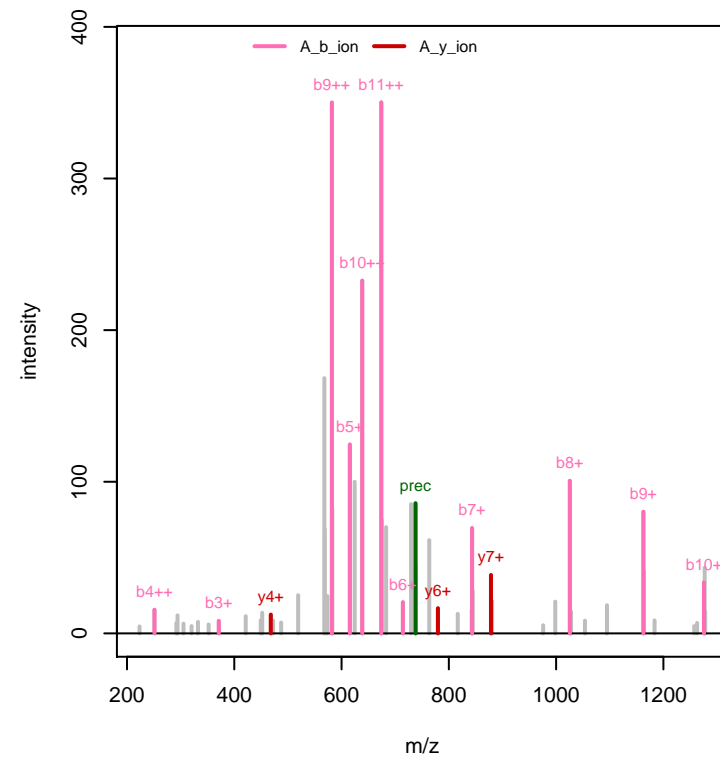

LTREDVEKHLAK+XL\_L

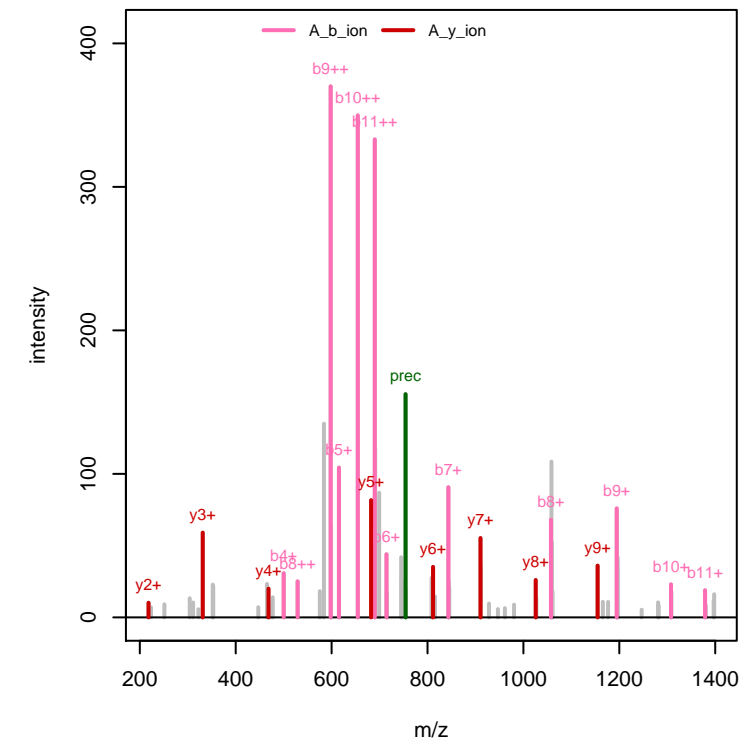

APAKESAPAAAAPAAQPALAAR+XL\_S

APAKESAPAAAAPAAQPALAAR+XL\_L

VVNQIKTR  
TKADQEKMGLALGR

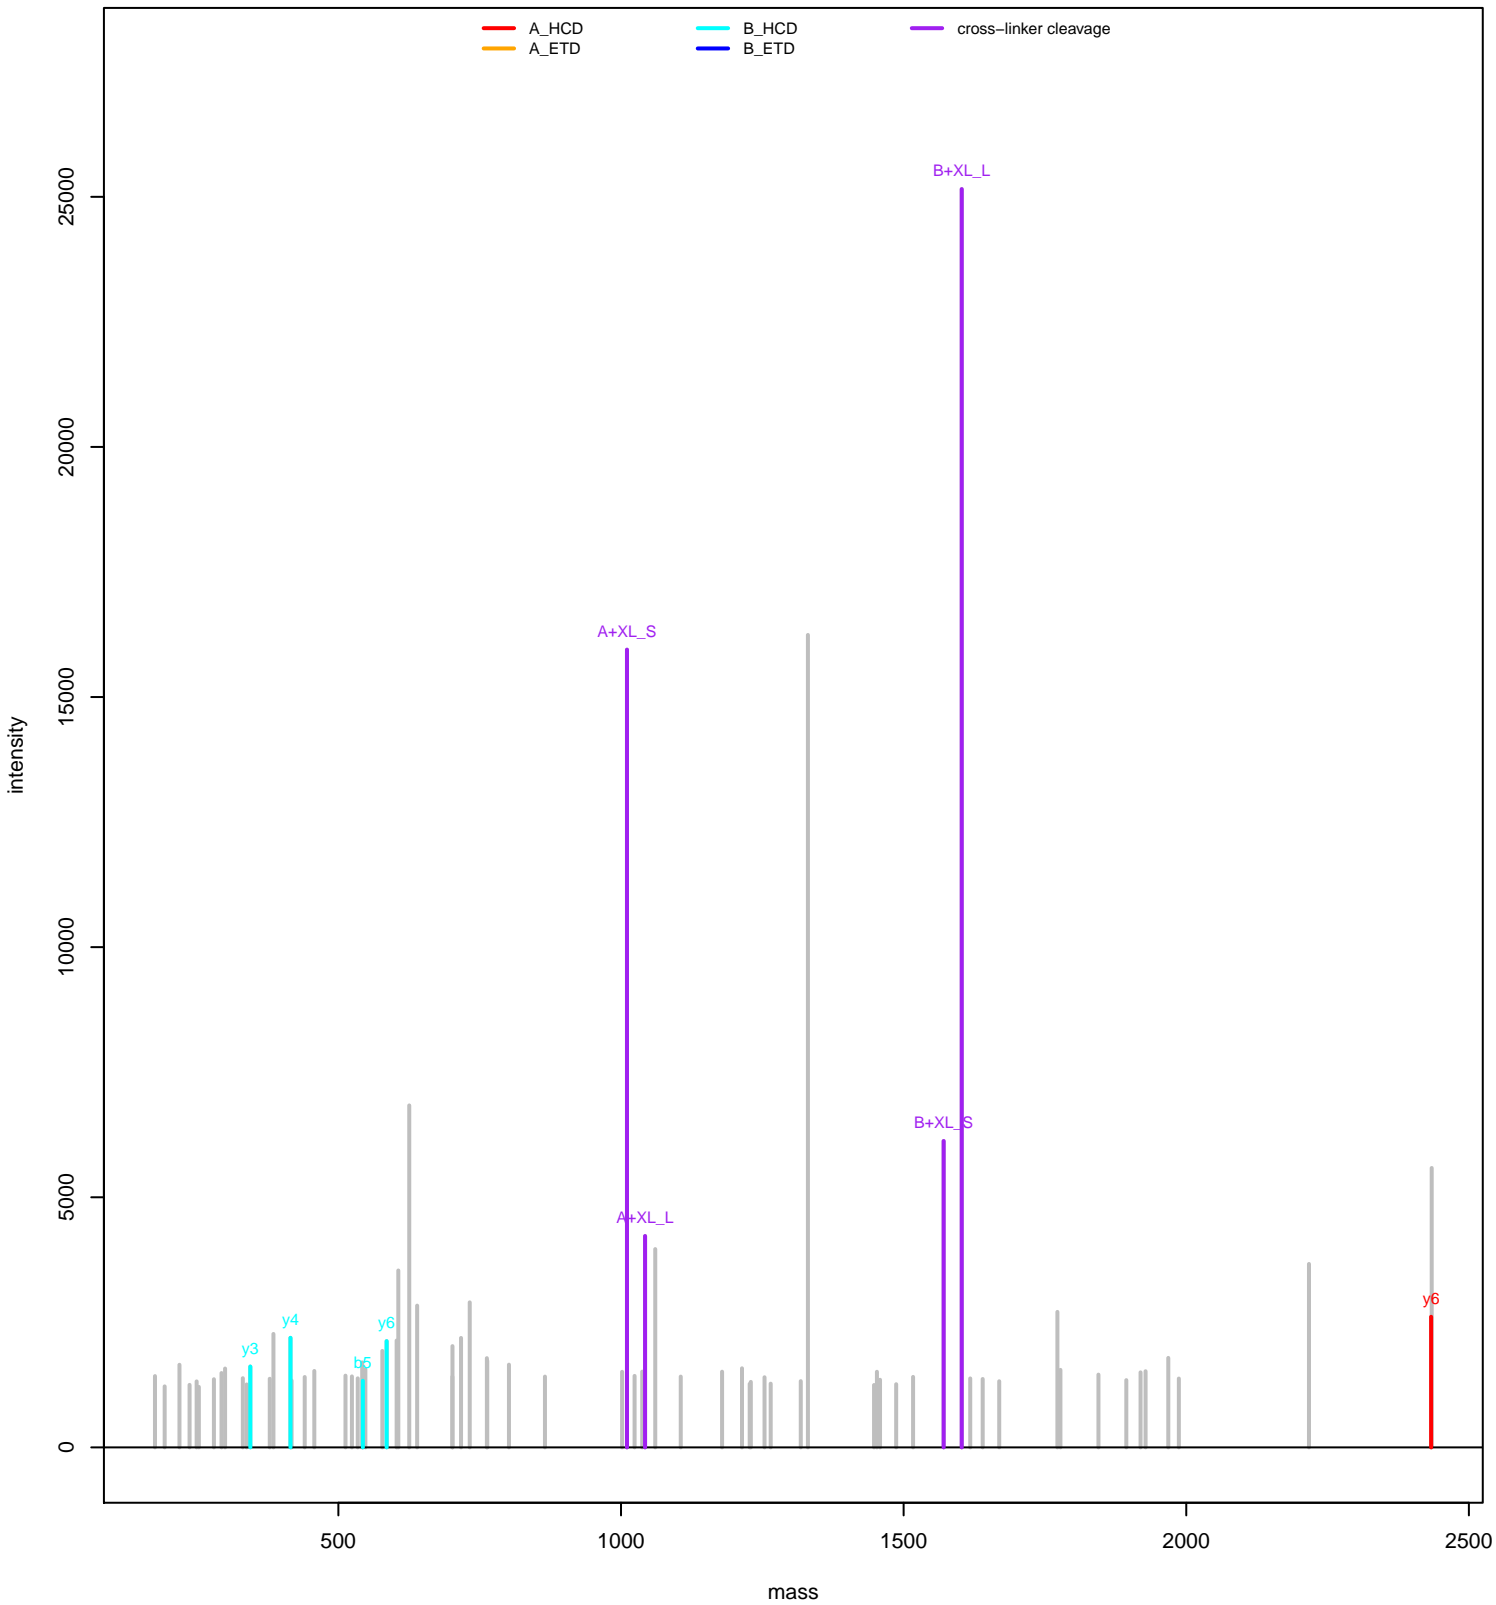

VVNQIKTR+XL\_S

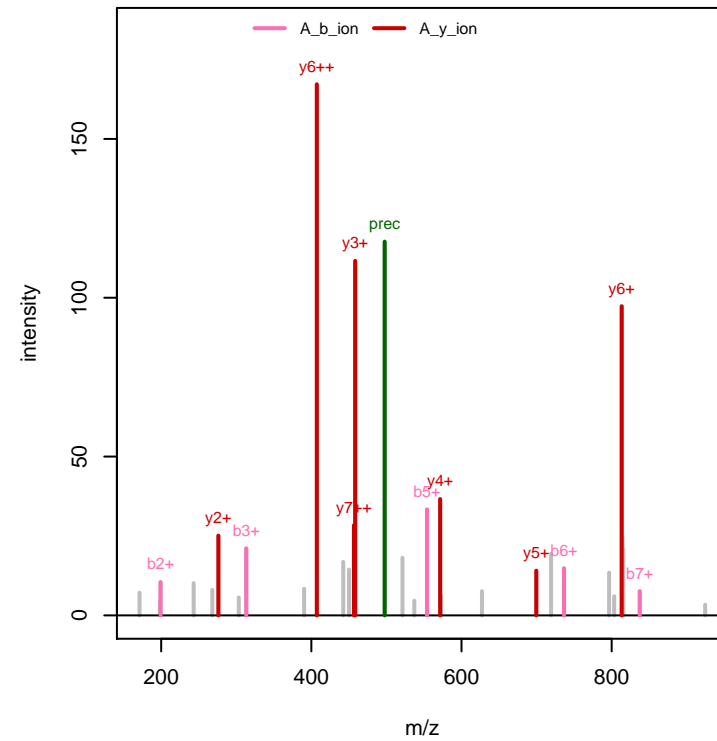

VVNQIKTR+XL\_L

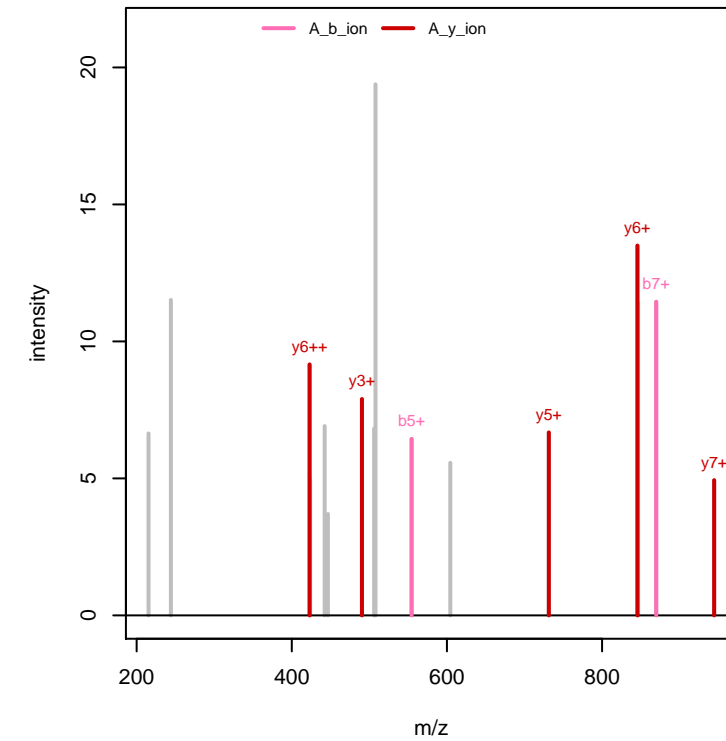

TKADQEKMGLALGR+XL\_S

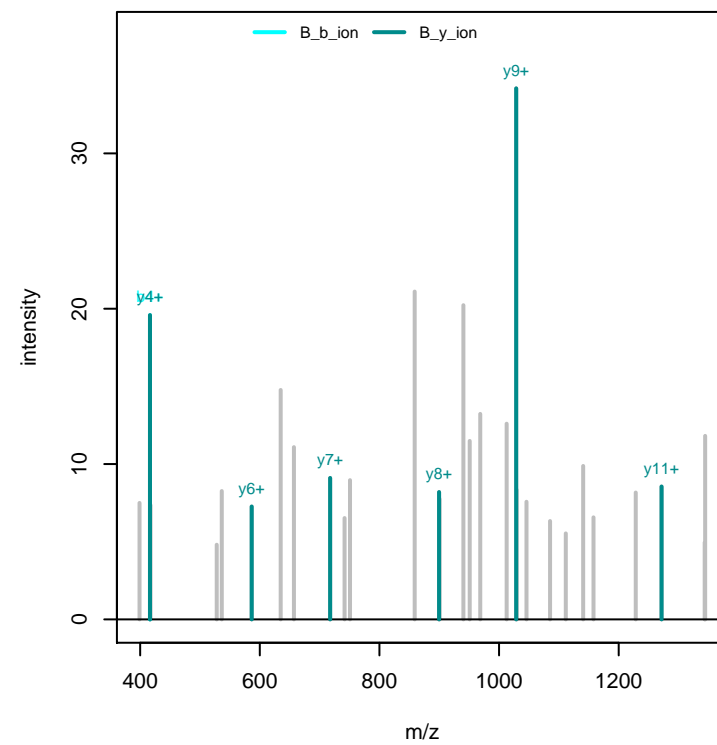

TKADQEKMGLALGR+XL\_L

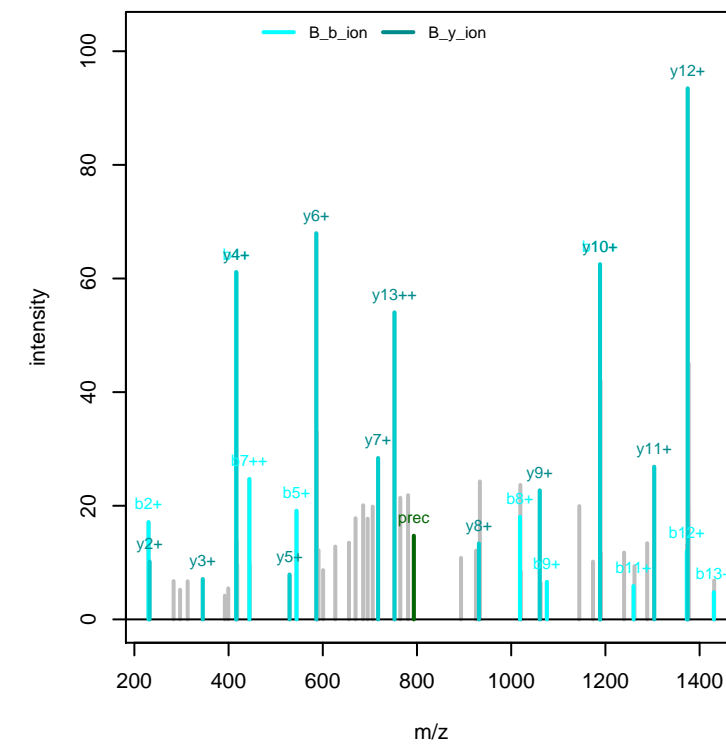

AAGANKVAVIK  
EGVSKDDAEALKK

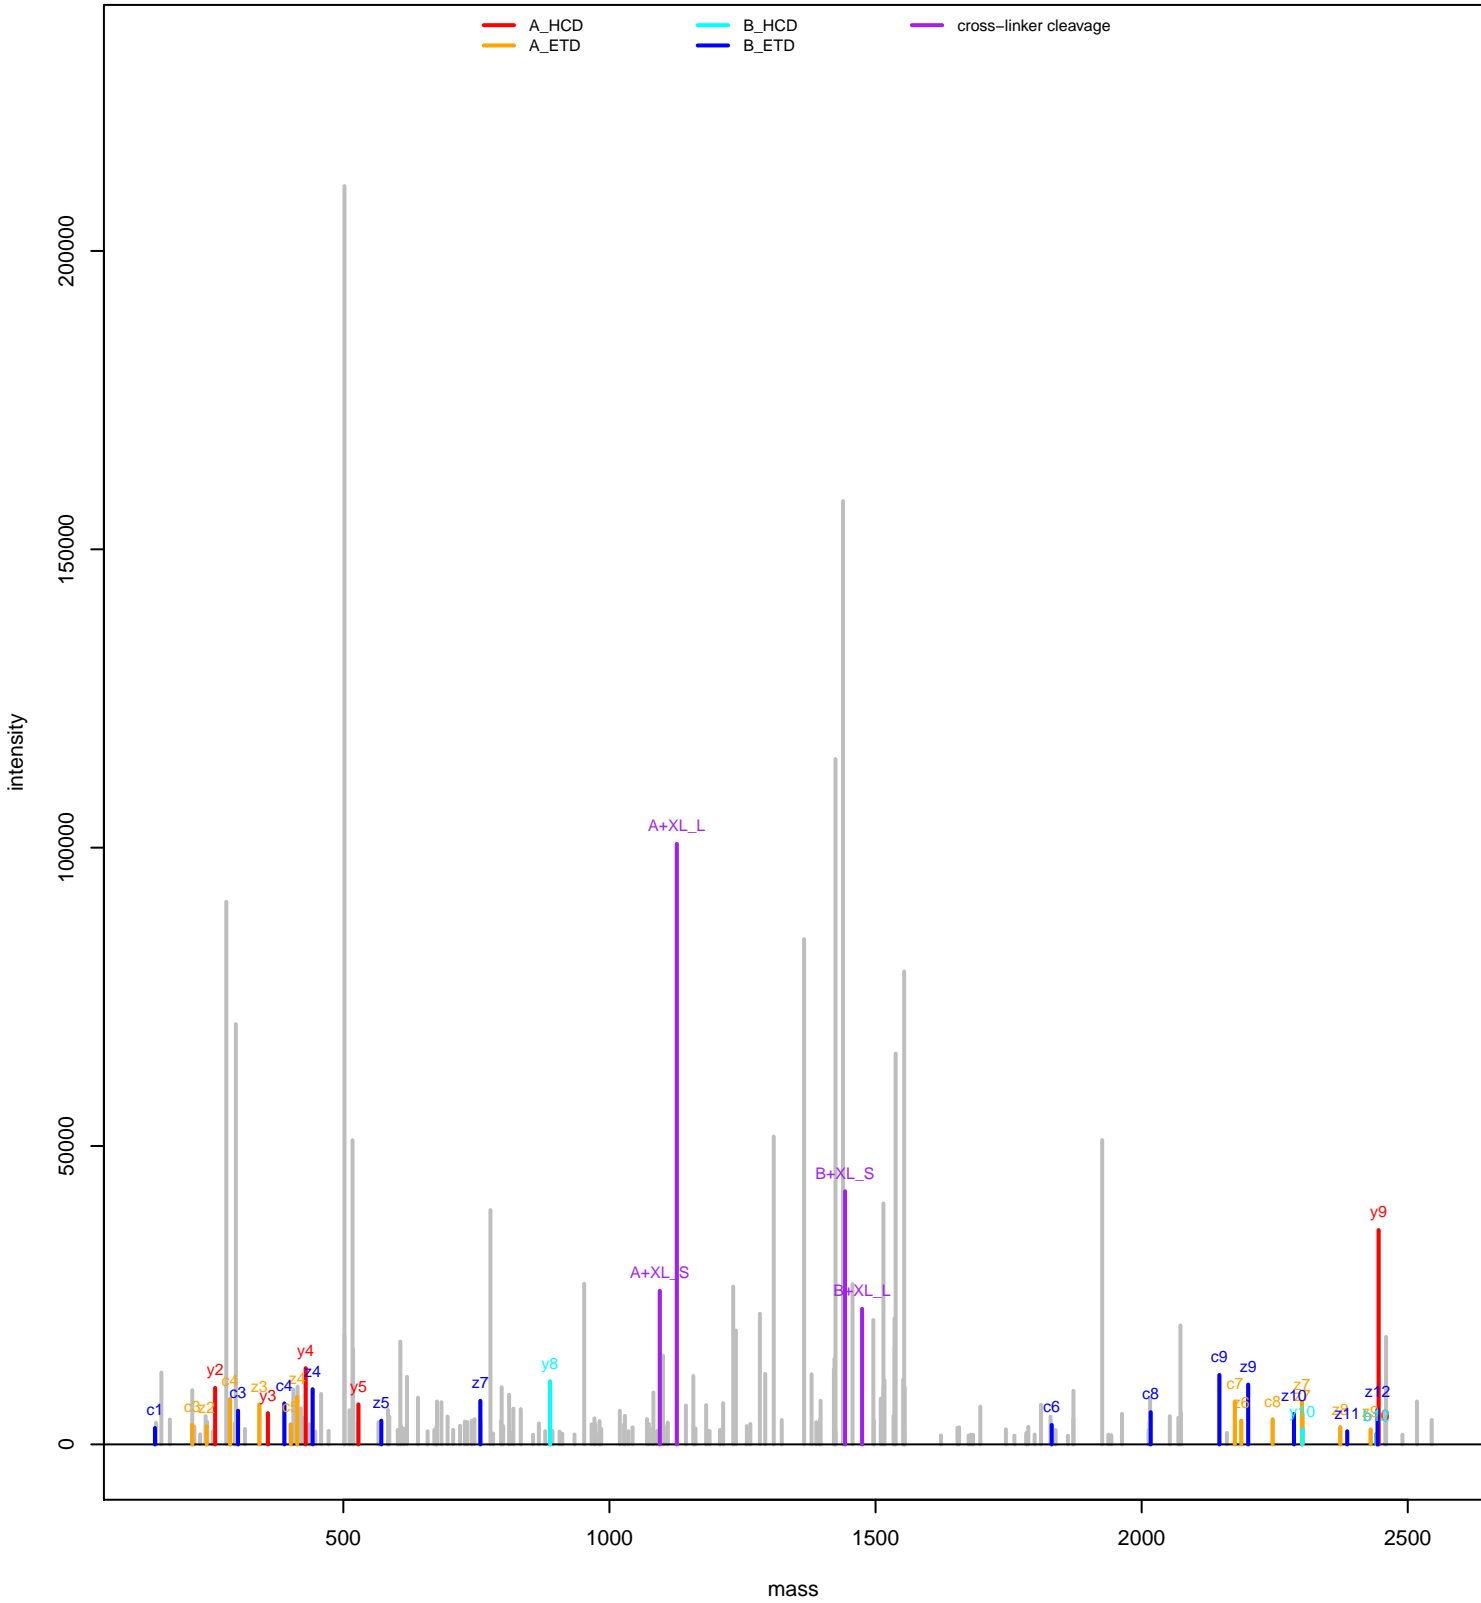

AAGANKVAVIK+XL\_S

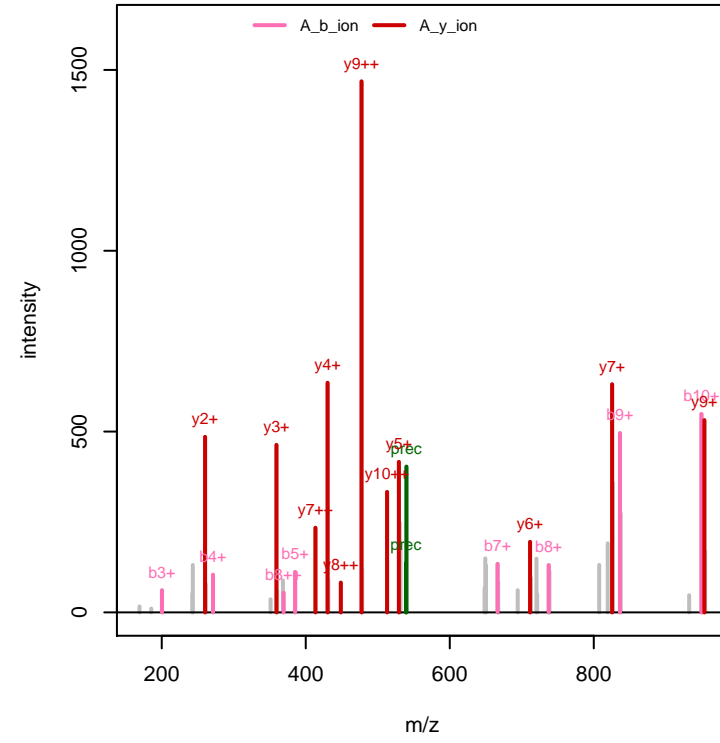

AAGANKVAVIK+XL\_L

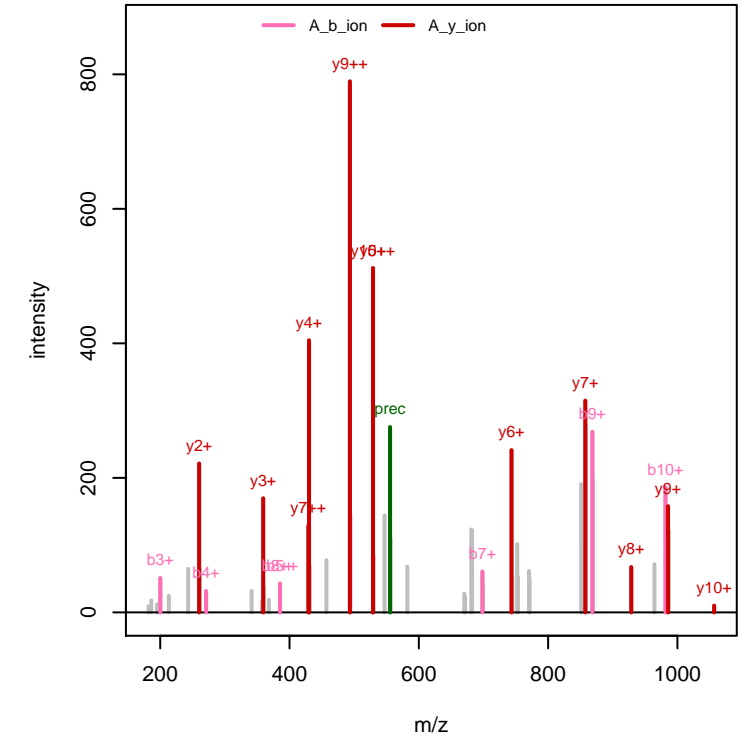

EGVSKDDAEALKK+XL\_S

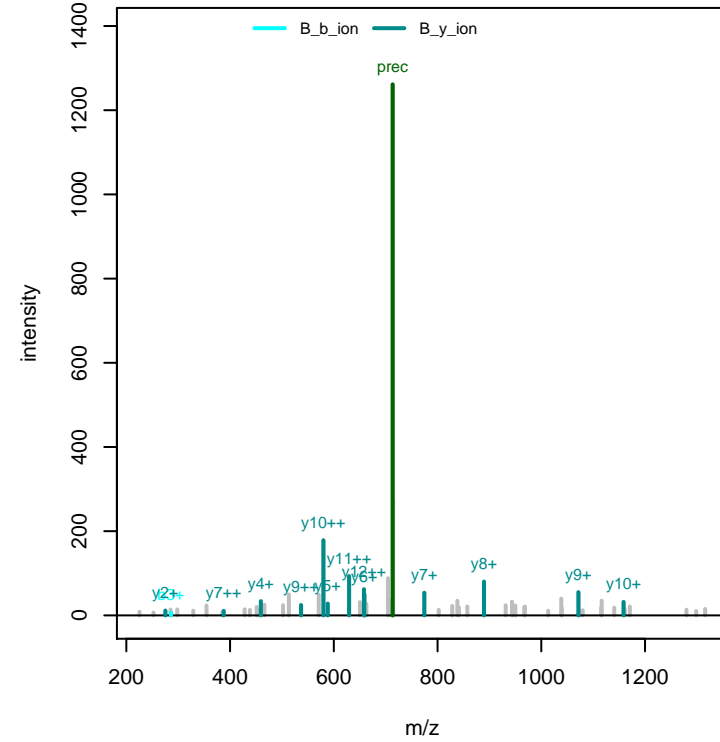

EGVSKDDAEALKK+XL\_L

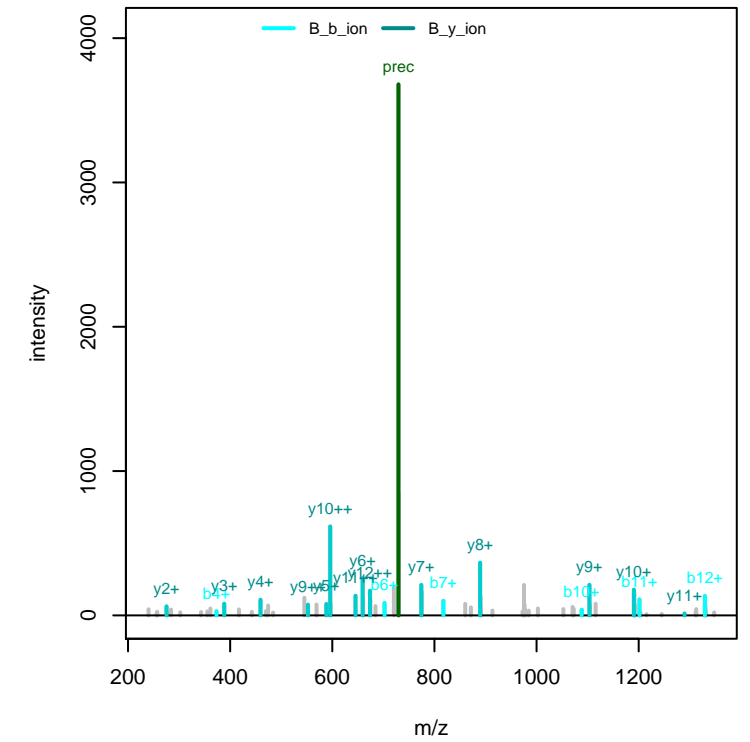

### EKLEGYAEAK IENKLANEGFVAR

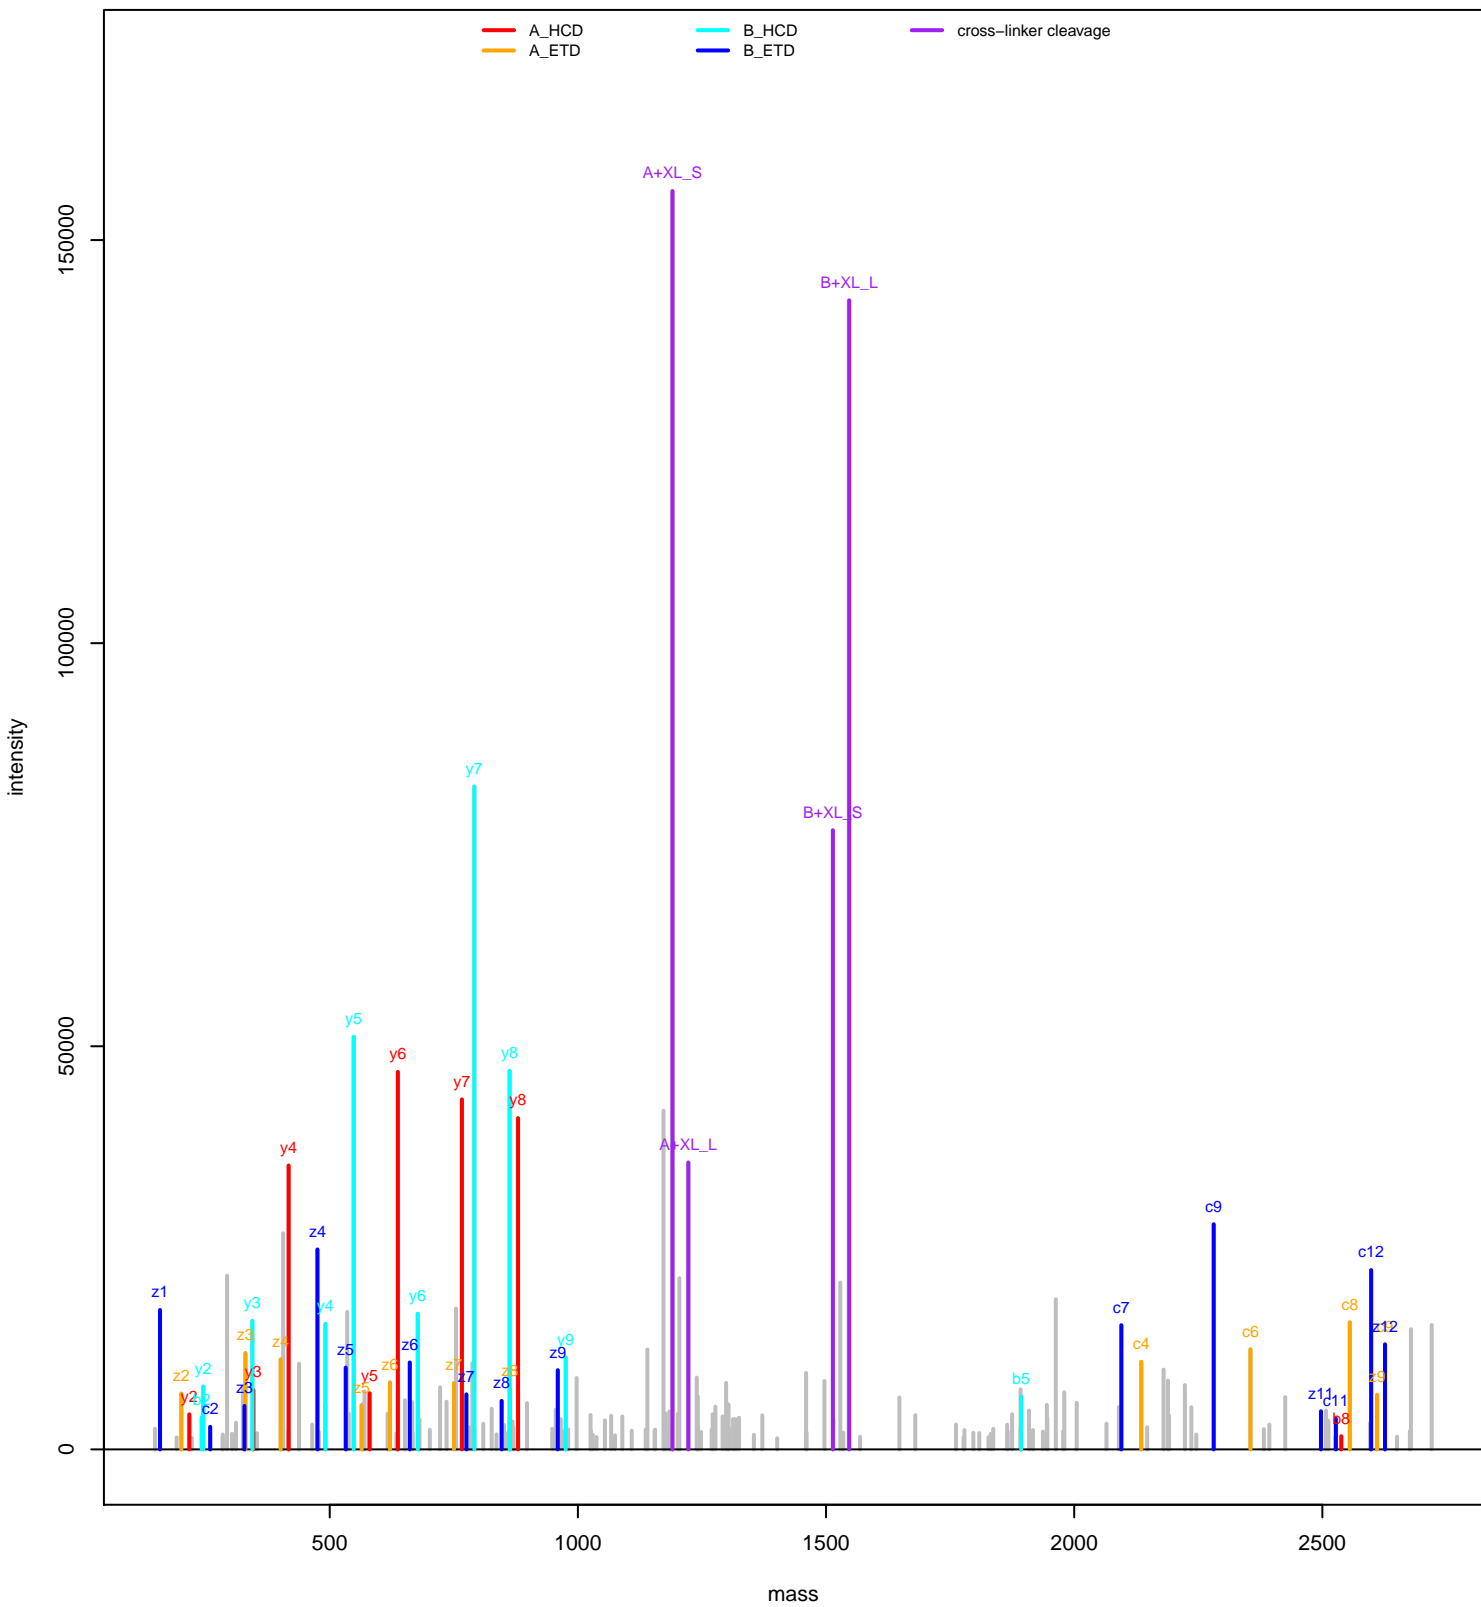

### EKLEGYAEAK+XL\_S

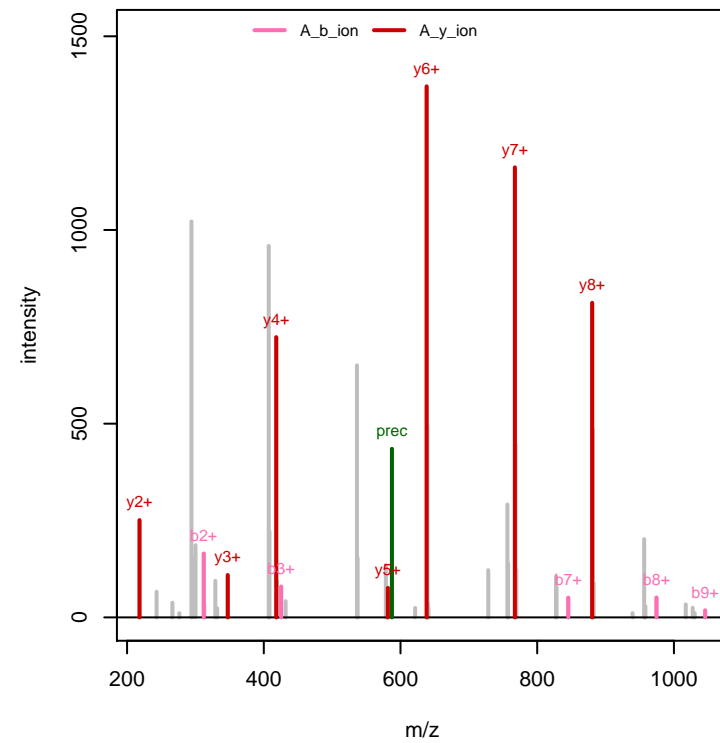

### EKLEGYAEAK+XL\_L

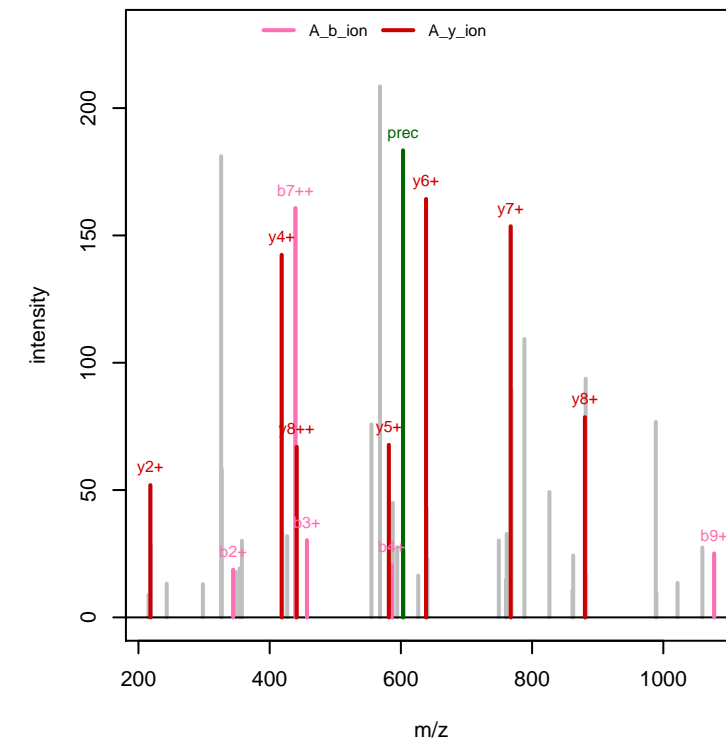

### IENKLANEGFVAR+XL\_S

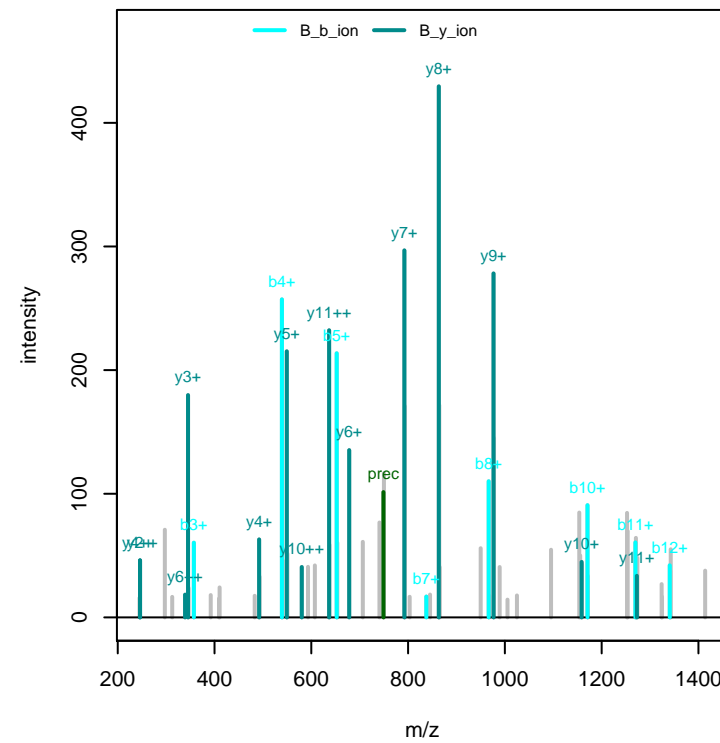

### IENKLANEGFVAR+XL\_L

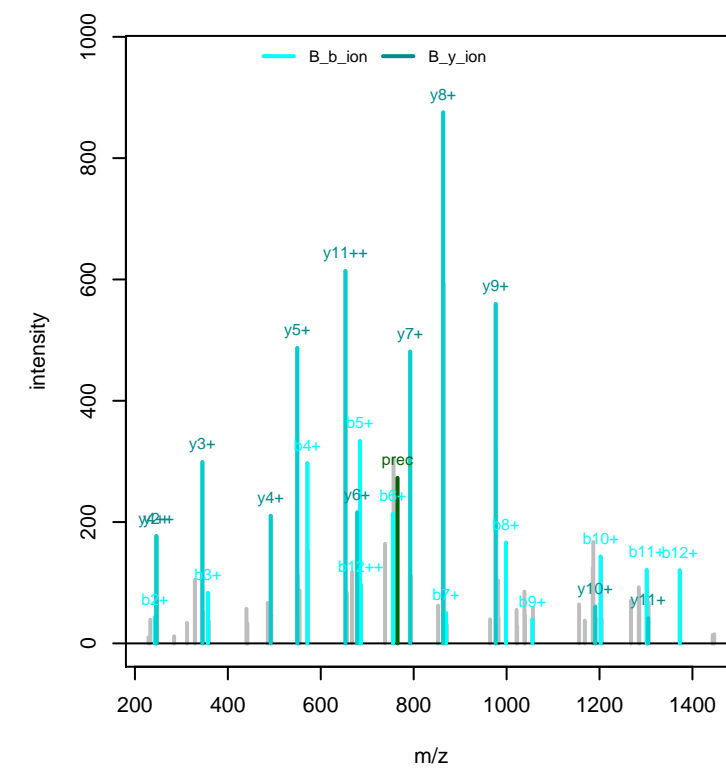

**AQALGKER  
GYLDYDAKK**

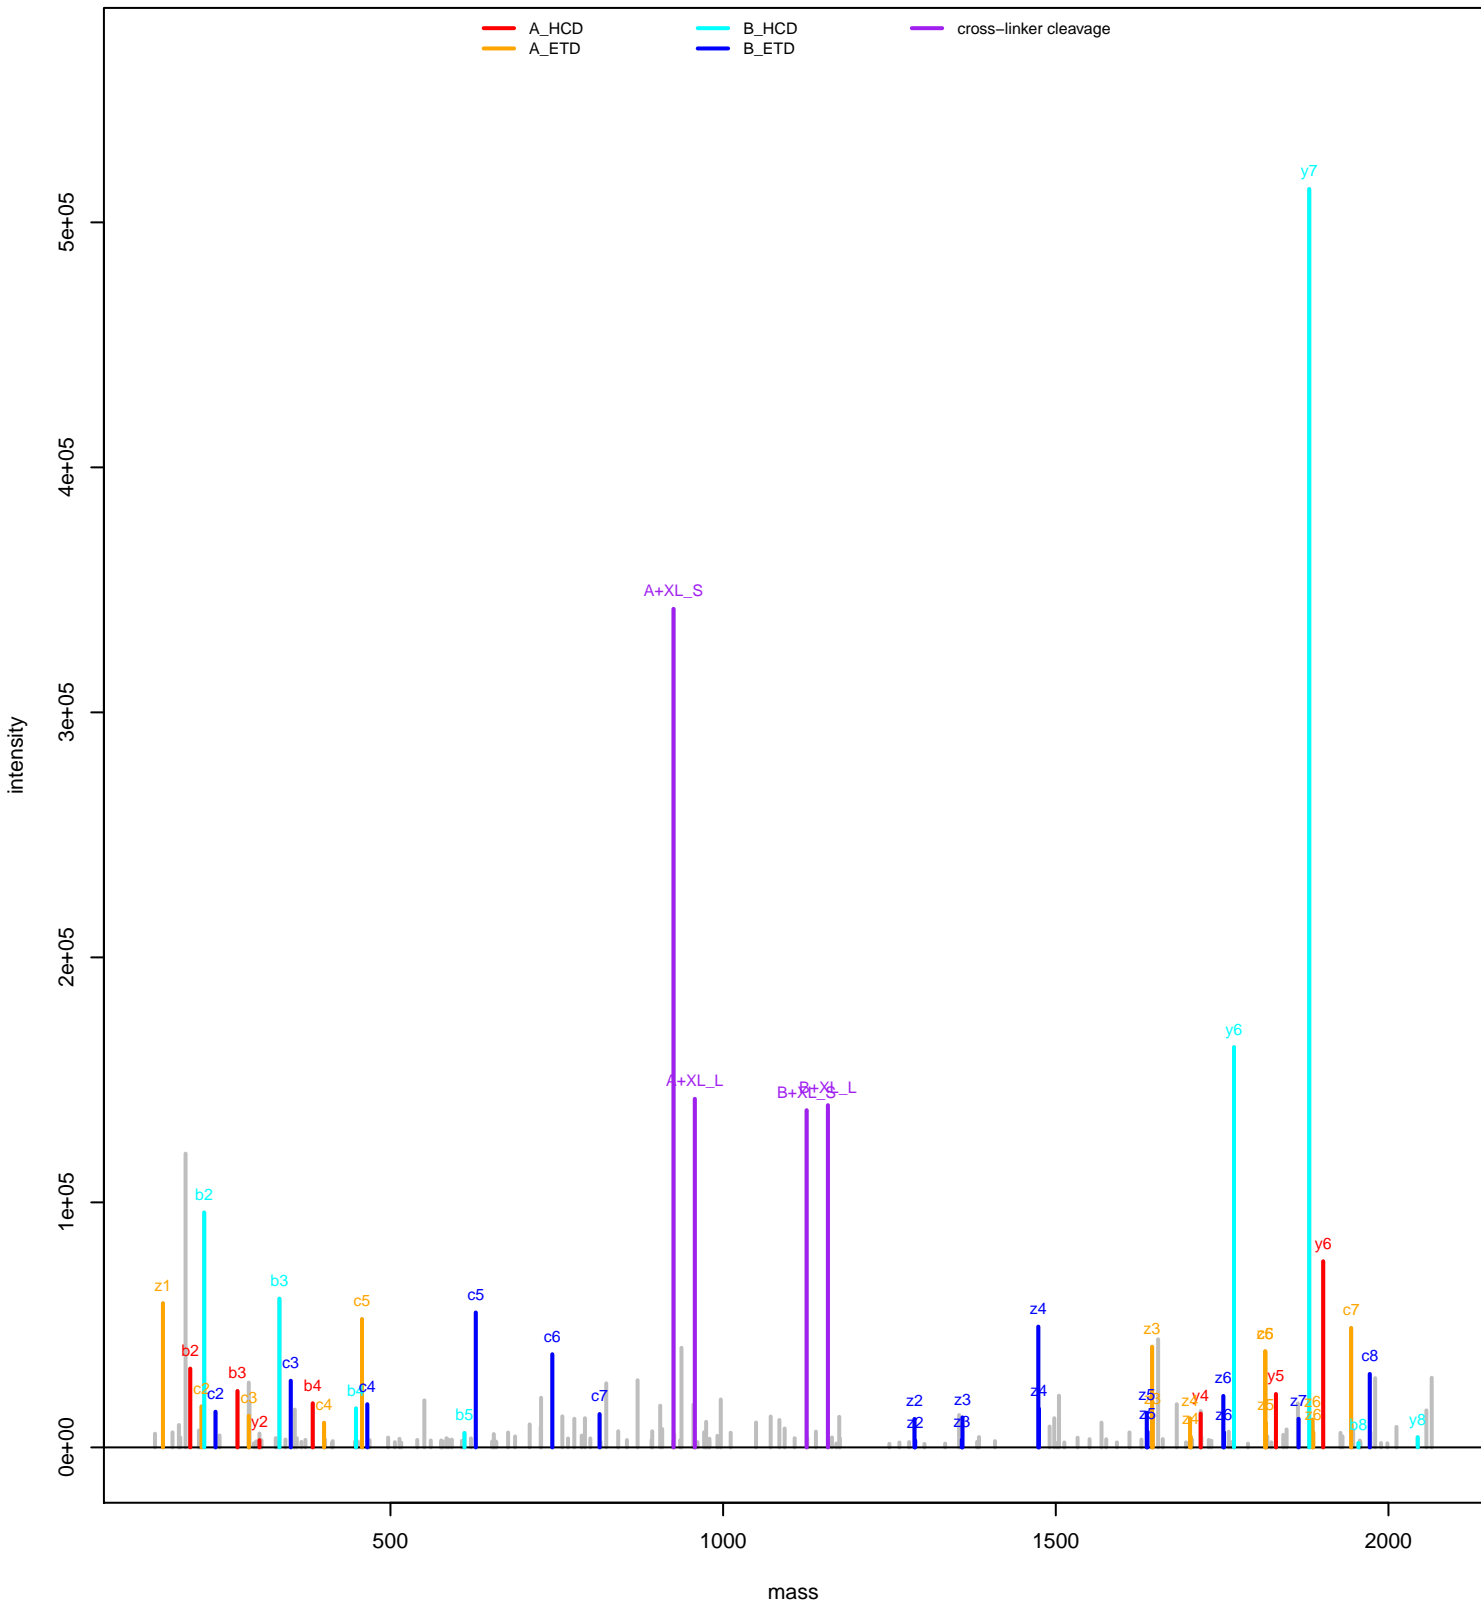

**AQALGKER+XL\_S**

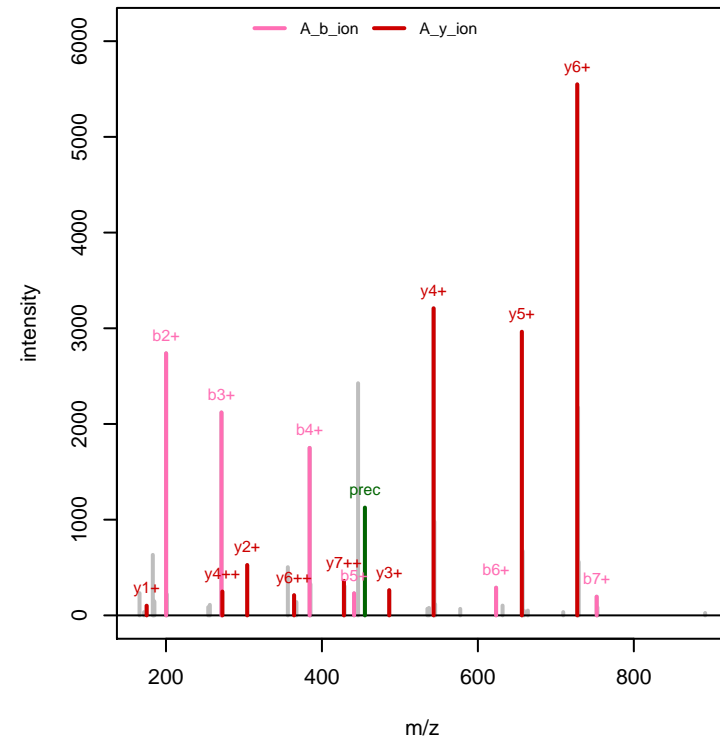

**AQALGKER+XL\_L**

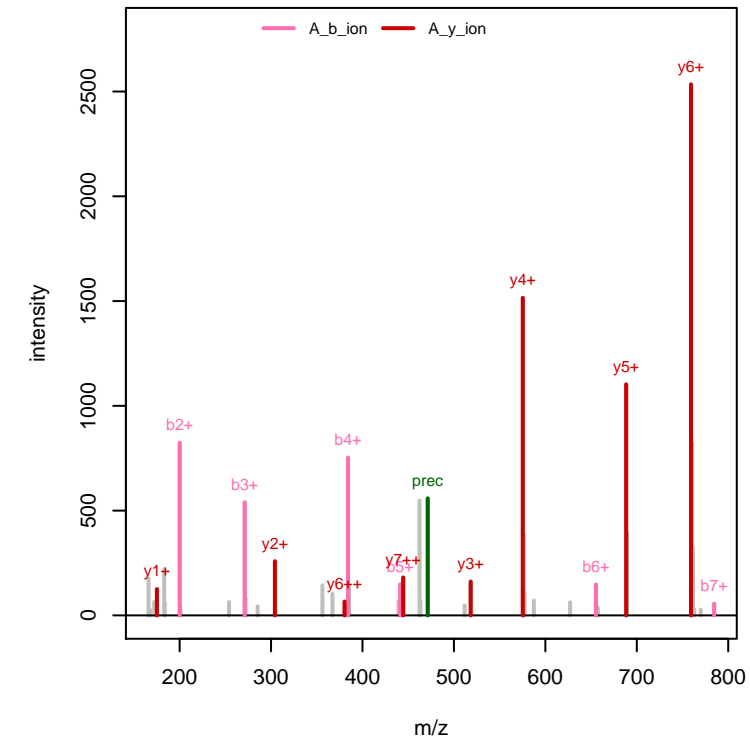

**GYLDYDAKK+XL\_S**

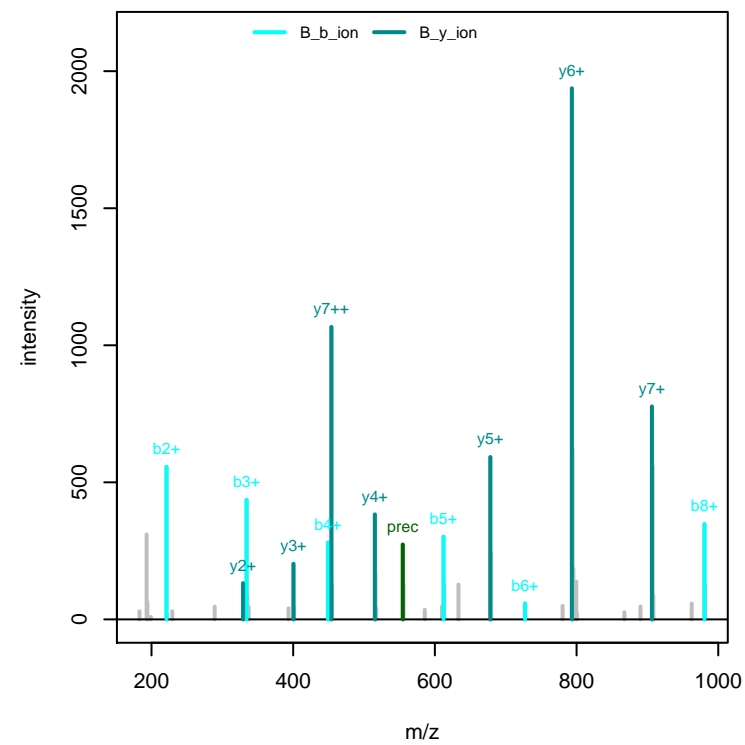

**GYLDYDAKK+XL\_L**

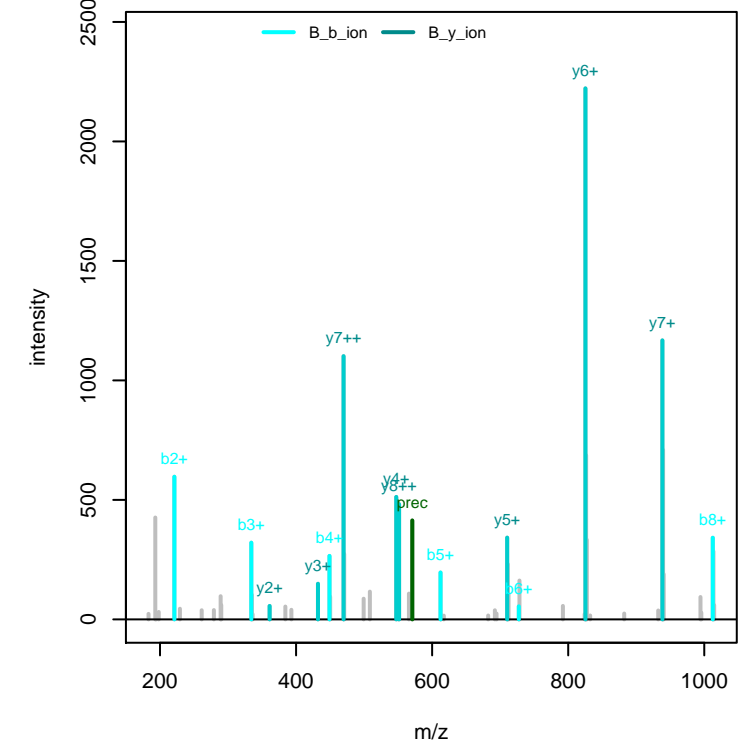

MAALMKQR  
VVSMPTDAFDKQDAAYR

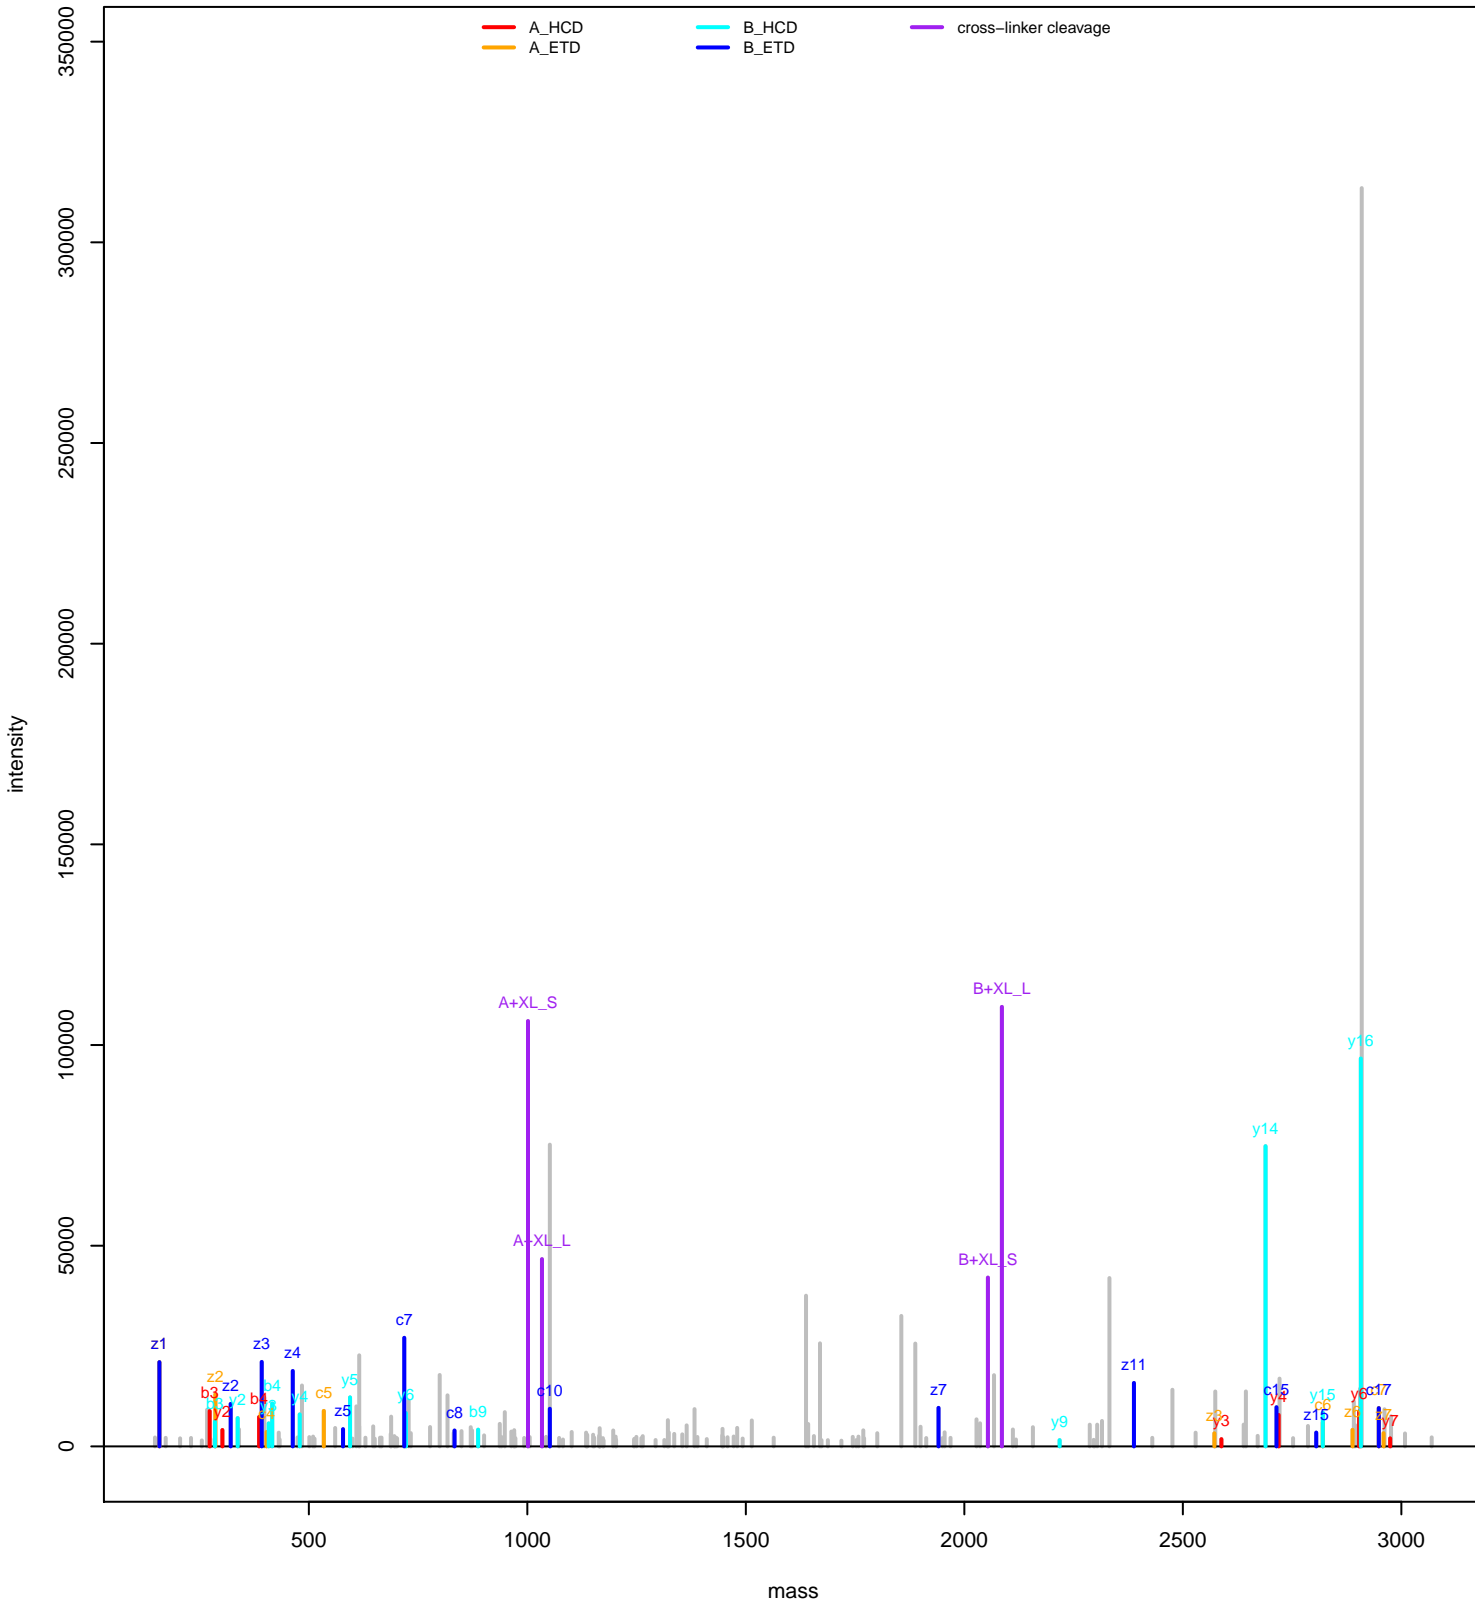

MAALMKQR+XL\_S

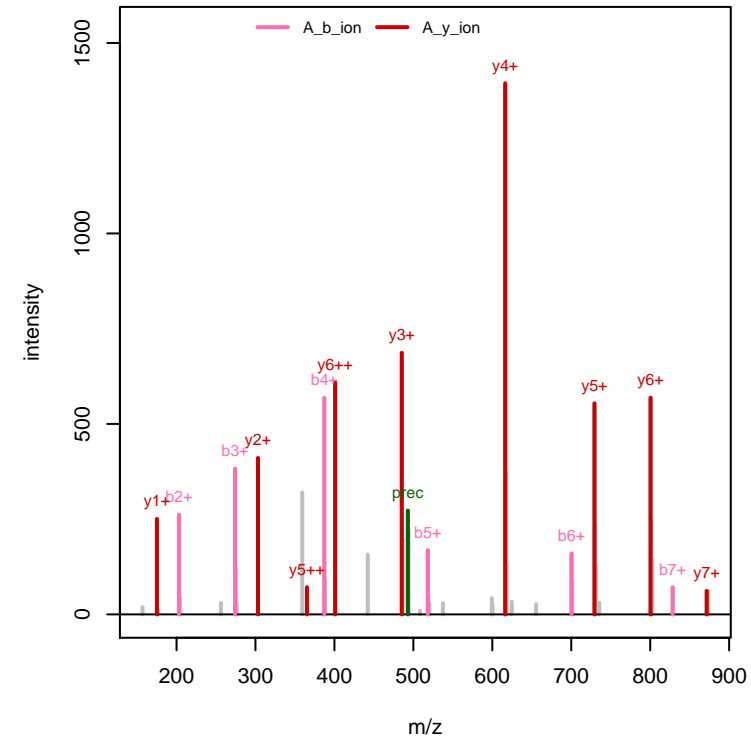

MAALMKQR+XL\_L

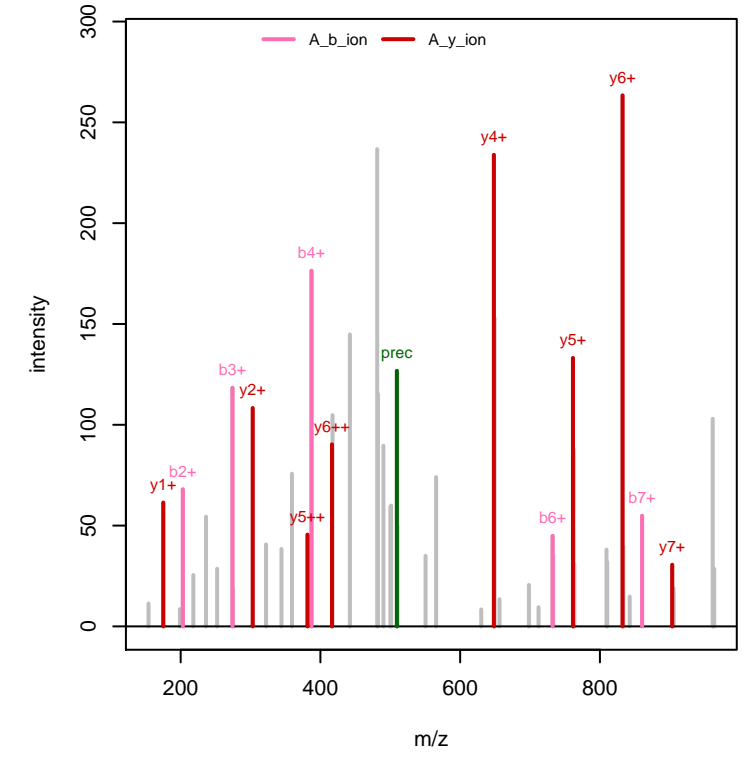

VVSMPTDAFDKQDAAYR+XL\_S

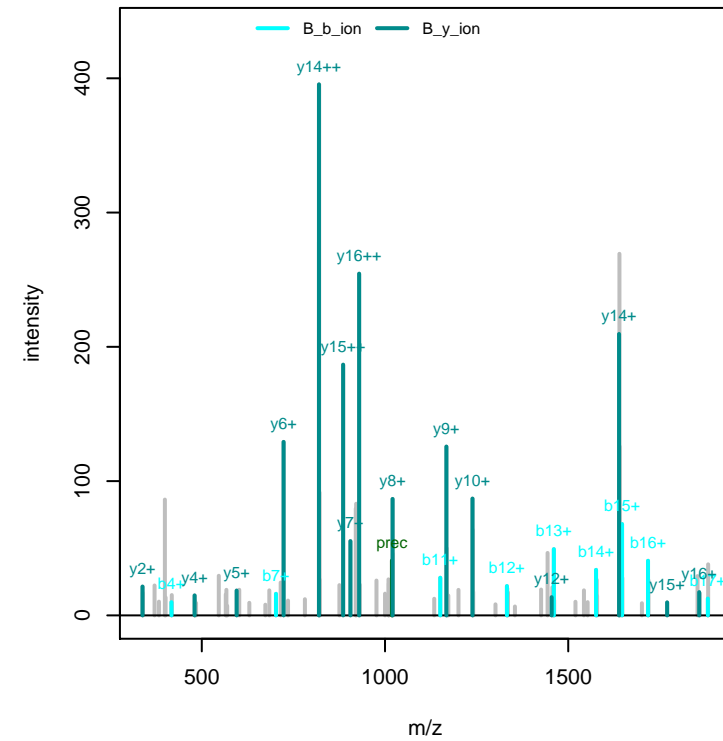

VVSMPTDAFDKQDAAYR+XL\_L

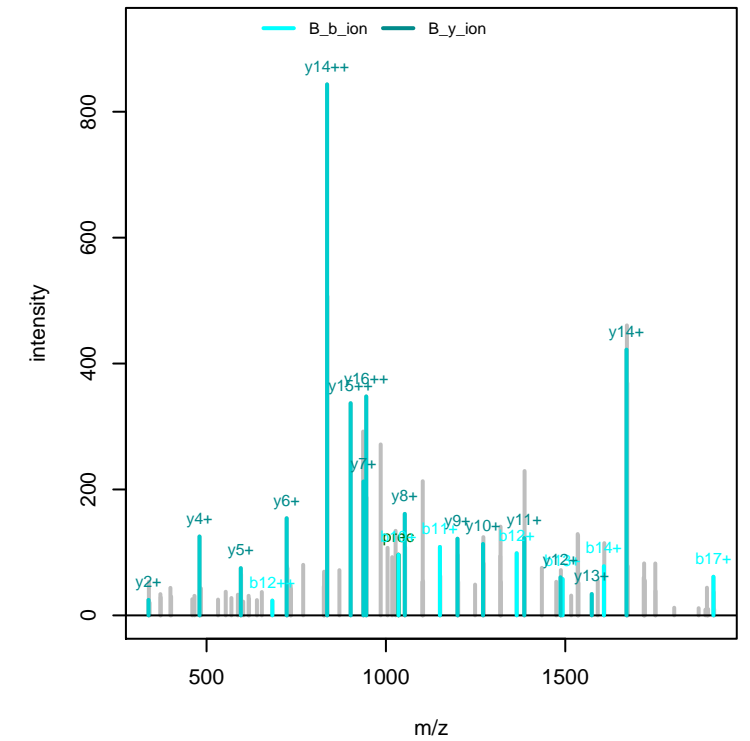



CKALAR  
DLSGIGIPVAKK

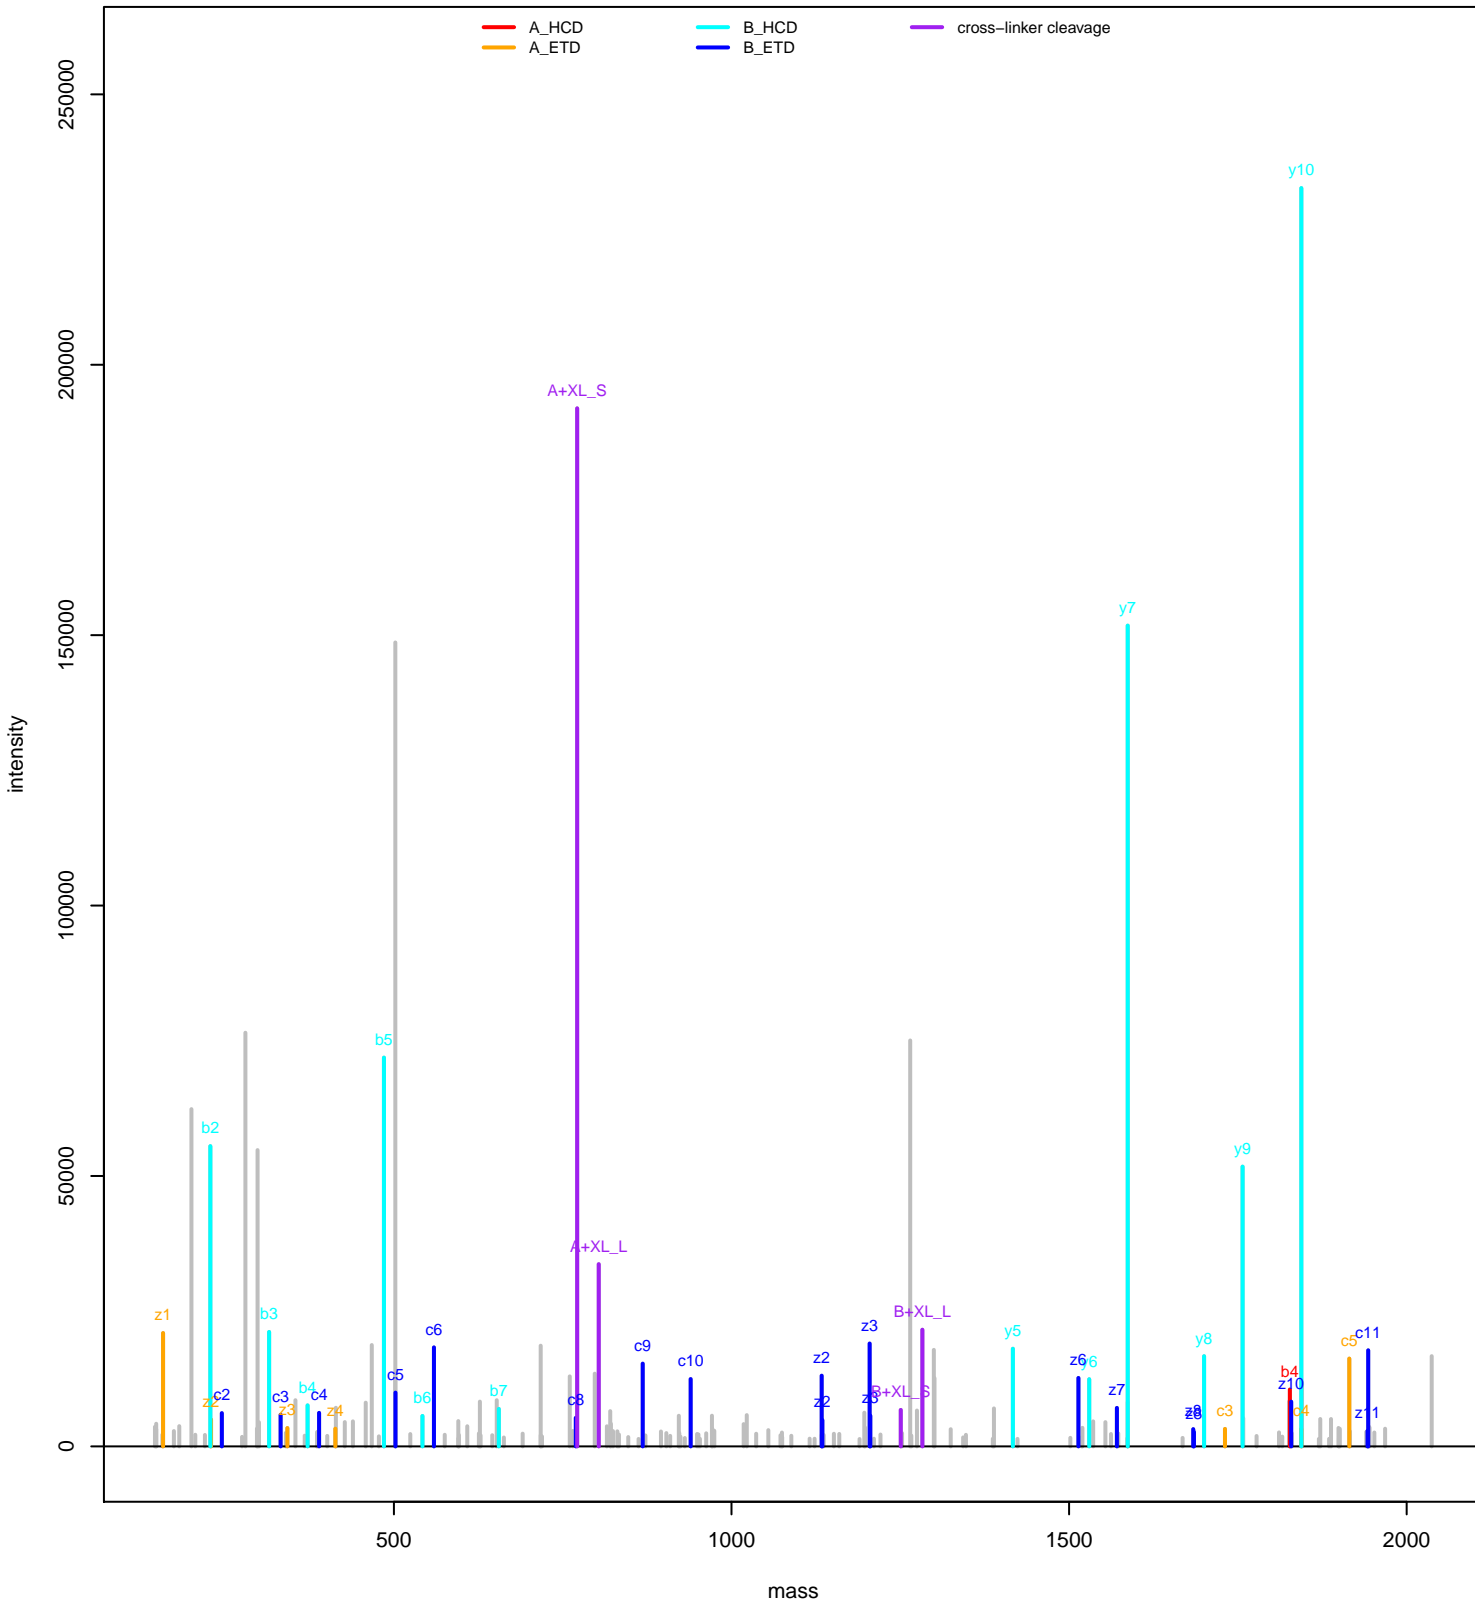

CKALAR+XL\_S

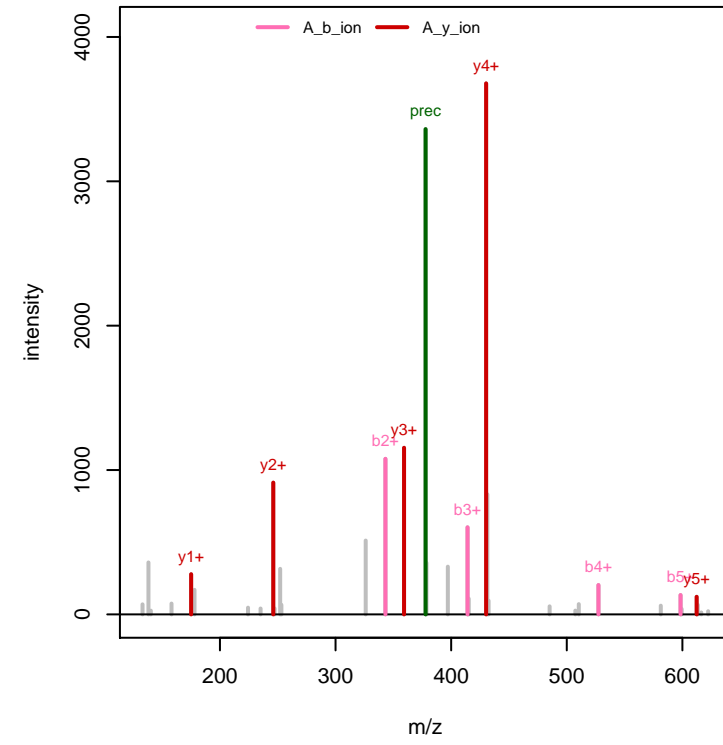

CKALAR+XL\_L

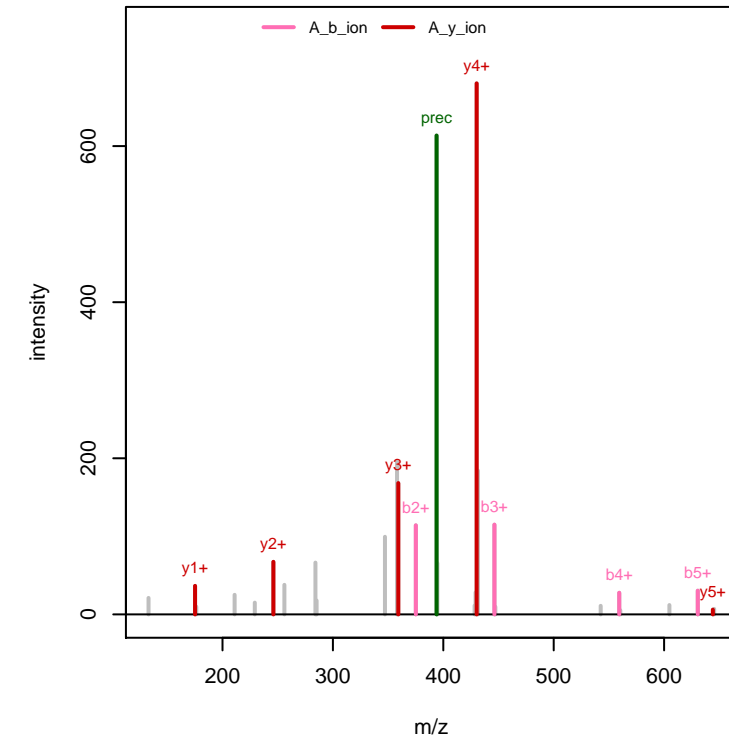

DLSGIGIPVAKK+XL\_S

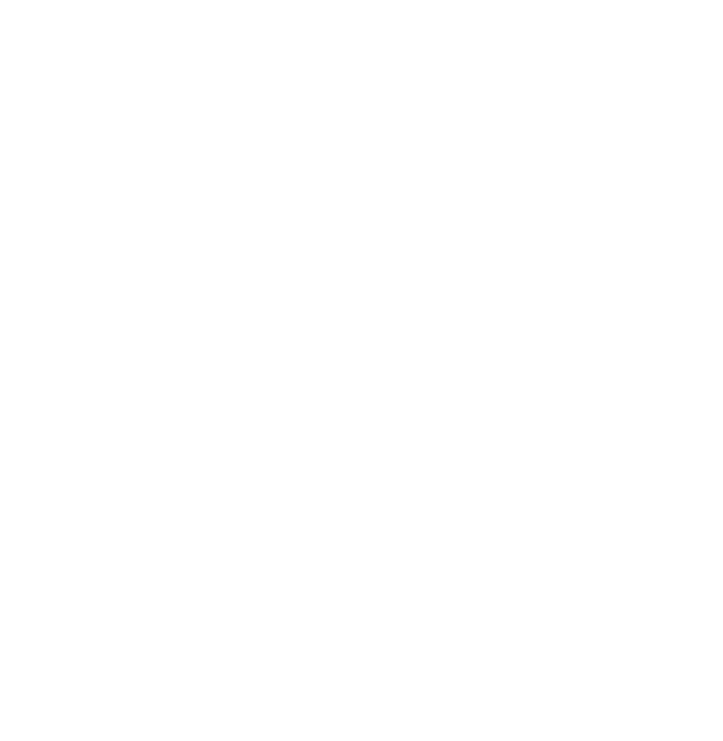

DLSGIGIPVAKK+XL\_L

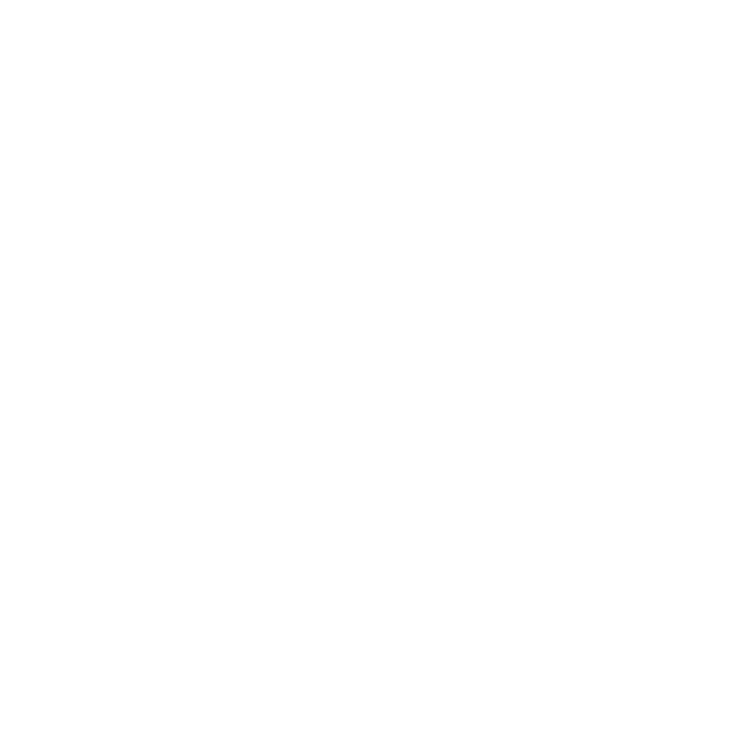

**QKVTDVEGK  
AKPVLLEPIMK**

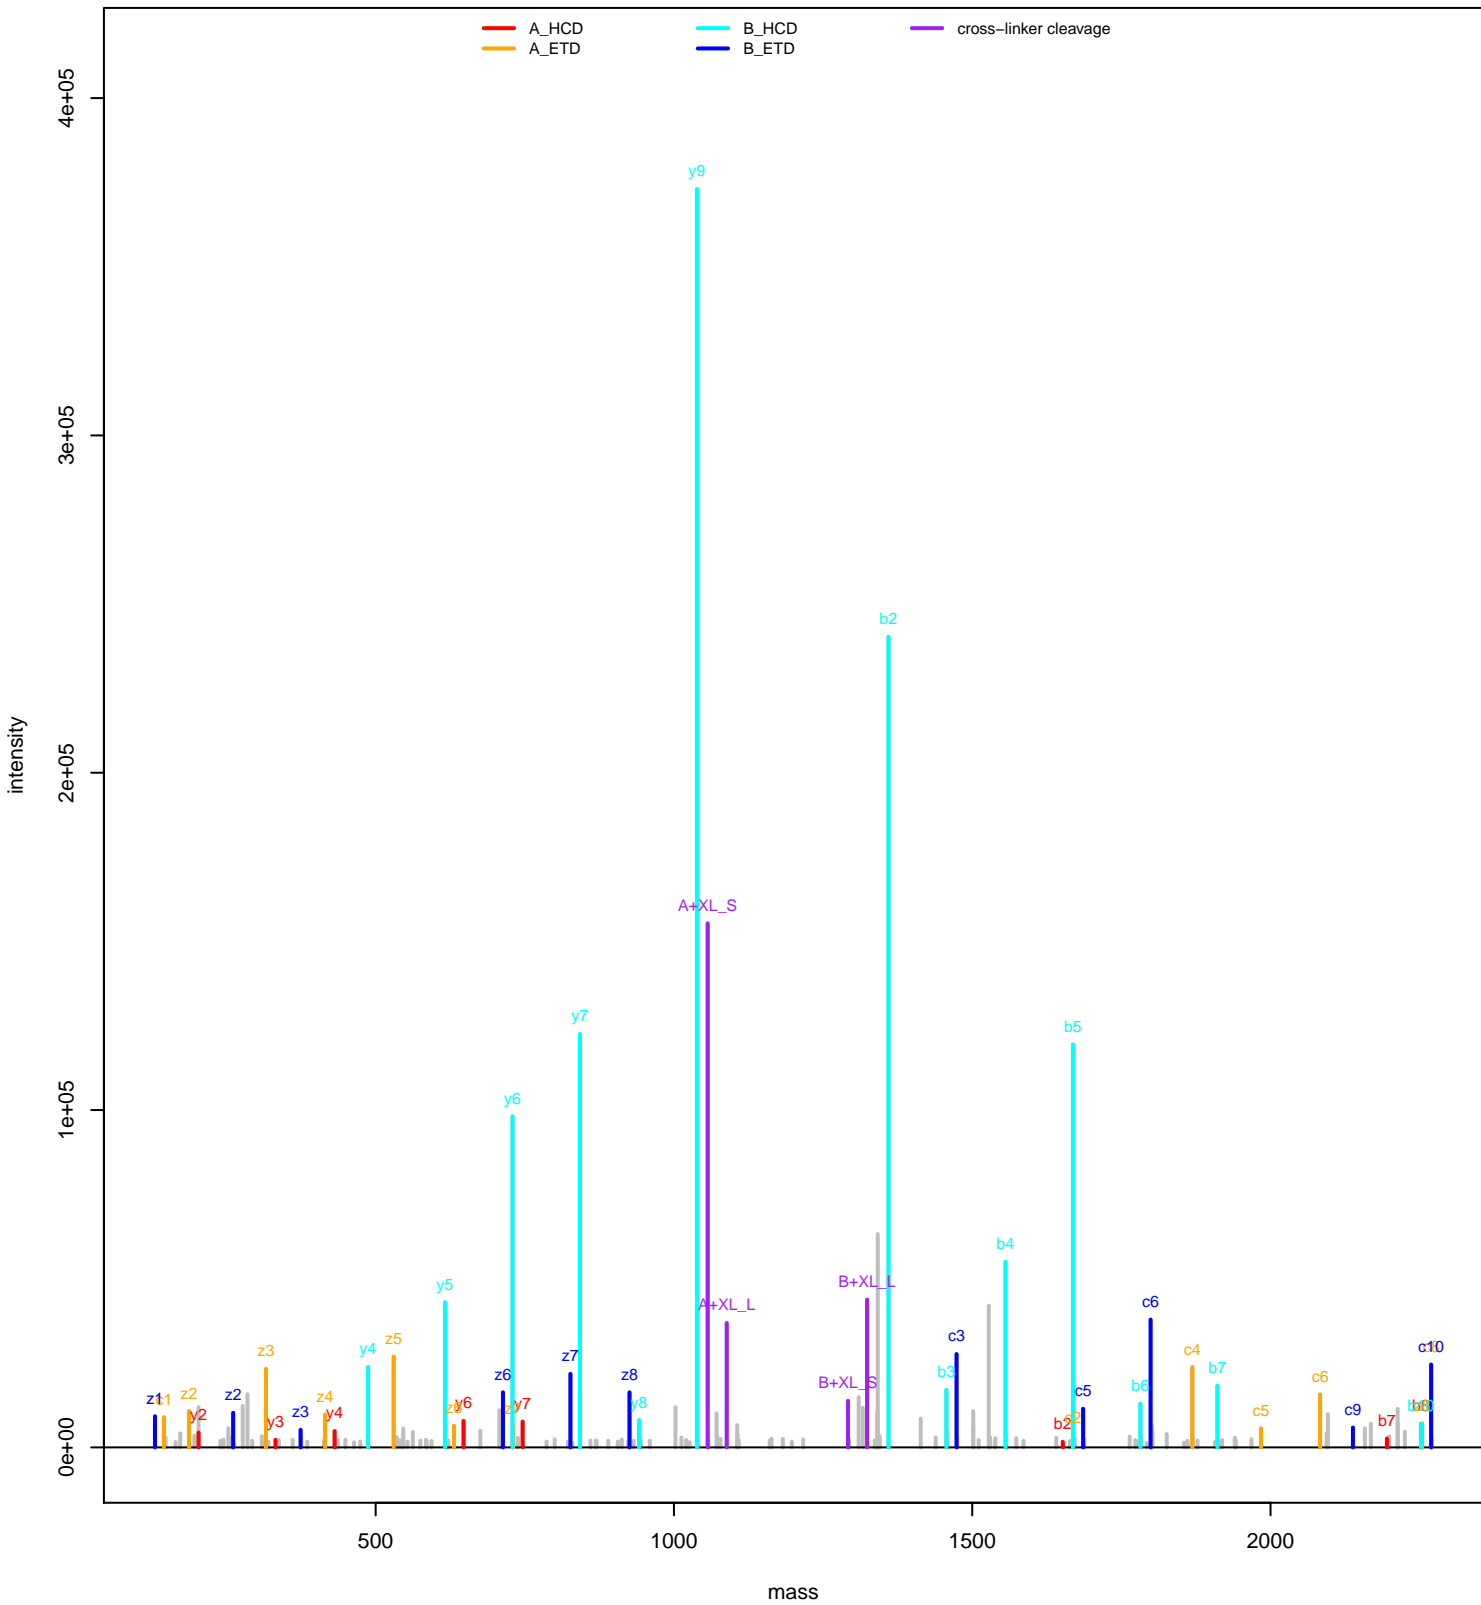

**QKVTDVEGK+XL\_S**

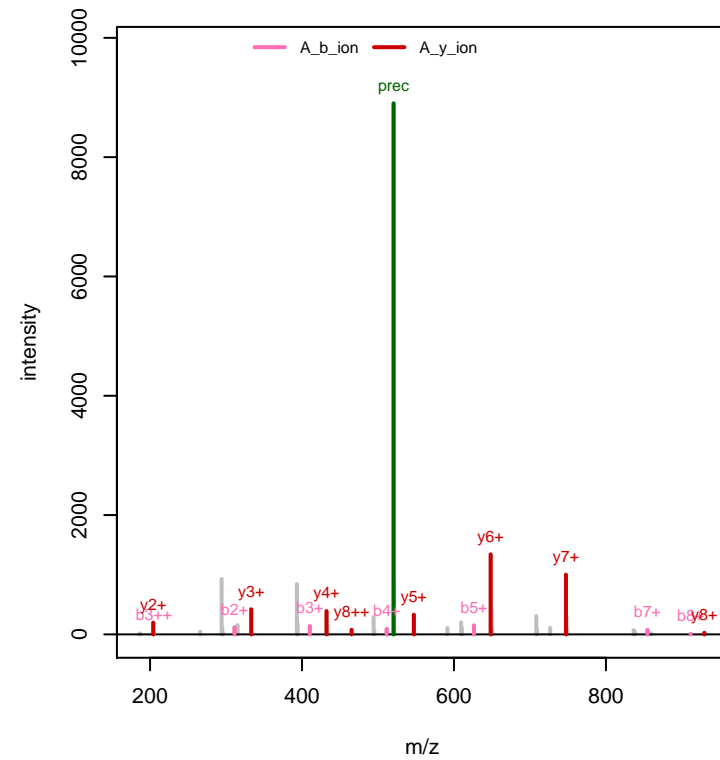

**QKVTDVEGK+XL\_L**

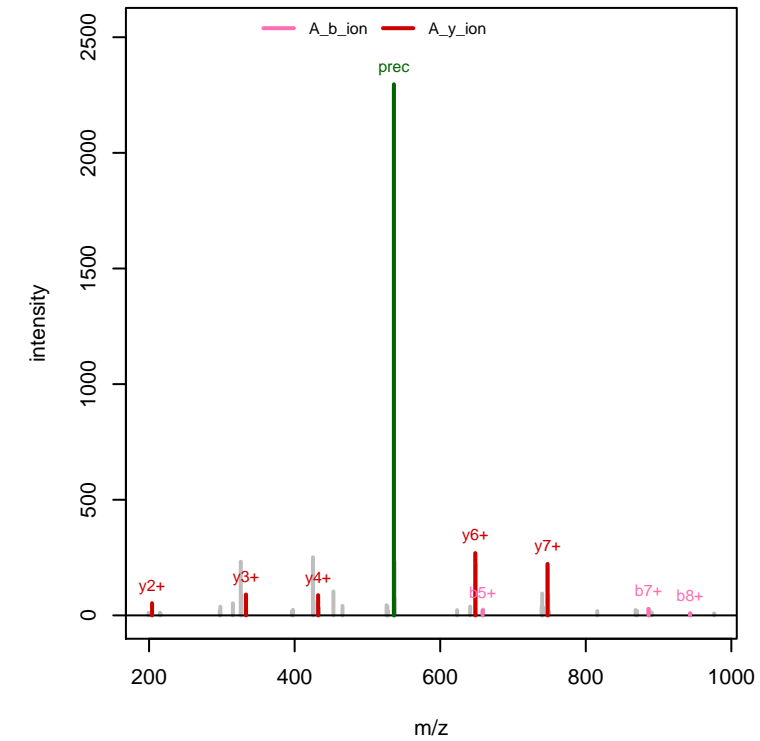

**AKPVLLEPIMK+XL\_S**

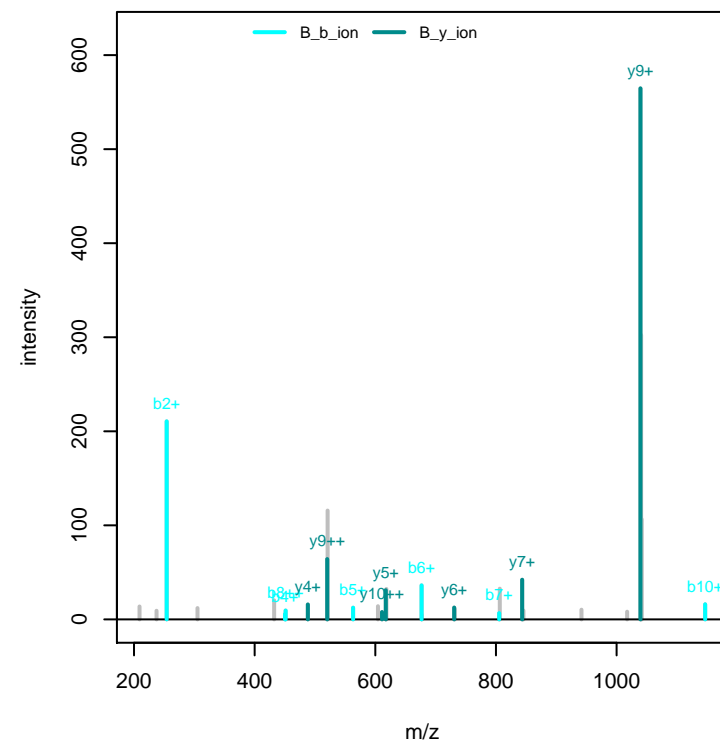

**AKPVLLEPIMK+XL\_L**

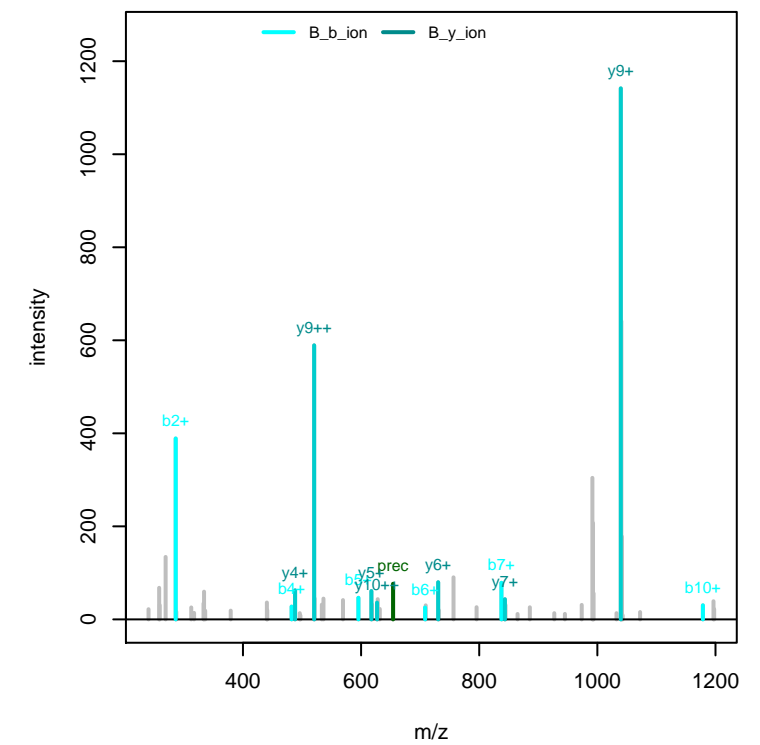

GKGVAEGYK  
KAELESAALNAR

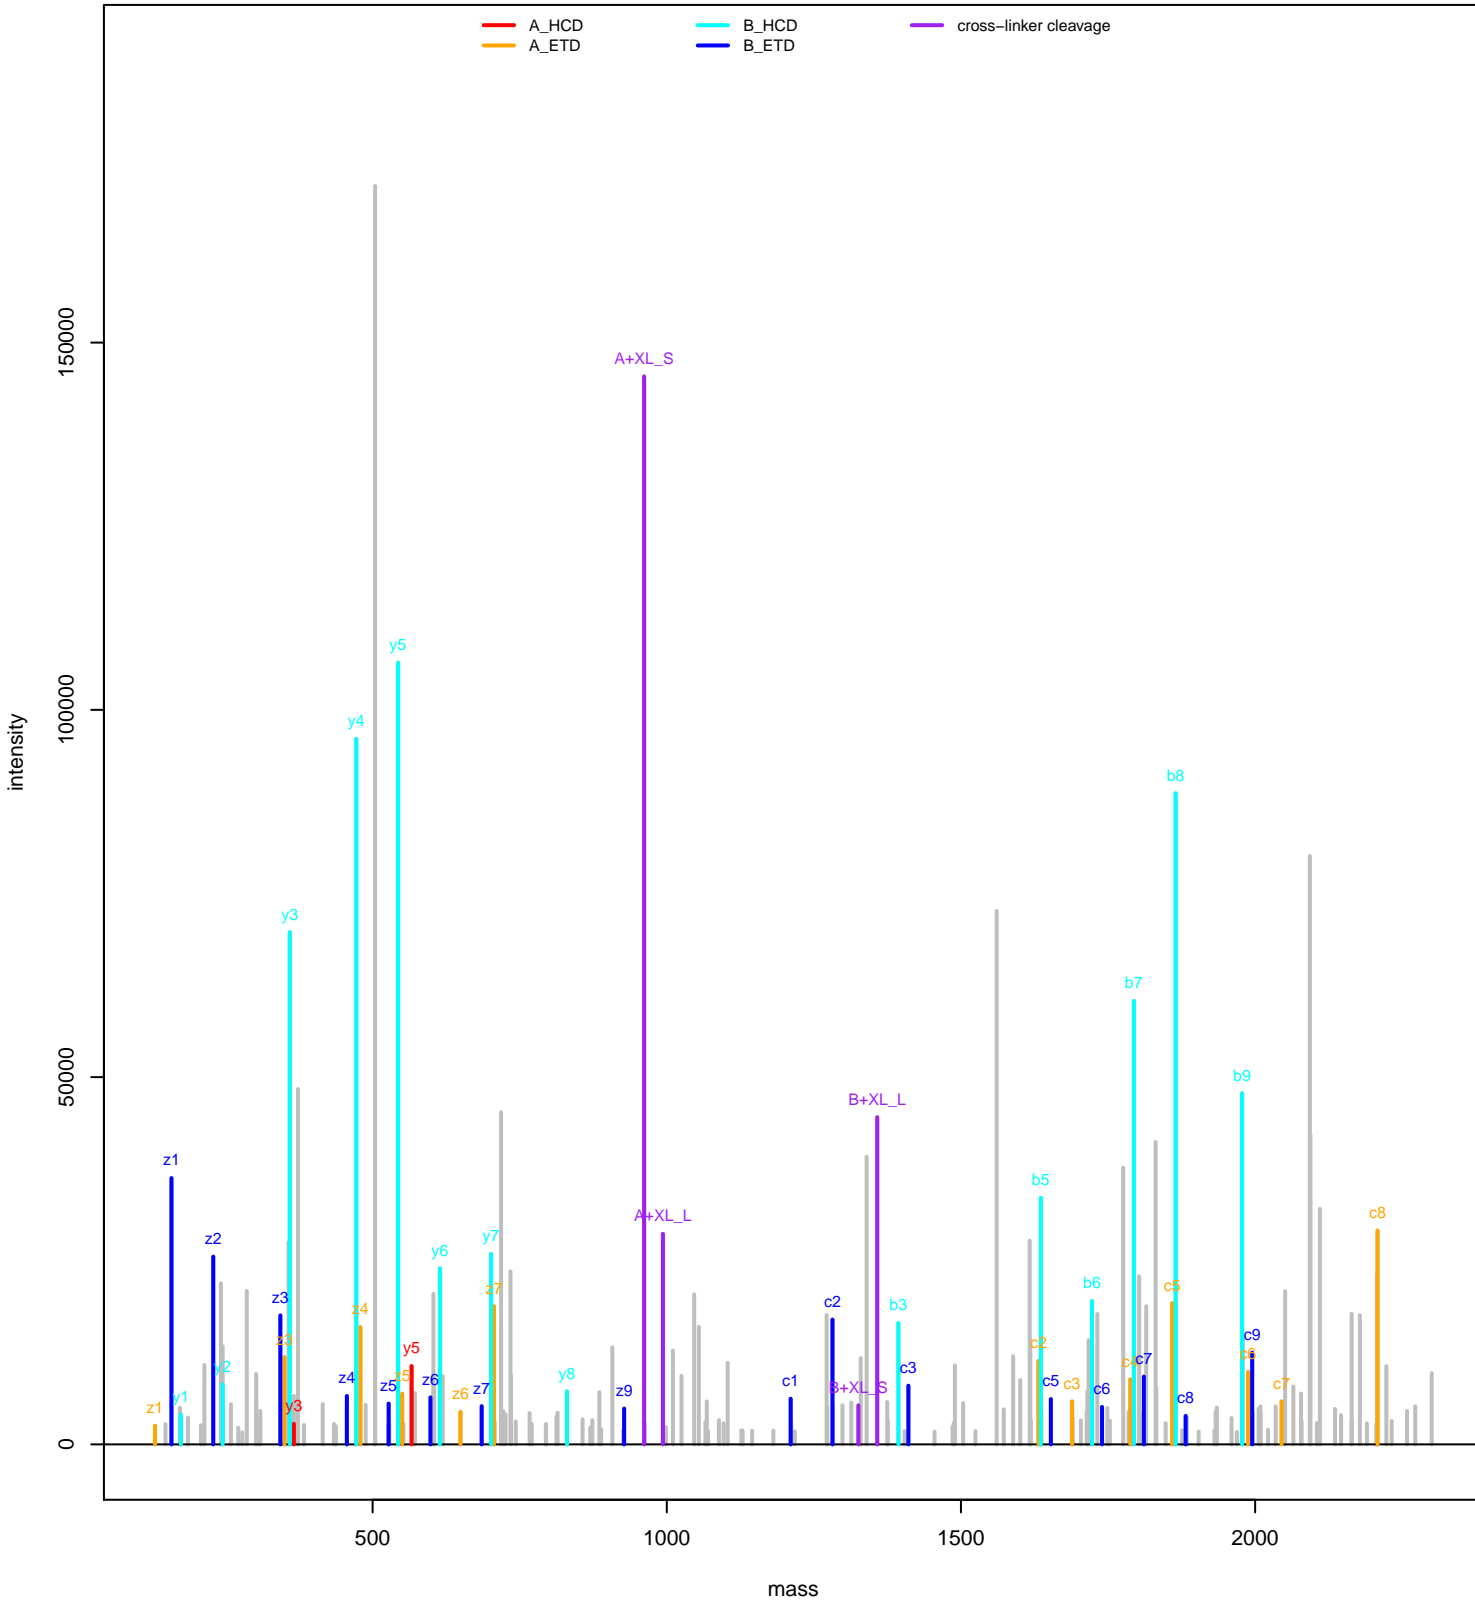

GKGVAEGYK+XL\_S

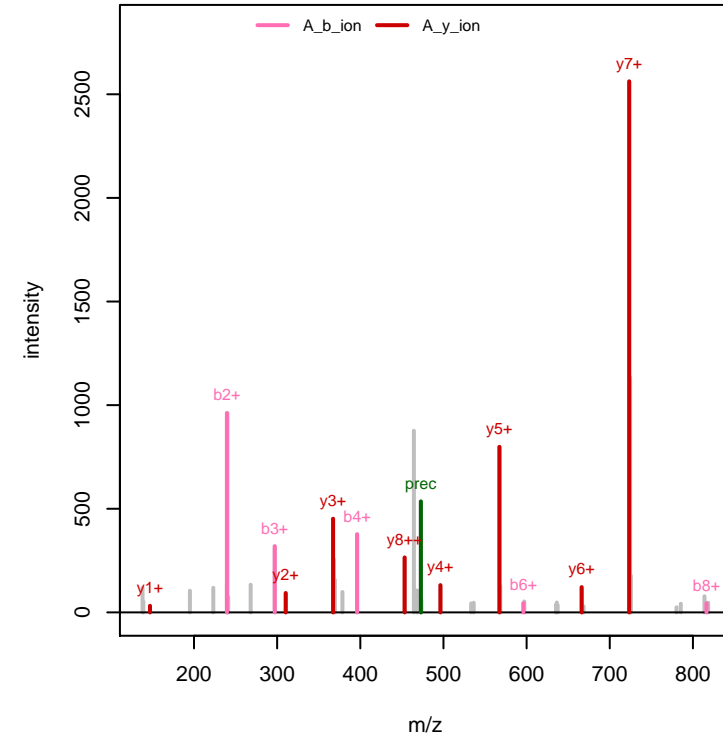

GKGVAEGYK+XL\_L

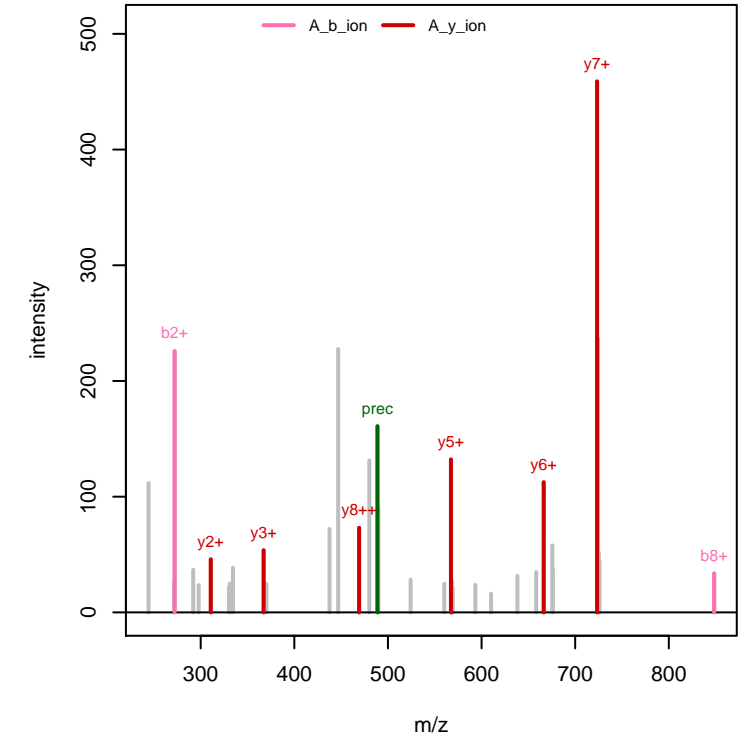

KAELESAALNAR+XL\_S

KAELESAALNAR+XL\_S

KAELESAALNAR+XL\_L

KAELESAALNAR+XL\_L

KVYAAIEAGDK  
AAAQKAFNEMQPIVDR

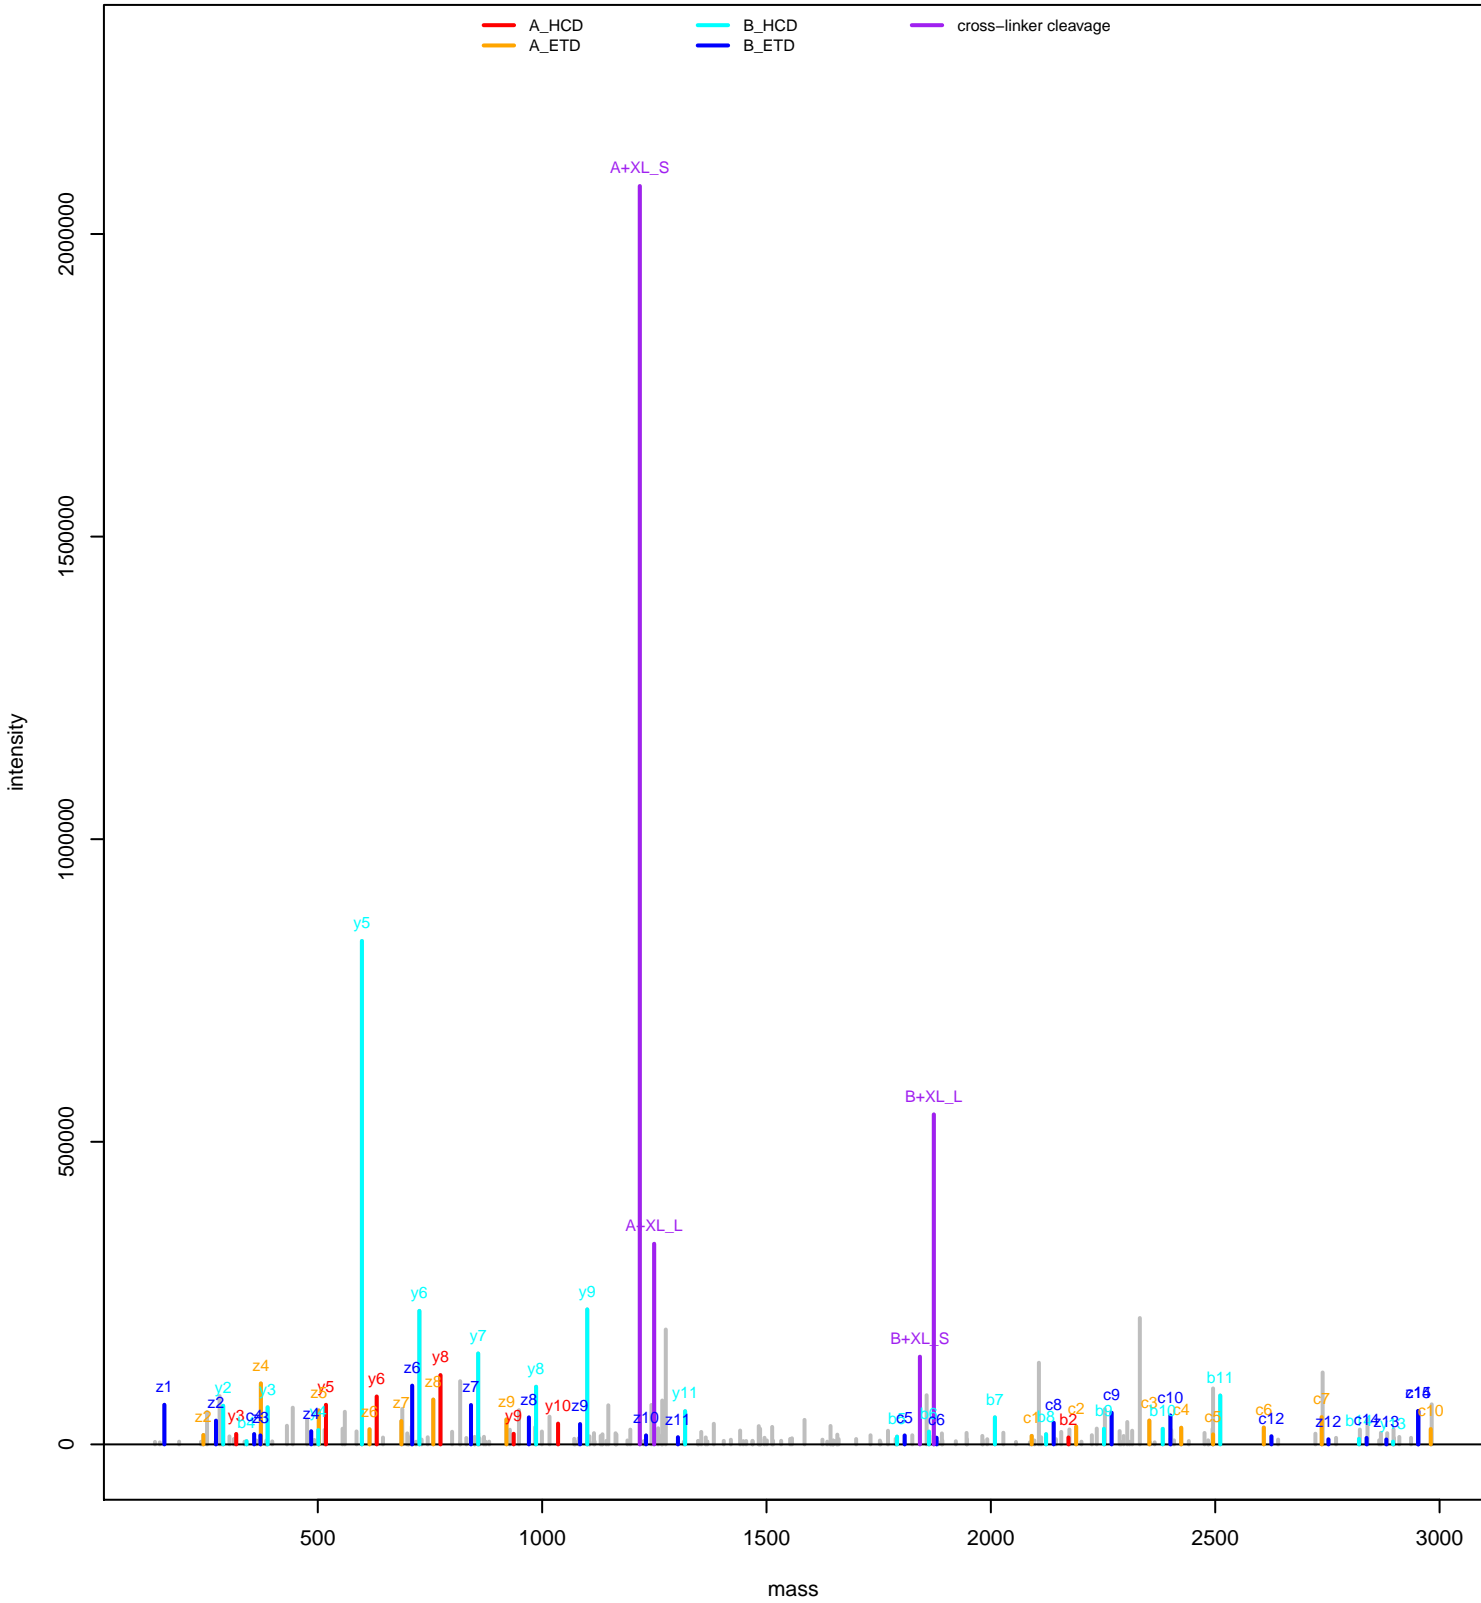

KVYAAIEAGDK+XL\_S

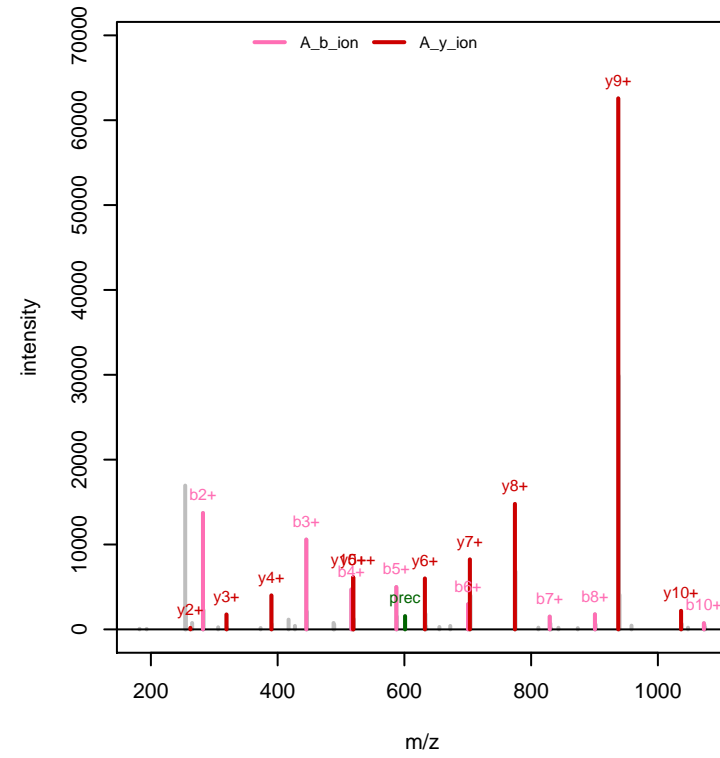

KVYAAIEAGDK+XL\_L

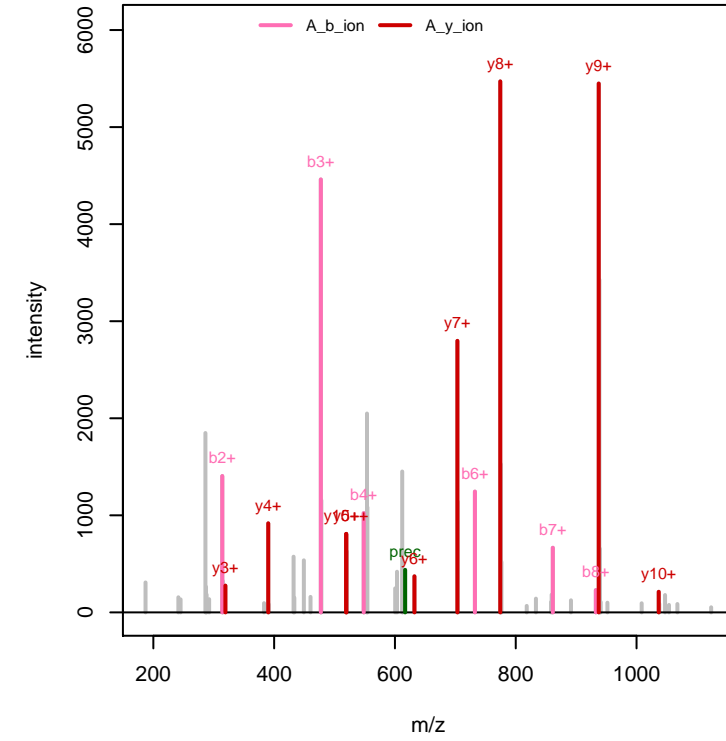

AAAQKAFNEMQPIVDR+XL\_S

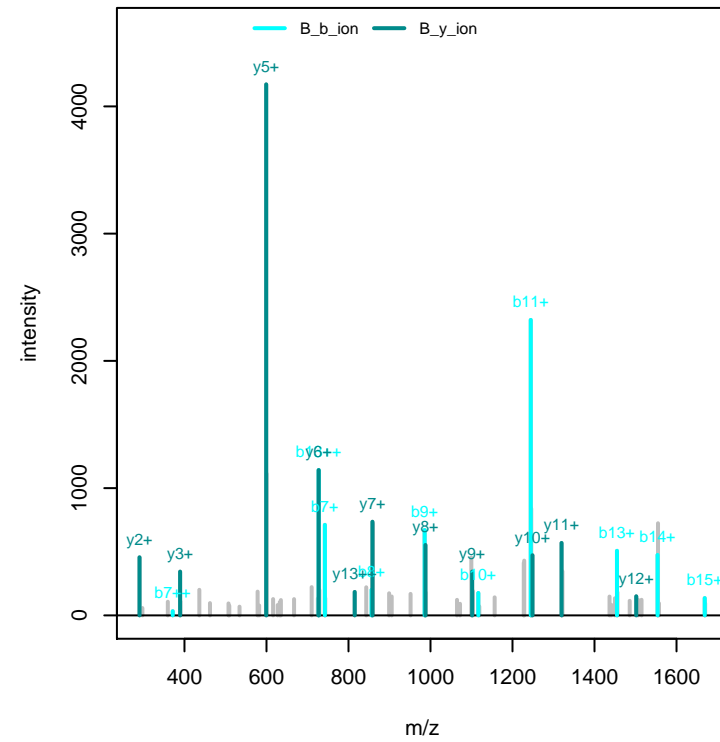

AAAQKAFNEMQPIVDR+XL\_L

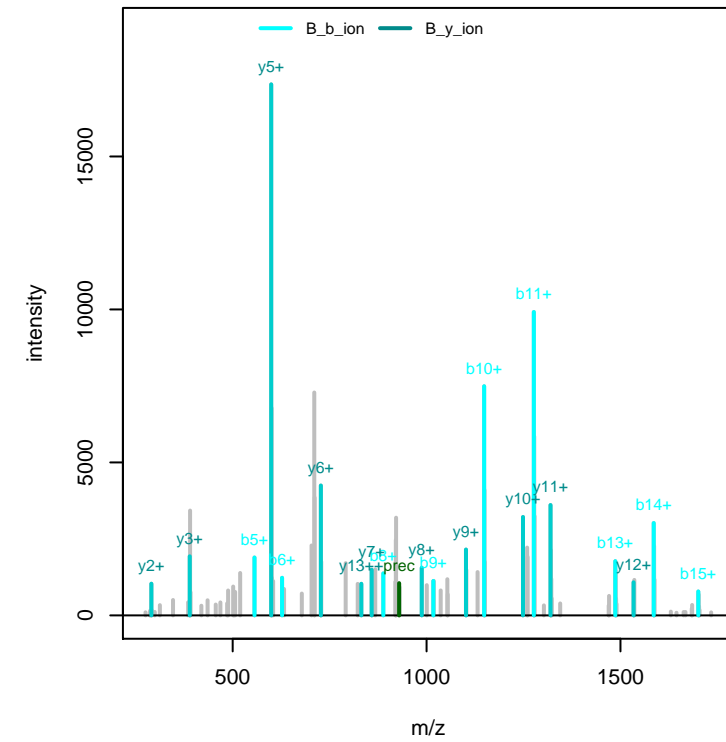

IKTIER  
YGDKVSALR

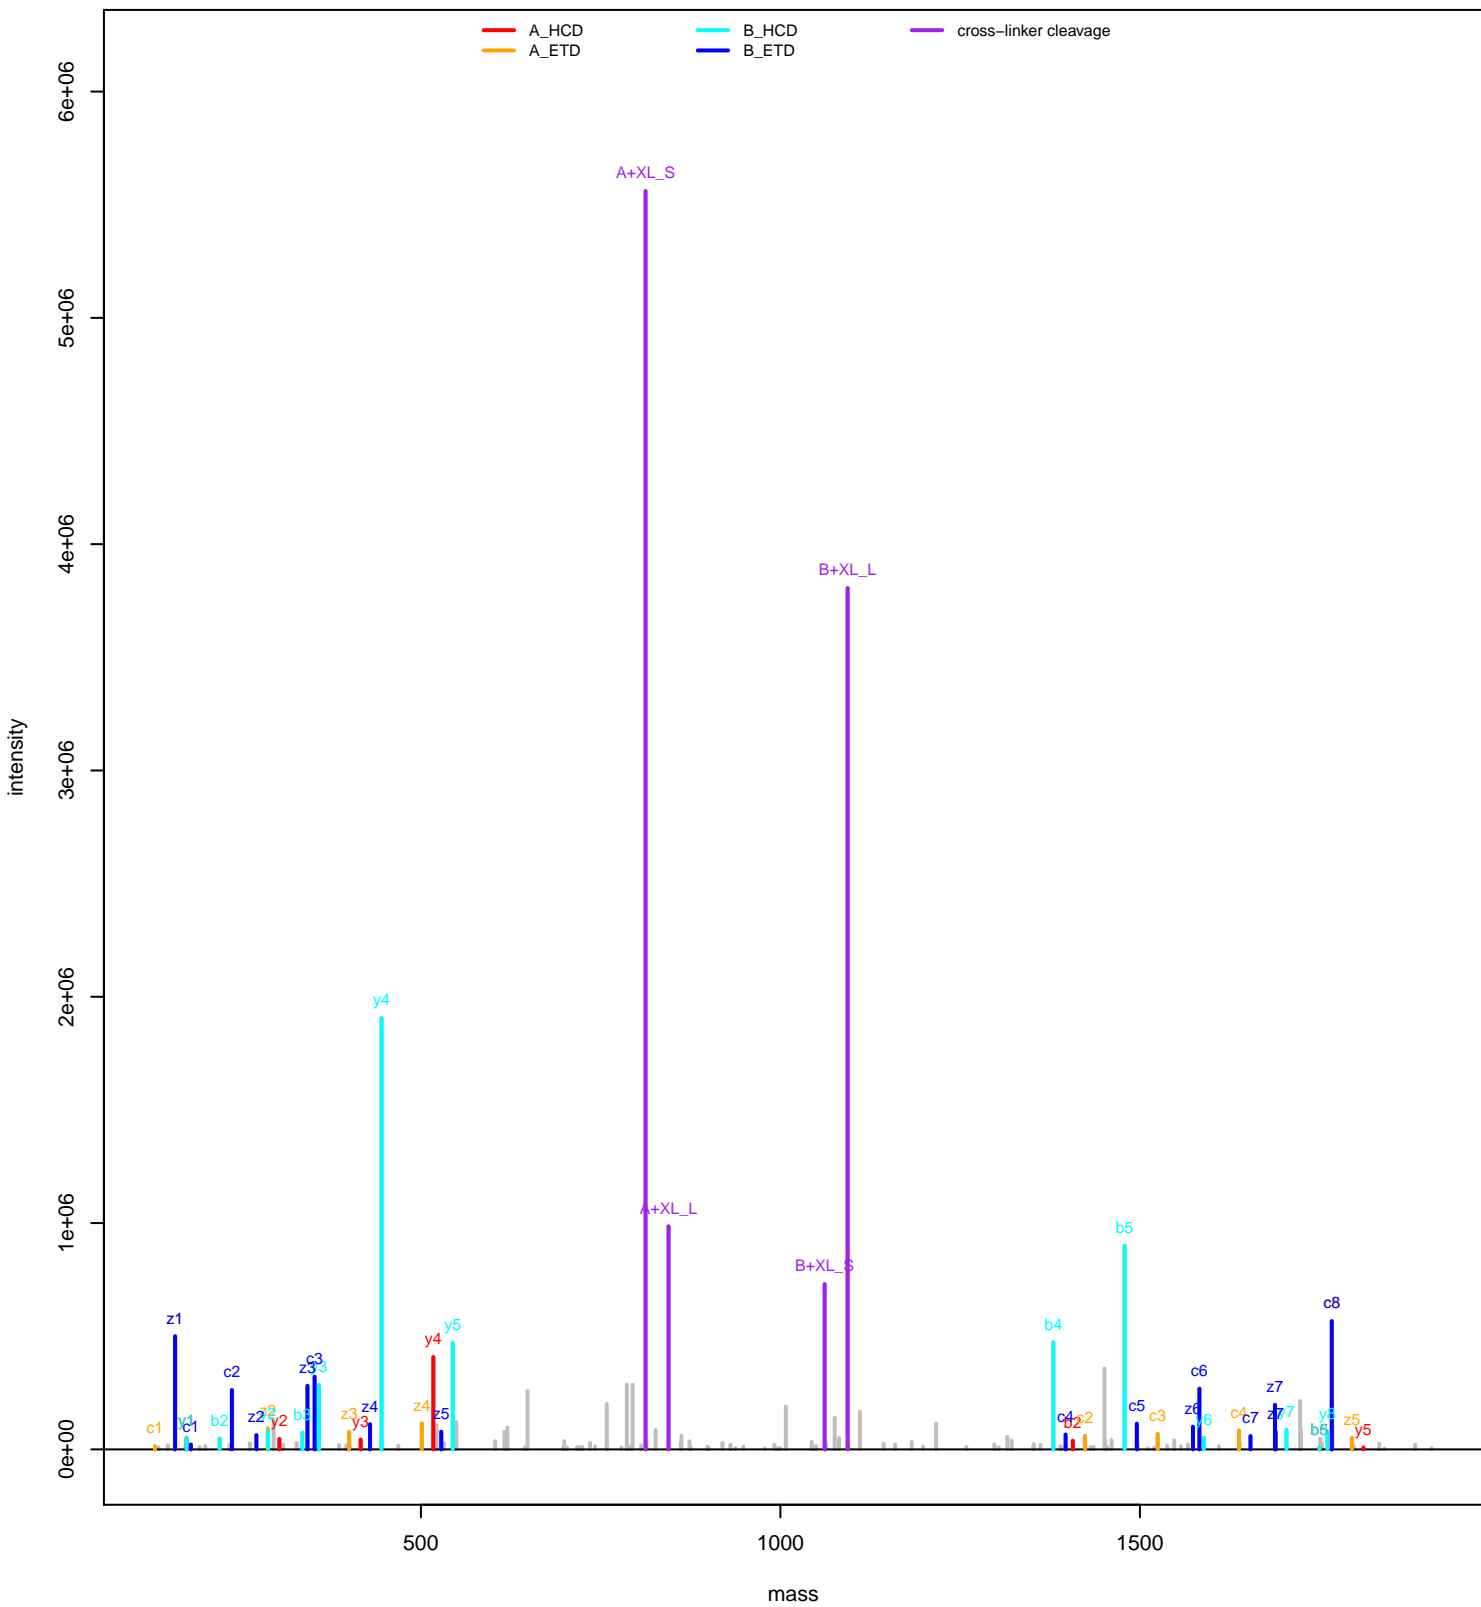

IKTIER+XL\_S

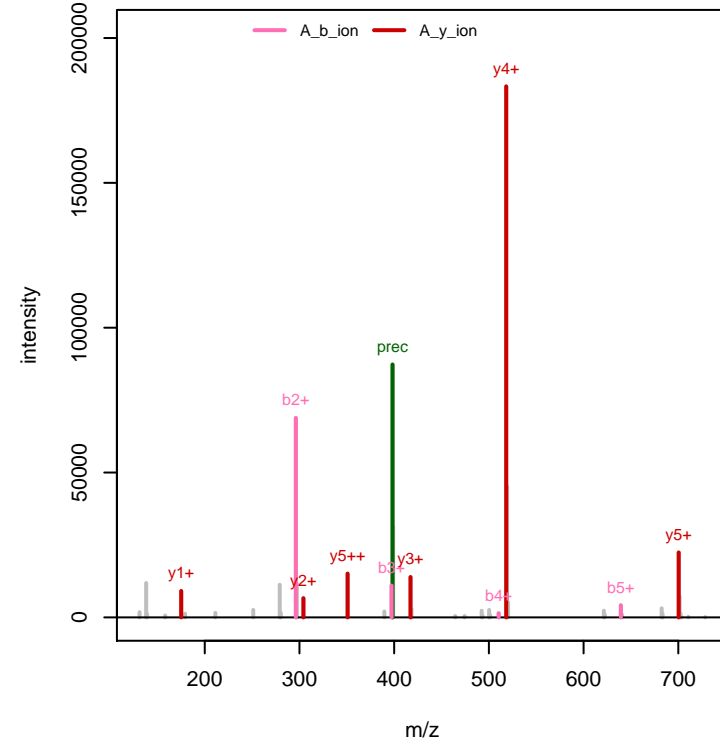

IKTIER+XL\_L

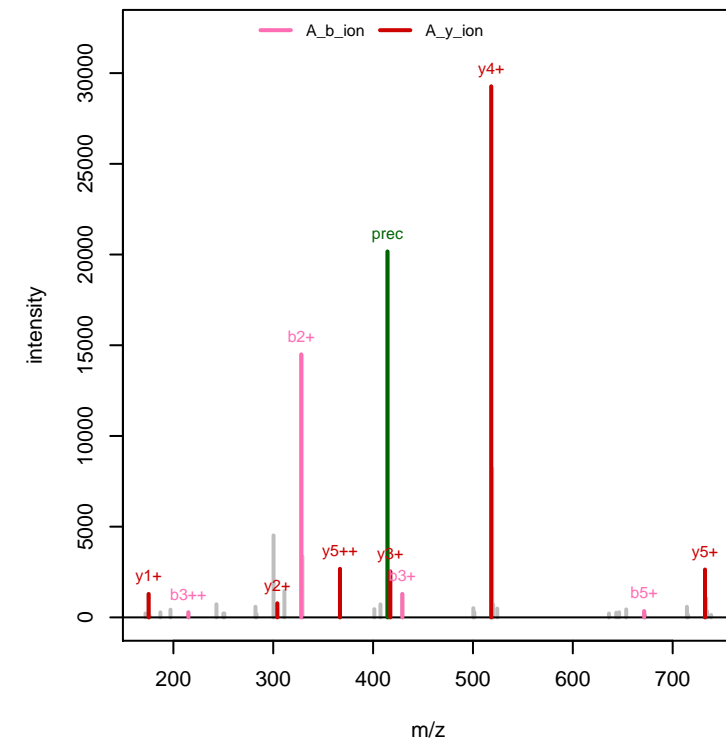

YGDKVSALR+XL\_S

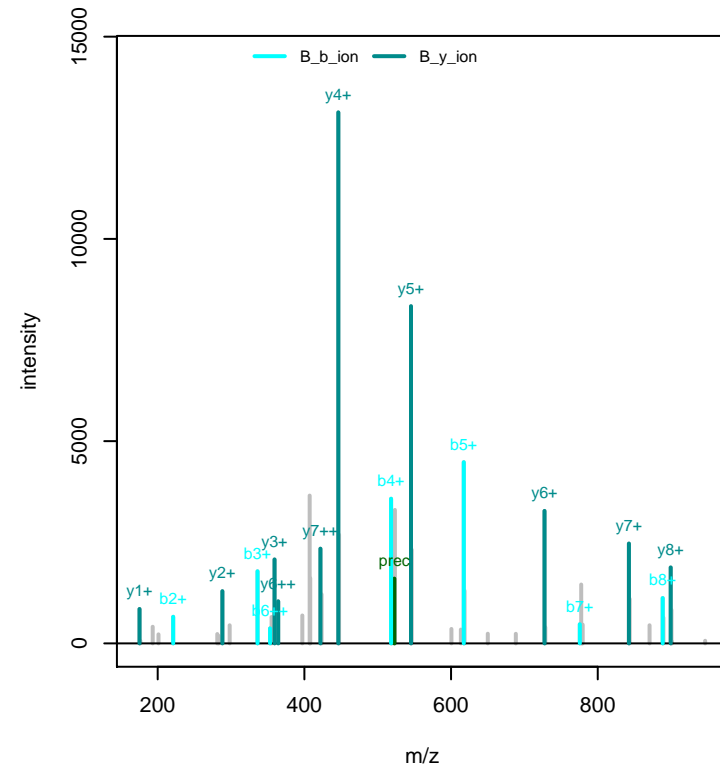

YGDKVSALR+XL\_L

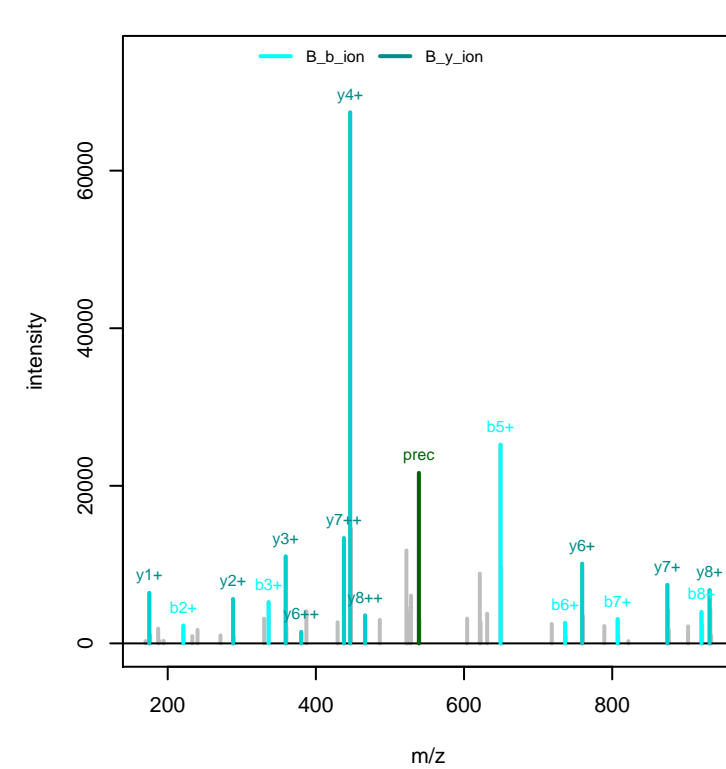

LLKVLR  
APHVSEKASTAMEK

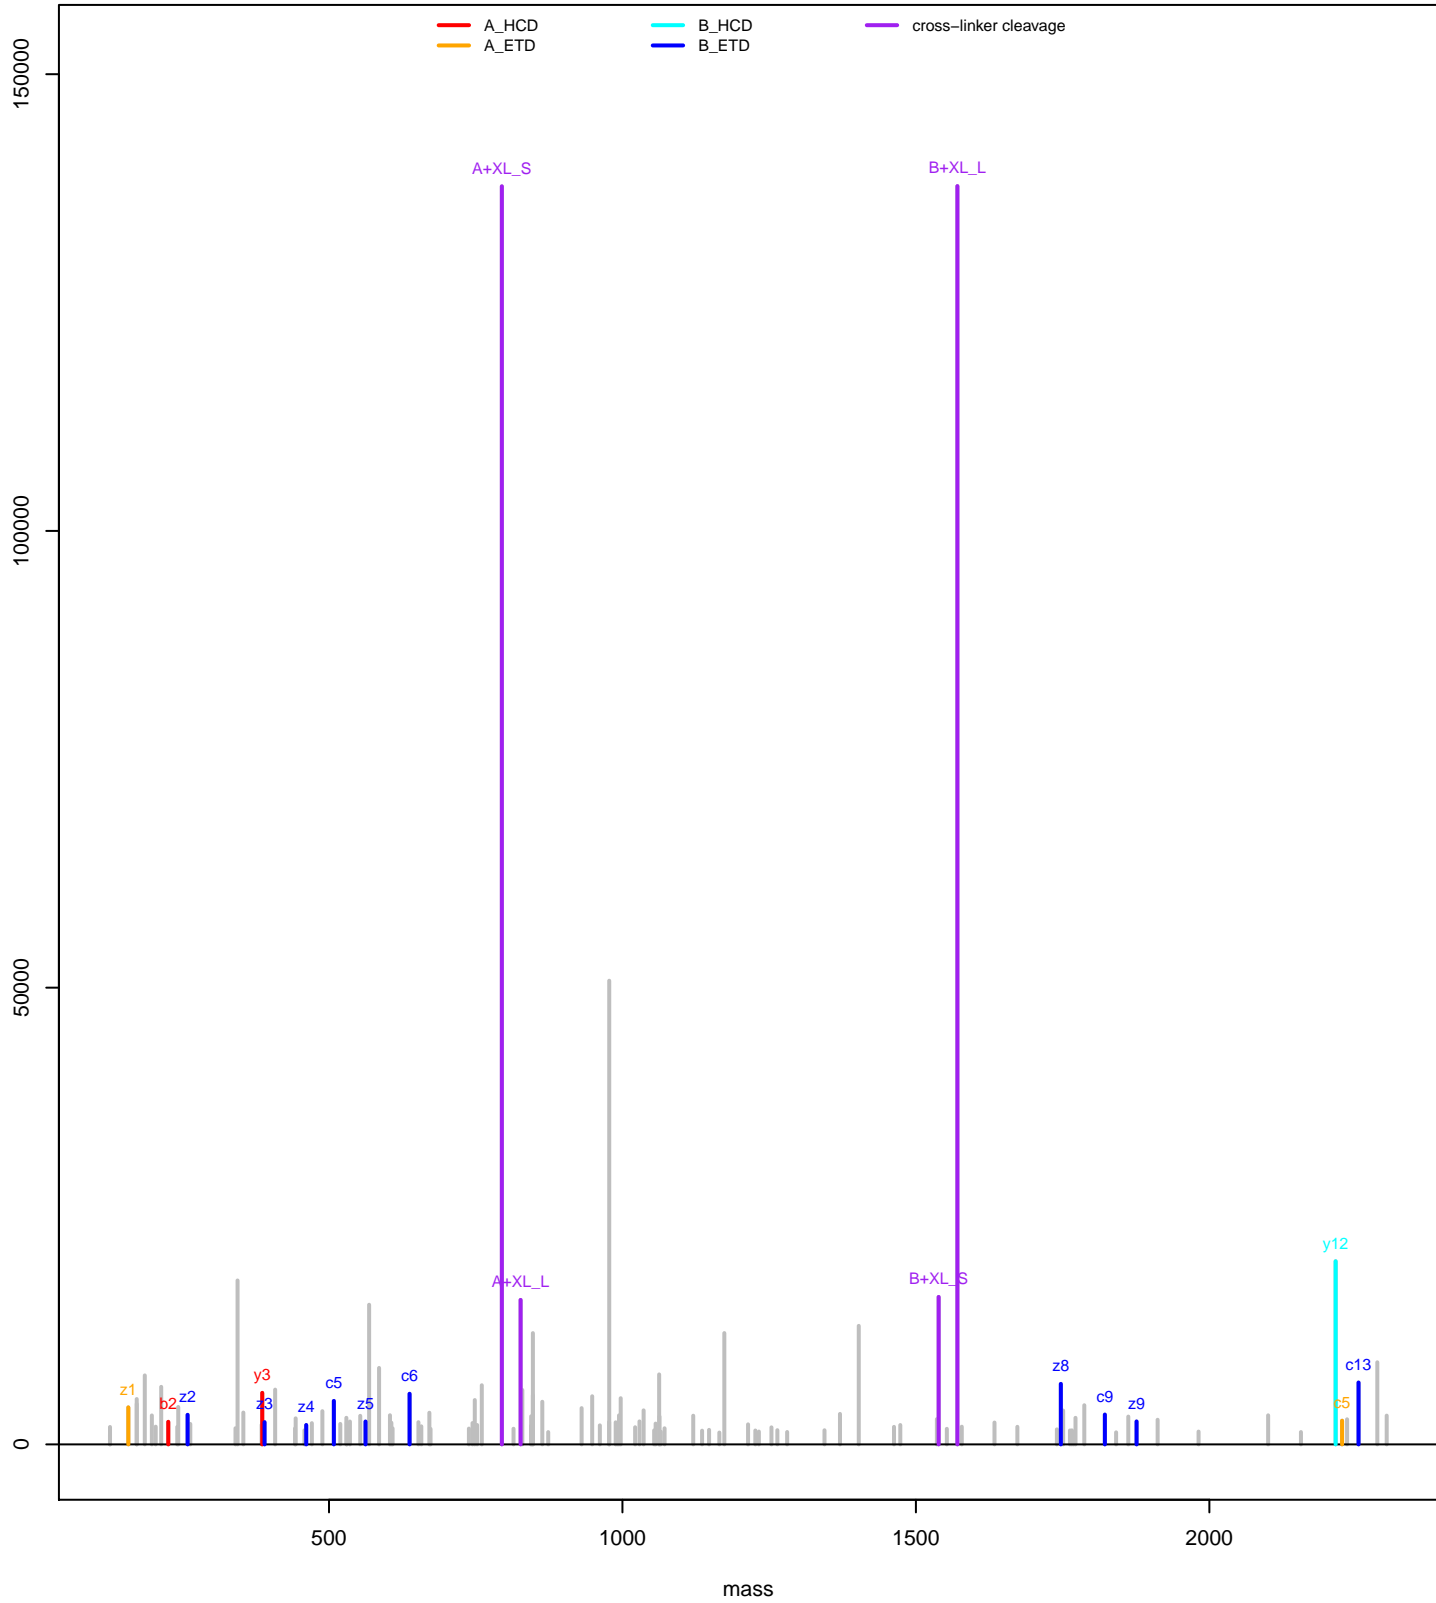

LLKVLR+XL\_S

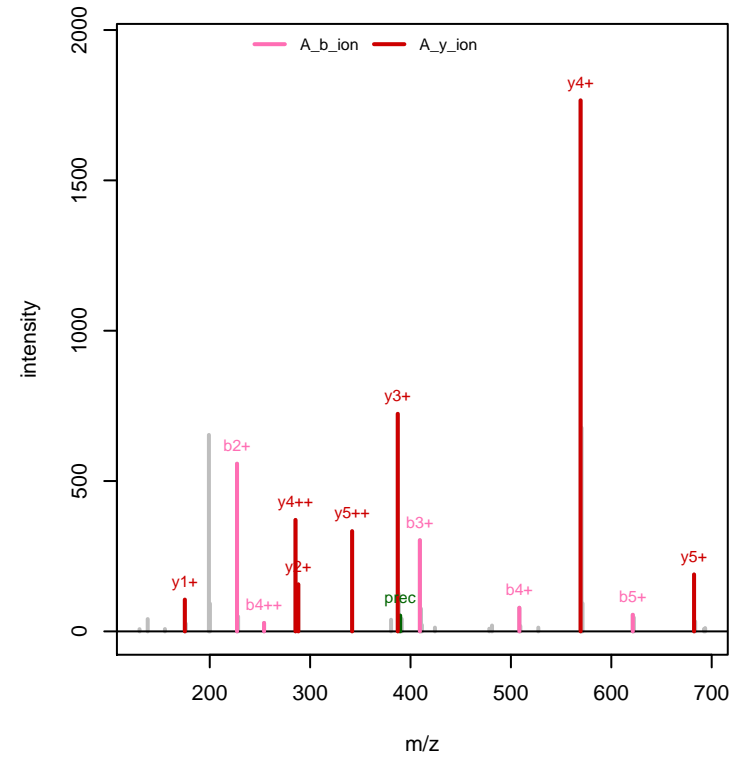

LLKVLR+XL\_L

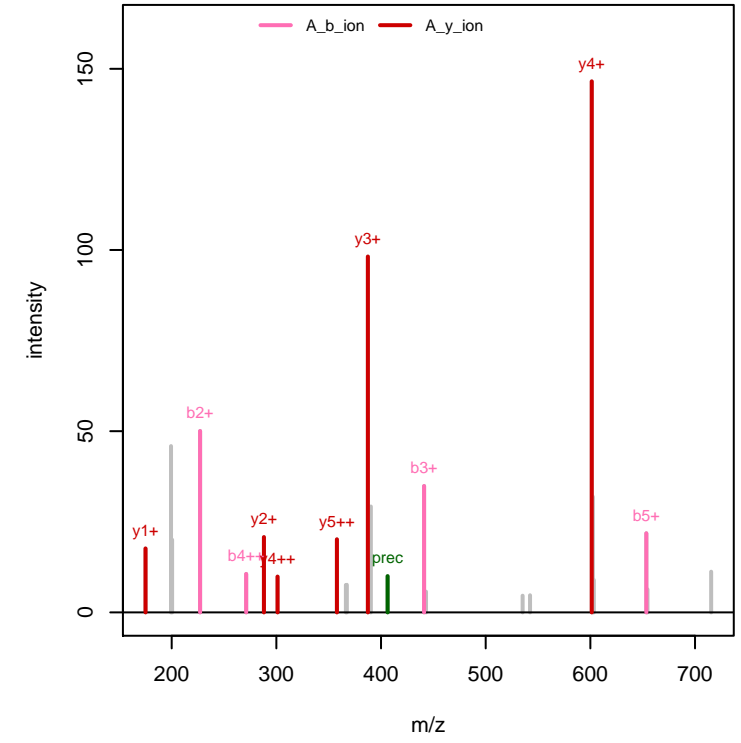

APHVSEKASTAMEK+XL\_S

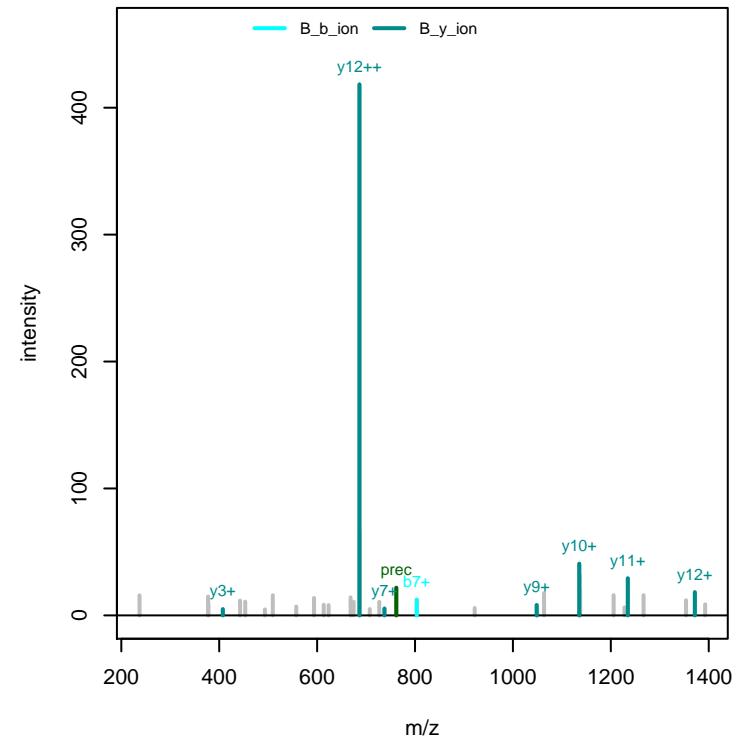

APHVSEKASTAMEK+XL\_L

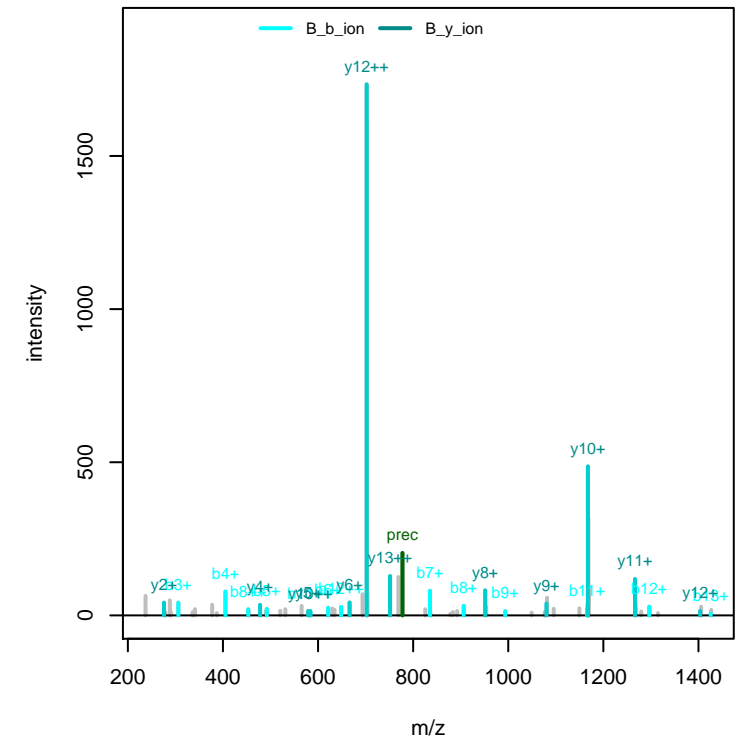

IKSNITPTR  
KASIPEGVWTK

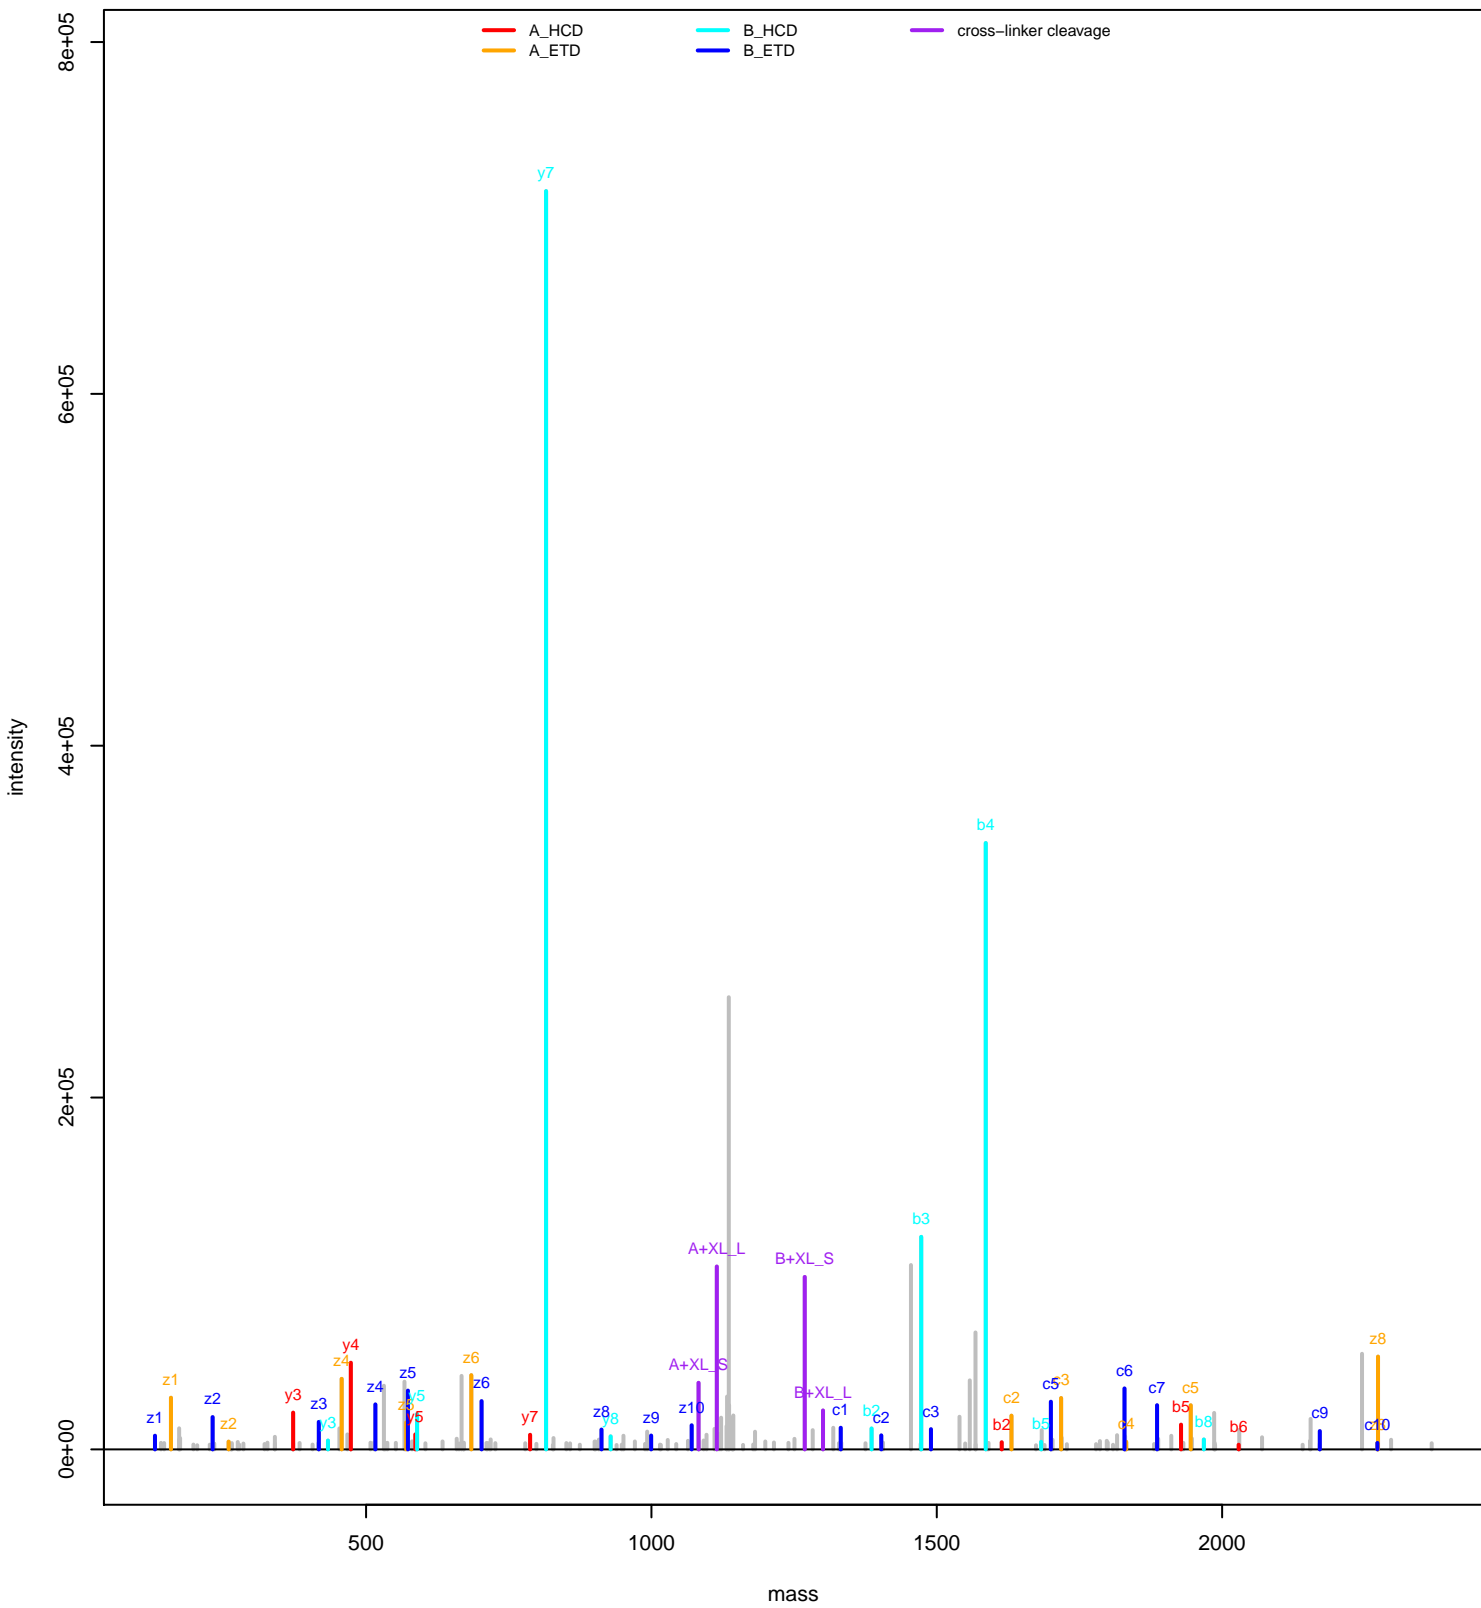

IKSNITPTR+XL\_S

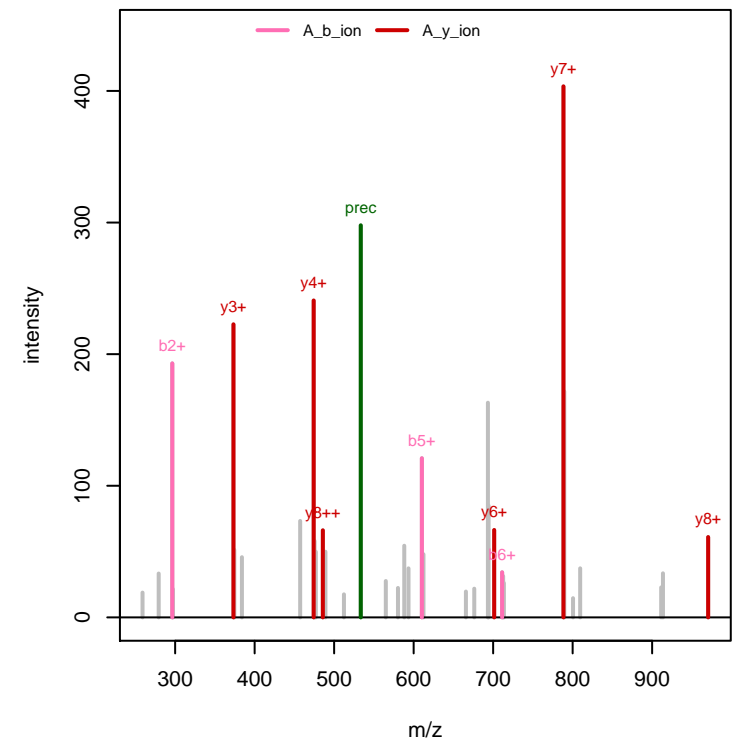

IKSNITPTR+XL\_L

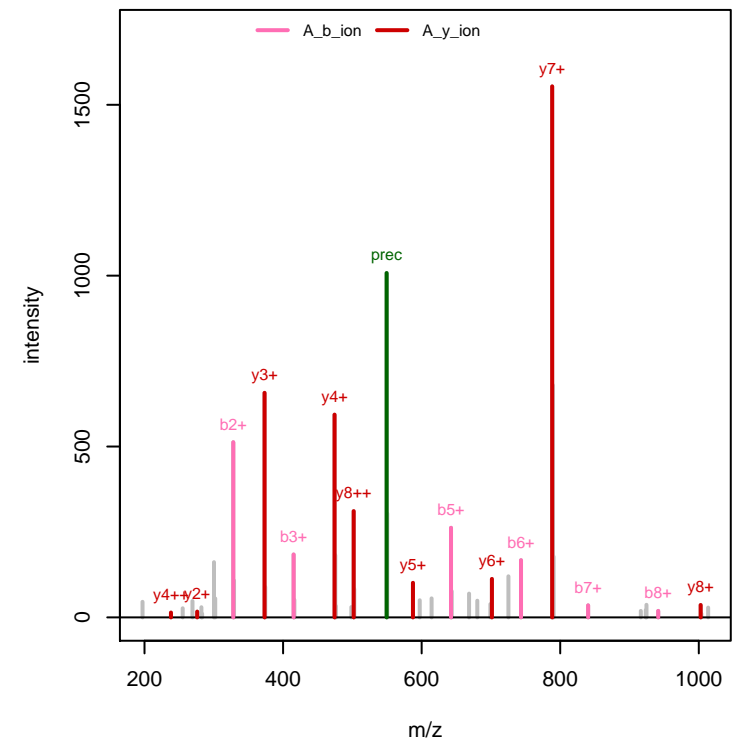

KASIPEGVWTK+XL\_S

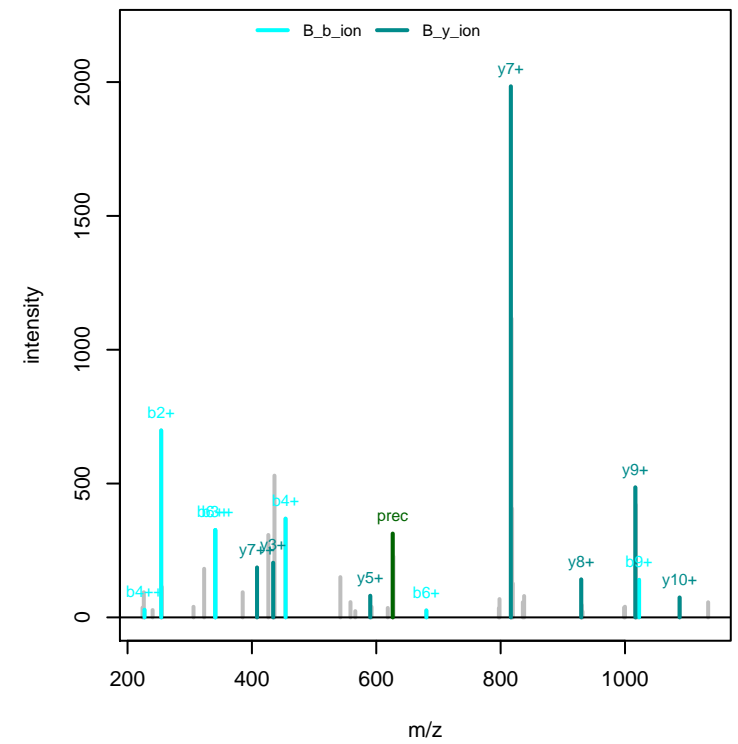

KASIPEGVWTK+XL\_L

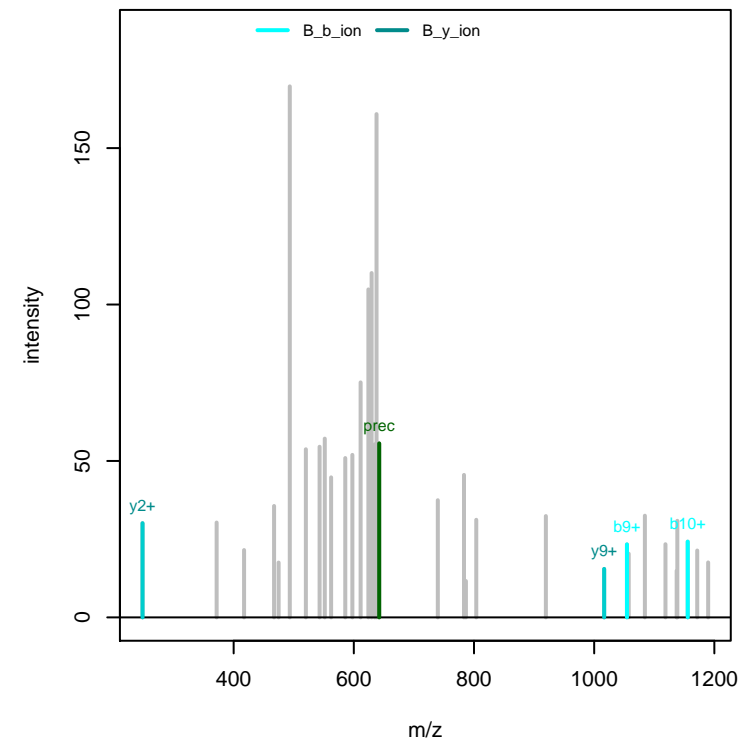

LEQHKER  
MAQWASQLPKGTR

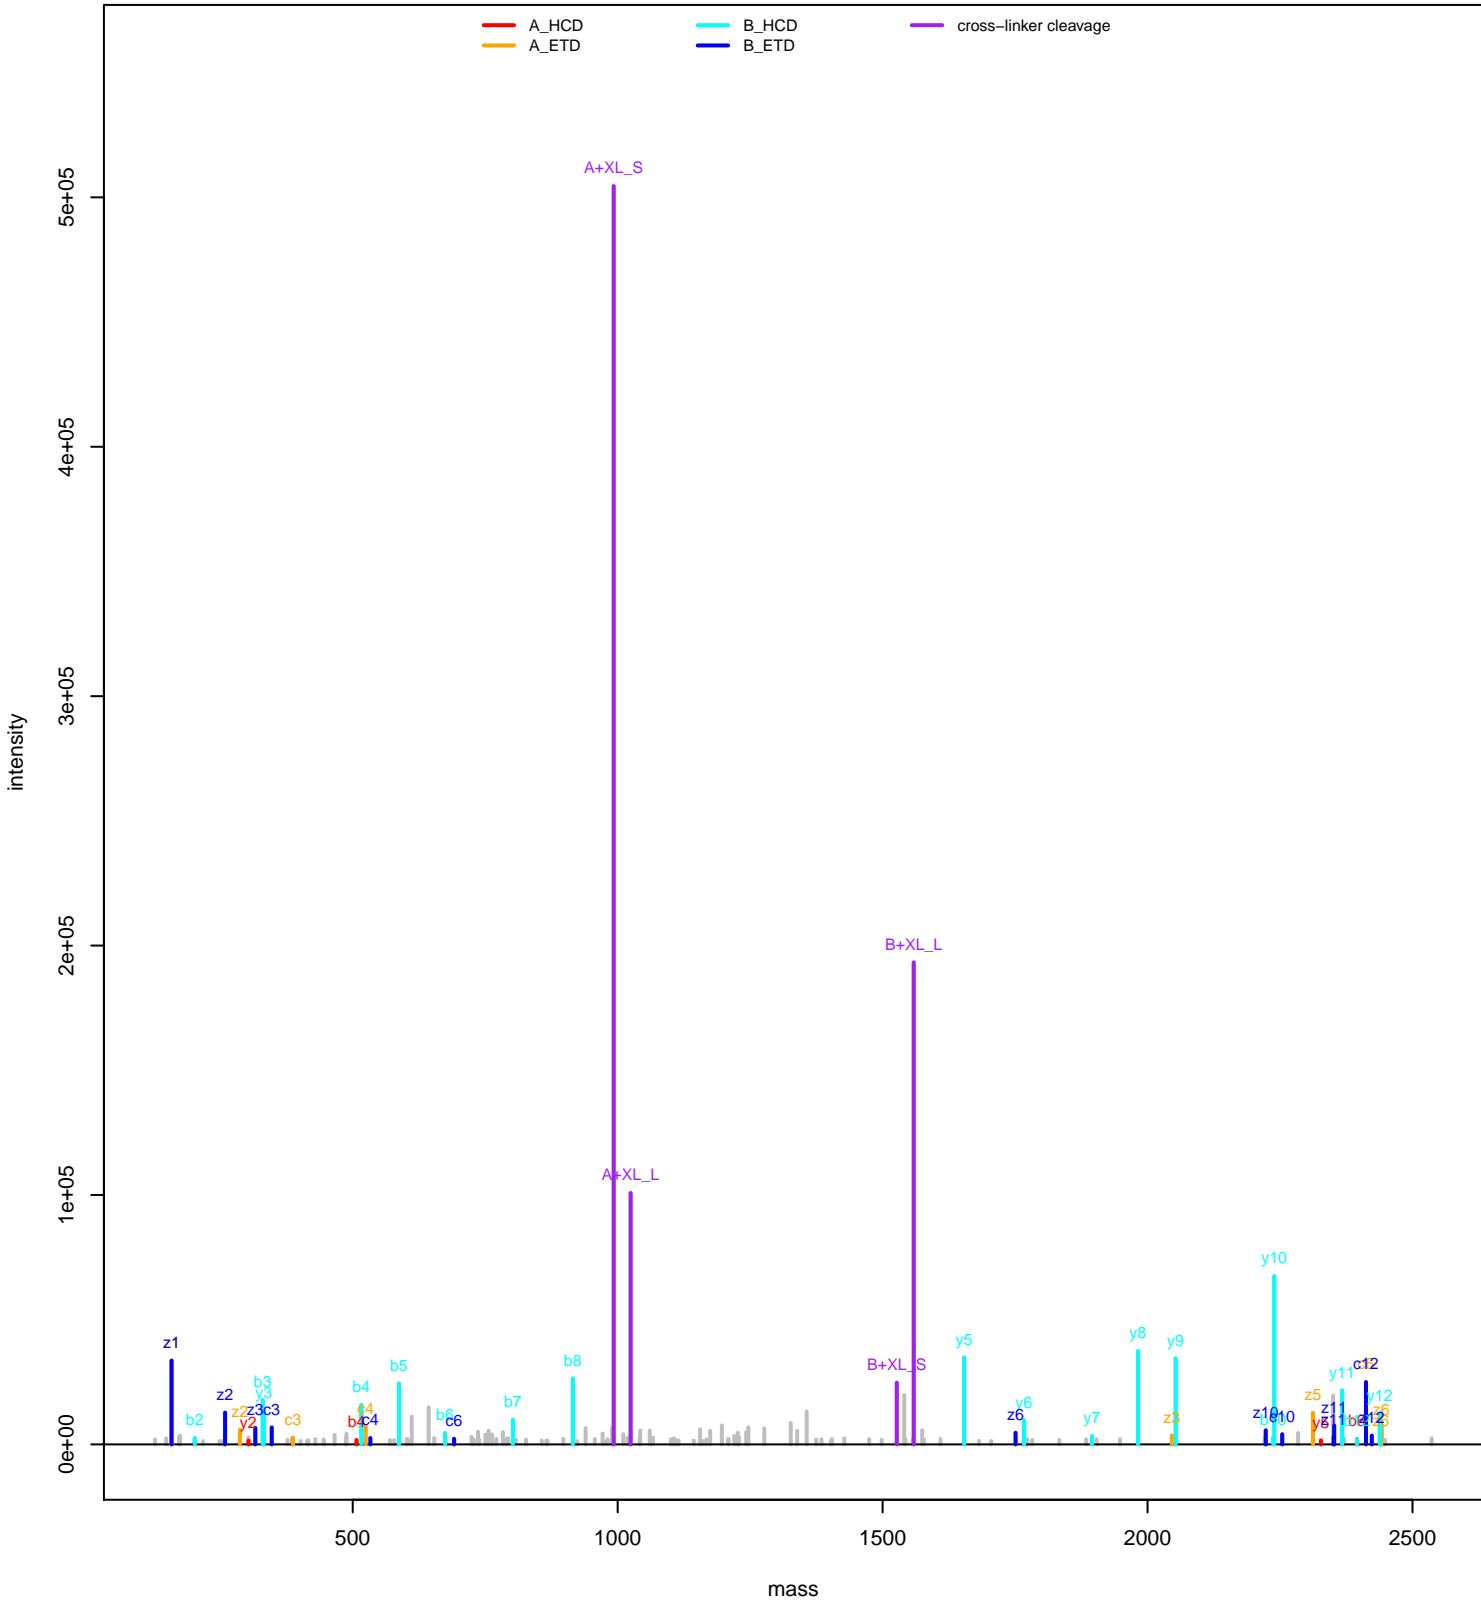

LEQHKER+XL\_S

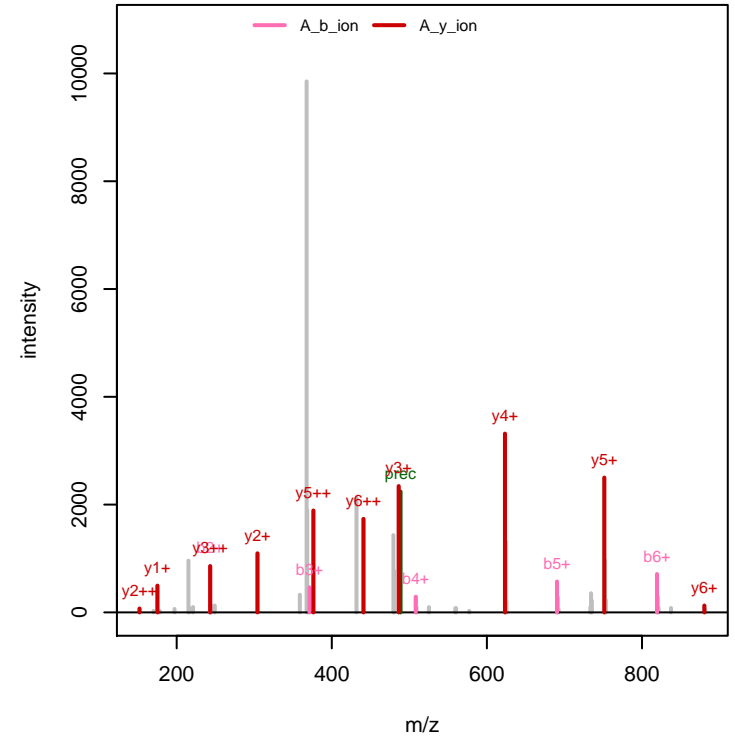

LEQHKER+XL\_L

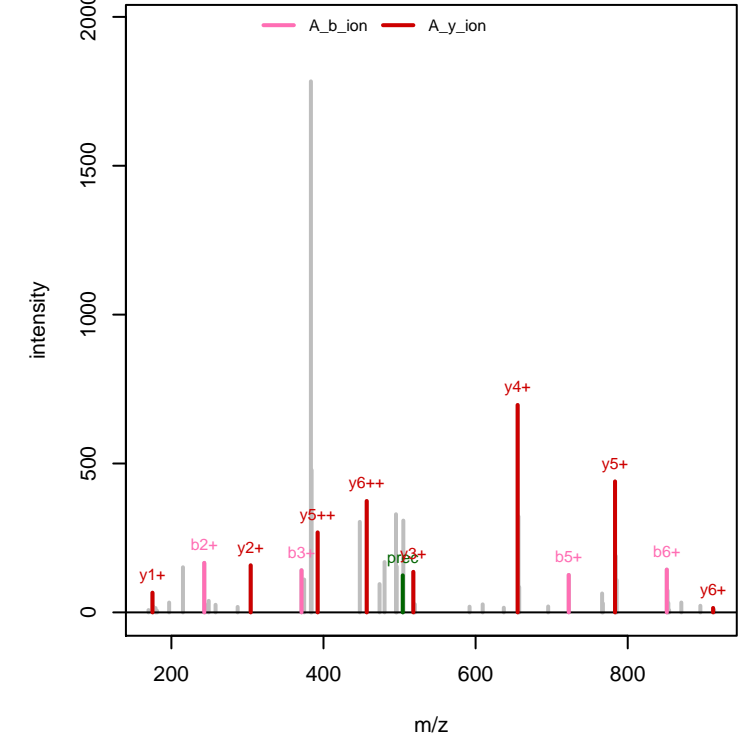

MAQWASQLPKGTR+XL\_S

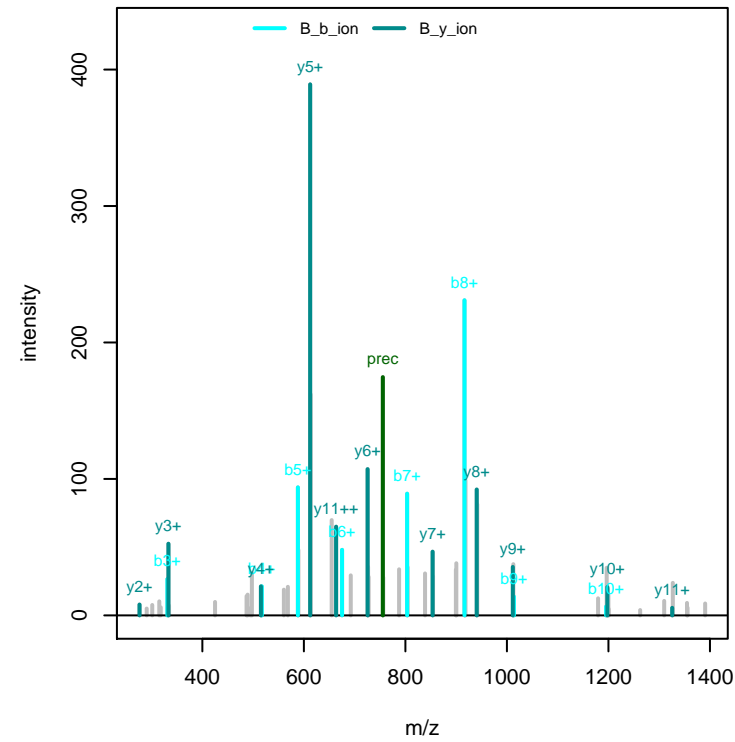

MAQWASQLPKGTR+XL\_L

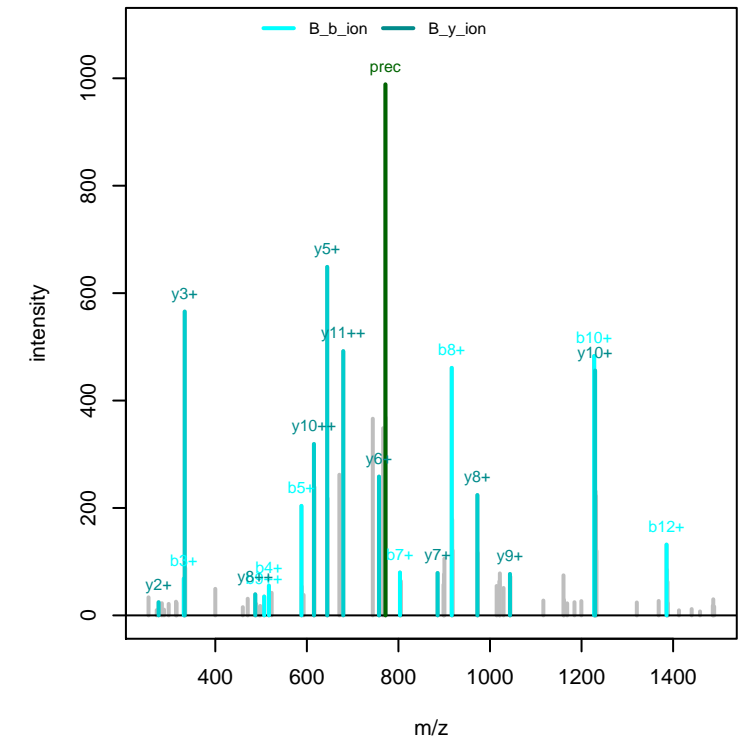



**KAISVTER  
KRLEDNLPR**

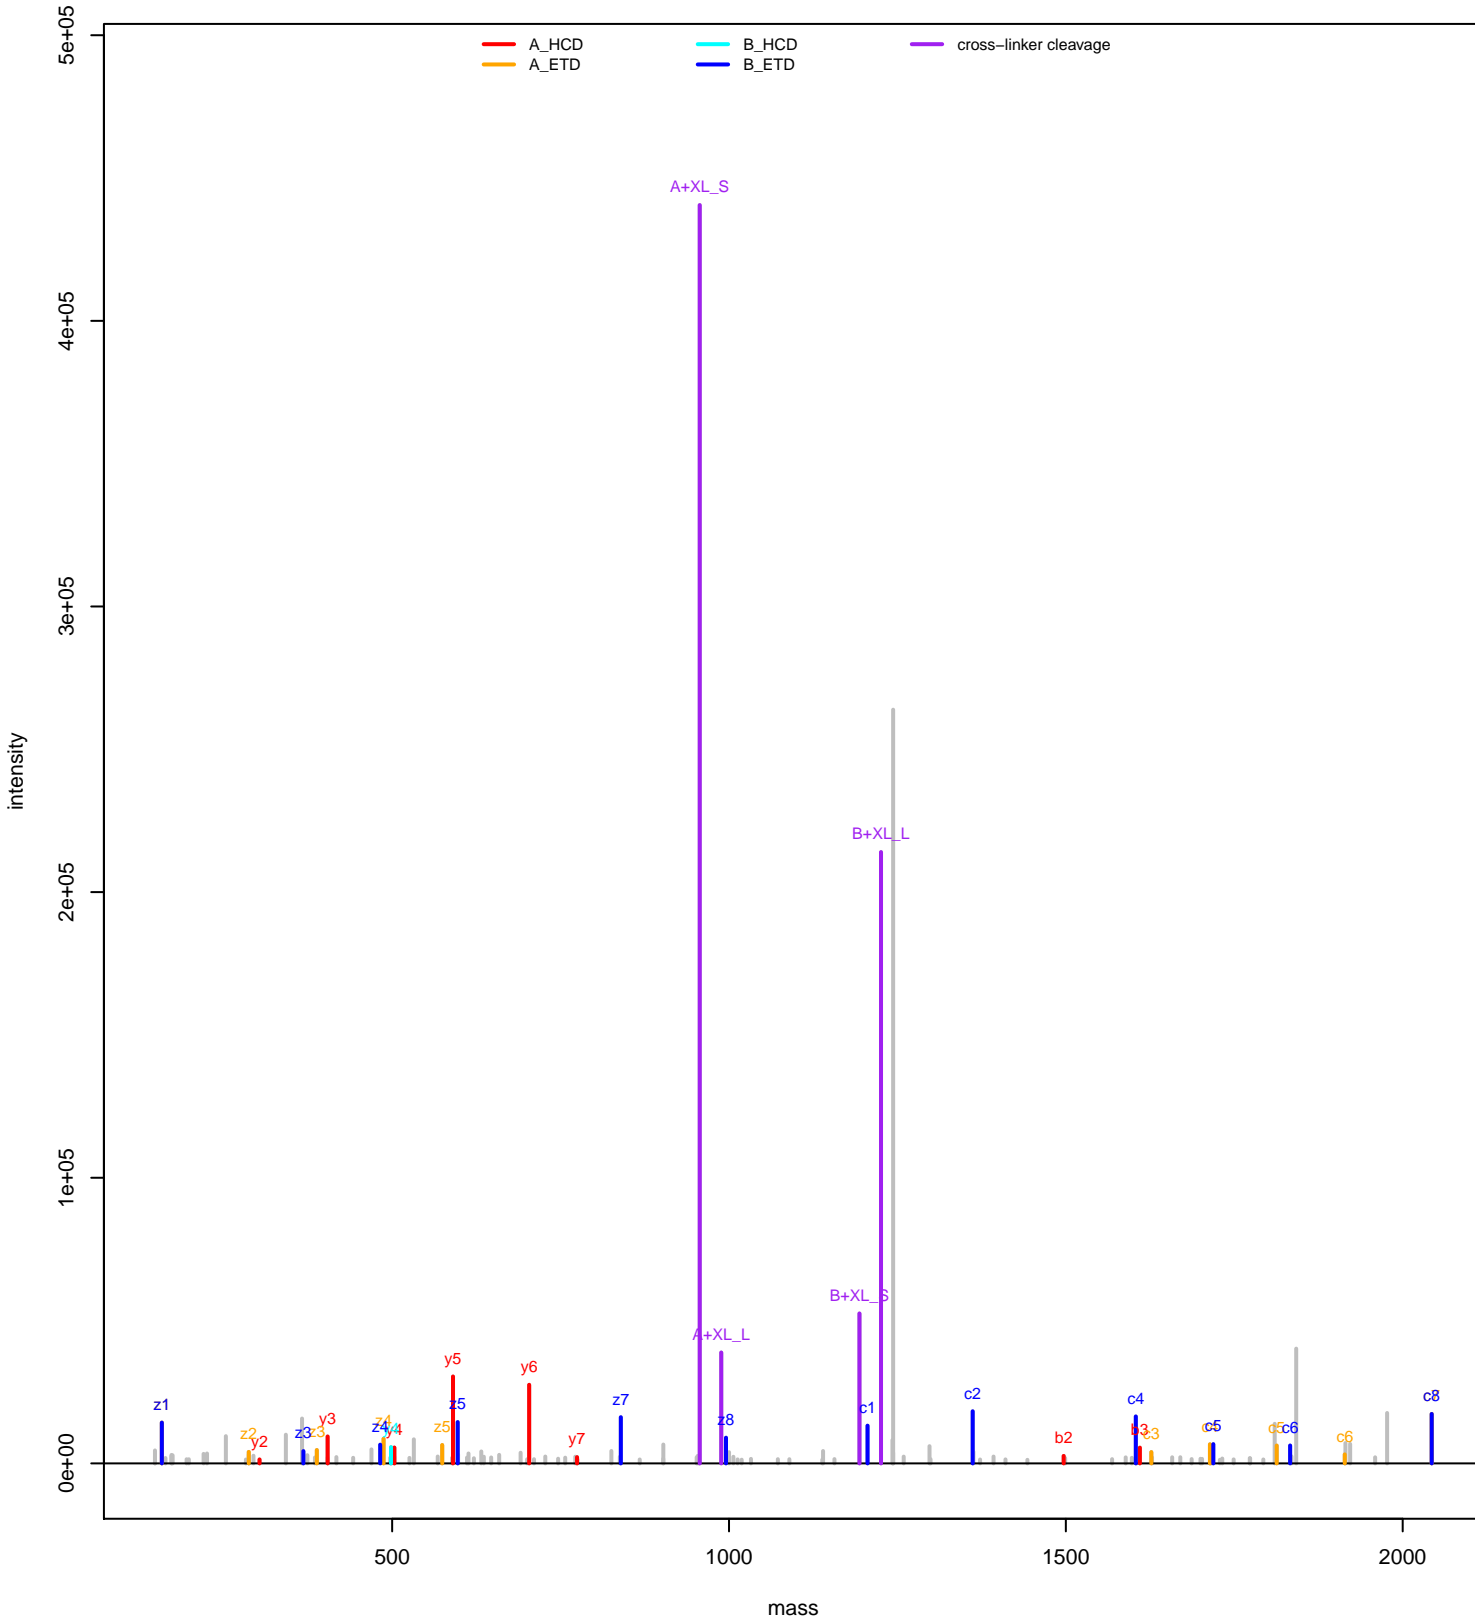

**KAISVTER+XL\_S**

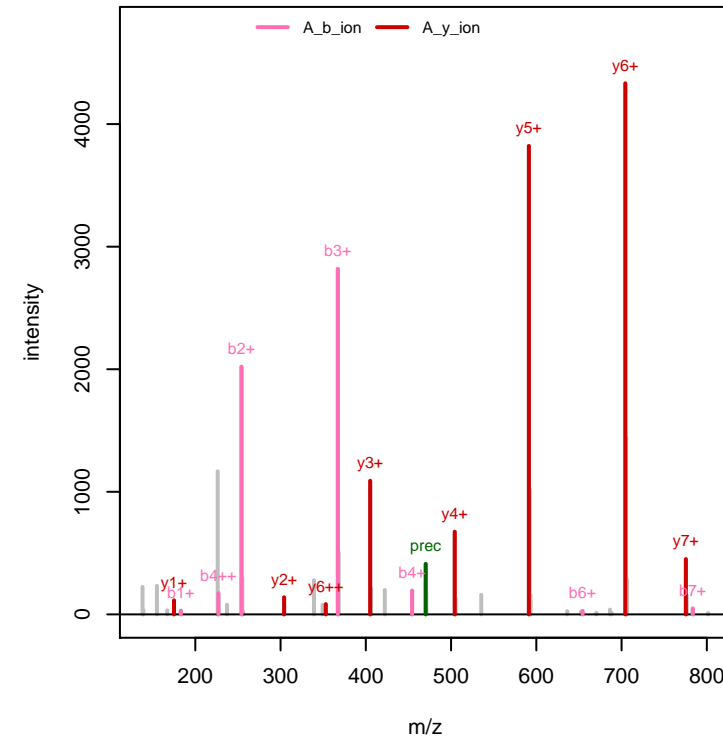

**KAISVTER+XL\_L**

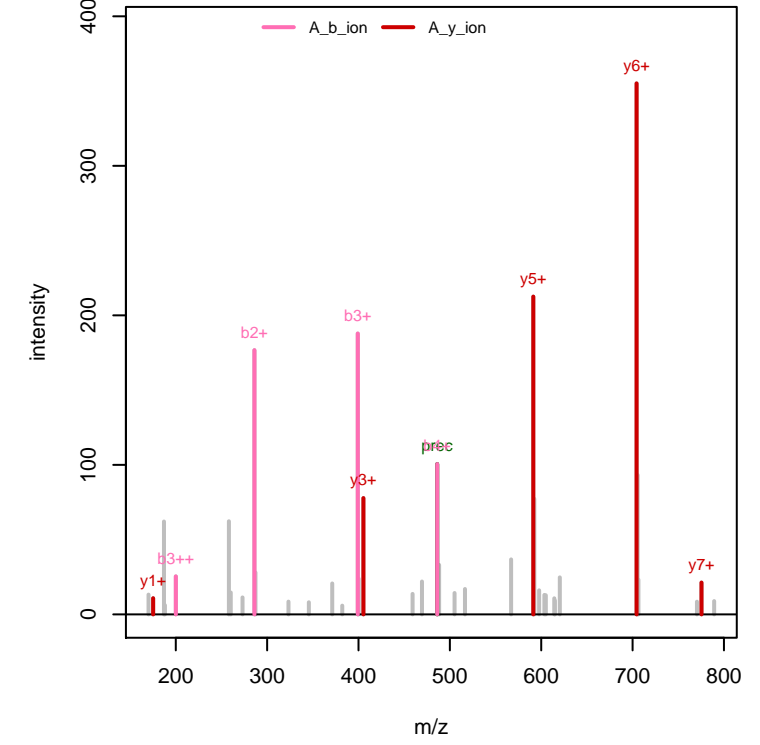

**KRLEDNLPR+XL\_S**

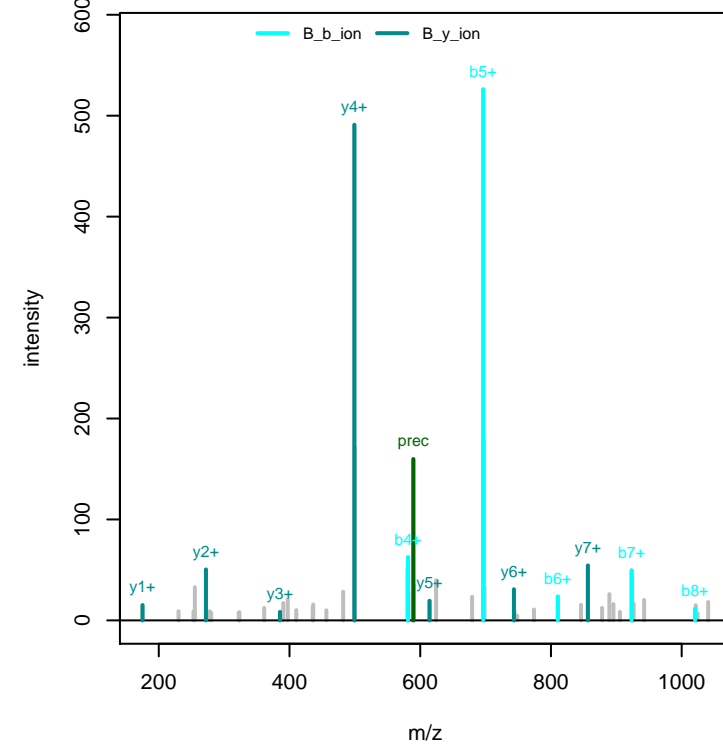

**KRLEDNLPR+XL\_L**

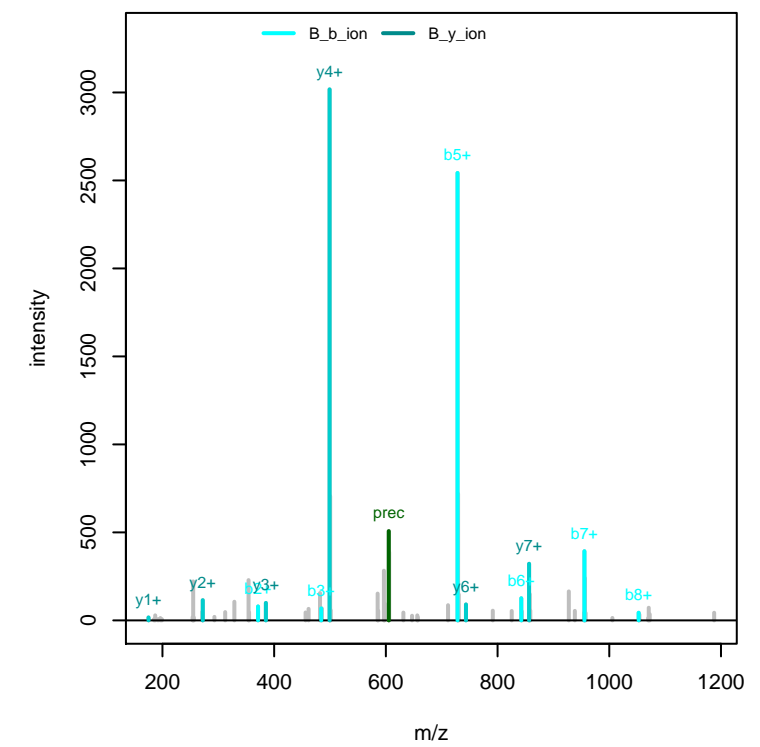

**GQVLAKPGTIK**  
**ETQKSTCTGVEMFR**

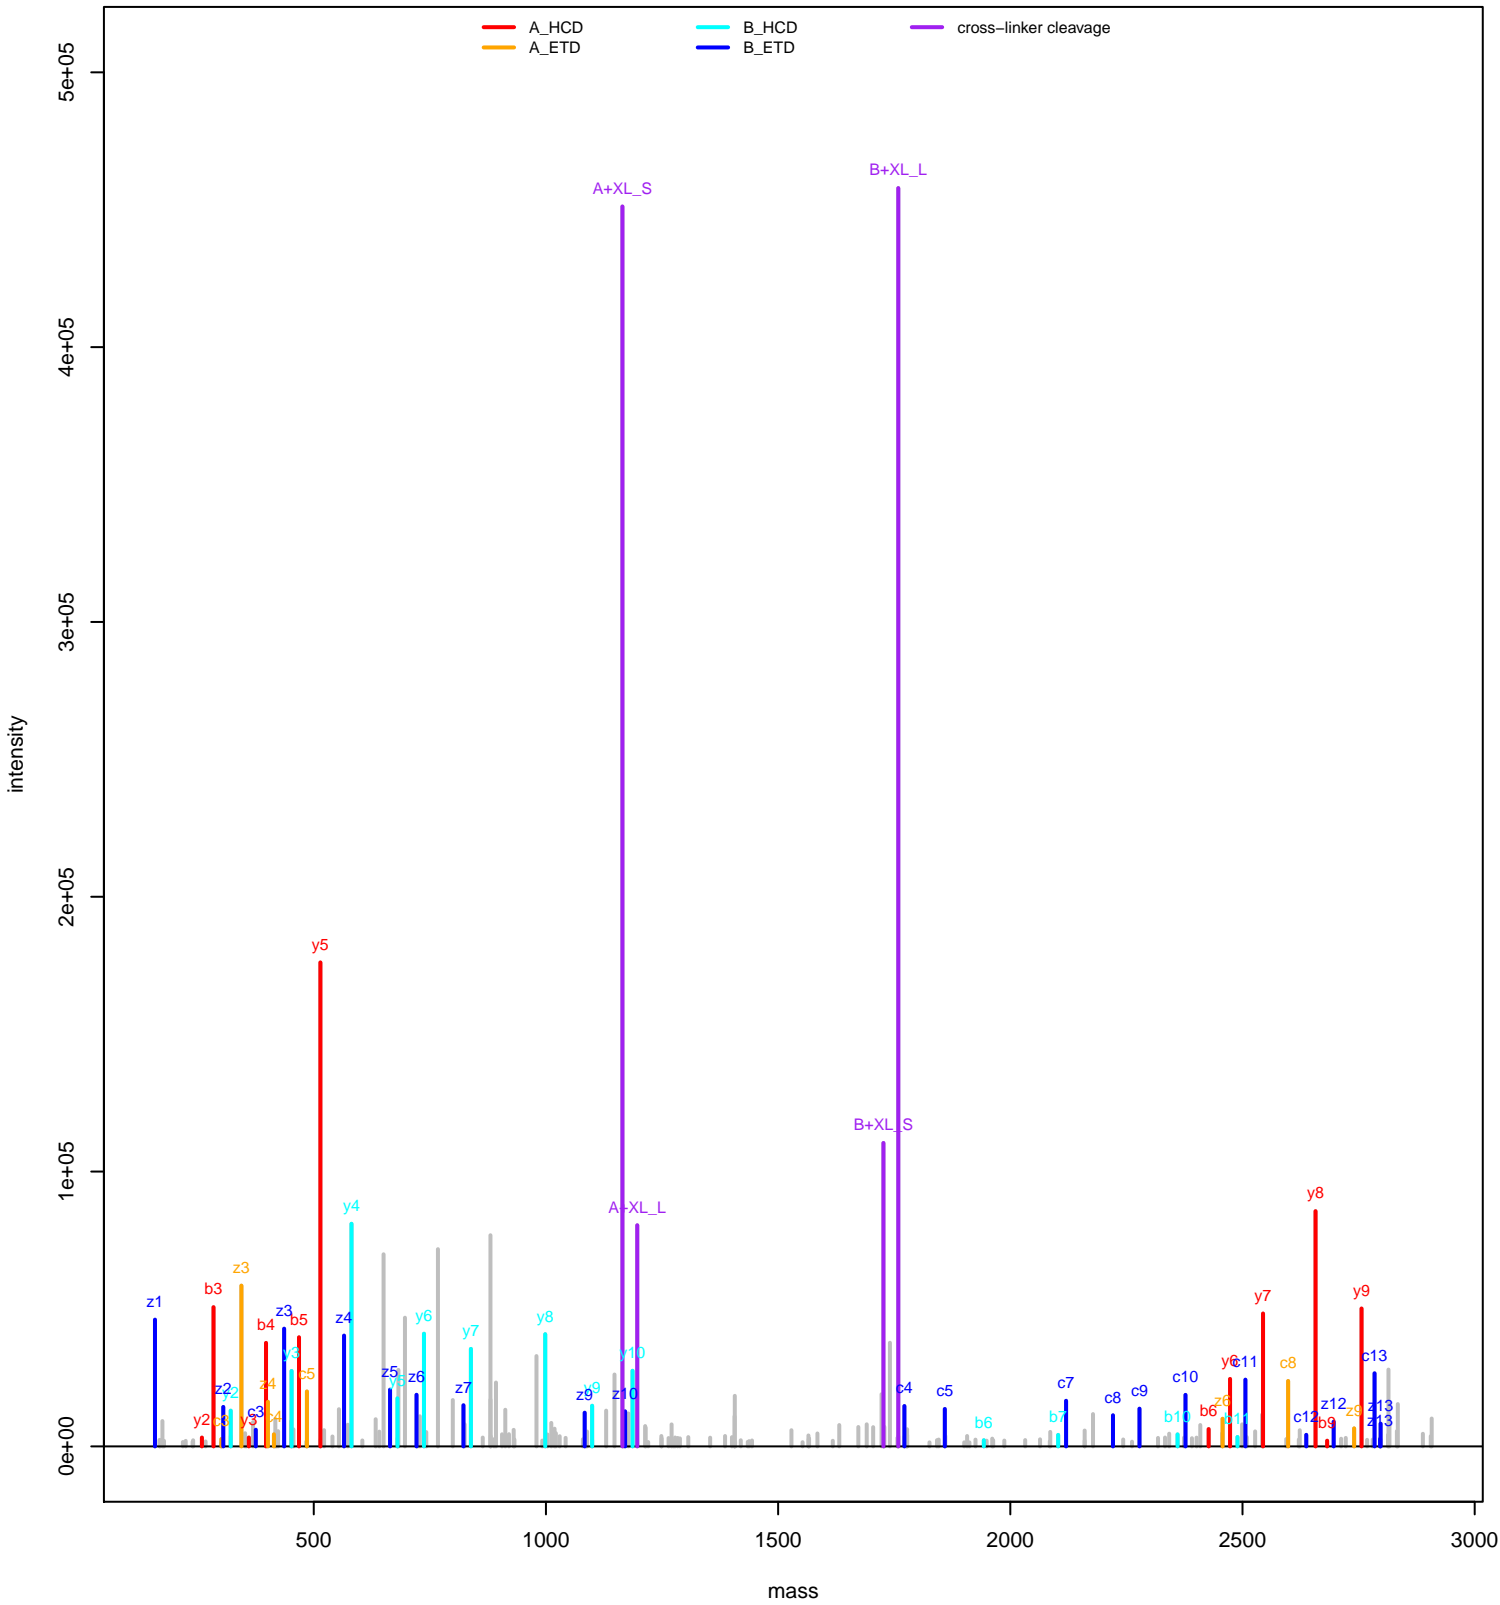

**GQVLAKPGTIK+XL\_S**

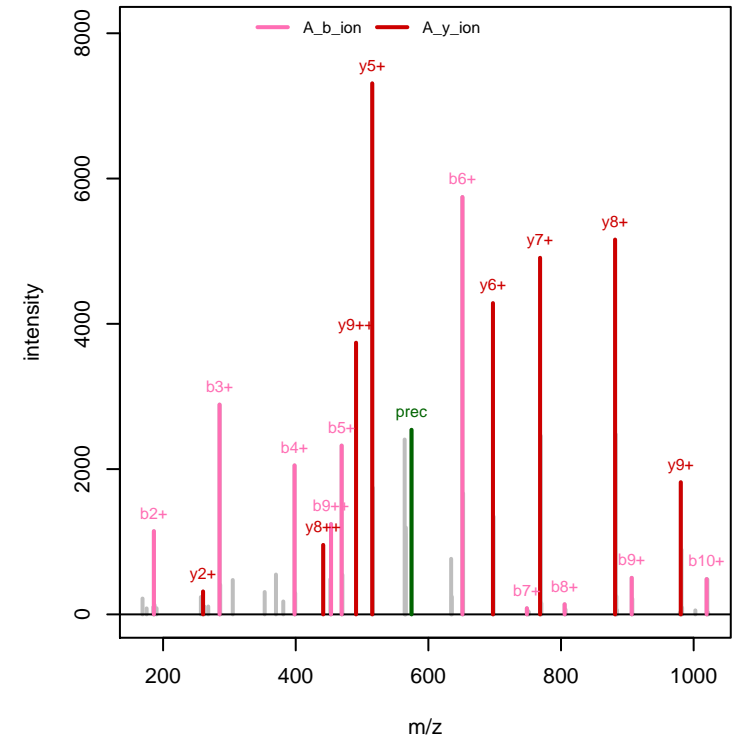

**GQVLAKPGTIK+XL\_L**

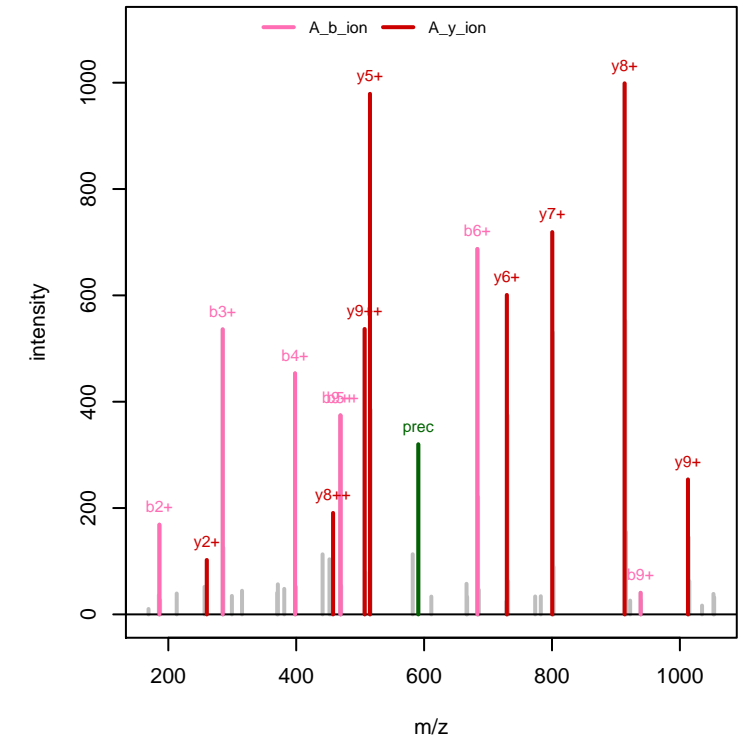

**ETQKSTCTGVEMFR+XL\_S**

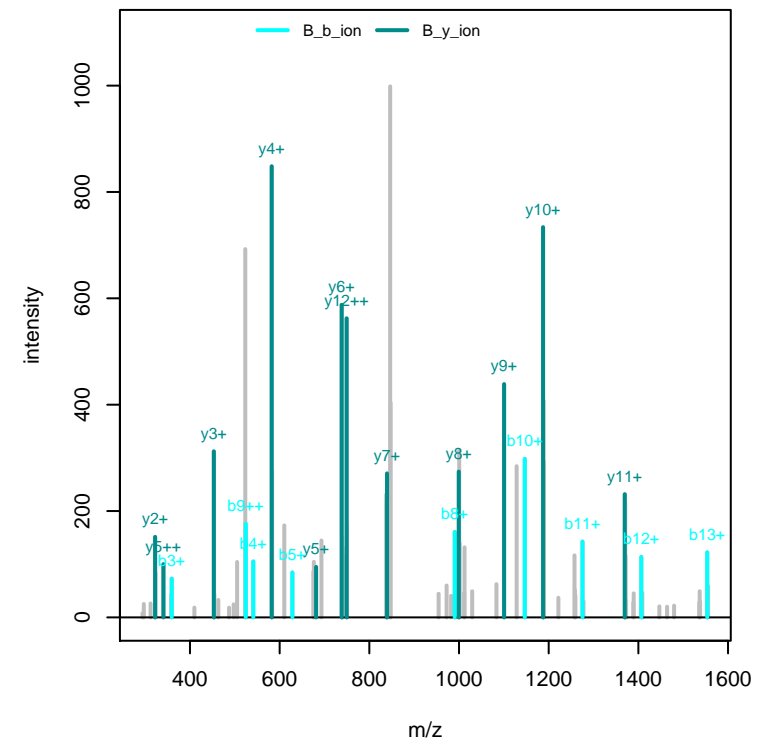

**ETQKSTCTGVEMFR+XL\_L**

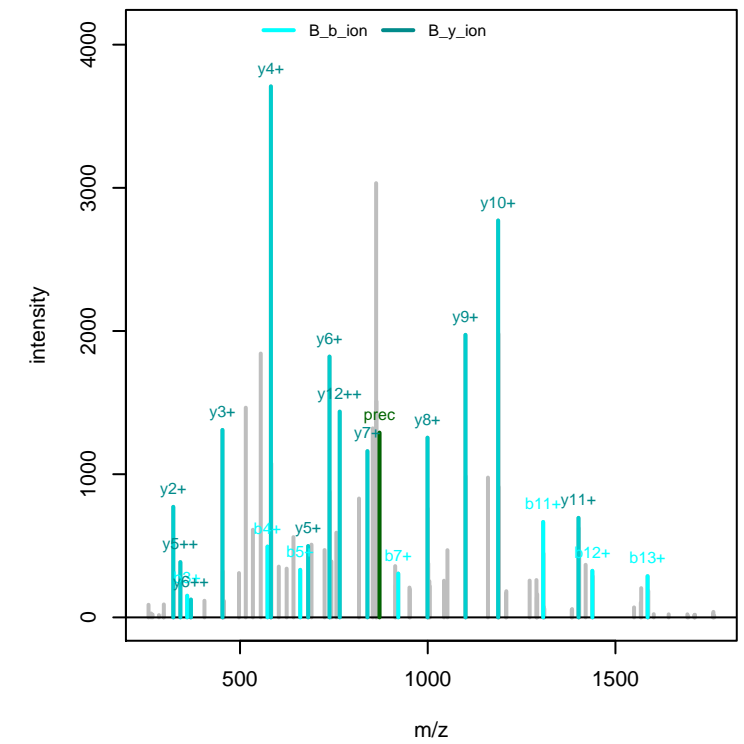

AHKVLGVK  
ESVLPKAVTAR

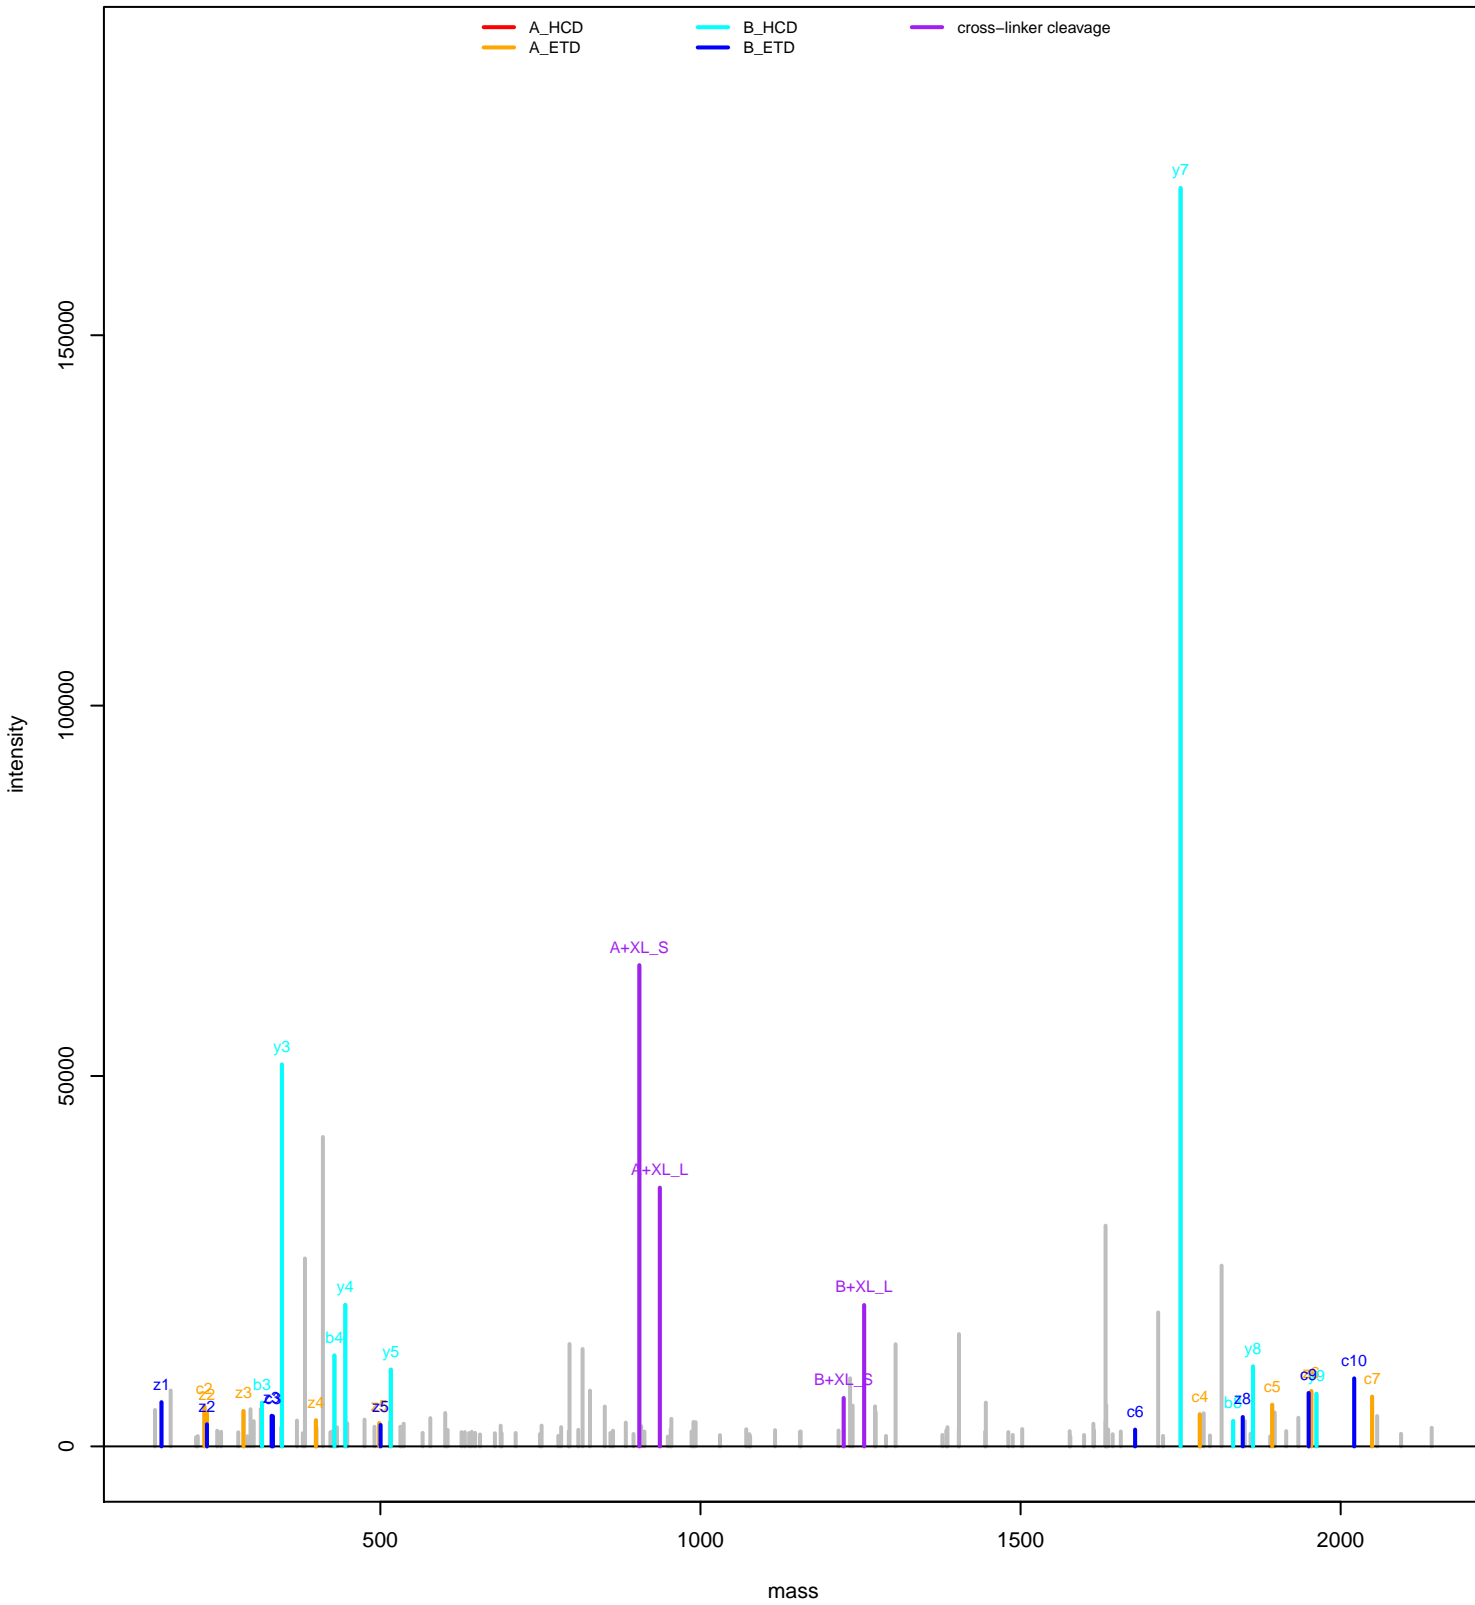

AHKVLGVK+XL\_S

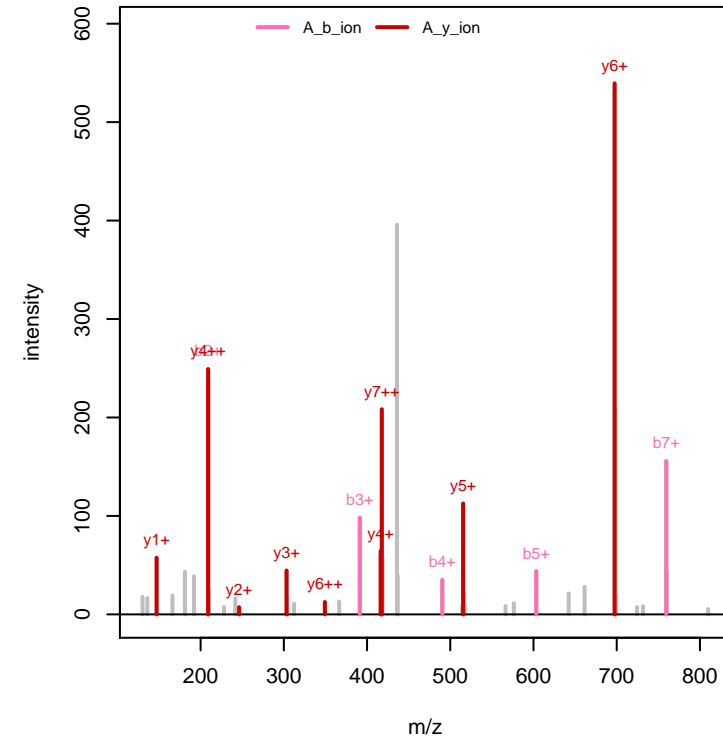

AHKVLGVK+XL\_L

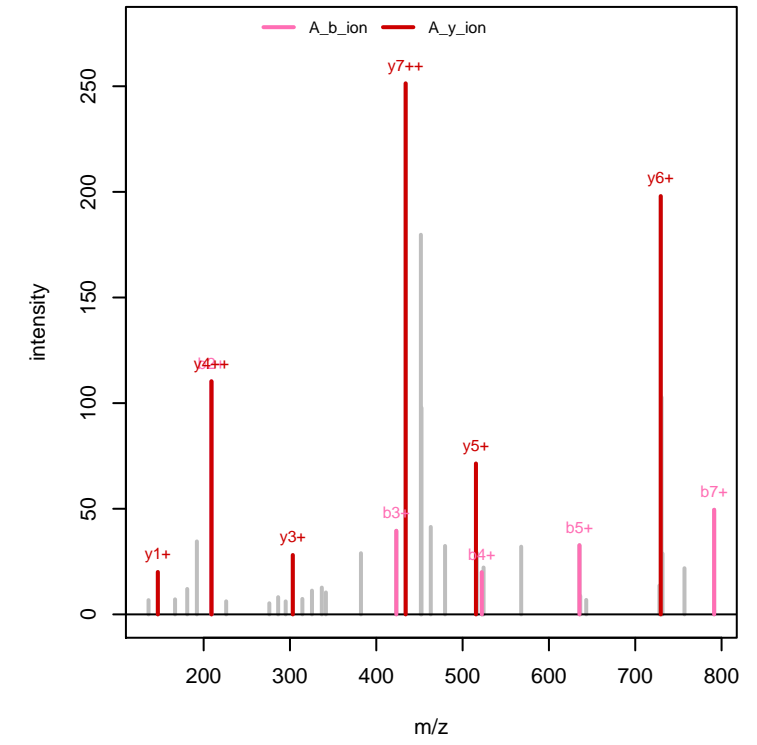

ESVLPKAVTAR+XL\_S

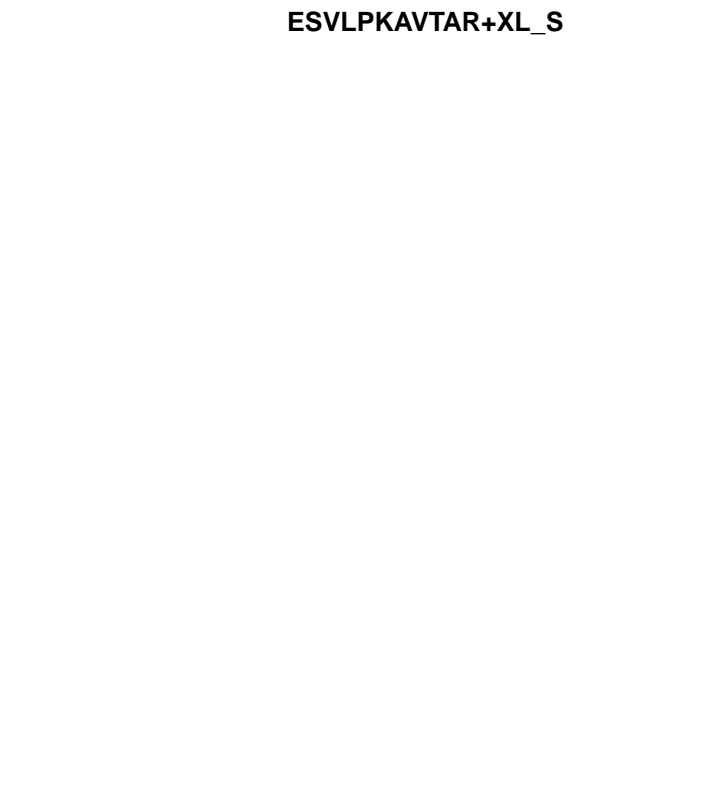

ESVLPKAVTAR+XL\_L

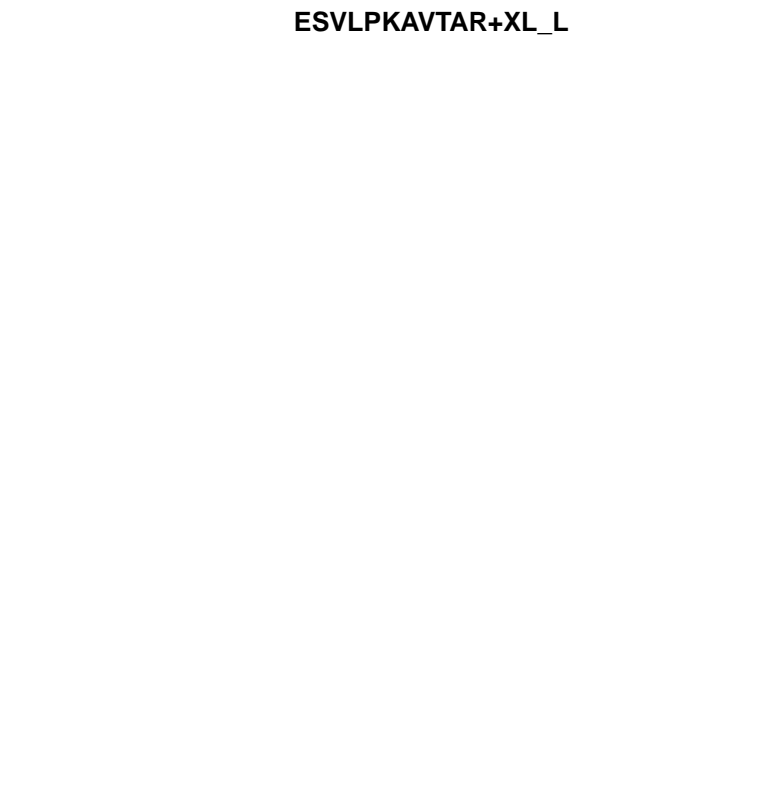

KVGMTR  
VTQVKDLANDGYR

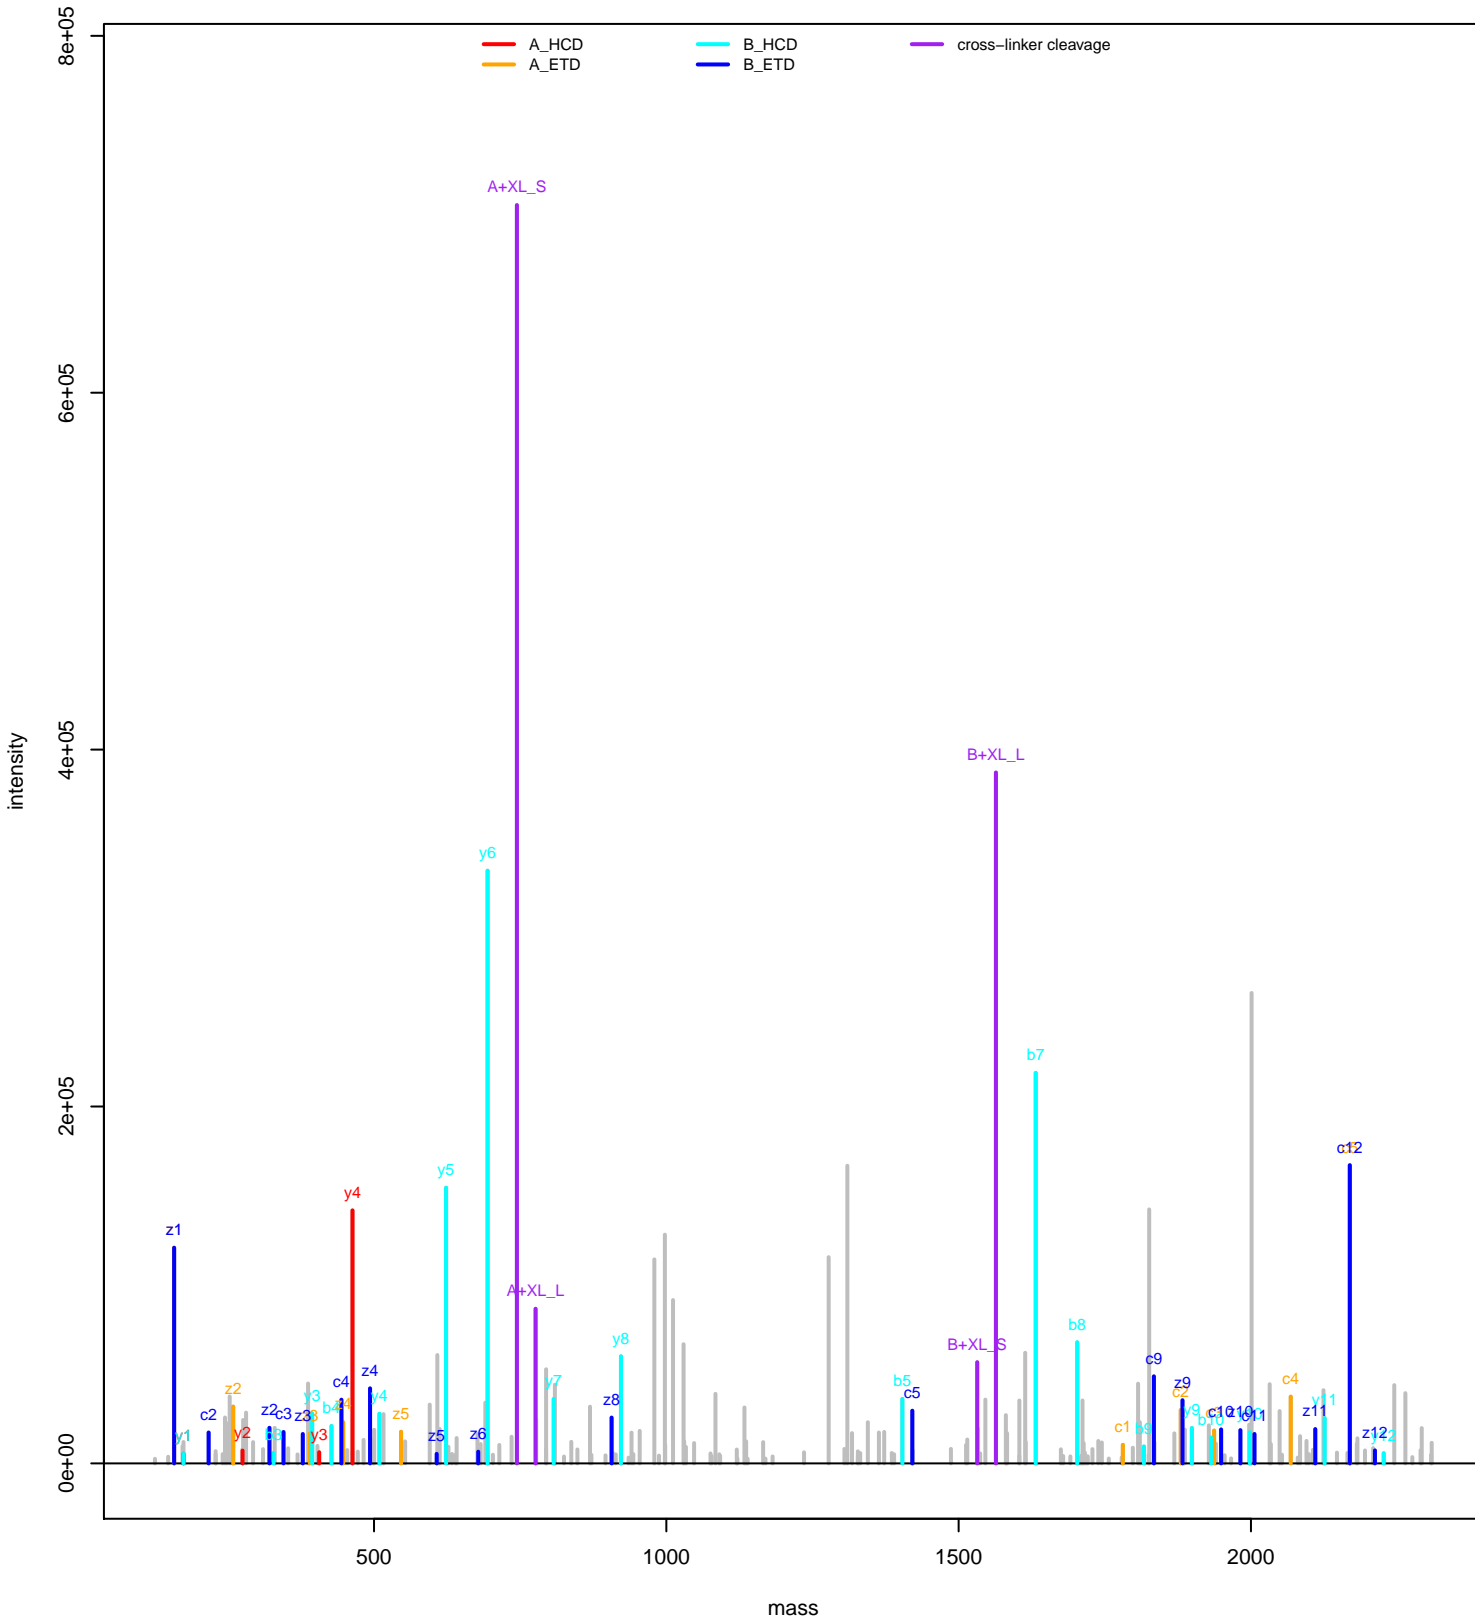

KVGMTR+XL\_S

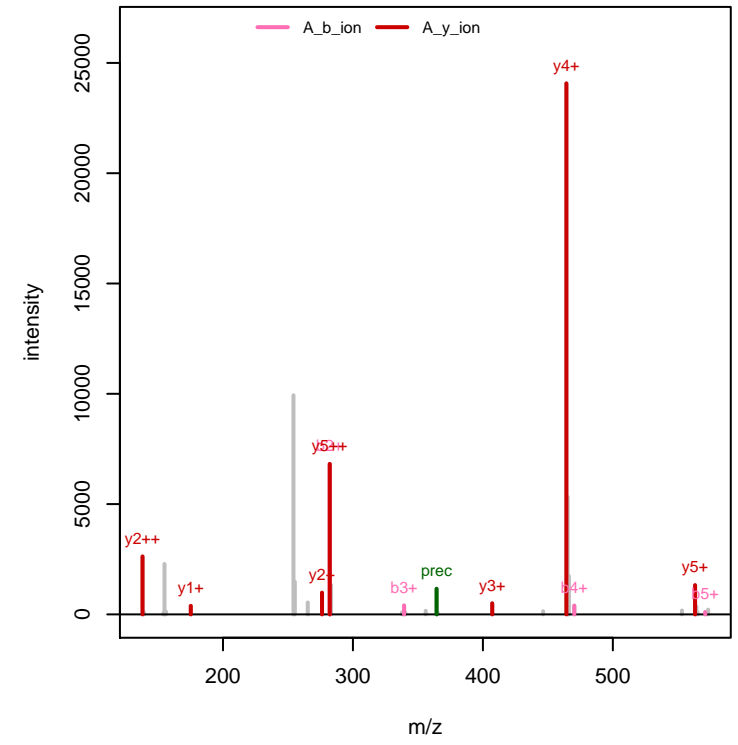

KVGMTR+XL\_L

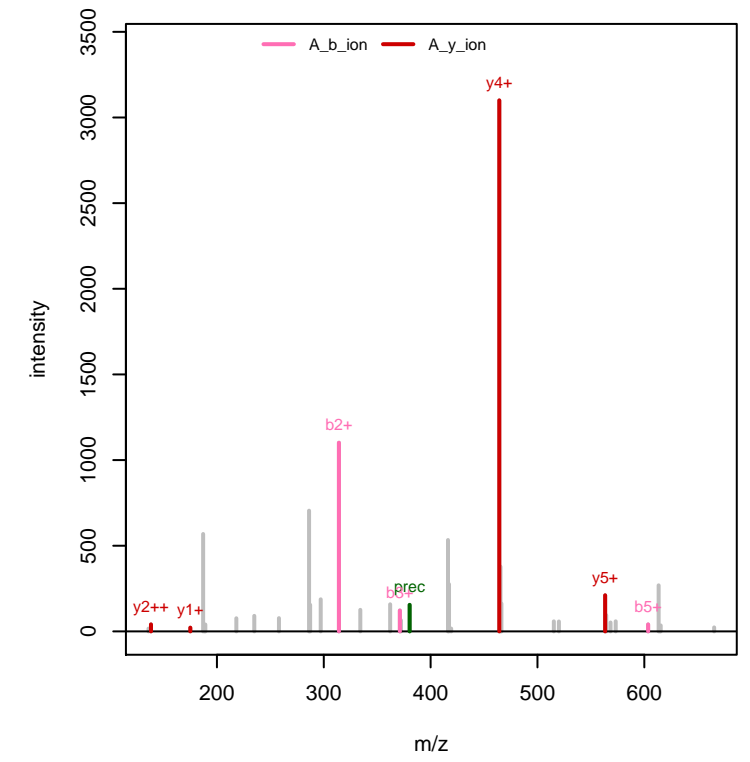

VTQVKDLANDGYR+XL\_S

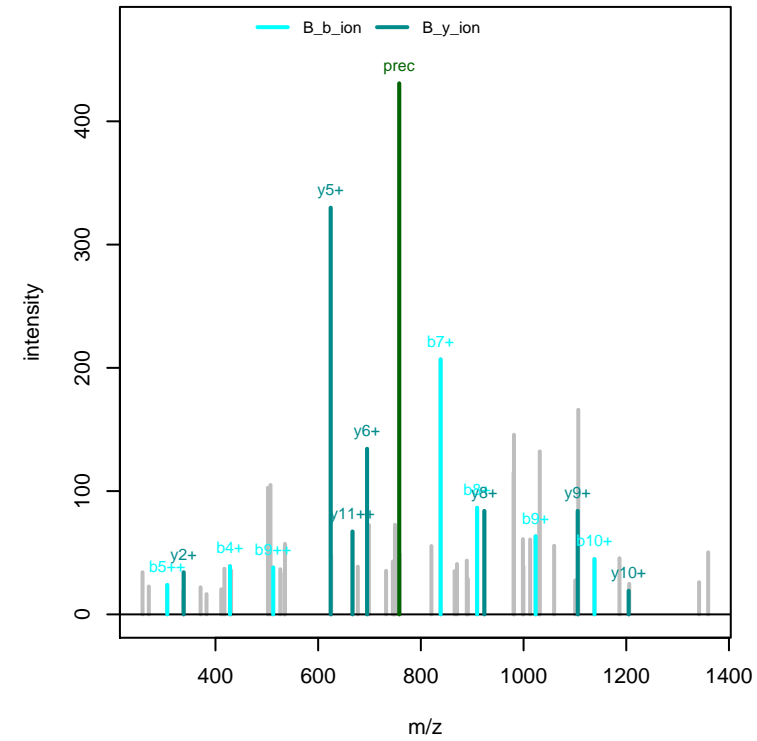

VTQVKDLANDGYR+XL\_L

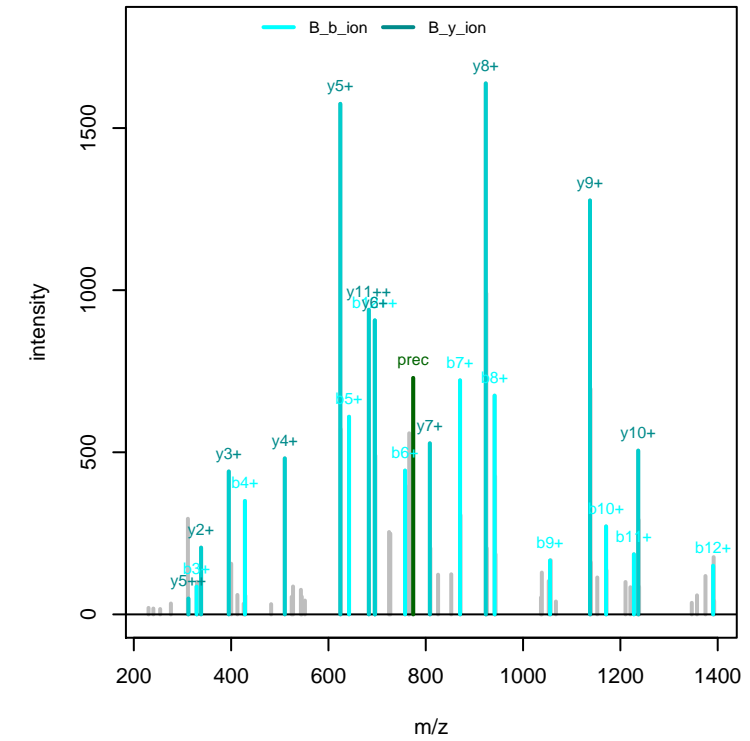

GGHDPKK  
SERFPNDVDPIETR

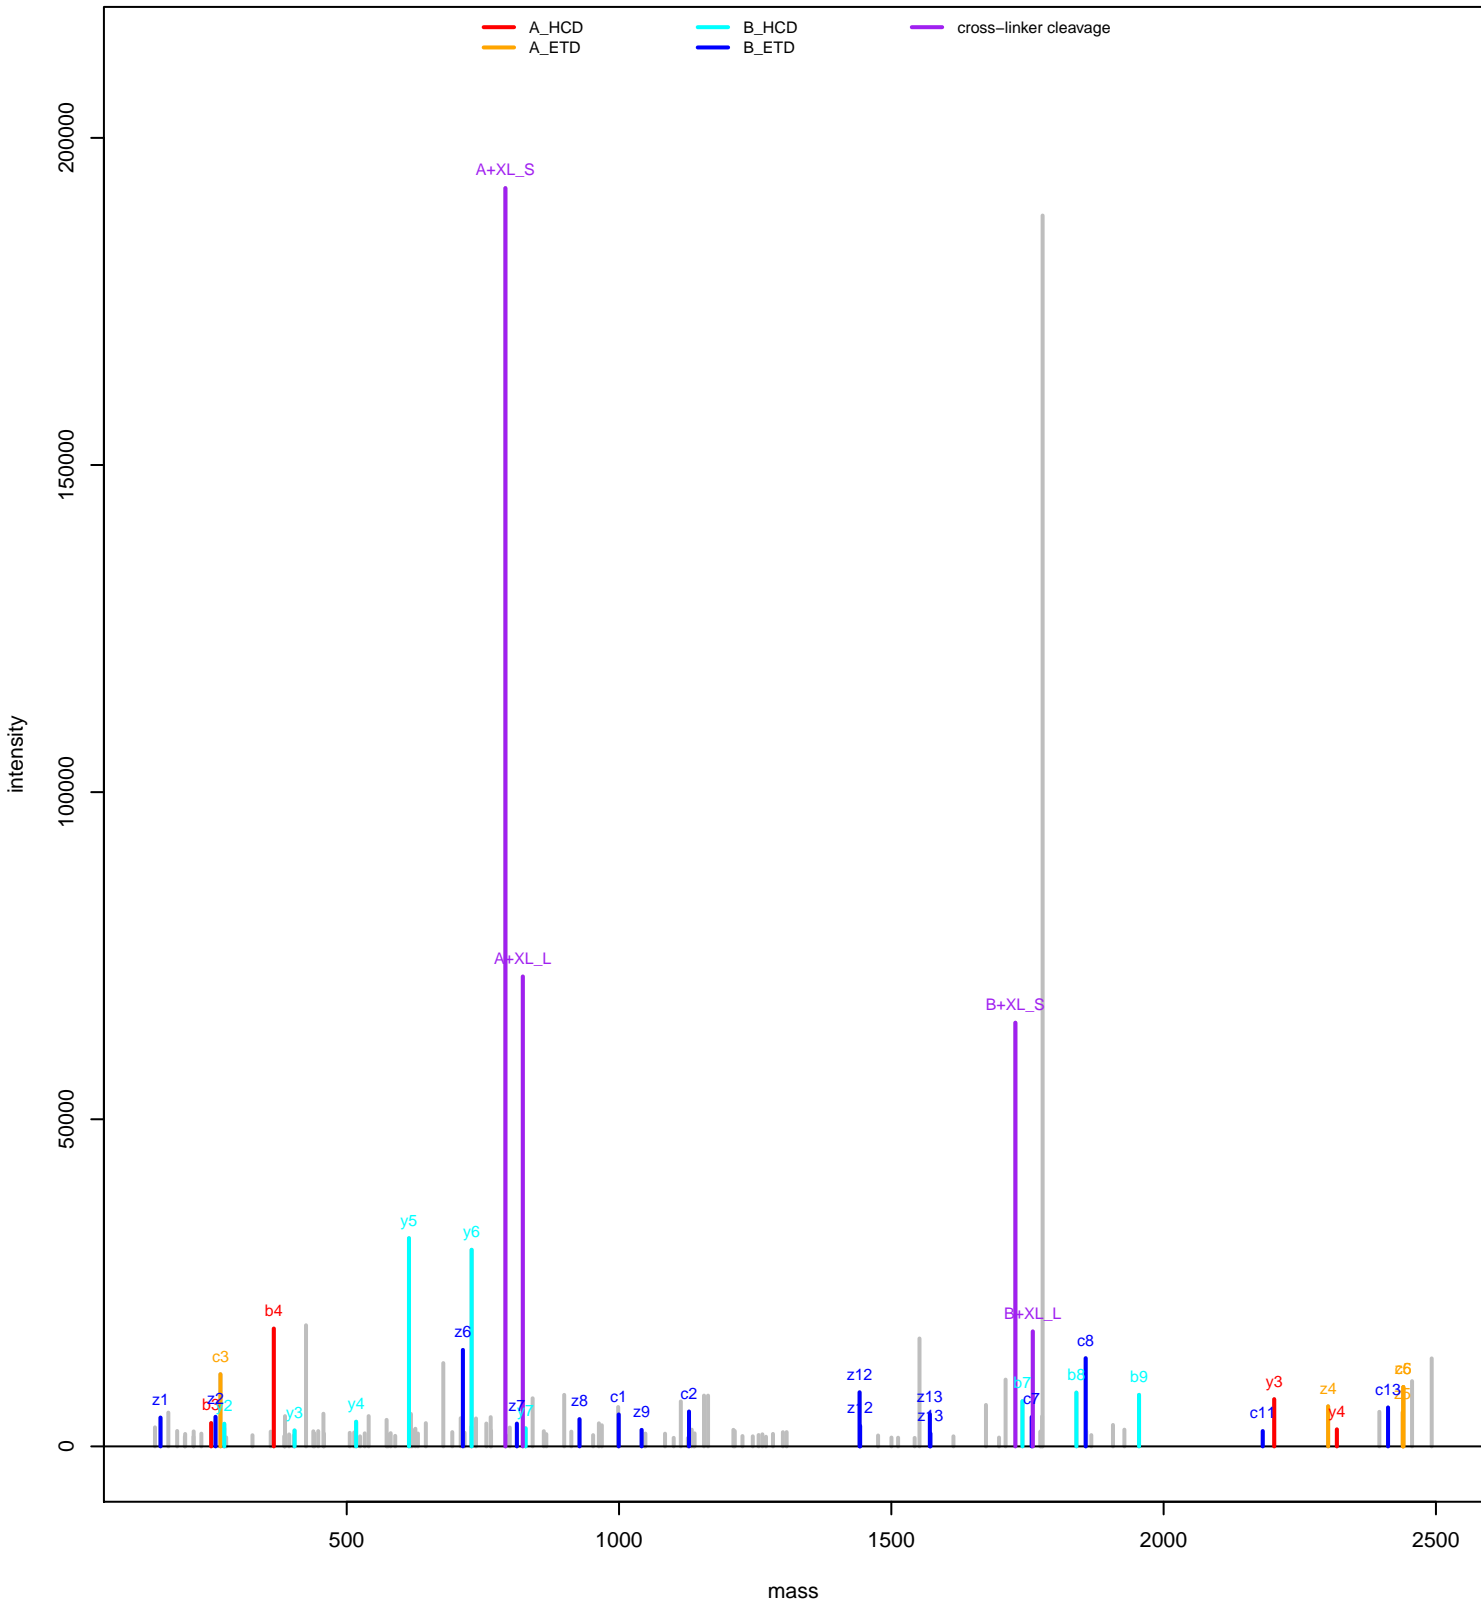

GGHDPKK+XL\_S

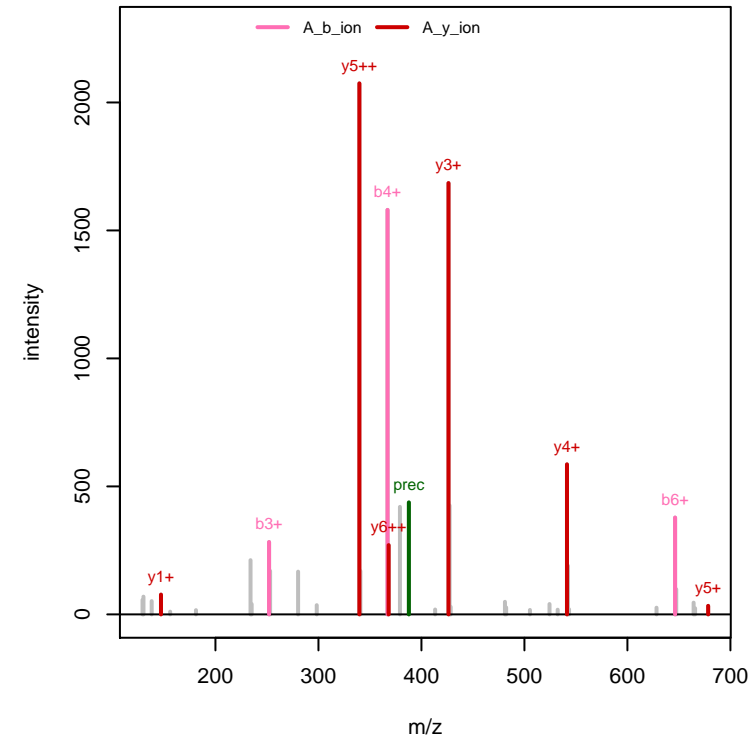

GGHDPKK+XL\_L

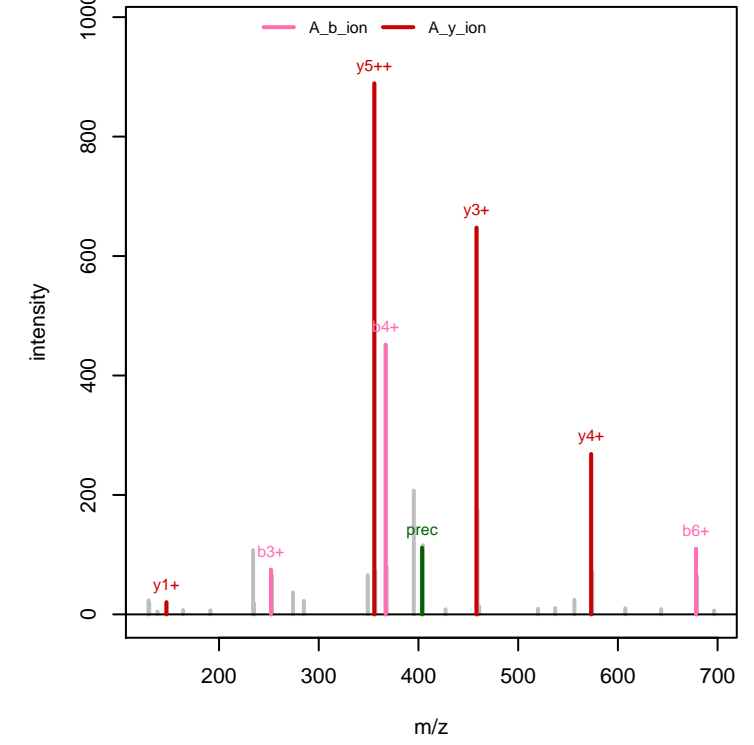

SERFPNDVDPIETR+XL\_S

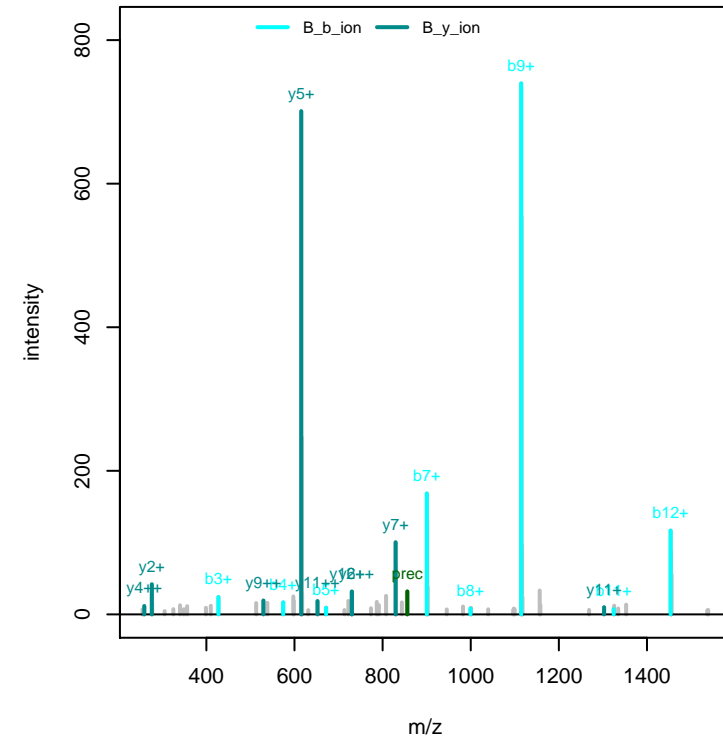

SERFPNDVDPIETR+XL\_L

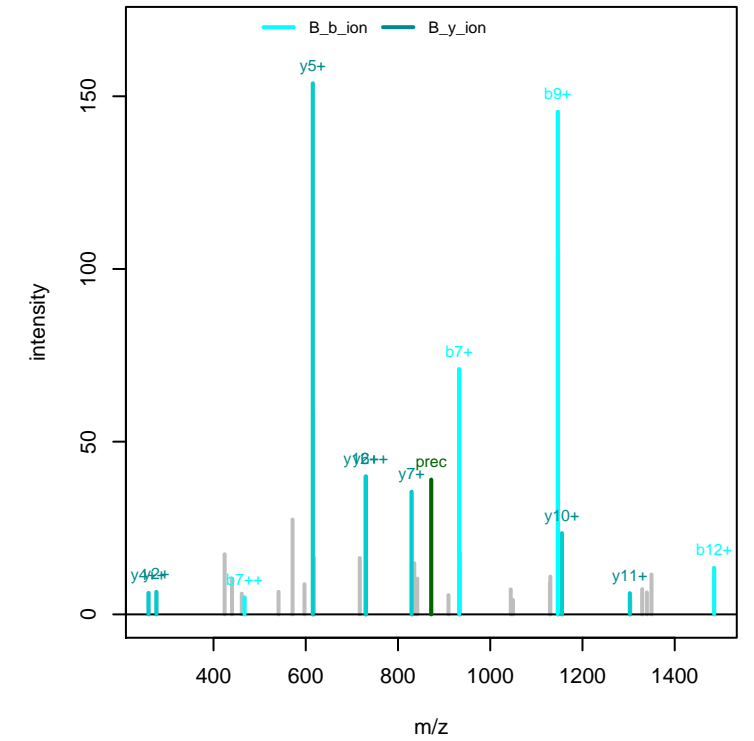

**KGNEGTIK  
LAALDLVKK**

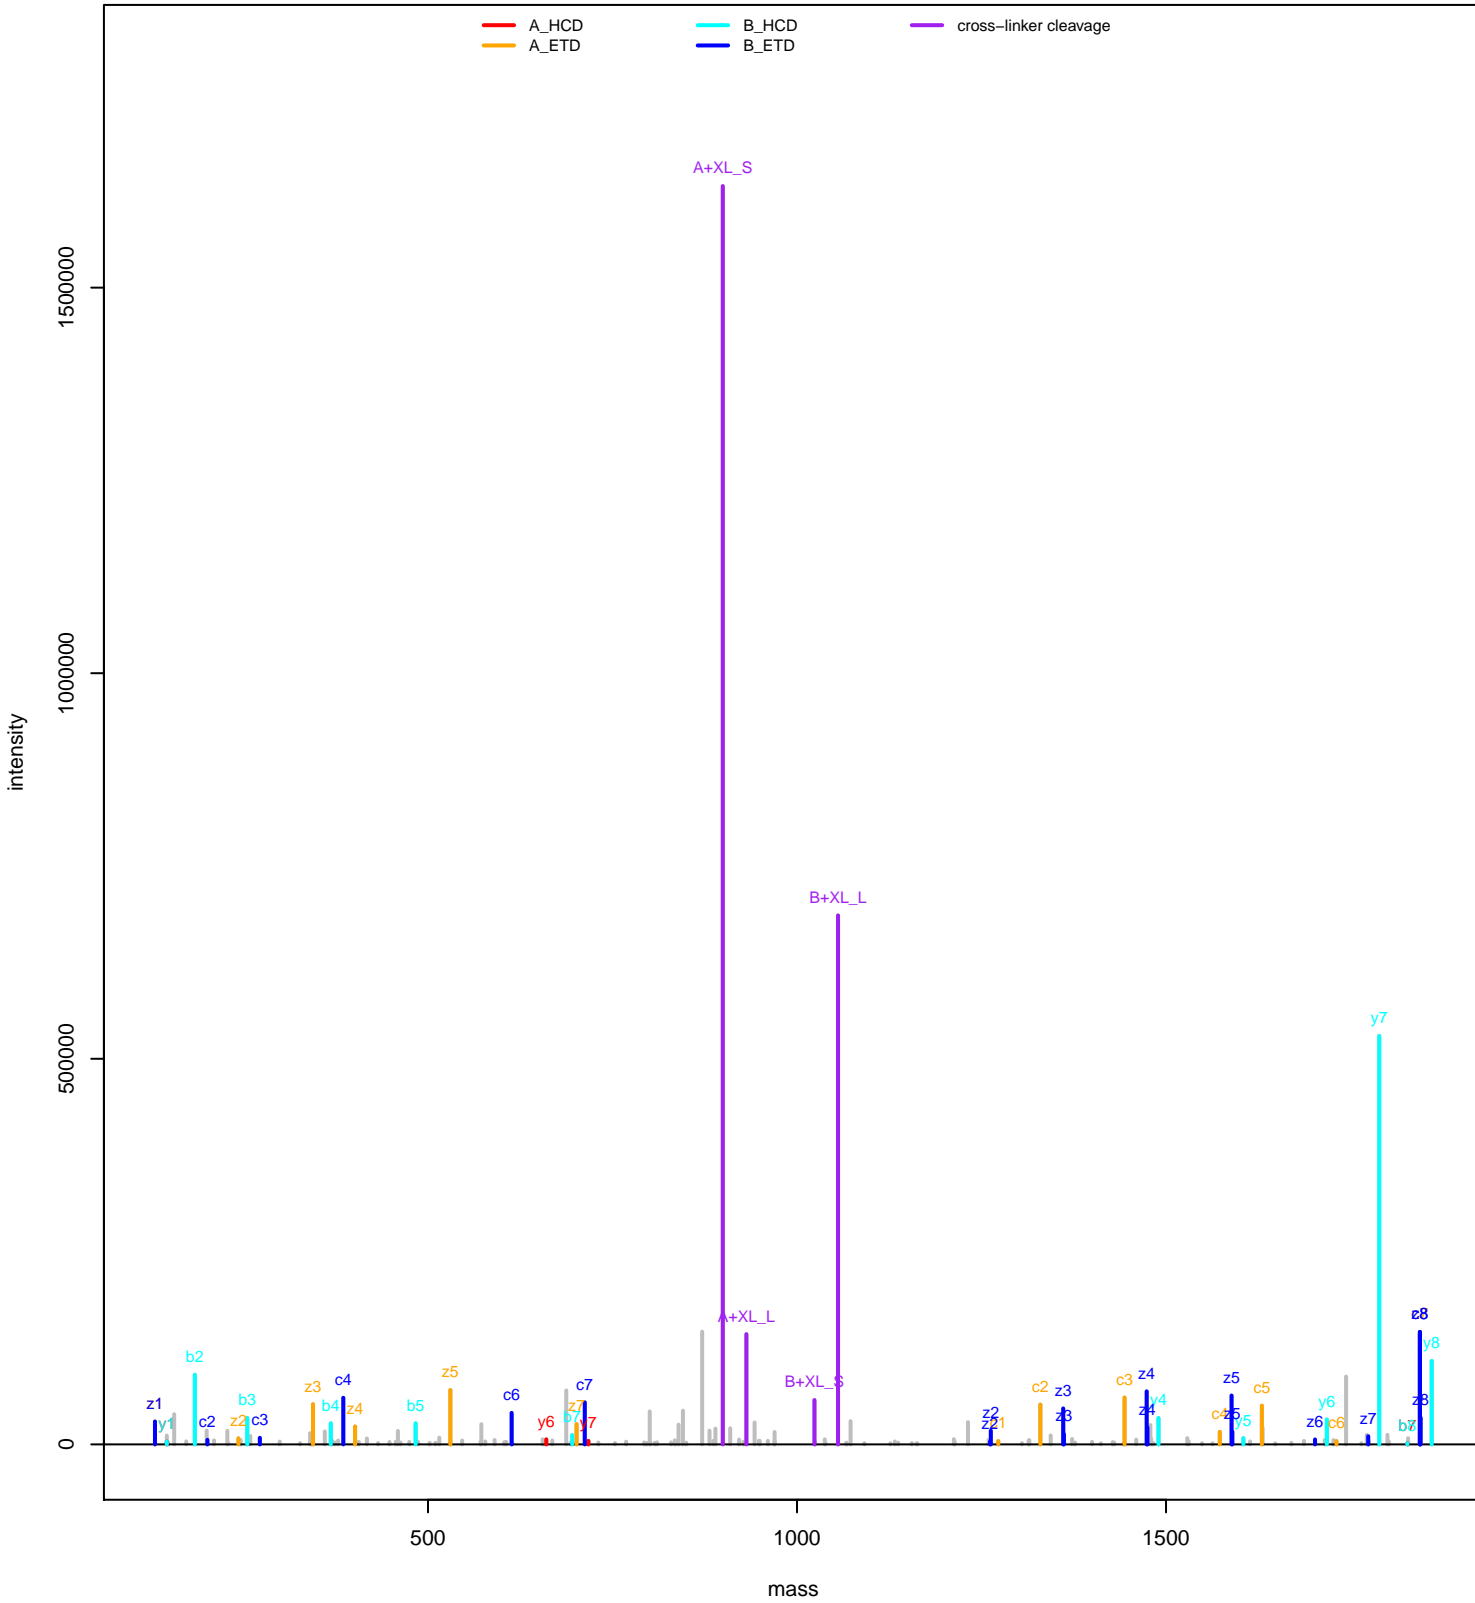

**KGNEGTIK+XL\_S**

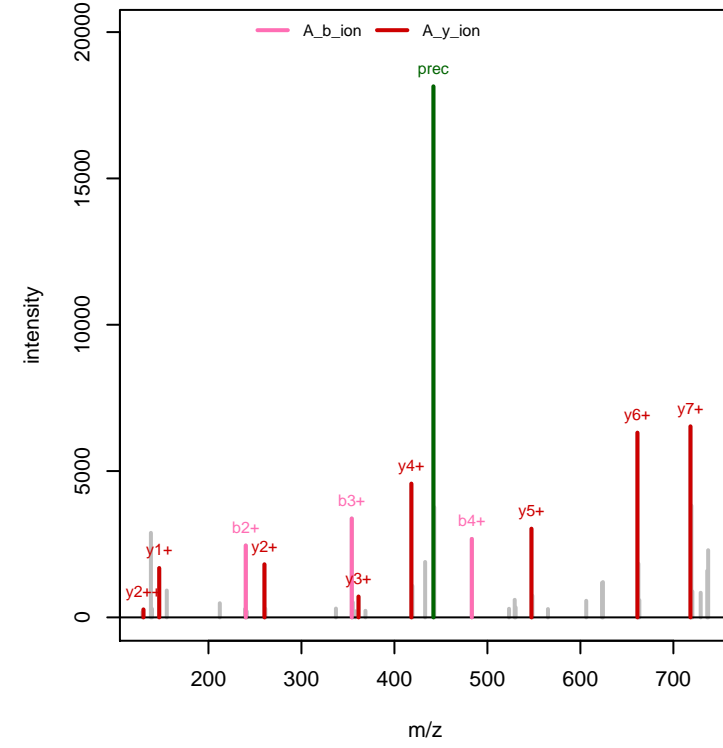

**KGNEGTIK+XL\_L**

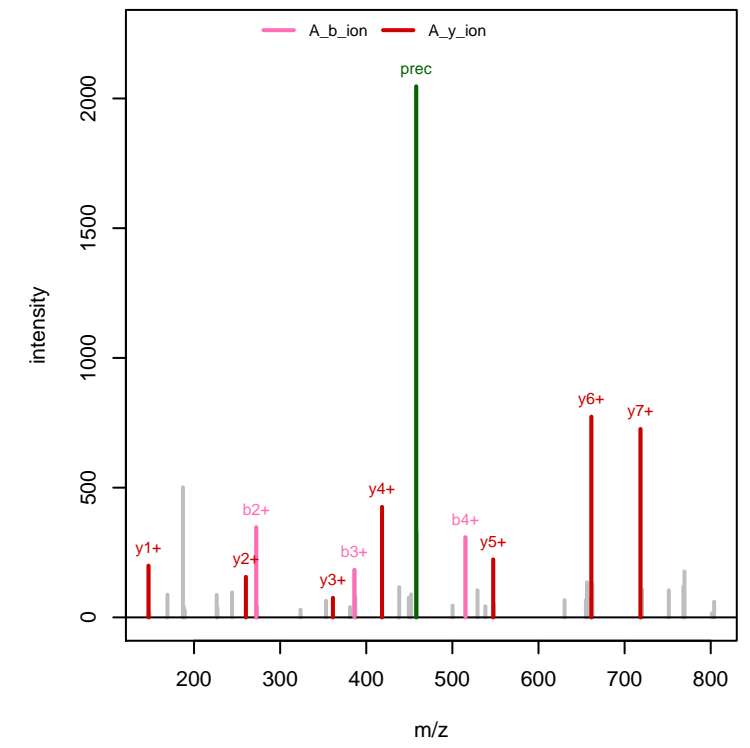

**LAALDLVKK+XL\_S**

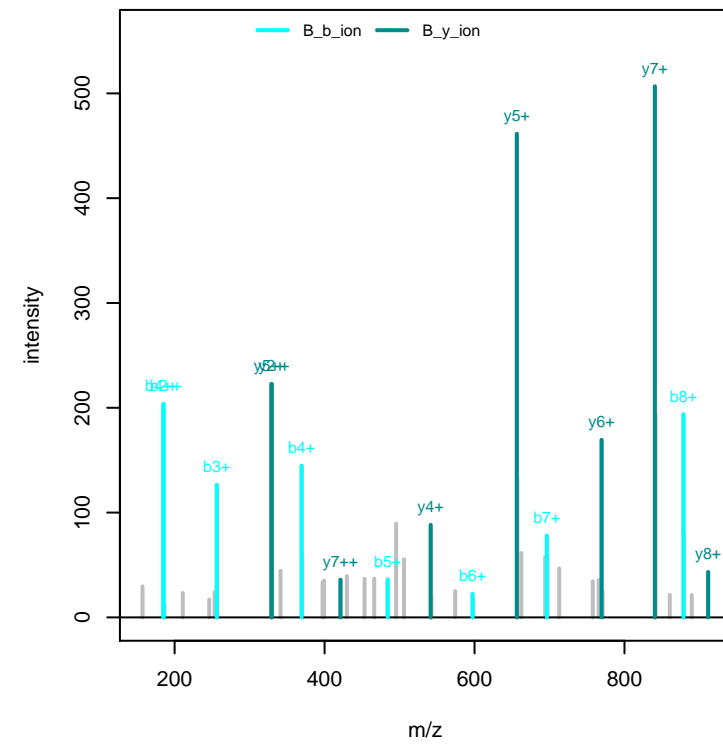

**LAALDLVKK+XL\_L**

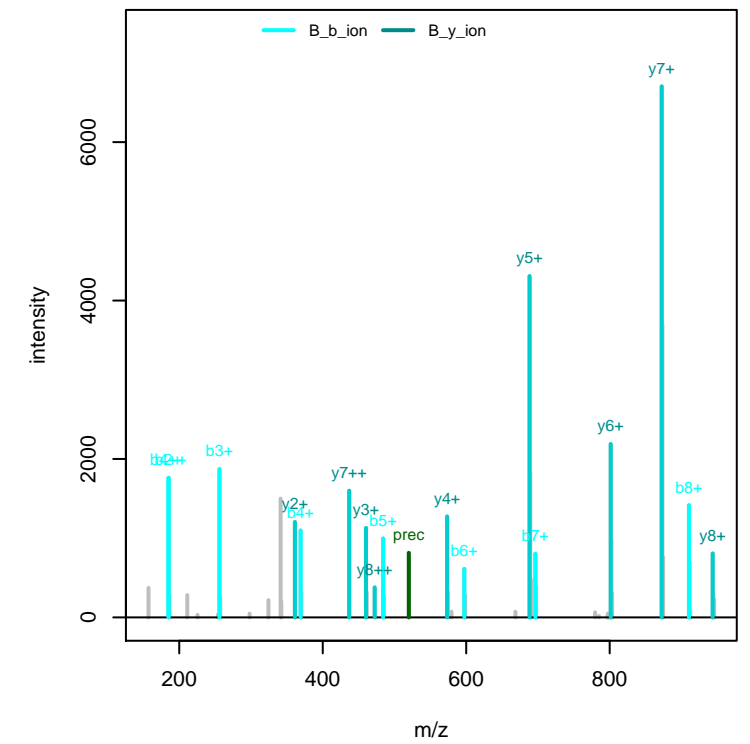

AKVNNVDPK  
KHQFAQSLNYEIAK

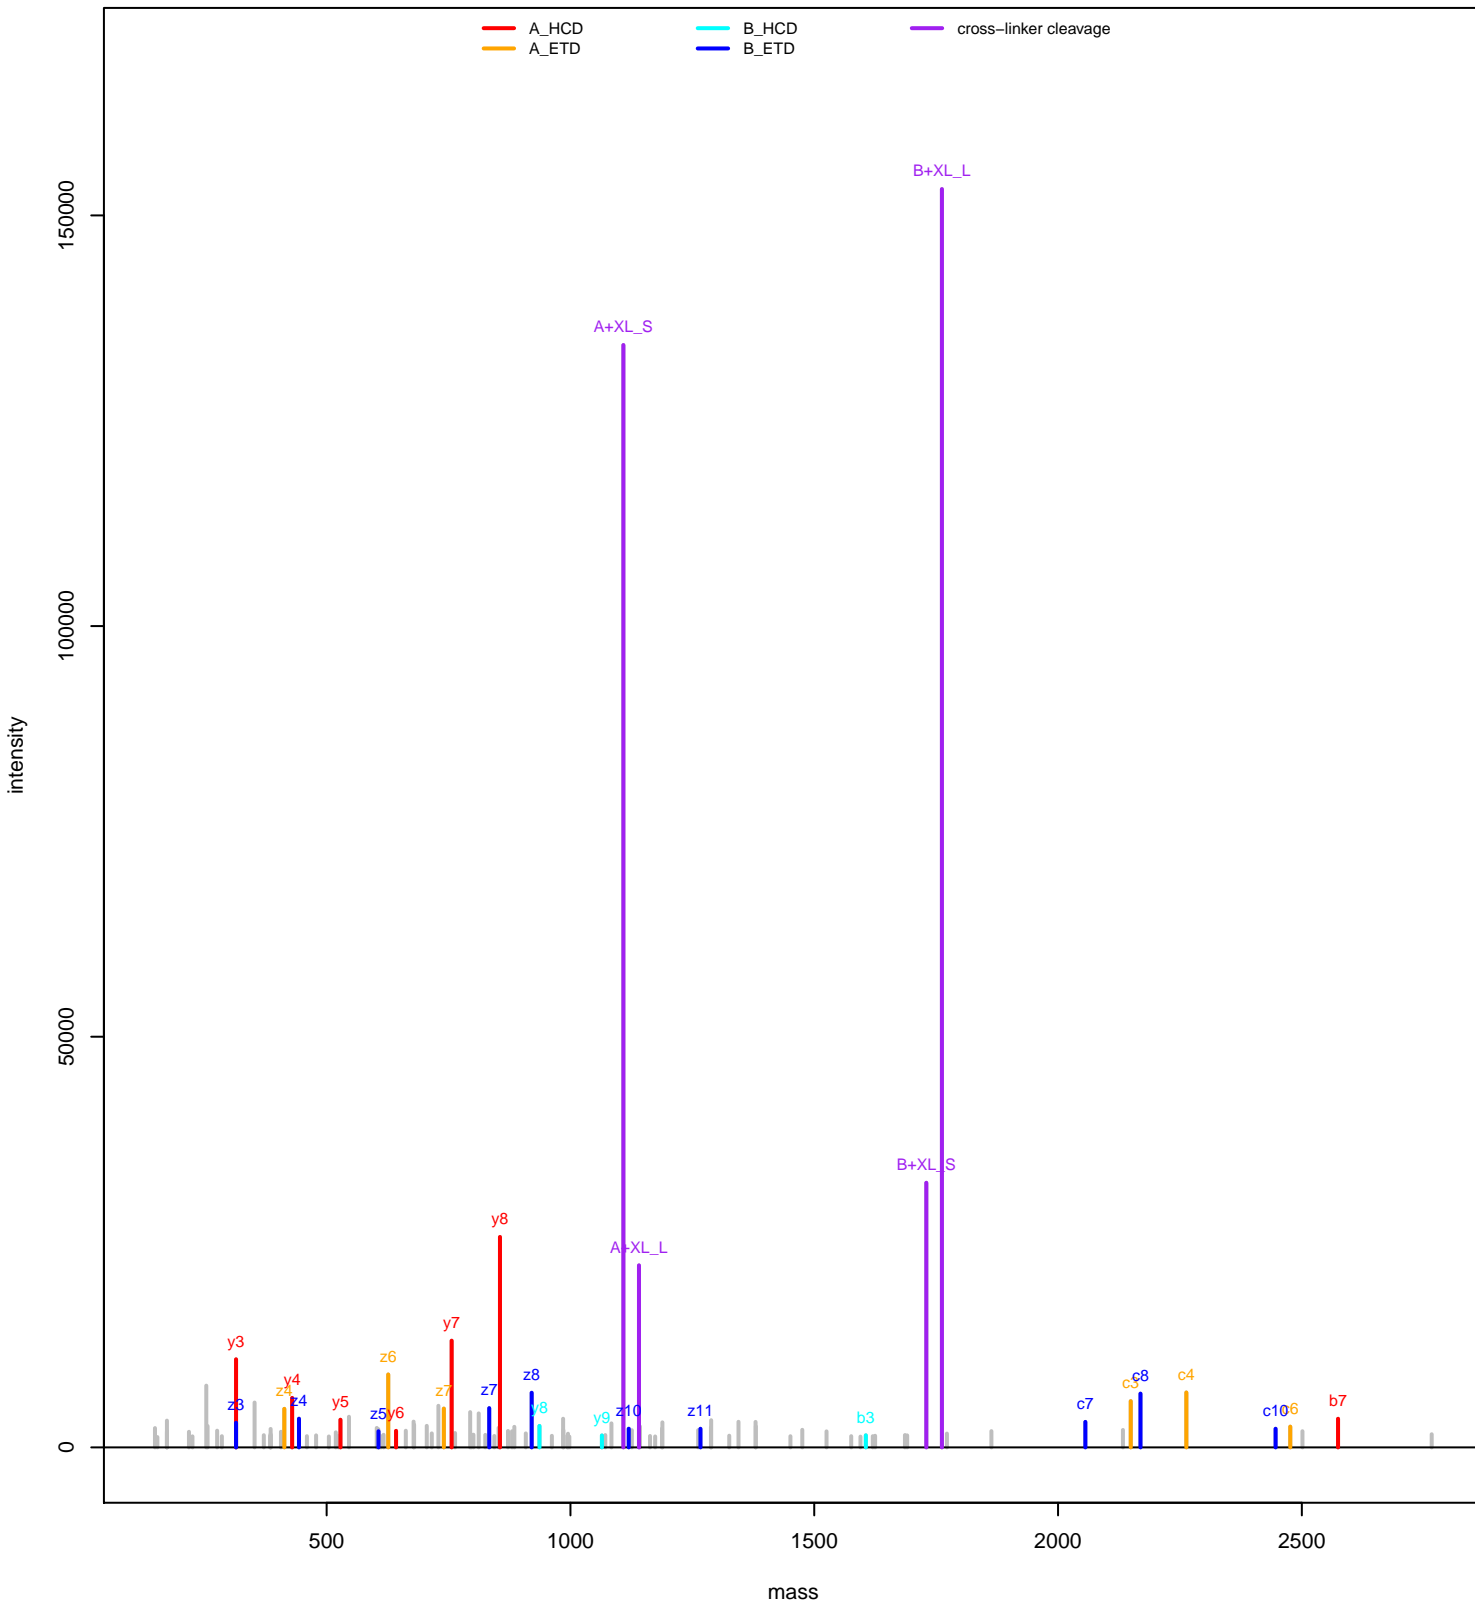

AKVNNVDPK+XL\_S

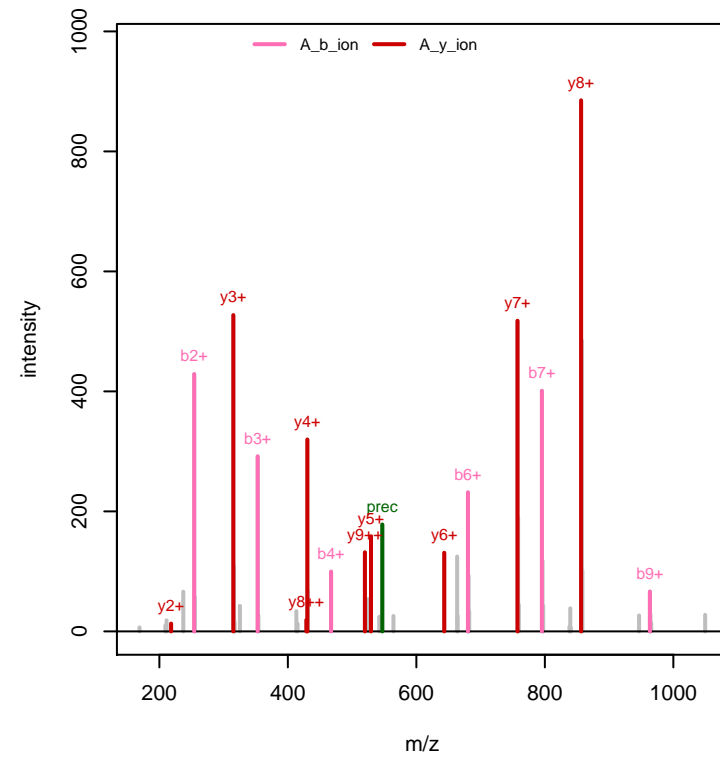

AKVNNVDPK+XL\_L

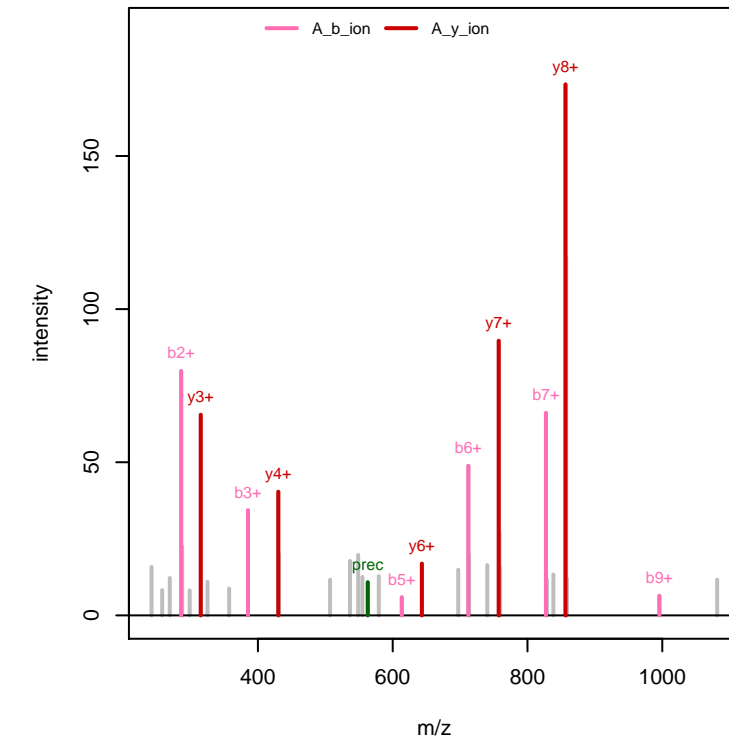

KHQFAQSLNYEIAK+XL\_S

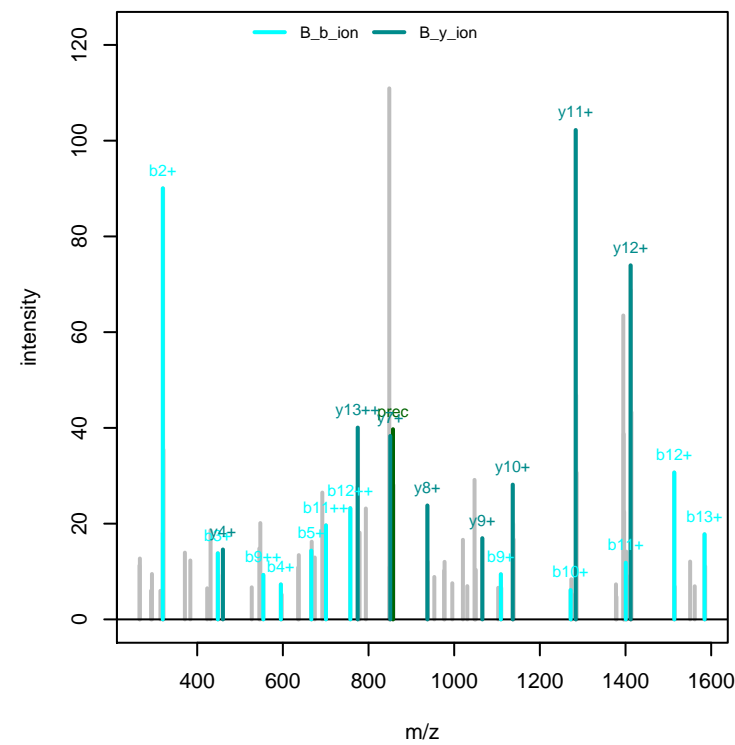

KHQFAQSLNYEIAK+XL\_L

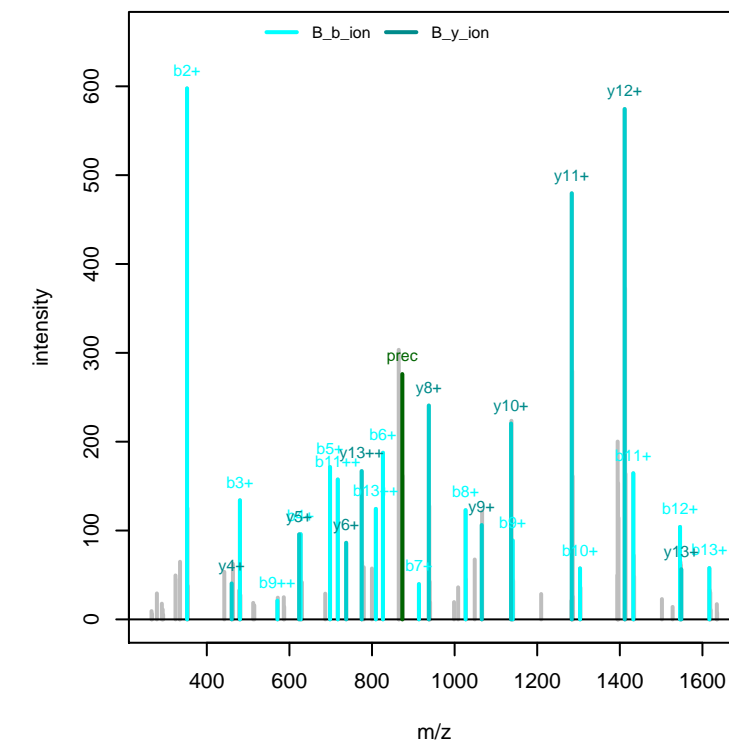

KEAAPAK  
YNANDNPTKQTAFSQYDRPQAR

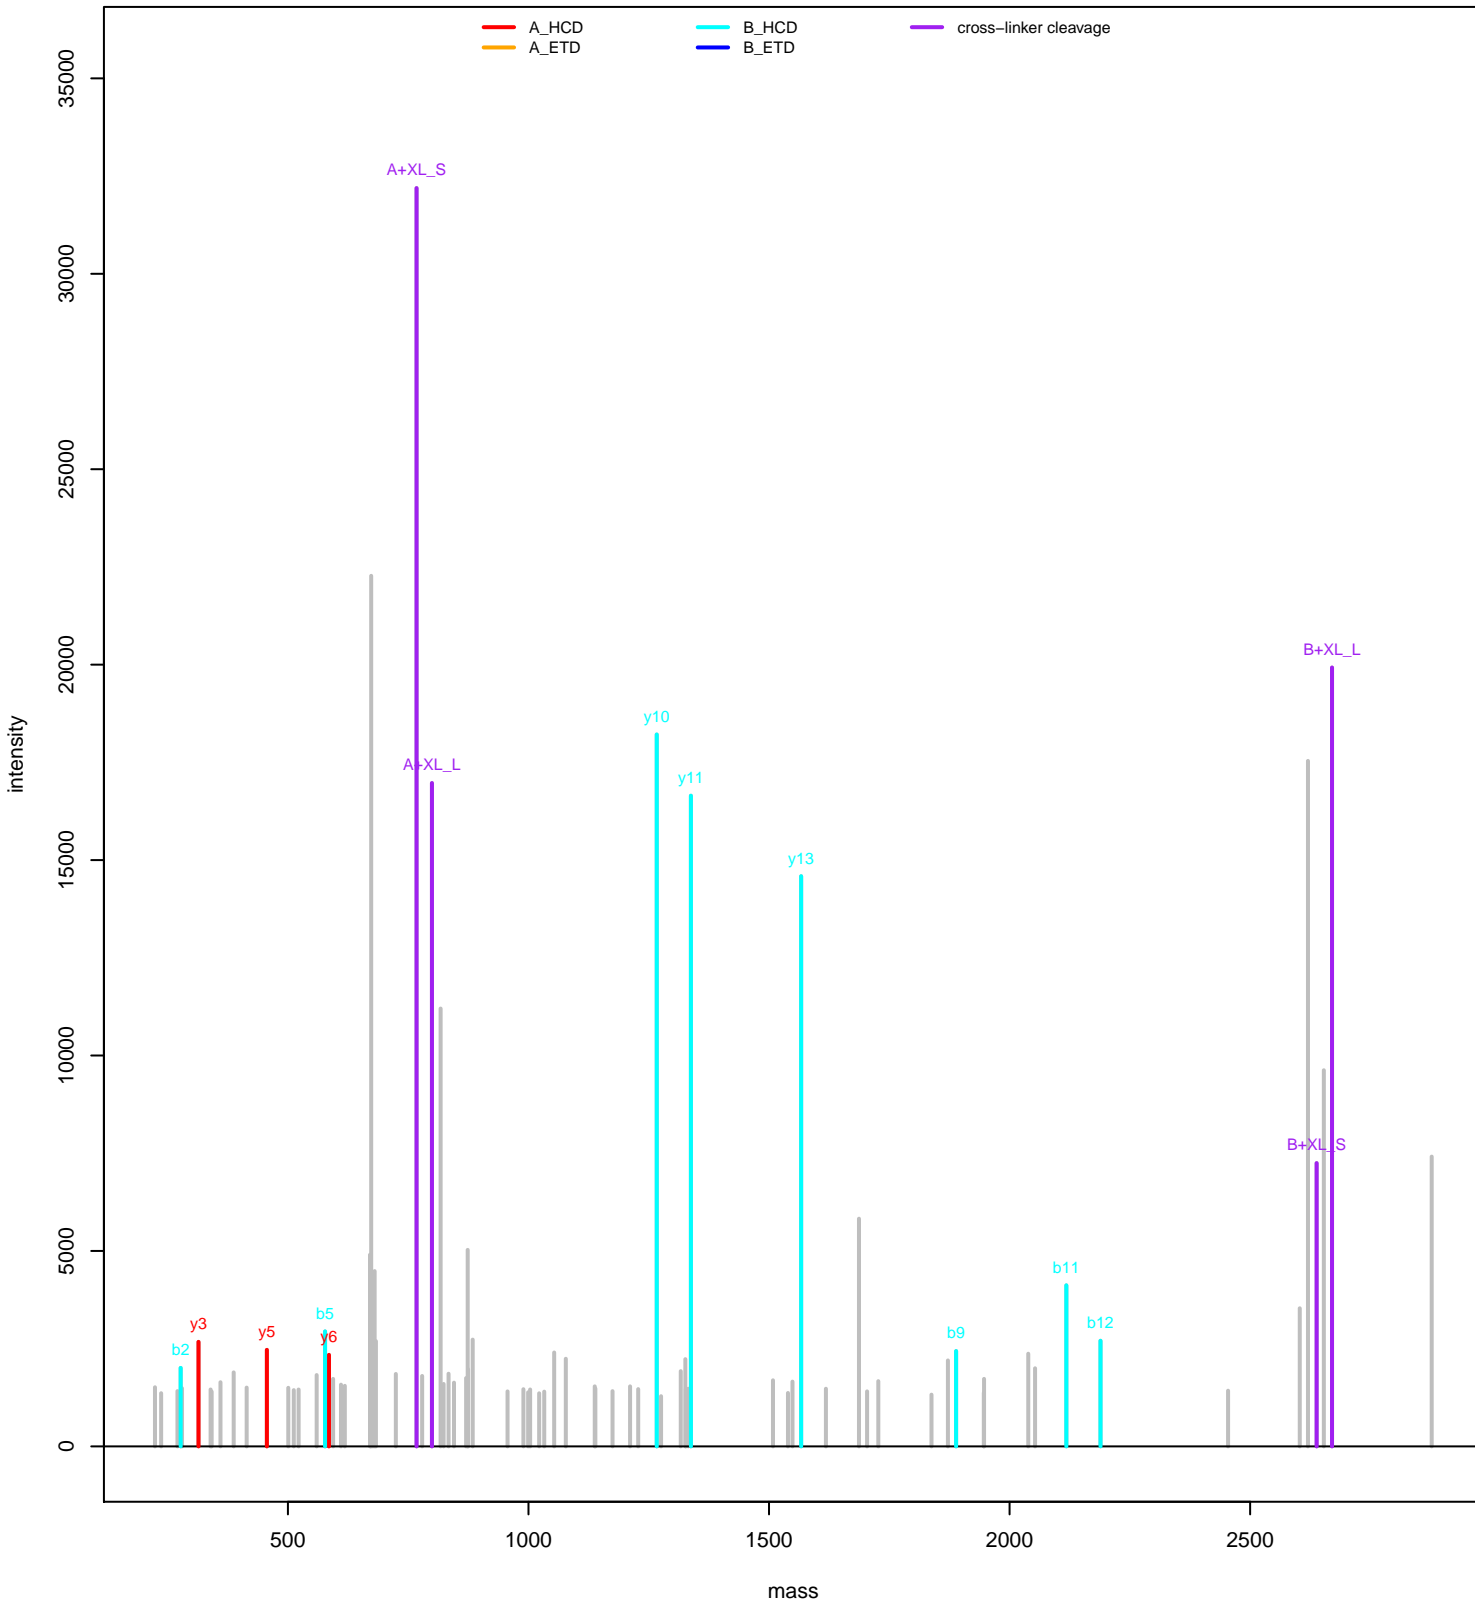

KEAAPAK+XL\_S

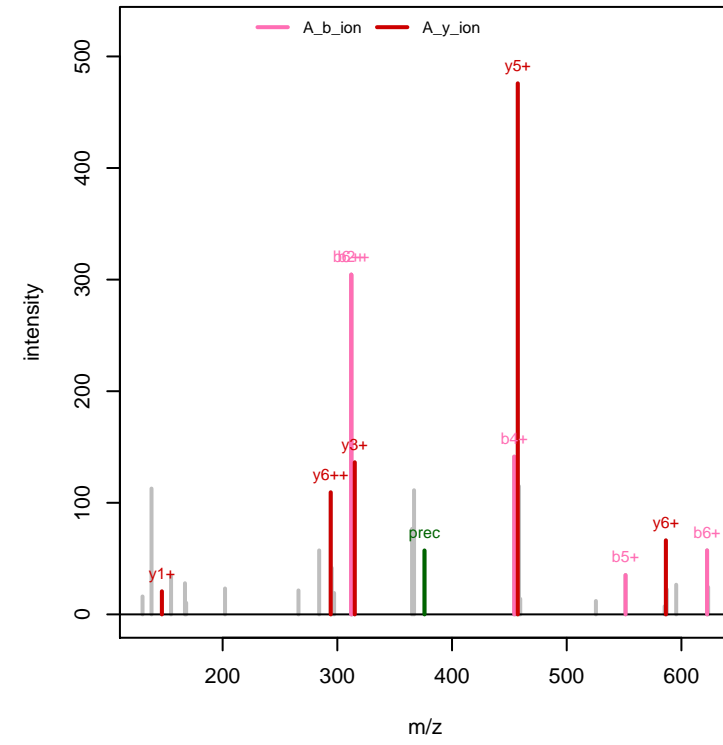

KEAAPAK+XL\_L

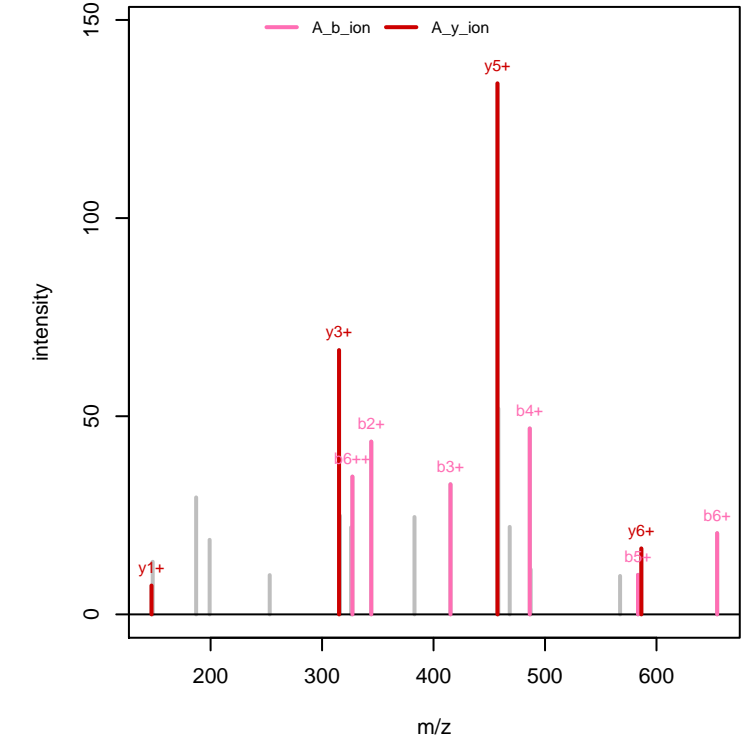

YNANDNPTKQTAFSQYDRPQAR+XL\_S

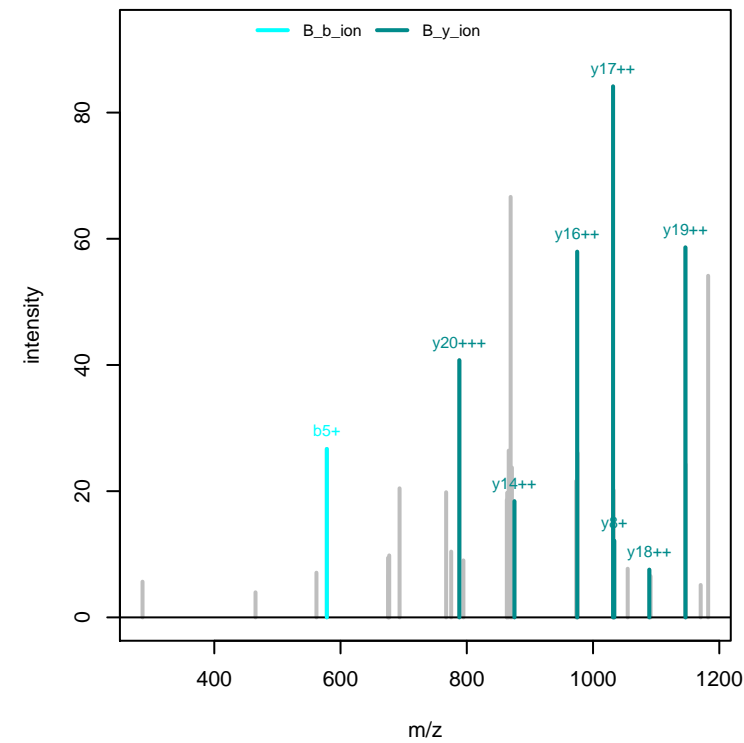

YNANDNPTKQTAFSQYDRPQAR+XL\_L

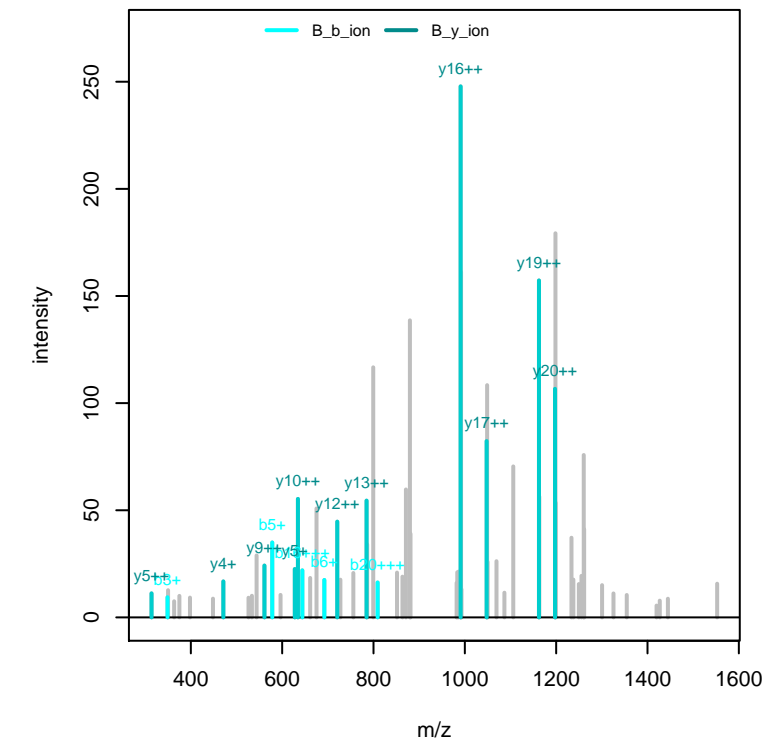



GKILFVGTK  
LKDLETQSQDGTDFDK

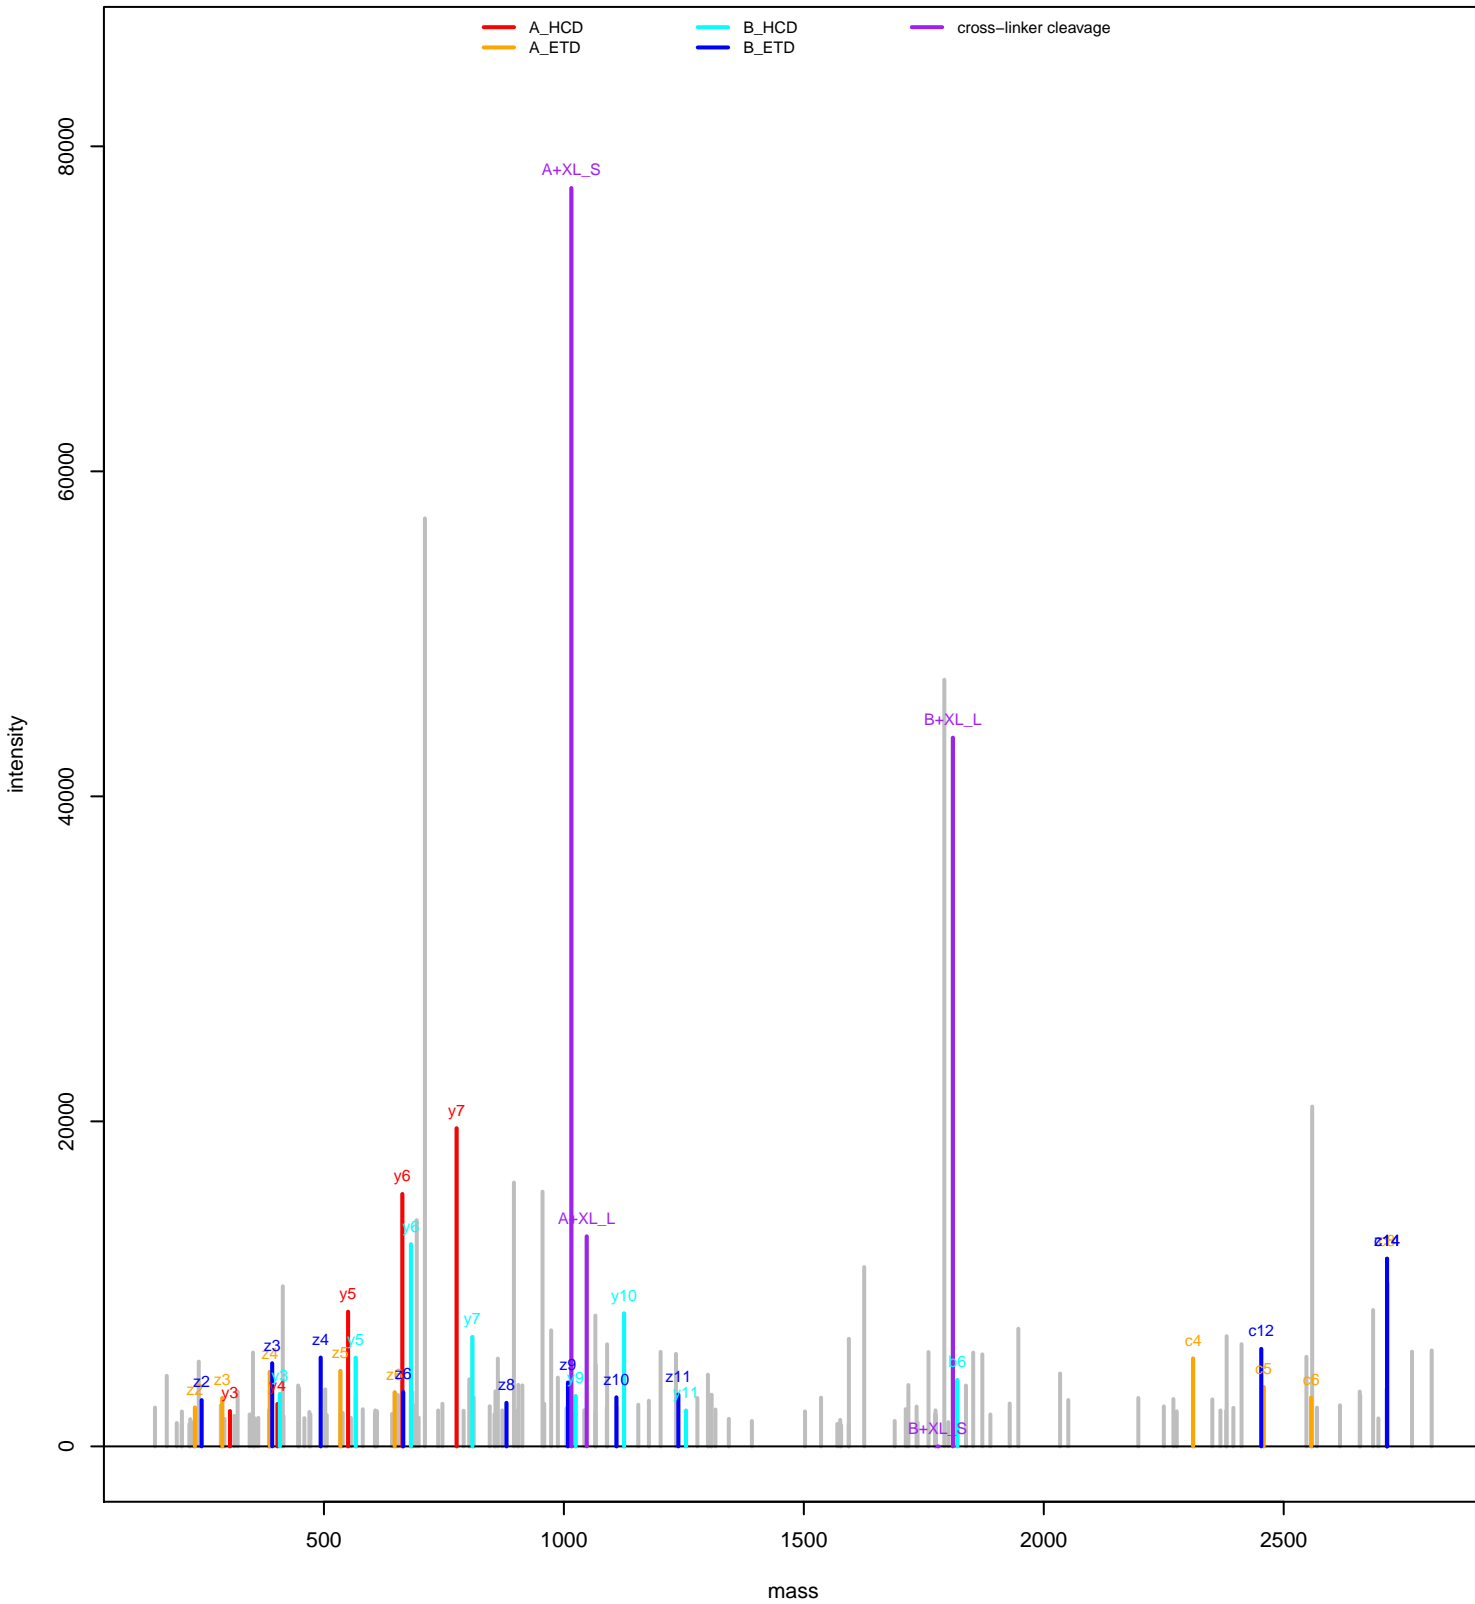

GKILFVGTK+XL\_S

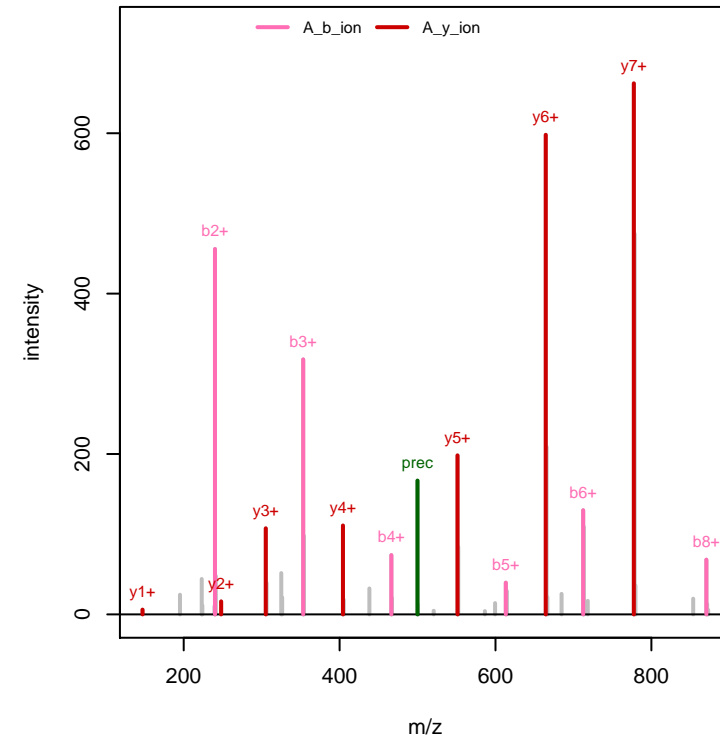

GKILFVGTK+XL\_L

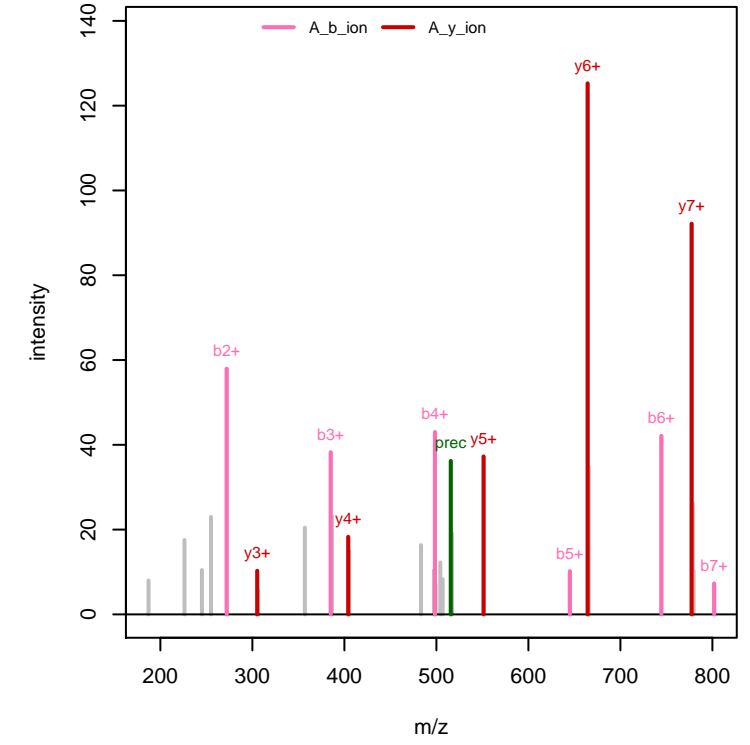

LKDLETQSQDGTDFDK+XL\_S

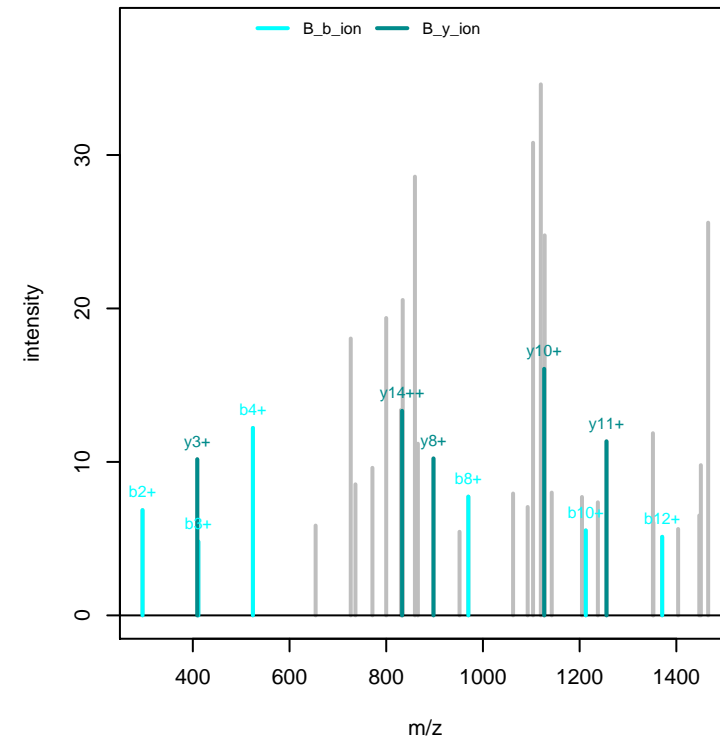

LKDLETQSQDGTDFDK+XL\_L

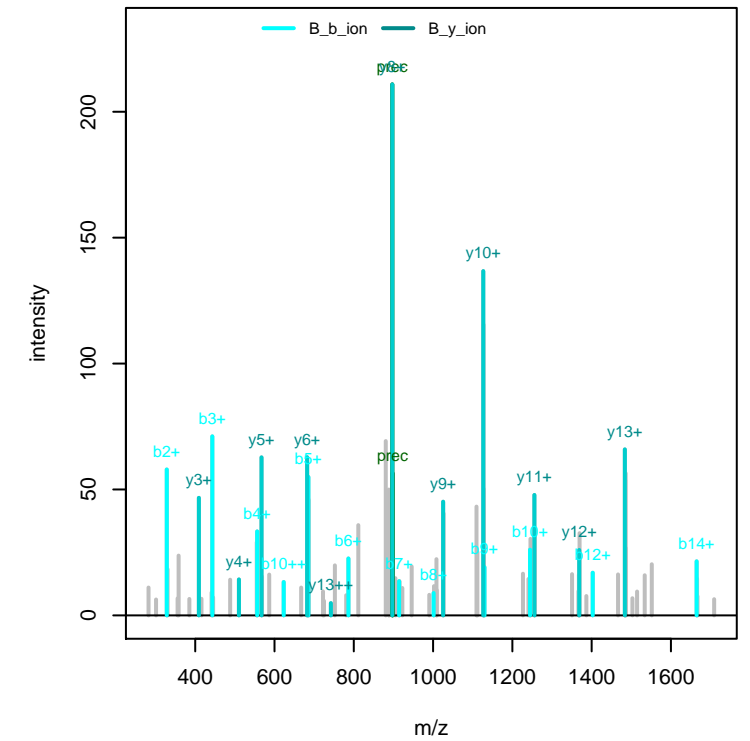

GNQLLPVSLVKR  
KTTLAPNTQTASPR

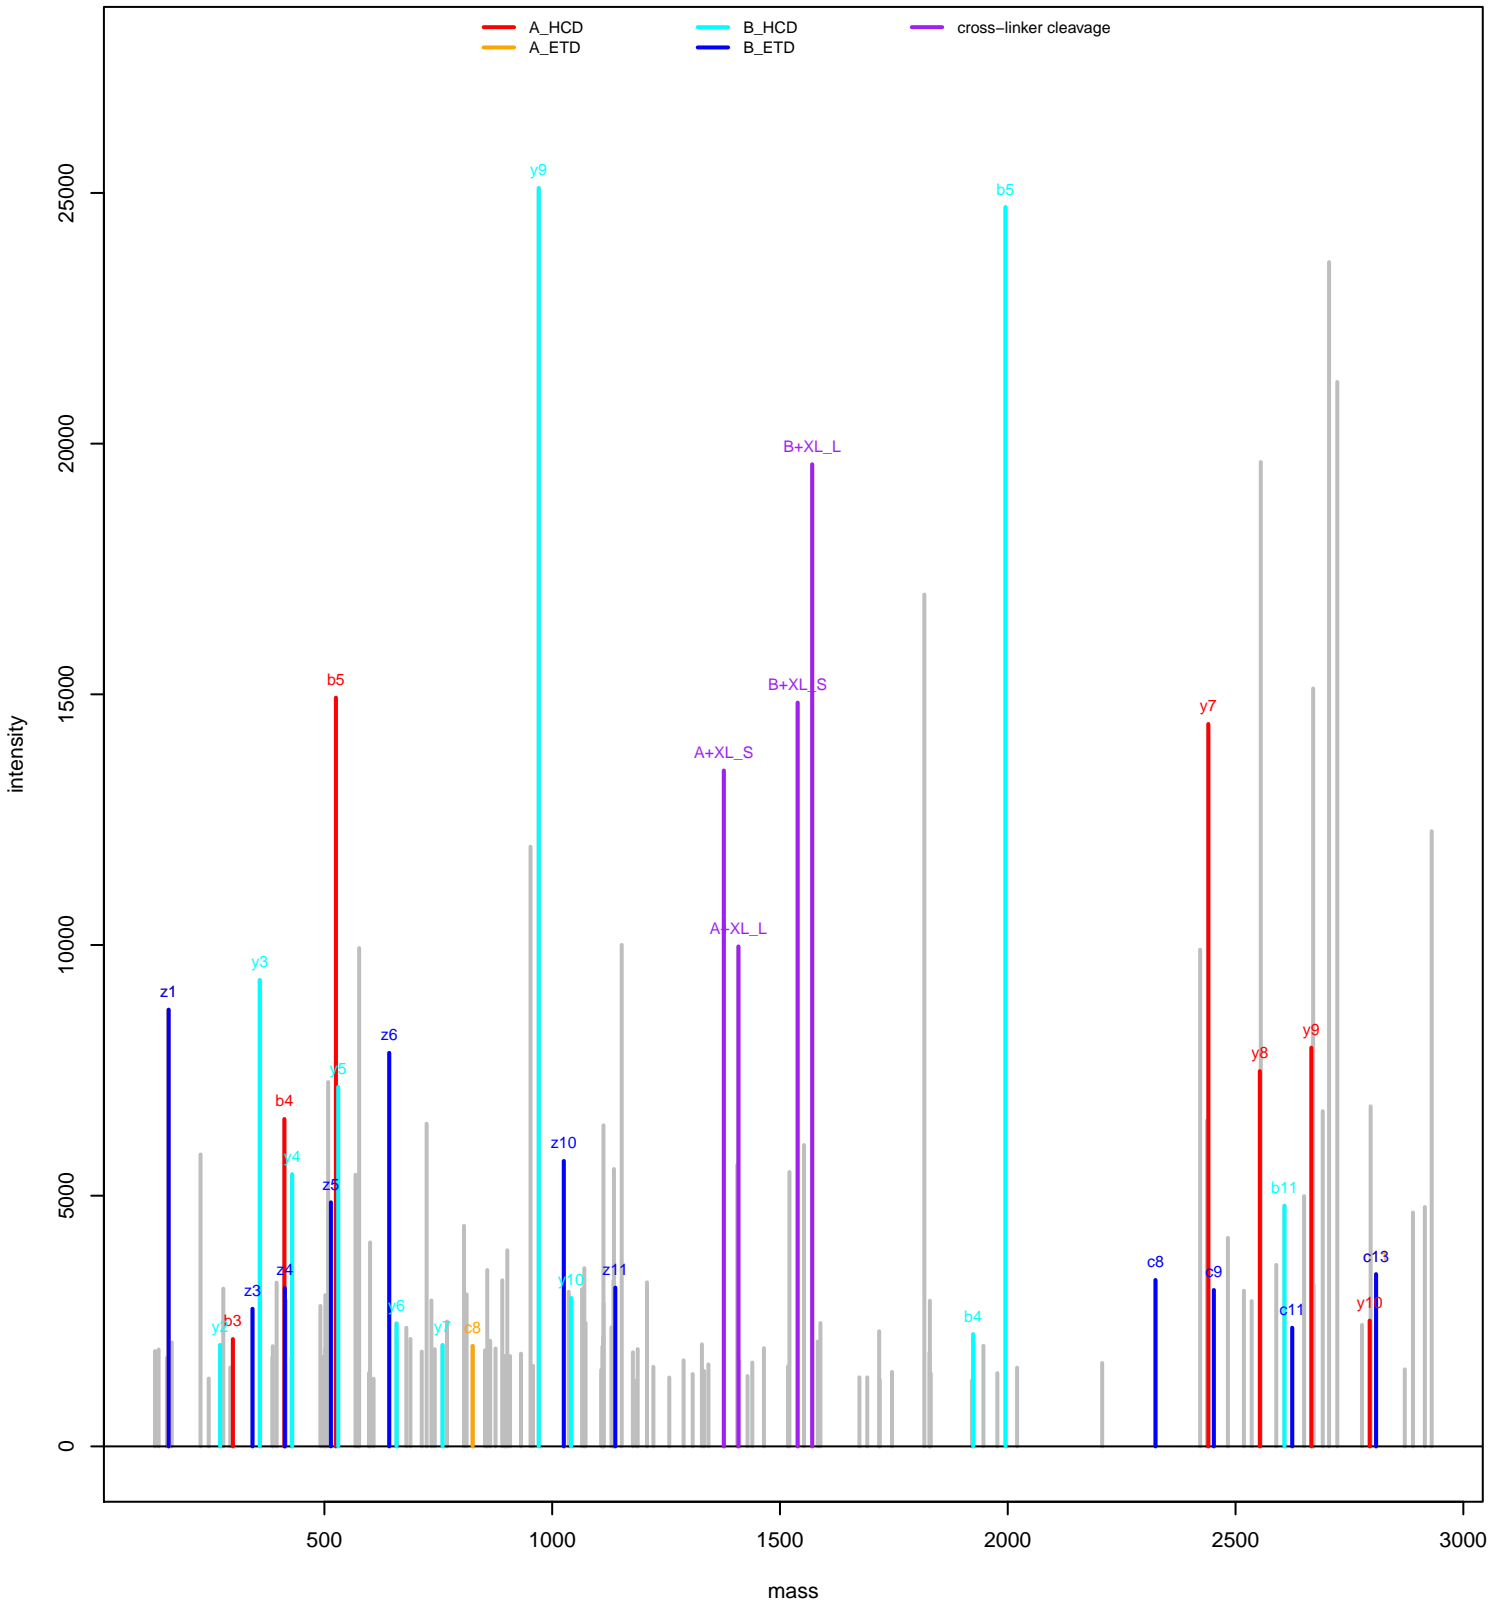

GNQLLPVSLVKR+XL\_S

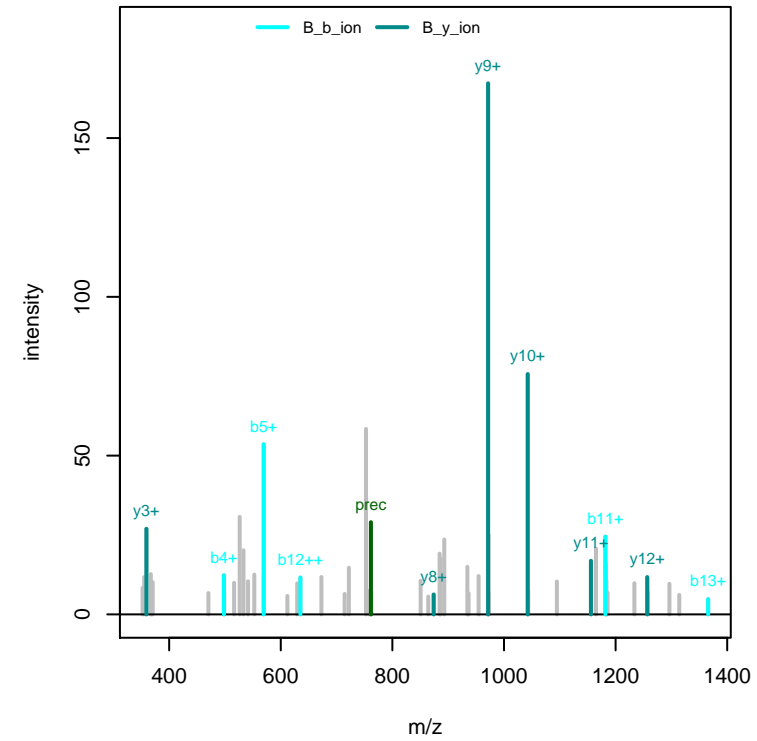

GNQLLPVSLVKR+XL\_L

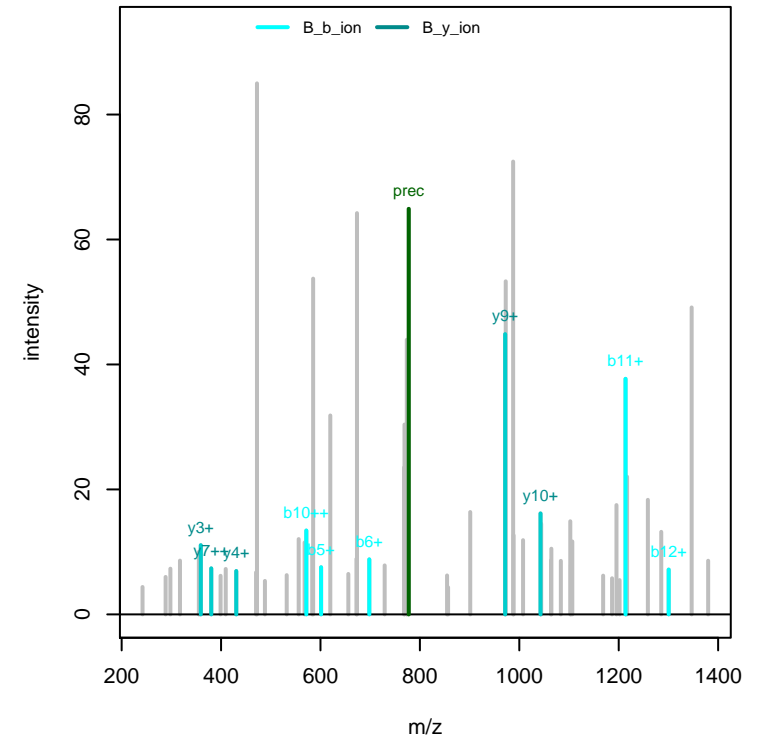

KTTLAPNTQTASPR+XL\_S

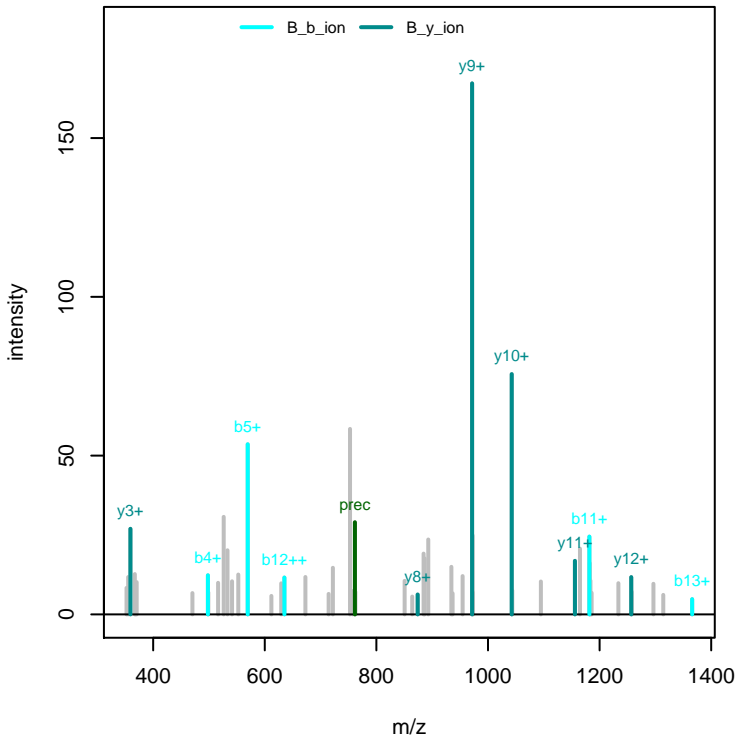

KTTLAPNTQTASPR+XL\_L



GVKSVR  
TLSVKIPAGVDTGDR

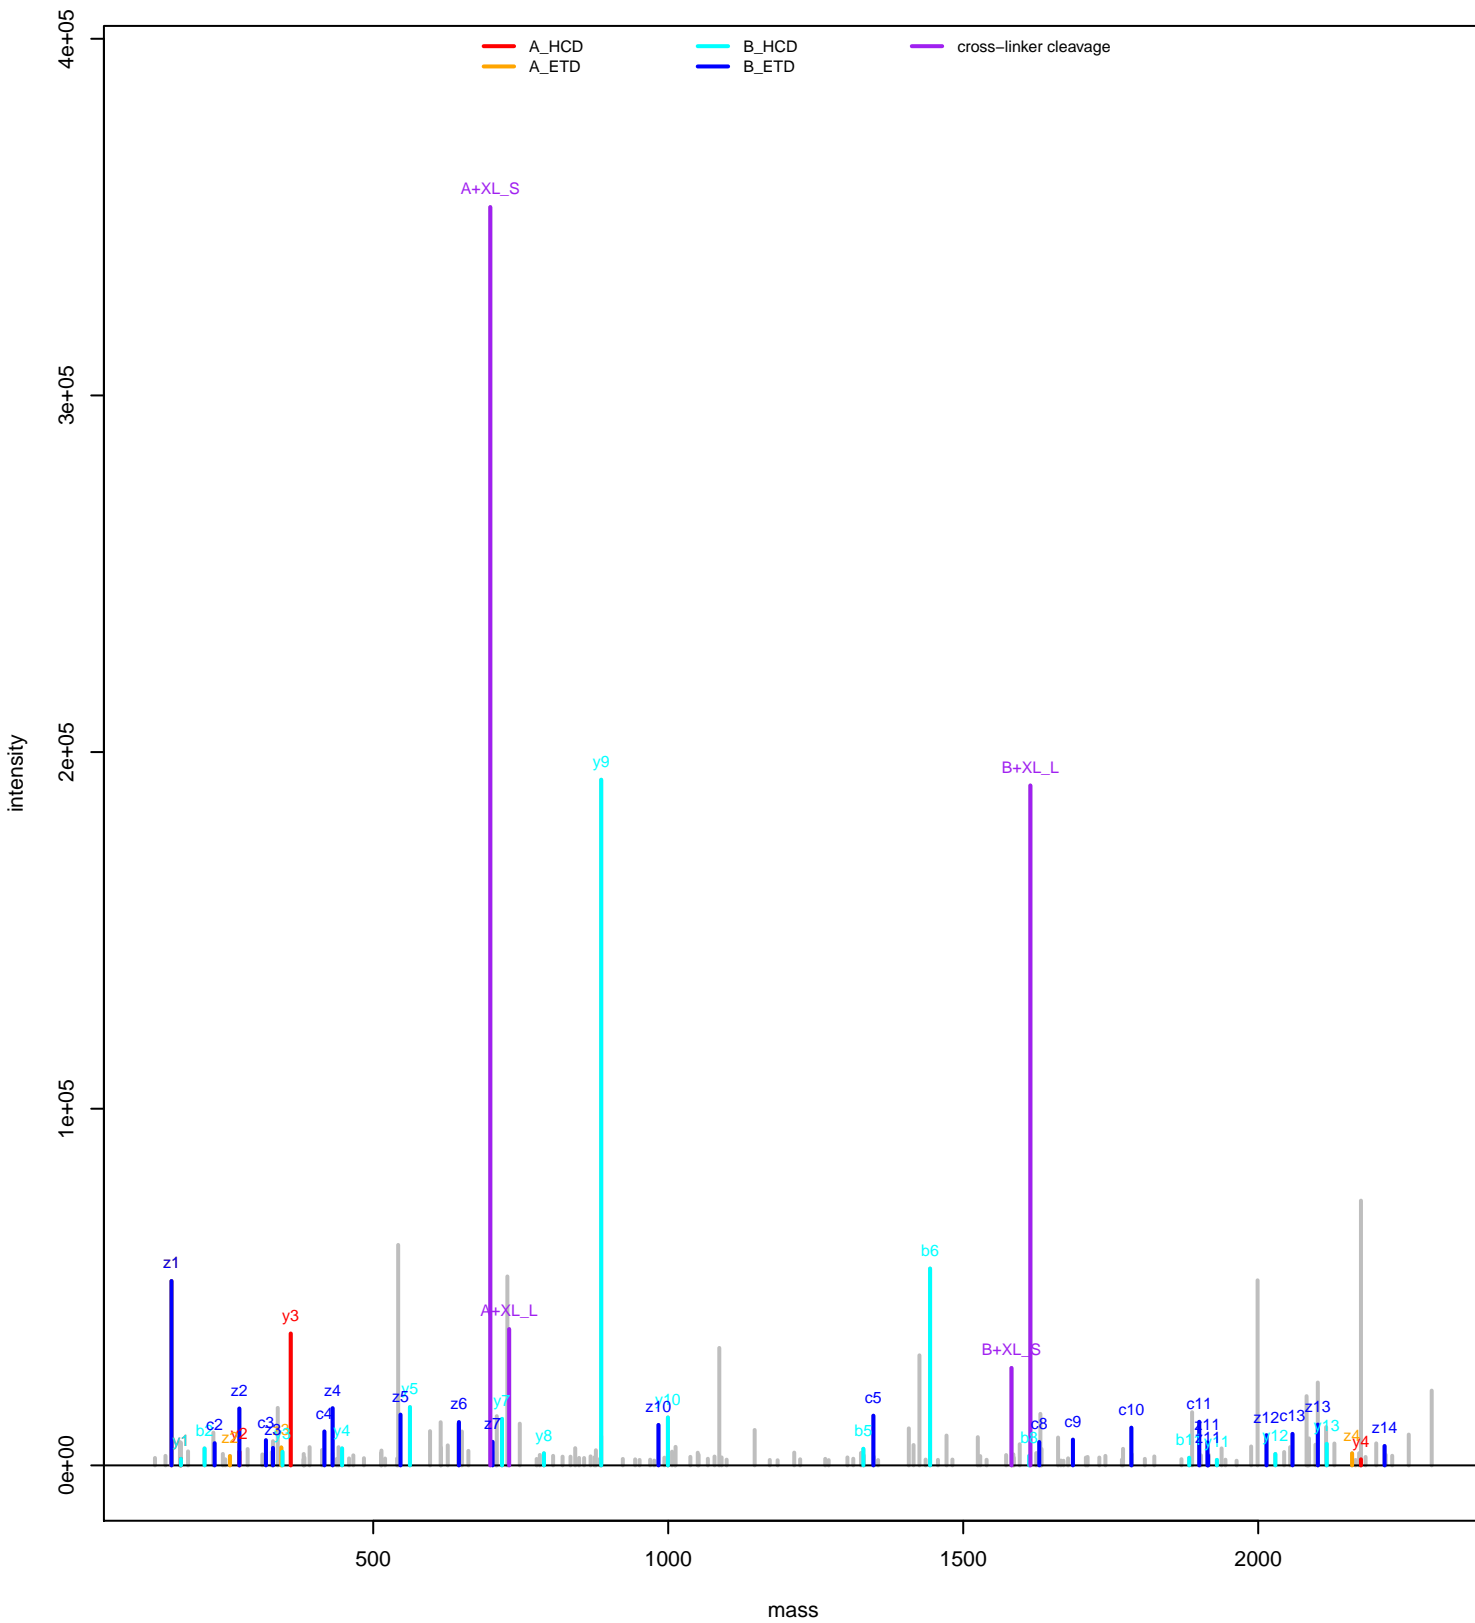

GVKSVR+XL\_S

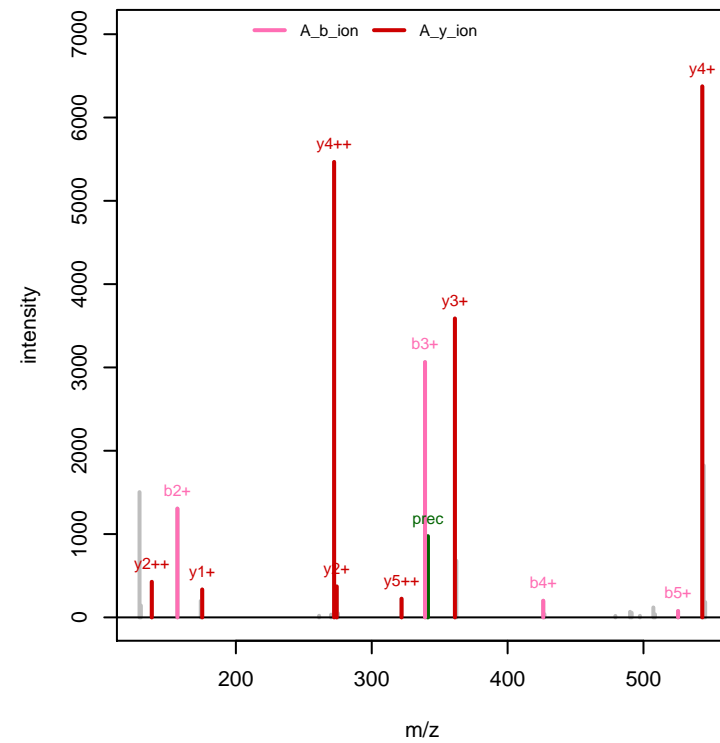

GVKSVR+XL\_L

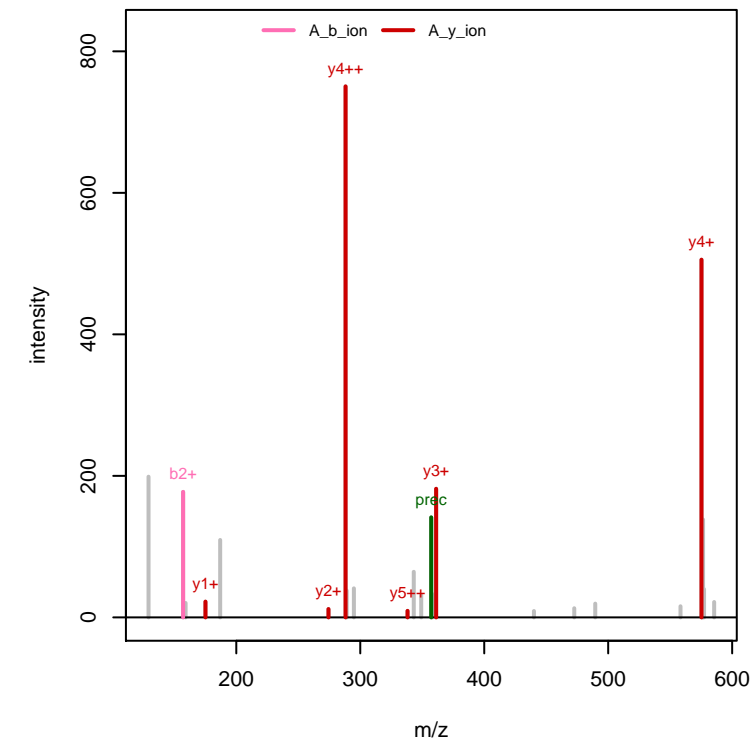

TLVSKIPAGVDTGDR+XL\_S

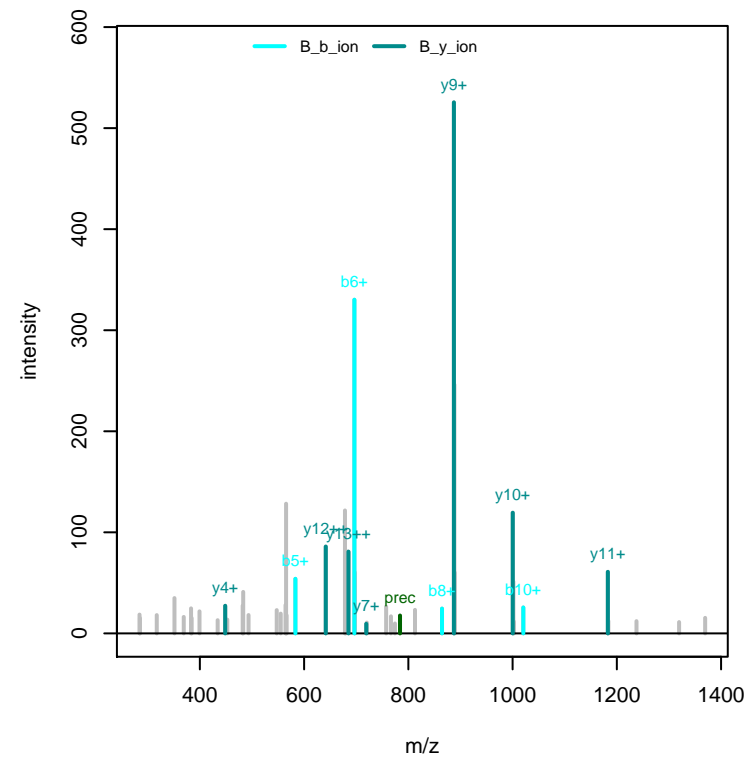

TLVSKIPAGVDTGDR+XL\_L

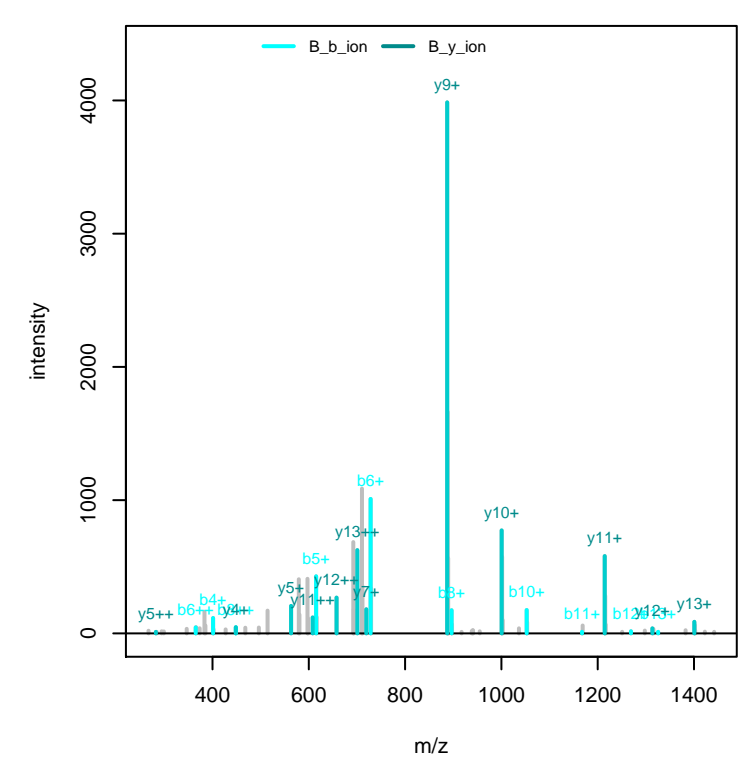

GAADGTNWKIDNK  
AYYVGTDSKESGIIQGDLIAK

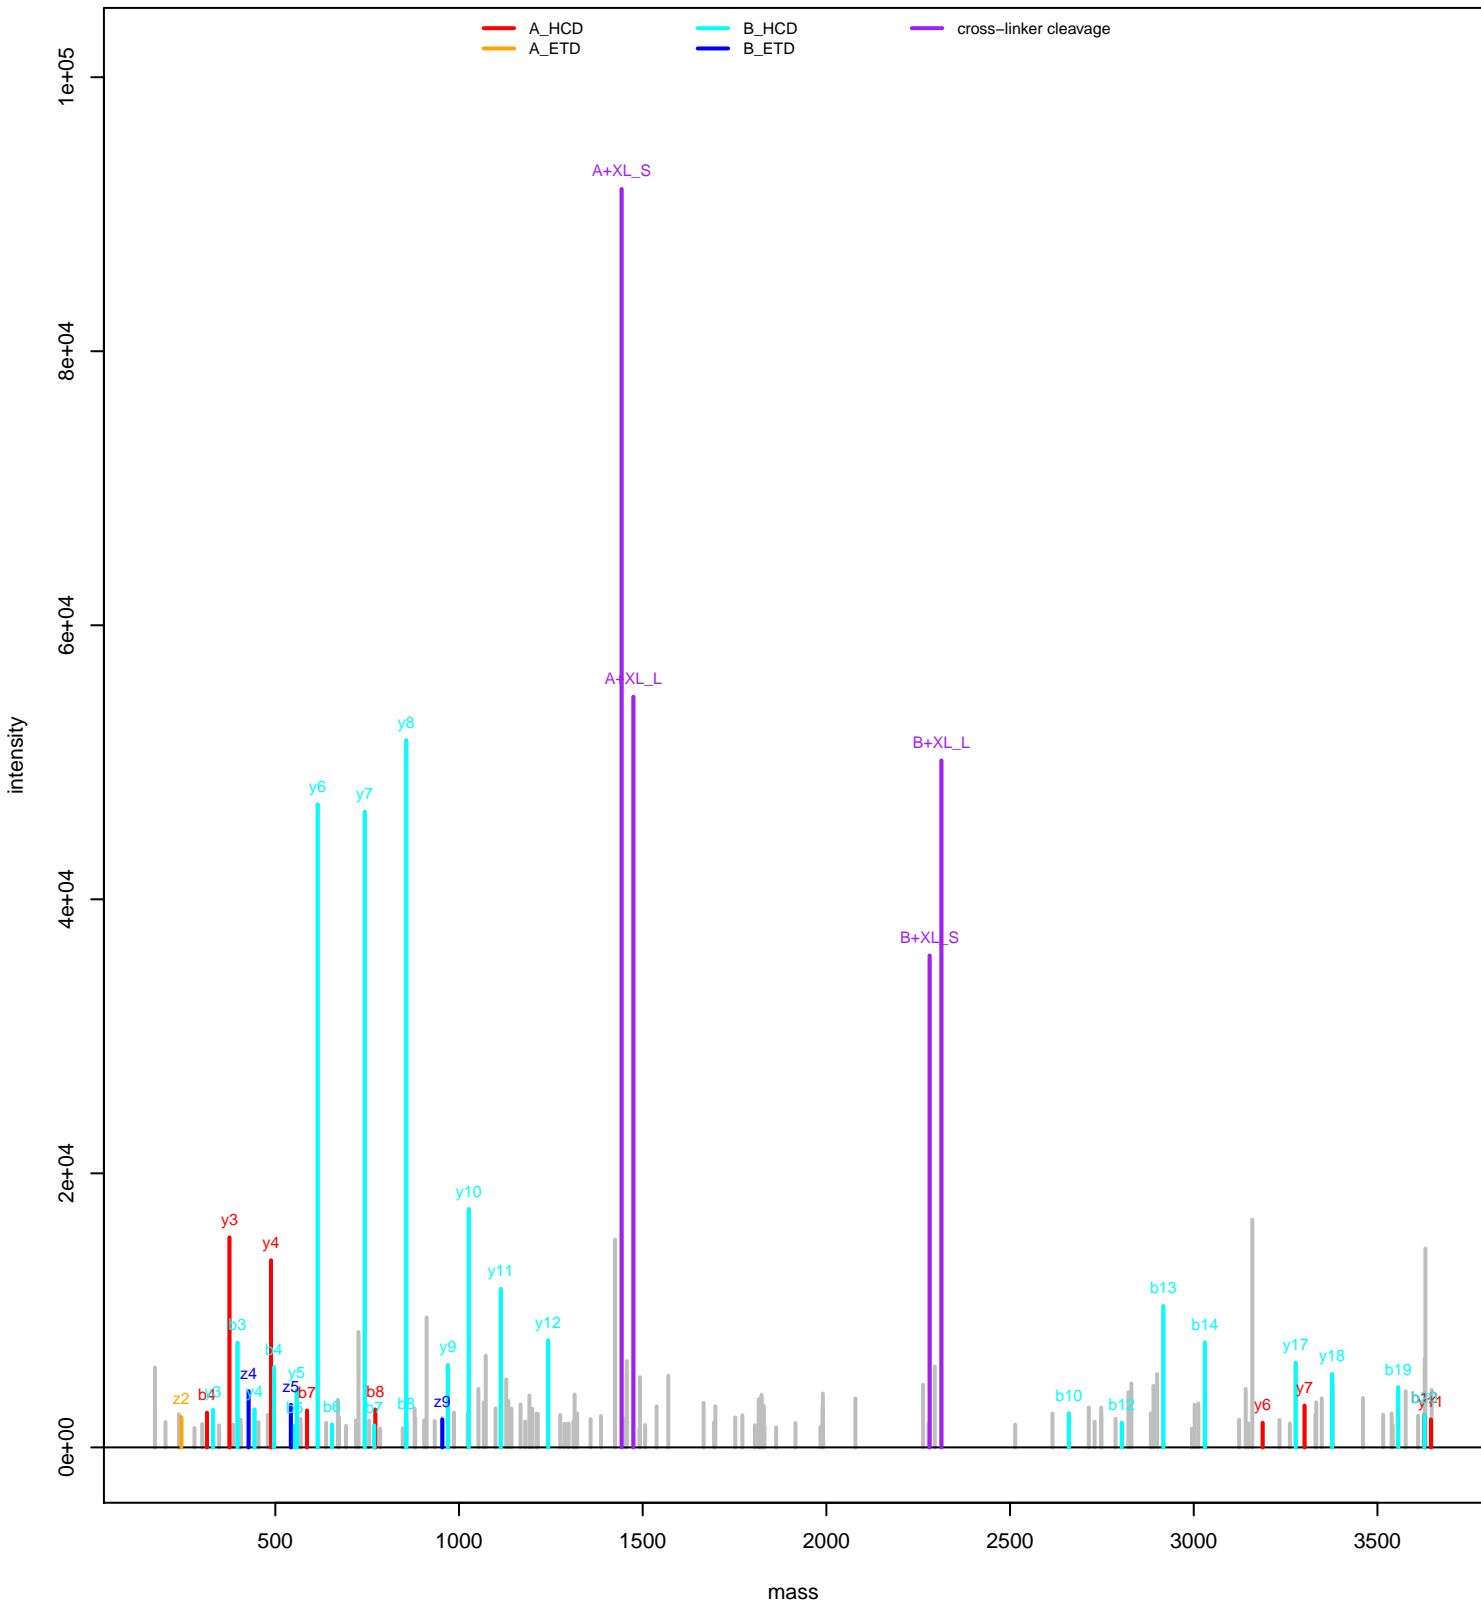

GAADGTNWKIDNK+XL\_S

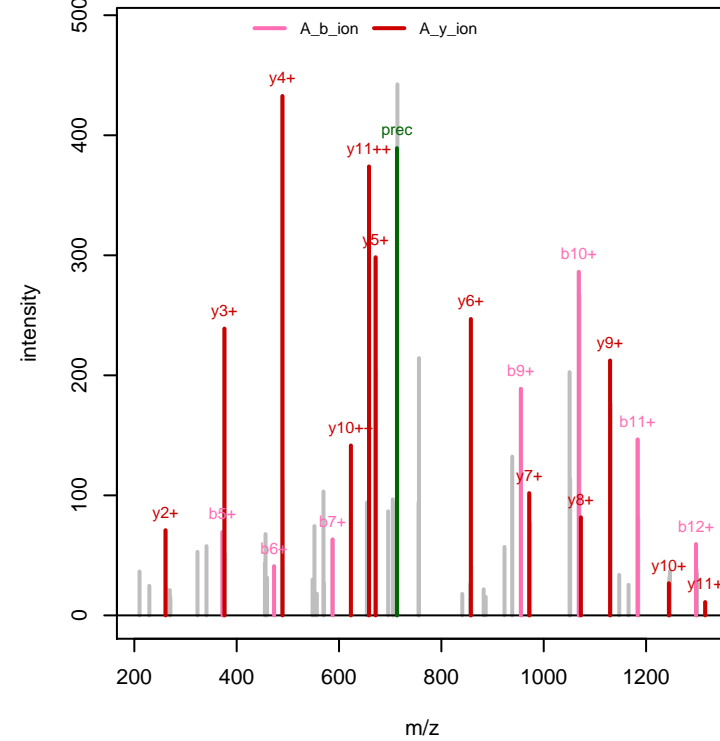

GAADGTNWKIDNK+XL\_L

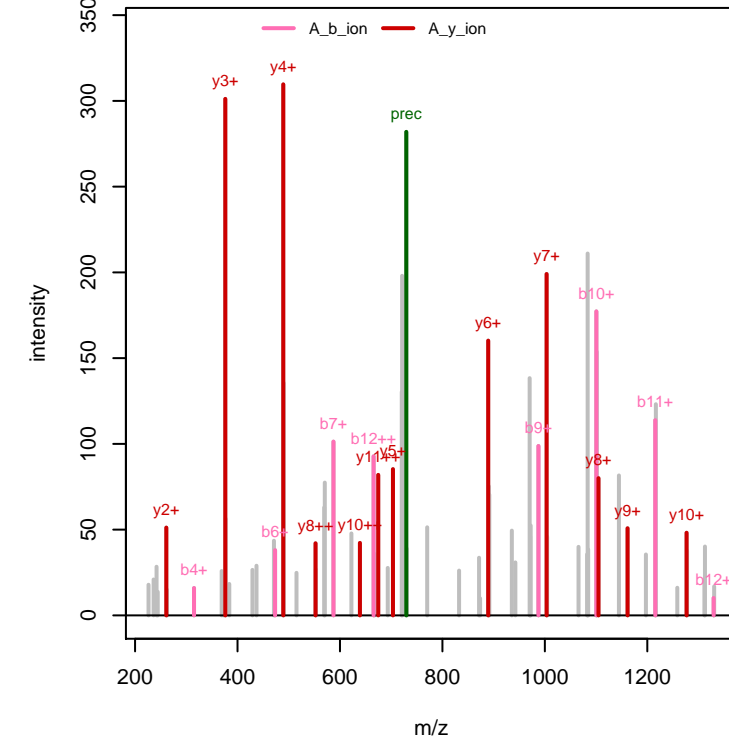

AYYVGTDSKESGIIQGDLIAK+XL\_S

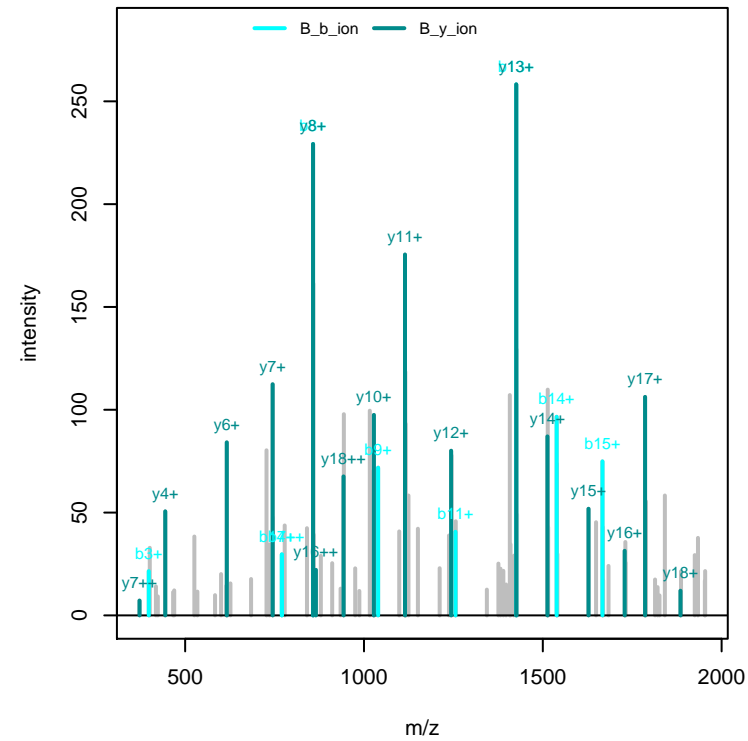

AYYVGTDSKESGIIQGDLIAK+XL\_L

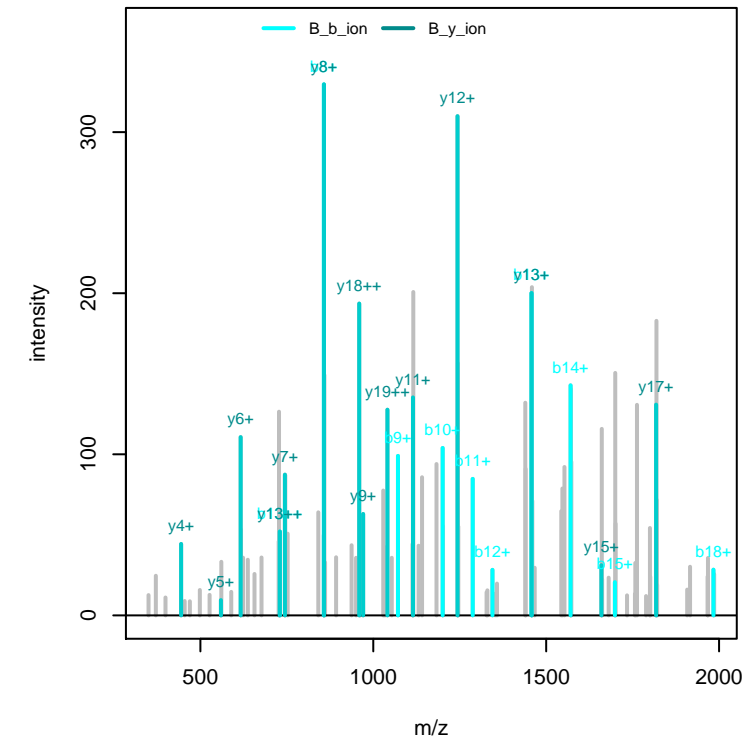

AVAAGMNPMDLKR  
SFGAPTITKDGVSVAR

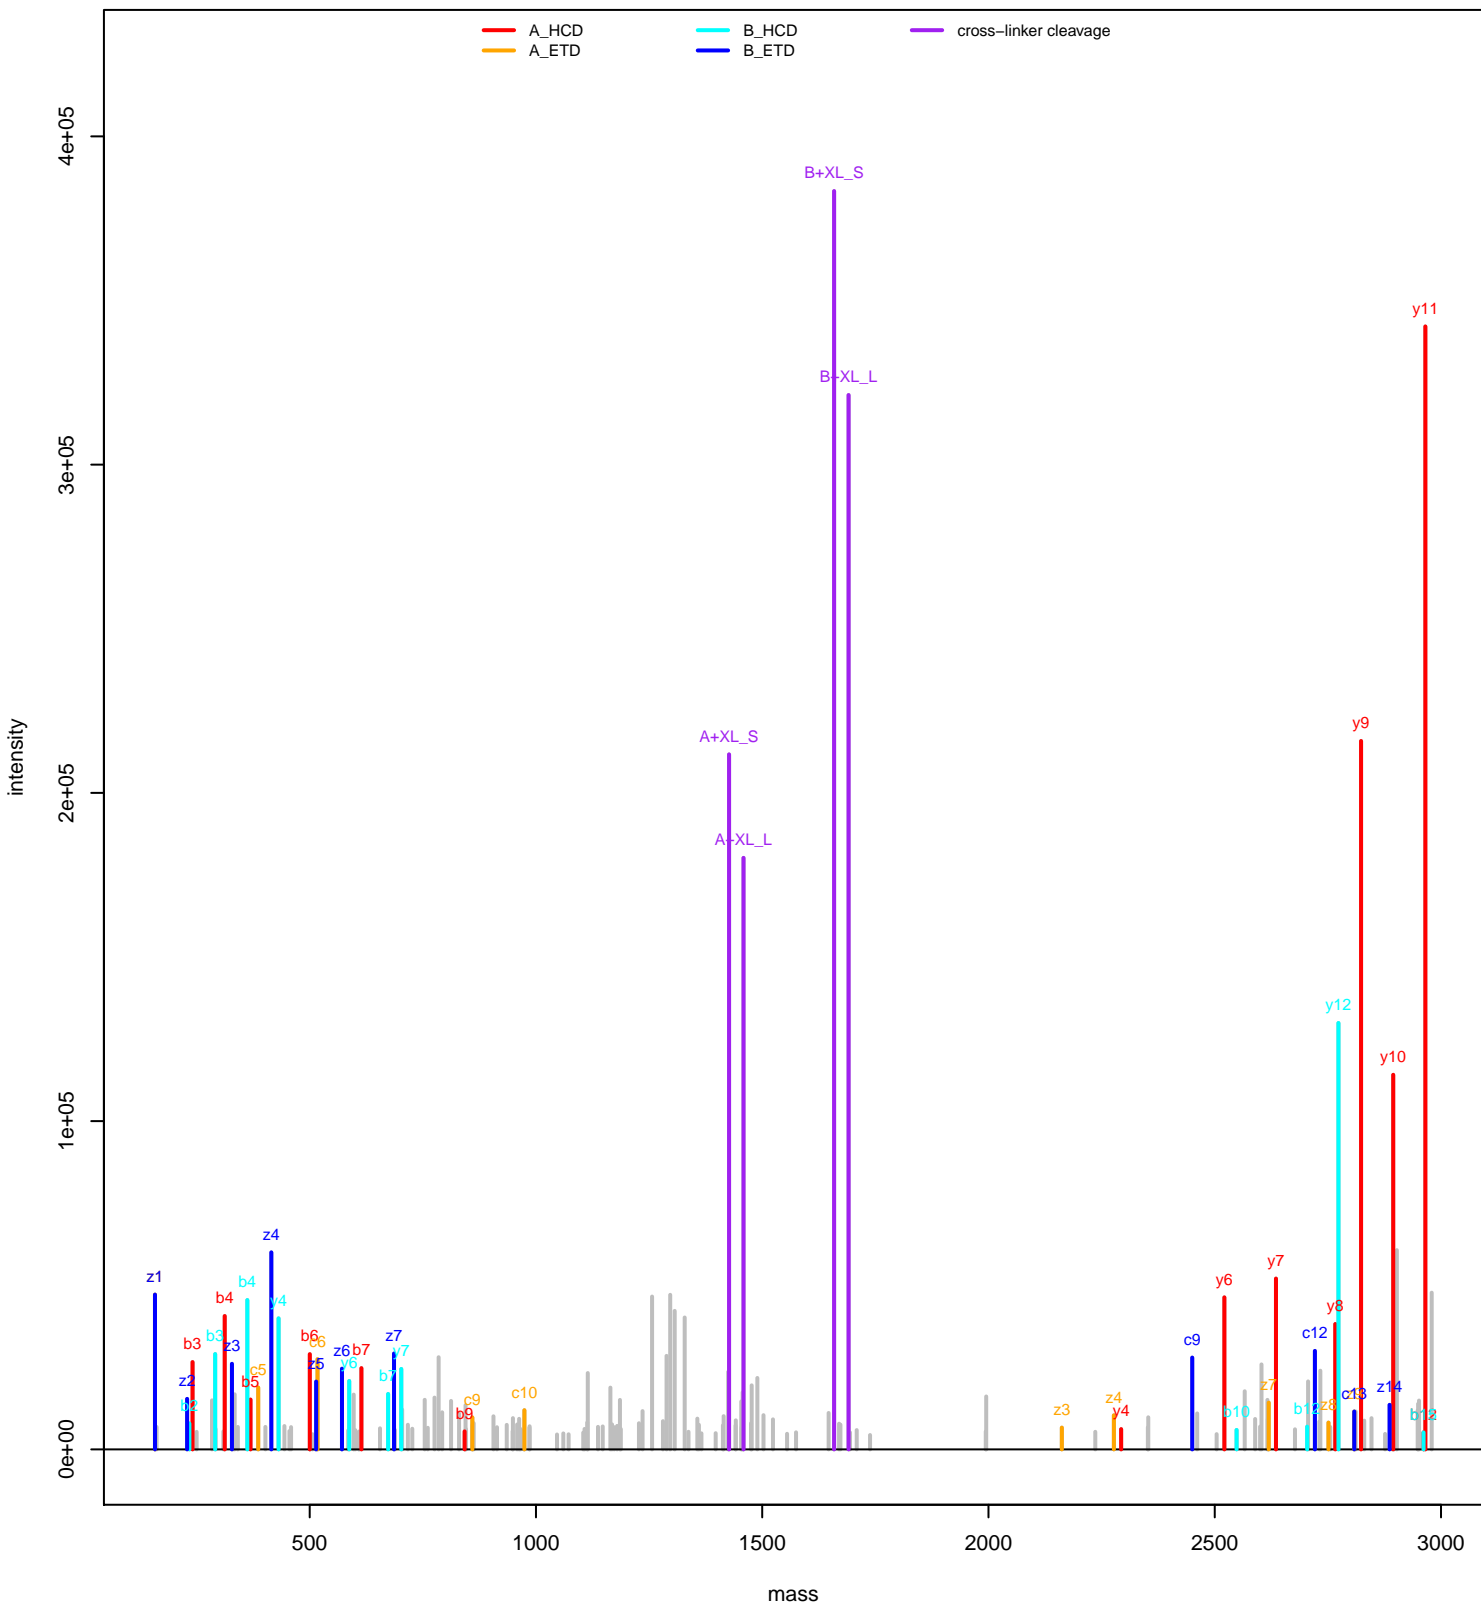

AVAAGMNPMDLKR+XL\_S

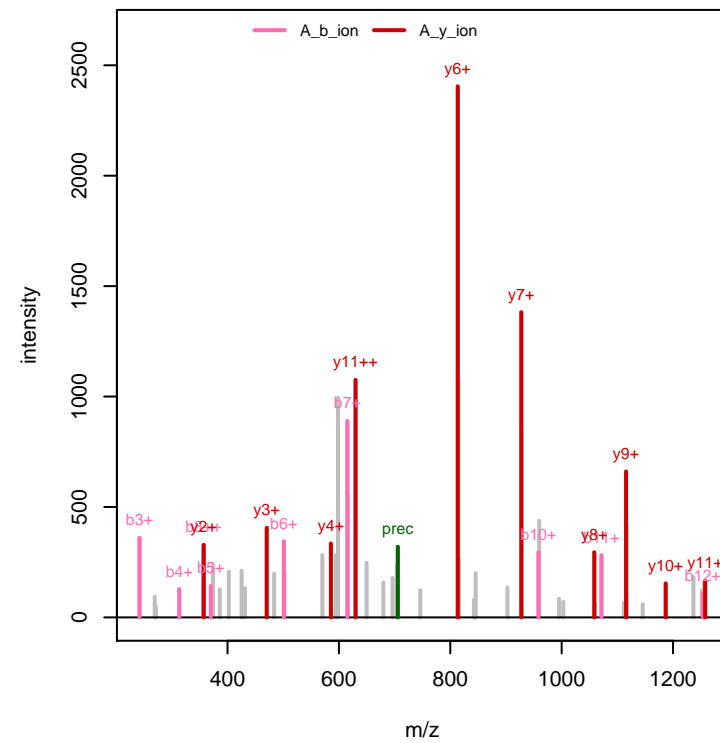

AVAAGMNPMDLKR+XL\_L

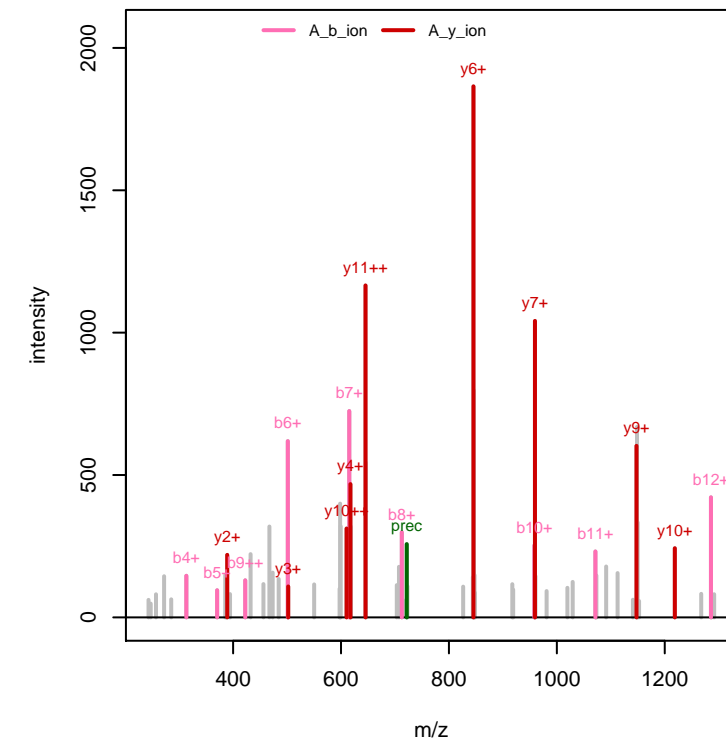

SFGAPTITKDGVSVAR+XL\_S

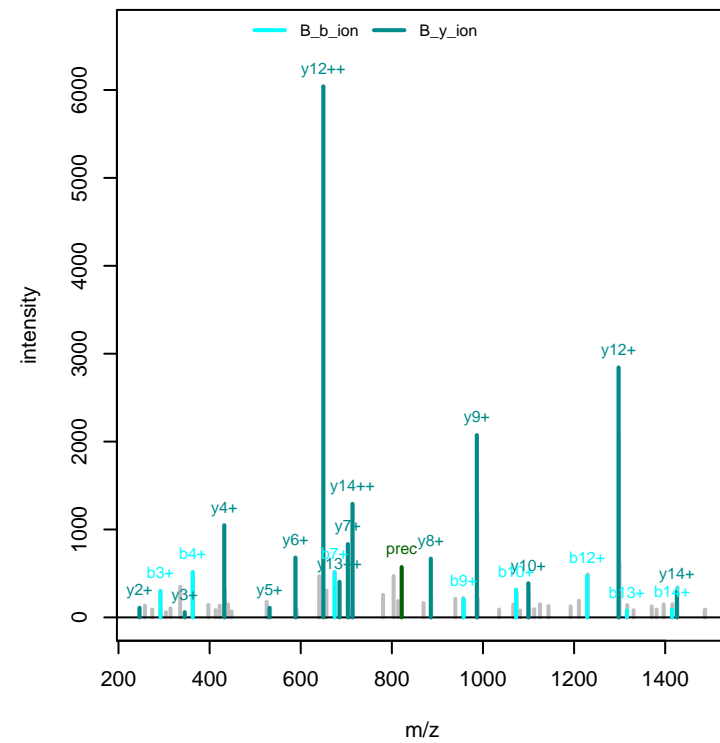

SFGAPTITKDGVSVAR+XL\_L

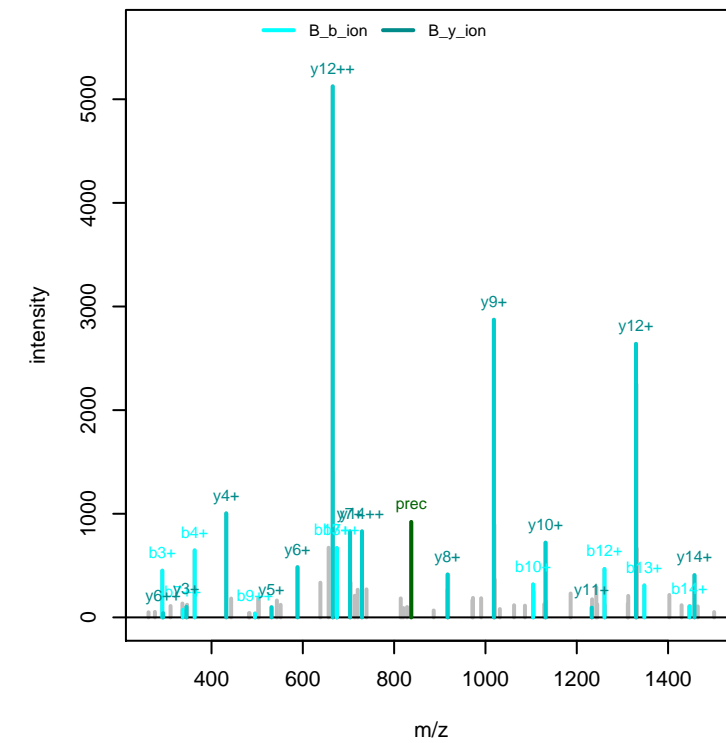

ILVYTVNKPQR  
GGGKLAPENTLASIDVGAK

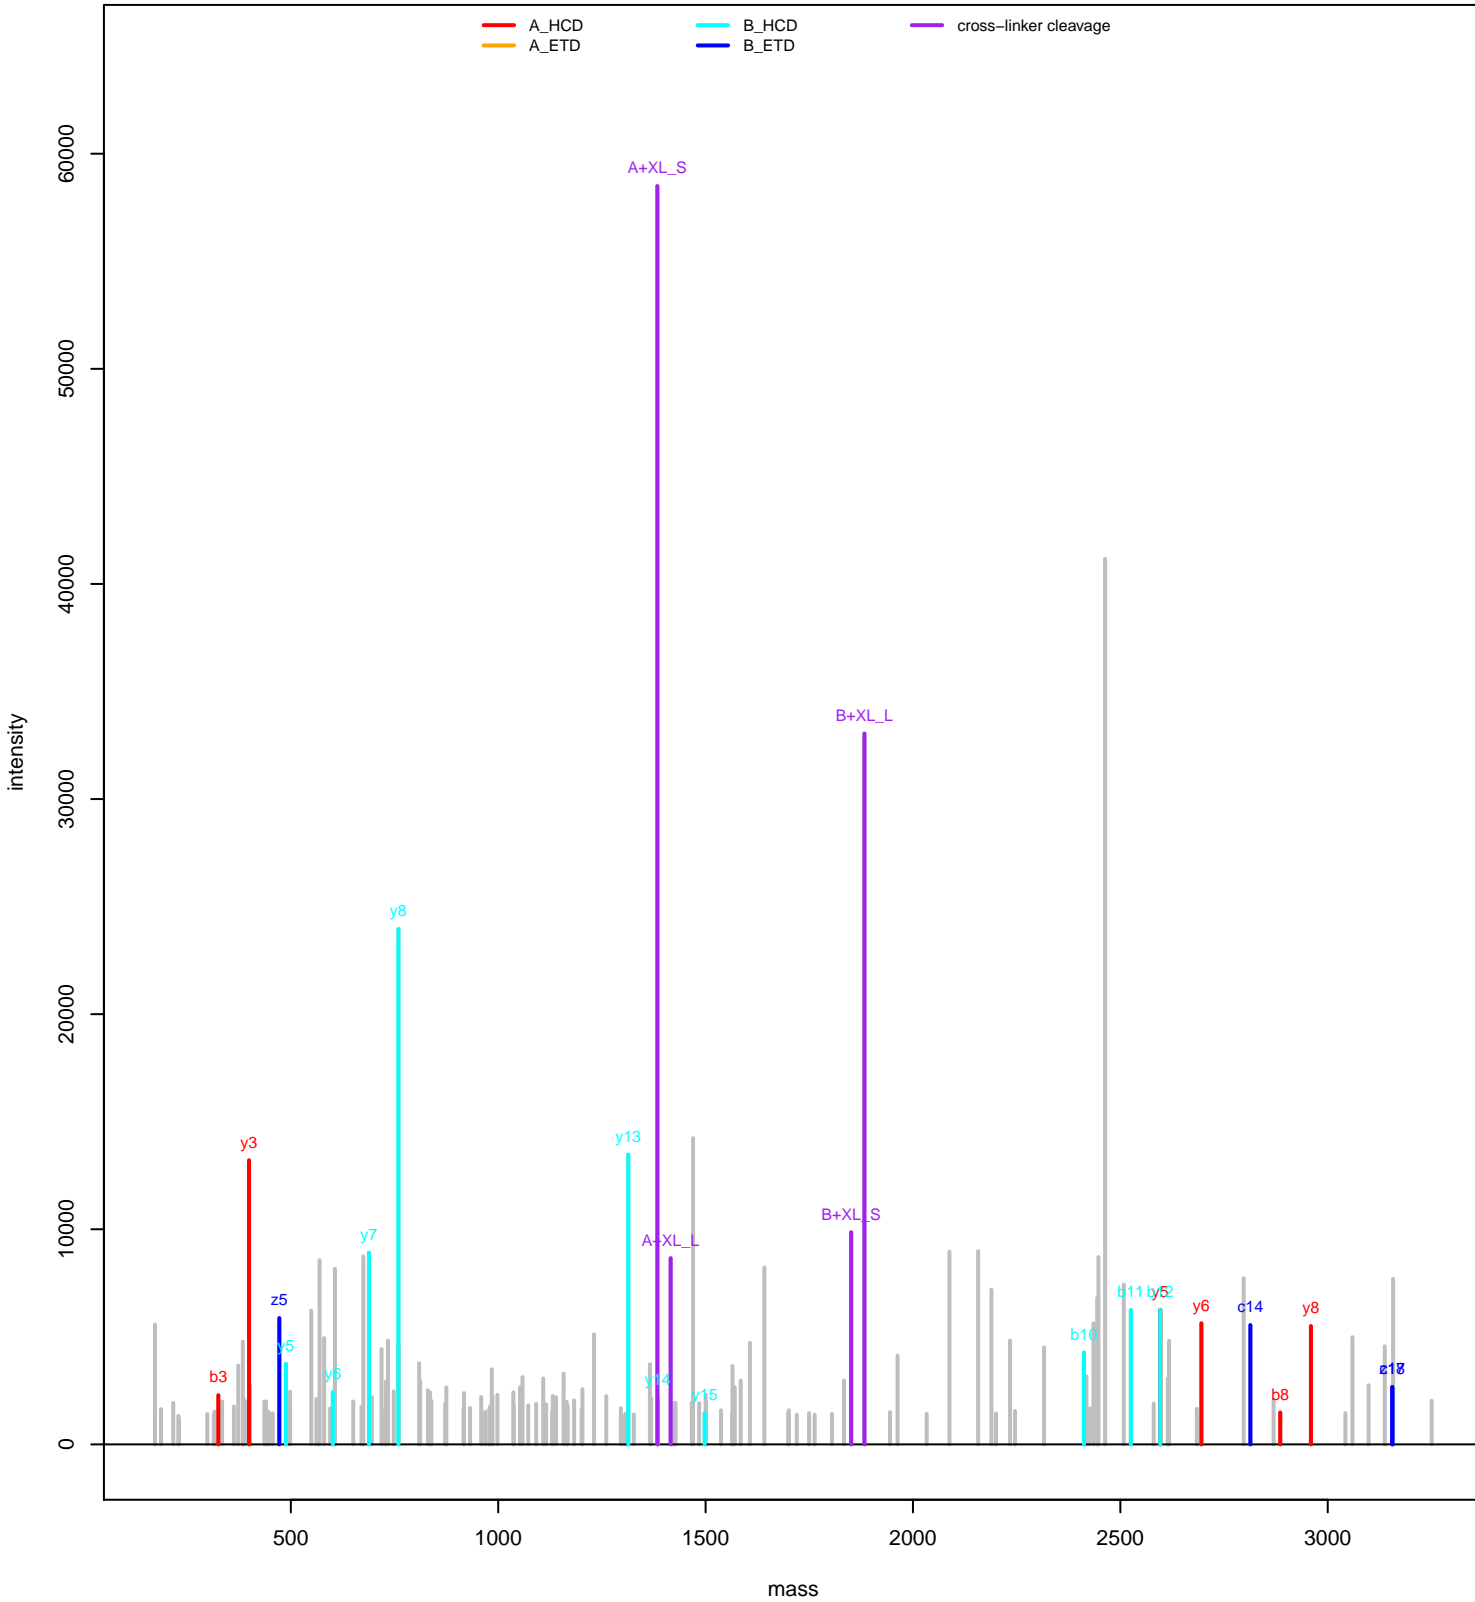

ILVYTVNKPQR+XL\_S

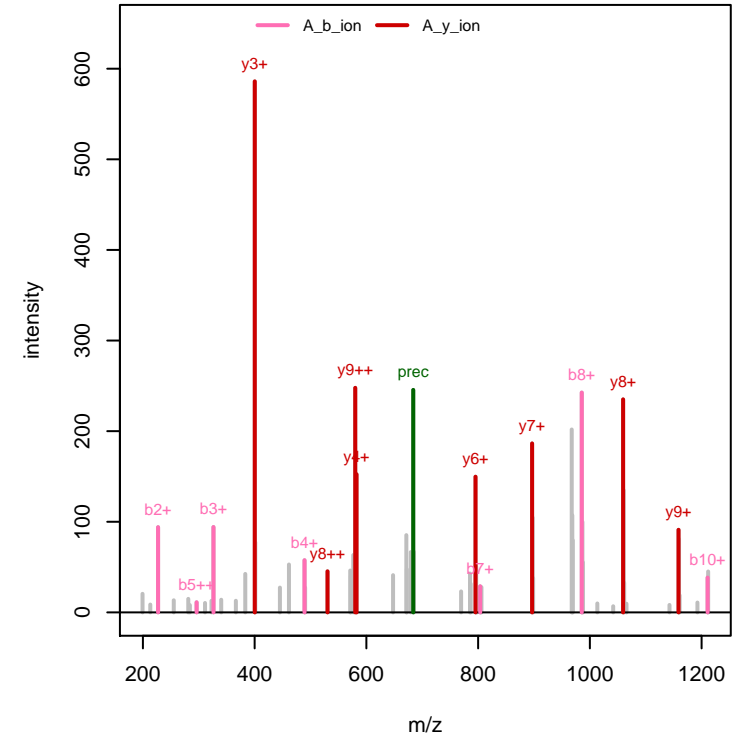

ILVYTVNKPQR+XL\_L

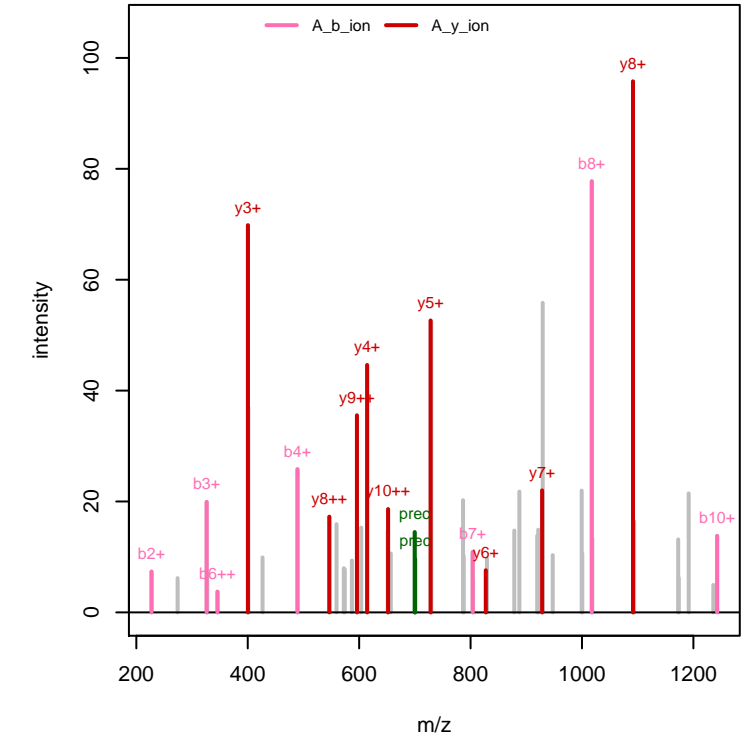

GGGKLAPENTLASIDVGAK+XL\_S

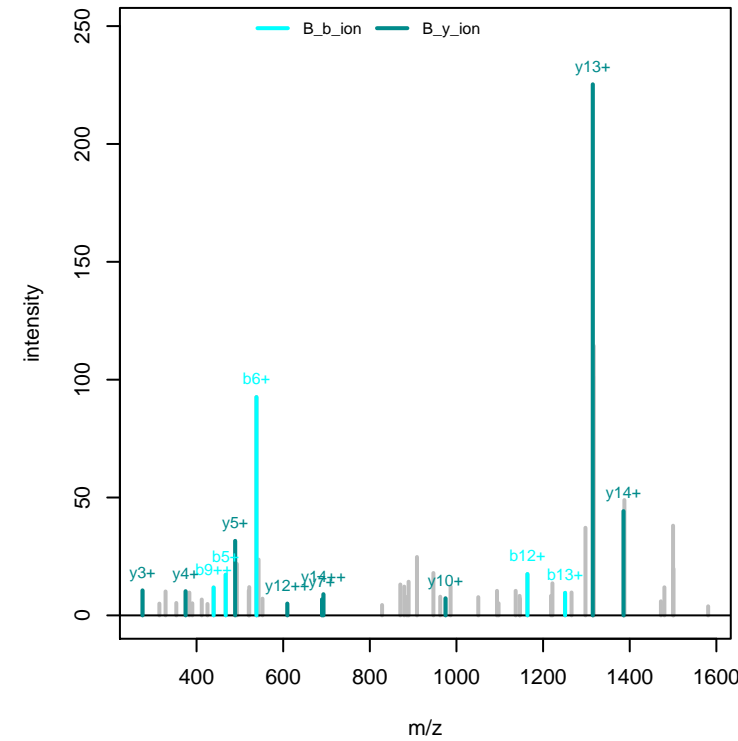

GGGKLAPENTLASIDVGAK+XL\_L

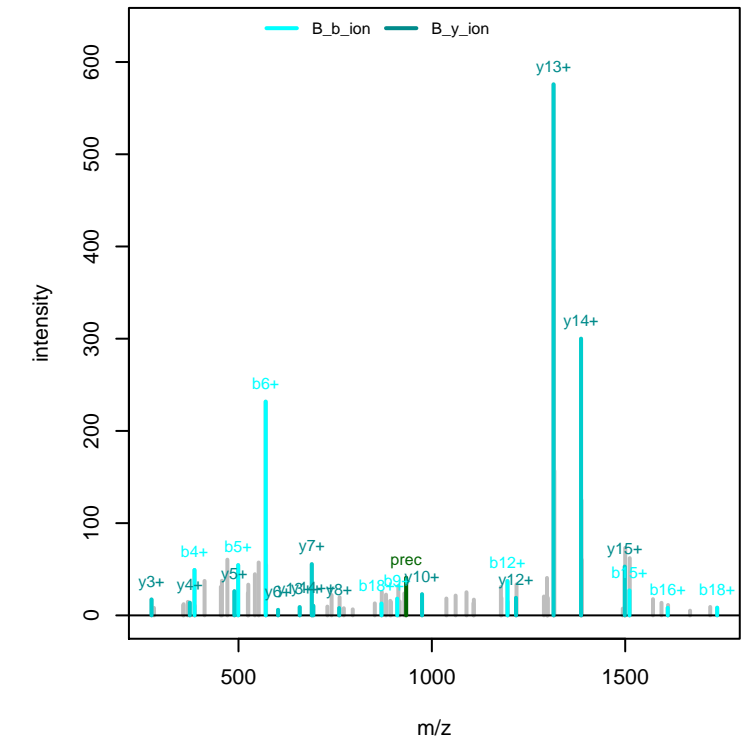



SSAQKVR  
VSQALDILTYTNKK

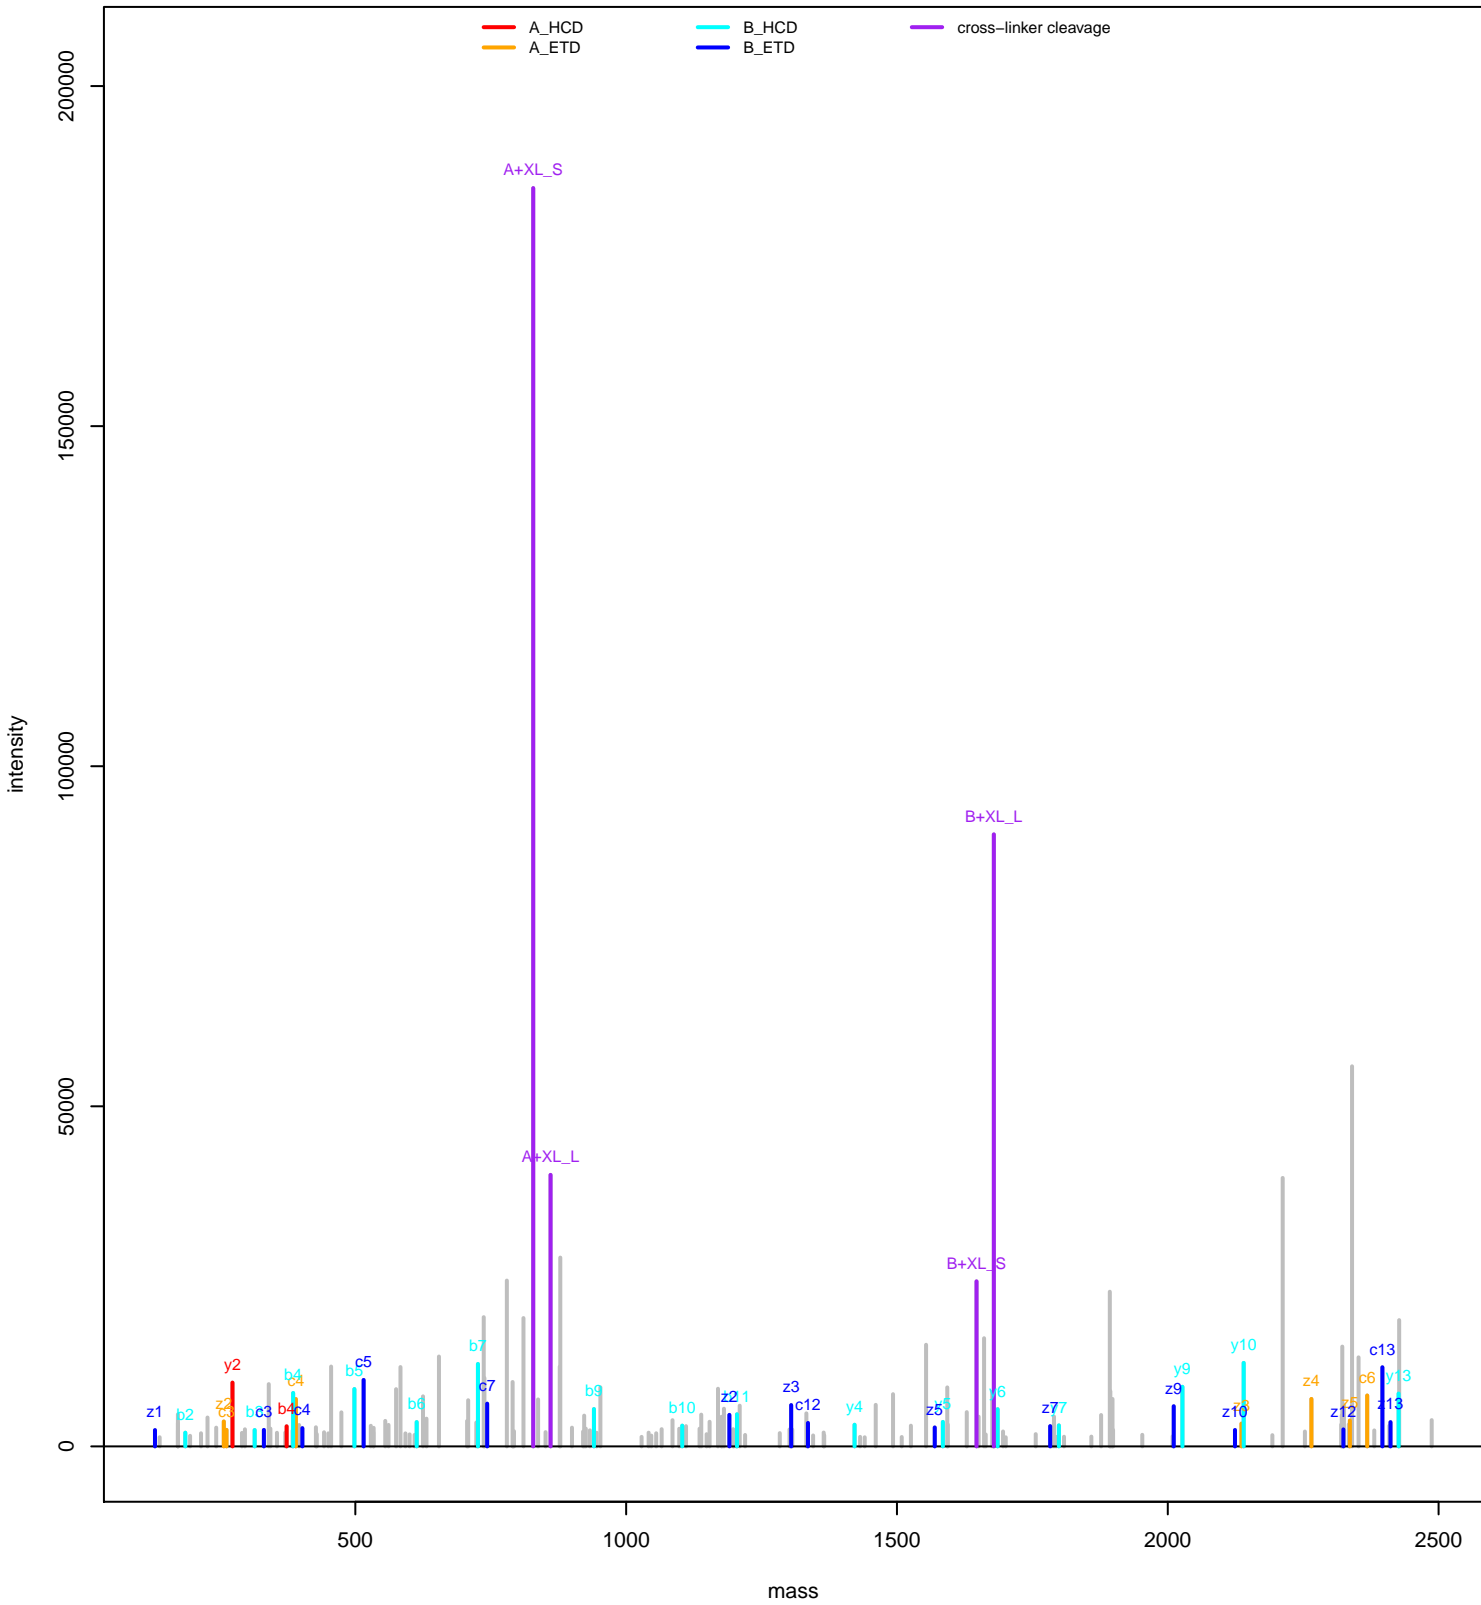

SSAQKVR+XL\_S

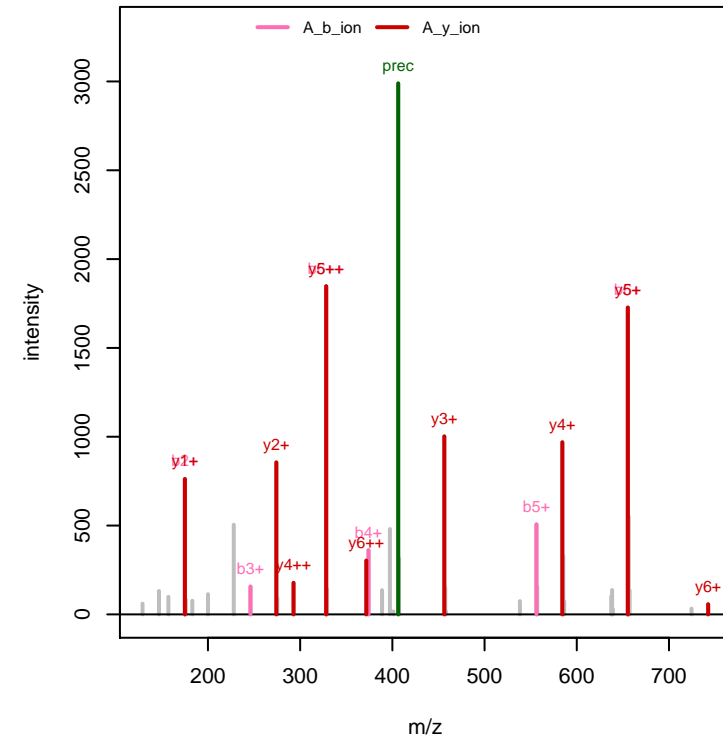

SSAQKVR+XL\_L

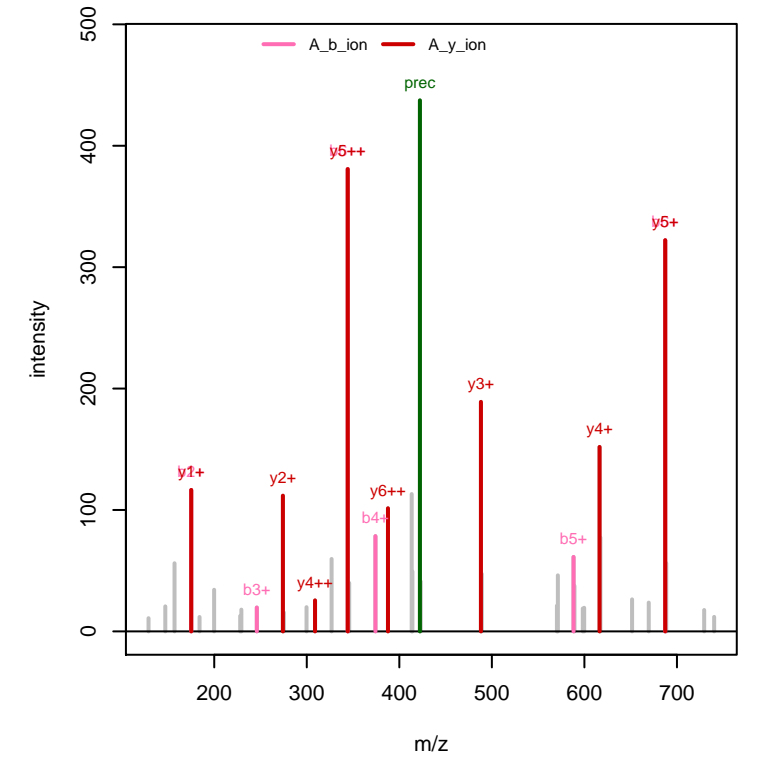

VSQALDILTYTNKK+XL\_S

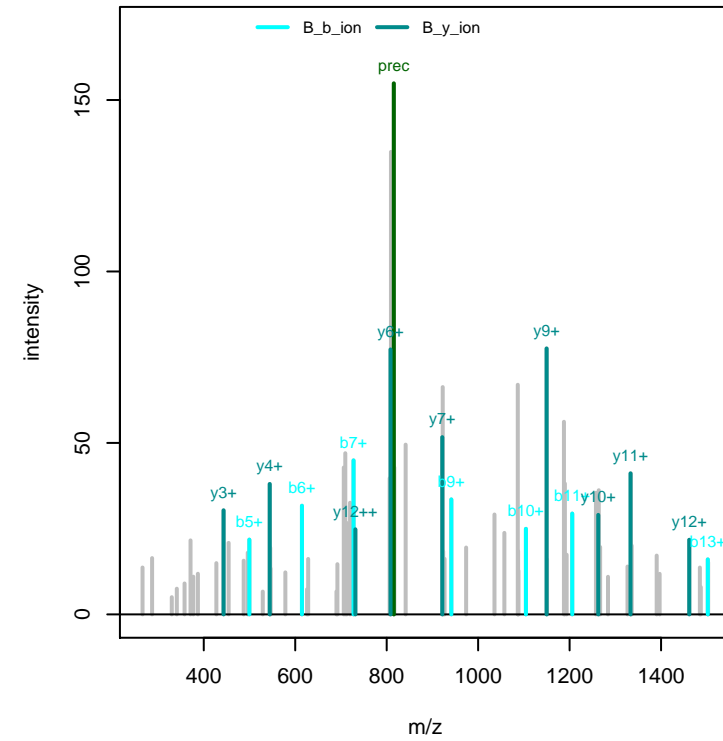

VSQALDILTYTNKK+XL\_L

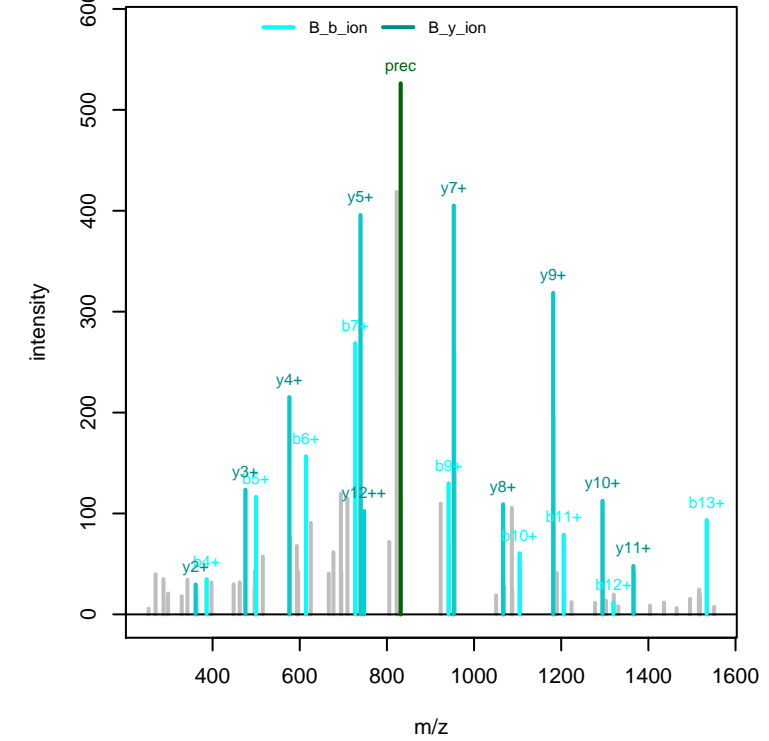



**AELAKLK  
KIIRNTNFEDAK**

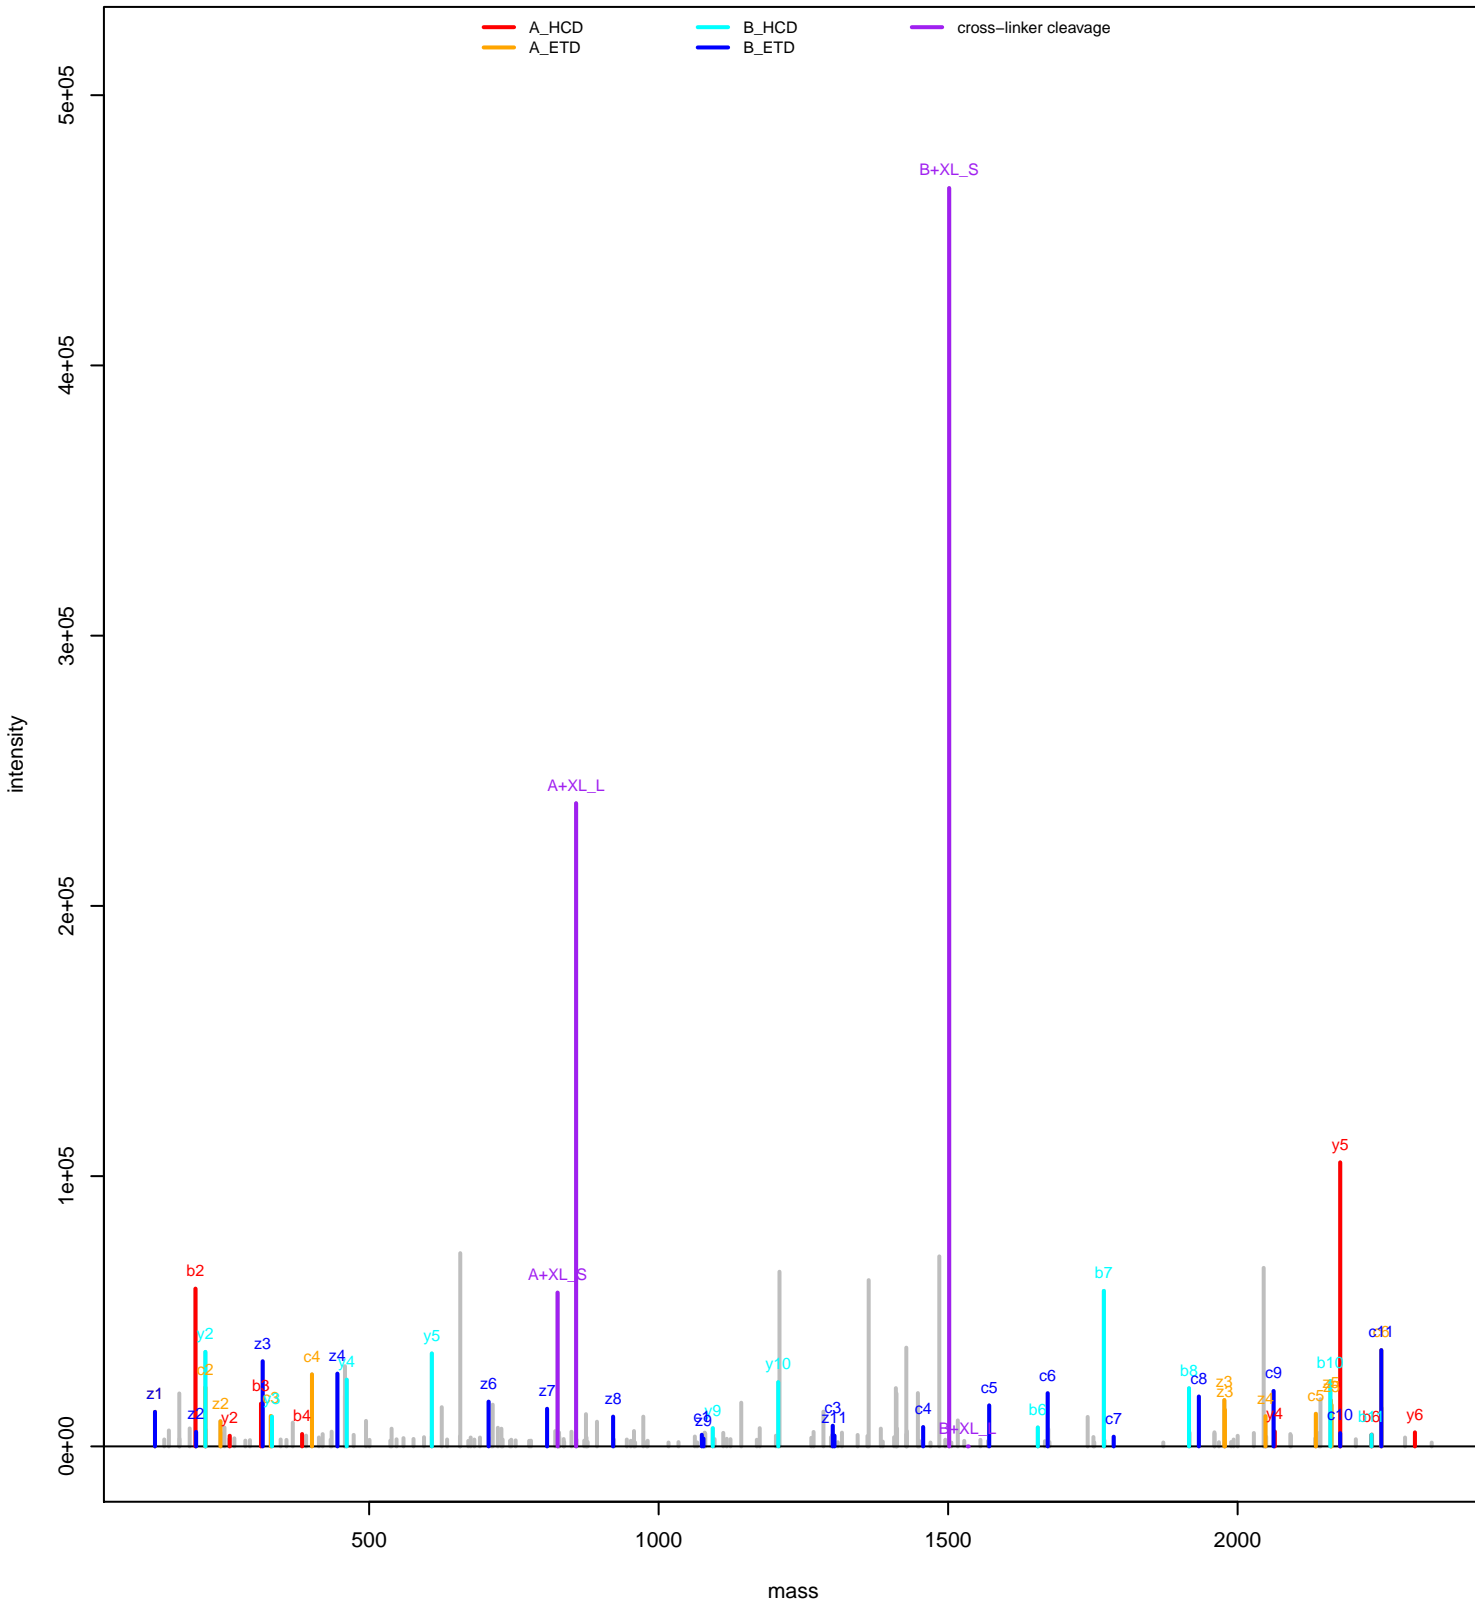

**AELAKLK+XL\_S**

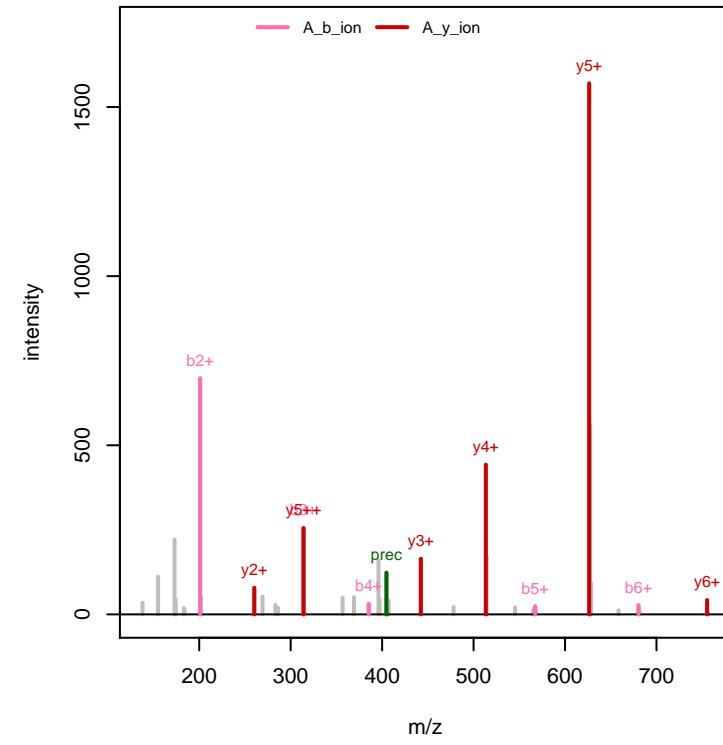

**AELAKLK+XL\_L**

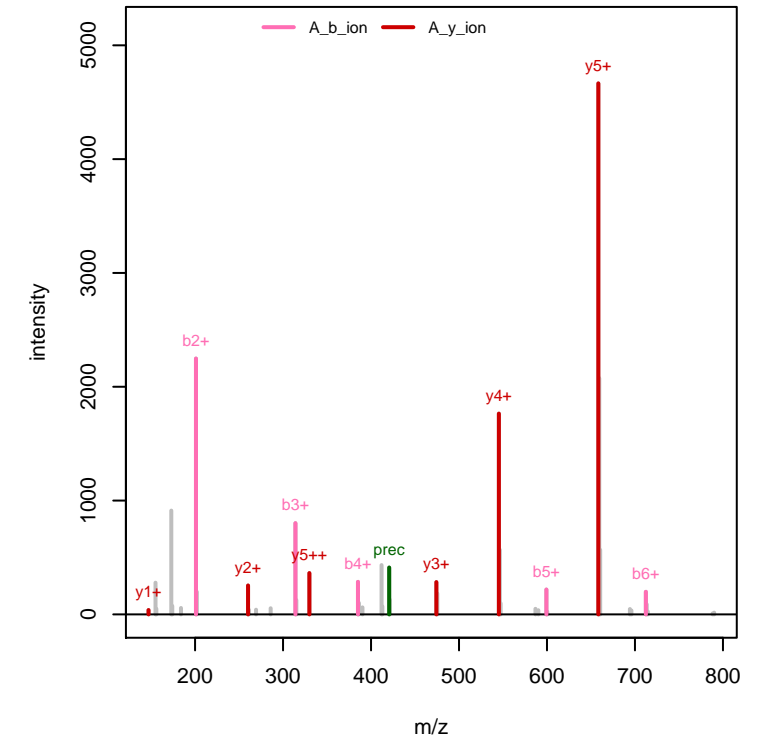

**KIIRNTNFEDAK+XL\_S**

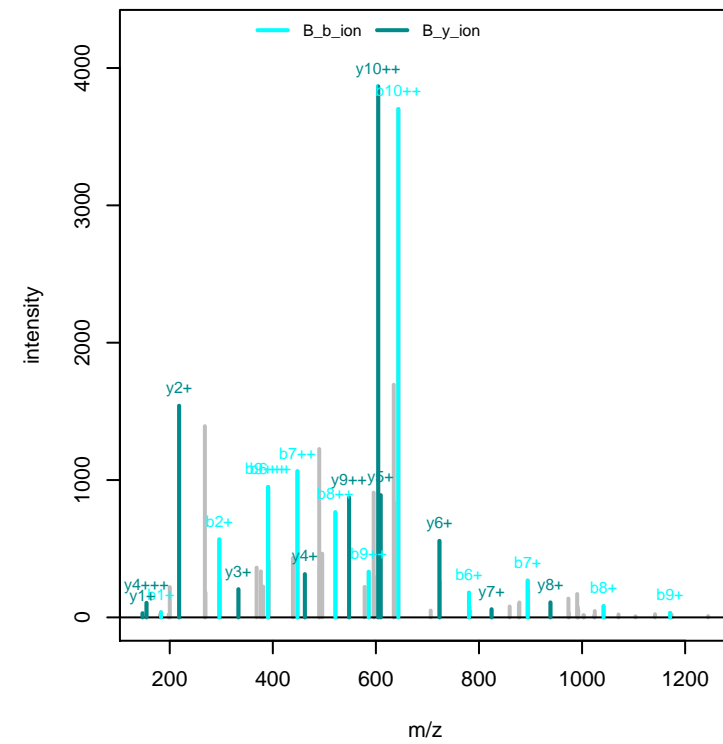

**KIIRNTNFEDAK+XL\_L**

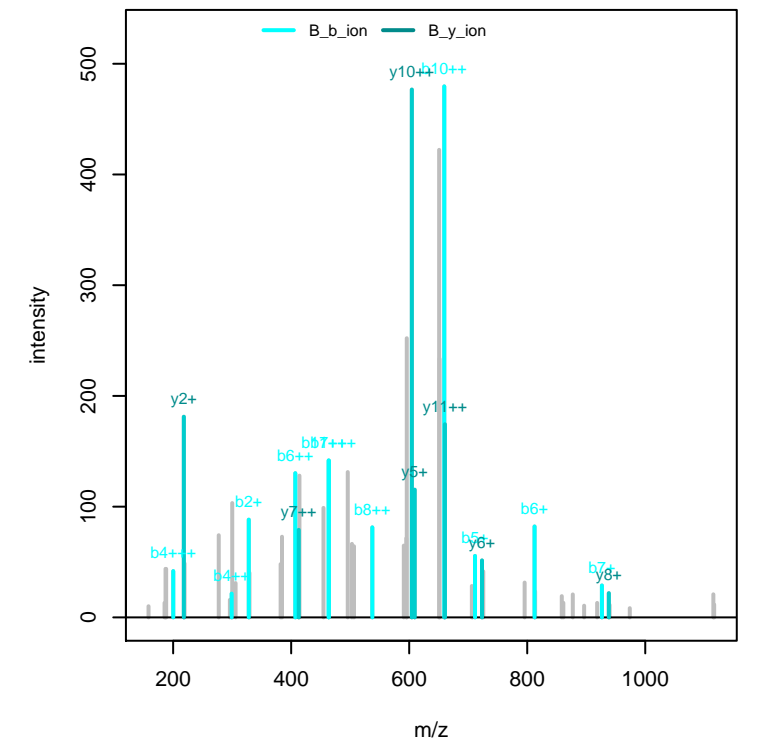

STDISVKTDQK  
VKAALVDHDK

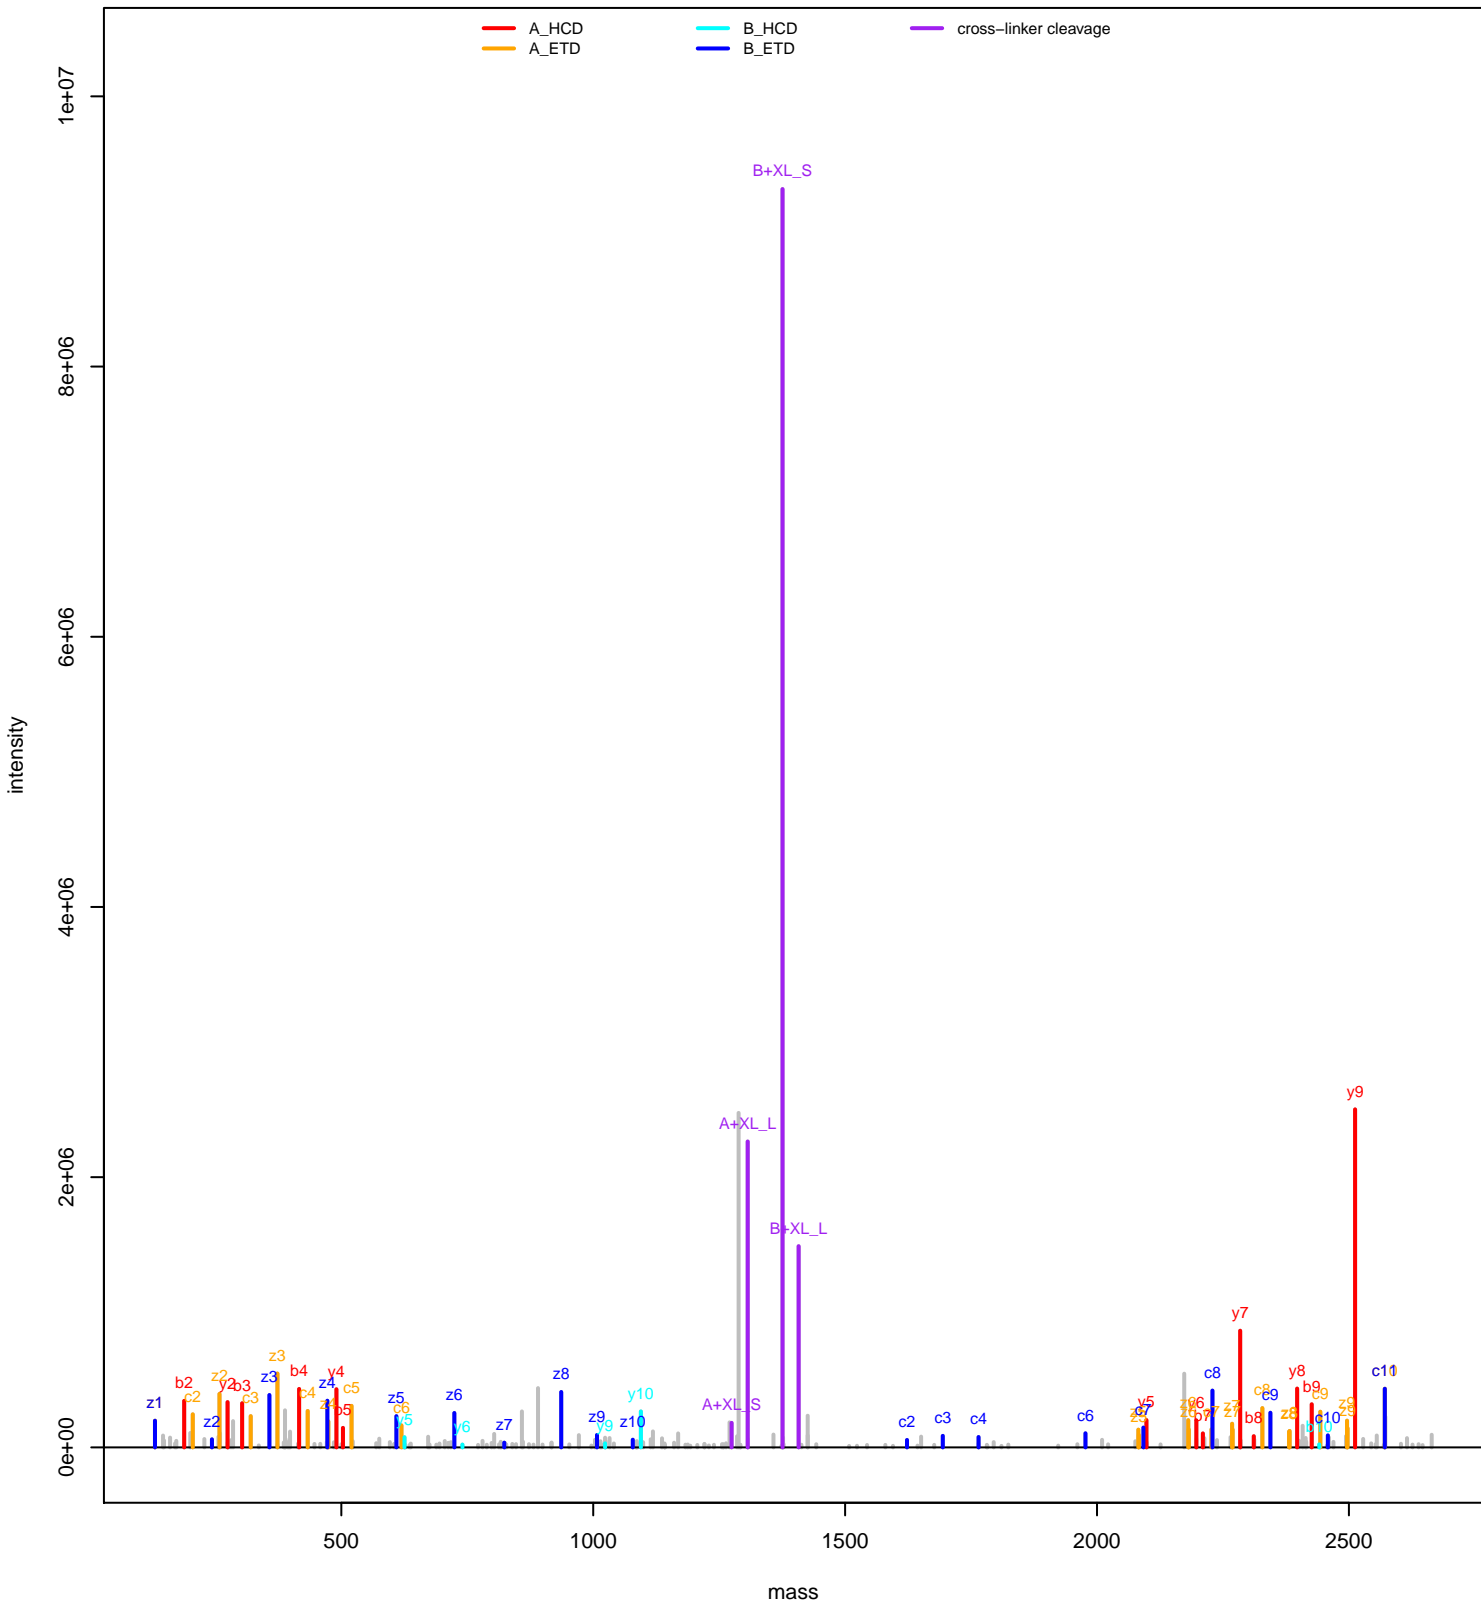

STDISVKTDQK+XL\_S

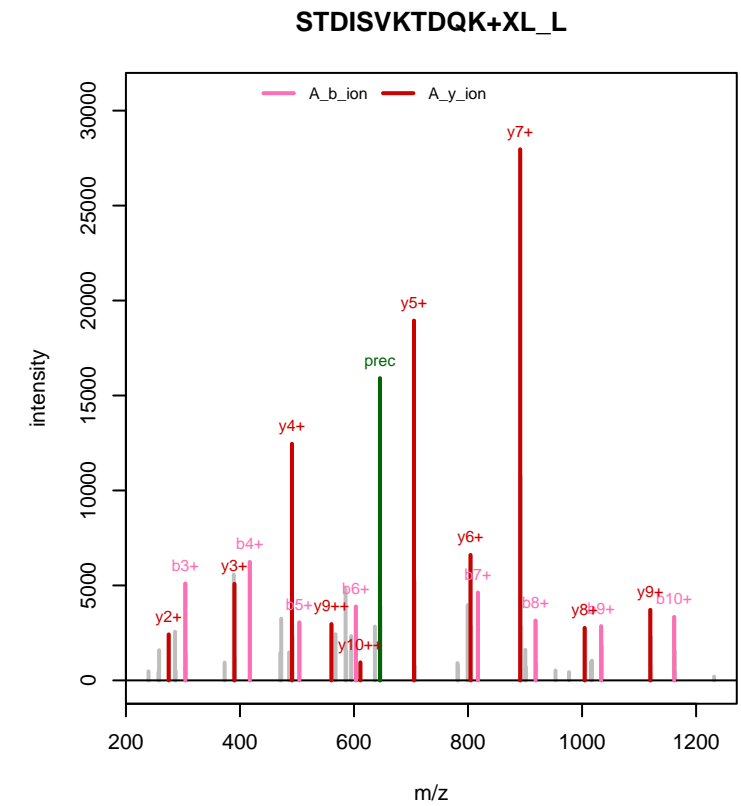

VKAALVDHDK+XL\_S

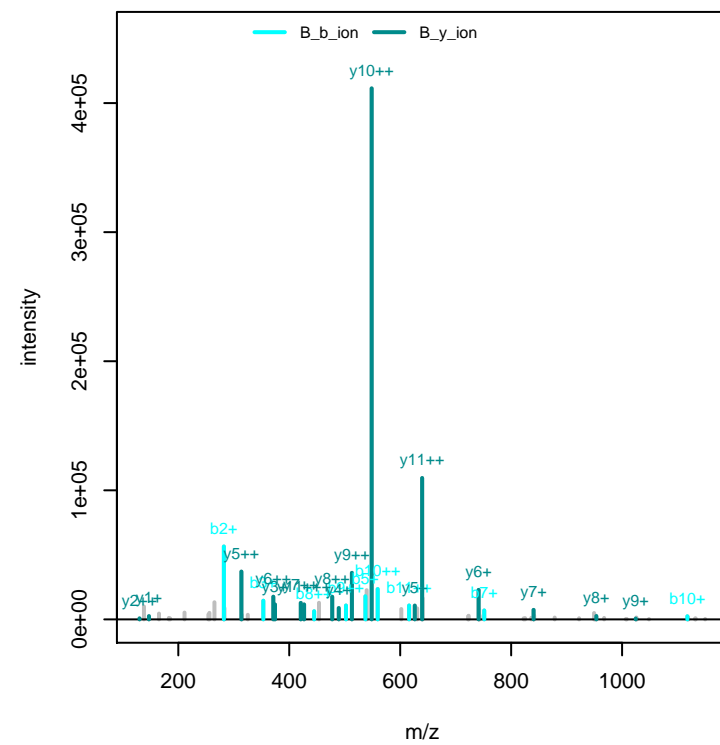

VKAALVDHDK+XL\_L

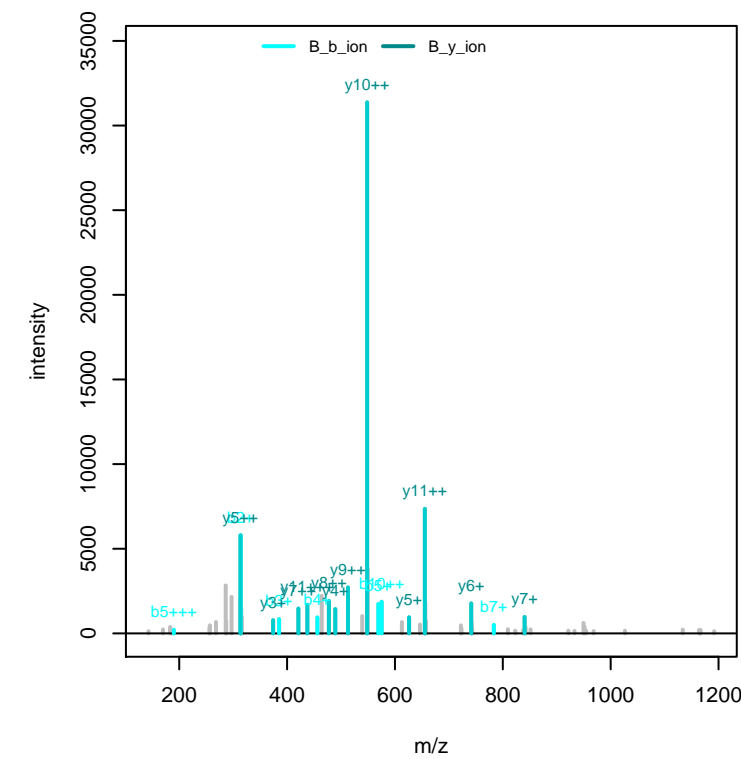

**QKVIQVK  
FLYEKSK**

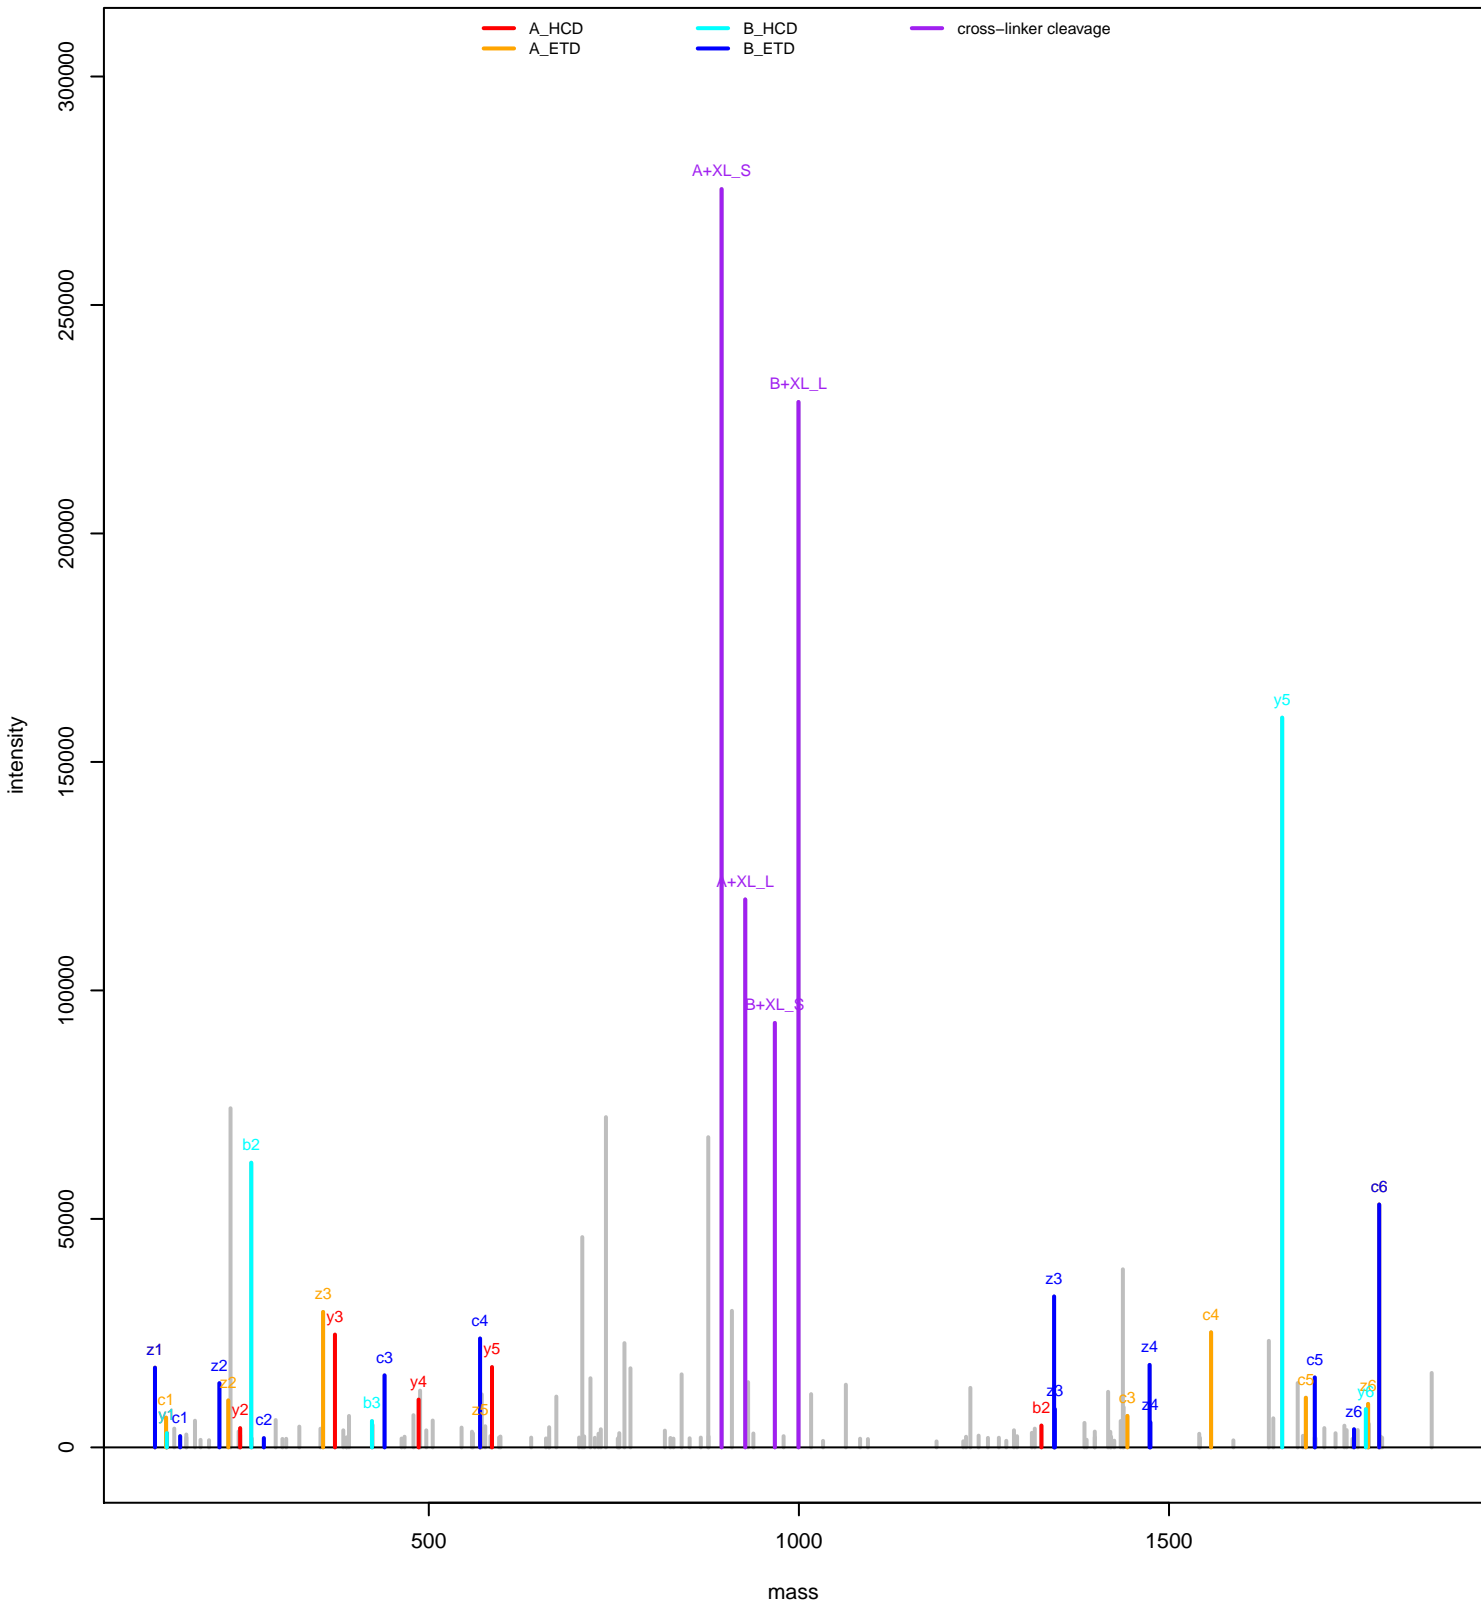

**QKVIQVK+XL\_S**

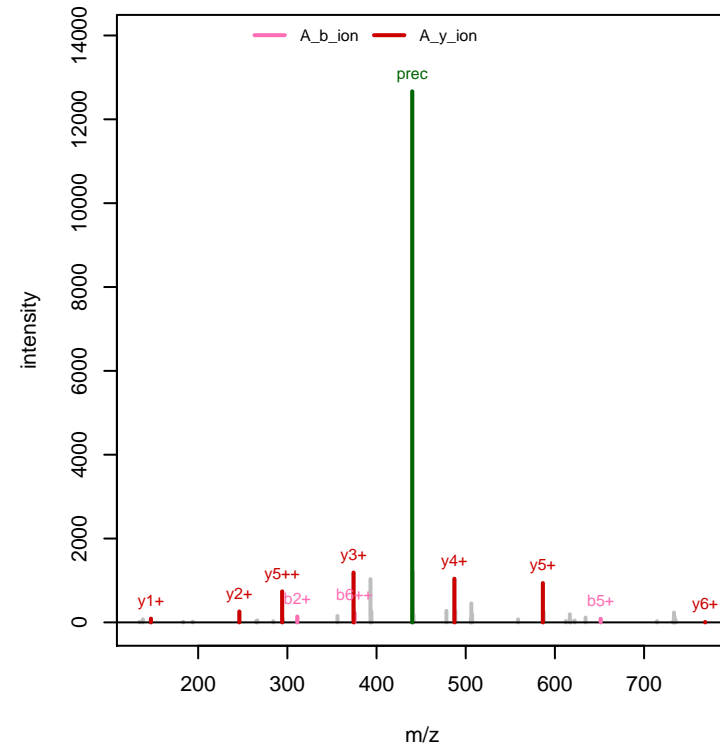

**QKVIQVK+XL\_L**

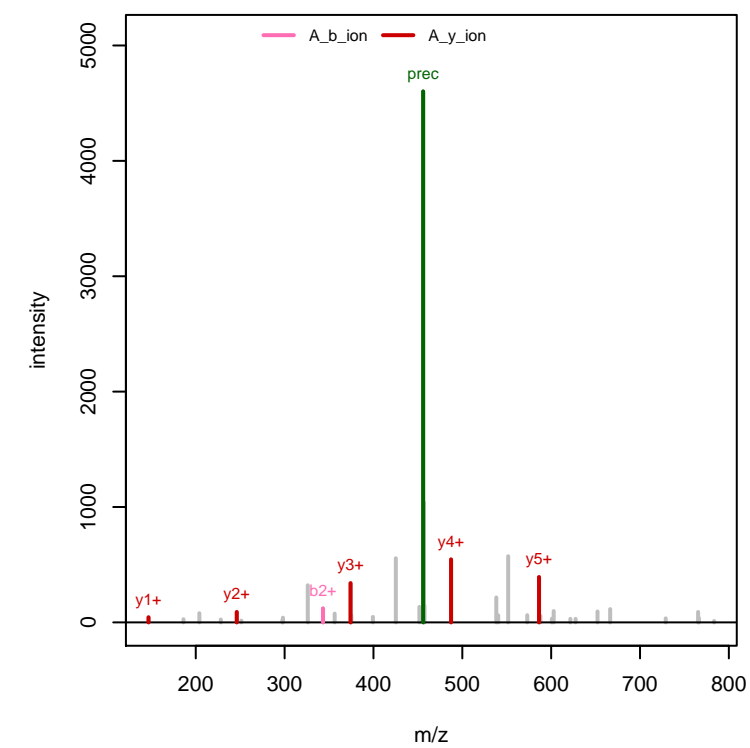

**FLYEKSK+XL\_S**

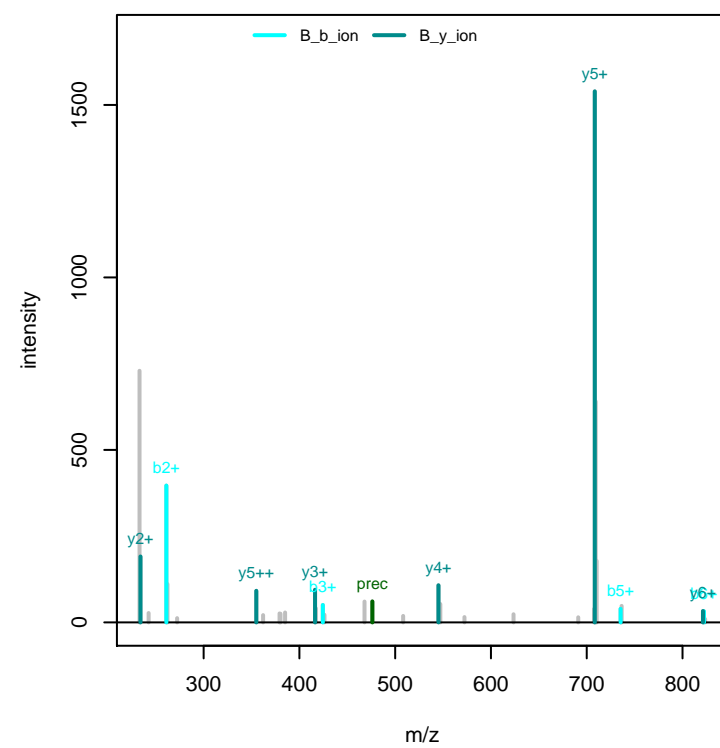

**FLYEKSK+XL\_L**

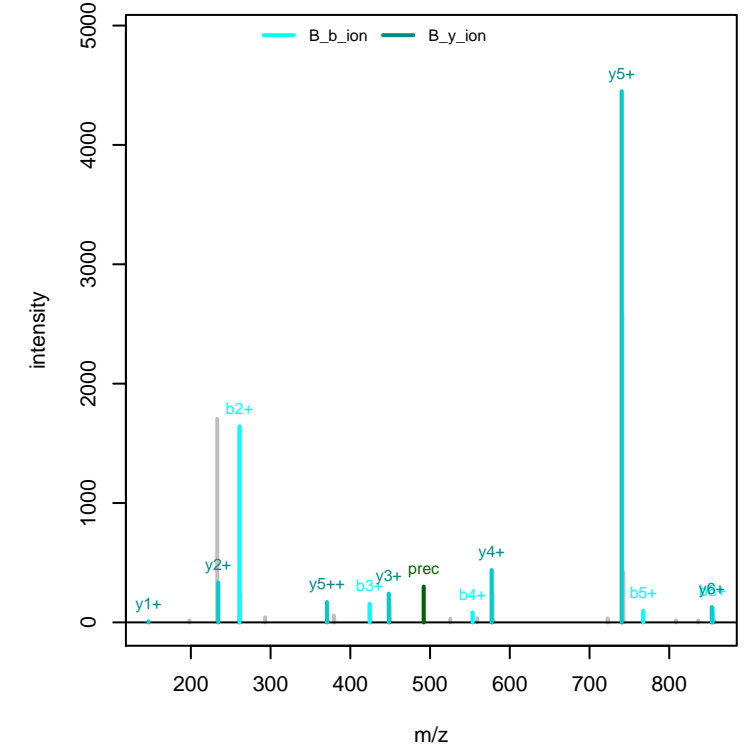

TPKPIAQLAEGK  
FTDVNGETKTWTGQGR

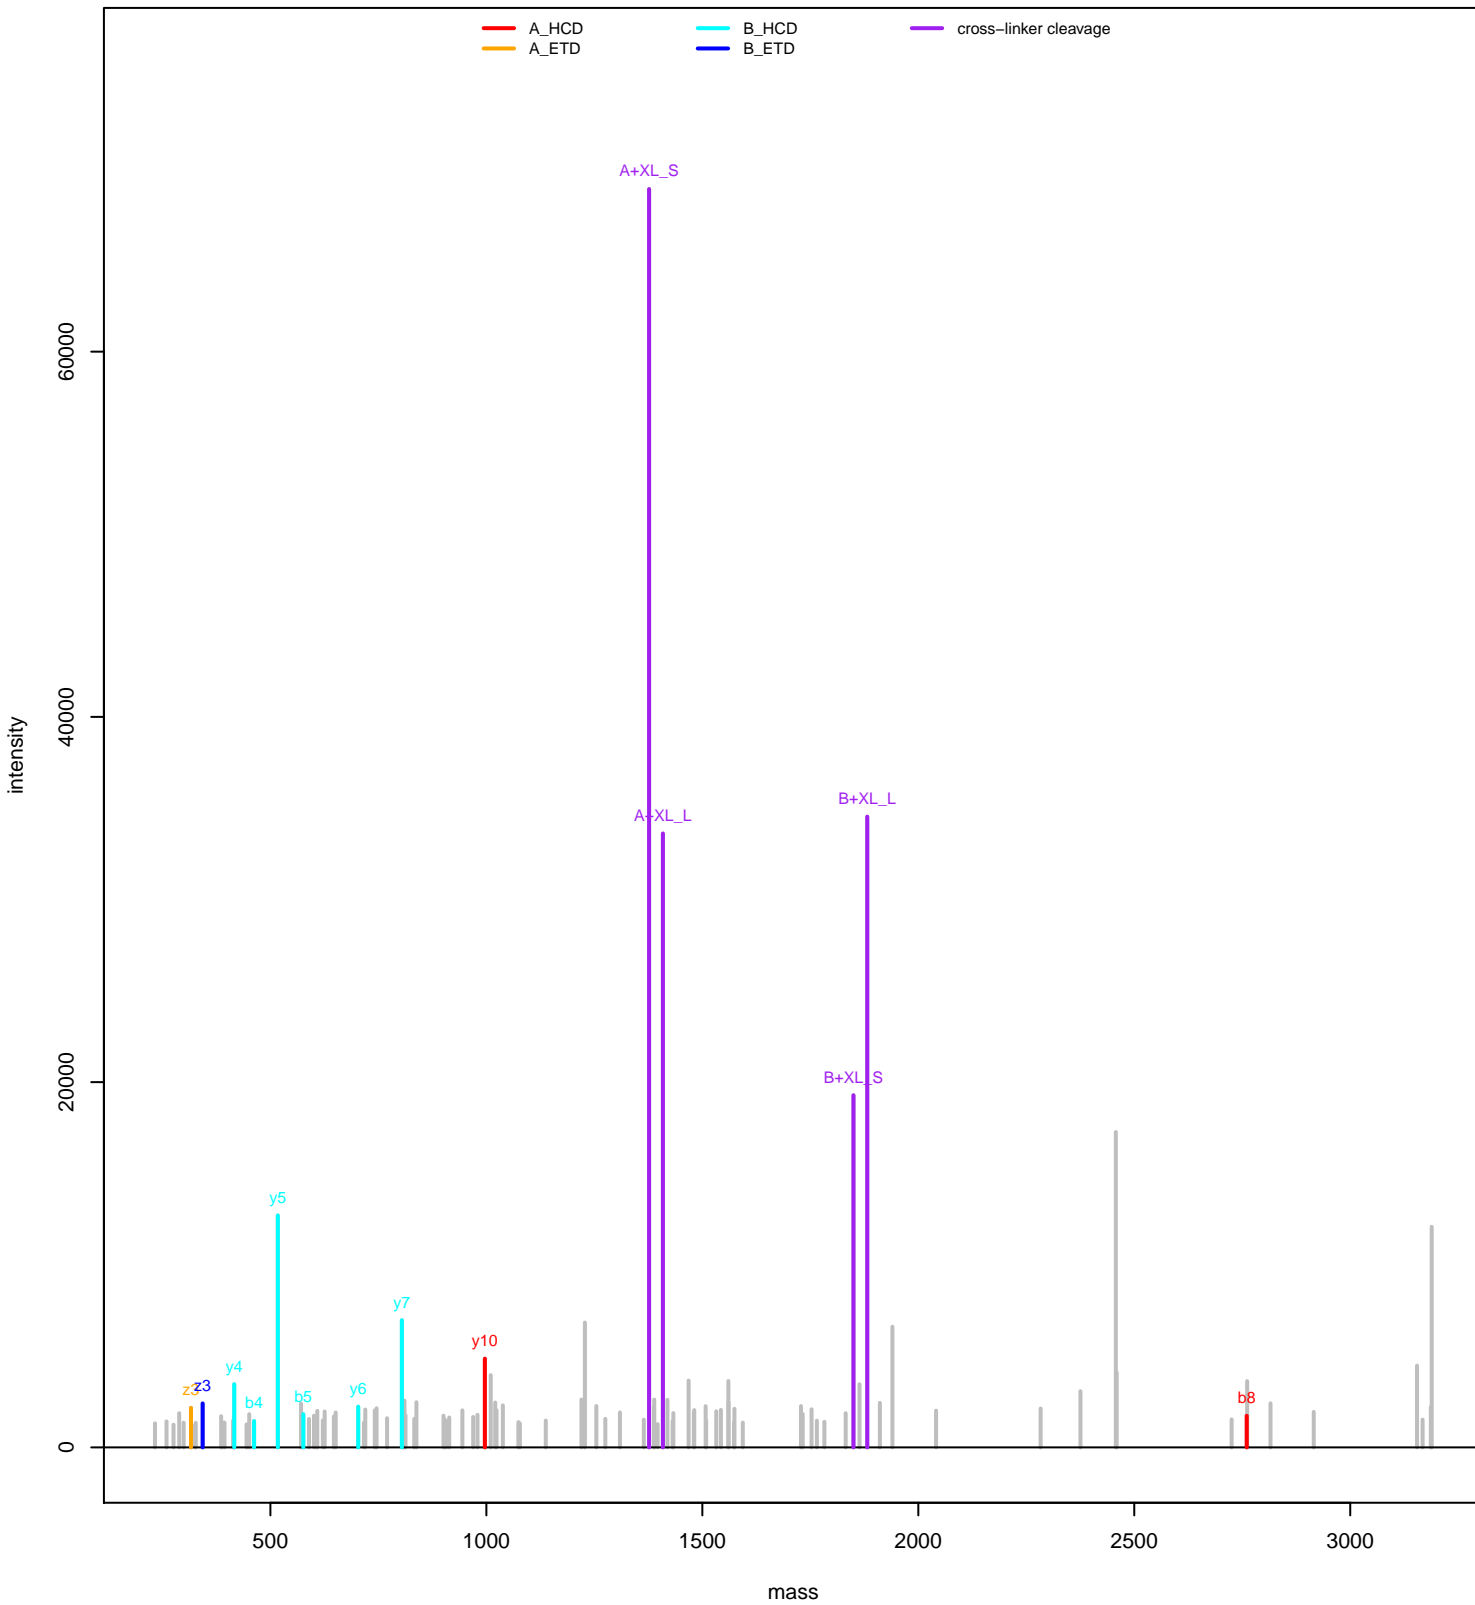

TPKPIAQLAEGK+XL\_S

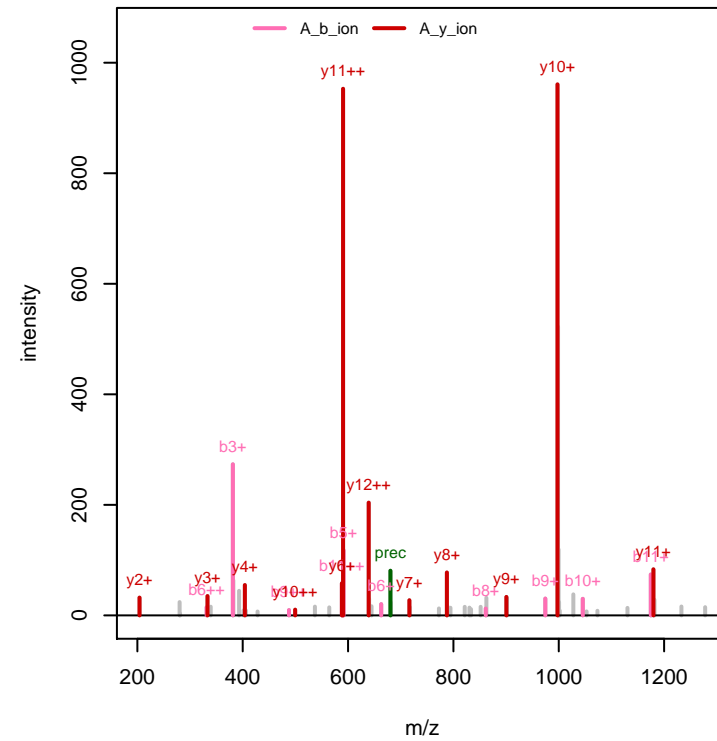

TPKPIAQLAEGK+XL\_L

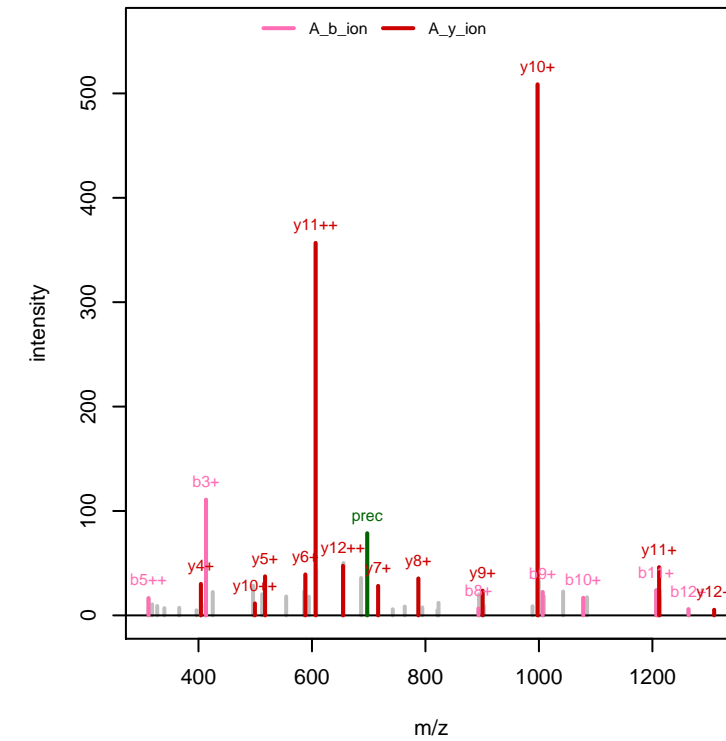

FTDVNGETKTWTGQGR+XL\_S

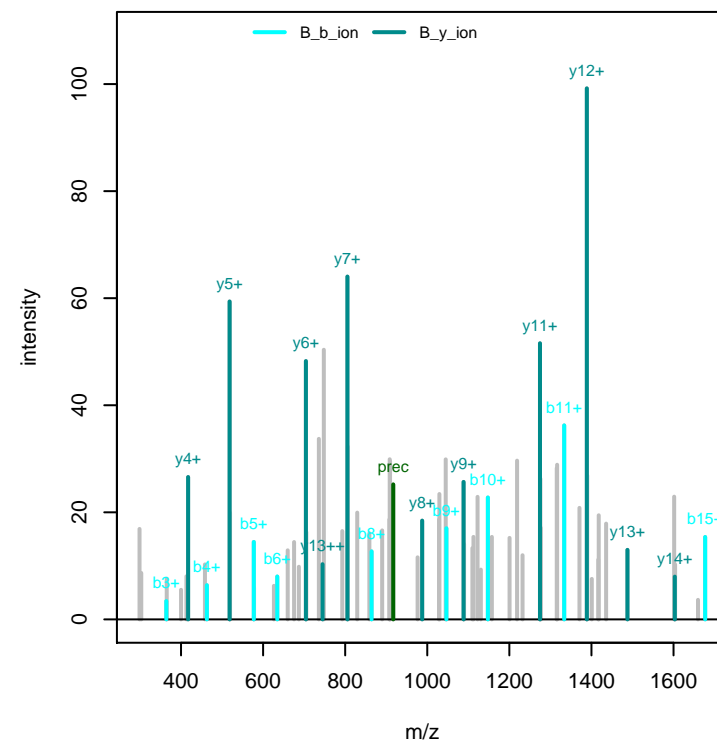

FTDVNGETKTWTGQGR+XL\_L

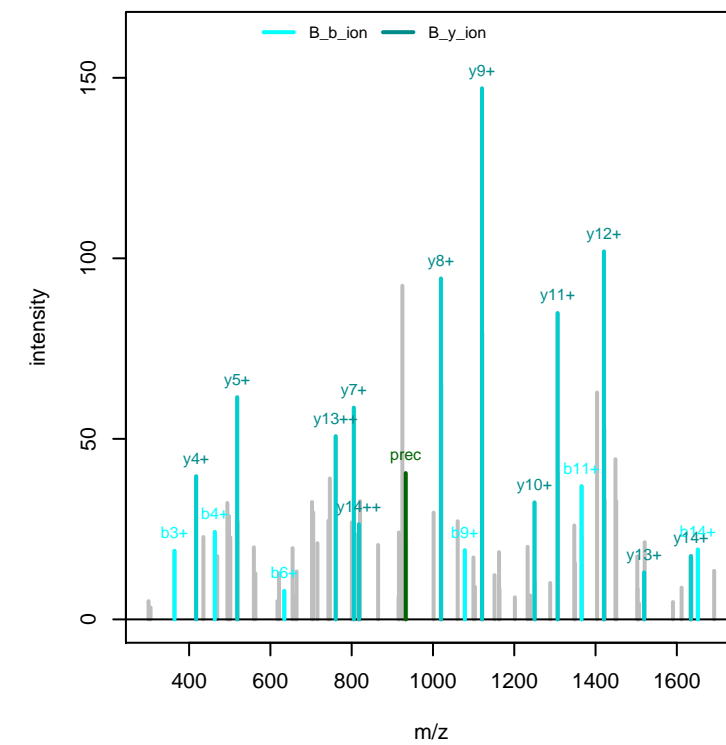

LSPKESVLR  
LLEKISAGGYGDK

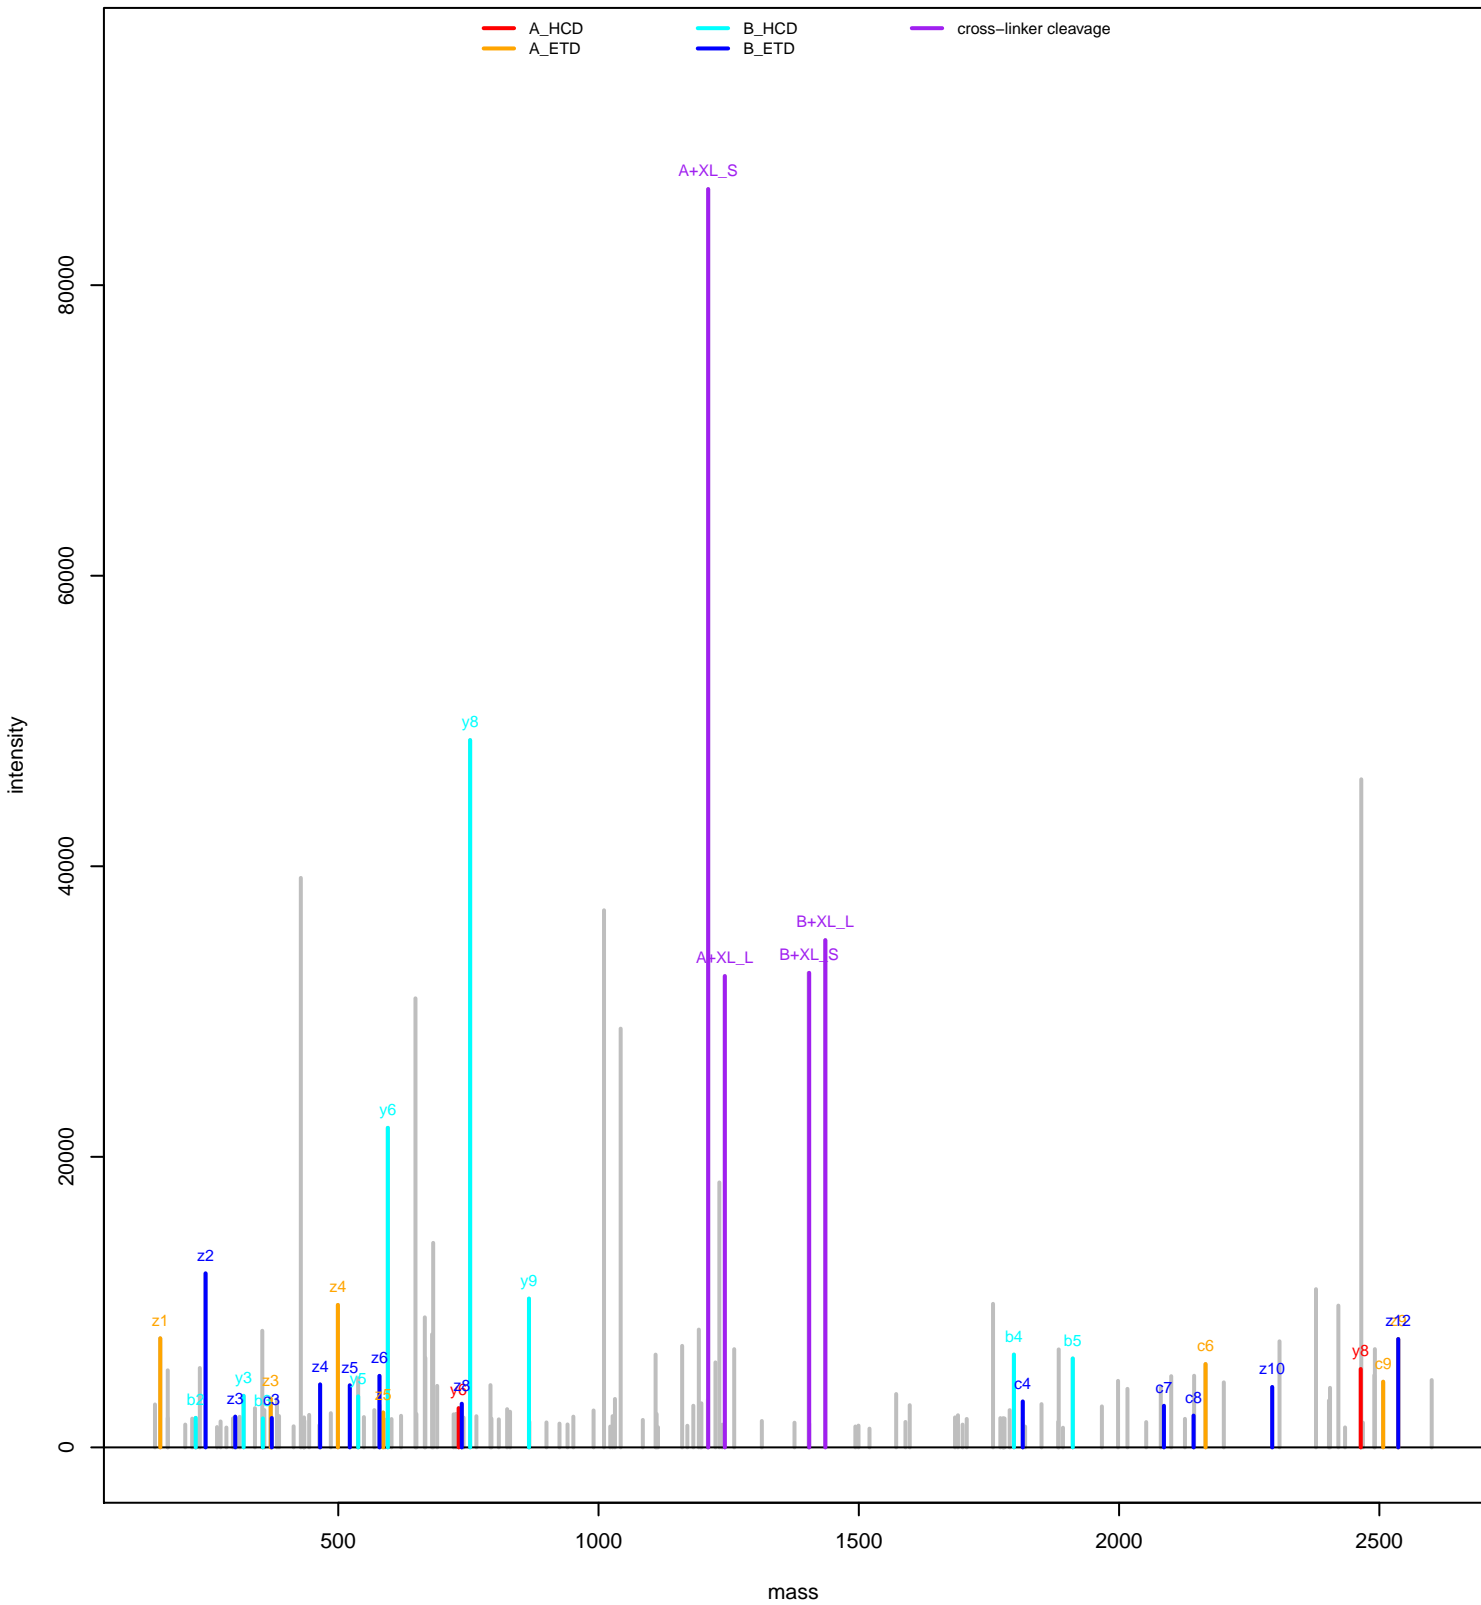

LSPKESVLR+XL\_S

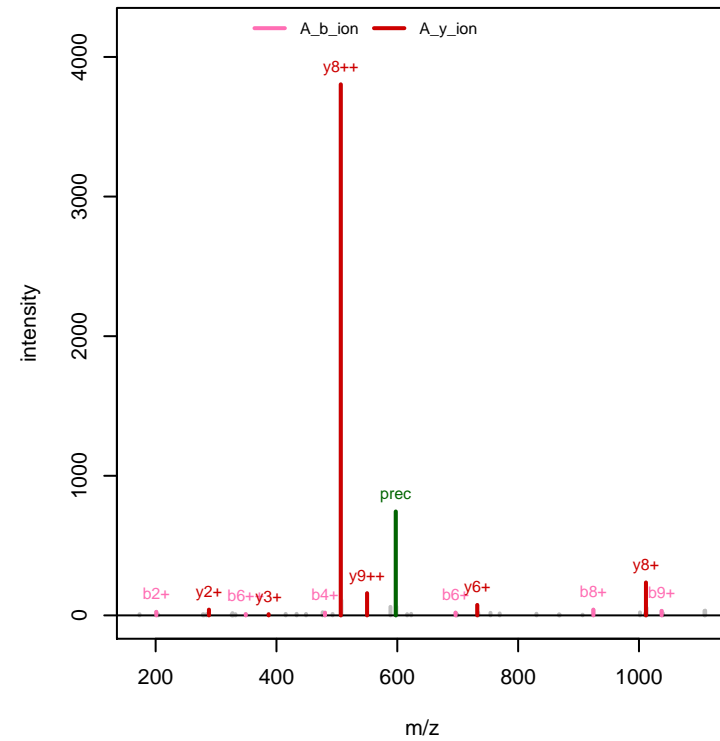

LSPKESVLR+XL\_L

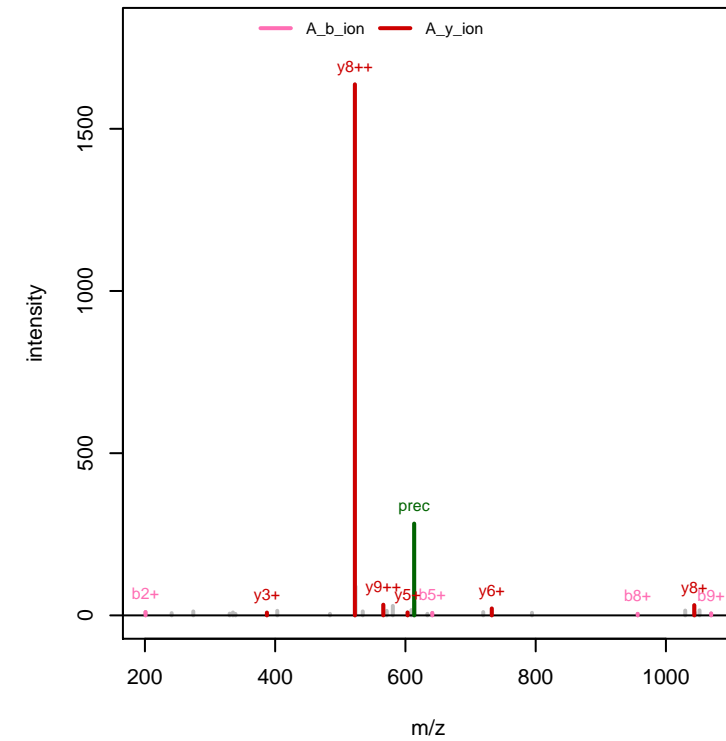

LLEKISAGGYGDK+XL\_S

LLEKISAGGYGDK+XL\_L

FMSACLKK  
SLTPQQQKMRECNNQATQQSLK

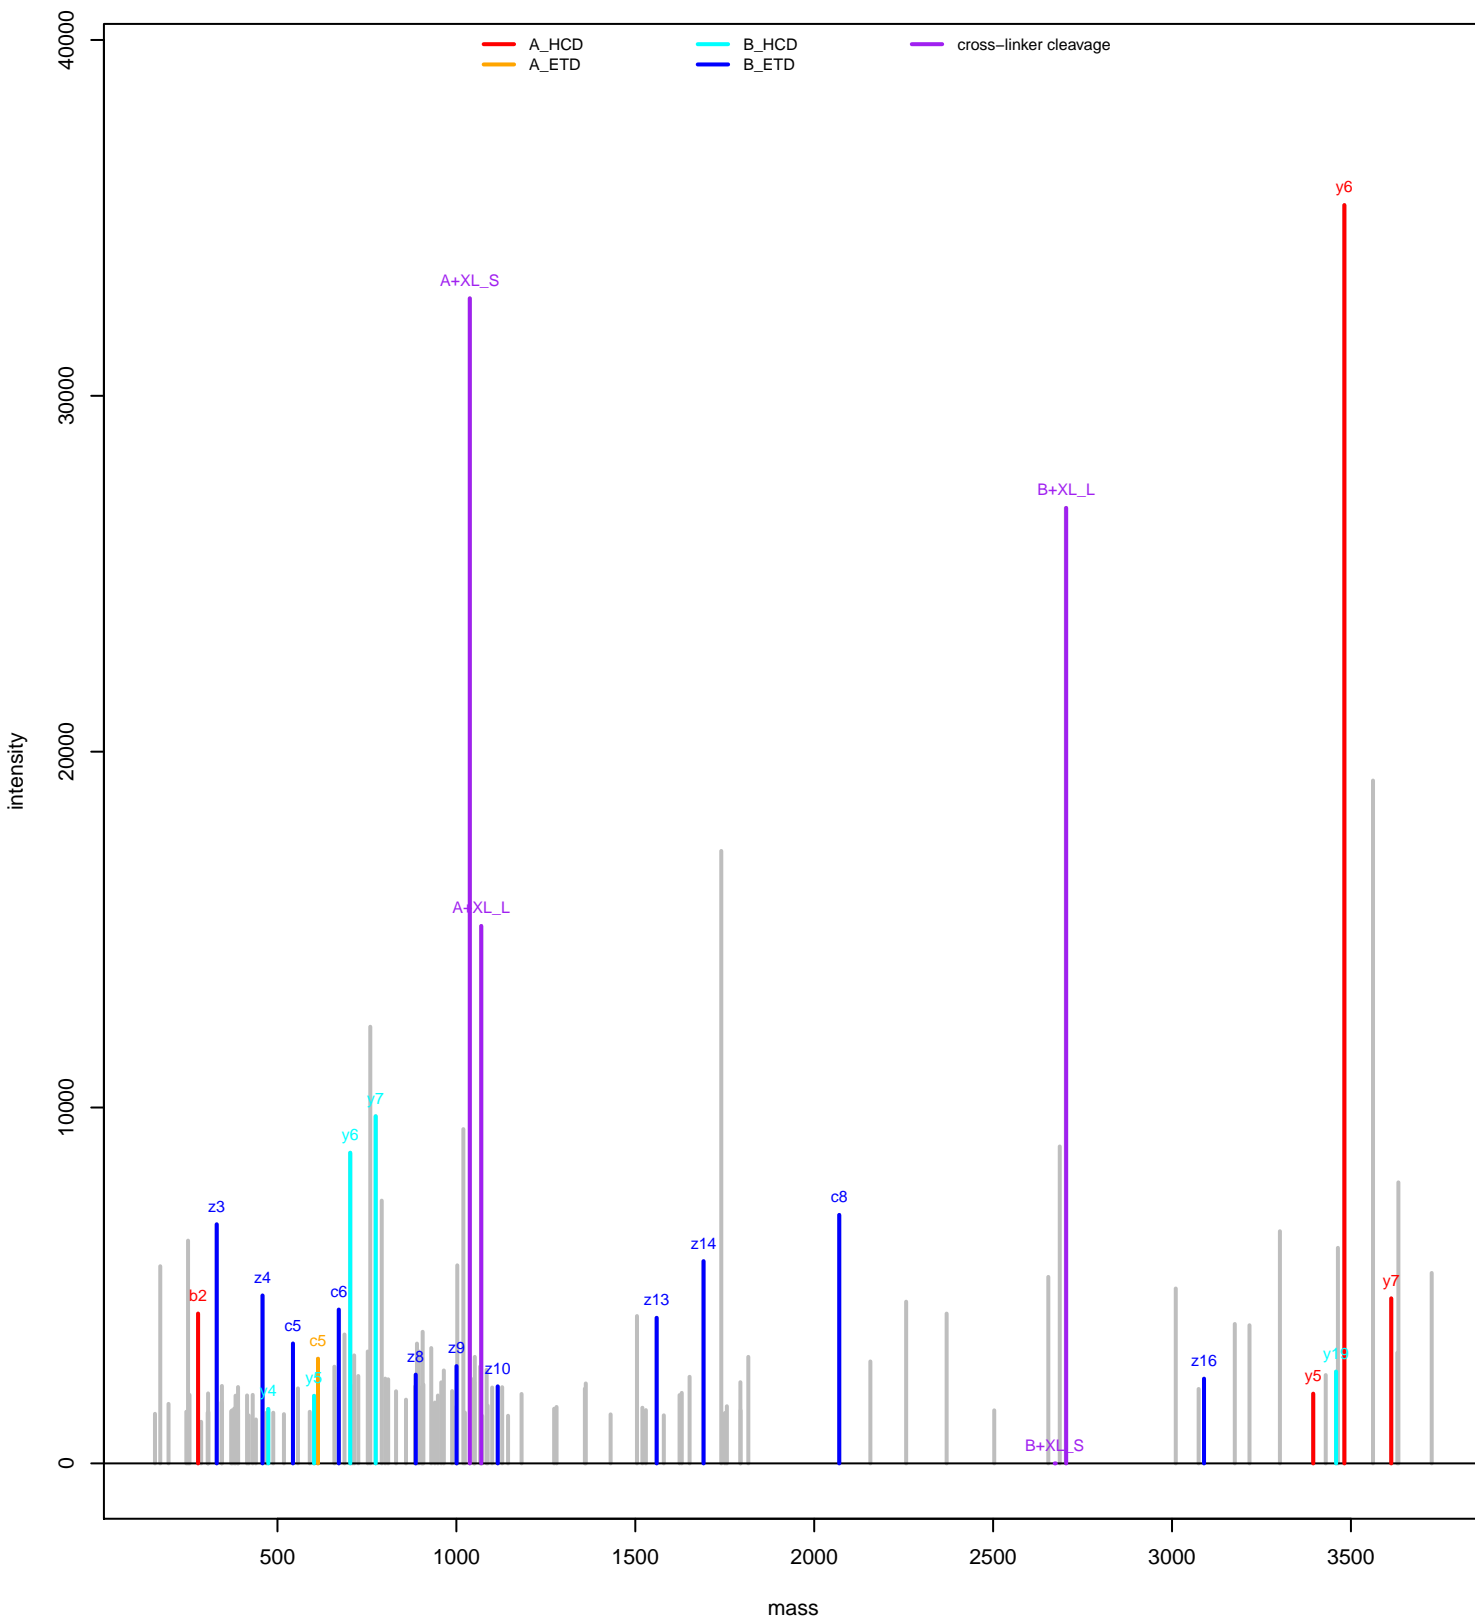

FMSACLKK+XL\_S

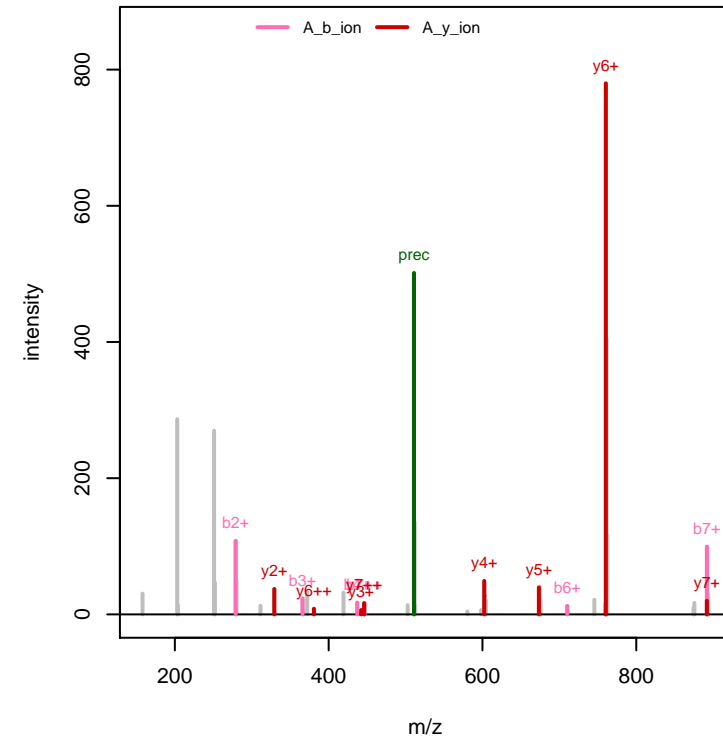

FMSACLKK+XL\_L

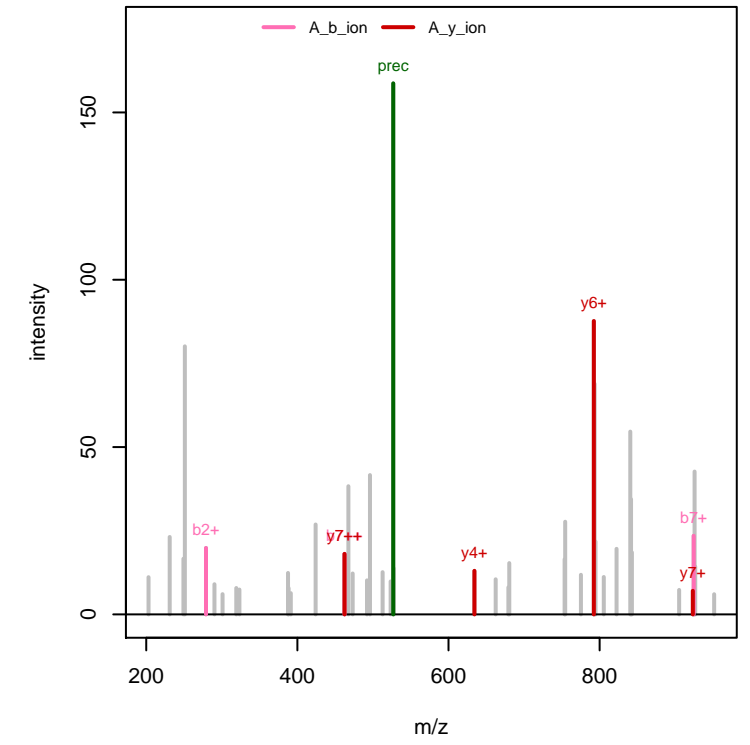

SLTPQQQKMRECNNQATQQSLK+XL\_S

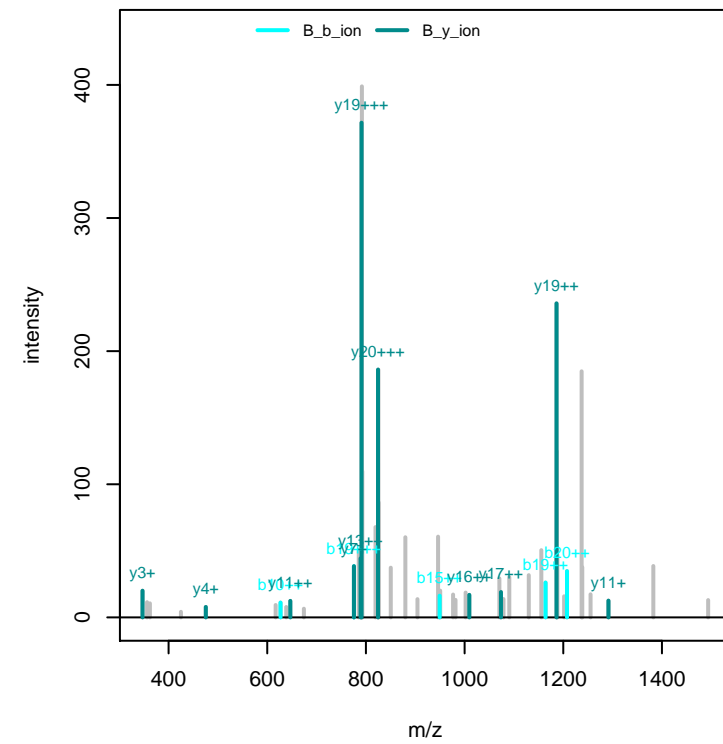

SLTPQQQKMRECNNQATQQSLK+XL\_L

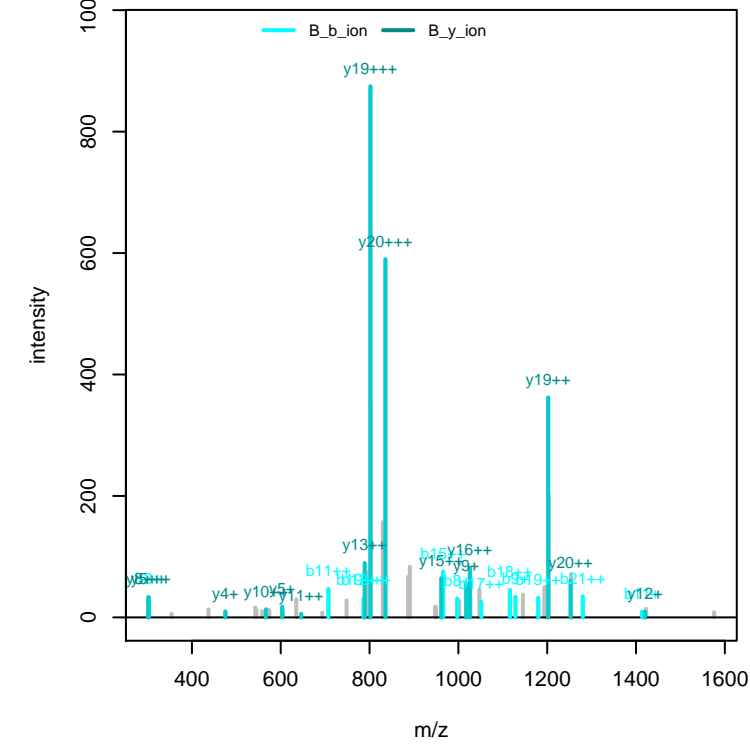

VTLGPKGR  
NVVLDKSFSGAPTITK

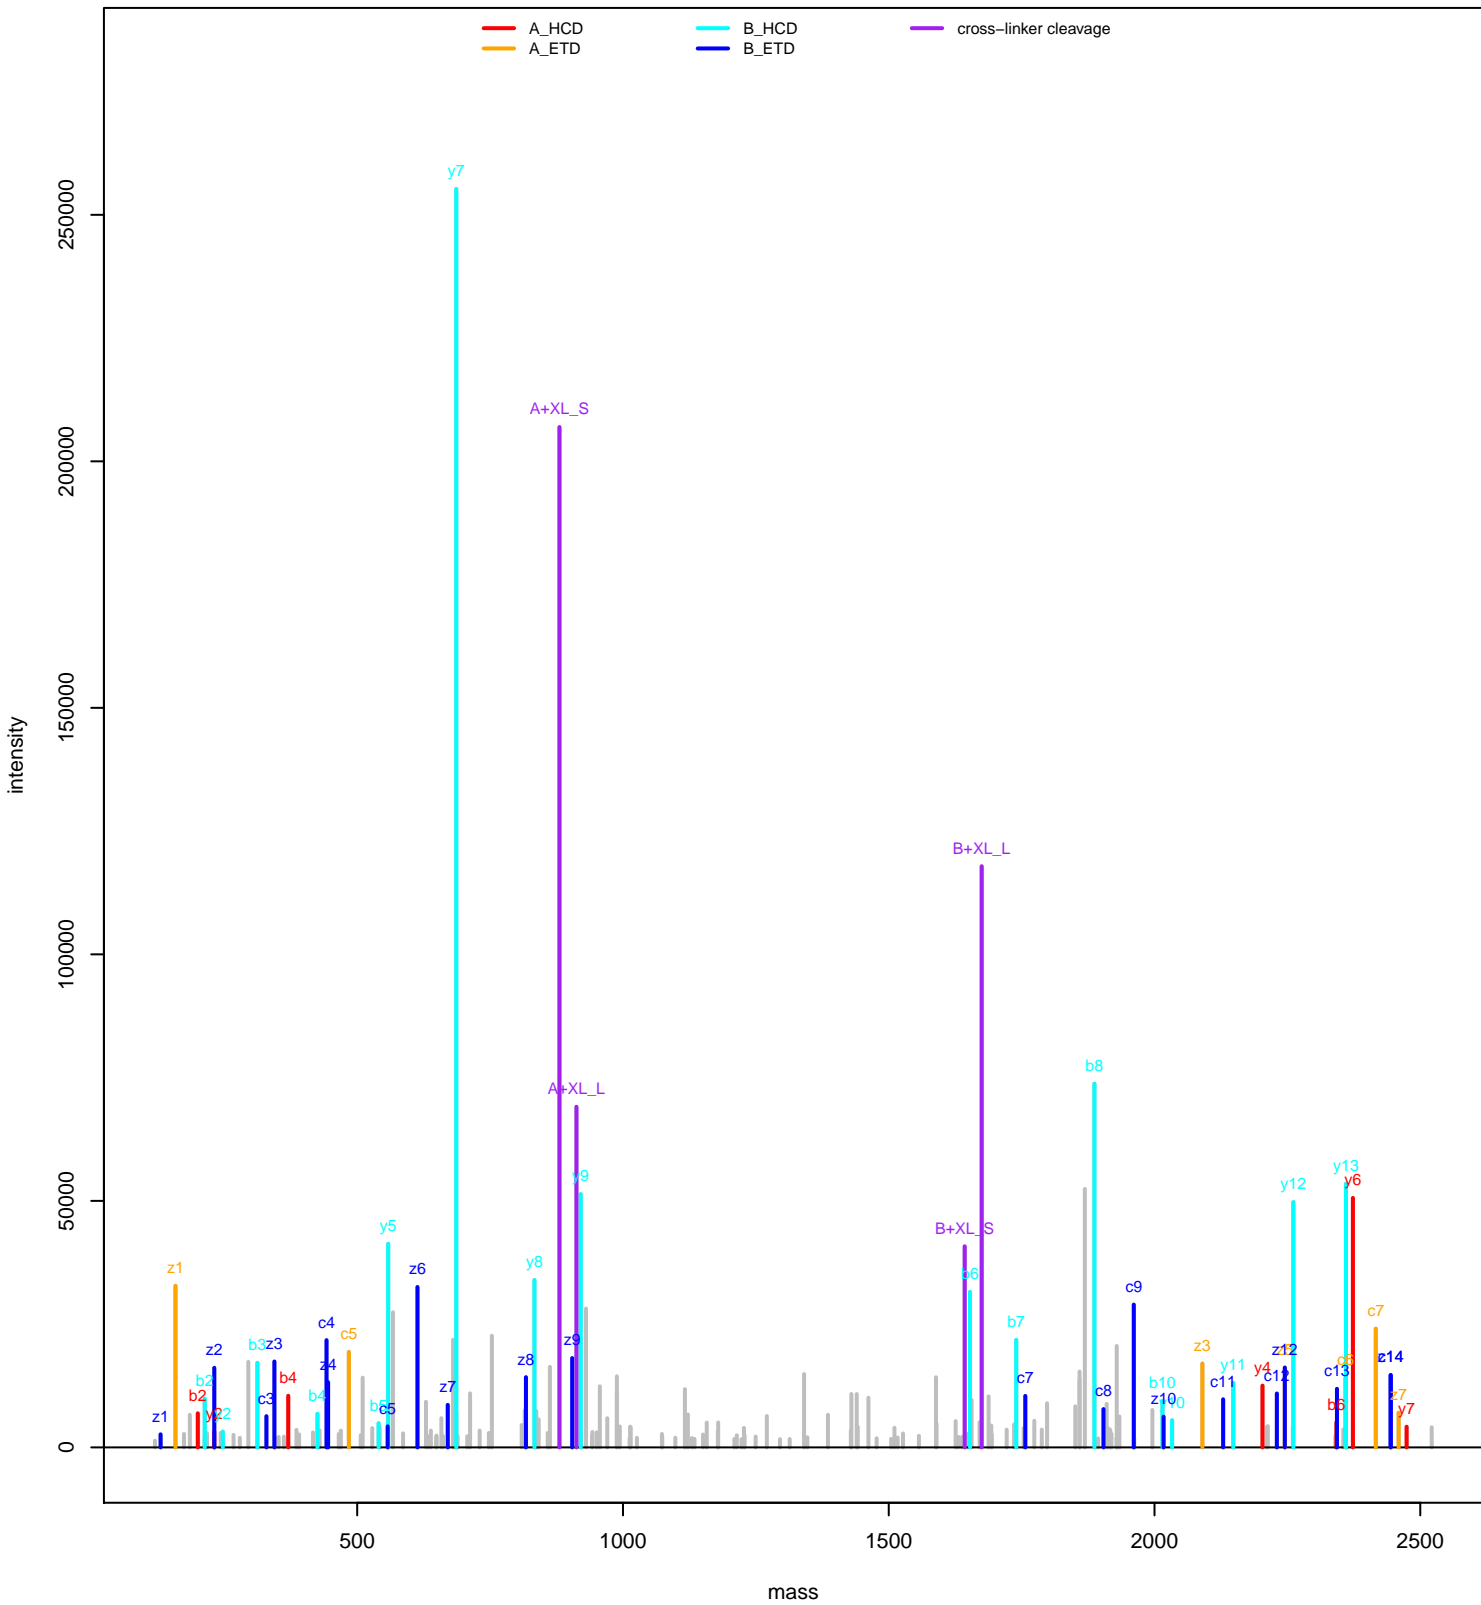

VTLGPKGR+XL\_S

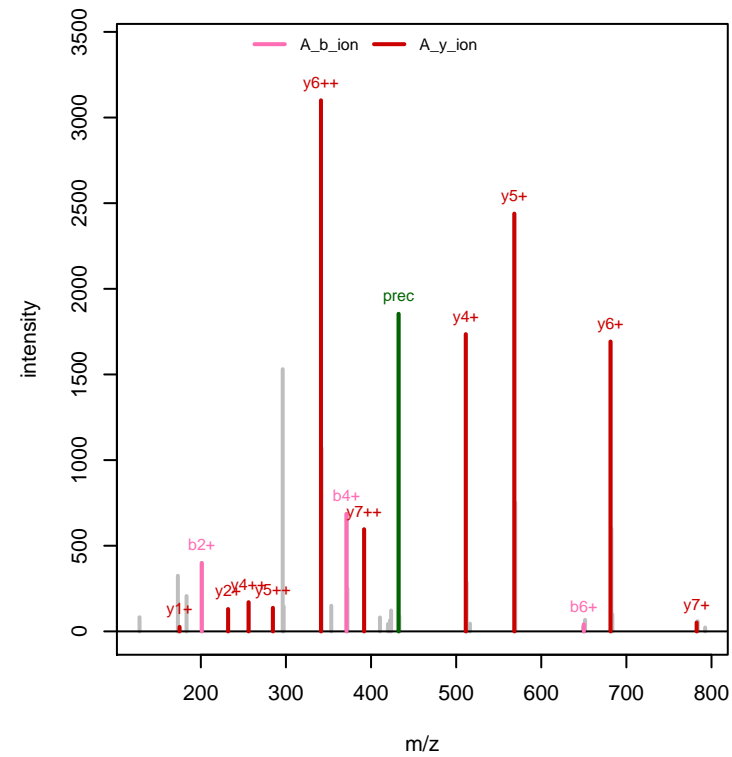

VTLGPKGR+XL\_L

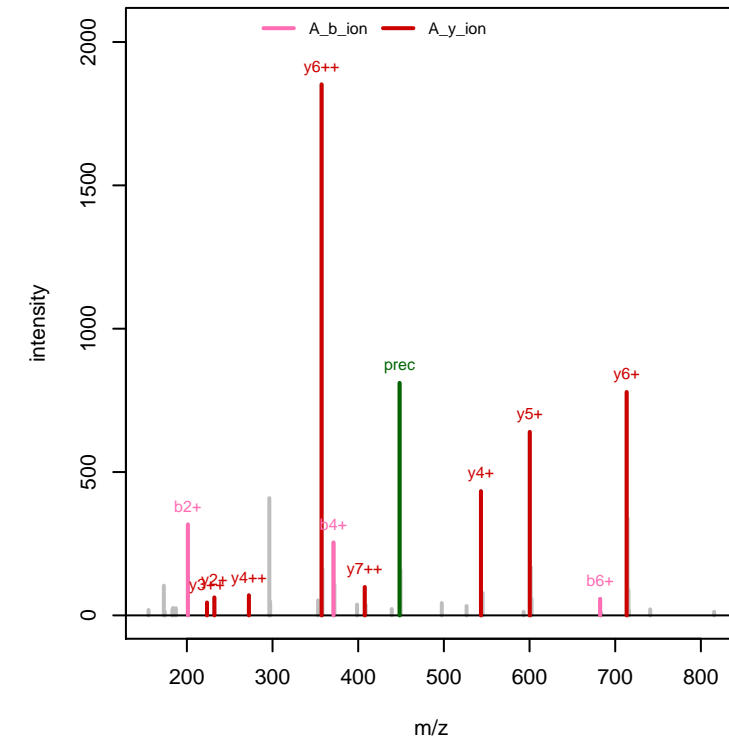

NVVLDKSFSGAPTITK+XL\_S

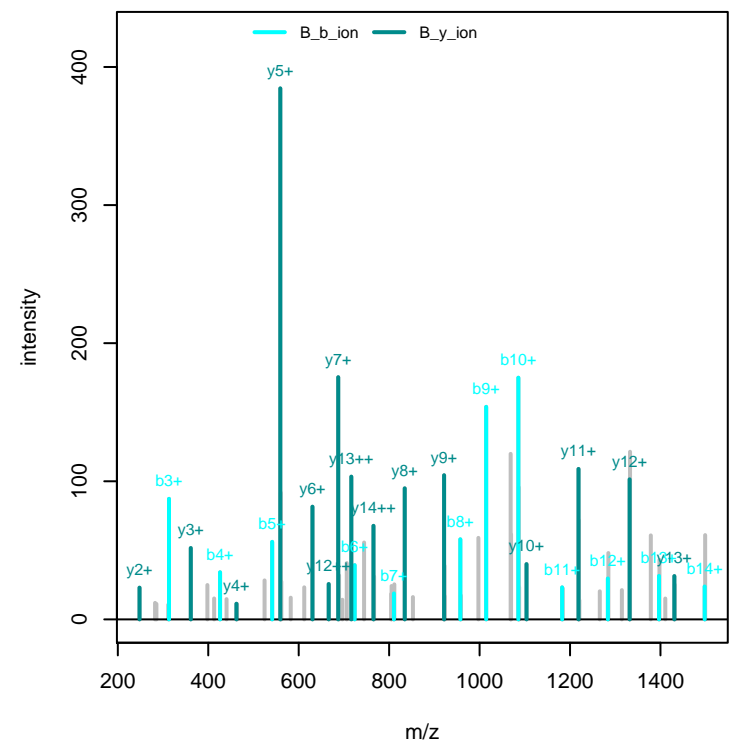

NVVLDKSFSGAPTITK+XL\_L

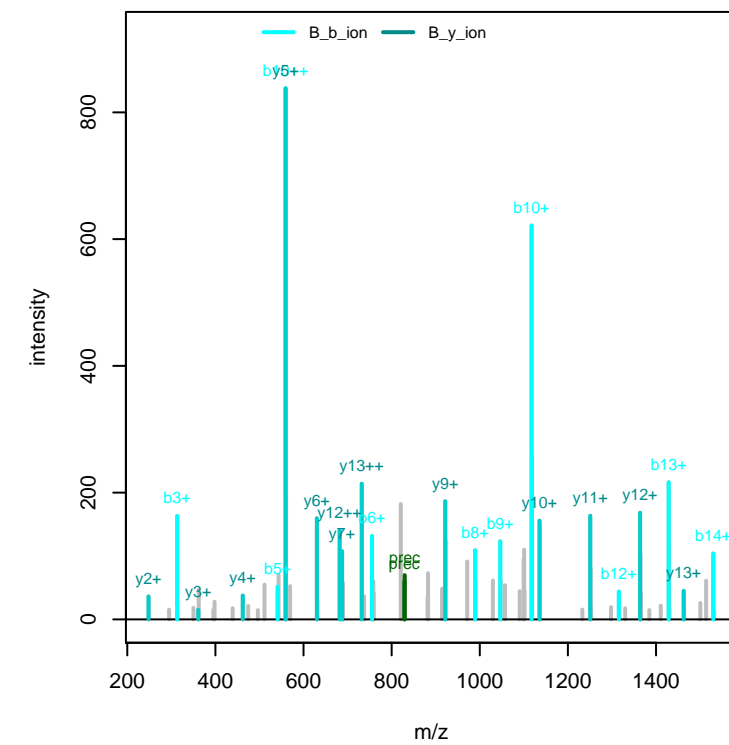

ISGFKAR  
SDNDTIVAQATPPGRGGVGILR

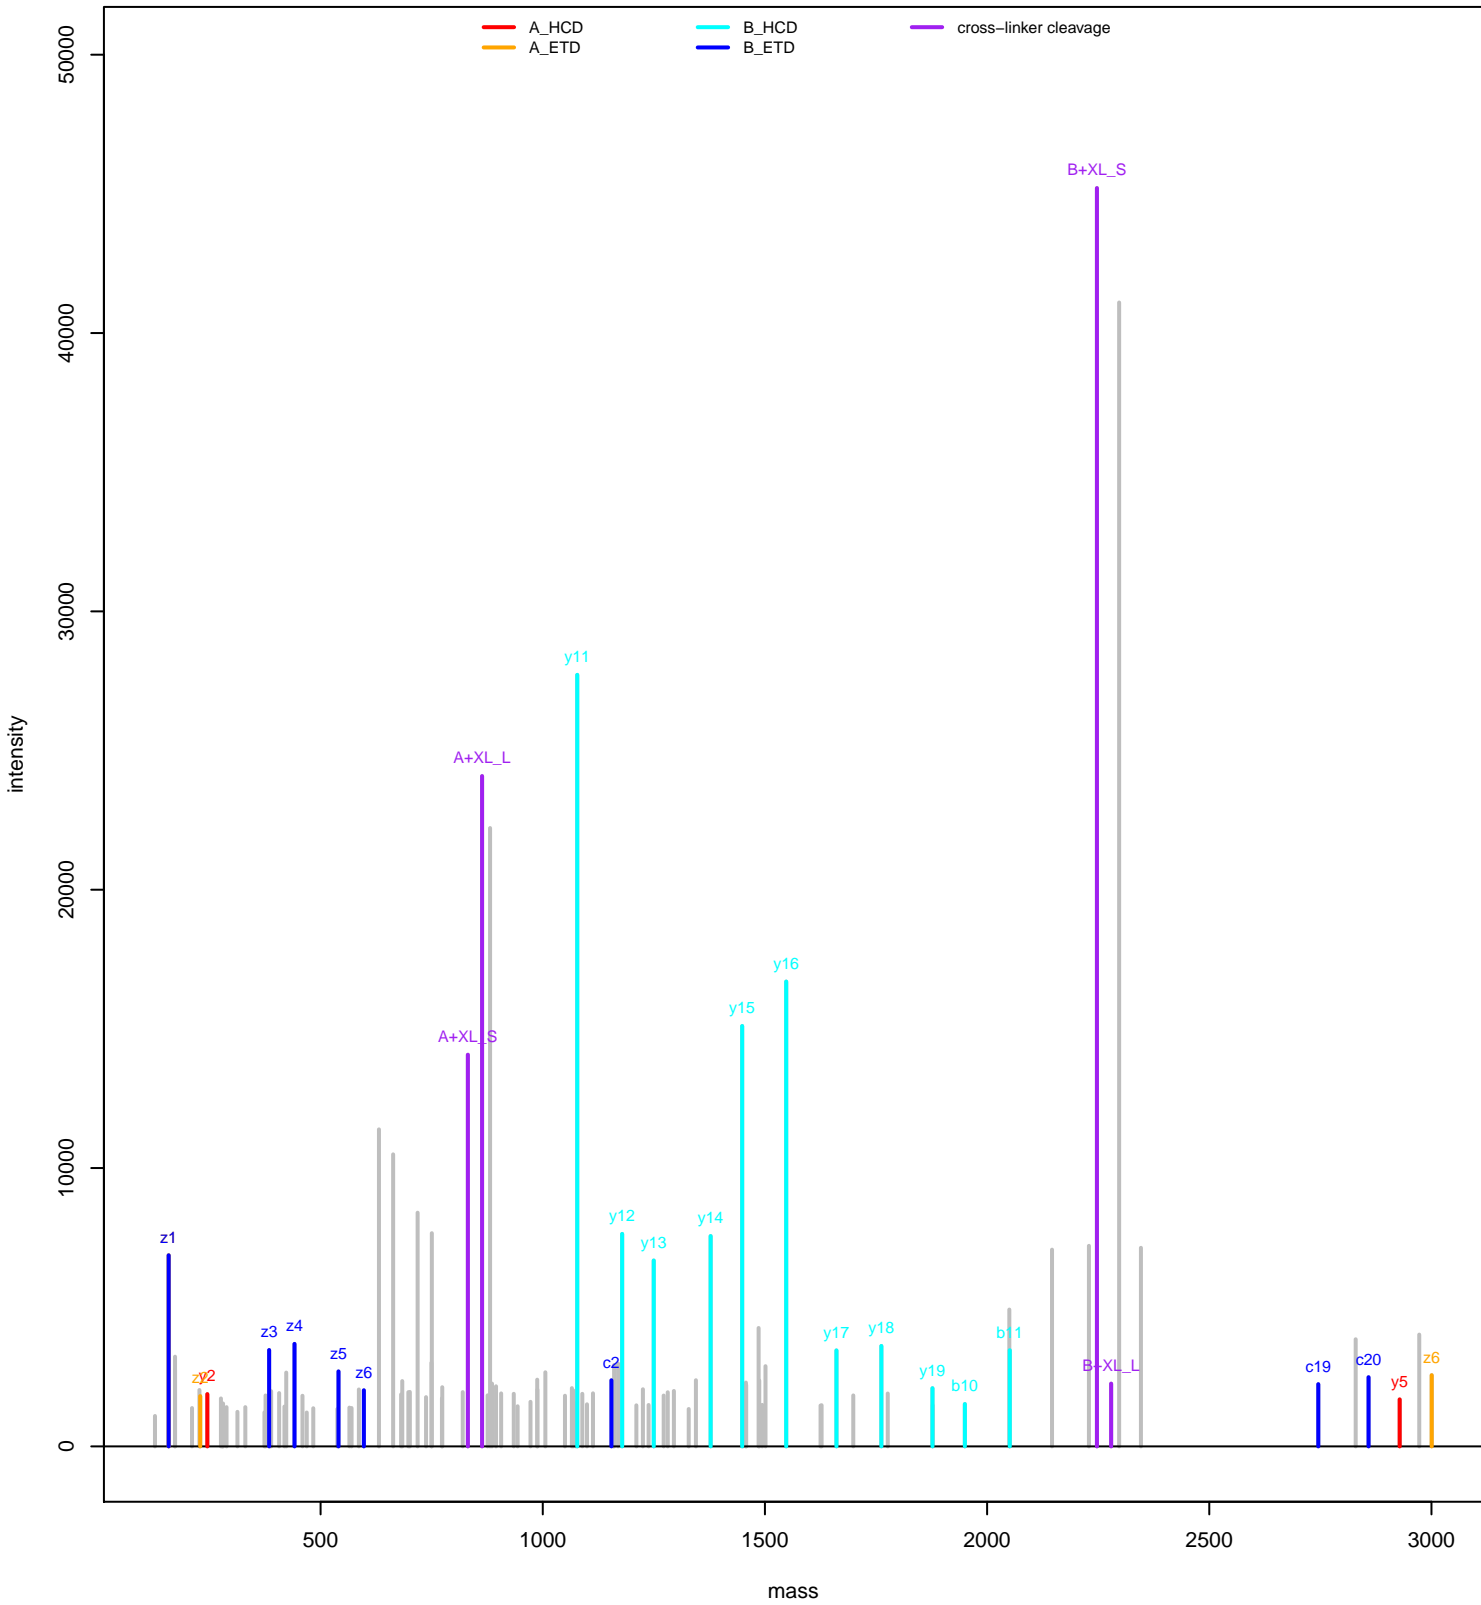

ISGFKAR+XL\_S

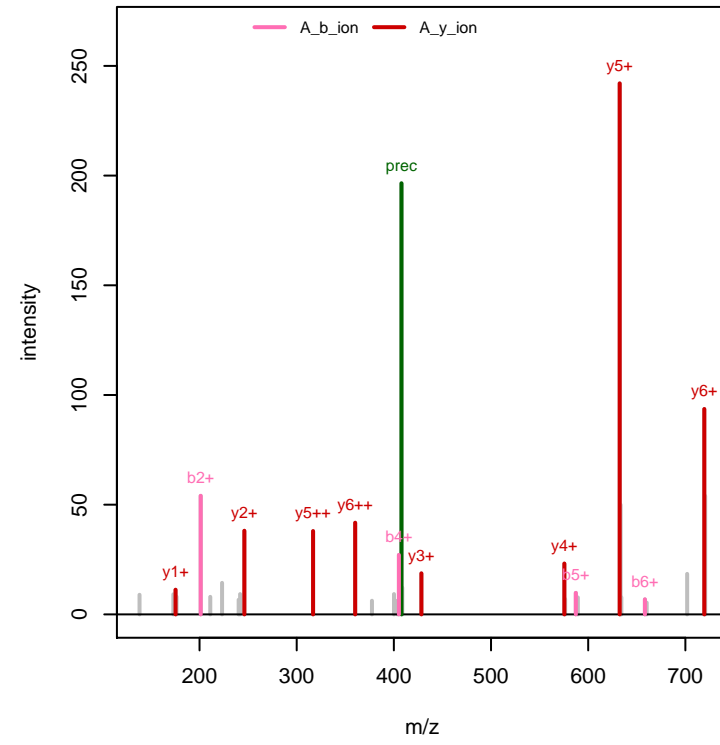

ISGFKAR+XL\_L

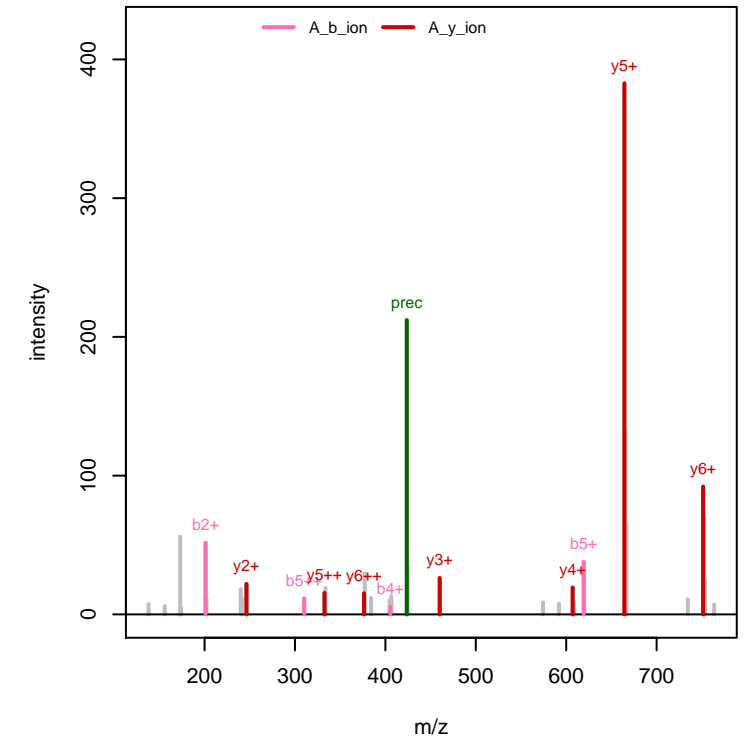

SDNDTIVAQATPPGRGGVGILR+XL\_S

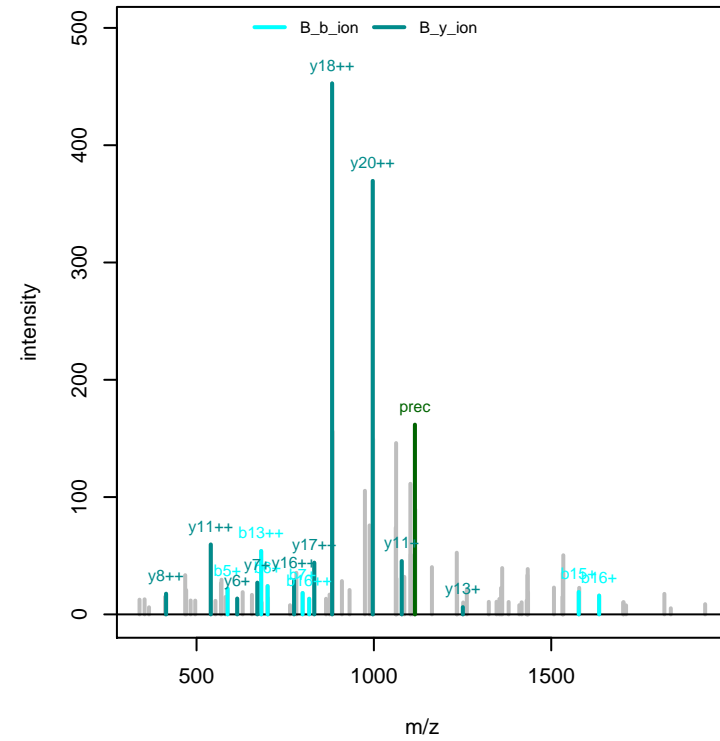

SDNDTIVAQATPPGRGGVGILR+XL\_L

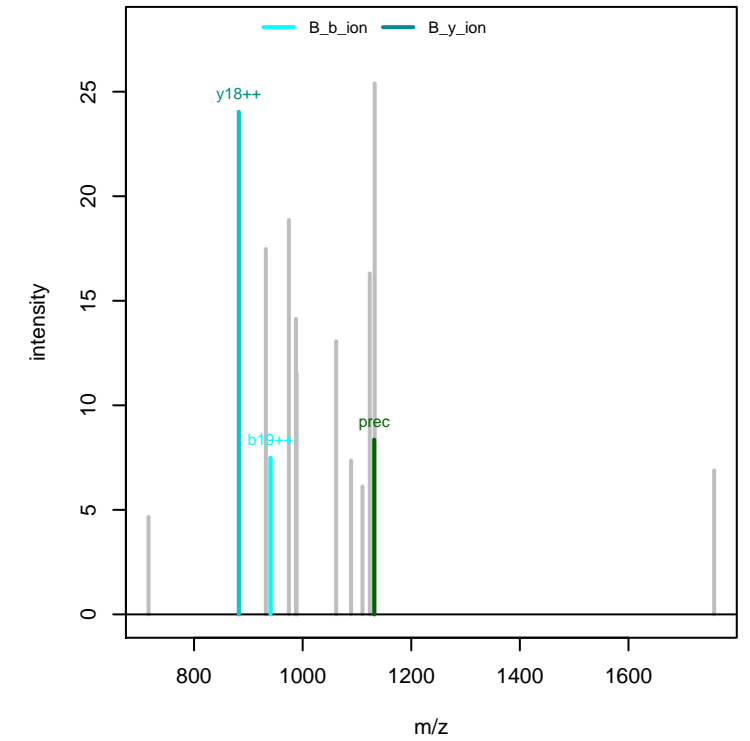



QLEEKAR  
YLYGVKPGATR

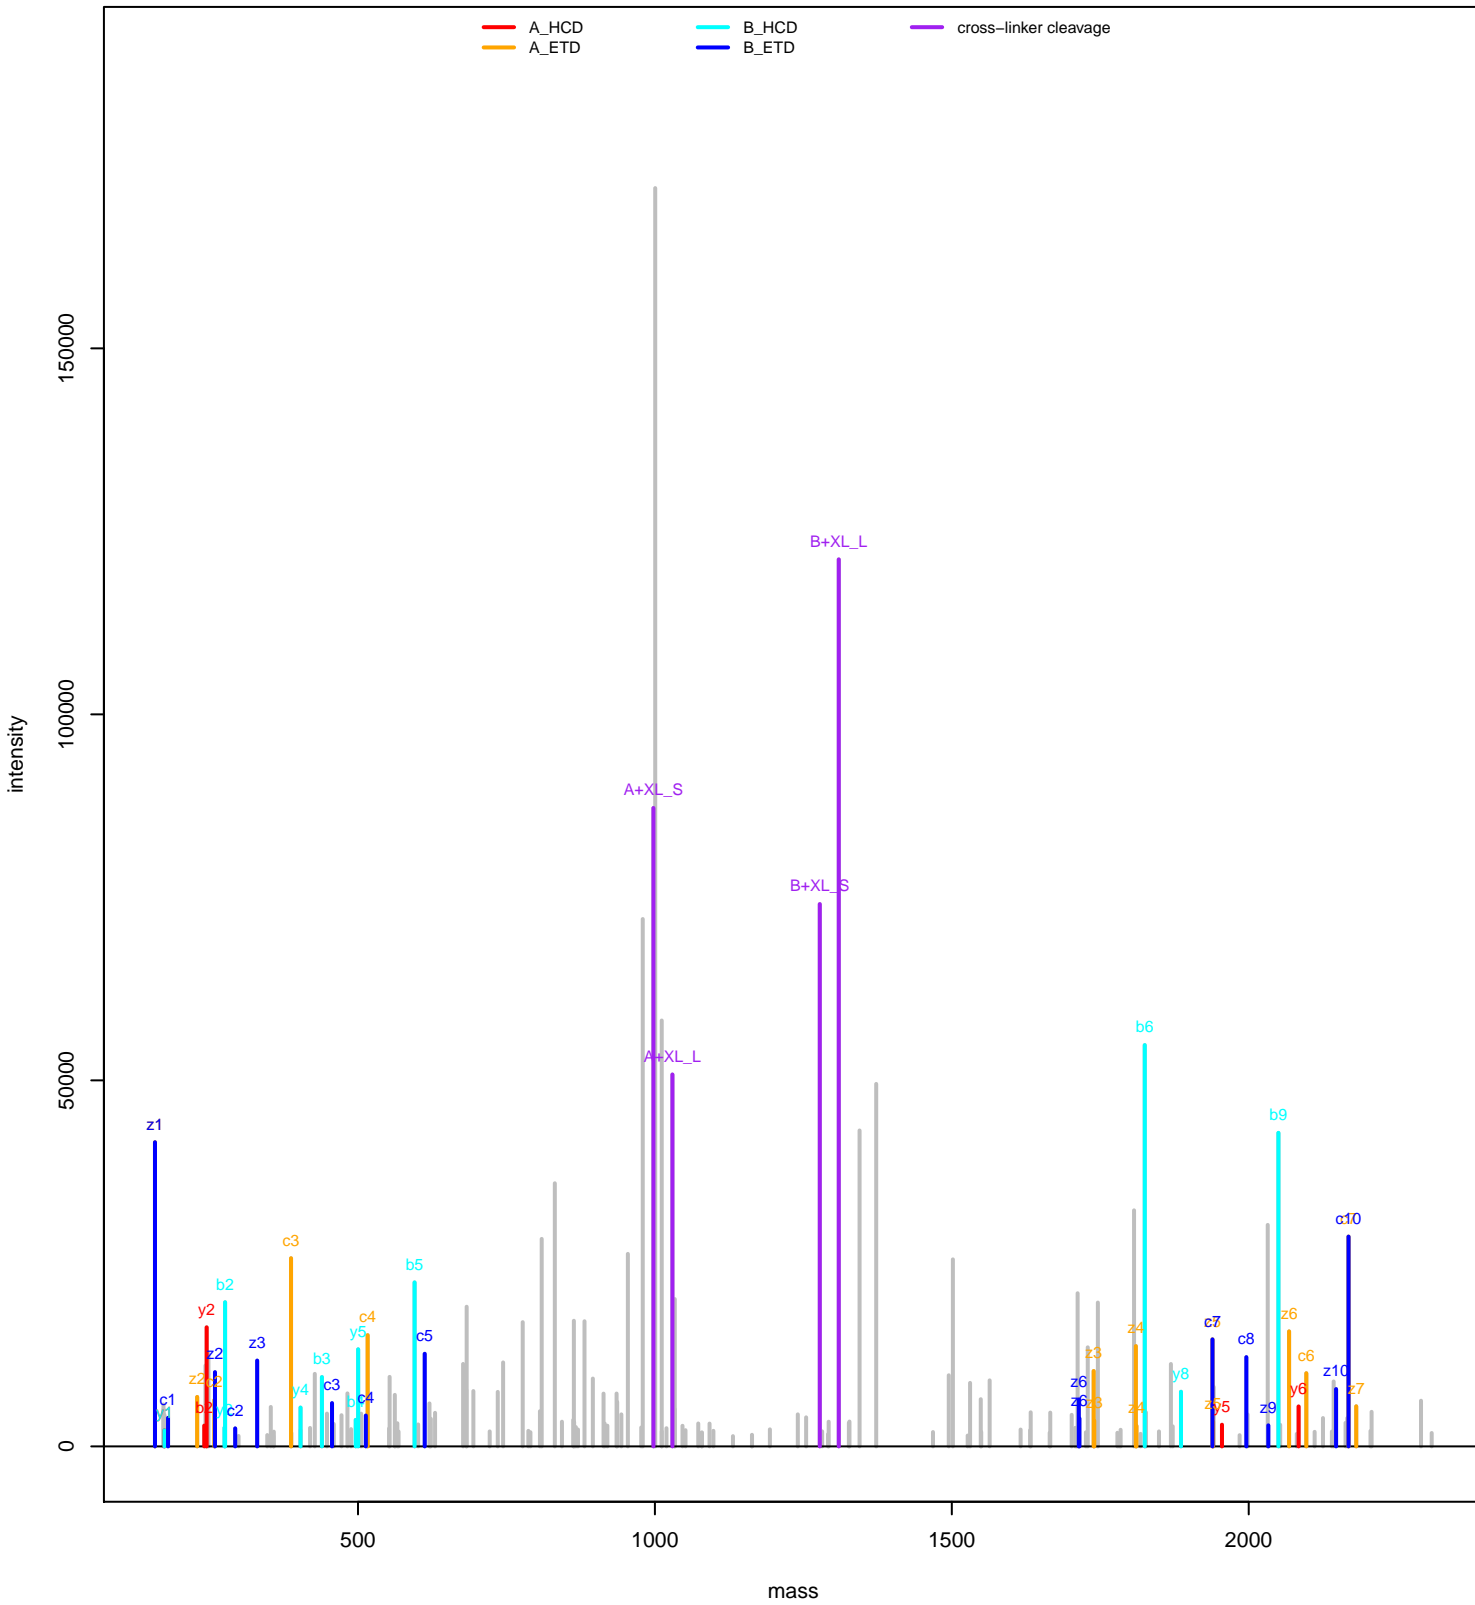

QLEEKAR+XL\_S

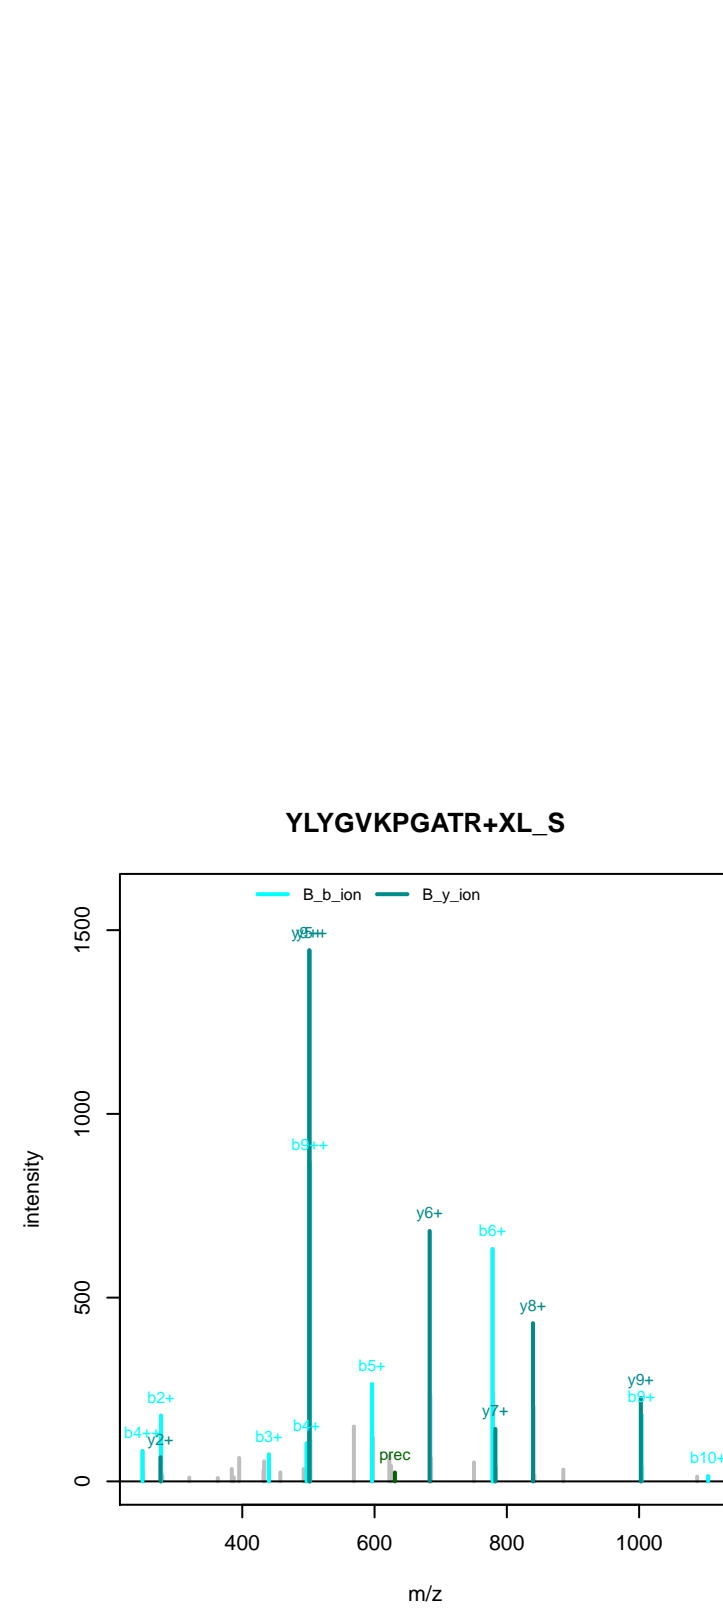

QLEEKAR+XL\_L

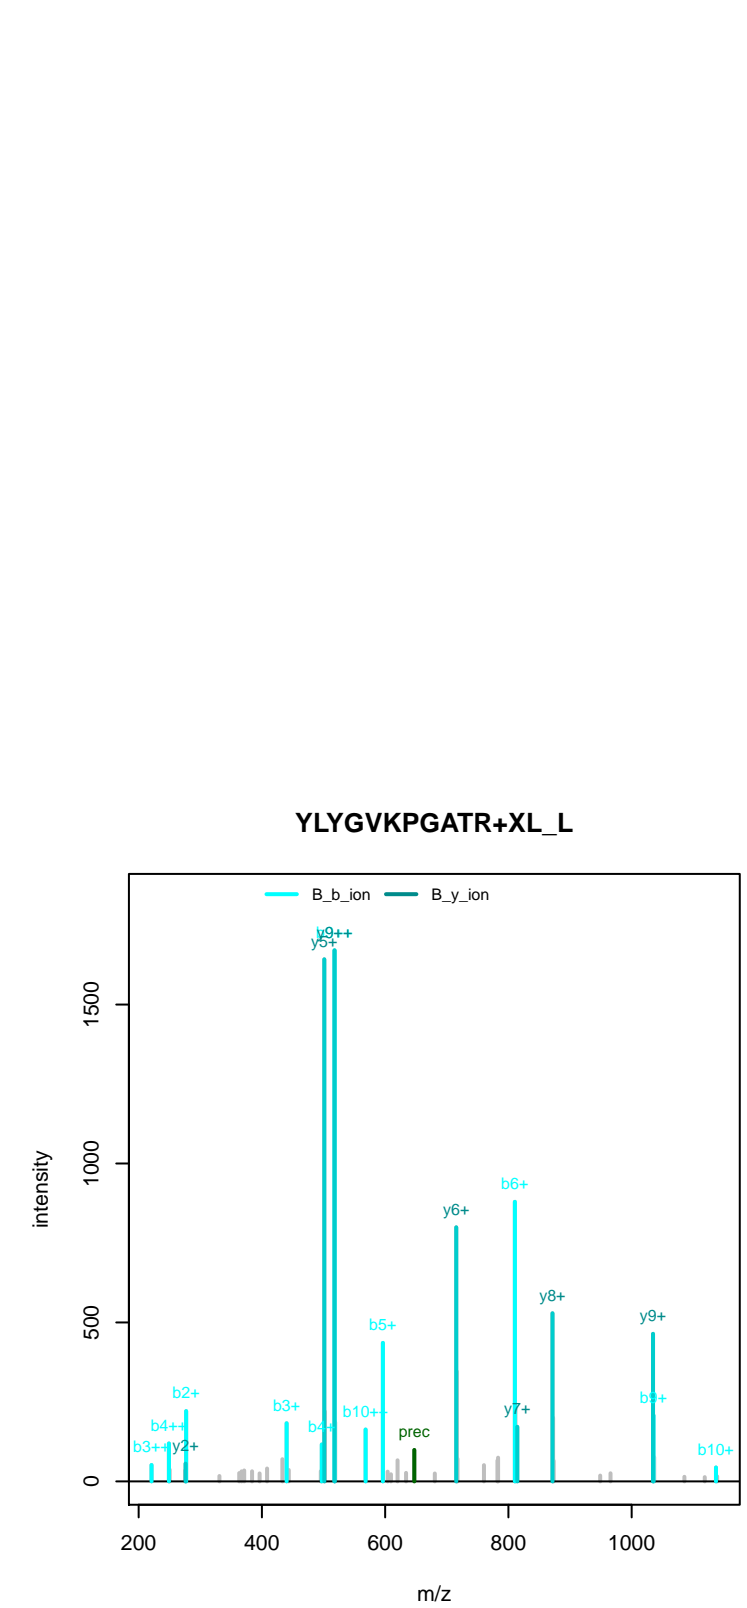

YLYGVKPGATR+XL\_S

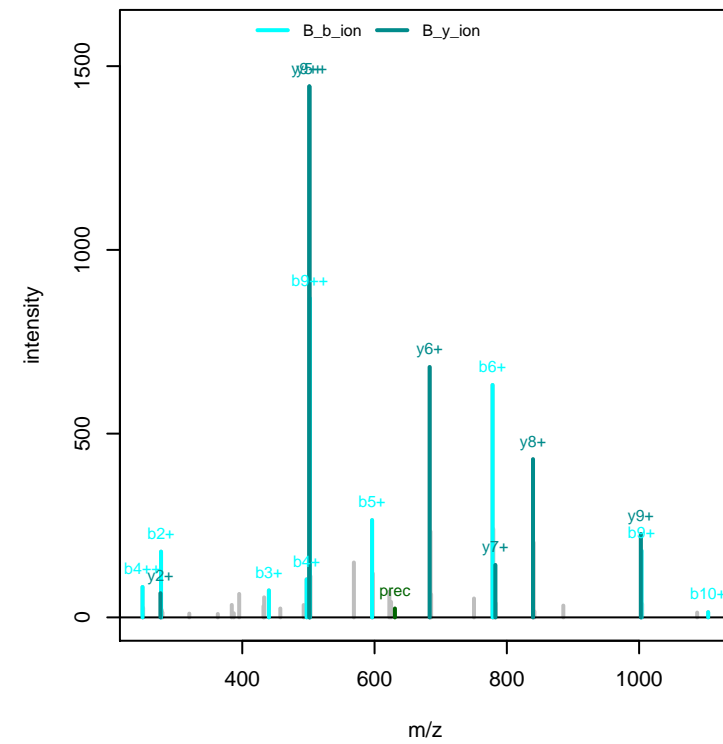

YLYGVKPGATR+XL\_L

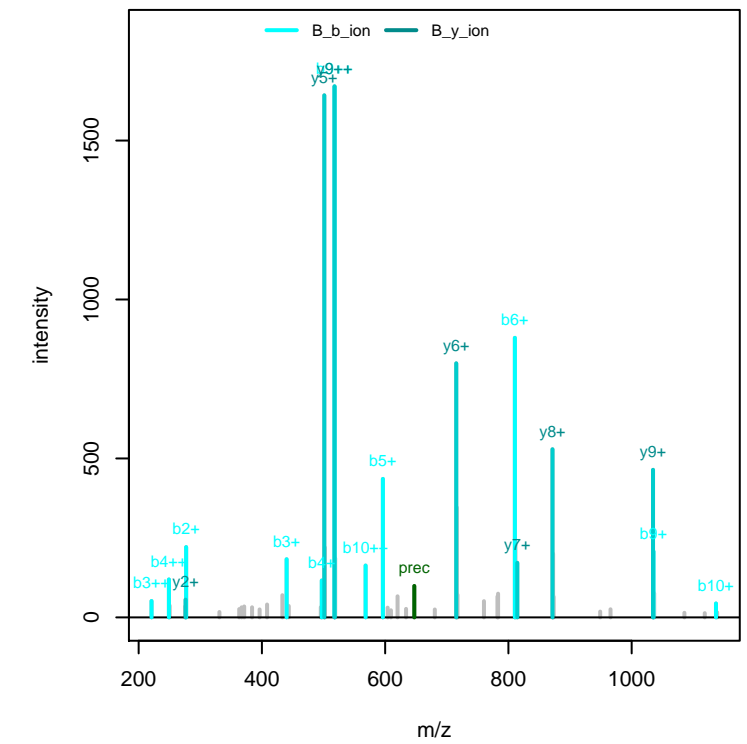

**ANNNDVKSVK**  
TAGNGQFKAVGDSLEAQQYGIAPFK

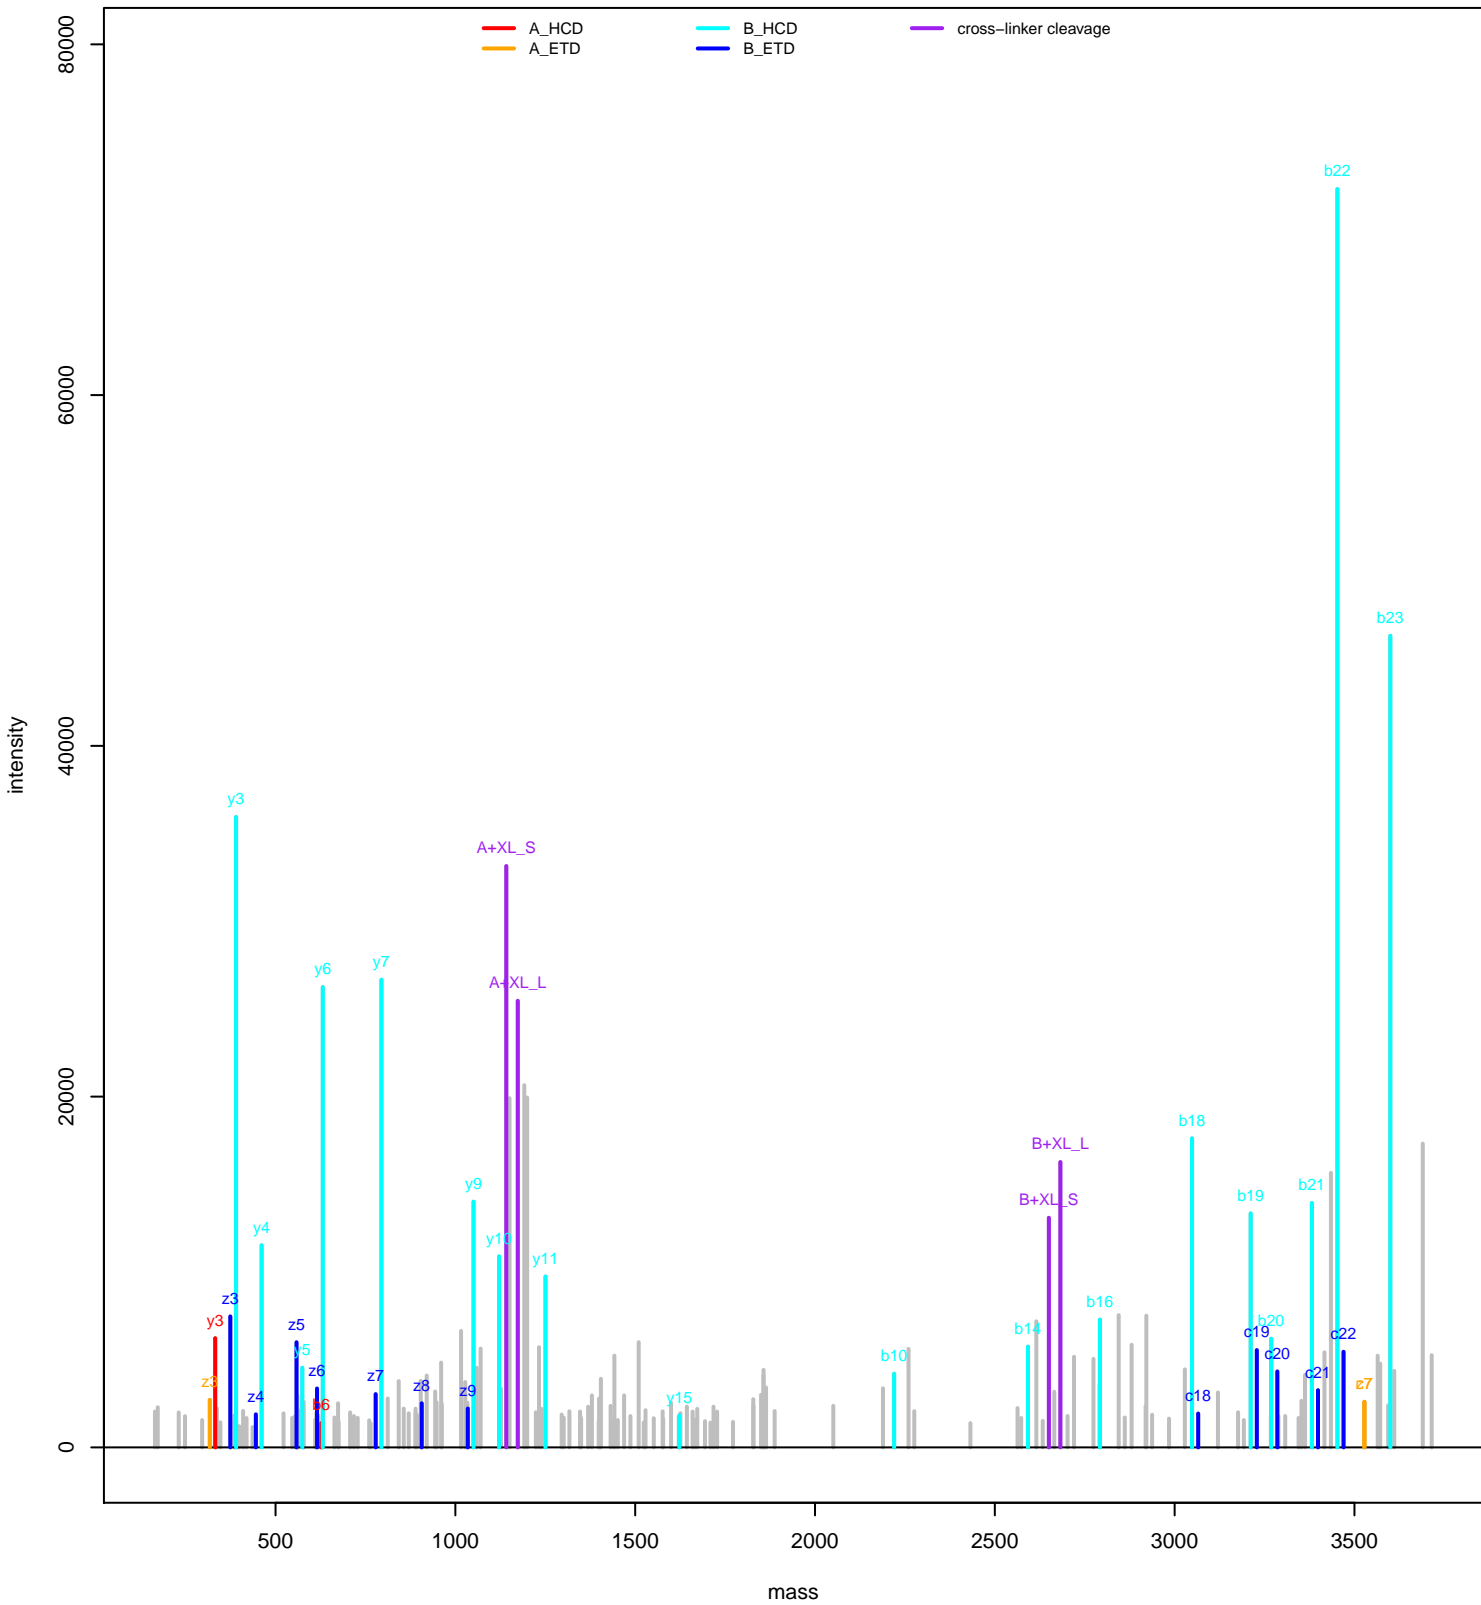

**ANNNDVKSVK+XL\_S**

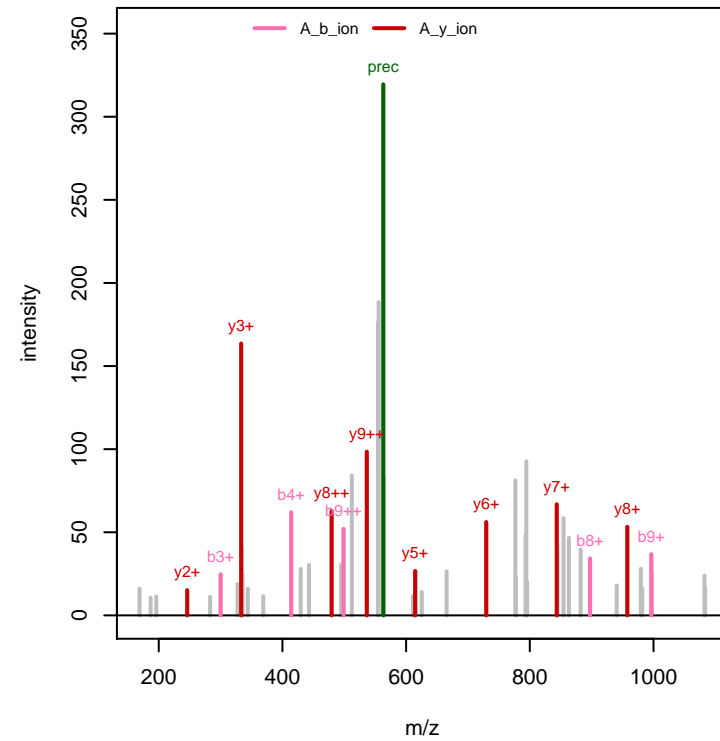

**ANNNDVKSVK+XL\_L**

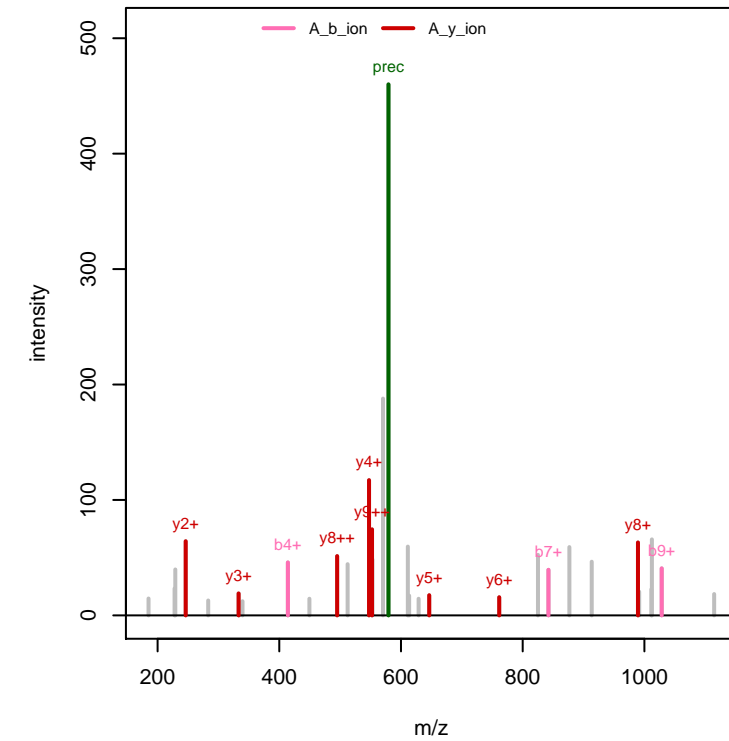

**TAGNGQFKAVGDSLEAQQYGIAPFK+XL\_S**

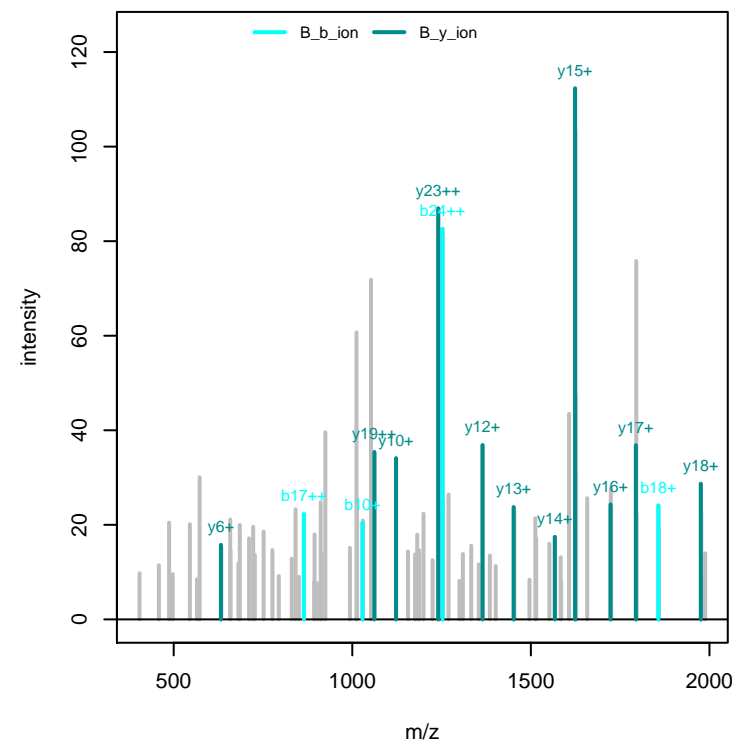

**TAGNGQFKAVGDSLEAQQYGIAPFK+XL\_L**

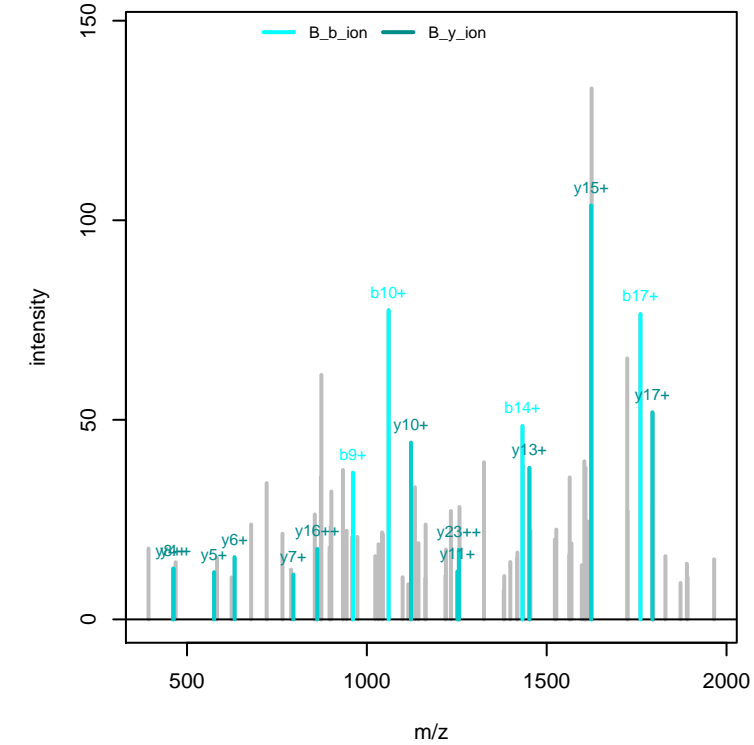

VGAATEVEMoKEK  
VAVKAPGFGDRRK

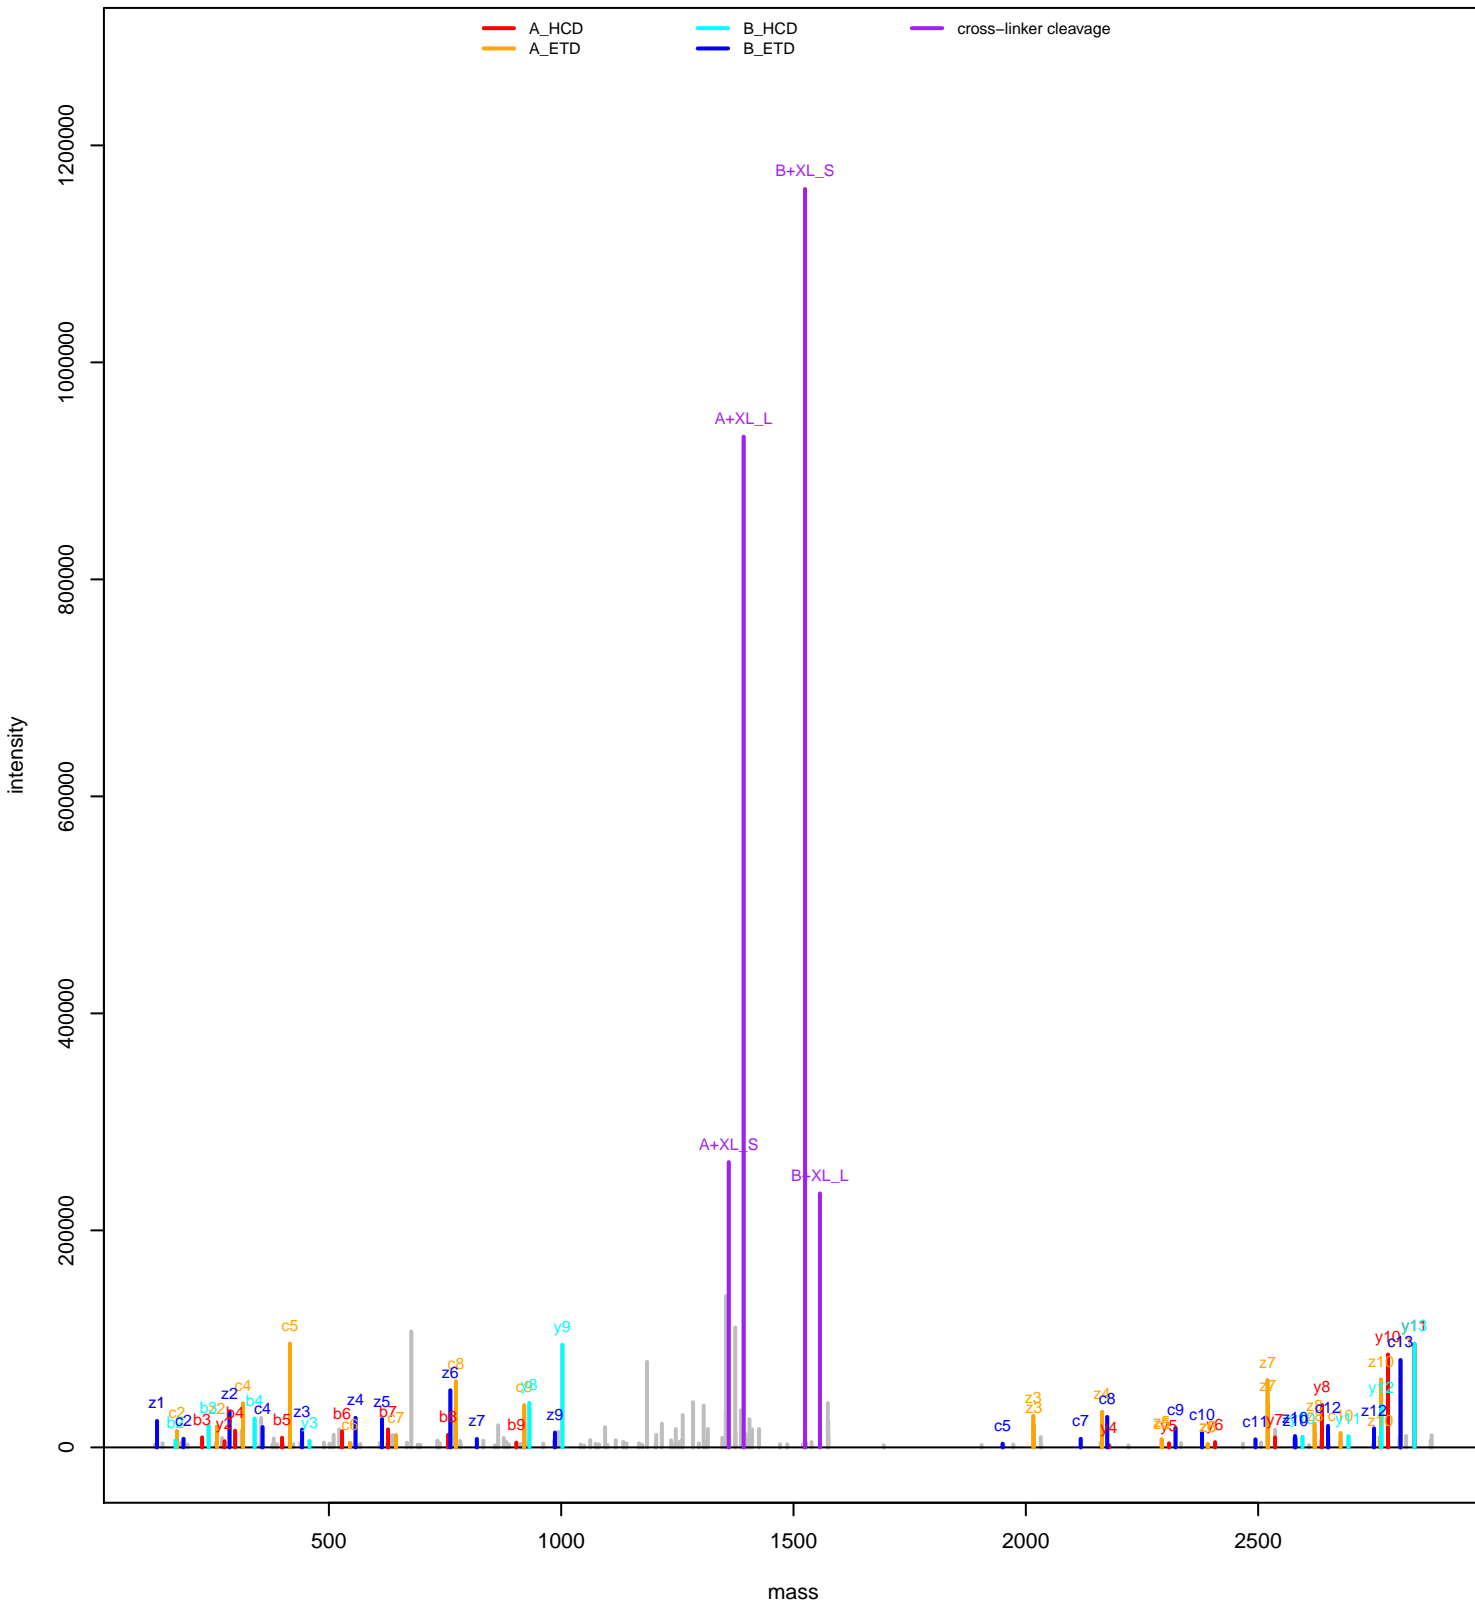

VGAATEVEMoKEK+XL\_S

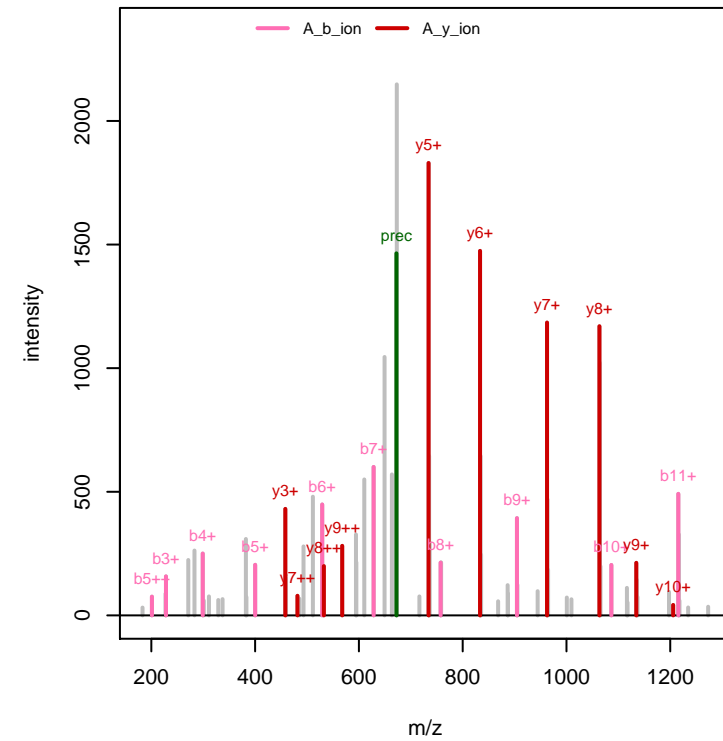

VGAATEVEMoKEK+XL\_L

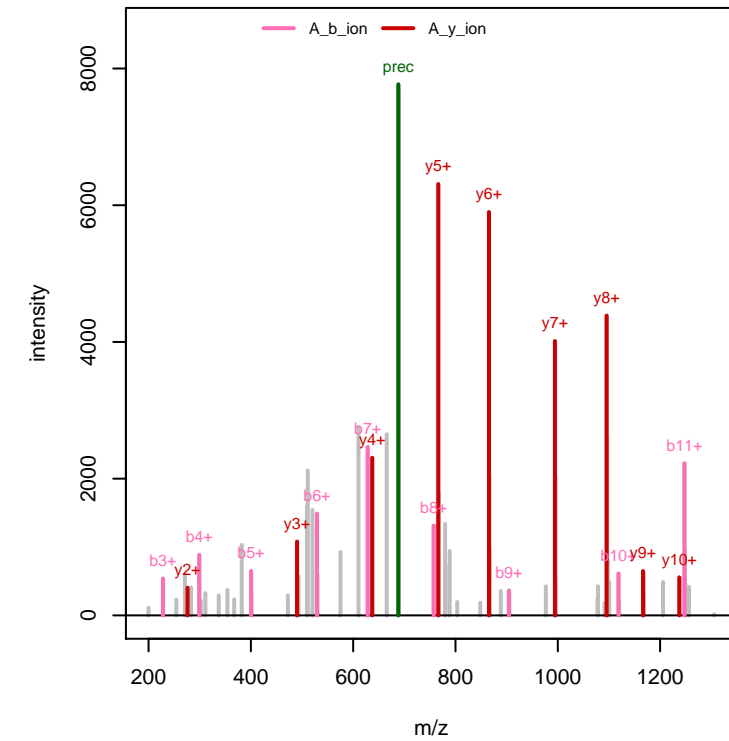

VAVKAPGFGDRRK+XL\_S

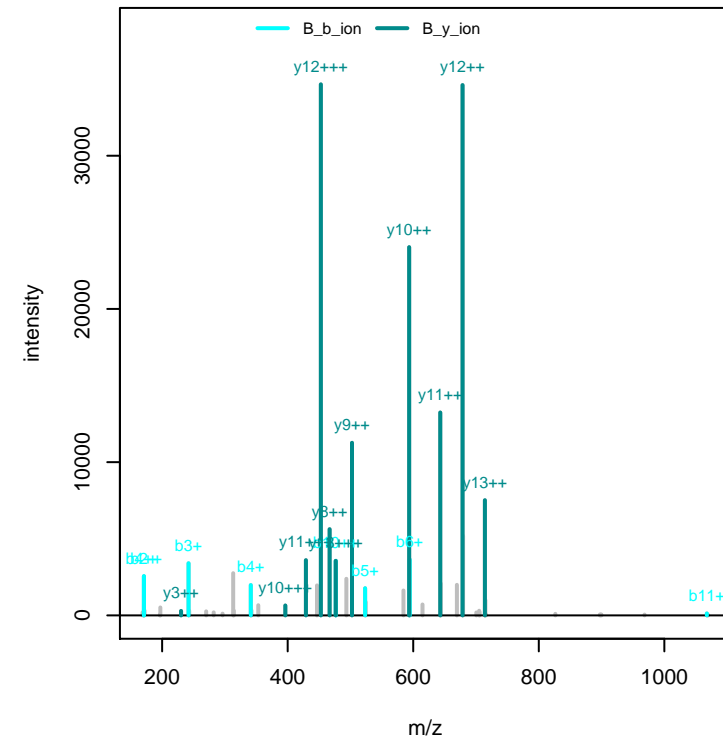

VAVKAPGFGDRRK+XL\_L

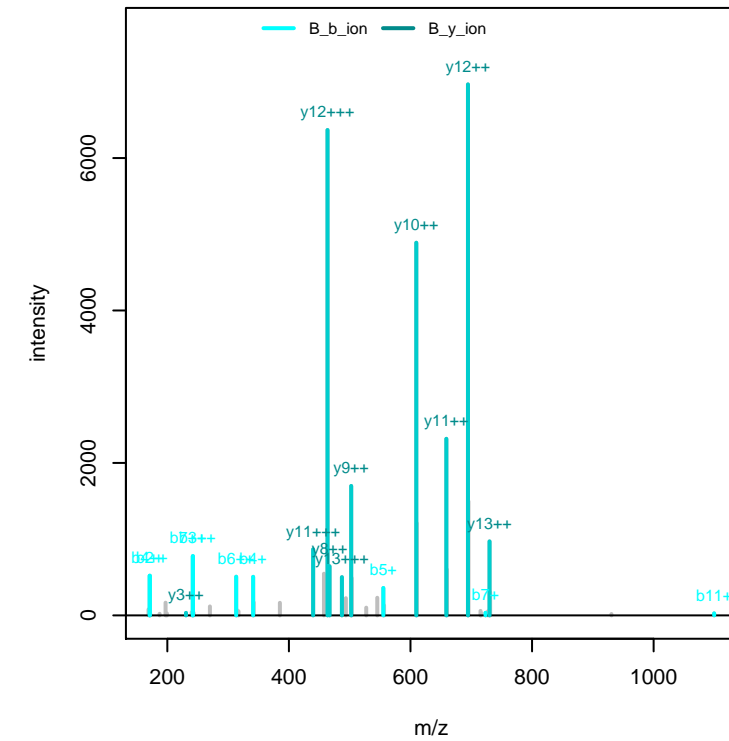

**ITDKQER  
MLNPIVRK**

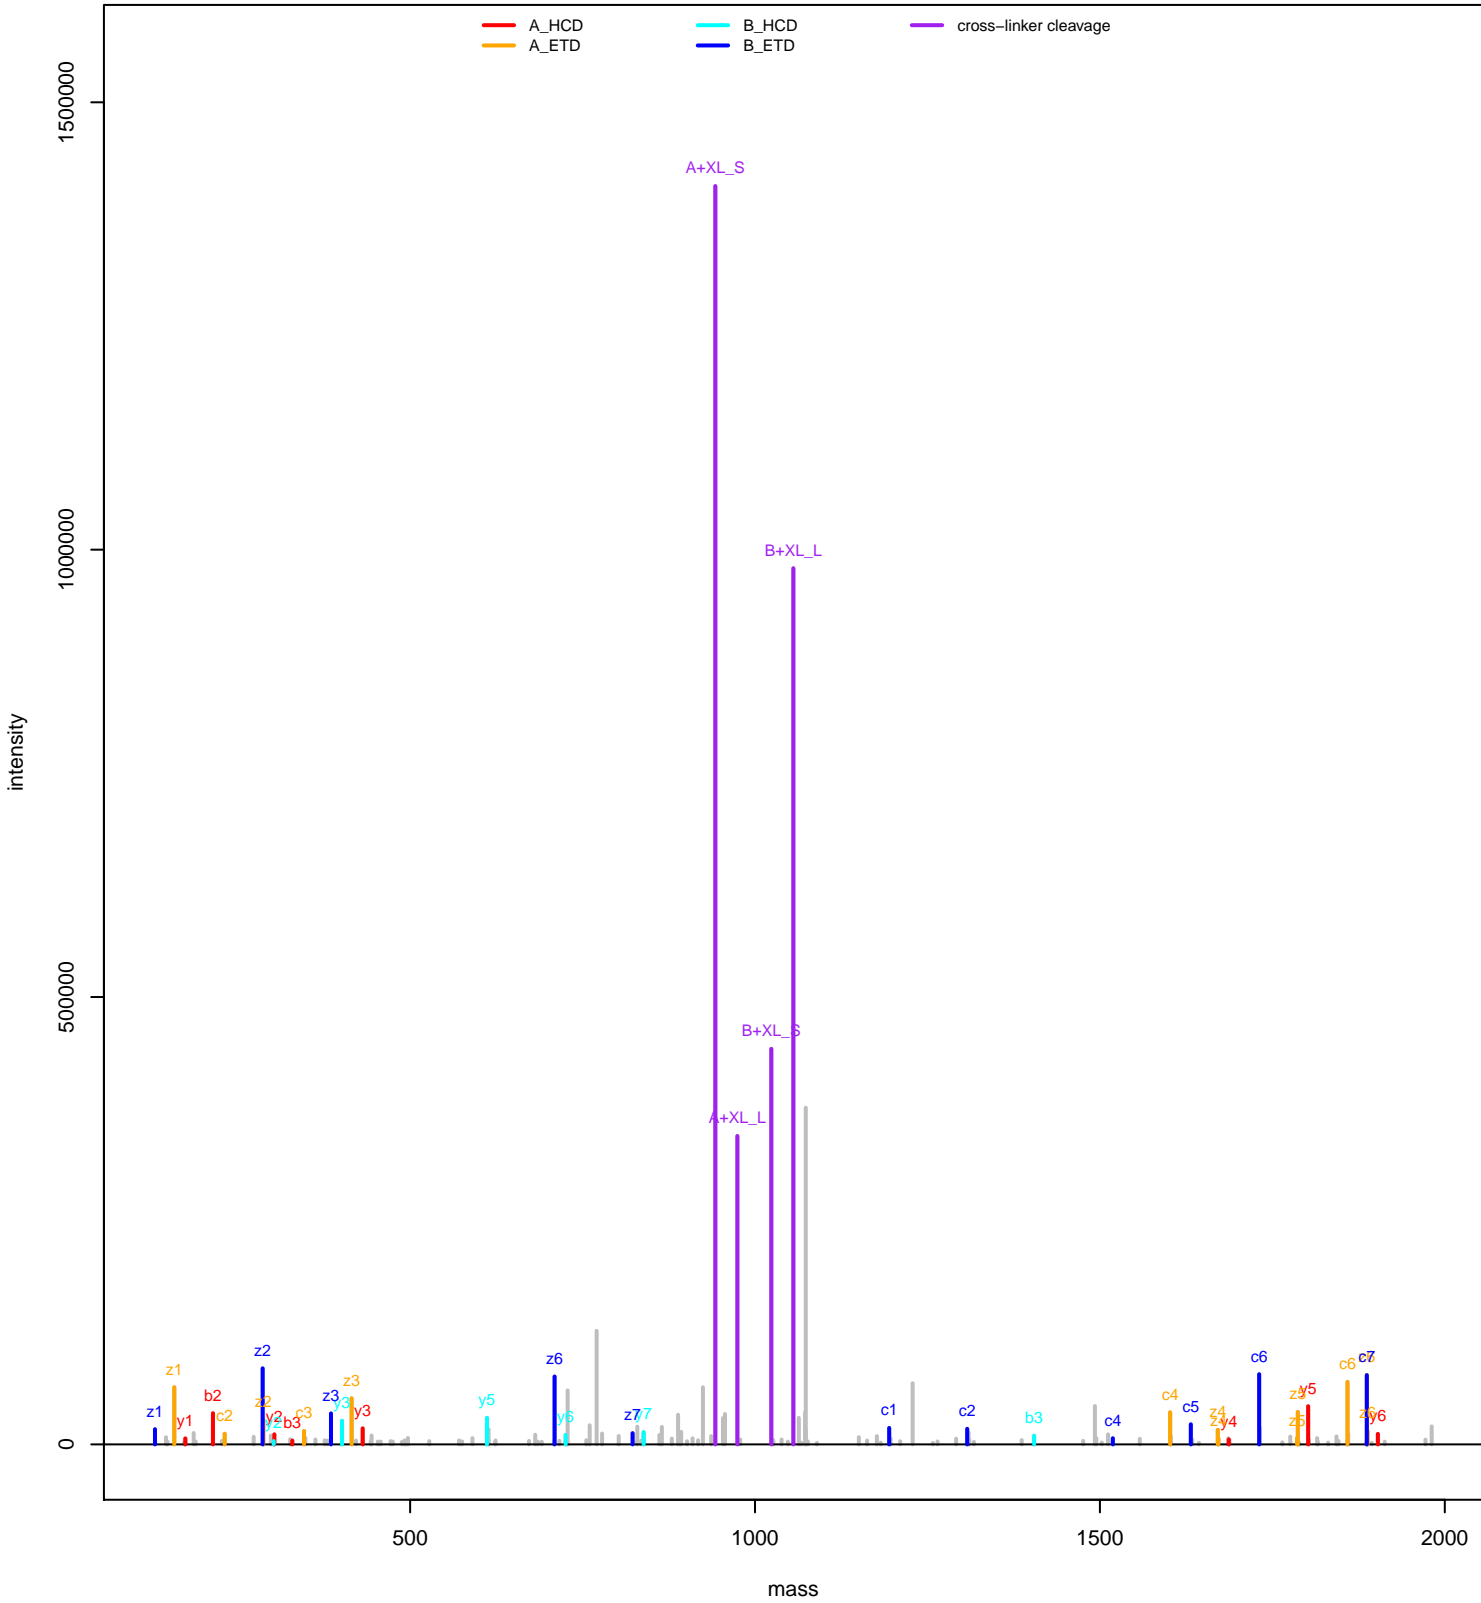

**ITDKQER+XL\_S**

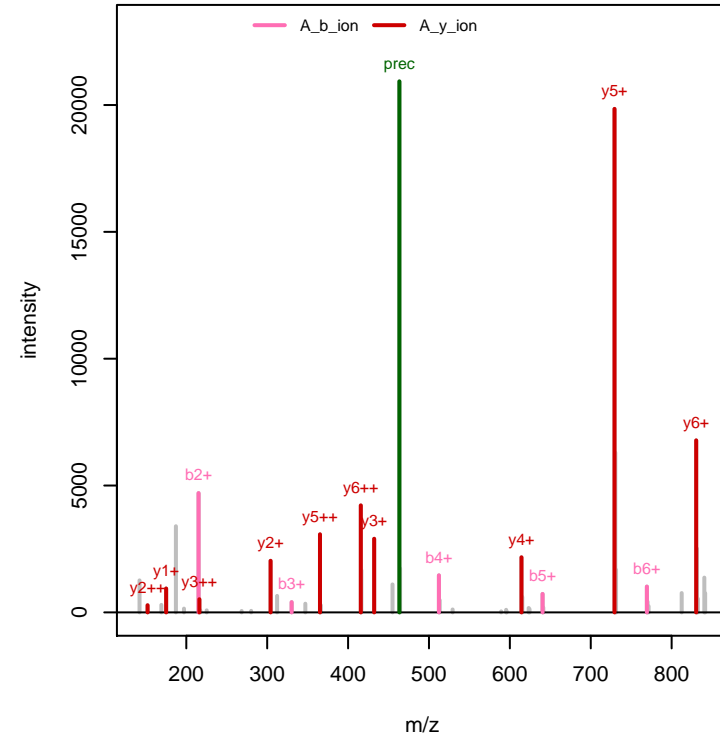

**ITDKQER+XL\_L**

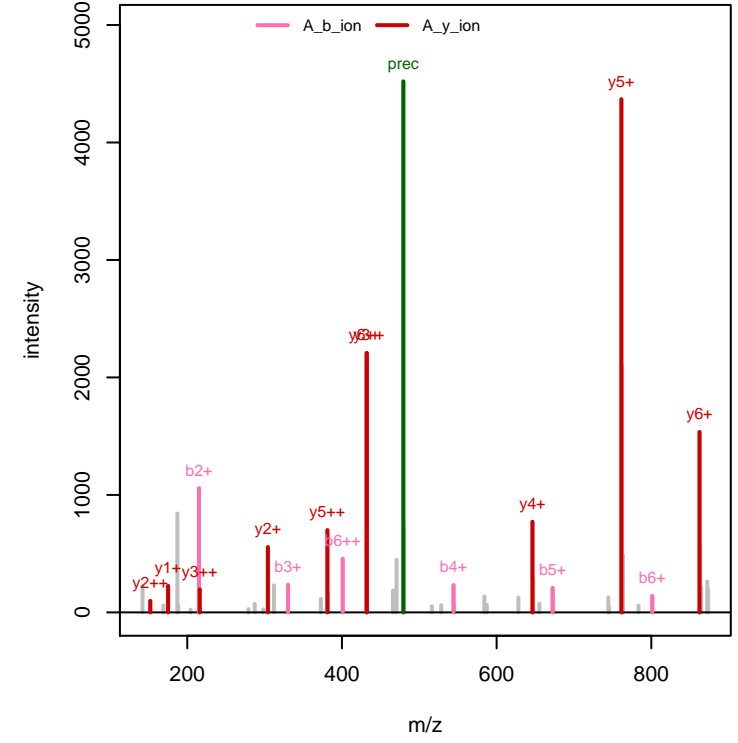

**MLNPIVRK+XL\_S**

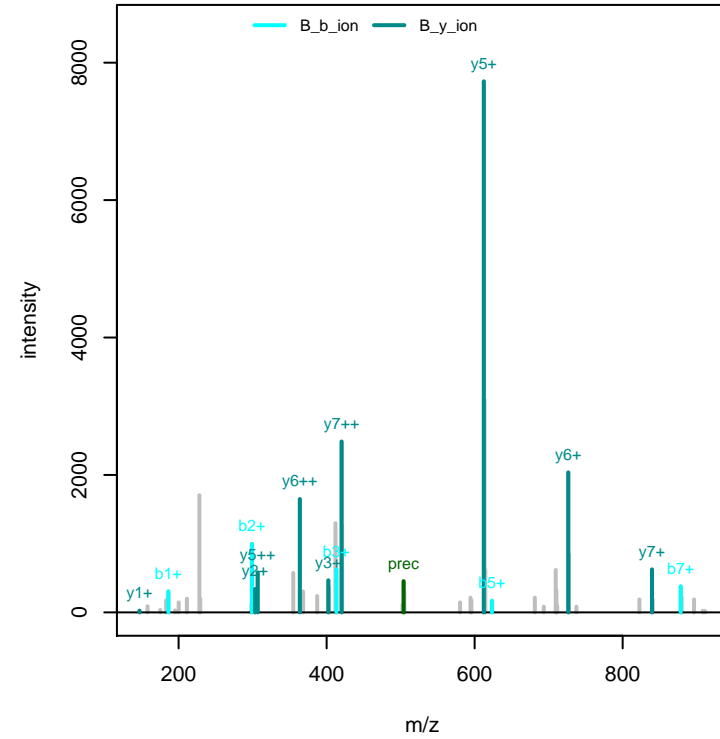

**MLNPIVRK+XL\_L**

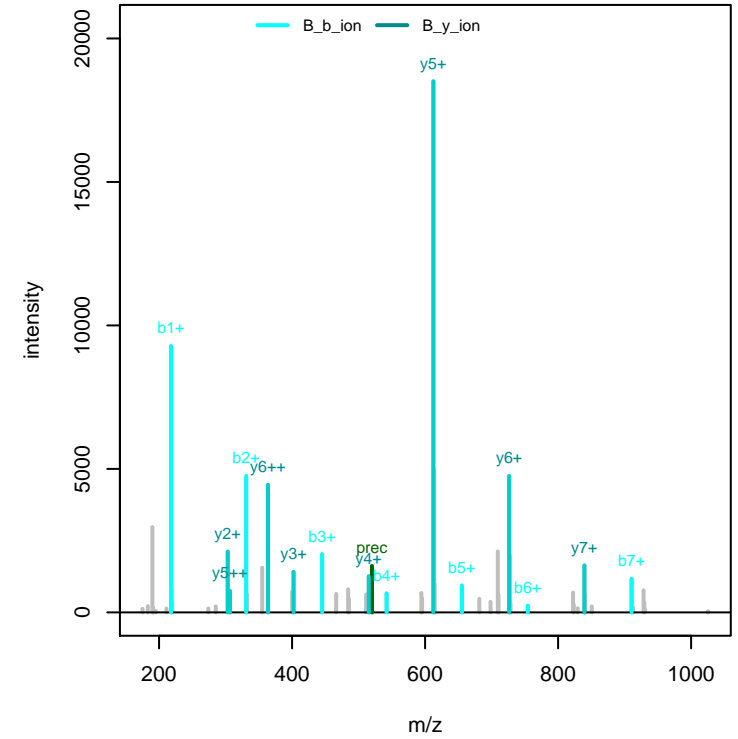

SPGVFFDSDK GK  
IPQESGGTKDITGGLPR

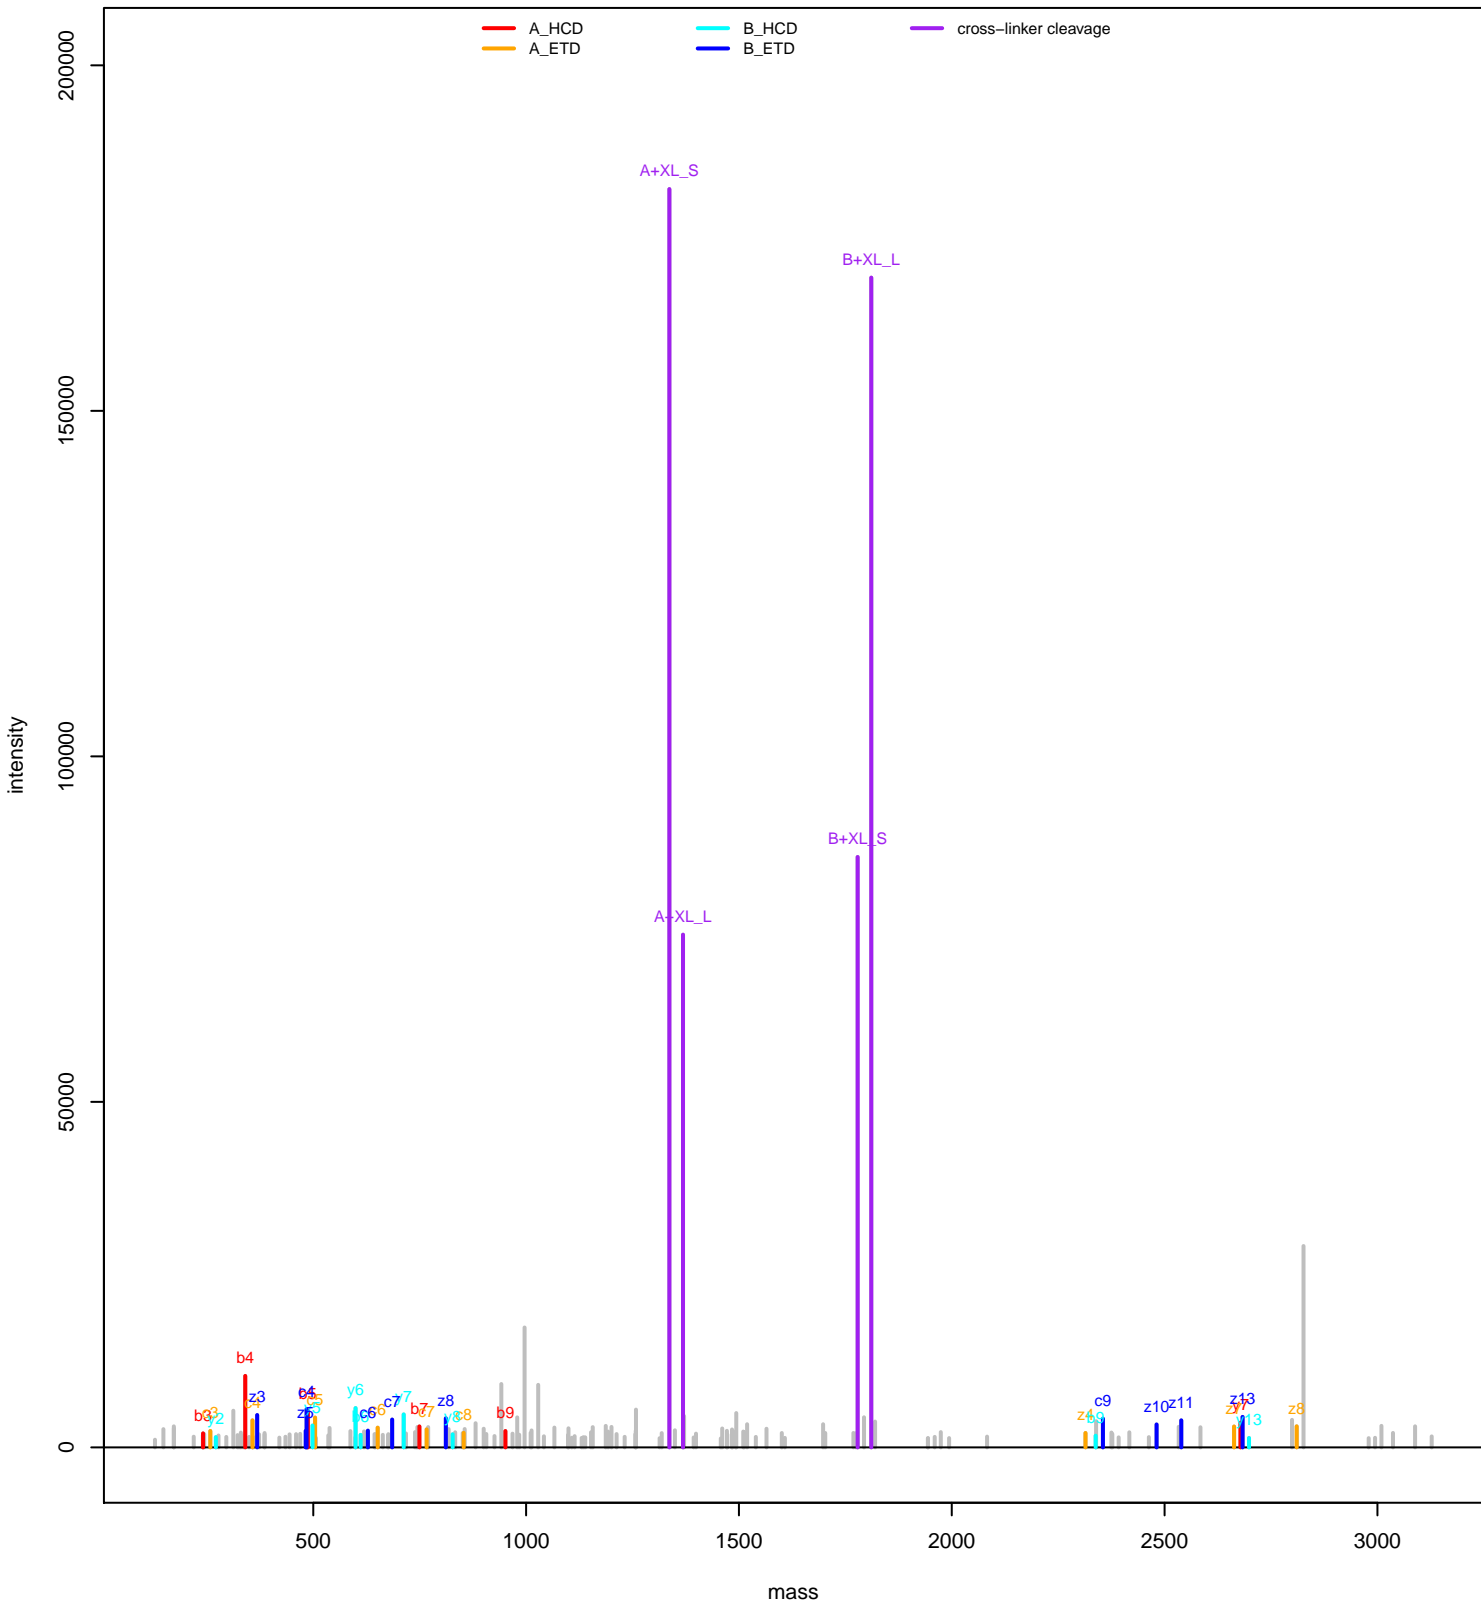

SPGVFFDSDK GK+XL\_S

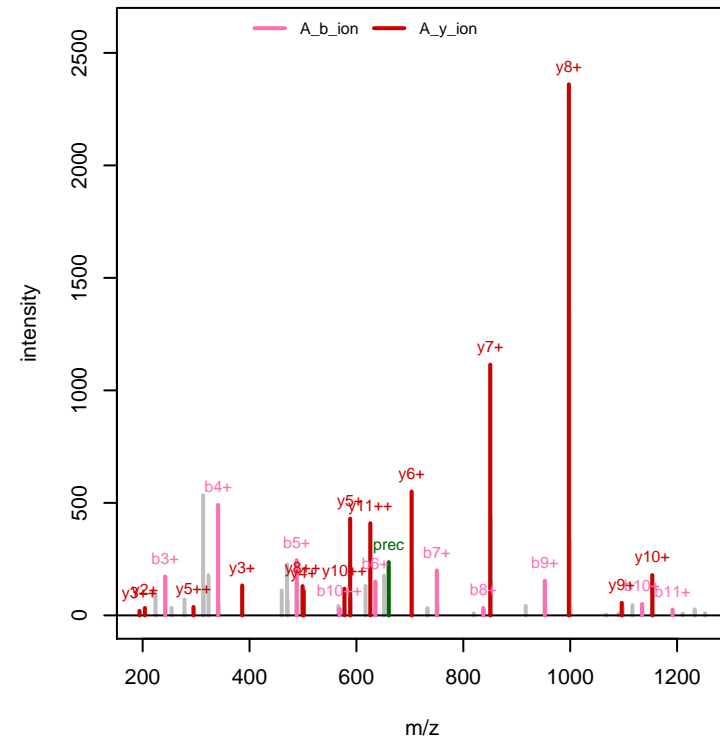

SPGVFFDSDK GK+XL\_L

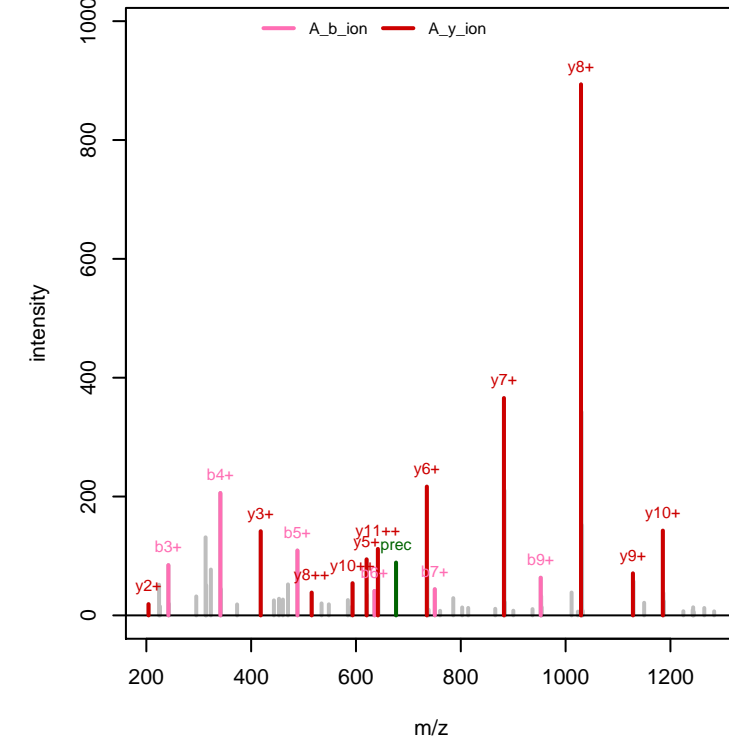

IPQESGGTKDITGGLPR+XL\_S

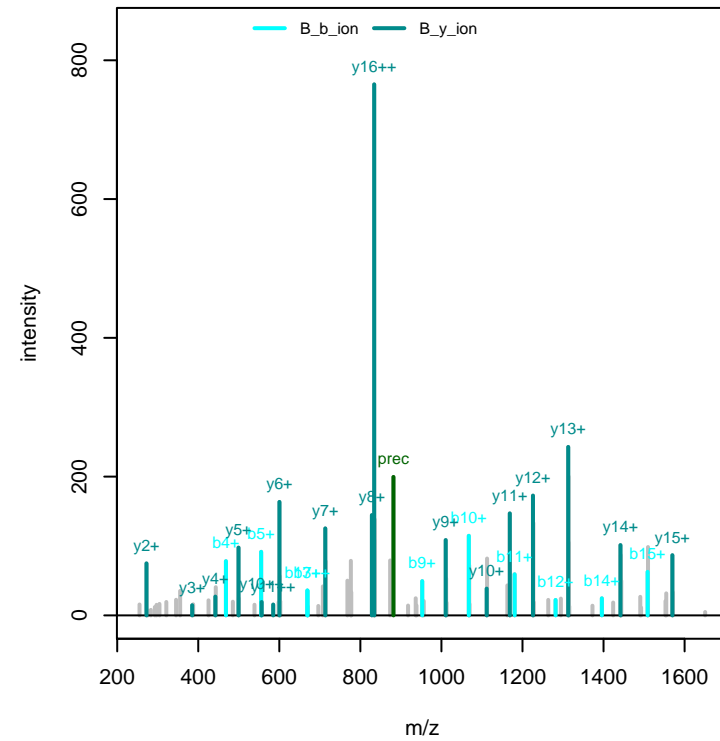

IPQESGGTKDITGGLPR+XL\_L

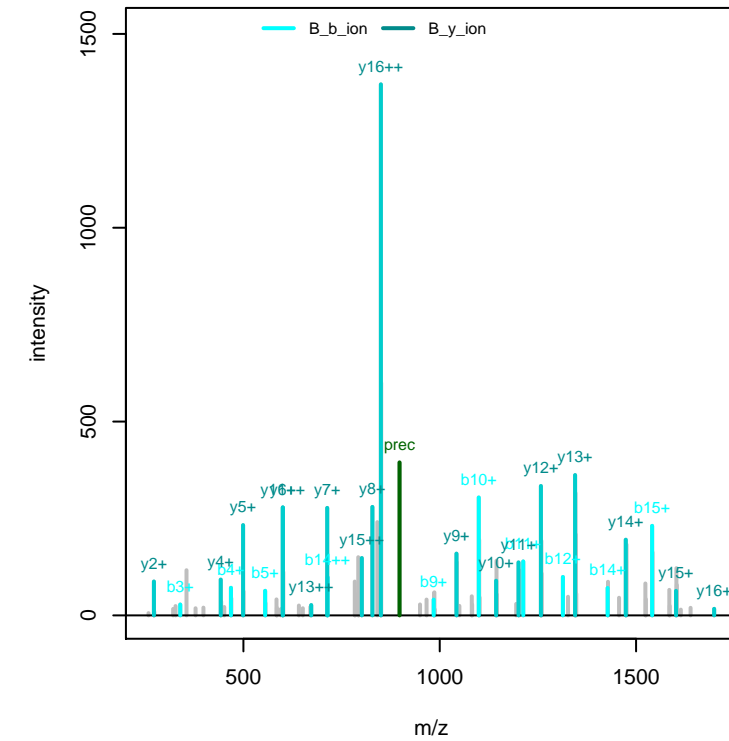

DAKEGSVK  
AALVDHNDNIKSTDISVK

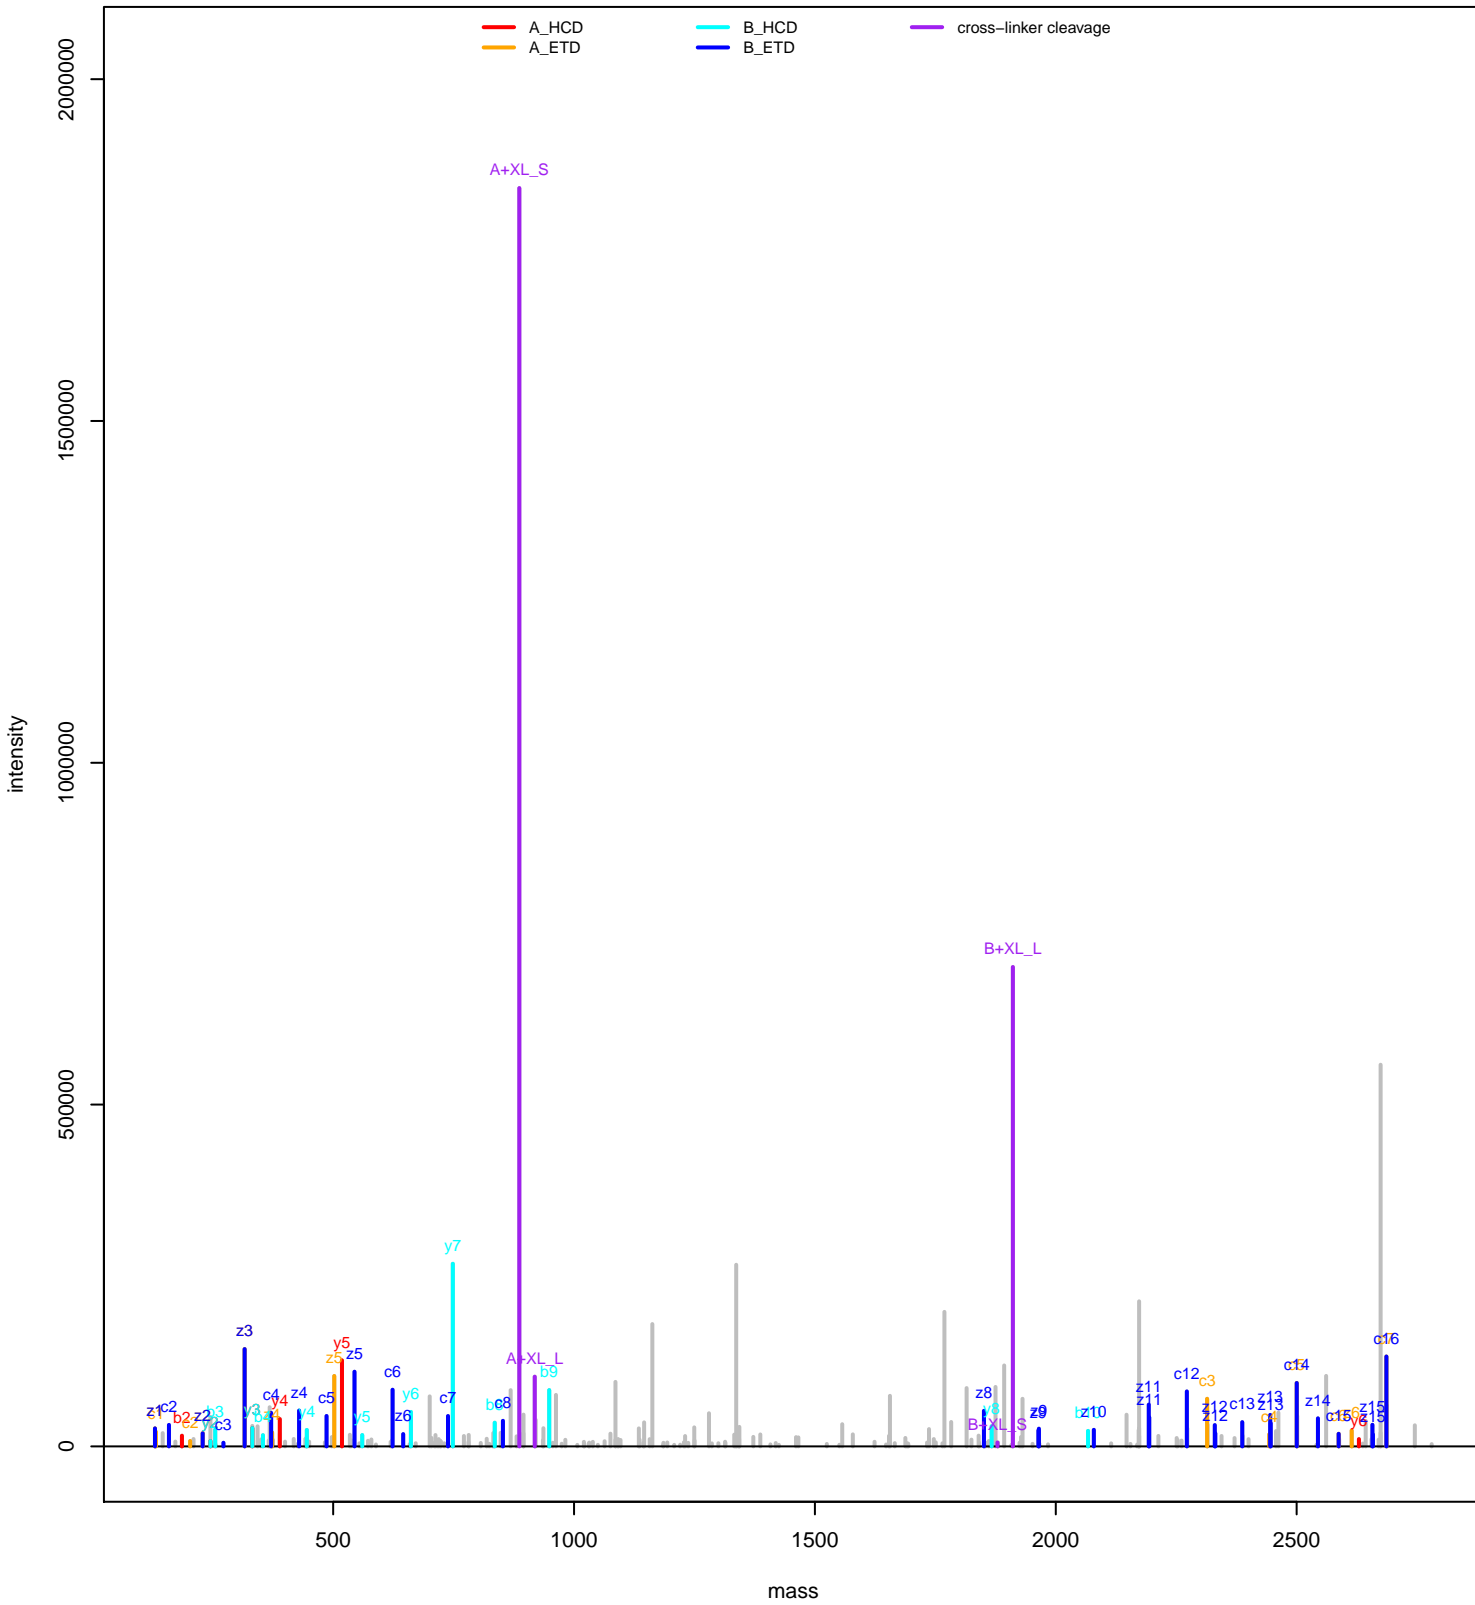

DAKEGSVK+XL\_S

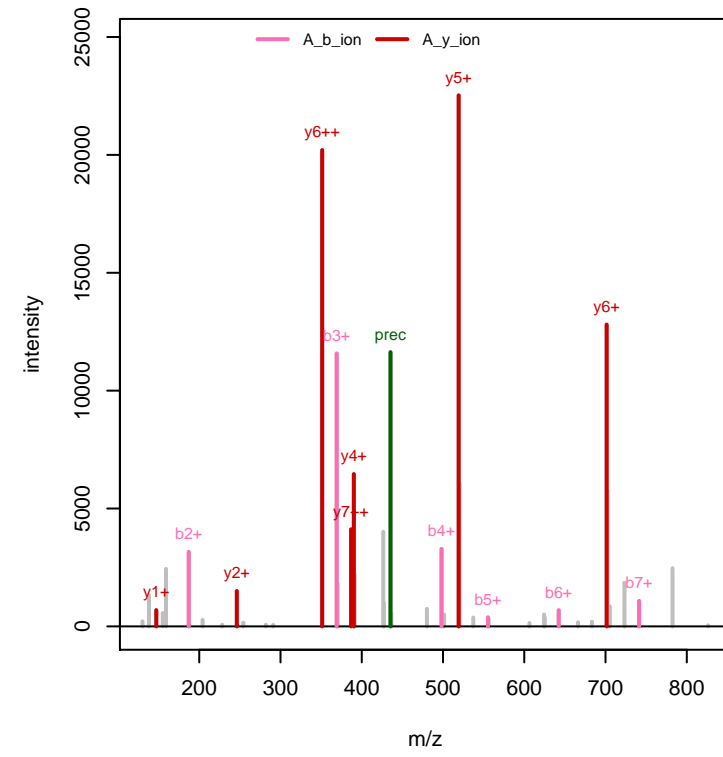

DAKEGSVK+XL\_L

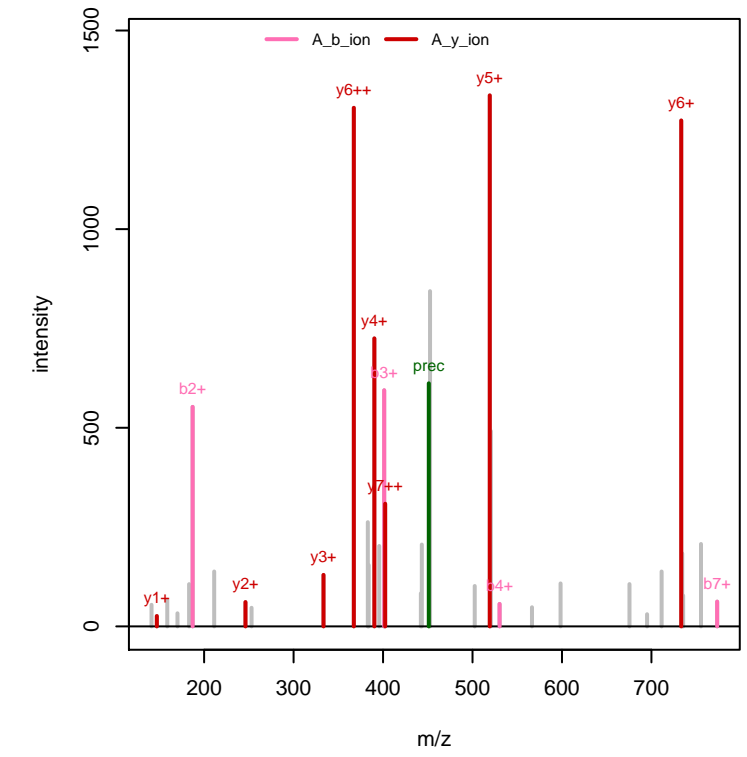

AALVDHNDNIKSTDISVK+XL\_S

AALVDHNDNIKSTDISVK+XL\_L

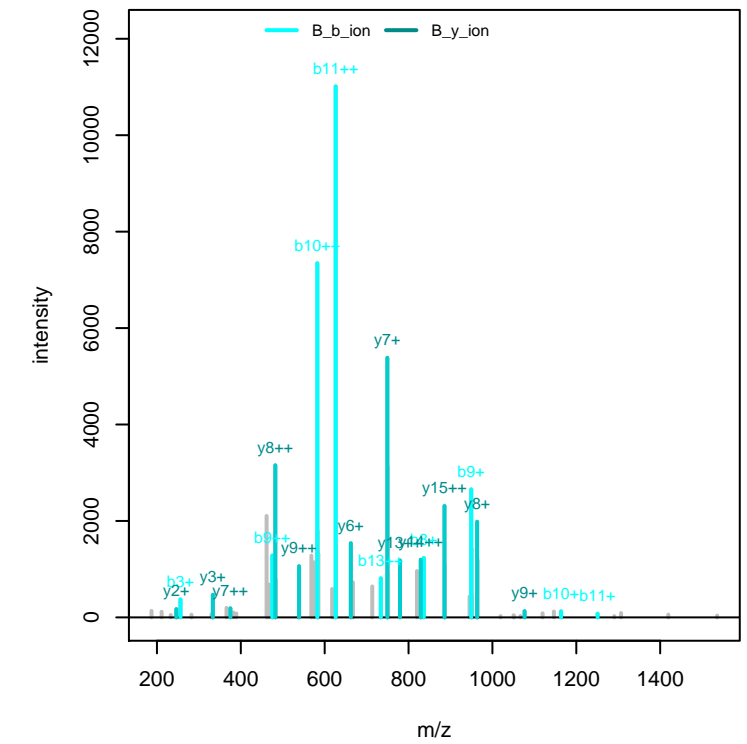

VIKLDQK  
VLKFDRLR

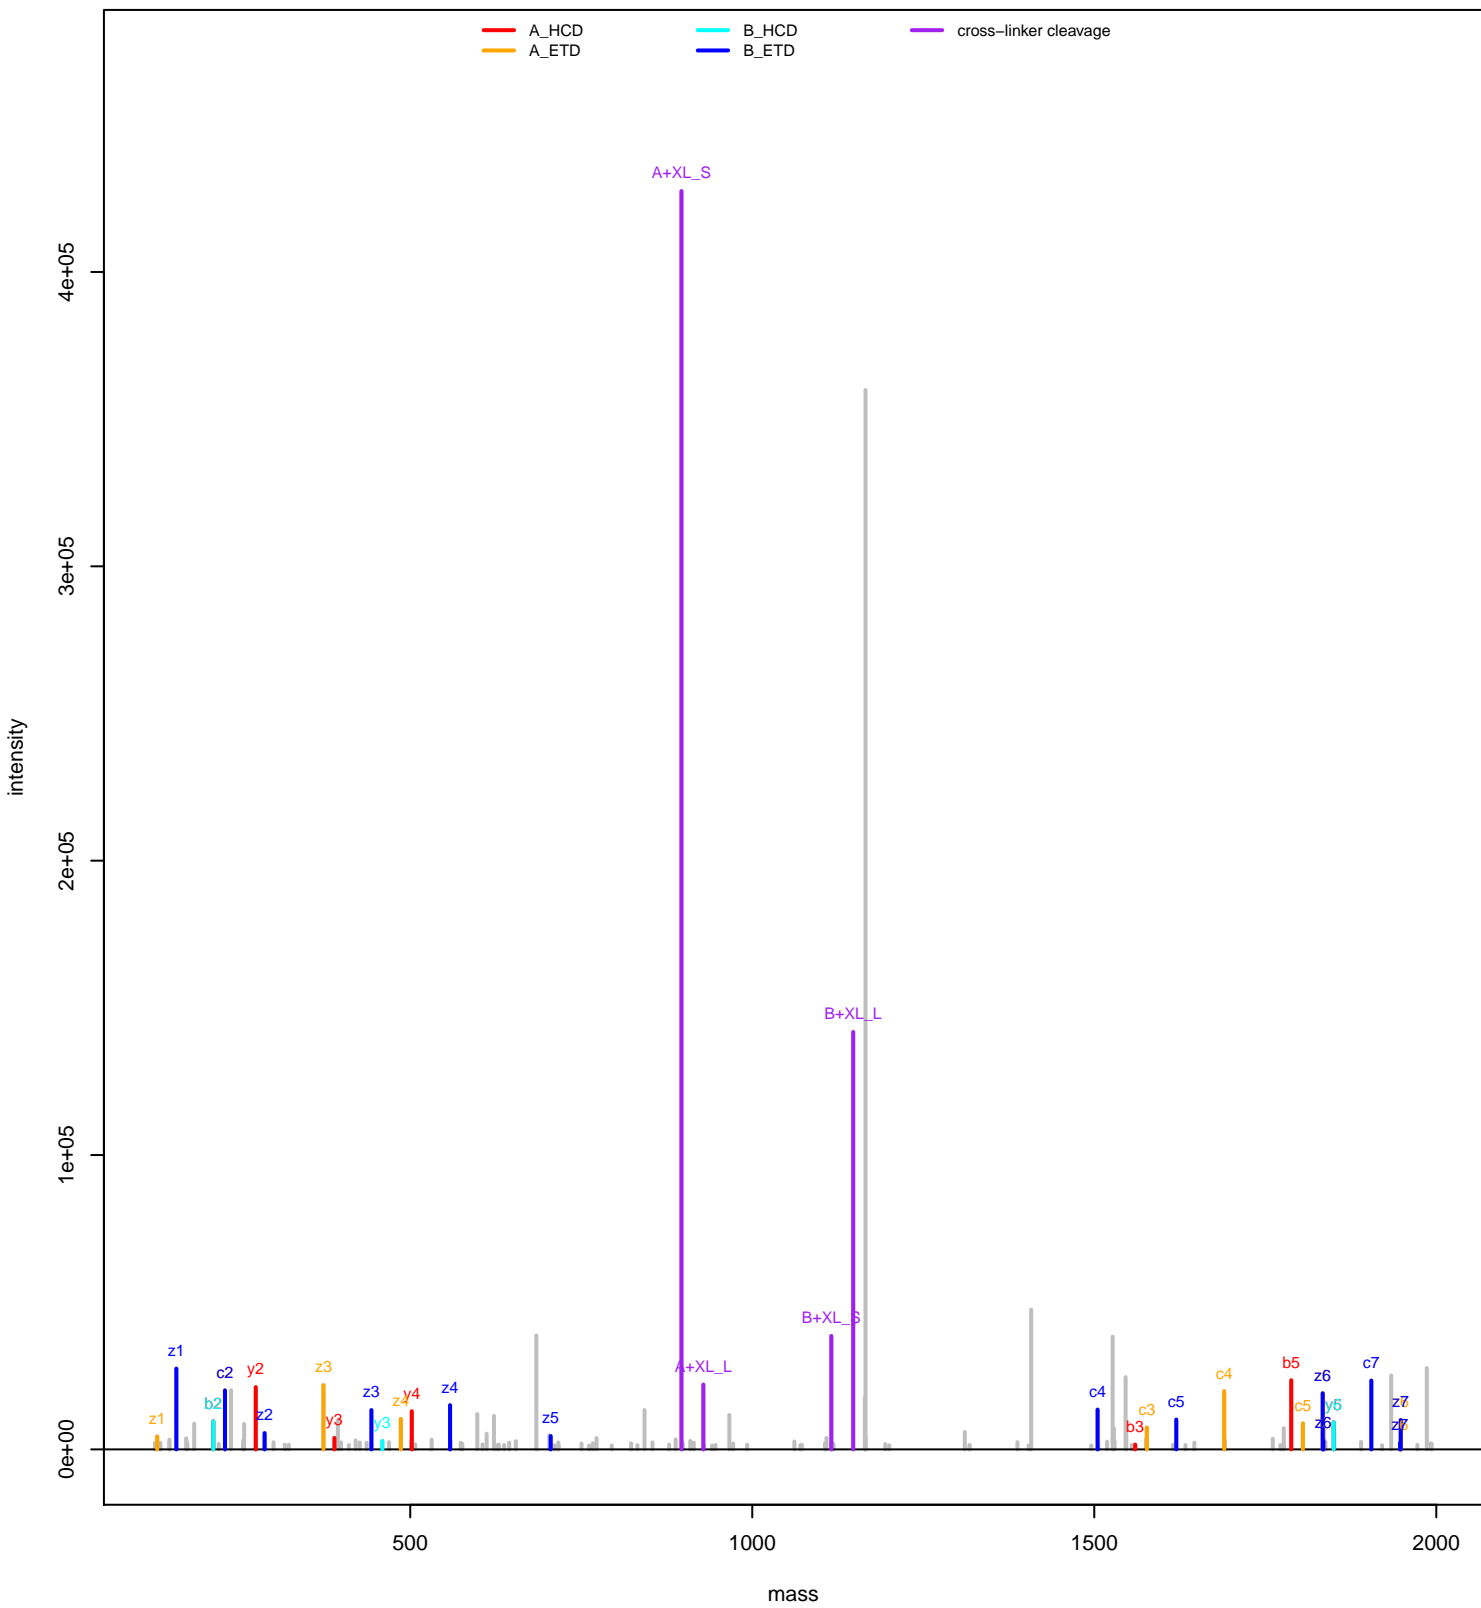

VIKLDQK+XL\_S

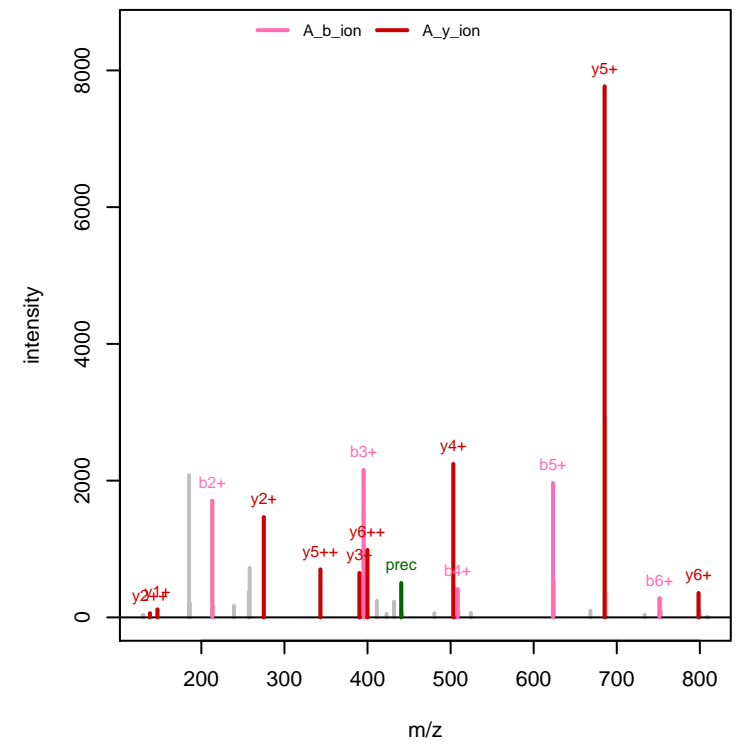

VIKLDQK+XL\_L

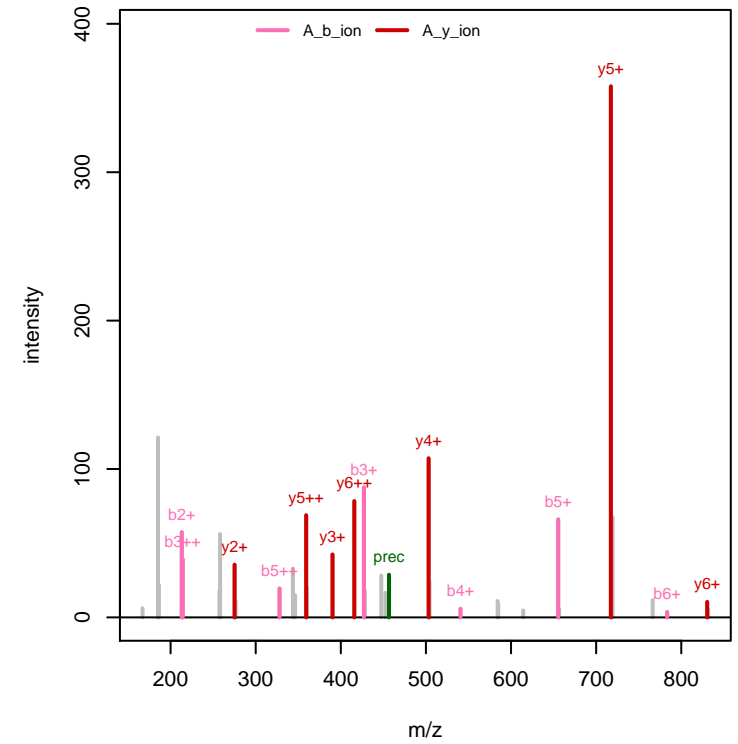

VLKFDRLR+XL\_S

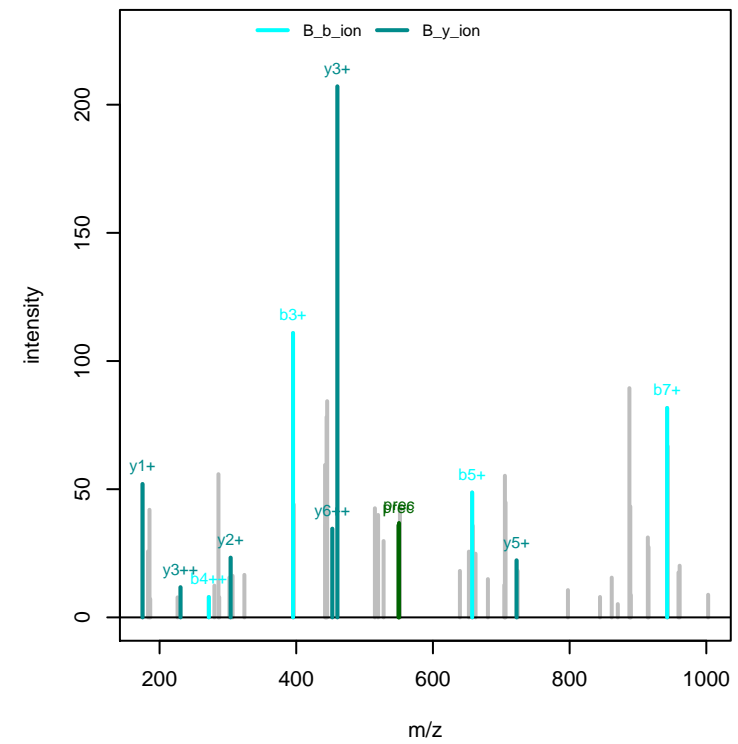

VLKFDRLR+XL\_L

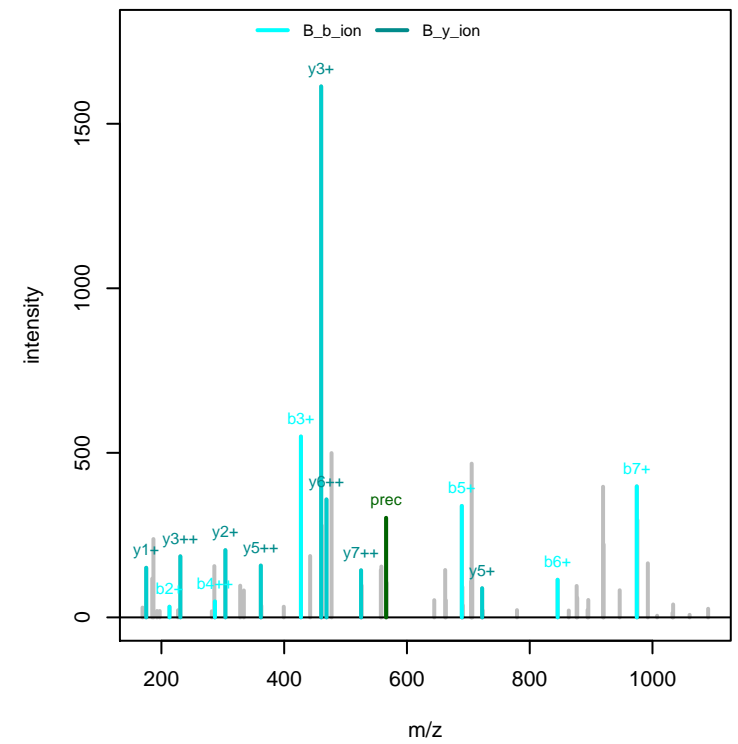

**QATKDAGR**  
**ASSGLNEDEIQKMVR**

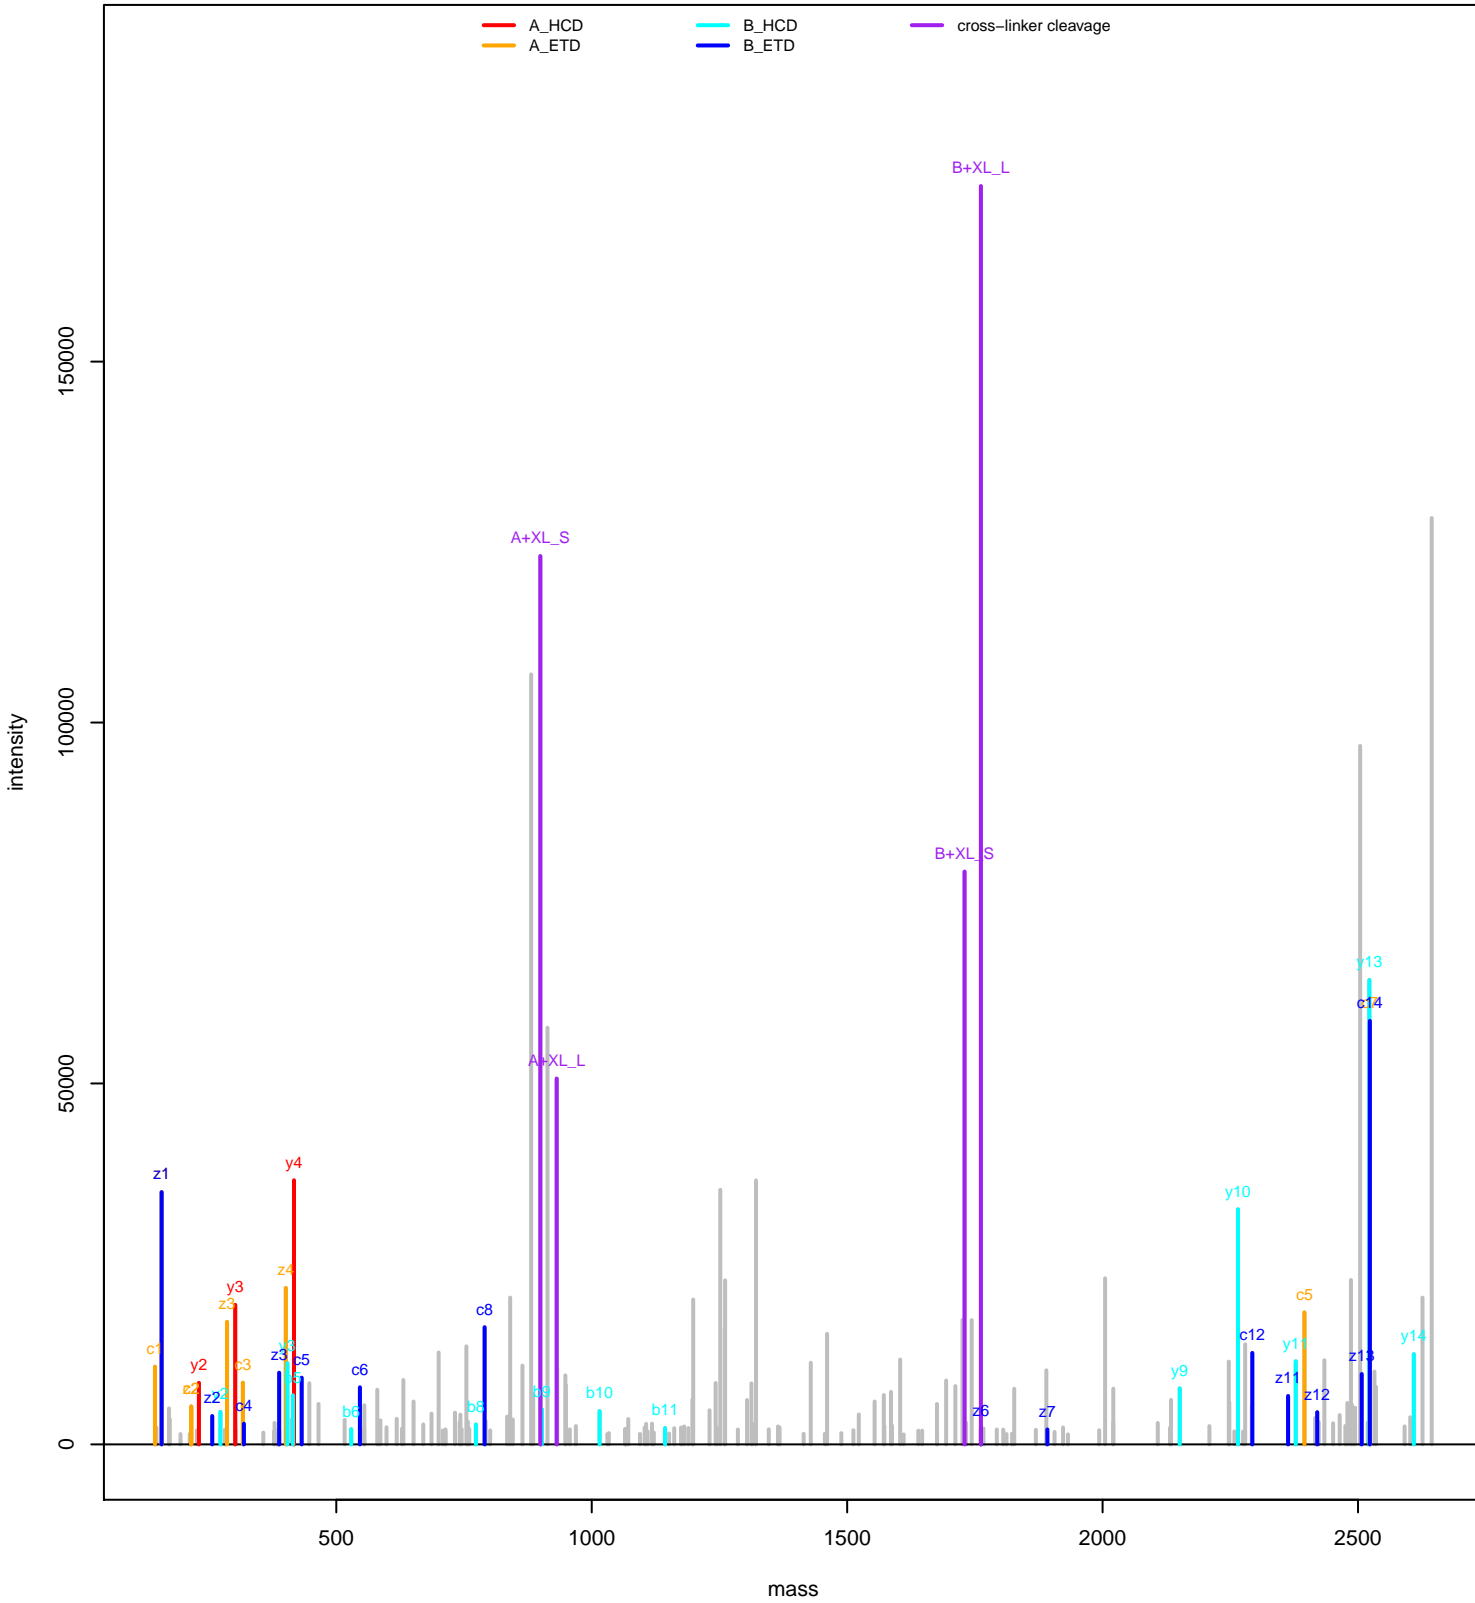

**QATKDAGR+XL\_S**

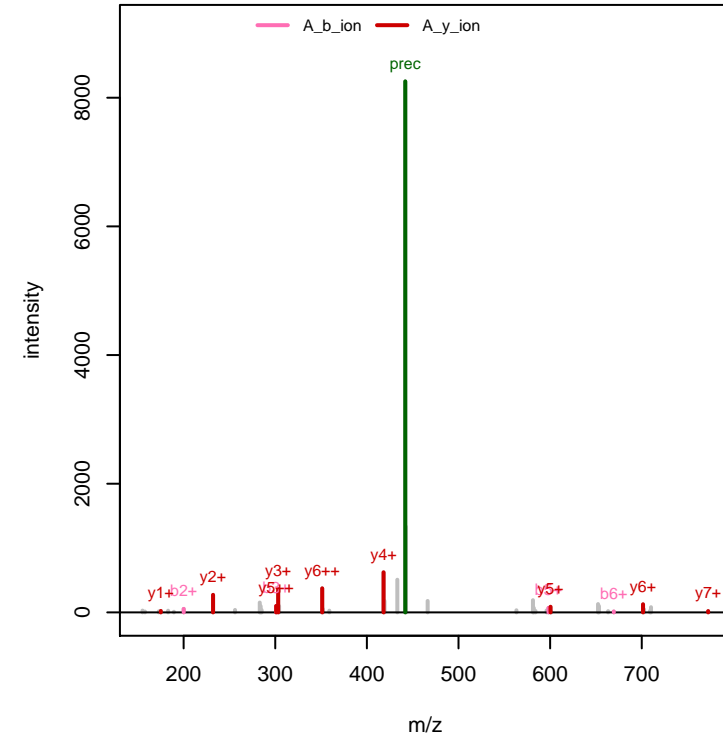

**QATKDAGR+XL\_L**

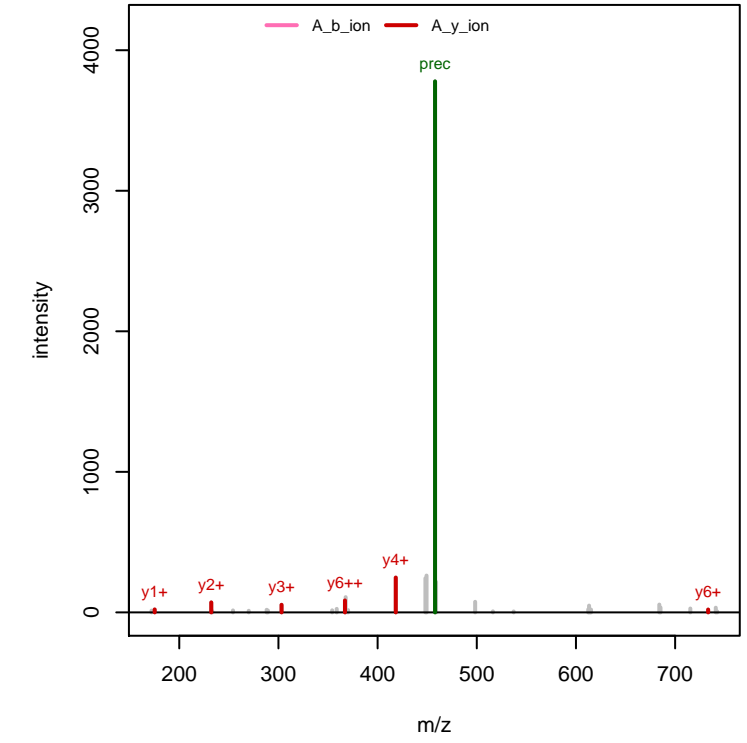

**ASSGLNEDEIQKMVR+XL\_S**

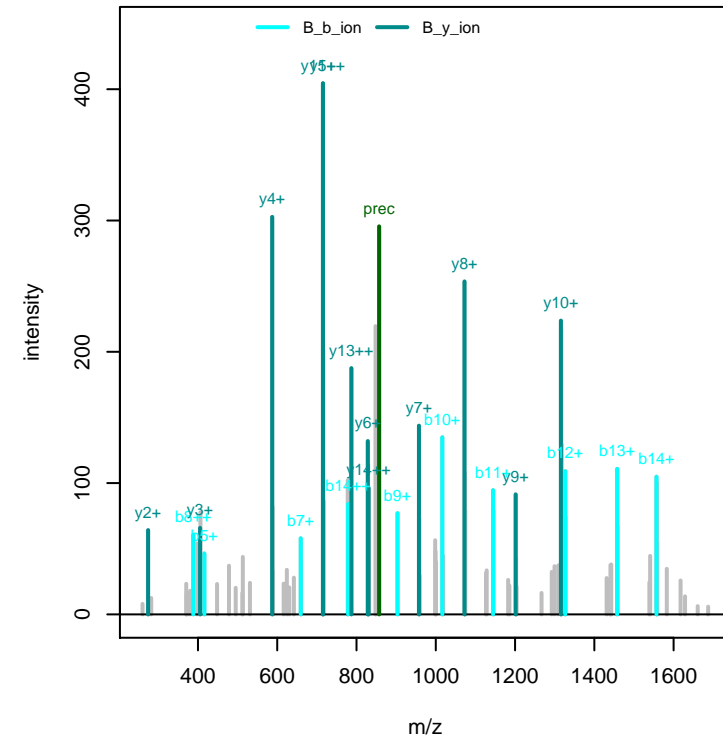

**ASSGLNEDEIQKMVR+XL\_L**

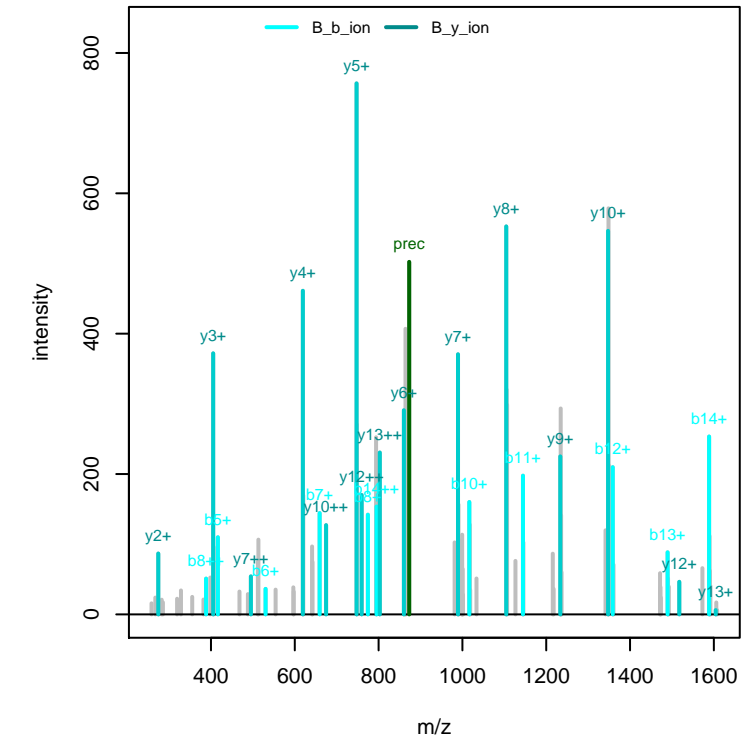



**AQLEKK**  
**KRLENGDDYFAVNP**

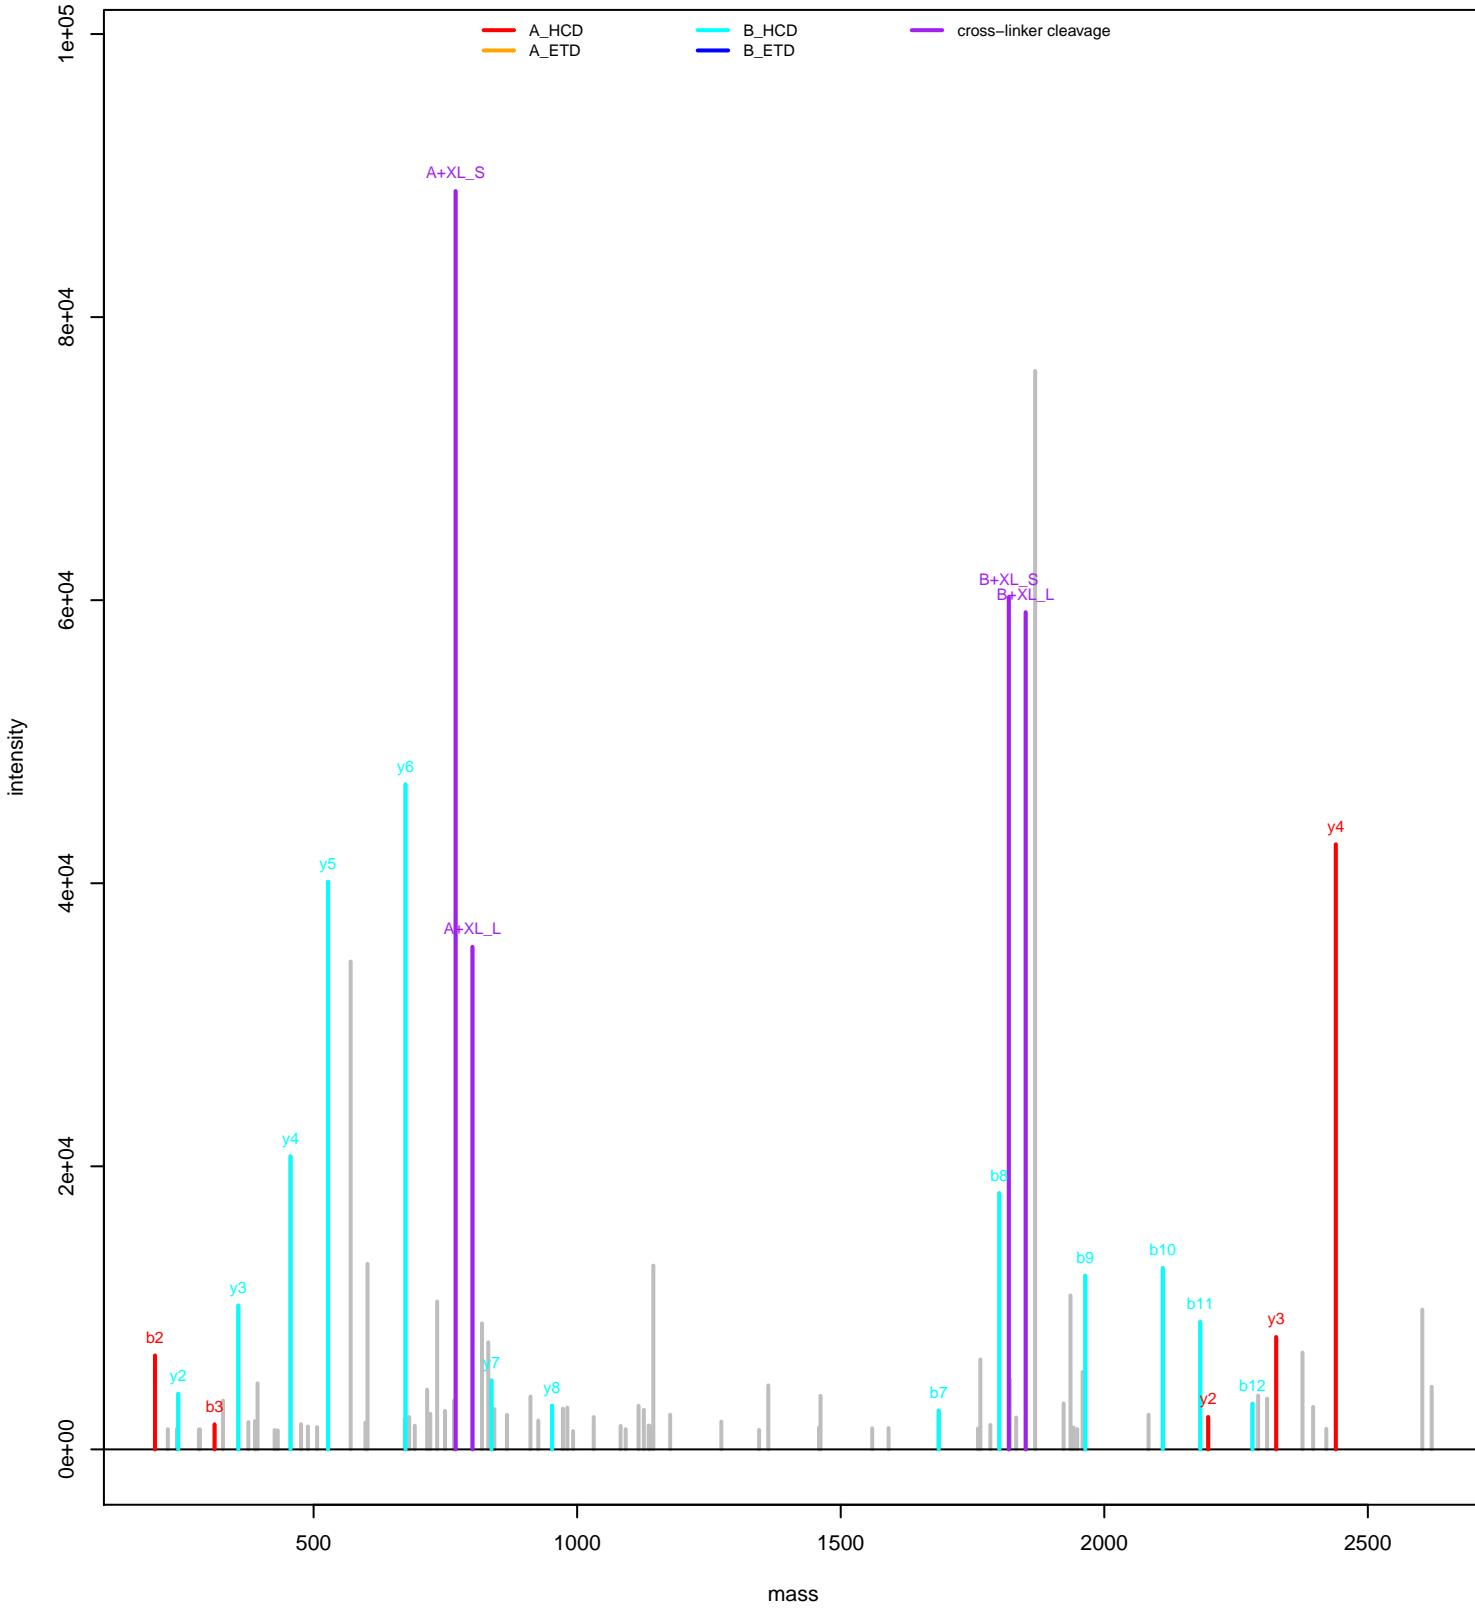

**AQLEKK+XL\_S**

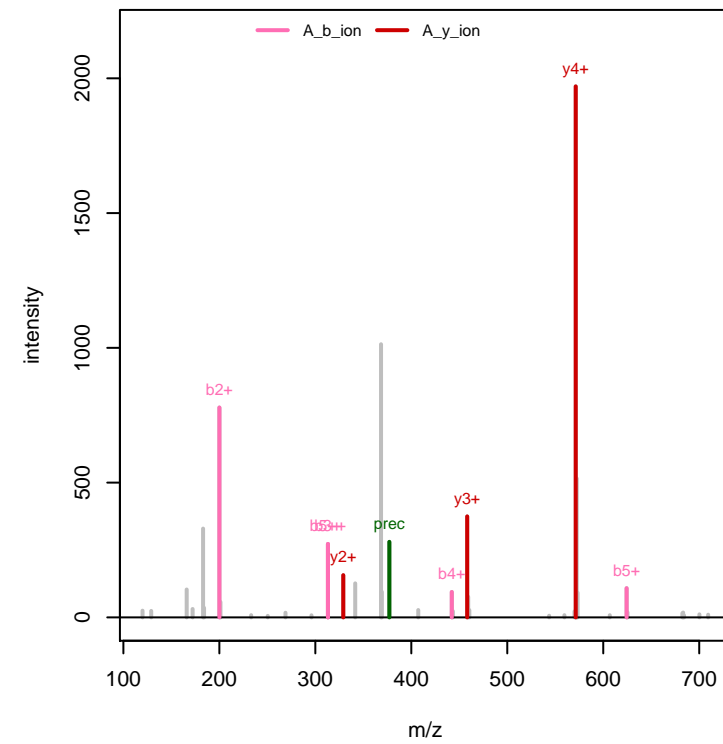

**AQLEKK+XL\_L**

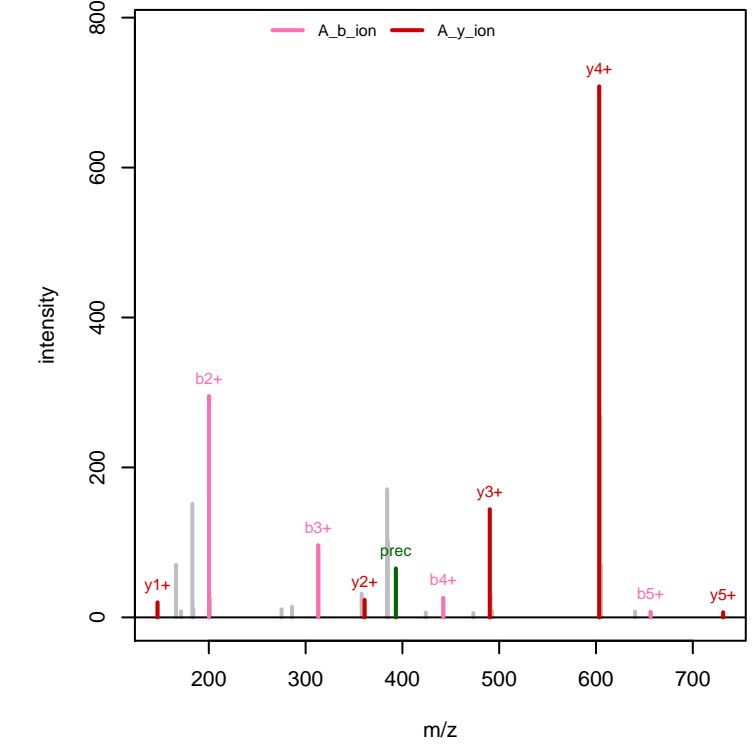

**KRLENGDDYFAVNP+XL\_S**

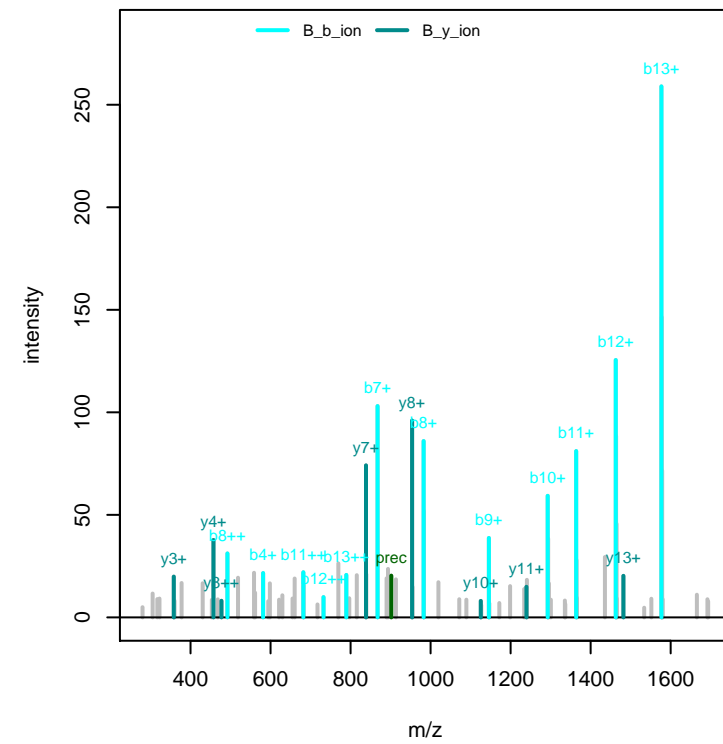

**KRLENGDDYFAVNP+XL\_L**

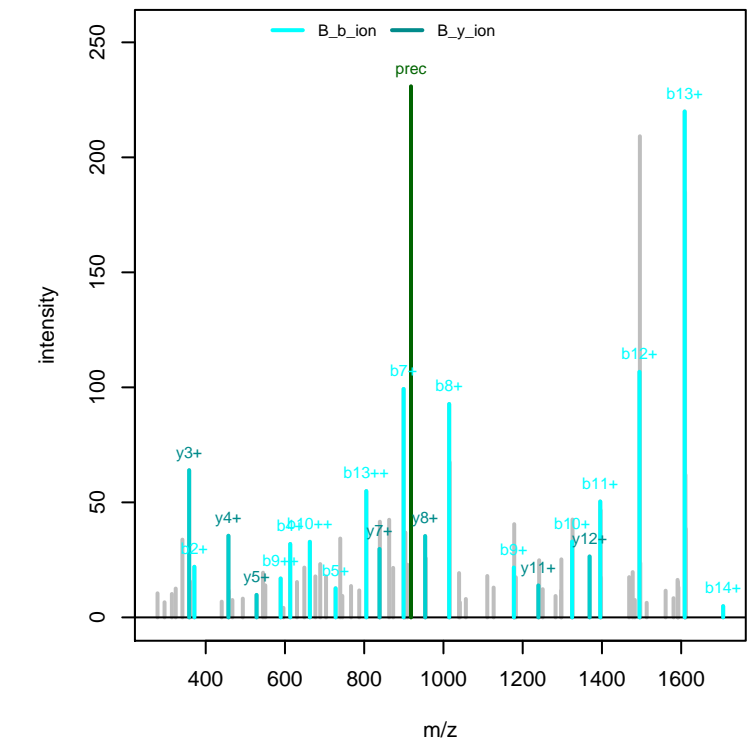

FLGKGVTK  
EALELRDGDKSR

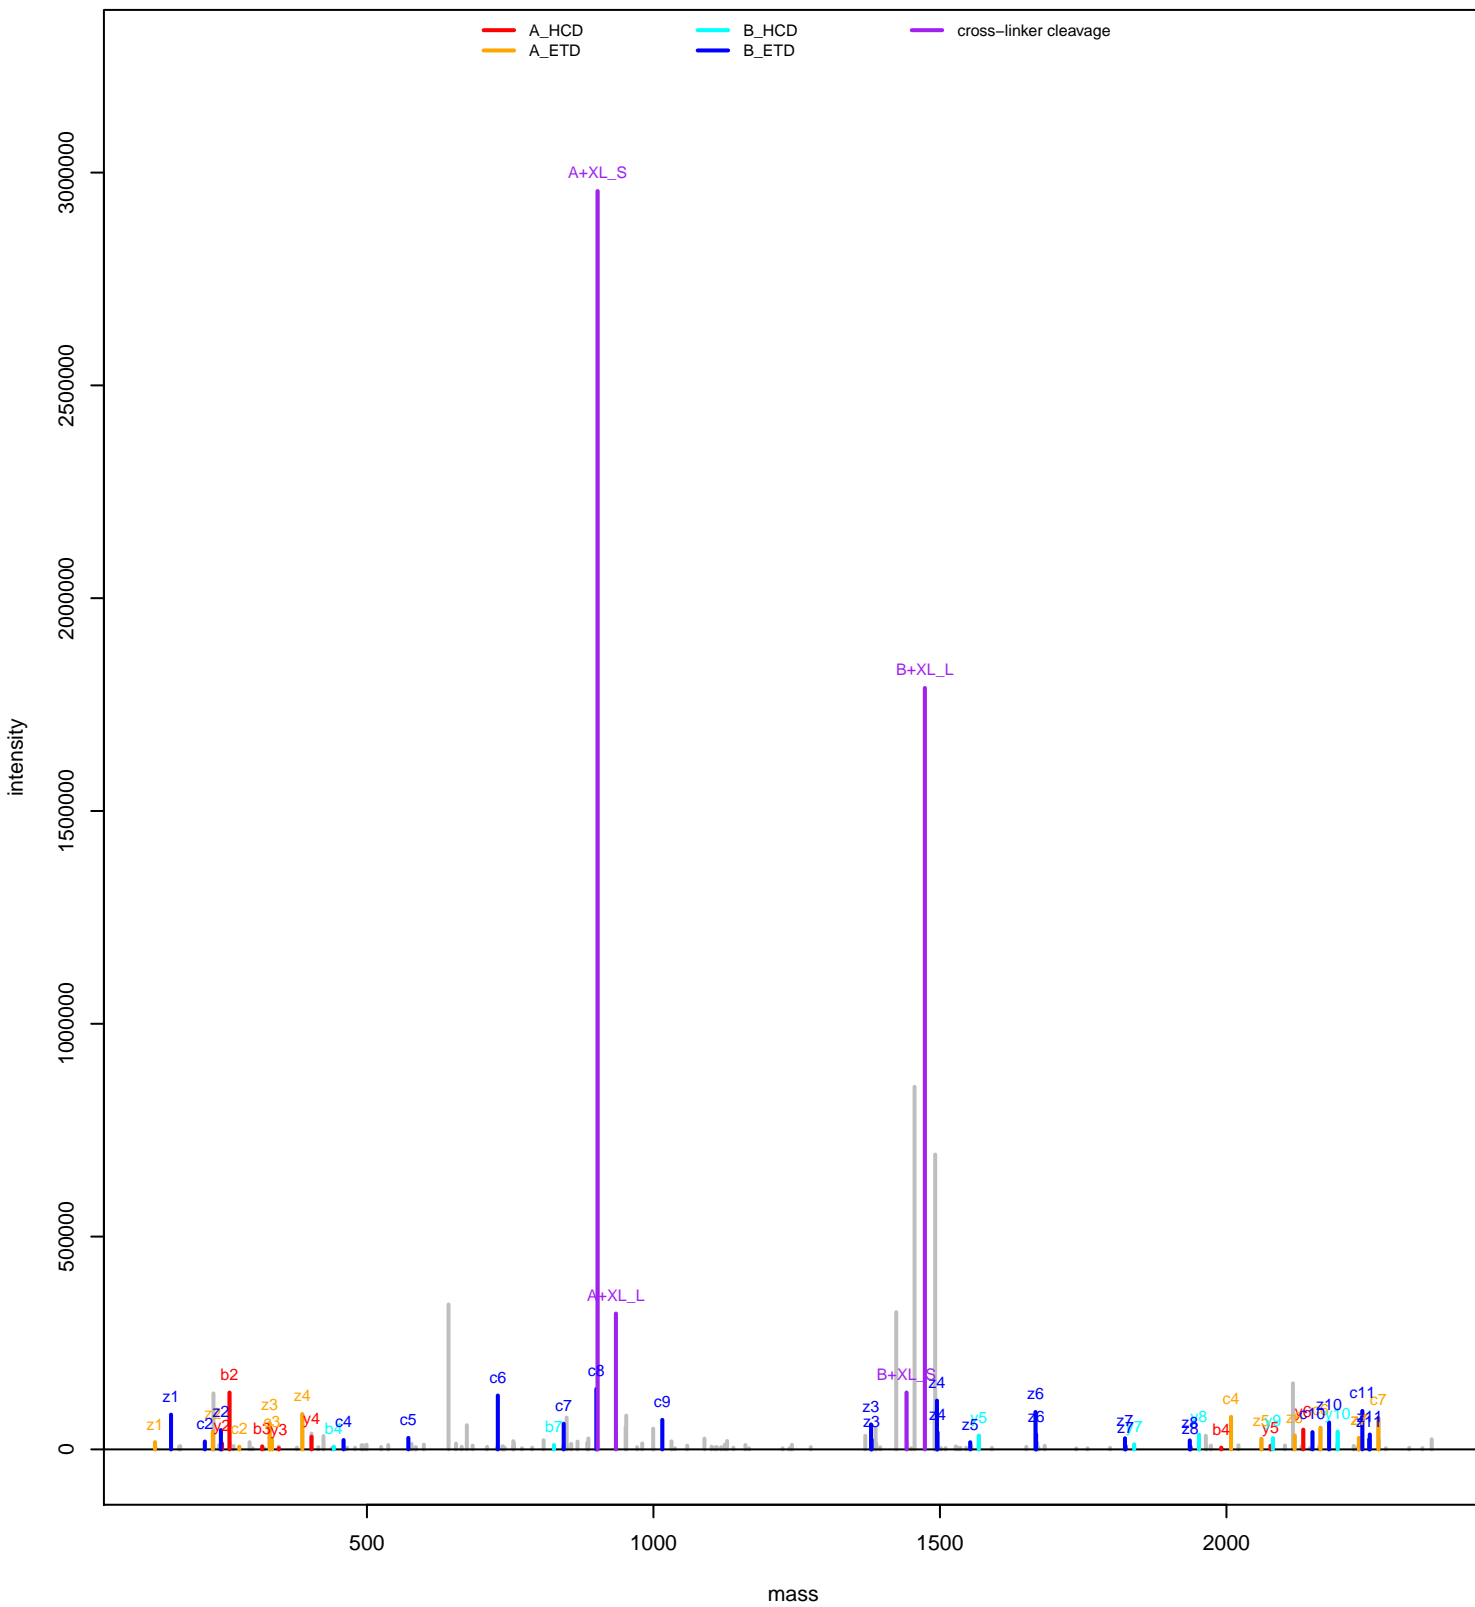

FLGKGVTK+XL\_S

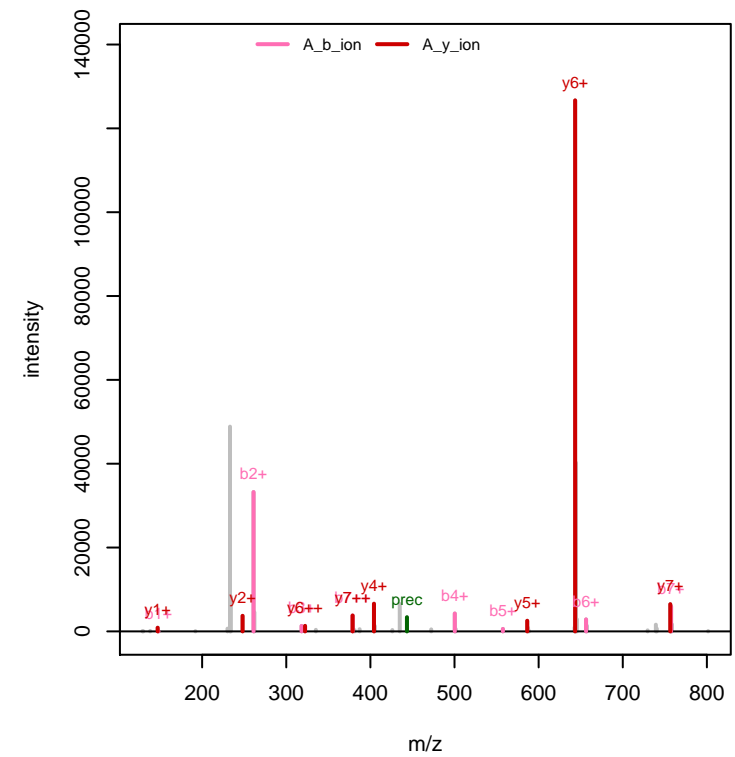

FLGKGVTK+XL\_L

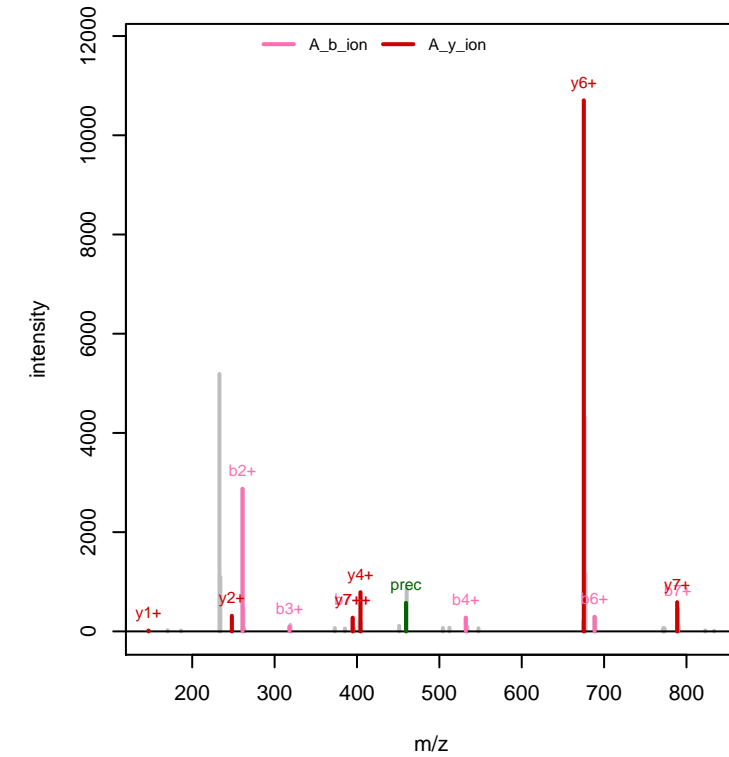

EALELRDGDKSR+XL\_S

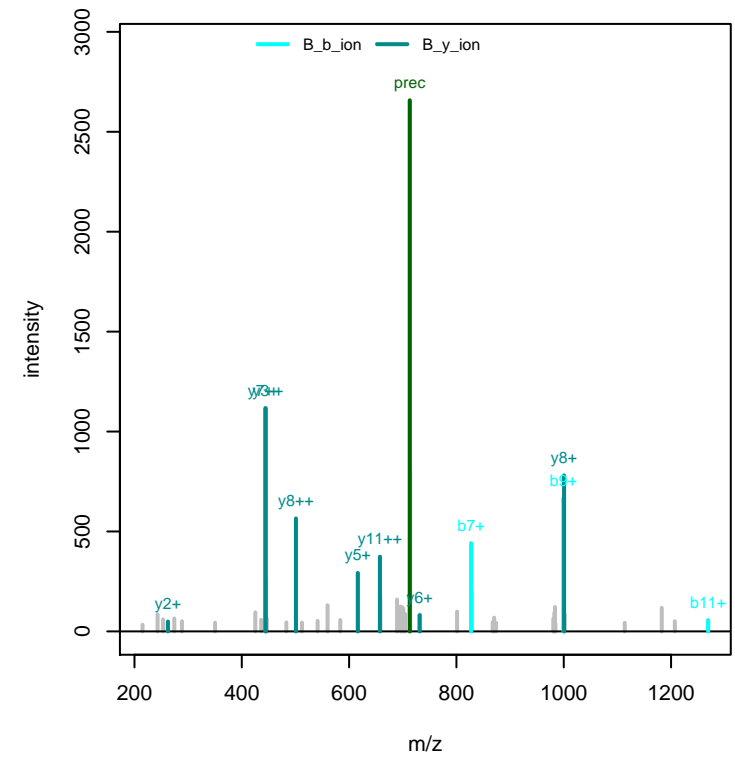

EALELRDGDKSR+XL\_L

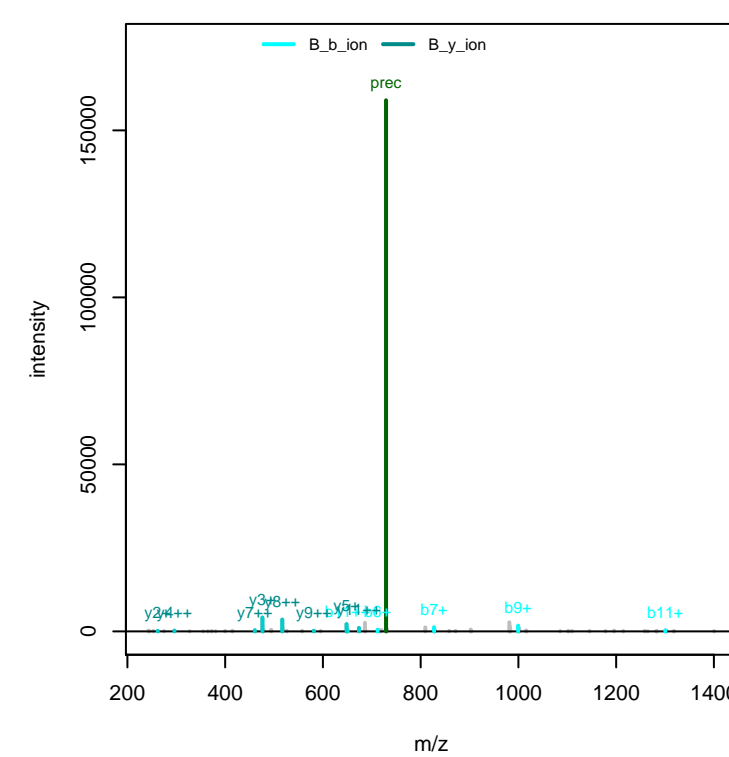

MAPPQISAEVLKK  
IIADNGDAWVEVKGQK

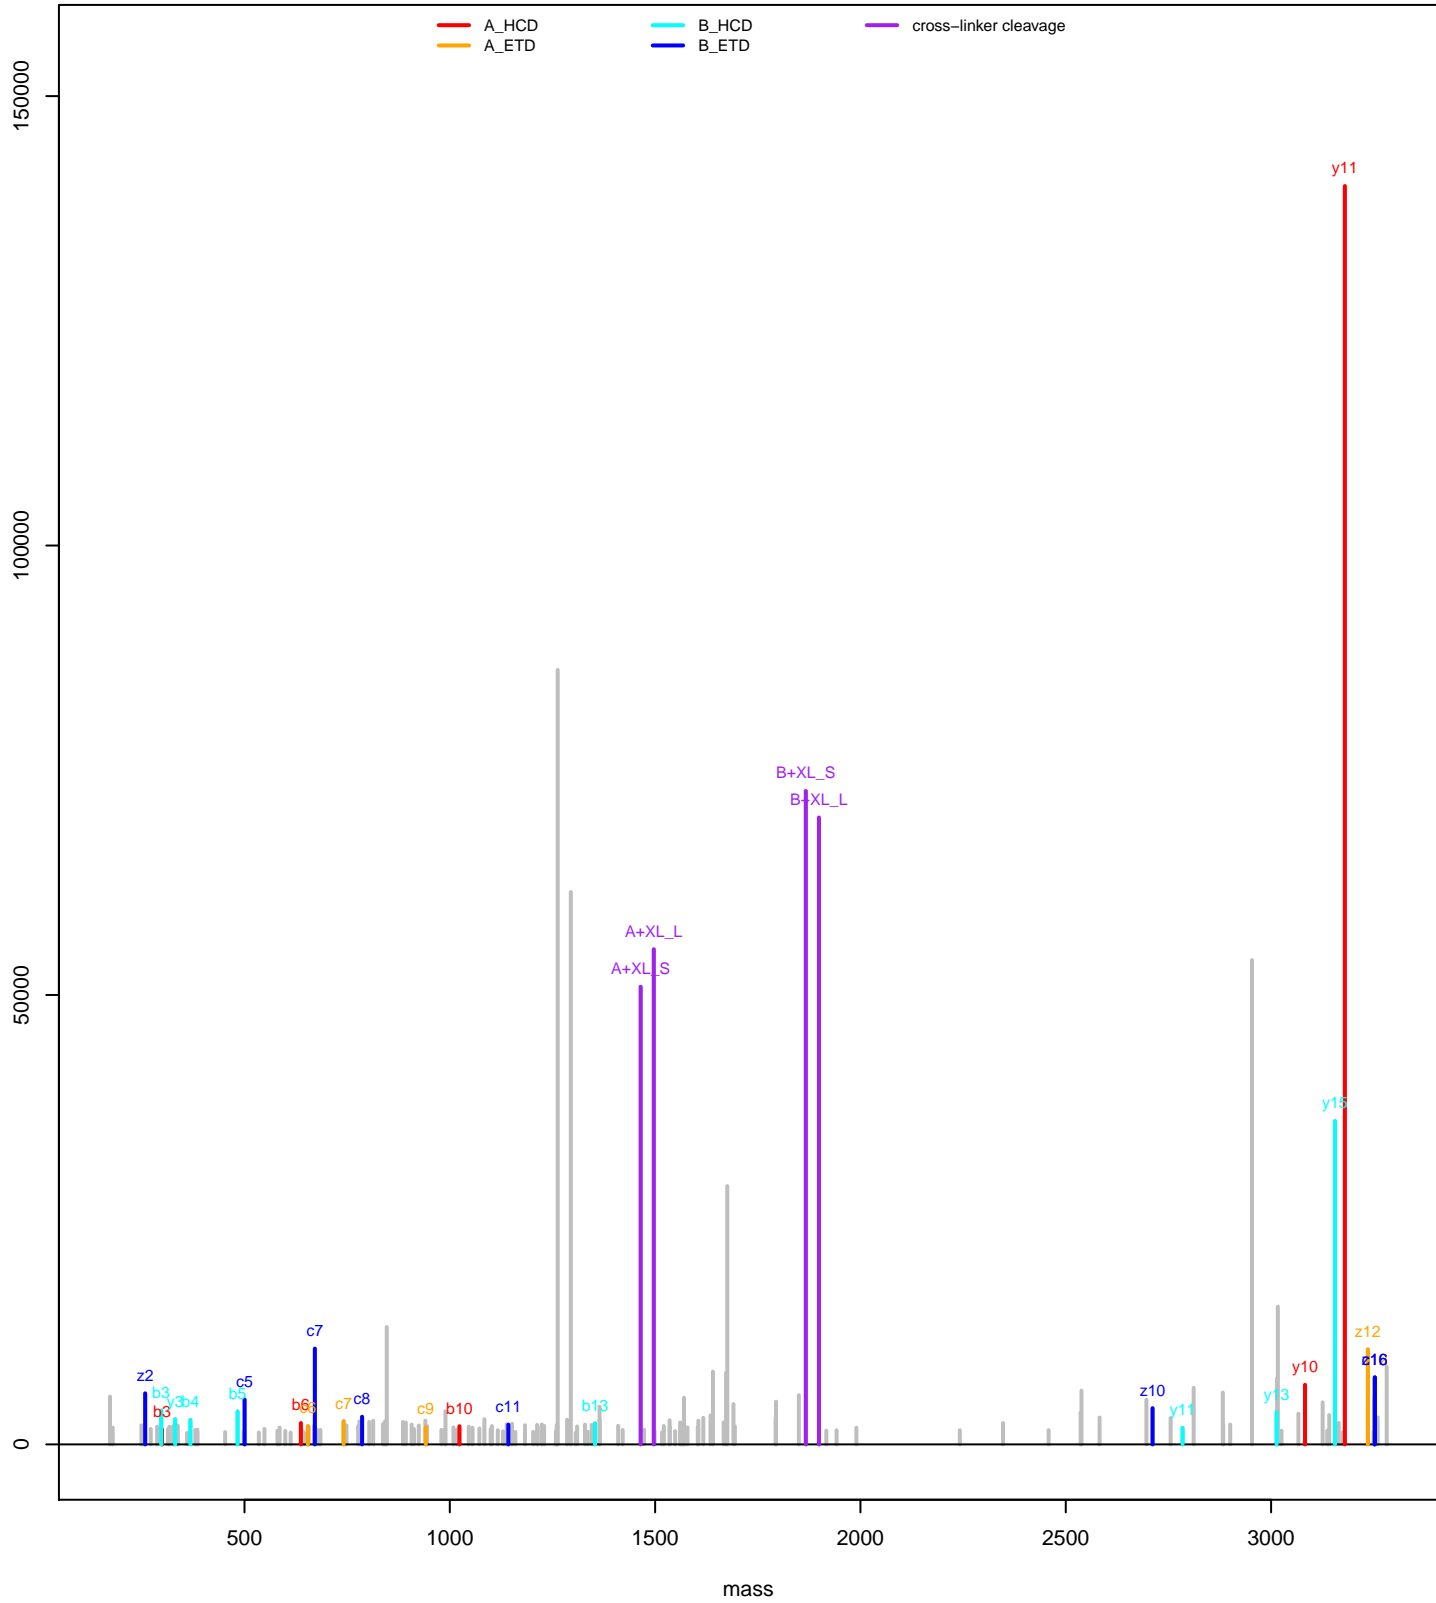

MAPPQISAEVLKK+XL\_S

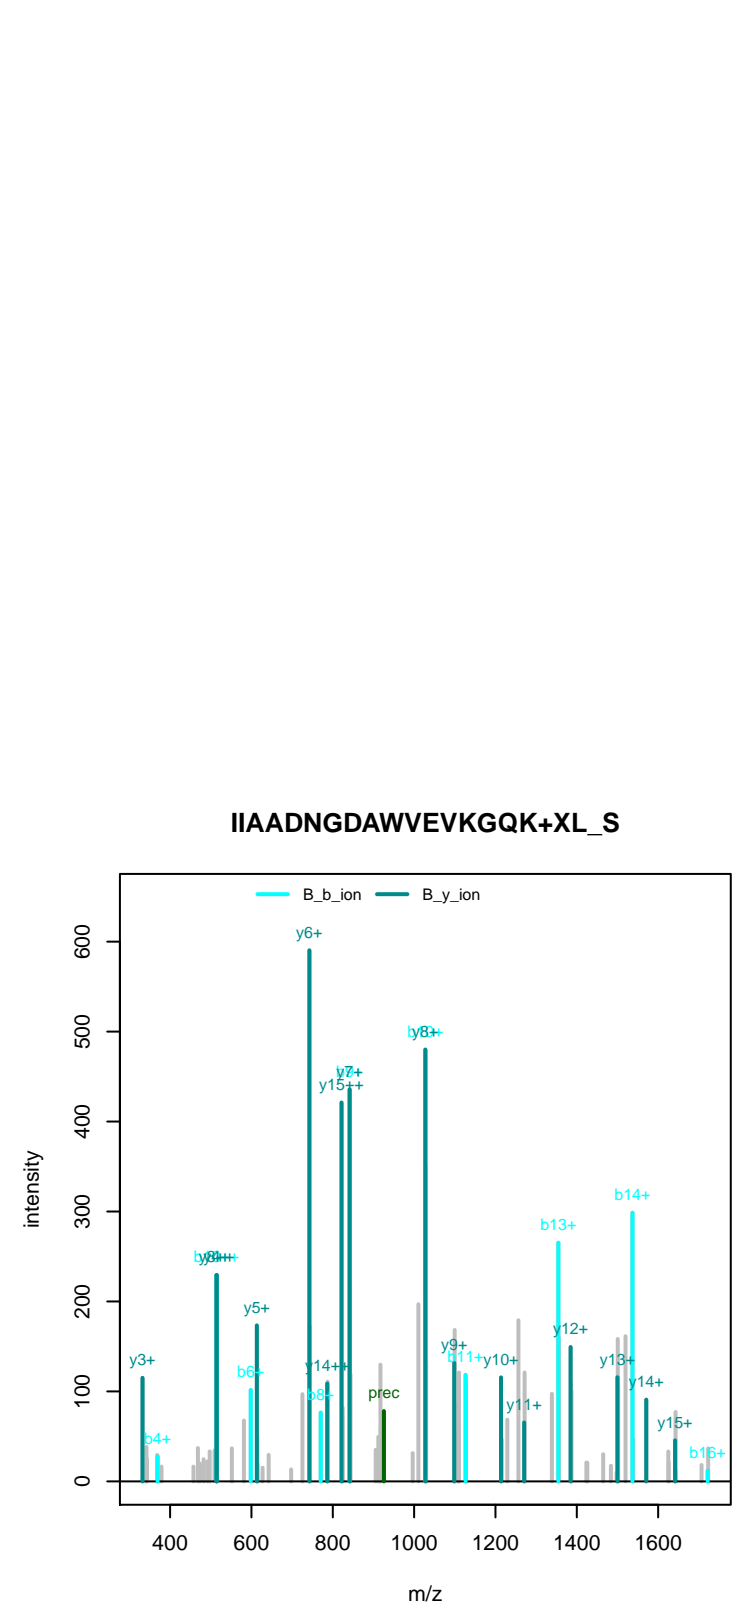

MAPPQISAEVLKK+XL\_L

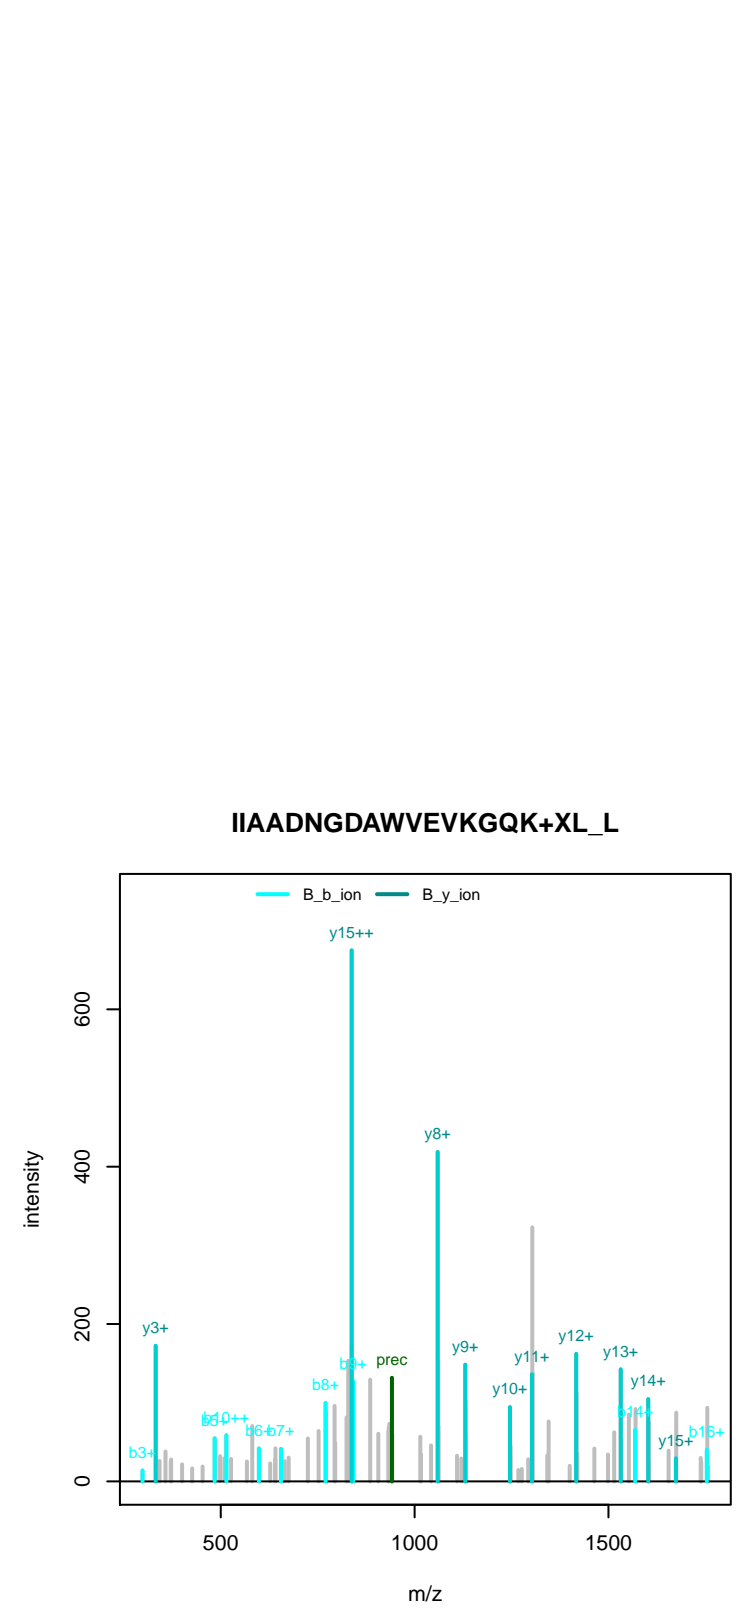

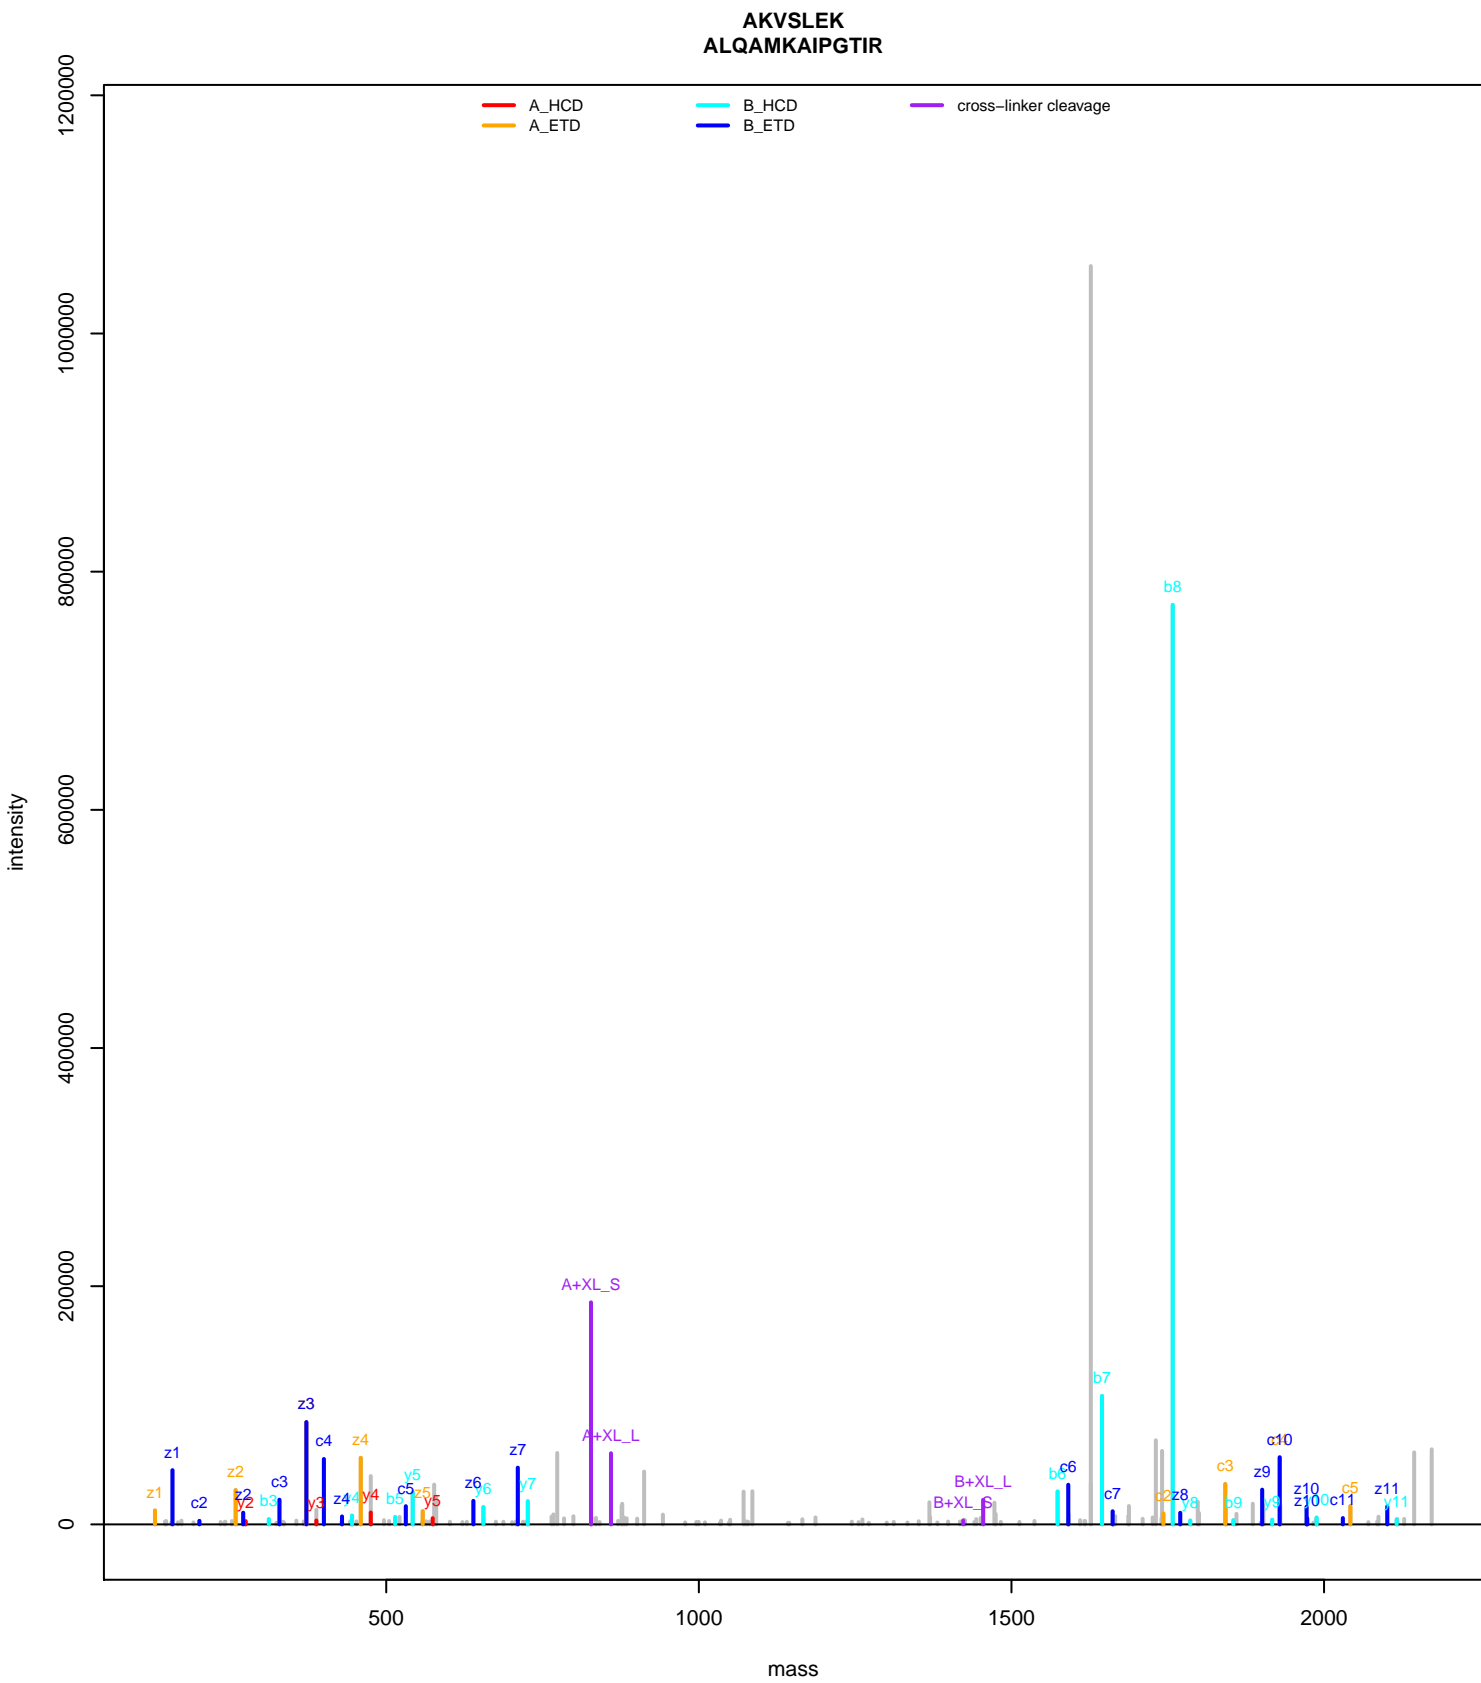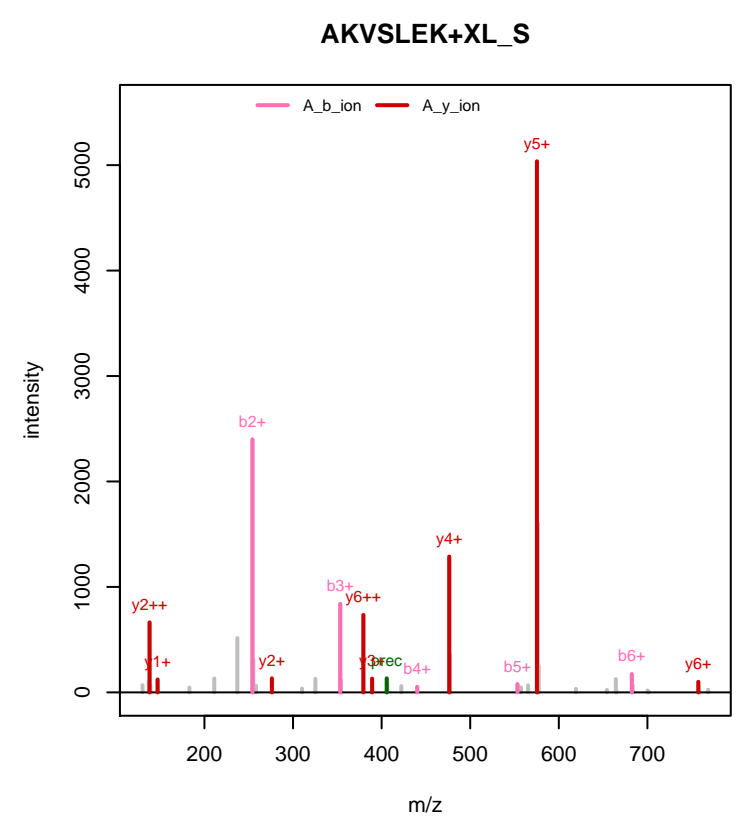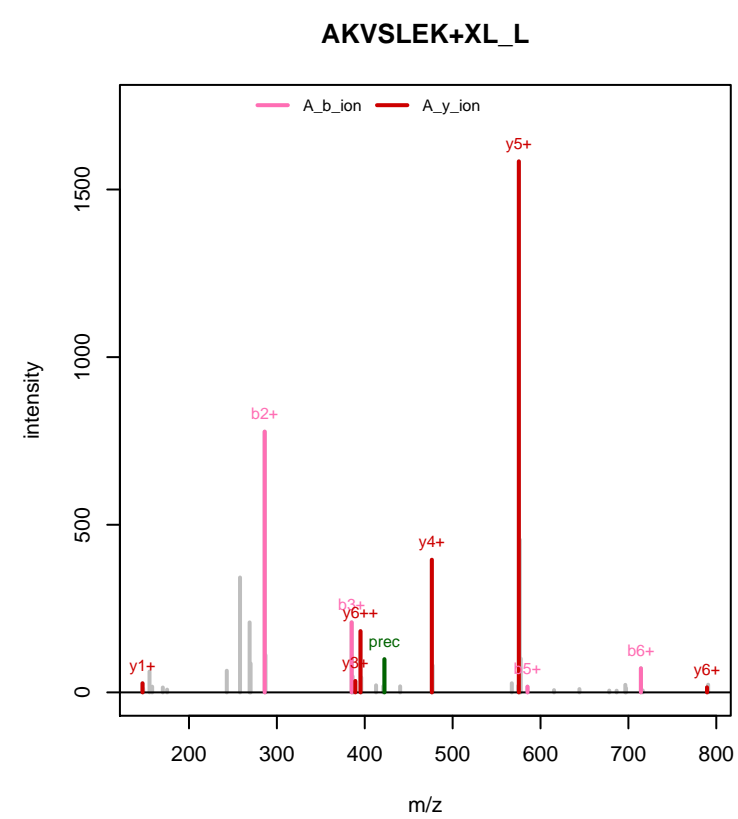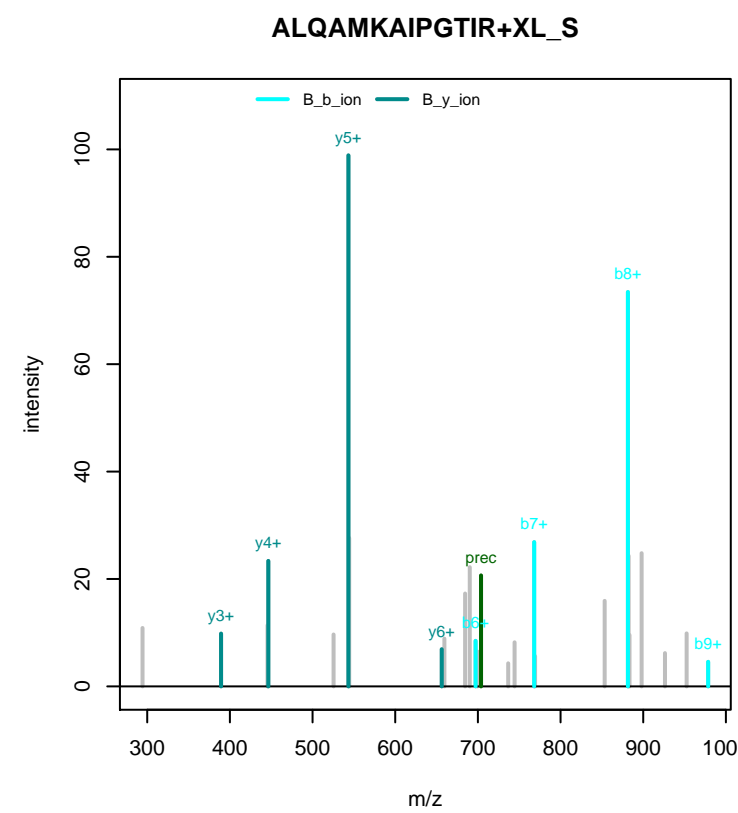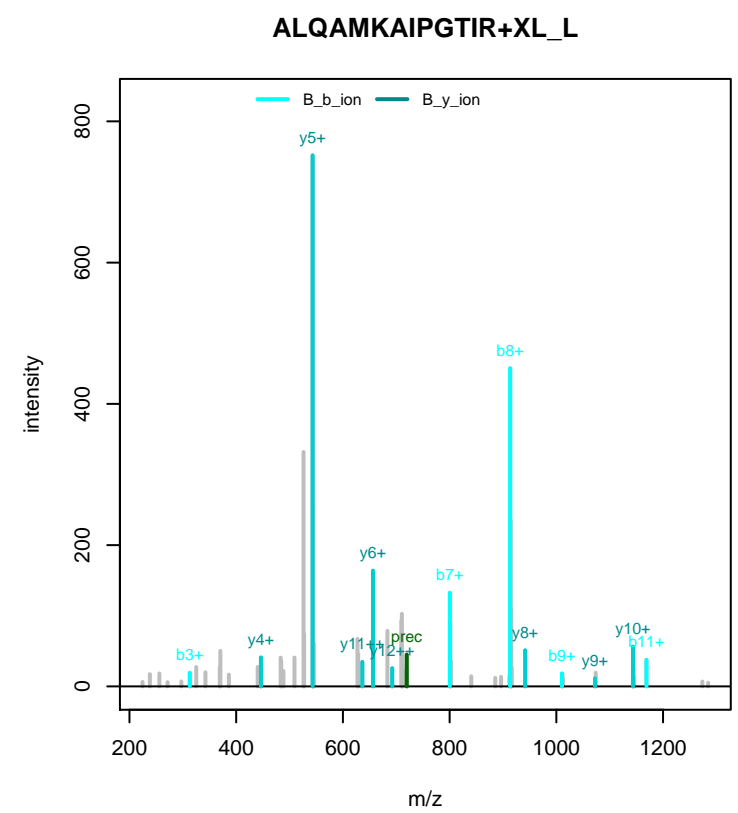

GSQVIKAMMK  
GSSLQQGFQKPAQAVNR

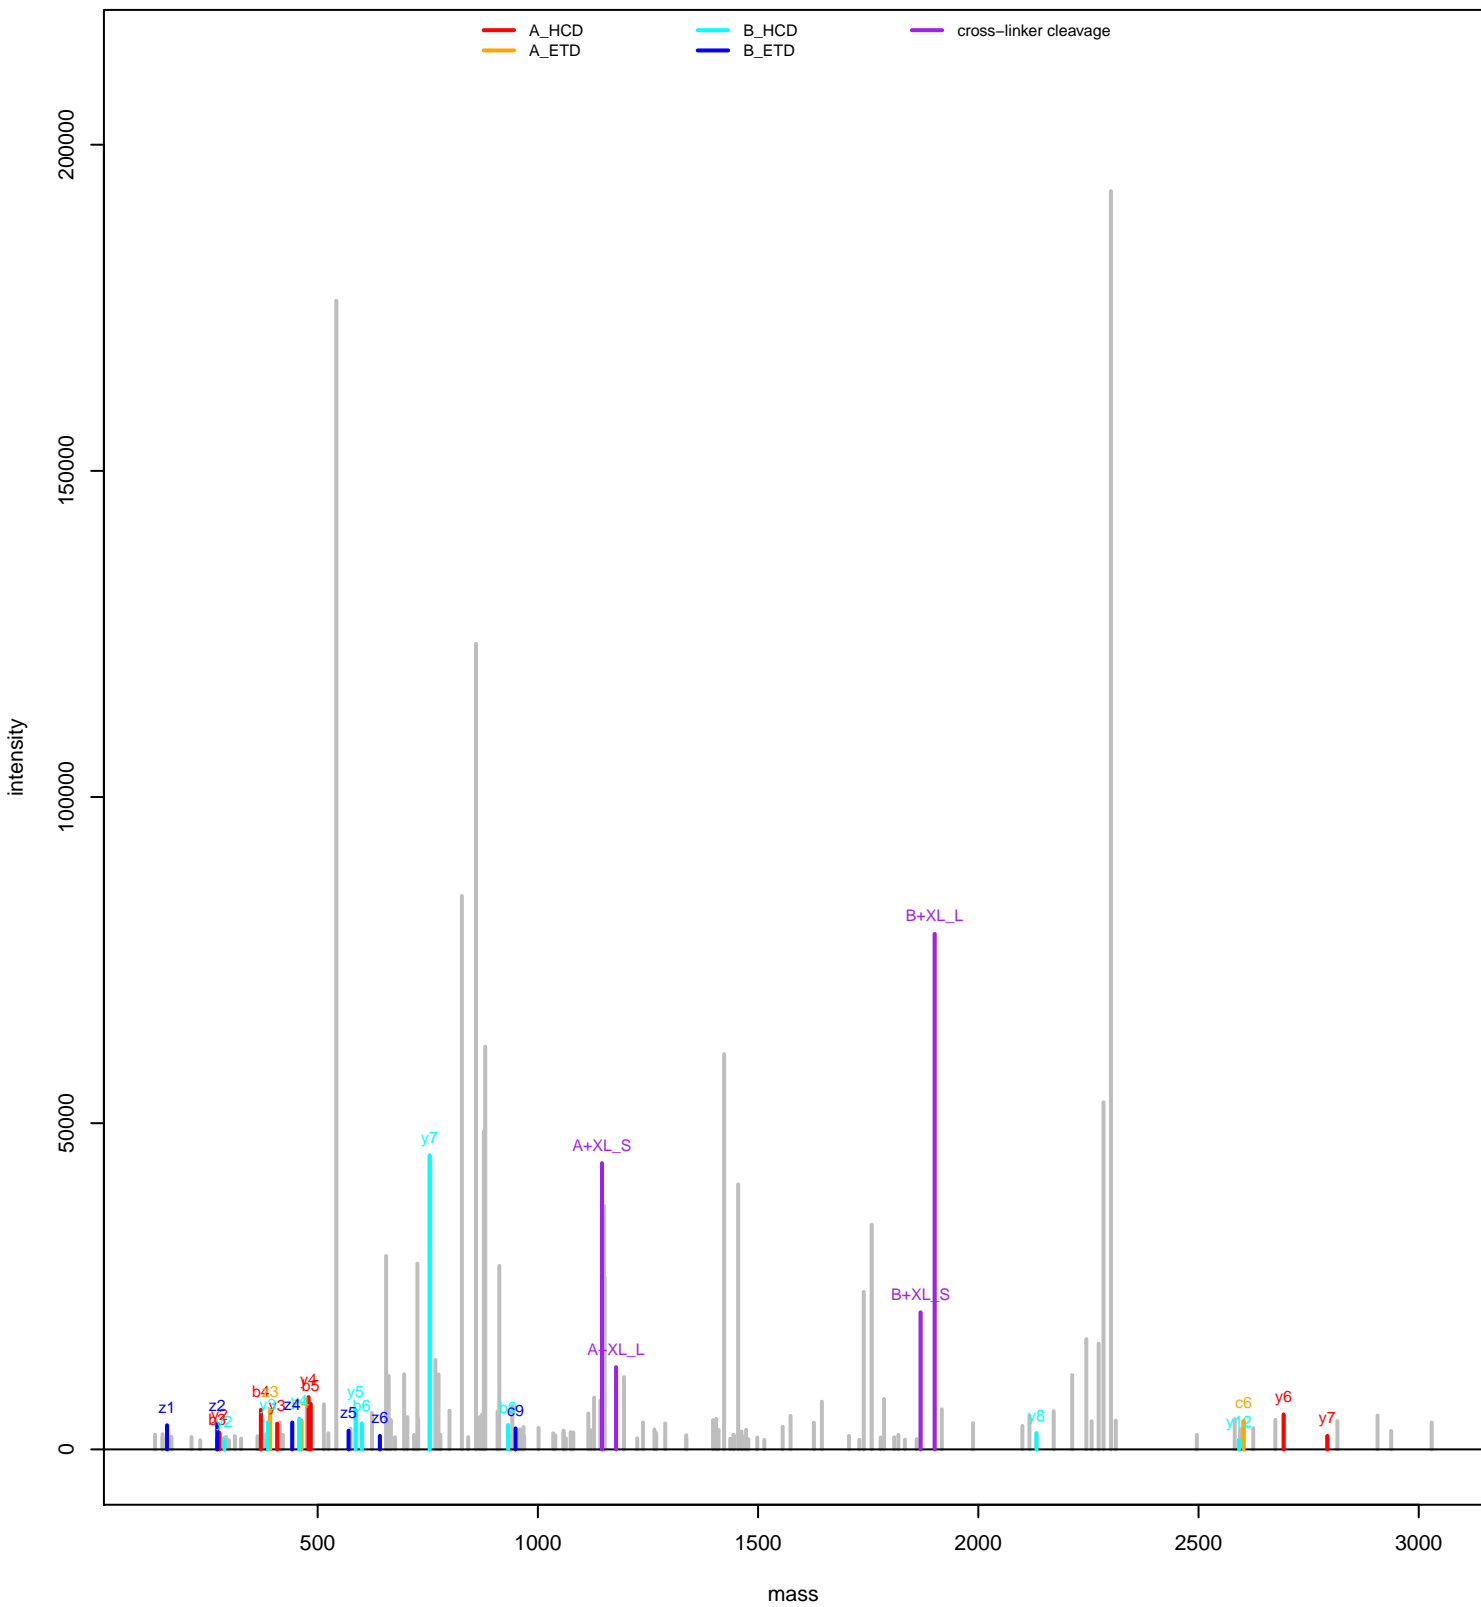

GSQVIKAMMK+XL\_S

GSSLQQGFQKPAQAVNR+XL\_S

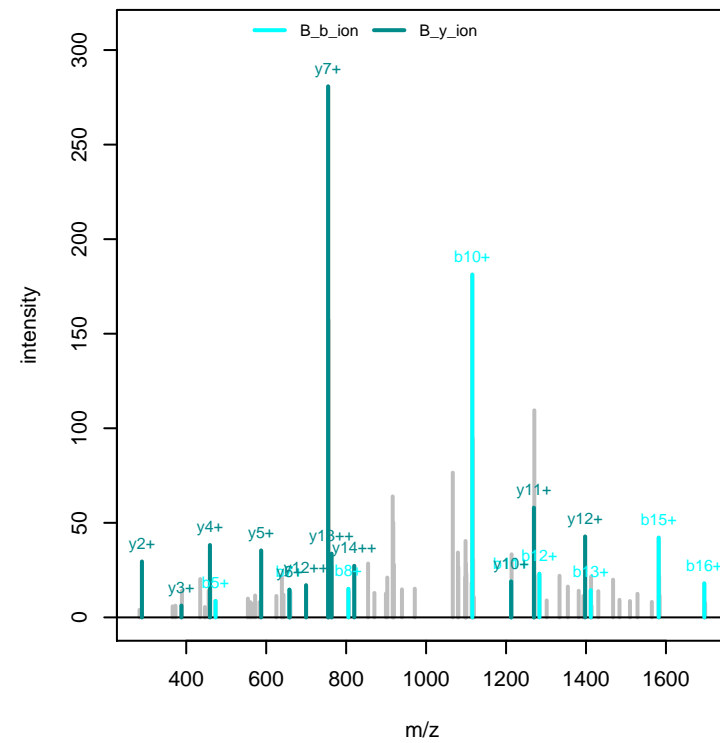

GSQVIKAMMK+XL\_L

GSSLQQGFQKPAQAVNR+XL\_L

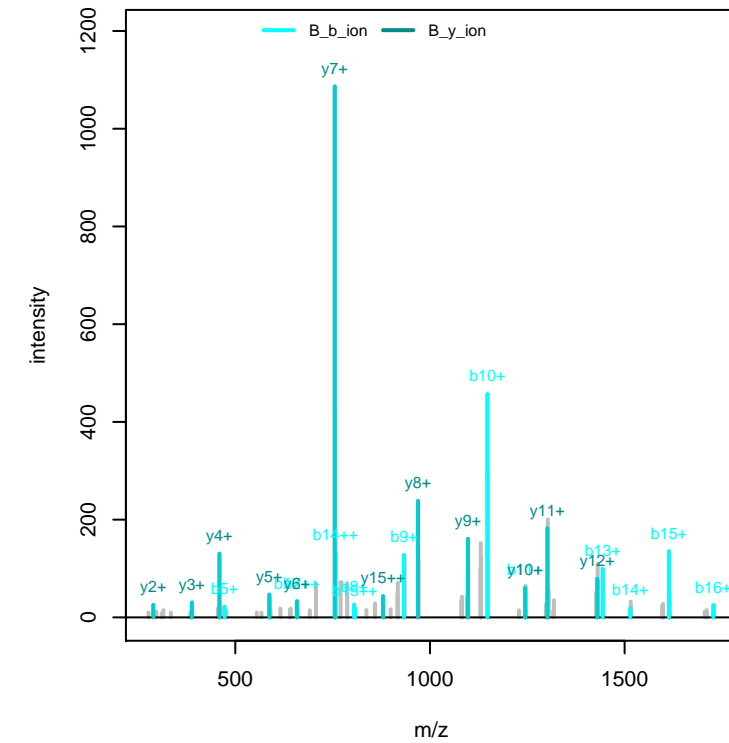

VAVIKAVR  
INGQVITIKGK

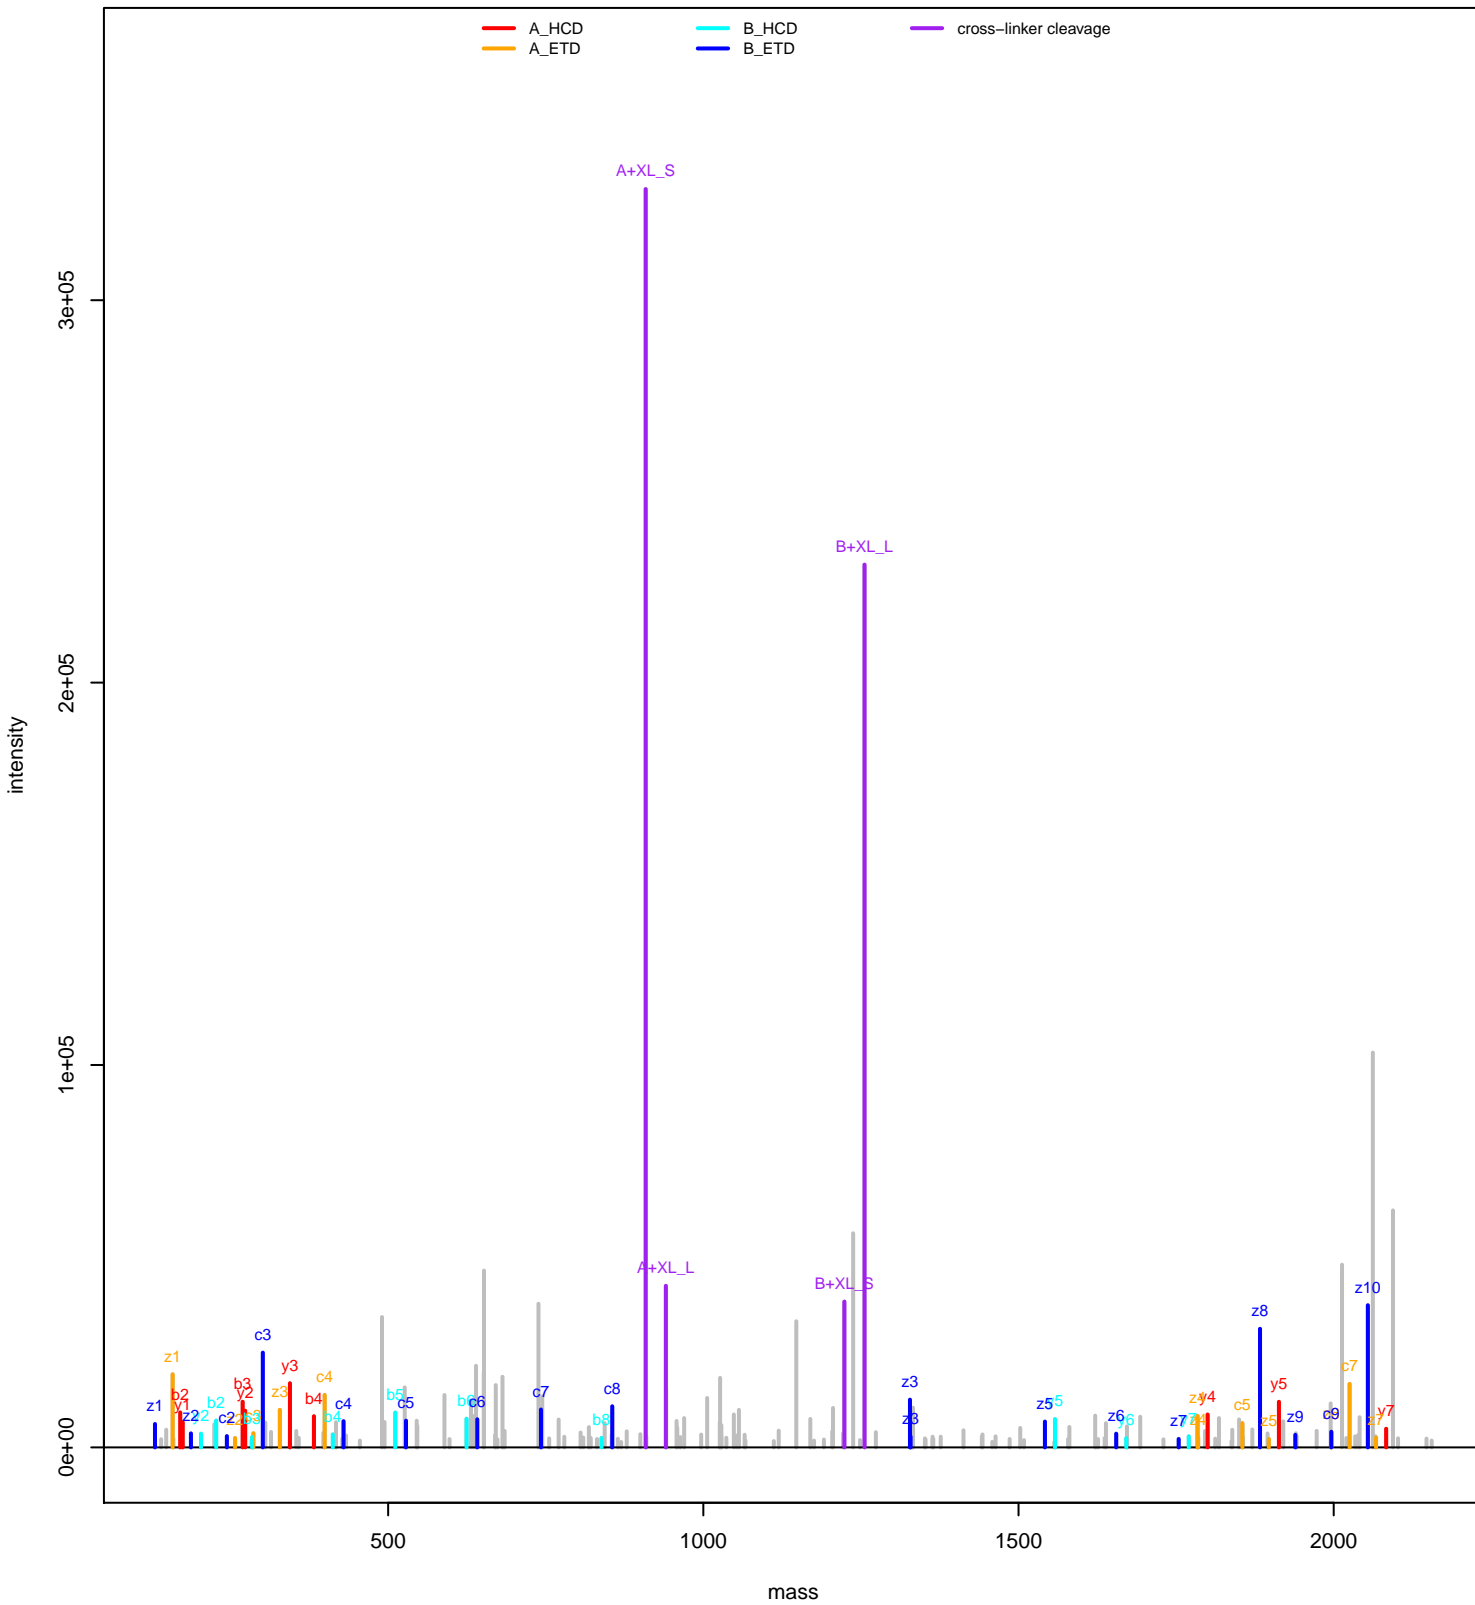

VAVIKAVR+XL\_S

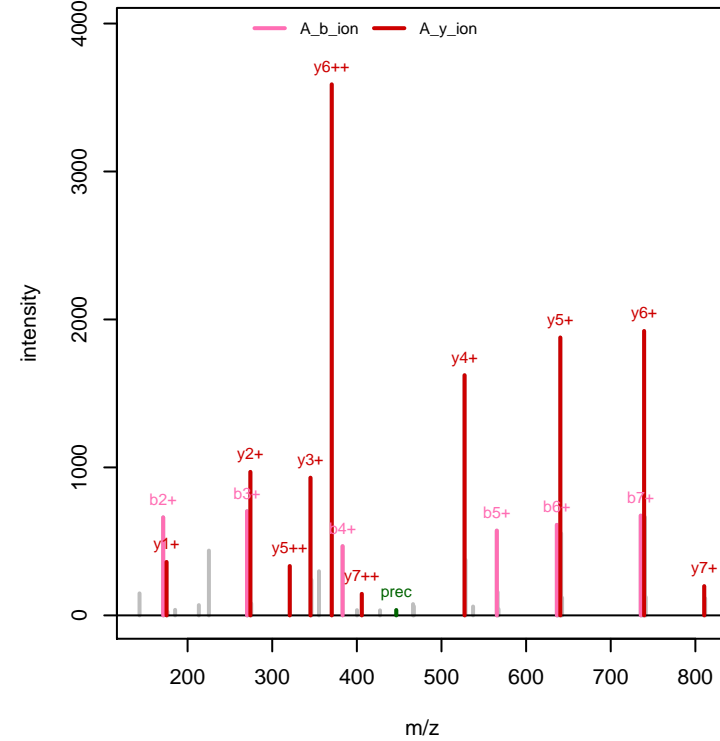

VAVIKAVR+XL\_L

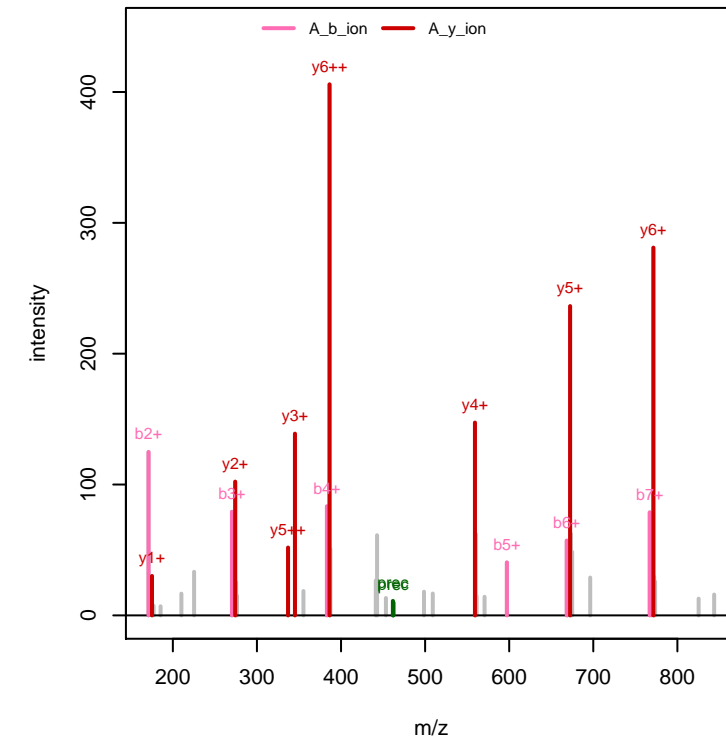

INGQVITIKGK+XL\_S

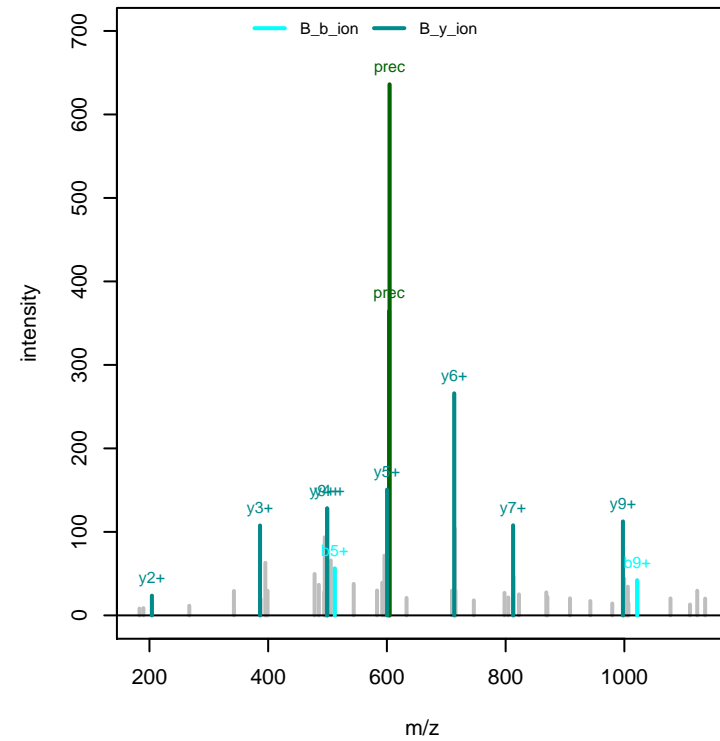

INGQVITIKGK+XL\_L

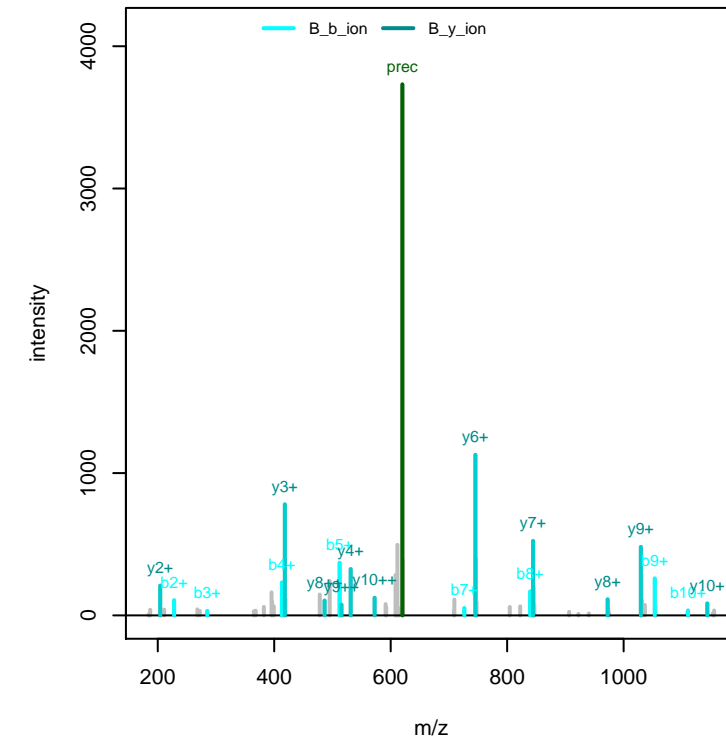

MNIENLK  
TGKEVTSIQFTAREK

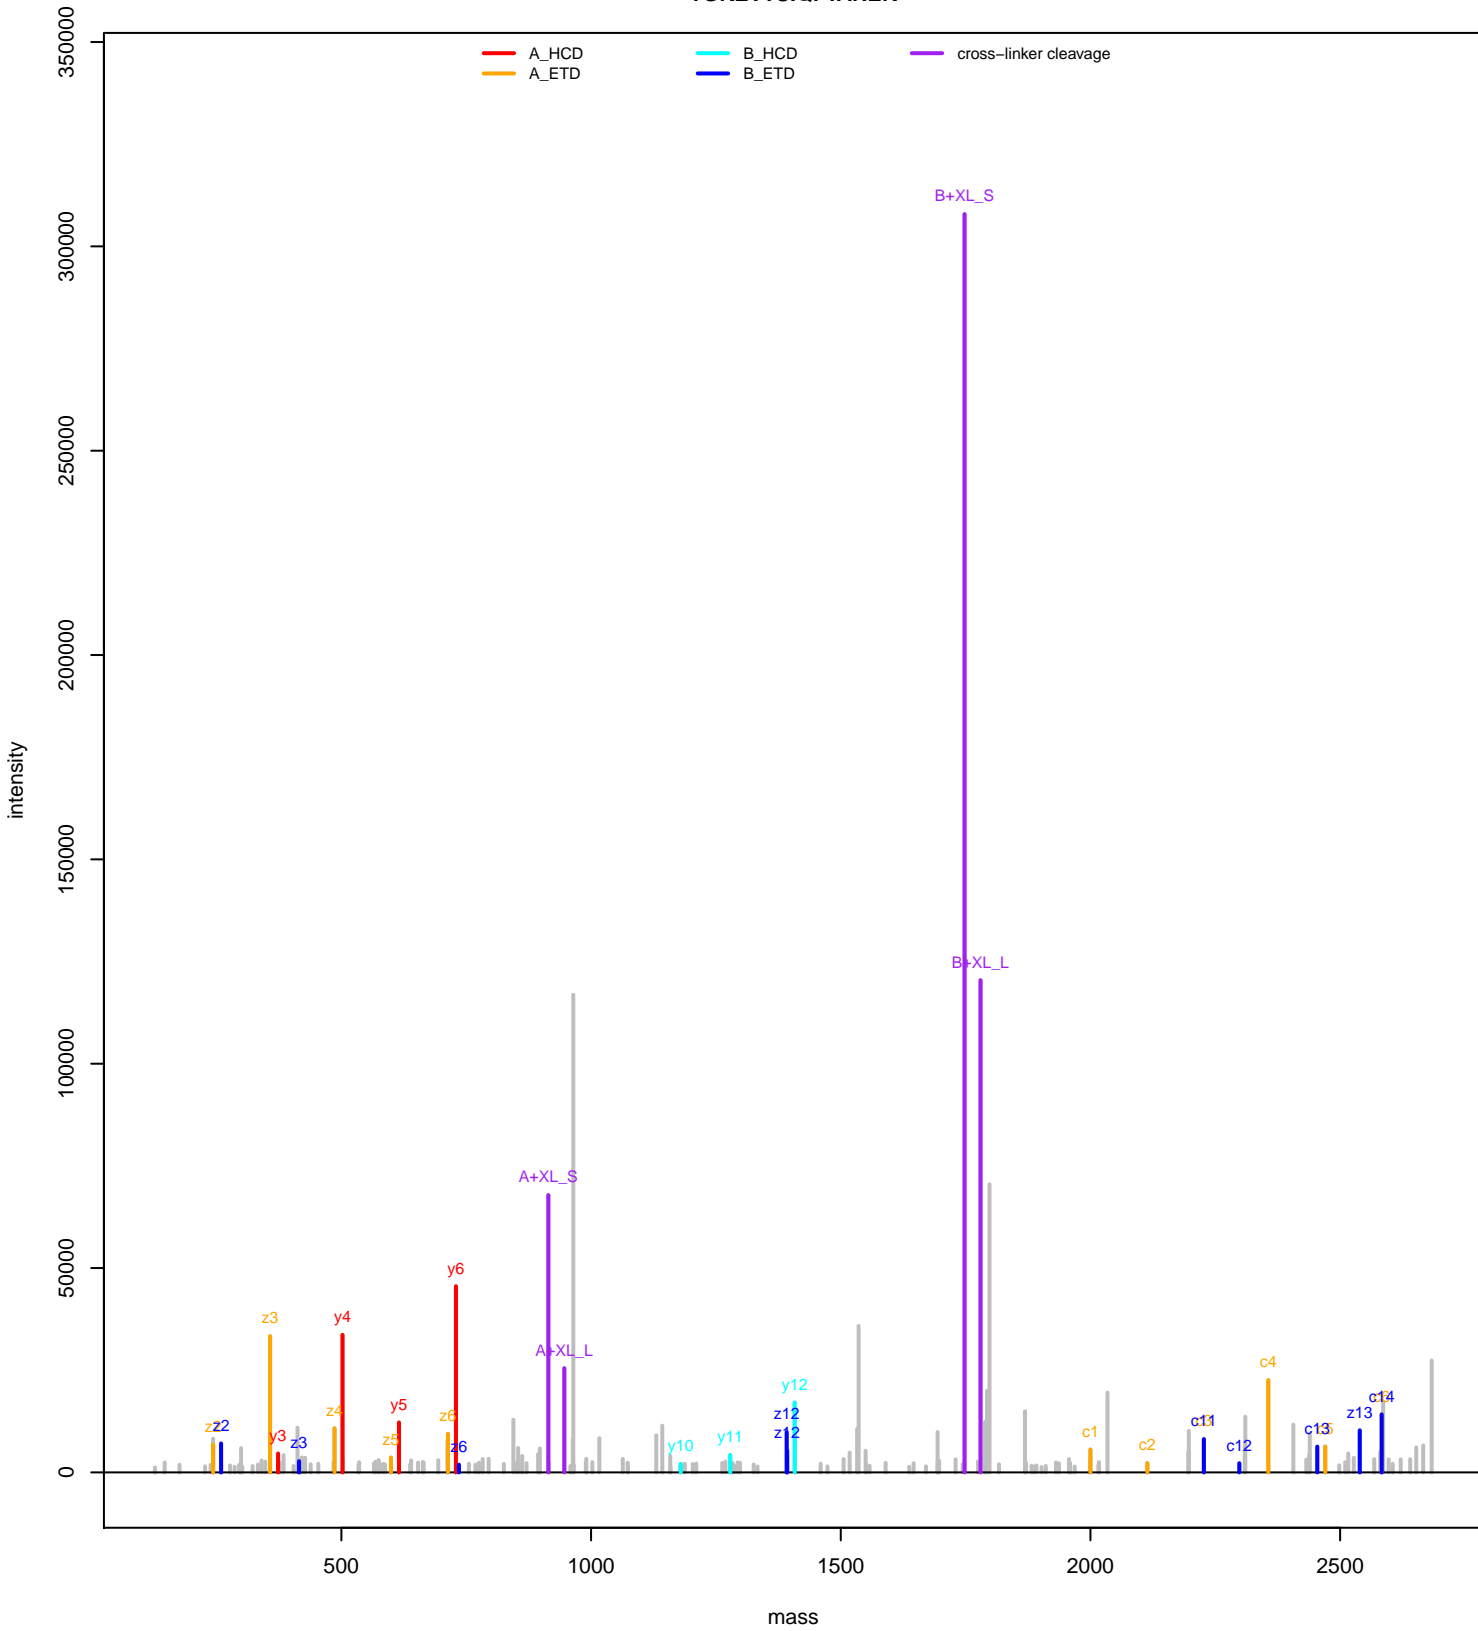

MNIENLK+XL\_S

TGKEVTSIQFTAREK+XL\_S

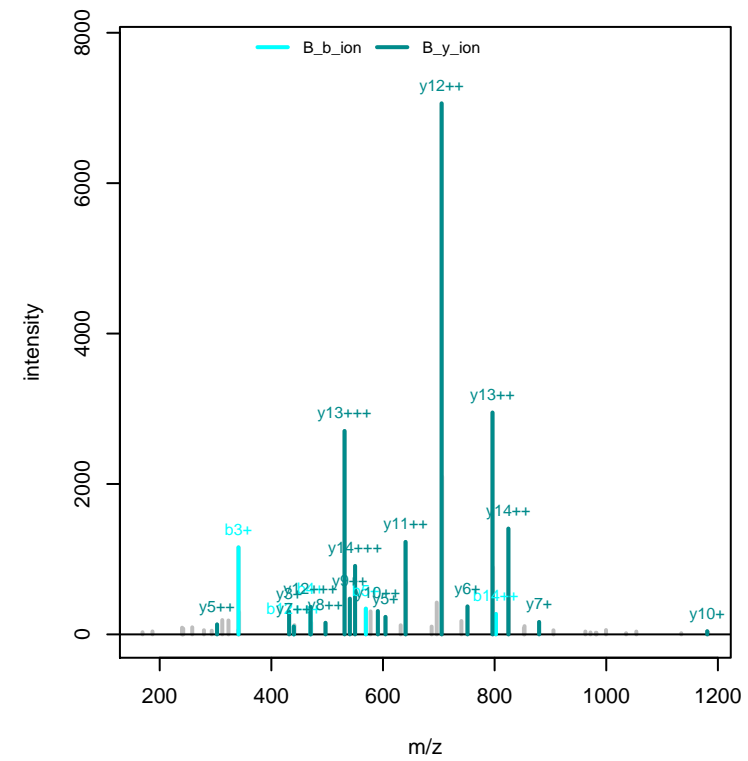

MNIENLK+XL\_L

TGKEVTSIQFTAREK+XL\_L

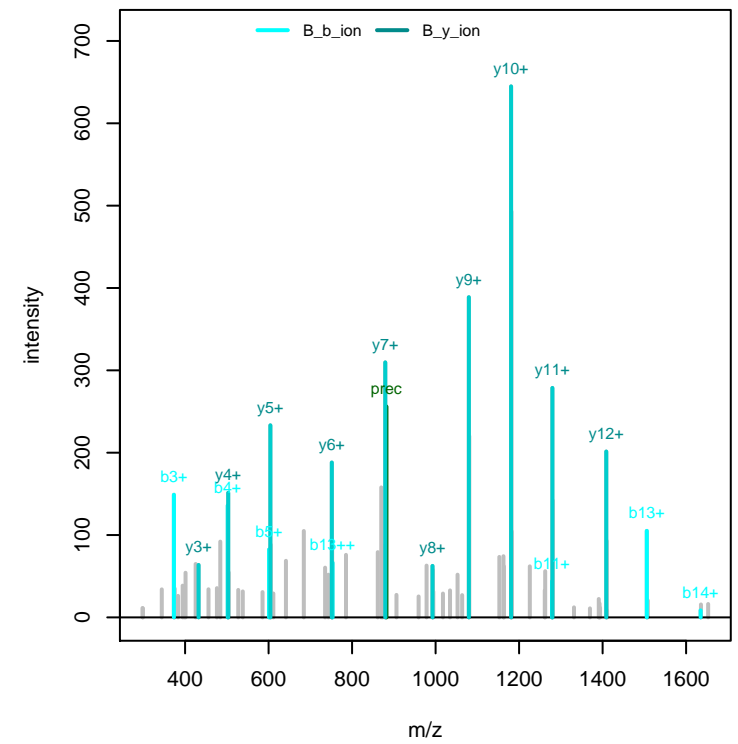

GYAGDTATTSEIKAK  
AALVDHNDIKSTDISVK

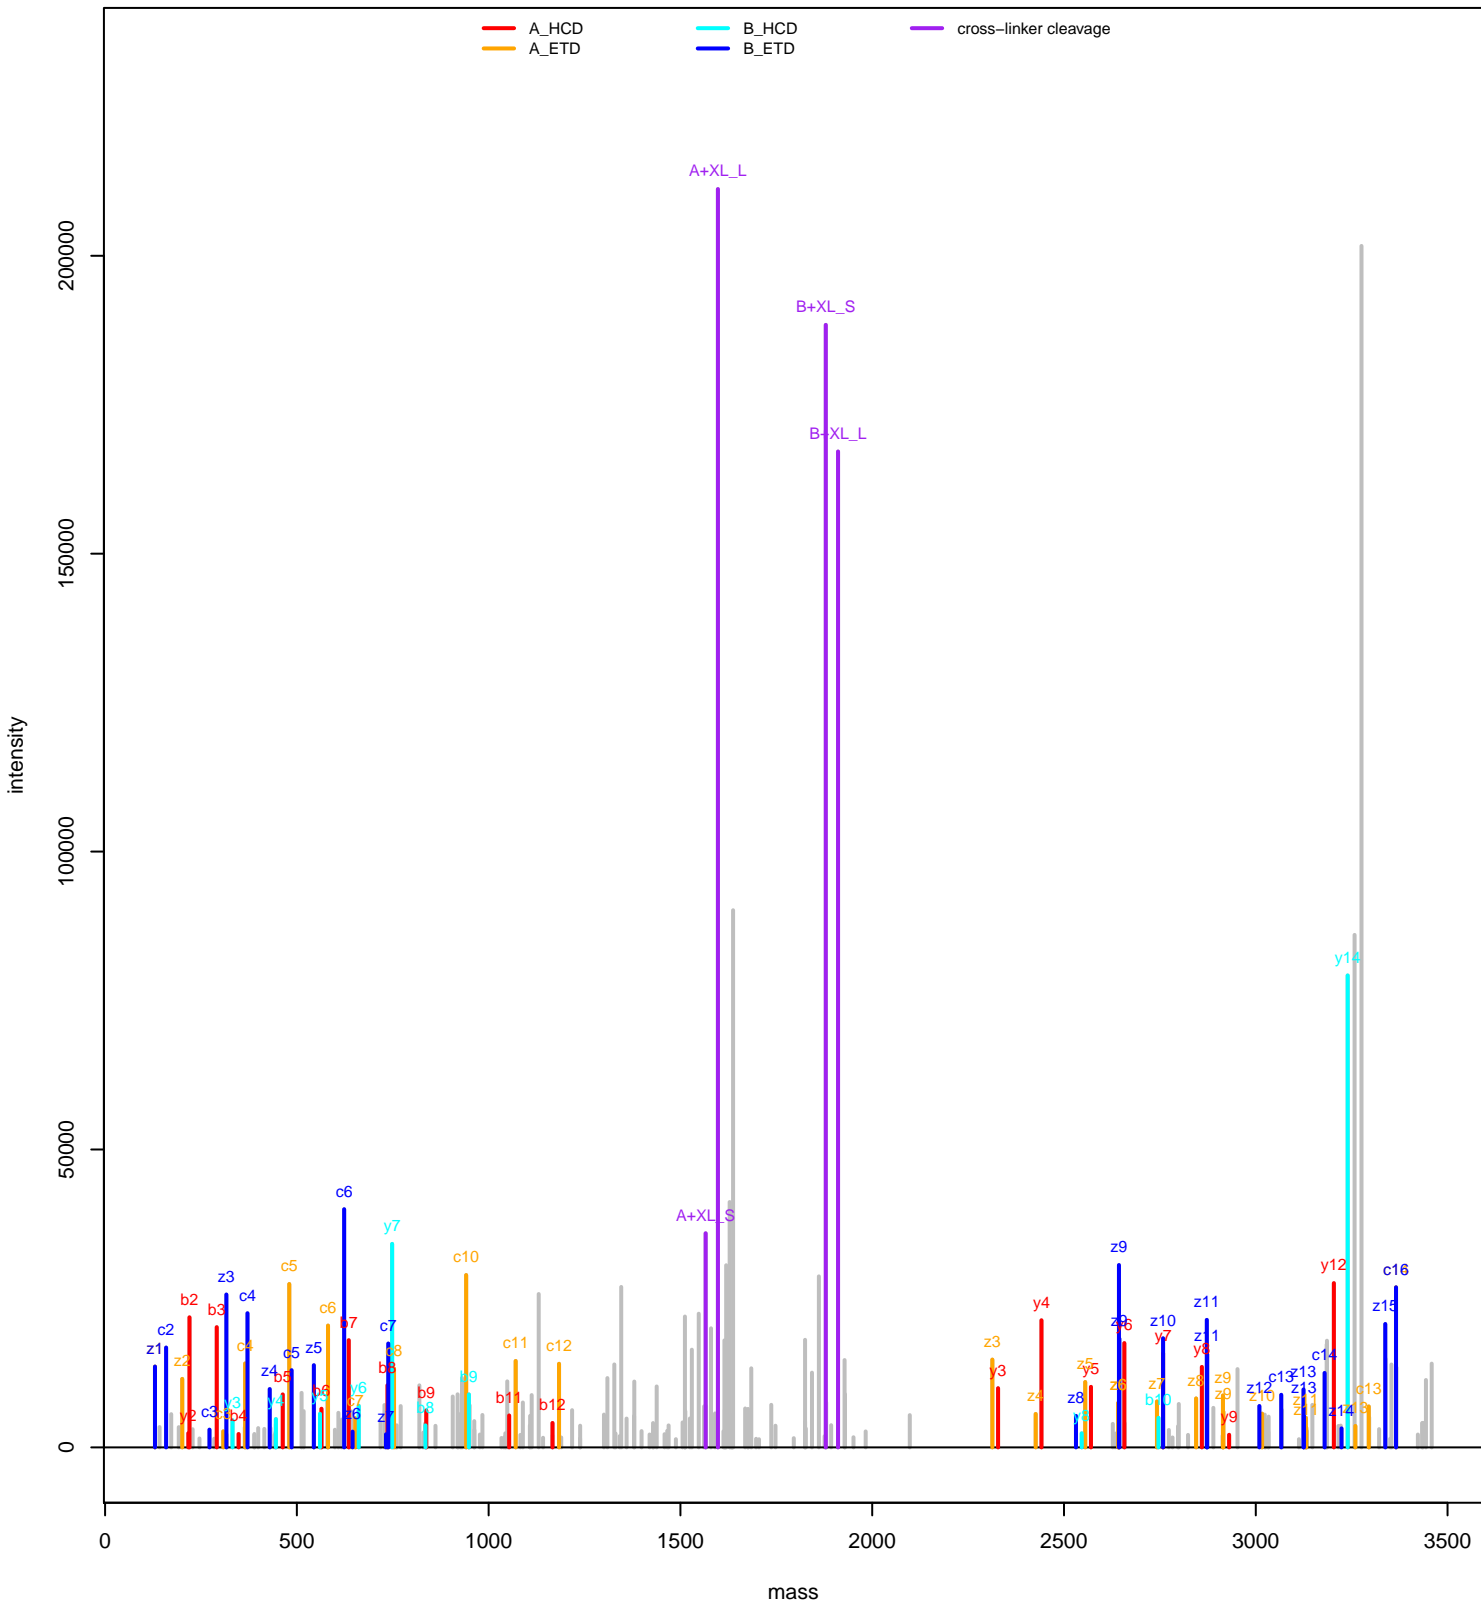

GYAGDTATTSEIKAK+XL\_S

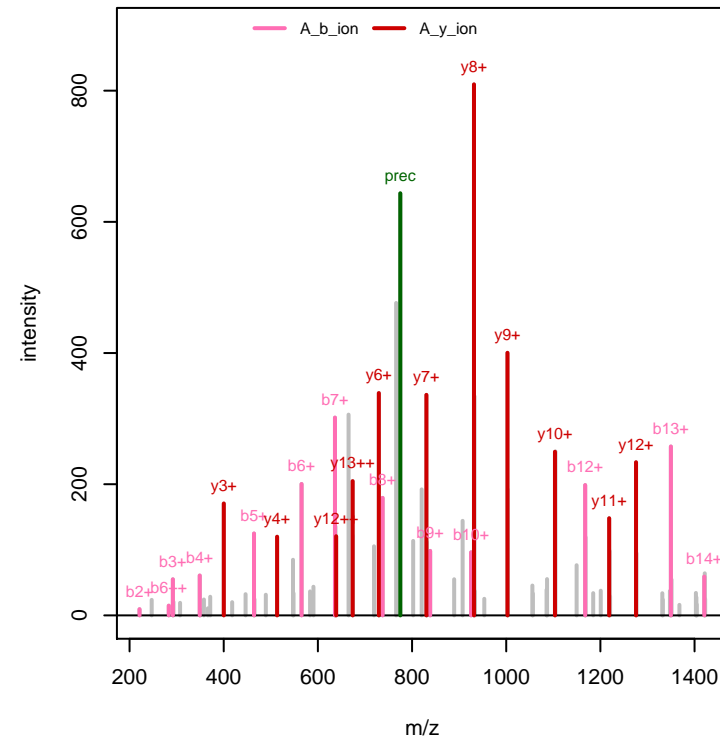

GYAGDTATTSEIKAK+XL\_L

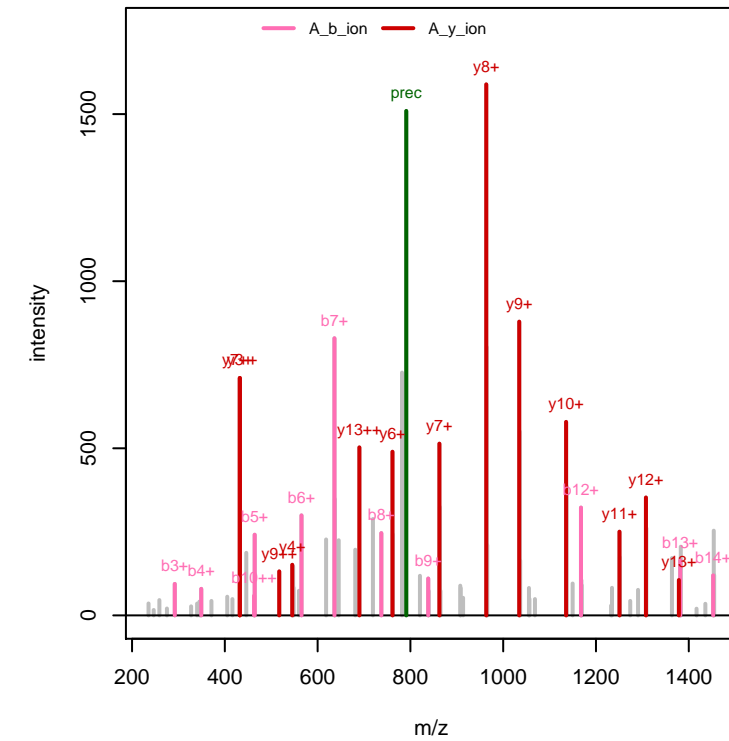

AALVDHNDIKSTDISVK+XL\_S

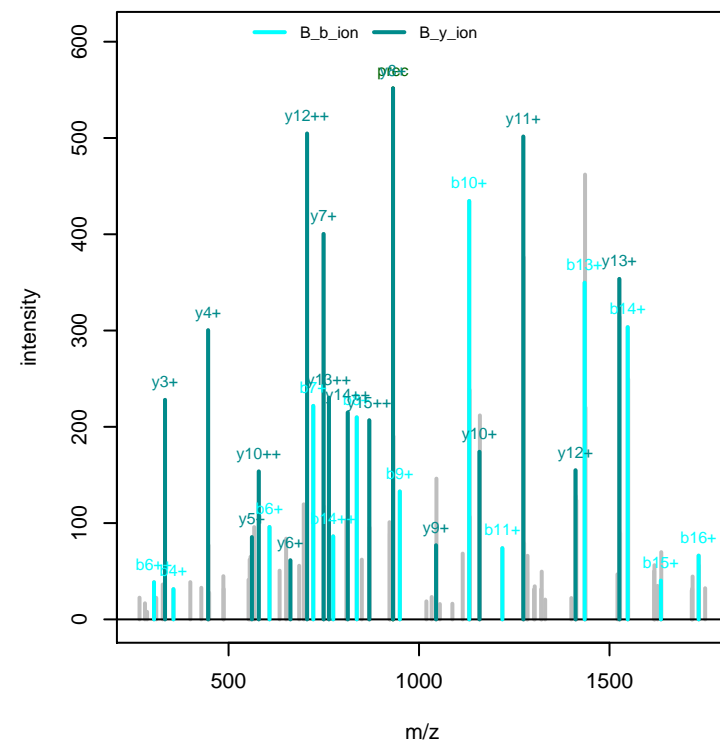

AALVDHNDIKSTDISVK+XL\_L

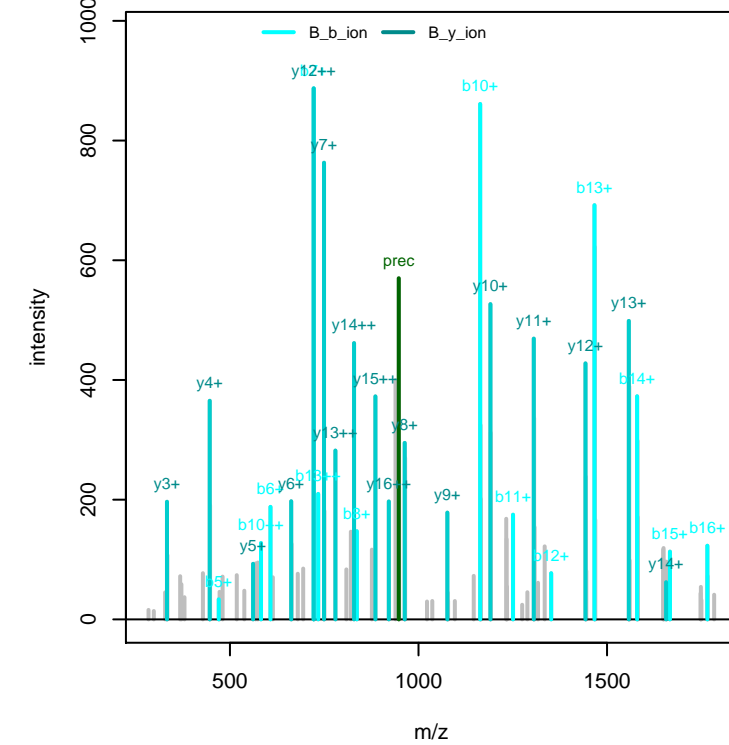



TKPTQHSVK  
AKIALFCNVPEK

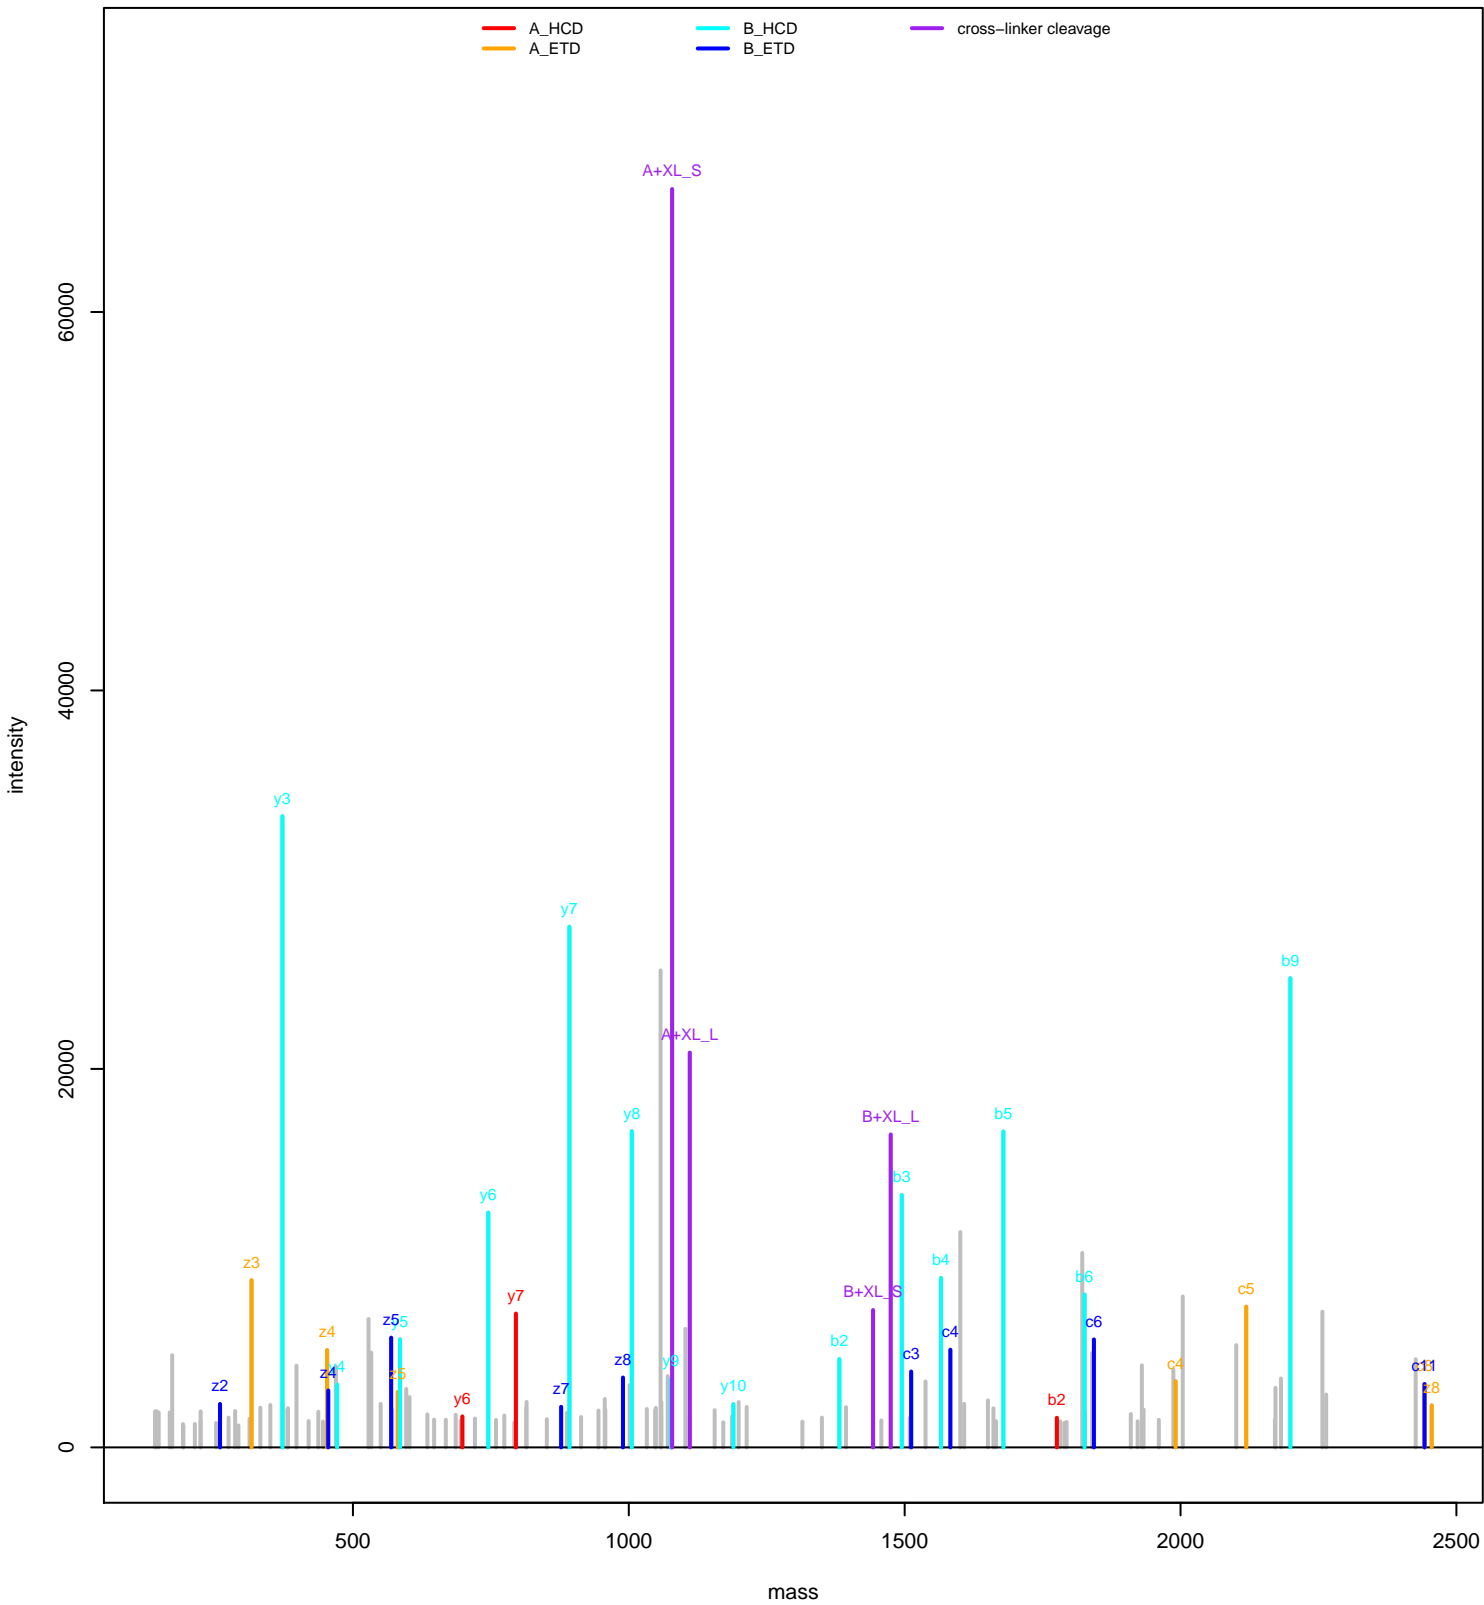

TKPTQHSVK+XL\_S

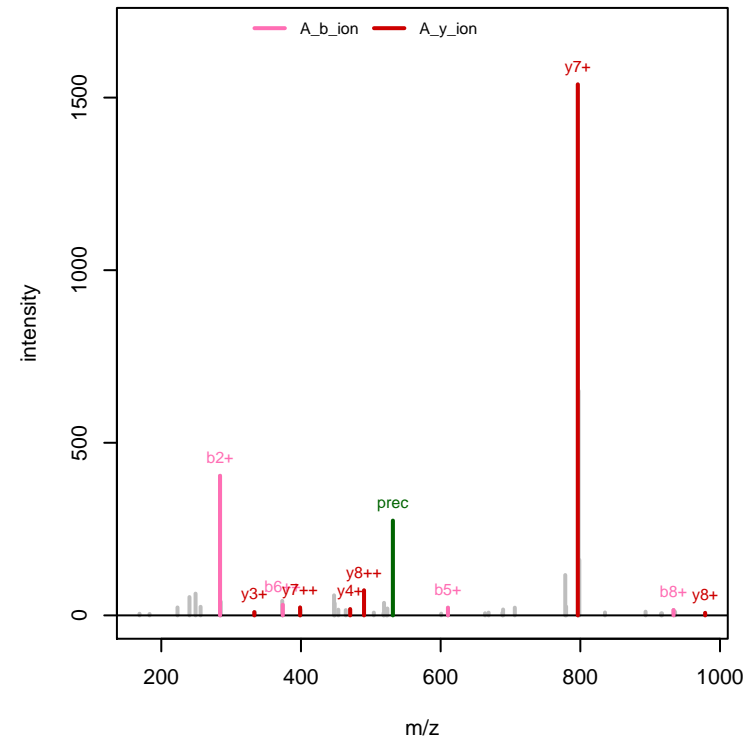

TKPTQHSVK+XL\_L

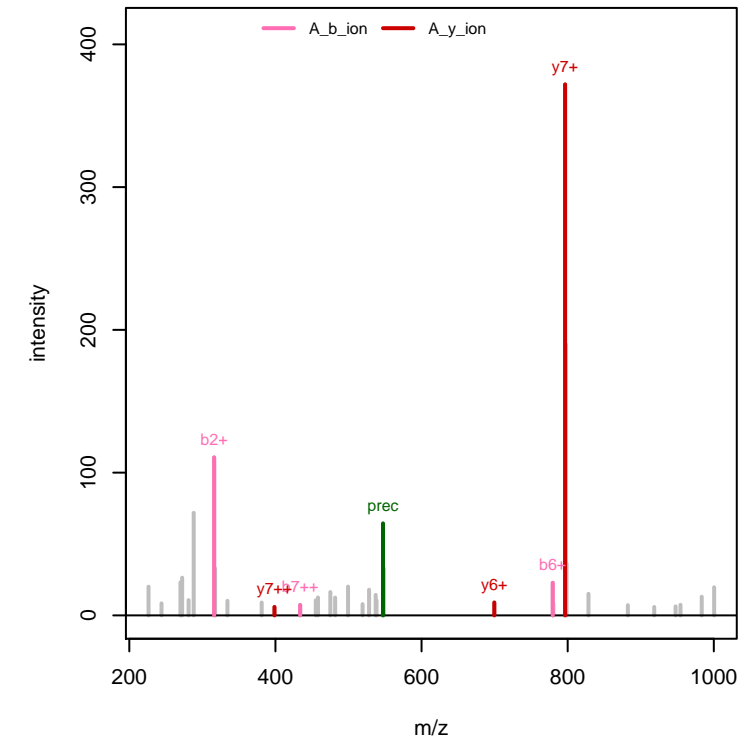

AKIALFCNVPEK+XL\_S

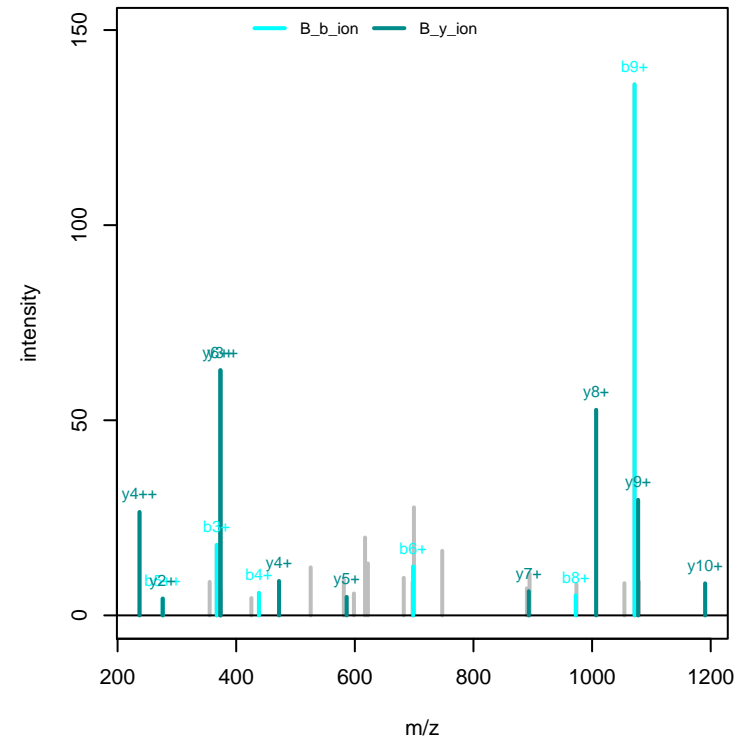

AKIALFCNVPEK+XL\_L

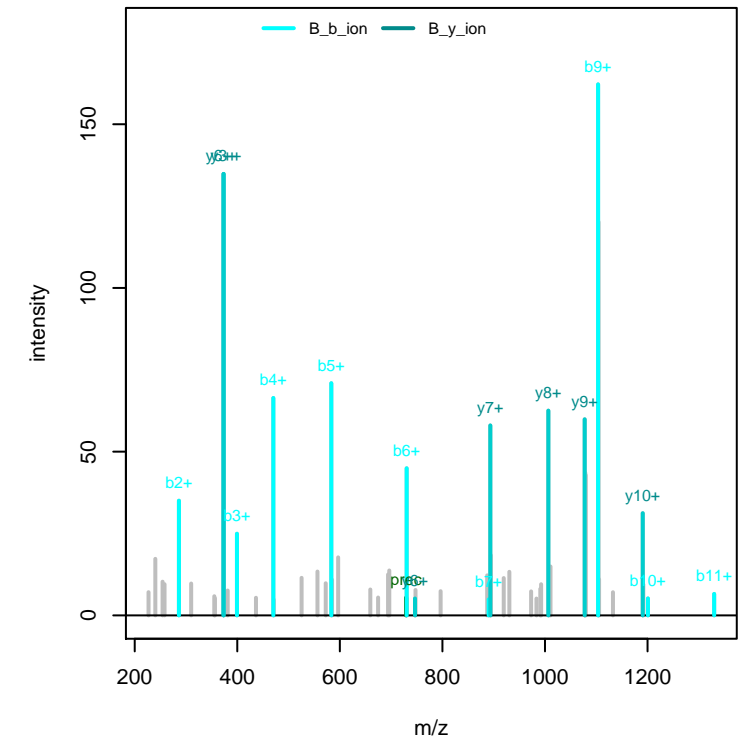

**VTLGPKGR**  
**SFGAPTITKDGVSVAR**

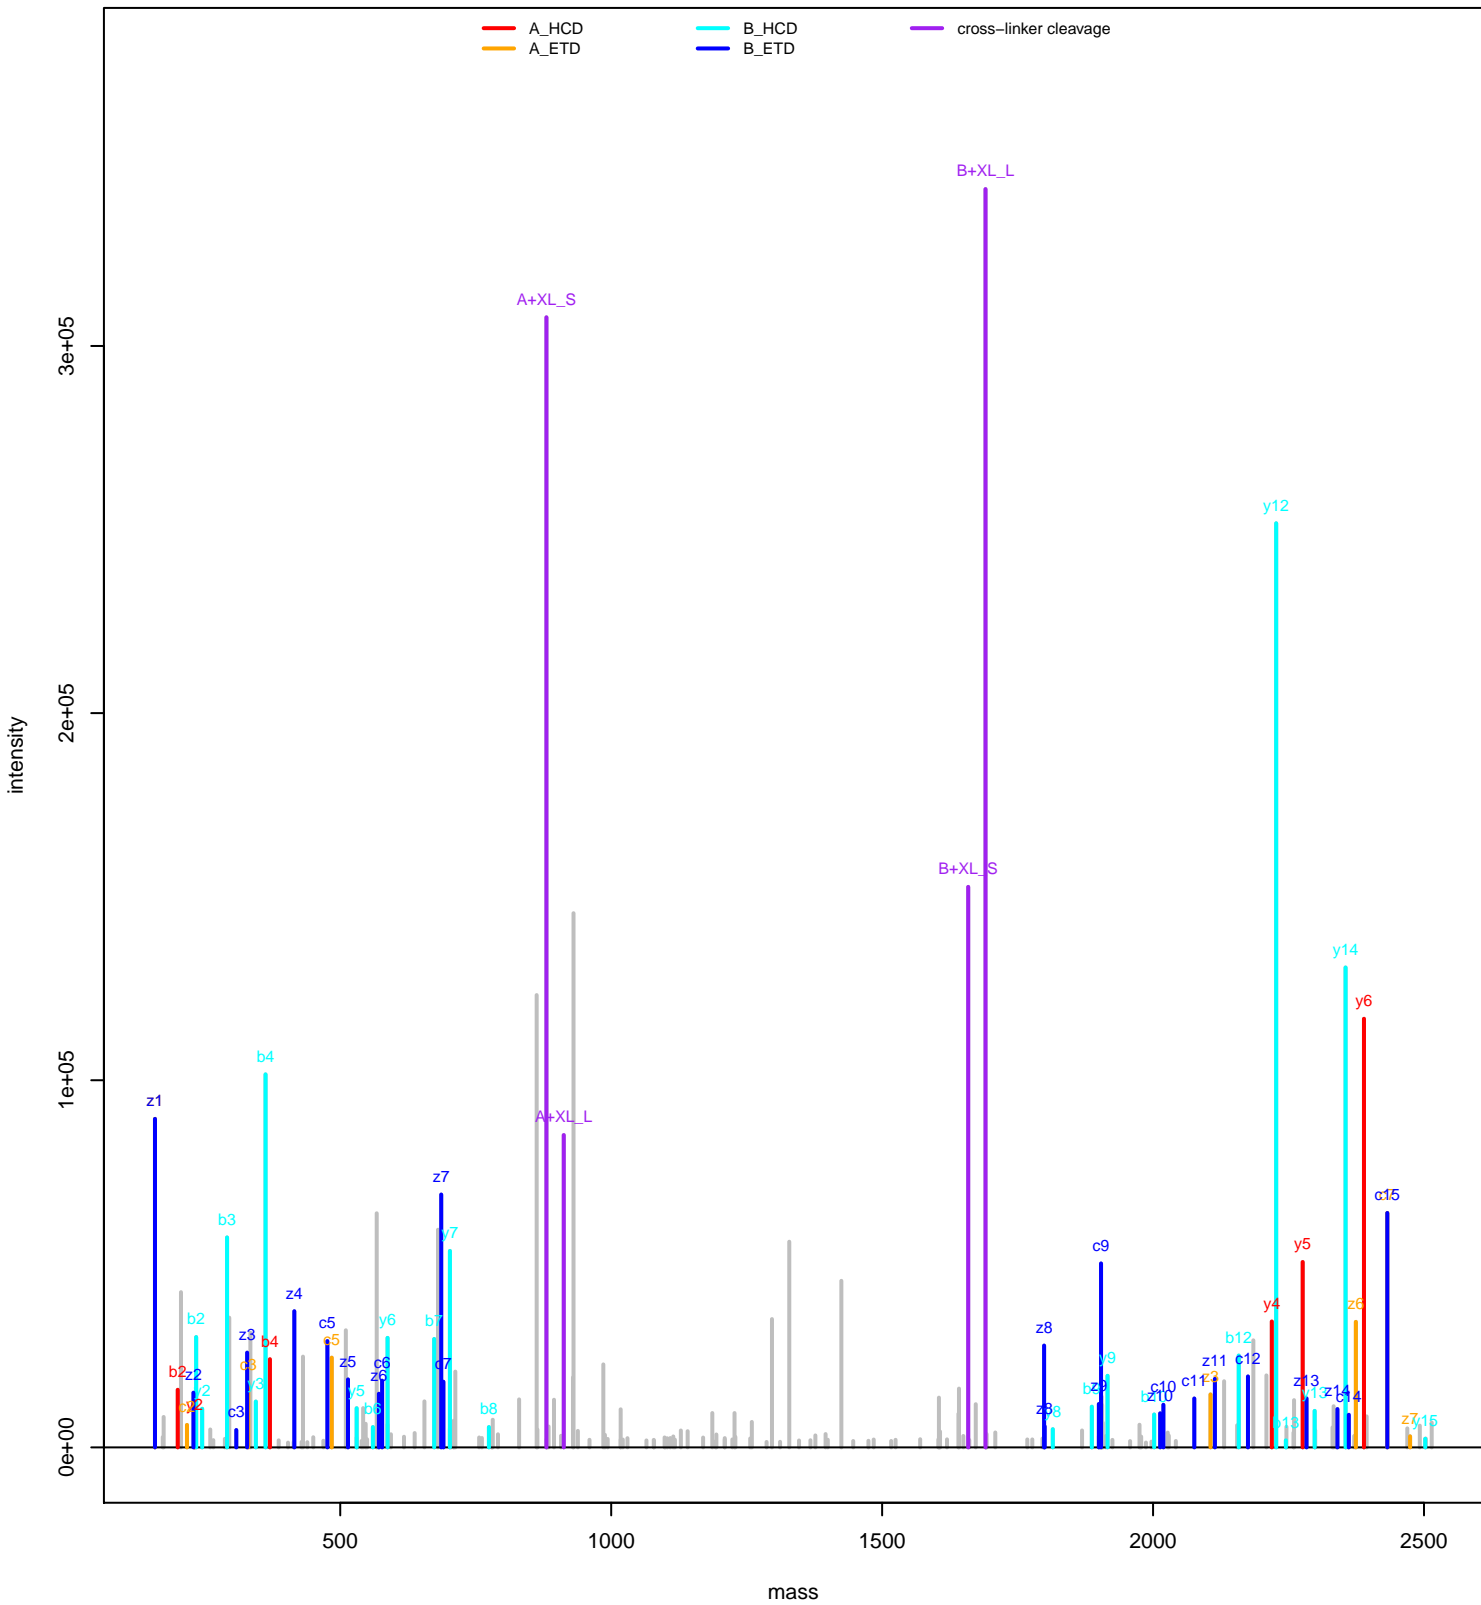

**VTLGPKGR+XL\_S**

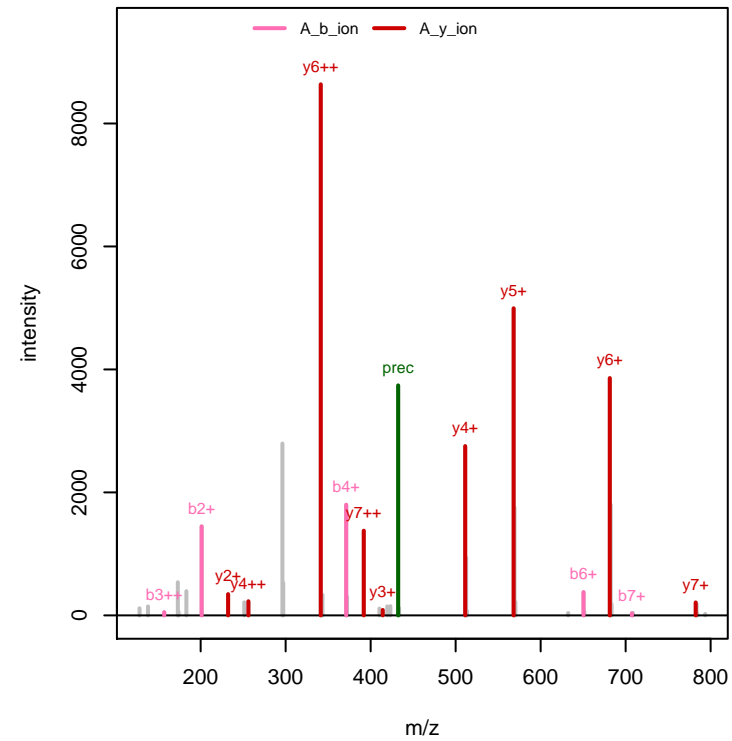

**VTLGPKGR+XL\_L**

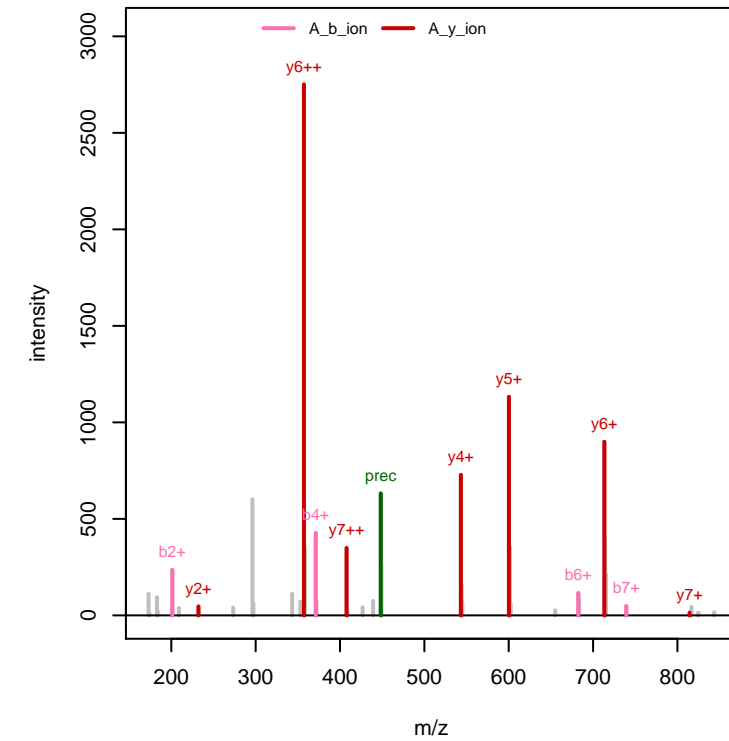

**SFGAPTITKDGVSVAR+XL\_S**

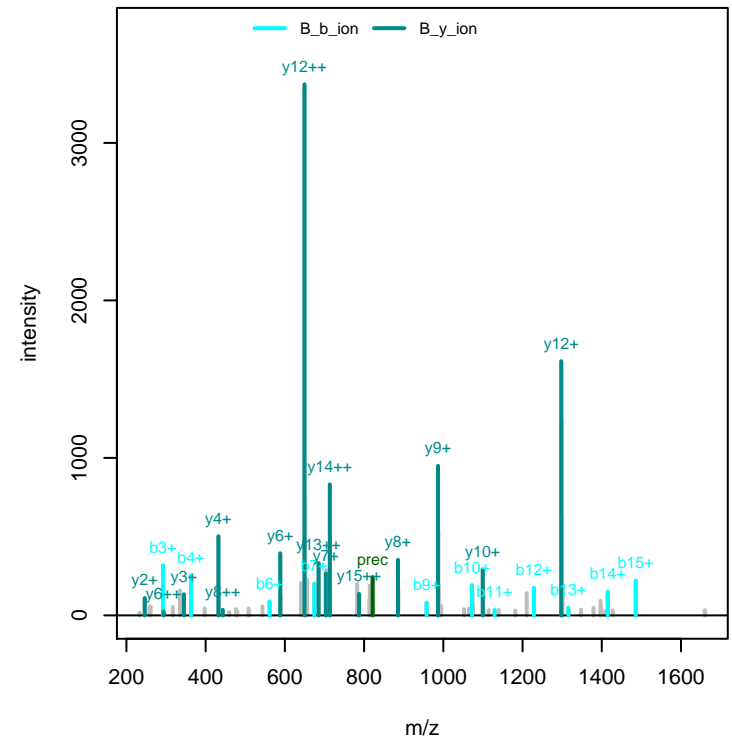

**SFGAPTITKDGVSVAR+XL\_L**

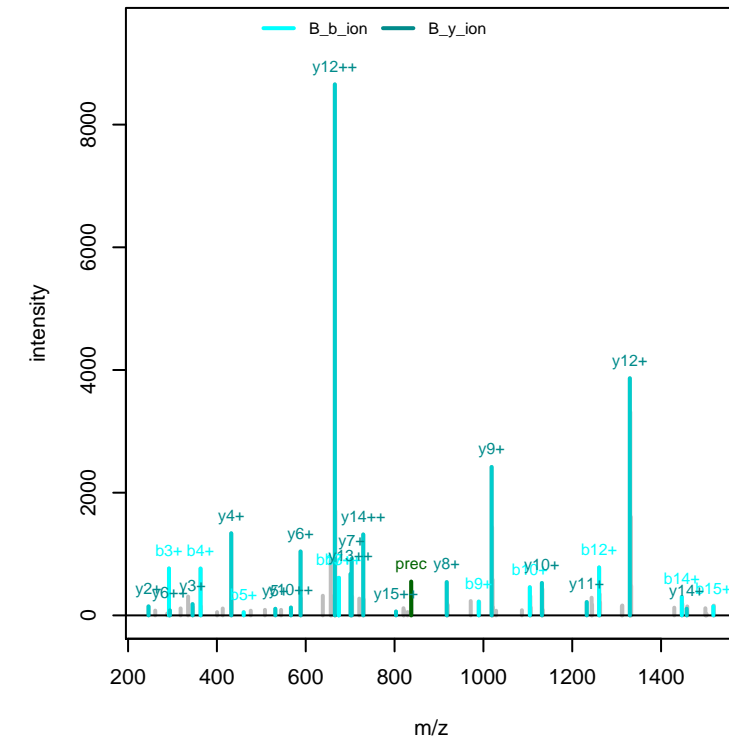

**KSGTEPLIR  
AKVGDYRVLEK**

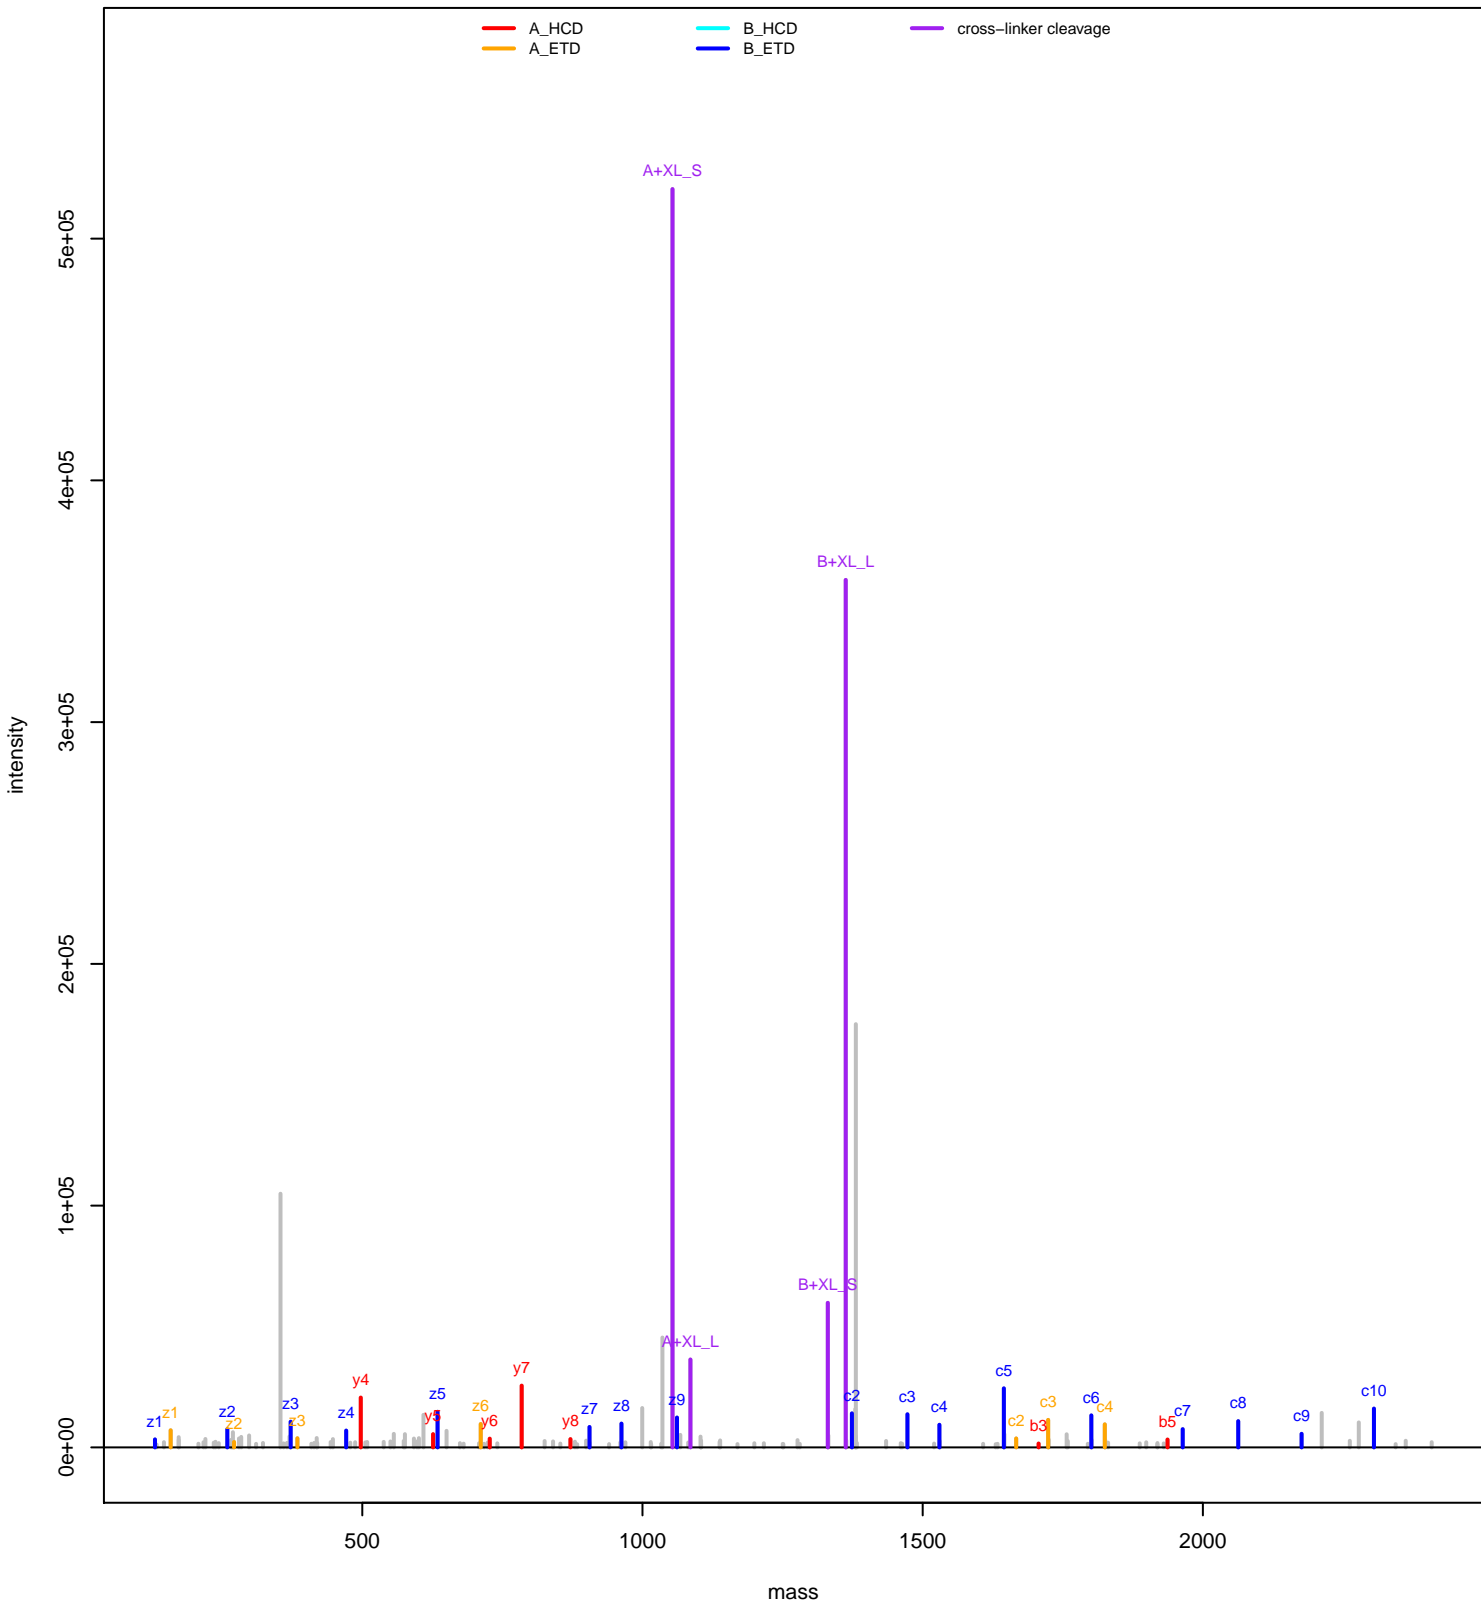

**KSGTEPLIR+XL\_S**

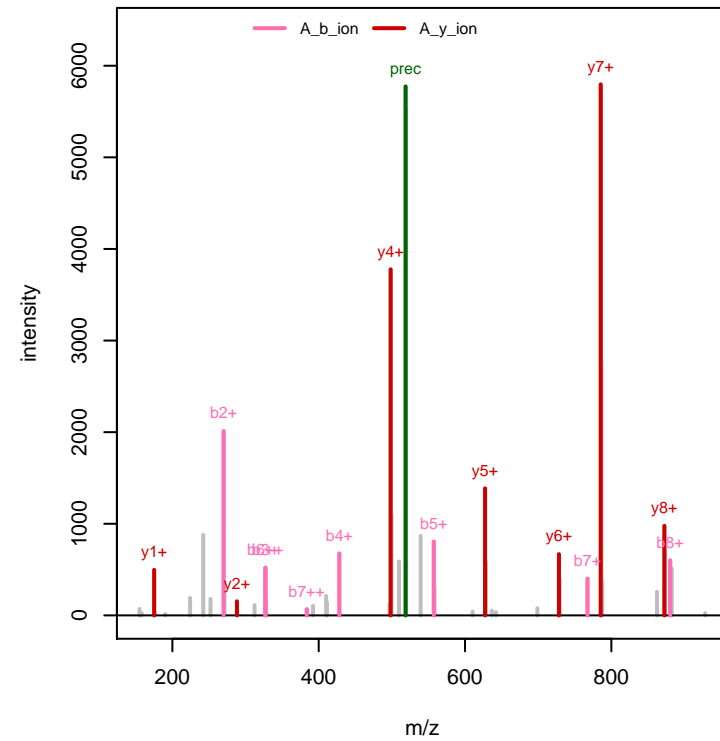

**KSGTEPLIR+XL\_L**

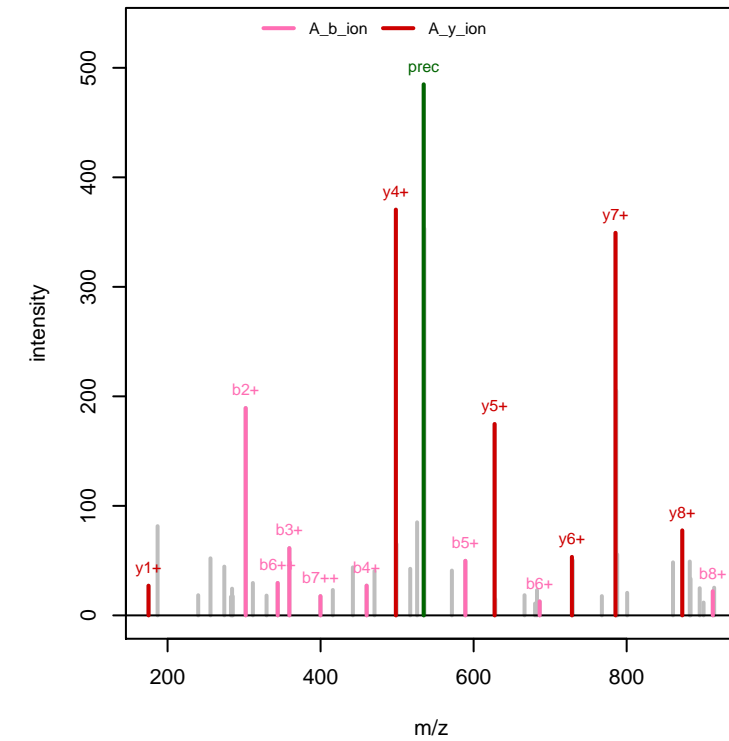

**AKVGDYRVLEK+XL\_S**

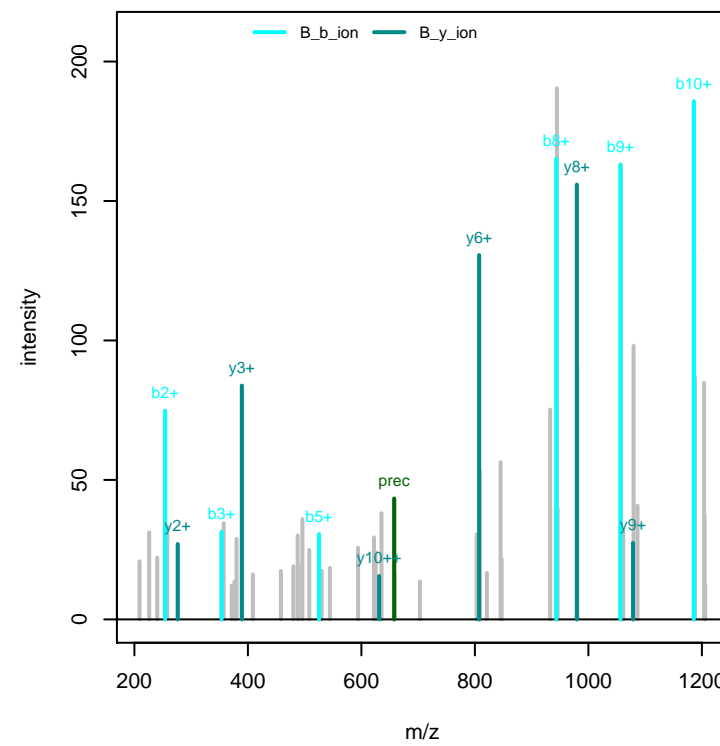

**AKVGDYRVLEK+XL\_L**

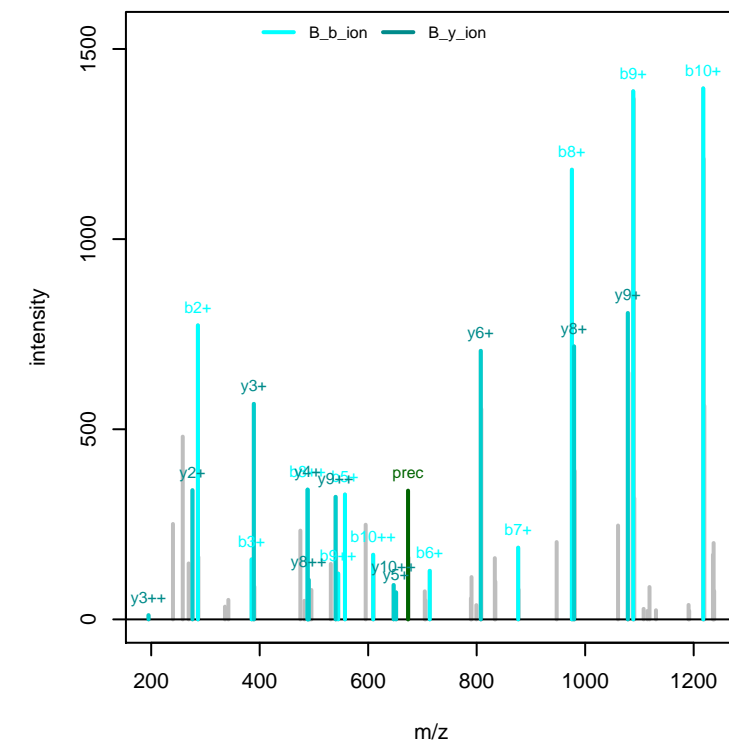

DPKTGK  
GLTFTYEPKVLRL

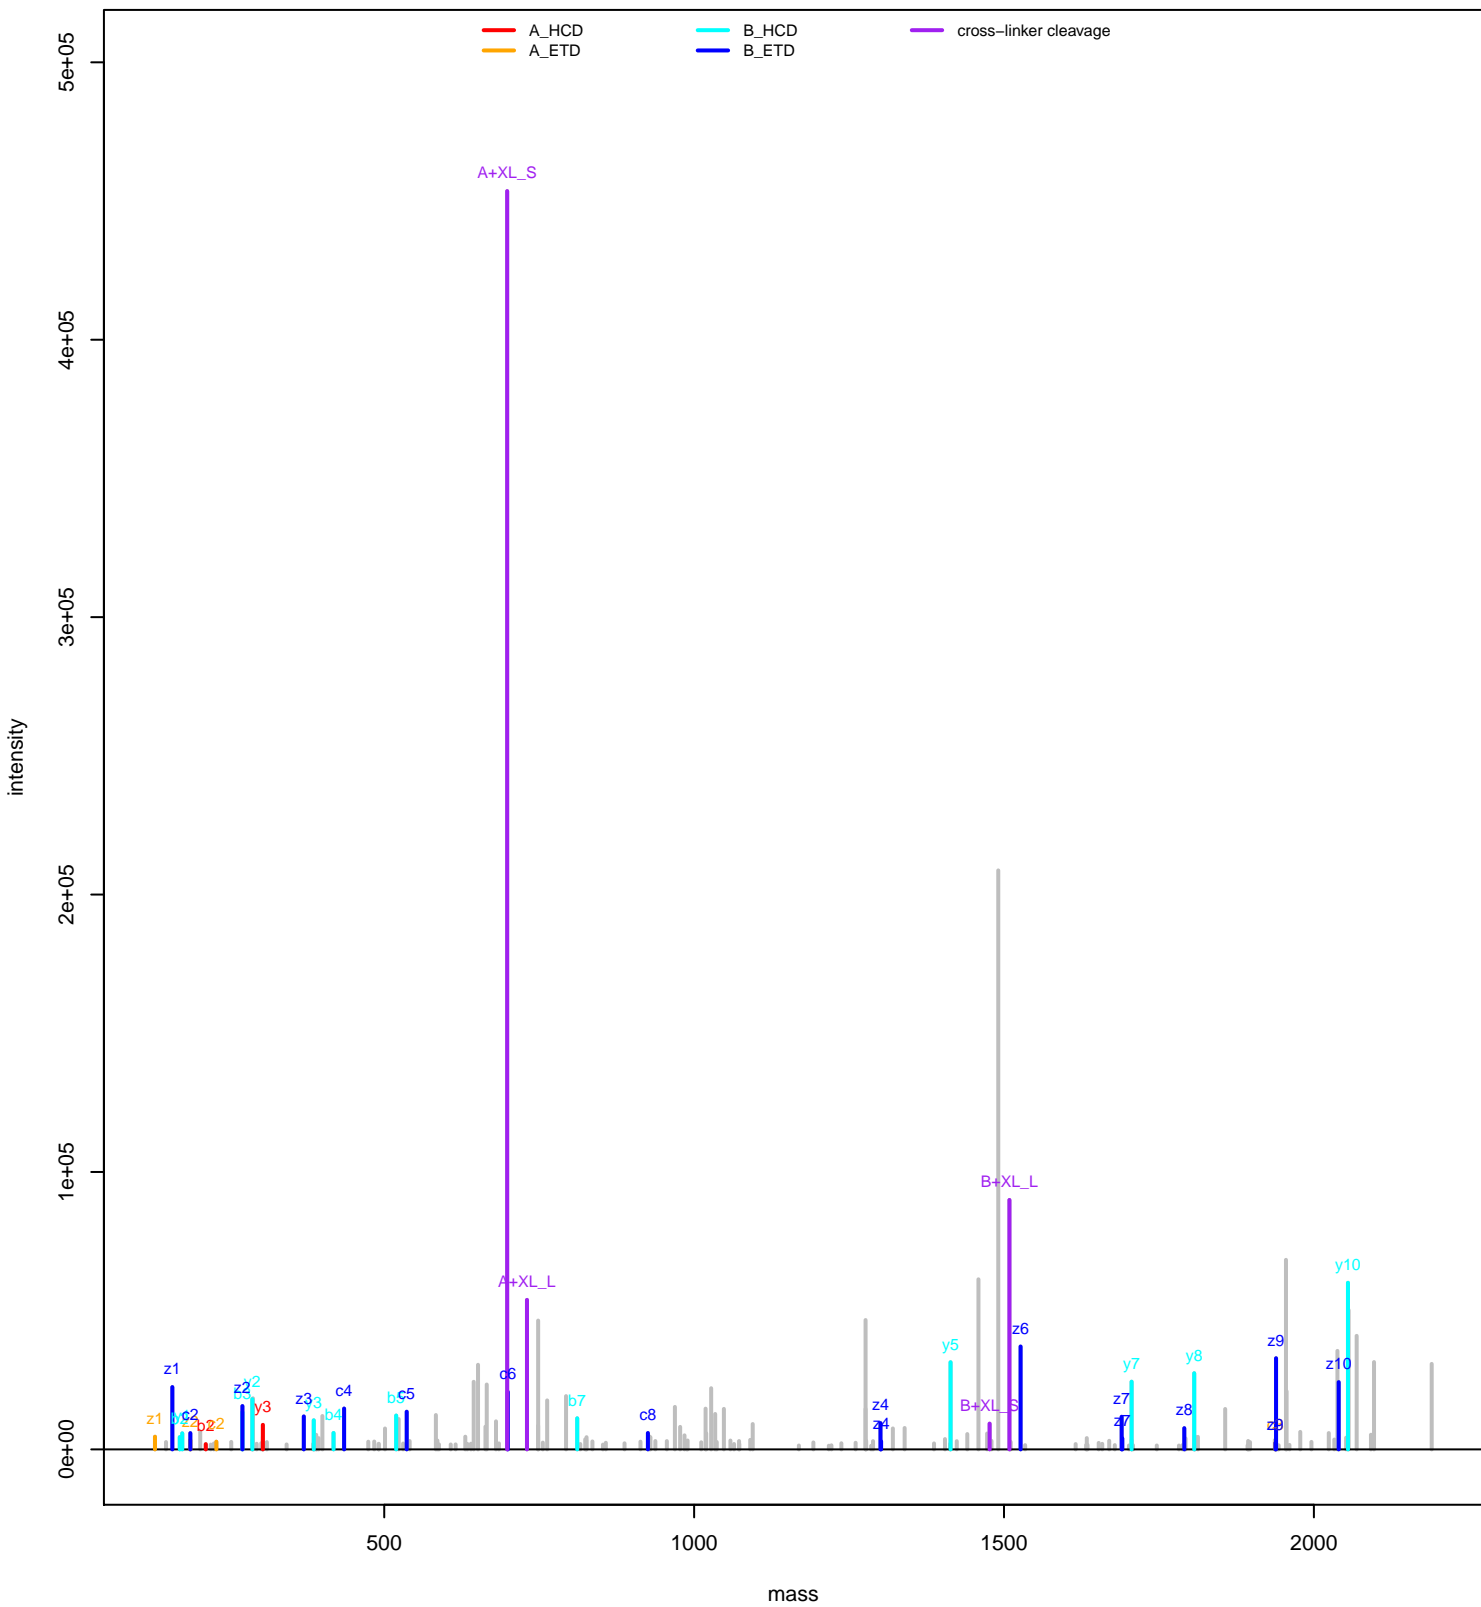

DPKTGK+XL\_S

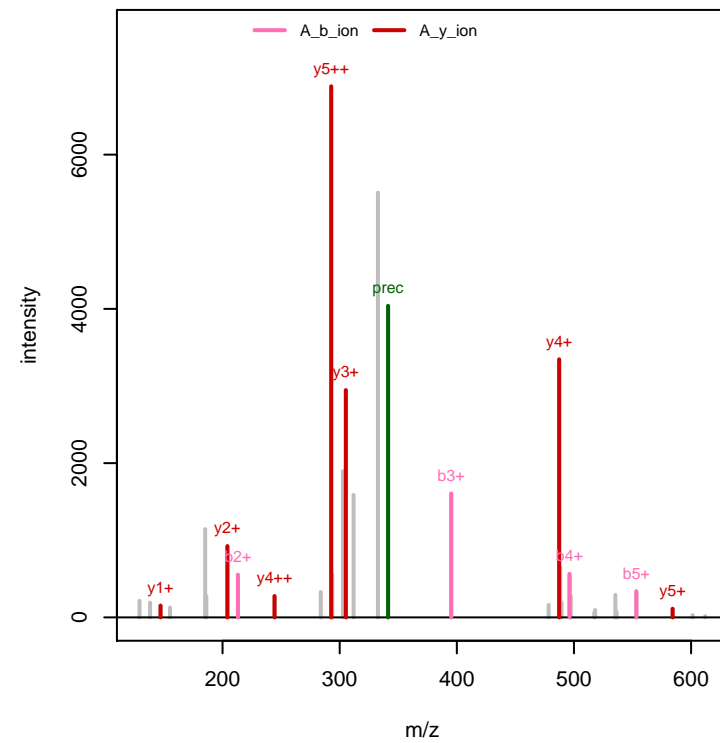

DPKTGK+XL\_L

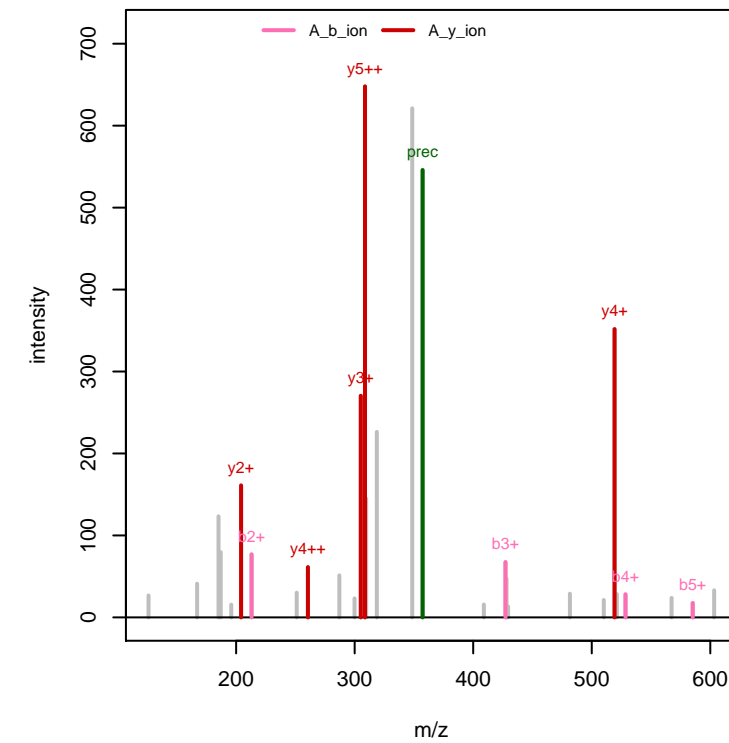

GLTFTYEPKVLRL+XL\_S

GLTFTYEPKVLRL+XL\_L

**IKDIEAK**  
**MQAIPMTLRGAEK**

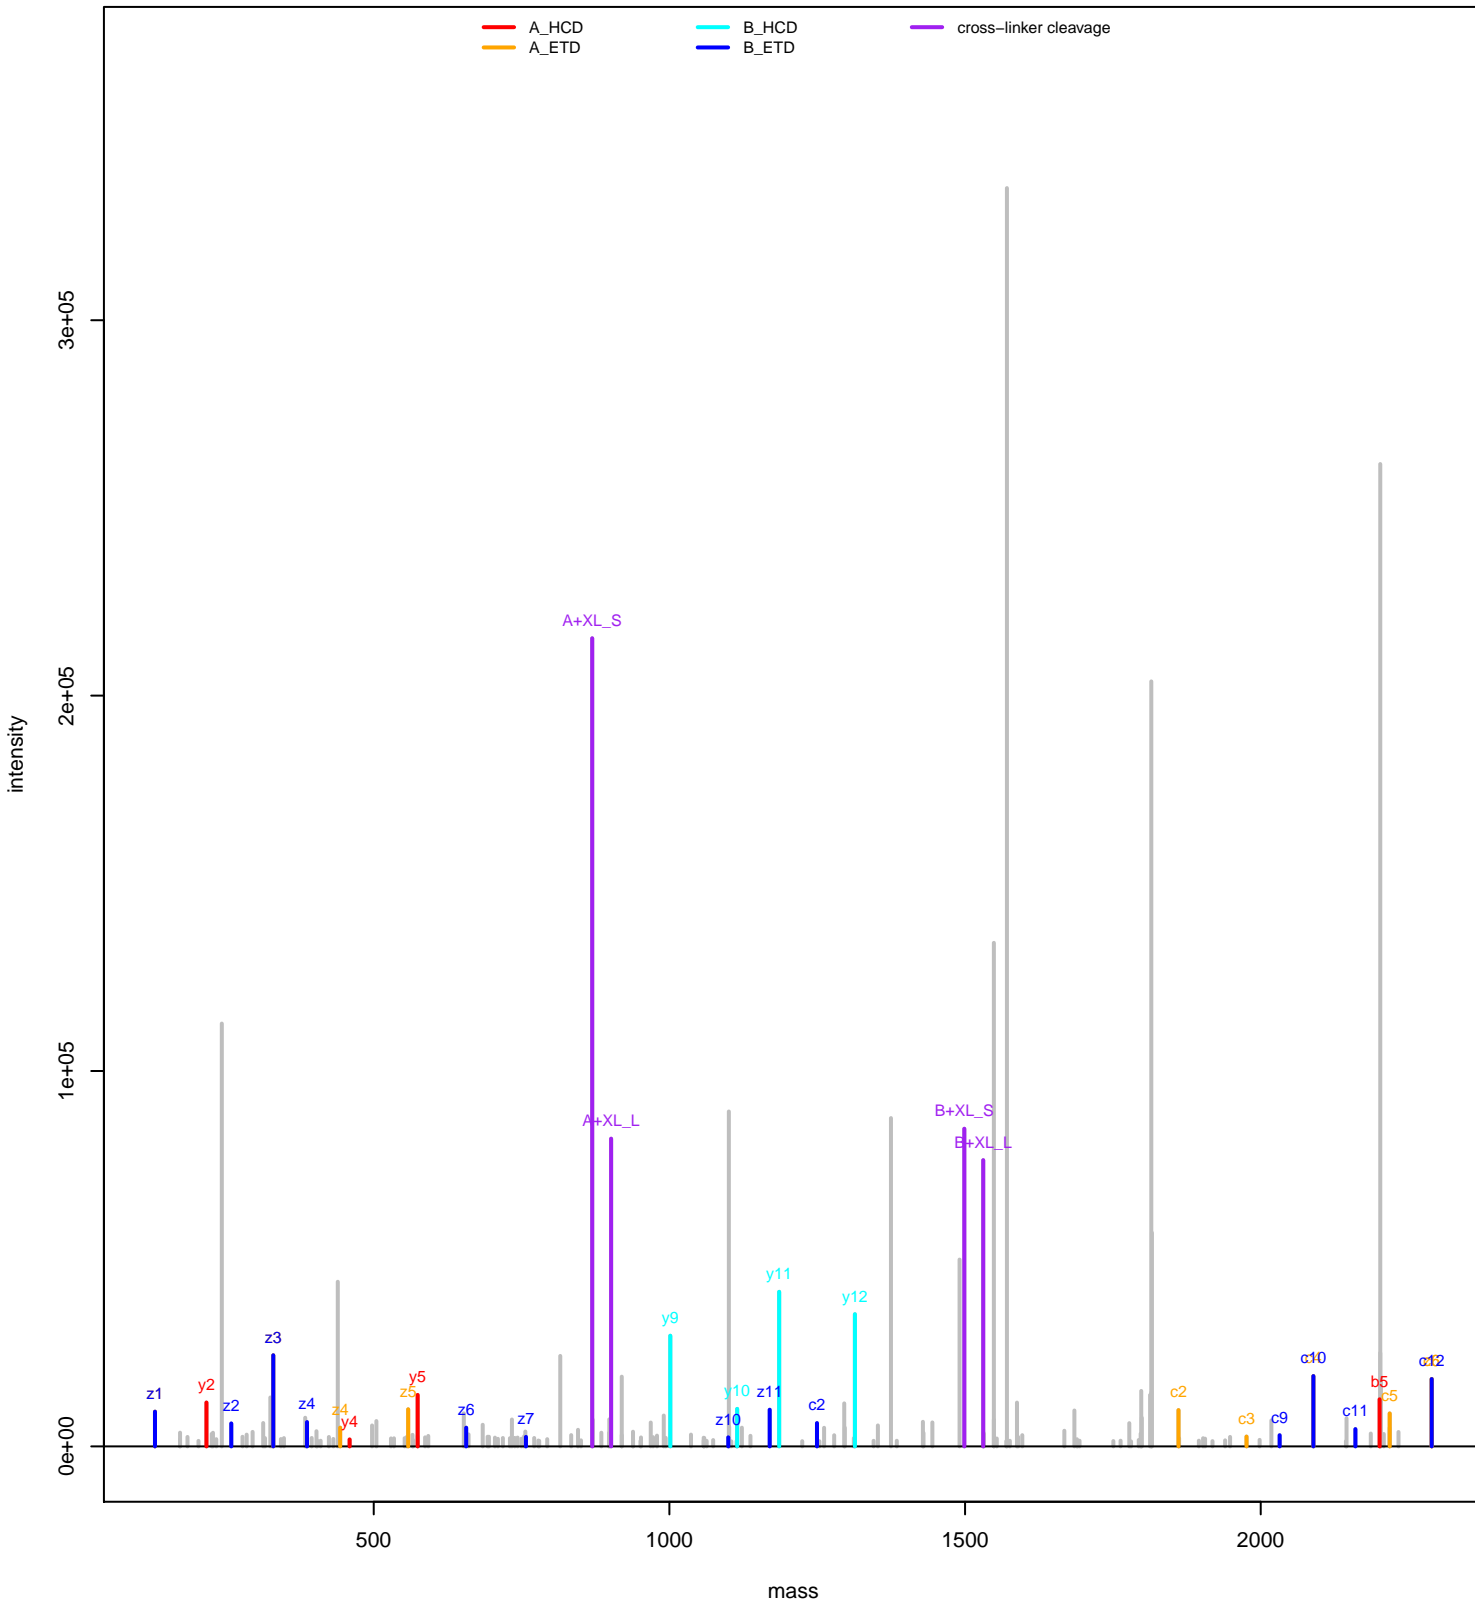

**IKDIEAK+XL\_S**

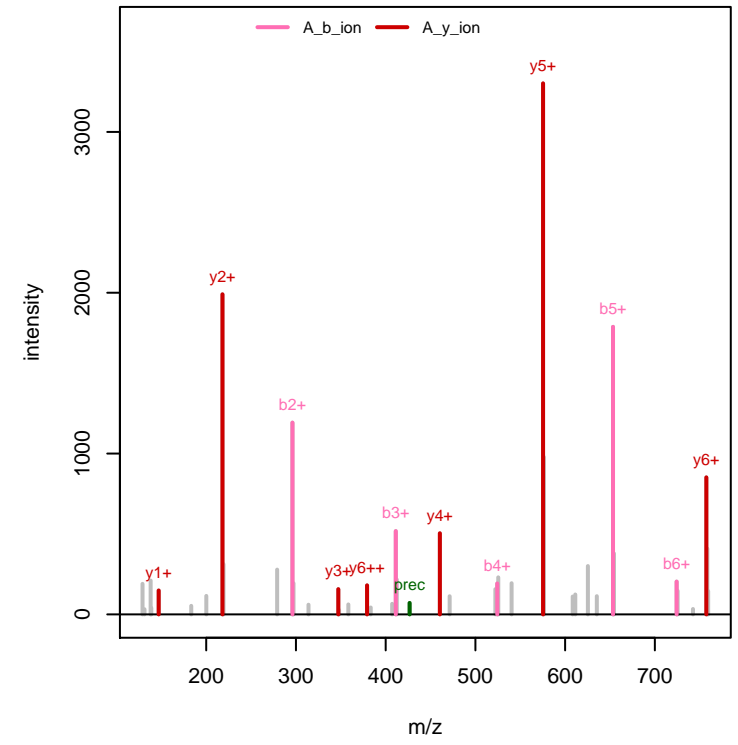

**IKDIEAK+XL\_L**

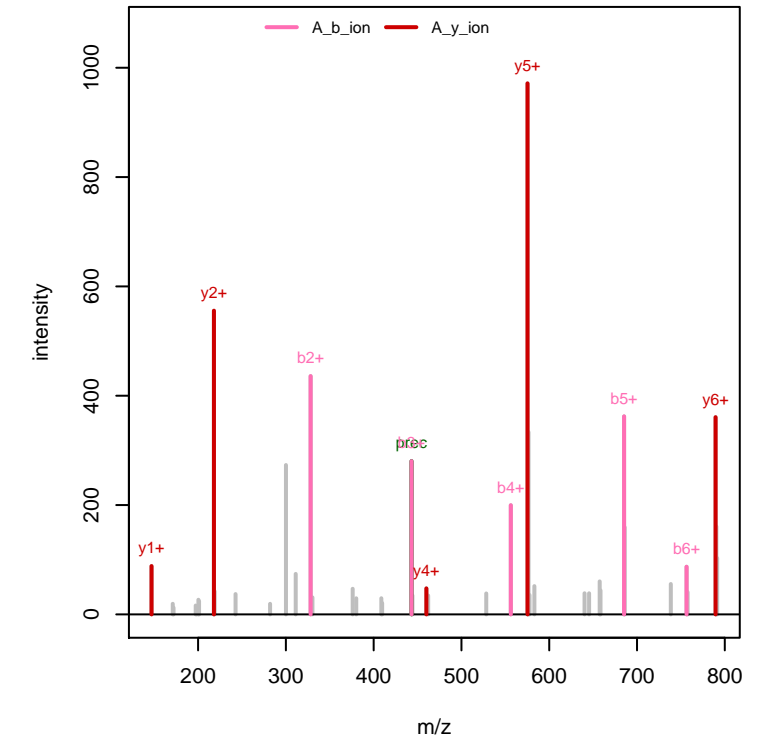

**MQAIPMTLRGAEK+XL\_S**

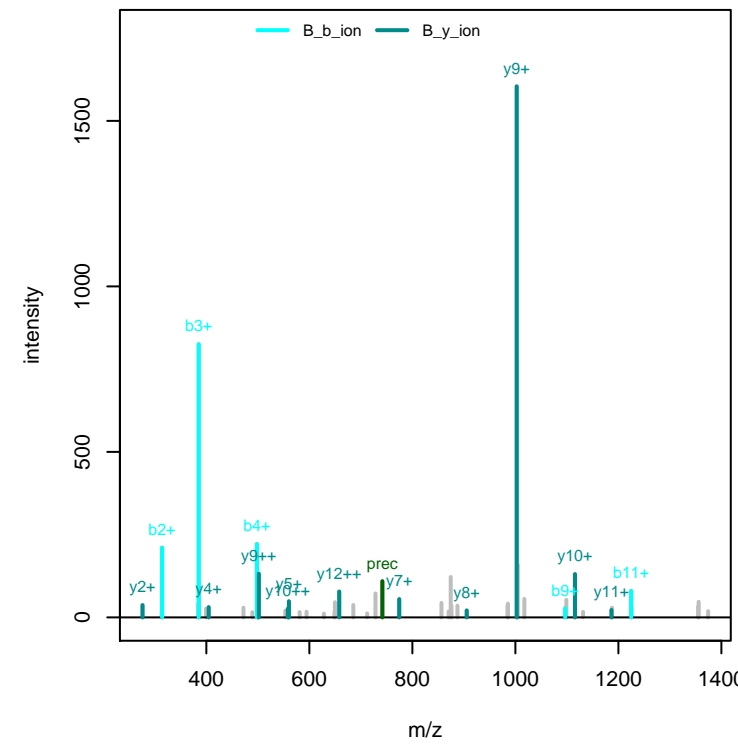

**MQAIPMTLRGAEK+XL\_L**

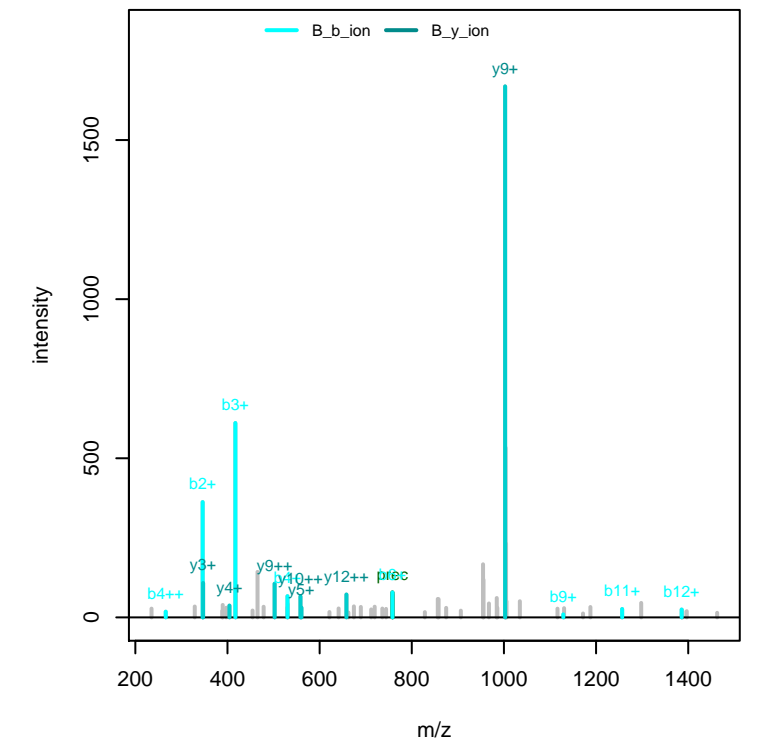

LSKSSR  
MNEQYSALRSNVSMGLK

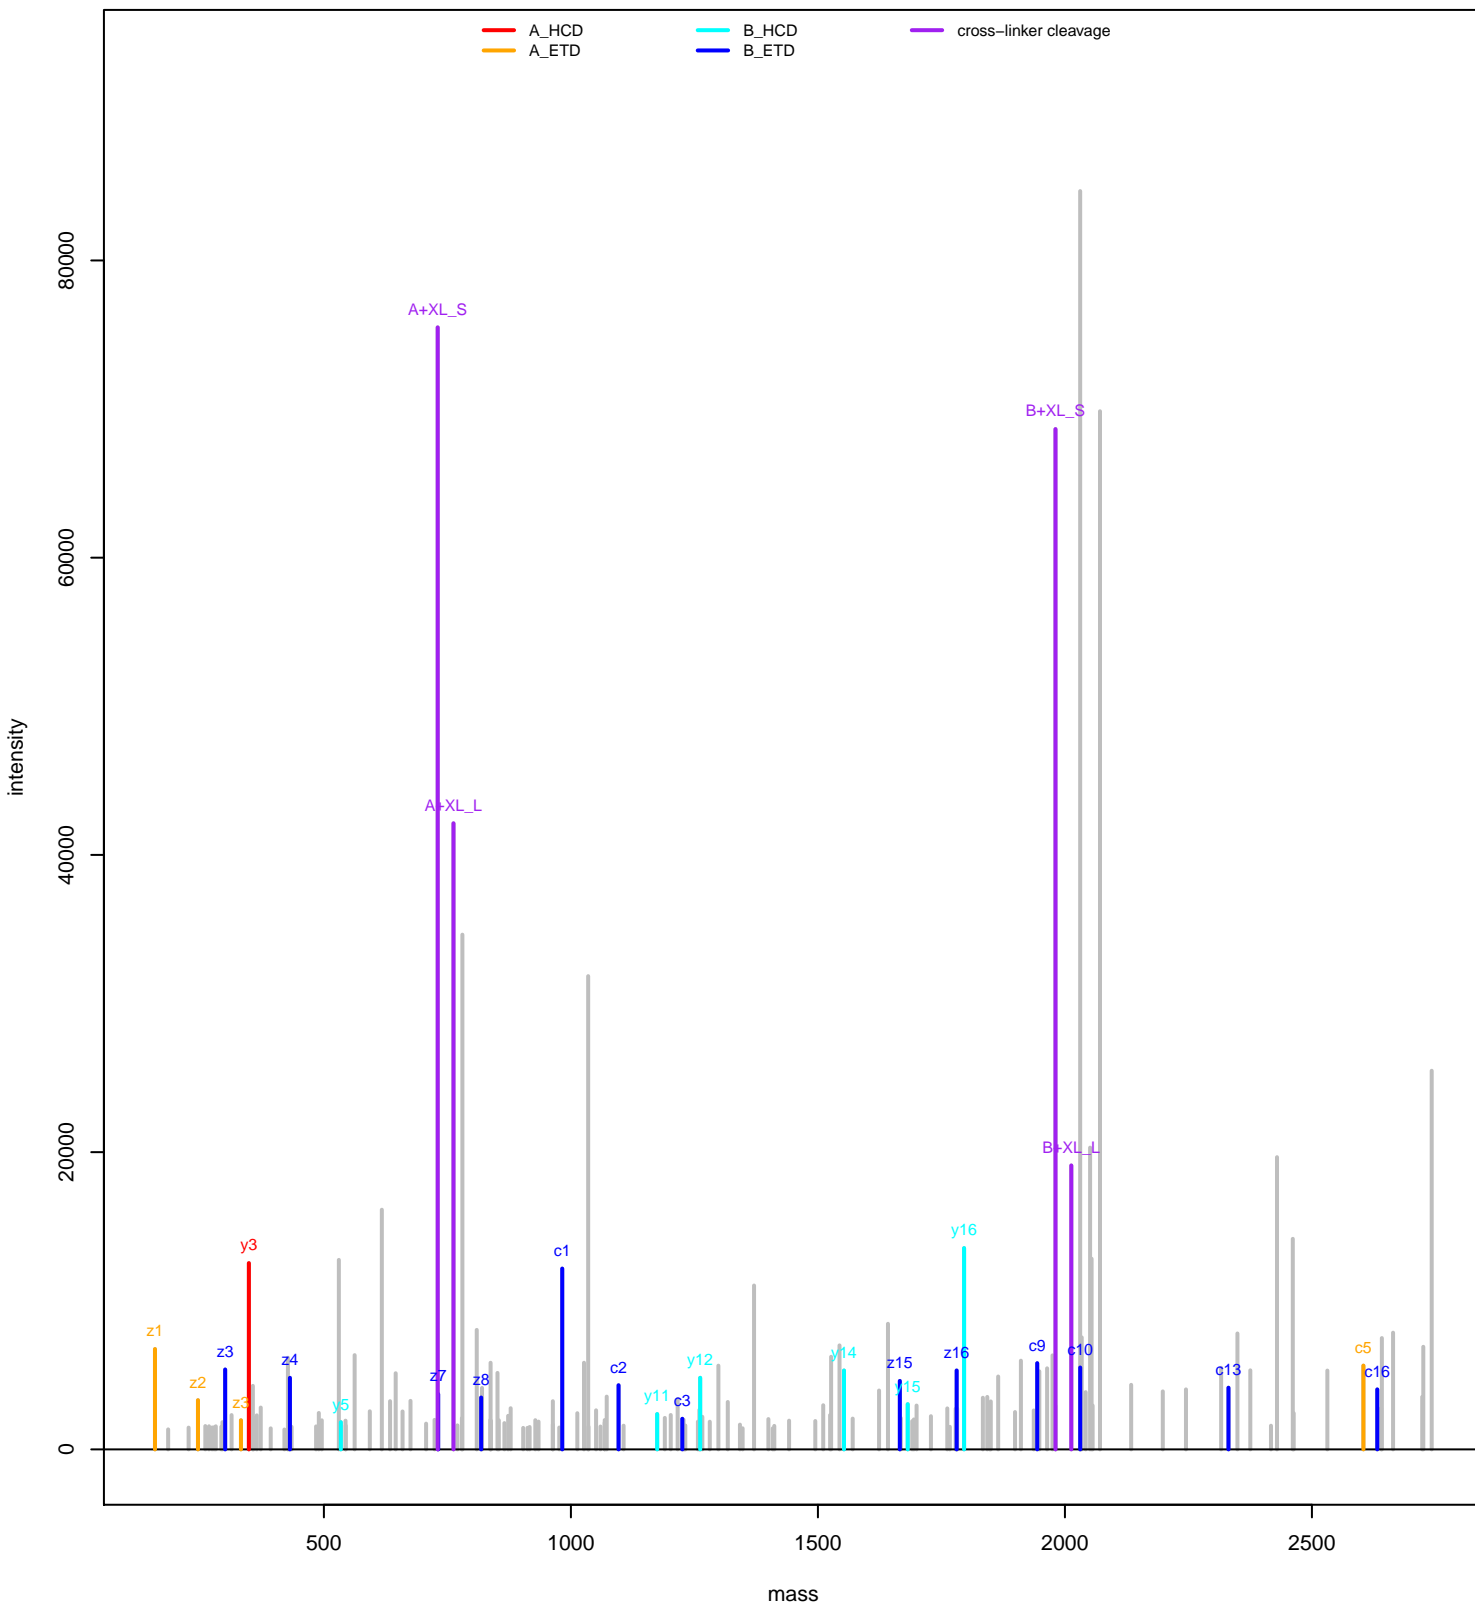

LSKSSR+XL\_S

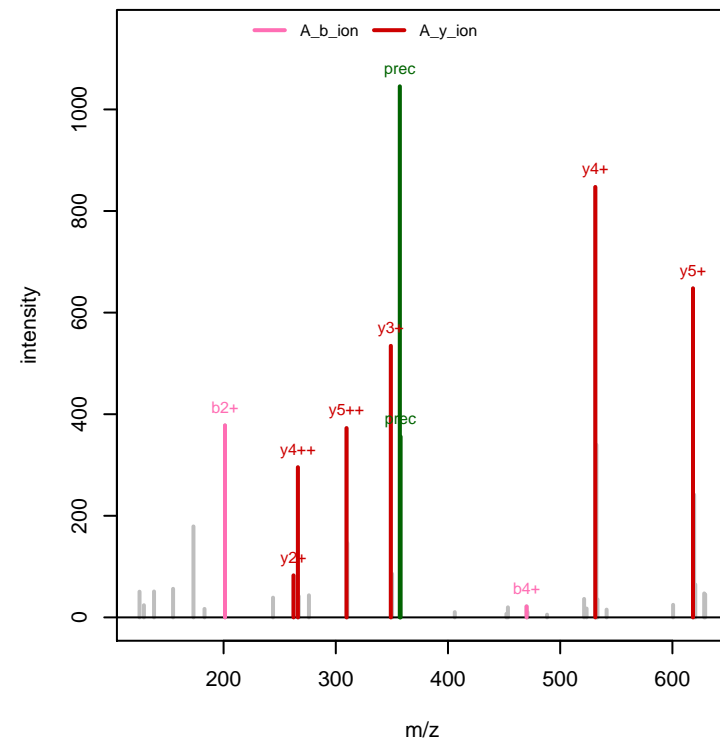

LSKSSR+XL\_L

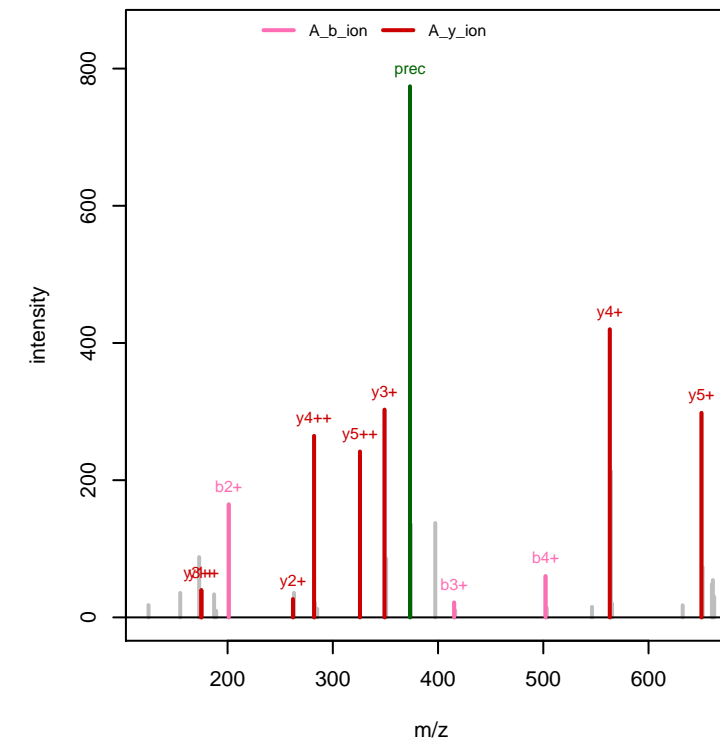

MNEQYSALRSNVSMGLK+XL\_S

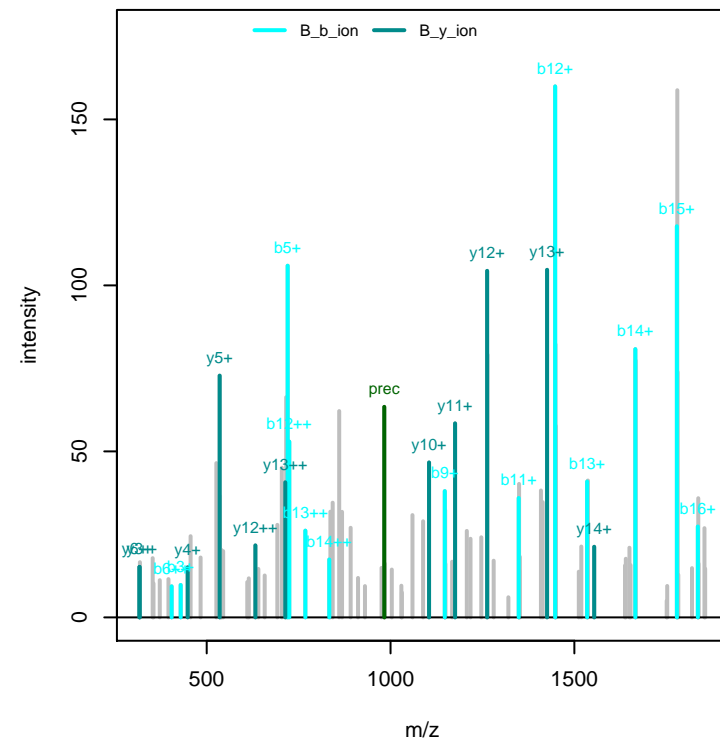

MNEQYSALRSNVSMGLK+XL\_L

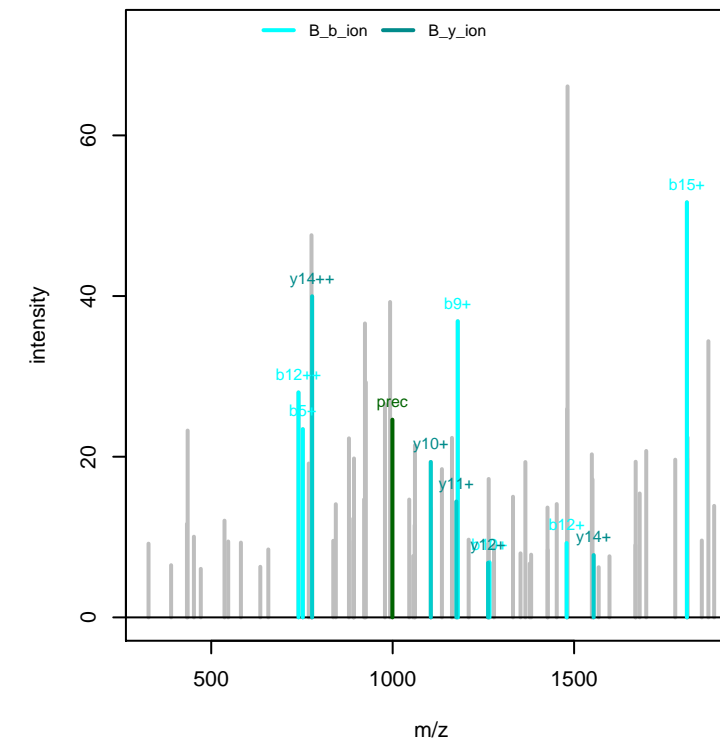

QLEAATQLEGKTMR  
ASLSGTQTIKAELEQAK

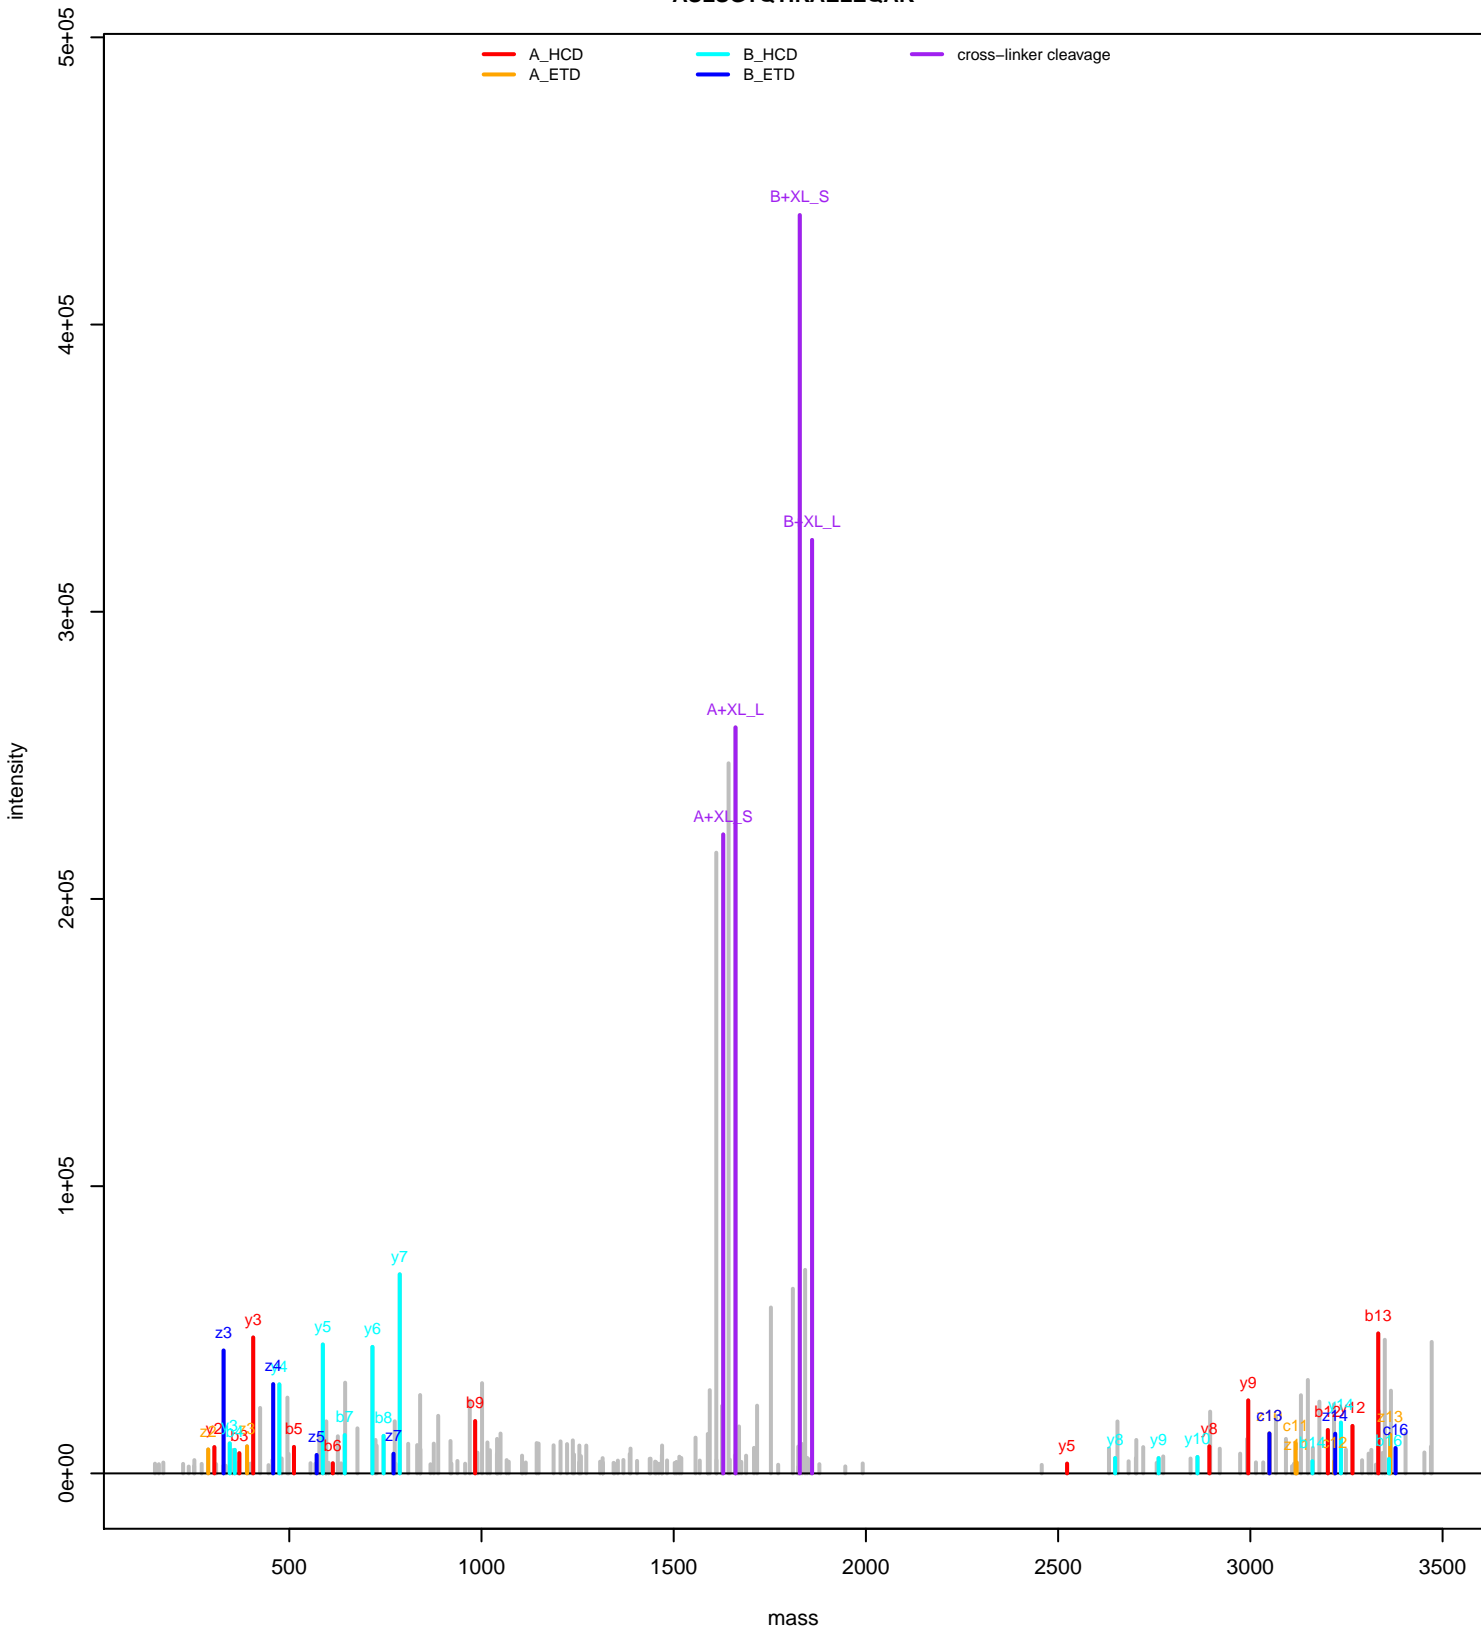

QLEAATQLEGKTMR+XL\_S

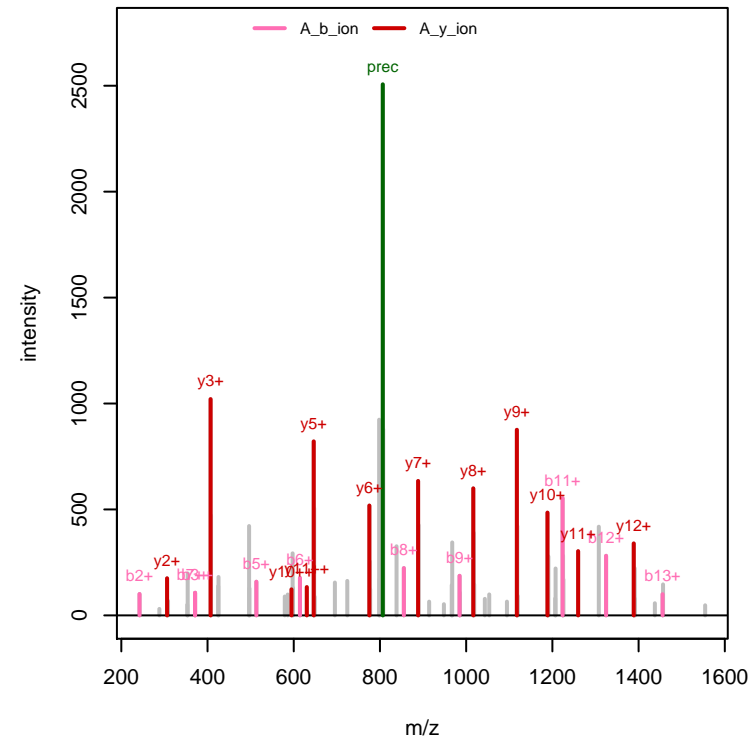

QLEAATQLEGKTMR+XL\_L

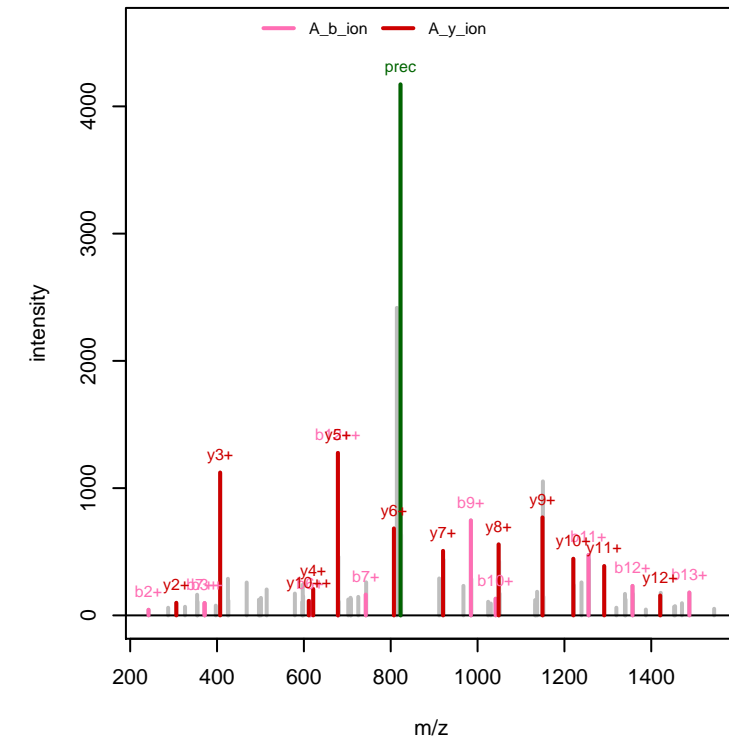

ASLSGTQTIKAELEQAK+XL\_S

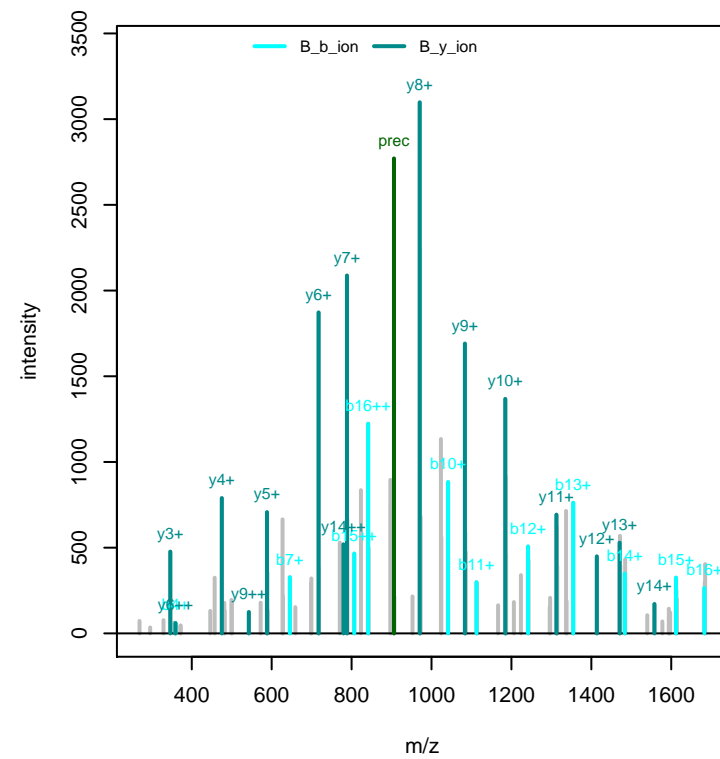

ASLSGTQTIKAELEQAK+XL\_L

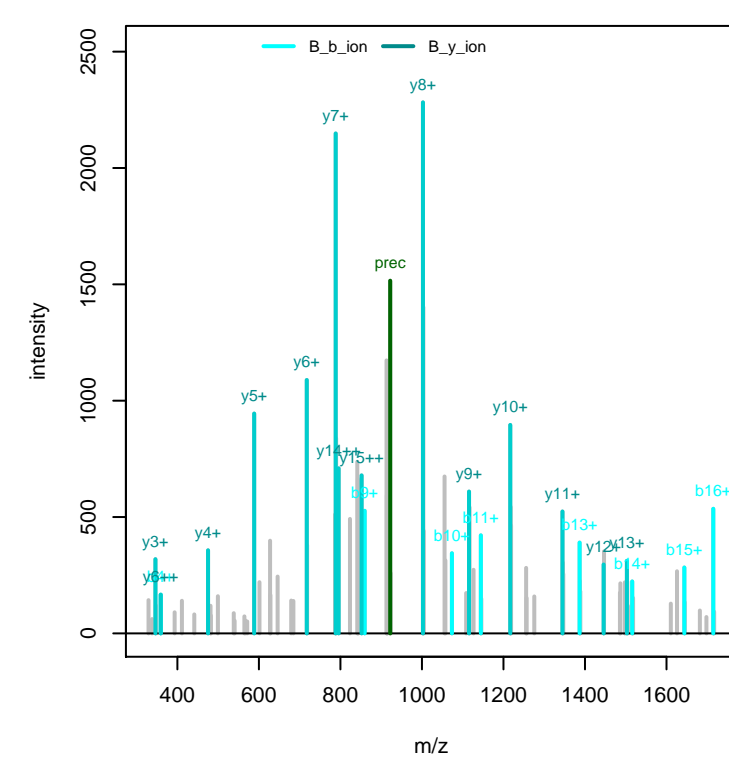

LGIKLDK  
AAFKNDDQK

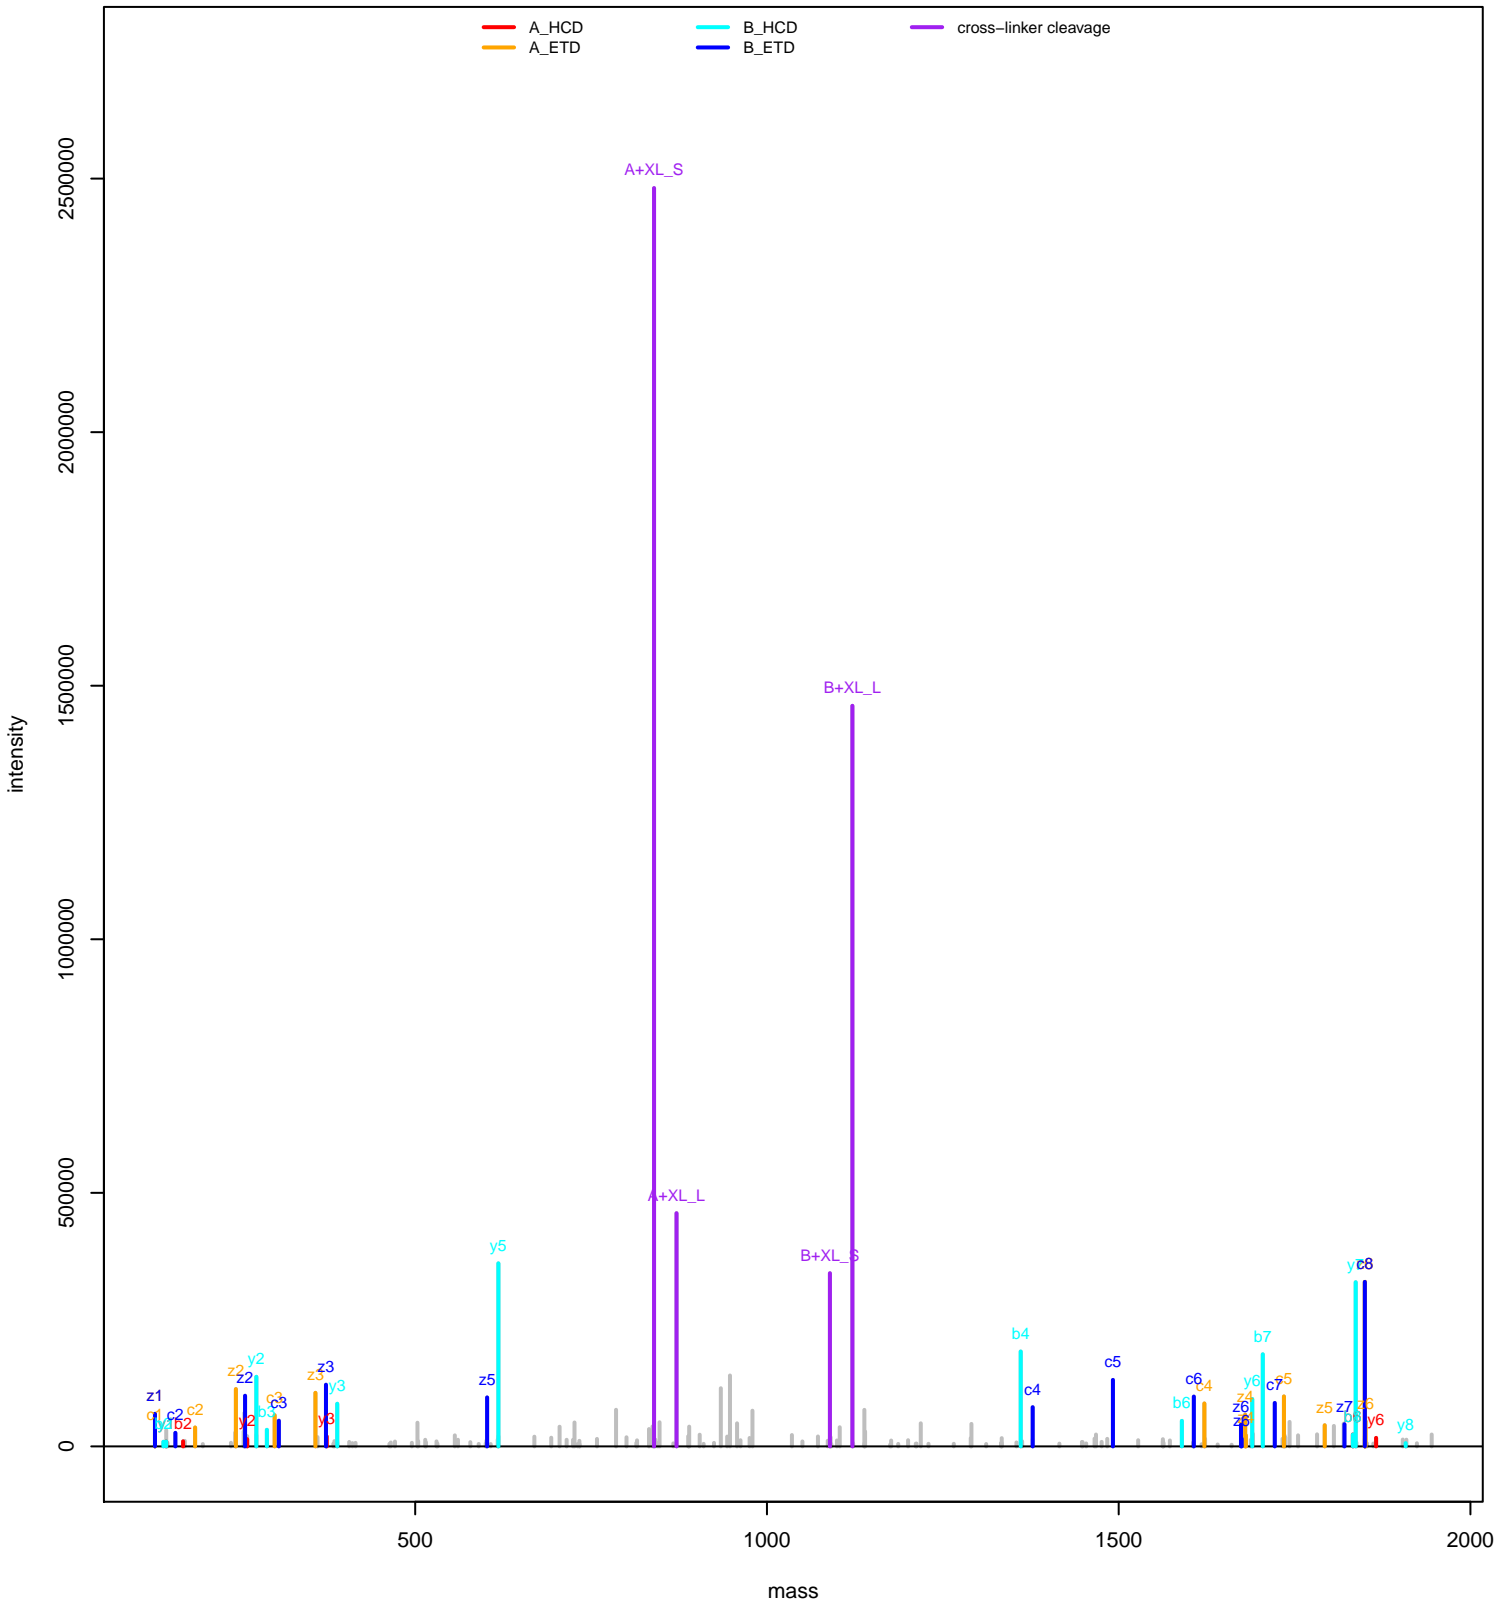

LGIKLDK+XL\_S

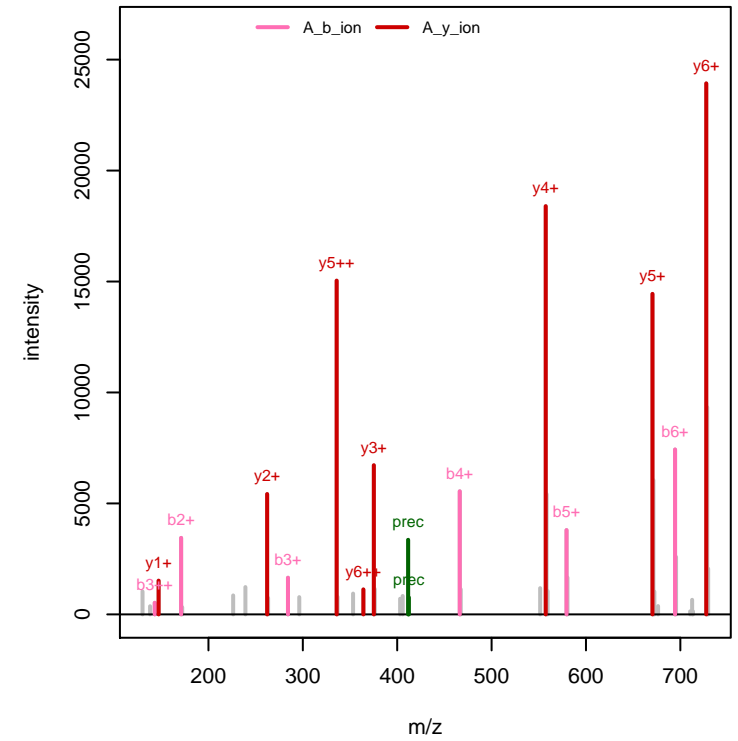

LGIKLDK+XL\_L

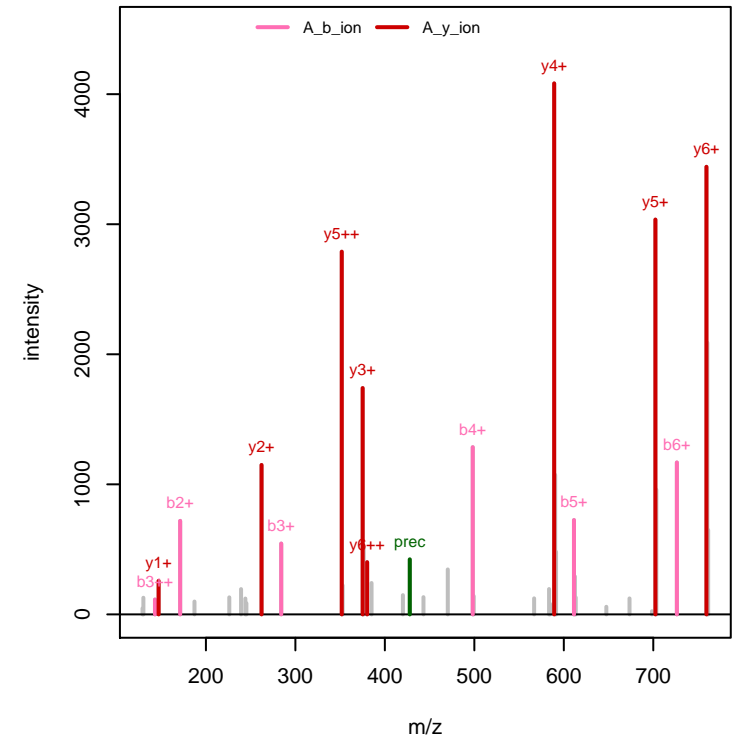

AAFKNDDQK+XL\_S

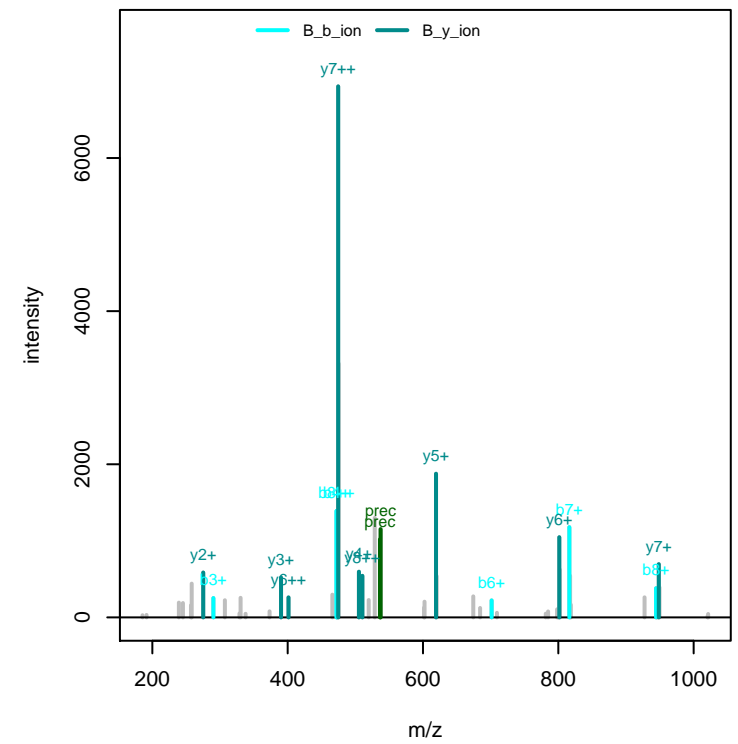

AAFKNDDQK+XL\_L

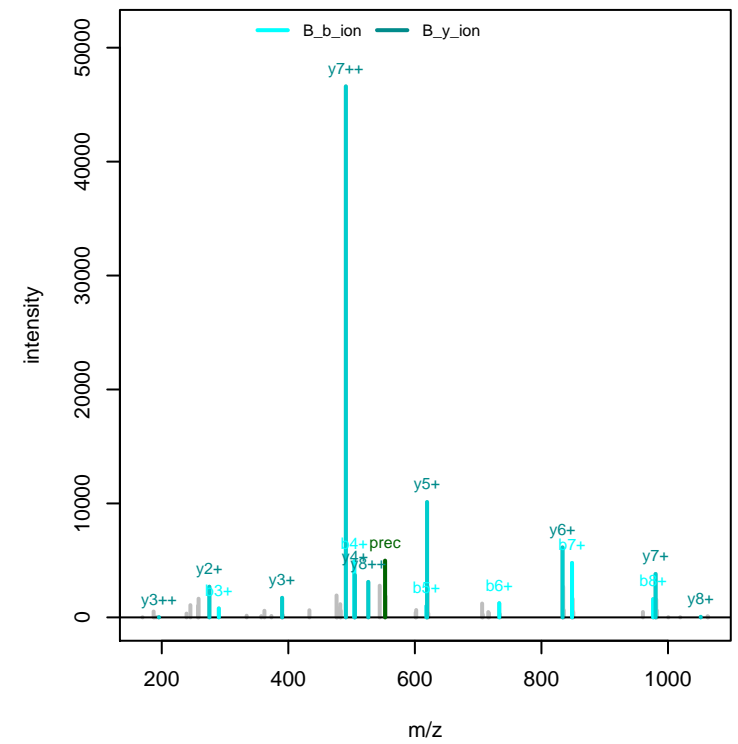



LVAKHDPDNK  
LFTLVQDPK

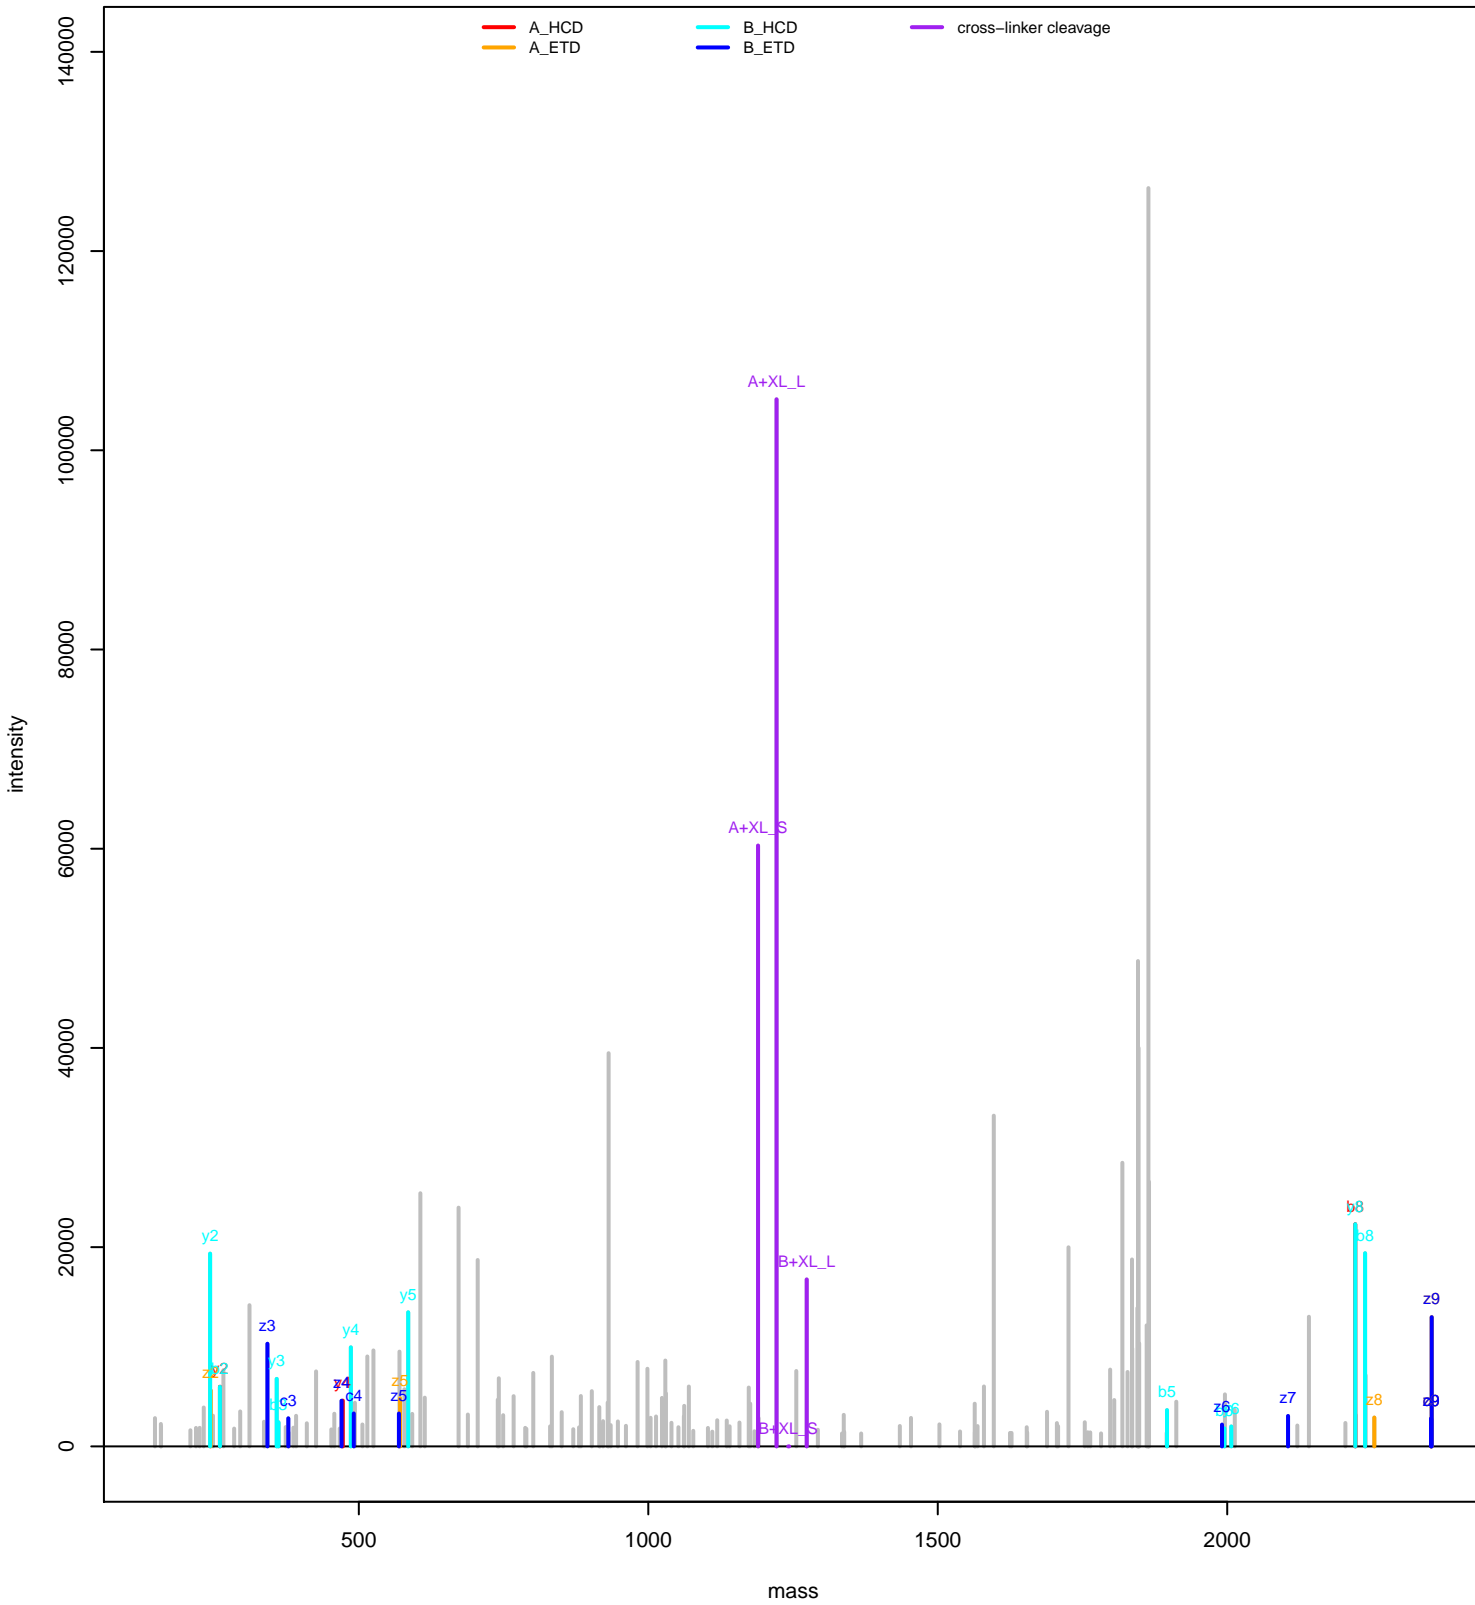

LVAKHDPDNK+XL\_S

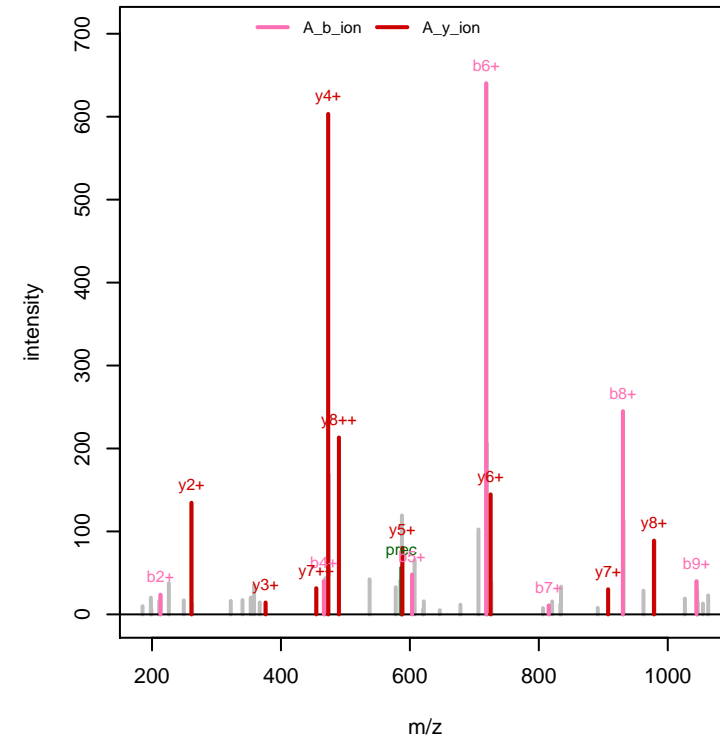

LVAKHDPDNK+XL\_L

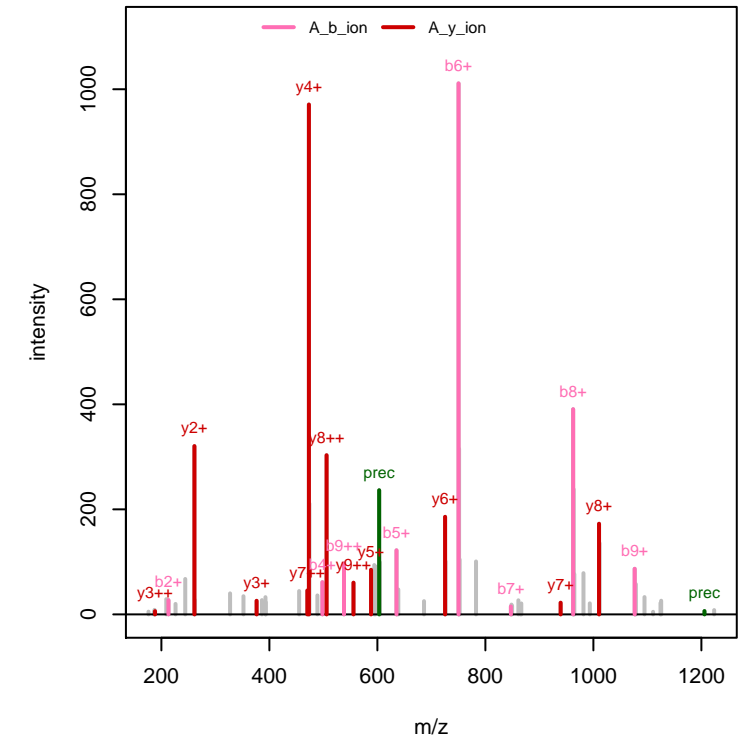

LFTLVQDPK+XL\_S

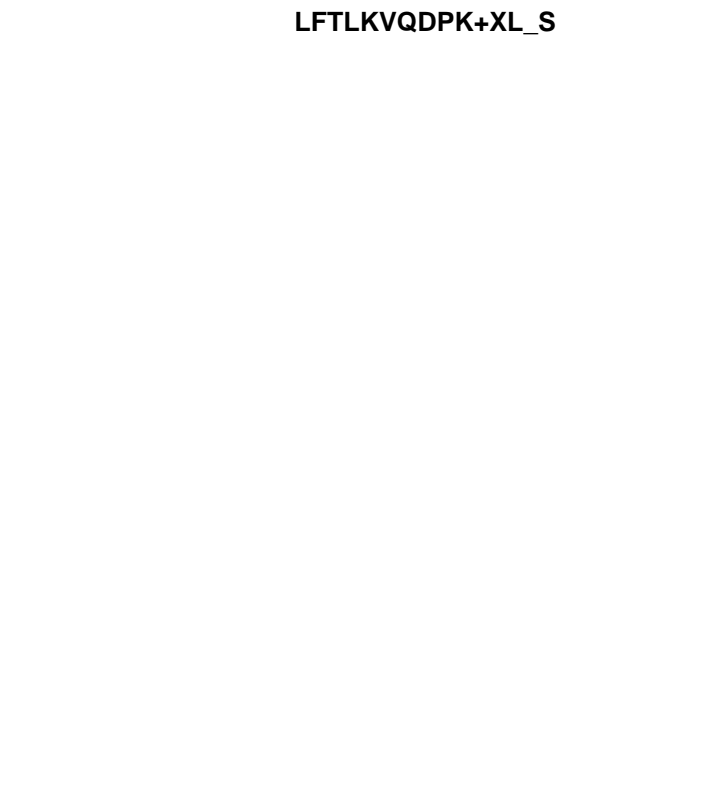

LFTLVQDPK+XL\_L

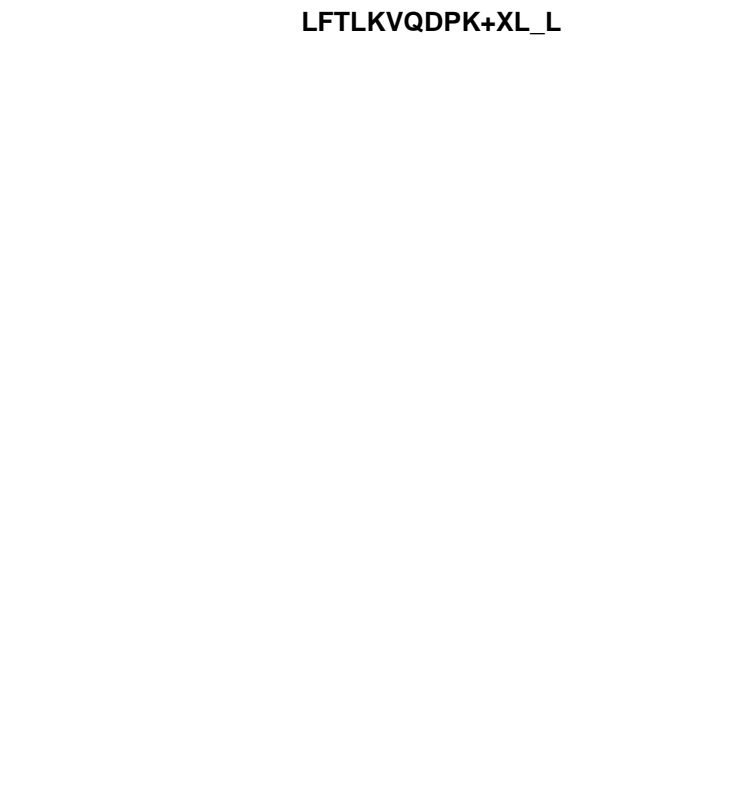

QGTKDAAR  
ALLQISEPGLSAAPHQR

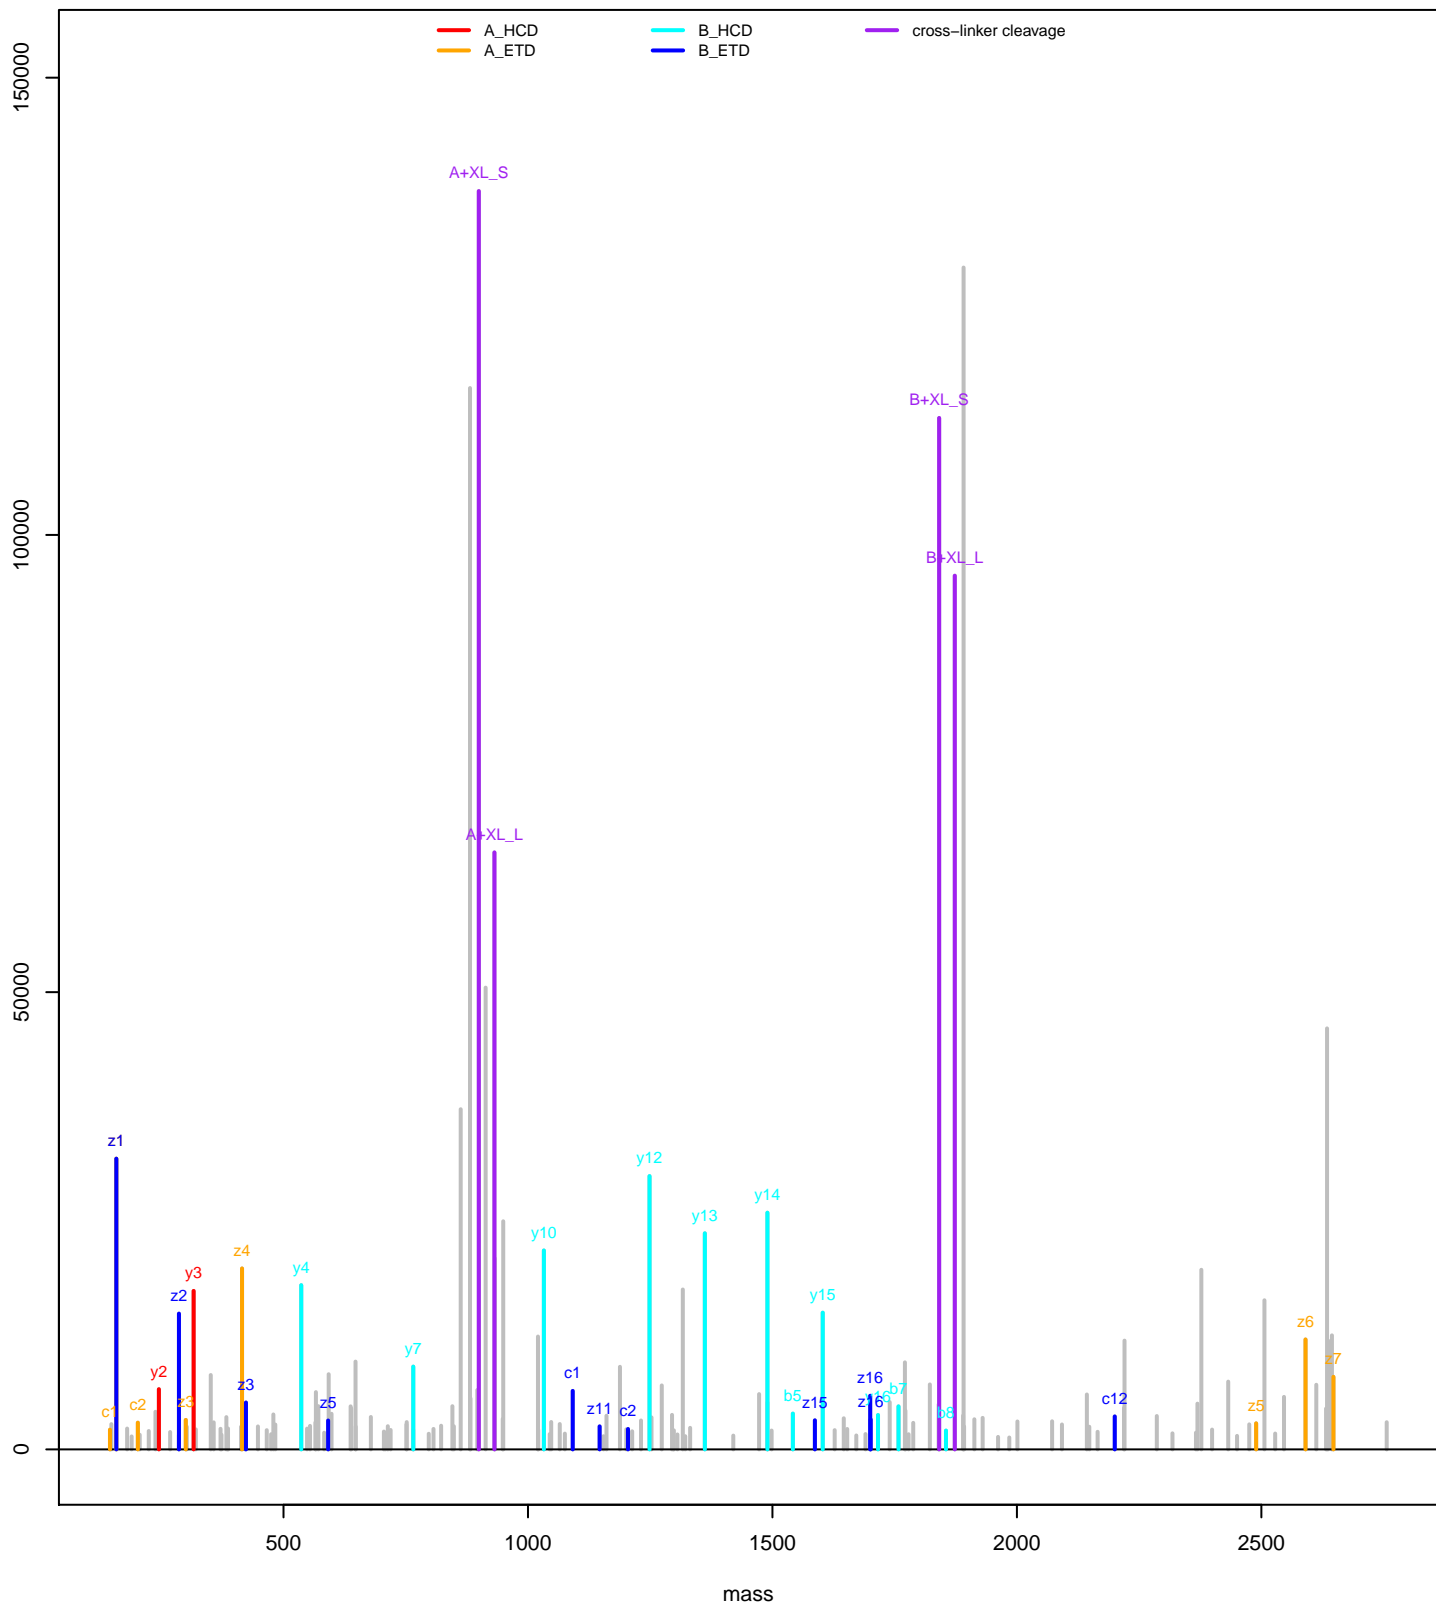

QGTKDAAR+XL\_S

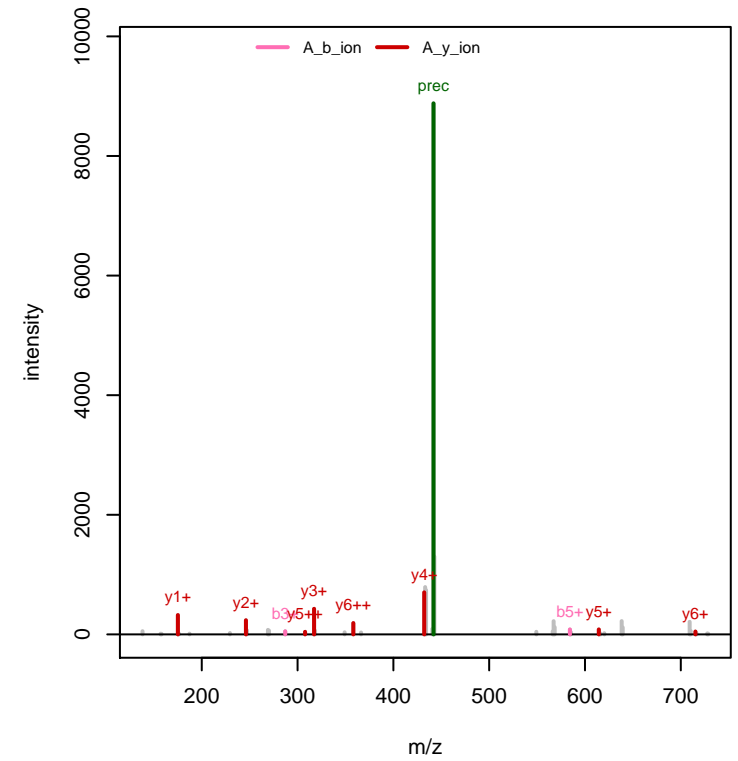

QGTKDAAR+XL\_L

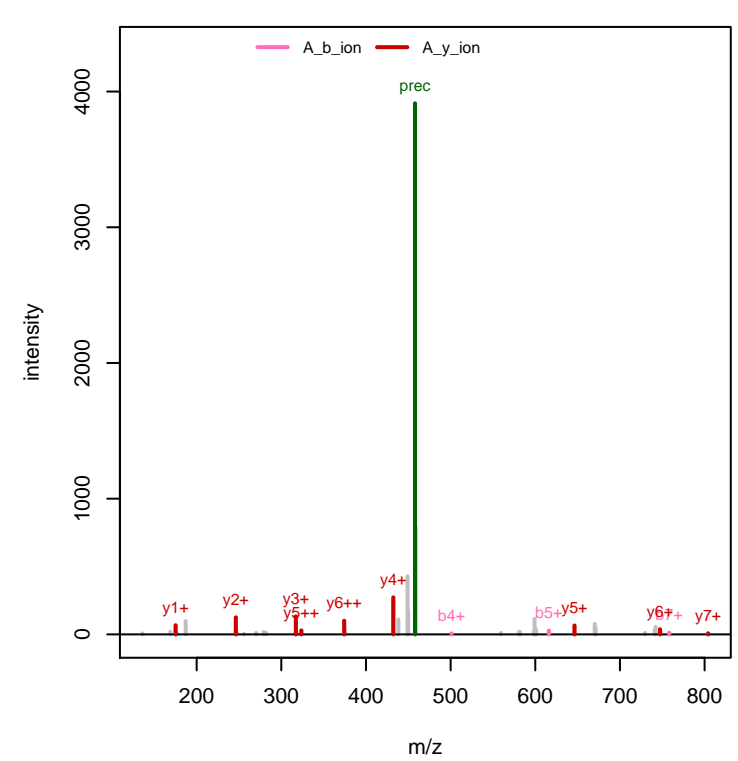

ALLQISEPGLSAAPHQR+XL\_S

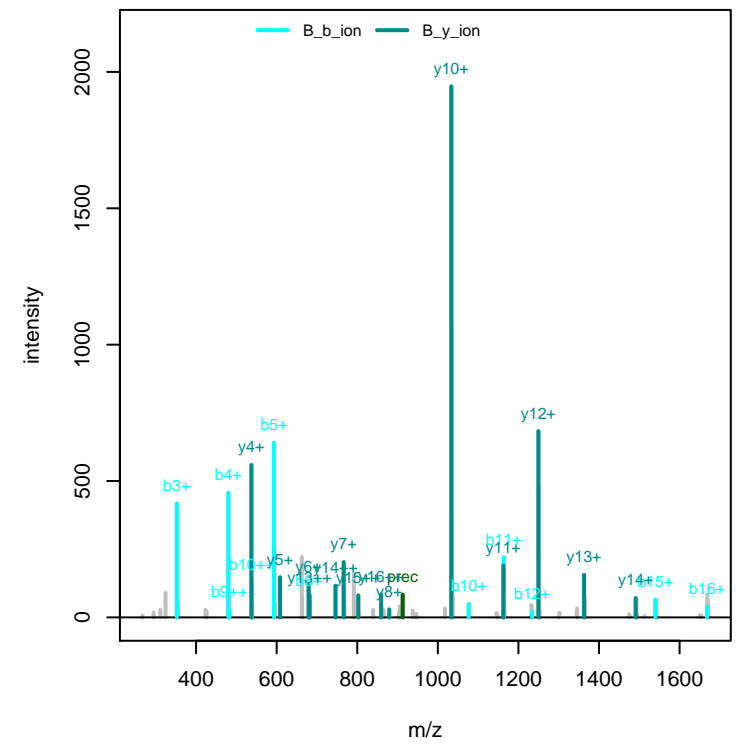

ALLQISEPGLSAAPHQR+XL\_L

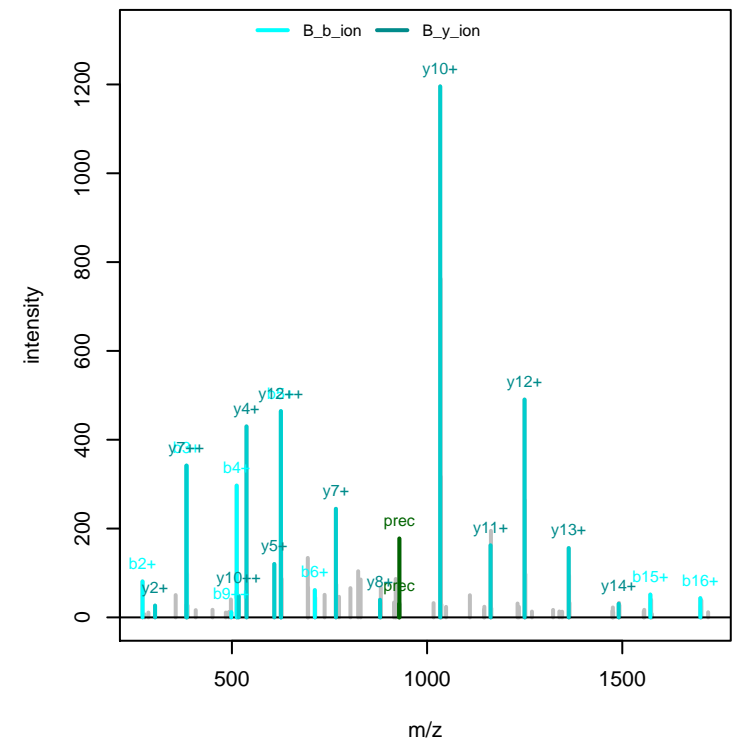

**KVEADCR**  
**NFGKHPVTPWGVQTK**

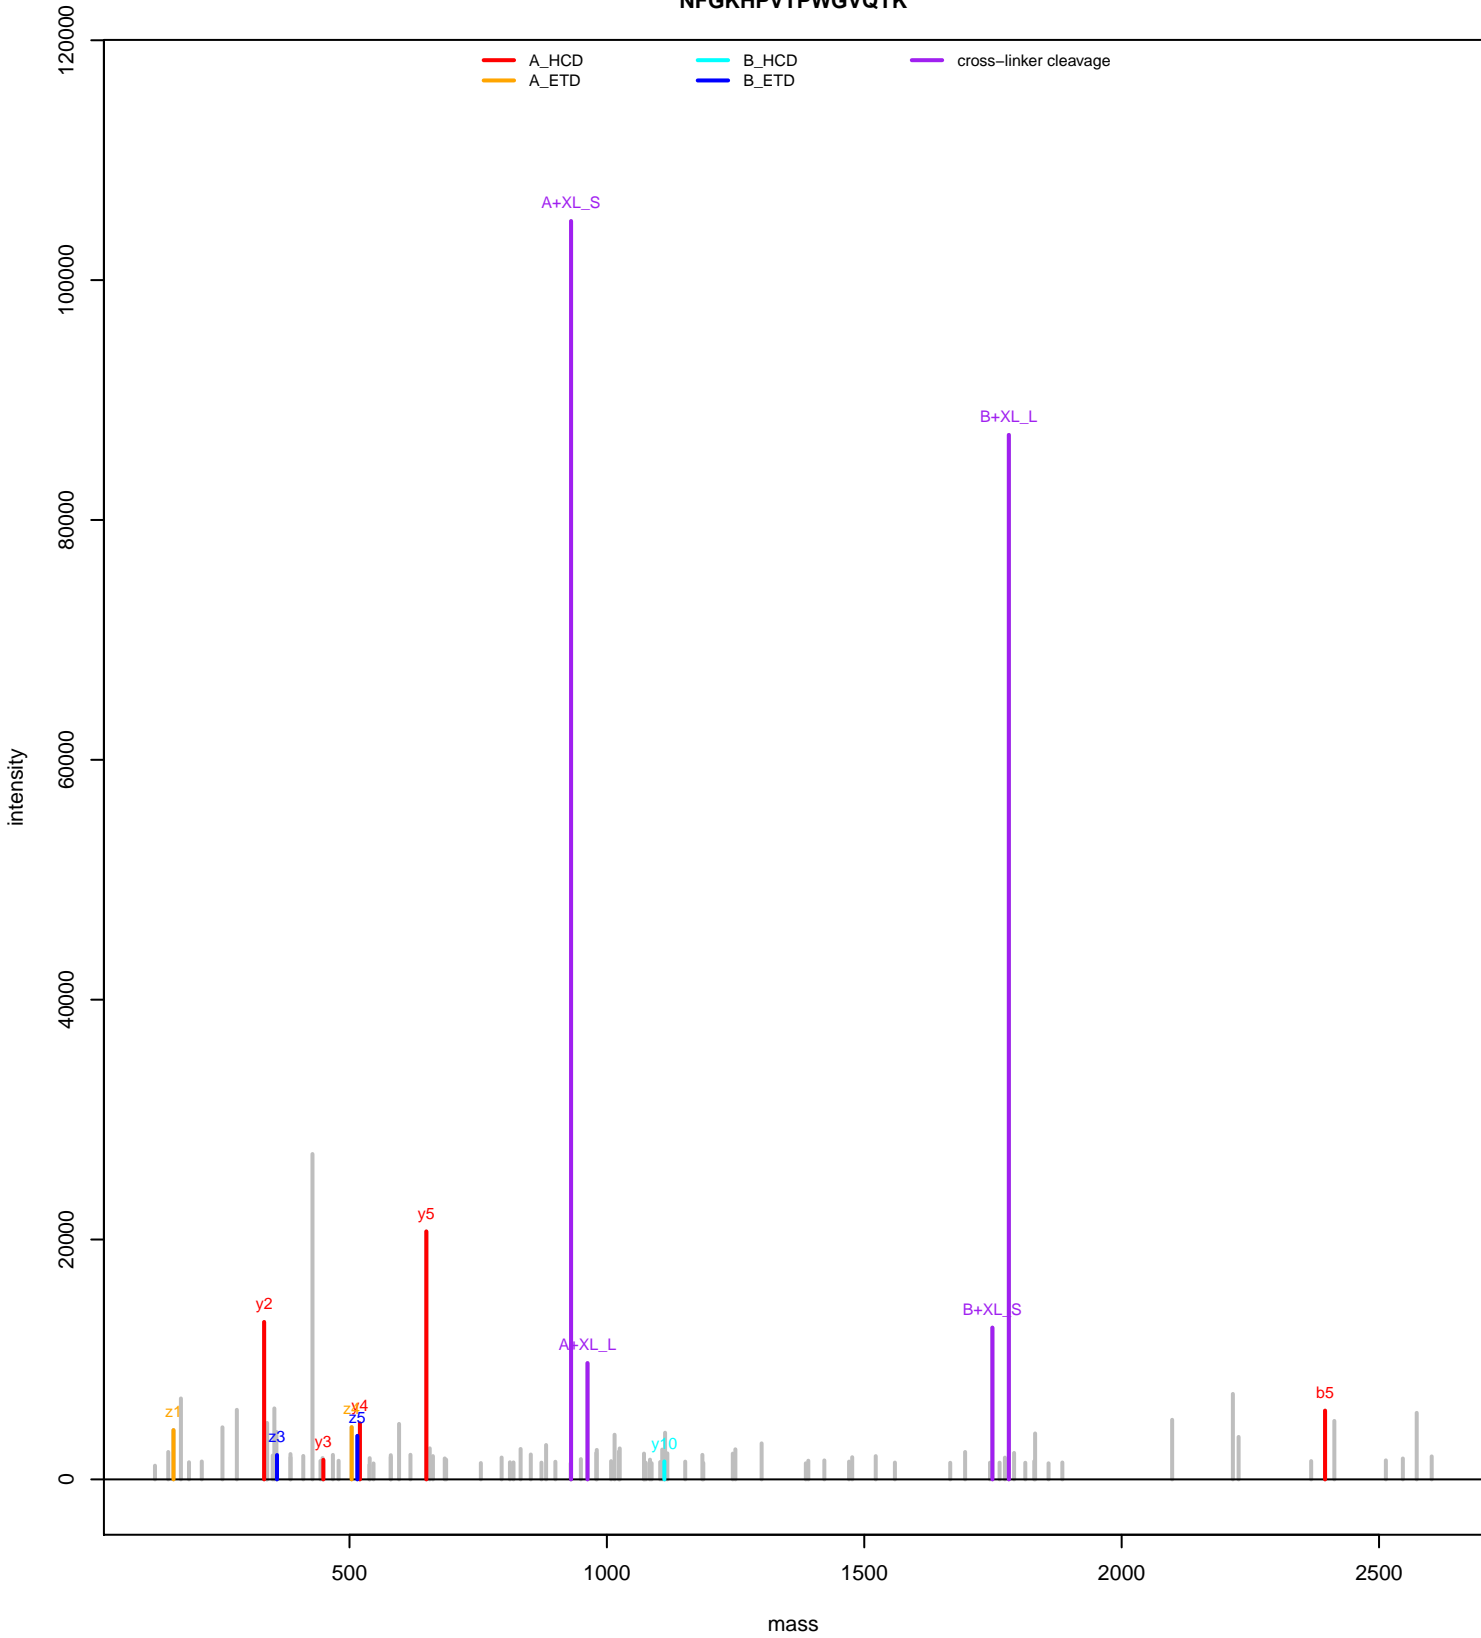

**KVEADCR+XL\_S**

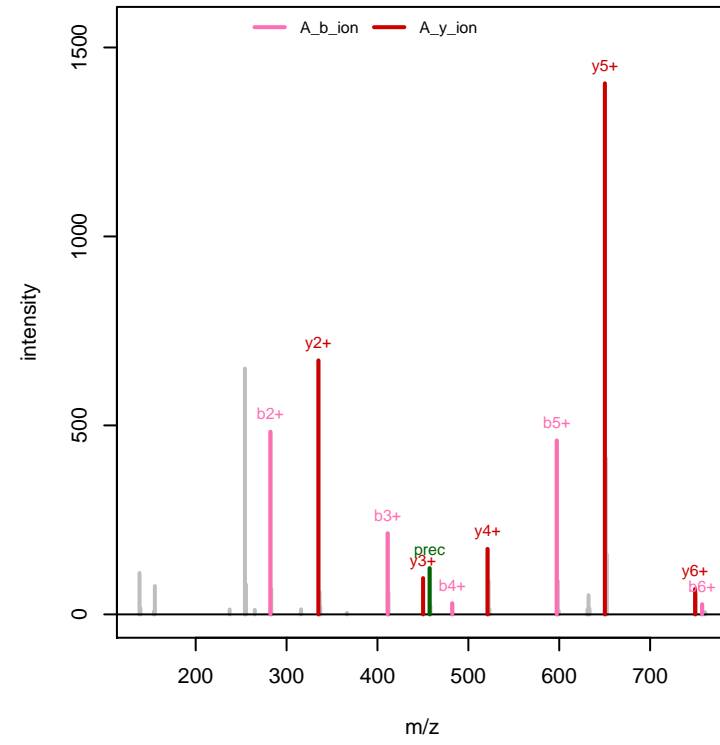

**KVEADCR+XL\_L**

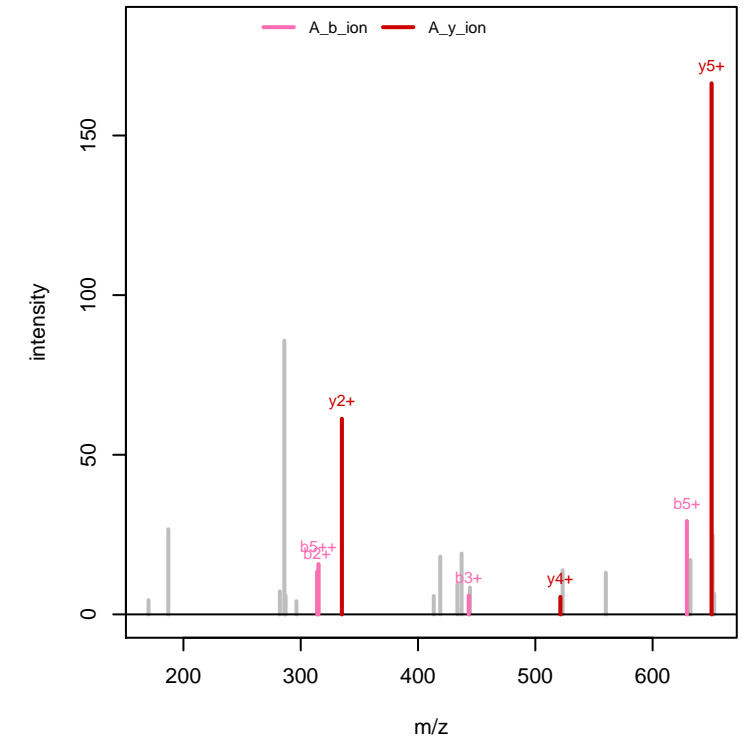

**NFGKHPVTPWGVQTK+XL\_S**

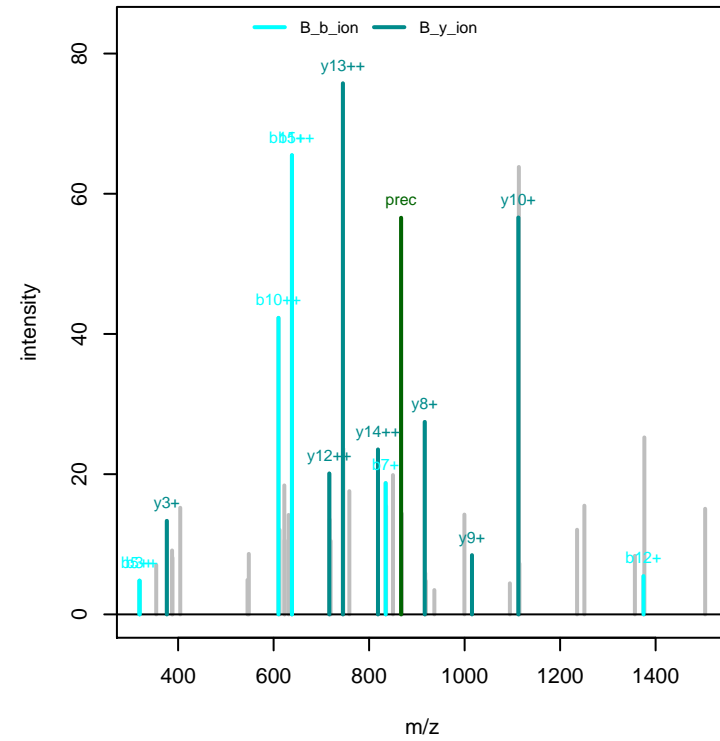

**NFGKHPVTPWGVQTK+XL\_L**

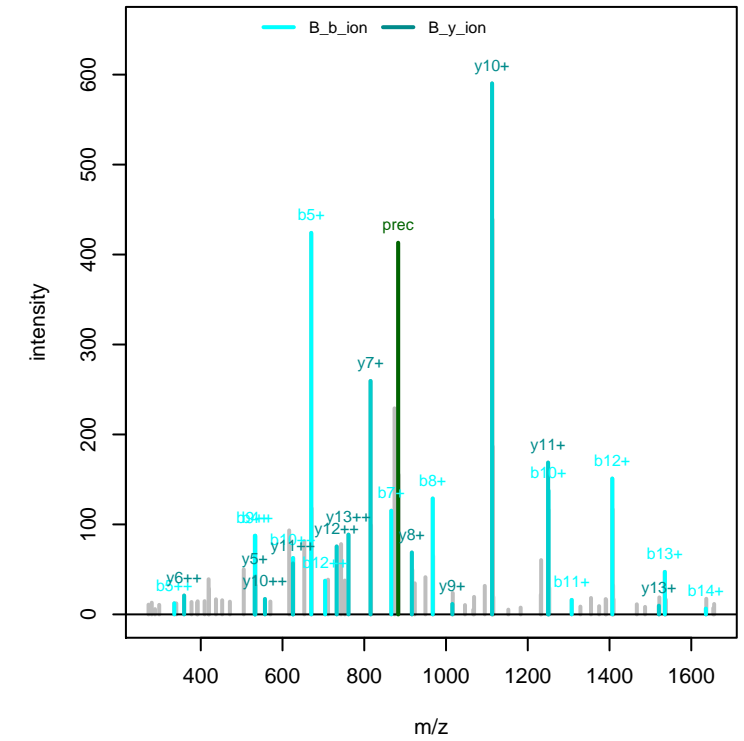

### KSVAGFK PLITKAR

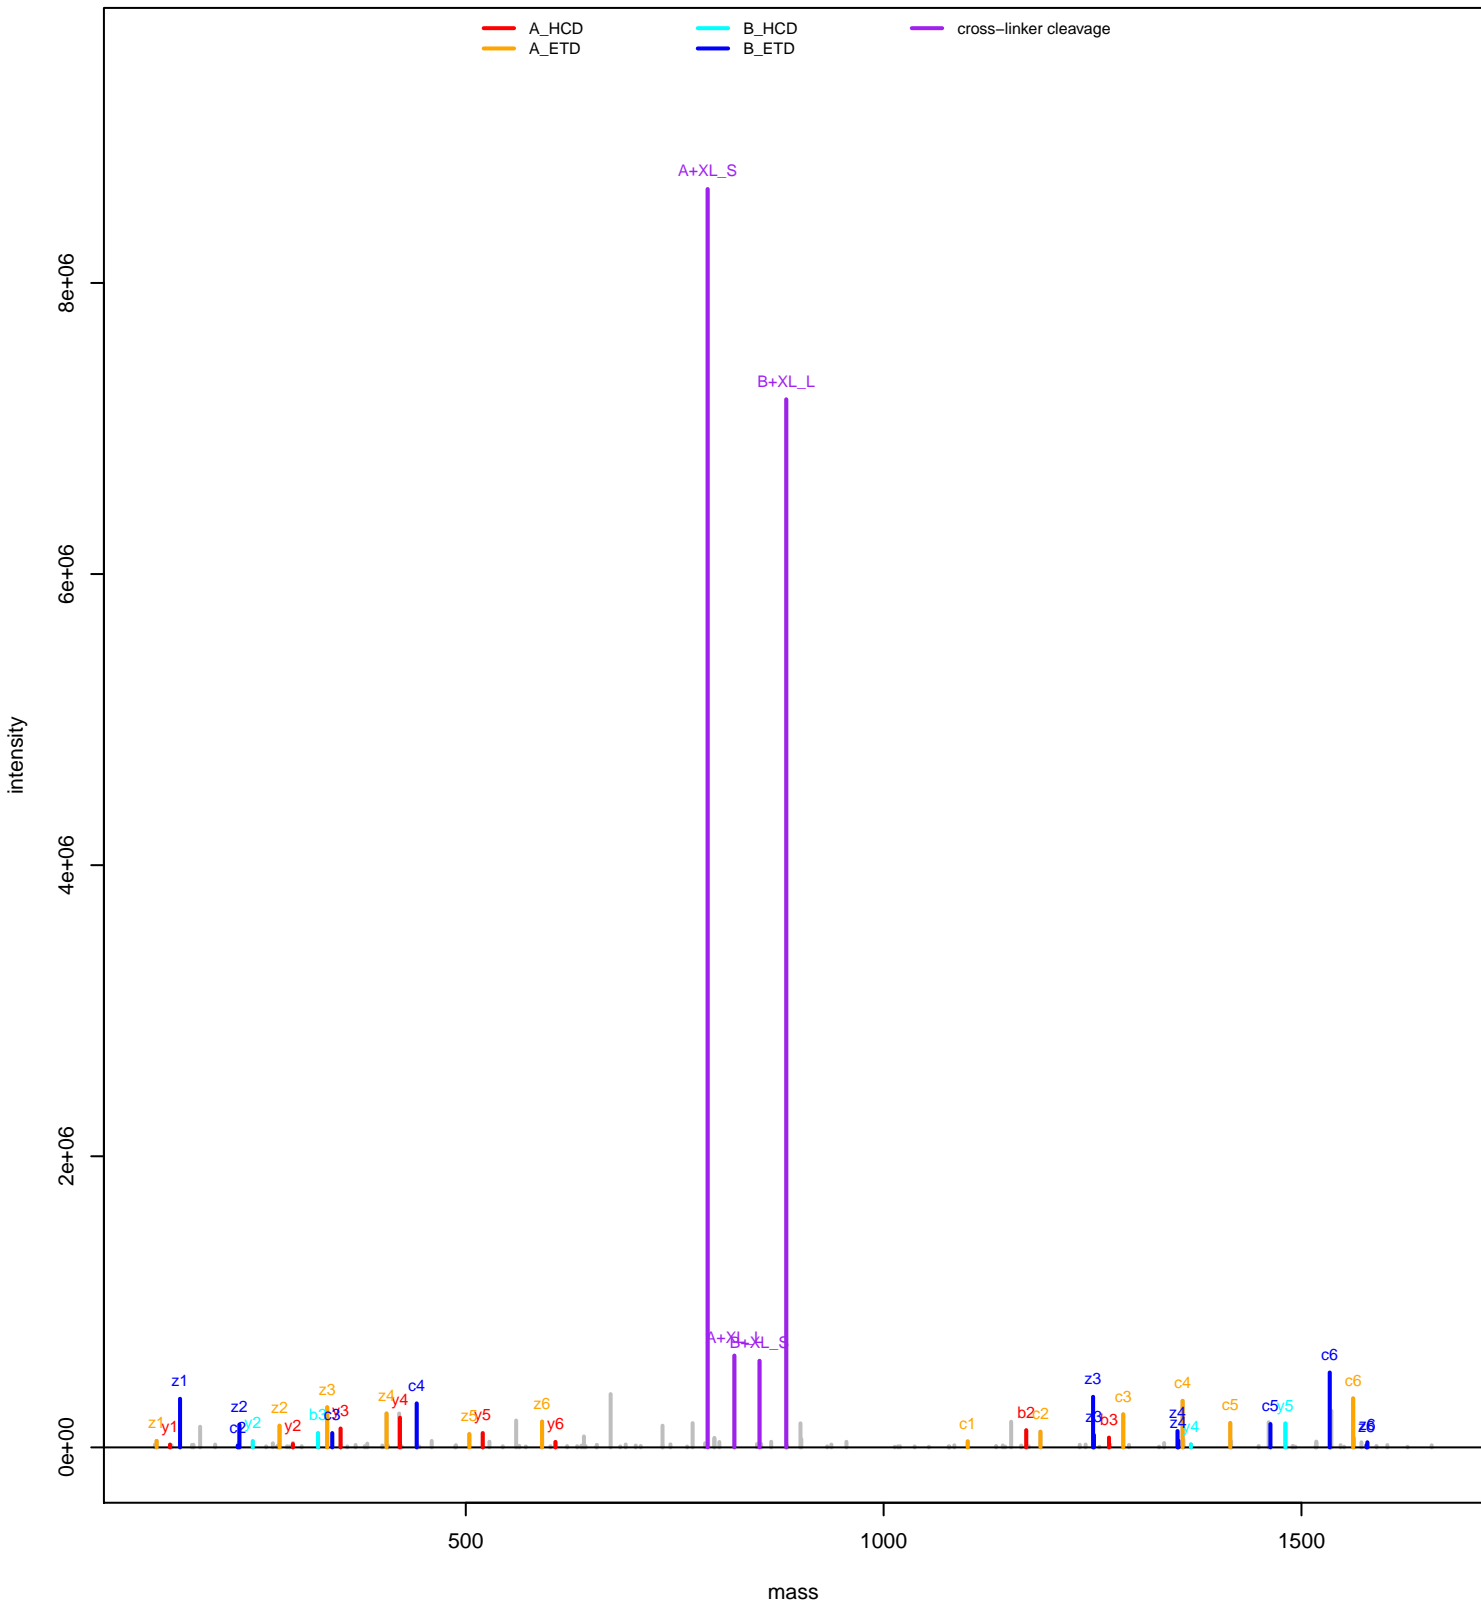

### KSVAGFK+XL\_S

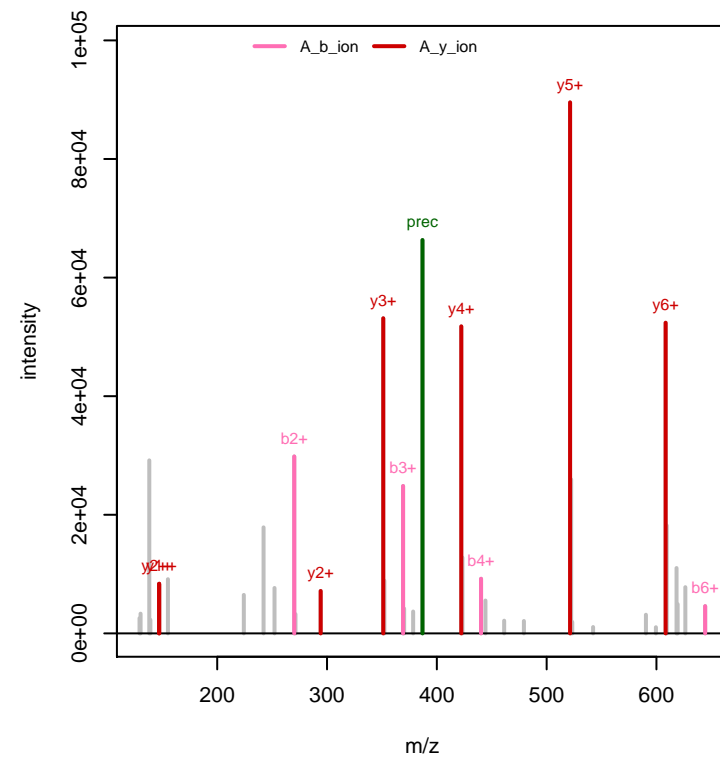

### KSVAGFK+XL\_L

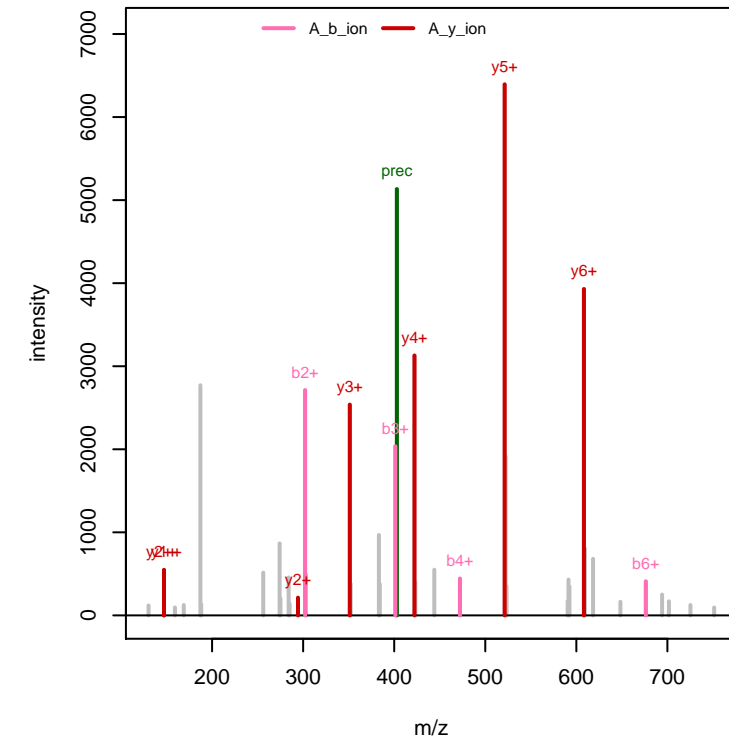

### PLITKAR+XL\_S

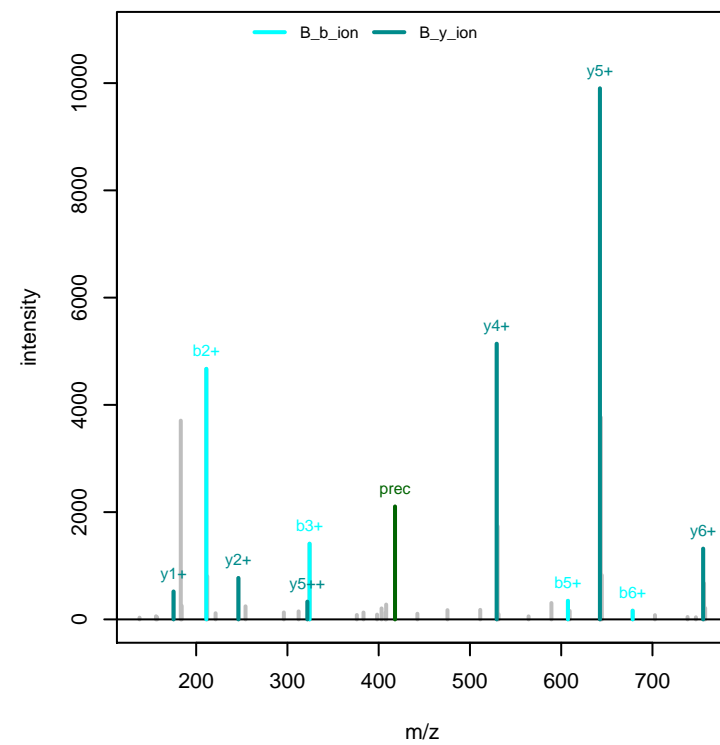

### PLITKAR+XL\_L

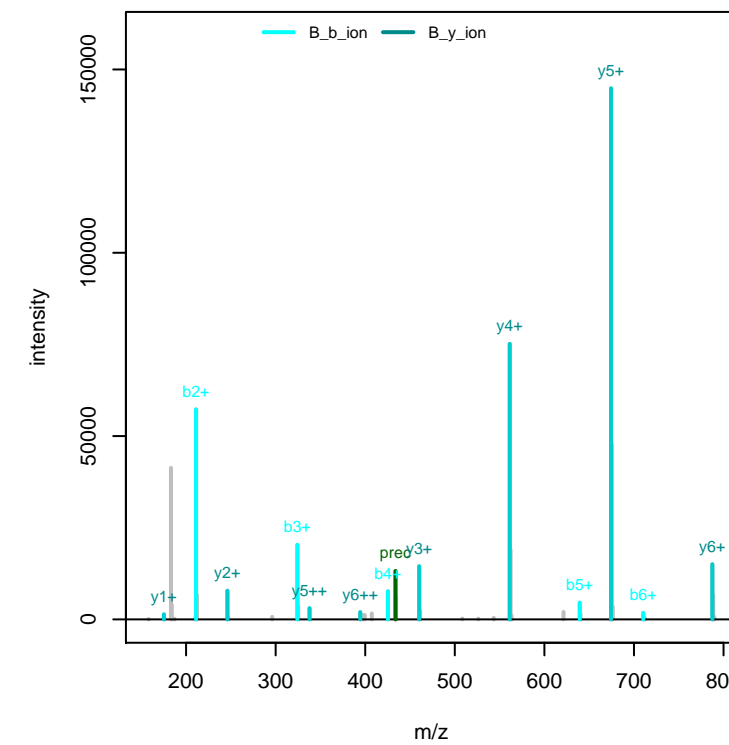

DVHKTIAK  
AKITVPVDATEEQVRER

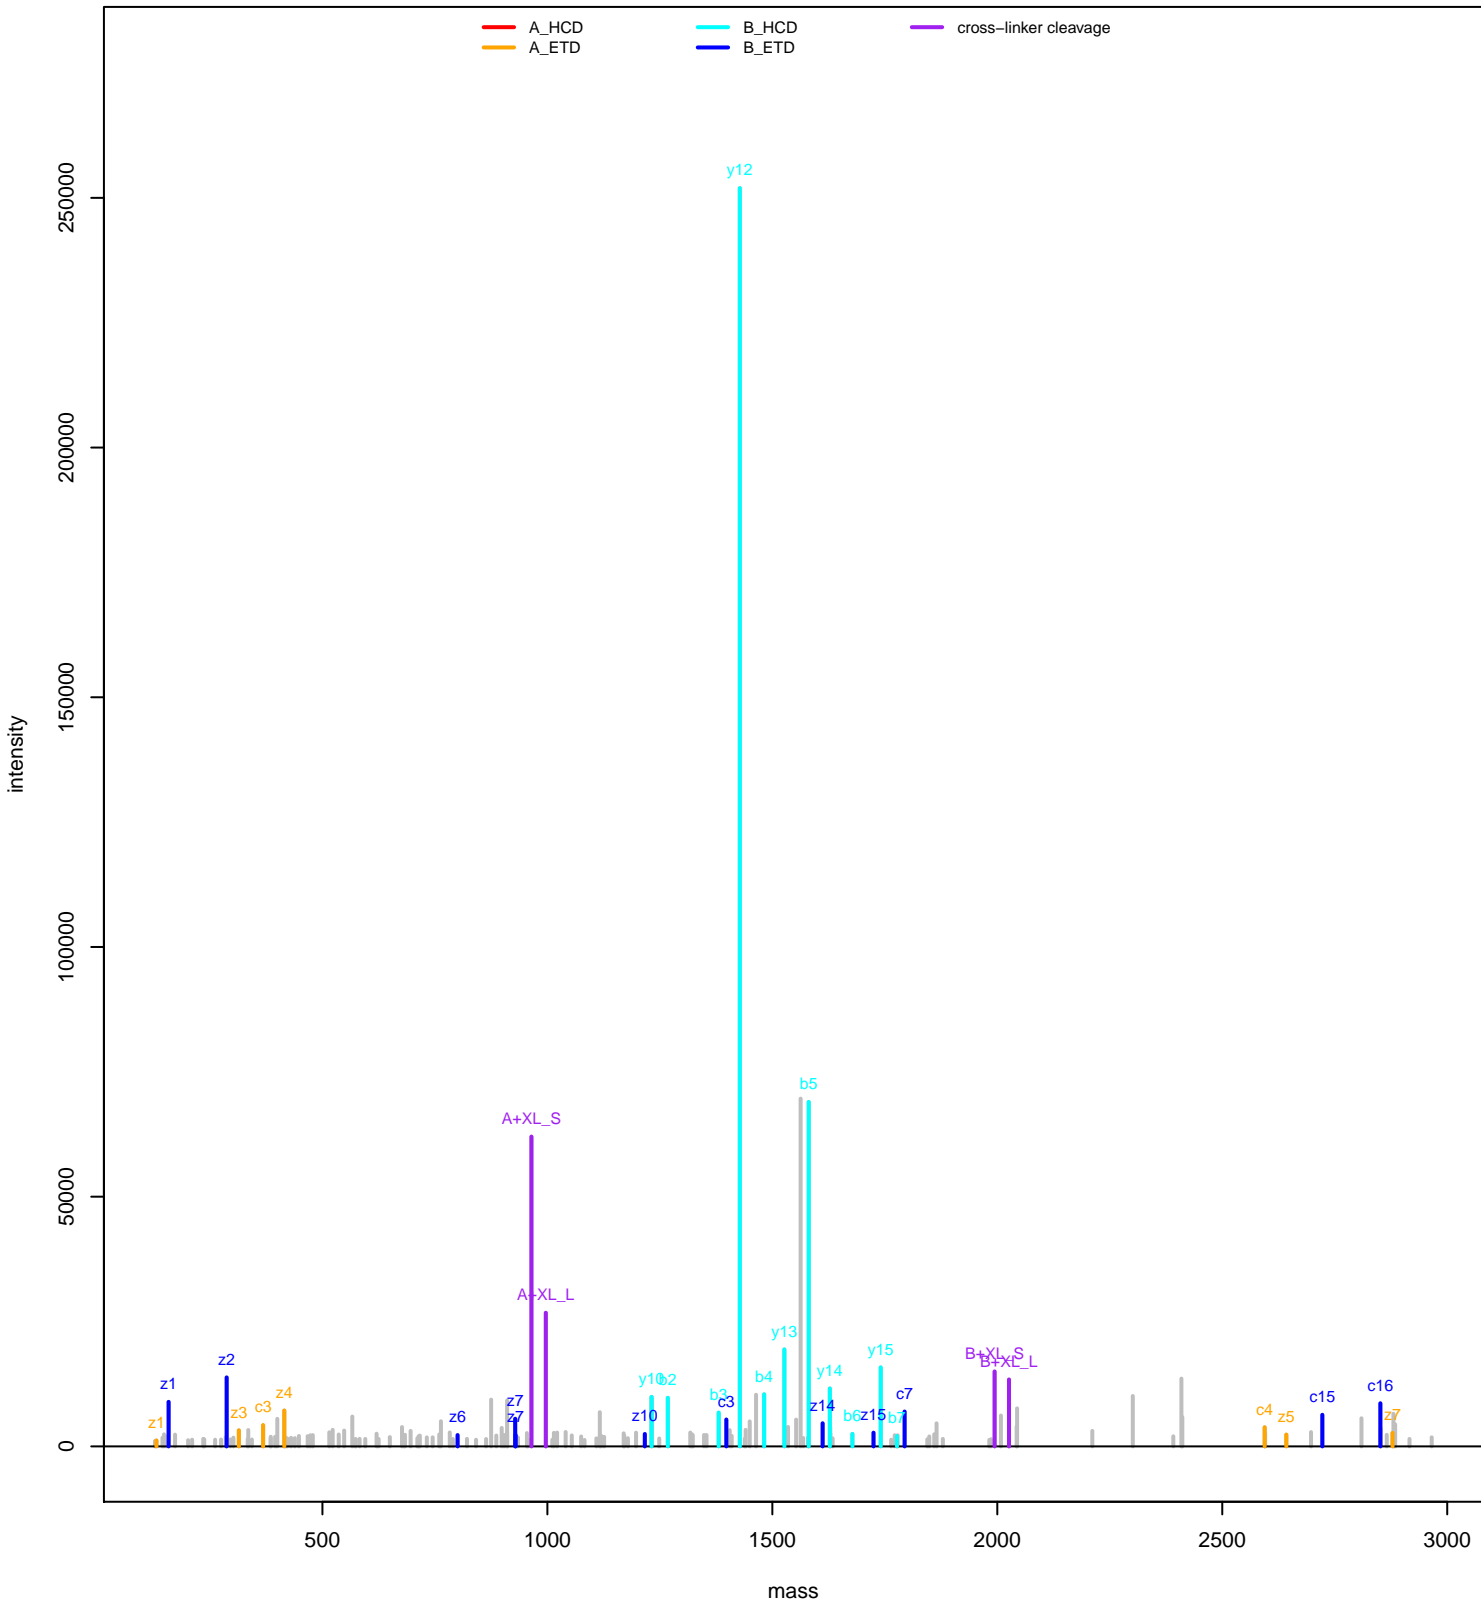

DVHKTIAK+XL\_S

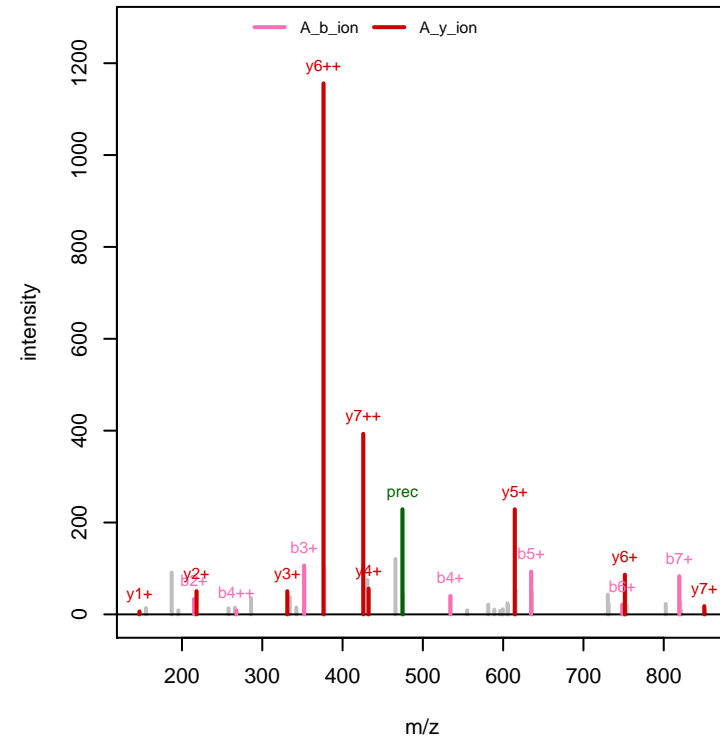

DVHKTIAK+XL\_L

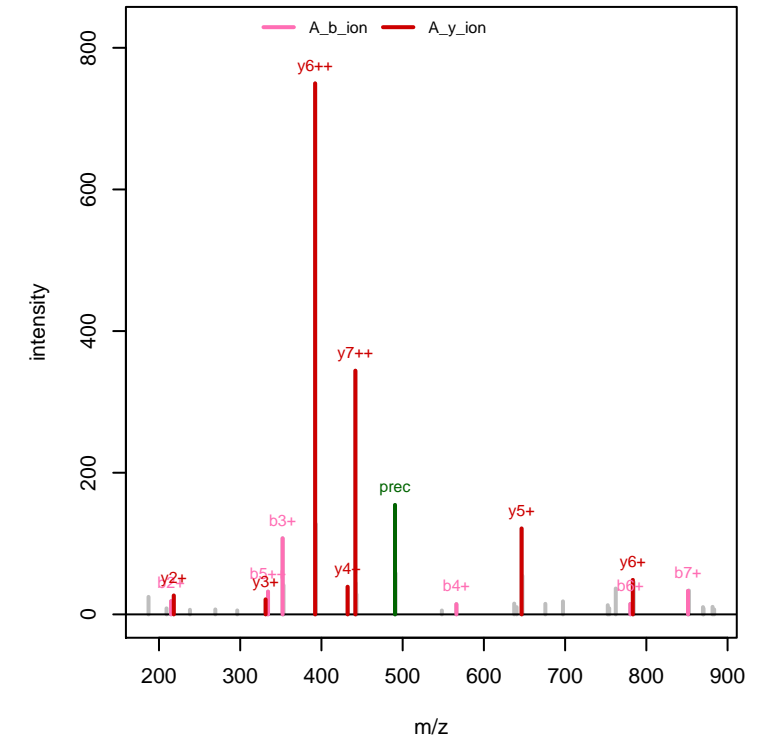

AKITVPVDATEEQVRER+XL\_S

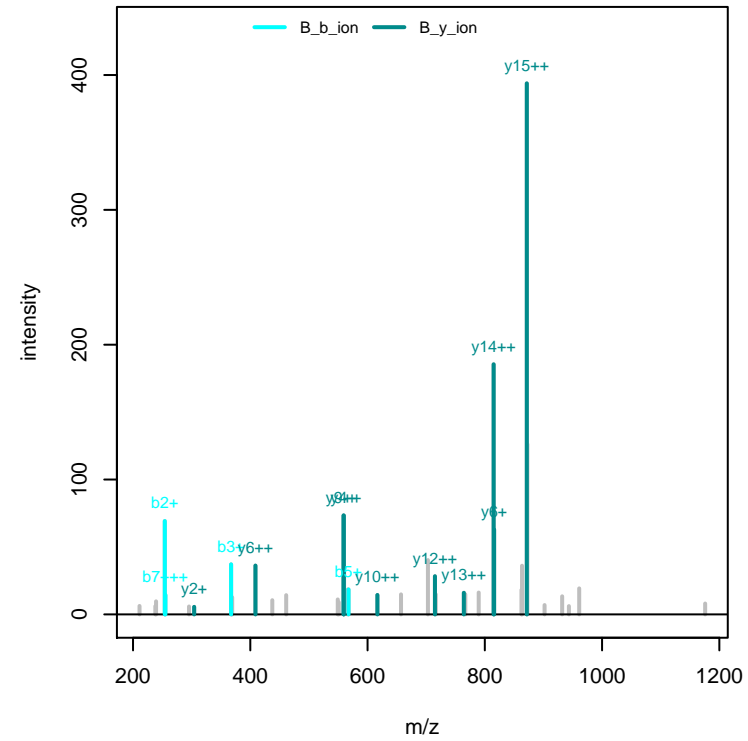

AKITVPVDATEEQVRER+XL\_L

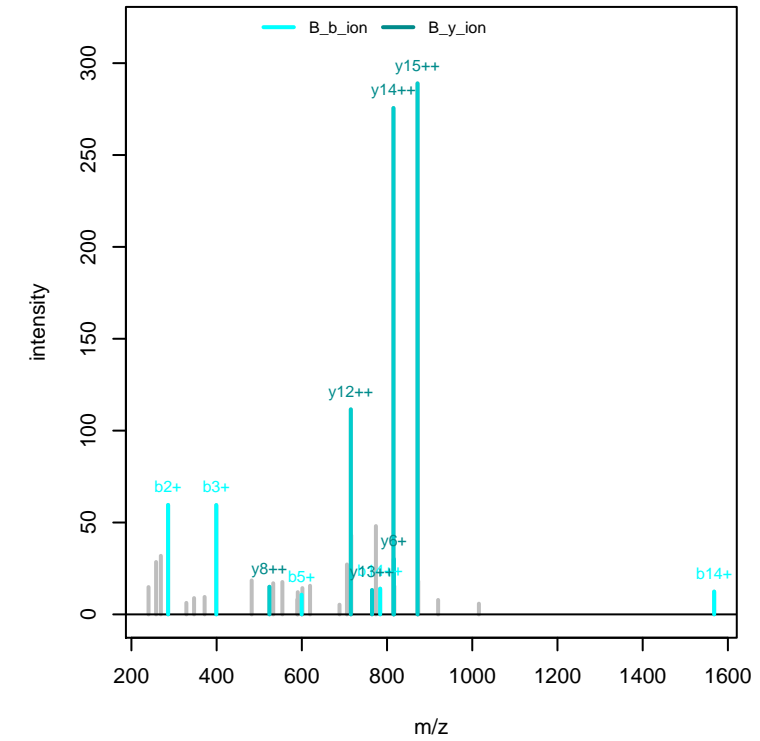

VKAALVDHDNIK  
GYAGDTATTSEIKAK

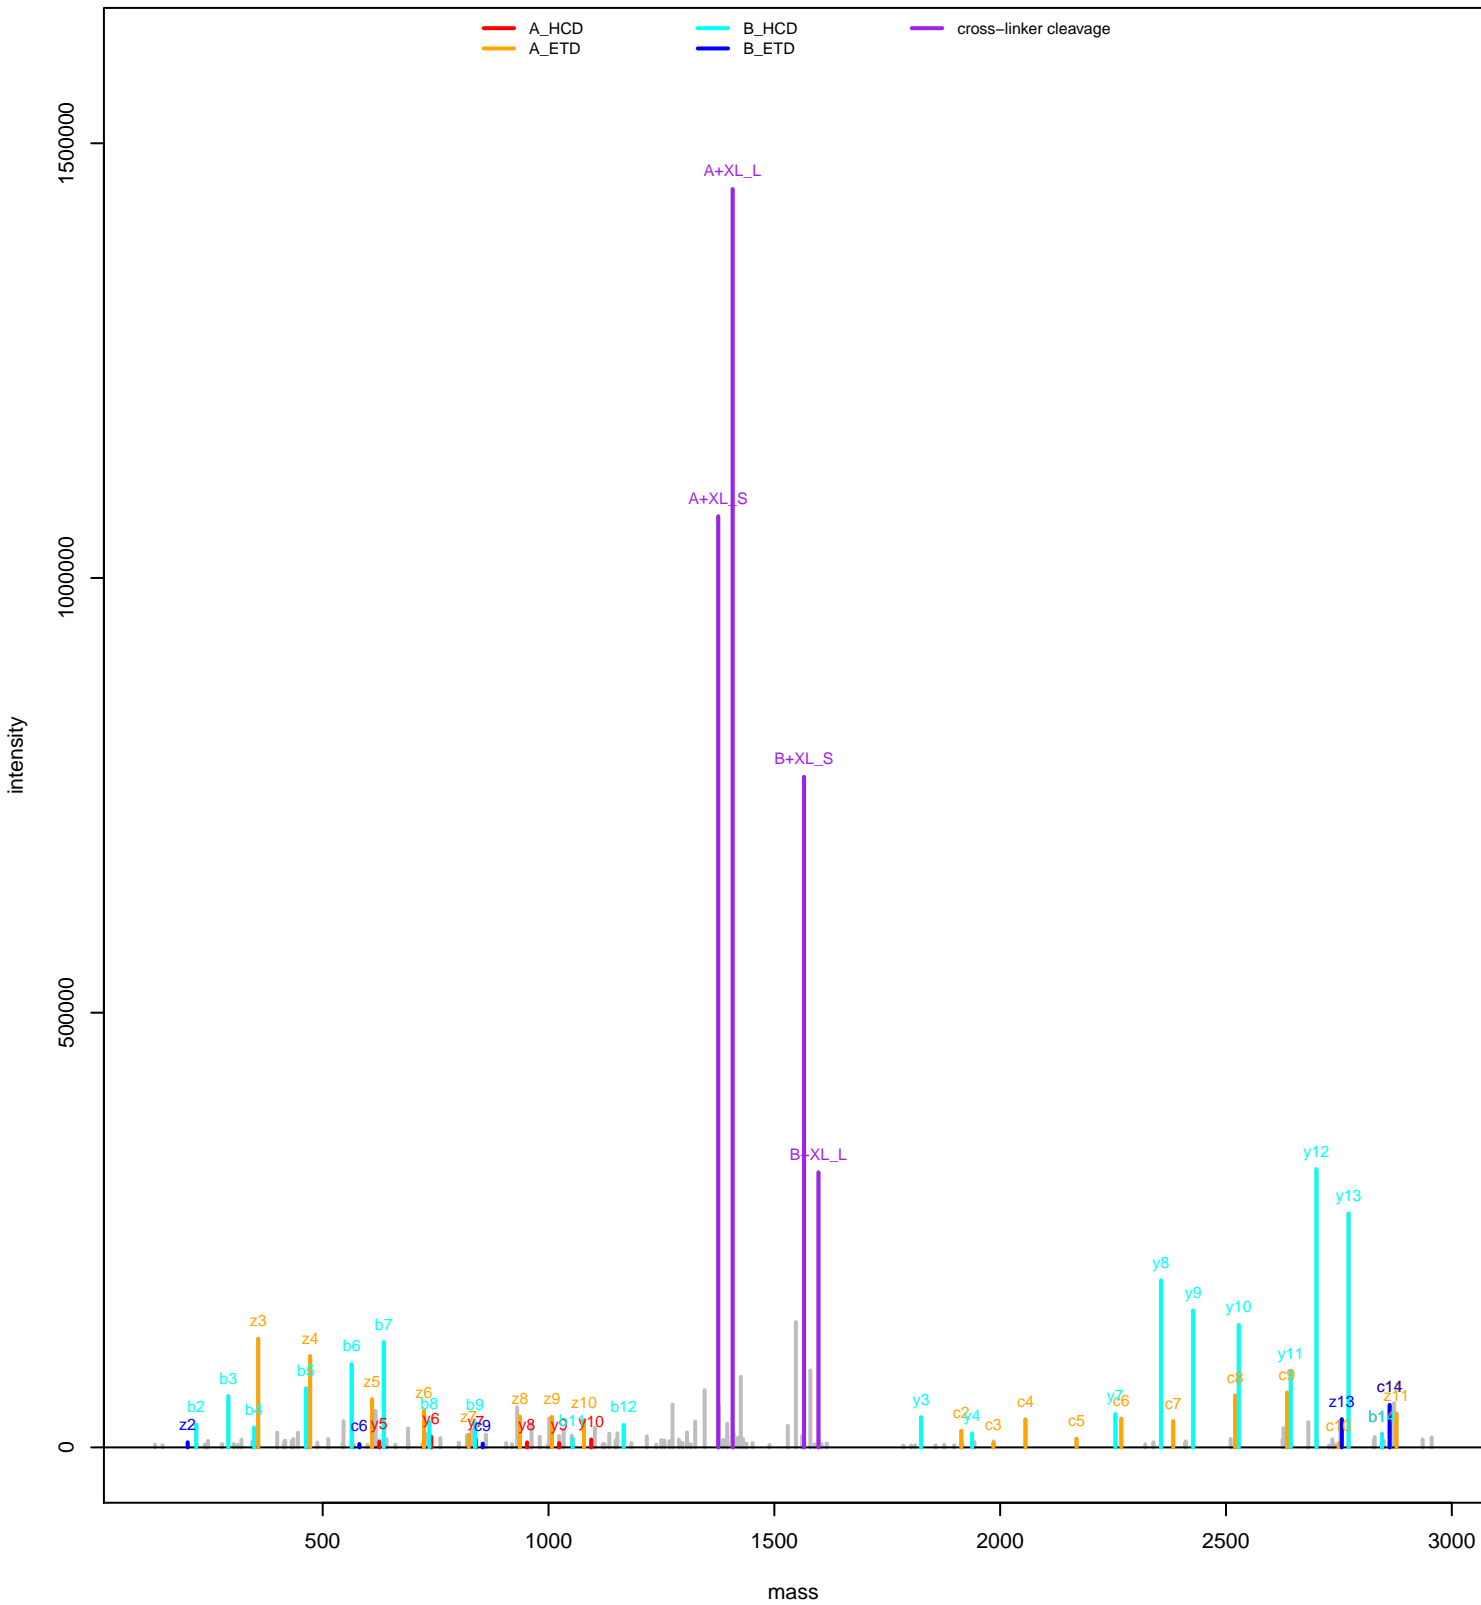

VKAALVDHDNIK+XL\_S

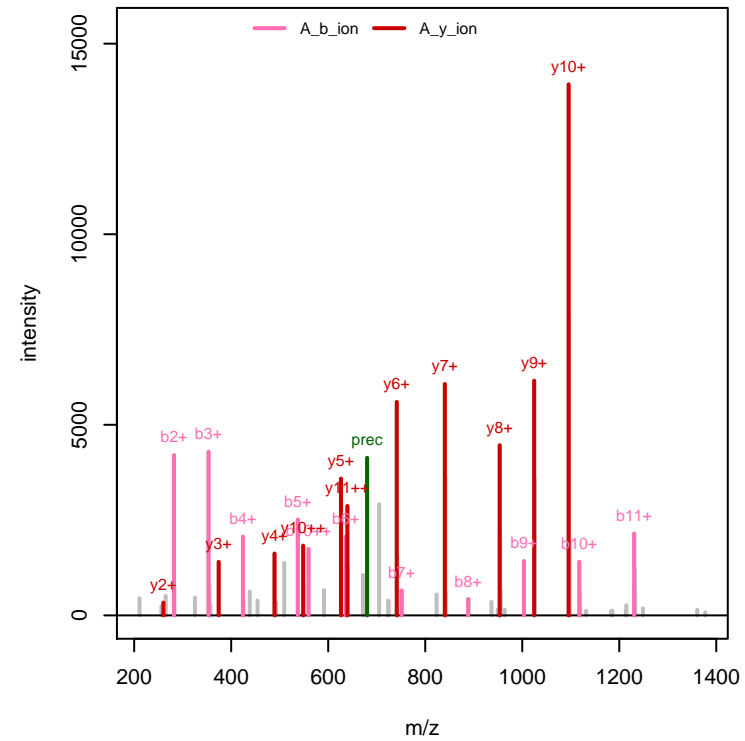

VKAALVDHDNIK+XL\_L

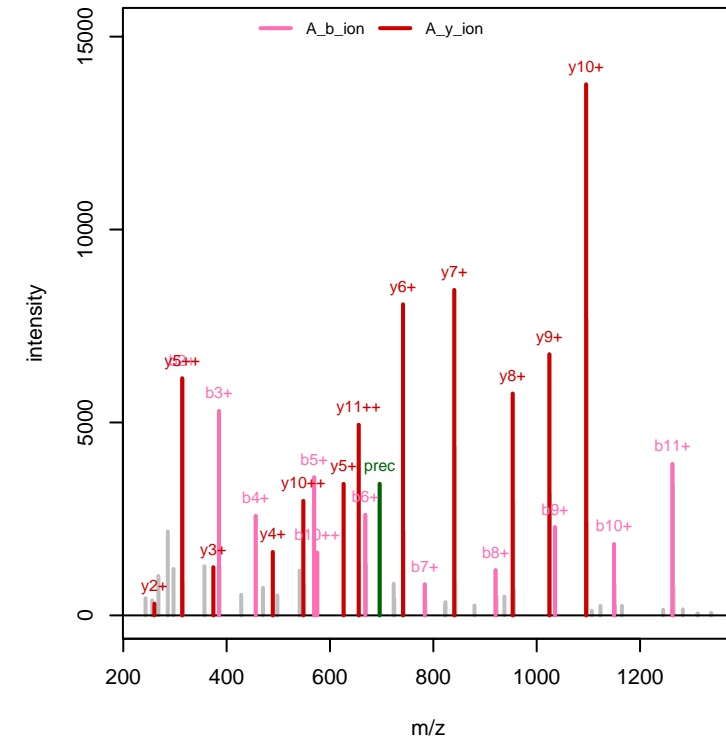

GYAGDTATTSEIKAK+XL\_S

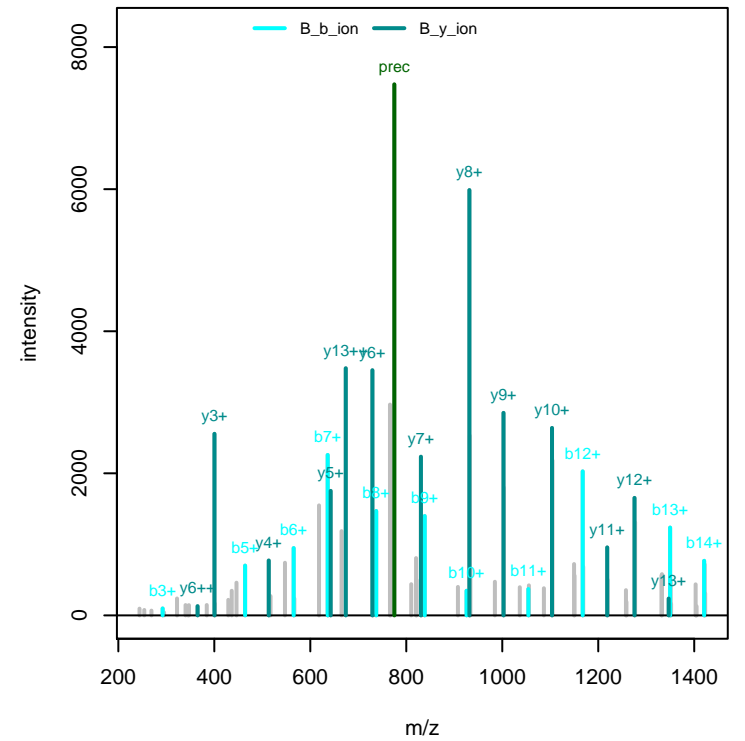

GYAGDTATTSEIKAK+XL\_L

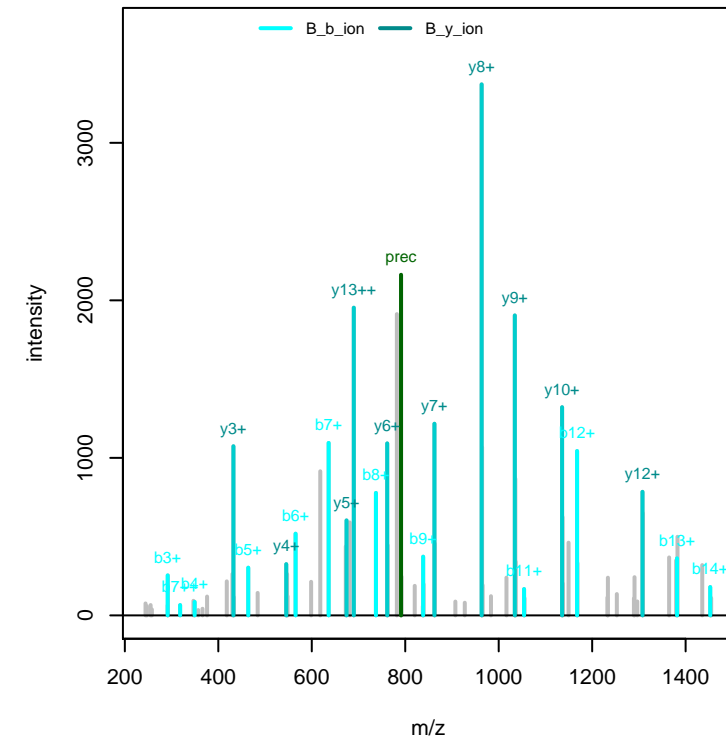

VKGTGRK  
EFGVNLAKVK

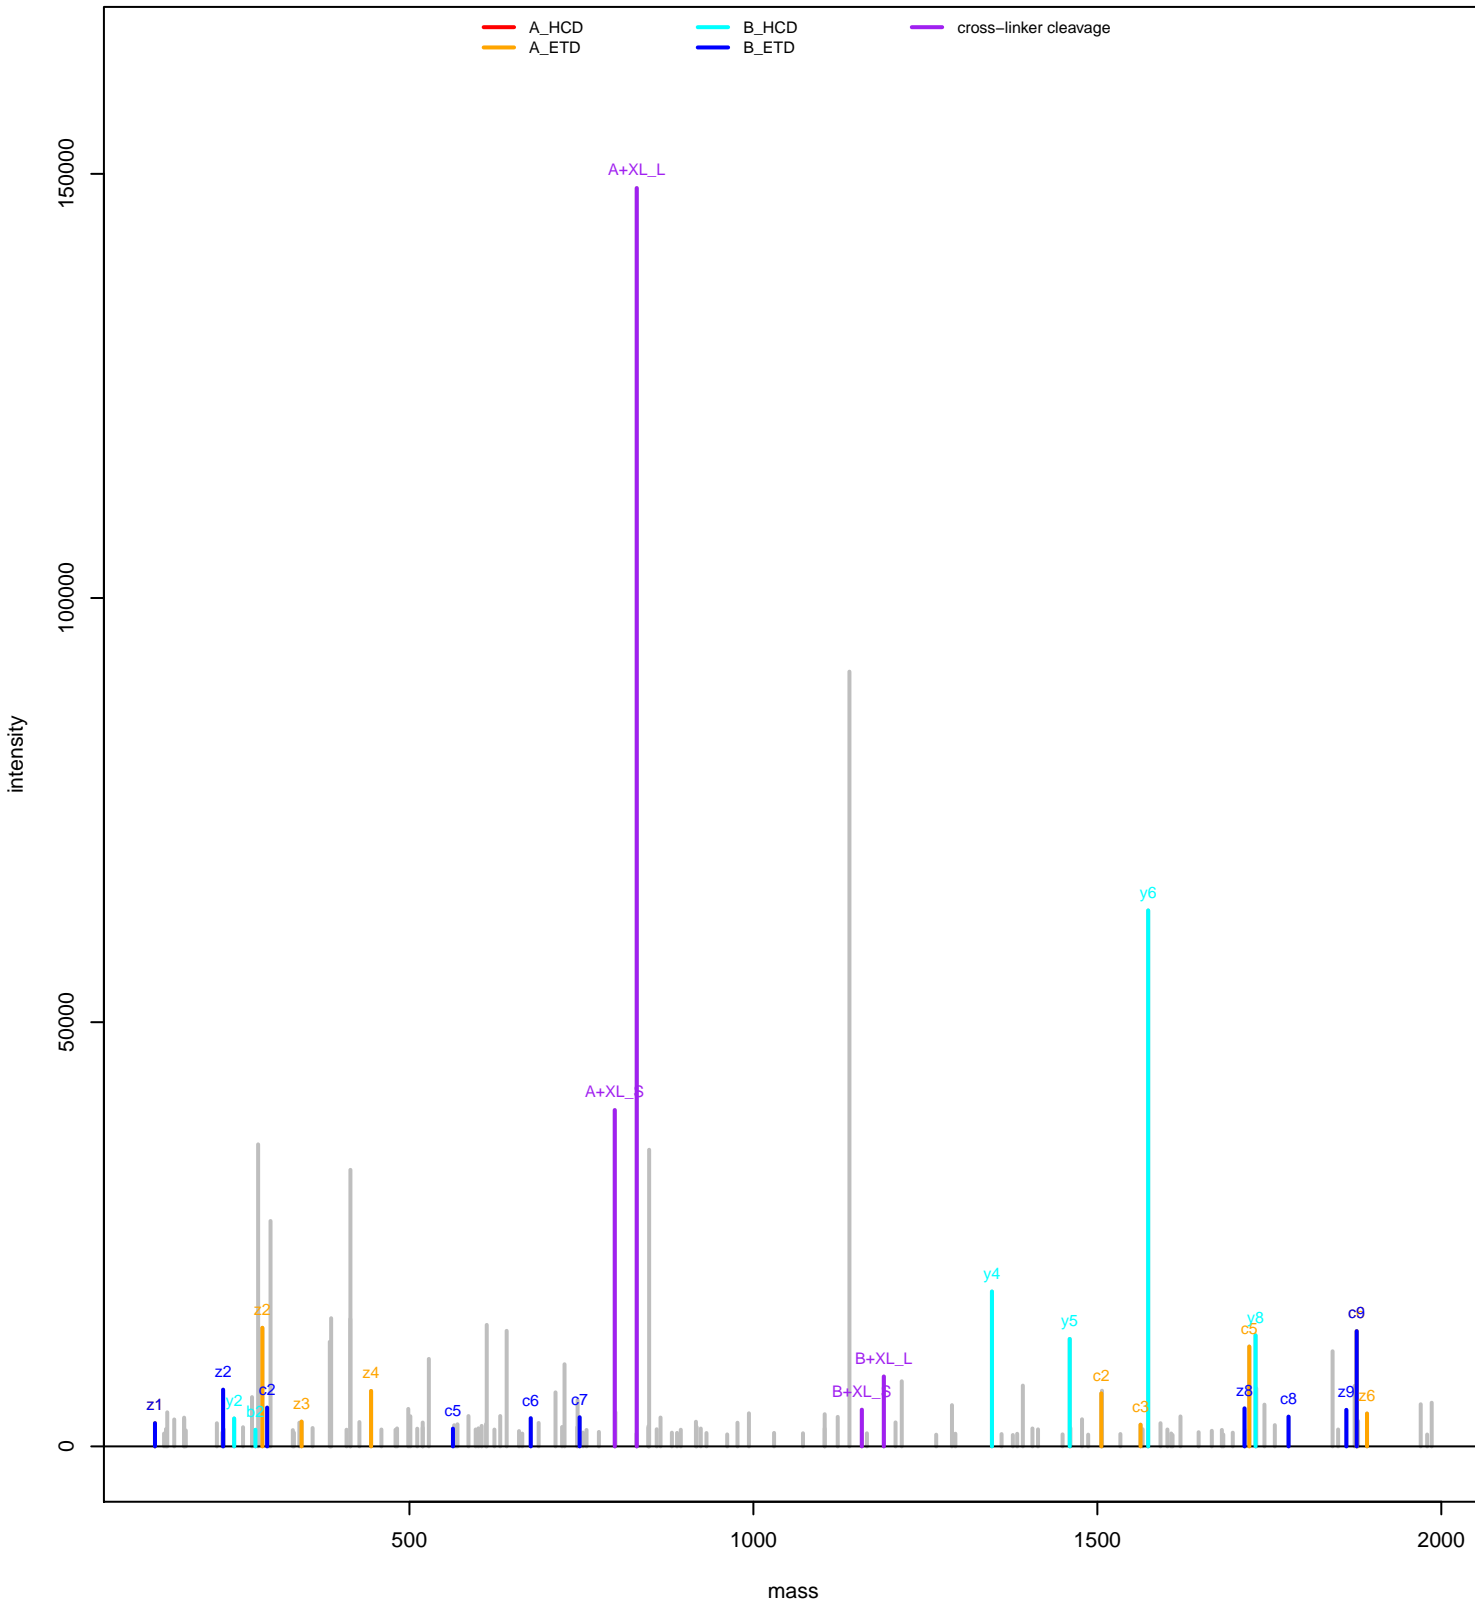

VKGTGRK+XL\_S

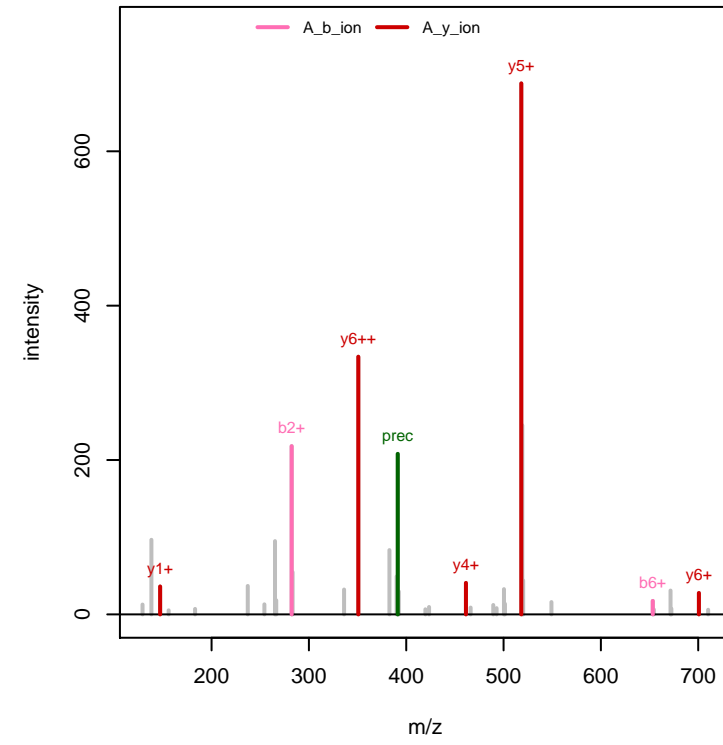

EFGVNLAKVK+XL\_S

VKGTGRK+XL\_L

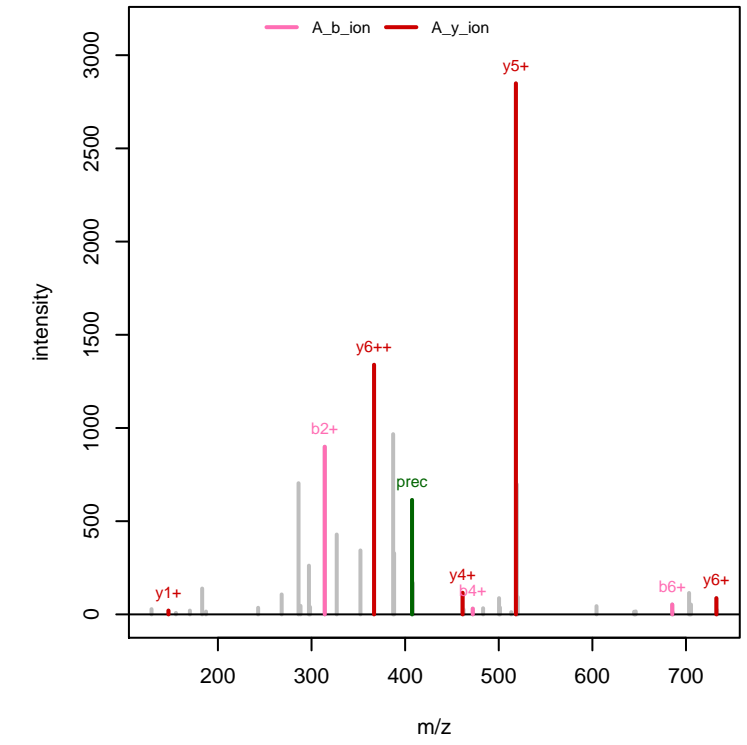

EFGVNLAKVK+XL\_L

GIKREEIER  
ETQKSTCTGVEMFR

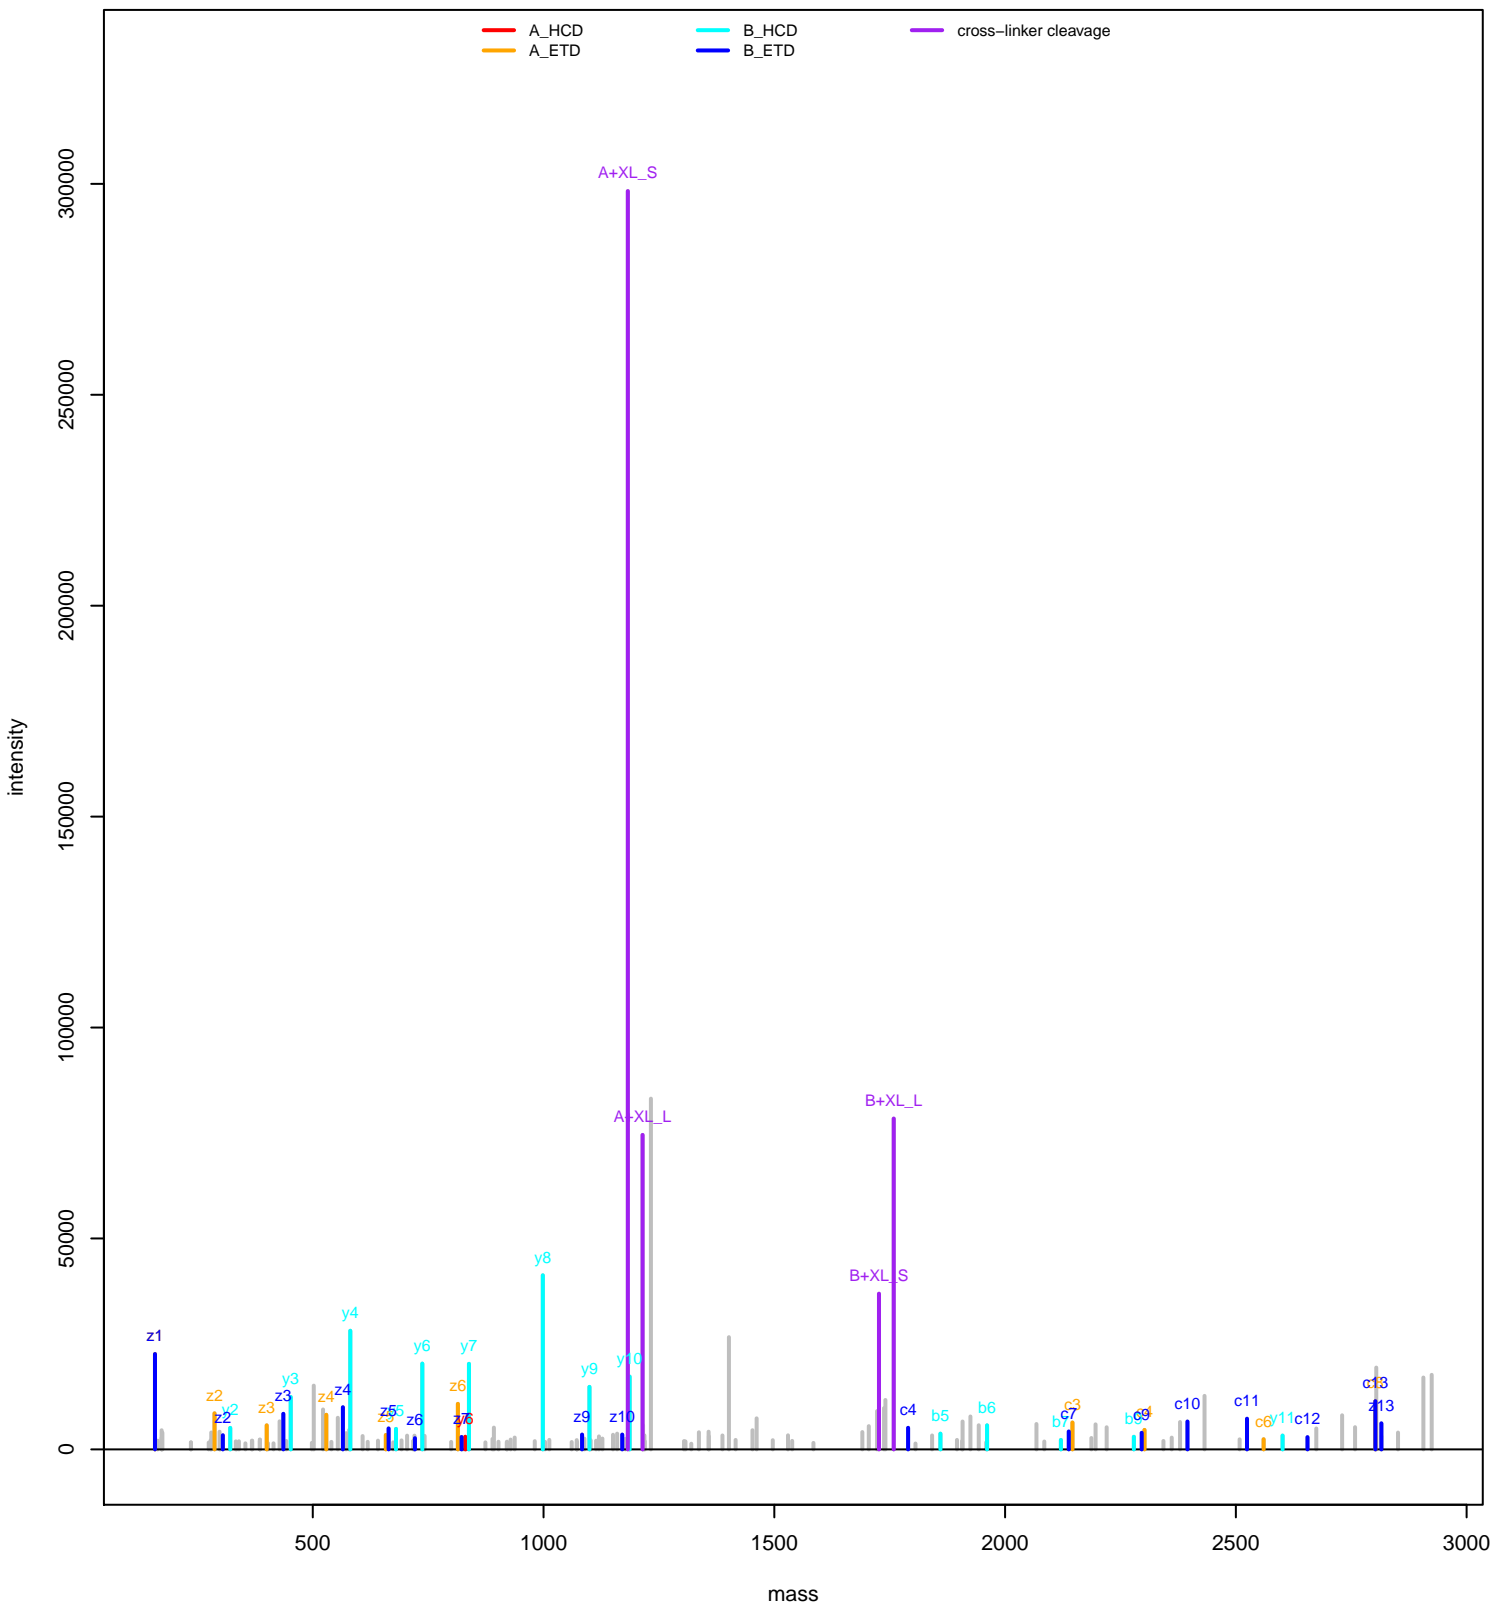

GIKREEIER+XL\_S

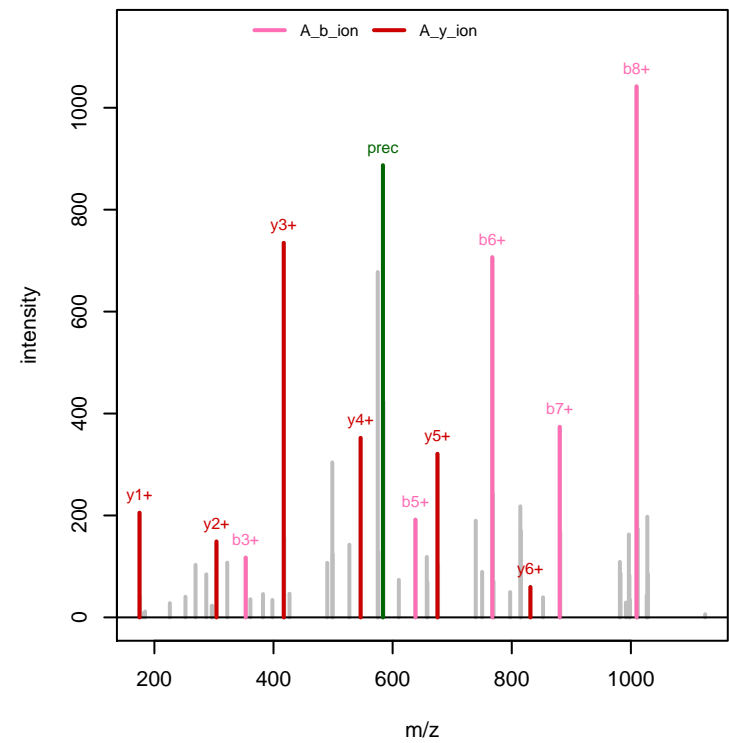

GIKREEIER+XL\_L

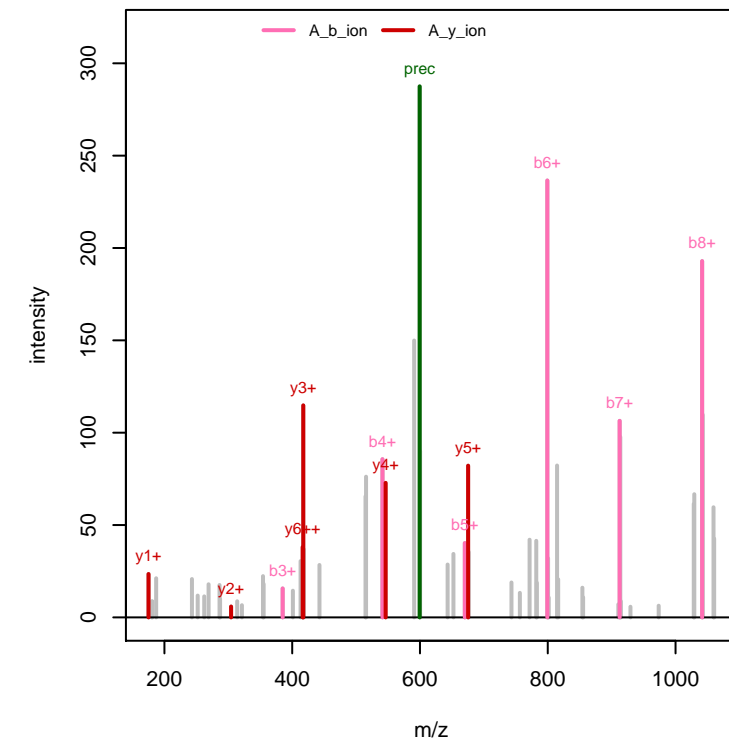

ETQKSTCTGVEMFR+XL\_S

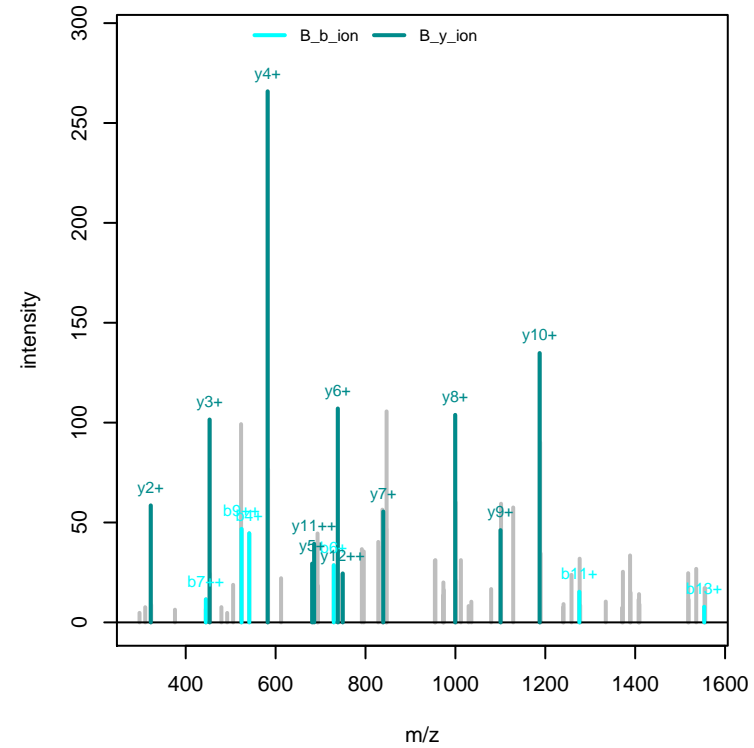

ETQKSTCTGVEMFR+XL\_L

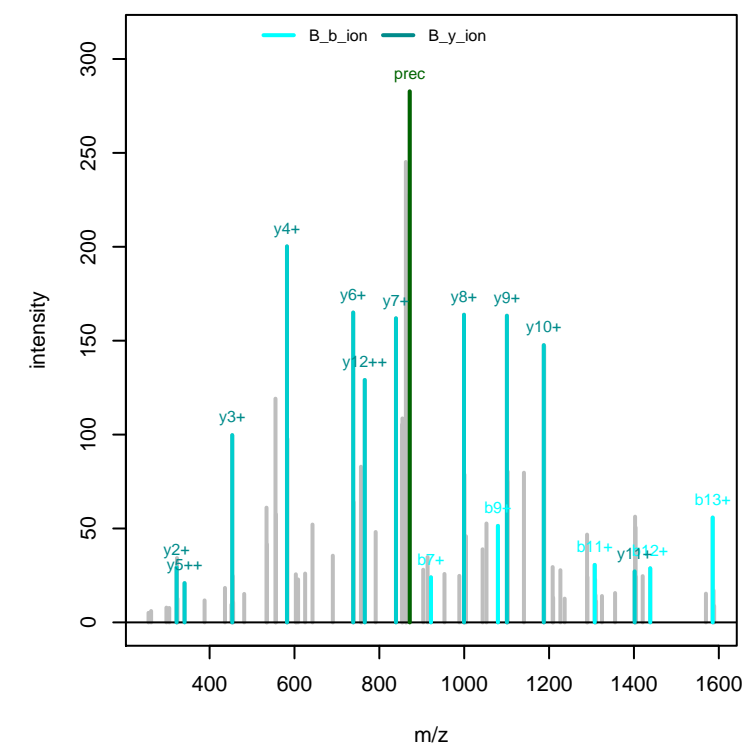



KFTPESVSR  
LLEKISAGGYGDK

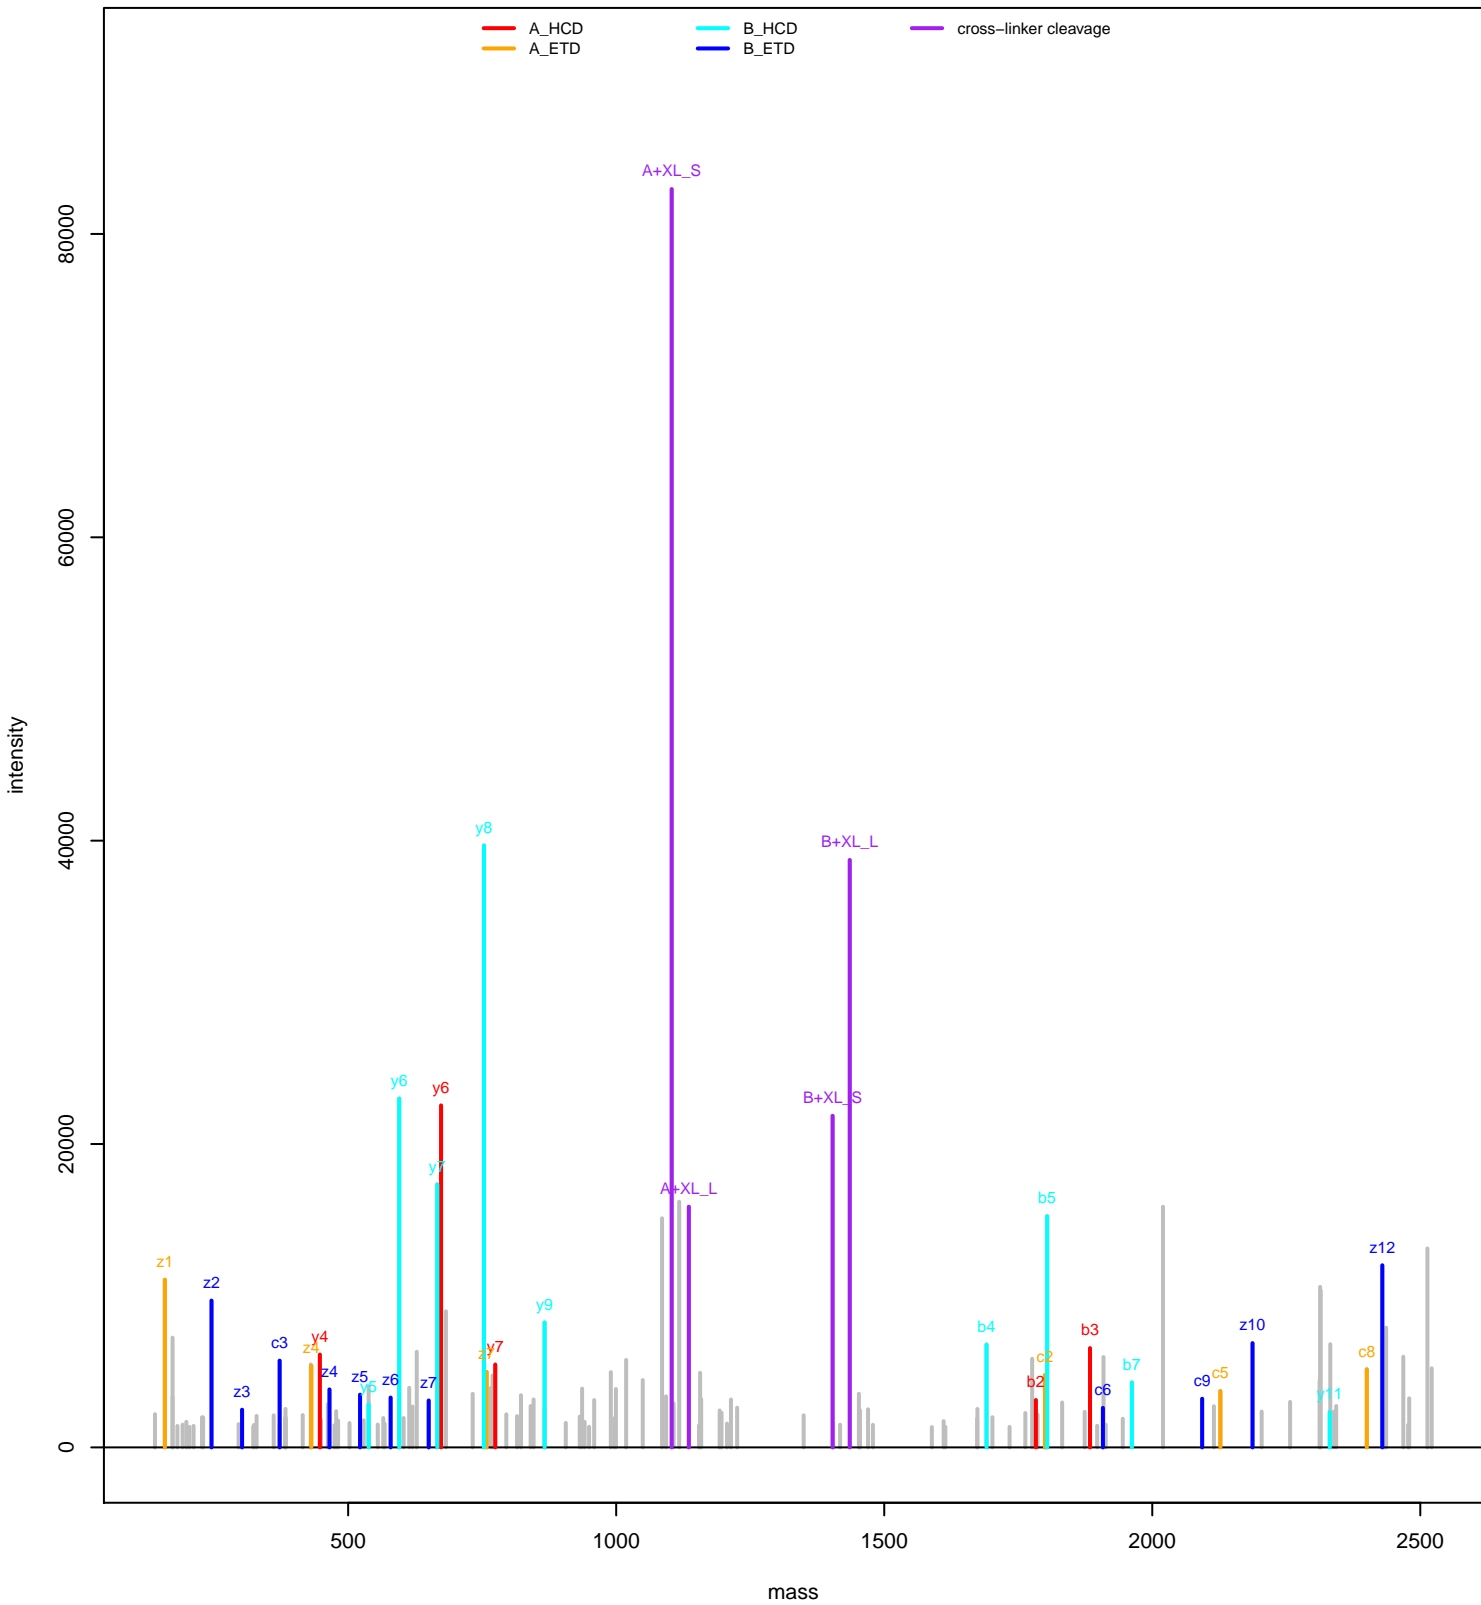

KFTPESVSR+XL\_S

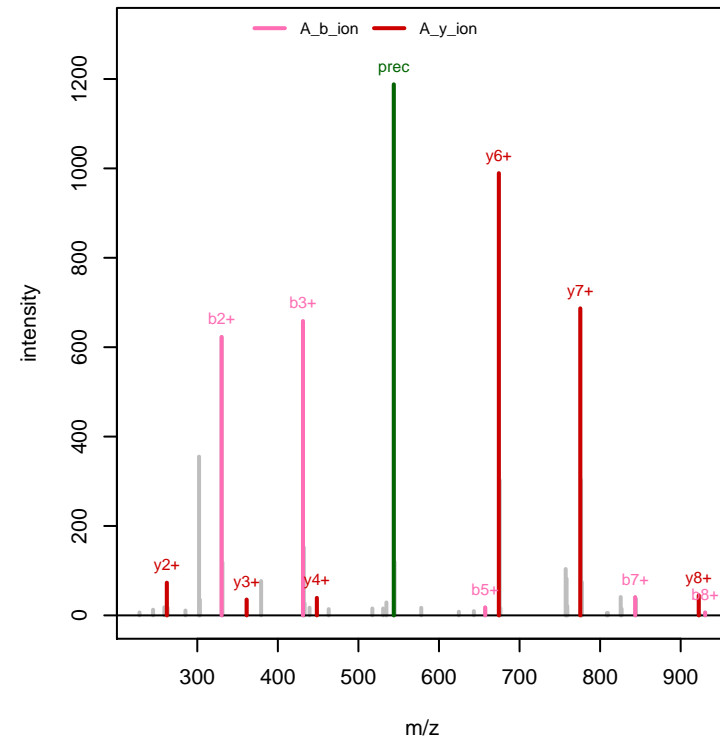

KFTPESVSR+XL\_L

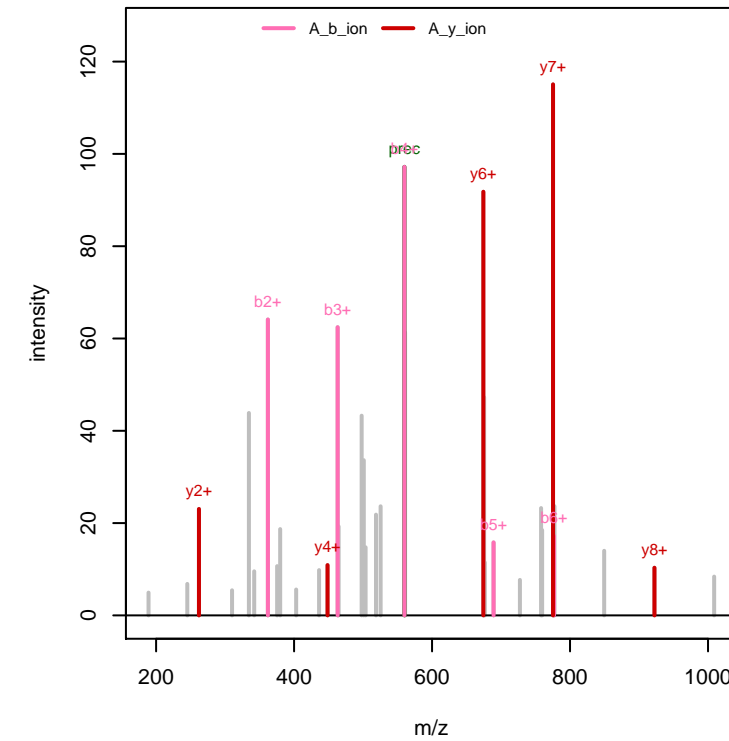

LLEKISAGGYGDK+XL\_S

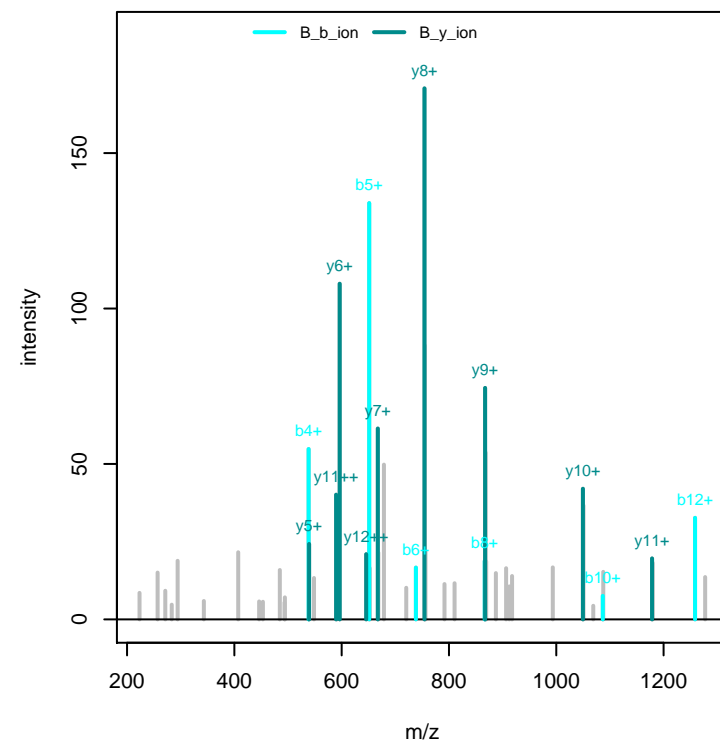

LLEKISAGGYGDK+XL\_L

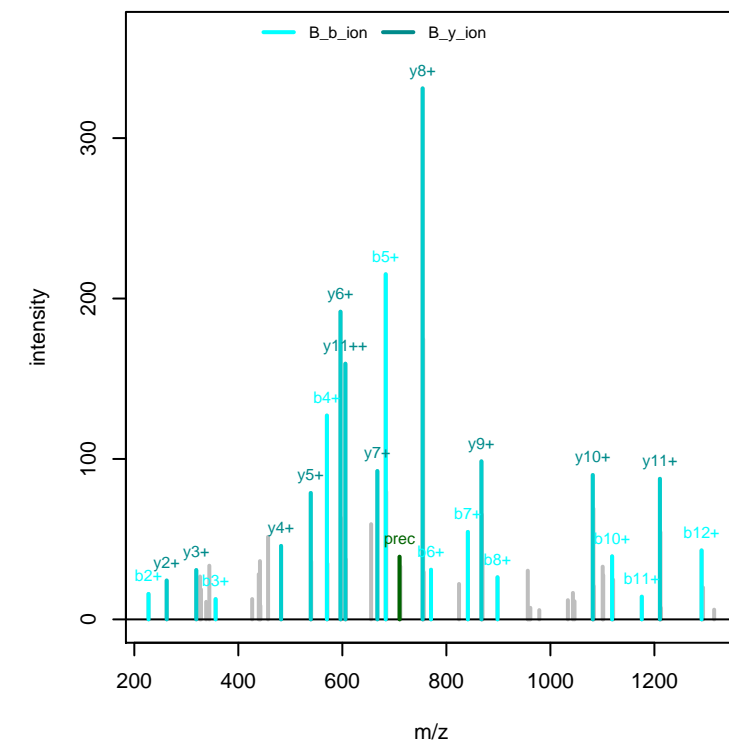

**IKELAVK  
LTREDVEKHLAK**

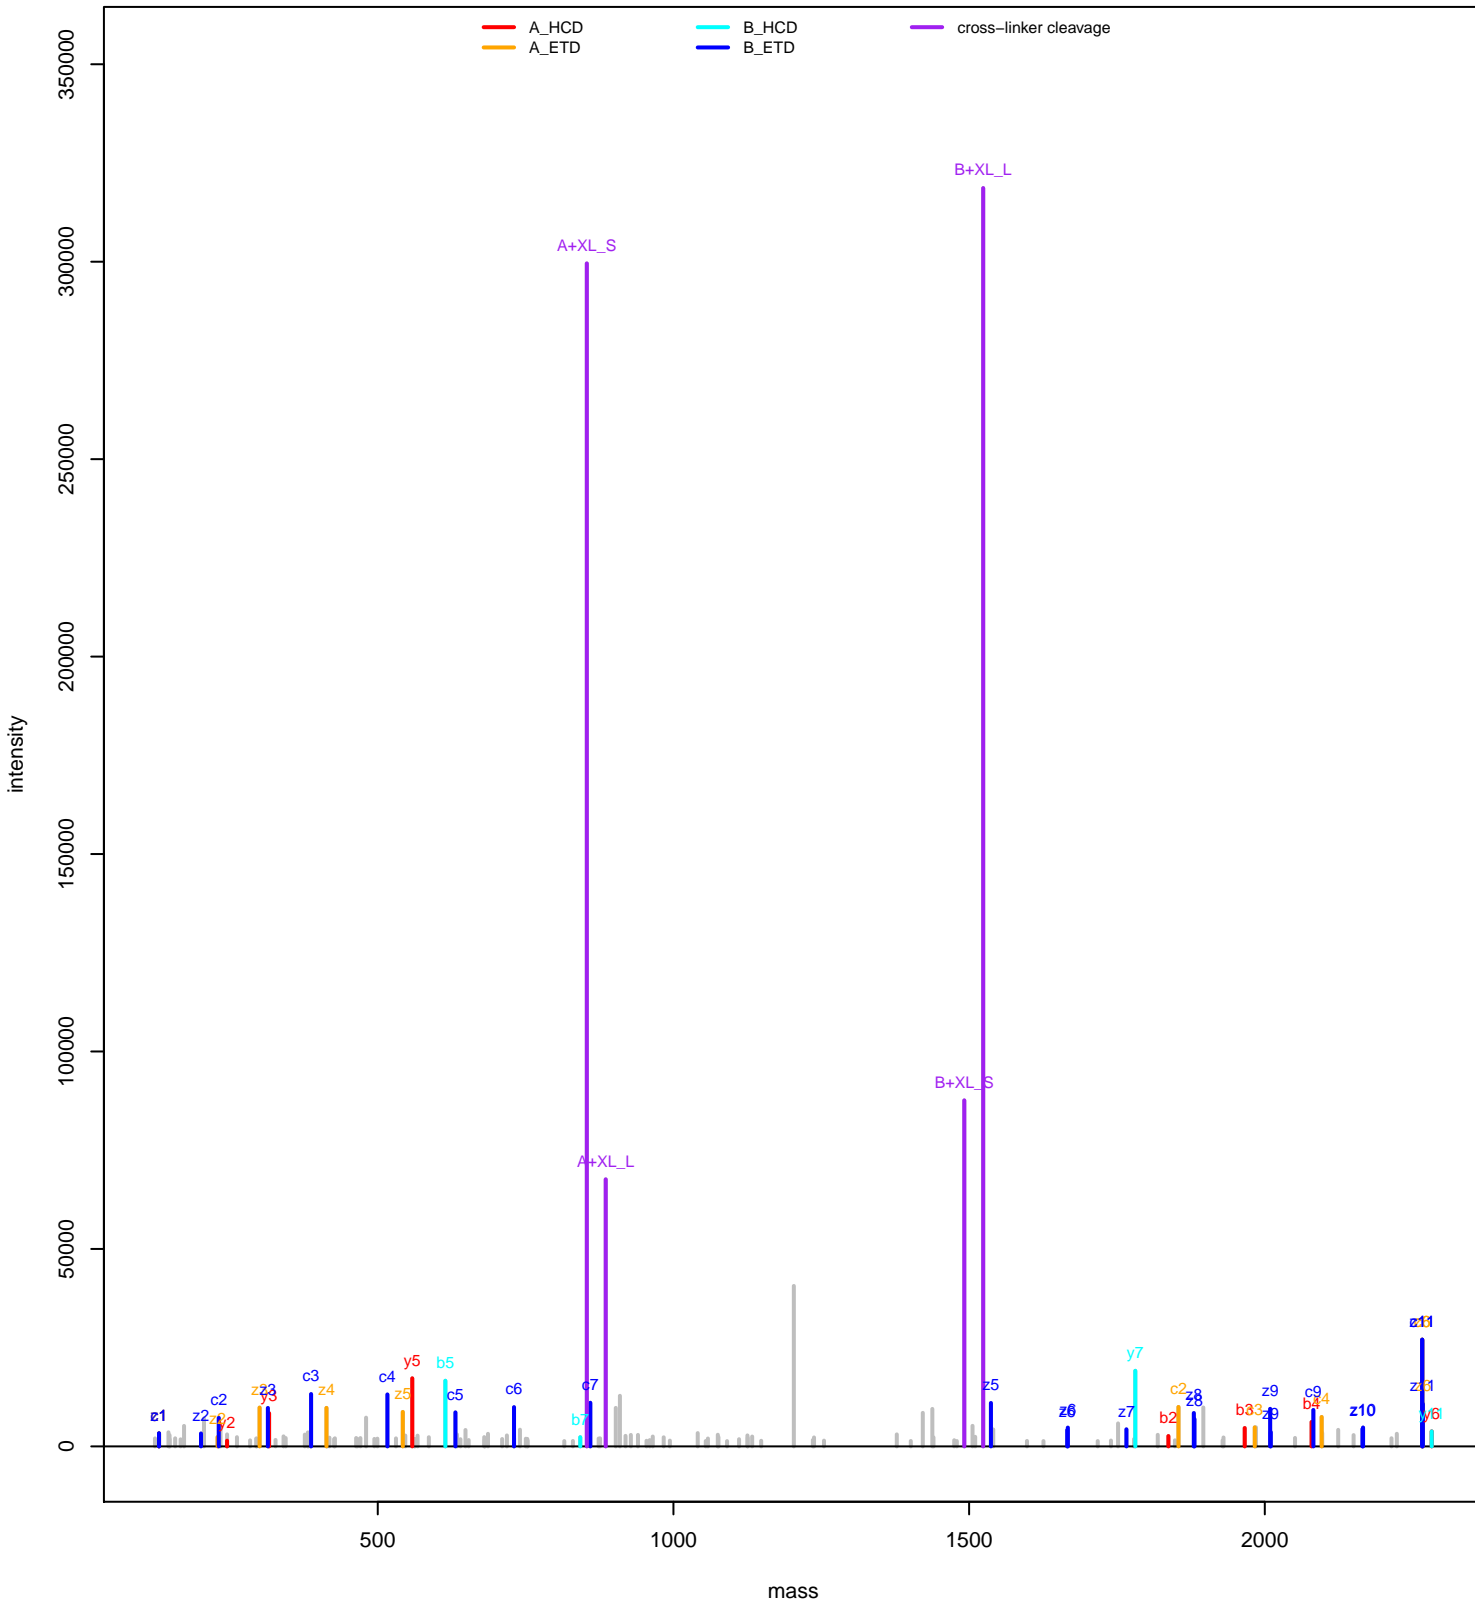

**IKELAVK+XL\_S**

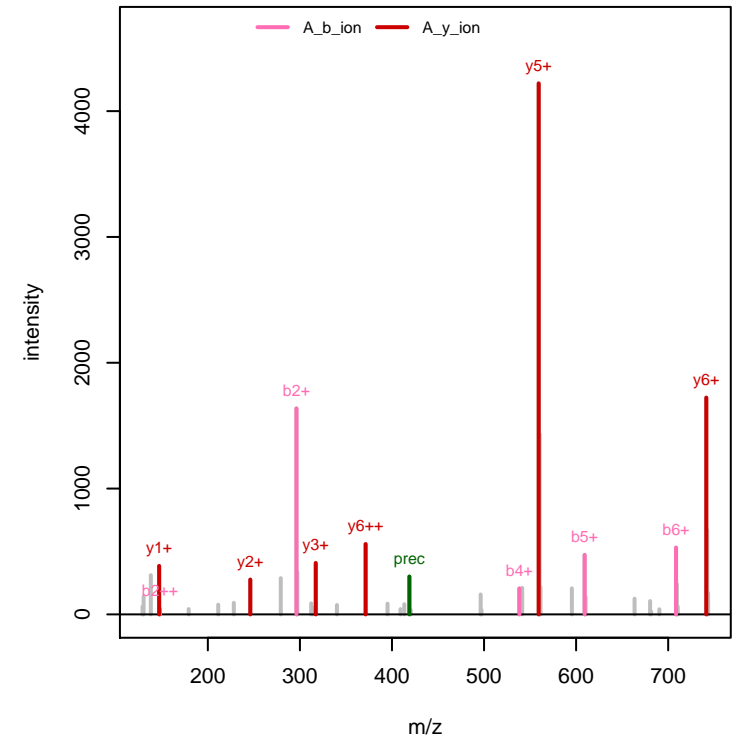

**IKELAVK+XL\_L**

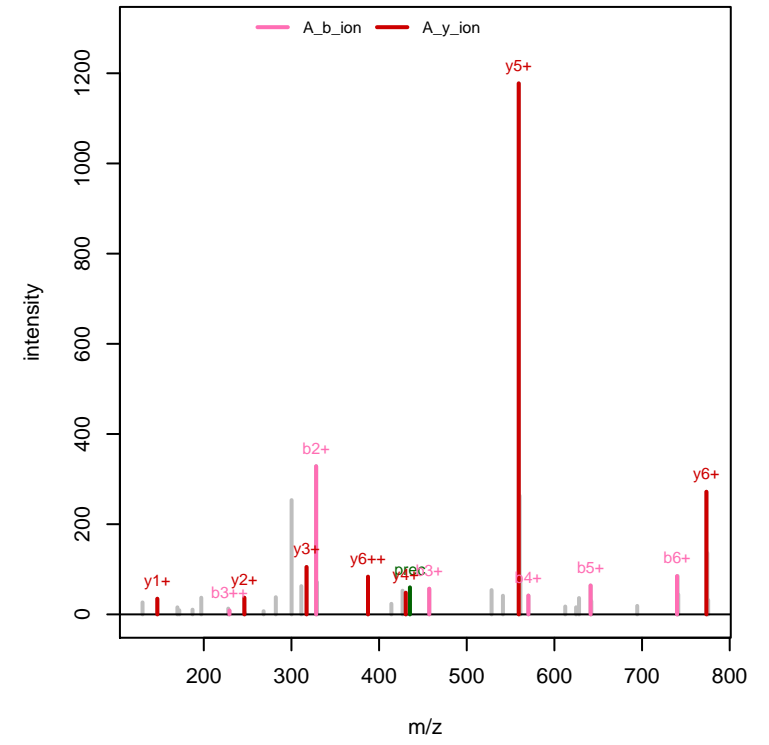

**LTREDVEKHLAK+XL\_S**

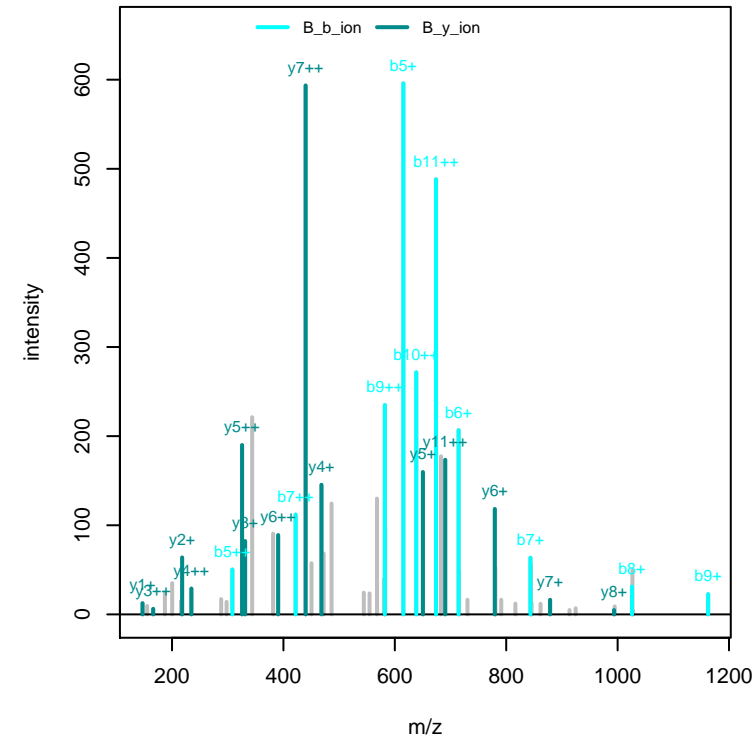

**LTREDVEKHLAK+XL\_L**

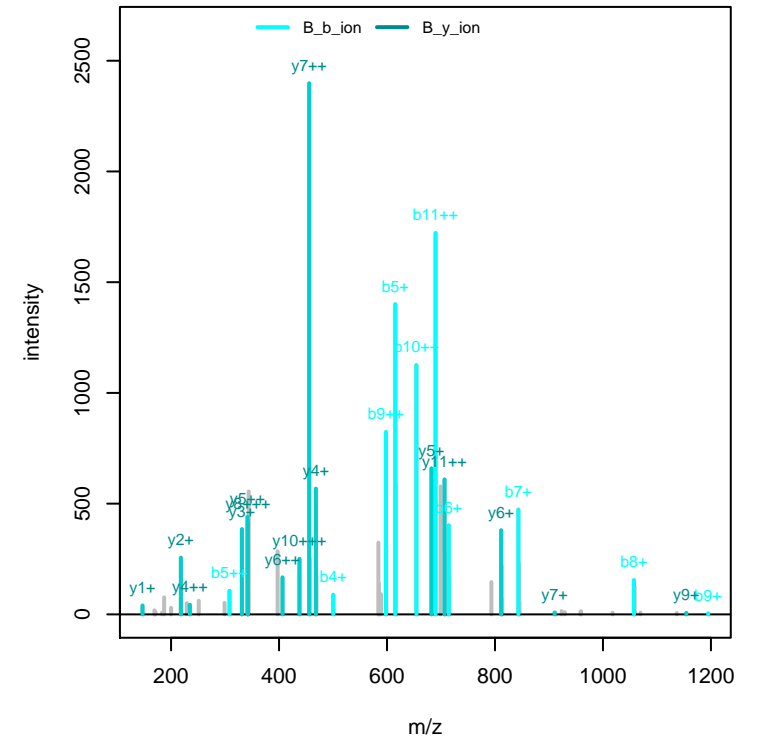

**MKIVEVK  
IVEVKHPLVK**

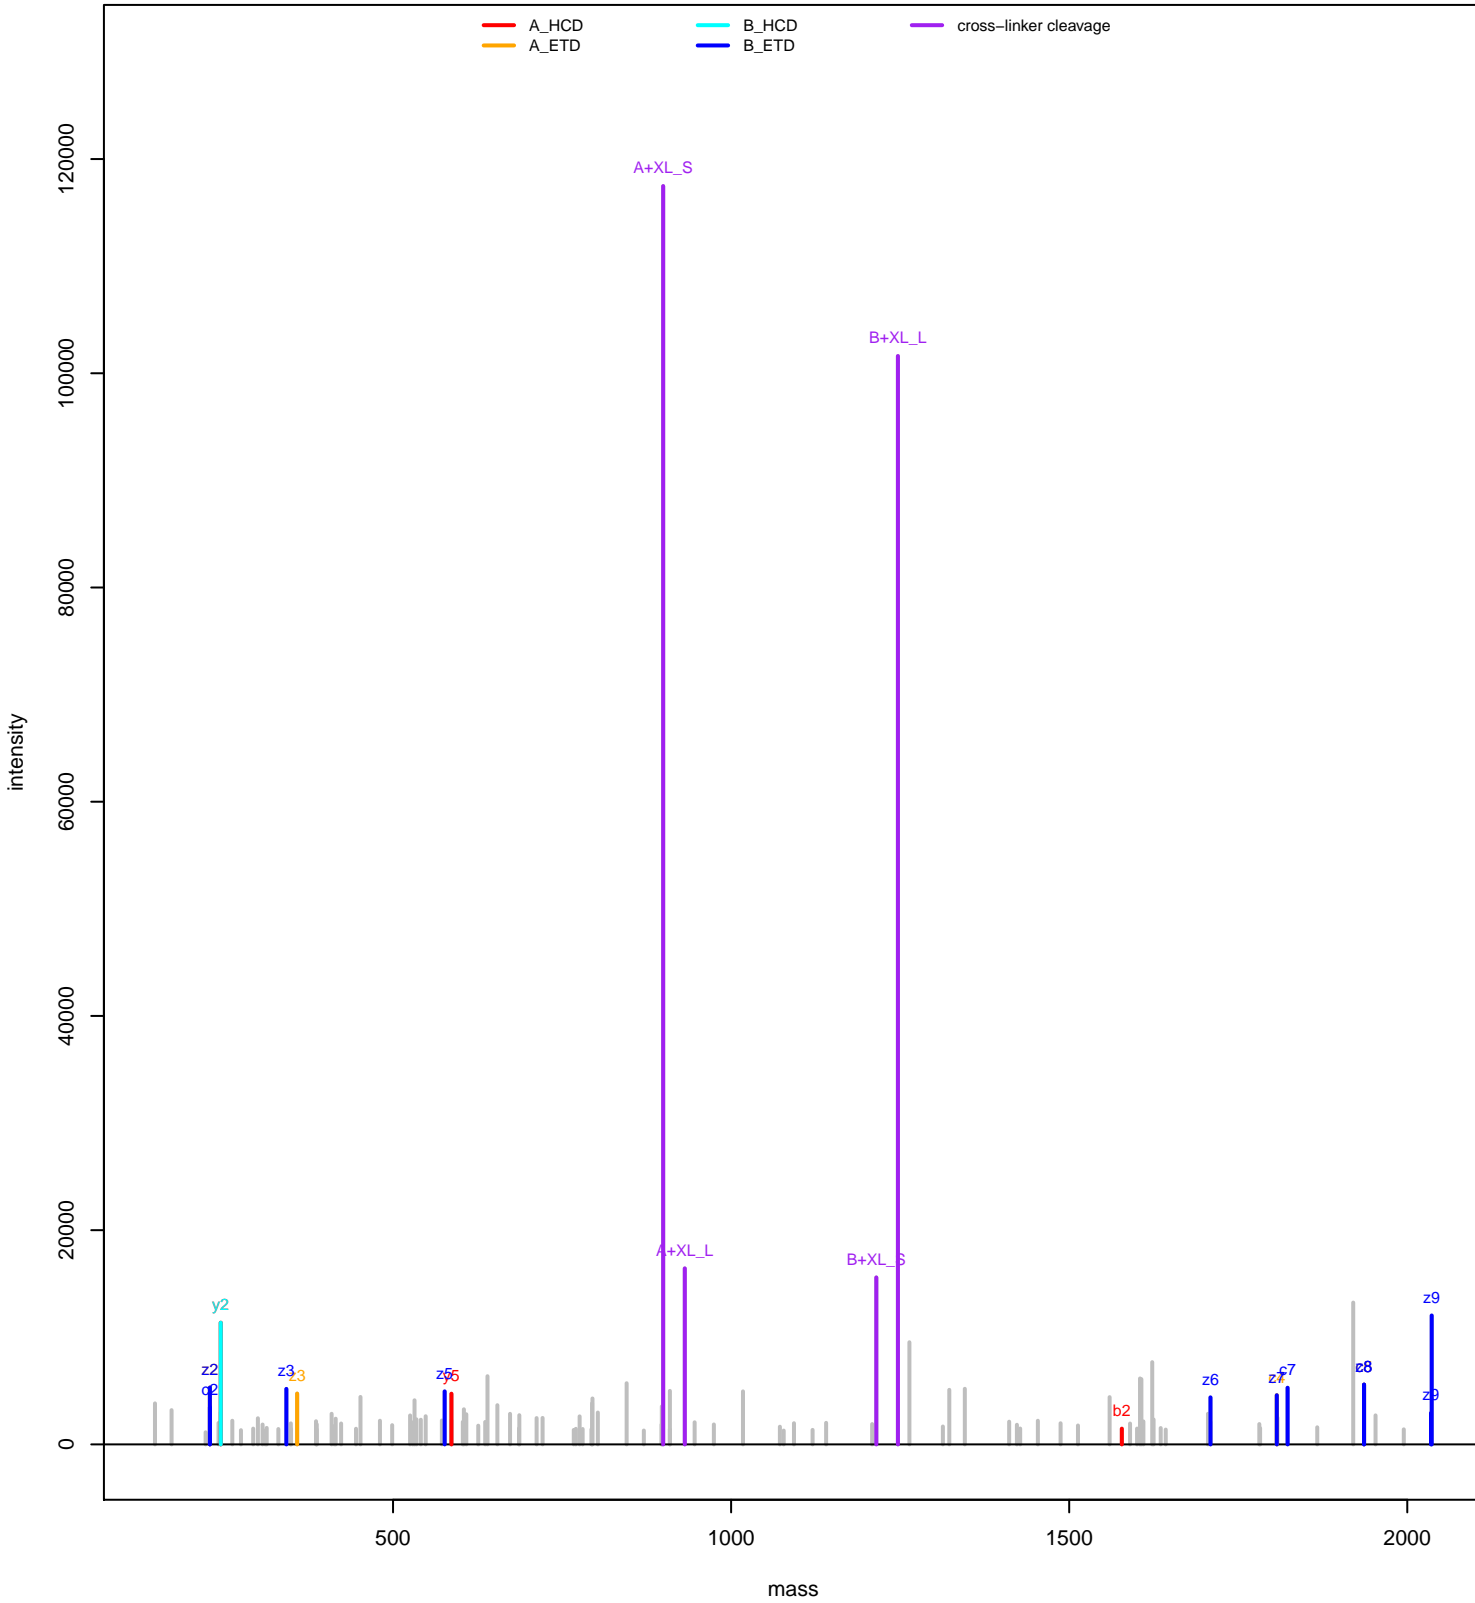

**MKIVEVK+XL\_S**

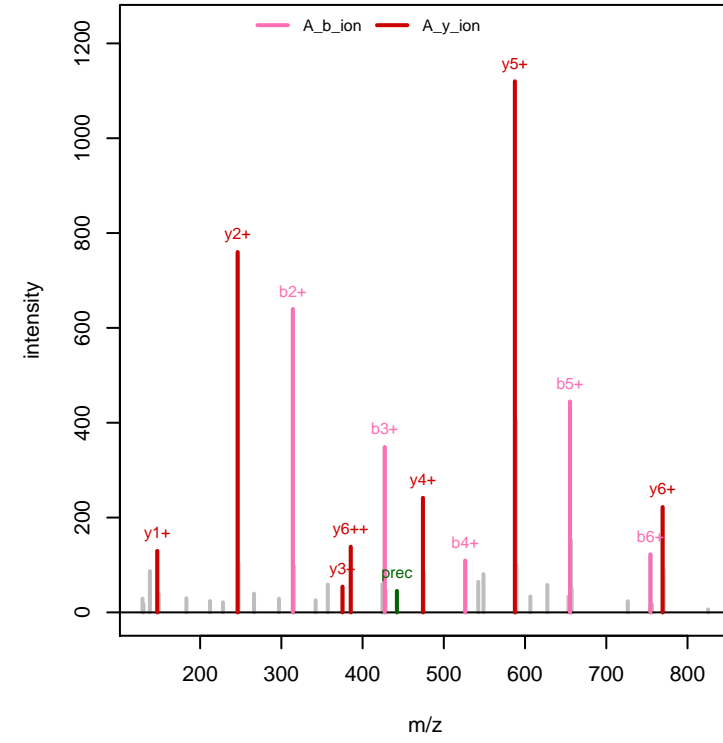

**MKIVEVK+XL\_L**

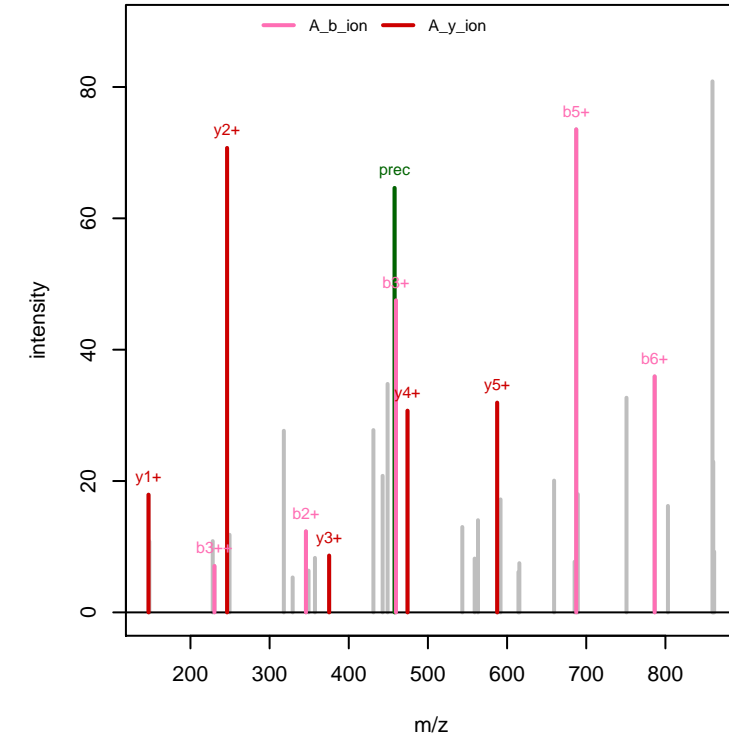

**IVEVKHPLVK+XL\_S**

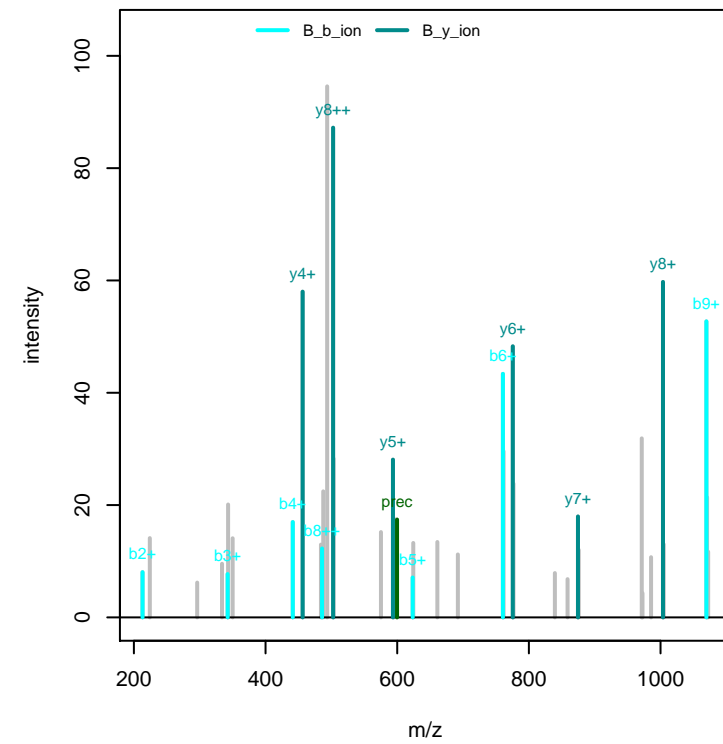

**IVEVKHPLVK+XL\_L**

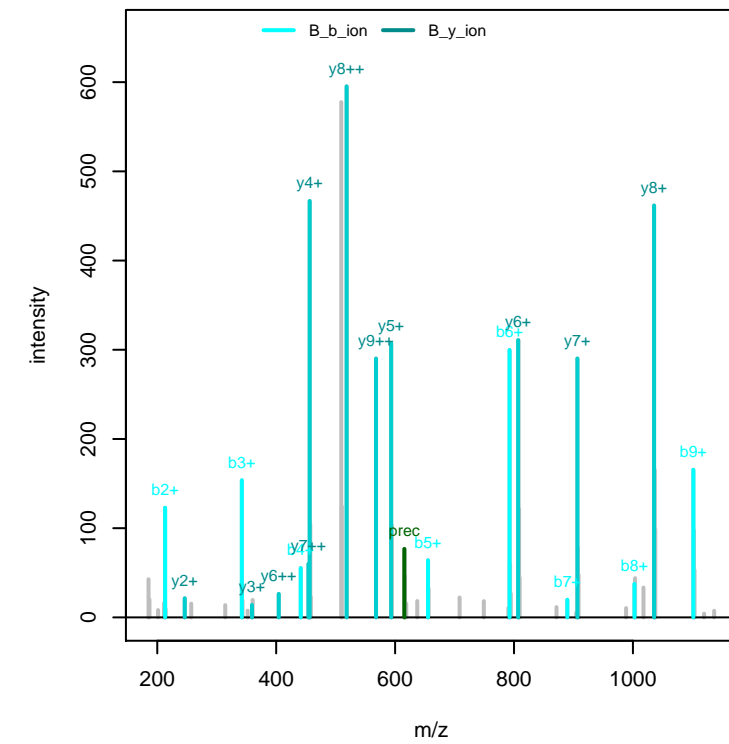

DGKVTSDAR  
DKLSNPVRLVK

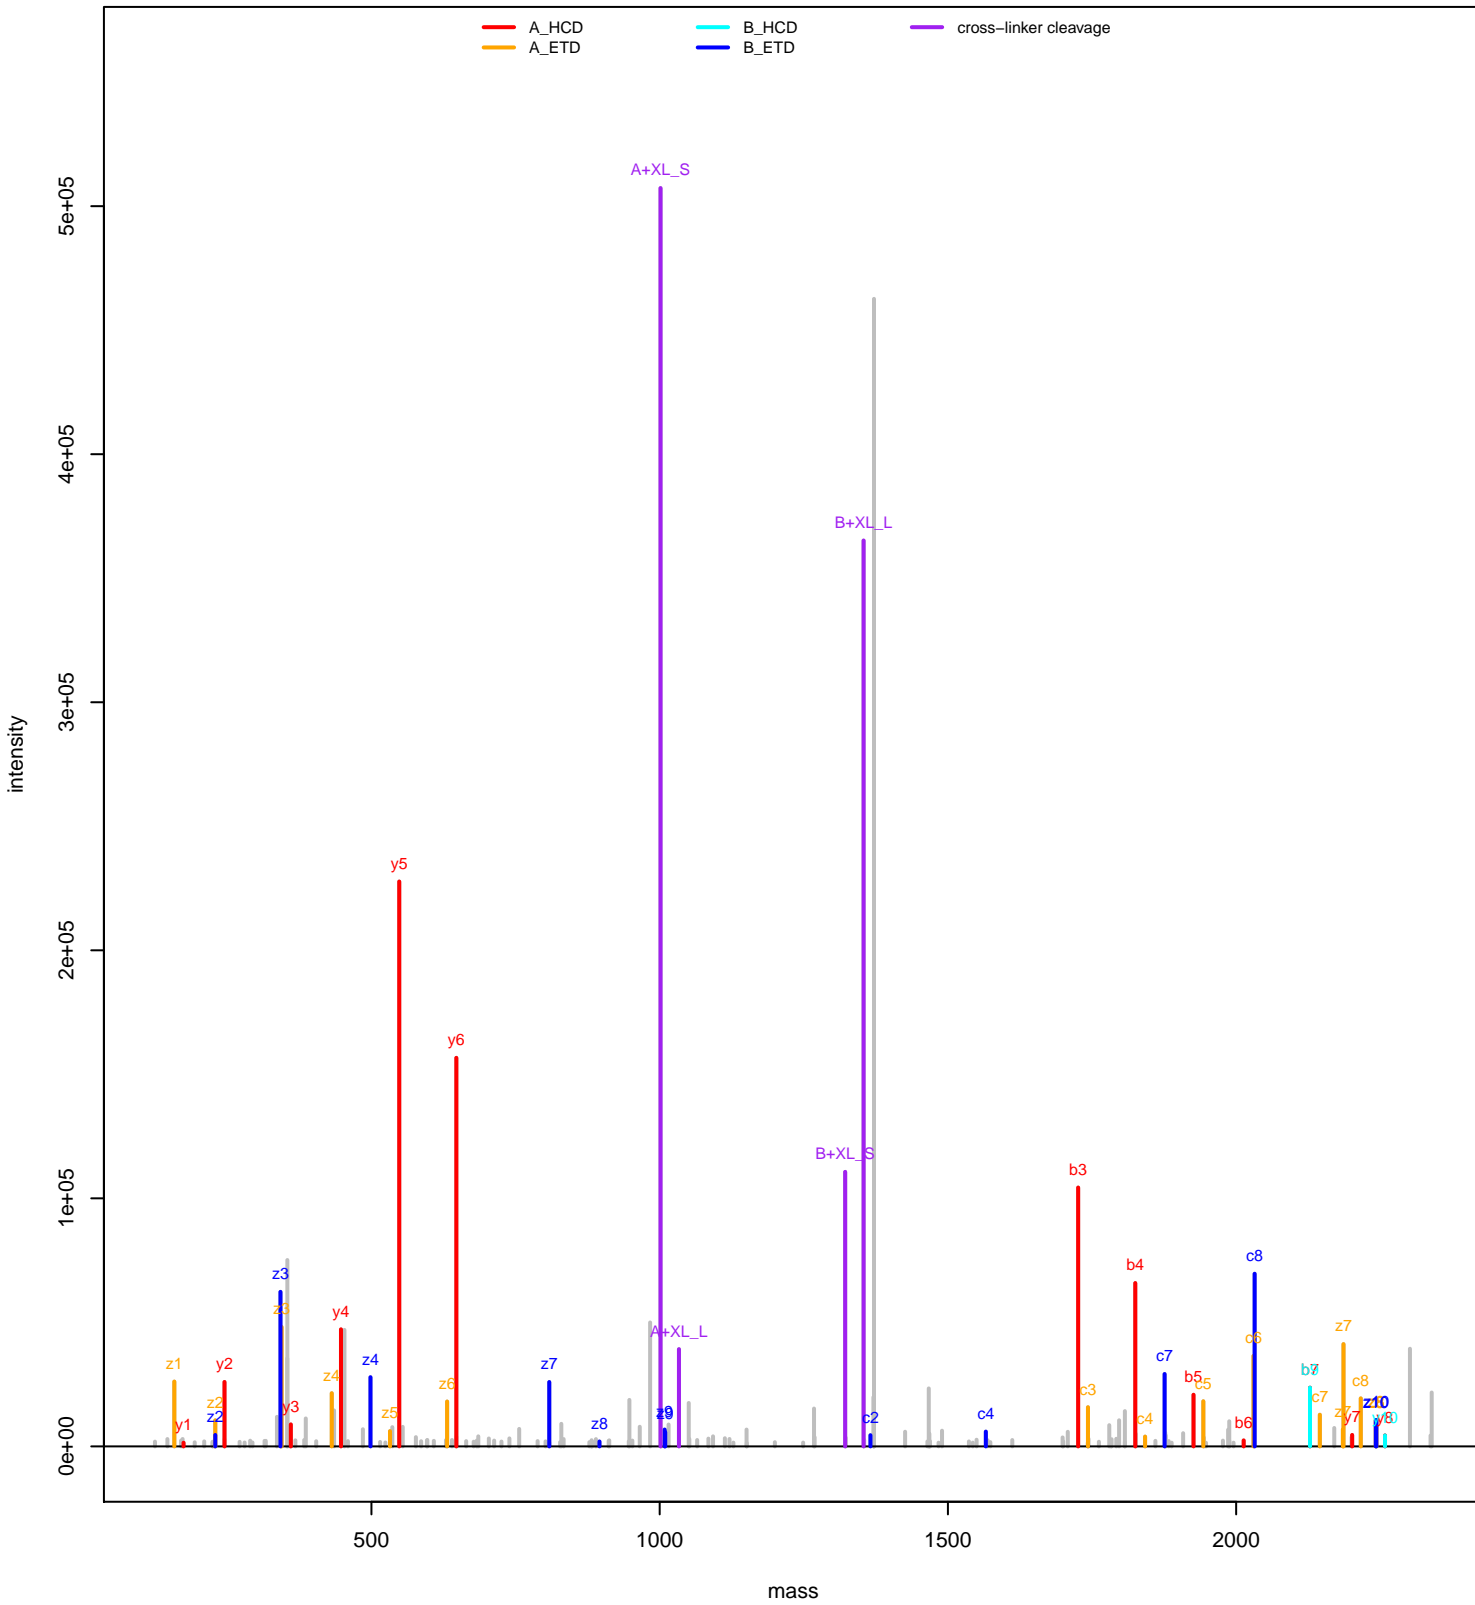

DGKVTSDAR+XL\_S

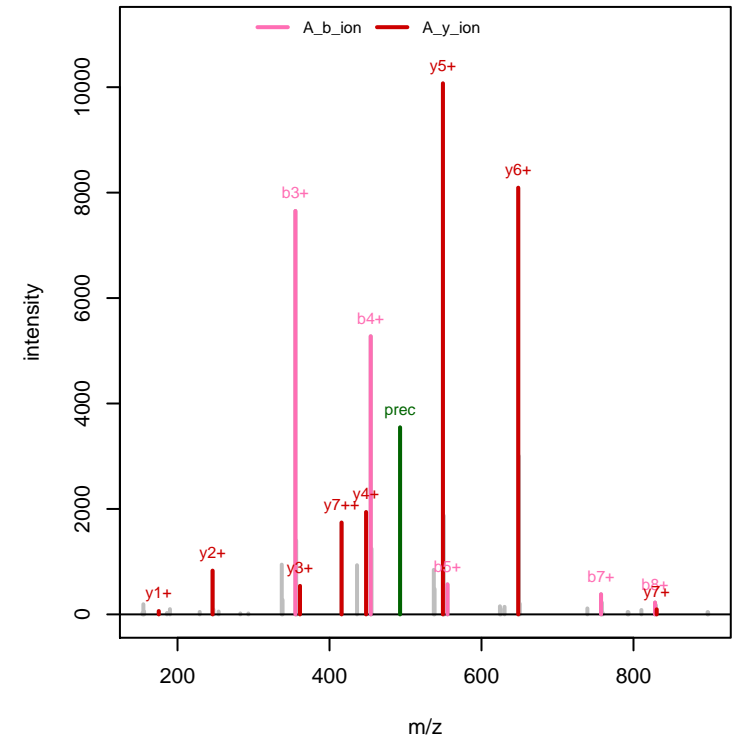

DGKVTSDAR+XL\_L

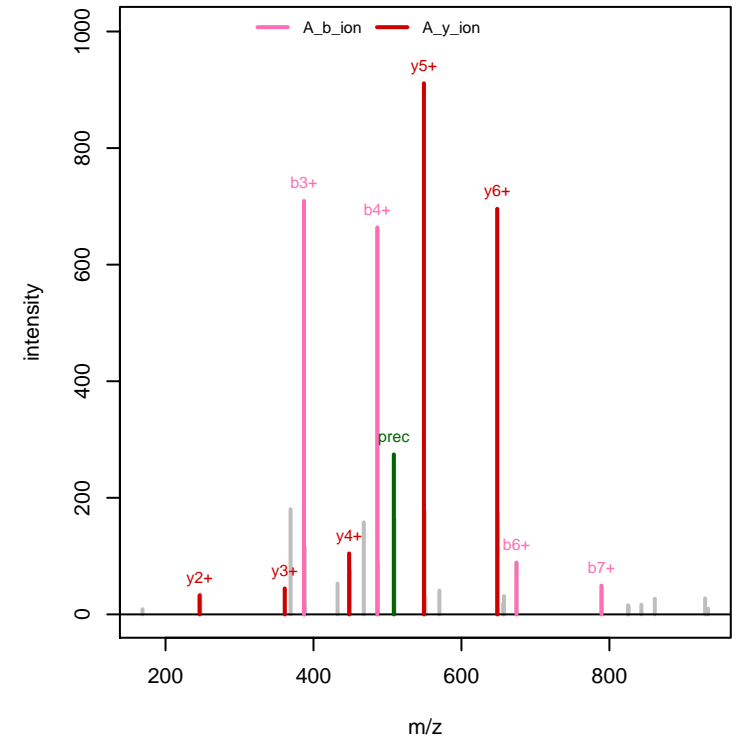

DKLSNPVRLVK+XL\_S

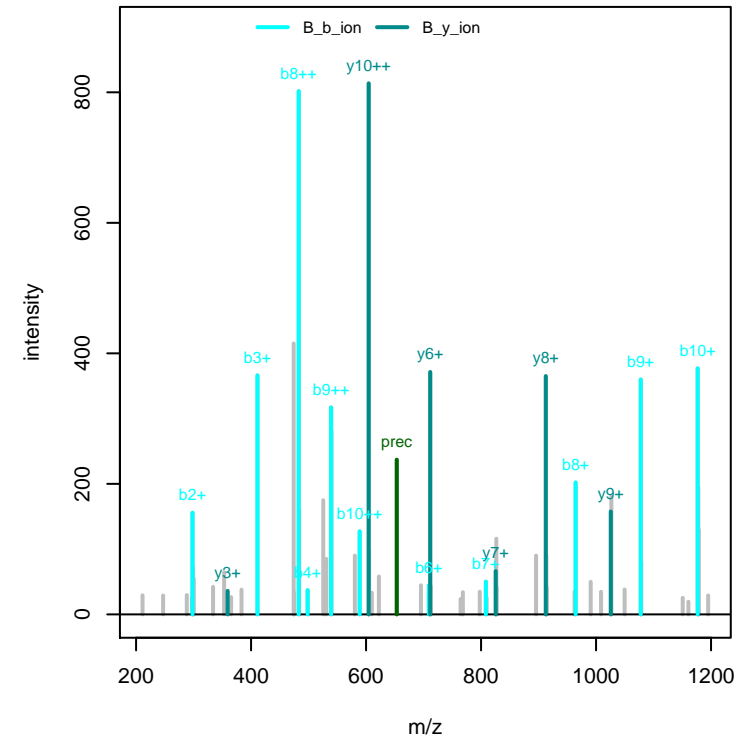

DKLSNPVRLVK+XL\_L

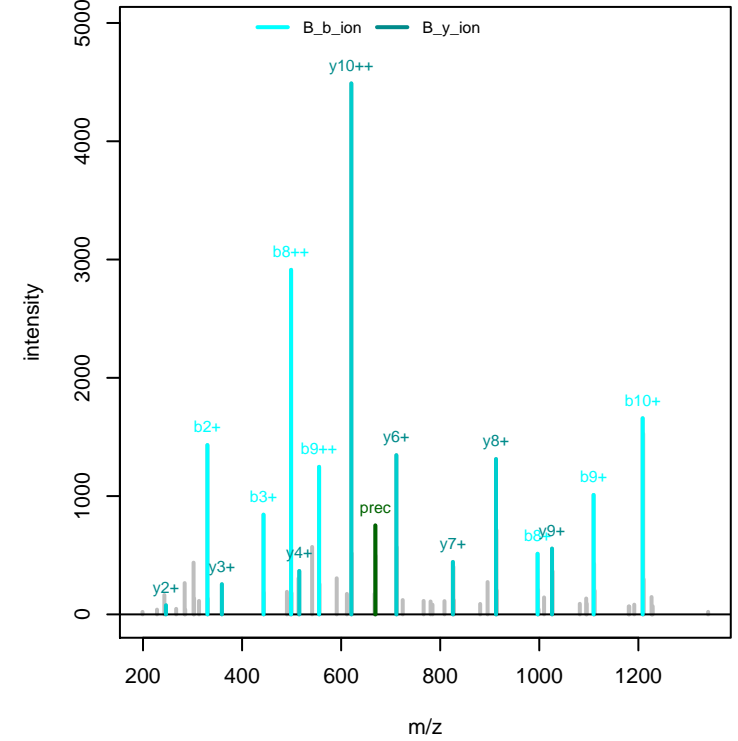

YAEGYPGKR  
NSVPNDPKSPFVTSGIR

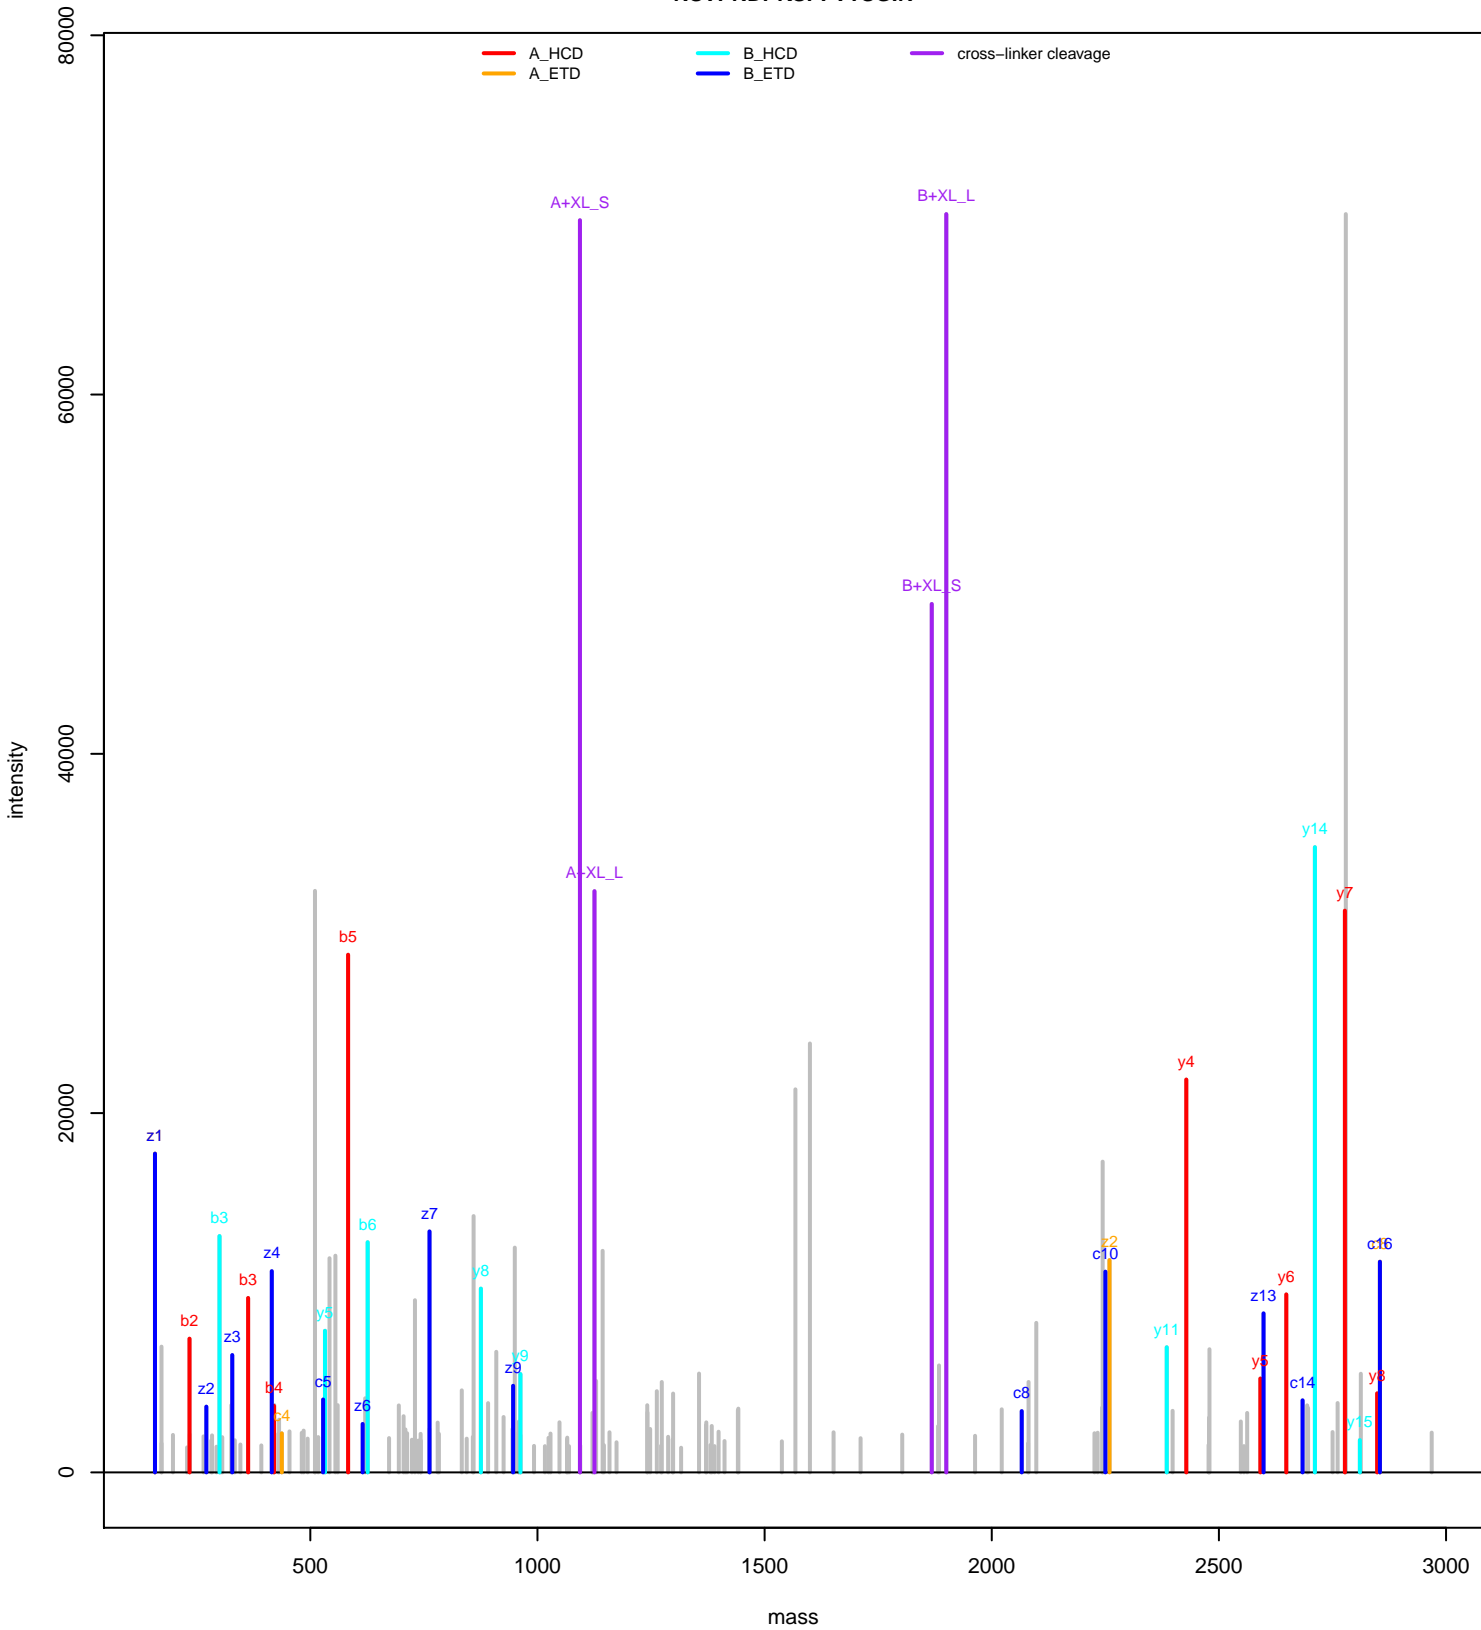

YAEGYPGKR+XL\_S

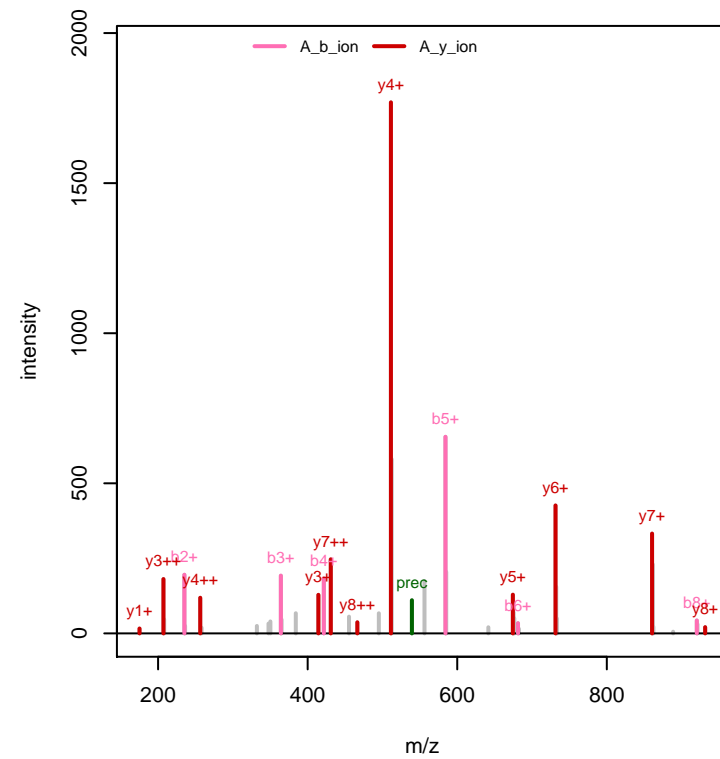

YAEGYPGKR+XL\_L

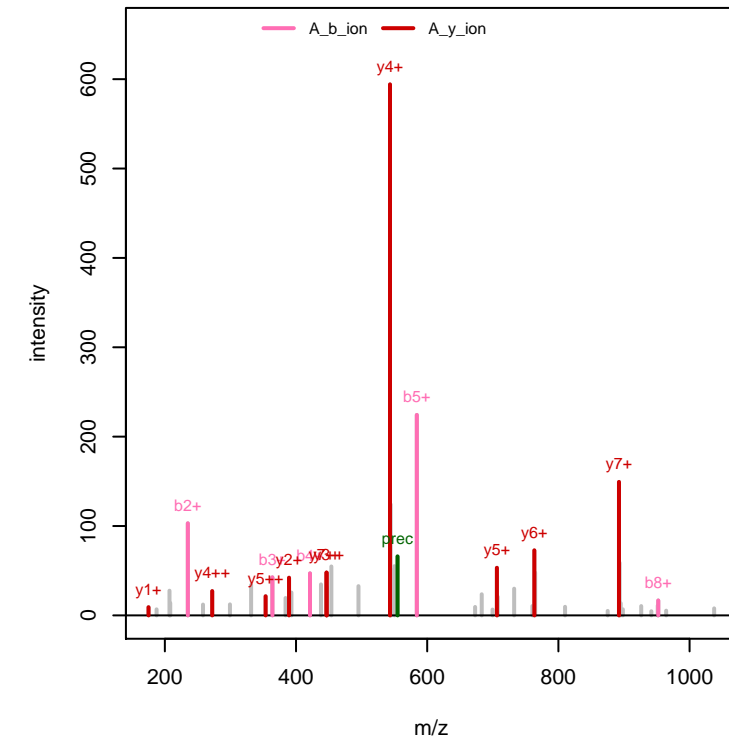

NSVPNDPKSPFVTSGIR+XL\_S

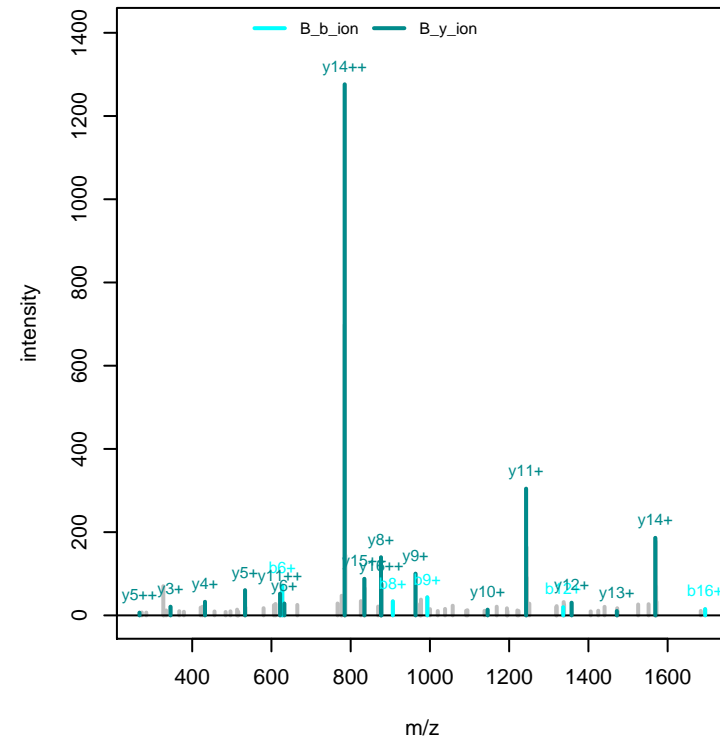

NSVPNDPKSPFVTSGIR+XL\_L

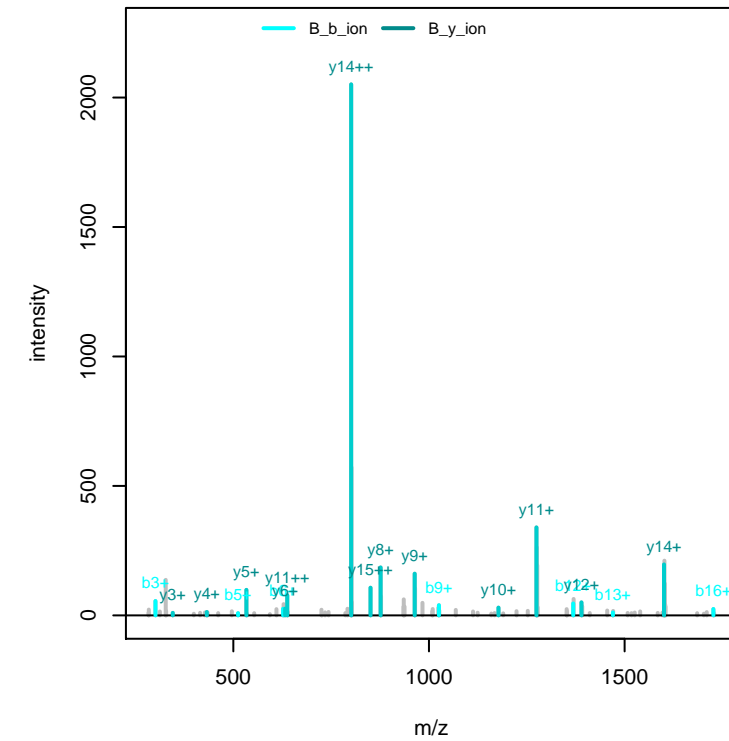

VYVEKGR  
DNKLQMELVPER

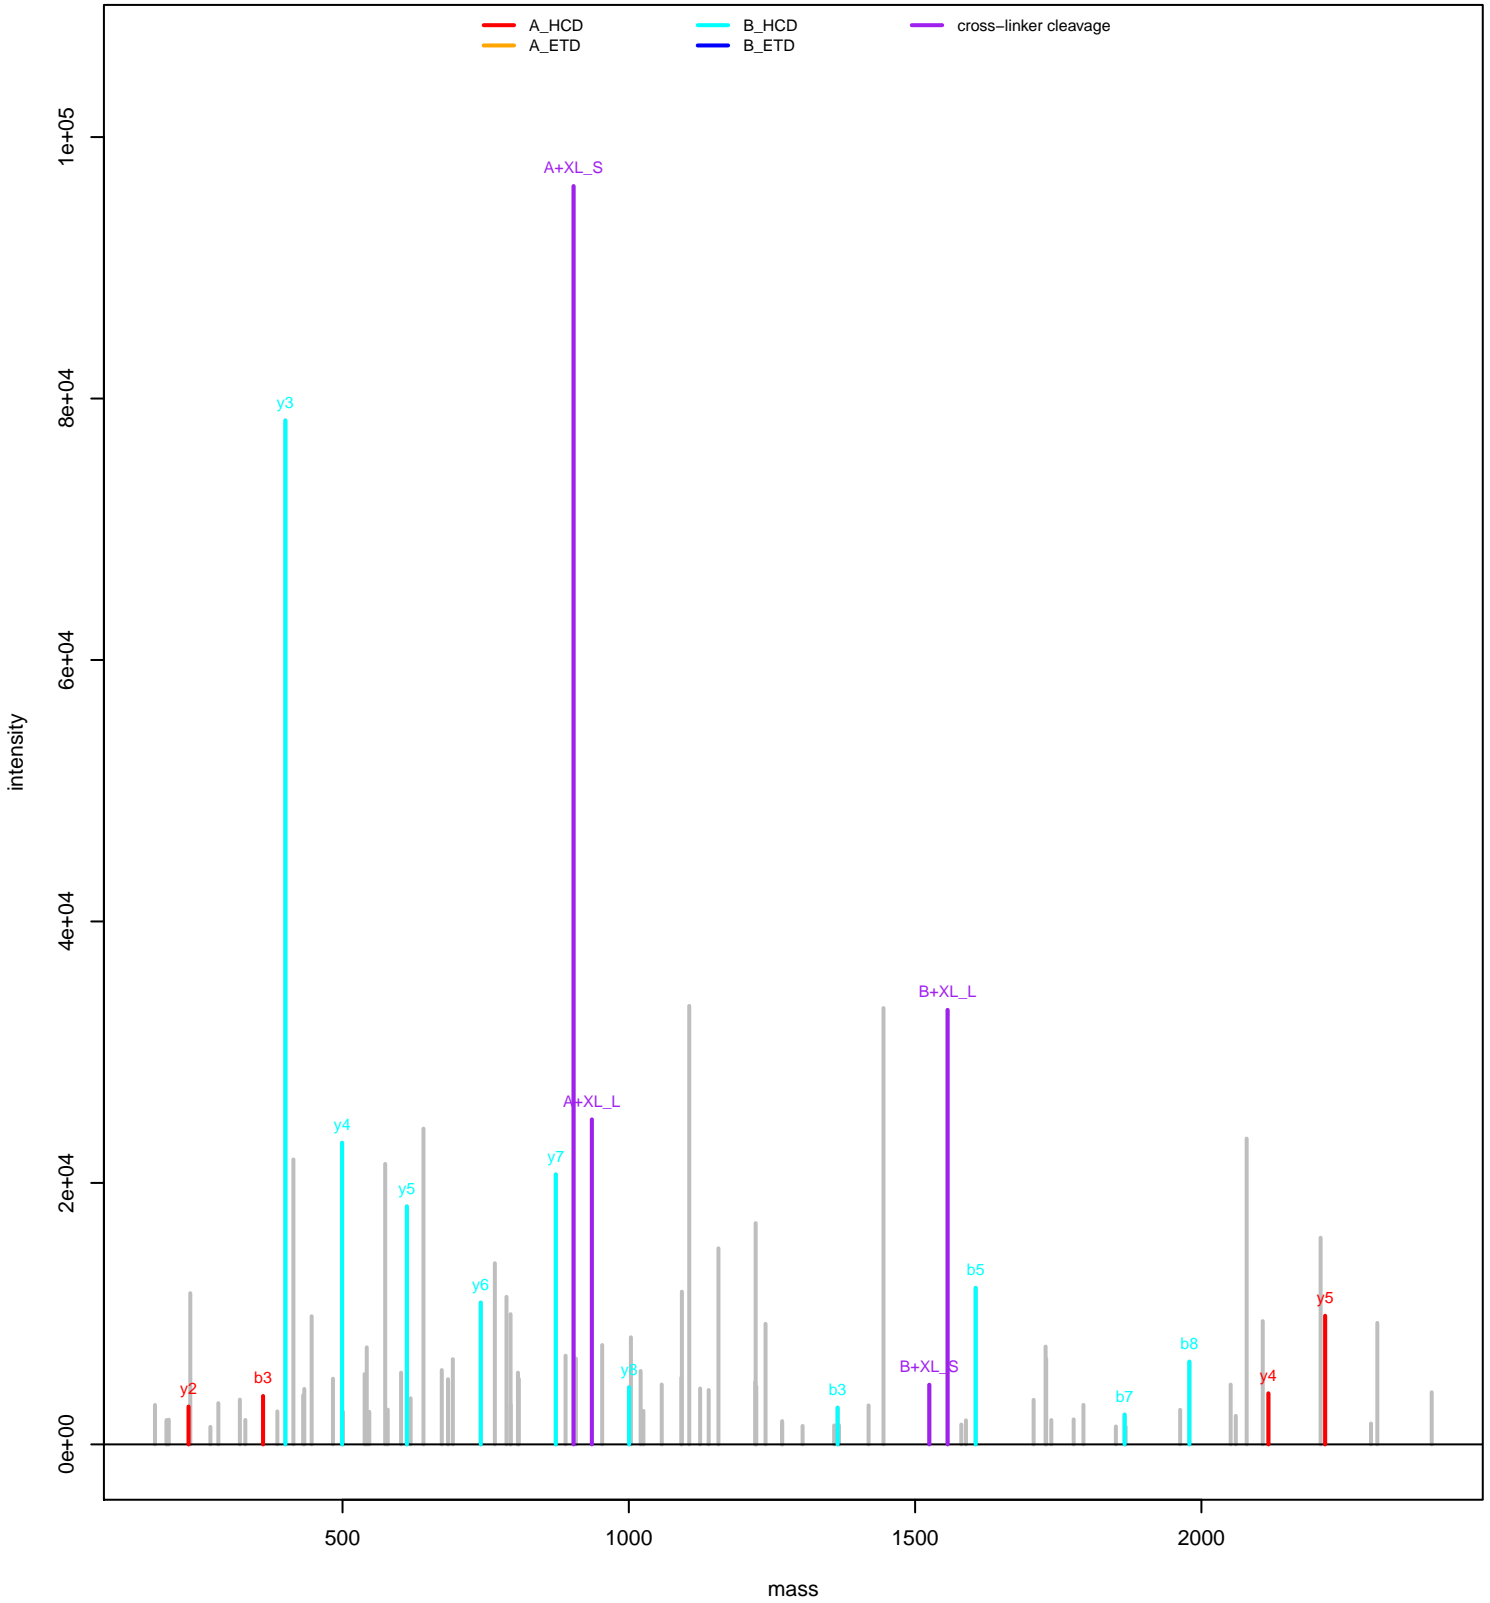

VYVEKGR+XL\_S

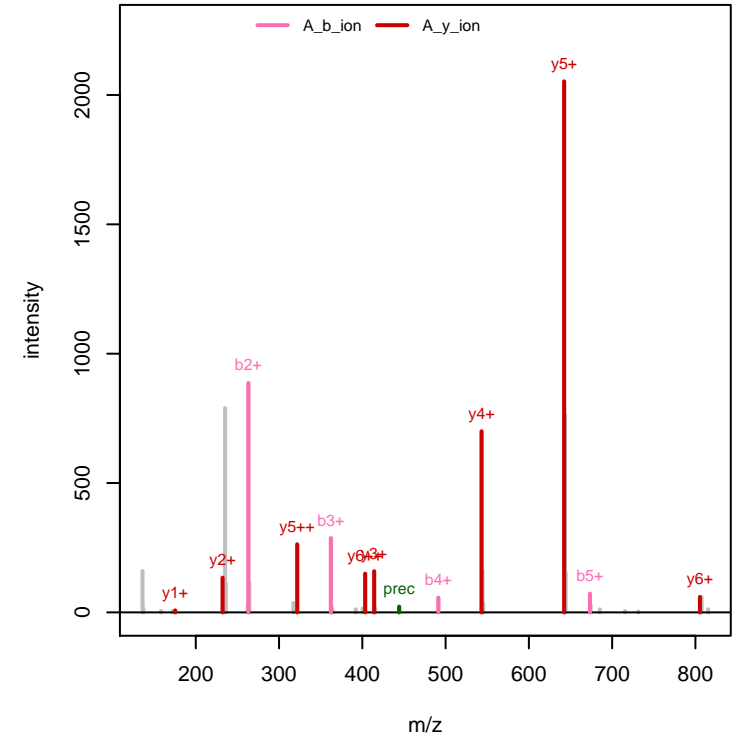

VYVEKGR+XL\_L

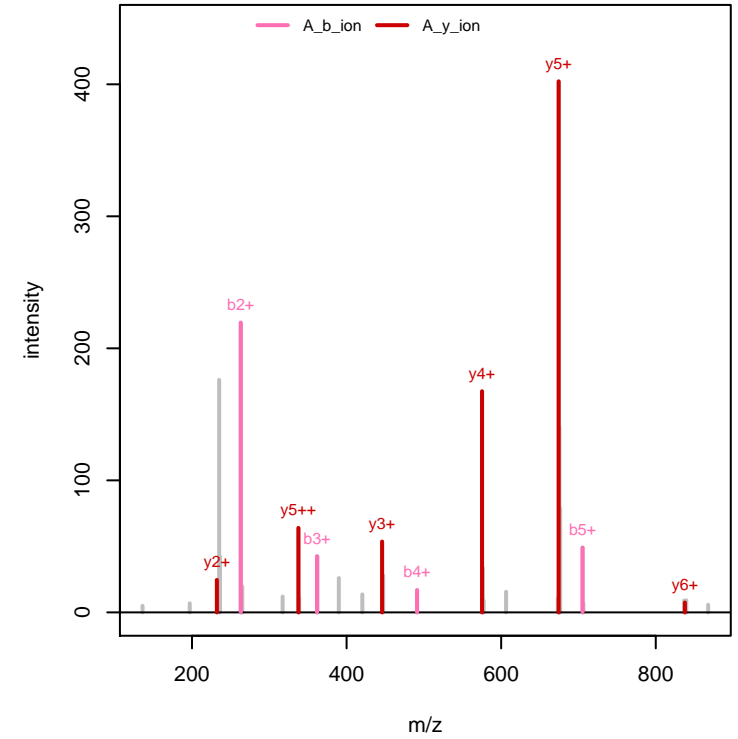

DNKLQMELVPER+XL\_S

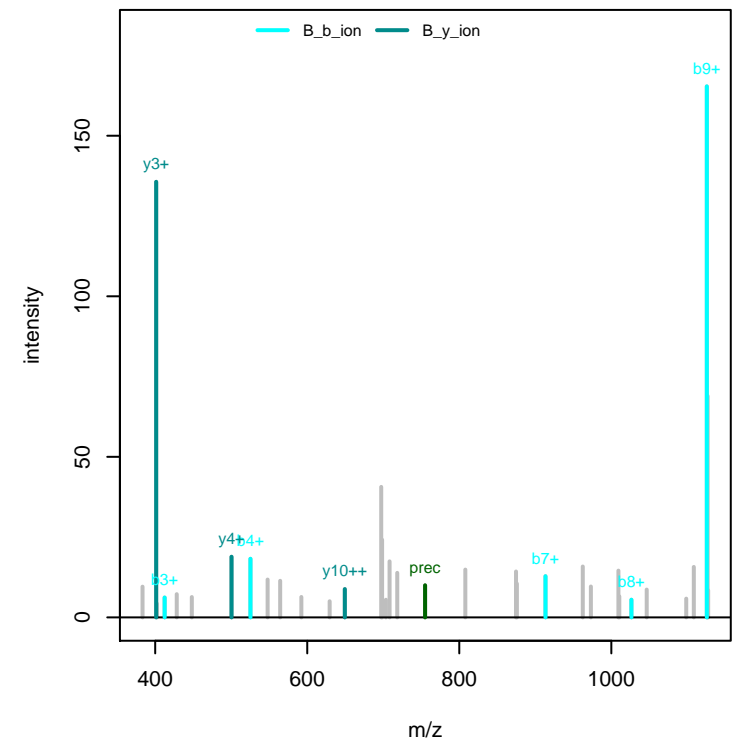

DNKLQMELVPER+XL\_L

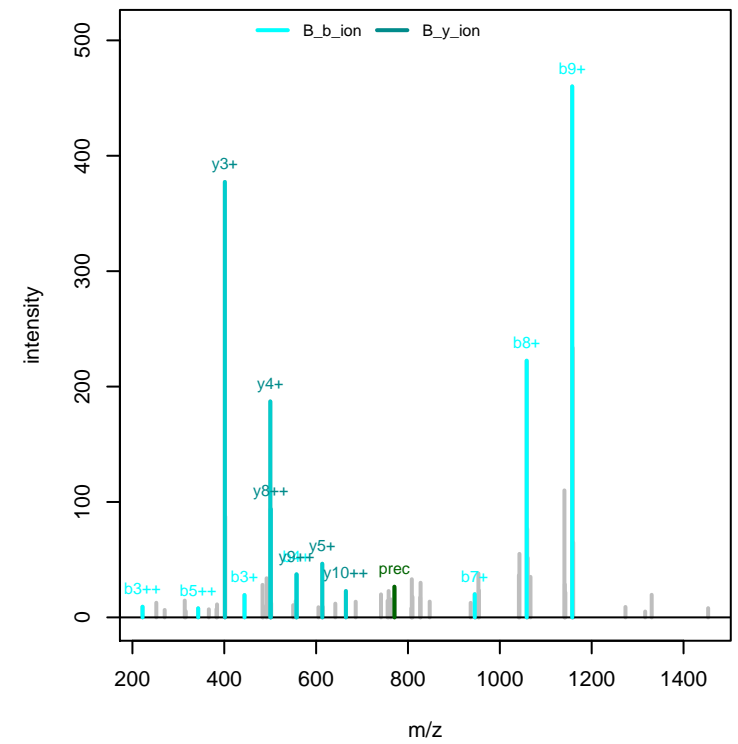

AAAVANQGKAK  
FTGWYDVDLSEKGVSEAK

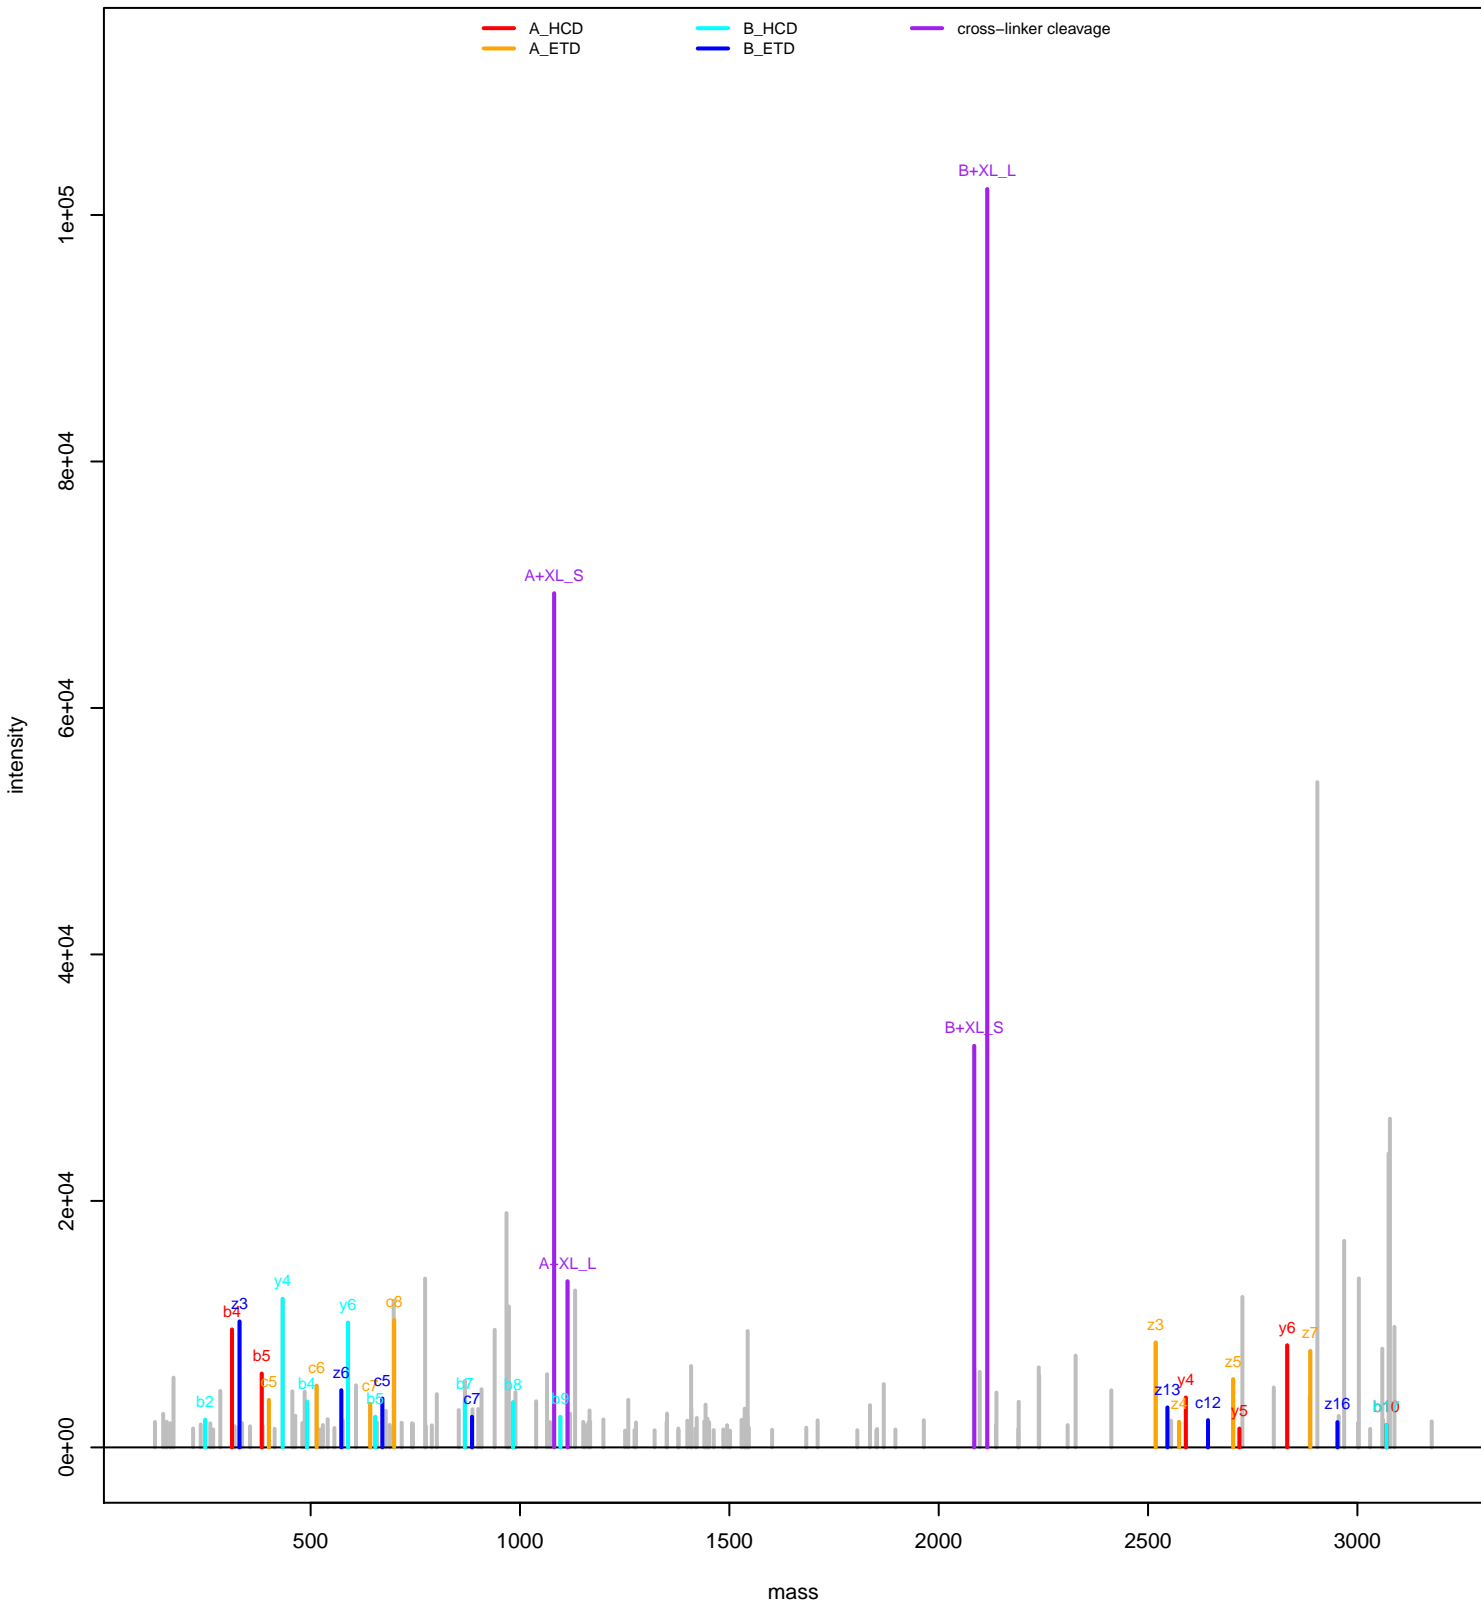

AAAVANQGKAK+XL\_S

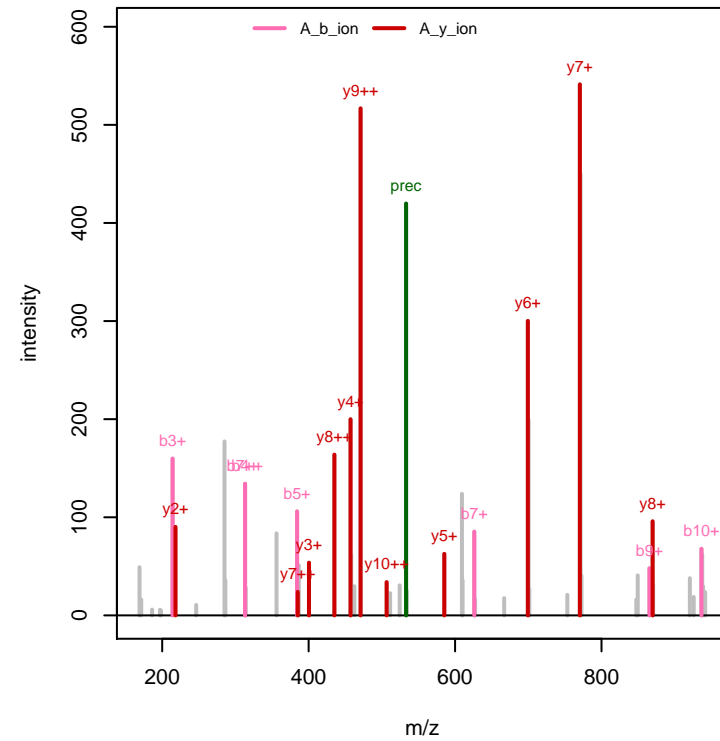

AAHAVANQGKAK+XL\_L

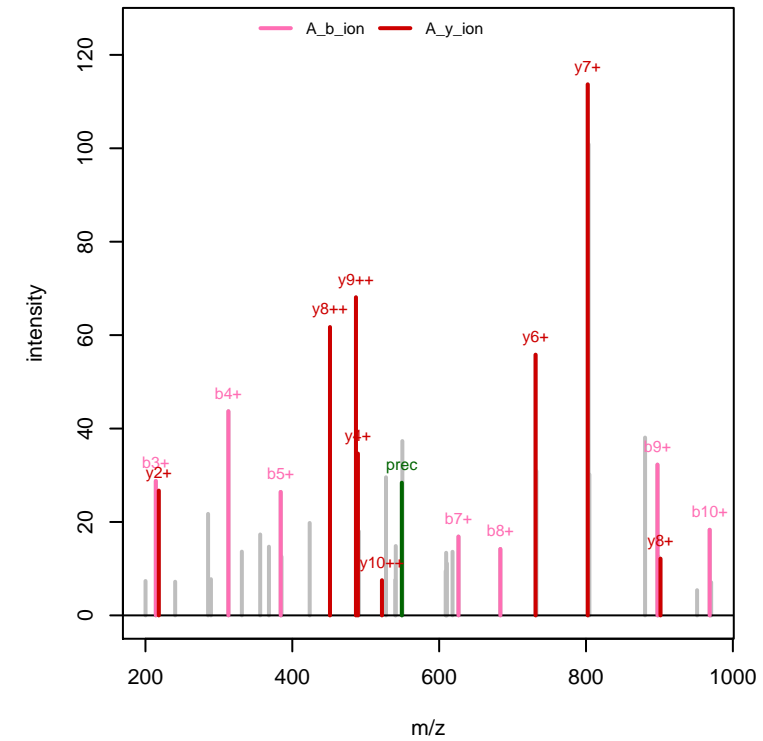

FTGWYDVDLSEKGVSEAK+XL\_S

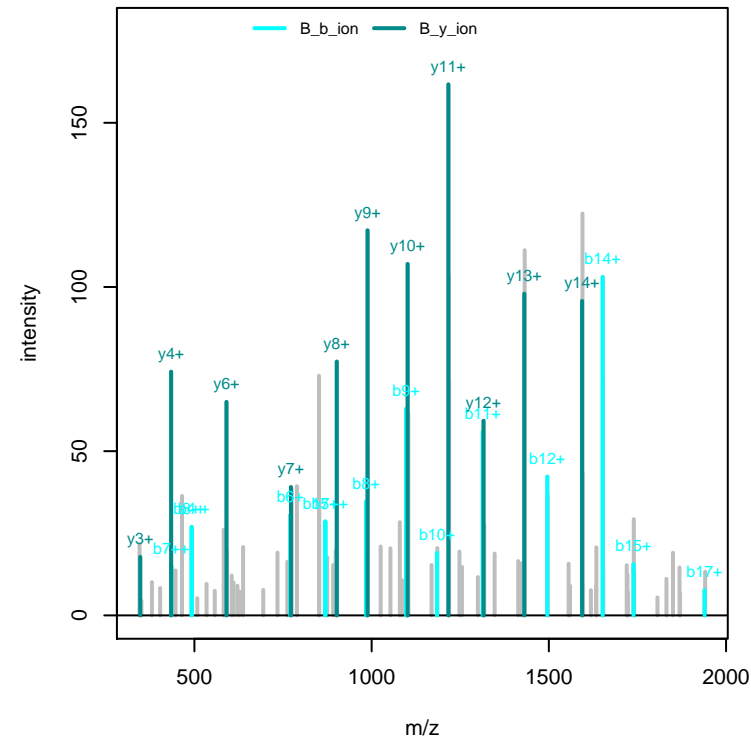

FTGWYDVDLSEKGVSEAK+XL\_L

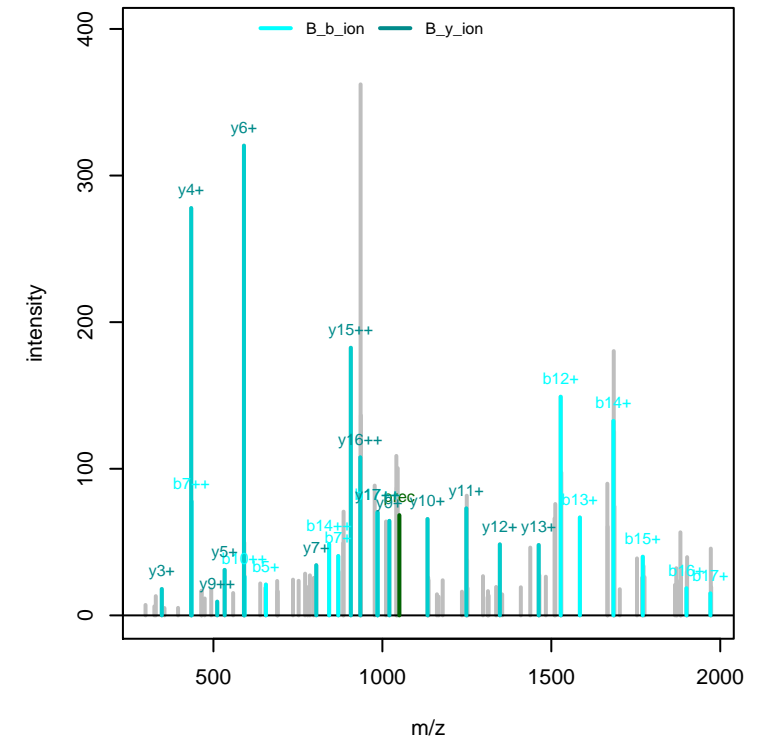

DFKSDIKR  
QLYTGYEKR

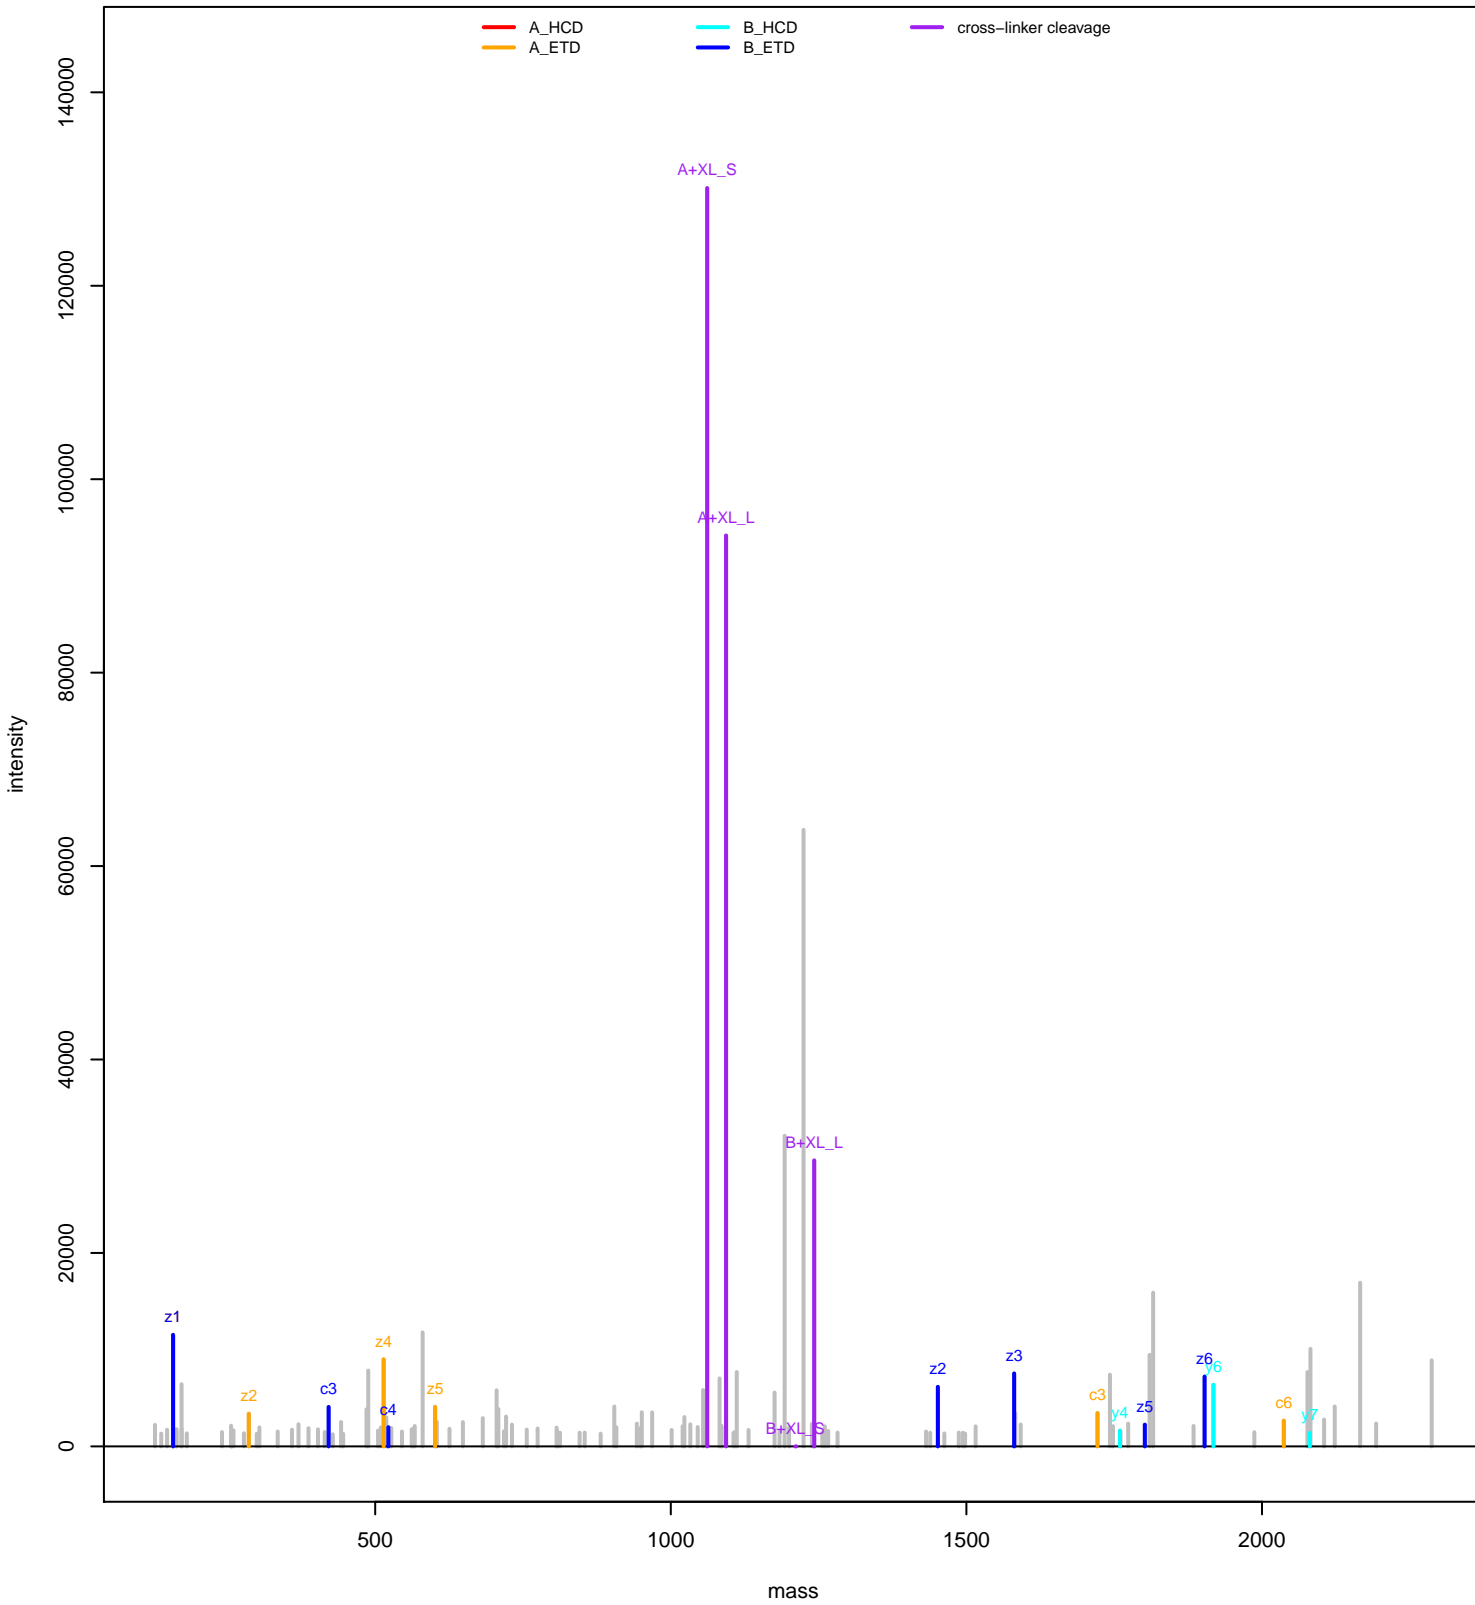

DFKSDIKR+XL\_S

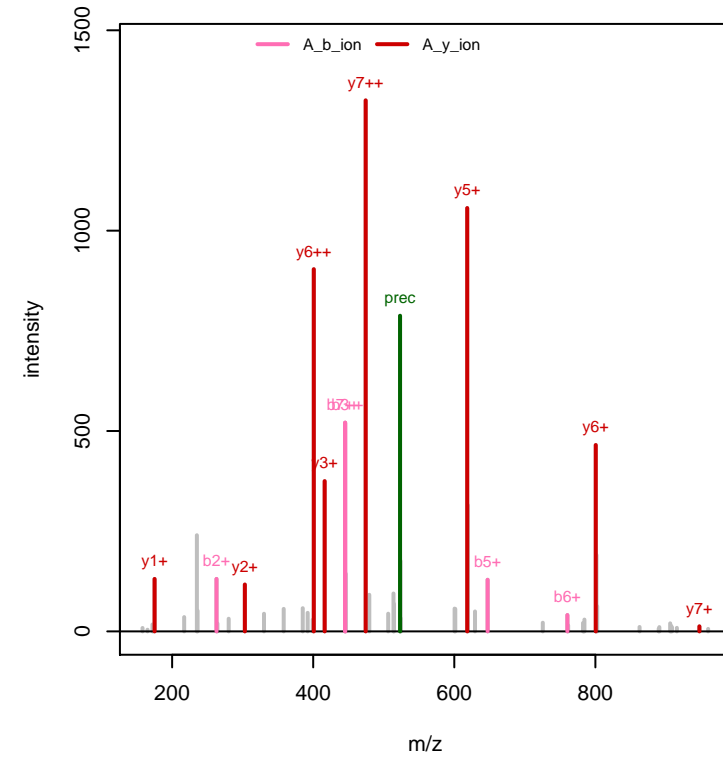

DFKSDIKR+XL\_L

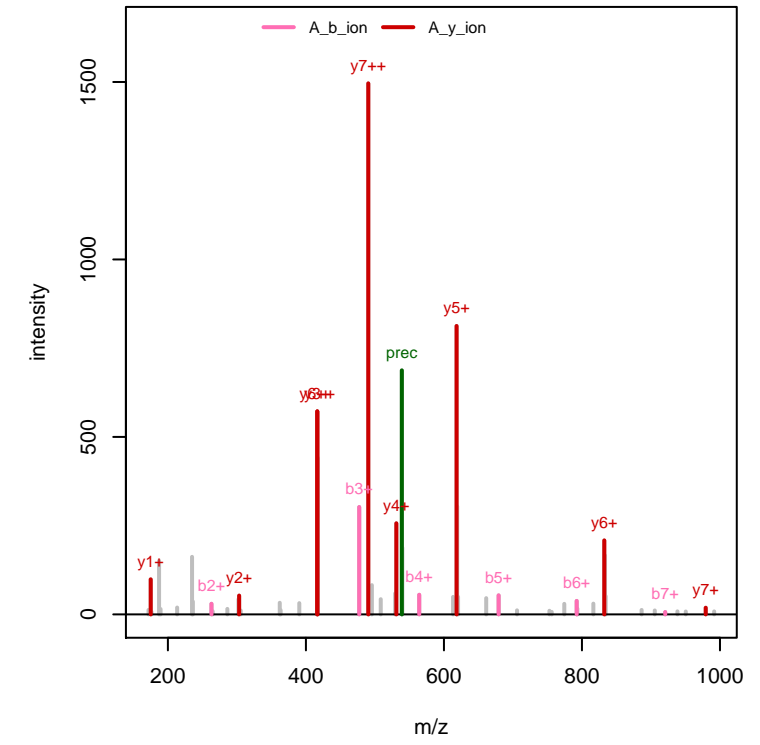

QLYTGYEKR+XL\_S

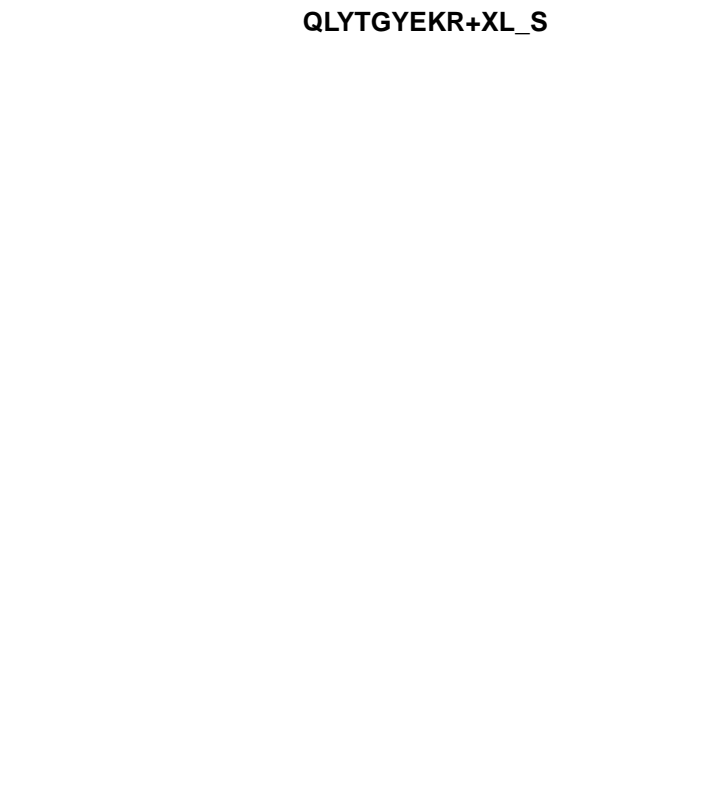

QLYTGYEKR+XL\_L

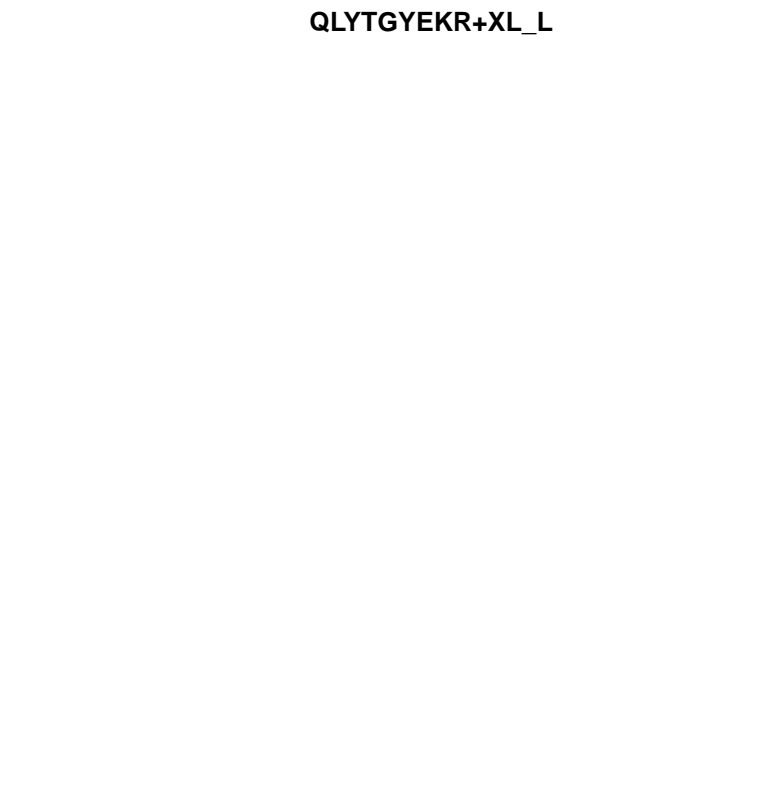



STAKLVK  
SKATNLLYTRNDVSDSEKK

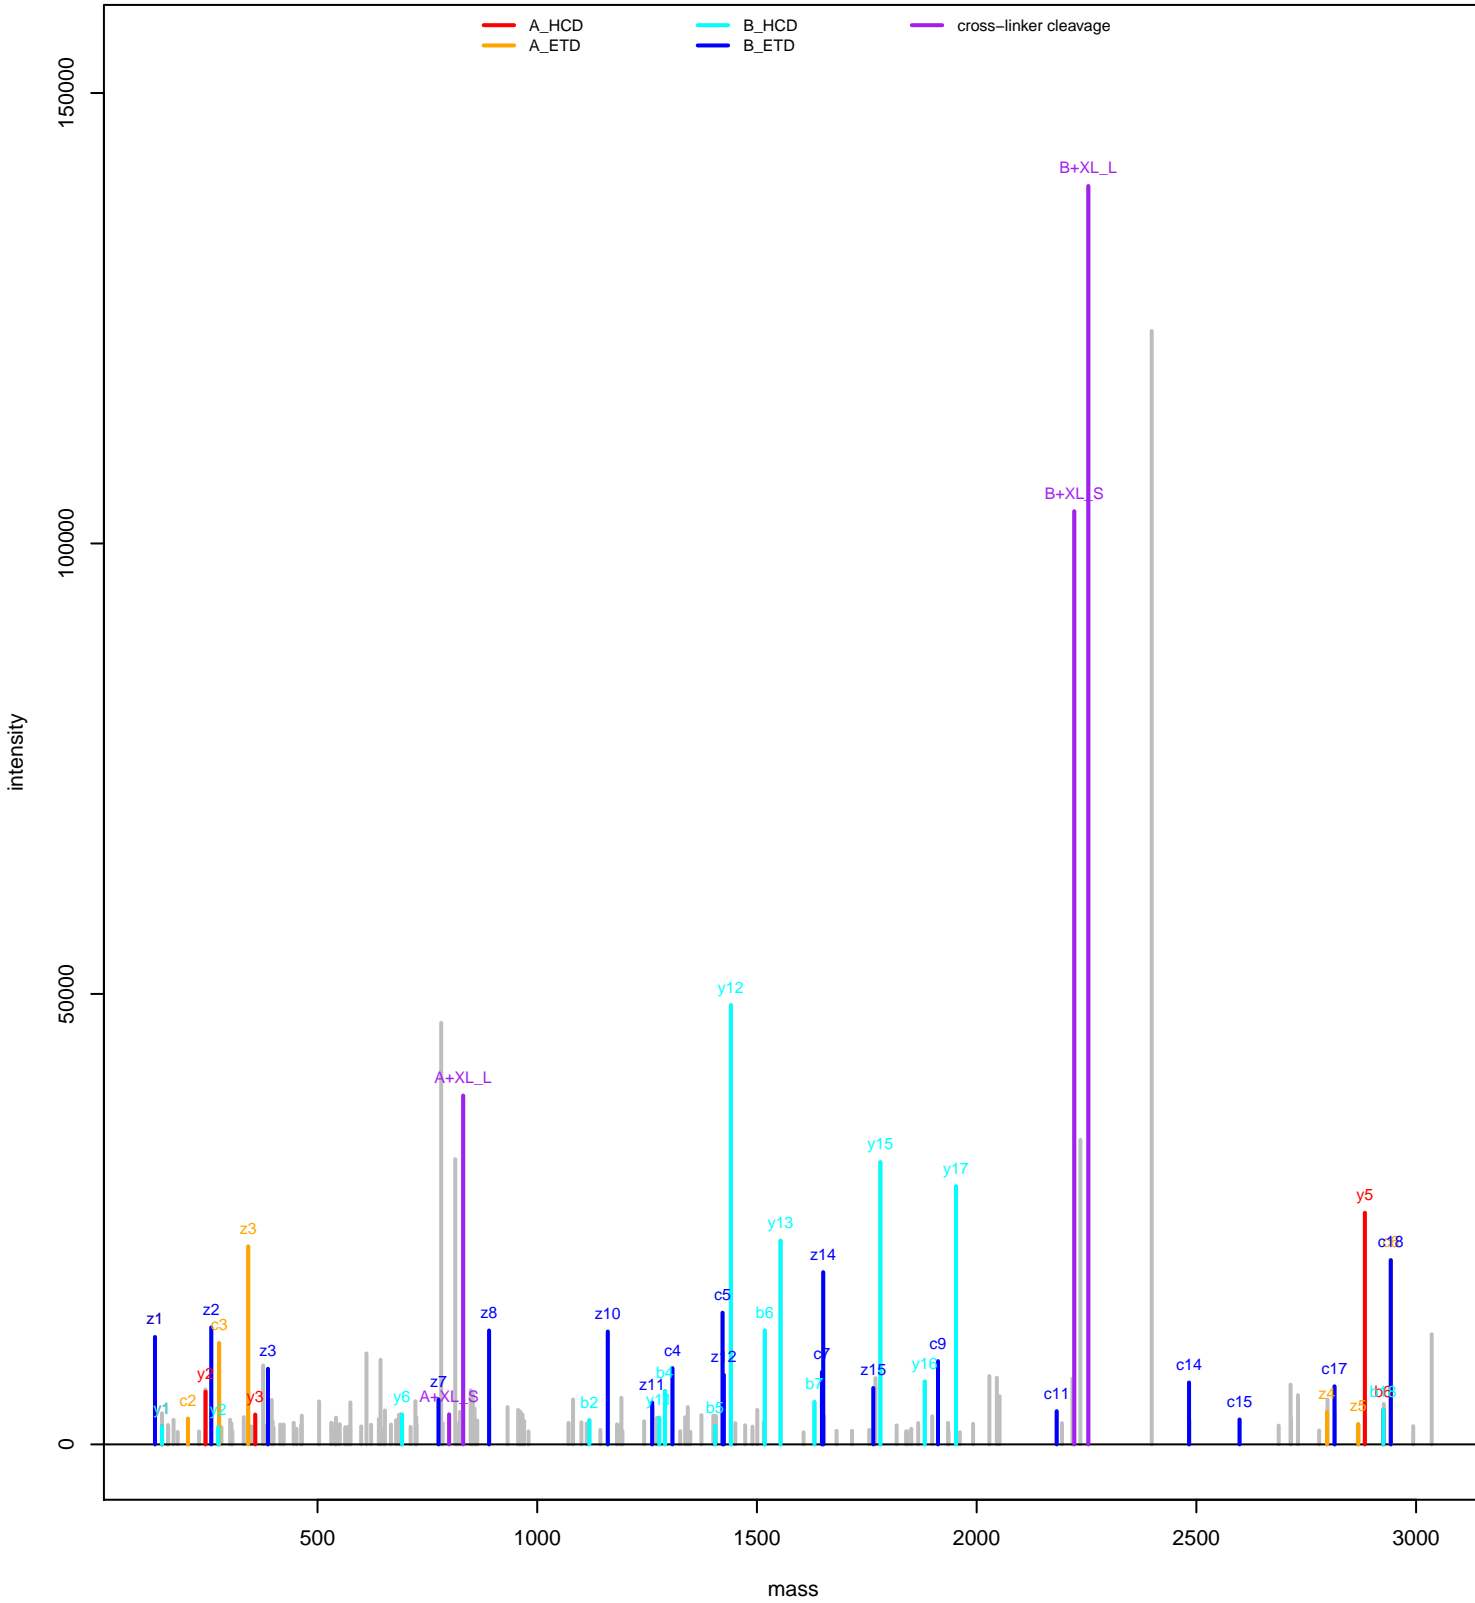

STAKLVK+XL\_S

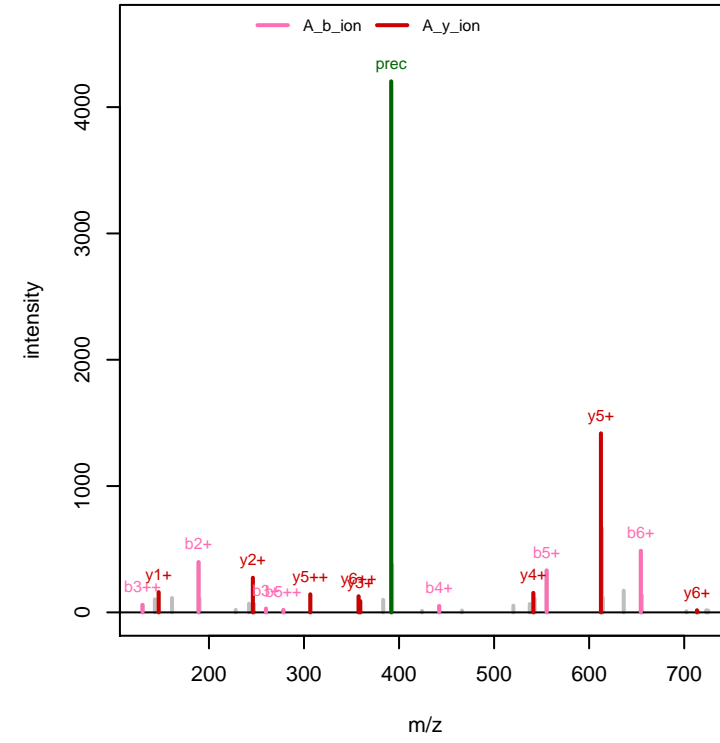

STAKLVK+XL\_L

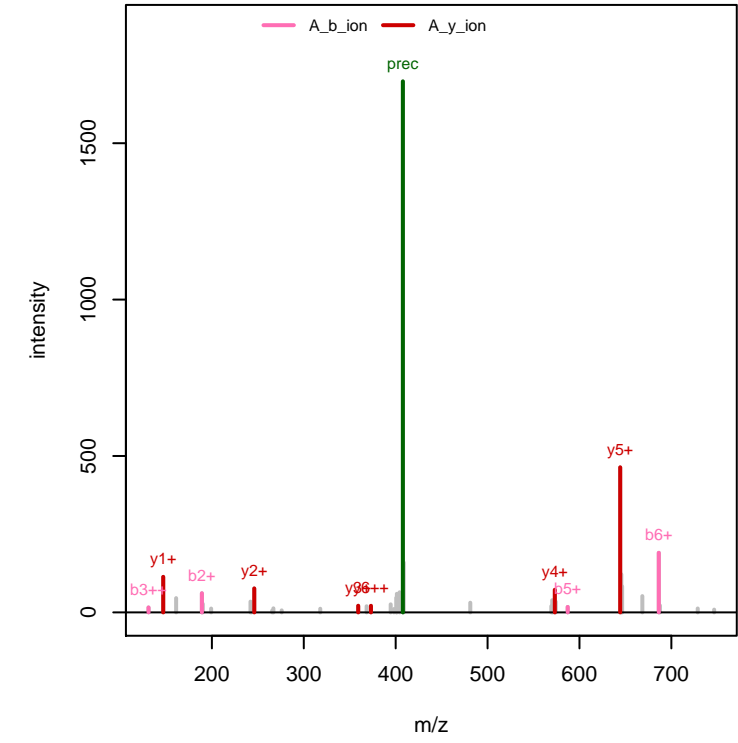

SKATNLLYTRNDVSDSEKK+XL\_S

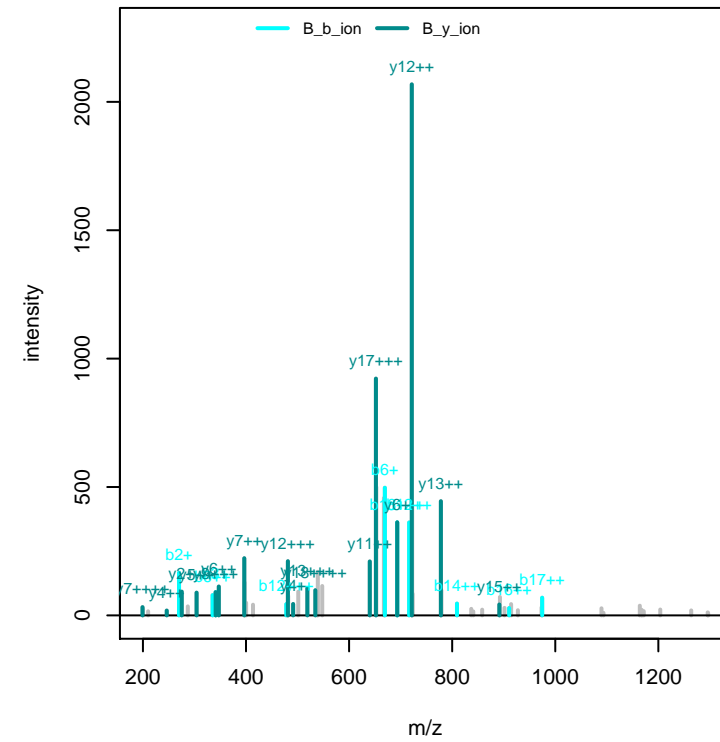

SKATNLLYTRNDVSDSEKK+XL\_L

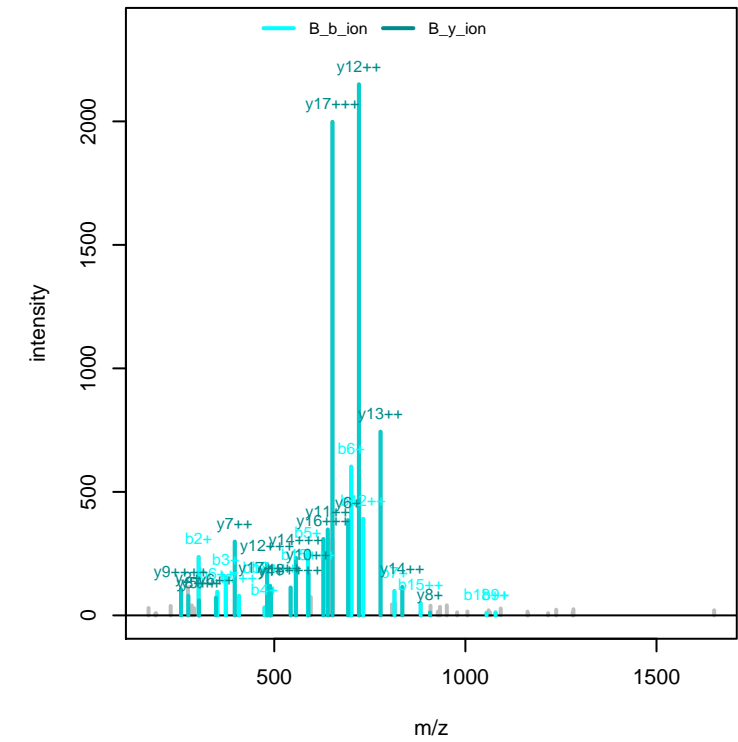

**KGAIVT GK**  
**QEDANFSNNAMAEAFKAAK**

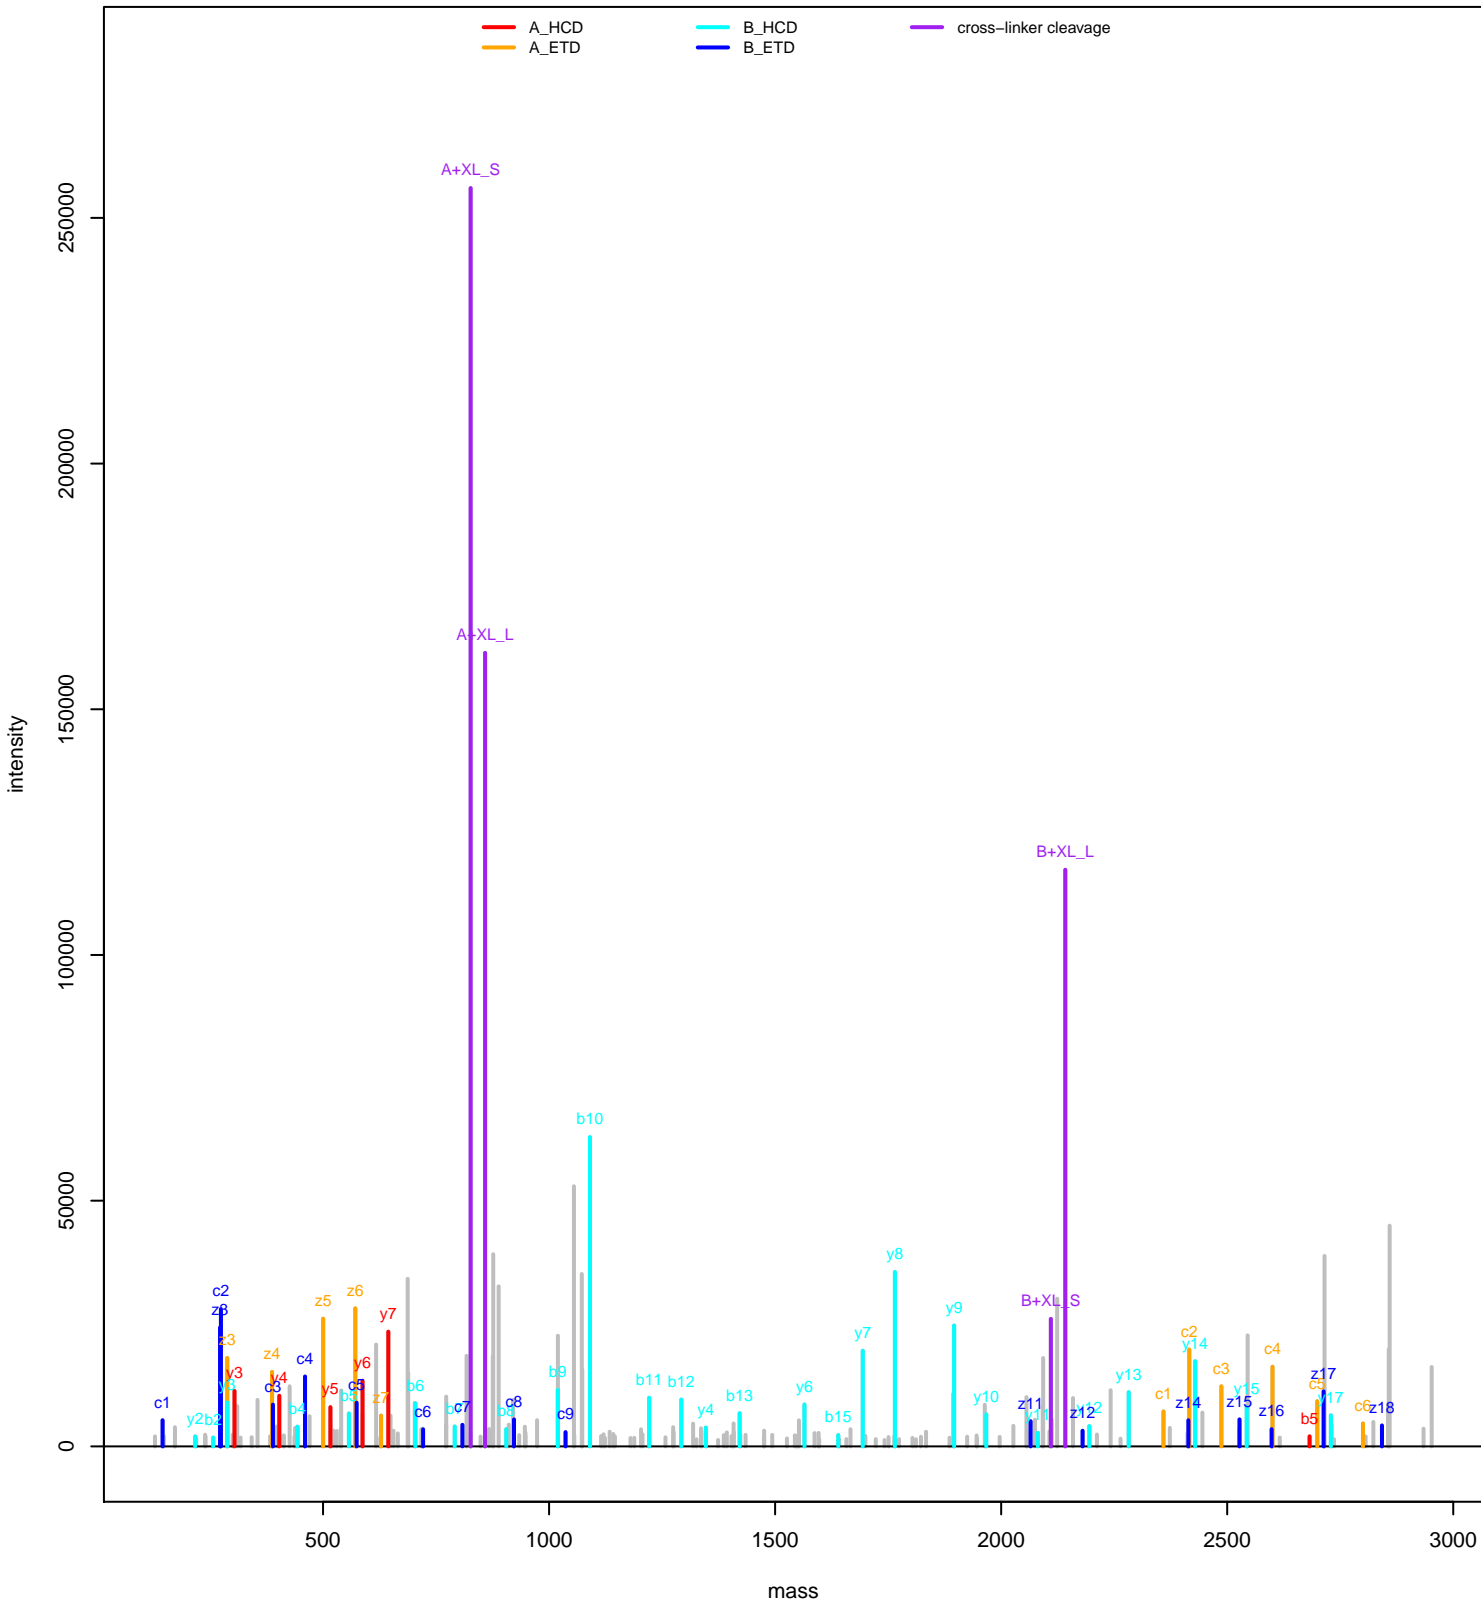

**KGAIVT GK+XL\_S**

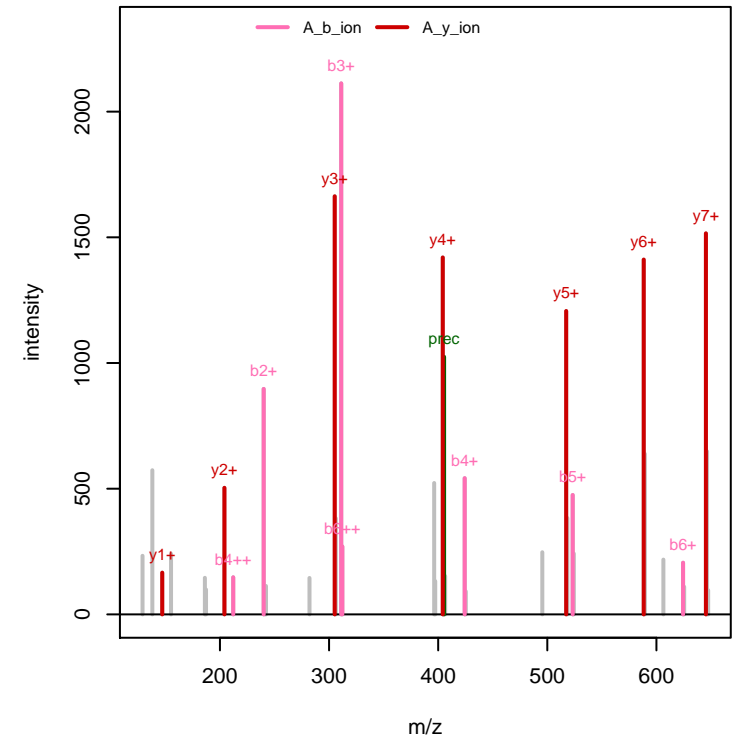

**KGAIVT GK+XL\_L**

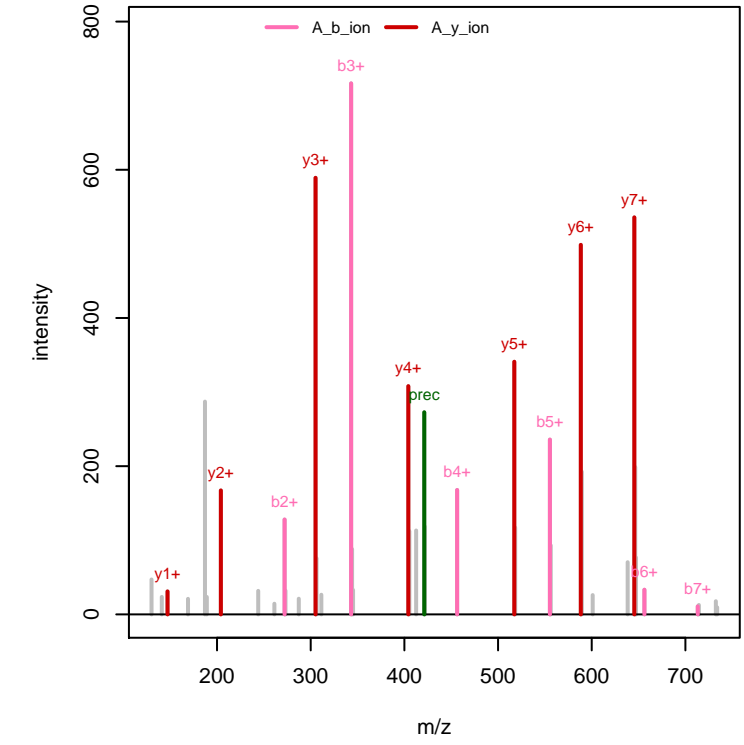

**QEDANFSNNAMAEAFKAAK+XL\_S**

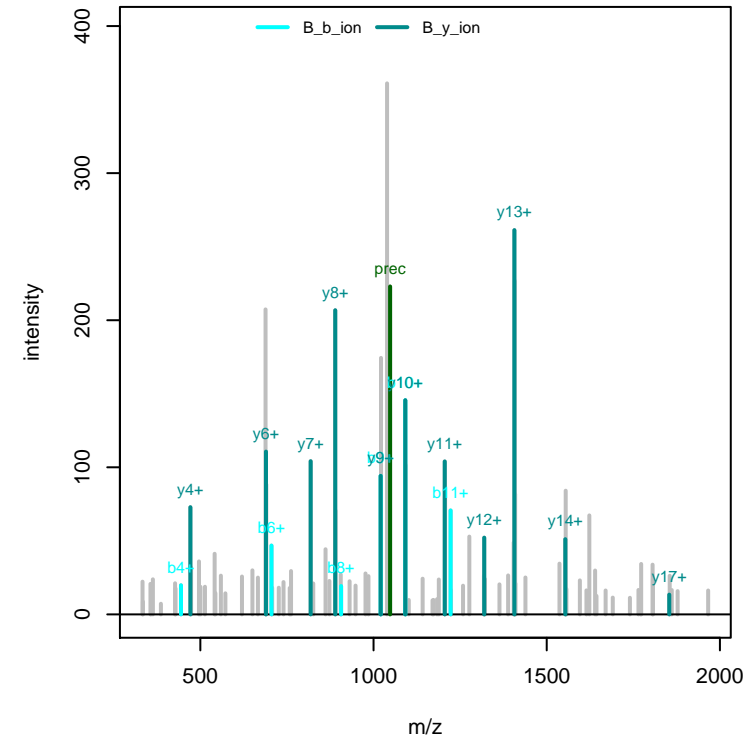

**QEDANFSNNAMAEAFKAAK+XL\_L**

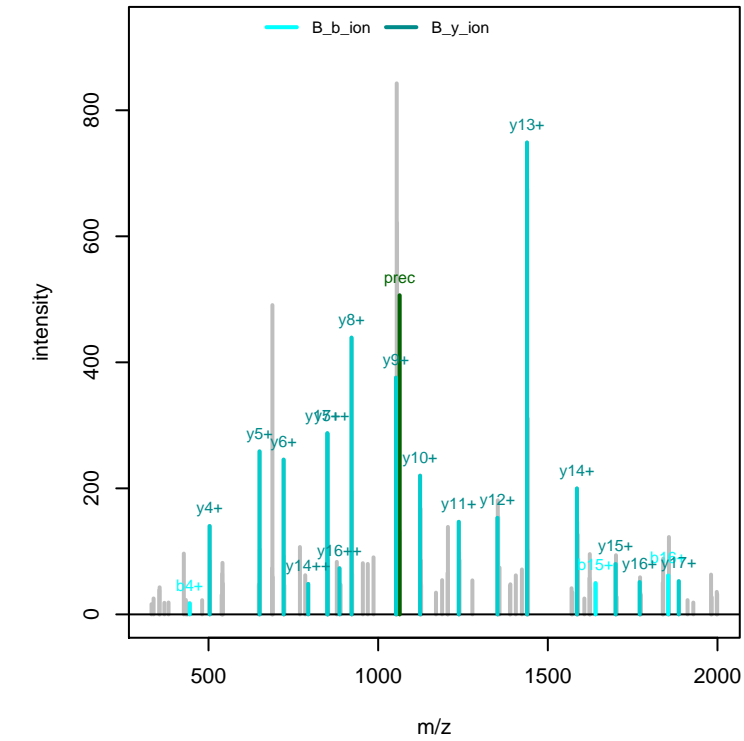

### DKDALTR ILGILASKSR

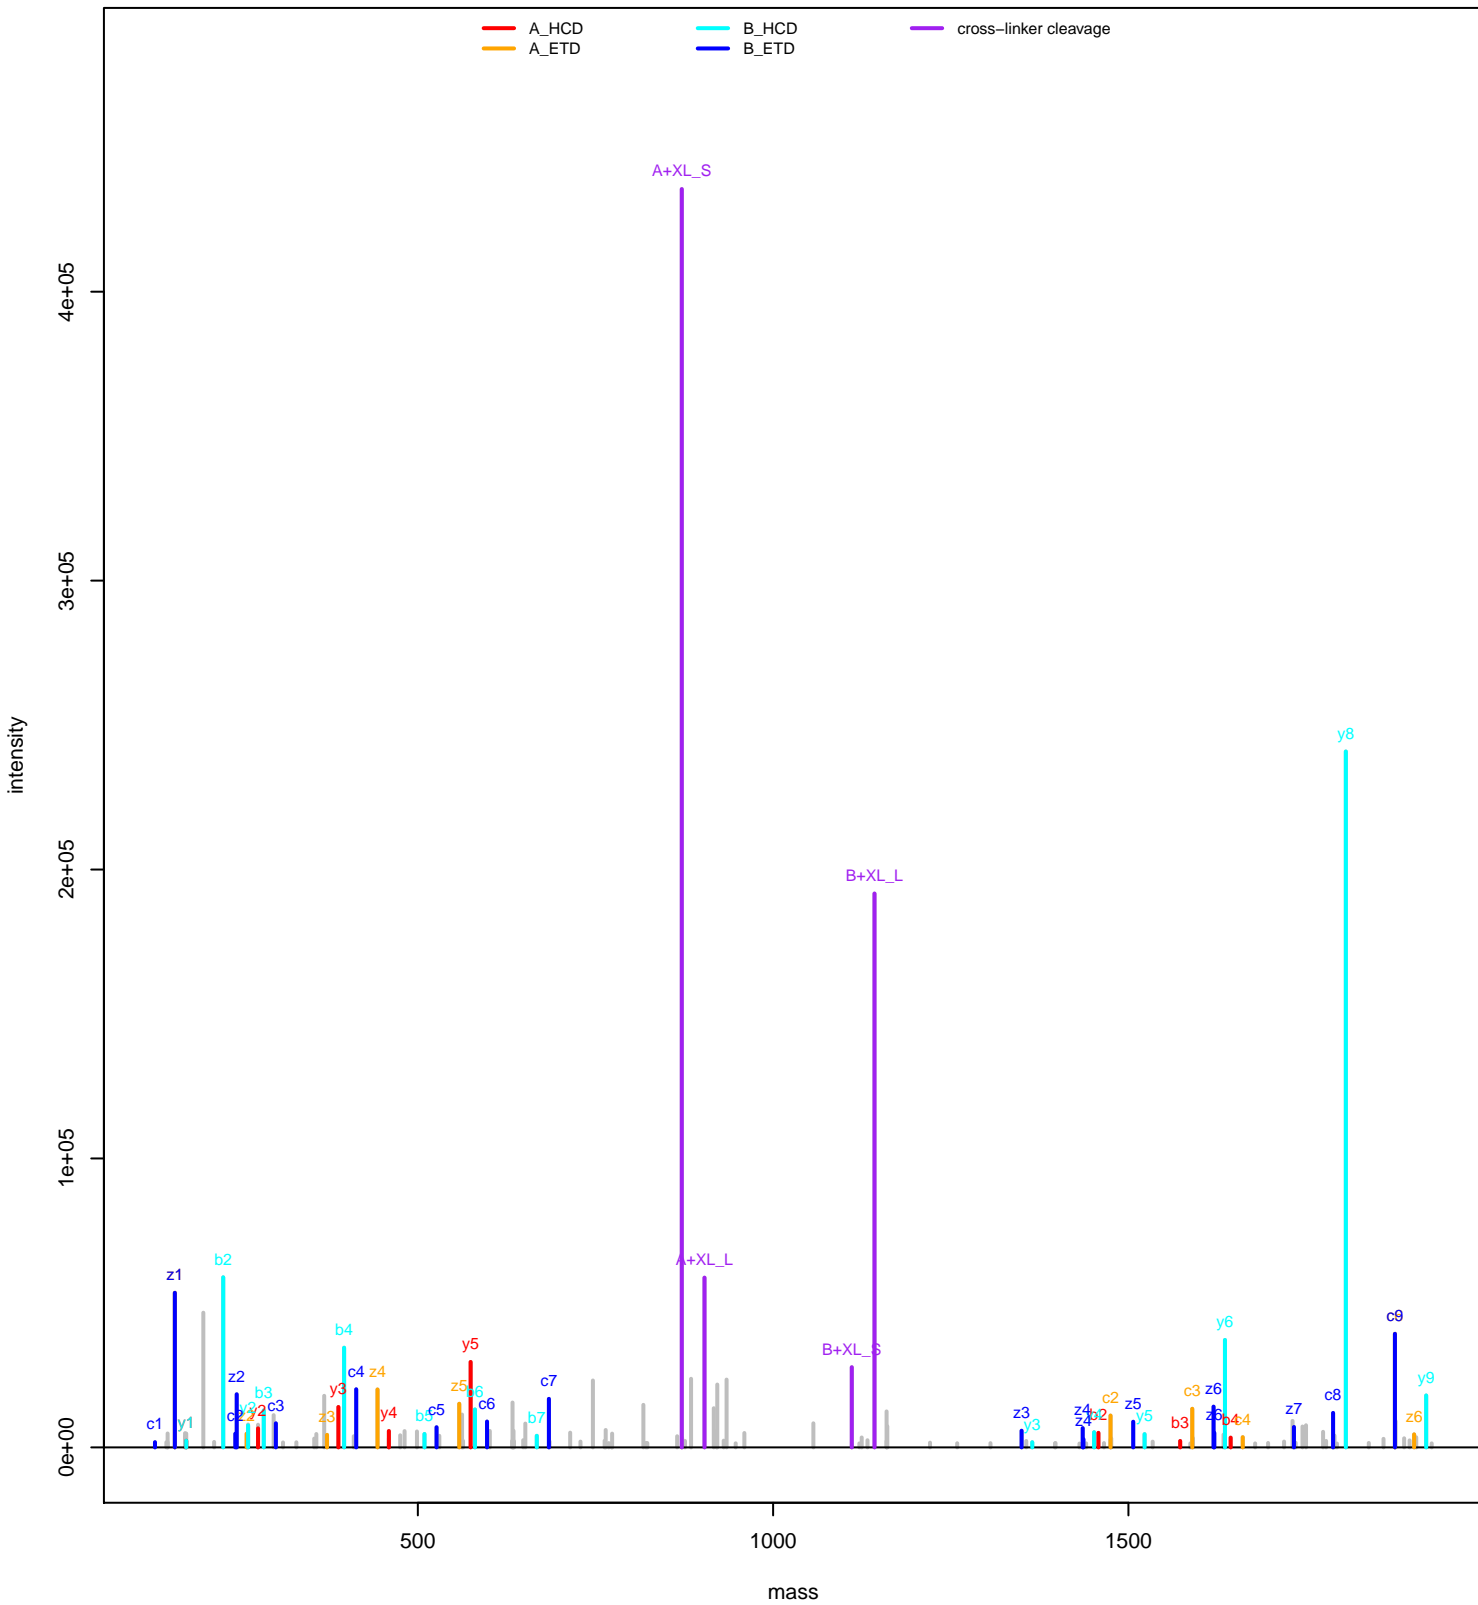

### DKDALTR+XL\_S

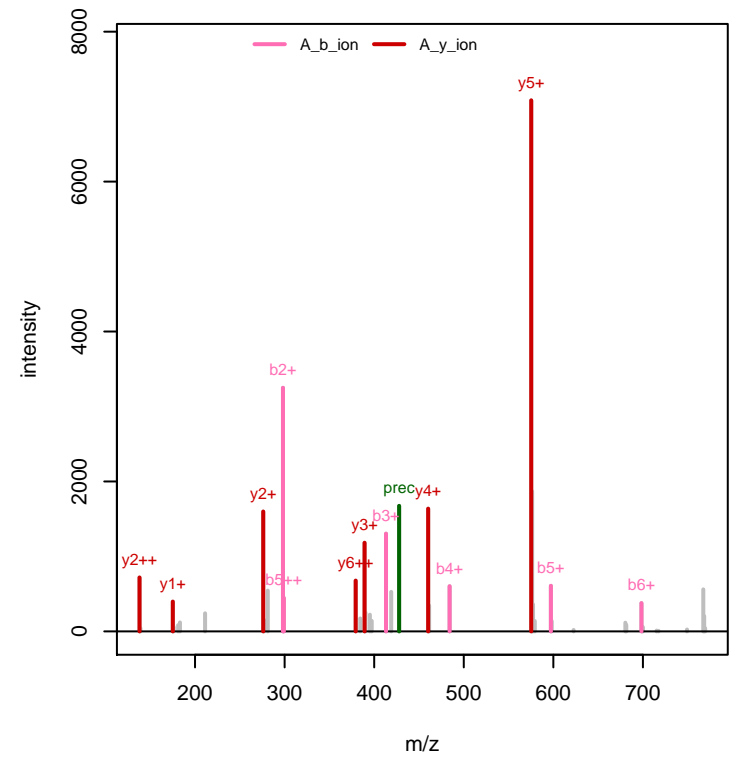

### DKDALTR+XL\_L

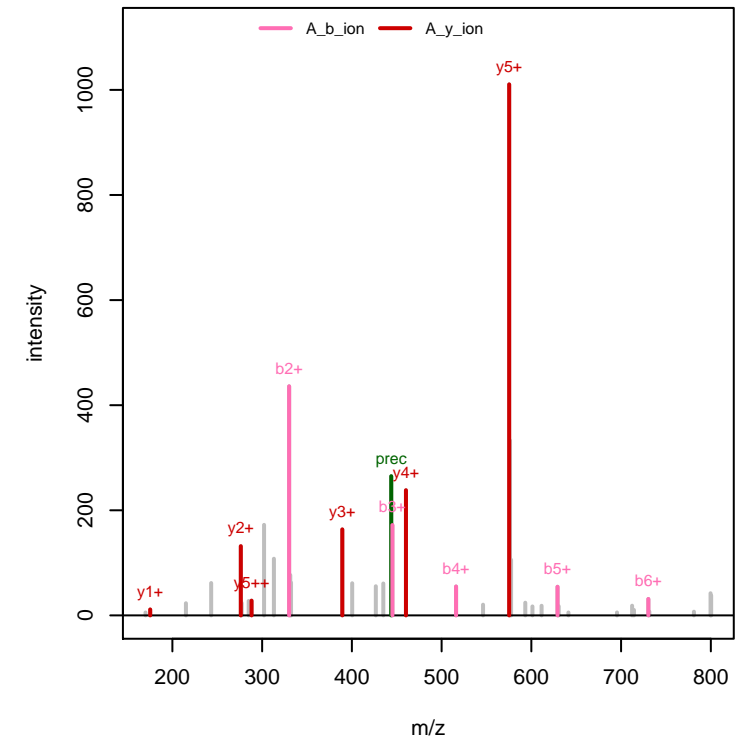

### ILGILASKSR+XL\_S

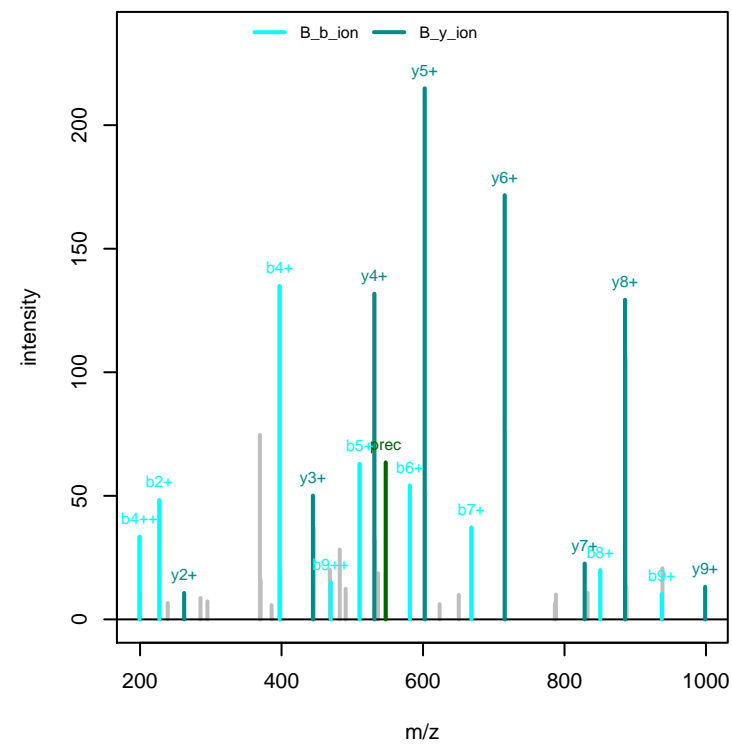

### ILGILASKSR+XL\_L

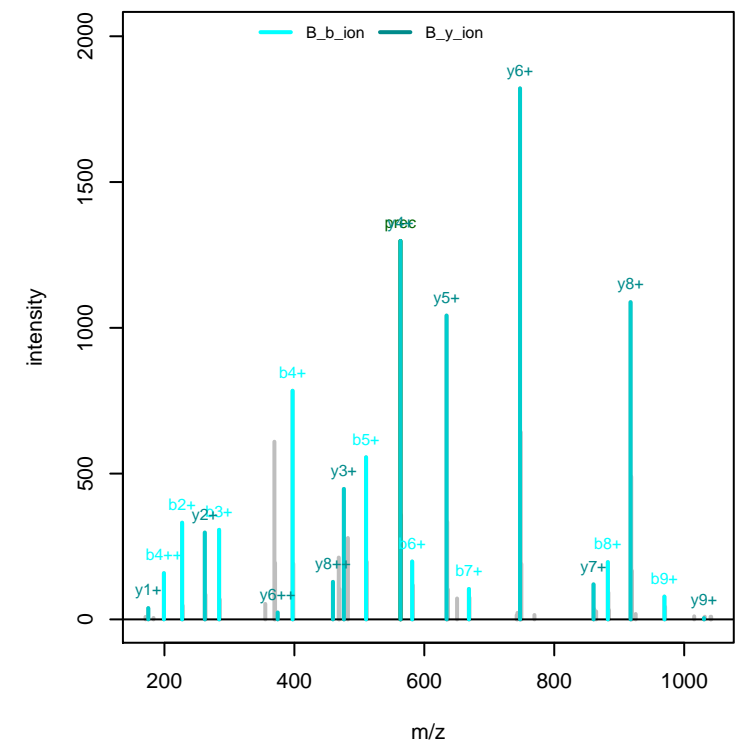

SELVNVAKK  
KGKVPMNIVAQR

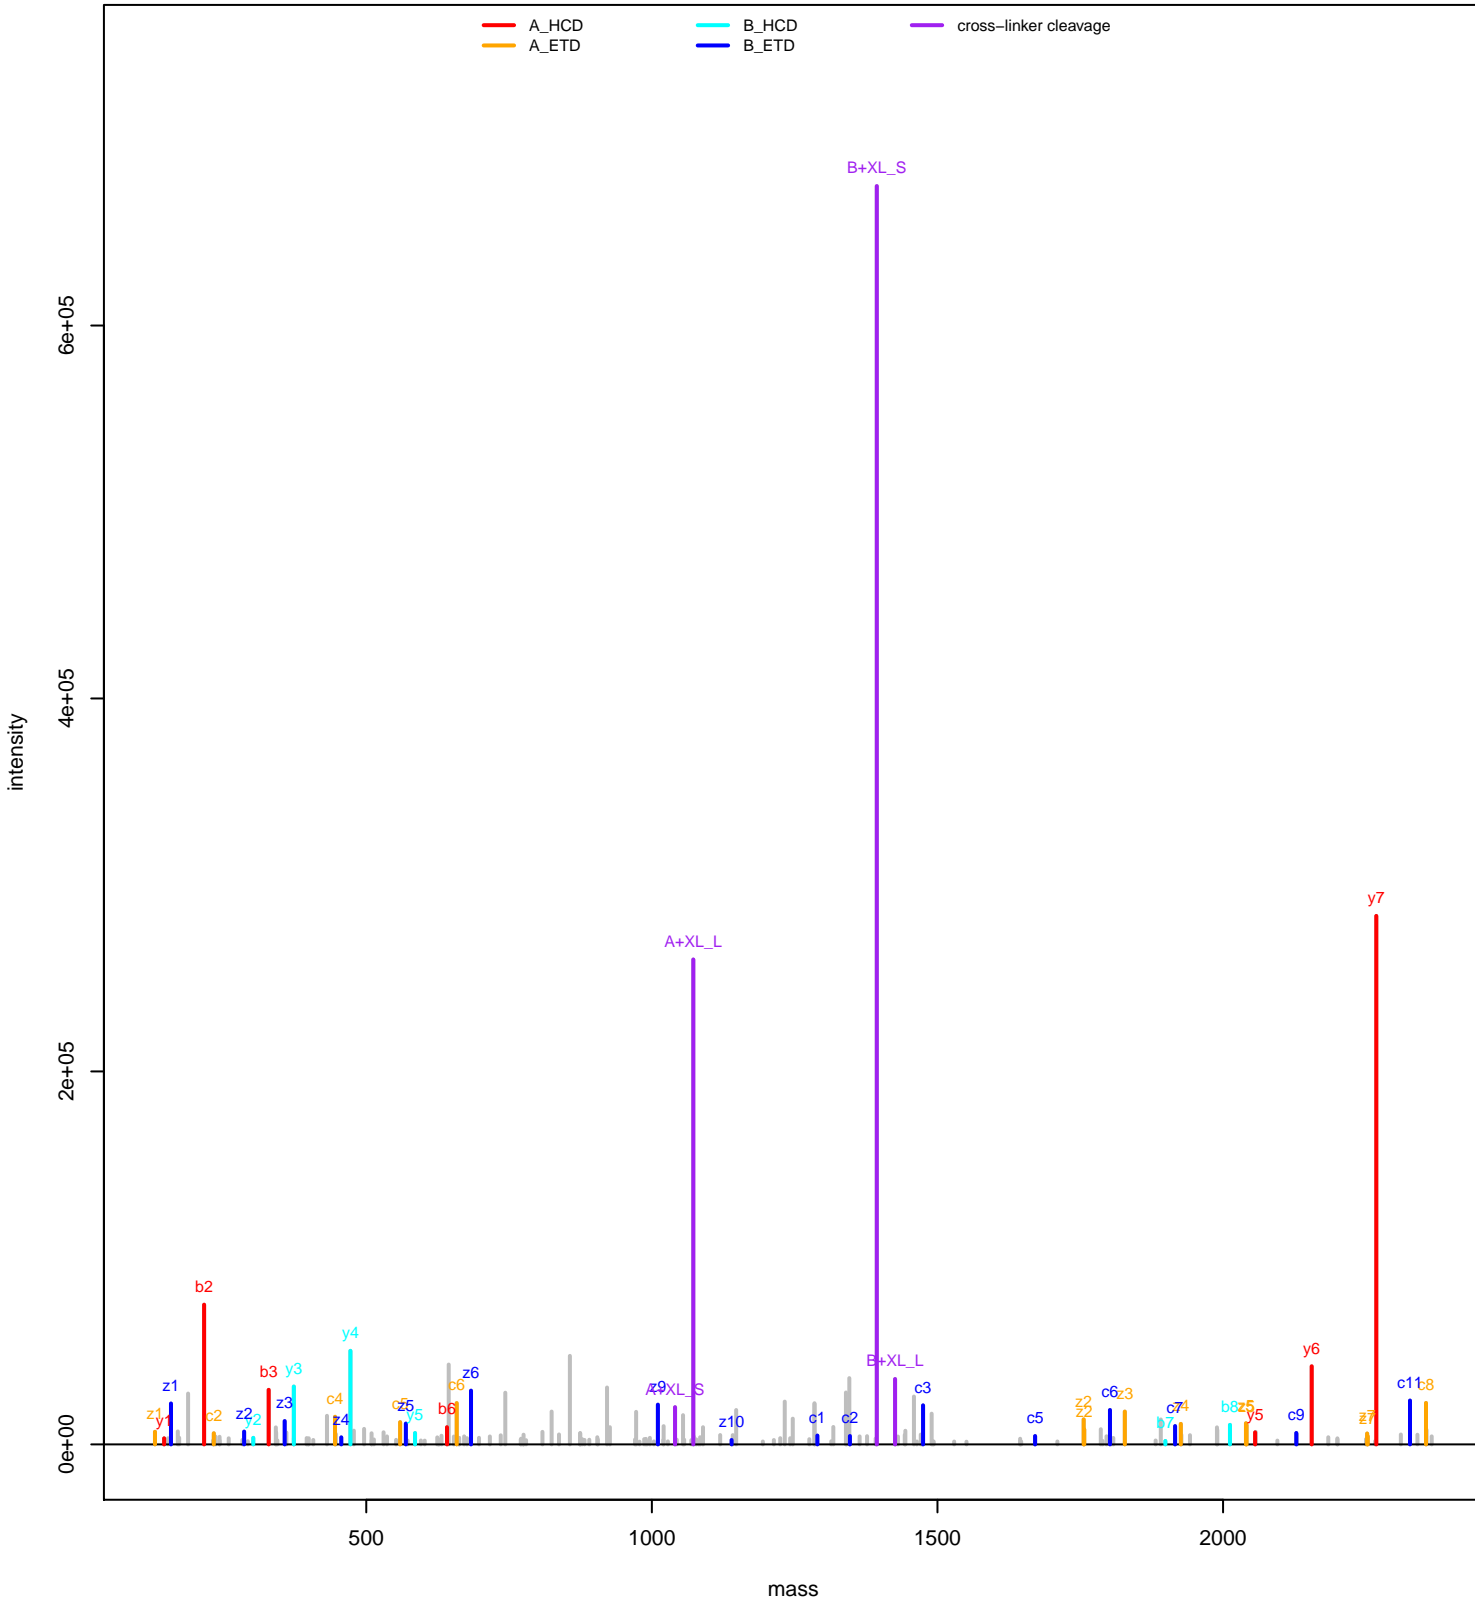

SELVNVAKK+XL\_S

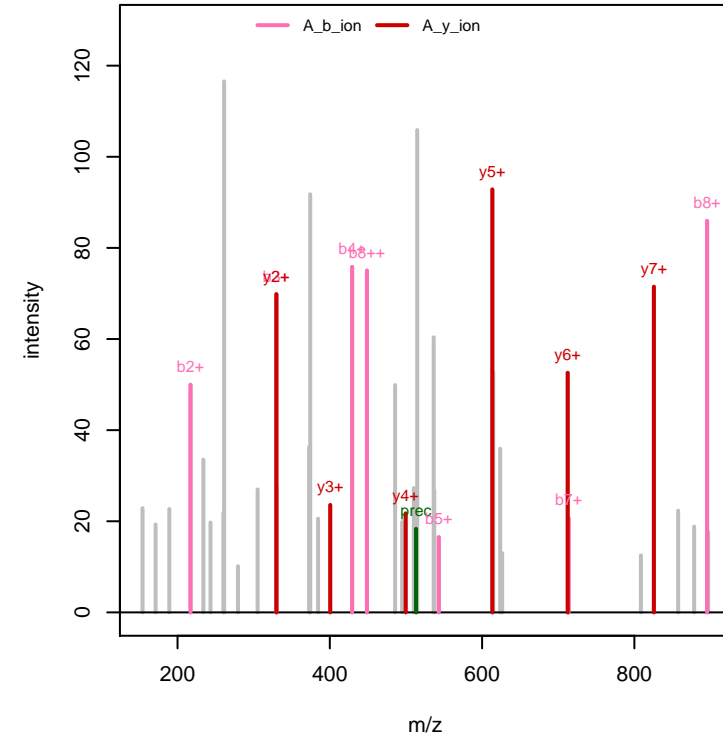

SELVNVAKK+XL\_L

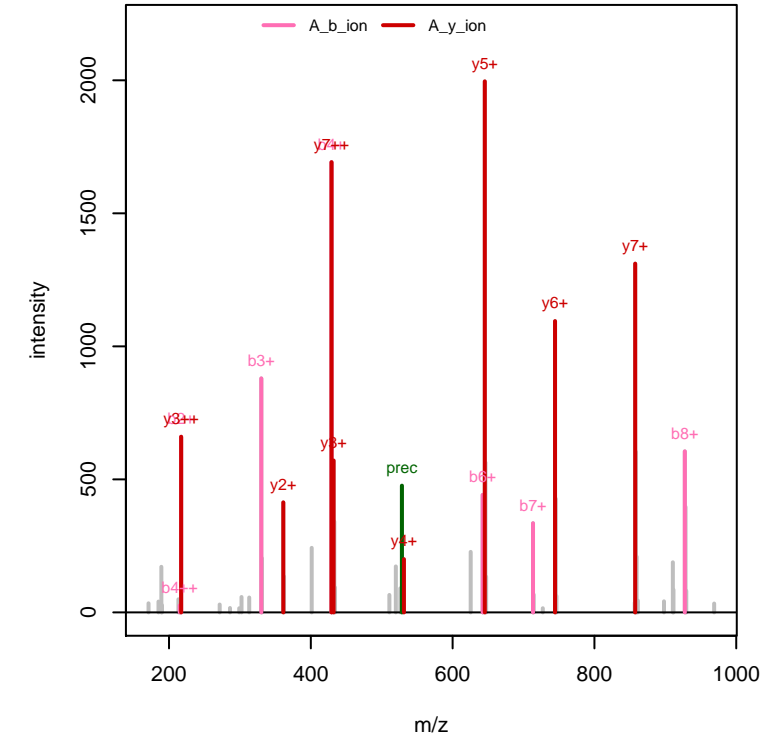

KGKVPMNIVAQR+XL\_S

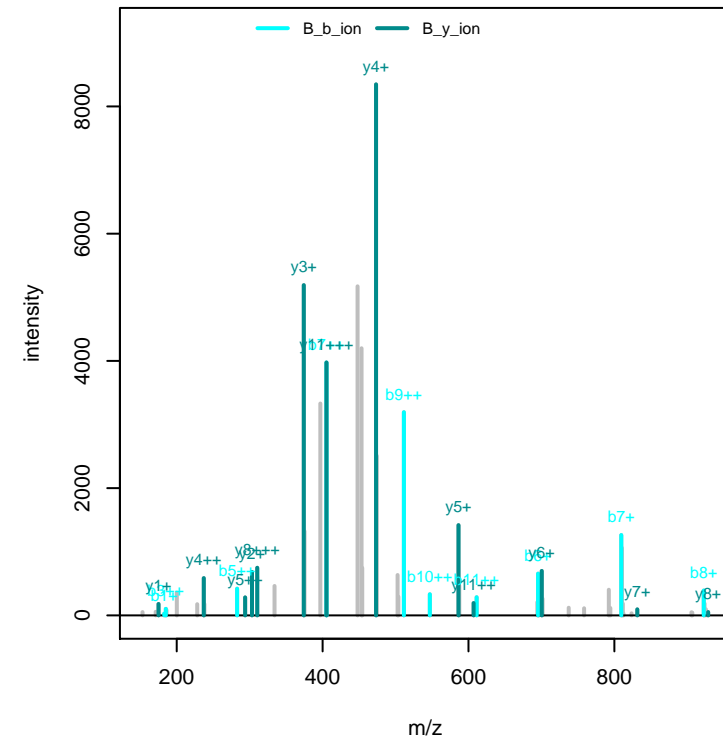

KGKVPMNIVAQR+XL\_L

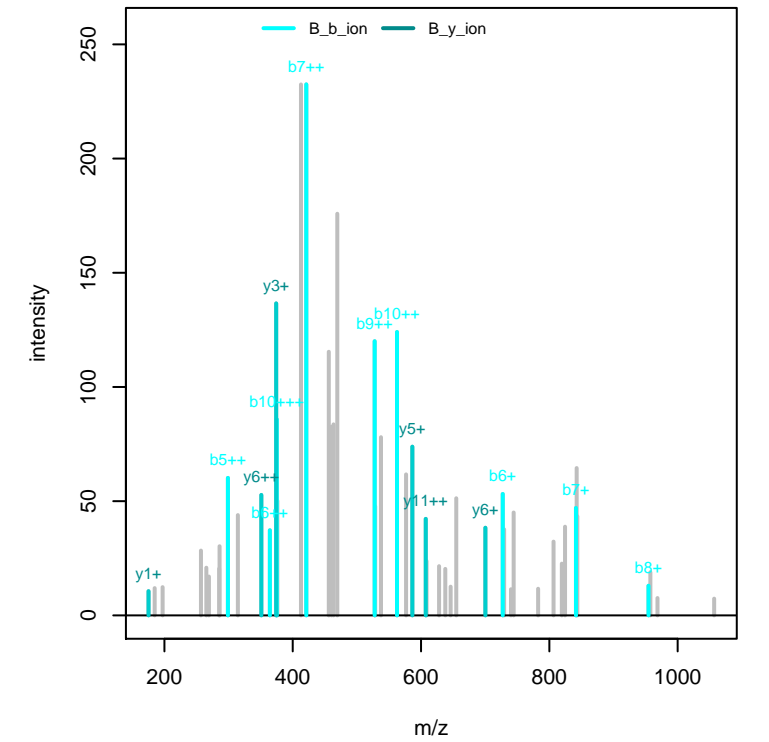

MKPSIVAK  
EMAQDELREAKEK

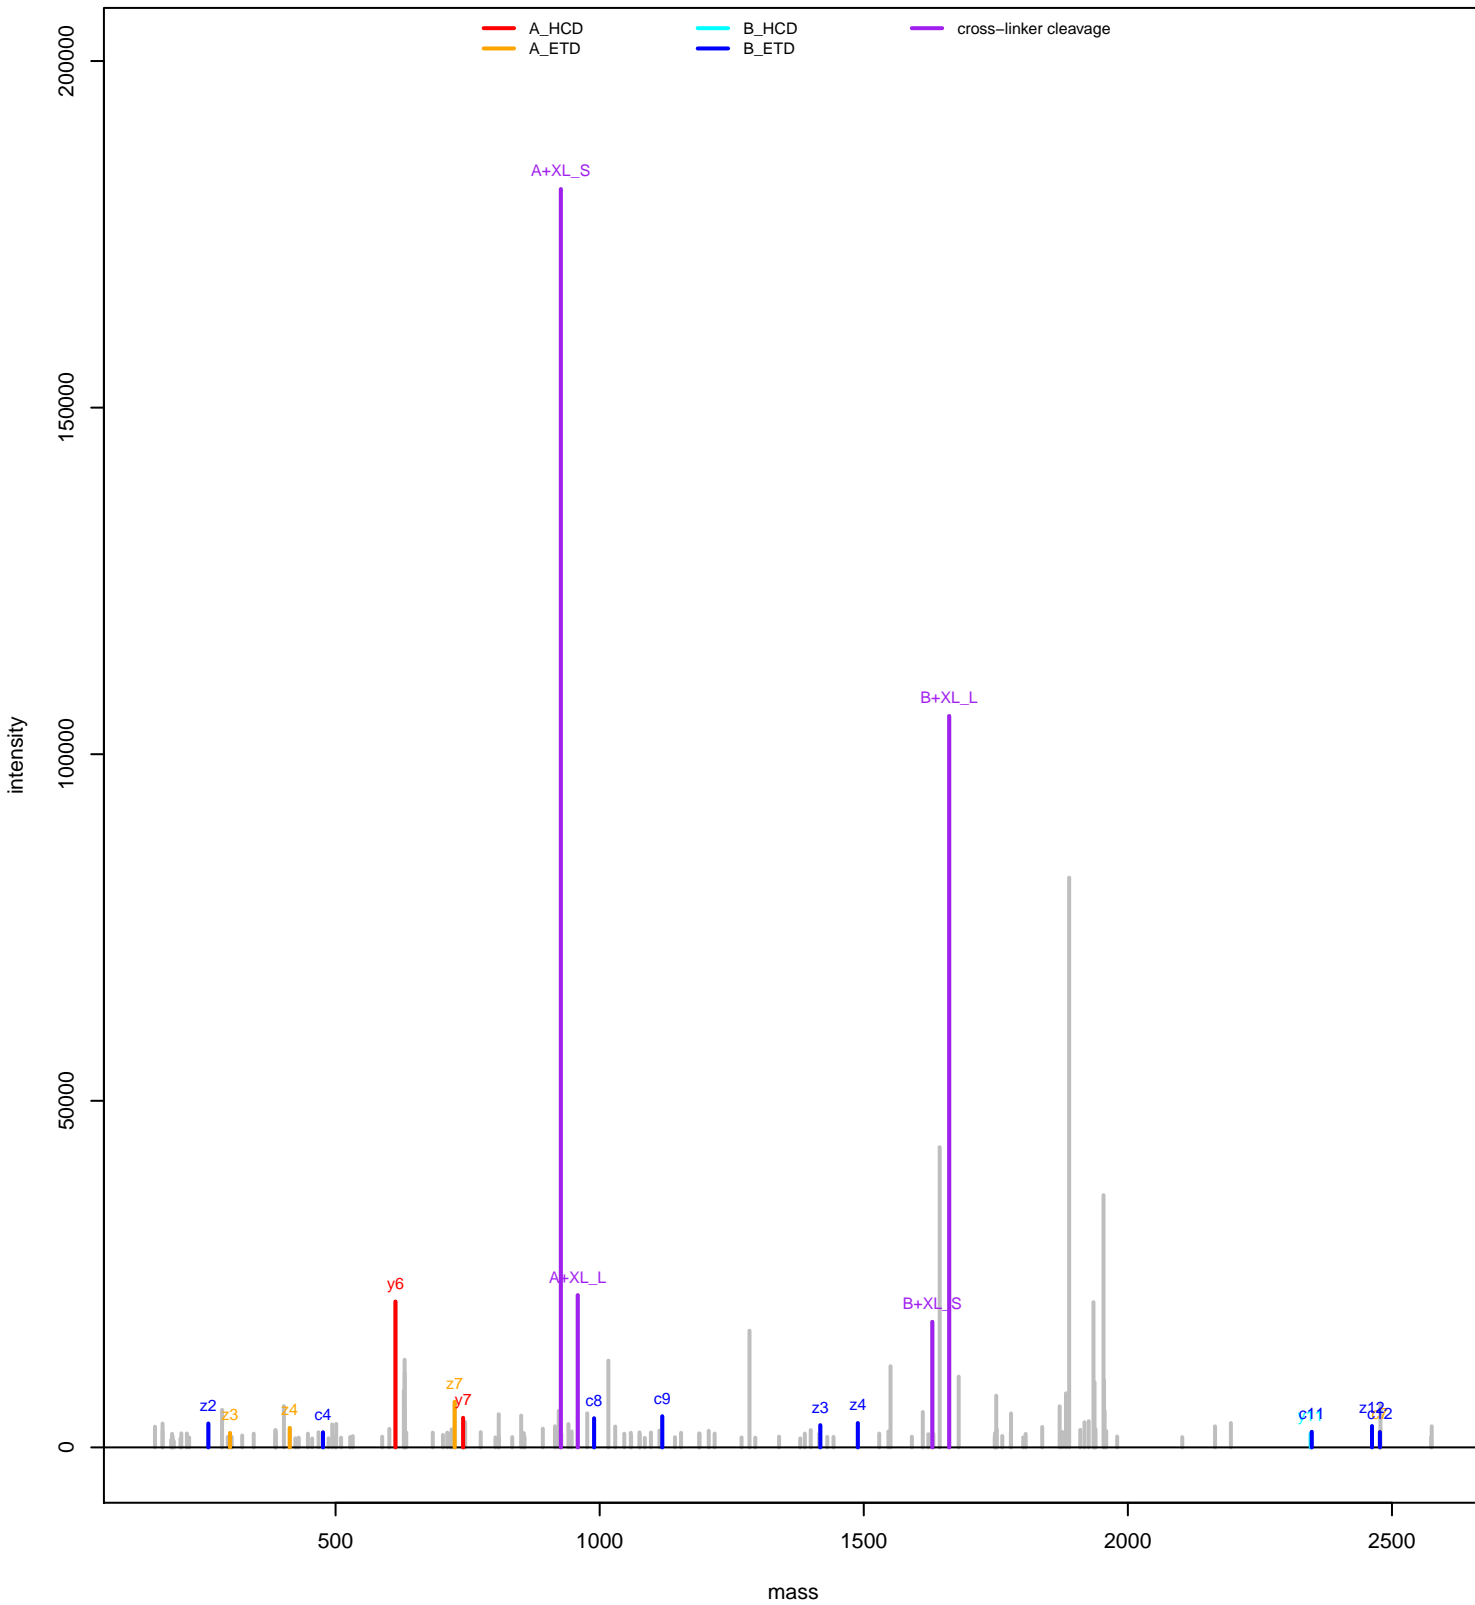

MKPSIVAK+XL\_S

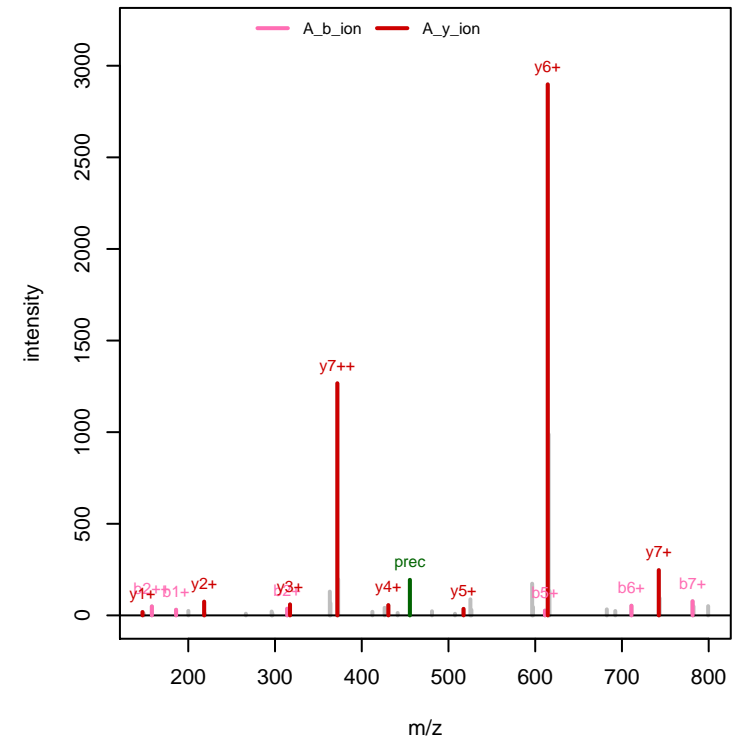

MKPSIVAK+XL\_L

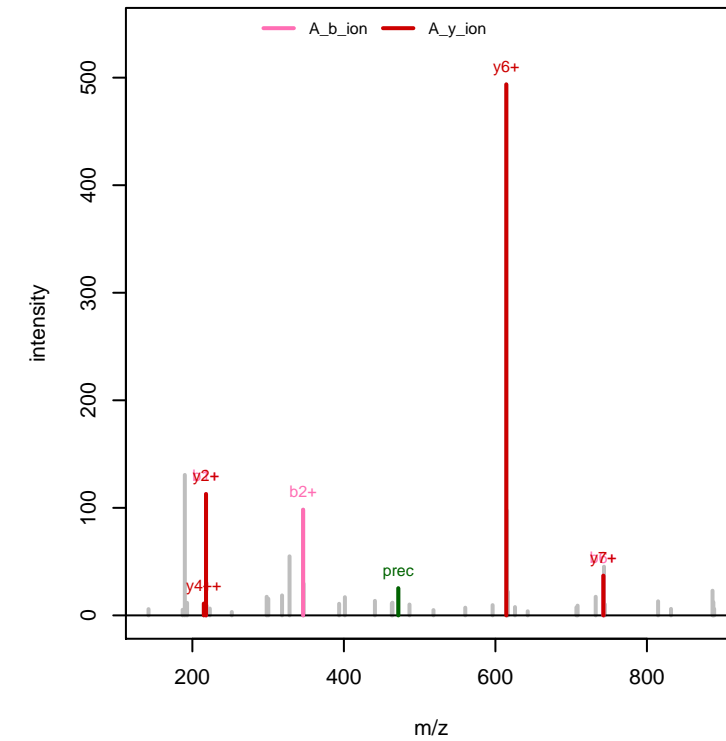

EMAQDELREAKEK+XL\_S

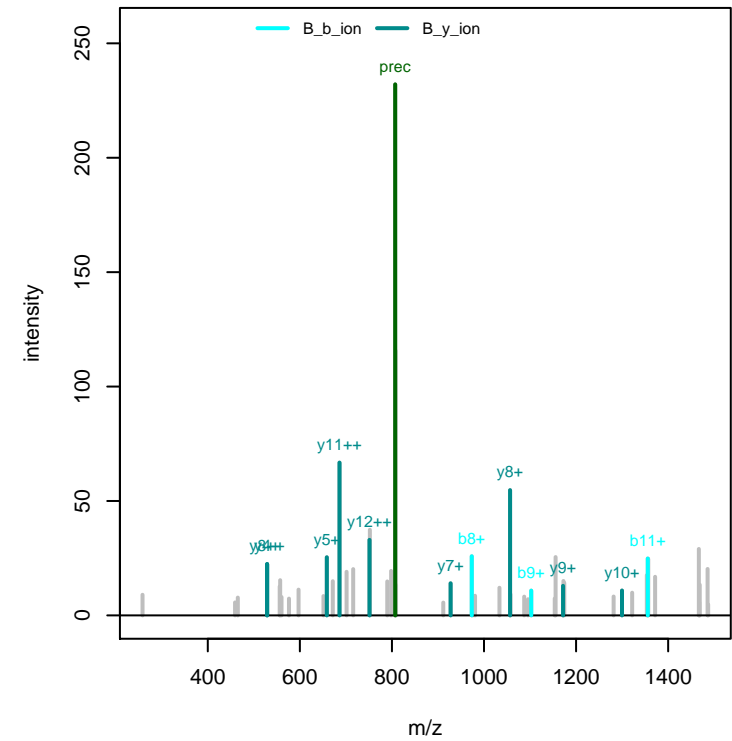

EMAQDELREAKEK+XL\_L

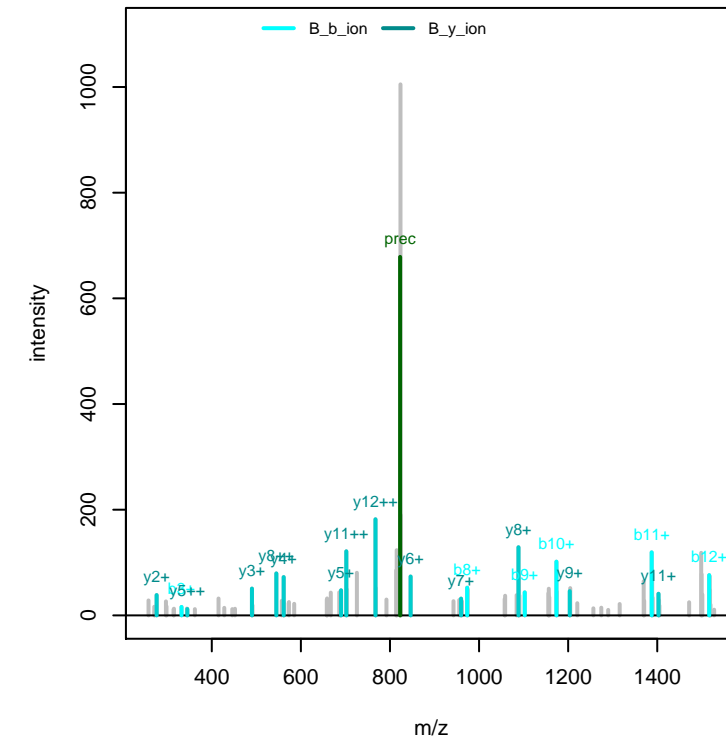

TNKSEPR  
ILLIGCGKER

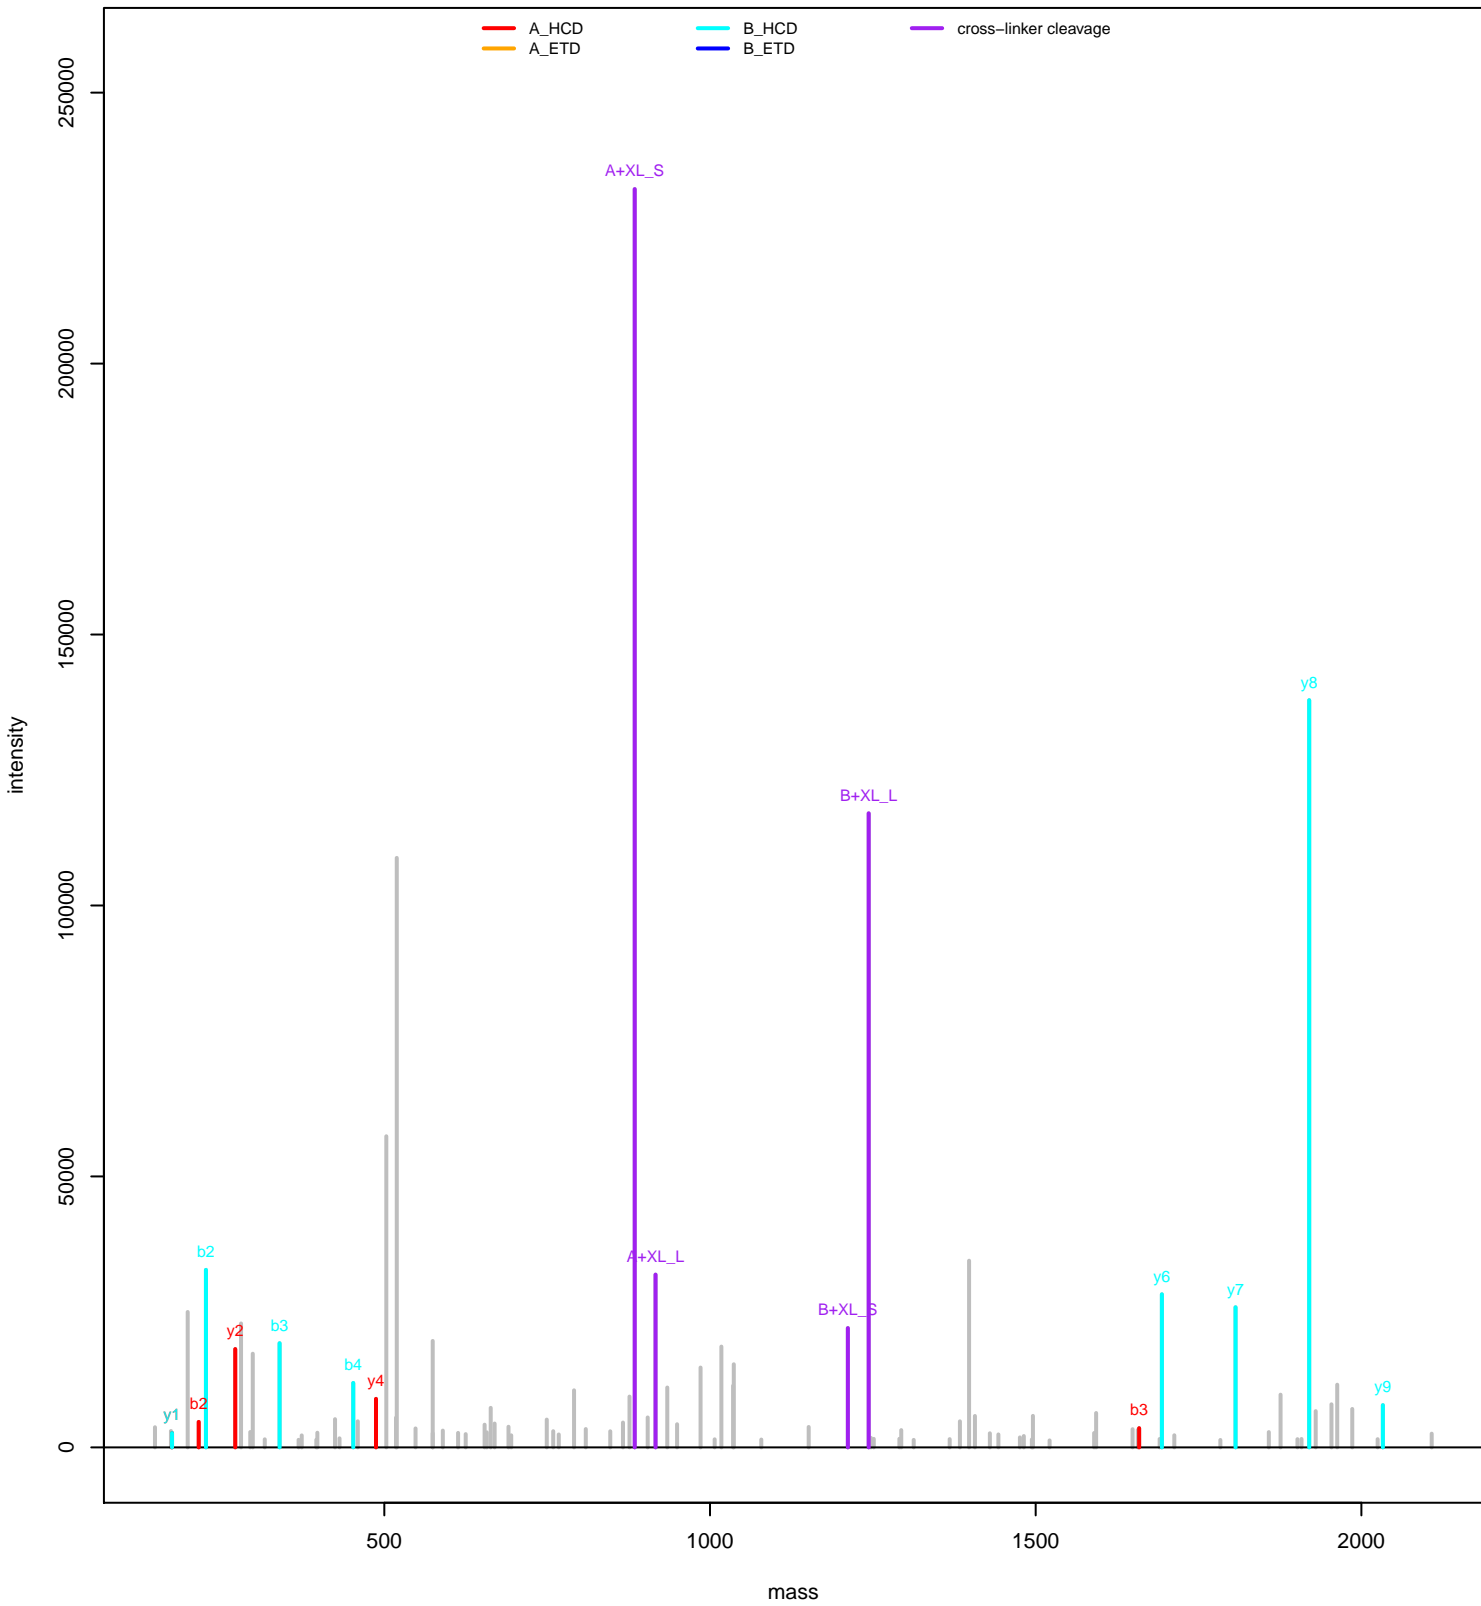

TNKSEPR+XL\_S

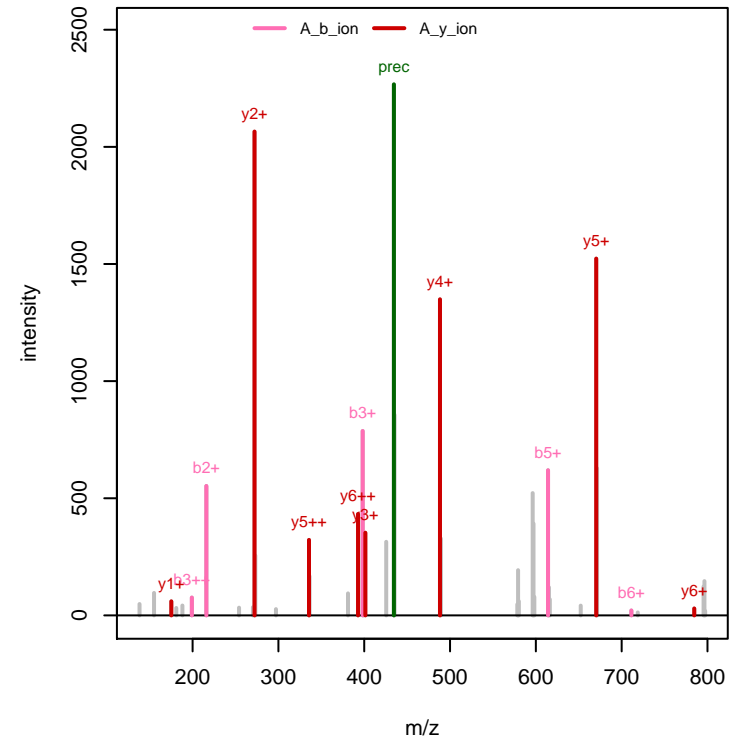

TNKSEPR+XL\_L

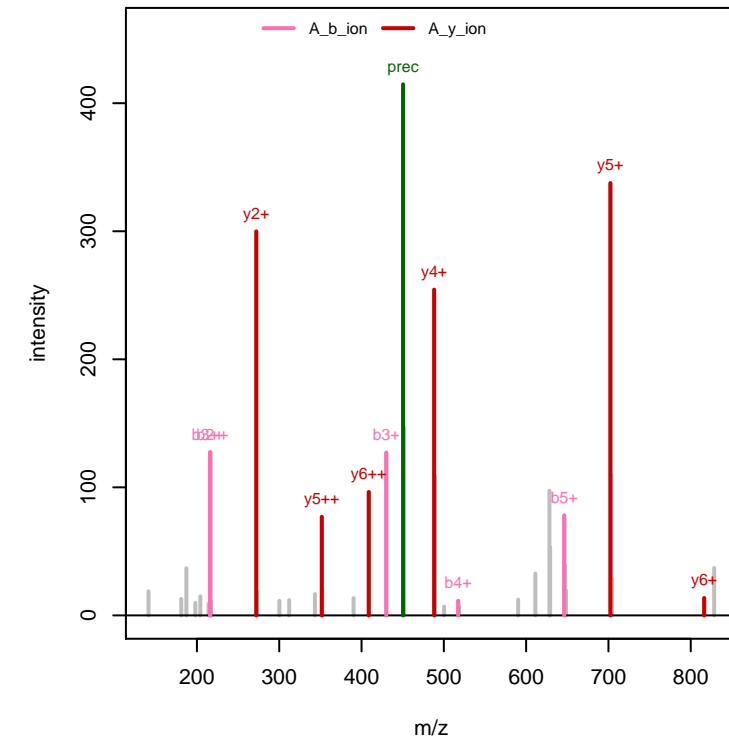

ILLIGCGKER+XL\_S

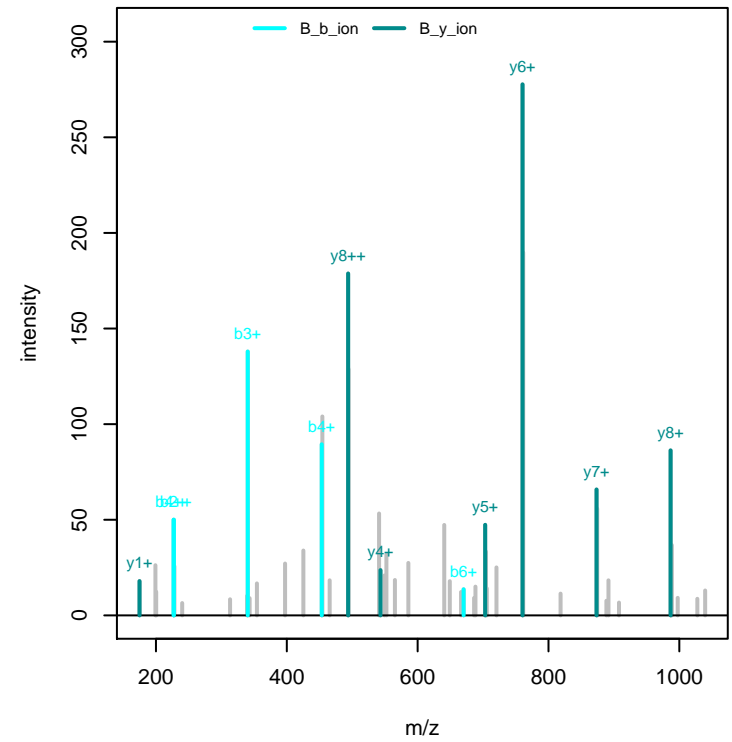

ILLIGCGKER+XL\_L

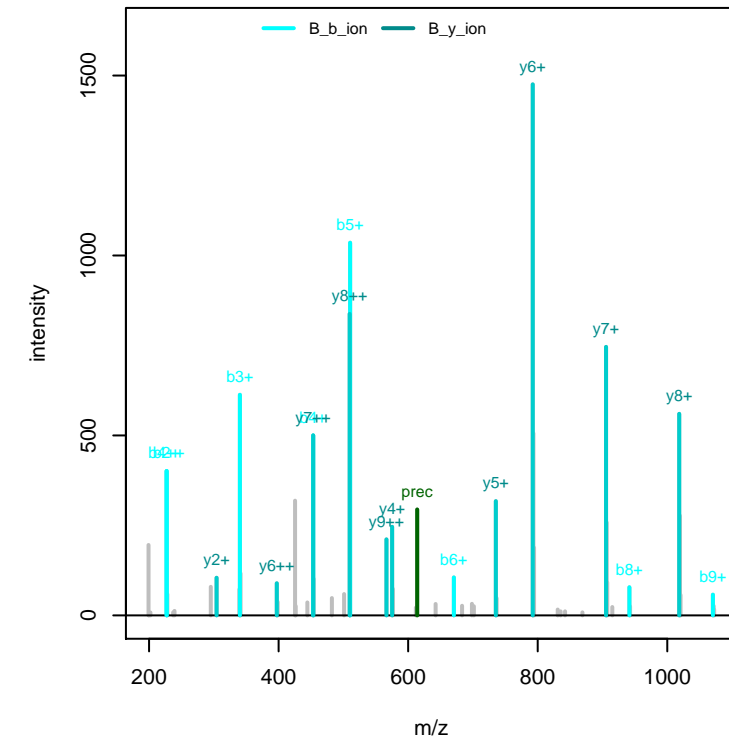

TTYVIKELNDK  
GIKTEQLQLDTAMoWDTAQAK

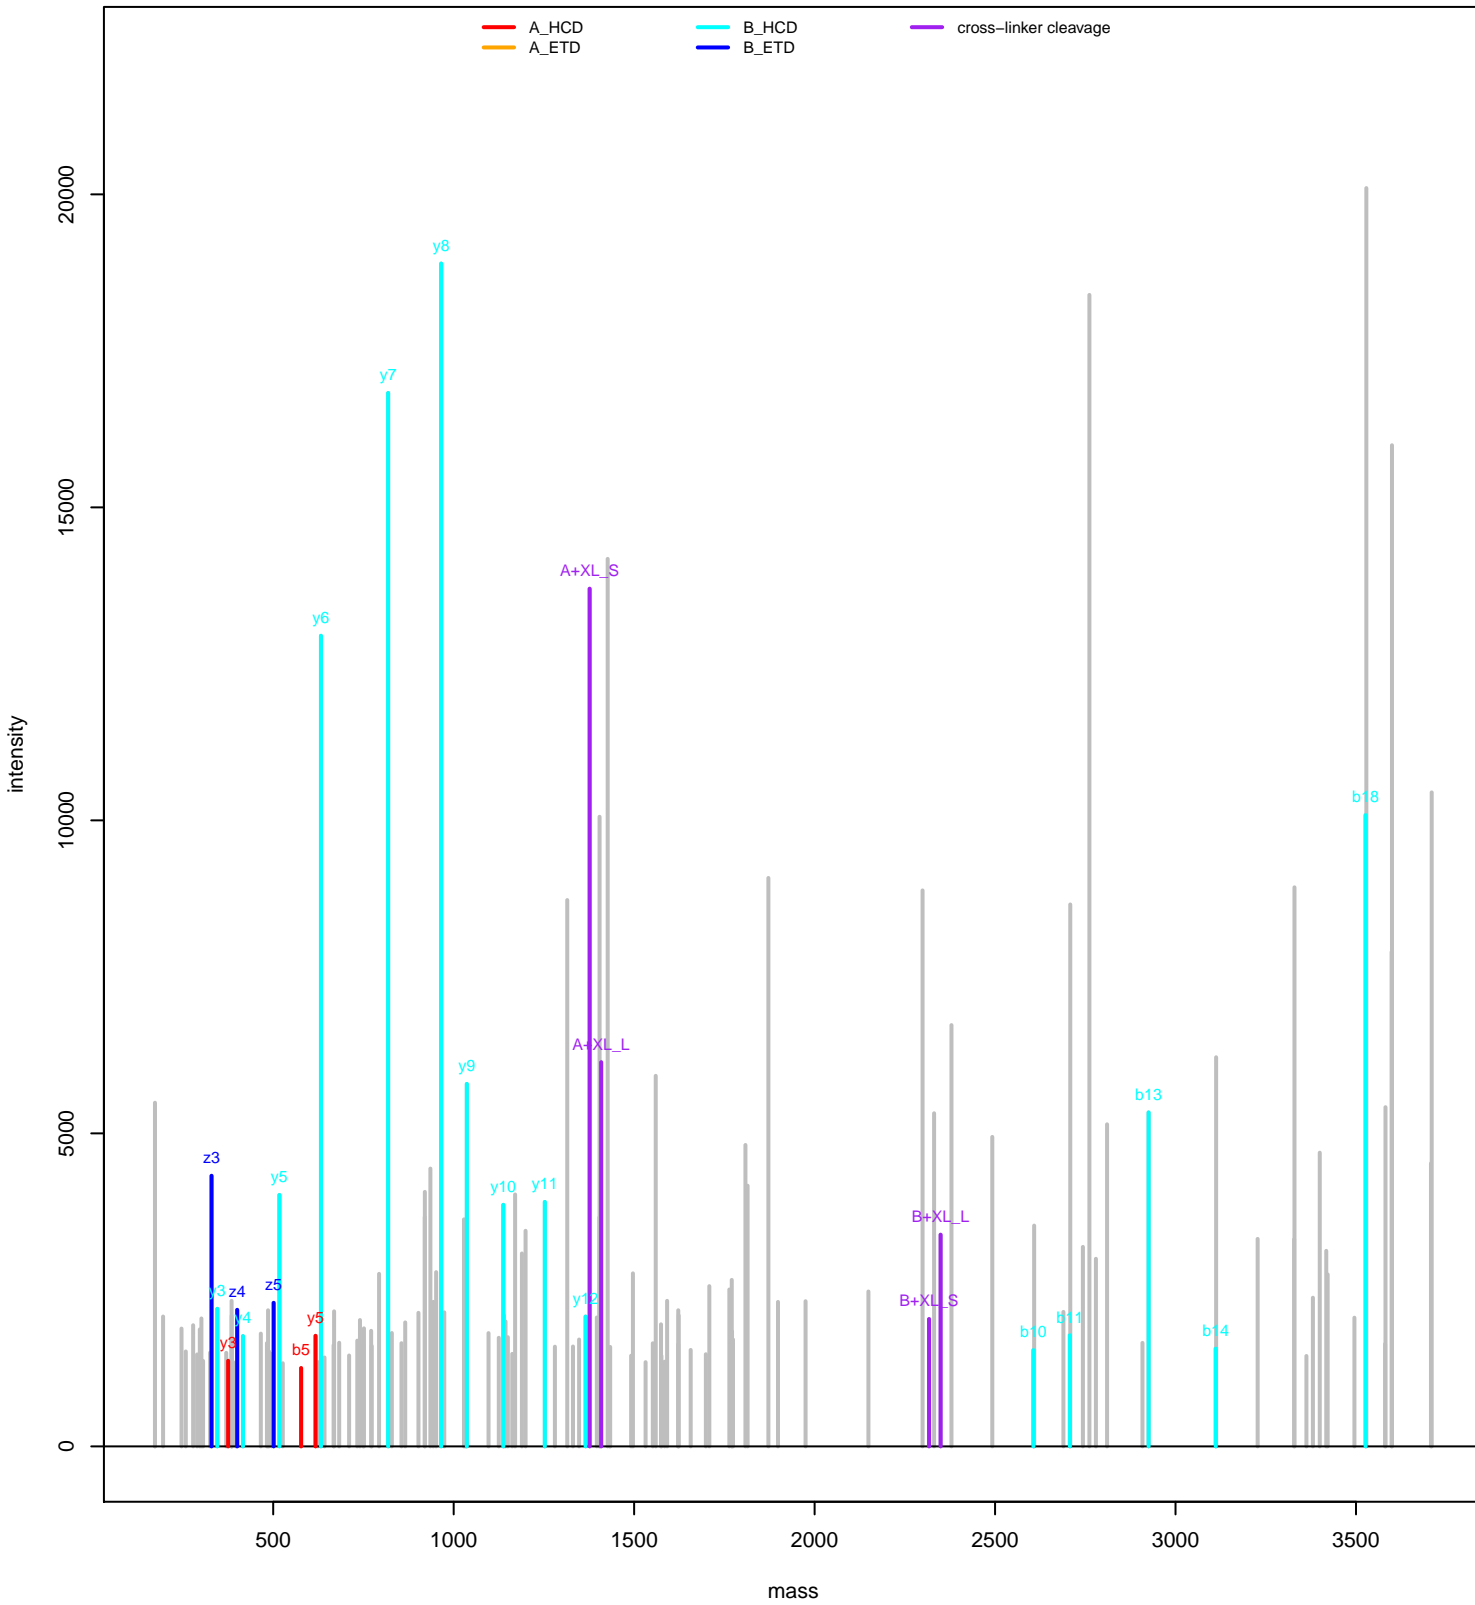

TTYVIKELNDK+XL\_S

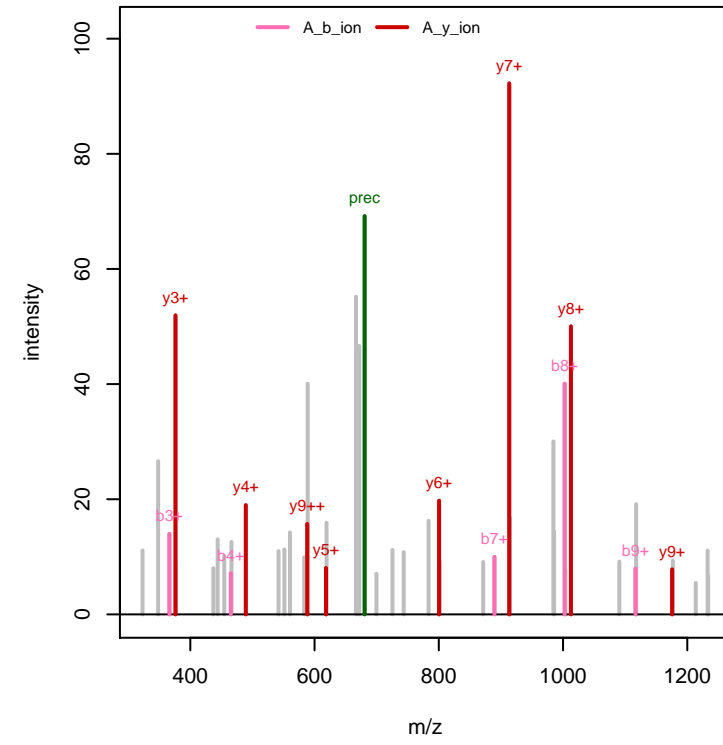

GIKTEQLQLDTAMoWDTAQAK+XL\_S

TTYVIKELNDK+XL\_L

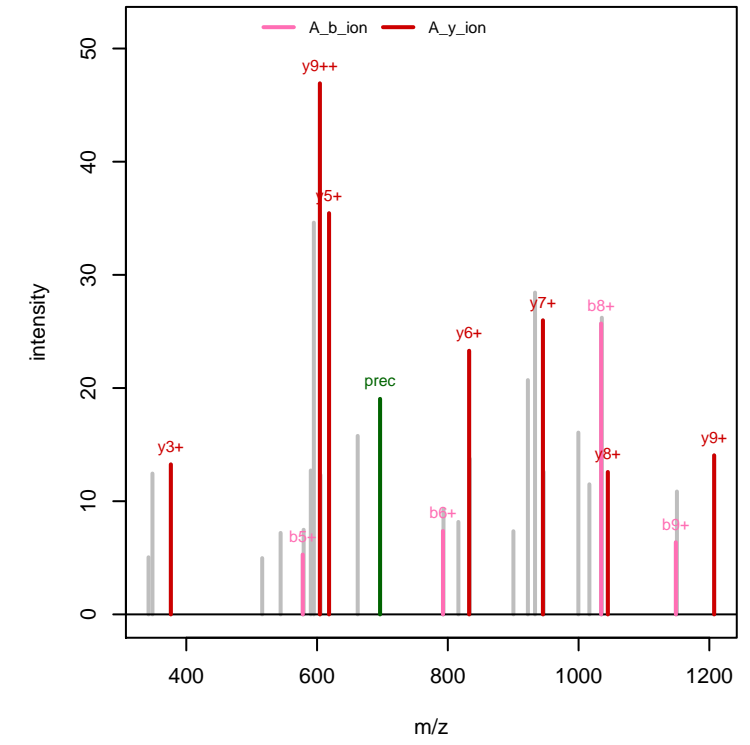

GIKTEQLQLDTAMoWDTAQAK+XL\_L

**AIDTKCK  
EGTDLFLKSGVR**

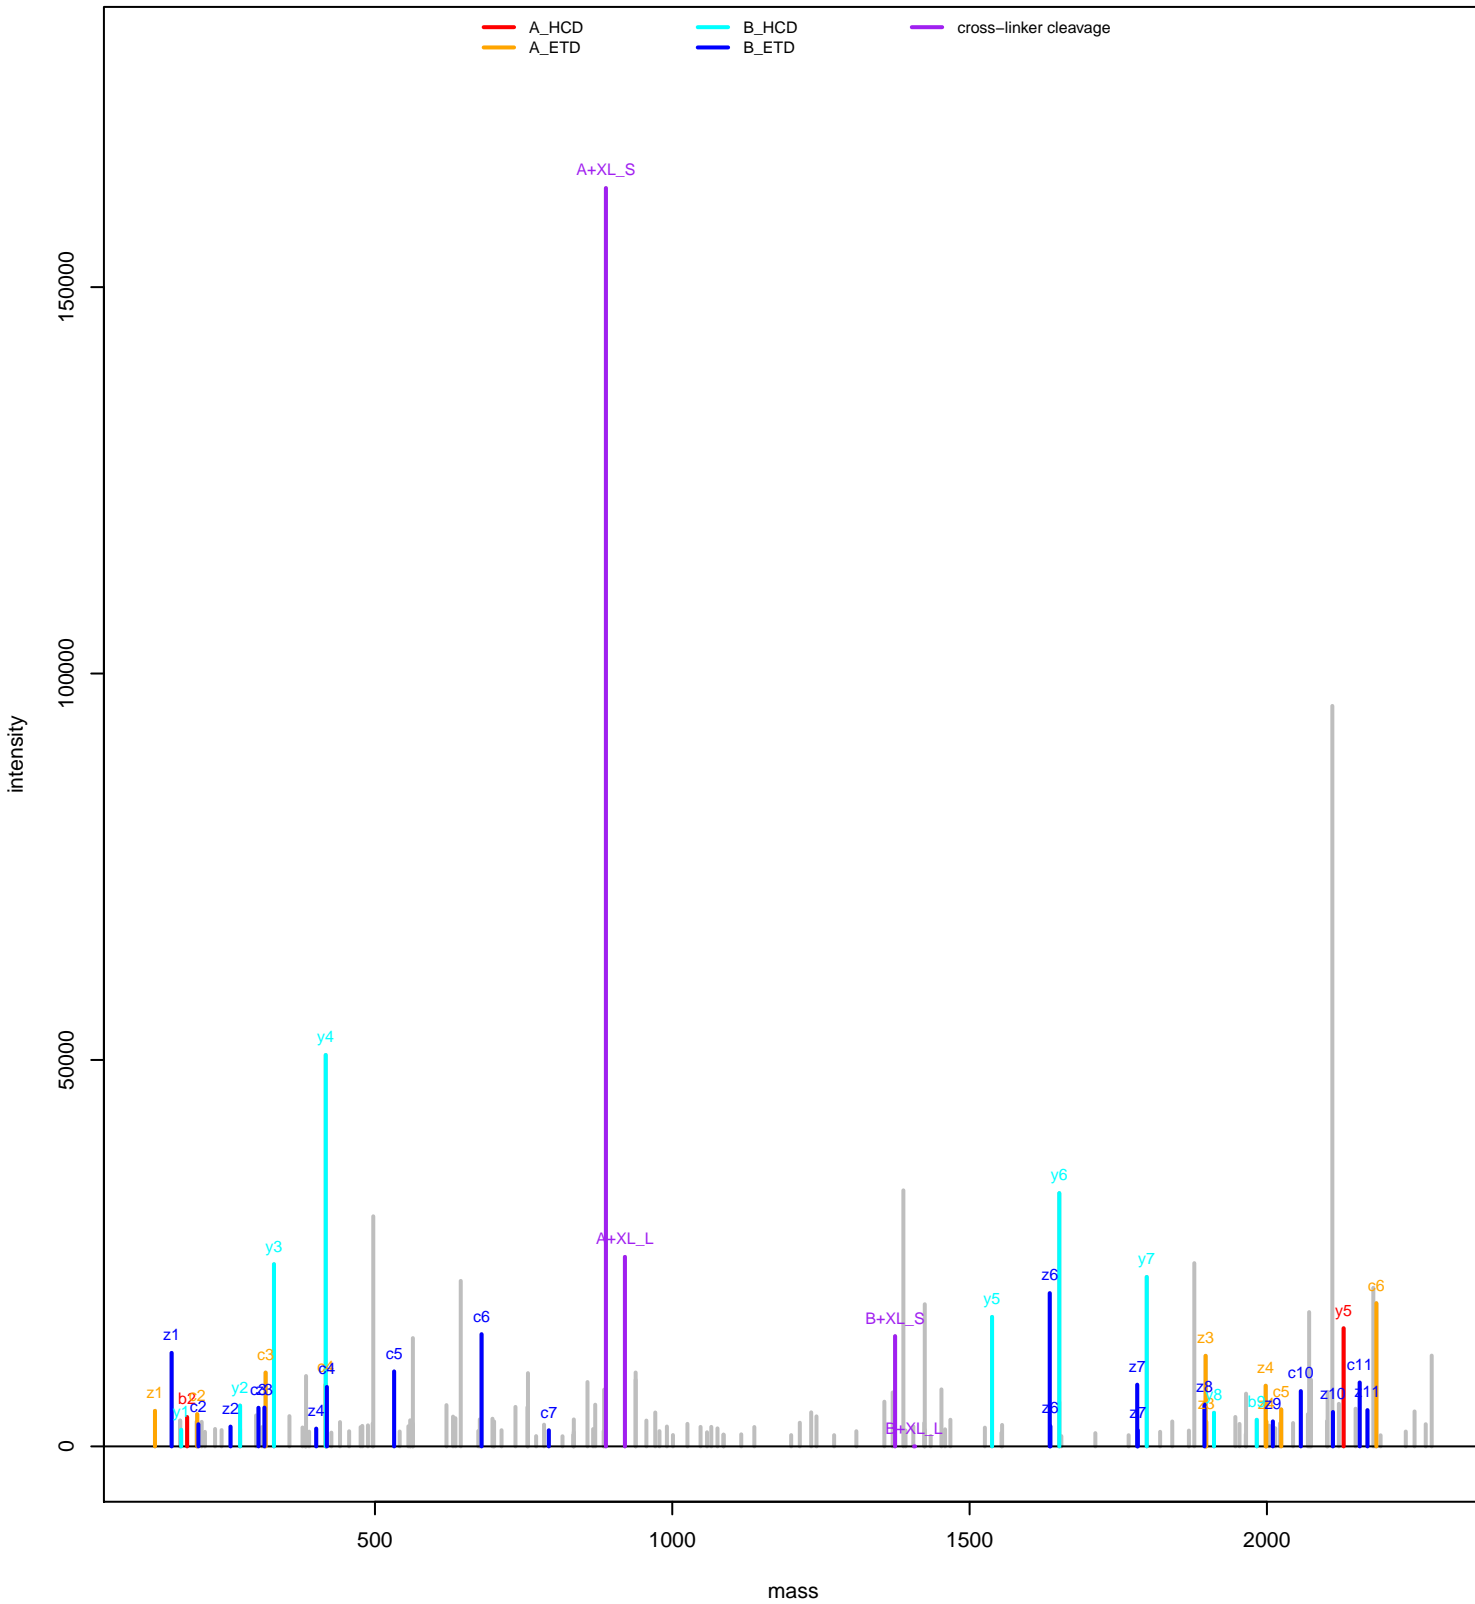

**AIDTKCK+XL\_S**

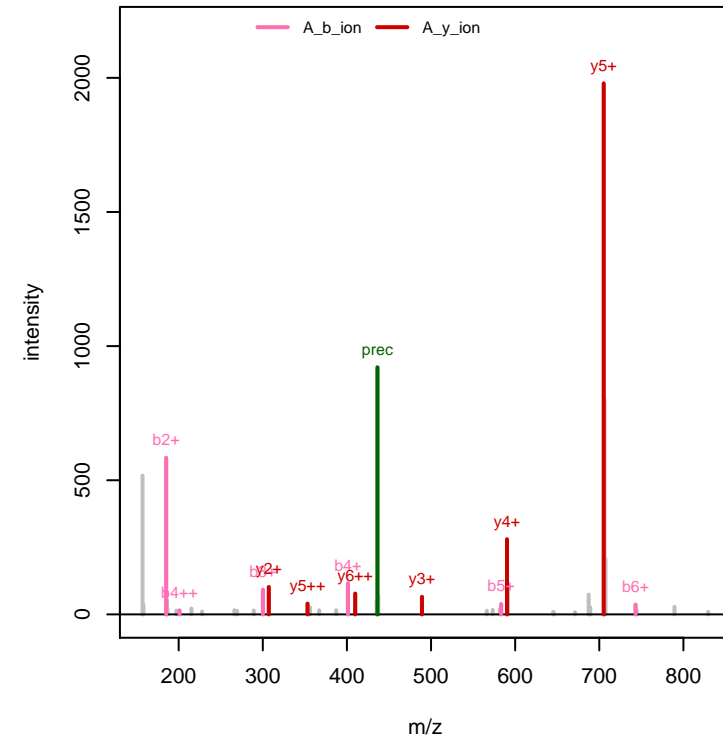

**AIDTKCK+XL\_L**

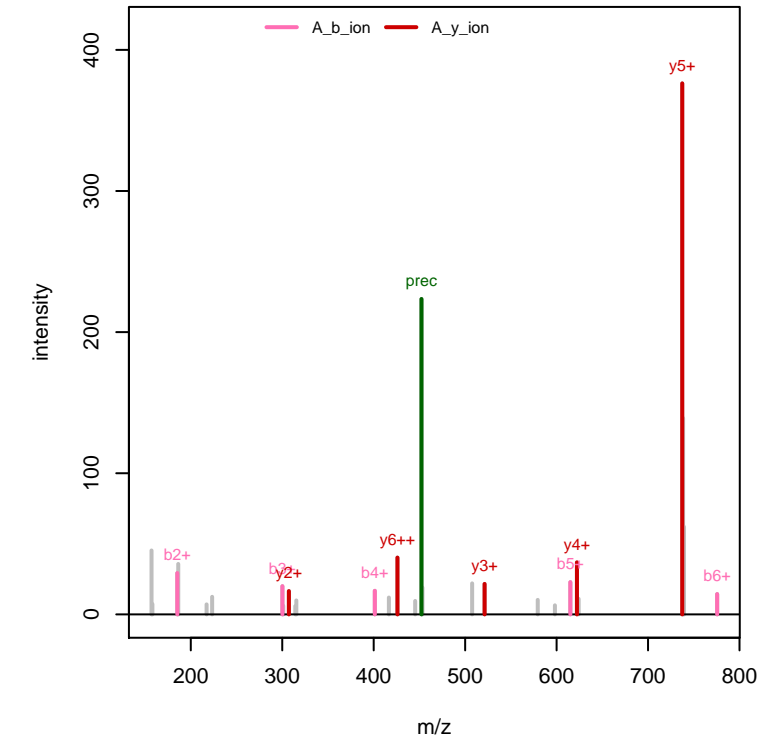

**EGTDLFLKSGVR+XL\_S**

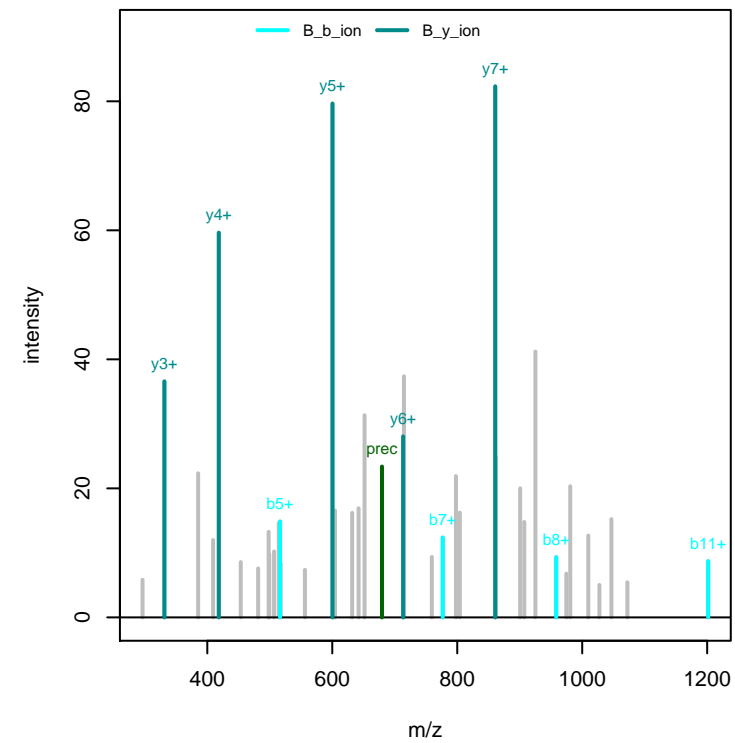

**EGTDLFLKSGVR+XL\_L**

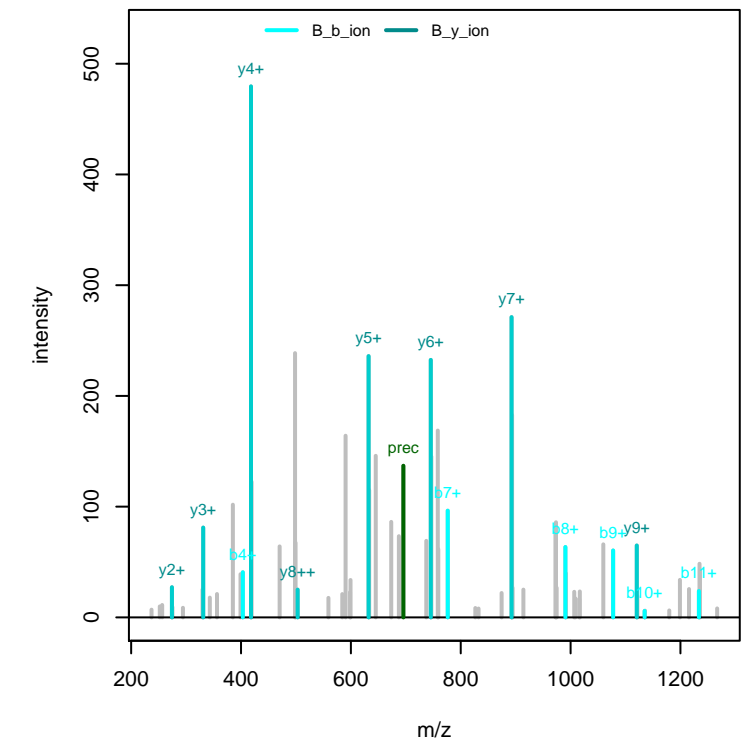



**KMNMDGVR**  
**GYGMGDAAEGKNIAHQVK**

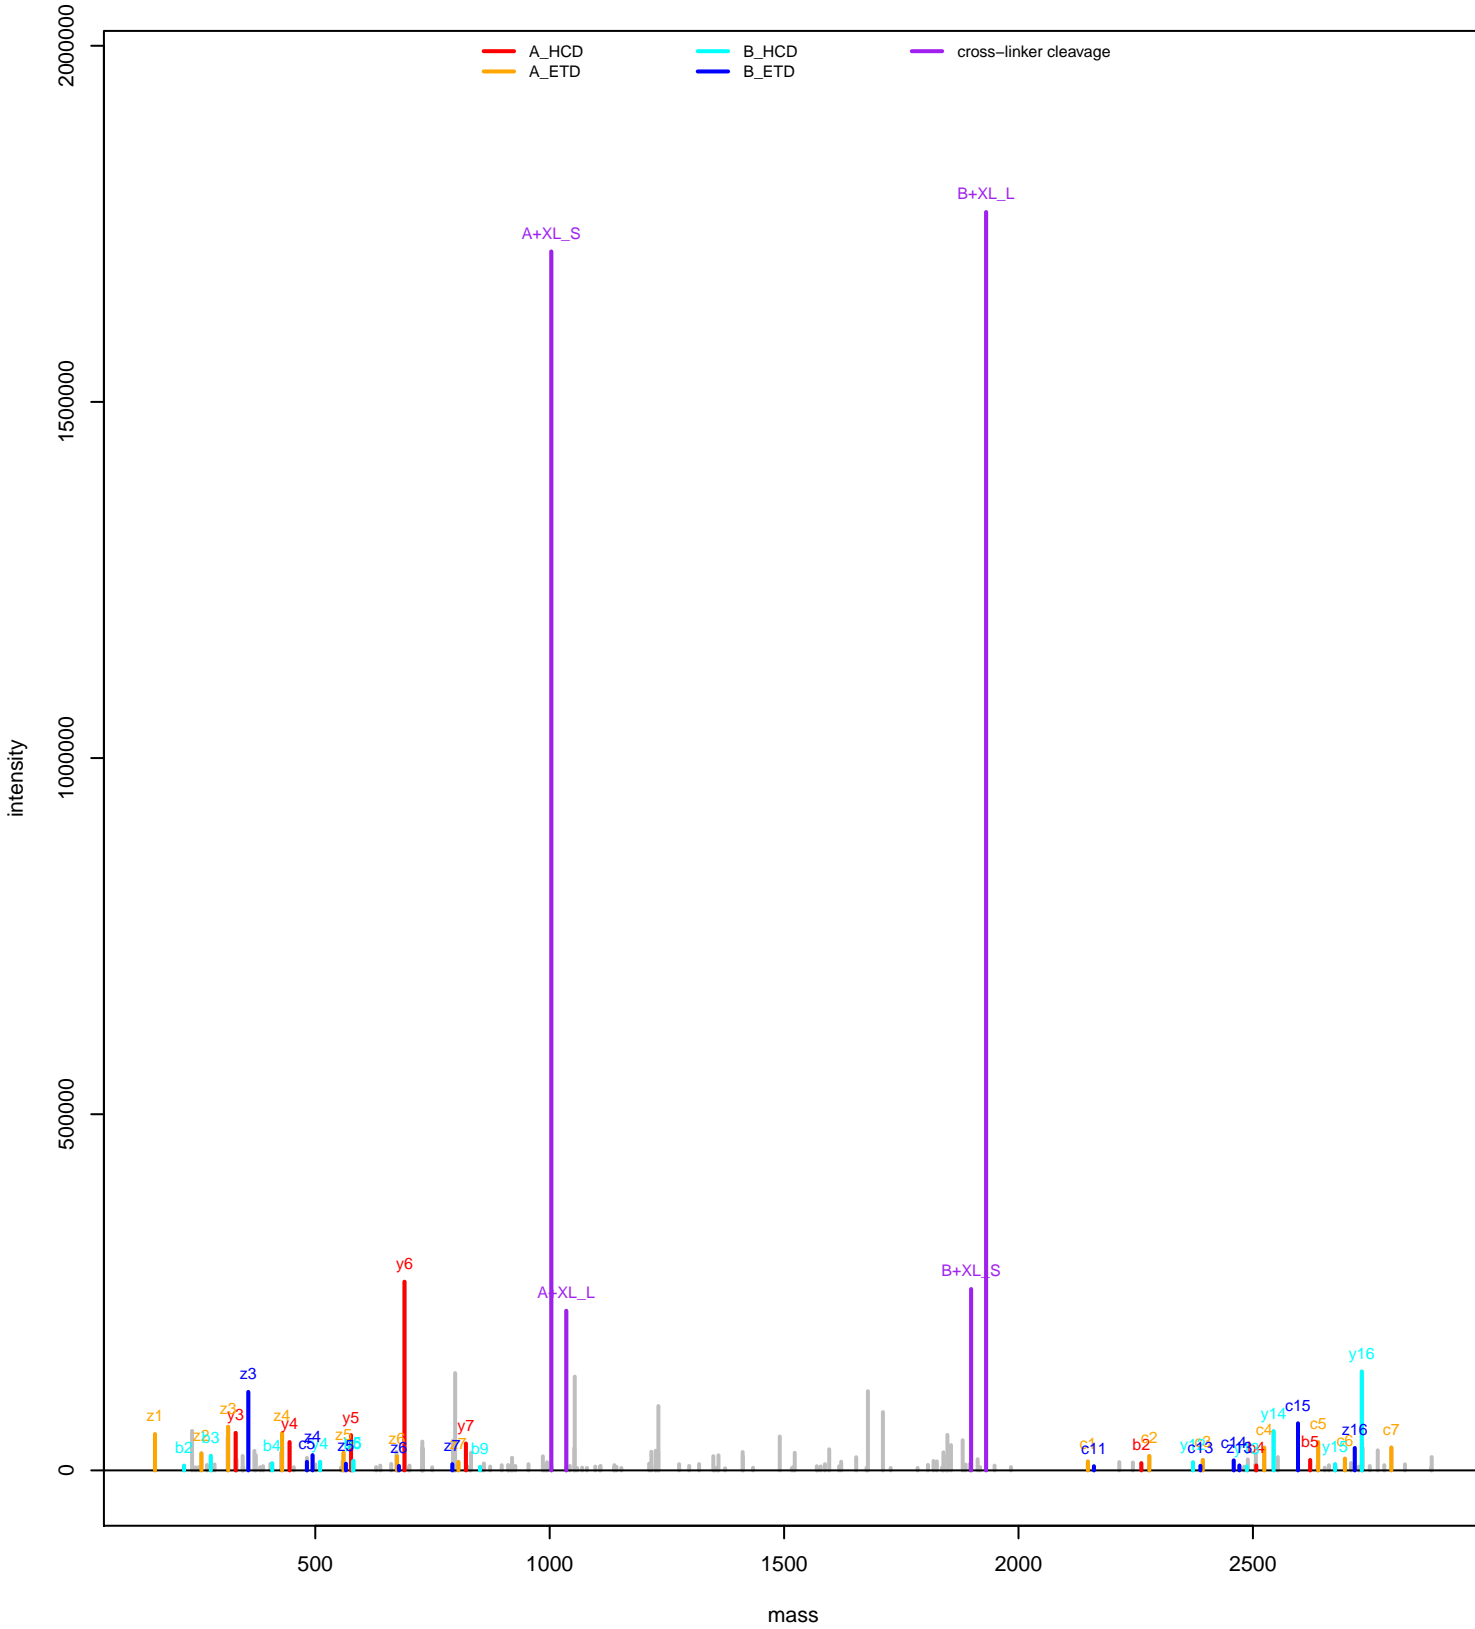

**KMNMDGVR+XL\_S**

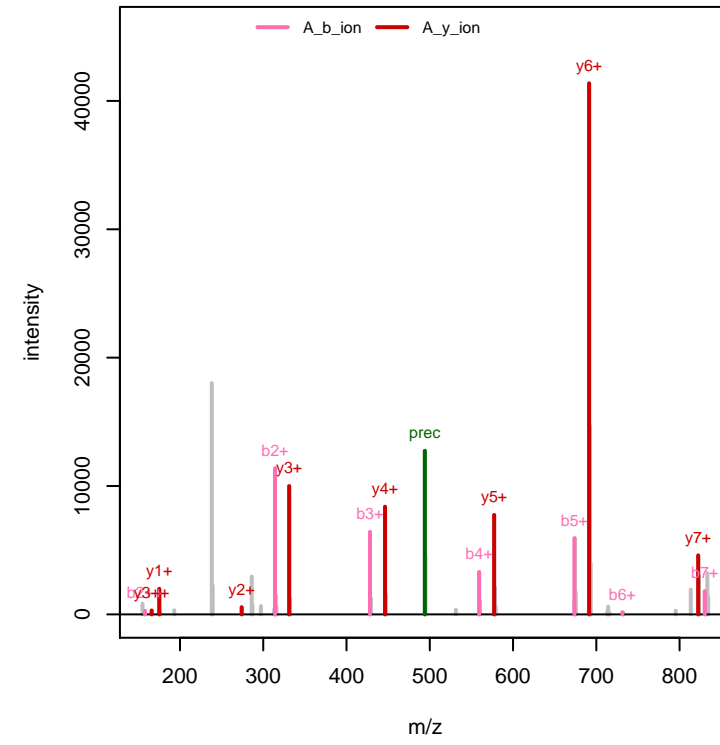

**KMNMDGVR+XL\_L**

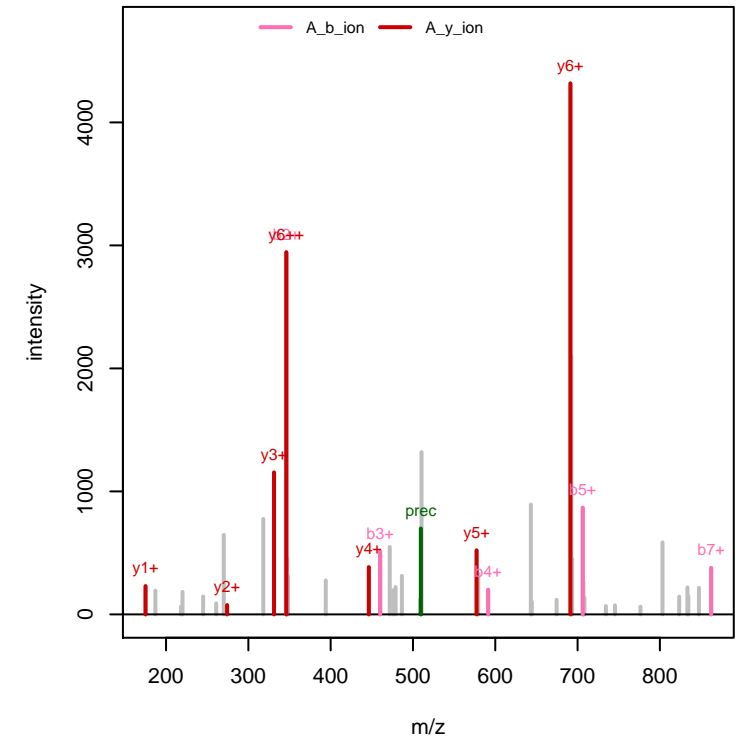

**GYGMGDAAEGKNIAHQVK+XL\_S**

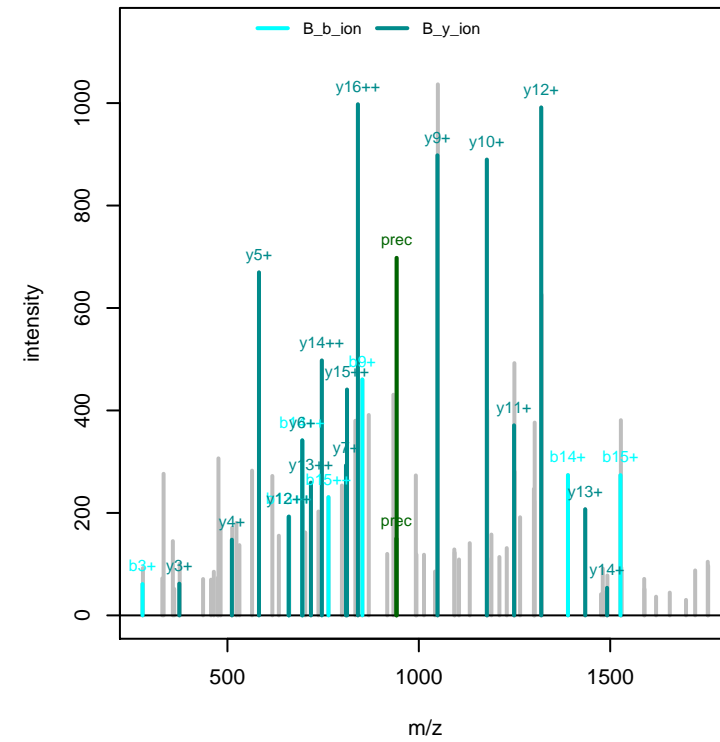

**GYGMGDAAEGKNIAHQVK+XL\_L**

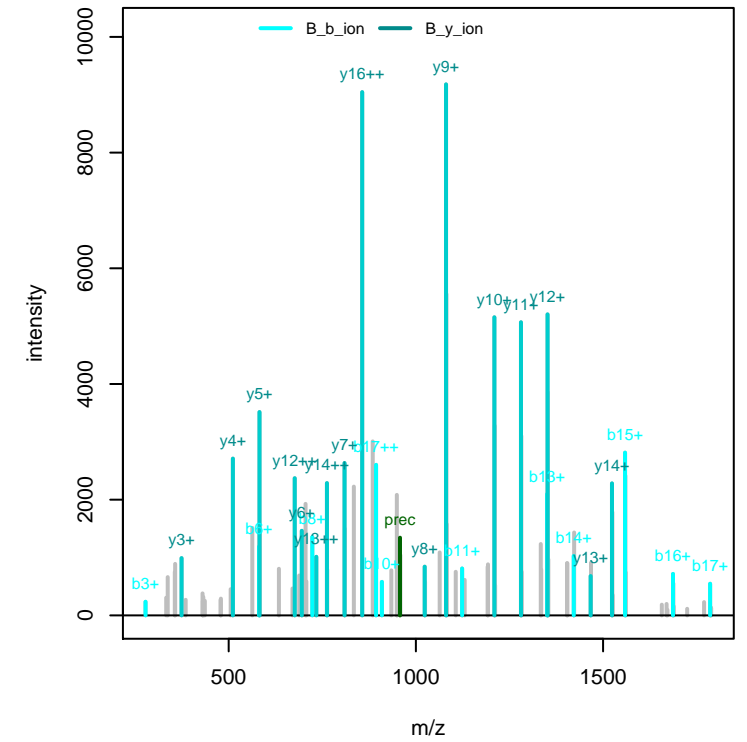

LSQSGHKR  
DNKLQMELVPER

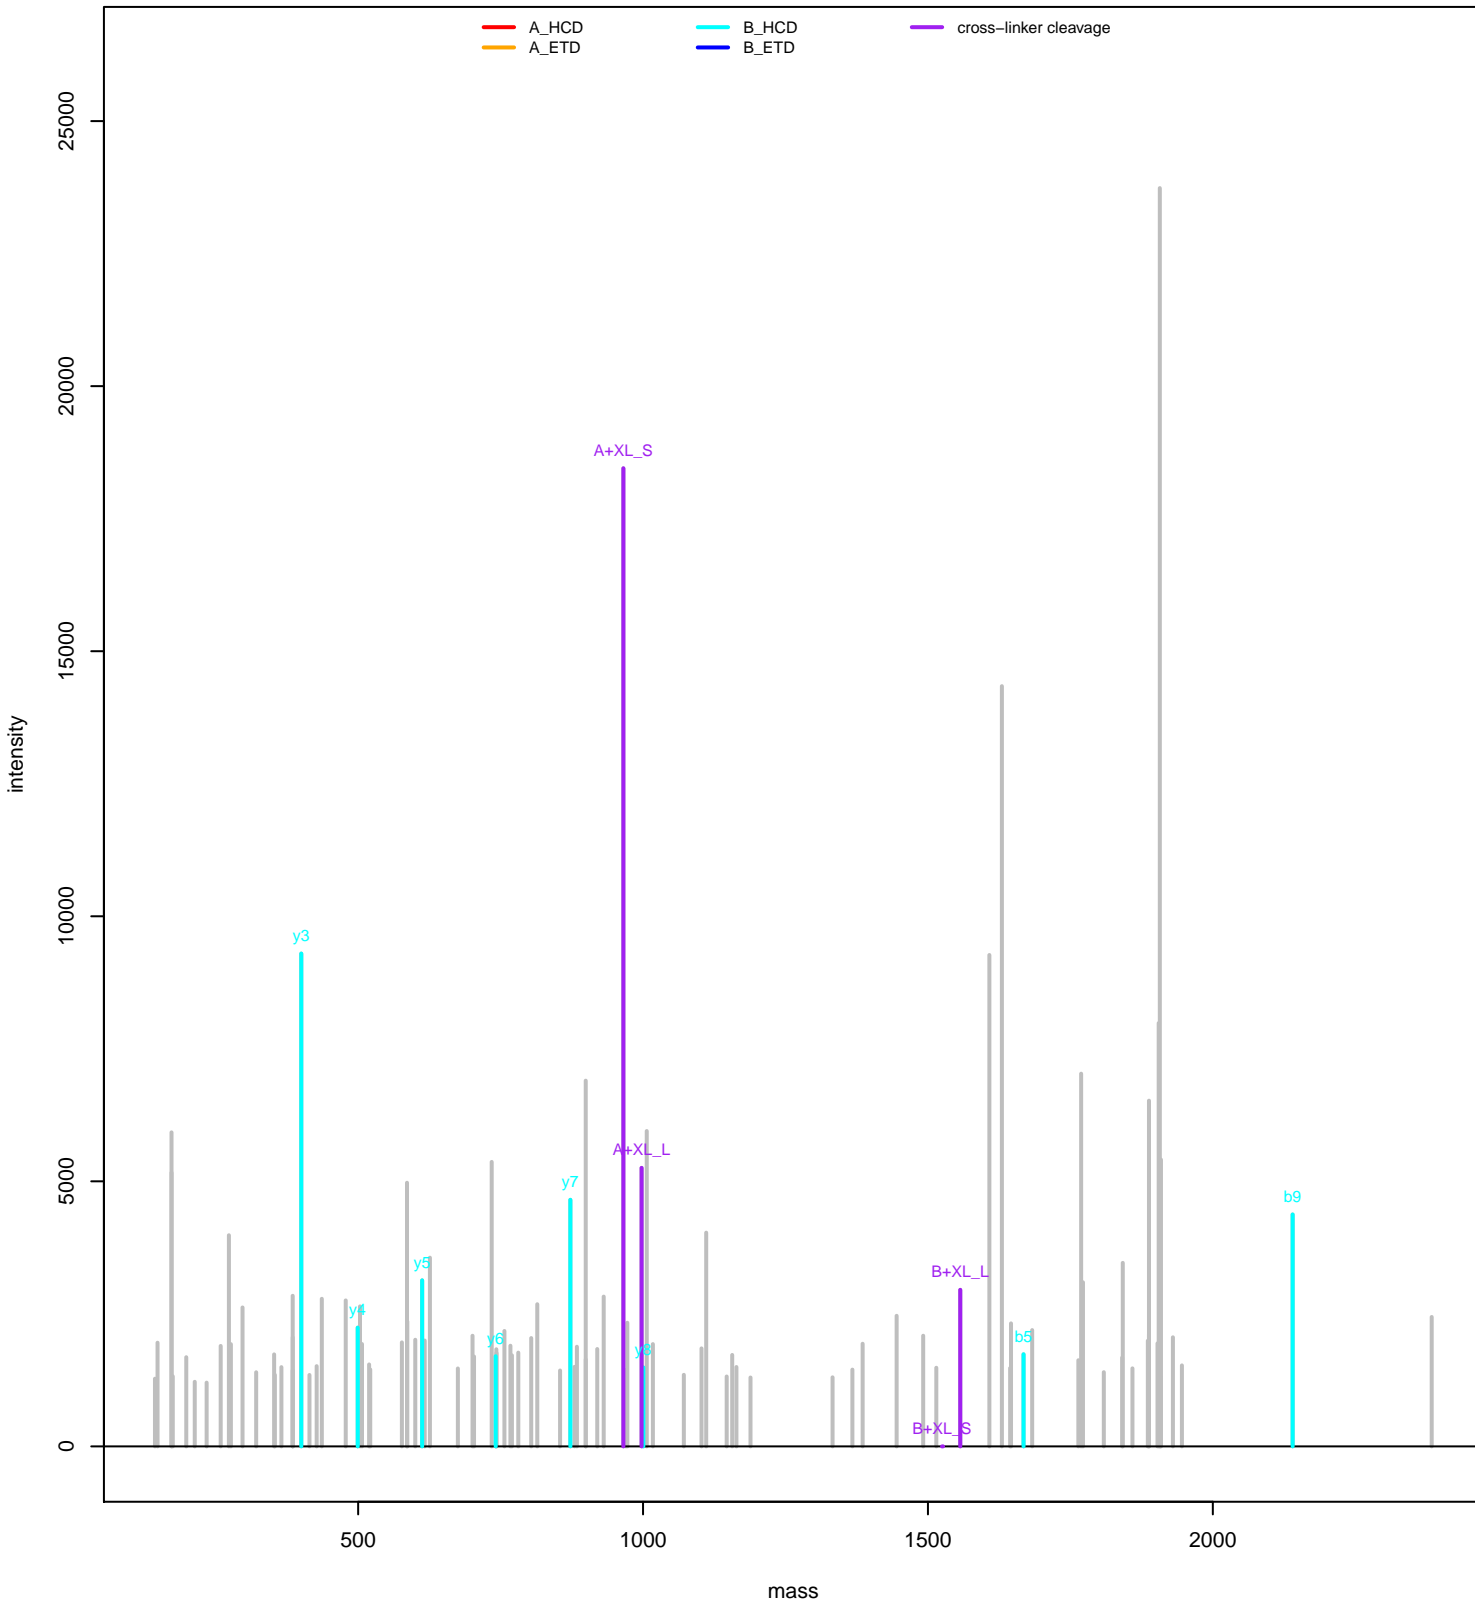

LSQSGHKR+XL\_S

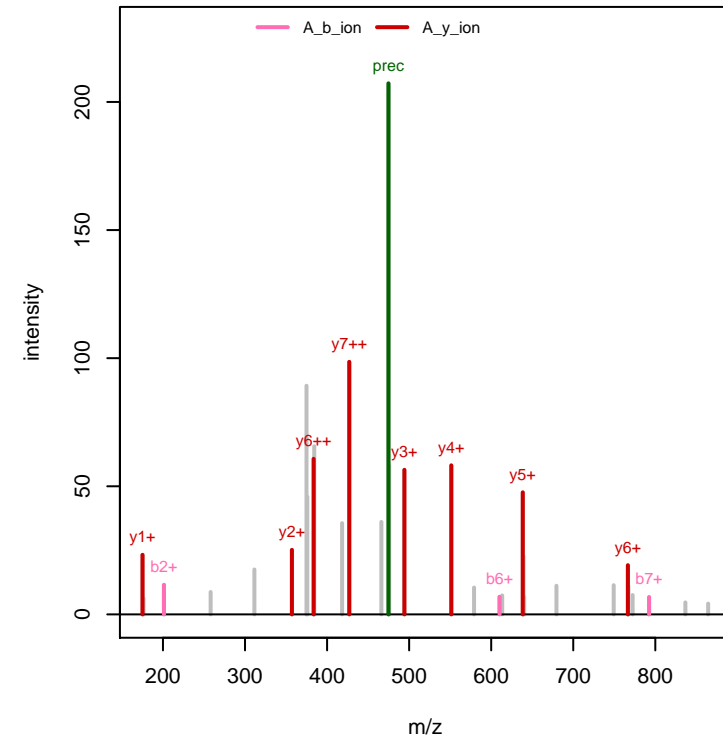

DNKLQMELVPER+XL\_S

LSQSGHKR+XL\_L

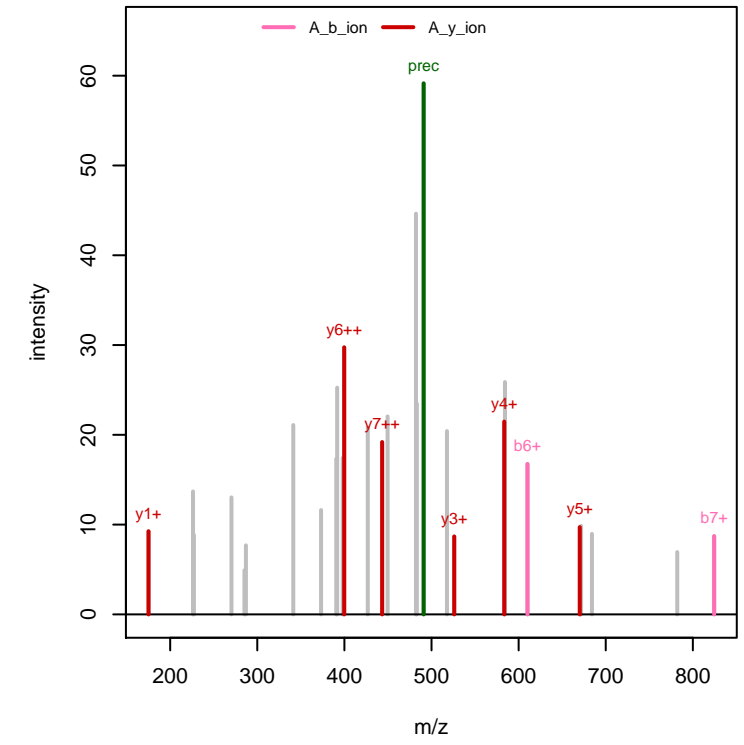

DNKLQMELVPER+XL\_L

FEKDTGIK  
GYNGLAEVGGK

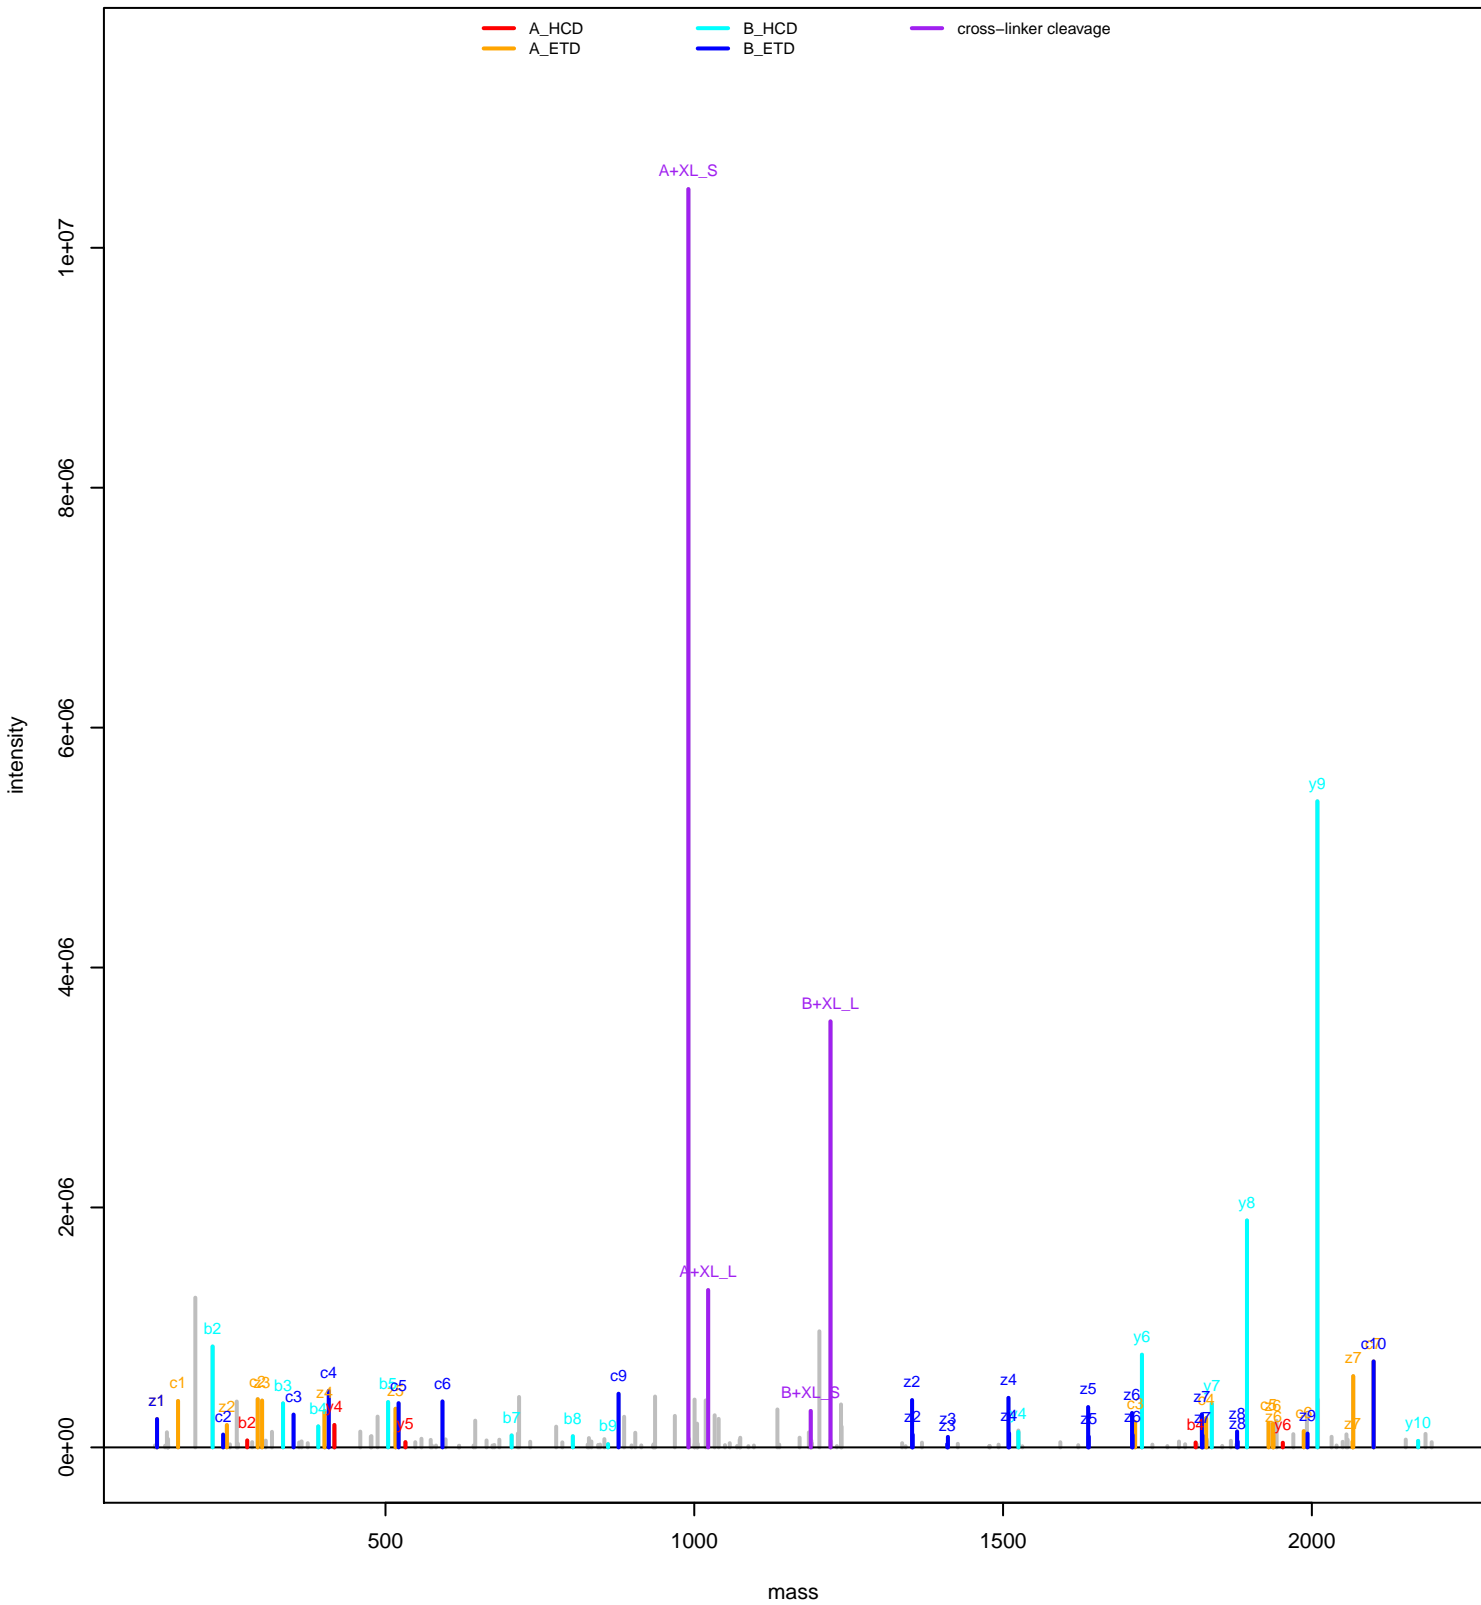

FEKDTGIK+XL\_S

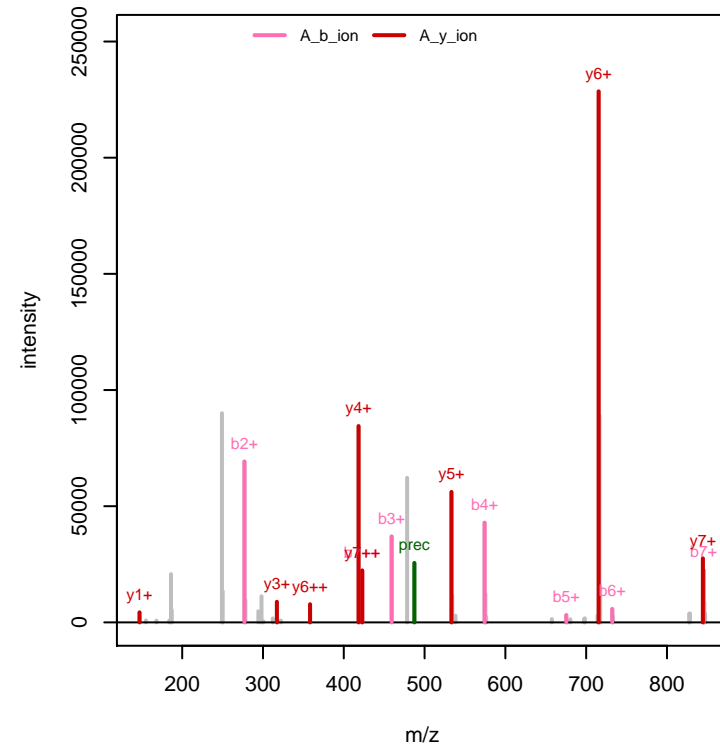

FEKDTGIK+XL\_L

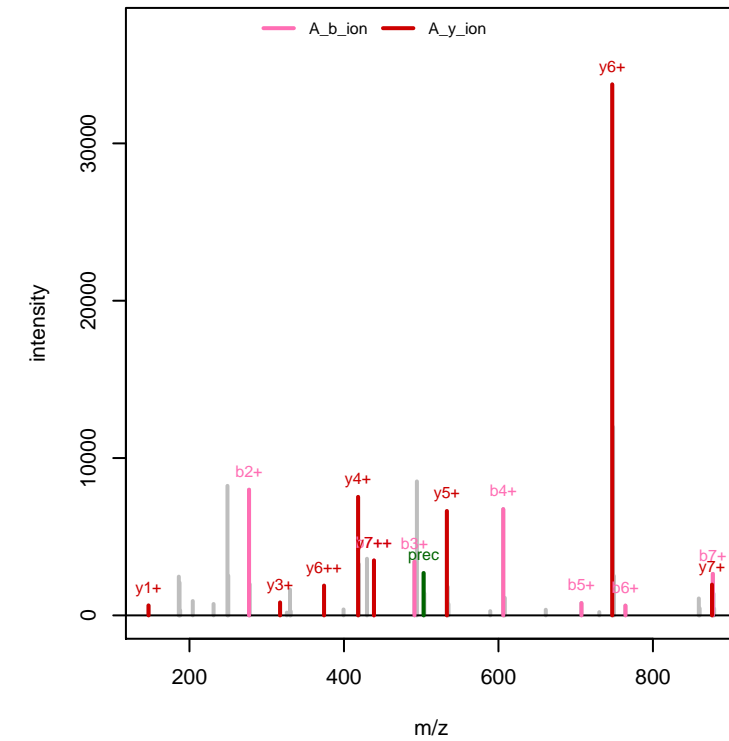

GYNGLAEVGGK+XL\_S

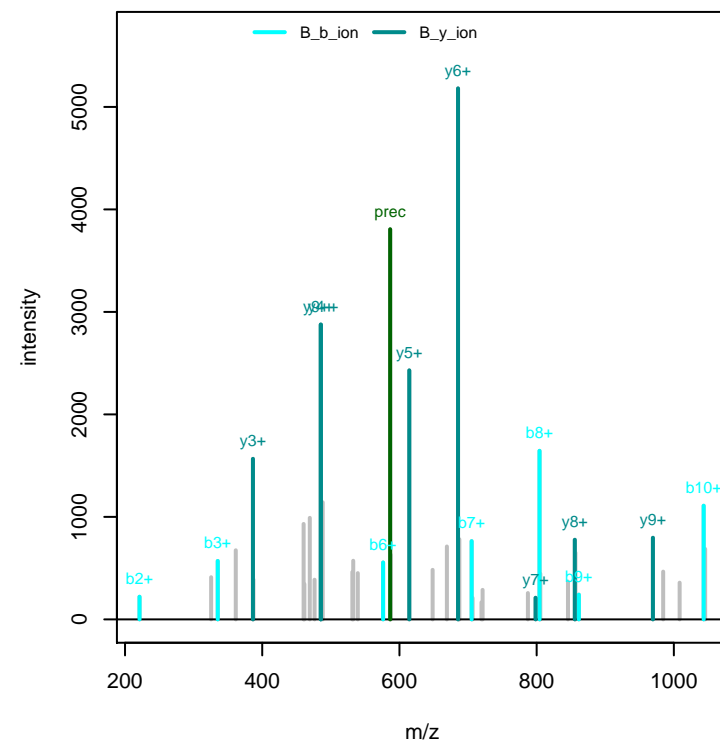

GYNGLAEVGGK+XL\_L

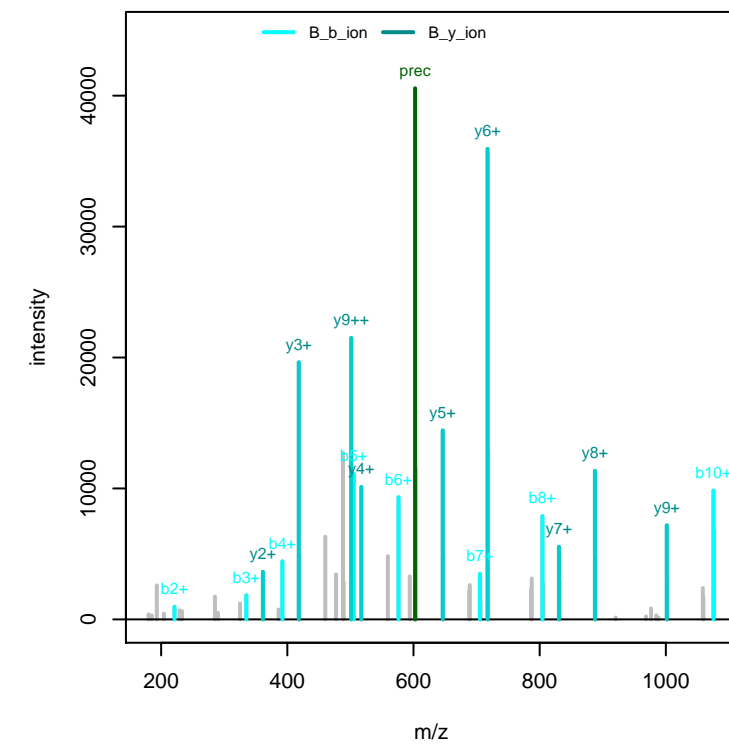

**KGDVLK  
ITIKEAIPRGK**

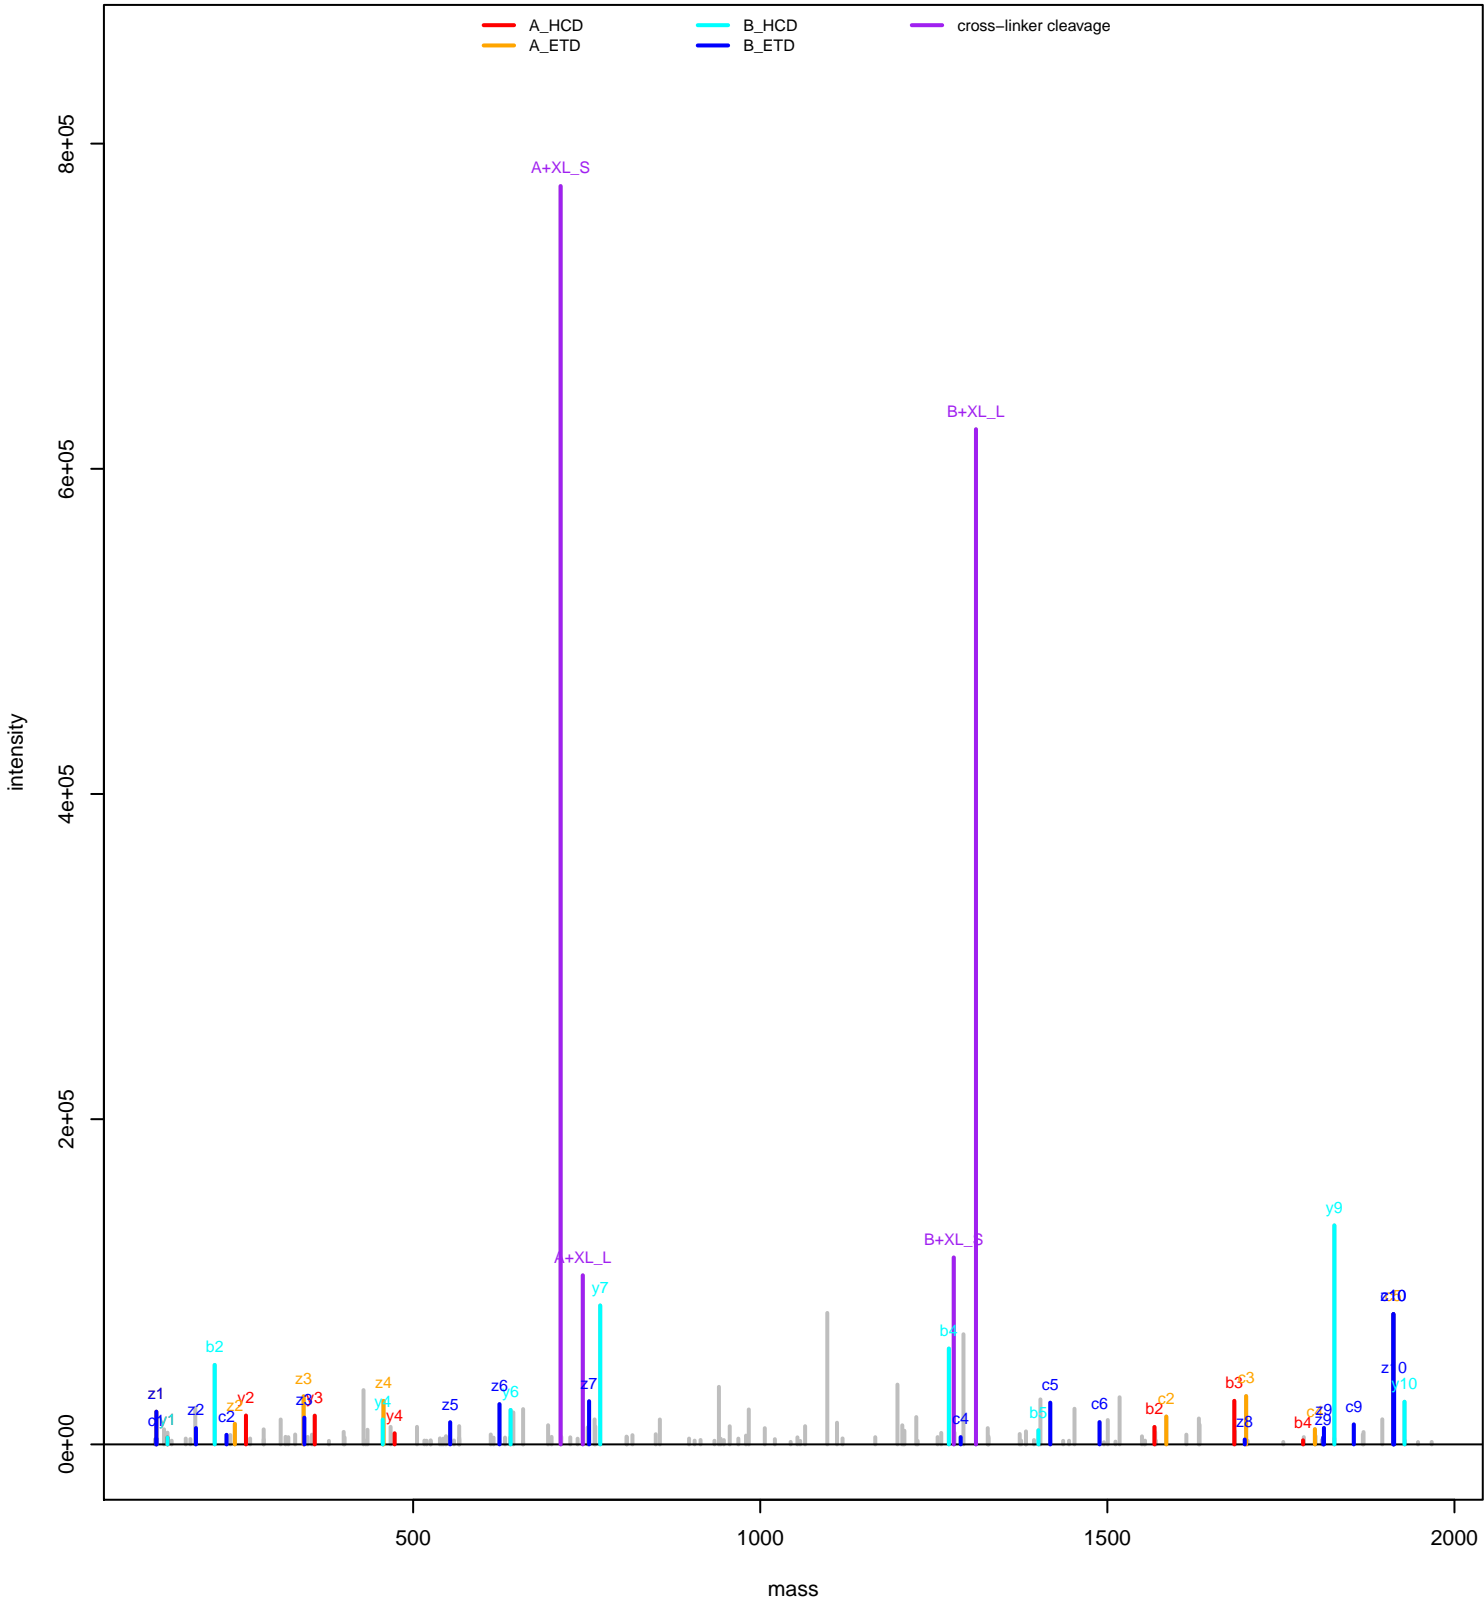

**KGDVLK+XL\_S**

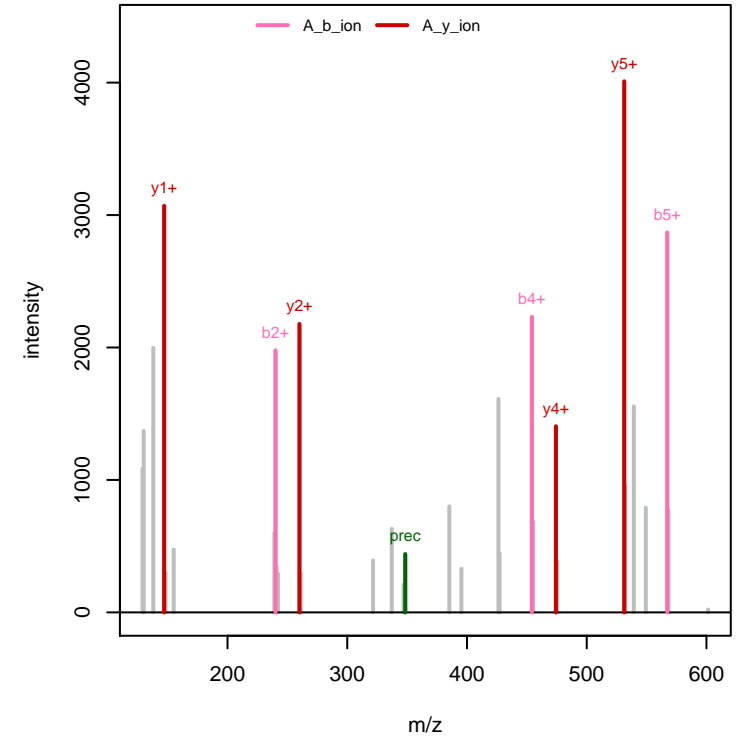

**KGDVLK+XL\_L**

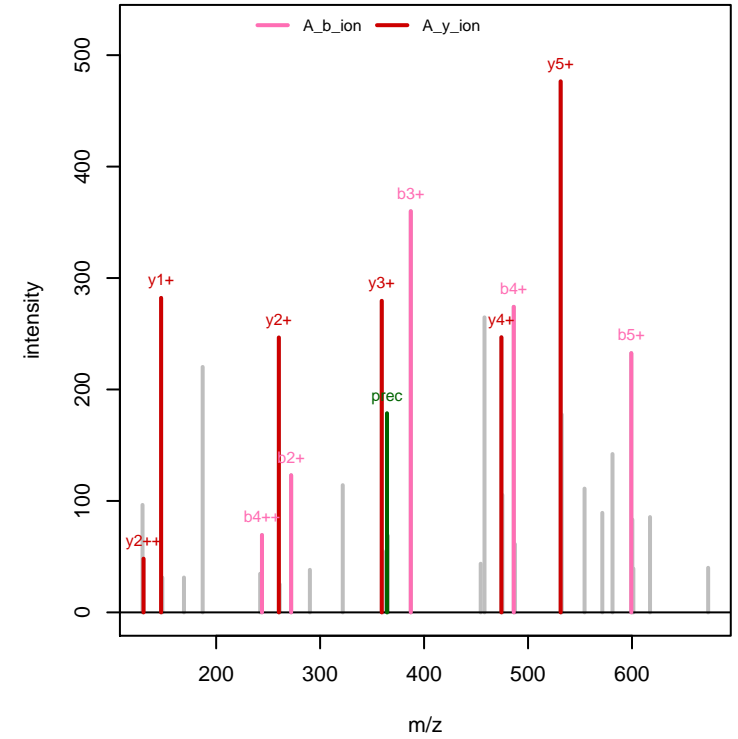

**ITIKEAIPRGK+XL\_S**

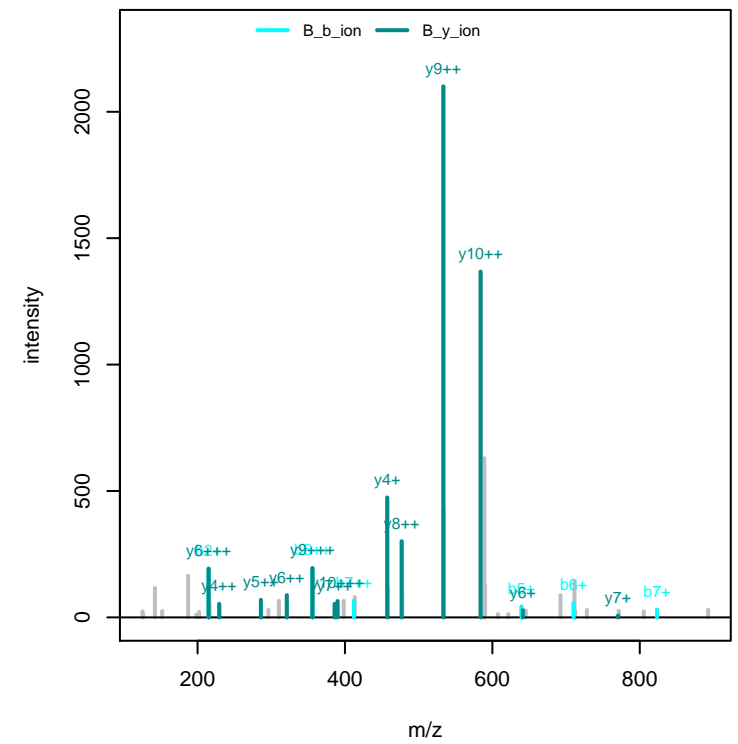

**ITIKEAIPRGK+XL\_L**

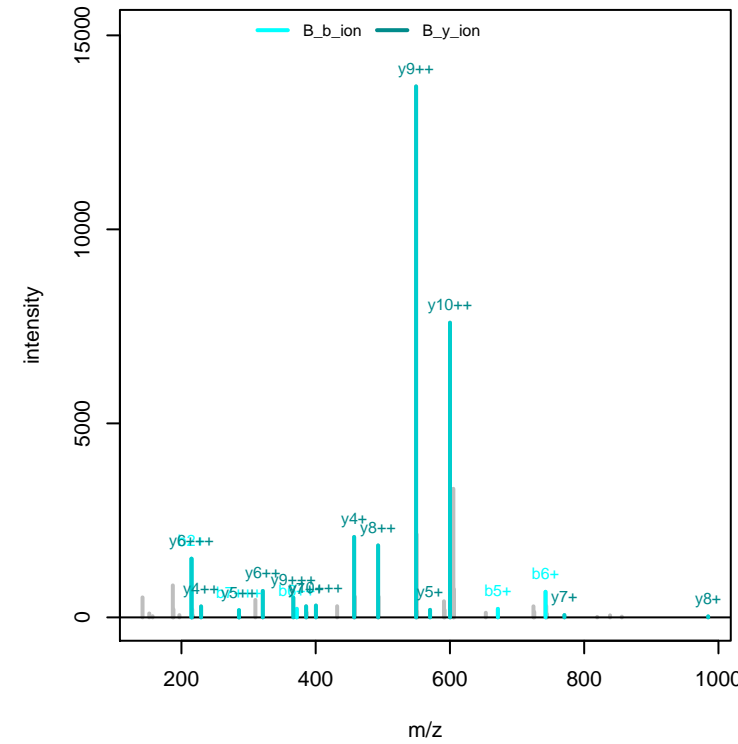

NGEKQLIK  
NLDNDDIEYKYRR

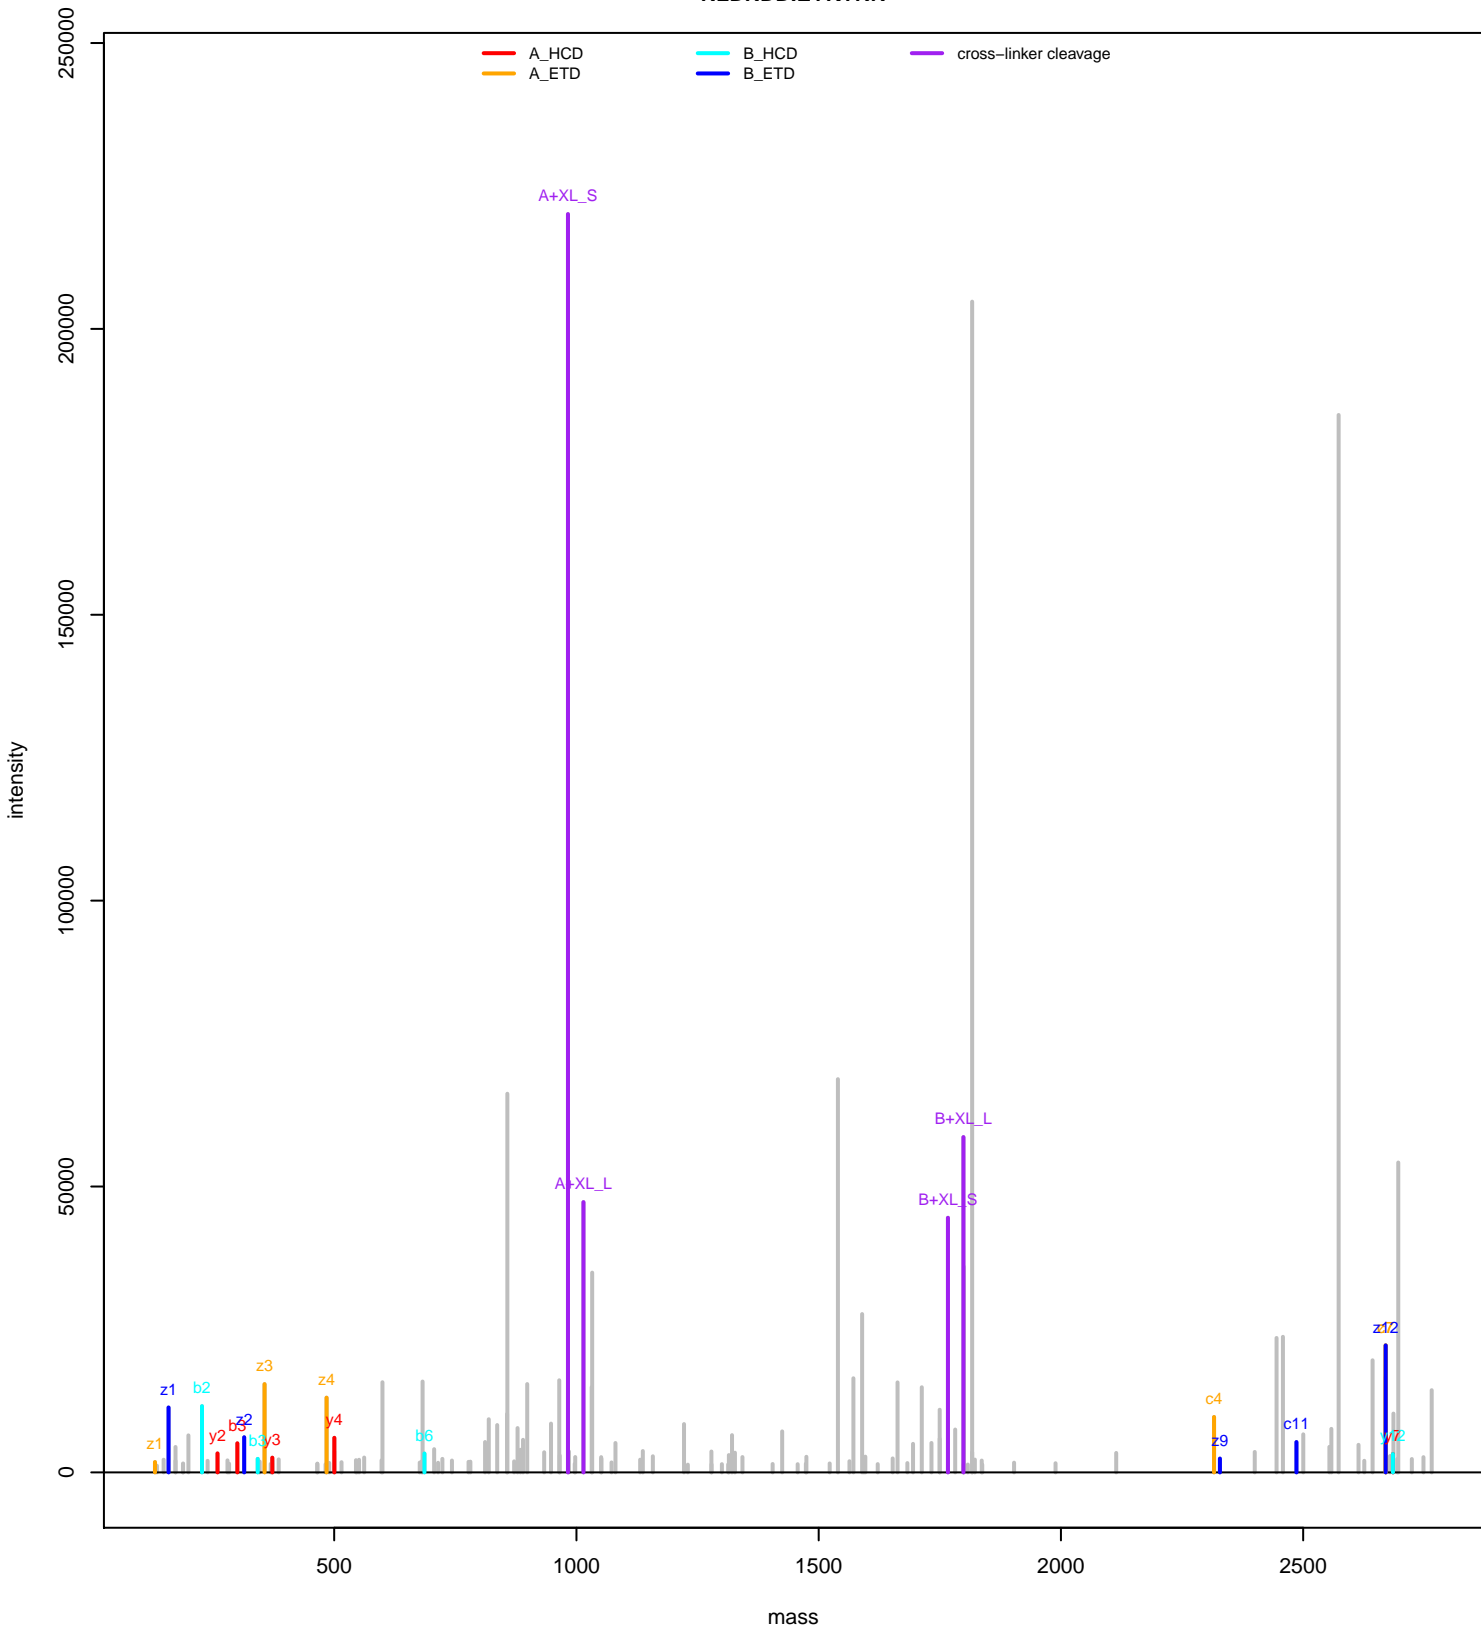

NGEKQLIK+XL\_S

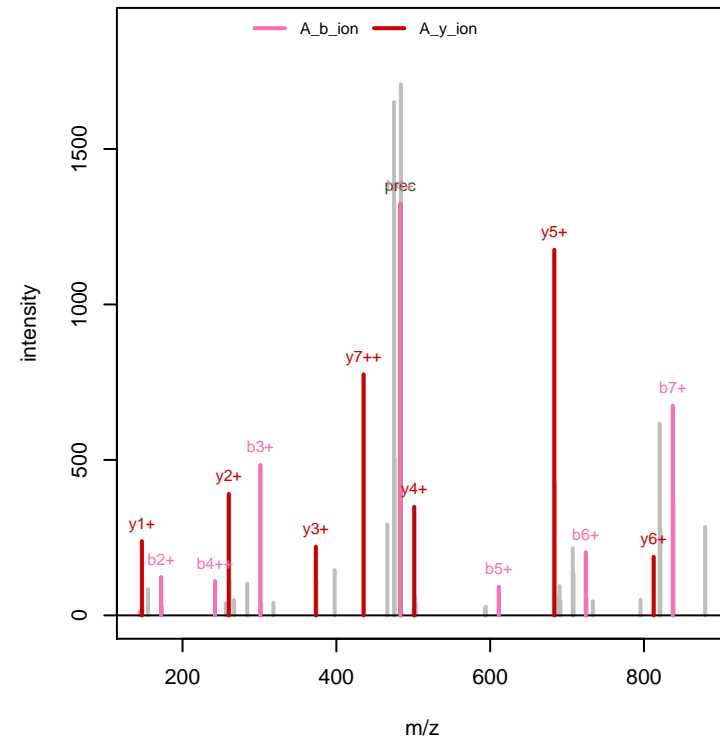

NGEKQLIK+XL\_L

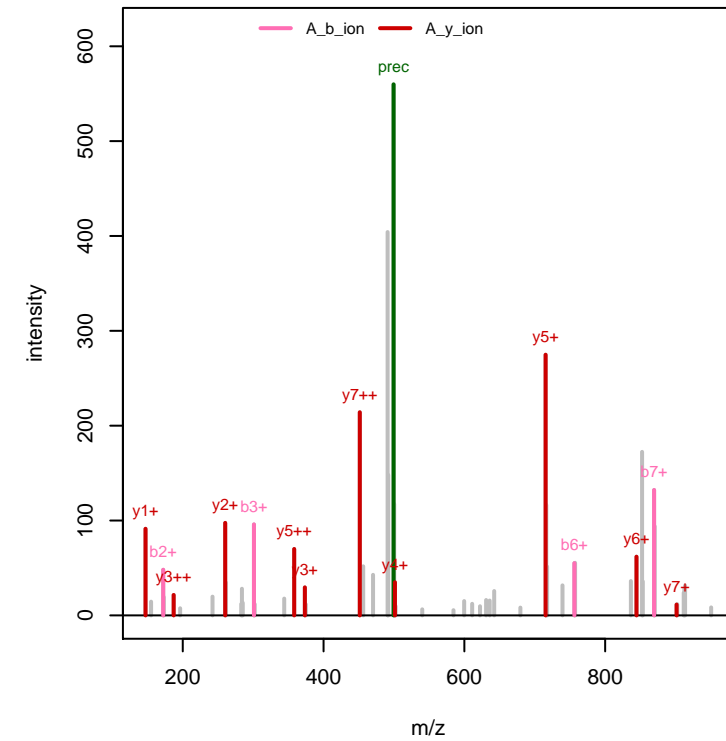

NLDNDDIEYKYRR+XL\_S

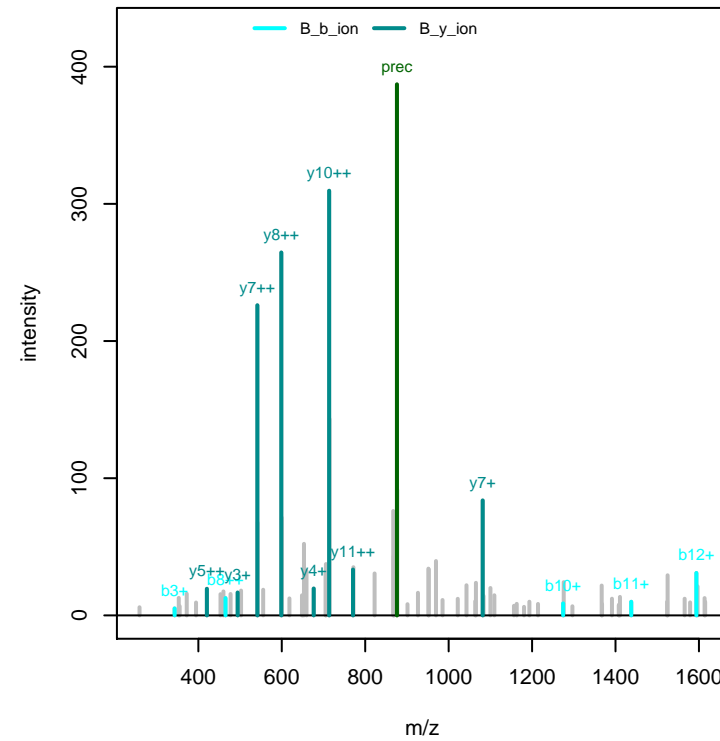

NLDNDDIEYKYRR+XL\_L

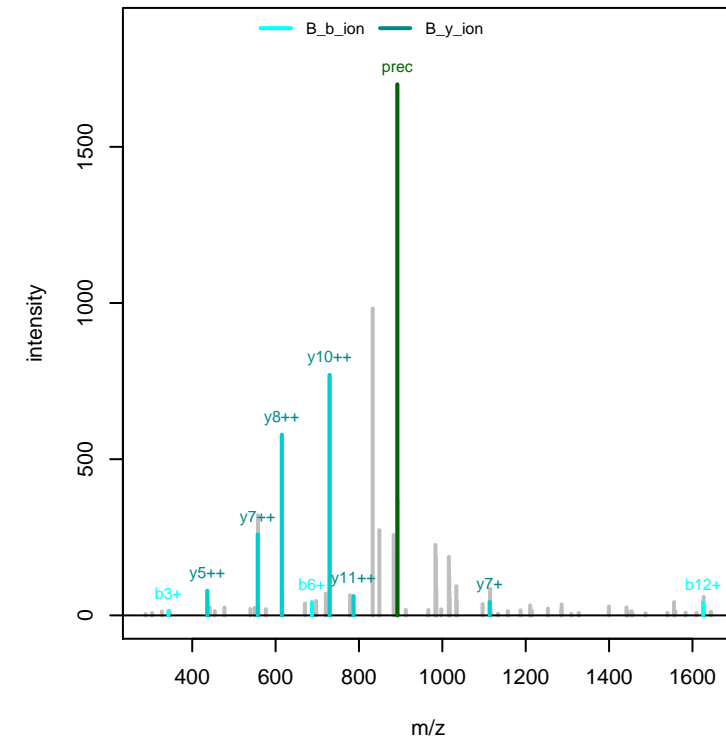

AAGANKVAVIK  
AVRGATGLGLKEAK

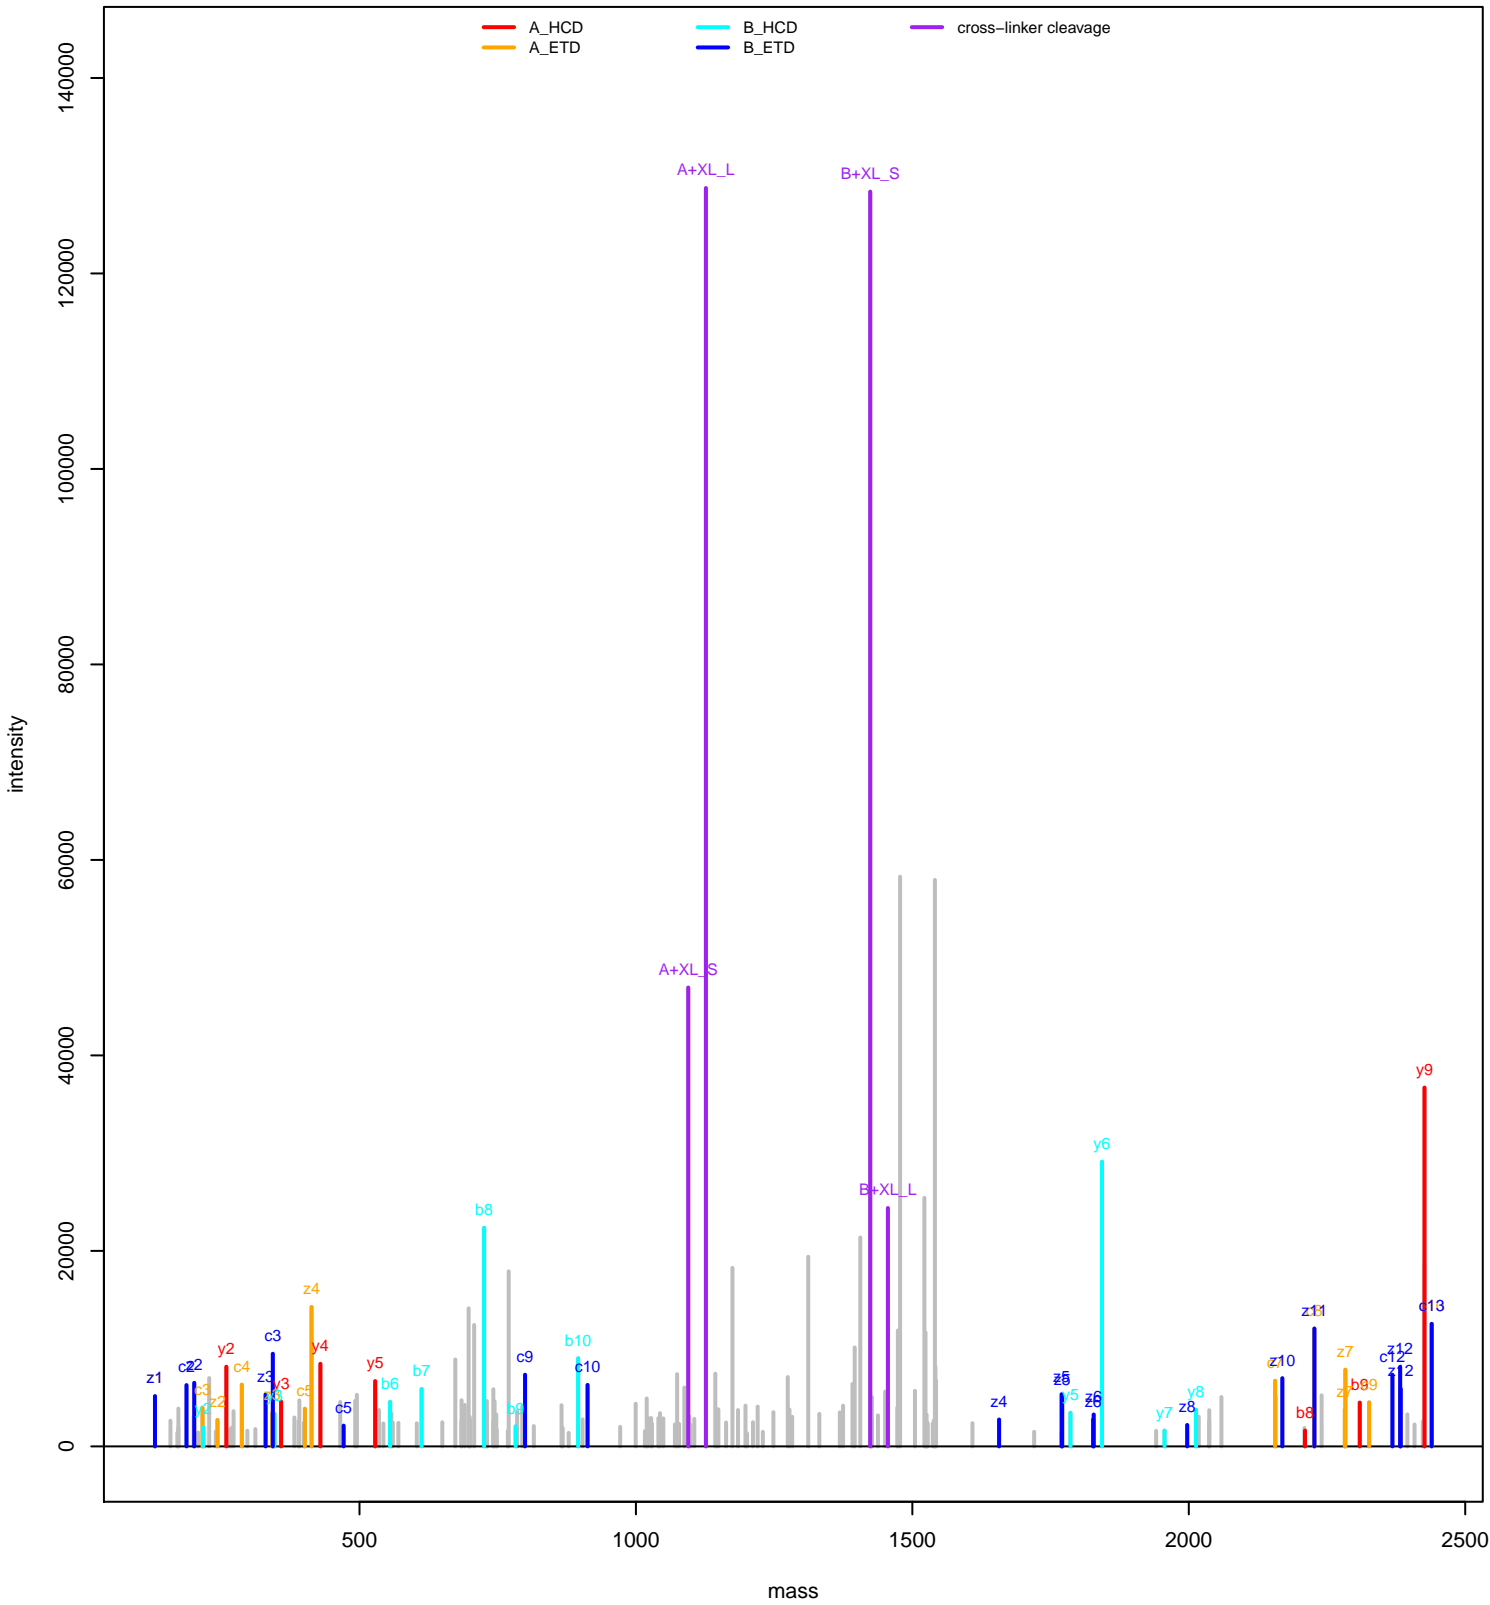

AAGANKVAVIK+XL\_S

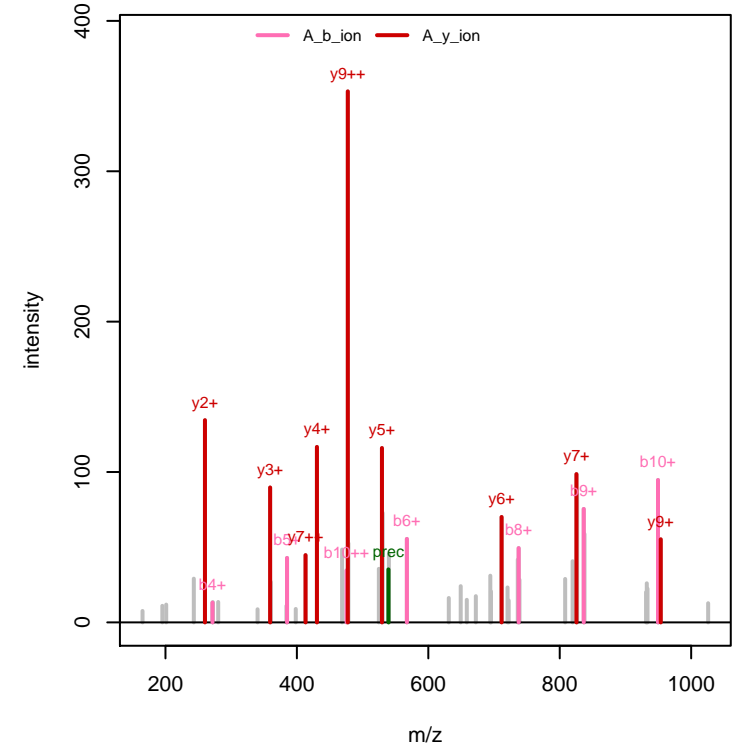

AAGANKVAVIK+XL\_L

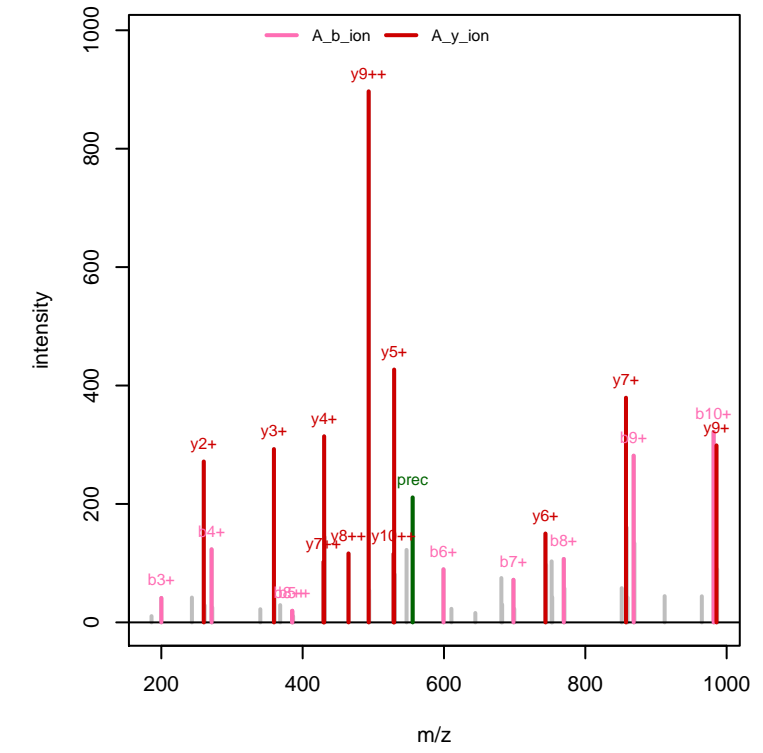

AVRGATGLGLKEAK+XL\_S

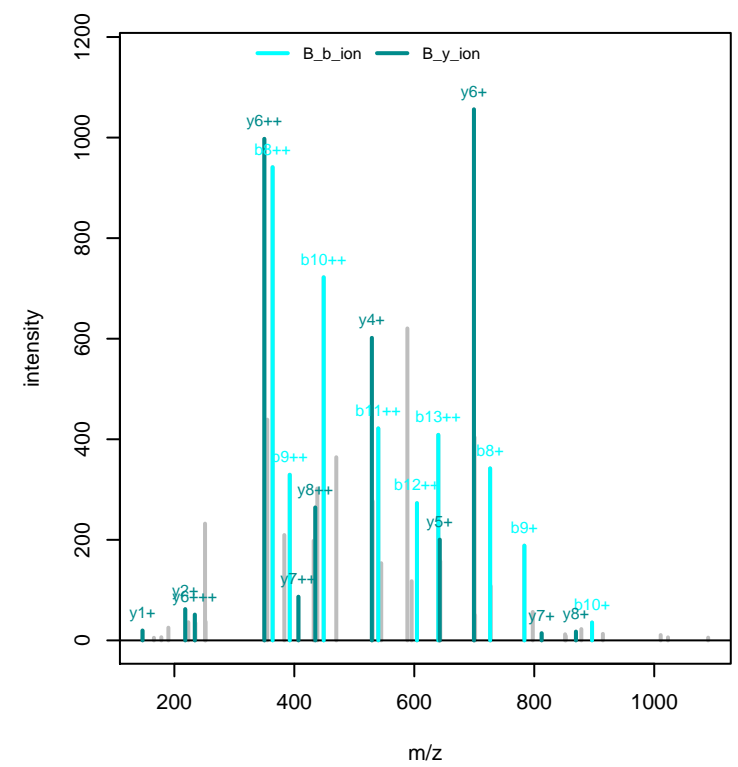

AVRGATGLGLKEAK+XL\_L

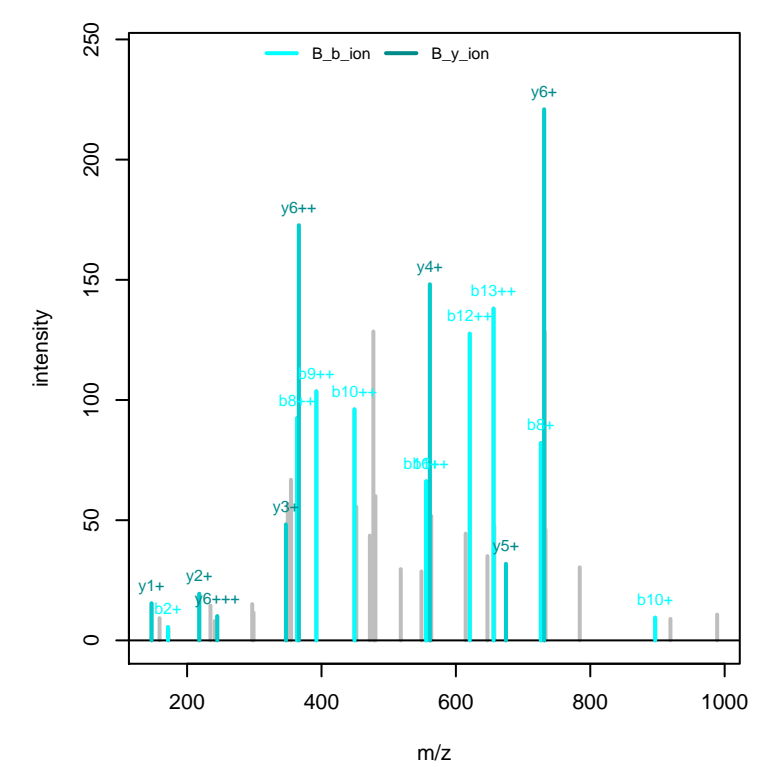

**KAGEGEAVR**  
**LEHNPVKYIPEELR**

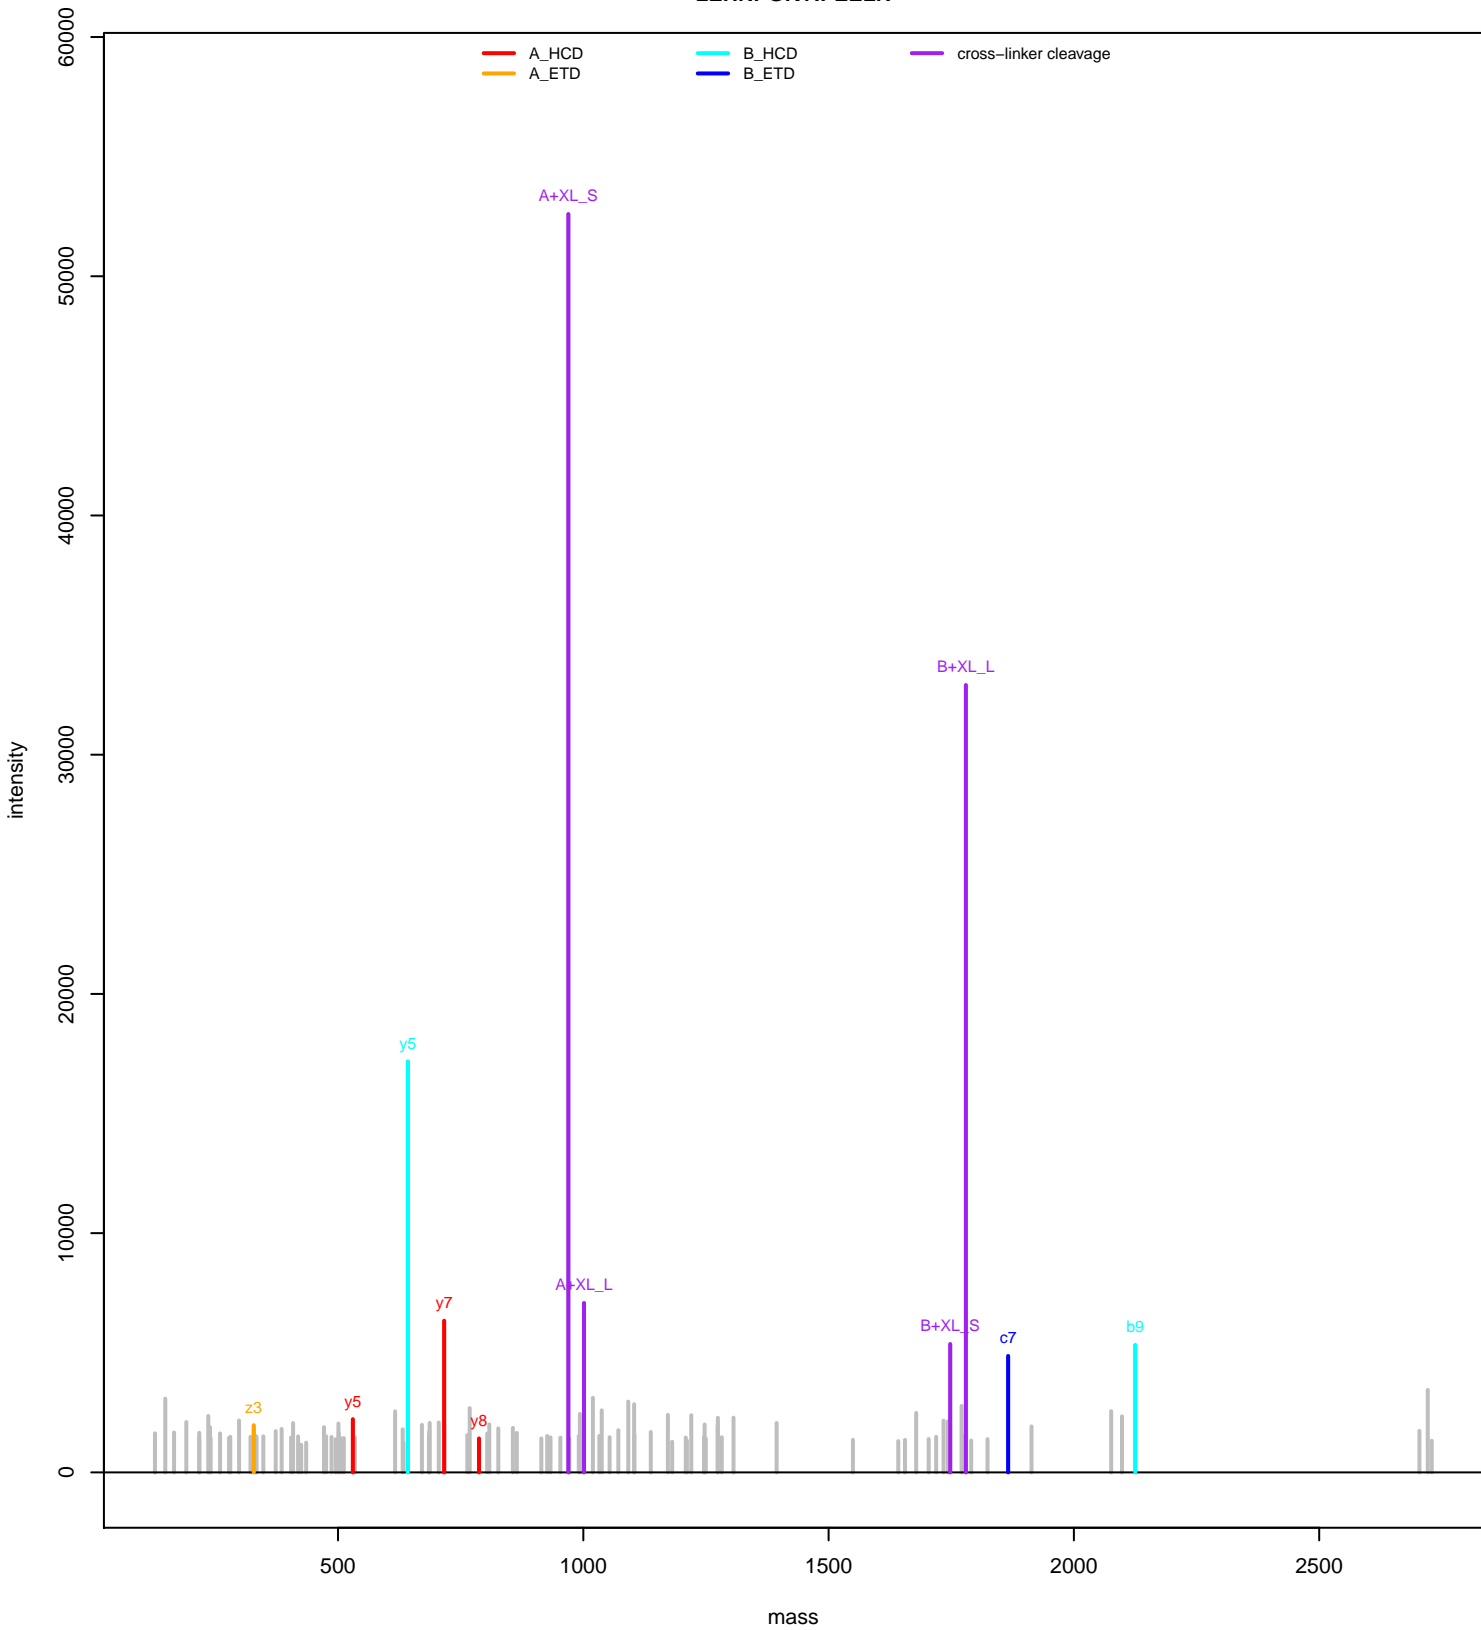

**KAGEGEAVR+XL\_S**

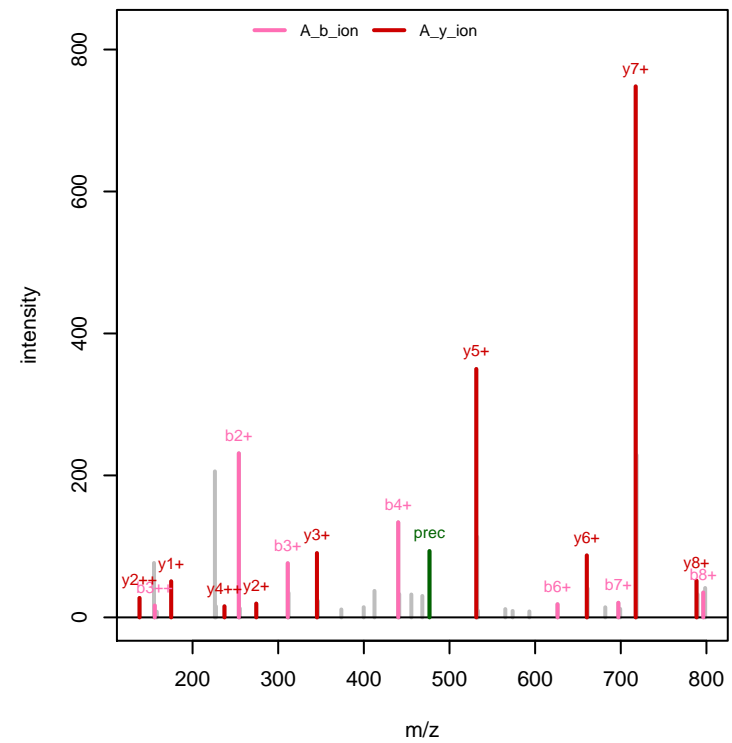

**KAGEGEAVR+XL\_L**

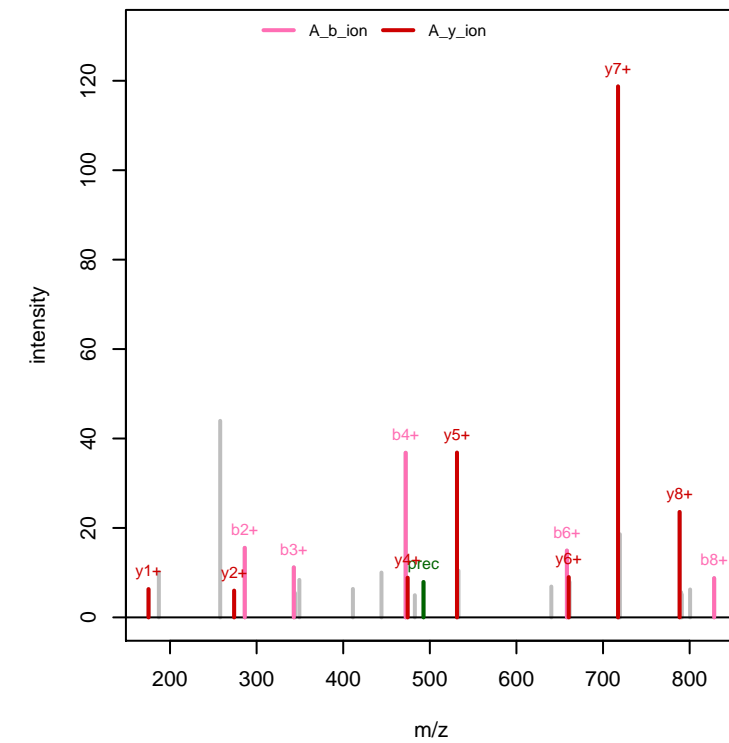

**LEHNPVKYIPEELR+XL\_S**

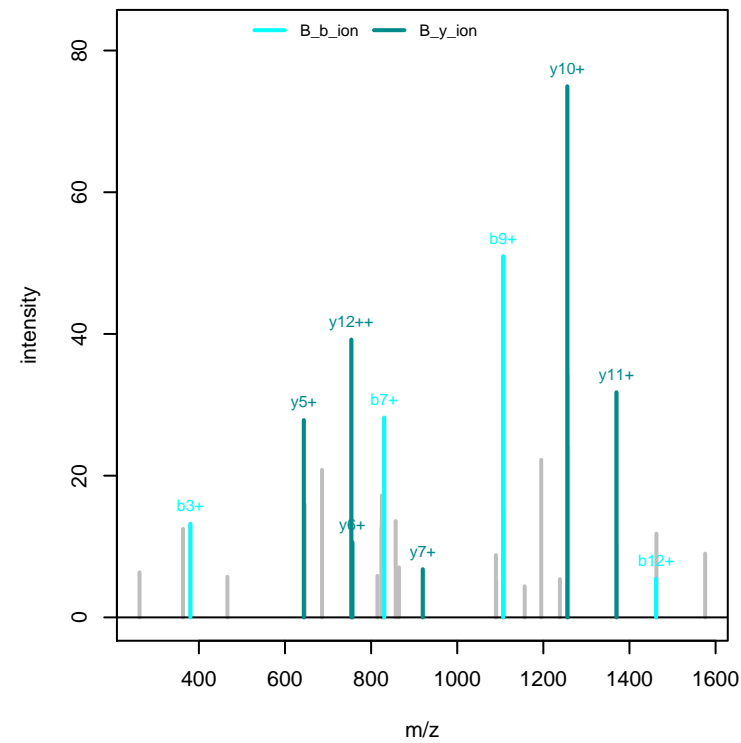

**LEHNPVKYIPEELR+XL\_L**

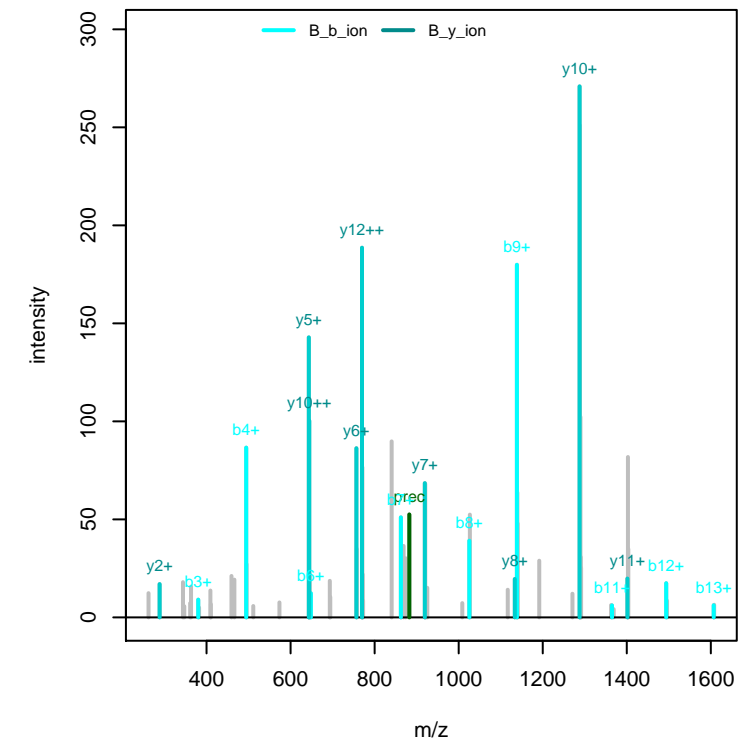

VKAALVDHDNIK  
EGSVKGYAGDTATTSEIK

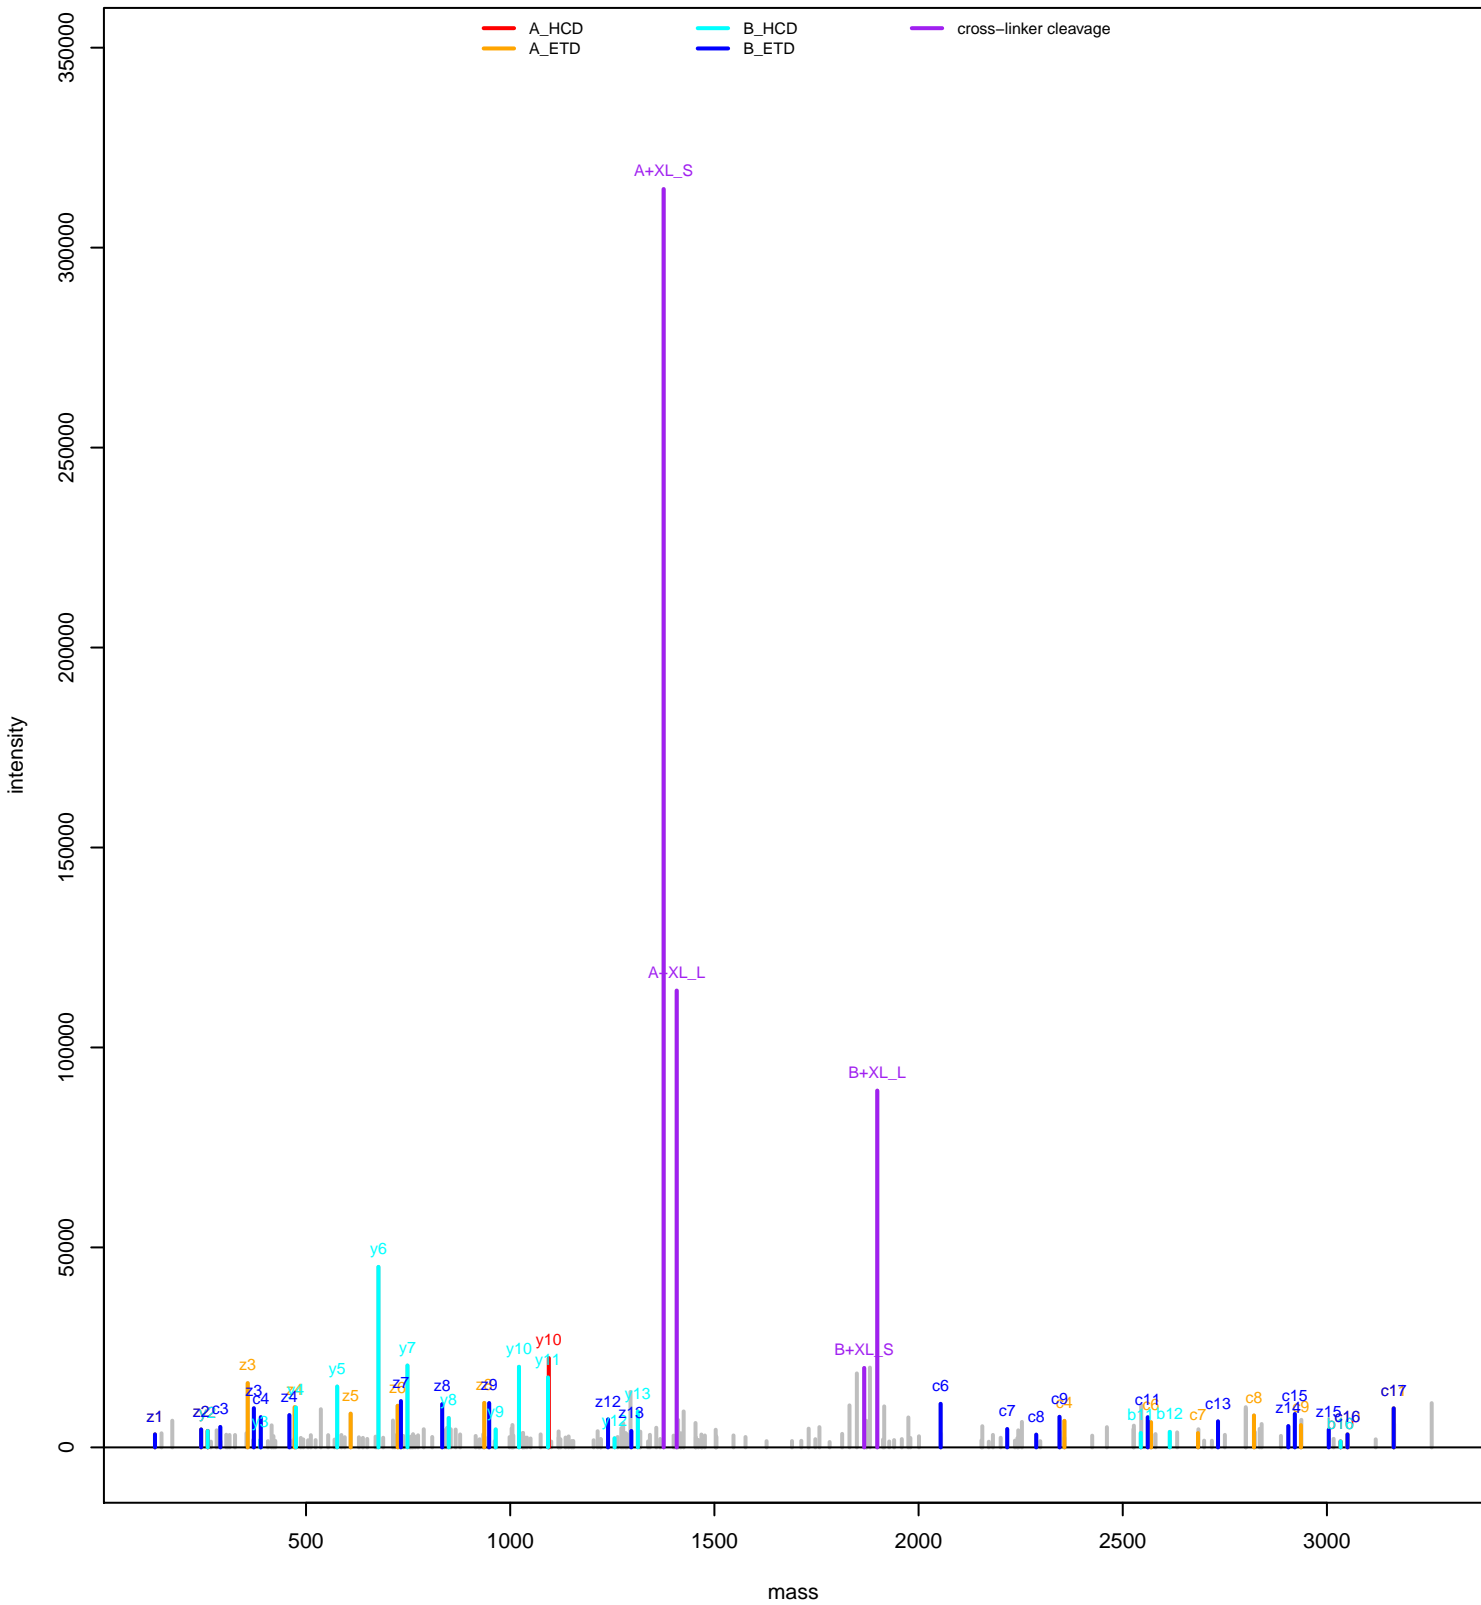

VKAALVDHDNIK+XL\_S

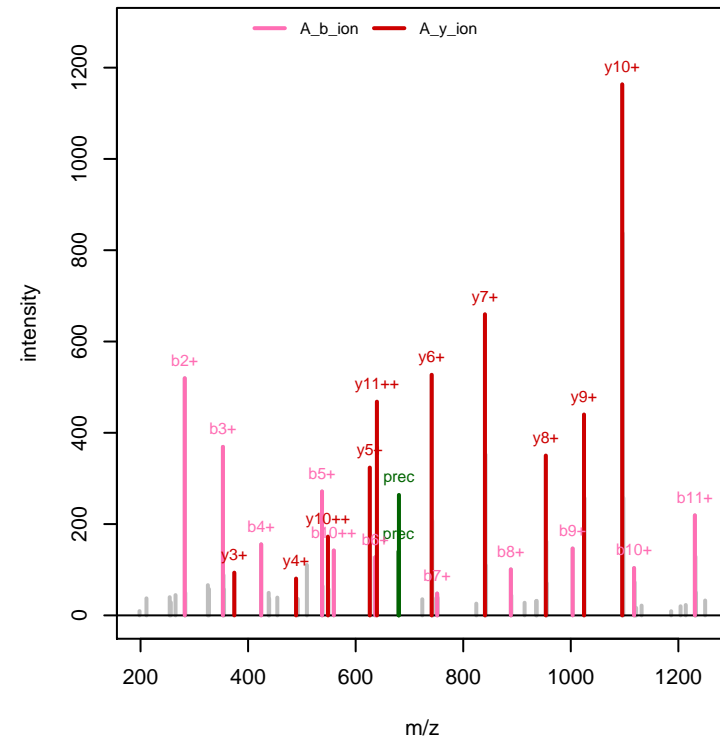

VKAALVDHDNIK+XL\_L

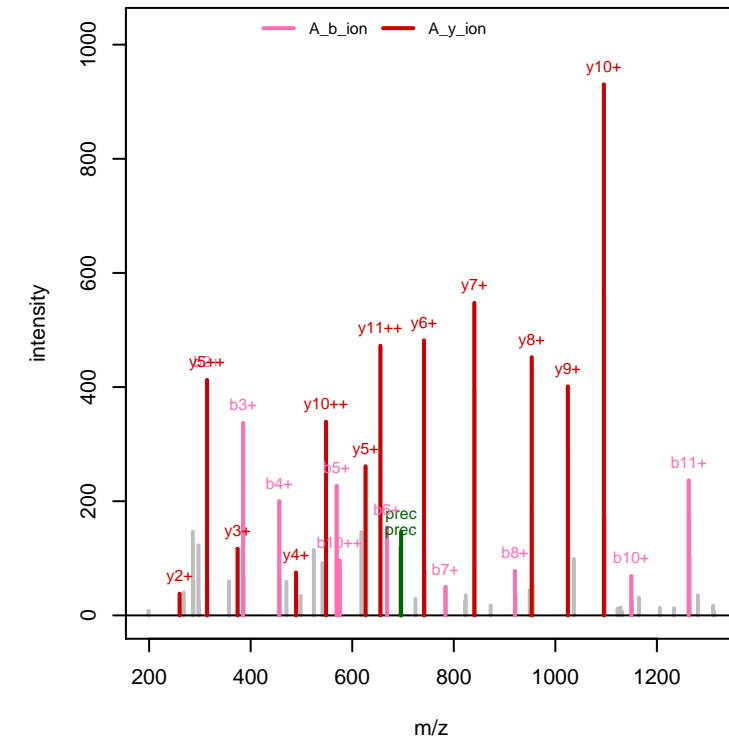

EGSVKGYAGDTATTSEIK+XL\_S

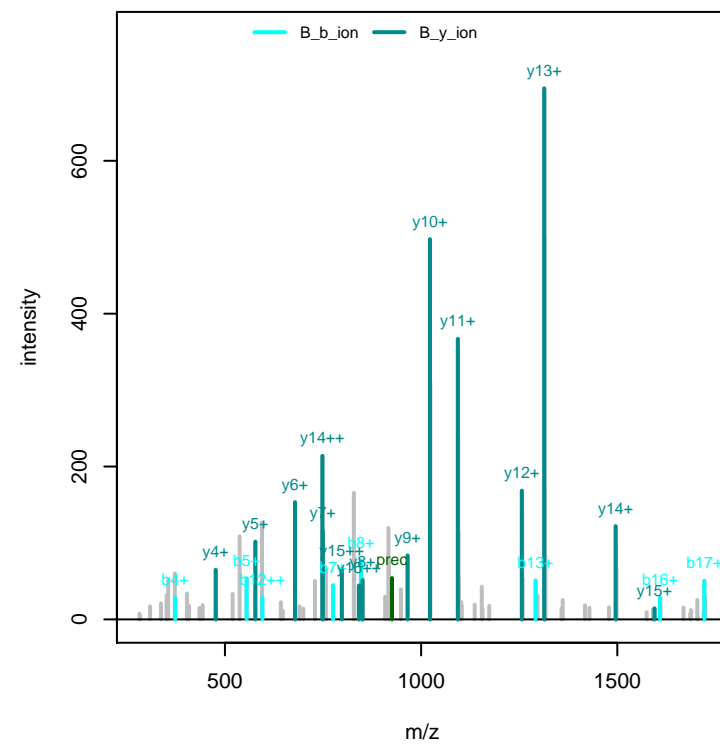

EGSVKGYAGDTATTSEIK+XL\_L

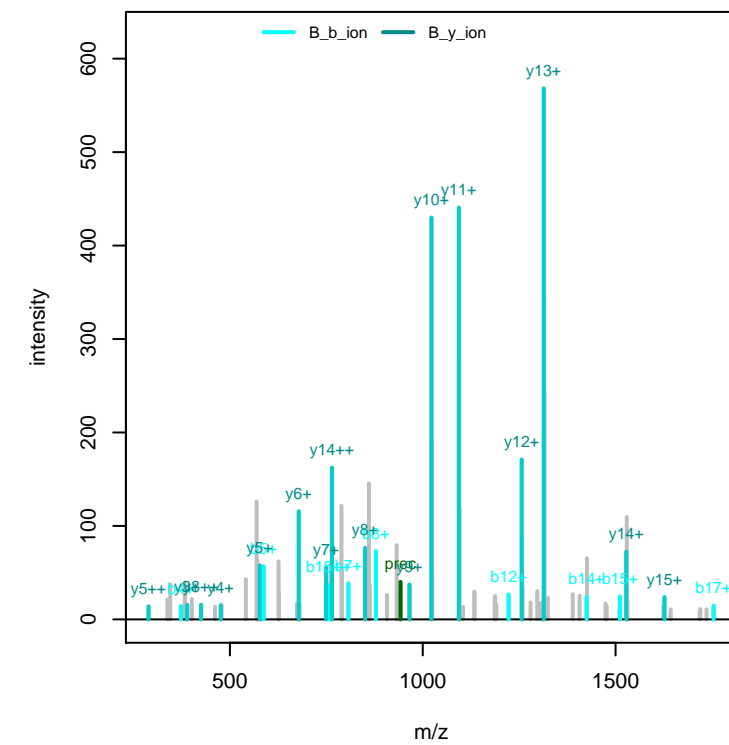



AFDQIDNAPEEKAR  
FESEVYILSKDEGGR

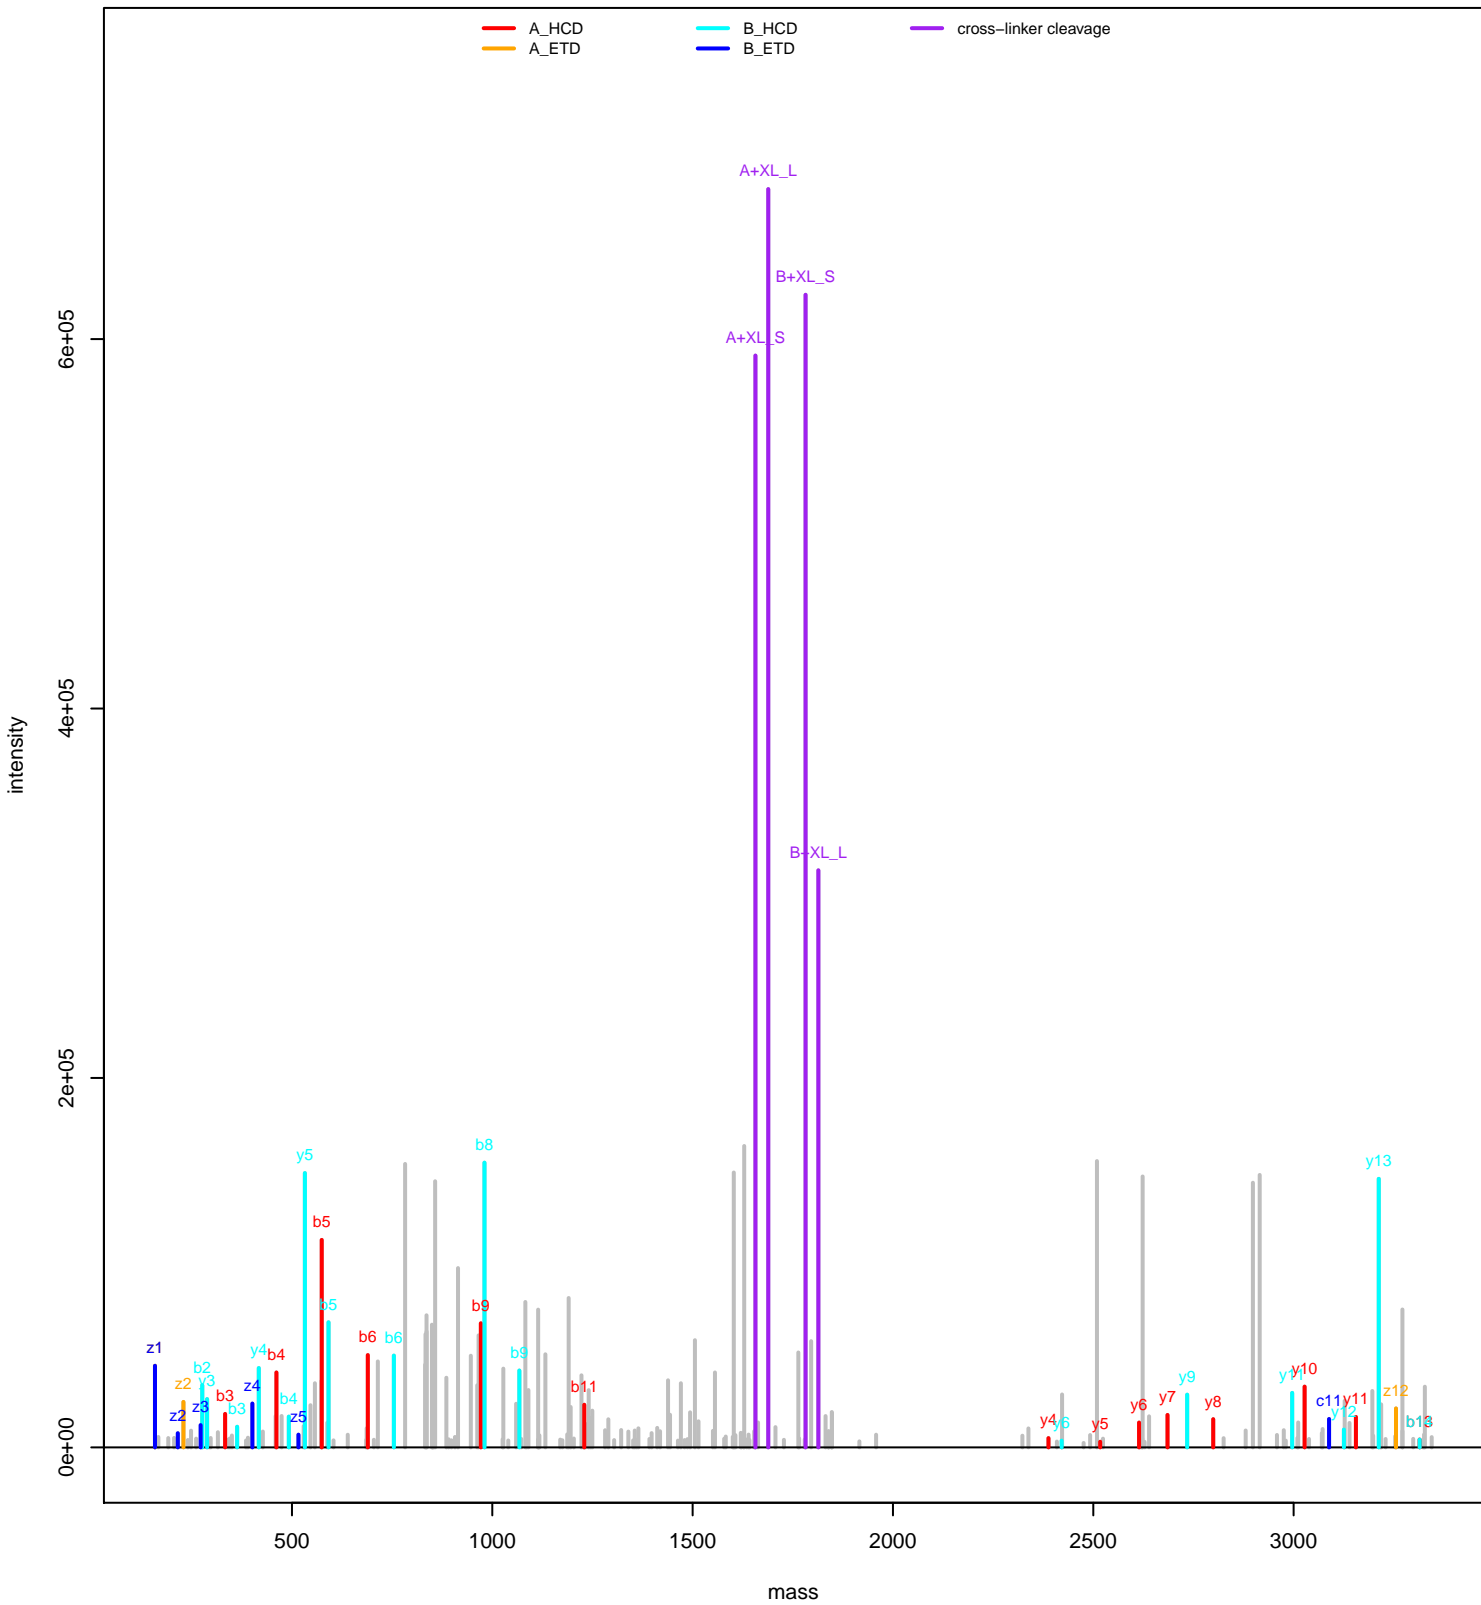

AFDQIDNAPEEKAR+XL\_S

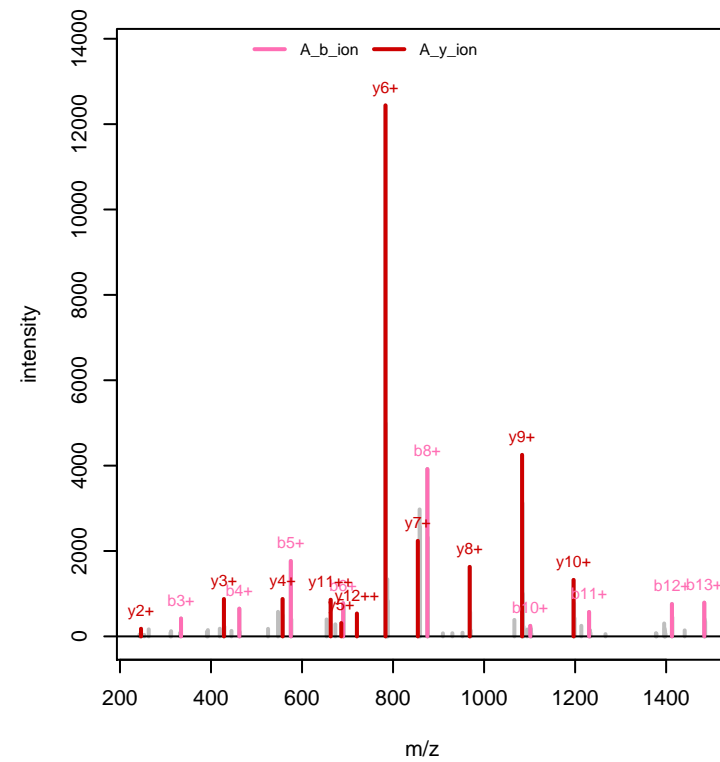

AFDQIDNAPEEKAR+XL\_L

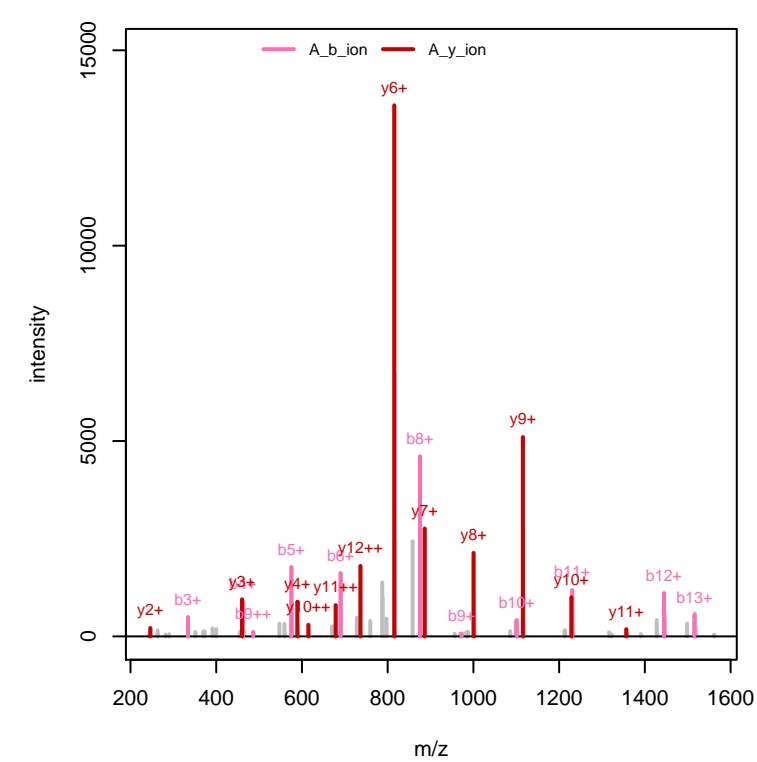

FESEVYILSKDEGGR+XL\_S

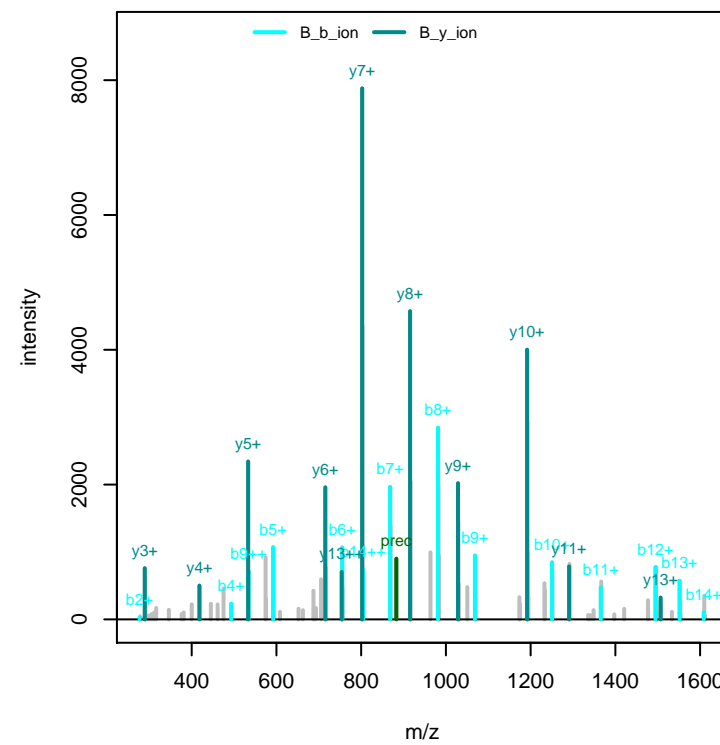

FESEVYILSKDEGGR+XL\_L

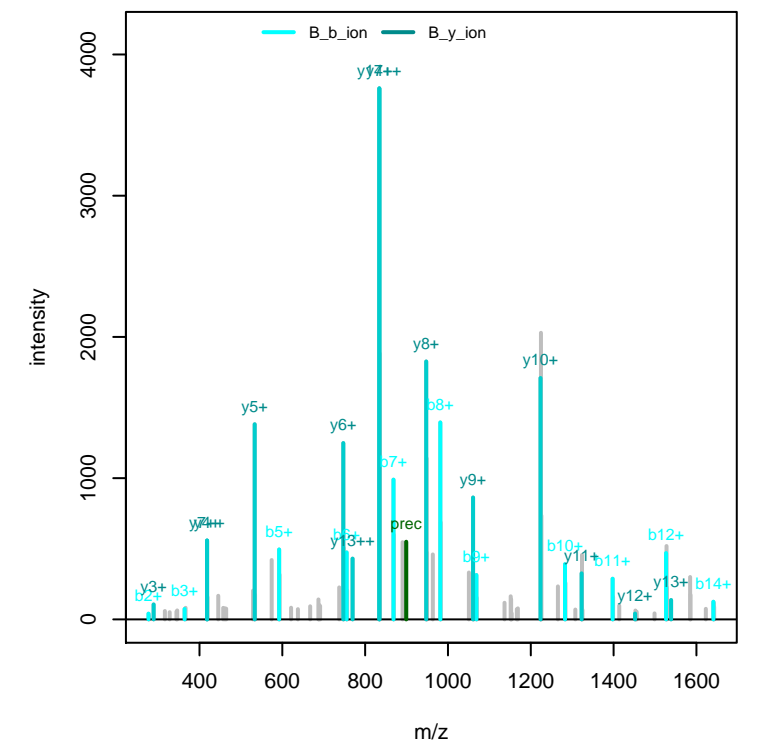

DFQKAER  
LKEIIHQMGGLR

A\_HCD B\_HCD cross-linker cleavage  
A\_ETD B\_ETD

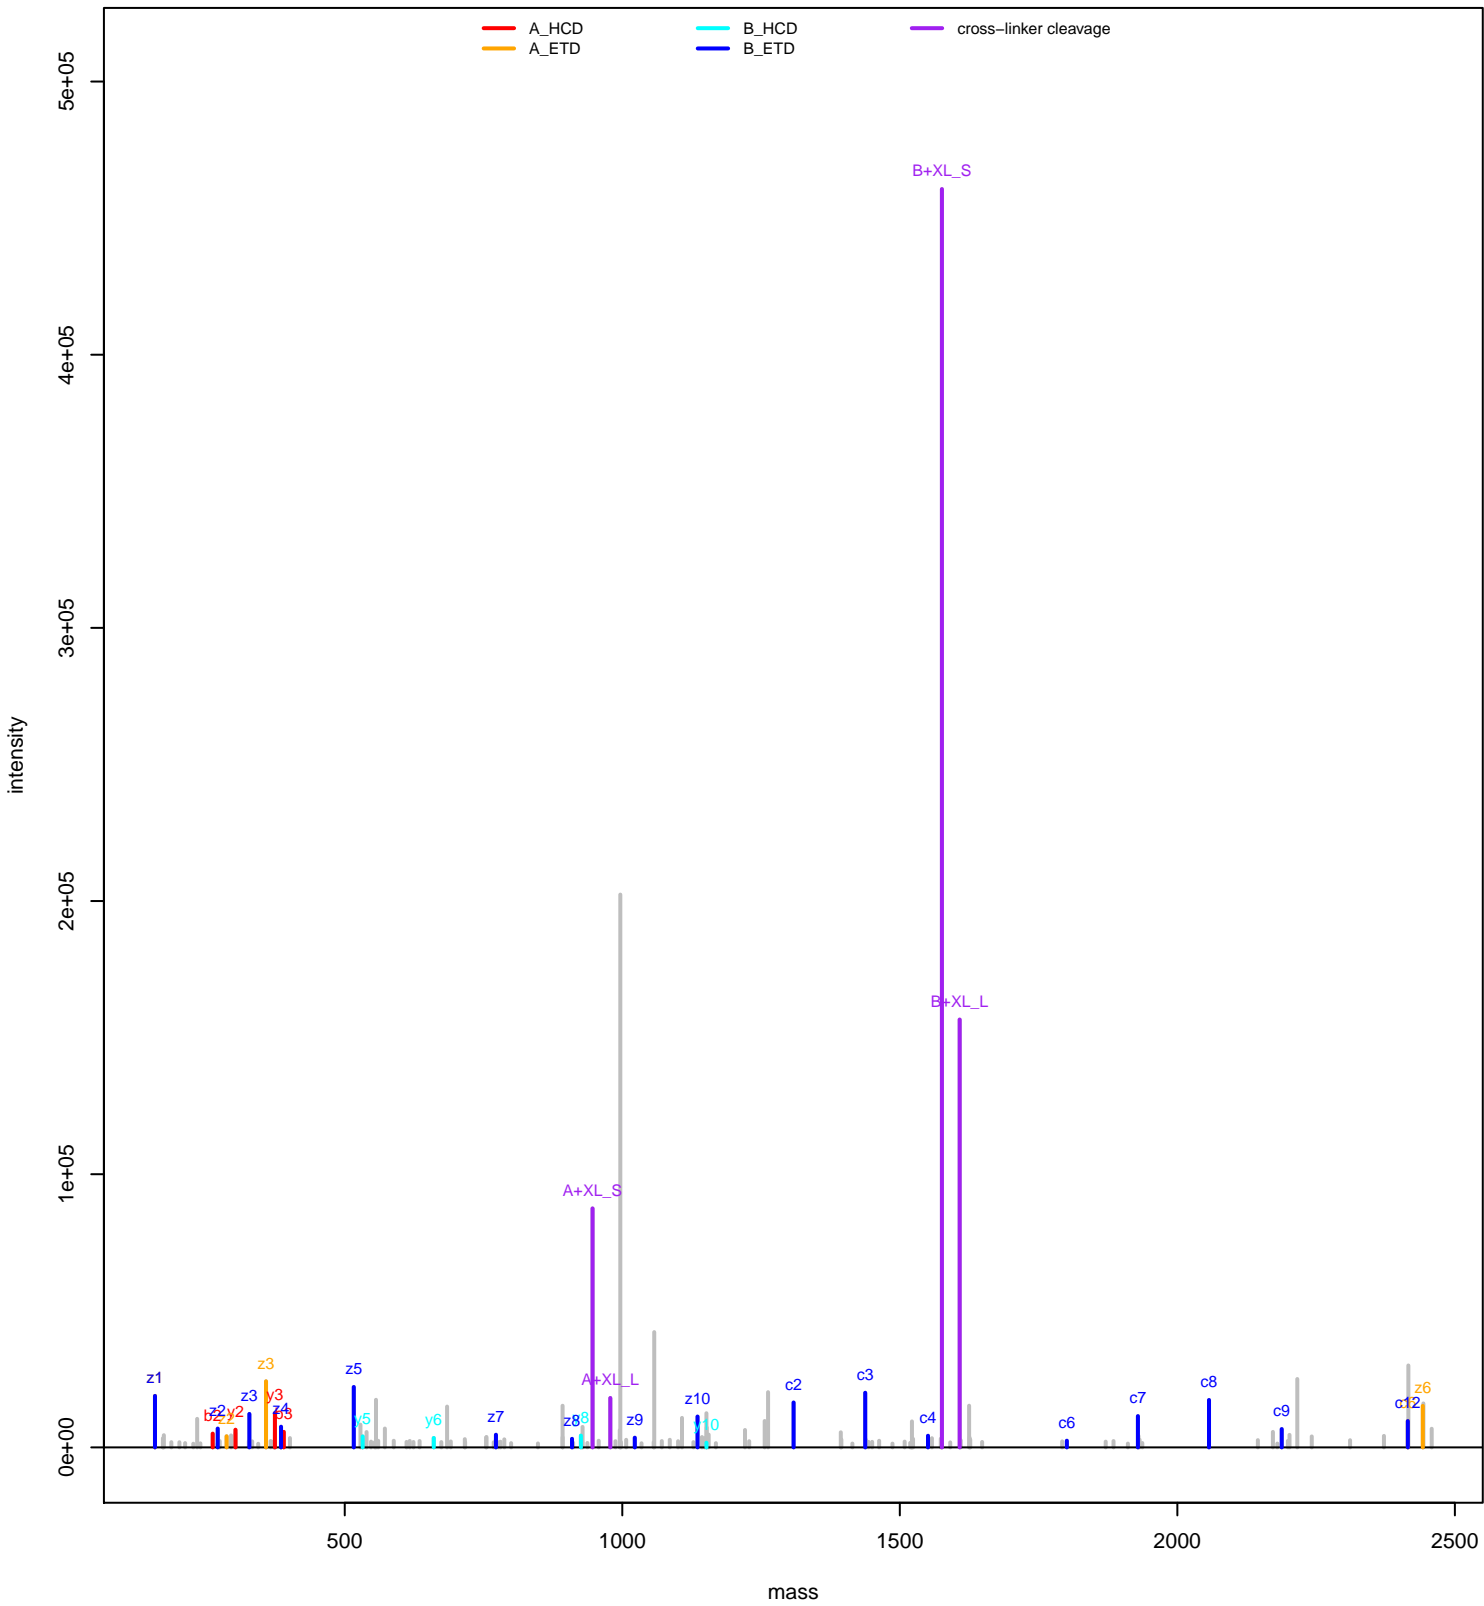

DFQKAER+XL\_S

DFQKAER+XL\_L

LKEIIHQMGGLR+XL\_S

LKEIIHQMGGLR+XL\_L

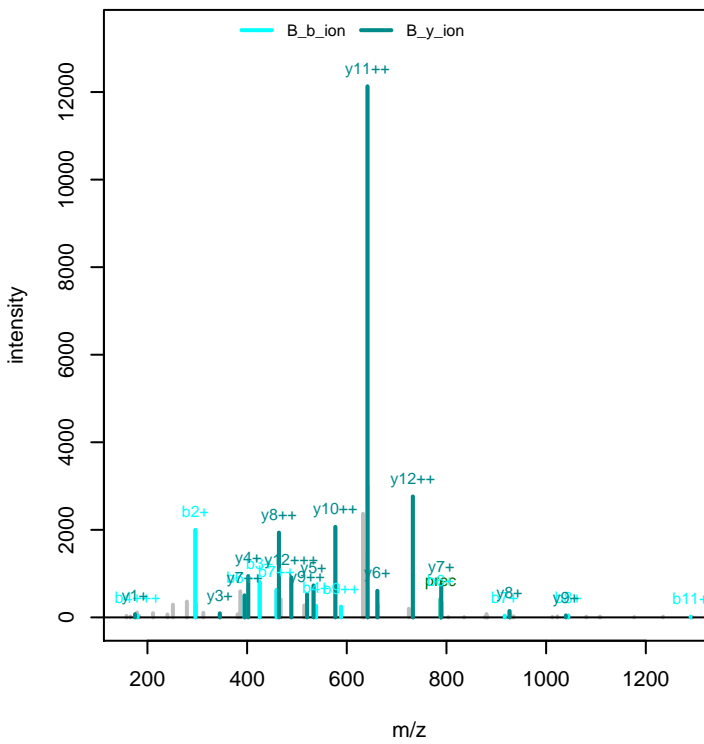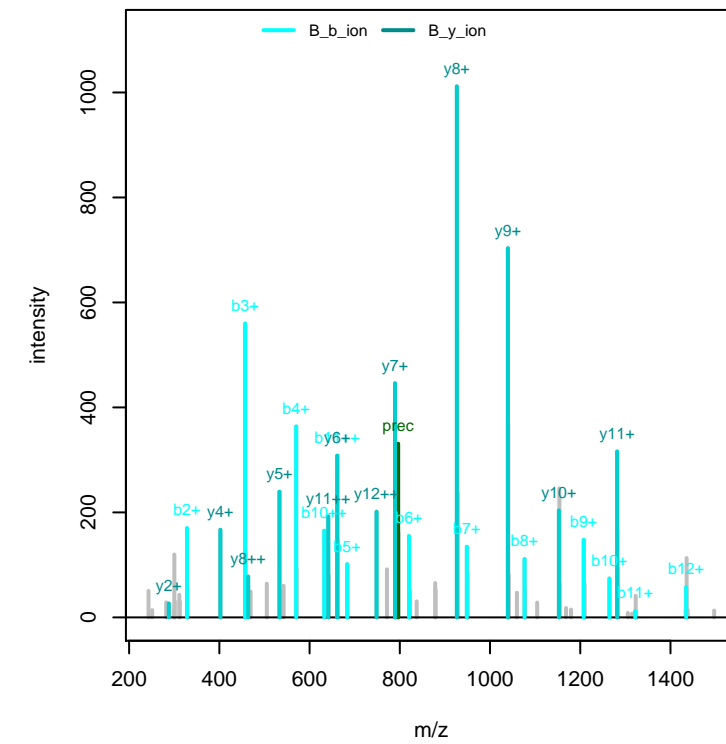

EQEKLGIK  
GTLIDGKEFDNSYTR

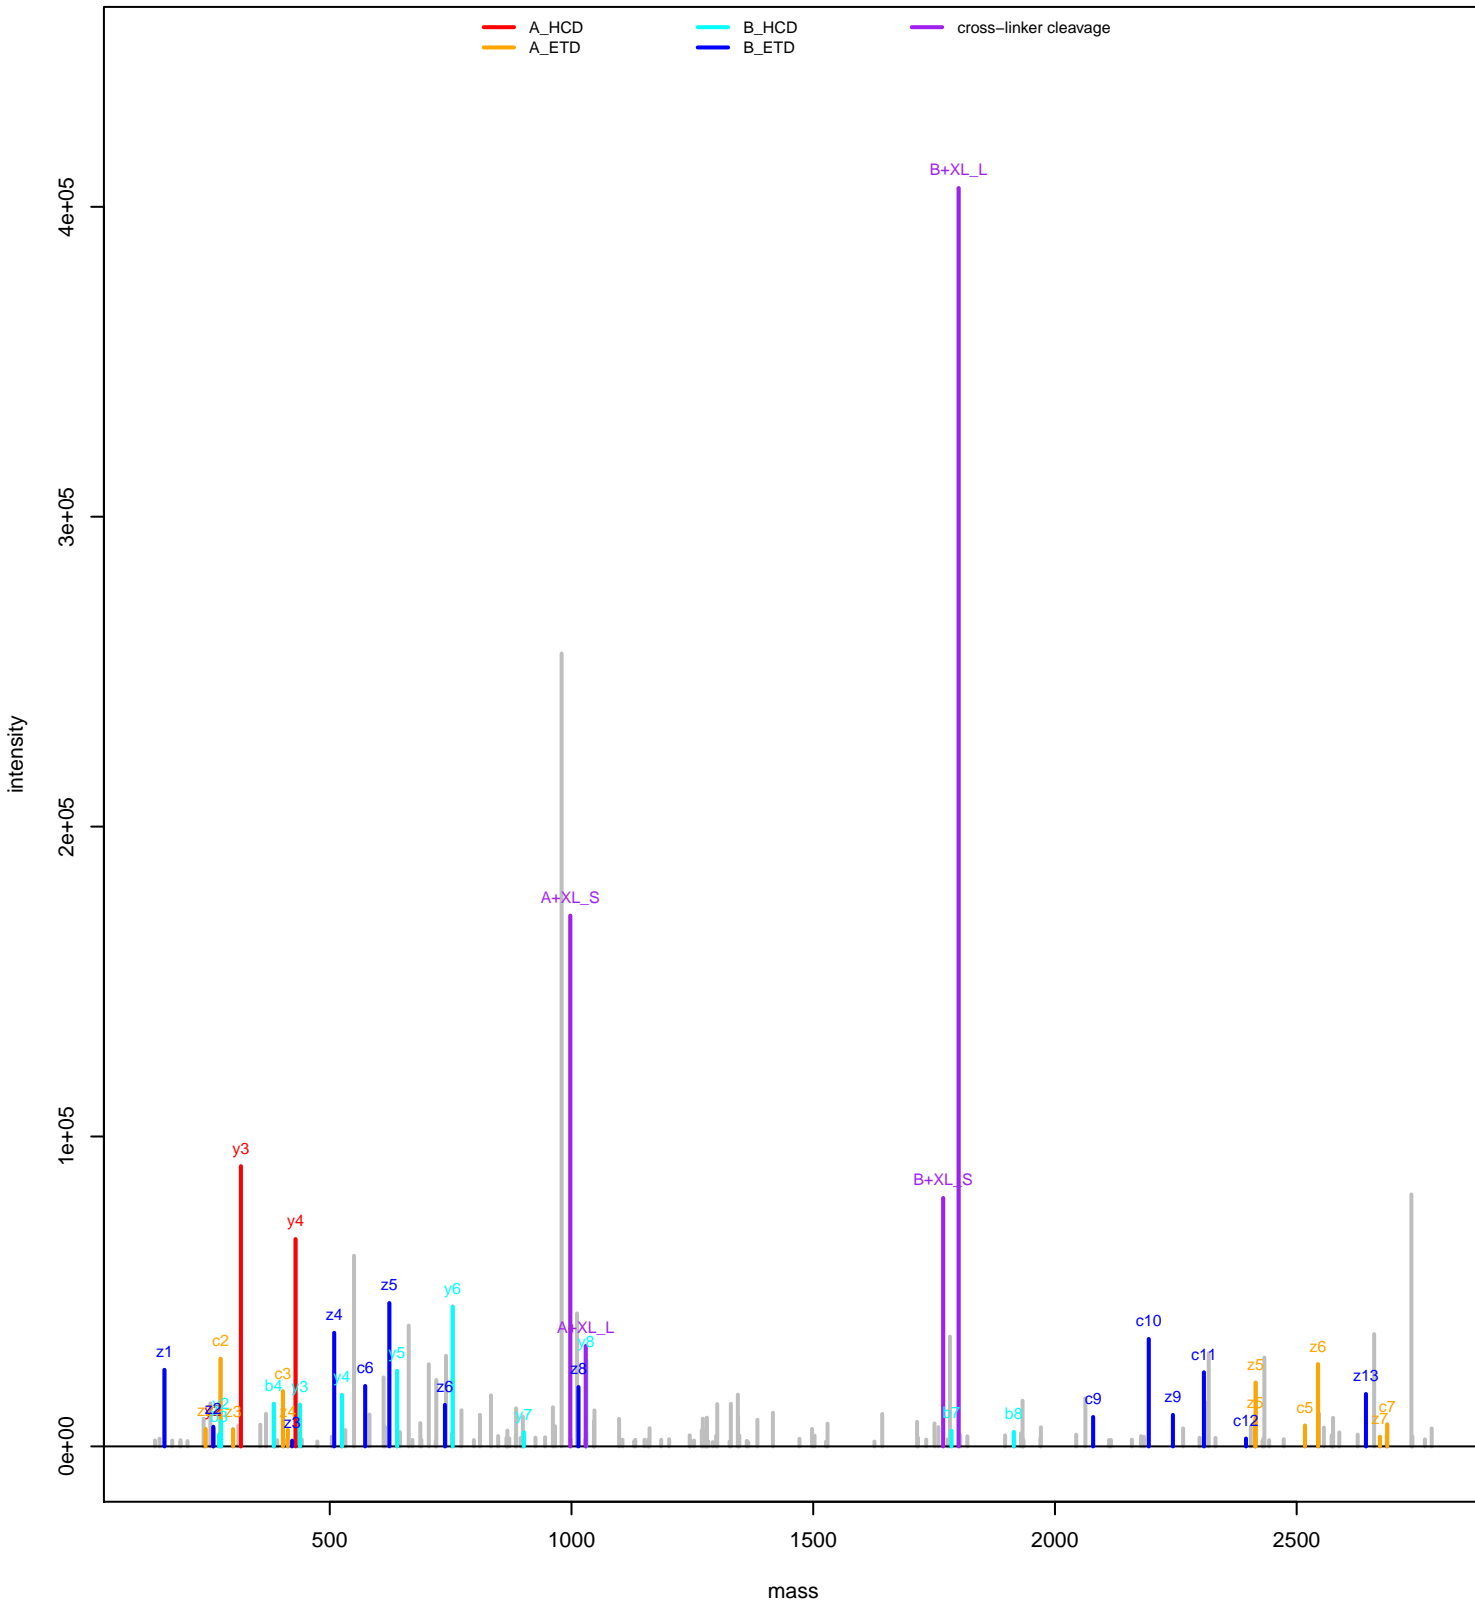

EQEKLGIK+XL\_S

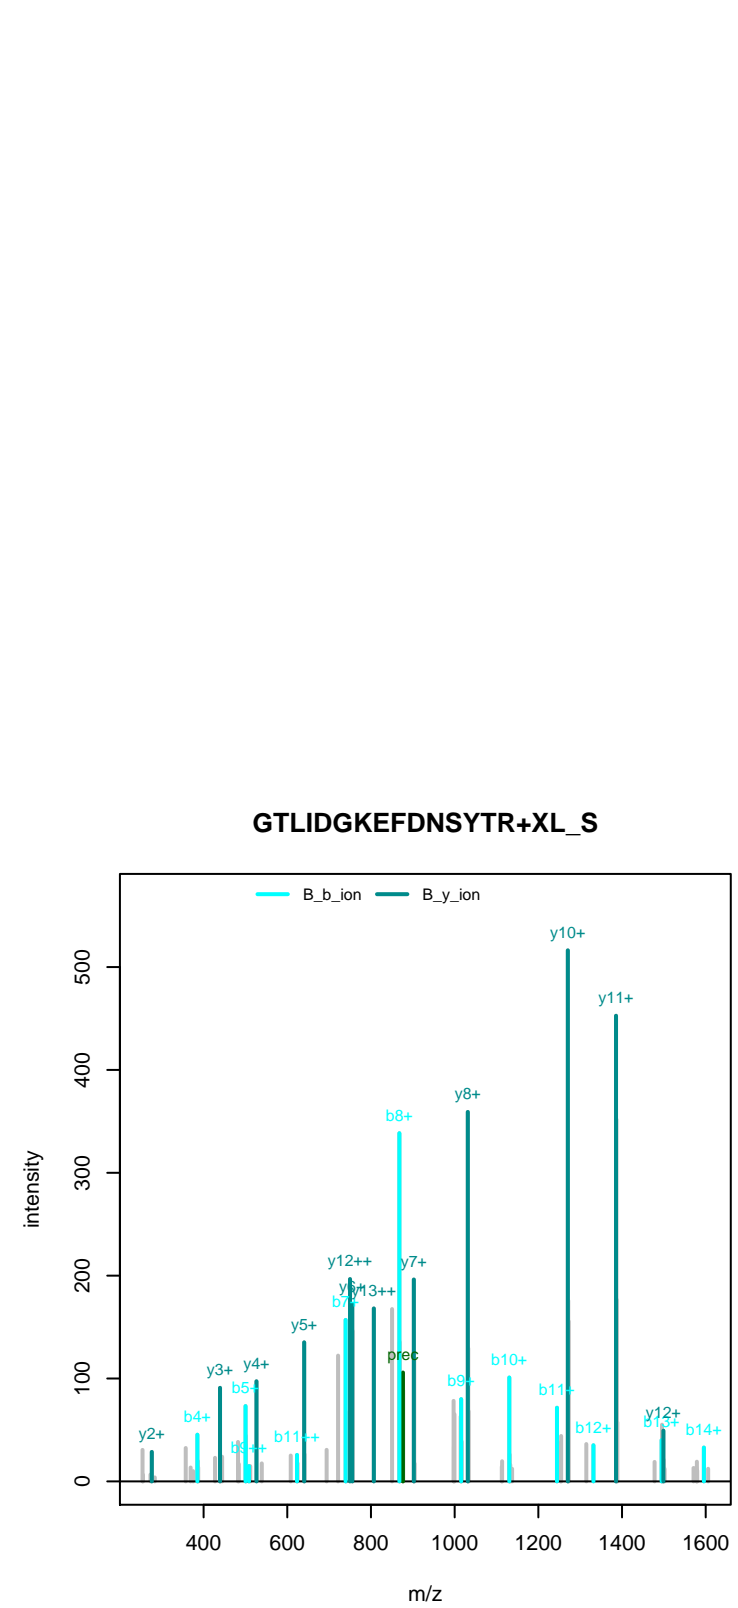

EQEKLGIK+XL\_L

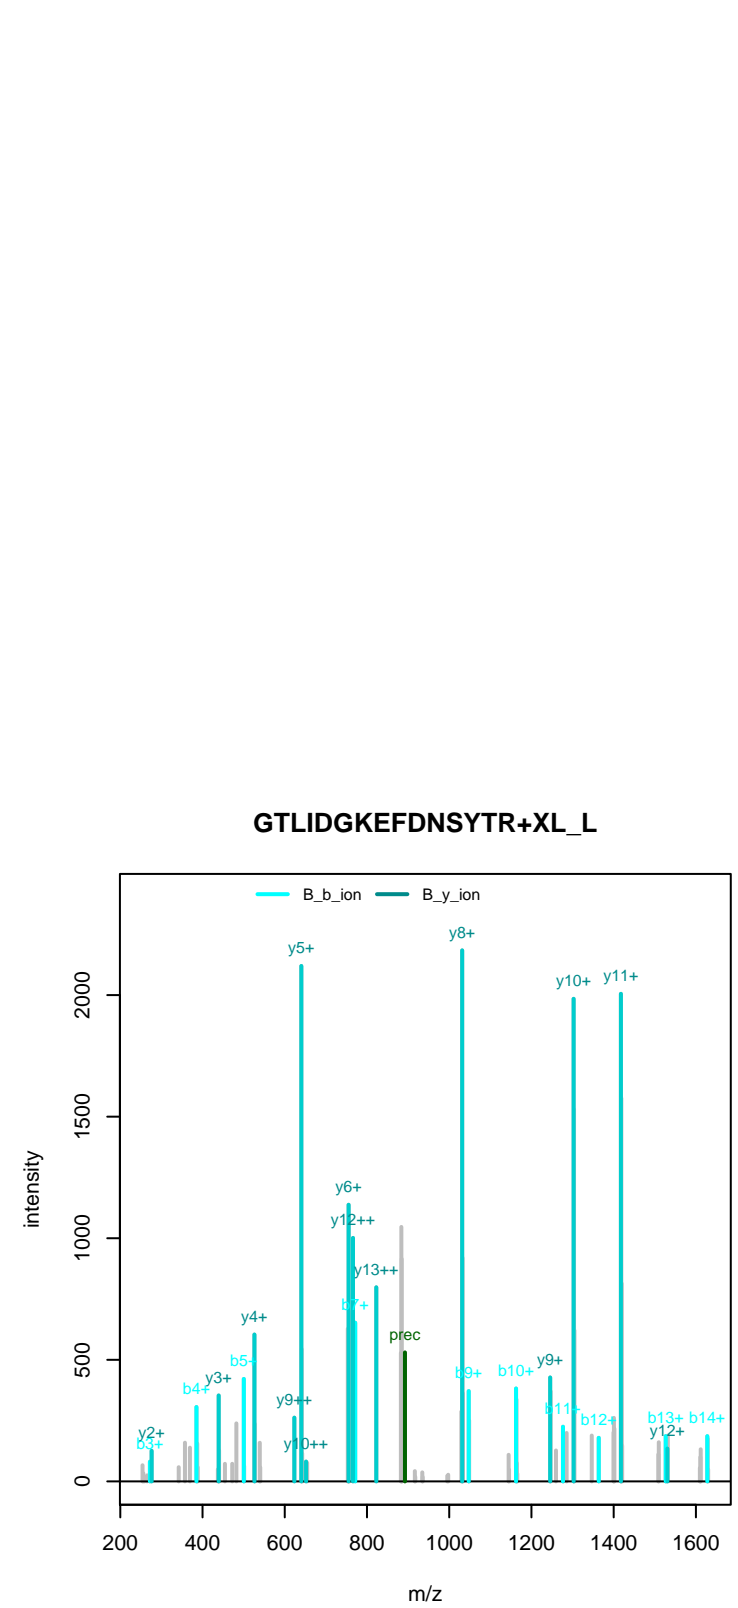

GTLIDGKEFDNSYTR+XL\_S

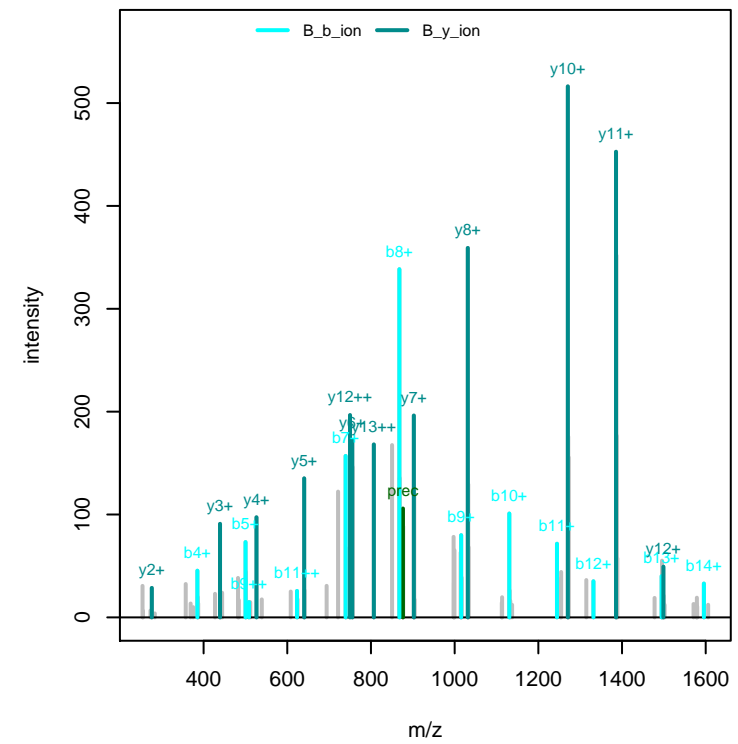

GTLIDGKEFDNSYTR+XL\_L

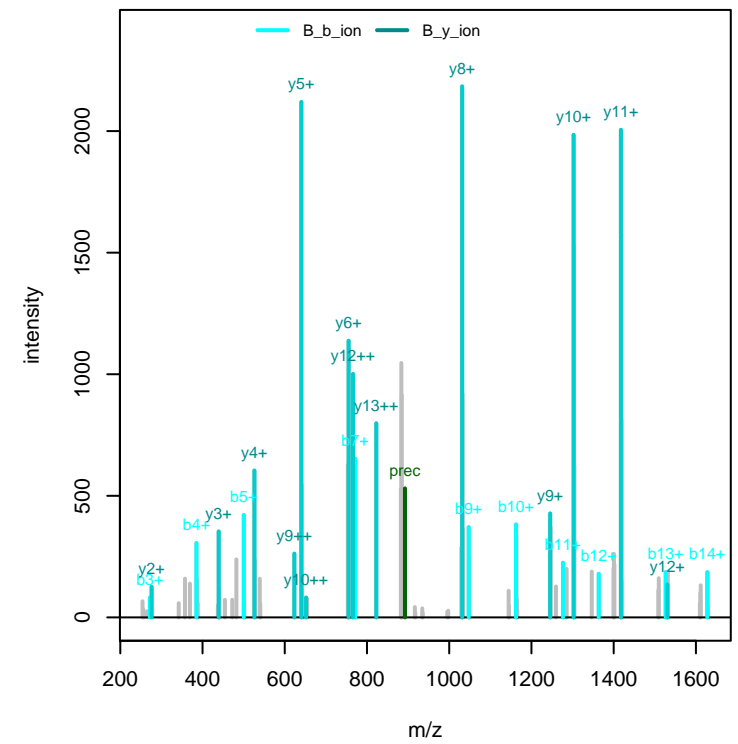

VAADFLAKNTSVK  
VAADFLAKNTSVK

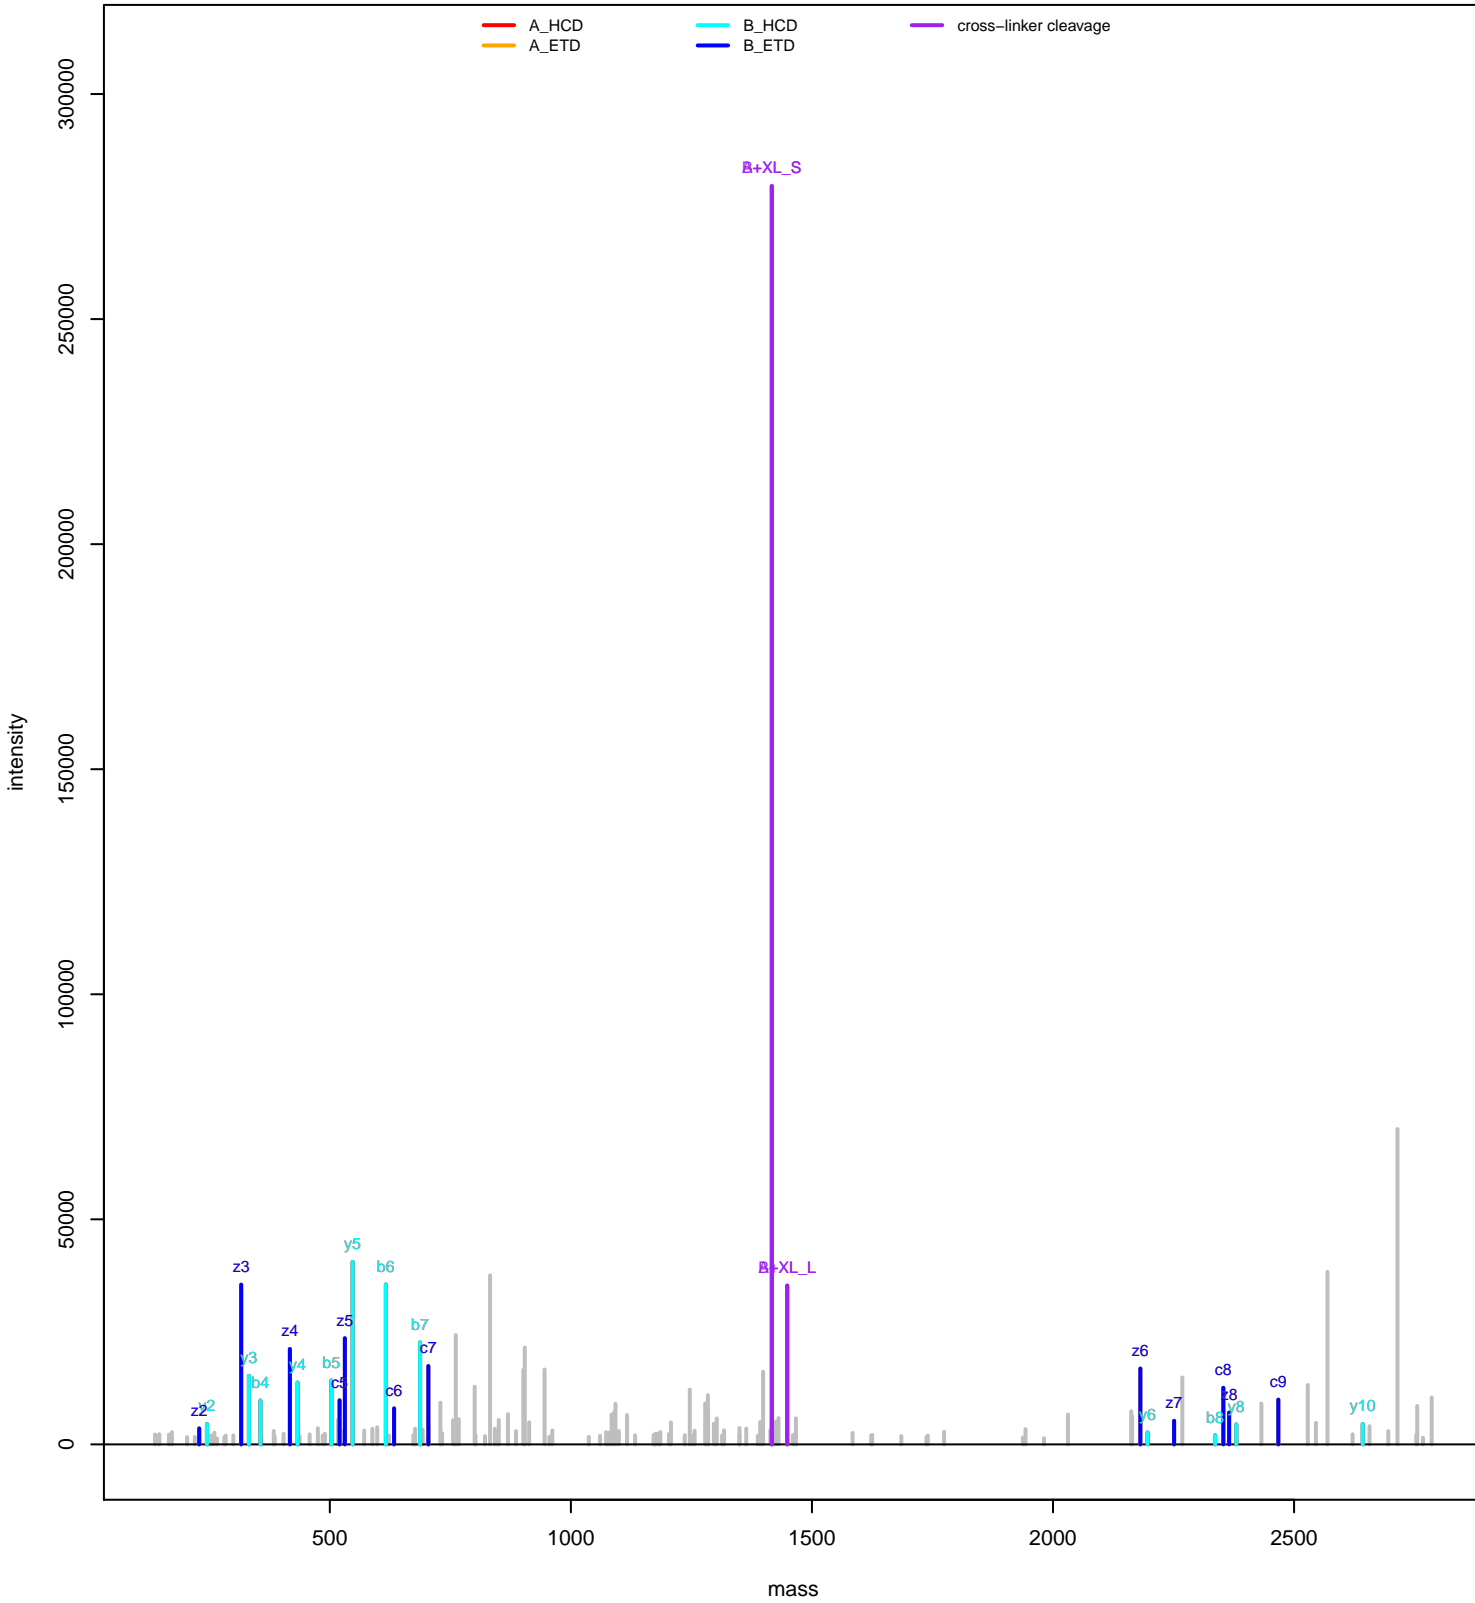

VAADFLAKNTSVK+XL\_S

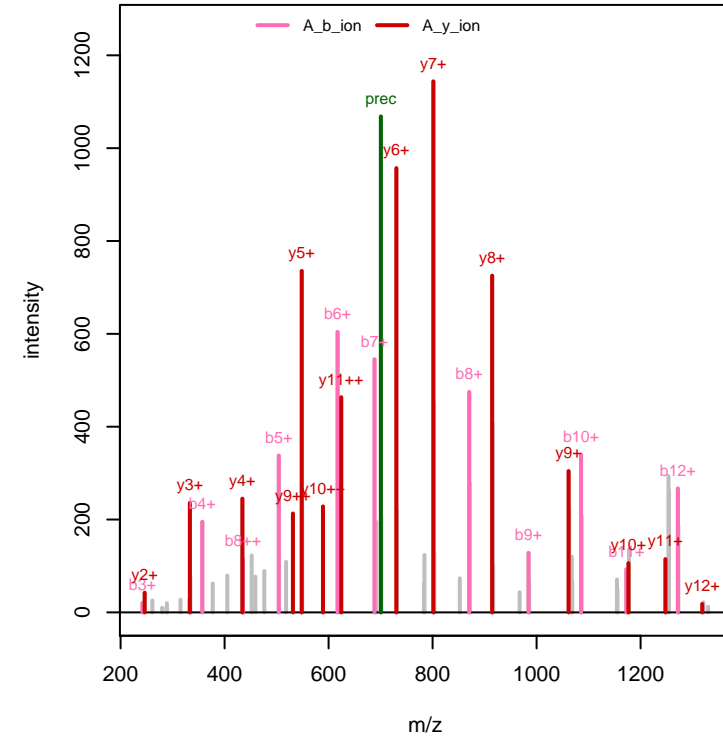

VAADFLAKNTSVK+XL\_L

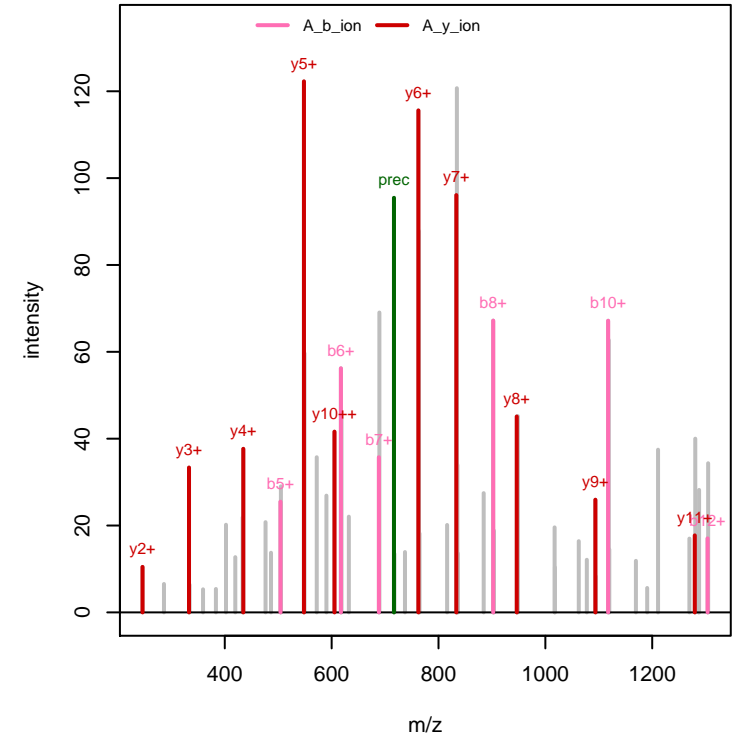

VAADFLAKNTSVK+XL\_S

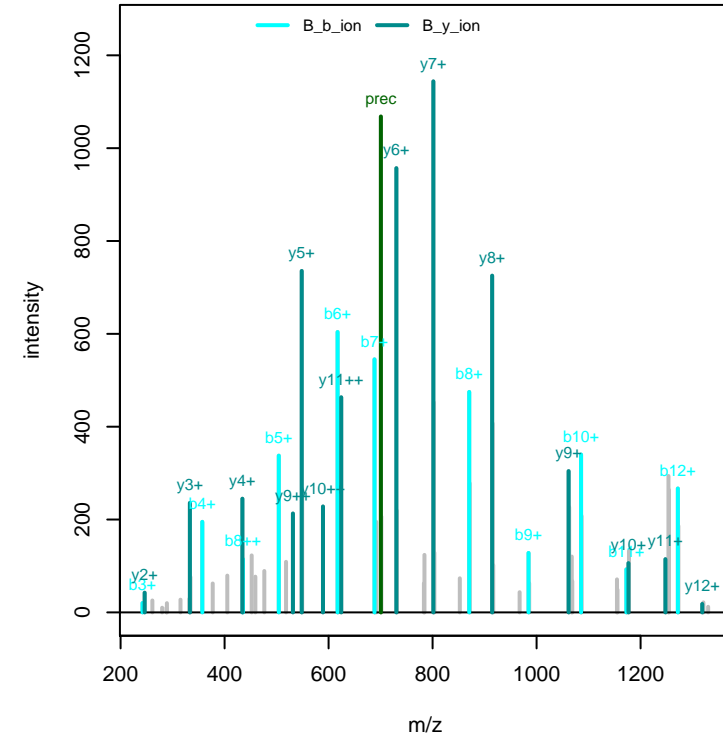

VAADFLAKNTSVK+XL\_L

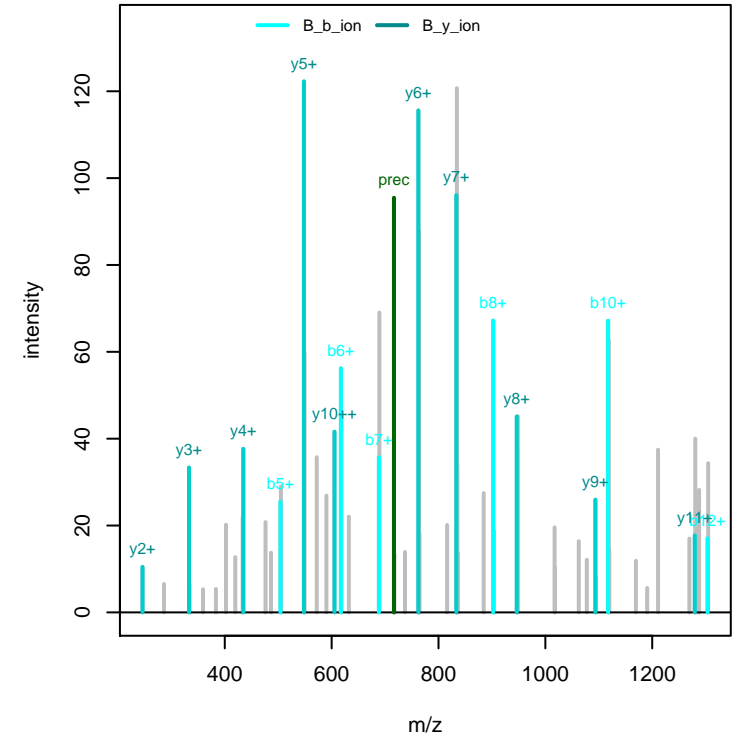

LAKLEK  
TMNITSKQMEITPAIR

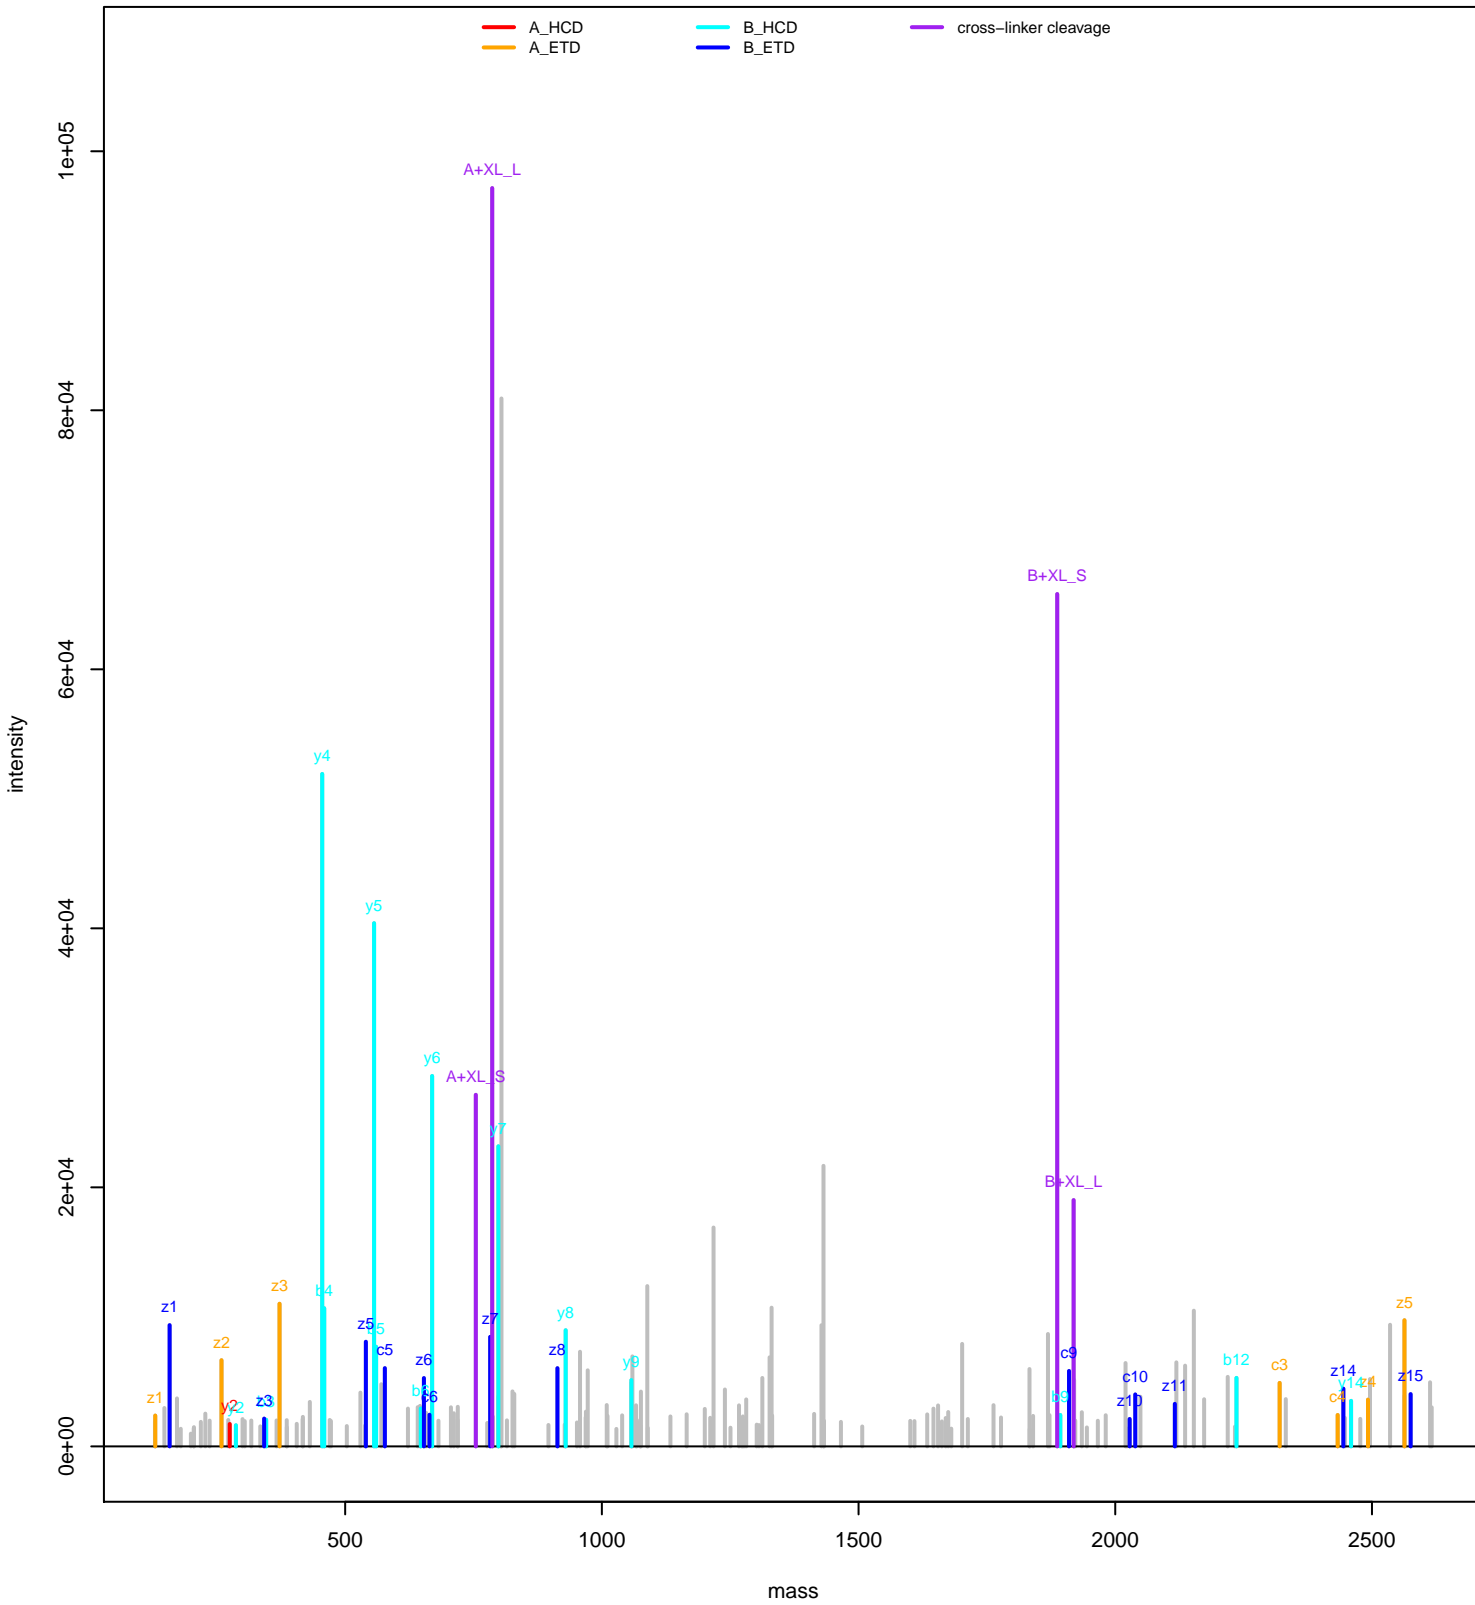

LAKLEK+XL\_S

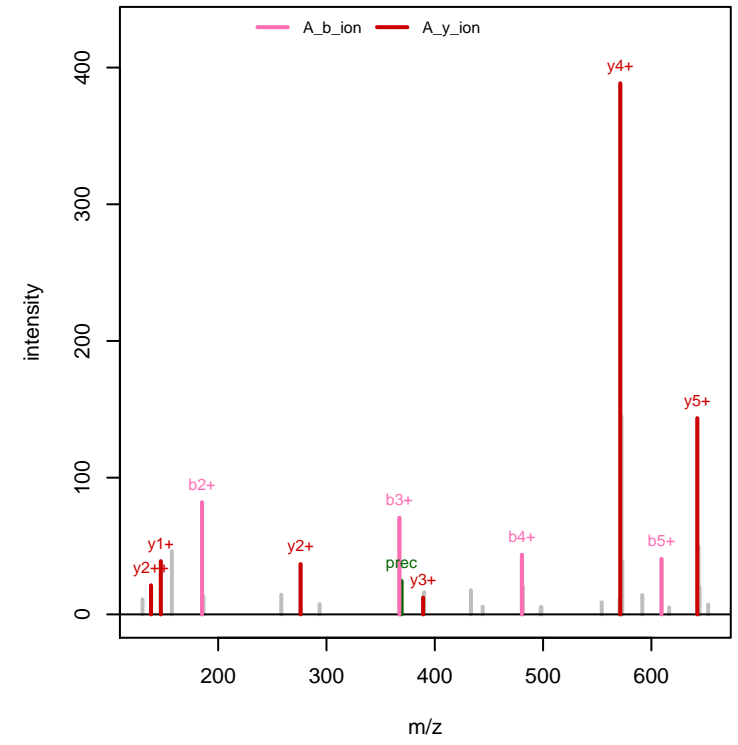

LAKLEK+XL\_L

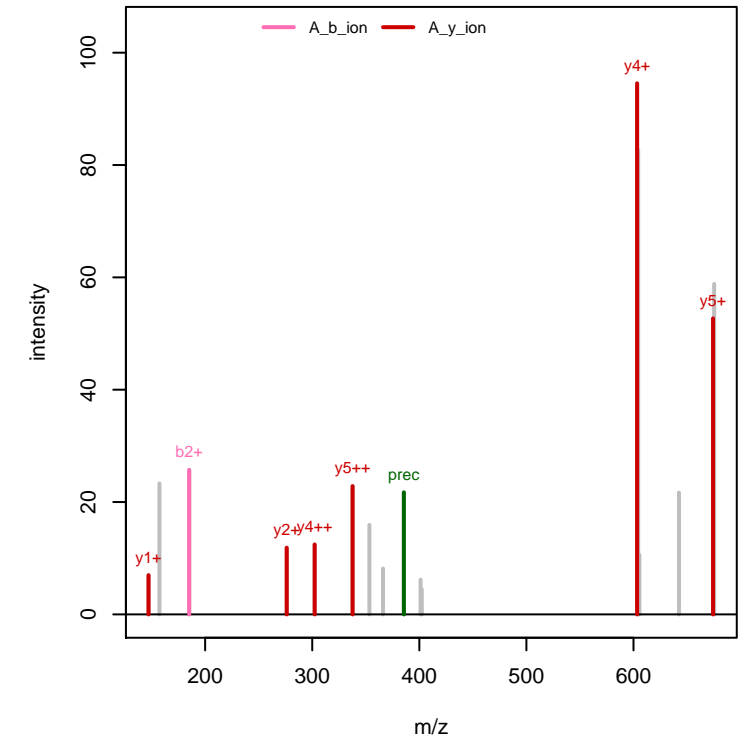

TMNITSKQMEITPAIR+XL\_S

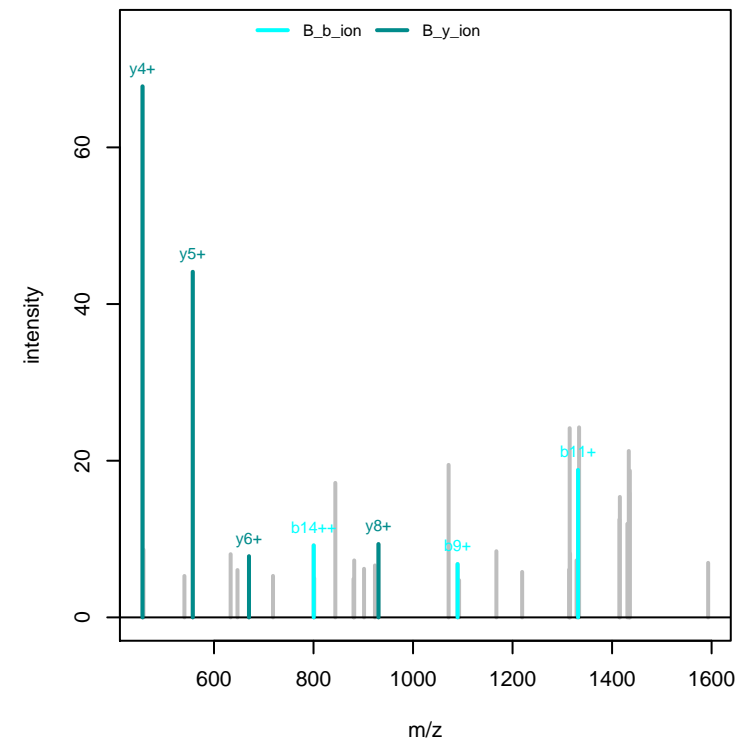

TMNITSKQMEITPAIR+XL\_L

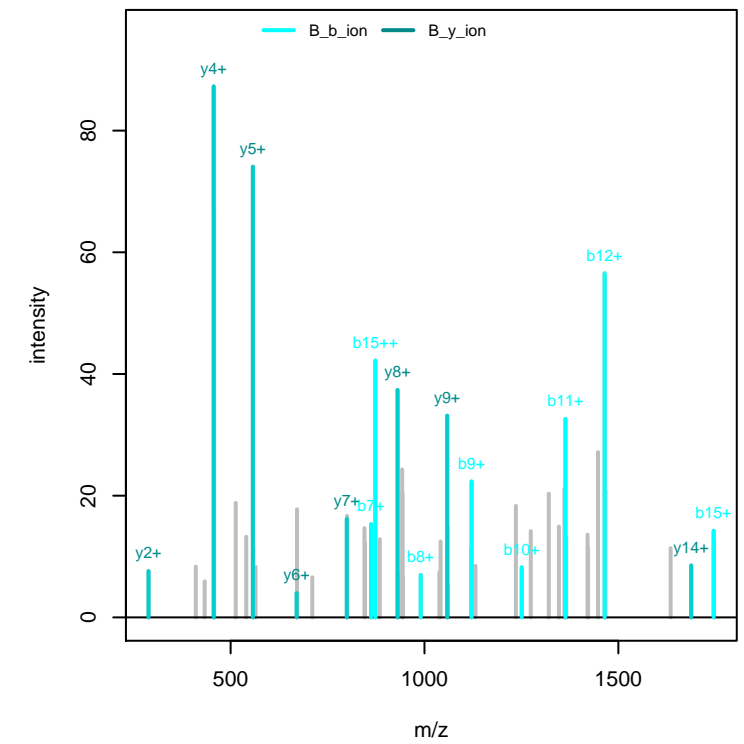

**MSIGEAKAR  
EGEIDIAKR**

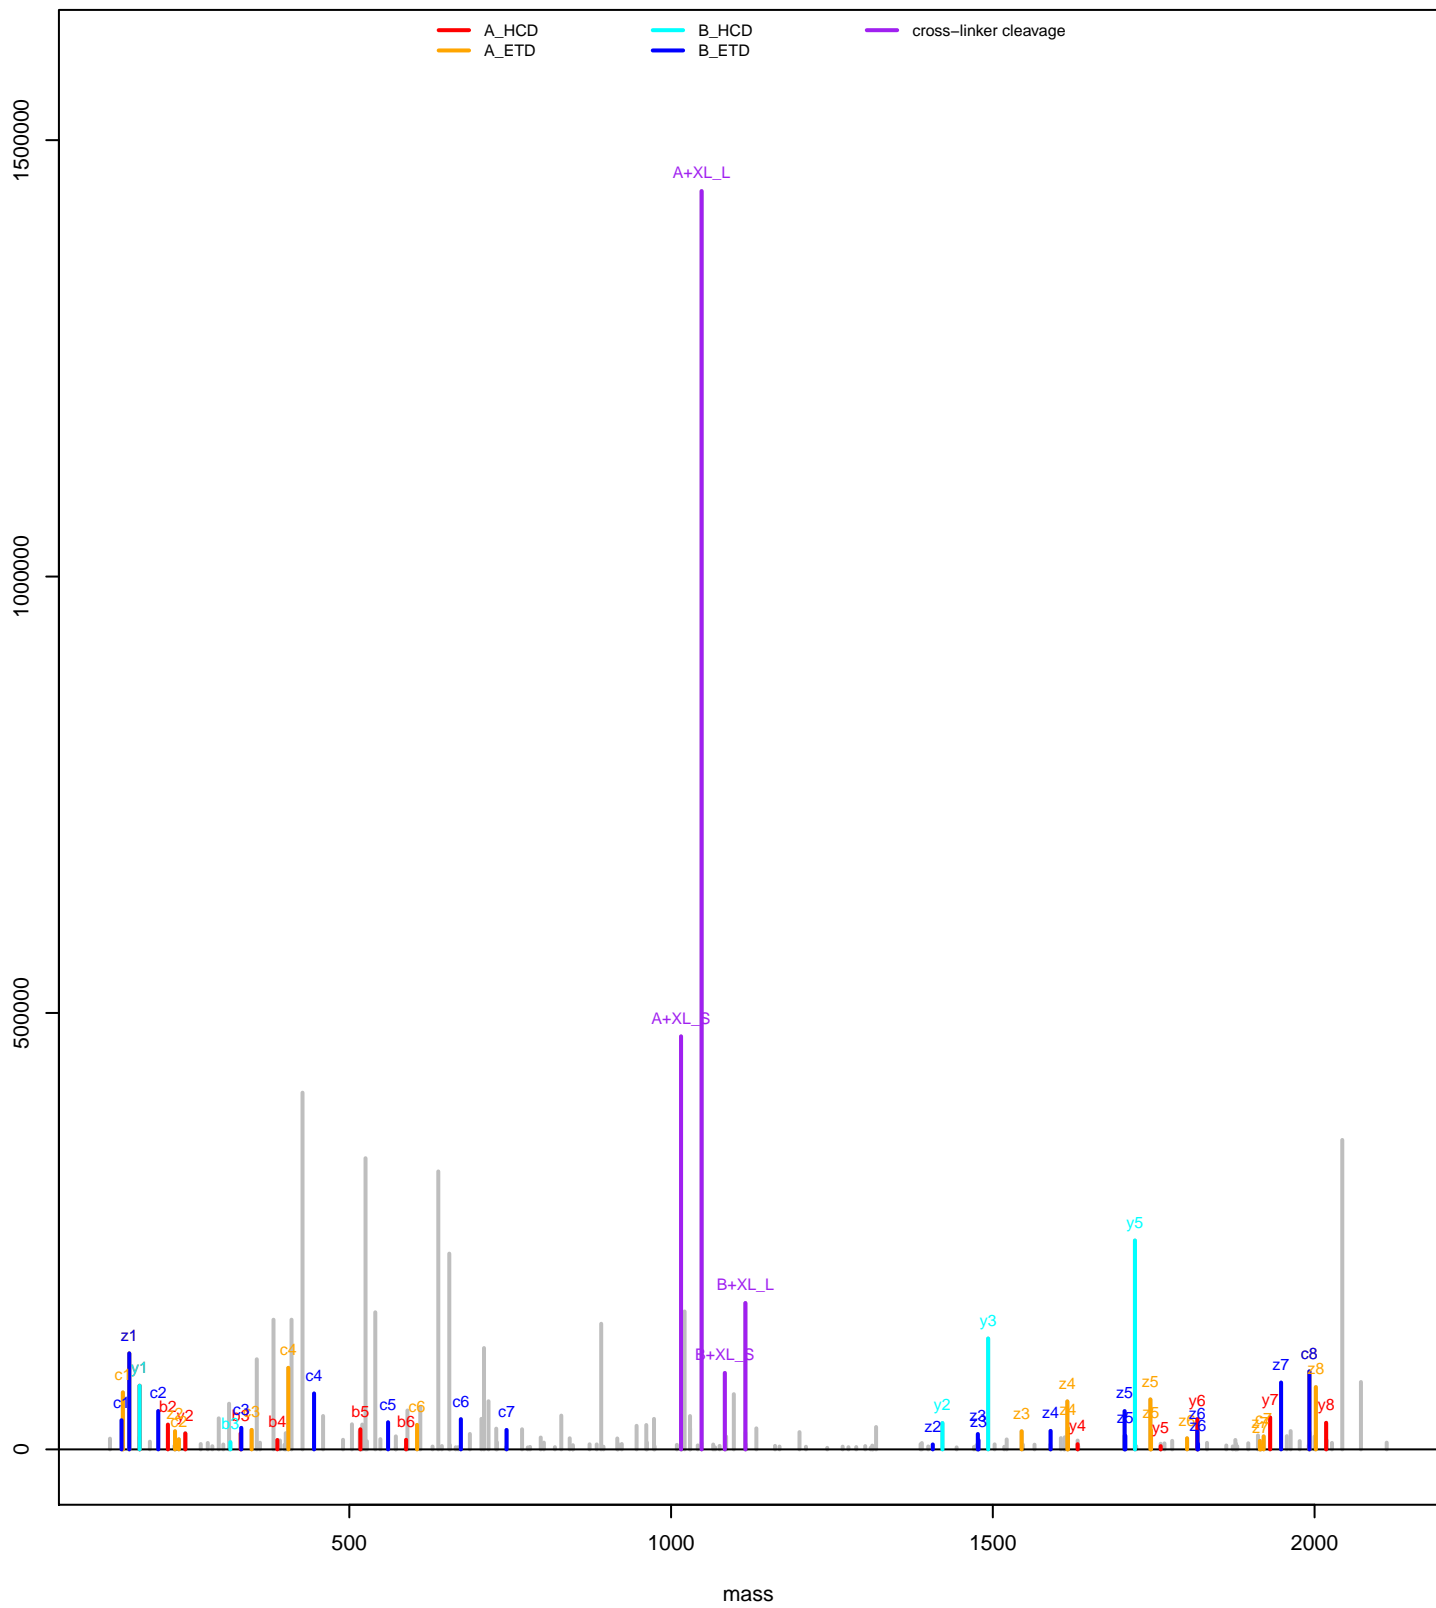

**MSIGEAKAR+XL\_S**

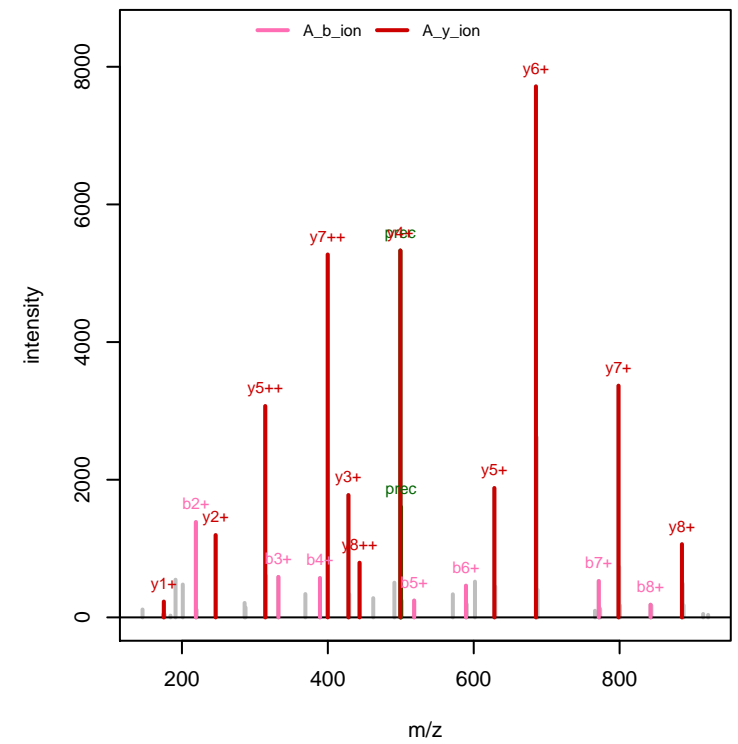

**MSIGEAKAR+XL\_L**

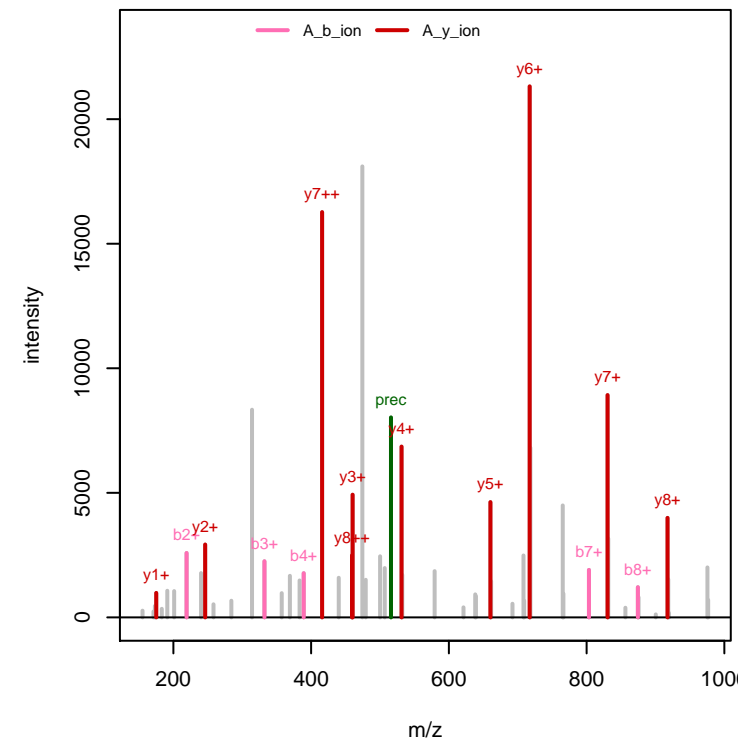

**EGEIDIAKR+XL\_S**

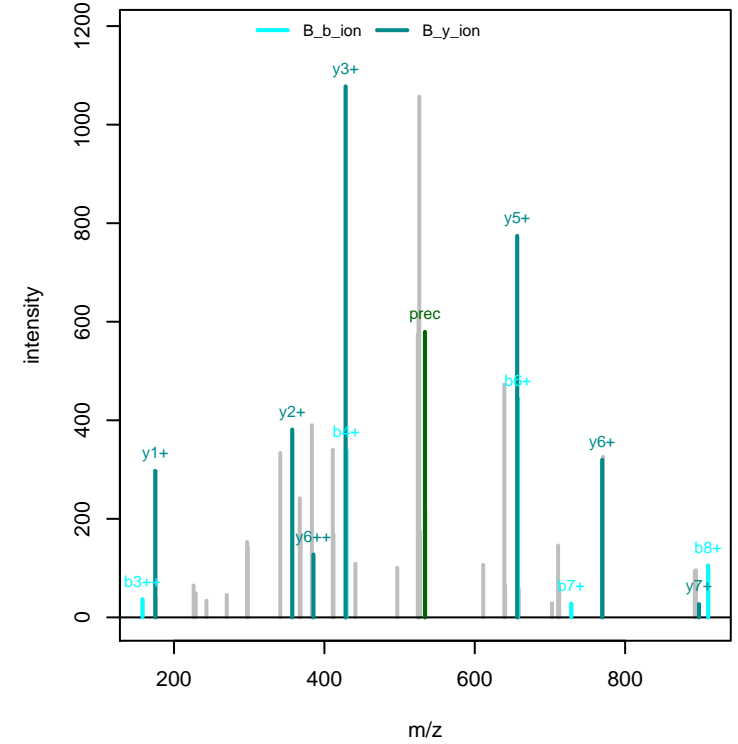

**EGEIDIAKR+XL\_L**

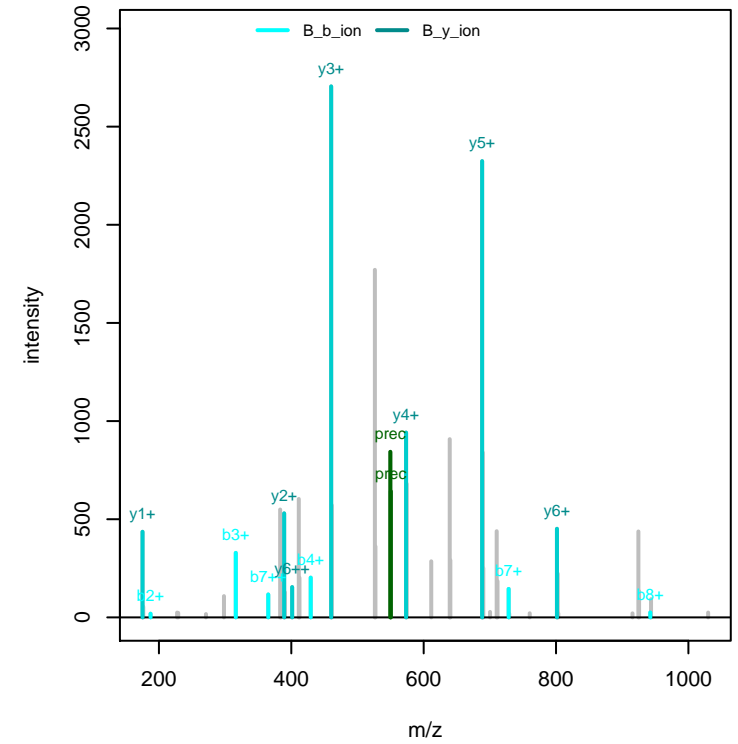

FPMGKSDFR  
KYGYTGKDDK

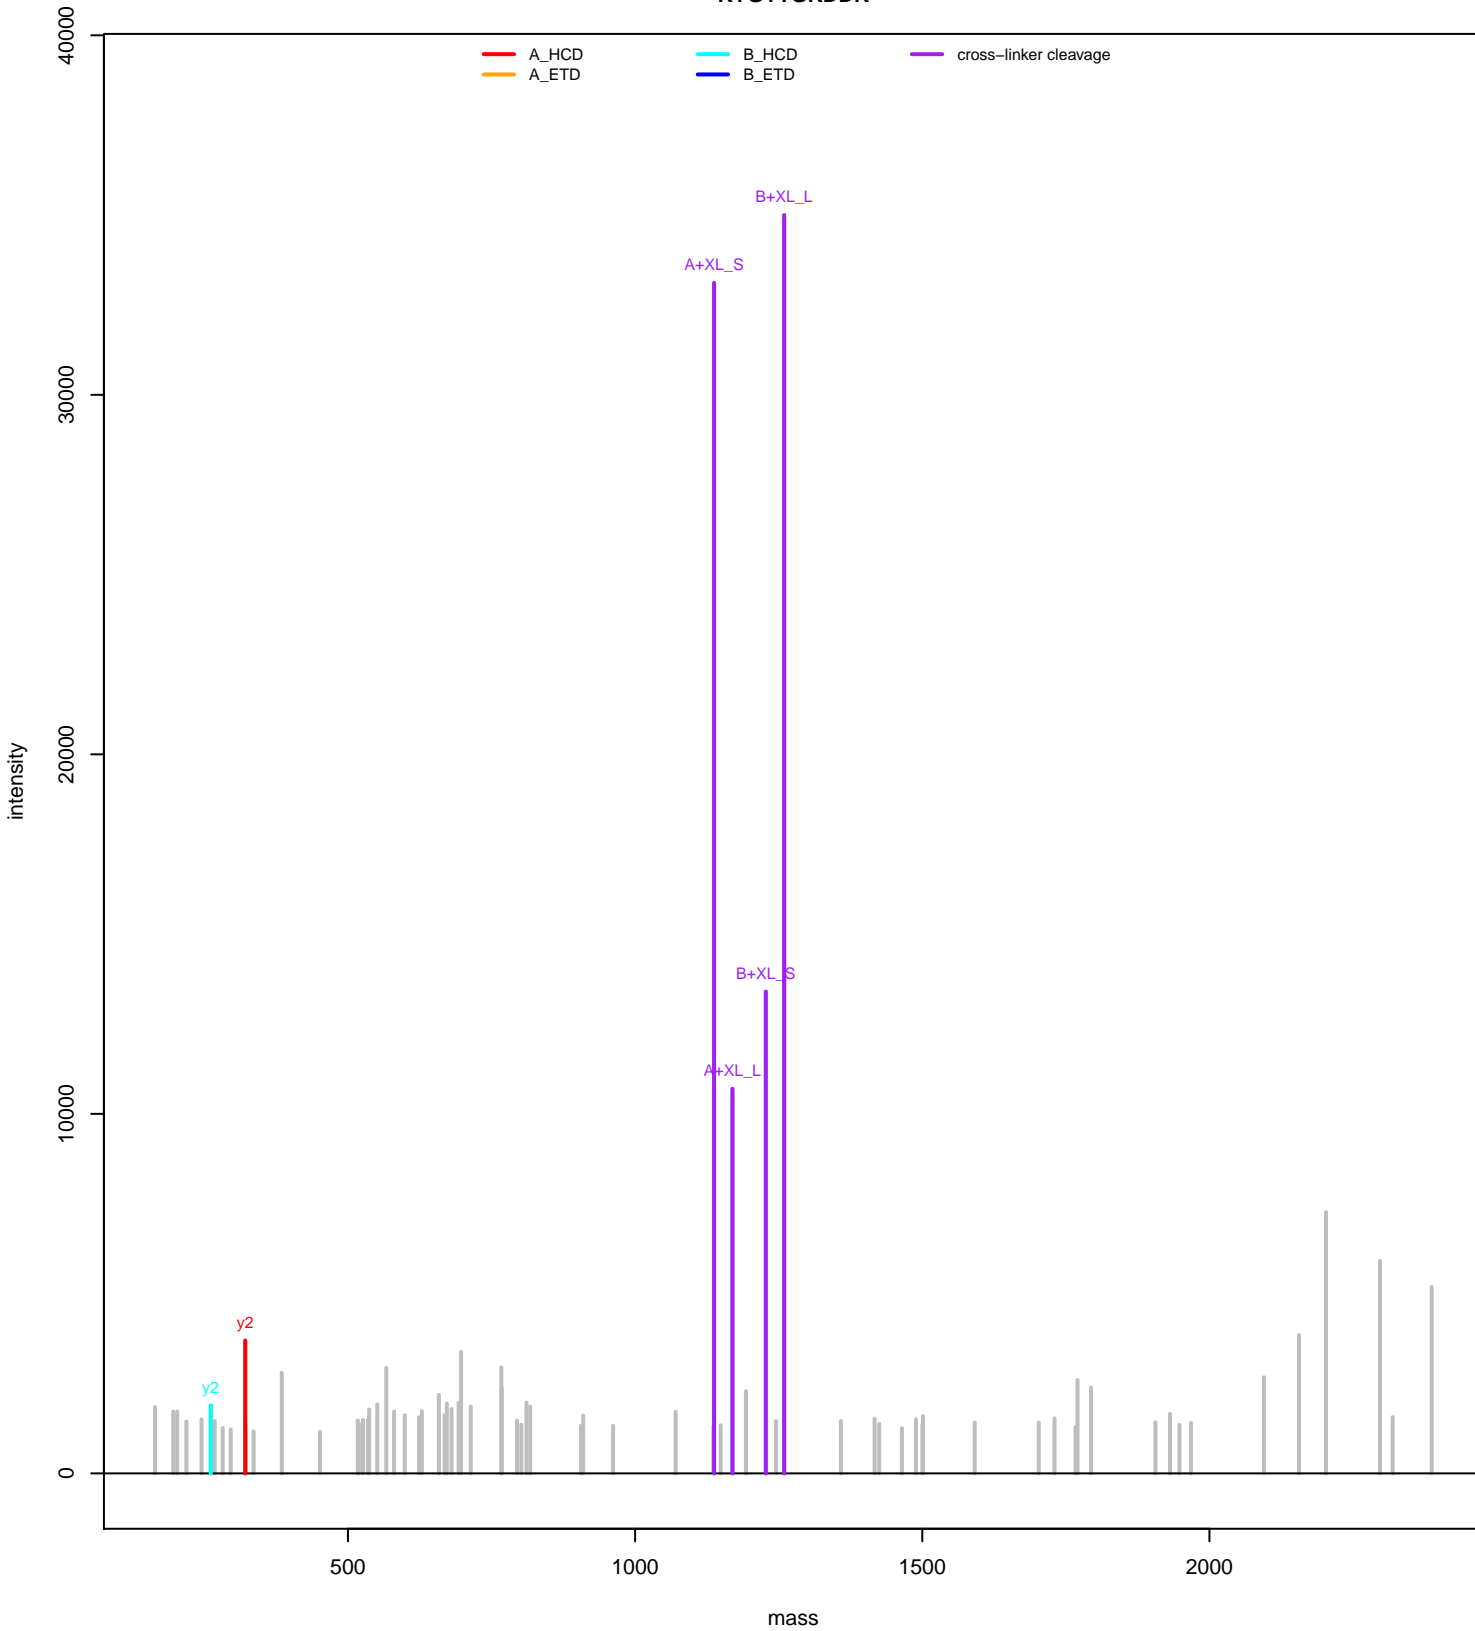

FPMGKSDFR+XL\_S

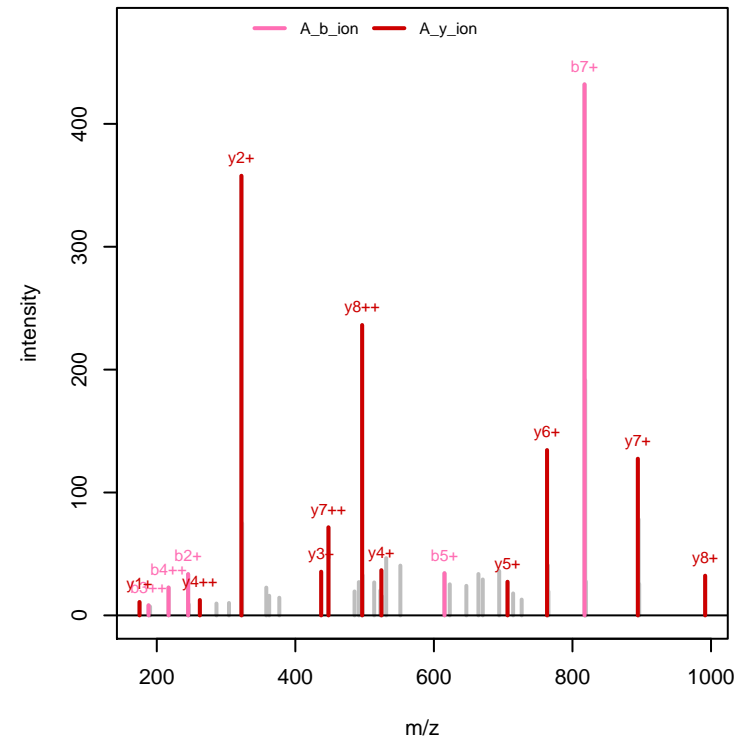

FPMGKSDFR+XL\_L

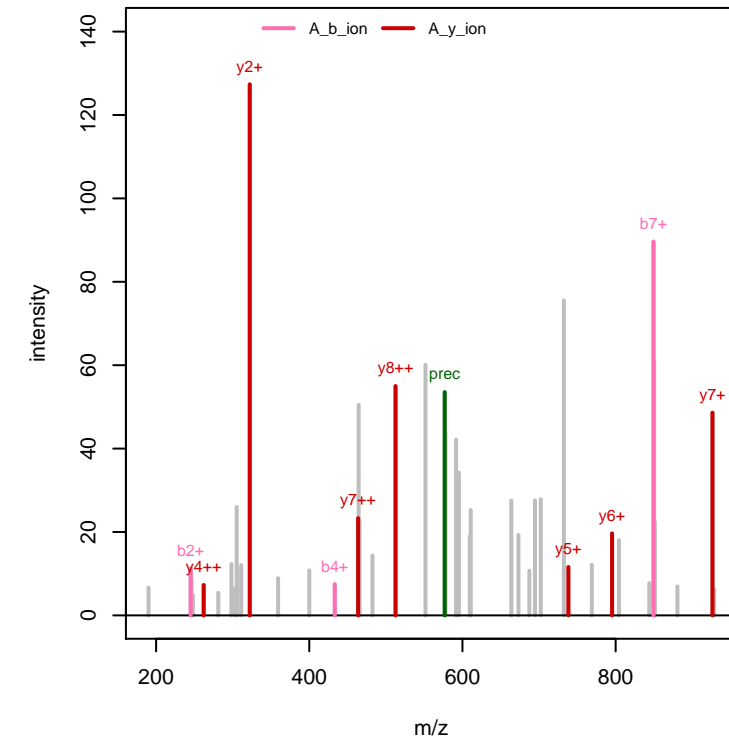

KYGYTGKDDK+XL\_S

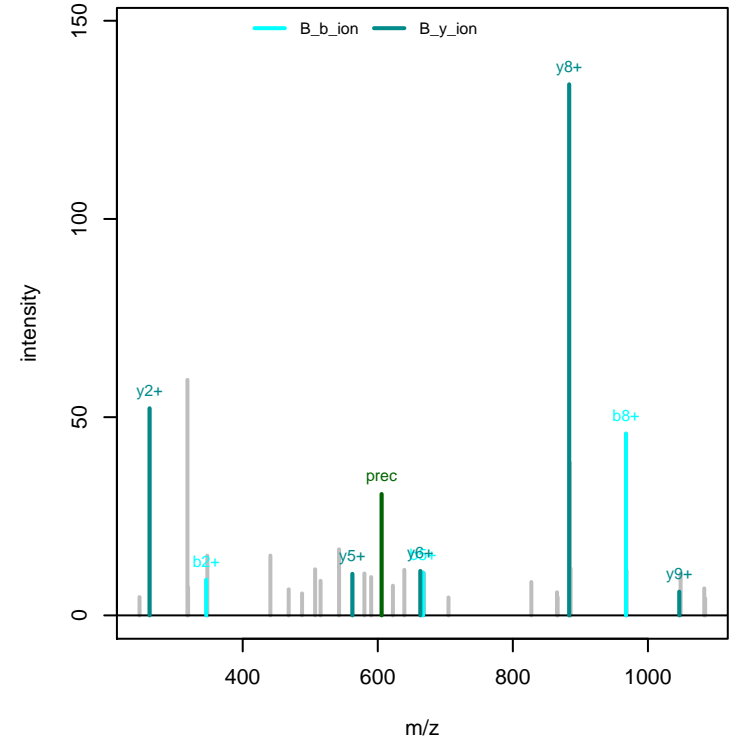

KYGYTGKDDK+XL\_L

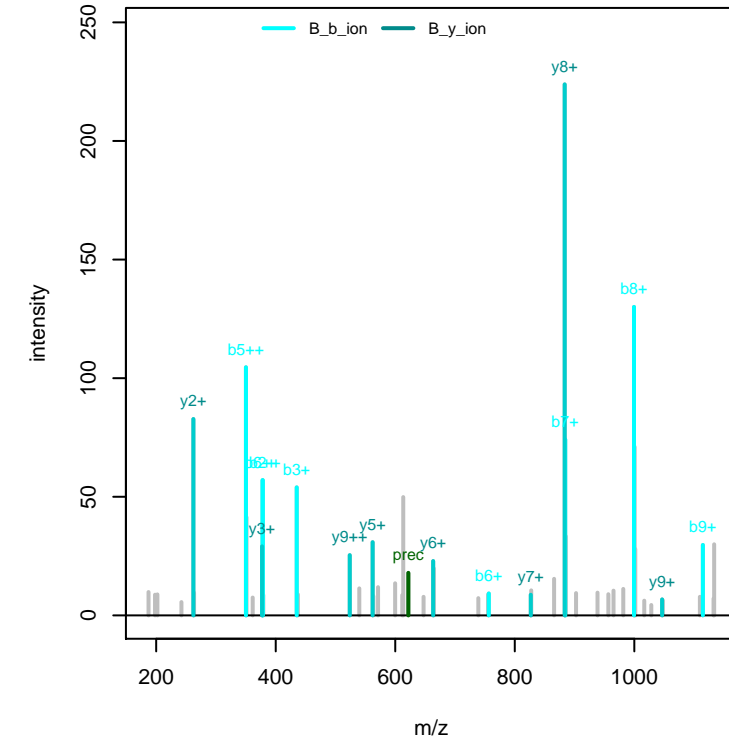

KAQHNENNK  
CVEKDIDVAESLK

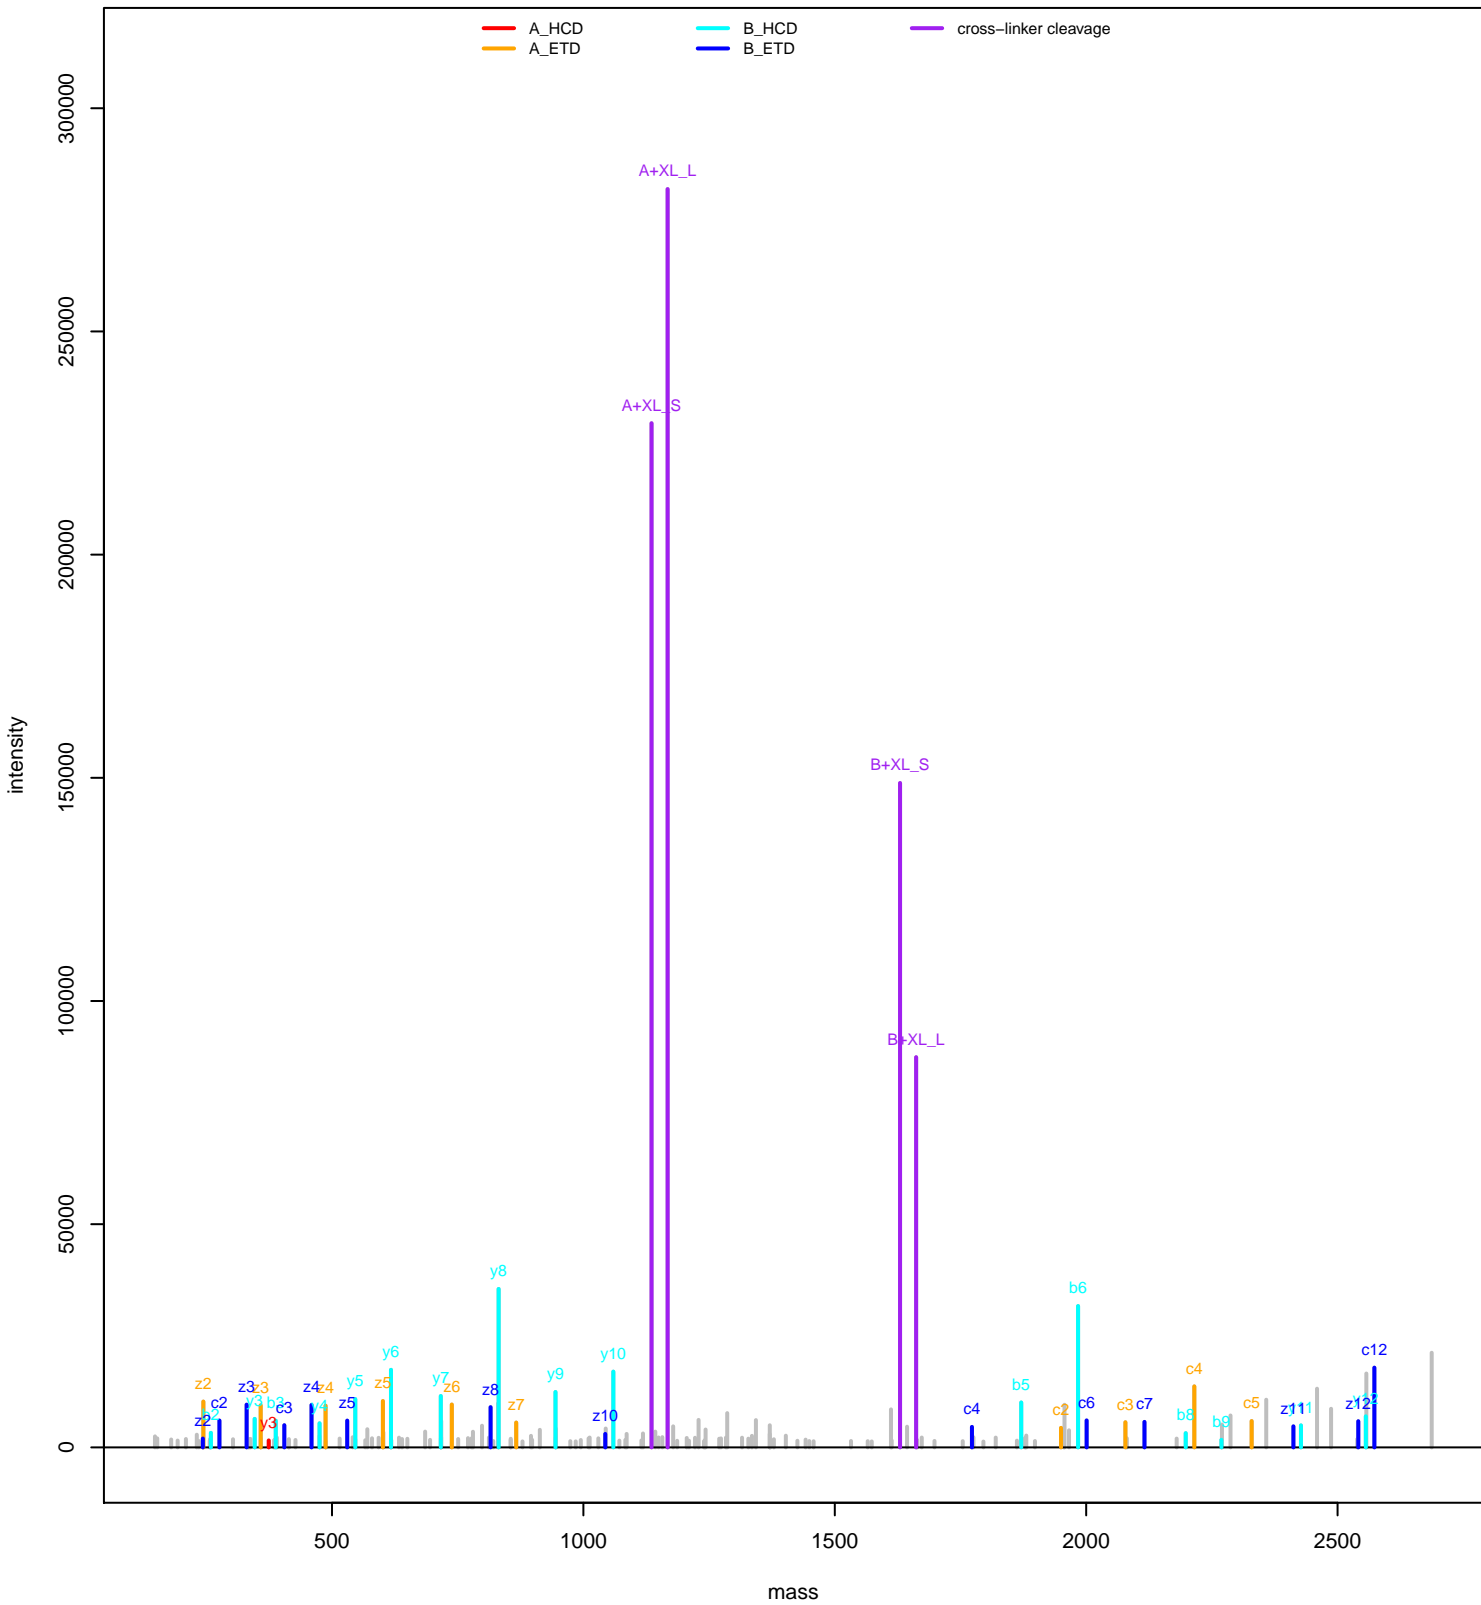

KAQHNENNK+XL\_S

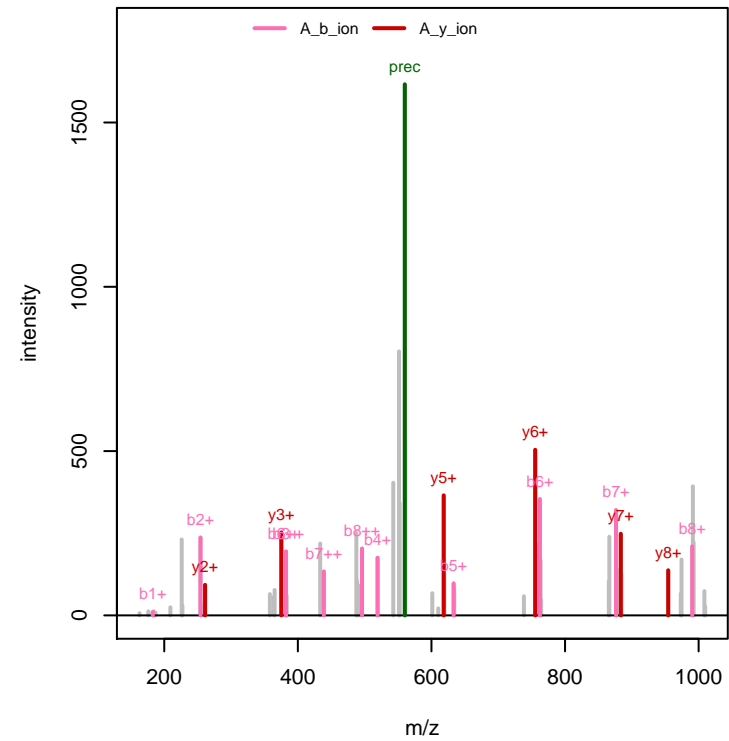

KAQHNENNK+XL\_L

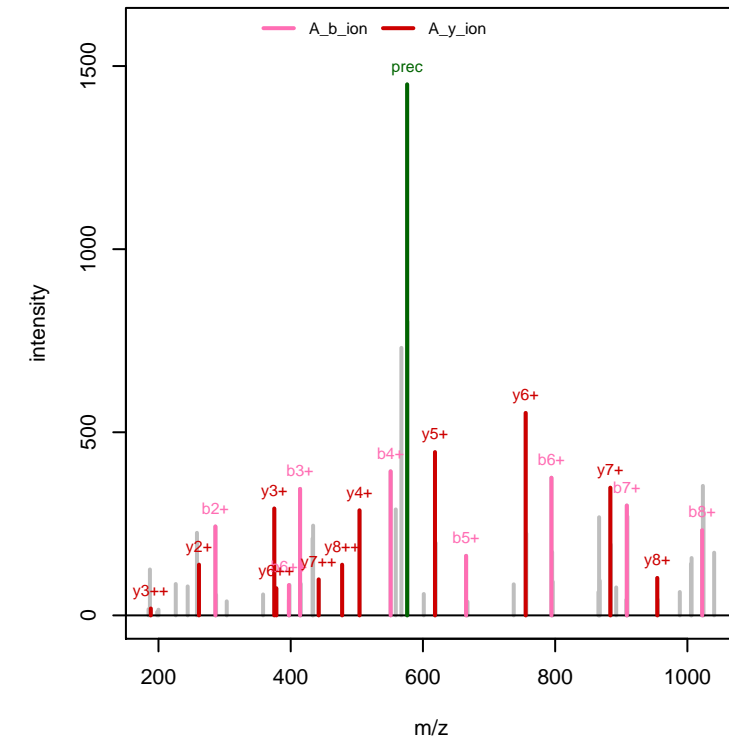

CVEKDIDVAESLK+XL\_S

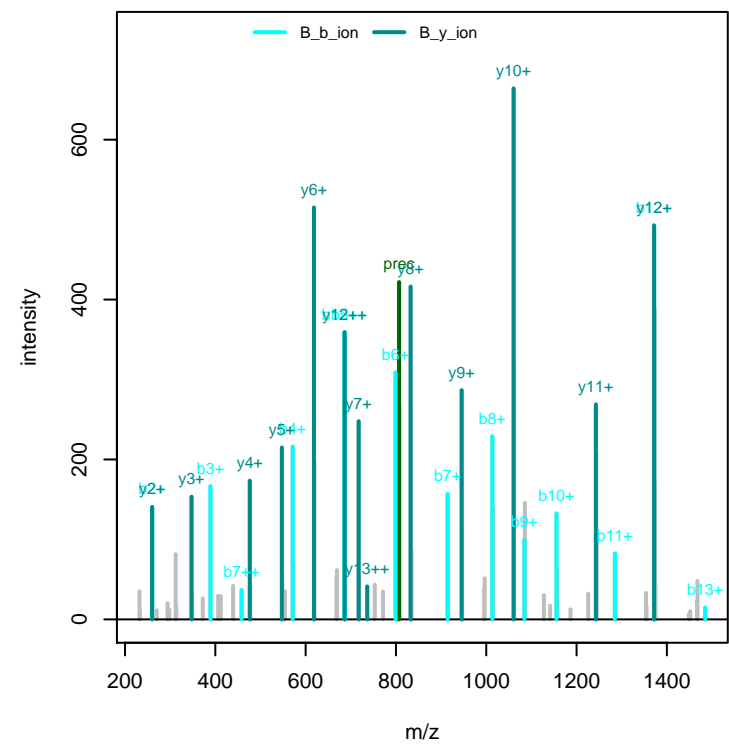

CVEKDIDVAESLK+XL\_L

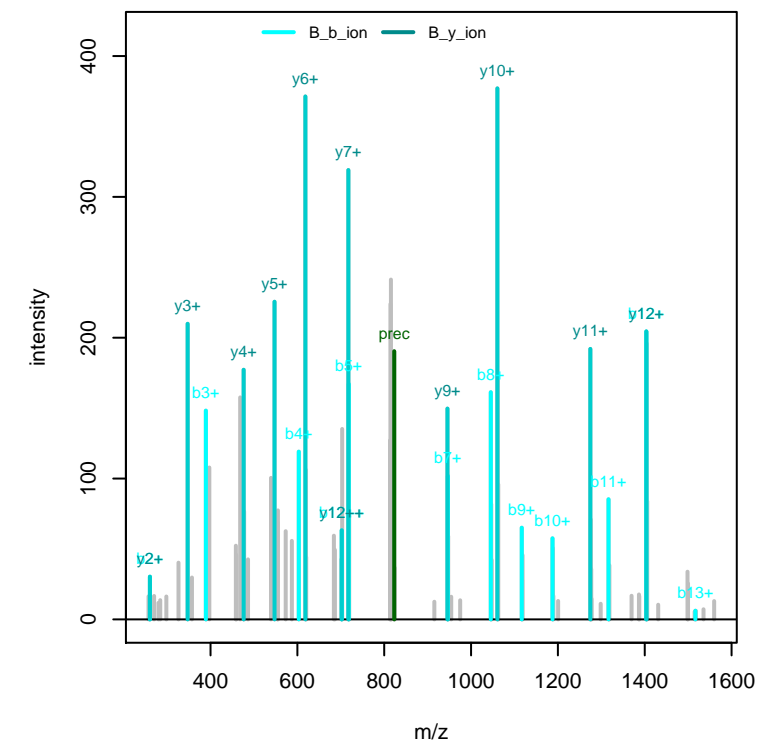



VYSAKIAGIK  
IAGIKAADEGLEVK

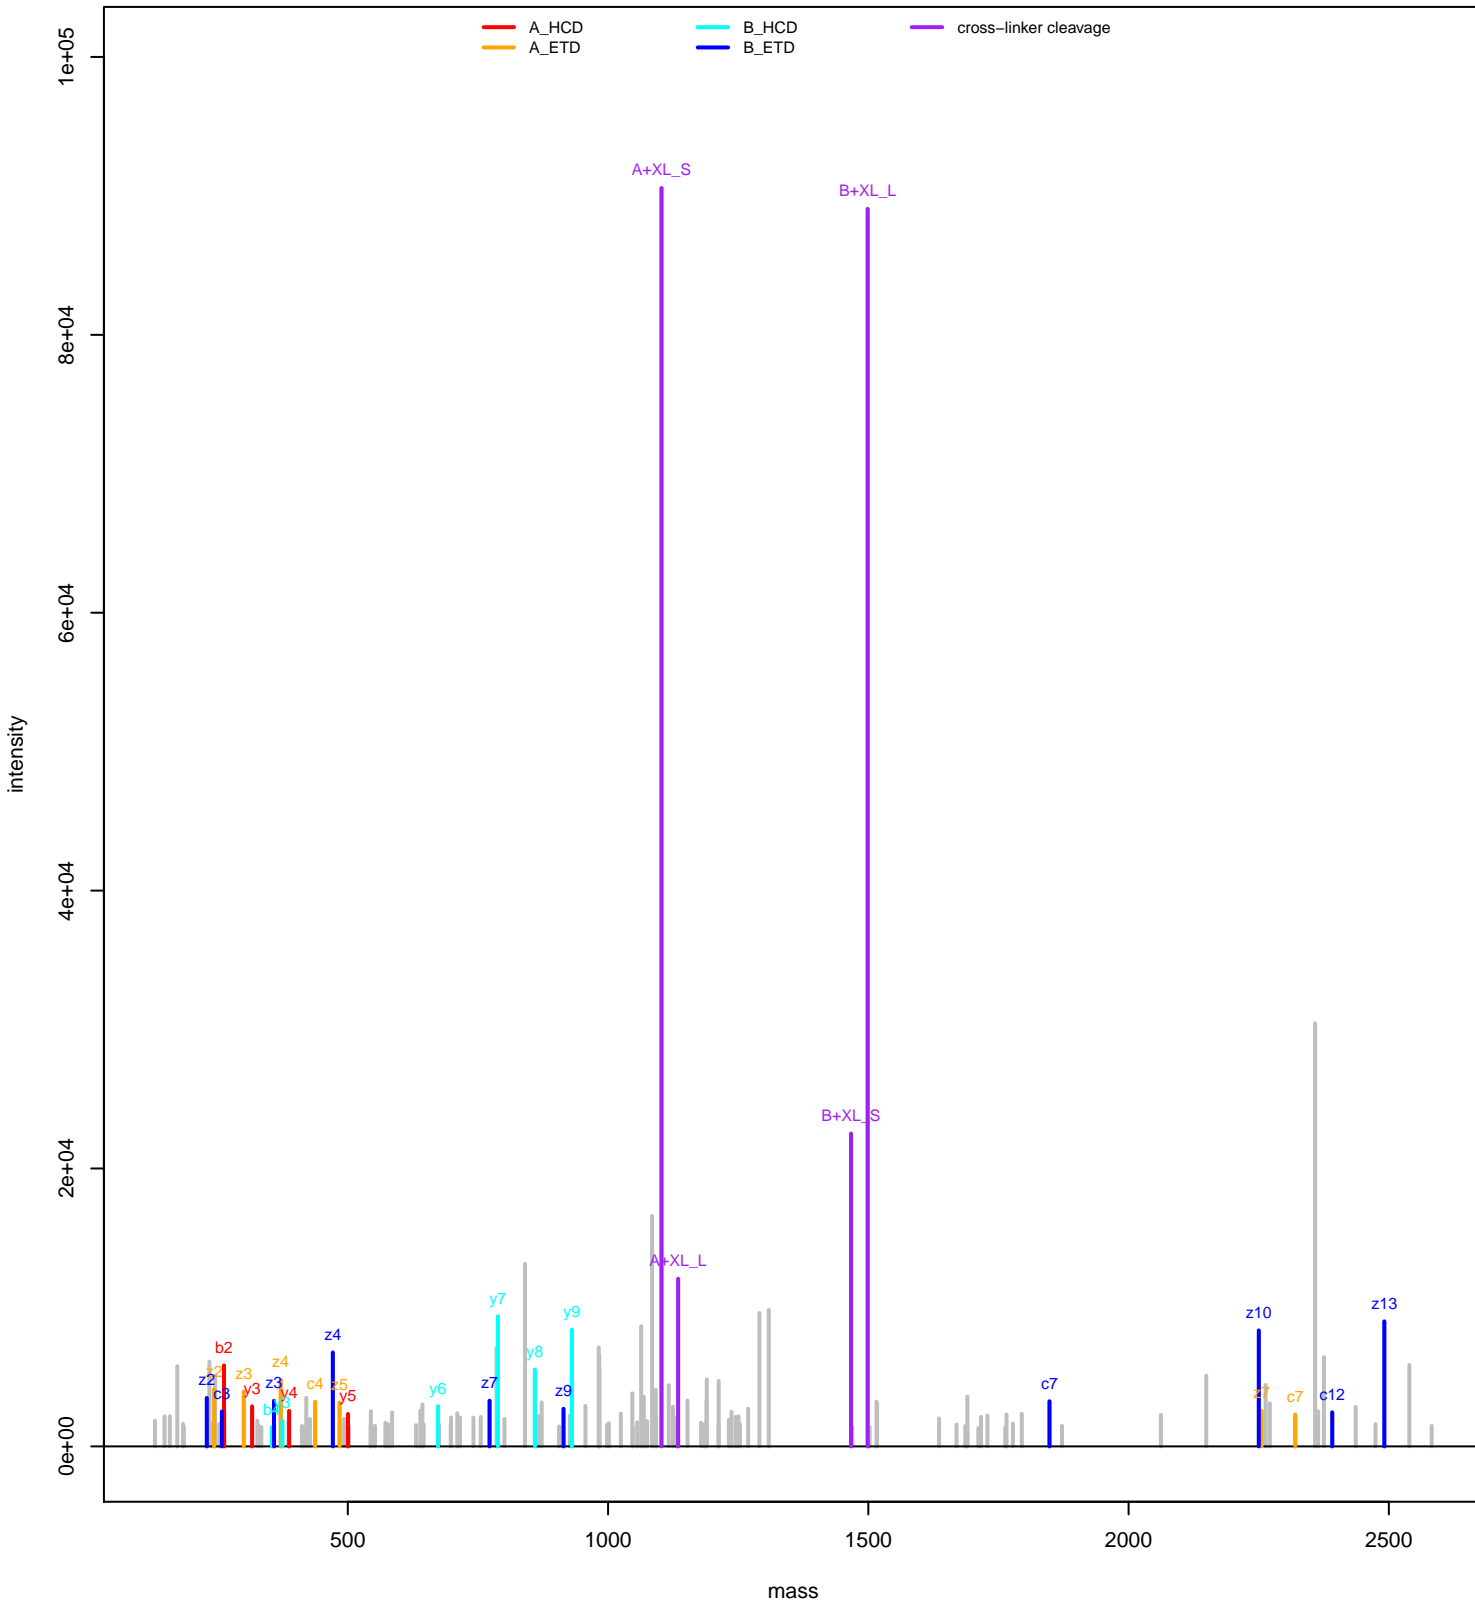

VYSAKIAGIK+XL\_S

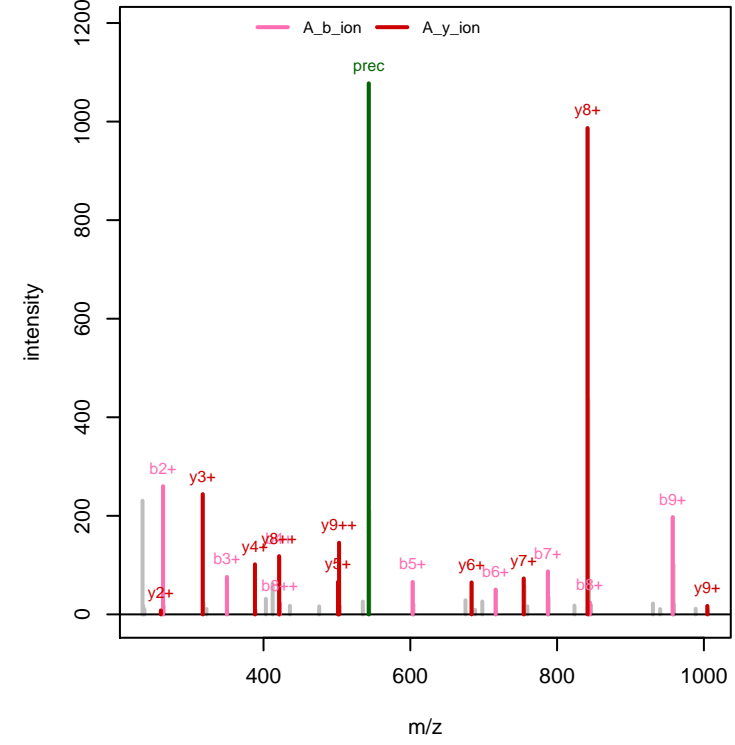

VYSAKIAGIK+XL\_L

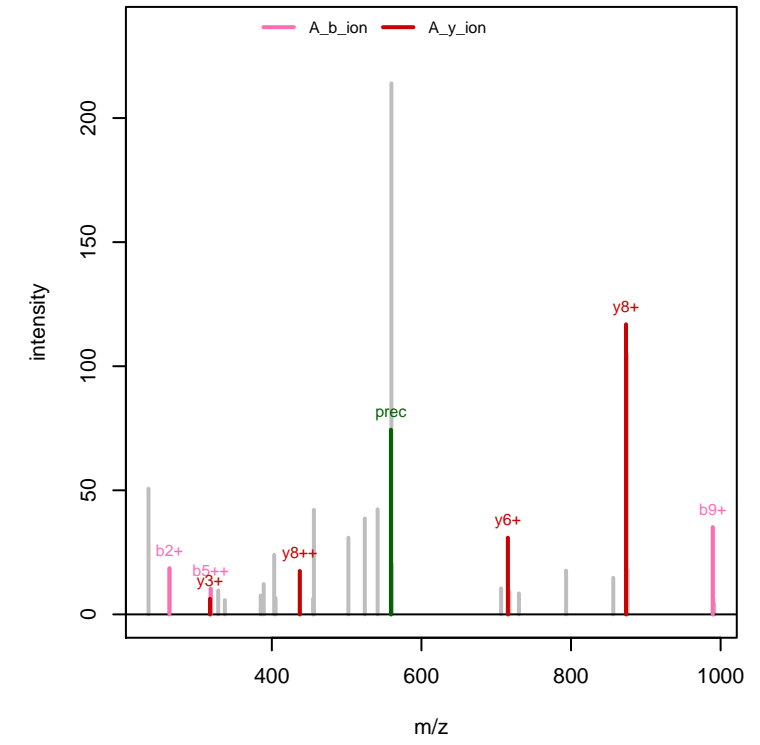

IAGIKAADEGLEVK+XL\_S

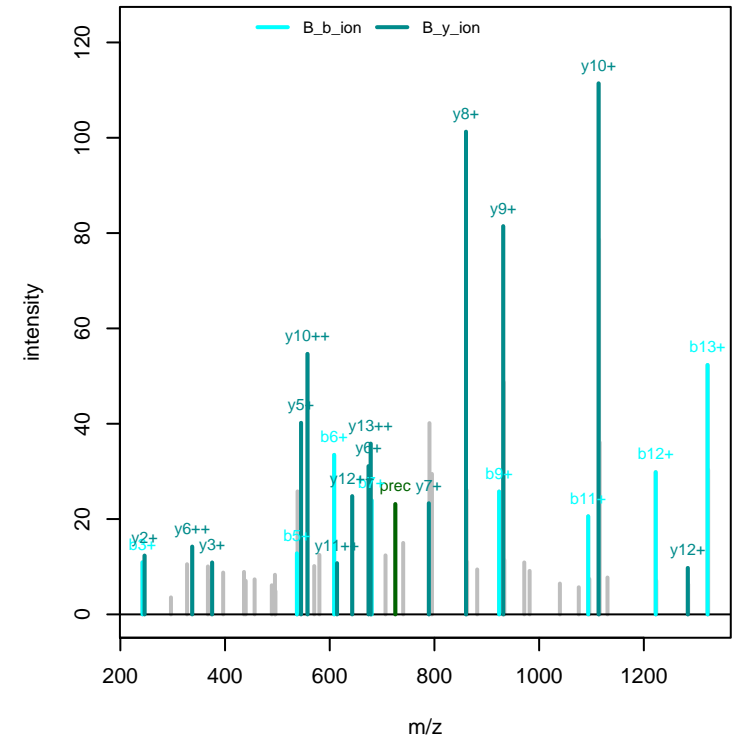

IAGIKAADEGLEVK+XL\_L

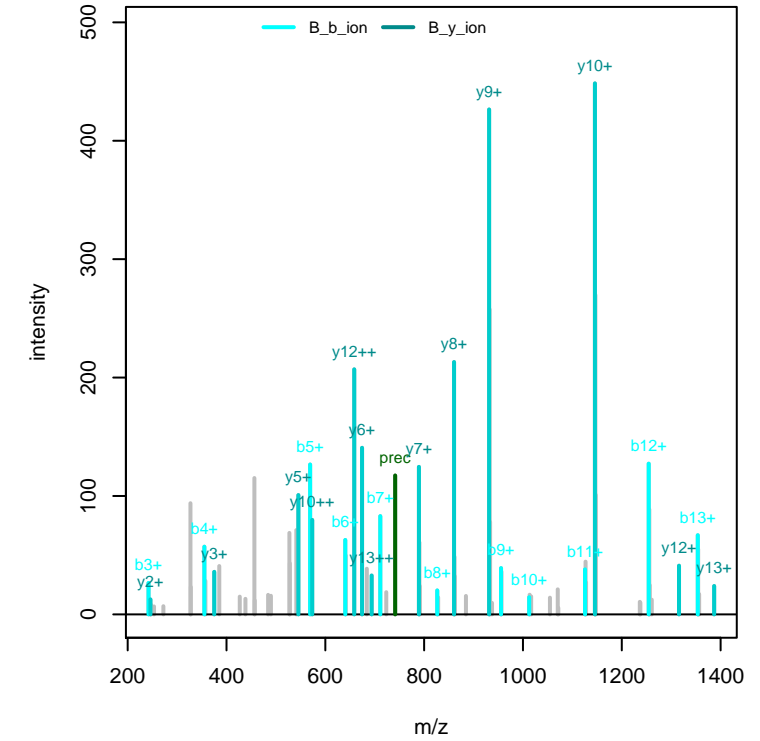

VMDSNDLEKER  
LNKELVHNVALR

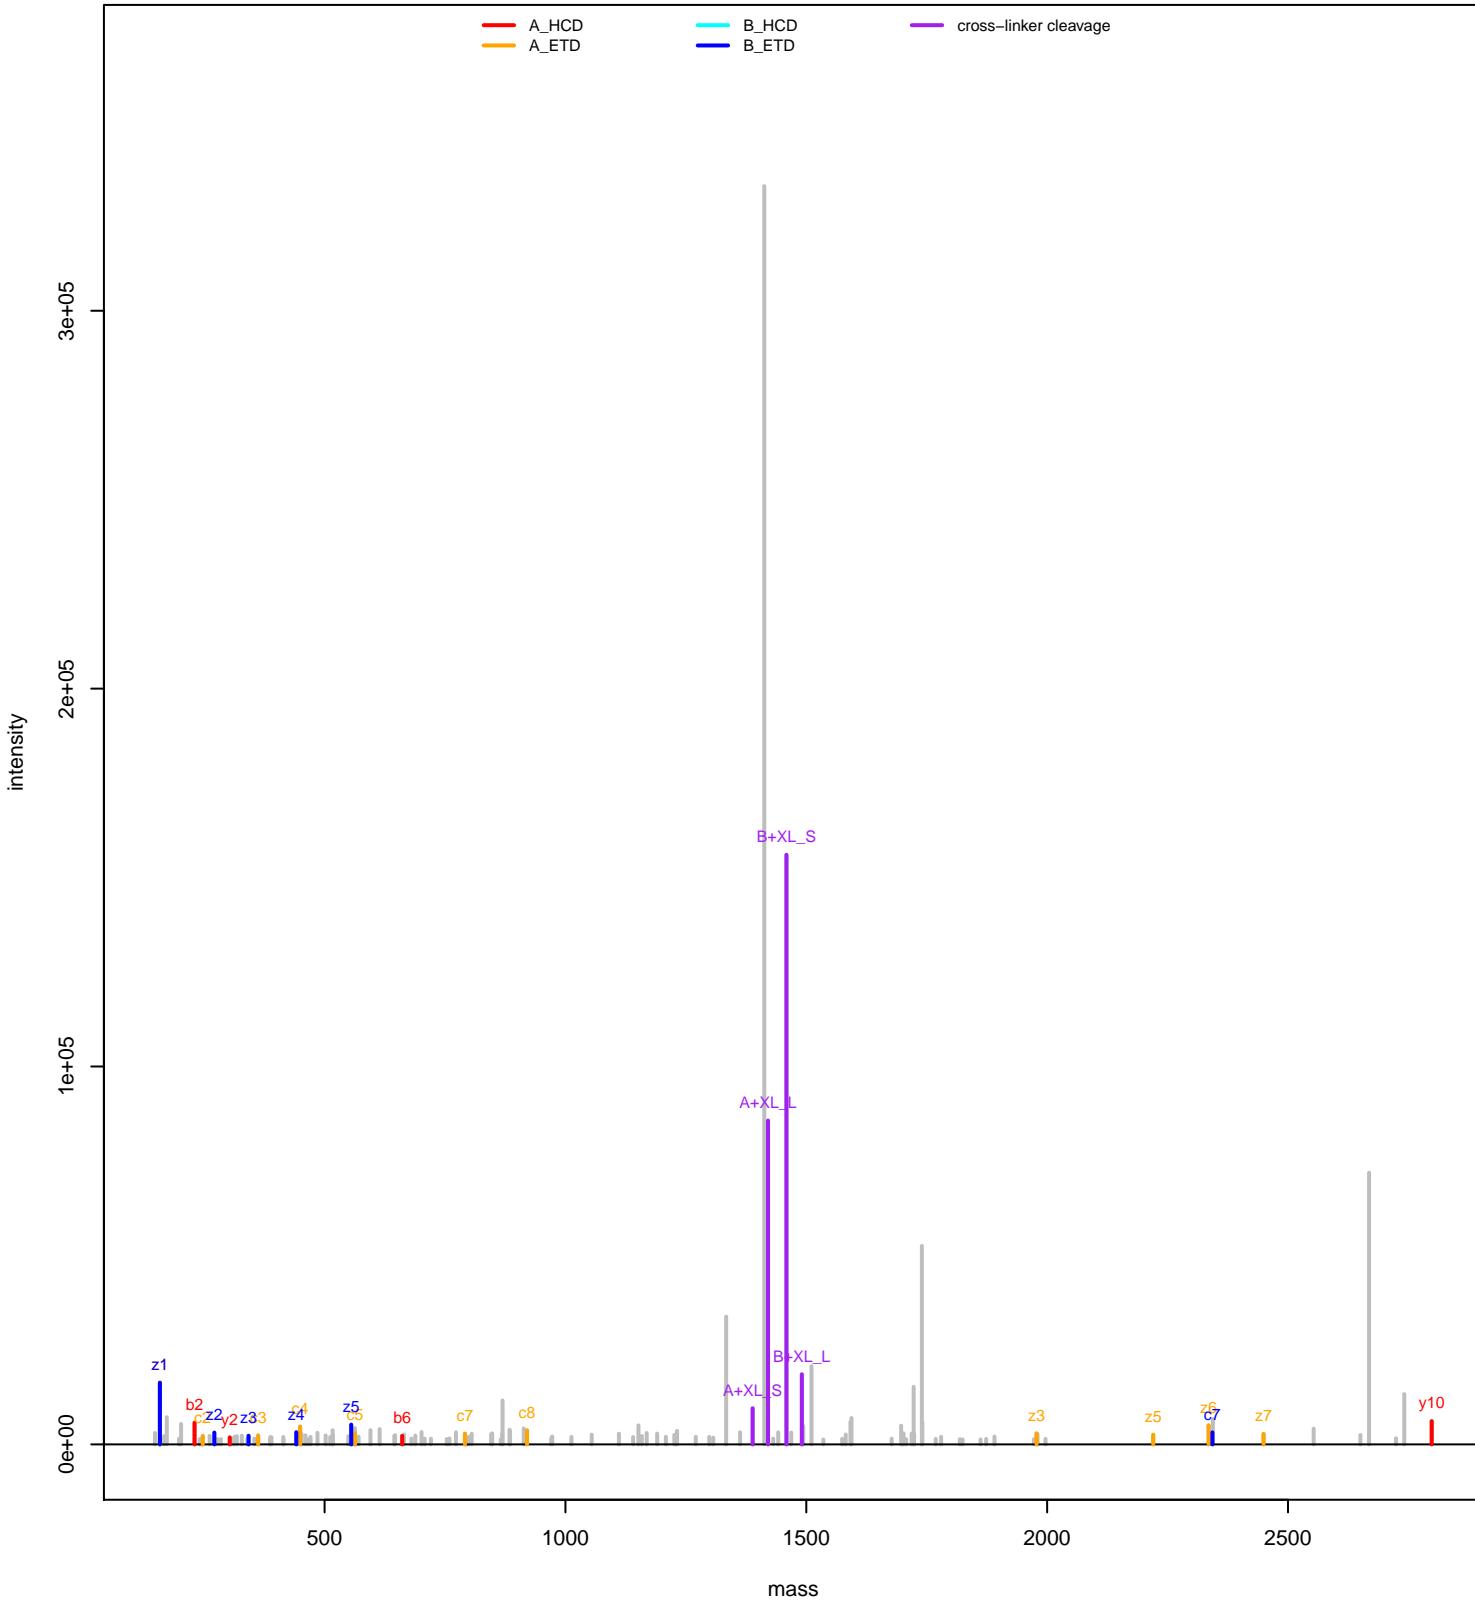

VMDSNDLEKER+XL\_S

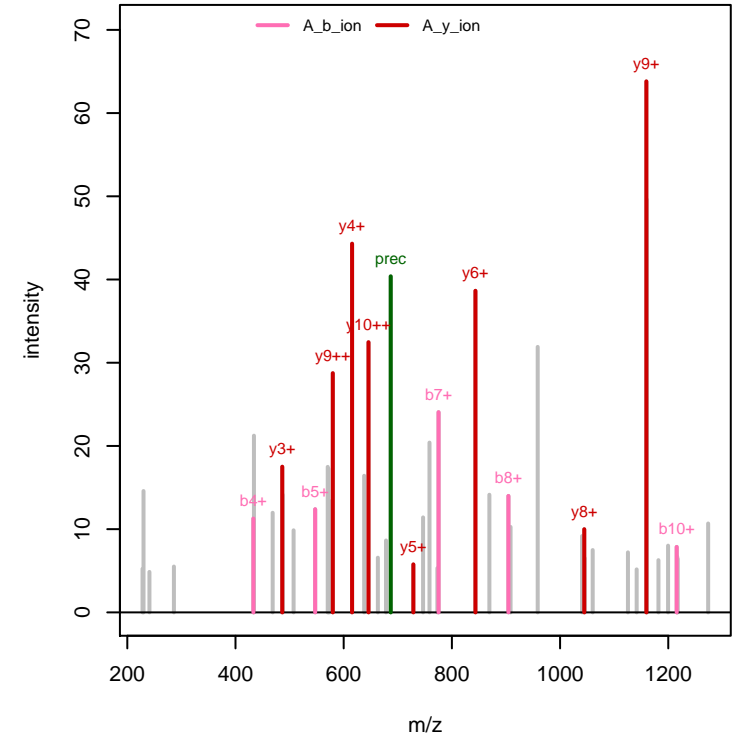

VMDSNDLEKER+XL\_L

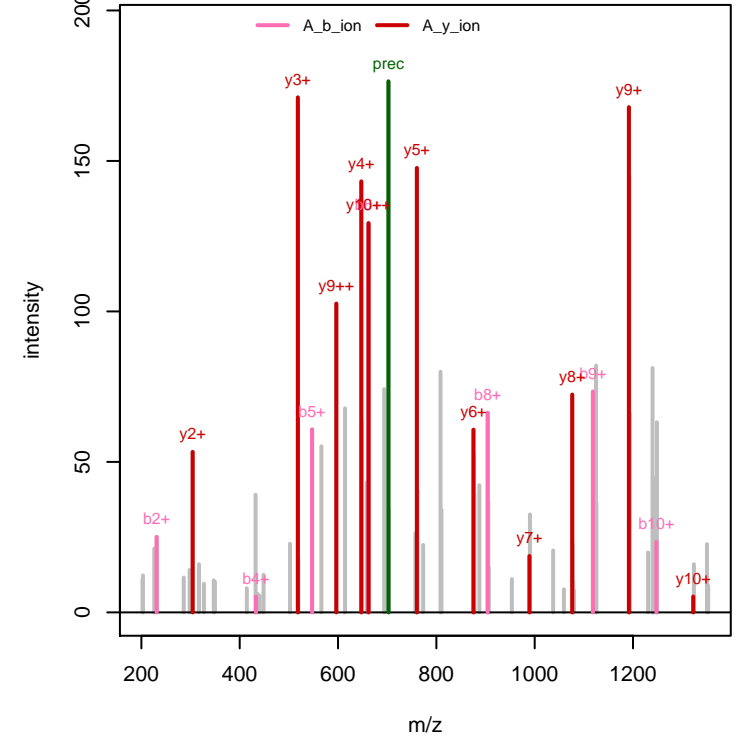

LNKELVHNVALR+XL\_S

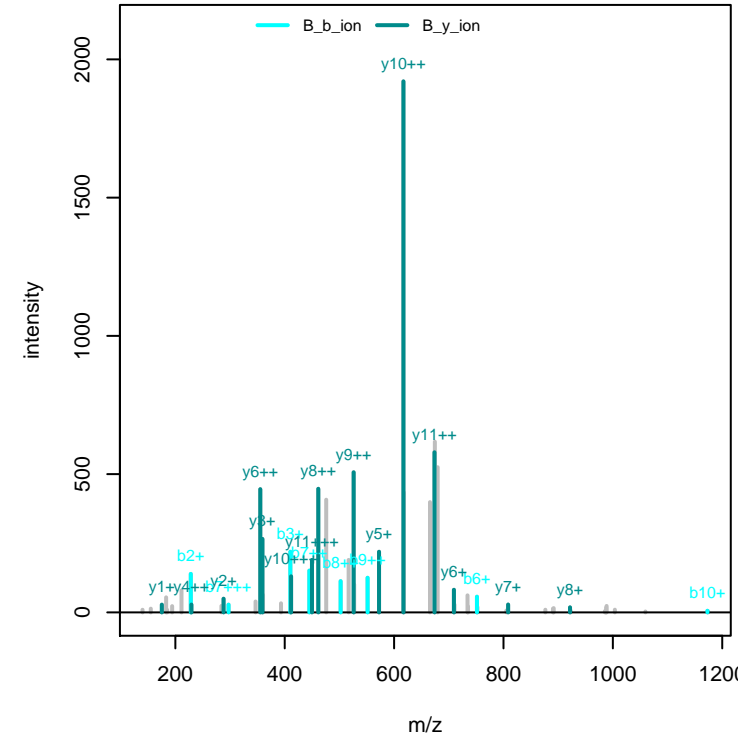

LNKELVHNVALR+XL\_L

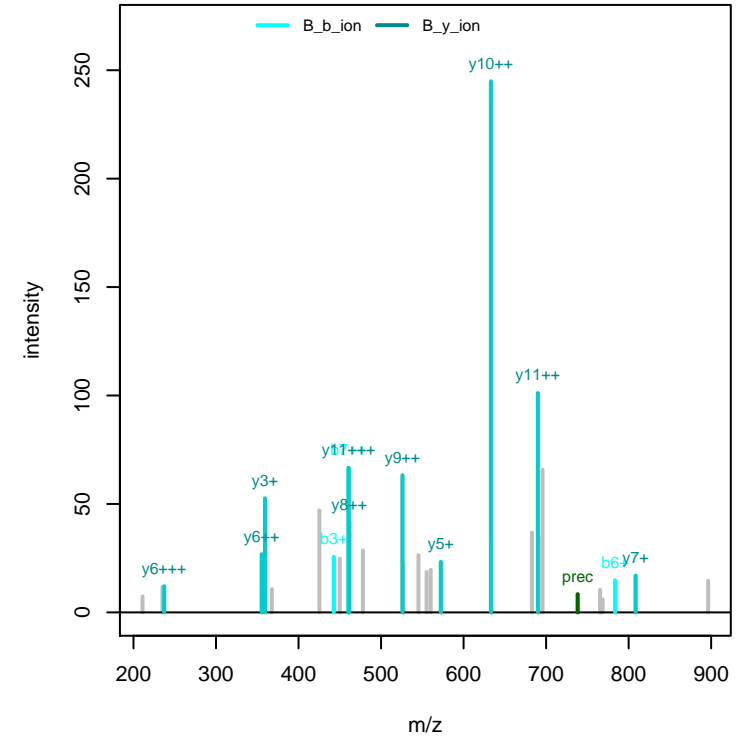

VKNVLSSGK  
VIVEGINLVKK

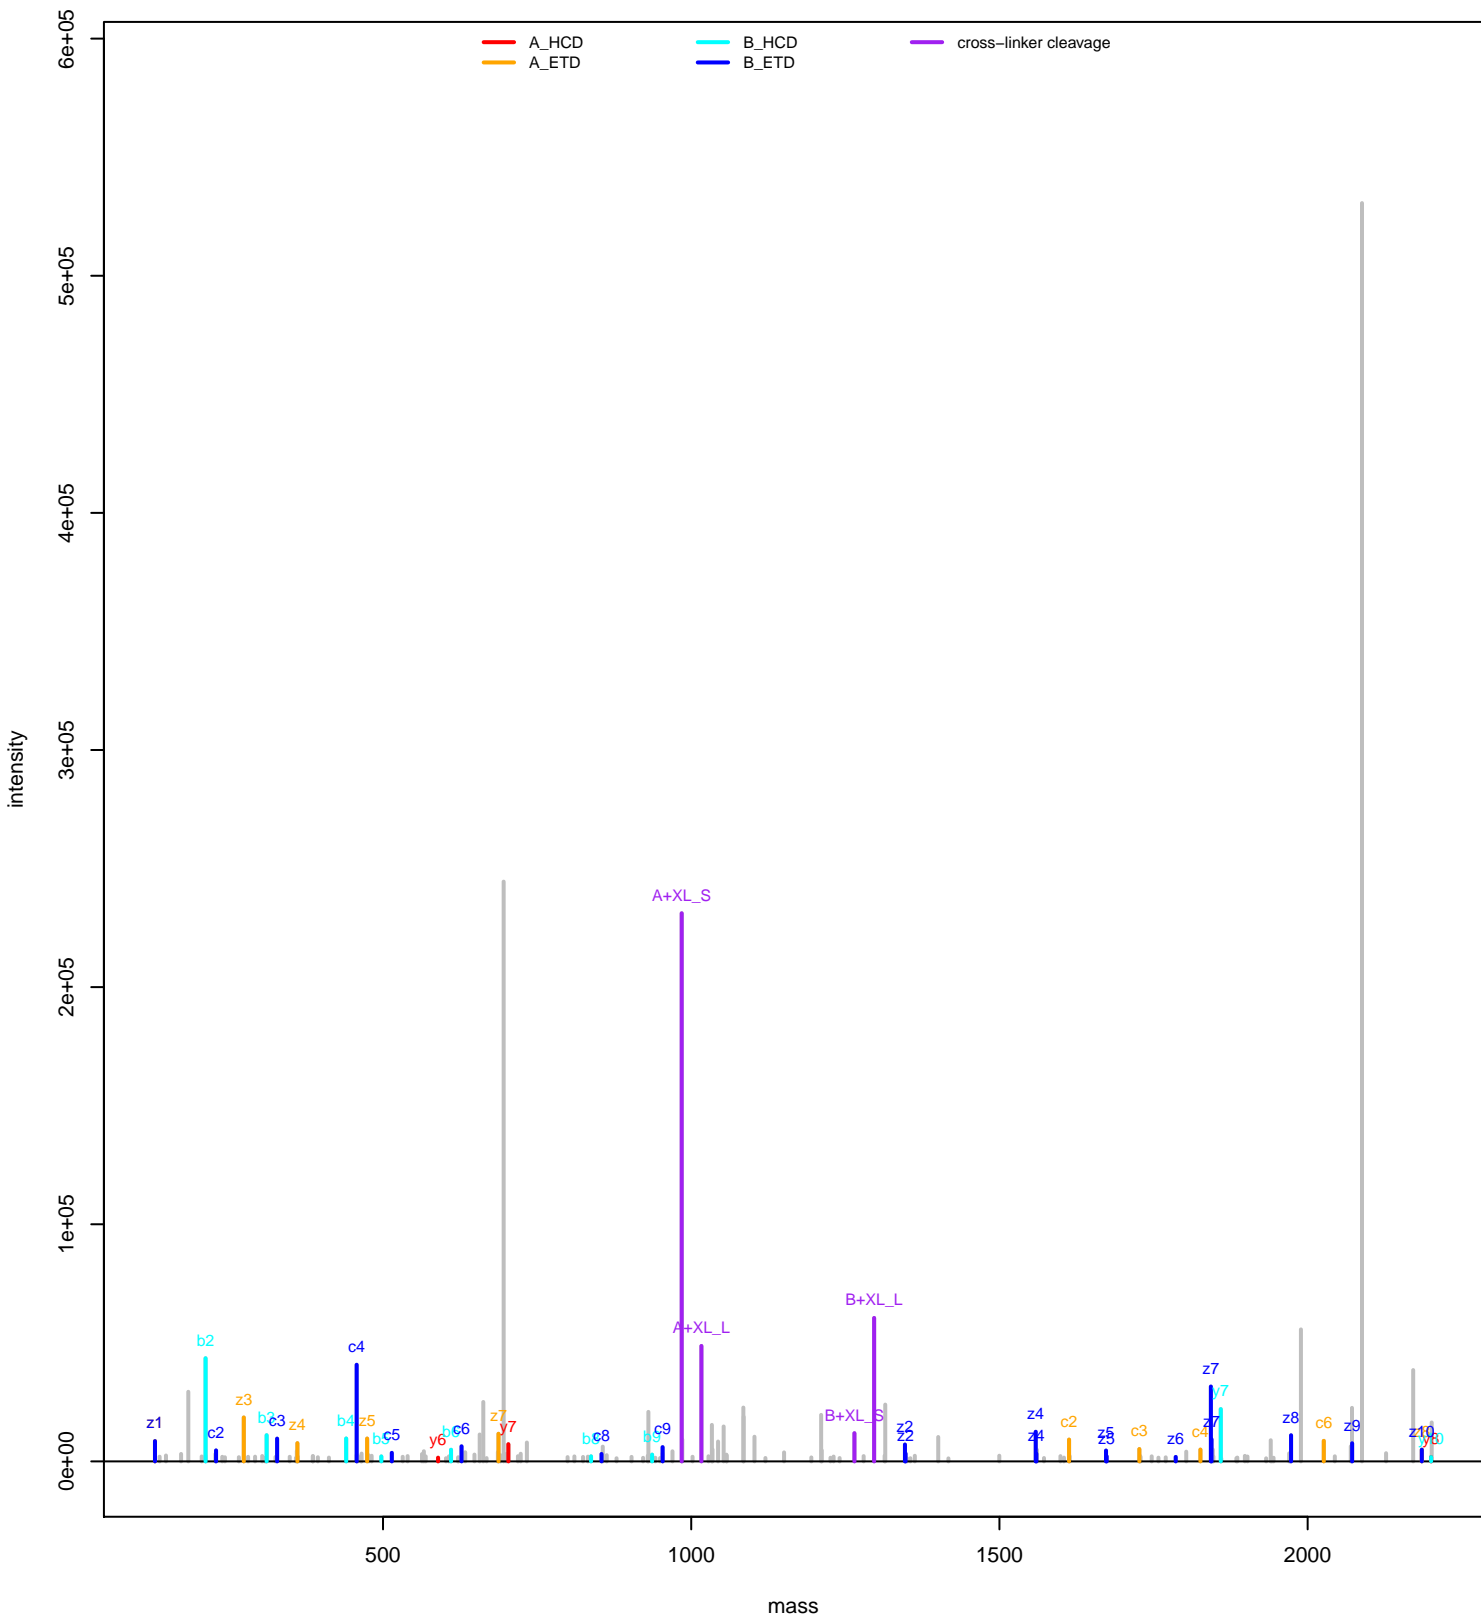

VKNVLSSGK+XL\_S

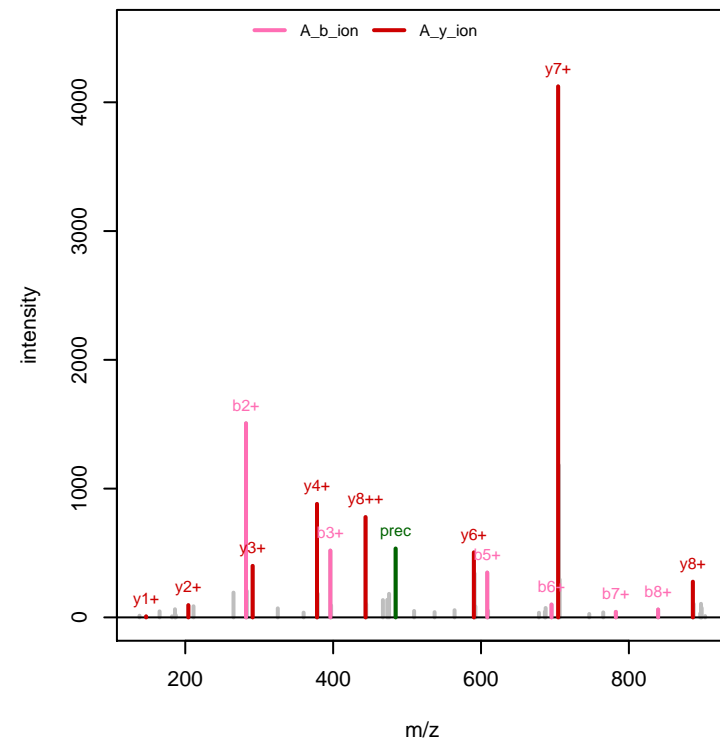

VKNVLSSGK+XL\_L

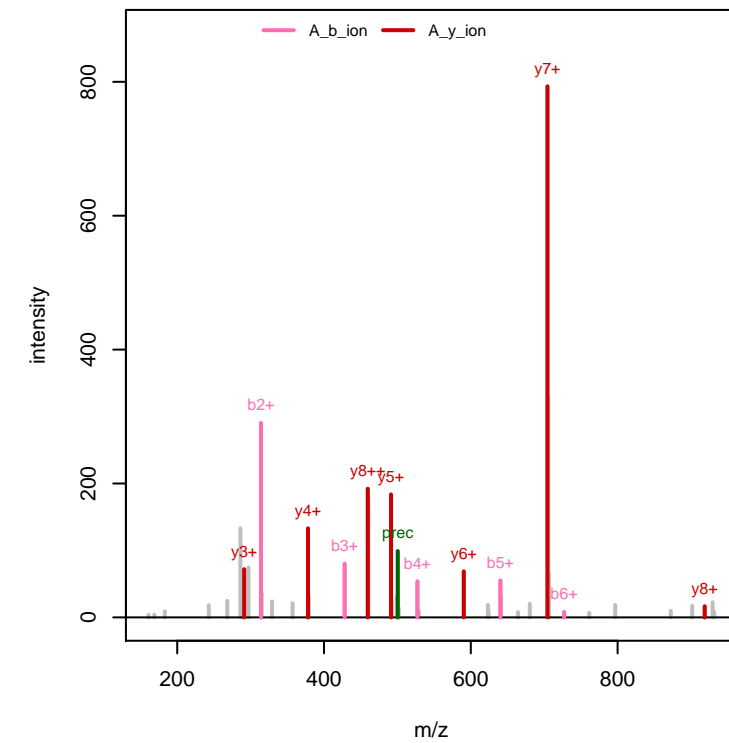

VIVEGINLVKK+XL\_S

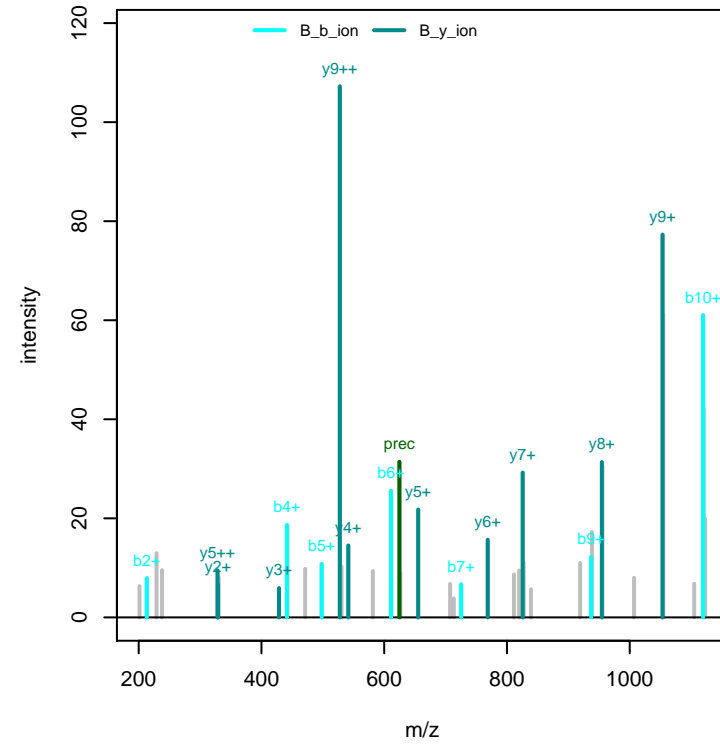

VIVEGINLVKK+XL\_L

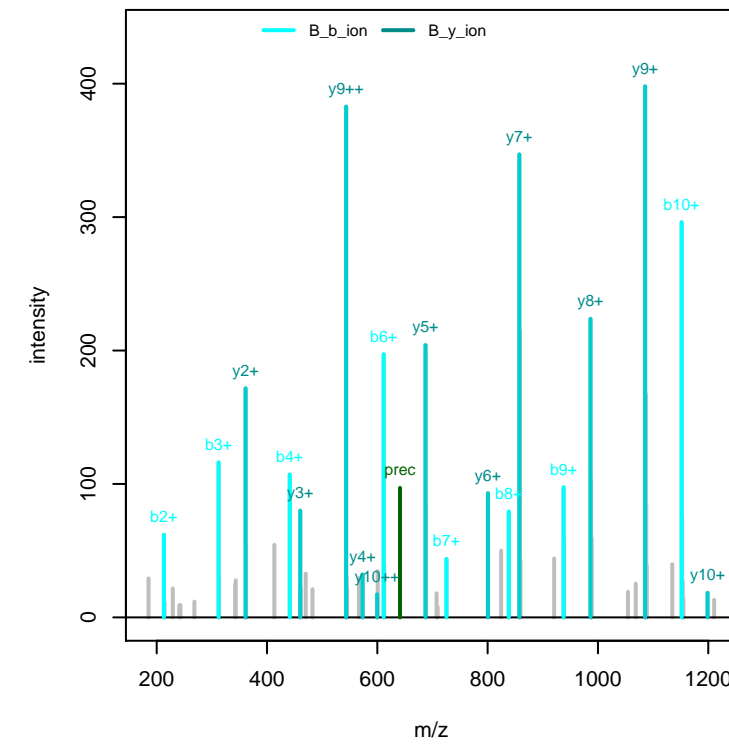

**KGLADTALK  
SPGVFFDSDKGK**

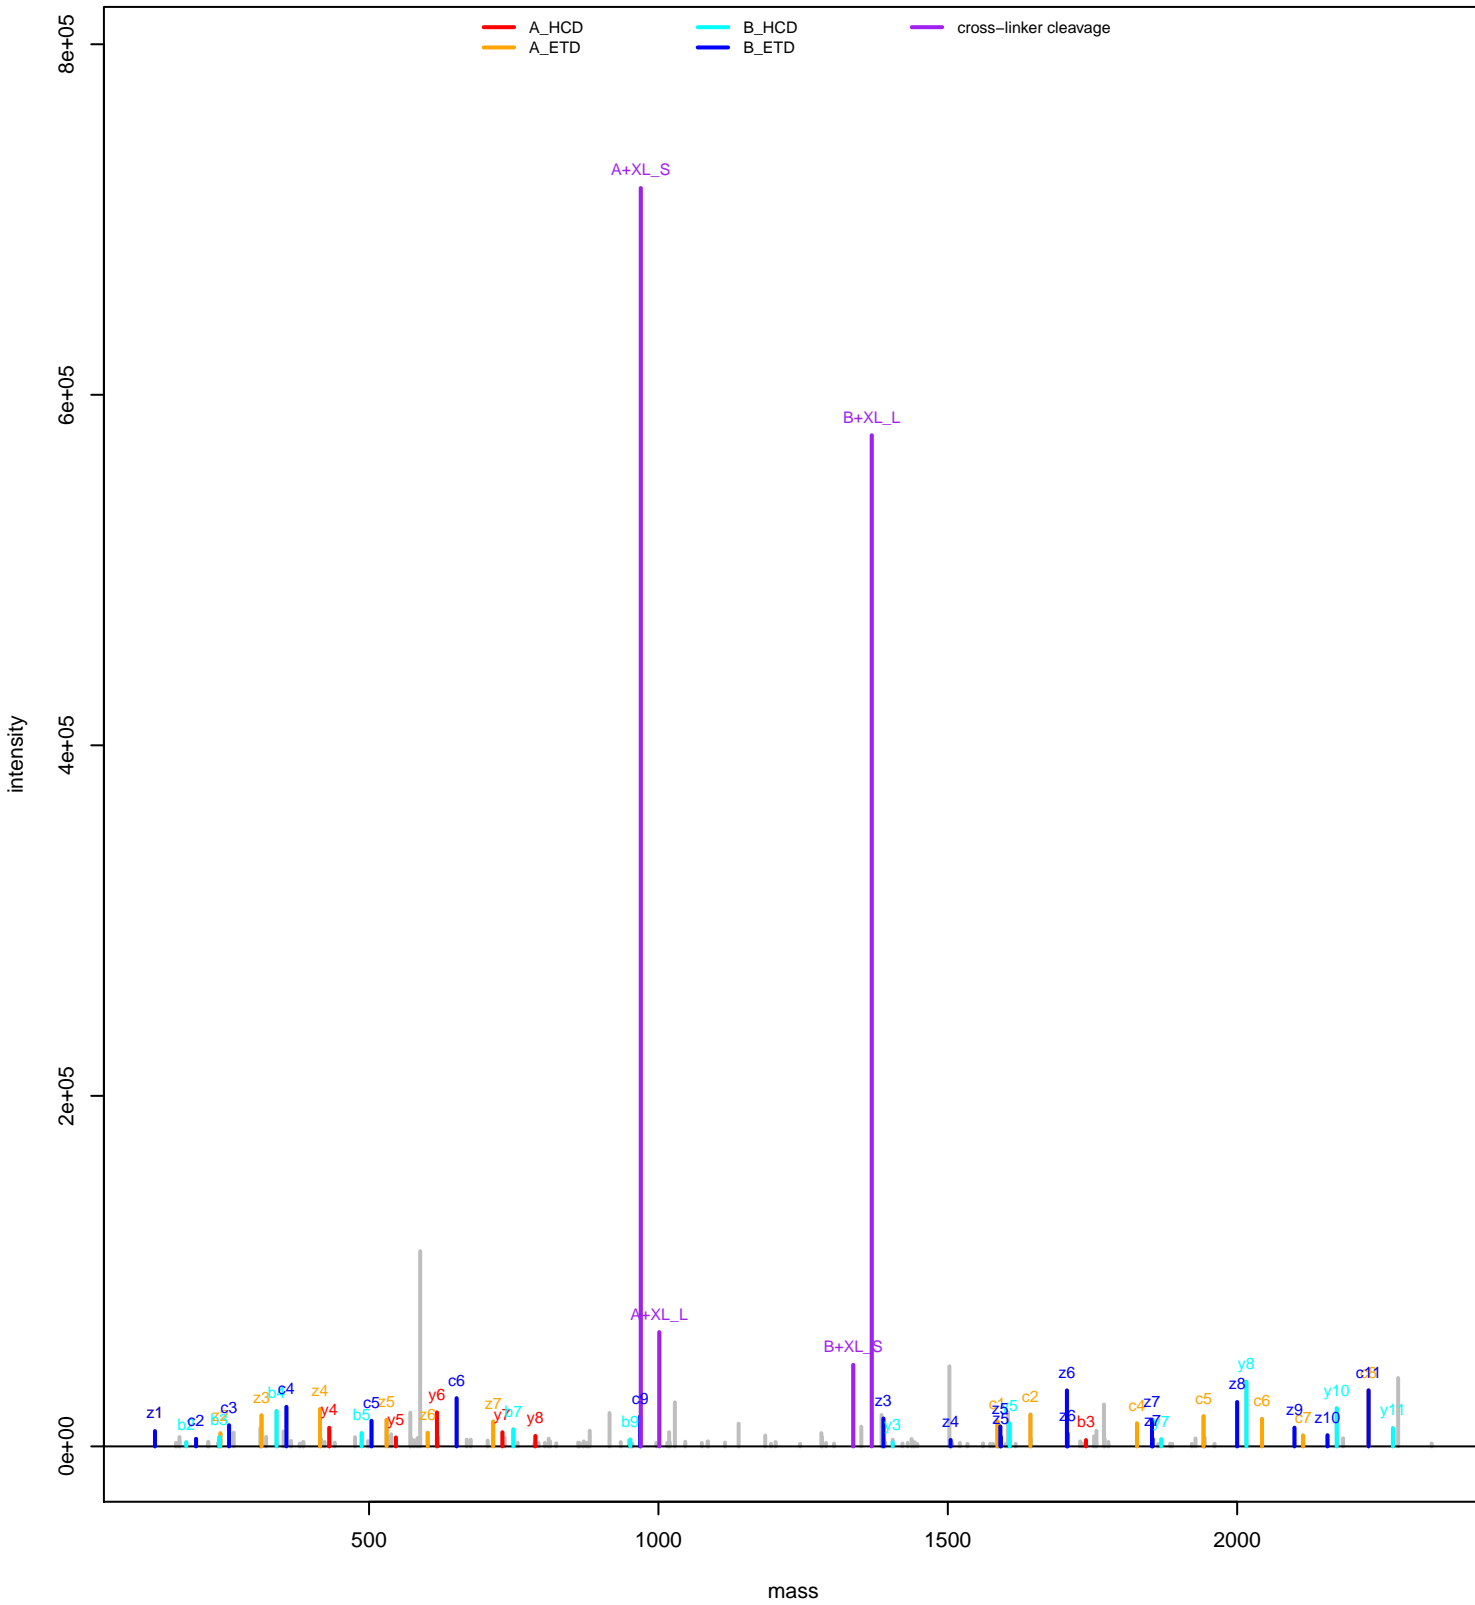

**KGLADTALK+XL\_S**

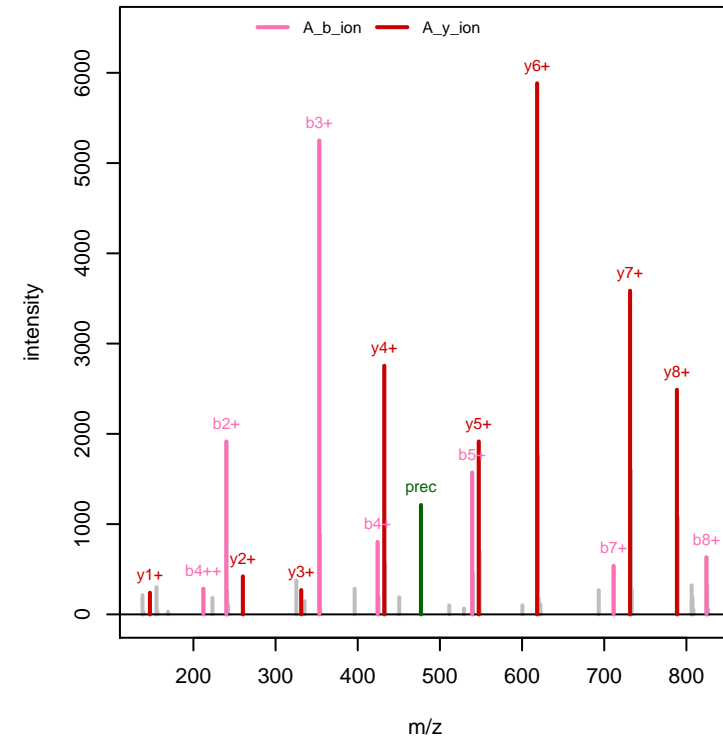

**KGLADTALK+XL\_L**

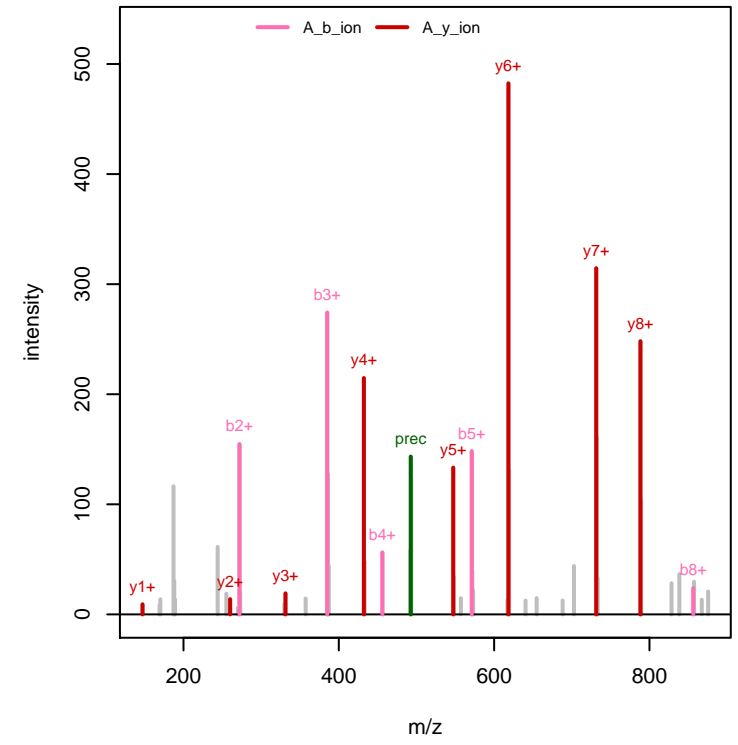

**SPGVFFDSDKGK+XL\_S**

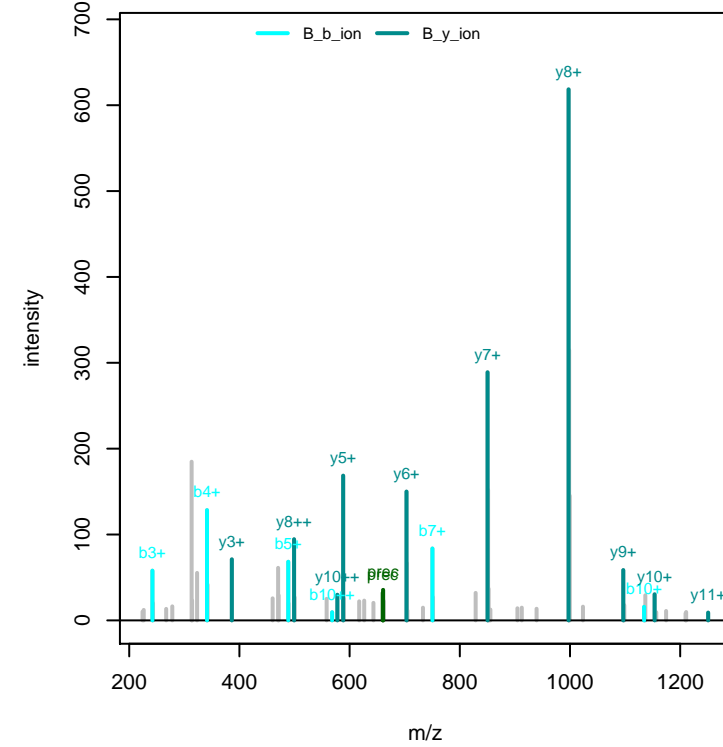

**SPGVFFDSDKGK+XL\_L**

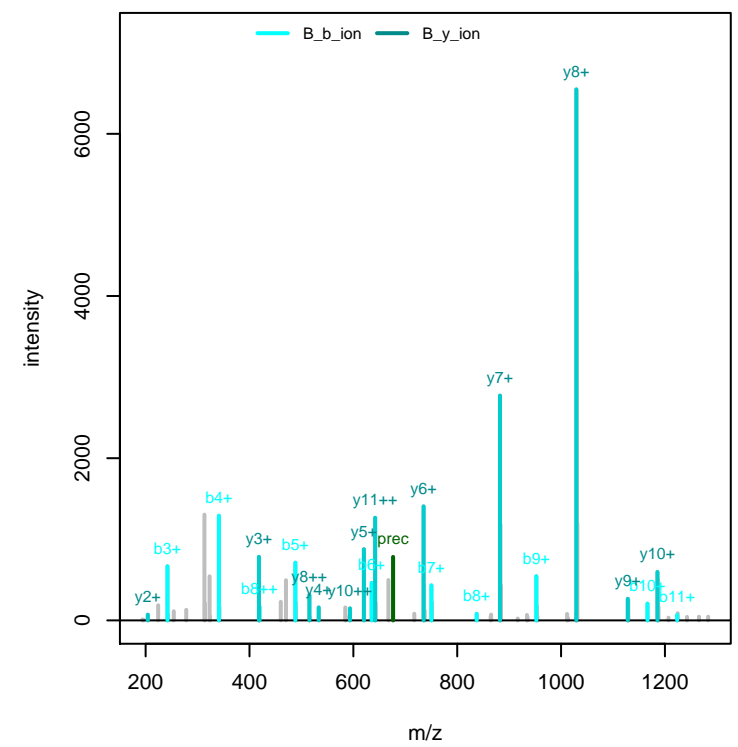

LKNENPR  
LQLKDEMLK

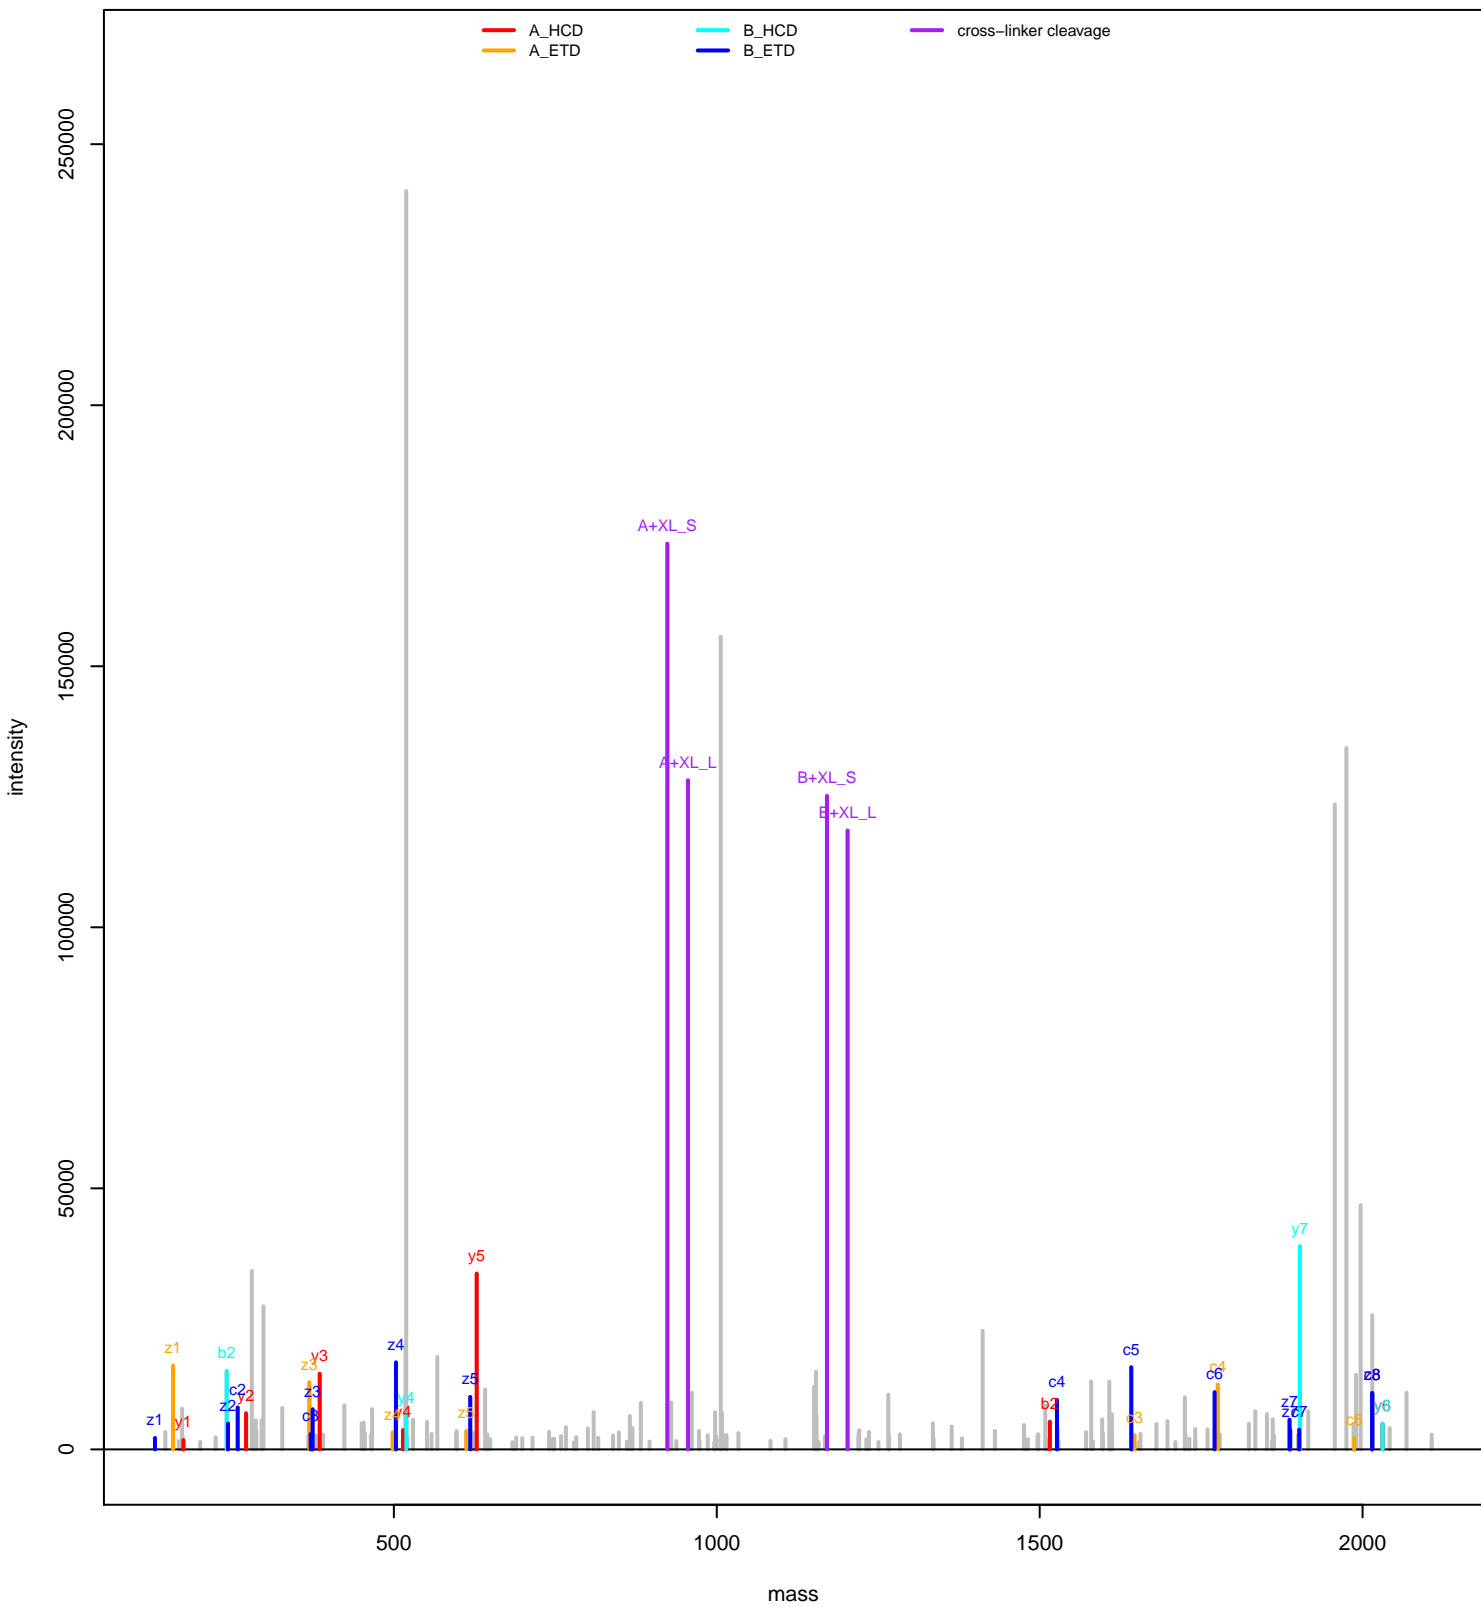

LKNENPR+XL\_S

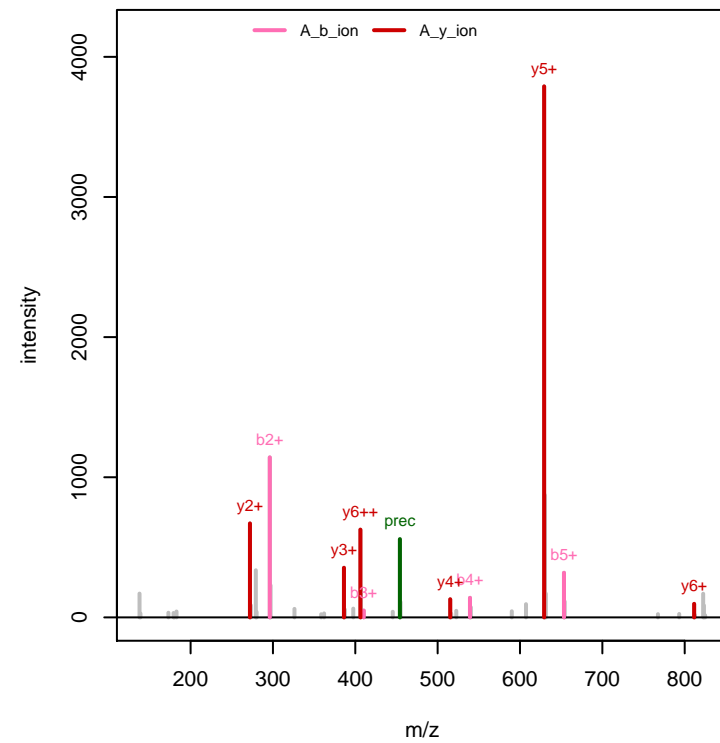

LKNENPR+XL\_L

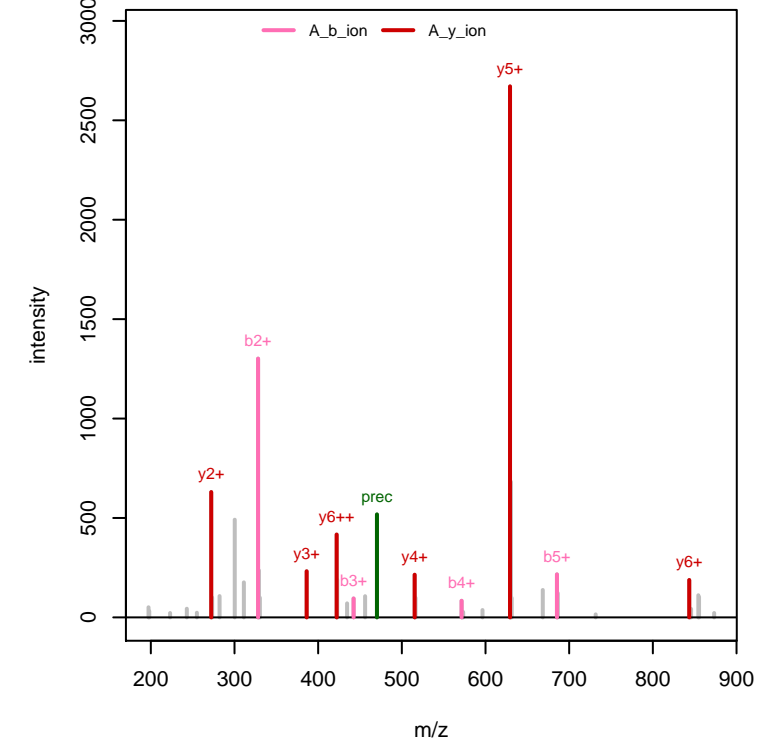

LQLKDEMLK+XL\_S

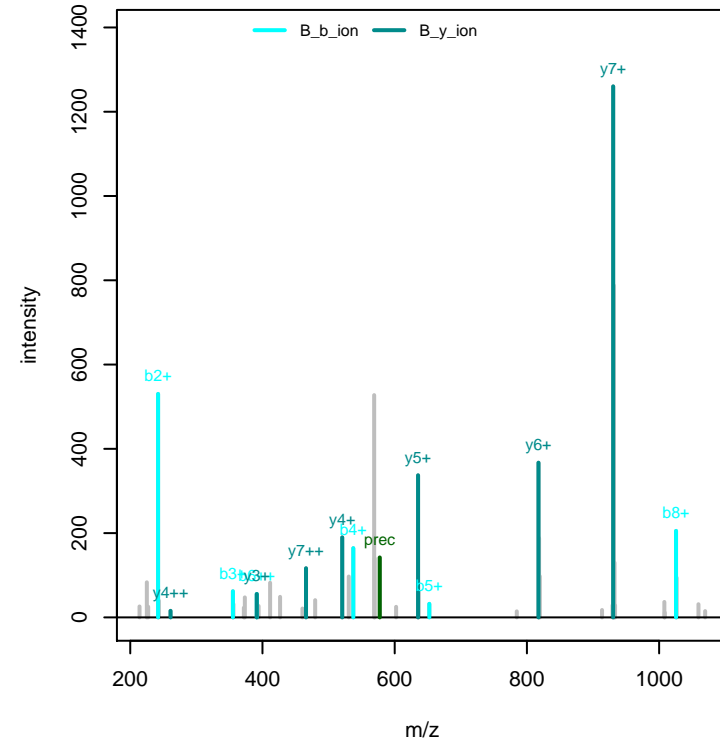

LQLKDEMLK+XL\_L

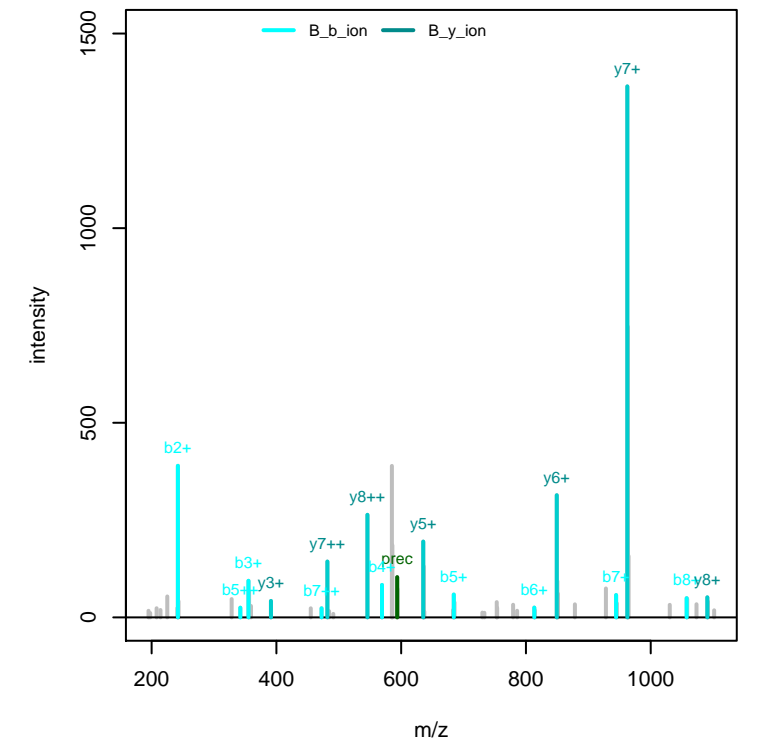

TTYVIKELNDK  
AYYVGTDSKESGIIQGDLIAK

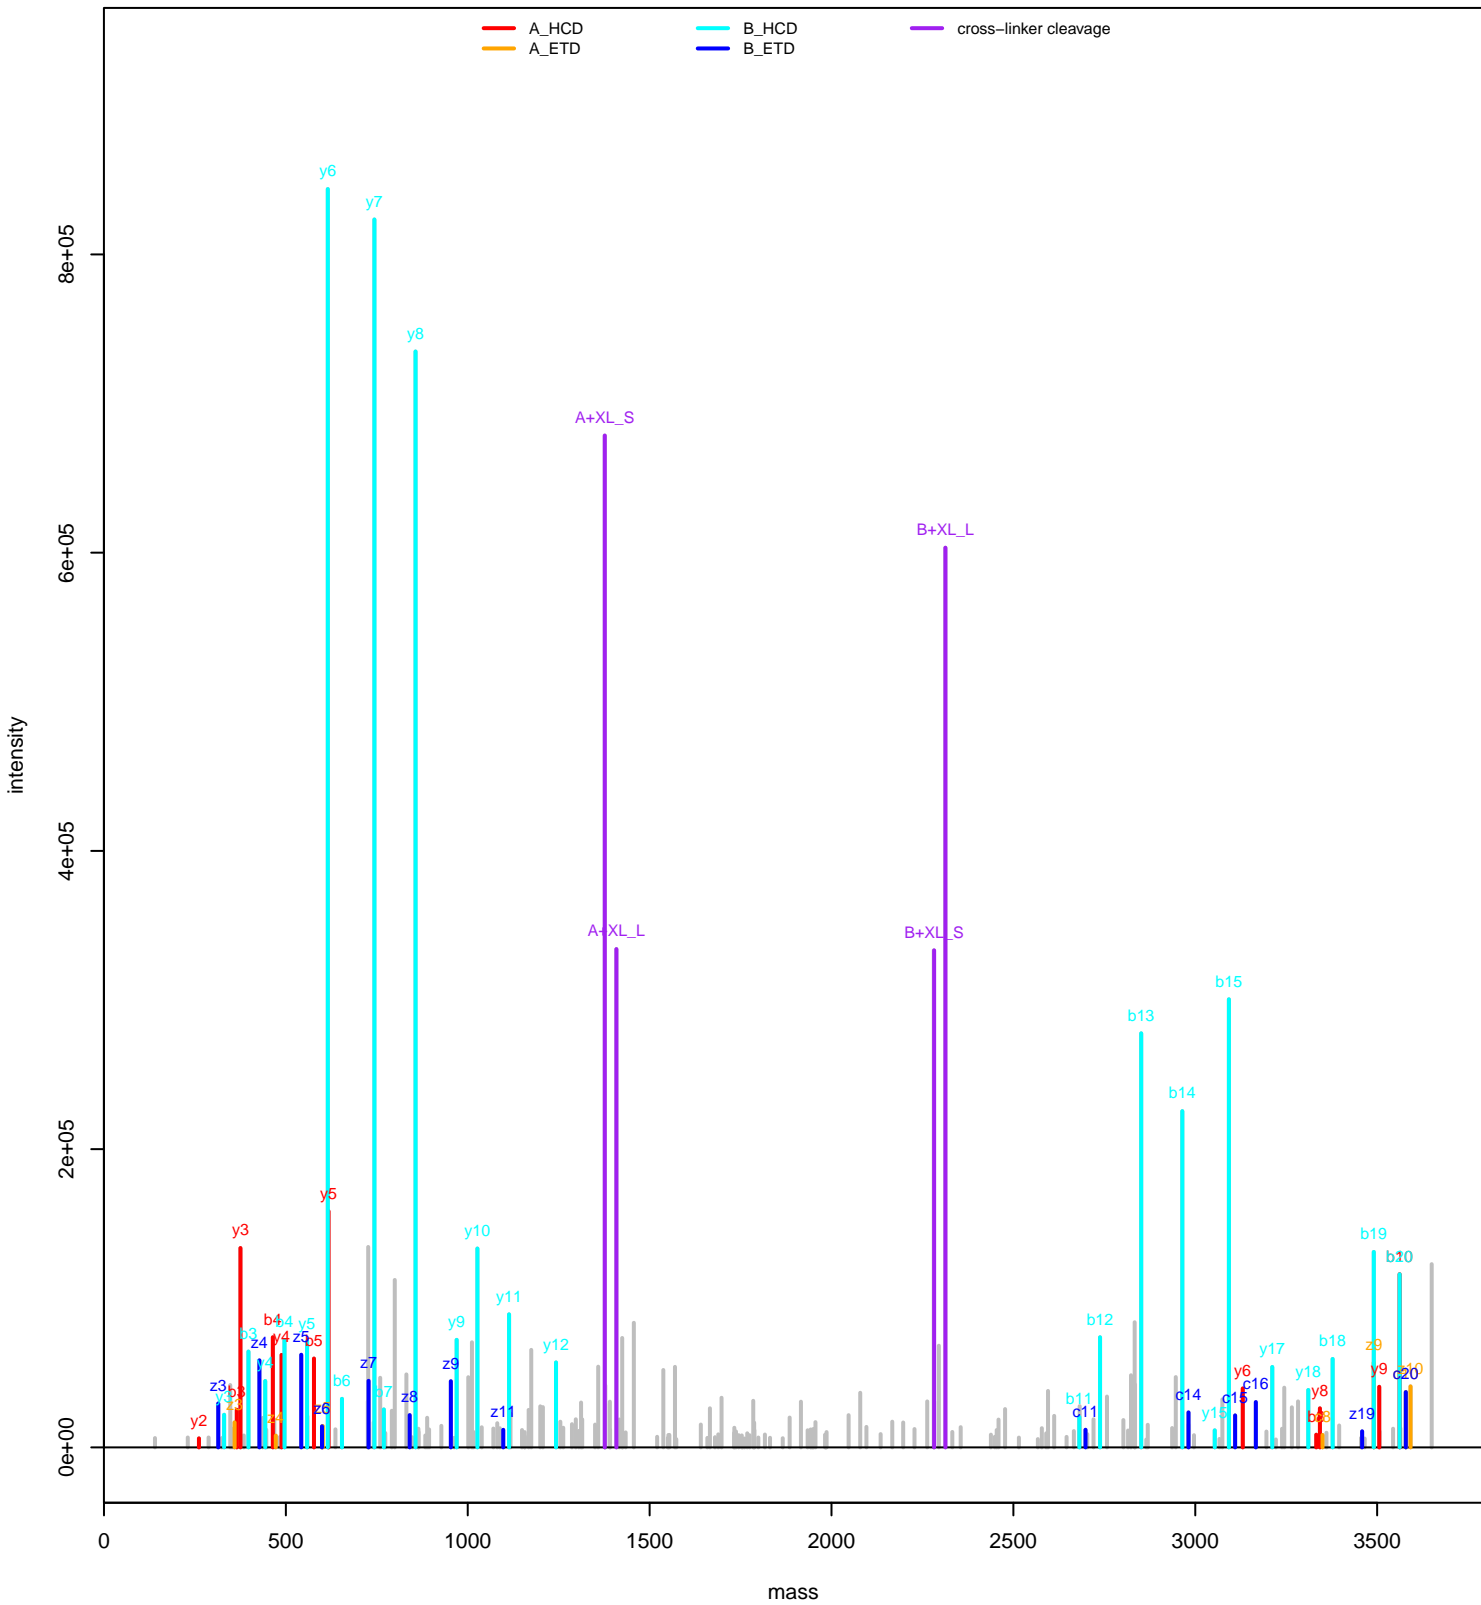

TTYVIKELNDK+XL\_S

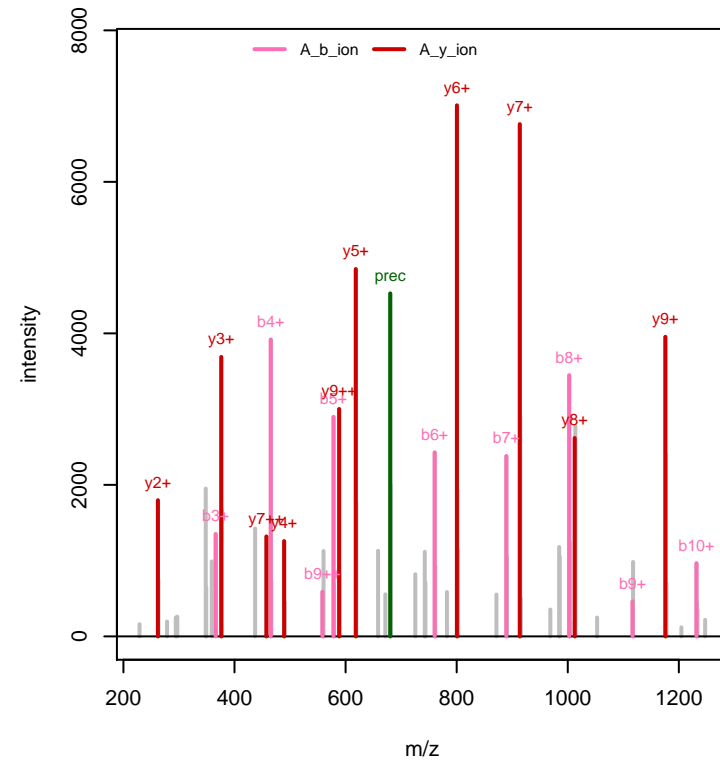

TTYVIKELNDK+XL\_L

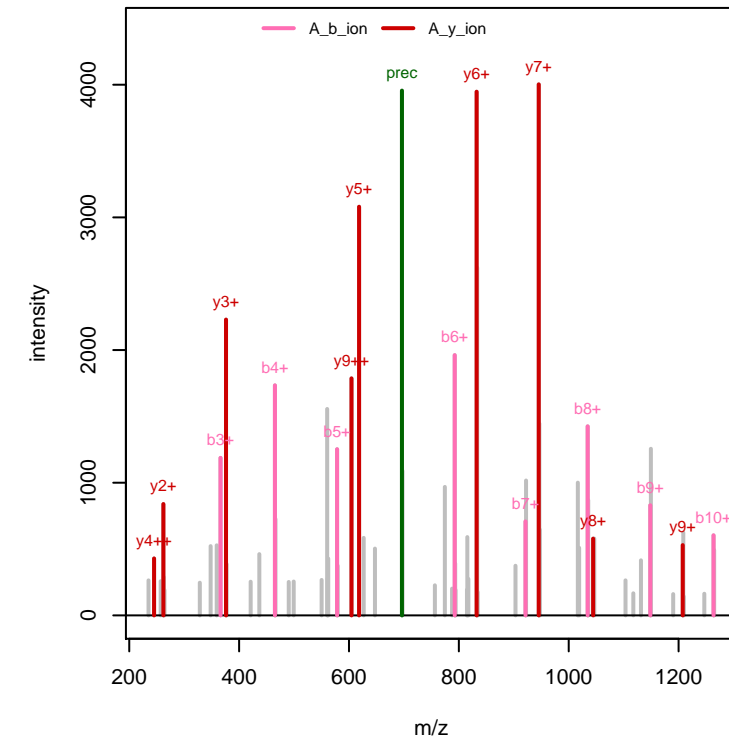

AYYVGTDSKESGIIQGDLIAK+XL\_S

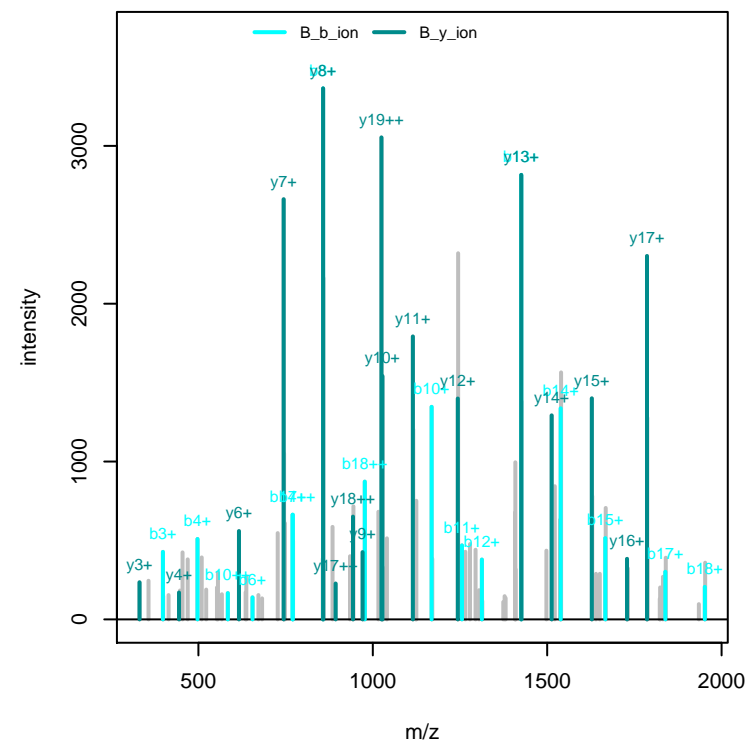

AYYVGTDSKESGIIQGDLIAK+XL\_L

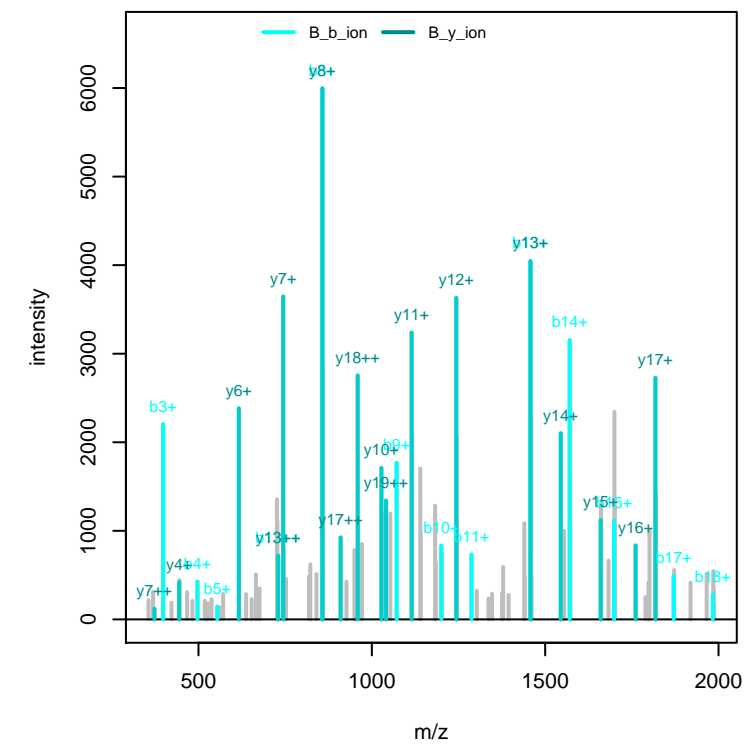

LAKEDPSFR  
VYSGVVNSGDTVLNSVKAAR

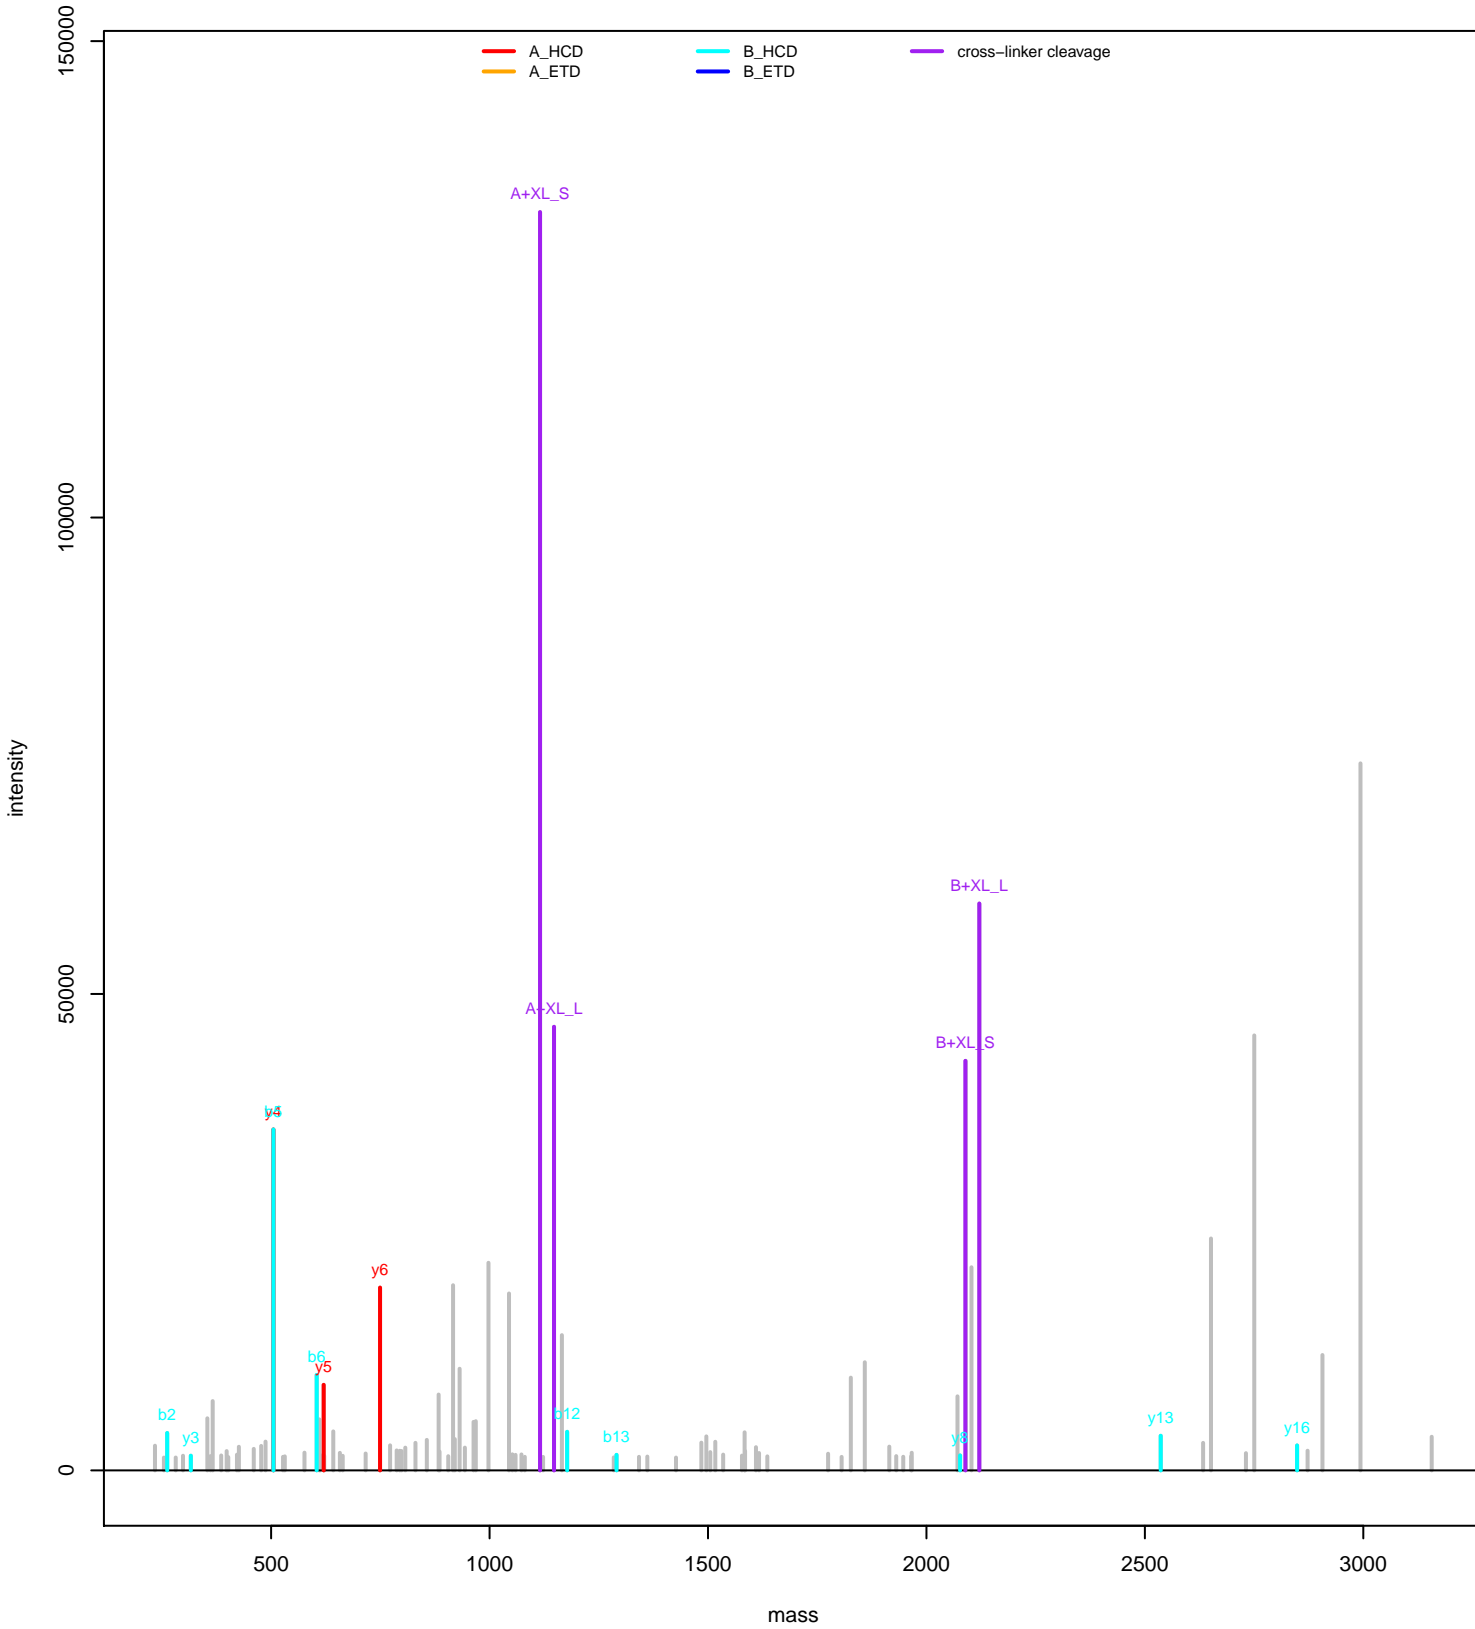

LAKEDPSFR+XL\_S

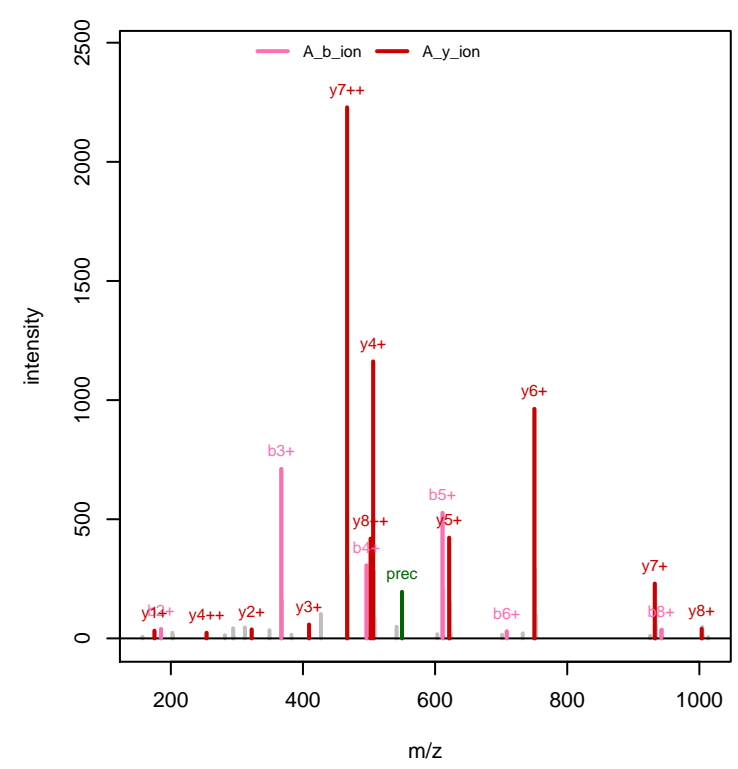

LAKEDPSFR+XL\_L

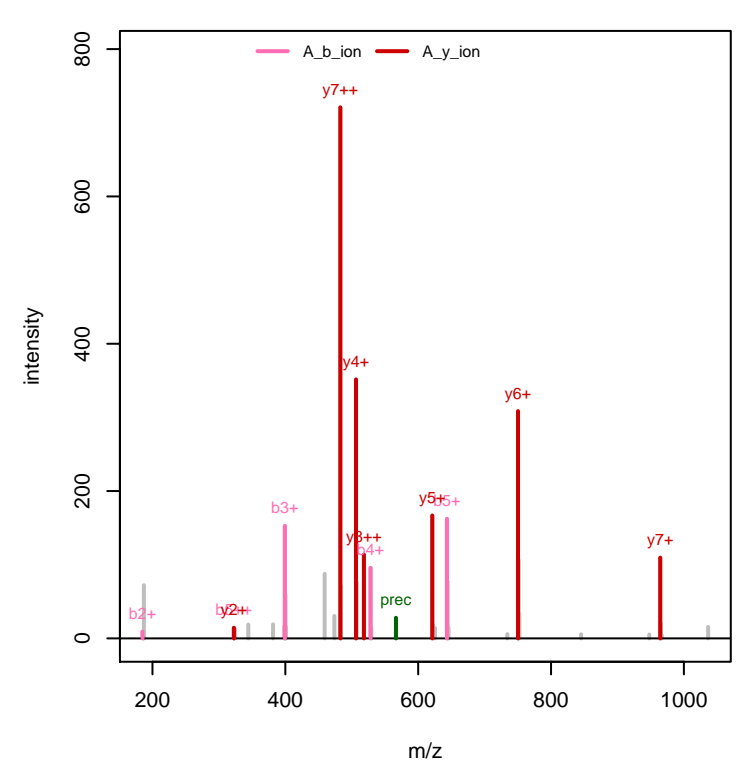

VYSGVVNSGDTVLNSVKAAR+XL\_S

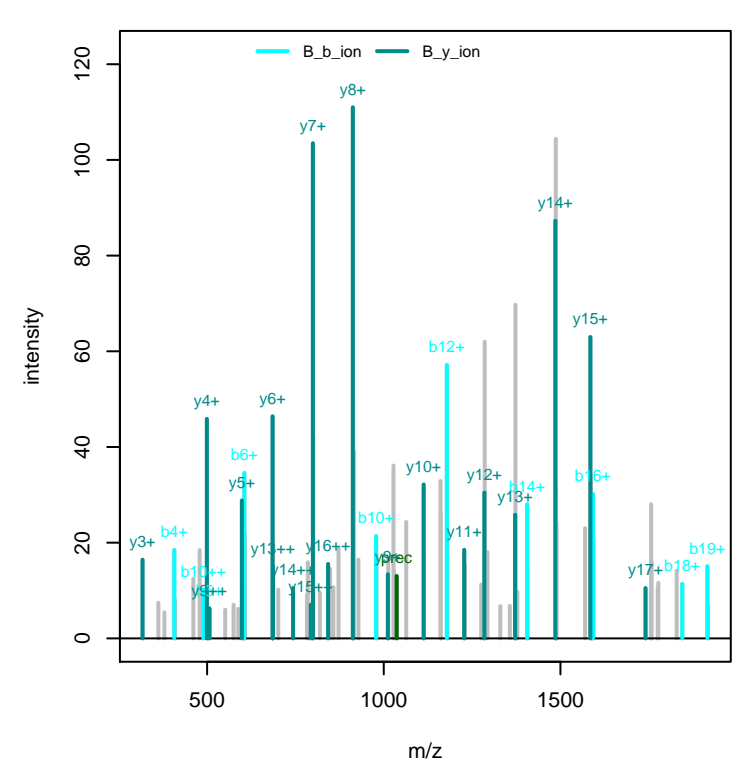

VYSGVVNSGDTVLNSVKAAR+XL\_L

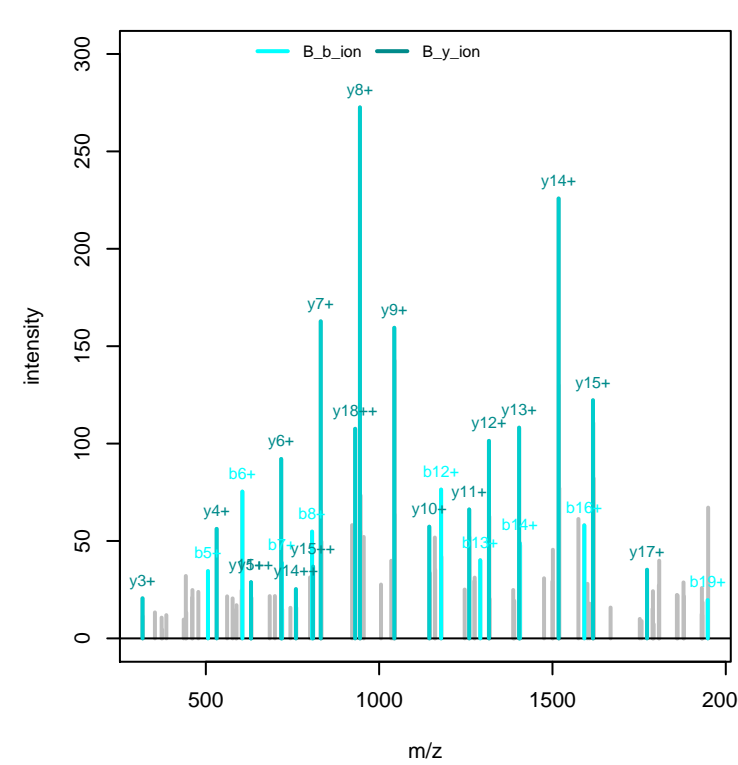

EIAEKMVEGR  
KFTGEVSLTGQPFVMEPSK

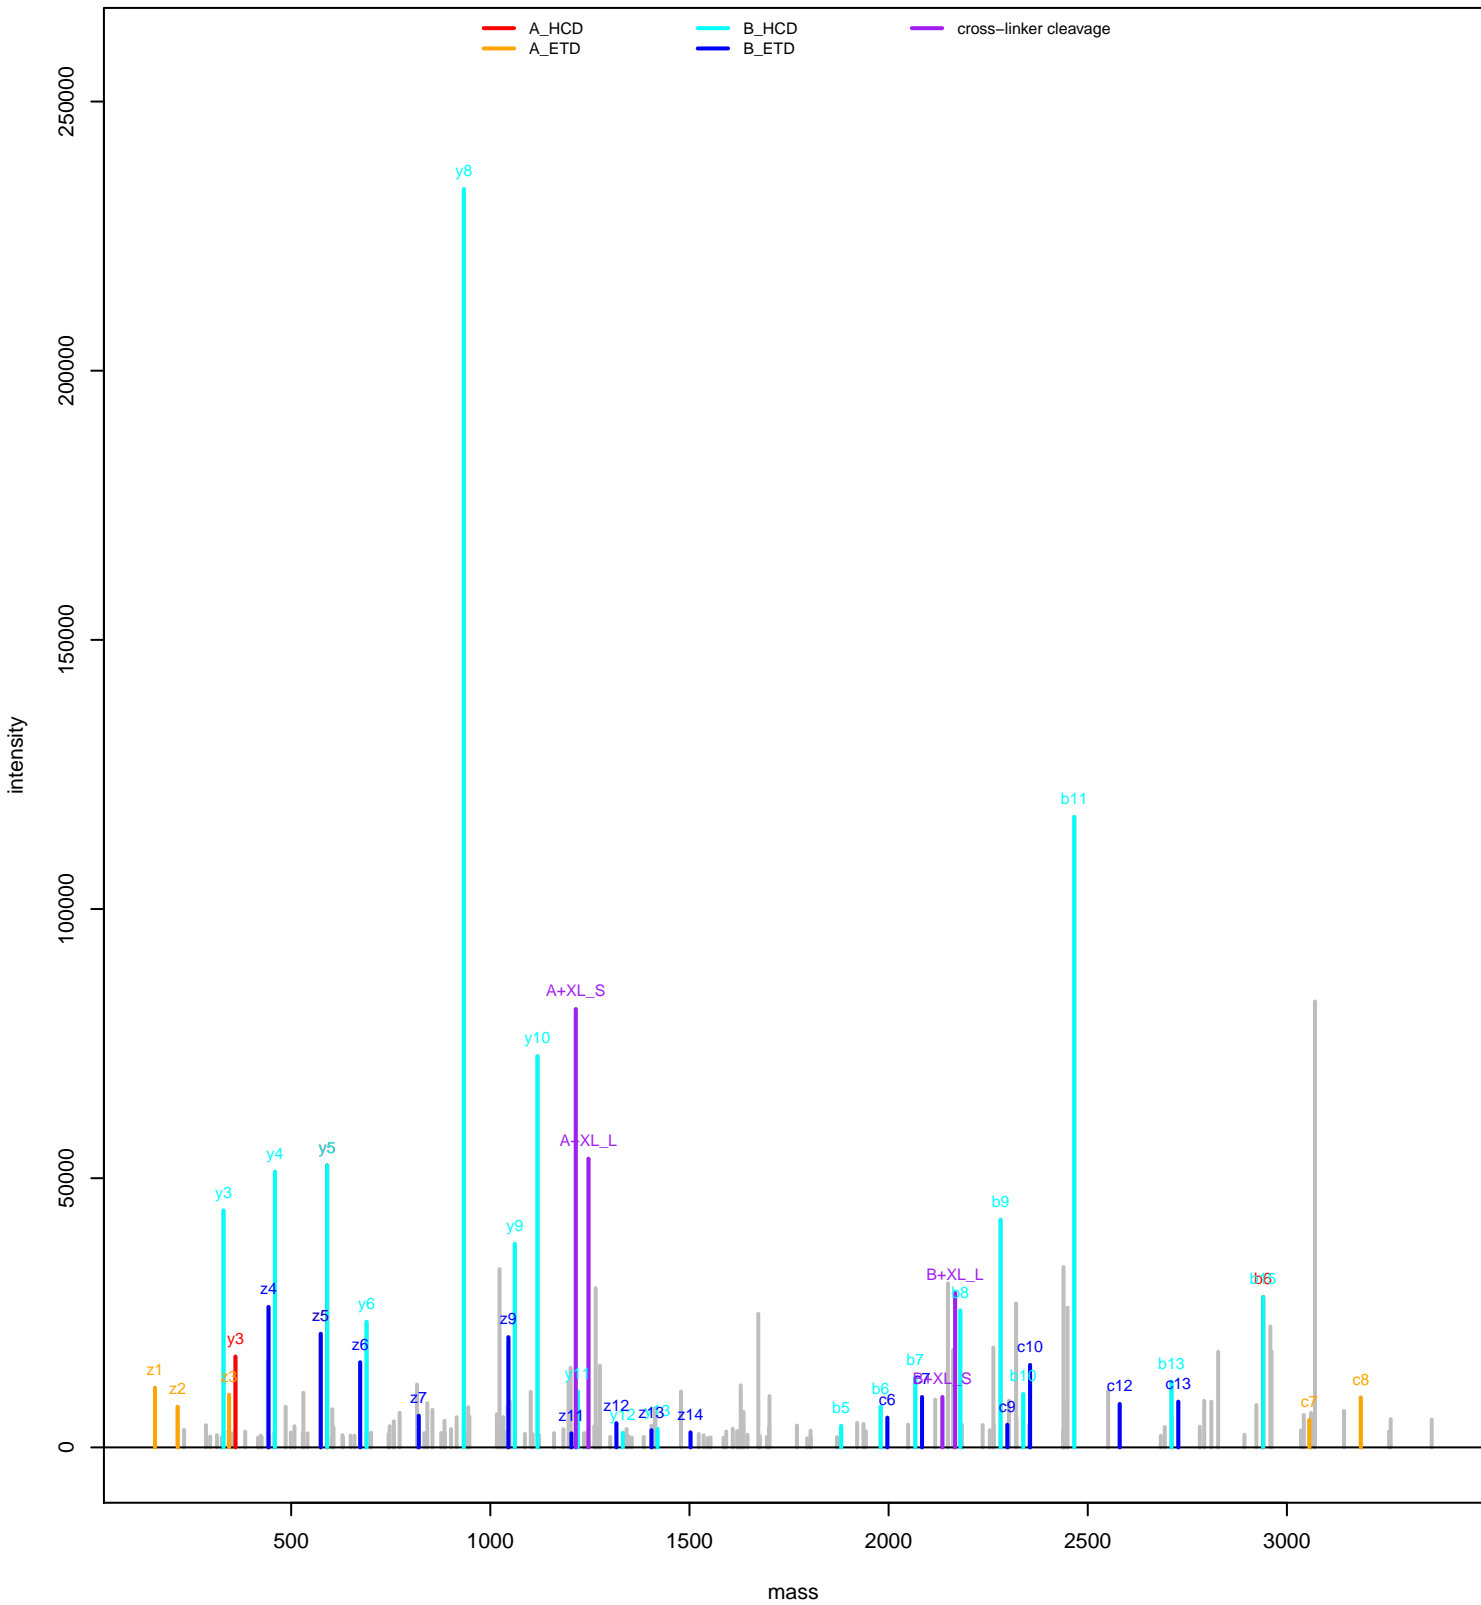

EIAEKMVEGR+XL\_S

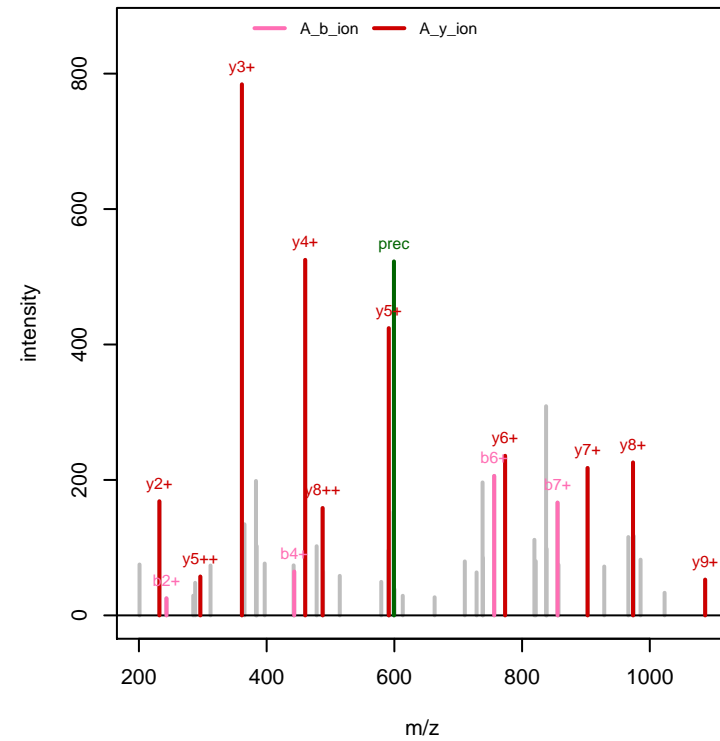

EIAEKMVEGR+XL\_L

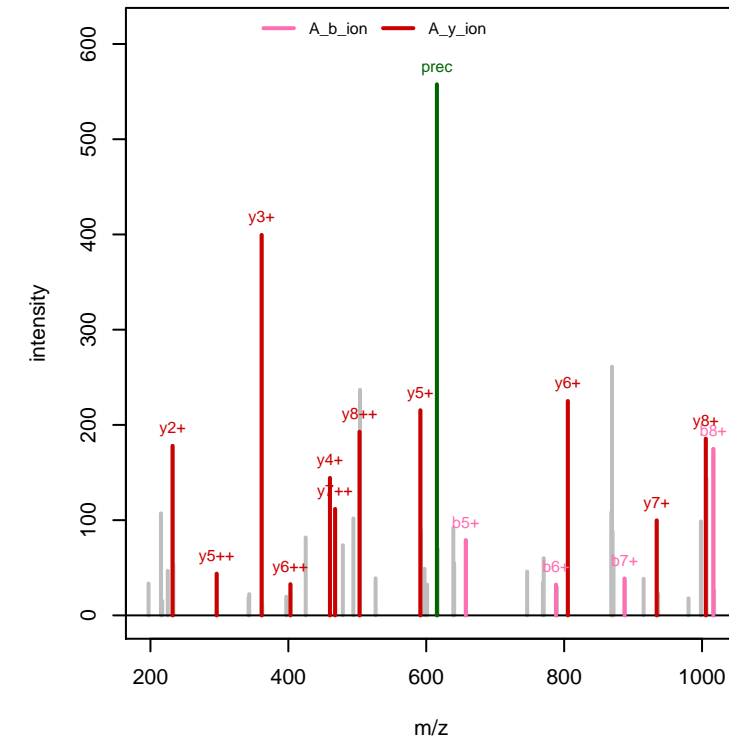

KFTGEVSLTGQPFVMEPSK+XL\_S

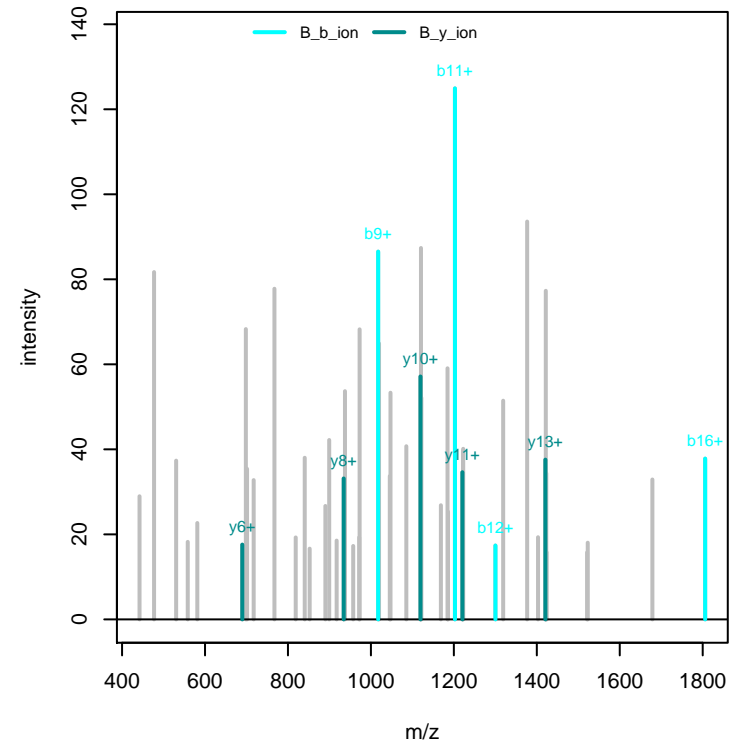

KFTGEVSLTGQPFVMEPSK+XL\_L

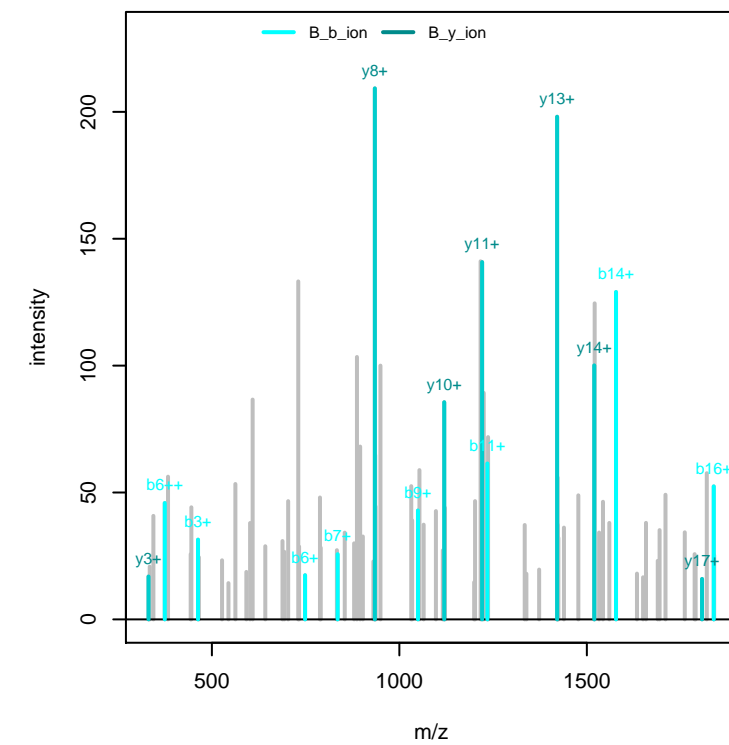



ALKDAVK  
EIKIAAANVPAFVSGK

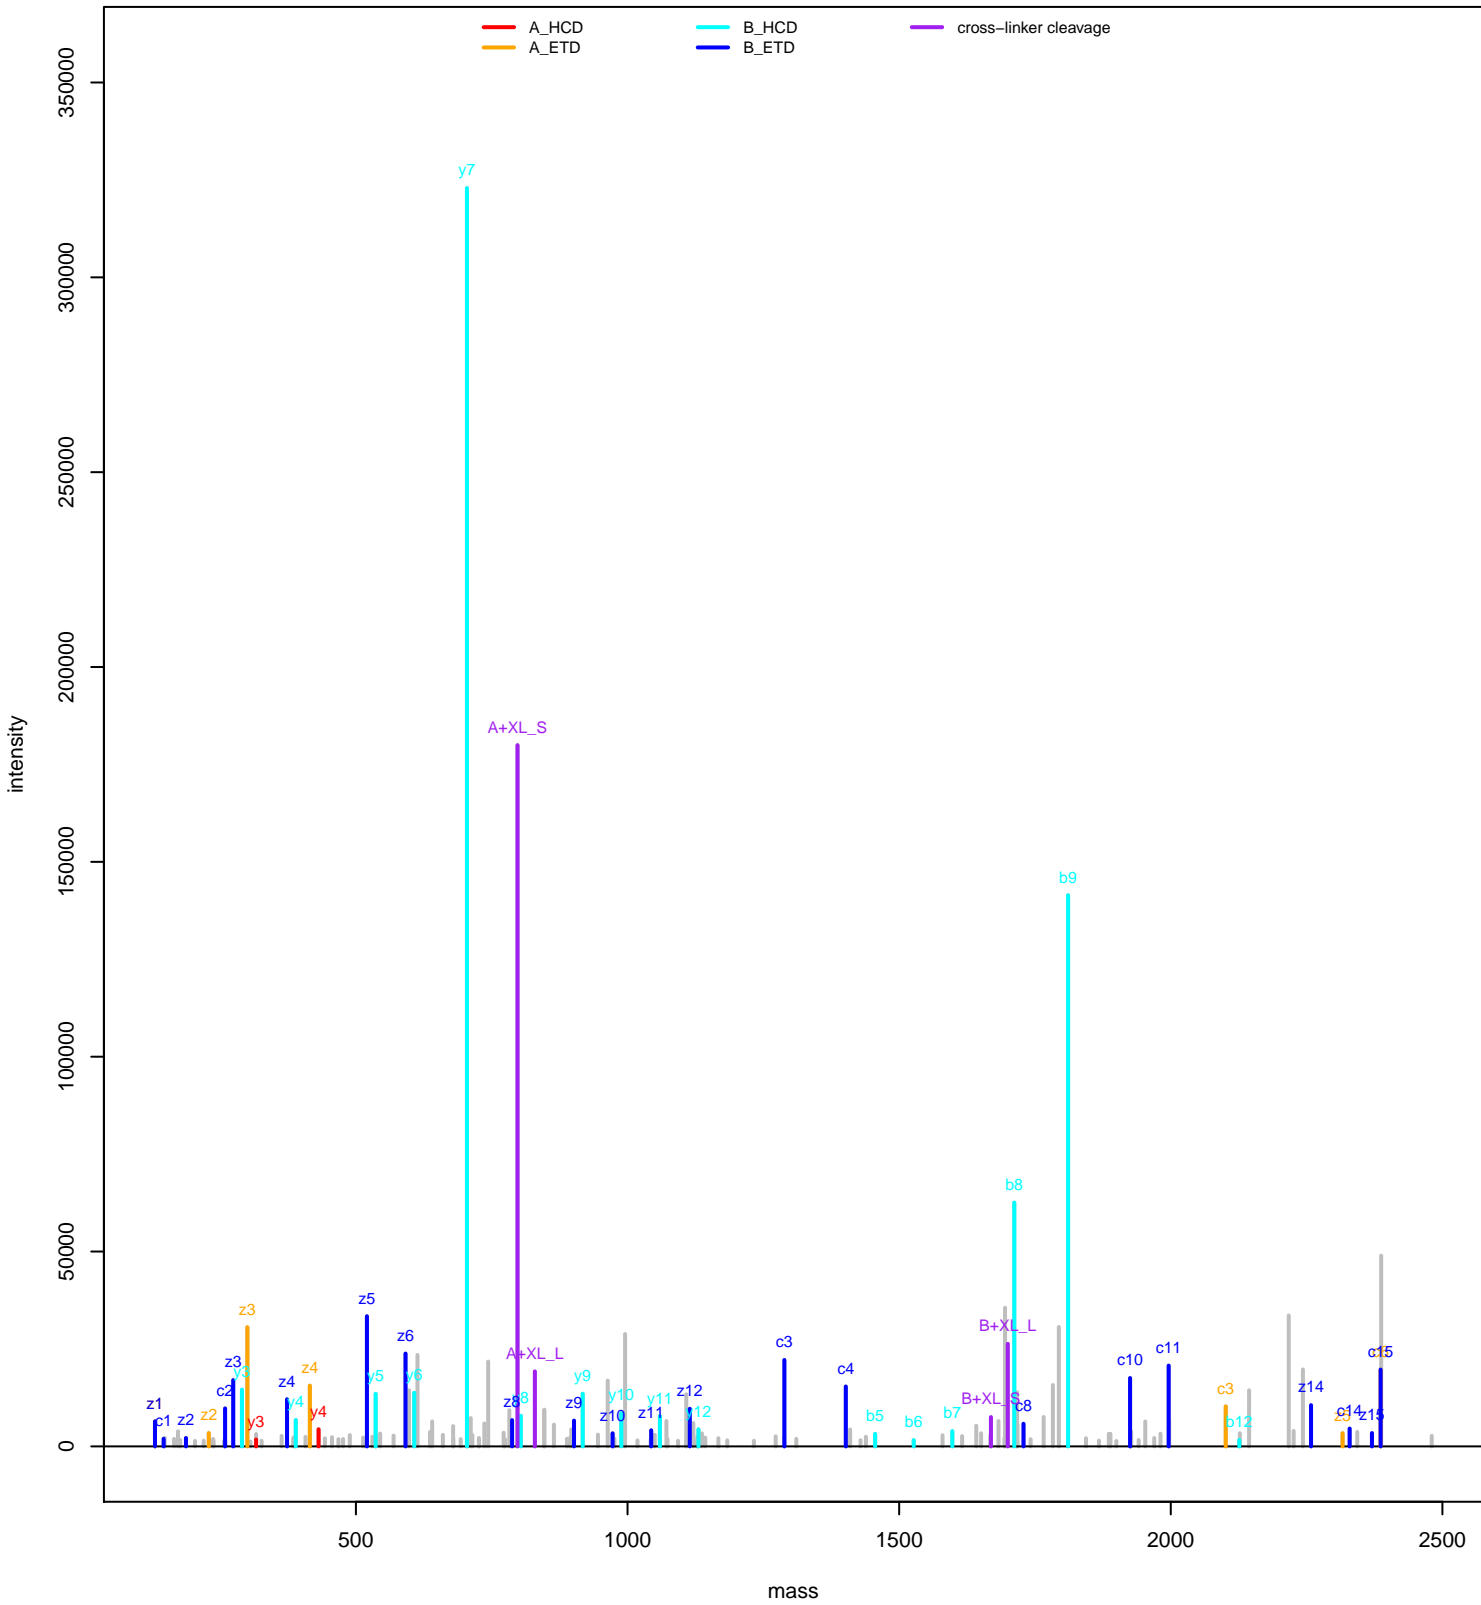

ALKDAVK+XL\_S

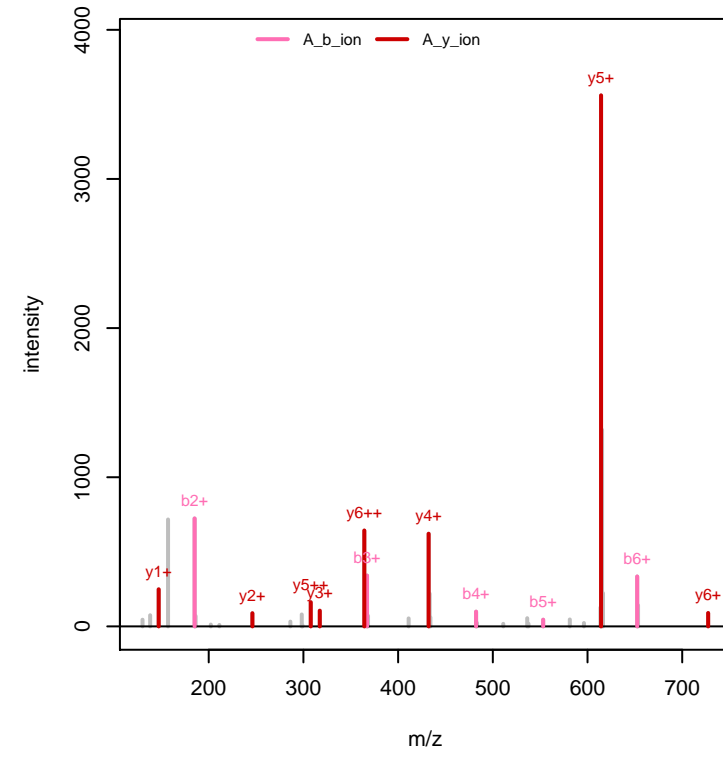

ALKDAVK+XL\_L

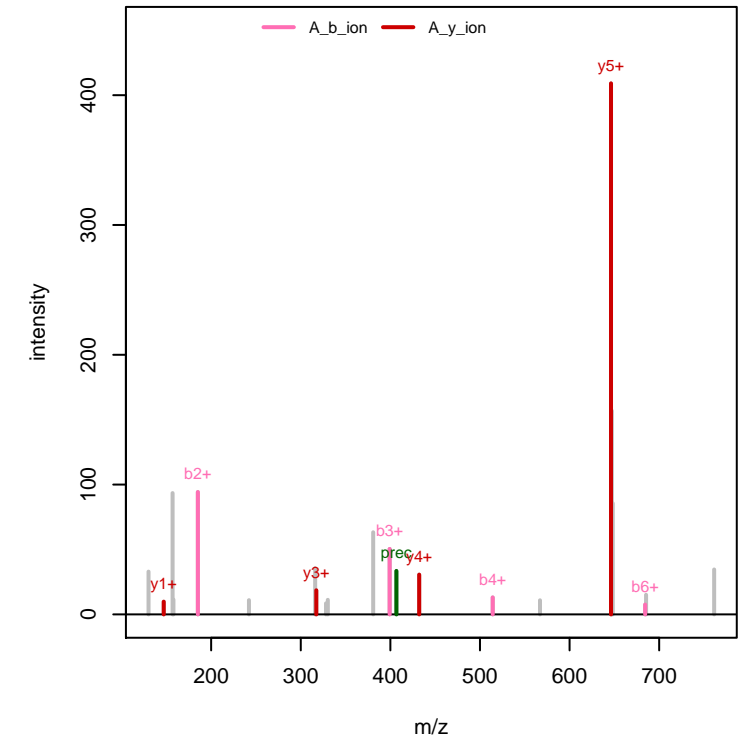

EIKIAAANVPAFVSGK+XL\_S

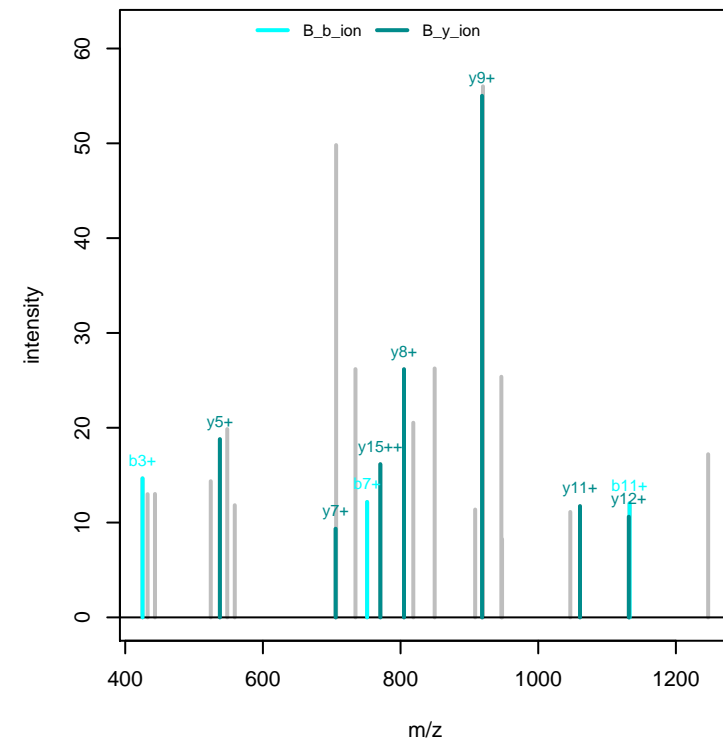

EIKIAAANVPAFVSGK+XL\_L

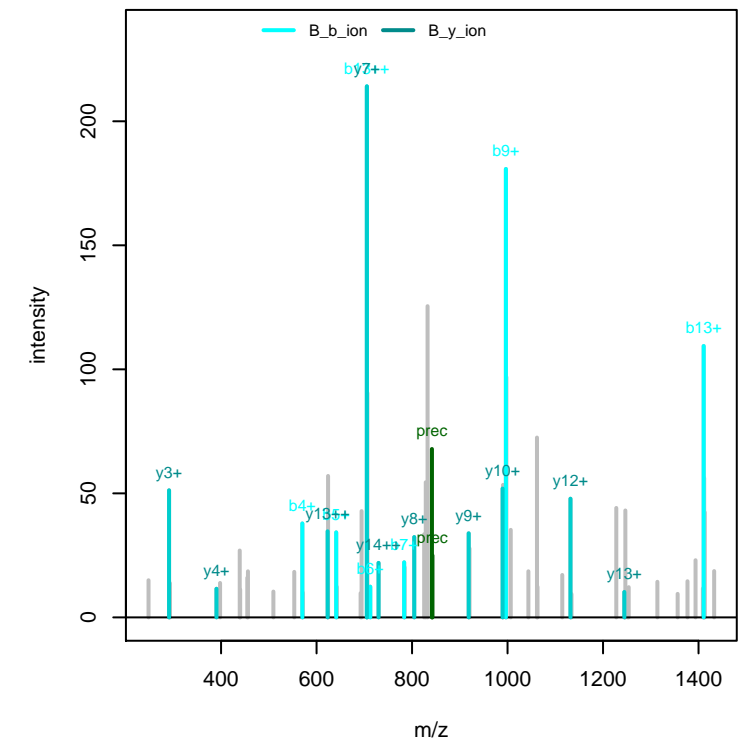

ELNDKGIK  
AYYVGTDSKESGIIQGDLIAK

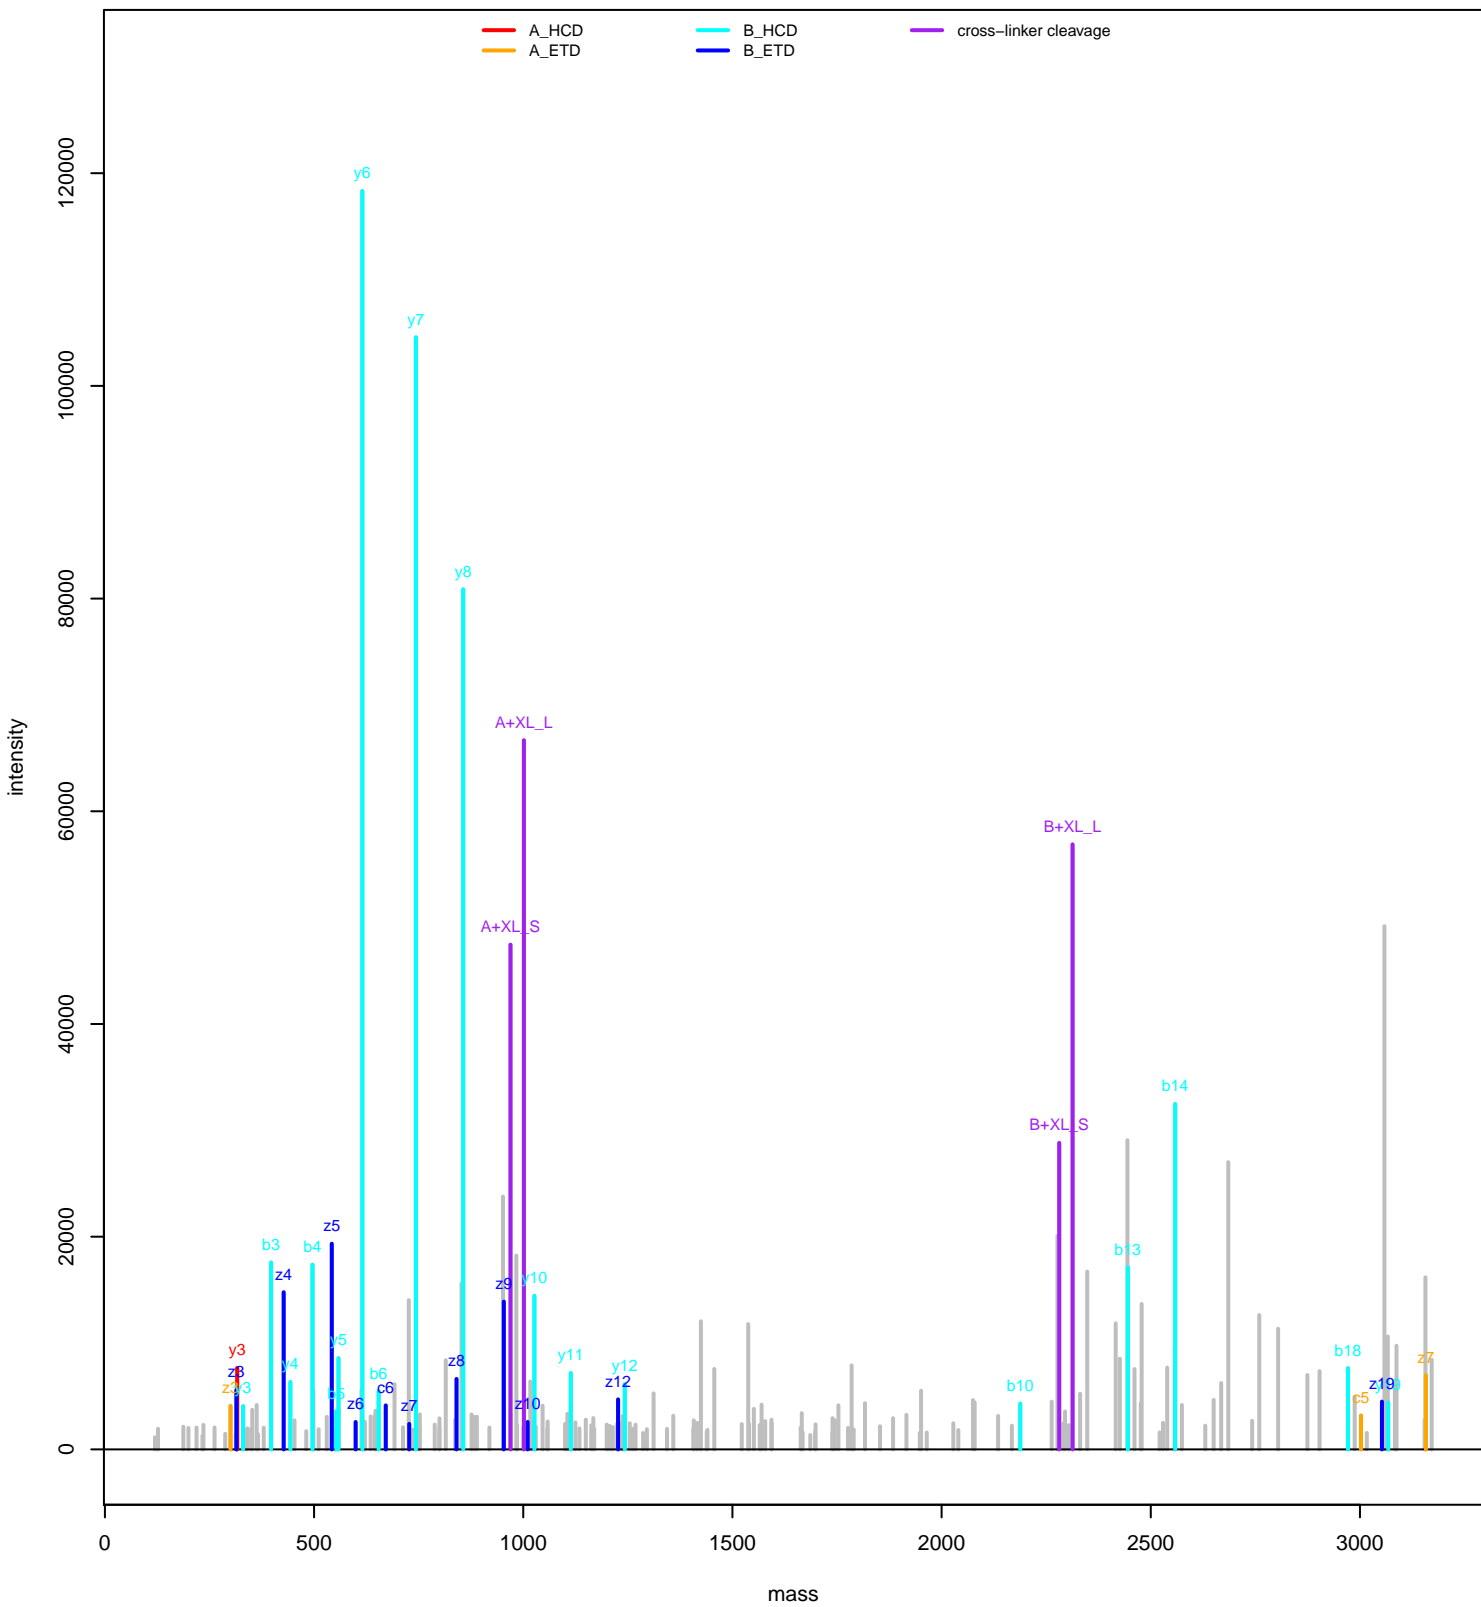

ELNDKGIK+XL\_S

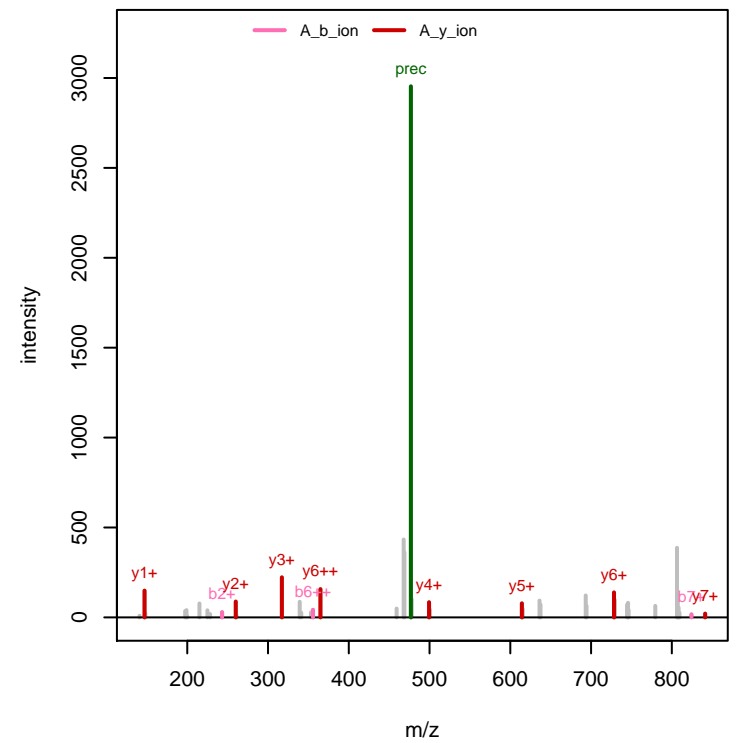

ELNDKGIK+XL\_L

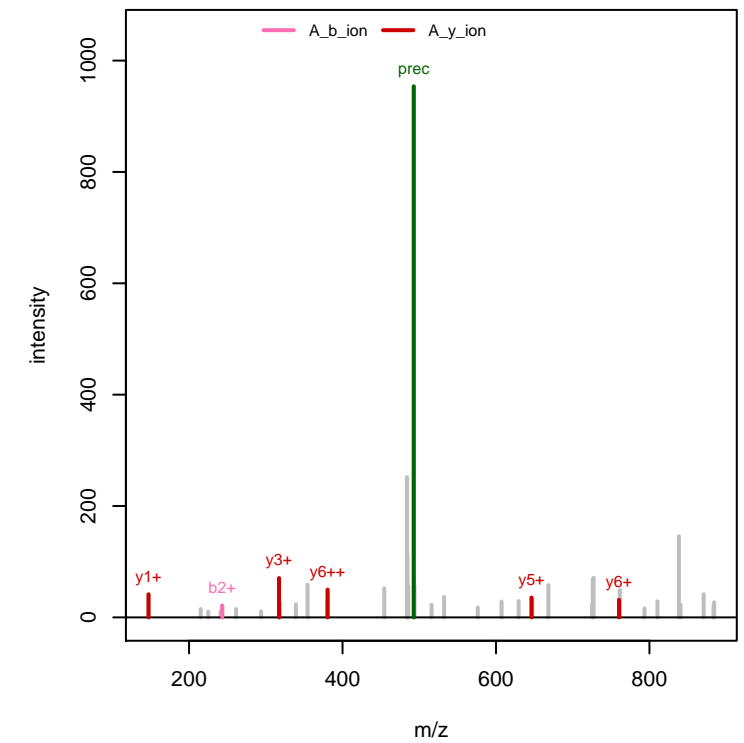

AYYVGTDSKESGIIQGDLIAK+XL\_S

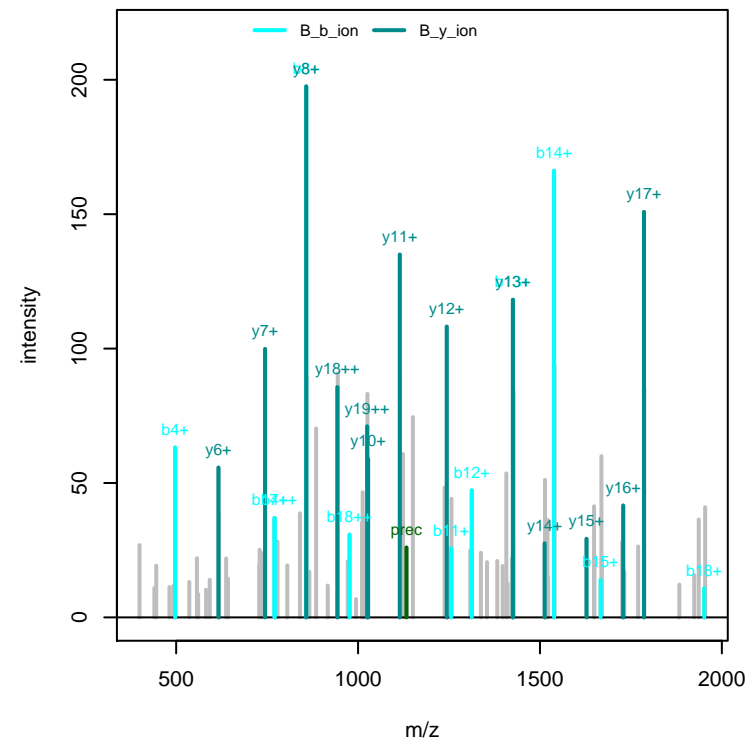

AYYVGTDSKESGIIQGDLIAK+XL\_L

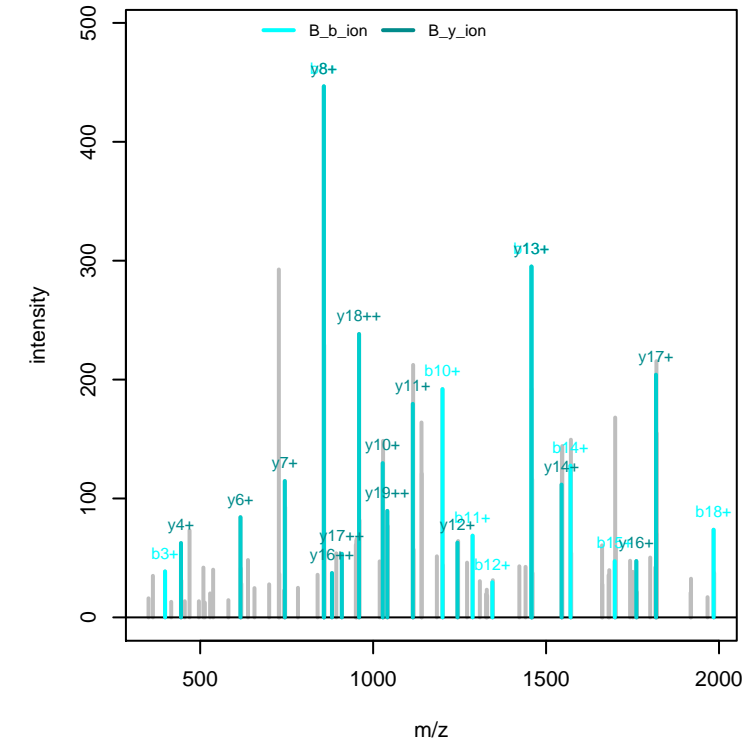



**KAGEGAK**  
AVNDGKLAATIAQLPDQIGAK

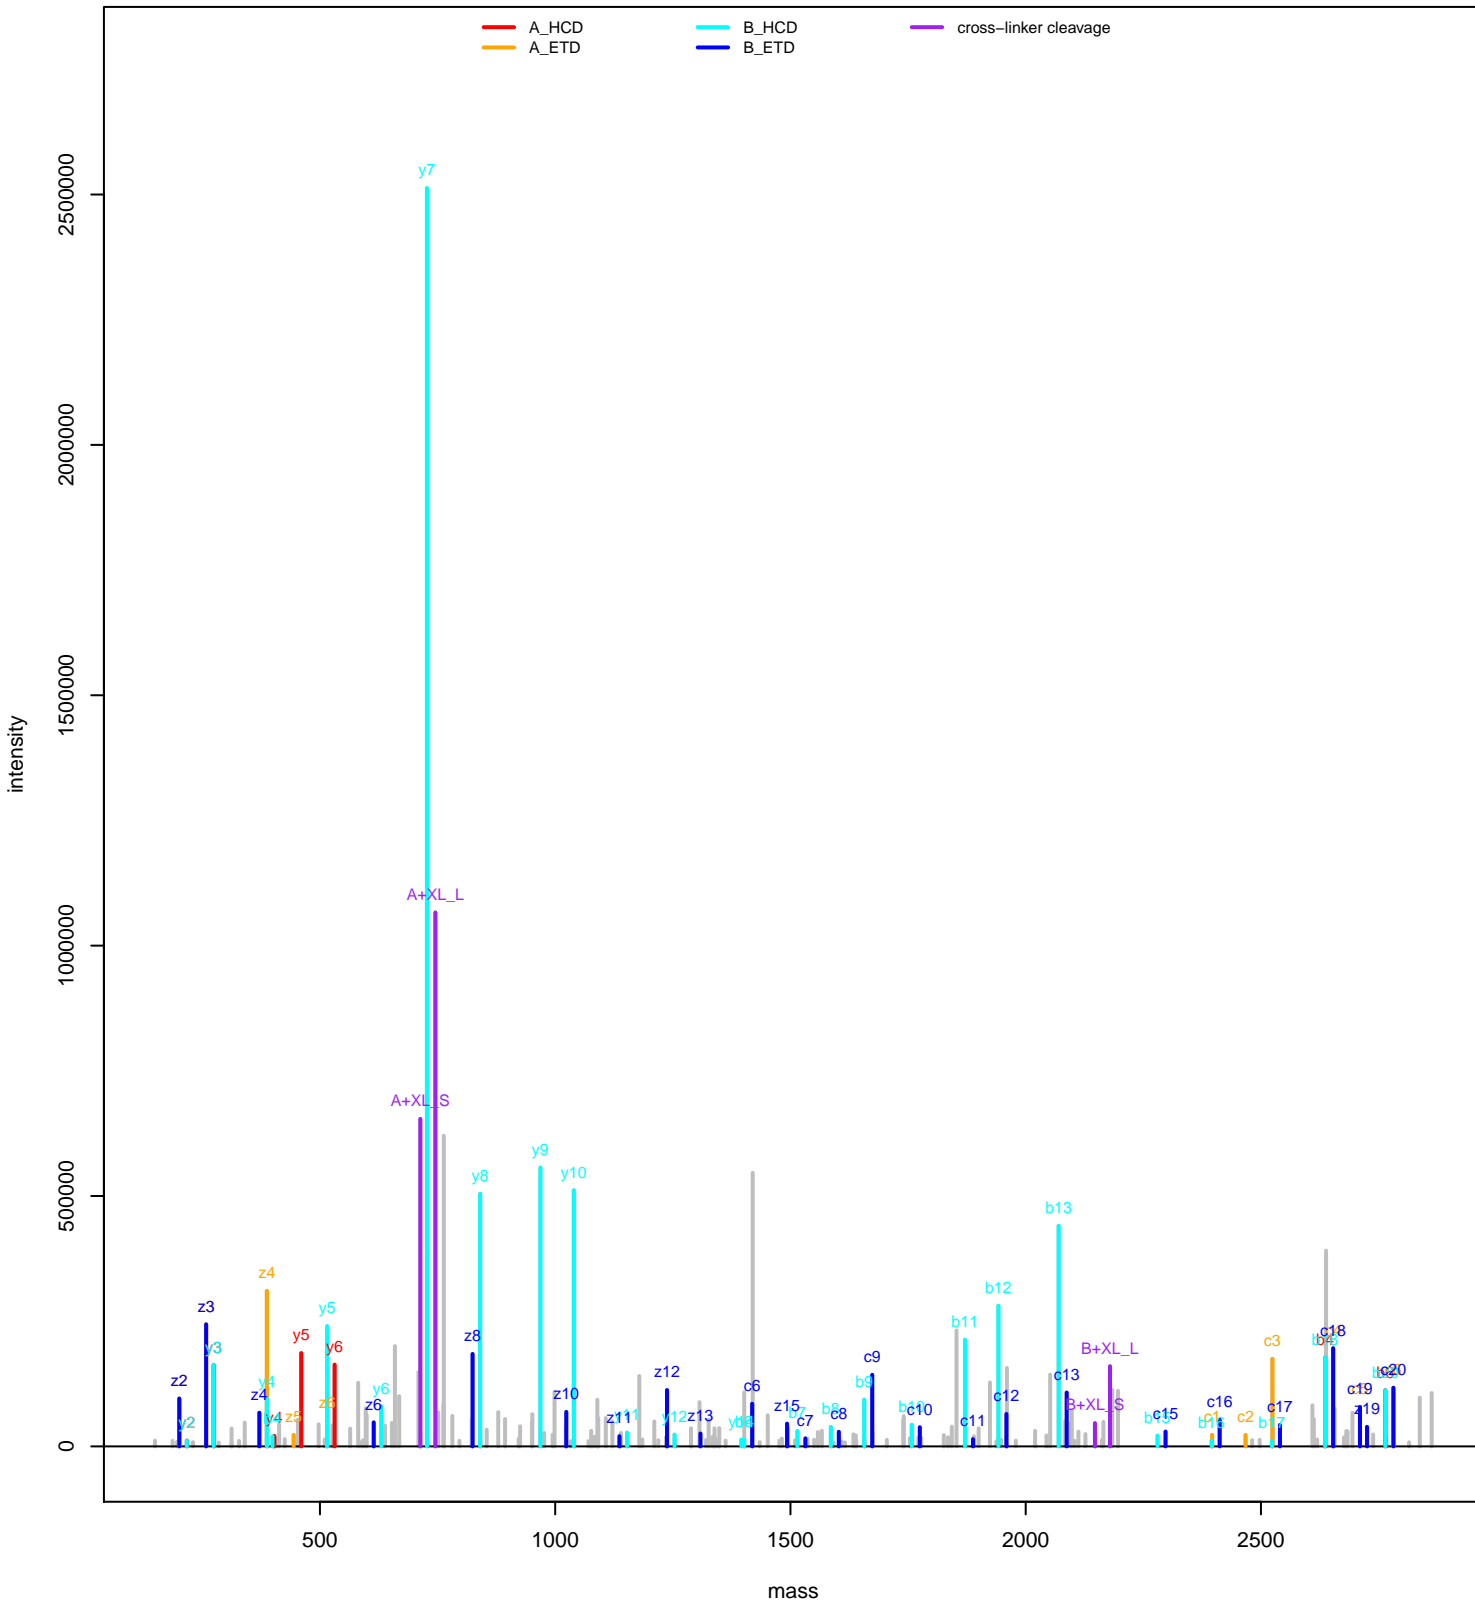

**KAGEGAK+XL\_S**

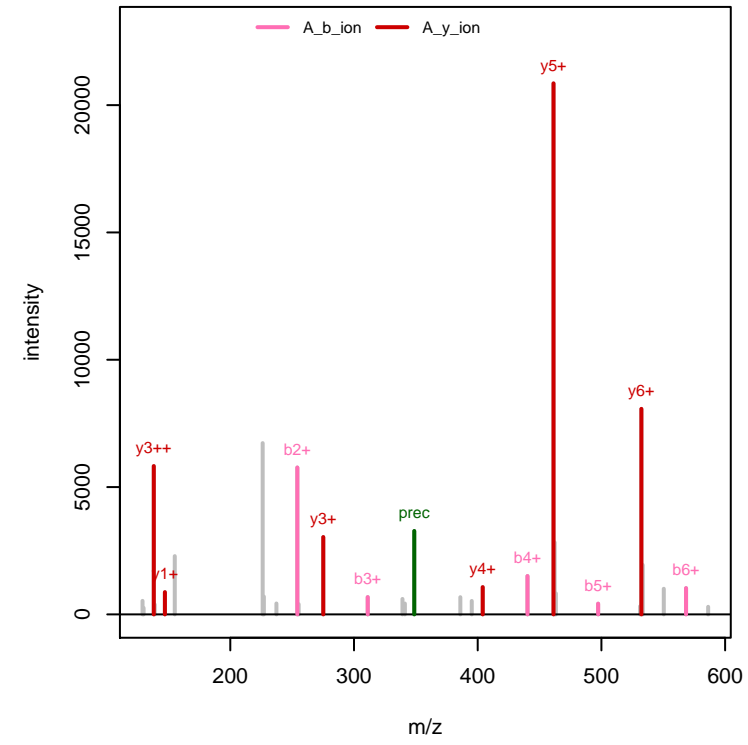

**KAGEGAK+XL\_L**

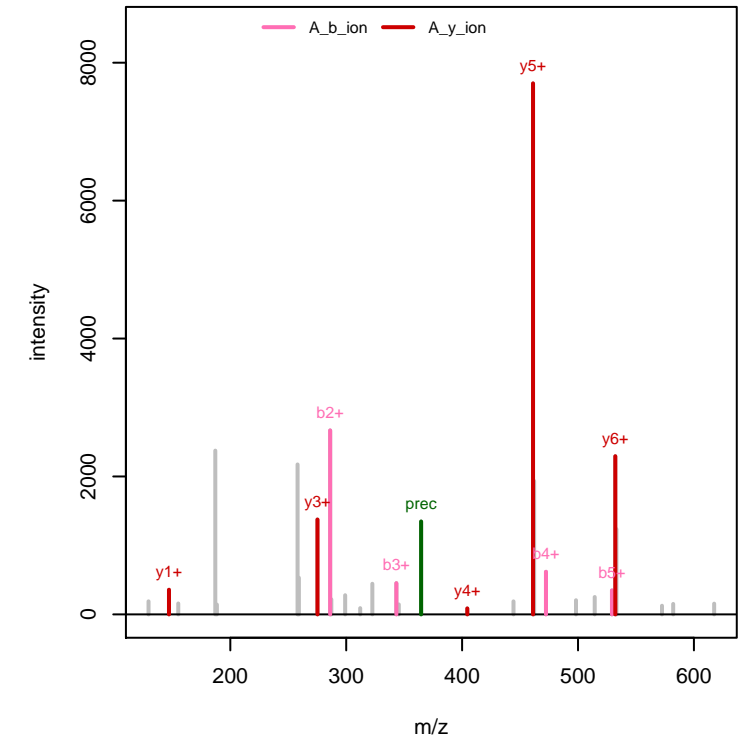

**AVNDGKLAATIAQLPDQIGAK+XL\_S**

**AVNDGKLAATIAQLPDQIGAK+XL\_L**

VDKDAVSR  
ADDMKFFAER

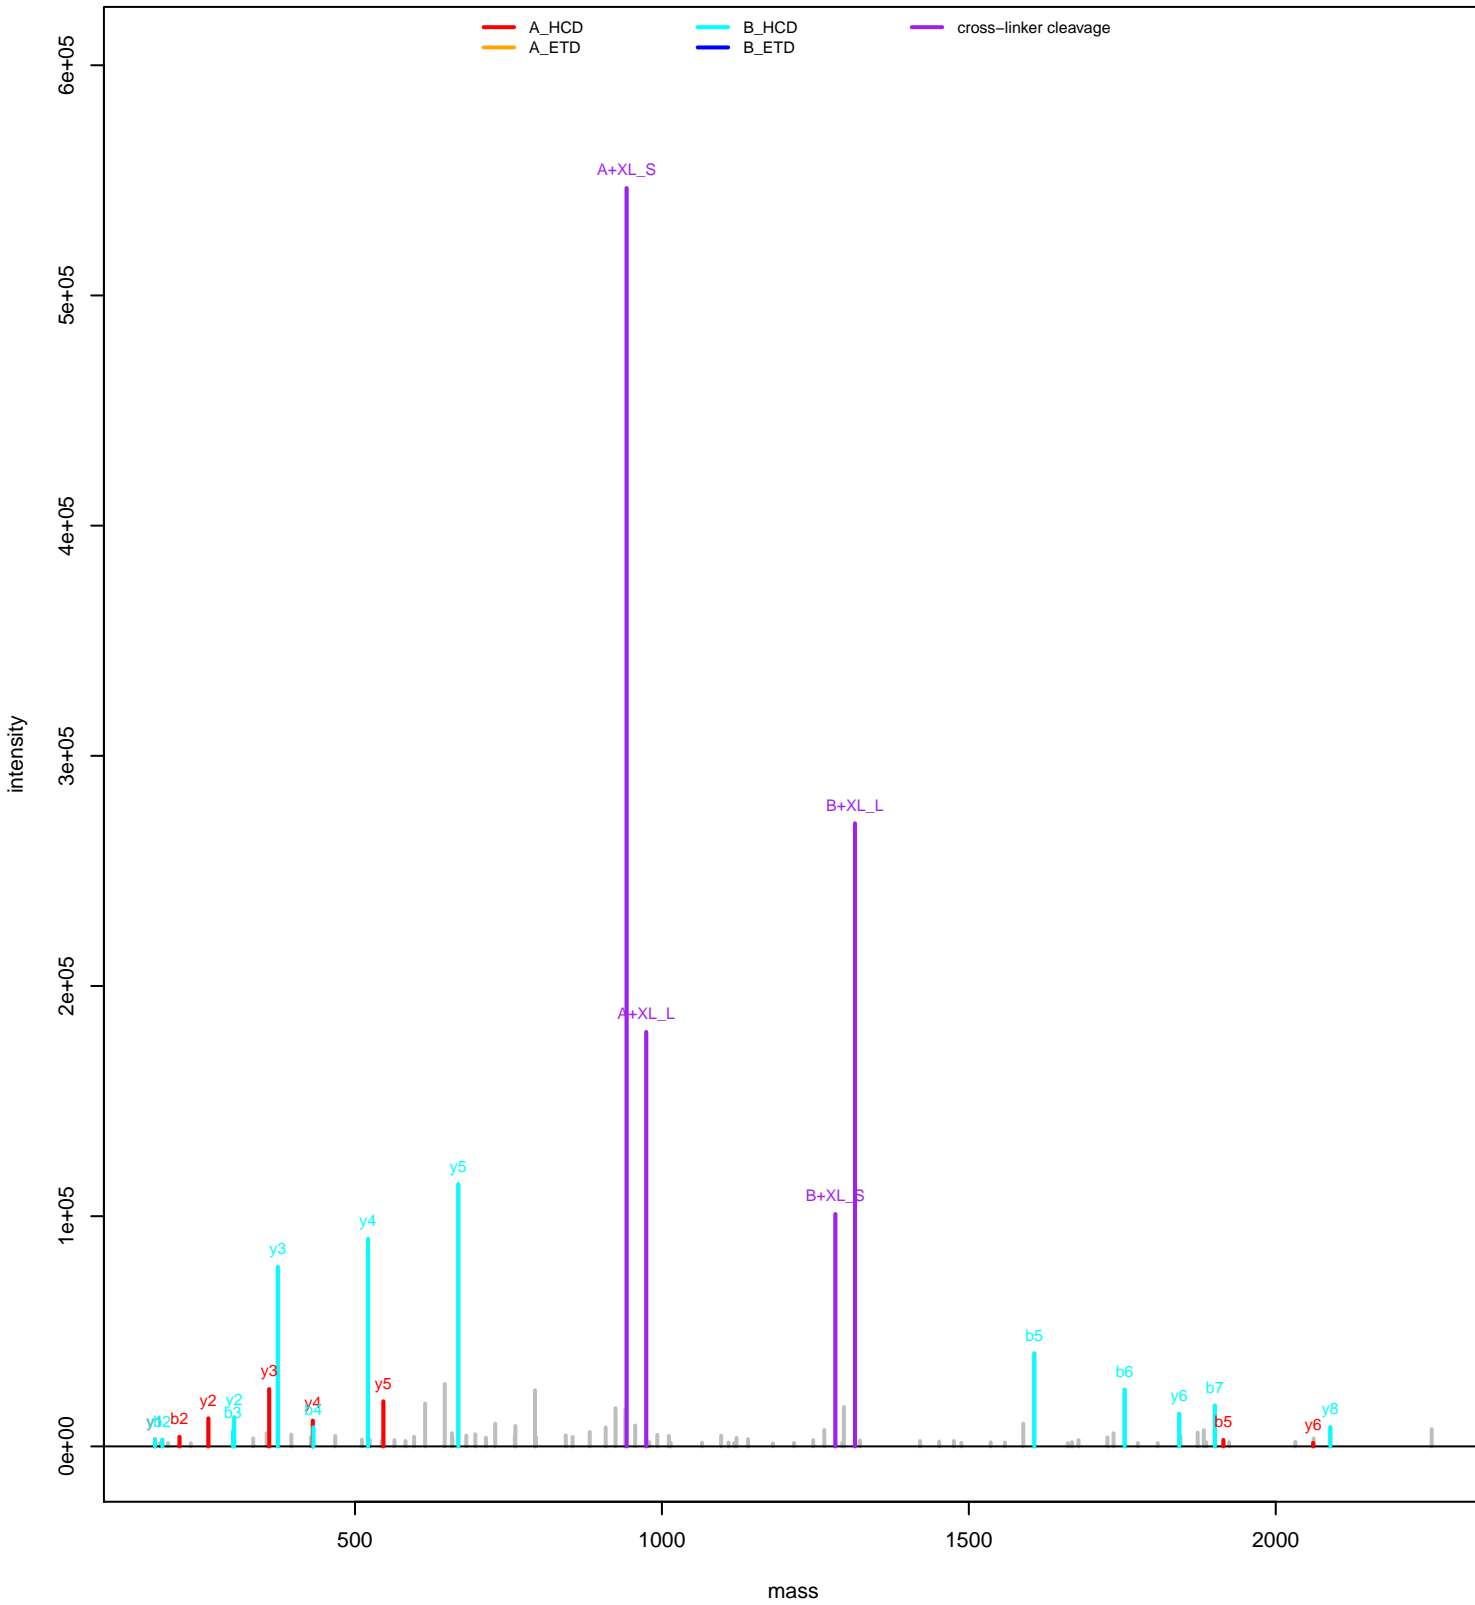

VDKDAVSR+XL\_S

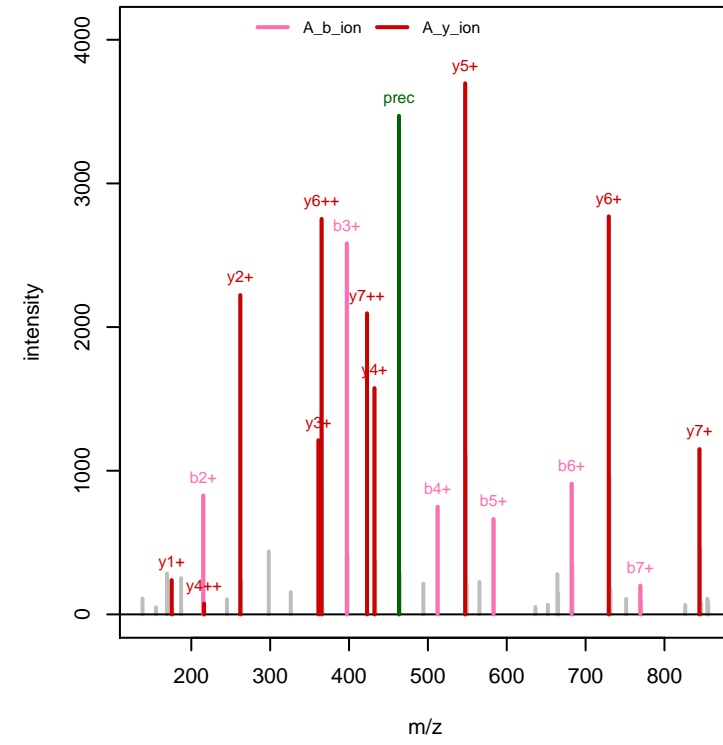

VDKDAVSR+XL\_L

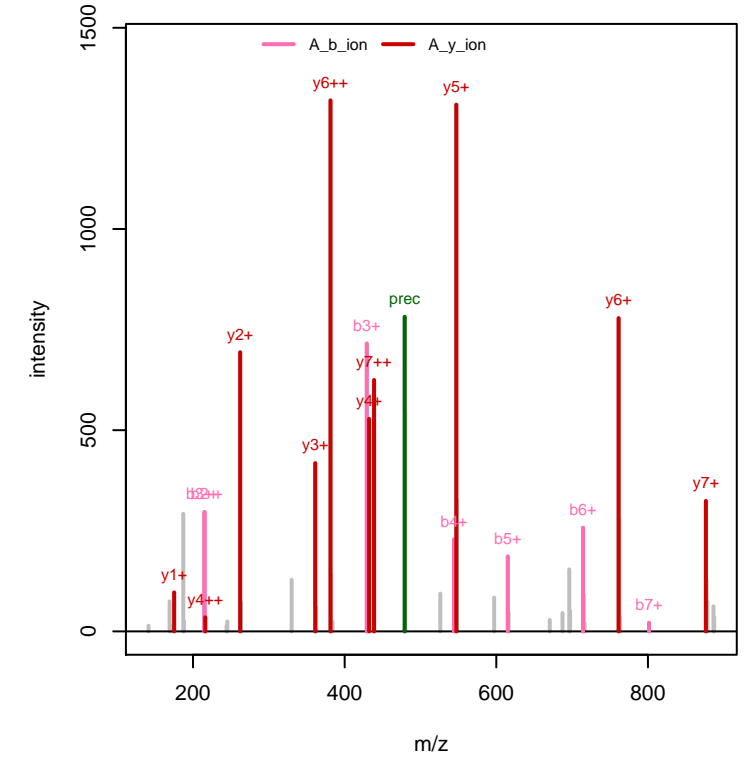

ADDMKFFAER+XL\_S

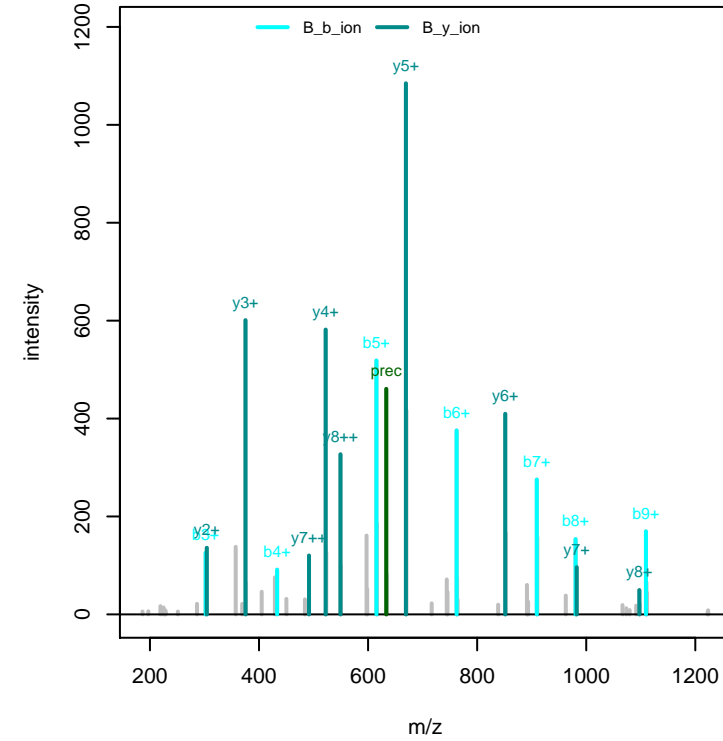

ADDMKFFAER+XL\_L

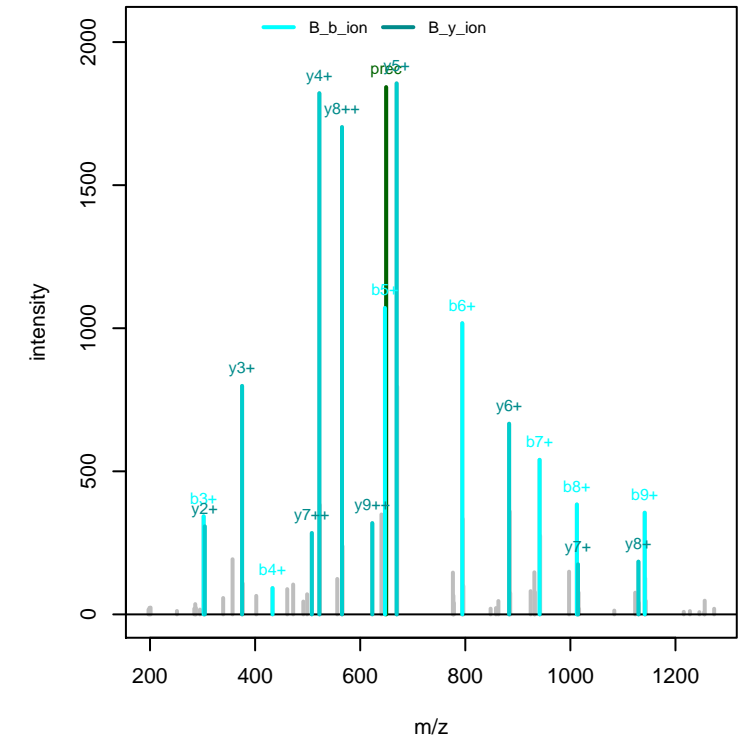

AAAVANQGKAK  
LNERHYGALQGLNKAETAEK

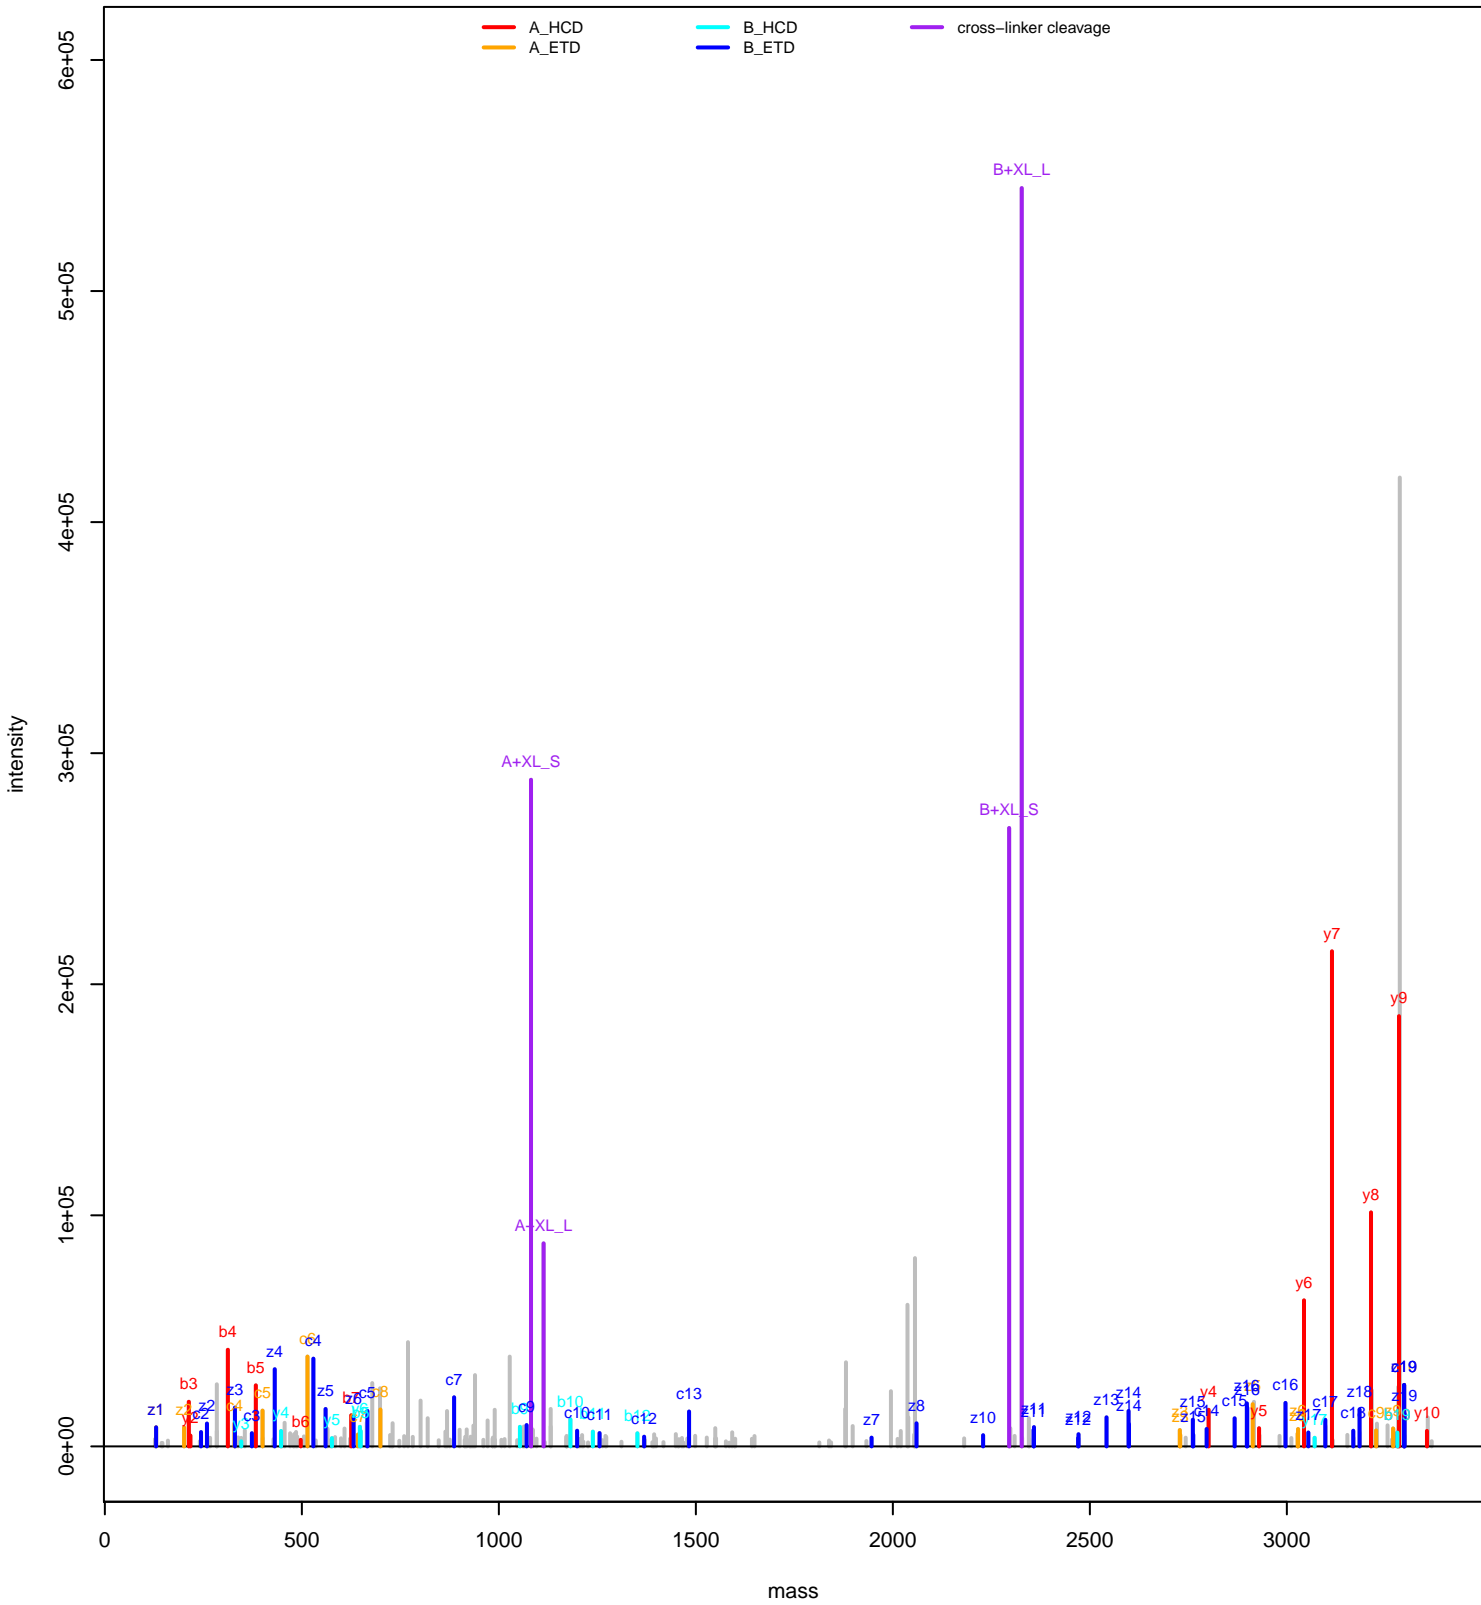

AAIVANQGKAK+XL\_S

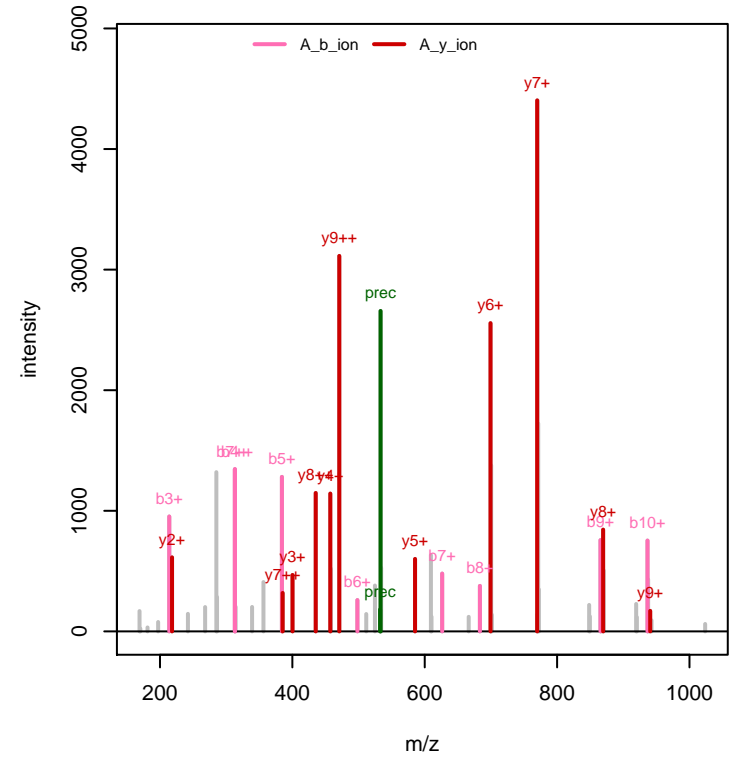

AAIVANQGKAK+XL\_L

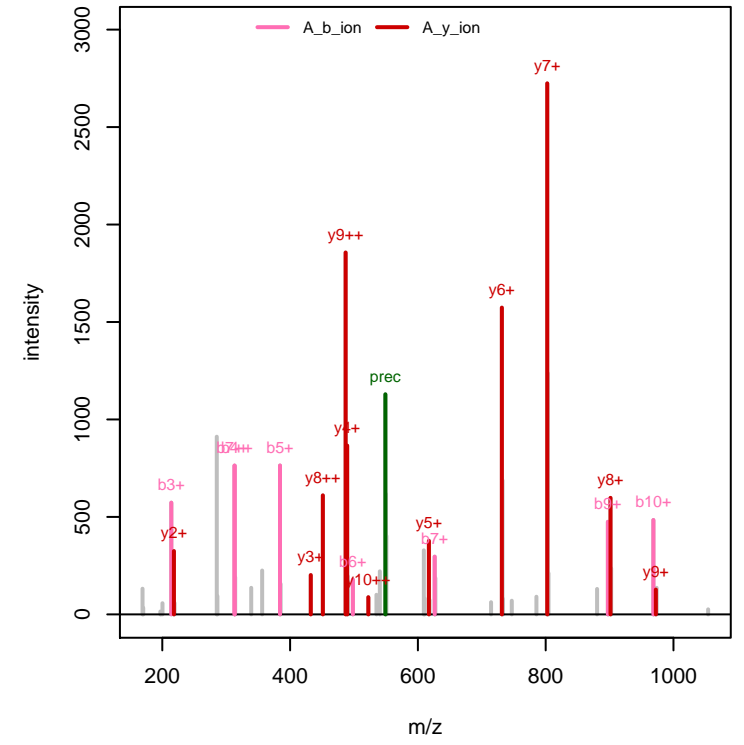

LNERHYGALQGLNKAETAEK+XL\_S

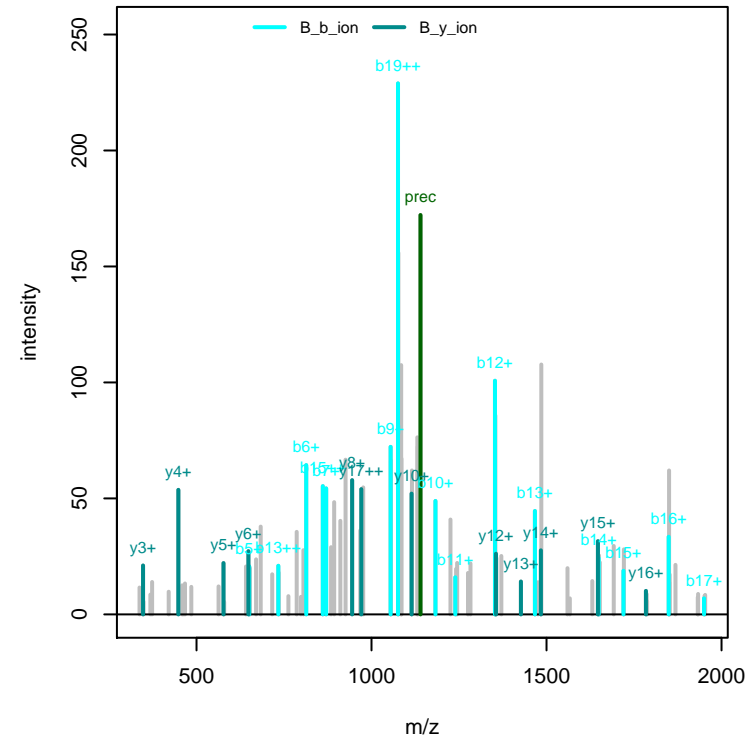

LNERHYGALQGLNKAETAEK+XL\_L

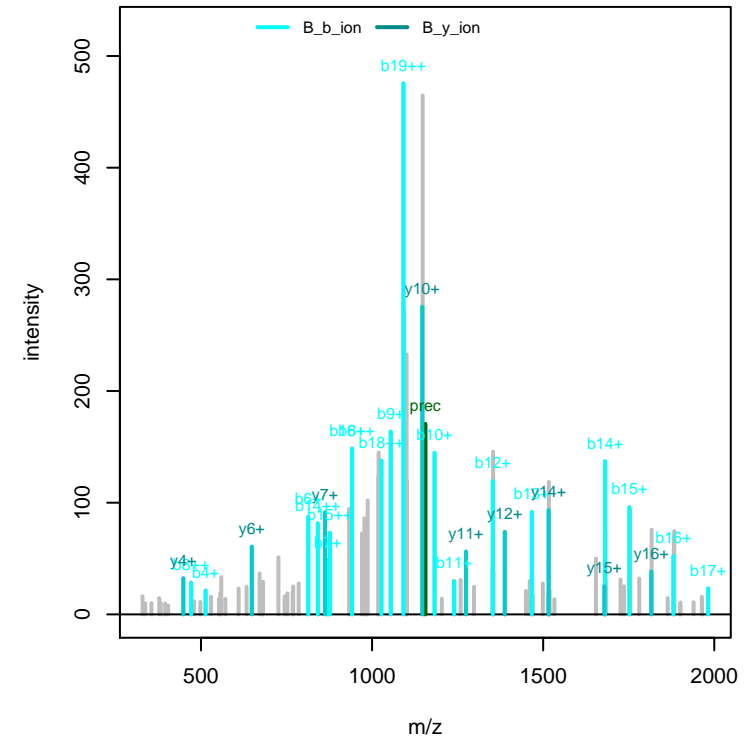

TQISKIR  
MDKCVEAFK

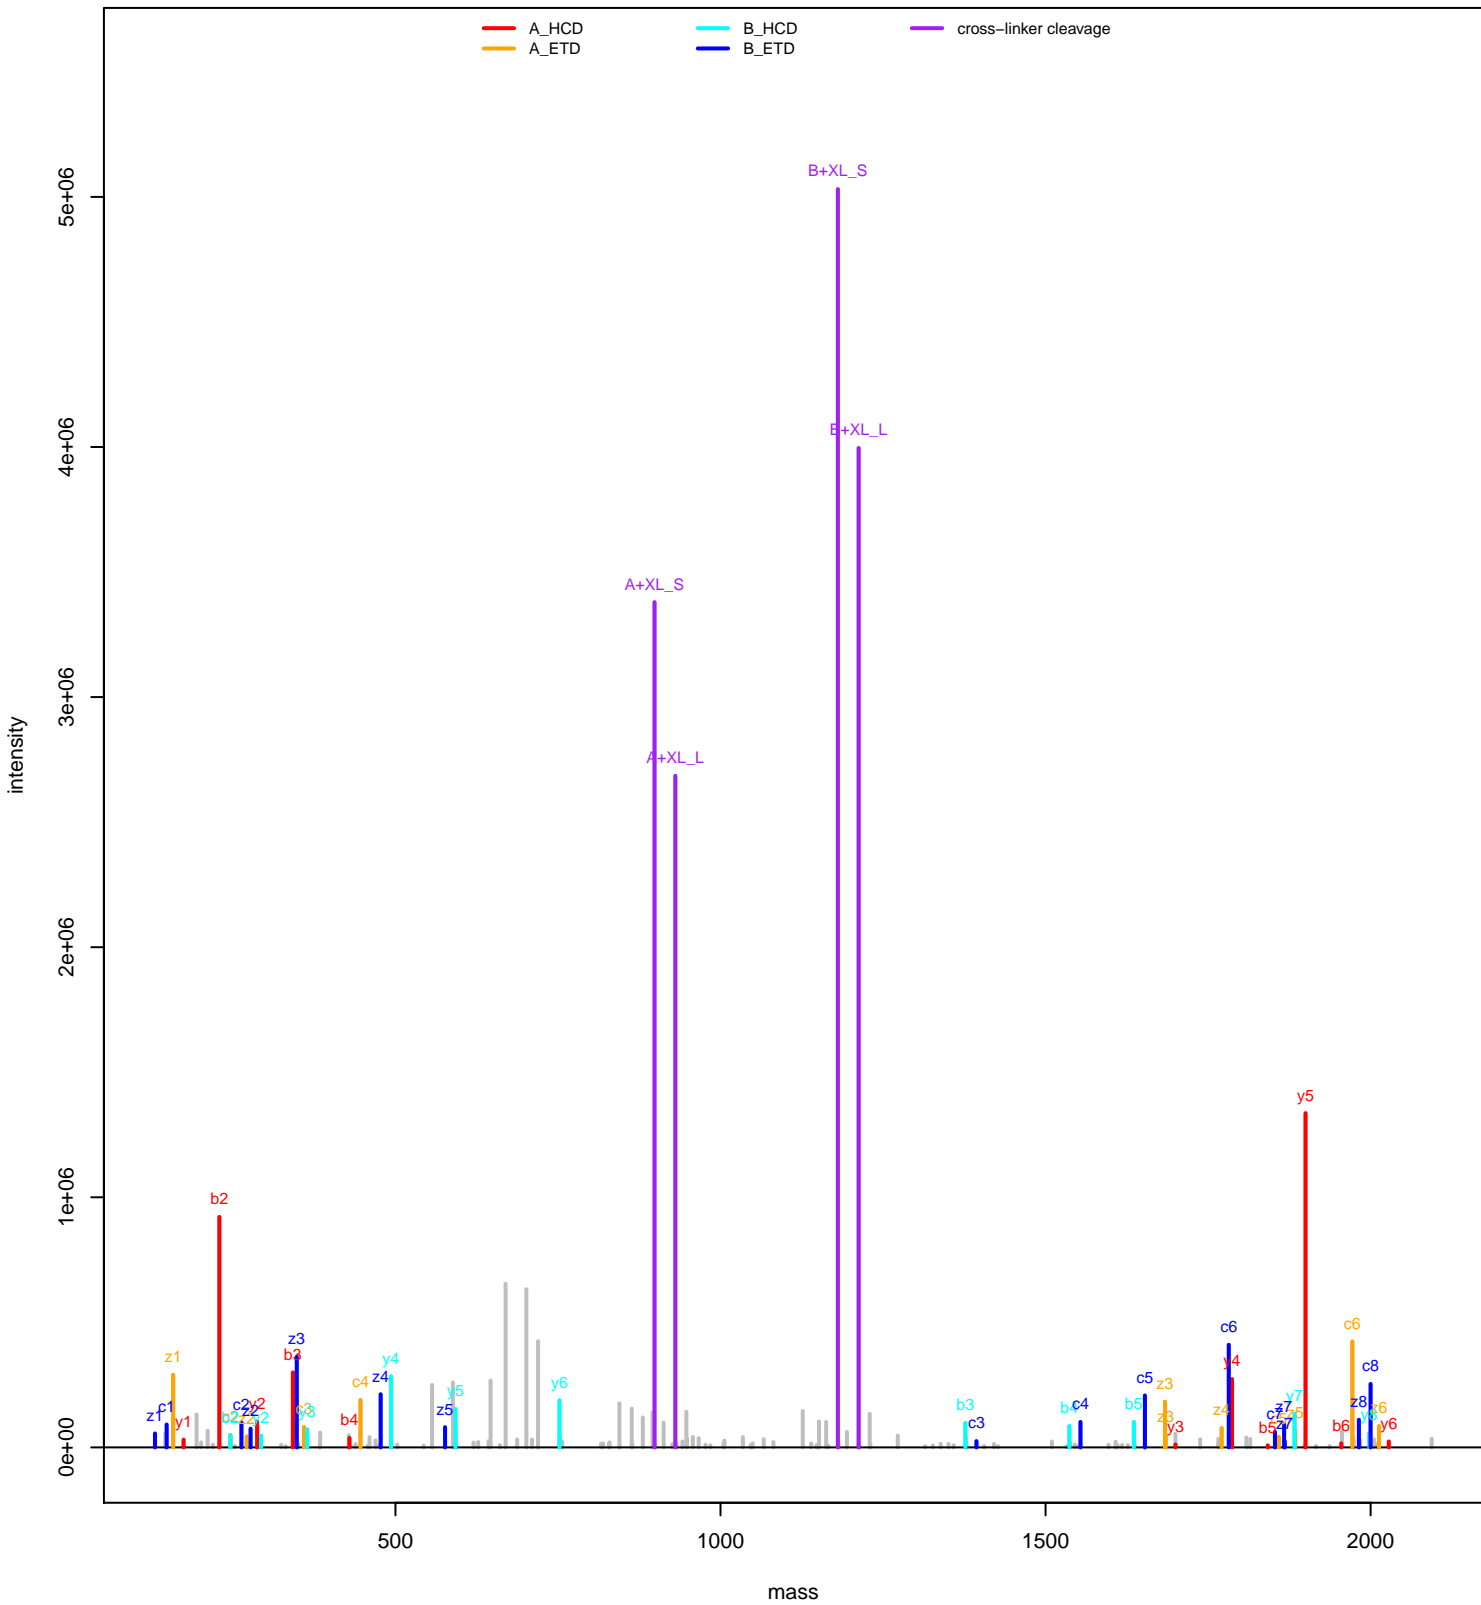

TQISKIR+XL\_S

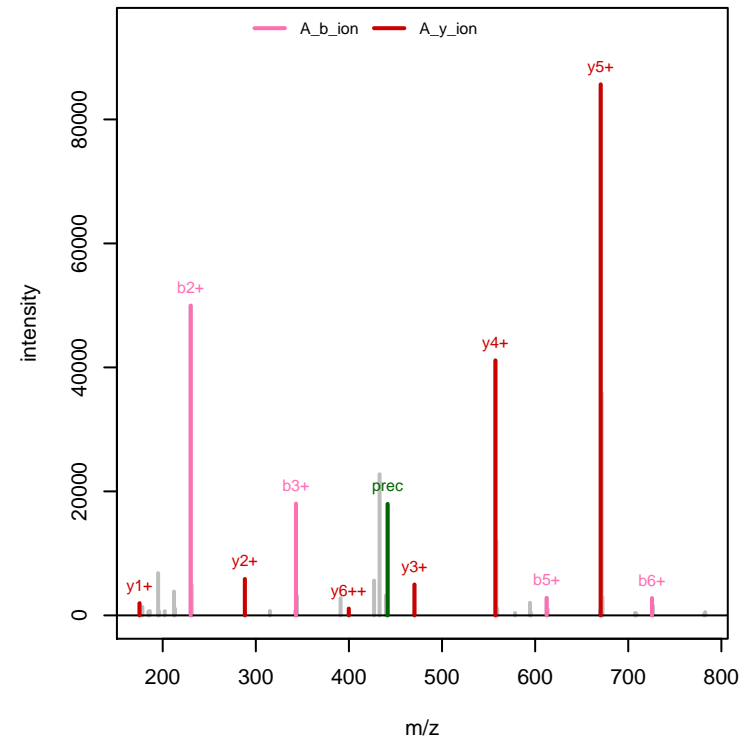

TQISKIR+XL\_L

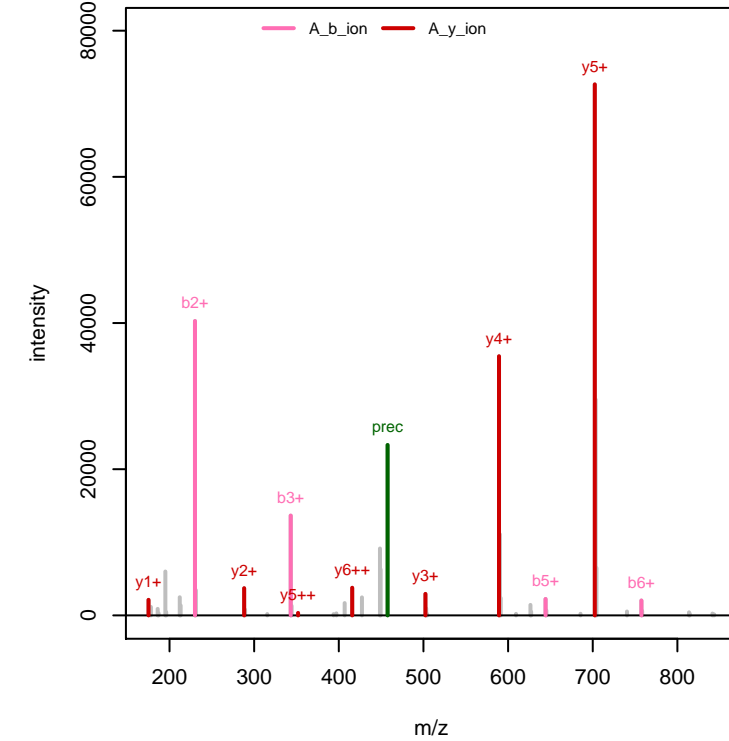

MDKCVEAFK+XL\_S

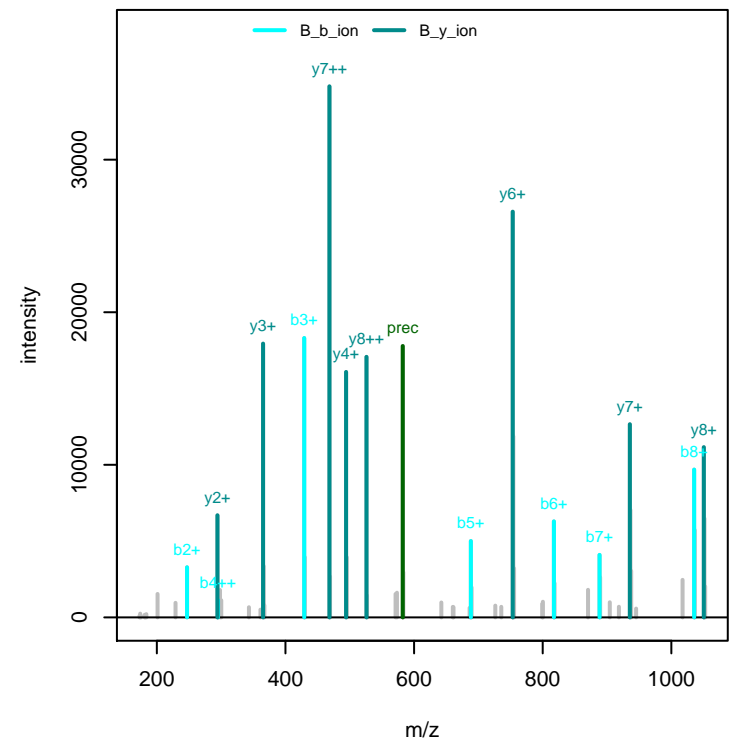

MDKCVEAFK+XL\_L

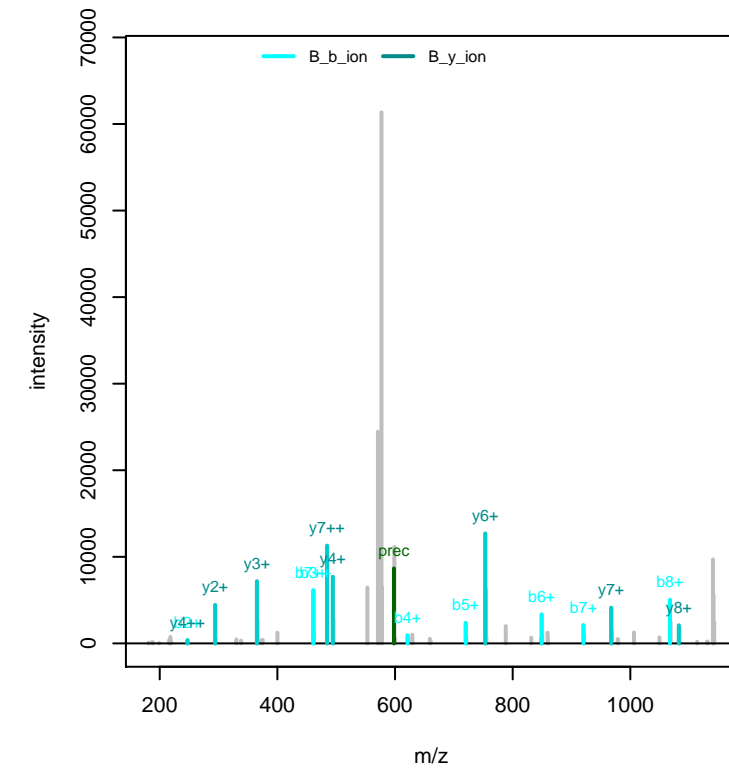

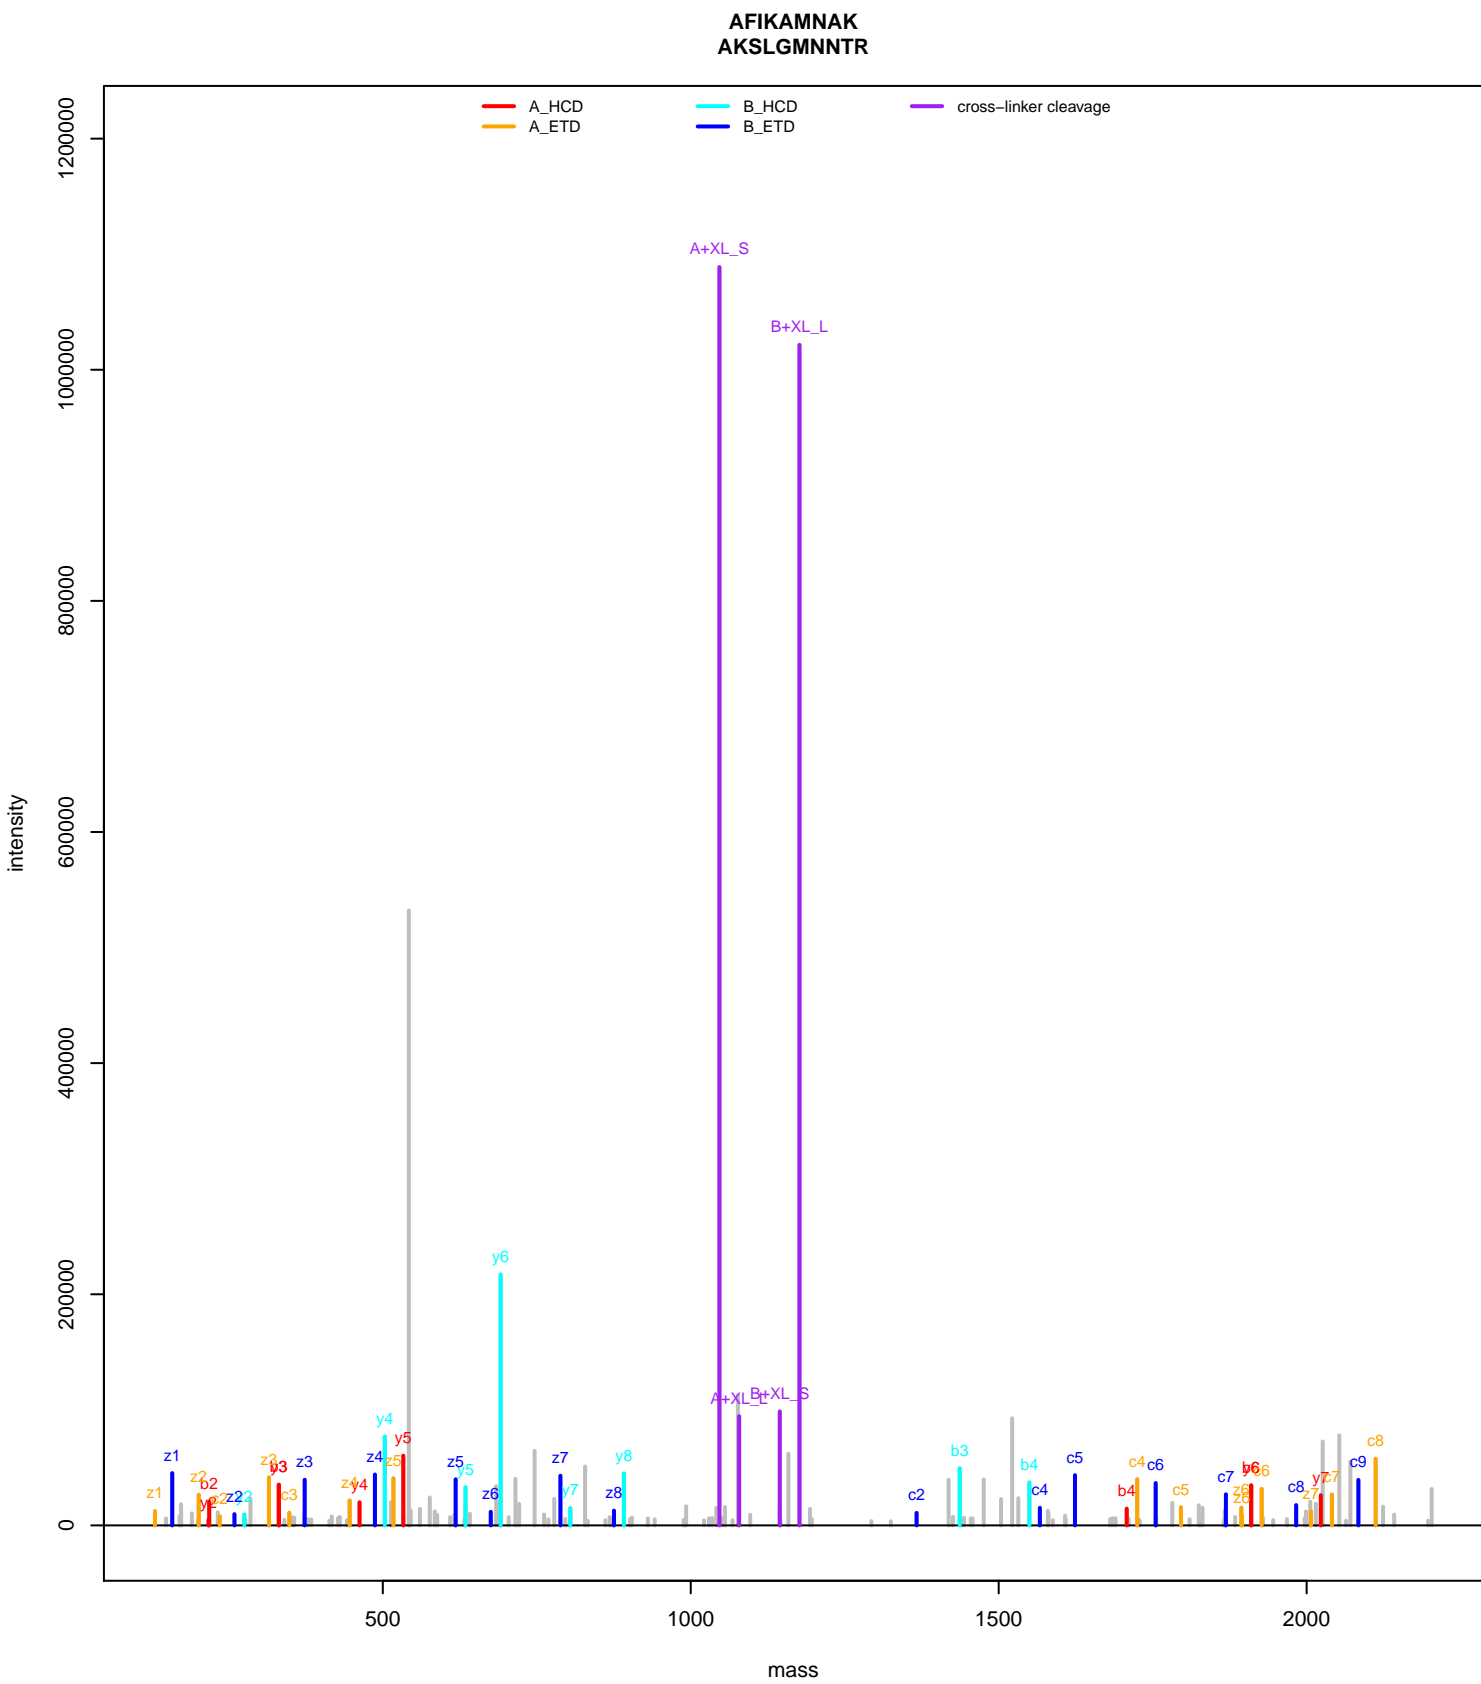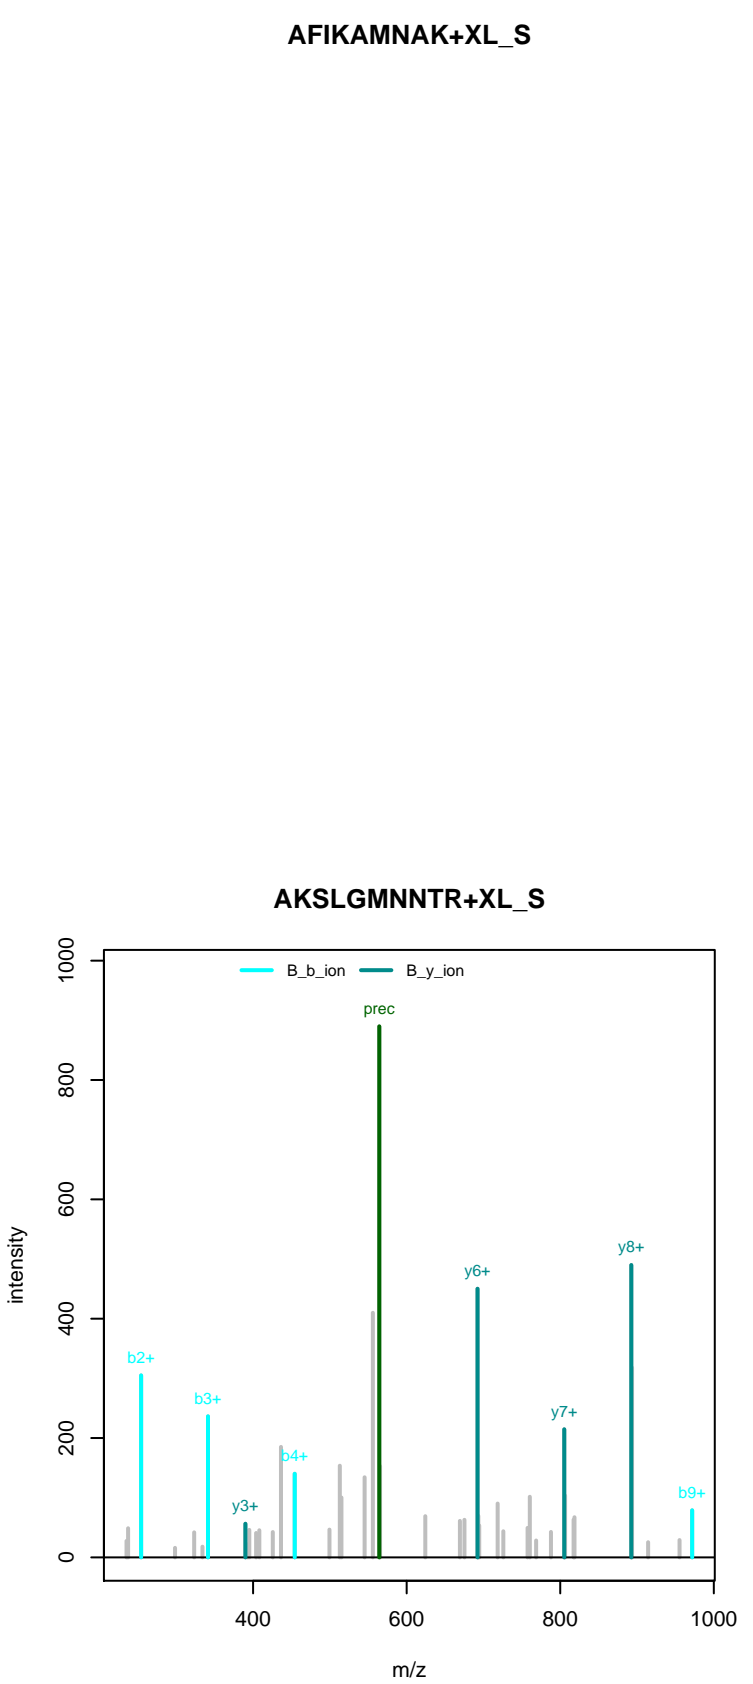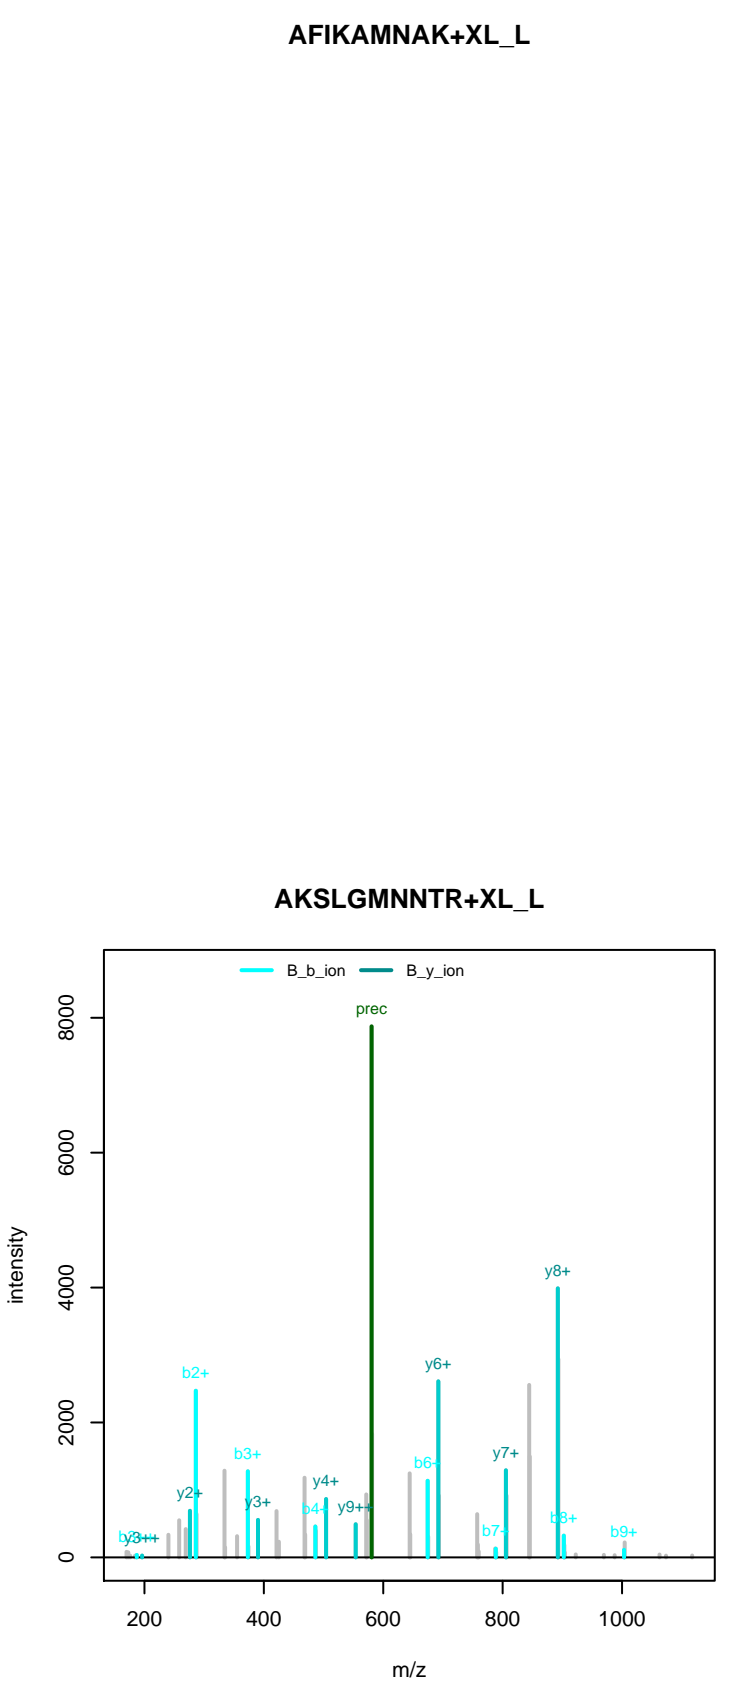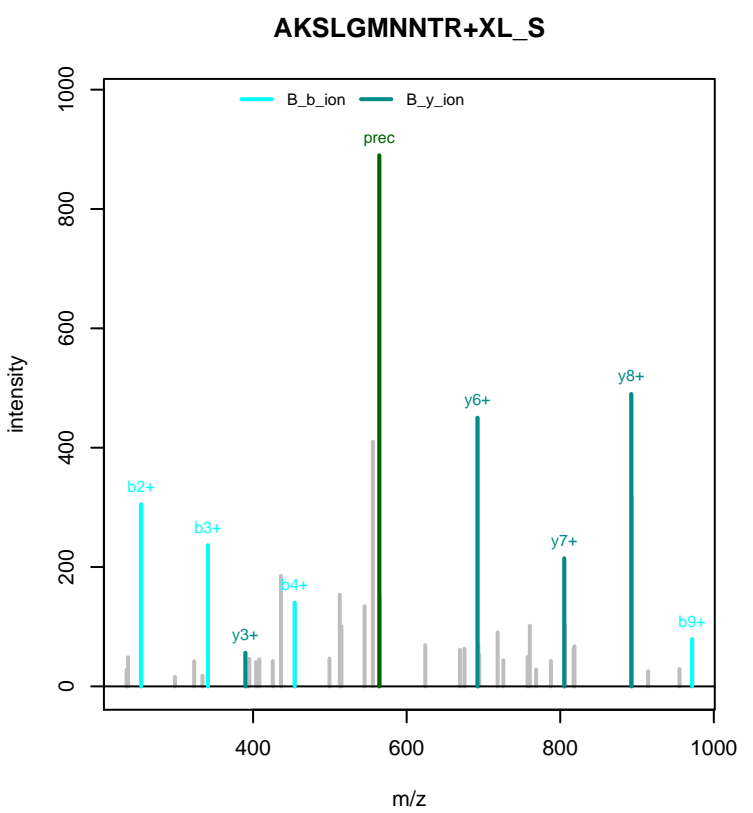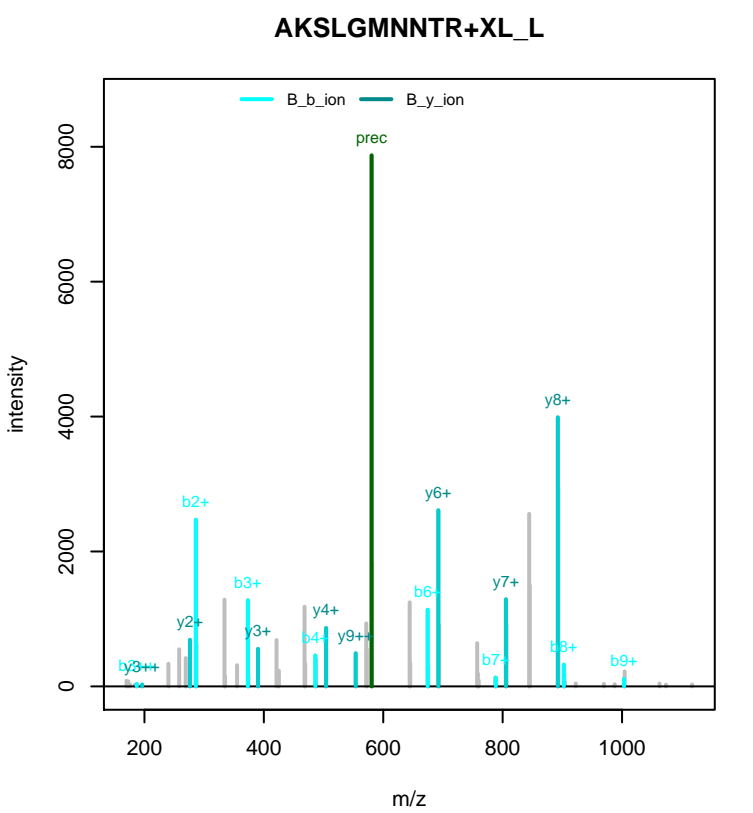



LQDLAKECDLAGAIK  
MKNINPTQTAAWQALQK

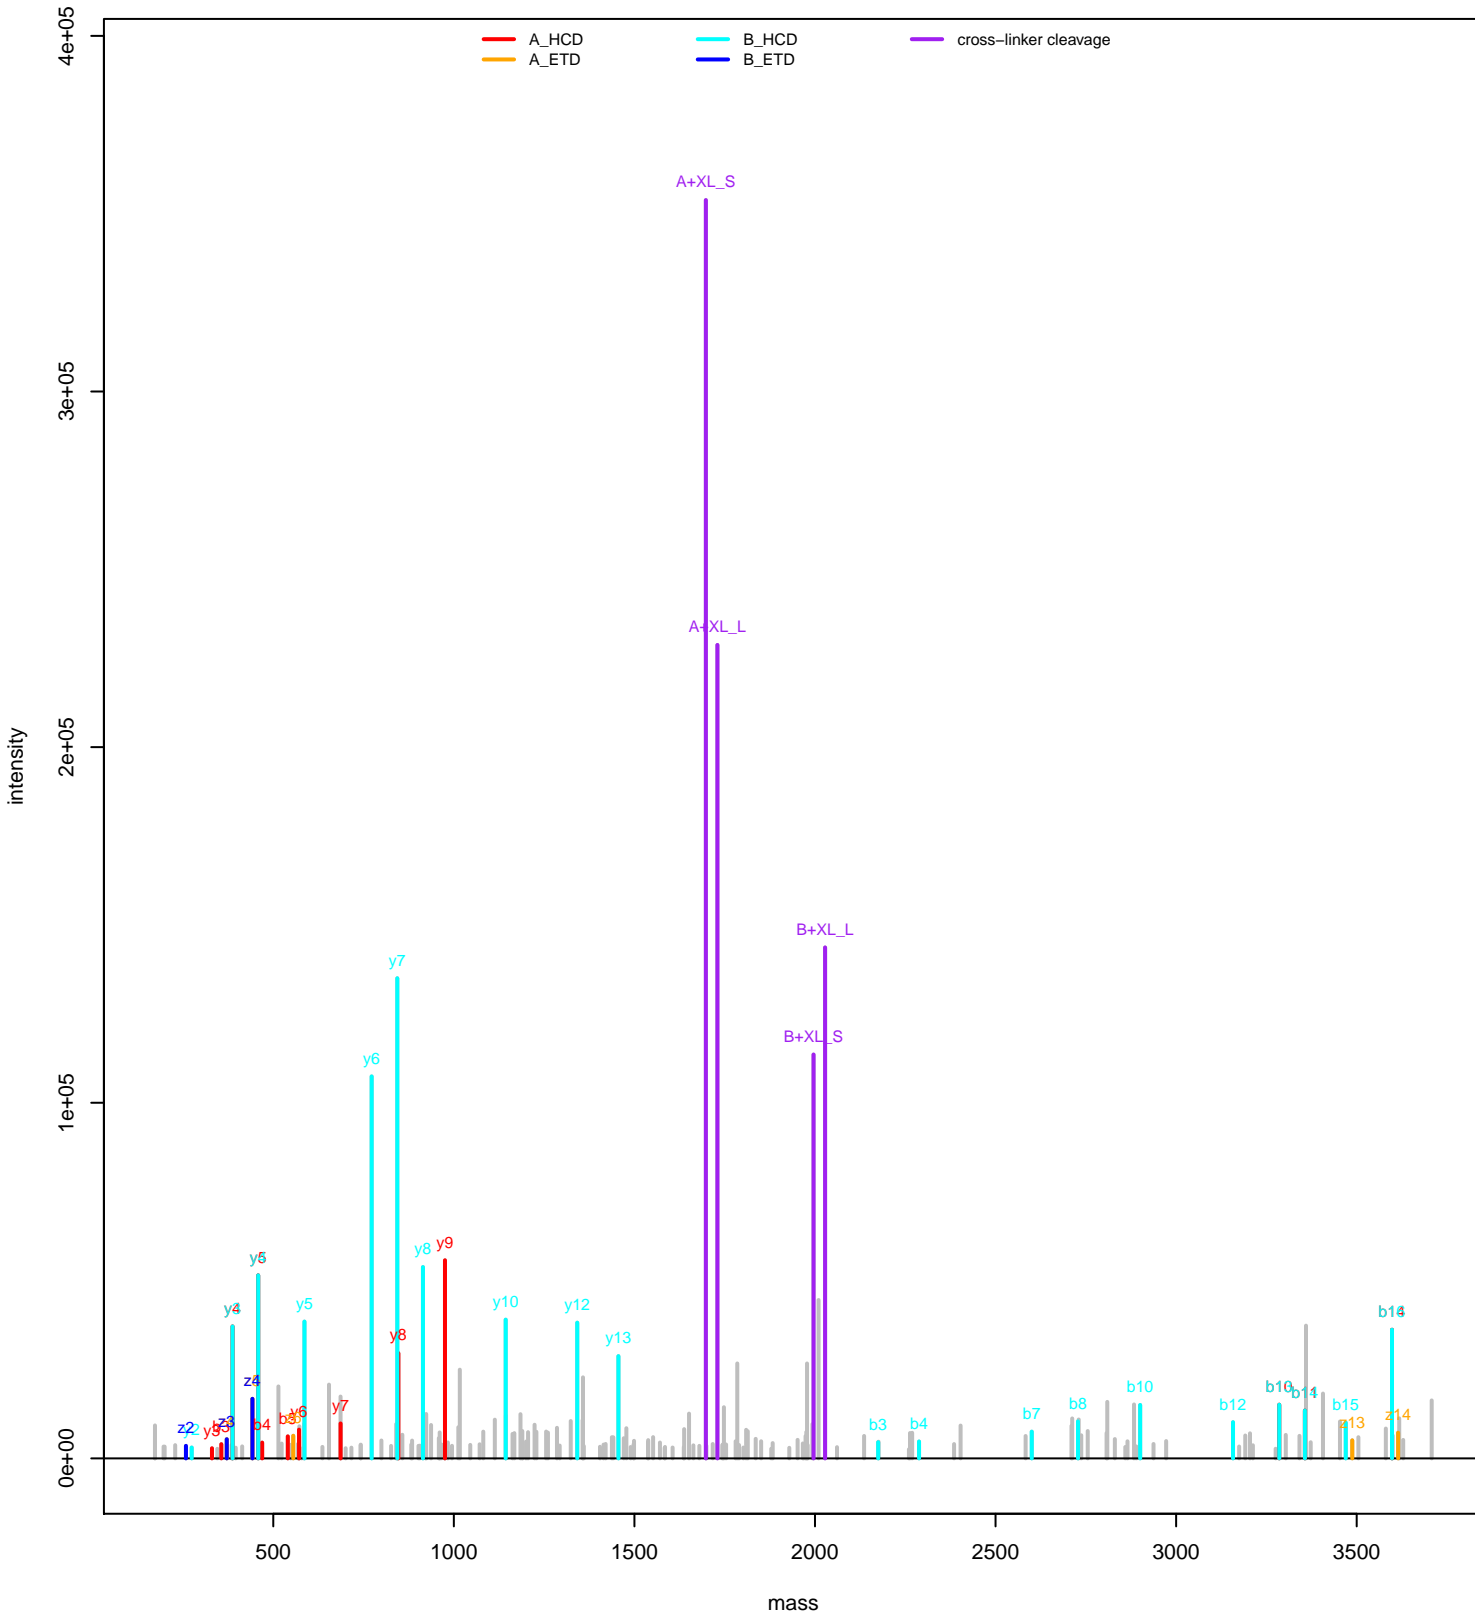

LQDLAKECDLAGAIK+XL\_S

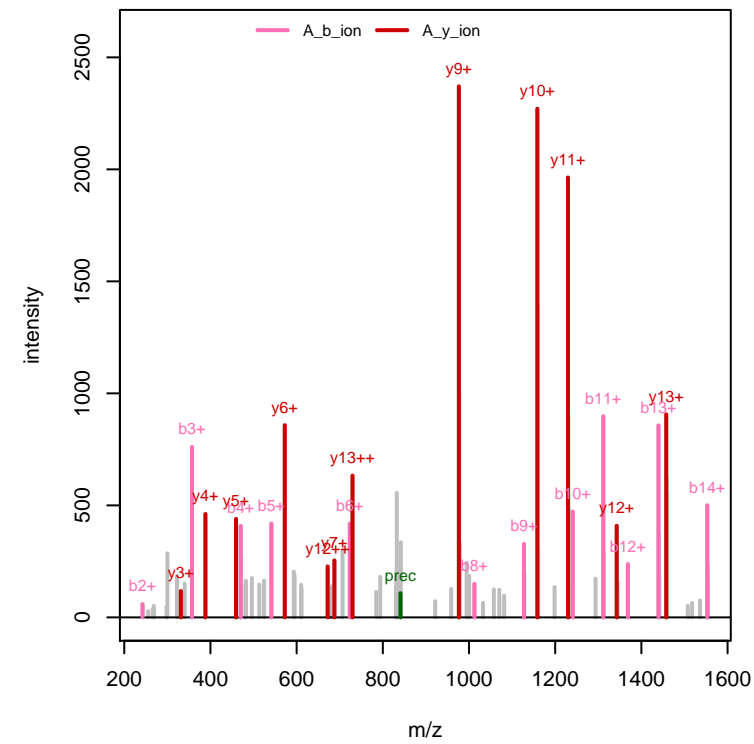

LQDLAKECDLAGAIK+XL\_L

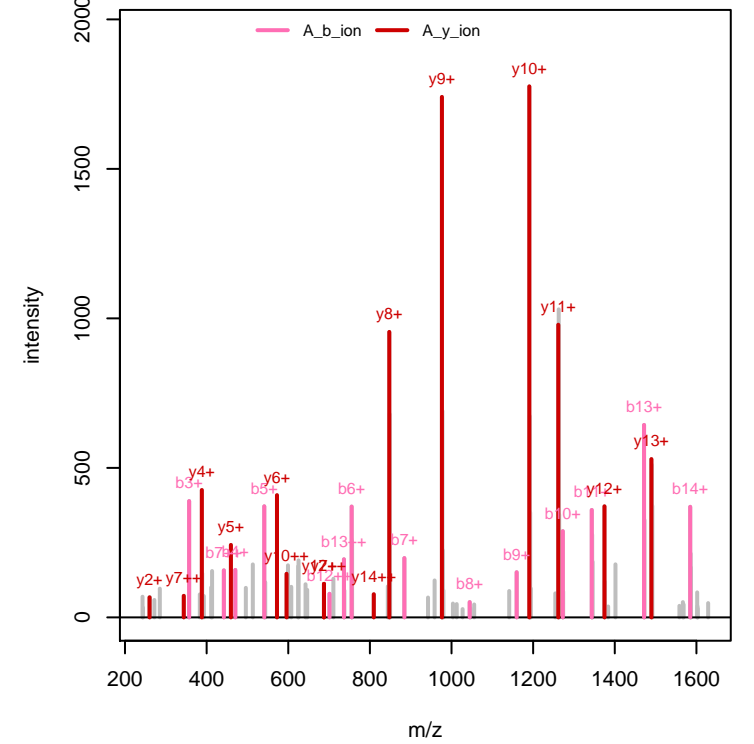

MKNINPTQTAAWQALQK+XL\_S

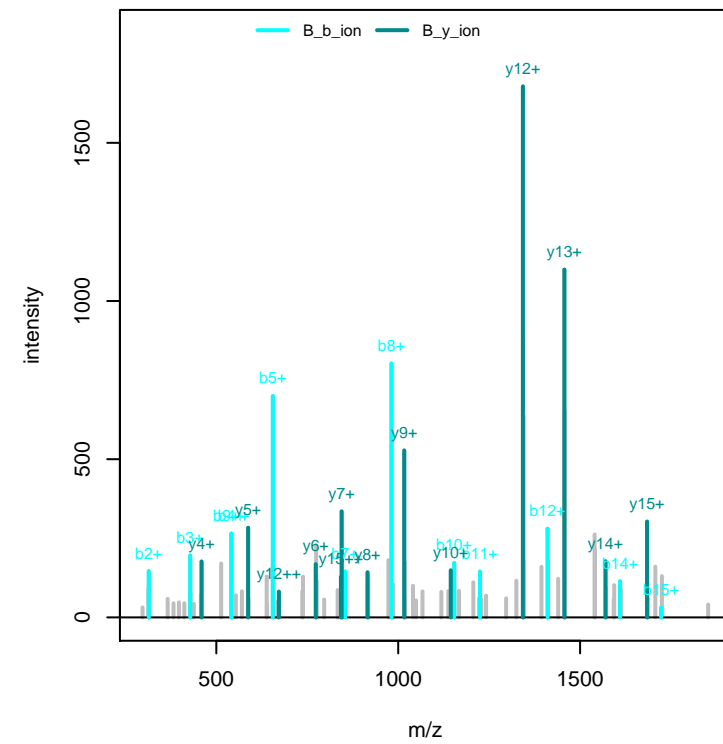

MKNINPTQTAAWQALQK+XL\_L

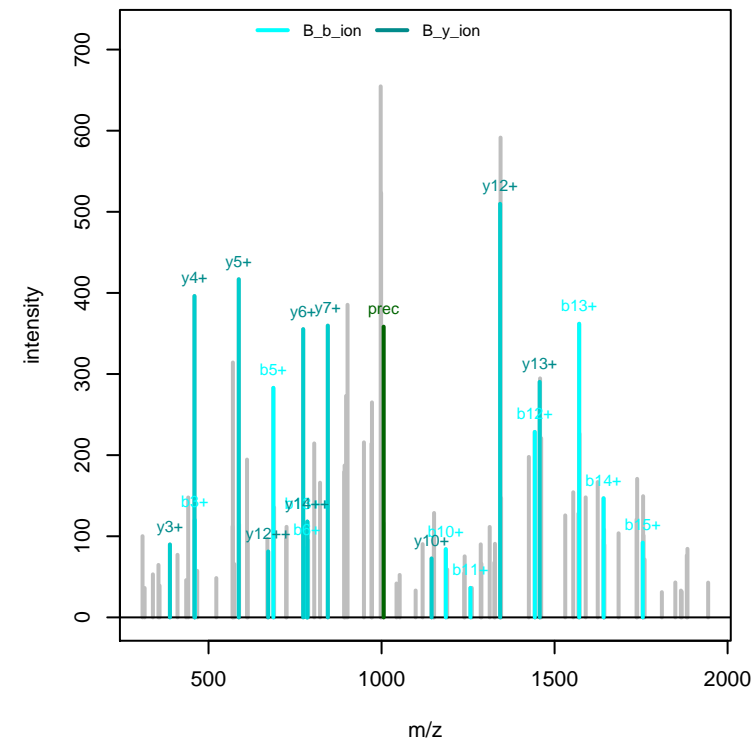

LKELTR  
YGIEKPYEK

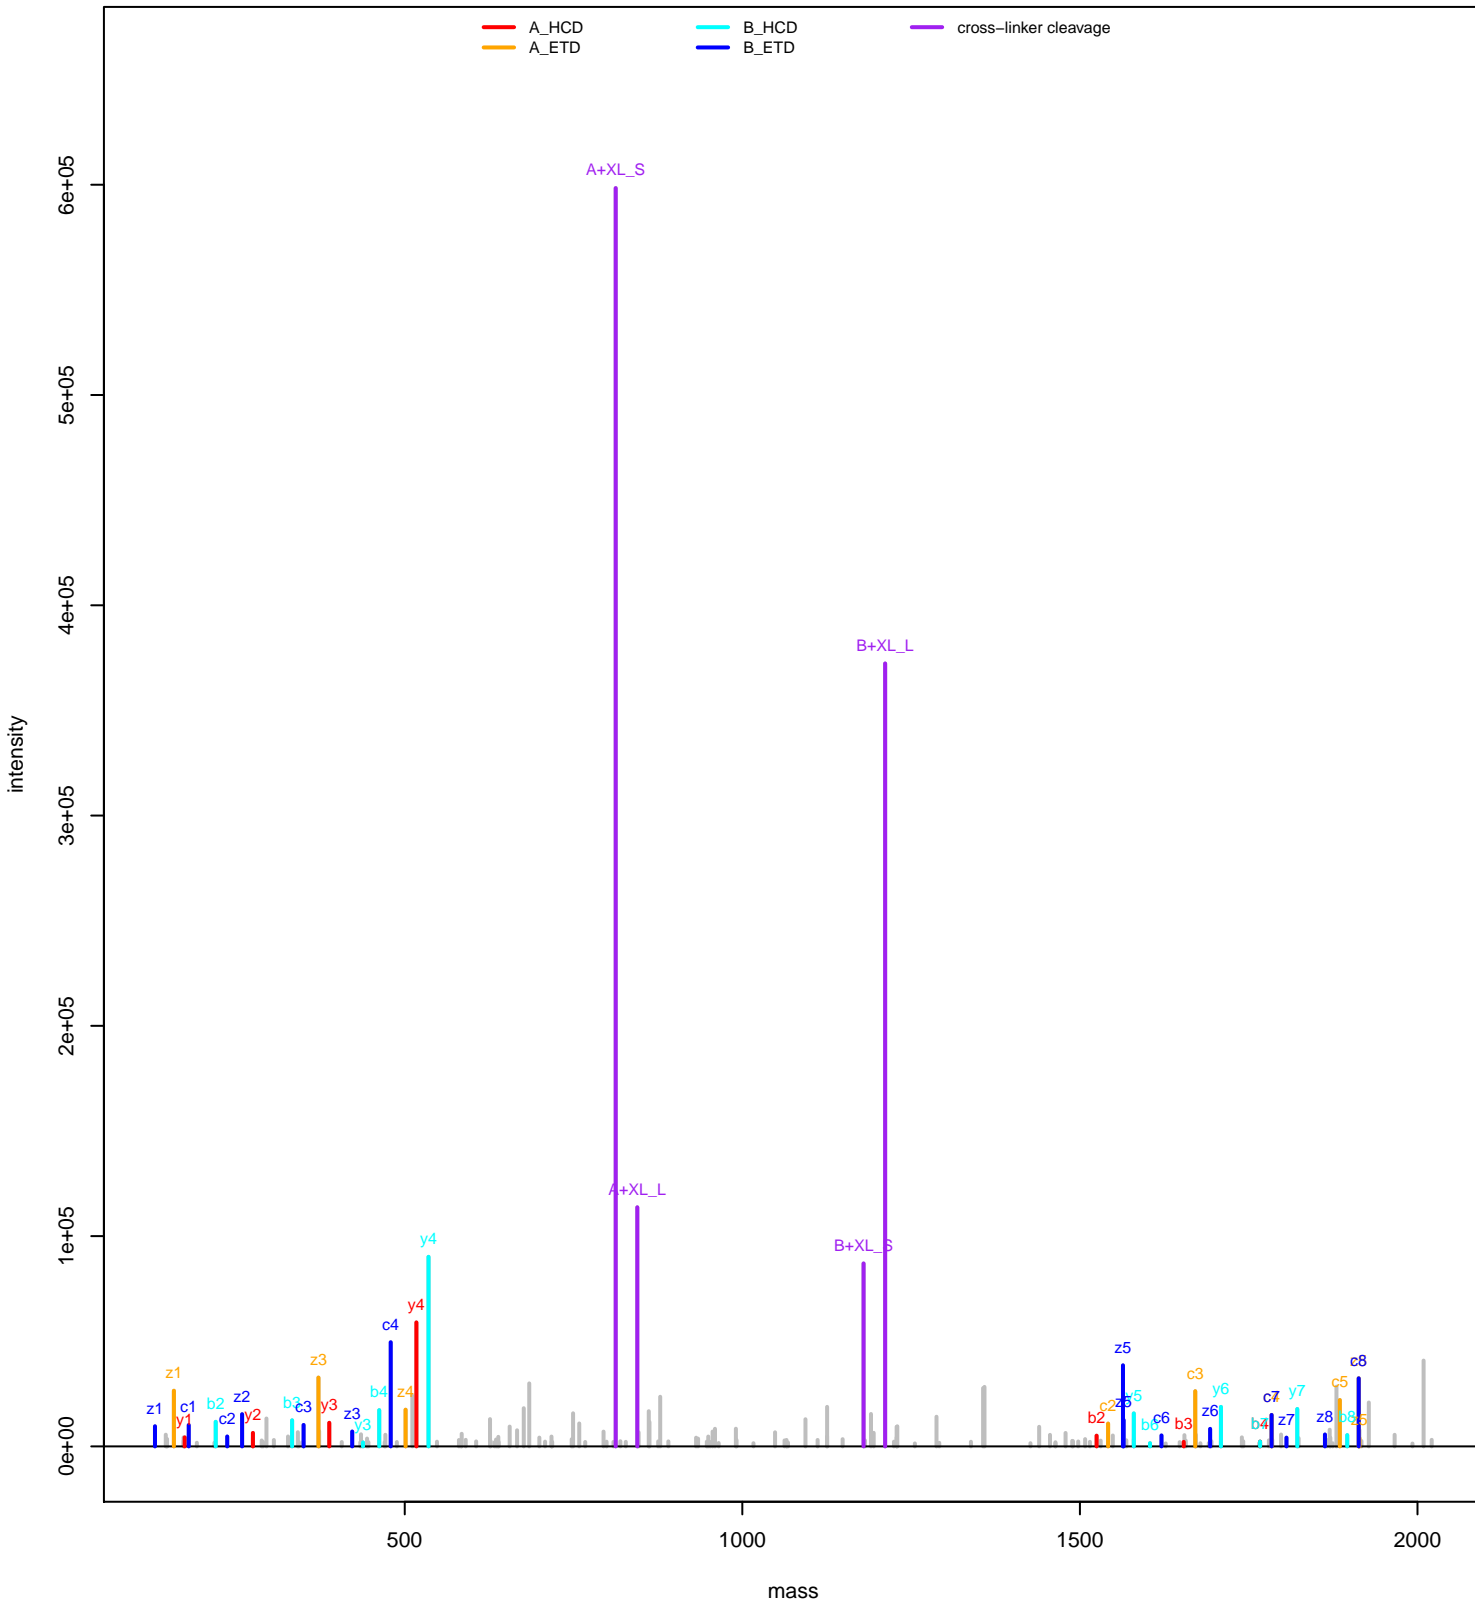

LKELTR+XL\_S

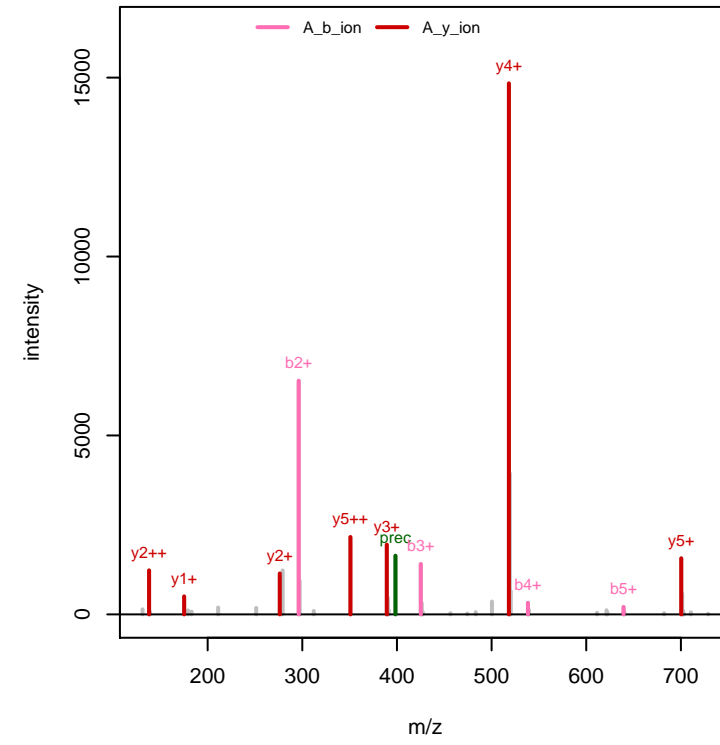

LKELTR+XL\_L

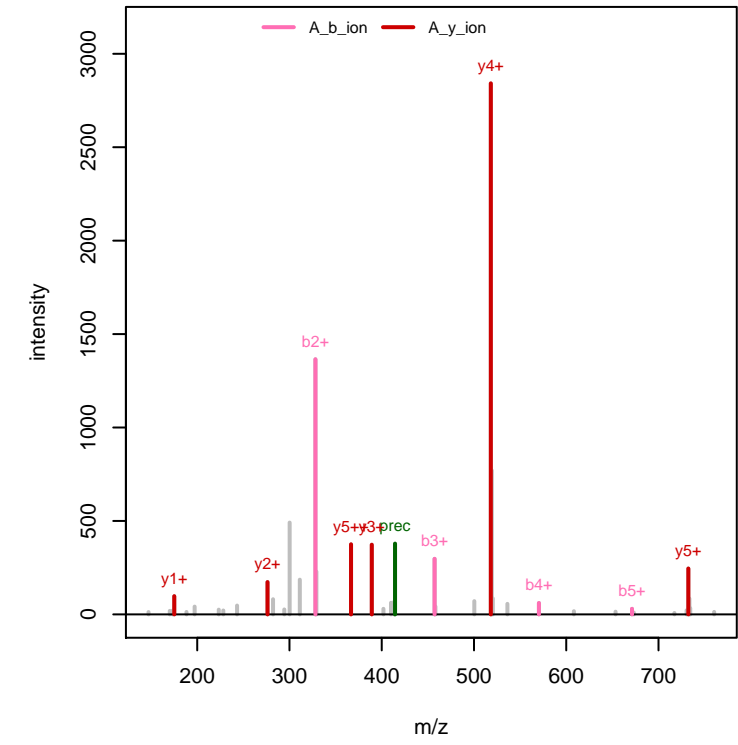

YGIEKPYEK+XL\_S

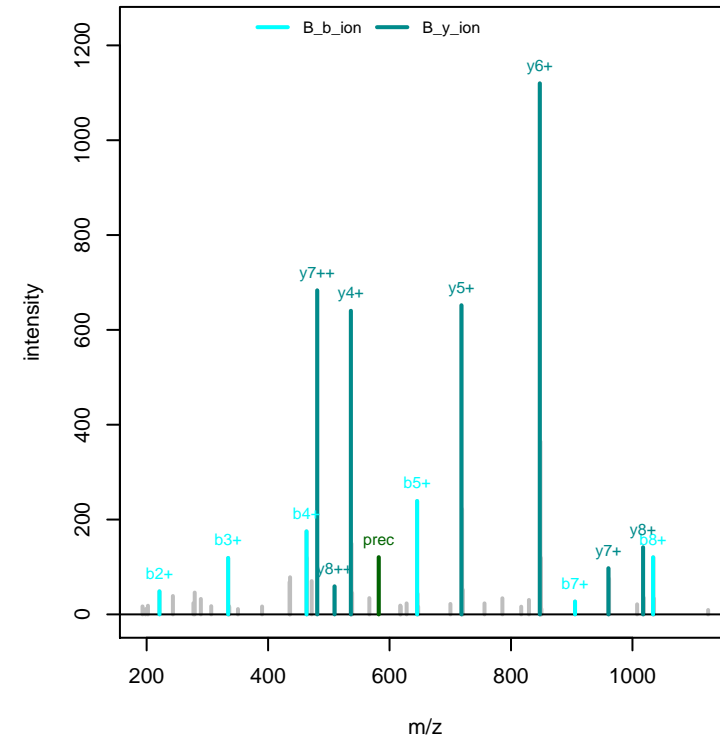

YGIEKPYEK+XL\_L

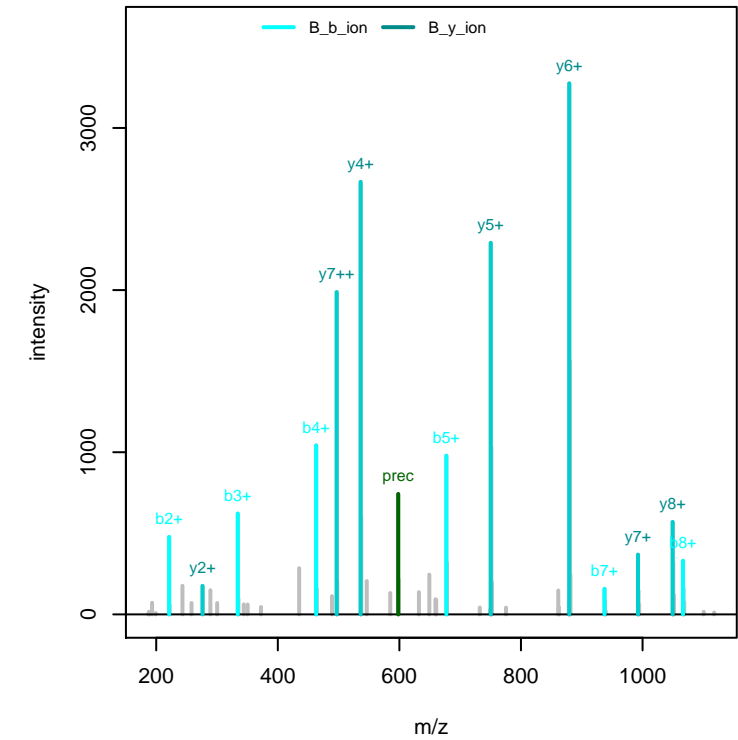

SEQETR  
IQLYVARDSLPEGVYNDQFKK

SEQETR+XL\_S

SEQETR+XL\_L

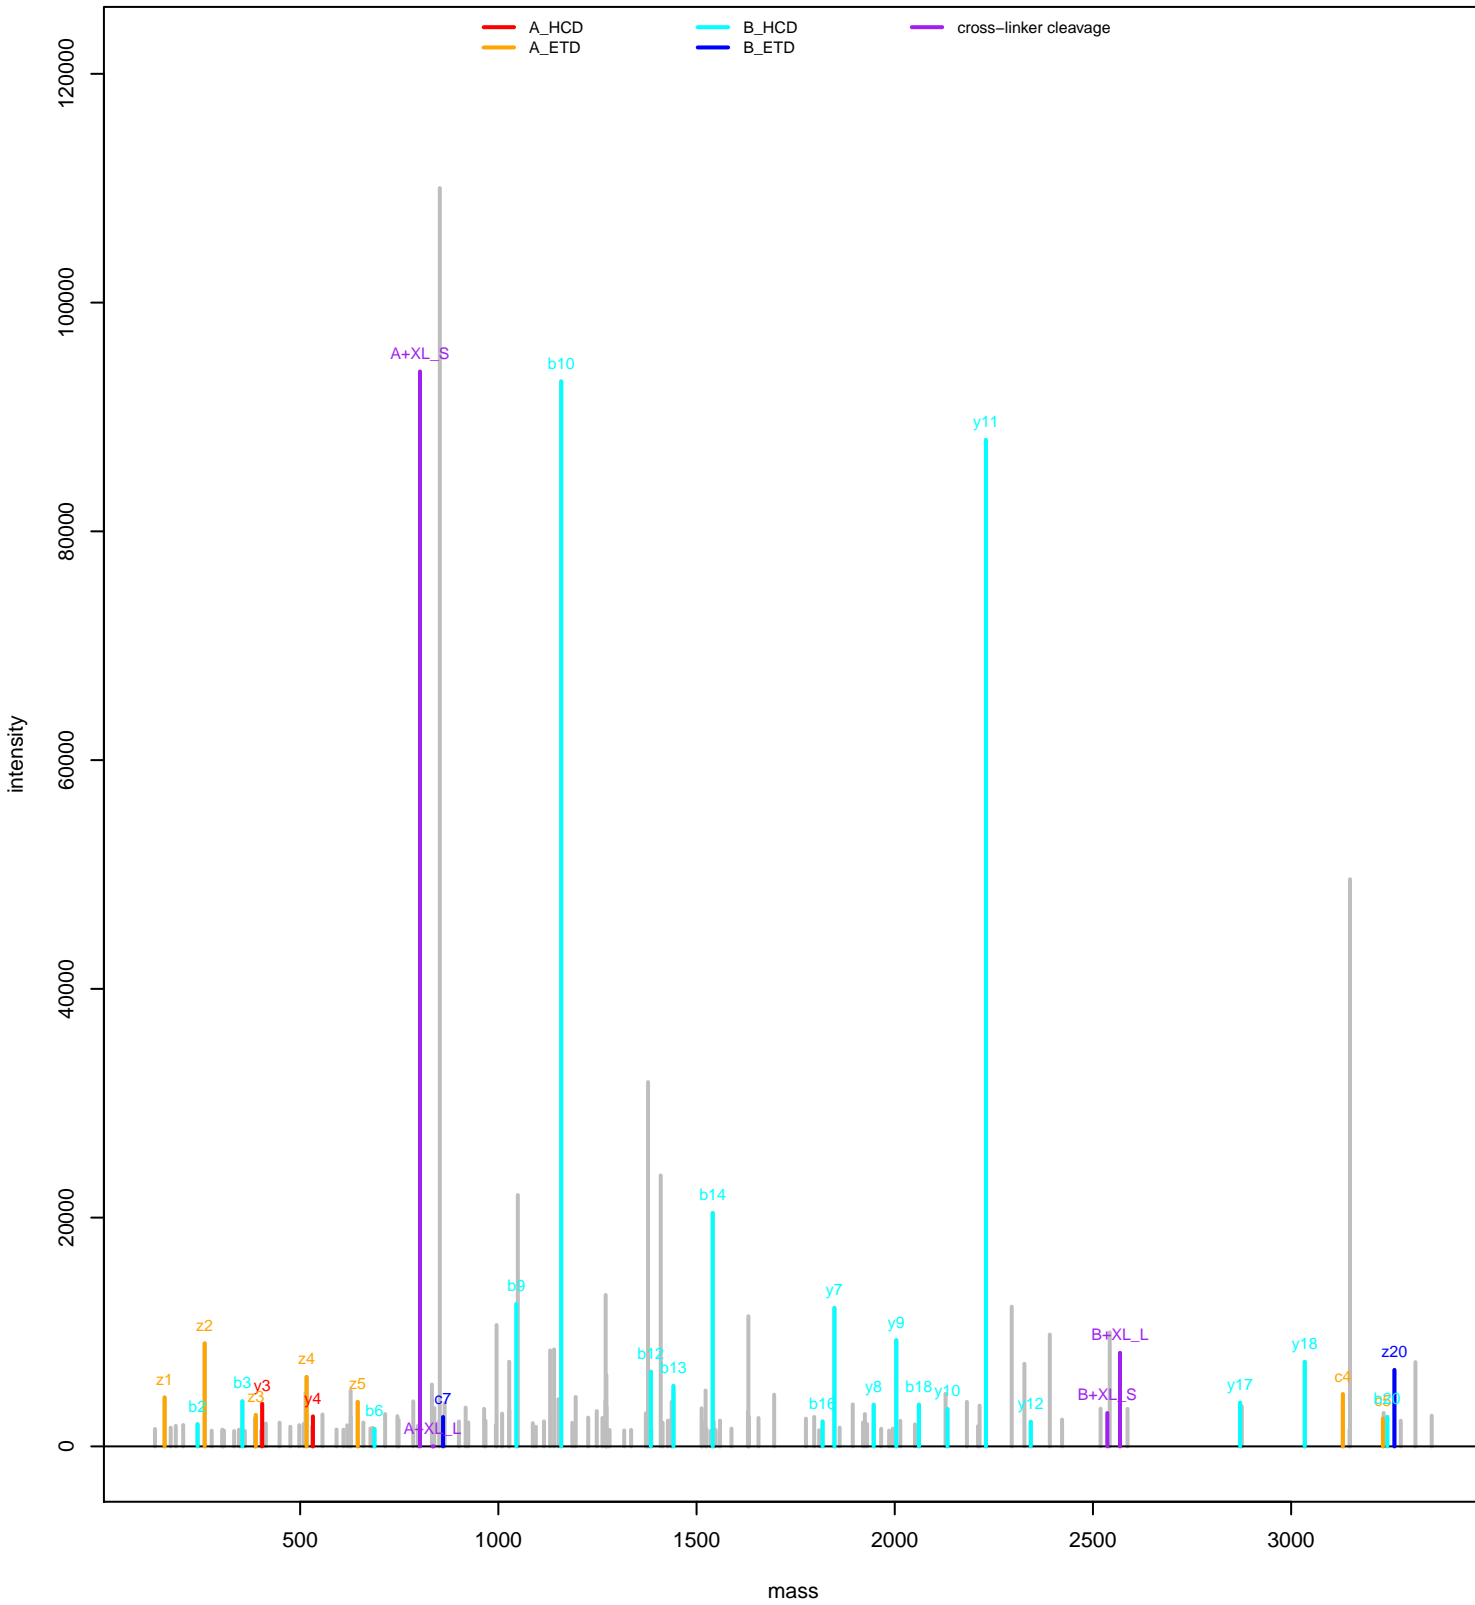

IQLYVARDSLPEGVYNDQFKK+XL\_S

IQLYVARDSLPEGVYNDQFKK+XL\_L

VVNQIKTR  
ETIRQKVT DVEGK

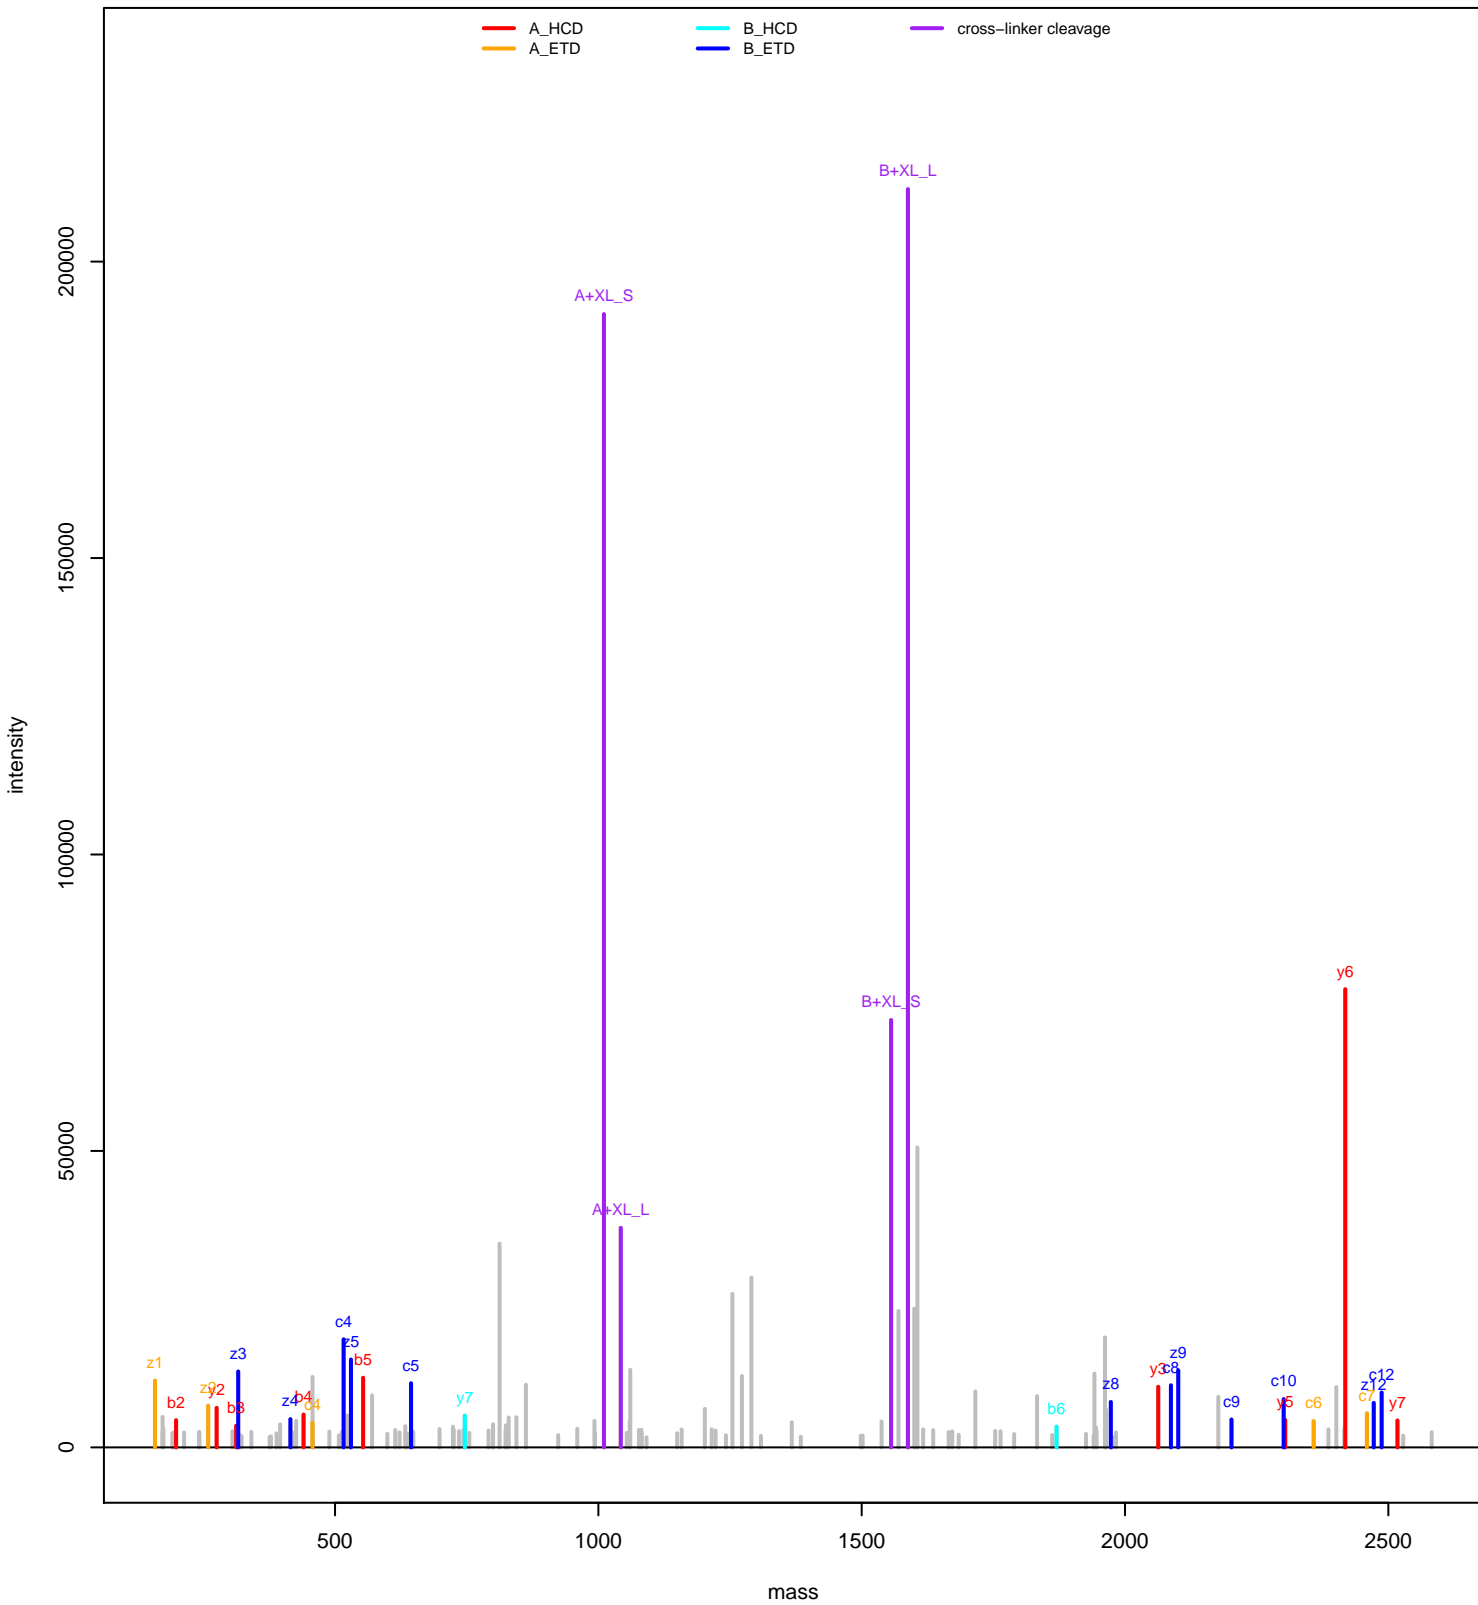

VVNQIKTR+XL\_S

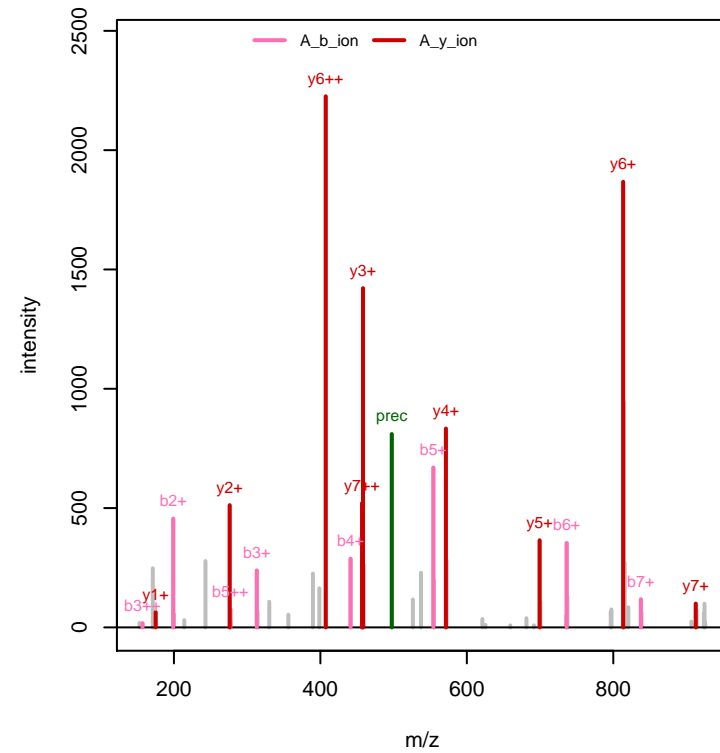

VVNQIKTR+XL\_L

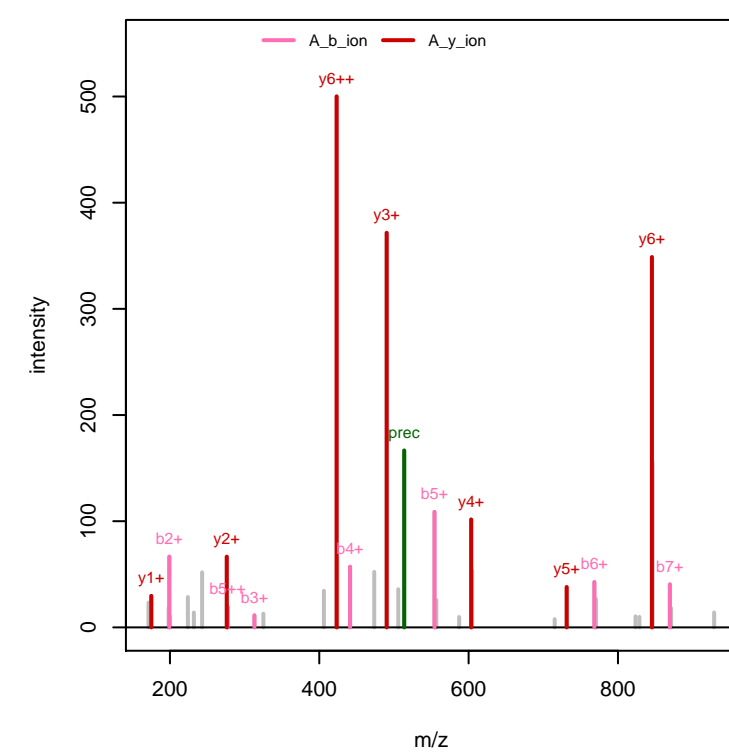

ETIRQKVT DVEGK+XL\_S

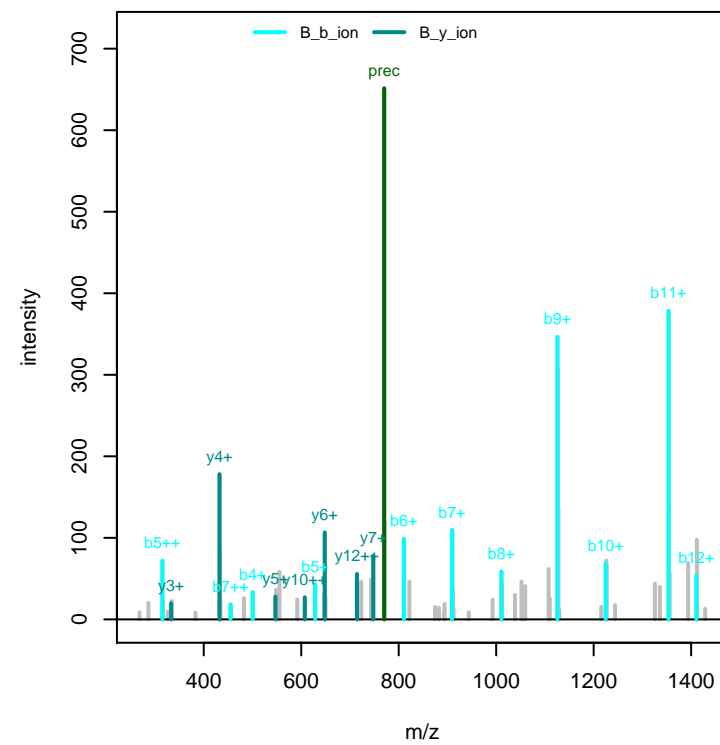

ETIRQKVT DVEGK+XL\_L

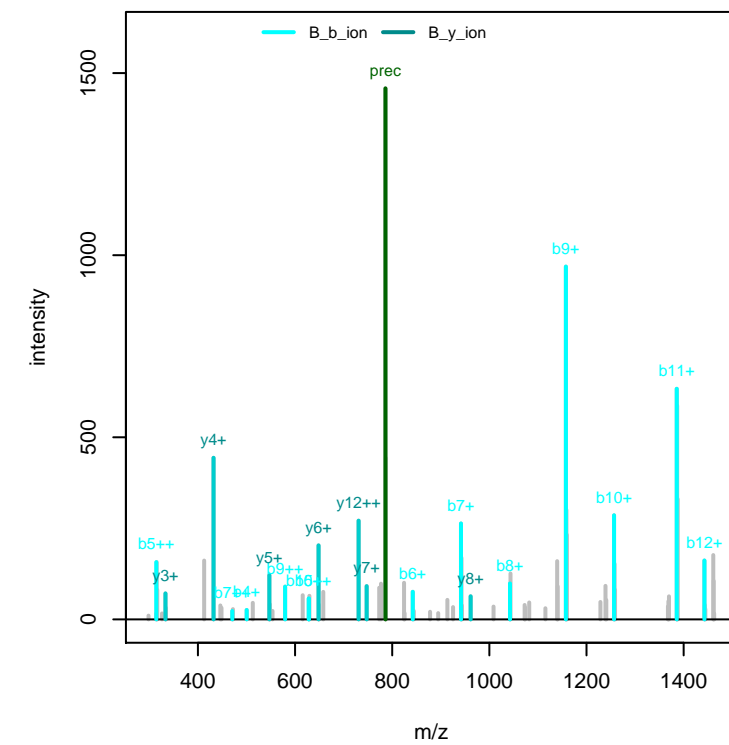

ADQVLQDKLR  
SLKNVDIILNAQTTEVK

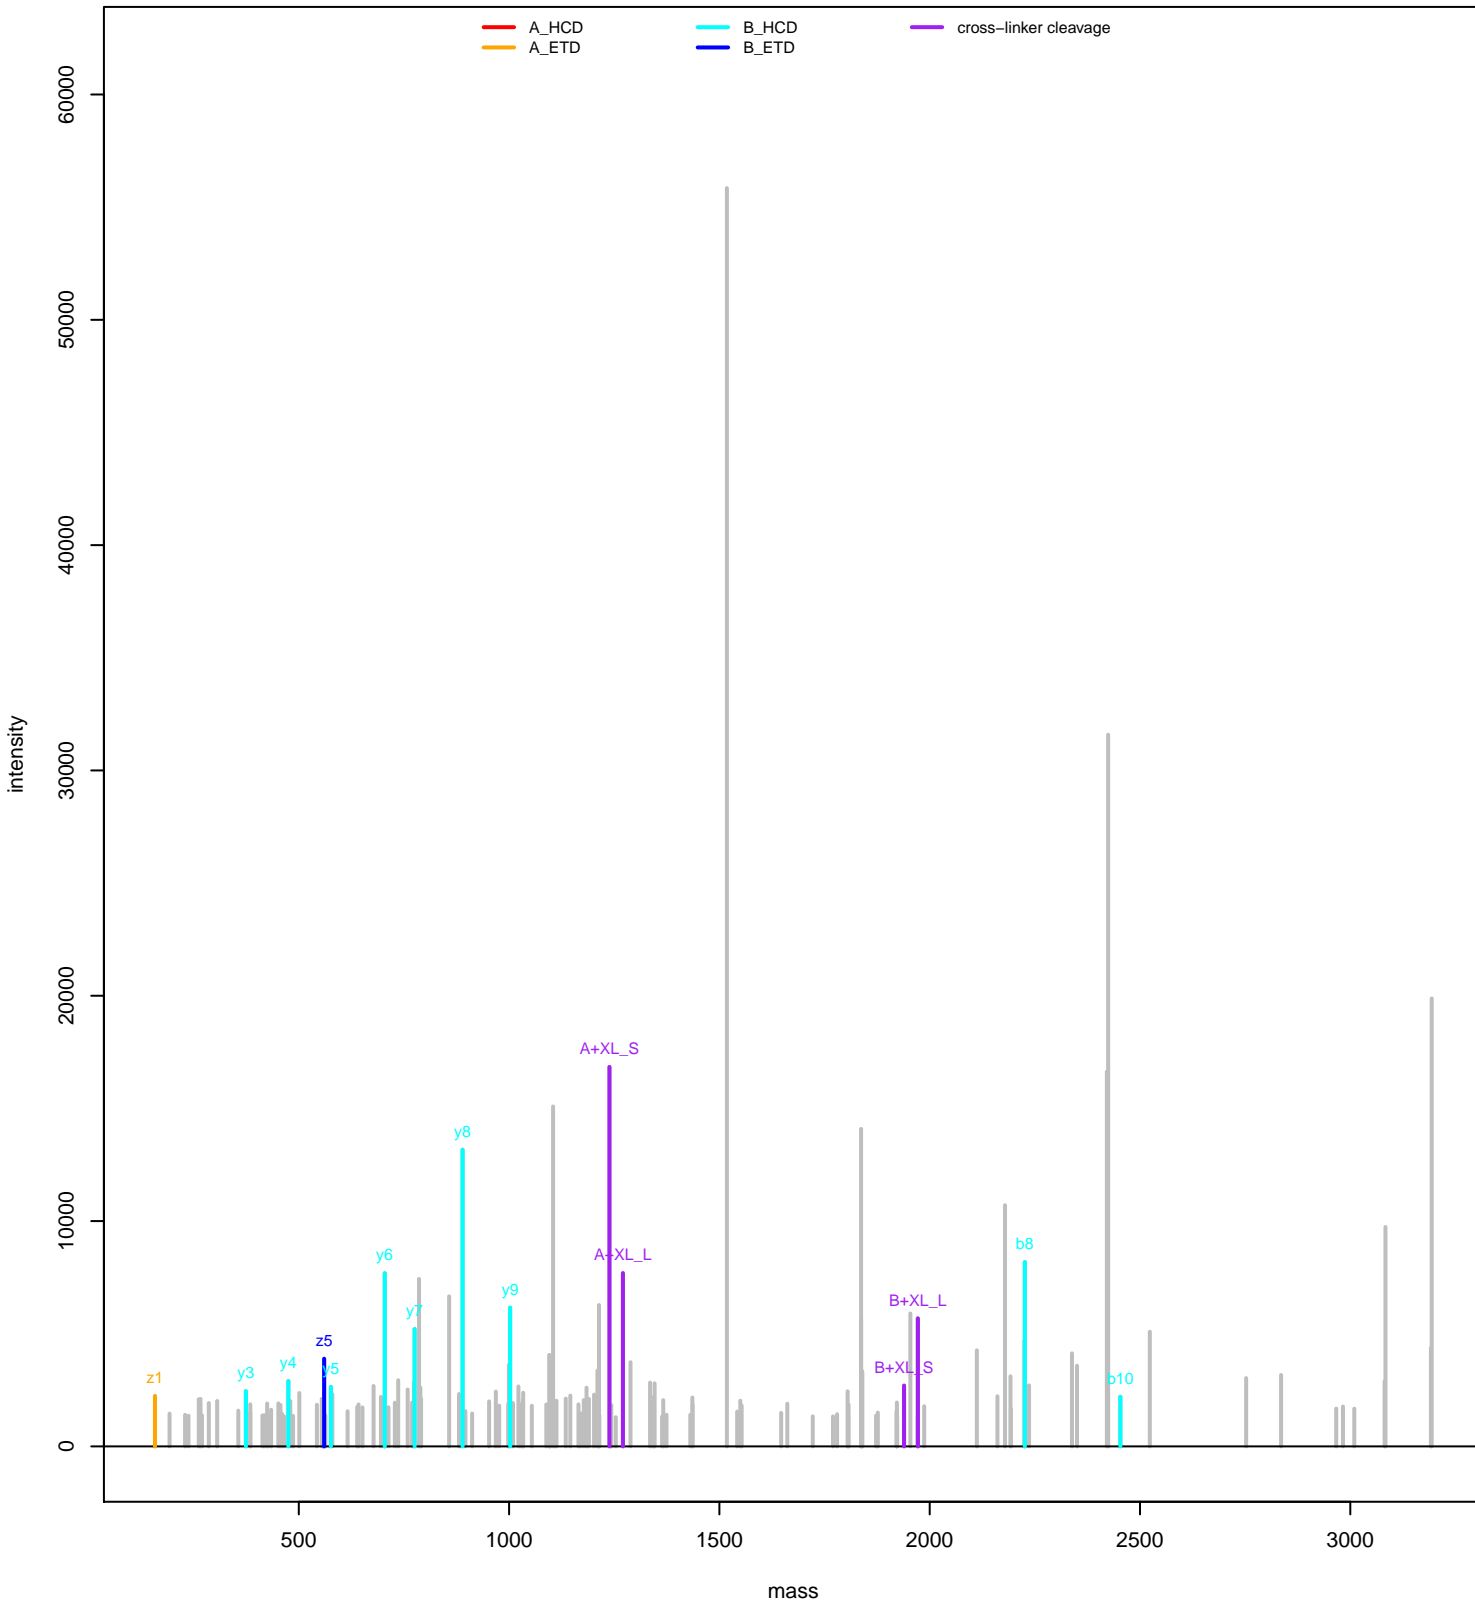

ADQVLQDKLR+XL\_S

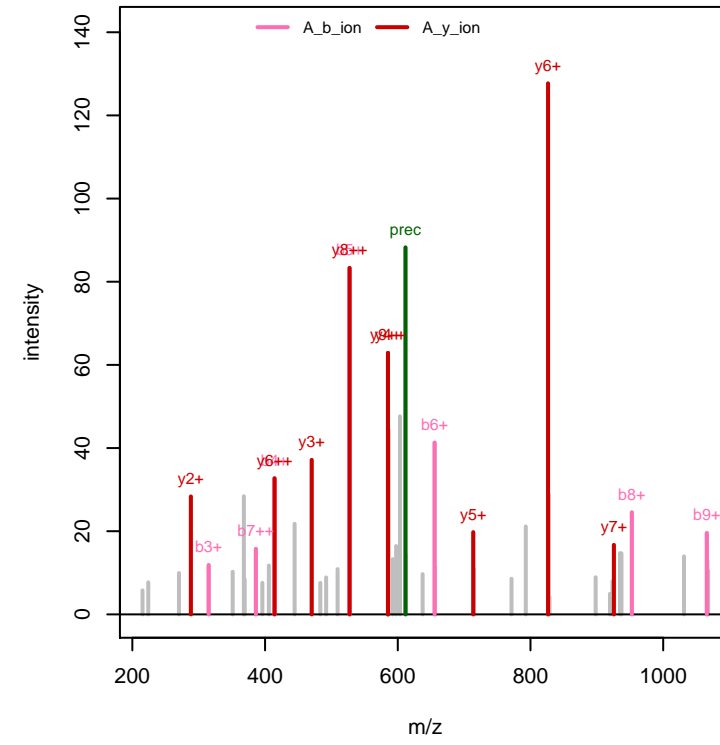

ADQVLQDKLR+XL\_L

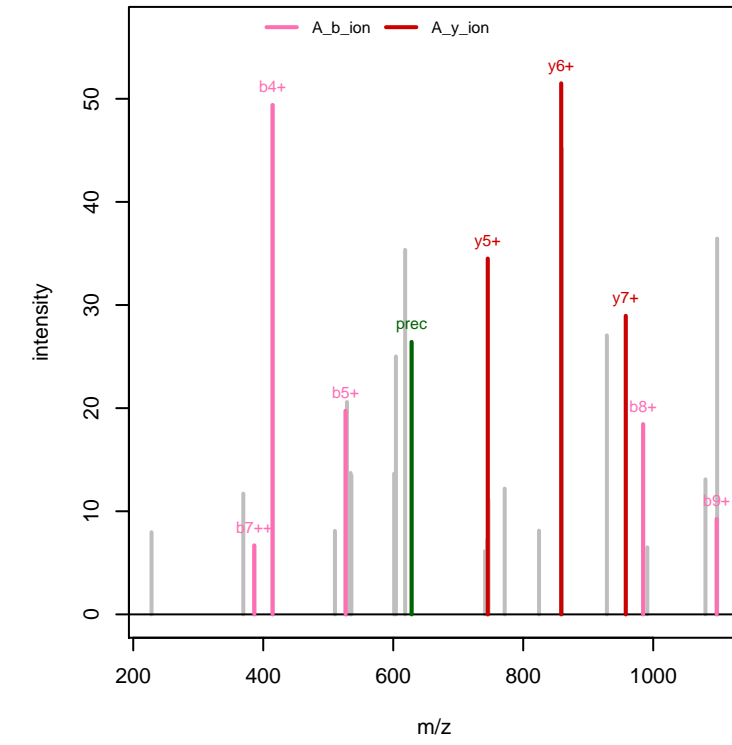

SLKNVDIILNAQTTEVK+XL\_S

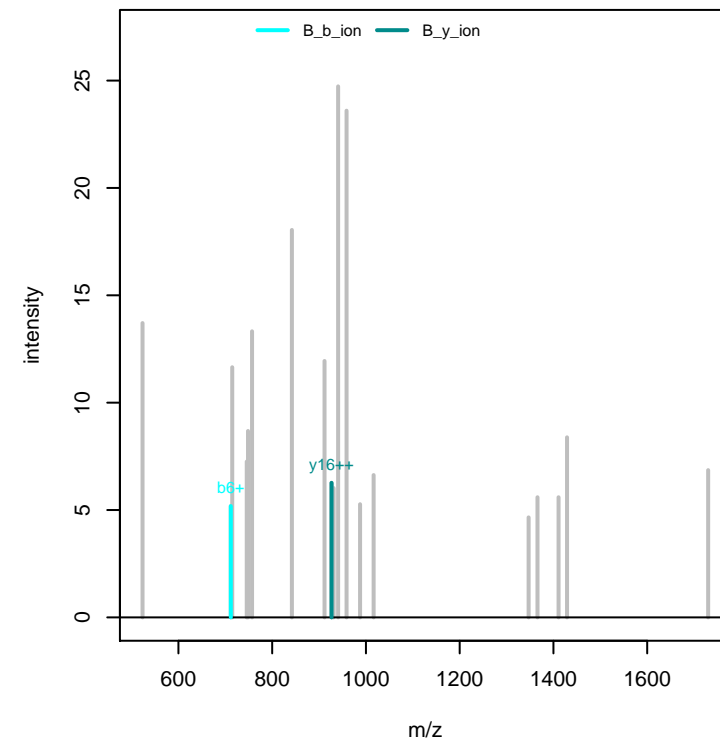

SLKNVDIILNAQTTEVK+XL\_L

**EQGKGASR  
MFTINAEVRK**

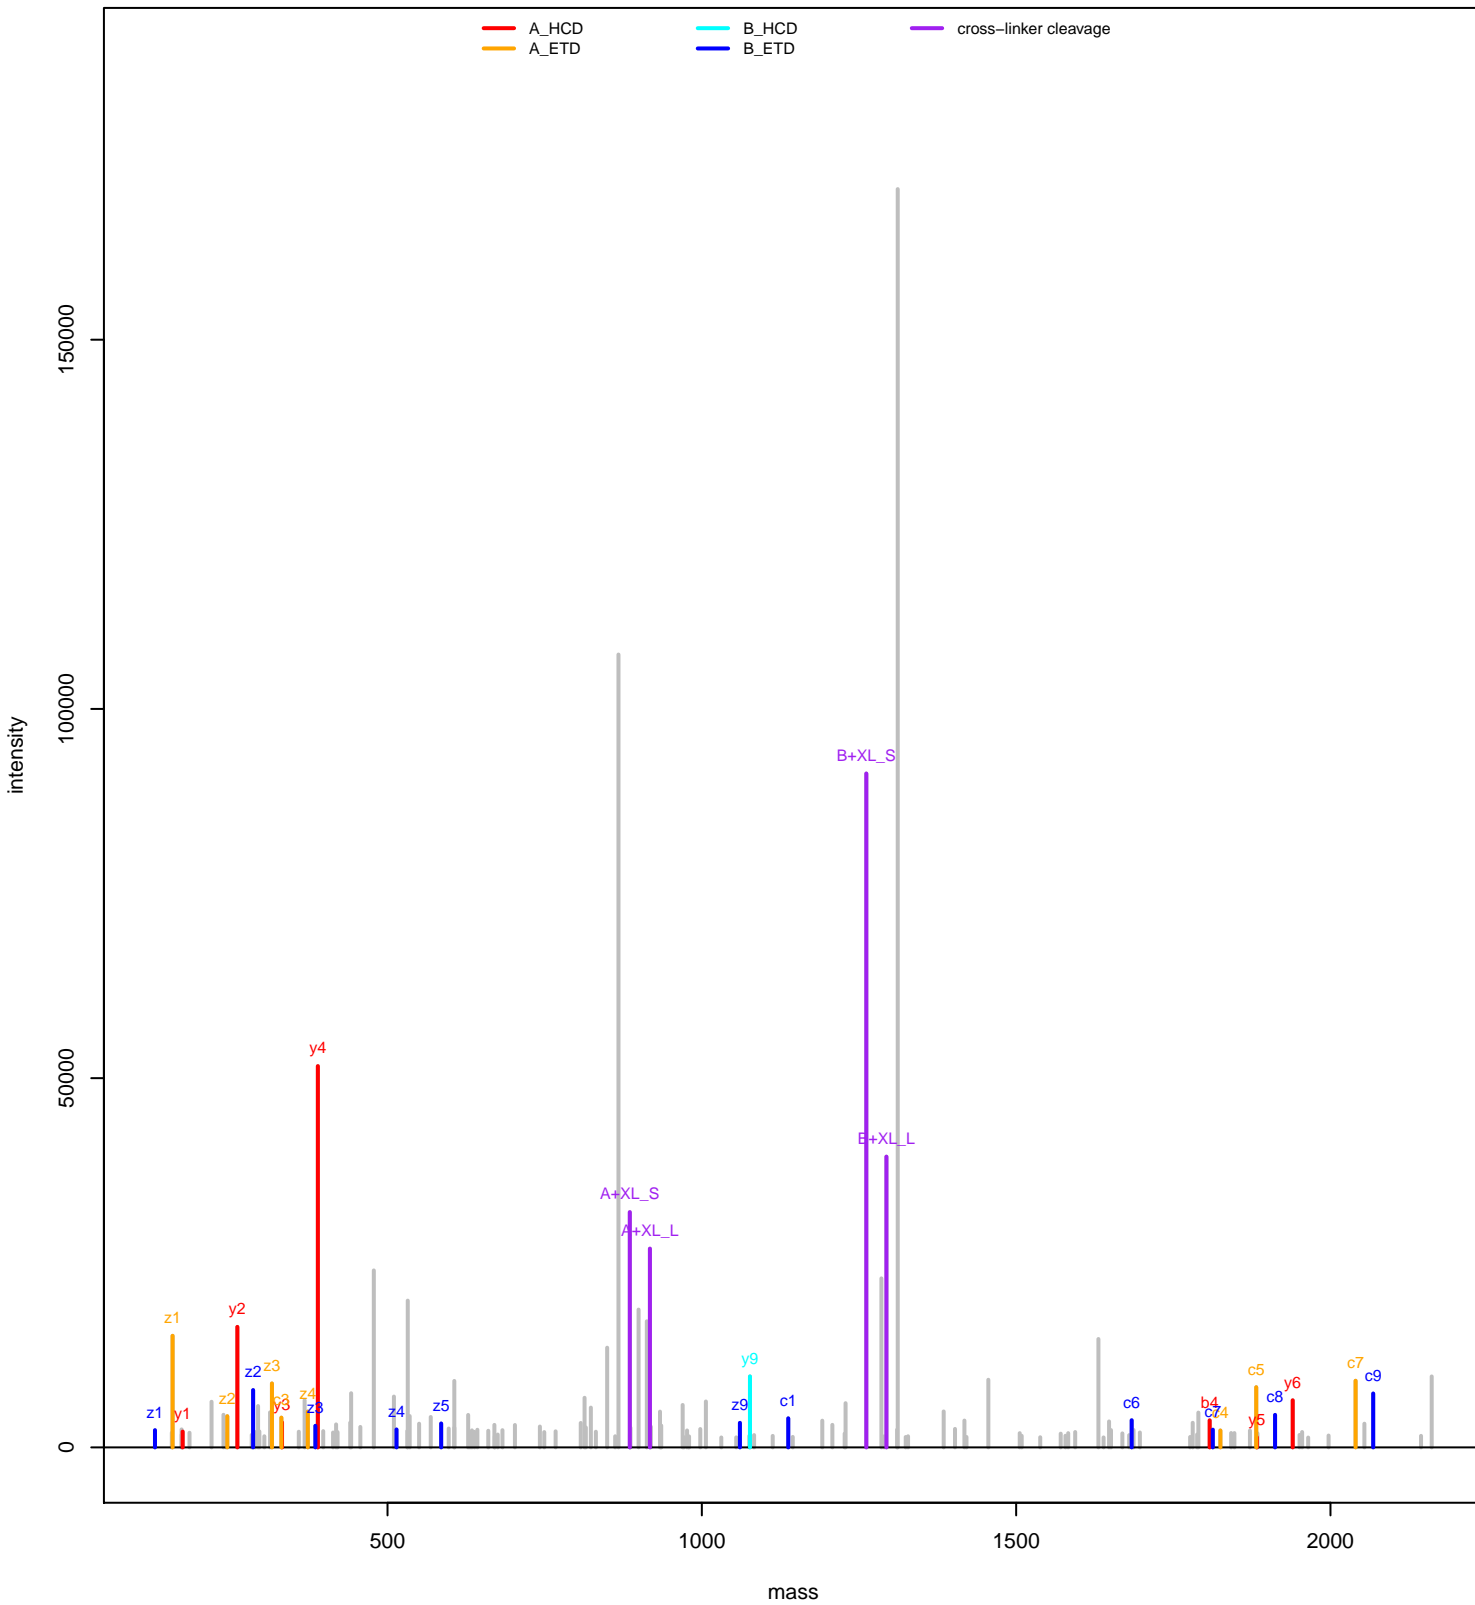

**EQGKGASR+XL\_S**

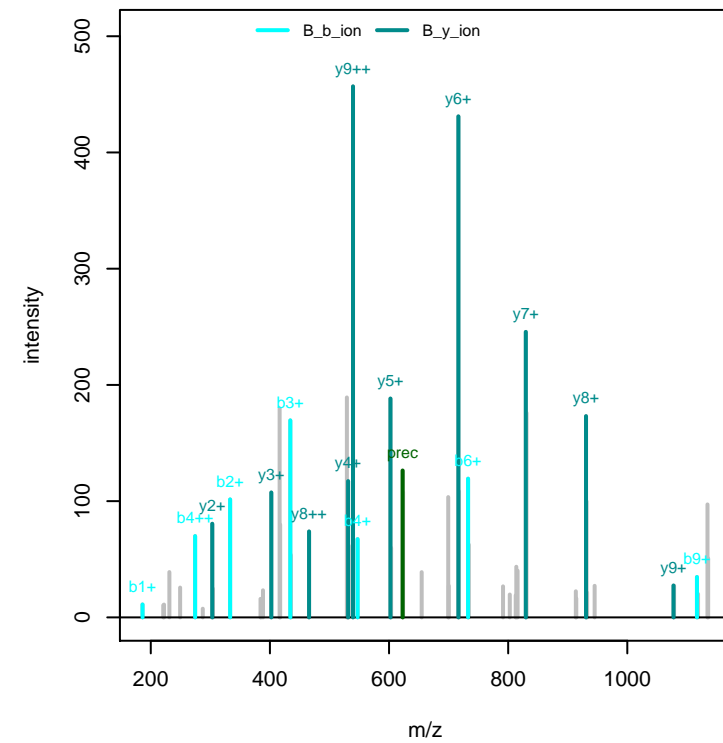

**EQGKGASR+XL\_L**

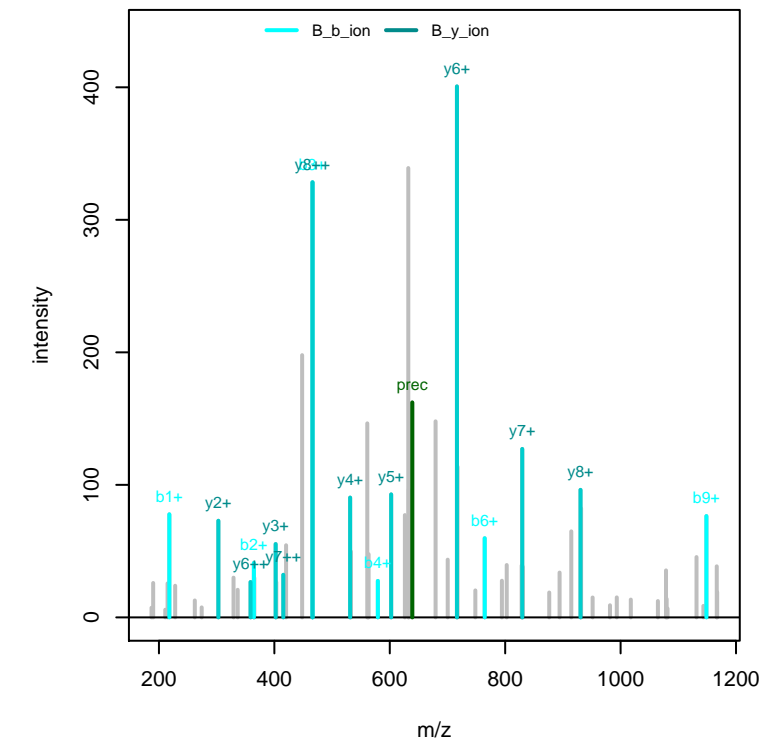

**MFTINAEVRK+XL\_S**



**MFTINAEVRK+XL\_L**



EESIVKR  
IFHHQPLTVVK

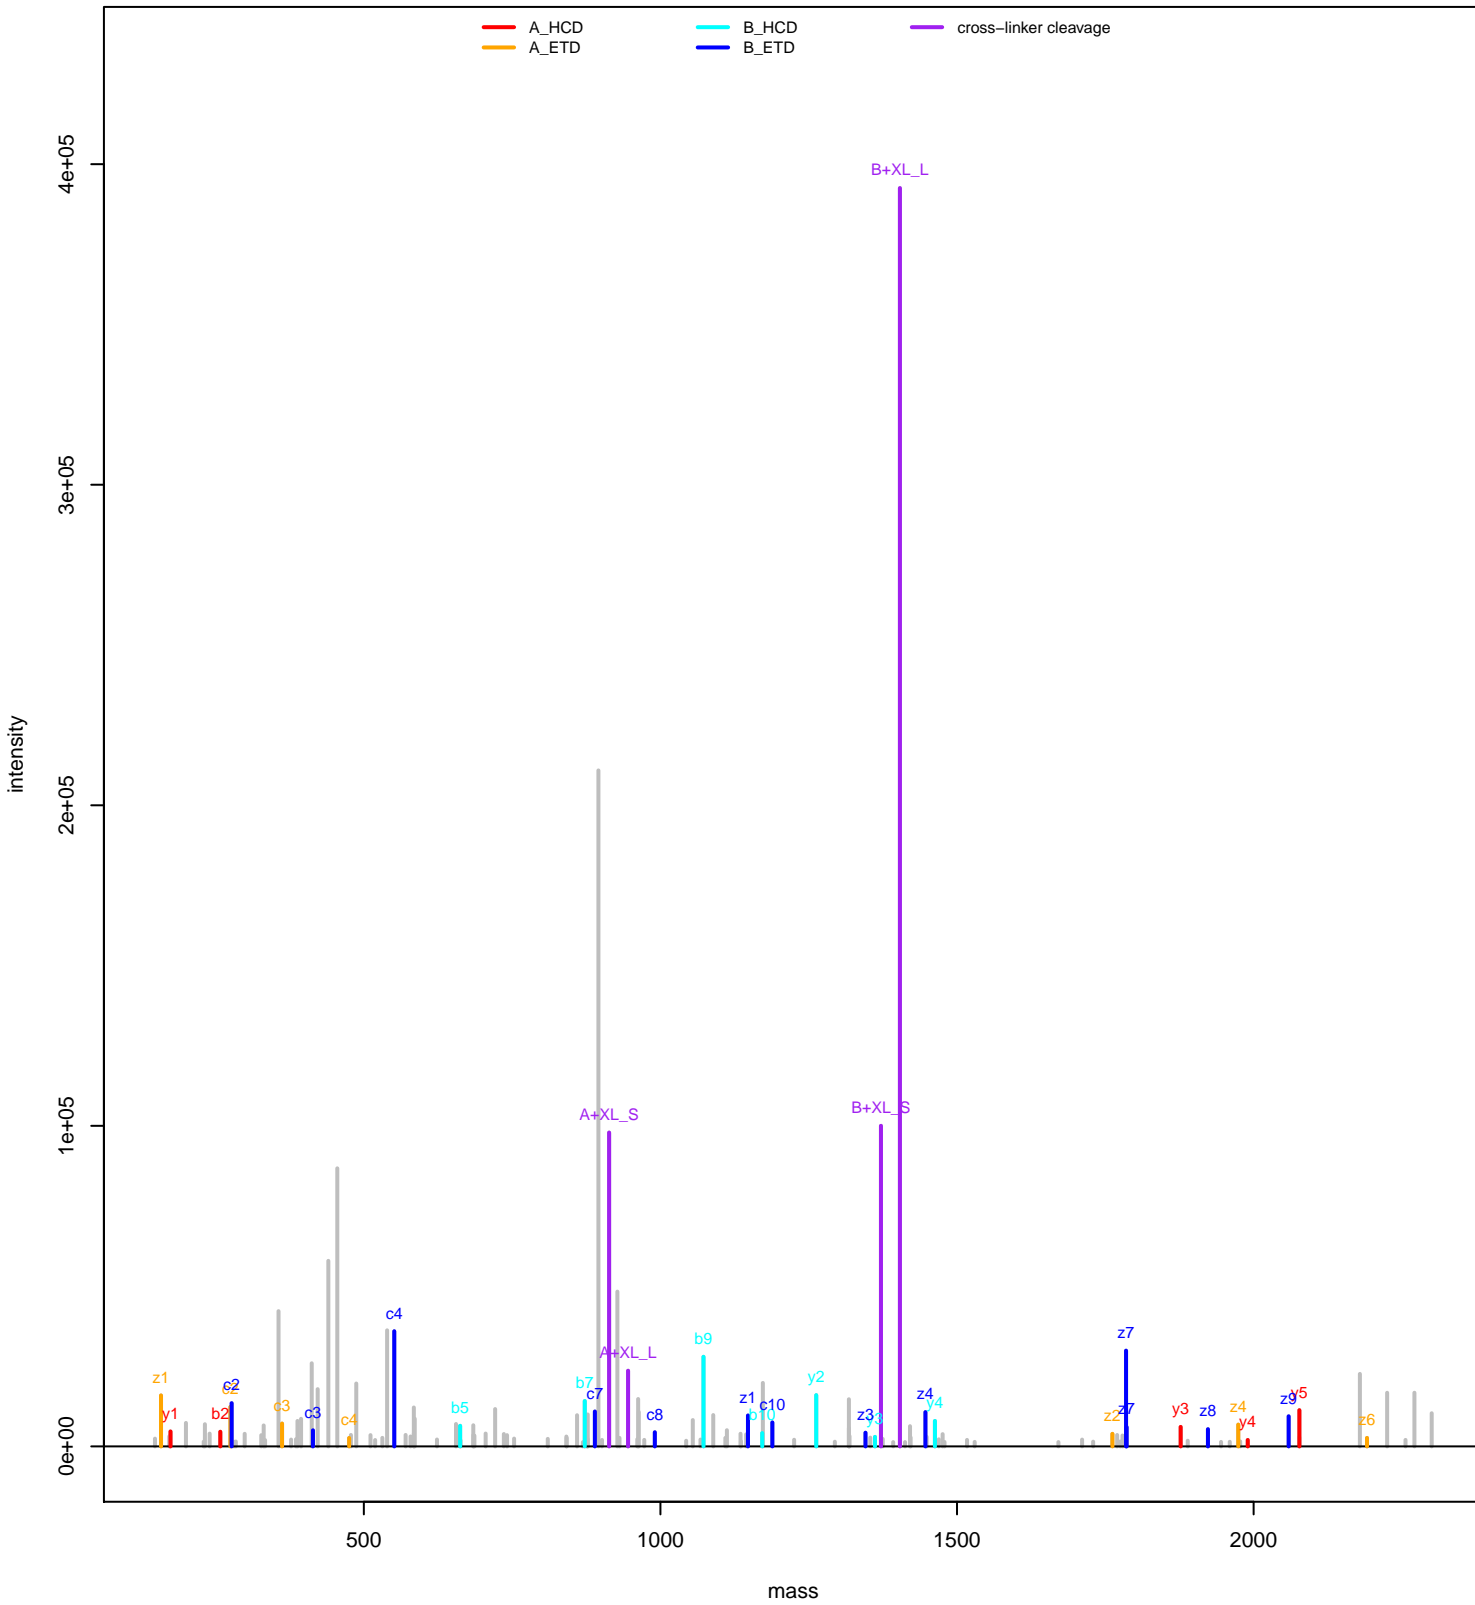

EESIVKR+XL\_S

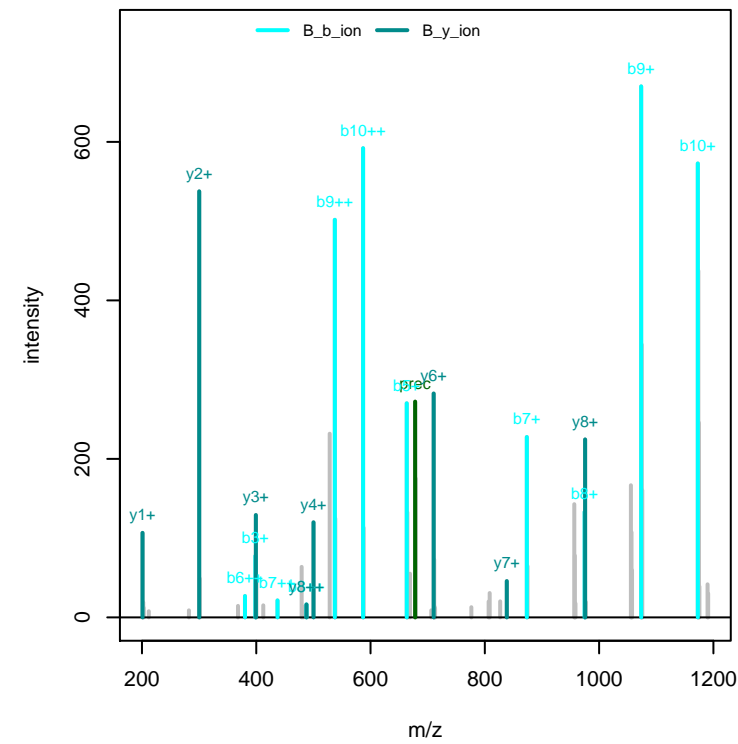

EESIVKR+XL\_L

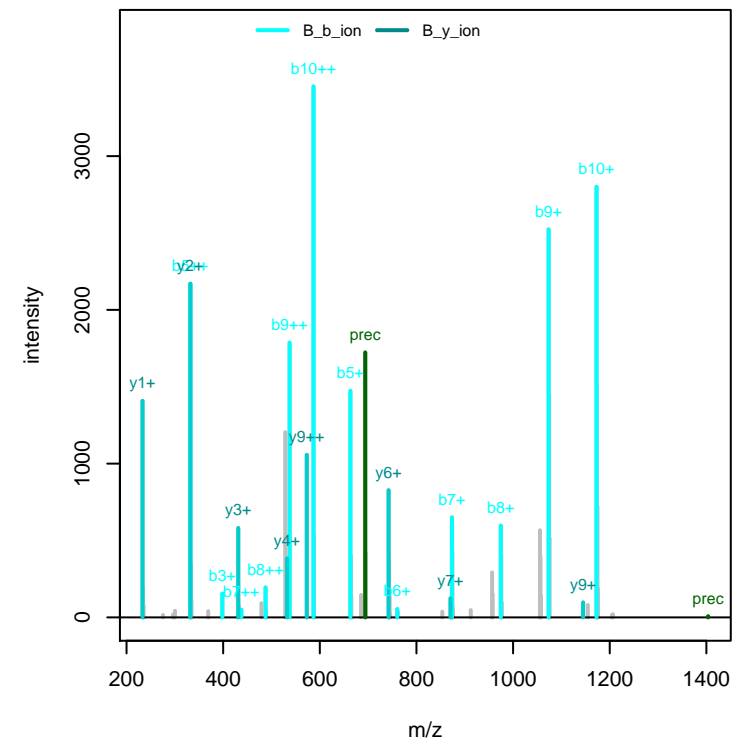

IFHHQPLTVVK+XL\_S

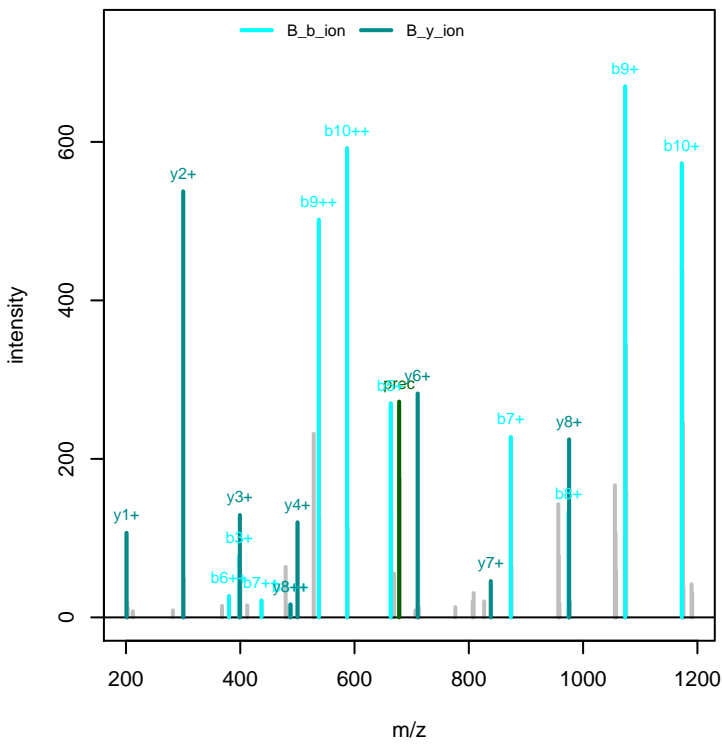

IFHHQPLTVVK+XL\_L



TGLKVEER  
GAATLYKMR

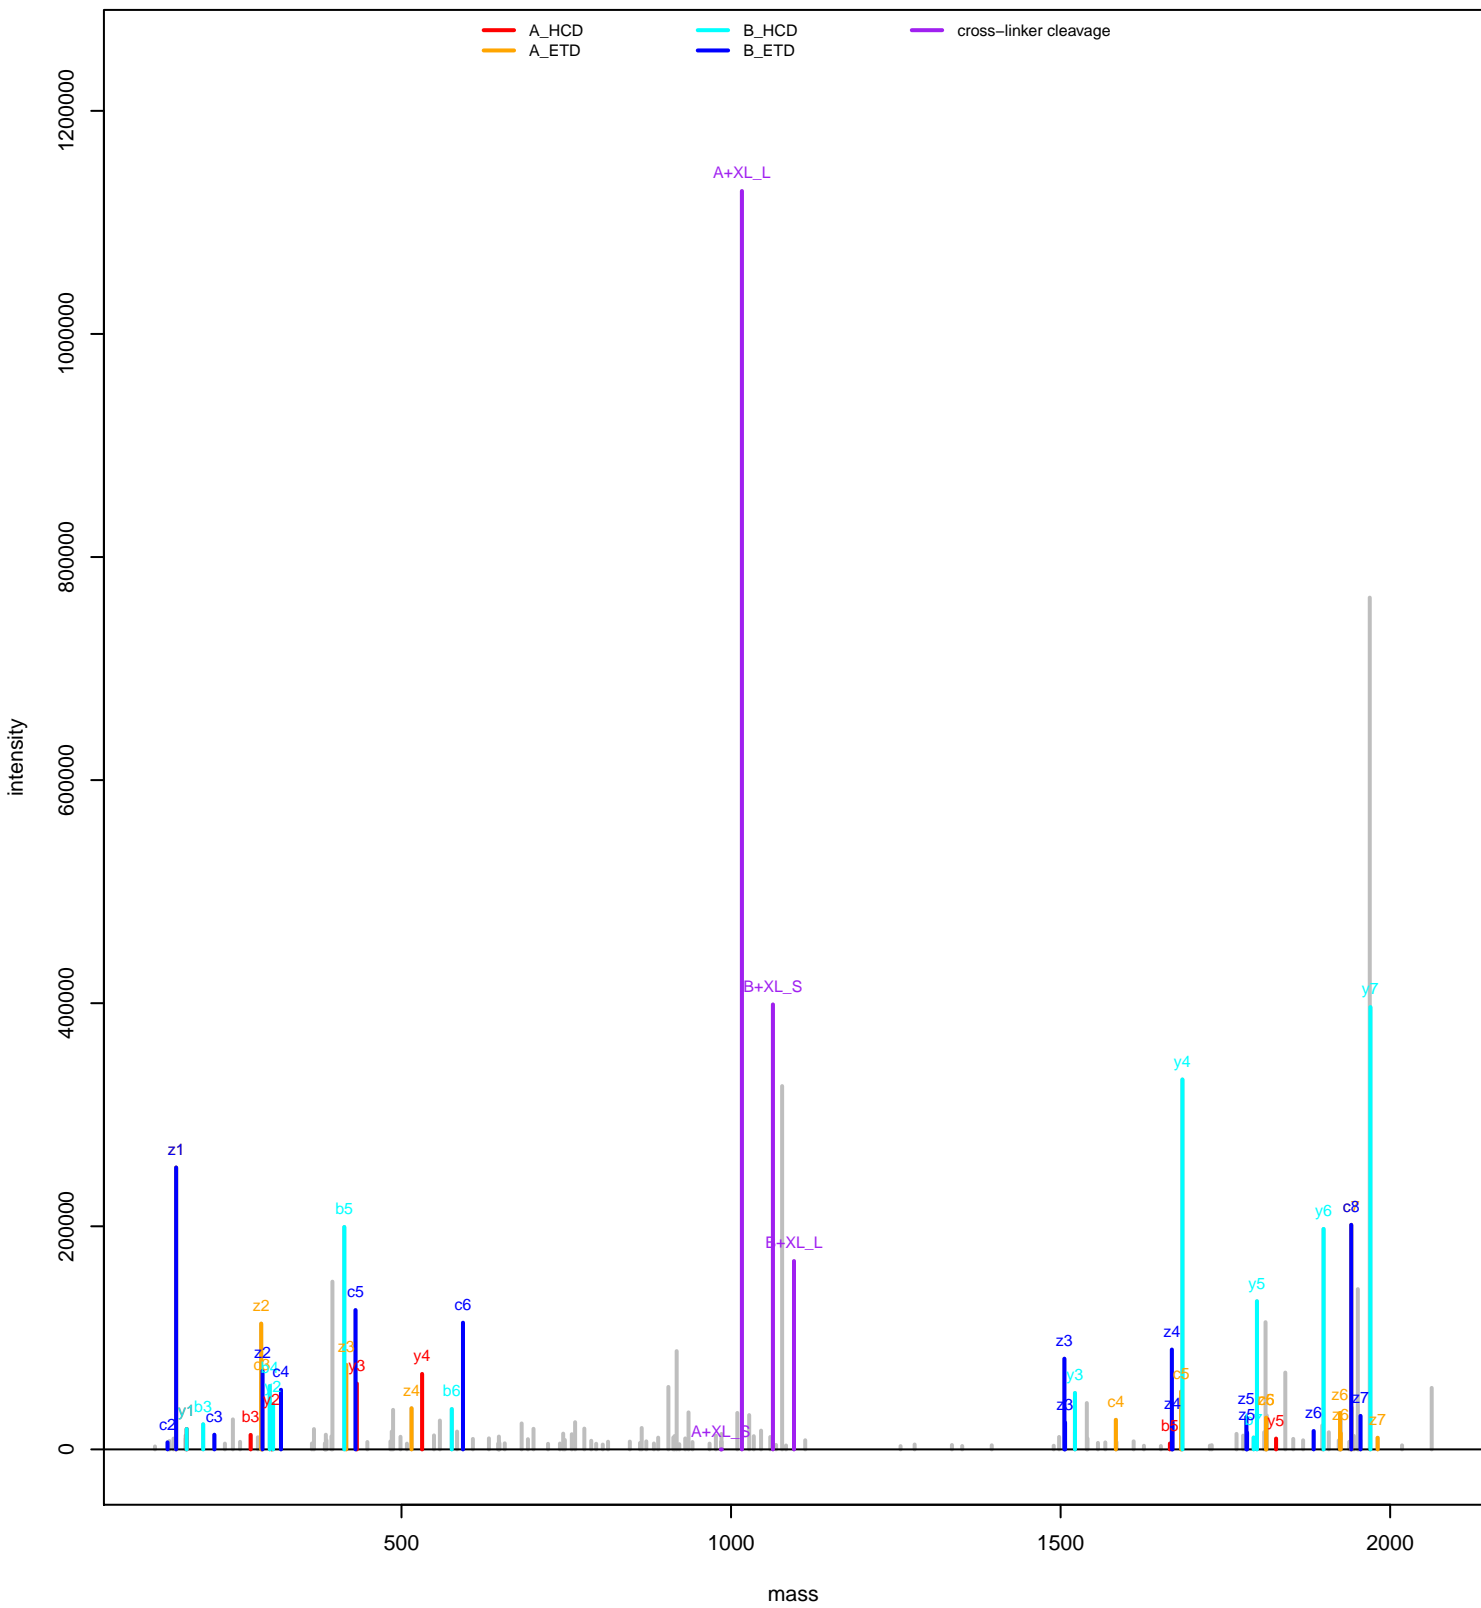

TGLKVEER+XL\_S

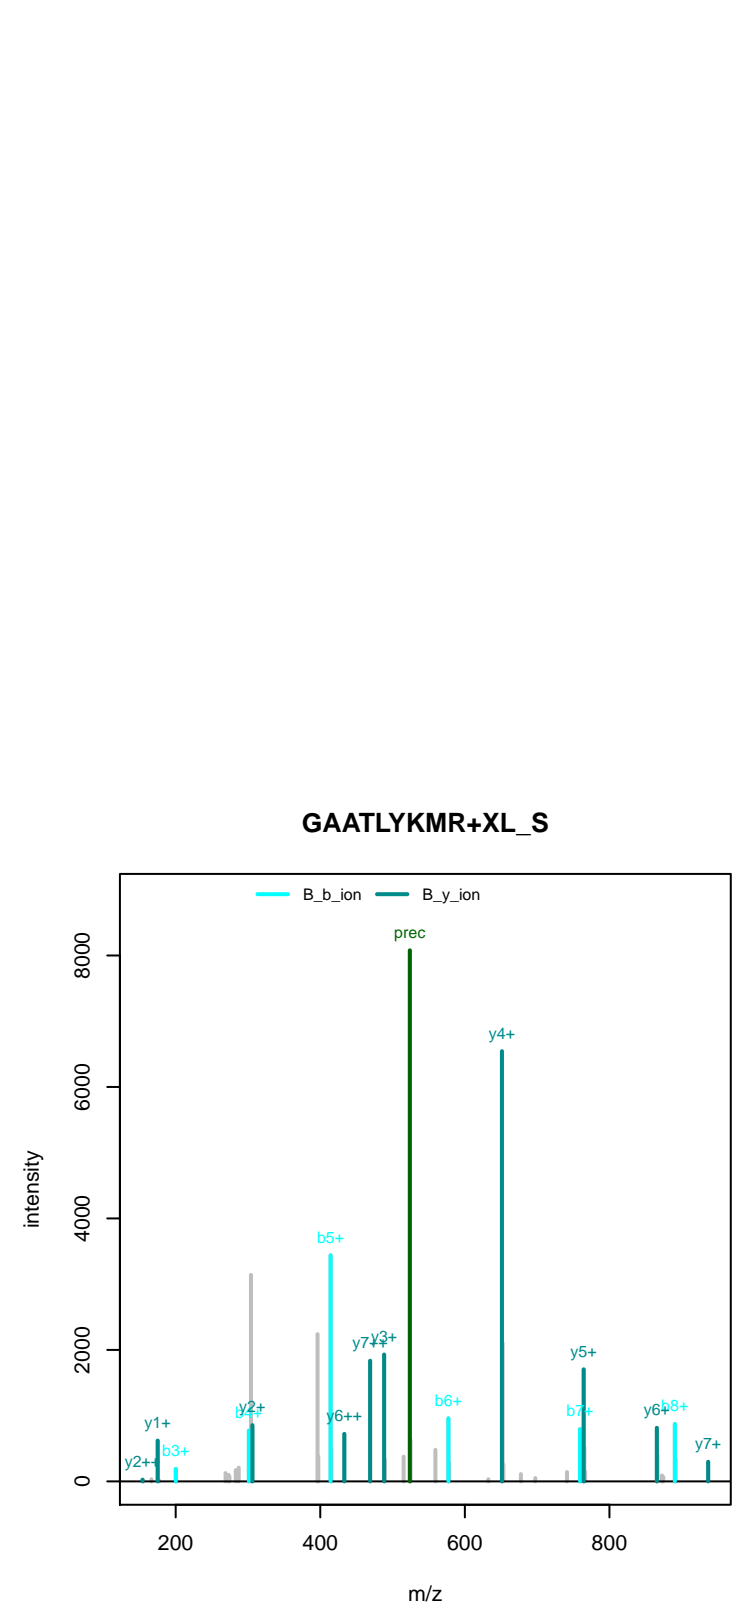

TGLKVEER+XL\_L

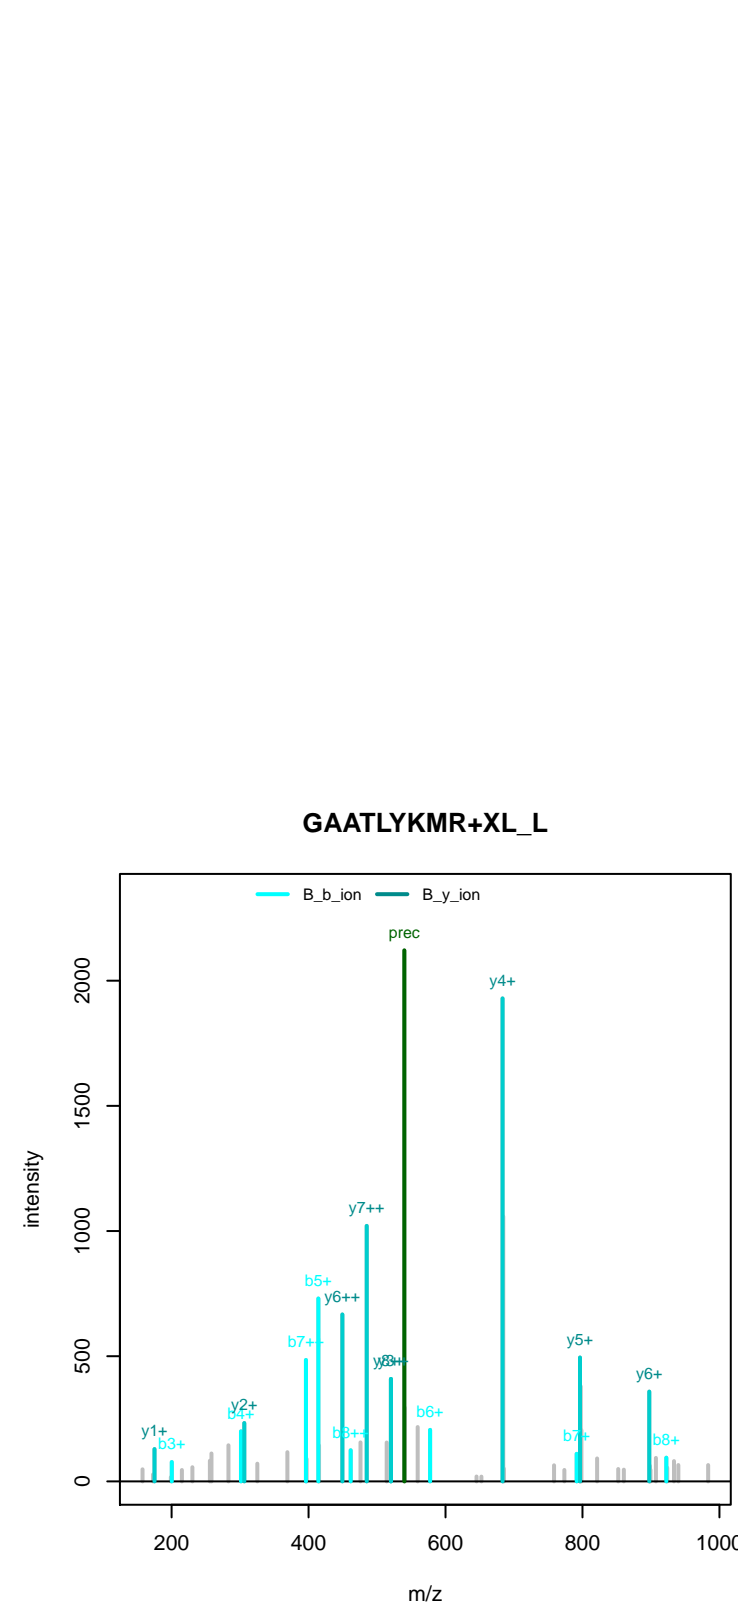

GAATLYKMR+XL\_S

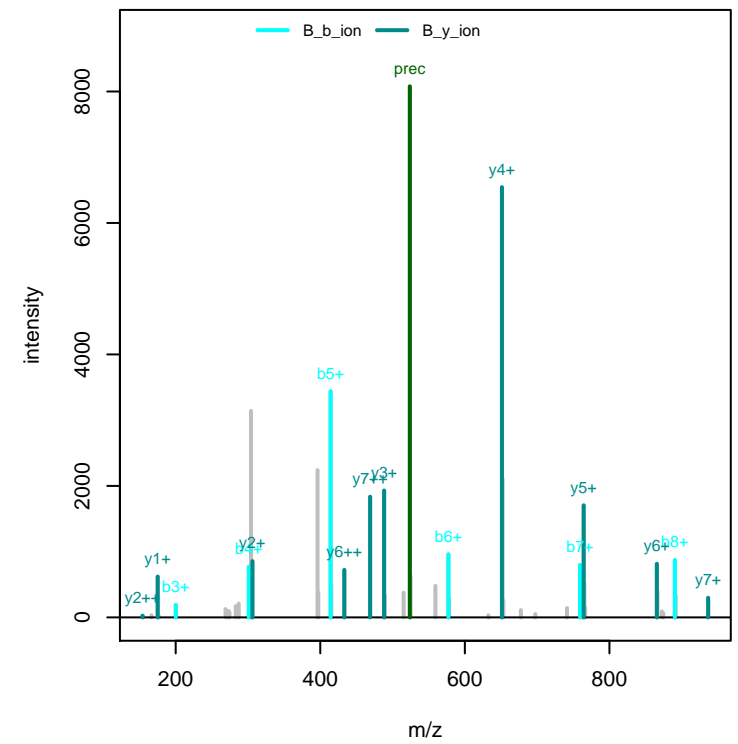

GAATLYKMR+XL\_L

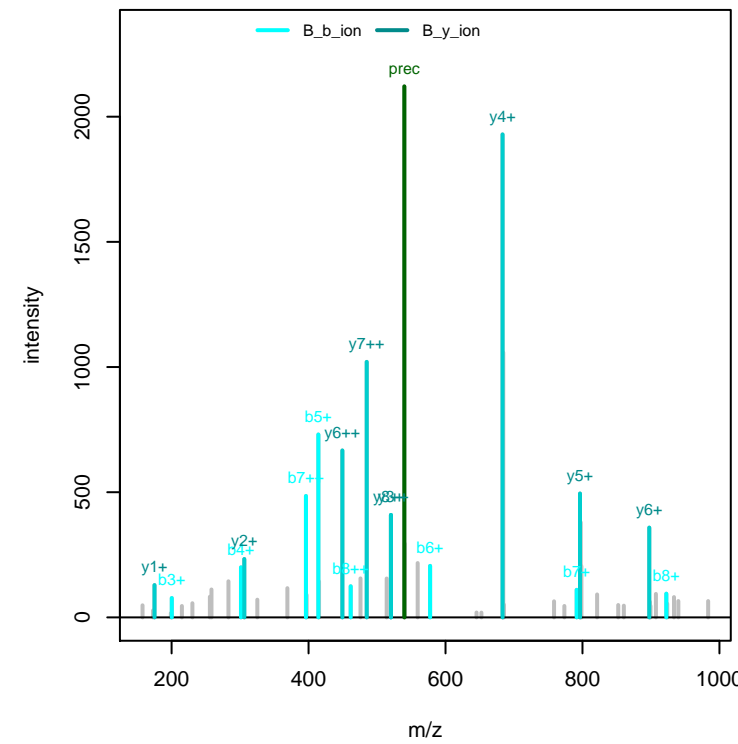



DYSVKLIER  
VVTFRPGQKLK

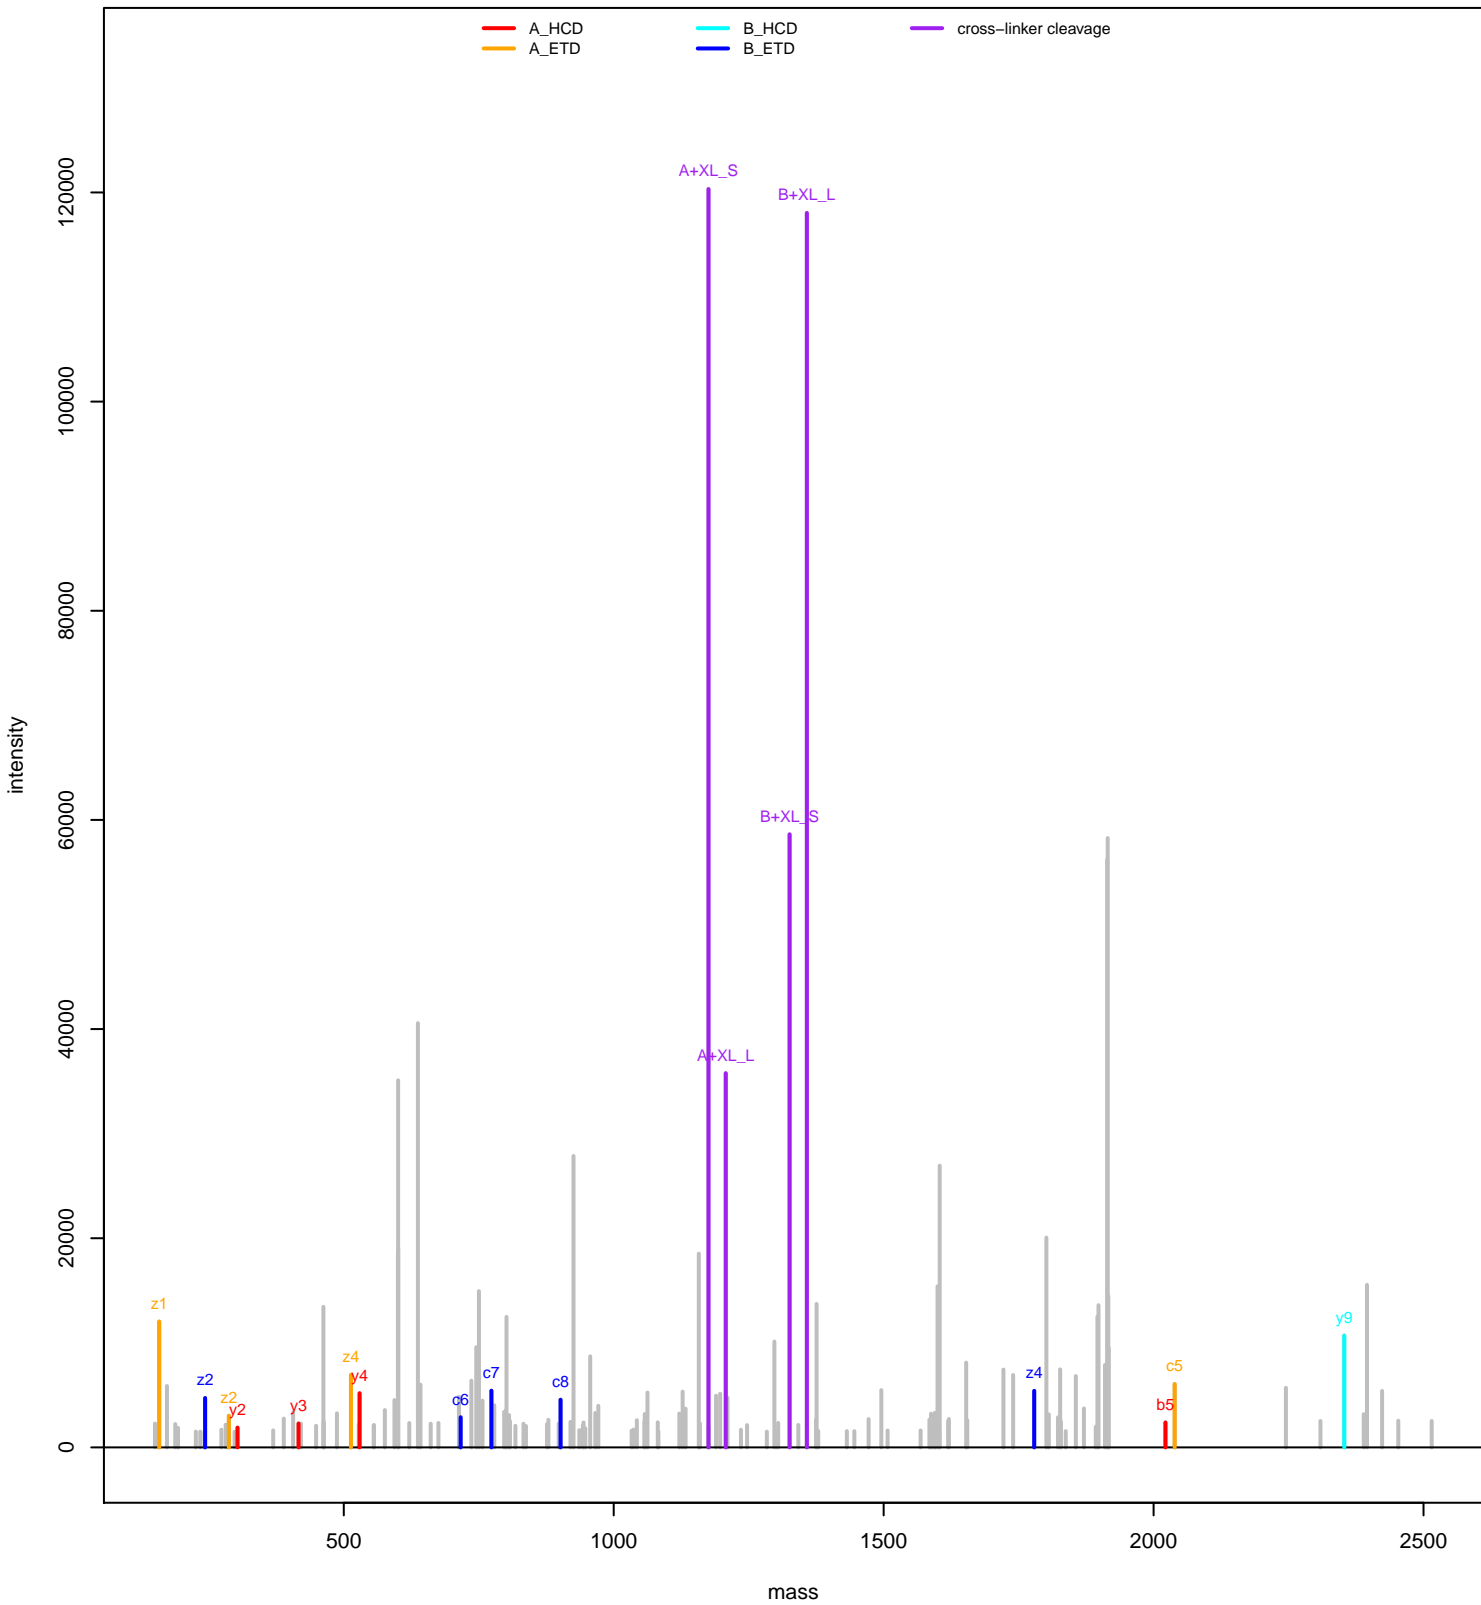

DYSVKLIER+XL\_S

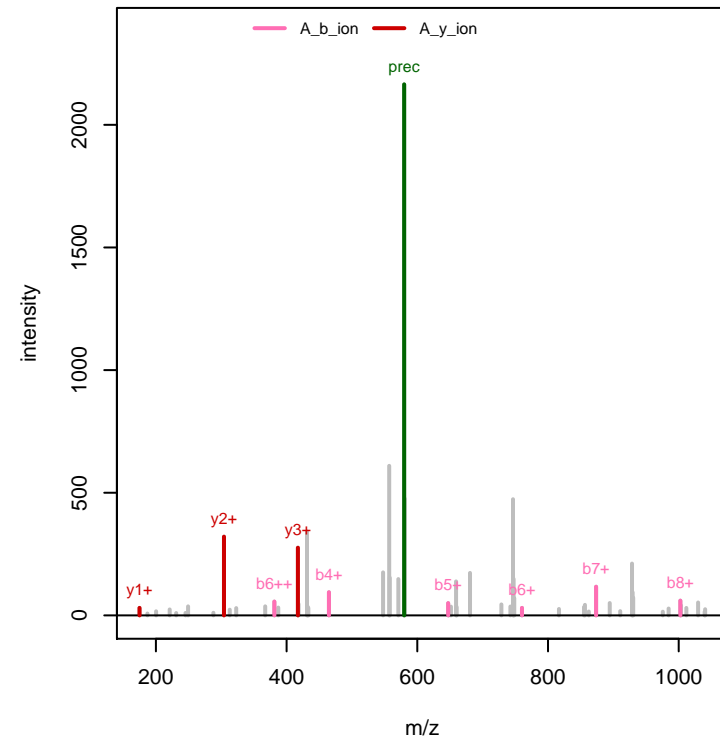

DYSVKLIER+XL\_L

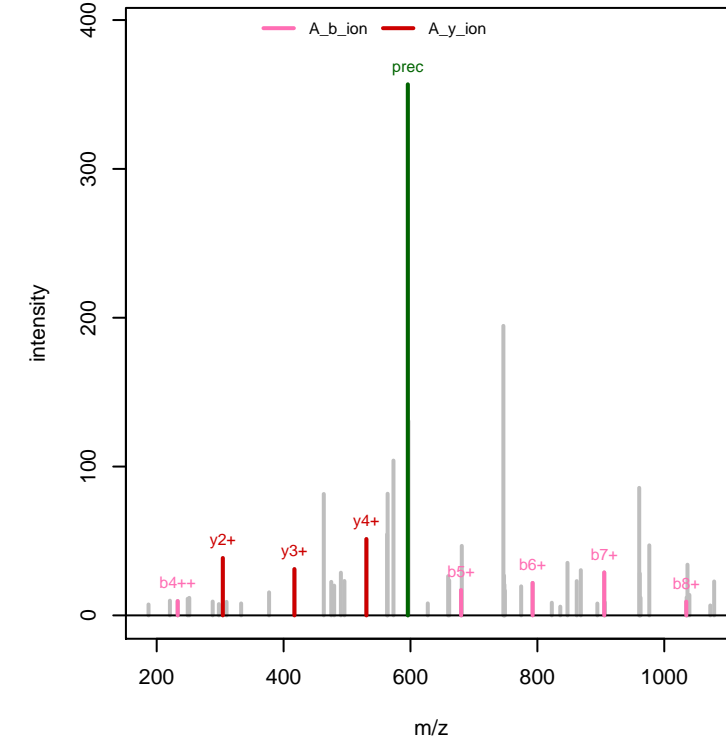

VVTFRPGQKLK+XL\_S

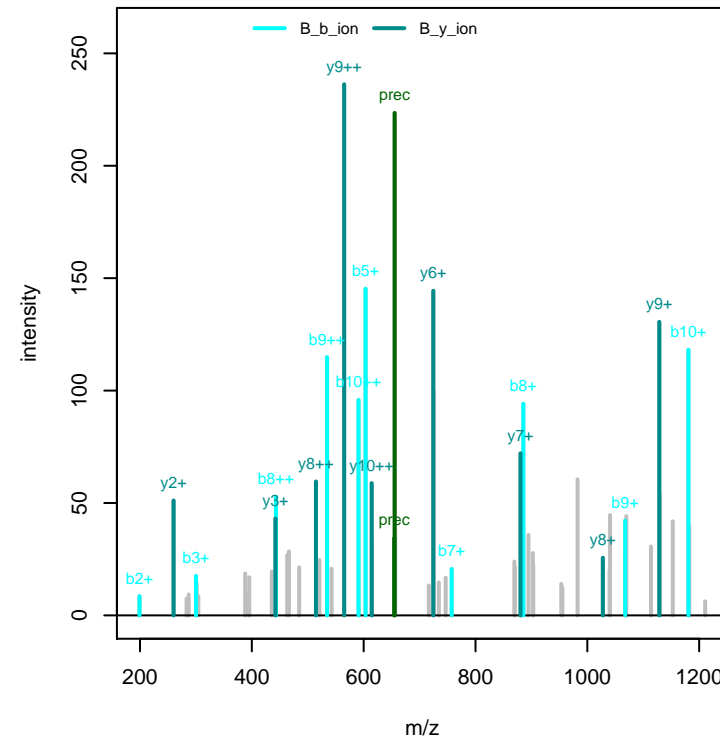

VVTFRPGQKLK+XL\_L

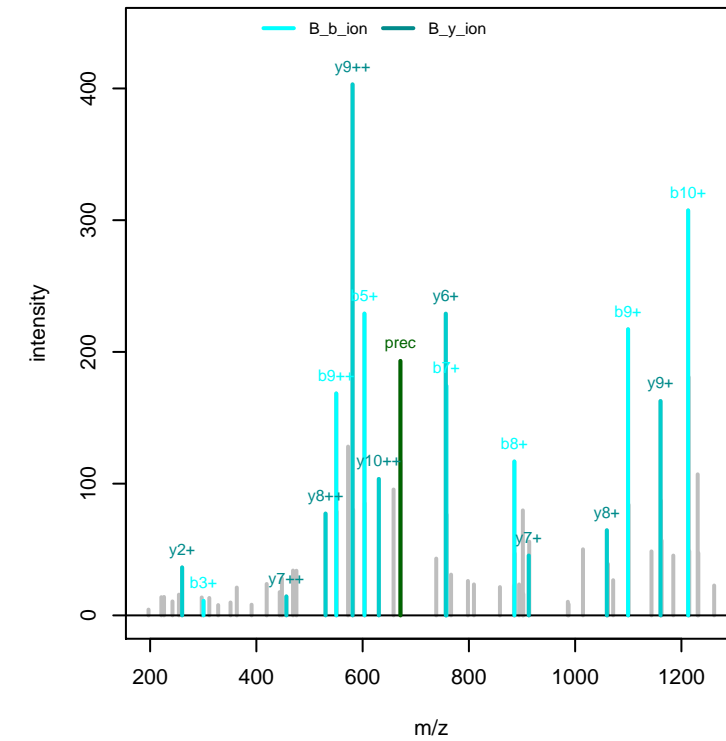

MTATIGGK  
CHPFFTGKQR

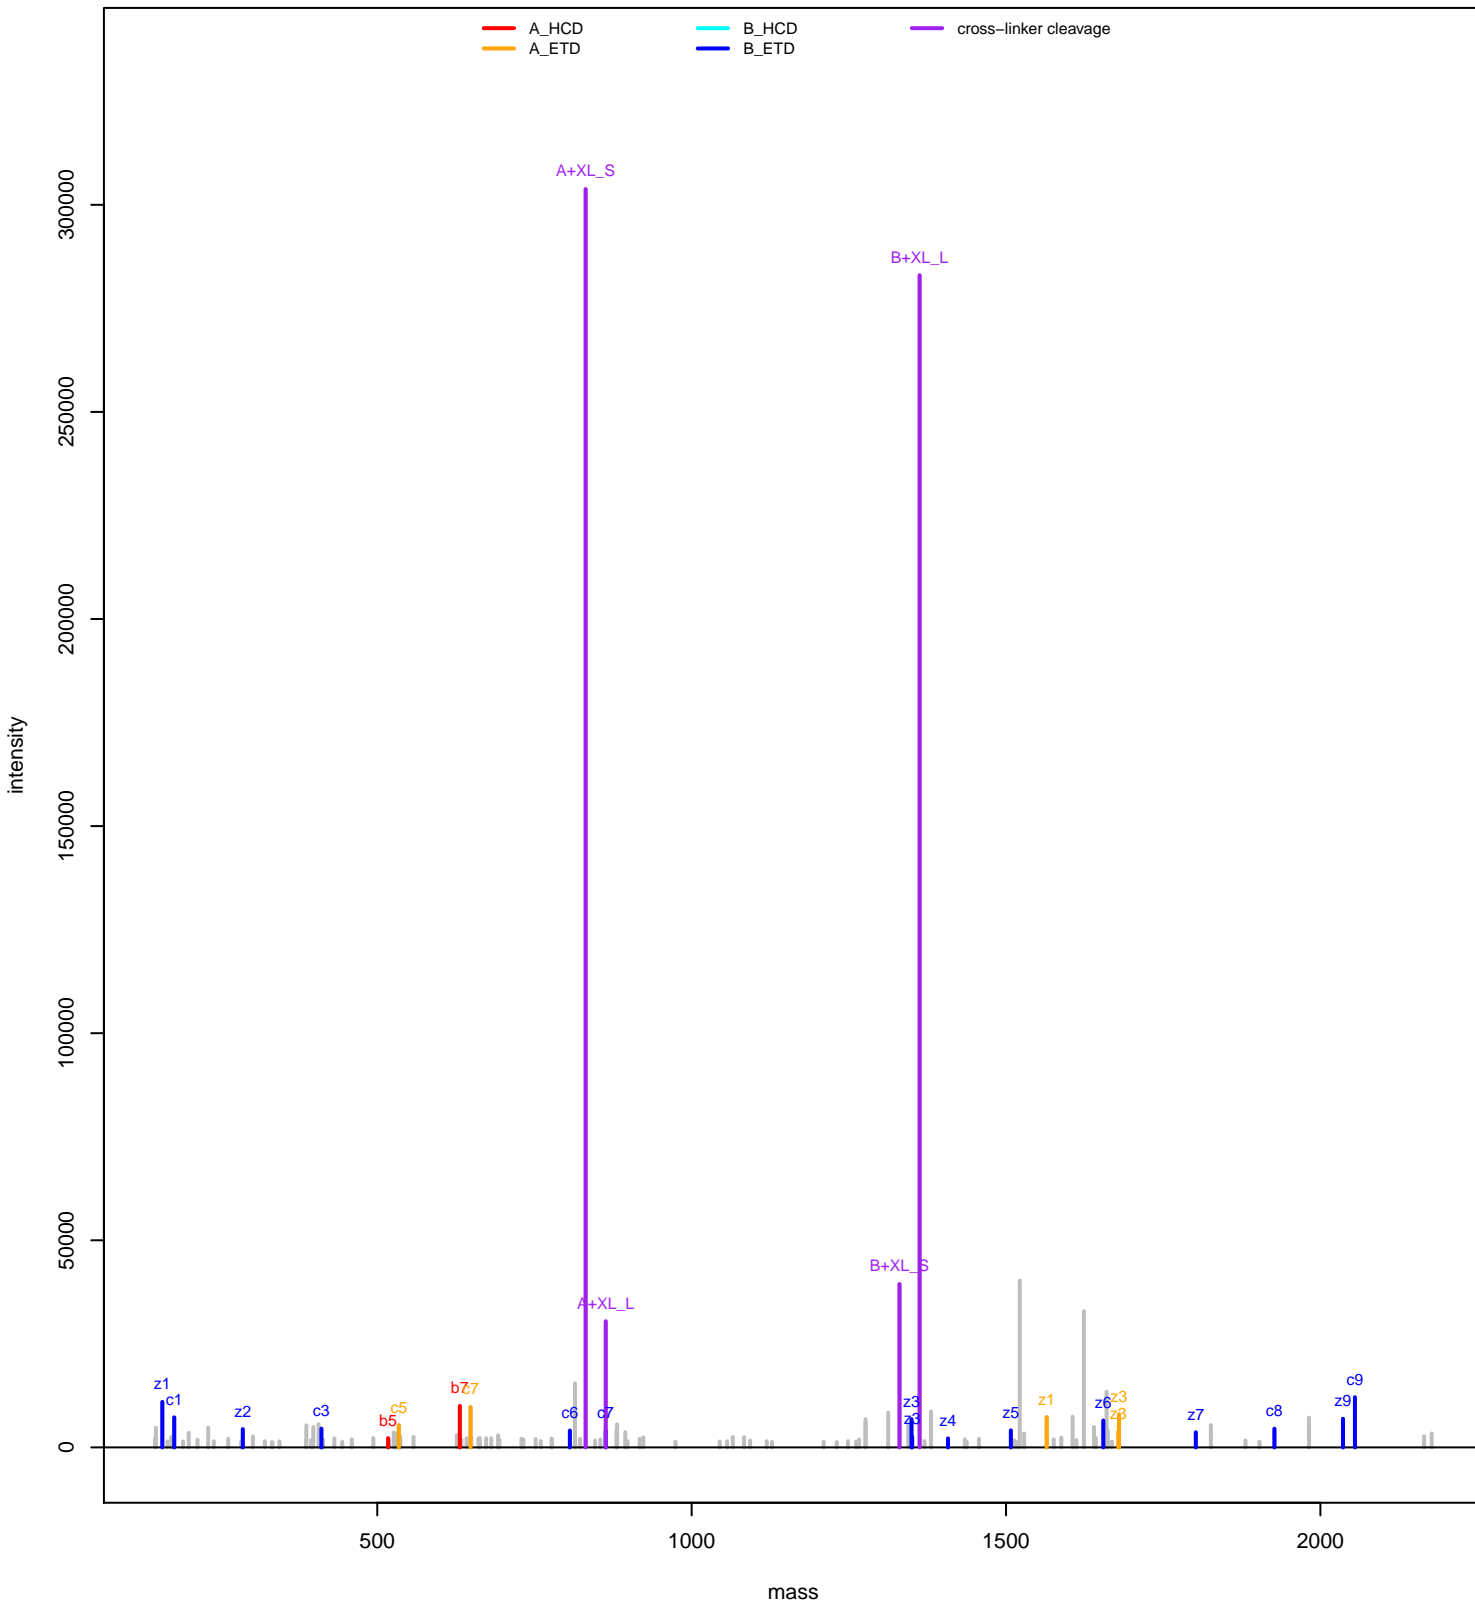

MTATIGGK+XL\_S

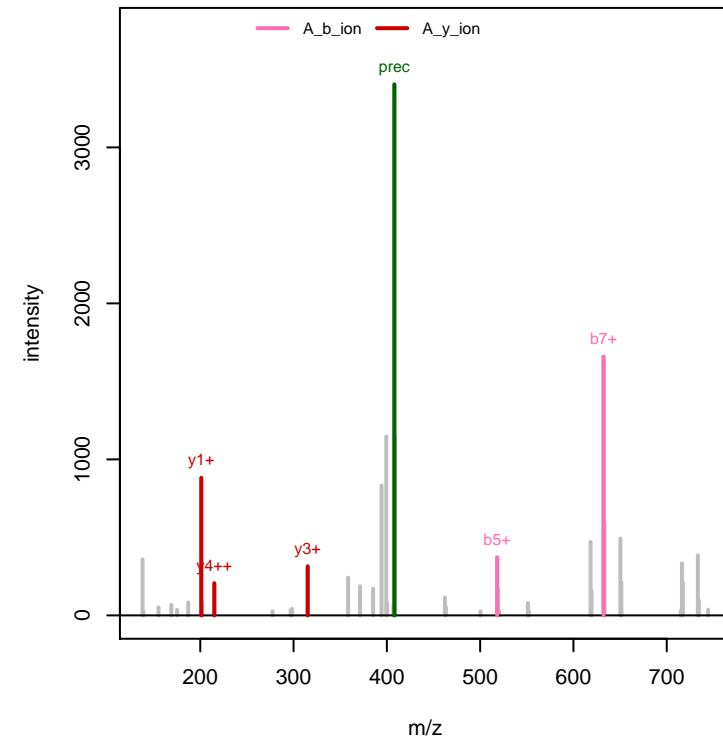

MTATIGGK+XL\_L

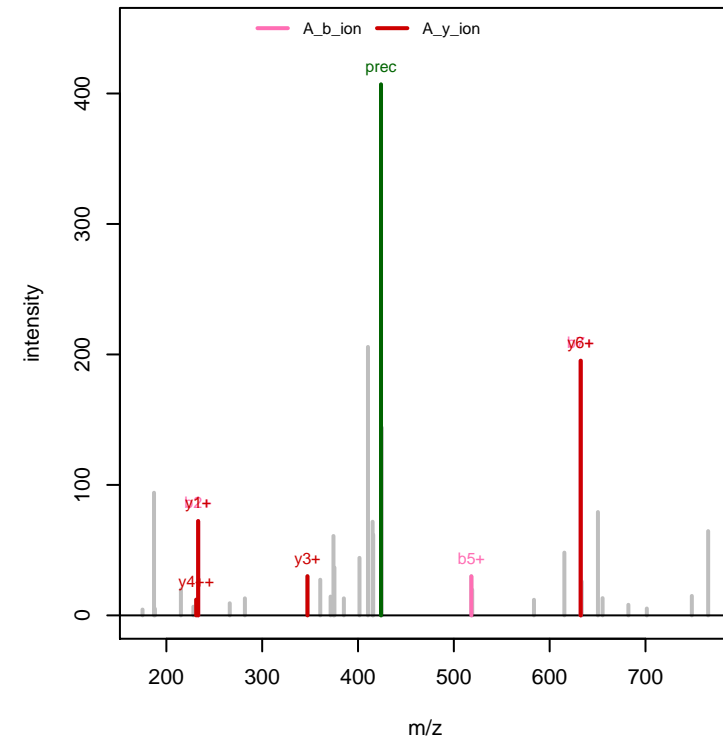

CHPFFTGKQR+XL\_S

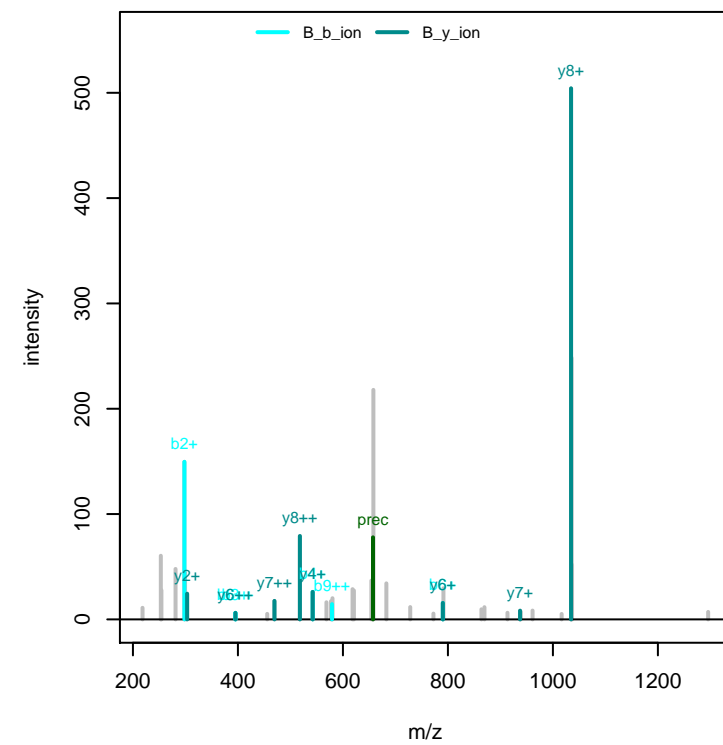

CHPFFTGKQR+XL\_L

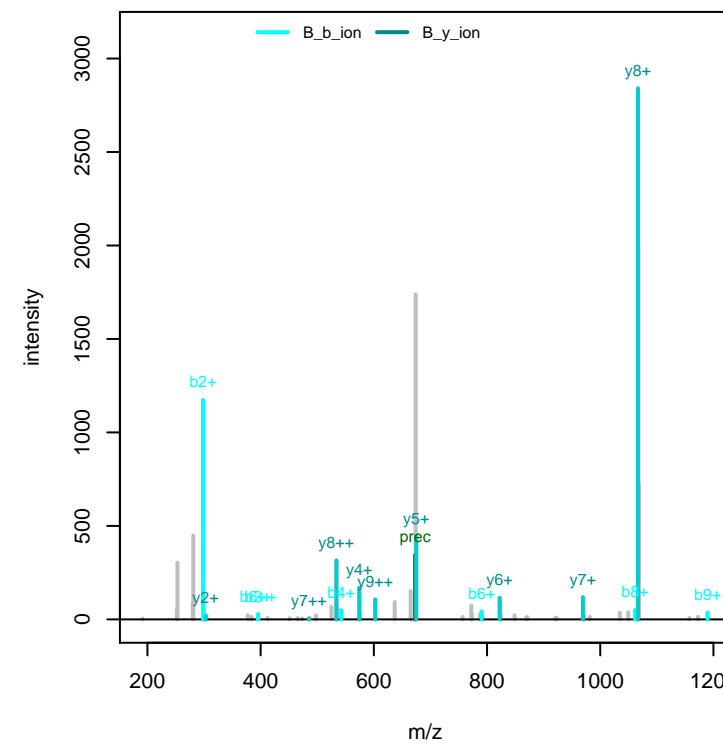

KACEEVGFVSR  
IIDGKTIAQQVR

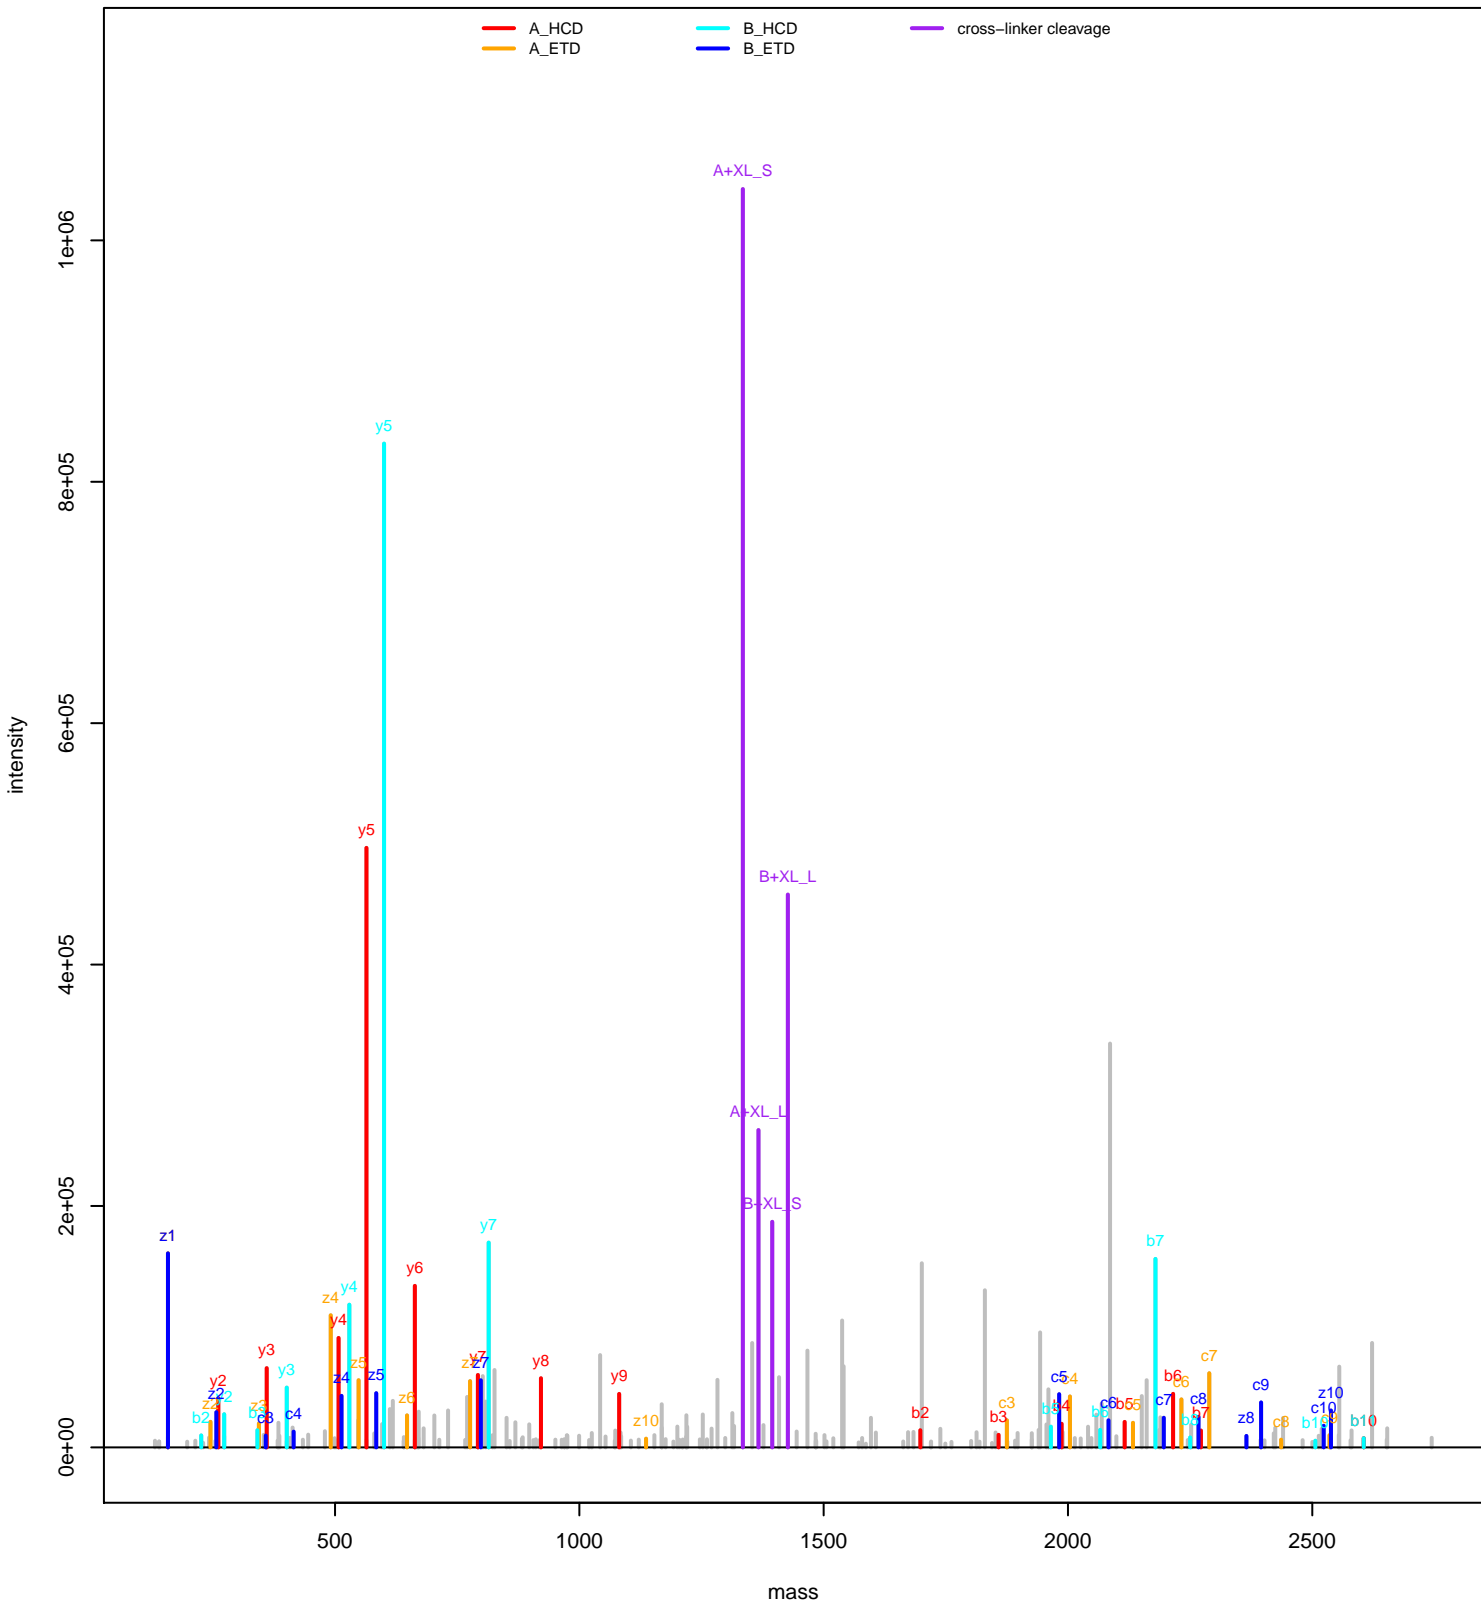

KACEEVGFVSR+XL\_S

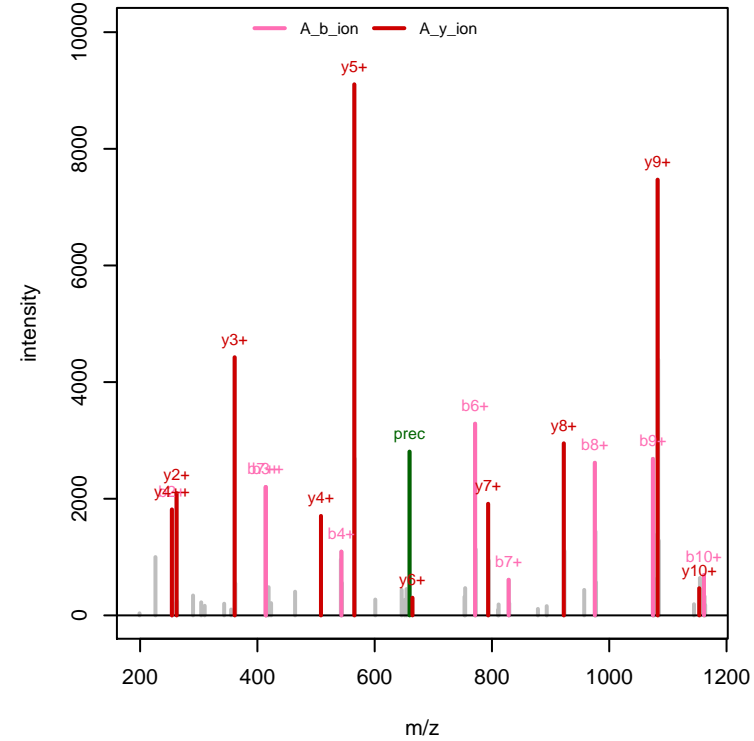

KACEEVGFVSR+XL\_L

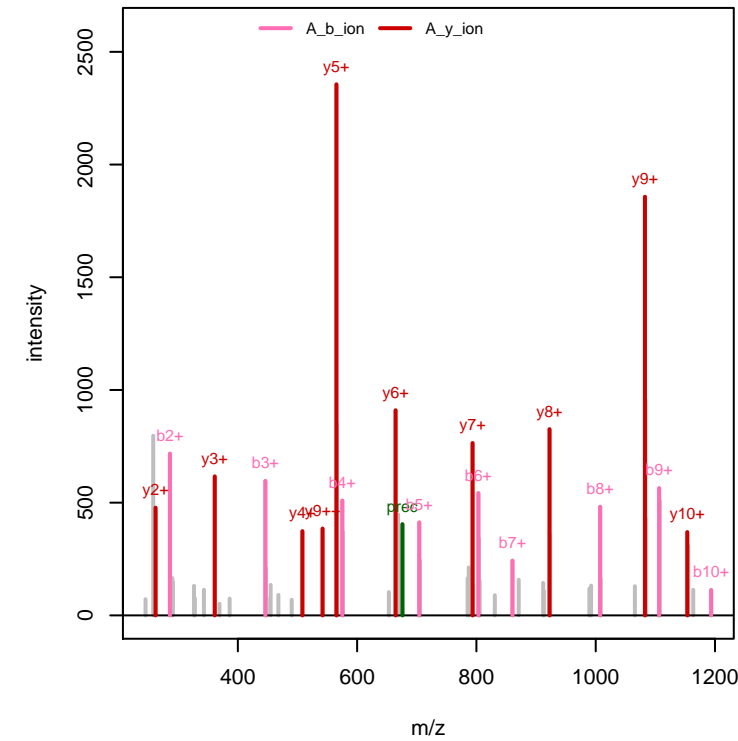

IIDGKTIAQQVR+XL\_S

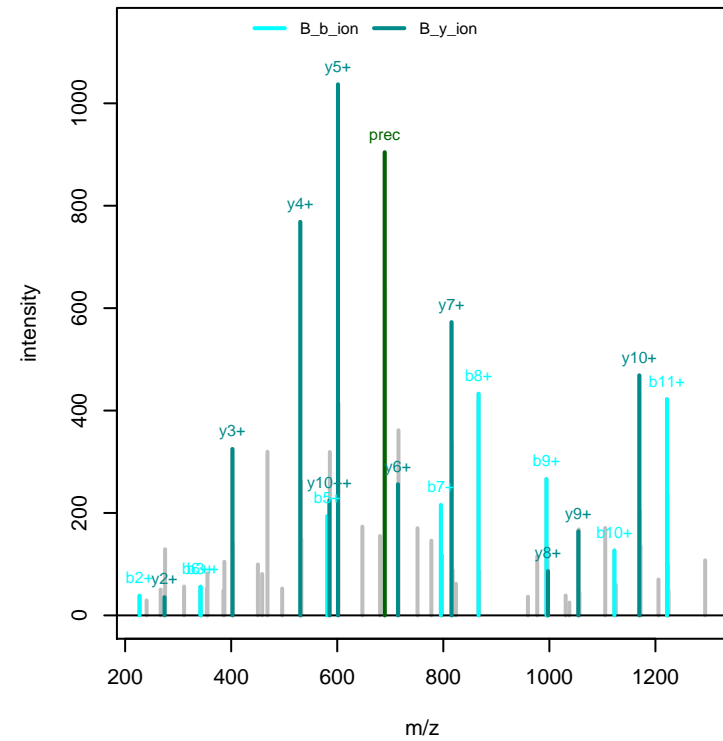

IIDGKTIAQQVR+XL\_L

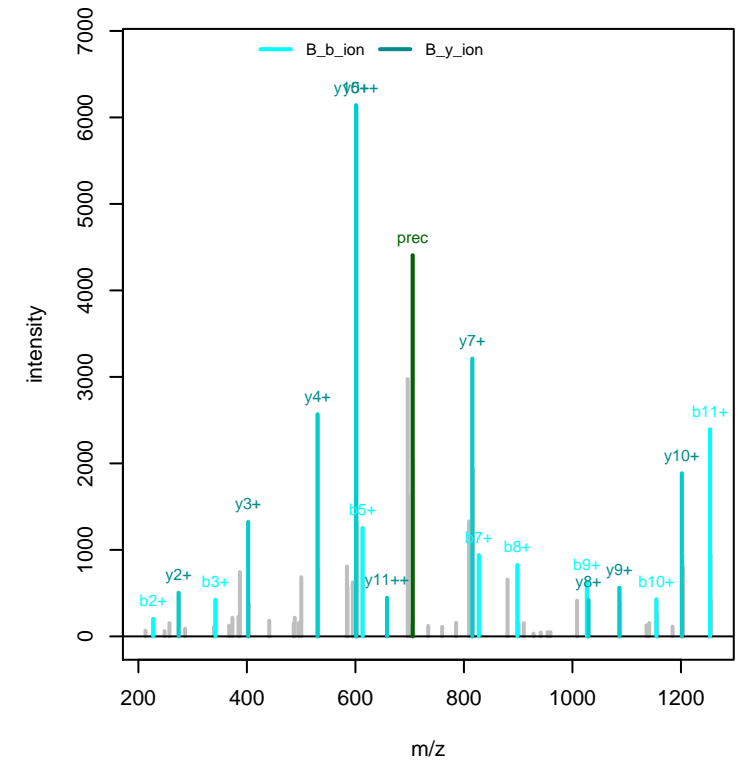

IEQMLSQDKR  
SVNIFDKTGAEVK

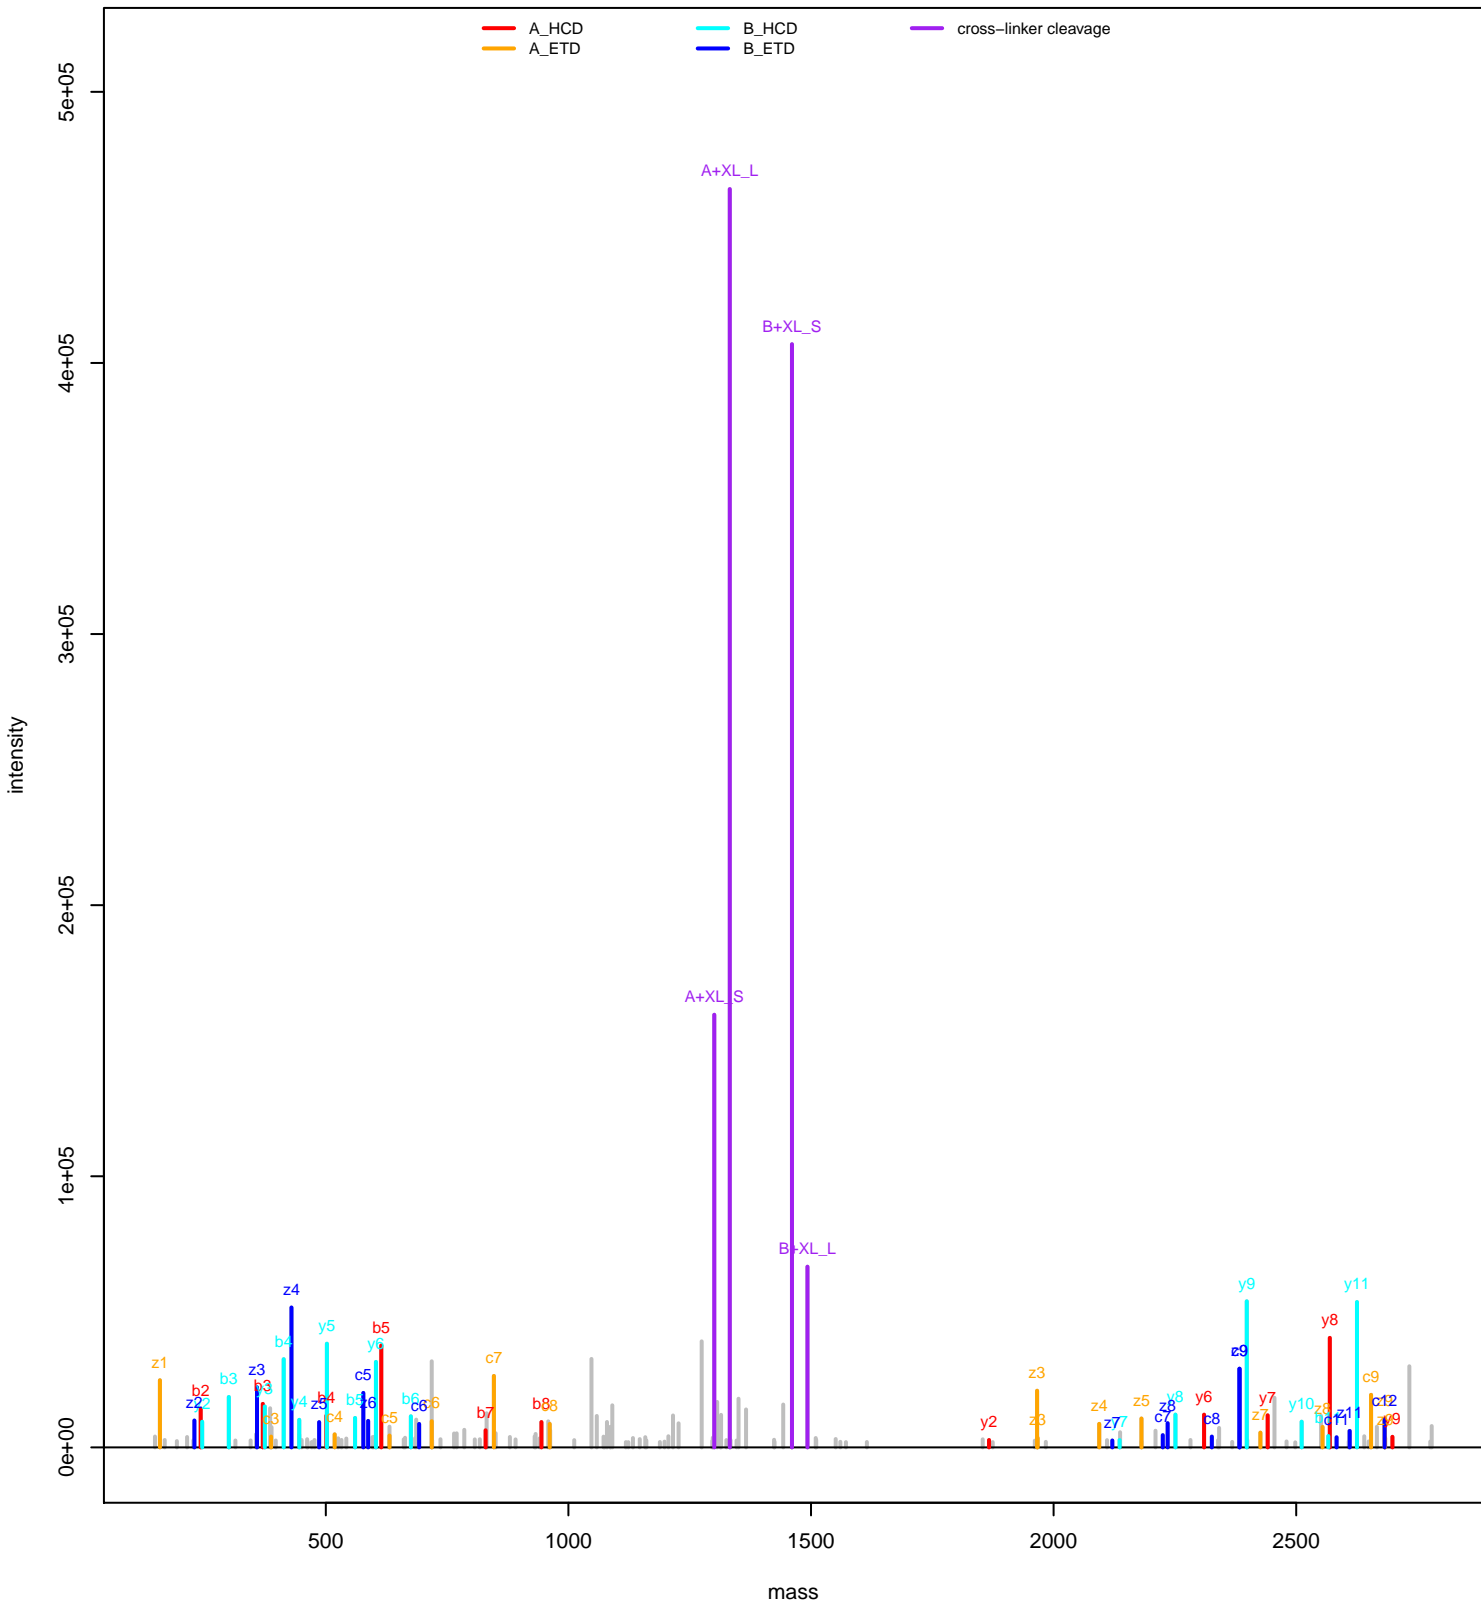

IEQMLSQDKR+XL\_S

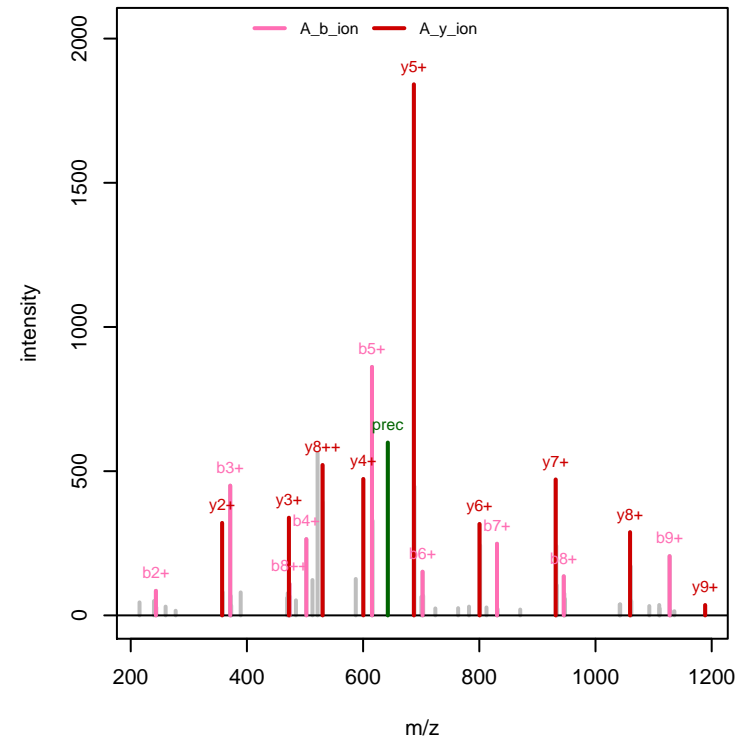

IEQMLSQDKR+XL\_L

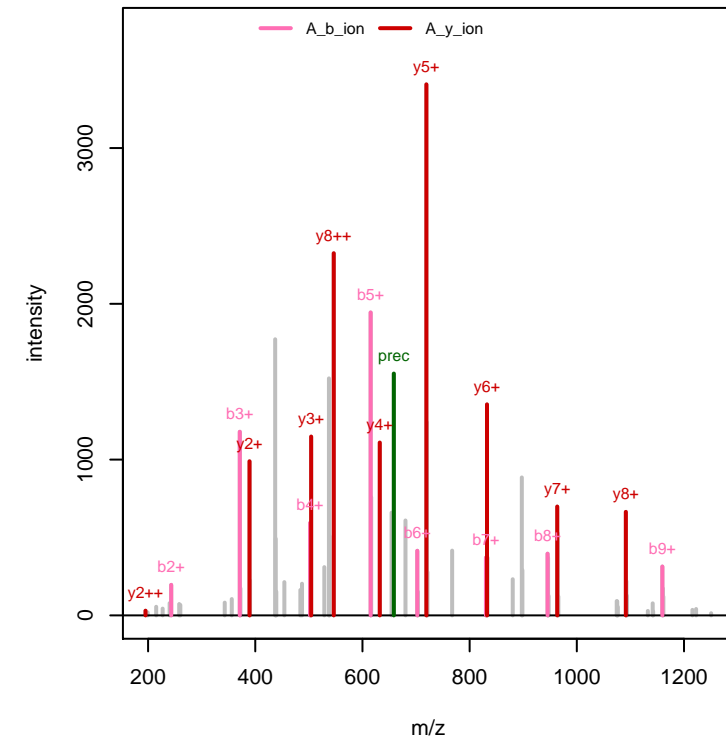

SVNIFDKTGAEVK+XL\_S

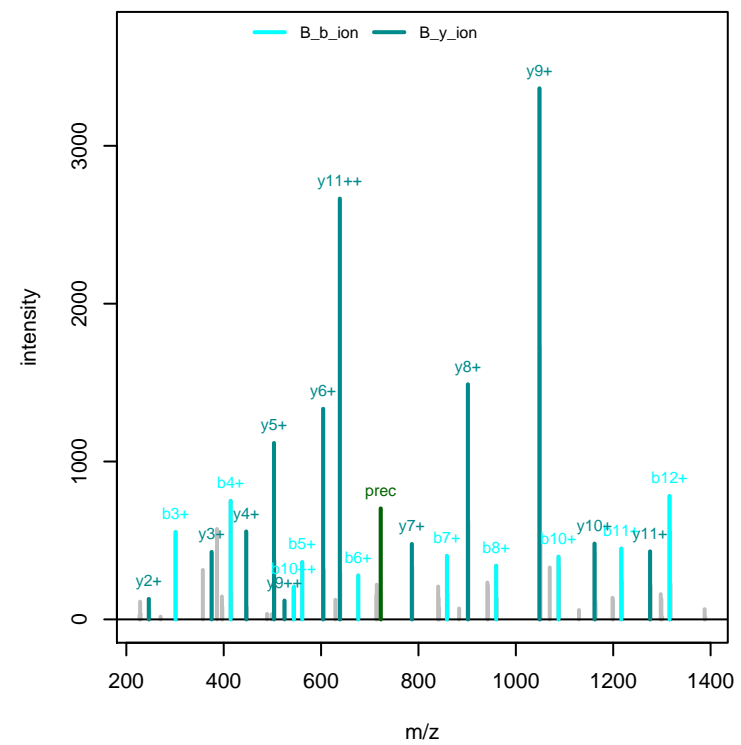

SVNIFDKTGAEVK+XL\_L

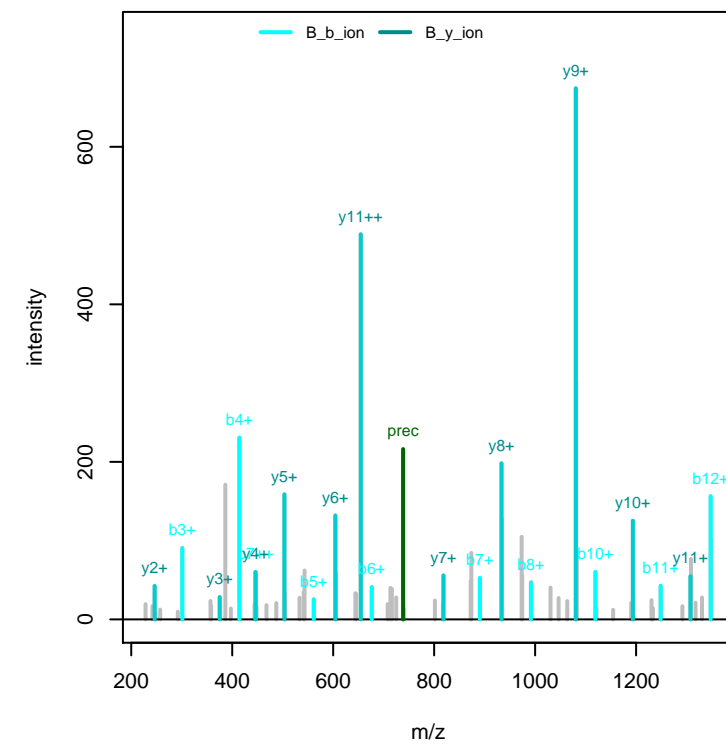

**GQVLAKPGTIKPHTK**  
**ETQKSTCTGVEMFR**

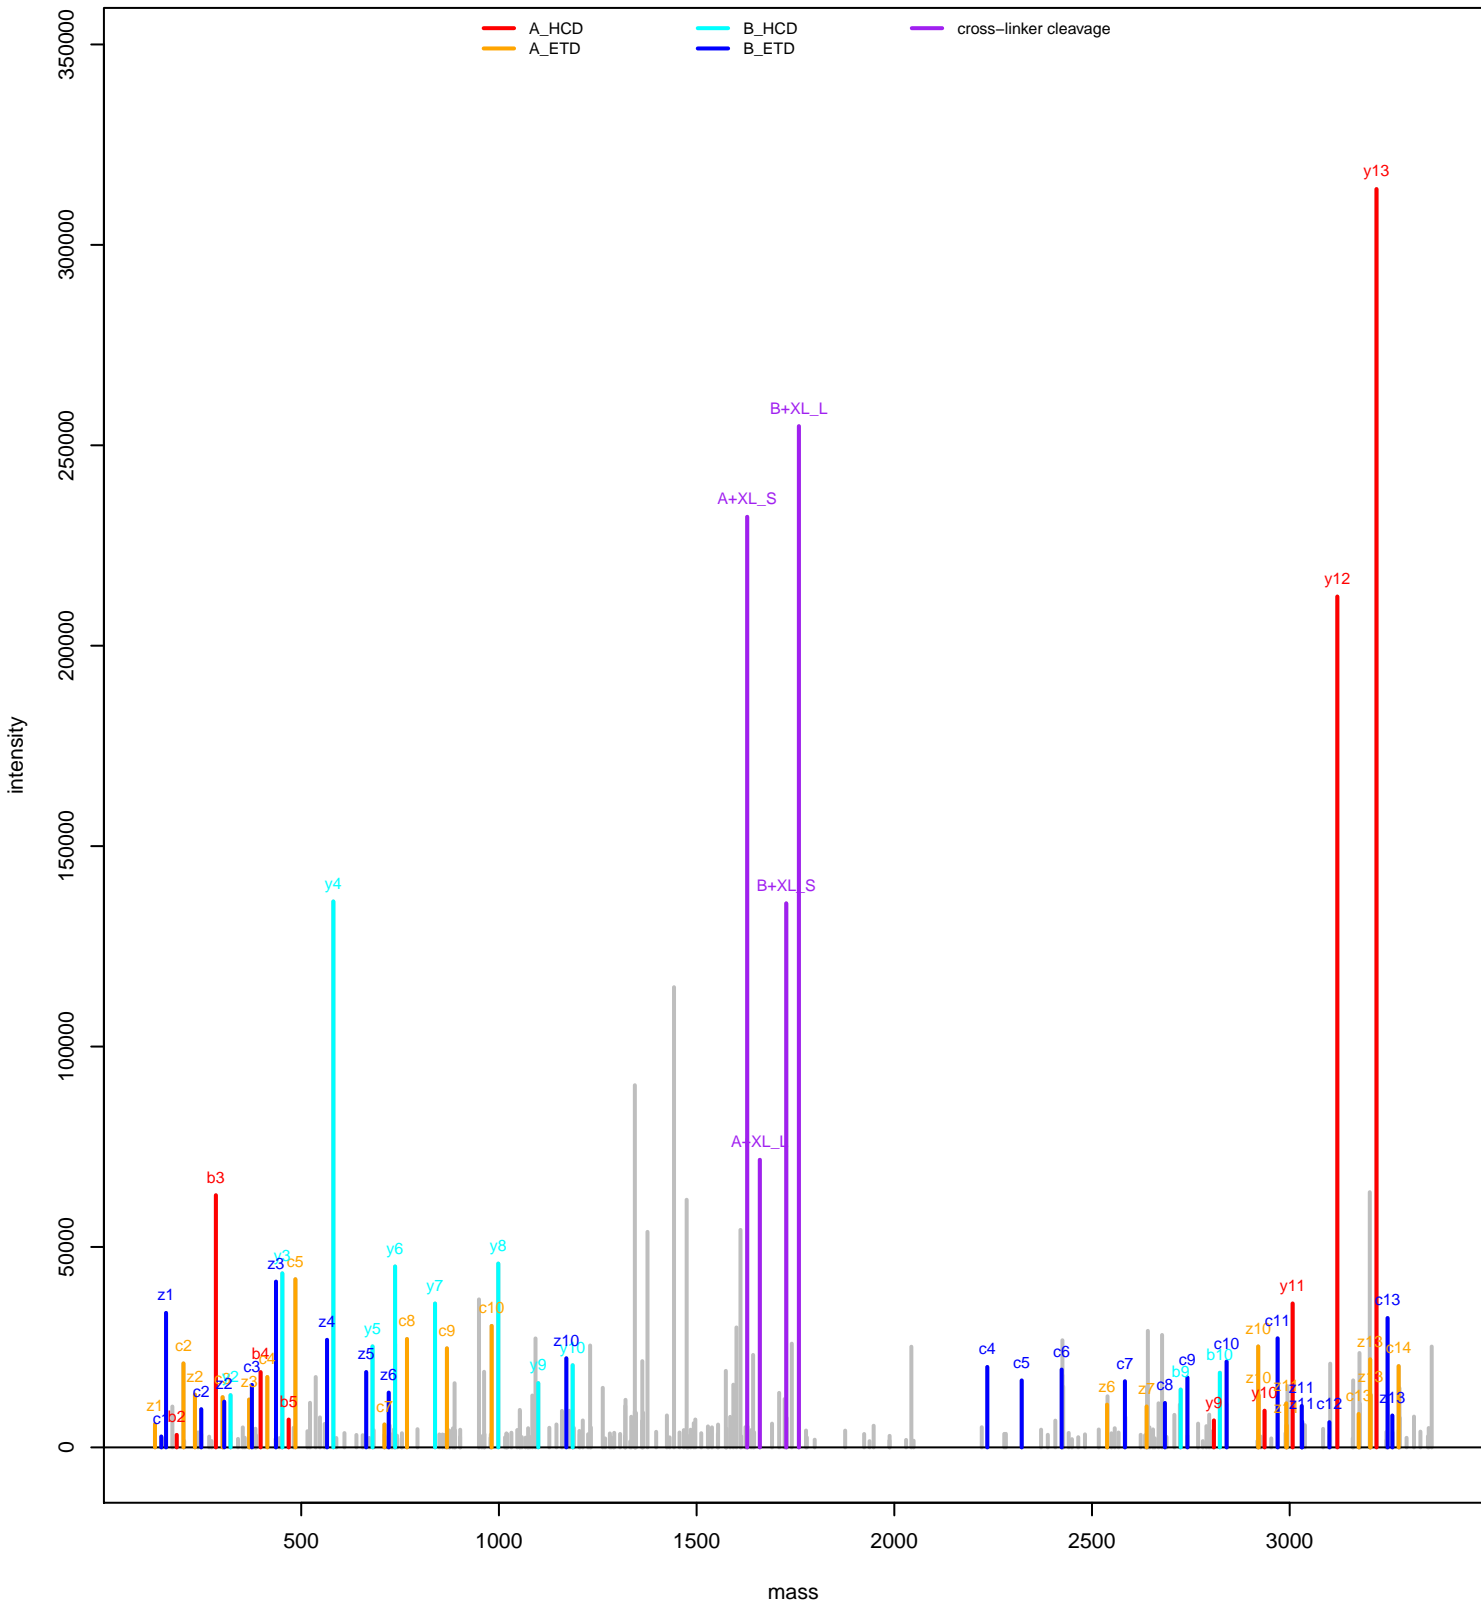

**GQVLAKPGTIKPHTK+XL\_S**

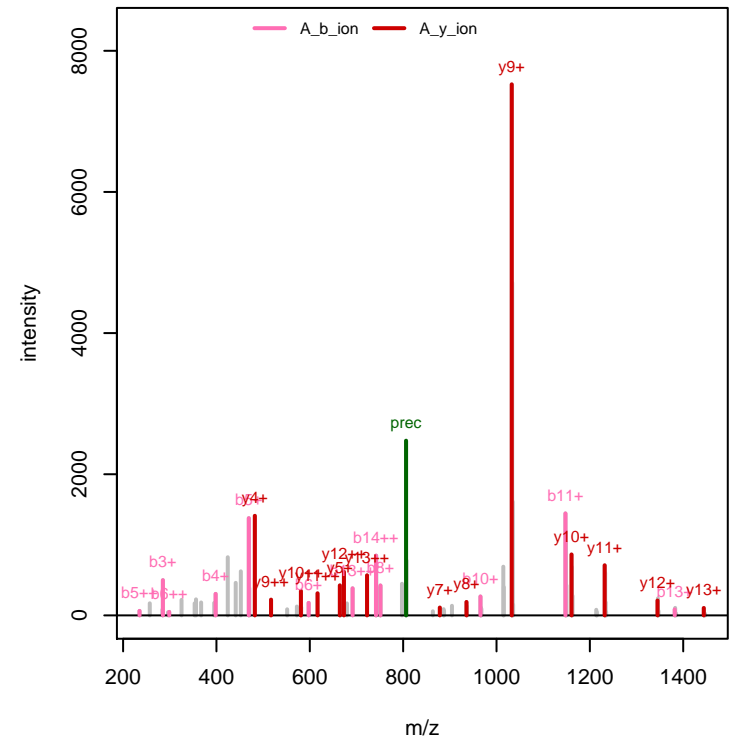

**GQVLAKPGTIKPHTK+XL\_L**

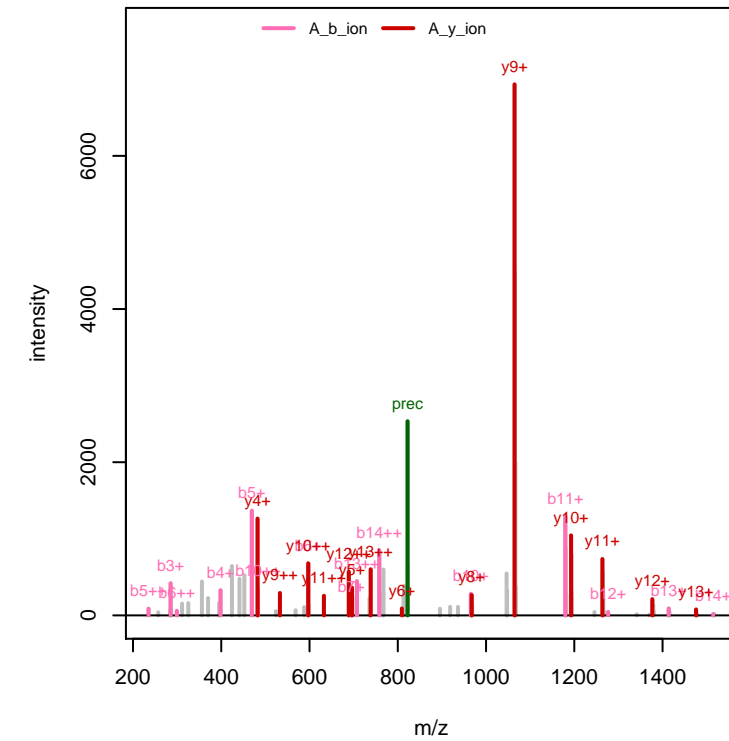

**ETQKSTCTGVEMFR+XL\_S**

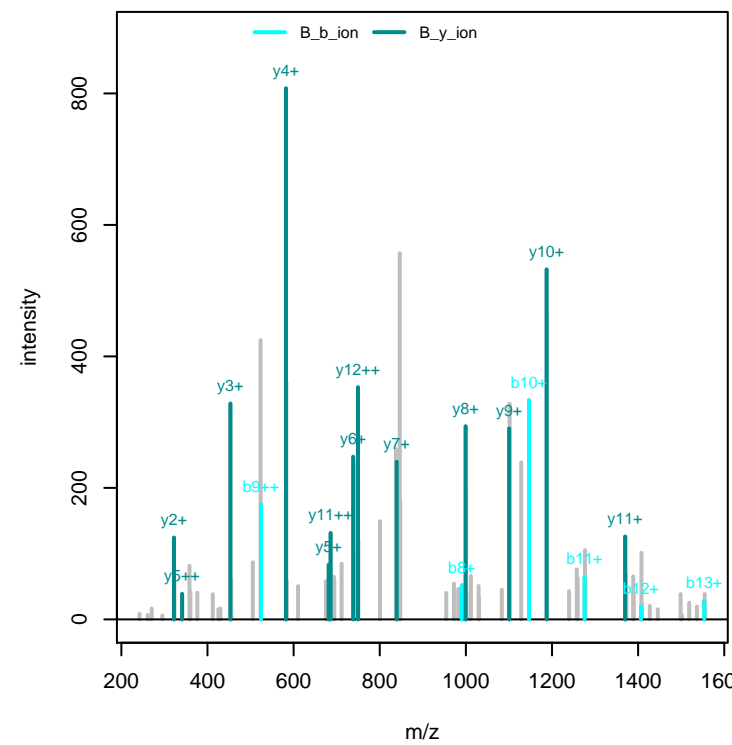

**ETQKSTCTGVEMFR+XL\_L**

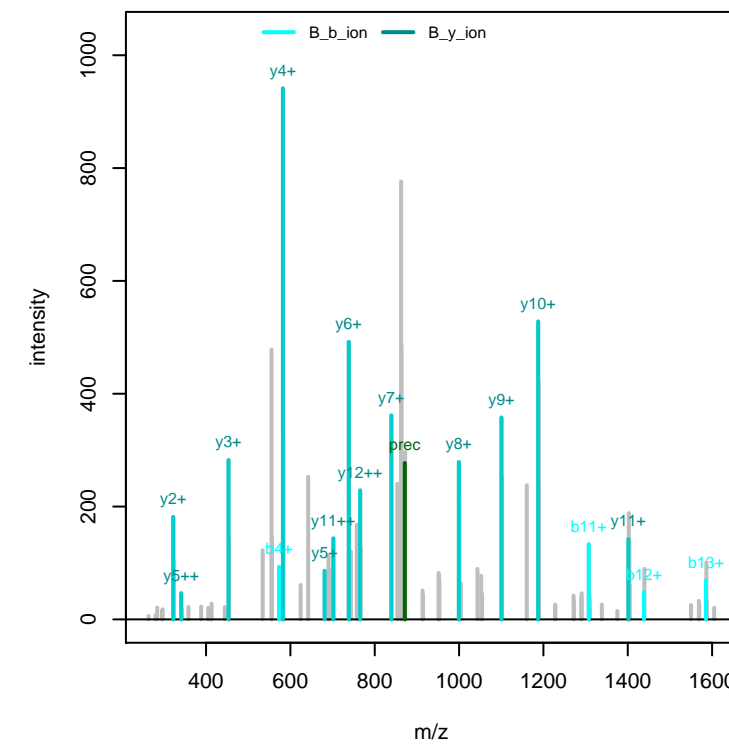

TVDGPSHKDWR  
GASQNIIPSSTGAAKAVGK

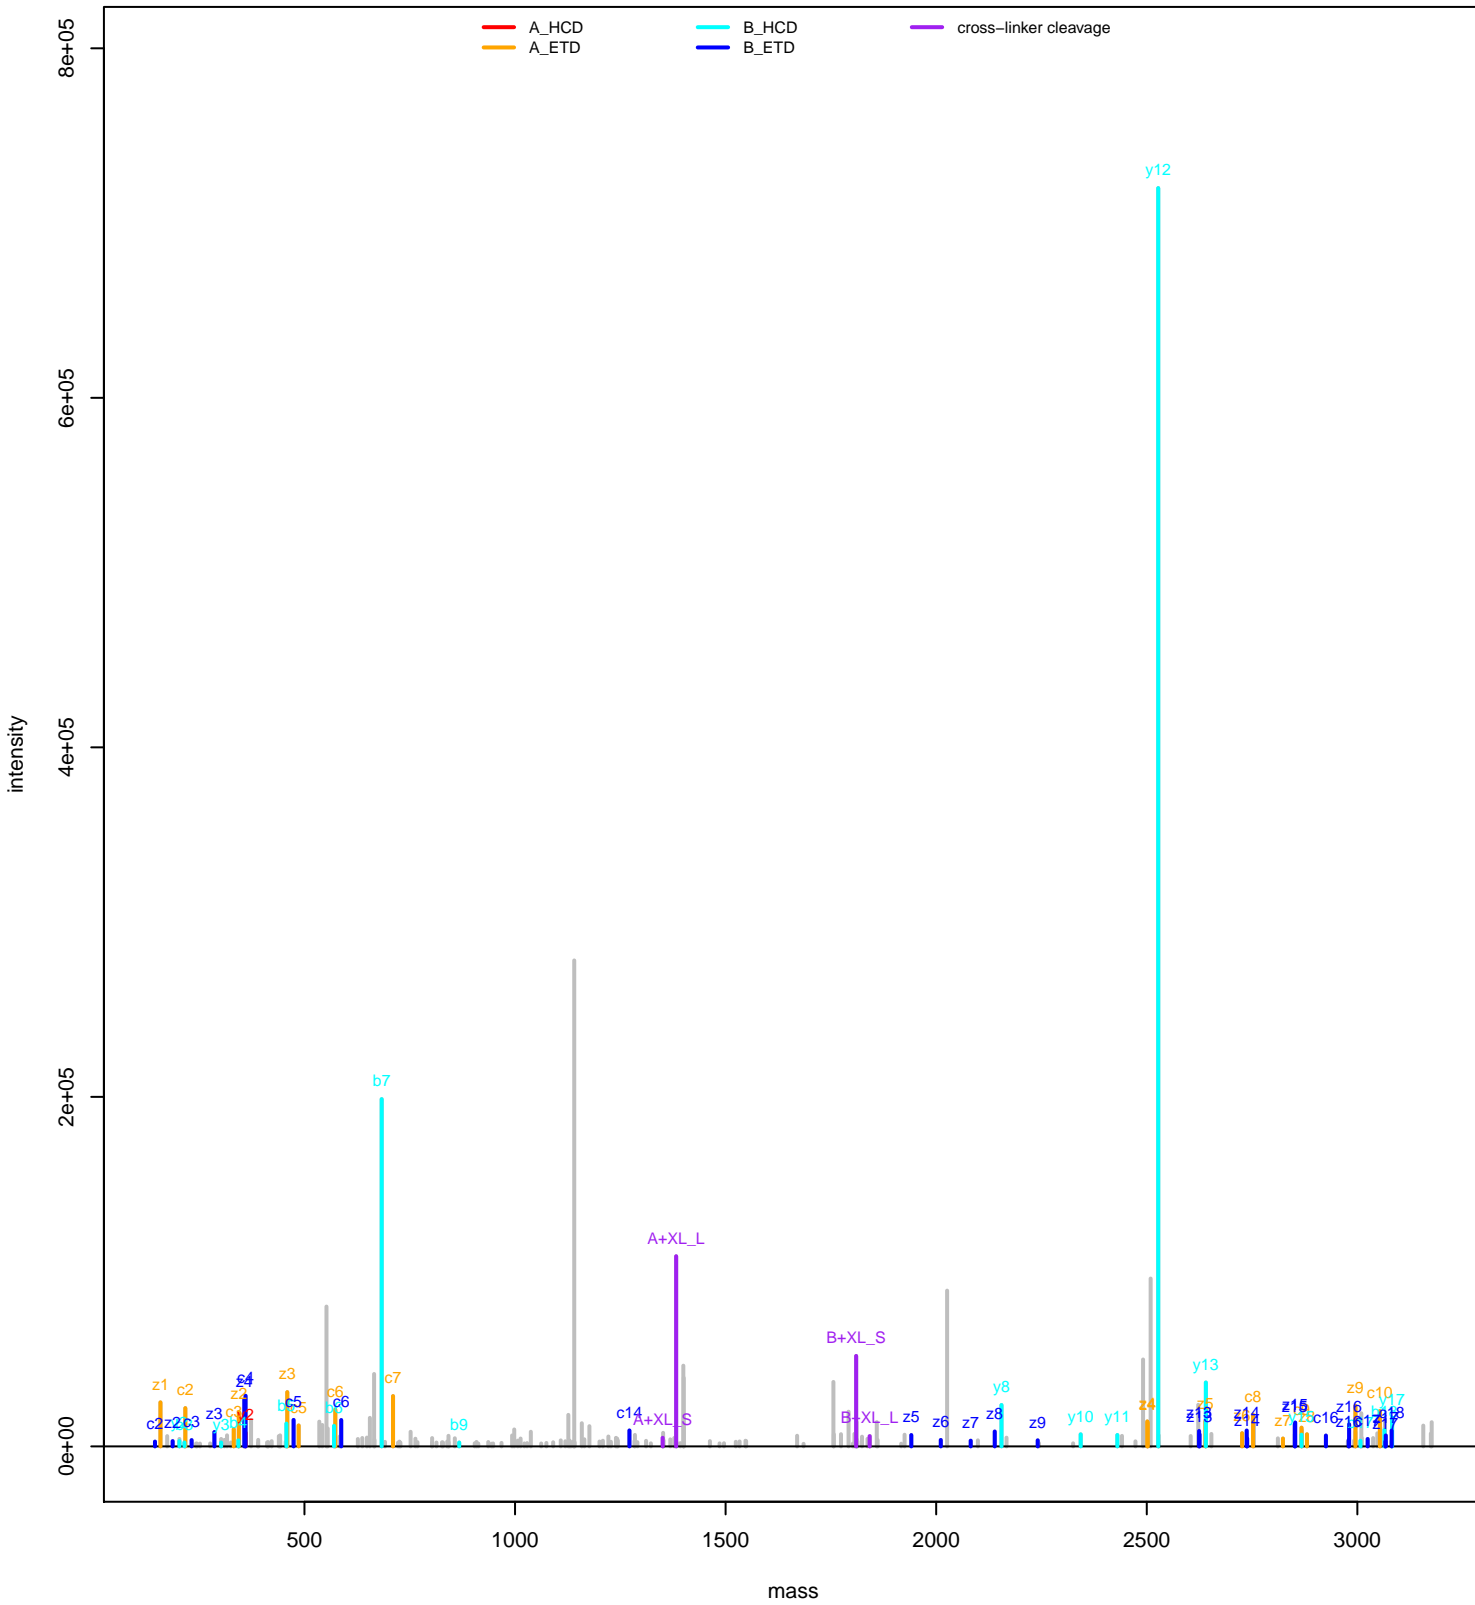

TVDGPSHKDWR+XL\_S

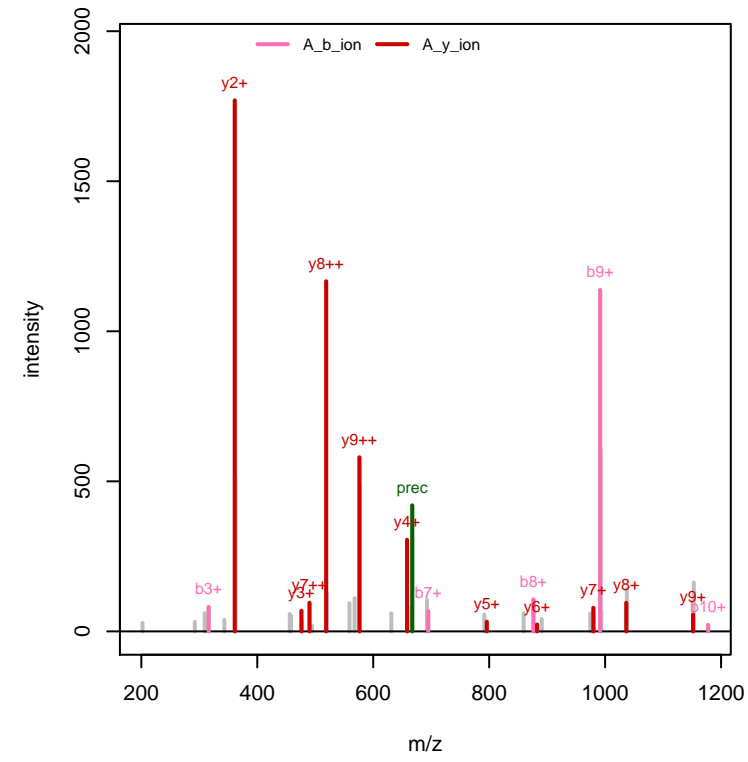

TVDGPSHKDWR+XL\_L

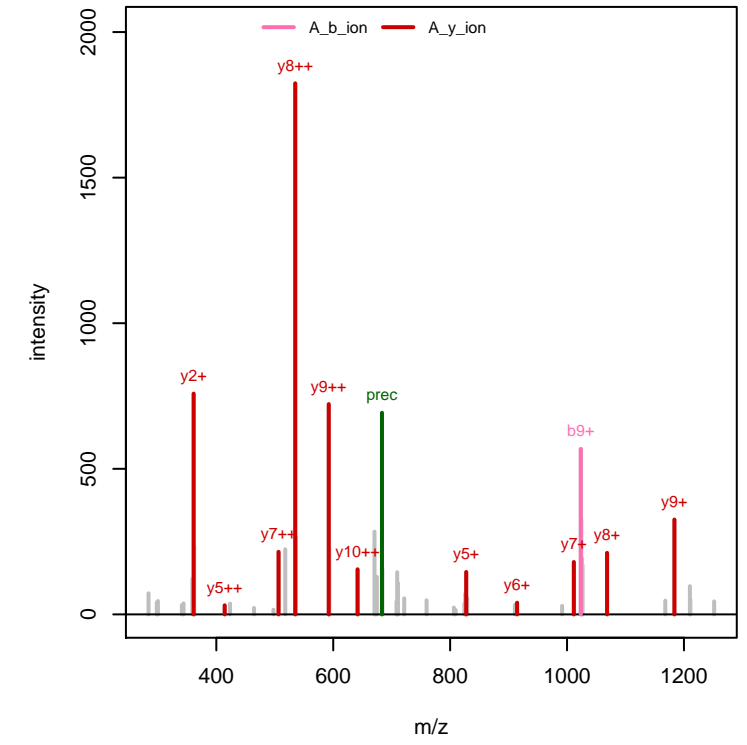

GASQNIIPSSTGAAKAVGK+XL\_S

GASQNIIPSSTGAAKAVGK+XL\_L

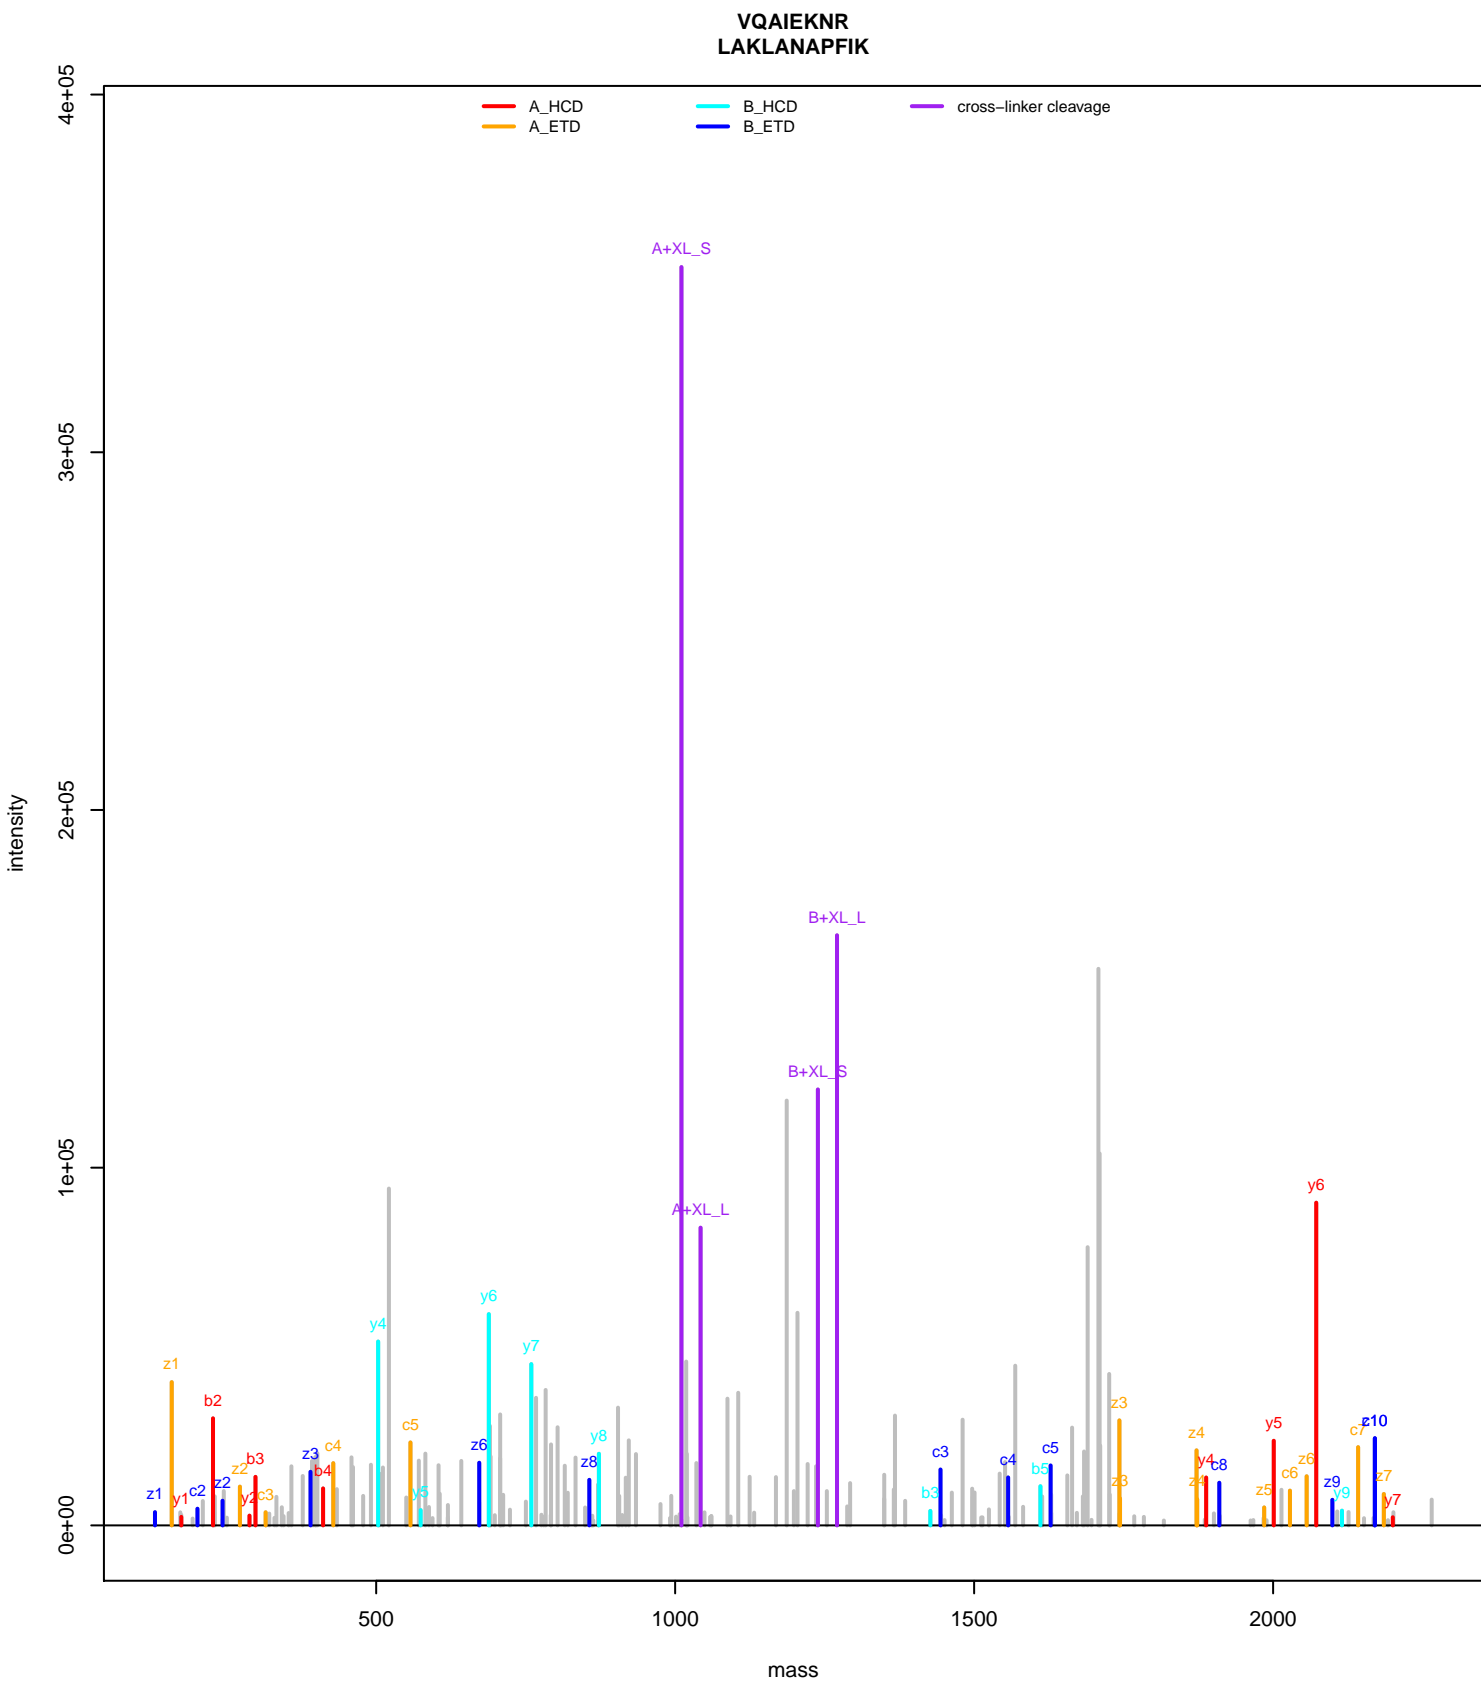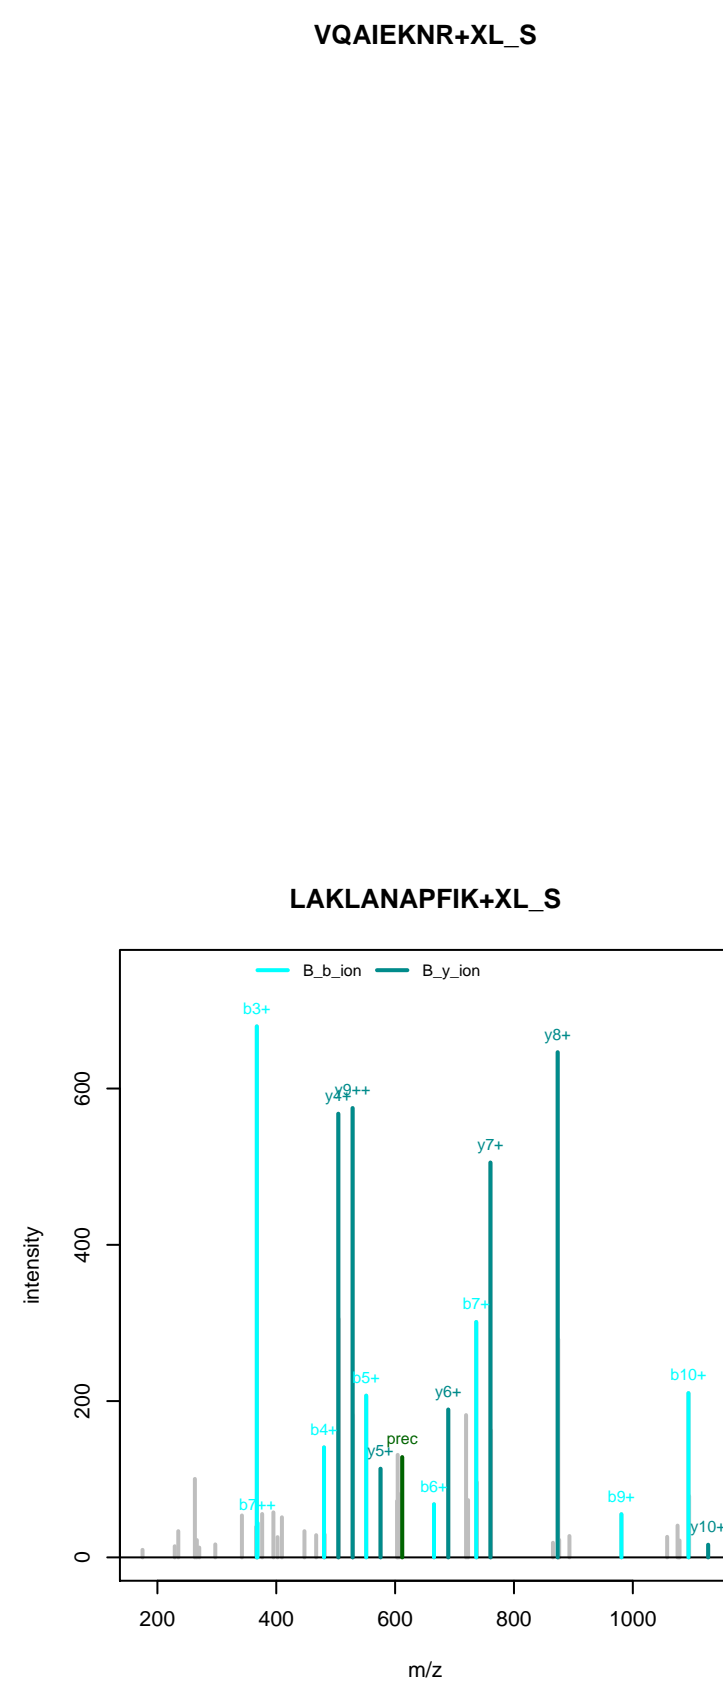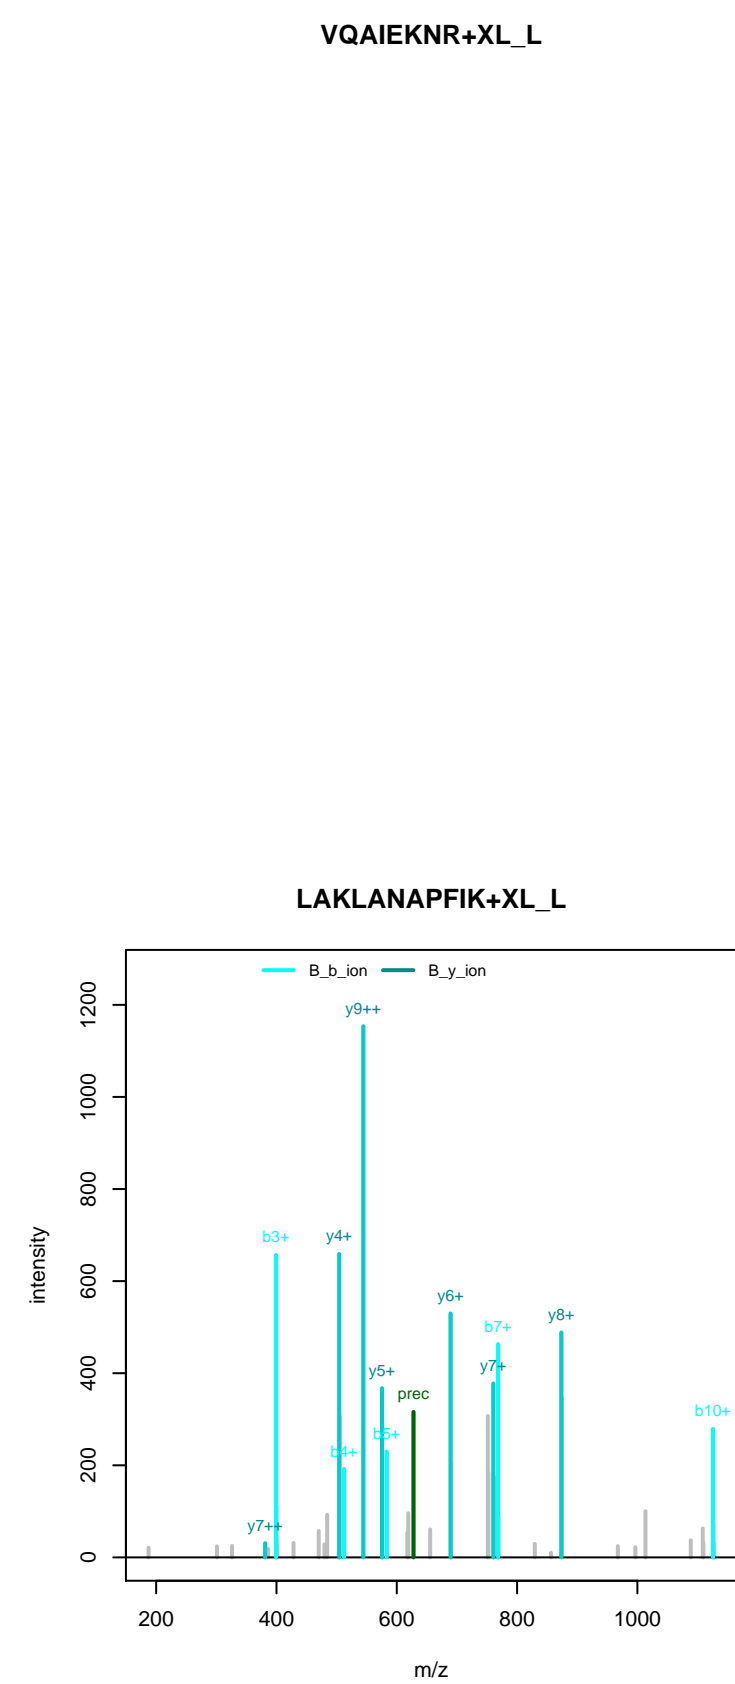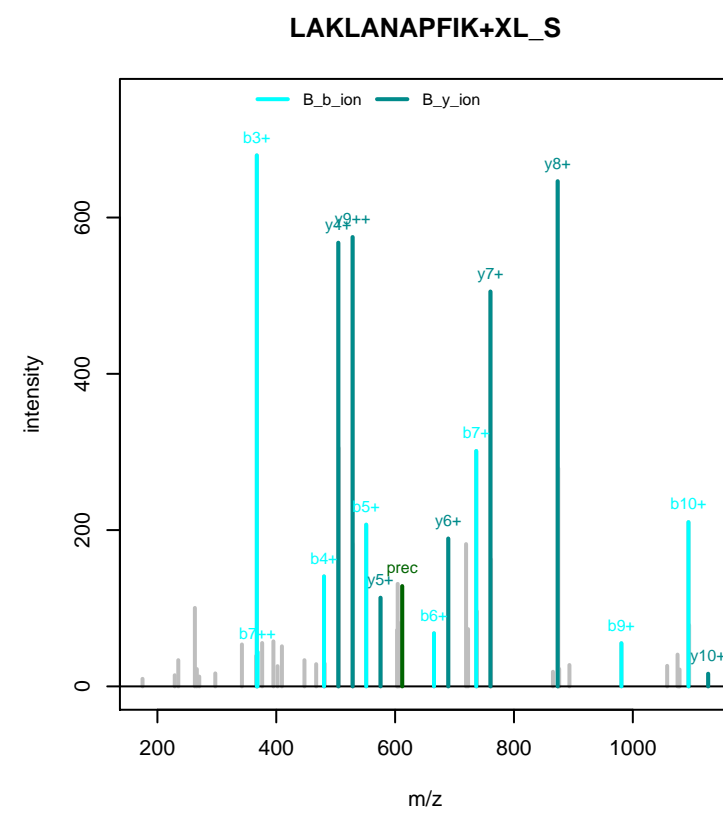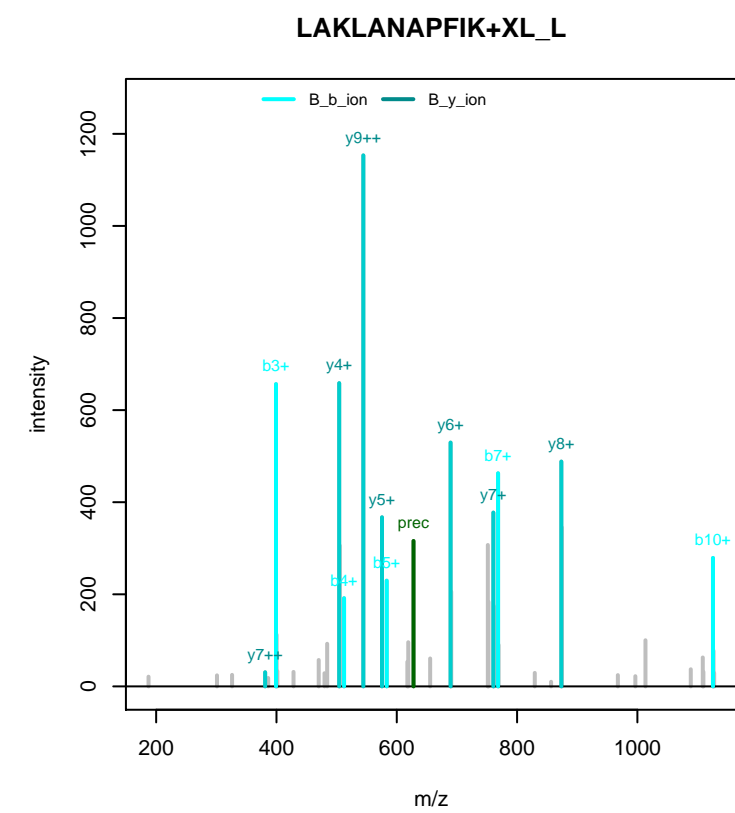





VKNVLSSGK  
FGGNEKQALELPR

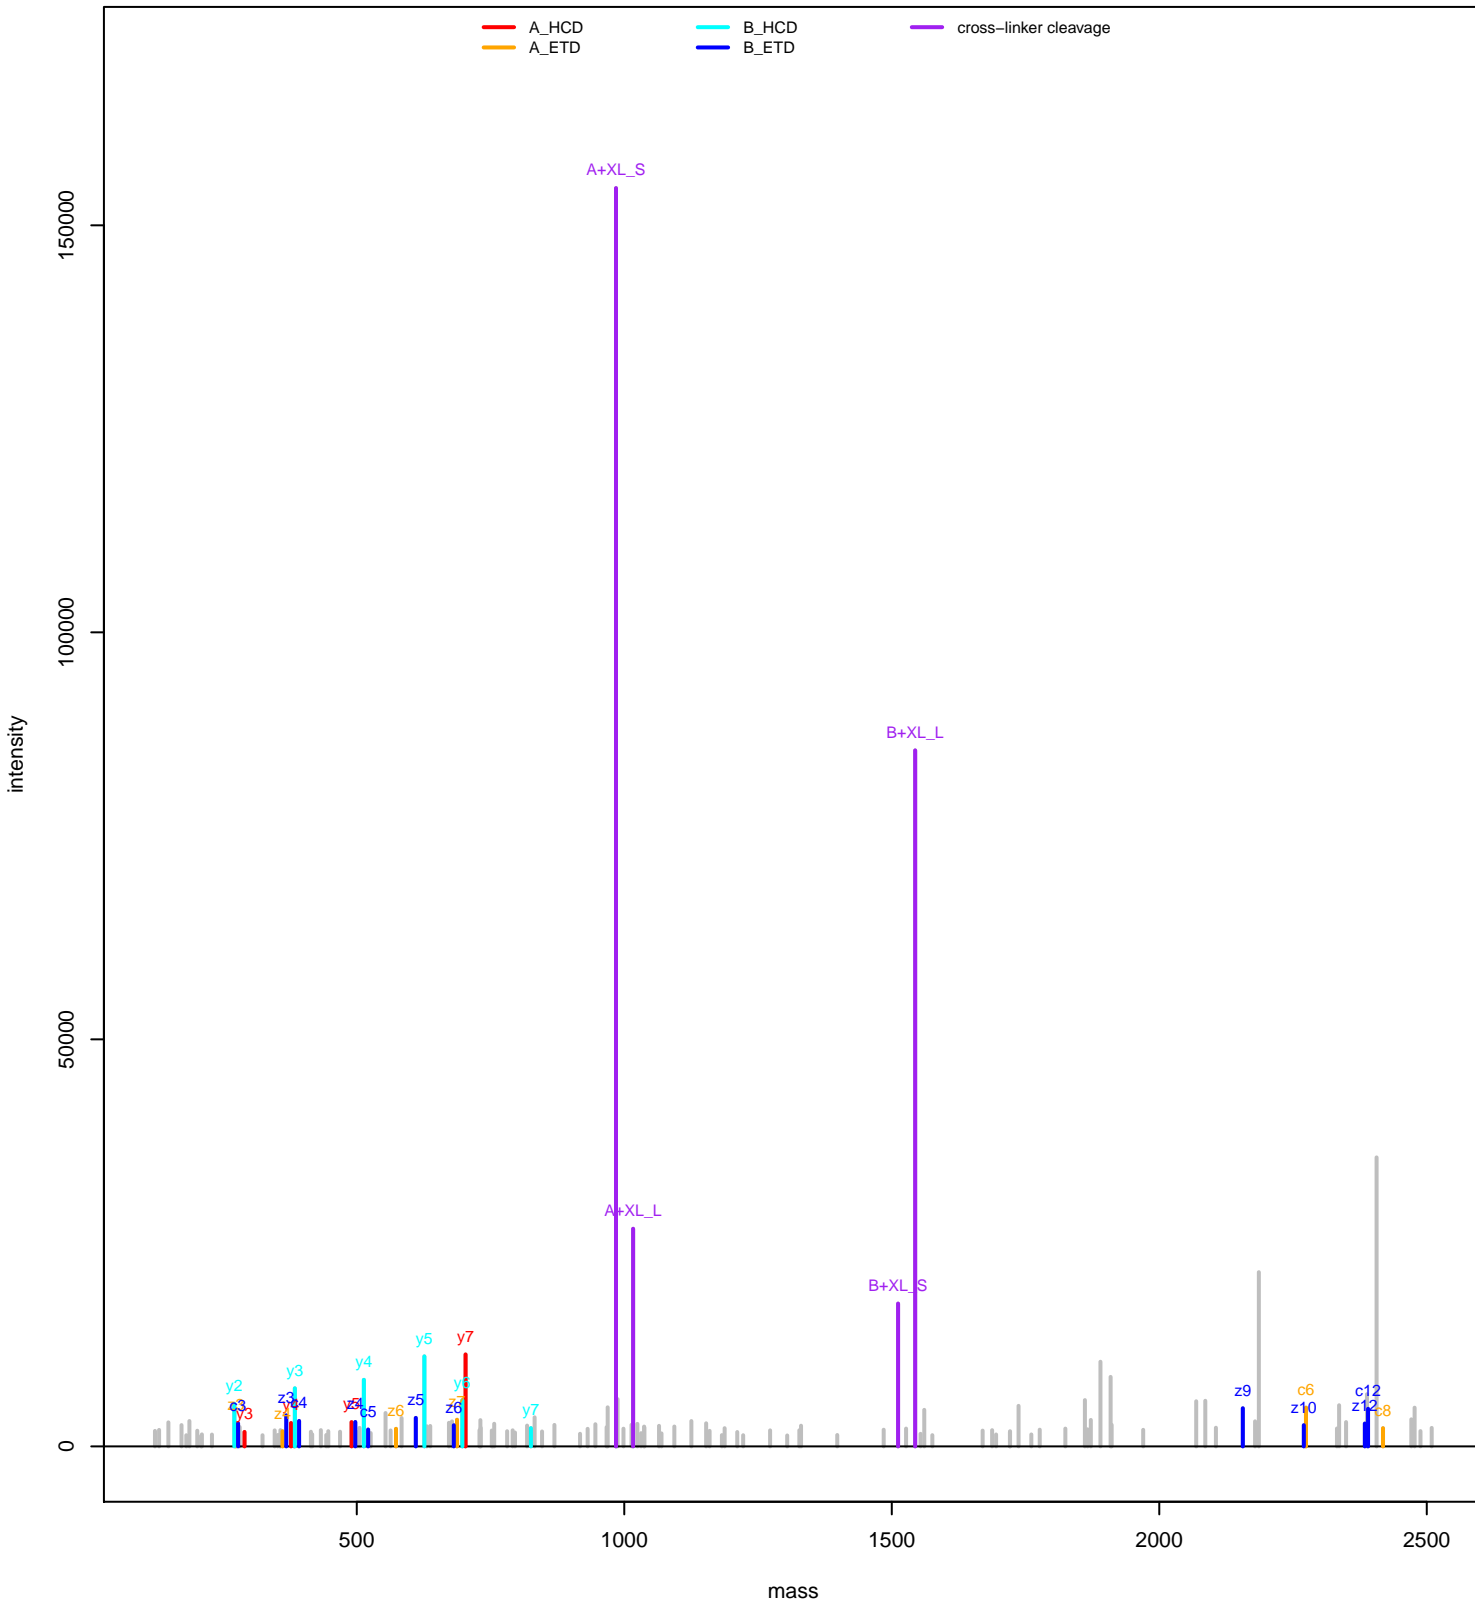

VKNVLSSGK+XL\_S

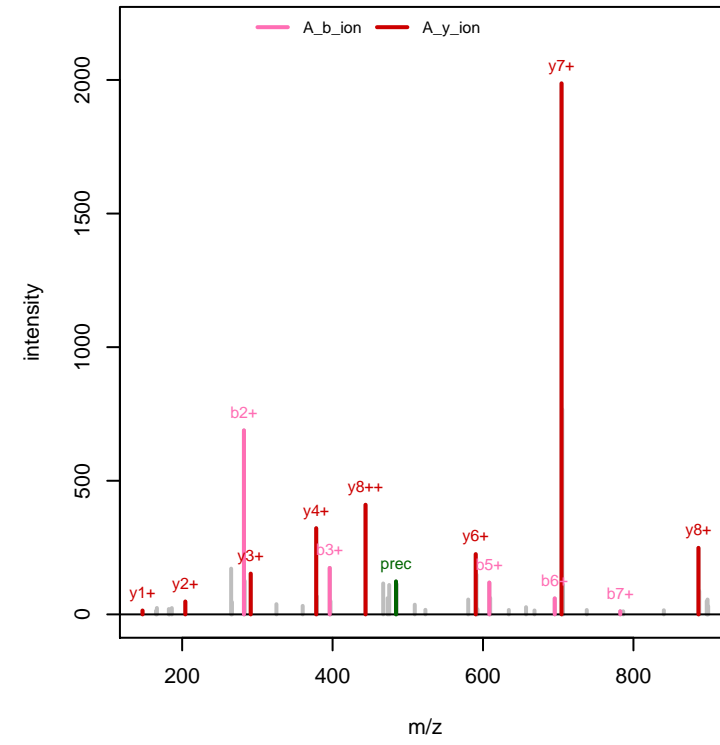

VKNVLSSGK+XL\_L

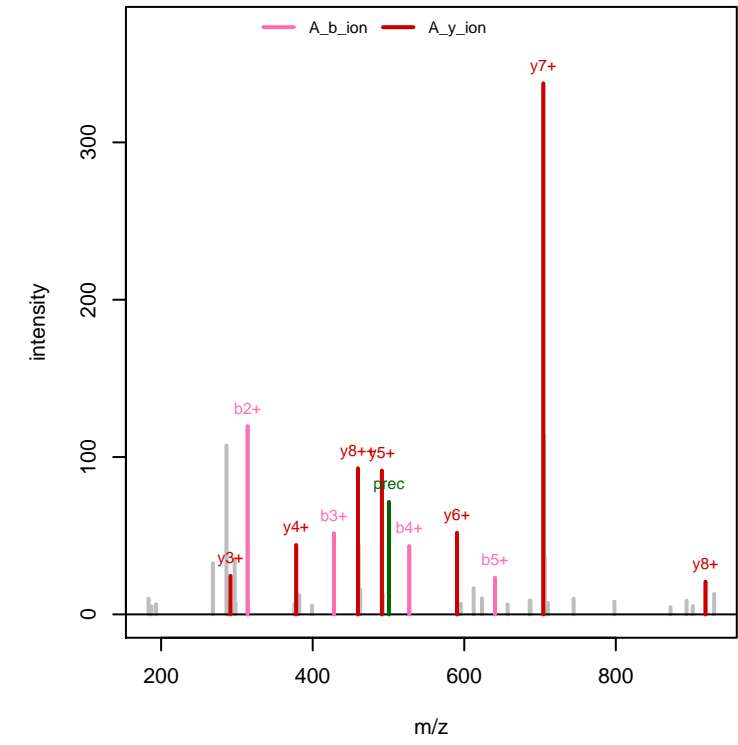

FGGNEKQALELPR+XL\_S

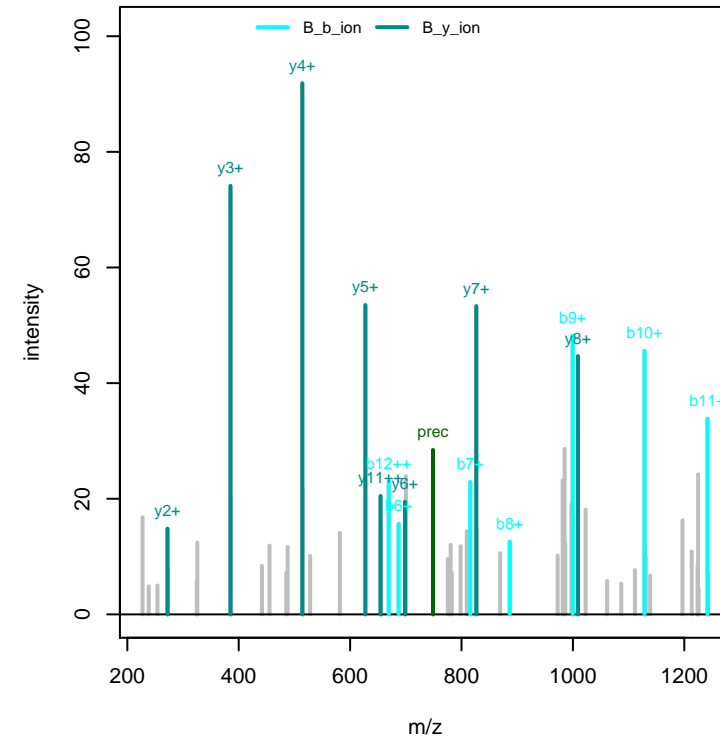

FGGNEKQALELPR+XL\_L

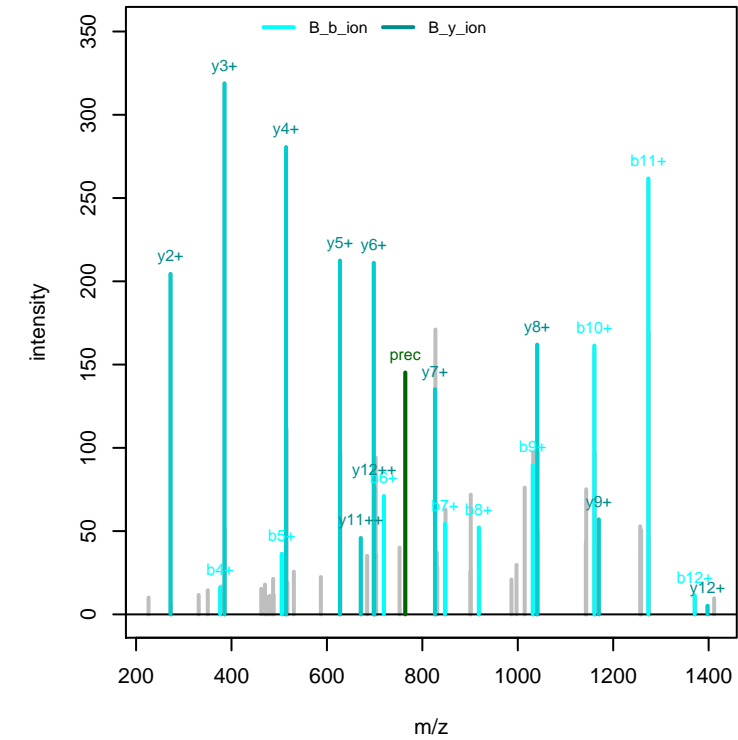

KGIVMFEK  
NIIAVSSGKGGVGK

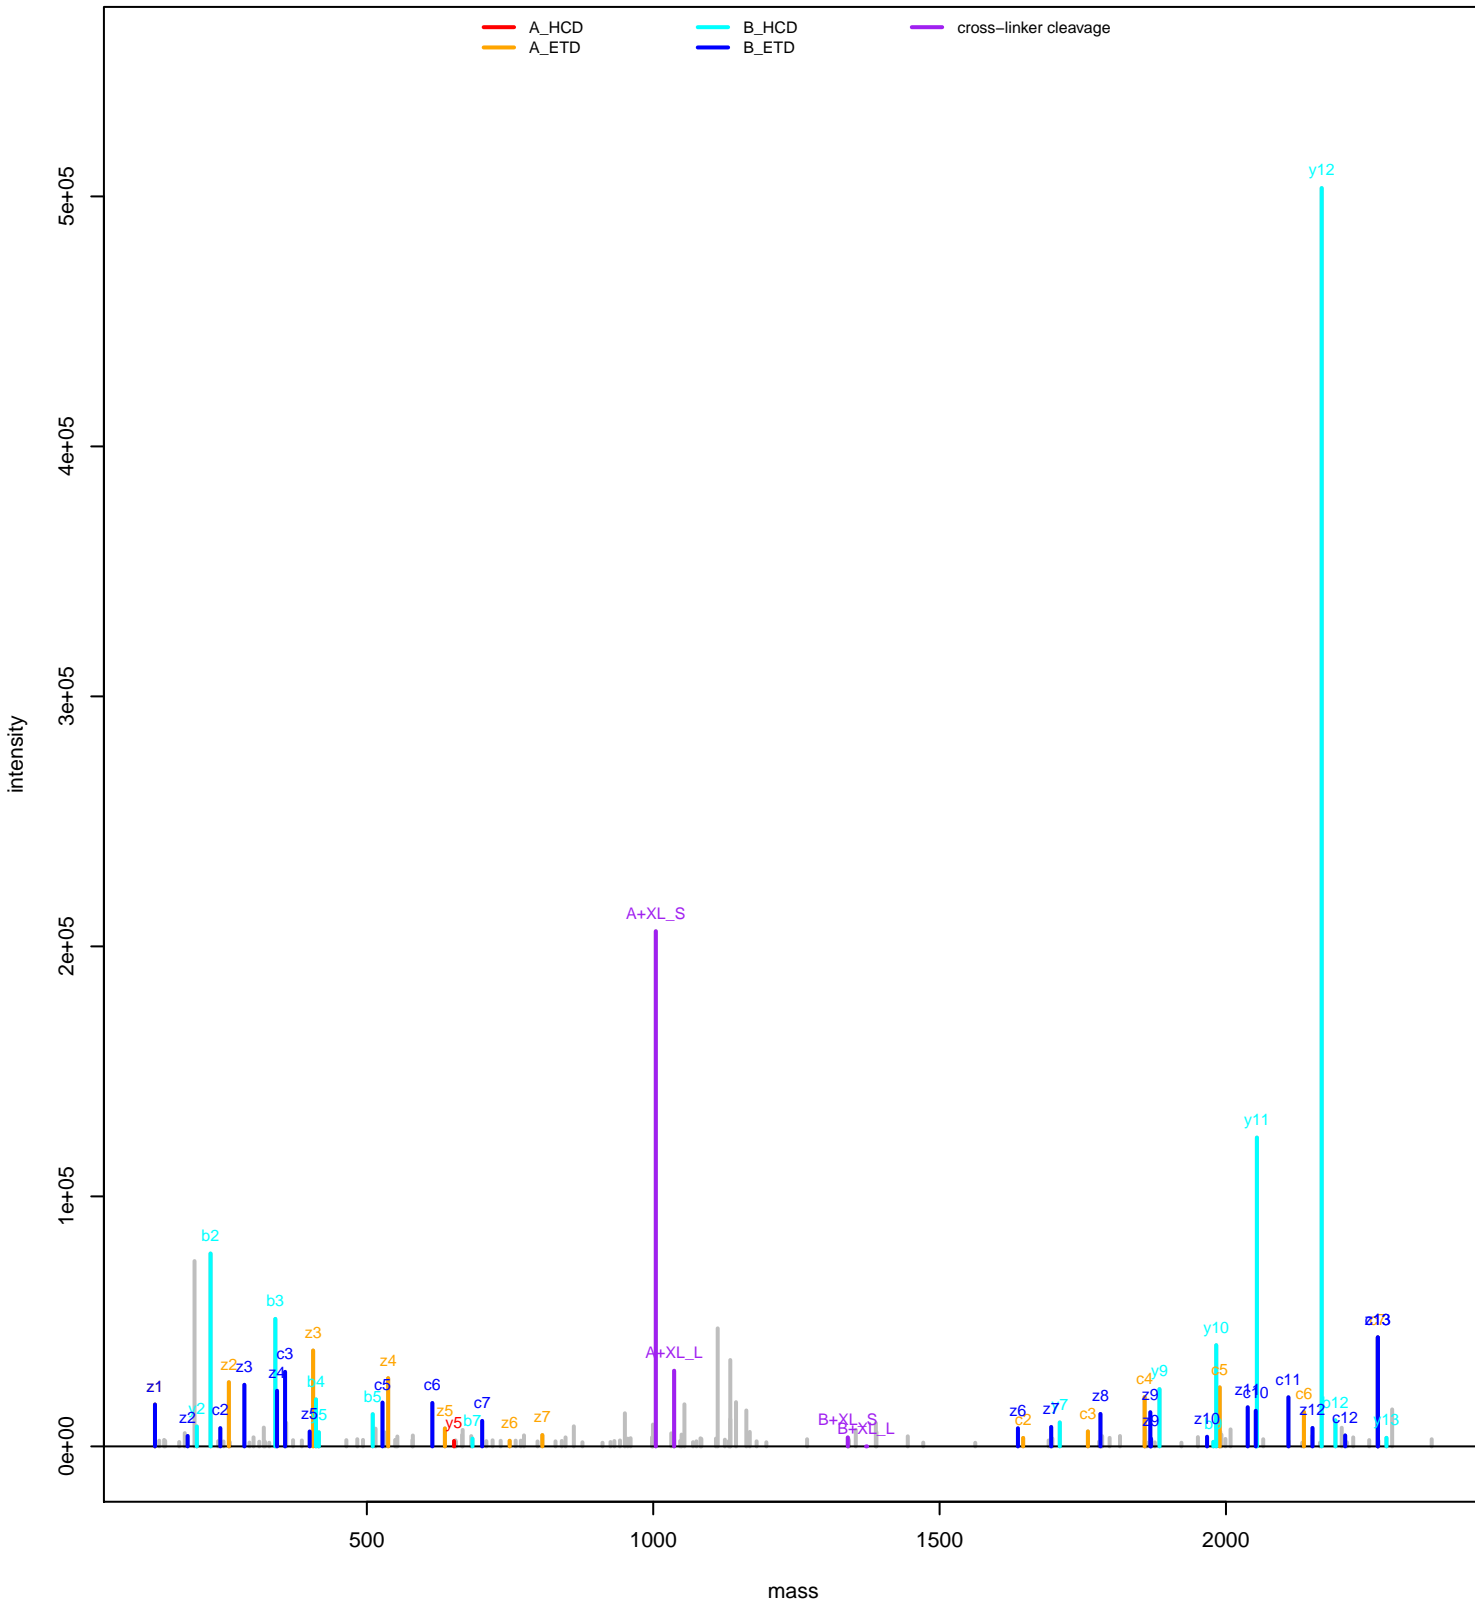

KGIVMFEK+XL\_S

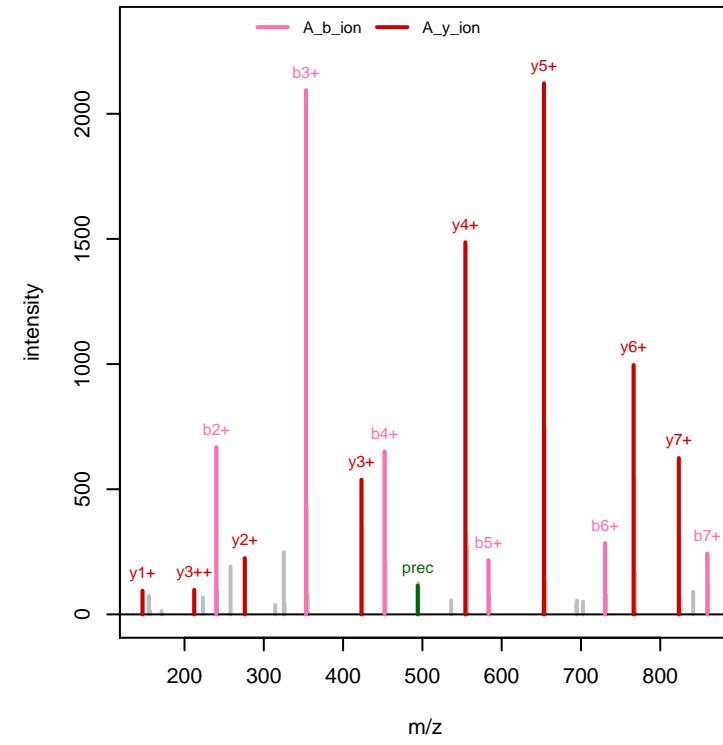

KGIVMFEK+XL\_L

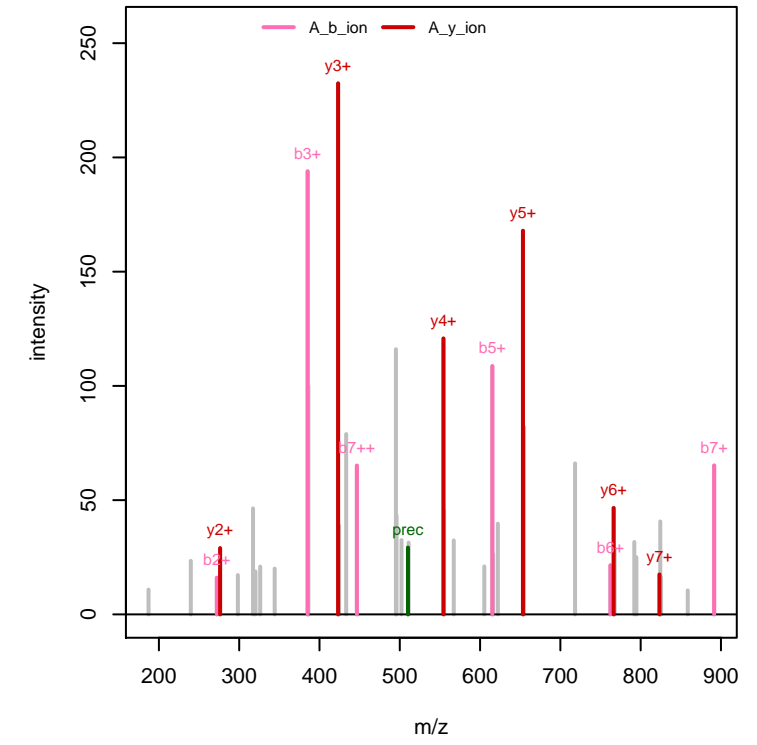

NIIAVSSGKGGVGK+XL\_S

NIIAVSSGKGGVGK+XL\_L

KNLESNLK  
ALKDEVIAR

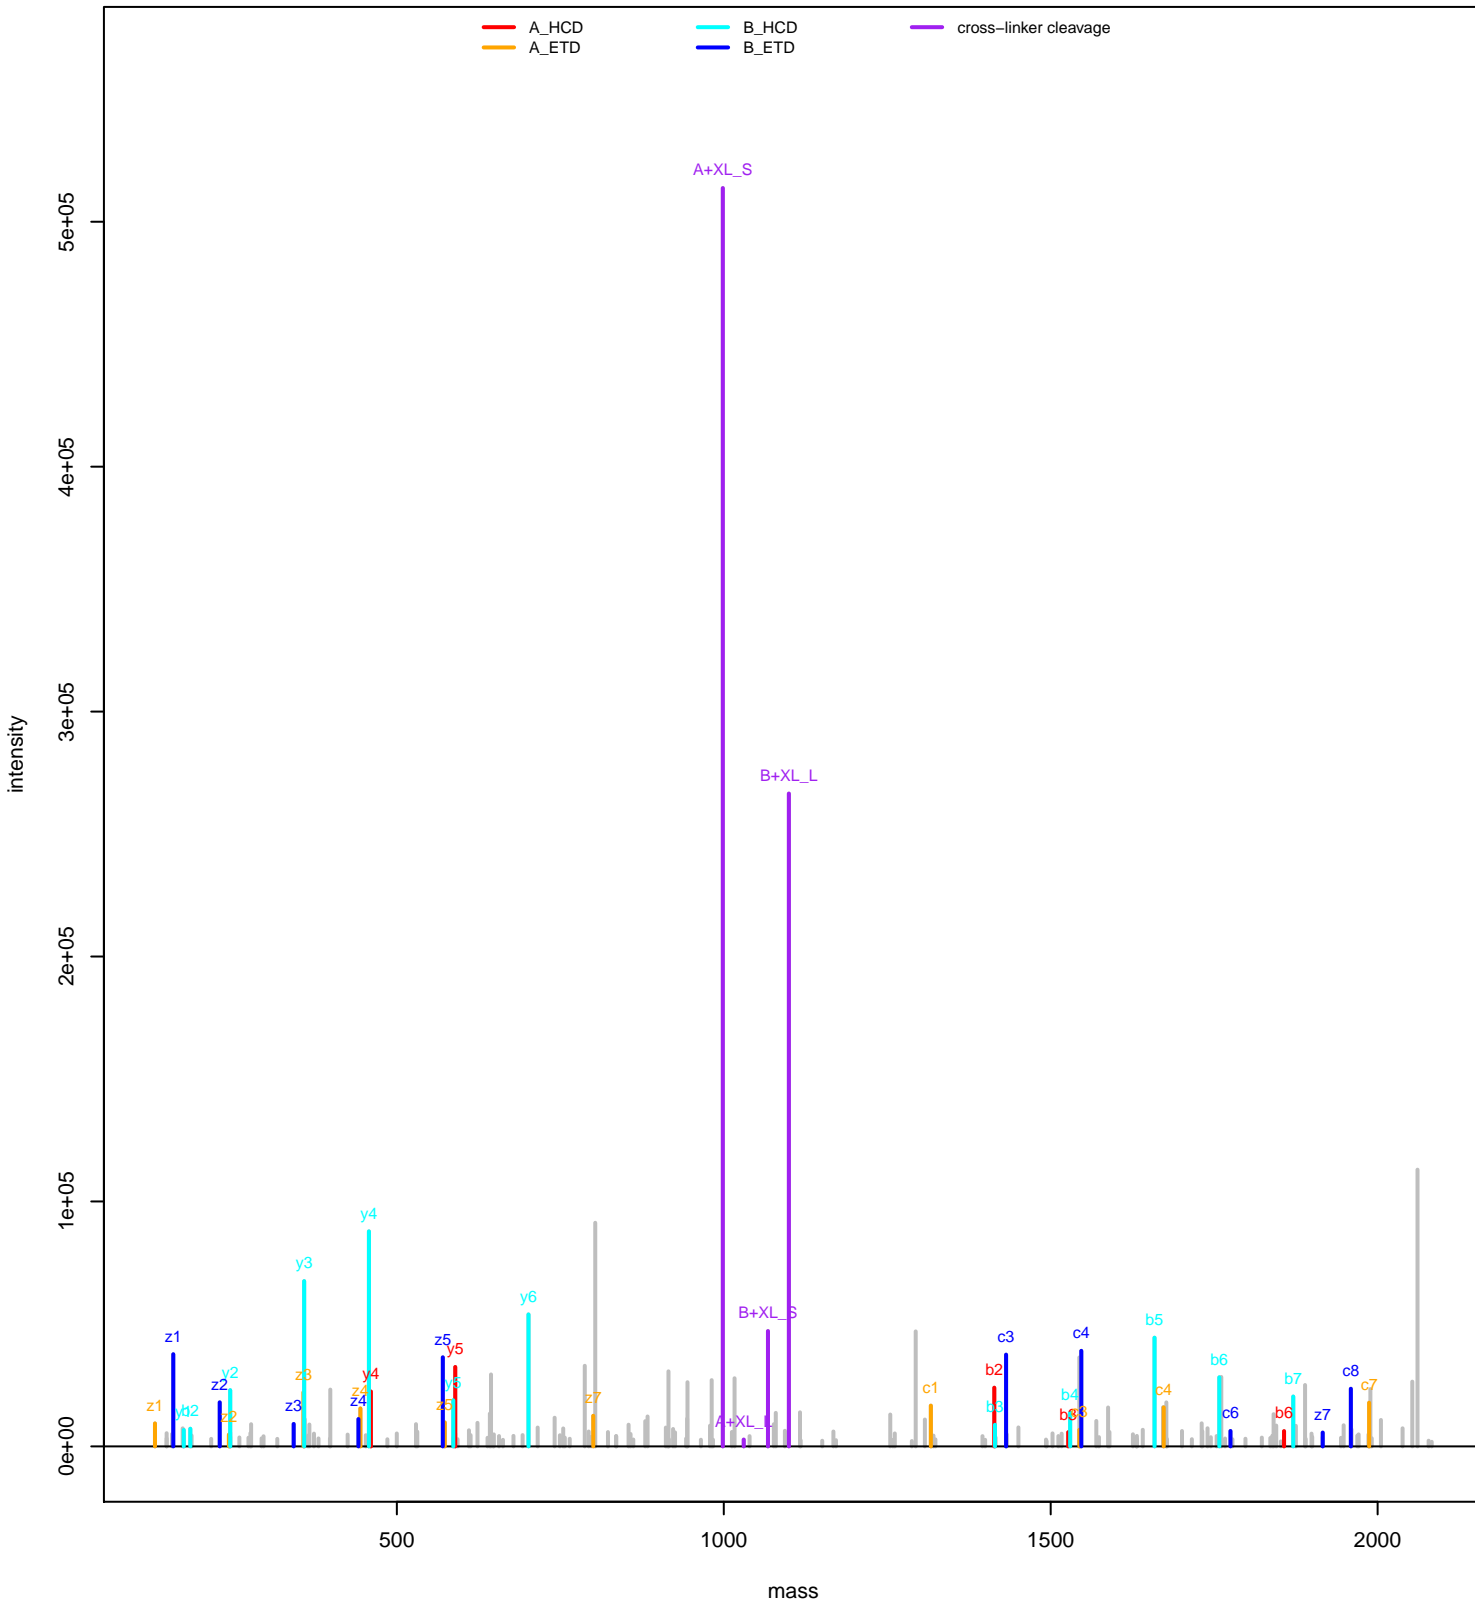

KNLESNLK+XL\_S

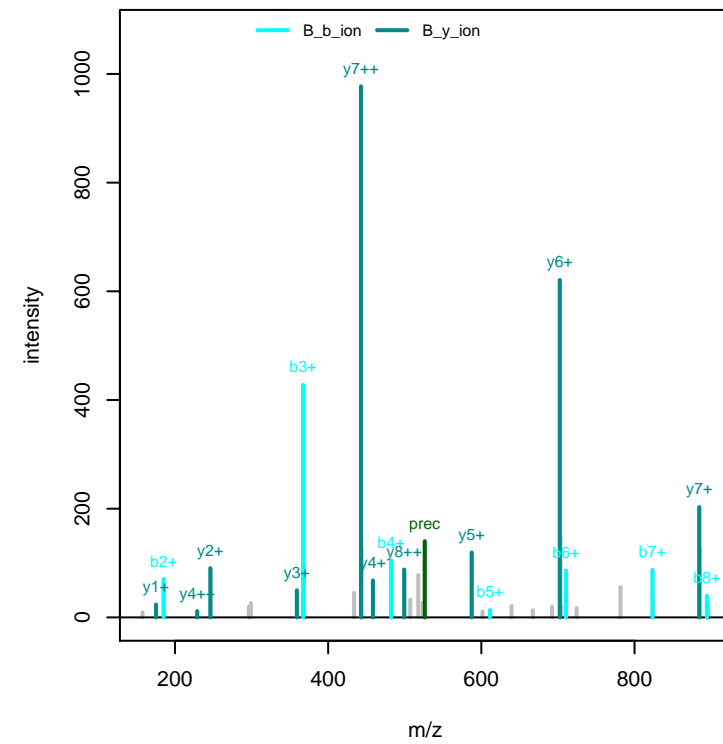

KNLESNLK+XL\_L

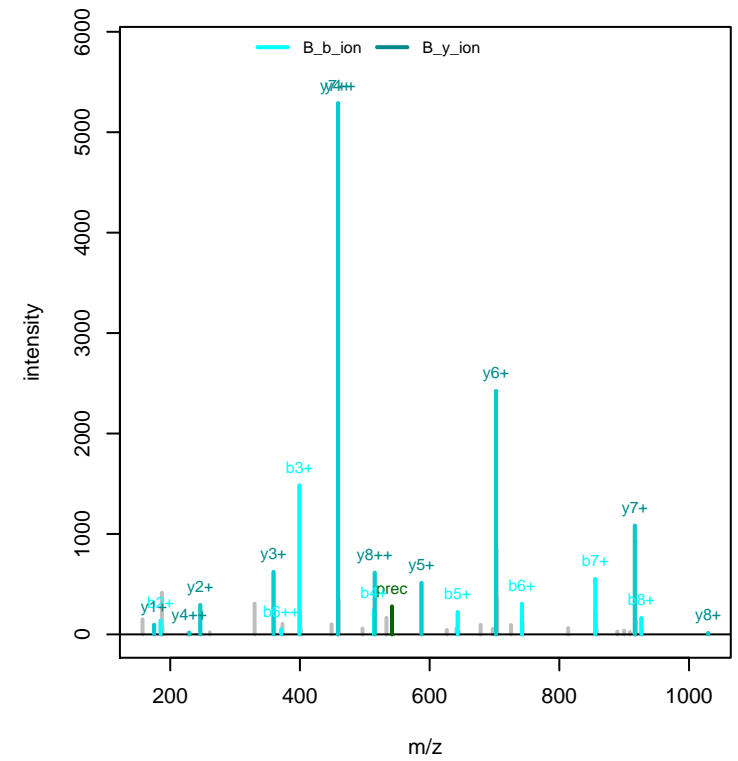

ALKDEVIAR+XL\_S



ALKDEVIAR+XL\_L



IALYELSKR  
IALYELSKR

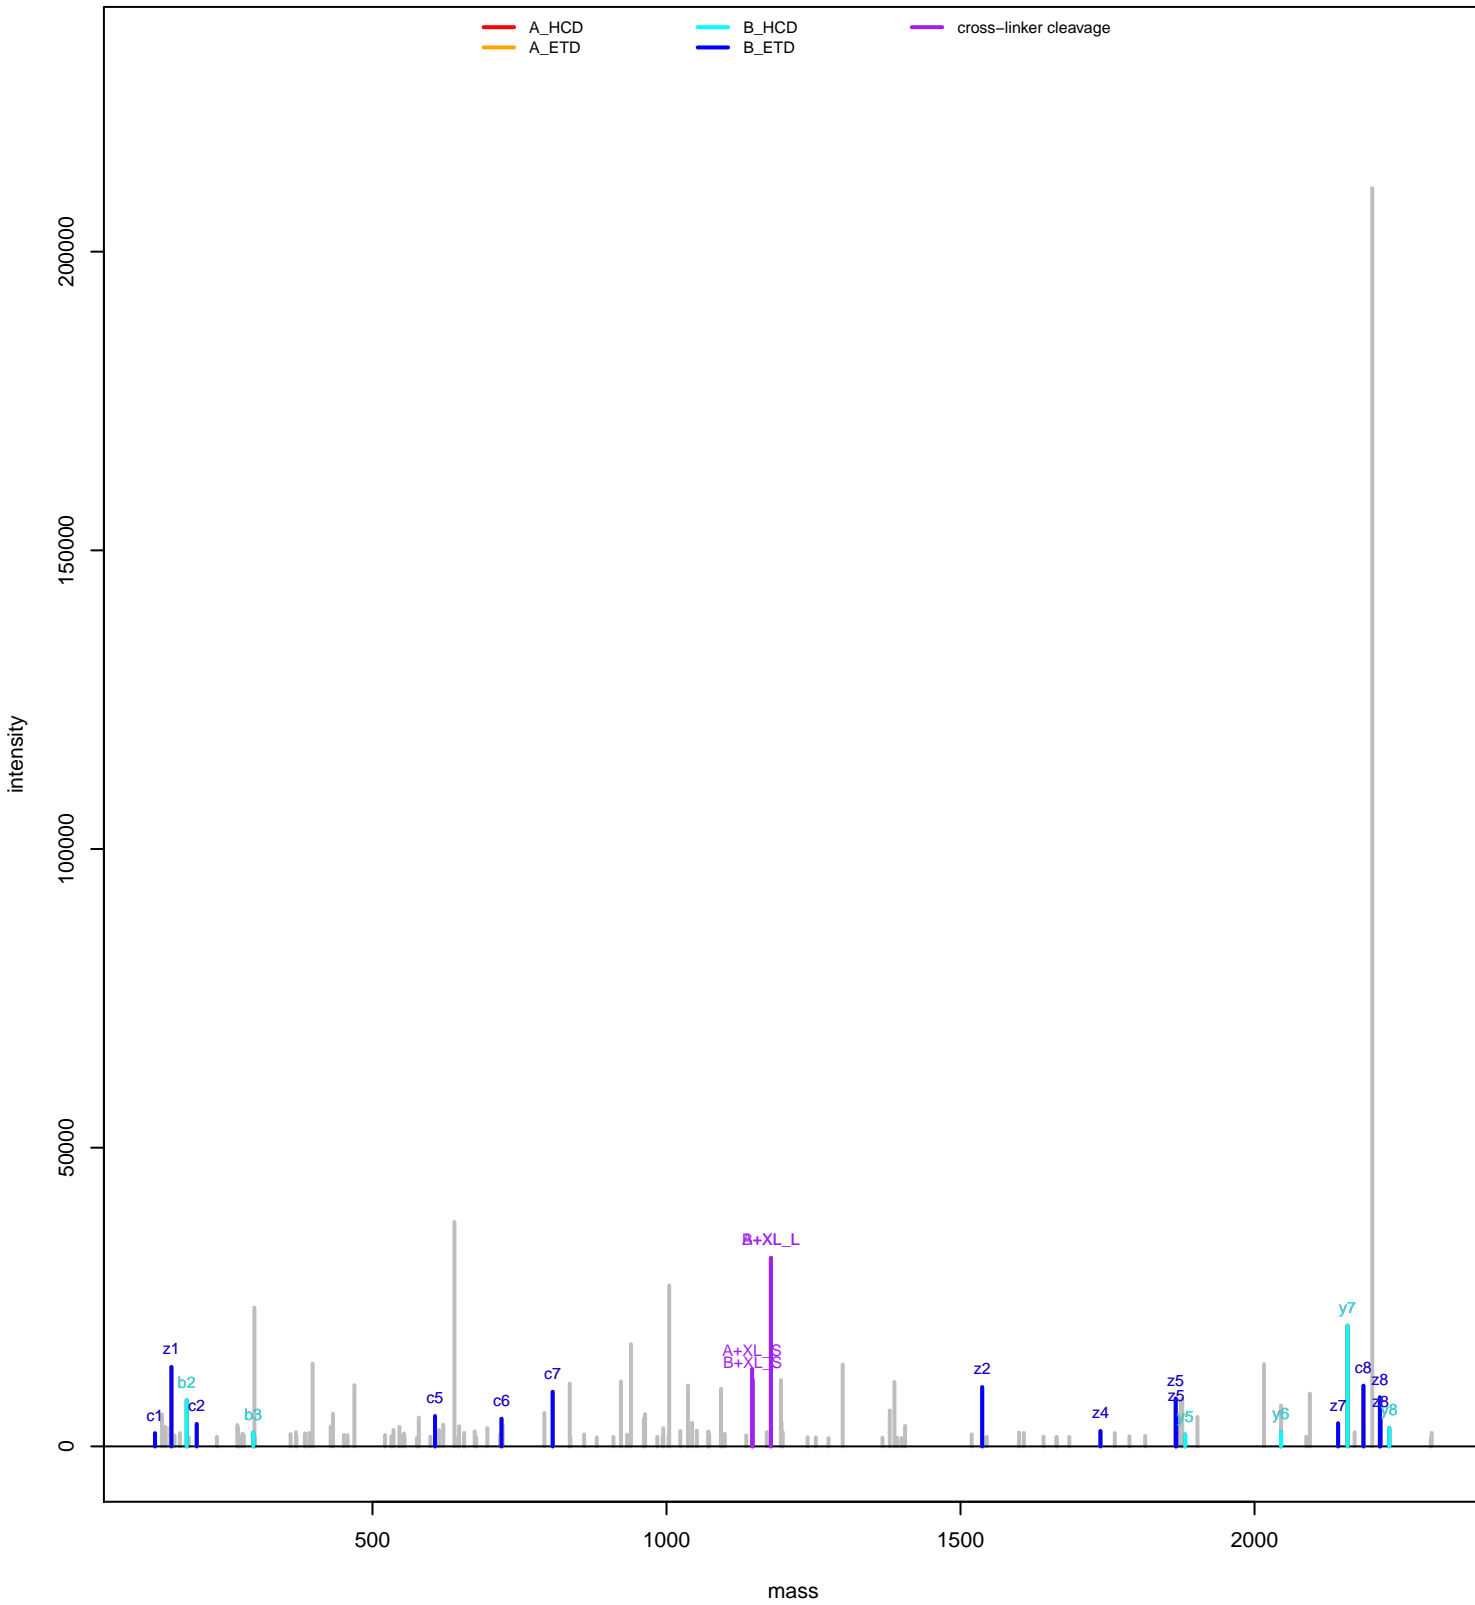

IALYELSKR+XL\_S

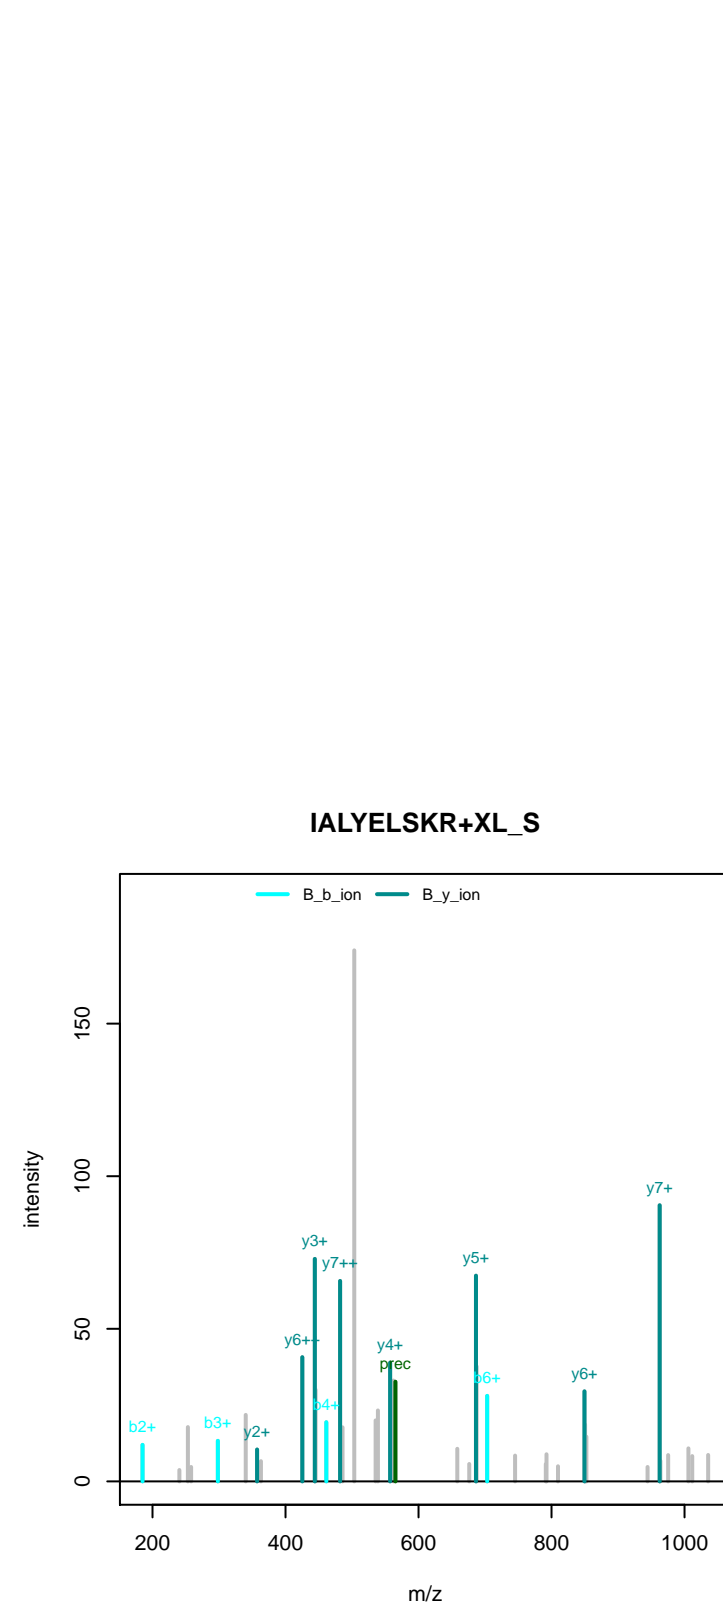

IALYELSKR+XL\_L

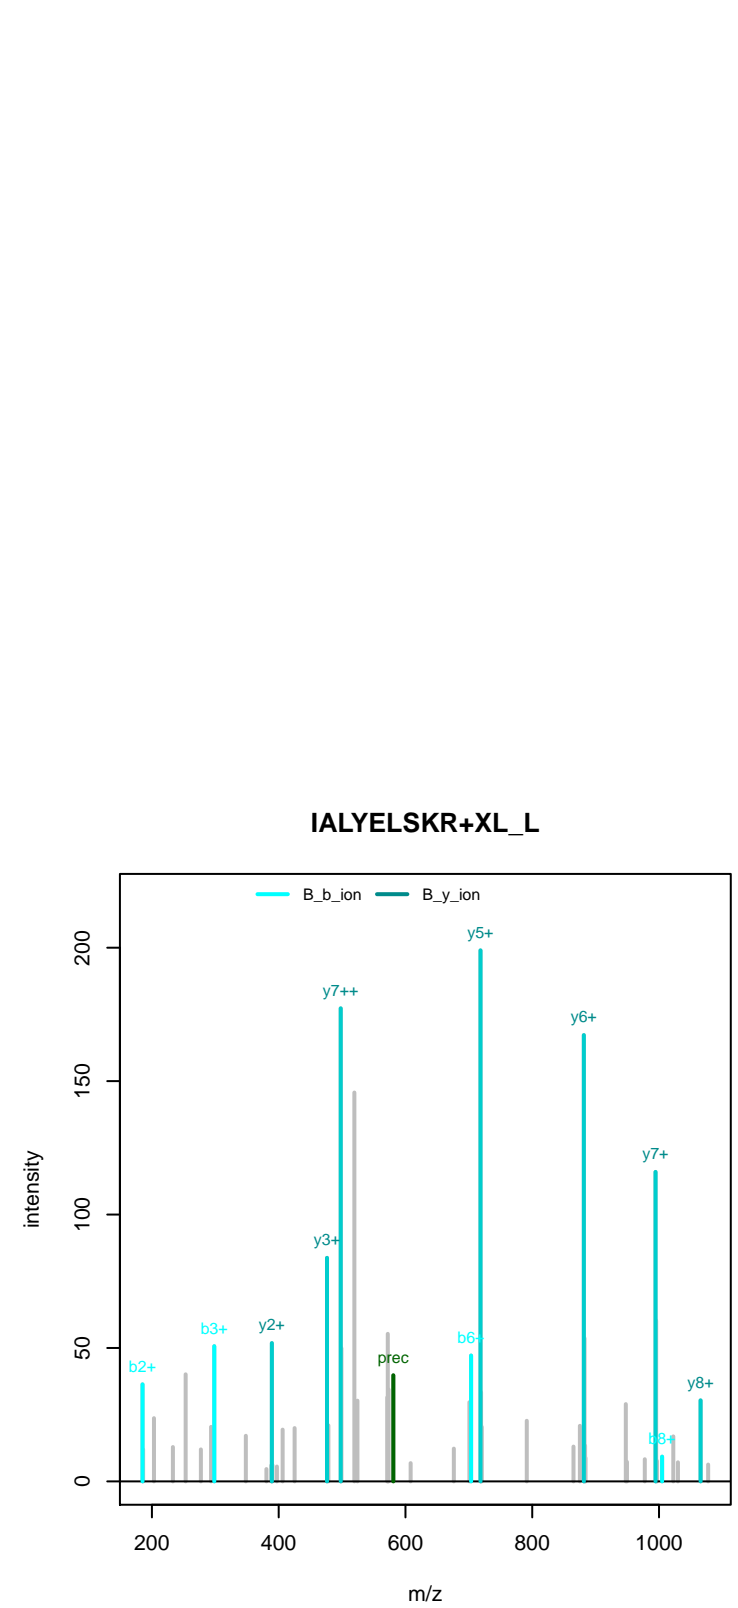

IIELKK  
EKMTGLESYDVK

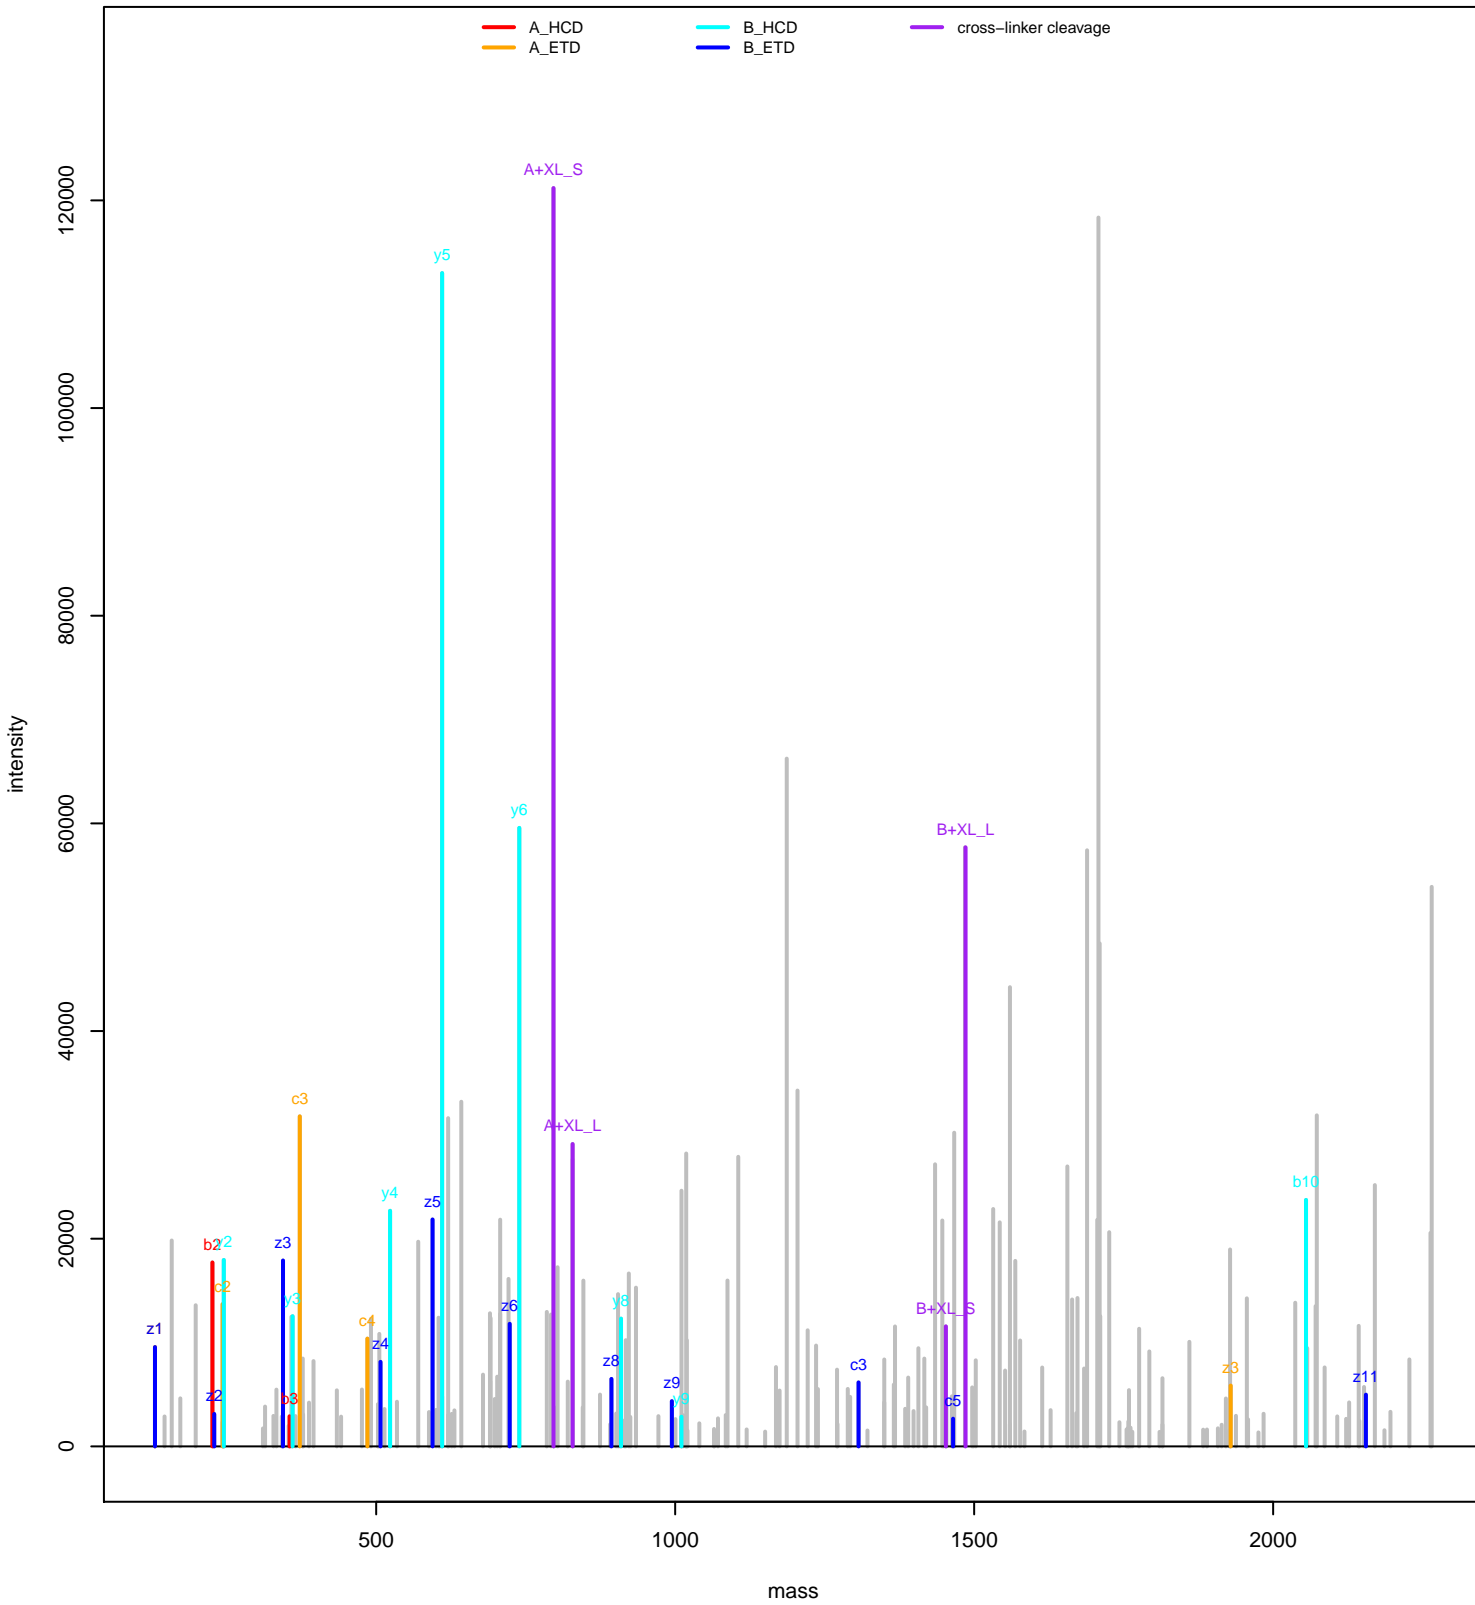

IIELKK+XL\_S

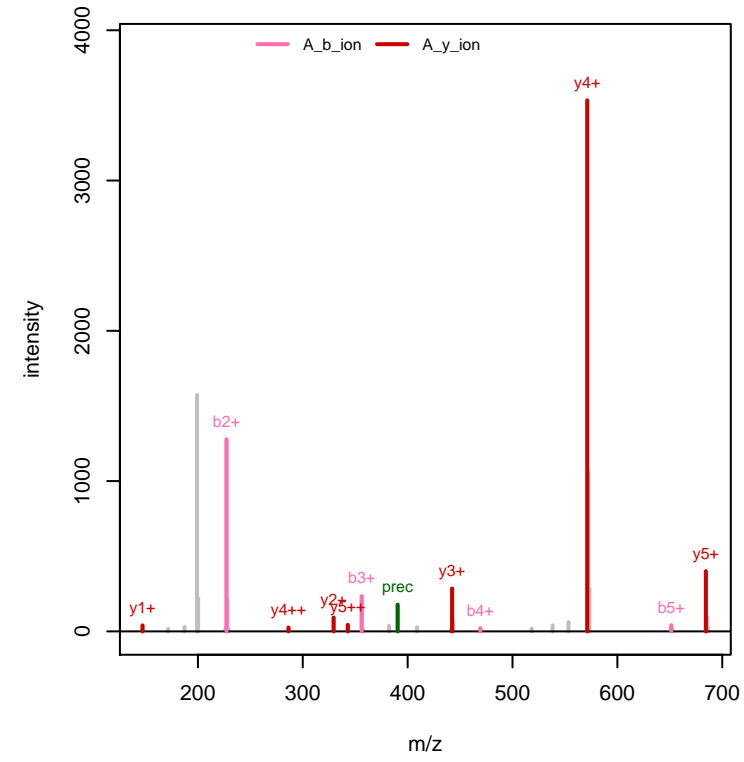

IIELKK+XL\_L

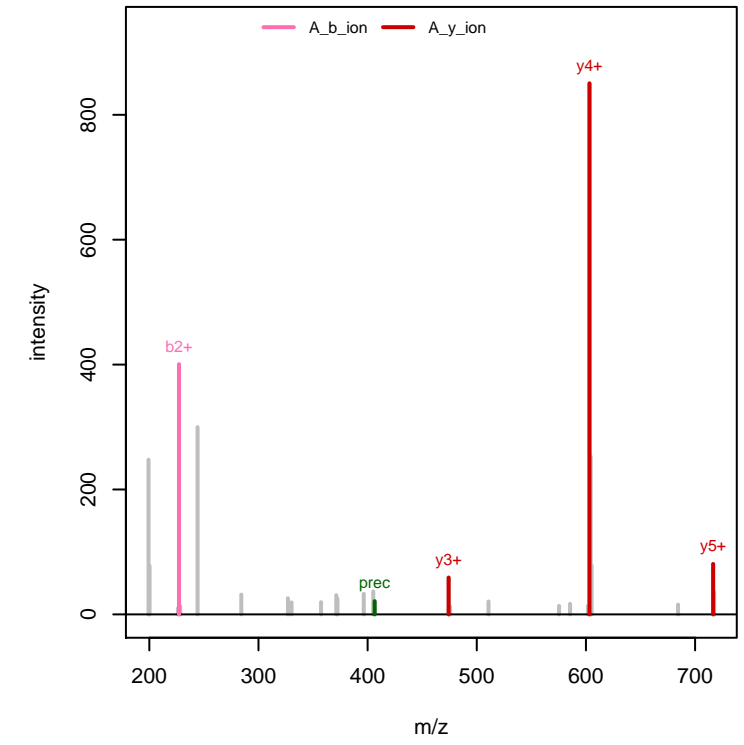

EKMTGLESYDVK+XL\_S

EKMTGLESYDVK+XL\_L

ISLGLKQCK  
RYPEGTKLTGR

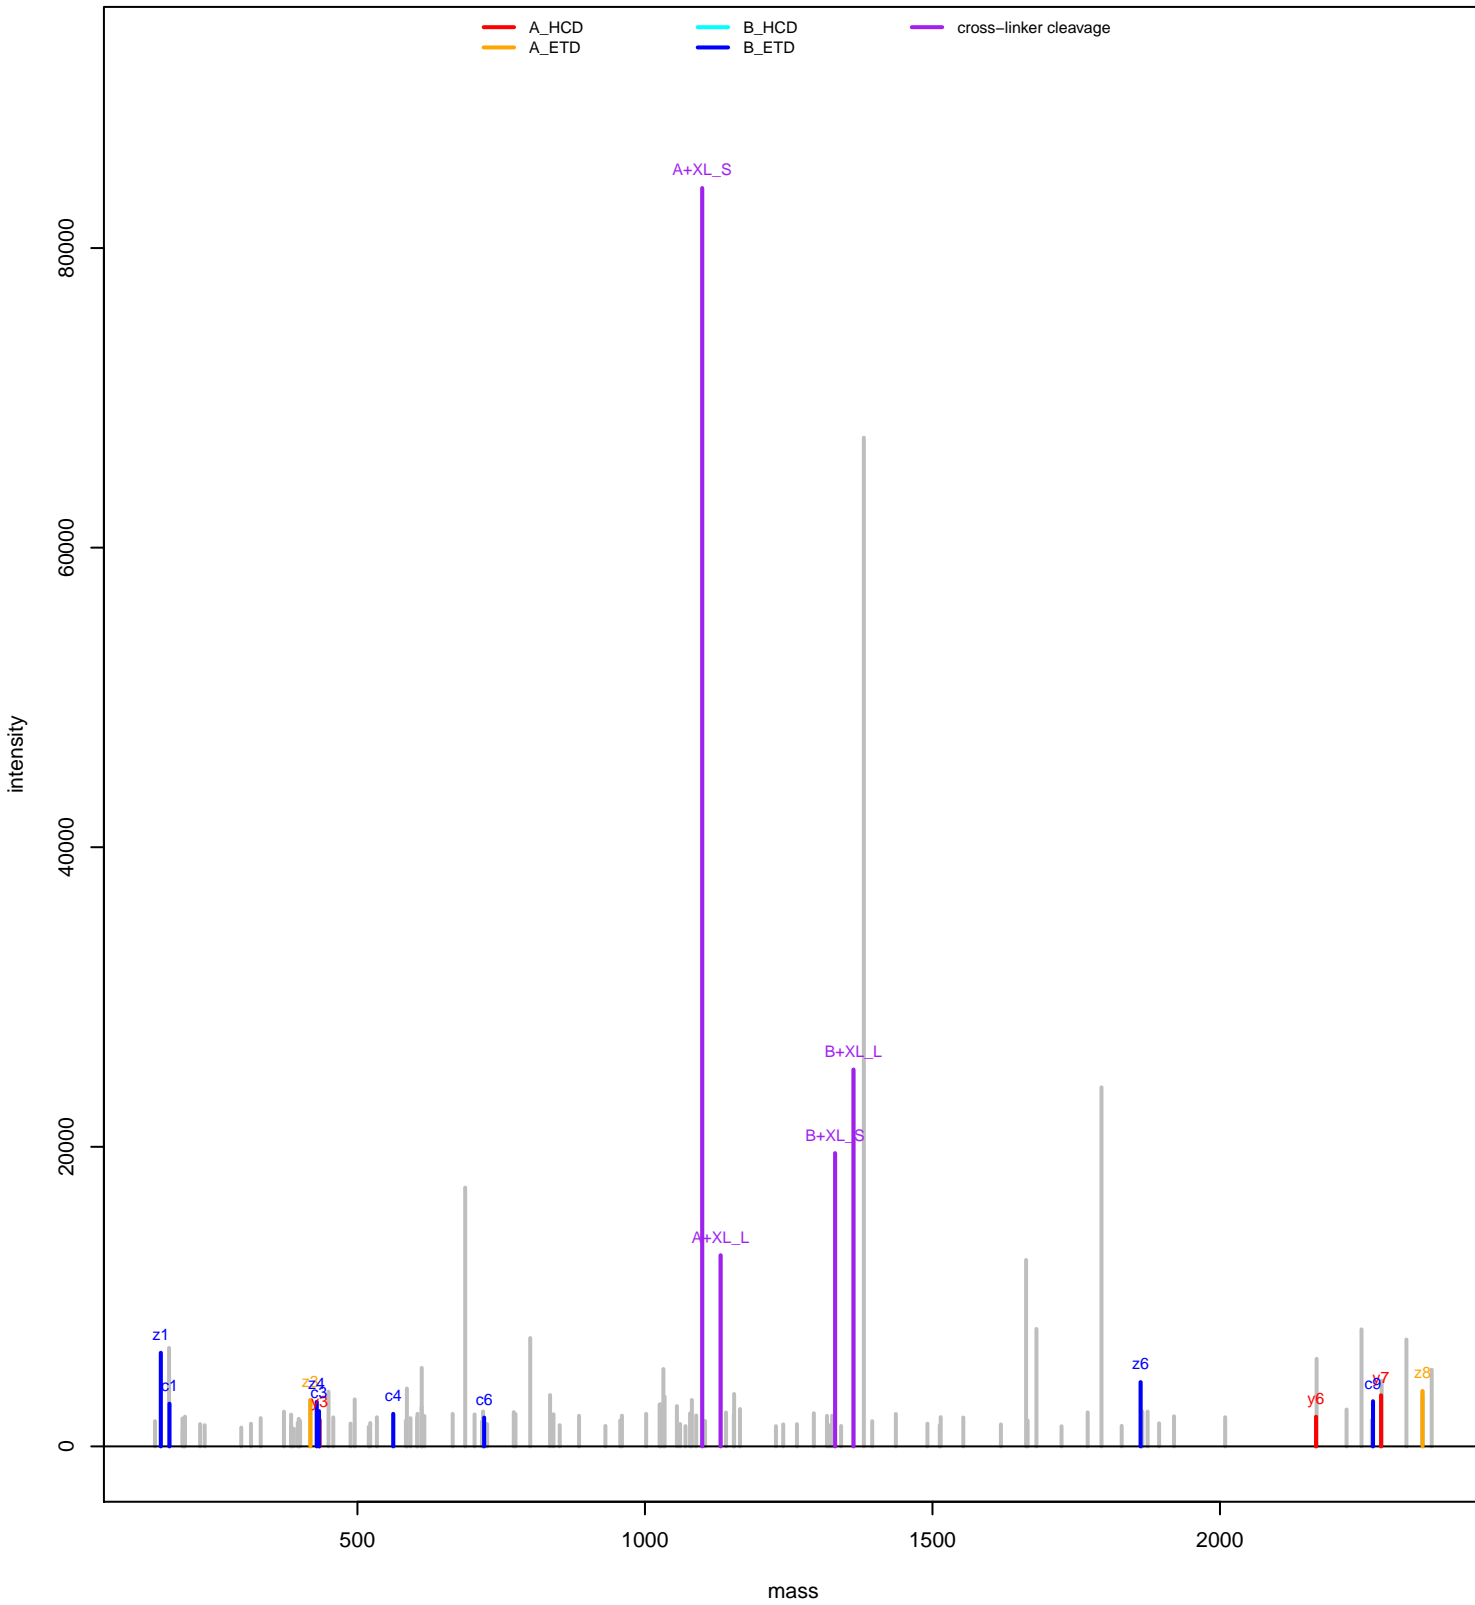

ISLGLKQCK+XL\_S

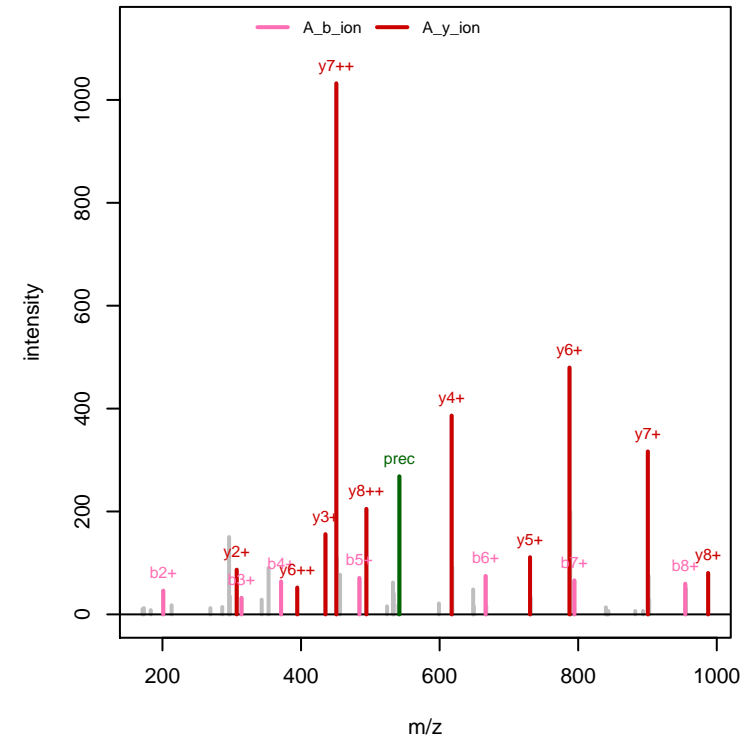

ISLGLKQCK+XL\_L

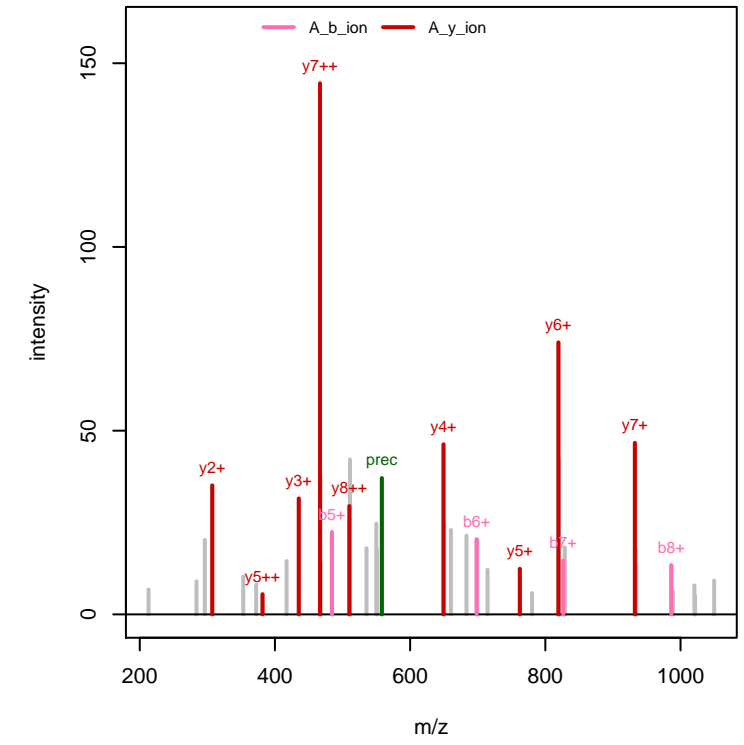

RYPEGTKLTGR+XL\_S

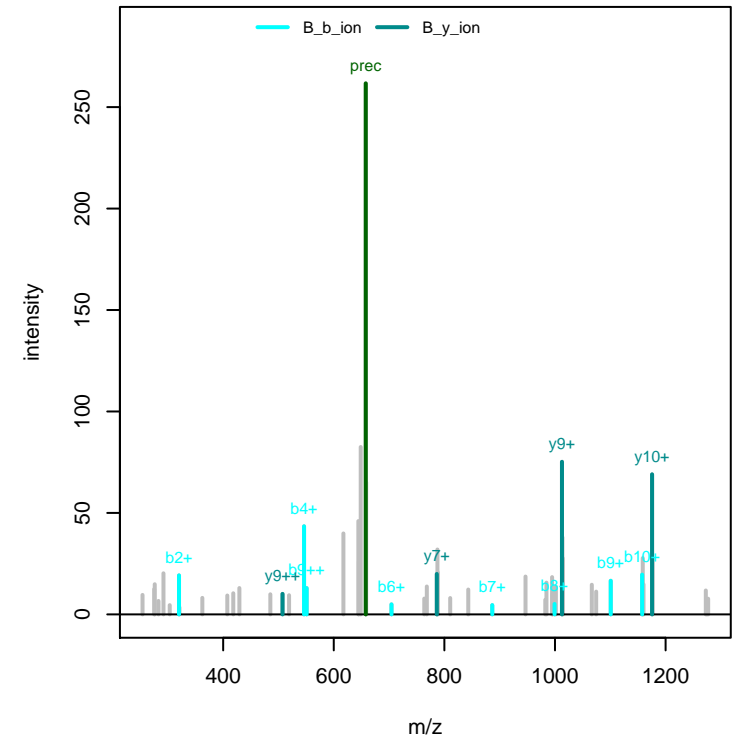

RYPEGTKLTGR+XL\_L

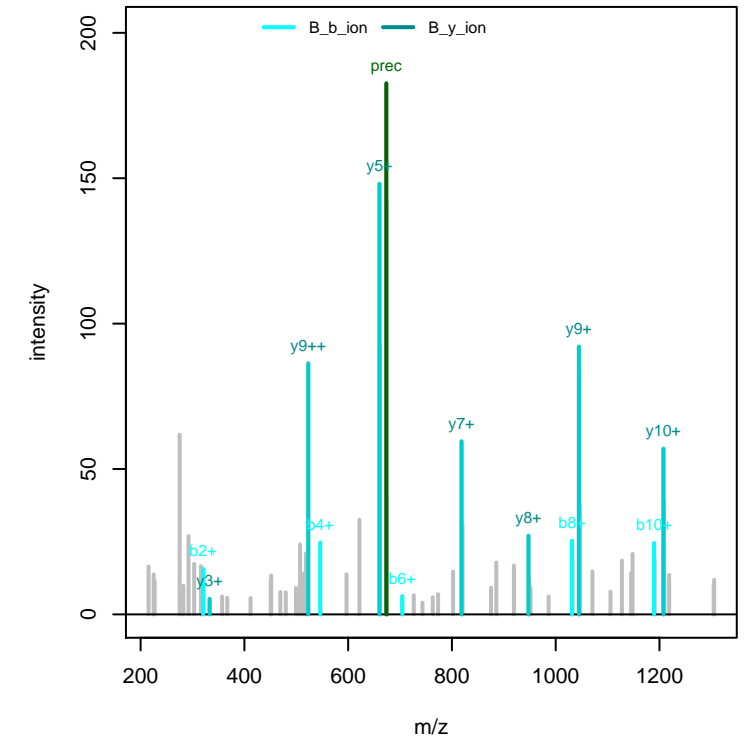

KISNGEGVER  
VFQTHSPVVDISIVKR

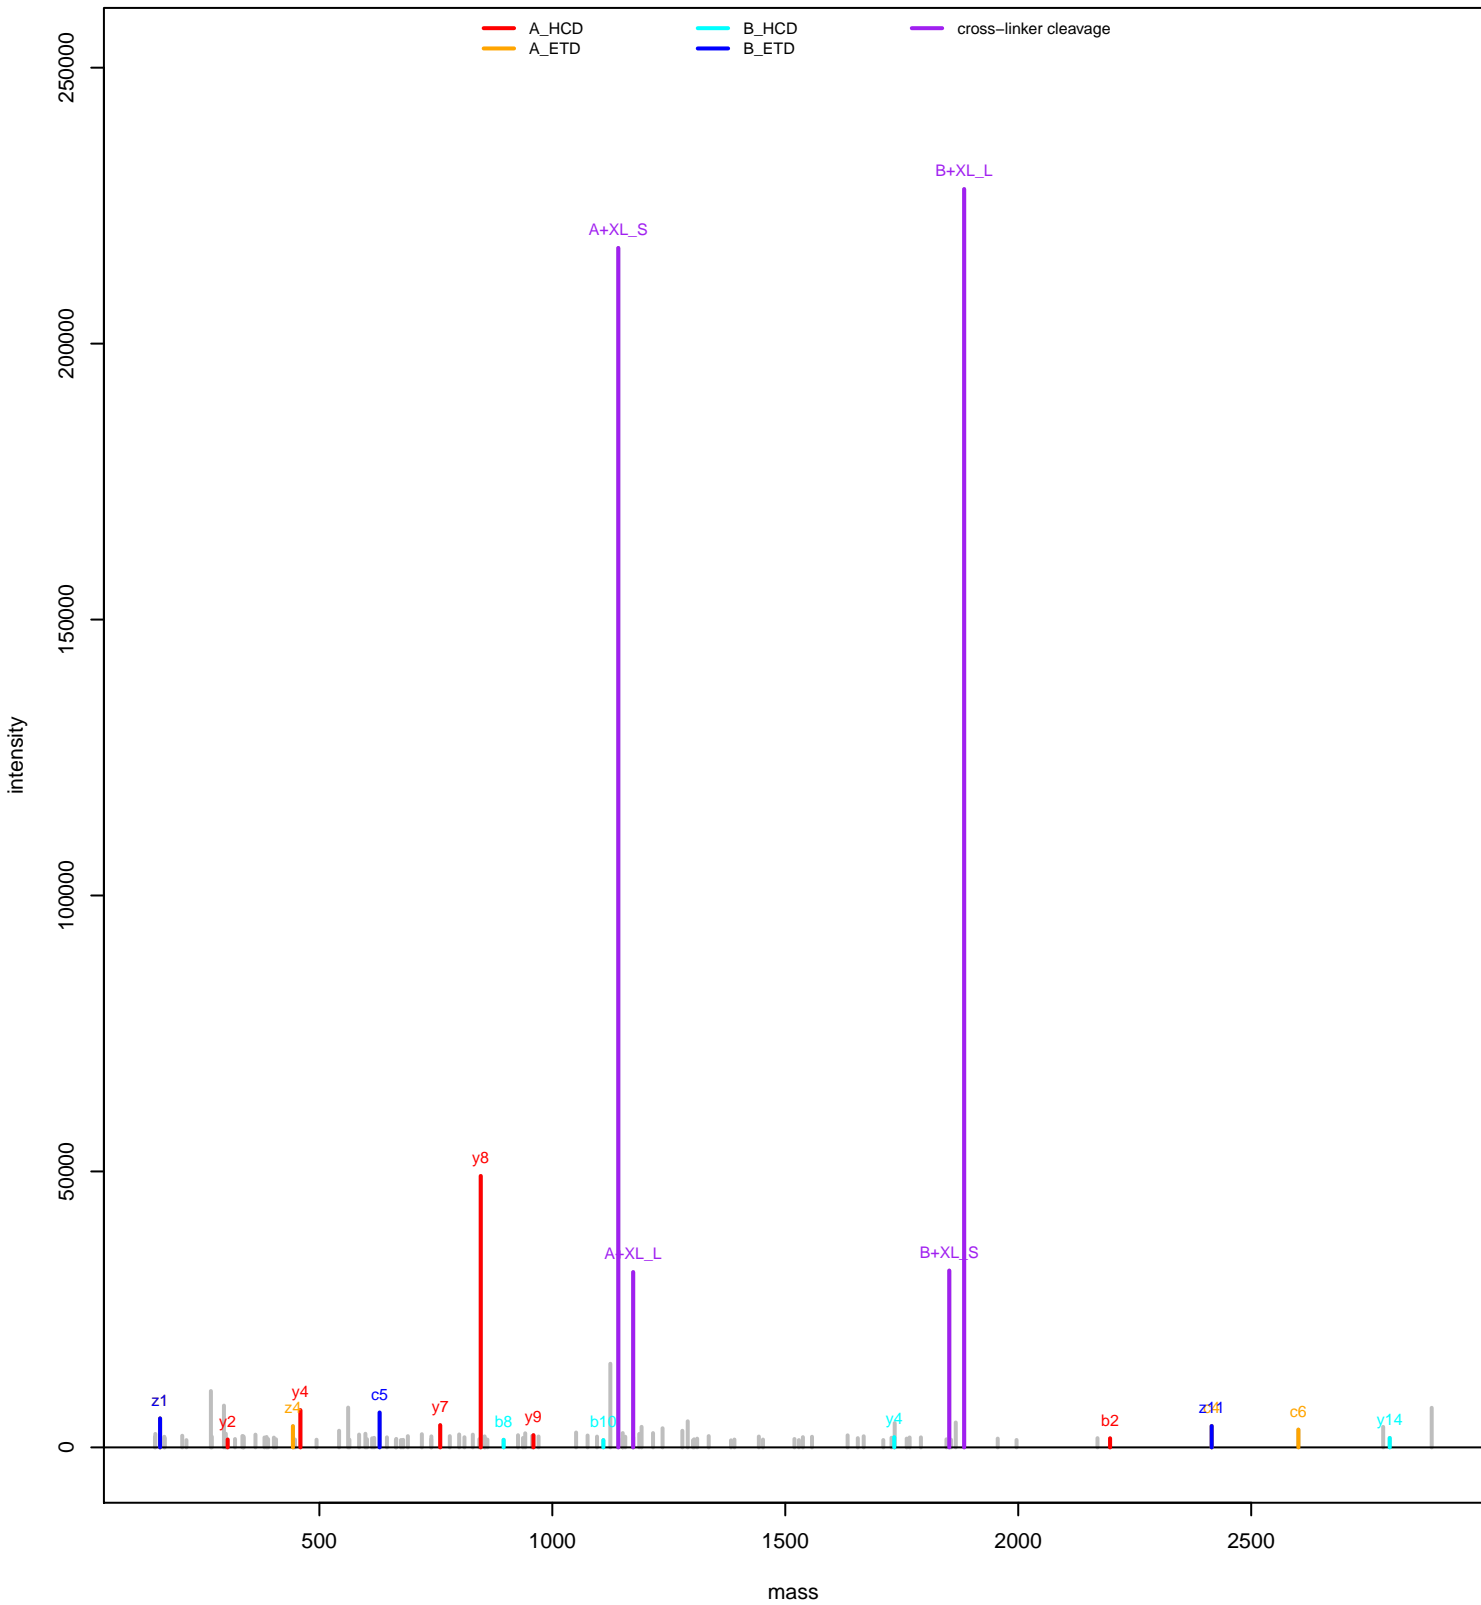

KISNGEGVER+XL\_S

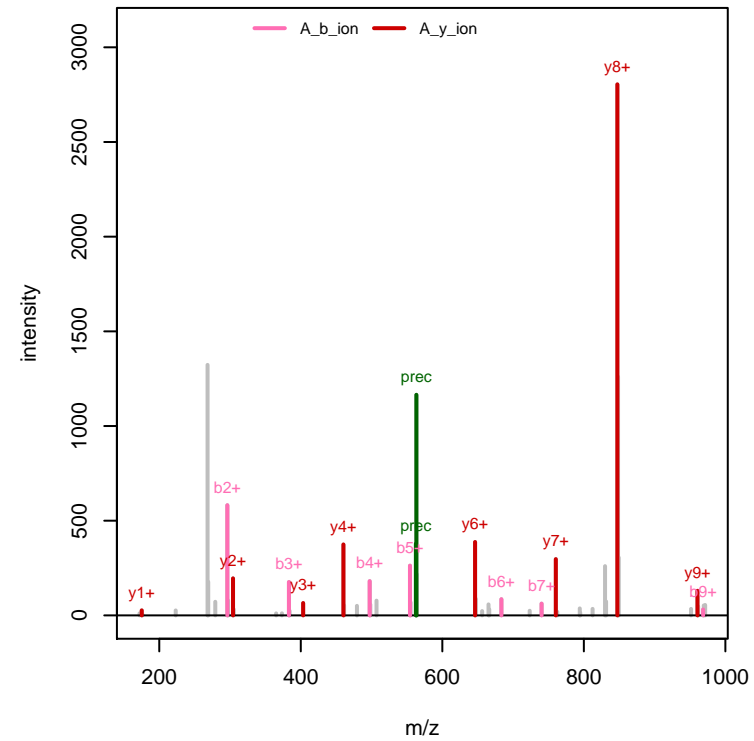

KISNGEGVER+XL\_L

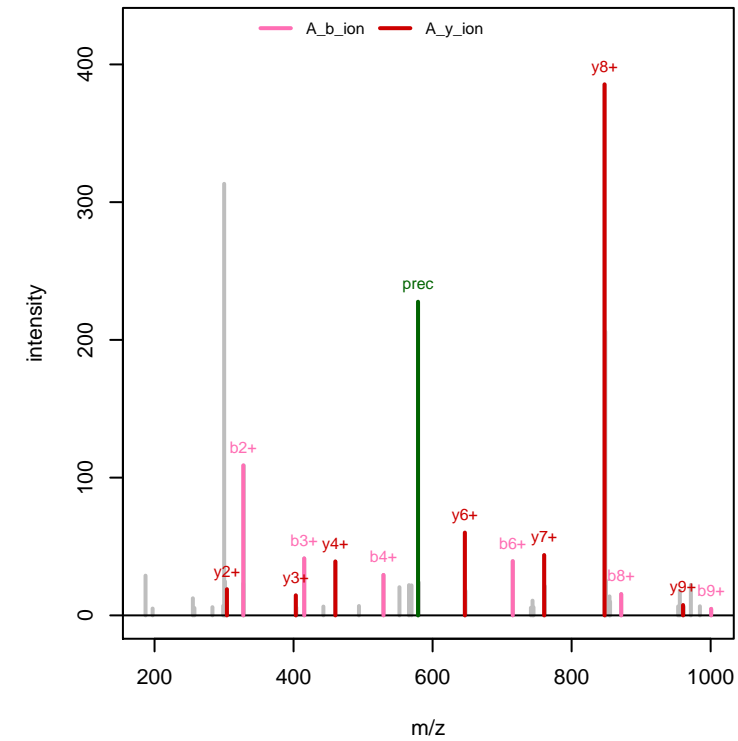

VFQTHSPVVDISIVKR+XL\_S

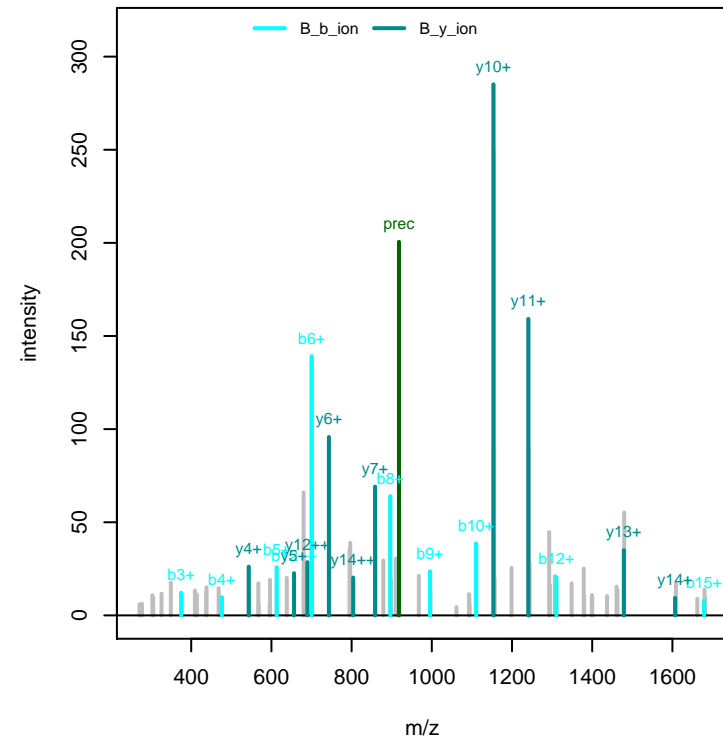

VFQTHSPVVDISIVKR+XL\_L

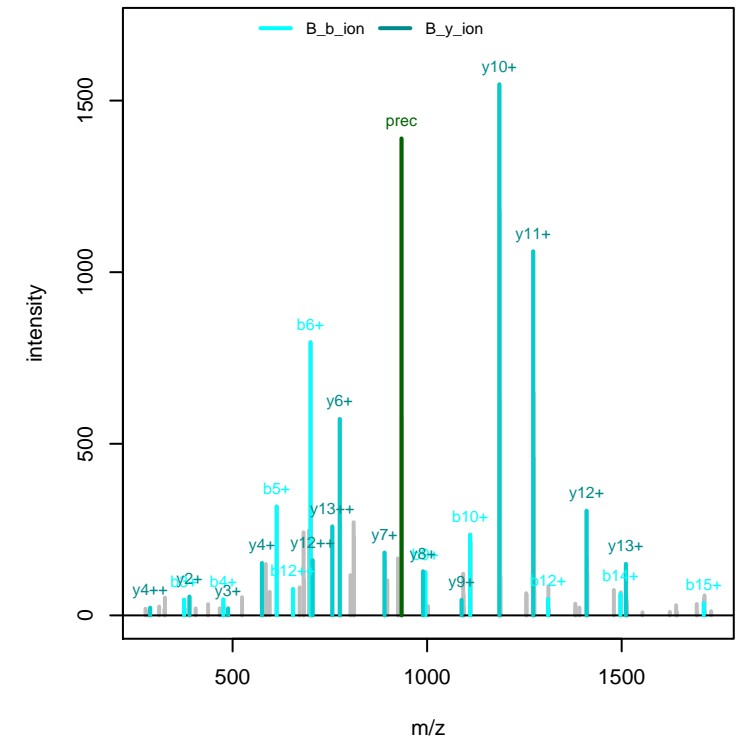

AIFGEKASDVK  
GETQLTPEEKLLR

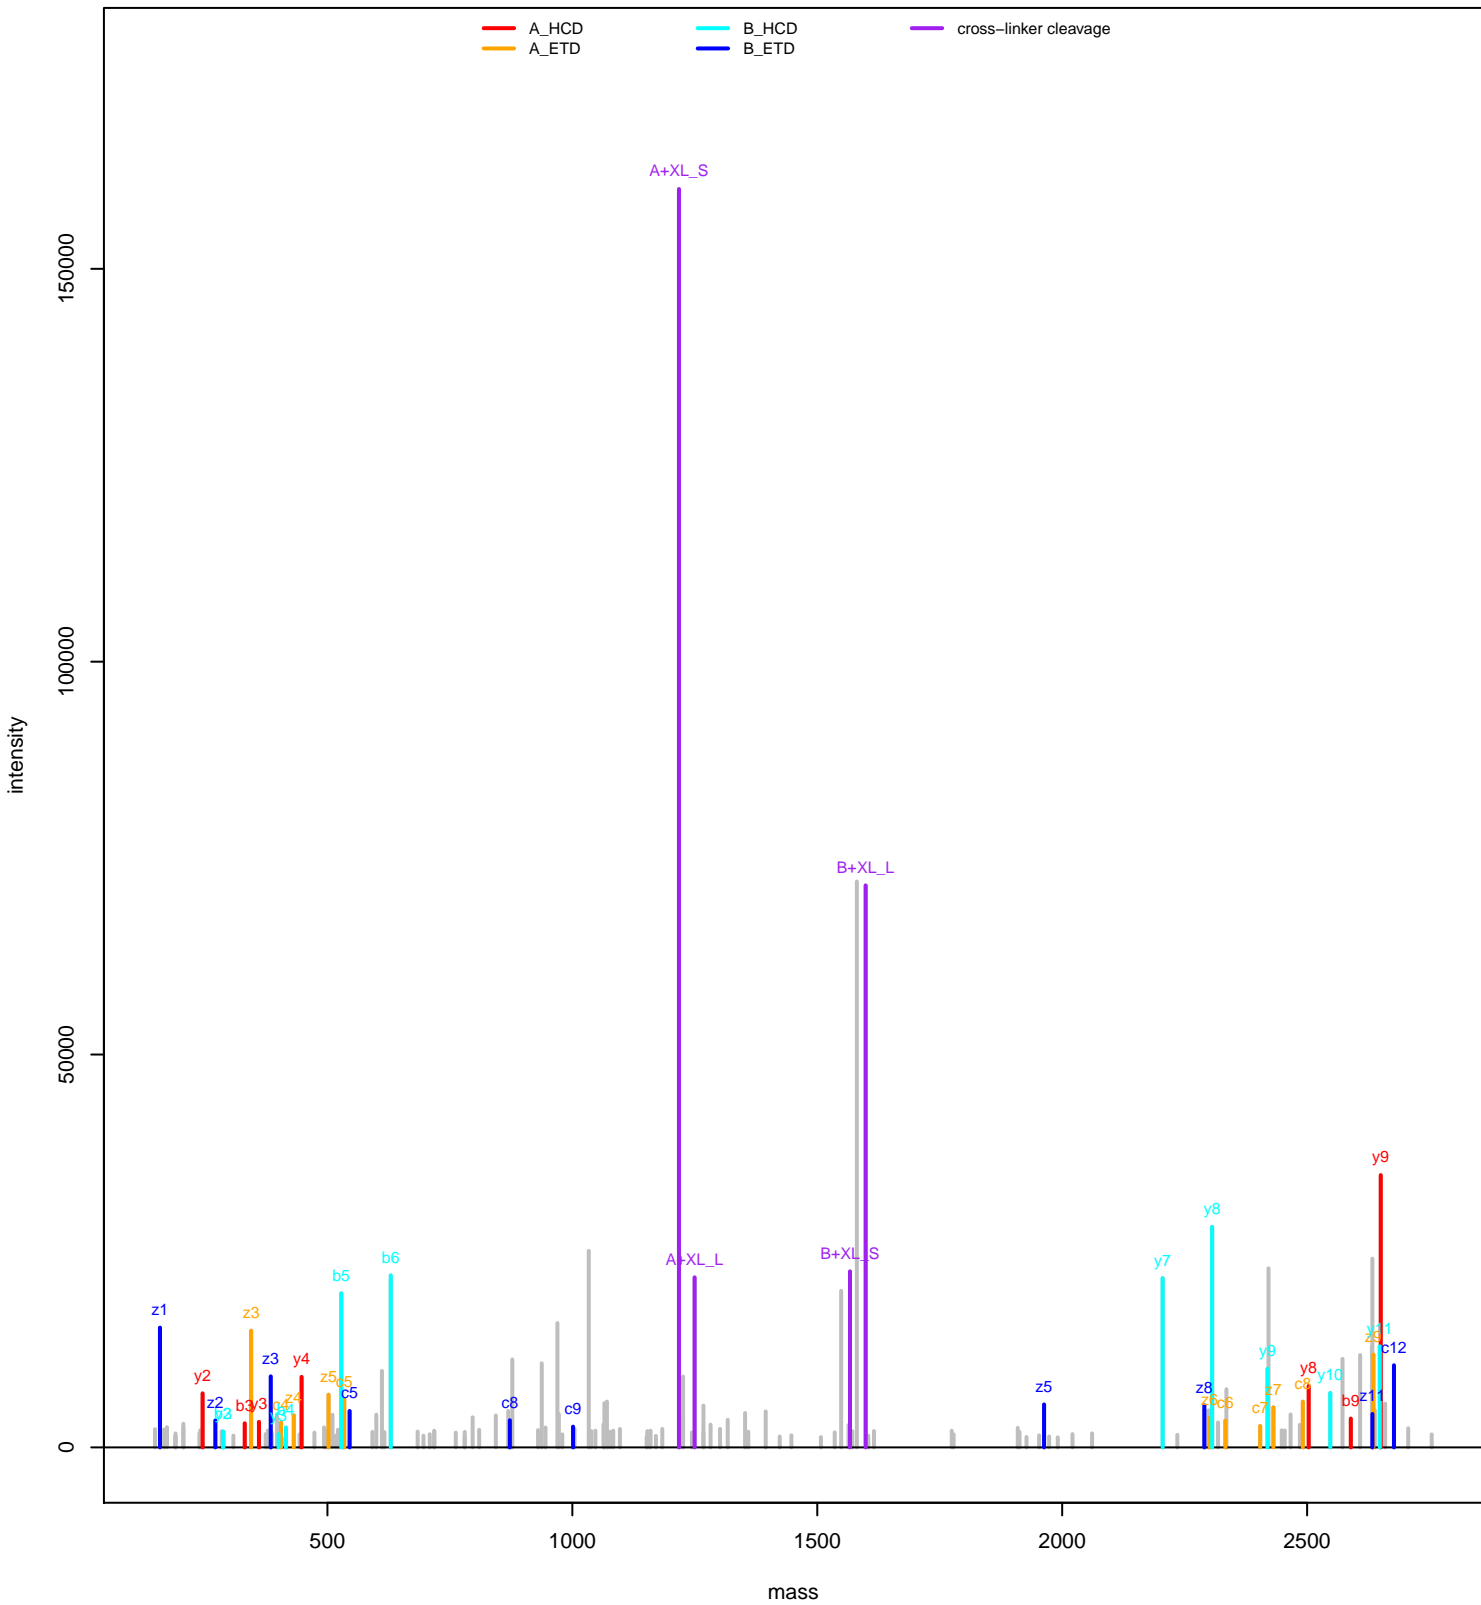

AIFGEKASDVK+XL\_S

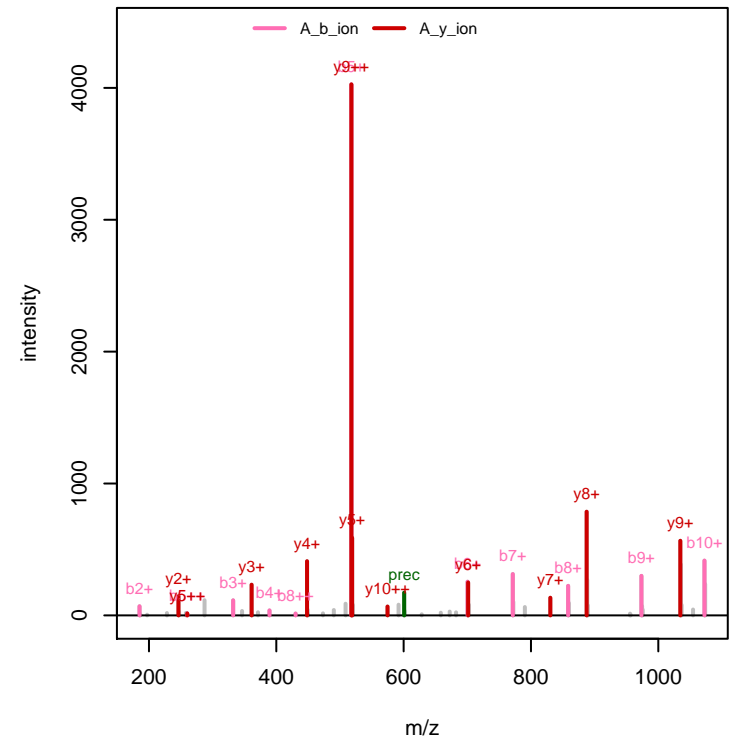

AIFGEKASDVK+XL\_L

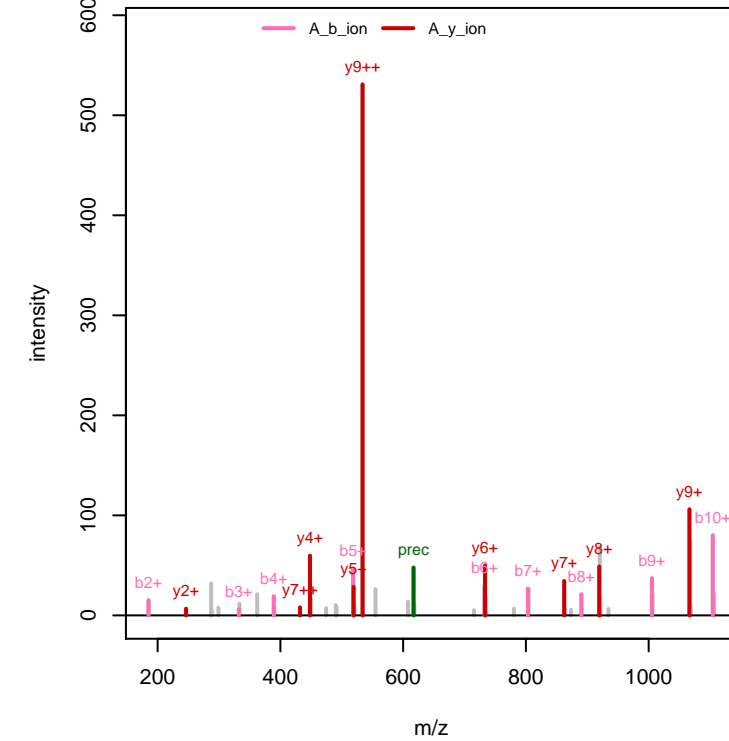

GETQLTPEEKLLR+XL\_S

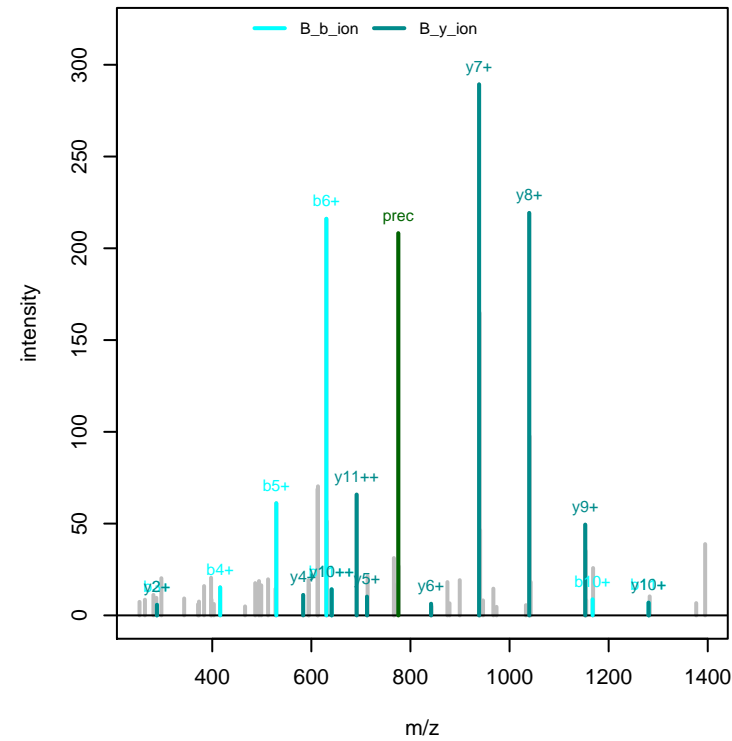

GETQLTPEEKLLR+XL\_L

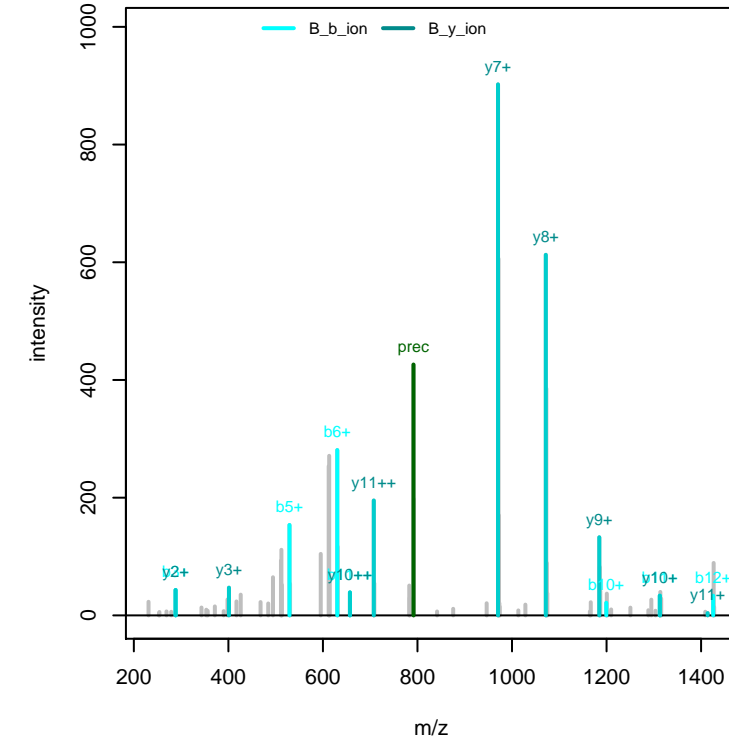



DSLPEGVYNDQFKK  
IMGKASFVTLQDVGGR

DSLPEGVYNDQFKK+XL\_S

DSLPEGVYNDQFKK+XL\_L

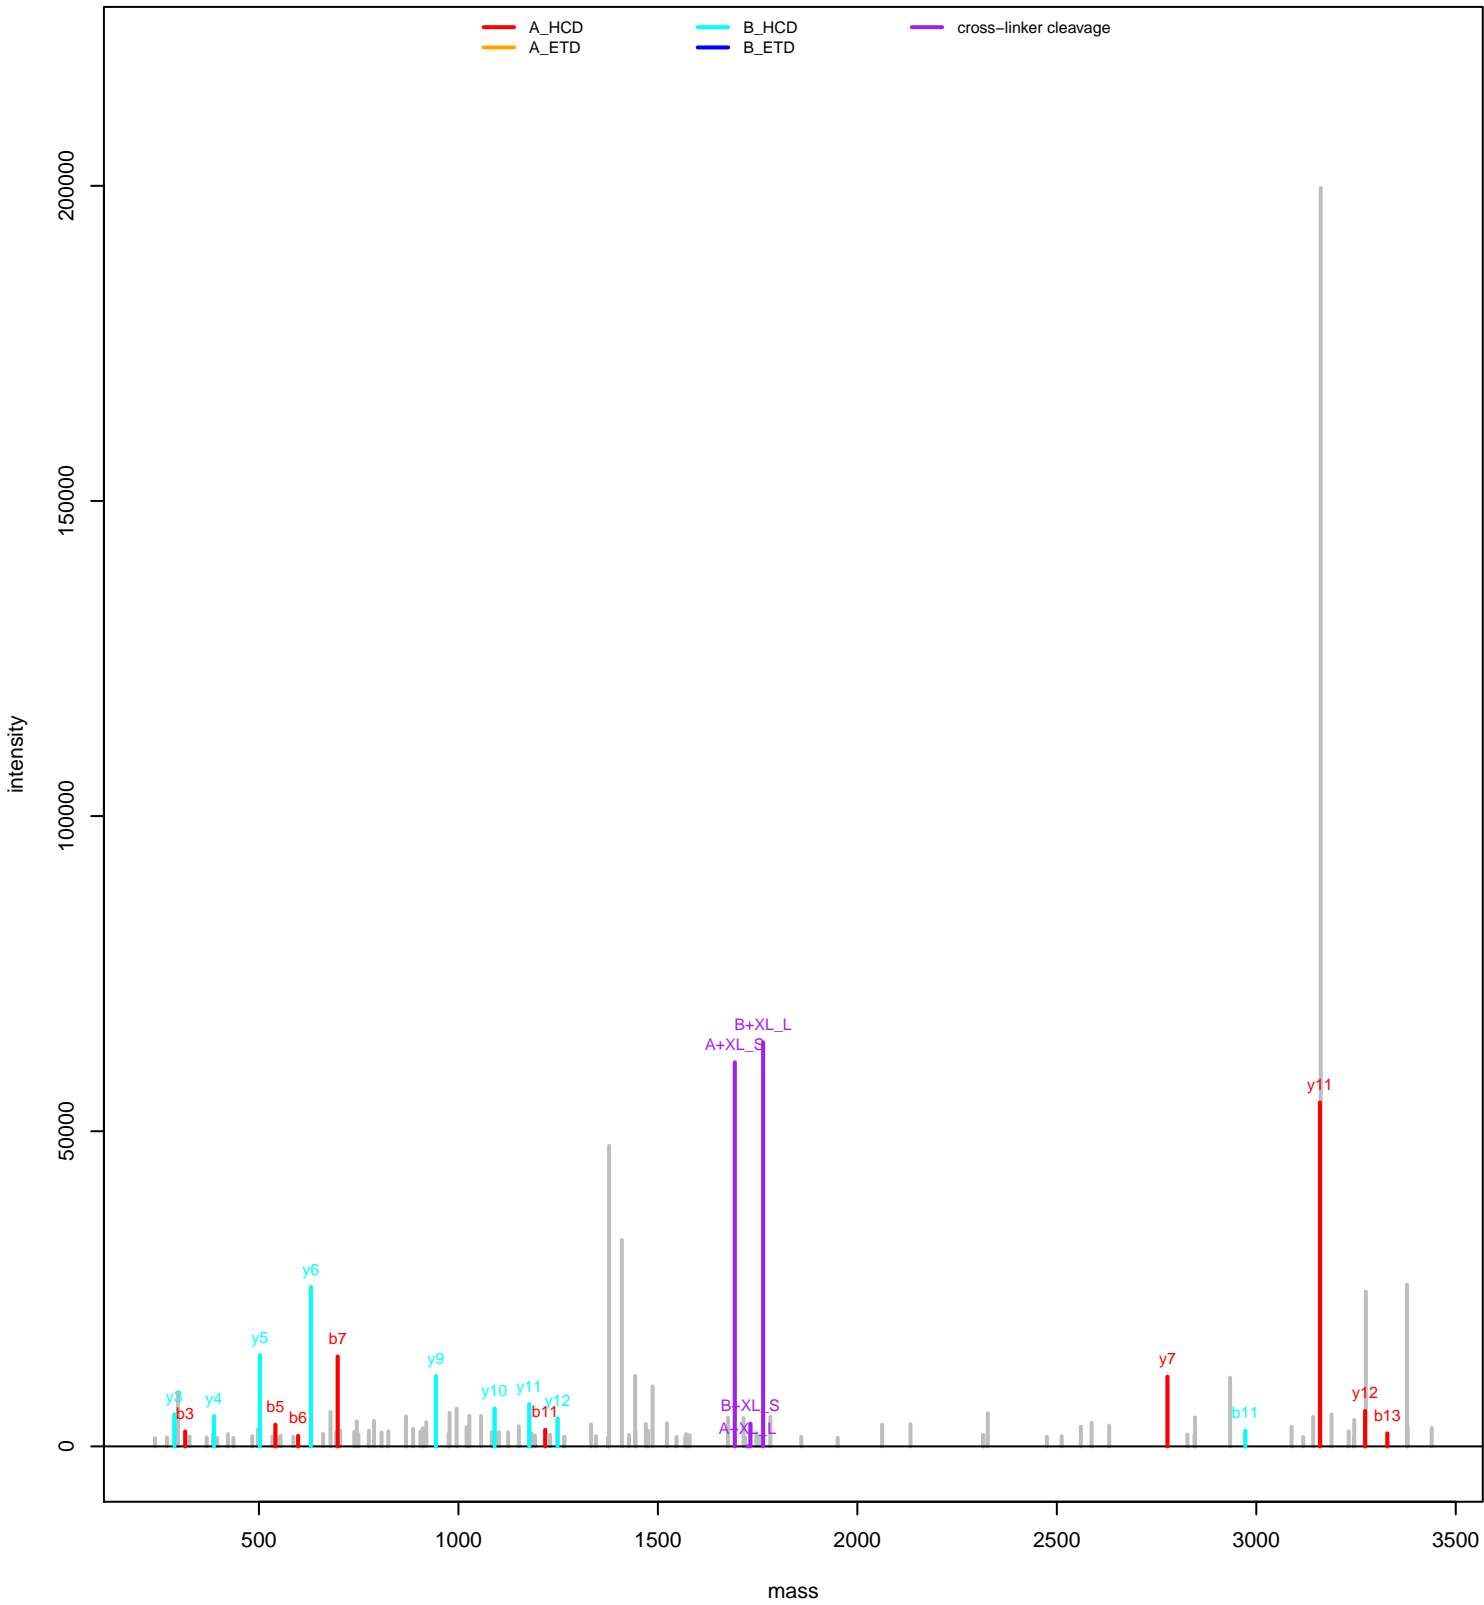

IMGKASFVTLQDVGGR+XL\_S

IMGKASFVTLQDVGGR+XL\_L

**KGEDVEK**  
**KVVADIAGVPAQINIAEVR**

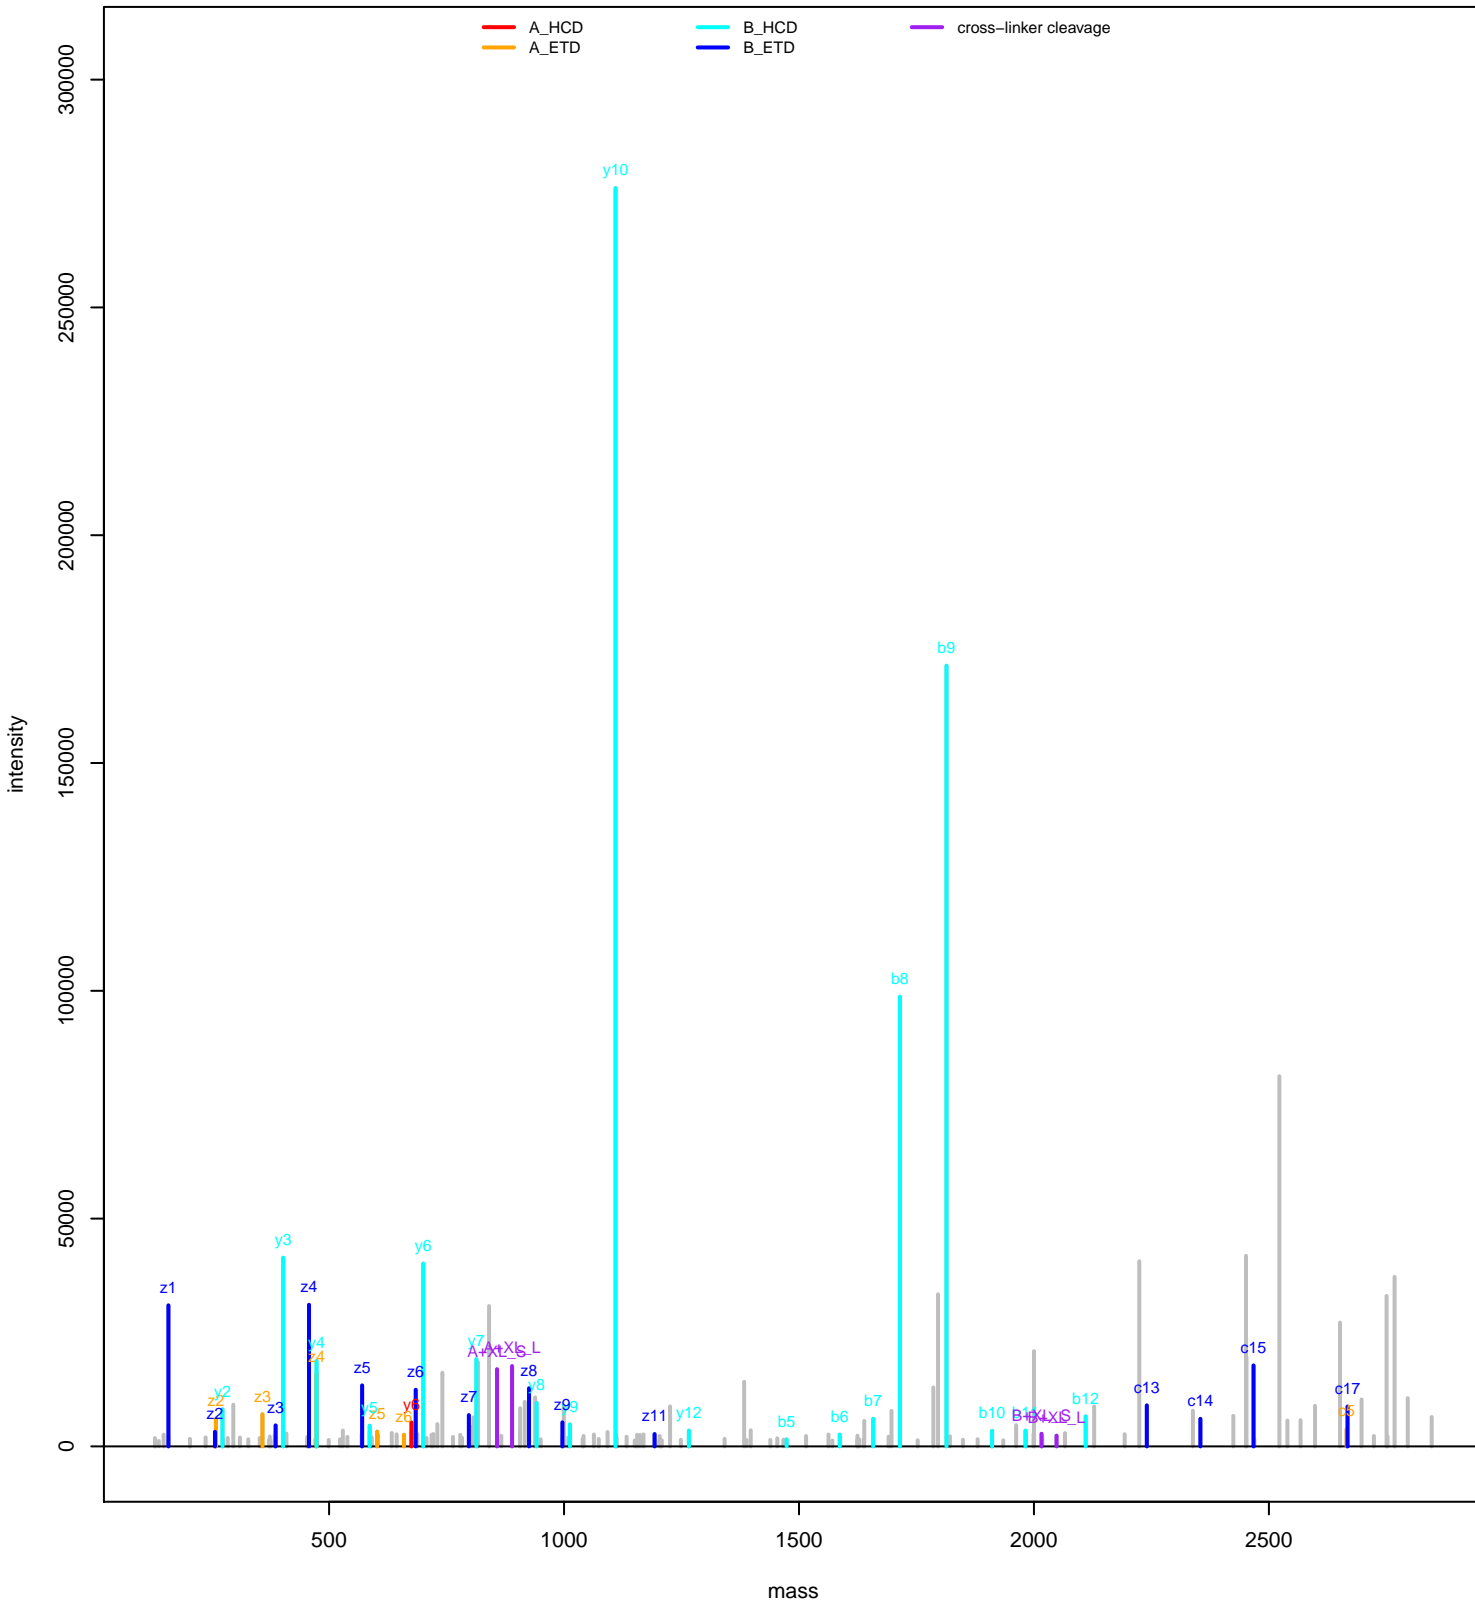

**KGEDVEK+XL\_S**

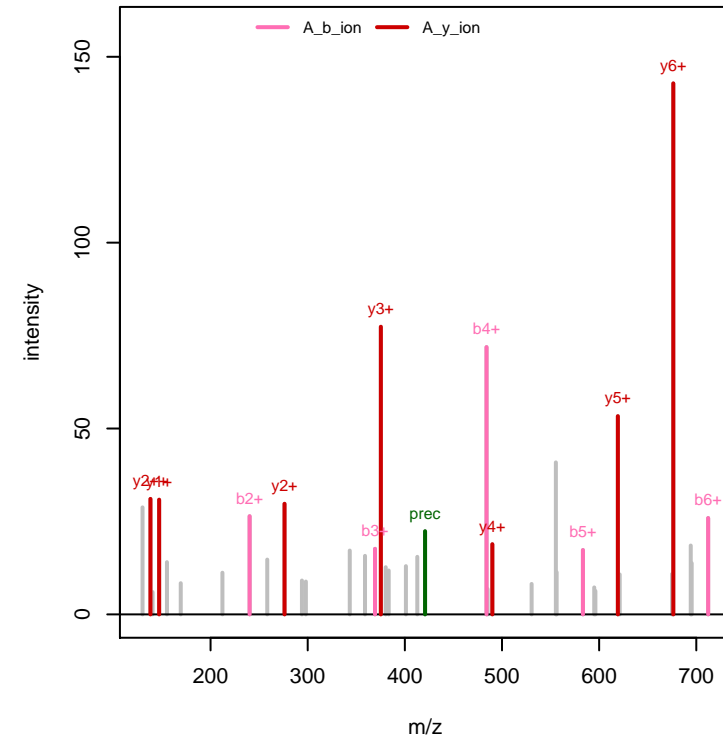

**KGEDVEK+XL\_L**

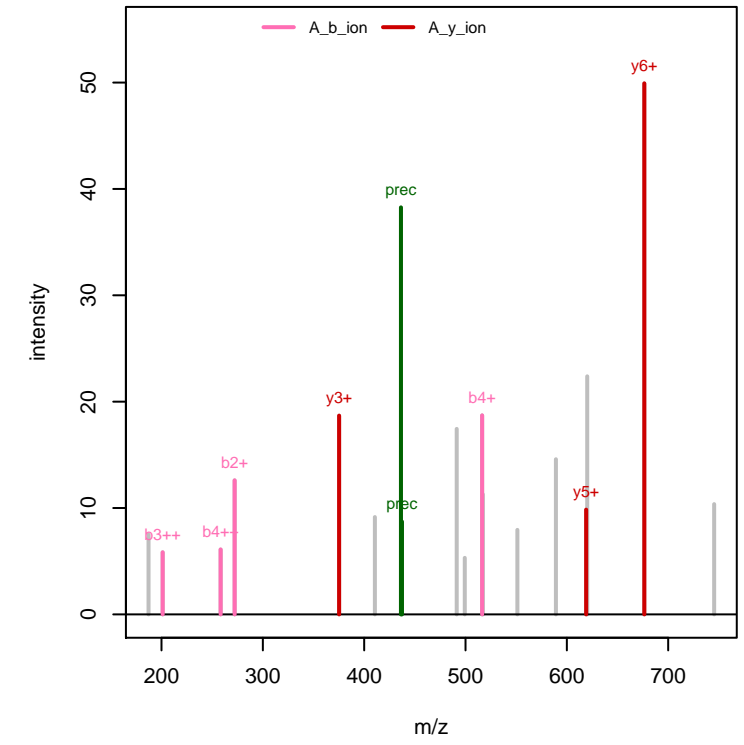

**KVVADIAGVPAQINIAEVR+XL\_S**

**KVVADIAGVPAQINIAEVR+XL\_L**

TPAVIKK  
AMDEQGKSLDDFLIKQ

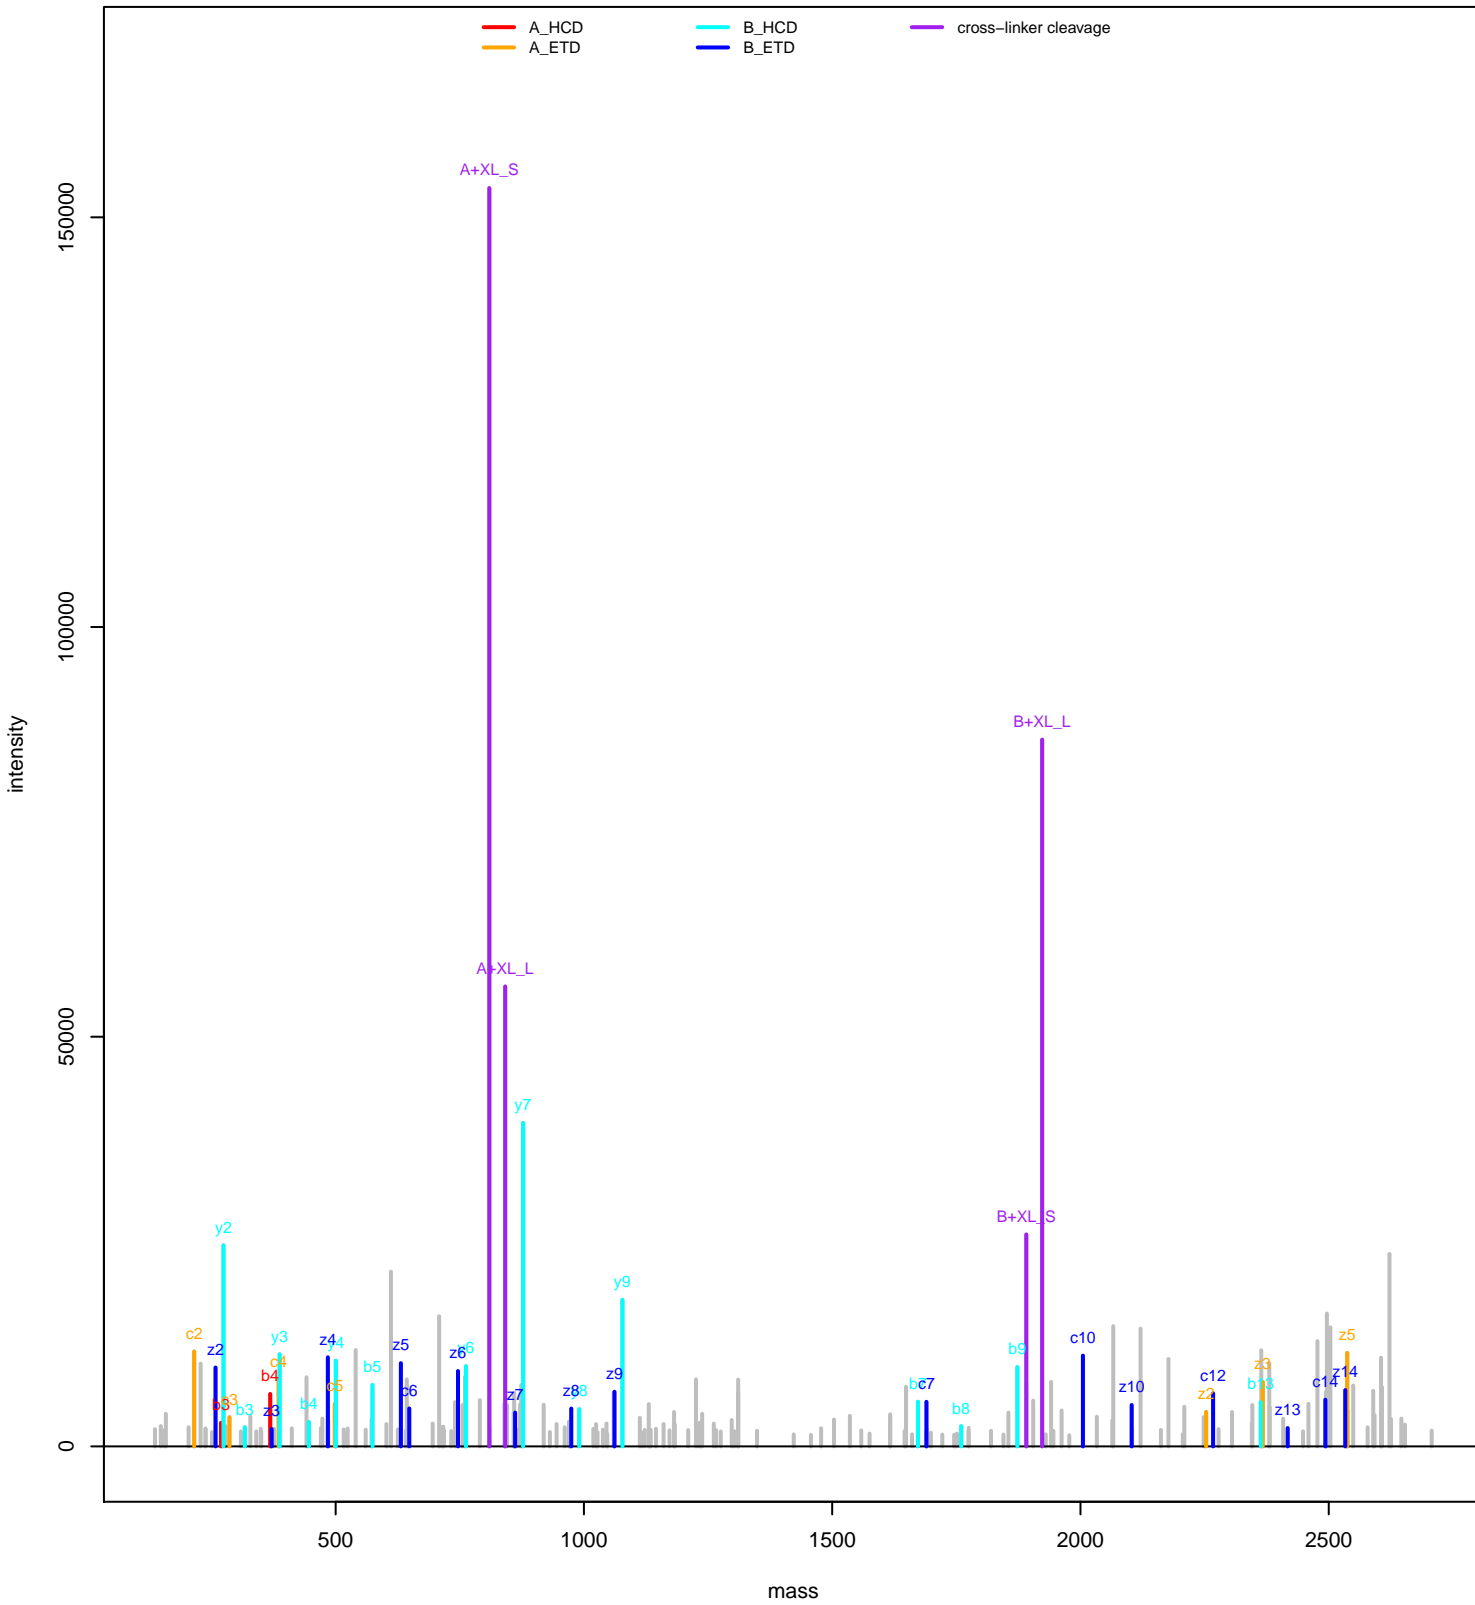

TPAVIKK+XL\_S

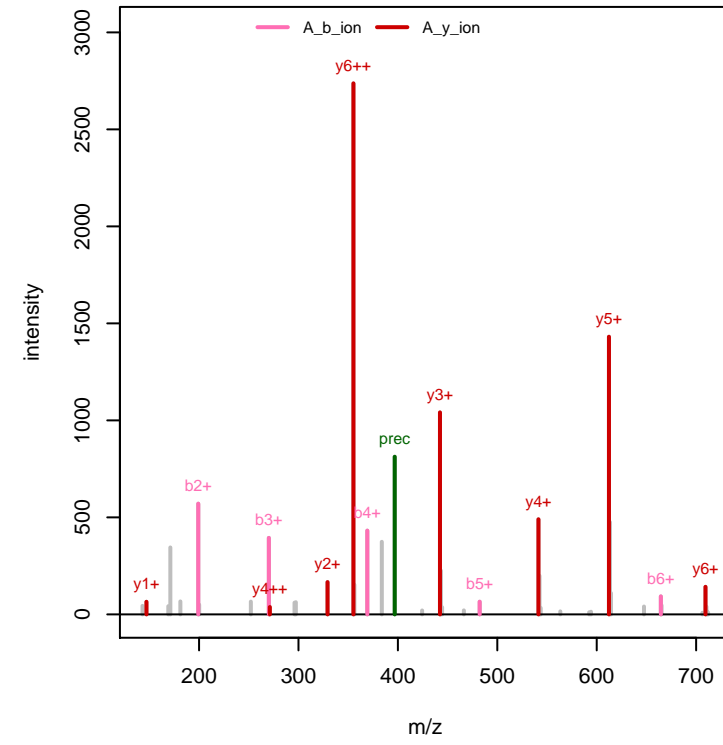

TPAVIKK+XL\_L

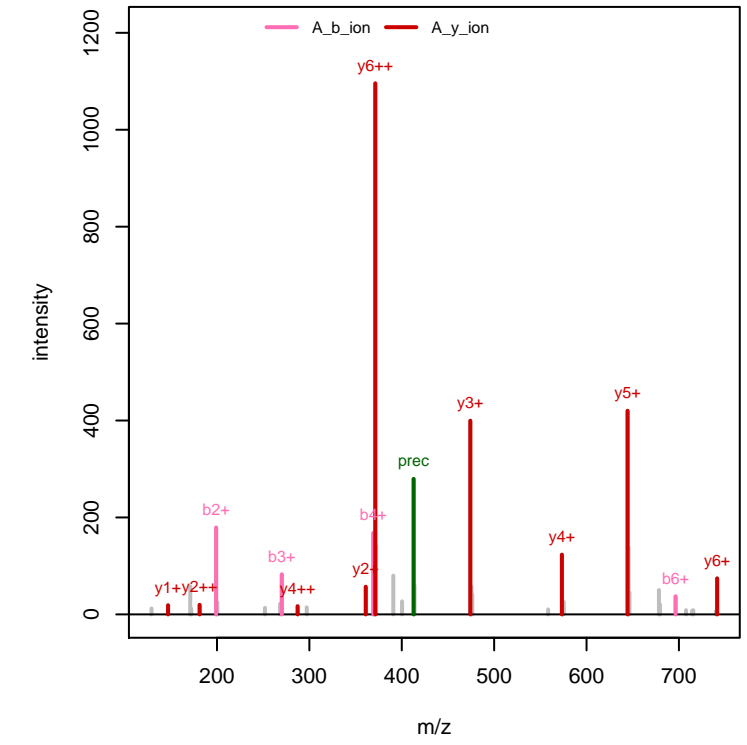

AMDEQGKSLDDFLIKQ+XL\_S

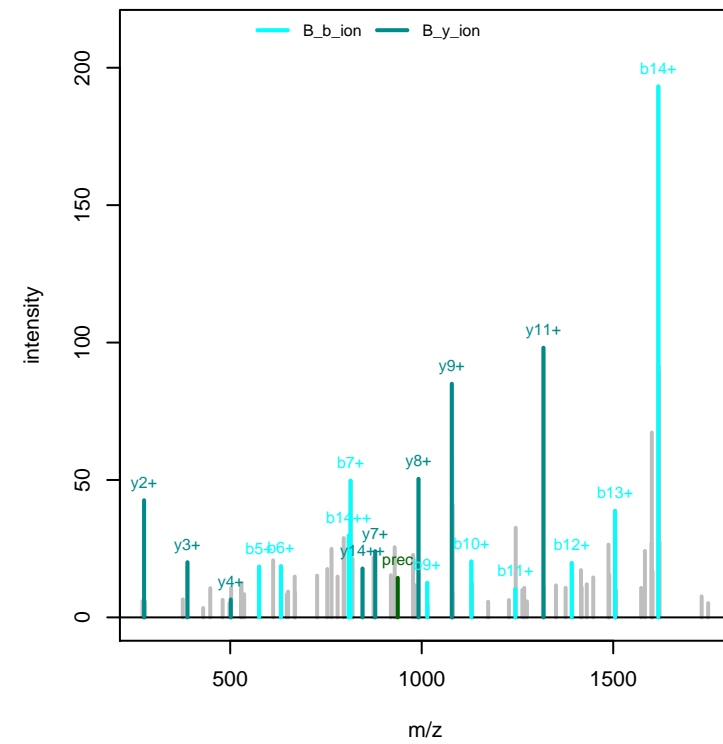

AMDEQGKSLDDFLIKQ+XL\_L

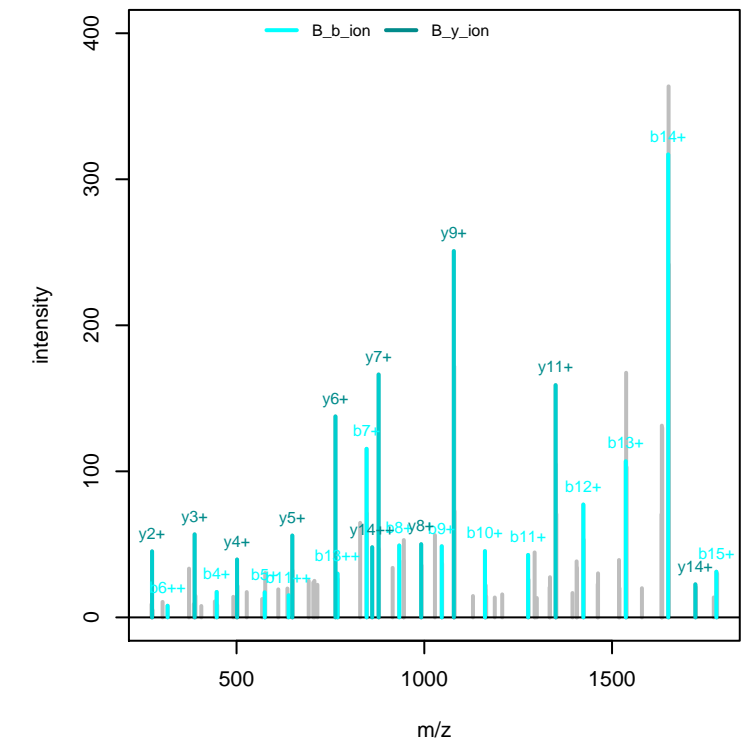

**ILENGEVKPLDVK**  
**VGDIVIFNDGYGVKSEK**

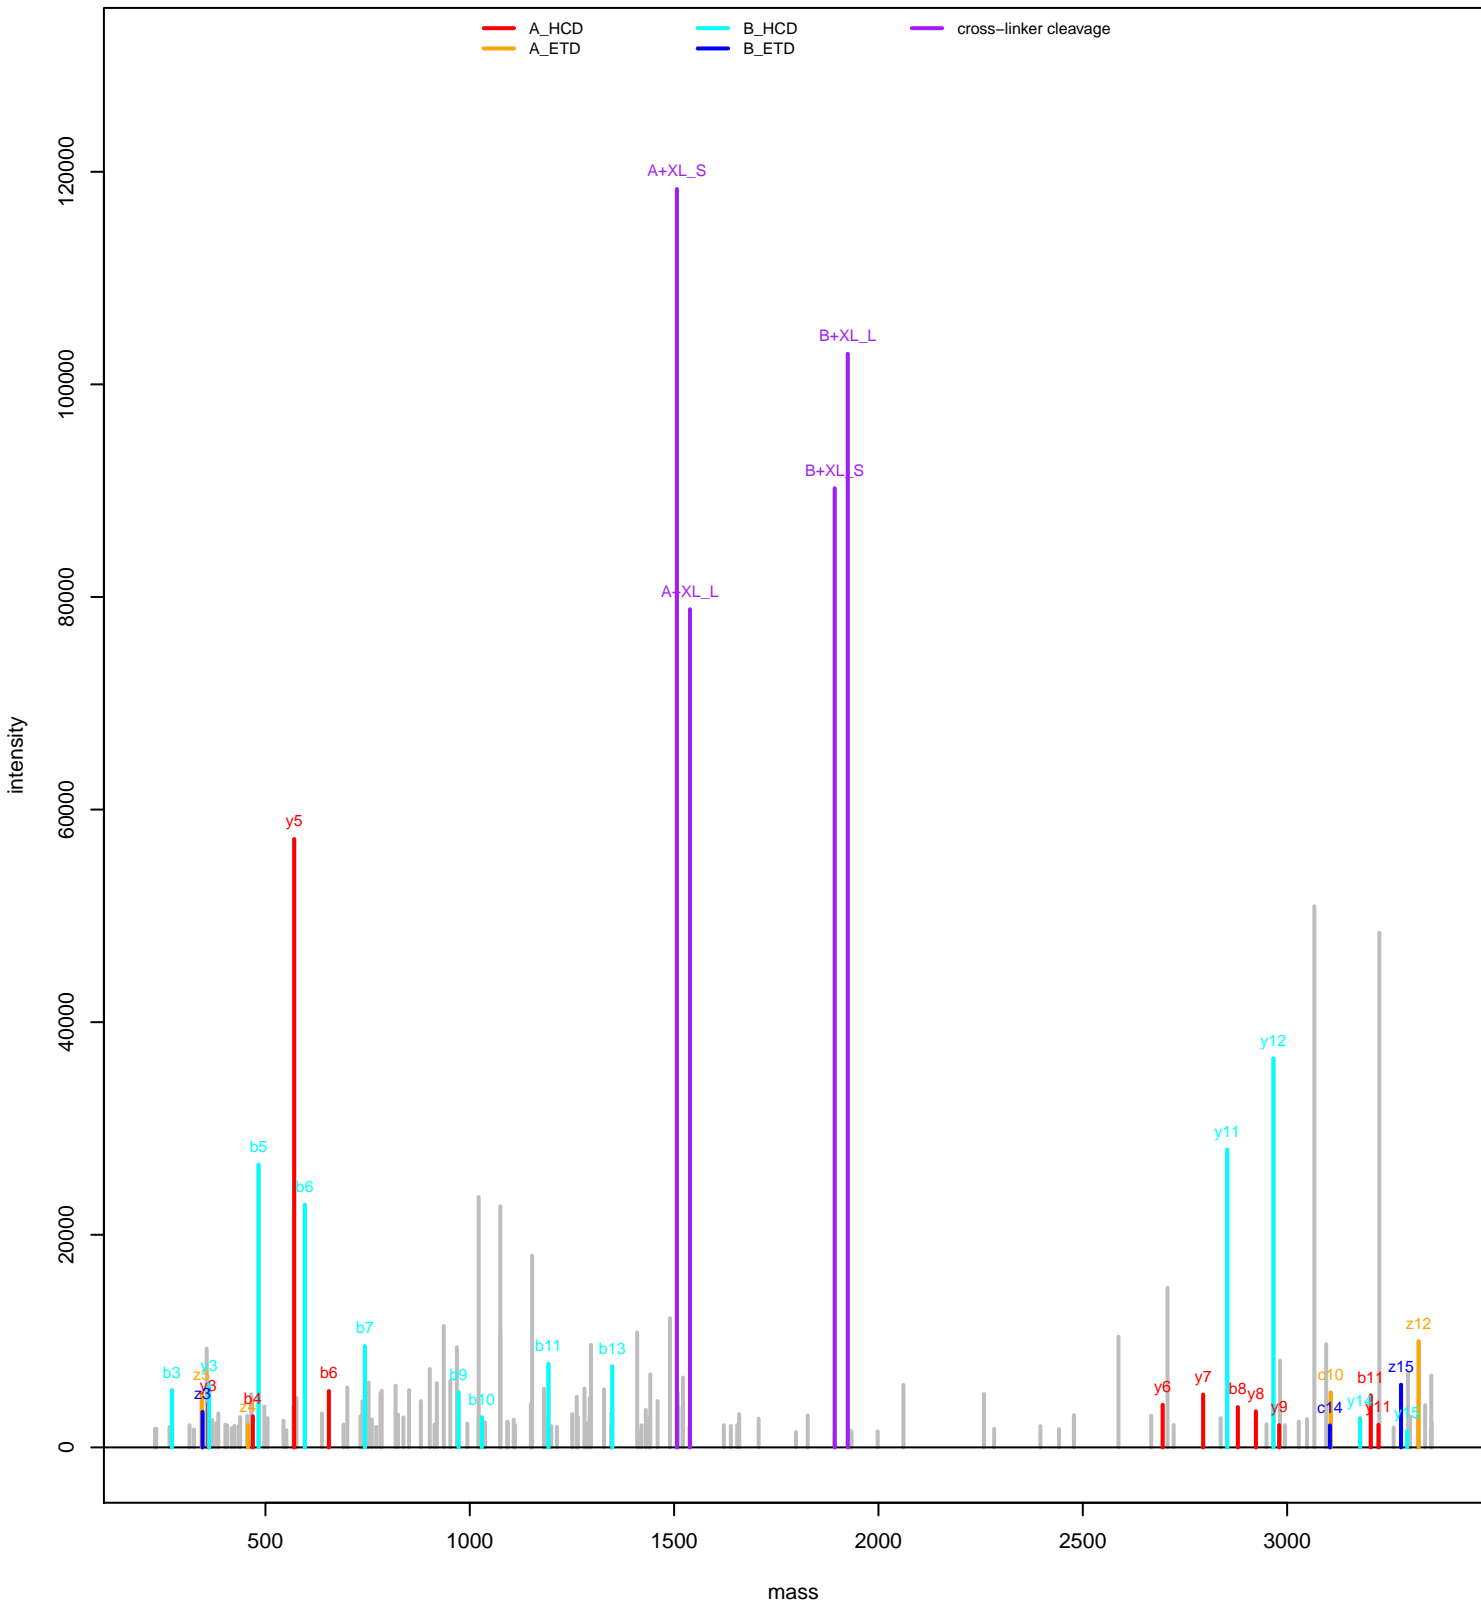

**ILENGEVKPLDVK+XL\_S**

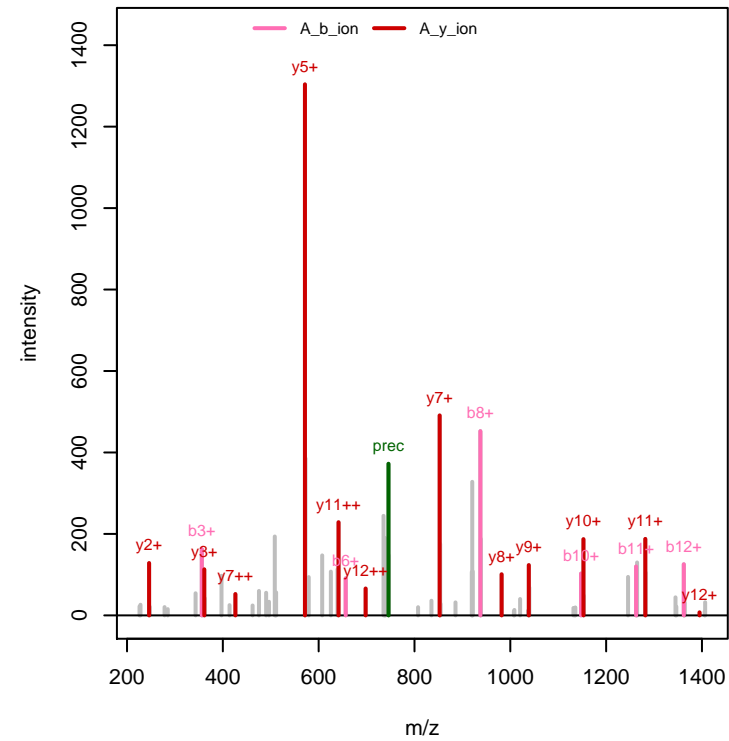

**ILENGEVKPLDVK+XL\_L**

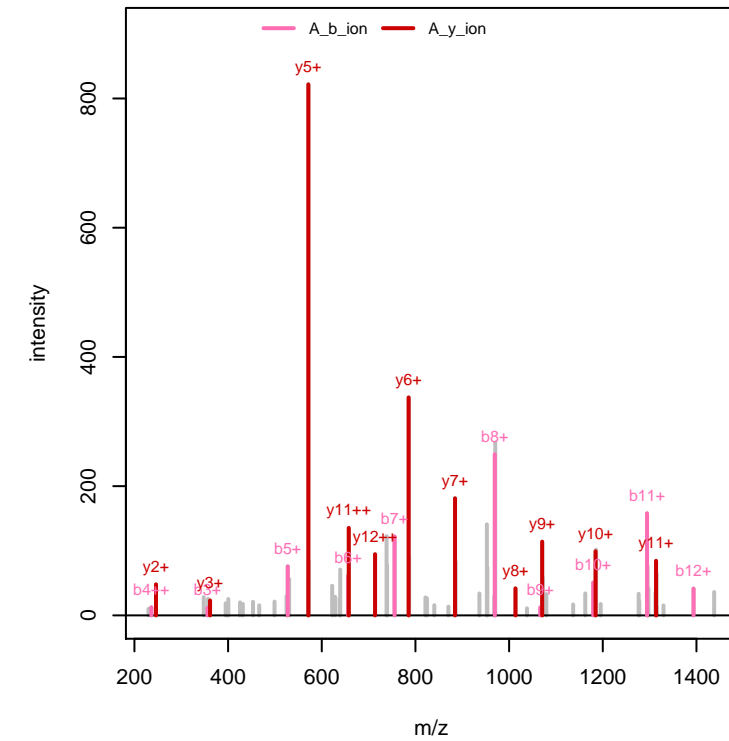

**VGDIVIFNDGYGVKSEK+XL\_S**

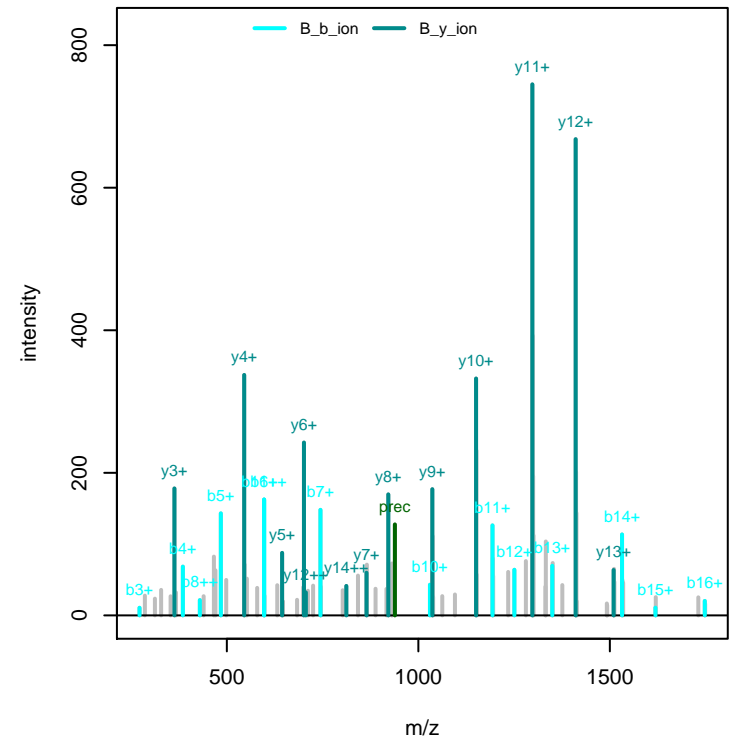

**VGDIVIFNDGYGVKSEK+XL\_L**

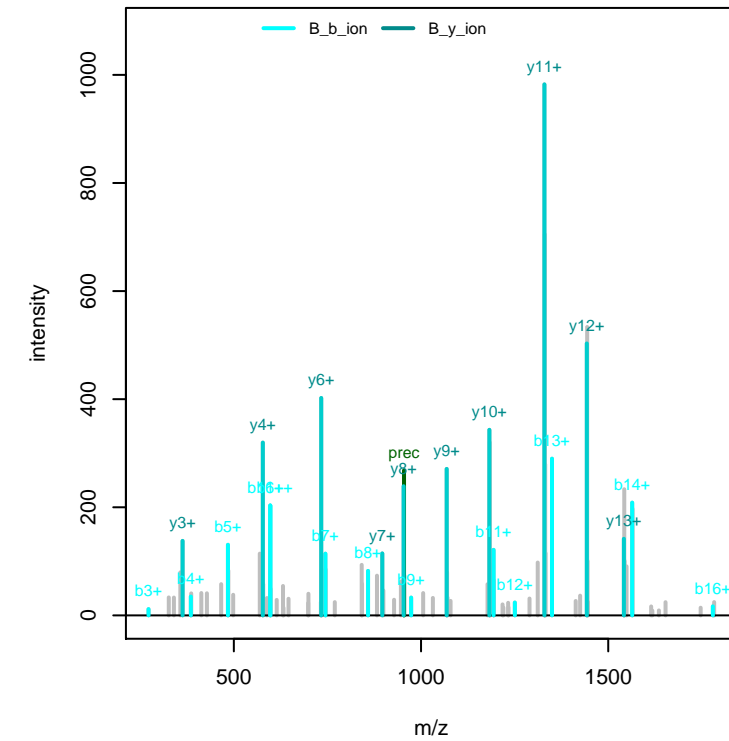

FIEEKTIC  
KIIRNTNFEDAK

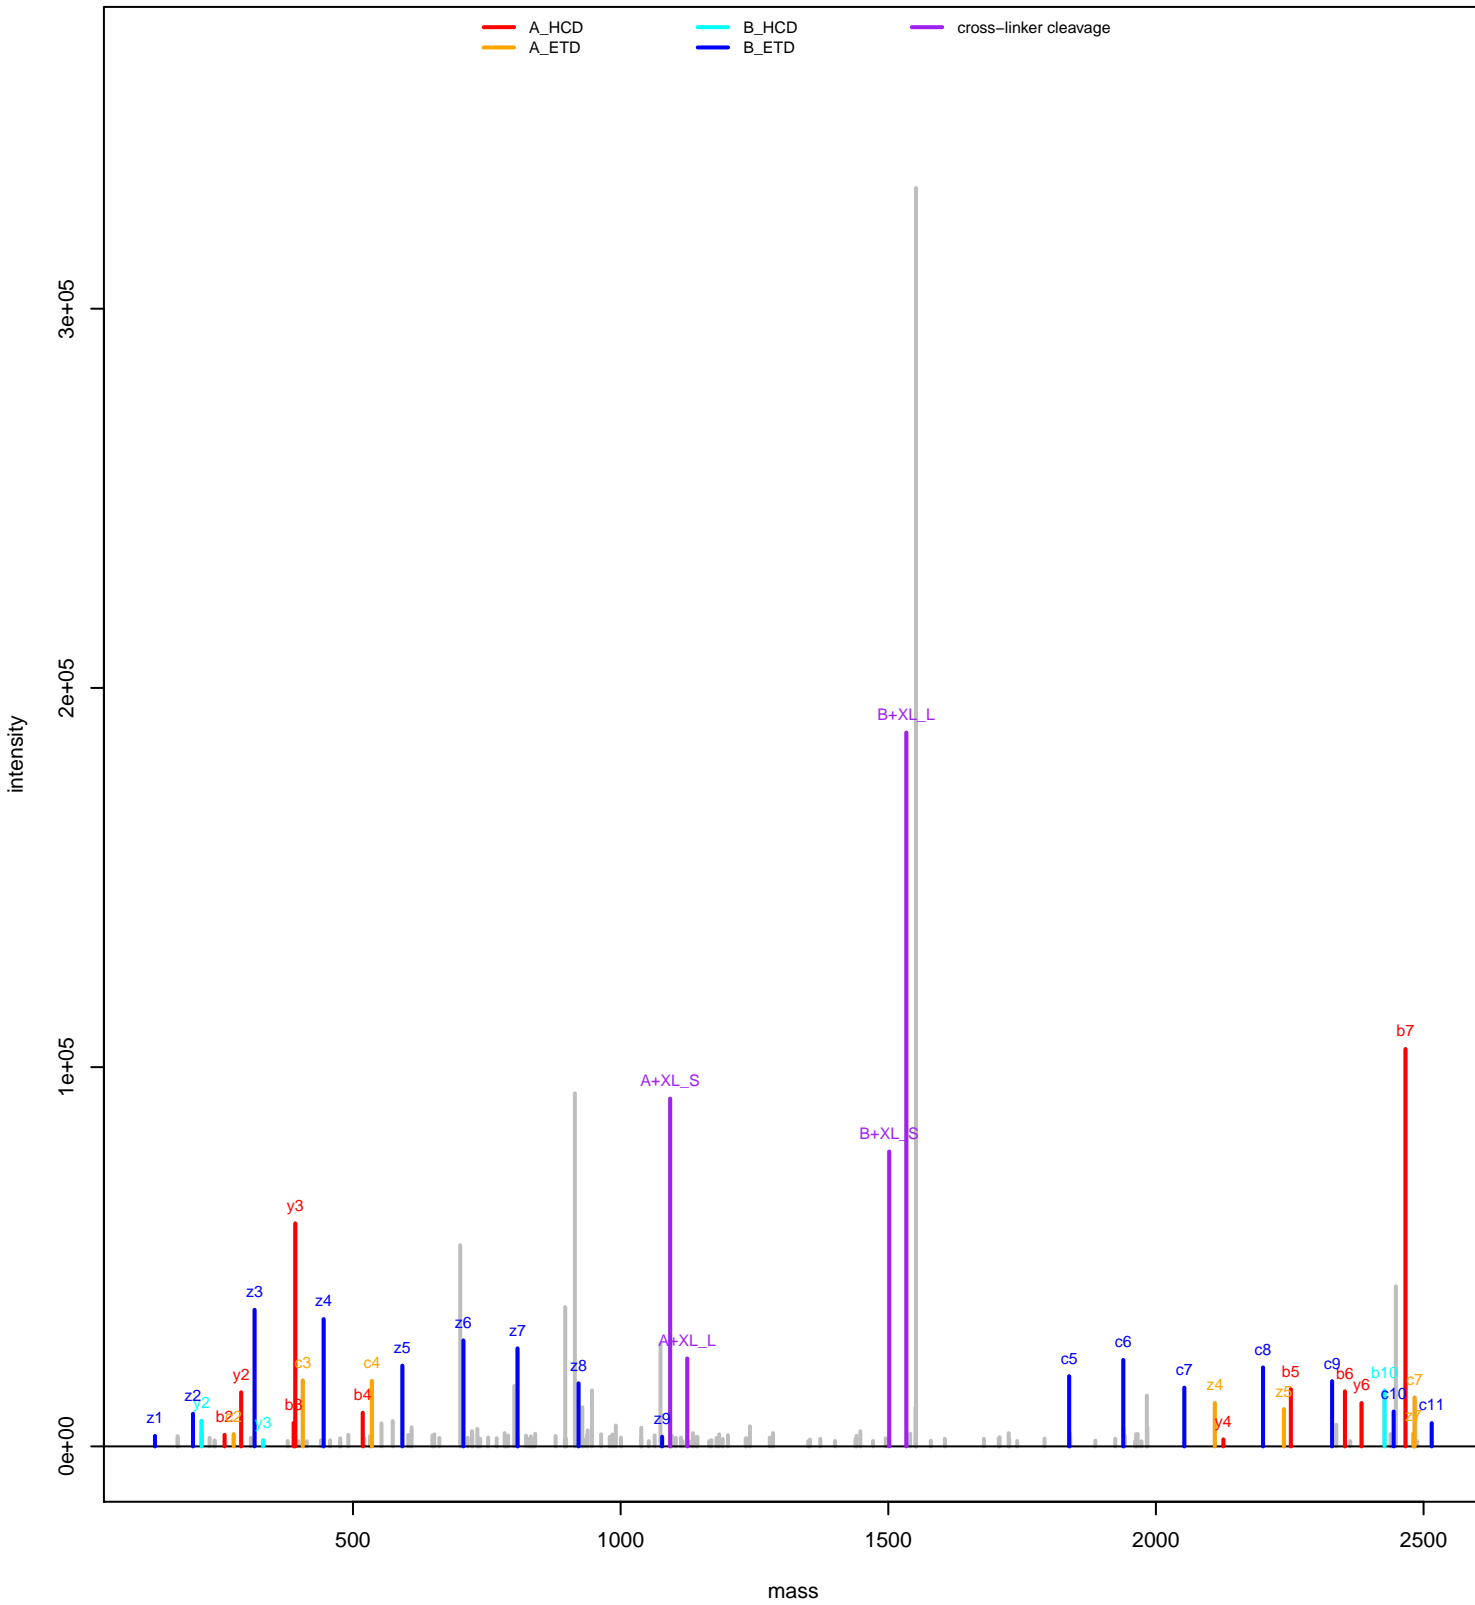

FIEEKTIC+XL\_S

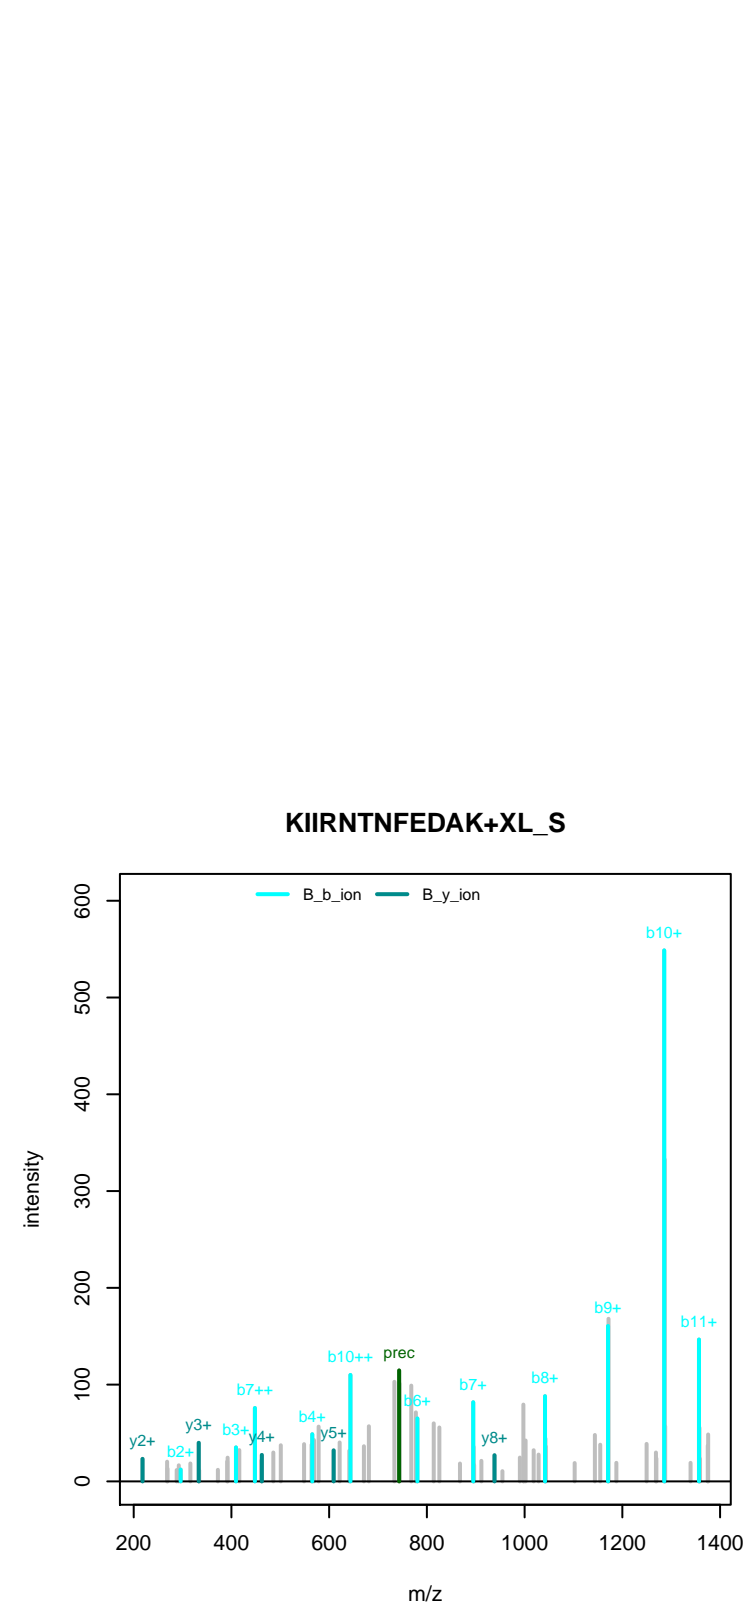

FIEEKTIC+XL\_L

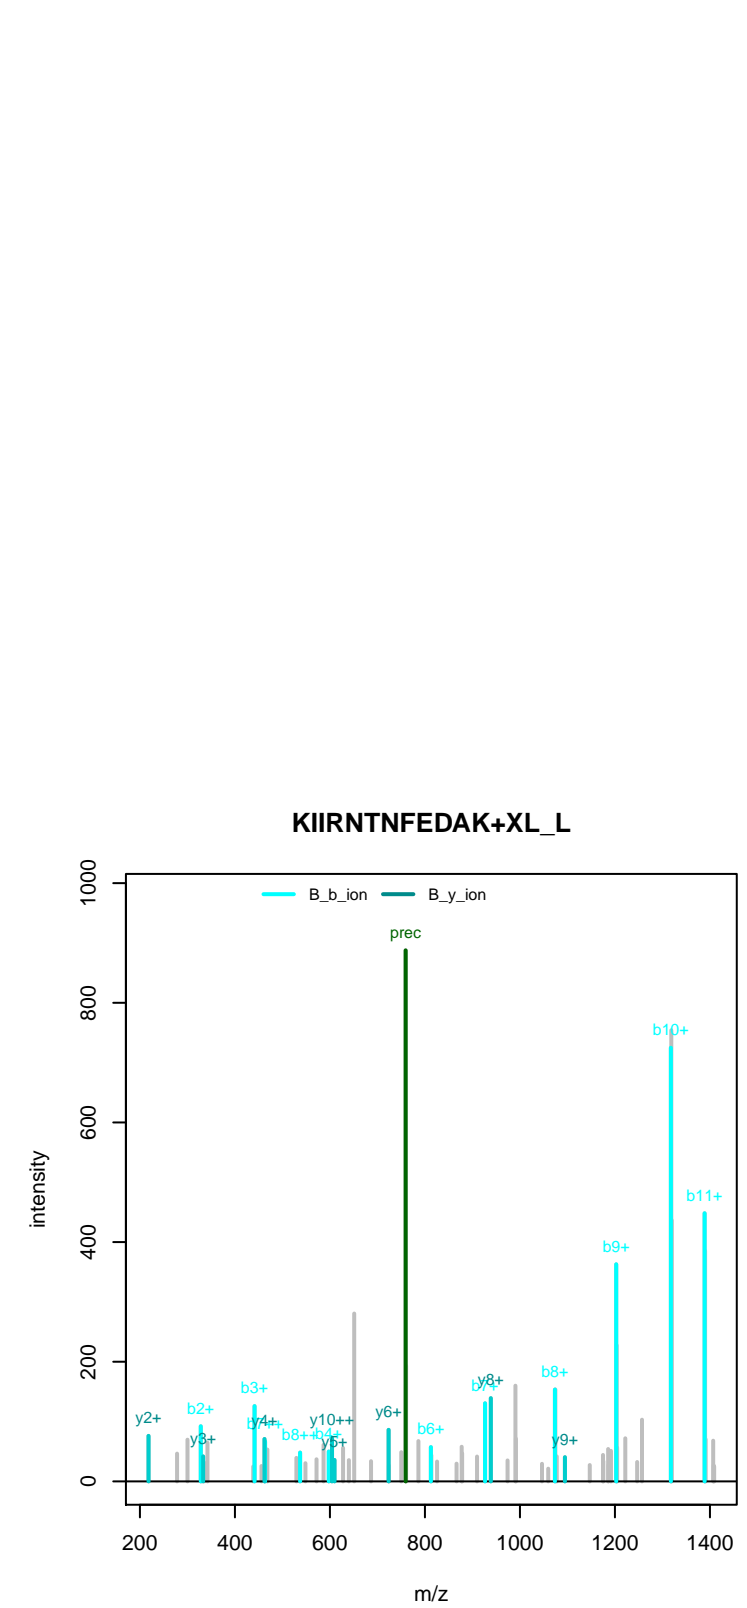

KIIRNTNFEDAK+XL\_S

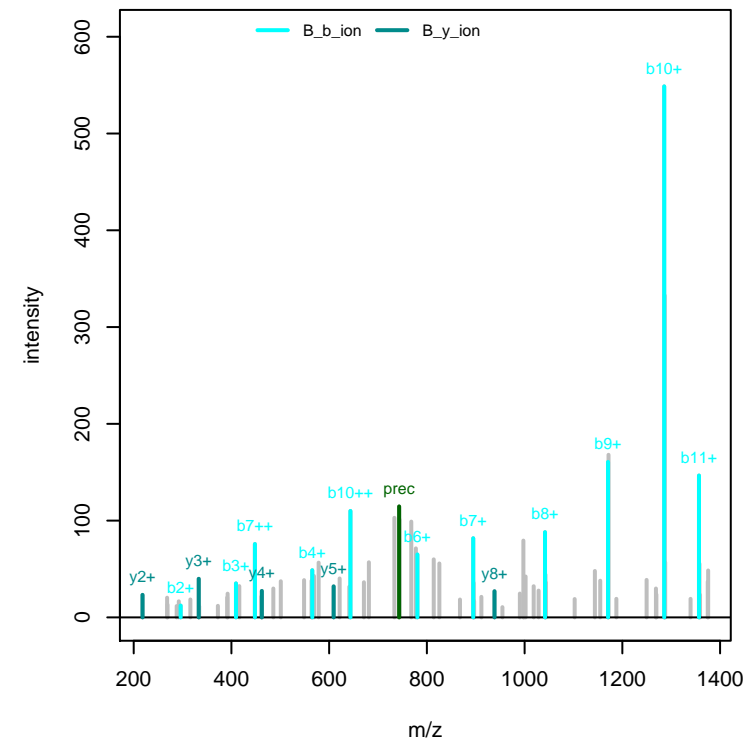

KIIRNTNFEDAK+XL\_L

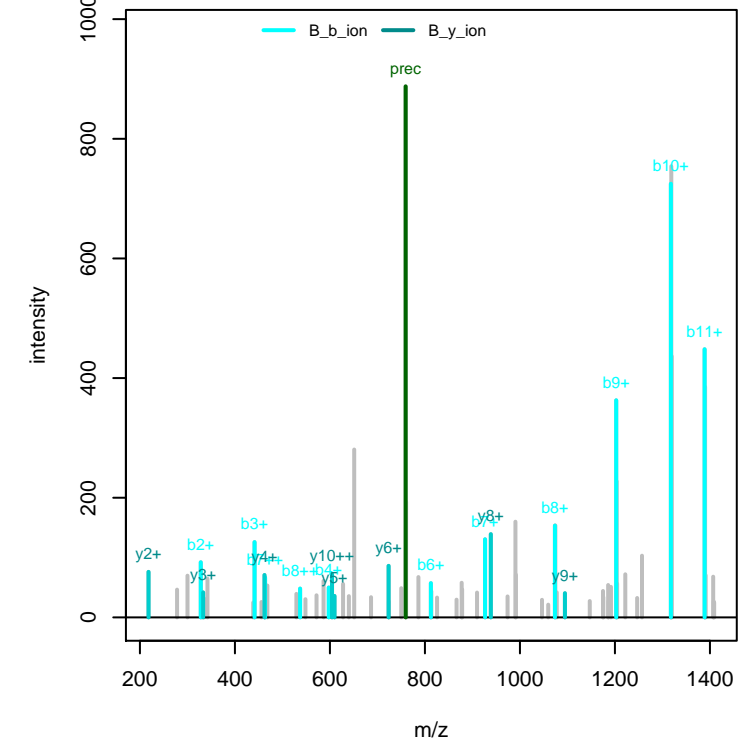

VSV<sup>D</sup>GKIAK  
LGDRVEVTPGLKIR

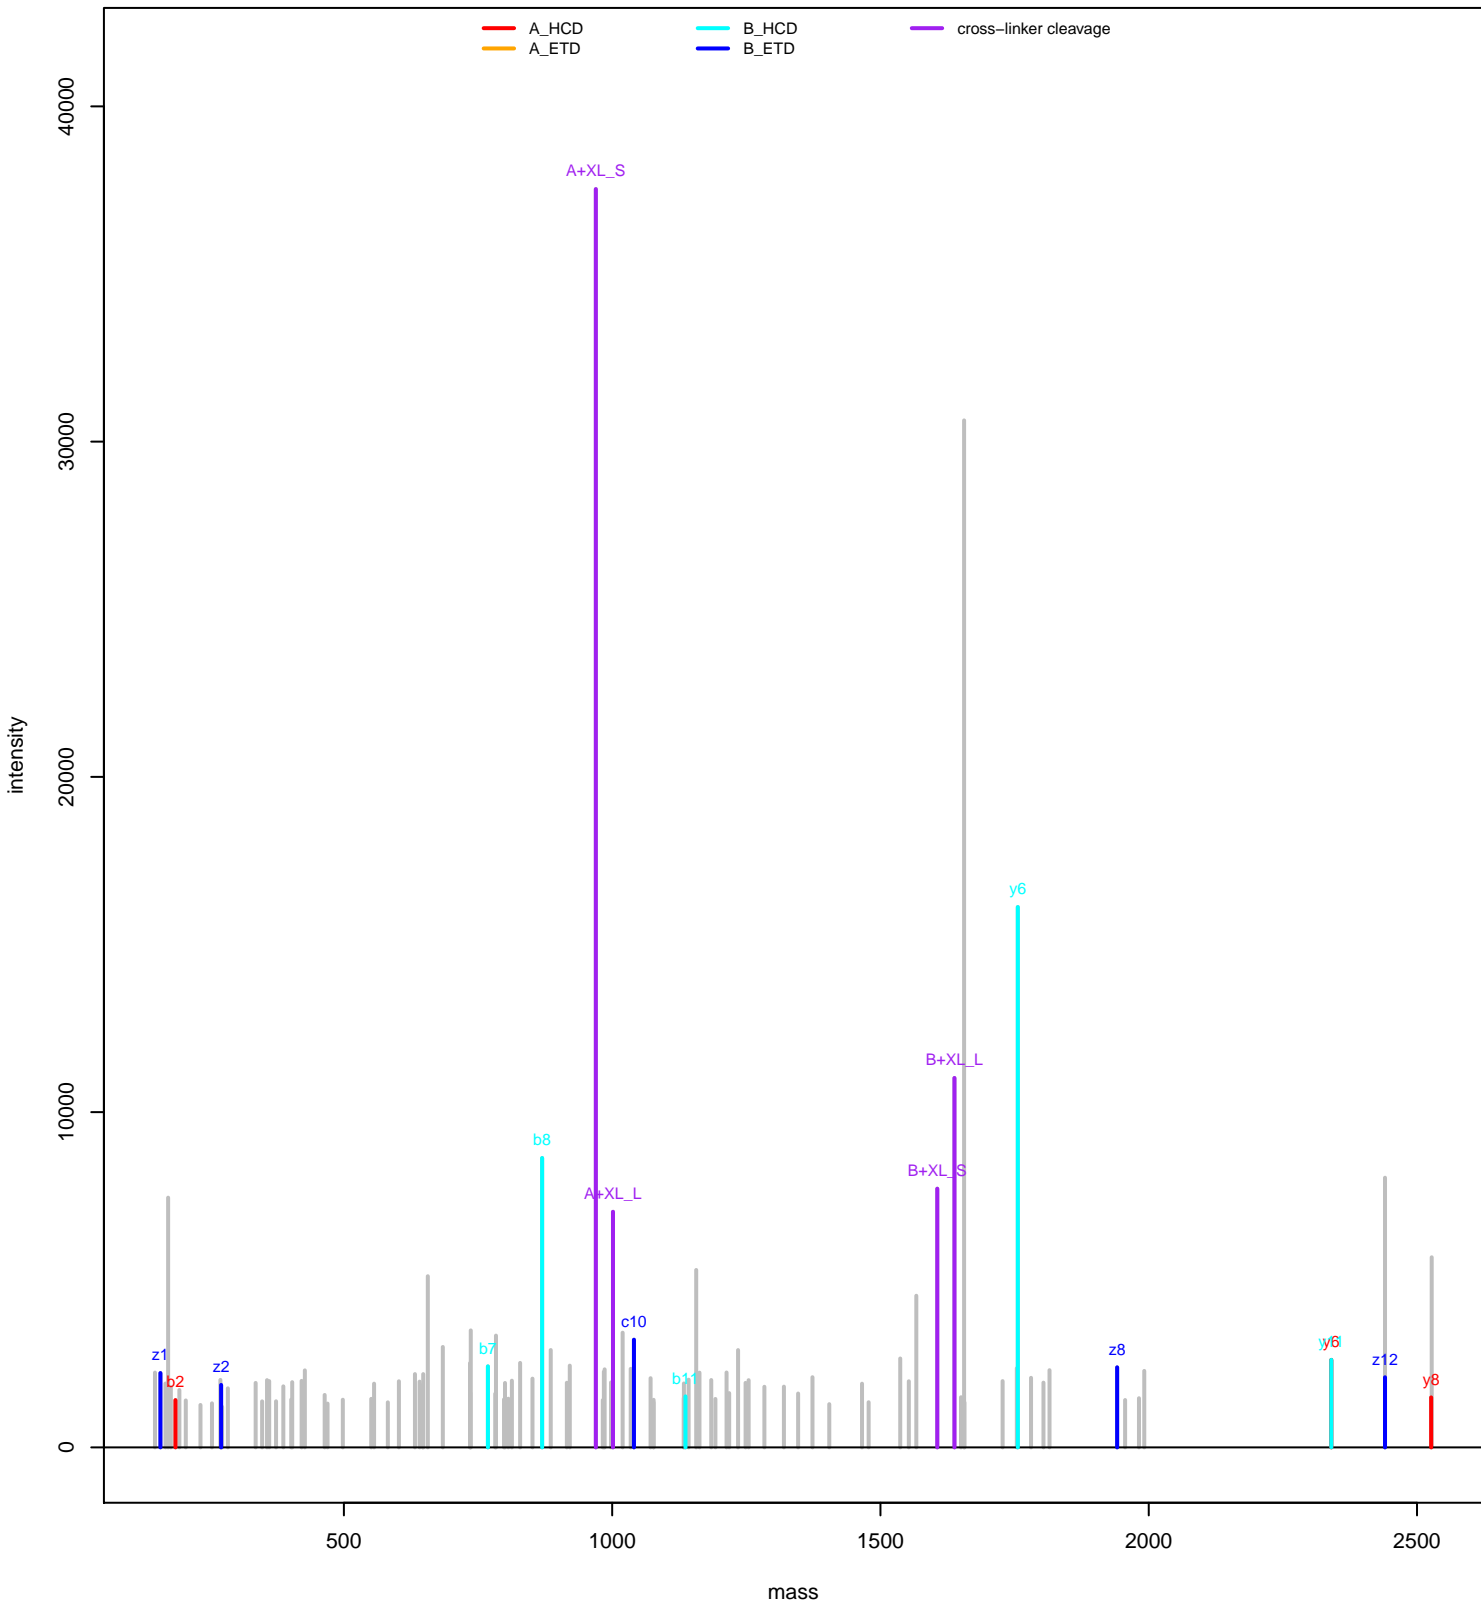

VSV<sup>D</sup>GKIAK+XL\_S

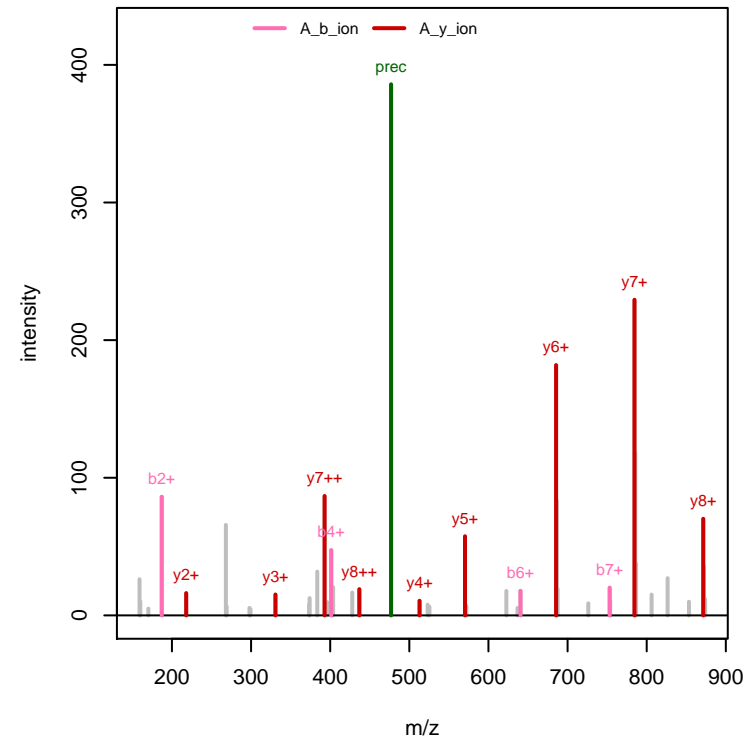

VSV<sup>D</sup>GKIAK+XL\_L

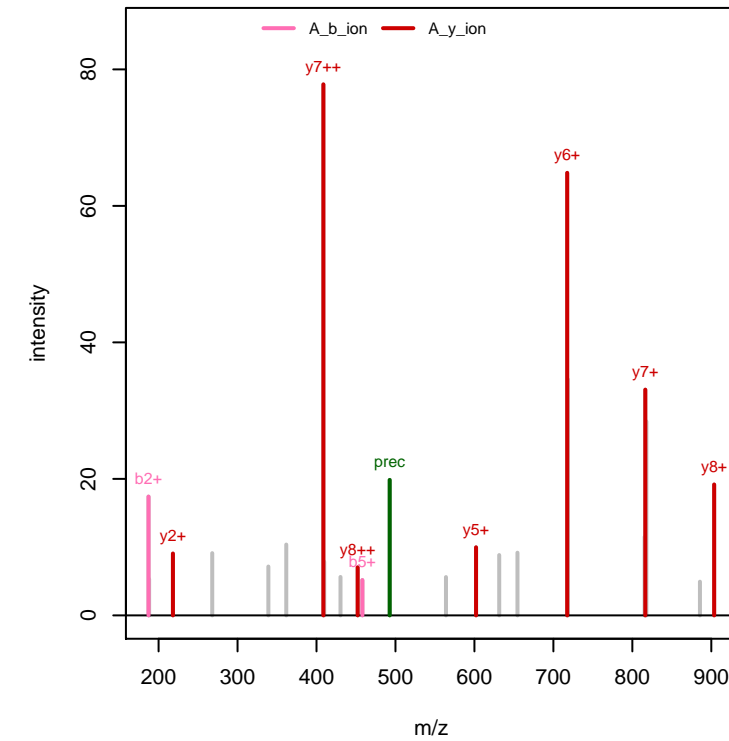

LGDRVEVTPGLKIR+XL\_S

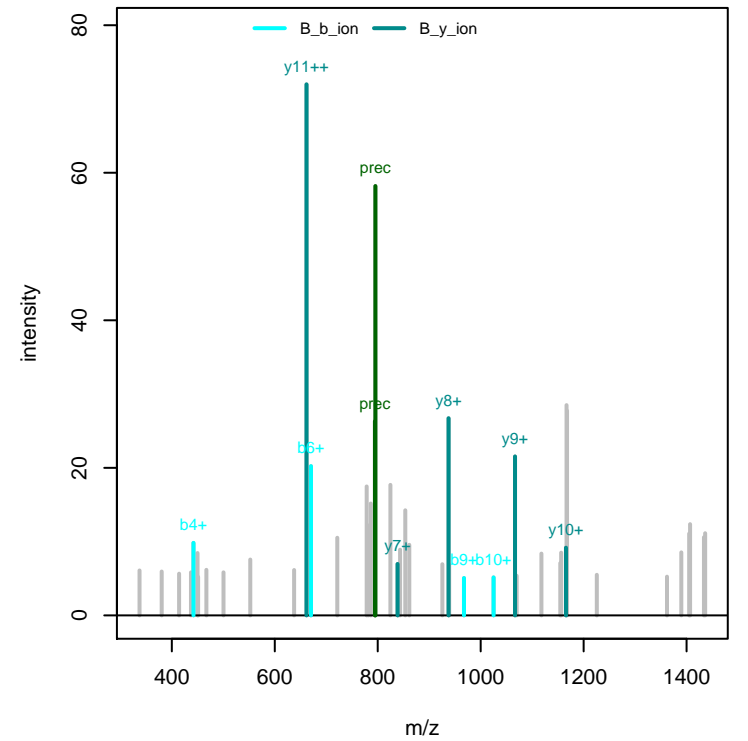

LGDRVEVTPGLKIR+XL\_L

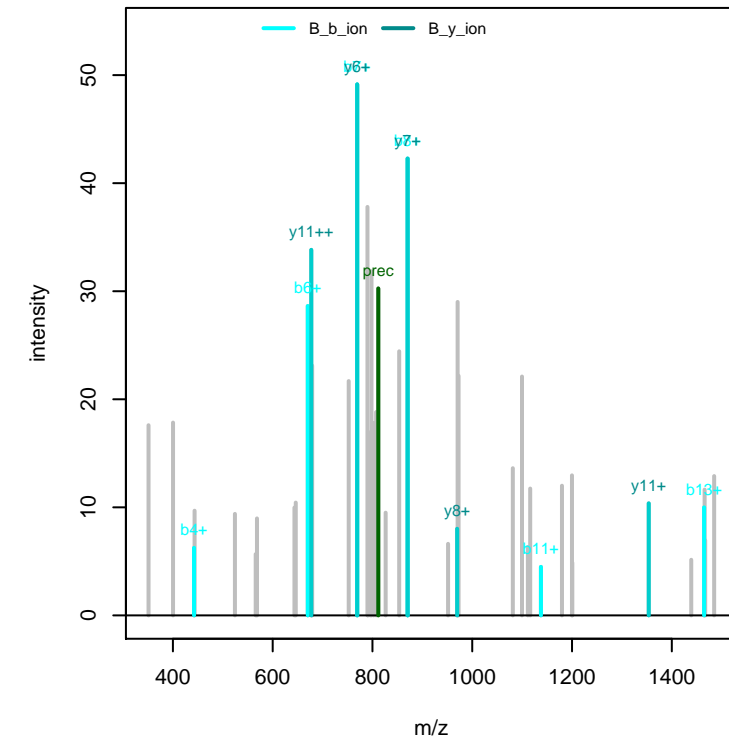

**QENQIKAVR**  
**RGITLKIADGQQK**

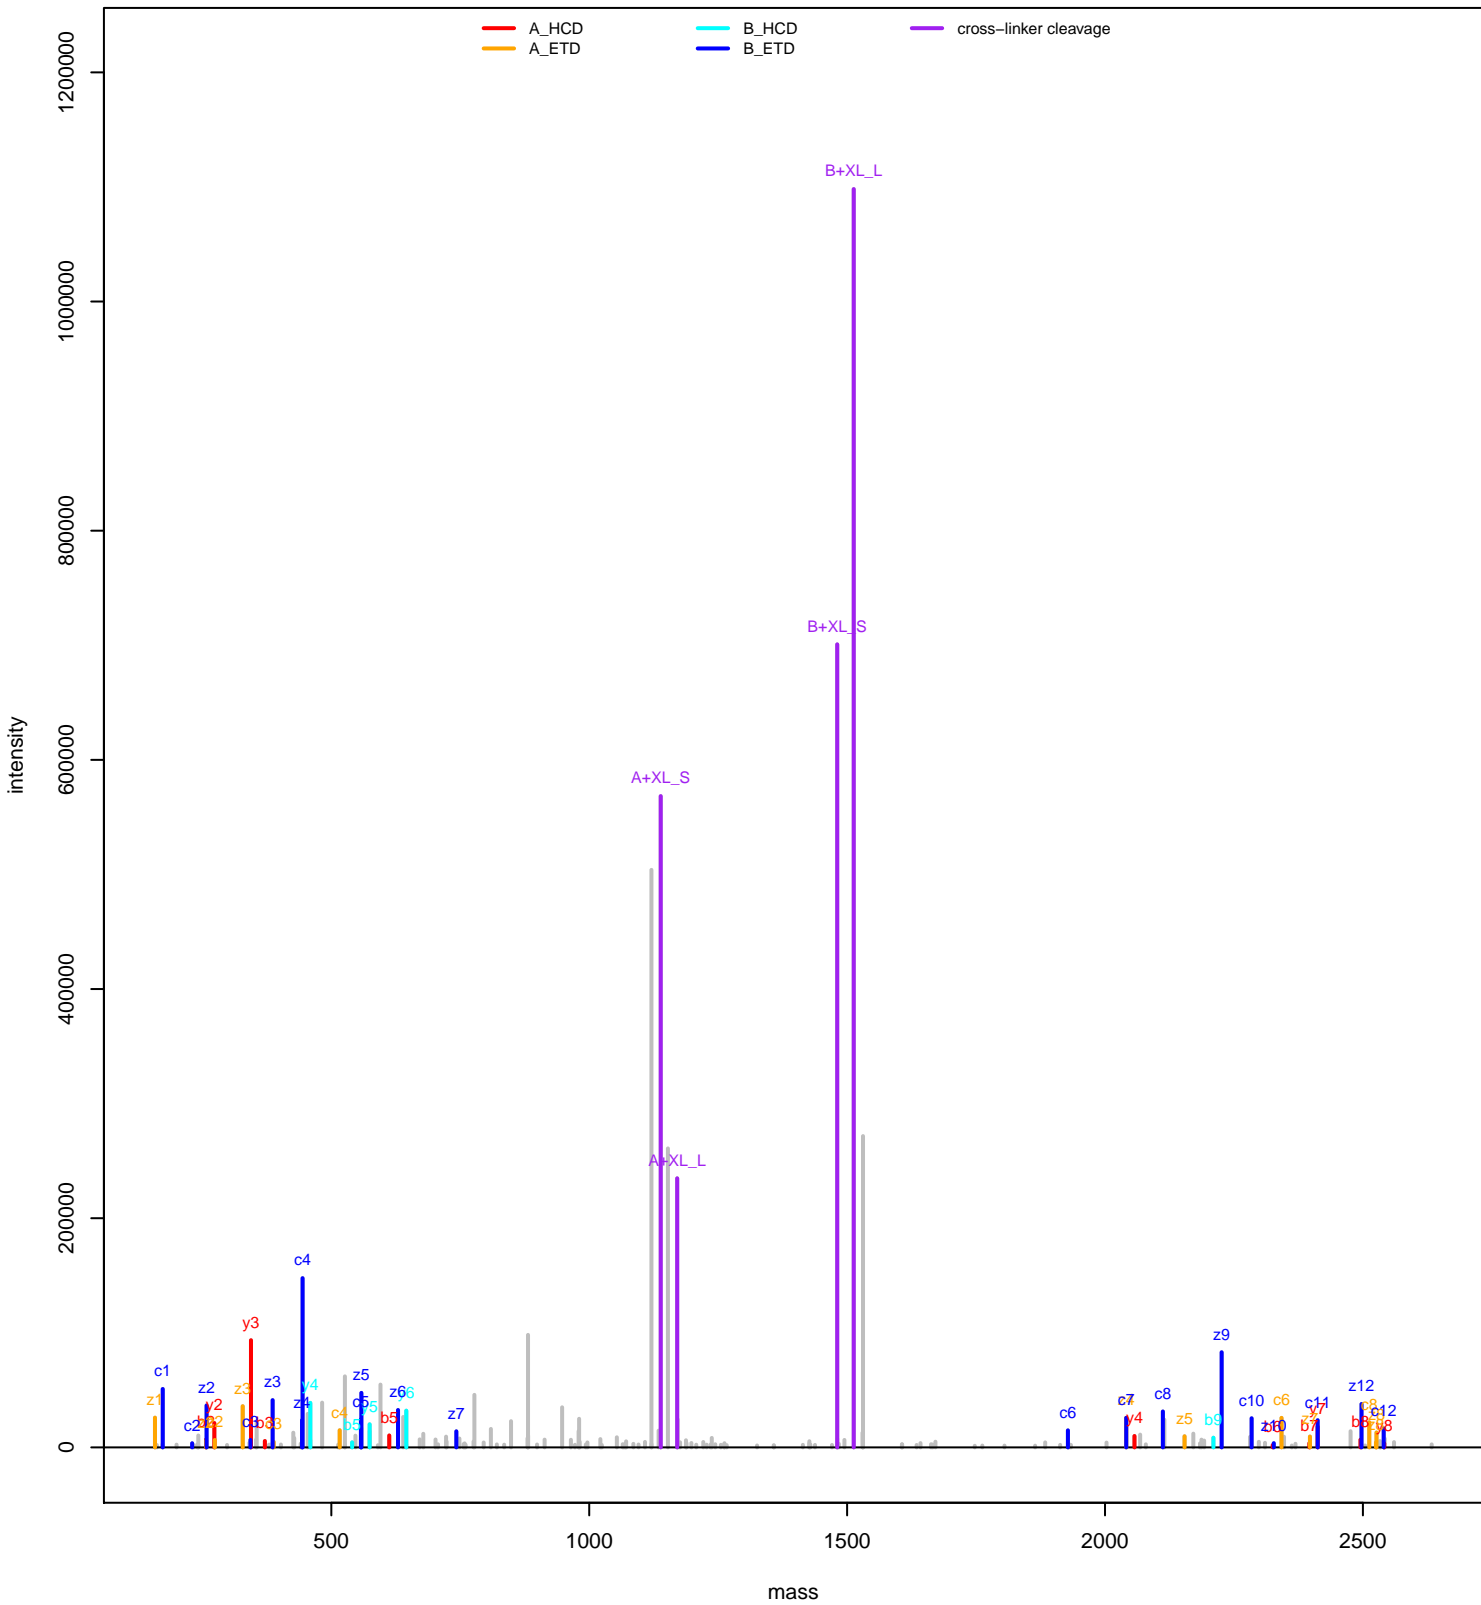

**QENQIKAVR+XL\_S**

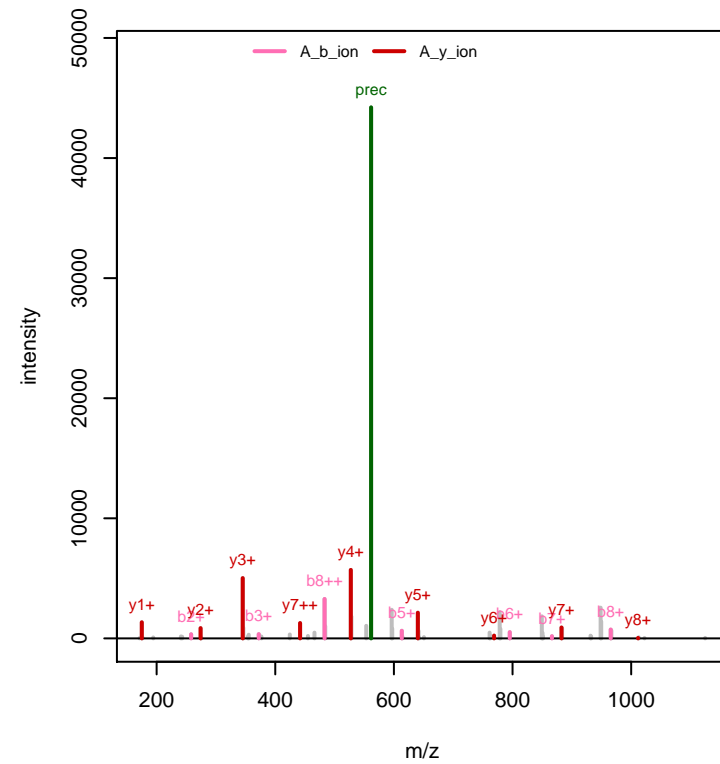

**QENQIKAVR+XL\_L**

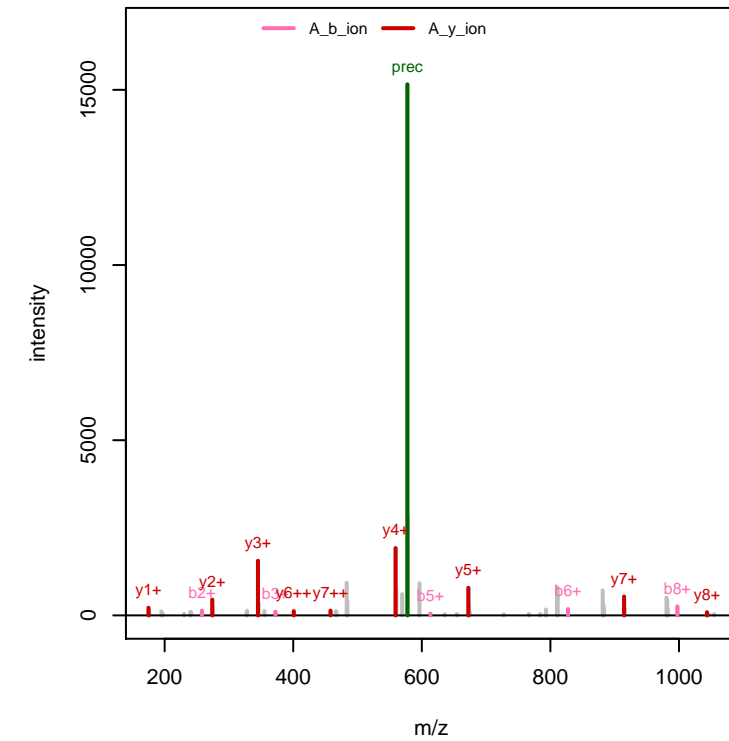

**RGITLKIADGQQK+XL\_S**

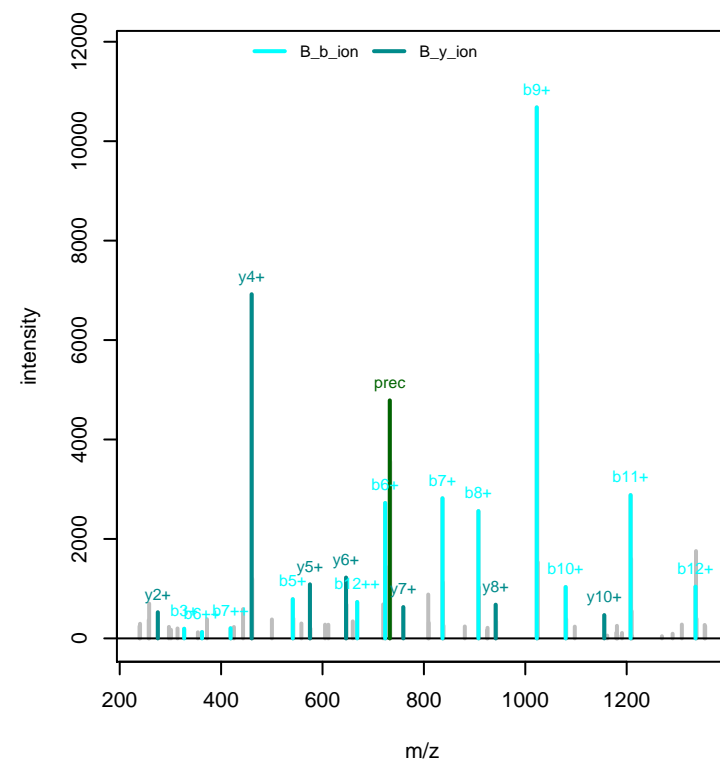

**RGITLKIADGQQK+XL\_L**

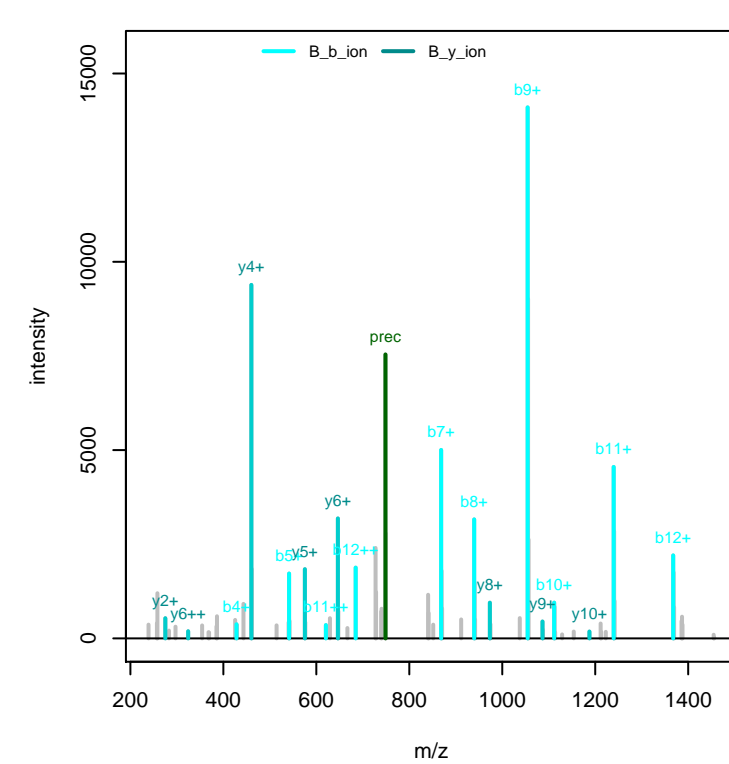

**TSAKEK  
NATLIEAIKSAK**

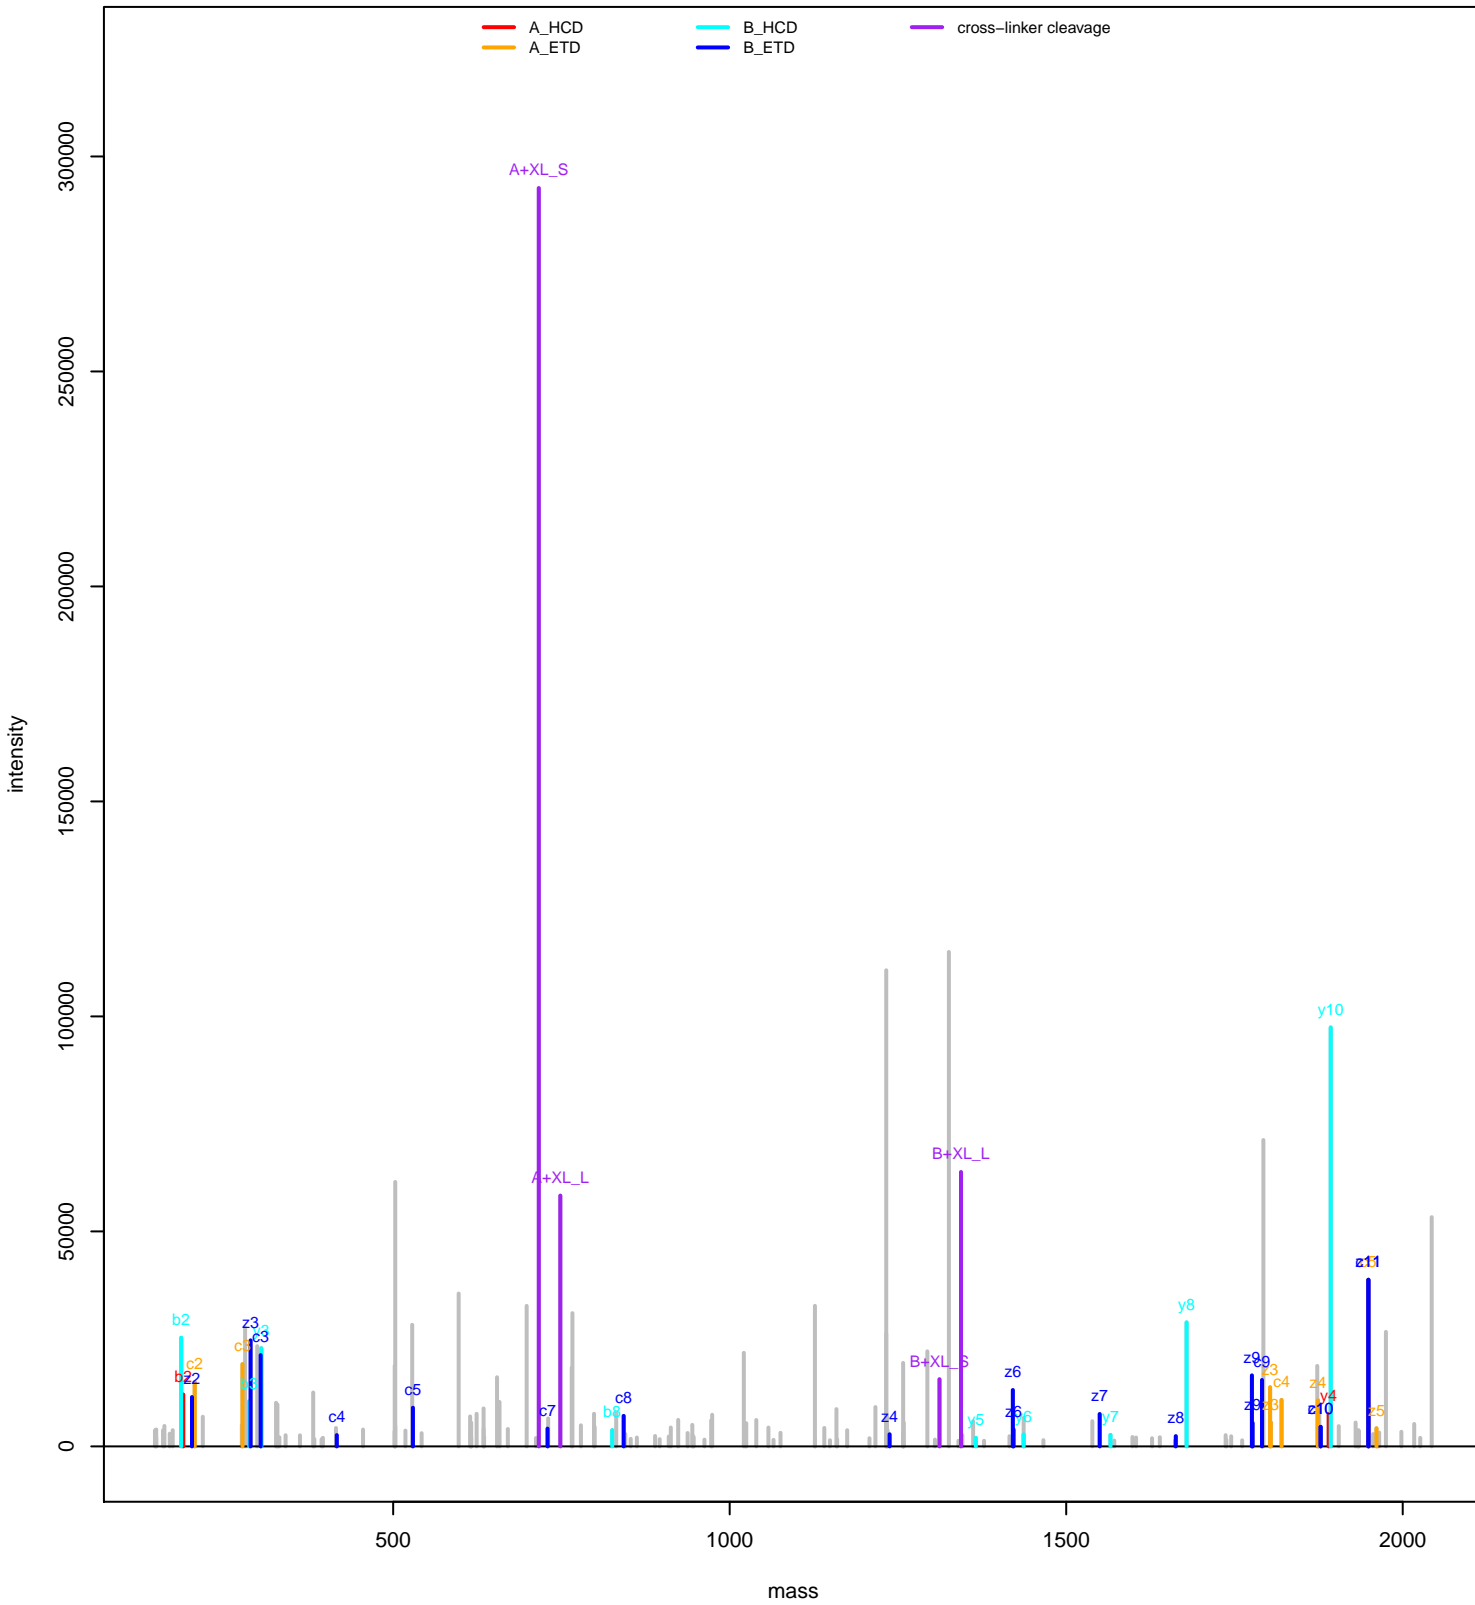

**TSAKEK+XL\_S**

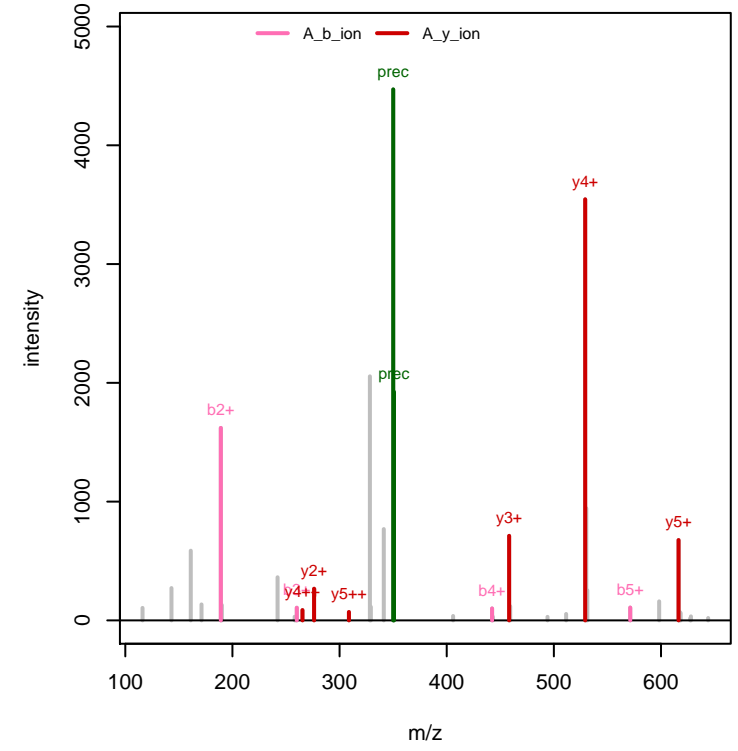

**TSAKEK+XL\_L**

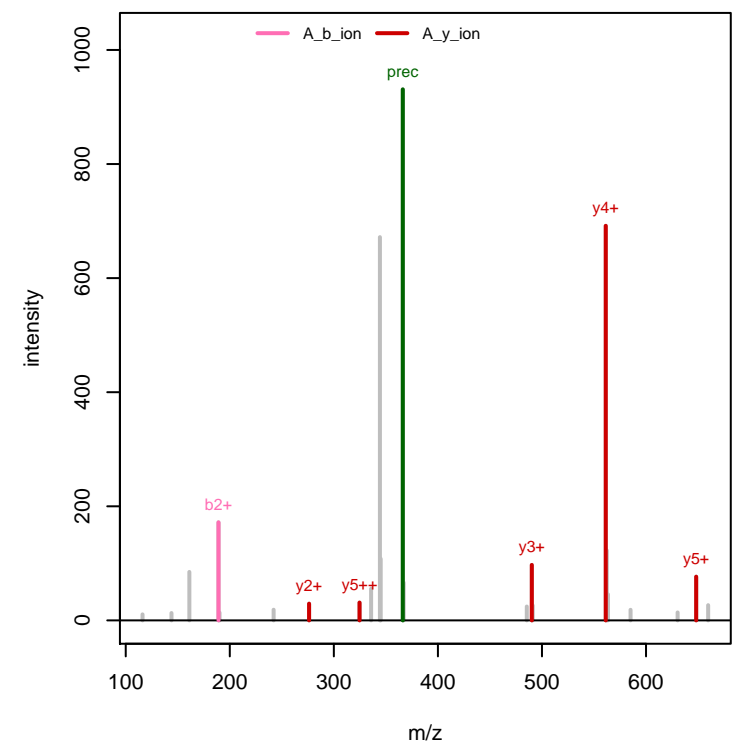

**NATLIEAIKSAK+XL\_S**

**NATLIEAIKSAK+XL\_L**



TGLKVEER  
KGMVLNYNGK

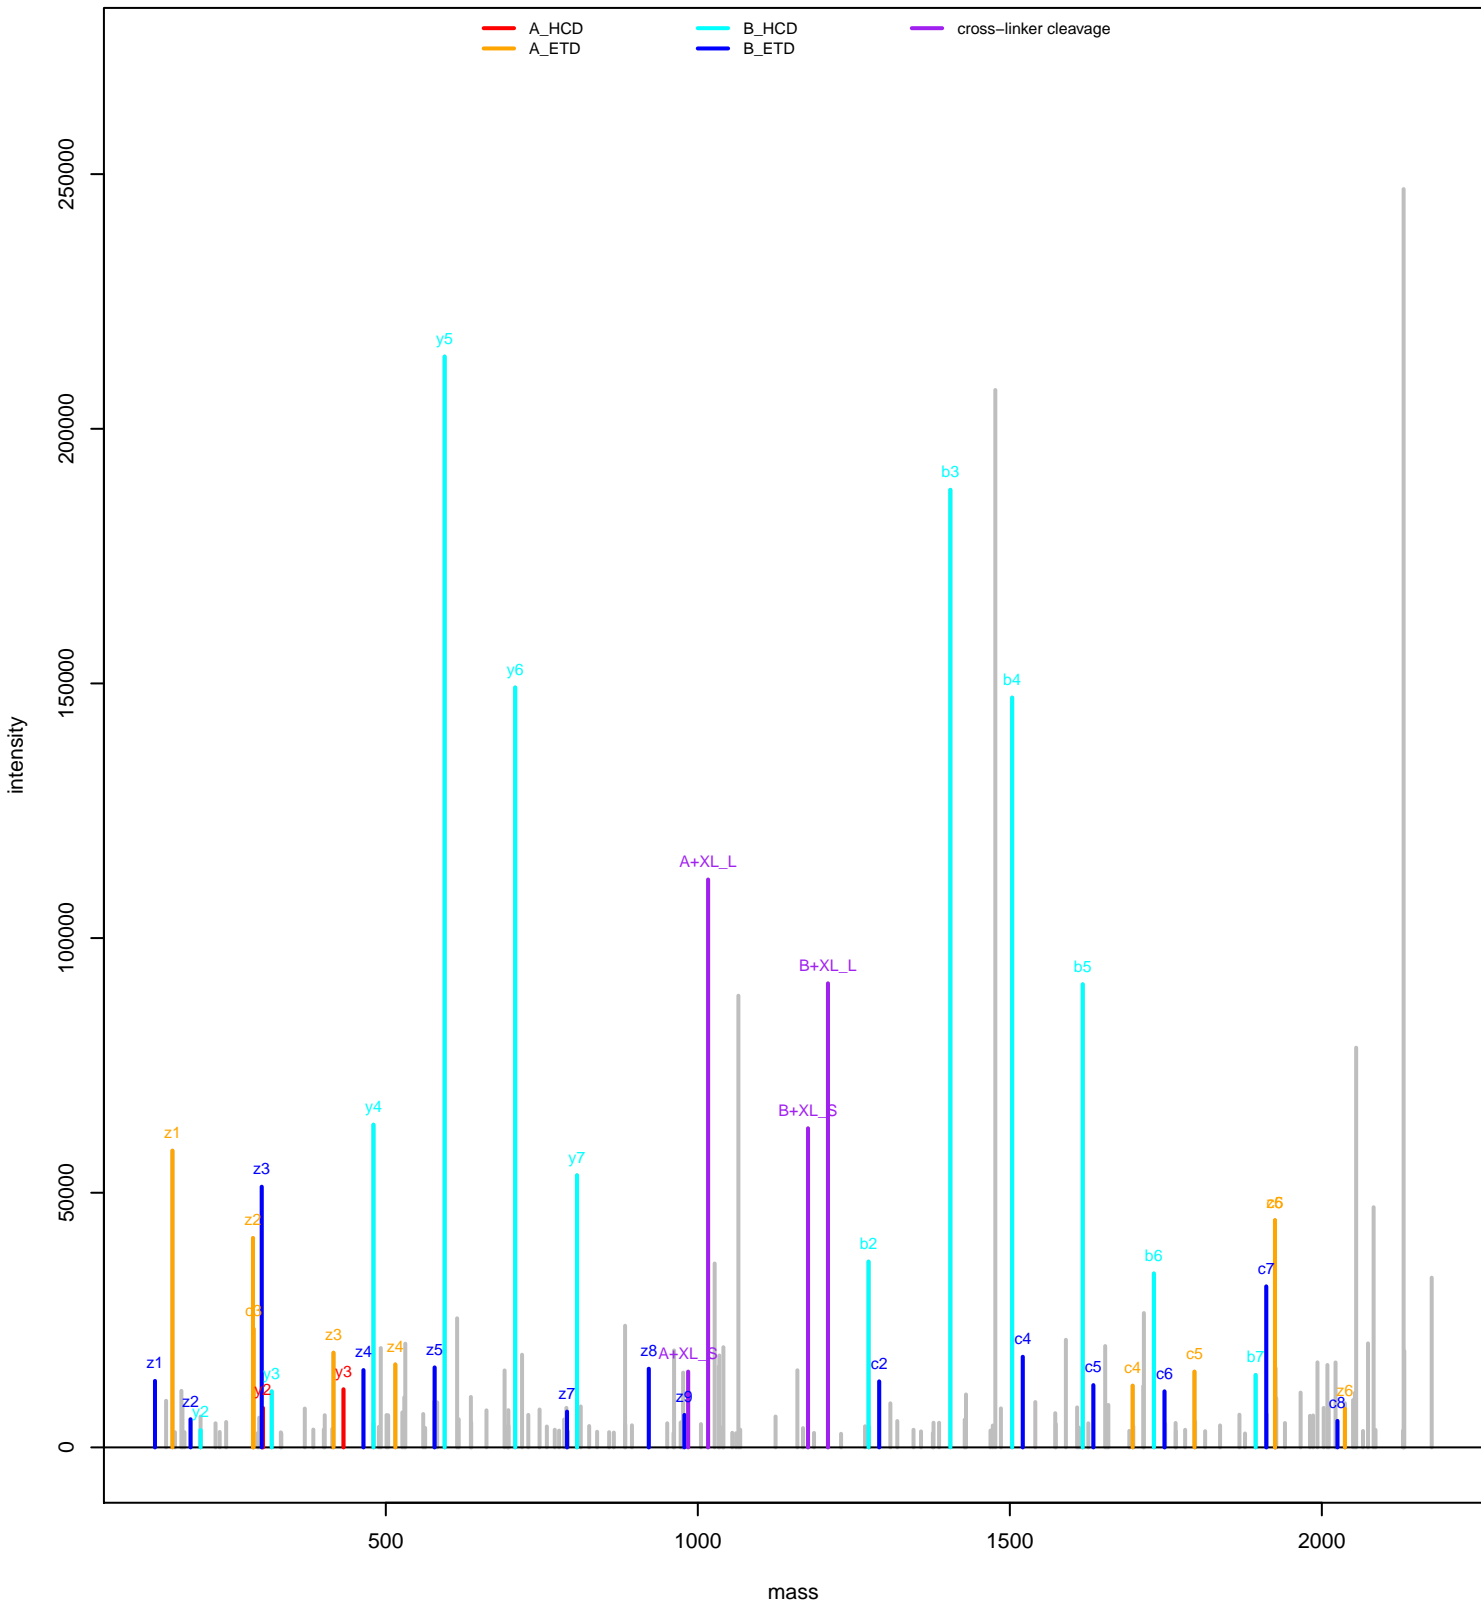

TGLKVEER+XL\_S

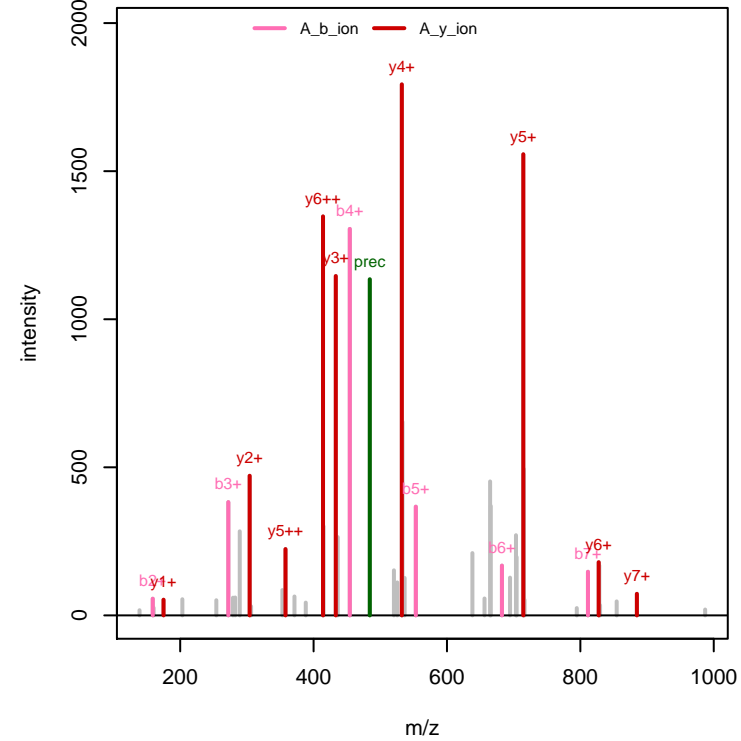

TGLKVEER+XL\_L

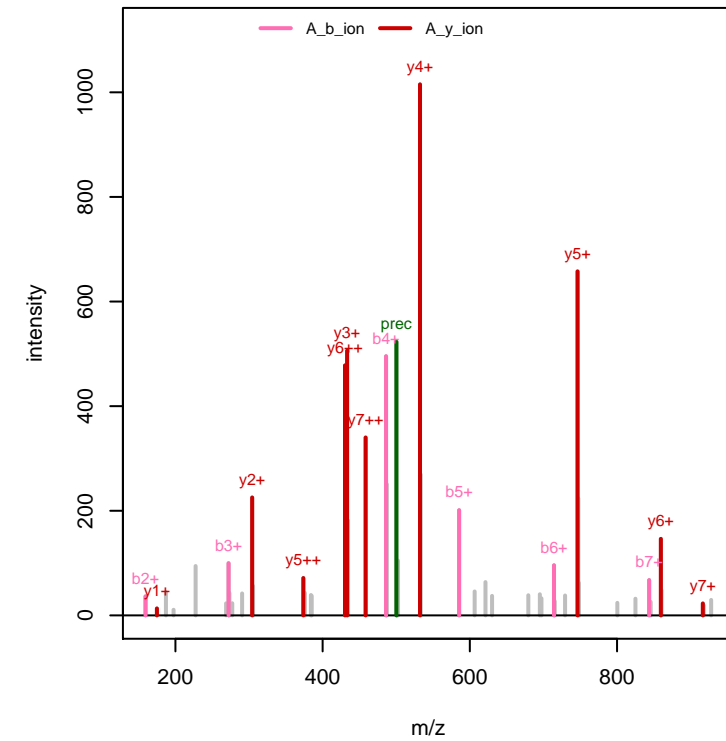

KGMVLNYNGK+XL\_S

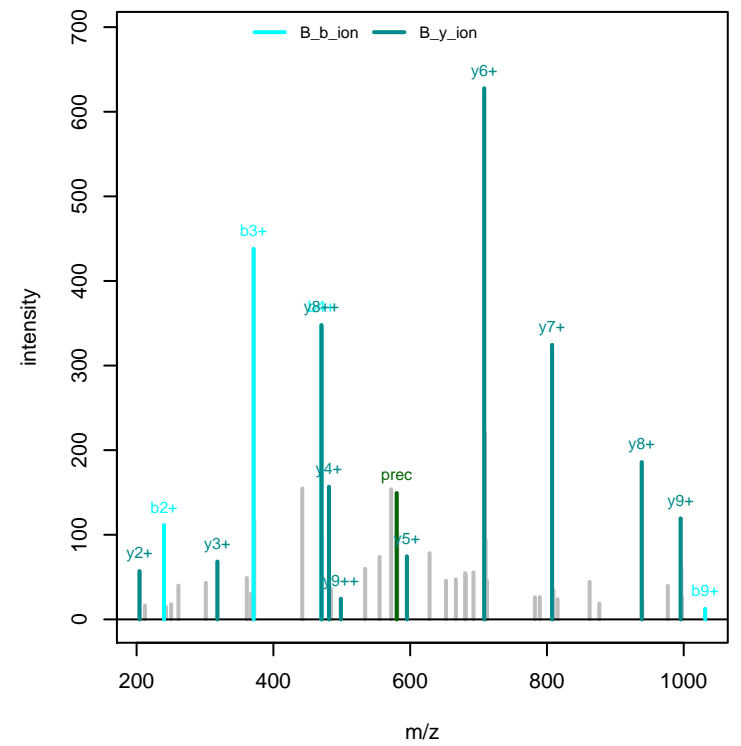

KGMVLNYNGK+XL\_L

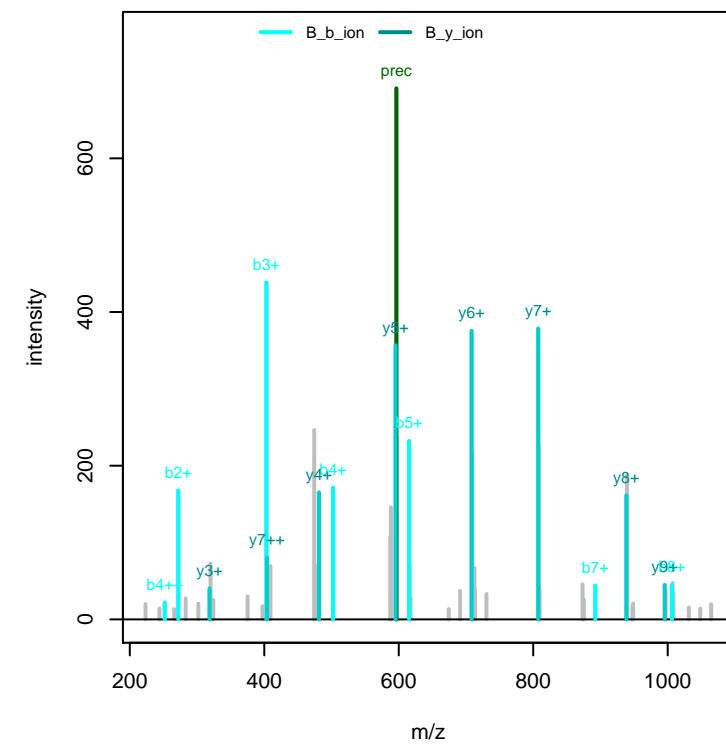

YAKLSEK  
SWKLNER

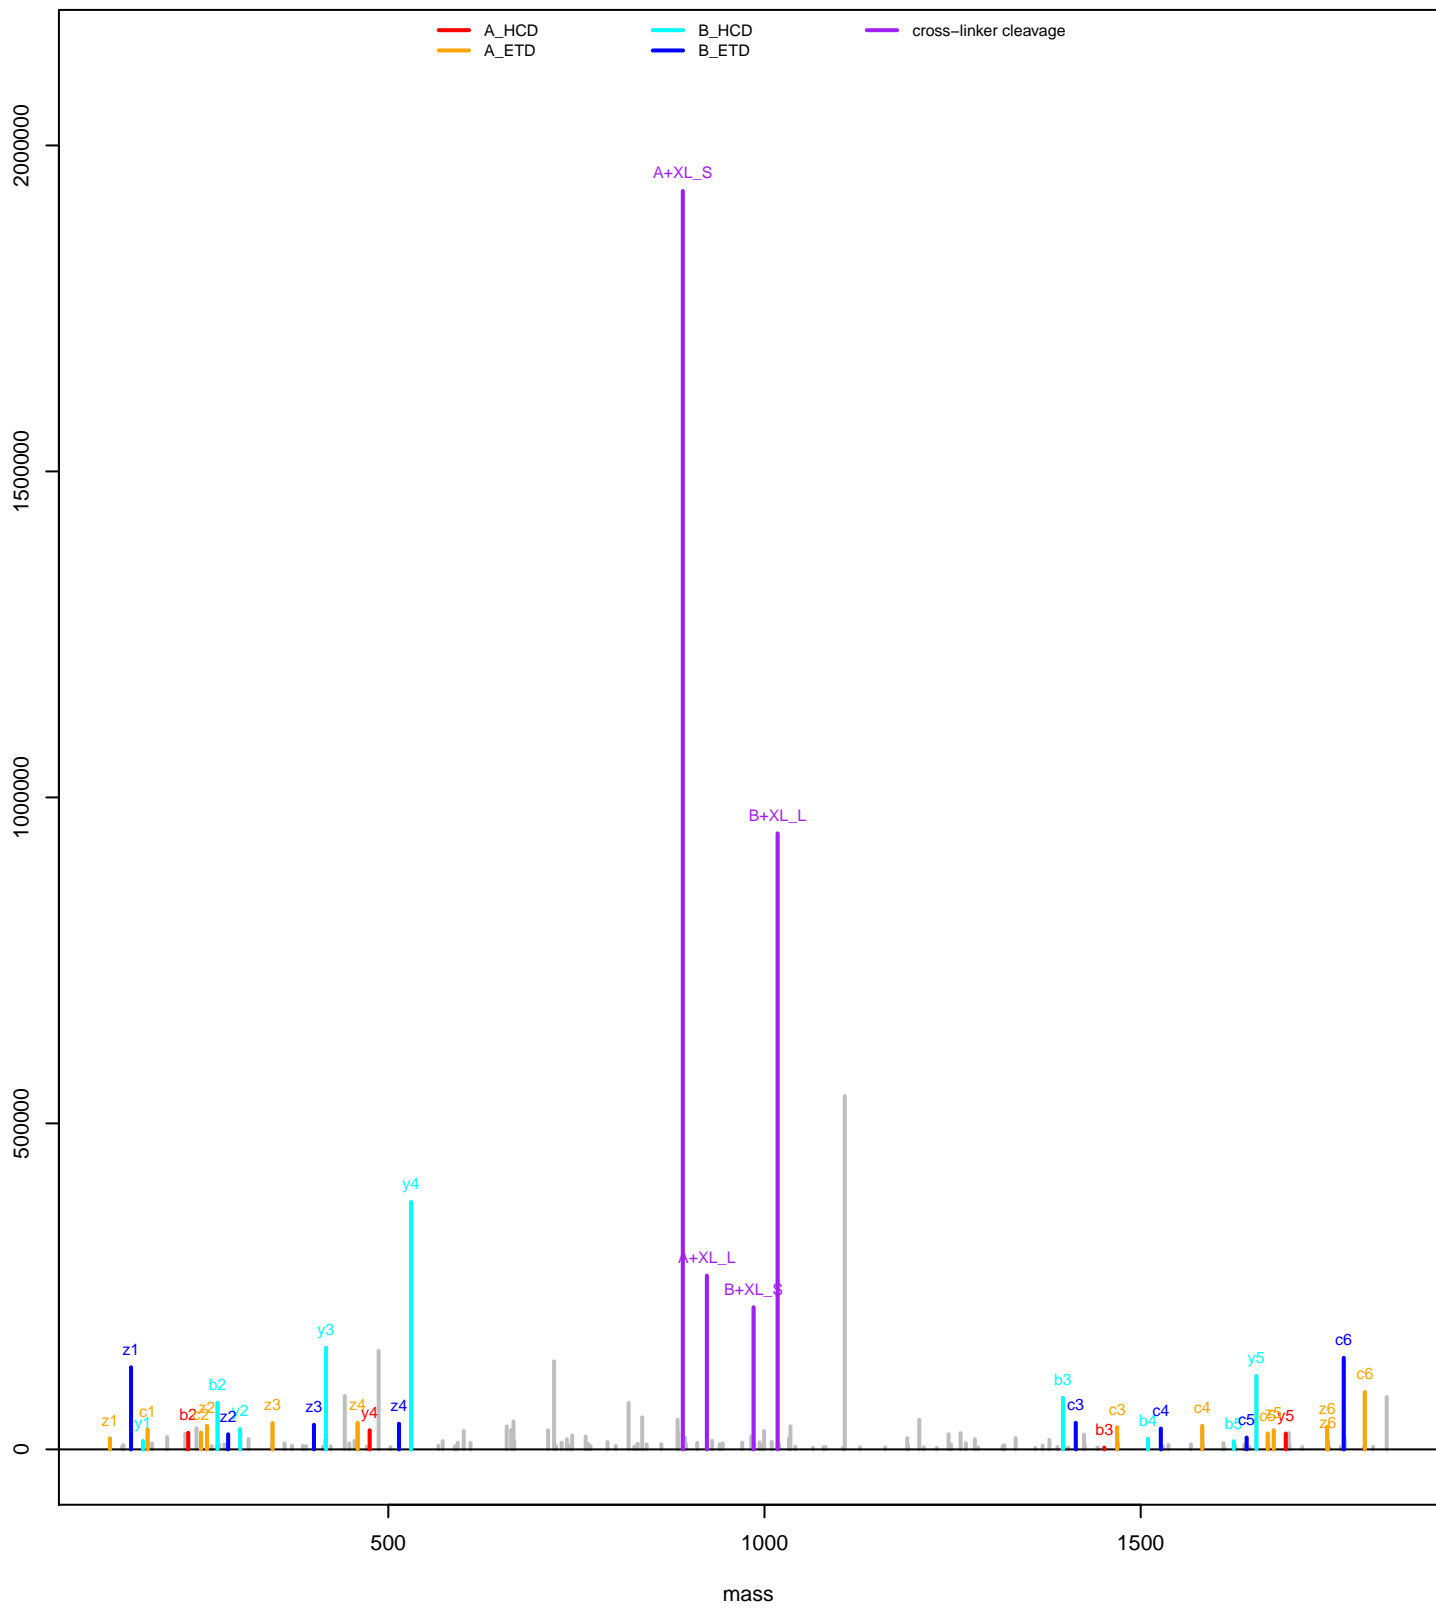

YAKLSEK+XL\_S

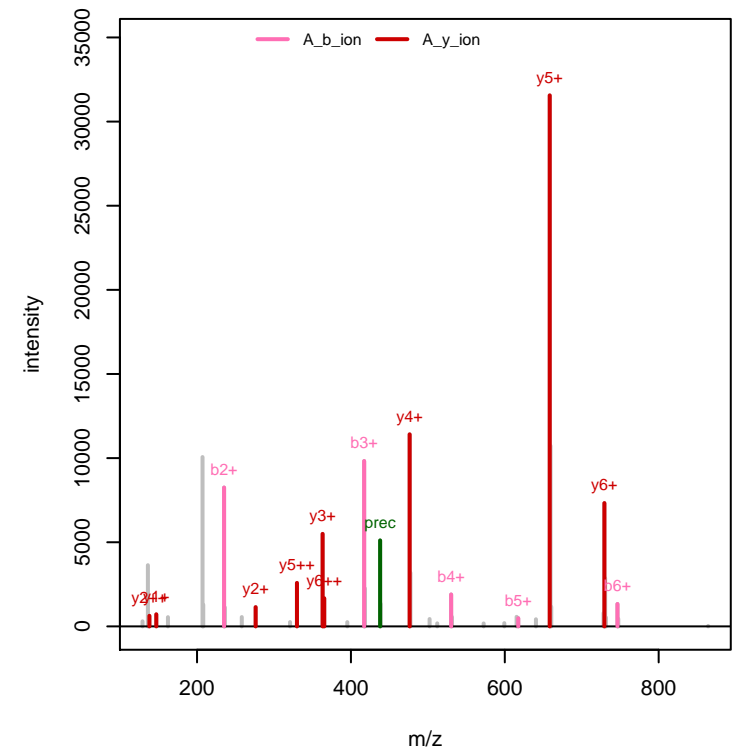

YAKLSEK+XL\_L

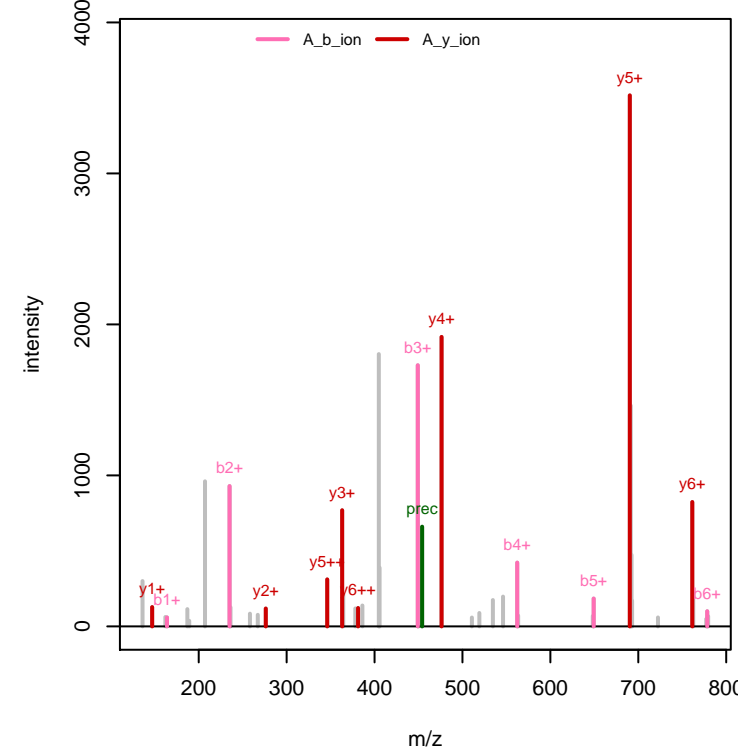

SWKLNER+XL\_S

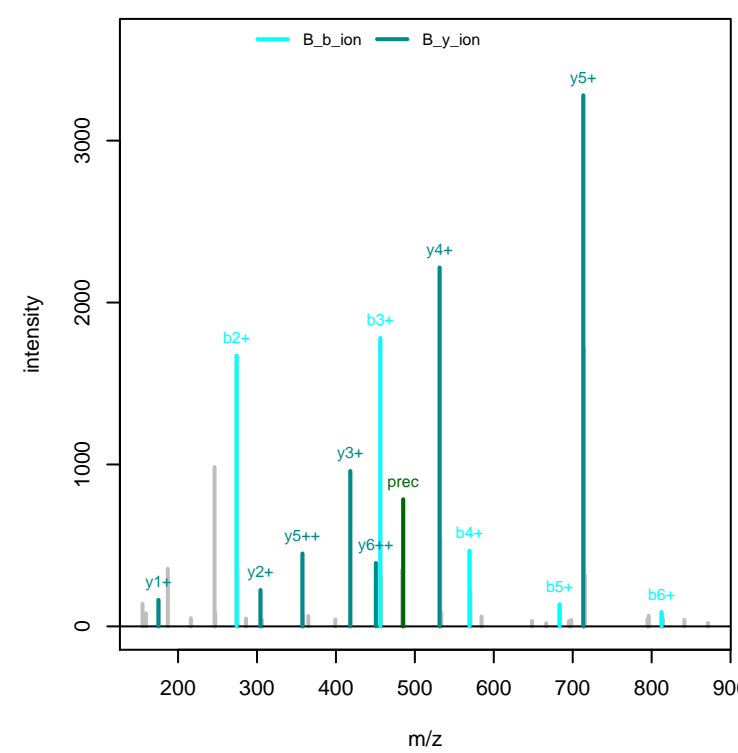

SWKLNER+XL\_L

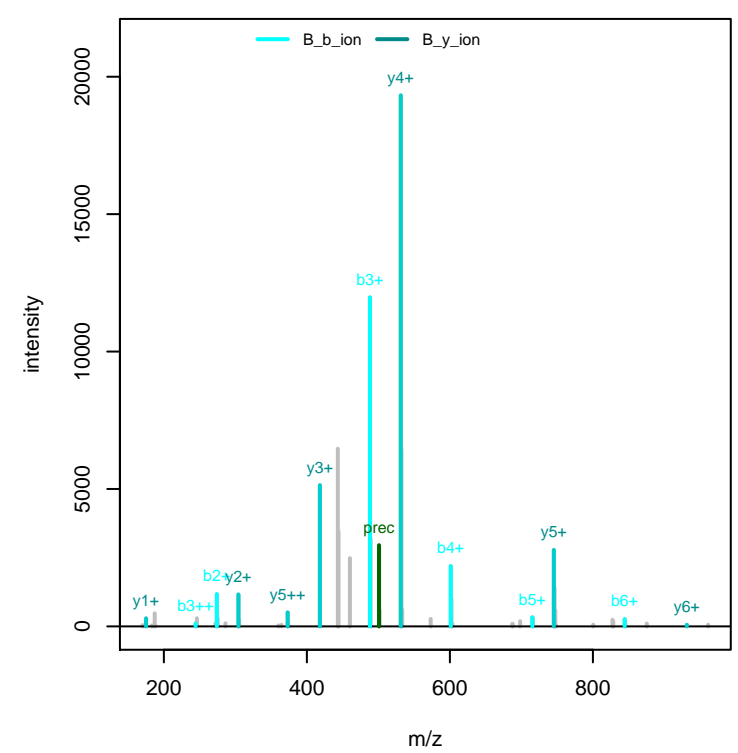

SEEKASTPAQR  
LLAEHNLDASAIKGTGVGGR

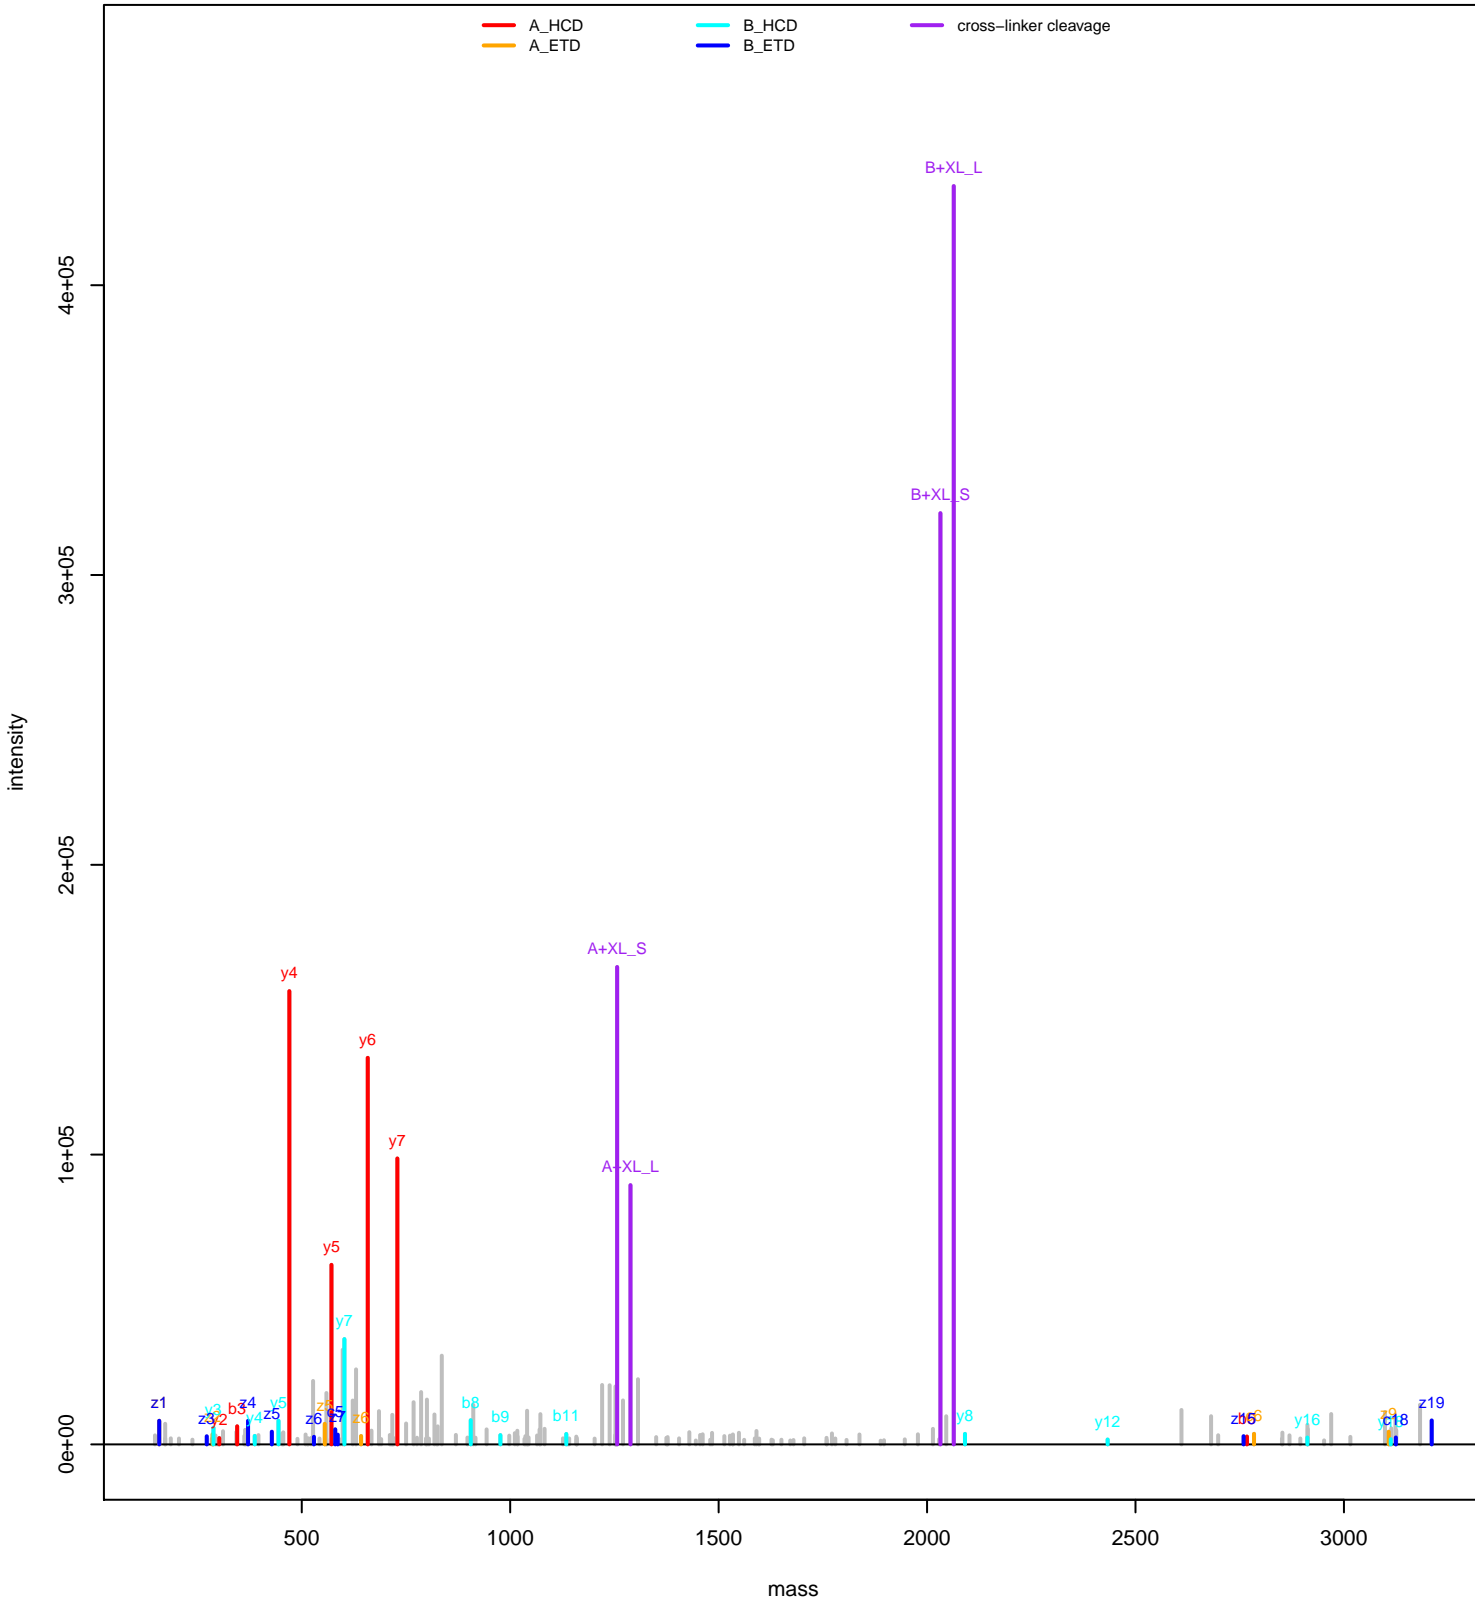

SEEKASTPAQR+XL\_S

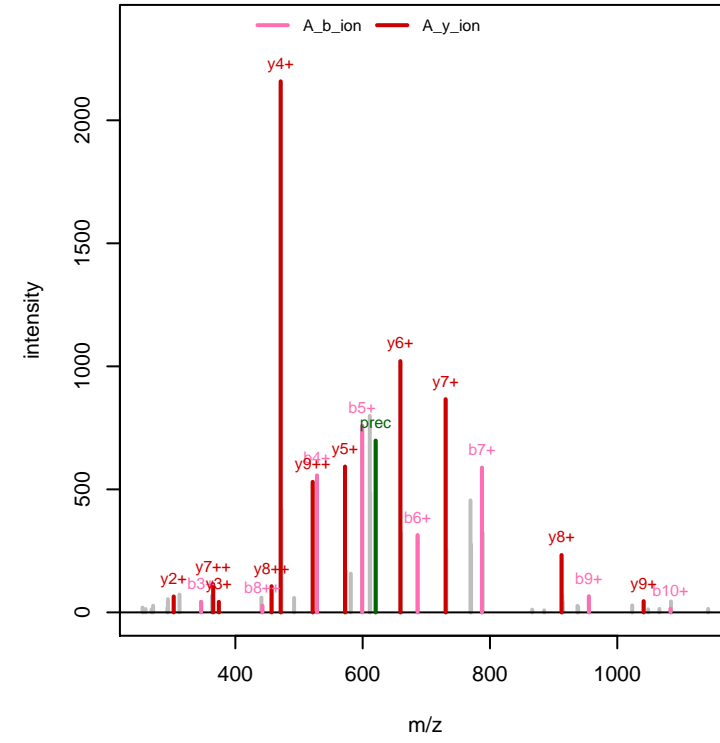

SEEKASTPAQR+XL\_L

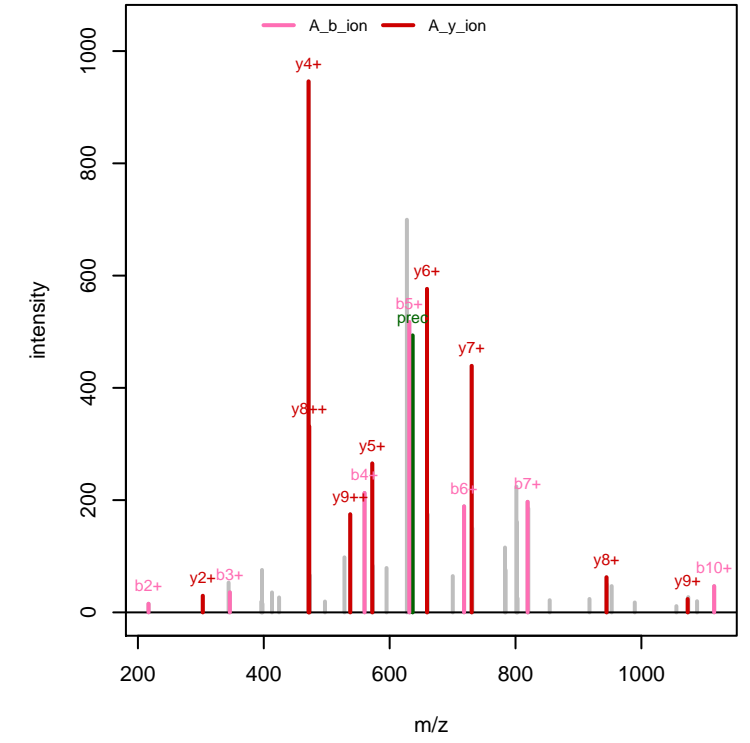

LLAEHNLDASAIKGTGVGGR+XL\_S

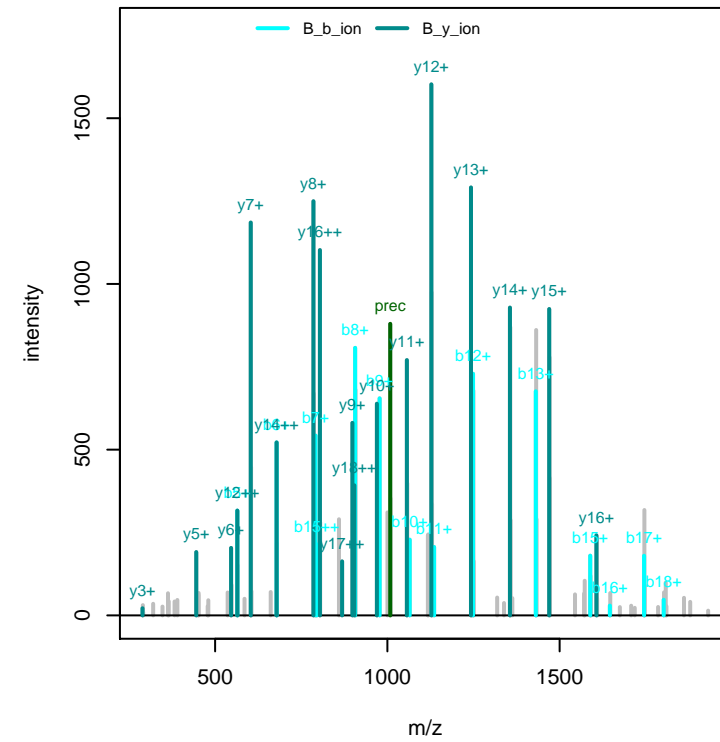

LLAEHNLDASAIKGTGVGGR+XL\_L

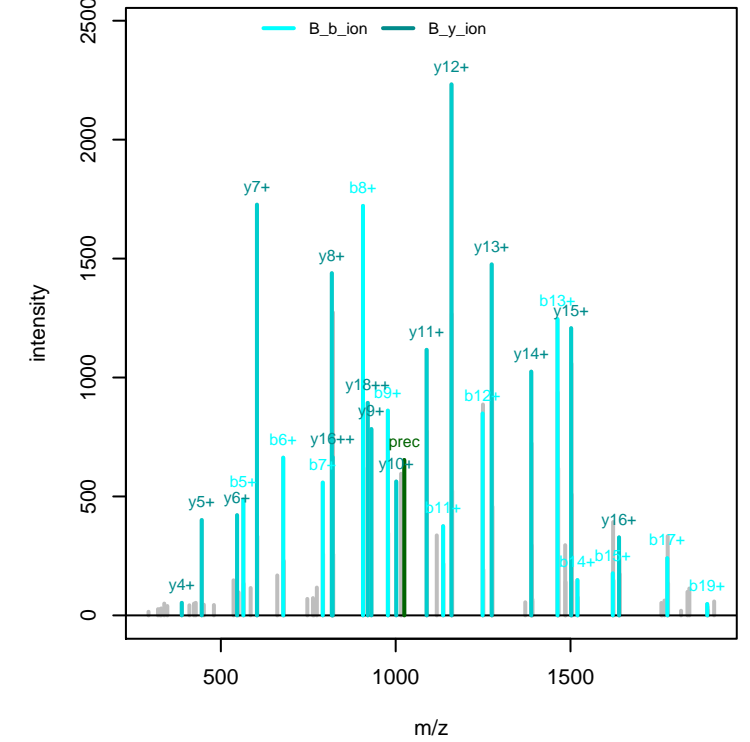

VVNPELHKGK  
PFAPLLEKNSK

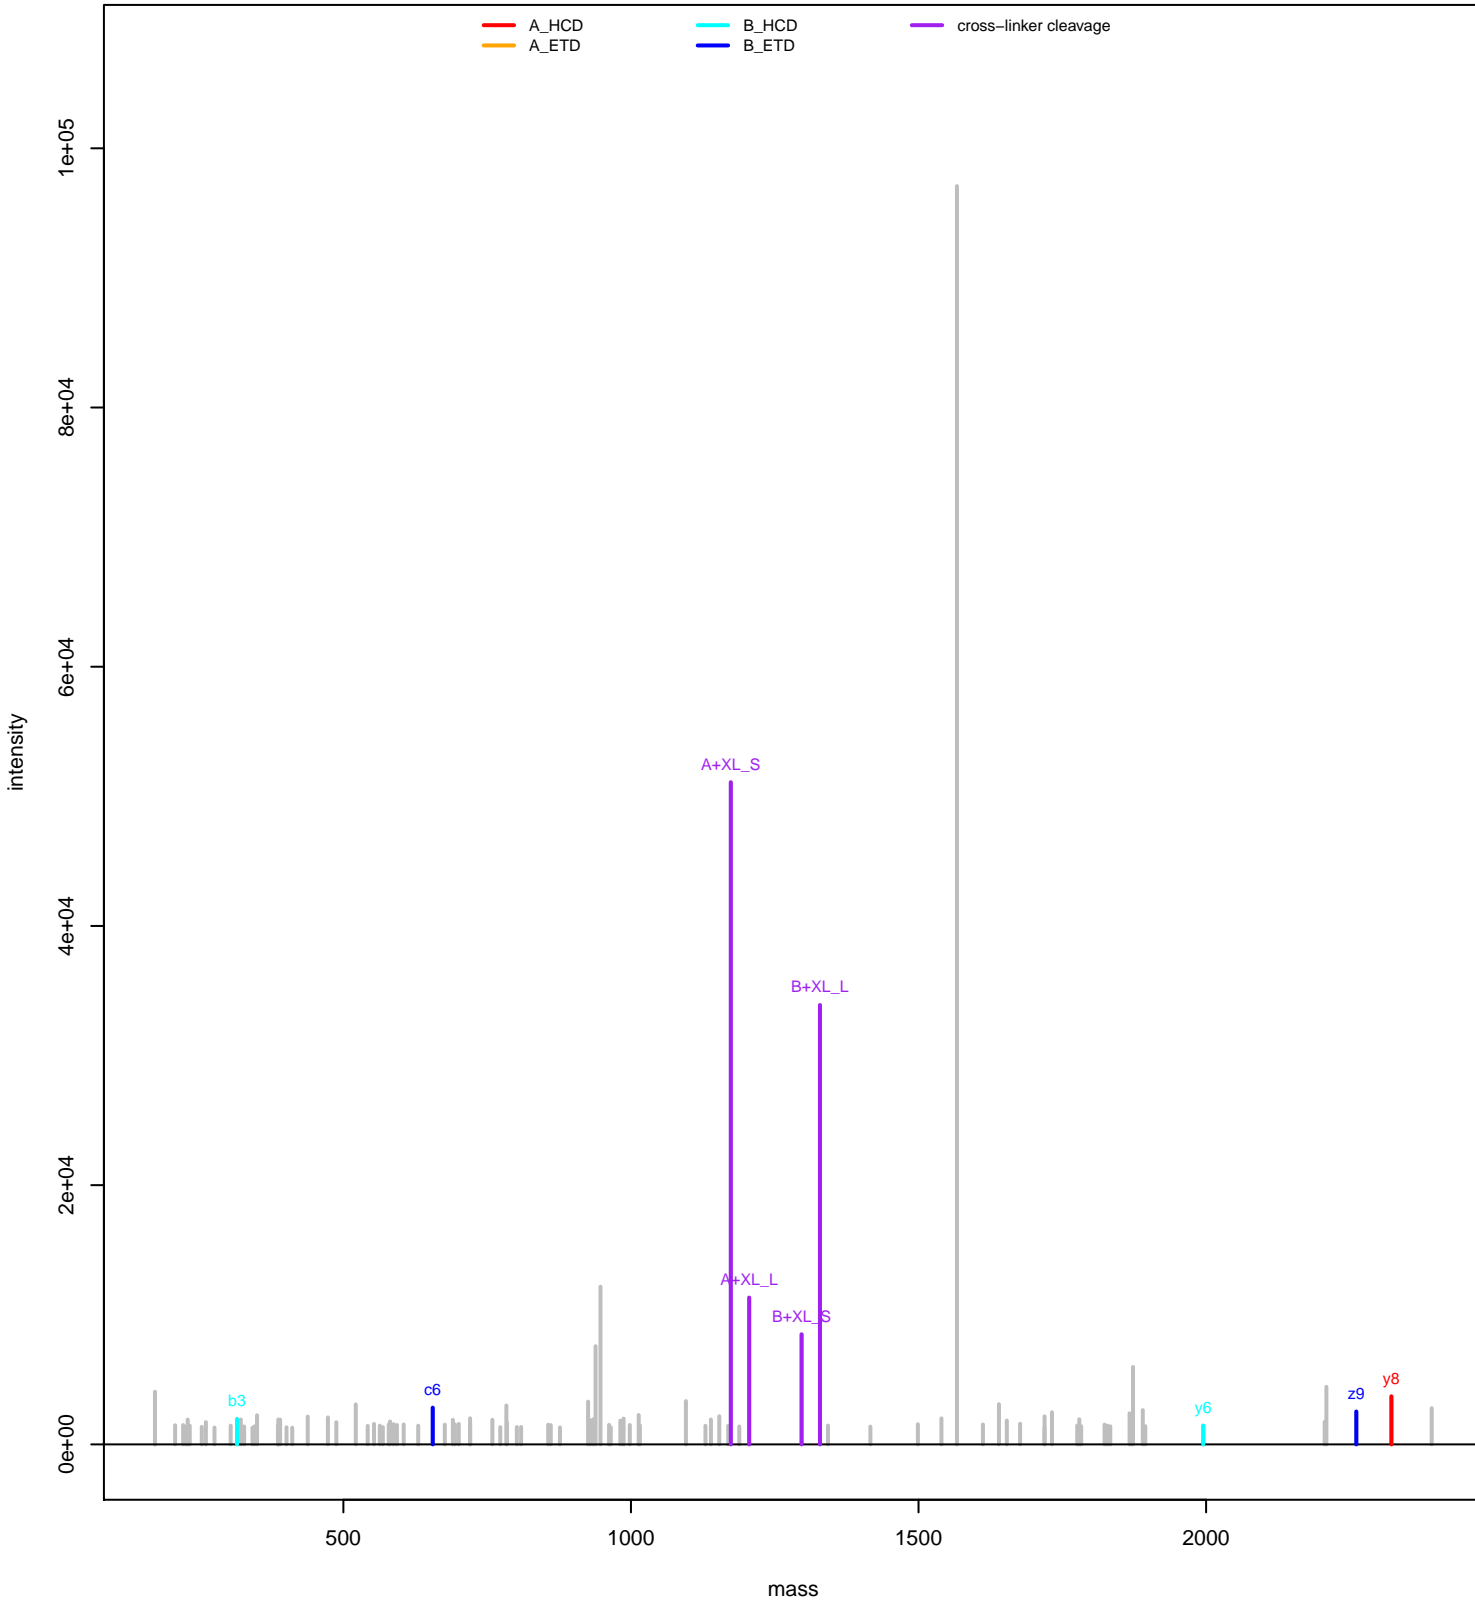

VVNPELHKGK+XL\_S

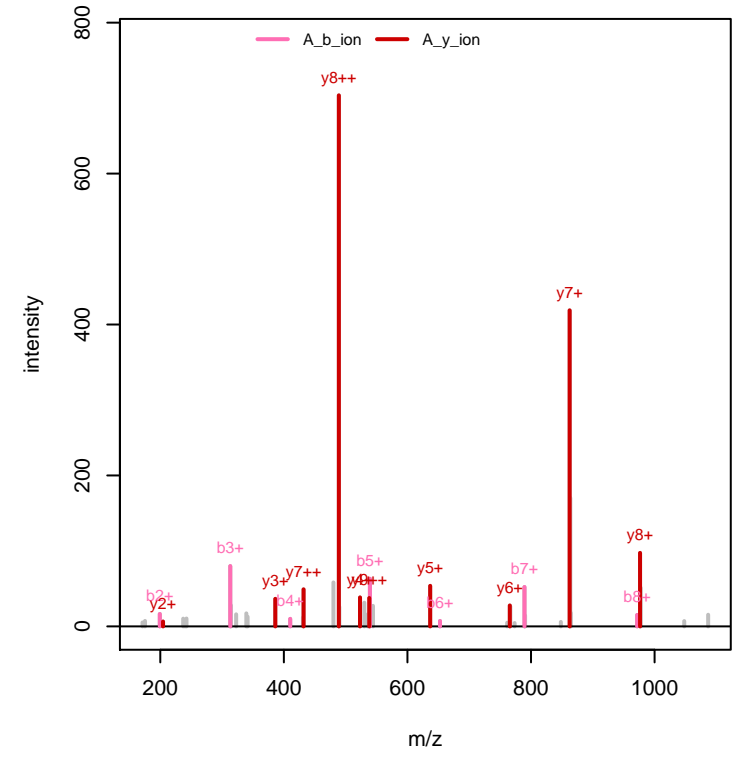

VVNPELHKGK+XL\_L

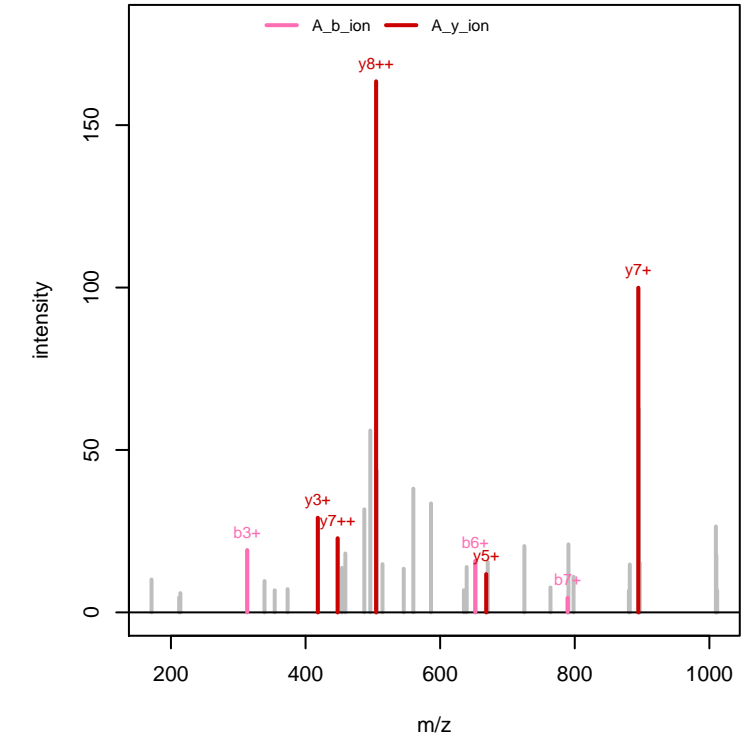

PFAPLLEKNSK+XL\_S

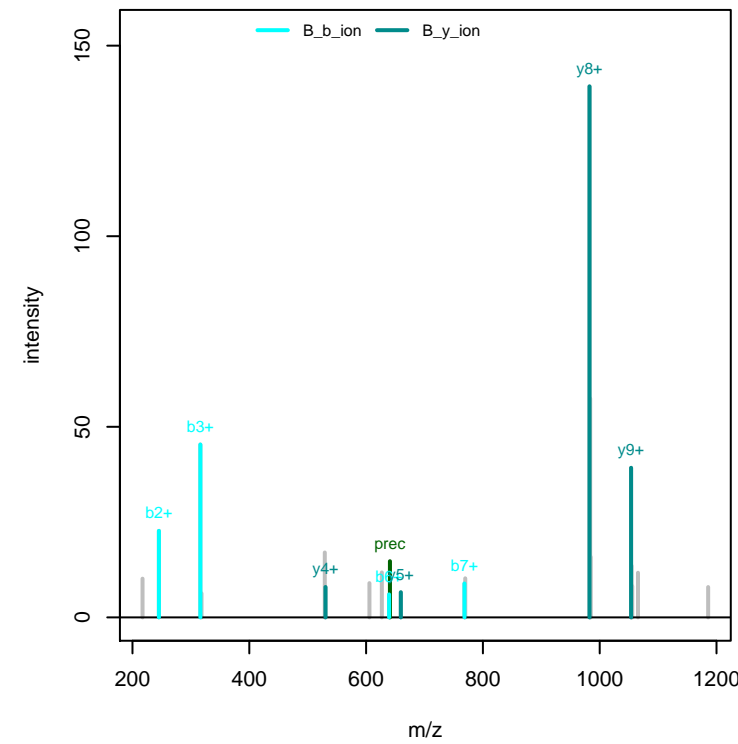

PFAPLLEKNSK+XL\_L

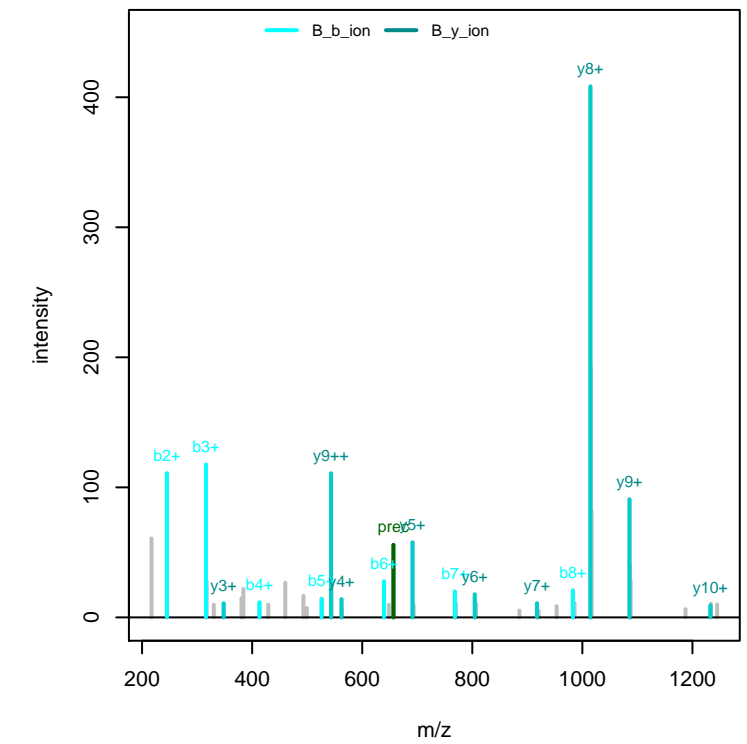



VAVIKAVR  
ANAKFEVK

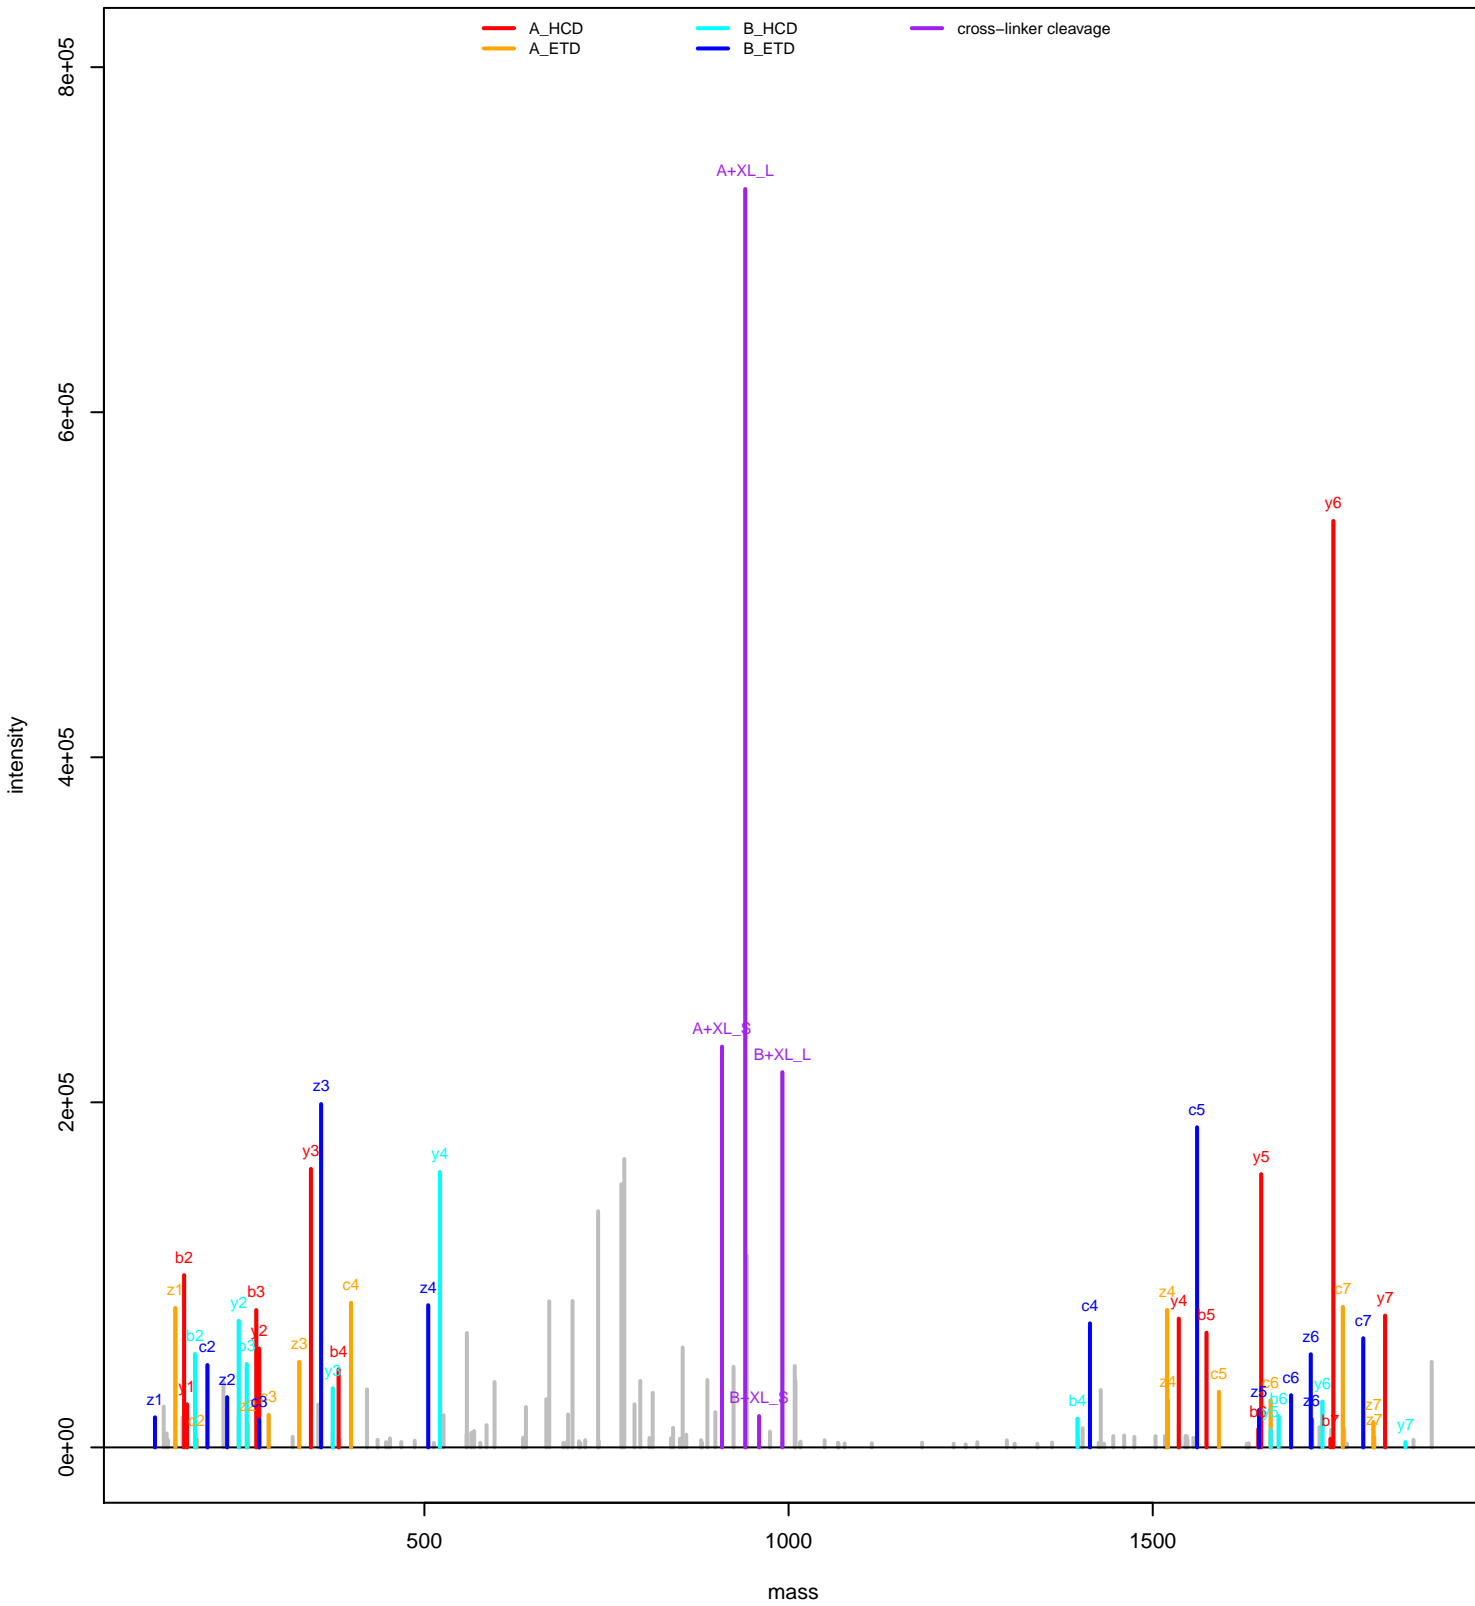

VAVIKAVR+XL\_S

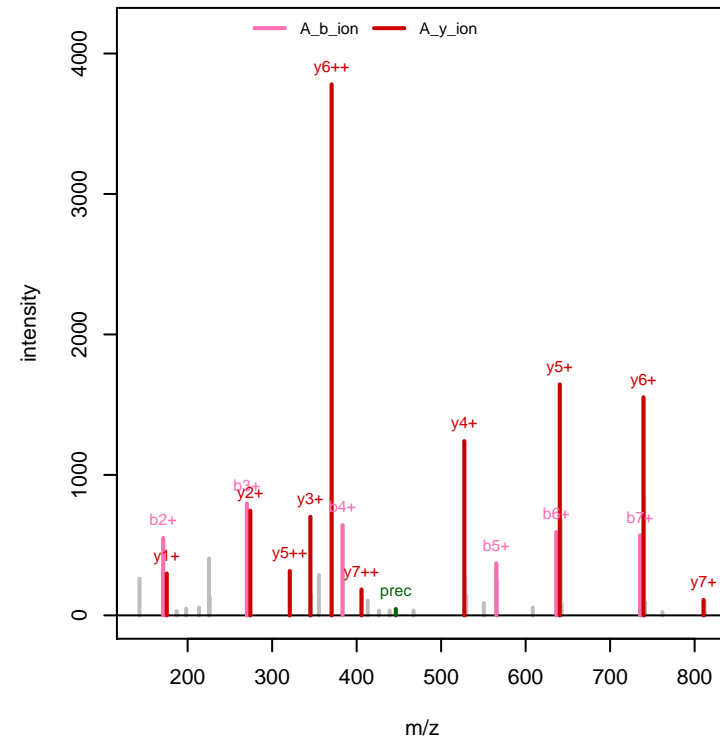

VAVIKAVR+XL\_L

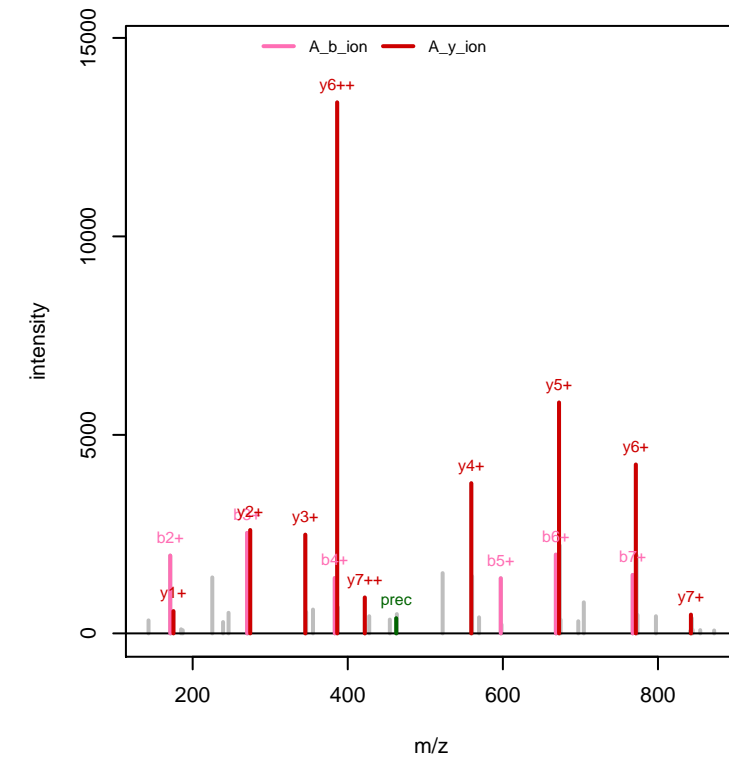

ANAKFEVK+XL\_S

ANAKFEVK+XL\_L

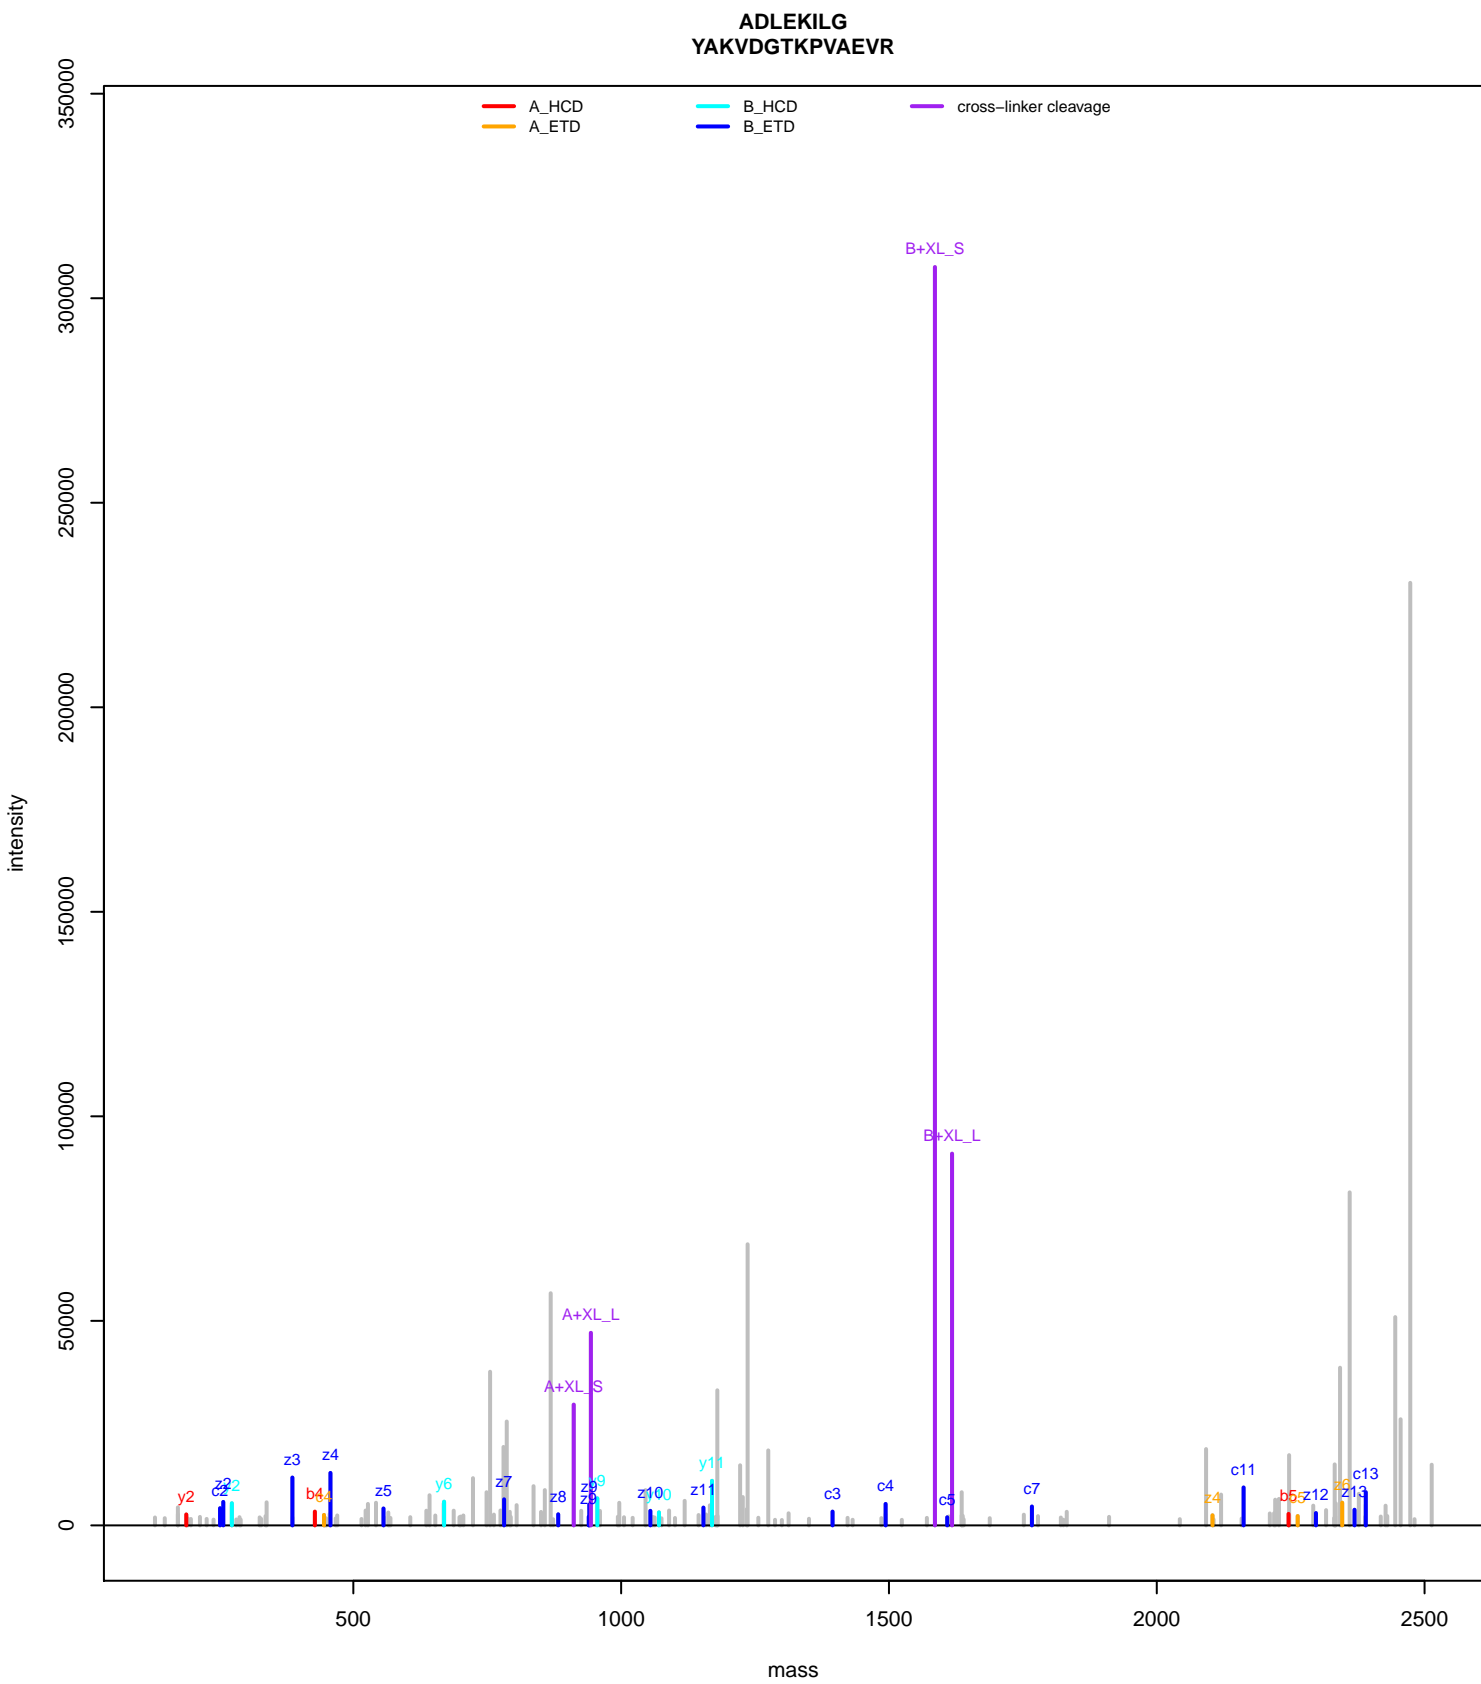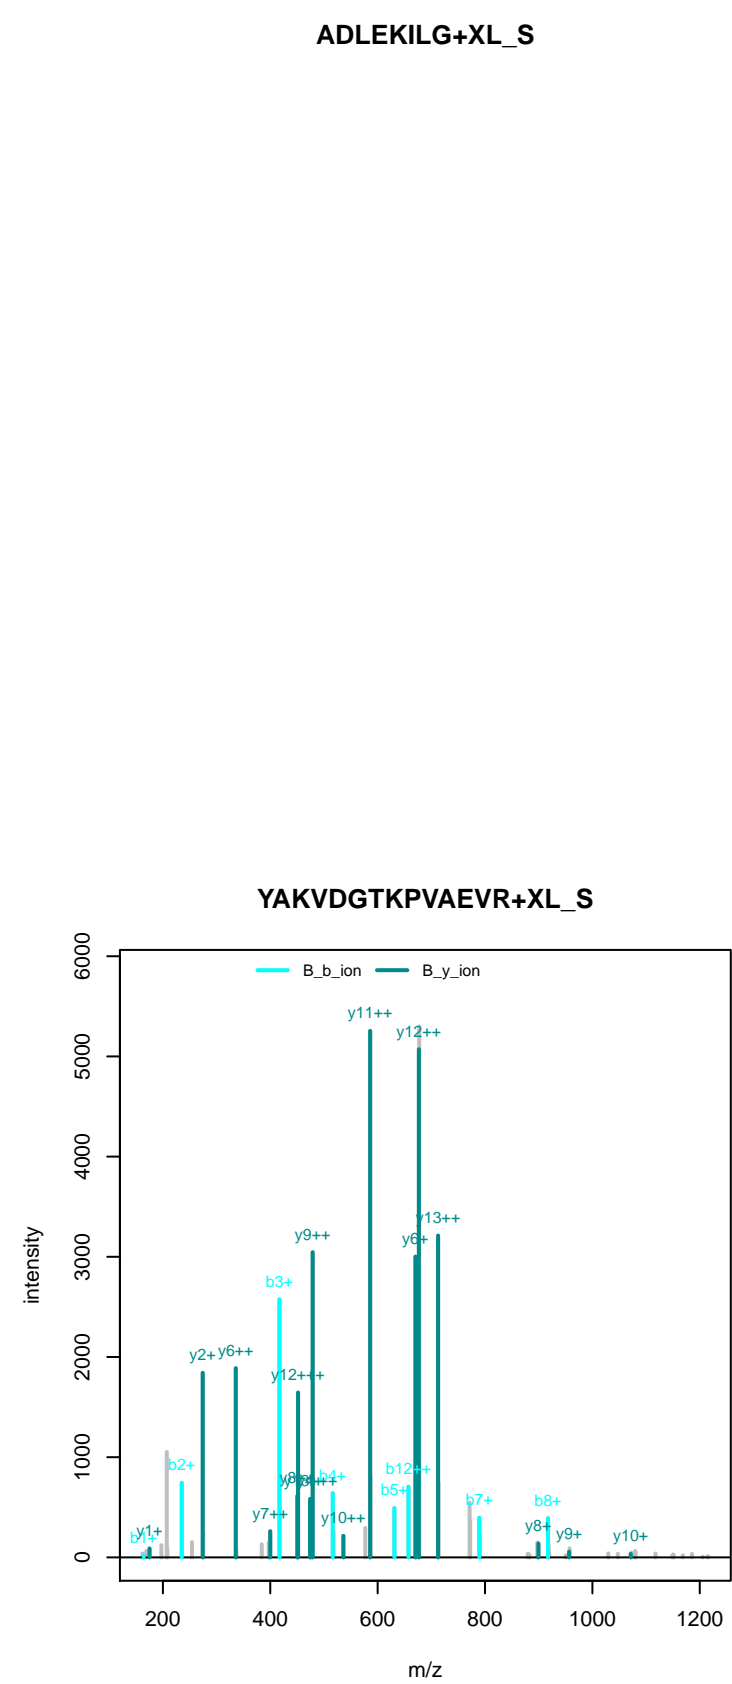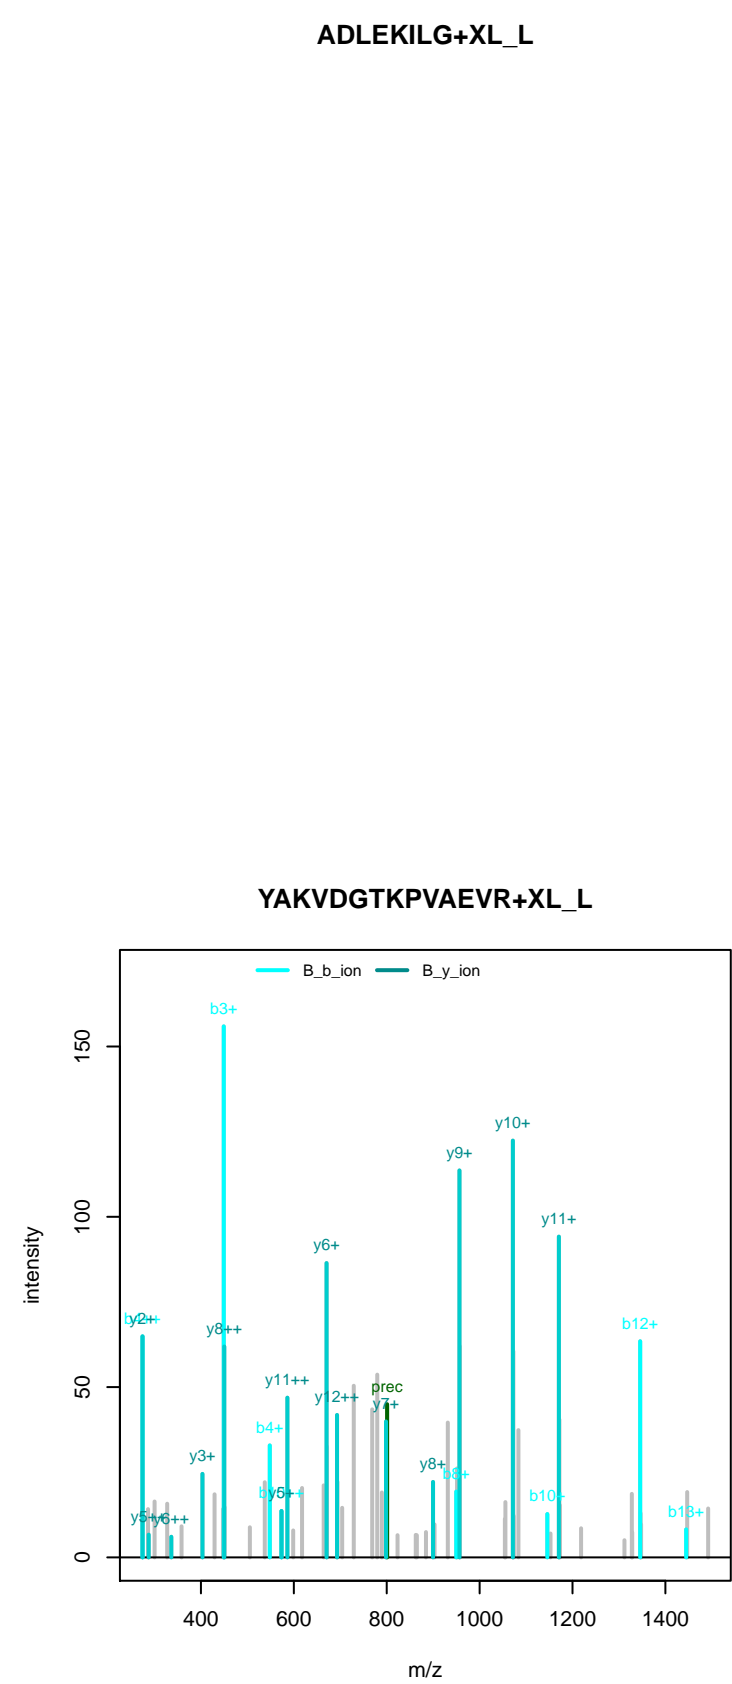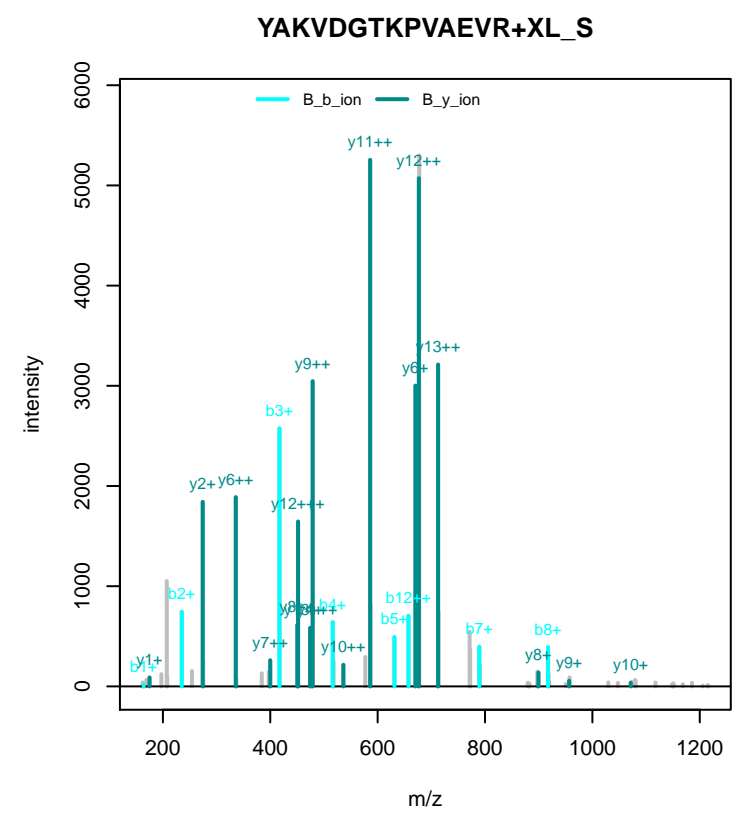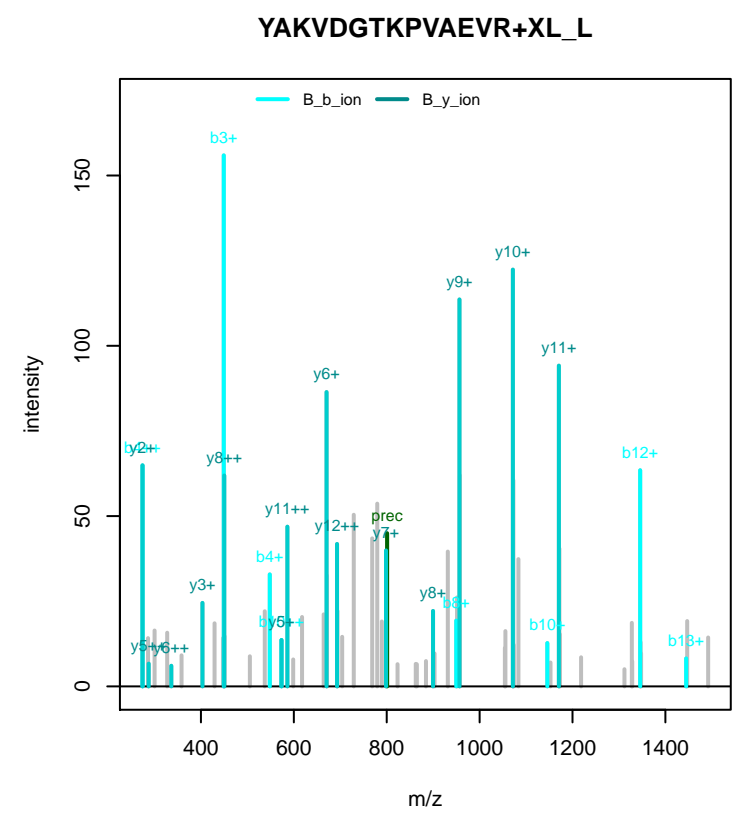

MTATIGGK  
GLSAKSFDR

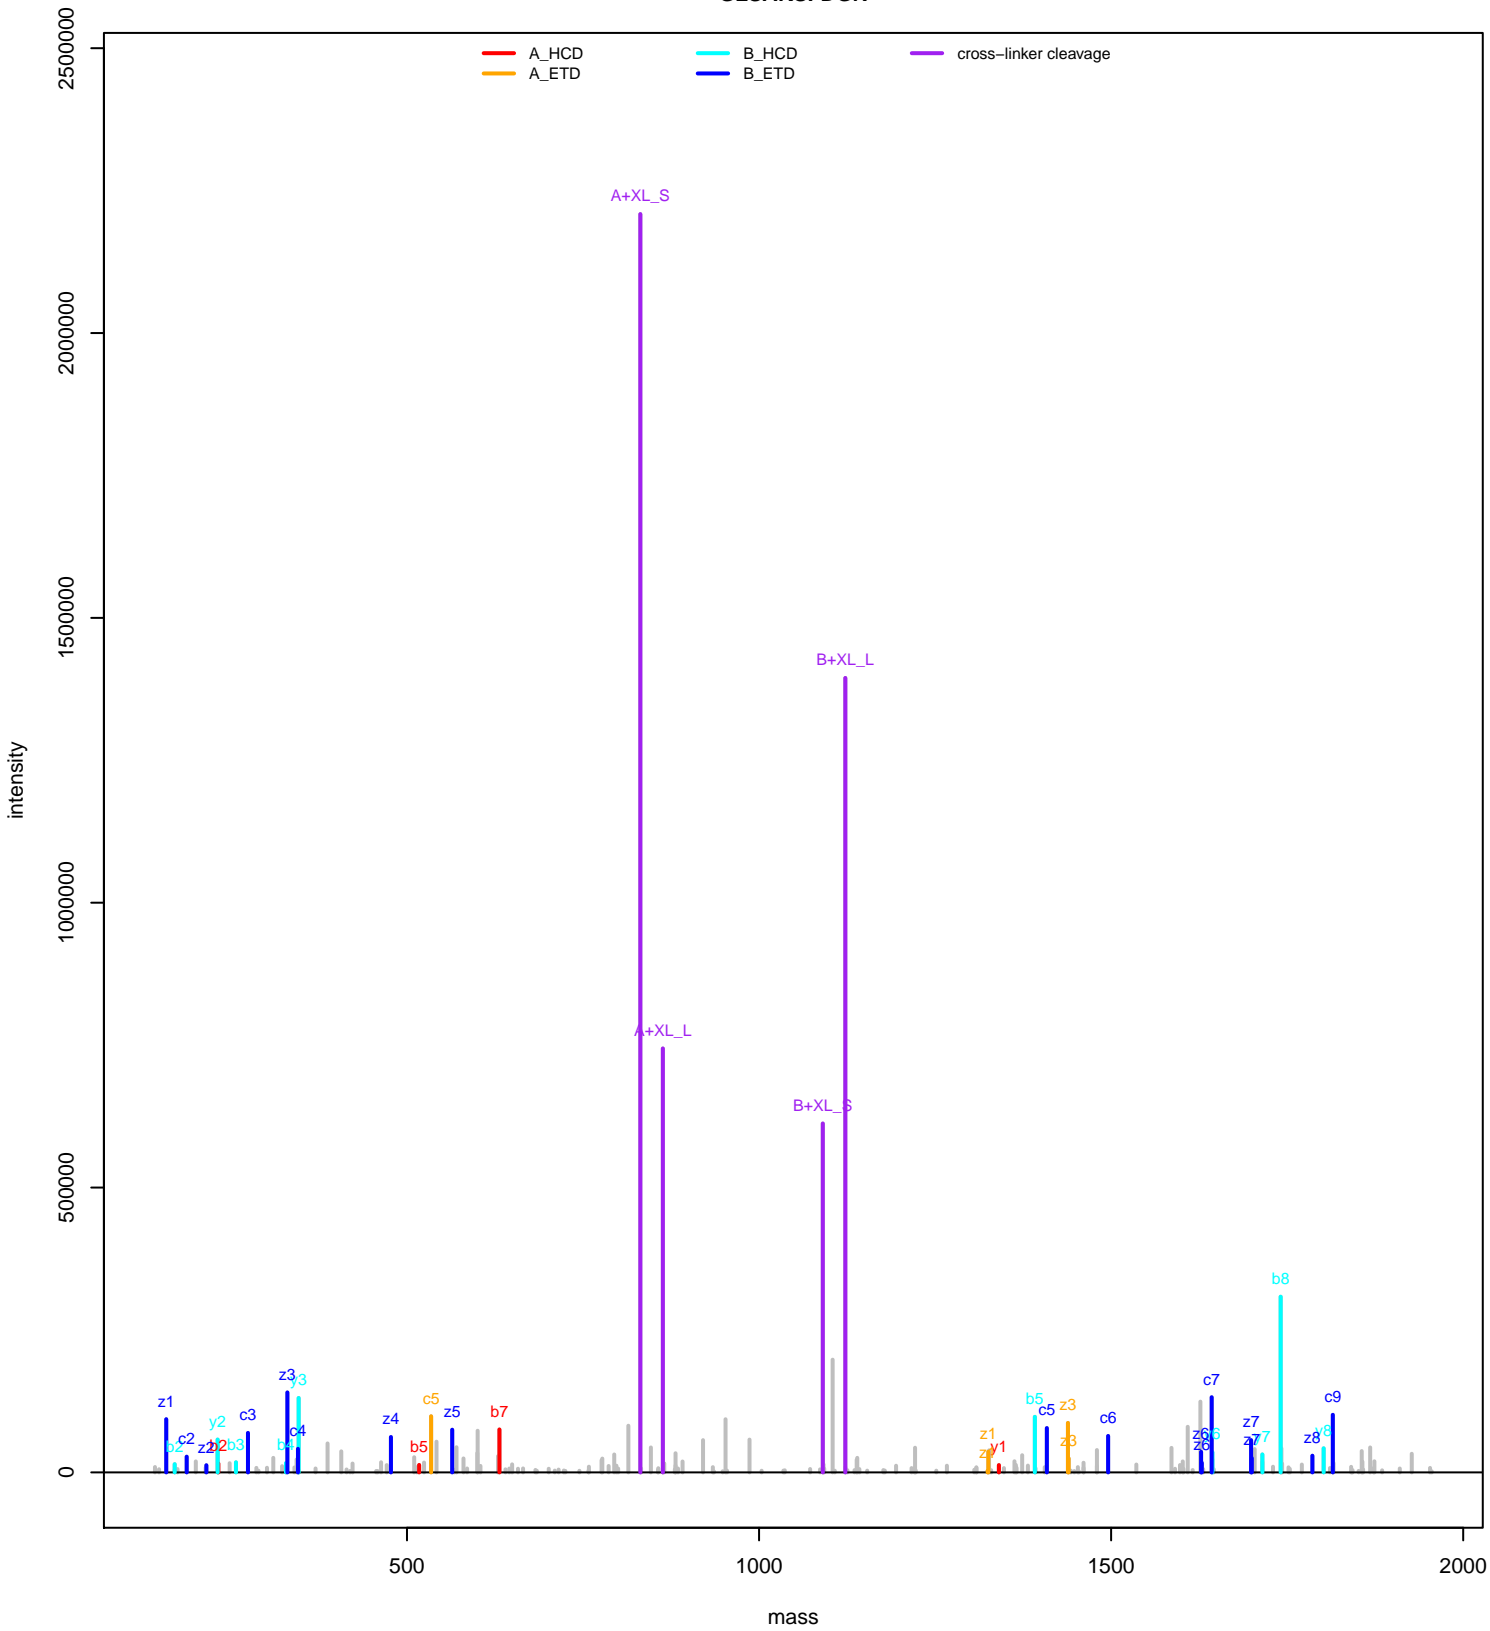

MTATIGGK+XL\_S

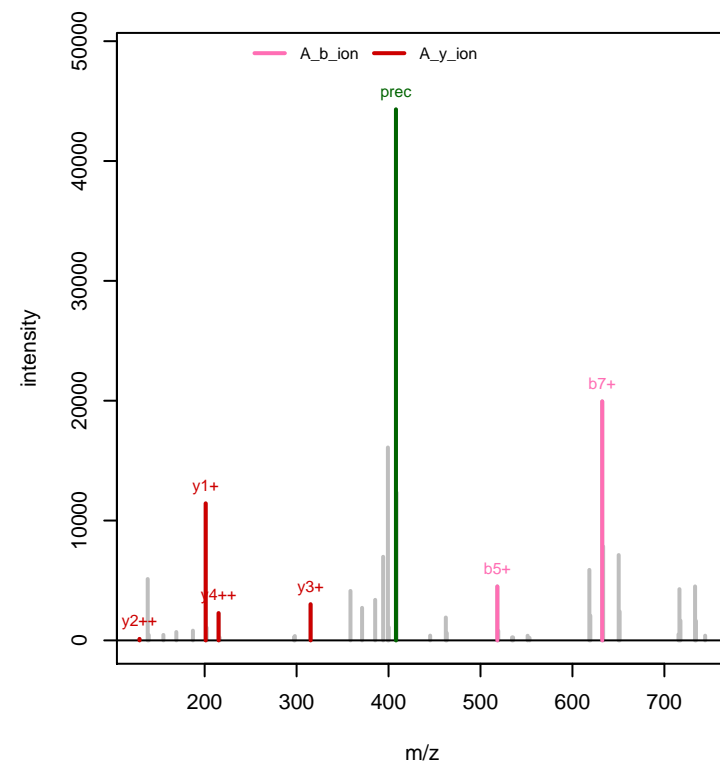

MTATIGGK+XL\_L

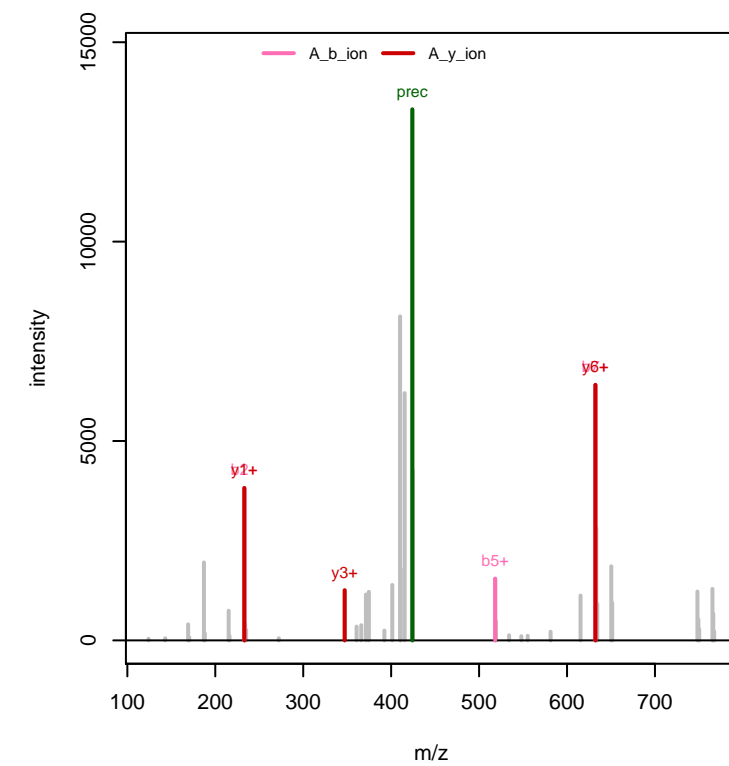

GLSAKSFDR+XL\_S

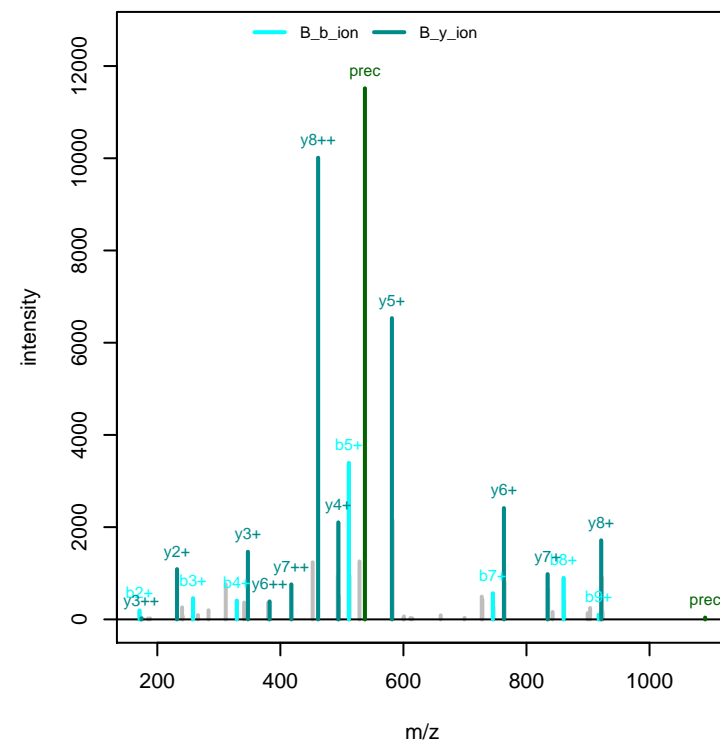

GLSAKSFDR+XL\_L

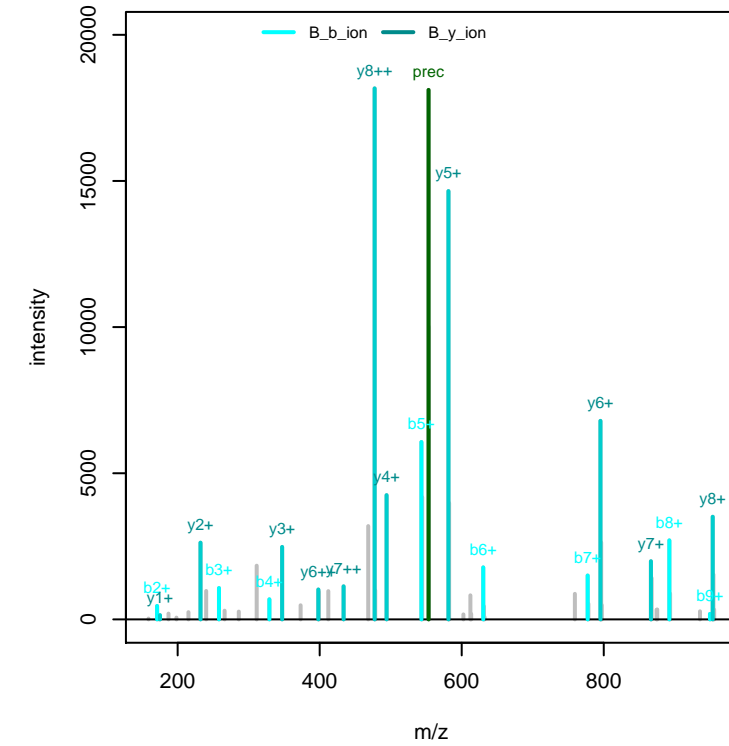



**TDKLTSLR  
KLSYTGEVK**

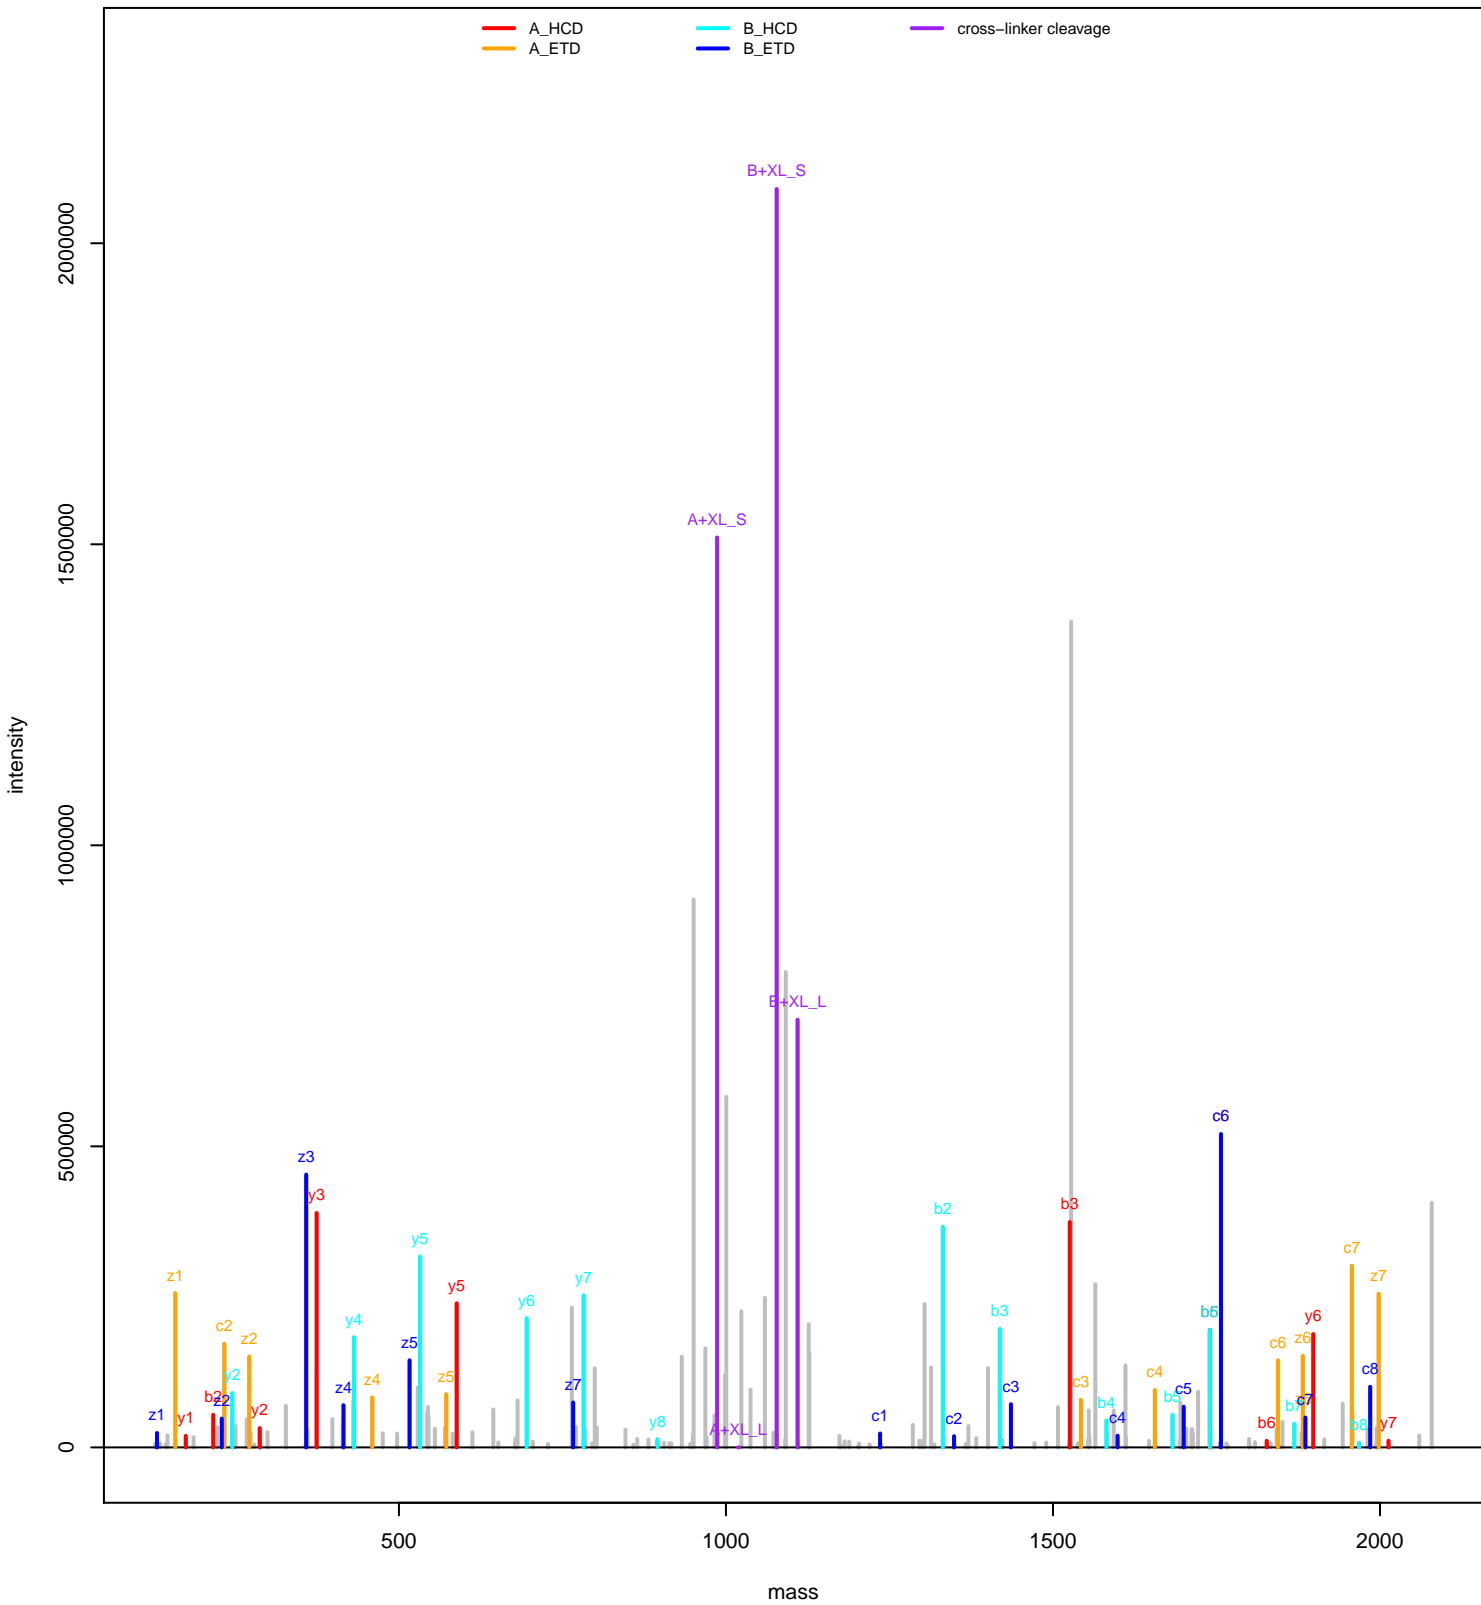

**TDKLTSLR+XL\_S**

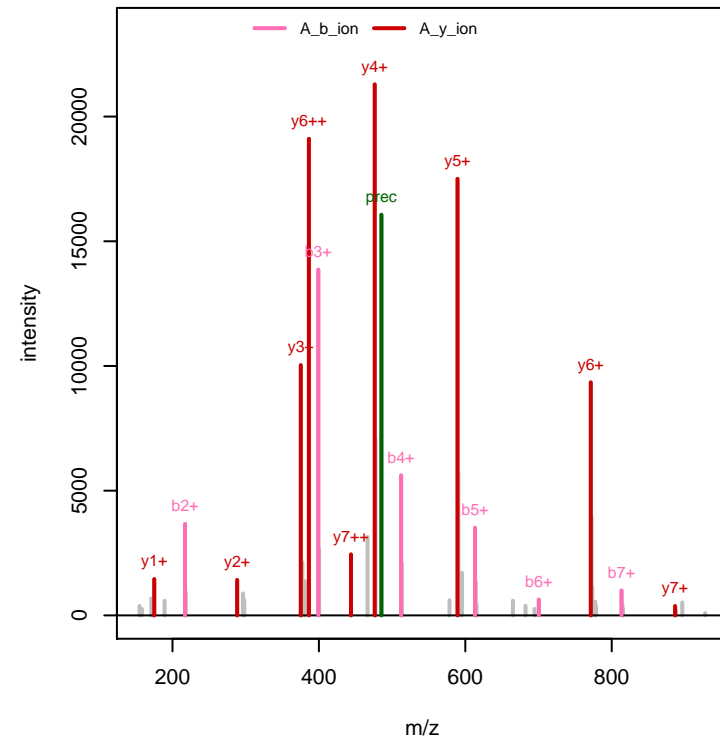

**TDKLTSLR+XL\_L**

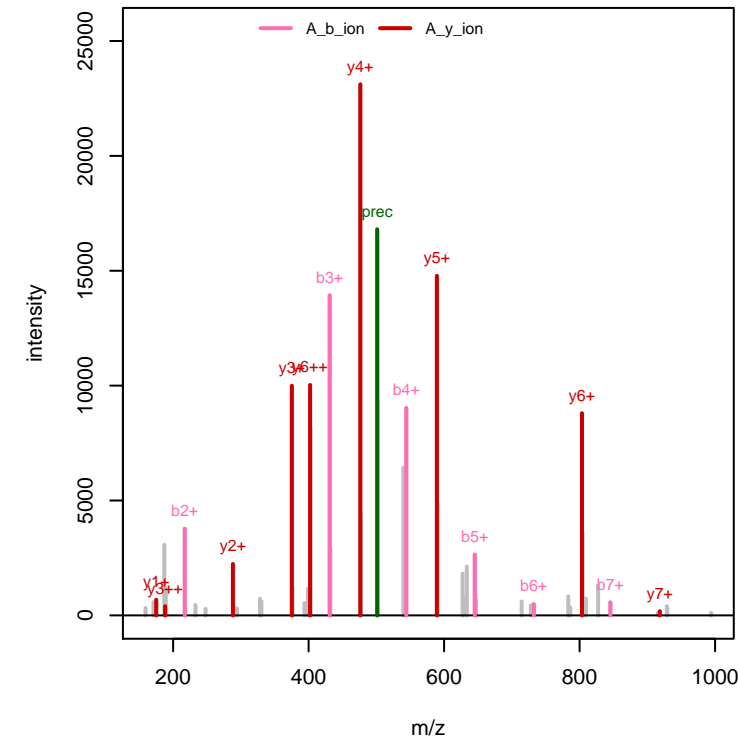

**KLSYTGEVK+XL\_S**

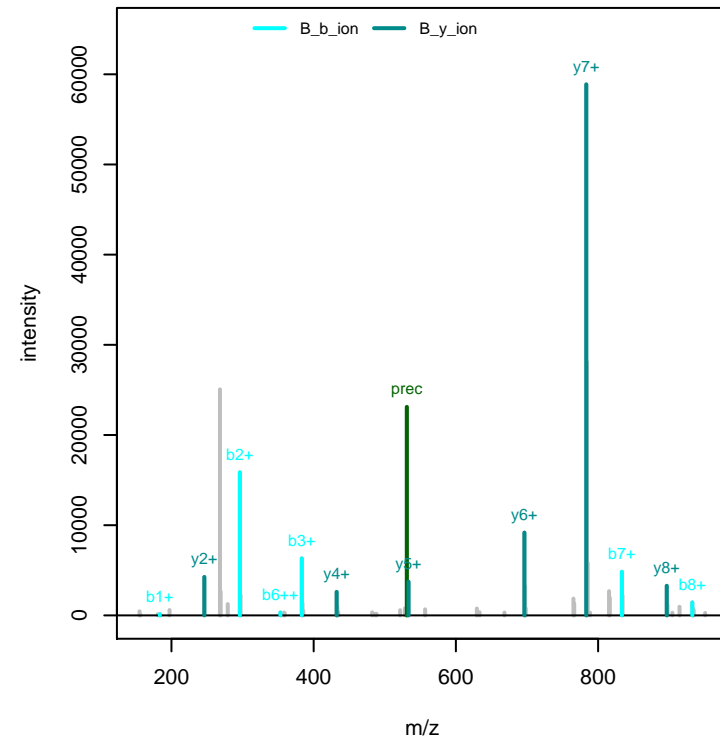

**KLSYTGEVK+XL\_L**

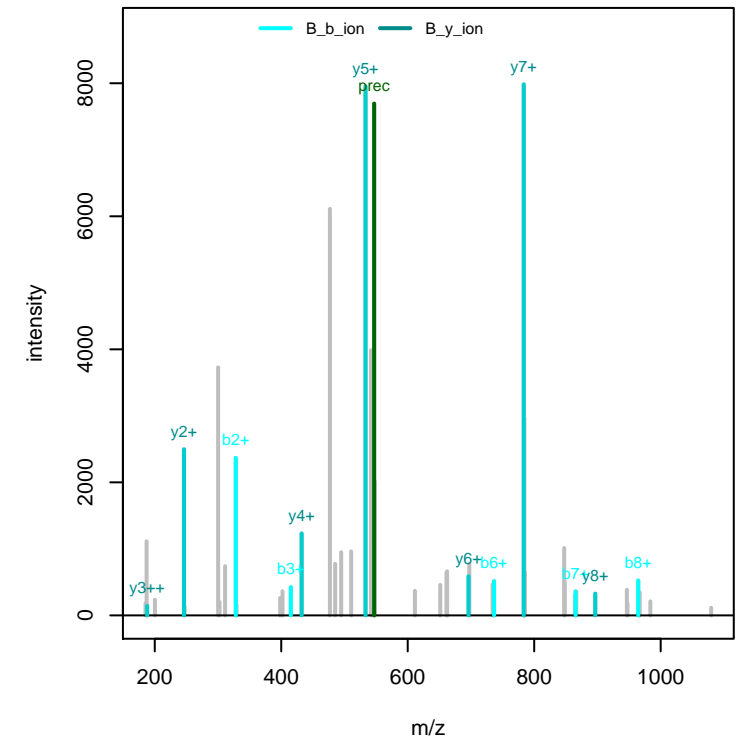

KFDPVVR  
LVSSAGTGHFYTTTKNK

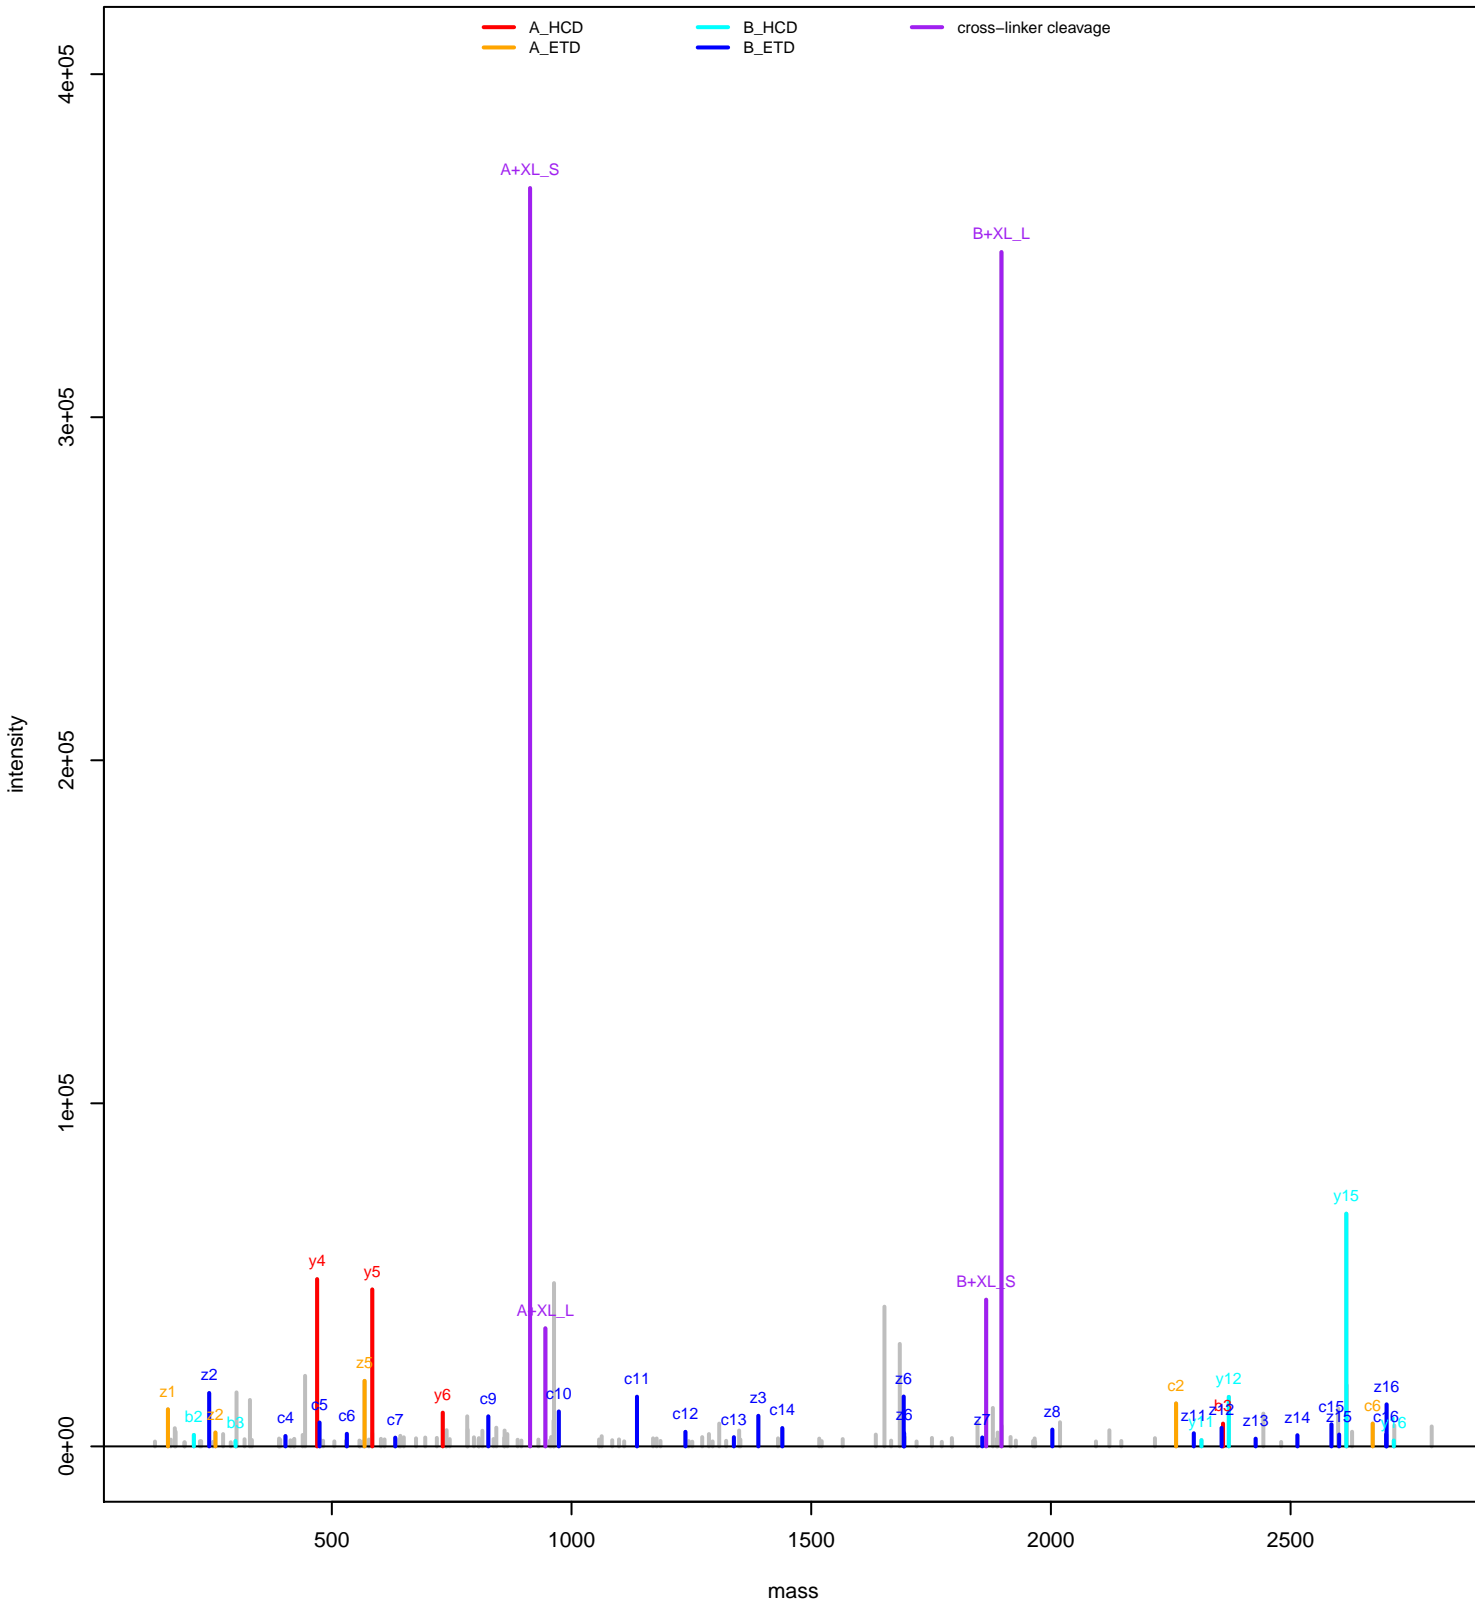

KFDPVVR+XL\_S

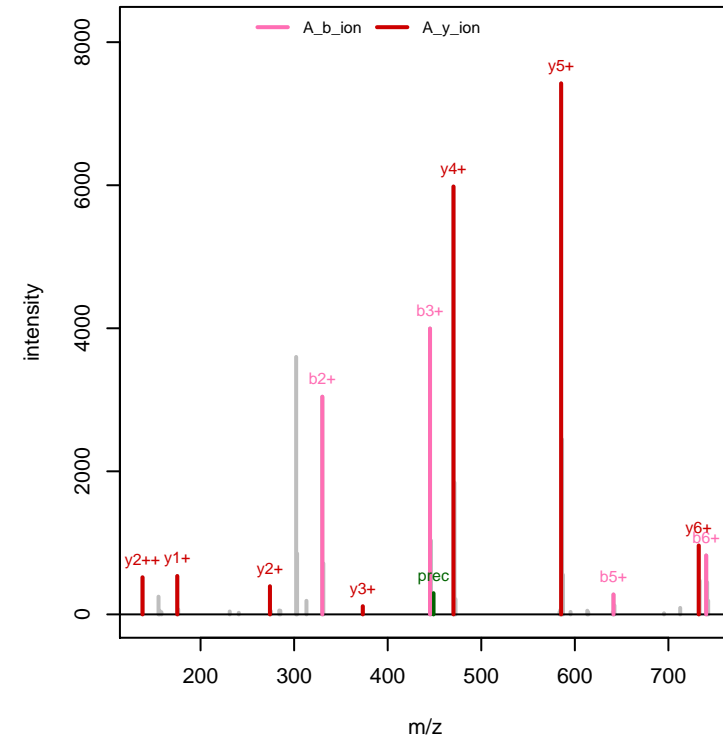

KFDPVVR+XL\_L

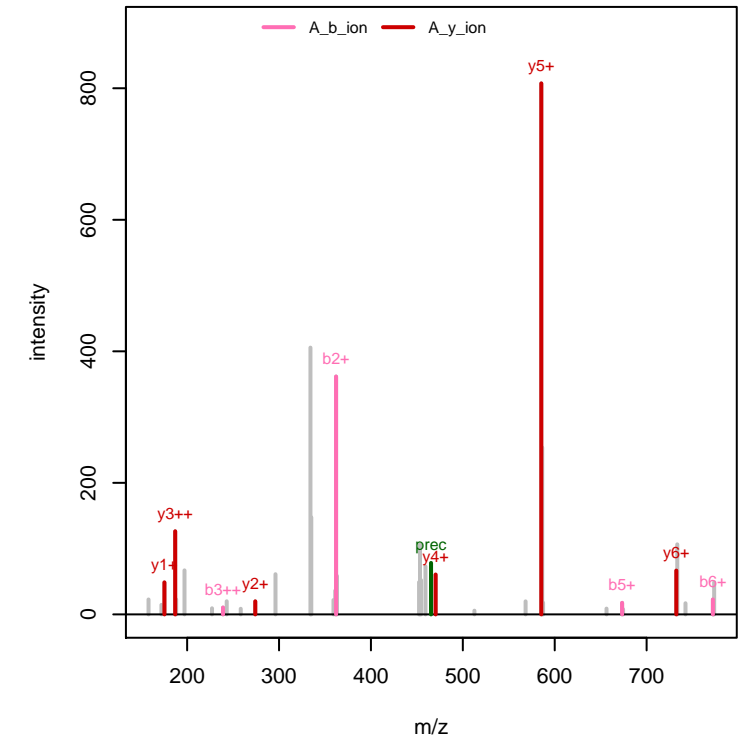

LVSSAGTGHFYTTTKNK+XL\_S

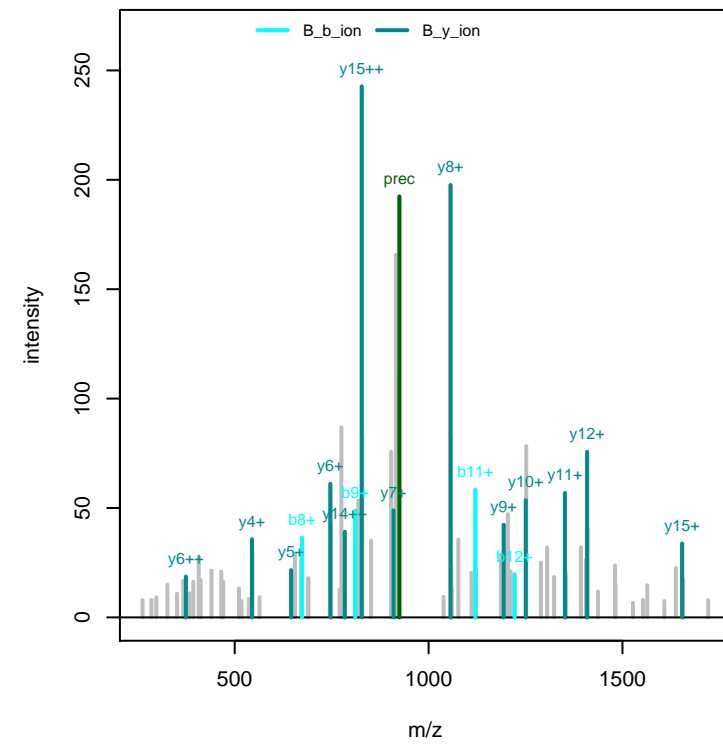

LVSSAGTGHFYTTTKNK+XL\_L

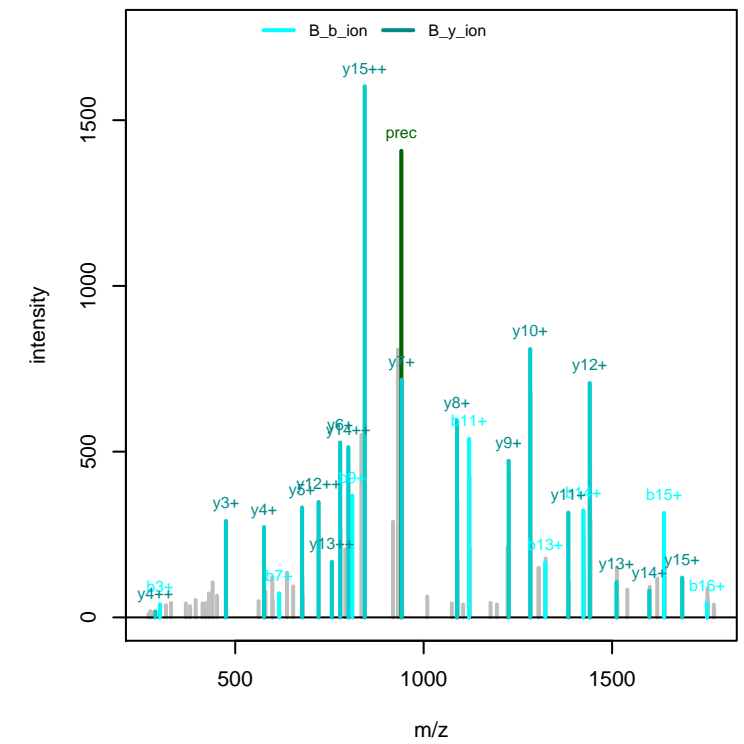

EKSLLR  
LVLAAGR

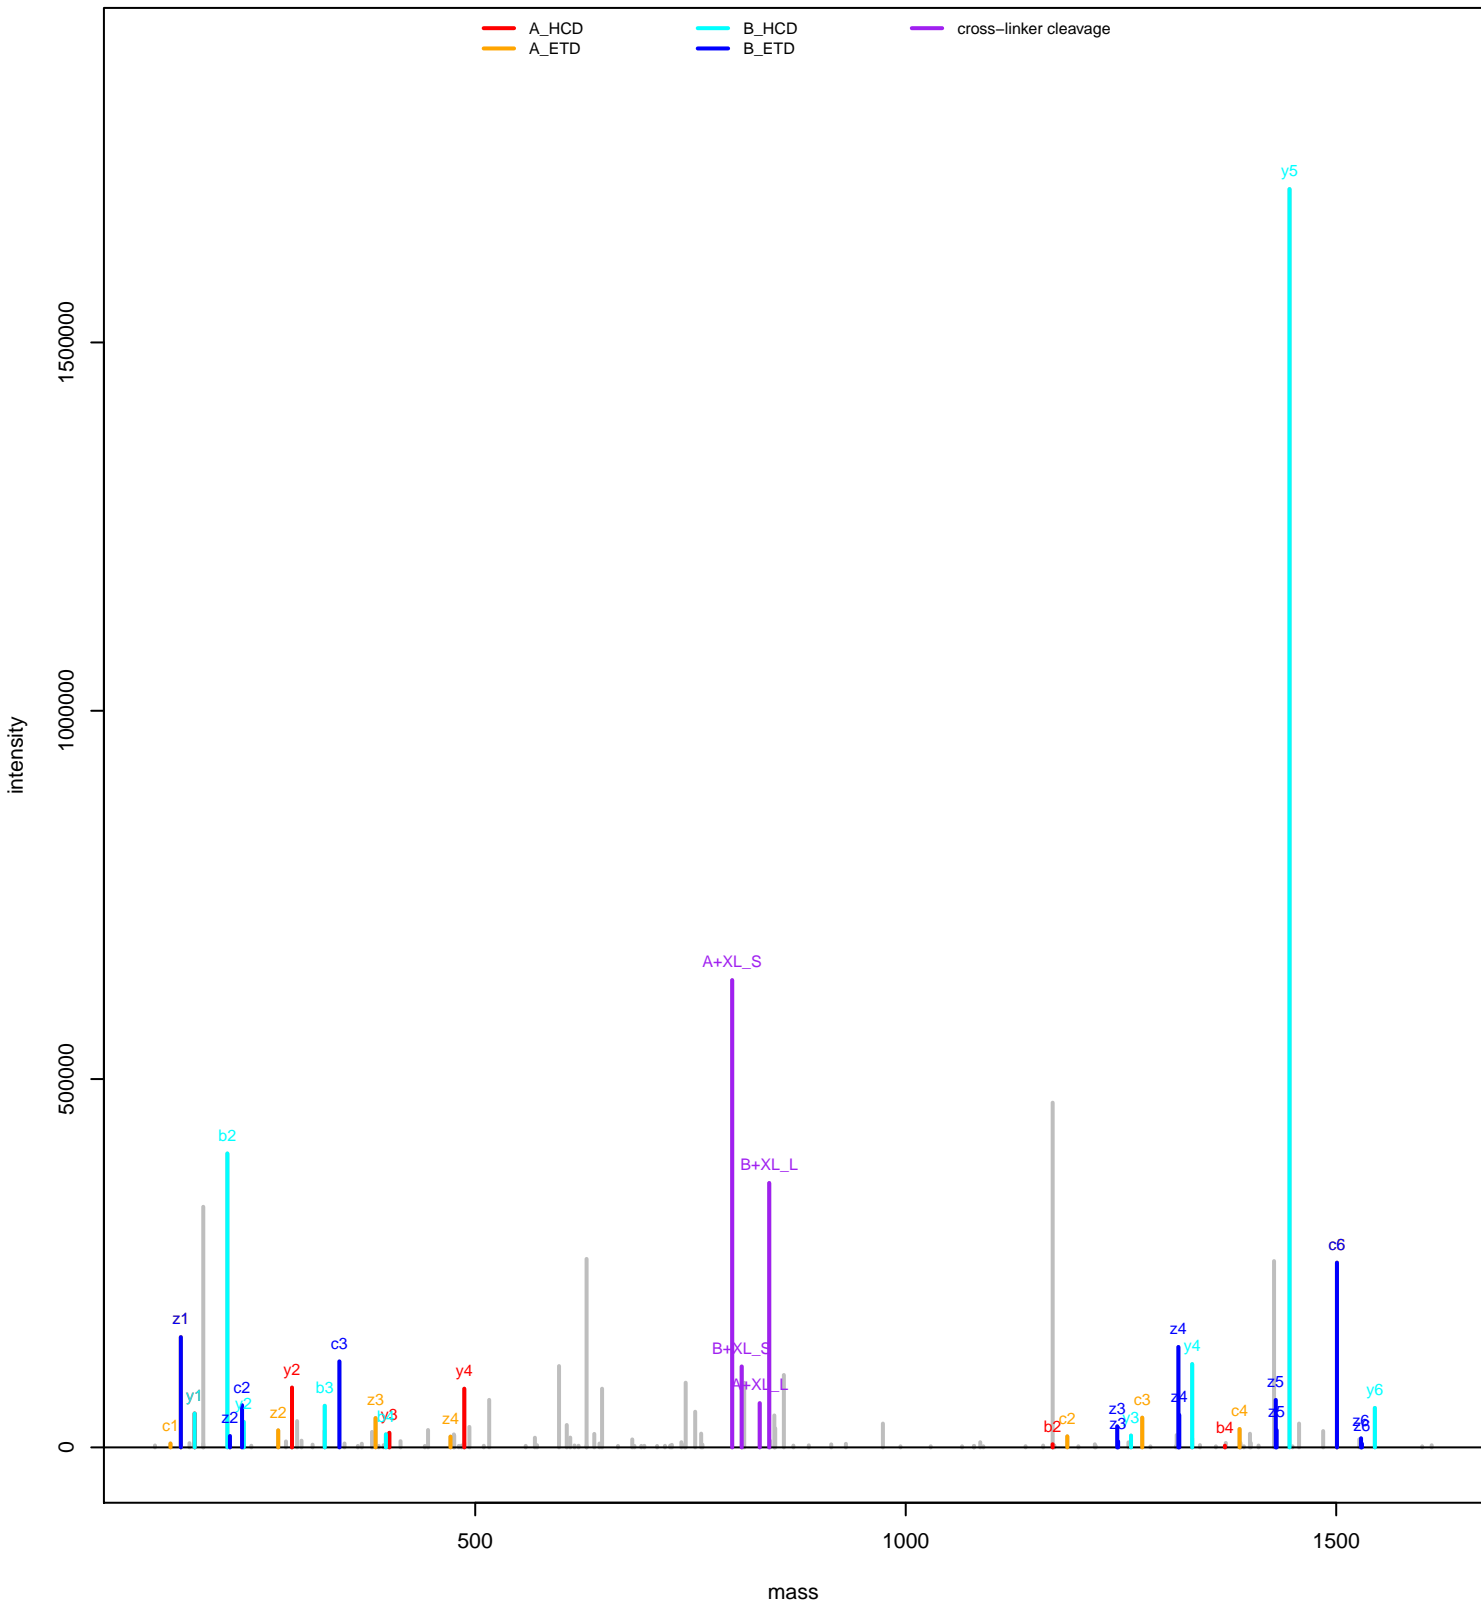

EKSLLR+XL\_S

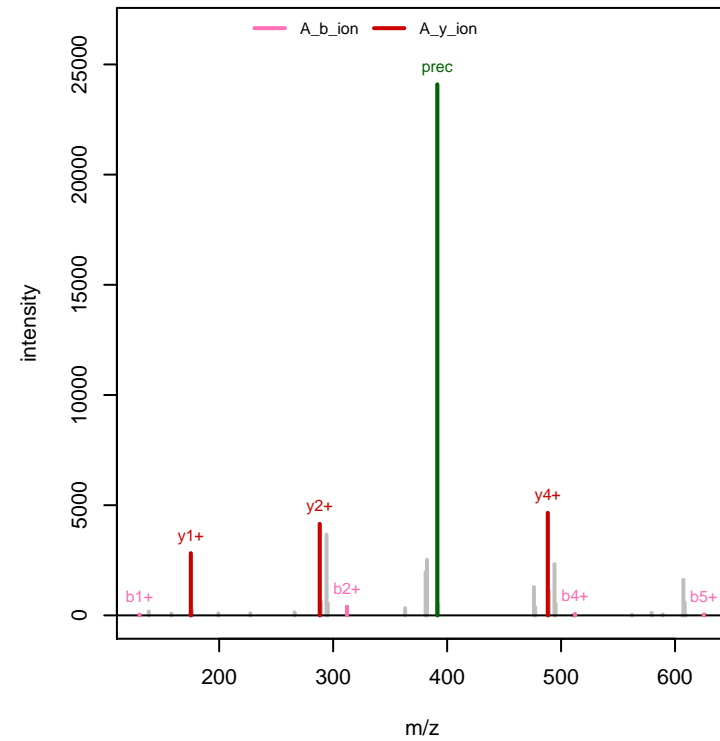

EKSLLR+XL\_L

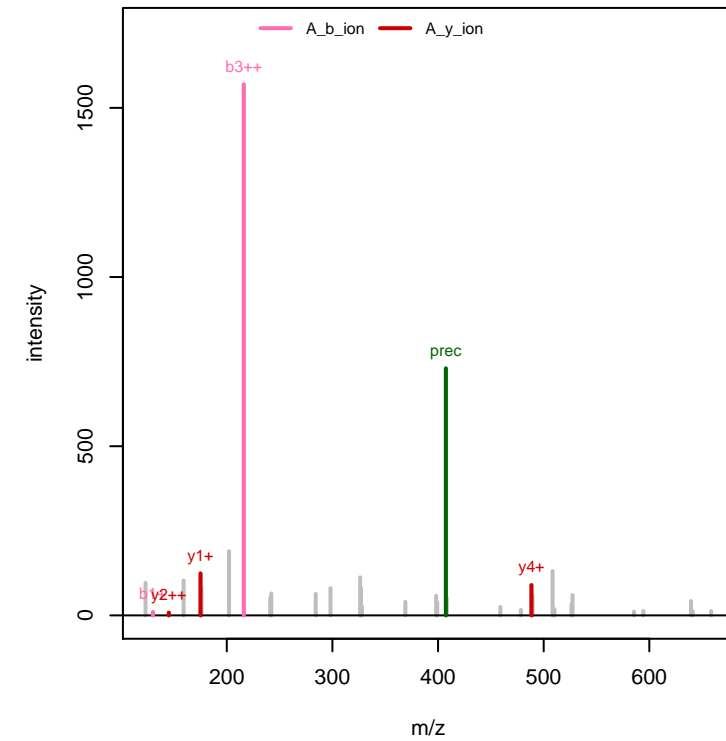

LVLAAGR+XL\_S

LVLAAGR+XL\_L

MVIGNKGAK  
IKTIGIEAR

MVIGNKGAK+XL\_S

MVIGNKGAK+XL\_L

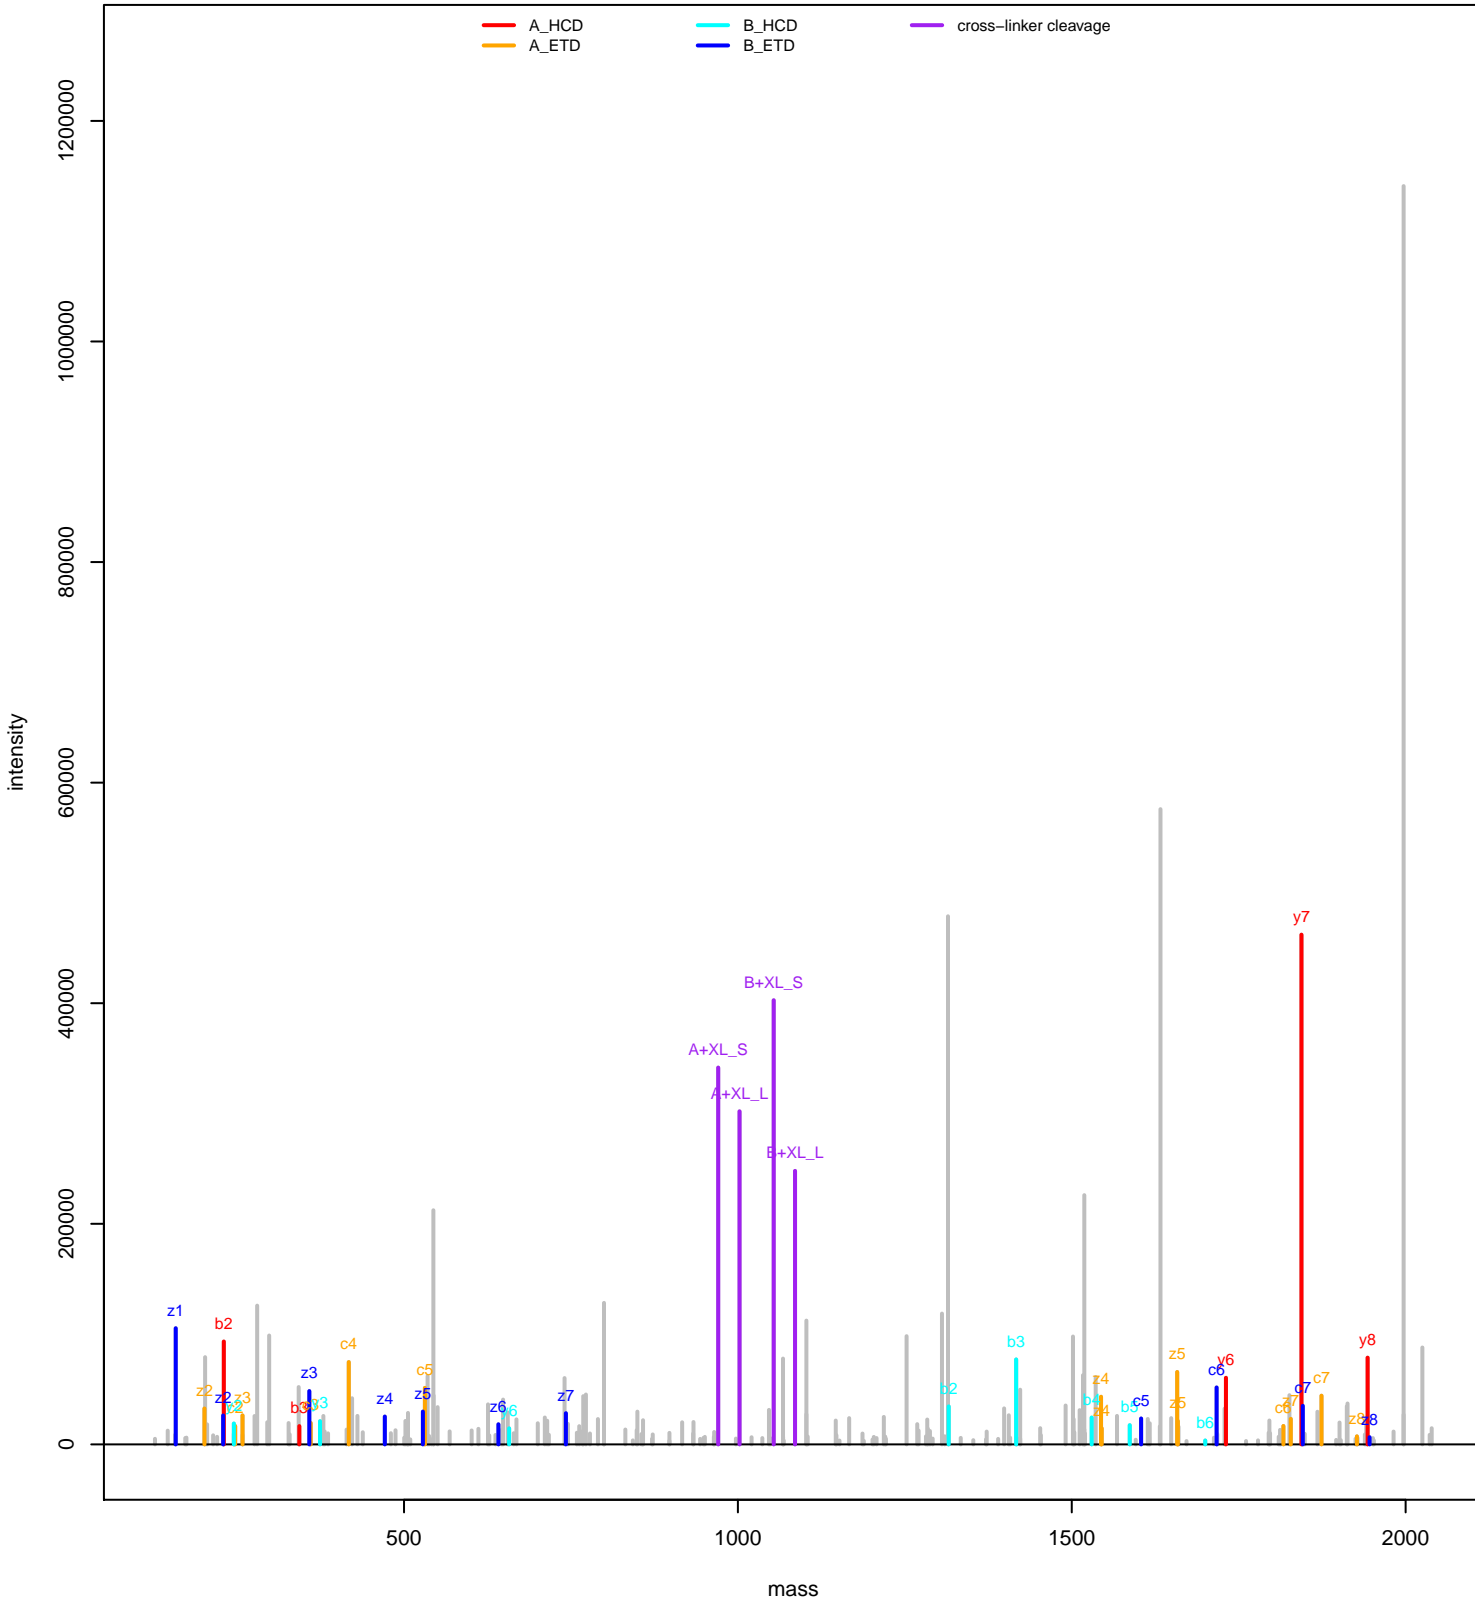

IKTIGIEAR+XL\_S

IKTIGIEAR+XL\_L

TKAGETFGEEK  
KVLGFITDAGGR

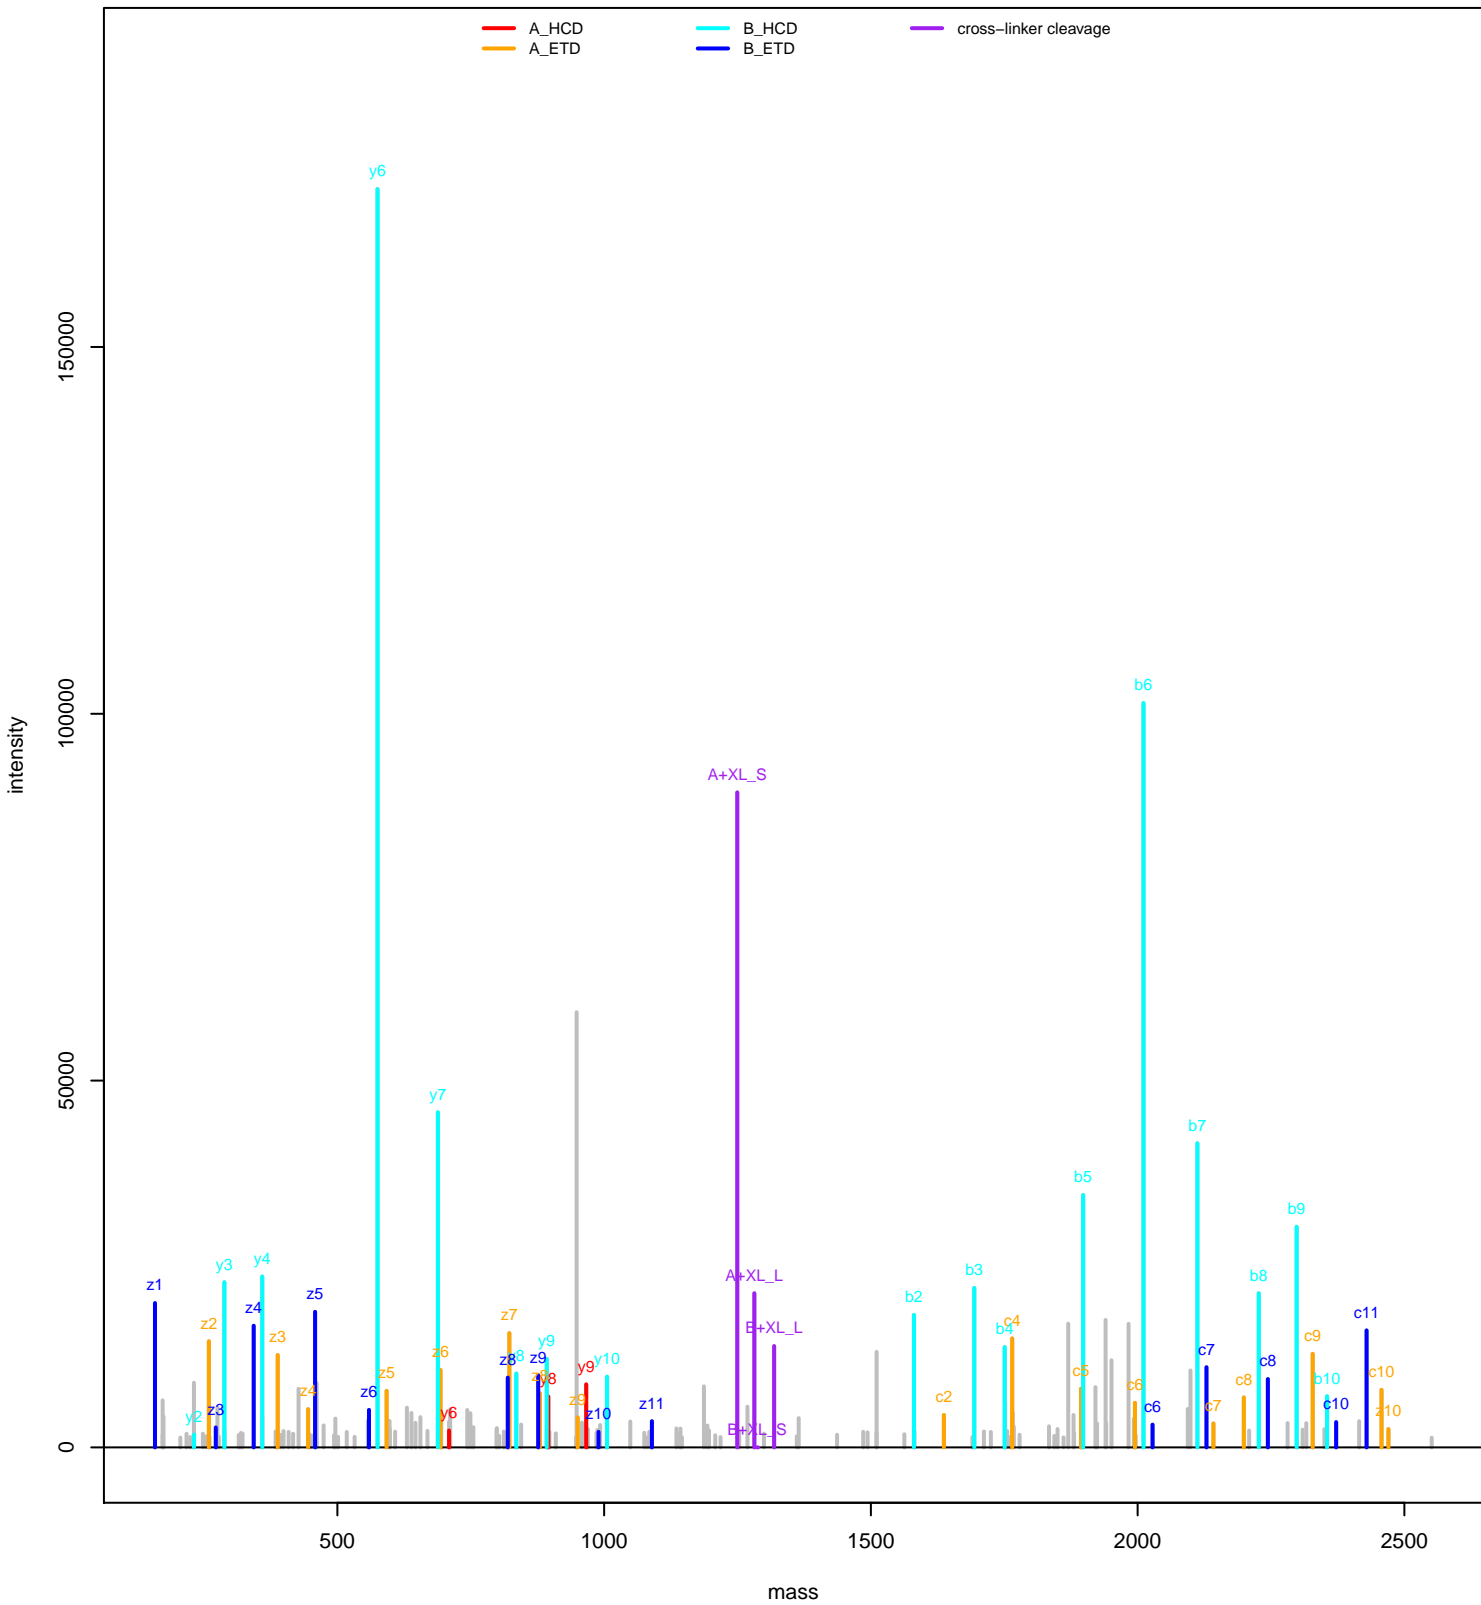

TKAGETFGEEK+XL\_S

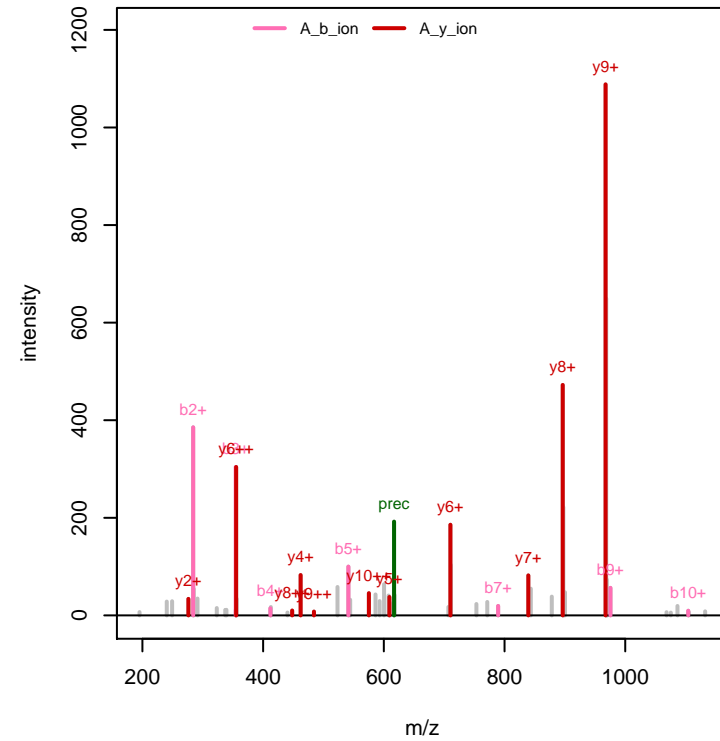

TKAGETFGEEK+XL\_L

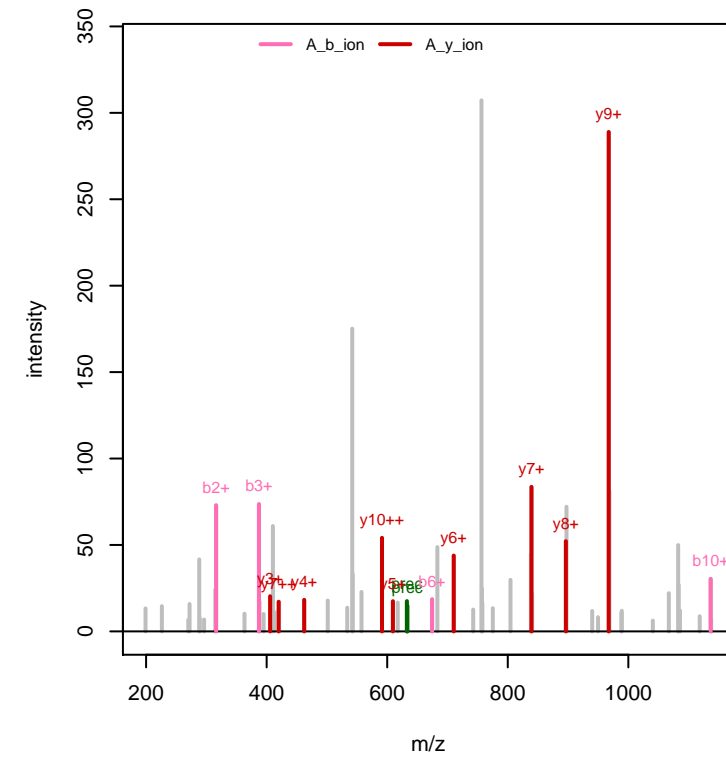

KVLGFITDAGGR+XL\_S

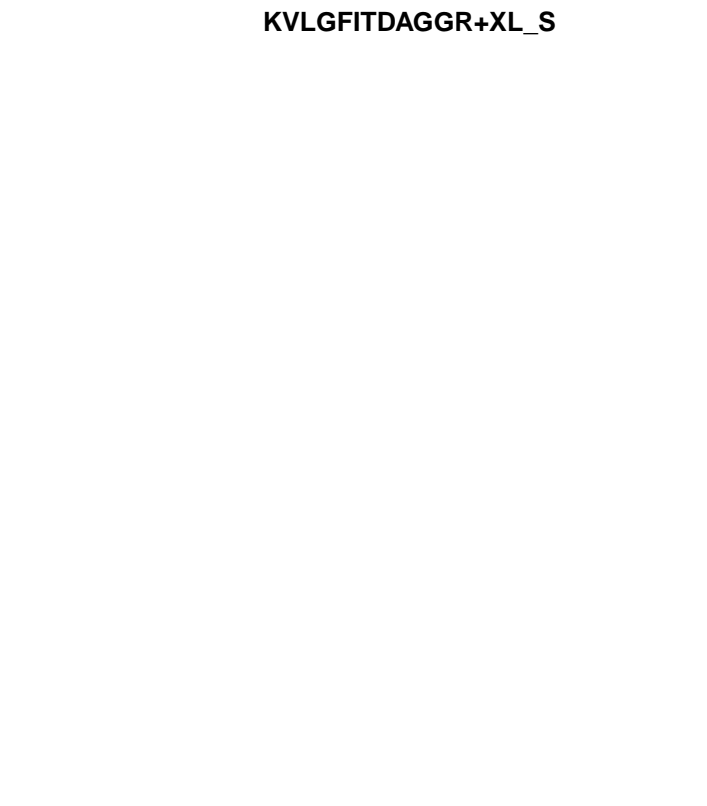

KVLGFITDAGGR+XL\_L

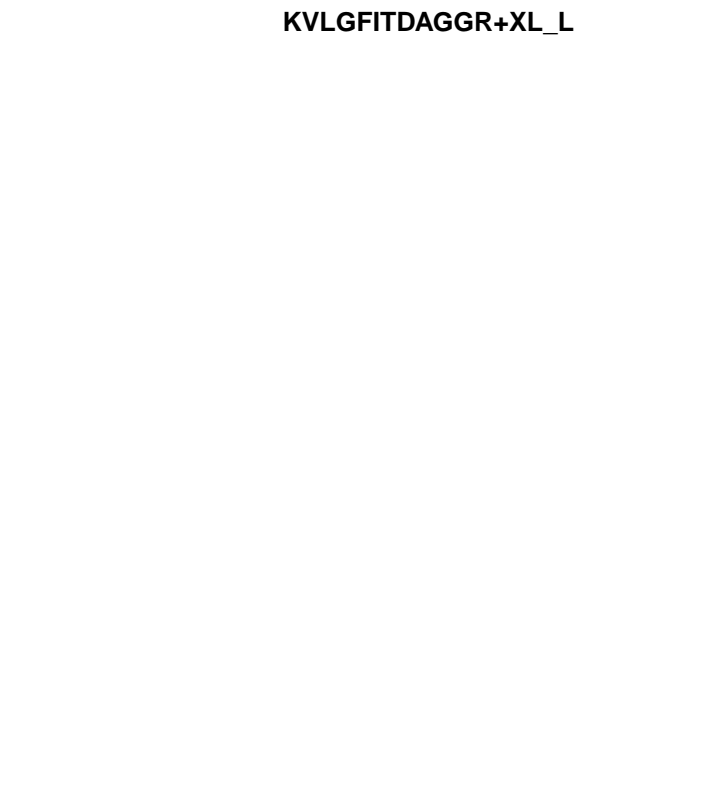

ASDVKDSSLR  
IFGPVKDYECLCGK

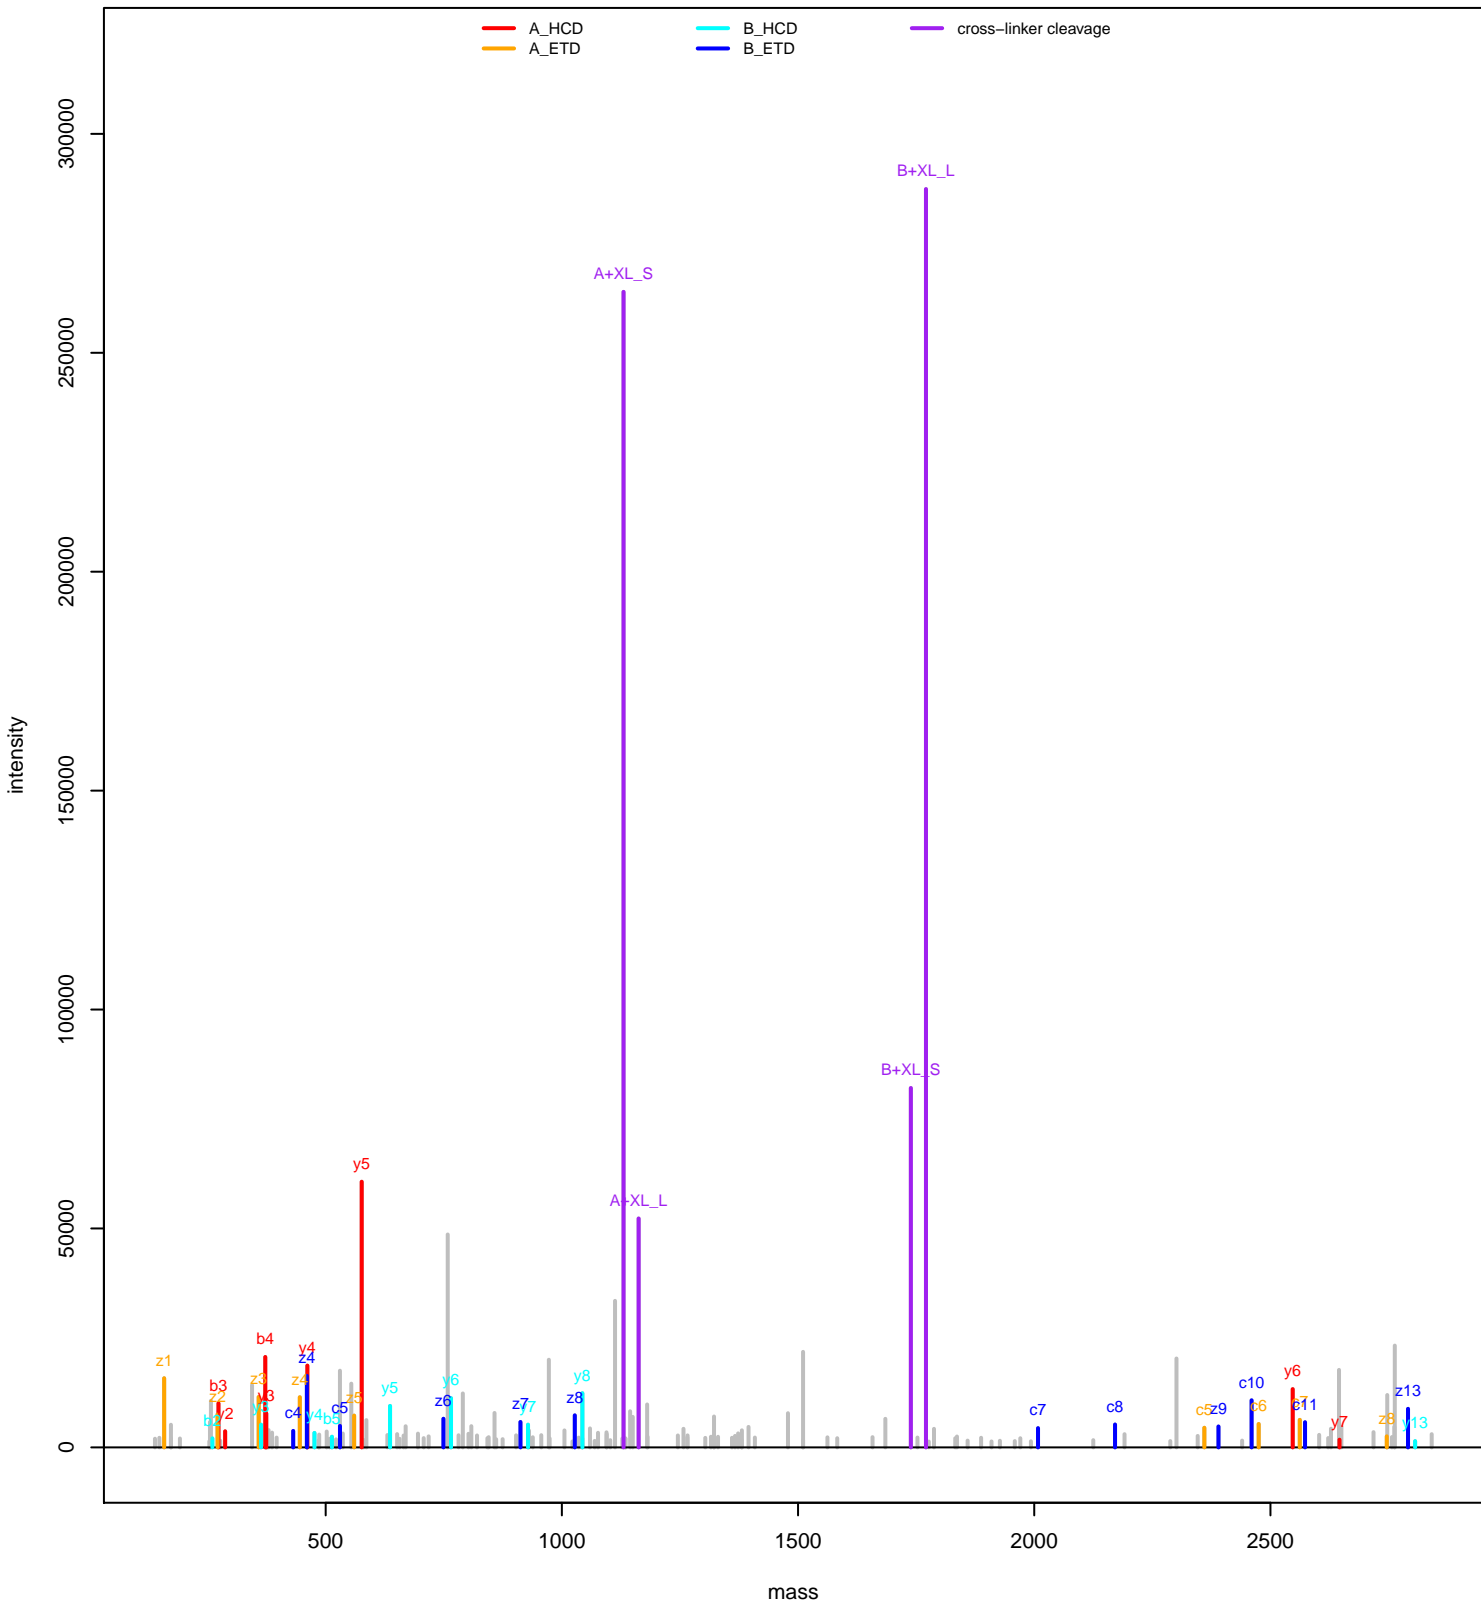

ASDVKDSSLR+XL\_S

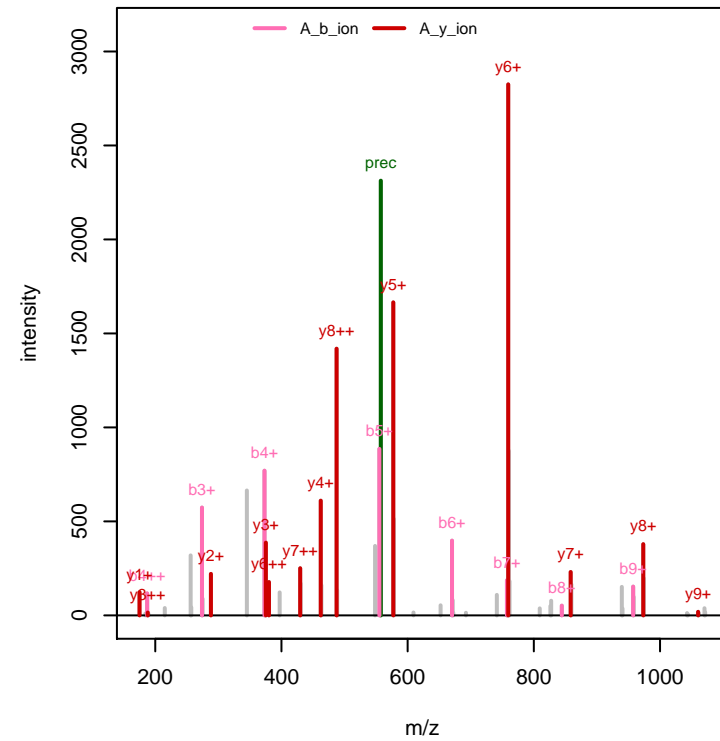

ASDVKDSSLR+XL\_L

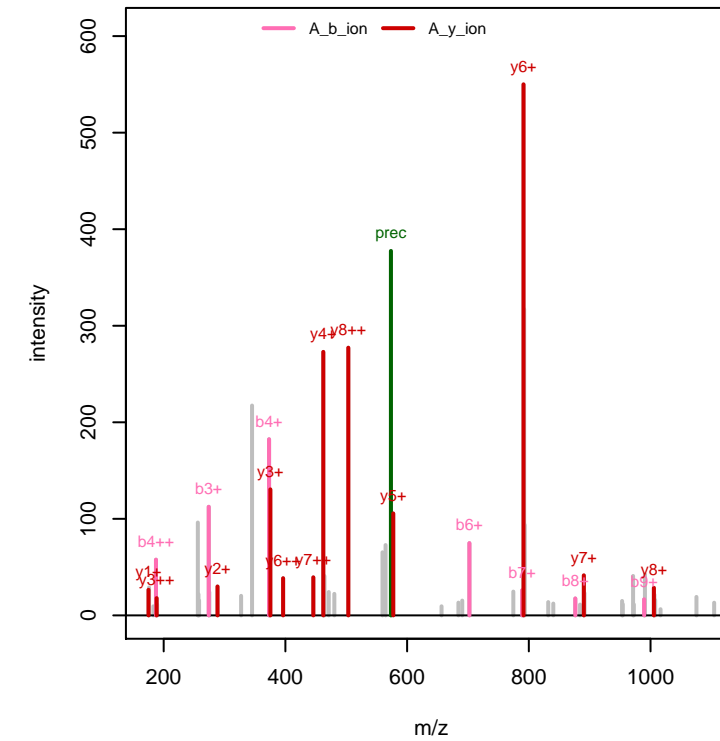

IFGPVKDYECLCGK+XL\_S

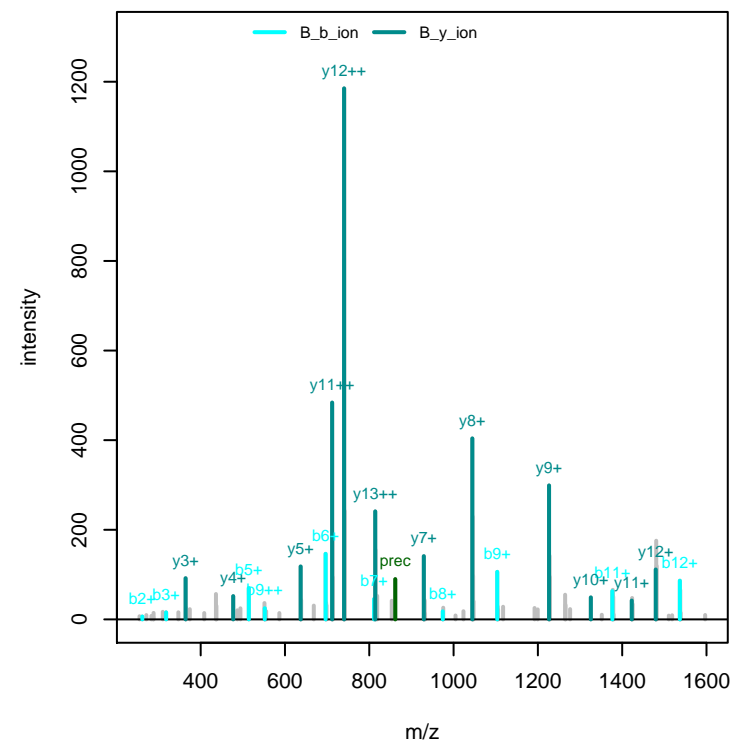

IFGPVKDYECLCGK+XL\_L

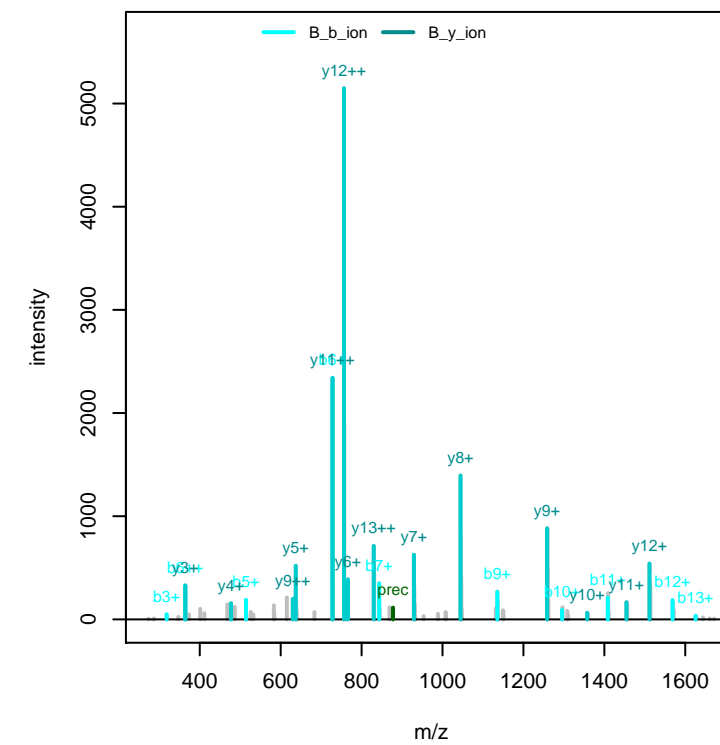

EKVGIDYK  
IRVSTFKEGK

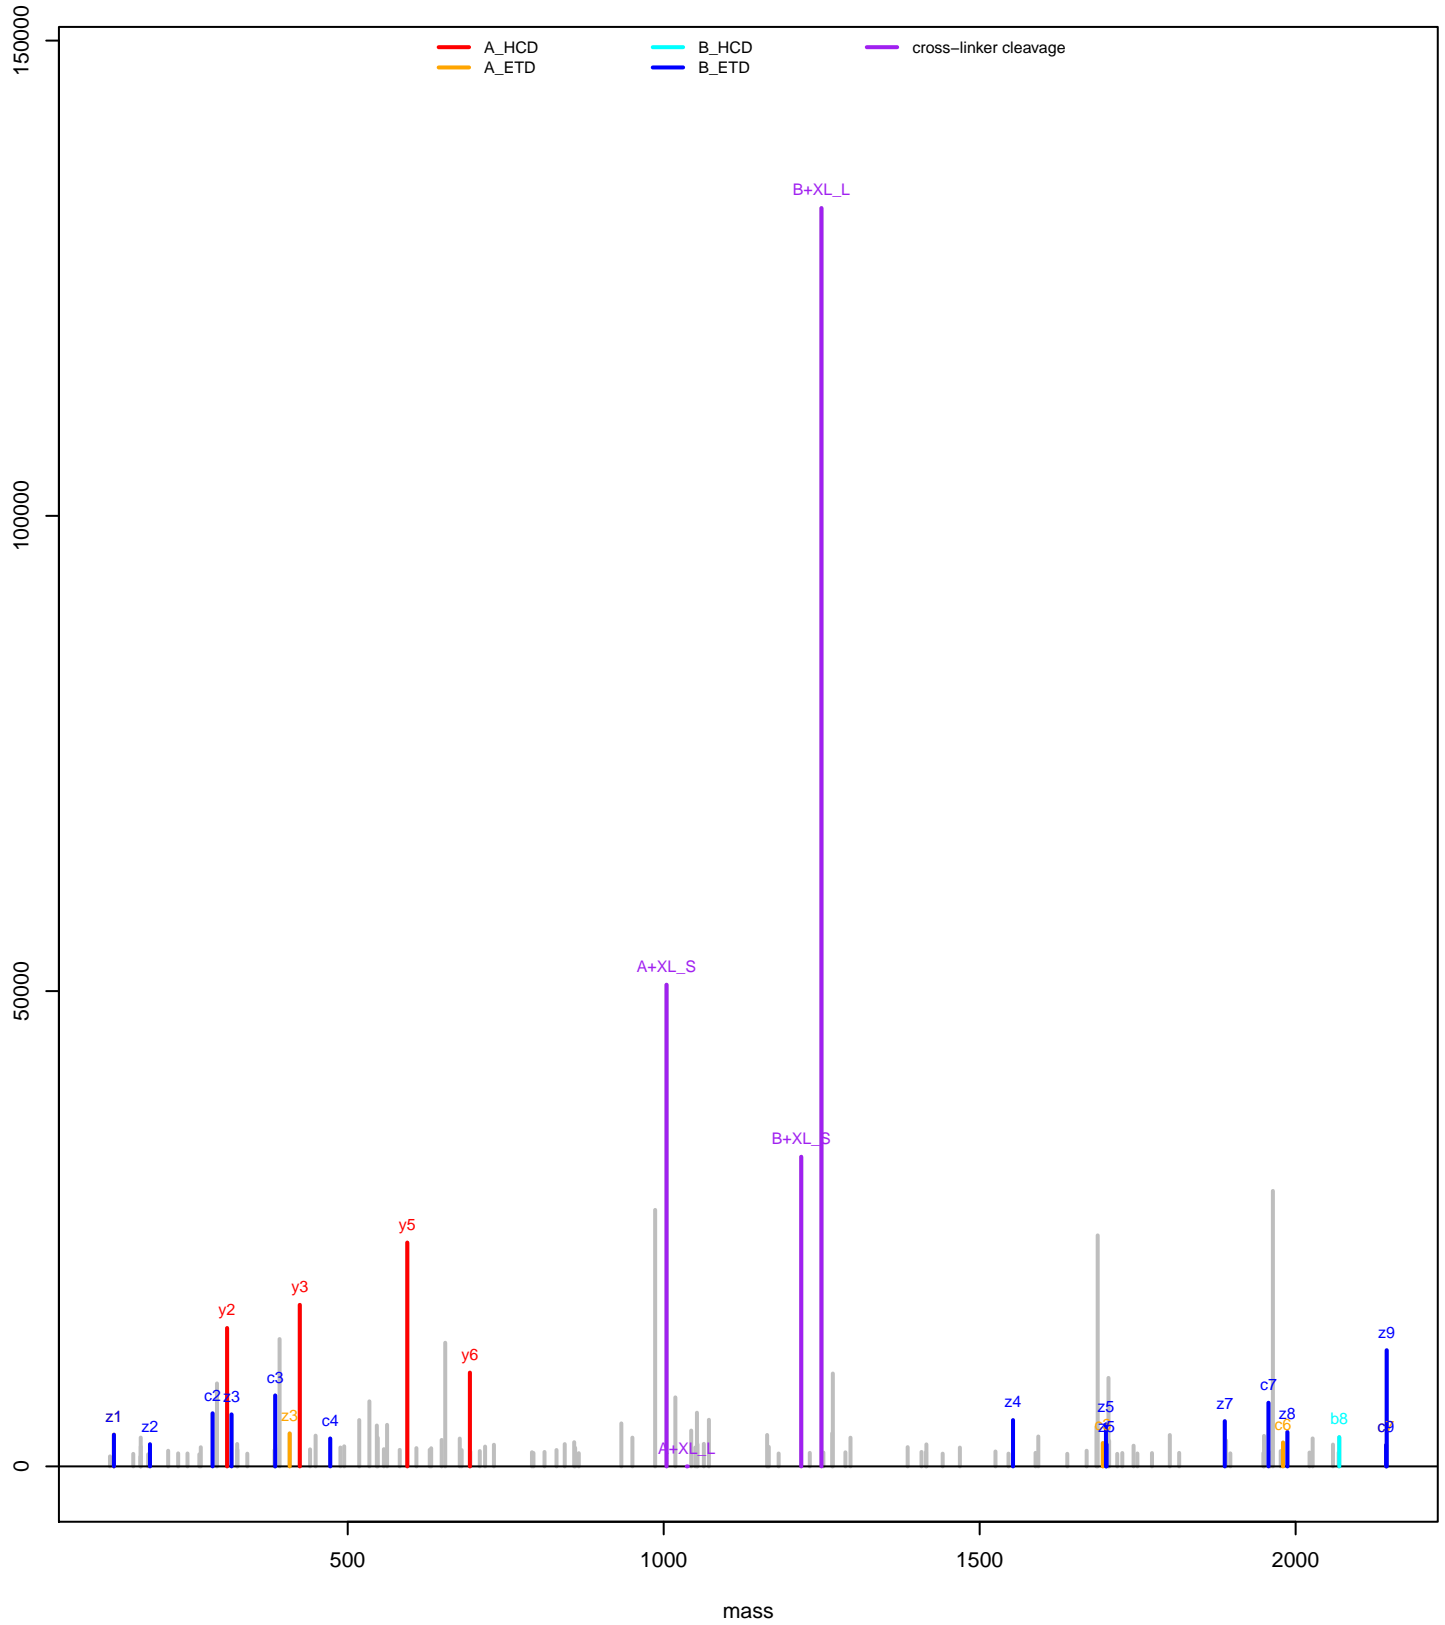

EKVGIDYK+XL\_S

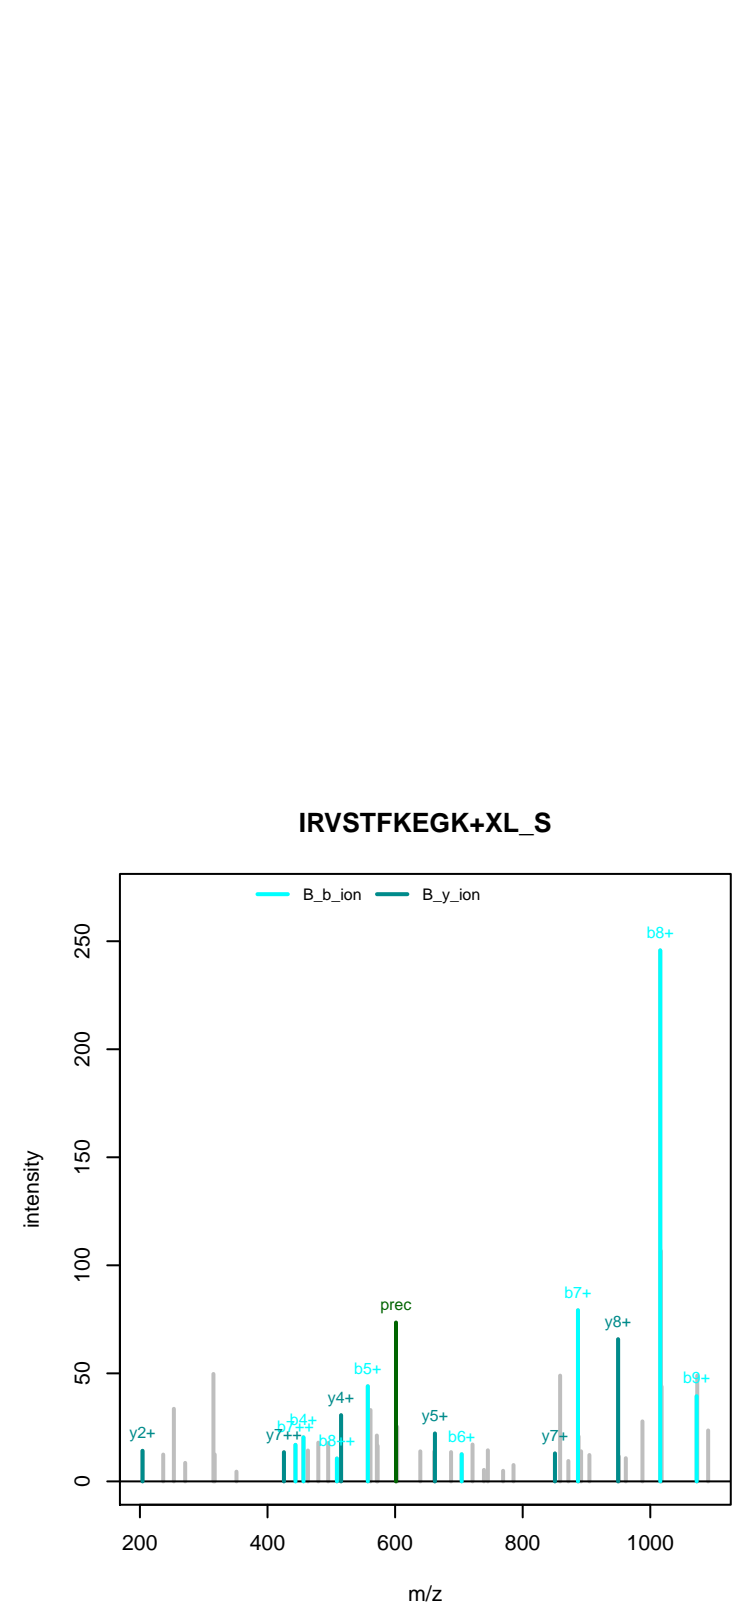

EKVGIDYK+XL\_L

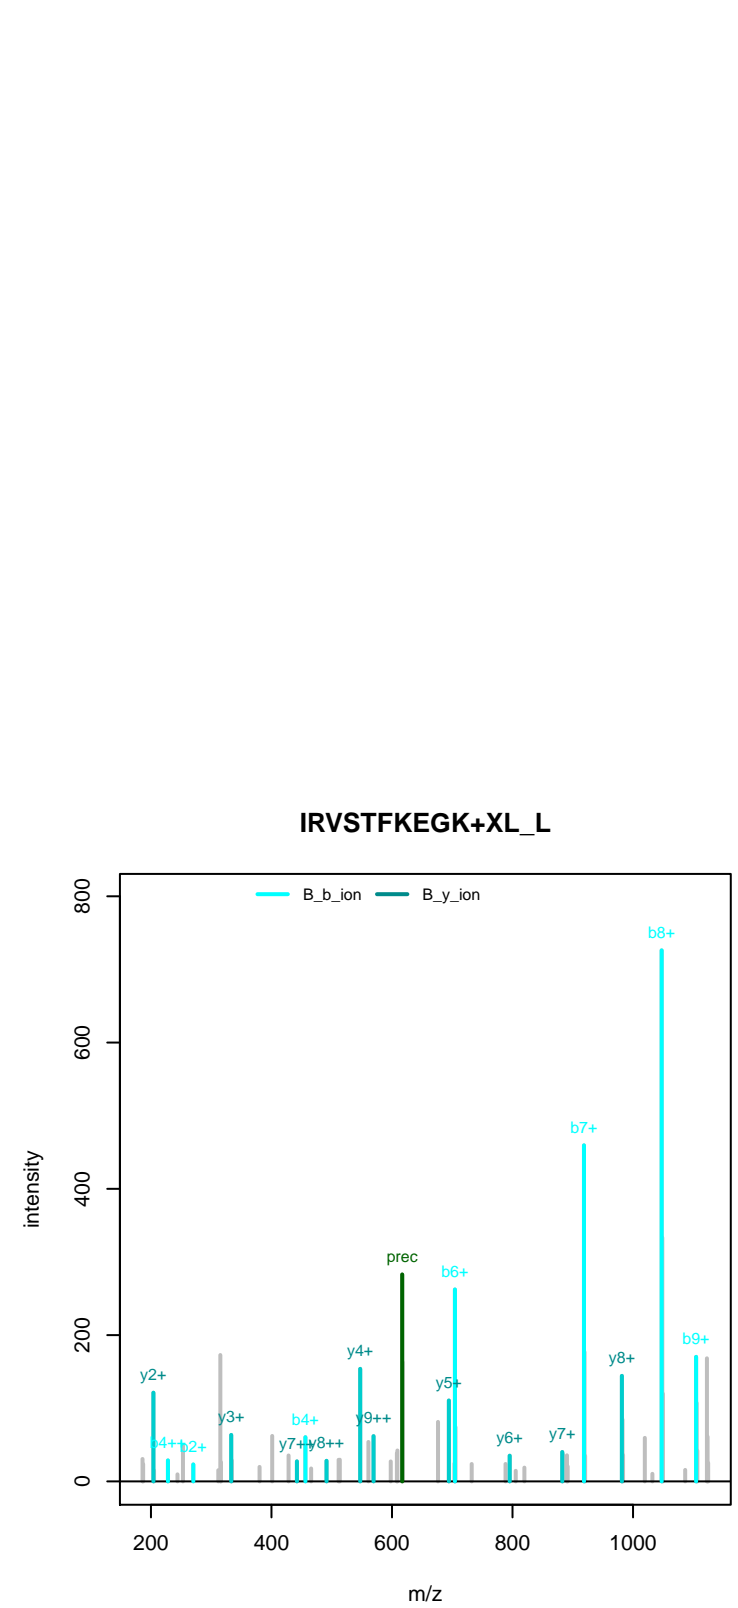

IRVSTFKEGK+XL\_S

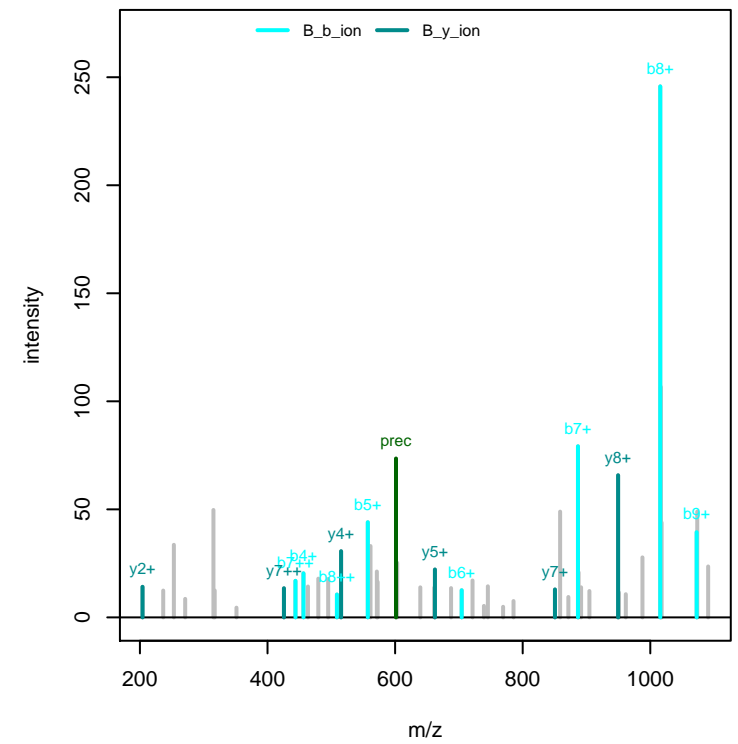

IRVSTFKEGK+XL\_L

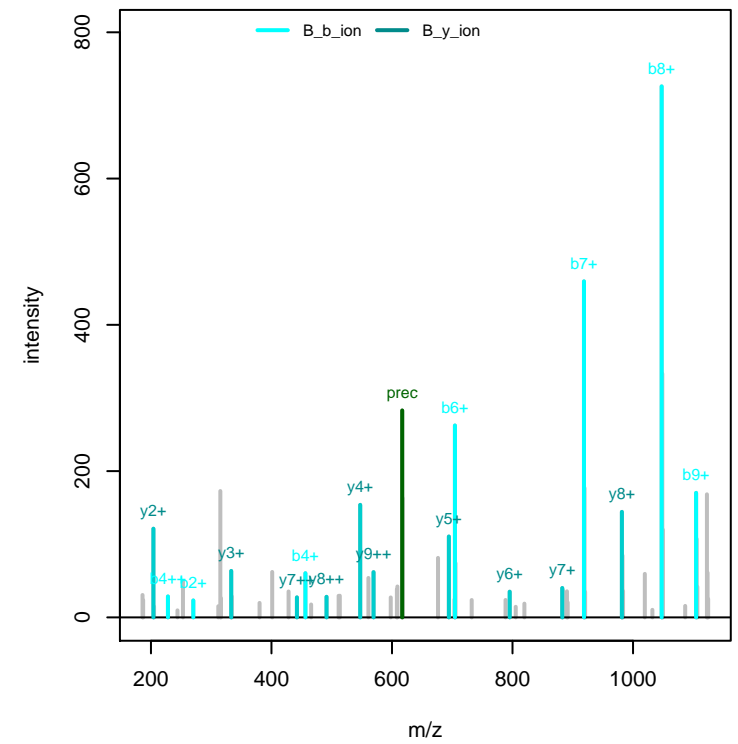

SKACLIQR  
CGIKINLHTQR

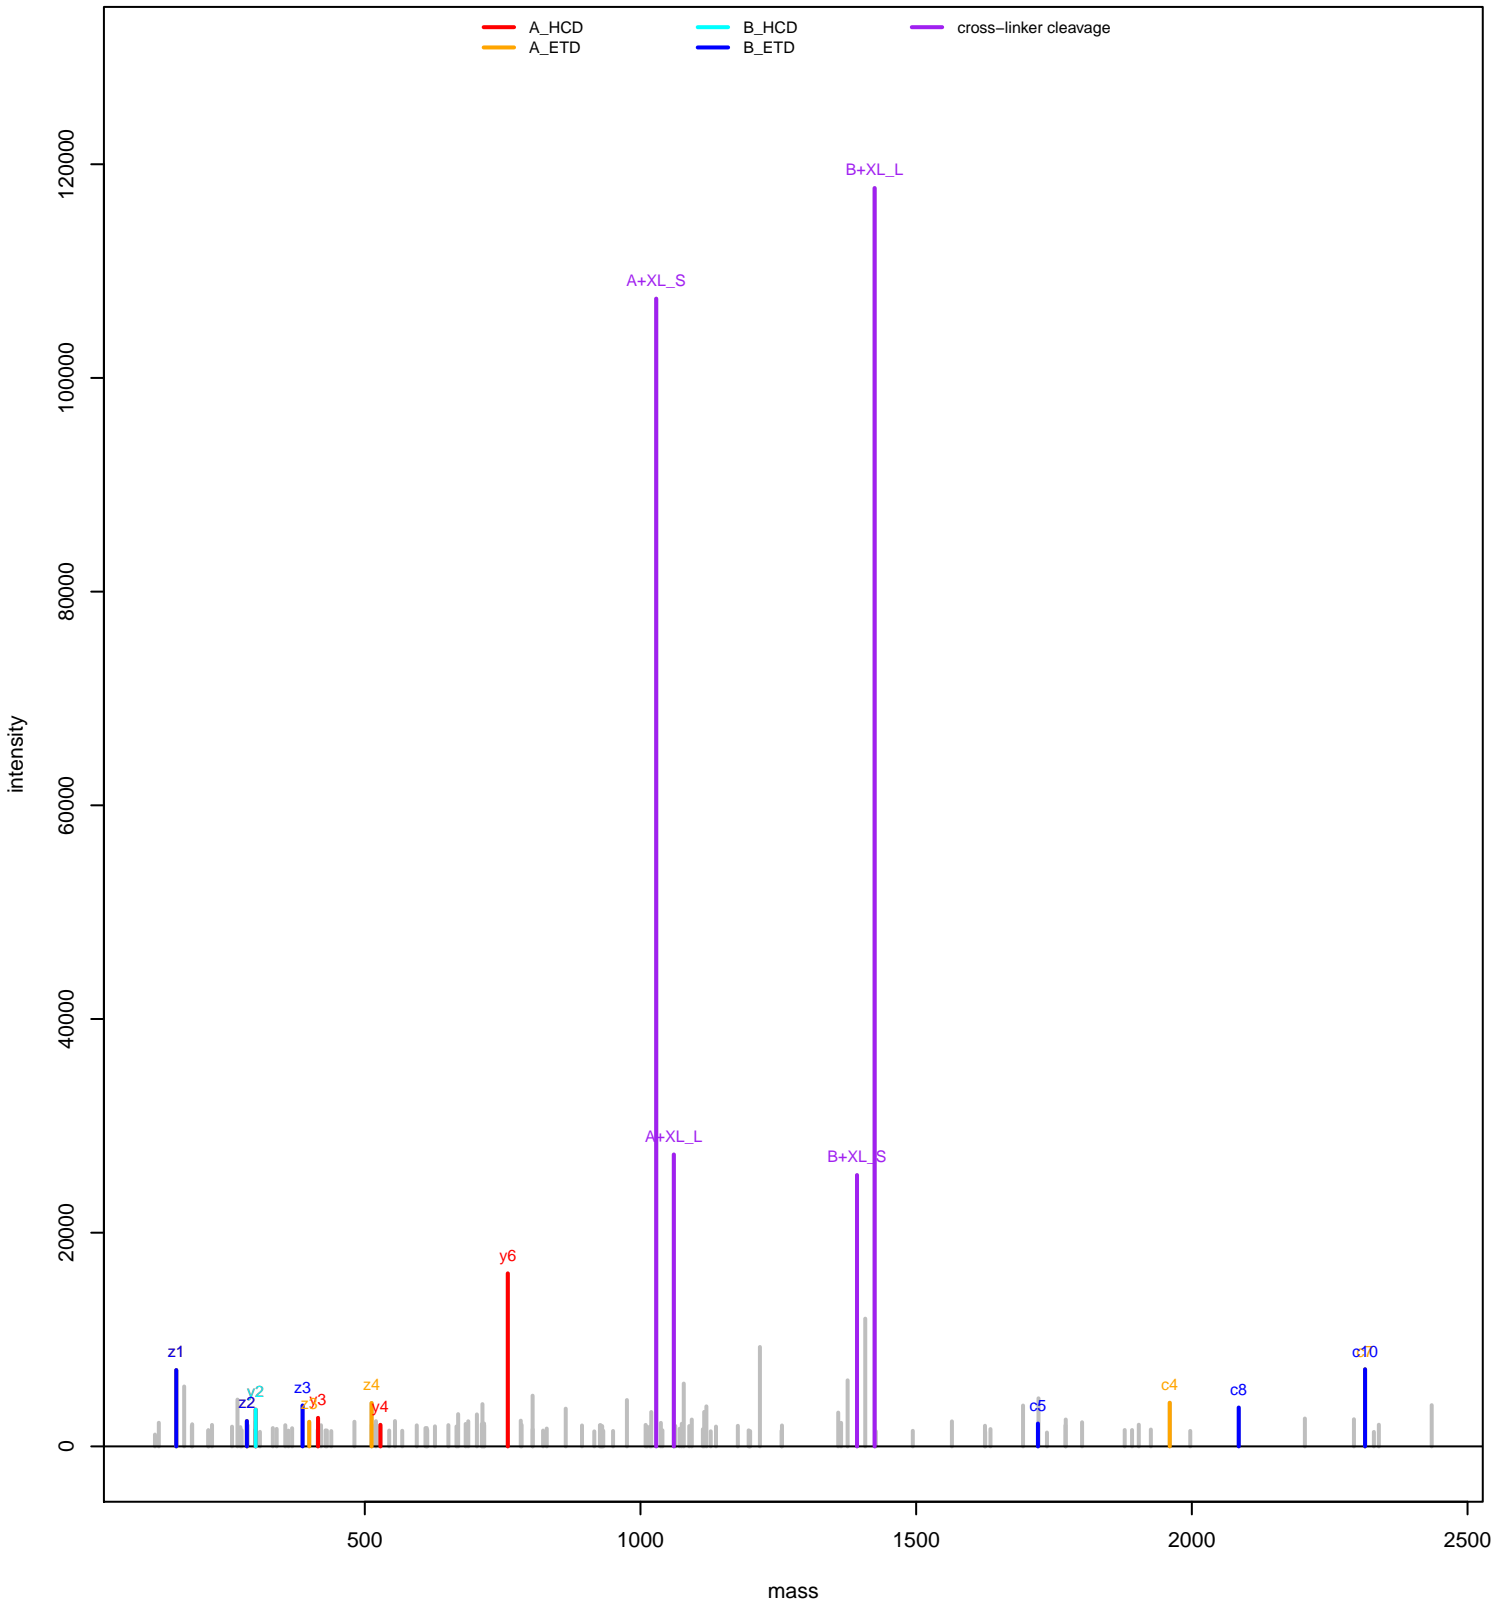

SKACLIQR+XL\_S

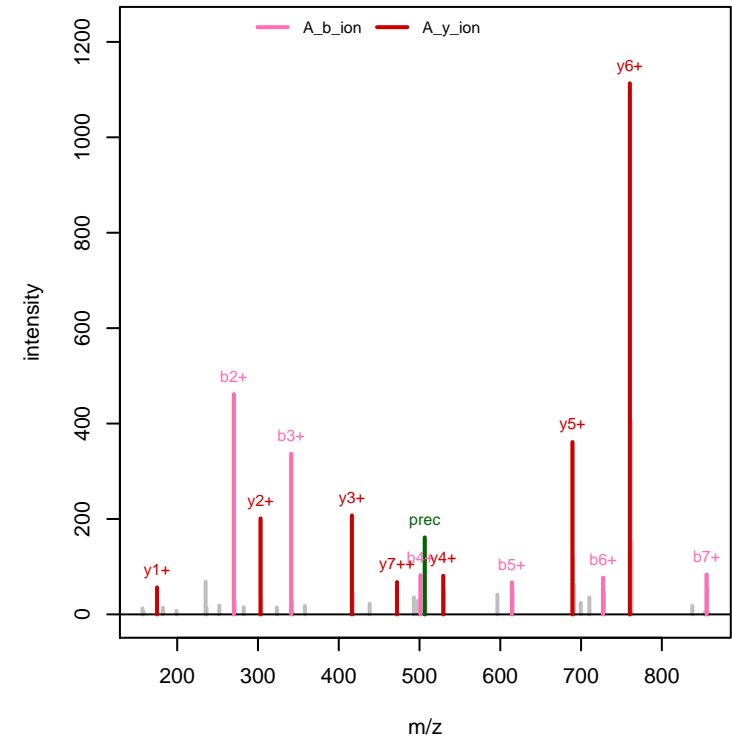

SKACLIQR+XL\_L

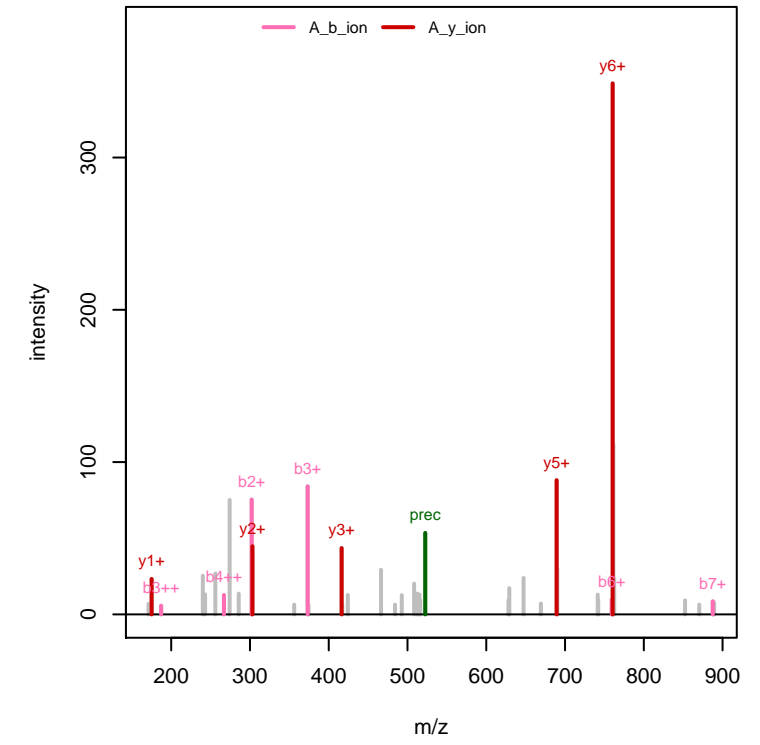

CGIKINLHTQR+XL\_S

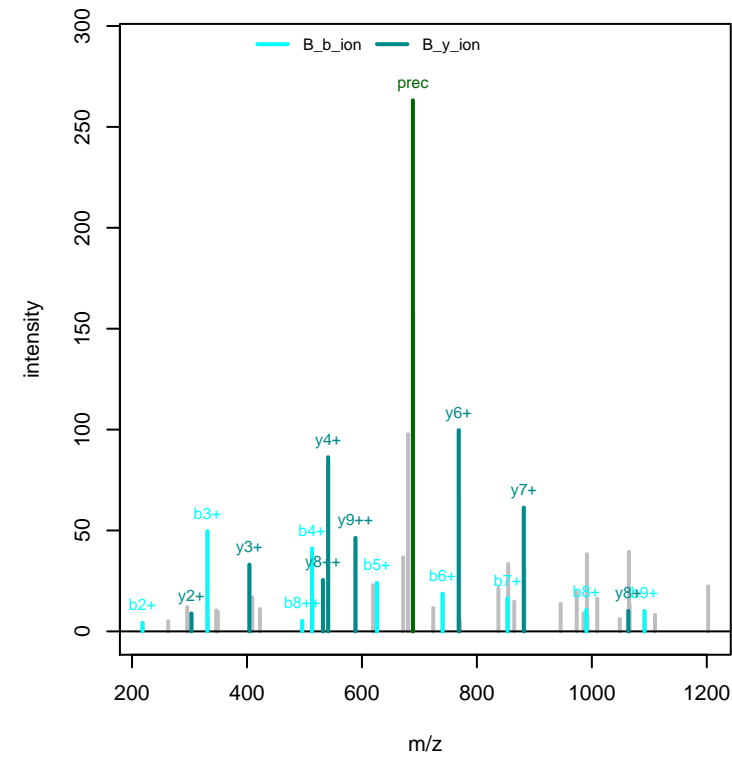

CGIKINLHTQR+XL\_L

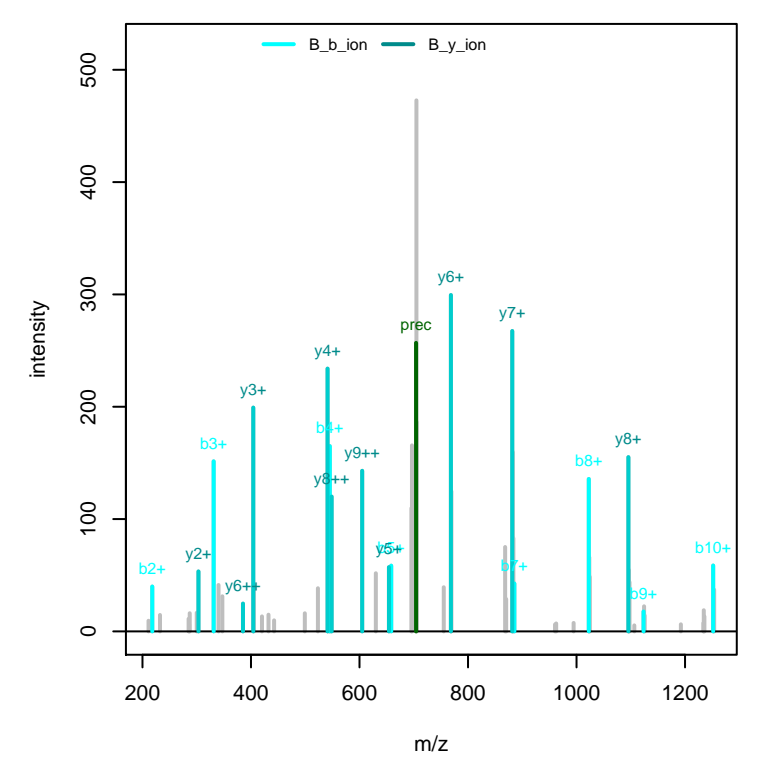



AREVKR  
VALADKYFAK

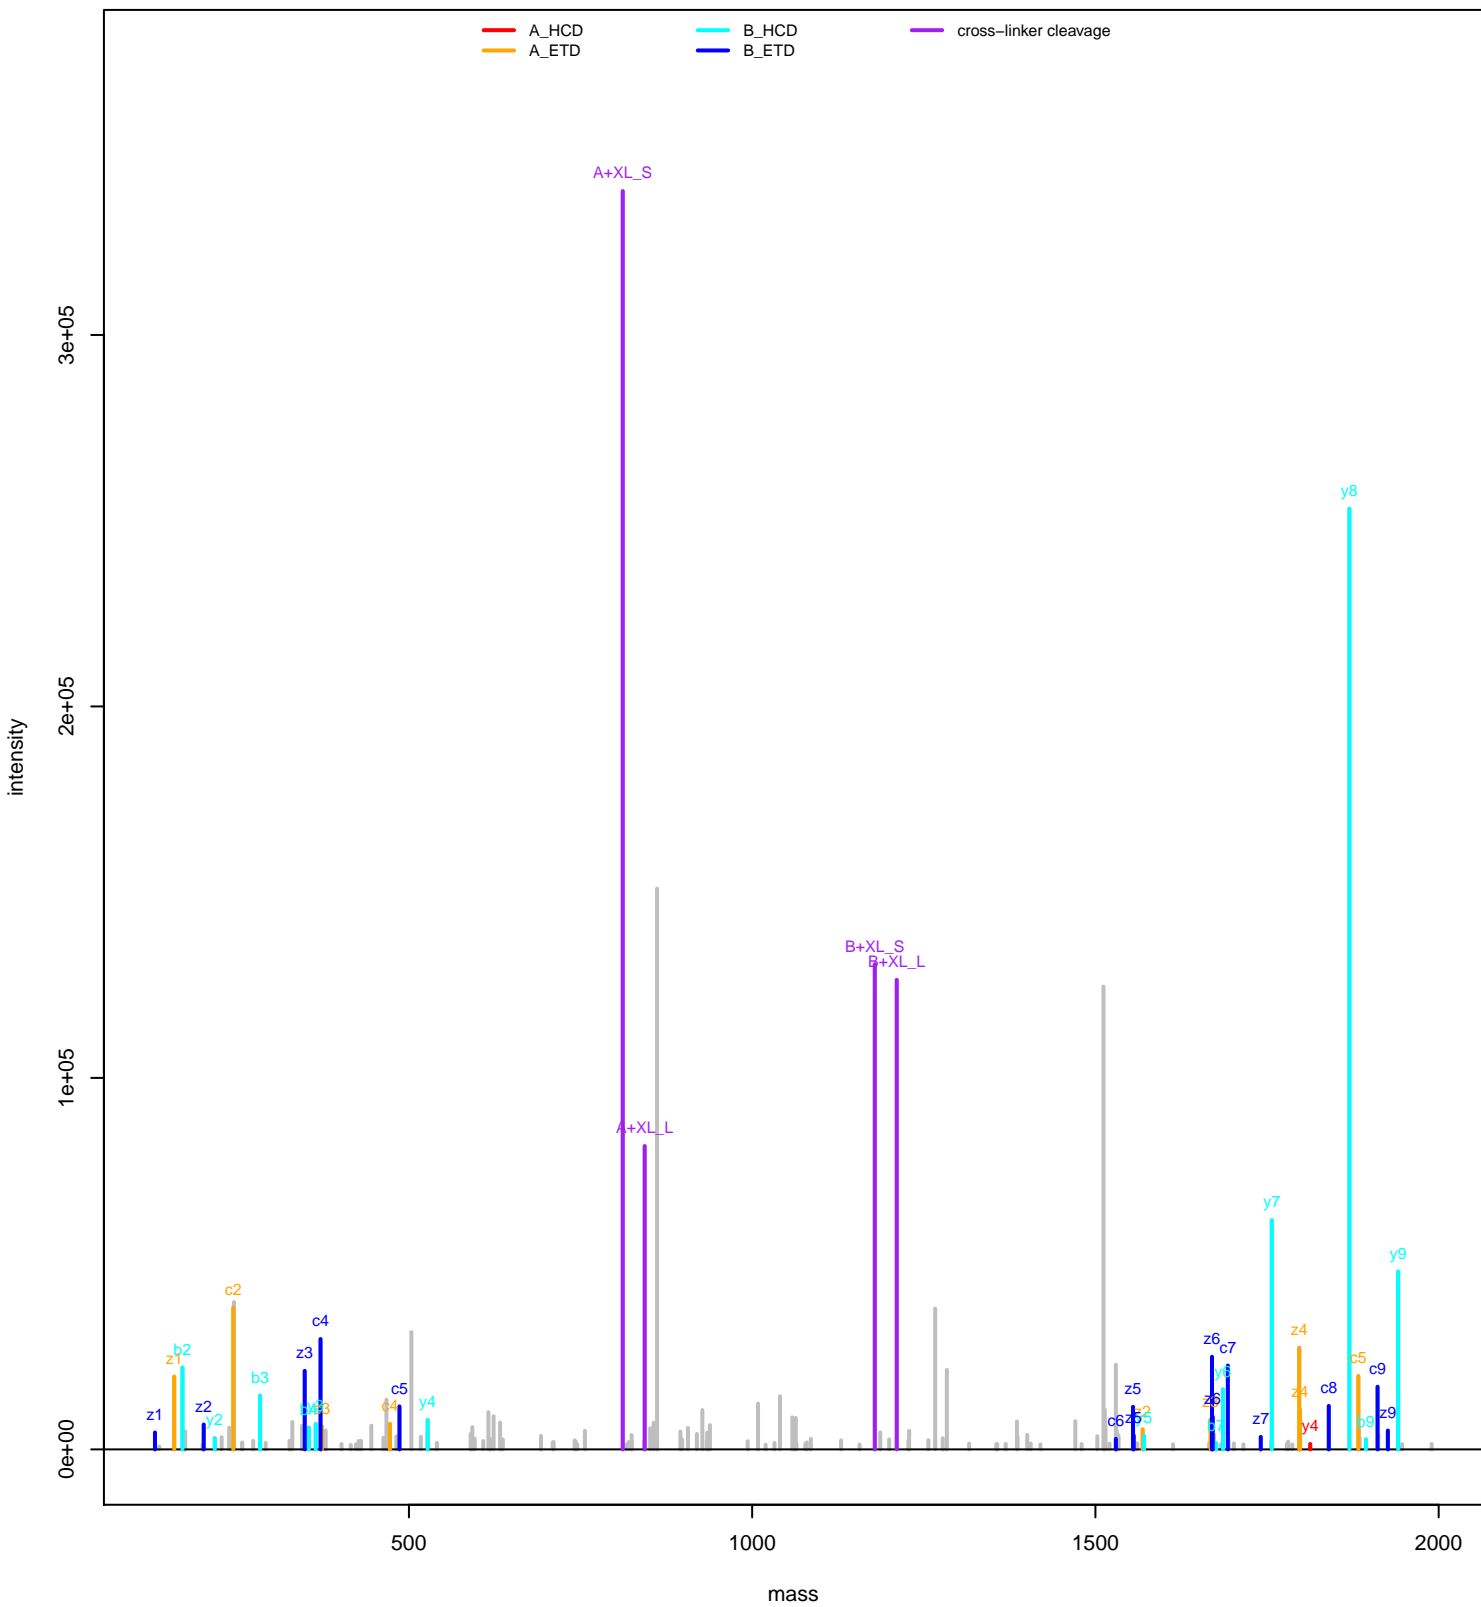

AREVKR+XL\_S

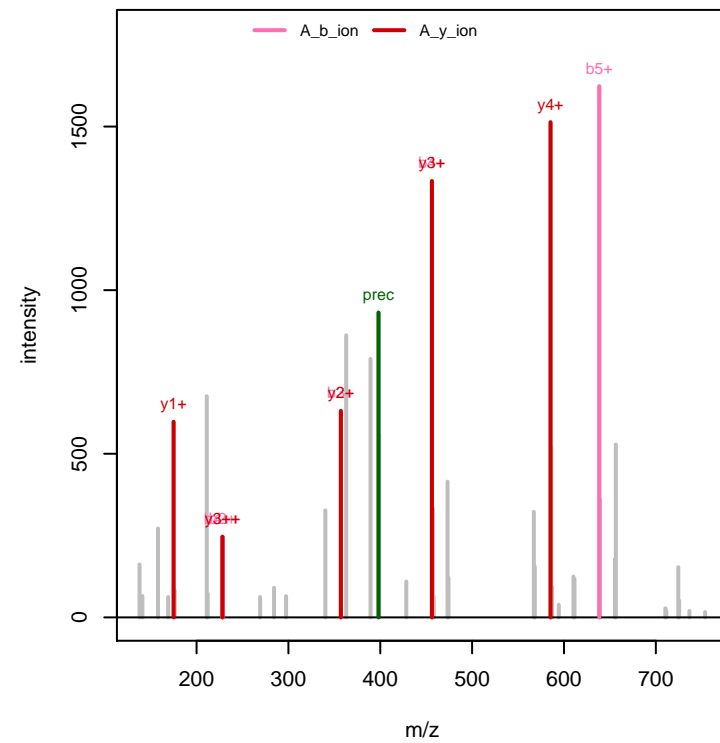

AREVKR+XL\_L

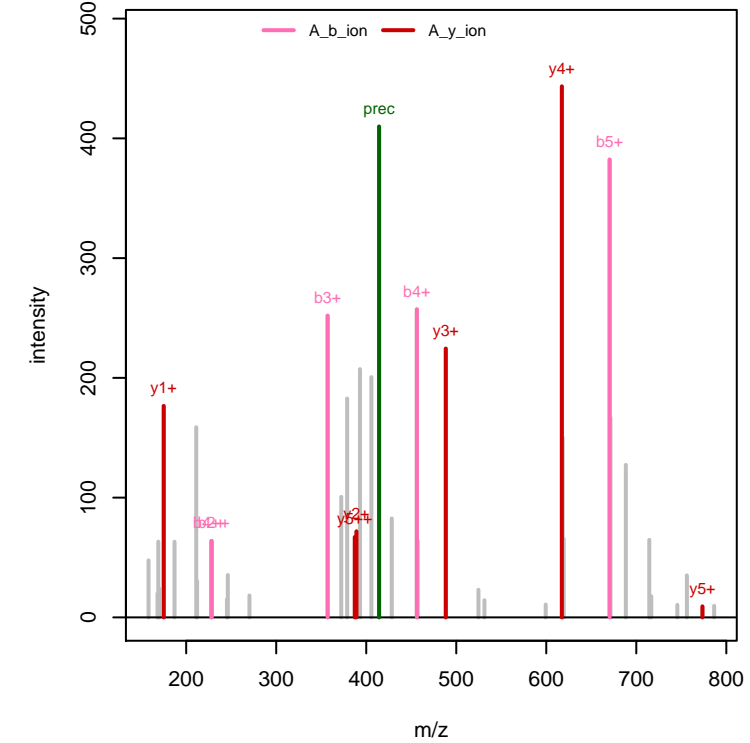

VALADKYFAK+XL\_S

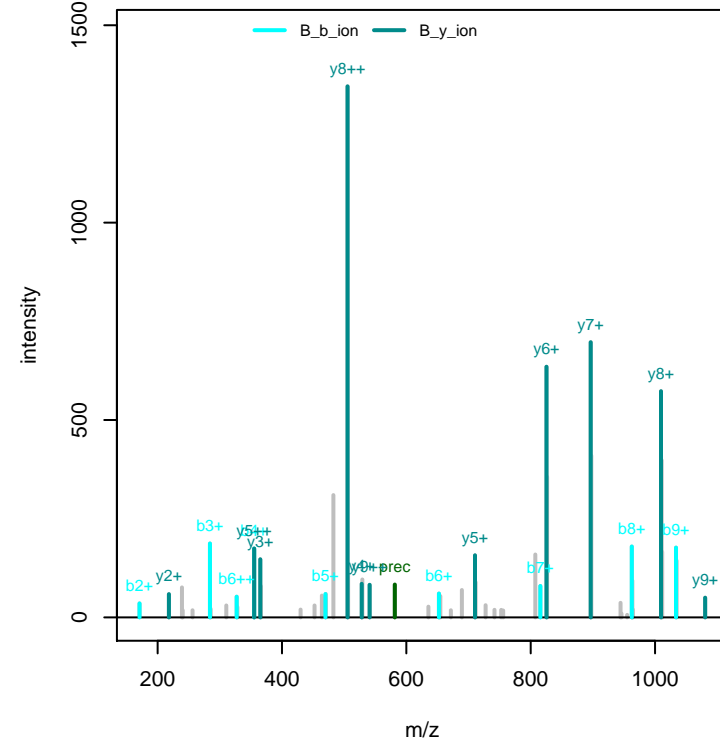

VALADKYFAK+XL\_L

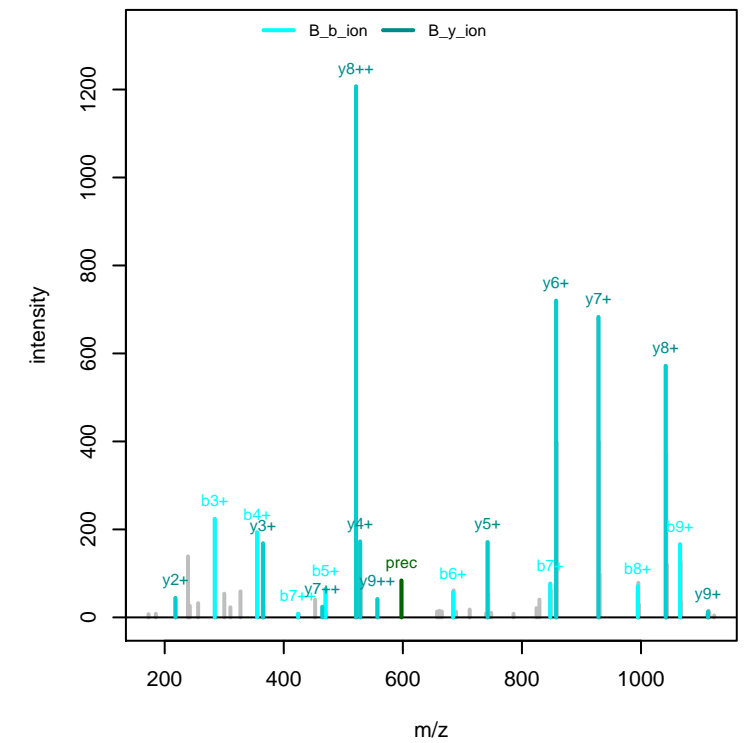

AVDGVKSVK  
AALVDHNDIKSTDISVK

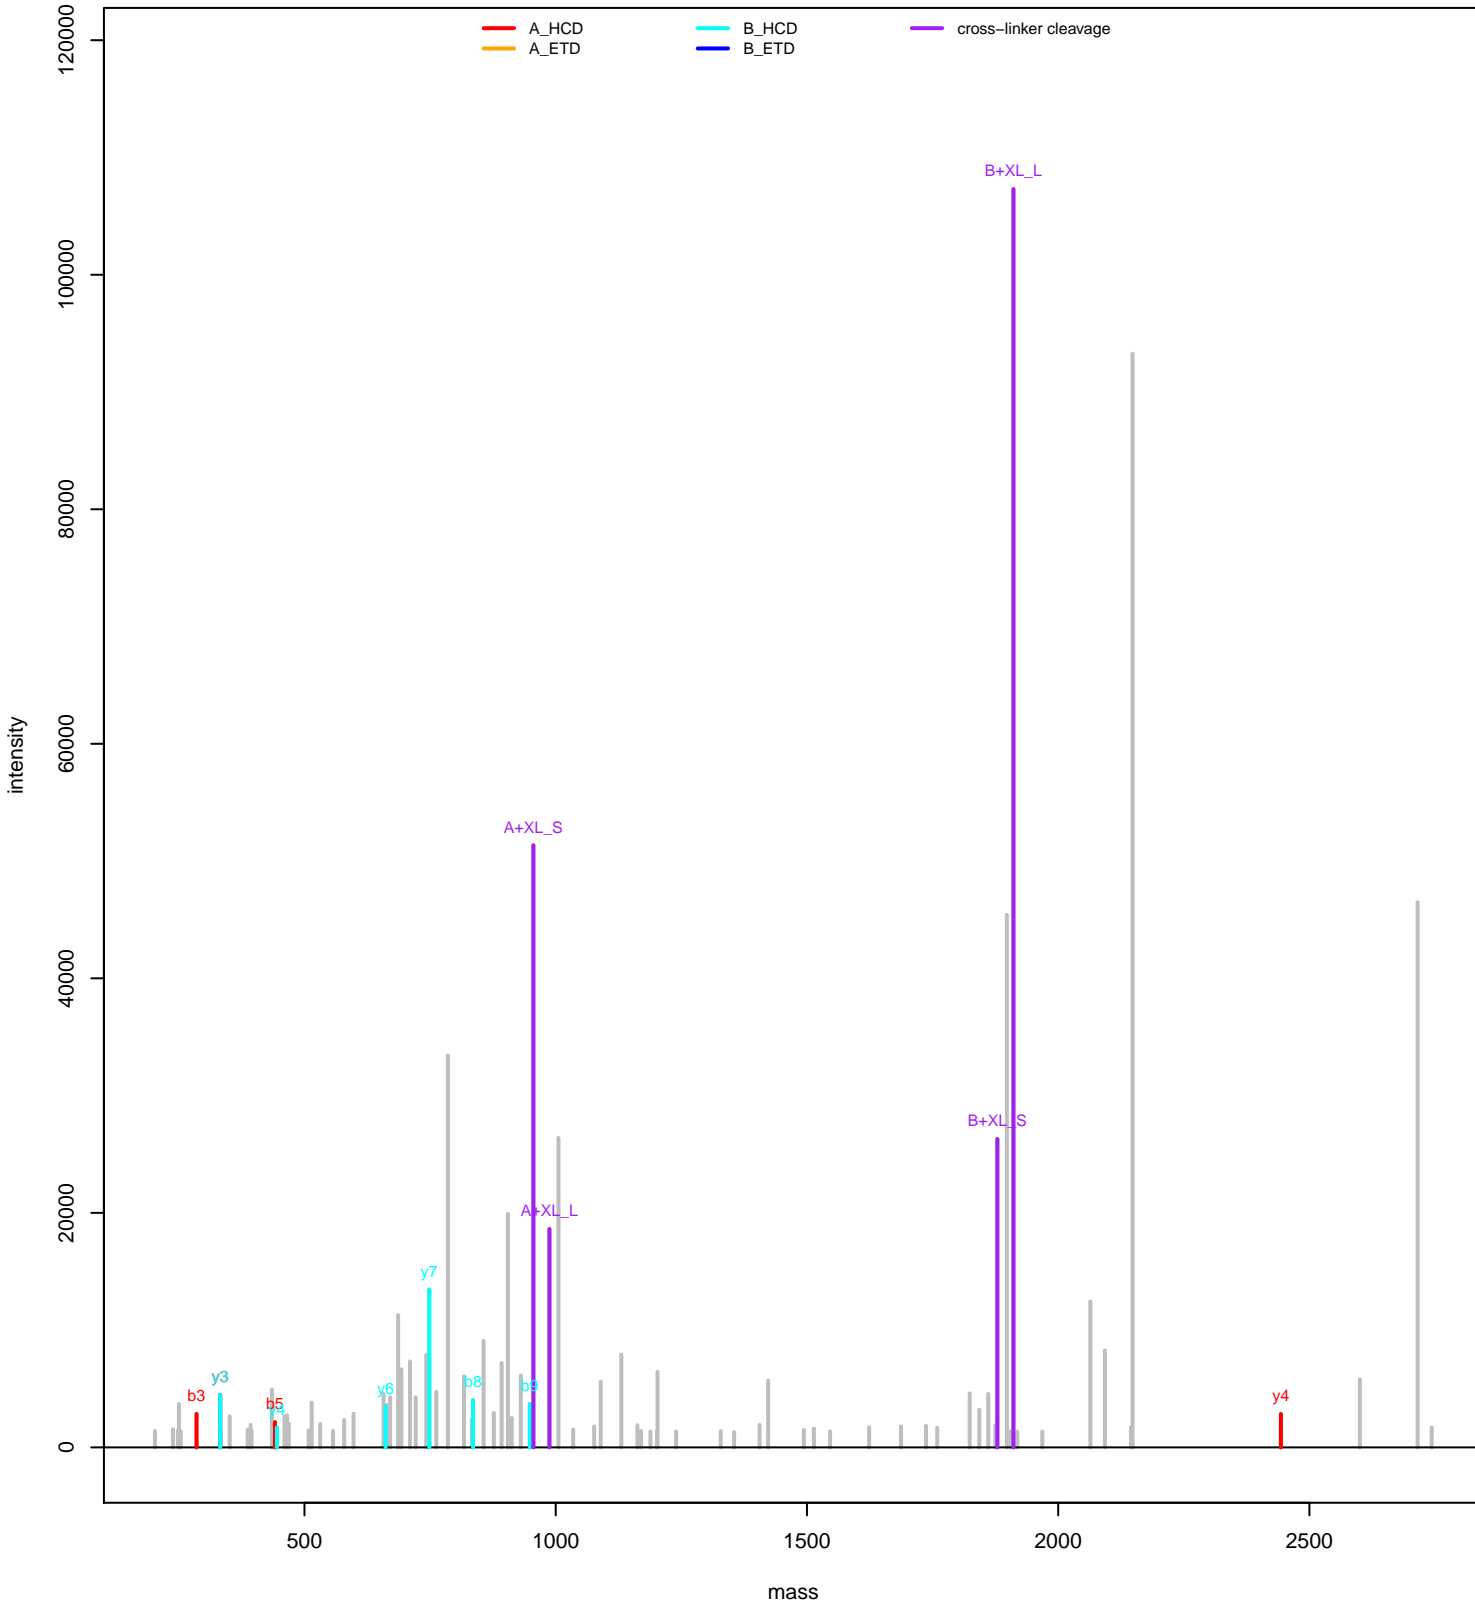

AVDGVKSVK+XL\_S

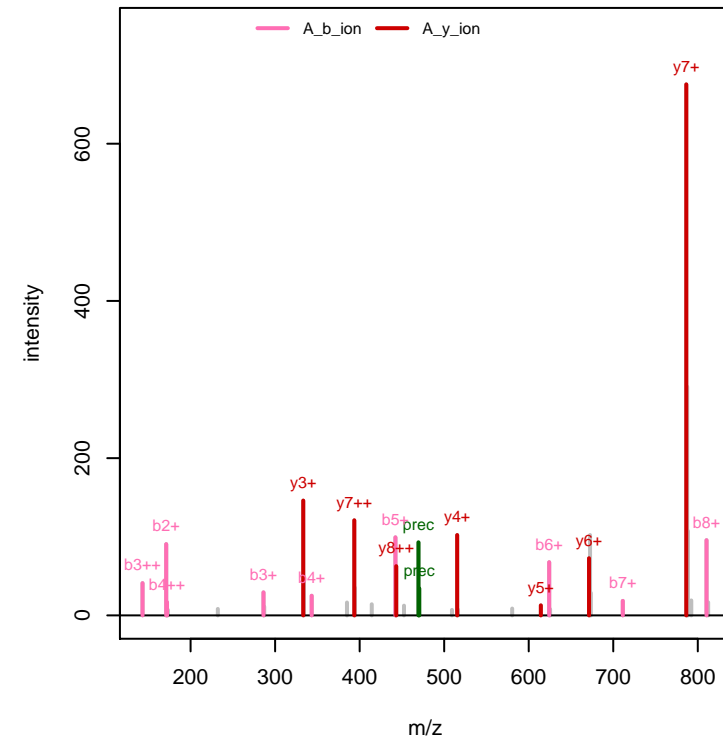

AVDGVKSVK+XL\_L

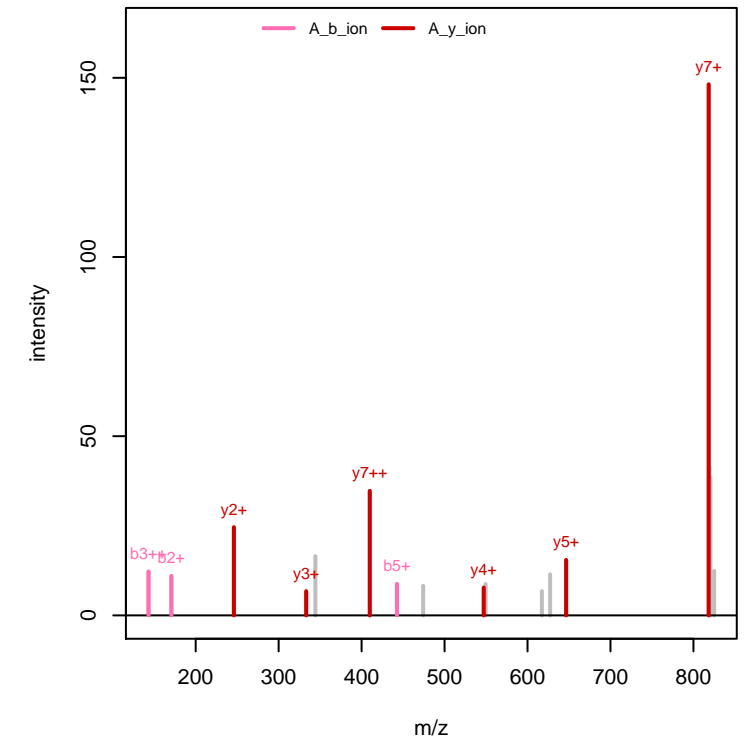

AALVDHNDIKSTDISVK+XL\_S

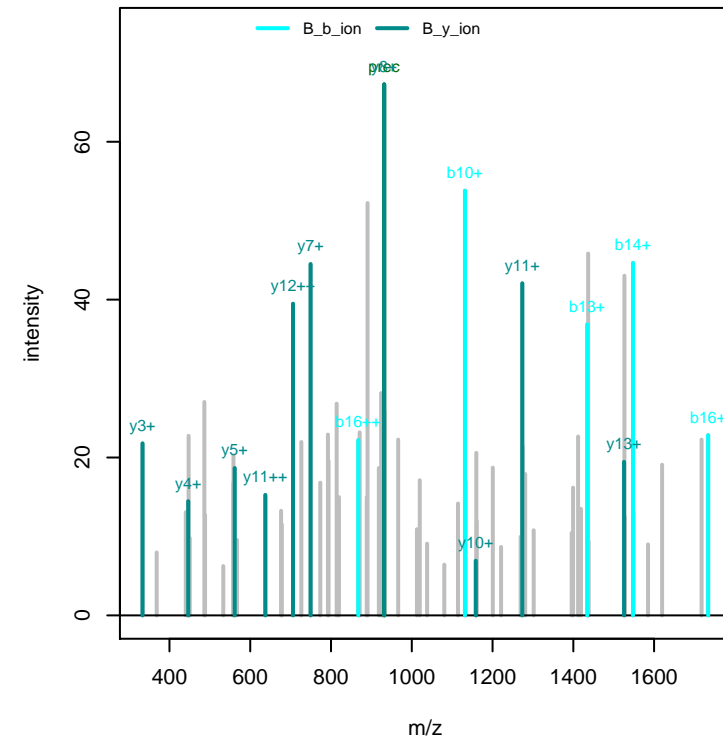

AALVDHNDIKSTDISVK+XL\_L

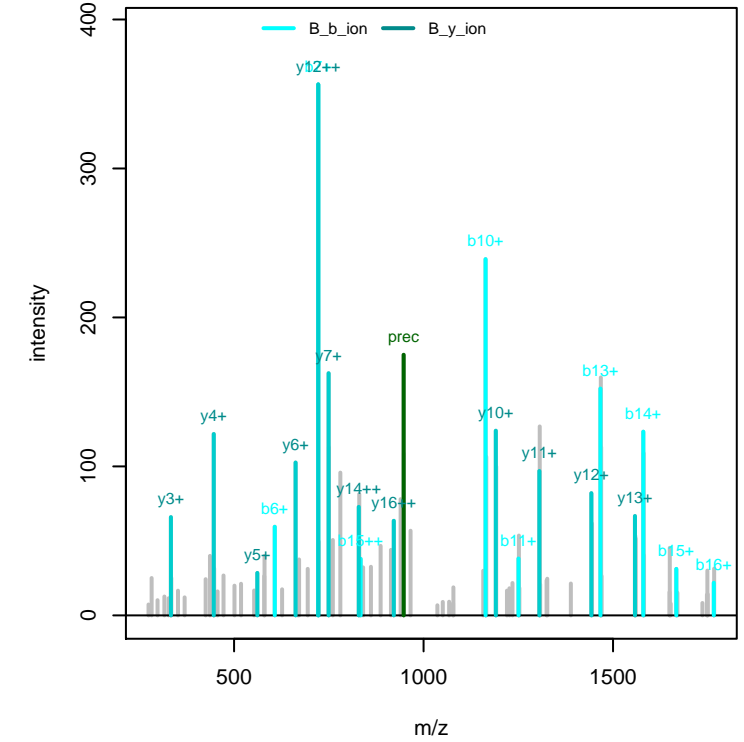

RGVIKPR  
VLEQSAESVPEYGVKAVNIK

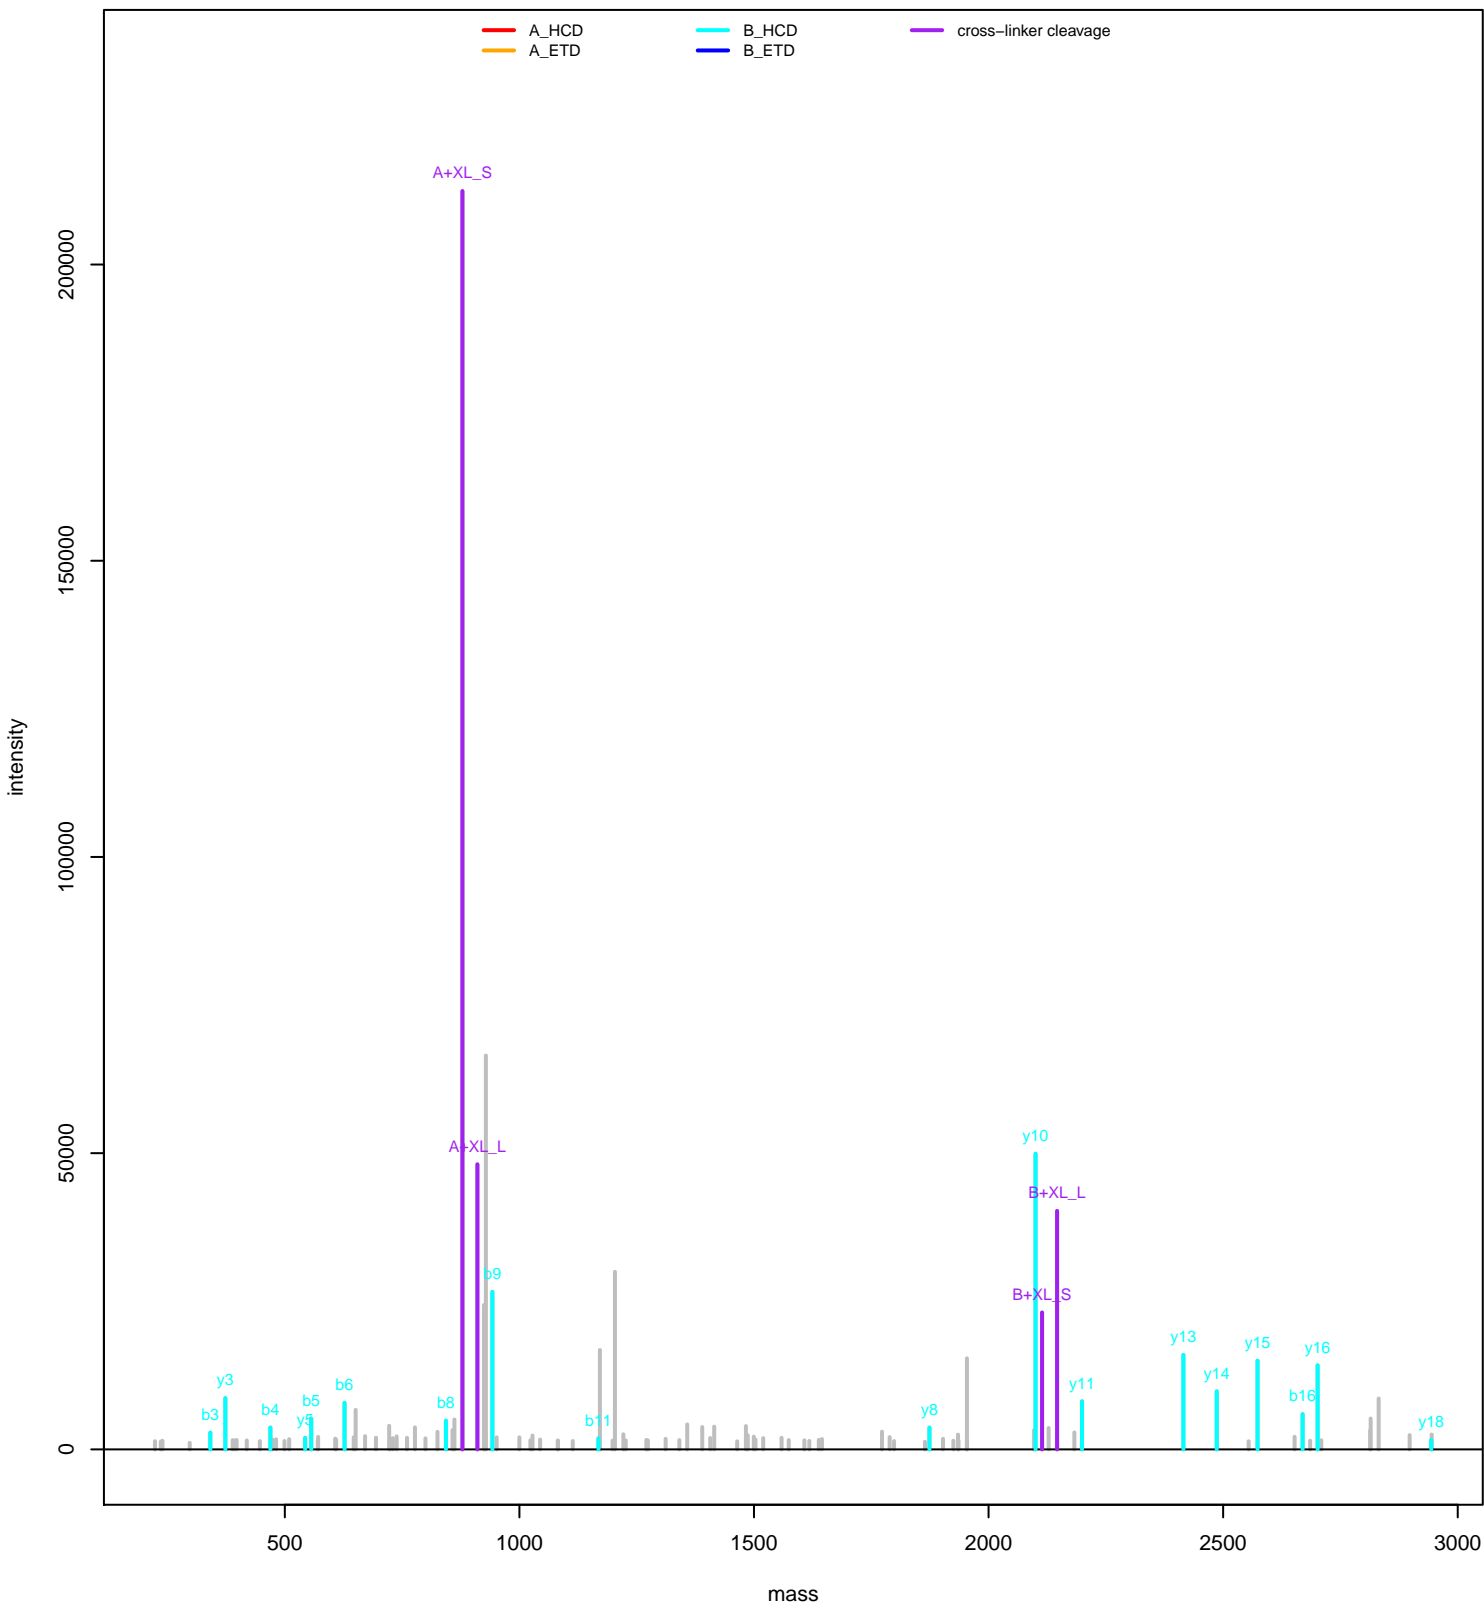

RGVIKPR+XL\_S

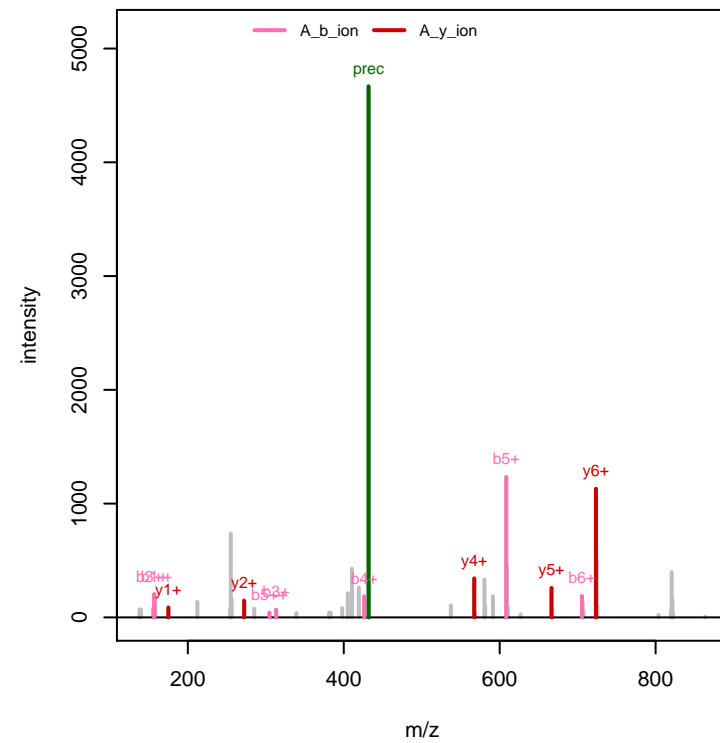

RGVIKPR+XL\_L

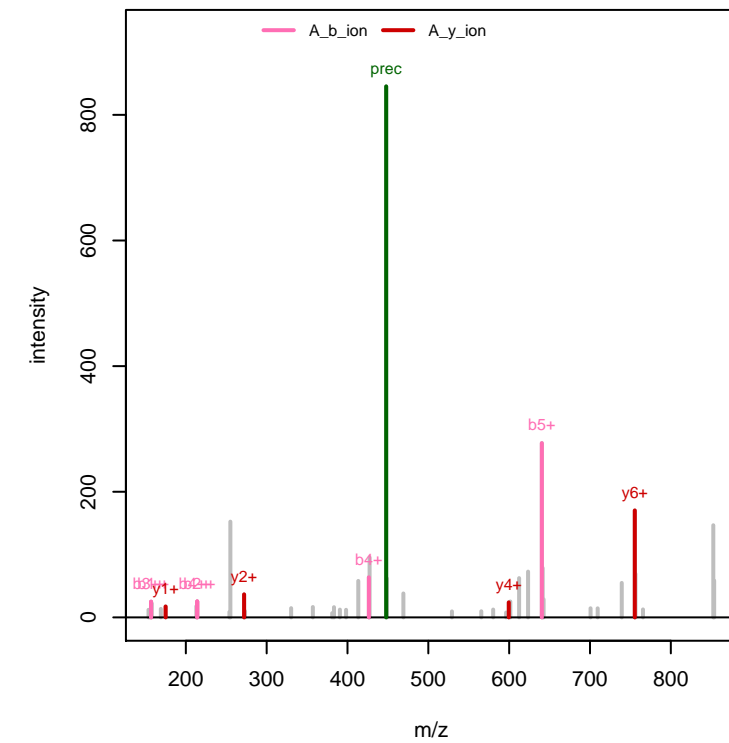

VLEQSAESVPEYGVKAVNIK+XL\_S

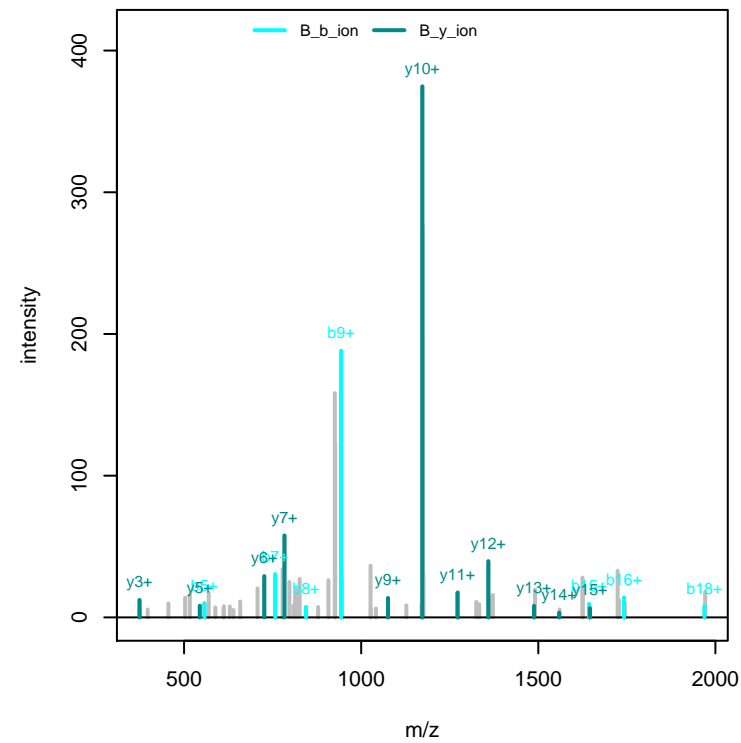

VLEQSAESVPEYGVKAVNIK+XL\_L

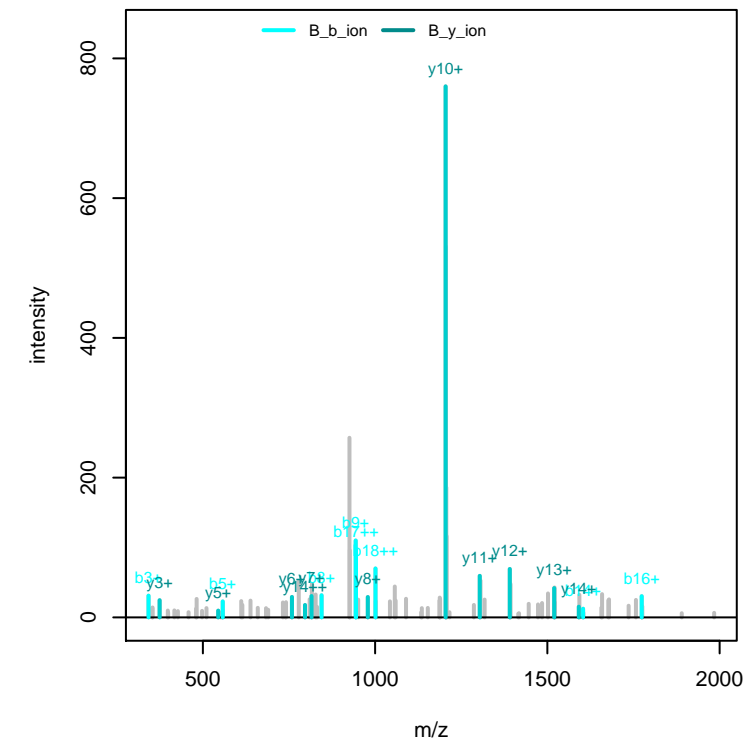

**AELSKTQAK**  
**MNKTQLIDVIAEK**

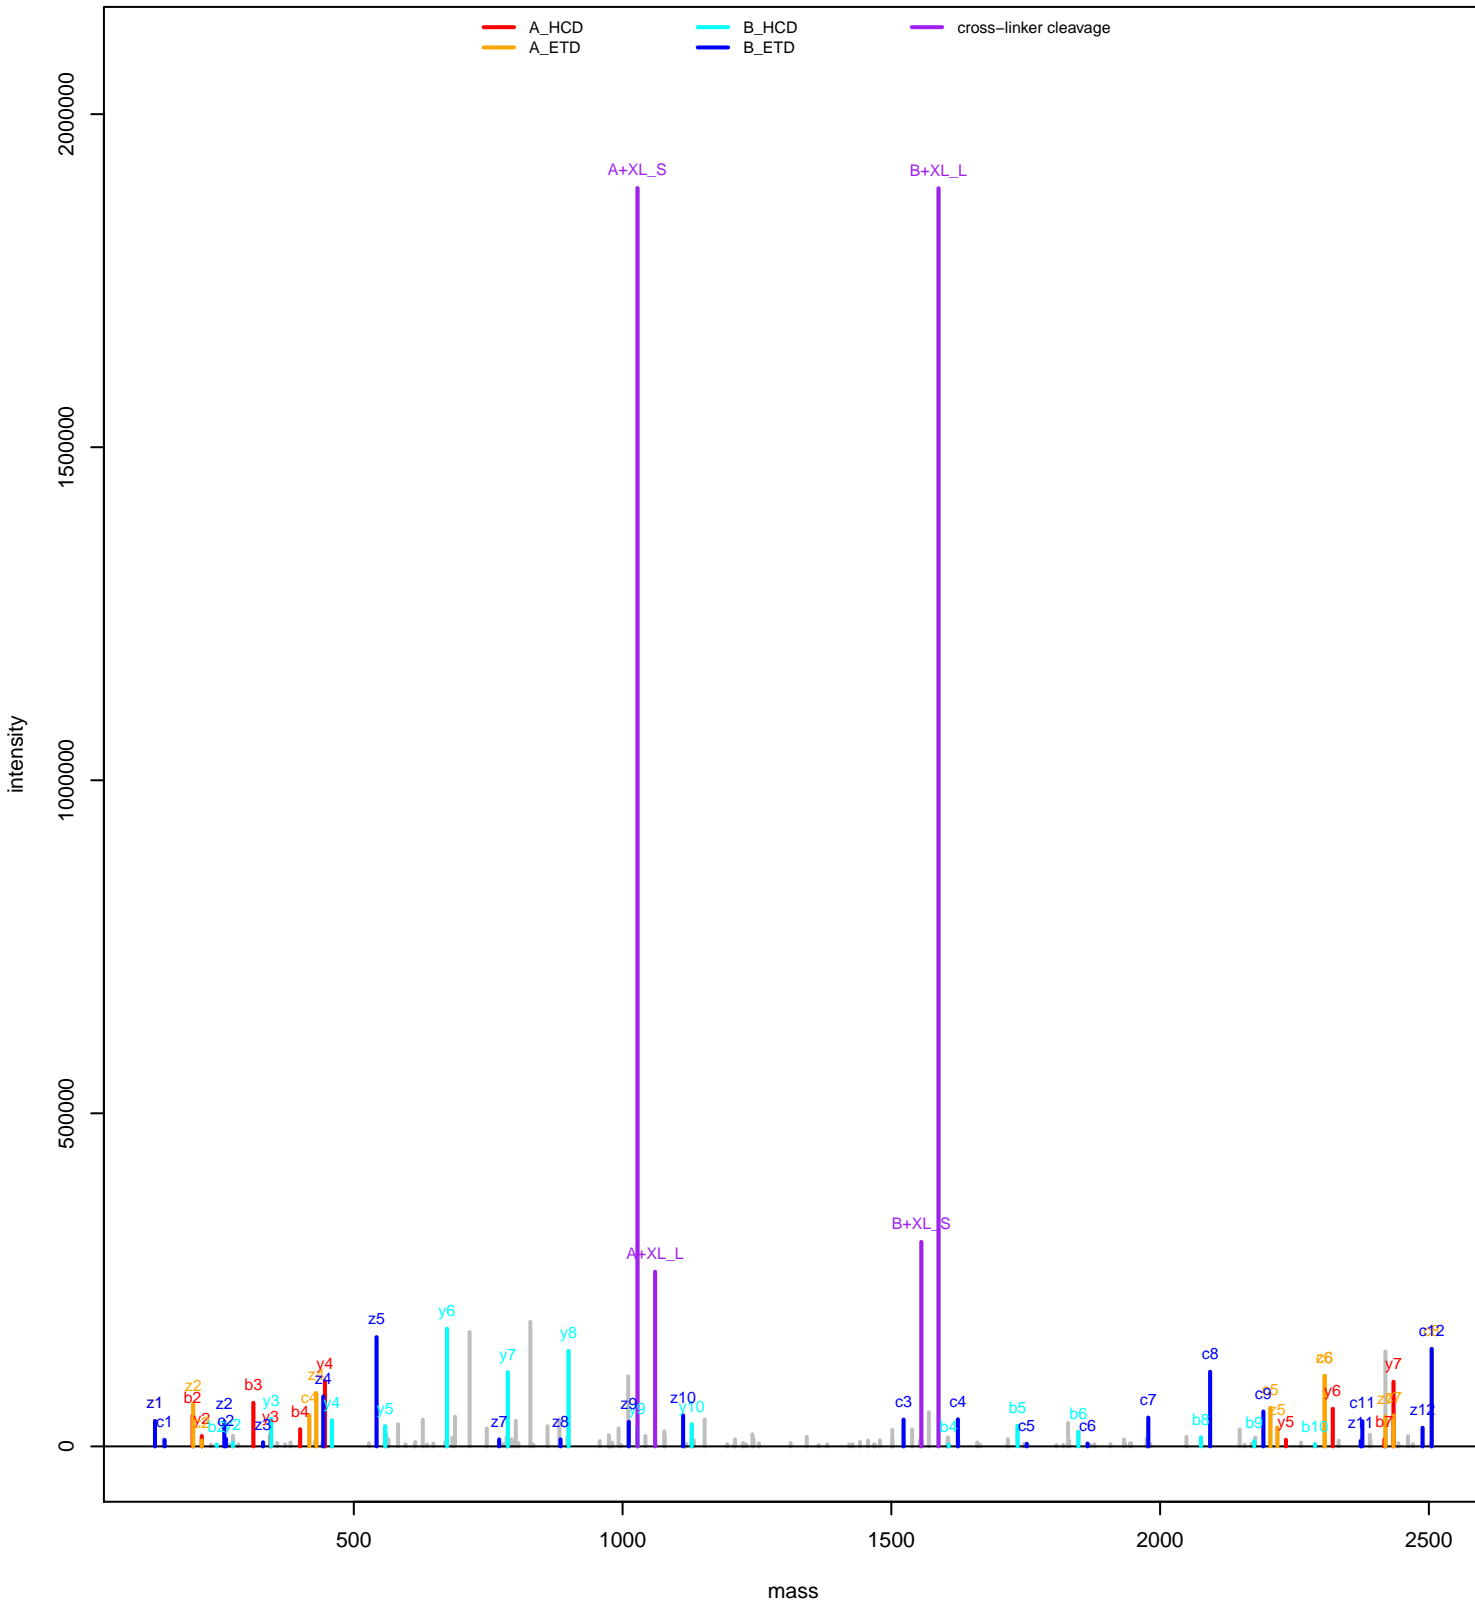

**AELSKTQAK+XL\_S**

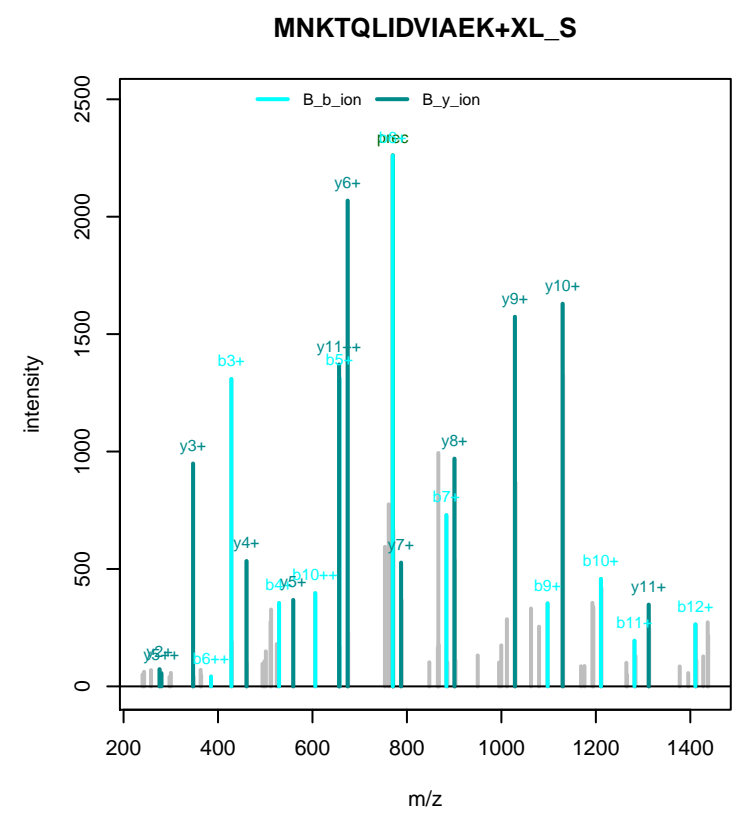

**AELSKTQAK+XL\_L**

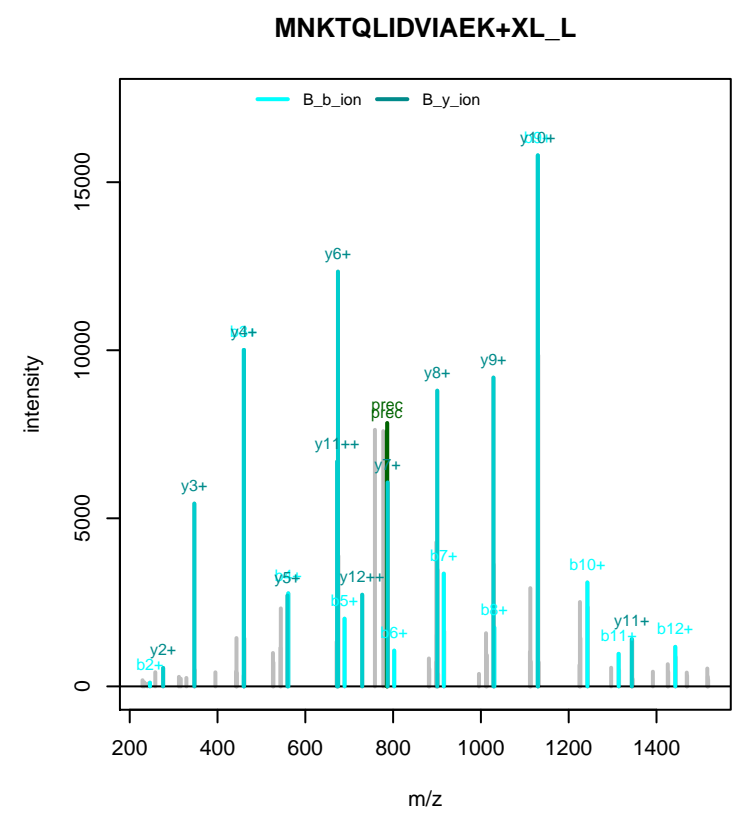

SKPIVMER  
MALIPVKNVATER

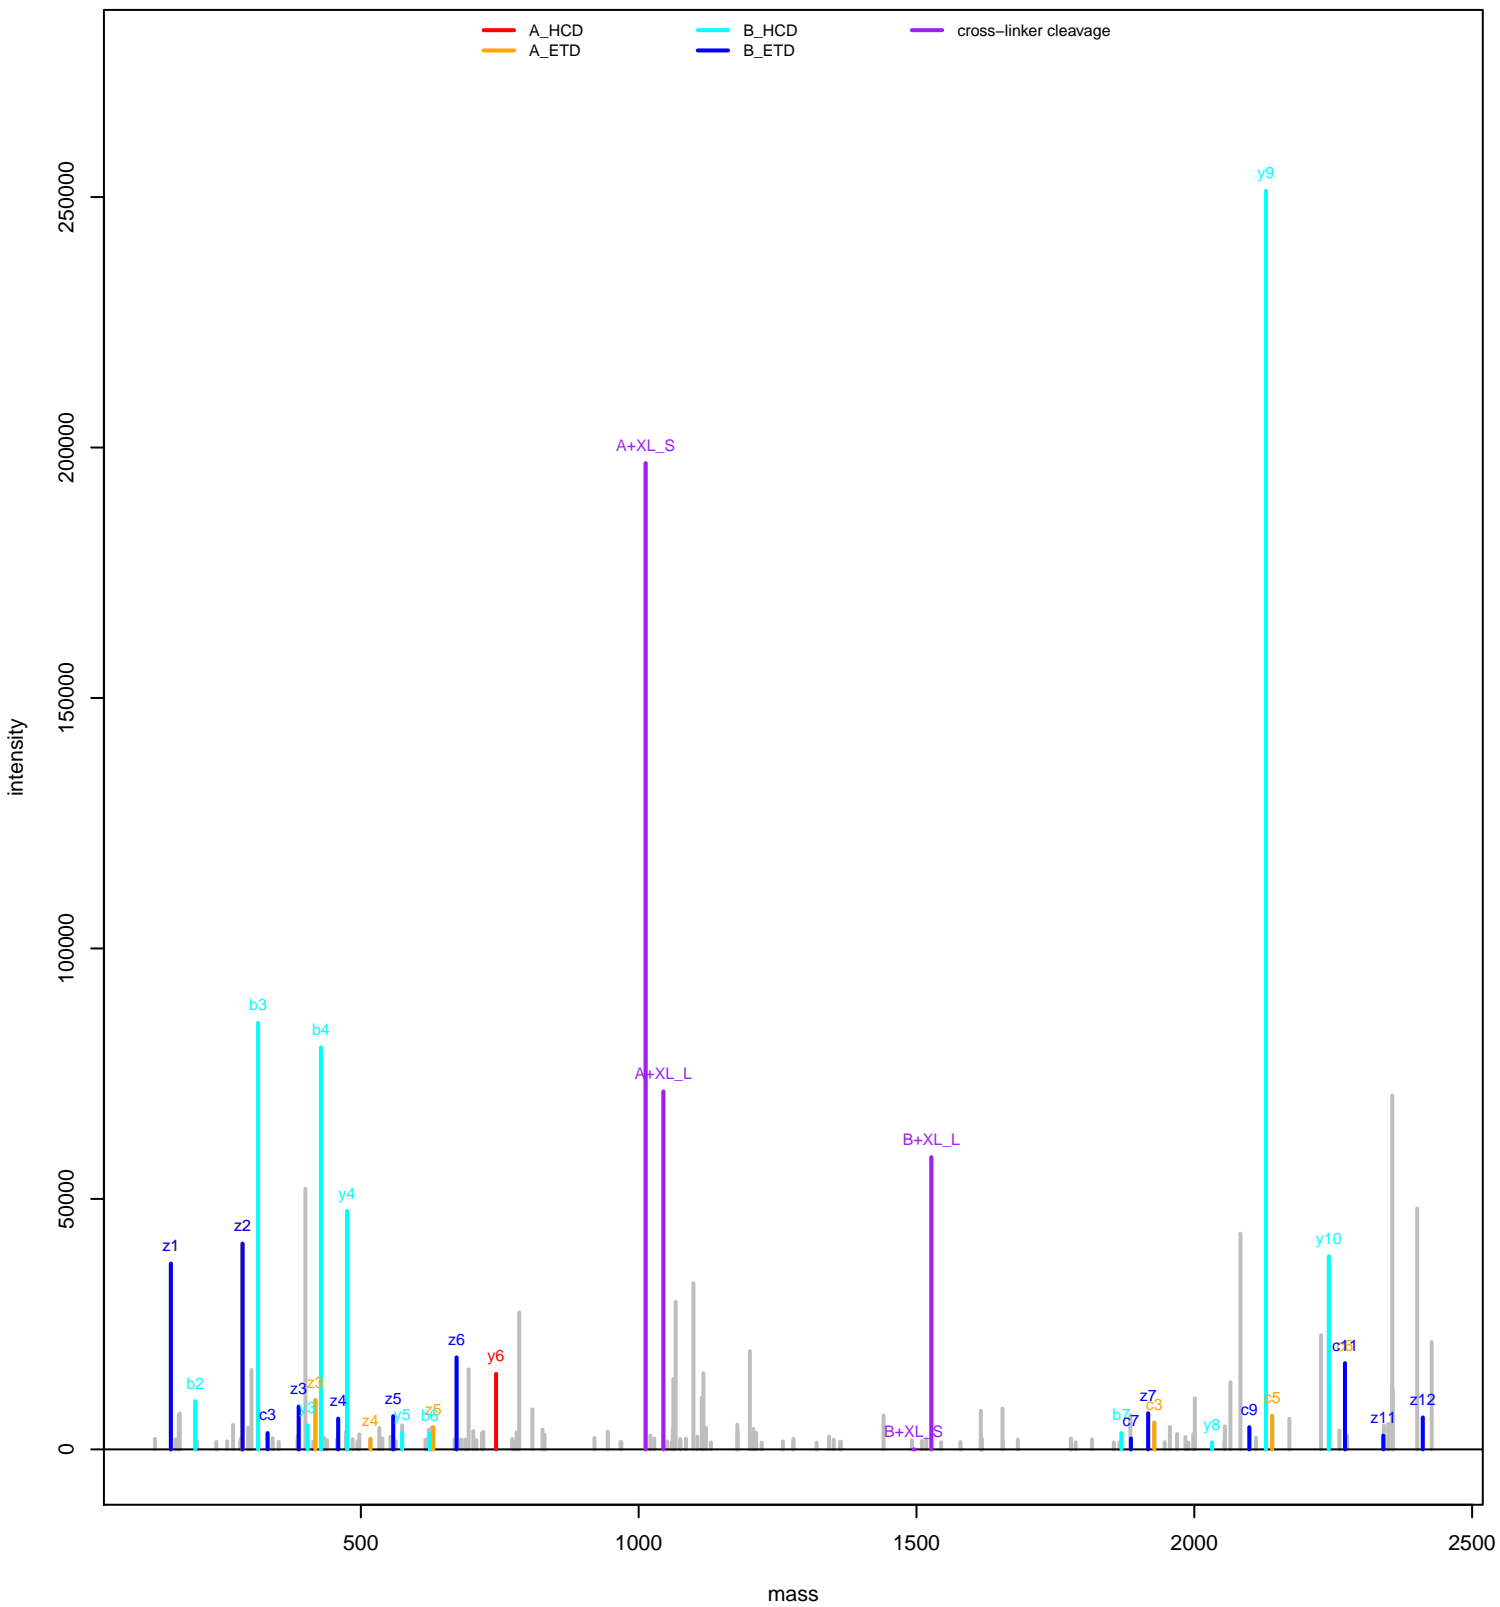

SKPIVMER+XL\_S

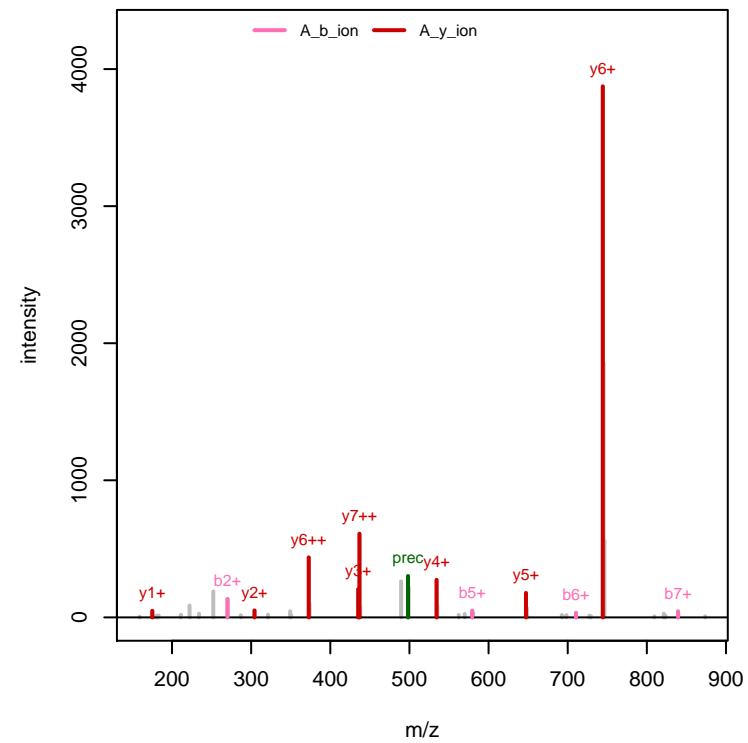

SKPIVMER+XL\_L

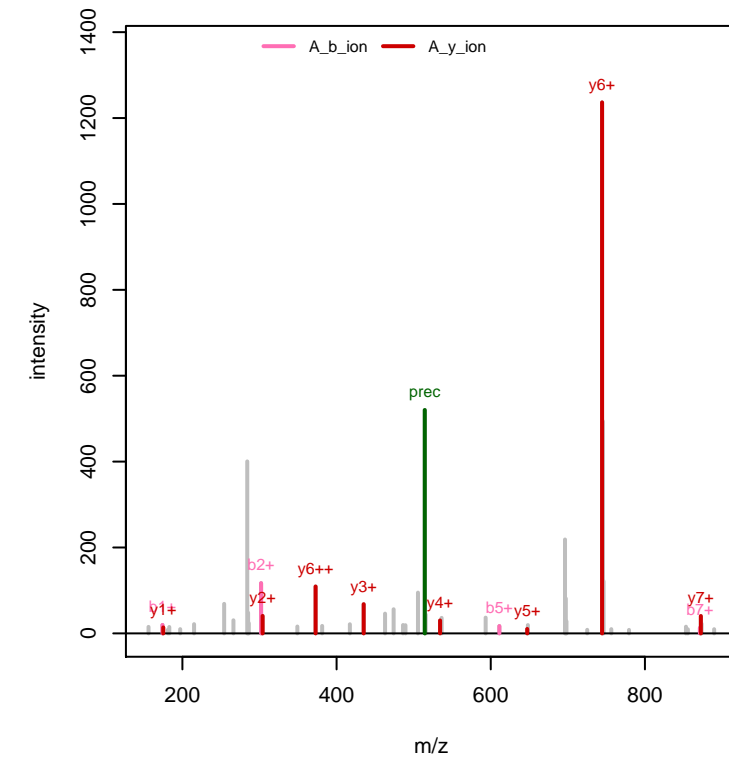

MALIPVKNVATER+XL\_S

MALIPVKNVATER+XL\_L

KVVMTGPSK  
VLDLIAHISK

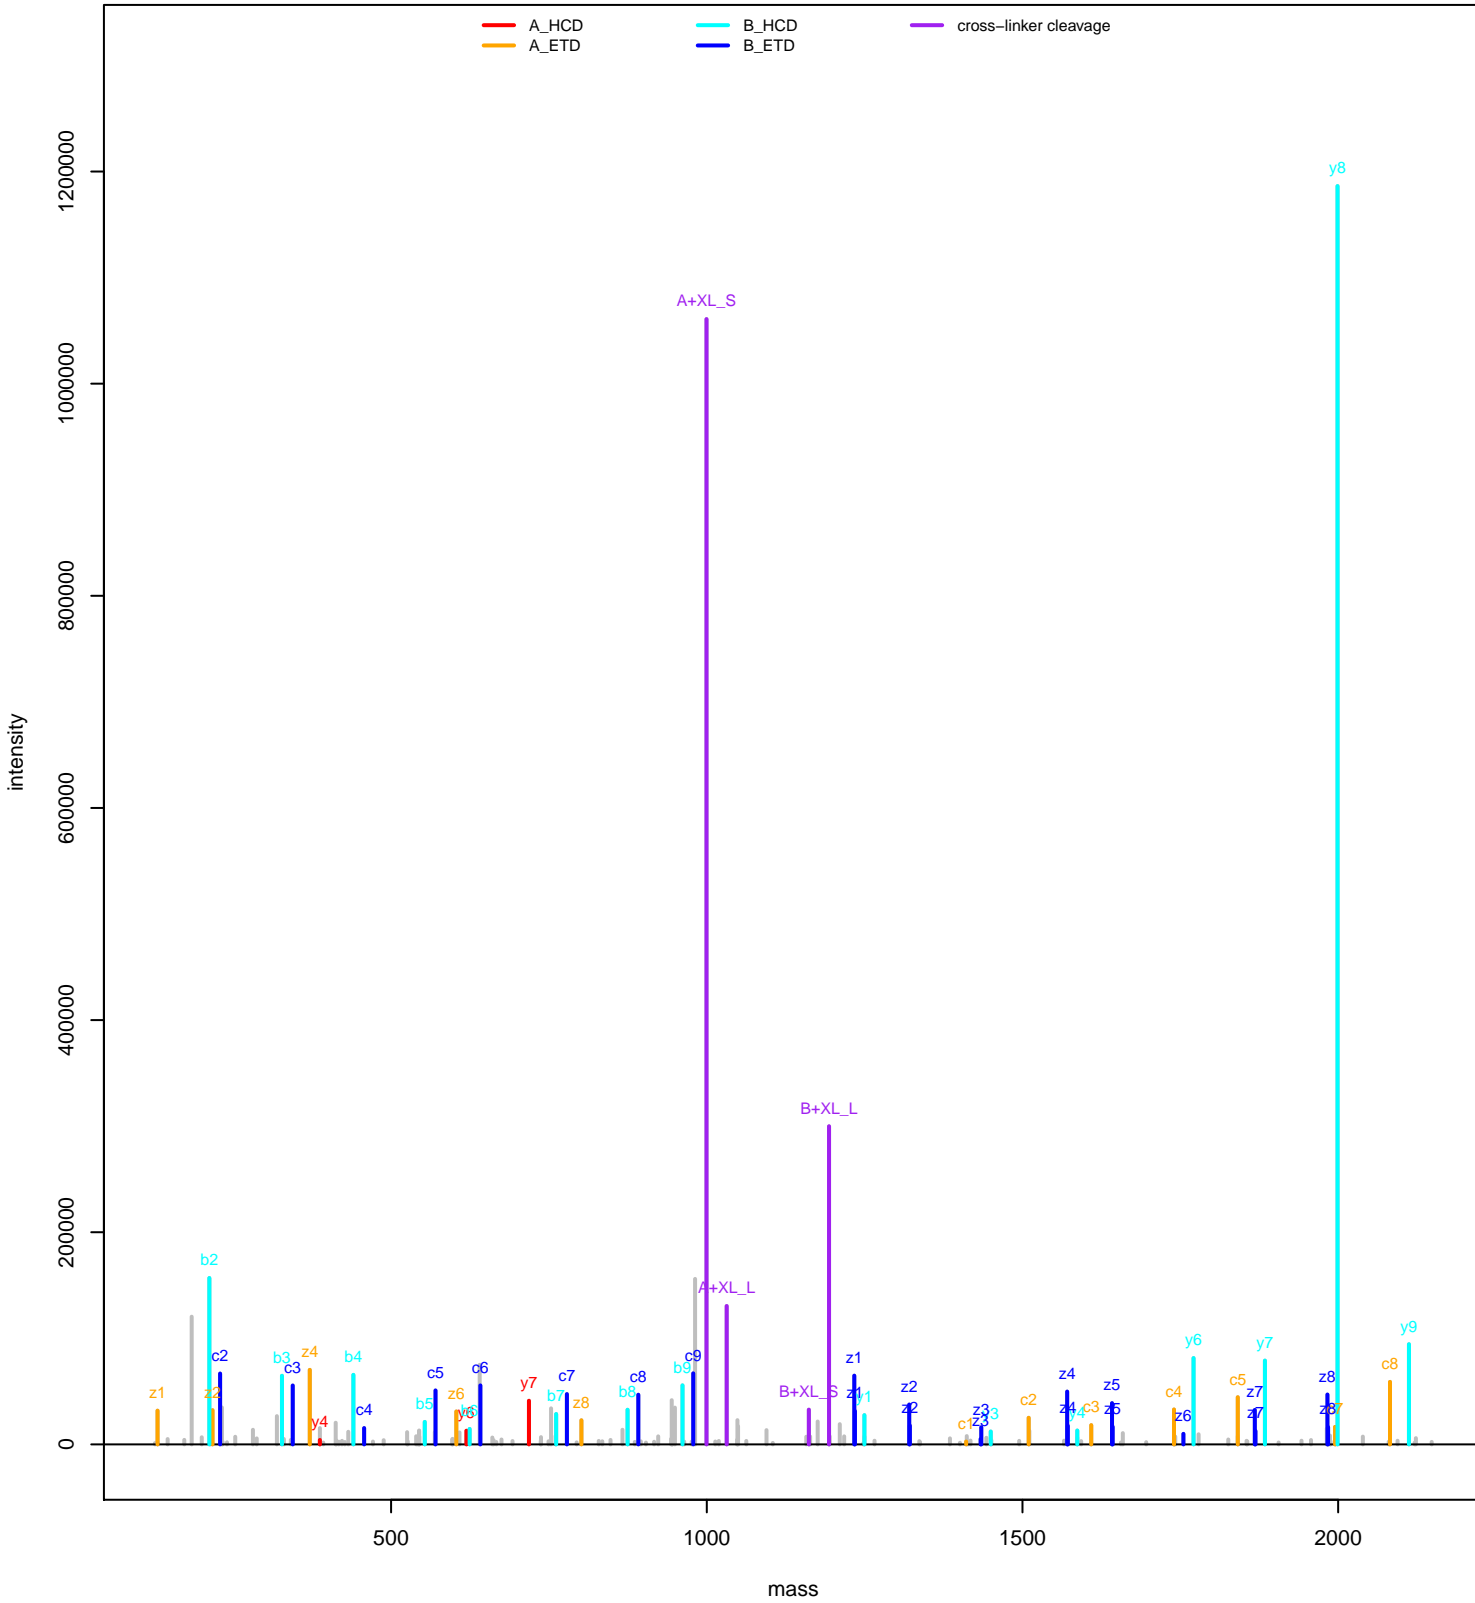

KVVMTGPSK+XL\_S

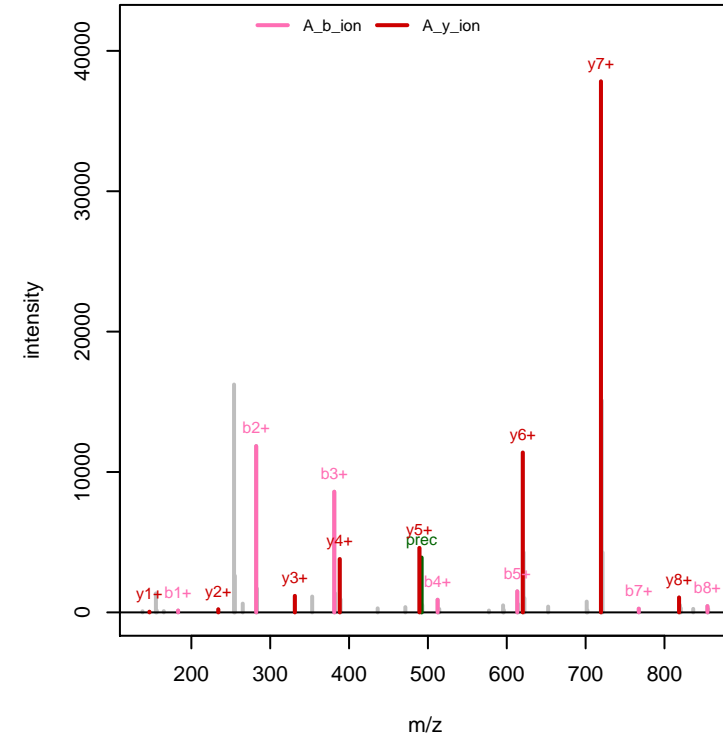

KVVMTGPSK+XL\_L

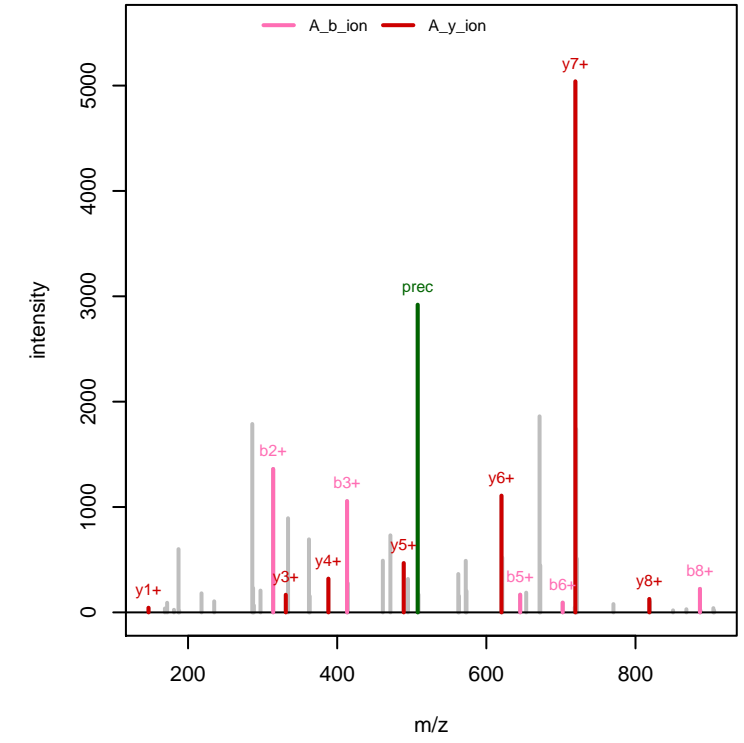

VLDLIAHISK+XL\_S

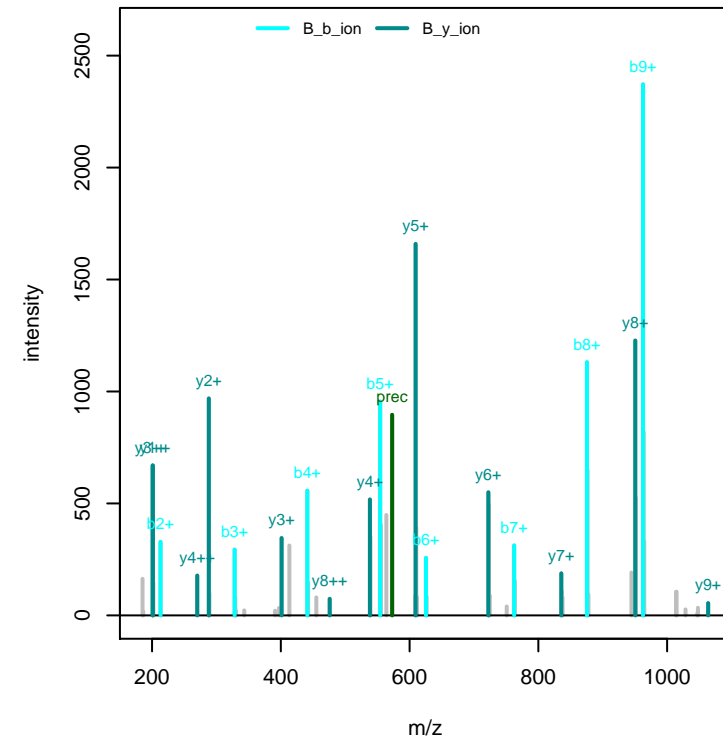

VLDLIAHISK+XL\_L

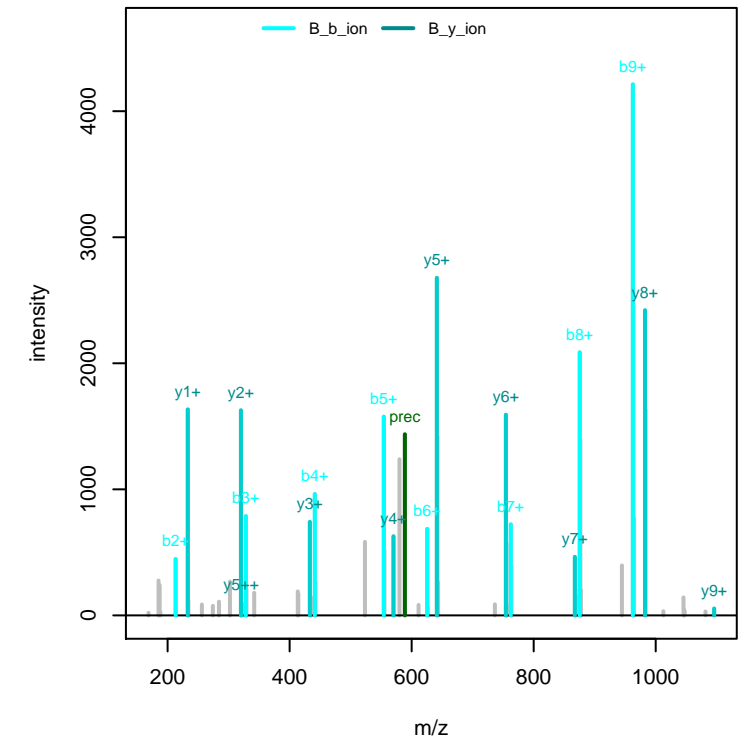

**KQQNEEAAK**  
**SAMEPVWNGKEFVPR**

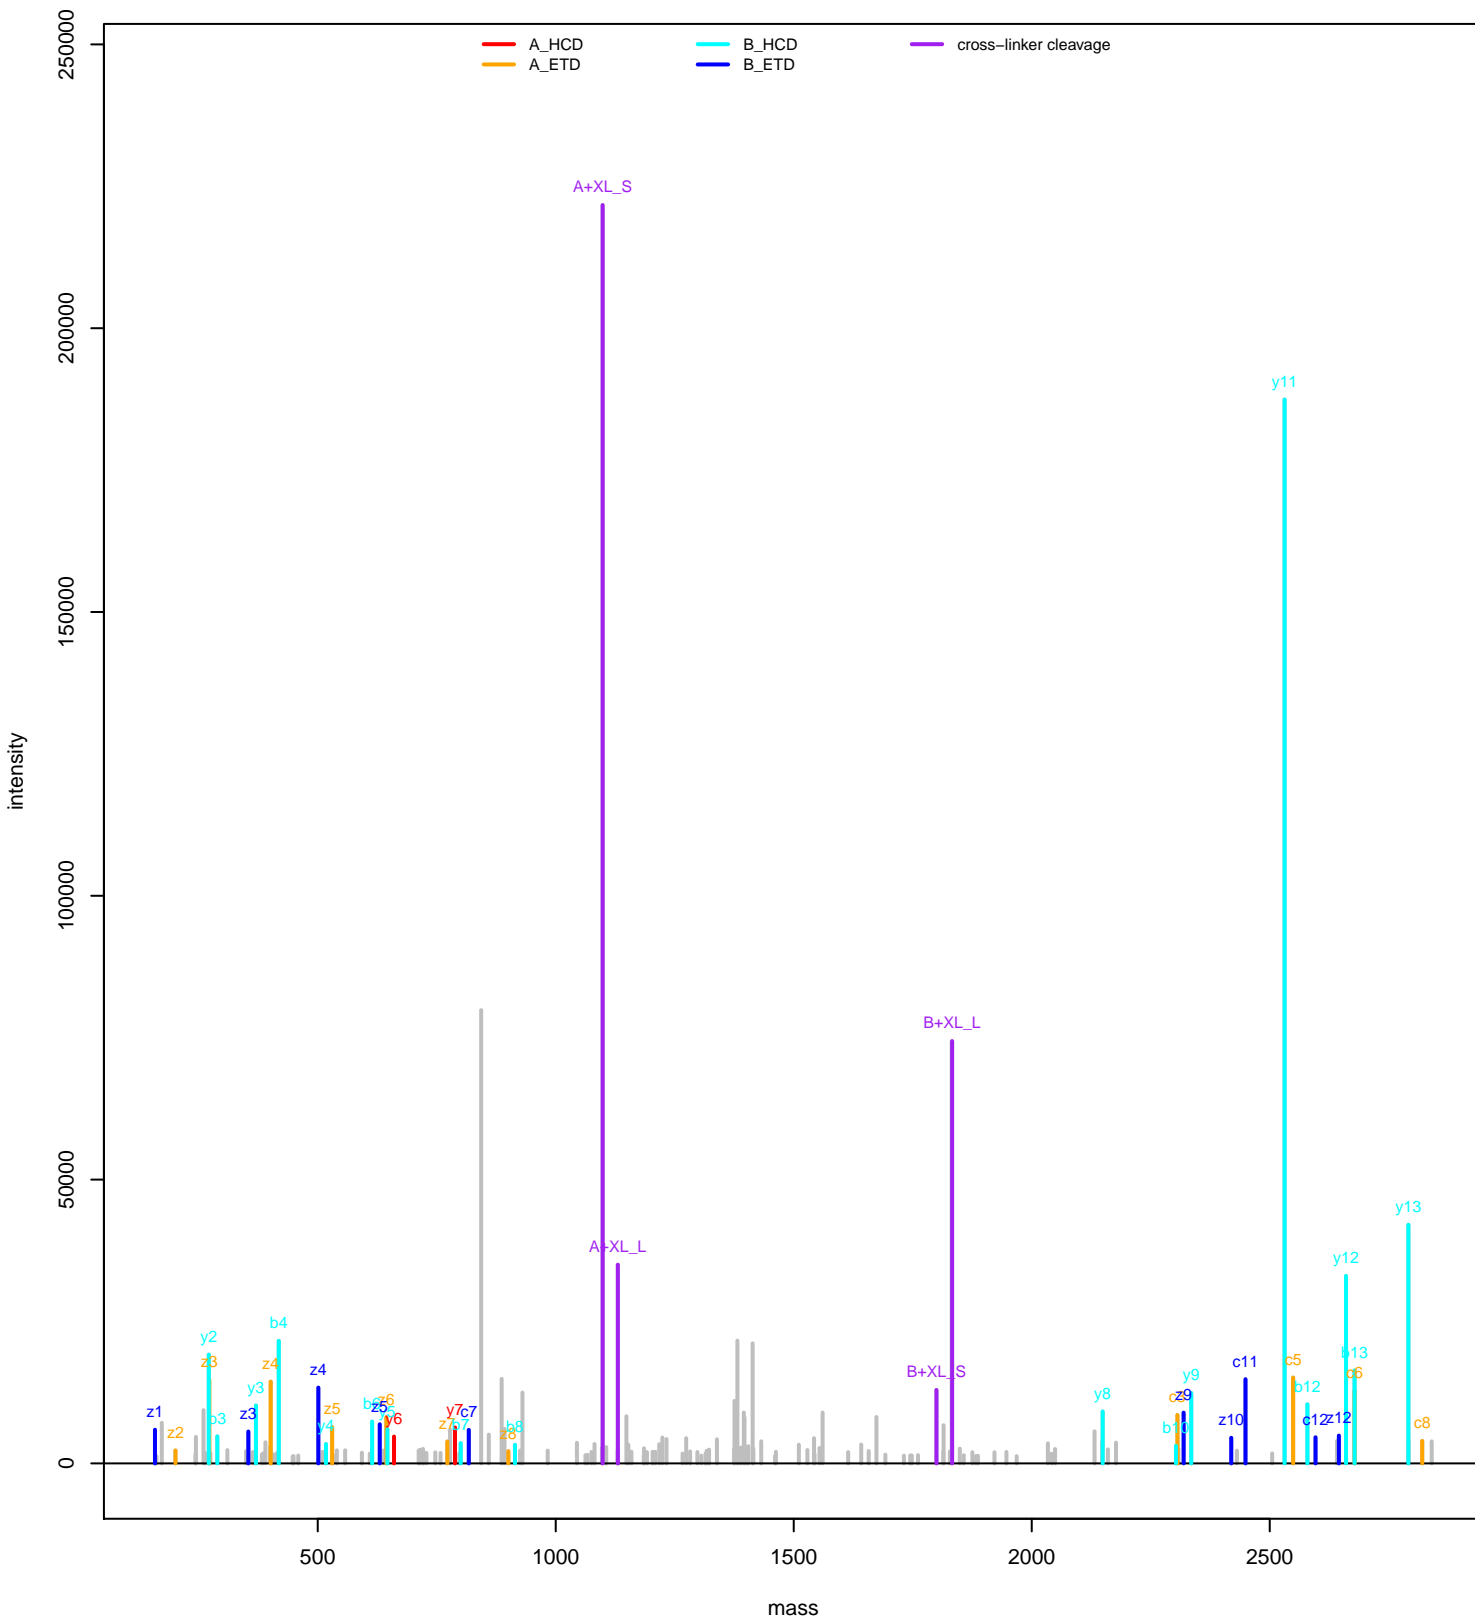

**KQQNEEAAK+XL\_S**

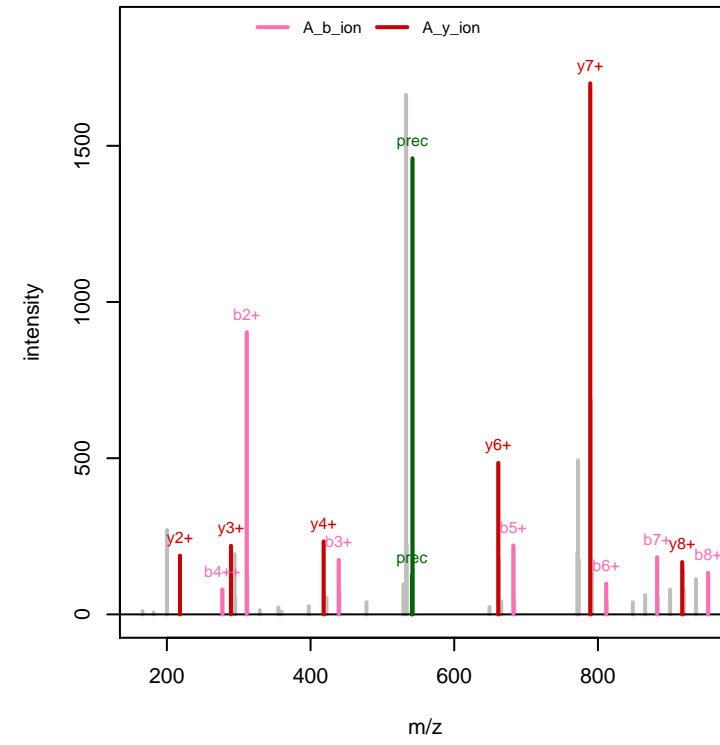

**KQQNEEAAK+XL\_L**

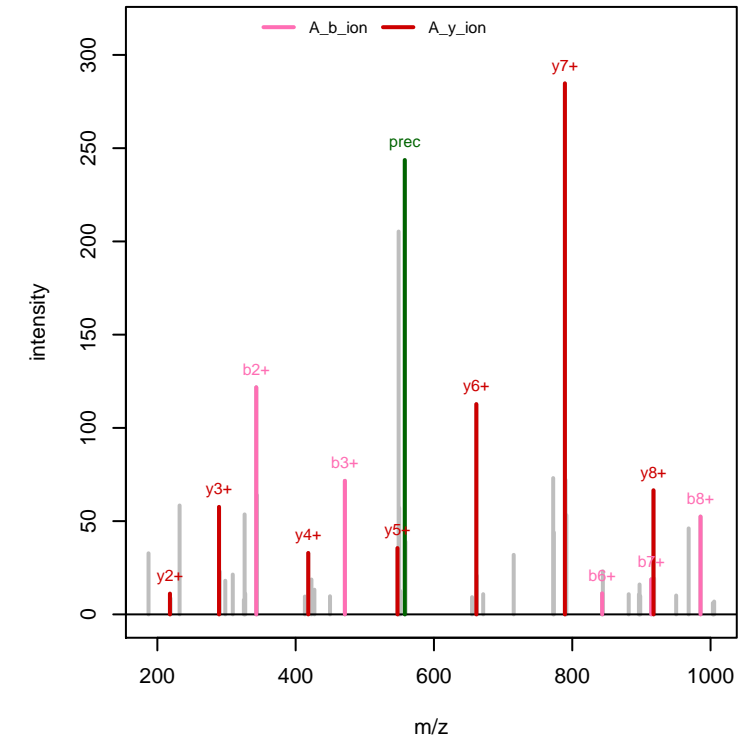

**SAMEPVWNGKEFVPR+XL\_S**

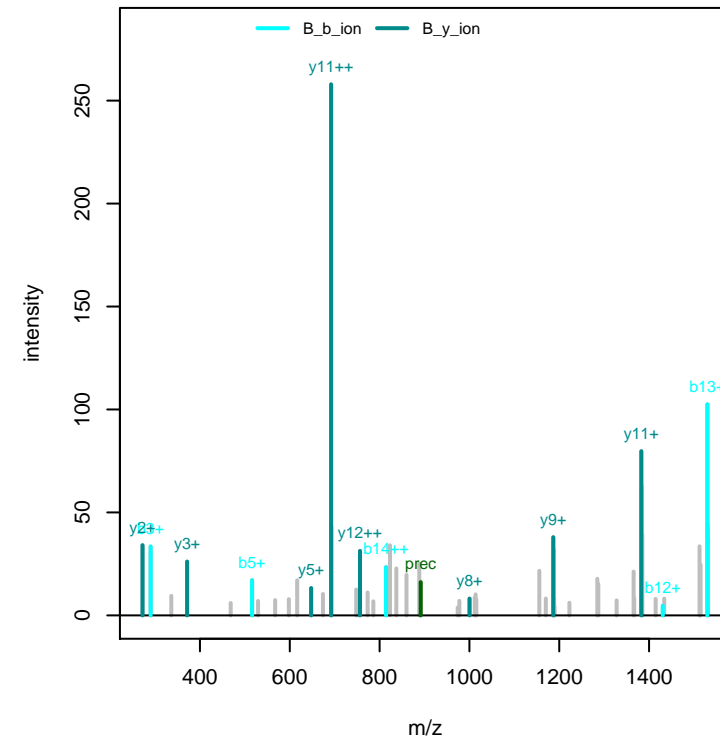

**SAMEPVWNGKEFVPR+XL\_L**

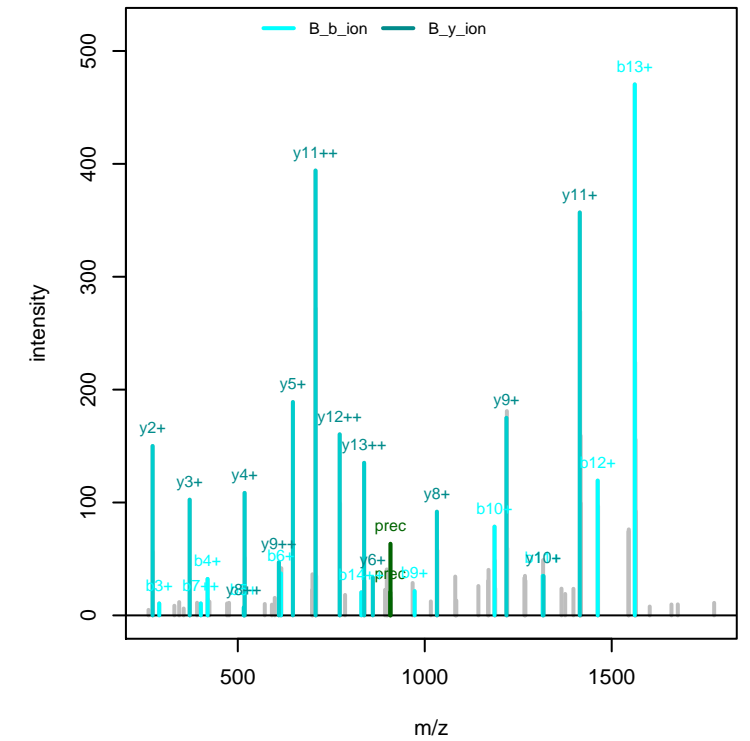

TGAGMMDCKK  
KFTGEVSLTGQPFVMEPSK

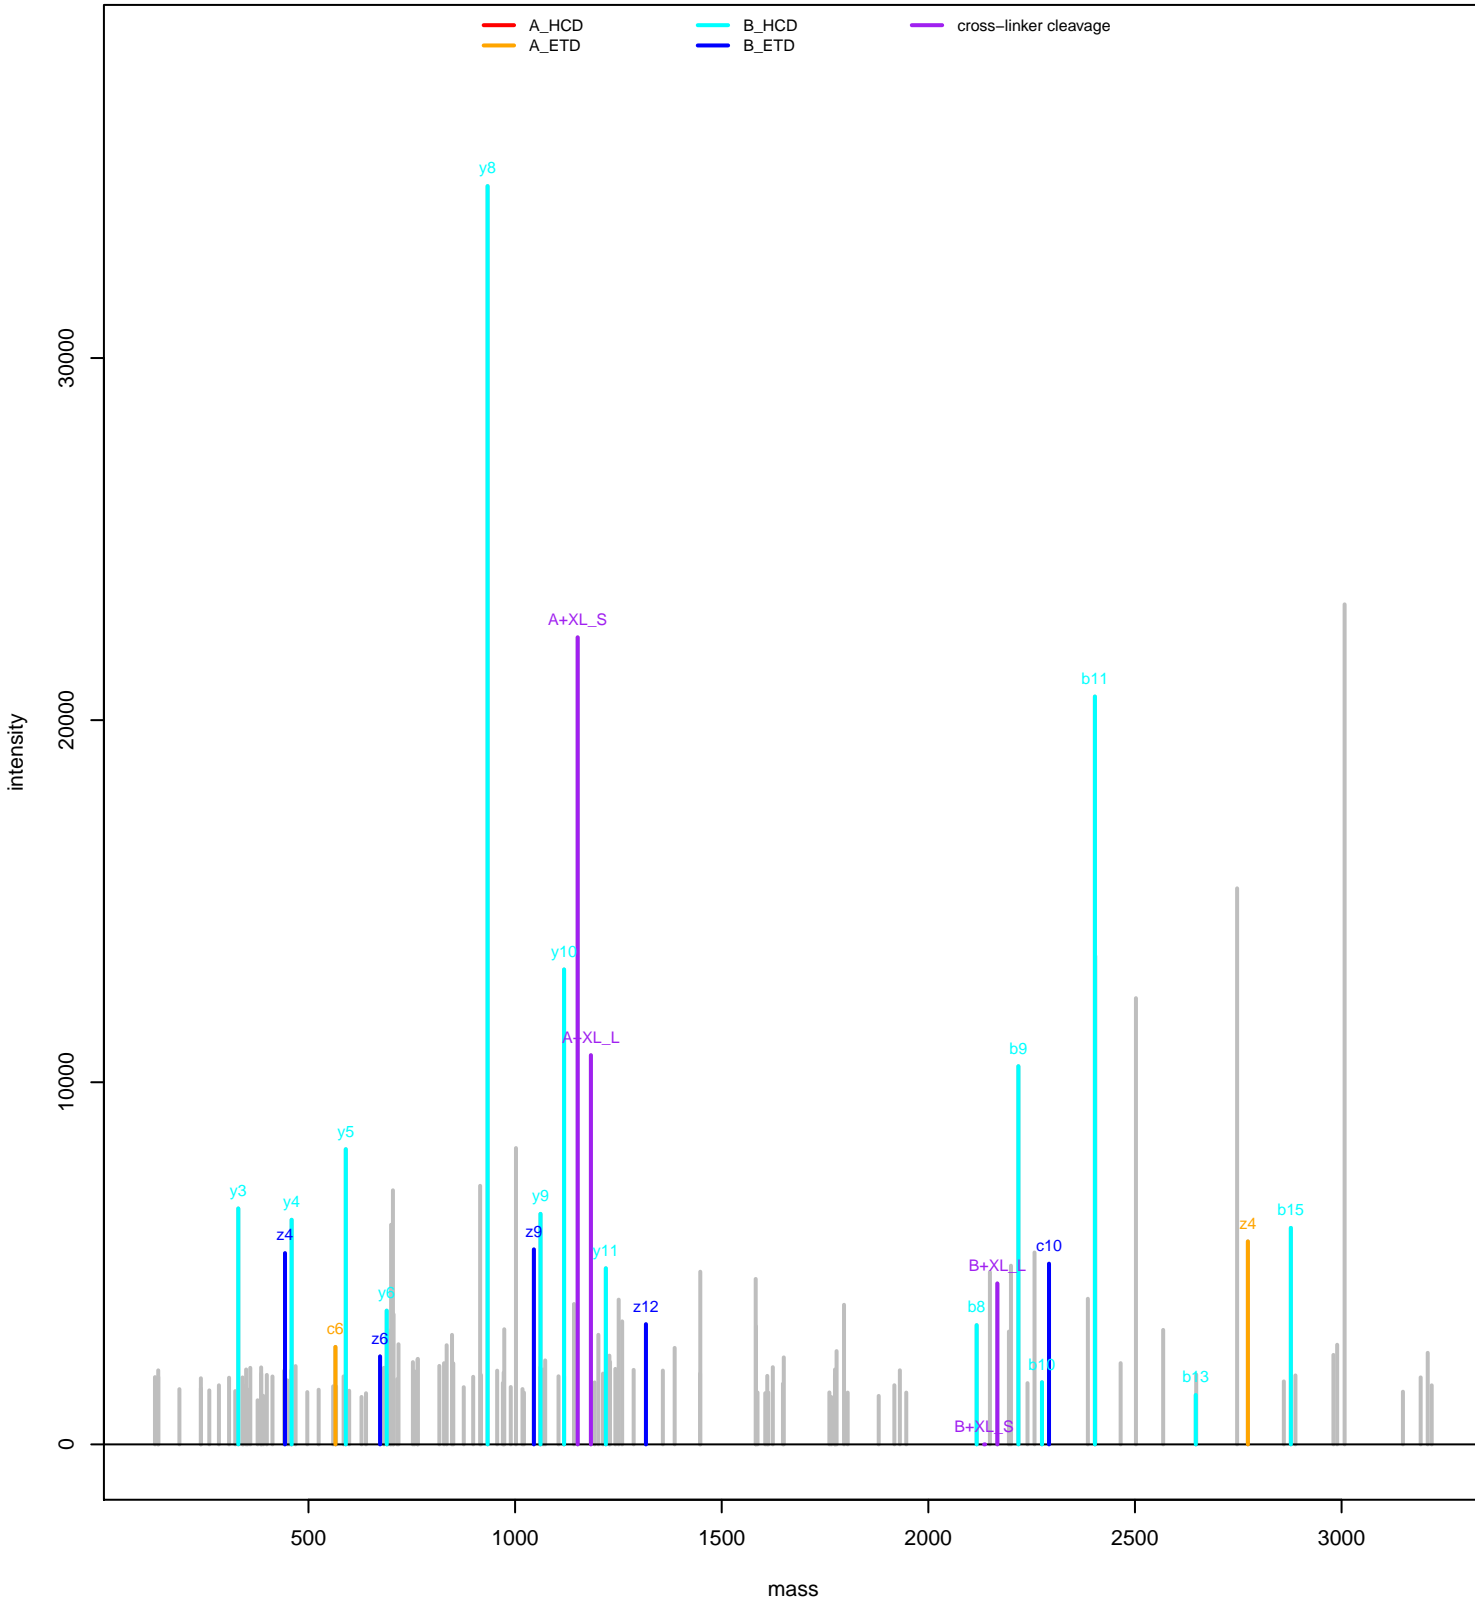

TGAGMMDCKK+XL\_S

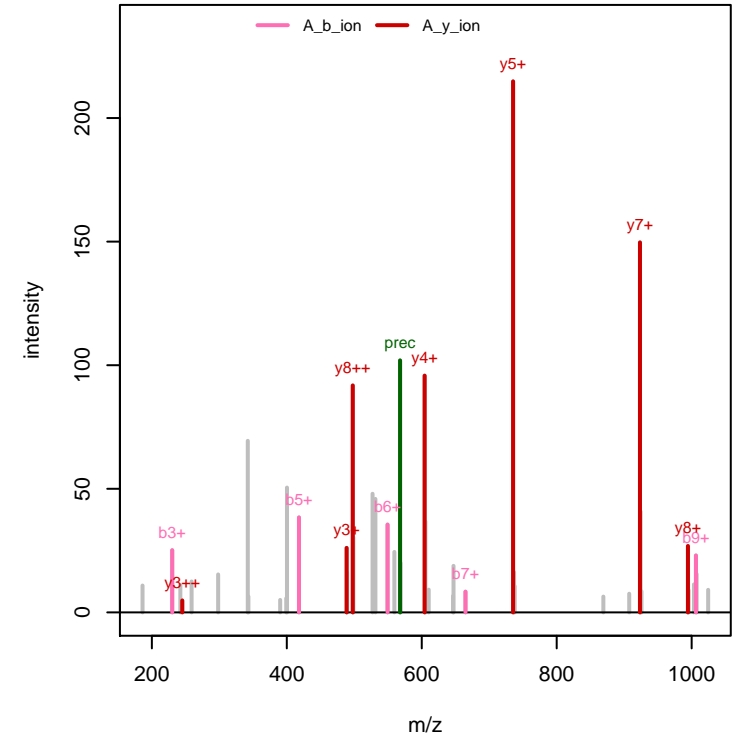

KFTGEVSLTGQPFVMEPSK+XL\_S

TGAGMMDCKK+XL\_L

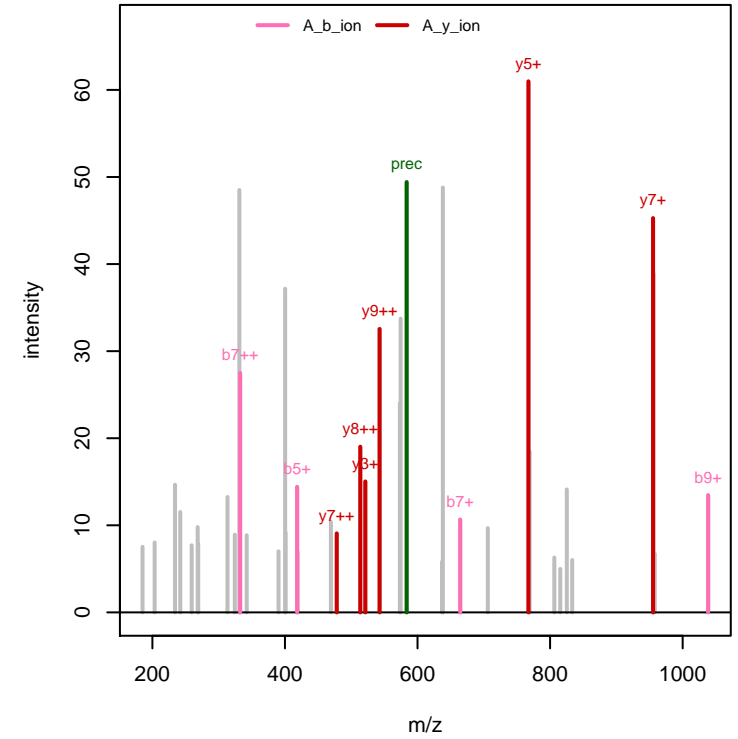

KFTGEVSLTGQPFVMEPSK+XL\_L



GGAGLHKLCR  
RGITLKIADGQQK

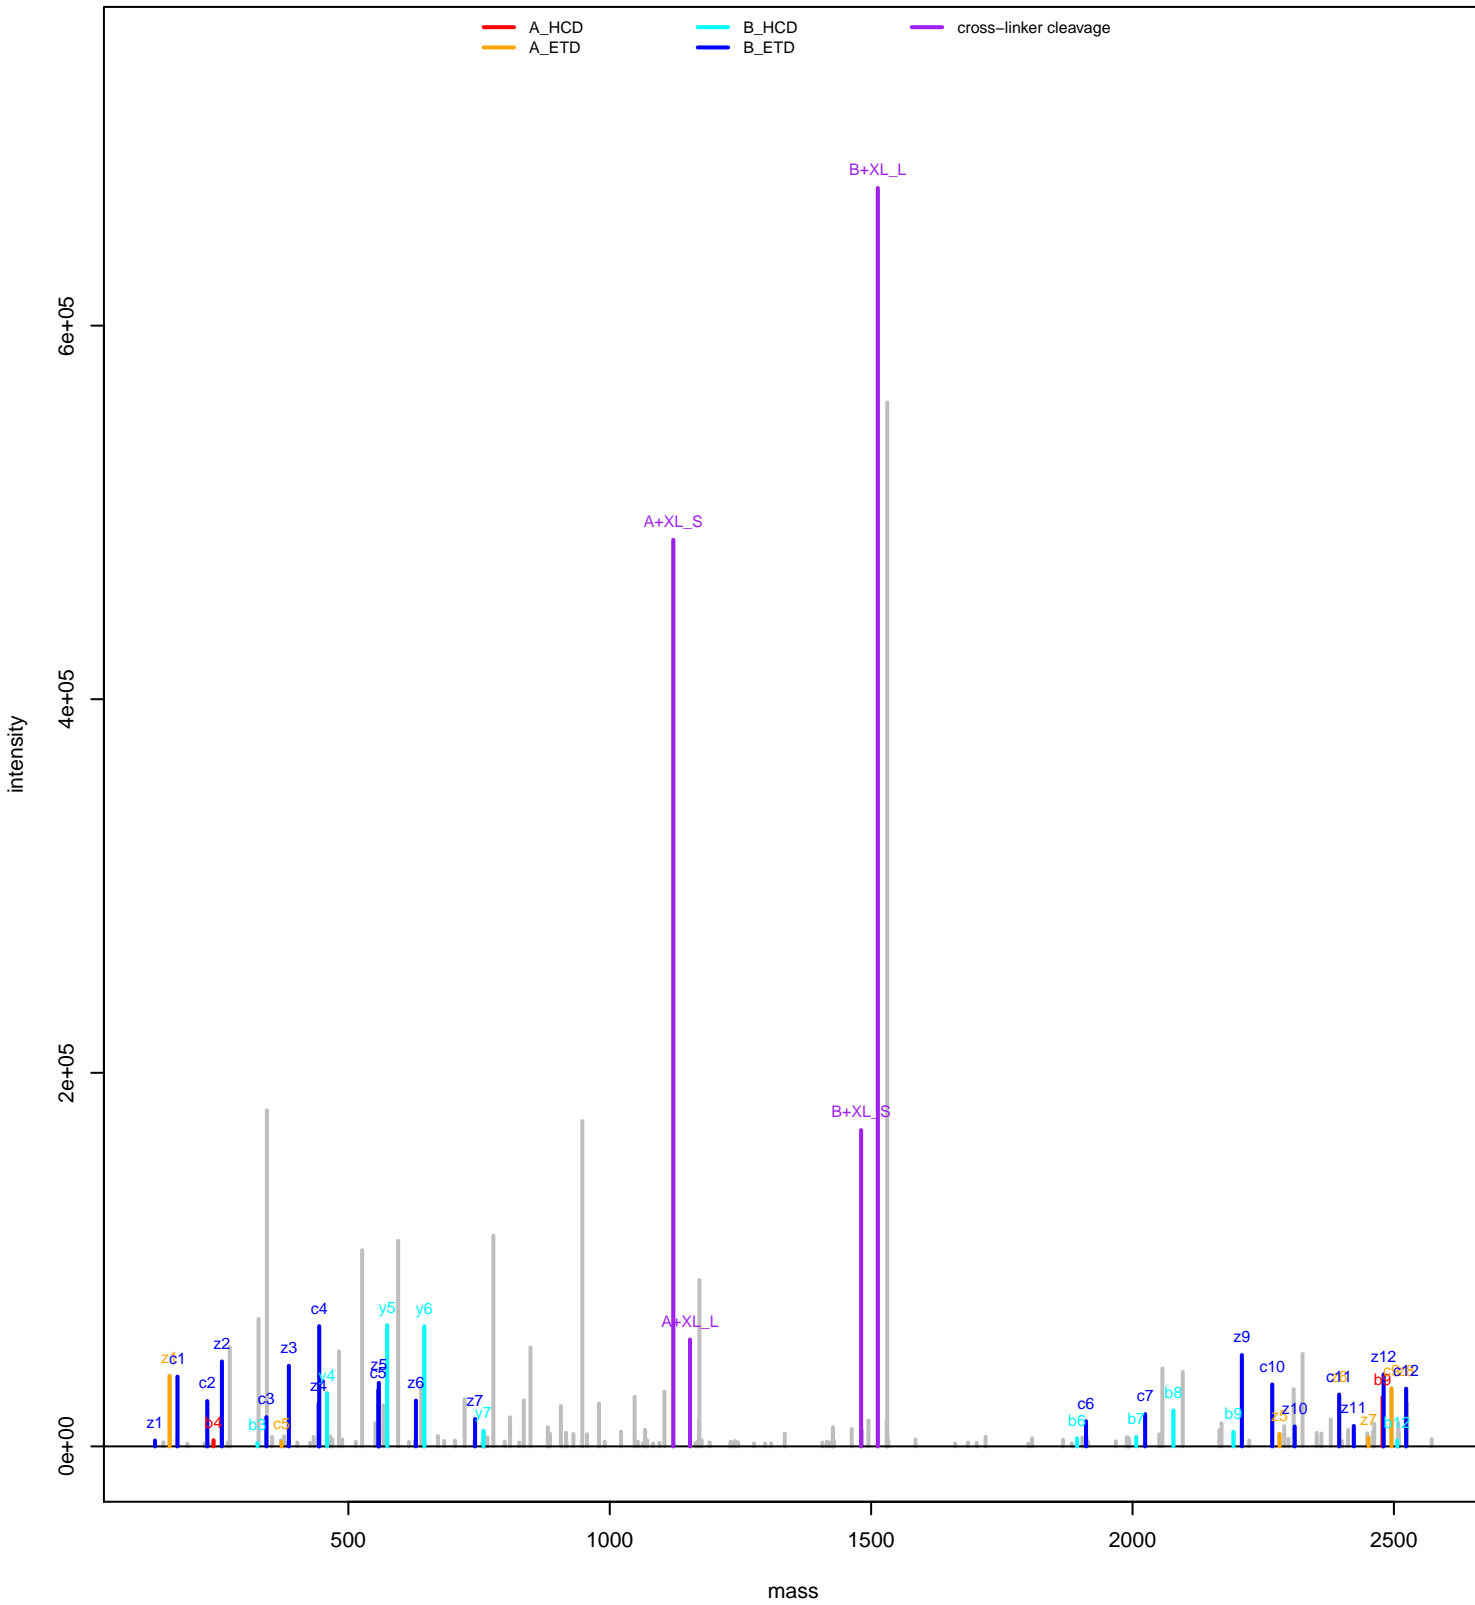

GGAGLHKLCR+XL\_S

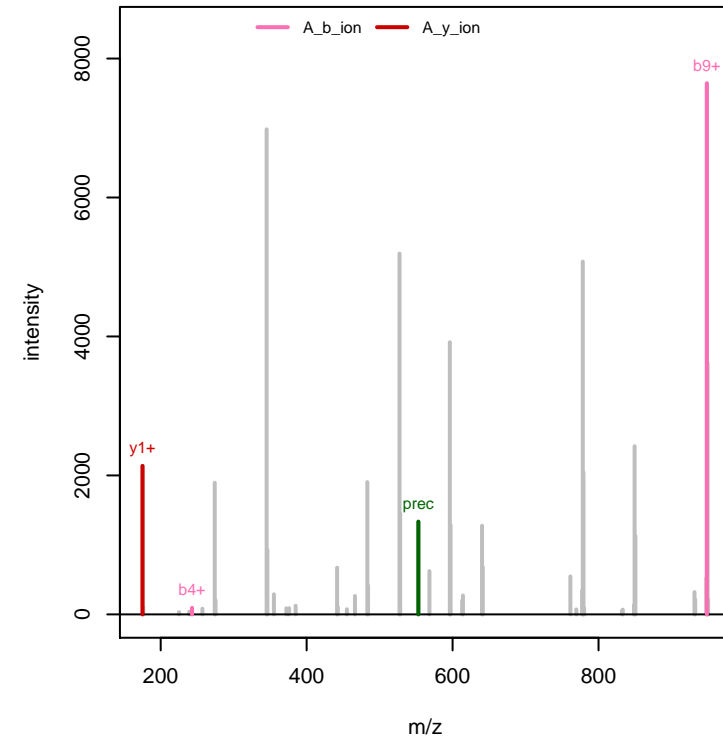

GGAGLHKLCR+XL\_L

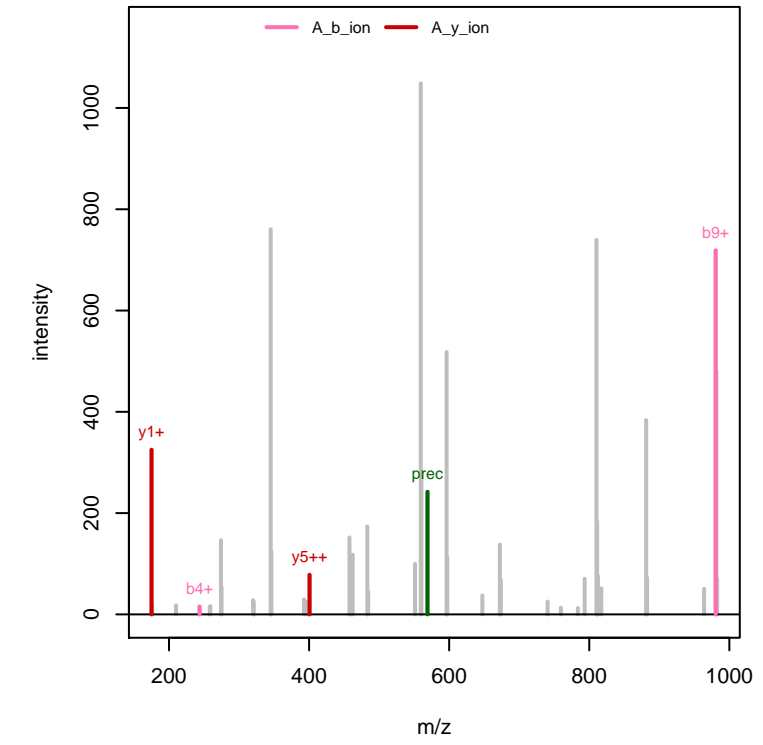

RGITLKIADGQQK+XL\_S

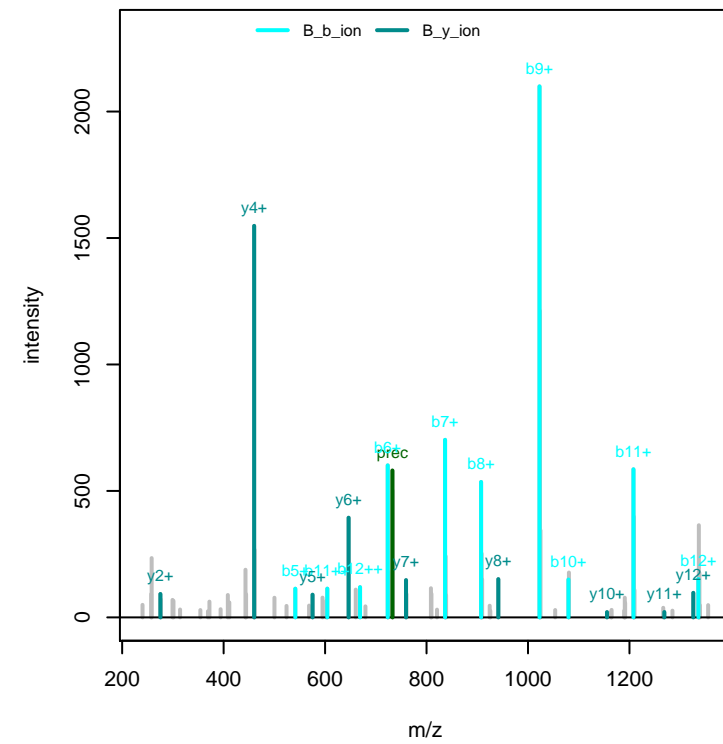

RGITLKIADGQQK+XL\_L

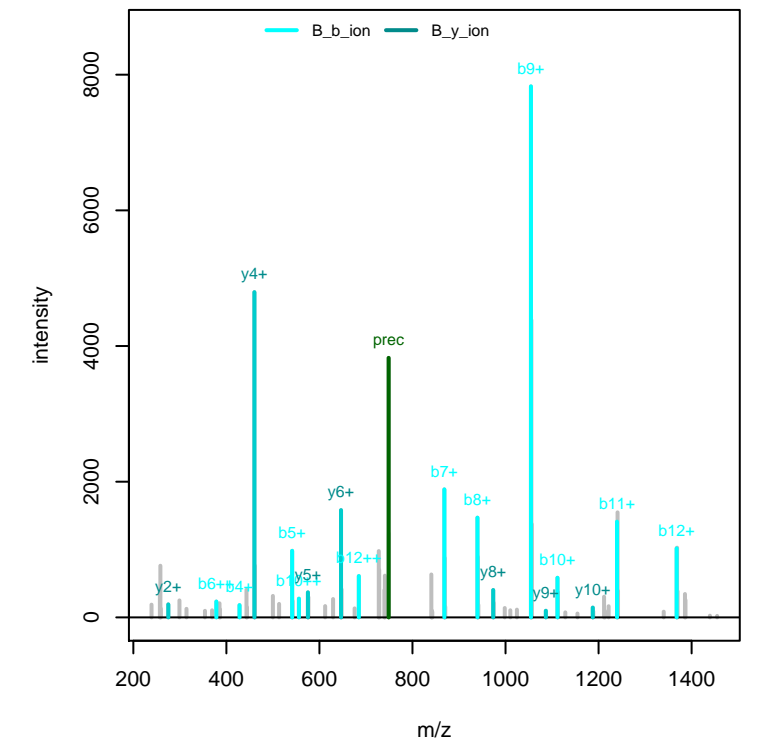

**KTGNTPDGR**  
**CRKSGVLTGLPDAYGR**

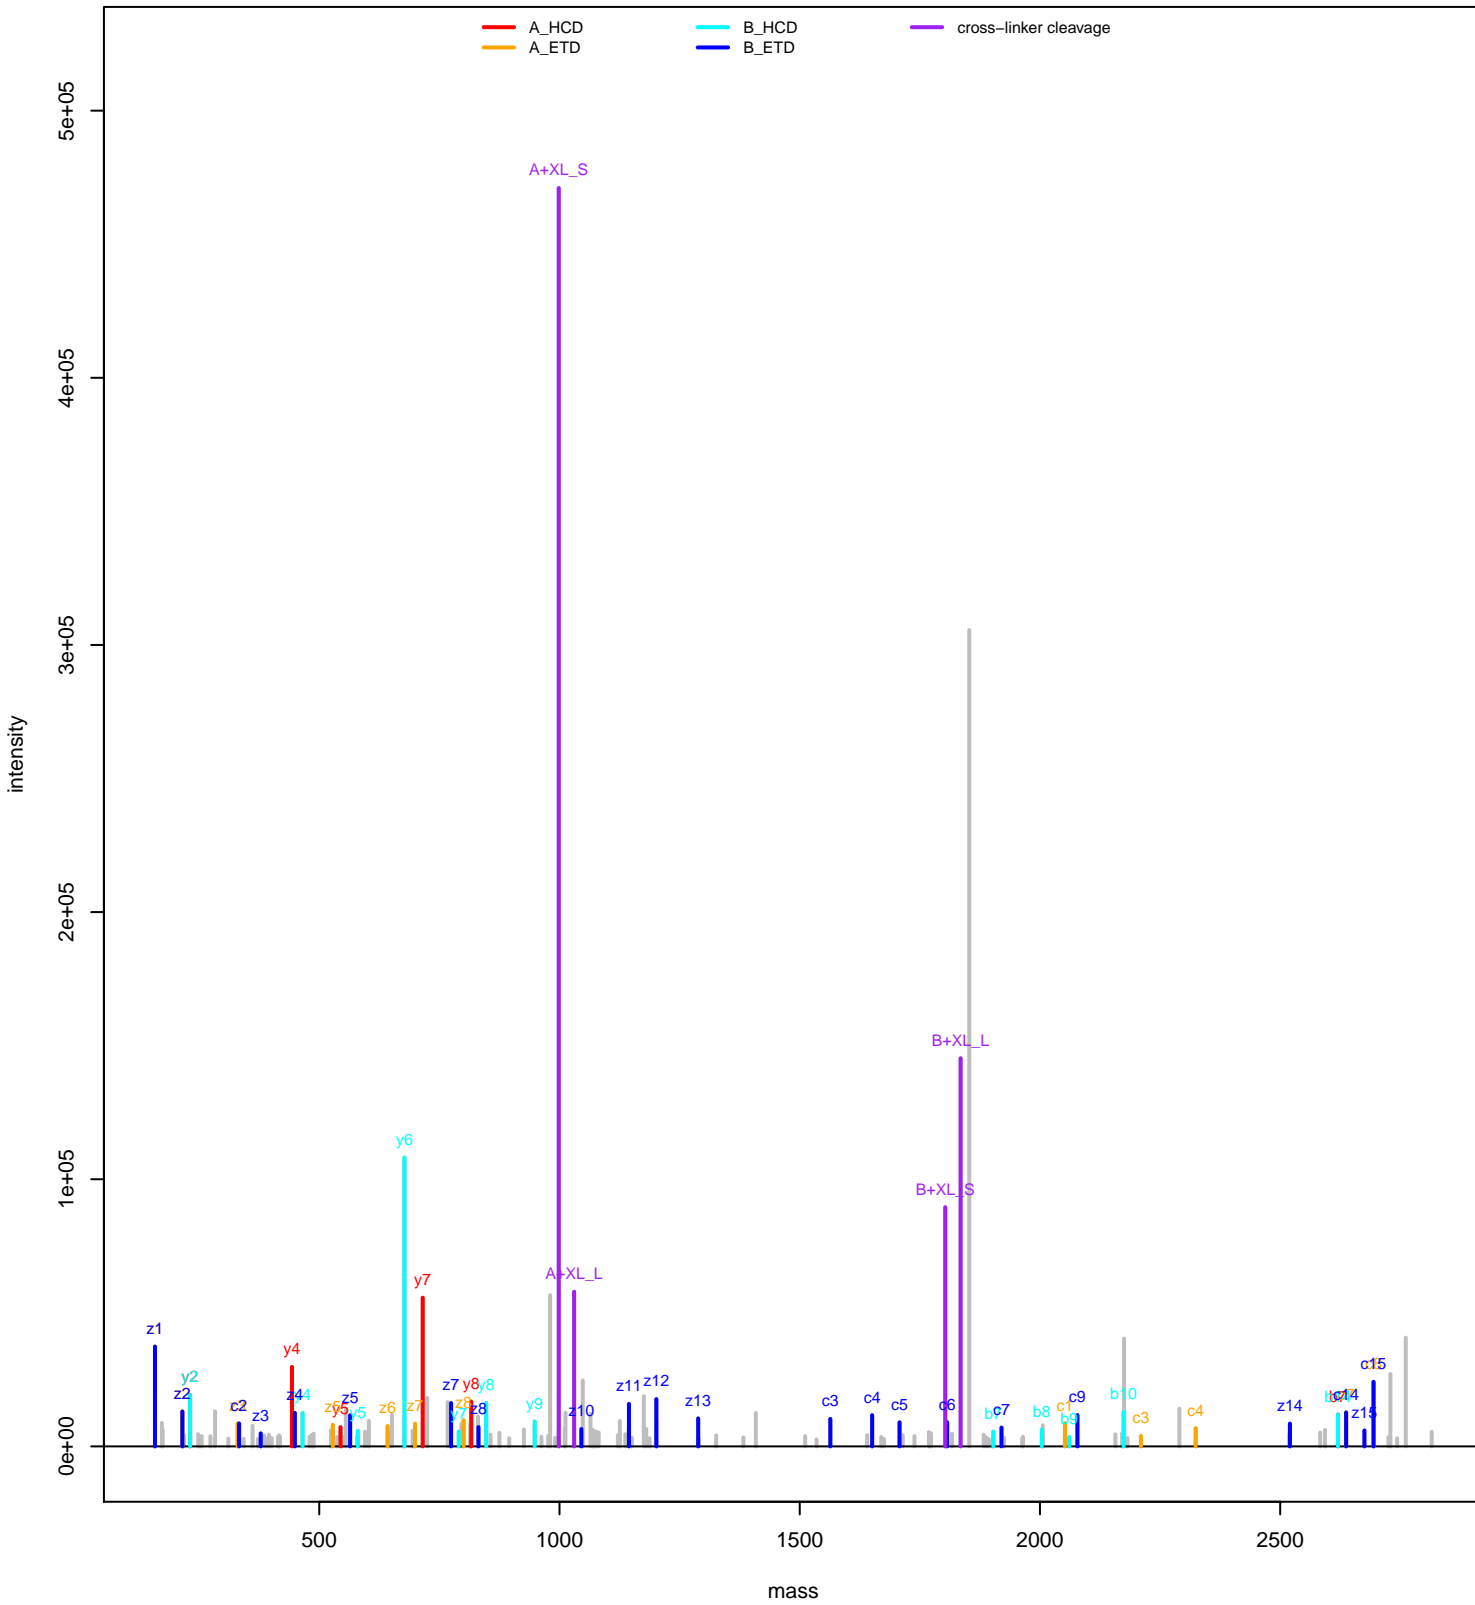

**KTGNTPDGR+XL\_S**

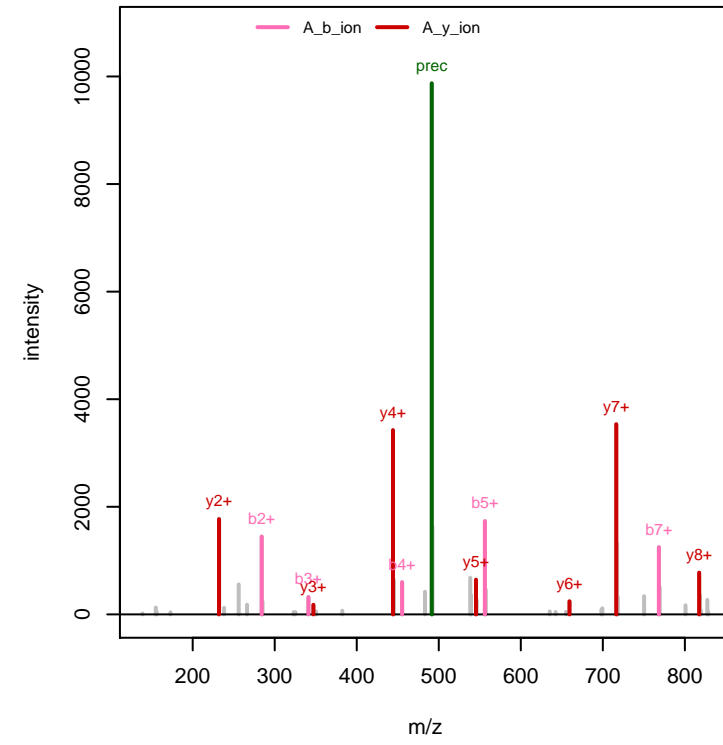

**KTGNTPDGR+XL\_L**

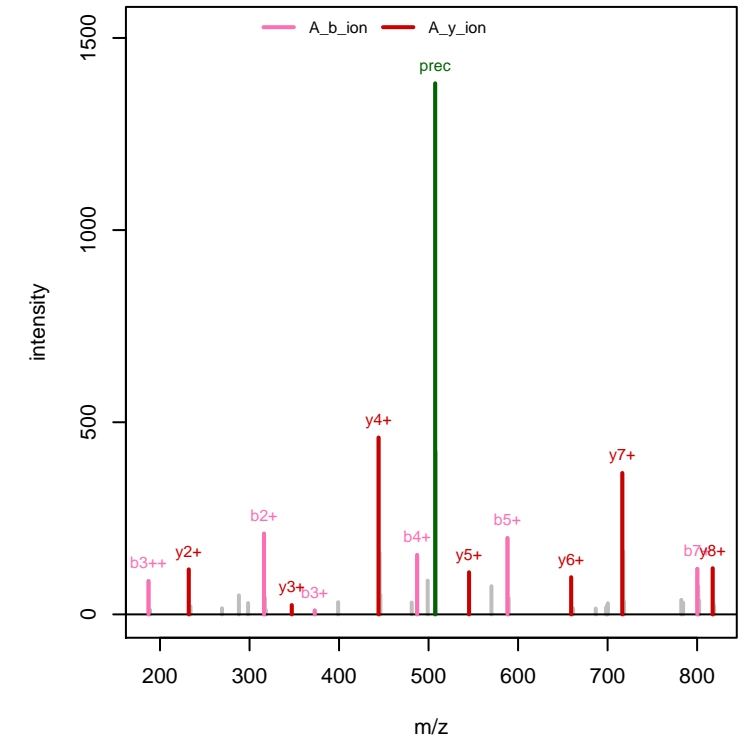

**CRKSGVLTGLPDAYGR+XL\_S**

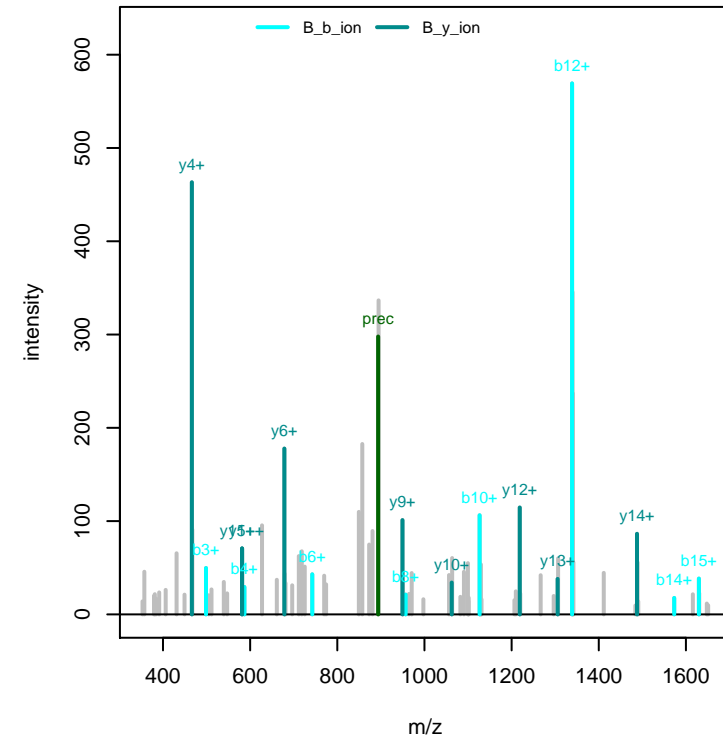

**CRKSGVLTGLPDAYGR+XL\_L**

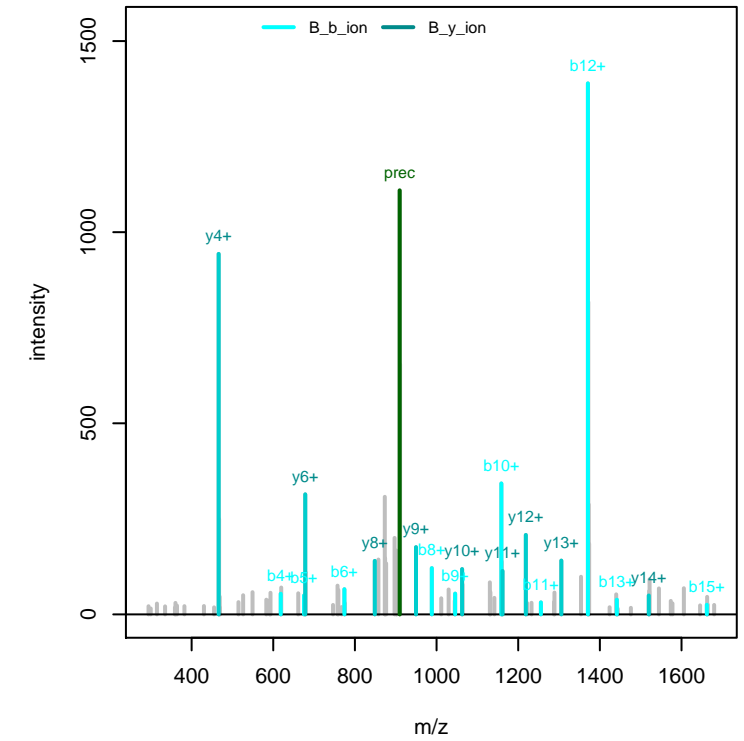

**VMoEGVKLENR  
ETLEDAVKHPEK**

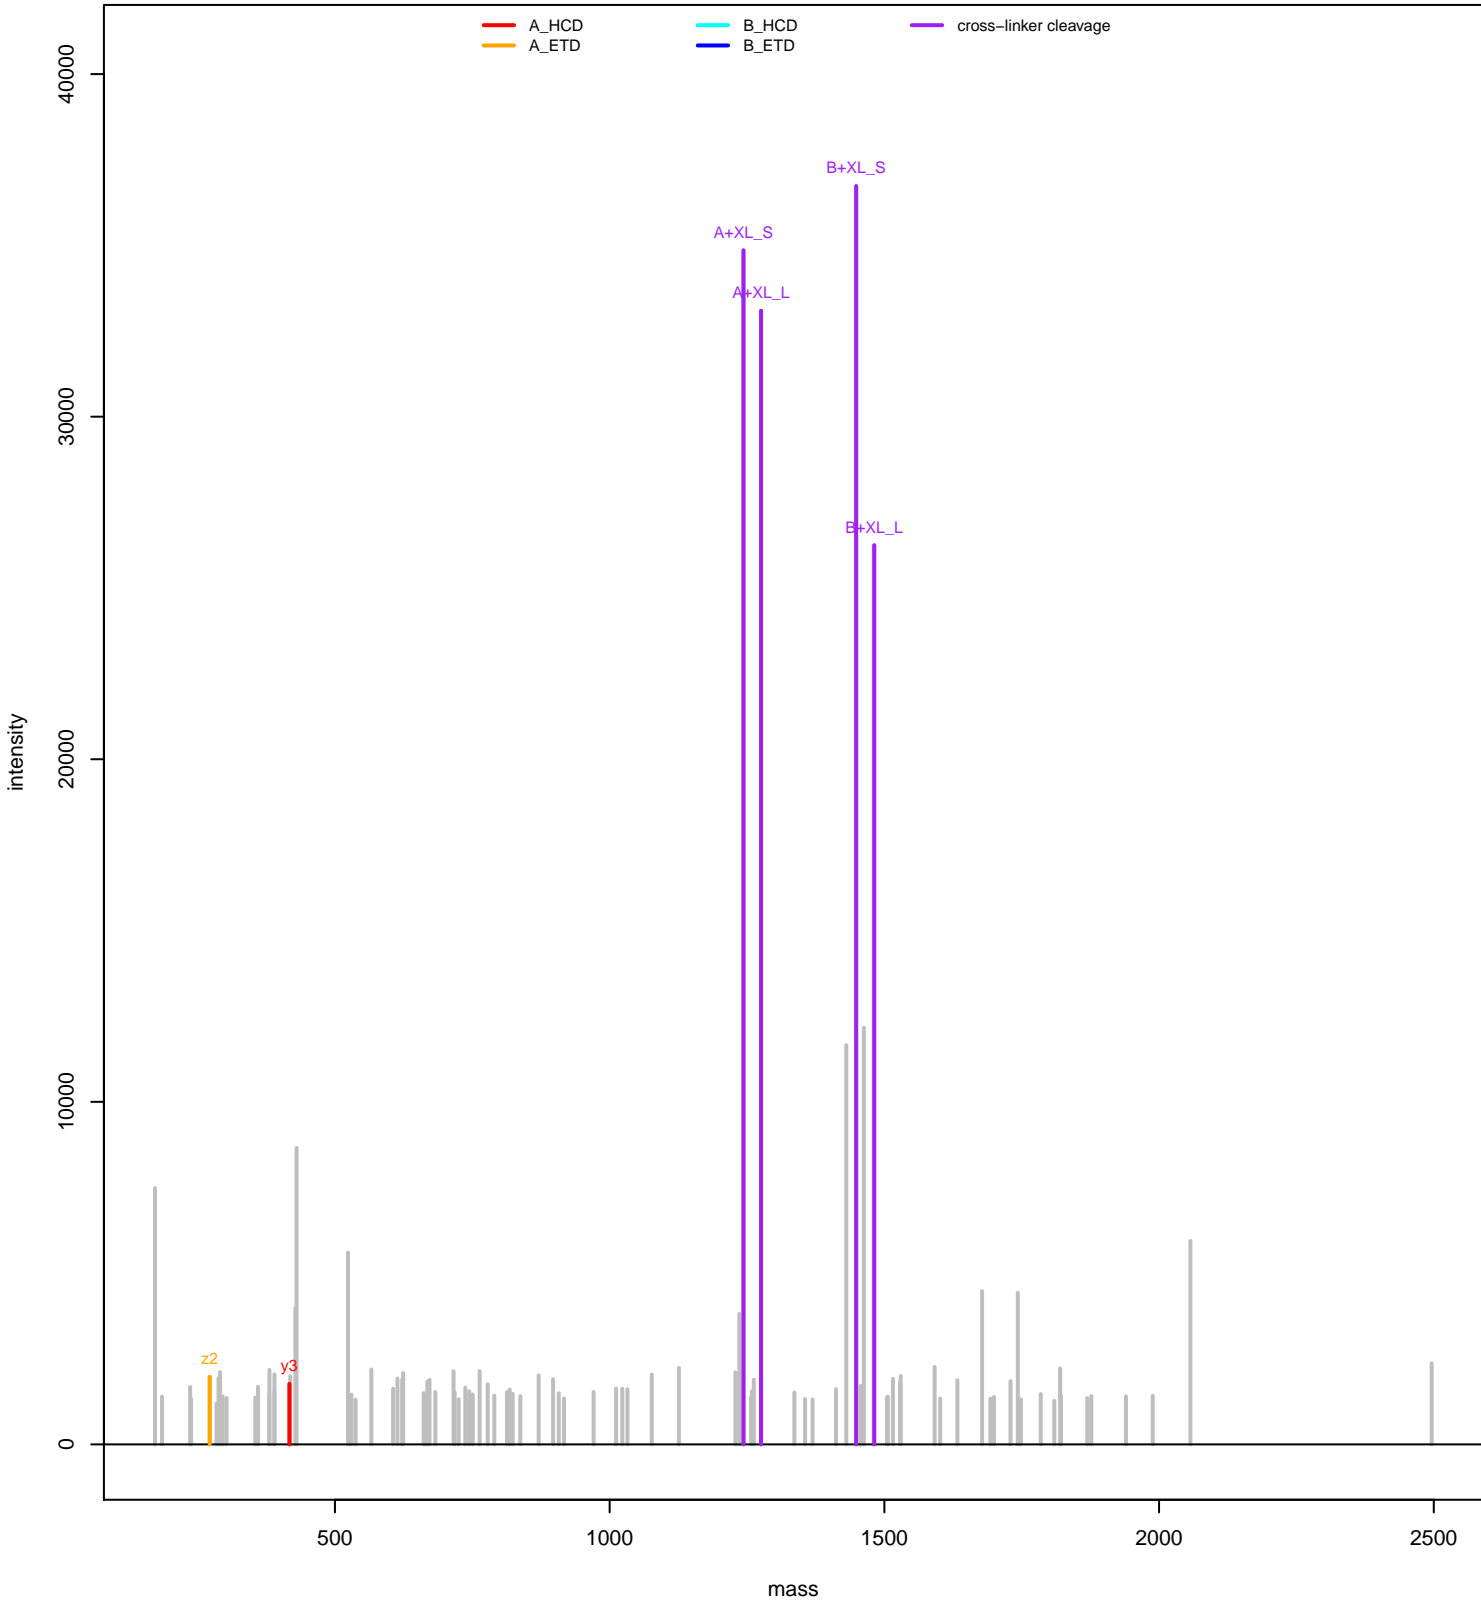

**VMoEGVKLENR+XL\_S**

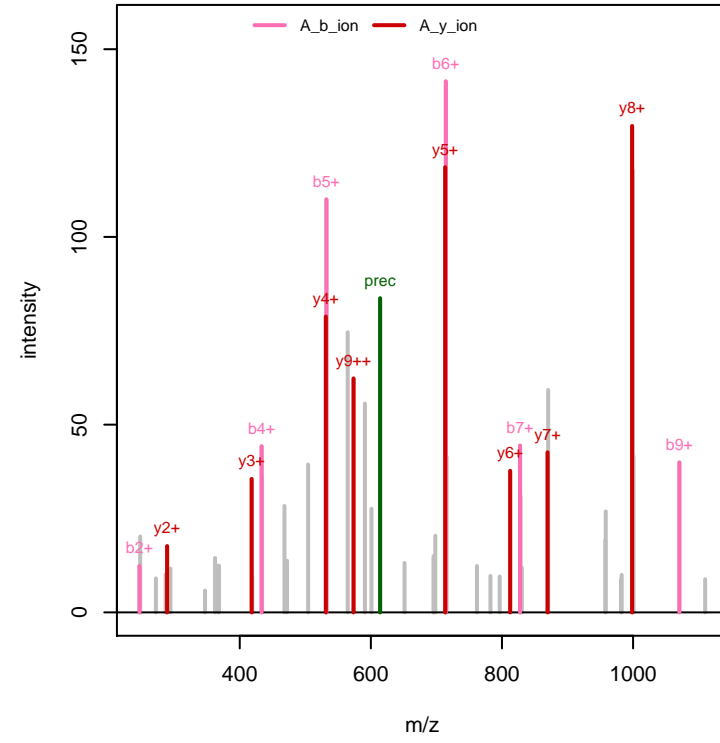

**VMoEGVKLENR+XL\_L**

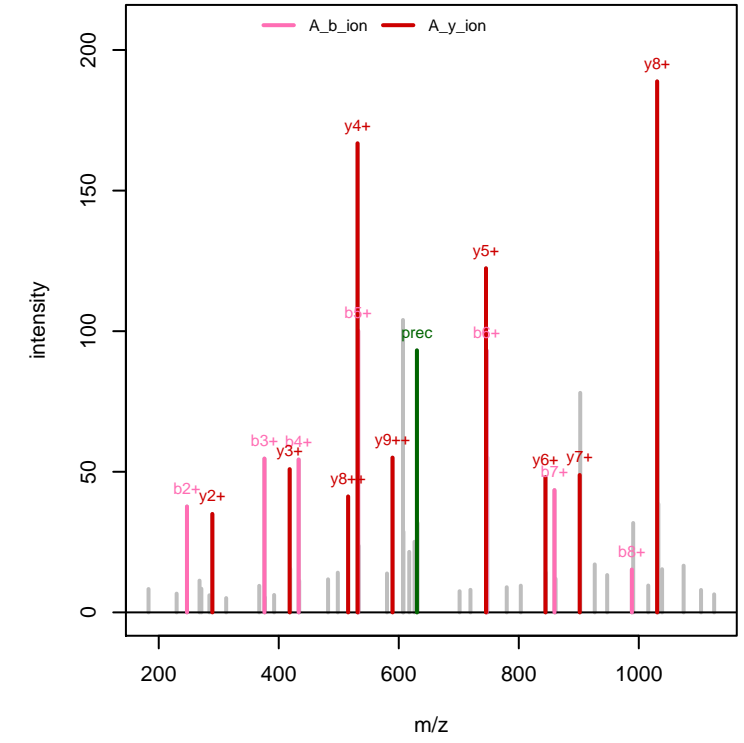

**ETLEDAVKHPEK+XL\_S**

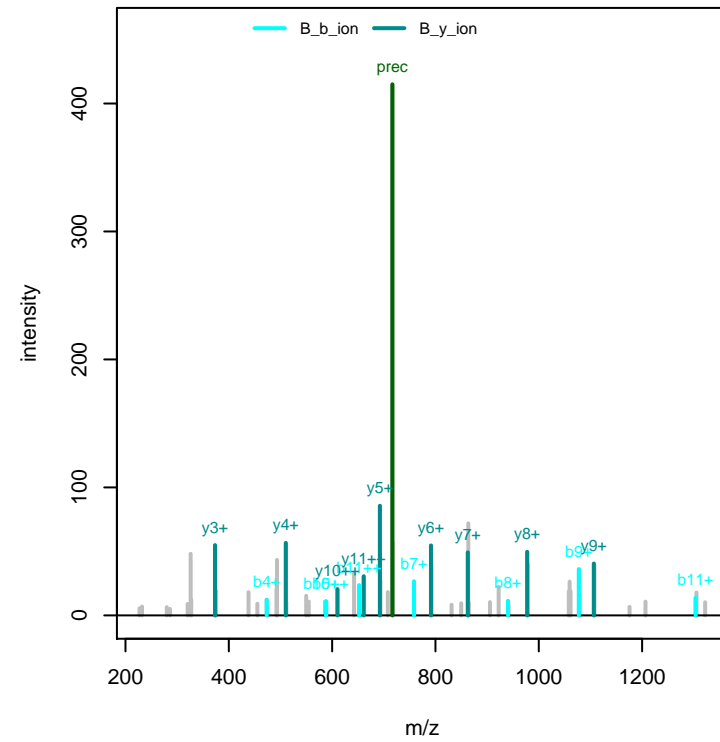

**ETLEDAVKHPEK+XL\_L**

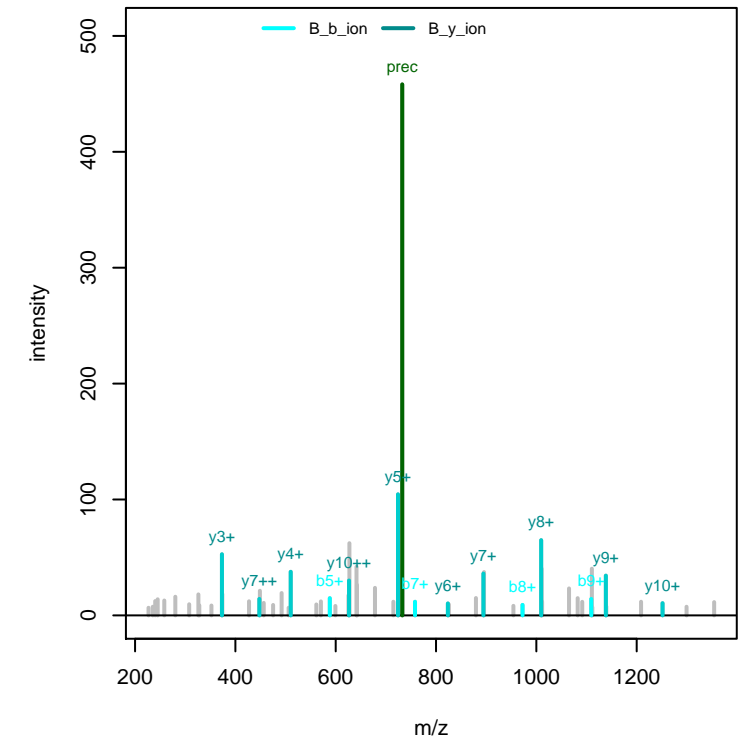

SGKTTFAAAAK  
VKLEQIAADIK

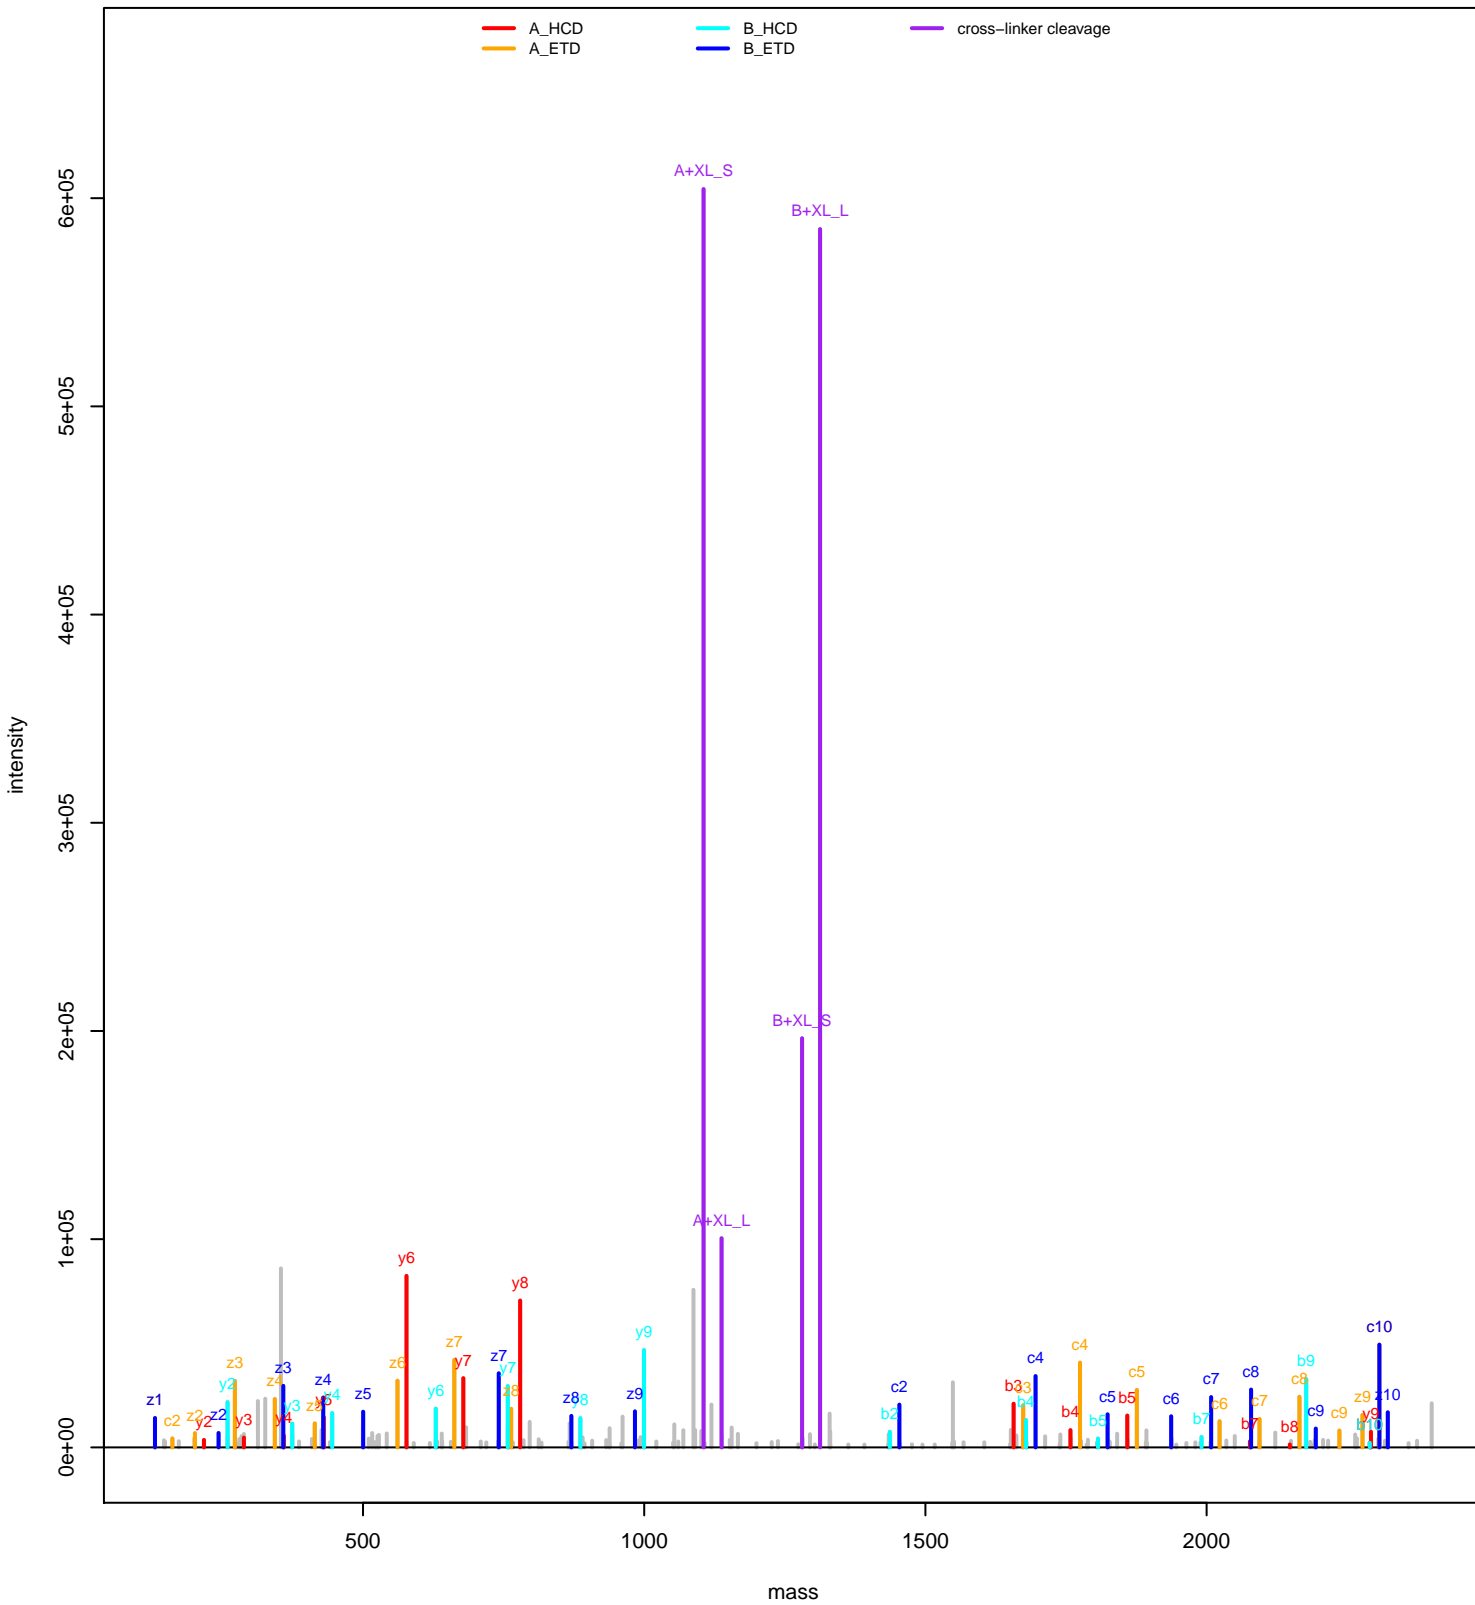

SGKTTFAAAAK+XL\_S

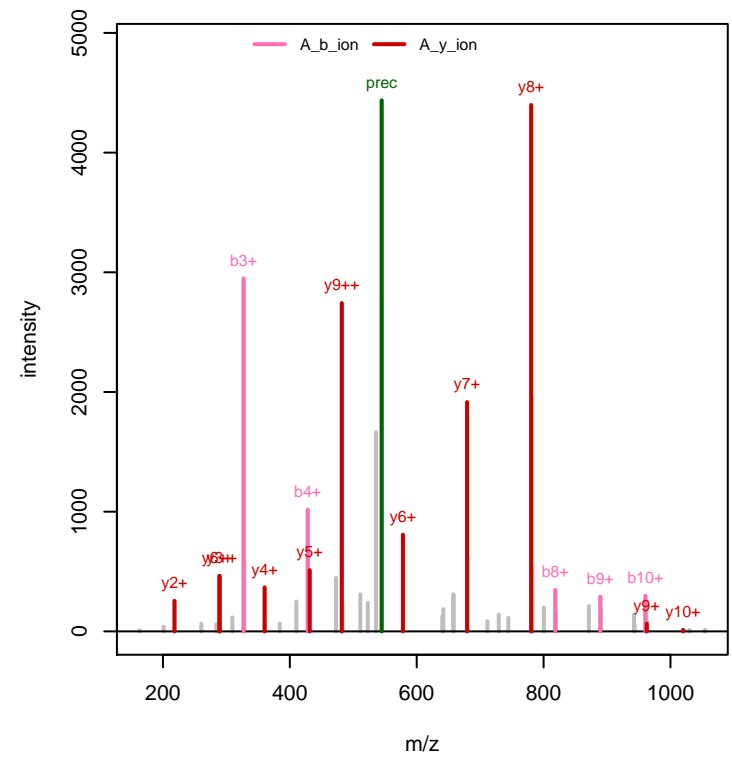

SGKTTFAAAAK+XL\_L

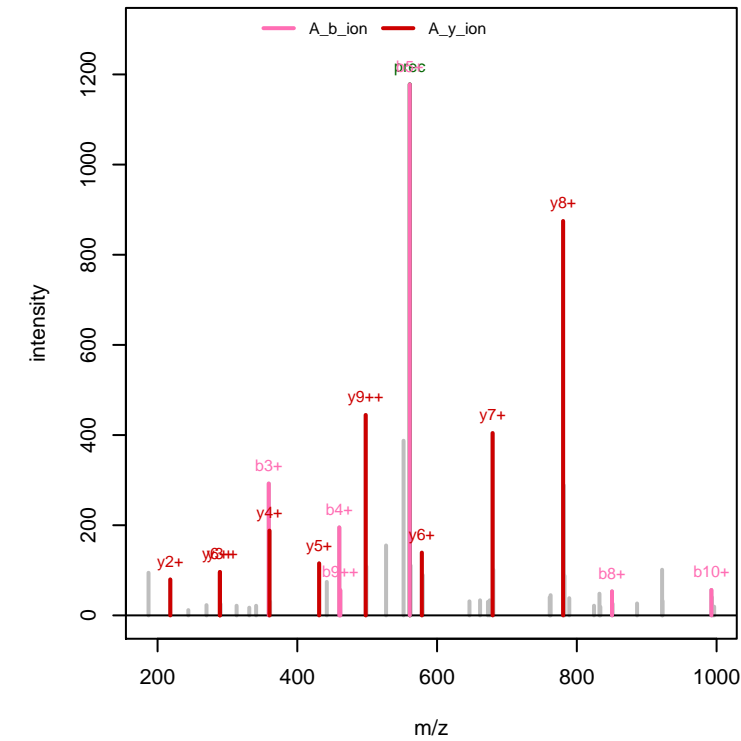

VKLEQIAADIK+XL\_S

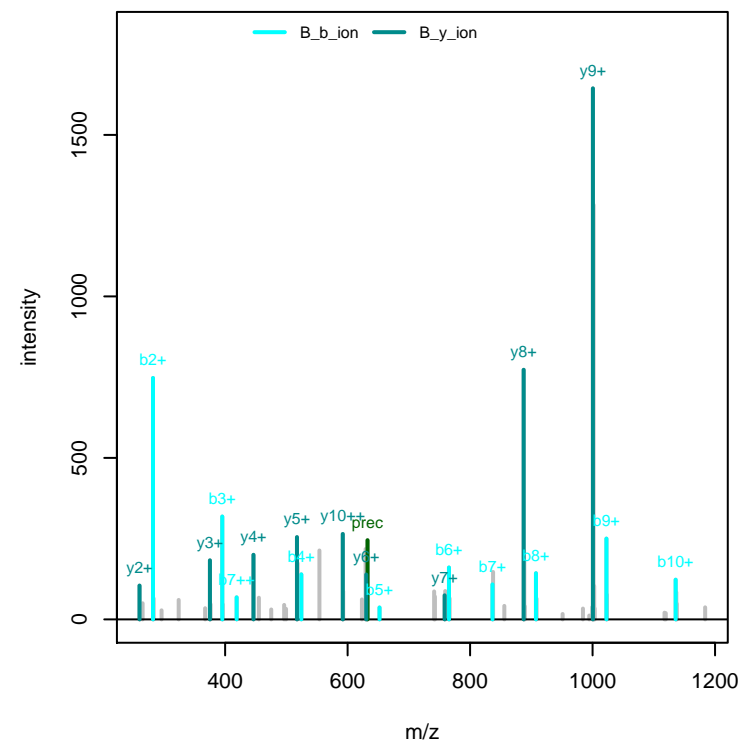

VKLEQIAADIK+XL\_L

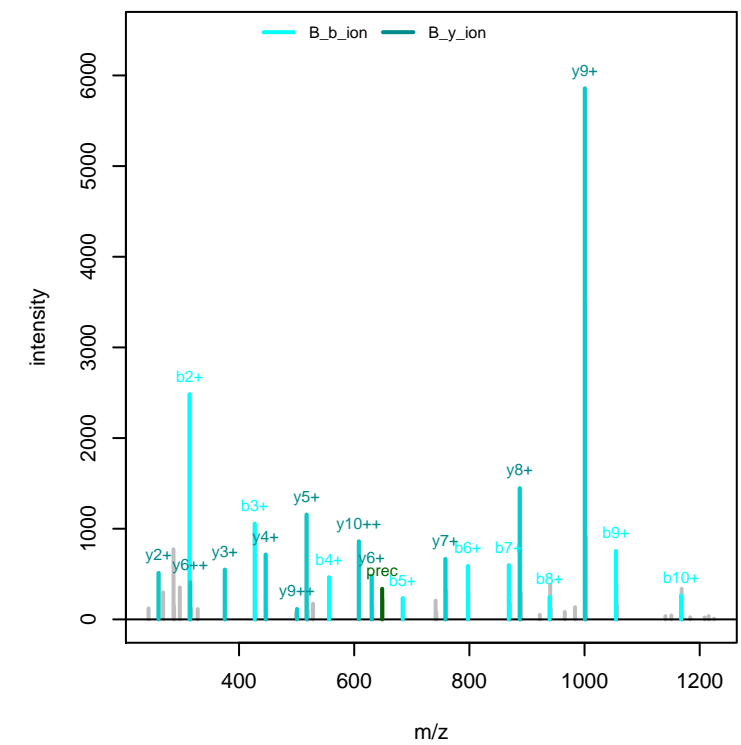



VKEQWGK  
DEAGGNWKQFK

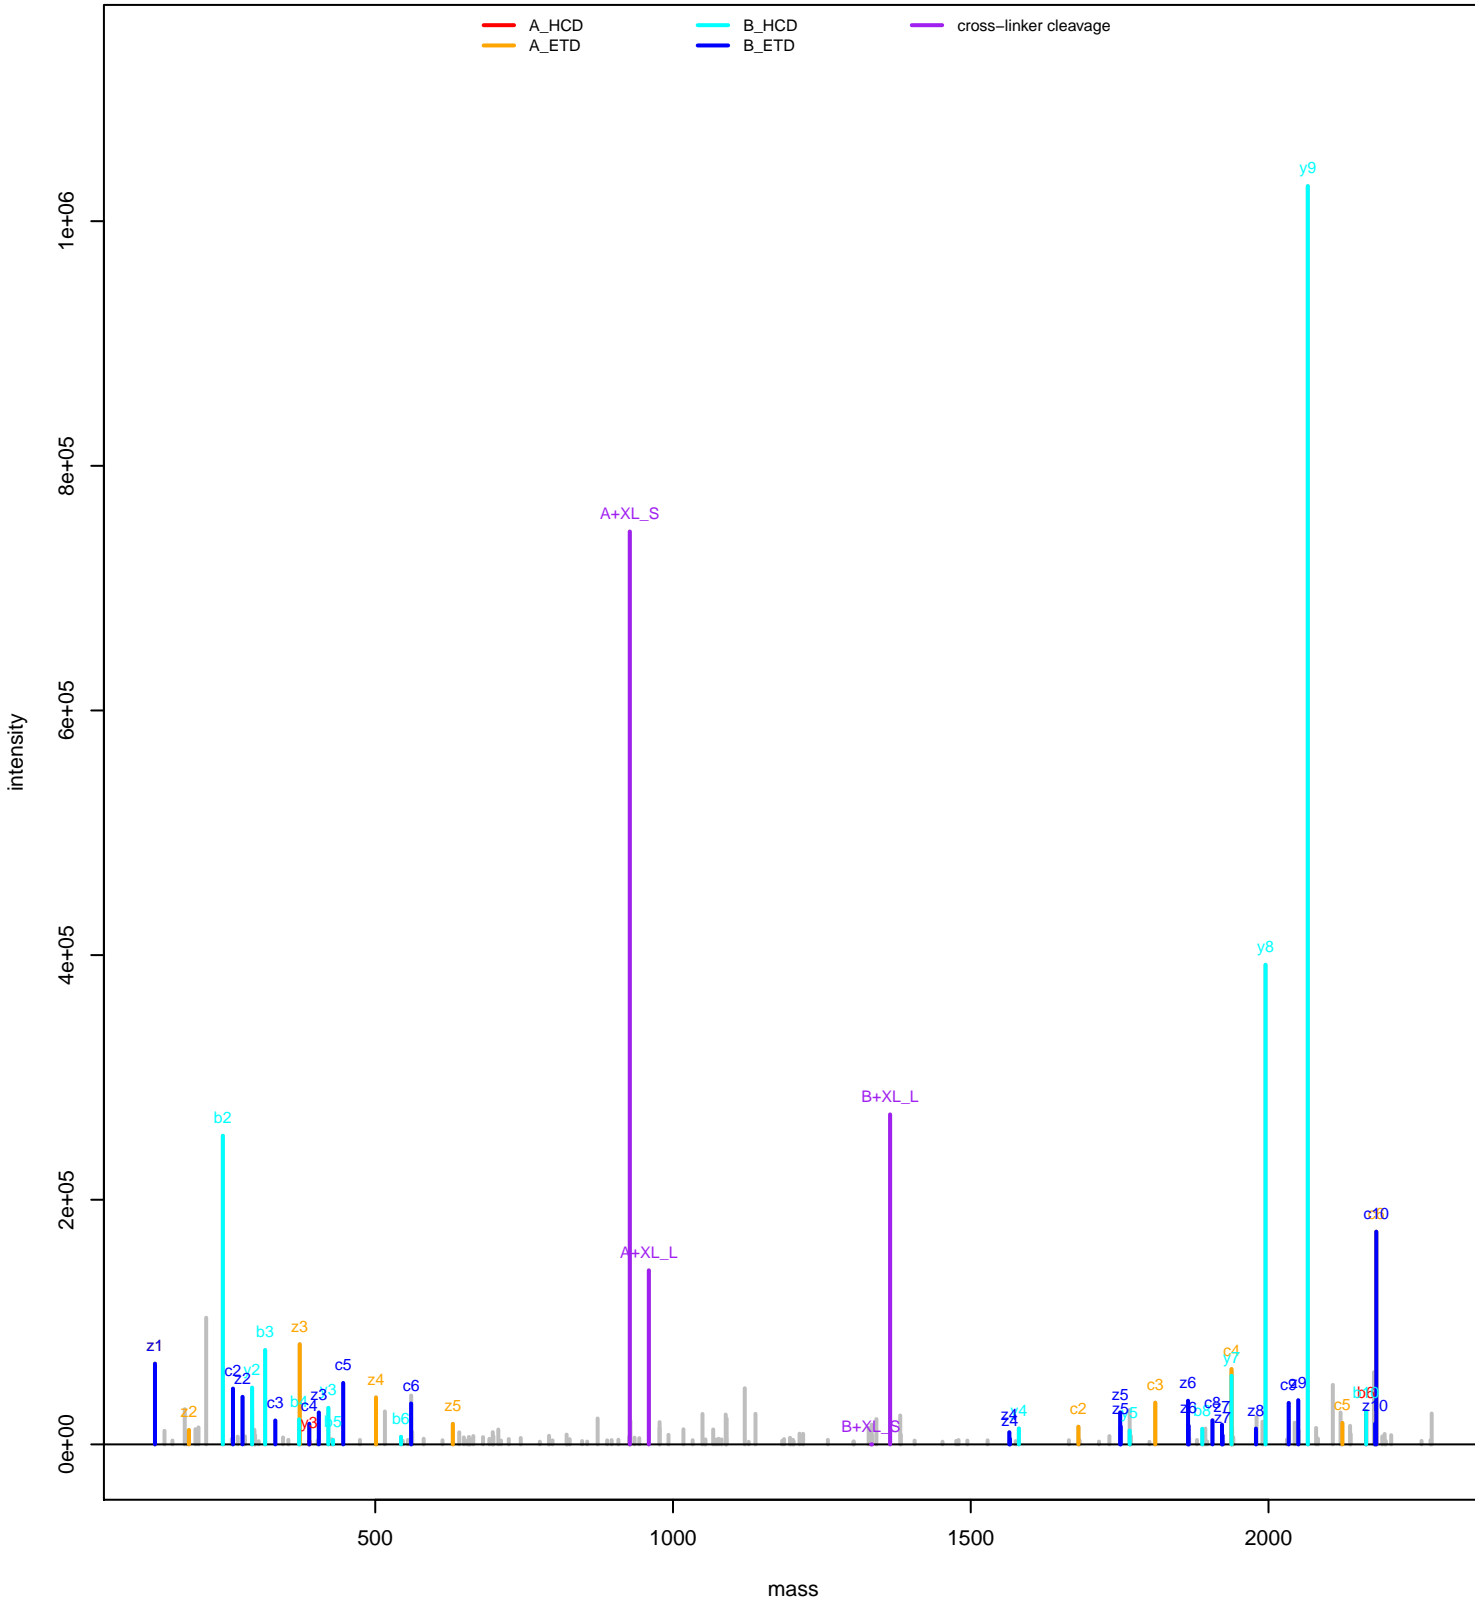

VKEQWGK+XL\_S

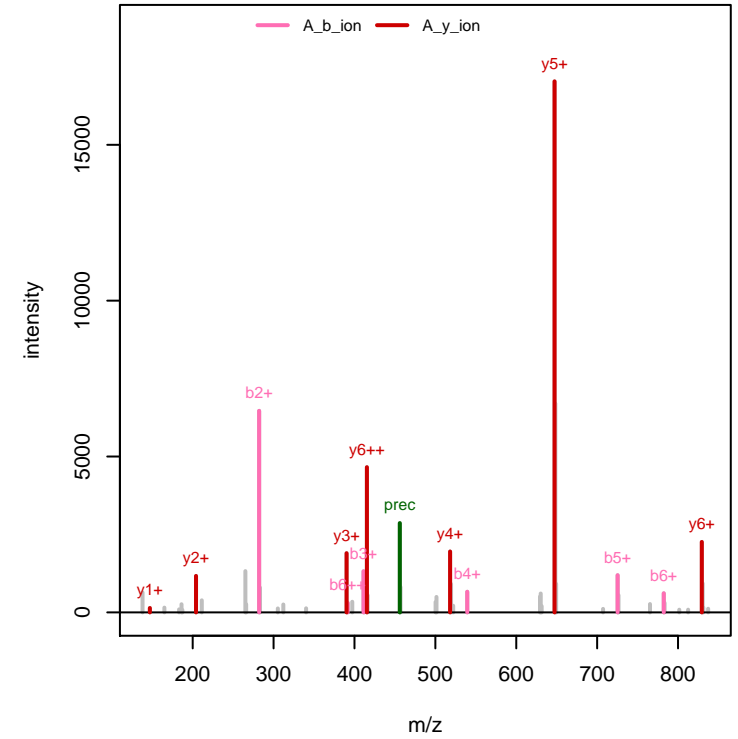

VKEQWGK+XL\_L

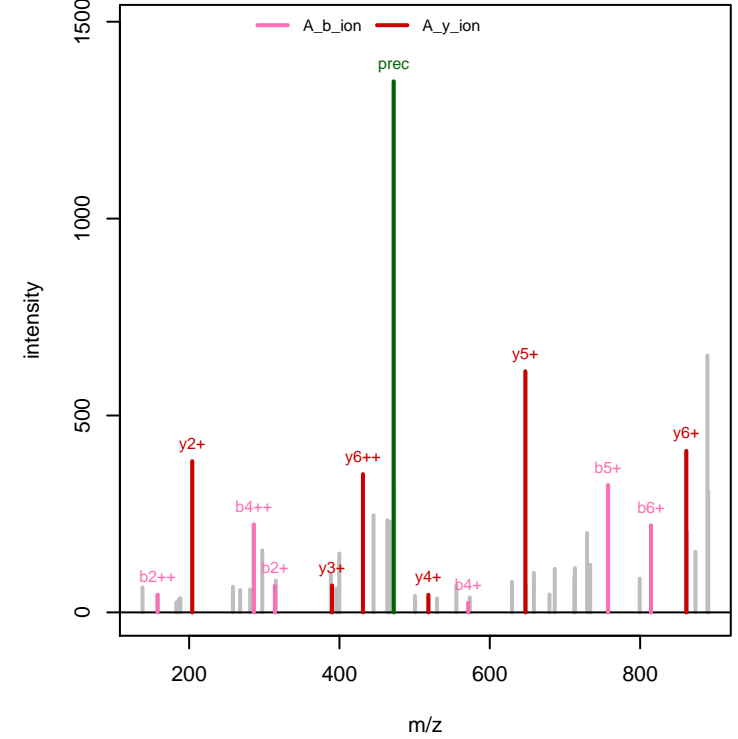

DEAGGNWKQFK+XL\_S

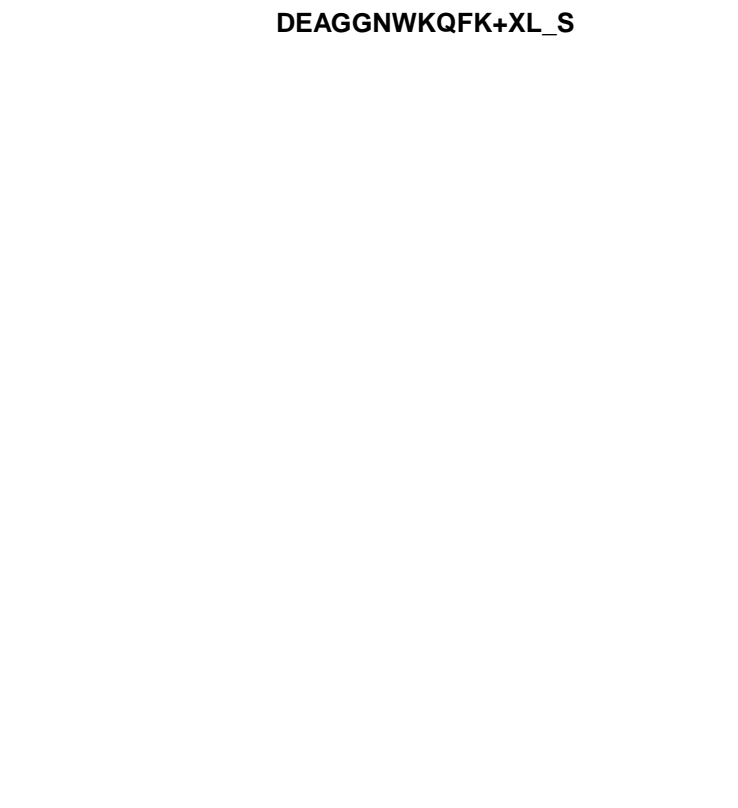

DEAGGNWKQFK+XL\_L

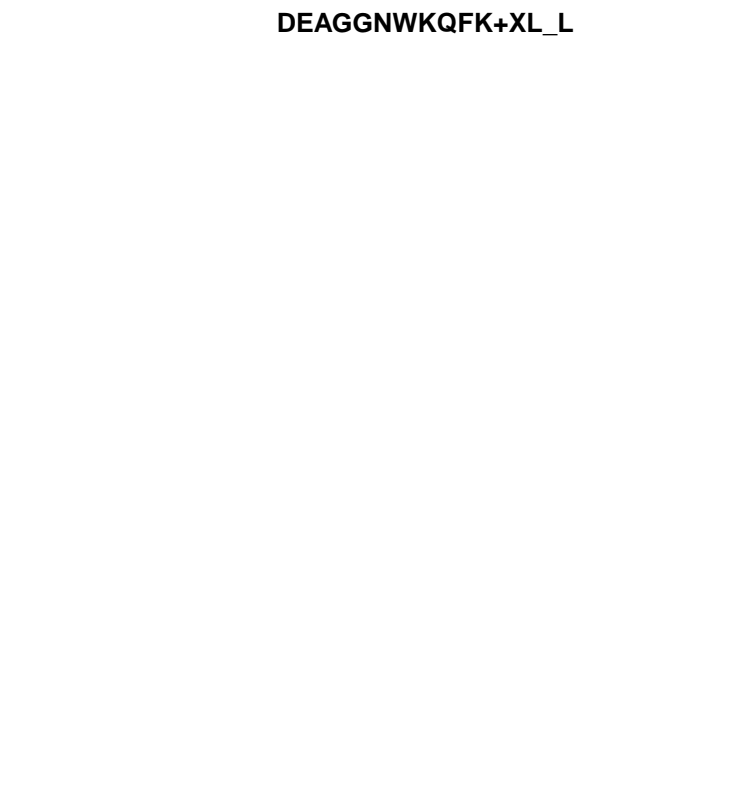

VAVIKAVR  
VAVIKAVR

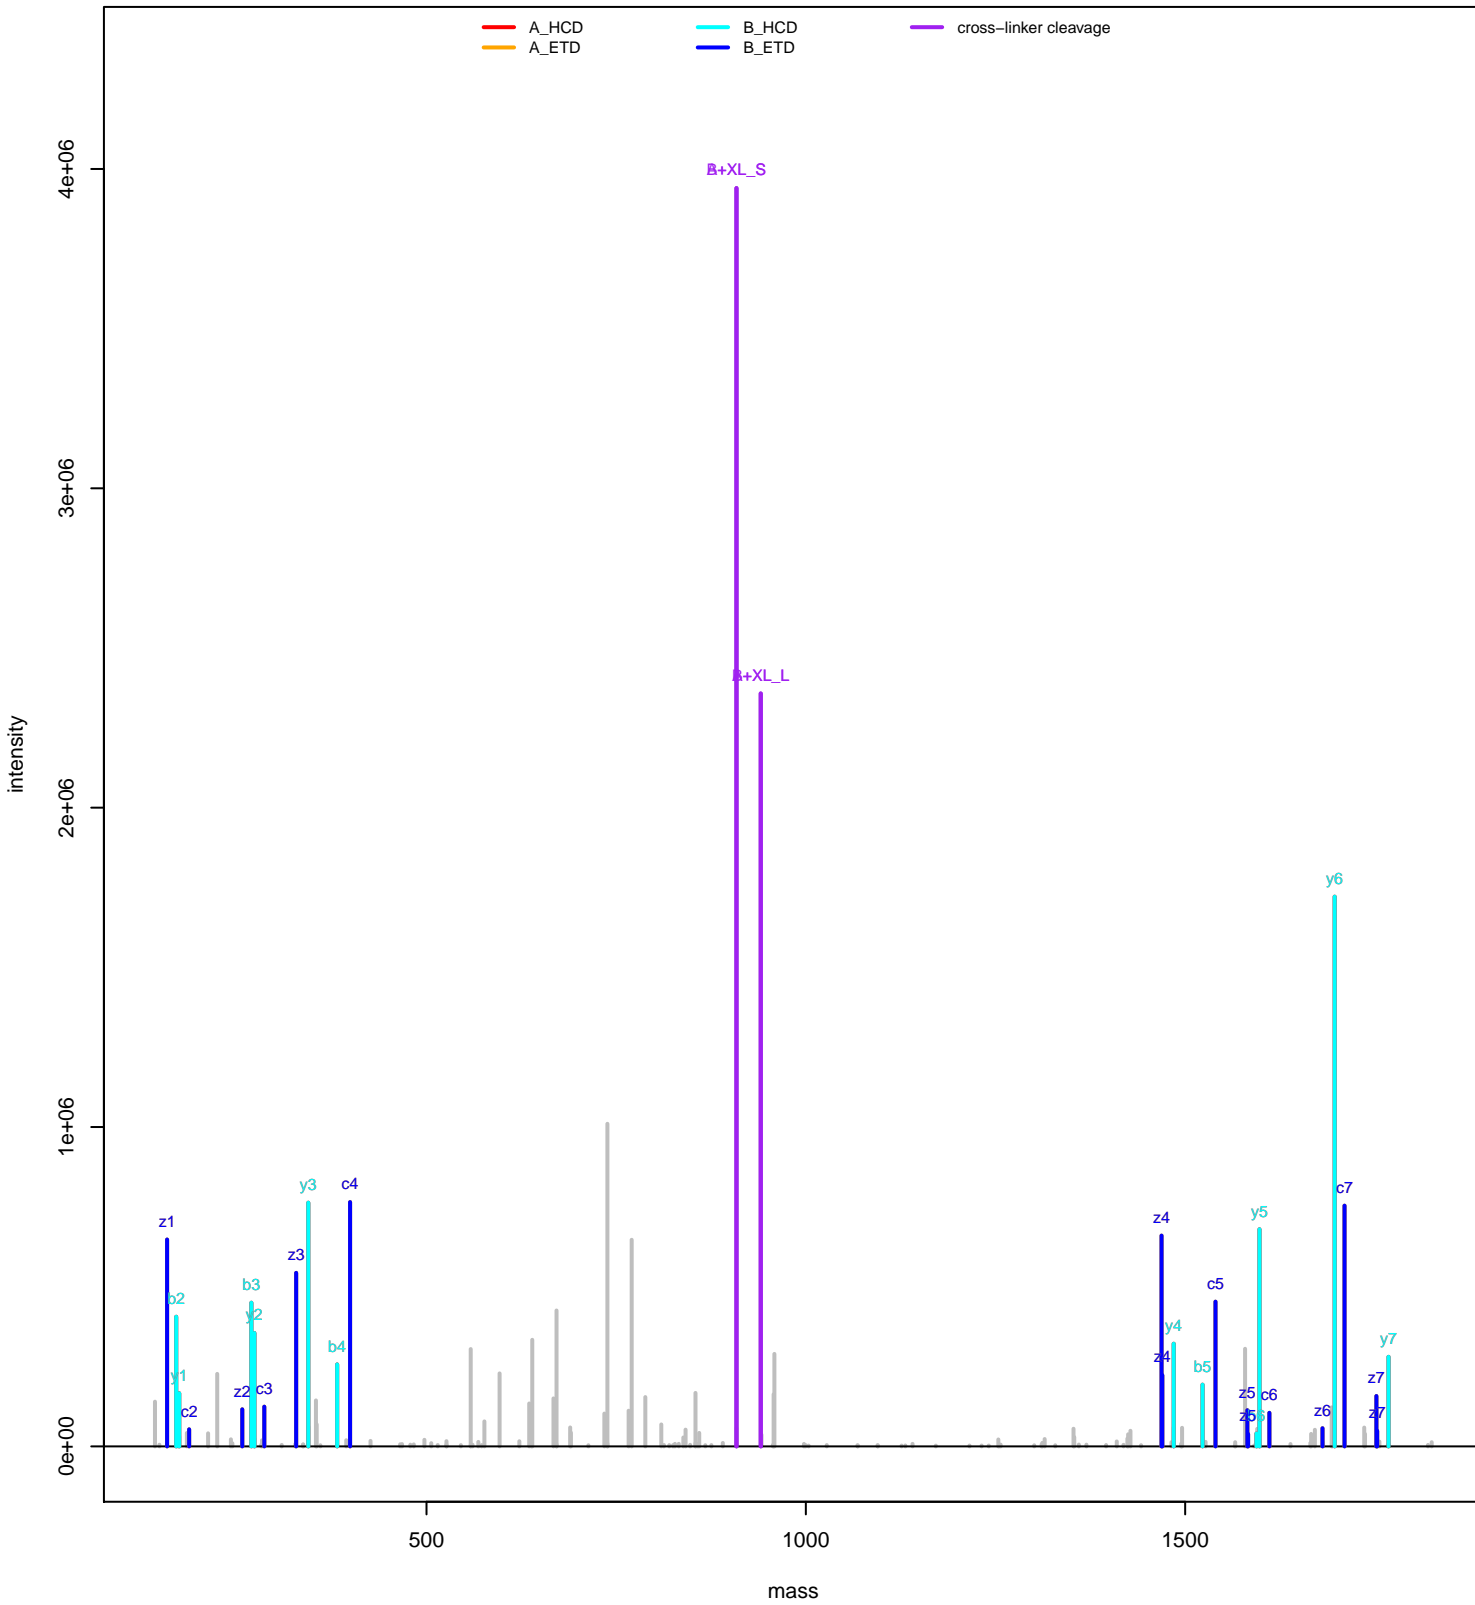

VAVIKAVR+XL\_S

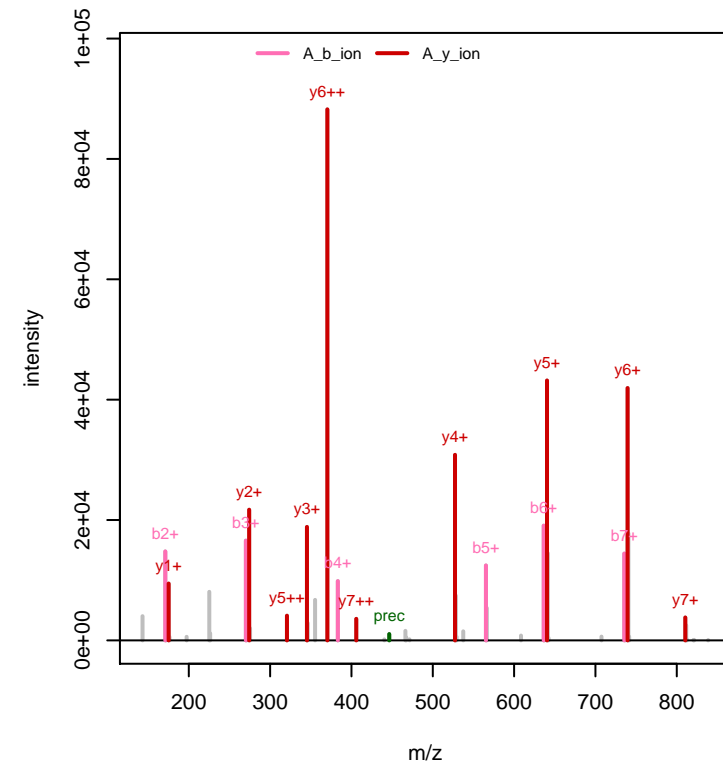

VAVIKAVR+XL\_L

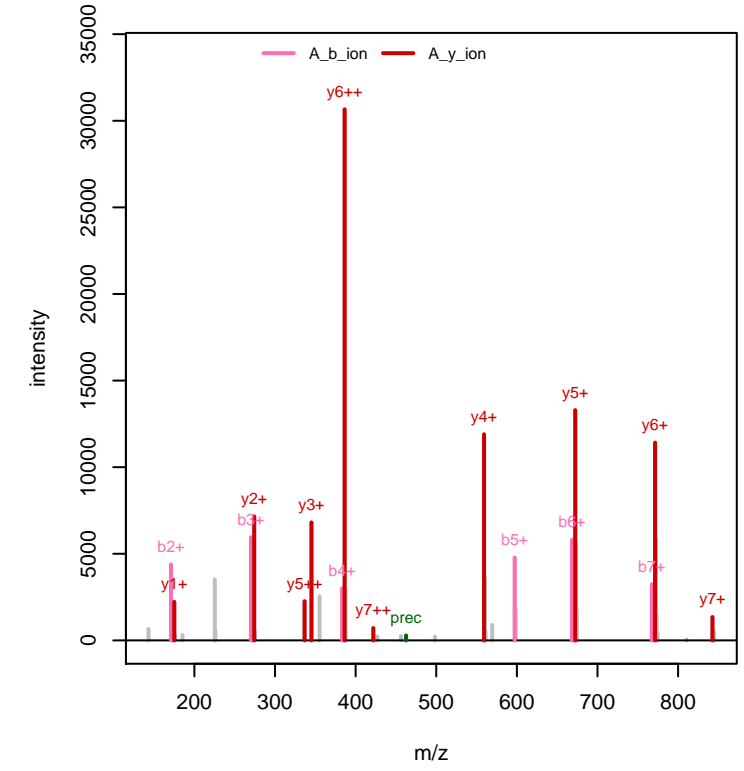

VAVIKAVR+XL\_S

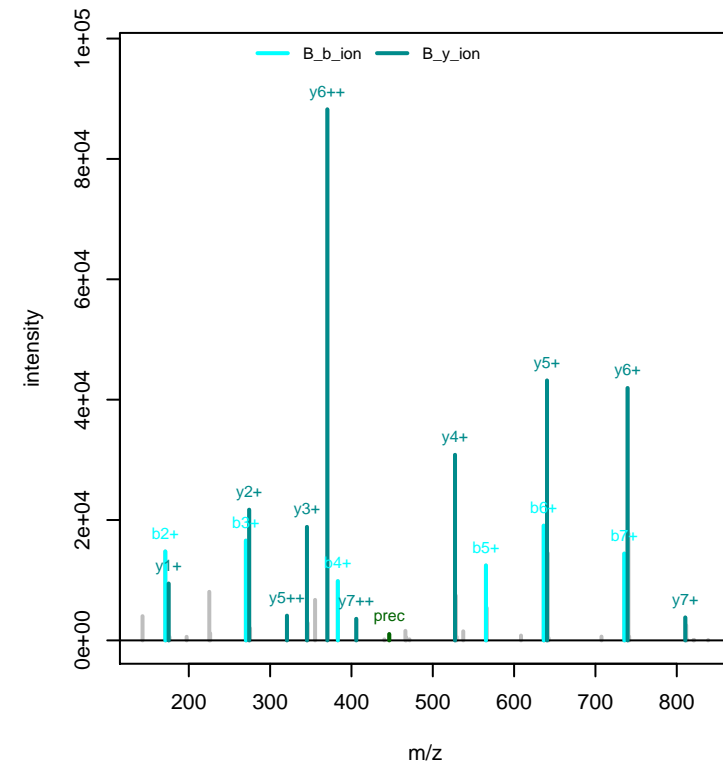

VAVIKAVR+XL\_L

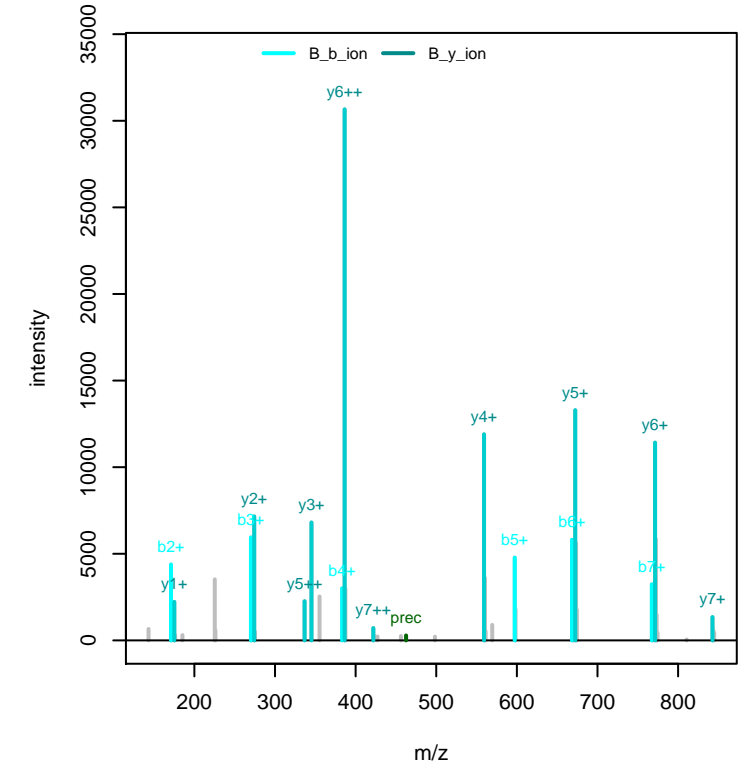

EAFKLAAAK  
LPIKTTFVTK

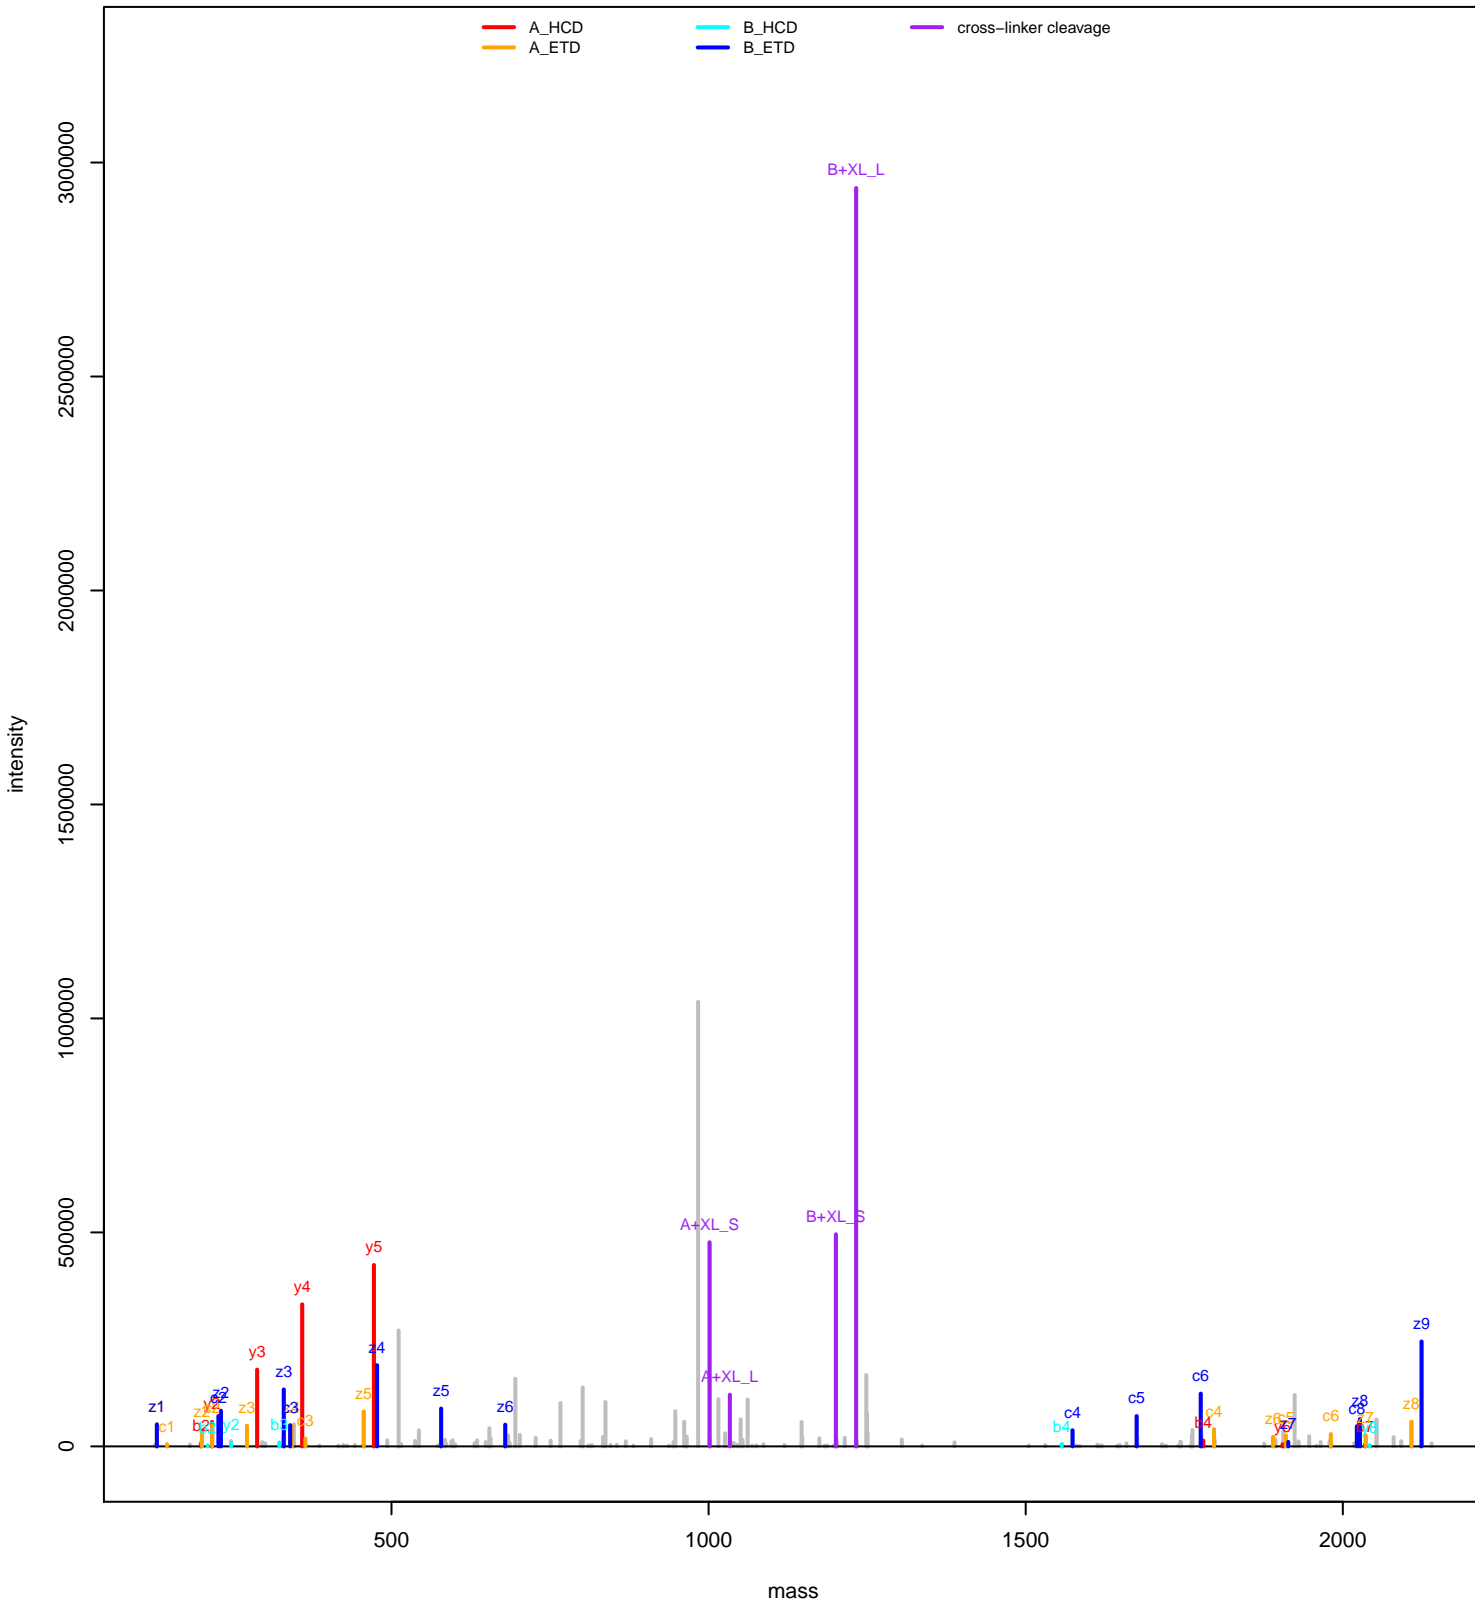

EAFKLAAAK+XL\_S

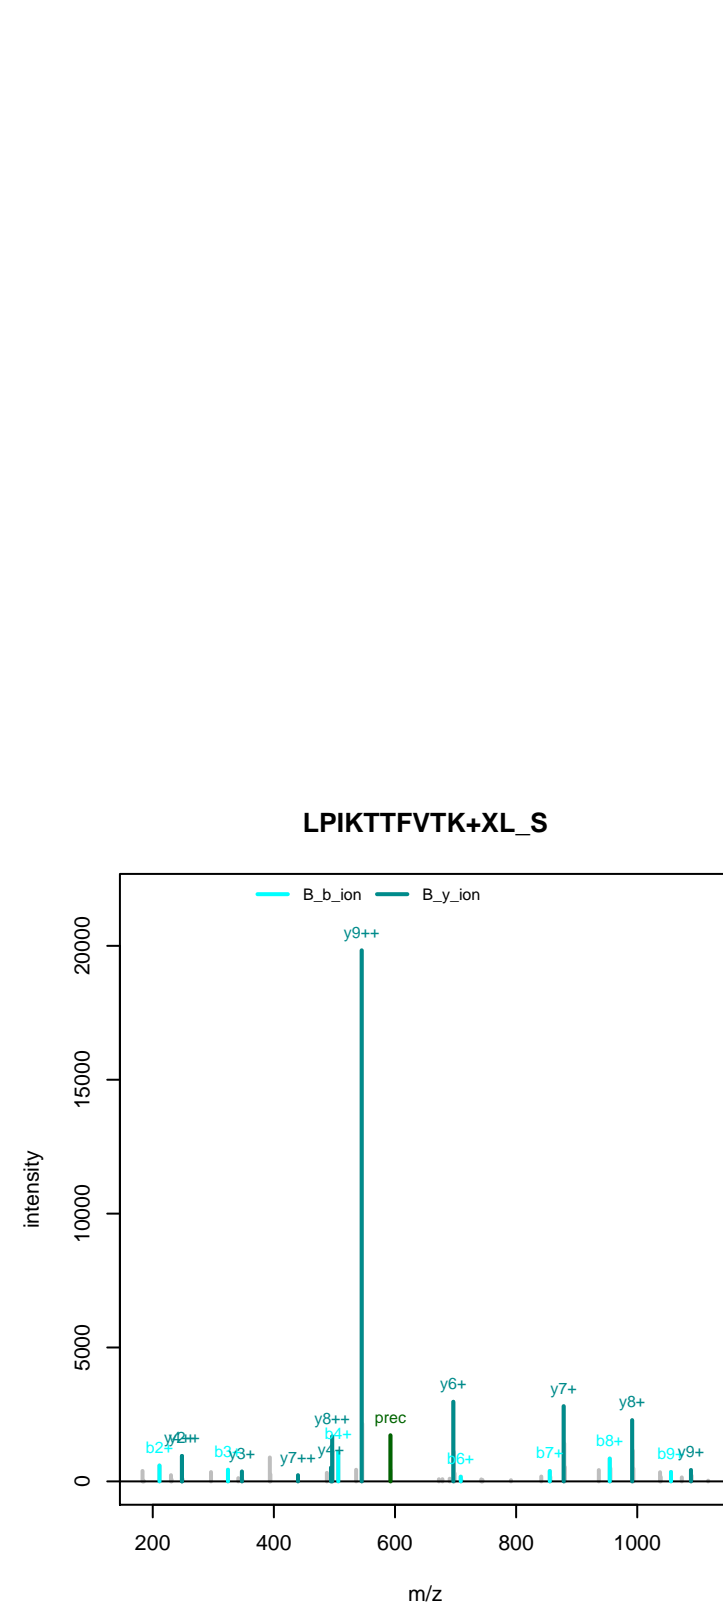

EAFKLAAAK+XL\_L

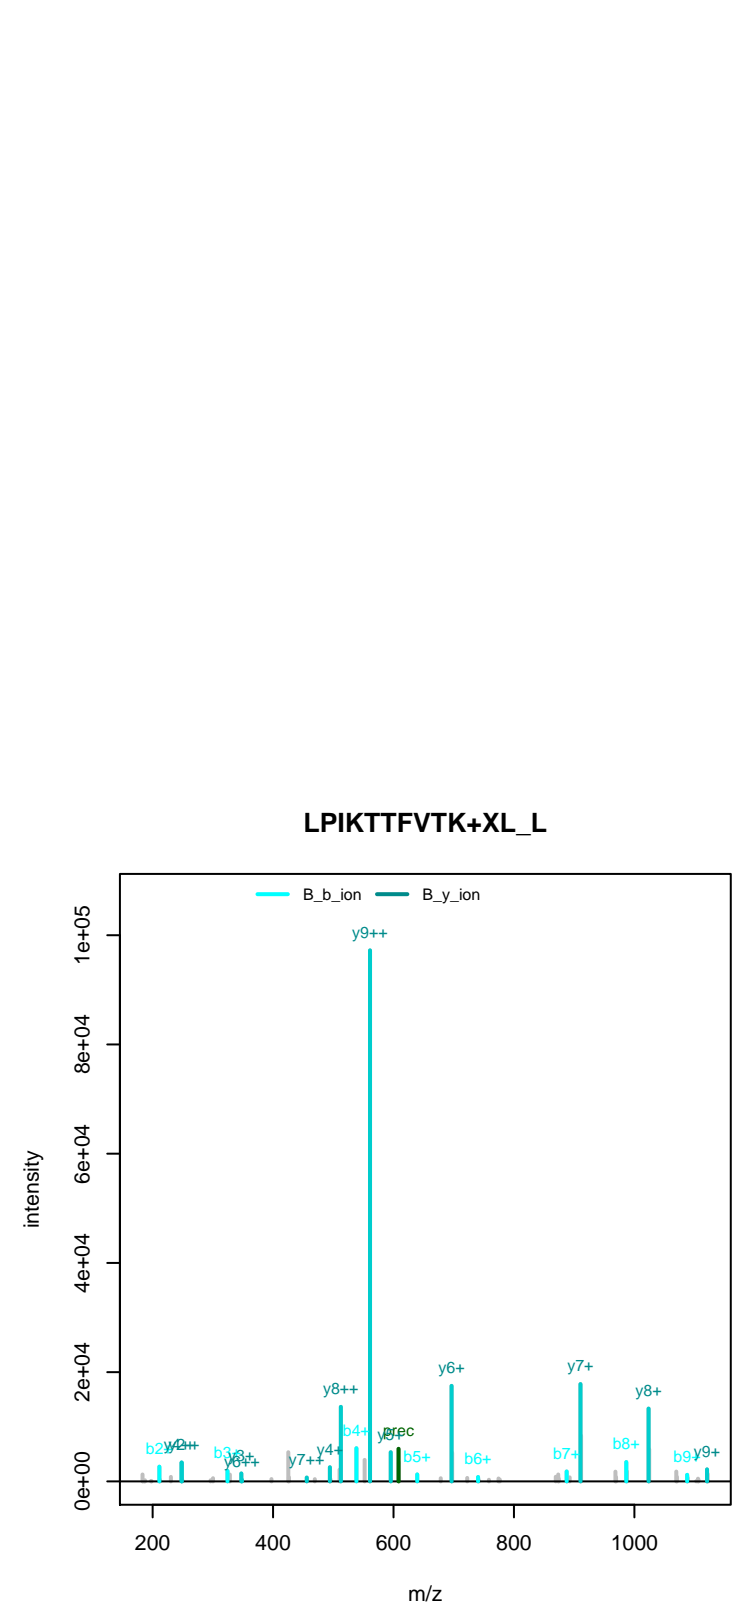

LPIKTTFVTK+XL\_S

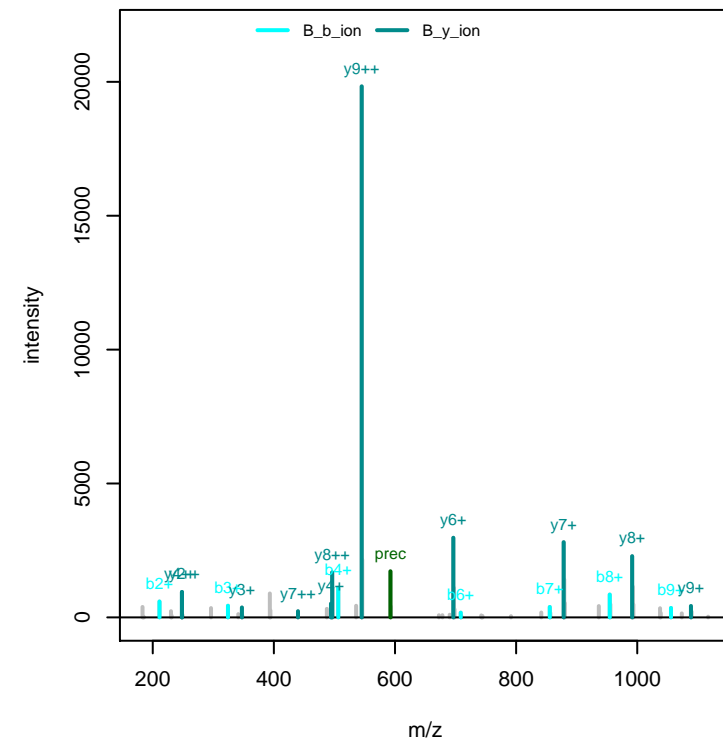

LPIKTTFVTK+XL\_L

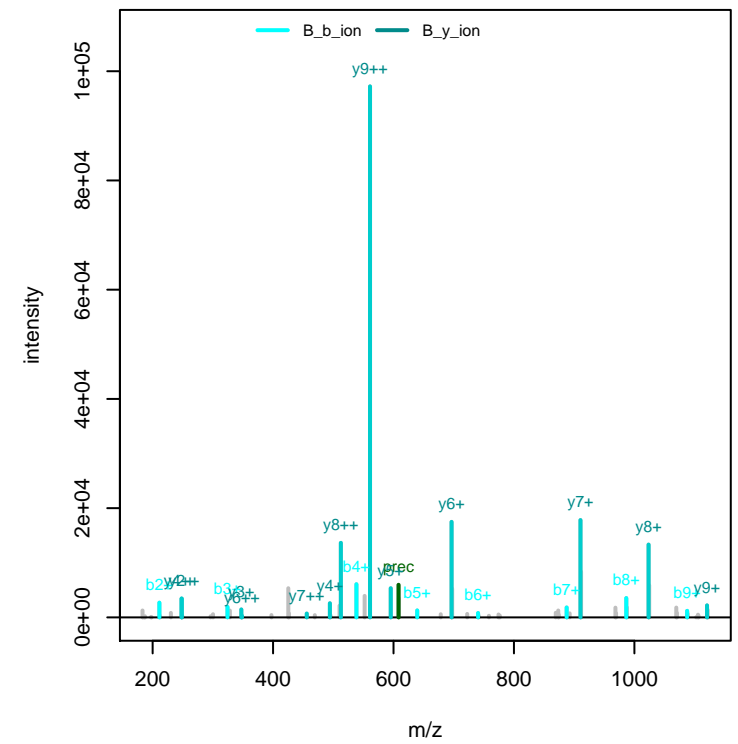





KATVELLNR  
AVQLGGVALGTTQVINSKTPLK

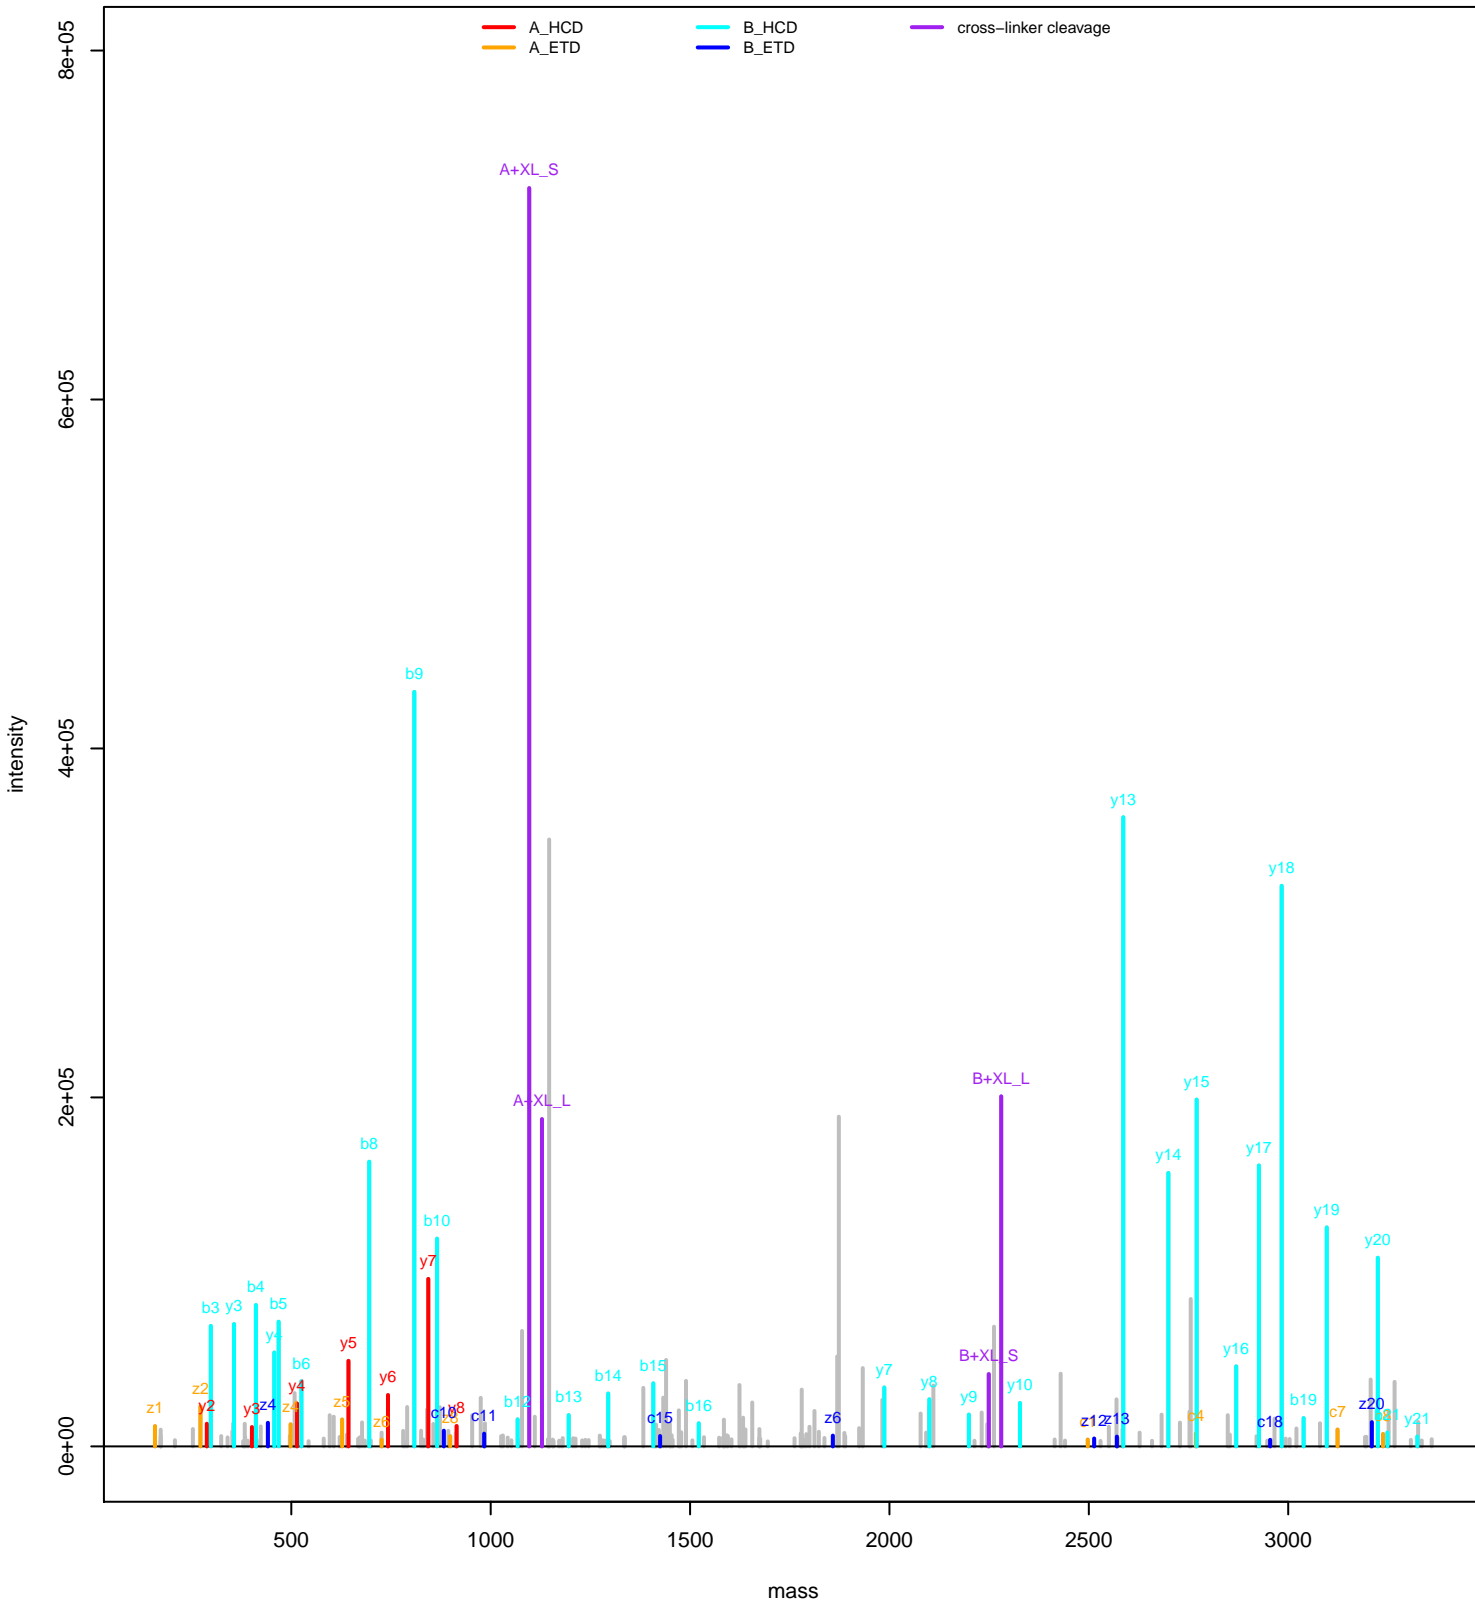

KATVELLNR+XL\_S

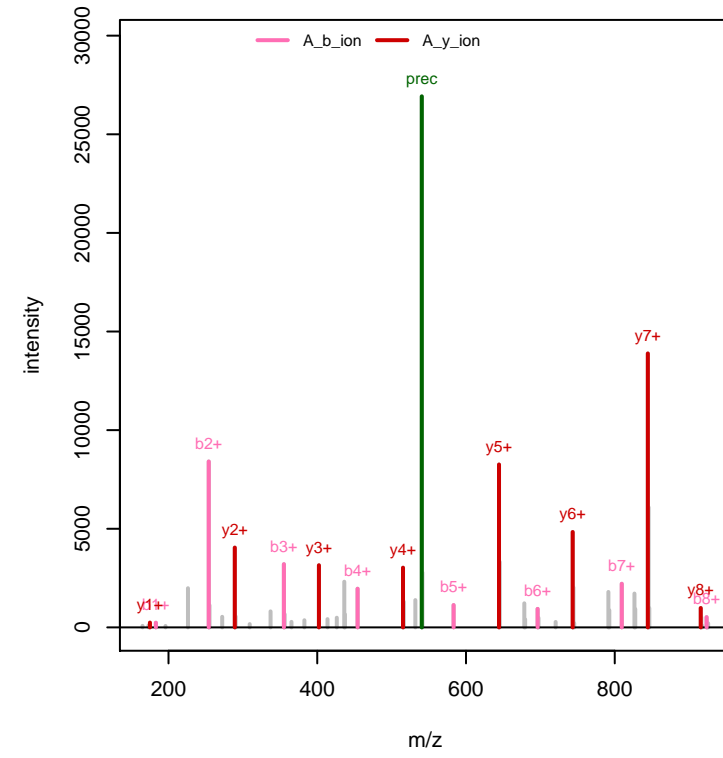

KATVELLNR+XL\_L

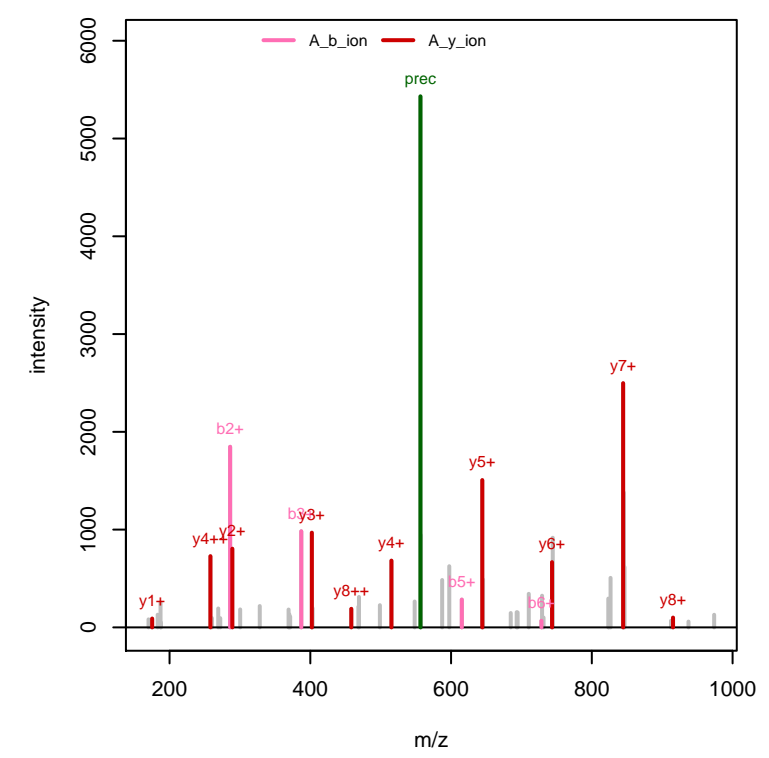

AVQLGGVALGTTQVINSKTPLK+XL\_S

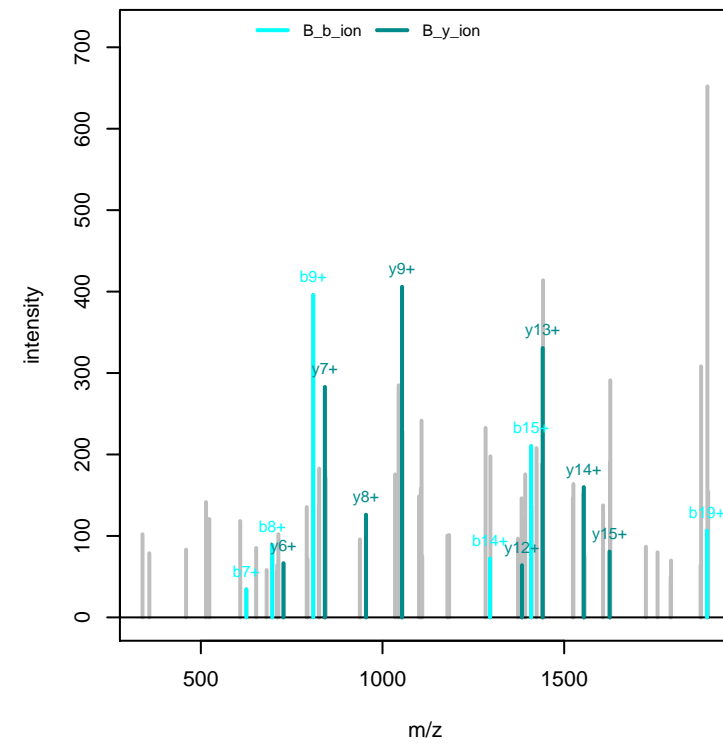

AVQLGGVALGTTQVINSKTPLK+XL\_L

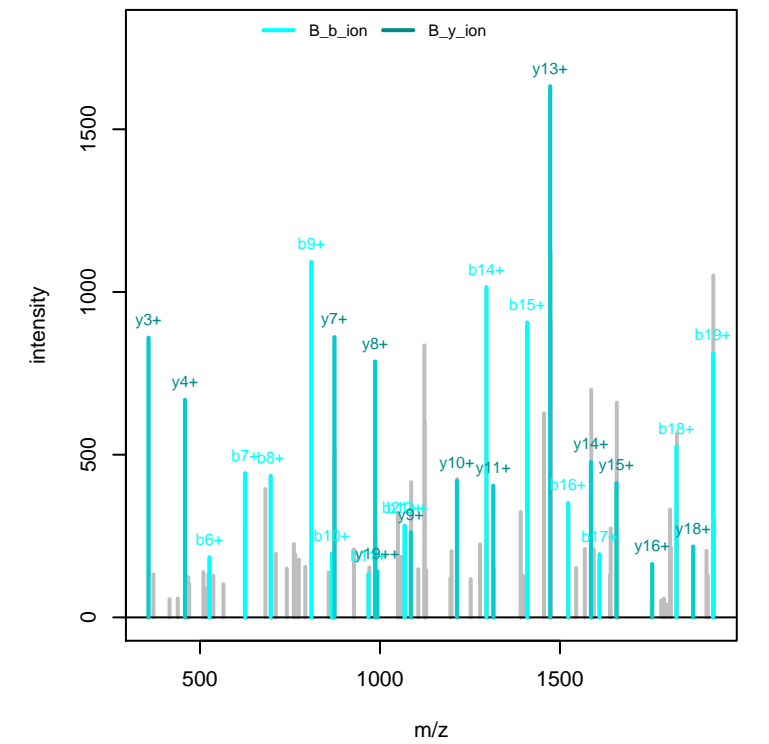

**ANAKFEVK**  
**GVTVDKMTLRLK**

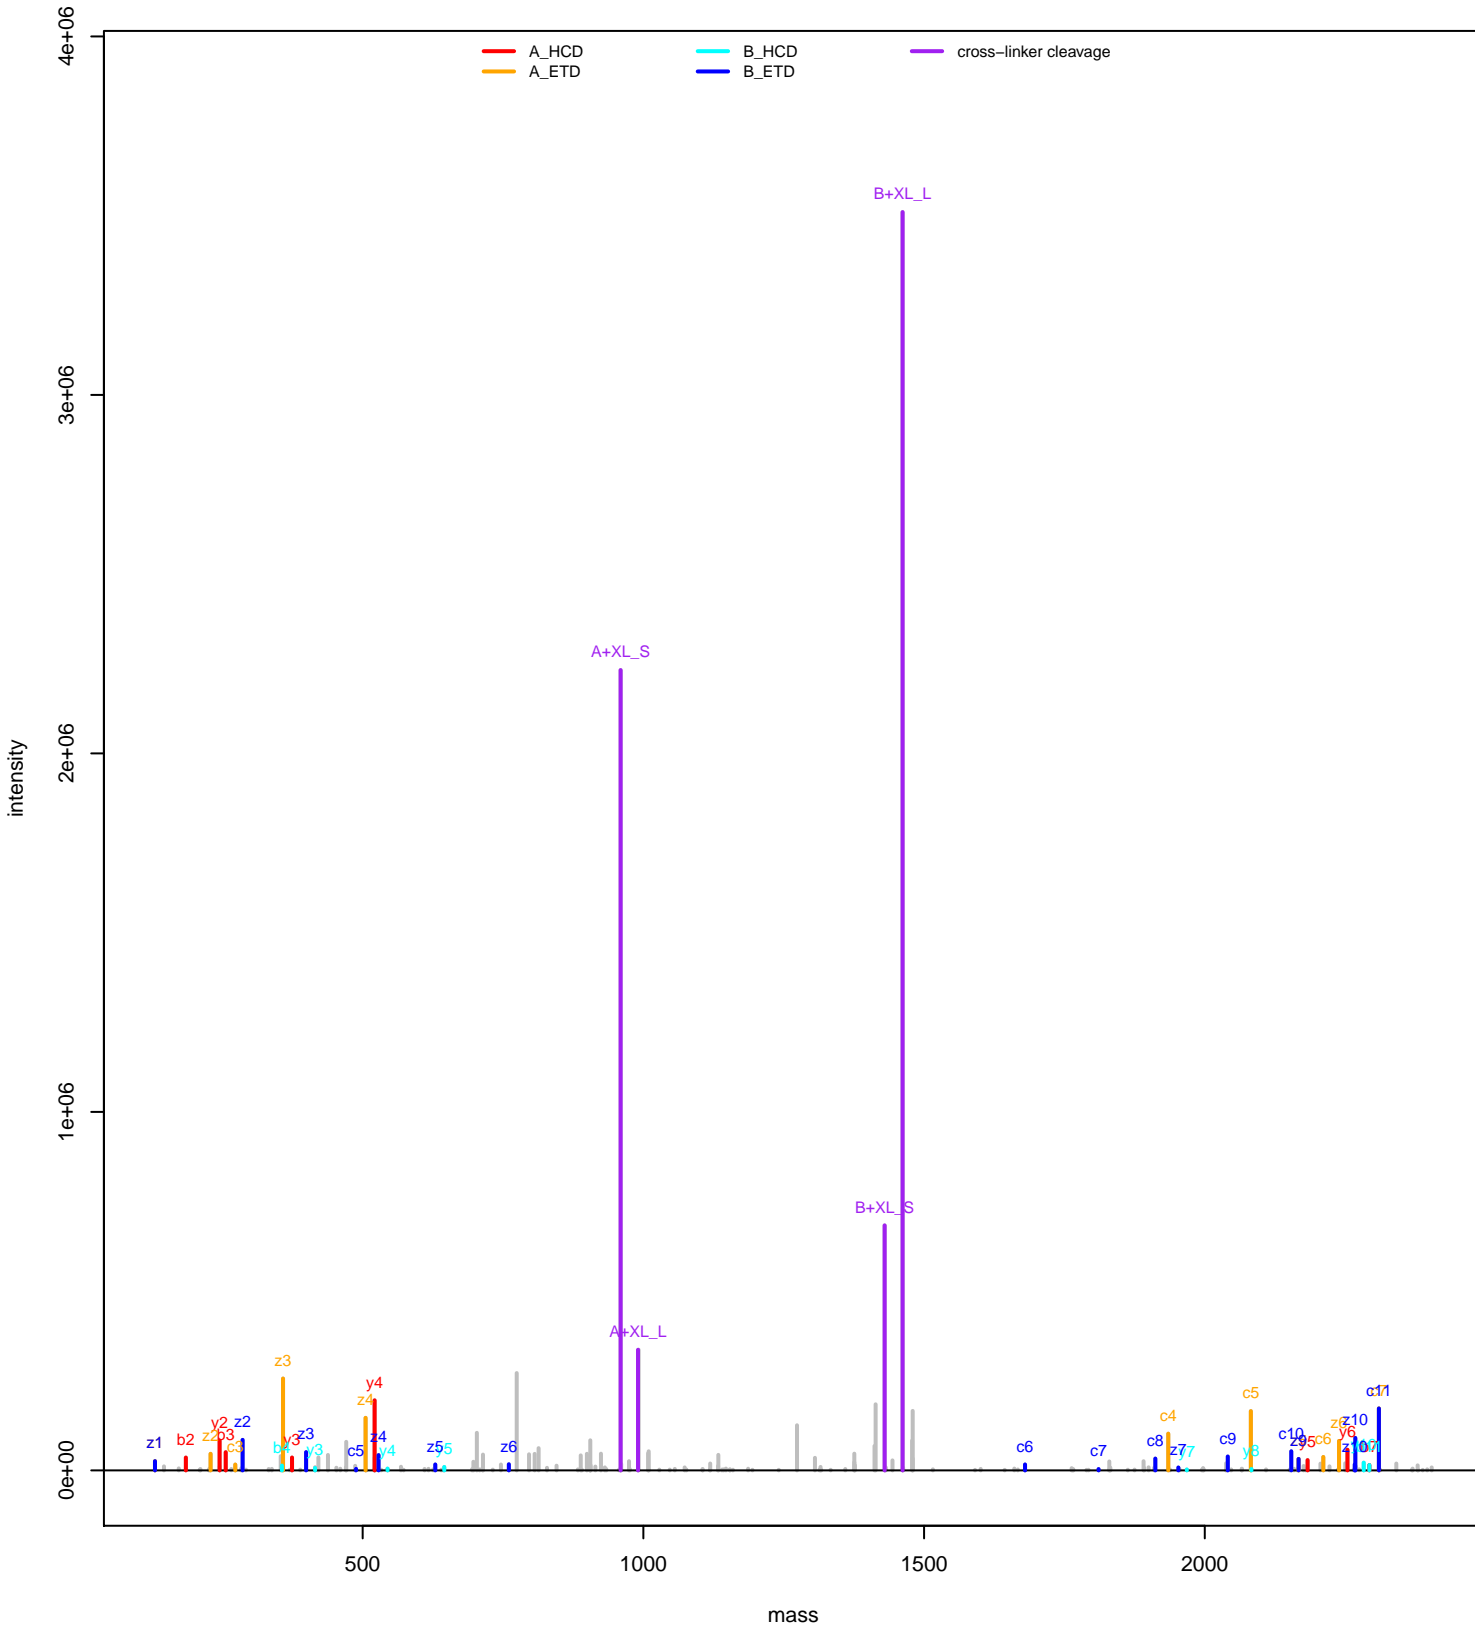

**ANAKFEVK+XL\_S**

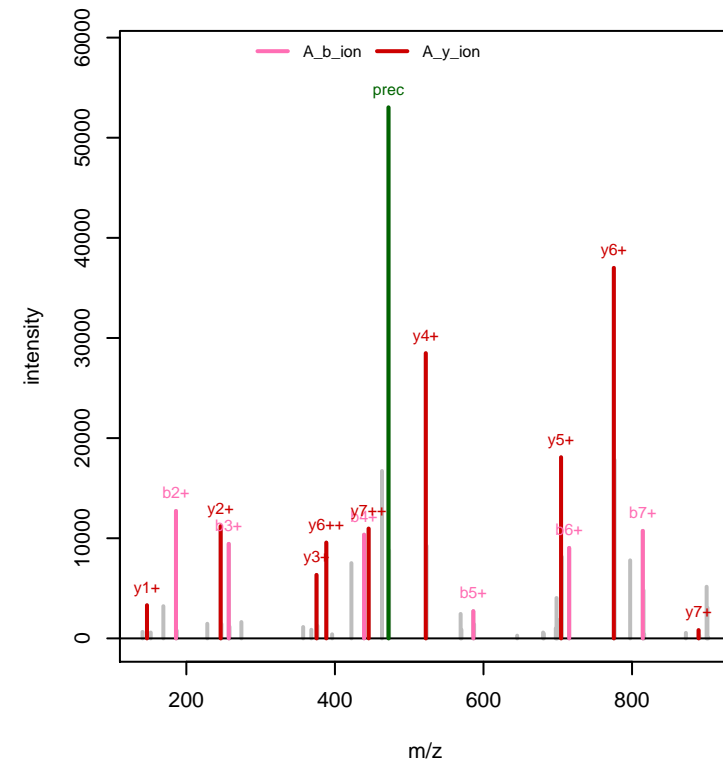

**ANAKFEVK+XL\_L**

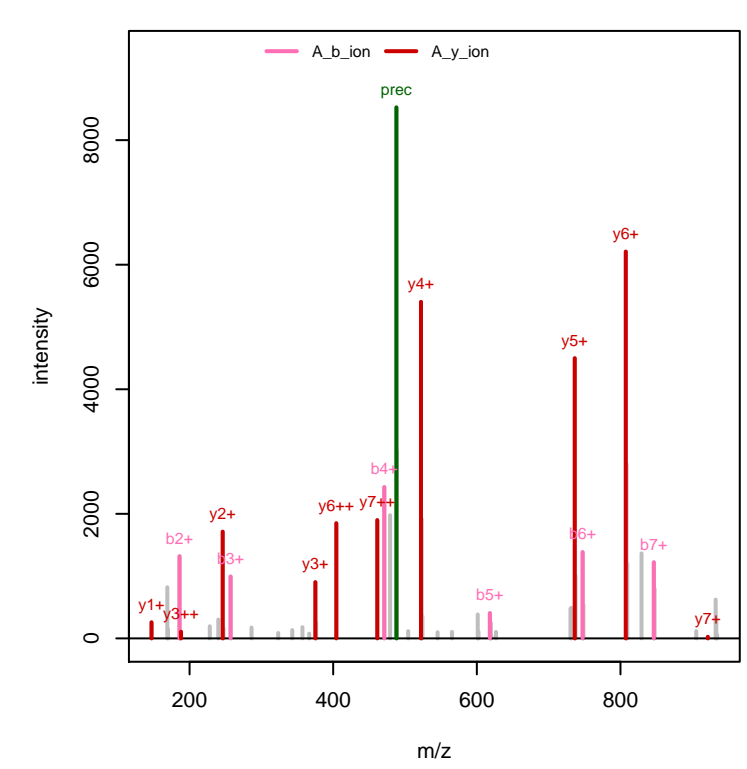

**GVTVDKMTLRLK+XL\_S**

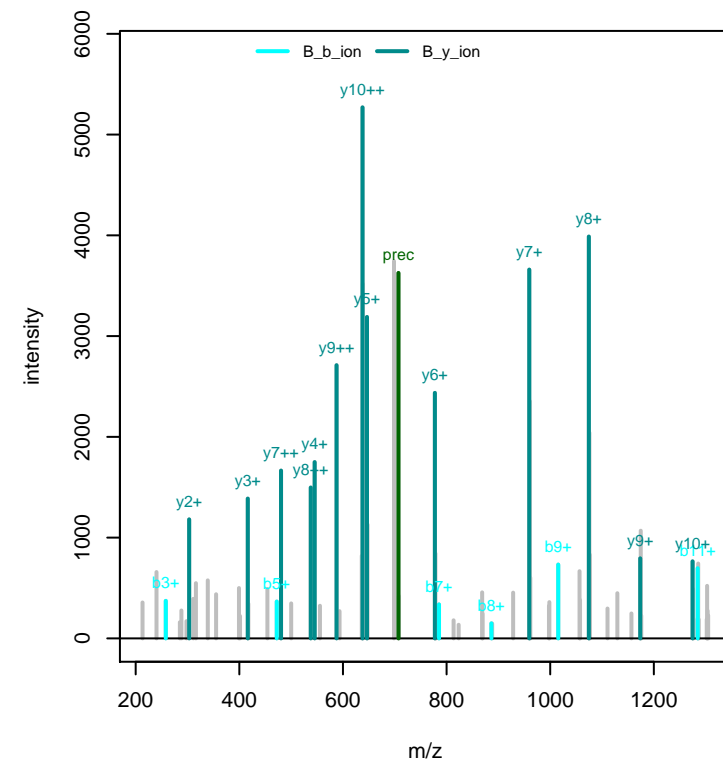

**GVTVDKMTLRLK+XL\_L**

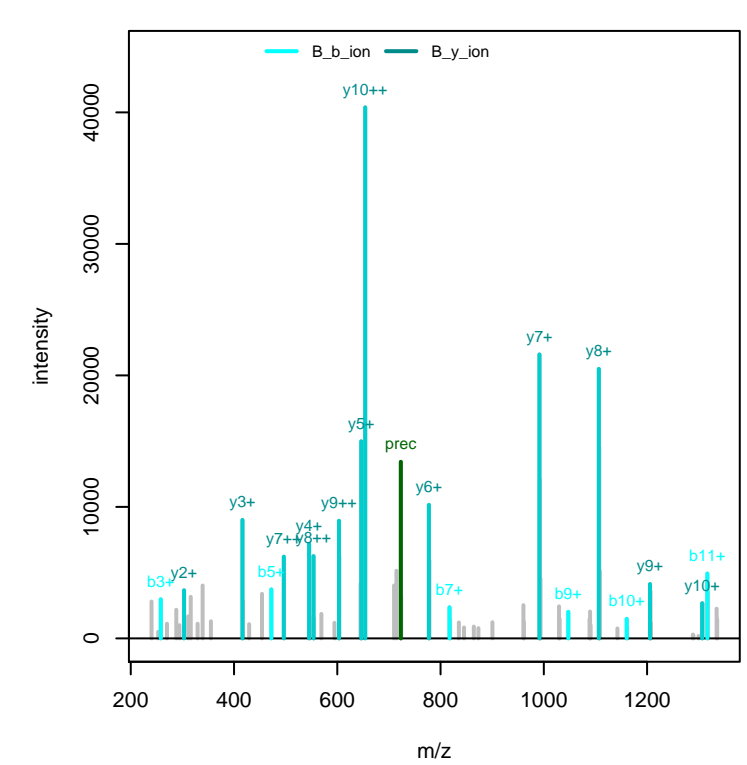



KVDAKTR  
GKVGINELLR

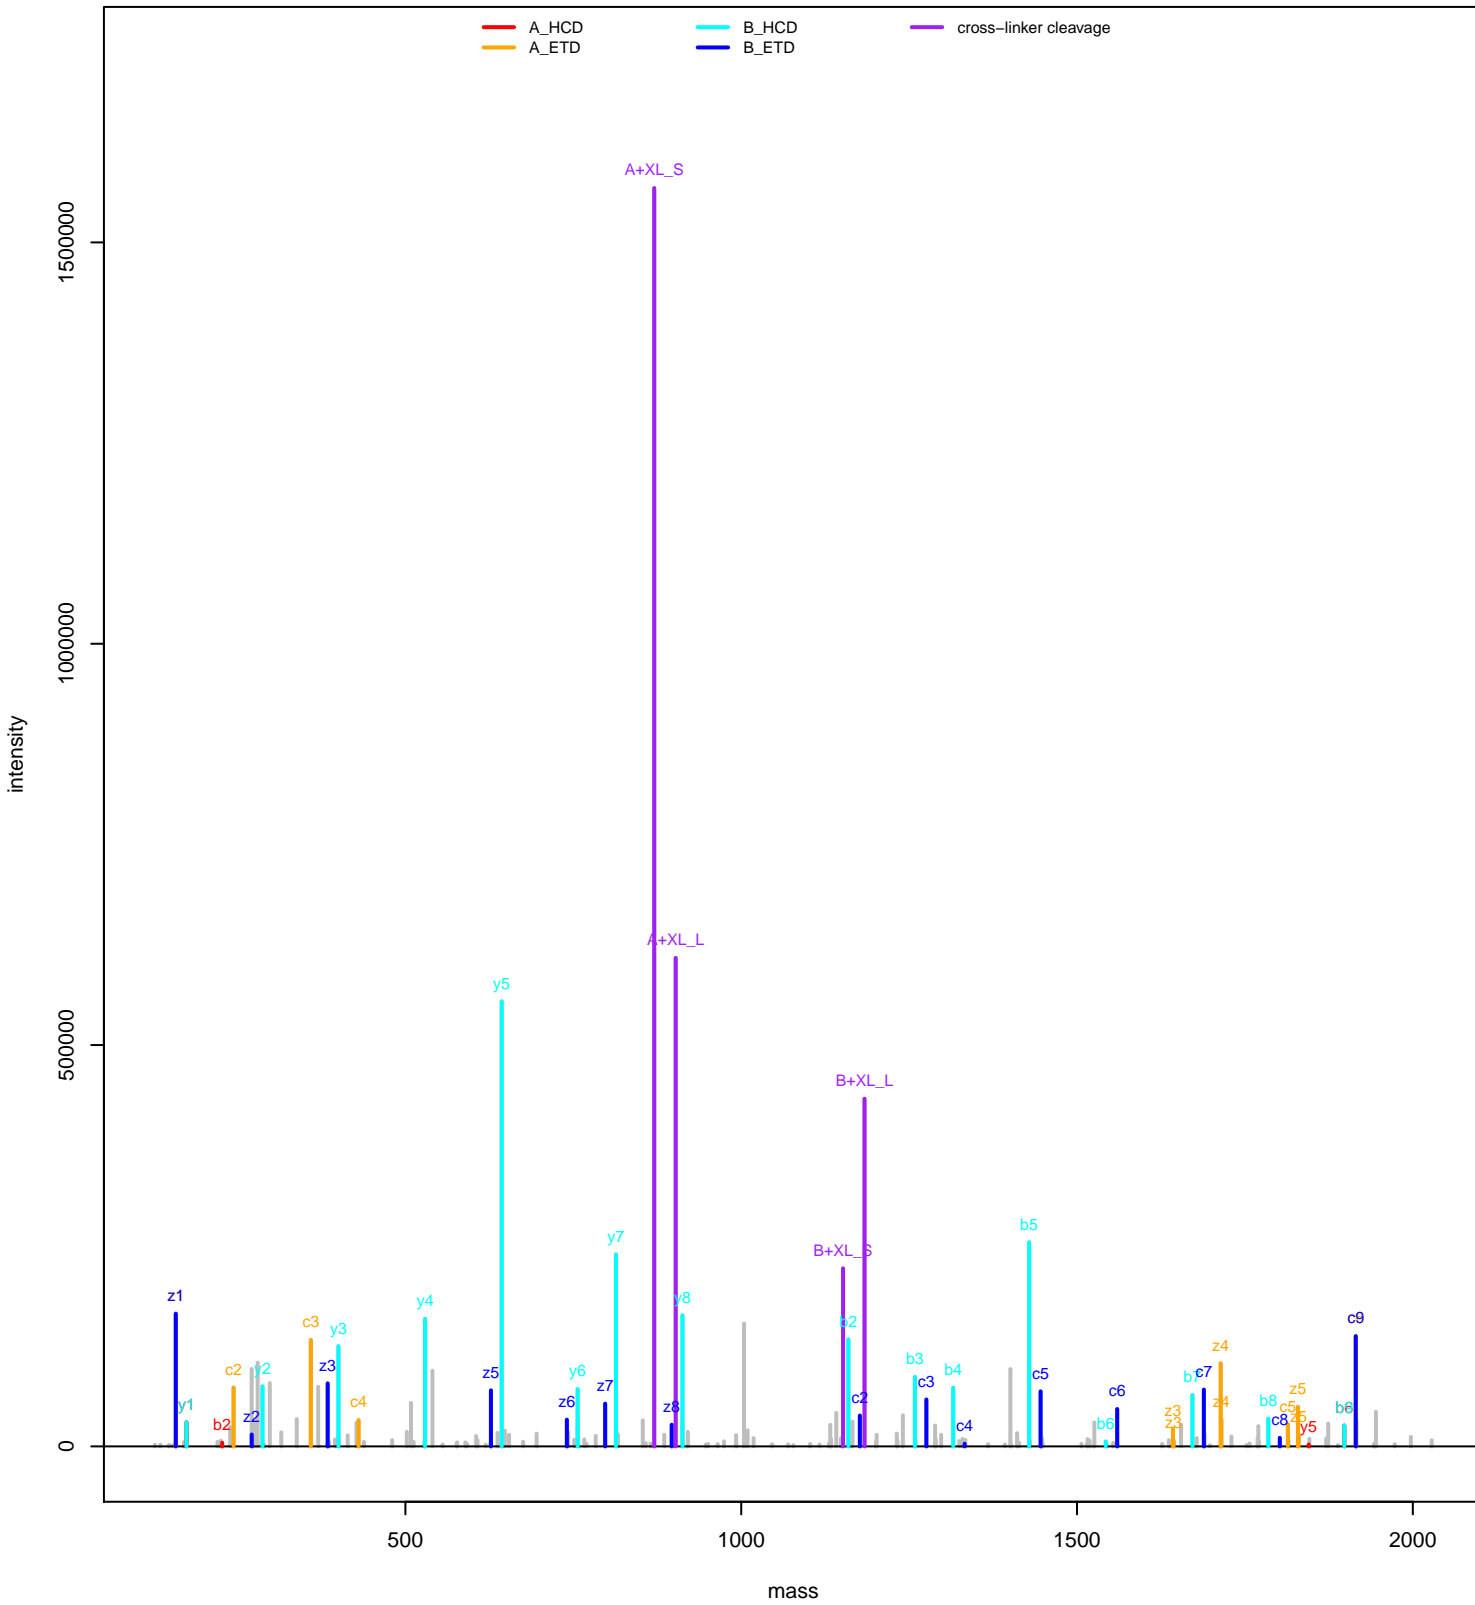

KVDAKTR+XL\_S

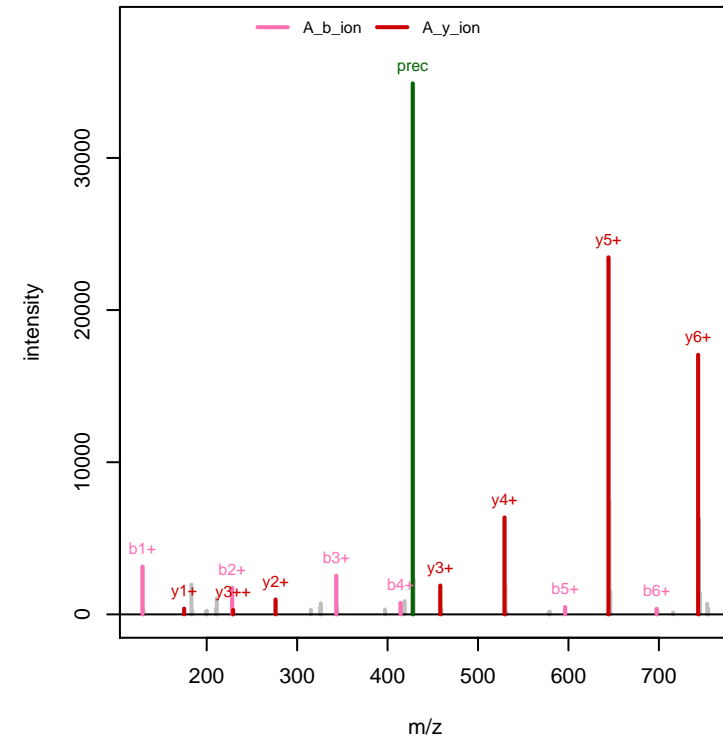

KVDAKTR+XL\_L

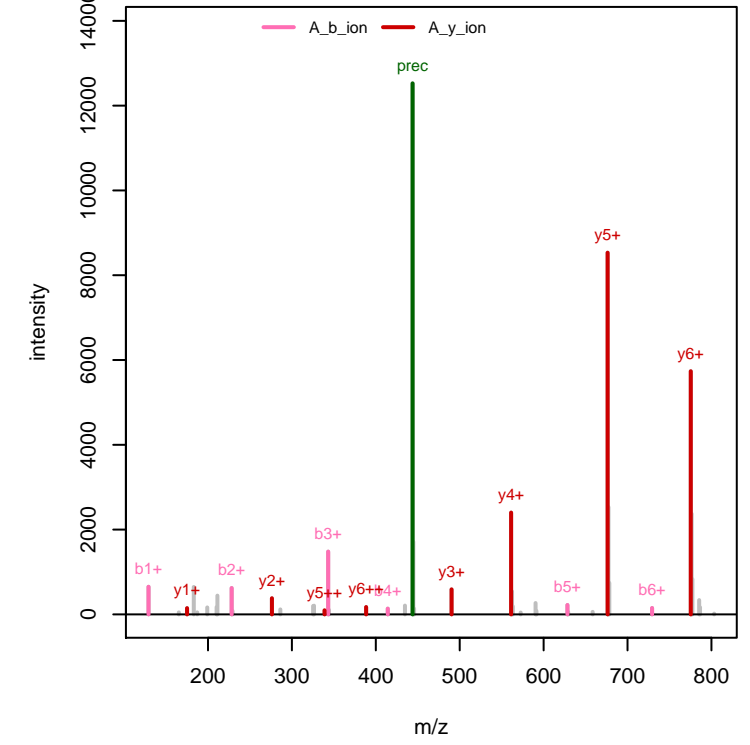

GKVGINELLR+XL\_S

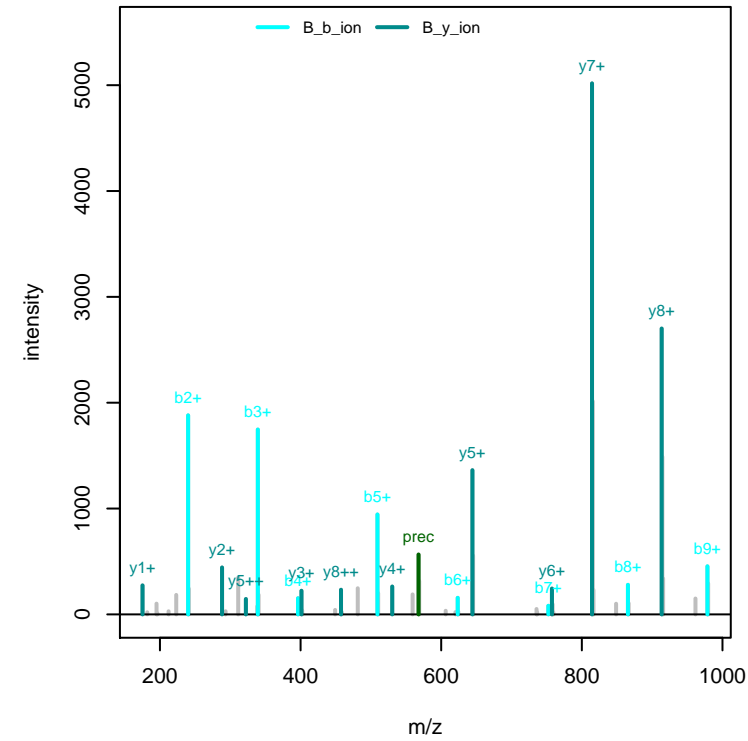

GKVGINELLR+XL\_L

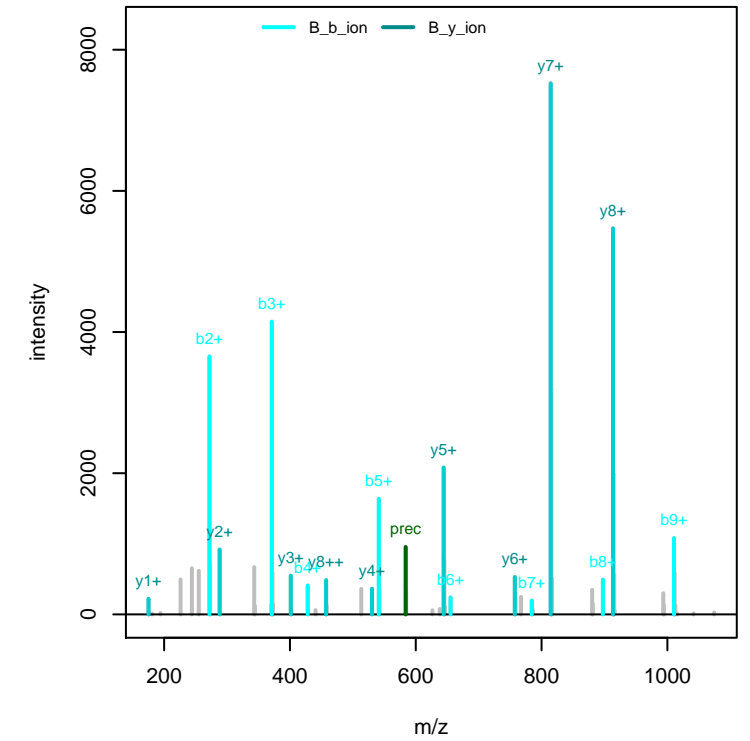

GYAGDTATTSEIKAK  
GVEGTVSVSDKLHVRDAK

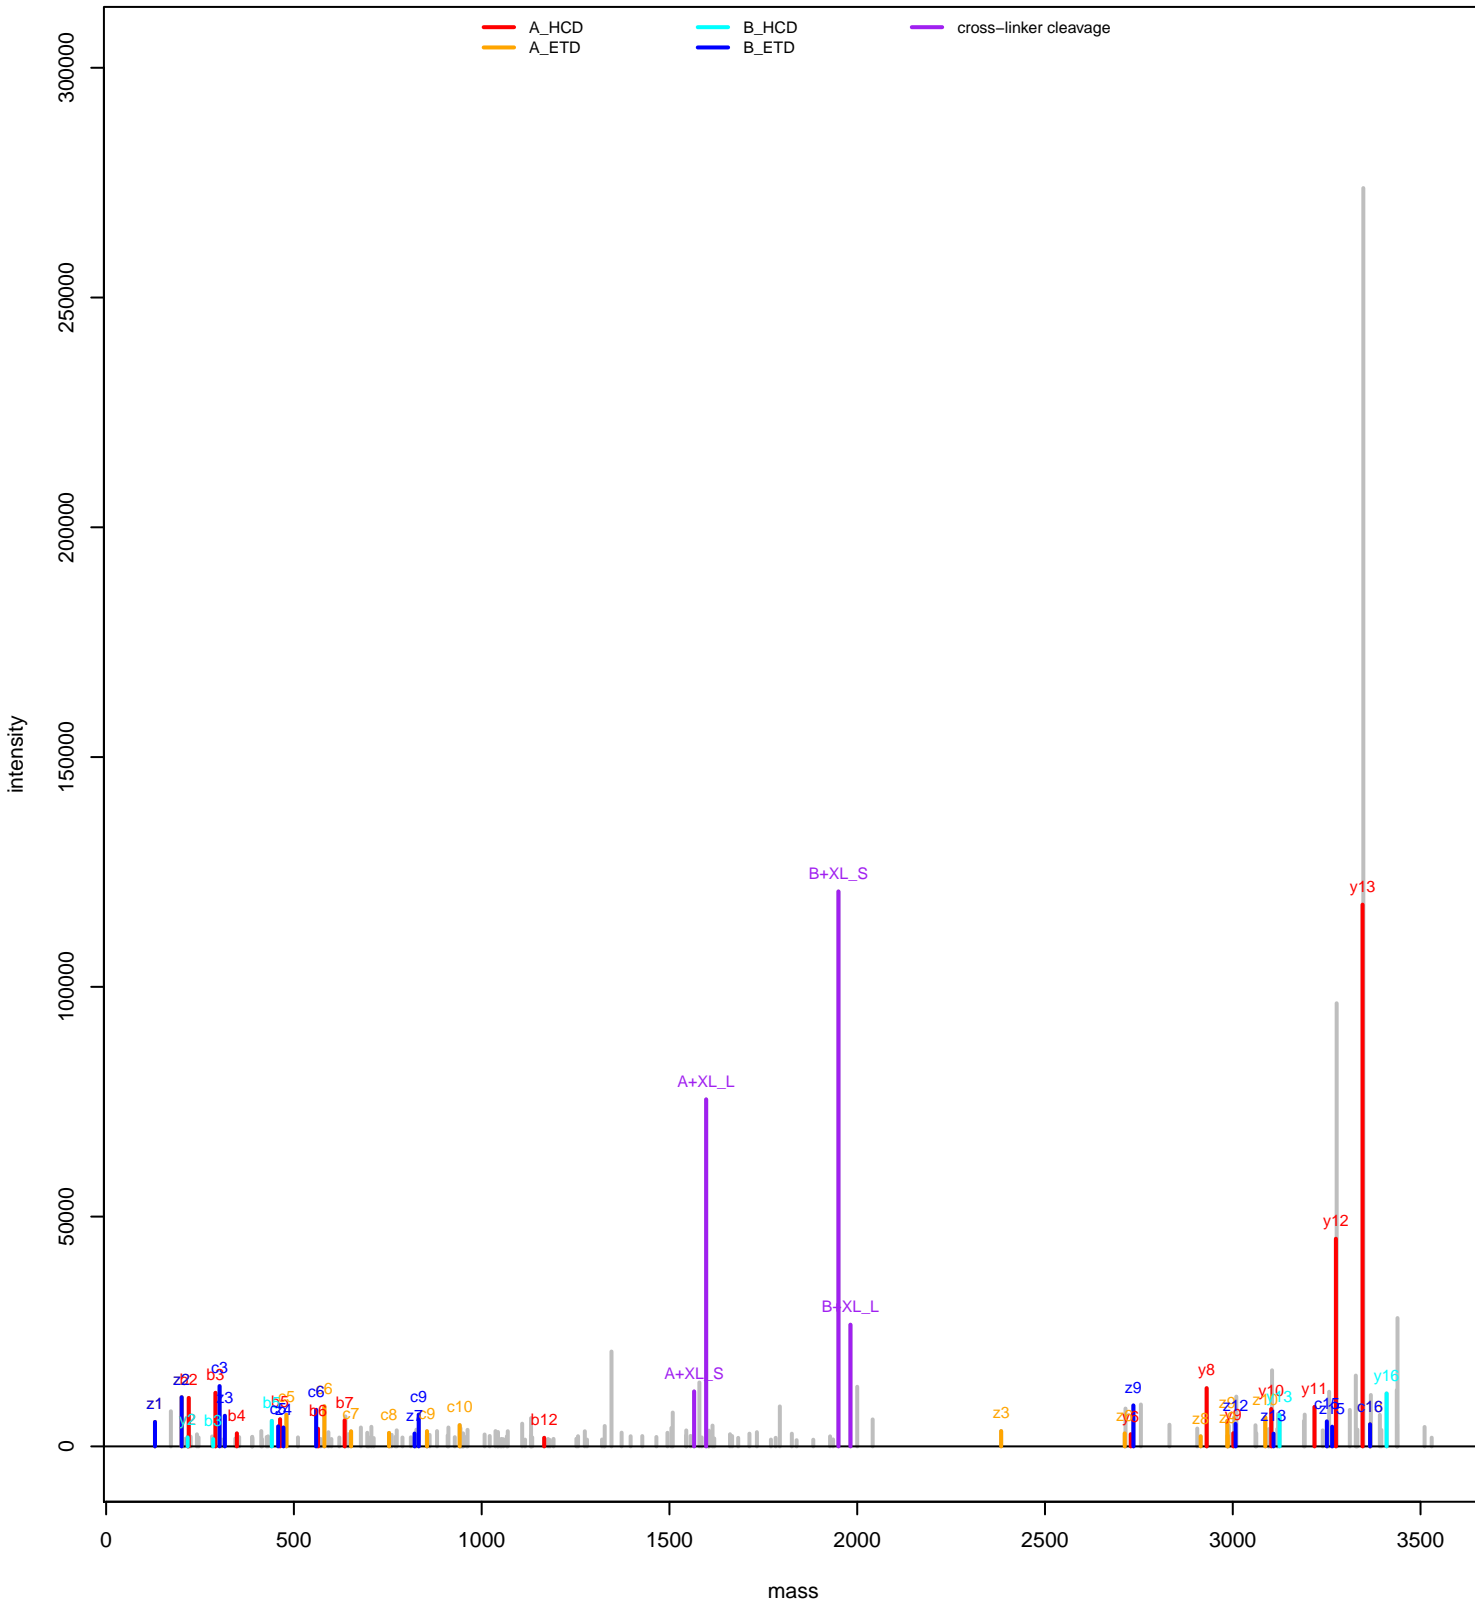

GYAGDTATTSEIKAK+XL\_S

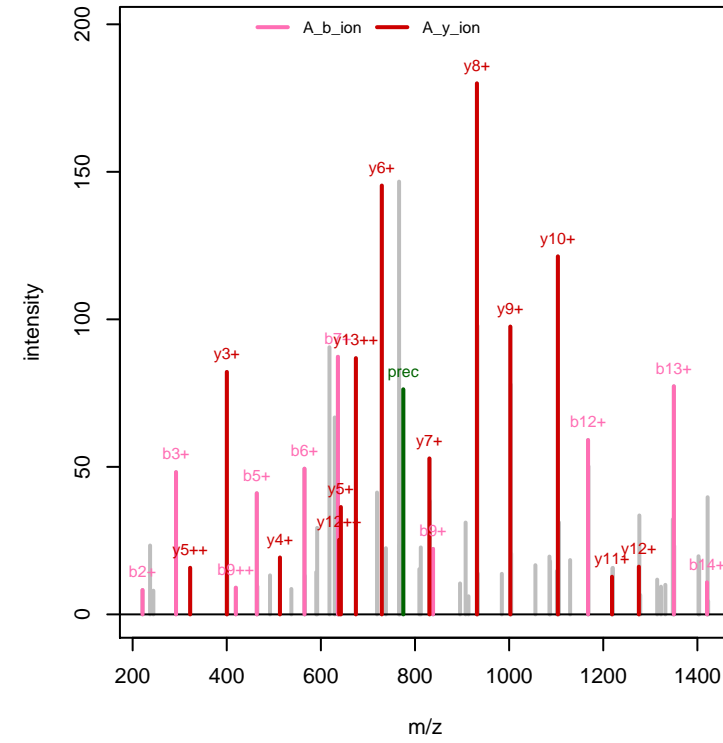

GYAGDTATTSEIKAK+XL\_L

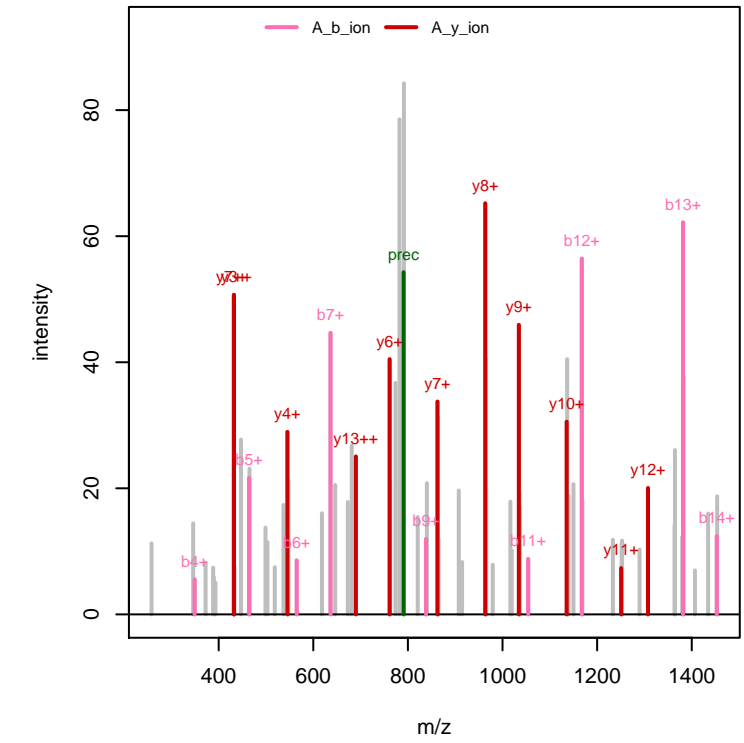

GVEGTVSVSDKLHVRDAK+XL\_S

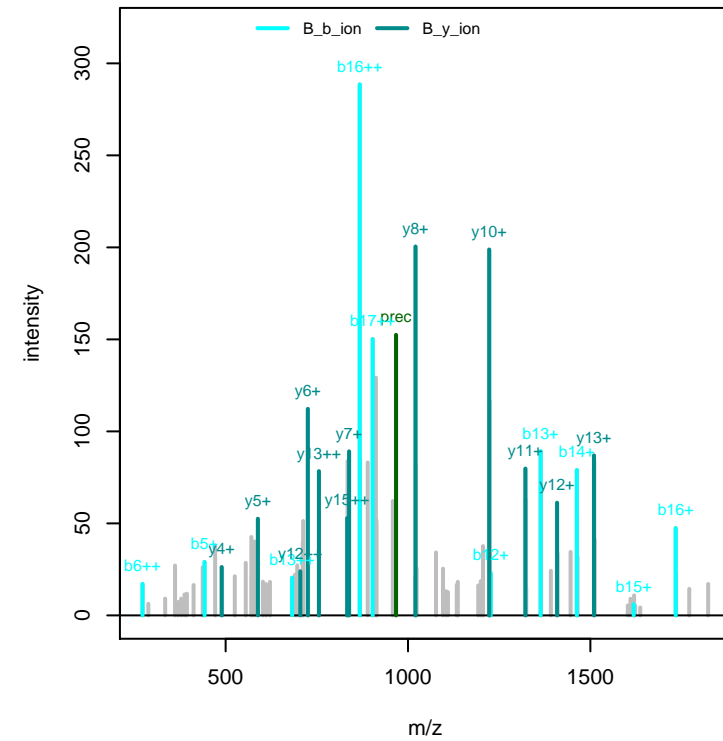

GVEGTVSVSDKLHVRDAK+XL\_L

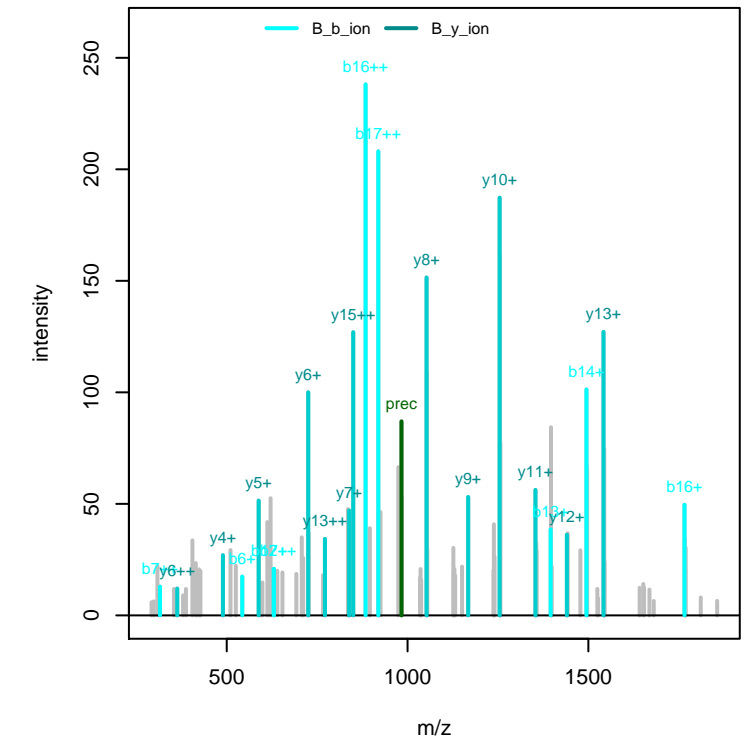

IYAAFKK  
QKLHGYLPSR

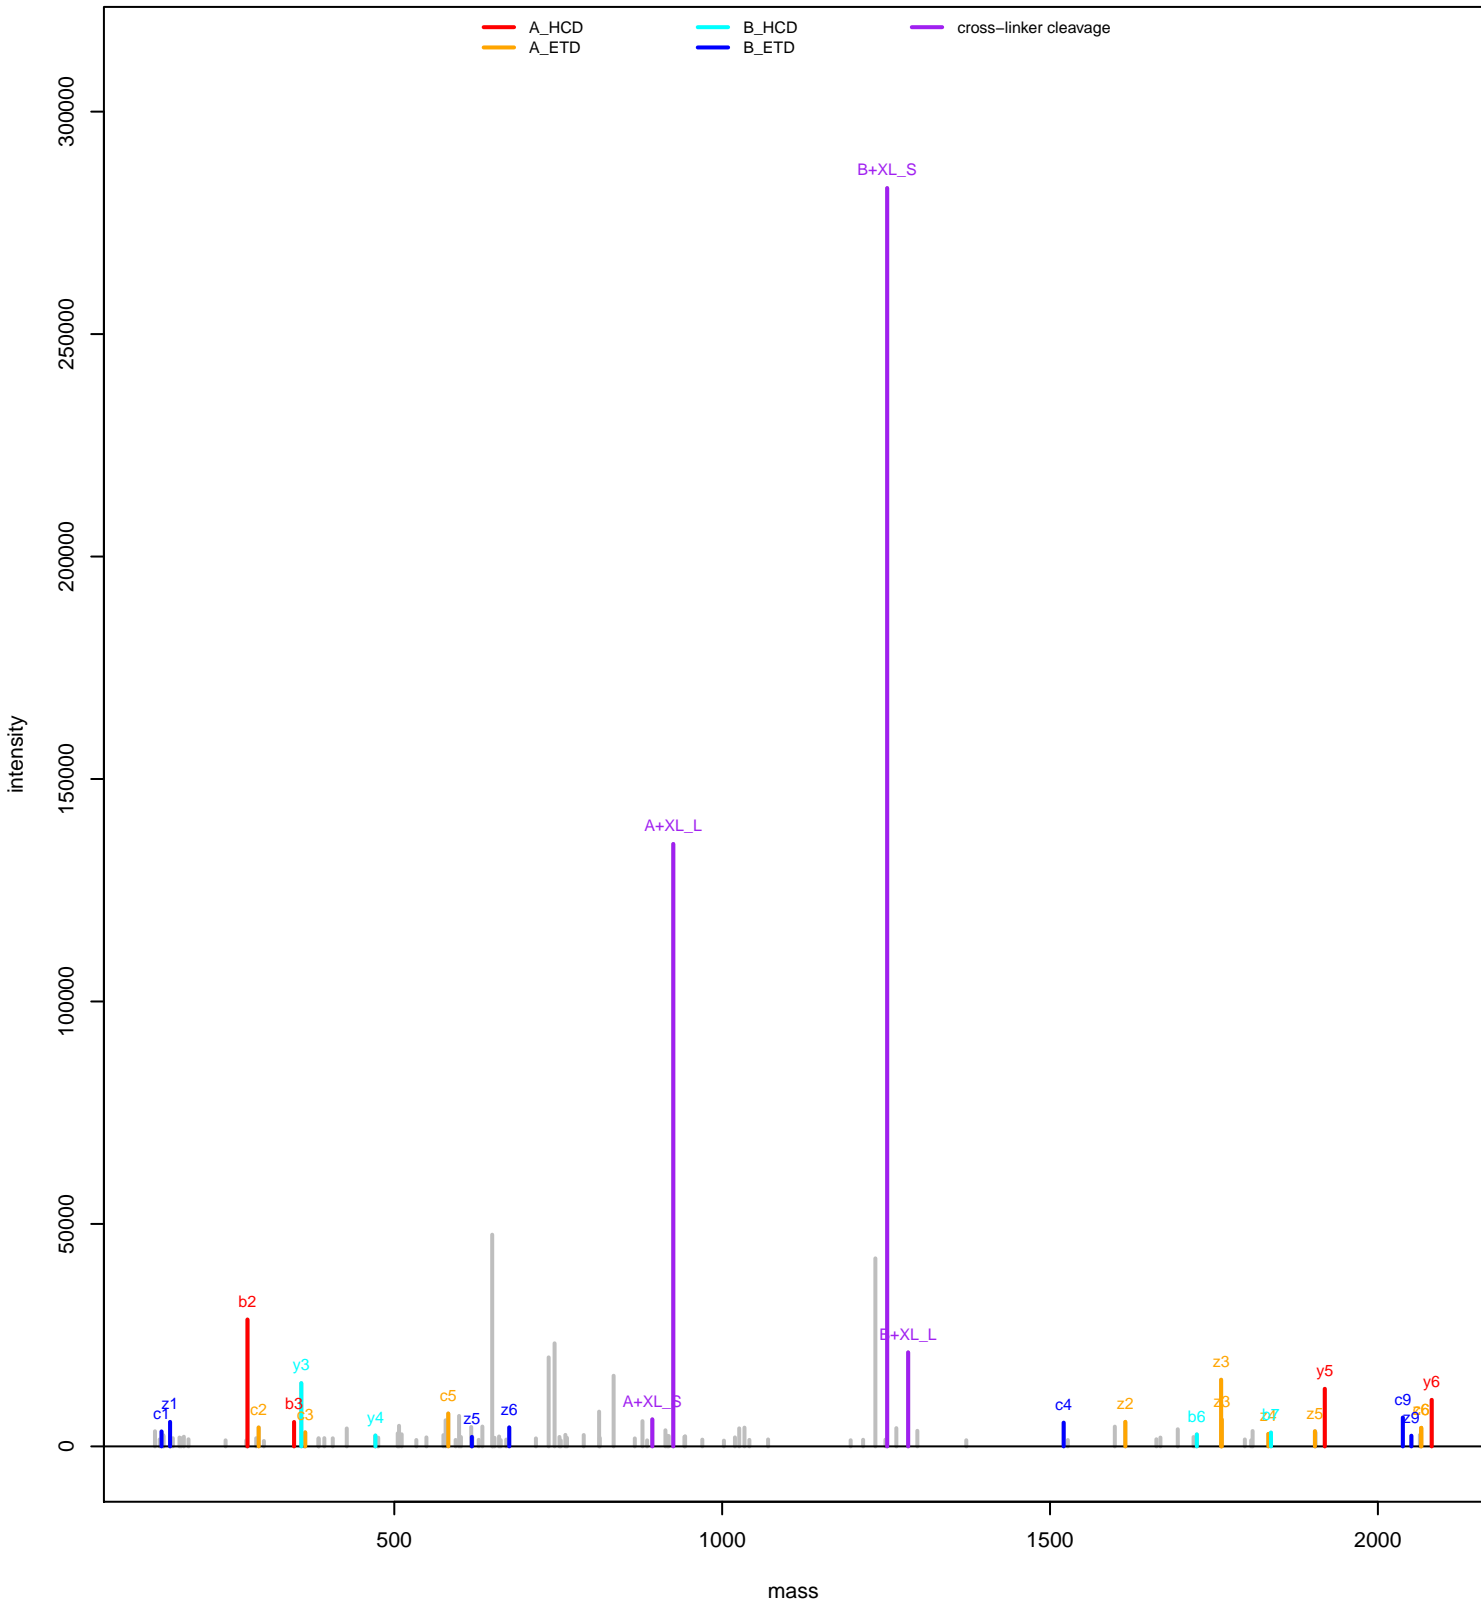

IYAAFKK+XL\_S

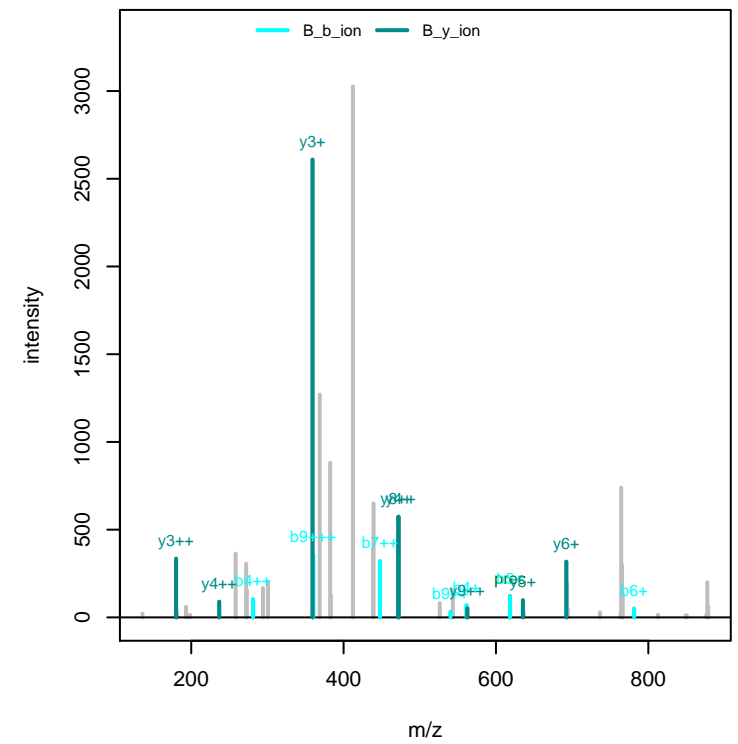

IYAAFKK+XL\_L

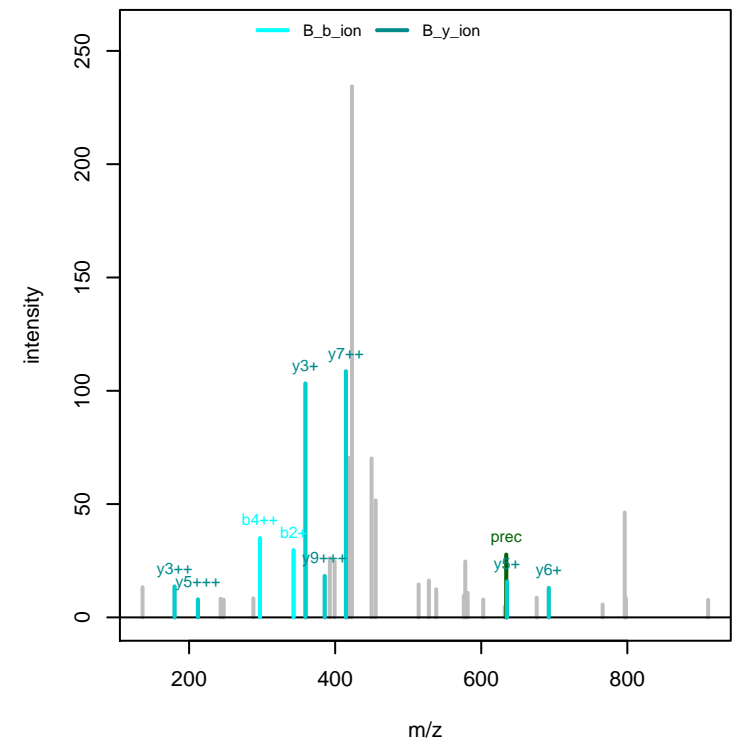

QKLHGYLPSR+XL\_S



QKLHGYLPSR+XL\_L



### HLINKK EYLPASYHEGSKNPVAR

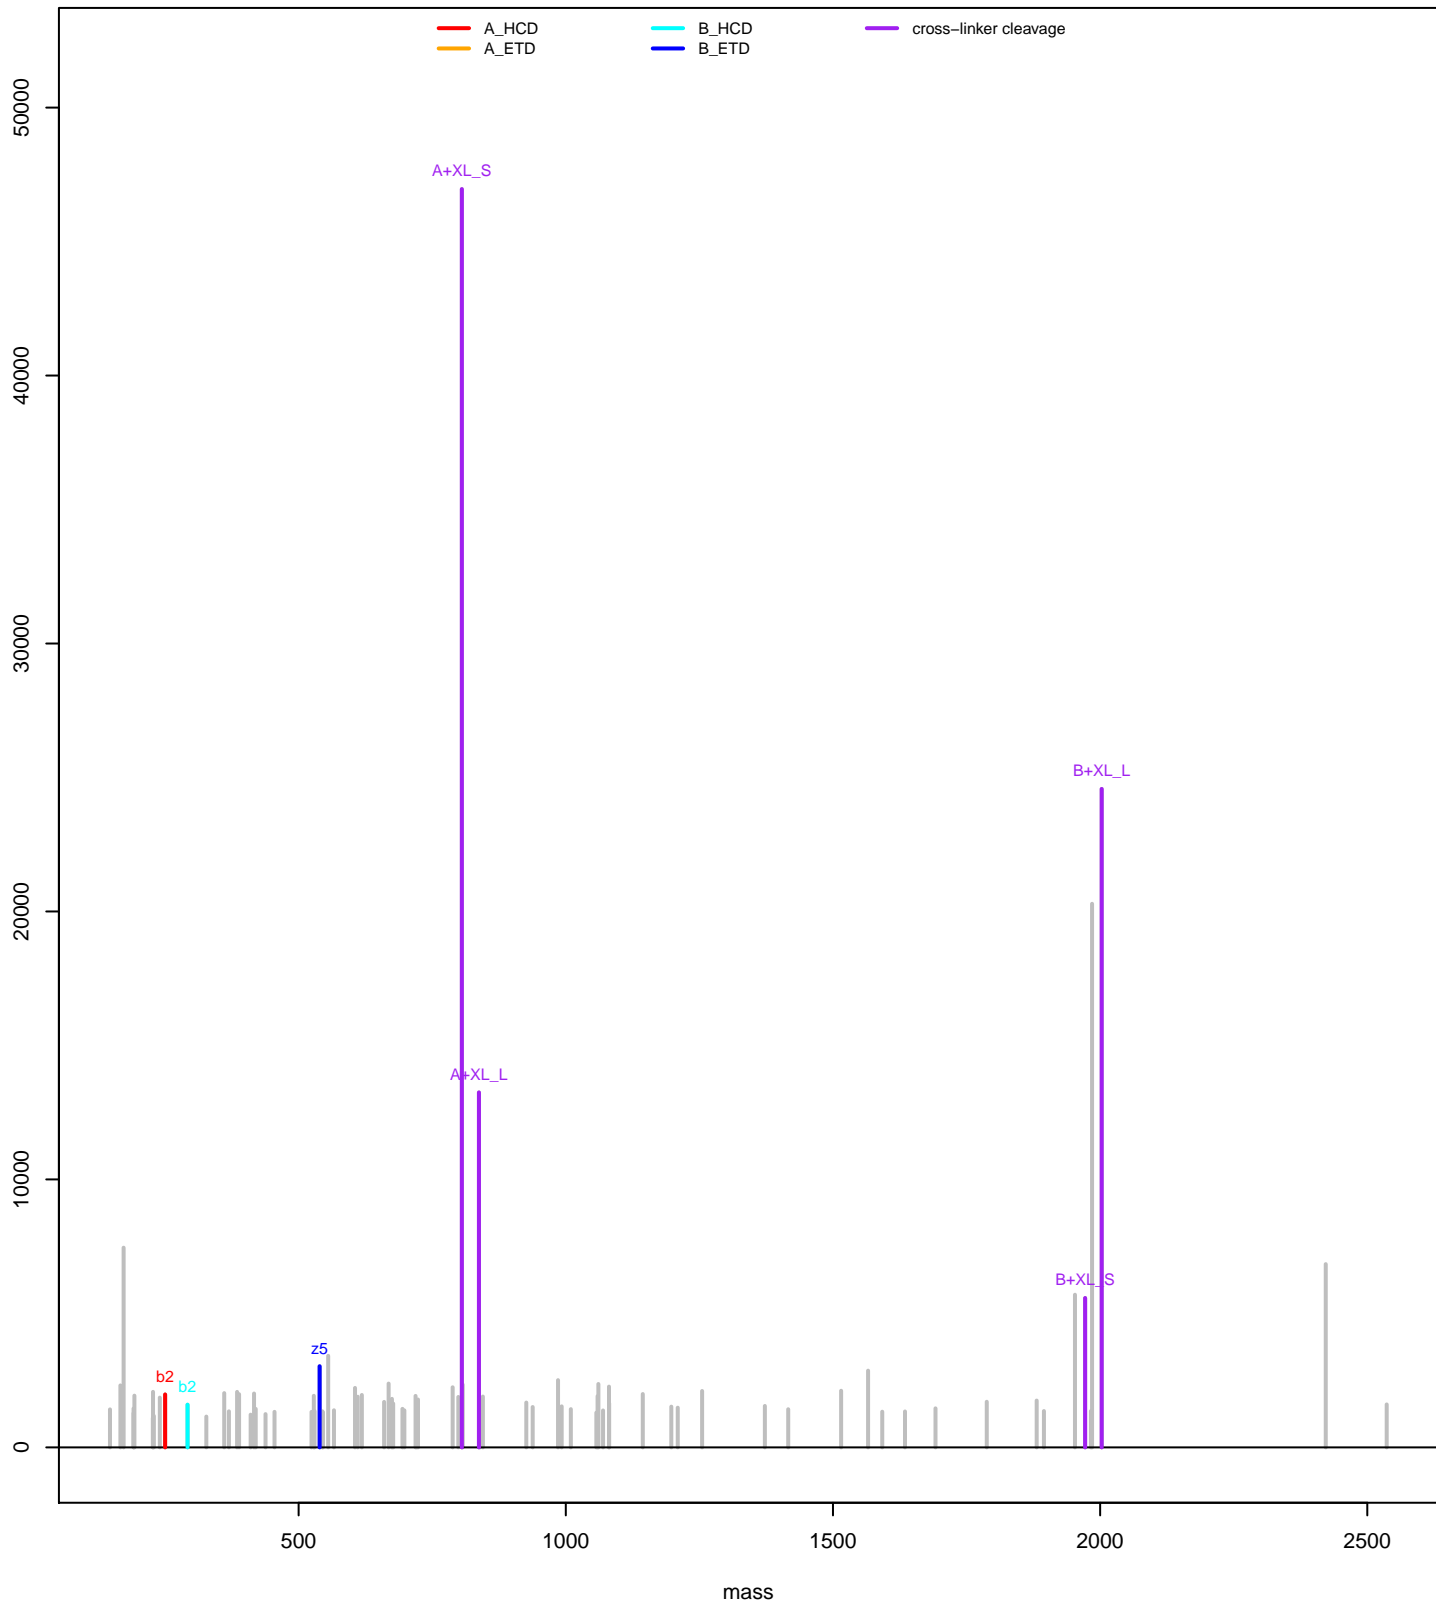

### HLINKK+XL\_S

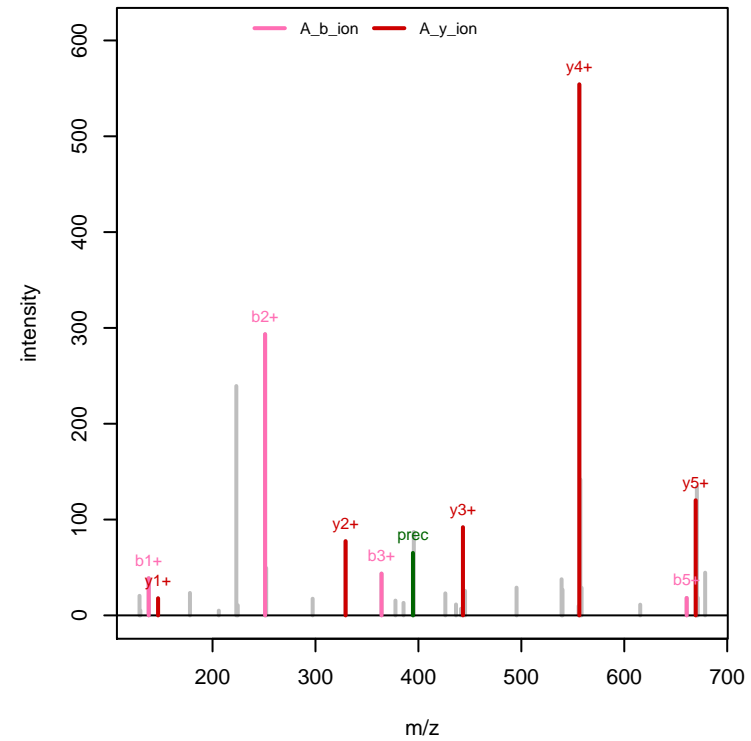

### HLINKK+XL\_L

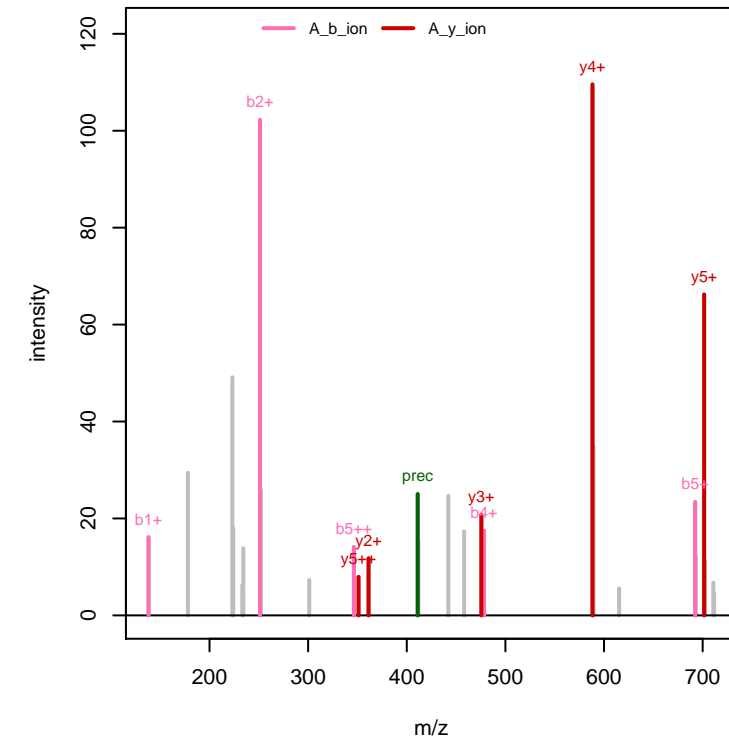

### EYLPASYHEGSKNPVAR+XL\_S

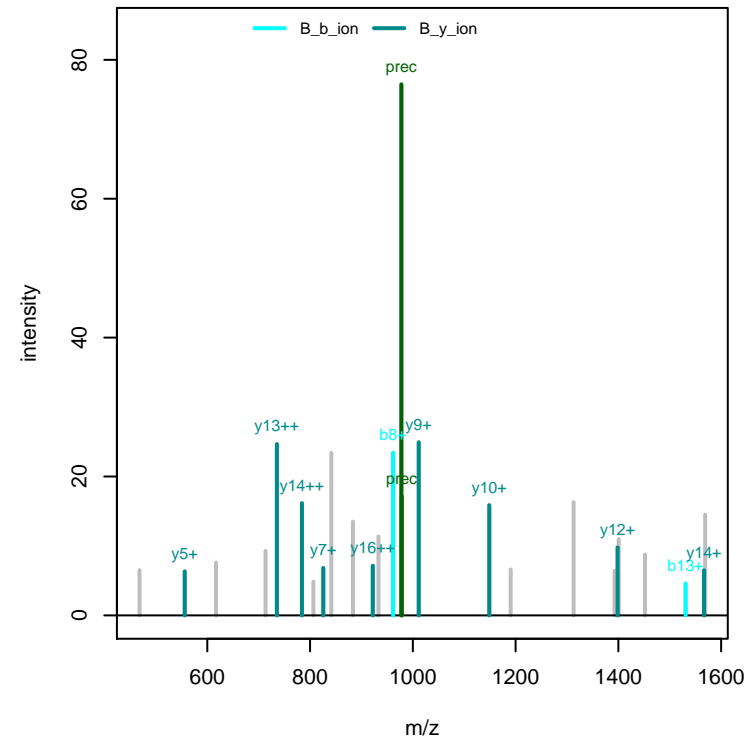

### EYLPASYHEGSKNPVAR+XL\_L

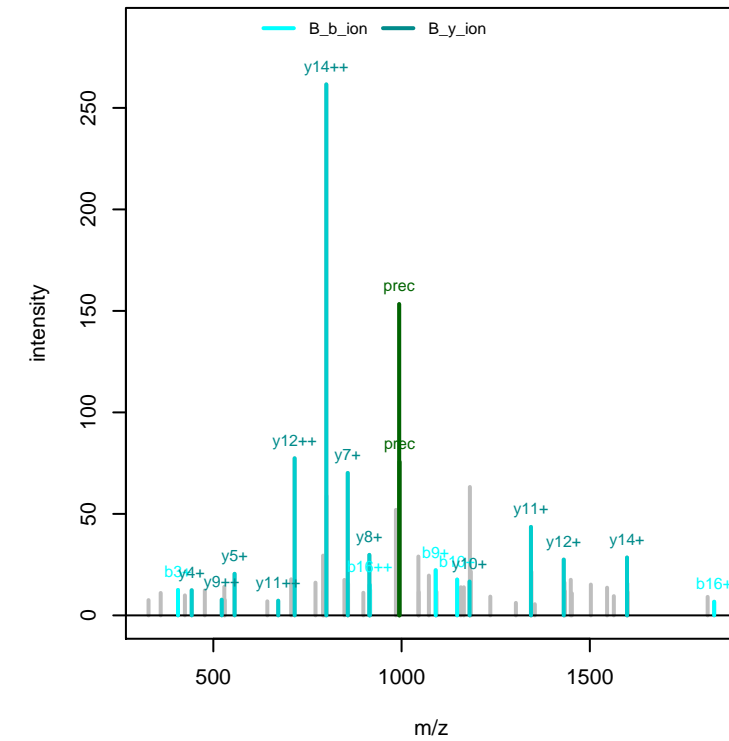



SQFFYIHPDNPQQR  
KGGVIVYPTDSGYALGCK

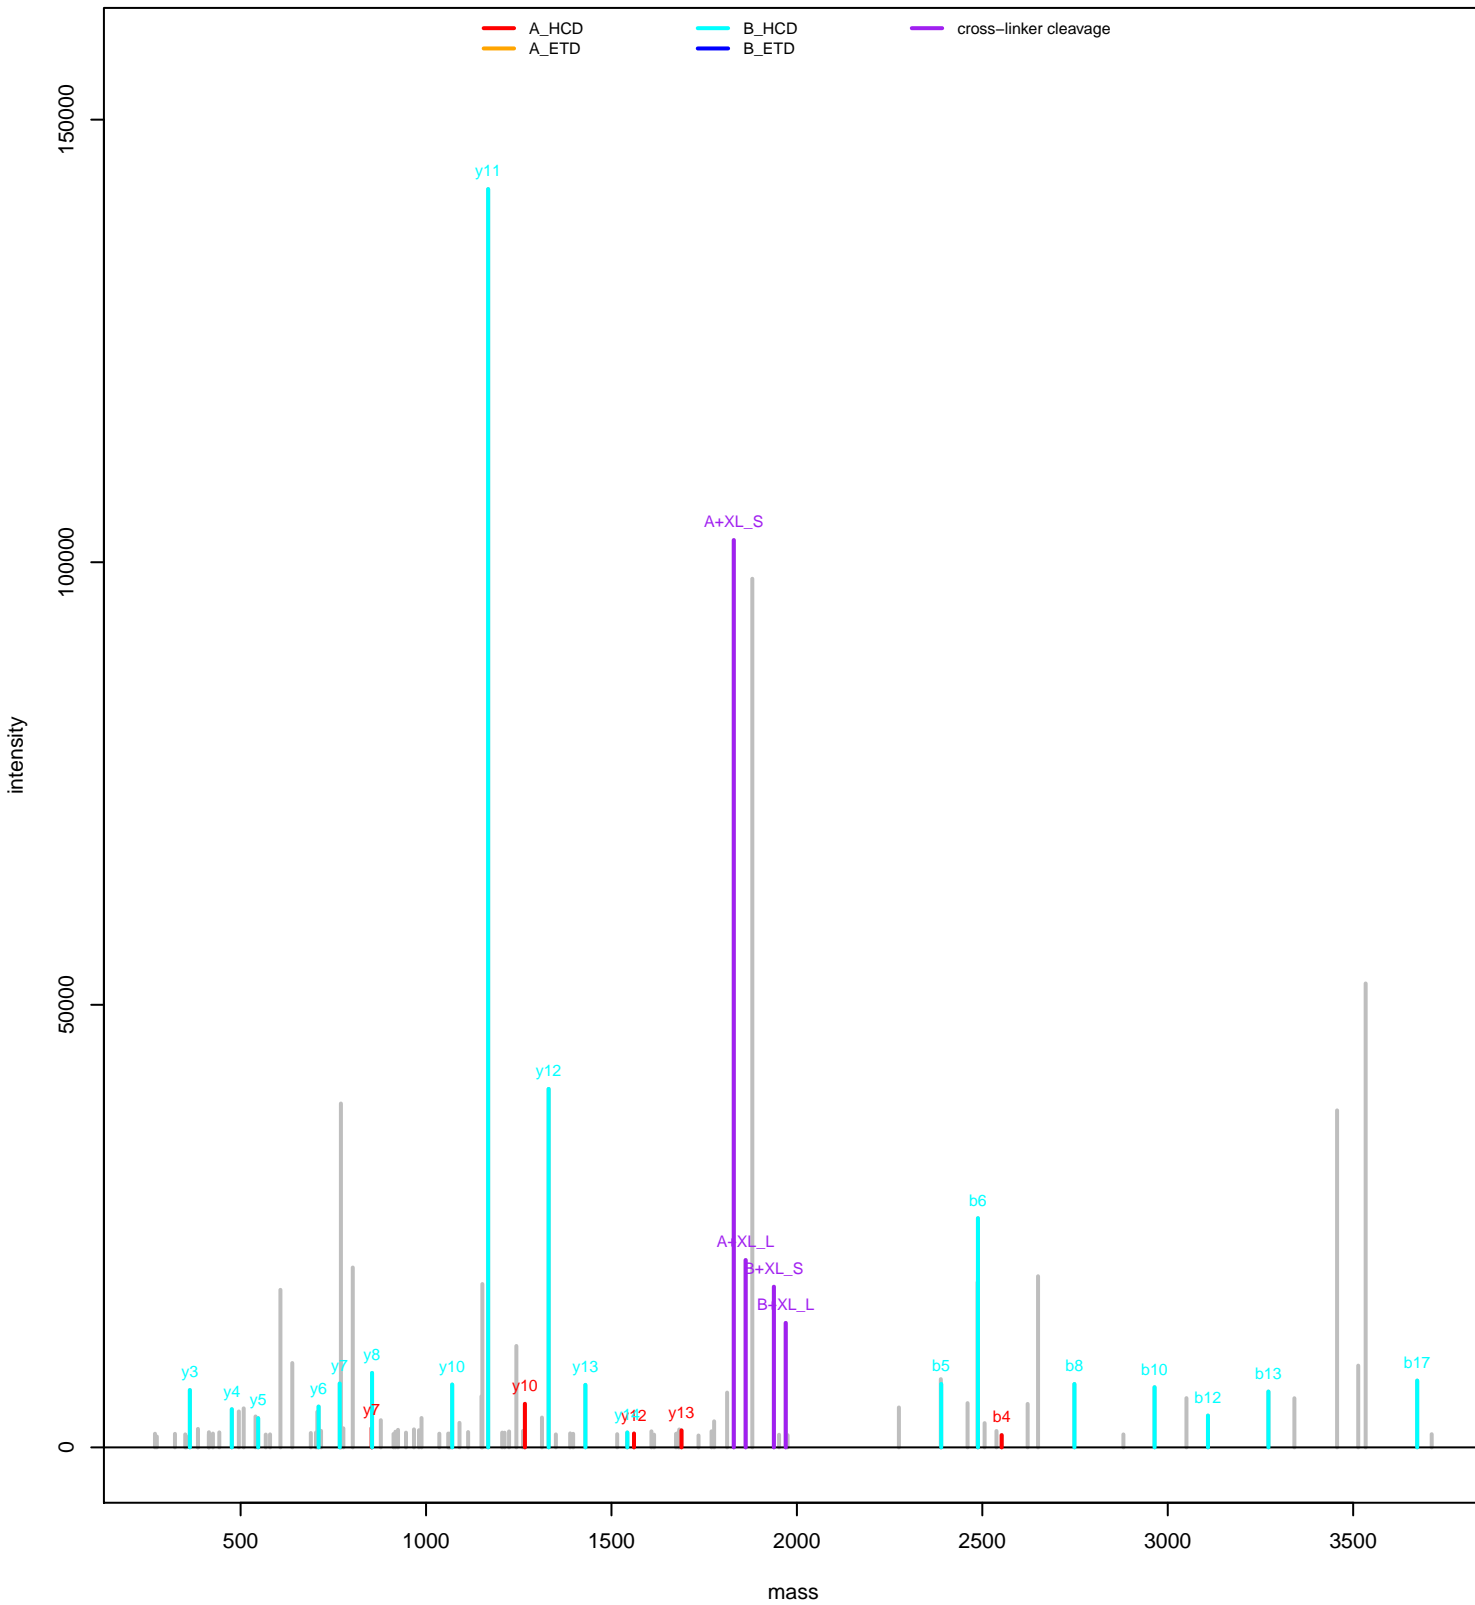

SQFFYIHPDNPQQR+XL\_S

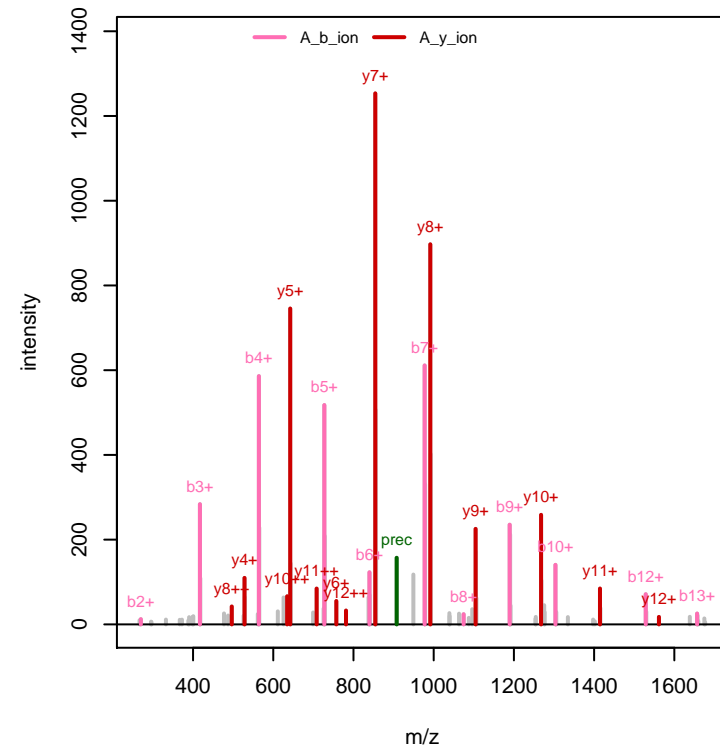

KGGVIVYPTDSGYALGCK+XL\_S

SQFFYIHPDNPQQR+XL\_L

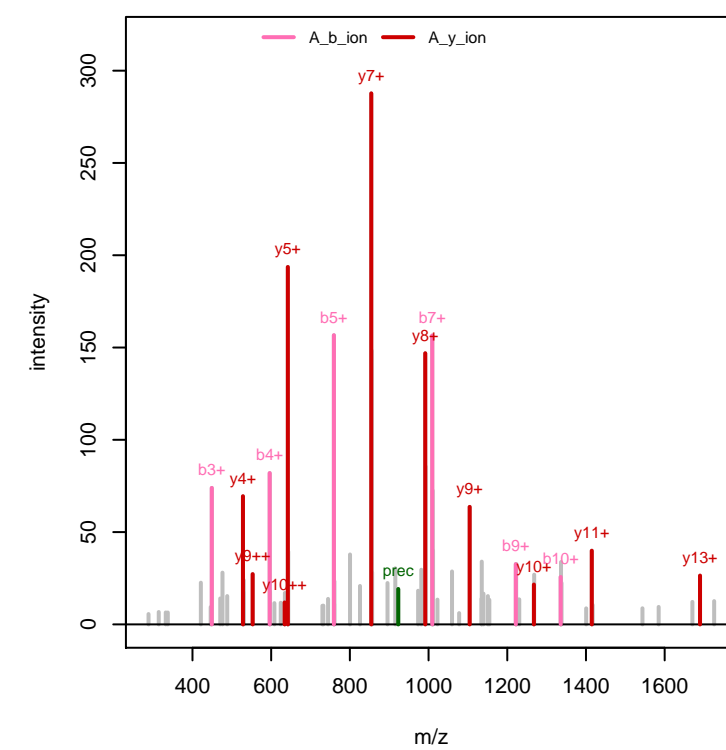

KGGVIVYPTDSGYALGCK+XL\_L

TDLKASSLR  
ALKLMDLTTLNDDDTDEK

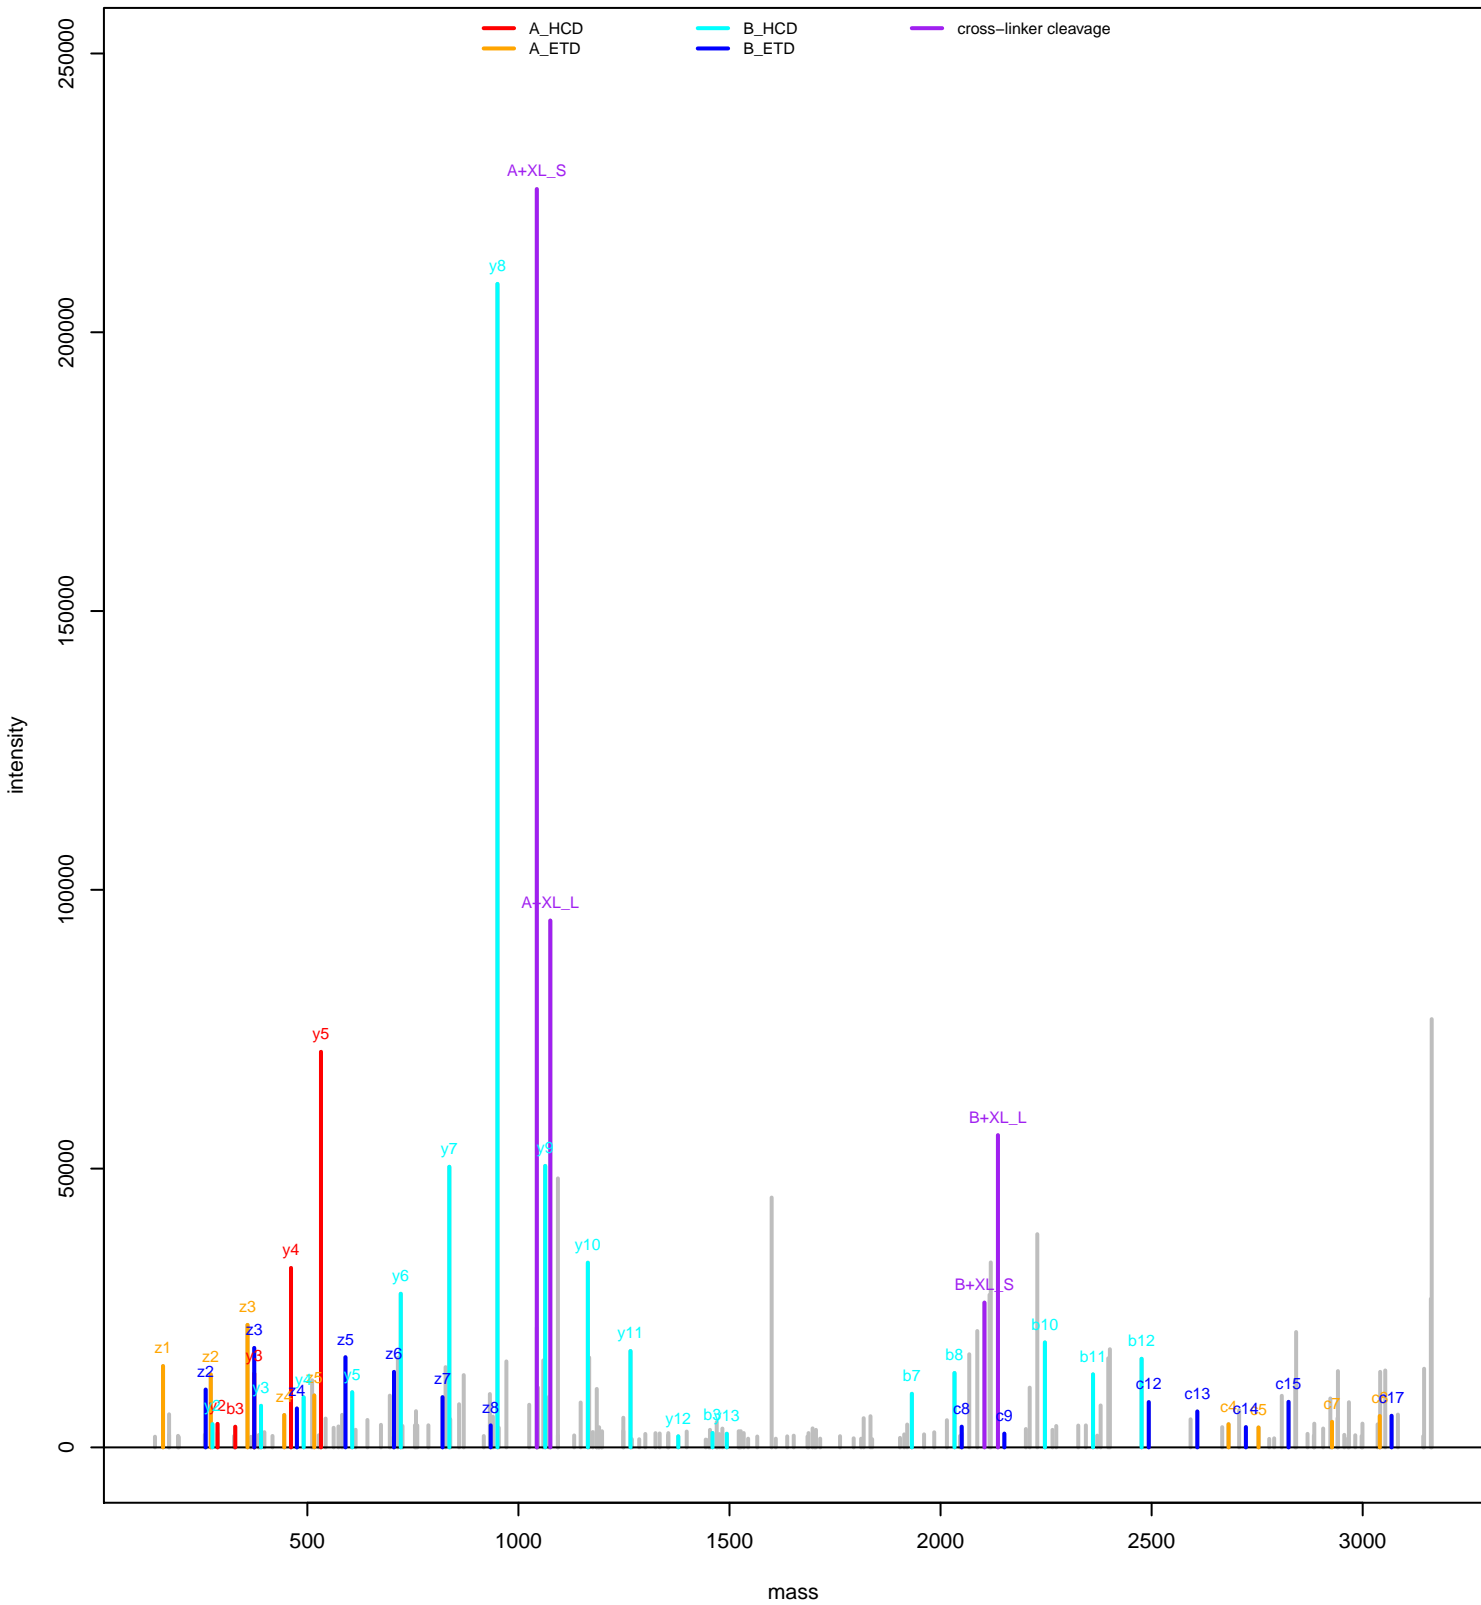

TDLKASSLR+XL\_S

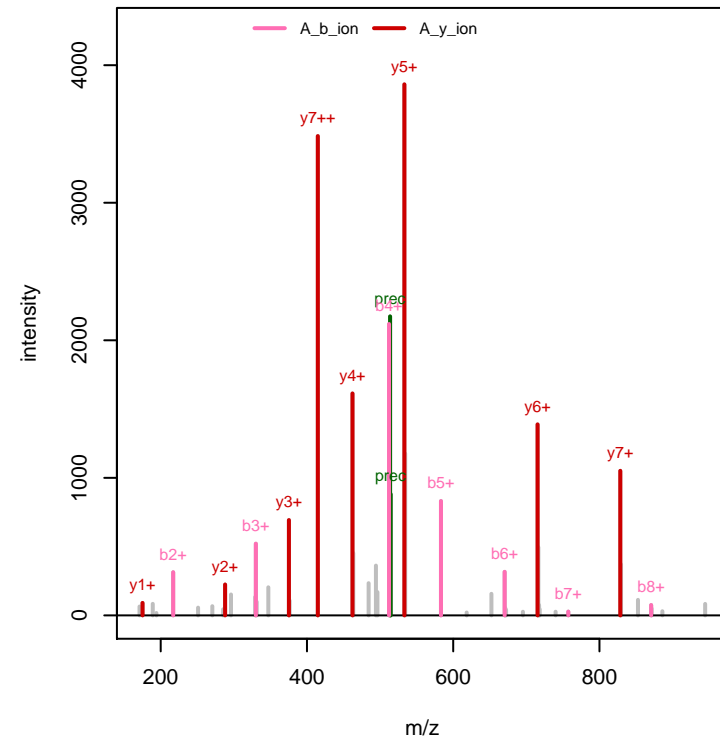

TDLKASSLR+XL\_L

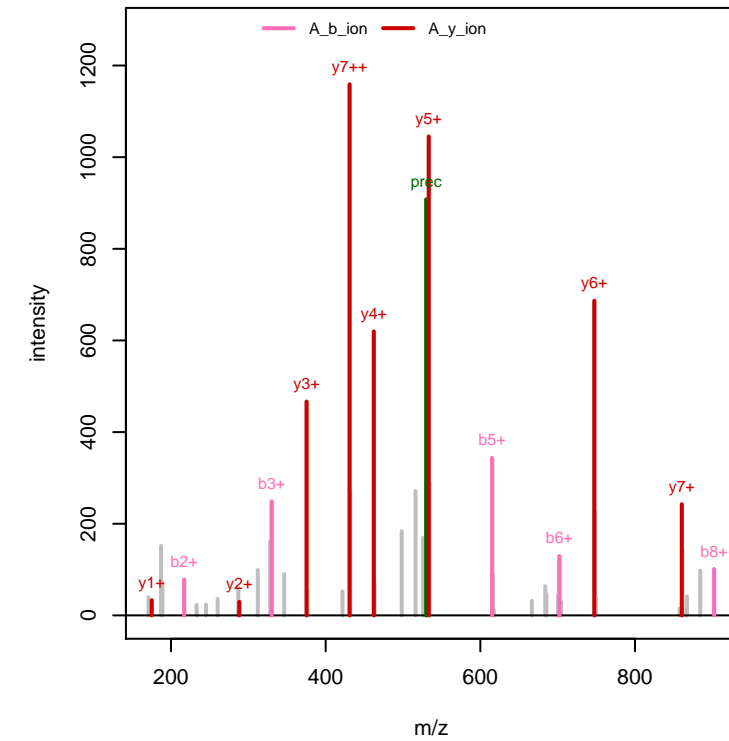

ALKLMDLTTLNDDDTDEK+XL\_S

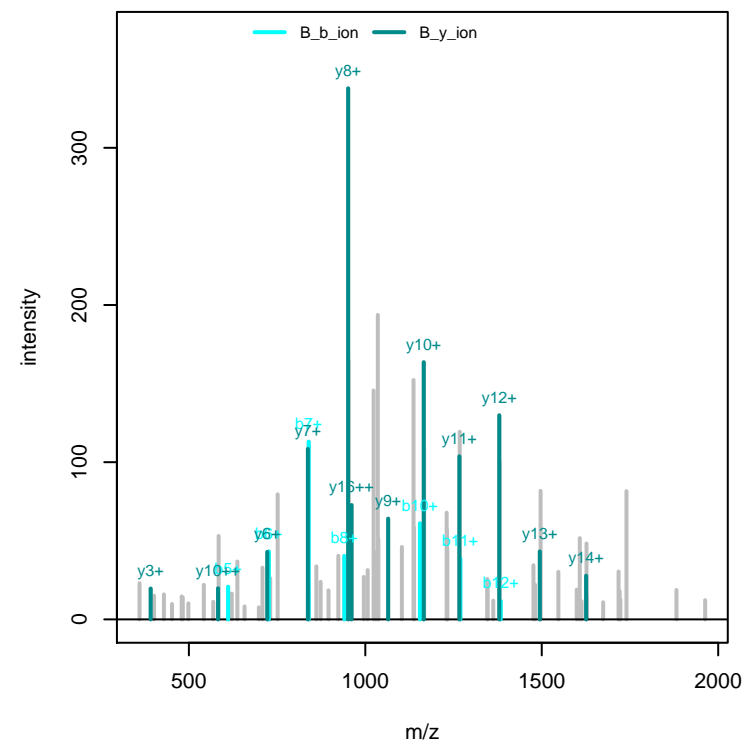

ALKLMDLTTLNDDDTDEK+XL\_L

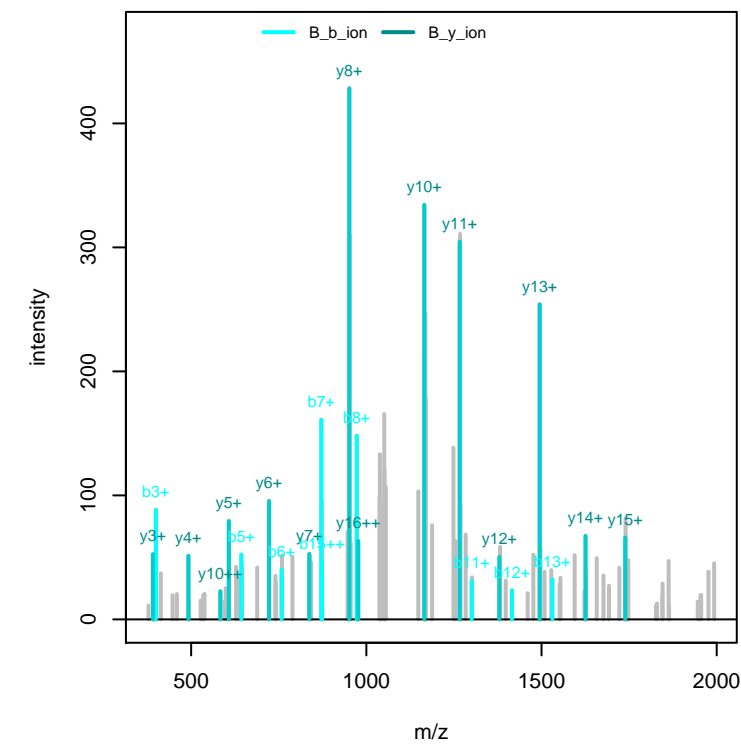

**METIAKHR  
VTKIFVDEGPSMK**

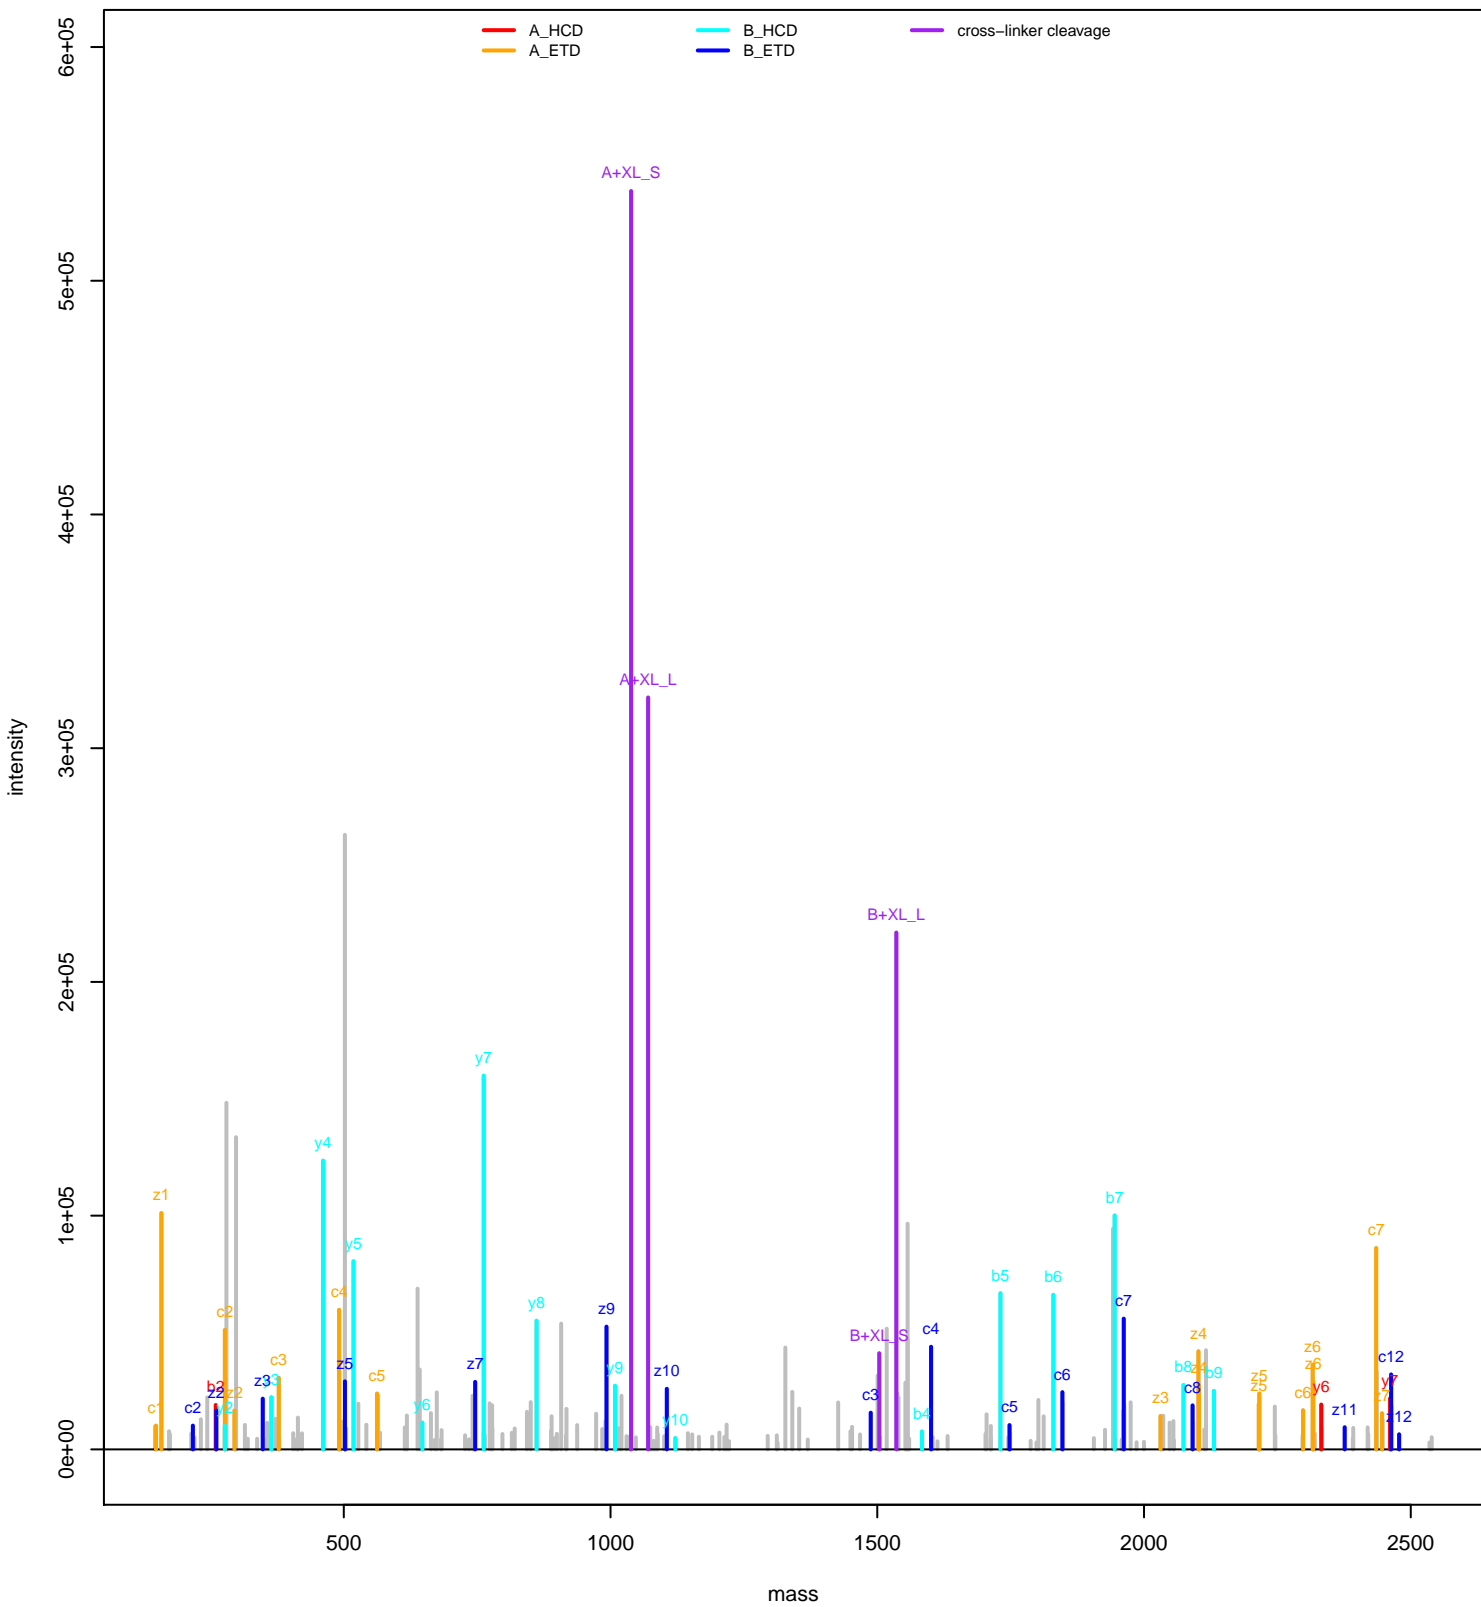

**METIAKHR+XL\_S**

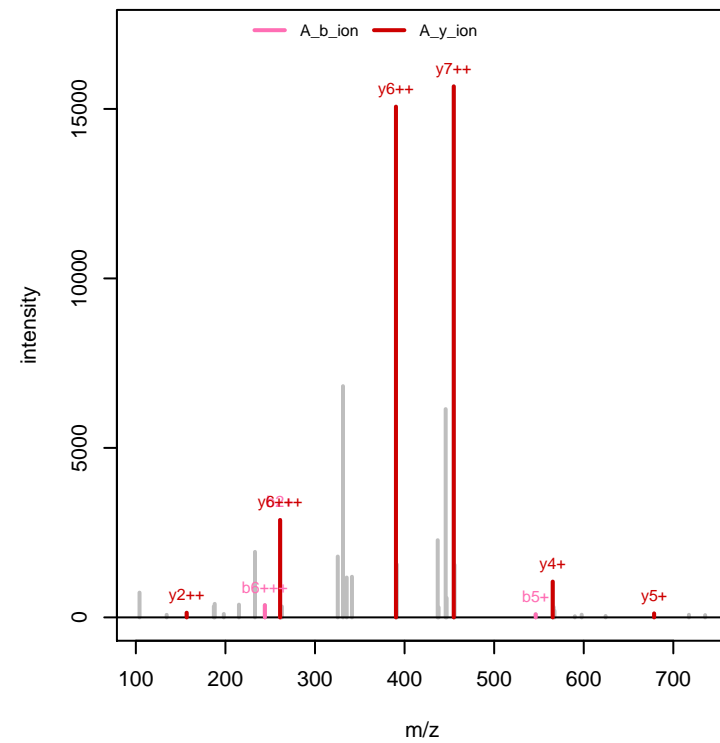

**METIAKHR+XL\_L**

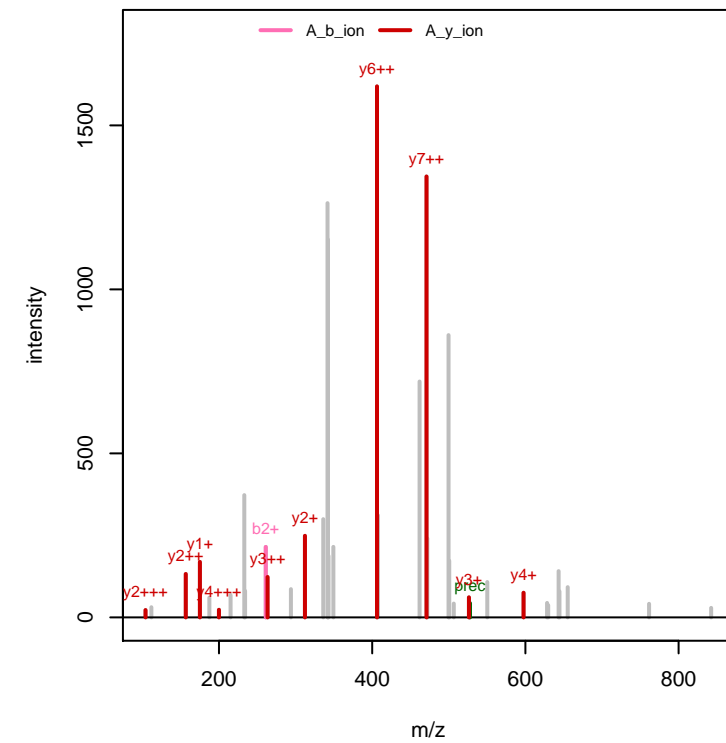

**VTKIFVDEGPSMK+XL\_S**

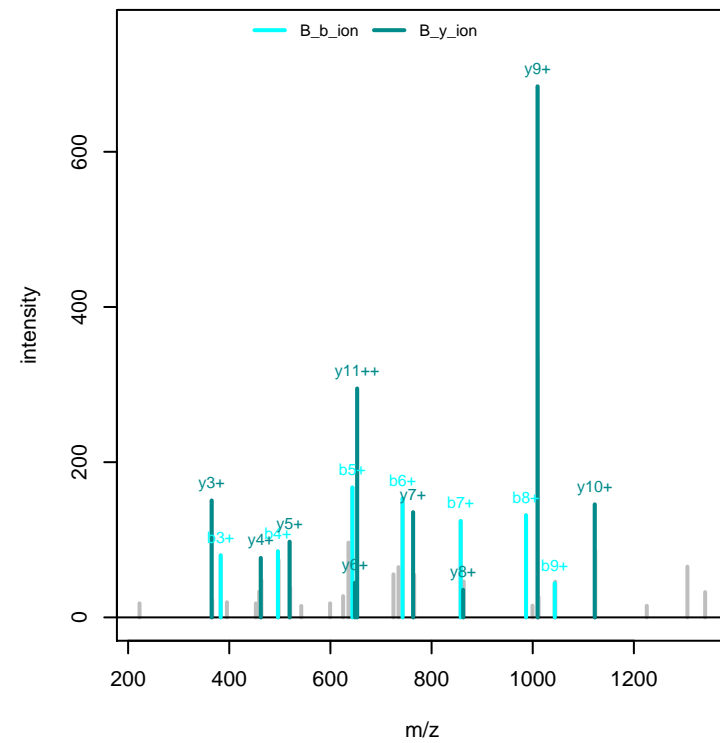

**VTKIFVDEGPSMK+XL\_L**

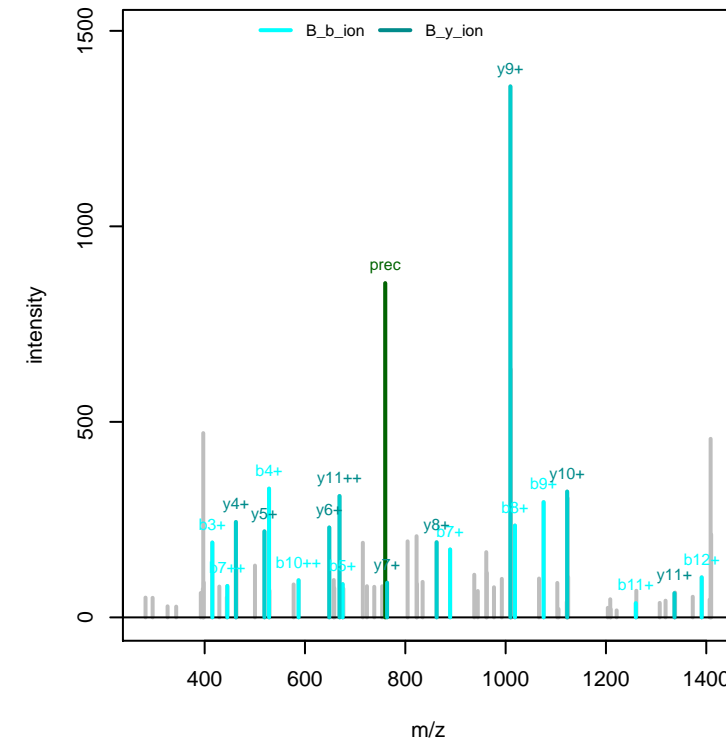

GHYTFSVK  
ITGPKNENIK

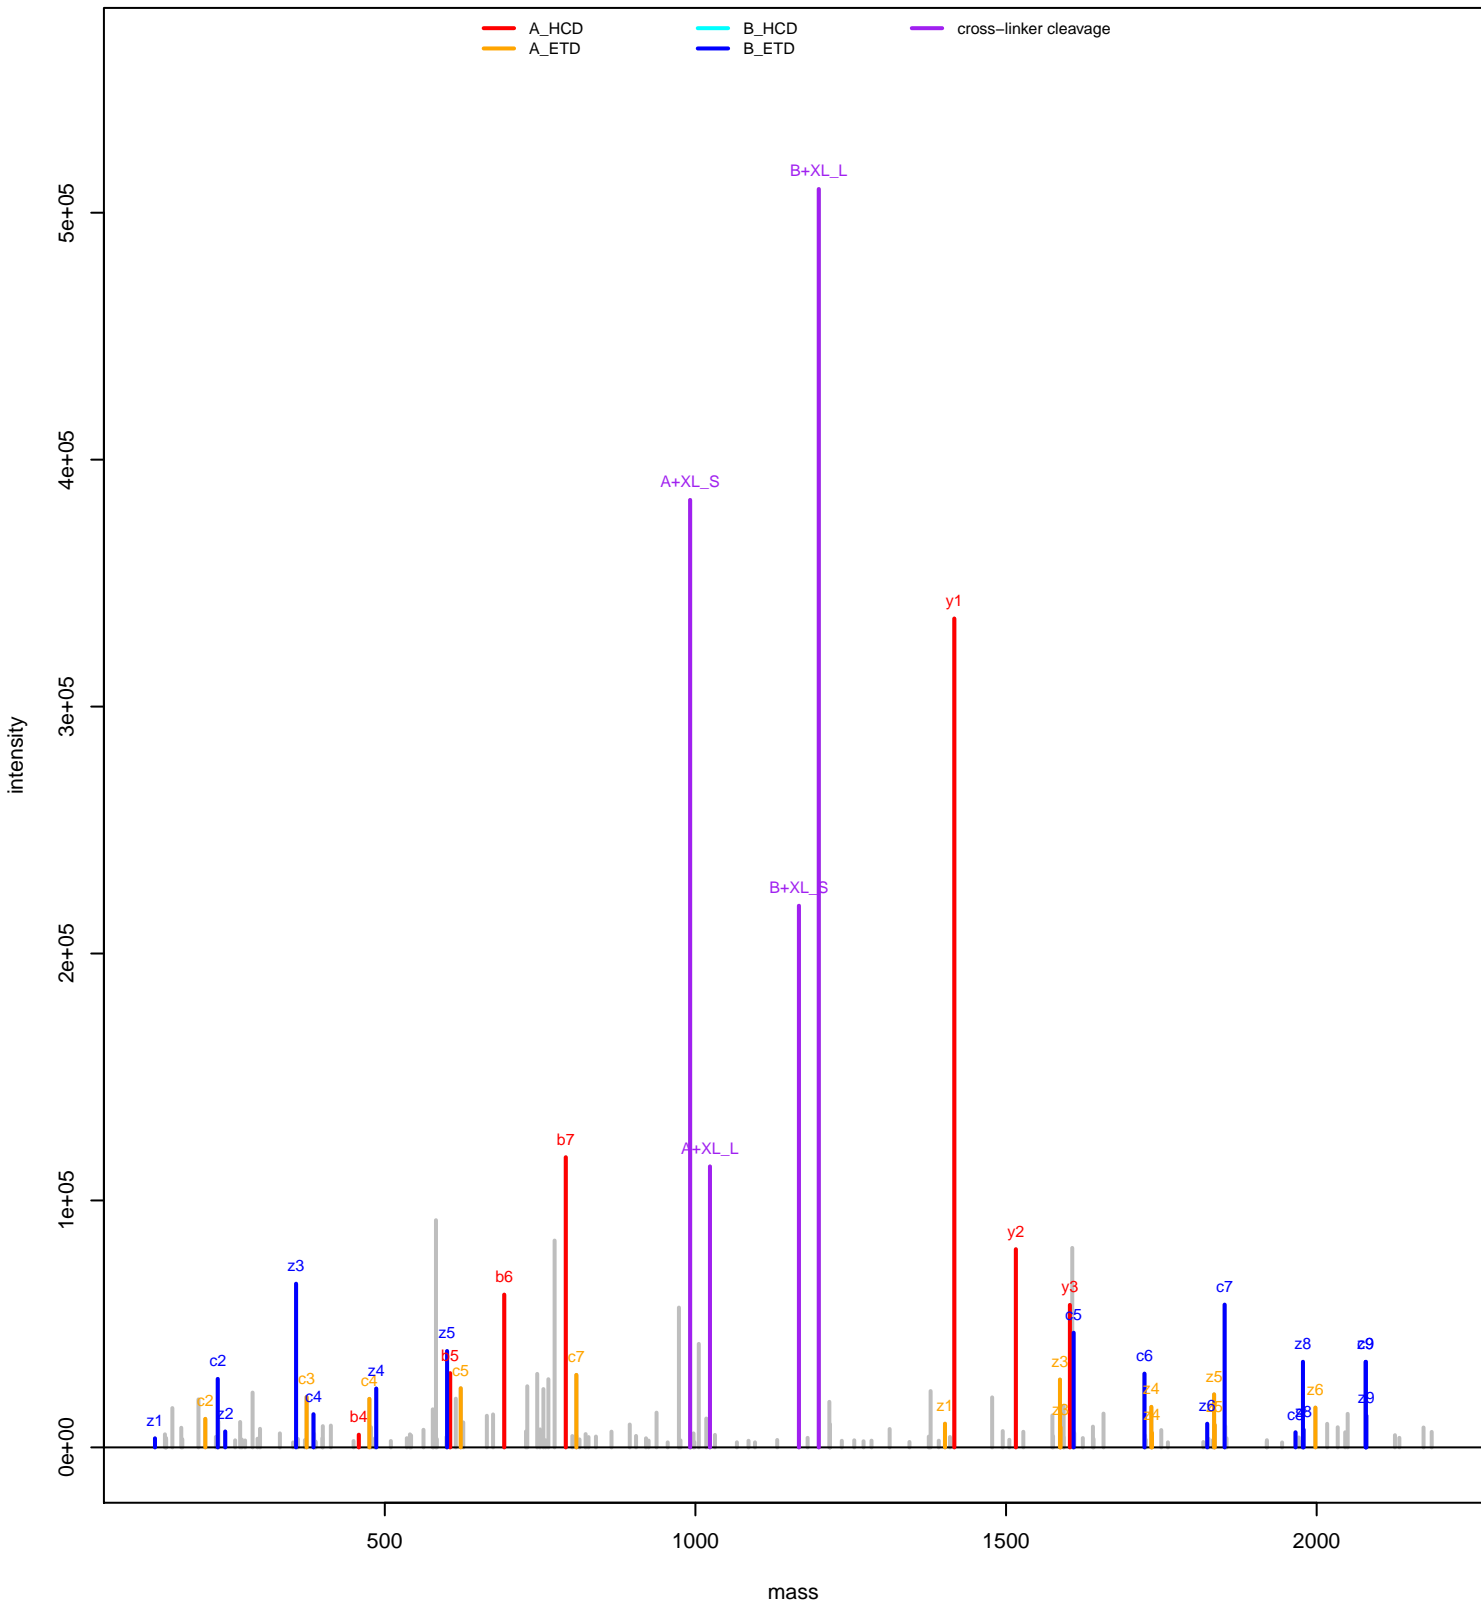

GHYTFSVK+XL\_S

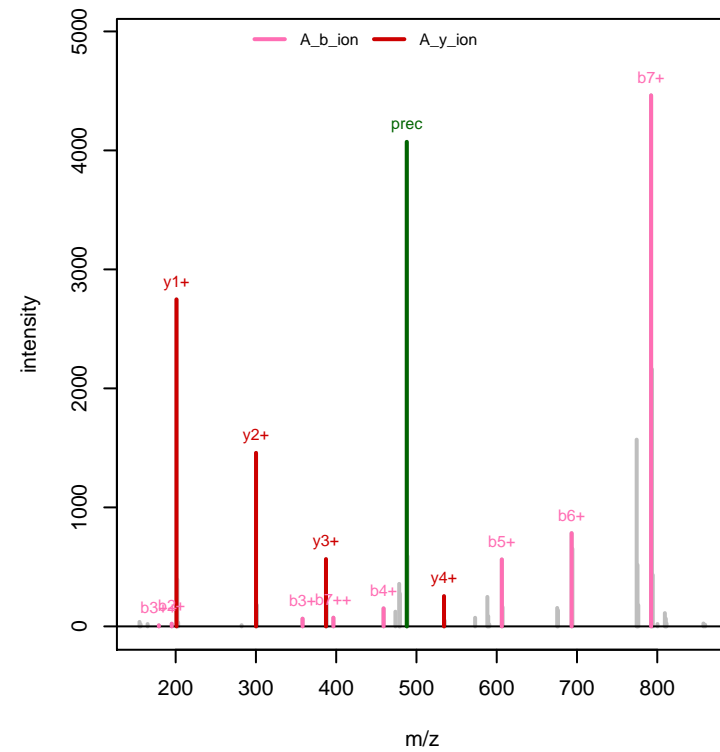

GHYTFSVK+XL\_L

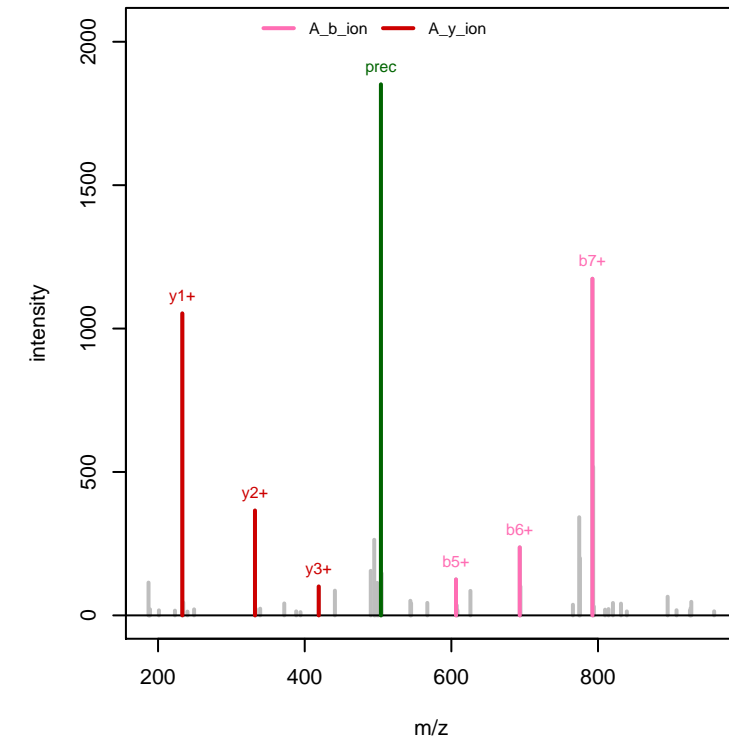

ITGPKNENIK+XL\_S

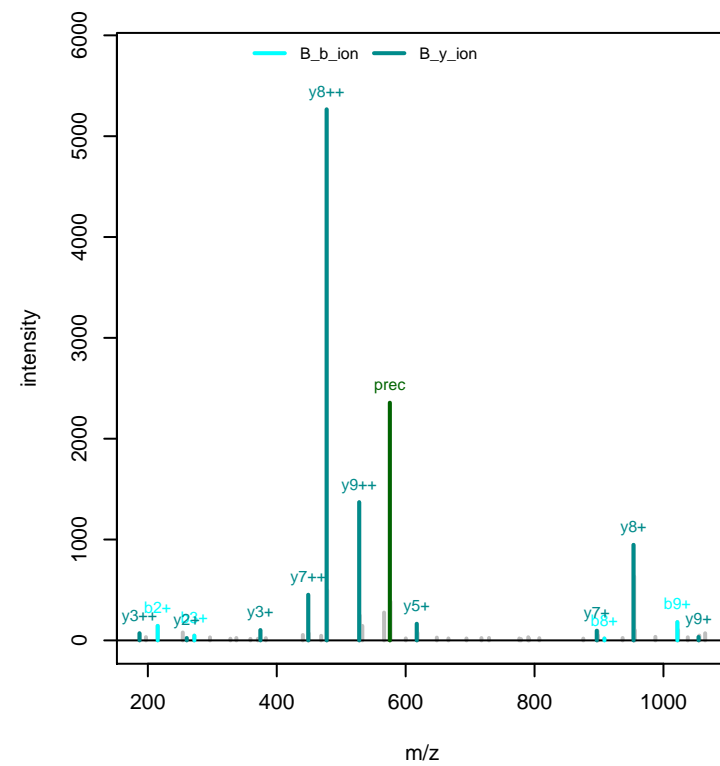

ITGPKNENIK+XL\_L

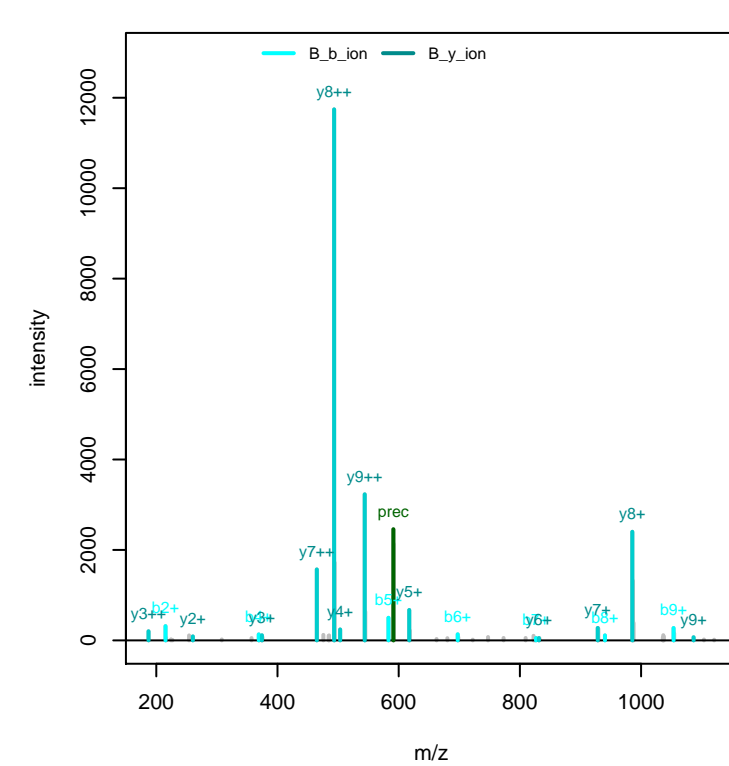

LVDKALWPLGK  
QAEKEGQEPDPR

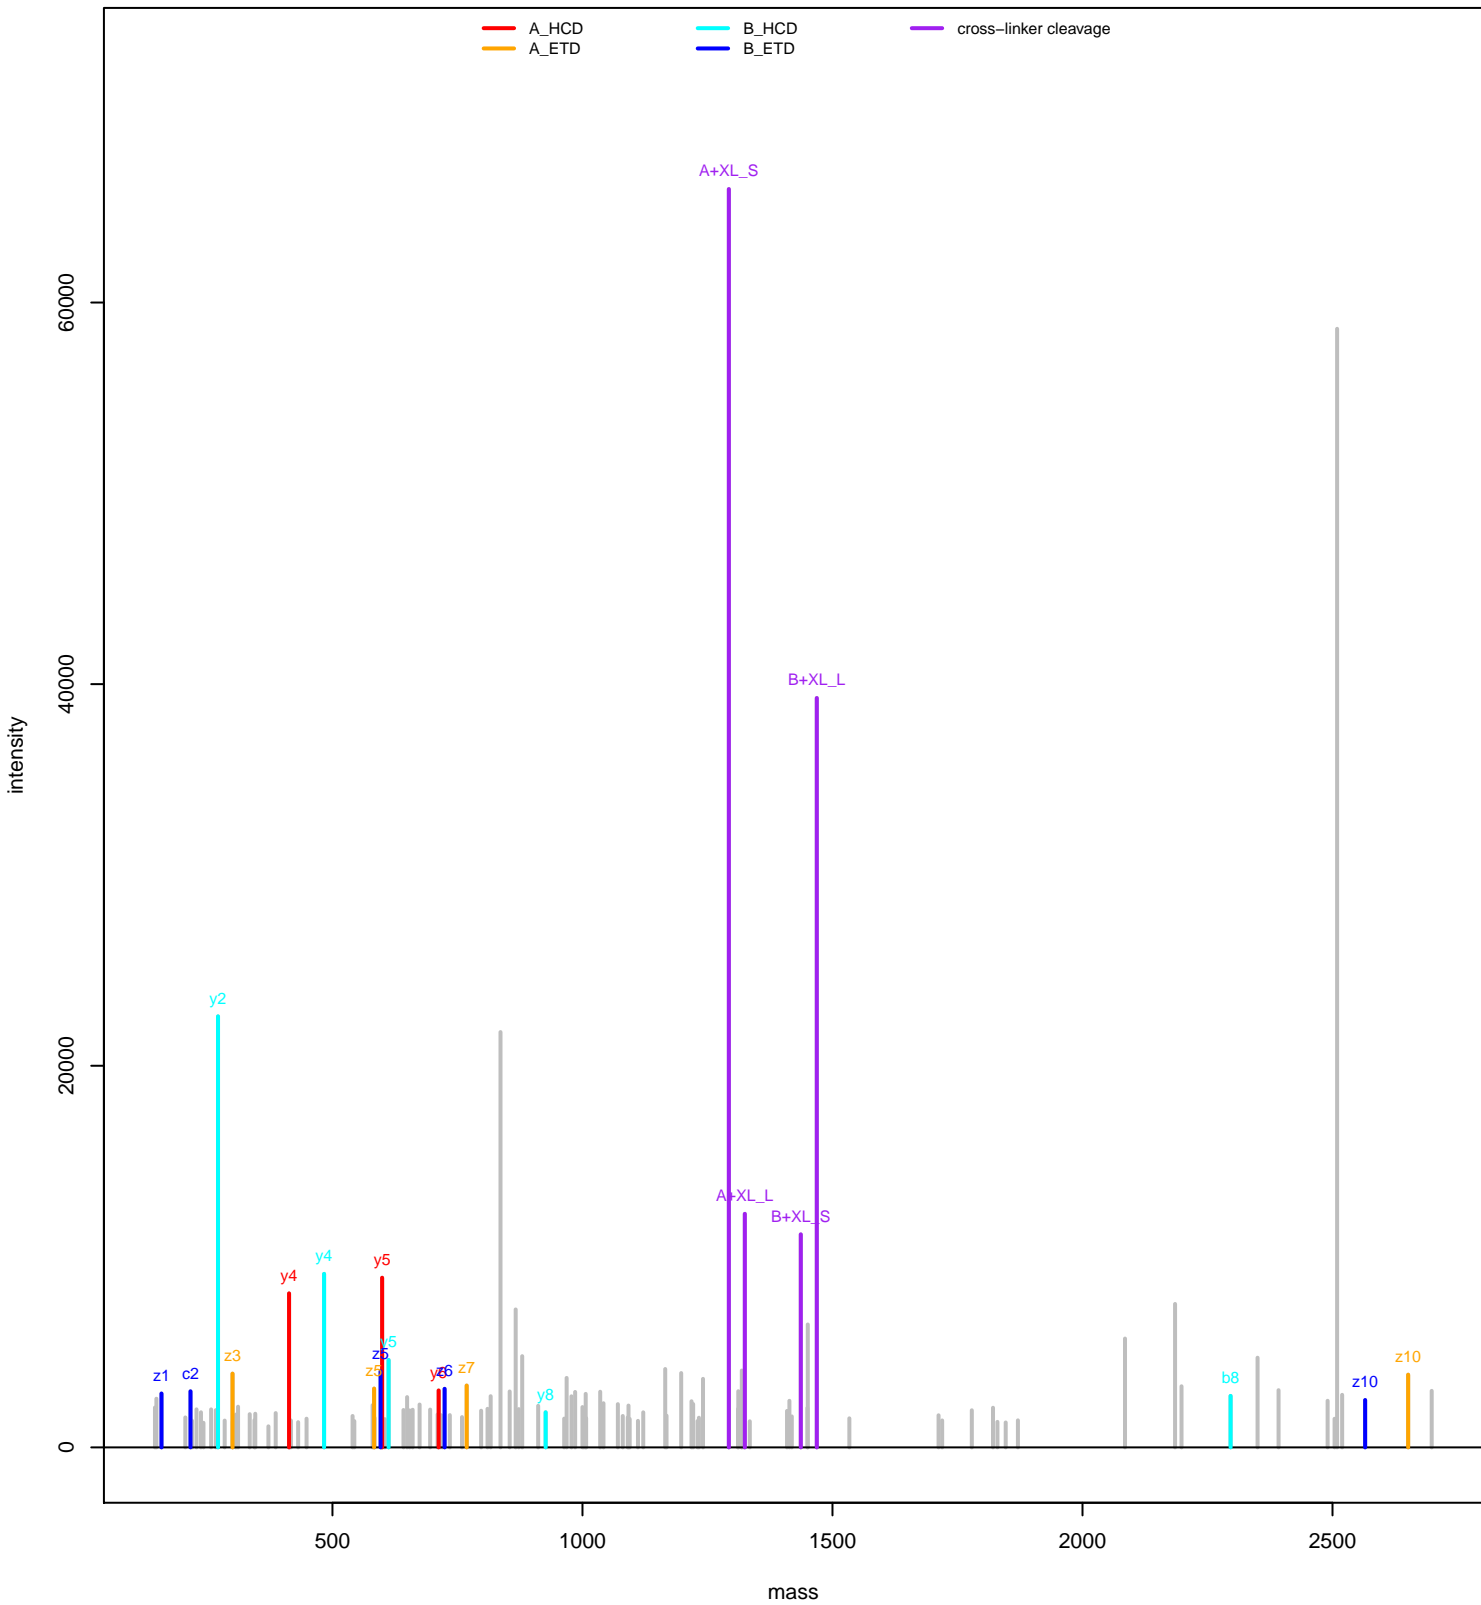

LVDKALWPLGK+XL\_S

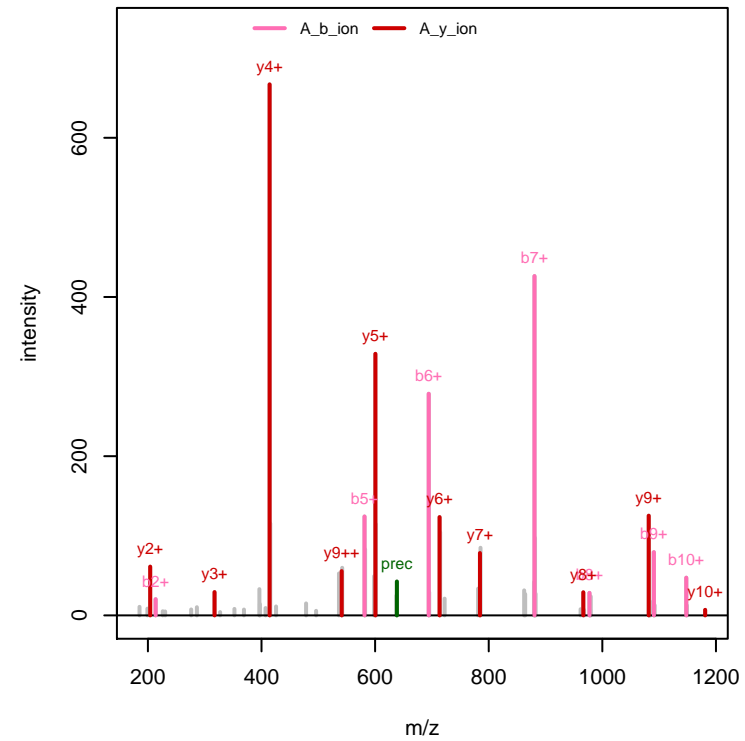

LVDKALWPLGK+XL\_L

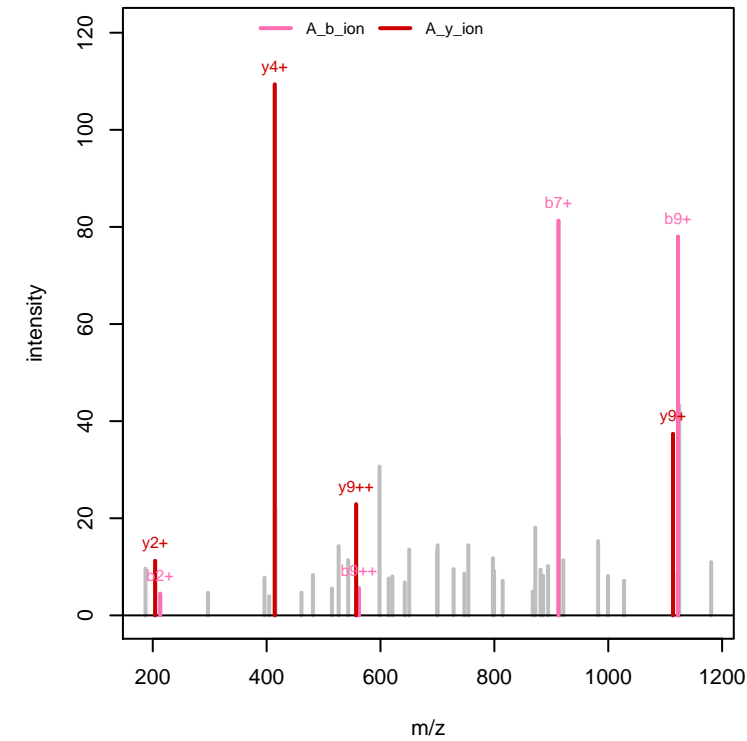

QAEKEGQEPDPR+XL\_S

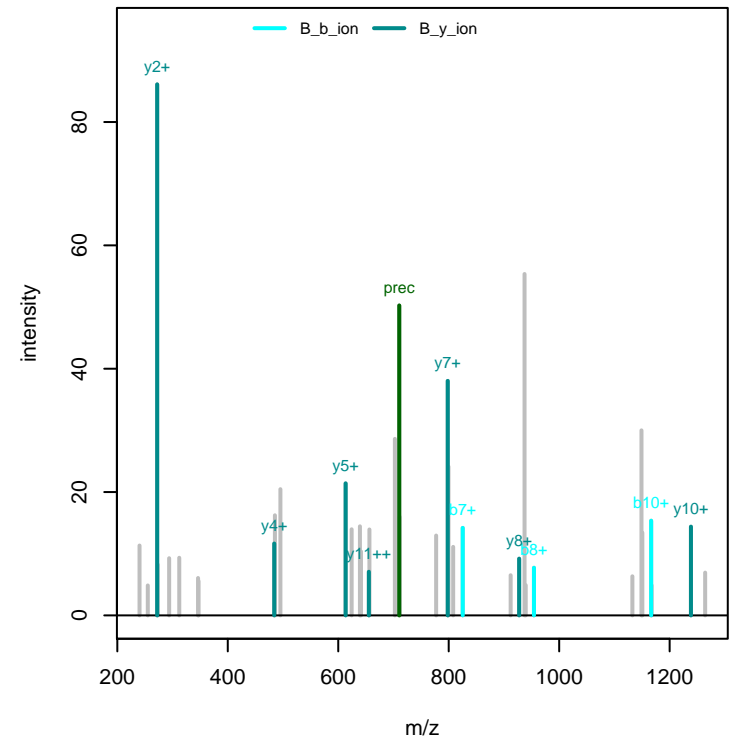

QAEKEGQEPDPR+XL\_L

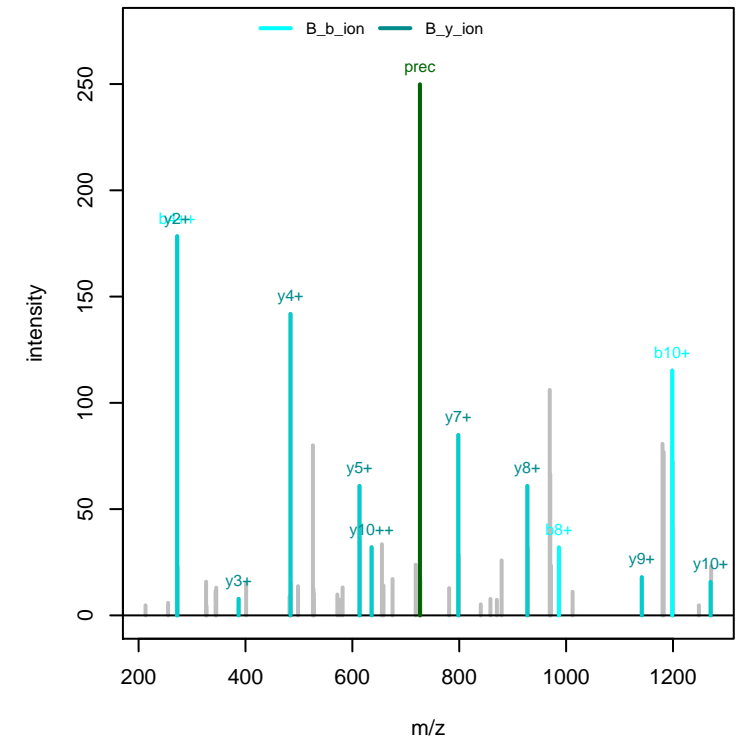

EQEKGLDR  
KYDIPVVMDSAR

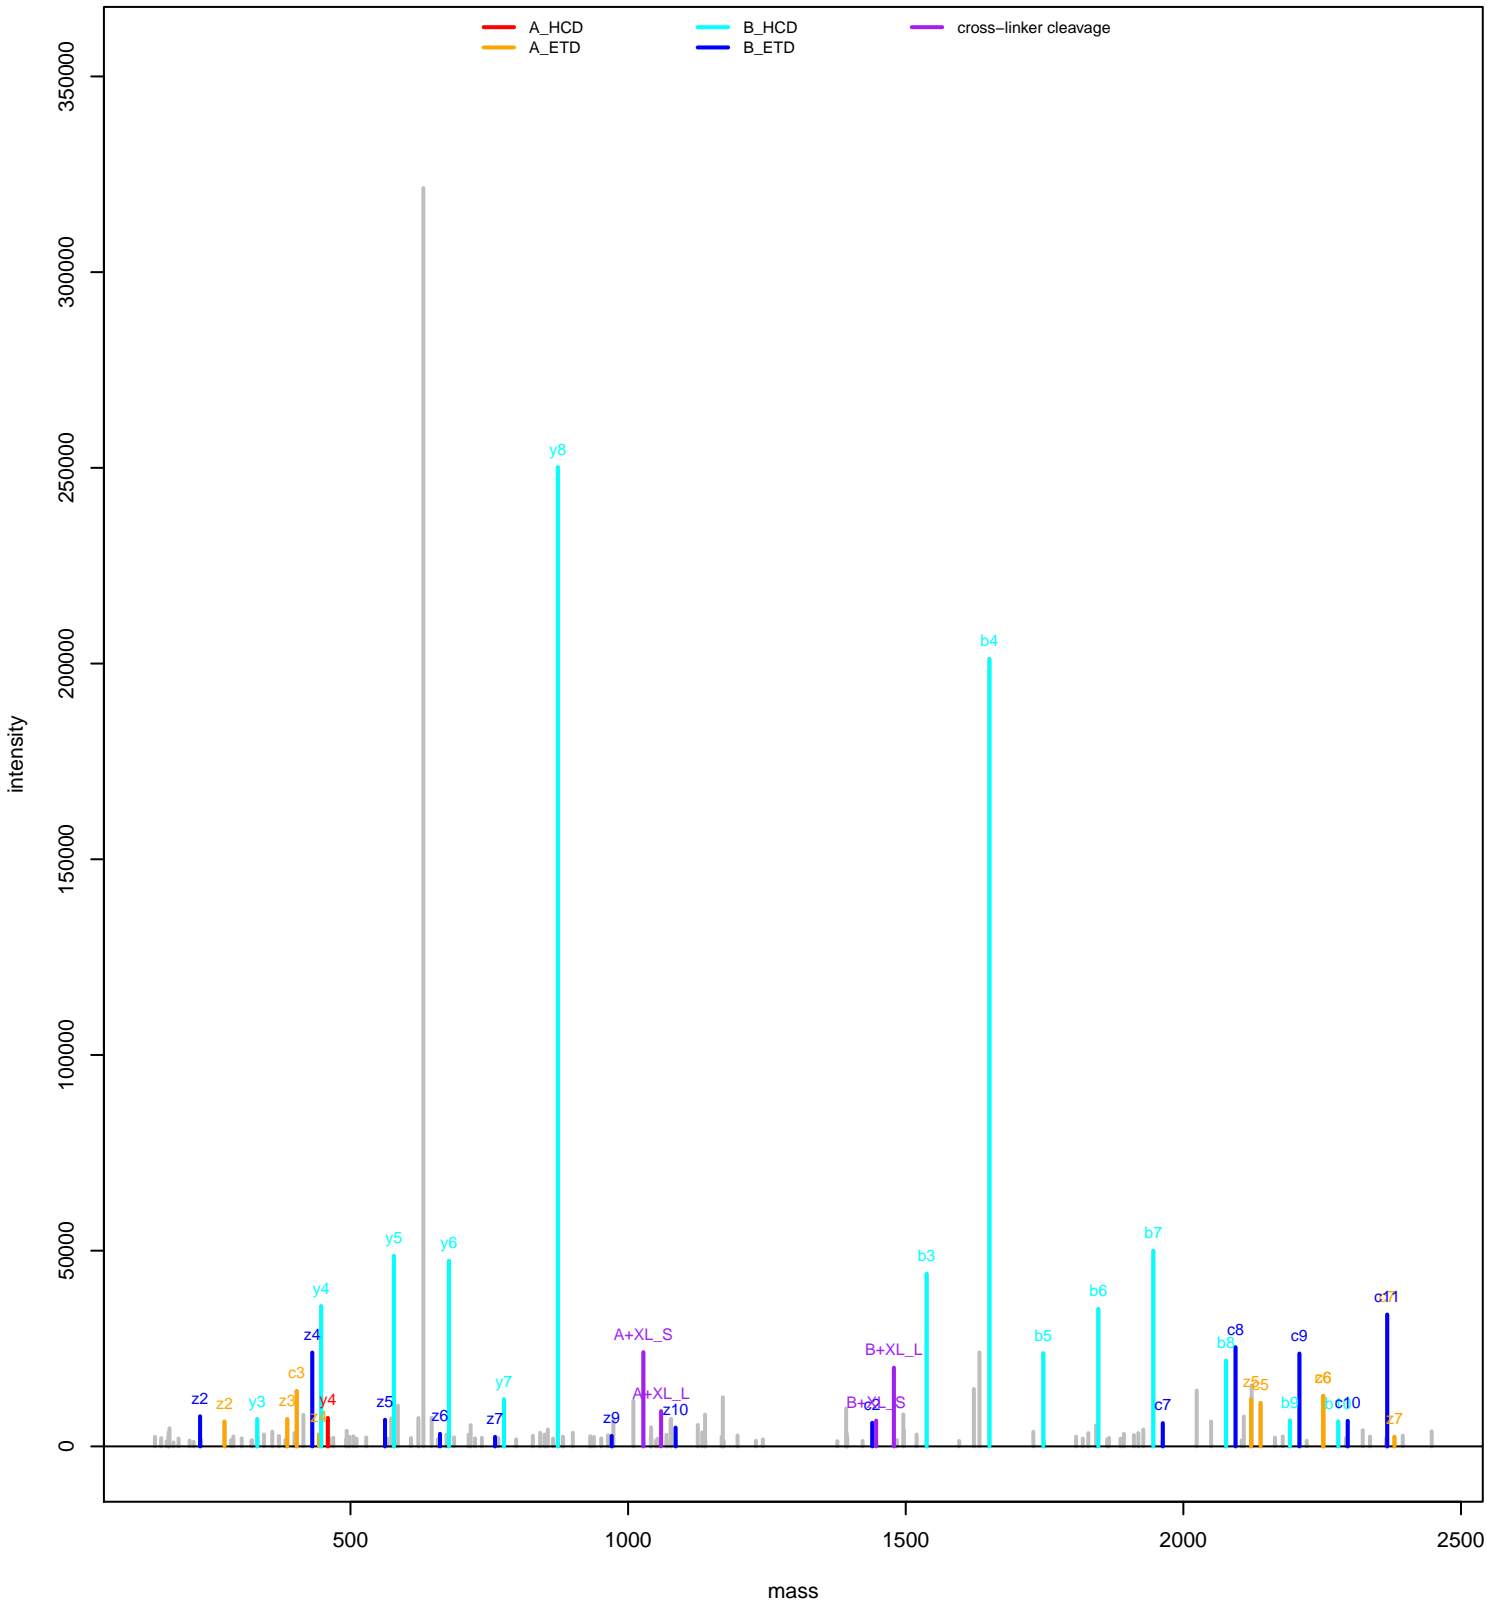

EQEKGLDR+XL\_S

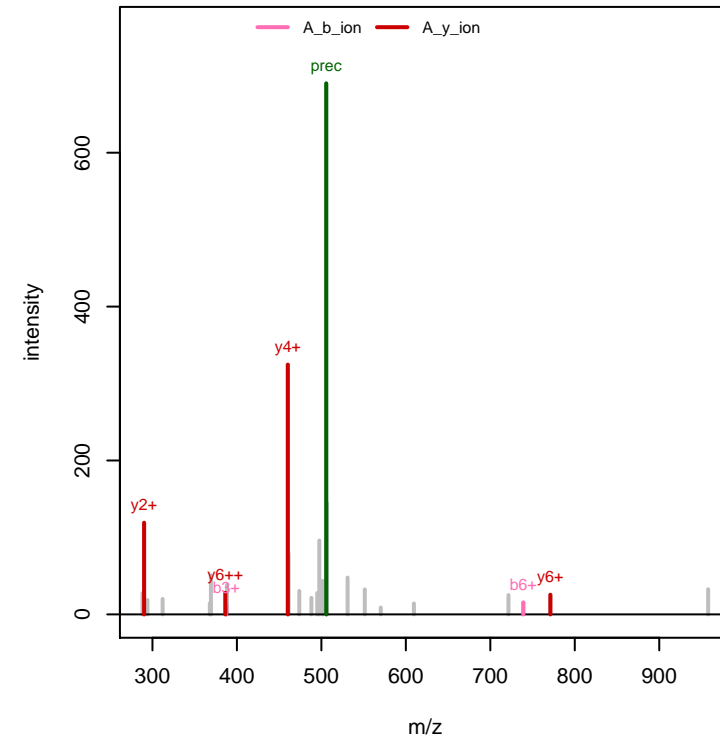

EQEKGLDR+XL\_L

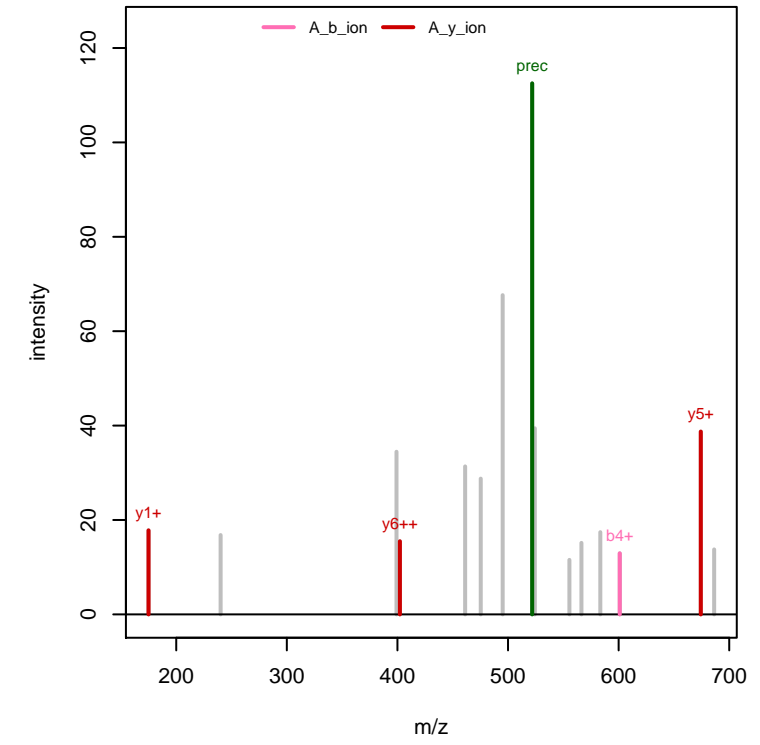

KYDIPVVMDSAR+XL\_S

KYDIPVVMDSAR+XL\_L

KSGVLTGLPDAYGR  
TMLYAINGGVDEKLK

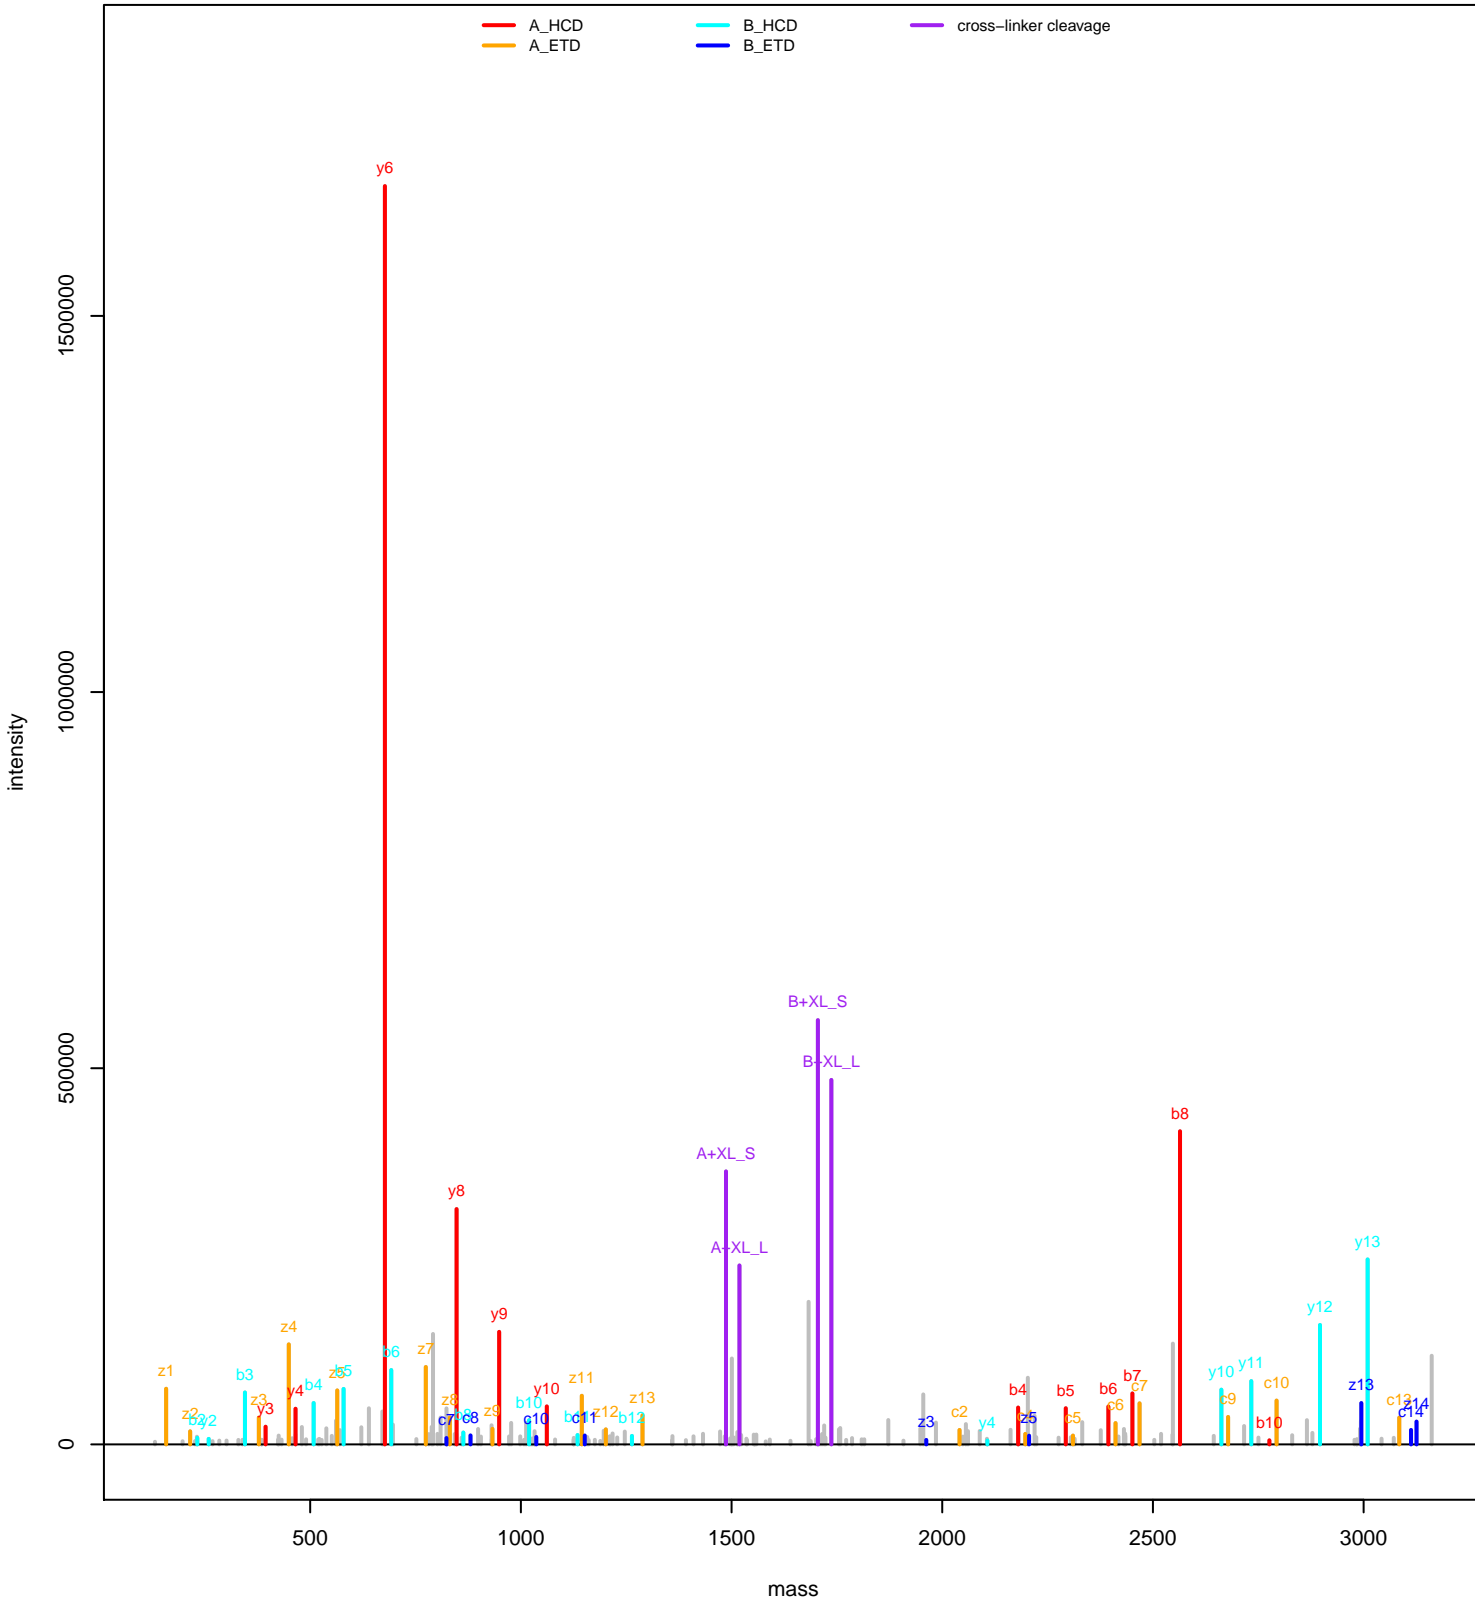

KSGVLTGLPDAYGR+XL\_S

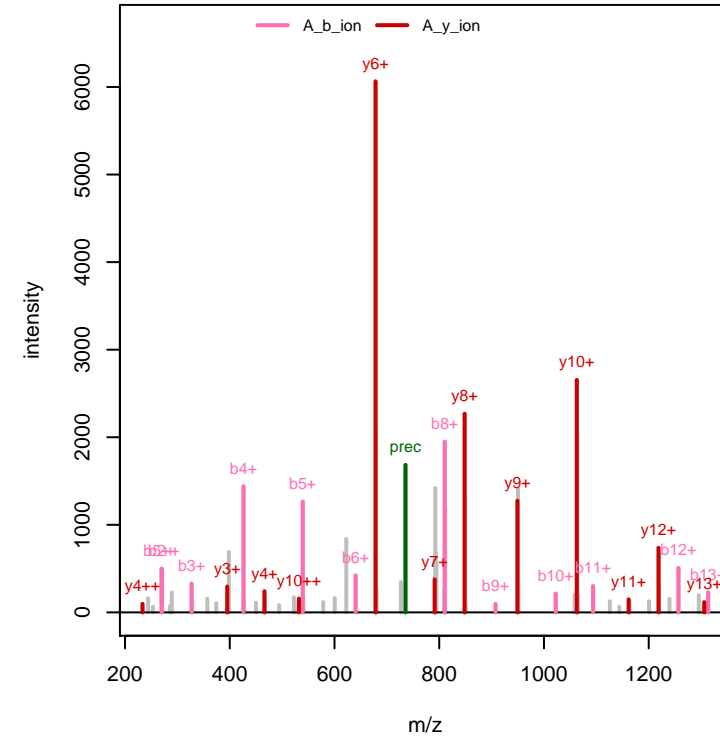

KSGVLTGLPDAYGR+XL\_L

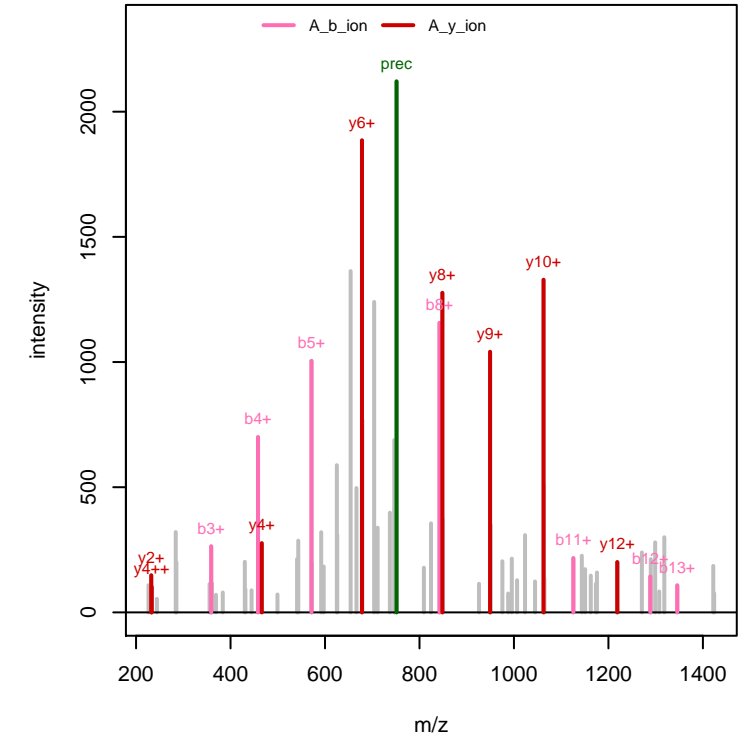

TMLYAINGGVDEKLK+XL\_S

TMLYAINGGVDEKLK+XL\_L

SEKRVPMTR  
STFQQLPGTGVKPDQFHSQTR

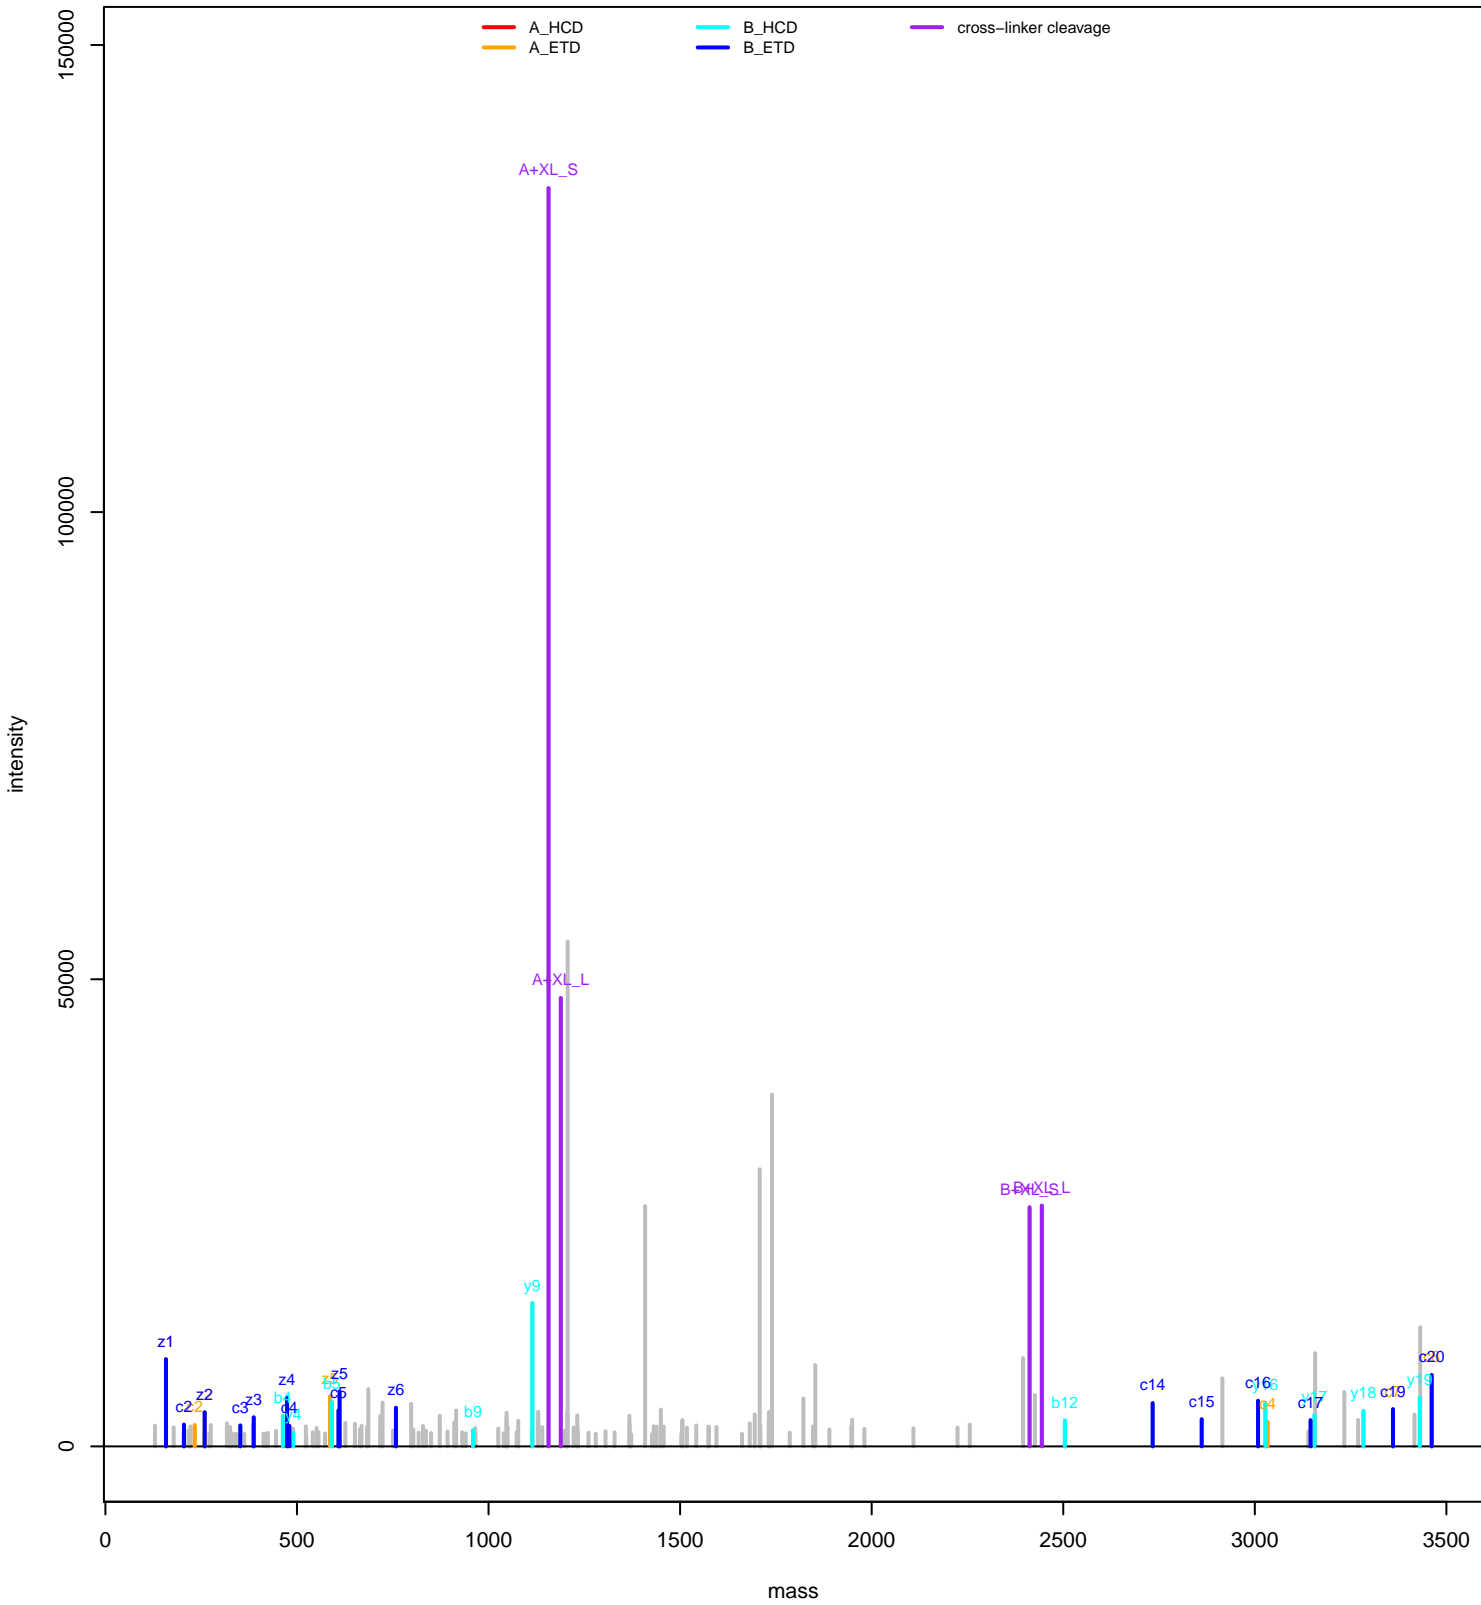

SEKRVPMTR+XL\_S

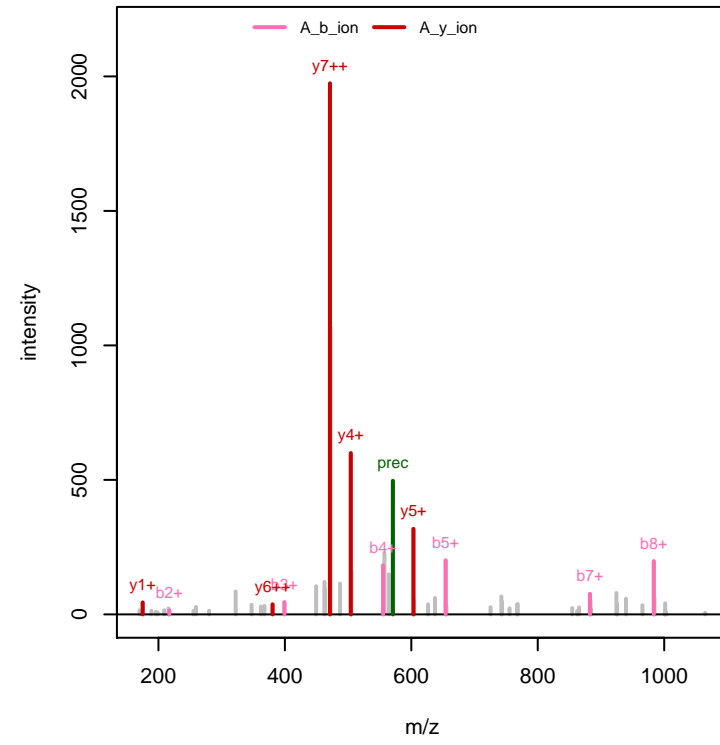

SEKRVPMTR+XL\_L

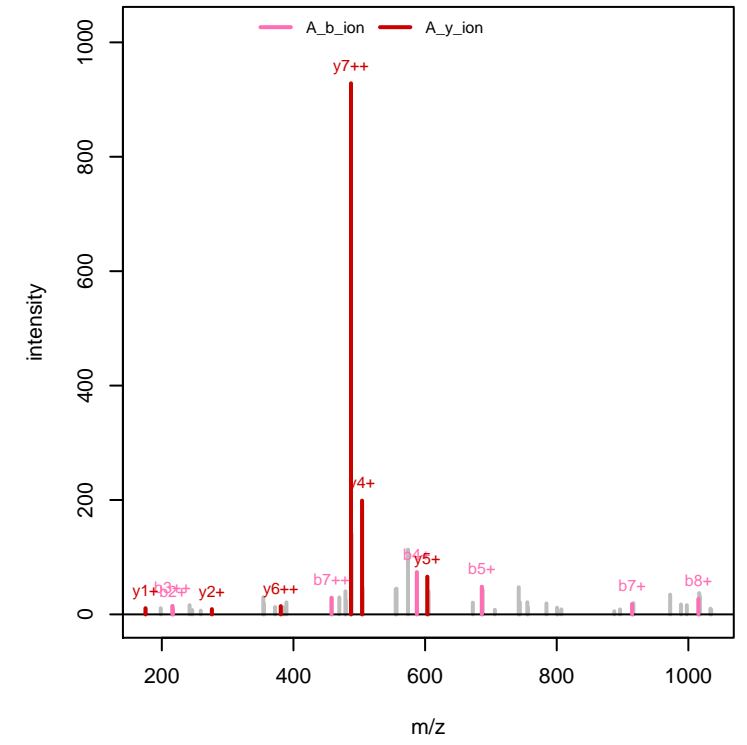

STFQQLPGTGVKPDQFHSQTR+XL\_S

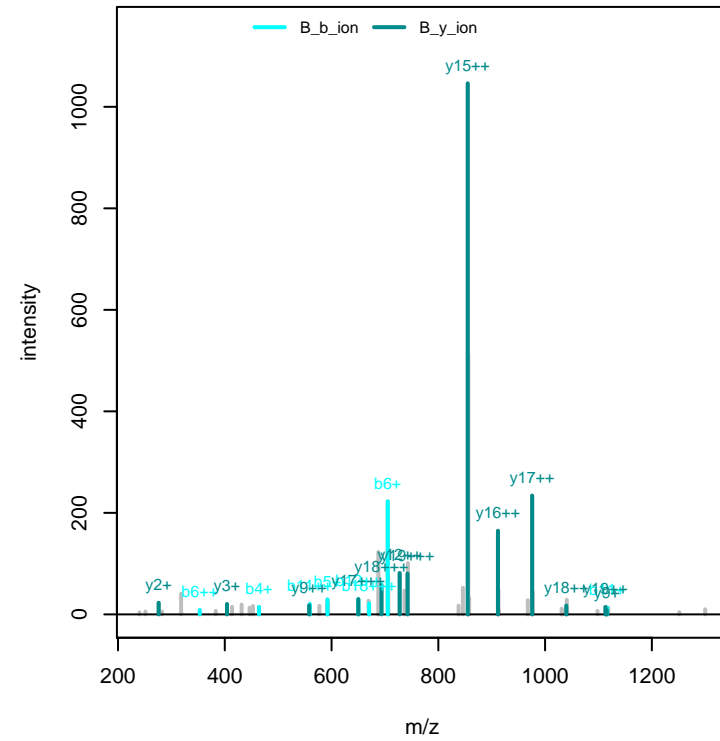

STFQQLPGTGVKPDQFHSQTR+XL\_L

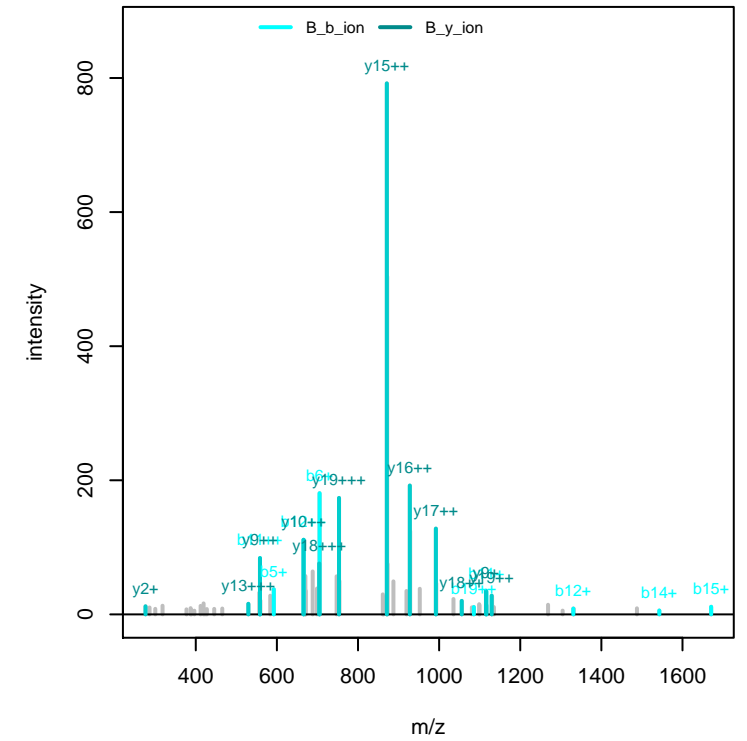



SKATNLLYTR  
AVQLGGVALGTTQVINSKTPK

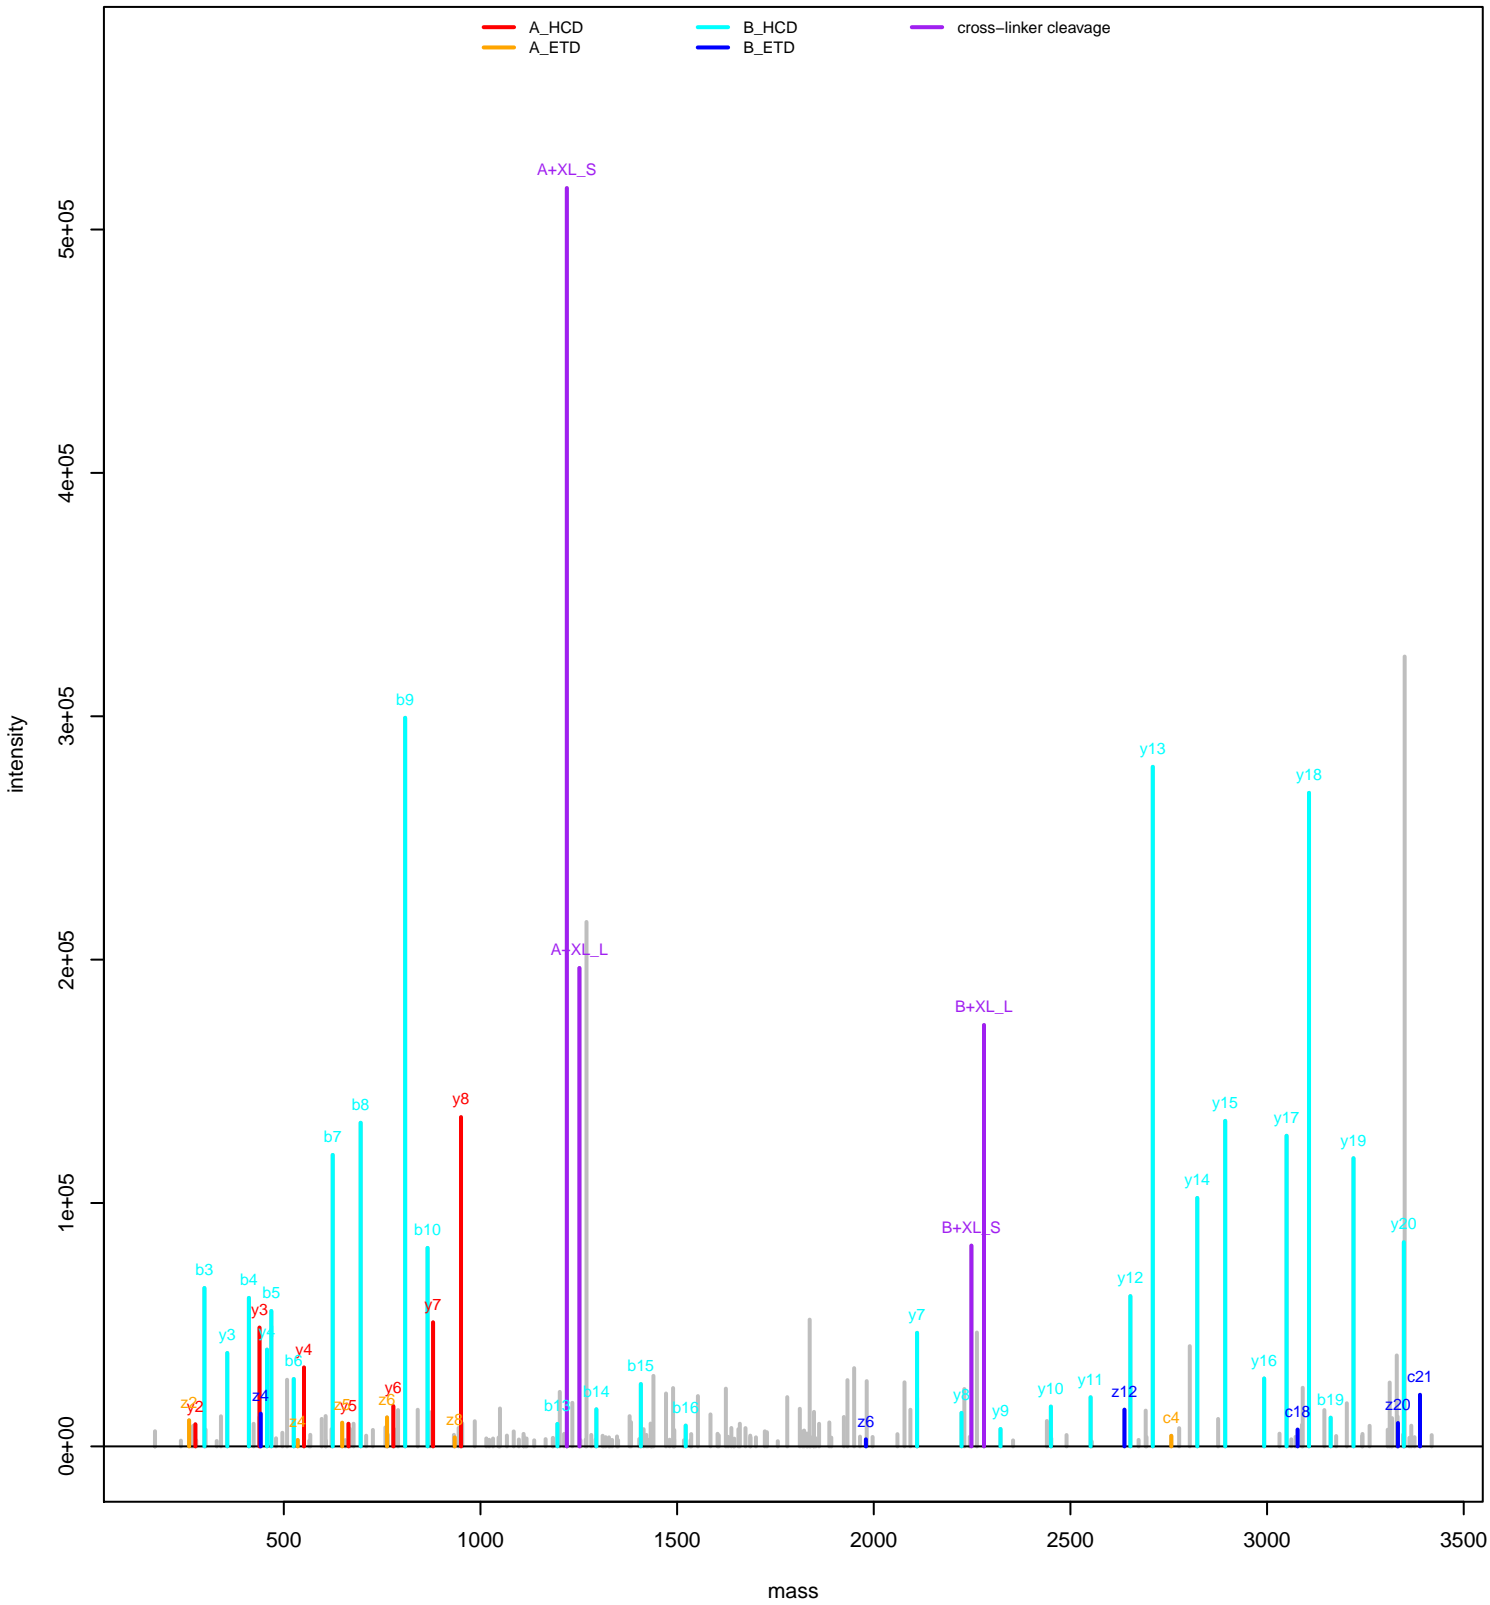

SKATNLLYTR+XL\_S

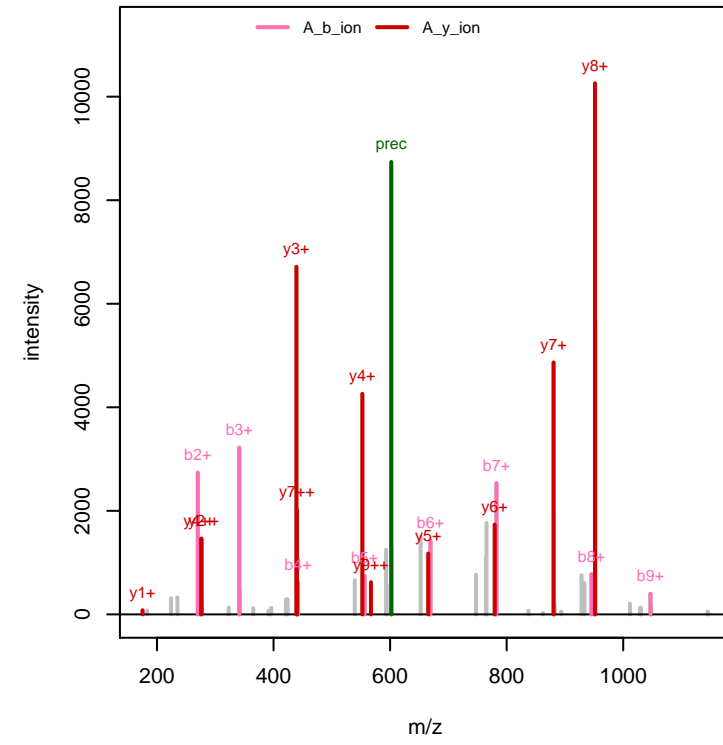

SKATNLLYTR+XL\_L

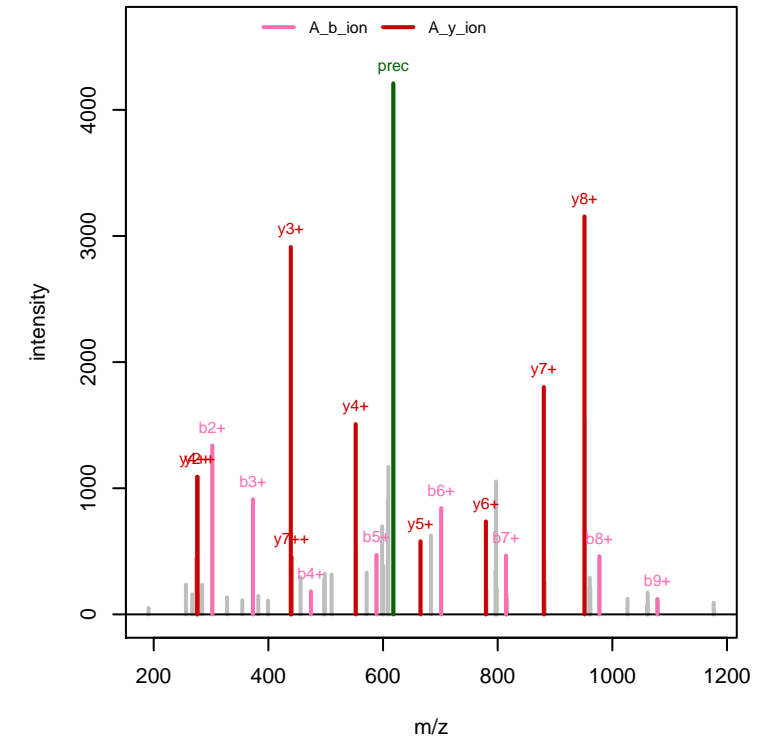

AVQLGGVALGTTQVINSKTPK+XL\_S

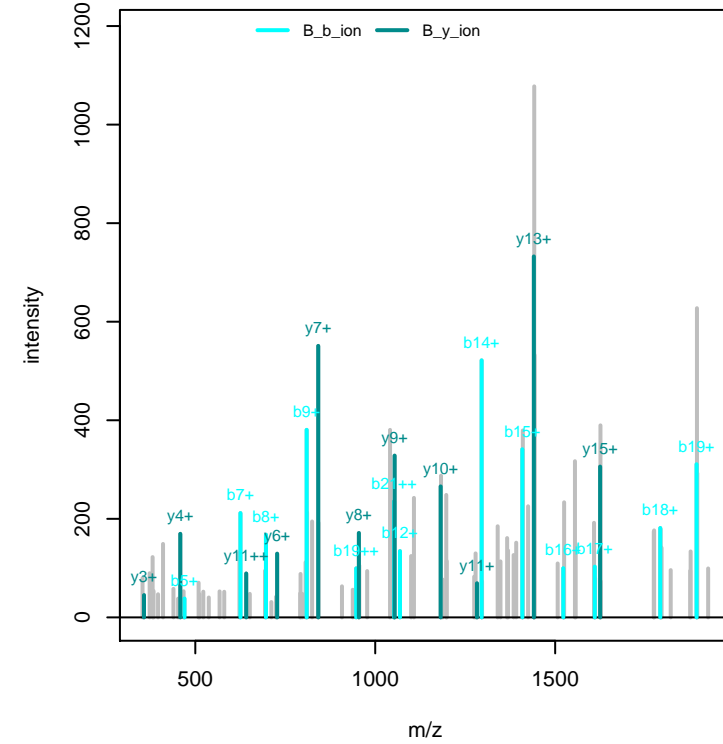

AVQLGGVALGTTQVINSKTPK+XL\_L

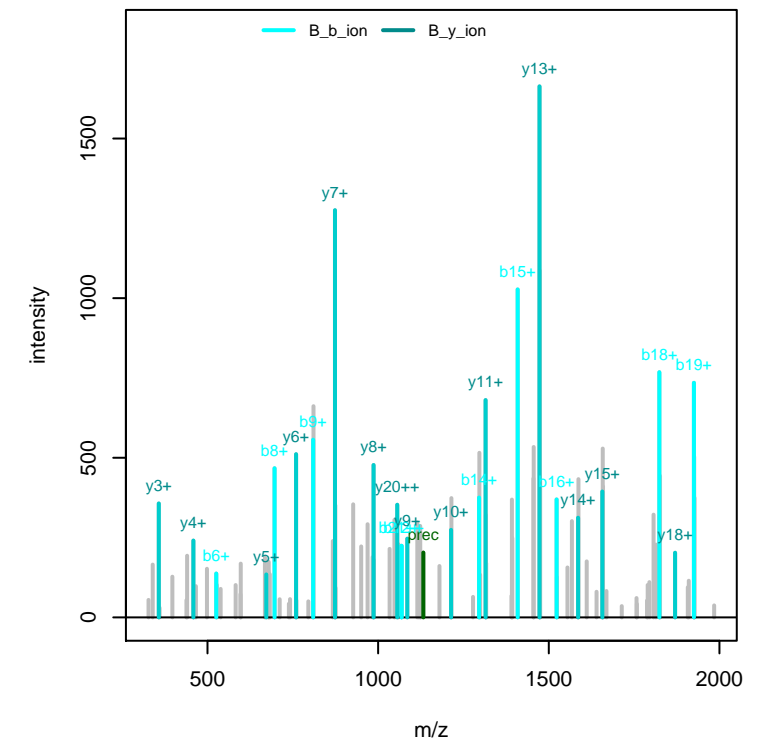

AKDATNK  
AVTNVAELNALVERVK

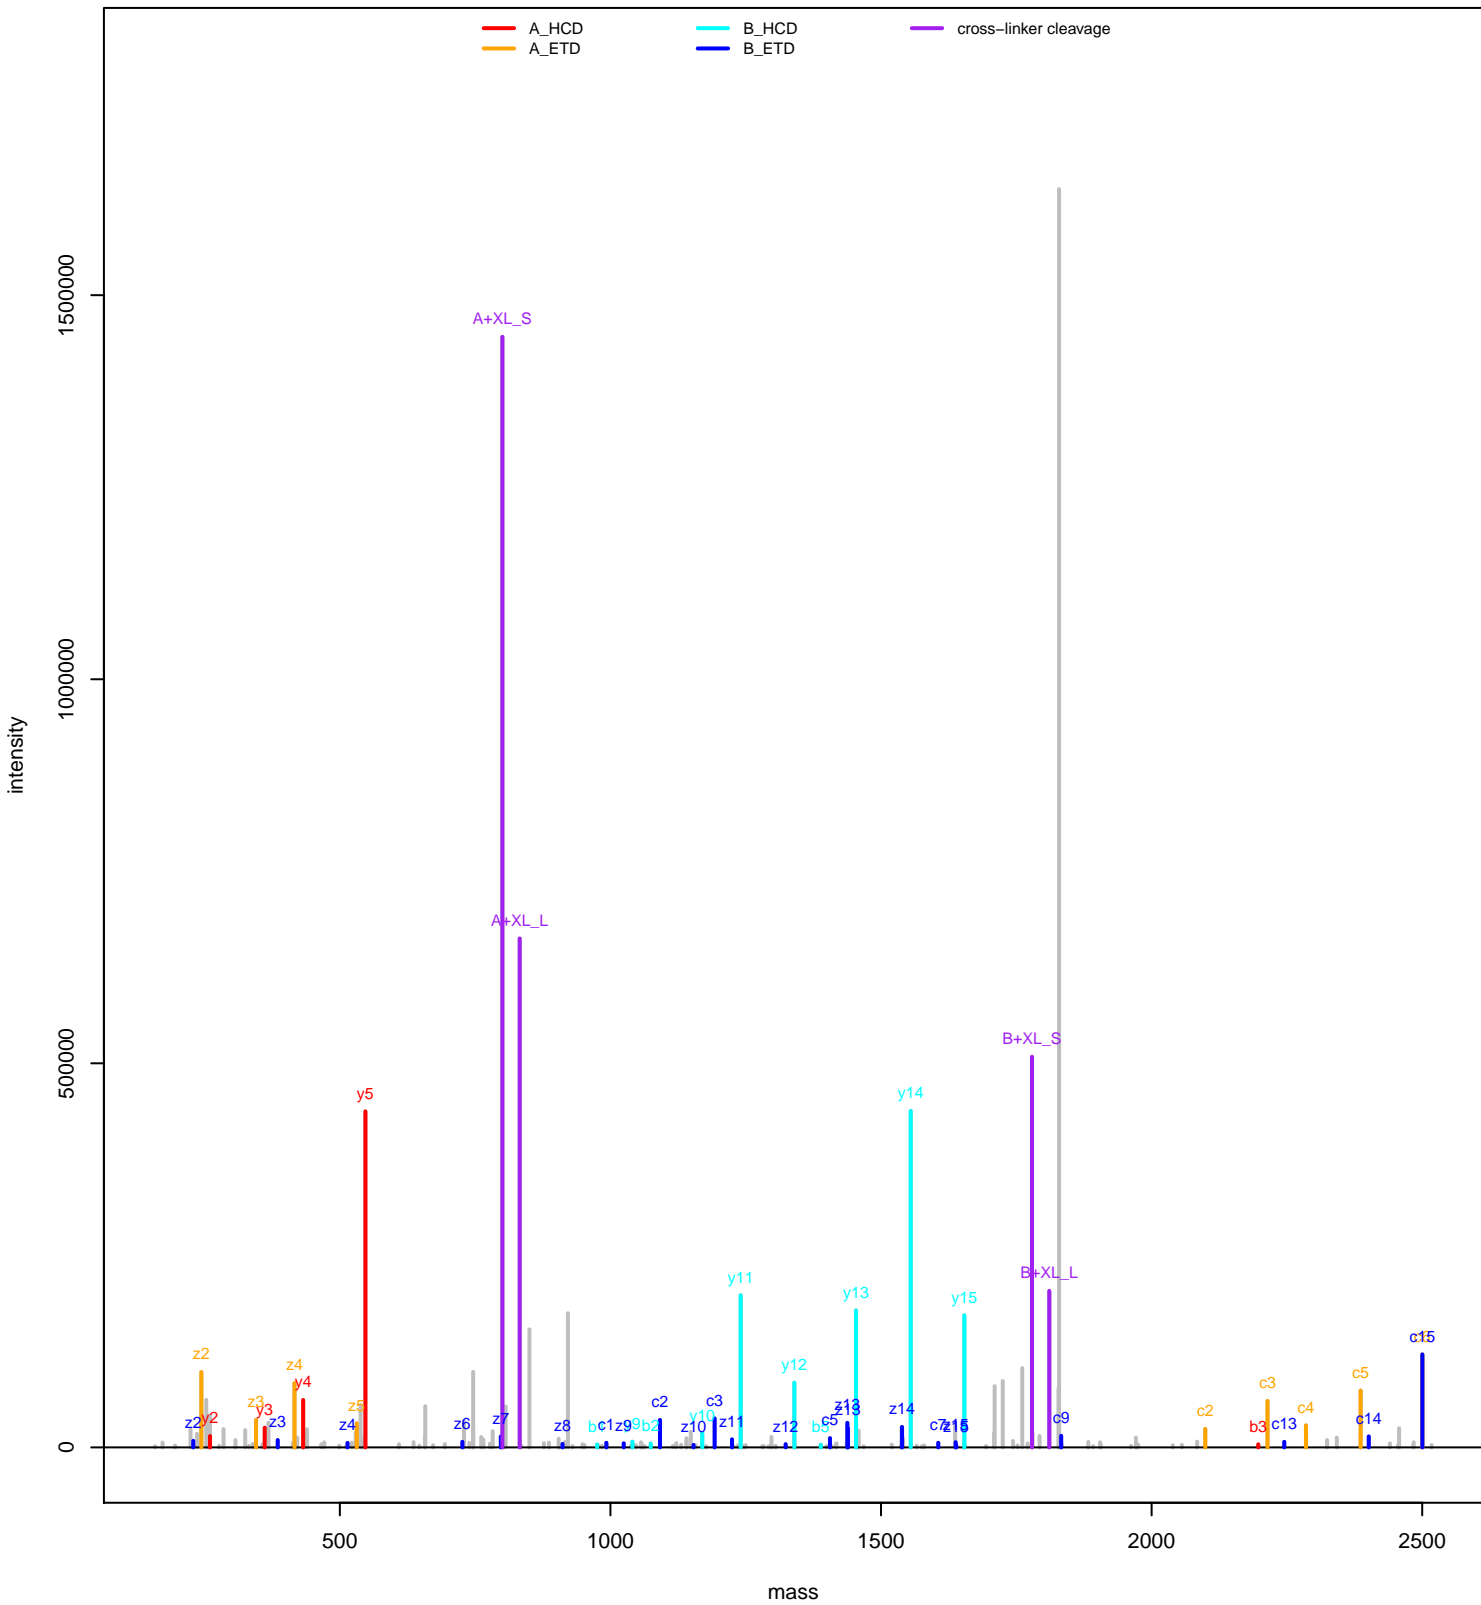

AKDATNK+XL\_S

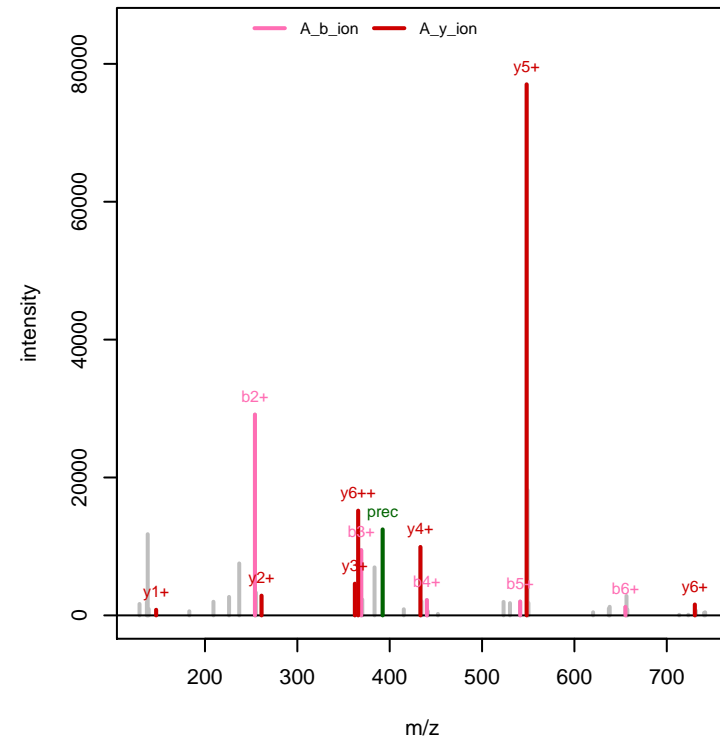

AKDATNK+XL\_L

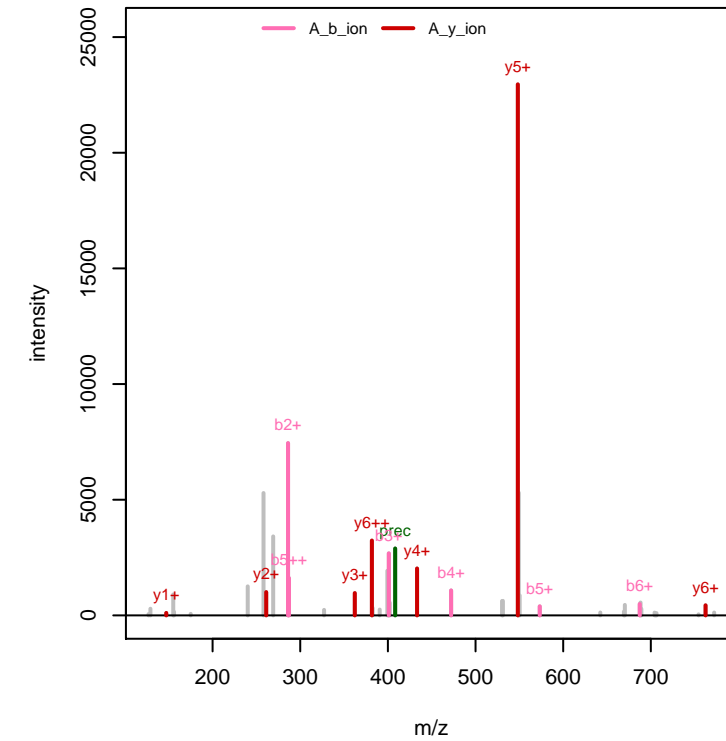

AVTNVAELNALVERVK+XL\_S

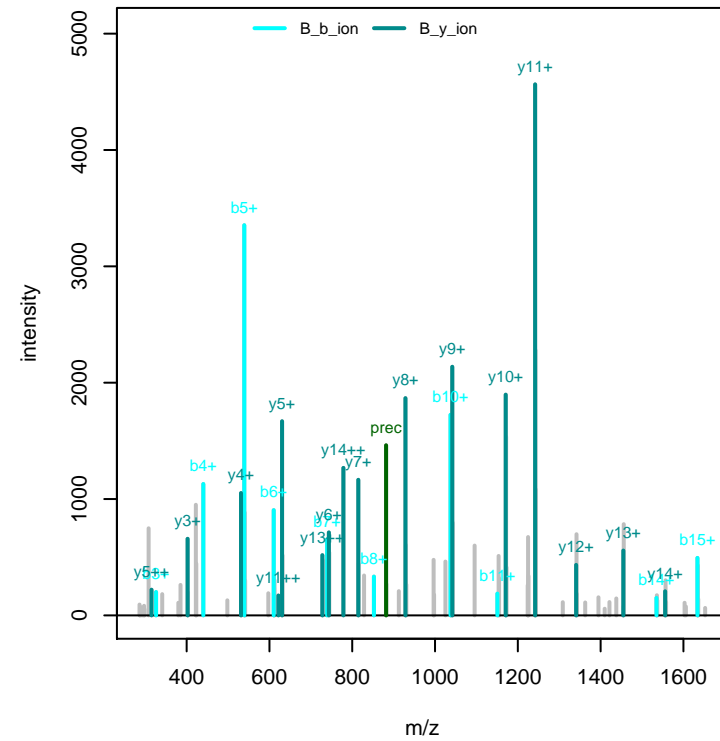

AVTNVAELNALVERVK+XL\_L

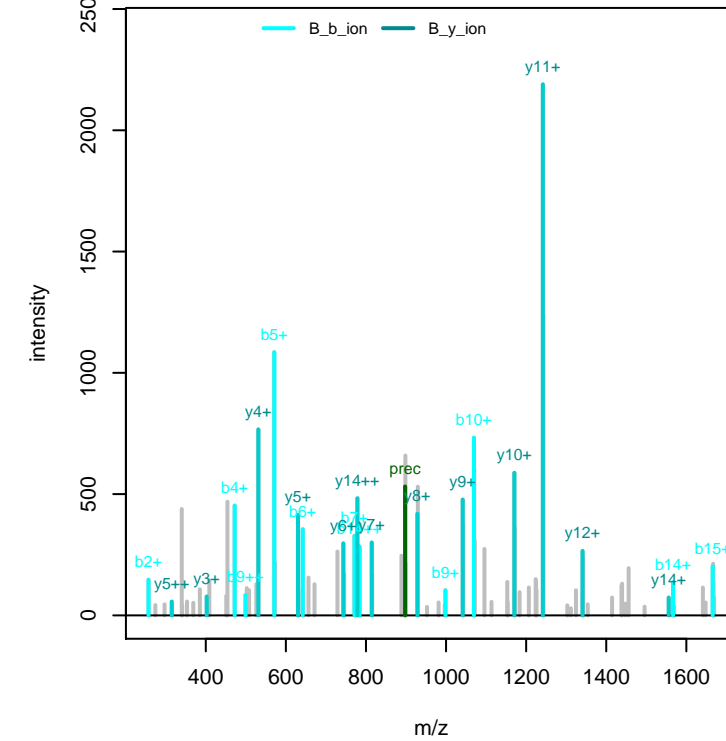

EQKITIK  
QATKDAGRIAGLEVK

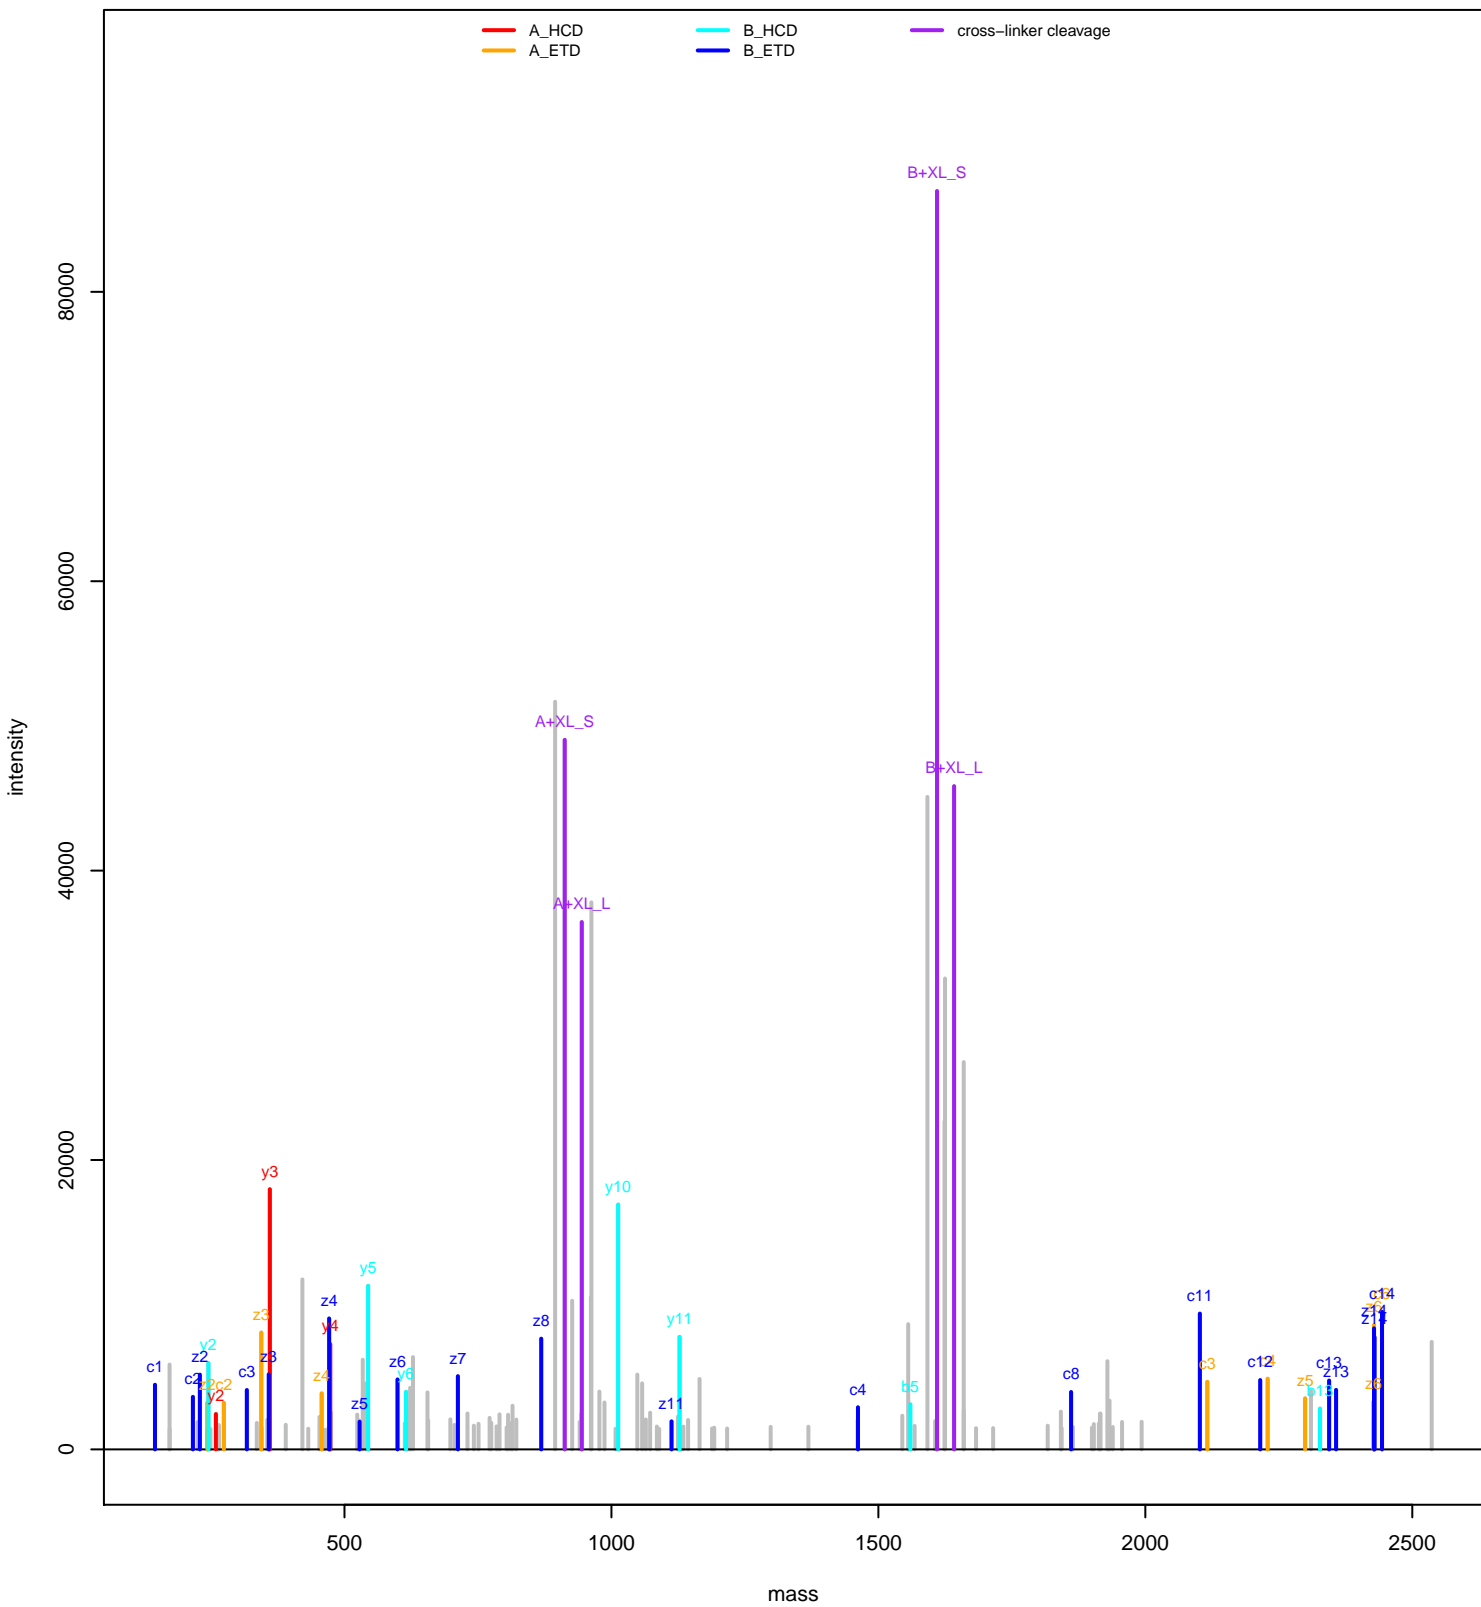

EQKITIK+XL\_S

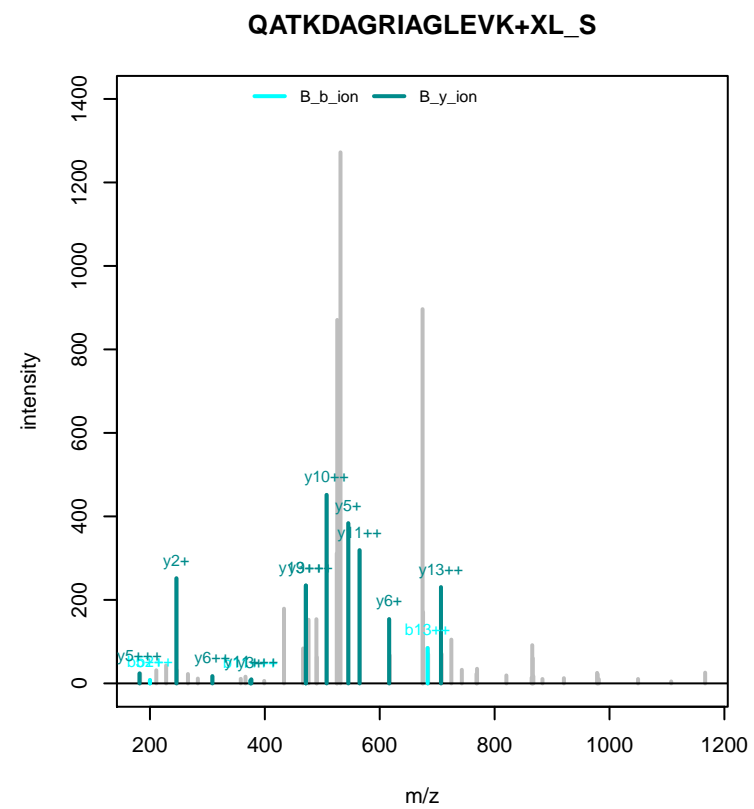

EQKITIK+XL\_L

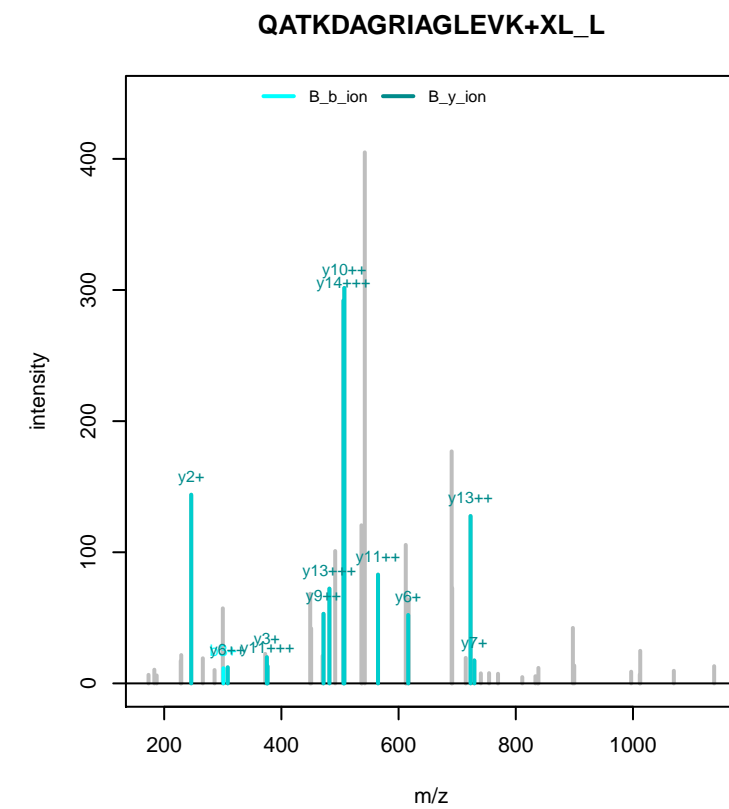

IAGDYIAKK  
YPVDLKLTVKQ

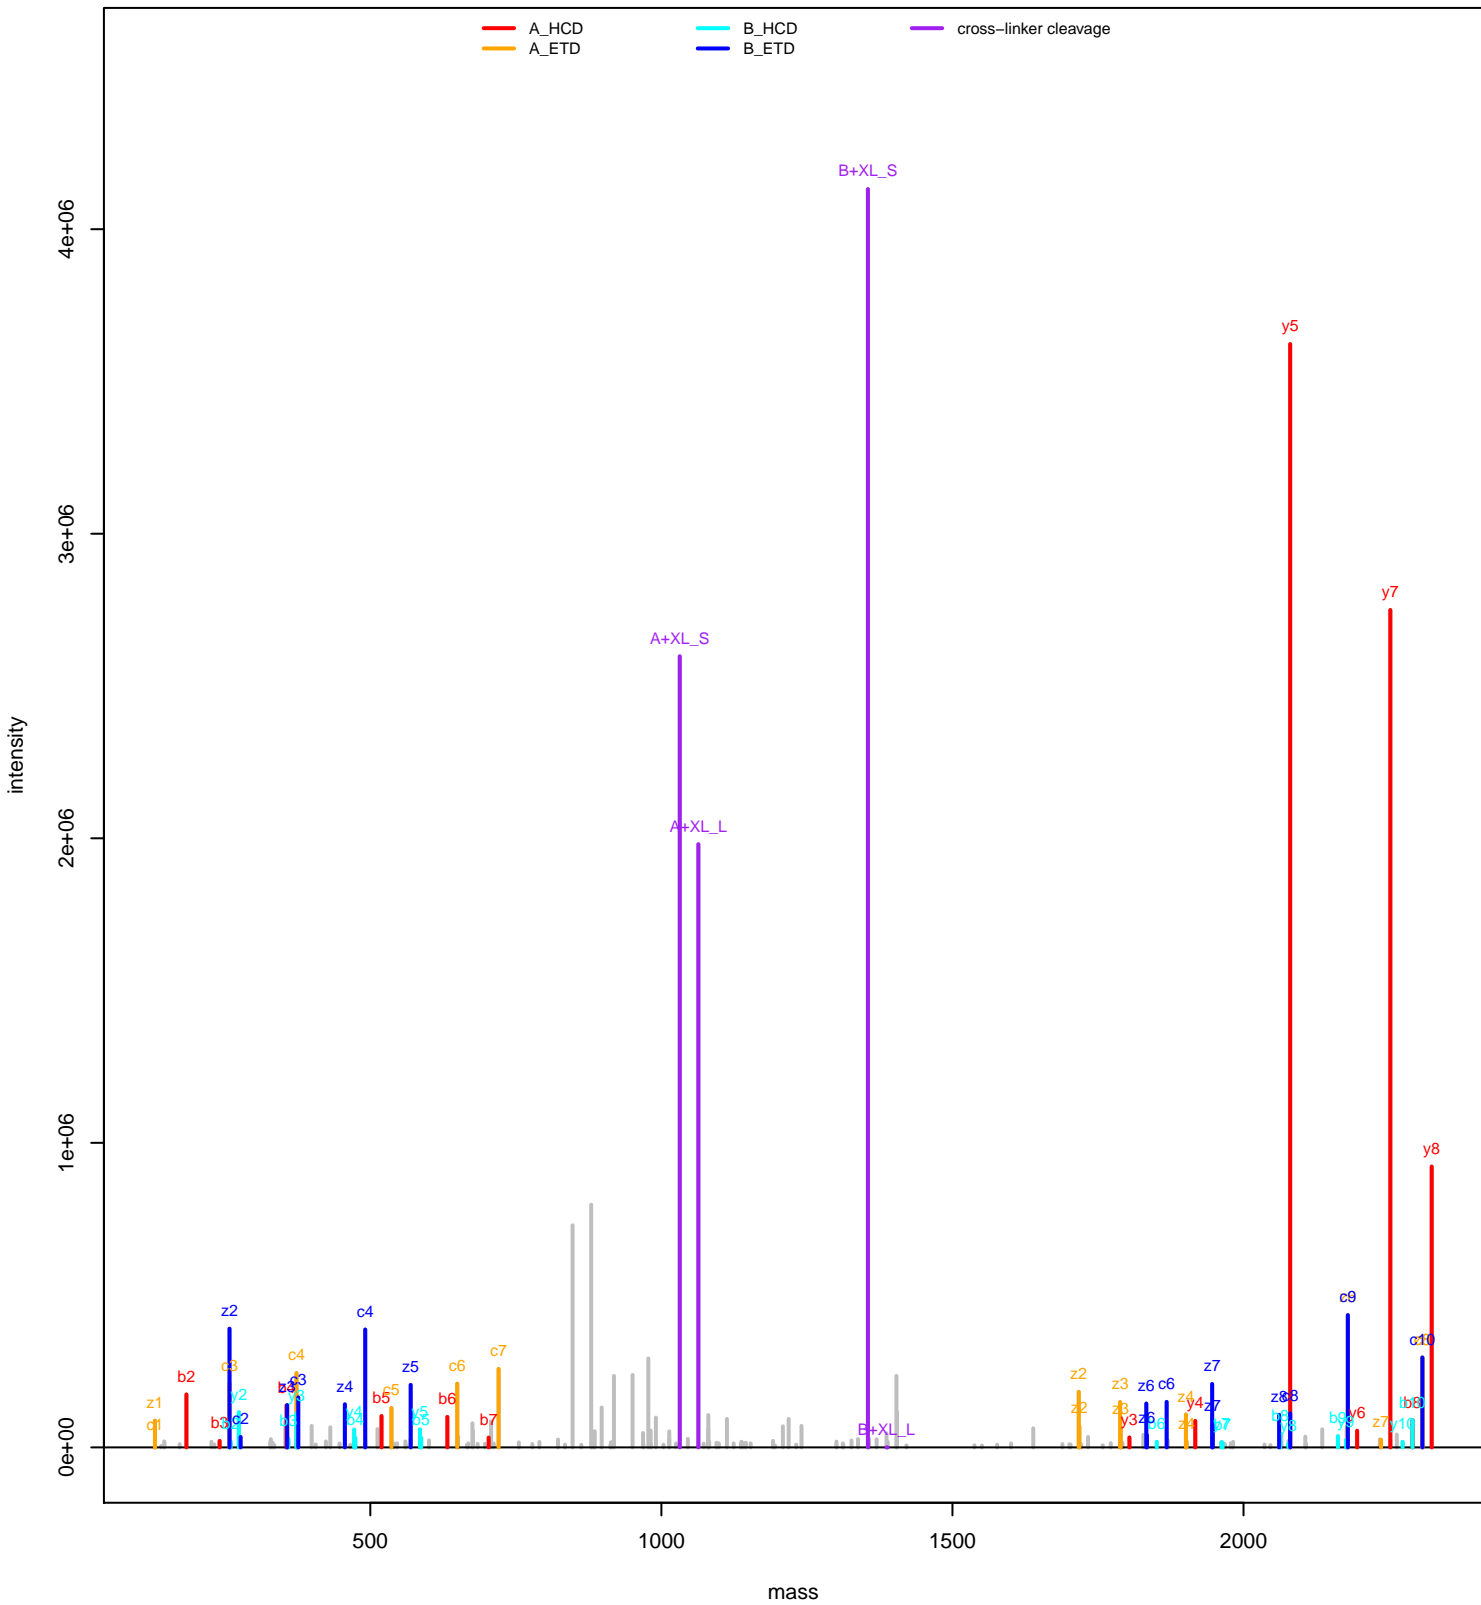

AQHNNNKETV  
CVEKDIDVAESLK

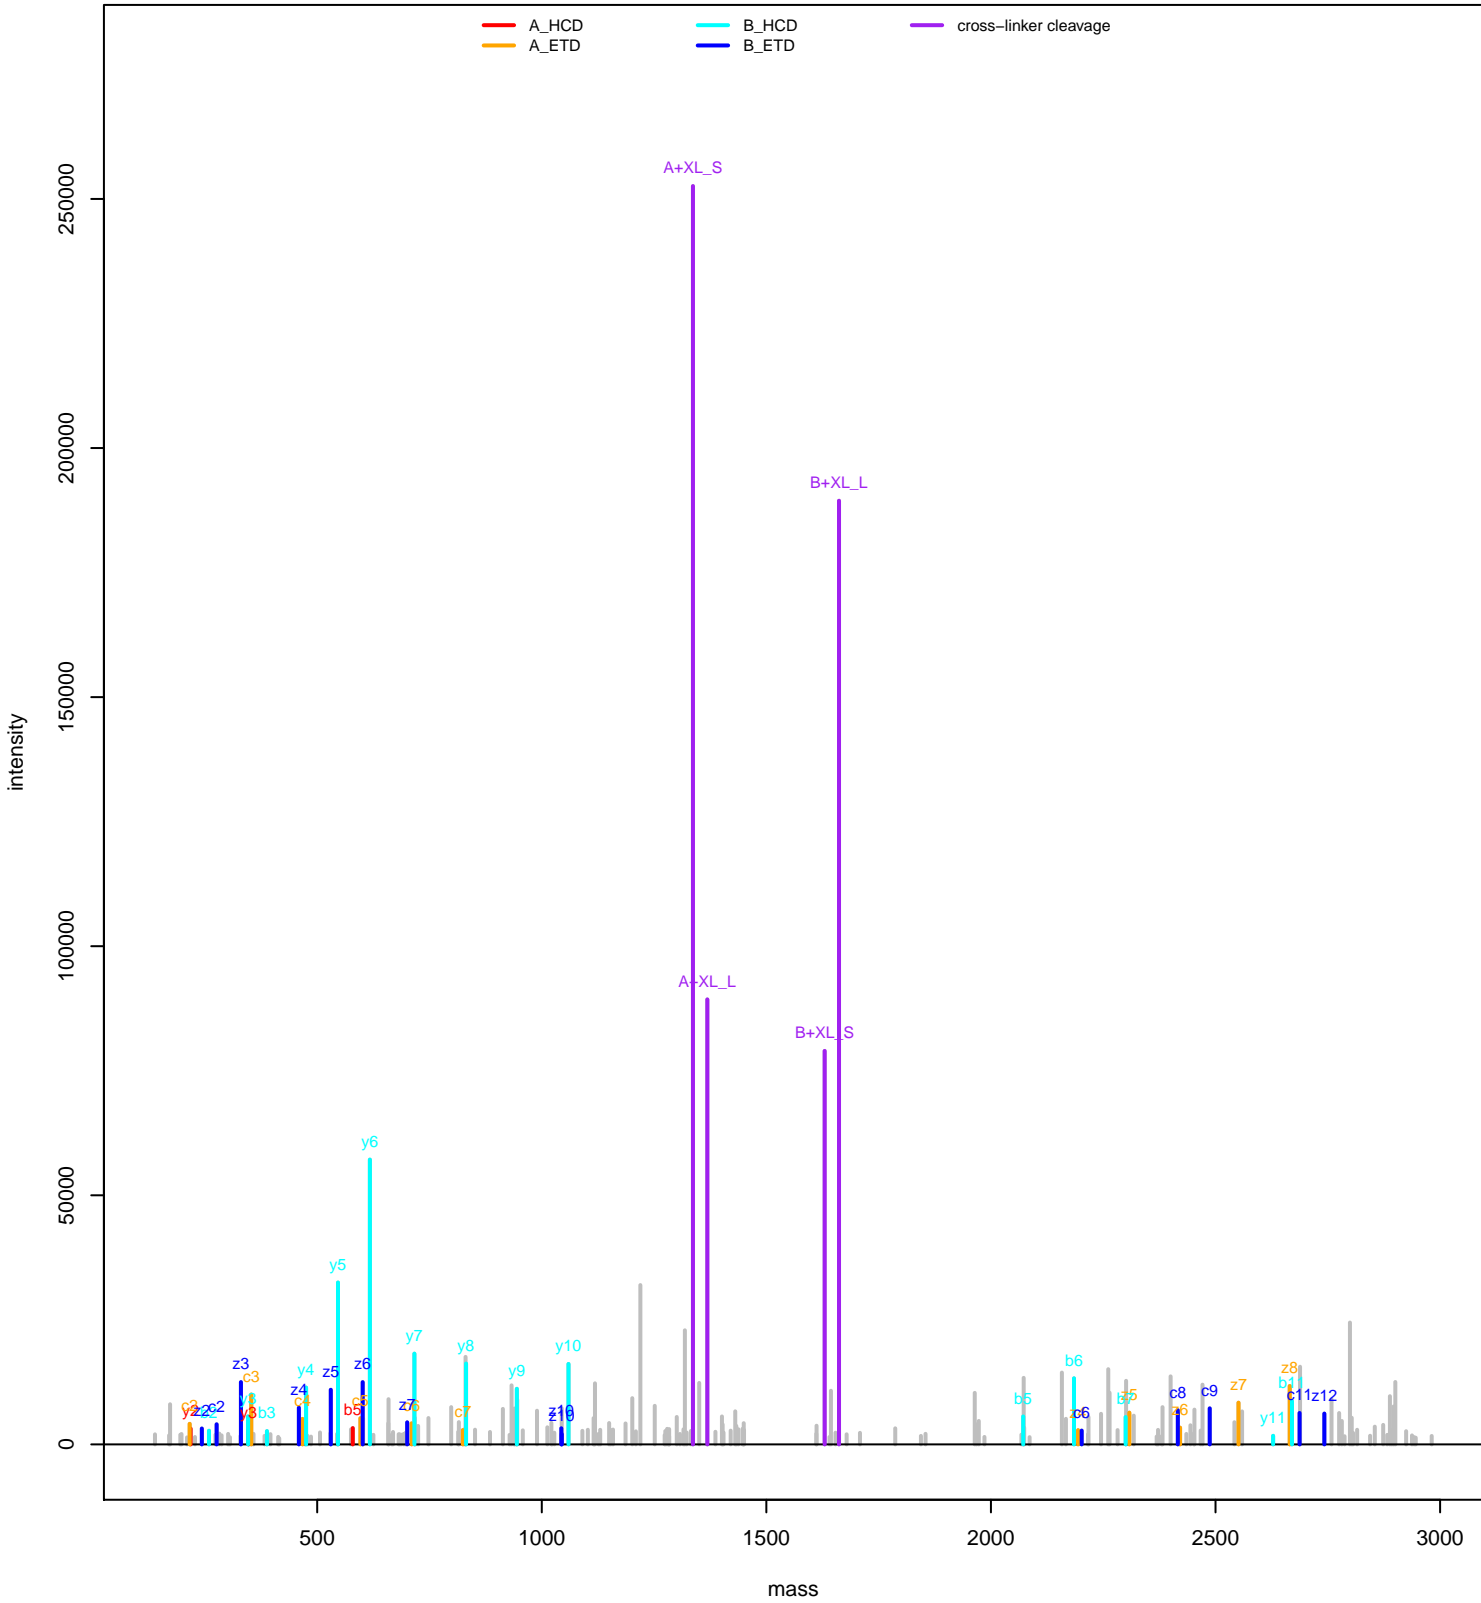

AQHNNNKETV+XL\_S

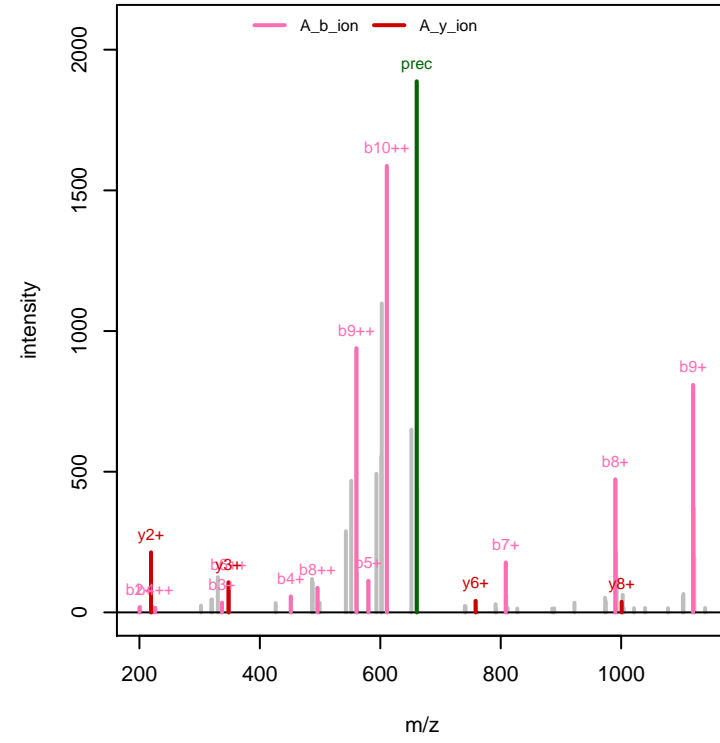

AQHNNNKETV+XL\_L

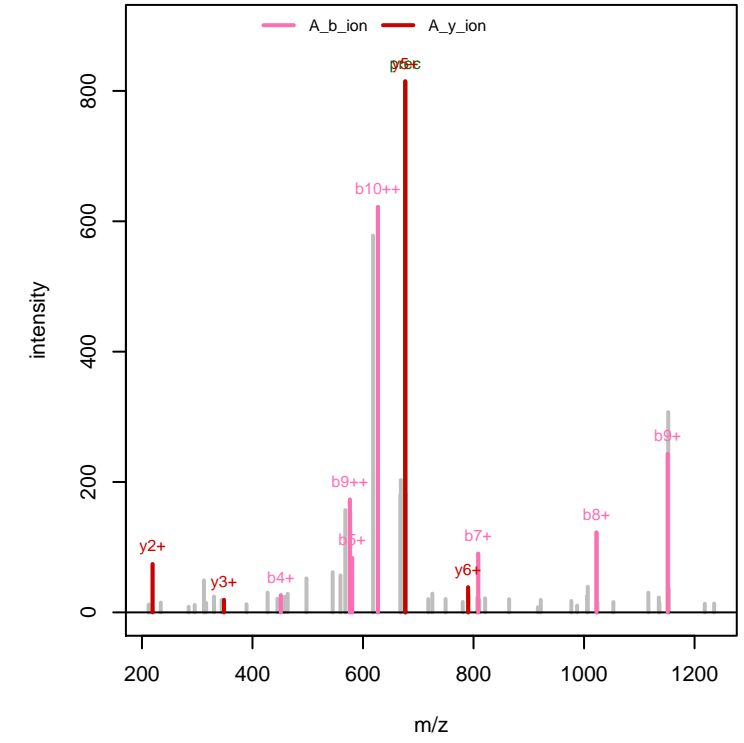

CVEKDIDVAESLK+XL\_S

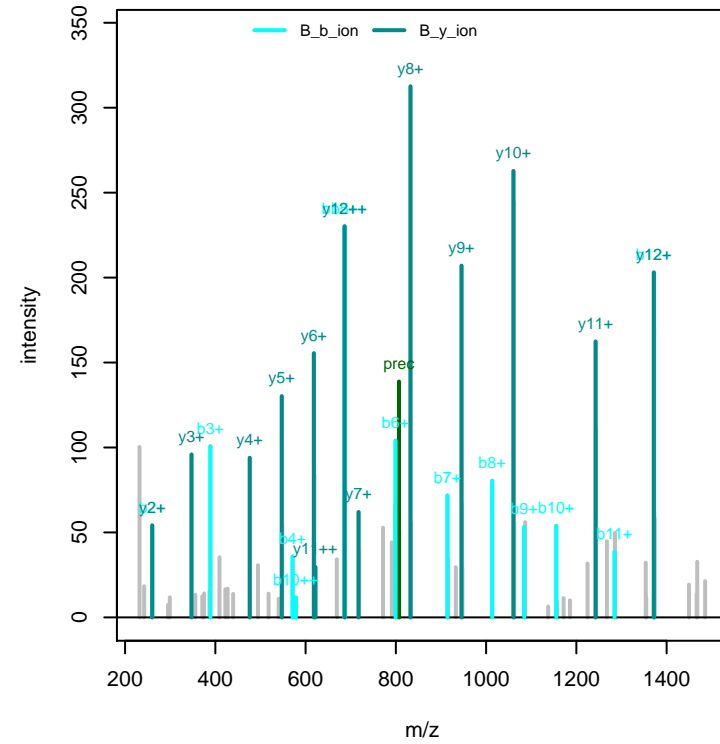

CVEKDIDVAESLK+XL\_L

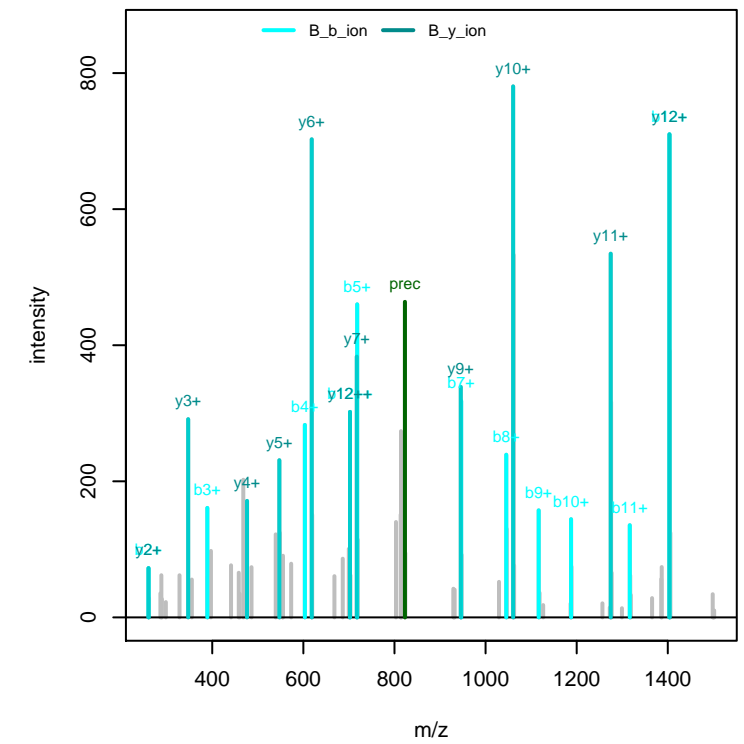

**MNIEELKK  
MTGLESYDVKIK**

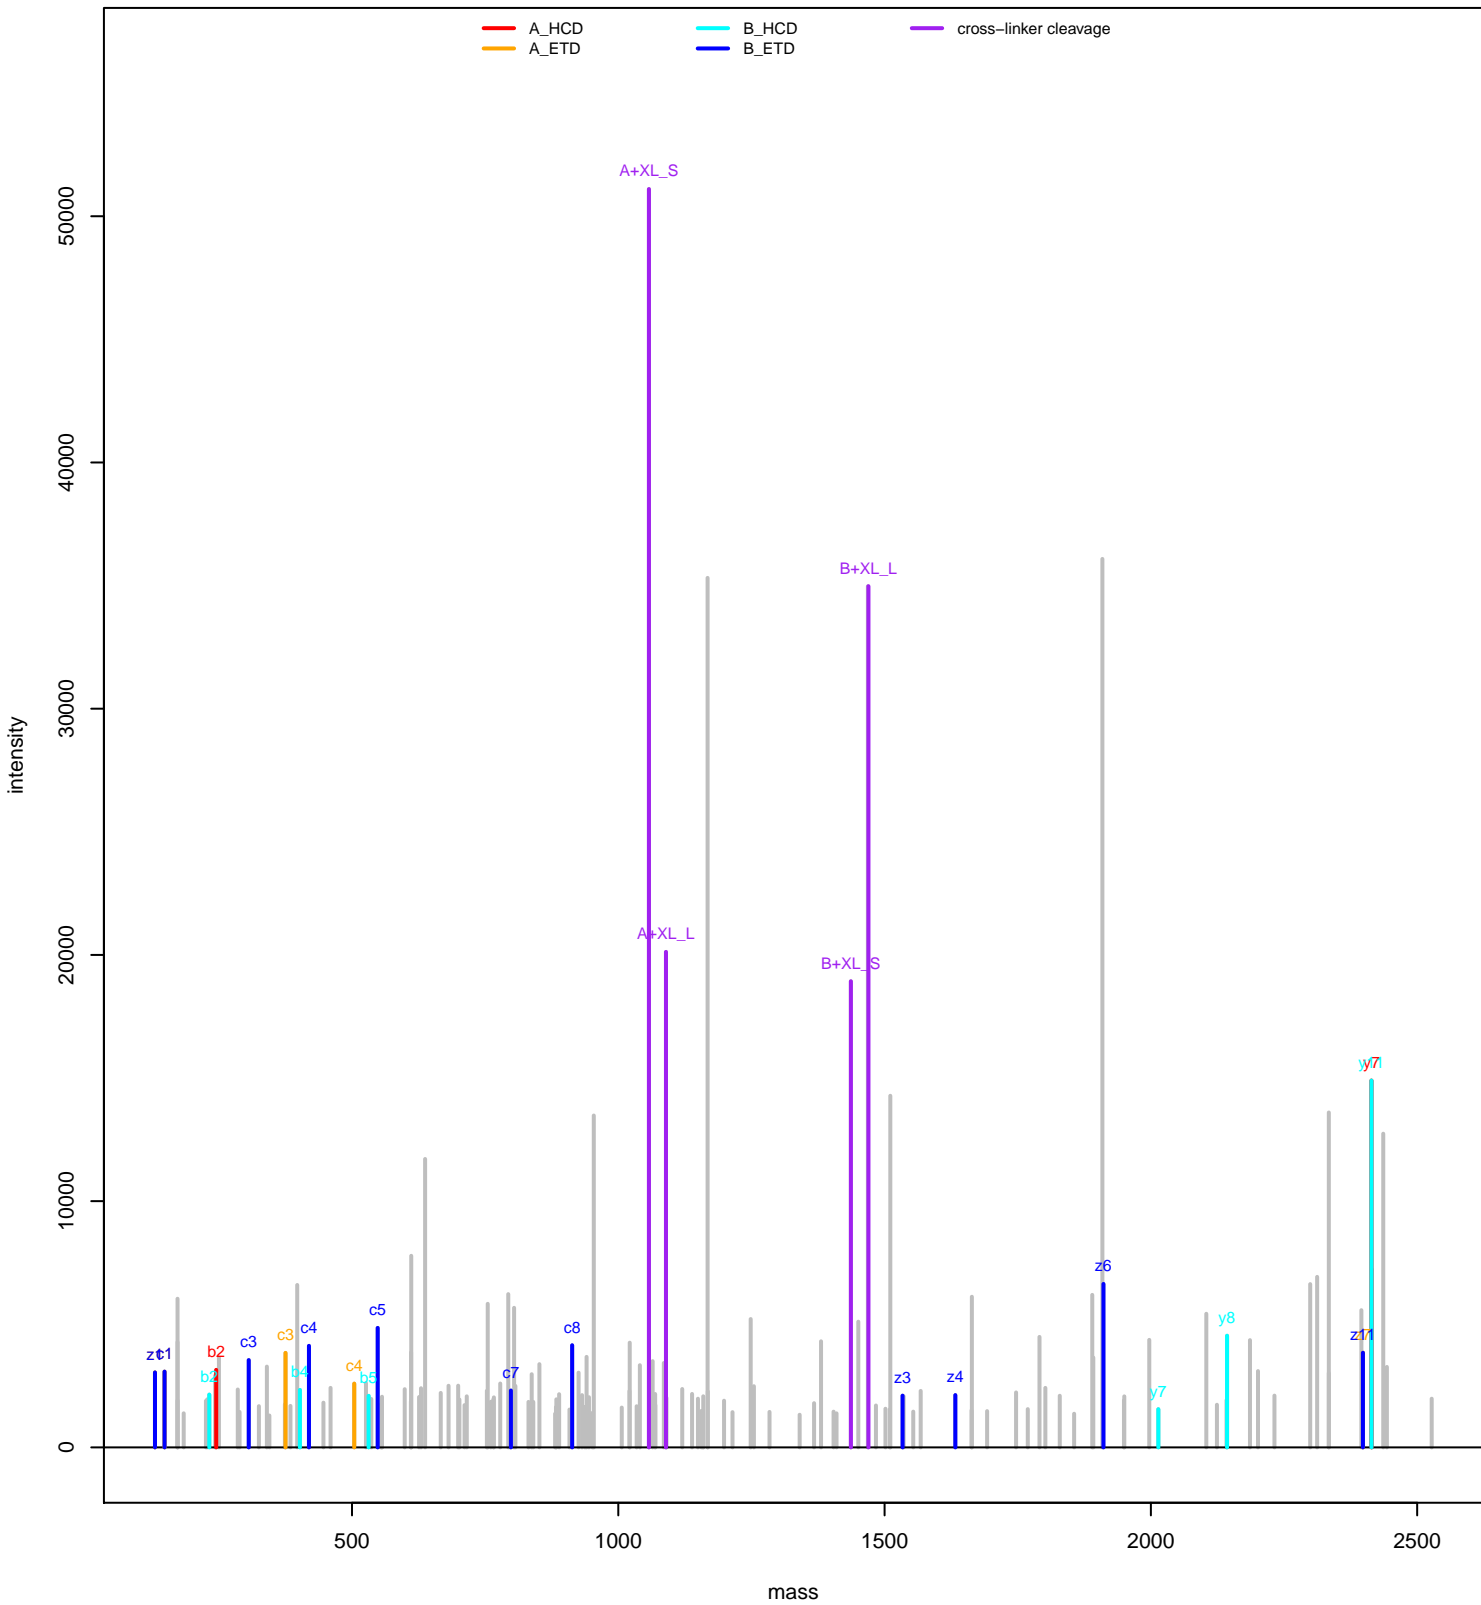

**MNIEELKK+XL\_S**

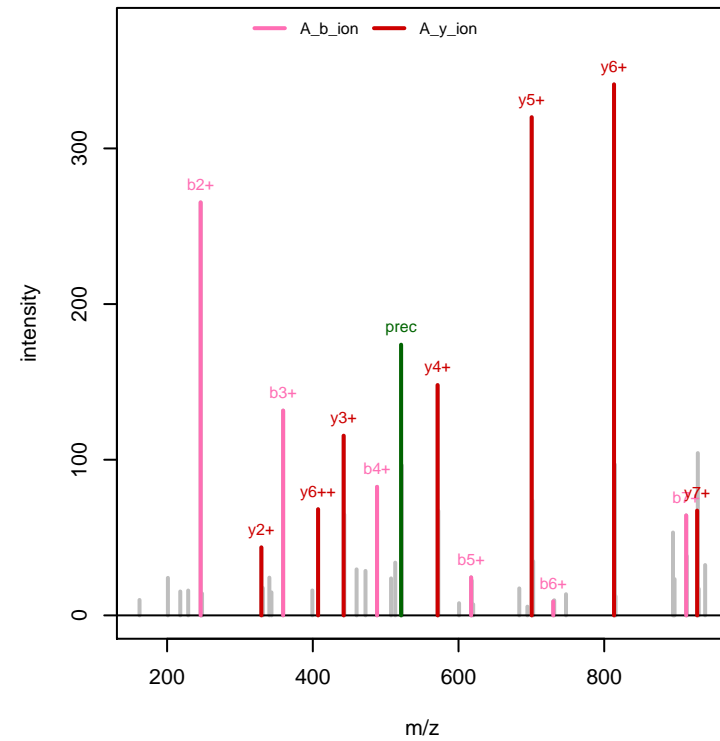

**MNIEELKK+XL\_L**

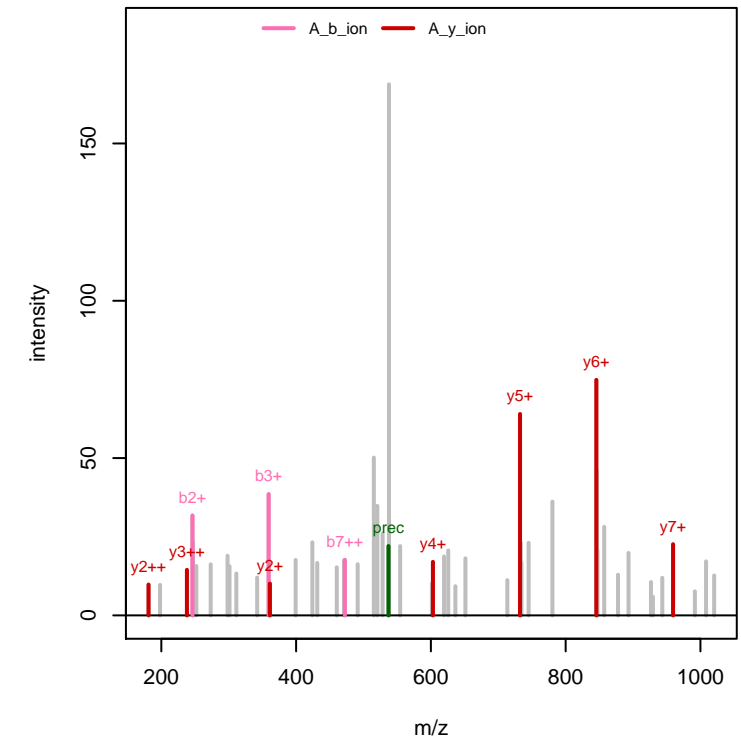

**MTGLESYDVKIK+XL\_S**

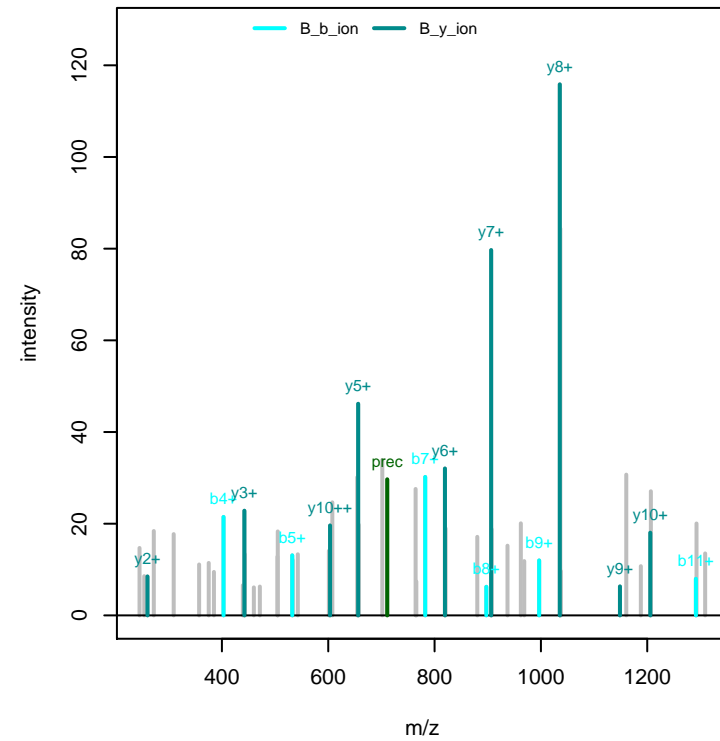

**MTGLESYDVKIK+XL\_L**

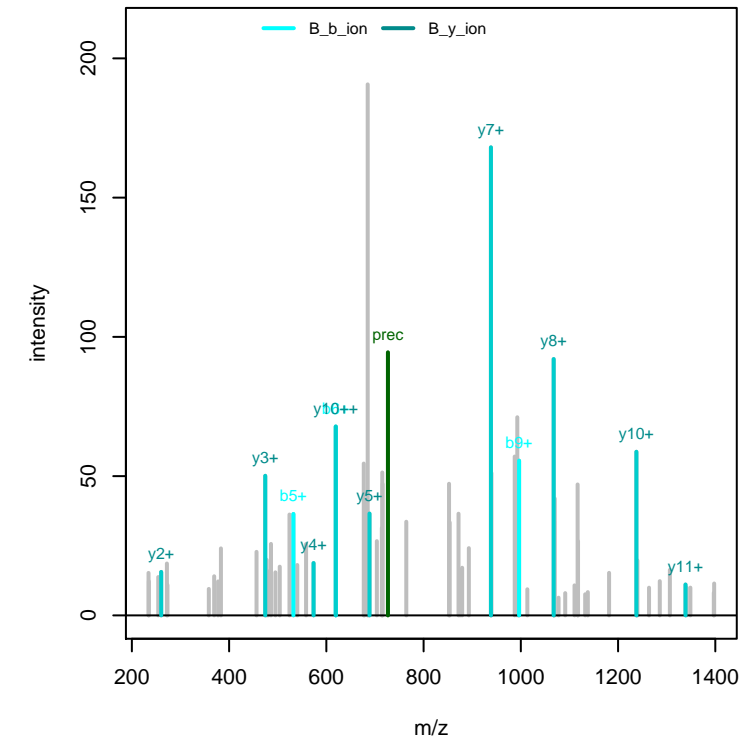

VLDLIAHISK  
DNTPMoFVKGANFDK

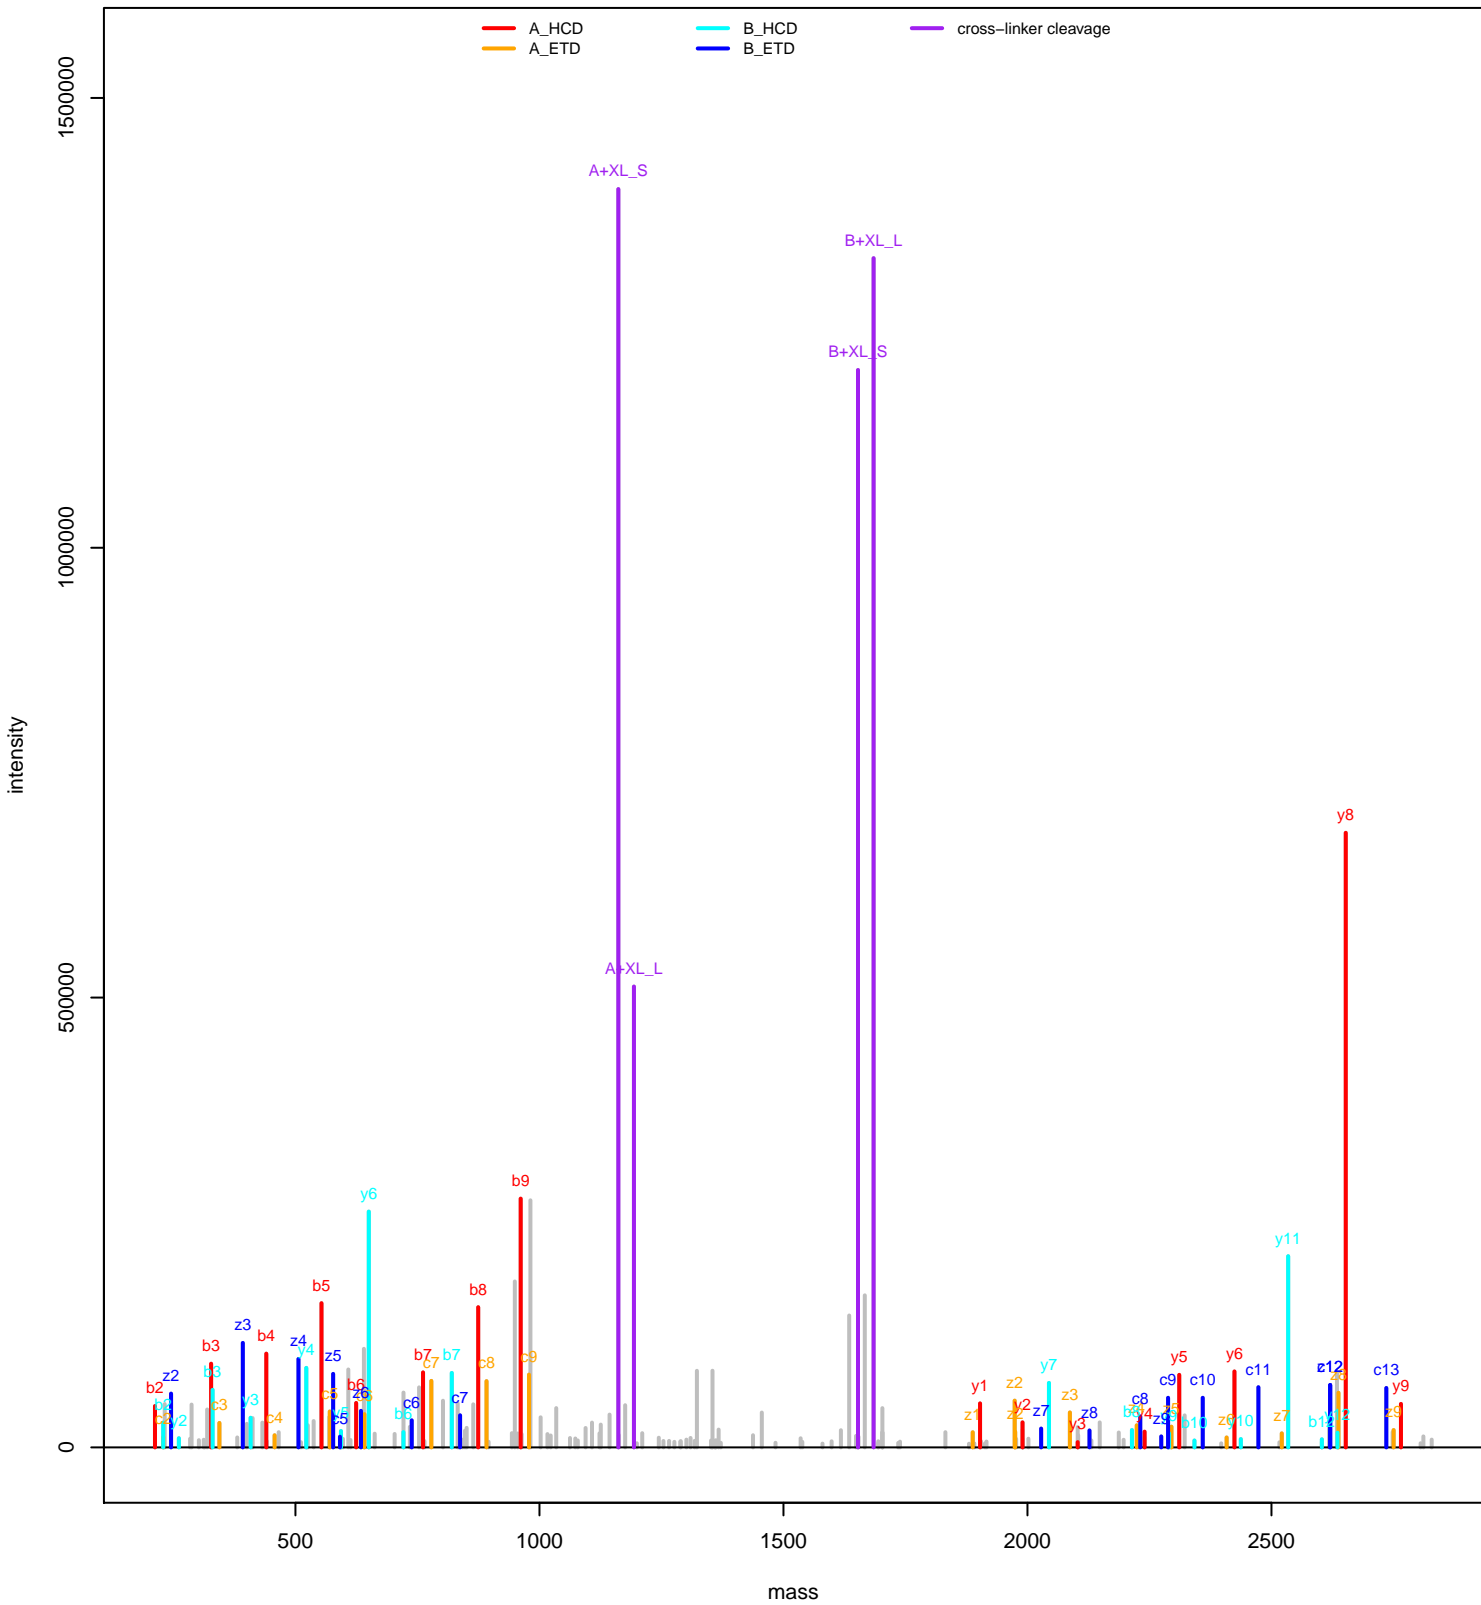

VLDLIAHISK+XL\_S

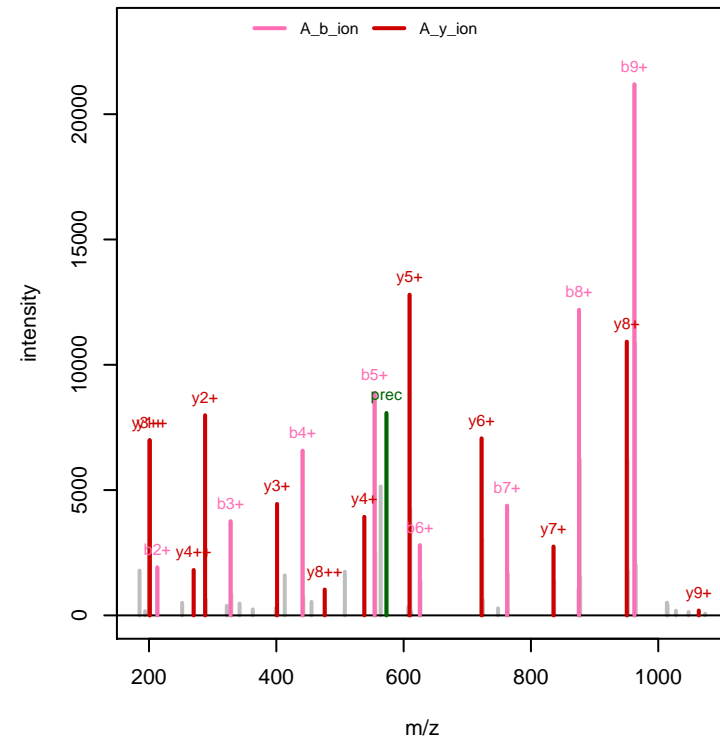

VLDLIAHISK+XL\_L

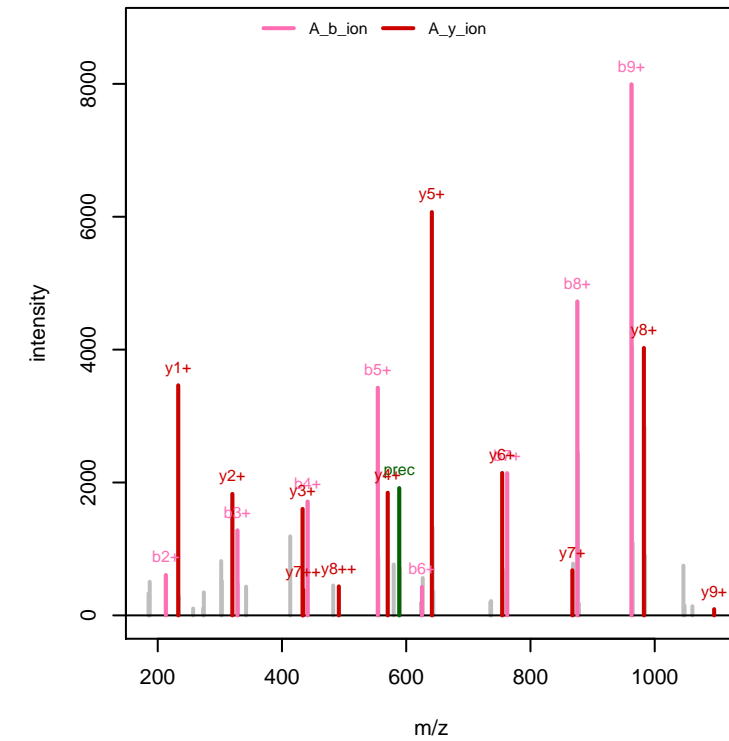

DNTPMoFVKGANFDK+XL\_S

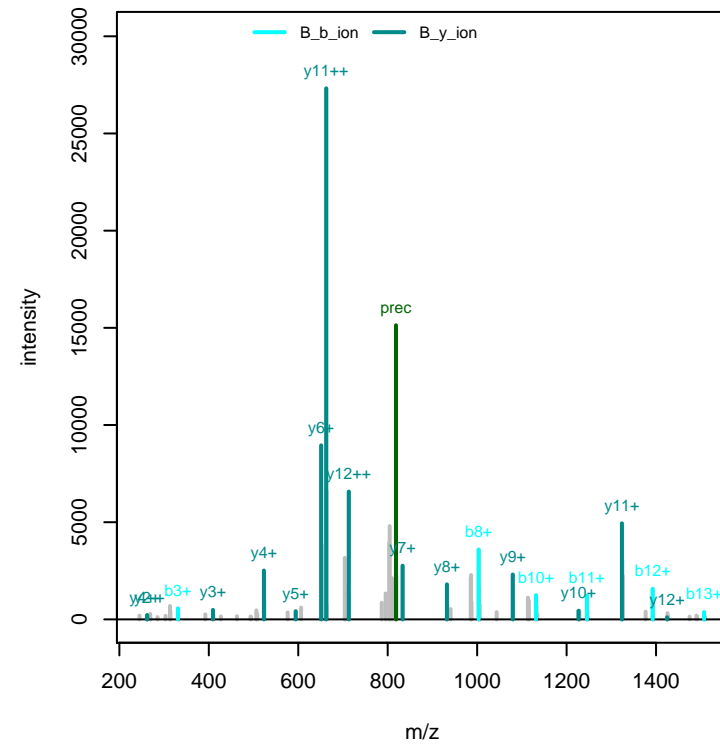

DNTPMoFVKGANFDK+XL\_L

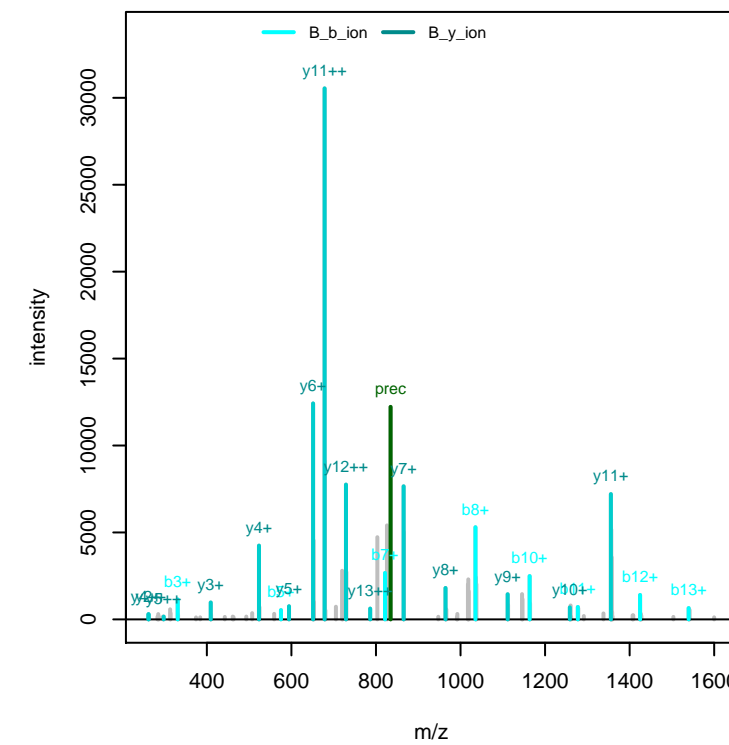

MTPAVKLLLEK  
STGYLVGGISPLGQKK

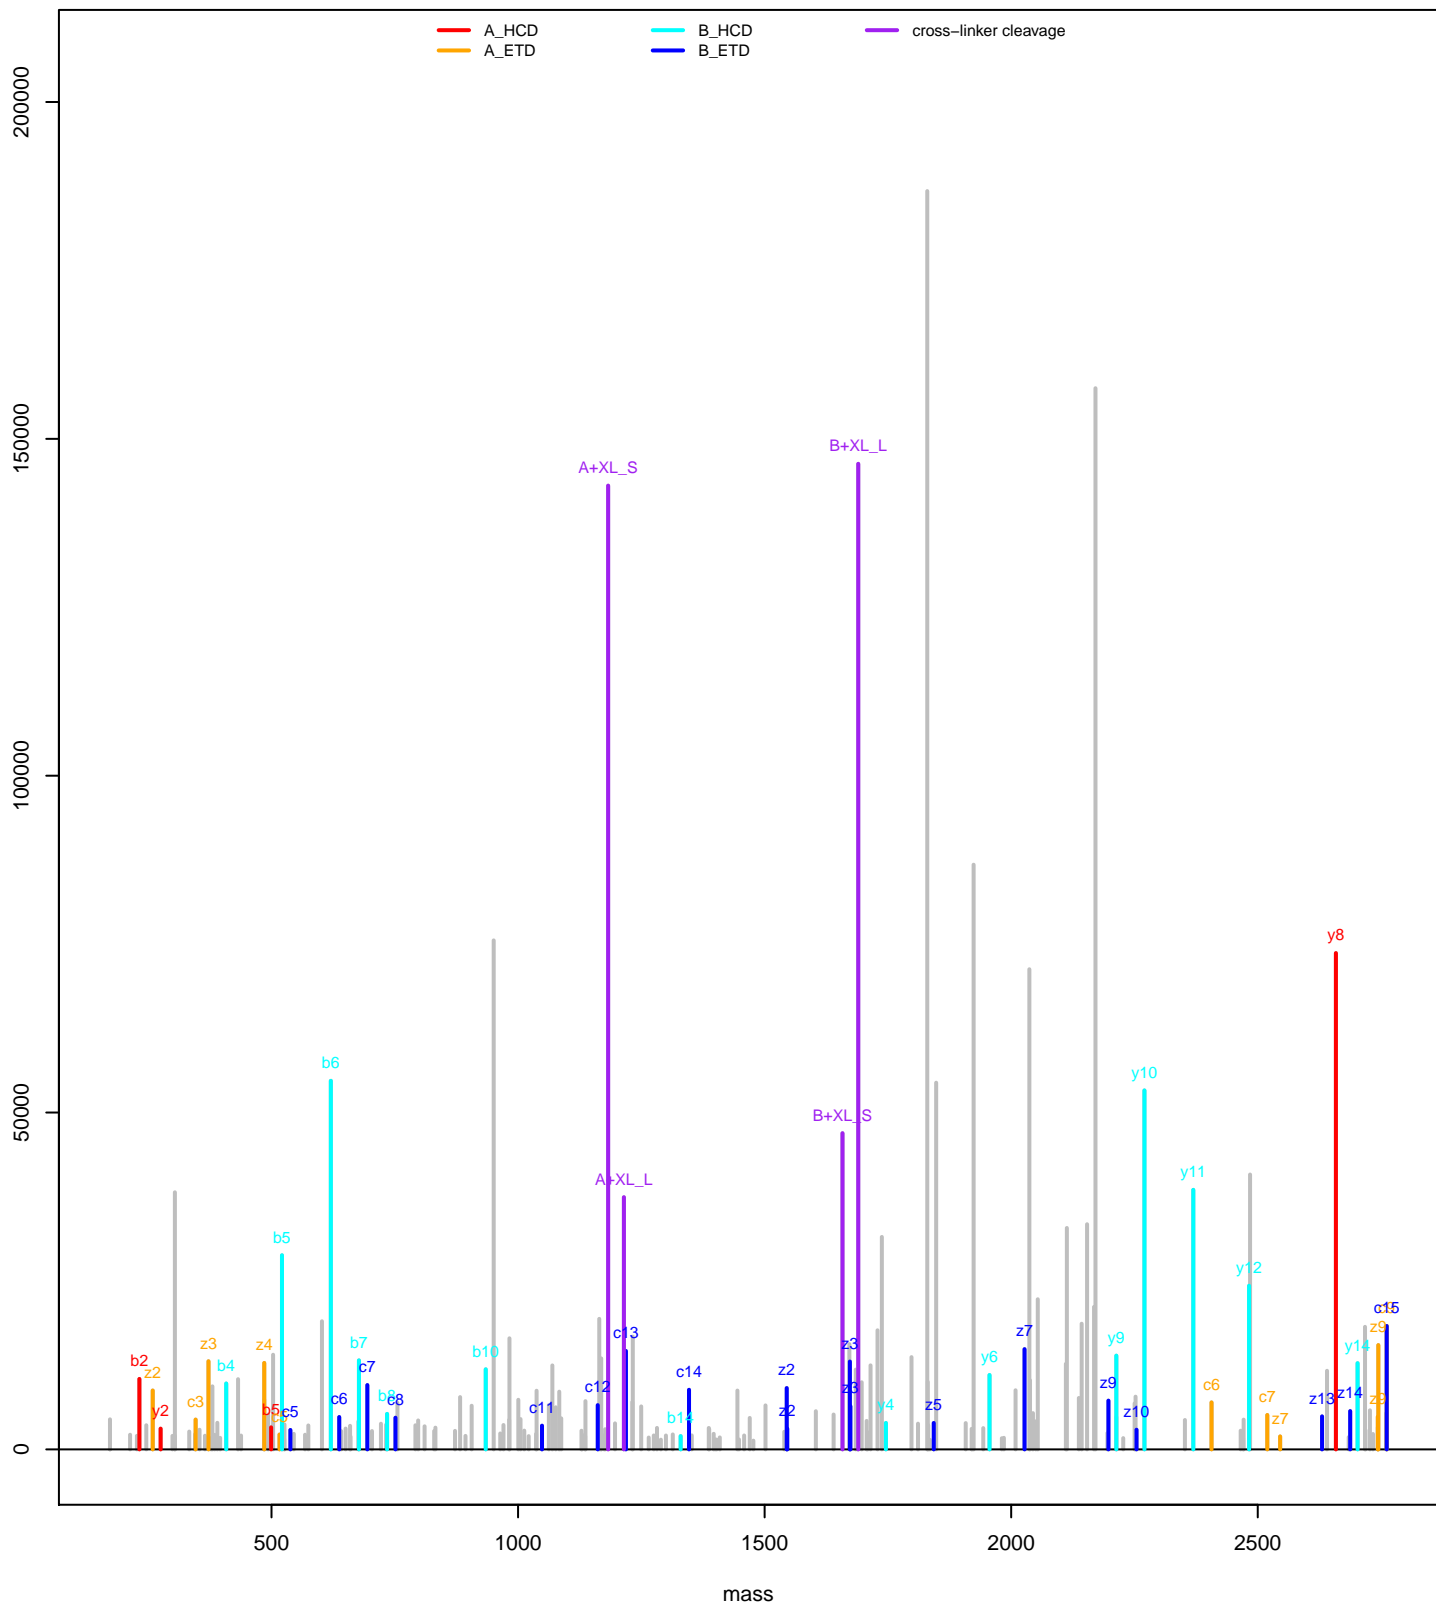

MTPAVKLLLEK+XL\_S

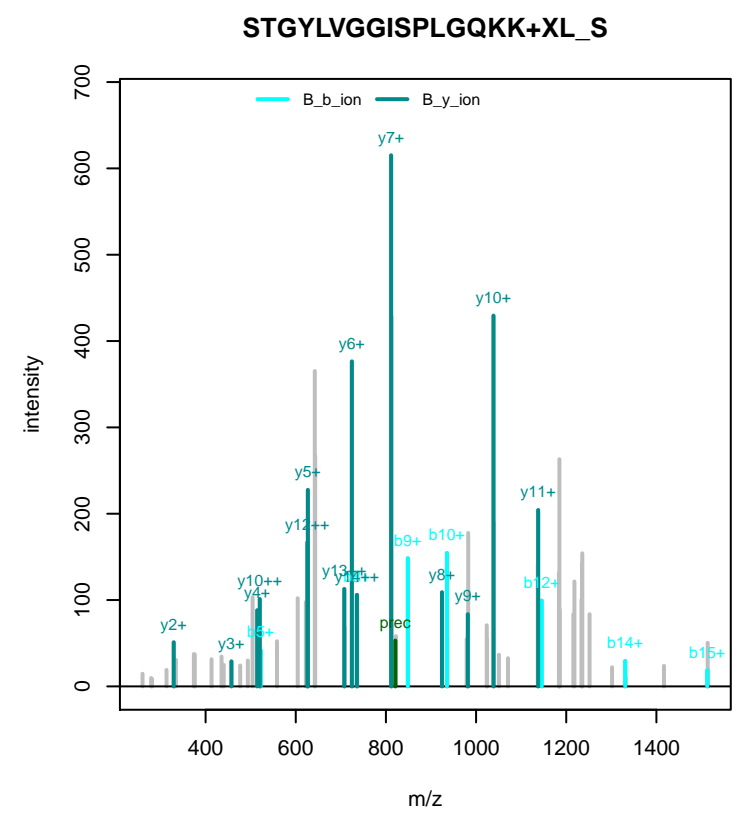

MTPAVKLLLEK+XL\_L

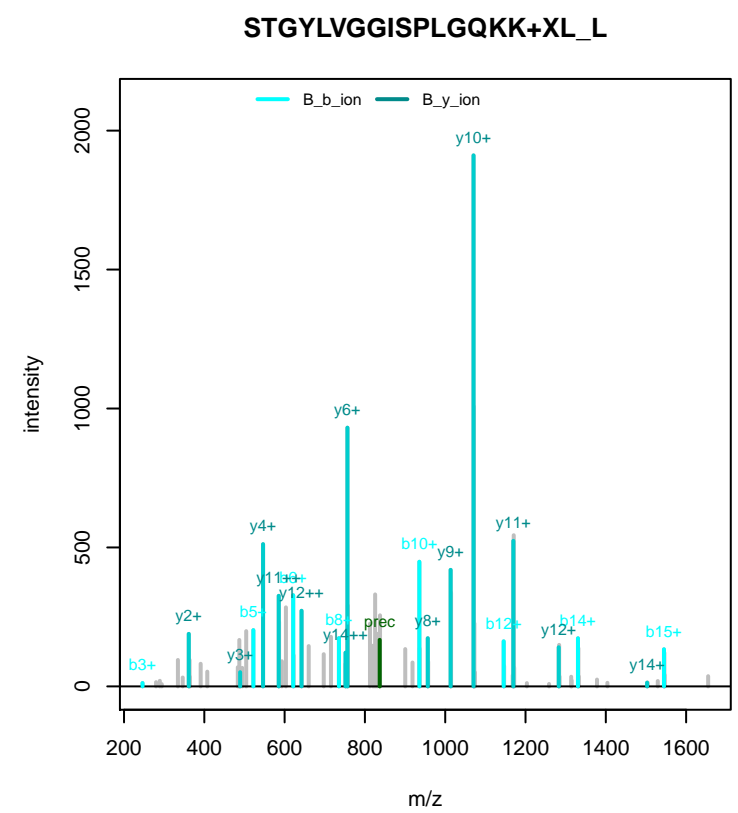



**AKGDALAR**  
**QLGDKPADVRDVAQLK**

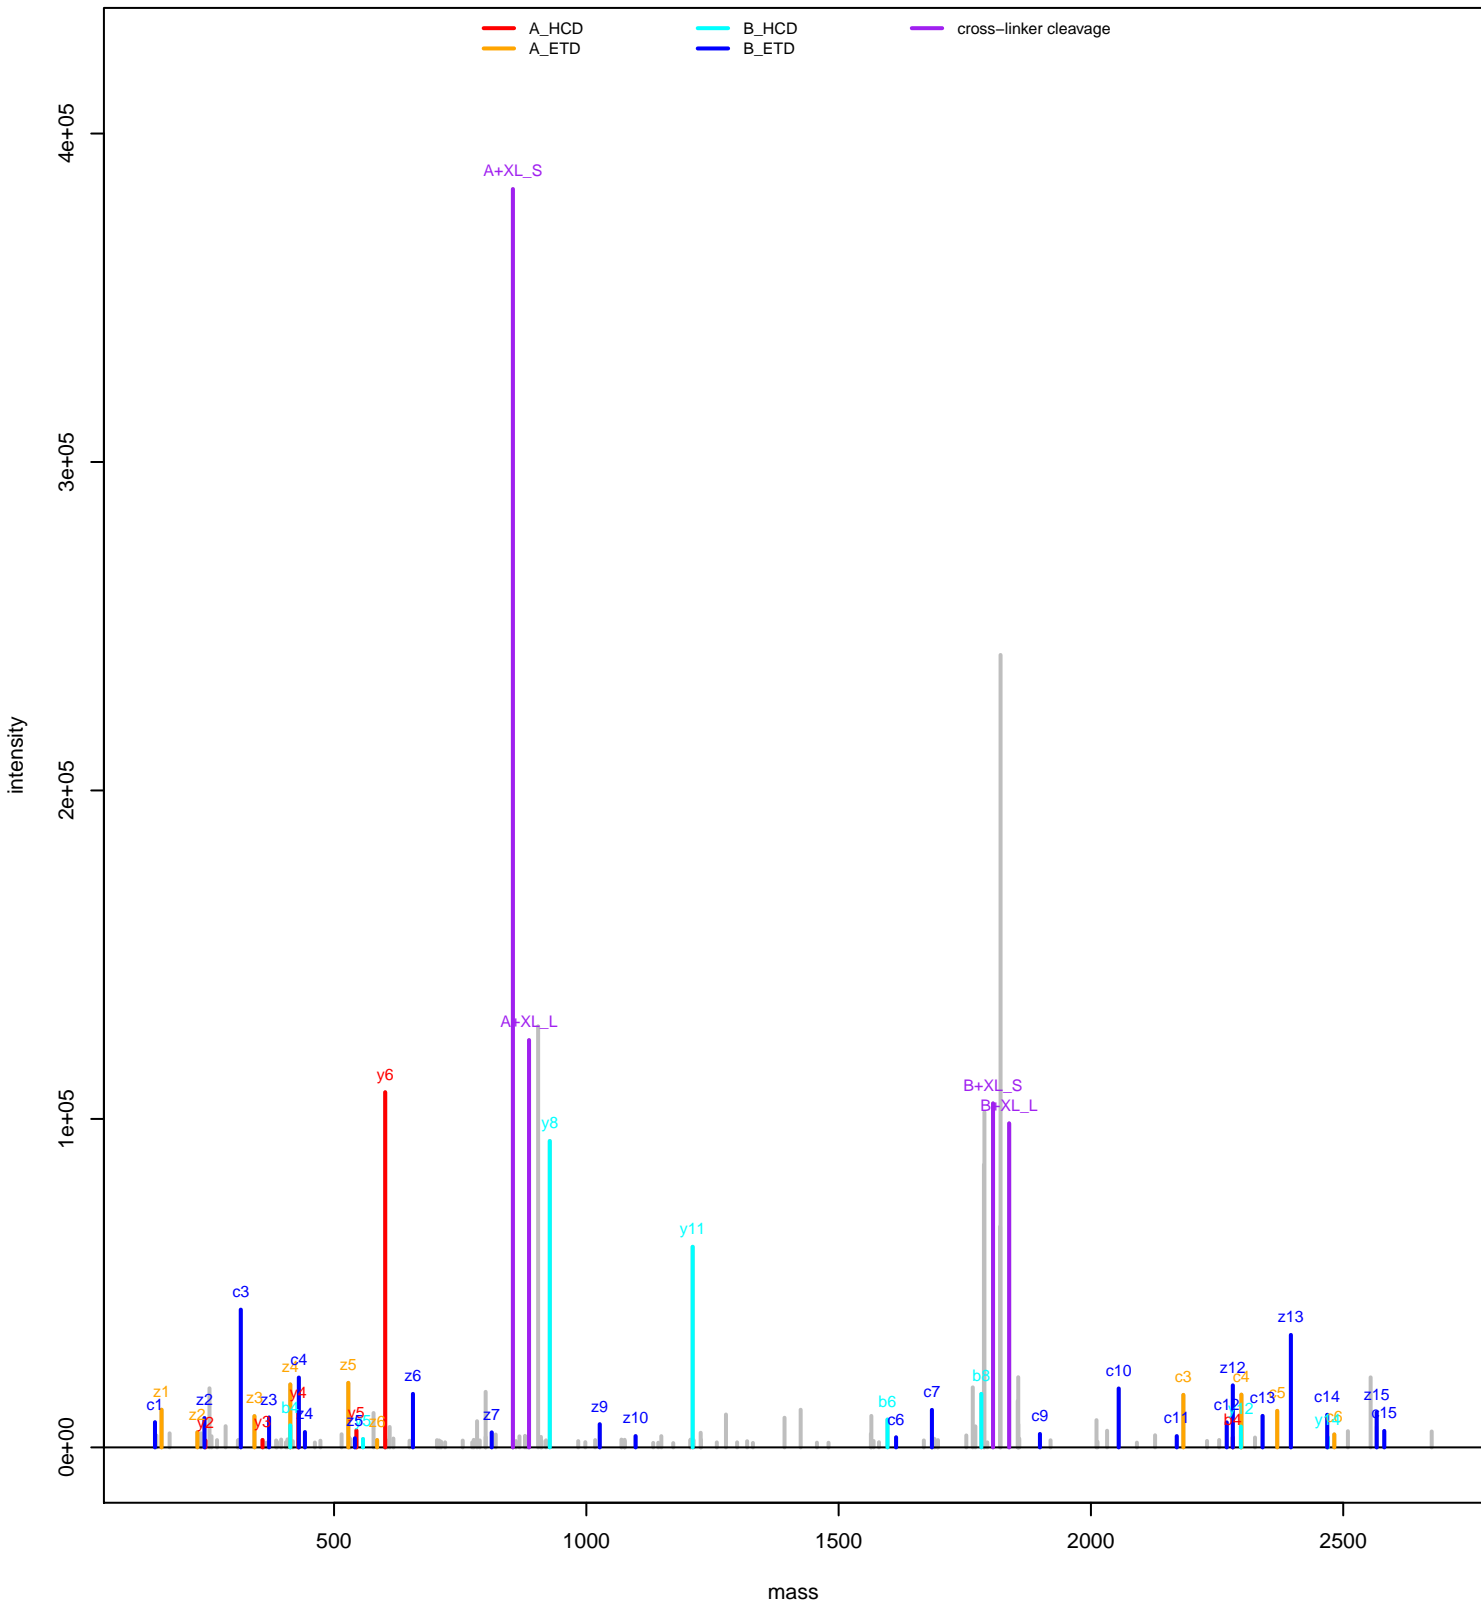

**AKGDALAR+XL\_S**

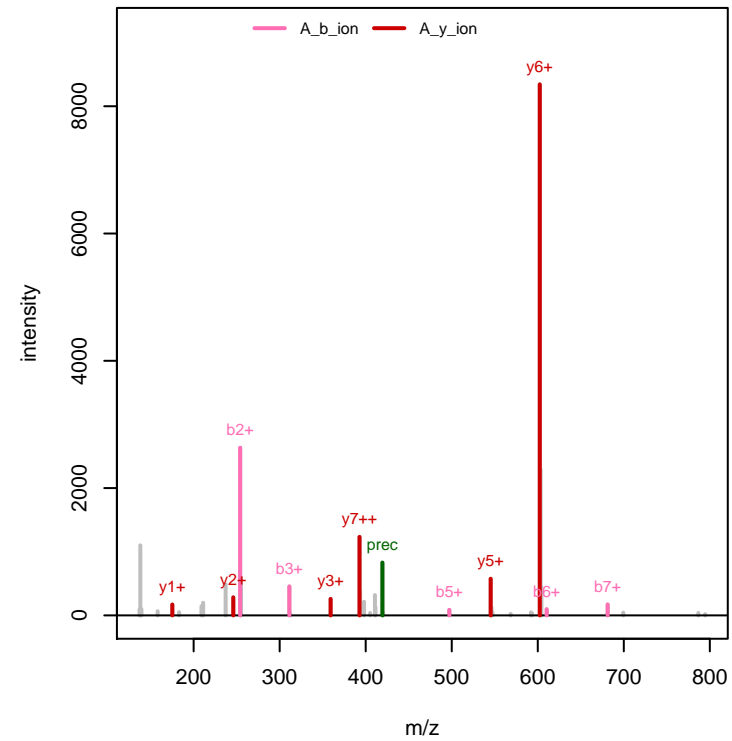

**AKGDALAR+XL\_L**

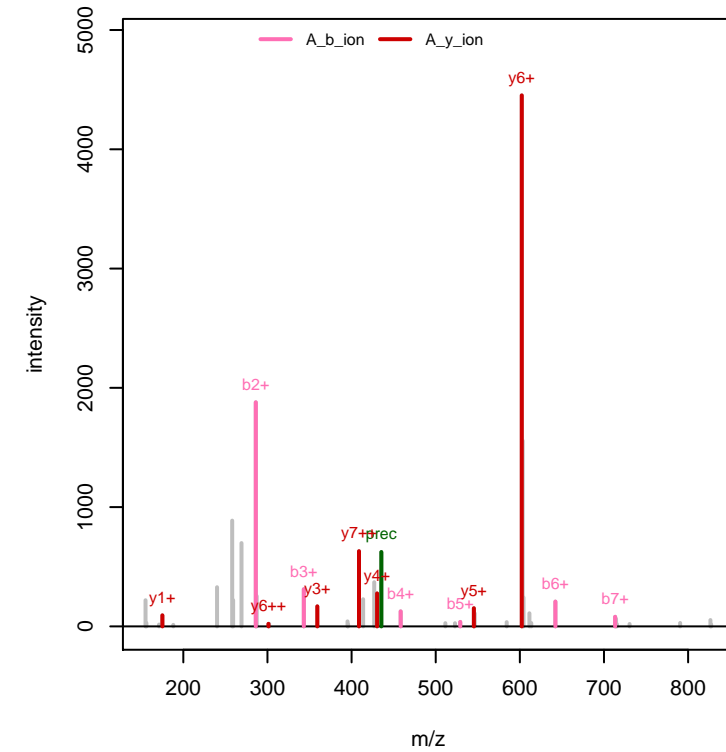

**QLGDKPADVRDVAQLK+XL\_S**

**QLGDKPADVRDVAQLK+XL\_L**

LGLQEK  
IMNDENFQHGGTNIHYLEKK

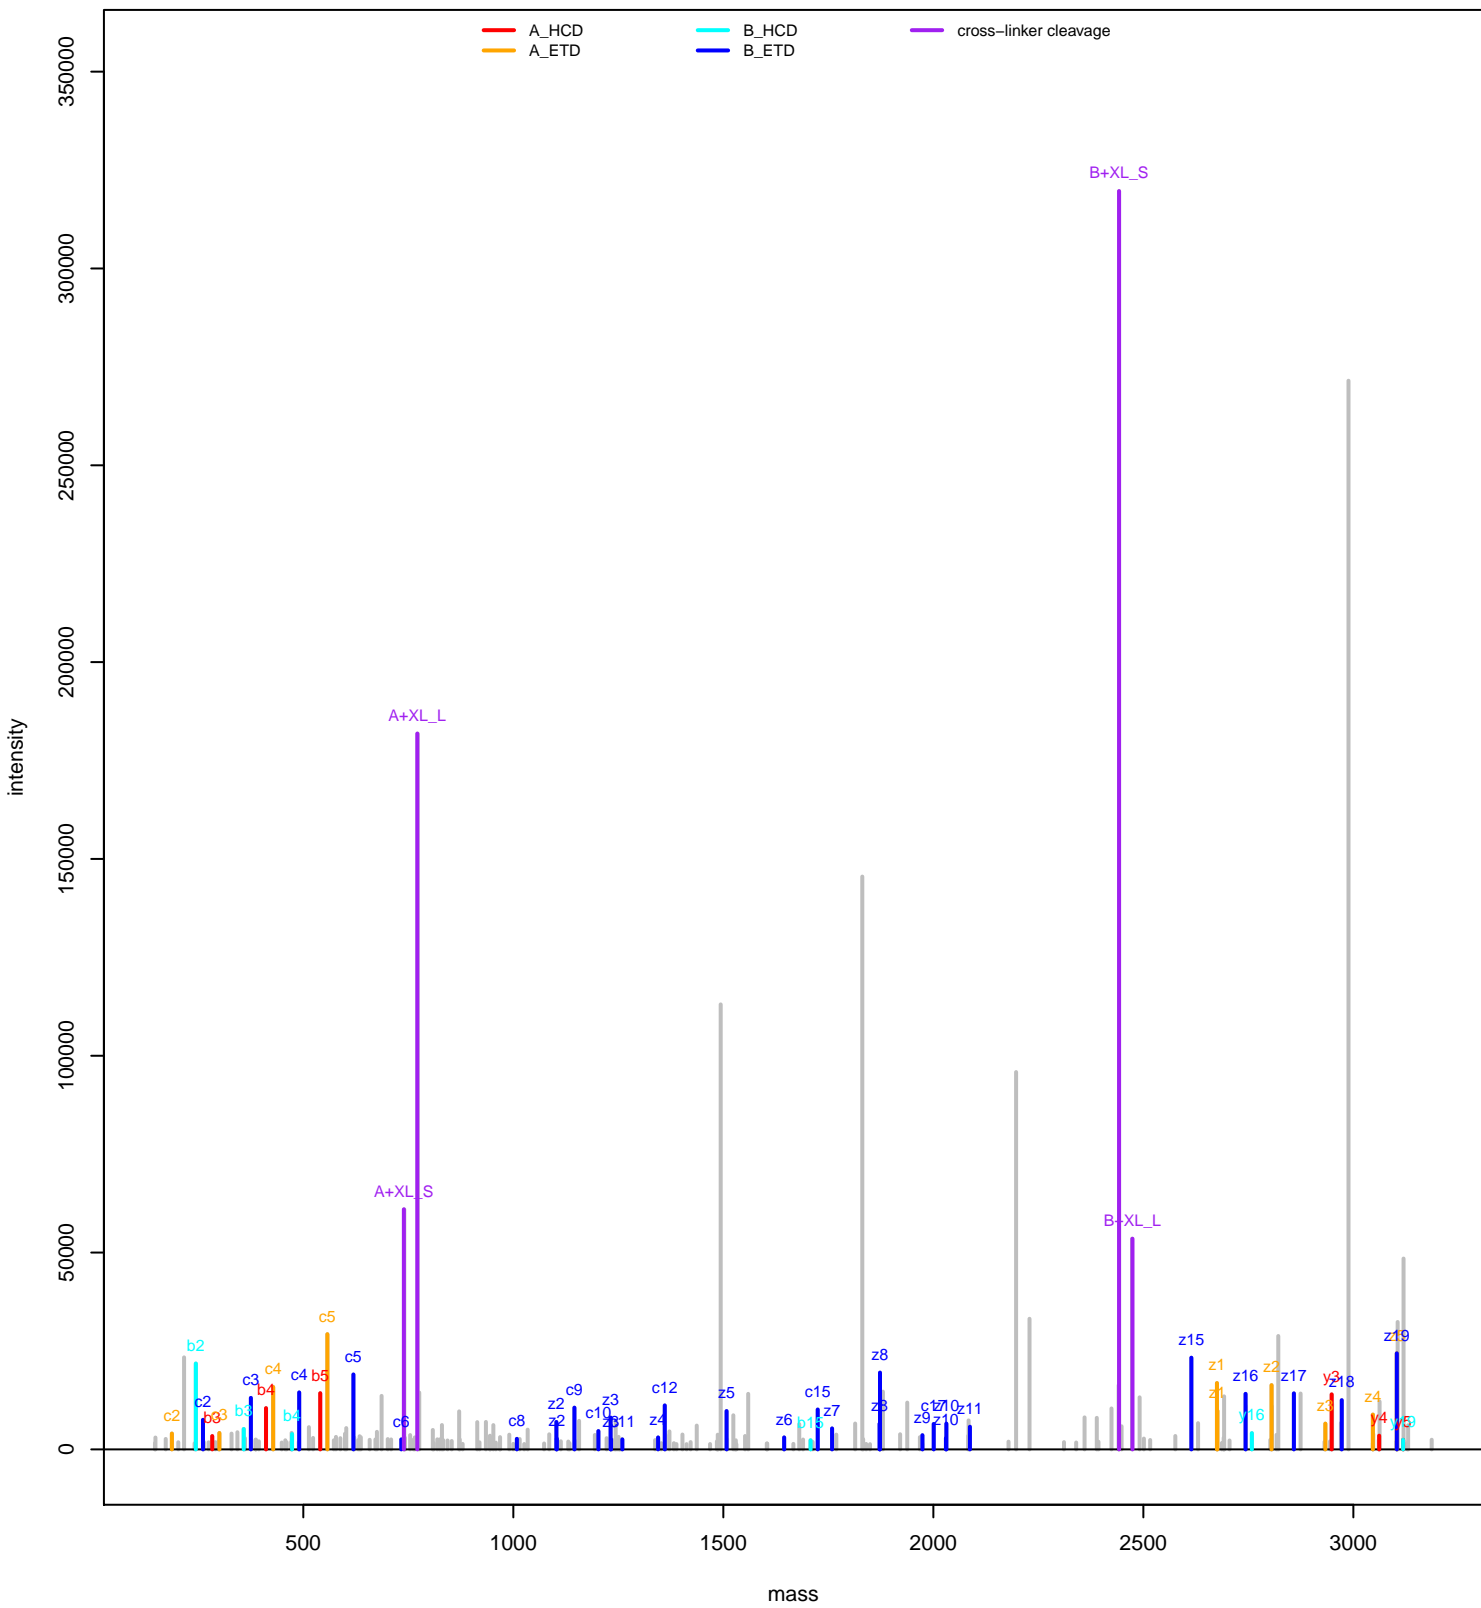

LGLQEK+XL\_S

IMNDENFQHGGTNIHYLEKK+XL\_S

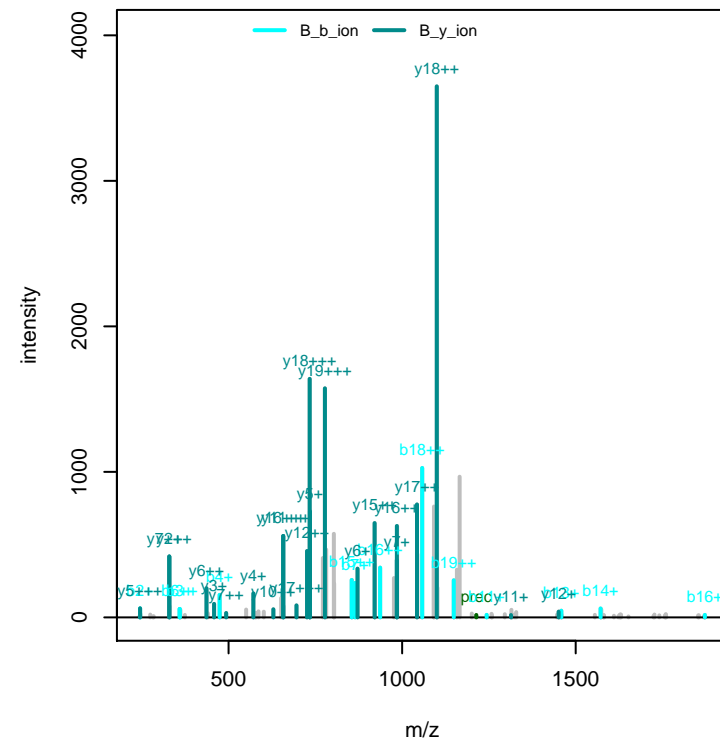

LGLQEK+XL\_L

IMNDENFQHGGTNIHYLEKK+XL\_L

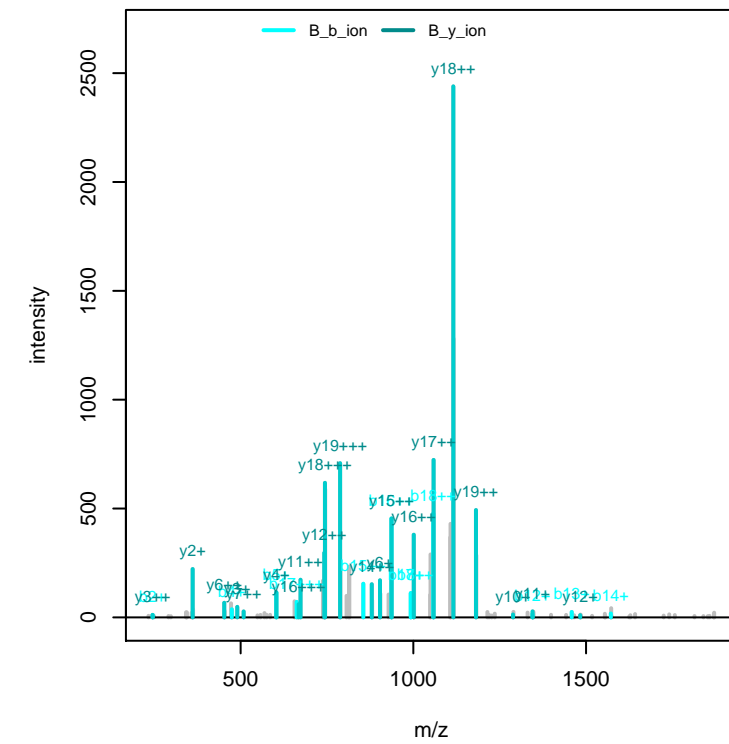

EDVEKHLAK  
LLAEHNLDASAIKGTGVGGR

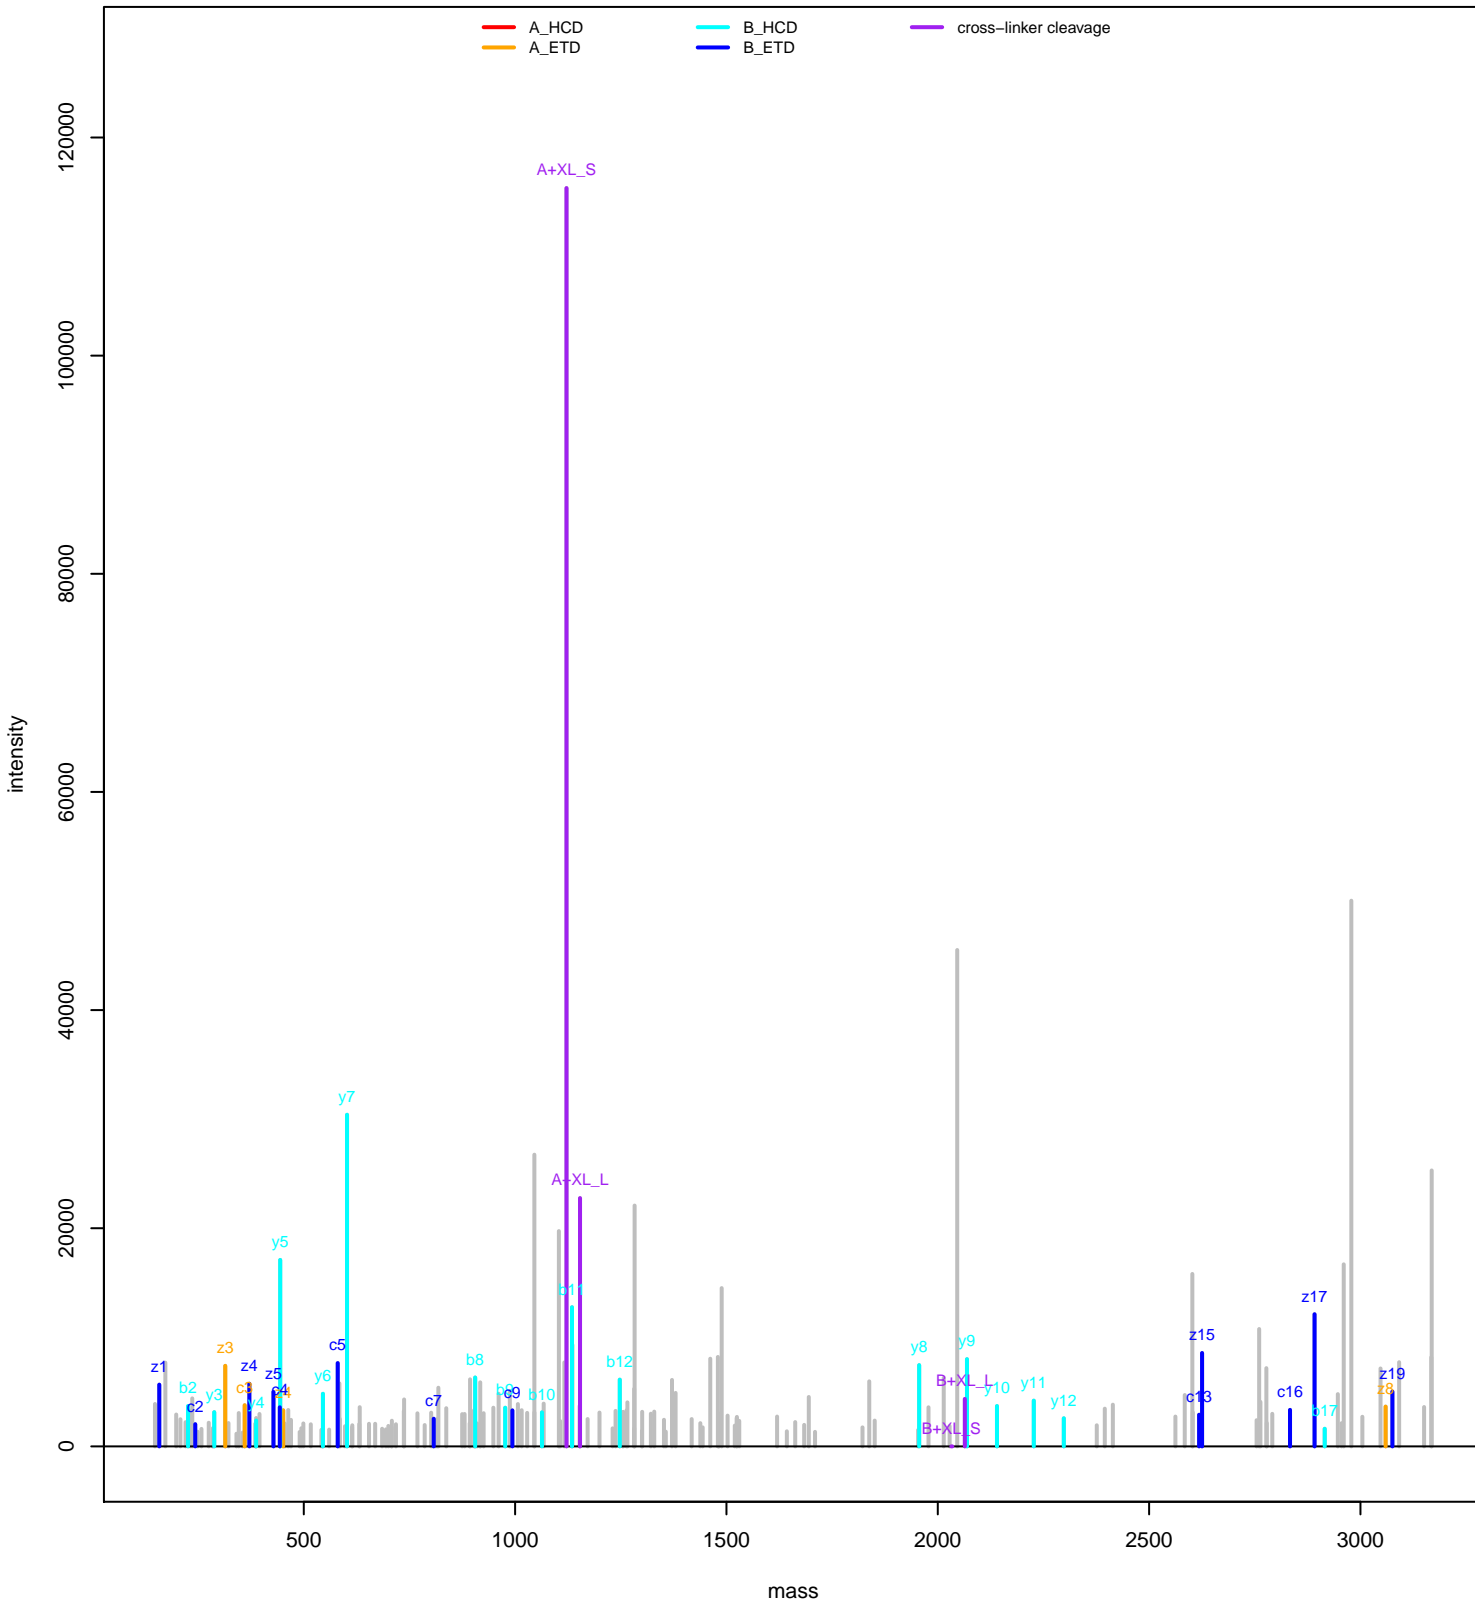

EDVEKHLAK+XL\_S

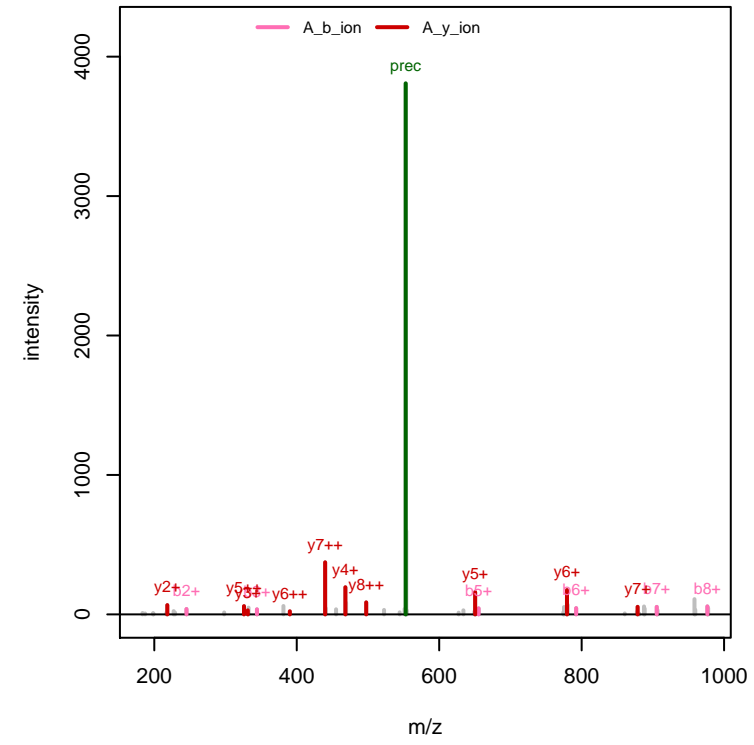

EDVEKHLAK+XL\_L

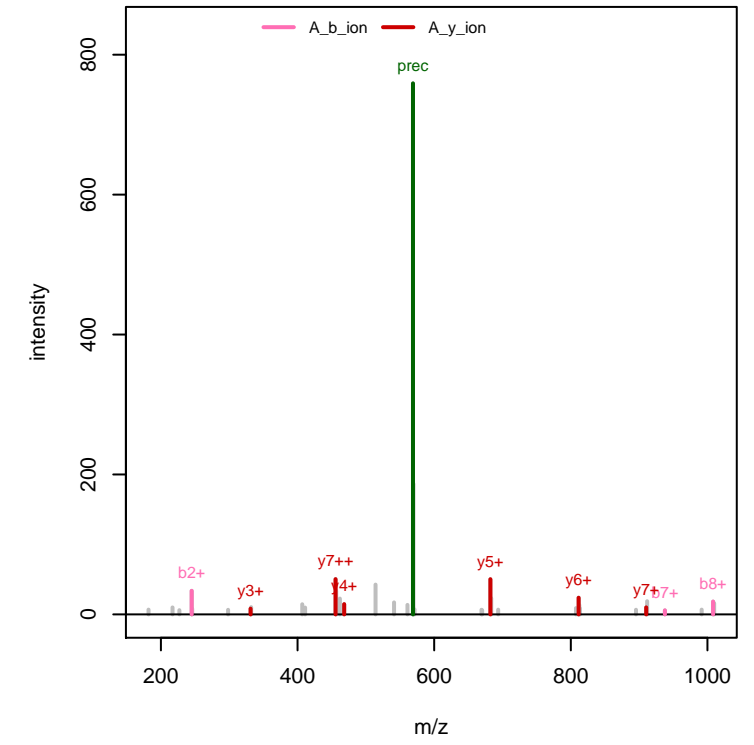

LLAEHNLDASAIKGTGVGGR+XL\_S

LLAEHNLDASAIKGTGVGGR+XL\_L

SILKGYR  
TQPDYDYQDGKSILK

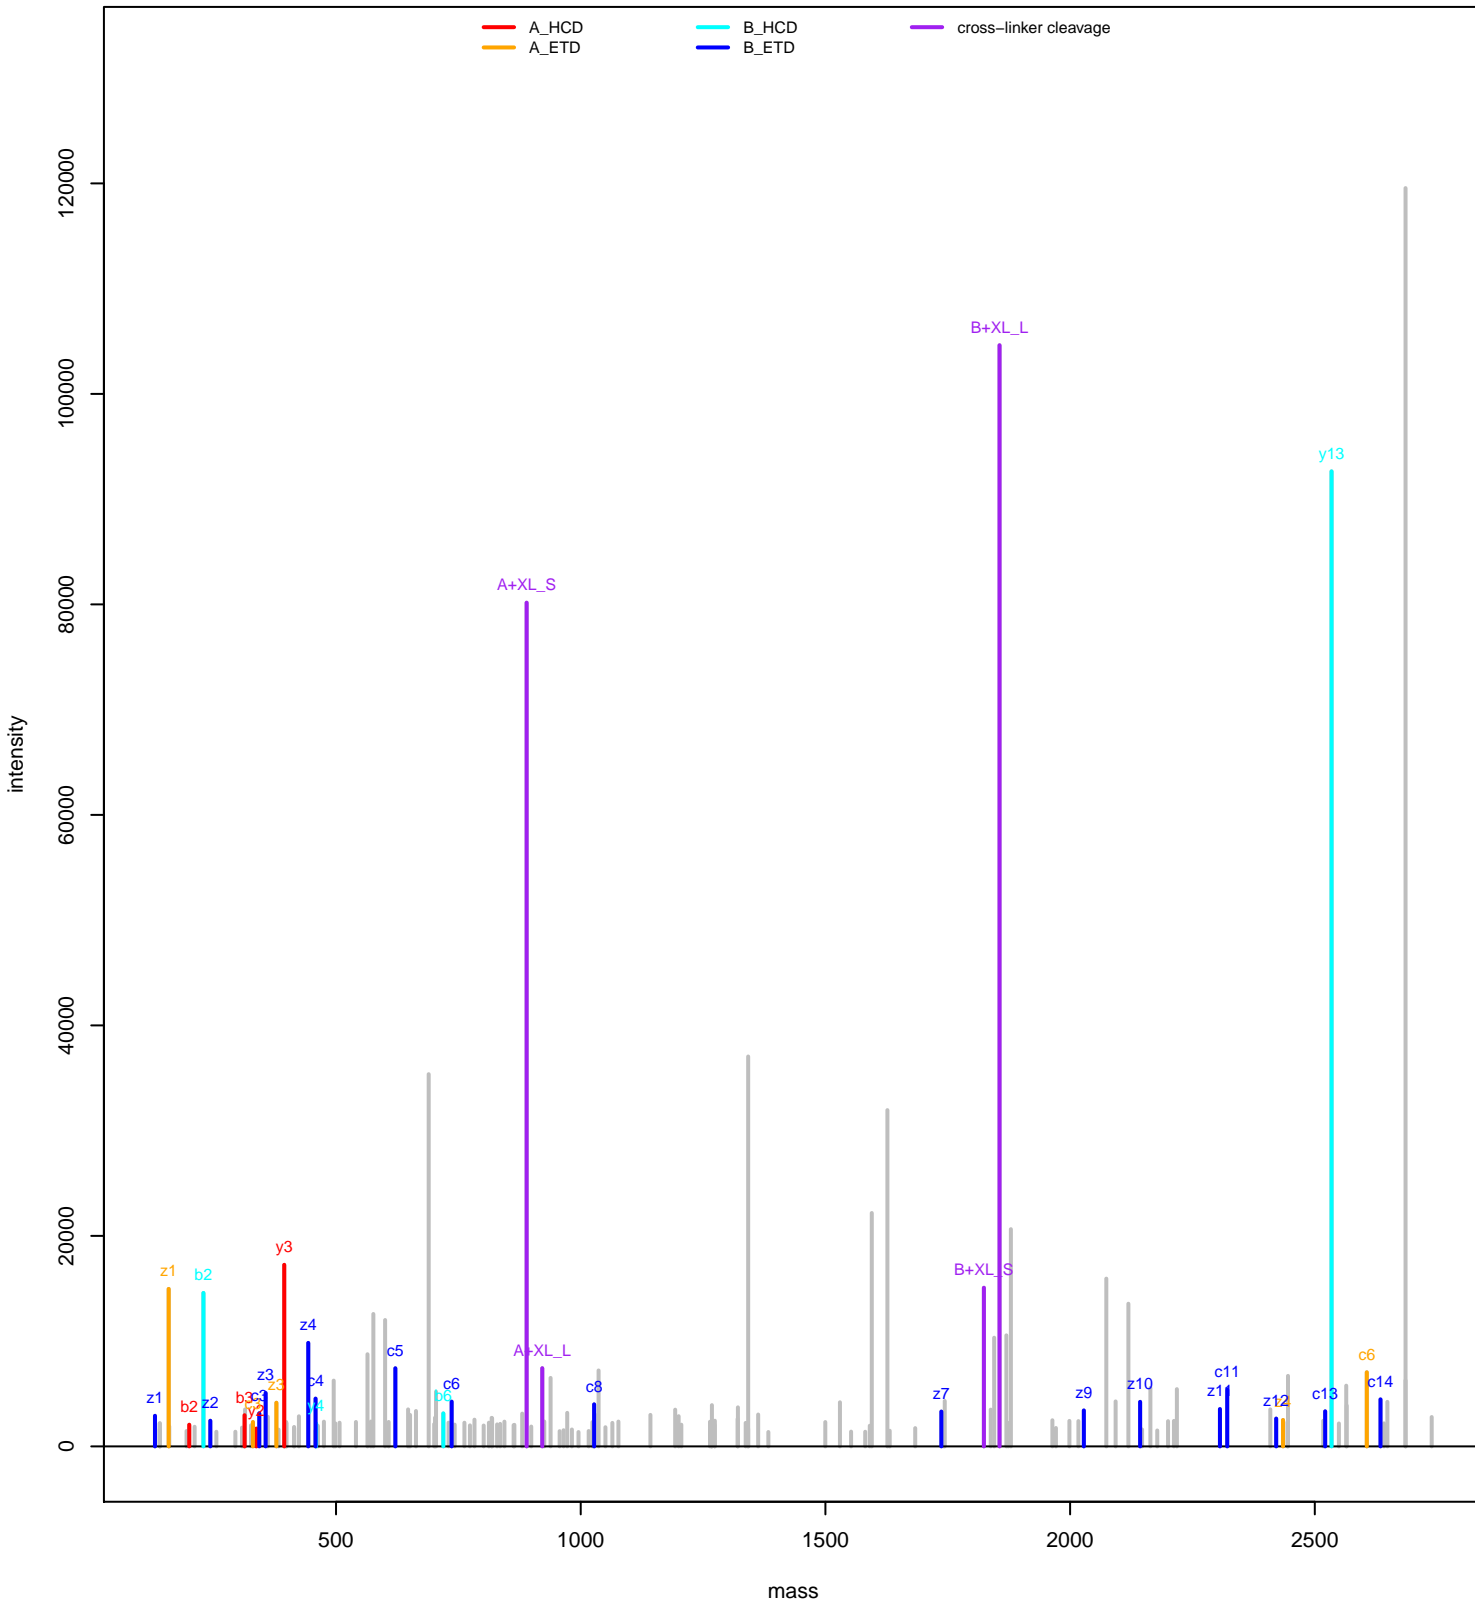

SILKGYR+XL\_S

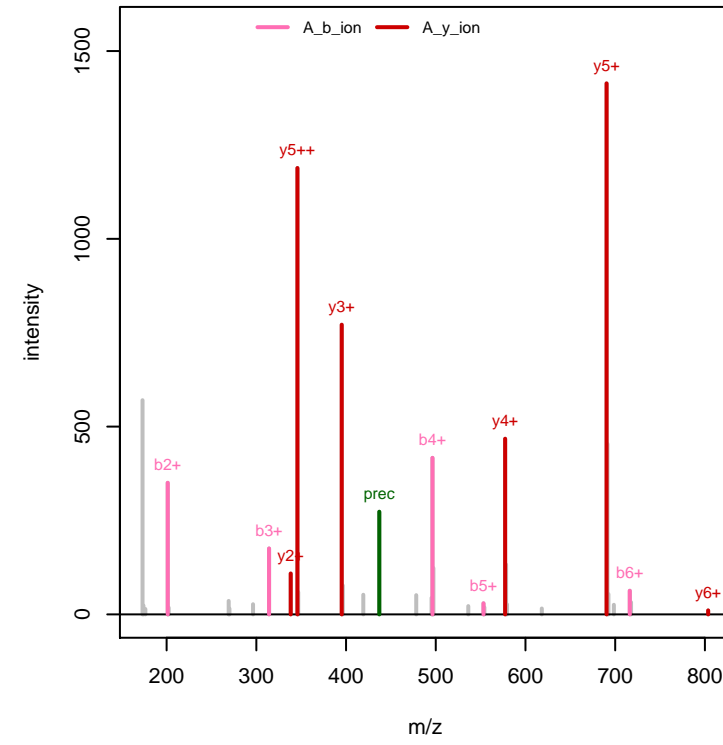

SILKGYR+XL\_L

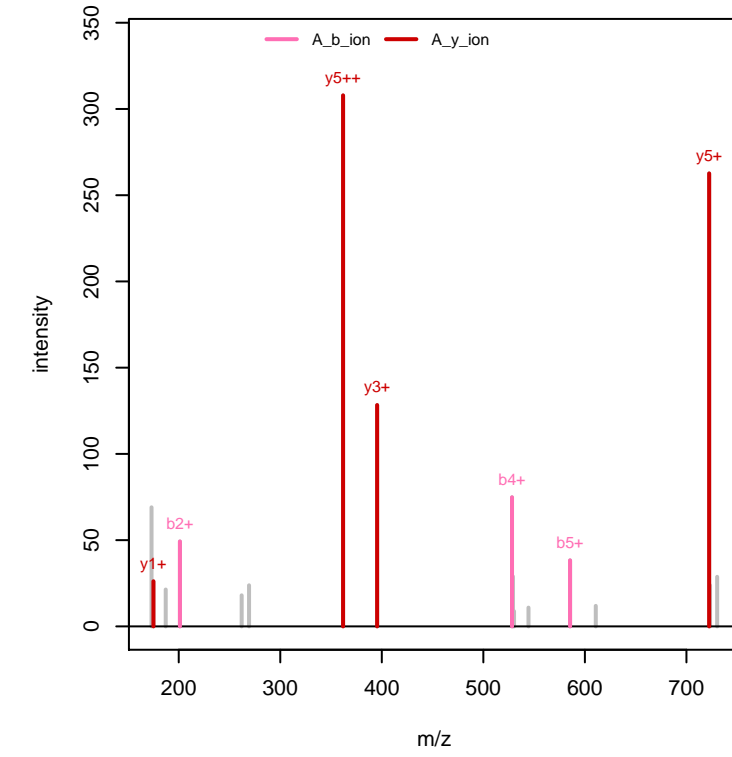

TQPDYDYQDGKSILK+XL\_S

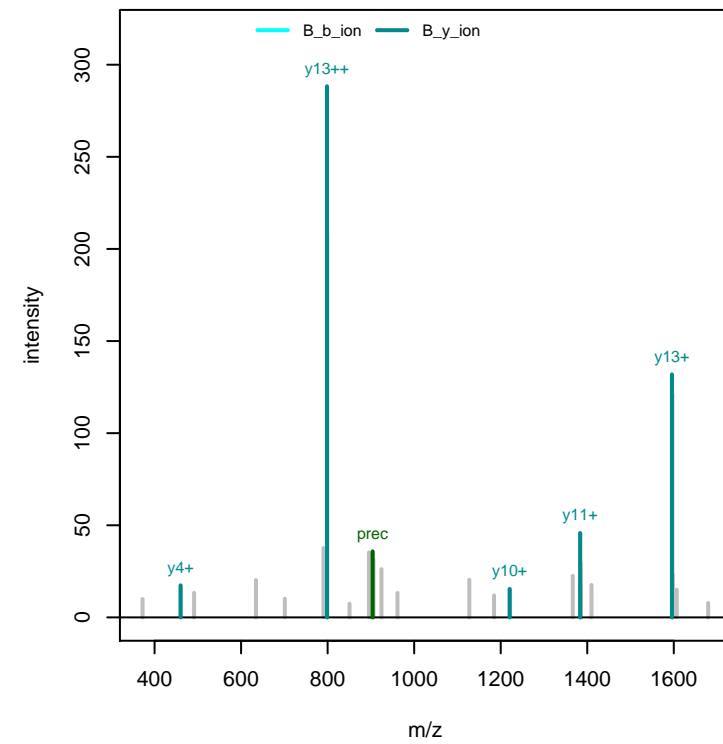

TQPDYDYQDGKSILK+XL\_L

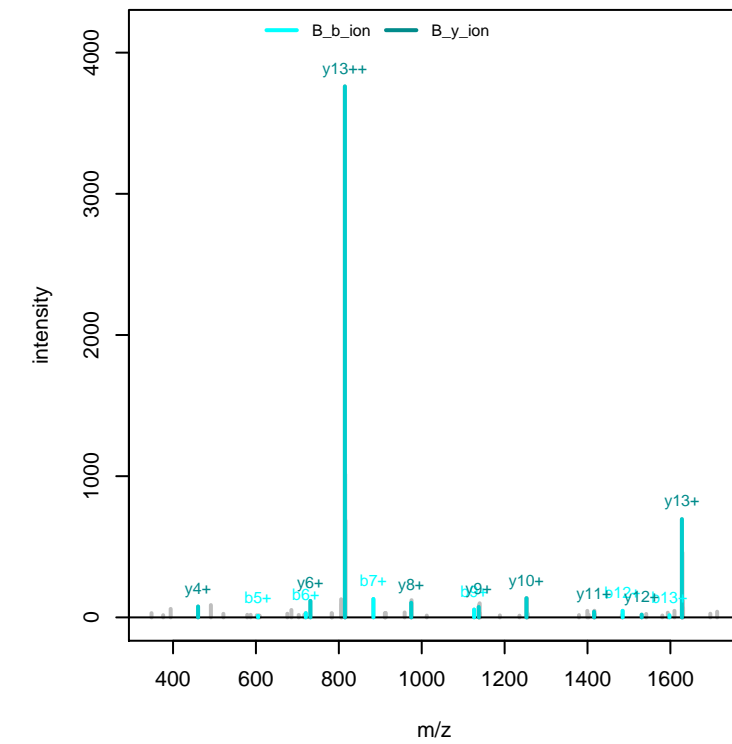

AKALLSSK  
ANVEIYTKETCPYCHR

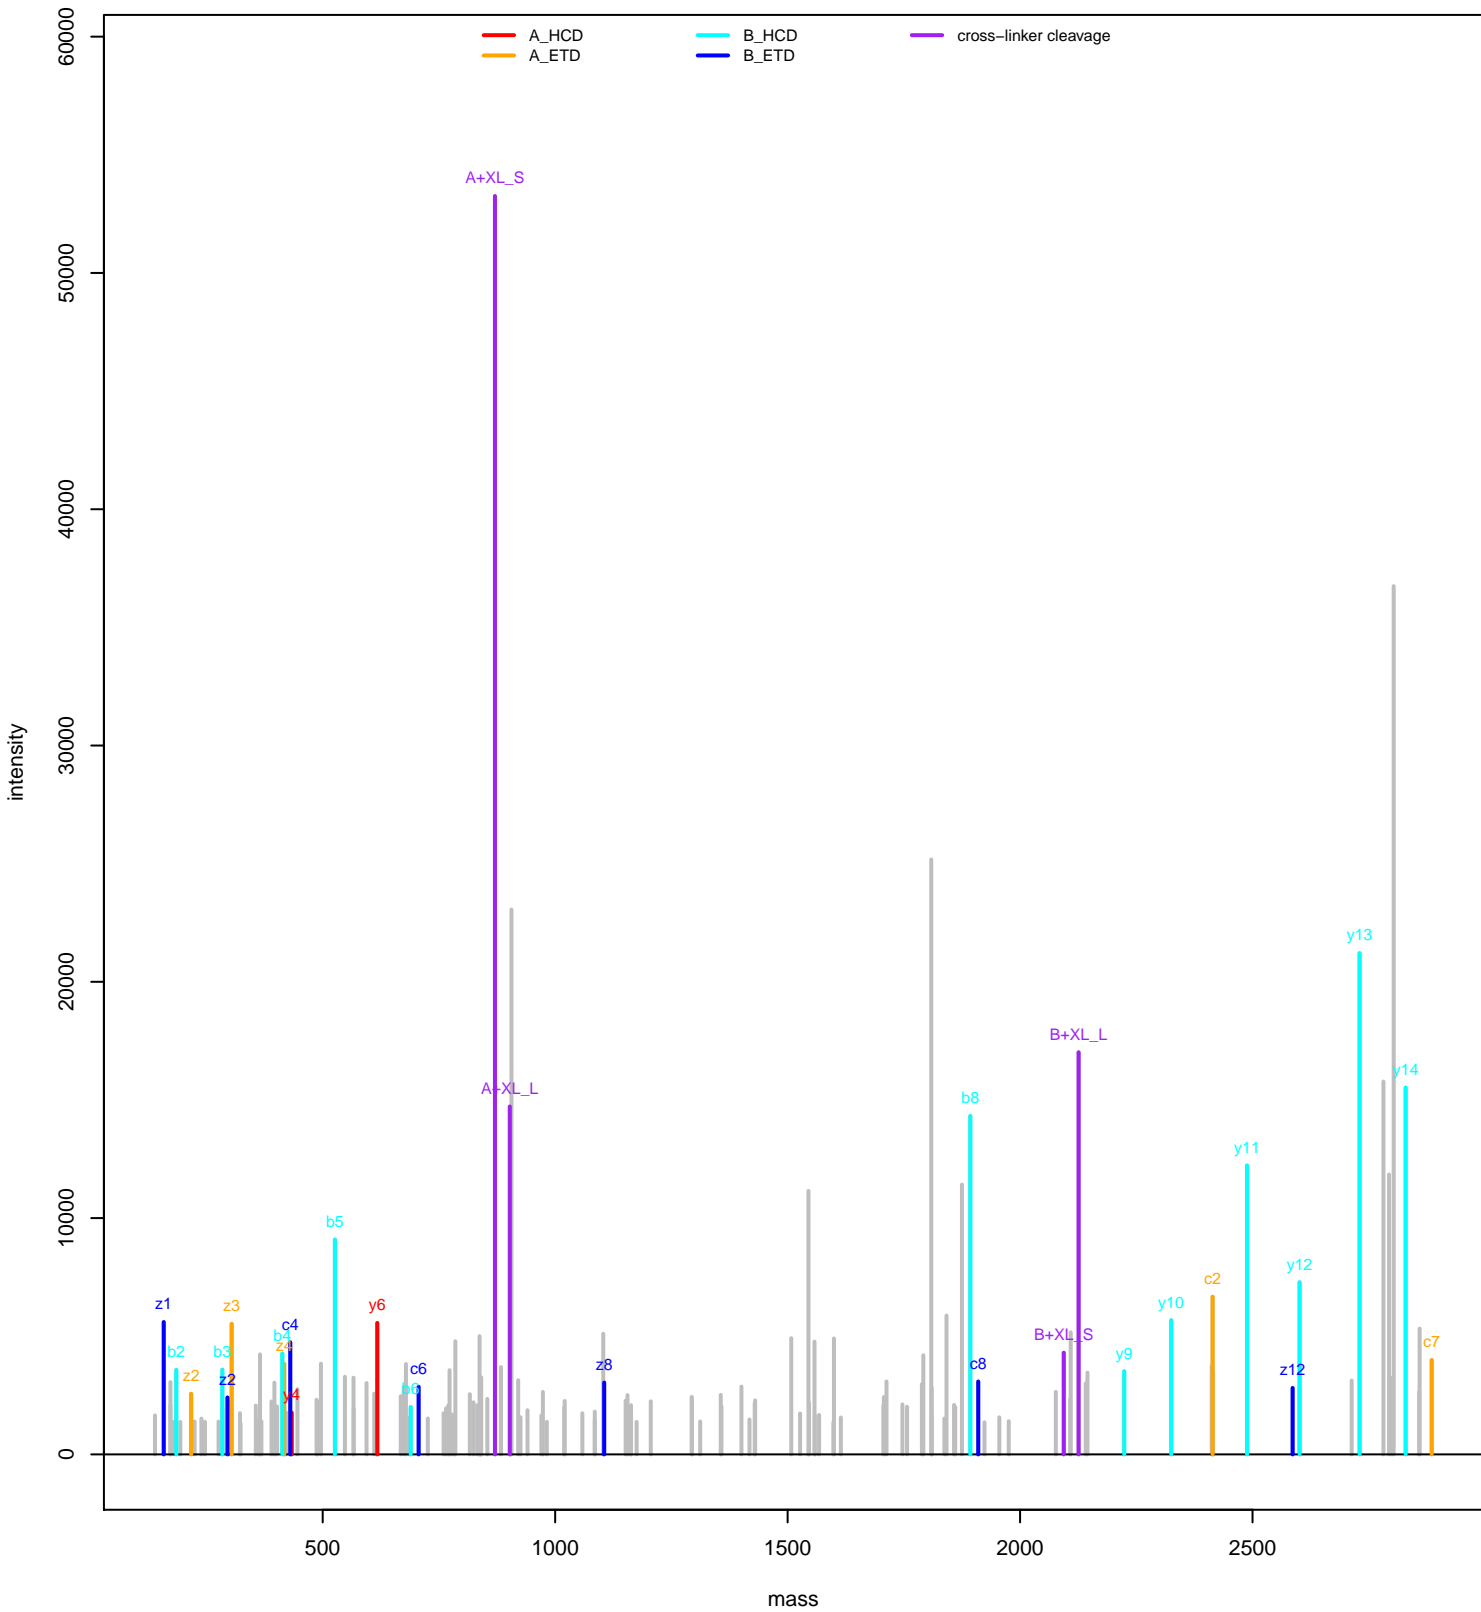

AKALLSSK+XL\_S

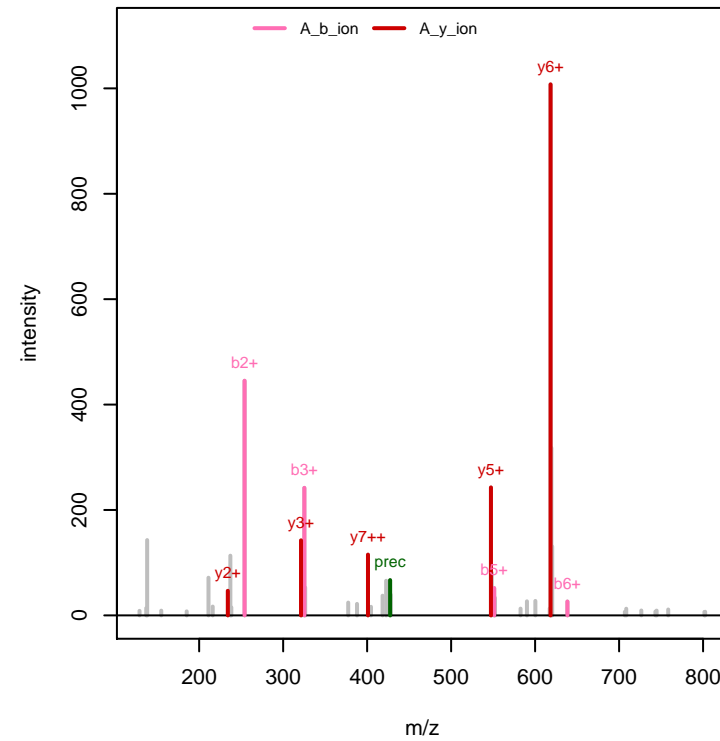

AKALLSSK+XL\_L

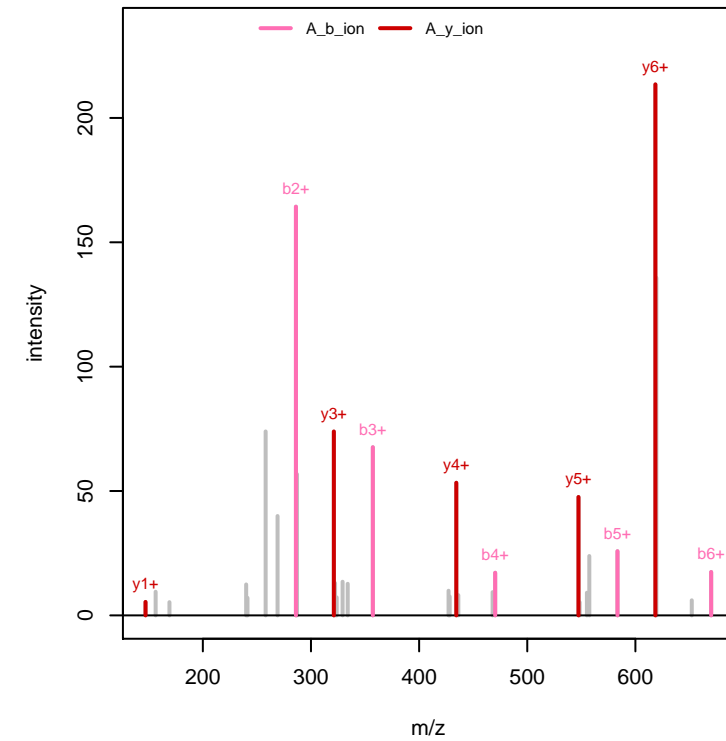

ANVEIYTKETCPYCHR+XL\_S

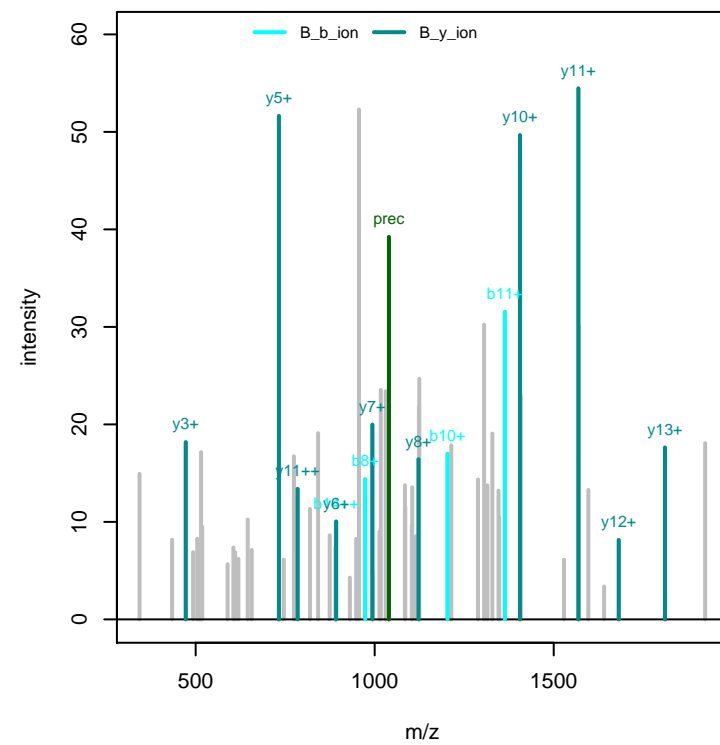

ANVEIYTKETCPYCHR+XL\_L

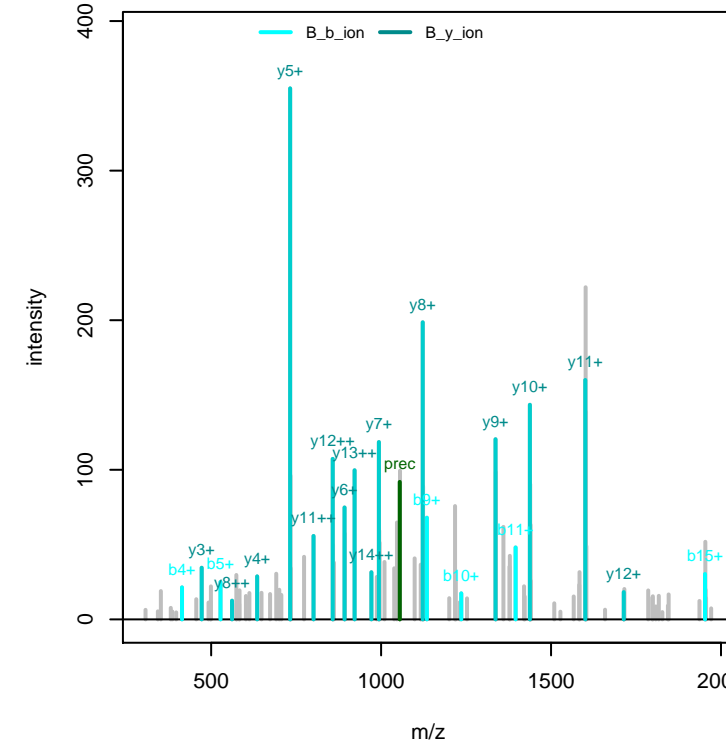

VSYFGQKMK  
KAQREYASFTQEVDK

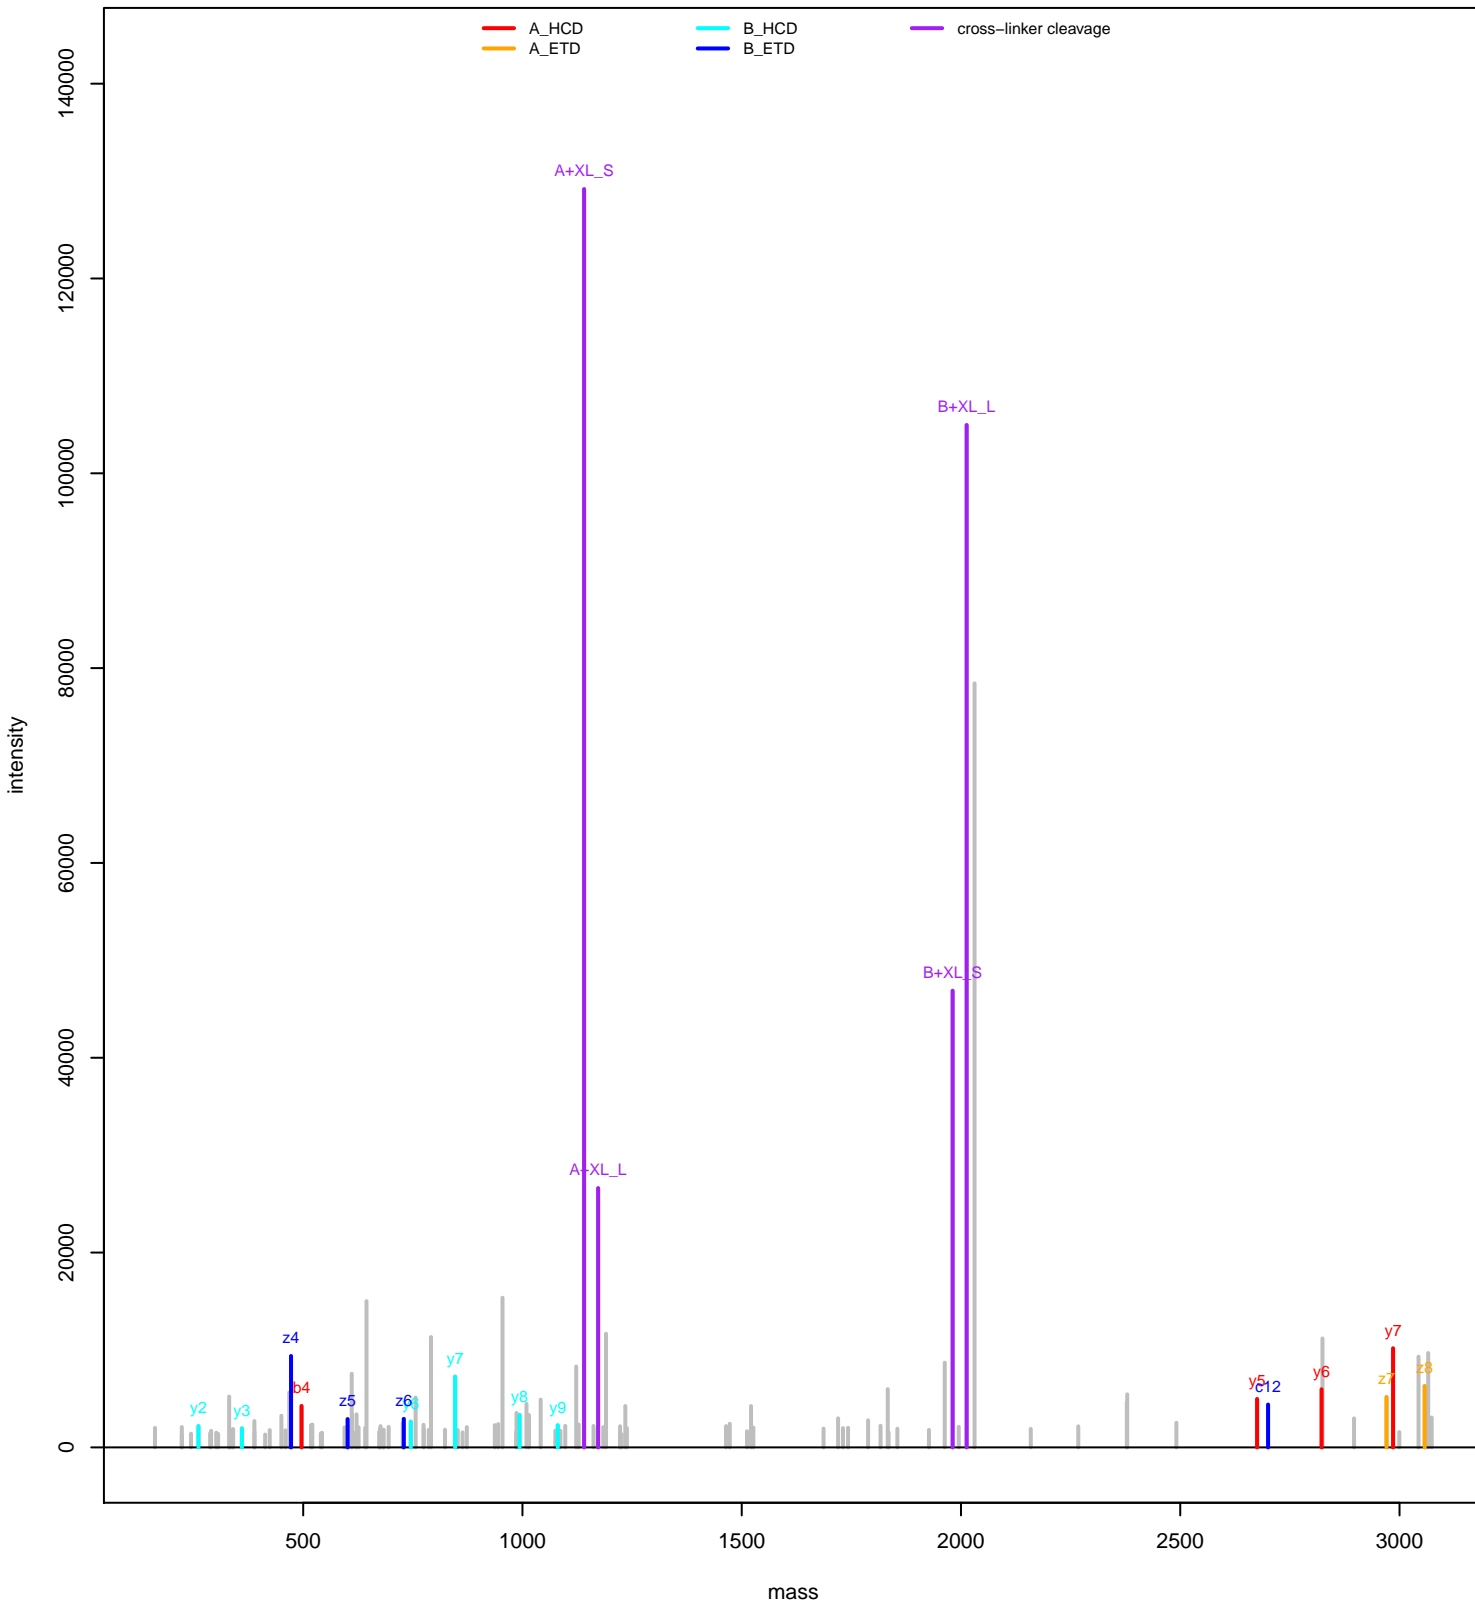

VSYFGQKMK+XL\_S

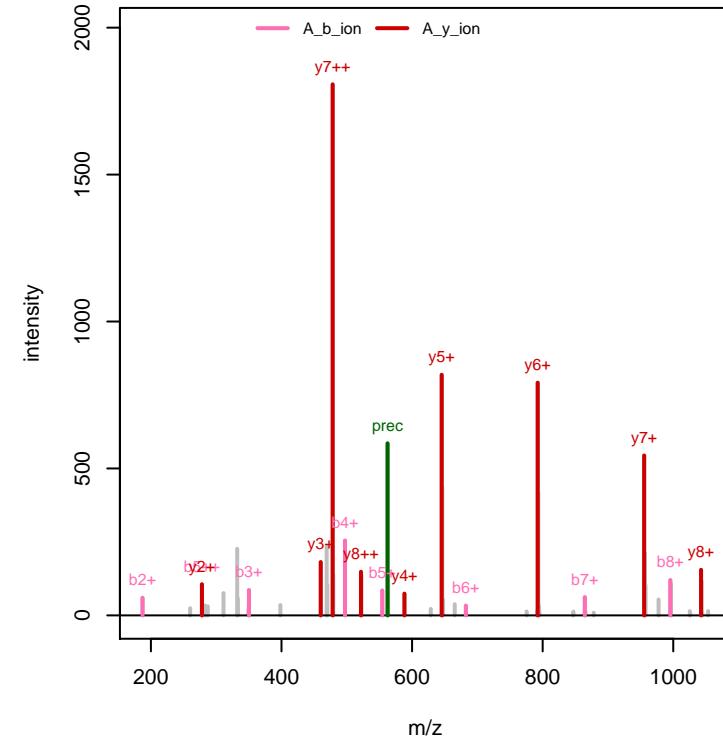

VSYFGQKMK+XL\_L

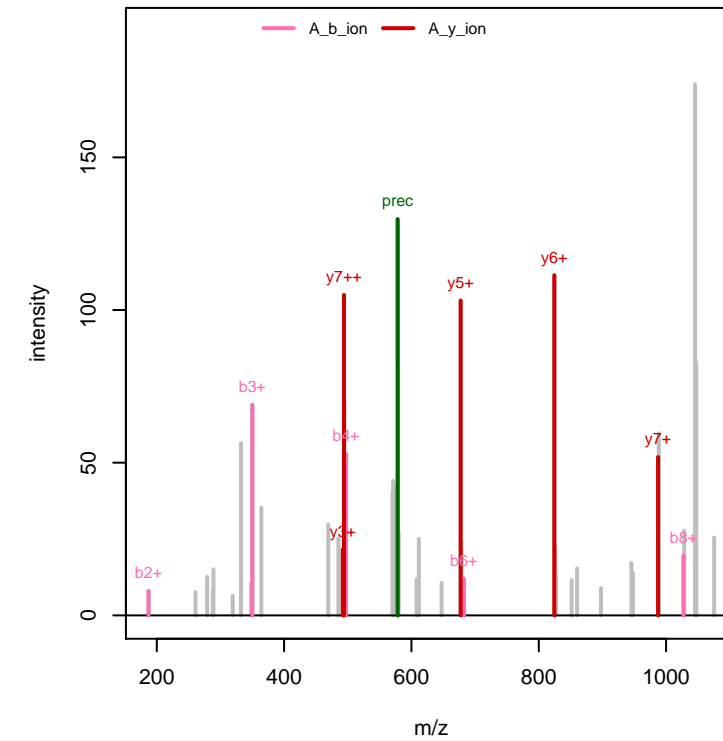

KAQREYASFTQEVDK+XL\_S

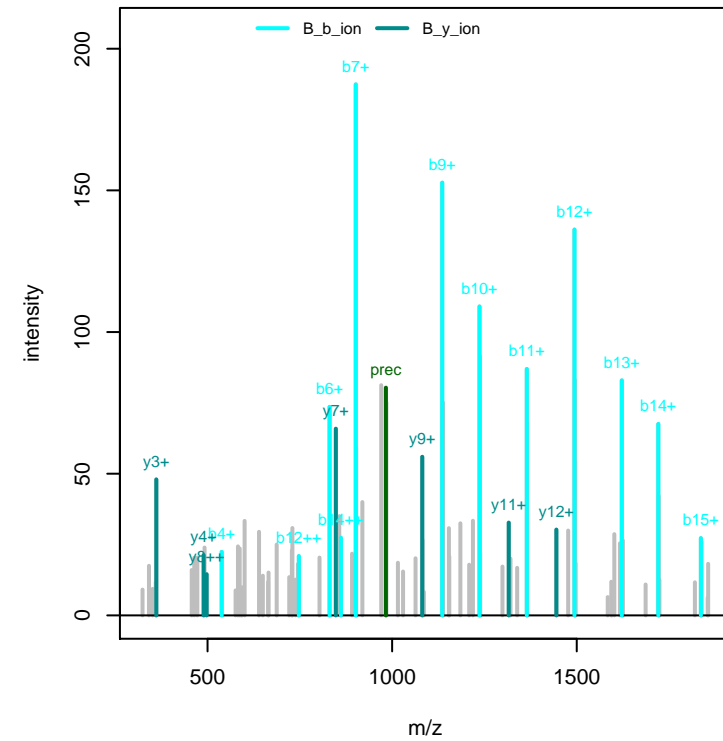

KAQREYASFTQEVDK+XL\_L

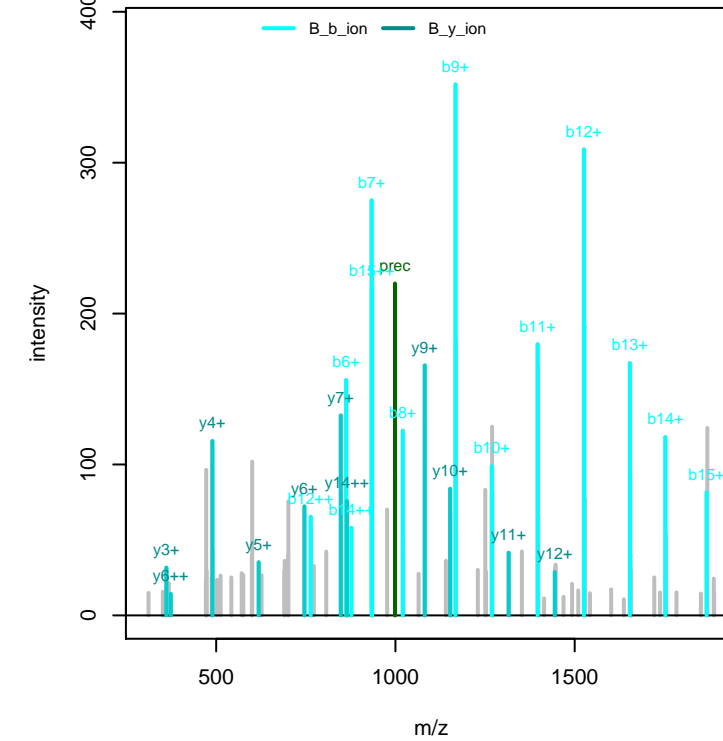

VQLHWDEKR  
TFEVTEDESKEK

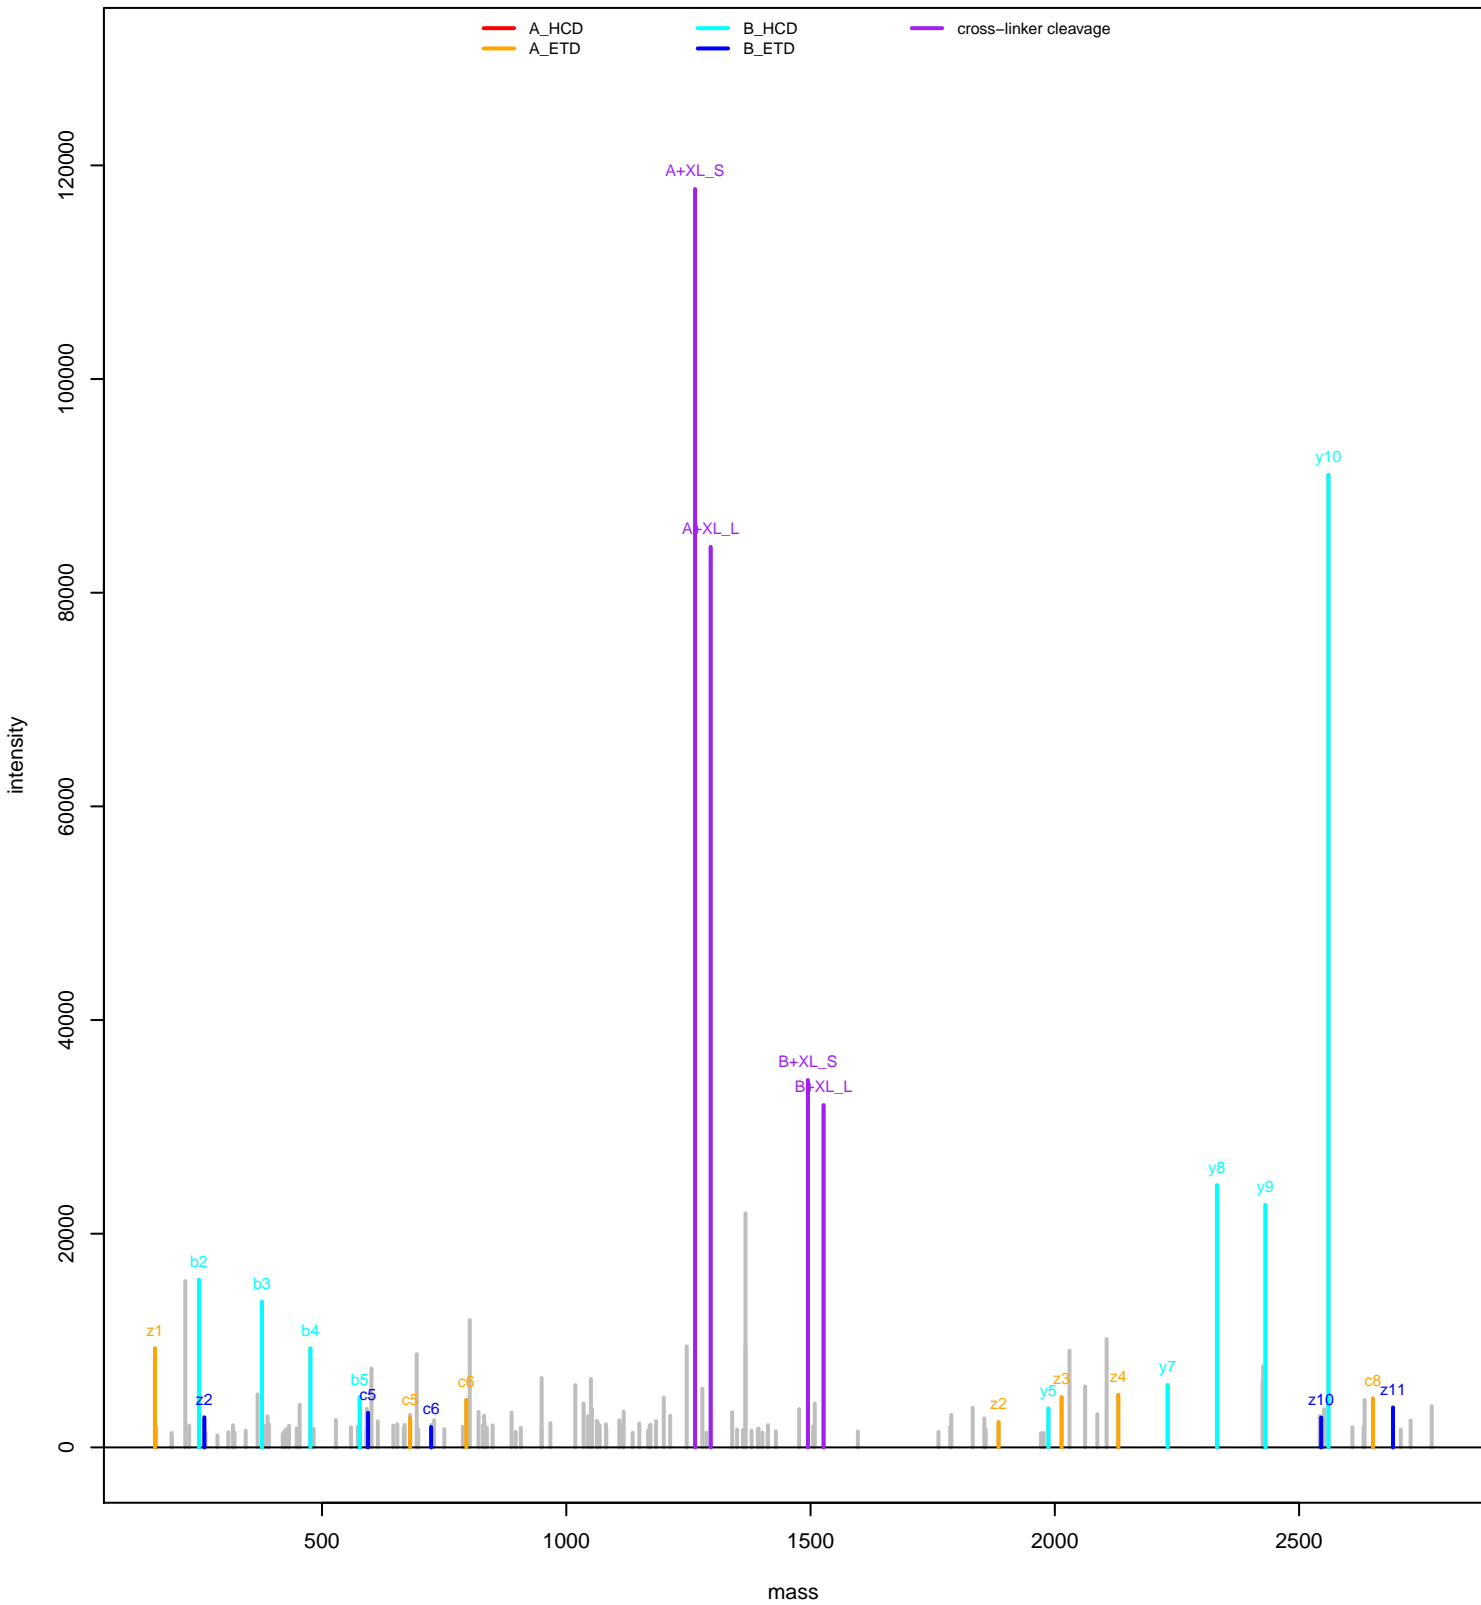

VQLHWDEKR+XL\_S

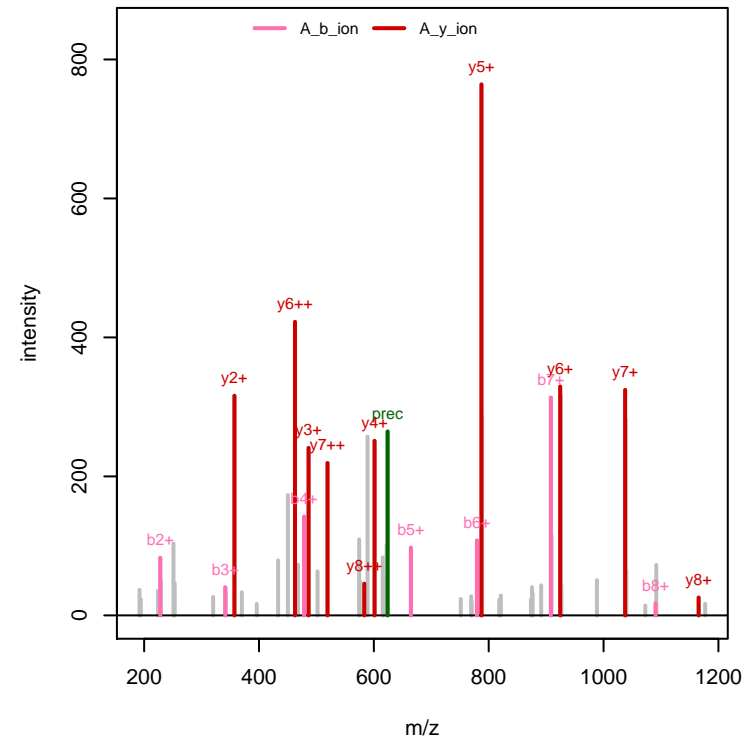

VQLHWDEKR+XL\_L

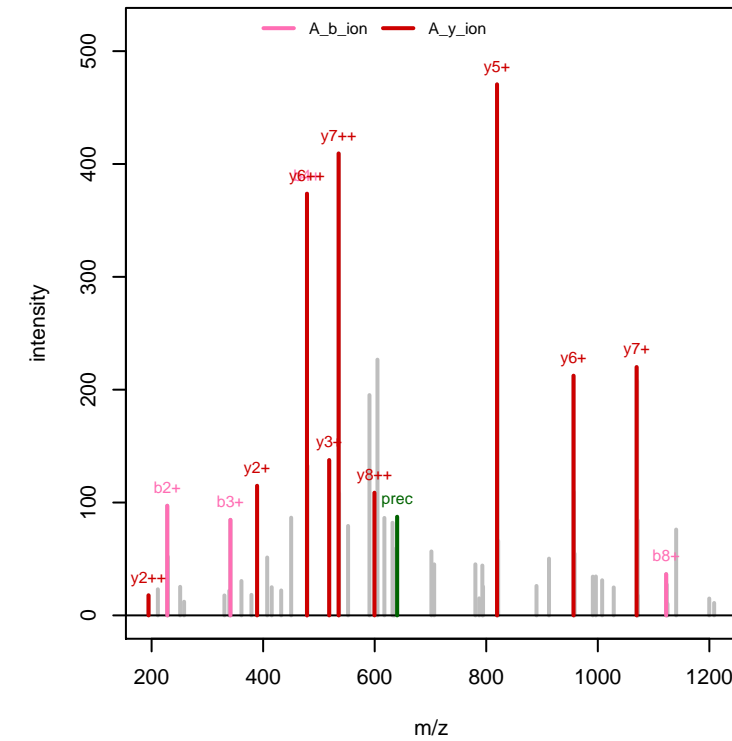

TFEVTEDESKEK+XL\_S

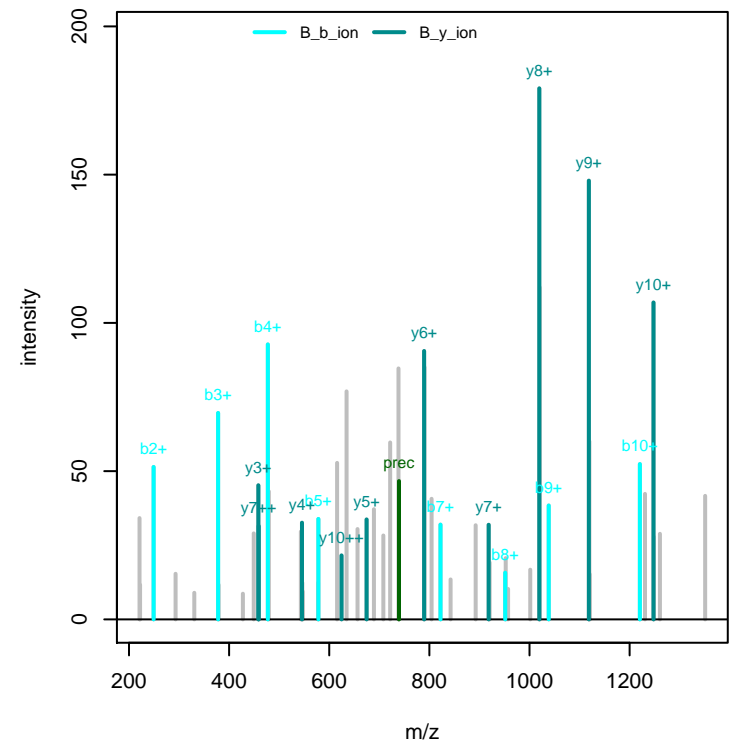

TFEVTEDESKEK+XL\_L

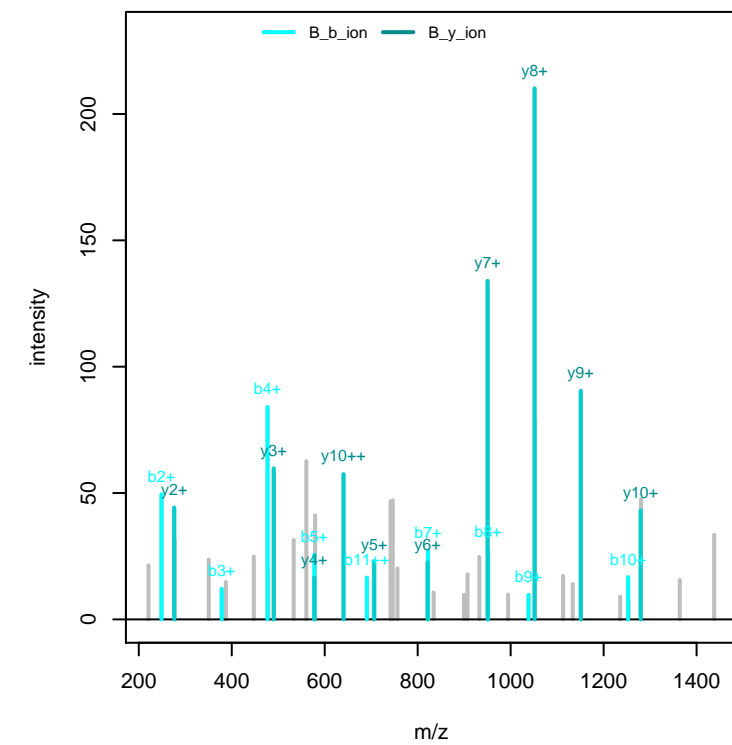

**VGKVLGHLGLER  
VMDSNDLEKER**

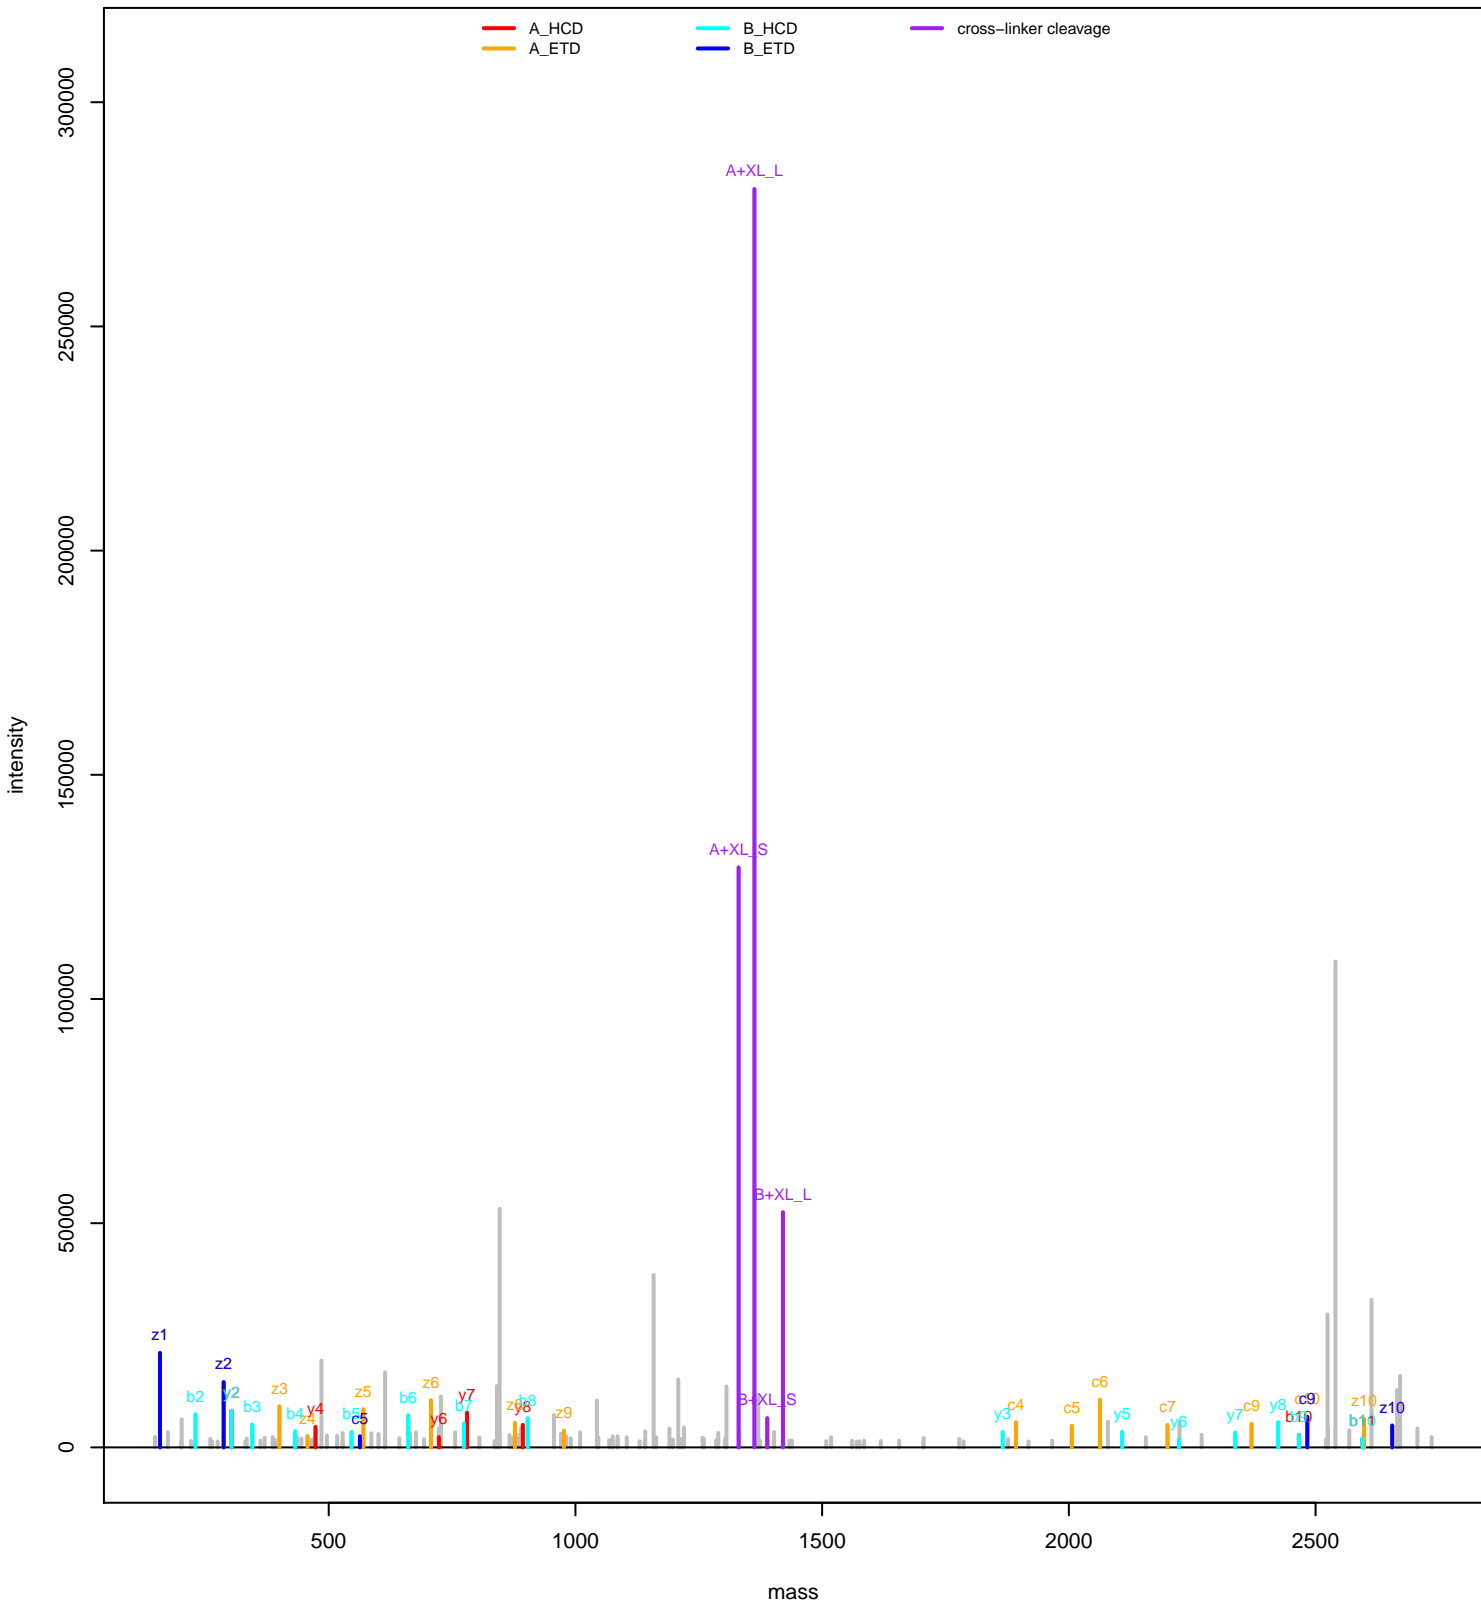

**VGKVLGHLGLER+XL\_S**

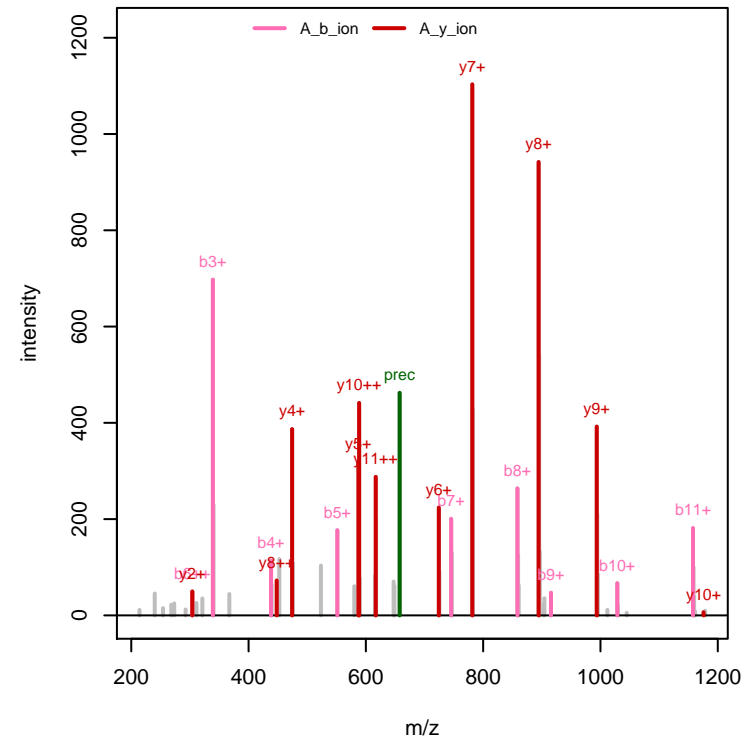

**VGKVLGHLGLER+XL\_L**

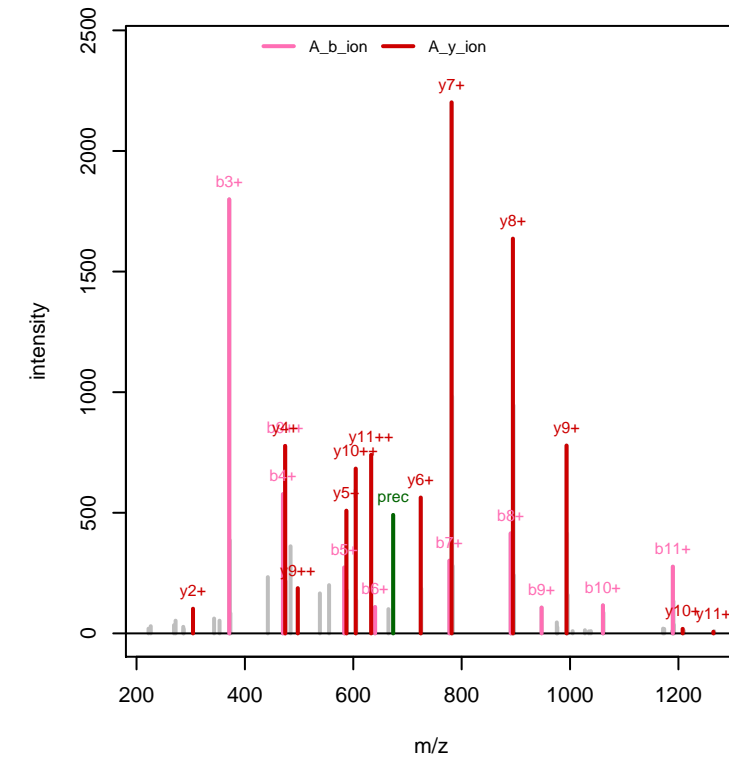

**VMDSNDLEKER+XL\_S**

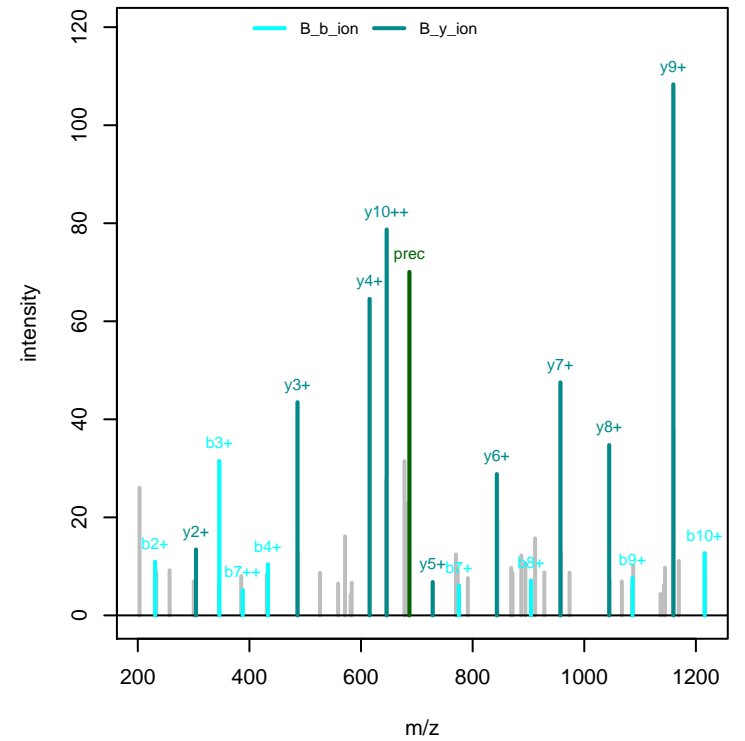

**VMDSNDLEKER+XL\_L**

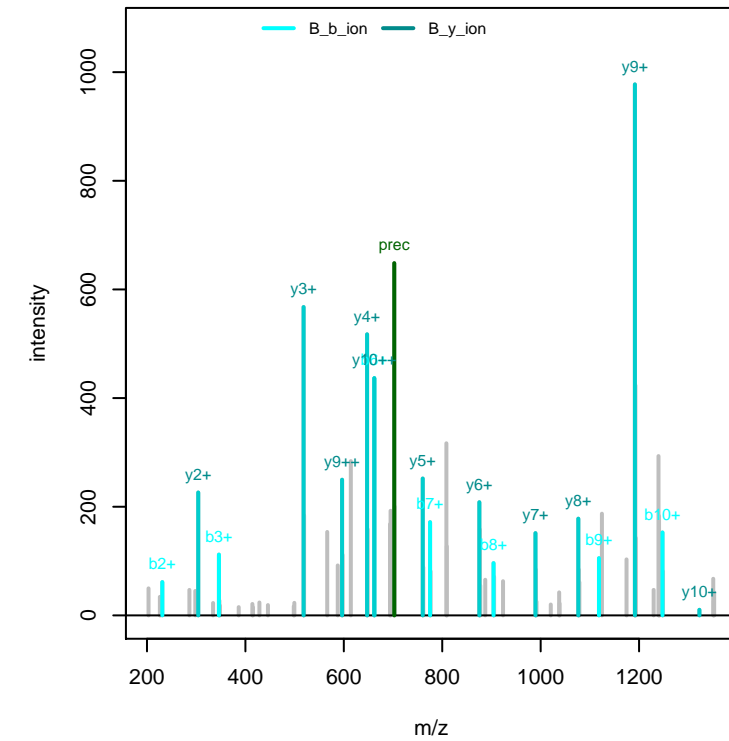





LFKEFAK  
EAKDLVESAPAALK

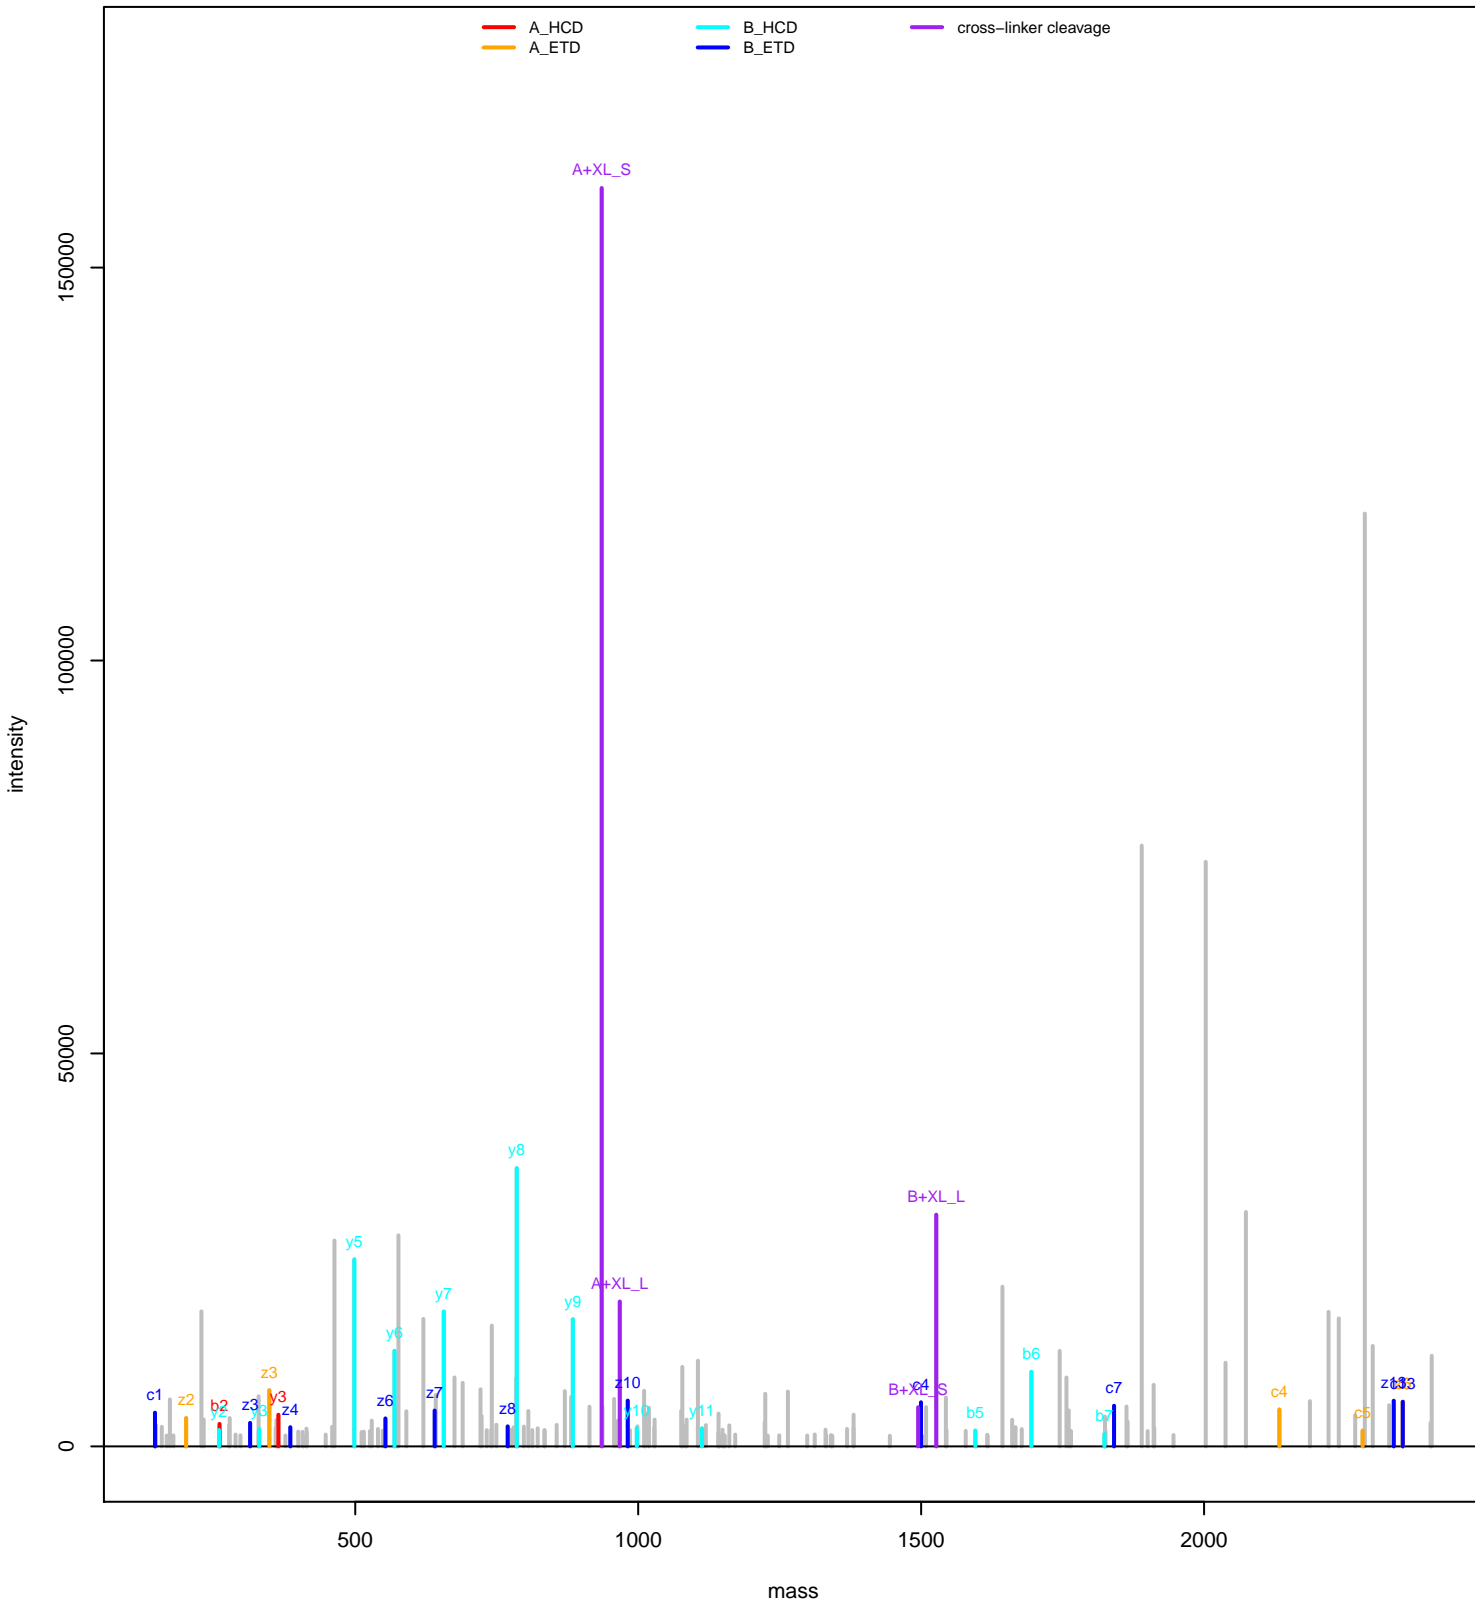

LFKEFAK+XL\_S

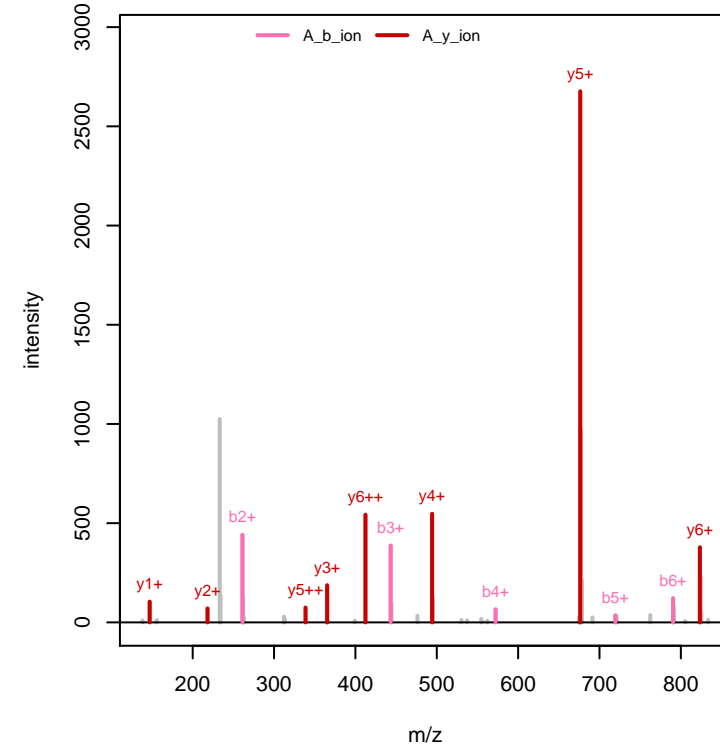

LFKEFAK+XL\_L

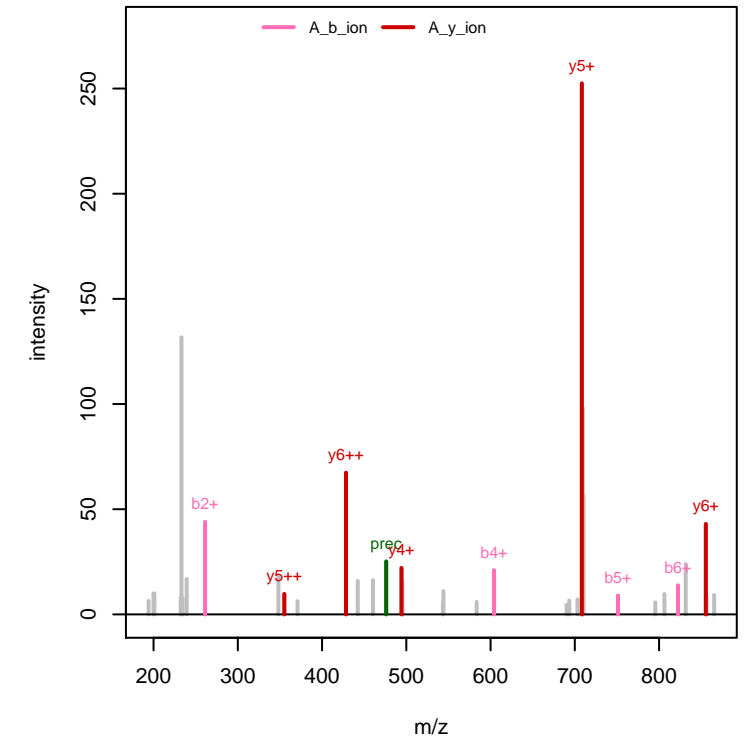

EAKDLVESAPAALK+XL\_S

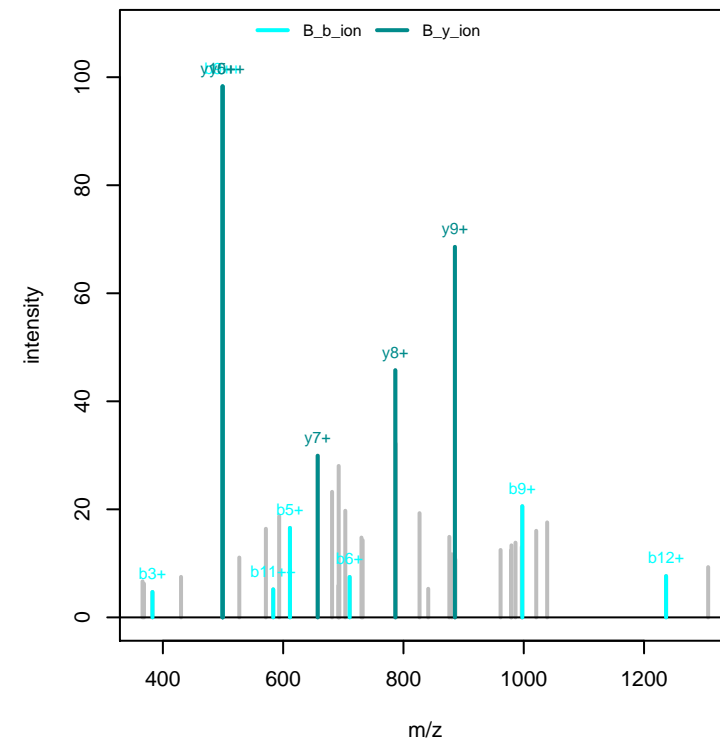

EAKDLVESAPAALK+XL\_L

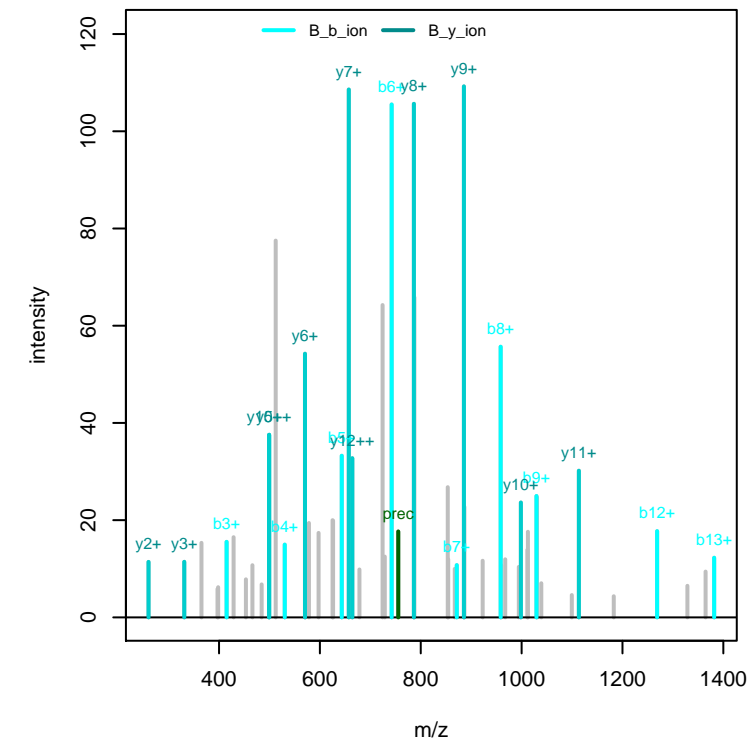

**LGIKLDK  
YMENSLKEQEK**

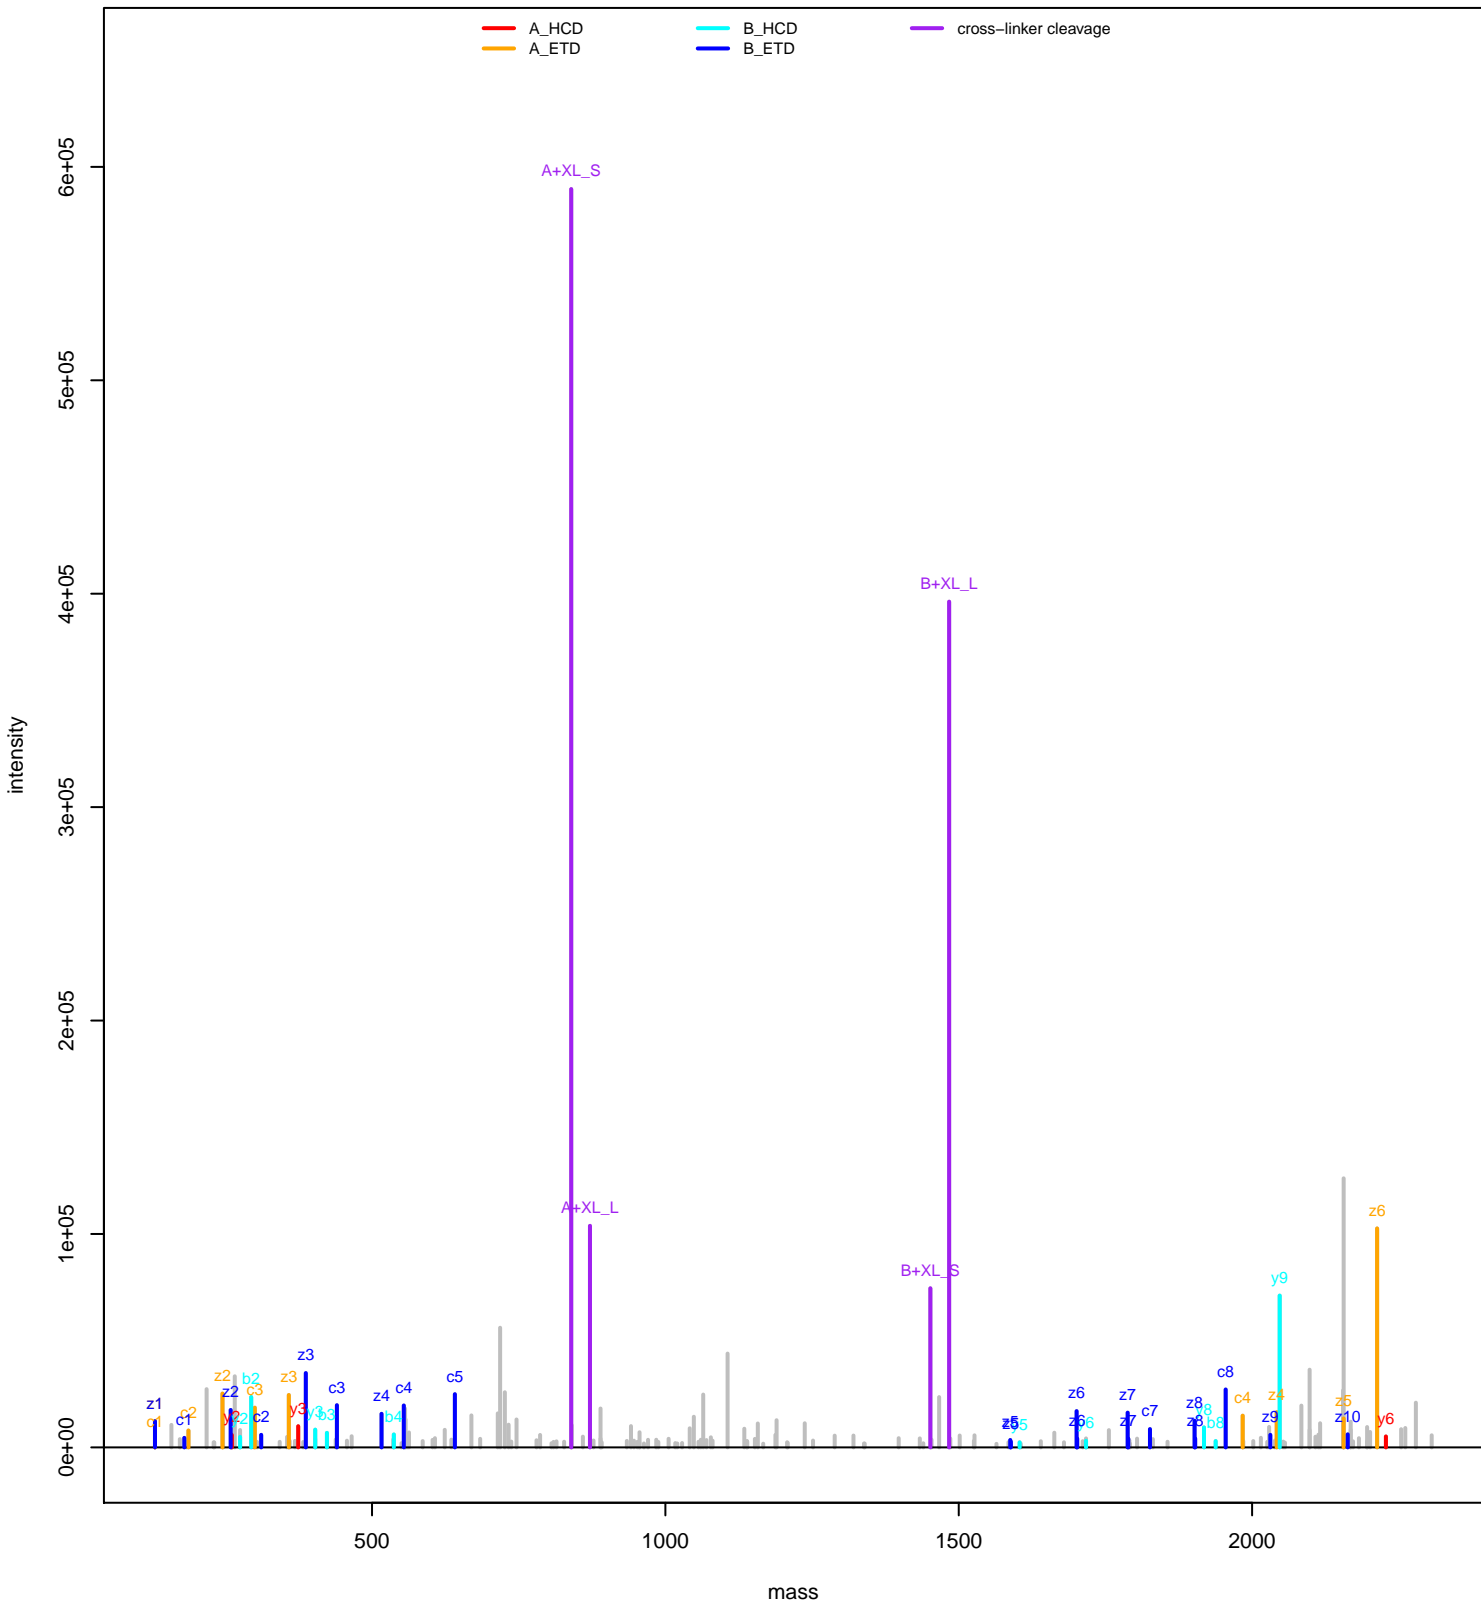

**TMAAKLEQNK  
DKLLTFAEGK**

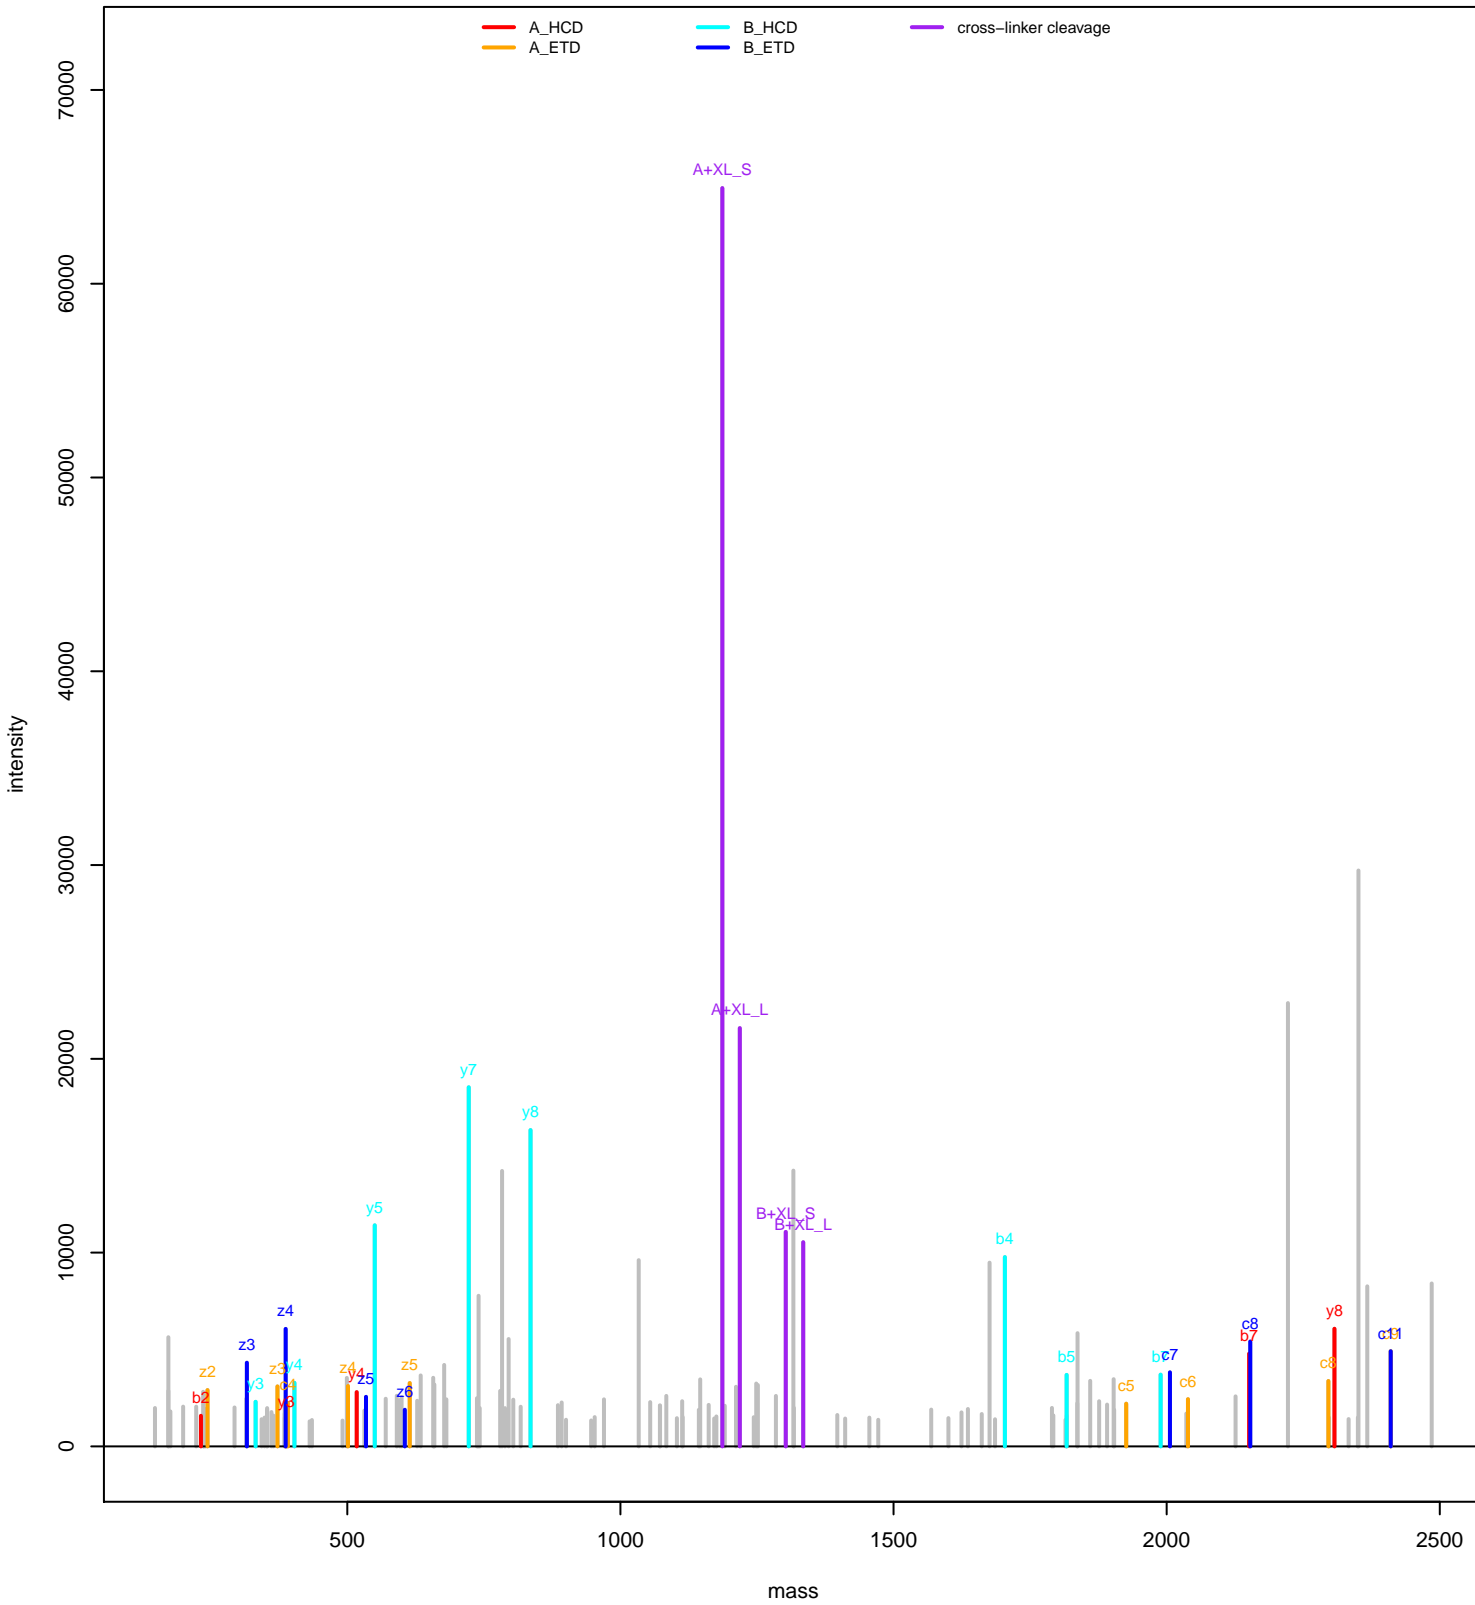

**TMAAKLEQNK+XL\_S**

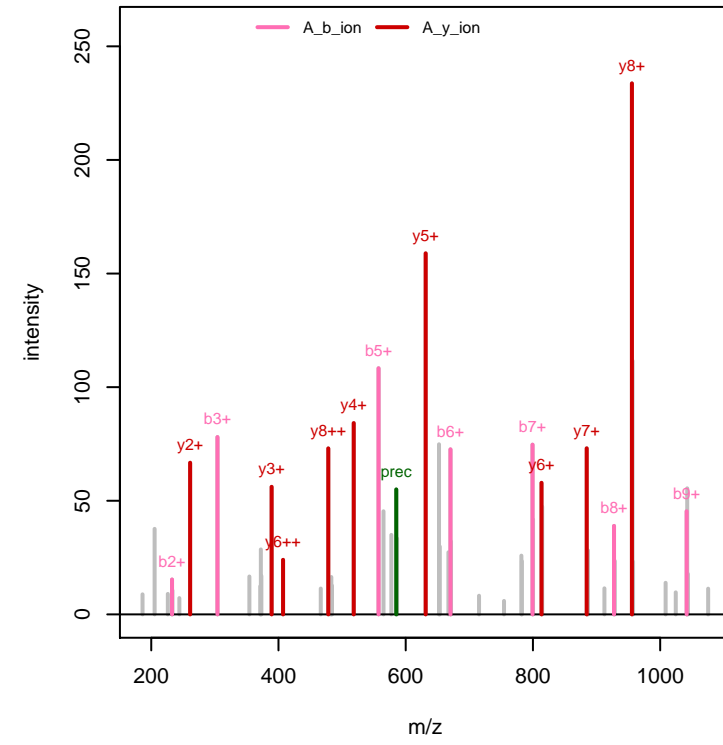

**TMAAKLEQNK+XL\_L**

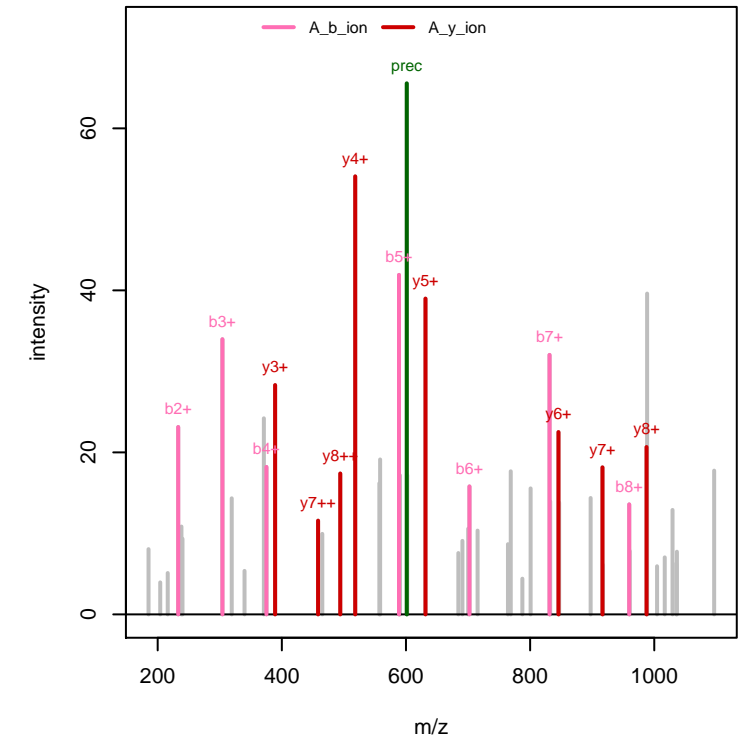

**DKLLTFAEGK+XL\_S**

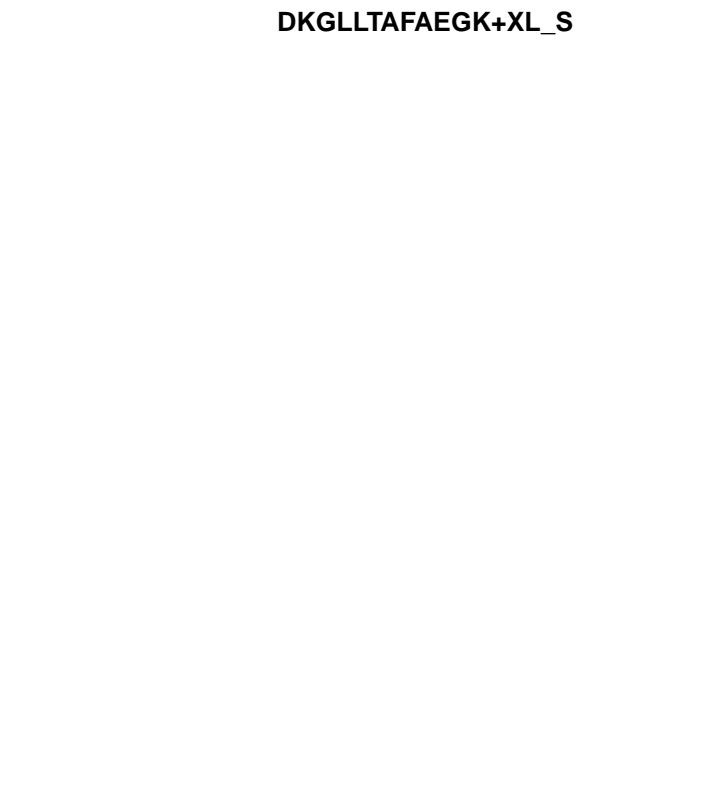

**DKLLTFAEGK+XL\_L**

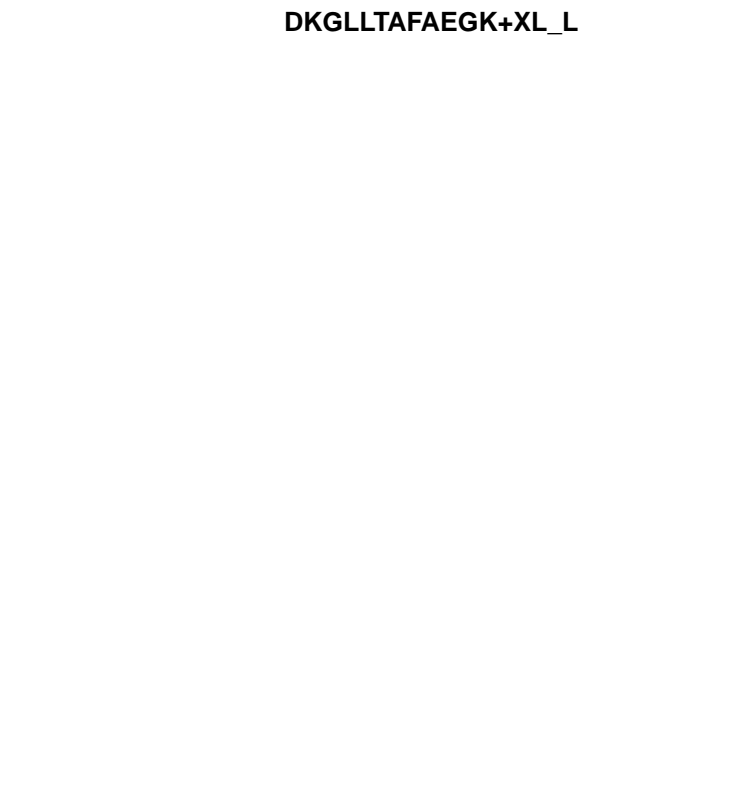

AFDQIDNAPEEKAR  
GSALKALEGDAEWEAK

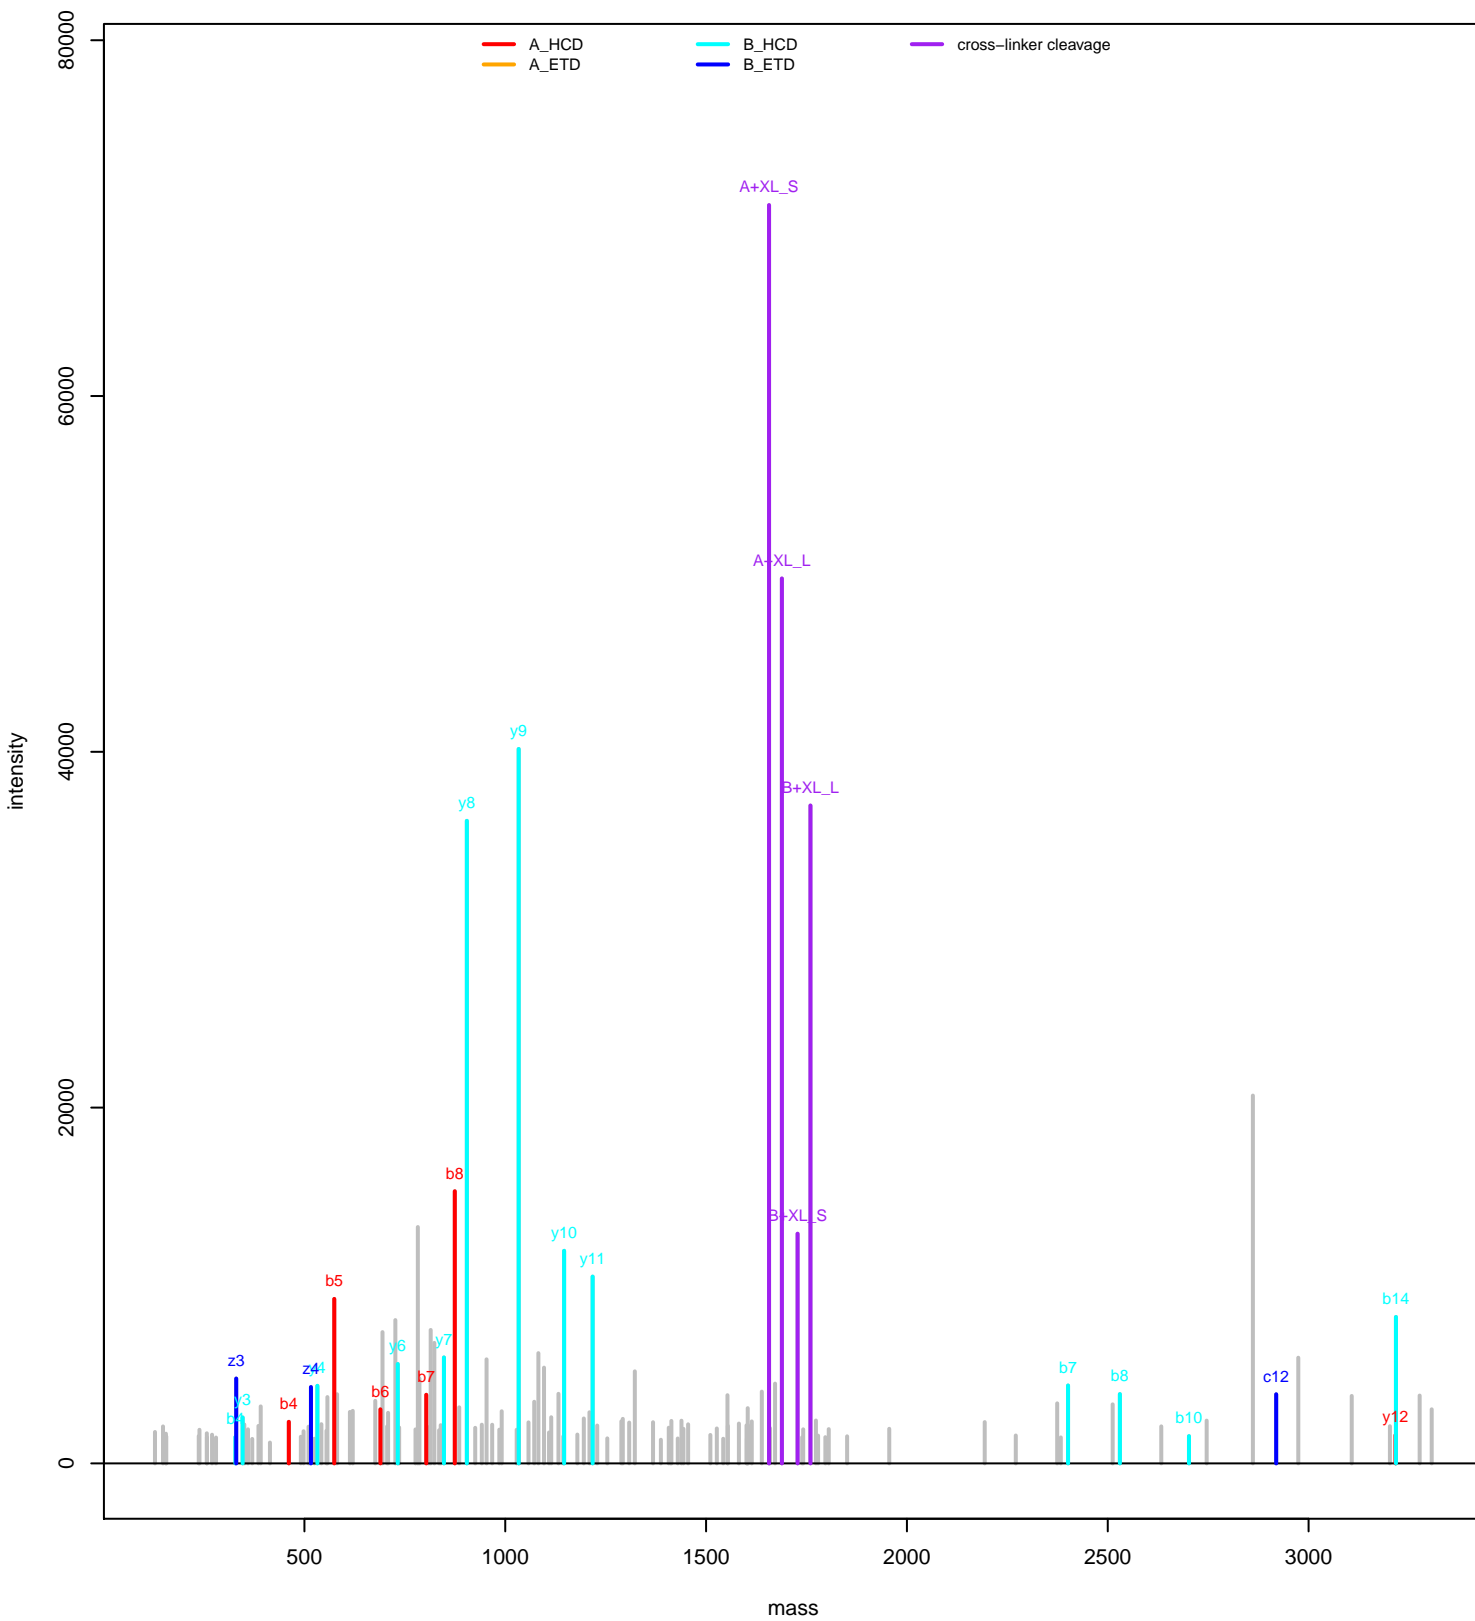

AFDQIDNAPEEKAR+XL\_S

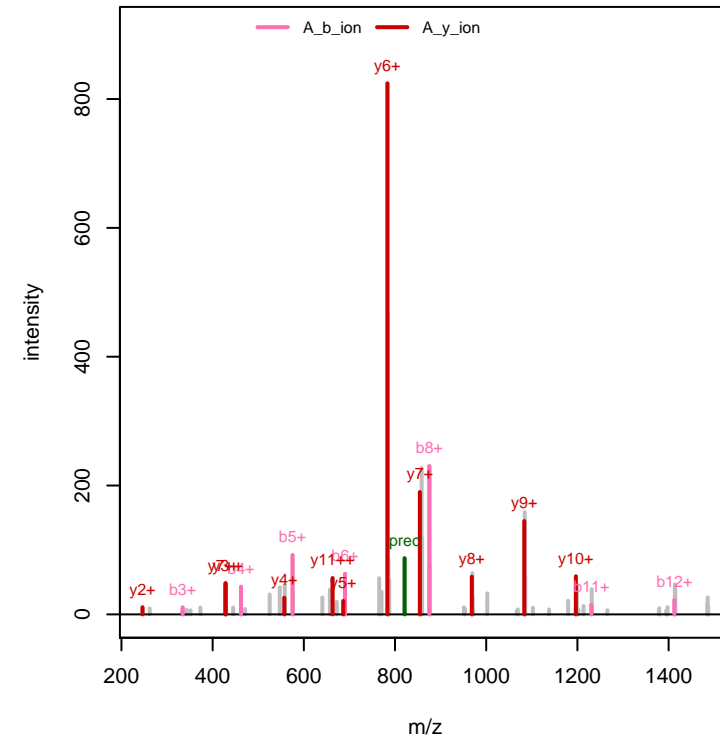

AFDQIDNAPEEKAR+XL\_L

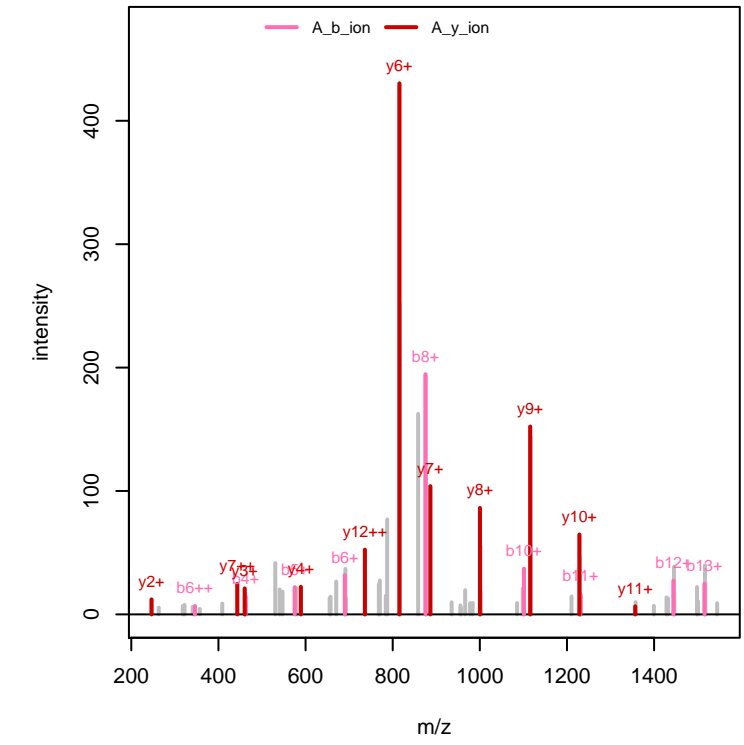

GSALKALEGDAEWEAK+XL\_S

GSALKALEGDAEWEAK+XL\_S

GSALKALEGDAEWEAK+XL\_L

GSALKALEGDAEWEAK+XL\_L

LEEAAGR  
LMKTAGAYWR

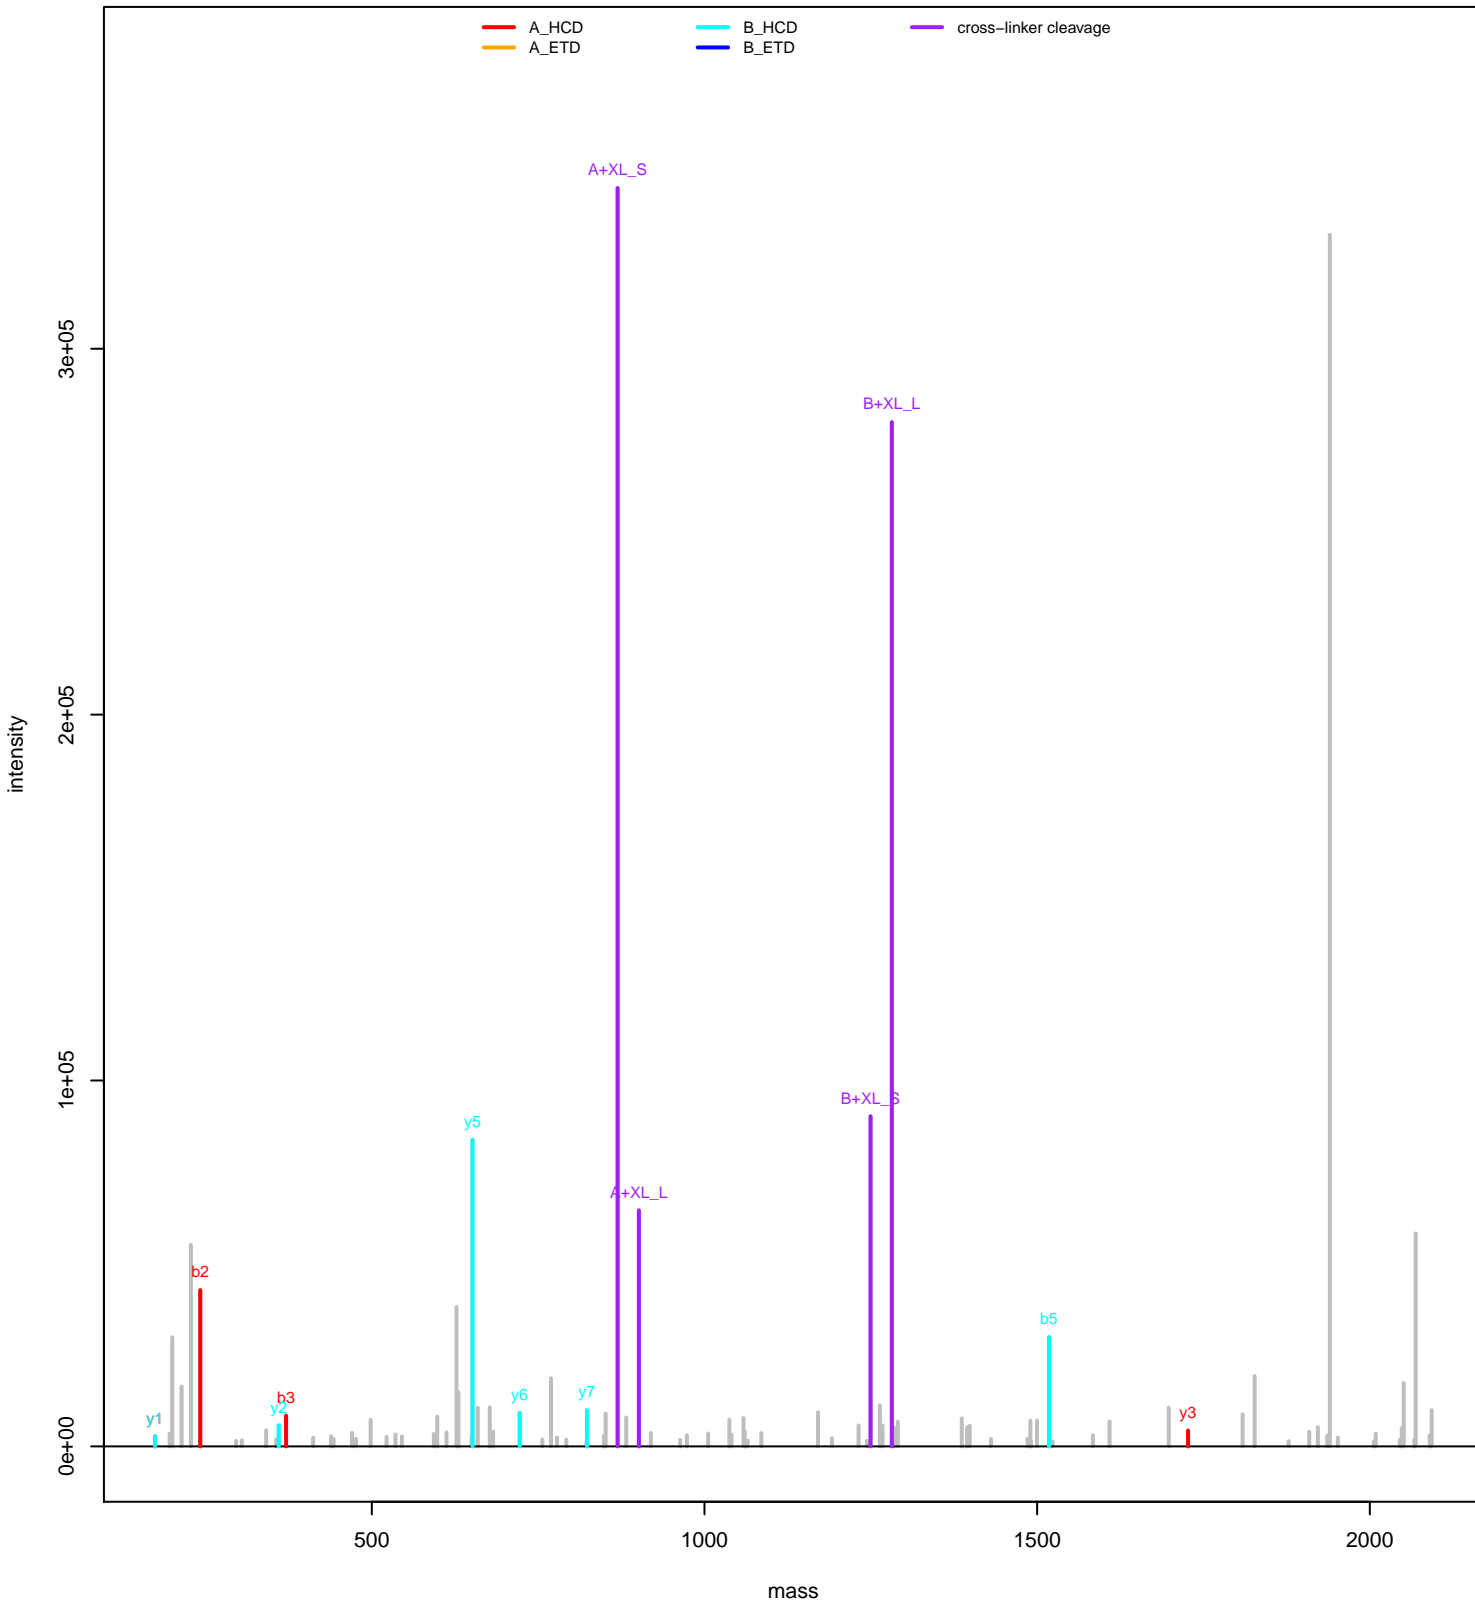

LEEAAGR+XL\_S

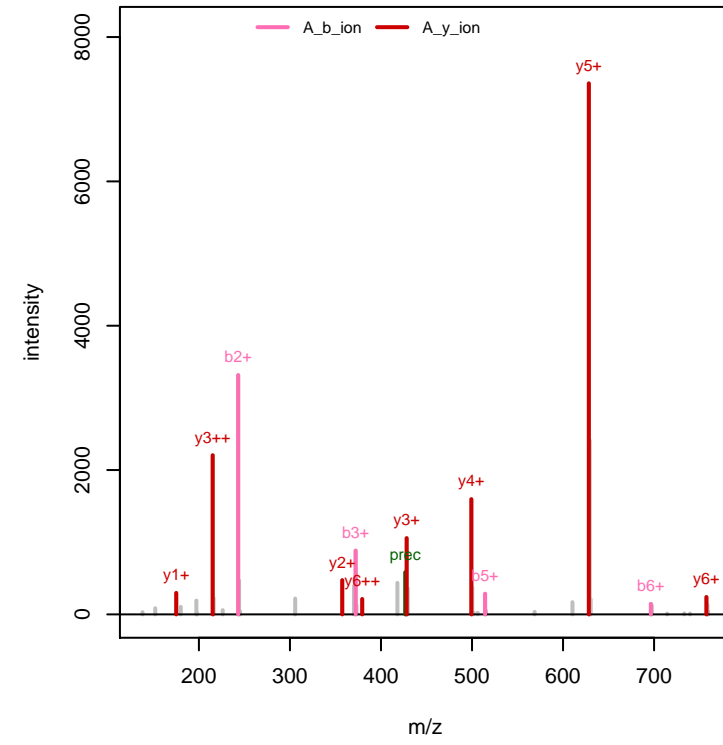

LEEAAGR+XL\_L

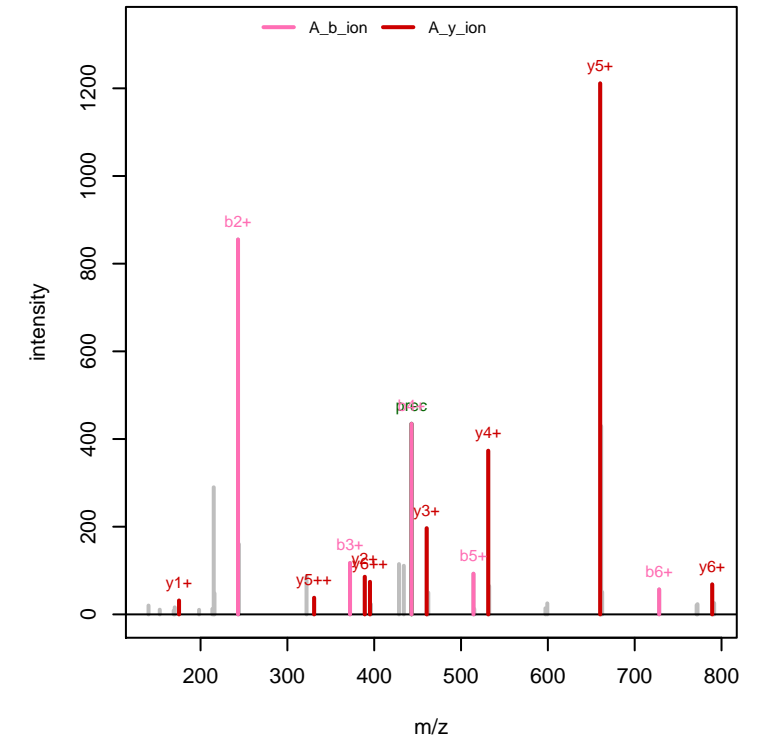

LMKTAGAYWR+XL\_S

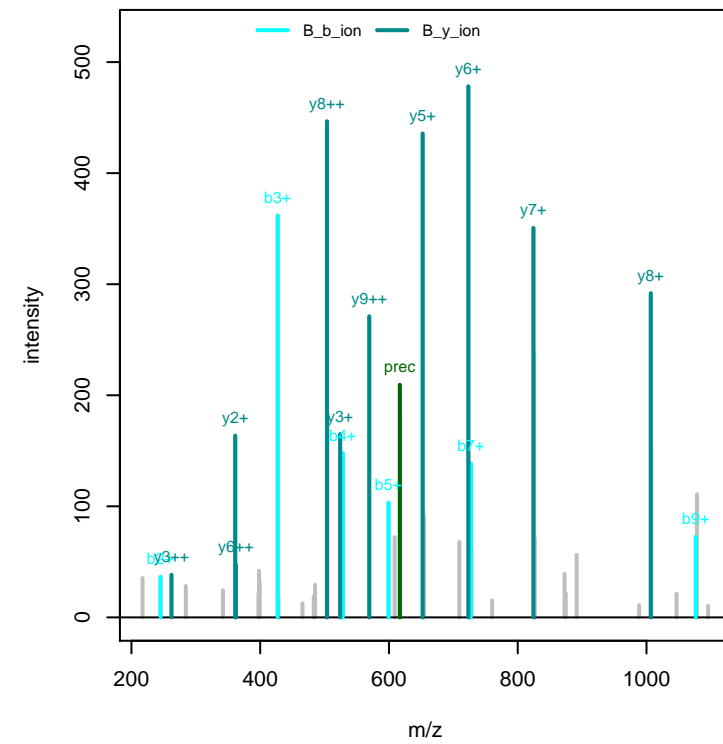

LMKTAGAYWR+XL\_L

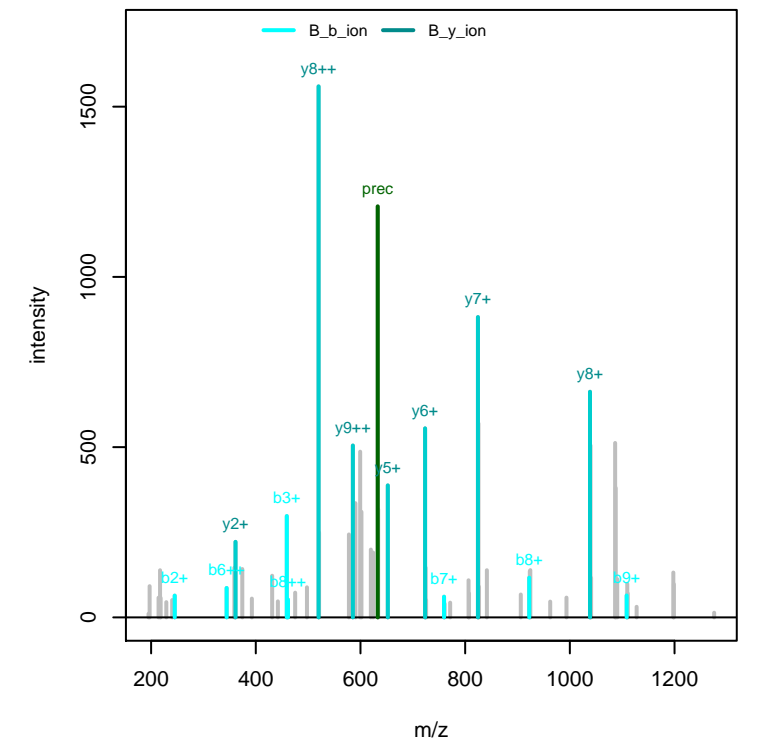

AKDYQADMTR  
ALVNAYEGLFGKAPVVDK

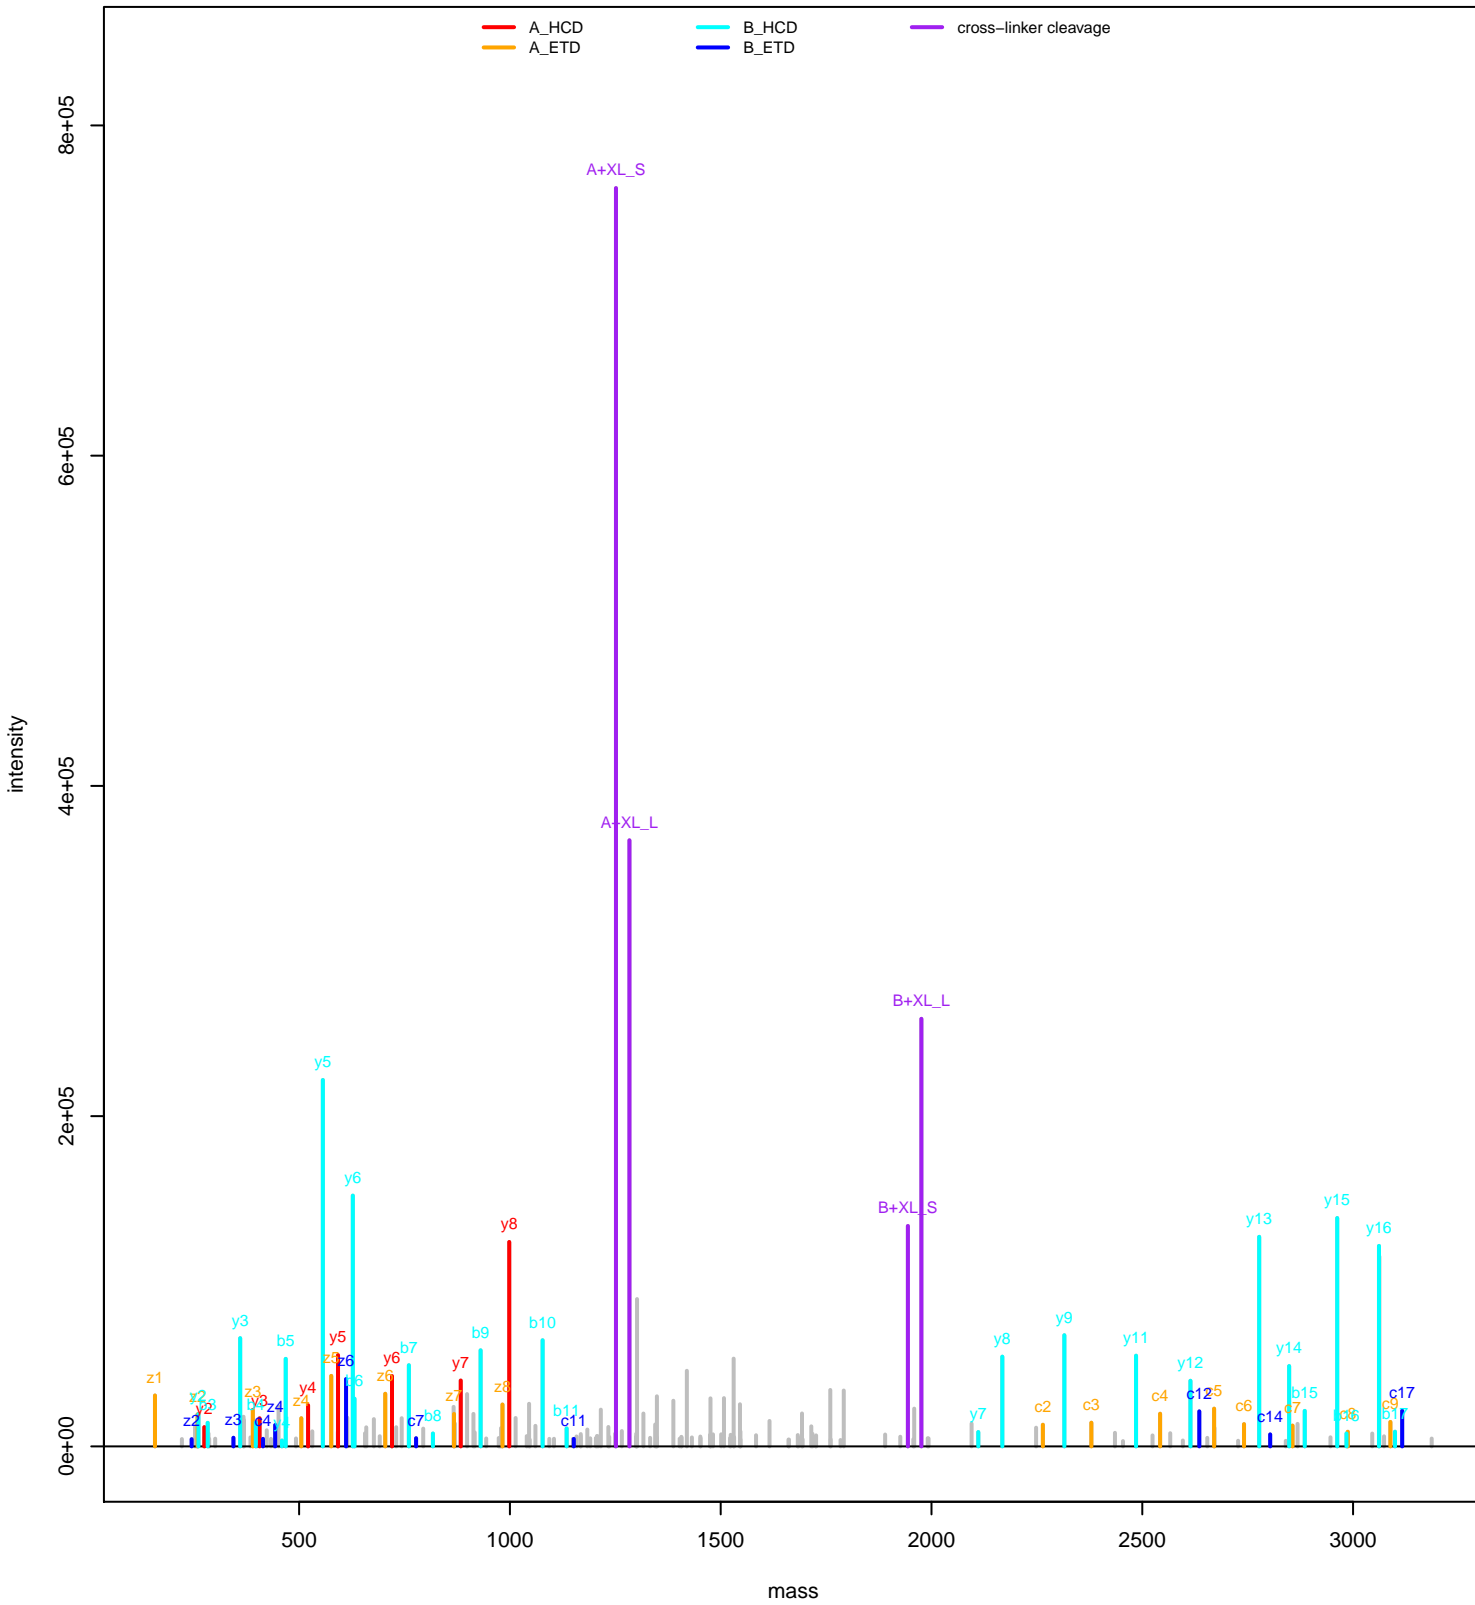

AKDYQADMTR+XL\_S

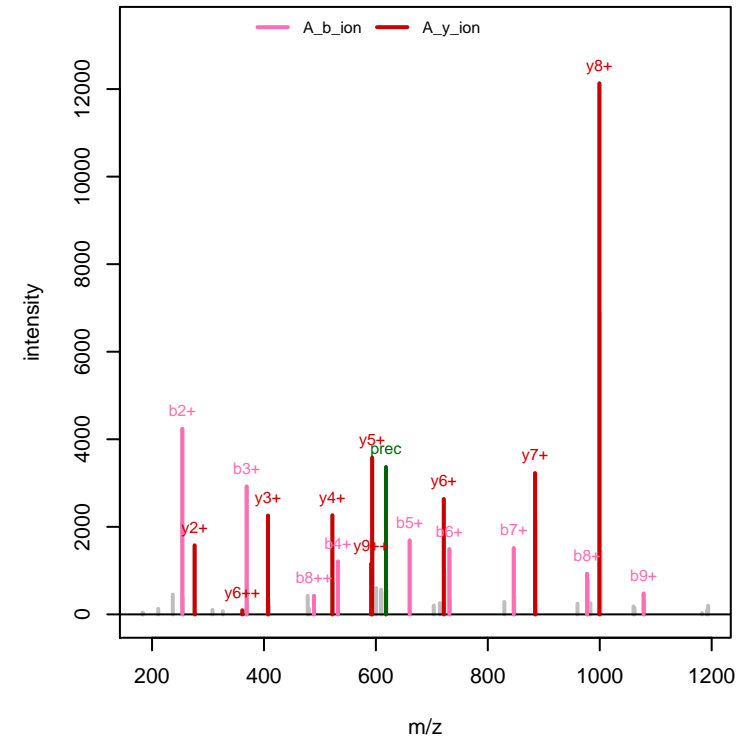

AKDYQADMTR+XL\_L

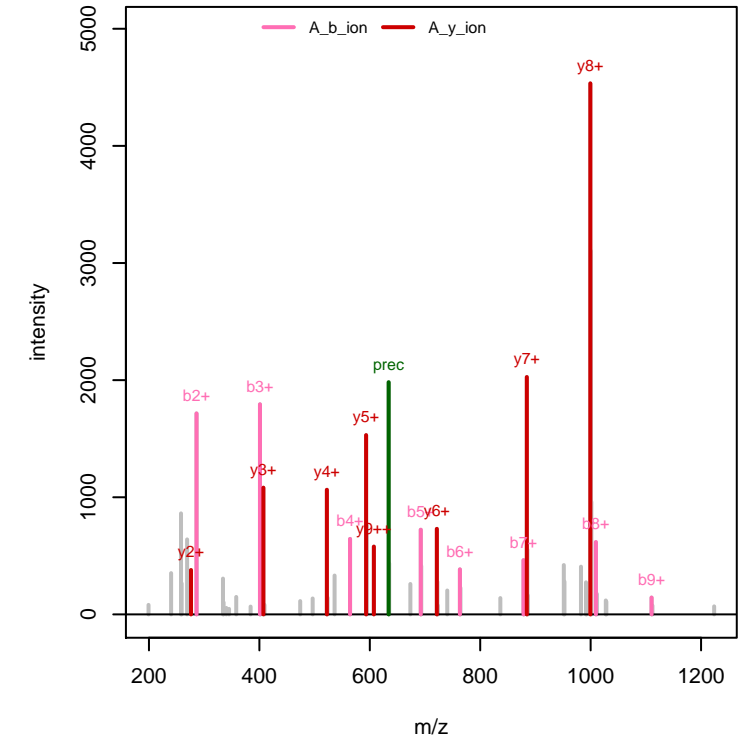

ALVNAYEGLFGKAPVVDK+XL\_S

ALVNAYEGLFGKAPVVDK+XL\_L

**SNSETIK**  
**VGFRFEDGKK**

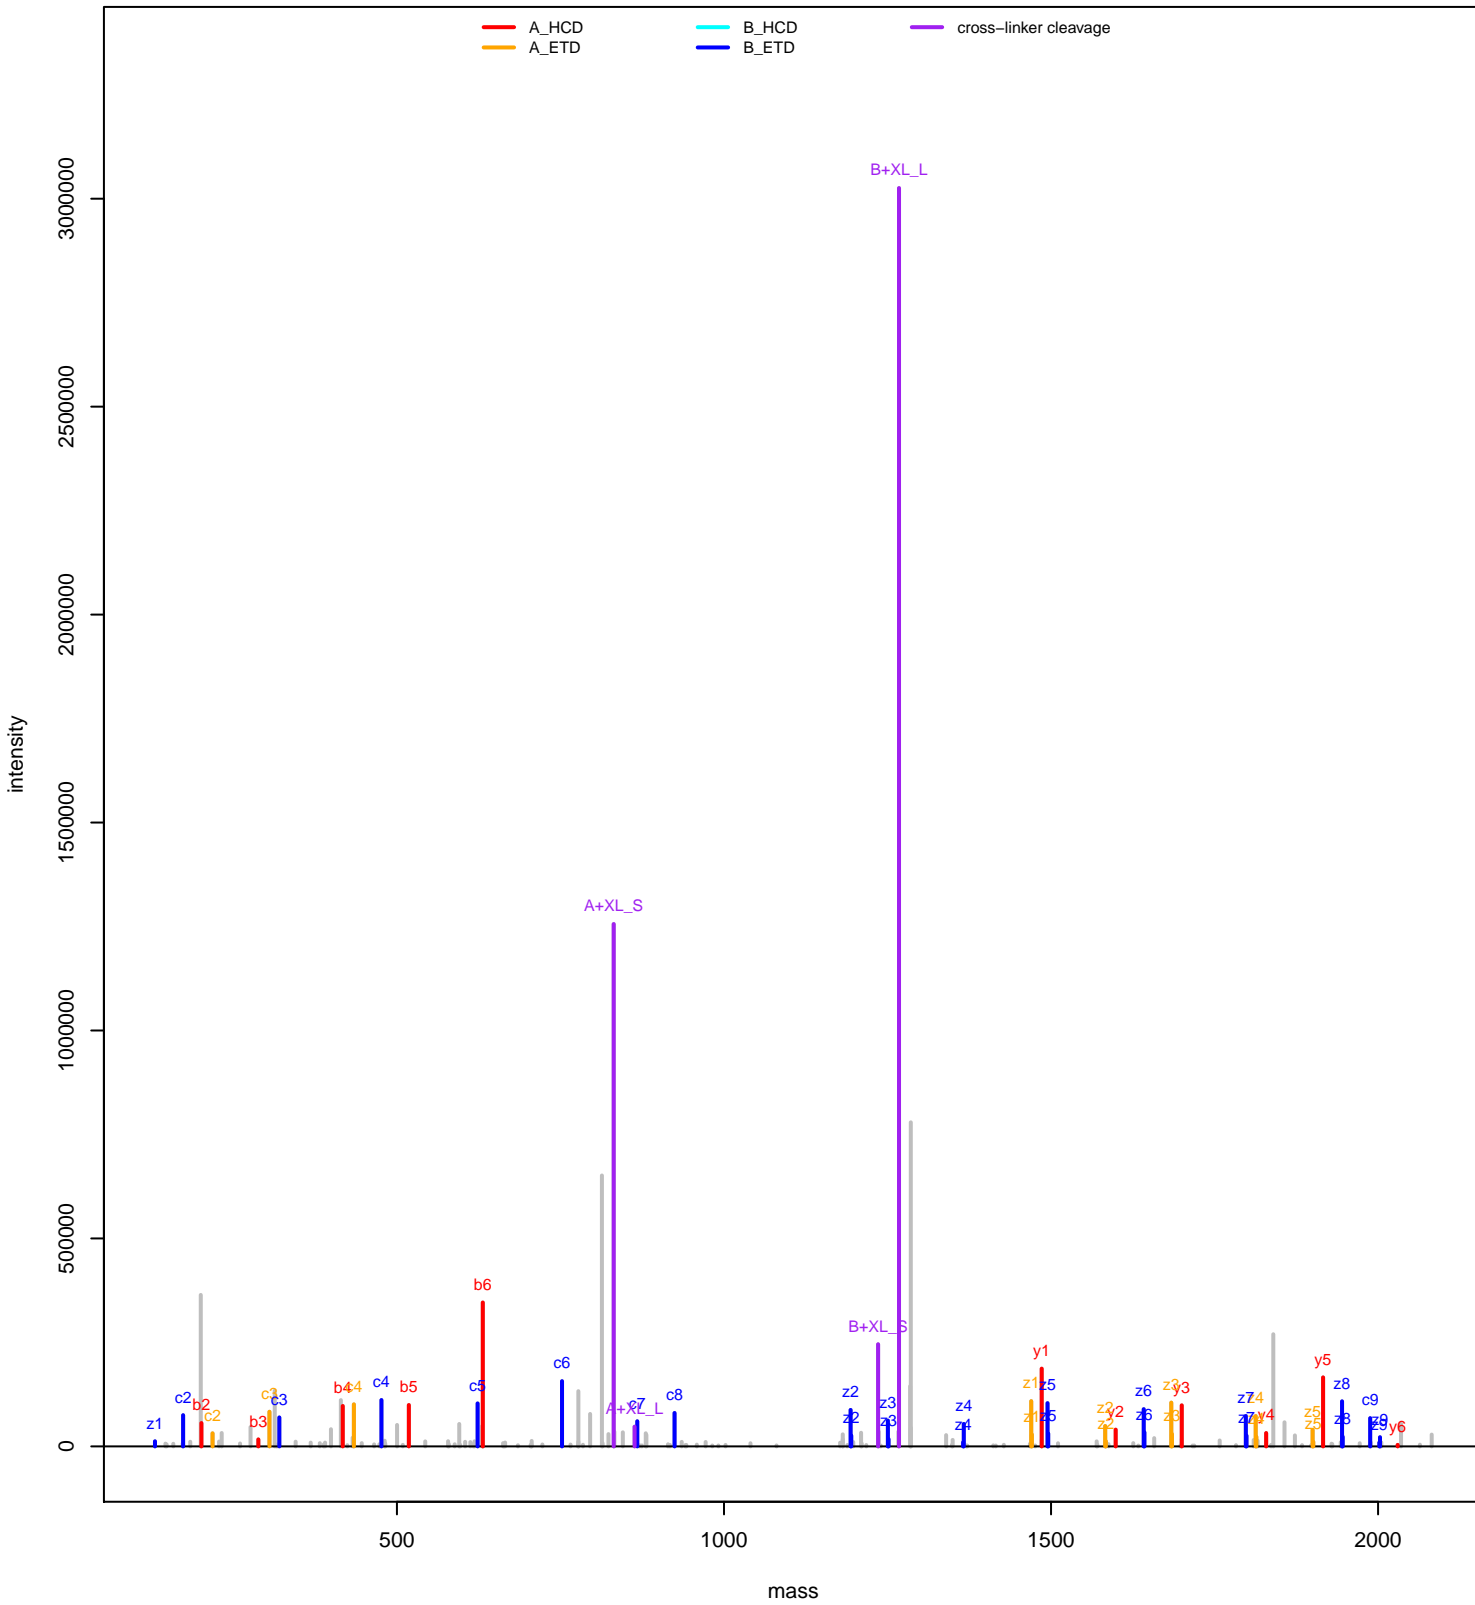

**SNSETIK+XL\_S**

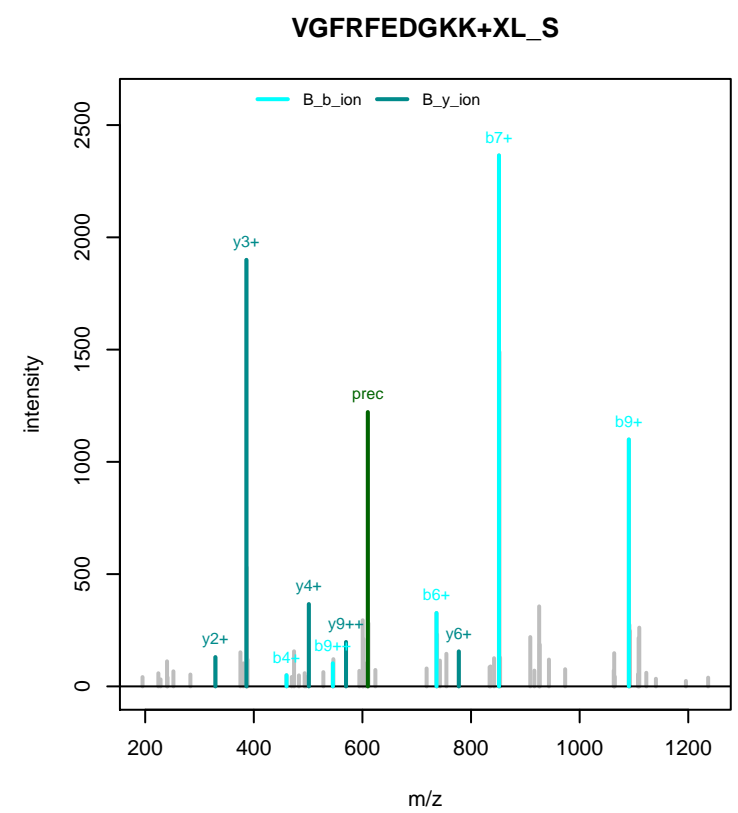

**SNSETIK+XL\_L**

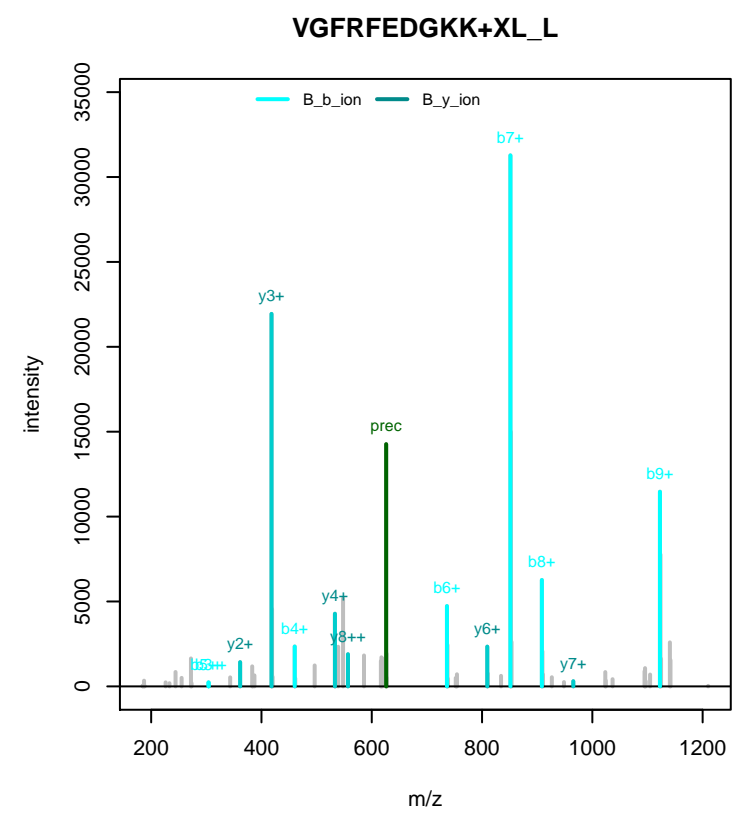

**VGFRFEDGKK+XL\_S**

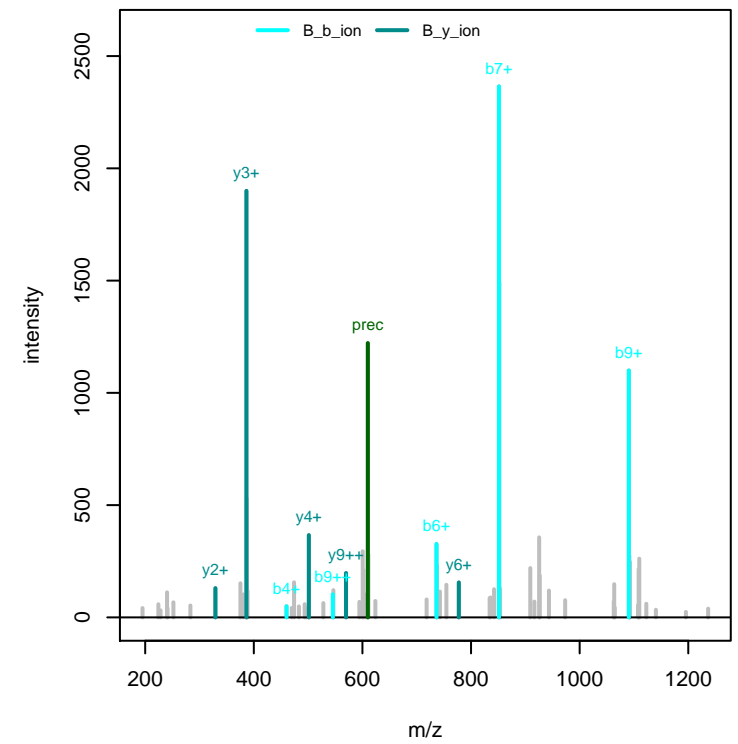

**VGFRFEDGKK+XL\_L**

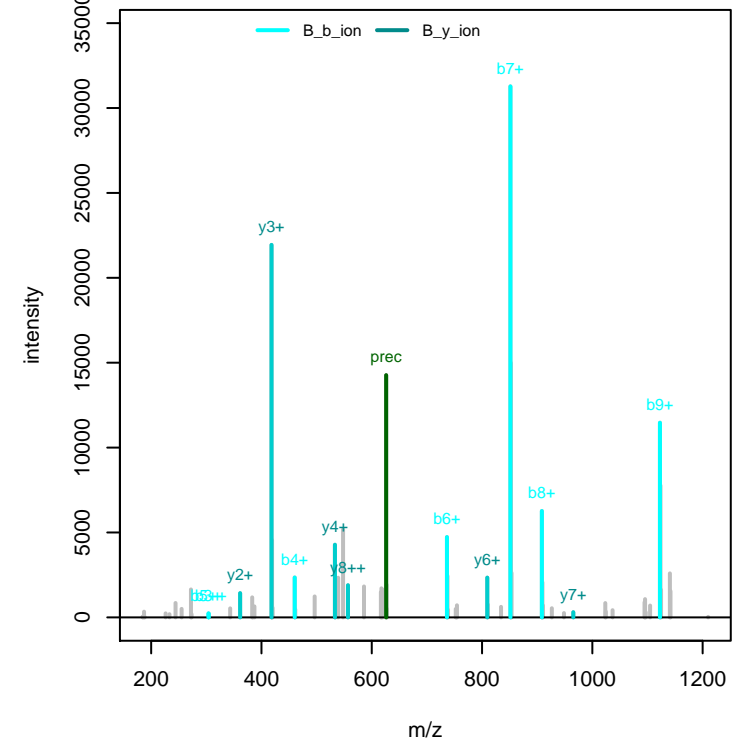



**GIKREEIER  
VGEEVEIVGIKETQK**

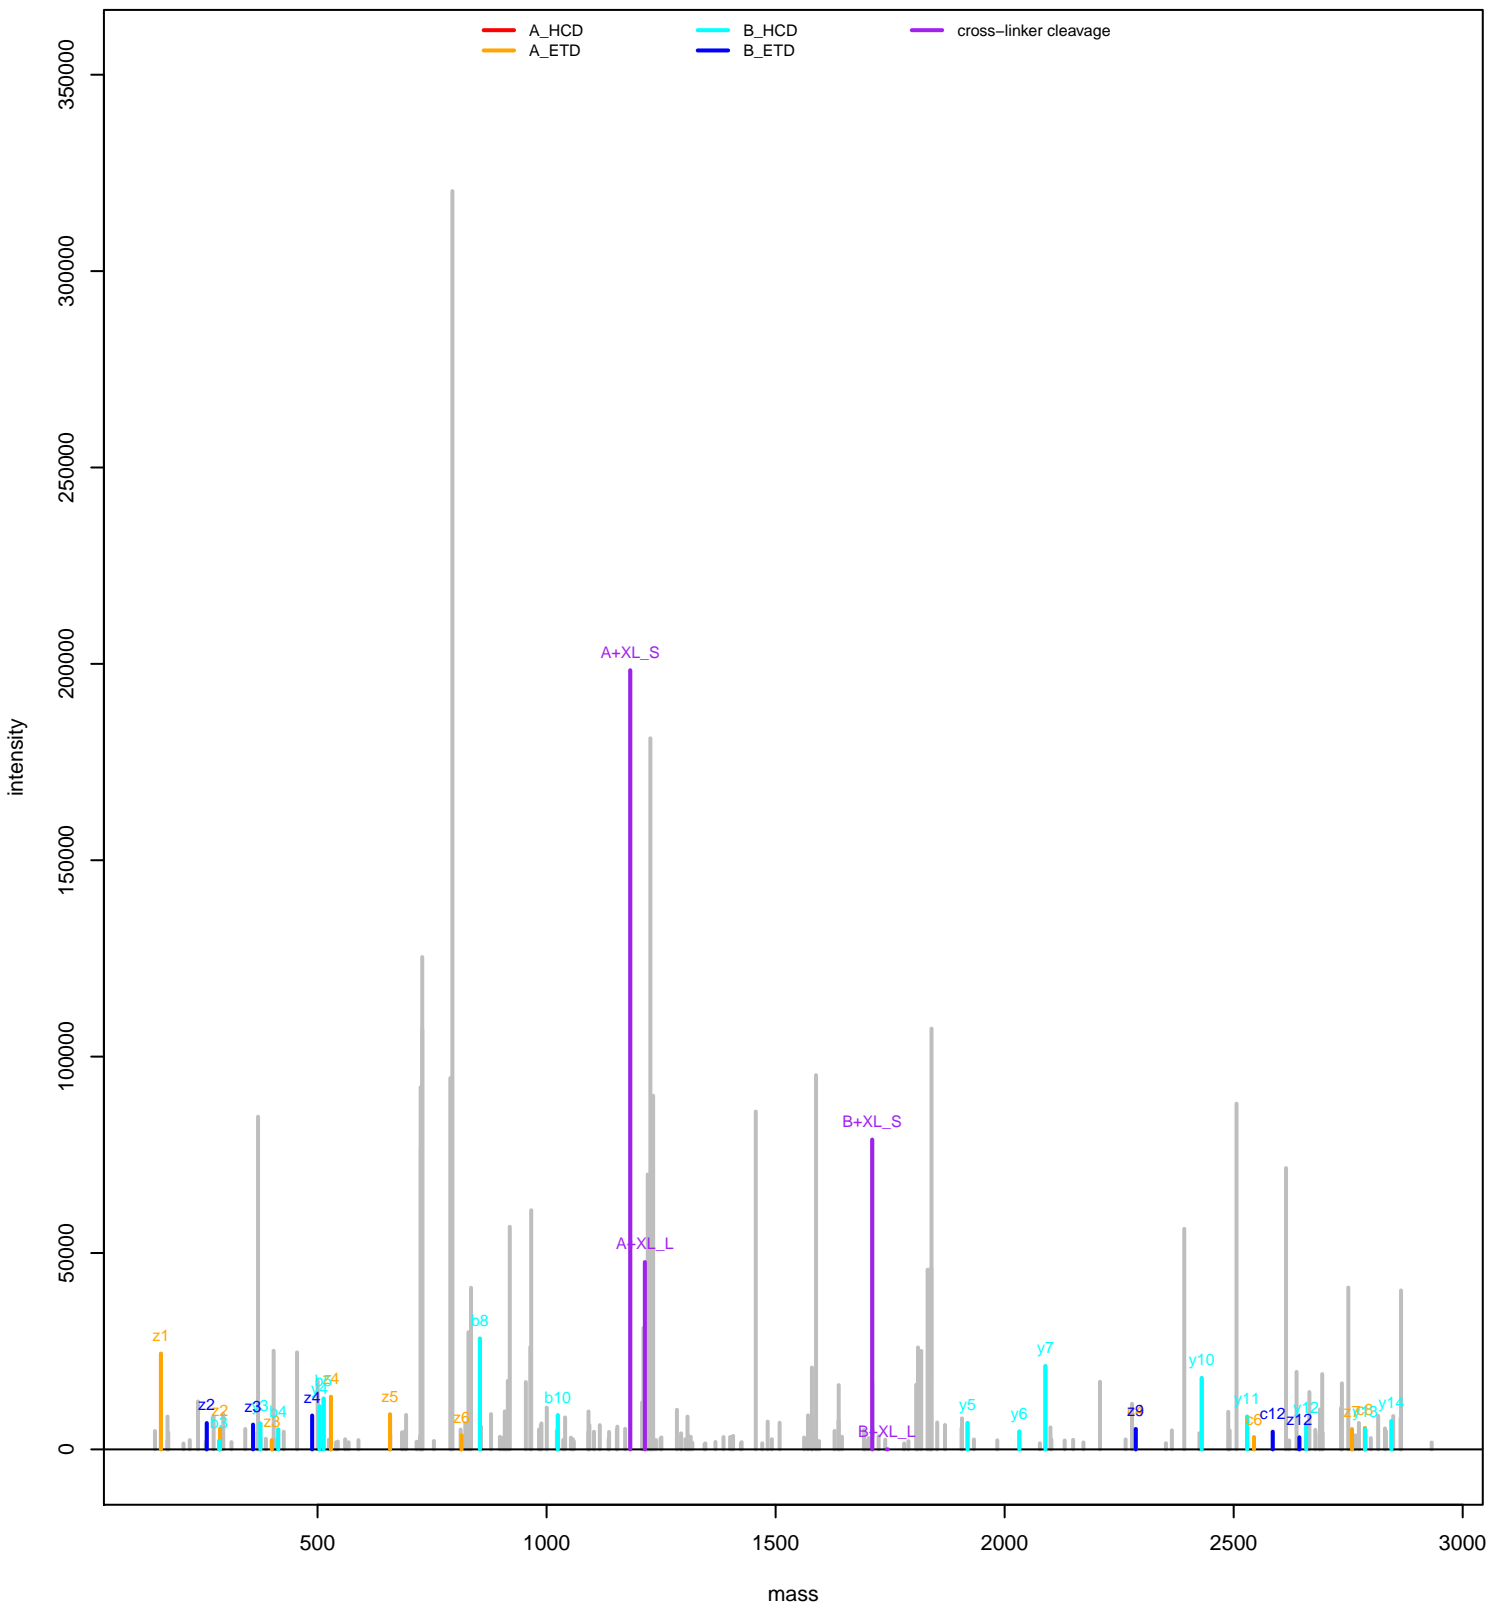

**GIKREEIER+XL\_S**

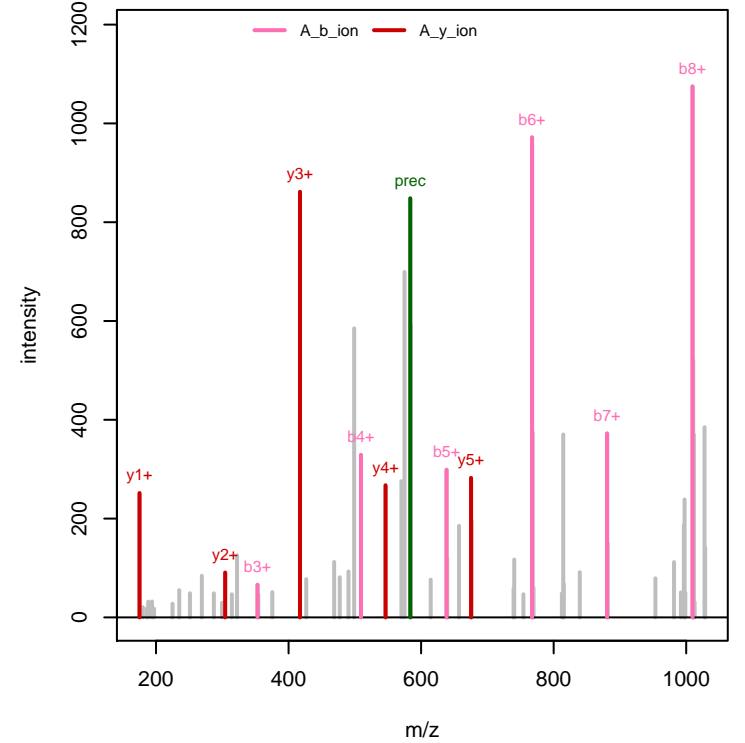

**GIKREEIER+XL\_L**

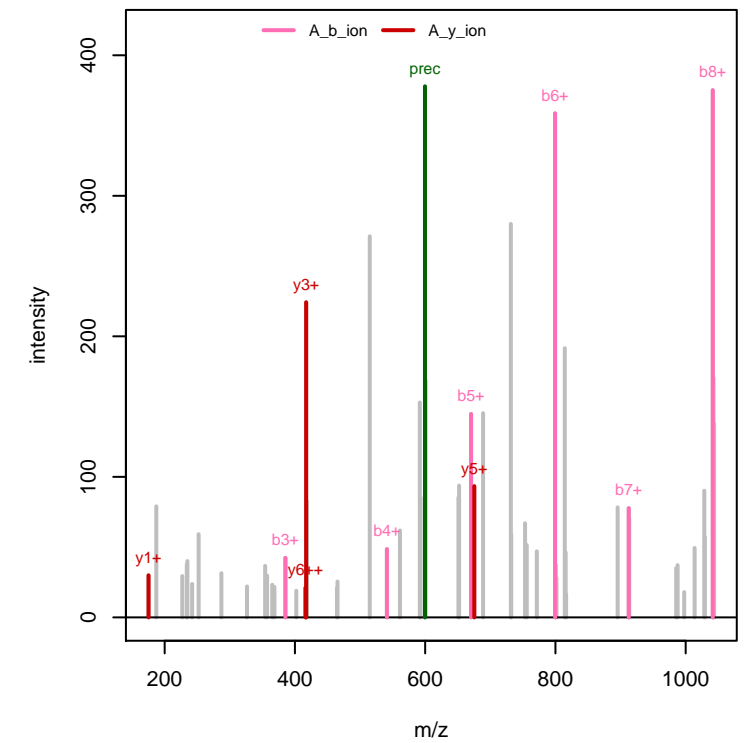

**VGEEVEIVGIKETQK+XL\_S**

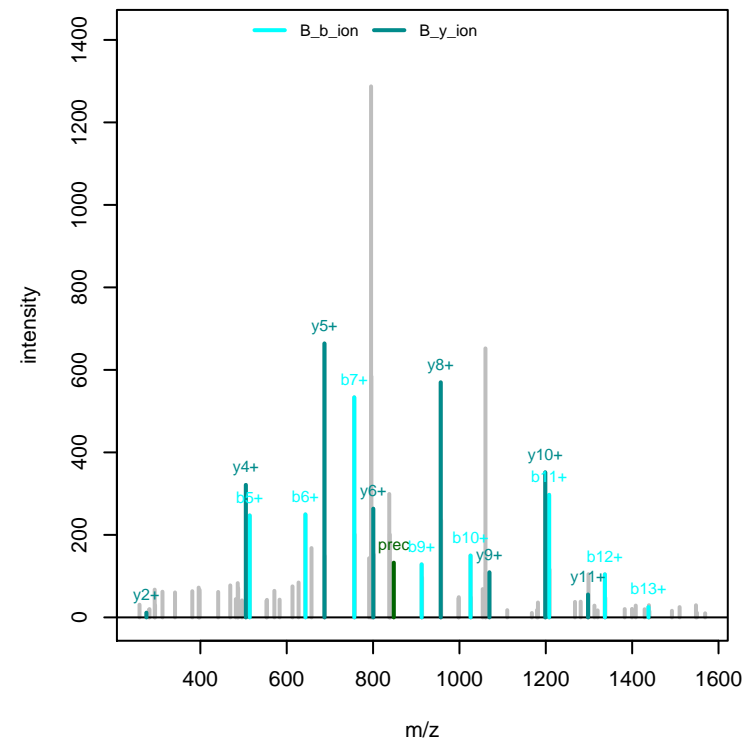

**VGEEVEIVGIKETQK+XL\_L**

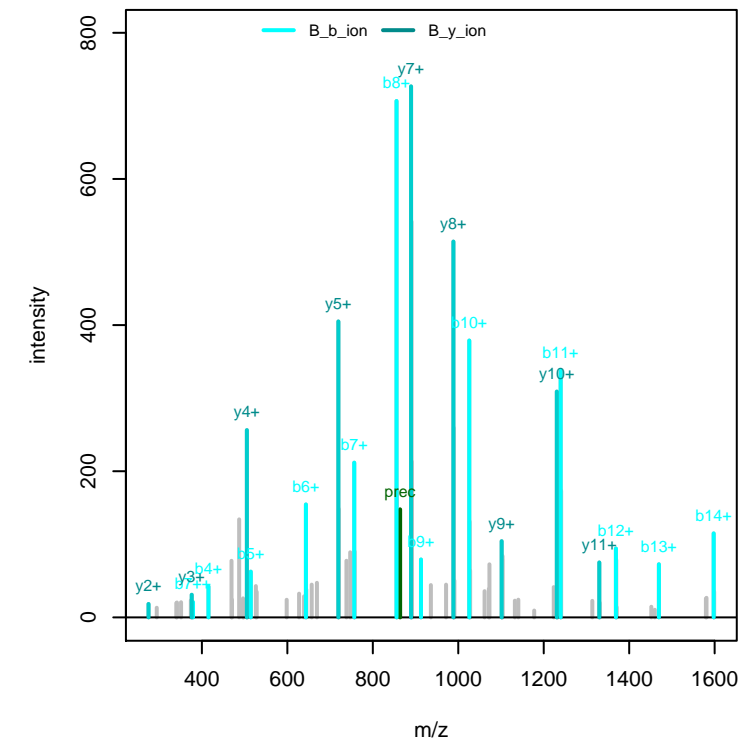

NGATEAFKK  
ASQIKLVASQPADWDR

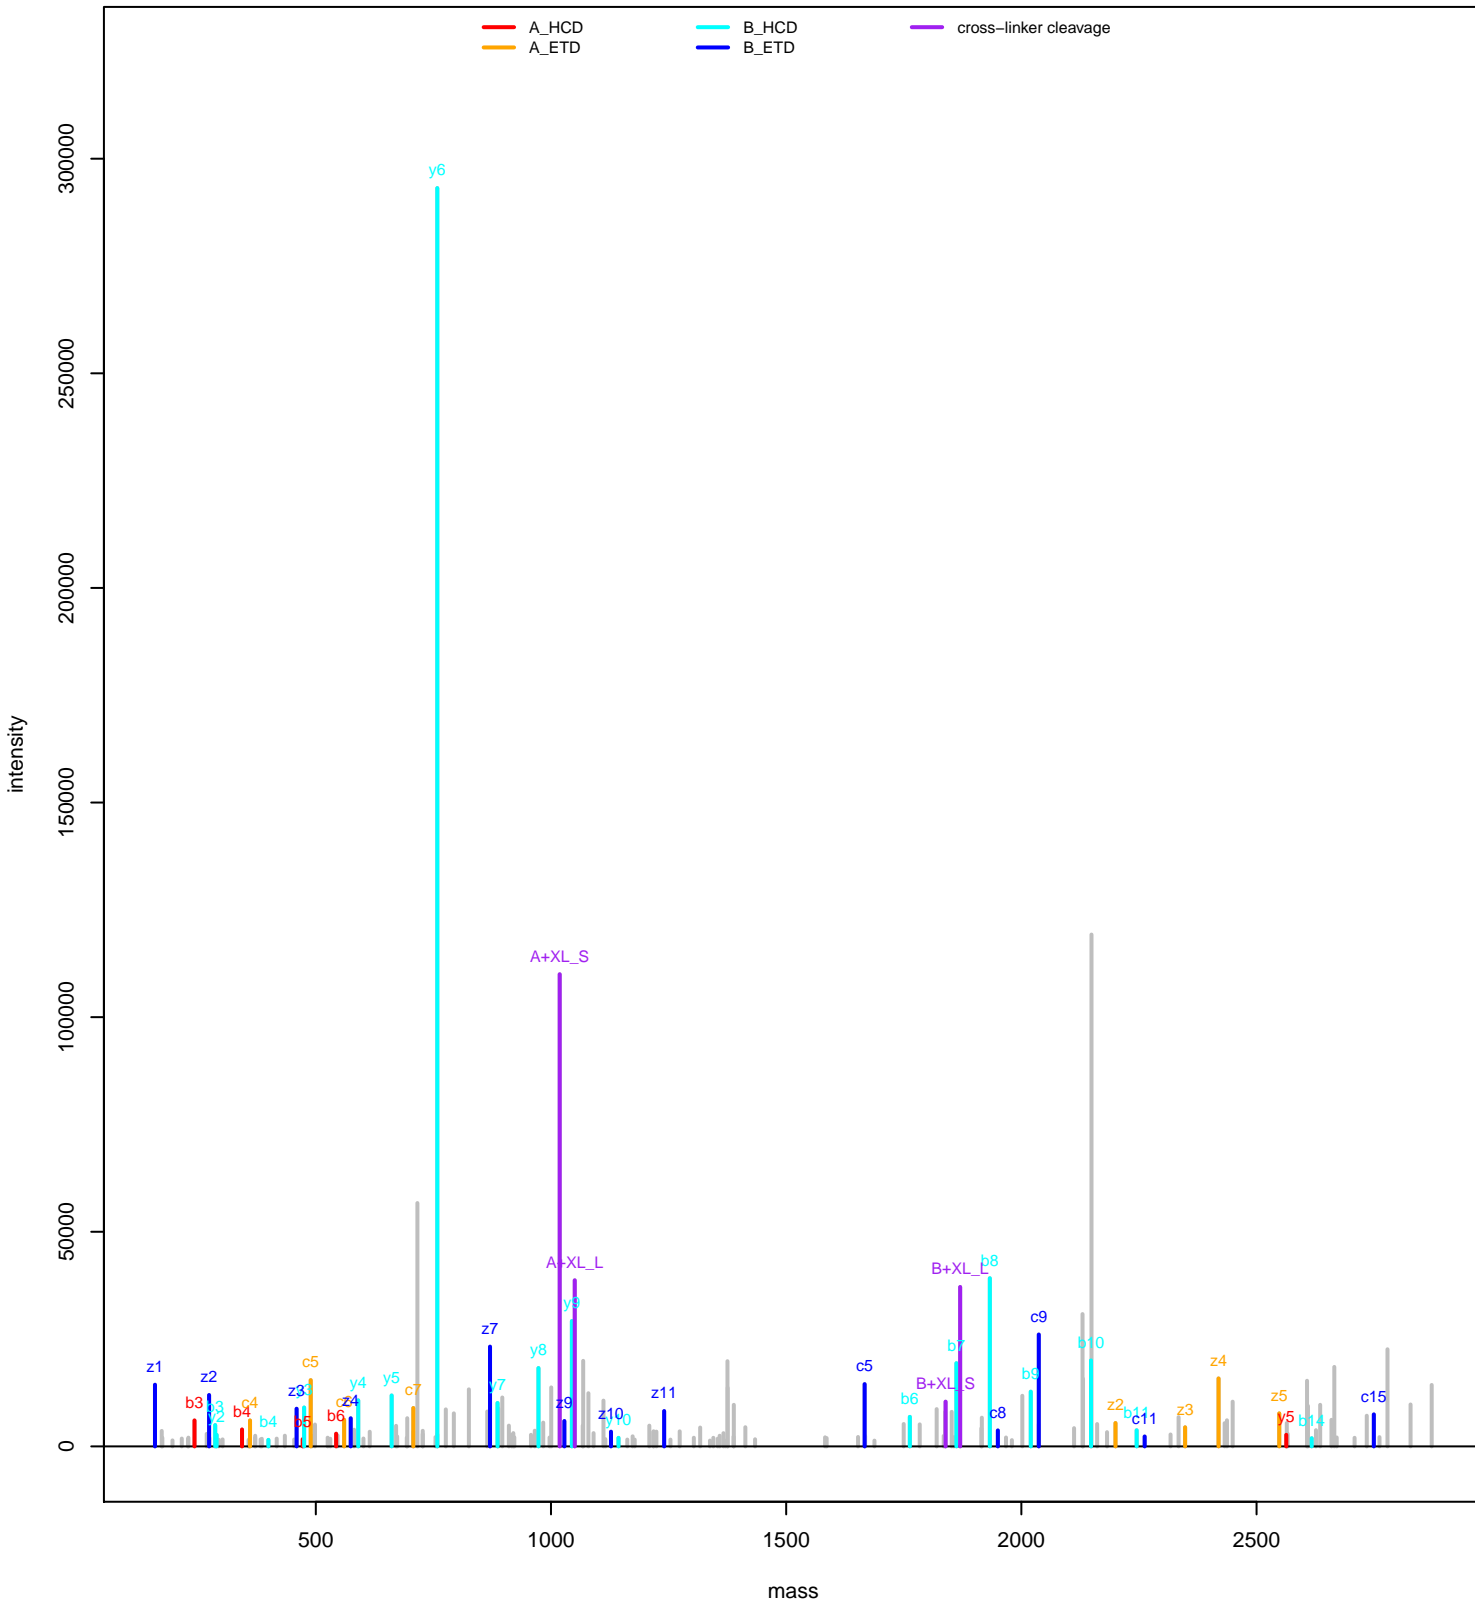

NGATEAFKK+XL\_S

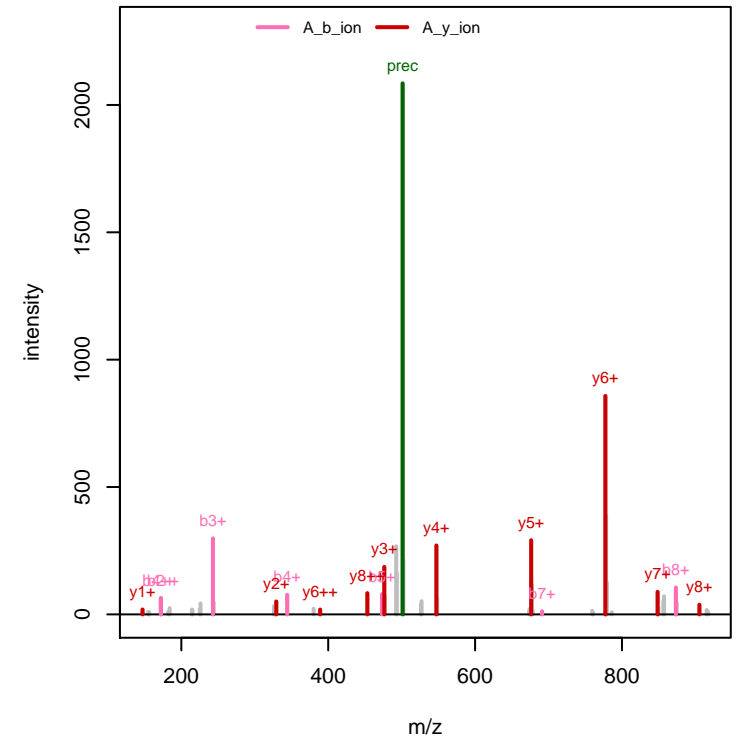

NGATEAFKK+XL\_L

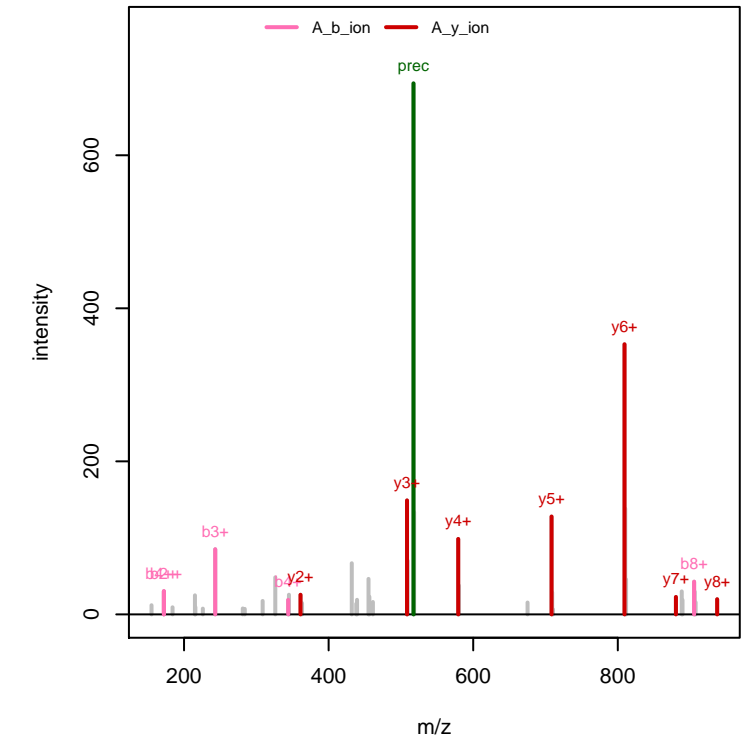

ASQIKLVASQPADWDR+XL\_S

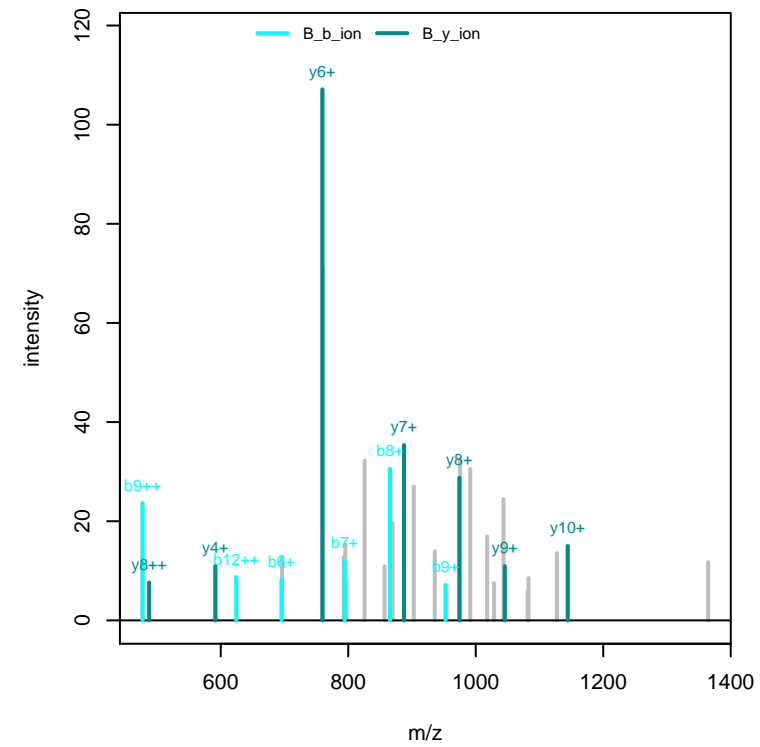

ASQIKLVASQPADWDR+XL\_L

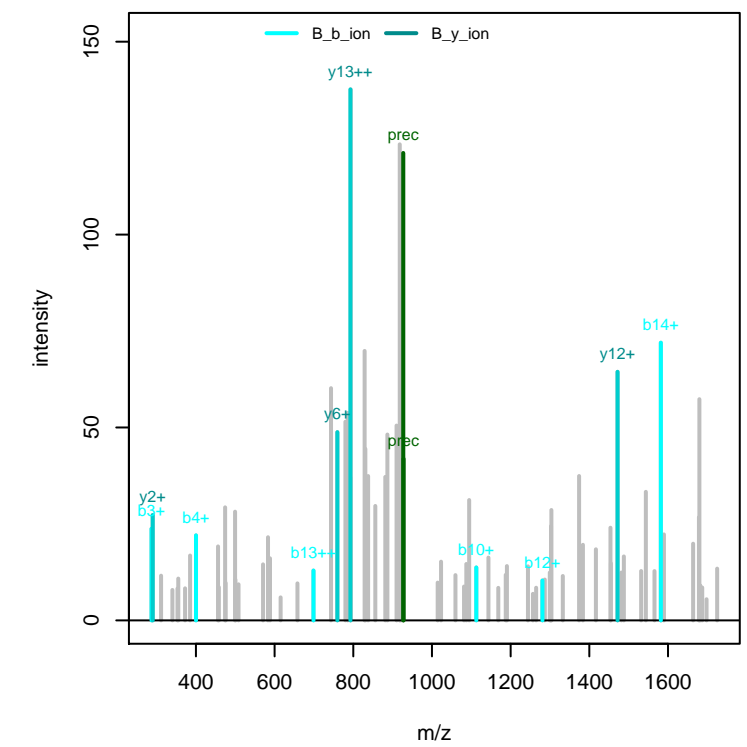

**INLDKIHR  
NQNLLVTKR**

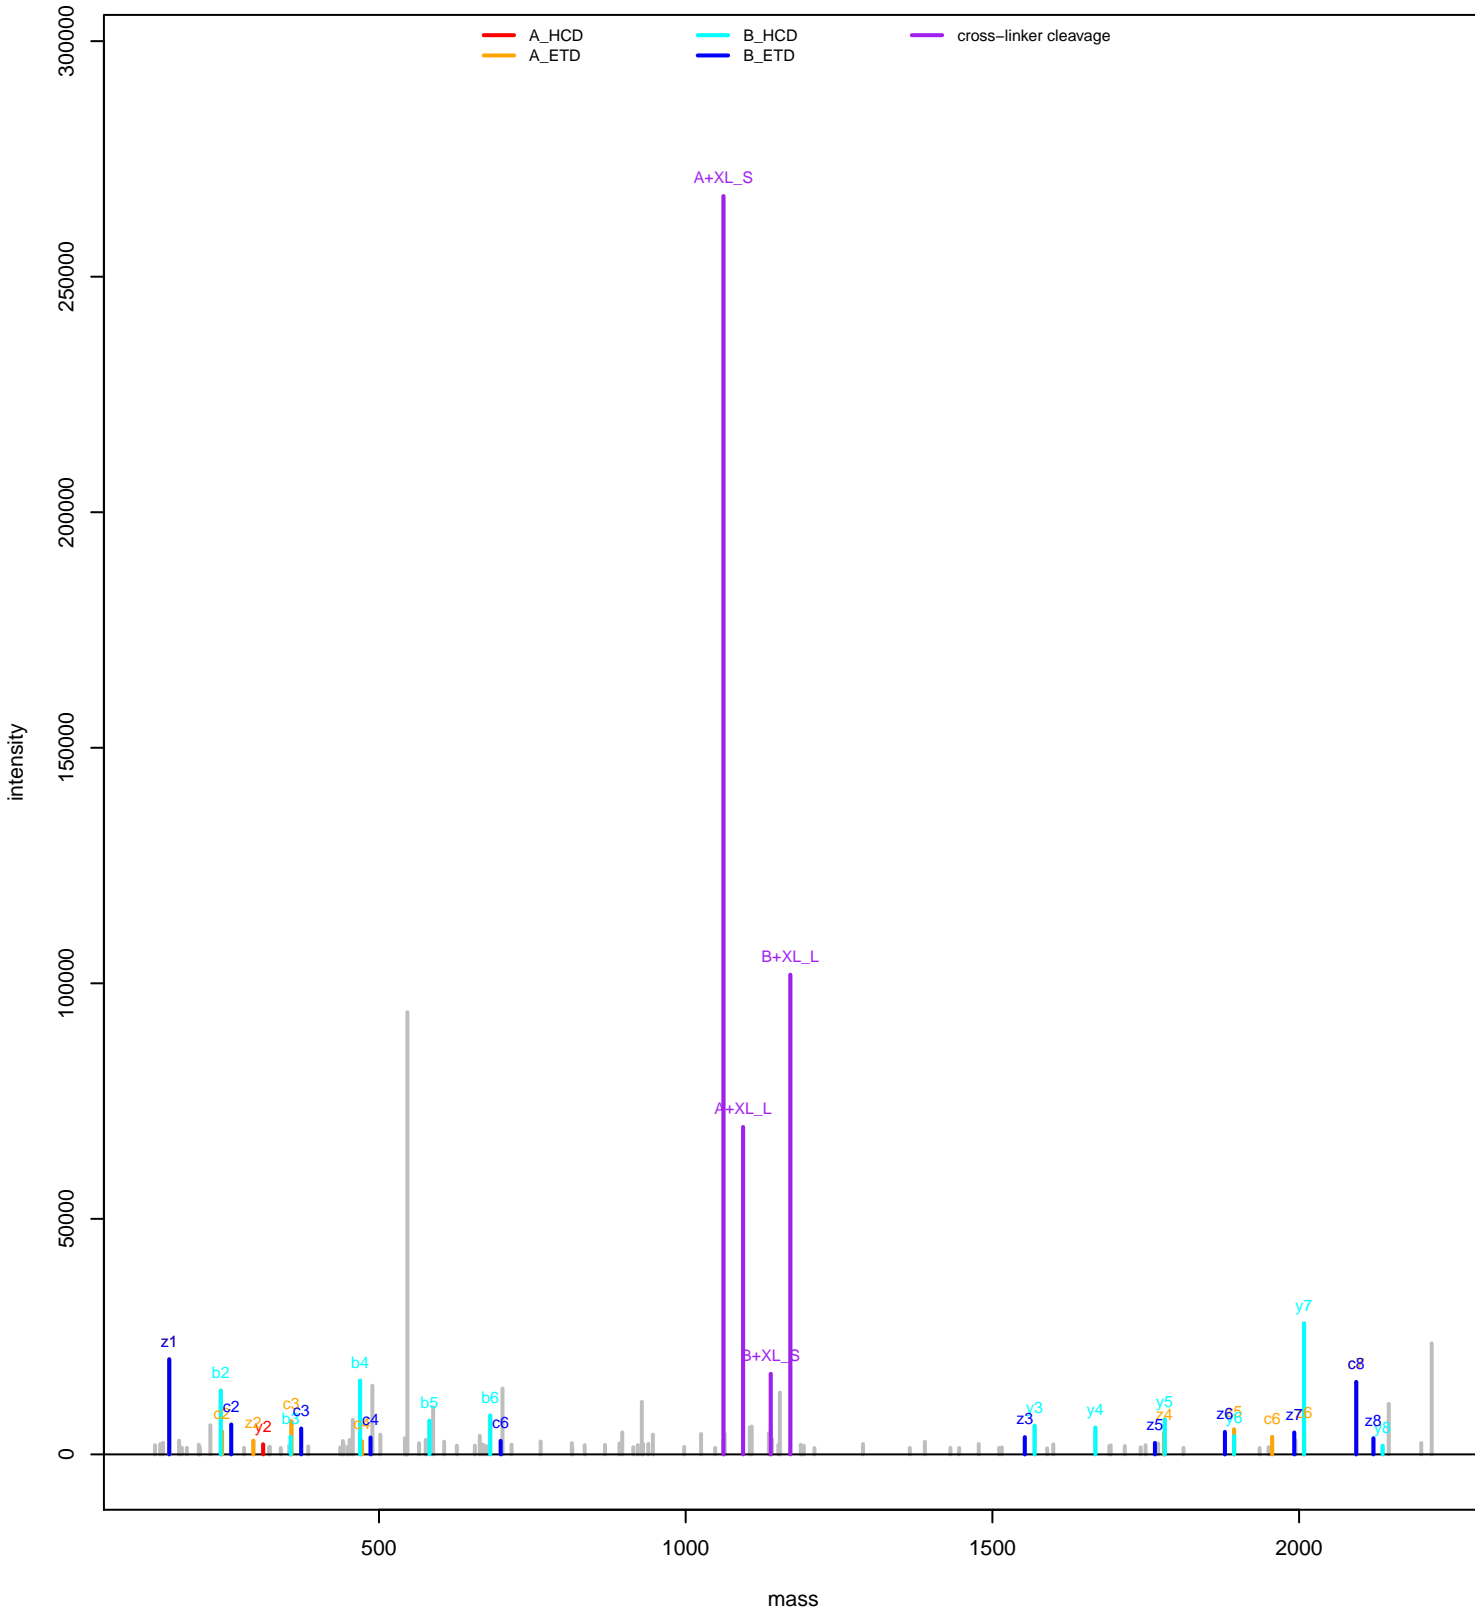

**INLDKIHR+XL\_S**

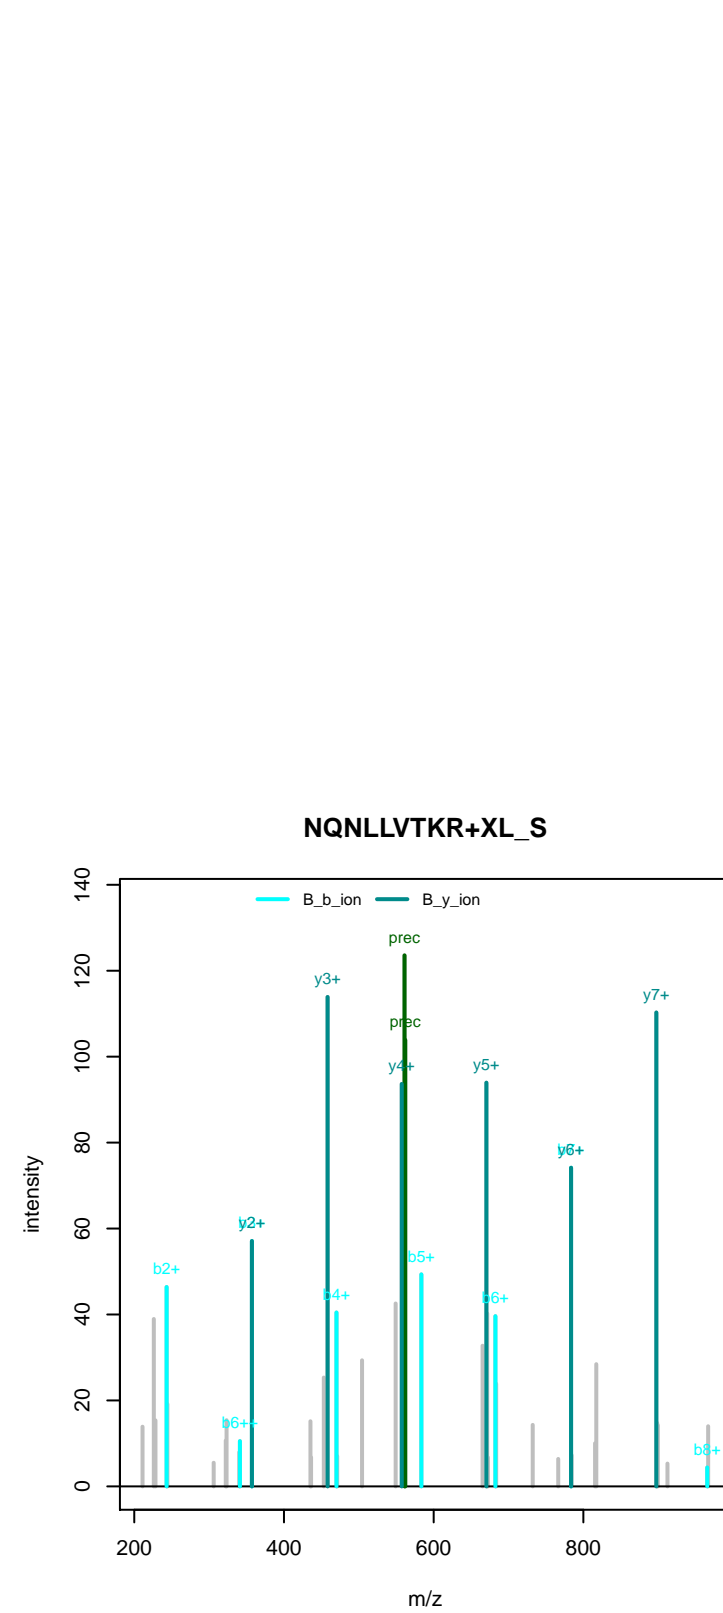

**INLDKIHR+XL\_L**

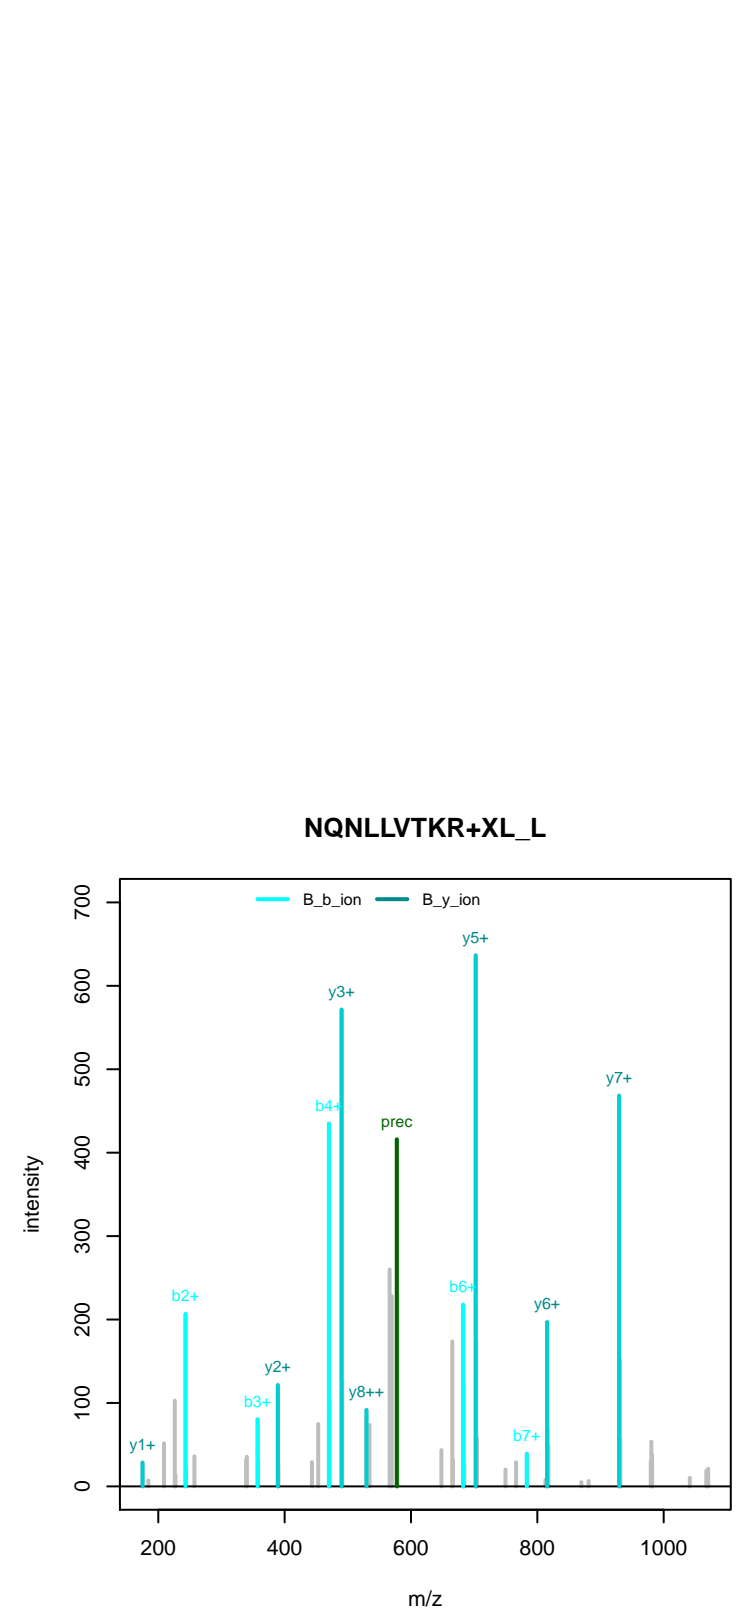

**NQNLLVTKR+XL\_S**

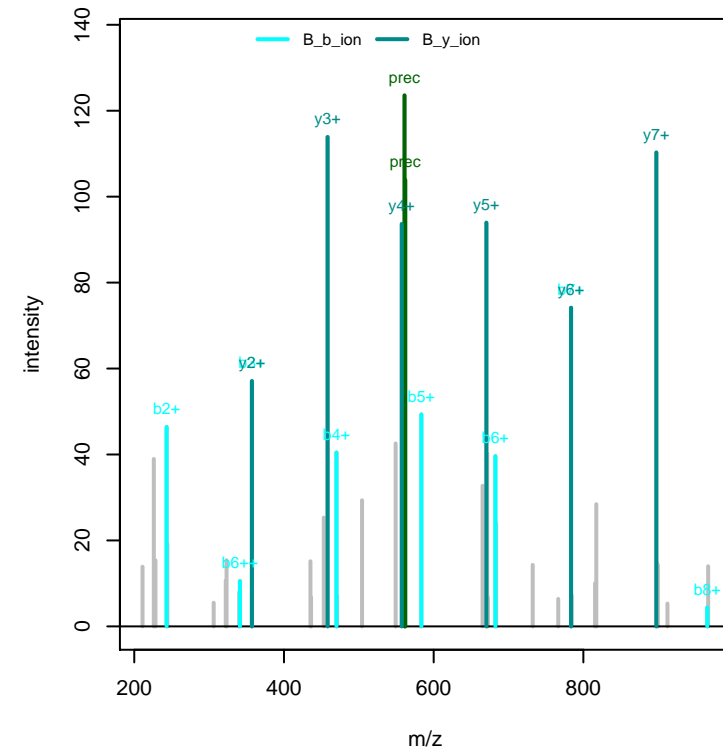

**NQNLLVTKR+XL\_L**

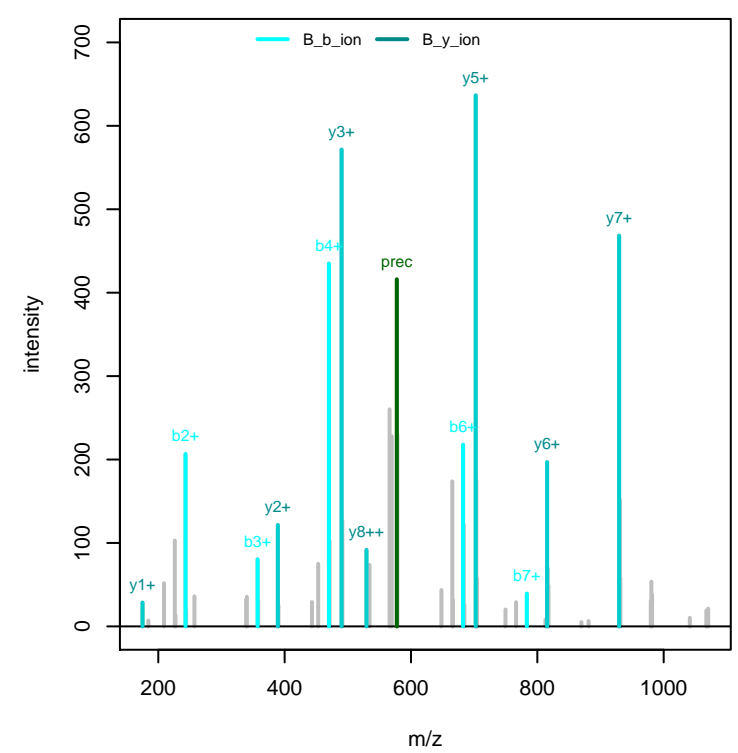

KQQATWK  
EKINPAGAPTYVPGEYK

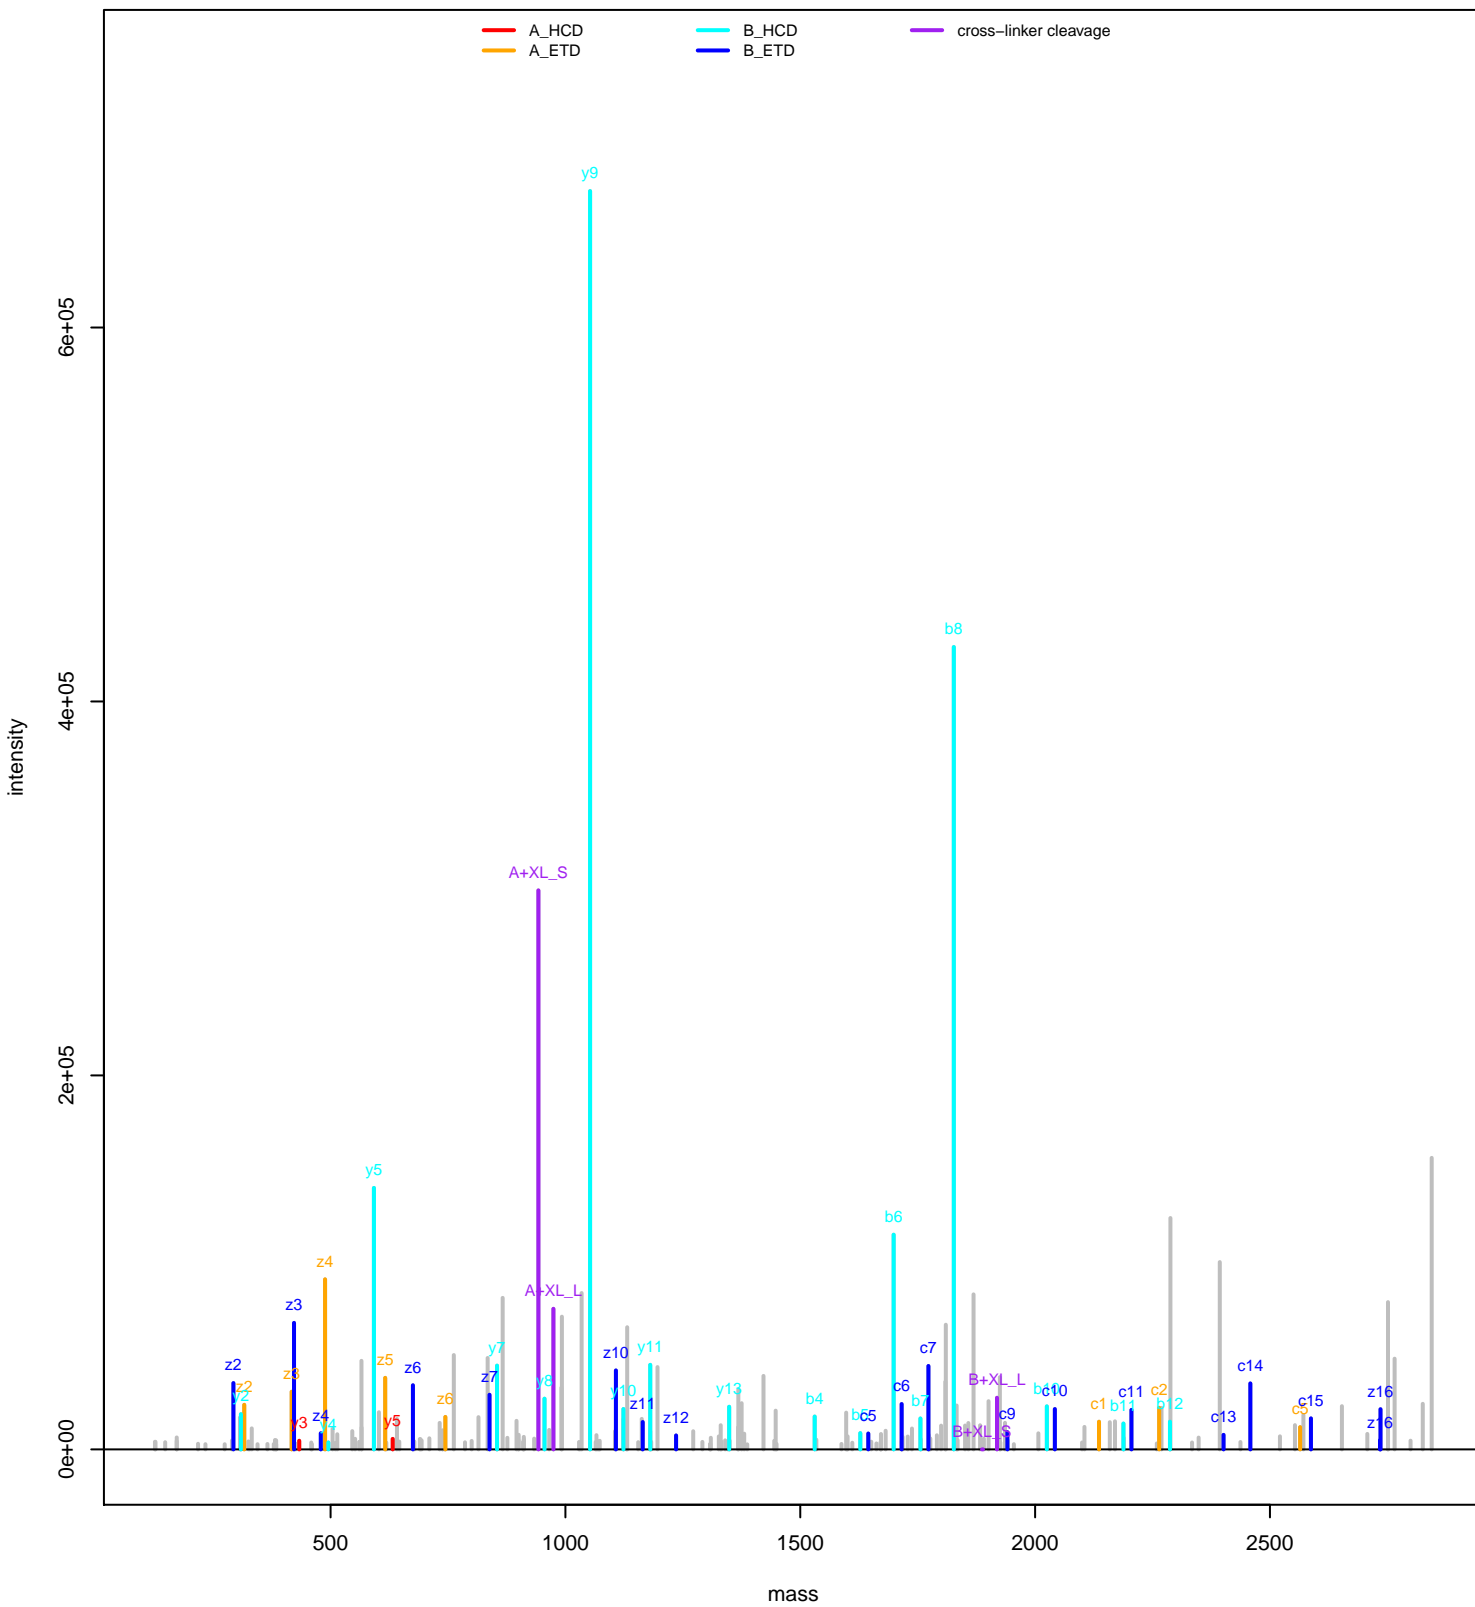

KQQATWK+XL\_S

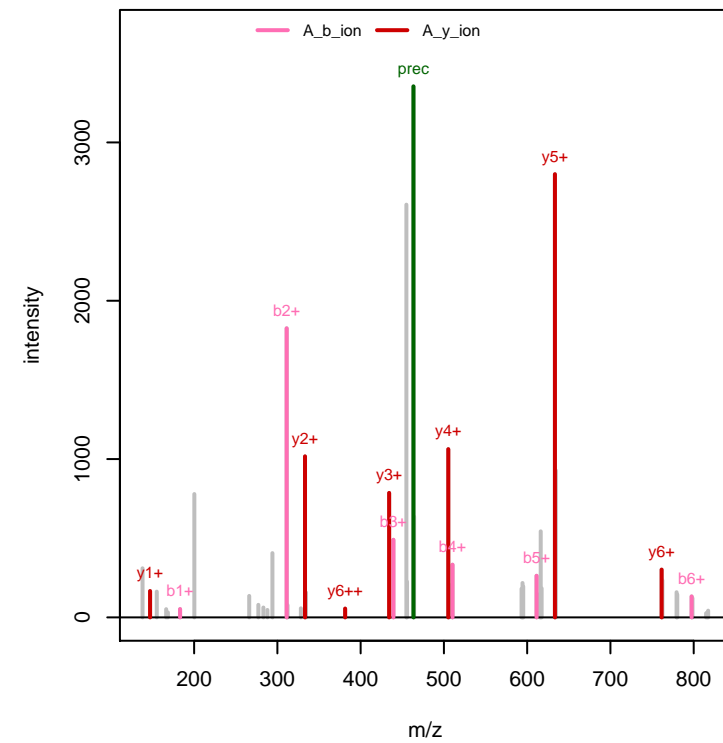

KQQATWK+XL\_L

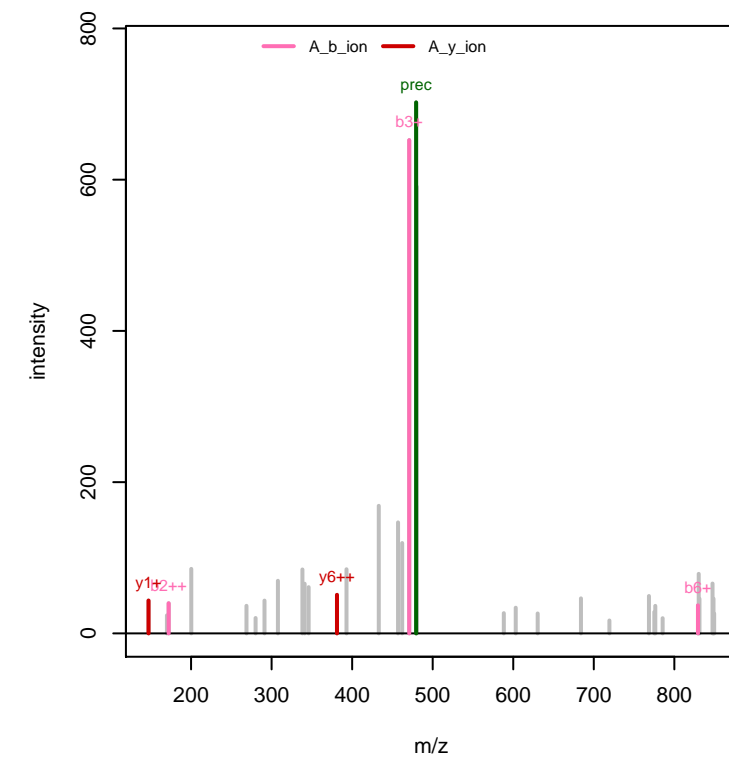

EKINPAGAPTYVPGEYK+XL\_S

EKINPAGAPTYVPGEYK+XL\_L



GYNGLAEVGGK  
DTGIKVTVEHPDKLEEK

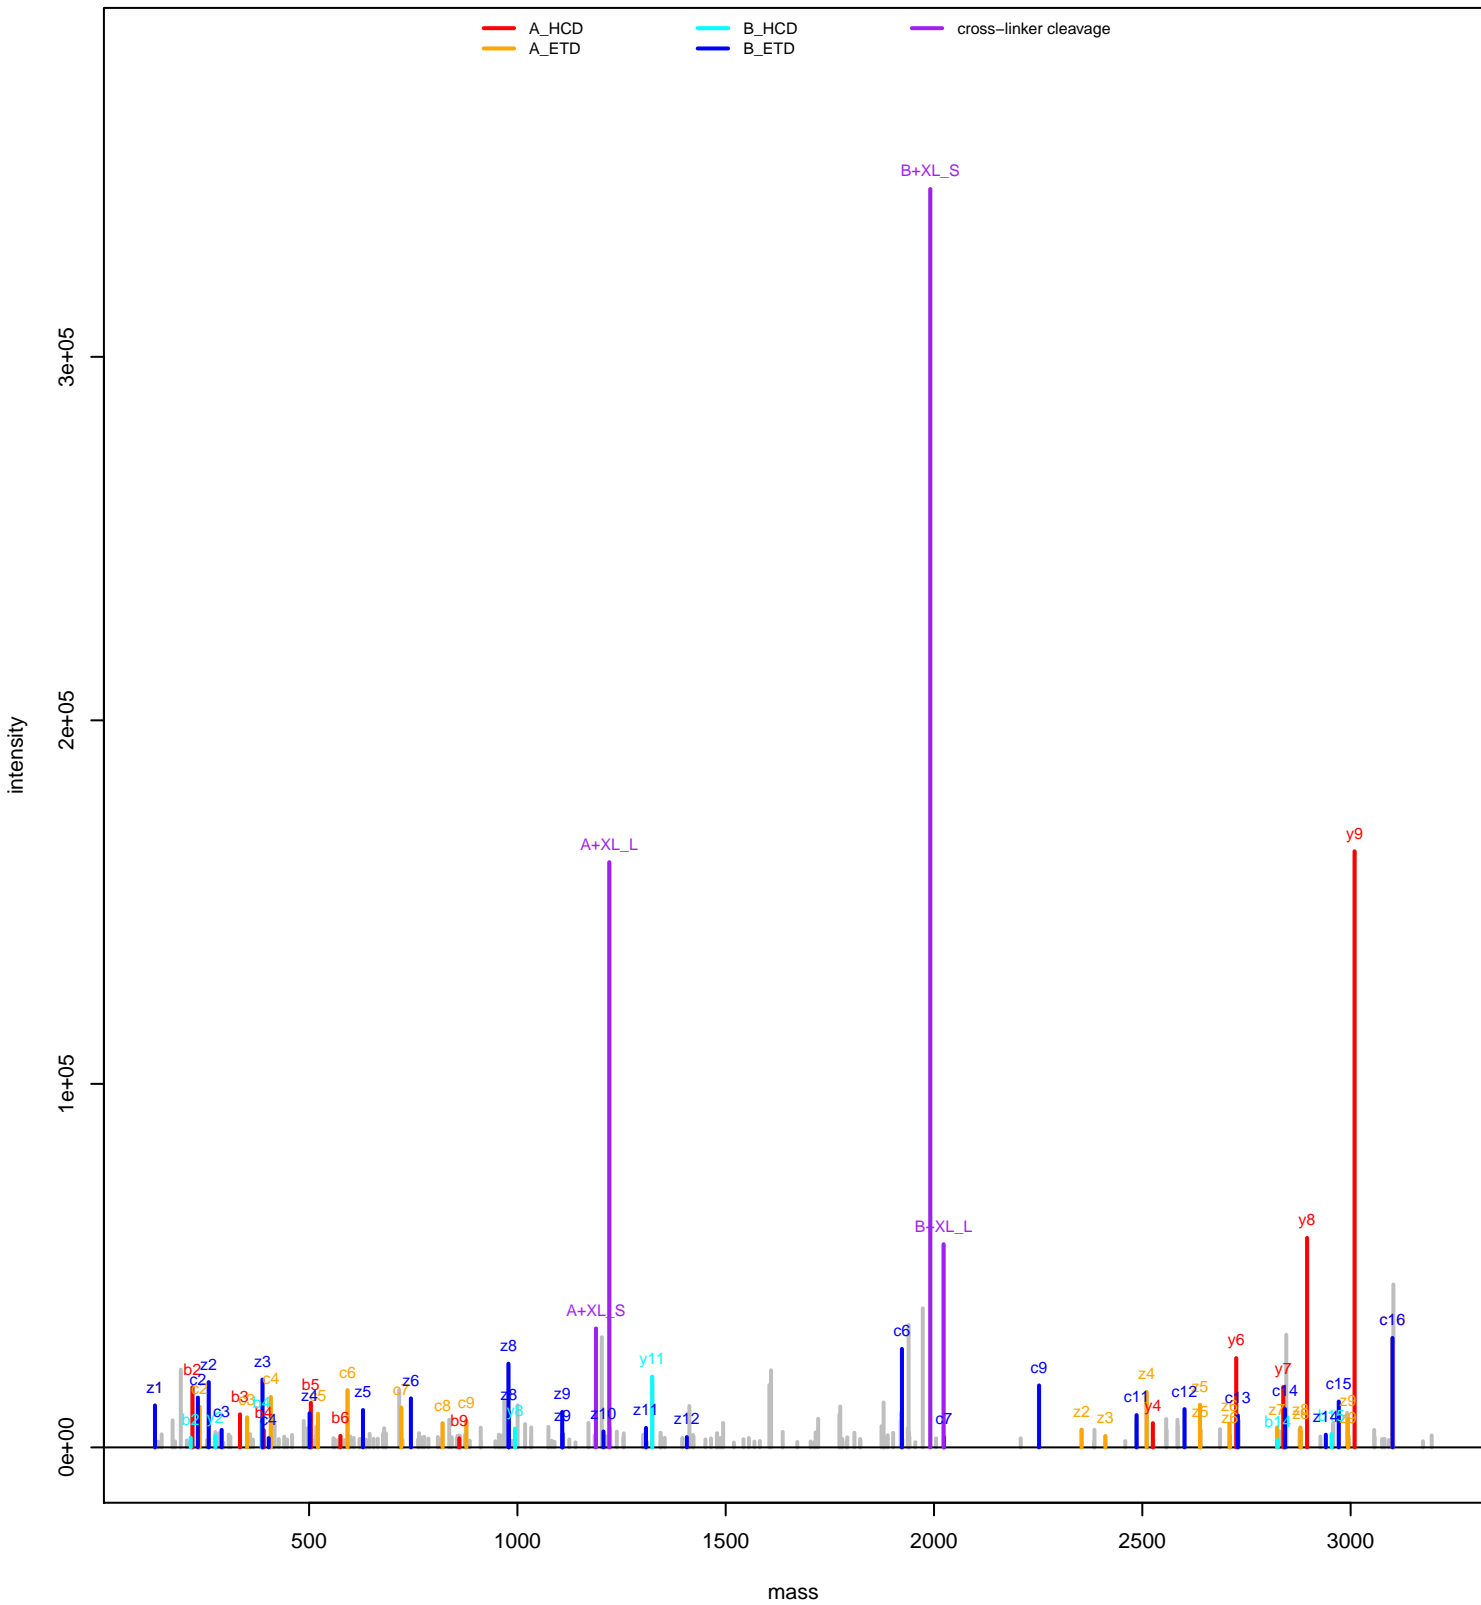

GYNGLAEVGGK+XL\_S

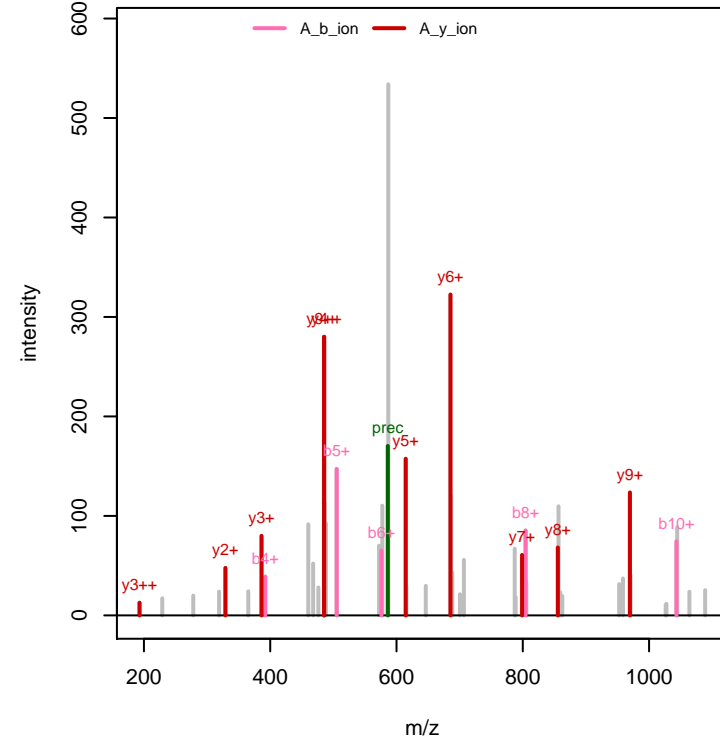

GYNGLAEVGGK+XL\_L

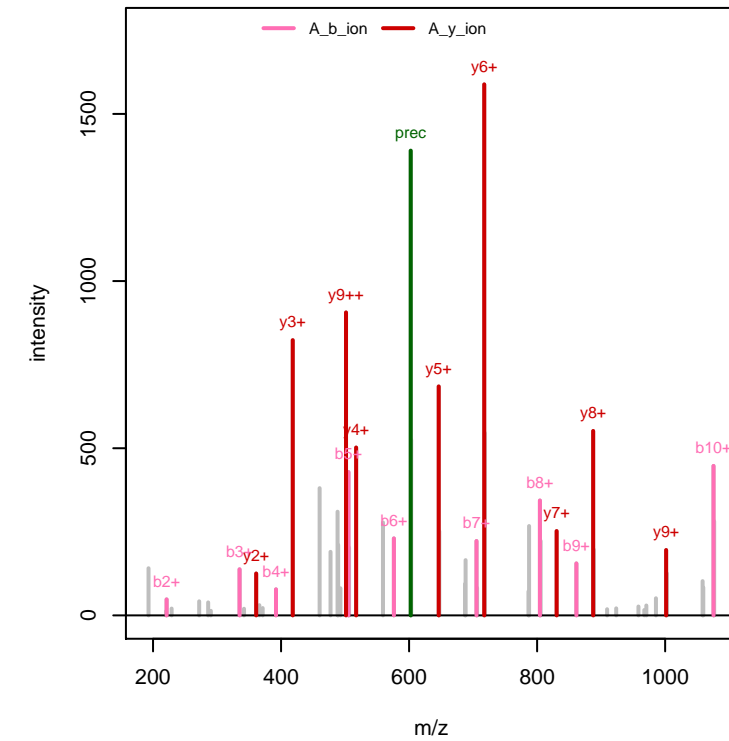

DTGIKVTVEHPDKLEEK+XL\_S

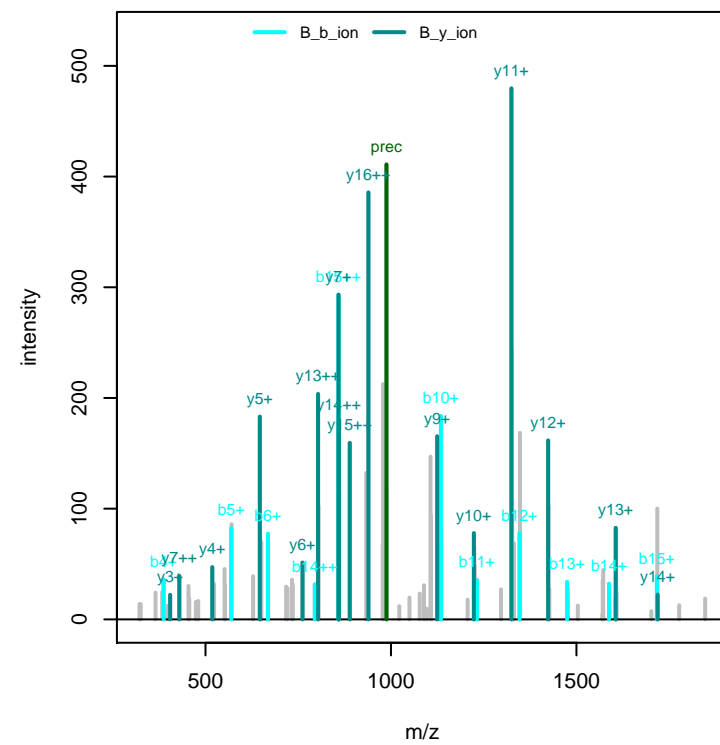

DTGIKVTVEHPDKLEEK+XL\_L

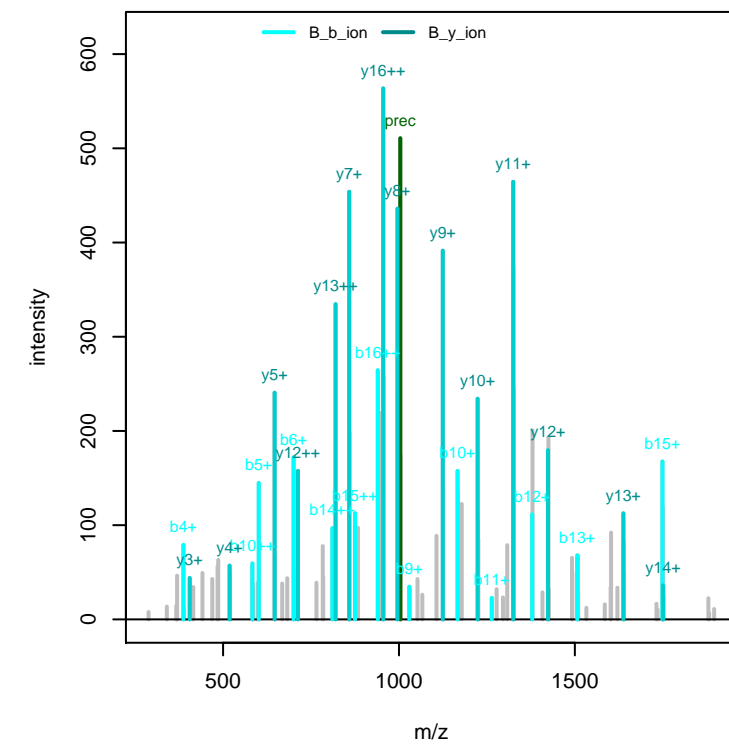

EPIKNEANGLK  
APETVKNFLDYCR

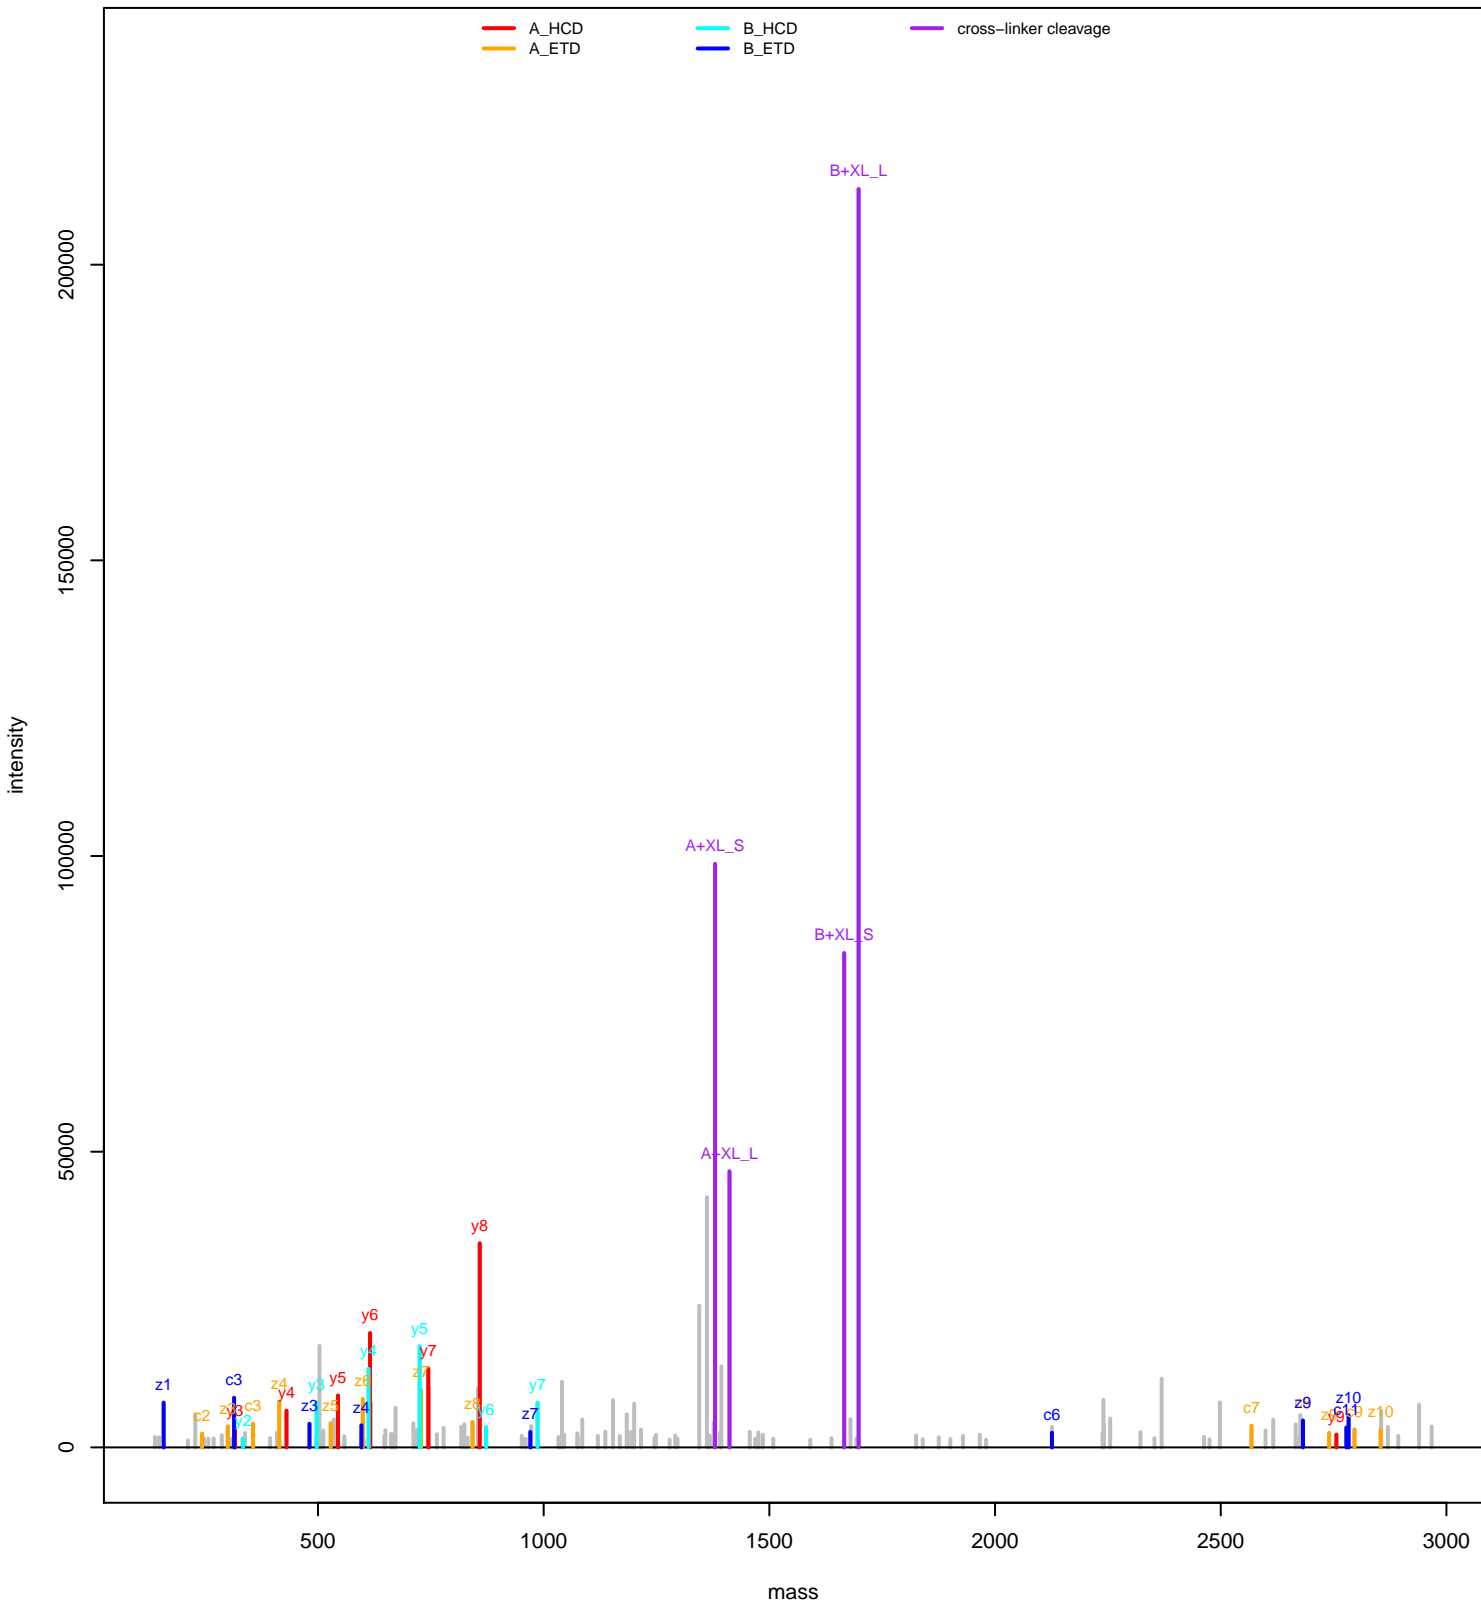

EPIKNEANGLK+XL\_S

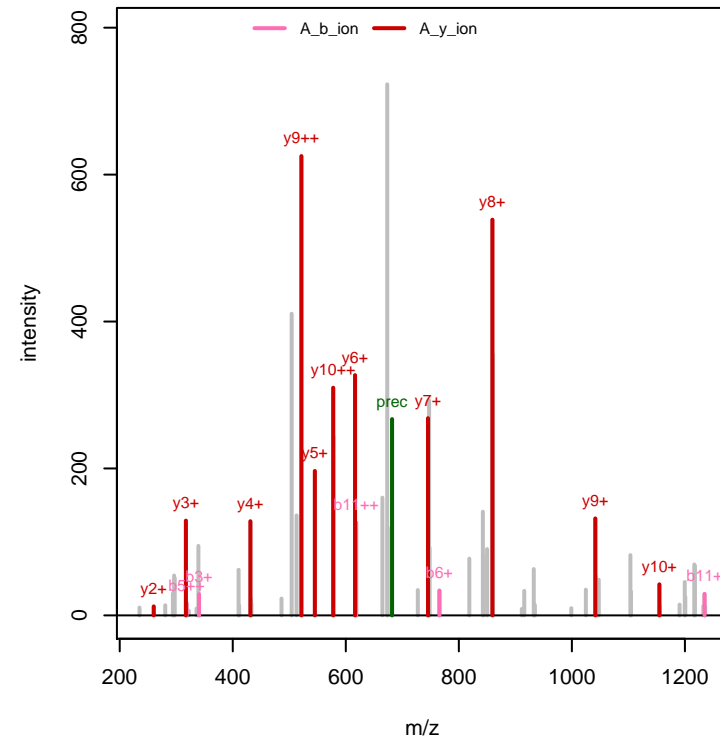

EPIKNEANGLK+XL\_L

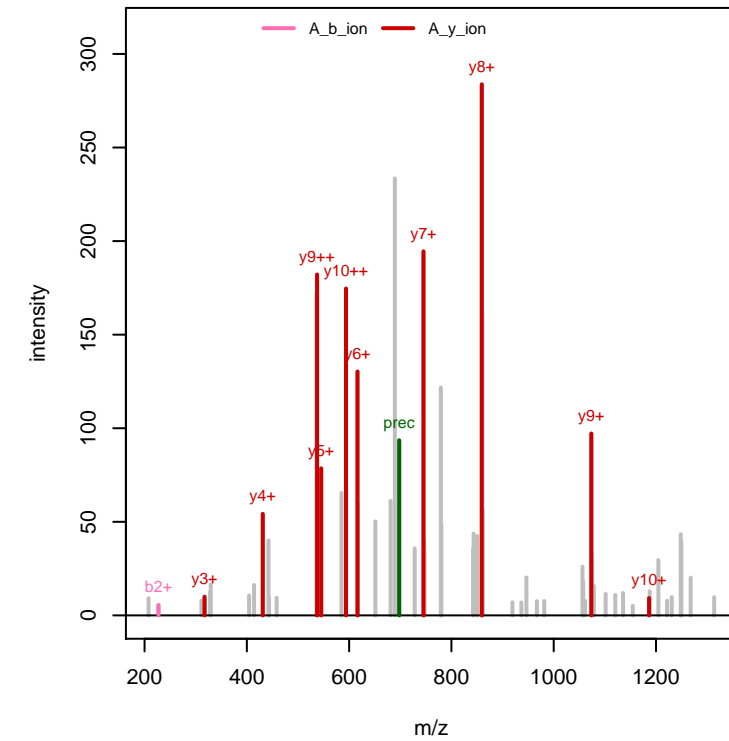

APETVKNFLDYCR+XL\_S

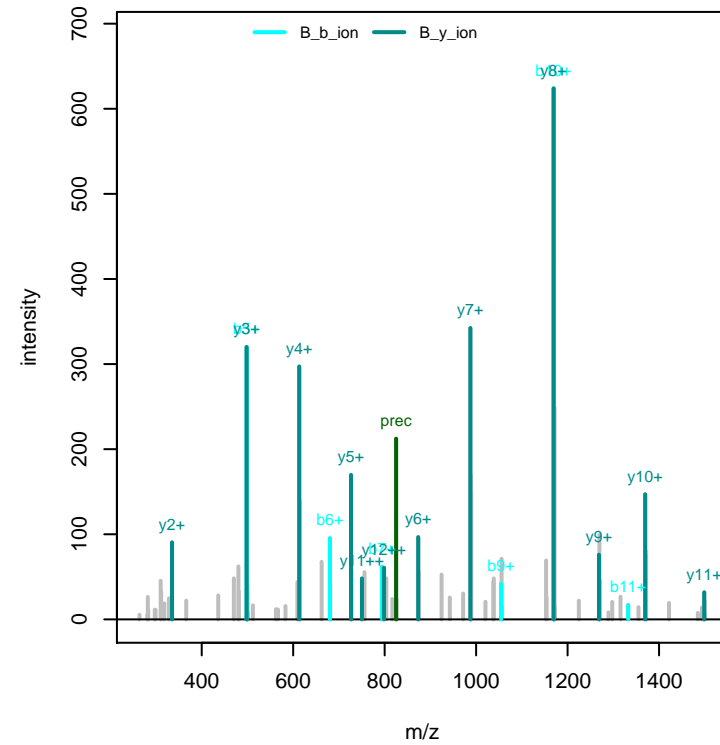

APETVKNFLDYCR+XL\_L

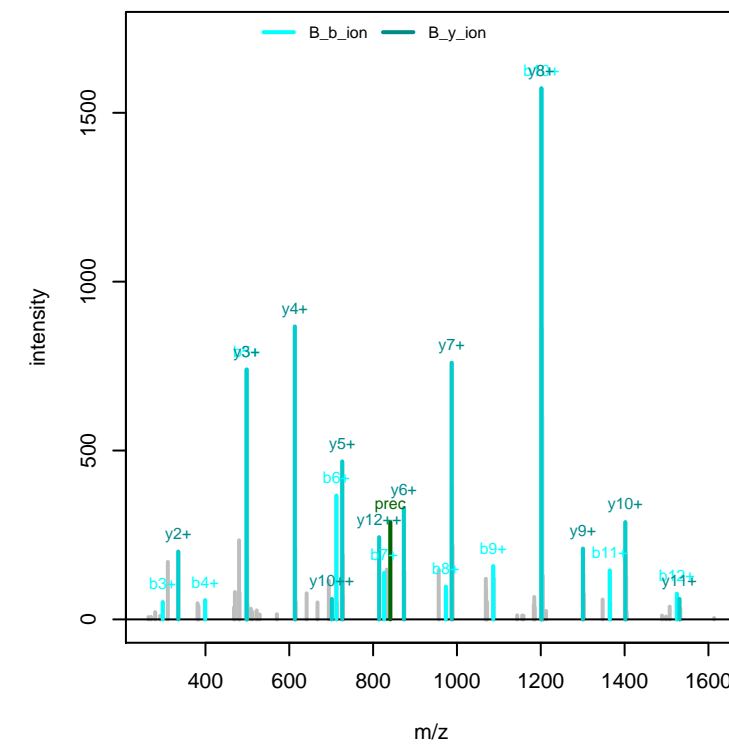

FFETQSSKGGR  
YTVTLPDGTKVEELNK

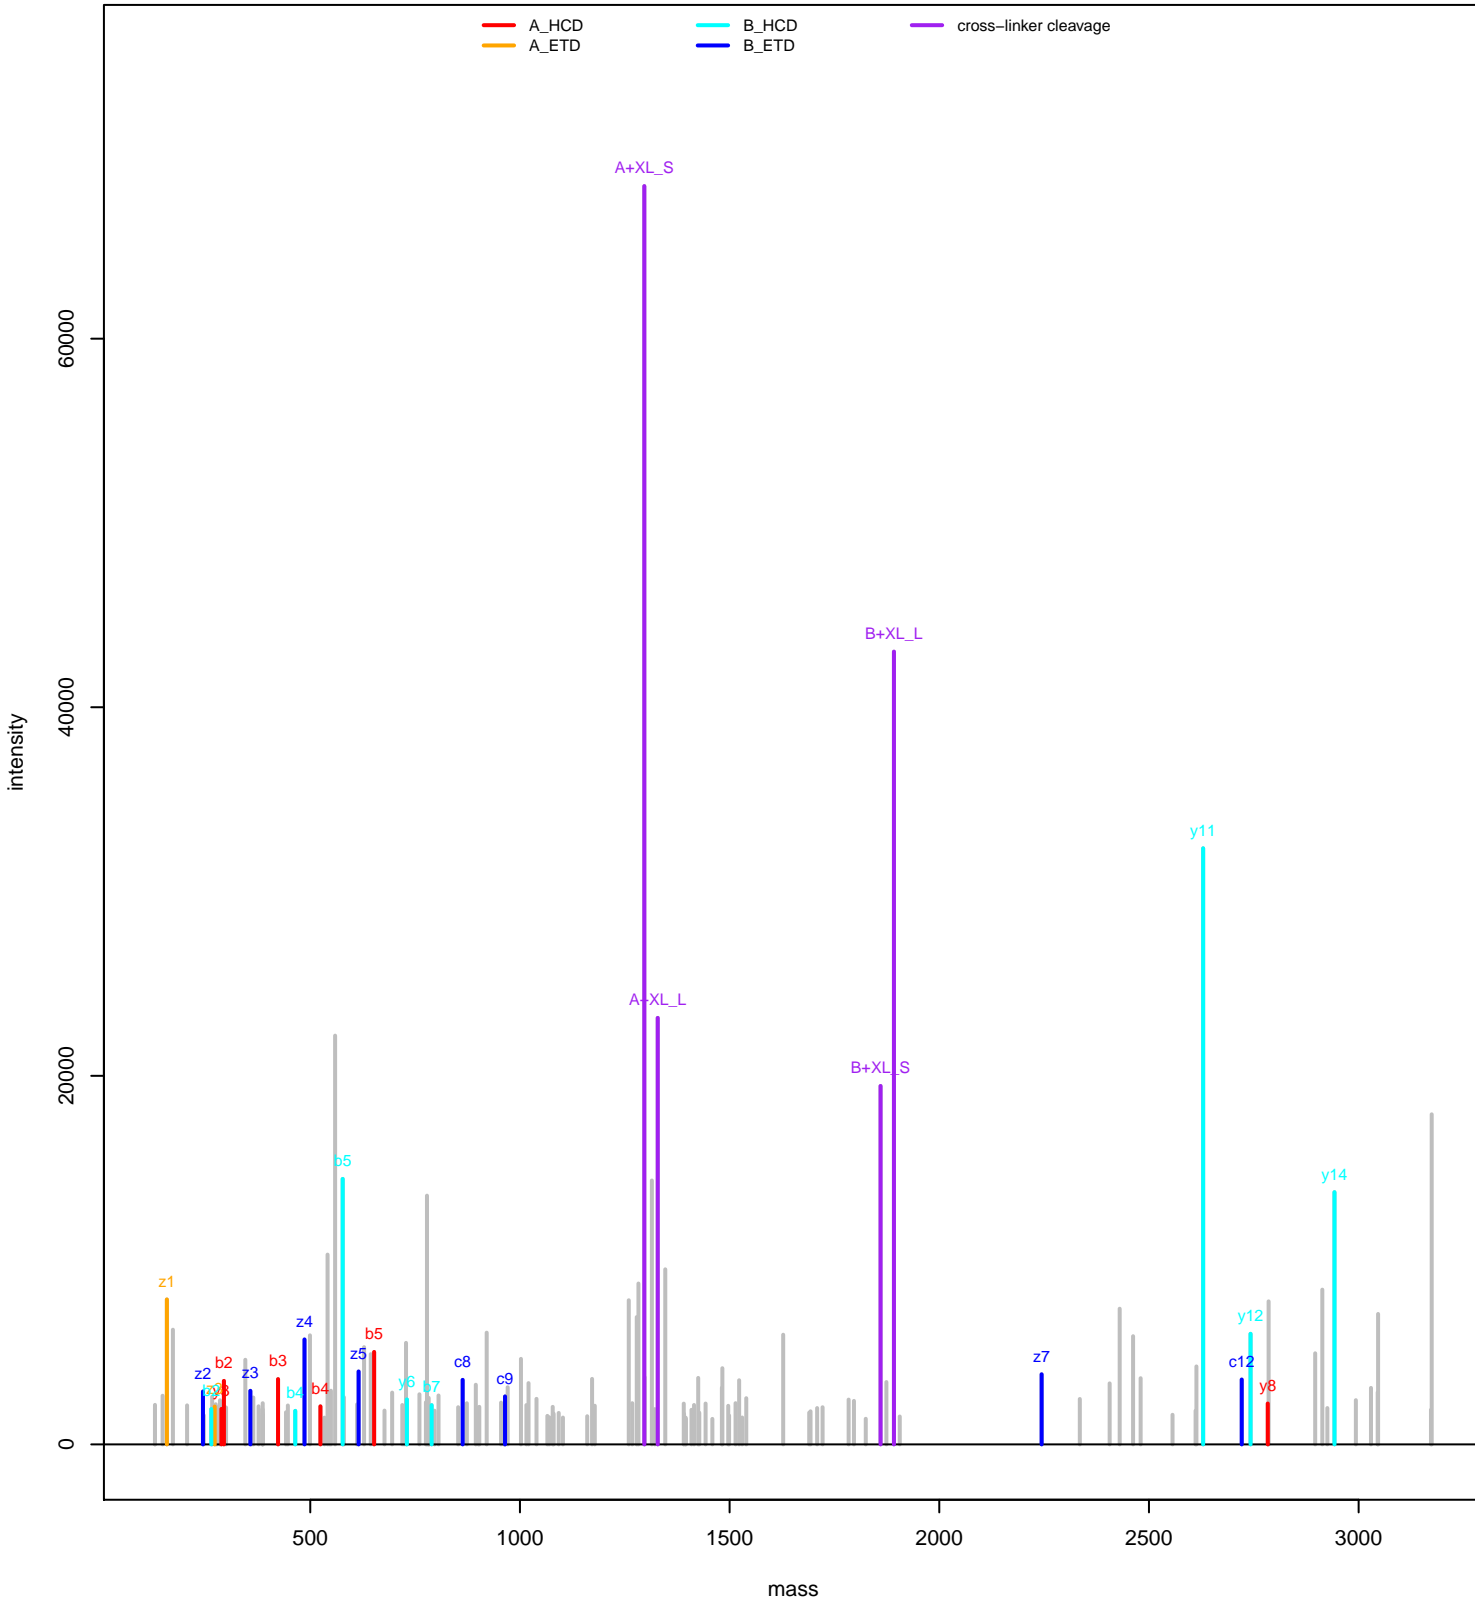

FFETQSSKGGR+XL\_S

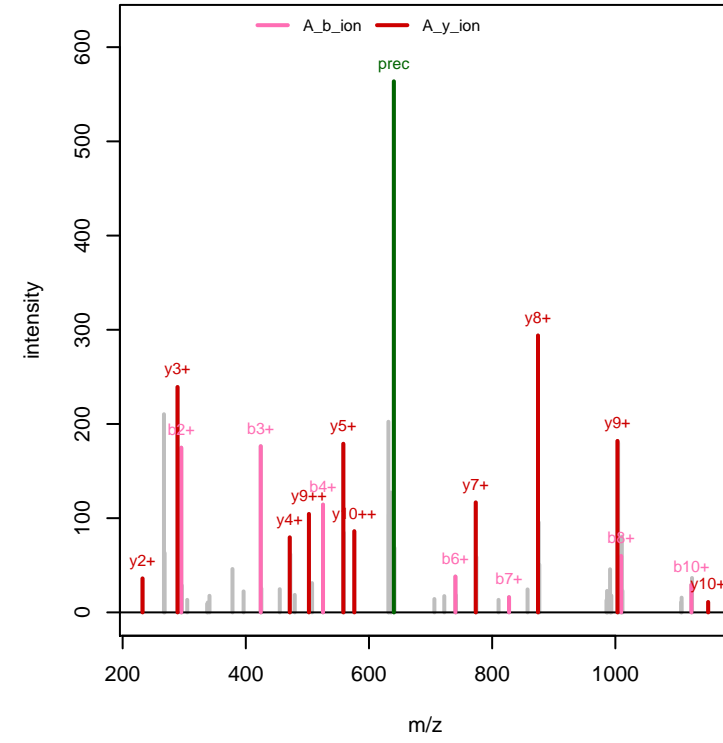

FFETQSSKGGR+XL\_L

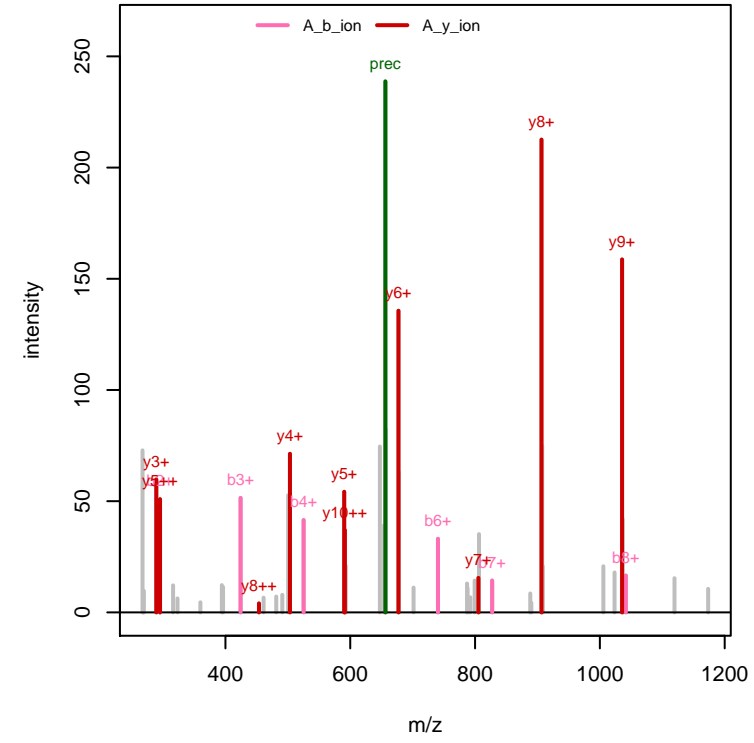

YTVTLPDGTKVEELNK+XL\_S

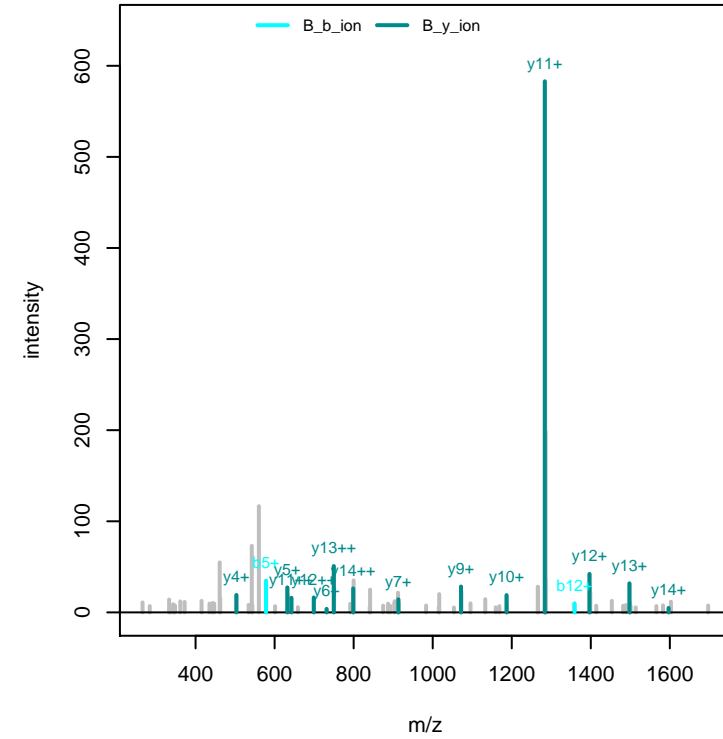

YTVTLPDGTKVEELNK+XL\_L

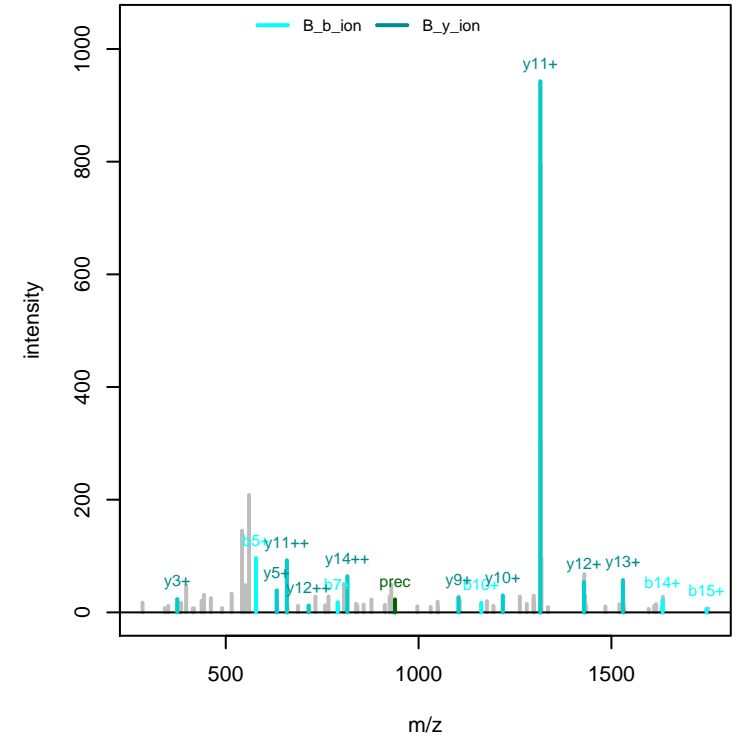



**KGAIVTGK**  
**DLETQSQDGTDFDKLTKK**

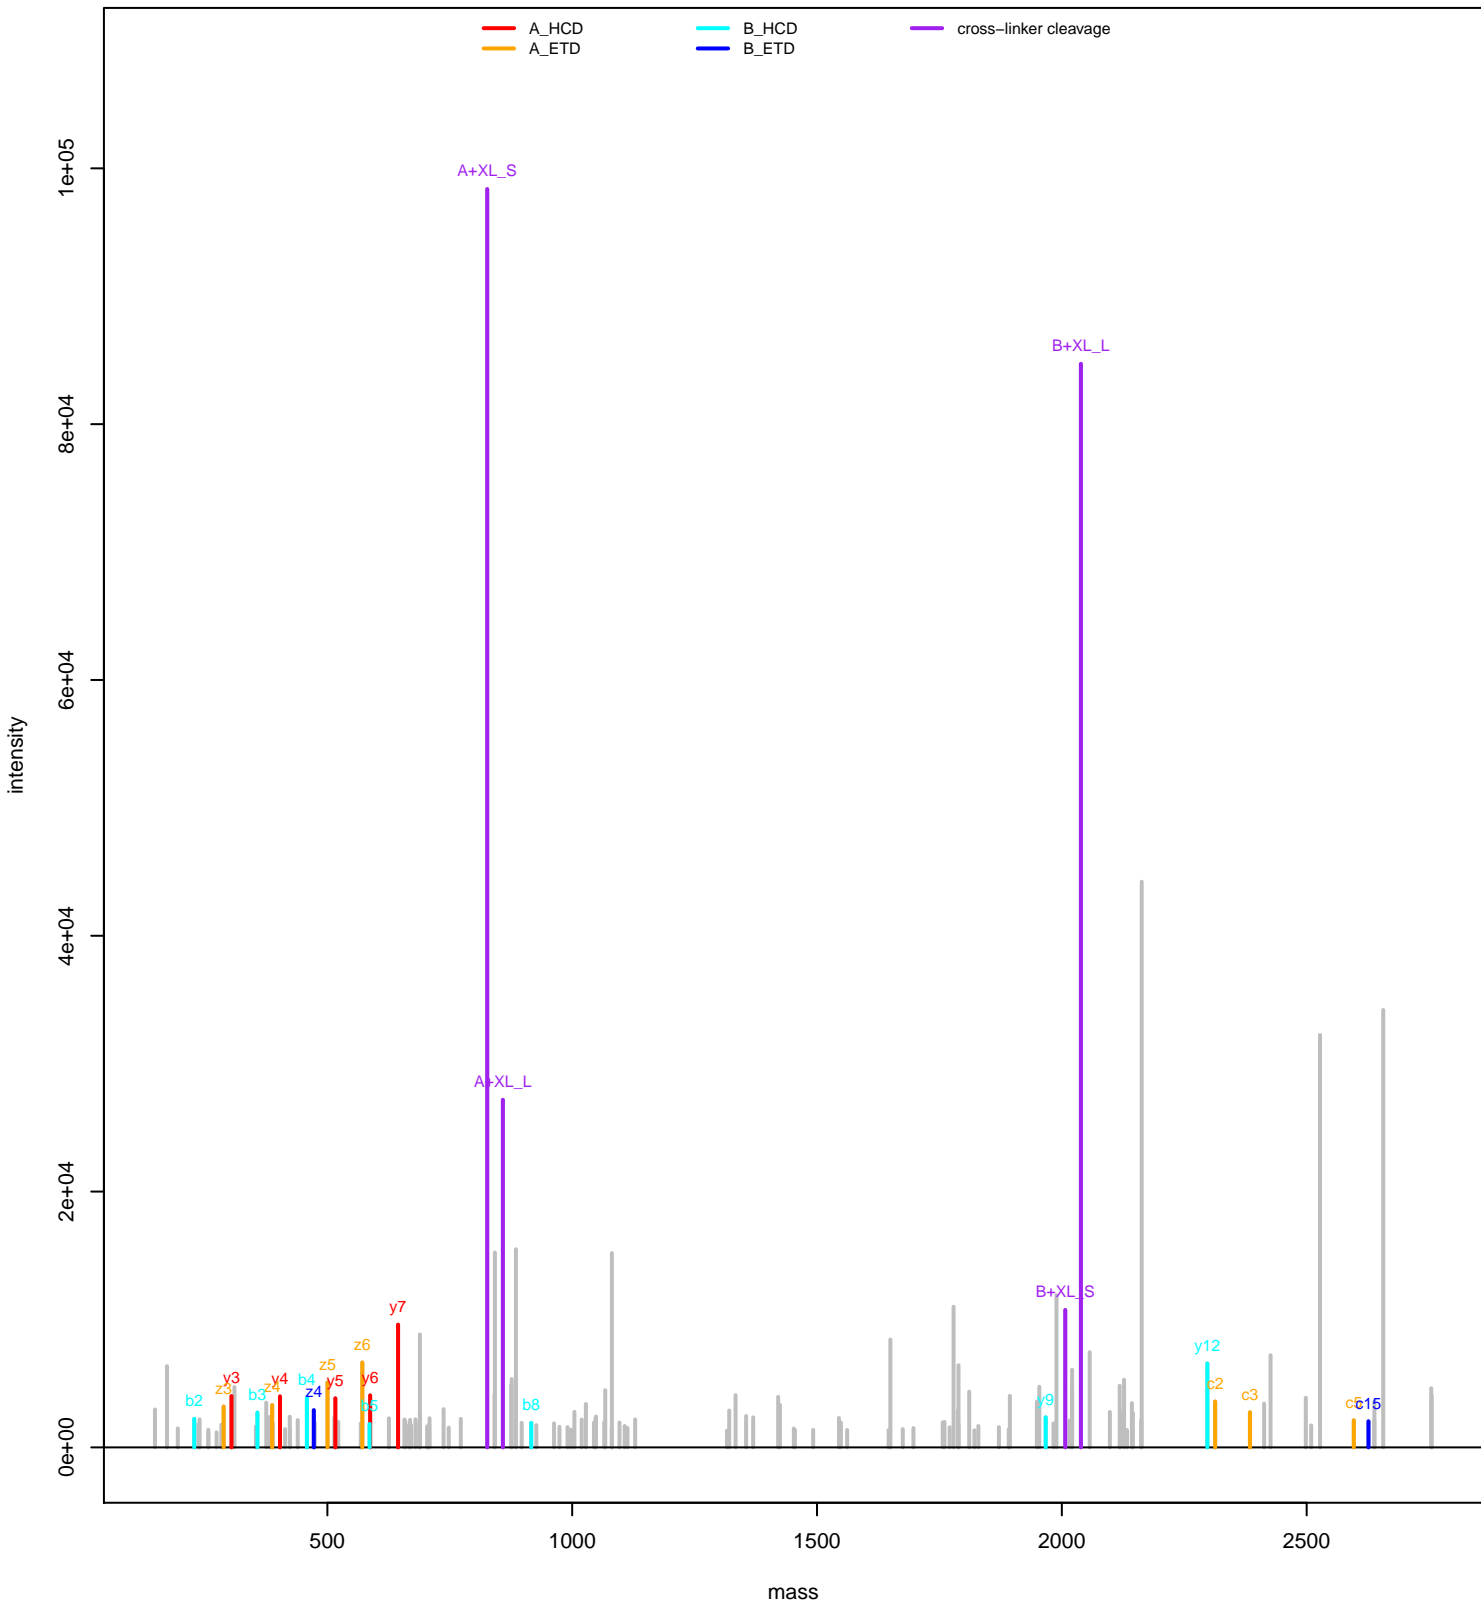

**KGAIVTGK+XL\_S**

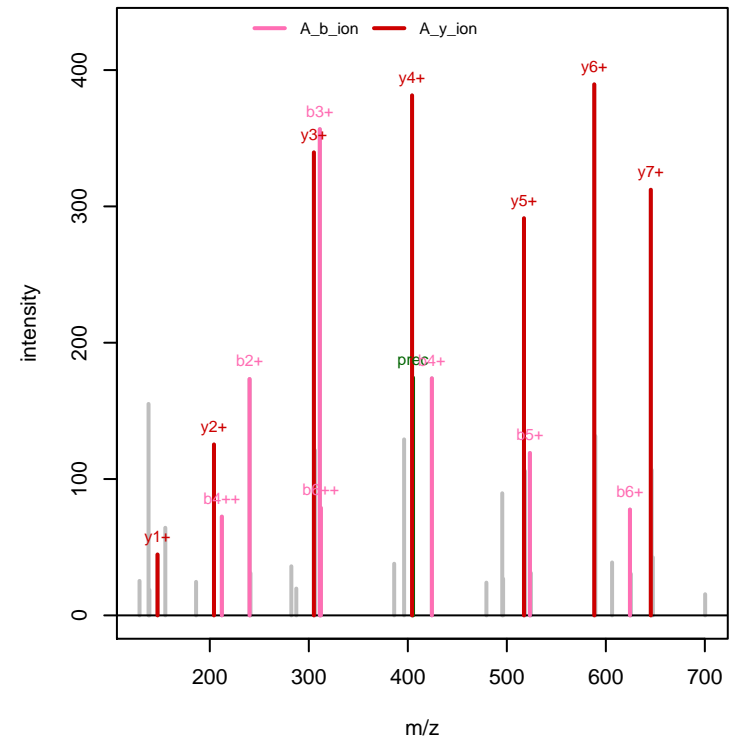

**KGAIVTGK+XL\_L**

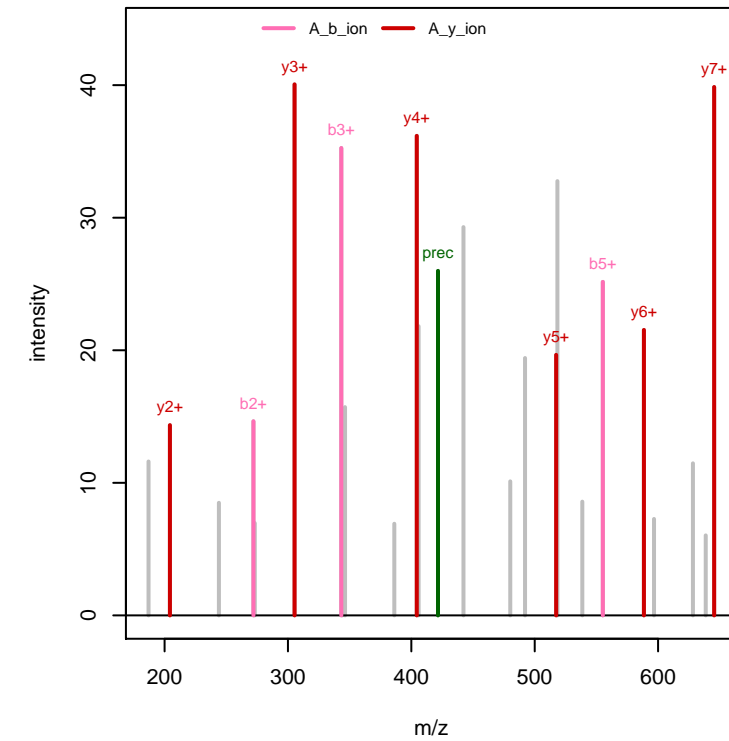

**DLETQSQDGTDFDKLTKK+XL\_S**

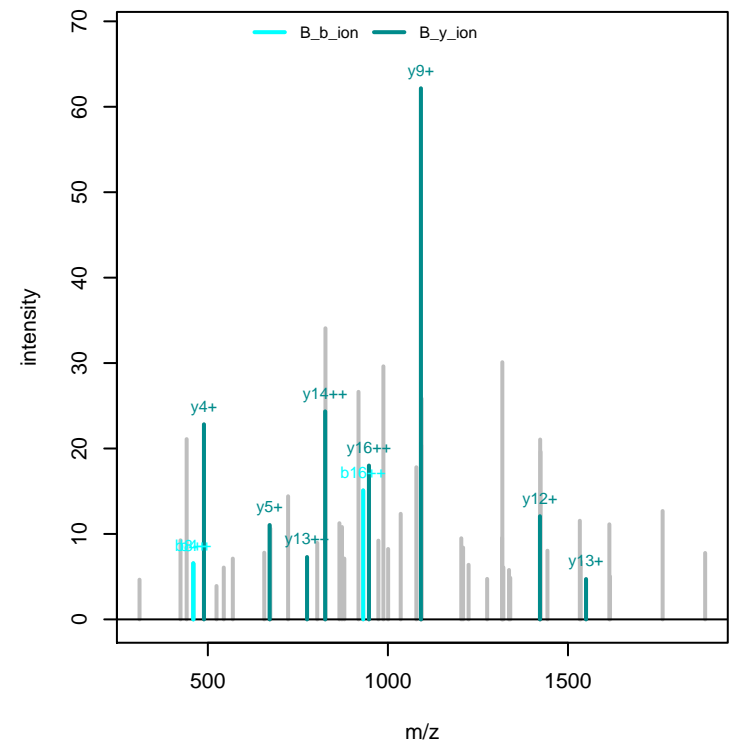

**DLETQSQDGTDFDKLTKK+XL\_L**

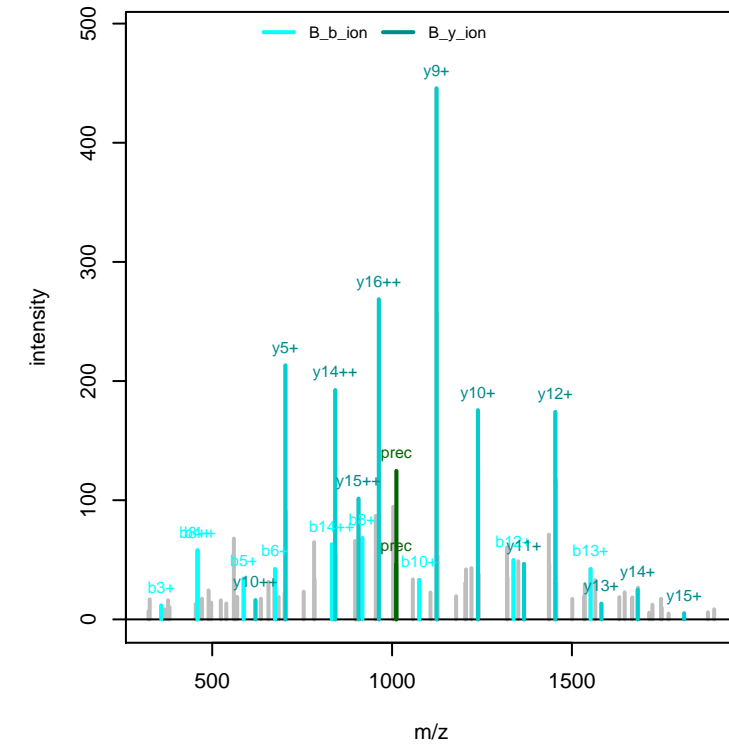

TGAGMMDCKK  
AEITASLVKELR

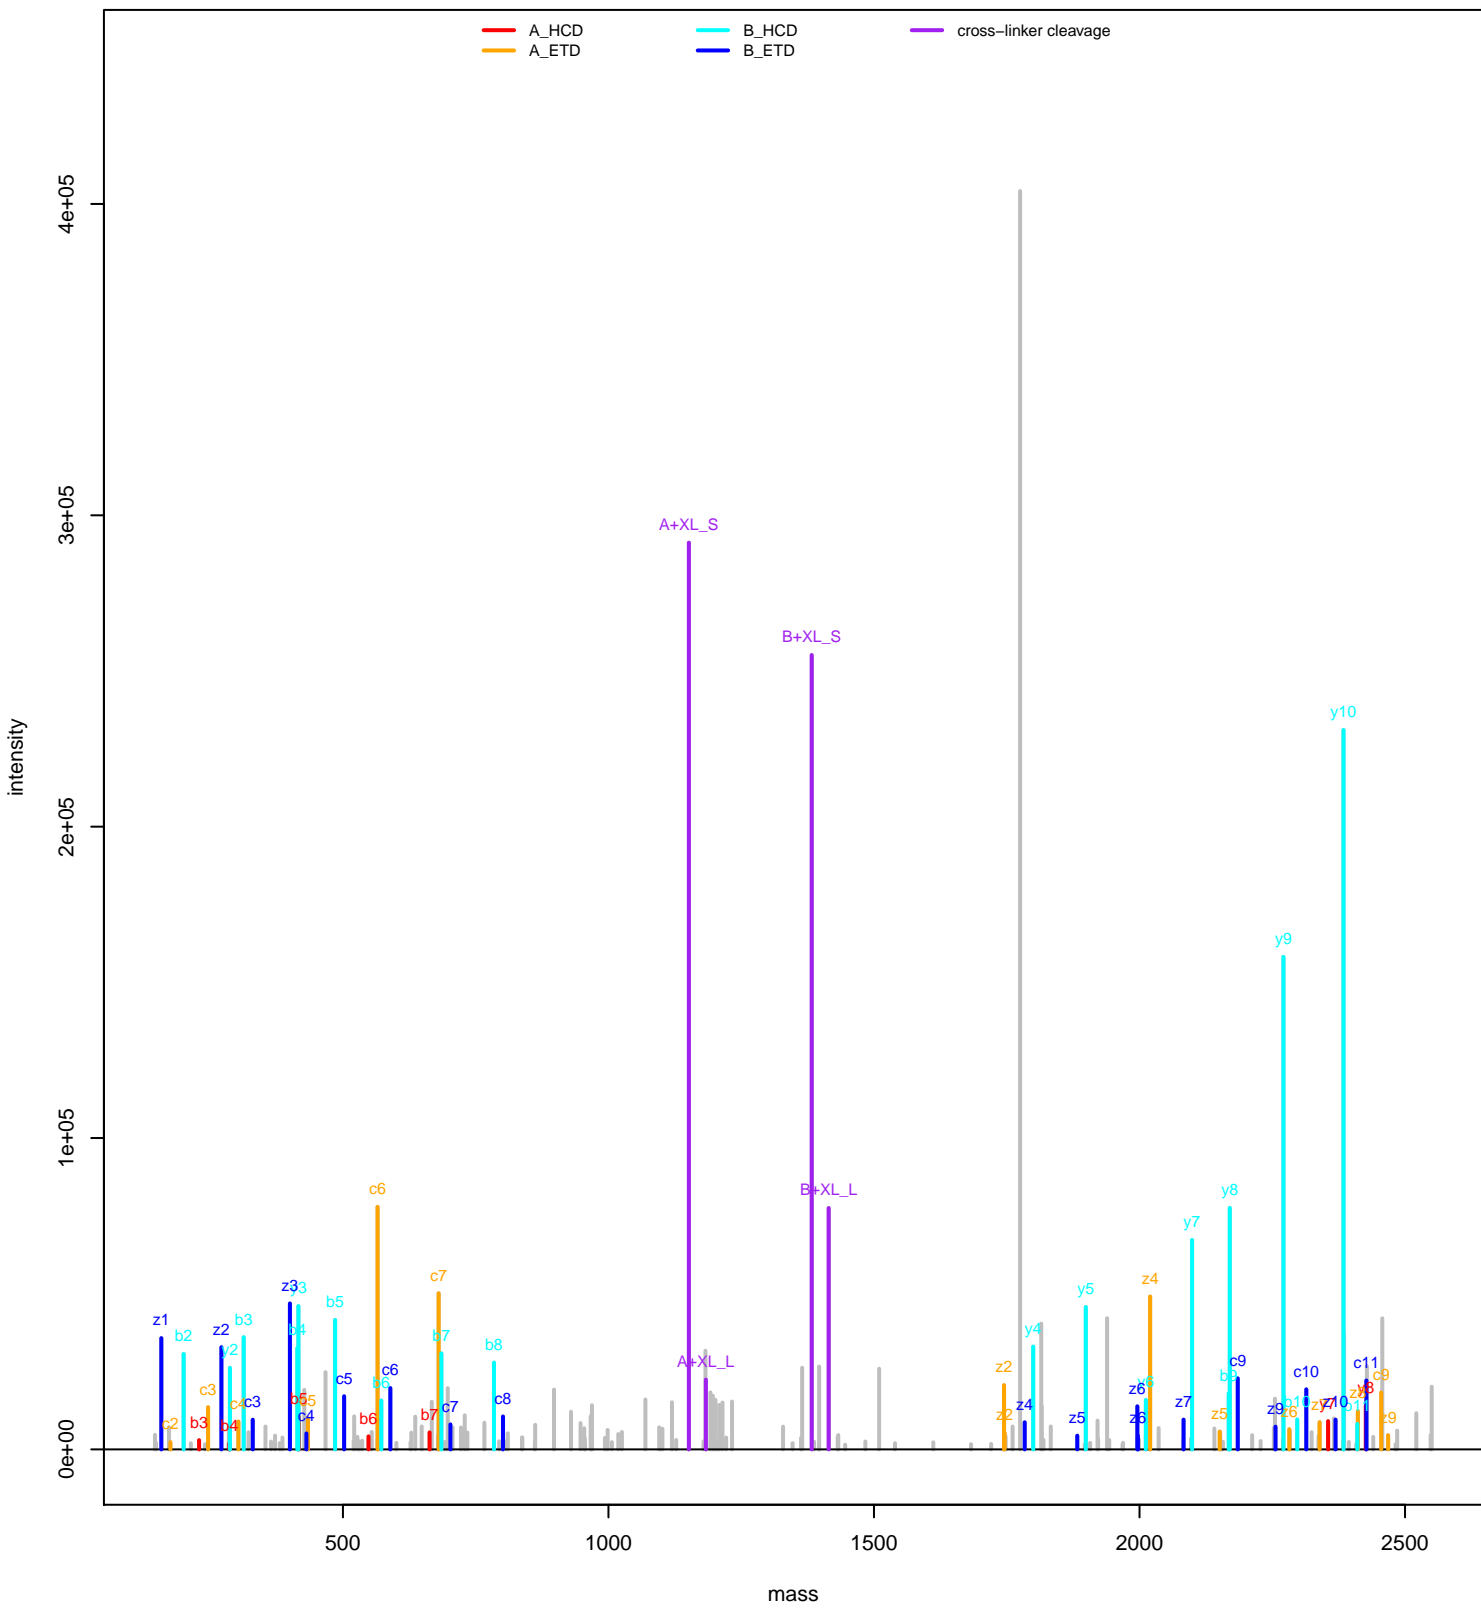

TGAGMMDCKK+XL\_S

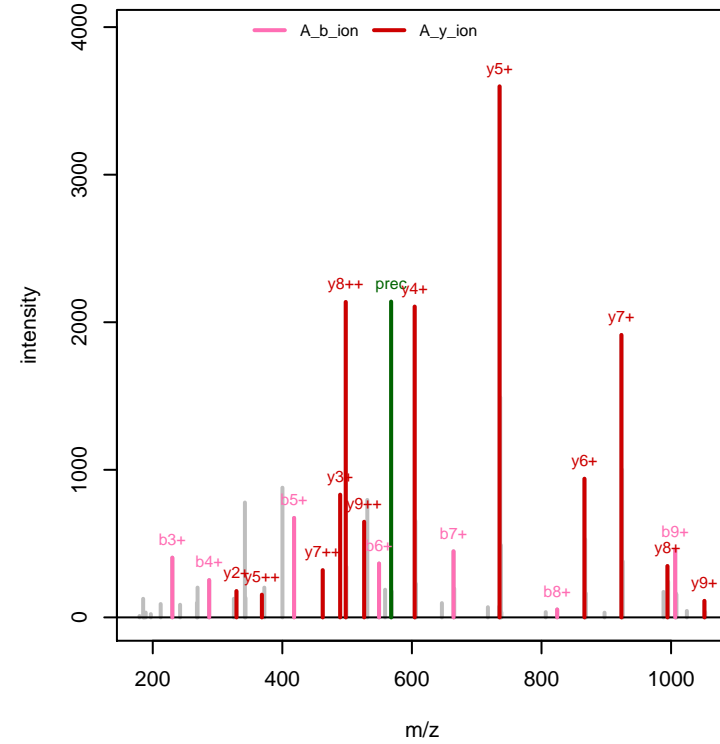

TGAGMMDCKK+XL\_L

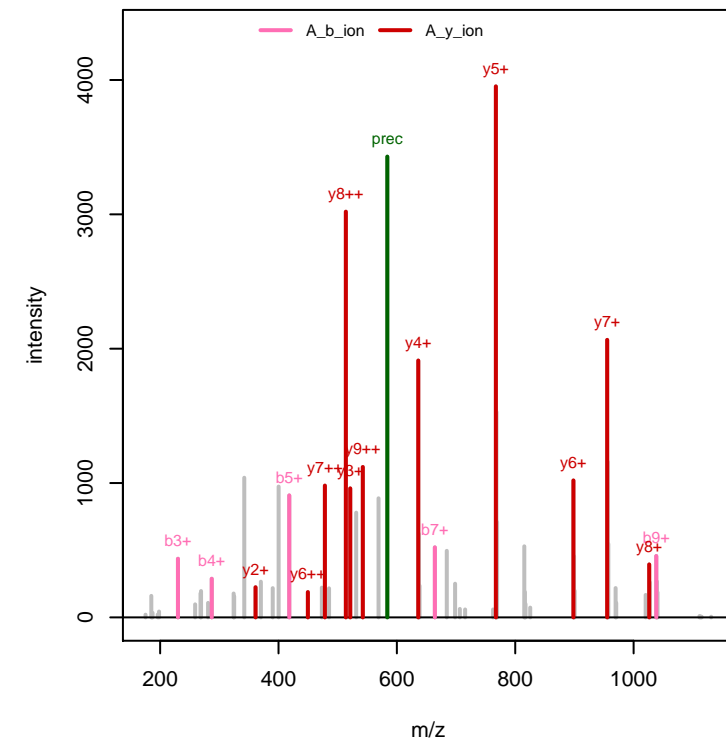

AEITASLVKELR+XL\_S

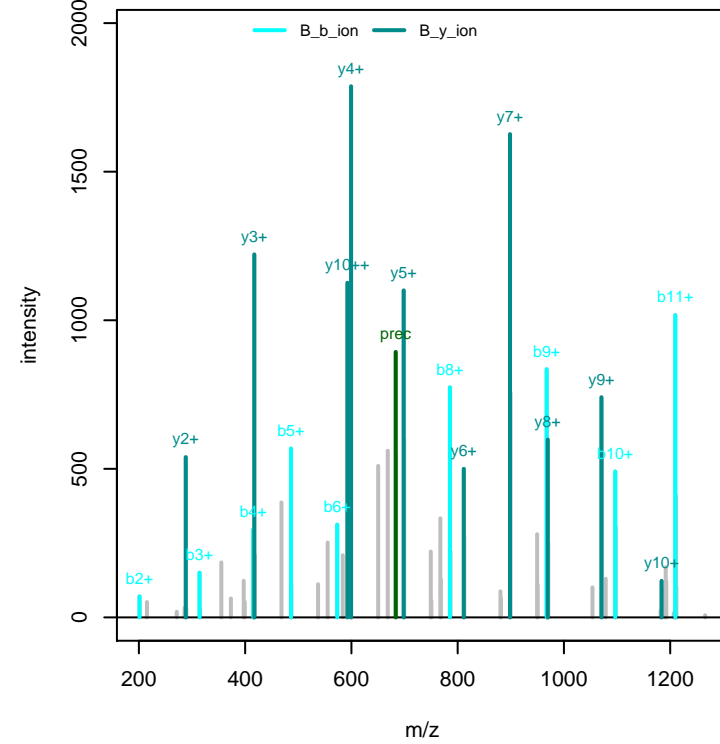

AEITASLVKELR+XL\_L

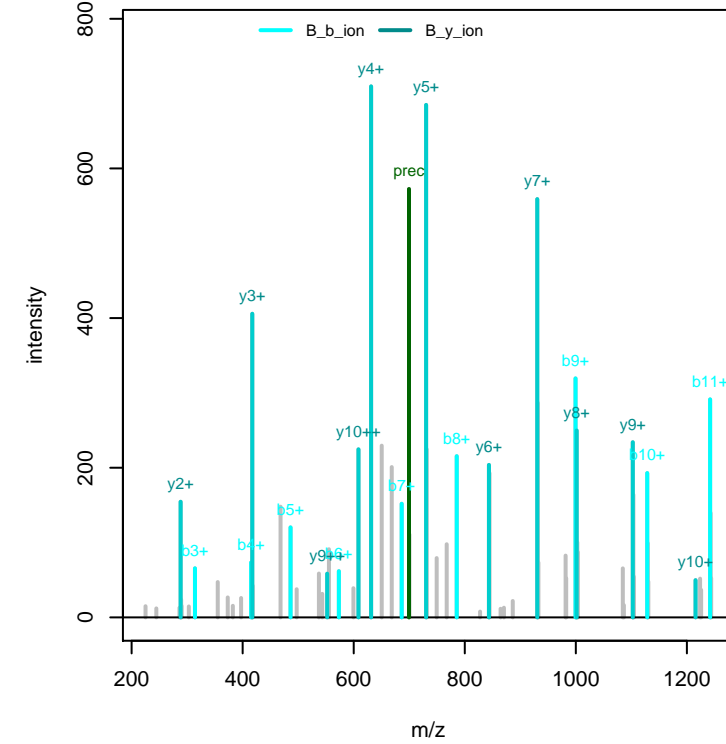

STVKQLR  
MKDLIPR

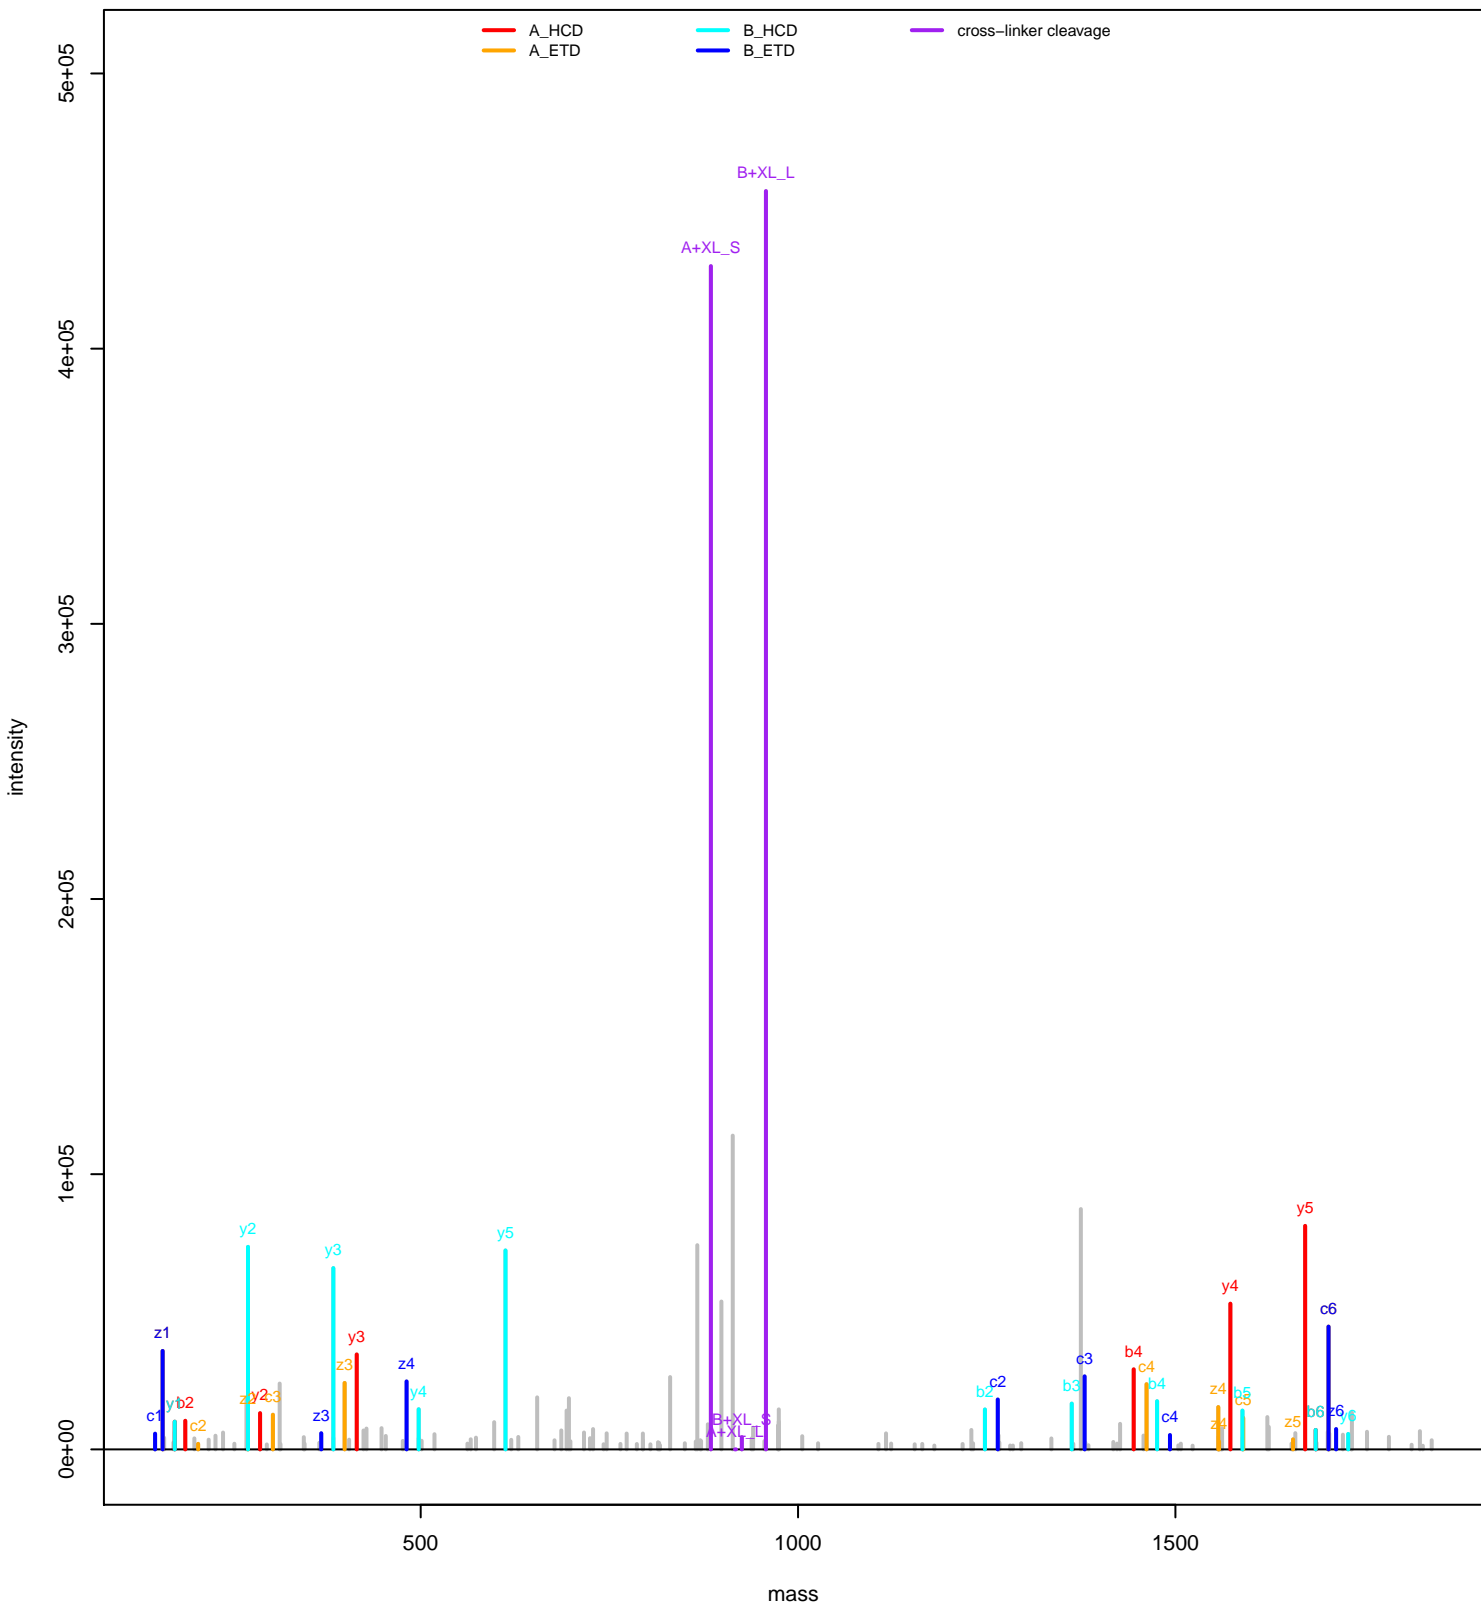

STVKQLR+XL\_S

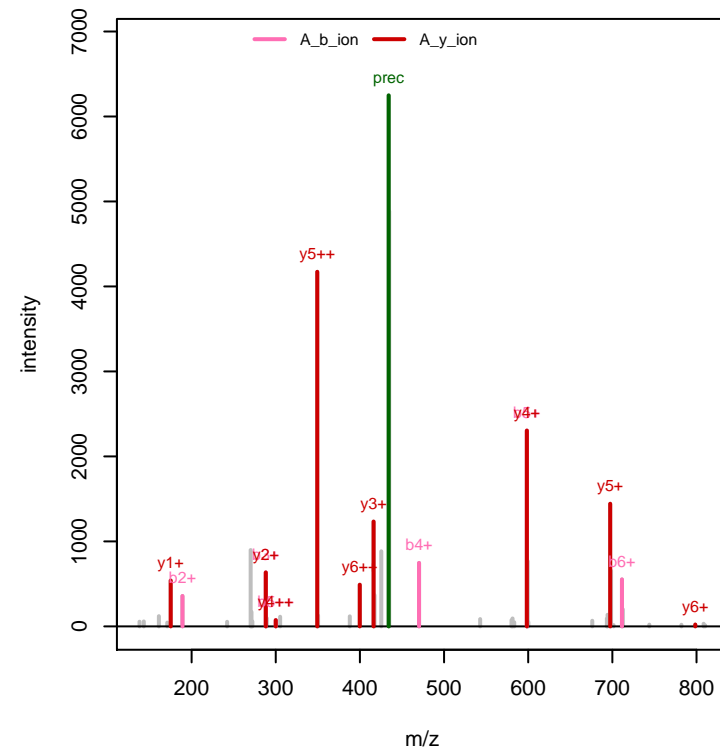

STVKQLR+XL\_L

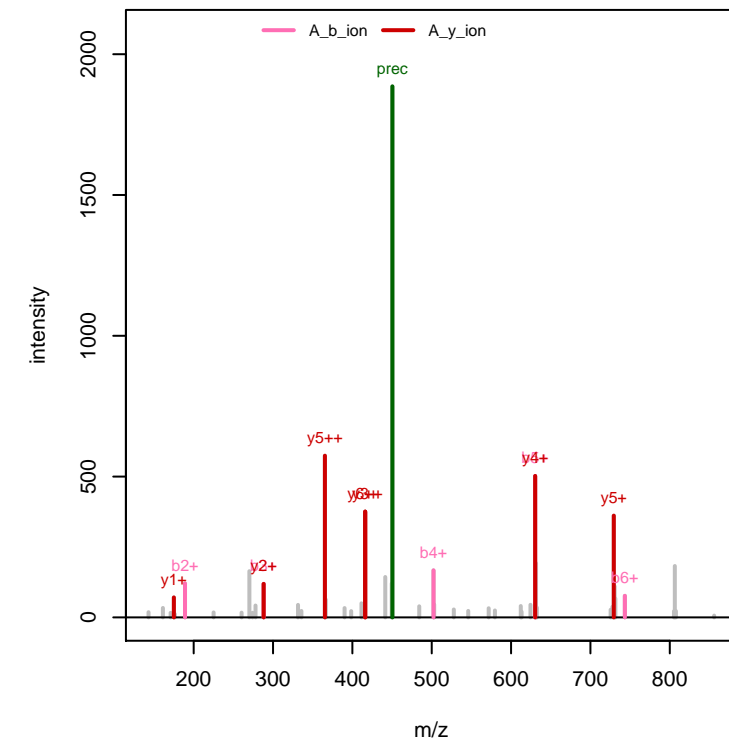

MKDLIPR+XL\_S

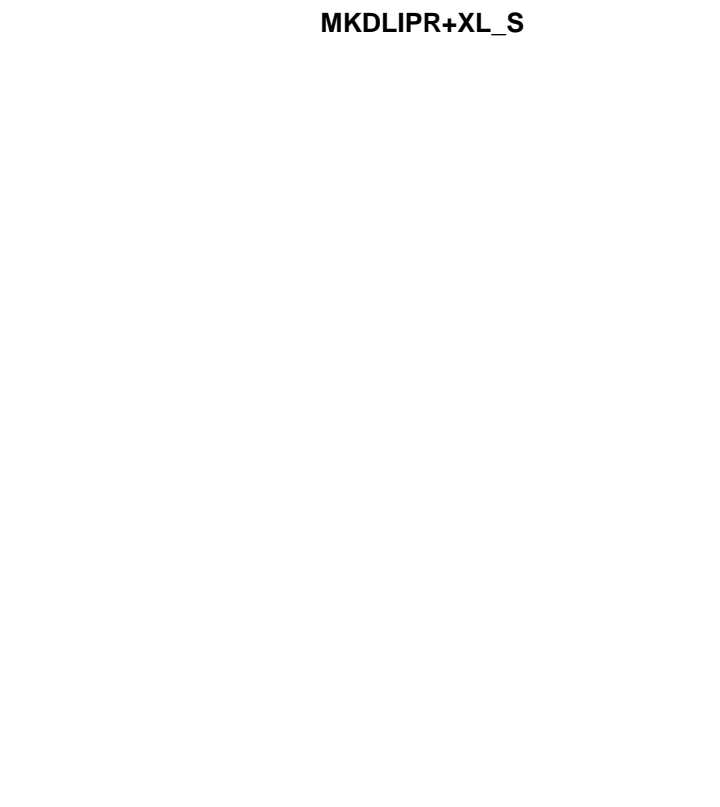

MKDLIPR+XL\_L

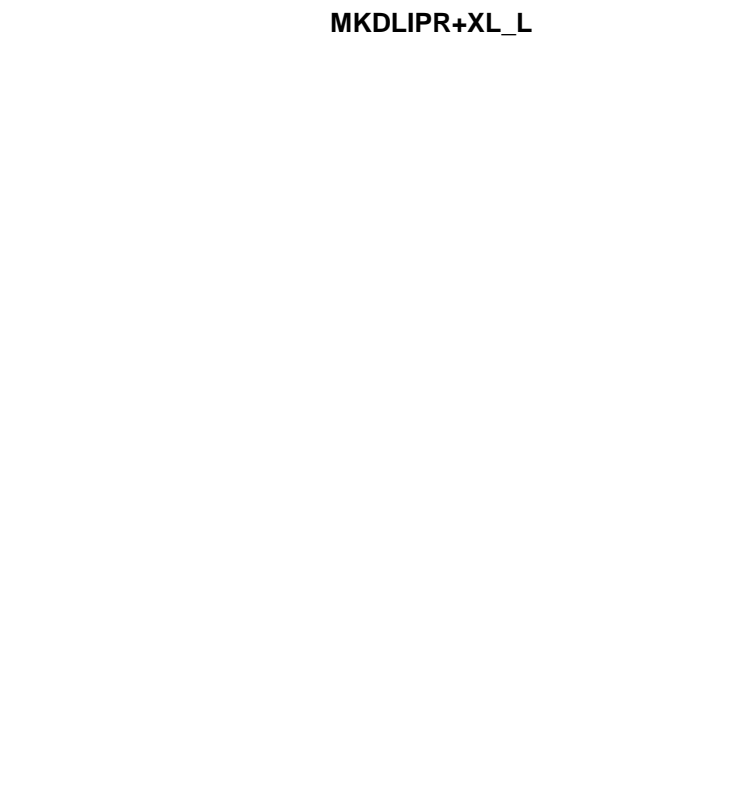

AGKALK  
MNKTQLIDVIAEK

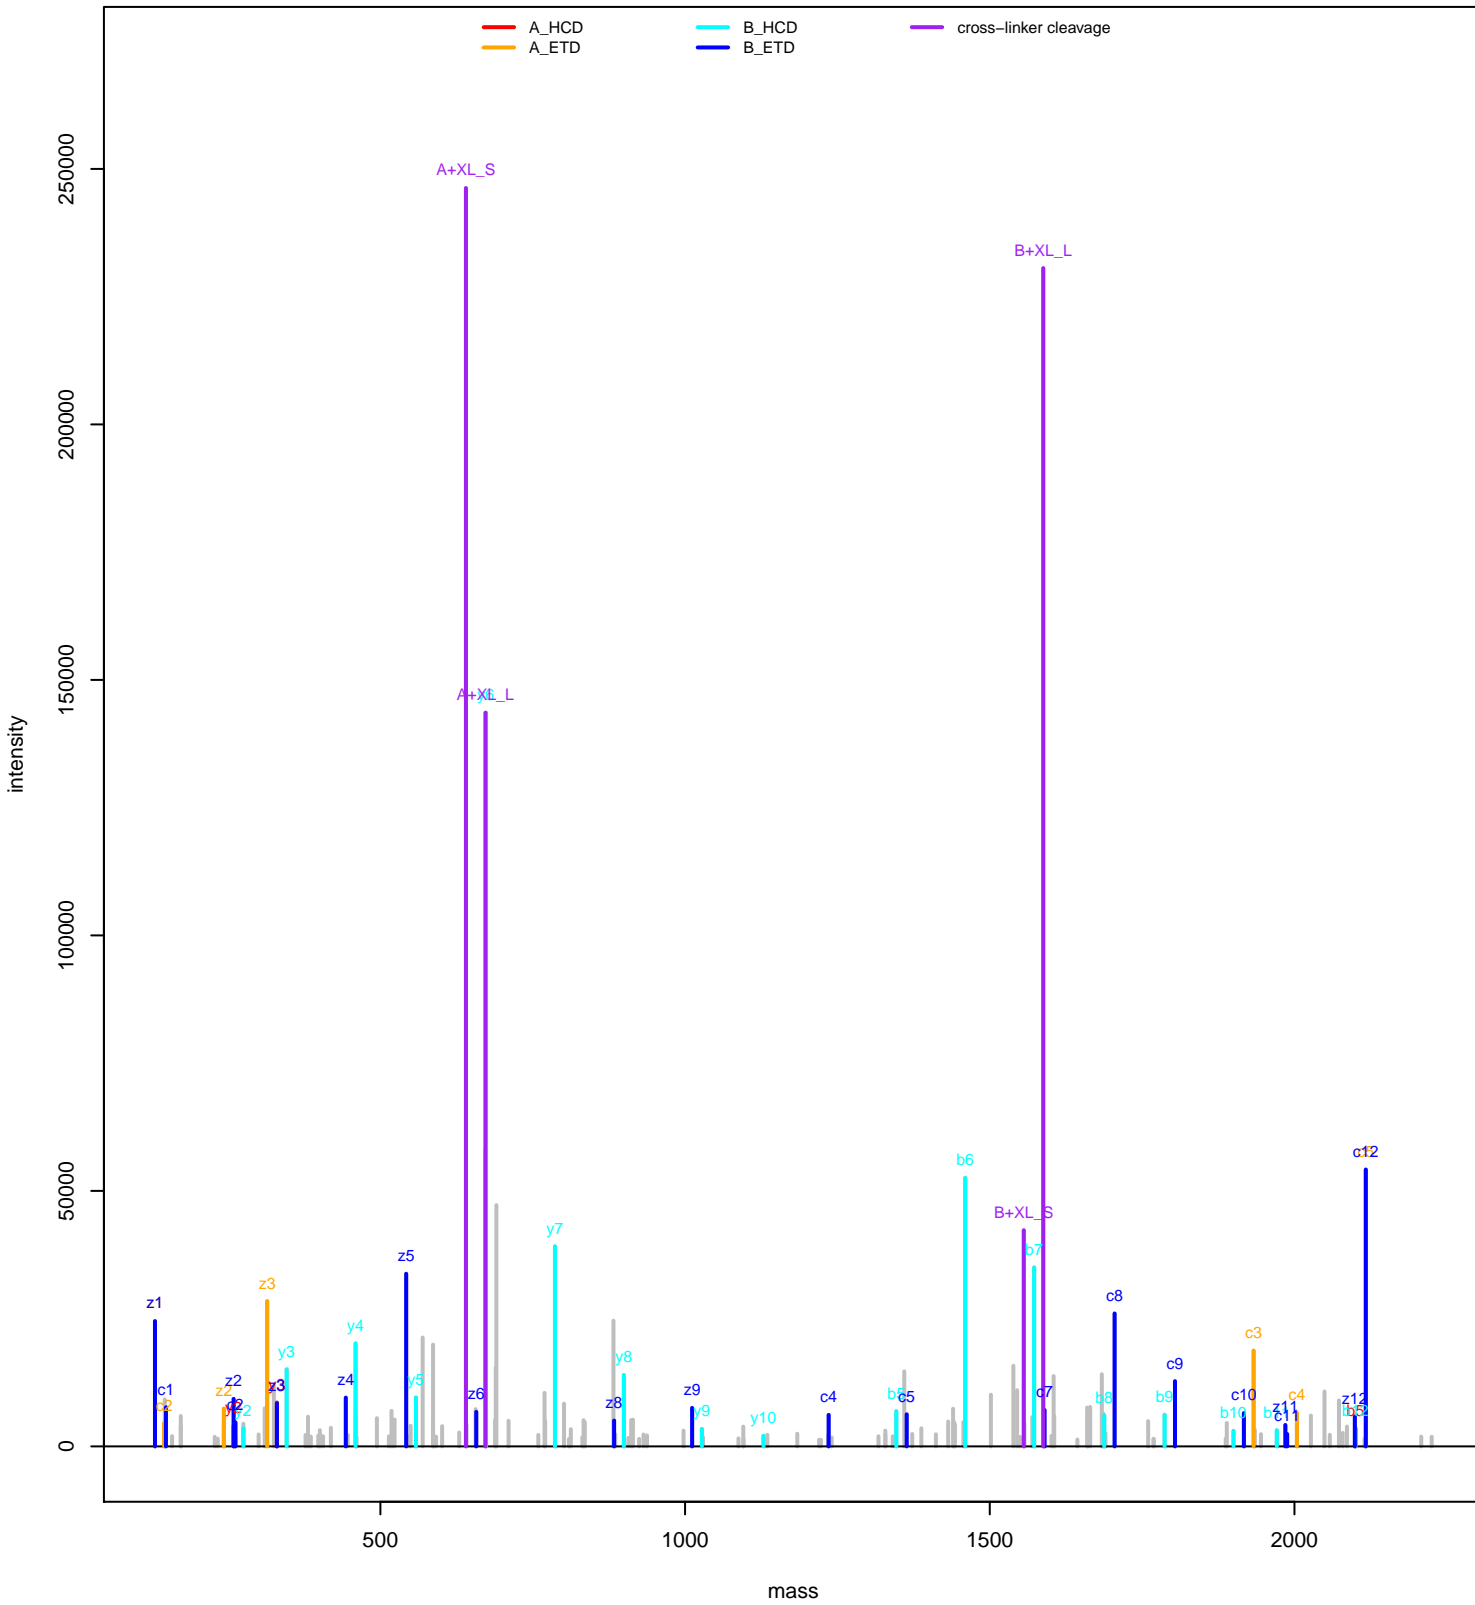

AGKALK+XL\_S

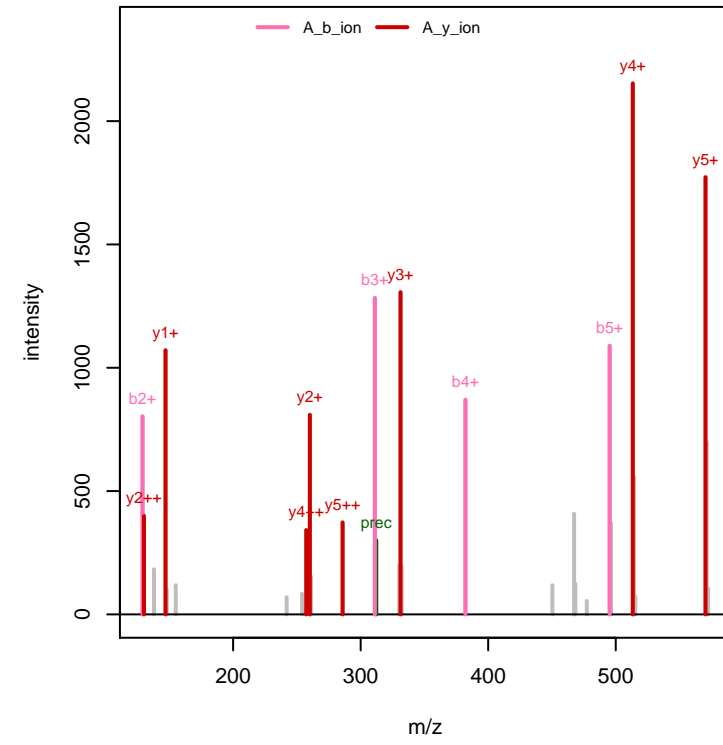

AGKALK+XL\_L

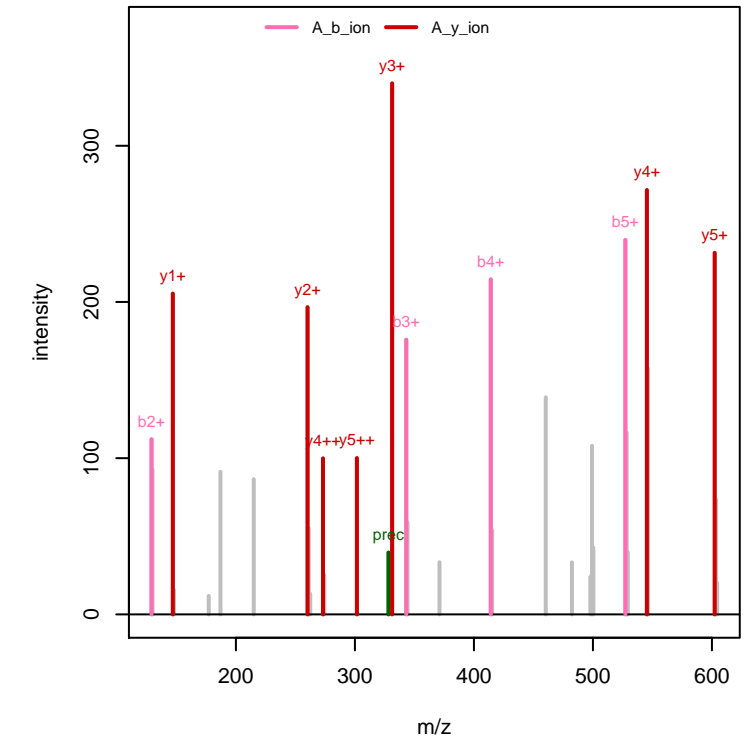

MNKTQLIDVIAEK+XL\_S

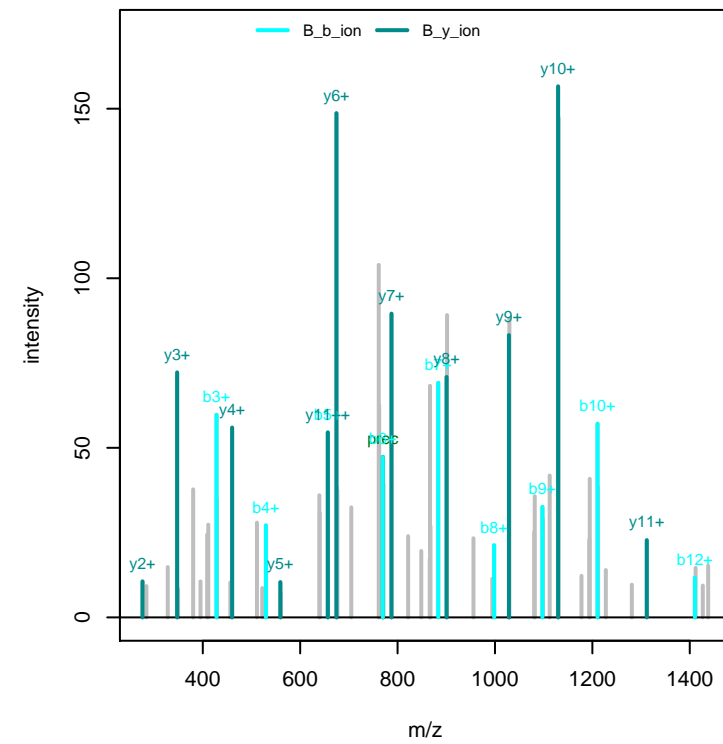

MNKTQLIDVIAEK+XL\_L

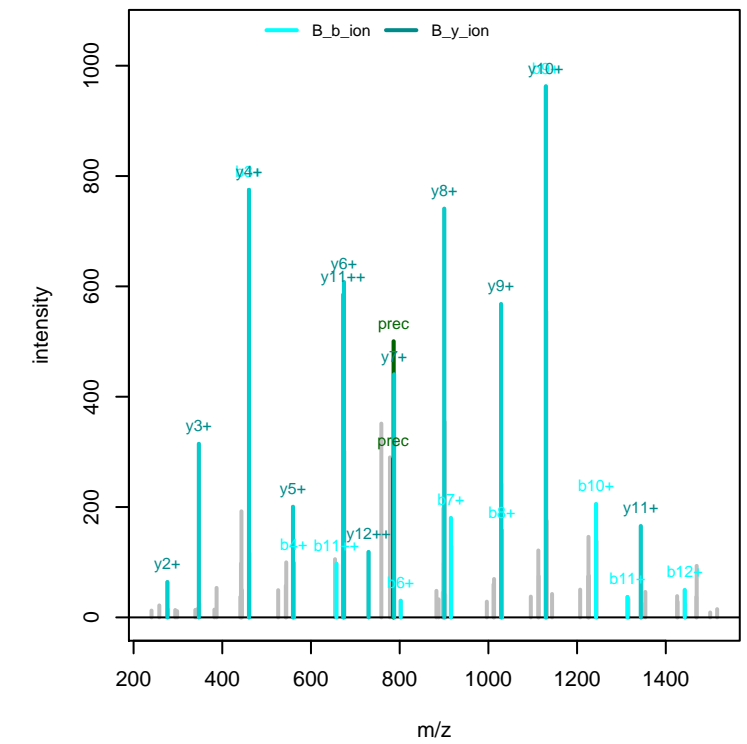

**FNIPGSK**  
DVATGGRVDRFNKR

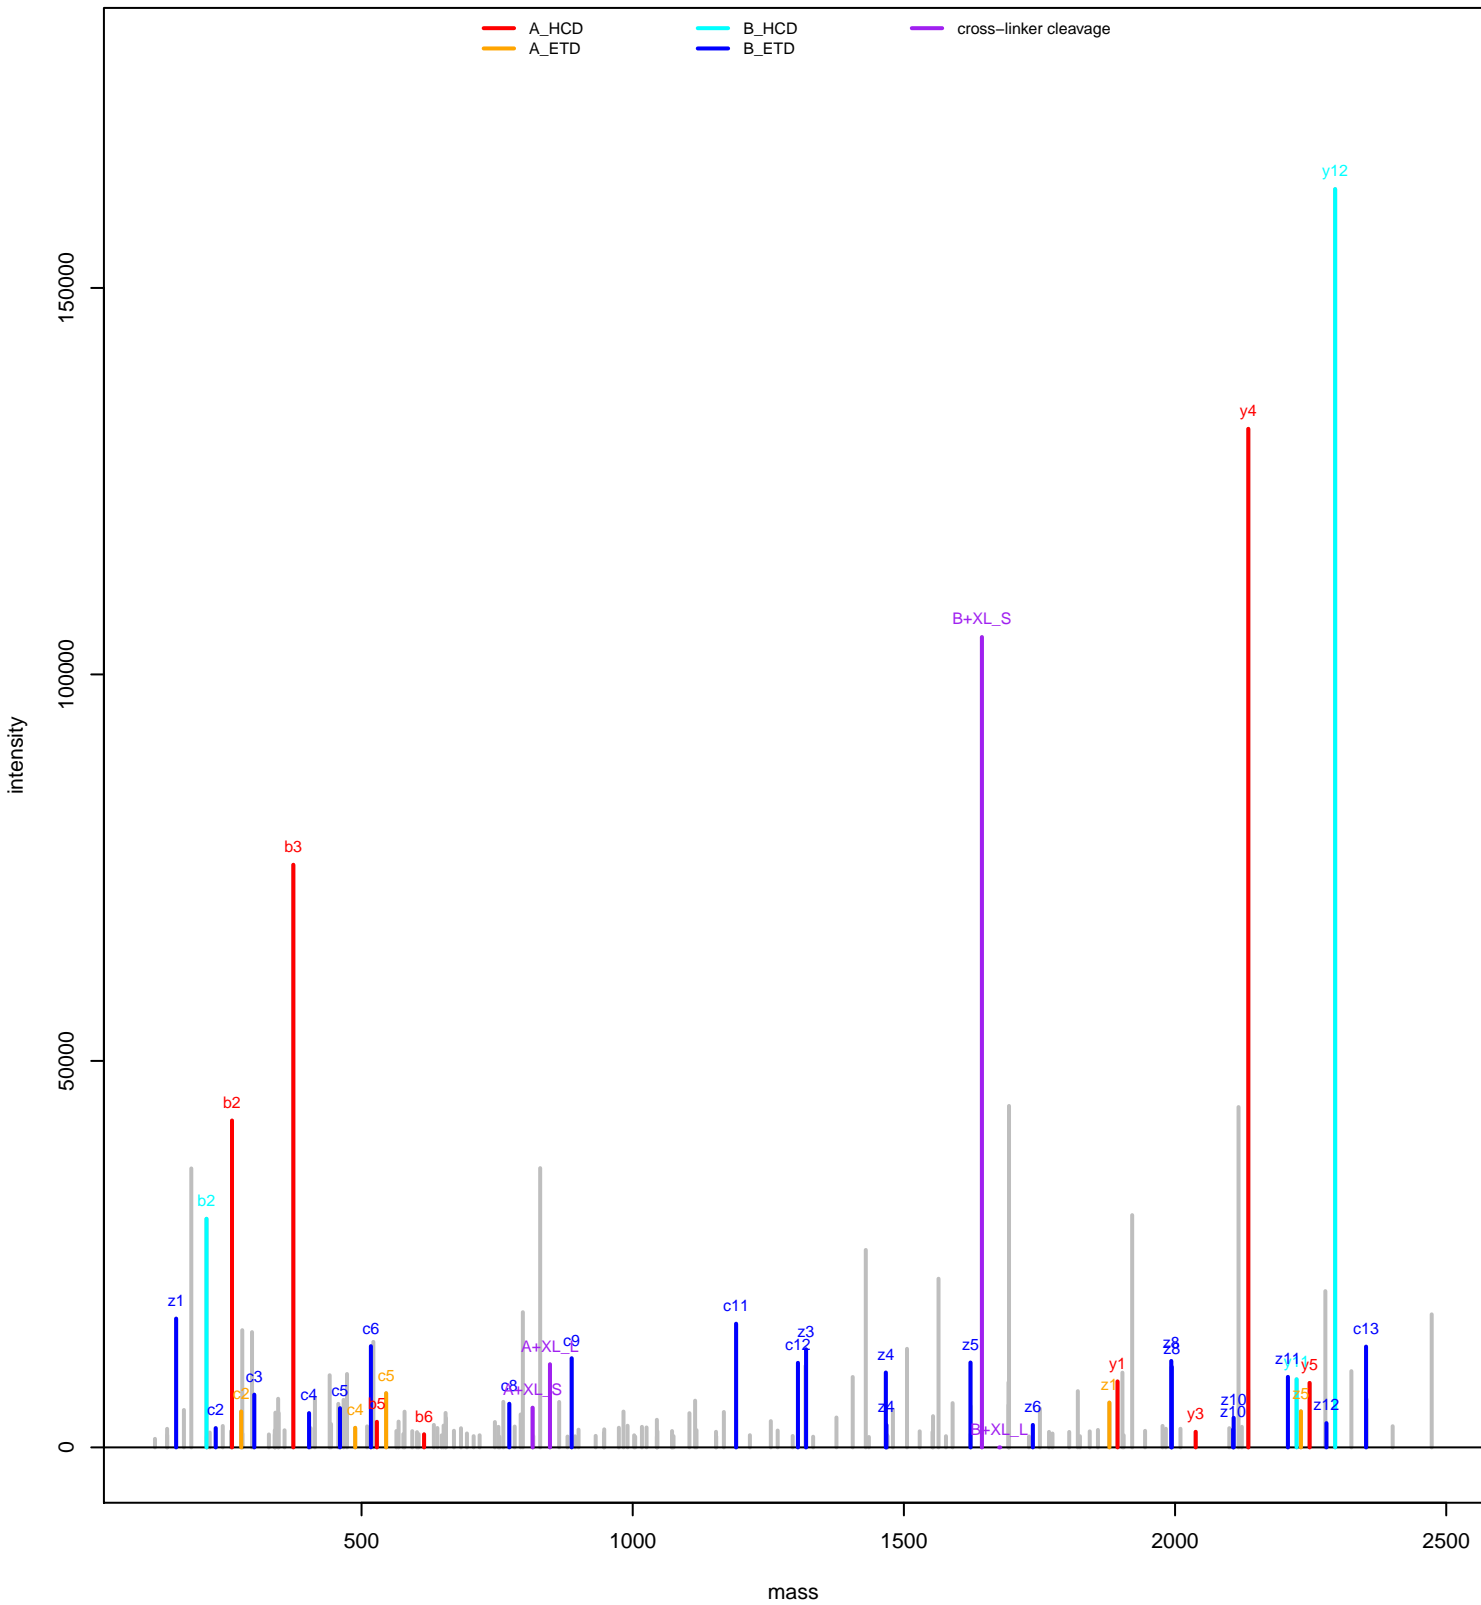

**FNIPGSK+XL\_S**

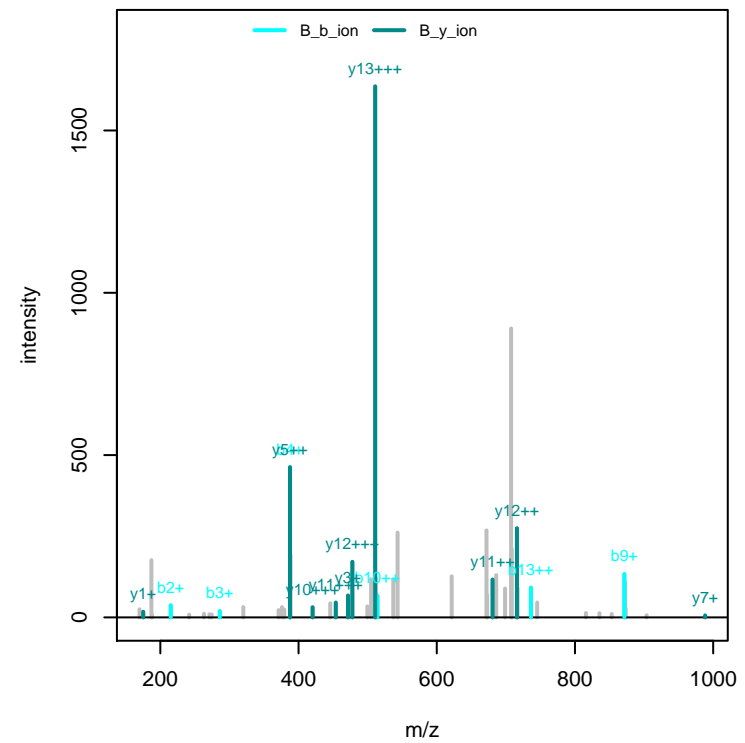

**FNIPGSK+XL\_L**

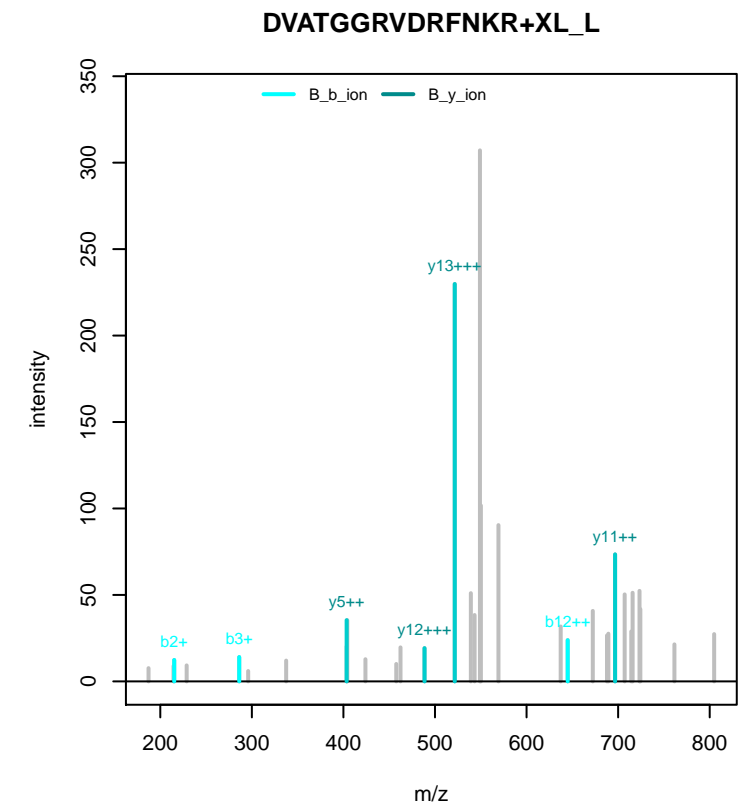

**DVATGGRVDRFNKR+XL\_S**



**DVATGGRVDRFNKR+XL\_L**

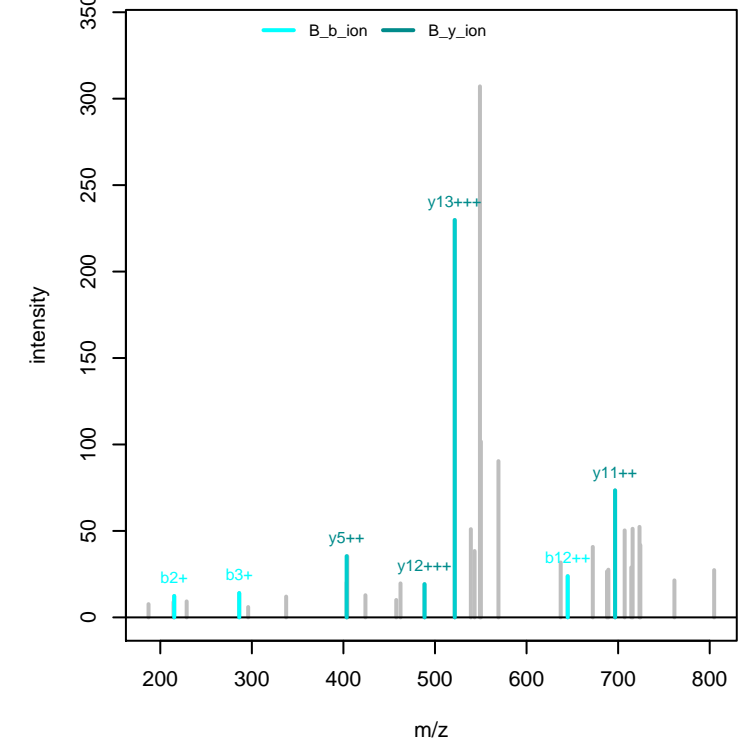

GKTHSSGK  
GLADTALKTANSGYLTR

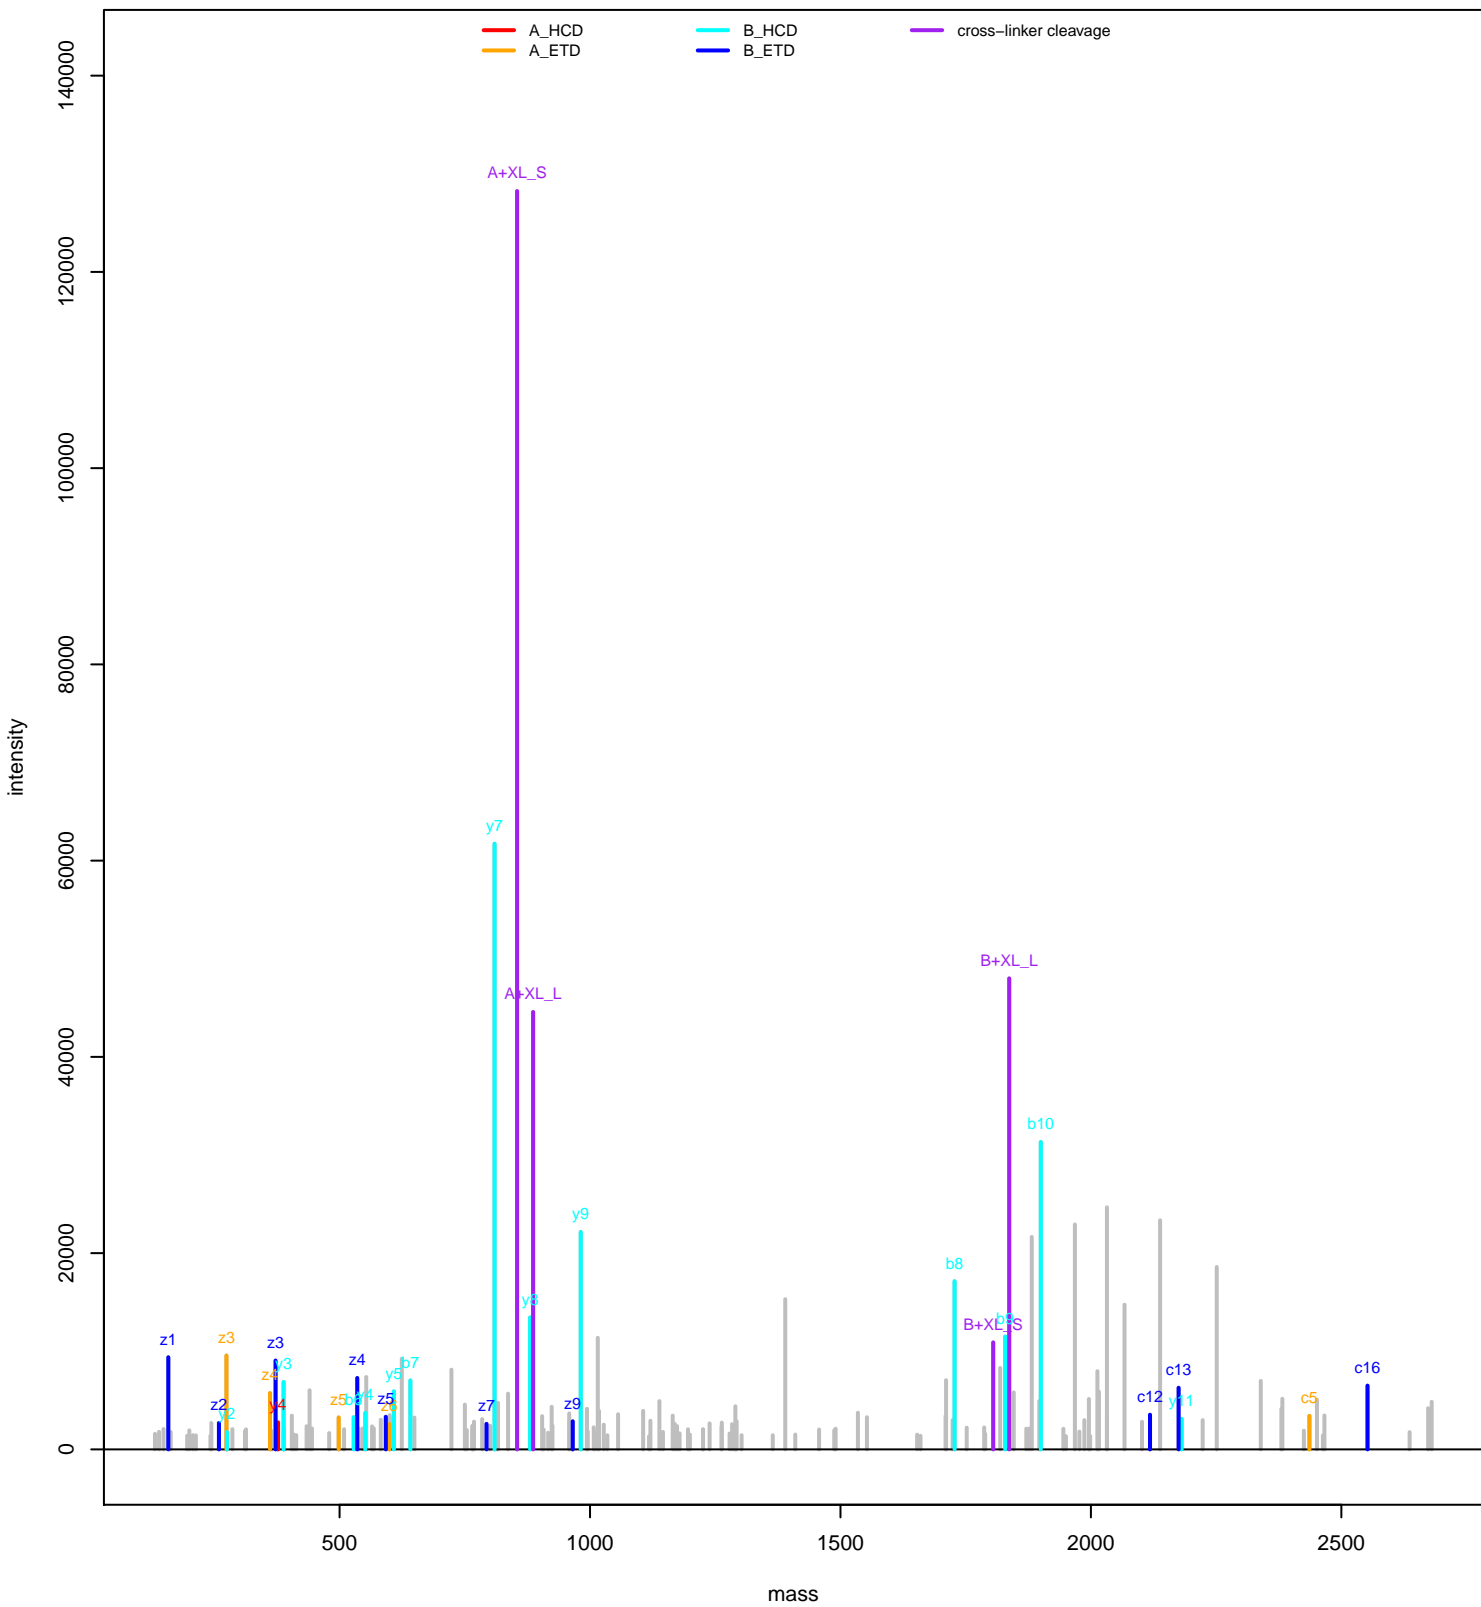

GKTHSSGK+XL\_S

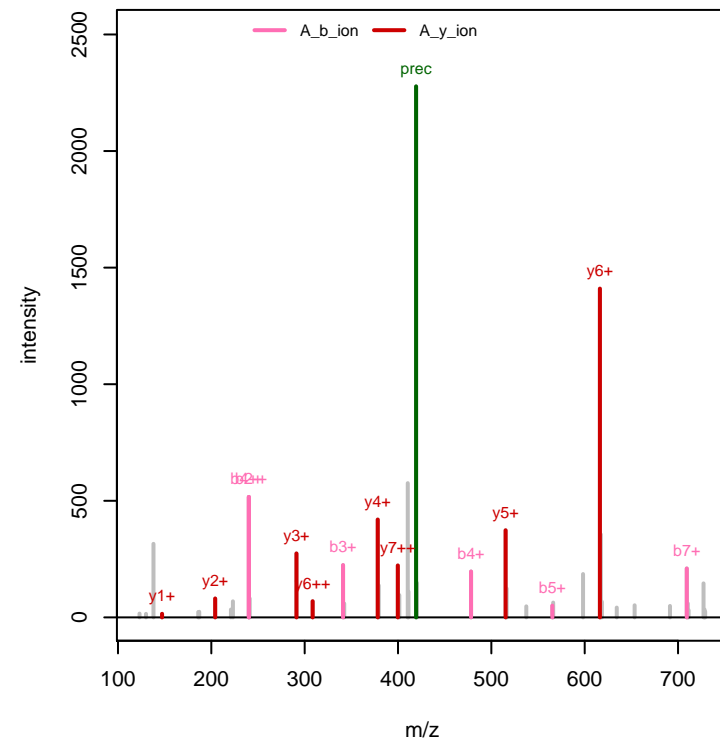

GKTHSSGK+XL\_L

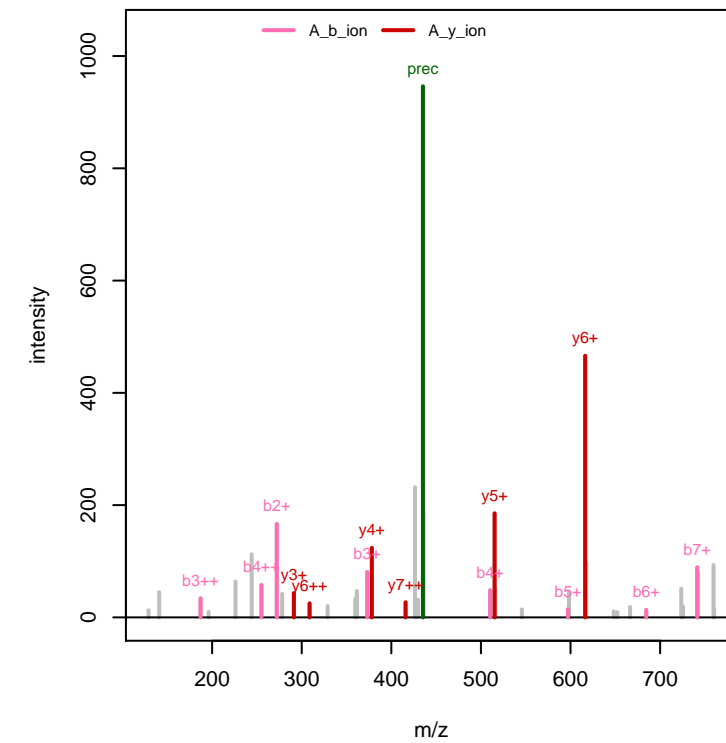

GLADTALKTANSGYLTR+XL\_S

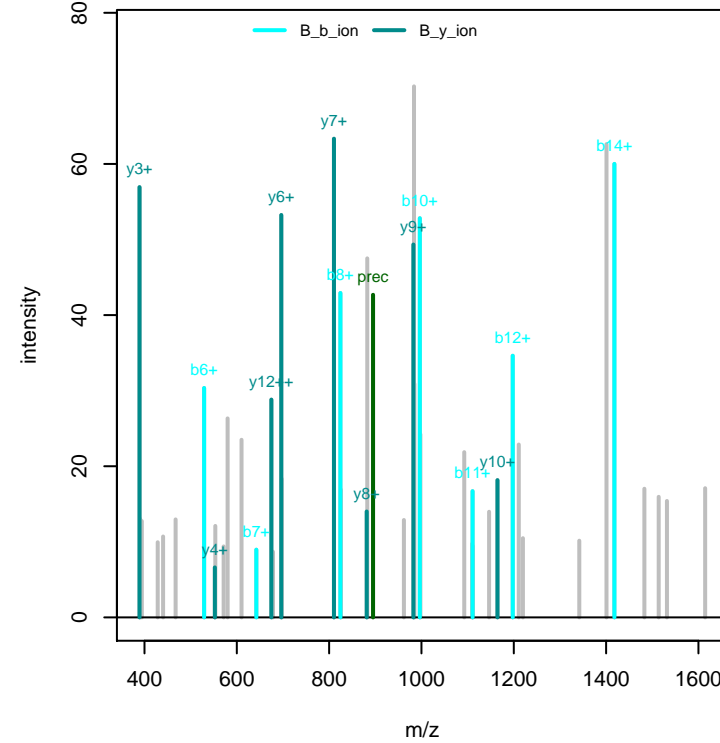

GLADTALKTANSGYLTR+XL\_L

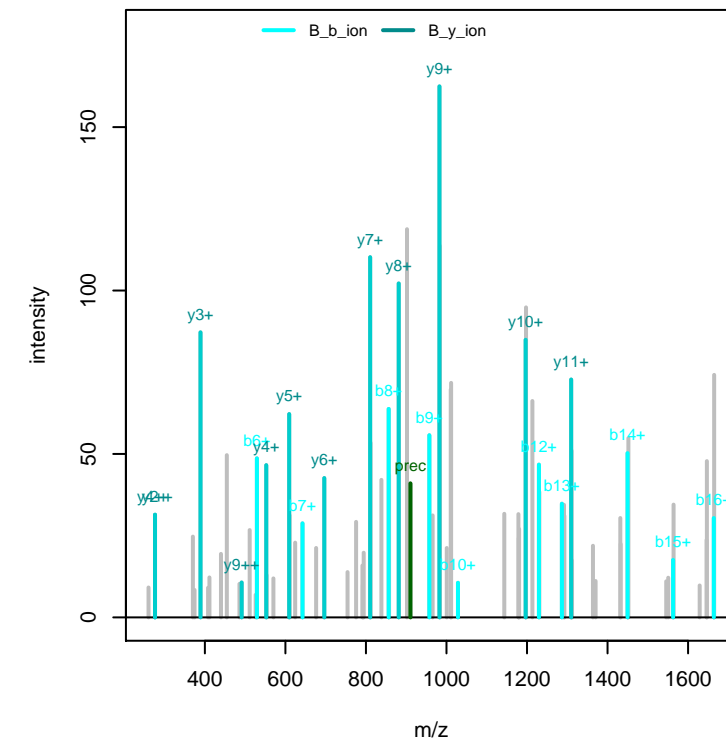

DHPIKFFPAK  
TGKCSFLPEER

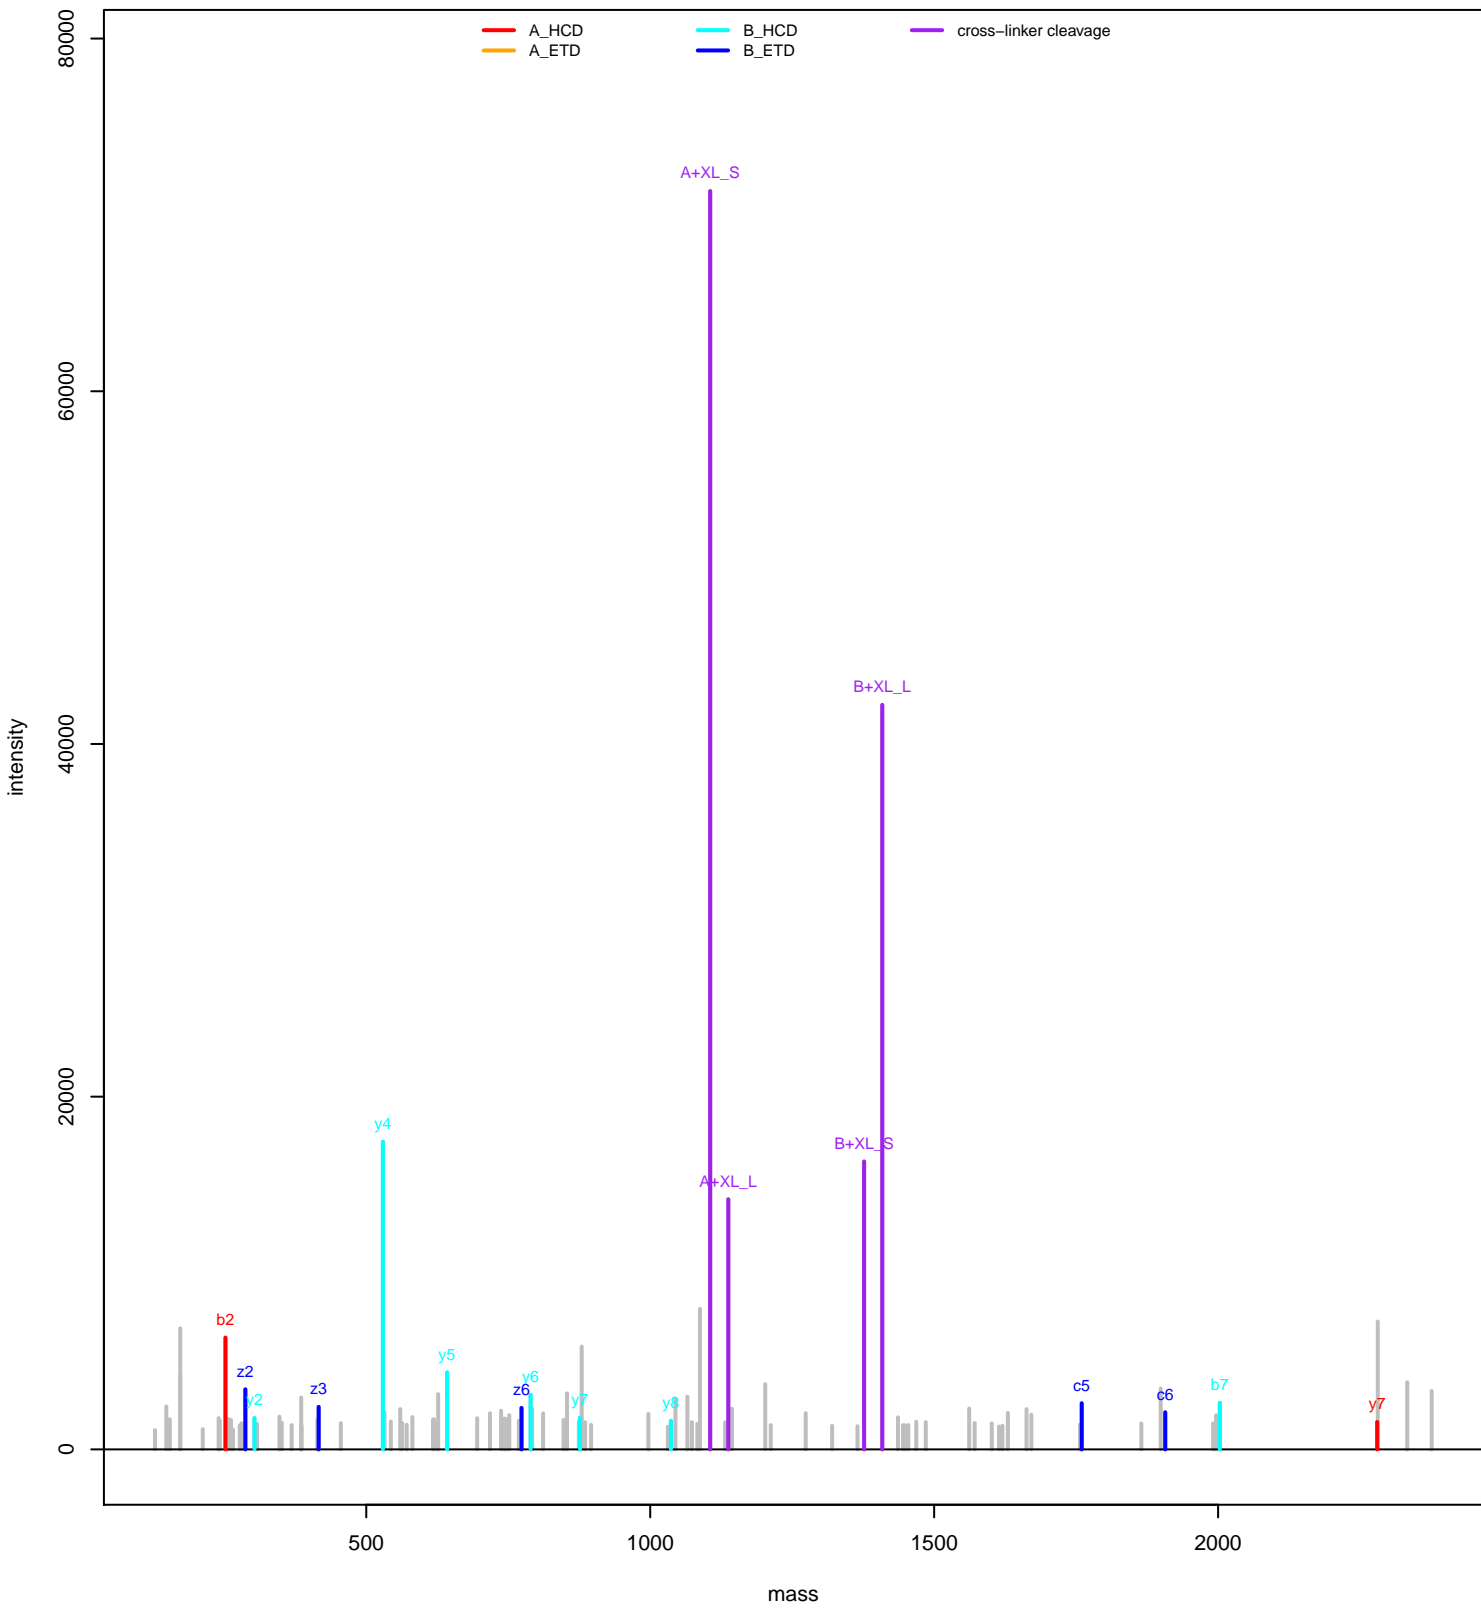

DHPIKFFPAK+XL\_S

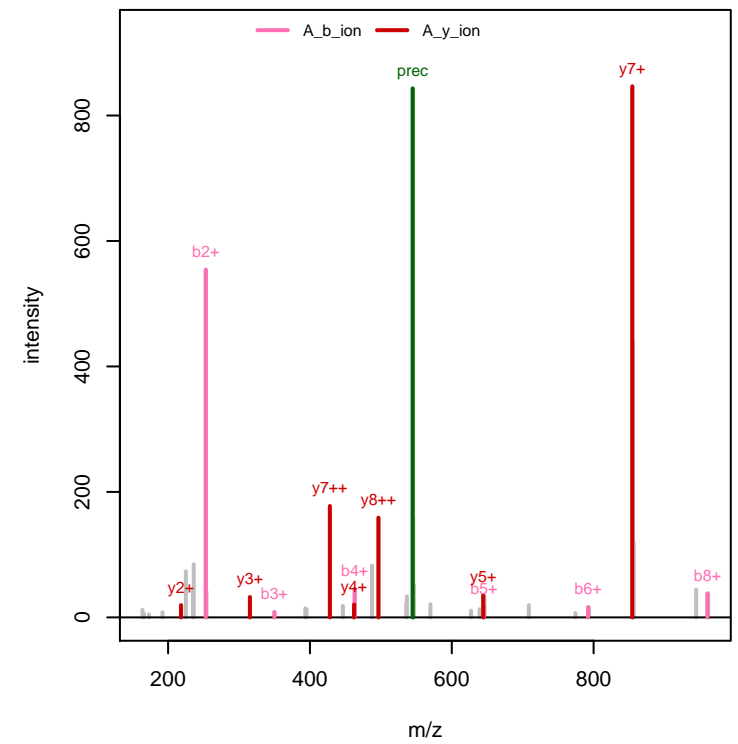

DHPIKFFPAK+XL\_L

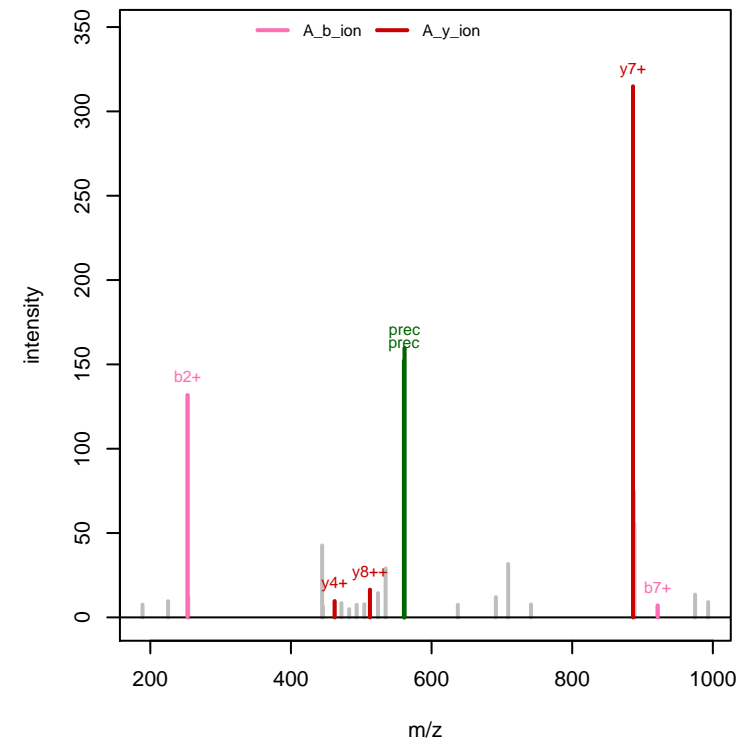

TGKCSFLPEER+XL\_S

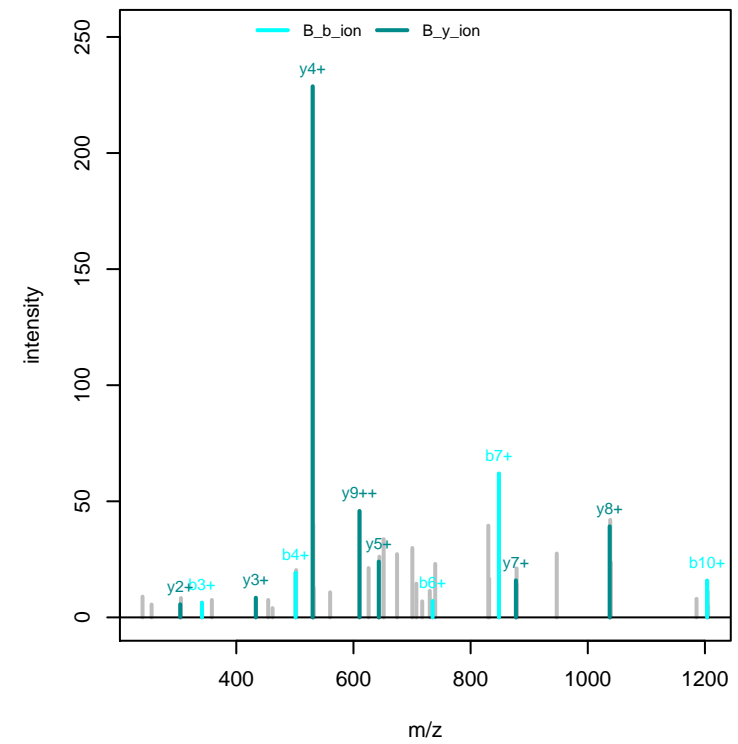

TGKCSFLPEER+XL\_L

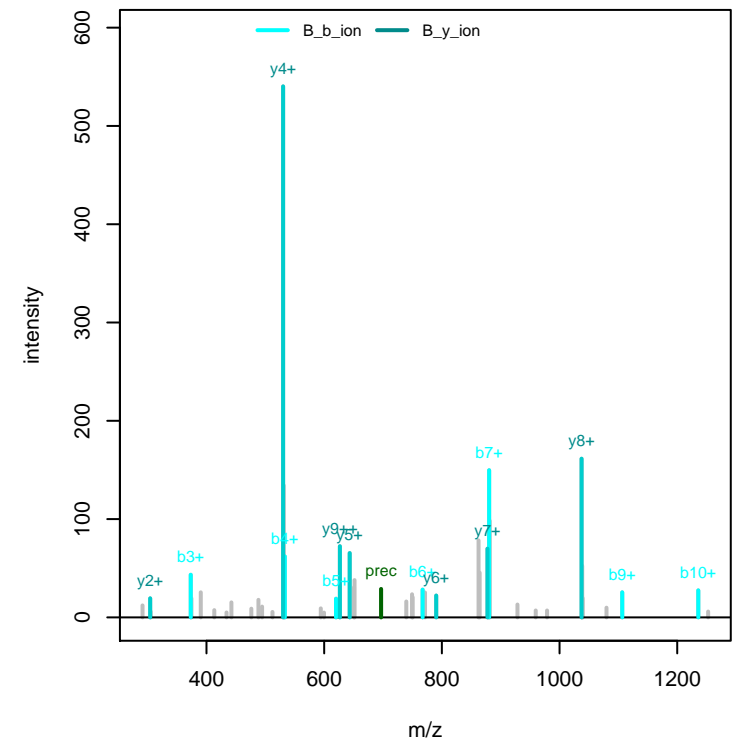

DAKEGSVK  
GVEGVTSVSDKLHVR

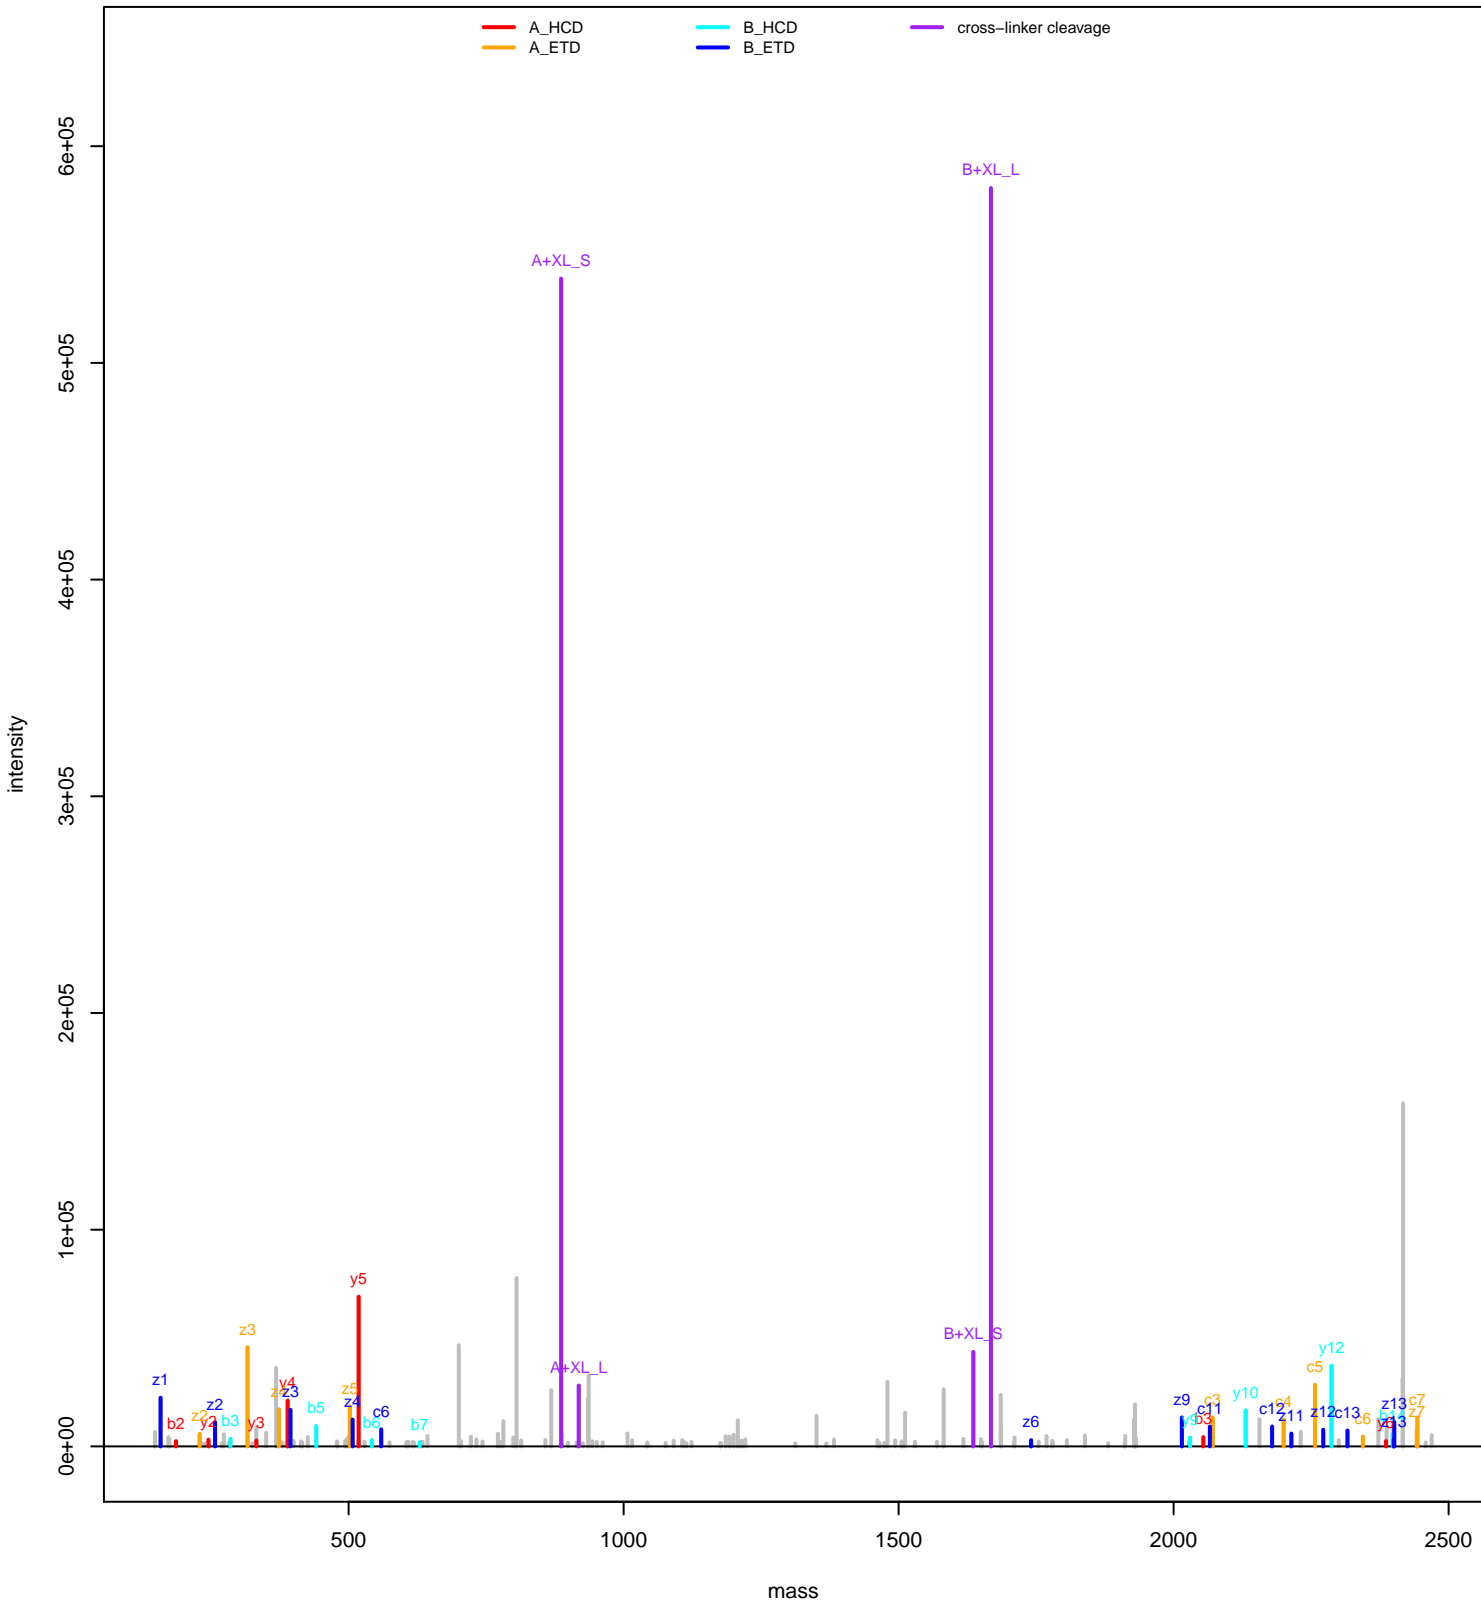

DAKEGSVK+XL\_S

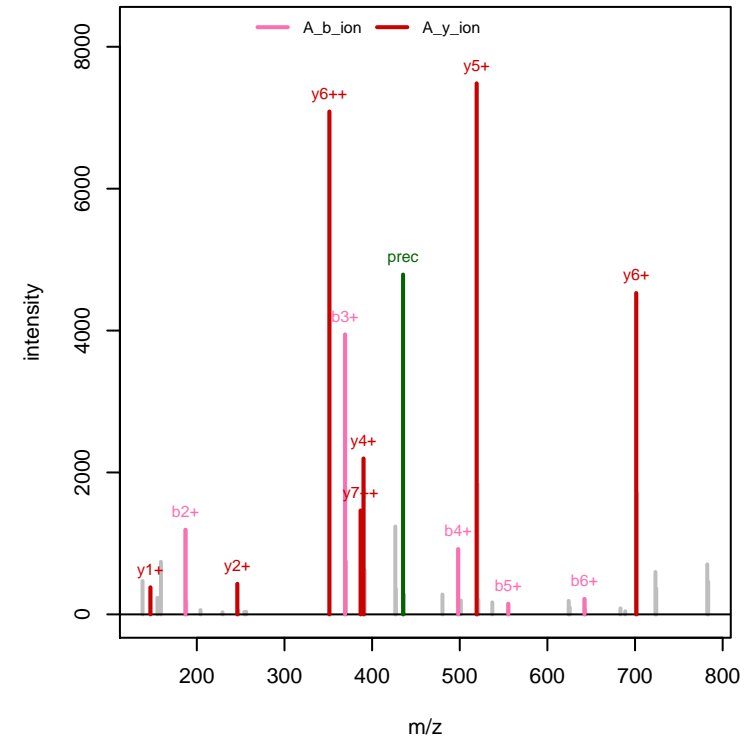

DAKEGSVK+XL\_L

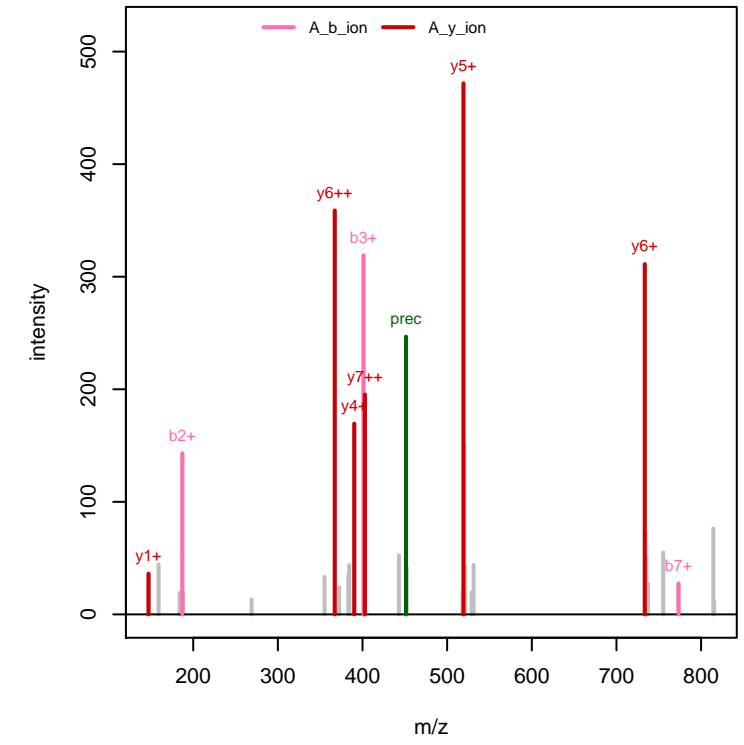

GVEGVTSVSDKLHVR+XL\_S

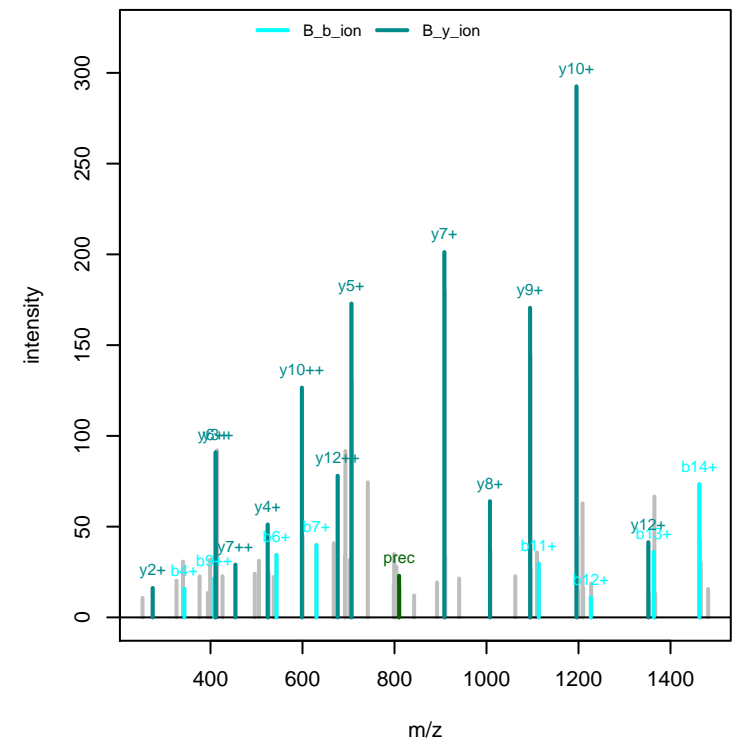

GVEGVTSVSDKLHVR+XL\_L

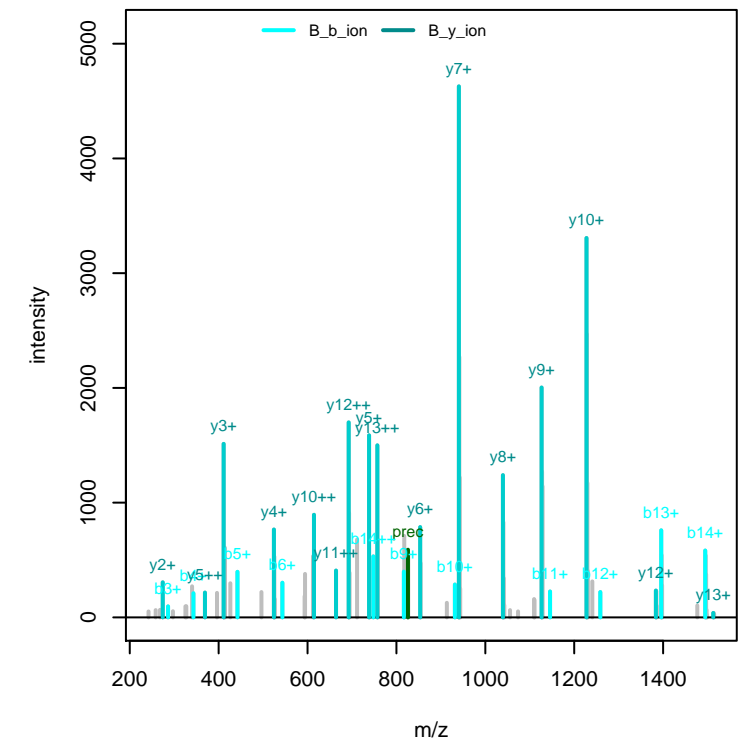



AESIKAVDGVK  
VKAALVDHDK

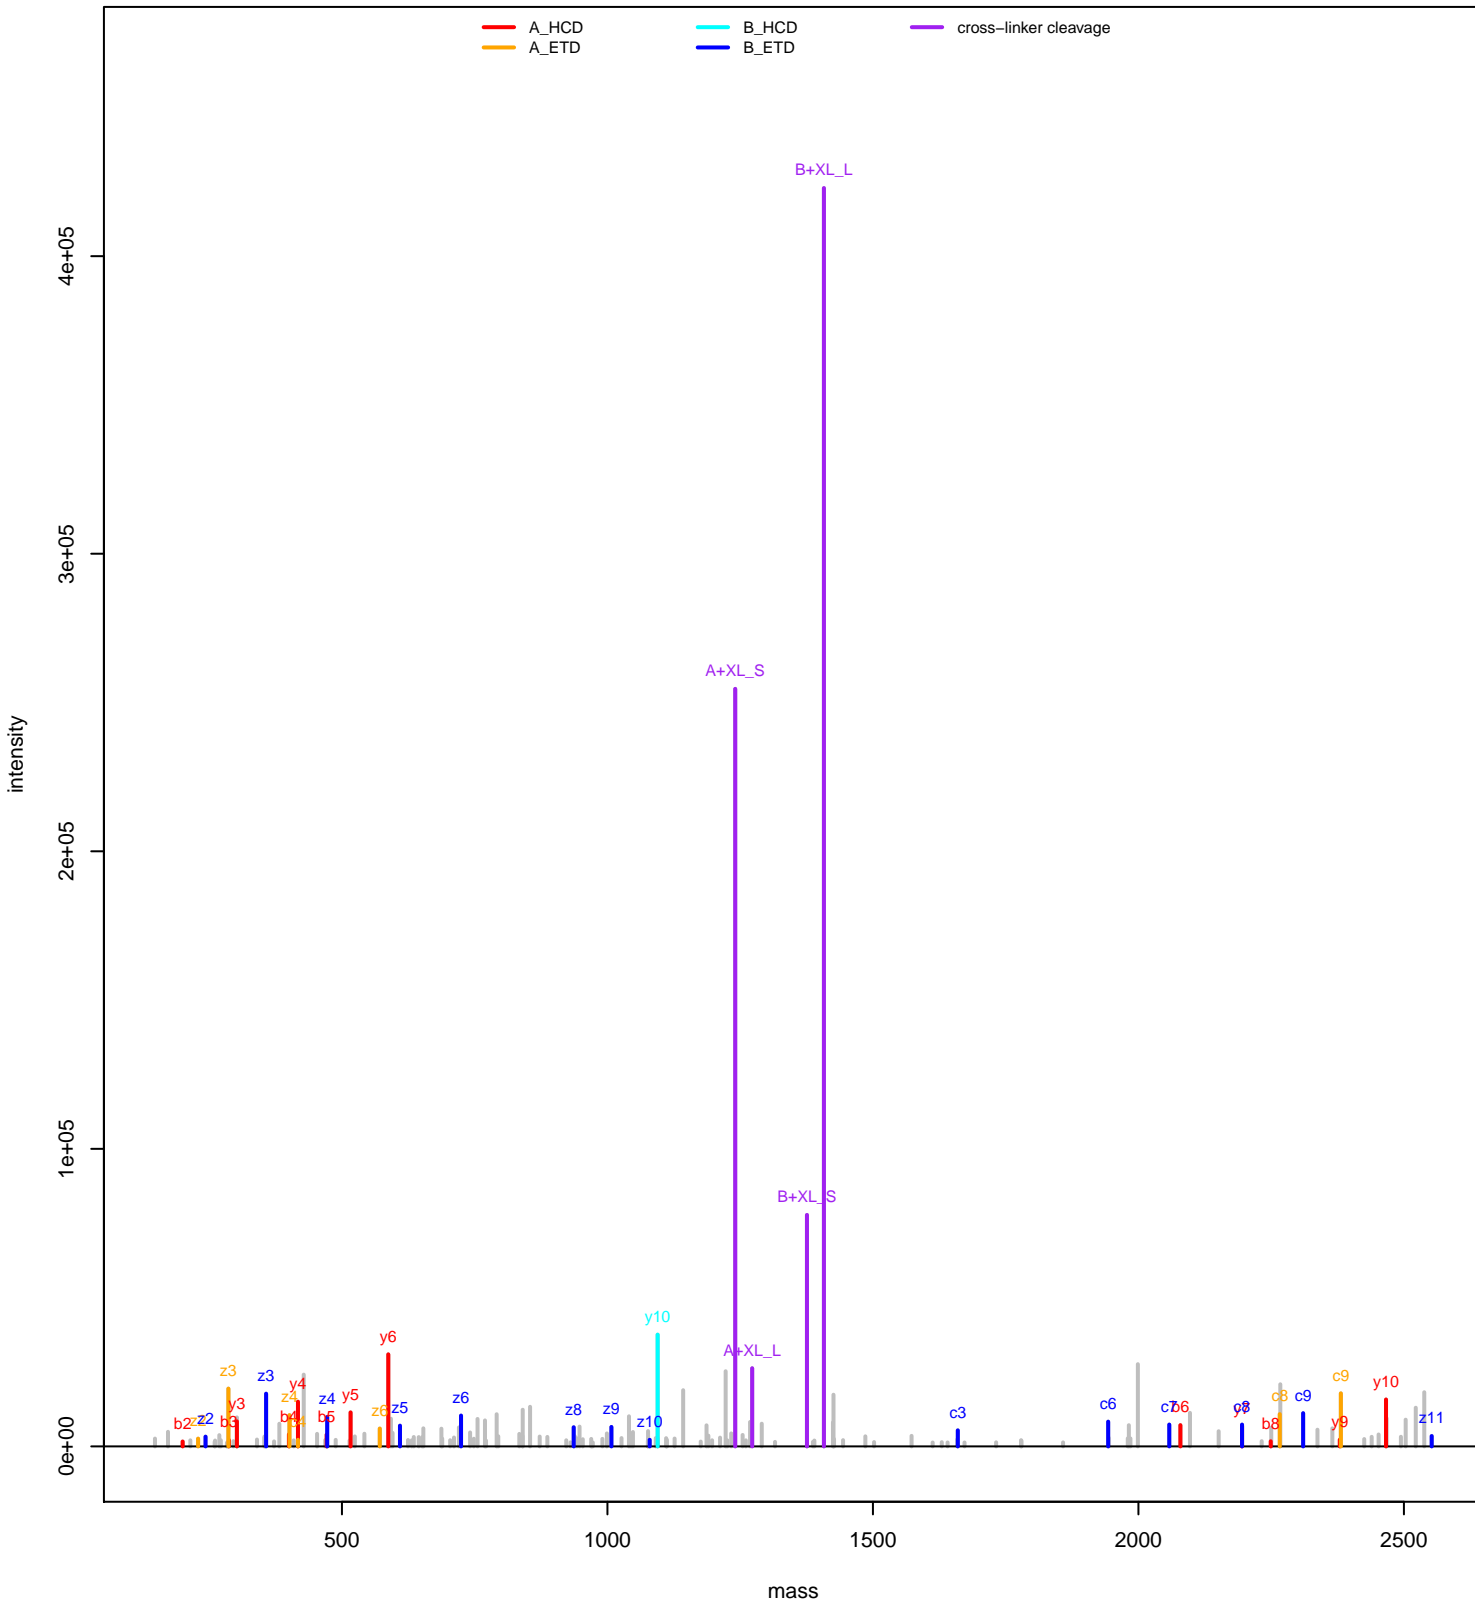

AESIKAVDGVK+XL\_S

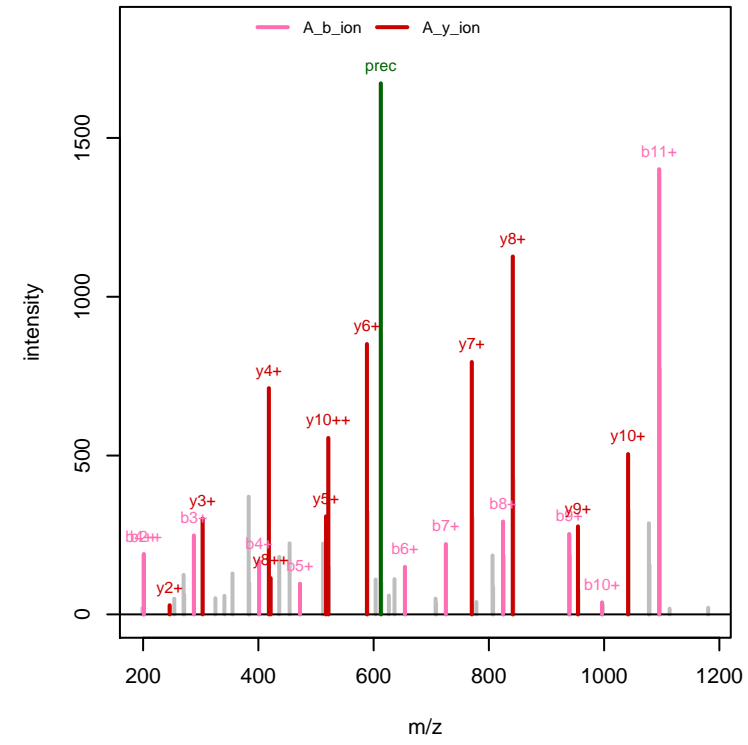

AESIKAVDGVK+XL\_L

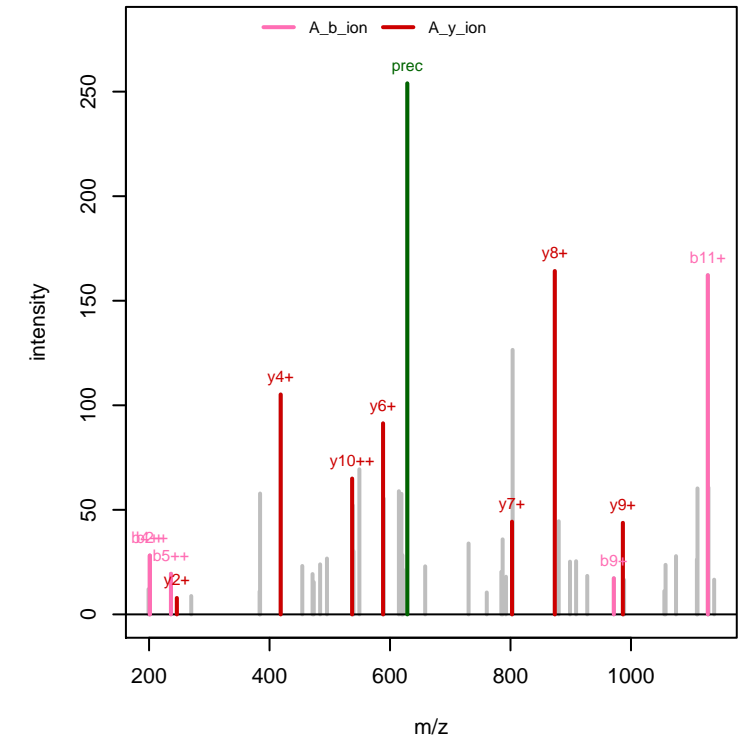

VKAALVDHDK+XL\_S

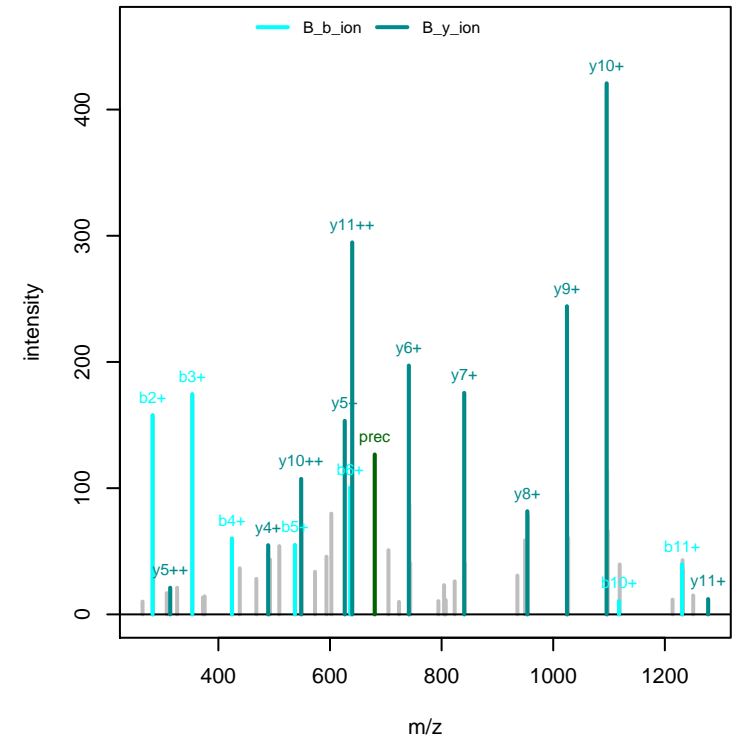

VKAALVDHDK+XL\_L

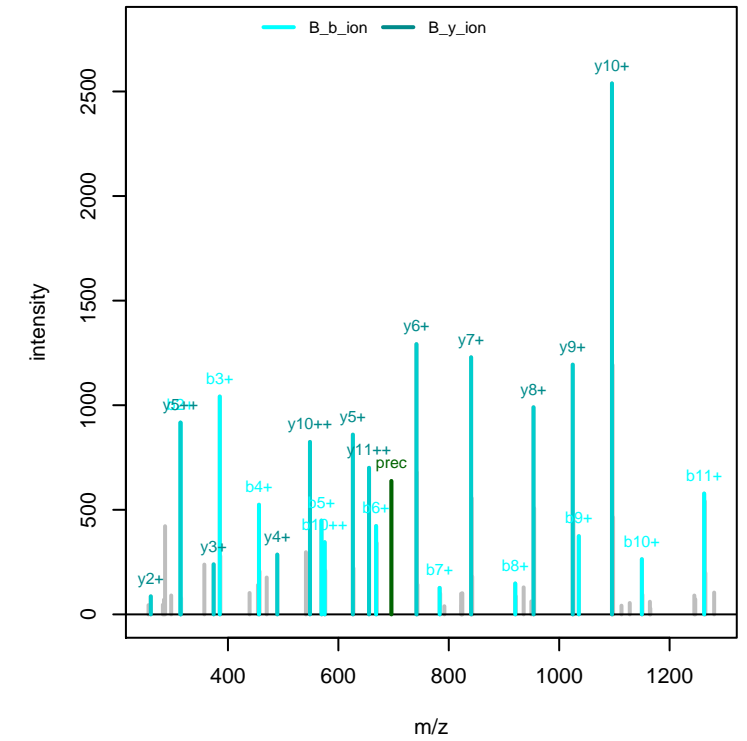

Supplement: ncomms15473-s3.pdf [file ncomms15473-s3.pdf]
